# Supplementary material for: Novel robust biomarkers for human bladder cancer based on activation of intracellular signaling pathways
Source: PubMed Central journal article supplement (PMC4253415; doi:10.18632/oncotarget.2493), 2014-09-16
Supplement: oncotarget-05-9022-s001.pdf [file oncotarget-05-9022-s001.pdf]

| SYMBOL  | Normal_pool_A.AVG_Signal |                      | Normal_pool_B.AVG_Signal |                      |
|---------|--------------------------|----------------------|--------------------------|----------------------|
|         | Normal_13.AVG_Signal     | Normal_43.AVG_Signal | Tumour_55.AVG_Signal     | Tumour_56.AVG_Signal |
|         | Tumour_56.AVG_Signal     | Tumour_60.AVG_Signal | Tumour_64.AVG_Signal     | Tumour_66.AVG_Signal |
|         | Tumour_66.AVG_Signal     | Tumour_68.AVG_Signal | Tumour_69.AVG_Signal     | Tumour_72.AVG_Signal |
| 7A5     | 148.497497694754         | 126.103561089901     | 148.13657736444          | 149.091925032548     |
|         | 145.530904040477         | 146.143941384453     | 164.659092629962         | 154.193086881801     |
|         | 133.802898895457         | 146.944628763232     | 130.390722272955         | 155.883386742315     |
| A1BG    | 142.77817647952          | 162.484777758676     | 160.27511502306          | 135.934976183762     |
|         | 146.171094379173         | 141.779801021888     | 162.586012723045         | 138.824082857747     |
|         | 140.163936299053         | 139.609751976657     | 145.625205055601         | 145.442914818456     |
| A1CF    | 140.775447163954         | 146.311966562883     | 131.972669163481         | 142.902838068479     |
|         | 143.569894807386         | 136.244995503799     | 138.017249996128         | 134.060214479265     |
|         | 143.785769607842         | 132.164132609317     | 137.27298184582          | 133.150660840801     |
| A26C3   | 141.308299074832         | 140.510889880872     | 141.609037401299         | 143.447768653042     |
|         | 136.754116864655         | 143.13304460184      | 138.22823004719          | 135.771423315597     |
|         | 140.622130978368         | 138.82269002406      | 139.159510392614         | 132.996622574111     |
| A2BP1   | 128.604270382206         | 134.527165454543     | 132.741859397511         | 126.482660154852     |
|         | 130.249430984172         | 126.180714796187     | 126.566165822427         | 129.455347273068     |
|         | 130.114464233633         | 126.531502877517     | 130.564962937297         | 130.874283538818     |
| A2LD1   | 186.156006020985         | 170.941404165185     | 143.772376623996         | 170.590817818414     |
|         | 303.724140156439         | 173.790848780011     | 172.521737547052         | 162.085813676373     |
|         | 204.770742504612         | 166.606522485953     | 176.340265963032         | 212.5119818331       |
| A2M     | 7699.37963536892         | 7992.84111657183     | 3515.36256599555         | 5361.3600315322      |
|         | 565.609400092543         | 1810.68433539154     | 605.583144451322         | 2698.5455305009      |
|         | 2723.55722258794         | 505.404271675438     | 619.75986112089          | 744.523059417351     |
| A2ML1   | 103.09089100768          | 122.460829835477     | 108.404733392914         | 101.316813921703     |
|         | 121.067907968175         | 113.222264855561     | 122.996616773523         | 170.376620730856     |
|         | 206.35895739543          | 1880.35608492553     | 158.002906093899         | 109.599589420575     |
| A3GALT2 | 129.487458179949         | 134.758752741831     | 142.677386111317         |                      |
|         | 150.198869833614         | 135.127041919869     | 143.772376623996         | 152.207601283271     |
|         | 138.737332306848         | 141.703410265546     | 150.756776447358         | 124.772219140795     |
|         | 135.99579763634          |                      |                          |                      |
| A4GALT  | 366.408565514304         | 336.212224495877     | 249.339449789861         |                      |
|         | 371.00603789759          | 515.327420453564     | 140.664303738113         | 545.566596665916     |
|         | 162.082166316002         | 340.193863653875     | 277.406445570925         | 357.972320648217     |
|         | 130.574019477669         |                      |                          |                      |
| A4GNT   | 156.71199811686          | 136.504438803108     | 151.627496656808         | 141.047709861055     |
|         | 165.737618983611         | 147.038700869156     | 145.82249684619          | 166.341564850299     |
|         | 149.962143642332         | 134.201392031199     | 169.220974415101         | 155.069048442532     |
| AAA1    | 137.06192448185          | 134.224781719944     | 135.105147647223         | 133.682715540066     |
|         | 133.906867716171         | 132.741859397511     | 136.77666893627          | 134.452938571435     |
|         | 128.318545300038         | 126.728375196449     | 136.436762791912         | 139.870306695324     |
| AAAS    | 196.16056297158          | 200.506615977654     | 207.718619151226         | 212.312154721246     |
|         | 252.514569129392         | 148.424970450231     | 175.442400672352         | 179.060189557496     |
|         | 180.986305037222         | 167.764352429391     | 220.578790067967         | 175.857952663383     |
| AACS    | 162.327039624723         | 157.155105022743     | 149.999838961906         | 152.654938328424     |
|         | 231.314944217099         | 234.661864595717     | 195.16856673253          | 178.928873342925     |
|         | 209.487240895674         | 327.324711245289     | 189.840366340622         | 219.441959146815     |
| AACSL   | 179.389797867379         | 161.577683729655     | 155.07594431078          | 162.06940121135      |
|         | 149.832456450186         | 162.259941098076     | 166.040918339519         | 147.54950981909      |
|         | 158.14434287956          | 185.661496988658     | 166.835922279372         | 169.612203020686     |

|          |                  |                  |                  |                  |
|----------|------------------|------------------|------------------|------------------|
| AADAC    | 152.818046945164 | 143.607579034109 | 154.011708696954 | 142.976123206776 |
|          | 174.717158790668 | 237.171424222756 | 149.622695843398 | 198.863347487219 |
|          | 147.218415065692 | 143.338628928675 | 145.892876412762 | 133.268239762624 |
| AADACL1  | 232.276667029184 | 230.91747428831  | 246.989526028884 |                  |
|          | 233.464856303761 | 309.798246248863 | 293.986292438714 | 283.191303666907 |
|          | 352.22815095475  | 439.727046291381 | 257.5097052677   | 315.863232876382 |
|          | 332.798130757632 |                  |                  |                  |
| AADACL2  | 157.010145291837 | 144.259643132933 | 155.290648078877 |                  |
|          | 148.729753117861 | 137.549175595441 | 135.536810684197 | 140.916876460413 |
|          | 142.261639670072 | 154.466614452651 | 151.09974848374  | 146.129805607031 |
|          | 149.615585907229 |                  |                  |                  |
| AADACL3  | 119.057157701097 | 129.340996658802 | 140.020294940544 |                  |
|          | 173.408784502027 | 132.906201428703 | 136.482609639417 | 133.667852983262 |
|          | 148.388093331273 | 126.247378598596 | 132.087183382523 | 115.80656409185  |
|          | 133.404671629495 |                  |                  |                  |
| AADACL4  | 140.330400168187 | 120.686906898624 | 138.947760022173 |                  |
|          | 124.134916773123 | 119.049388179929 | 120.428171428188 | 120.201521341263 |
|          | 114.826501559828 | 129.121598974852 | 123.926293128246 | 139.293775885106 |
|          | 120.77691423934  |                  |                  |                  |
| AADAT    | 190.809584998617 | 189.307823427362 | 242.037132958656 | 185.154876233931 |
|          | 155.53992663898  | 300.358738353443 | 262.349315496653 | 294.653534388707 |
|          | 202.622747952763 | 144.727773039491 | 187.893420010787 | 271.989060206794 |
| AAGAB    | 431.413030534188 | 427.637083424453 | 326.055727207966 | 368.879825610754 |
|          | 434.792010353541 | 503.757797957538 | 508.127470400078 | 400.23671843715  |
|          | 419.4017188518   | 273.61337724143  | 525.287367366192 | 603.906237227931 |
| AAK1     | 186.268881719287 | 172.583615020042 | 185.071775840607 | 163.885645883066 |
|          | 236.292053621233 | 247.236004734567 | 202.524668687686 | 206.999289979742 |
|          | 189.0608798771   | 619.995008098949 | 212.959246855759 | 205.341121539273 |
| AAMP     | 480.101253056873 | 470.578335285993 | 483.174262289559 | 524.725307261999 |
|          | 600.162650426961 | 400.98290237416  | 565.059609779245 | 415.113340335205 |
|          | 563.490027149224 | 429.268202514543 | 528.767644181119 | 490.464012303239 |
| AANAT    | 110.024815508703 | 110.536316697732 | 104.780306305981 | 118.21084414402  |
|          | 114.960460615926 | 105.925737068775 | 122.089332300031 | 115.80656409185  |
|          | 106.393497890486 | 114.378420394004 | 120.497796762933 | 104.154182930018 |
| AARS     | 3019.57419253979 | 2758.01526530661 | 3083.98169220838 | 3219.27851139047 |
|          | 2648.41012401723 | 1382.12750708801 | 2794.89048827025 | 1637.66306286151 |
|          | 2715.55326746591 | 3033.50962589321 | 1727.7144253077  | 1336.75600604068 |
| AARS2    | 283.163770658619 | 289.21739941764  | 263.47760086159  | 328.33387481068  |
|          | 290.867822301134 | 242.221324619171 | 408.758021864761 | 287.703569453502 |
|          | 416.933146258428 | 280.127735578097 | 281.44159425243  | 299.935166870211 |
| AARSD1   | 561.062594540005 | 619.635734567779 | 589.409235971915 |                  |
|          | 779.623566217277 | 325.642275889649 | 461.229315272354 | 384.566987097657 |
|          | 620.760947818536 | 461.413469623811 | 365.140886302762 | 301.369680426563 |
|          | 369.275635424092 |                  |                  |                  |
| AASDH    | 252.222481637238 | 230.053292316517 | 269.853718252574 | 222.156471143857 |
|          | 221.18757533703  | 231.769926214655 | 299.513950278952 | 273.353254857377 |
|          | 265.712482648121 | 225.4575611466   | 224.981439707657 | 198.925776755081 |
| AASDHPPT | 284.715092831843 | 265.110264596425 | 309.283897272661 |                  |
|          | 250.885949055834 | 254.517135747445 | 319.685597963267 | 412.648926259488 |
|          | 326.055727207966 | 300.602422224047 | 409.592855687405 | 364.331860640225 |
|          | 419.690542859168 |                  |                  |                  |
| AASS     | 214.295260811046 | 184.223623297663 | 227.092319765009 | 191.38608906576  |
|          | 158.74180418577  | 164.389447533163 | 230.015981563049 | 141.181931072161 |
|          | 171.130215858803 | 187.069074575776 | 164.332073056902 | 158.826907233022 |

|        |                  |                  |                  |                  |
|--------|------------------|------------------|------------------|------------------|
| AATF   | 401.267425721838 | 435.037306125887 | 468.496972957503 | 548.014025722956 |
|        | 651.43207839949  | 517.42417250172  | 685.354305381323 | 818.761934233826 |
|        | 596.3549500121   | 413.398641688413 | 616.014975366684 | 442.334886941795 |
| AATK   | 167.164675439456 | 162.10411532202  | 162.819608252826 | 170.035994634371 |
|        | 154.227433553131 | 156.123528587917 | 170.202597821861 | 170.636731478608 |
|        | 154.935741493562 | 159.154102271517 | 166.863589702453 | 166.788336808924 |
| ABAT   | 126.256716138724 | 128.533900744619 | 134.640783050966 | 130.735223763219 |
|        | 160.892163220381 | 172.783430414523 | 180.867208892996 | 131.308384127079 |
|        | 152.952479729682 | 128.289680999565 | 252.593574250965 | 183.26554404668  |
| ABCA1  | 2135.04382065446 | 1742.84803427086 | 2267.0818302379  | 1619.67820476414 |
|        | 1179.42590997099 | 378.037190077449 | 1169.43742964112 | 826.314416168552 |
|        | 1736.03342040646 | 412.129826478453 | 920.083835296898 | 365.441289363381 |
| ABCA10 | 168.783725505491 | 163.074919710259 | 173.951605889009 |                  |
|        | 159.0794075765   | 131.532660547328 | 145.654559623732 | 150.132420238581 |
|        | 162.620593985693 | 161.481227197715 | 135.982797108848 | 163.102043862117 |
|        | 212.591357254196 |                  |                  |                  |
| ABCA11 | 156.916784141484 | 154.746081871718 | 155.268650584431 |                  |
|        | 154.598520288855 | 133.138744413911 | 153.328585916625 | 154.524588318927 |
|        | 164.905467905433 | 159.320692108734 | 150.203281104753 | 164.991522994763 |
|        | 175.469375624274 |                  |                  |                  |
| ABCA12 | 114.084543168359 | 125.025064237439 | 116.5272207025   |                  |
|        | 115.002176041974 | 116.514299377365 | 114.790717658188 | 115.491262364277 |
|        | 114.334059060506 | 121.144174389418 | 170.233084517898 | 131.114995025516 |
|        | 112.666812944192 |                  |                  |                  |
| ABCA13 | 120.170269310738 | 115.649568330705 | 107.221547998974 |                  |
|        | 105.712302595131 | 138.680447175582 | 115.041324824728 | 112.456644814178 |
|        | 144.642717750351 | 118.578205738502 | 220.098071755353 | 138.116568200293 |
|        | 111.10737497653  |                  |                  |                  |
| ABCA2  | 174.866036336378 | 177.862368731138 | 153.271518348258 | 191.029458520006 |
|        | 188.062732621031 | 127.04217189075  | 142.643027992419 | 135.507247740621 |
|        | 131.302225305148 | 141.470472968171 | 182.969563278473 | 147.369111678068 |
| ABCA3  | 263.448958595597 | 301.591430919567 | 327.010503005631 | 313.412131722189 |
|        | 237.641190133427 | 156.702300398105 | 163.904137395349 | 179.432235153344 |
|        | 190.031339775209 | 157.895460674072 | 156.128116786072 | 163.141010815086 |
| ABCA4  | 140.113334247294 | 141.331397551086 | 151.026905311756 | 143.576177625265 |
|        | 155.214638707046 | 137.510586346207 | 132.195666100325 | 132.829401072883 |
|        | 153.276938815536 | 146.21362402936  | 154.594339065082 | 131.468537312778 |
| ABCA5  | 131.22421475185  | 130.2867846895   | 127.924195488323 | 119.9652990395   |
|        | 115.725323816619 | 134.053685488055 | 140.222121251146 | 126.599418127637 |
|        | 124.025104622631 | 132.344296085487 | 147.132625797946 | 131.965184111199 |
| ABCA6  | 328.680312364877 | 289.037033338975 | 330.405026390912 | 231.955750250711 |
|        | 144.387375194186 | 166.582931148846 | 273.709160508205 | 252.280435525505 |
|        | 166.842970309527 | 152.933230159216 | 442.334886941795 | 168.582192754233 |
| ABCA7  | 155.011931456736 | 165.143417235314 | 144.468333012278 | 148.038291195414 |
|        | 179.96623248843  | 153.398587738216 | 146.559502785264 | 162.61434899634  |
|        | 160.499355902773 | 180.392337212428 | 164.022021048626 | 146.897528834303 |
| ABCA8  | 473.60579090007  | 367.825328832492 | 351.998551165704 | 320.936905584424 |
|        | 140.820807603291 | 202.887417145119 | 158.308558656144 | 174.698724064671 |
|        | 161.700258550244 | 140.485102148597 | 150.339554736141 | 155.997210529742 |
| ABCA9  | 230.399207047948 | 193.124599671798 | 224.62335524729  | 203.563098303937 |
|        | 138.633019006784 | 164.690739760426 | 156.433603187722 | 162.033909093358 |
|        | 158.499787920522 | 152.939759795631 | 198.783034238774 | 228.524222740306 |

ABCB1 166.173429365582 159.603586227897 127.842177770276 134.928967716193  
 133.223310036542 140.965498009244 129.532122459128 143.290642777702  
 137.936605651724 133.944538335319 124.513891912986 130.033927910392  
 ABCB10 292.524552445564 236.164692035094 344.575967665039  
 248.690121805116 273.353254857377 429.096075419528 329.82030842286  
 354.705553237406 282.561381978659 303.380479700334 258.998065427002  
 342.935878735854  
 ABCB11 147.526701500887 151.159145294127 157.089650890944  
 175.055634340766 149.173121214851 161.281195929918 141.418737063013  
 178.966169998125 160.667815093292 161.922462797736 147.178598908199  
 158.7912155022  
 ABCB4 165.763459146818 153.585849286113 159.39197109516 152.987939791009  
 132.407736899761 118.039780360151 151.09670688533 123.042372128864  
 143.458937009197 142.558109812638 112.75167046116 126.595668758744  
 ABCB5 98.1433670546536 105.900294919664 109.242622591321 110.553759711075  
 106.066897223031 102.024765473404 110.678680817471 101.713609383766  
 107.520000793184 101.761615925097 107.884870799936 105.976284291356  
 ABCB6 473.057488824363 478.479988875208 602.371843434907 618.437282203498  
 424.025588636796 271.615621030842 507.95331185029 256.687384001447  
 241.039766283972 330.457534783492 402.366797969833 323.788197265954  
 ABCB7 453.875259610173 496.328898534802 368.879825610754 708.268962600305  
 325.011269531407 303.638516587721 394.65807885612 238.978845152474  
 300.094509257518 511.670320118232 346.118765910093 336.279209908669  
 ABCB8 133.079767347356 124.347680638586 140.951031275943 131.575356402693  
 163.373180928181 142.984243805285 149.563405421366 148.012353232918  
 163.239195865198 149.091925032548 131.679566454851 135.155955441604  
 ABCB9 201.893722965557 222.526610842047 180.231462528702 296.75326294587  
 417.731815310276 272.351487980415 263.888891822857 251.787648609546  
 230.399207047948 214.132445321197 188.20675818131 245.317436234586  
 ABCC1 163.558869203898 155.507030276749 150.409919207059 150.105503384881  
 154.792156982219 168.443386067427 160.822287037366 157.963634535239  
 158.160604786093 152.411545237204 155.878493935166 155.041173289759  
 ABCC10 172.319604146201 178.819486867379 168.156002330441  
 188.891032176388 260.489744360233 184.041062308263 171.795878750365  
 153.748035612441 153.551359970644 163.340435089911 190.5930909277  
 201.931760074628  
 ABCC11 136.041605158822 134.619470709414 135.271290872348  
 133.505261458701 133.879079395215 136.891612156271 134.688504981603  
 141.259186690966 136.332399354517 139.734784859495 127.023543953724  
 131.827899207029  
 ABCC12 113.980716384814 124.302581985661 115.613348109569  
 115.30786313391 125.231476412101 116.678969343492 114.841964705981  
 119.060186838239 114.504409331018 114.056147008769 123.351112976814  
 114.44610607807  
 ABCC13 132.971844952199 139.435000959919 156.417000271727  
 153.033582154882 128.578494940165 140.012295249756 133.397734409167  
 131.80257432775 140.857793157932 141.169908353507 140.125575976708  
 136.614620534169  
 ABCC2 148.564655847496 128.259909378964 126.806537241253 129.985797334276  
 112.534864678892 131.715579653796 128.52473663996 128.630613404354  
 108.483284007316 131.954310449801 137.826458479398 118.134614195753  
 ABCC3 213.468420853218 229.881164774875 226.35854874278 165.960176666275  
 731.284098301795 285.980446338971 573.074116810032 1294.18114559128  
 959.126054626181 226.919545367682 719.369561410372 1235.75946952752



|         |                  |                  |                  |                  |
|---------|------------------|------------------|------------------|------------------|
| ABCC4   | 315.863232876382 | 299.390443444504 | 300.358738353443 | 271.791126011275 |
|         | 222.605195861218 | 813.454826901794 | 665.106631364961 | 270.201322204641 |
|         | 325.859917318516 | 203.089661928125 | 724.777166238211 | 697.97116981445  |
| ABCC5   | 337.487980551006 | 357.140791982825 | 334.709049890042 | 320.390351199433 |
|         | 274.01377986185  | 508.449904285771 | 521.215655189324 | 715.43295523922  |
|         | 423.152420192284 | 302.637859140061 | 1114.10687039922 | 324.25775261173  |
| ABCC6   | 136.218750083407 | 140.421945574721 | 139.675292022085 | 135.485867373592 |
|         | 140.051904905695 | 145.768857553634 | 135.675570204709 | 131.326536951329 |
|         | 138.266328639467 | 138.081268025435 | 141.408545519654 | 137.652358744527 |
| ABCC6P1 | 149.483826392464 | 128.26423663004  | 147.371905597494 |                  |
|         | 137.354782768068 | 143.891725249061 | 141.86370253437  | 159.012011848781 |
|         | 146.112388101621 | 138.858138379065 | 141.712693059287 | 163.331424612891 |
|         | 142.598106777707 |                  |                  |                  |
| ABCC6P2 | 144.316475814221 | 140.946008063839 | 161.225608630791 |                  |
|         | 140.115154069602 | 148.000706956532 | 164.736294372006 | 142.802965008073 |
|         | 155.333294650676 | 145.937733795336 | 148.224587582189 | 162.893396525252 |
|         | 161.8627732644   |                  |                  |                  |
| ABCC8   | 125.593595066736 | 138.393565473857 | 111.276543583667 | 126.553693803748 |
|         | 112.14768481333  | 107.580425848009 | 111.837468699281 | 105.62620788923  |
|         | 110.234403581151 | 122.251178920649 | 111.204065131669 | 107.365390754133 |
| ABCC9   | 153.118492567137 | 163.579282884905 | 165.942761337382 | 145.095023408224 |
|         | 136.263658288289 | 149.127963327999 | 138.664401460739 | 143.784022884904 |
|         | 162.026757124868 | 148.158062155247 | 147.338615809214 | 144.585120811896 |
| ABCD1   | 209.596792486876 | 247.806371601734 | 155.150904036206 | 336.70893120135  |
|         | 371.941204080246 | 118.740346254406 | 141.78867917709  | 139.989830921287 |
|         | 165.504532455205 | 136.254966566424 | 168.111124820968 | 128.683044953833 |
| ABCD2   | 132.649409216699 | 121.049927973123 | 131.215202712283 | 128.669887479835 |
|         | 122.642077625035 | 122.989642938474 | 123.96665768708  | 132.767474034305 |
|         | 123.13812550459  | 124.679444852938 | 110.925532078514 | 130.782296492278 |
| ABCD3   | 228.675099004411 | 243.501083338279 | 241.251507026982 | 204.057019122032 |
|         | 494.538861626895 | 979.019125719101 | 472.793332506369 | 474.14051635531  |
|         | 888.04996477314  | 242.096692715029 | 453.875259610173 | 329.604568691377 |
| ABCD4   | 131.984467471242 | 138.263361518905 | 134.182902752156 | 136.77260462185  |
|         | 135.673080643346 | 137.52653395793  | 128.700516033555 | 133.63022526522  |
|         | 136.121873179928 | 135.705904966172 | 141.917318809044 | 134.904123162692 |
| ABCE1   | 335.239364345057 | 277.129985959184 | 300.985037429772 | 229.017256104437 |
|         | 317.121202656311 | 936.221322010828 | 465.029298672645 | 602.703887178113 |
|         | 654.881990232975 | 547.516635695872 | 441.578261054602 | 609.309339417625 |
| ABCF1   | 925.009157785129 | 1060.24125879951 | 968.548243081111 | 1201.82026045778 |
|         | 1013.60354455825 | 943.677679525947 | 972.468110850466 | 922.877217016704 |
|         | 1033.03719406038 | 865.435843446989 | 1046.13353853089 | 1000.91520225219 |
| ABCF2   | 172.077522197357 | 174.255919030841 | 172.319604146201 | 195.019706886336 |
|         | 196.16056297158  | 220.047563627558 | 195.618369827396 | 218.839681873515 |
|         | 181.771654391653 | 233.71520737817  | 168.841313096346 | 205.821101661022 |
| ABCF3   | 152.323927317575 | 165.219393390909 | 134.801507994667 | 184.694741621812 |
|         | 251.472556189141 | 164.236417852165 | 181.578228610334 | 152.577131215027 |
|         | 173.816408146725 | 165.131463797217 | 207.453490385508 | 155.247452081206 |
| ABCG1   | 178.377461551319 | 182.929326147069 | 174.903798946103 | 168.753660955229 |
|         | 260.356834114611 | 157.13859713415  | 367.567681162661 | 179.451637129672 |
|         | 242.695286989672 | 285.172001915966 | 395.133831206474 | 197.427788552936 |
| ABCG2   | 130.208619015193 | 126.841836614341 | 105.096927149239 | 106.923686318112 |
|         | 114.209249333221 | 132.576755070703 | 113.427848757112 | 107.32960937124  |
|         | 122.905225081965 | 111.867464669155 | 138.149037534929 | 119.161972571516 |

ABCG4 151.325068155715 155.883386742315 159.43317827517 162.57736365619  
151.196713920345 176.516540713888 150.544779197947 171.350620456505  
159.563866056798 164.87433908877 162.439052954676 167.912321820083  
ABCG5 142.493119780028 160.234704406302 142.329137800558 139.258468432364  
135.544048708523 137.429832103492 133.930997975106 154.904424749528  
148.435419356331 148.807422049327 133.272540012108 147.264690436042  
ABCG8 154.594339065082 175.128935809466 141.094578556895 159.724824188037  
182.02250582556 183.493455947795 161.094103878416 150.354401669138  
161.870389635266 148.654099017805 148.42845062376 152.933230159216  
ABHD1 159.26101905957 141.606501859513 130.018928906449 137.959775678716  
147.617354114584 135.691862612951 147.932875151331 145.97512573326  
148.446949168794 130.551216910933 147.314687795555 140.204023682096  
ABHD10 364.766154056243 444.374521095495 359.256193328366  
391.500696444149 232.918330930051 396.611050163857 258.036064876416  
235.372592051464 304.479999301061 195.384273821324 265.536429548886  
241.527811817146  
ABHD11 142.771962099818 141.226901872221 146.058477355527  
150.431052959951 171.86363382331 150.82596027483 259.146673652222  
248.761038207278 159.257221624668 148.611352905643 172.175584707792  
246.049729366987  
ABHD12 263.47760086159 283.874600697211 253.463871742303  
258.109876262342 673.824770556885 1055.22233969473 498.05778289794  
425.229044880287 1043.14253624883 272.968792195442 744.808064061459  
451.380376296813  
ABHD12B 149.267019532847 141.484730939562 147.716353308549  
150.841261270382 145.481279504679 141.306418675404 147.393178410954  
152.142909854773 141.972403120632 141.987635042691 137.832597613423  
140.000880942015  
ABHD13 145.142331981651 147.261153294747 148.993620368781  
148.825790628891 144.472969298036 163.413365060063 142.114181233875  
148.391885541349 141.33919297402 163.621658579697 148.143367490426  
168.560093633607  
ABHD14A 372.088129459528 380.821355948507 337.652945958921  
386.544913399837 1228.89116158868 297.862653495715 473.60579090007  
324.401611136662 334.316711893654 282.47352481715 441.435444003241  
434.325609889068  
ABHD14B 256.924134409998 284.534369213195 287.334035234496  
267.422232051733 321.25076864104 183.993497813128 162.047249964859  
176.830879422227 182.698275130489 160.32812671237 326.83982672544  
202.343343669937  
ABHD15 210.015199832609 203.888365494623 173.773876769683  
188.194202408999 485.731287873723 322.956882599715 319.639103463458  
492.207833630086 306.773350448741 186.975609955892 336.898462056187  
278.737944234055  
ABHD2 152.970079142629 148.532339759414 137.361967082029 140.229267364503  
204.999796322451 146.470444212748 157.530573508003 183.464897811105  
186.185055364718 156.581569063195 173.325724300712 154.537240112989  
ABHD3 146.309171902112 135.613240463445 151.382199195953 112.590379042108  
186.961638857905 185.071775840607 159.762733951454 329.068463281182  
218.08515867102 234.339913501761 234.156713102803 170.67334244323  
ABHD4 237.249949461085 247.942904862478 233.809899915394 285.980446338971  
218.896760804208 141.666394024363 147.8838487685 151.755205401737  
181.453575300661 190.348359536057 187.645390502607 149.303427221111

|        |                  |                  |                  |                  |
|--------|------------------|------------------|------------------|------------------|
| ABHD5  | 178.464811133    | 176.47556448977  | 149.805955402639 | 153.922713834296 |
|        | 431.546135503733 | 446.698665191047 | 655.431236290512 | 346.476121089685 |
|        | 306.333710880618 | 376.962937292973 | 362.899103657252 | 375.958347293549 |
| ABHD6  | 313.322307299463 | 269.379272725008 | 308.148212607944 | 310.23294370018  |
|        | 310.426513884979 | 233.394506254045 | 220.791884858764 | 216.805365763069 |
|        | 267.800523478098 | 251.011148303246 | 250.003965480779 | 198.15257384667  |
| ABHD7  | 182.357065848298 | 173.592875508663 | 216.582862850259 | 164.253219197128 |
|        | 186.563913311757 | 334.772648743153 | 181.622689471026 | 214.413674287972 |
|        | 197.326259802349 | 160.469645948225 | 160.026178505749 | 162.54008293513  |
| ABHD8  | 361.904370514991 | 370.555627307623 | 377.27961559752  | 544.669441360594 |
|        | 707.715412321304 | 280.848426993226 | 340.728888109597 | 368.711718874343 |
|        | 245.082816415008 | 215.532132200821 | 244.054469051058 | 271.713695056313 |
| ABHD9  | 133.71965790848  | 147.436408919939 | 120.460433297007 | 121.04331582508  |
|        | 584.548578914846 | 165.851677392967 | 535.758943850734 | 179.358460170348 |
|        | 353.774297577869 | 136.71484425521  | 239.474937674583 | 220.169099923628 |
| ABI1   | 333.270203737291 | 307.363302726074 | 360.756455184184 | 302.219514290905 |
|        | 324.346723939622 | 425.708048519408 | 316.722160860531 | 378.308562999445 |
|        | 334.350011399462 | 356.699466789374 | 440.657747083721 | 431.799795646414 |
| ABI2   | 208.363905749882 | 186.359770878343 | 202.44778603643  | 190.22021453133  |
|        | 183.853381322135 | 189.142295015168 | 181.098584949344 | 185.896304740844 |
|        | 179.376968970326 | 185.984938124891 | 170.035994634371 | 189.434597063058 |
| ABI3   | 133.427561208907 | 167.586897846525 | 125.547399456656 | 141.181931072161 |
|        | 166.592366578462 | 139.508029141287 | 127.663578933727 | 160.290104492275 |
|        | 181.79418355897  | 126.216519704249 | 174.690052785405 | 127.382266838772 |
| ABI3BP | 1658.78888936164 | 1505.90883940934 | 979.761537450366 |                  |
|        | 1610.38263368771 | 132.661036963636 | 147.630900093277 | 130.143953880391 |
|        | 192.418895349837 | 238.124340832815 | 133.499361793303 | 148.720181793879 |
|        | 152.28262533486  |                  |                  |                  |
| ABL1   | 837.603727062008 | 976.360310504918 | 778.846928848361 | 1340.79810963983 |
|        | 364.022018936132 | 203.693188114912 | 199.776140037612 | 222.118666699301 |
|        | 251.268669431283 | 274.316982298975 | 371.280926727395 | 176.912121142015 |
| ABL2   | 149.721351307304 | 156.597497458992 | 142.119327380686 | 141.233642252649 |
|        | 142.276853170778 | 147.450681897766 | 140.085359251038 | 141.913001976093 |
|        | 137.975369568585 | 247.145700155364 | 141.36525744062  | 141.710076413441 |
| ABLIM1 | 814.759191652981 | 743.510369438587 | 762.8576747113   |                  |
|        | 736.963699775724 | 268.568824794145 | 371.369895979832 | 321.977549744483 |
|        | 373.656487297238 | 333.270203737291 | 524.640879446426 | 833.430847243676 |
|        | 468.569725051459 |                  |                  |                  |
| ABLIM2 | 153.488903967311 | 148.054367166566 | 144.81077501446  |                  |
|        | 165.752558888845 | 127.00963790814  | 139.39442529119  | 120.935863853101 |
|        | 138.712529531951 | 128.262195551255 | 140.856864690669 | 140.552143090027 |
|        | 131.228779762508 |                  |                  |                  |
| ABLIM3 | 276.434192872962 | 291.914408947328 | 175.437651670246 |                  |
|        | 280.656087497806 | 262.691387377392 | 135.699583036042 | 204.851374931284 |
|        | 148.844916975586 | 173.751615672365 | 182.624130582754 | 510.972389503051 |
|        | 174.820064644203 |                  |                  |                  |
| ABO    | 117.740022708444 | 114.249891266241 | 118.04359489354  | 116.983869766097 |
|        | 122.452541100946 | 115.002176041974 | 116.787791109549 | 118.770061426689 |
|        | 112.742895297124 | 113.582654469735 | 133.587927144452 | 115.224011128183 |
| ABP1   | 122.903428611669 | 128.236840746655 | 124.329980024986 | 128.150801169886 |
|        | 128.314990390649 | 125.739946257697 | 128.783262618114 | 135.188445928844 |
|        | 129.476648077532 | 125.280736217267 | 129.222714748528 | 139.444577046509 |

|        |                  |                  |                  |                  |
|--------|------------------|------------------|------------------|------------------|
| ABR    | 442.493108530222 | 455.21285026588  | 399.248044997427 | 506.562512021352 |
|        | 307.264586007015 | 407.442337662943 | 324.713347085998 | 641.12919339861  |
|        | 307.083179338165 | 325.43977732888  | 468.170972478717 | 463.187551361986 |
| ABRA   | 117.834484996559 | 111.349642316073 | 119.355650892262 | 115.587874563785 |
|        | 112.936472036608 | 115.884253217495 | 114.902673141786 | 116.252227301161 |
|        | 119.810421687953 | 117.958297137758 | 134.811625739766 | 118.233024867228 |
| ABT1   | 183.764215745794 | 201.507971833902 | 181.229308386808 | 192.153420834889 |
|        | 187.30908753142  | 202.97197145851  | 225.130011390856 | 195.831574717135 |
|        | 207.598754515294 | 170.505553609318 | 210.64483507528  | 180.599150102184 |
| ABTB1  | 414.114051645565 | 514.463945278314 | 552.662610888399 | 600.430996779799 |
|        | 394.186683910377 | 182.861900982333 | 237.734385188542 | 228.524222740306 |
|        | 256.964577037118 | 245.153736298067 | 286.230656780335 | 274.736124442229 |
| ABTB2  | 160.486513643798 | 160.573172150801 | 149.763038696374 | 155.147962740503 |
|        | 238.375823012603 | 153.574068503306 | 139.825088162247 | 158.890522392445 |
|        | 154.500326135559 | 162.624786423084 | 143.127795310829 | 142.22515098612  |
| ACAA1  | 404.726926716133 | 412.344820823968 | 539.471166362469 | 426.649095732979 |
|        | 1932.39418448203 | 827.863789600981 | 1153.5175534971  | 1022.55215097491 |
|        | 980.67040349547  | 746.296354515617 | 678.365575489532 | 1468.50184641042 |
| ACAA2  | 482.048928546145 | 517.23393716516  | 552.167699318911 | 574.399909181723 |
|        | 269.100400678077 | 399.364160668615 | 271.638179116269 | 633.762608454521 |
|        | 274.092048989484 | 157.035739033122 | 313.708197191587 | 313.536451935268 |
| ACACA  | 533.279122416818 | 612.758976723556 | 704.152296359463 | 867.369315017411 |
|        | 467.187222441283 | 315.689865927834 | 571.950858678221 | 826.771587455122 |
|        | 828.276436883306 | 479.053300726301 | 512.895335481876 | 559.899430596368 |
| ACACB  | 2124.12760841901 | 2446.31228564539 | 2437.63566094439 | 4016.35381420598 |
|        | 151.334463063946 | 174.840923772532 | 167.933231844271 | 236.052008824688 |
|        | 205.705962405954 | 163.215507313506 | 298.573180660083 | 201.748876422401 |
| ACAD10 | 247.971366020963 | 254.359737178714 | 252.056131165397 |                  |
|        | 308.877027622691 | 207.400490077106 | 233.272000923172 | 313.248029961291 |
|        | 320.154891655397 | 382.186095123659 | 211.34069504665  | 347.411500022053 |
|        | 293.12968694683  |                  |                  |                  |
| ACAD11 | 803.133619199479 | 584.199252444401 | 980.67040349547  |                  |
|        | 616.014975366684 | 198.815448428294 | 387.403502892897 | 438.03648998391  |
|        | 484.658140651032 | 544.107739610054 | 591.89966781883  | 256.538195034956 |
|        | 436.982960786839 |                  |                  |                  |
| ACAD8  | 271.087125858775 | 226.287196839644 | 287.195290301363 | 266.842778974988 |
|        | 408.60092780174  | 223.453776362112 | 272.41397350779  | 264.628012152168 |
|        | 269.673122990604 | 182.861900982333 | 344.247544510881 | 271.638179116269 |
| ACAD9  | 342.935878735854 | 432.726040933545 | 398.512947526406 | 518.478990211753 |
|        | 640.90860274227  | 316.409887372431 | 610.759447723026 | 364.964572587289 |
|        | 759.058176862524 | 418.772484676858 | 290.754210152709 | 473.529519031797 |
| ACADL  | 154.324955232468 | 140.933444607646 | 163.290050020756 | 134.89031458837  |
|        | 138.106499370074 | 150.856917125736 | 139.13396769999  | 148.582022536314 |
|        | 146.916683989962 | 193.124599671798 | 122.125746529725 | 134.013748718539 |
| ACADM  | 737.42784787426  | 737.843412273272 | 935.784743413185 | 745.153336165802 |
|        | 859.113541787323 | 800.013123376748 | 1031.59140059071 | 1252.28642463619 |
|        | 919.165331064155 | 703.587139938769 | 818.225731093346 | 930.704688414069 |
| ACADS  | 167.521700144143 | 185.17273221366  | 193.04138438685  | 213.966288689715 |
|        | 351.934158805882 | 154.001258677199 | 192.737713851863 | 223.058699622386 |
|        | 188.567747377006 | 187.993907528473 | 200.603836348642 | 176.579096613849 |
| ACADSB | 151.826103919919 | 167.087850057037 | 142.625414022199 |                  |
|        | 157.5032461329   | 139.648187461906 | 170.370934381883 | 157.643461899964 |
|        | 164.1572198075   | 155.737364431382 | 152.702847643082 | 159.874161198304 |
|        | 165.523150623132 |                  |                  |                  |

|        |                  |                  |                  |                  |
|--------|------------------|------------------|------------------|------------------|
| ACADVL | 1722.26954281876 | 1622.17491781572 | 1818.92700816112 |                  |
|        | 1918.14260920544 | 1550.61855325662 | 1695.26858186096 | 986.972987865318 |
|        | 1948.24432908972 | 1276.14915305515 | 1550.61855325662 | 1167.26555140613 |
|        | 1164.22995893381 |                  |                  |                  |
| ACAN   | 105.132185249959 | 119.701313125748 | 105.606964521964 | 106.876902604214 |
|        | 109.266533255266 | 116.889373249017 | 113.163651806803 | 108.631224817901 |
|        | 107.395559299582 | 109.454483612299 | 112.922918499398 | 112.476111928742 |
| ACAP1  | 173.577723566555 | 152.265624144393 | 128.105527466559 | 134.176106740247 |
|        | 135.146767090951 | 121.031695489398 | 136.83883055114  | 170.306241656131 |
|        | 285.46340356157  | 159.159106382346 | 159.276726310525 | 126.583342262489 |
| ACAP2  | 171.561940747015 | 163.616115299926 | 249.029098902357 | 170.024833610695 |
|        | 174.928155956396 | 324.203537490975 | 228.499052416183 | 303.483515328621 |
|        | 316.409887372431 | 282.282663608264 | 197.848577663238 | 288.728608411903 |
| ACAP3  | 144.544001385895 | 145.00699763203  | 136.781417098789 | 138.942901099402 |
|        | 130.657342262492 | 155.330215726109 | 113.927168436775 | 131.142841840284 |
|        | 142.819669471009 | 157.848456517169 | 133.642815510945 | 166.182850621447 |
| ACAT1  | 1607.52029676299 | 1754.99663827472 | 2921.59274577877 | 1788.35884039549 |
|        | 565.313436777992 | 939.213447046823 | 487.799854351205 | 675.596864001032 |
|        | 576.873245313776 | 491.635435224507 | 238.724909152512 | 475.213525346293 |
| ACAT2  | 193.674681547989 | 201.235056368151 | 223.765583953184 | 200.468804559127 |
|        | 252.655315526015 | 359.162549472301 | 341.761516859319 | 370.390323116113 |
|        | 384.051170099325 | 1010.05884008623 | 249.171307797736 | 384.365878895439 |
| ACBD3  | 653.264945856916 | 662.781145703653 | 590.142817130684 | 509.702881232139 |
|        | 727.114956464515 | 793.891277937782 | 849.389818300305 | 589.953707188378 |
|        | 911.782783698439 | 866.413995755699 | 811.362219801362 | 904.211195986553 |
| ACBD4  | 215.365809536522 | 209.44506543433  | 196.955723006838 | 245.240006198482 |
|        | 202.278323489515 | 153.154592981962 | 178.06221214103  | 150.091854035356 |
|        | 161.577683729655 | 145.041430440608 | 221.491633607126 | 165.192945734166 |
| ACBD5  | 124.3501719829   | 114.556542069712 | 119.968081249475 | 117.231243105897 |
|        | 134.310685502031 | 141.141047405344 | 134.575671434471 | 132.418902141838 |
|        | 149.987571884748 | 125.855451679929 | 137.215025712057 | 136.124385992905 |
| ACBD6  | 267.839640412797 | 274.092048989484 | 274.120234926832 | 348.98762709818  |
|        | 267.970798709017 | 220.816812192169 | 246.237243726748 | 228.797912452429 |
|        | 263.321559283966 | 280.990656342284 | 285.402072939954 | 348.506289278042 |
| ACBD7  | 138.058404474114 | 141.075421936212 | 128.645334554749 | 129.618097261902 |
|        | 207.467591256549 | 236.707875629511 | 145.941674563997 | 167.212960569538 |
|        | 142.474762834848 | 124.652072110334 | 130.445920648705 | 164.917470819096 |
| ACCN1  | 135.809383370957 | 127.928195199945 | 123.926293128246 | 134.537123332992 |
|        | 134.838366830668 | 128.79607493422  | 124.895023786422 | 133.382099379709 |
|        | 137.994334667126 | 132.541420804792 | 139.853333847856 | 141.630183595813 |
| ACCN2  | 182.130970182242 | 193.444080047879 | 146.056723380149 | 205.821101661022 |
|        | 143.791908191551 | 128.306607216705 | 140.487887891414 | 131.095431530473 |
|        | 137.022366035333 | 131.007779278656 | 130.75707278606  | 133.911650164508 |
| ACCN3  | 141.689210867136 | 138.414916506716 | 138.086270564406 | 132.793020446043 |
|        | 135.313148180961 | 135.807494668545 | 126.494665743087 | 147.297163685914 |
|        | 125.67874617392  | 127.171331062578 | 139.501279970508 | 128.351235762192 |
| ACCN4  | 133.058788697693 | 123.336074100984 | 124.69564501518  | 123.563243360247 |
|        | 127.179420421981 | 120.485138937899 | 121.416038813102 | 126.501648842366 |
|        | 118.970693476152 | 126.662329971897 | 138.230197299262 | 130.355969431473 |
| ACCN5  | 138.289361041588 | 122.165046954625 | 152.72717701452  | 129.051642626091 |
|        | 140.515996180923 | 142.281657284178 | 129.295956874012 | 128.077692981235 |
|        | 138.383183017683 | 153.435218661228 | 134.657787366869 | 141.597692730835 |

|        |                  |                  |                  |                  |
|--------|------------------|------------------|------------------|------------------|
| ACCS   | 363.539983343859 | 432.969886744613 | 509.512410867348 | 480.593729033799 |
|        | 436.482580413523 | 222.156471143857 | 589.722914993267 | 238.588762326319 |
|        | 509.400965222318 | 219.351080515508 | 465.926873285563 | 291.369577397743 |
| ACCSL  | 128.637470206958 | 119.418866166776 | 123.766373146588 | 125.863969666806 |
|        | 125.655823846115 | 129.925548182204 | 165.767629164724 | 128.798413084891 |
|        | 119.669441891401 | 125.563646710294 | 131.190238038695 | 123.853588042292 |
| ACD    | 278.428310548805 | 277.726756691133 | 271.823243396395 | 357.928880740814 |
|        | 437.770841893227 | 204.851374931284 | 264.563741039382 | 209.070372320593 |
|        | 223.128108720503 | 248.010317392179 | 224.67853219142  | 274.092048989484 |
| ACE    | 136.468434653208 | 125.328704545727 | 126.370252616961 | 135.758133410577 |
|        | 137.161065320948 | 142.321476446203 | 138.586620636835 | 125.315736755156 |
|        | 133.152523054305 | 126.705446263769 | 129.346063085291 | 132.815753681623 |
| ACE2   | 145.728370703165 | 158.325554470875 | 150.346002924933 | 150.536178574986 |
|        | 134.809348917858 | 143.458937009197 | 156.280701500421 | 159.508223180752 |
|        | 156.895079878556 | 150.46669393448  | 165.619206216088 | 149.8035588048   |
| ACER1  | 128.245734702114 | 130.06068534054  | 128.669887479835 | 130.321133400634 |
|        | 126.22472822166  | 136.537117054998 | 131.880438747579 | 139.429008129291 |
|        | 127.753065449769 | 126.536245975137 | 129.132523684894 | 117.335748689217 |
| ACER2  | 174.657352858049 | 182.478971050701 | 185.374745525698 | 155.056545639862 |
|        | 430.649188209901 | 543.584413650467 | 835.834013018438 | 469.930860750773 |
|        | 415.113340335205 | 203.852316712377 | 446.262895953004 | 323.667189206453 |
| ACER3  | 201.480444219547 | 179.950904921667 | 194.998142472864 | 188.593378315122 |
|        | 162.879707592164 | 198.191669030952 | 186.722842989058 | 155.550532734718 |
|        | 140.002249873656 | 159.06002608158  | 188.593378315122 | 172.774914399844 |
| ACHE   | 137.904786382385 | 134.606126134531 | 143.215828010442 | 133.994376985194 |
|        | 131.074021609161 | 137.584340154725 | 141.990639998829 | 133.111791289725 |
|        | 144.516274148451 | 145.311964807443 | 140.326012404526 | 141.094578556895 |
| ACIN1  | 650.263737836685 | 650.679096367632 | 662.58366387795  | 822.88742008931  |
|        | 738.579262579782 | 422.338508598153 | 468.170972478717 | 564.588706307423 |
|        | 568.935113269368 | 542.544172683021 | 1244.67453201339 | 674.571475335107 |
| ACLY   | 795.720196538039 | 728.176339659082 | 596.54904286299  | 757.406530000489 |
|        | 941.936830901588 | 1167.26555140613 | 634.774041584043 | 1778.73916100529 |
|        | 1241.59946353857 | 1022.11537745428 | 480.923468806193 | 989.77058497525  |
| ACMSD  | 139.470557140547 | 119.263824982583 | 126.557869929234 | 146.231937458616 |
|        | 126.158204790885 | 119.866898356501 | 133.645044060866 | 111.515588041012 |
|        | 130.890314257211 | 124.568534983277 | 126.649739818781 | 124.436549041911 |
| ACN9   | 234.182164952936 | 237.01460308334  | 274.343238288436 | 269.673122990604 |
|        | 528.650794915616 | 483.312894744803 | 380.310795921752 | 603.061485415867 |
|        | 405.130899553871 | 380.146996799549 | 290.037325939883 | 549.047065540118 |
| ACO1   | 1793.75125318113 | 1777.29626660109 | 2282.94927629821 | 2363.50330960038 |
|        | 944.47112348734  | 552.494327858264 | 839.662936279727 | 875.7694907383   |
|        | 757.877066703516 | 1235.02626456572 | 592.957842630046 | 646.117381960716 |
| ACO2   | 460.24741151155  | 479.761165832339 | 737.843412273272 | 551.206833852215 |
|        | 612.61438059983  | 571.838717184447 | 442.493108530222 | 497.269957926657 |
|        | 576.451964662024 | 485.576566972696 | 612.61438059983  | 579.678635803225 |
| ACOT1  | 203.652936507291 | 205.728673153914 | 234.738241125899 | 301.49286558088  |
|        | 190.371287639453 | 138.047487233711 | 132.823333905679 | 180.561514455864 |
|        | 155.456077670662 | 147.176801913145 | 172.698181201849 | 152.857278986877 |
| ACOT11 | 211.891710626953 | 232.641965649602 | 210.550995170071 |                  |
|        | 224.335742510577 | 797.73902873919  | 339.379250332987 | 477.87583927675  |
|        | 515.929937825133 | 465.683139139622 | 211.438615793742 | 542.267204956846 |
|        | 551.086785904249 |                  |                  |                  |
| ACOT12 | 134.081308836364 | 122.447154928139 | 124.690141443832 |                  |
|        | 121.661141741782 | 119.655162437465 | 117.231243105897 | 127.31283918221  |

|       |                  |                  |                  |                  |
|-------|------------------|------------------|------------------|------------------|
|       | 125.172189715764 | 118.122186617611 | 133.980792743661 | 150.132420238581 |
|       | 125.732389000341 |                  |                  |                  |
| ACOT2 | 212.78038645414  | 222.086635504858 | 283.807827536147 | 199.980312703646 |
|       | 170.951009118578 | 147.211769989922 | 140.538020869886 | 178.835679834487 |
|       | 139.47828235176  | 140.227863970629 | 164.181915898563 | 169.466129742085 |
| ACOT4 | 171.071893074072 | 168.588120398433 | 153.126111237668 | 155.545904088857 |
|       | 428.340060893467 | 179.55905250703  | 206.650760711745 | 335.47484353322  |
|       | 313.248029961291 | 178.445384902129 | 281.570685561526 | 217.670330817769 |
| ACOT6 | 143.814798097425 | 149.016767620428 | 146.007311764212 | 194.112534914308 |
|       | 165.480489678822 | 144.026432356249 | 160.72962443421  | 161.234304237838 |
|       | 150.933724024651 | 141.831596320865 | 141.235290792352 | 143.59105195427  |
| ACOT7 | 229.017256104437 | 235.291035302211 | 211.395593720534 | 282.797367565702 |
|       | 423.966625351913 | 311.848379951974 | 221.297127685676 | 373.361263985383 |
|       | 326.325210657599 | 386.461076717316 | 208.869189492052 | 313.025250337353 |
| ACOT8 | 143.086872363116 | 172.657668514226 | 163.764600217347 | 187.73896437823  |
|       | 343.048904374136 | 214.100698312272 | 331.018914429561 | 190.255797389524 |
|       | 200.536814571322 | 204.378245089766 | 173.635827398273 | 203.616580991715 |
| ACOT9 | 446.194196064909 | 318.690043546203 | 372.94852645418  | 363.539983343859 |
|       | 202.369905673351 | 196.777776509371 | 189.83433085782  | 231.439252571168 |
|       | 239.827648772906 | 400.353795948162 | 198.681190016247 | 207.338645756456 |
| ACOX1 | 151.961811748754 | 151.543678860049 | 164.529828080312 | 135.380208104863 |
|       | 247.622351589081 | 254.133112176024 | 324.067396271281 | 631.653707589221 |
|       | 546.755305058958 | 194.312315077985 | 304.985269874607 | 295.678097392123 |
| ACOX2 | 595.120528902501 | 619.487800014979 | 991.611982265221 | 818.445501500731 |
|       | 142.719216118914 | 130.616175018332 | 138.814930200619 | 152.14012587515  |
|       | 172.345201438148 | 182.028675726969 | 128.435400481403 | 160.085325256991 |
| ACOX3 | 434.176007498693 | 614.094097408035 | 374.033009122079 | 1085.38819961412 |
|       | 408.444629429553 | 362.445813697676 | 642.934824227327 | 409.073045356073 |
|       | 1650.77281891596 | 538.647888236878 | 541.460843251764 | 415.642099109855 |
| ACOXL | 121.965131419551 | 117.324368138398 | 142.603436693587 | 128.585911203394 |
|       | 120.065876525792 | 147.865114383296 | 132.256047602234 | 130.625825024195 |
|       | 132.210100574787 | 139.880733465536 | 168.867373925372 | 165.062129636008 |
| ACP1  | 520.120193442648 | 507.236601481067 | 837.023434916281 | 418.319283832879 |
|       | 895.463355957918 | 1350.87073284396 | 1666.80650105101 | 1870.52504853779 |
|       | 1707.09830463606 | 1635.35544761095 | 911.782783698439 | 1527.87148052149 |
| ACP2  | 322.028360309592 | 335.059844742031 | 297.071121022183 | 359.024299091145 |
|       | 461.143361255467 | 215.698924670416 | 352.121800955822 | 344.298510200653 |
|       | 319.812293134357 | 293.4021207271   | 344.45331938267  | 285.214585324341 |
| ACP5  | 153.78045746564  | 148.452947427498 | 125.029516472944 | 131.263641389894 |
|       | 360.185005480216 | 145.748174062159 | 167.724233915361 | 162.629257046871 |
|       | 164.327140372968 | 231.287362732197 | 187.73896437823  | 132.277920991504 |
| ACP6  | 201.517356610591 | 245.553138677866 | 234.399431238026 | 242.365480246106 |
|       | 806.290662664708 | 288.88486628661  | 437.770841893227 | 526.970555181851 |
|       | 383.802494922918 | 185.801540278924 | 543.710330214344 | 524.855915371246 |
| ACPL2 | 187.407526616724 | 170.522853717911 | 174.881557472722 | 169.527424356913 |
|       | 270.727749014046 | 439.928008927647 | 327.566026396726 | 518.17401959981  |
|       | 323.841518852386 | 196.189101941489 | 237.825857080173 | 322.956882599715 |
| ACPP  | 187.183762762259 | 164.274491958161 | 229.284931844047 | 138.712529531951 |
|       | 211.369442150136 | 178.347708009405 | 179.687464522203 | 171.202766078337 |
|       | 172.251953149975 | 217.531179216305 | 150.48236051337  | 158.610249594568 |
| ACPT  | 147.248053518914 | 142.288110423886 | 146.698766621345 | 143.473523258521 |
|       | 168.588120398433 | 159.06002608158  | 139.97636570613  | 131.696834332724 |
|       | 148.838294770082 | 147.722646851008 | 168.491878435329 | 139.527577649638 |

|        |                  |                  |                  |                  |
|--------|------------------|------------------|------------------|------------------|
| ACR    | 125.187617901961 | 116.780639688465 | 119.11586630281  | 117.682034050478 |
|        | 142.607578275494 | 120.188885479773 | 124.012439490264 | 120.880547922392 |
|        | 130.235407859542 | 124.533543270311 | 150.380814008952 | 109.719356131043 |
| ACRBP  | 143.458937009197 | 133.778595695007 | 131.110018165002 | 130.430917518283 |
|        | 140.142884879106 | 119.822587087968 | 125.060387518072 | 188.924084292126 |
|        | 168.560093633607 | 137.177271162749 | 143.116451998409 | 120.577995272053 |
| ACRC   | 153.734347607222 | 148.790239150298 | 147.485960802692 | 142.440344960504 |
|        | 149.133055368147 | 136.116468624715 | 138.570150372729 | 141.264096014725 |
|        | 136.722636695506 | 133.697364081712 | 182.873752254411 | 144.779146672553 |
| ACRV1  | 127.874934513708 | 129.01094835739  | 133.550008967009 | 126.629012619208 |
|        | 125.390139830237 | 116.625518828978 | 124.635917999969 | 124.833659452957 |
|        | 120.524859681034 | 131.468537312778 | 143.327730271099 | 125.467668442298 |
| ACSBG1 | 147.87699690647  | 142.185903088074 | 141.541355091514 |                  |
|        | 138.523677181131 | 140.234485088845 | 141.18490443471  | 147.088665779406 |
|        | 1148.80141486692 | 157.484541464879 | 146.812248482145 | 155.76568091161  |
|        | 367.732191251547 |                  |                  |                  |
| ACSBG2 | 118.708644971927 | 122.494779505958 | 108.768730405582 |                  |
|        | 137.840396641618 | 120.241528853563 | 108.226917034591 | 117.119533897652 |
|        | 126.155486659114 | 113.769815606191 | 115.194730717797 | 112.133567992833 |
|        | 118.727279917776 |                  |                  |                  |
| ACSF2  | 316.955298948771 | 385.135014083686 | 292.366934378643 | 287.242697383558 |
|        | 890.507257588957 | 738.087203930249 | 1275.43768532088 | 670.347447480331 |
|        | 894.46029531926  | 173.315097944835 | 861.119262963015 | 377.462793982812 |
| ACSF3  | 139.22543724535  | 161.700258550244 | 148.861141988806 | 149.217191121377 |
|        | 182.608712782878 | 141.537578081123 | 151.511808301993 | 143.756242843438 |
|        | 160.923897048848 | 150.971453664961 | 141.308299074832 | 144.685707282641 |
| ACSL1  | 603.906237227931 | 525.138476928759 | 454.732029358748 | 455.392133846517 |
|        | 618.437282203498 | 454.64556253724  | 808.55123510297  | 1555.28458491244 |
|        | 1390.95426299323 | 802.017244099902 | 1484.32547474275 | 450.220658078322 |
| ACSL3  | 319.868227988842 | 264.936739264566 | 348.506289278042 | 229.660838239474 |
|        | 394.810886122555 | 271.989060206794 | 682.075583857856 | 277.946395491073 |
|        | 664.025683218037 | 506.165100641525 | 774.442392607873 | 585.721610434501 |
| ACSL4  | 259.575461599189 | 227.715558644326 | 241.675251479835 | 197.740912476527 |
|        | 169.544515294662 | 236.676029292922 | 160.281830914755 | 223.638850960288 |
|        | 580.859914041323 | 197.489903263216 | 210.316431648335 | 178.512206531256 |
| ACSL5  | 188.231614694297 | 248.791254839869 | 202.943987922418 | 155.731897985566 |
|        | 285.507315916663 | 153.104072845043 | 473.73182675469  | 704.653073777277 |
|        | 934.173273294189 | 153.136863548105 | 1186.23169583595 | 730.042712083388 |
| ACSL6  | 136.044670179122 | 120.606354515072 | 122.392159083328 | 123.586359806158 |
|        | 121.141432480683 | 127.398873370484 | 130.288547755599 | 127.310437599803 |
|        | 128.490341173553 | 122.300069045533 | 129.228874611916 | 121.45175516842  |
| ACSM1  | 118.432307370605 | 114.308806726044 | 119.455615461113 | 108.760780994582 |
|        | 110.355493122568 | 124.39748786803  | 113.214390213004 | 125.027095330593 |
|        | 113.388450168062 | 108.404733392914 | 125.598828334465 | 115.613348109569 |
| ACSM2A | 124.980683327416 | 132.634538733205 | 126.841836614341 |                  |
|        | 154.876638004094 | 117.455432751161 | 136.126542897364 | 133.988494850477 |
|        | 136.293084080479 | 134.932416370825 | 128.179293878252 | 128.702882993588 |
|        | 147.309245779031 |                  |                  |                  |
| ACSM2B | 139.082897743357 | 136.236441543681 | 149.72025962797  |                  |
|        | 144.40361834862  | 134.479828866339 | 150.343825300998 | 141.236939351298 |
|        | 136.55090238808  | 144.040342300793 | 147.255680306221 | 126.595668758744 |
|        | 152.432477504097 |                  |                  |                  |



|        |                  |                  |                  |                  |
|--------|------------------|------------------|------------------|------------------|
| ACSM3  | 143.036006001419 | 148.816369706133 | 139.805930686563 | 137.045772853855 |
|        | 190.889832855403 | 148.825790628891 | 199.933148219784 | 547.367381020623 |
|        | 277.129985959184 | 145.056914913573 | 190.787437782456 | 157.776321544382 |
| ACSM4  | 139.038389244329 | 134.42983422342  | 163.346402397924 | 136.267313223808 |
|        | 124.873289279767 | 148.627264102939 | 125.146558509674 | 137.367390177293 |
|        | 129.831076624826 | 145.120347147471 | 119.112063328364 | 124.277983696239 |
| ACSM5  | 135.889764019762 | 149.974080577906 | 139.811873260553 | 155.558839375761 |
|        | 140.196653553673 | 145.892876412762 | 133.387065801837 | 136.188868917386 |
|        | 136.969124414576 | 137.803749343493 | 138.086270564406 | 132.433109154079 |
| ACSS1  | 293.080122239022 | 290.914381066573 | 279.159925913207 | 312.845219991659 |
|        | 197.298982267459 | 196.470718183575 | 169.16155608071  | 215.931781291835 |
|        | 252.473612525884 | 177.802767772786 | 230.015981563049 | 219.318938396989 |
| ACSS2  | 469.206346008875 | 526.726224327409 | 502.063888359427 | 638.287221212947 |
|        | 346.566241319814 | 382.630113452429 | 474.750156829195 | 367.732191251547 |
|        | 333.049612399093 | 583.938727139698 | 282.561381978659 | 314.292700455545 |
| ACSS3  | 151.984619204523 | 137.234384760487 | 134.664652044646 | 159.52833930625  |
|        | 129.151171025294 | 160.997179739138 | 125.863969666806 | 131.755881982599 |
|        | 157.891350650633 | 145.560161803925 | 159.365070384451 | 131.447941902406 |
| ACTA1  | 151.04846635538  | 213.674150322581 | 163.919426088318 | 294.653534388707 |
|        | 127.57284871013  | 126.061141885666 | 126.845048064014 | 124.170242736875 |
|        | 116.780639688465 | 109.156349683299 | 120.757288533244 | 123.884643288534 |
| ACTA2  | 29868.1819370827 | 27501.6698286039 | 30573.5859783923 | 27501.6698286039 |
|        | 1420.27222765071 | 2649.39312662326 | 541.642309122976 | 3829.87905458534 |
|        | 5240.40795364202 | 4465.66734676111 | 1362.1486006778  | 2568.95060767776 |
| ACTB   | 23427.4695172122 | 22750.0246358215 | 24377.1316448061 | 24731.0629964468 |
|        | 18953.8127741918 | 10075.6573898939 | 14228.7550296952 | 10953.6229702446 |
|        | 12654.3779830648 | 18562.671630167  | 11918.214537866  | 13217.7001749493 |
| ACTBL2 | 134.758222337831 | 128.165775629664 | 128.0805889548   |                  |
|        | 147.407093814154 | 147.829502959865 | 134.635645106042 | 119.472410874778 |
|        | 130.450930089722 | 139.526241501184 | 139.966813133326 | 134.576622528874 |
|        | 130.839508306116 |                  |                  |                  |
| ACTC1  | 7786.96143641382 | 9994.54490550759 | 7838.92787031423 | 14755.8570847826 |
|        | 129.754376995879 | 124.546520456419 | 136.220324225816 | 131.500591219916 |
|        | 129.529372508883 | 133.077760160486 | 129.819820730239 | 127.715766031466 |
| ACTG1  | 8881.86480594052 | 10836.7380675792 | 9099.13956219312 | 9560.32907282993 |
|        | 15745.699731183  | 18760.3823237058 | 16925.9167115963 | 15745.699731183  |
|        | 13324.7465248375 | 20381.3859535625 | 10250.645112753  | 18146.8167991873 |
| ACTG2  | 26522.0142925211 | 25295.5071561111 | 29532.7890259497 | 25808.3502428915 |
|        | 358.654569870431 | 1265.88446775977 | 151.364528898537 | 768.67030514096  |
|        | 1804.63762008613 | 938.499337889075 | 212.933062534244 | 585.234286698678 |
| ACTL6A | 369.974231530826 | 380.888728347647 | 502.499539192864 |                  |
|        | 302.601458409102 | 676.570119607984 | 1461.64901688125 | 743.023225859813 |
|        | 1411.90426595229 | 1298.60552708737 | 915.015154168627 | 766.420275252501 |
|        | 1151.89087953837 |                  |                  |                  |
| ACTL6B | 129.971670681199 | 130.753793881071 | 162.961792330623 |                  |
|        | 138.215708514725 | 135.143532936828 | 116.566190779365 | 149.219602109121 |
|        | 152.56002779985  | 134.648780131578 | 131.001996509052 | 153.630125822178 |
|        | 136.042982529628 |                  |                  |                  |
| ACTL7A | 114.835386789236 | 104.36042819601  | 105.859916438163 |                  |
|        | 113.840813583258 | 111.373854978307 | 112.771141378159 | 105.164790181452 |
|        | 98.1433670546536 | 114.977135060317 | 122.828060462887 | 124.003914369077 |
|        | 113.018985316061 |                  |                  |                  |
| ACTL7B | 140.260053206523 | 143.025570700585 | 149.839827383681 |                  |
|        | 158.414776465951 | 156.704278982517 | 163.170983091116 | 145.273209648677 |

|        |                  |                  |                  |                  |
|--------|------------------|------------------|------------------|------------------|
|        | 137.824985884649 | 132.899305777714 | 163.799748670842 | 152.188770978528 |
|        | 146.539196738195 |                  |                  |                  |
| ACTL8  | 120.714981493593 | 128.563180697606 | 109.851507510788 | 117.348231147283 |
|        | 239.31180635241  | 132.28931085483  | 132.864018034342 | 130.0140921487   |
|        | 112.509731206295 | 130.316282003711 | 148.530422089937 | 128.666652639862 |
| ACTN1  | 7104.65816621275 | 7167.29945083872 | 7771.28016059011 | 9272.37780151073 |
|        | 1141.13648305827 | 580.859914041323 | 707.173691257322 | 731.848844821402 |
|        | 1038.93733638848 | 2473.22803972431 | 246.049729366987 | 705.737228226014 |
| ACTN2  | 182.919385608842 | 148.255769084026 | 162.857083430123 | 133.186678625229 |
|        | 134.596391166462 | 131.056011738962 | 142.041992878641 | 128.217078449064 |
|        | 138.18056202179  | 153.721460633166 | 127.814109293214 | 144.077080621909 |
| ACTN3  | 124.672483602517 | 113.077691687266 | 119.972337070176 | 117.992729826121 |
|        | 117.097159106043 | 120.456817031716 | 121.95061962467  | 109.46255295836  |
|        | 111.949644842971 | 103.36057518781  | 147.710252756854 | 108.362609680556 |
| ACTN4  | 1800.25771851544 | 2203.82462320864 | 1007.41624313399 | 2882.51330563735 |
|        | 2915.72823797537 | 1024.95957828641 | 1125.28599595312 | 715.638378711433 |
|        | 1140.40904196731 | 853.535700321202 | 1205.45751308367 | 731.848844821402 |
| ACTR10 | 738.579262579782 | 628.485648053393 | 828.683748921915 |                  |
|        | 609.100385482325 | 558.810095726517 | 587.54075434249  | 679.557656724243 |
|        | 837.413261433363 | 568.555967950896 | 969.360864006371 | 685.354305381323 |
|        | 754.97177863997  |                  |                  |                  |
| ACTR1A | 855.415038498392 | 1183.82018168635 | 1069.25265476373 |                  |
|        | 1603.87451959083 | 597.952909577121 | 471.15333189869  | 495.655170027296 |
|        | 470.868288641048 | 514.213675499369 | 493.209107049493 | 653.749043828462 |
|        | 617.474181543858 |                  |                  |                  |
| ACTR1B | 697.97116981445  | 669.731546951281 | 648.823677010146 |                  |
|        | 676.570119607984 | 629.97342429259  | 419.763812610671 | 312.961981998512 |
|        | 391.185365567603 | 443.853458865556 | 387.908774438461 | 424.495400604335 |
|        | 406.54518900348  |                  |                  |                  |
| ACTR2  | 1796.26091584668 | 1515.38811502277 | 2233.00694575483 | 1104.61581891596 |
|        | 1530.45813438919 | 3883.05620256963 | 2856.14739820295 | 4465.66734676111 |
|        | 2080.47567326037 | 2956.63335018838 | 3304.82581034038 | 3253.76017336684 |
| ACTR3  | 1119.71228054585 | 913.934874451961 | 1160.78730097715 | 989.396074034945 |
|        | 457.650982600462 | 1125.95664591686 | 895.114975754684 | 922.50743596248  |
|        | 726.731270955732 | 1165.95924778817 | 1281.1883621512  | 1213.06007305892 |
| ACTR3B | 149.019120812629 | 143.270153772245 | 155.964242240771 |                  |
|        | 150.734560844391 | 166.570606752678 | 160.76044995335  | 148.866229889479 |
|        | 152.122141650397 | 146.75924072364  | 154.499313851756 | 151.855884026072 |
|        | 159.838626443912 |                  |                  |                  |
| ACTR5  | 176.355556618289 | 191.322056430728 | 187.352655464866 | 215.81995779019  |
|        | 222.565515020501 | 248.010317392179 | 233.103476996669 | 250.626556981376 |
|        | 228.926077117474 | 221.231455446574 | 274.595218795127 | 227.64196401771  |
| ACTR6  | 421.459312180809 | 463.622673539254 | 472.030150842569 | 415.322560616847 |
|        | 617.185364180303 | 562.089999265955 | 667.892385395063 | 659.106229917309 |
|        | 558.810095726517 | 442.698000781597 | 123.344450694117 | 494.875547886209 |
| ACTR8  | 193.008902902654 | 170.202597821861 | 198.925776755081 | 184.611146047556 |
|        | 180.941090529551 | 200.342786450248 | 205.4648759901   | 197.308952757609 |
|        | 227.587590278412 | 207.764456828813 | 194.388383297922 | 213.634295832535 |
| ACTRT1 | 165.149464497921 | 184.801068553988 | 167.806420483187 |                  |
|        | 194.686527131656 | 187.955617187544 | 194.112534914308 | 183.545741265706 |
|        | 178.819486867379 | 175.452986514346 | 188.924084292126 | 192.59376129133  |
|        | 163.463191619941 |                  |                  |                  |
| ACTRT2 | 119.950579480571 | 100.04568139926  | 118.32560379073  |                  |
|        | 112.832122823829 | 119.131613164405 | 114.056147008769 | 132.398041172151 |

|        |                  |                  |                  |                  |
|--------|------------------|------------------|------------------|------------------|
|        | 126.401145439668 | 122.223184326586 | 128.438401976279 | 125.050945917101 |
|        | 117.015097017246 |                  |                  |                  |
| ACVR1  | 1212.55338792557 | 902.822697602452 | 833.841469195516 | 783.373390305885 |
|        | 444.826775824095 | 533.893360199271 | 366.636754272029 | 367.644907862372 |
|        | 384.566987097657 | 740.973440818582 | 422.590112942156 | 571.838717184447 |
| ACVR1B | 180.641419603362 | 183.513101761782 | 166.014450044695 |                  |
|        | 178.222120802125 | 235.407064742194 | 216.05364037271  | 188.580458613357 |
|        | 198.681190016247 | 272.16090053595  | 231.600532144945 | 212.016247864691 |
|        | 230.424145472916 |                  |                  |                  |
| ACVR1C | 143.035245560484 | 167.521700144143 | 141.042265614693 |                  |
|        | 128.005043478952 | 159.920703254935 | 134.838366830668 | 143.313605534609 |
|        | 143.336538157639 | 155.290648078877 | 171.410912120195 | 157.547814187442 |
|        | 164.332073056902 |                  |                  |                  |
| ACVR2A | 278.555009982029 | 290.502085667398 | 359.363523948825 |                  |
|        | 285.402072939954 | 208.816482659752 | 440.203336761263 | 255.945470052489 |
|        | 388.710465457313 | 289.517820913799 | 161.841975820372 | 220.710324965453 |
|        | 288.026656721827 |                  |                  |                  |
| ACVR2B | 131.876061826583 | 133.593569062647 | 120.060776752215 |                  |
|        | 137.927403204849 | 154.618685493541 | 127.789230402245 | 131.280092370361 |
|        | 117.856184272322 | 121.286130275542 | 123.689439578326 | 146.763046352405 |
|        | 136.067657949844 |                  |                  |                  |
| ACVRL1 | 476.641032594868 | 410.954095610904 | 190.645917992472 |                  |
|        | 358.897128592042 | 220.047563627558 | 210.729945718068 | 180.578528984075 |
|        | 228.968779778407 | 279.159925913207 | 232.250434241457 | 188.348499229585 |
|        | 187.264411519101 |                  |                  |                  |
| ACY1   | 159.867178630115 | 207.764456828813 | 155.119146797226 | 183.193029399643 |
|        | 1856.05025952611 | 595.120528902501 | 400.621427274425 | 438.340341490622 |
|        | 485.731287873723 | 394.101052511043 | 320.877897822963 | 835.284130042504 |
| ACY3   | 108.868679899494 | 114.812254477058 | 106.900679222135 | 118.000757530896 |
|        | 123.720229113779 | 112.949643549398 | 113.018985316061 | 115.582048644075 |
|        | 111.457176315964 | 113.799997627317 | 111.876915242732 | 112.252555403121 |
| ACYP1  | 240.12078342024  | 216.181417552574 | 232.778488697337 | 233.997642139328 |
|        | 240.054164412429 | 250.037172478288 | 220.999383789474 | 332.194163016646 |
|        | 241.353916553991 | 287.593221911064 | 239.845747958475 | 397.985856484851 |
| ACYP2  | 209.887047474042 | 224.027605834751 | 260.787104931135 | 218.031238893075 |
|        | 240.734451149197 | 238.548578086943 | 226.387465899611 | 227.375773052577 |
|        | 216.903719298575 | 244.925472495705 | 214.200081541057 | 265.61506544085  |
| ADA    | 242.848821222611 | 187.183762762259 | 191.628693083169 | 245.082816415008 |
|        | 250.647644543963 | 336.120322555703 | 272.456310079164 | 176.579096613849 |
|        | 252.404931238338 | 590.849222581206 | 166.988725688589 | 215.219246394594 |
| ADAD1  | 146.798444724408 | 128.594951429021 | 133.676112304498 | 132.681475162386 |
|        | 148.794293762142 | 146.390223079987 | 150.648444878067 | 141.895211025017 |
|        | 133.606068125828 | 124.922004609558 | 124.447971788029 | 145.78573175226  |
| ADAD2  | 116.241531823869 | 121.619593453259 | 119.952108688414 | 115.878861991823 |
|        | 148.49560238679  | 132.411757518105 | 129.299810898979 | 118.430401197079 |
|        | 167.505381046729 | 115.80656409185  | 158.799917136119 | 136.728975205893 |
| ADAL   | 196.615914367563 | 187.997940126066 | 208.095384605737 | 189.419941381565 |
|        | 155.124158030085 | 182.074569356713 | 165.244616507084 | 166.730974538475 |
|        | 162.466301774088 | 161.250520154112 | 160.251996476232 | 187.73896437823  |
| ADAM10 | 166.879042308539 | 160.374491283254 | 201.931760074628 |                  |
|        | 155.463400179872 | 178.885625009973 | 387.355661073935 | 349.623729591612 |
|        | 312.601510033941 | 663.668537495345 | 269.673122990604 | 353.285905782951 |
|        | 650.494111214312 |                  |                  |                  |

ADAM11 131.747367613225 124.079745873727 144.529801006864  
133.728378162206 142.712218120721 129.003317344469 131.611842804029  
135.15791174418 138.776108280637 136.227202534196 170.18781660707  
142.294922363188

ADAM12 140.301389592487 146.518478800271 152.204730003016  
139.974586762939 140.845958602151 136.946137446743 149.035590153457  
138.896595888876 142.605816057276 146.832797779597 141.374831983971  
142.33269270703

ADAM15 442.12886967939 716.229989890801 385.888395433066  
755.79669622705 4602.81651147558 1219.36024606325 545.362650746876  
1496.0924333403 855.112210714686 1258.16519121331 562.232754247201  
1102.38234645327

ADAM17 406.54518900348 395.588345893987 326.246702537465  
398.571054759451 441.001837510132 445.214621023114 373.096629378654  
345.832589037442 283.760131847707 358.217145707718 418.420753332232  
309.098519056843

ADAM18 111.336798977475 94.3531468700382 105.952640312359  
117.045020667394 102.661440700541 113.40684693417 114.213405341709  
107.544568250154 110.651971902576 121.067907968175 105.450273343324  
110.651971902576

ADAM19 858.020739710943 664.60530723006 761.89271251455  
938.049312229961 143.313605534609 160.769011617127 162.247608931408  
154.455641374384 194.584034984339 216.903719298575 164.603403251634  
153.95855605751

ADAM2 159.961729971624 144.612549022264 168.744610747563 172.157660228549  
172.245089970803 157.627490896581 162.274094333189 173.071892362758  
153.200153031275 198.815448428294 160.543465620248 167.645930148254

ADAM20 114.749597426757 129.16337177104 114.589757401741  
120.174672871542 132.133979108537 122.706176540192 123.893768254549  
129.508990861362 120.702740607924 112.088944448944 119.586157804692  
121.347339077474

ADAM21 132.70643154246 123.96665768708 129.502730573463  
123.991249190444 125.609542142983 132.541420804792 118.697969266426  
123.678365506247 120.413468119484 124.258412895333 147.818956338752  
121.580726825432

ADAM21P 133.766199453456 123.959050197189 123.629279569085  
110.355493122568 120.337241026338 131.468537312778 116.810827219571  
125.729079191033 113.521599852465 118.684077097437 120.238706364491  
115.975794003391

ADAM22 130.198147836925 137.468570135972 126.182856027765  
140.402944266863 133.439077726411 113.852849454448 116.118745494794  
124.511674561183 122.789656787728 116.759526220736 129.044445373107  
117.682034050478

ADAM23 148.534143255537 139.714198638713 130.396593013401  
148.272252953881 128.702882993588 134.522715664256 126.00304757051  
131.899614022767 126.925982415892 177.103802332144 136.02474314035  
127.211469322857

ADAM28 126.766964875664 130.092881020271 127.871445879091  
118.75237770613 119.774204444899 125.752962155179 140.03443832328  
121.508233749444 137.674025476238 118.855500322915 167.640645997754  
141.03218895811

ADAM29 147.238896426423 138.707412596757 144.748564682545  
149.52880714343 161.543072816738 142.338352884053 158.411846122784

175.437651670246 140.332045911008 160.786907816025 159.286484253487  
164.078423844421  
ADAM30 131.373012256275 127.657961561231 120.15332480712  
136.843164021899 146.125125252096 144.479410859199 151.92638745703  
123.972321838378 138.023752854109 136.77260462185 113.521599852465  
124.676743480622  
ADAM32 142.592455241752 156.47237266917 139.631165400881  
144.781438651649 371.06697207449 148.936888662374 140.793616429174  
140.385509382606 141.204458186976 130.116771999391 130.66863243733  
137.335501759561  
ADAM33 173.507835230243 148.353927712013 175.148318011395  
154.433679792749 130.814702312493 125.600500146679 127.407418037777  
124.324855155055 122.503984297406 138.43301474649 153.222807811478  
133.413325516456  
ADAM3A 142.268018184723 139.926488041421 136.126542897364  
149.471240458766 152.032418787633 145.987228759402 149.37190049932  
145.041430440608 151.04846635538 134.519697269443 138.649502040582  
146.96155692518  
ADAM5 138.875827888646 132.748478264583 127.990453128978 145.212306927438  
140.933444607646 146.606442726047 145.291984088491 135.014118238255  
129.838790698396 137.006917665541 131.702788057359 136.609461559853  
ADAM5P 117.623103460369 109.282814458761 117.480506535399  
112.456644814178 110.510191137073 116.700397932007 121.865696440776  
124.74291205933 130.043904881142 123.668707648172 119.733311319912  
111.73388372572  
ADAM6 151.234397206563 134.029984991385 149.786445079456 152.007436762651  
129.246066890078 155.824409540332 138.021559586328 146.481298877242  
139.480361732772 151.954389699615 136.922282125029 131.17119492692  
ADAM7 124.947565043721 122.472909598385 118.45291712775 121.423030266904  
123.807693112932 109.74983281634 123.538037290702 120.831070822199  
123.291258843371 125.739133257542 137.559204418819 144.220296819311  
ADAM8 134.793399942417 136.532168520039 128.144653206398 121.877276961306  
143.222342904886 157.528409294029 211.660148497276 214.396920524803  
273.402804140541 154.710000519109 321.492900106953 467.04976953755  
ADAM9 294.069353373633 228.616558999054 221.18757533703 238.344676327918  
265.260411490697 427.390091157726 217.628802427037 177.772019227116  
159.738700107615 332.666916002481 178.294972422671 225.820503820866  
ADAMDEC1 133.158570377793 140.505338990718 137.500310477851  
134.356796881432 144.692900548503 144.568417378353 149.427217345037  
272.16090053595 229.660838239474 172.442311733494 149.8035588048  
154.985781979984  
ADAMTS1 1254.19980463817 1369.89073267996 394.892918166519  
631.653707589221 214.739818213164 488.57622466019 358.217145707718  
362.899103657252 274.77366169918 277.86338481075 297.228563607097  
233.335353447342  
ADAMTS10 123.159407368236 119.094868654252 126.097544650407  
127.7962242731 117.47631318854 115.033355516602 121.36708642226  
119.854401979951 127.921209207879 123.312000381122 124.857461801227  
115.305518560239  
ADAMTS12 123.361179535626 130.877306095063 117.539640414775  
126.853028093579 128.756818133357 120.046892432373 128.36121178972  
124.879018642505 123.051777473512 122.75516501062 140.318155161909  
129.267923706188

ADAMTS13 128.116394188709 126.401775332213 121.30744400137  
129.984214994811 127.015086299437 126.784243009941 130.06441029462  
126.310788291075 117.639216182057 125.810756286648 134.262346867514  
129.745892720738  
ADAMTS14 143.155998311198 137.864637728155 130.272086123019  
131.162118170837 125.016608289141 124.97886512783 129.445240570626  
128.783262618114 137.625415175495 130.576944864484 136.162938063831  
129.854478528455  
ADAMTS15 135.664877050226 145.870135196037 159.324816814876  
139.051656180599 168.384397488011 170.069291215013 157.328404229451  
141.872426752329 142.261639670072 166.655585160657 150.914644894869  
149.31422191209  
ADAMTS16 115.5765427629 110.081964209973 116.695313319162  
111.568329540016 126.401145439668 116.070254821073 110.347631909888  
109.680532131035 120.871693555514 105.050093408041 135.155955441604  
115.531710316716  
ADAMTS17 156.994265858123 148.350919010575 154.947359473187  
157.78390301218 137.990806386929 139.420025842675 124.783306383852  
154.212927357622 153.770852731422 143.298218989451 153.67215573765  
142.736148814019  
ADAMTS18 126.809252651352 136.411722212312 132.37450516592  
116.844361858869 134.250052775987 136.944378905743 129.505139430366  
133.184279519985 124.424565172377 127.629258006335 126.991140761102  
130.277107538053  
ADAMTS19 140.840895590527 138.938546468136 116.639787832302  
112.264005988662 145.511473738224 120.054065939835 114.067790137477  
115.389934936253 126.180714796187 120.809659457873 113.460835359833  
111.020070405368  
ADAMTS2 175.819983804497 161.485353443949 149.513744292932  
183.42877315644 138.62994237184 143.818379692331 130.563756903074  
134.7552564959 141.486042999328 154.021906399992 128.189685312596  
139.490103923544  
ADAMTS20 125.746184969983 130.584348445667 131.794065532001  
141.225533609907 129.034770823878 136.313623567821 132.440818532628  
143.015905927379 132.218907367109 140.762415240824 127.144291519133  
133.173541338355  
ADAMTS3 146.512045729234 139.501279970508 130.113673389232  
139.843416673512 135.296271683847 132.322618637842 134.666505160831  
136.587165242663 137.163699337032 148.263293819238 112.661607612444  
149.350630572336  
ADAMTS4 115.949513659403 110.838647534175 110.003750007057  
110.688722702767 121.841080387875 107.365390754133 111.820208385514  
112.198629213643 118.533346268154 141.890803125137 131.416923875254  
113.163651806803  
ADAMTS5 167.243544185778 188.708596785144 158.089922688997  
157.713227527385 135.760578586004 138.374092984164 128.340524378217  
121.360822445187 140.120051507626 136.470025638057 135.028746262383  
127.352386363217  
ADAMTS6 179.067275037015 179.854800301573 244.954917633904  
235.76573393374 150.613624696604 156.801189586018 141.208106961875  
168.205277839471 159.771672778698 144.154217446011 168.801737310947  
147.382177739631  
ADAMTS7 140.794929983858 137.182323015758 142.530082312562  
149.611601613715 154.620194499553 139.776830704087 139.488057371254

140.796641921516 136.633726784926 140.497181450706 139.297276687352  
 157.672378669483  
 ADAMTS8 337.585502787016 347.73629731446 154.744065805492  
 504.617795280805 152.080057231881 175.9510758779 181.747090380435  
 184.709768457405 155.798048652444 192.022864170934 147.638057399165  
 172.942666836182  
 ADAMTS9 214.355086255855 262.259969786927 148.791182443623  
 269.238332581564 136.357788670568 171.373932115412 125.975257879912  
 143.546629073997 154.591116158776 131.210866639392 146.6306281408  
 125.997109913348  
 ADAMTSL1 139.287871460674 136.846912694371 125.569364049349  
 132.047328970556 132.164132609317 127.167918433035 124.01558540593  
 133.954514563283 131.226834630025 124.285969778268 137.271702725819  
 133.627890571828  
 ADAMTSL2 410.42088953434 383.503040287678 134.247361216412  
 168.861884032201 260.195256836955 328.919401925375 163.36682525399  
 260.489744360233 263.74335003375 295.607161318725 176.194292036542  
 160.042251279235  
 ADAMTSL3 416.638529499878 312.339824919124 364.022018936132  
 363.150472154973 139.811873260553 154.398416018484 144.082452235267  
 134.646131480502 137.401137659118 149.645548888832 147.086734464001  
 138.279087298069  
 ADAMTSL4 206.413554839865 186.430014478919 156.146154578237  
 210.290500215377 154.591116158776 133.252140649104 136.837430157894  
 132.115817176834 152.47429737104 181.722373730185 135.358837968905  
 131.38692240237  
 ADAMTSL5 171.426334687626 163.607125532236 148.780775862239  
 185.046826969912 141.539503634005 141.850952191423 165.355764467096  
 168.588120398433 152.72717701452 202.583967728957 156.392603045231  
 172.486839924297  
 ADAP1 181.530767521222 143.455941298415 171.880470629305 137.187640876289  
 302.809011218879 205.830321788612 145.633647856775 164.295628750438  
 156.671252606074 154.509924503184 196.269193578525 227.587590278412  
 ADAP2 269.261595558589 275.543576337502 200.518684601283 331.795832780176  
 254.607324522225 274.974304050999 250.25959091612 280.948704707655  
 339.069385816411 588.076436392983 300.401370666633 210.061754644824  
 ADAR 1320.74943817958 1086.33540858772 835.284130042504 1098.78649254838  
 1147.96742431386 1149.3250945792 1190.62010668045 1730.30703463073  
 1341.78081782818 944.92617668298 1373.67062432073 1561.87054049124  
 ADARB1 1699.8374761666 1727.7144253077 2291.40912229281  
 2180.31963682546 140.372463604232 149.984657985607 162.786351190659  
 163.203582580217 184.742960975938 187.920789153124 182.209056248253  
 127.058373069911  
 ADARB2 148.454344601562 136.886677060418 150.442821494908  
 137.861973133557 122.711143209444 144.370811043456 142.02169810999  
 129.173772079264 142.157512965166 142.874797429568 158.020651857664  
 151.660152977515  
 ADAT1 212.016247864691 197.848577663238 251.993821914623 231.180528071672  
 222.156471143857 277.406445570925 270.231637012624 261.988345506548  
 304.8111116024094 264.476846259384 274.934292929666 328.550286726543  
 ADAT2 150.610633329908 138.947760022173 145.063062479224 175.98210925643  
 167.025336068642 156.18389905051 154.886628987246 150.021512237553  
 140.01151290873 148.993620368781 162.304178370233 184.577511730401

|         |                  |                  |                  |                  |
|---------|------------------|------------------|------------------|------------------|
| ADAT3   | 181.966110264509 | 167.315702949236 | 156.942156078314 | 164.48570046081  |
|         | 204.347931209047 | 215.094633380547 | 179.950904921667 | 222.243523614518 |
|         | 180.889946069121 | 204.237952297239 | 201.441808401878 | 184.989027770708 |
| ADC     | 165.553581848949 | 149.198753359122 | 143.45723206497  | 164.274491958161 |
|         | 134.132312782731 | 133.794524856909 | 141.205975588506 | 130.101422420432 |
|         | 139.515794685984 | 141.272049404557 | 139.571752933877 | 143.137158027738 |
| ADCK1   | 255.413231082357 | 275.437030326768 | 282.282663608264 | 378.151202933526 |
|         | 352.354687089427 | 178.966169998125 | 196.734037460218 | 219.103510284905 |
|         | 202.458096827378 | 212.312154721246 | 192.627266049516 | 213.652091843896 |
| ADCK2   | 404.54681330209  | 438.03648998391  | 422.973606694449 | 433.405369327168 |
|         | 1557.00226259883 | 660.535644289024 | 946.273229715791 | 986.441377365124 |
|         | 833.841469195516 | 491.112594297928 | 712.94845413251  | 1018.38836615952 |
| ADCK4   | 161.803438841859 | 190.405863264717 | 158.679903271595 | 251.787648609546 |
|         | 512.184962338131 | 271.004741629789 | 217.748916080172 | 200.741234443918 |
|         | 184.398672994943 | 156.073428882485 | 199.490190715307 | 171.869472272081 |
| ADCK5   | 183.397833894087 | 194.337080066417 | 162.689415085423 | 165.82215325714  |
|         | 232.385176936256 | 172.468440317443 | 168.018785514306 | 221.272872023413 |
|         | 237.521746704115 | 192.580288063603 | 191.830711714844 | 183.779065928447 |
| ADCY1   | 154.792156982219 | 142.234554325754 | 144.975347788913 | 142.416237823488 |
|         | 161.072844903925 | 144.301577198126 | 203.206743799353 | 185.560737176115 |
|         | 159.918778562802 | 145.483667452136 | 173.640326140494 | 162.519642881848 |
| ADCY10  | 127.233439204926 | 141.213588194832 | 140.226586111216 |                  |
|         | 138.196640512429 | 147.52403424052  | 144.0534341937   | 129.80429516198  |
|         | 156.632939064629 | 147.604213625382 | 149.907472831817 | 127.893555451807 |
|         | 135.443856371548 |                  |                  |                  |
| ADCY2   | 142.063338490772 | 146.291932367254 | 155.52533851273  | 142.299535614113 |
|         | 136.565191271943 | 131.539170756533 | 151.282370273189 | 144.219104742099 |
|         | 142.75592155869  | 130.642810886161 | 137.773960847088 | 132.087183382523 |
| ADCY3   | 1237.56662467492 | 1379.26881813339 | 517.529147171876 | 961.931130189779 |
|         | 1177.70376288106 | 1324.56751399862 | 657.058213650454 | 831.610501402173 |
|         | 673.824770556885 | 1012.44277312494 | 294.323621186916 | 882.798927428142 |
| ADCY4   | 331.464977124667 | 422.840163973614 | 220.742788129847 | 336.380724981693 |
|         | 130.927299997874 | 177.72965427263  | 128.593112520767 | 194.488249052694 |
|         | 241.203521822269 | 156.262515148436 | 212.107842040568 | 144.920107068083 |
| ADCY5   | 228.100112133941 | 193.95909424044  | 223.872330412144 | 242.188218870393 |
|         | 143.795399778897 | 150.993910190626 | 143.969566798989 | 163.298729857831 |
|         | 146.720204808211 | 143.683545371898 | 155.004104153679 | 156.430981244063 |
| ADCY6   | 284.891415492568 | 347.866264631778 | 256.022057262325 | 356.699466789374 |
|         | 429.922530506572 | 206.753993163216 | 391.569187190375 | 299.851173200352 |
|         | 392.746574862867 | 188.654966029389 | 444.374521095495 | 240.376851873817 |
| ADCY7   | 172.552923333095 | 172.222262910052 | 174.560168983121 | 187.325542100762 |
|         | 151.958818313561 | 142.768691899824 | 155.52533851273  | 154.71904132098  |
|         | 196.759802659759 | 302.272304483941 | 232.621526025603 | 173.735045816949 |
| ADCY8   | 142.411117330429 | 137.597788349982 | 150.717996520257 | 157.061602966797 |
|         | 134.216088147701 | 141.272049404557 | 135.507247740621 | 135.670409501435 |
|         | 150.43722766614  | 145.085091507228 | 147.140771901106 | 152.247504238261 |
| ADCY9   | 359.440639663655 | 396.988248940183 | 385.379119927642 | 431.686900474971 |
|         | 144.436358527414 | 125.738320262644 | 180.20999937977  | 127.368207232723 |
|         | 142.483308497682 | 144.916193282062 | 145.826955036113 | 137.118488157416 |
| ADCYAP1 | 113.043089777907 | 116.5272207025   | 108.955761698524 |                  |
|         | 114.115609163126 | 115.963144087717 | 116.46192274217  | 108.589444216106 |
|         | 115.137475087954 | 127.731816003312 | 101.149125916797 | 121.057111457792 |
|         | 106.576058729493 |                  |                  |                  |



|           |                  |                  |                  |                  |
|-----------|------------------|------------------|------------------|------------------|
| ADCYAP1R1 | 115.01682934323  | 116.082361389405 | 112.38543517651  |                  |
|           | 111.43827410589  | 111.152235113722 | 108.497209666203 | 109.333276735523 |
|           | 110.273174147374 | 121.059923601223 | 112.612099135361 | 117.178495957357 |
|           | 125.840932898827 |                  |                  |                  |
| ADD1      | 3528.62443098065 | 4047.99200599472 | 3560.23794634993 | 5347.78127066964 |
|           | 1607.52029676299 | 1373.67062432073 | 2131.68478964427 | 1787.32566525551 |
|           | 1726.15788525017 | 1490.02976786379 | 2236.73950603157 | 1439.37593006882 |
| ADD2      | 129.086186239653 | 123.069963218224 | 127.654130155446 | 127.155818626031 |
|           | 126.506749037908 | 124.555847618988 | 123.813766735115 | 124.676743480622 |
|           | 127.723052839953 | 125.234097725749 | 122.547842148486 | 125.569364049349 |
| ADD3      | 612.06231165648  | 545.760623858473 | 426.364663722264 | 464.323065038265 |
|           | 320.812909889014 | 362.195903246495 | 517.42417250172  | 435.183433729519 |
|           | 424.37437028833  | 296.428342247529 | 583.697431061521 | 431.182384100794 |
| ADH1A     | 2672.77147589342 | 2028.67873136046 | 3029.07443443457 | 1995.6000523628  |
|           | 127.171331062578 | 295.463118191589 | 122.297401003756 | 367.983166440977 |
|           | 454.854528472591 | 141.568970008164 | 179.601348561497 | 126.37572518012  |
| ADH1B     | 527.226517960073 | 490.269418483997 | 454.34729744062  | 425.13721408756  |
|           | 129.888444399067 | 157.754622099874 | 148.844916975586 | 149.041707216561 |
|           | 158.911404625381 | 126.288011849541 | 129.818020166075 | 135.285224699704 |
| ADH1C     | 161.813099560175 | 207.023221559302 | 161.501062527272 | 221.152973486208 |
|           | 156.562197068687 | 192.375251343504 | 141.865758685796 | 217.435155984897 |
|           | 173.70035122661  | 153.222807811478 | 152.647566393845 | 154.057771254252 |
| ADH4      | 153.726935957906 | 163.146581498065 | 133.957160768065 | 165.977852973826 |
|           | 125.143281492089 | 126.617737577634 | 126.702705908175 | 157.739526559807 |
|           | 186.611870261871 | 130.807596523171 | 148.382228428693 | 121.893446546512 |
| ADH5      | 243.10297424873  | 228.243668453958 | 467.512355593598 | 234.996704304673 |
|           | 158.610249594568 | 434.509391836336 | 230.079664410595 | 169.061364889307 |
|           | 168.687845035401 | 232.083160165968 | 232.986366625889 | 230.723142236623 |
| ADH6      | 130.450930089722 | 141.156434225355 | 131.958760372325 | 124.300285428221 |
|           | 138.519129384809 | 124.873289279767 | 117.65847906412  | 132.784949538167 |
|           | 359.703969802888 | 128.611740835252 | 157.076284096905 | 143.40955339735  |
| ADH7      | 135.99579763634  | 159.424105896749 | 164.198494818485 | 170.283532007581 |
|           | 156.262515148436 | 223.359785518285 | 165.239214141562 | 272.456310079164 |
|           | 347.487059316081 | 214.241635800083 | 145.517559593811 | 132.269567096683 |
| ADHFE1    | 368.0573385048   | 326.354469134694 | 727.814681346494 |                  |
|           | 327.480268032814 | 165.342790388607 | 171.028432989066 | 183.83720937589  |
|           | 158.241349852419 | 159.452527363763 | 191.445291899108 | 155.7441762827   |
|           | 163.59704679338  |                  |                  |                  |
| ADI1      | 507.56875910742  | 484.903322308422 | 387.403502892897 | 552.167699318911 |
|           | 422.590112942156 | 742.517302567436 | 501.005898087825 | 441.958777965408 |
|           | 305.93974940209  | 319.090371885653 | 506.562512021352 | 437.344765185802 |
| ADIG      | 115.247223837316 | 120.089228795888 | 111.908965758799 | 114.200099628087 |
|           | 111.525984720592 | 109.770126492743 | 110.202982683256 | 104.406314027414 |
|           | 109.113476990309 | 116.540729581355 | 132.559118679298 | 110.382724813928 |
| ADIPOQ    | 156.548858402702 | 148.73620012231  | 162.863781294205 |                  |
|           | 161.655336107432 | 152.667721542507 | 146.795608819024 | 151.84373370805  |
|           | 163.099009810658 | 161.866405026758 | 147.459385142695 | 140.92066676704  |
|           | 152.883970401452 |                  |                  |                  |
| ADIPOR1   | 320.648966489586 | 346.356312668445 | 428.569462312363 |                  |
|           | 295.678097392123 | 414.200068430184 | 490.464012303239 | 721.11578916385  |
|           | 342.315456386729 | 650.911886508922 | 909.020708316287 | 780.734359041347 |
|           | 721.11578916385  |                  |                  |                  |
| ADIPOR2   | 628.000860165888 | 659.483452217461 | 542.740017003369 |                  |
|           | 724.777166238211 | 386.305638633172 | 429.595453454621 | 609.100385482325 |

|         |                  |                  |                  |                  |
|---------|------------------|------------------|------------------|------------------|
|         | 693.781708146282 | 769.958422740085 | 755.42757464615  | 600.919152191636 |
|         | 412.202049714695 |                  |                  |                  |
| ADK     | 184.655641182839 | 184.655641182839 | 207.023221559302 | 172.430211711547 |
|         | 245.153736298067 | 219.709231012465 | 285.131244588624 | 219.792171863015 |
|         | 222.118666699301 | 357.191675549592 | 264.628012152168 | 263.74335003375  |
| ADM     | 2423.84327263111 | 1914.96285167893 | 2078.76377557352 | 1362.1486006778  |
|         | 1808.26383618901 | 694.288215755716 | 2792.13364570755 | 2222.16226526877 |
|         | 1205.45751308367 | 12457.6956682374 | 2086.15449885278 | 1702.68441407727 |
| ADM2    | 143.795399778897 | 141.960809148036 | 140.36602776806  | 125.444541266623 |
|         | 154.150568177135 | 134.273326732349 | 143.491142564838 | 159.413535577361 |
|         | 171.384487293154 | 153.432933930805 | 142.281657284178 | 156.375876454394 |
| ADNP    | 324.671490117952 | 321.119758814618 | 376.189276074918 | 283.874600697211 |
|         | 372.024884481775 | 673.176084400831 | 630.473042320288 | 405.64711132293  |
|         | 495.099443245153 | 354.656612182522 | 511.779988437654 | 425.229044880287 |
| ADNP2   | 489.022371276542 | 407.711669482083 | 441.112782197591 | 362.502631441716 |
|         | 359.577827010792 | 546.841563406813 | 564.200165295159 | 702.981741565482 |
|         | 459.973764138144 | 528.767644181119 | 495.56459361431  | 631.408955630318 |
| ADO     | 524.541494680558 | 485.026081242201 | 466.4890990178   | 467.944850290806 |
|         | 432.604462607037 | 388.573321838751 | 371.693808540758 | 340.301980622308 |
|         | 352.945088028205 | 285.980446338971 | 521.215655189324 | 425.13721408756  |
| ADORA1  | 149.772157318769 | 151.024201732633 | 138.411148122407 |                  |
|         | 135.268963938932 | 144.961095334901 | 139.54738445816  | 144.445496145045 |
|         | 136.85323853426  | 150.985061659285 | 144.570725886413 | 150.364511432468 |
|         | 141.181931072161 |                  |                  |                  |
| ADORA2A | 165.06655355918  | 161.704966315183 | 181.681929801968 |                  |
|         | 178.728925255163 | 159.592581700976 | 165.51742391186  | 166.81024151246  |
|         | 172.310673499572 | 176.208206282902 | 176.77183598995  | 145.522435728191 |
|         | 145.588981165456 |                  |                  |                  |
| ADORA2B | 213.338918839446 | 188.503673684625 | 156.481871341275 |                  |
|         | 167.100039749329 | 460.408628542721 | 447.909277144896 | 281.694635436938 |
|         | 245.553138677866 | 160.773510498005 | 423.489441909617 | 328.730722366546 |
|         | 267.190228116903 |                  |                  |                  |
| ADORA3  | 154.316929706697 | 155.722314592388 | 155.917655560227 |                  |
|         | 139.334552725255 | 139.991780068793 | 151.3362561751   | 178.835679834487 |
|         | 198.390247605355 | 171.350620456505 | 212.710910778949 | 155.608876496443 |
|         | 179.079061789059 |                  |                  |                  |
| ADPGK   | 321.794887577351 | 297.176755638159 | 315.130912368929 | 280.913748398876 |
|         | 369.646624431062 | 458.151323130855 | 463.187551361986 | 362.795691170335 |
|         | 502.170430910893 | 408.037874667173 | 344.915370555826 | 429.595453454621 |
| ADPRH   | 189.678680702271 | 188.623897093065 | 183.937484597232 | 204.103018614608 |
|         | 148.245974323625 | 161.866405026758 | 137.736771579507 | 138.861385127242 |
|         | 165.337956130606 | 145.551717838423 | 170.701964358516 | 138.726894569892 |
| ADPRHL1 | 137.016495611111 | 139.989830921287 | 134.418976976995 |                  |
|         | 137.4552565025   | 176.167129202773 | 140.208983238283 | 129.945543636232 |
|         | 134.737901773547 | 143.521510363933 | 128.232091717966 | 148.237980436128 |
|         | 158.434048174501 |                  |                  |                  |
| ADPRHL2 | 370.390323116113 | 425.826693178023 | 497.916883763059 |                  |
|         | 489.022371276542 | 686.679573646733 | 705.020444579319 | 846.425467119342 |
|         | 684.715981522999 | 803.840404197117 | 740.800822095116 | 495.099443245153 |
|         | 604.737834405874 |                  |                  |                  |
| ADRA1A  | 132.639070127232 | 131.861469782134 | 124.368438691944 |                  |
|         | 126.759554774012 | 126.720031203392 | 124.595925483149 | 129.723501897231 |
|         | 120.735176435195 | 121.825639714374 | 126.494665743087 | 134.405155876727 |
|         | 133.583297305219 |                  |                  |                  |

ADRA1B 137.543128522665 139.552533656255 136.657107363796  
143.305848051593 157.134782748175 136.670253859184 132.541420804792  
116.653897702566 138.173547382901 134.084602409011 154.239755912437  
125.431735524937  
ADRA1D 125.157459724842 111.65024009102 108.850992642446  
109.506450285923 114.39161822971 107.48180681159 112.971776964469  
114.730641277464 112.936472036608 102.343275379164 127.558034562151  
105.050093408041  
ADRA2A 209.5184563244 253.463871742303 171.465178761171  
237.473927775823 189.985520850855 146.82149406175 165.960176666275  
167.893596681867 164.448110885609 173.468958175014 174.576132939661  
154.691783046492  
ADRA2B 185.374745525698 186.653791045656 178.946928223991  
206.502189514795 171.494975393562 187.082082429597 174.027190728107  
165.092451754065 168.427124752461 170.266415287865 166.503112149416  
176.704617691988  
ADRA2C 131.973896985615 131.93683726912 127.277128410056  
130.991496243273 135.131890100292 125.800508653231 129.705735906962  
124.595925483149 131.534097198718 129.108534267222 150.314462939164  
130.980885733161  
ADRB1 143.78994470501 139.980504765791 147.595573192579 118.988269692812  
168.052288484172 144.565926379402 160.76044995335 164.942652212218  
132.681475162386 147.036768856136 171.494975393562 150.754492902512  
ADRB2 322.64731764456 325.493177980483 241.019436415703 362.795691170335  
221.45275440794 177.549330396268 182.984076352185 252.593574250965  
225.803528238368 1460.24985399013 174.274996381853 193.871324880919  
ADRB3 190.444387031552 176.317805247749 175.98210925643 246.186104432792  
152.925281215593 137.803749343493 141.849319373594 135.175806654971  
127.001546144286 130.977864137459 127.941584184869 142.866874321248  
ADRBK1 481.933386283351 531.555532787504 515.432065049838  
642.255110250493 1455.75693295732 1131.22418479945 797.73902873919  
661.826149512811 1144.07896461196 838.93563319979 841.623780229898  
816.823443819069  
ADRBK2 136.6729514905 131.150252587865 138.836422729663  
148.380555606786 152.371569700039 131.442186260672 128.78647242525  
139.420025842675 142.411117330429 145.068061371609 148.222477811166  
131.917194849285  
ADRM1 754.406896156858 816.580880338838 780.461254794127 1084.10984365393  
3024.62888503536 1504.15682715484 1230.00744483191 1042.40539020413  
1109.79571066685 973.543357809971 960.775251871864 1186.23169583595  
ADSL 1198.53117439169 1079.58110075176 1341.78081782818 1364.83036157729  
1154.1046856215 1311.34904760947 1061.79595707572 1170.88763035931  
1189.11053680293 1558.22238167317 1044.52286986369 1278.30505902957  
ADSS 537.982214580518 463.187551361986 657.77730563722 402.824964079515  
374.106258053201 902.089561157715 720.077057619735 794.636255515909  
601.997464467917 709.303384219887 365.441289363381 1000.05896885496  
ADSSL1 154.01988200569 158.371599884762 165.192945734166  
164.929445749888 239.845747958475 151.151297821117 185.938983266802  
164.284396793834 152.705458417973 240.631264915238 188.818012746123  
193.292596471113  
AEBP1 3119.93811557461 3019.57419253979 1827.03179366146 2399.88695085752  
270.651318838953 247.373571011712 183.236087954054 330.703588385626  
533.279122416818 962.559482864549 171.071893074072 180.719868519867

|         |                  |                  |                  |                  |
|---------|------------------|------------------|------------------|------------------|
| AEBP2   | 410.216584967666 | 366.473258467746 | 505.560841055884 | 335.938170230765 |
|         | 306.550948766362 | 306.550948766362 | 352.180110869664 | 258.998065427002 |
|         | 278.942695435238 | 359.363523948825 | 246.457698183615 | 262.452869676209 |
| AEN     | 228.284236550547 | 207.417884407459 | 158.374760929273 | 212.545989139388 |
|         | 239.789994201722 | 185.100455193182 | 198.885004378065 | 199.776140037612 |
|         | 218.134101819445 | 168.582192754233 | 172.641322197031 | 175.874387612235 |
| AES     | 1470.23096656138 | 1637.66306286151 | 1880.35608492553 | 2159.2992548378  |
|         | 2733.68308784024 | 1155.4487861163  | 1405.2134783352  | 1106.75785702993 |
|         | 1143.0779222425  | 671.387334588652 | 1889.05071563459 | 1228.89116158868 |
| AFAP1   | 420.446810988909 | 425.708048519408 | 434.073729807058 | 563.648536446918 |
|         | 159.539320132392 | 162.472783116487 | 150.19577351885  | 163.558869203898 |
|         | 166.099940078284 | 183.472290949588 | 147.896919205072 | 181.328458560967 |
| AFAP1L1 | 162.481362579872 | 193.008902902654 | 165.537853089052 |                  |
|         | 190.825209733575 | 165.673535349675 | 185.905819051223 | 151.070654092886 |
|         | 184.505279093688 | 169.301498852556 | 238.946506103155 | 165.977852973826 |
|         | 143.236593995493 |                  |                  |                  |
| AFAP1L2 | 299.106362530855 | 291.720204789005 | 161.581641777014 |                  |
|         | 235.997227173296 | 165.863118584978 | 155.172667450053 | 134.640783050966 |
|         | 156.674411447713 | 177.60876237572  | 258.16437138327  | 245.489266602897 |
|         | 173.599961799334 |                  |                  |                  |
| AFAR3   | 129.966755942173 | 155.878493935166 | 165.570531605115 | 141.069243738242 |
|         | 145.34041912391  | 156.399808270033 | 140.368070973566 | 139.771342253058 |
|         | 143.112205432731 | 132.243900762936 | 150.073816271065 | 142.390243984362 |
| AFARP1  | 147.959740692766 | 138.9183380982   | 147.367666575705 |                  |
|         | 138.146668191454 | 143.697931551096 | 139.886499402506 | 157.36568754472  |
|         | 155.502363062633 | 148.380555606786 | 151.669421563954 | 138.521952850632 |
|         | 133.883527462382 |                  |                  |                  |
| AFF1    | 261.541138637729 | 216.859640534581 | 297.419034136005 | 232.151020756625 |
|         | 154.768422926874 | 257.941367816557 | 237.940015617254 | 284.195575802966 |
|         | 289.616527814137 | 227.467161919443 | 278.192669077191 | 270.490971664802 |
| AFF2    | 124.952026709219 | 130.270184521521 | 130.461084106455 | 123.055210862247 |
|         | 130.433405111592 | 119.135701239571 | 121.603608840998 | 124.176944998906 |
|         | 127.086470811408 | 124.15094220181  | 119.882472552083 | 131.606765174514 |
| AFF3    | 403.208138816247 | 401.461825804111 | 411.71606840872  | 434.792010353541 |
|         | 122.506058130261 | 132.568354349687 | 114.45792163942  | 118.879931299016 |
|         | 150.176942469551 | 124.452631766045 | 120.29173510435  | 129.421772713718 |
| AFF4    | 712.699853328955 | 526.896146537814 | 1092.74905085695 | 465.926873285563 |
|         | 208.214764518526 | 710.531876484467 | 939.213447046823 | 691.397238677552 |
|         | 536.46884541183  | 1185.70008959602 | 465.683139139622 | 1194.42925868786 |
| AFG3L1  | 158.627416752905 | 158.604431001643 | 171.254015232189 |                  |
|         | 145.491525555916 | 141.840858913807 | 149.277880094957 | 158.100395482569 |
|         | 157.627490896581 | 156.695440330379 | 152.547558436703 | 167.164675439456 |
|         | 164.991522994763 |                  |                  |                  |
| AFG3L2  | 893.676600121113 | 913.22732386079  | 1004.97723186946 |                  |
|         | 968.548243081111 | 464.323065038265 | 1478.09582385838 | 987.564350211893 |
|         | 1312.44215746801 | 1086.33540858772 | 1089.16489859253 | 961.931130189779 |
|         | 1358.29475573637 |                  |                  |                  |
| AFM     | 120.944267930809 | 106.701716475947 | 107.466184687811 | 109.625579596864 |
|         | 116.074423050416 | 111.928204694188 | 114.867454554206 | 99.9173294438729 |
|         | 109.398997827329 | 107.498500136859 | 125.639355645626 | 107.221547998974 |
| AFMID   | 156.389361240637 | 163.010527914347 | 162.9279134169   | 167.594414386475 |
|         | 187.196424491482 | 188.515336186633 | 194.430896269275 | 188.995551740427 |
|         | 180.952017616136 | 158.8246699332   | 167.130843160309 | 210.822216545773 |

|        |                  |                  |                  |                  |
|--------|------------------|------------------|------------------|------------------|
| AFP    | 124.516264338772 | 144.858656365799 | 143.227410286571 | 137.363483527372 |
|        | 127.777945516765 | 140.482728188987 | 144.954595802474 | 122.944699010173 |
|        | 150.058160923921 | 143.07651558428  | 129.928047362701 | 130.701801496564 |
| AFTP   | 318.112626495401 | 310.174932137546 | 315.786908578669 | 256.99019407912  |
|        | 348.506289278042 | 534.276129011237 | 372.088129459528 | 502.935749606918 |
|        | 390.809169896009 | 352.741885295157 | 380.146996799549 | 328.486476842582 |
| AGA    | 250.737252834098 | 230.469548500304 | 254.812605074045 | 222.20526515049  |
|        | 227.689356258276 | 259.472319994929 | 385.750371084    | 347.224999246223 |
|        | 333.822167152866 | 439.616817413027 | 391.706404954357 | 429.351447428661 |
| AGAP1  | 134.994013668445 | 144.551233687082 | 128.186963138555 | 136.258073395013 |
|        | 140.453219944445 | 132.70109232982  | 137.884051774657 | 135.067056559409 |
|        | 126.378952839132 | 144.328571856869 | 134.041098536814 | 140.158309892319 |
| AGAP11 | 120.806180547422 | 121.207040901483 | 116.288113598488 |                  |
|        | 125.224197852606 | 127.641370873147 | 115.920514336615 | 125.83678485646  |
|        | 115.293844461817 | 112.90900939264  | 134.624322761212 | 121.607527525765 |
|        | 127.247764390727 |                  |                  |                  |
| AGAP2  | 125.353389826276 | 137.388190728367 | 135.082715974111 | 129.699765645519 |
|        | 129.647514123731 | 126.720031203392 | 125.202468372015 | 122.292692083352 |
|        | 135.151438845363 | 134.512204051277 | 157.390513637267 | 129.794293922951 |
| AGAP3  | 179.841665686703 | 205.244843885276 | 196.942880967705 | 209.785886171295 |
|        | 333.439929772897 | 368.134303229682 | 286.945784387294 | 243.246632667118 |
|        | 185.691922436569 | 314.063025950327 | 227.092319765009 | 364.191263843897 |
| AGAP6  | 251.511405838796 | 250.602978521808 | 310.8725368426   | 238.904826940476 |
|        | 210.316431648335 | 320.390351199433 | 271.004741629789 | 347.812754957414 |
|        | 310.301616266762 | 210.692705153337 | 248.204358220728 | 435.037306125887 |
| AGAP7  | 148.967232828819 | 138.773042747912 | 141.508424382665 | 156.200313064999 |
|        | 152.91729346961  | 138.681348536008 | 149.842326869644 | 152.593934787262 |
|        | 137.415158613413 | 137.53070284697  | 150.587882657674 | 130.143953880391 |
| AGAP8  | 764.774225930479 | 736.963699775724 | 1036.40082234884 | 692.53483413403  |
|        | 269.468453936818 | 916.4187683687   | 753.007562127186 | 1737.57015396357 |
|        | 1032.4540300024  | 479.983368253935 | 838.63350090385  | 1524.46745239811 |
| AGBL1  | 118.397482835514 | 123.505435008269 | 130.016401638936 | 115.795989631016 |
|        | 118.388993232718 | 121.99477069153  | 115.3611179192   | 113.23302126254  |
|        | 119.087972087745 | 125.050945917101 | 124.990876565715 | 117.432860005907 |
| AGBL2  | 153.461396593156 | 154.136467767927 | 160.75642485037  | 135.185283076286 |
|        | 161.744366588564 | 165.549190801014 | 162.629257046871 | 153.541193559658 |
|        | 147.52403424052  | 160.361025839456 | 163.227953876329 | 147.841960346835 |
| AGBL3  | 132.848926011576 | 138.834309377225 | 141.760529549196 | 138.231715814115 |
|        | 140.264060906597 | 146.548348470748 | 140.89666990854  | 141.65642171417  |
|        | 137.418345713224 | 132.018833785059 | 136.130740418851 | 130.949405011154 |
| AGBL4  | 121.44038832089  | 134.512204051277 | 121.799209715087 | 119.544004279354 |
|        | 125.04156726504  | 121.991692204056 | 117.408465686218 | 118.93828679356  |
|        | 128.359034755228 | 117.646963986512 | 131.340453291188 | 119.755151432304 |
| AGBL5  | 396.04031733841  | 499.321667633972 | 491.709723745226 | 749.515603904233 |
|        | 601.640387246951 | 397.985856484851 | 447.909277144896 | 295.047418816148 |
|        | 285.172001915966 | 300.047728281275 | 267.869879189095 | 278.598913464804 |
| AGC1   | 118.505980204837 | 130.370405378213 | 117.555999801887 | 118.319950396126 |
|        | 142.886493948916 | 119.463337435512 | 130.766401858384 | 120.270397272069 |
|        | 122.243585162452 | 121.824805374887 | 143.625188247966 | 120.433080754232 |
| AGER   | 142.752536416014 | 147.310807346272 | 142.846100831941 | 159.124592503759 |
|        | 136.369287857303 | 142.907969322845 | 154.199534276226 | 144.708780756278 |
|        | 150.449621353865 | 141.378381097266 | 146.805832438977 | 146.176240539176 |

|        |                  |                  |                  |                  |
|--------|------------------|------------------|------------------|------------------|
| AGFG1  | 285.131244588624 | 251.787648609546 | 232.200025766422 | 241.058691798484 |
|        | 175.989742412417 | 224.62335524729  | 262.416137698884 | 199.96834355685  |
|        | 204.616225498655 | 269.892633574243 | 294.48534582475  | 241.867699338253 |
| AGFG2  | 172.836730741407 | 171.602950766191 | 177.379186278216 | 172.509081696309 |
|        | 166.964057265095 | 175.562070915794 | 197.326259802349 | 164.352366170527 |
|        | 163.904137395349 | 176.883702717029 | 150.584633044901 | 164.701183249762 |
| AGGF1  | 249.129943906228 | 239.73396414153  | 280.170464338141 | 228.243668453958 |
|        | 215.897620927751 | 349.248144552634 | 476.641032594868 | 274.14931964455  |
|        | 302.219514290905 | 368.825190022937 | 285.659010982301 | 354.205670284123 |
| AGK    | 326.525579400607 | 288.542264120468 | 390.809169896009 | 320.774102343889 |
|        | 255.493109705211 | 470.308610828825 | 363.343480850598 | 529.228238133018 |
|        | 394.65807885612  | 447.579975492958 | 352.50679573356  | 574.779350011402 |
| AGL    | 295.241644408321 | 301.087947101876 | 260.224777636733 | 361.26540006942  |
|        | 210.392662092721 | 258.109876262342 | 220.578790067967 | 217.074639597142 |
|        | 196.615914367563 | 174.971350923613 | 207.204293555178 | 200.72147365413  |
| AGMAT  | 118.039780360151 | 108.296042016208 | 118.833188167696 | 113.143436184959 |
|        | 220.533113603343 | 171.36717256867  | 124.291944151031 | 213.510783808898 |
|        | 187.112176929485 | 112.629266772219 | 159.317429821638 | 166.803359138942 |
| AGPAT1 | 199.191065549132 | 214.888126361789 | 221.975219056555 |                  |
|        | 245.489266602897 | 248.531972733475 | 145.601922576321 | 171.022976593689 |
|        | 143.567488854011 | 159.298815559223 | 142.390243984362 | 183.406510146725 |
|        | 166.485040297098 |                  |                  |                  |
| AGPAT2 | 270.727749014046 | 234.996704304673 | 252.10470581893  |                  |
|        | 239.762135294506 | 1027.96306543235 | 370.066087375401 | 225.31216514083  |
|        | 309.937351755502 | 306.193157874683 | 396.126485121994 | 724.442411170786 |
|        | 557.405157178952 |                  |                  |                  |
| AGPAT3 | 127.9575507576   | 126.214166842097 | 122.204249636472 |                  |
|        | 121.924036463998 | 144.551233687082 | 138.333435927107 | 169.568915494577 |
|        | 143.193305421206 | 176.579096613849 | 158.691830524781 | 180.456659320226 |
|        | 164.337486856997 |                  |                  |                  |
| AGPAT4 | 220.446775597113 | 213.046162847735 | 157.28429690041  |                  |
|        | 219.619022209985 | 140.10798818623  | 129.668506092785 | 178.606255846041 |
|        | 133.011320549232 | 170.646233722767 | 154.949840064881 | 166.1601847682   |
|        | 132.948096807634 |                  |                  |                  |
| AGPAT5 | 134.299575239865 | 127.709638375626 | 142.51308872439  |                  |
|        | 122.290822230565 | 155.70645844794  | 189.174957940401 | 217.148957110623 |
|        | 277.539110964815 | 182.886100305943 | 304.713434036642 | 193.315380090713 |
|        | 267.589020526148 |                  |                  |                  |
| AGPAT6 | 174.603285240228 | 186.103491222924 | 179.048139035247 |                  |
|        | 178.835679834487 | 242.848821222611 | 234.484787292284 | 198.055877414824 |
|        | 187.607426452073 | 213.813667557079 | 194.125840053843 | 186.296882059398 |
|        | 194.961531388323 |                  |                  |                  |
| AGPAT9 | 433.491835341321 | 360.361719991381 | 421.583441056026 |                  |
|        | 209.464347017443 | 159.102070980047 | 140.837360719964 | 140.301945597122 |
|        | 167.526798465556 | 161.00635457883  | 214.229228850802 | 130.441808139335 |
|        | 158.308558656144 |                  |                  |                  |
| AGPS   | 258.145539382199 | 213.914599384797 | 249.763375041547 | 236.651601701157 |
|        | 221.961758403614 | 249.129943906228 | 231.890885094917 | 280.558463661137 |
|        | 277.314675225943 | 452.167674725454 | 215.115324454215 | 264.654879741889 |
| AGR2   | 206.73292907905  | 480.36420271348  | 231.239126548656 | 142.301581642006 |
|        | 2372.26073354008 | 1074.19589851599 | 1336.75600604068 | 1287.3125466789  |
|        | 303.638516587721 | 172.857643600385 | 3188.90202907403 | 4579.62296570302 |

|         |                  |                  |                  |                  |
|---------|------------------|------------------|------------------|------------------|
| AGR3    | 157.08300736206  | 156.285963197762 | 143.626857507866 | 149.42148494796  |
|         | 148.727953739127 | 162.723310549554 | 153.681775929182 | 169.349922114861 |
|         | 142.326319895395 | 147.978039160763 | 153.853856339585 | 144.80318019871  |
| AGRN    | 278.061498892643 | 280.204167582951 | 248.260998007814 | 301.087947101876 |
|         | 1698.08853832248 | 681.591028334969 | 751.077307018319 | 556.863361789449 |
|         | 628.197839884392 | 364.331860640225 | 1139.14730341921 | 742.751664201272 |
| AGRP    | 139.962307072428 | 136.444883411968 | 135.484360570738 | 137.830435972191 |
|         | 132.273354705213 | 133.499361793303 | 137.024230648861 | 134.372560968918 |
|         | 134.406692724353 | 129.633387503618 | 132.01588294465  | 133.125084506877 |
| AGT     | 159.097020087275 | 135.723554819107 | 131.007779278656 | 144.955918499353 |
|         | 161.104993402456 | 144.92594578882  | 126.305273697185 | 175.41089164969  |
|         | 160.98571841915  | 128.105527466559 | 155.566065673542 | 156.704278982517 |
| AGTPBP1 | 194.337080066417 | 168.347445148881 | 180.113222861966 |                  |
|         | 152.91729346961  | 176.5588805282   | 156.920867019849 | 146.29600238749  |
|         | 157.225479764928 | 165.642728895682 | 262.488050186425 | 165.337956130606 |
|         | 132.923237903246 |                  |                  |                  |
| AGTR1   | 448.260934224454 | 439.33566689752  | 666.847934976479 | 557.868300839263 |
|         | 170.844002412425 | 170.825161347825 | 170.768398273919 | 170.035994634371 |
|         | 167.55209828062  | 170.040914594182 | 152.990523860831 | 160.964435028806 |
| AGTR2   | 128.02595294499  | 126.910075365358 | 124.232144678947 | 130.272086123019 |
|         | 124.595925483149 | 129.842252702648 | 118.764650384561 | 130.571827557149 |
|         | 126.473768158566 | 121.567879358508 | 142.603436693587 | 115.194730717797 |
| AGTRAP  | 167.949422301257 | 174.737828693216 | 142.736148814019 |                  |
|         | 181.991820141929 | 651.675427664911 | 183.081450609516 | 234.063633889254 |
|         | 181.088268167074 | 251.324685584062 | 348.413827101046 | 179.286187825363 |
|         | 187.112176929485 |                  |                  |                  |
| AGXT    | 135.773386496434 | 144.949897872252 | 145.043494048779 | 147.975551540256 |
|         | 135.32730674455  | 139.701504237962 | 150.63456320644  | 144.175551691291 |
|         | 140.793616429174 | 136.68056120003  | 144.259643132933 | 160.192540519103 |
| AGXT2   | 120.71782441569  | 115.902030217102 | 118.021169080914 | 121.360822445187 |
|         | 117.923459503989 | 116.831725094917 | 113.40684693417  | 115.270544506813 |
|         | 126.072053958666 | 110.081964209973 | 113.989682635964 | 114.893462783007 |
| AGXT2L1 | 116.331428876124 | 119.446359837504 | 130.160236228857 |                  |
|         | 131.473001455317 | 133.42964827086  | 121.53632327554  | 120.212294184999 |
|         | 132.958521136    | 131.31716158922  | 122.379537202709 | 132.981346767415 |
|         | 126.133366366356 |                  |                  |                  |
| AGXT2L2 | 179.730694272916 | 162.6762533989   | 166.730974538475 |                  |
|         | 170.866433766203 | 155.129304059037 | 146.746669300049 | 167.796474464069 |
|         | 152.746799687103 | 171.844483419604 | 187.686326872667 | 222.919473675549 |
|         | 178.06221214103  |                  |                  |                  |
| AHCTF1  | 282.652193666078 | 282.282663608264 | 290.867822301134 |                  |
|         | 257.100909006193 | 205.705962405954 | 405.469705787631 | 268.264885392368 |
|         | 386.917038897322 | 240.054164412429 | 210.989806933158 | 195.577739376082 |
|         | 363.594808277506 |                  |                  |                  |
| AHCY    | 1012.44277312494 | 891.194779815063 | 1383.68977267418 | 912.143424293236 |
|         | 2794.89048827025 | 1949.60516542965 | 2398.71483410593 | 1360.85309203233 |
|         | 1343.2623011534  | 1392.89422203207 | 1311.34904760947 | 1587.84395475807 |
| AHCYL1  | 2567.4299860517  | 1923.19560386389 | 2296.30423509176 |                  |
|         | 1632.84261181074 | 1284.19937294949 | 2423.84327263111 | 1565.64079526732 |
|         | 2328.65814406636 | 1657.72357544205 | 1129.76078220457 | 1730.30703463073 |
|         | 1490.02976786379 |                  |                  |                  |
| AHCYL2  | 171.528350399075 | 169.391557085902 | 167.083758835476 |                  |
|         | 133.21981037185  | 154.534605635191 | 170.381897441659 | 186.222567239198 |

|        |                  |                  |                  |                  |
|--------|------------------|------------------|------------------|------------------|
|        | 170.701964358516 | 175.767556472012 | 164.38282966938  | 181.950658782069 |
|        | 205.121123131992 |                  |                  |                  |
| AHDC1  | 267.342817344746 | 378.088675670786 | 195.218005582618 | 469.714826990063 |
|        | 238.270501389189 | 141.499192356469 | 154.250656489421 | 132.615324904193 |
|        | 145.294665838127 | 193.832033192375 | 193.292596471113 | 156.71199811686  |
| AHI1   | 546.274050902567 | 476.917496749381 | 469.794672718173 | 438.231717096337 |
|        | 181.558764396201 | 200.302384864371 | 276.32528705384  | 236.108432603479 |
|        | 249.400820221233 | 192.61436632814  | 301.188296465202 | 261.844708446856 |
| AHNAK  | 4238.41681589316 | 3586.00189997341 | 3024.62888503536 | 3883.05620256963 |
|        | 728.176339659082 | 514.354512083591 | 685.848203651889 | 437.931339781992 |
|        | 754.607039665508 | 2794.89048827025 | 1491.05501052706 | 1304.37930719411 |
| AHNAK2 | 2521.58055221647 | 2462.87034563426 | 1953.88327754946 |                  |
|        | 3024.62888503536 | 134.95415308911  | 128.601885372662 | 121.448671447499 |
|        | 127.694189114288 | 152.152106138031 | 3042.88425356552 | 156.981921830638 |
|        | 127.447218258785 |                  |                  |                  |
| AHR    | 5800.06300826802 | 5195.2087608308  | 4511.9116742833  | 4448.67183518984 |
|        | 2206.7447886564  | 6105.64727031051 | 3215.41238464601 | 5250.88041666757 |
|        | 4088.12910138929 | 2816.29814823646 | 3855.33040541264 | 4262.23145131525 |
| AHRR   | 111.794102015354 | 114.995889945366 | 113.321454160244 | 114.027244455291 |
|        | 115.884253217495 | 106.147993332294 | 122.125746529725 | 113.091739139626 |
|        | 116.71331256222  | 119.366599958278 | 115.845468537936 | 115.949513659403 |
| AHSA1  | 568.555967950896 | 536.46884541183  | 731.513306289481 | 615.254768508691 |
|        | 730.042712083388 | 417.615521090665 | 584.548578914846 | 916.026216386031 |
|        | 477.626693328013 | 620.899414581162 | 991.611982265221 | 675.480482223958 |
| AHSA2  | 509.618968665191 | 428.959561932229 | 488.14606875418  | 451.621888586656 |
|        | 400.621427274425 | 471.946284490029 | 759.058176862524 | 625.932910814208 |
|        | 499.321667633972 | 351.665934915634 | 731.848844821402 | 717.886050056576 |
| AHSG   | 107.622342073167 | 109.333276735523 | 110.820329153348 | 108.730058525654 |
|        | 114.826501559828 | 111.716607815635 | 111.672450681359 | 107.780763250481 |
|        | 108.079149792796 | 115.445219455559 | 109.282814458761 | 110.050374895171 |
| AHSP   | 167.357570666817 | 165.274189050141 | 166.182850621447 | 182.042104888745 |
|        | 157.367331080003 | 172.128489882364 | 174.775676782795 | 158.522877390859 |
|        | 179.632562895905 | 212.78038645414  | 151.167024833049 | 165.642728895682 |
| AICDA  | 157.885229749634 | 156.173099025259 | 156.381599544223 | 152.79367157305  |
|        | 160.667815093292 | 185.113098620798 | 156.576585764311 | 142.476530302265 |
|        | 166.272237117441 | 177.457362387052 | 151.690538050817 | 163.773702843544 |
| AIDA   | 4016.35381420598 | 3598.30438198858 | 3833.73632806344 | 3734.705550862   |
|        | 1056.43975075255 | 1751.22580157752 | 1732.52466021178 | 1157.02365469464 |
|        | 1645.05161227372 | 1800.25771851544 | 1772.75453735112 | 1429.25367024696 |
| AIF1   | 272.854435771465 | 264.201932544662 | 219.394500571586 | 254.812605074045 |
|        | 196.880135762817 | 275.696829424061 | 239.621756857095 | 347.292438587205 |
|        | 434.390613381746 | 308.767036855508 | 259.338947392465 | 227.267783818298 |
| AIF1L  | 1036.40082234884 | 861.516925304722 | 385.050282185255 | 774.997895985917 |
|        | 347.292438587205 | 302.735372807236 | 174.717158790668 | 261.96528977292  |
|        | 420.502251256406 | 267.696284751923 | 210.803130108618 | 171.660157220703 |
| AIFM1  | 237.266455875982 | 234.5655184349   | 259.277693314055 | 294.697622870418 |
|        | 448.644778906048 | 397.577760464197 | 261.469732730752 | 313.888035511709 |
|        | 296.915883082902 | 246.186104432792 | 383.626469817252 | 311.848379951974 |
| AIFM2  | 152.748807709142 | 166.674240866931 | 173.690008681514 | 195.123919692348 |
|        | 154.932132950843 | 131.275712196961 | 140.870849757111 | 133.088758771353 |
|        | 150.019181654237 | 122.793816135585 | 176.397715825653 | 160.632809953993 |
| AIFM3  | 127.720117789235 | 130.198147836925 | 131.578042179715 | 129.818020166075 |
|        | 219.351080515508 | 145.172776053    | 149.17029600091  | 152.961475450751 |
|        | 164.1572198075   | 127.135199316758 | 198.568180234676 | 174.928155956396 |



|        |                  |                  |                  |                  |
|--------|------------------|------------------|------------------|------------------|
| AIG1   | 333.868818855397 | 298.165097953983 | 362.899103657252 | 271.568797887976 |
|        | 412.582051585078 | 376.867306473426 | 966.731520471976 | 357.514919818489 |
|        | 307.518881119091 | 489.022371276542 | 1098.78649254838 | 1109.79571066685 |
| AIM1   | 171.145909843389 | 171.994330847901 | 190.371287639453 | 173.735045816949 |
|        | 253.538171006307 | 257.292125083248 | 340.42197893246  | 238.946506103155 |
|        | 292.068293167526 | 363.445110627483 | 403.582461109859 | 222.268494113686 |
| AIM1L  | 129.216693566478 | 138.352562277336 | 128.505296338657 | 129.088718286391 |
|        | 229.230239609291 | 224.92725876841  | 171.042491047256 | 178.294972422671 |
|        | 190.549084022965 | 268.264885392368 | 189.044966519228 | 226.531255313921 |
| AIM2   | 157.40255559397  | 211.545484517339 | 153.140087873773 | 161.208713751942 |
|        | 137.597788349982 | 140.36425603453  | 311.848379951974 | 179.54034642468  |
|        | 222.365208637146 | 244.280971257965 | 595.882696498804 | 424.912426797488 |
| AIMP2  | 634.356322976353 | 712.067161025165 | 859.113541787323 | 705.529158880221 |
|        | 1015.63768413332 | 921.546033242474 | 1074.96415574964 | 1449.33679383001 |
|        | 1050.90881385623 | 1087.69177809384 | 937.593129242257 | 1181.1611856364  |
| AIP    | 593.821622986351 | 730.673649872205 | 638.287221212947 | 926.670867201327 |
|        | 931.598413783099 | 403.984761333129 | 536.609777988581 | 326.417021307859 |
|        | 431.546135503733 | 272.314332734711 | 477.489368828457 | 449.952497751758 |
| AIPL1  | 128.190822428484 | 129.580421464913 | 123.908458472687 | 123.775443296174 |
|        | 123.069963218224 | 119.159078990339 | 132.675172817752 | 119.391213033544 |
|        | 119.859508630454 | 120.460433297007 | 153.511995286293 | 131.497454038525 |
| AIRE   | 6368.23123771343 | 5846.17594234628 | 6077.64695330731 | 6077.64695330731 |
|        | 1638.72366638732 | 6179.86800320807 | 3833.73632806344 | 4641.8793590085  |
|        | 4367.38154535901 | 3417.22292085668 | 3737.57754066891 | 3648.38765465889 |
| AJAP1  | 143.065258692424 | 140.336479395866 | 145.020615552964 | 137.033502466562 |
|        | 132.122273848715 | 145.814268094808 | 136.051070946954 | 134.024205981268 |
|        | 138.081268025435 | 137.118488157416 | 226.936810012475 | 138.032265227728 |
| AK1    | 319.685597963267 | 330.703588385626 | 293.234972169244 | 364.331860640225 |
|        | 301.798676825176 | 233.786136606682 | 155.214638707046 | 211.736398352592 |
|        | 182.861900982333 | 212.239485199343 | 155.415497832382 | 174.296028319781 |
| AK2    | 642.484527246259 | 714.91842349236  | 668.286400833485 | 728.743541467167 |
|        | 1176.01058971561 | 1131.96129284658 | 1402.14708471728 | 931.325266360957 |
|        | 1292.13921040404 | 1147.96742431386 | 892.515788744891 | 1372.63540073207 |
| AK2P2  | 376.124744806171 | 362.849380477089 | 307.020265874666 | 334.350011399462 |
|        | 199.191065549132 | 416.475440894731 | 258.998065427002 | 653.500279510032 |
|        | 230.367251714289 | 220.92105843037  | 282.282663608264 | 307.866499851733 |
| AK3    | 1682.64624665931 | 1683.83803339436 | 1619.67820476414 | 1637.66306286151 |
|        | 475.403662030875 | 896.185223980593 | 636.781477235579 | 1322.14570224119 |
|        | 1181.1611856364  | 1079.58110075176 | 1222.59895569348 | 740.527607312565 |
| AK3L1  | 416.715760038095 | 374.46180489079  | 412.277592266475 | 538.872348151809 |
|        | 154.783699020901 | 165.320977593677 | 230.161369375718 | 161.134322621805 |
|        | 162.98885109088  | 873.010676463707 | 166.232856234879 | 194.161930642068 |
| AK5    | 147.653573379877 | 145.797047170492 | 151.115031304764 | 156.551925771312 |
|        | 134.91213977595  | 143.978912435831 | 132.568354349687 | 133.962129094978 |
|        | 149.634975068742 | 140.668597897404 | 133.180554954396 | 134.115085057026 |
| AK7    | 107.72107116838  | 112.922918499398 | 113.816165294487 | 115.400592594965 |
|        | 116.973126196102 | 109.740801301993 | 118.983932995126 | 110.465934808915 |
|        | 114.161540771427 | 117.296972688814 | 126.205931638442 | 119.427342766092 |
| AKAP1  | 255.156682699288 | 225.99848688881  | 284.473085899219 | 254.517135747445 |
|        | 206.876572583814 | 207.104548555929 | 195.019706886336 | 214.739818213164 |
|        | 186.447049658314 | 145.56468363155  | 217.264041781337 | 178.584378959369 |
| AKAP10 | 181.453575300661 | 180.952017616136 | 238.183096218311 |                  |
|        | 203.436527043293 | 244.925472495705 | 200.094610104813 | 195.230219990395 |

184.923312649584 172.794570587596 205.121123131992 185.896304740844  
173.109461200603  
AKAP11 428.462270756201 341.714401872192 528.921893077914  
307.020265874666 216.126000558319 413.863345223345 195.384273821324  
258.807028561407 298.209907157762 283.326226944158 254.768537214795  
397.737702926328  
AKAP12 446.07651799079 317.273940108333 356.530530468568  
301.871924474014 218.615551704188 185.950131245699 173.260348096238  
196.014841240142 181.681929801968 161.704966315183 147.769702509047  
159.06002608158  
AKAP13 761.726829618132 725.065727257421 820.652972219658  
924.312051919404 270.604799126393 289.82072316082 265.068532248682  
300.482945704017 349.485727214325 425.59810308048 442.86942574917  
274.427235605909  
AKAP14 131.148926523383 128.920313557255 128.02595294499  
122.786030993629 116.998277297063 125.885715928839 126.245597154052  
130.564962937297 133.008987820479 122.644105247178 134.260779370821  
124.28313315915  
AKAP2 152.445022409208 153.011923016494 156.311009595629 154.932132950843  
146.108551647446 146.40904127542 152.699431442817 149.419308407564  
146.664285015996 145.560161803925 149.661929885679 150.717996520257  
AKAP3 134.319316977485 128.939572714685 119.366599958278 121.952255635669  
131.159946917777 118.912989775436 121.010811158088 120.288469716375  
123.781002620866 119.399971165857 147.959740692766 117.976107125982  
AKAP4 130.677737553727 128.907618218883 125.924219382375 127.093255830978  
131.193538235053 125.016608289141 130.890314257211 134.310685502031  
129.242093568433 126.63730651721 137.000868503792 130.852932147831  
AKAP5 141.735123971775 130.457981404612 144.792035839249 130.179742057015  
128.335132315812 140.000880942015 146.460464282676 132.918979842076  
128.858923585925 146.851307767958 127.377356715337 129.260551359984  
AKAP6 168.818595386221 160.085325256991 189.174957940401 162.358237198517  
120.585506729733 123.161953011069 117.101933186269 126.698158279472  
125.402714360058 131.292195405993 135.573170189235 116.236538651031  
AKAP7 191.040134068942 189.539458686123 189.799091507686 180.610891208146  
293.692083555844 166.232856234879 201.139510041141 272.968792195442  
146.179543599917 130.914932329297 538.252273740419 205.260673843294  
AKAP8 358.355621069787 360.285027176918 363.89527566597 385.135014083686  
313.828943866034 443.259619455624 333.592915218163 401.359711029934  
291.577778800314 290.326832430372 525.6579615077 405.766055310869  
AKAP8L 439.492285515997 544.669441360594 321.750495072759  
622.561634660589 483.549698382115 232.465880700217 312.177191402945  
334.607533045929 248.403014089812 217.491746961471 258.21341068758  
293.448046685909  
AKAP9 131.597937570173 130.621860095981 124.840101287634 113.504670764963  
125.402714360058 114.488760619745 130.322436253881 138.780488114634  
120.241528853563 129.099780410063 157.399880496076 138.780488114634  
AKIRIN1 322.099431638246 260.715580924916 331.684298221133  
290.420307322101 202.178451227304 356.154842959851 345.494740481759  
323.462252156562 283.896516724446 289.859695541999 240.005943851098  
344.45331938267  
AKIRIN2 586.867772838753 436.891409783298 568.310800941091  
429.922530506572 640.029195821436 414.267332328081 633.594811068524  
398.971838949075 531.711823481265 570.26564132238 540.946852709312  
557.214020485204

AKNA 354.263934274937 347.985315257161 225.820503820866 382.186095123659  
316.801725268792 216.680795762761 240.75934760601 317.163768837813  
436.891409783298 193.912456093767 272.277433294605 263.204269632206  
AKNAD1 159.913028912492 158.658110539162 182.861900982333  
176.791758333054 158.937341335707 159.133905701536 144.139062513587  
153.723169560972 157.761231106669 177.151218006672 142.639587833858  
167.268645224361  
AKR1A1 695.321886304133 733.86133557115 698.882871686866  
883.702573960415 1615.60472592991 1600.10235468018 984.181272274704  
1984.47173096657 1704.25279485563 781.208872924532 969.811933814244  
991.611982265221  
AKR1B1 1269.67110104843 1285.54492194393 1285.54492194393  
1049.52258147141 2288.63508719706 3855.33040541264 2176.59445919725  
1528.49457104932 1654.58270183167 692.729789121701 362.65285317327  
1756.88092410303  
AKR1B10 644.97200337335 511.113083958771 2041.03024136014  
568.701661112562 175.28261759639 498.641091757363 300.482945704017  
310.533399024851 273.478372861114 5558.51089816921 165.471587934831  
131.672014089487  
AKR1B15 241.077618798955 207.560911665319 602.86705608228  
256.764450748941 148.993620368781 200.506615977654 637.892677173103  
152.801801823442 161.430219824313 1730.30703463073 153.062710222618  
114.631759839092  
AKR1C1 107.520000793184 96.0426636429757 112.509731206295  
103.660742045068 114.143874572202 105.771723307783 106.285472845323  
109.37466528113 109.044879188971 110.234403581151 111.423140302983  
123.703840971923  
AKR1C2 343.346755862776 424.285848583977 387.135002880995  
234.789040617681 1986.81354260292 5532.93454600454 3515.36256599555  
2423.84327263111 320.812909889014 639.011144305614 1176.01058971561  
2048.13524244516  
AKR1C3 883.702573960415 1775.32632165475 1055.79590411506  
837.023434916281 11326.5935775813 20989.6494028551 13645.150201952  
10312.8407173696 8322.20177173035 1376.84058291266 5300.67886821231  
3949.19206005238  
AKR1C4 304.751330890753 385.522443482 369.198837083585  
201.167206950576 1622.17491781572 8617.2437024568 4793.22133852447  
3775.41389938231 1564.8868894162 970.634736994313 1720.14021303639  
2437.63566094439  
AKR1CL1 137.570343435498 124.699127988314 140.236618351922  
144.81689330206 130.213596986351 138.883710791382 141.970301370404  
133.195030751476 131.106613067333 135.24841020592 137.593577427321  
132.668344126625  
AKR1D1 13324.7465248375 12916.6904389018 14651.3379687477  
14348.4009261372 4749.69040198959 13013.8166277495 7930.82679738435  
11709.9785619141 9908.59593023839 8211.38792799248 5846.17594234628  
9793.92604780228  
AKR1E2 153.972471779464 169.158049136321 147.975551540256  
163.982415393606 168.124936529582 173.169905329013 143.26896117546  
162.900556089071 150.544779197947 162.484777758676 149.857861968652  
157.003367685421  
AKR7A2 1412.56164938199 1638.72366638732 1594.05763963363  
1654.58270183167 4134.02613649483 1846.61430264854 2037.96470181871

|          |                  |                  |                  |                  |
|----------|------------------|------------------|------------------|------------------|
|          | 2105.87438782831 | 1895.72330348767 | 2061.9164323309  | 2009.21931102311 |
|          | 1544.45026075974 |                  |                  |                  |
| AKR7A3   | 247.746304138866 | 264.563741039382 | 273.252023367028 |                  |
|          | 305.096320805078 | 613.063954859056 | 294.323621186916 | 334.199307788576 |
|          | 323.391456630794 | 290.241064926886 | 380.243136469602 | 328.680312364877 |
|          | 264.429717032654 |                  |                  |                  |
| AKR7L    | 126.887989471803 | 130.716570410608 | 129.794293922951 | 115.257318321108 |
|          | 129.859331207247 | 122.498794845416 | 119.780654293448 | 130.63591305094  |
|          | 125.35643274458  | 128.653335099674 | 133.463464118897 | 137.632470240792 |
| AKT1     | 1424.79466712859 | 1573.03248861784 | 1416.93831202323 | 2172.89794460273 |
|          | 2358.46955614953 | 729.729297413233 | 1030.97051104597 | 1133.87328758676 |
|          | 860.688314783077 | 893.264940736694 | 1160.25775445193 | 1374.92806285803 |
| AKT1S1   | 163.709174813901 | 186.747375844319 | 179.265395910119 |                  |
|          | 218.2454853526   | 377.661589835101 | 192.140442881209 | 179.973655632636 |
|          | 192.891507272665 | 212.272826965935 | 191.170105307944 | 192.059255232313 |
|          | 198.411812737082 |                  |                  |                  |
| AKT2     | 121.696353230886 | 126.623026026721 | 128.635684412304 | 124.892438890234 |
|          | 150.661584243174 | 123.265810024678 | 124.859984709406 | 118.863150637476 |
|          | 130.856249657101 | 127.718341524417 | 138.020031233095 | 130.449669345302 |
| AKT3     | 146.854523122404 | 145.10302792449  | 155.558839375761 | 151.204487316077 |
|          | 134.325520377207 | 152.301556397498 | 145.06736850005  | 147.841960346835 |
|          | 138.230197299262 | 138.541779821934 | 140.338622198206 | 145.962664629275 |
| AKTIP    | 723.640113902925 | 684.428198622716 | 817.342172321486 | 736.140249105836 |
|          | 382.485769373364 | 360.243484271891 | 516.088776850623 | 374.337030706199 |
|          | 391.644649726254 | 698.358285634451 | 437.049581919144 | 489.022371276542 |
| ALAD     | 226.824313642101 | 205.282221255986 | 293.17183601265  | 264.628012152168 |
|          | 188.685460181066 | 171.042491047256 | 187.231049280818 | 189.61702125418  |
|          | 208.214764518526 | 245.723316636363 | 193.589480577091 | 164.008063563113 |
| ALAS1    | 136.220324225816 | 127.456181182121 | 129.497266827284 | 133.864612785572 |
|          | 268.111403429364 | 200.065184172871 | 219.0221768576   | 166.091736766853 |
|          | 194.617252921731 | 139.484551562098 | 161.852665901359 | 153.039237274992 |
| ALAS2    | 130.66863243733  | 138.89354244296  | 141.398513269219 | 141.38749436393  |
|          | 141.695537669891 | 145.507330257603 | 170.313045875402 | 135.548042190047 |
|          | 139.023486014525 | 173.929353266244 | 134.00481287258  | 134.288349336742 |
| ALB      | 160.240052678401 | 167.384121560438 | 151.714420758741 | 161.490941000872 |
|          | 184.602704530362 | 186.904126552483 | 175.767556472012 | 151.276193269421 |
|          | 160.979182561773 | 155.957570398118 | 151.463200570499 | 148.25001336038  |
| ALCAM    | 986.441377365124 | 1053.09915077366 | 830.455793617181 | 794.165408266062 |
|          | 555.366765340014 | 847.276523445973 | 527.498114662967 | 2116.39371296122 |
|          | 1044.52286986369 | 487.597040819879 | 598.287431134037 | 378.728516779744 |
| ALDH16A1 | 219.0221768576   | 235.650688823345 | 261.592512762969 |                  |
|          | 223.279017022443 | 1015.10079945997 | 313.077481033093 | 352.22815095475  |
|          | 283.760131847707 | 389.686045618228 | 218.559622620349 | 252.761035334279 |
|          | 213.754156680604 |                  |                  |                  |
| ALDH18A1 | 274.316982298975 | 288.728608411903 | 256.795346052751 |                  |
|          | 311.337303524912 | 563.140382824149 | 384.733313349438 | 462.779122987815 |
|          | 356.413190087706 | 425.471195039676 | 296.24781576525  | 359.440639663655 |
|          | 380.664528809678 |                  |                  |                  |
| ALDH1A1  | 918.162638134305 | 685.080426814888 | 522.050619657197 |                  |
|          | 394.65807885612  | 145.679907578808 | 181.320895955585 | 137.508097741526 |
|          | 219.878230463206 | 215.635313821029 | 143.147325939994 | 152.534482748598 |
|          | 129.125709963326 |                  |                  |                  |
| ALDH1A2  | 255.374689750672 | 226.203994206714 | 158.521812954982 |                  |
|          | 229.181725450534 | 157.419333185365 | 208.42712014566  | 275.437030326768 |

181.681929801968 163.275138097131 164.935120145905 148.638400592682  
176.714471790643  
ALDH1A3 582.642500194997 494.067878734396 216.991823988763  
258.695920967489 323.462252156562 217.435155984897 704.152296359463  
323.628636799403 186.496160803789 693.180345649331 376.627801547869  
668.286400833485  
ALDH1B1 1293.38808483663 1047.78978081493 1481.24705642453  
1496.0924333403 221.82340413039 200.017741240426 164.14265547147  
193.858884443593 182.397795261147 180.304585602206 177.491294133515  
178.717719615544  
ALDH1L1 227.52352046188 313.025250337353 303.423450627377  
177.182321788711 817.036222521723 153.758353103323 367.644907862372  
185.961822133346 174.66966623557 150.359906271672 795.464850398761  
680.743052197025  
ALDH1L2 184.542232315662 163.331424612891 155.400191634632  
185.583997792931 151.998942684339 165.350777445902 142.548833391567  
139.432567336814 156.269957530519 167.662761175661 131.72852748835  
139.526241501184  
ALDH2 1253.05700051015 1237.56662467492 1949.60516542965 1482.15461429206  
144.892454033336 148.973277994329 158.884661398415 185.186497037695  
1443.68785521063 325.173931553891 174.646321871605 131.657454325126  
ALDH3A1 147.086734464001 167.900071375885 141.434699050015  
131.117294275244 2666.06582231934 229.511643376643 209.984545596312  
250.542405852865 267.901632267999 240.994507285383 116.780639688465  
176.680708339236  
ALDH3A2 422.973606694449 458.047799748696 597.459920611726  
426.769986378276 723.428294037428 418.889972660958 329.779210536849  
392.004079531068 282.963958072528 501.166869173253 199.118281632221  
228.588693548447  
ALDH3B1 150.660106369128 165.549190801014 153.360382235409  
175.510160114891 133.99226161886 132.213890220705 135.605541734293  
148.160350542849 148.258850340107 133.197002327259 160.361025839456  
138.106499370074  
ALDH3B2 124.193603137858 131.700854556022 124.977046954694  
122.670689386332 331.795832780176 236.651601701157 268.328002606268  
296.915883082902 917.188039935737 1447.07989164988 385.584224833836  
377.353441970543  
ALDH4A1 166.376907377447 193.412827246366 163.256472113745  
201.569913451219 591.437752991512 408.758021864761 398.892968579918  
206.164058935215 325.173931553891 204.453822958077 384.780426529733  
325.43977732888  
ALDH5A1 271.468939477052 295.851459742115 295.607161318725  
278.335289966805 402.299165610893 448.106077184152 444.479355480138  
303.300028849873 358.479218923158 261.639437655633 365.82705202869  
321.568127272161  
ALDH6A1 552.298965378403 495.099443245153 857.55777793754  
384.733313349438 420.95713139384 263.888891822857 344.021696764791  
278.335289966805 288.150694843614 224.963277964548 287.889774984754  
242.019489058244  
ALDH7A1 588.076436392983 608.351527783086 804.362909579005  
643.13571432061 1156.19575610918 205.162633740798 2005.76678571689  
401.840794789616 1231.37475540937 202.97197145851 169.378422829858  
441.112782197591

|         |                  |                  |                  |                  |
|---------|------------------|------------------|------------------|------------------|
| ALDH8A1 | 157.192320902906 | 153.857048476879 | 169.826068012389 |                  |
|         | 162.531630234824 | 149.964827055916 | 156.05583229359  | 165.267693285882 |
|         | 145.824996954376 | 156.717086120926 | 148.219406063533 | 141.305605155722 |
|         | 151.645636946799 |                  |                  |                  |
| ALDH9A1 | 4190.38366101529 | 4836.4008757421  | 5233.72882607795 |                  |
|         | 4628.04544865227 | 4022.23000497332 | 5425.58761099475 | 2630.78185410861 |
|         | 5479.24427823207 | 4847.77258830631 | 4621.99241522677 | 2921.59274577877 |
|         | 3994.64569045702 |                  |                  |                  |
| ALDOA   | 1103.81439809121 | 1221.58522138654 | 2065.51724858579 | 1656.02721259517 |
|         | 5981.08862268291 | 2542.44286642873 | 4425.66777919789 | 2159.2992548378  |
|         | 2157.50118108142 | 5455.91604383389 | 1488.37146754184 | 2763.86550710042 |
| ALDOB   | 162.54008293513  | 126.162713269943 | 163.821142892643 | 131.062360037777 |
|         | 107.126004317323 | 212.312154721246 | 161.285587312115 | 160.664407431261 |
|         | 193.203053225456 | 143.712450441816 | 203.436527043293 | 182.711318507496 |
| ALDOC   | 383.503040287678 | 472.669956708398 | 566.647927867646 | 468.496972957503 |
|         | 2770.7811954029  | 312.286788541158 | 1535.27496251381 | 1369.89073267996 |
|         | 541.764013317002 | 2026.85580212422 | 485.731287873723 | 932.505095432049 |
| ALG1    | 131.412979573687 | 127.949413503055 | 129.397378057767 | 127.476819912992 |
|         | 193.589480577091 | 135.317796804151 | 153.557991189227 | 167.447964370395 |
|         | 161.627546190964 | 172.509081696309 | 167.077669654786 | 177.825648107126 |
| ALG10   | 125.277002586952 | 154.725484895098 | 136.378203924435 | 123.379461430902 |
|         | 183.472290949588 | 152.970079142629 | 174.603285240228 | 163.356993518952 |
|         | 155.561821955048 | 128.336332748047 | 133.008120853618 | 141.691135410429 |
| ALG10B  | 142.442450622311 | 150.188128594079 | 152.296774123599 |                  |
|         | 148.291518446423 | 188.39062571513  | 163.487737425232 | 178.394895649664 |
|         | 161.139253742858 | 181.193963616037 | 150.489651880905 | 171.267907653007 |
|         | 162.586012723045 |                  |                  |                  |
| ALG11   | 227.499335248402 | 204.415267938007 | 274.179232297038 | 172.909795209733 |
|         | 184.530853446688 | 245.378747269929 | 150.933724024651 | 173.782474972742 |
|         | 183.951404362826 | 160.293522619371 | 194.831347257735 | 263.448958595597 |
| ALG12   | 194.388383297922 | 161.084088366981 | 167.180406126438 | 191.881157918071 |
|         | 192.914362049985 | 153.815239954928 | 156.990325995053 | 180.994249258457 |
|         | 147.866909109733 | 147.882530392424 | 194.724219884752 | 176.940723174814 |
| ALG13   | 216.277178481058 | 185.295480519718 | 168.906637816046 | 176.622758931306 |
|         | 310.301616266762 | 327.480268032814 | 355.213322760505 | 258.348298226232 |
|         | 310.917191279571 | 478.180723959397 | 241.917371866481 | 436.586158384666 |
| ALG14   | 150.72014060286  | 146.179543599917 | 152.182968451691 | 147.502116289881 |
|         | 172.222262910052 | 229.116153948948 | 221.512905853031 | 225.31216514083  |
|         | 199.135932984641 | 231.547654653783 | 217.094085829328 | 256.795346052751 |
| ALG1L   | 180.923089242255 | 211.572396862776 | 193.674681547989 | 154.459517779315 |
|         | 575.857954264295 | 821.862271569917 | 532.394088545421 | 840.276501350383 |
|         | 603.061485415867 | 362.252813848151 | 778.639512538949 | 770.19255305977  |
| ALG2    | 131.459400187744 | 150.259400712685 | 150.184863108453 | 142.156488113764 |
|         | 172.486839924297 | 159.678281513591 | 154.388776919015 | 150.746423638097 |
|         | 151.60113116166  | 160.180961887686 | 164.816672737691 | 143.589222264786 |
| ALG3    | 264.054997398621 | 283.27806319488  | 298.028932089399 | 322.684910198242 |
|         | 641.12919339861  | 359.256193328366 | 415.749051861123 | 415.497783305278 |
|         | 537.982214580518 | 371.457568934695 | 378.4377409749   | 366.007451523992 |
| ALG5    | 538.156335788156 | 522.050619657197 | 476.249239197777 | 486.197269936713 |
|         | 607.26455470867  | 836.235700891687 | 666.570977208535 | 677.023591987179 |
|         | 800.739422189427 | 726.731270955732 | 723.250763797522 | 1193.82799849555 |
| ALG6    | 241.527811817146 | 244.011434605133 | 188.910933952136 | 185.396765725228 |
|         | 438.611973005212 | 490.153210371094 | 396.459213999636 | 532.394088545421 |
|         | 393.375554593484 | 381.121621815163 | 276.414209660023 | 318.112626495401 |

|        |                  |                  |                  |                  |
|--------|------------------|------------------|------------------|------------------|
| ALG8   | 245.522497675754 | 259.900447705311 | 254.607324522225 | 247.746304138866 |
|        | 400.924914238052 | 569.656573915709 | 428.569462312363 | 468.170972478717 |
|        | 364.331860640225 | 295.047418816148 | 402.965083947376 | 467.944850290806 |
| ALG9   | 683.365770196967 | 480.797281489891 | 446.819873986024 | 512.467731561858 |
|        | 440.745866155629 | 305.577166690215 | 424.912426797488 | 449.408793796673 |
|        | 350.58427958432  | 407.957436380989 | 383.182507425579 | 602.703887178113 |
| ALK    | 159.636846021745 | 148.478570934155 | 128.678484452077 | 170.974759483946 |
|        | 129.501028506432 | 149.477373469387 | 161.657344146676 | 125.642282323003 |
|        | 123.752109790056 | 162.893396525252 | 156.733898702331 | 145.03804642447  |
| ALKBH1 | 188.995551740427 | 191.937607311711 | 217.607230767028 |                  |
|        | 188.277563426829 | 182.67941458824  | 185.706228572019 | 202.797135825668 |
|        | 201.773745532242 | 170.79303550487  | 191.740596601895 | 189.61702125418  |
|        | 202.545147073902 |                  |                  |                  |
| ALKBH2 | 313.828943866034 | 331.018914429561 | 322.302219773624 |                  |
|        | 355.290621188435 | 451.985108262982 | 437.836503489425 | 430.649188209901 |
|        | 342.245182599593 | 308.208276315292 | 248.927790738447 | 282.392419584508 |
|        | 353.285905782951 |                  |                  |                  |
| ALKBH3 | 331.747622606378 | 409.883222213537 | 390.979822976551 |                  |
|        | 374.9555524303   | 339.598452080917 | 137.324247703318 | 496.03509813734  |
|        | 227.806050911154 | 266.534316786801 | 463.754869412768 | 354.579728909336 |
|        | 260.888612454097 |                  |                  |                  |
| ALKBH4 | 149.31184788671  | 167.173670781451 | 143.222342904886 |                  |
|        | 156.224769056915 | 213.634295832535 | 147.626071601072 | 166.600109853461 |
|        | 144.00214898009  | 156.487049947247 | 145.25774926819  | 180.250420976613 |
|        | 182.470538043064 |                  |                  |                  |
| ALKBH5 | 5932.37714987741 | 6691.04319670055 | 6737.97308530049 |                  |
|        | 7104.65816621275 | 3822.05744774919 | 3321.1350545346  | 2708.20624364471 |
|        | 3093.38255333143 | 3024.62888503536 | 3677.23129570773 | 2947.51998516453 |
|        | 2352.01196541874 |                  |                  |                  |
| ALKBH6 | 307.16835174775  | 304.402066421813 | 282.137282466192 |                  |
|        | 382.069677030369 | 710.003412772888 | 411.71606840872  | 412.415549375221 |
|        | 404.876478833713 | 467.04976953755  | 361.218491712891 | 334.056545911557 |
|        | 339.663295617139 |                  |                  |                  |
| ALKBH7 | 303.858574395969 | 335.533053221675 | 343.048904374136 |                  |
|        | 329.068463281182 | 1092.33328323944 | 501.863855158062 | 484.131020584378 |
|        | 358.152044880733 | 315.828726297864 | 427.637083424453 | 530.267835989435 |
|        | 428.340060893467 |                  |                  |                  |
| ALKBH8 | 185.673549367125 | 219.103510284905 | 182.335981256243 |                  |
|        | 155.393326732887 | 155.626515272084 | 130.161889021281 | 145.928643520352 |
|        | 164.198494818485 | 677.023591987179 | 154.679076303046 | 204.914390718161 |
|        | 190.189217962555 |                  |                  |                  |
| ALLC   | 132.622032754473 | 133.722739936347 | 131.563719927798 | 131.111930163369 |
|        | 133.07218865002  | 130.939543211439 | 126.912226185444 | 128.700516033555 |
|        | 122.619429537799 | 126.34649262976  | 147.278236958386 | 132.521681289019 |
| ALMS1  | 214.396920524803 | 235.43707989982  | 242.614881095485 | 230.975434289172 |
|        | 218.644953001365 | 261.671277686467 | 214.100698312272 | 231.372316734945 |
|        | 193.744461104128 | 226.287196839644 | 204.740183832461 | 213.710058427654 |
| ALMS1P | 168.50246276469  | 171.373932115412 | 189.985520850855 |                  |
|        | 160.904946328482 | 161.090443294391 | 149.113794439994 | 171.69834783037  |
|        | 163.102043862117 | 164.103306492559 | 154.379788206936 | 157.254757078837 |
|        | 175.510160114891 |                  |                  |                  |
| ALOX12 | 143.318291243905 | 142.882391486465 | 144.511488474344 |                  |
|        | 137.823152565933 | 281.119138040097 | 261.366143735074 | 140.341589053972 |

160.882229345156 278.775971122032 242.902900881585 195.645181575647  
 136.951350782053  
 ALOX12B 127.911258242431 126.3539479619 119.275061991187  
 117.324368138398 125.874313058552 116.087696503753 130.820415610578  
 121.065278765151 125.044092929562 252.015257713669 130.378441113977  
 115.871151134713  
 ALOX12P2 130.066177538896 136.384308041001 156.998563448664  
 166.187099519035 137.846463796994 150.845846206549 138.764834713216  
 146.975258859244 141.906474266389 141.424508069834 125.701083319929  
 152.077204721895  
 ALOX15 144.669509071181 152.729355306724 150.026314061051  
 149.915251958706 161.632610858756 143.917152377544 142.500537230642  
 150.117906461237 149.881708604156 146.431166706908 143.703367582367  
 157.739526559807  
 ALOX15B 138.426531345939 134.257928609741 141.266129417042  
 138.639410179404 151.208728458188 153.481752643937 145.606098951179  
 153.550174378555 158.819151102054 213.046162847735 146.746669300049  
 137.824985884649  
 ALOX5 221.719848707318 254.133112176024 245.489266602897 178.445384902129  
 269.141120401835 362.095074331893 1376.84058291266 990.55038742453  
 330.944203807675 256.897177822238 1657.72357544205 1431.52979384867  
 ALOX5AP 651.998433127992 500.246996975 329.48021621087  
 395.425715632302 304.985269874607 423.966625351913 565.843200661721  
 793.891277937782 1144.53002508973 1744.58410715956 444.082440002333  
 386.738154577763  
 ALOXE3 124.86699236406 148.143367490426 148.8870854102  
 139.170102961407 156.818197172306 137.846463796994 150.794680375075  
 142.971972776388 147.164348704012 163.69442149145 156.801189586018  
 146.854523122404  
 ALPI 137.710725379804 142.416237823488 164.509354377985 137.44909445642  
 138.1342592966 149.668587078867 149.925051977052 145.291984088491  
 159.170943469313 147.922706629104 154.286043402527 137.680019787902  
 ALPK1 203.244917049745 235.133284525241 200.264756078778 228.100112133941  
 168.729301938015 172.622816559412 296.721891842563 248.643311972844  
 259.472319994929 204.078331021637 336.338518973032 249.449151040445  
 ALPK2 159.476343366991 144.175551691291 127.954231630338 115.678486138934  
 122.965328766807 117.904366738895 124.359615295938 145.987228759402  
 206.802308105224 214.566711351899 154.826710617351 132.709845352383  
 ALPK3 140.860339862967 159.138344477256 139.63811945162 164.092847913322  
 148.130993521745 142.416237823488 145.751336115646 154.252727576218  
 144.683260413888 157.927709922368 131.536457148878 134.01566484034  
 ALPL 172.965746521132 195.078843867124 132.801619479245 129.045189856765  
 279.113984512619 248.927790738447 239.388546850124 320.525885538523  
 269.100400678077 225.189991540262 181.876635968785 153.966815534288  
 ALPP 10836.7380675792 12109.3049135906 7733.95252458705 10533.5868398404  
 1801.74467005923 11112.4298269818 4857.3155917904 8473.21873478131  
 7054.92270618408 3744.5666678861 10704.4678928541 5670.70220800096  
 ALPPL2 154.177340021162 166.135707525987 167.212960569538  
 154.683723064797 133.9382467268 166.767004180603 150.112549201892  
 142.440344960504 158.312614511836 154.591116158776 165.200303470106  
 168.720694813918  
 ALS2 473.370240289761 381.808809625801 504.617795280805 474.917507160629  
 252.365946808078 387.224184063662 415.642099109855 606.162976359615  
 398.796188440256 434.390613381746 300.886032768166 428.782703561238



ALS2CL 130.491742824575 141.86836086844 130.083266044947  
137.203813576977 143.833057210822 132.697727983601 139.885054845153  
132.84268776659 139.223480216048 170.98312926 160.066390229416  
153.358189612307  
ALS2CR11 117.467618148107 134.119276589666 124.907788504503  
118.098274003405 113.427848757112 125.450077160575 129.462319953515  
121.54835308632 122.603226380439 119.131613164405 126.282575548237  
114.27112025541  
ALS2CR12 140.641308444844 147.537691509156 147.320976507643  
126.048382998393 154.598520288855 167.484236948415 114.342980656214  
142.003414252064 124.385193388896 148.134642821094 136.149732574763  
145.496033735748  
ALS2CR14 529.963453165714 590.515758538373 439.492285515997  
476.249239197777 232.590542016298 540.797164107185 378.920456227378  
452.357898123926 356.05426191171 359.577827010792 534.276129011237  
382.485769373364  
ALS2CR16 146.64835267642 159.848342125486 176.587559615019  
189.589053840976 149.157934946623 167.063762404009 152.961475450751  
162.320894555337 156.66832364923 132.681475162386 156.852187451794  
157.457468761338  
ALS2CR4 309.75140197669 278.942695435238 305.669636871734  
236.141982516399 359.162549472301 550.24496459253 510.972389503051  
506.80969228563 359.024299091145 684.428198622716 299.170431746759  
383.626469817252  
ALS2CR8 121.739219824085 129.601234646954 140.372463604232  
118.426600479326 117.024039521425 144.490452173336 119.810421687953  
128.759751330525 131.426355444136 126.48691003872 145.148058824491  
134.05596537871  
ALX1 160.247370279802 179.25743545231 160.50439457257 167.791351000743  
149.196539425588 139.615706918035 148.215172022129 168.654753237204  
185.961822133346 153.318678468245 163.72257517759 151.354187593773  
ALX3 144.087004064416 129.701347789845 138.165240772401 147.572660963285  
155.861829925386 153.918462601781 132.953762692926 153.563839578065  
144.388851371784 151.863048206341 146.738411200698 153.532954370572  
ALX4 133.031431118772 108.730058525654 133.545405737639 157.58659226599  
140.290598244169 130.471929699923 137.179058645907 125.488511939819  
147.893916750136 144.779146672553 126.997614441981 133.63022526522  
AMAC1 121.980744551615 136.011474063229 126.398884382537 120.665520347481  
125.20712393273 125.390139830237 123.877609932461 129.980354138975  
126.614876404146 122.94937342991 130.619624347751 131.789877096016  
AMAC1L1 136.682172321984 138.196640512429 143.993611400272  
136.321816321193 144.084441938143 161.050438117555 168.813895764991  
153.162313098346 154.043604150962 153.711354087243 141.189008902155  
152.879041561846  
AMAC1L2 140.878935632862 145.1382587433 168.389069732474  
147.552635527742 143.1288704752 150.168496148941 160.970946091146  
149.241358552148 157.264673452646 145.432667767652 166.485040297098  
153.143706194386  
AMAC1L3 154.869171648942 155.026276988302 154.892452237027  
161.050438117555 126.372374084002 153.295838391099 170.483686891321  
152.883970401452 144.161672064561 134.479828866339 157.192320902906  
146.880440100898

|        |                  |                  |                  |                  |
|--------|------------------|------------------|------------------|------------------|
| AMACR  | 152.633139090274 | 162.879707592164 | 174.985831291764 | 148.844916975586 |
|        | 224.008253365957 | 371.767182305618 | 174.059172465573 | 724.777166238211 |
|        | 190.22021453133  | 169.933706225406 | 187.955617187544 | 174.396061906109 |
| AMBN   | 147.369767631957 | 141.668101962049 | 139.099483279141 | 136.582137928022 |
|        | 146.541890150631 | 148.898587505337 | 142.945392802281 | 138.59175751301  |
|        | 145.847629576886 | 141.317113425046 | 133.353762794271 | 140.857793157932 |
| AMBP   | 127.696578575874 | 141.453255692229 | 139.502856192876 | 121.049927973123 |
|        | 133.264245969185 | 132.555211779043 | 129.189479305468 | 126.713610681382 |
|        | 118.492287441192 | 126.148379057536 | 133.948997488604 | 125.157459724842 |
| AMBRA1 | 157.341422939225 | 174.812134675989 | 149.85385474029  |                  |
|        | 156.75308999904  | 174.526176588454 | 139.497253870412 | 170.553940654493 |
|        | 131.156409942604 | 148.291518446423 | 153.348110626071 | 154.136467767927 |
|        | 159.368376366657 |                  |                  |                  |
| AMD1   | 617.318955611228 | 461.940616438547 | 600.919152191636 | 361.687156919012 |
|        | 399.537363692534 | 606.38343657878  | 634.046843336128 | 560.015499136193 |
|        | 486.047284379068 | 784.412433571927 | 371.369895979832 | 593.639955546556 |
| AMDHD1 | 126.439948611449 | 123.643292039274 | 129.059722322306 |                  |
|        | 140.842305941666 | 126.462522391125 | 114.3172128566   | 114.155592351175 |
|        | 127.000175858468 | 116.736174147084 | 166.285052506316 | 144.295556086504 |
|        | 129.697584673736 |                  |                  |                  |
| AMDHD2 | 175.617504025145 | 161.724388995749 | 146.49022197174  |                  |
|        | 217.287912825619 | 284.043349407812 | 195.239829623017 | 201.800357785022 |
|        | 227.499335248402 | 215.98963200839  | 273.75192868583  | 187.380064367869 |
|        | 204.877041314502 |                  |                  |                  |
| AMELX  | 127.517446456116 | 147.313494489487 | 146.238333981318 | 136.584199831088 |
|        | 134.449083873514 | 139.693261291326 | 130.226993687215 | 141.794898246882 |
|        | 124.295334523889 | 137.720747340105 | 132.883408554592 | 148.479865869644 |
| AMELY  | 148.450023054885 | 146.533374238616 | 137.352231982942 | 148.390417679848 |
|        | 132.113317893587 | 153.267549449395 | 150.921252152443 | 153.44628692569  |
|        | 139.470557140547 | 152.409211647994 | 148.224587582189 | 136.553568679965 |
| AMFR   | 268.034972830233 | 296.24781576525  | 305.577166690215 | 278.498278821829 |
|        | 394.294057009443 | 292.640251411131 | 292.28857006885  | 263.250833727291 |
|        | 255.793823796456 | 188.062732621031 | 244.689936990021 | 303.184785797741 |
| AMH    | 127.409603645289 | 115.02681415256  | 115.545558600232 | 119.849895979393 |
|        | 176.735168607281 | 119.052729327147 | 108.861243071977 | 119.13963074637  |
|        | 130.557209560361 | 116.038950886552 | 125.800508653231 | 110.774802298005 |
| AMHR2  | 141.760529549196 | 128.635684412304 | 114.740948266517 | 123.104790590045 |
|        | 111.506345174435 | 123.173506315166 | 118.918962530408 | 124.582577275358 |
|        | 127.028640787946 | 117.805556408194 | 125.826111950648 | 119.539713878832 |
| AMICA1 | 208.914498369991 | 186.813888805838 | 154.623548525522 |                  |
|        | 154.648806105422 | 159.806221777332 | 150.841261270382 | 186.778334749551 |
|        | 254.447650810819 | 276.138650967632 | 197.378801636702 | 184.25384366282  |
|        | 166.311421907434 |                  |                  |                  |
| AMIGO1 | 172.457165477145 | 167.526798465556 | 157.768329108254 |                  |
|        | 192.059255232313 | 175.638328370133 | 160.156127781701 | 176.019082929386 |
|        | 150.122035262873 | 160.20843950503  | 148.416483022749 | 159.932941342403 |
|        | 157.322594990954 |                  |                  |                  |
| AMIGO2 | 133.459221120979 | 124.757229519631 | 126.404523759643 |                  |
|        | 120.422401793885 | 136.903588075134 | 123.940632366675 | 126.499257771192 |
|        | 120.085340927108 | 116.142650095476 | 121.168550902281 | 154.528396813382 |
|        | 129.684916104674 |                  |                  |                  |
| AMIGO3 | 146.068360606981 | 120.015436934157 | 145.815454490804 |                  |
|        | 137.769431537236 | 147.572660963285 | 131.159946917777 | 138.645156942894 |

|          |                  |                  |                  |                  |
|----------|------------------|------------------|------------------|------------------|
|          | 137.244552699212 | 142.42442972908  | 140.603933807629 | 133.749271961438 |
|          | 128.711308958929 |                  |                  |                  |
| AMMECR1  | 193.945494721138 | 192.548337508559 | 194.240372898704 |                  |
|          | 190.125009931628 | 412.202049714695 | 339.069385816411 | 288.88486628661  |
|          | 273.106088088825 | 344.604699562938 | 486.047284379068 | 240.511797905018 |
|          | 295.367125961621 |                  |                  |                  |
| AMMECR1L | 333.676803661366 | 376.54010486682  | 306.716682293251 |                  |
|          | 351.188086838653 | 256.202924421798 | 387.305348482856 | 316.281469585496 |
|          | 313.248029961291 | 311.10841853984  | 276.32528705384  | 516.088776850623 |
|          | 376.627801547869 |                  |                  |                  |
| AMN      | 150.868712184357 | 145.374923175872 | 166.447510782568 | 172.138554350738 |
|          | 162.895923745031 | 159.870967387108 | 149.250205265163 | 152.418315087218 |
|          | 157.269049853539 | 161.021740537372 | 138.381508741146 | 147.958483355783 |
| AMN1     | 195.043838688467 | 163.988099963018 | 206.715020025609 | 183.83720937589  |
|          | 150.297422529071 | 165.926301648161 | 195.906137340918 | 172.376544221034 |
|          | 174.854570705    | 140.82351325907  | 204.990512488181 | 169.975329631607 |
| AMOT     | 408.510567121592 | 400.676876982655 | 381.323457262383 | 412.801213309591 |
|          | 315.689865927834 | 285.102778078056 | 197.543089645432 | 268.034972830233 |
|          | 324.79327985156  | 157.635531050489 | 247.053215951505 | 145.889336010424 |
| AMOTL1   | 147.319360896679 | 144.288714958892 | 156.748330788367 |                  |
|          | 172.926288703434 | 159.257221624668 | 163.904137395349 | 144.28597792625  |
|          | 140.091378604453 | 149.615585907229 | 150.058160923921 | 136.861019517134 |
|          | 153.244758030666 |                  |                  |                  |
| AMOTL2   | 207.023221559302 | 192.891507272665 | 171.629605754643 |                  |
|          | 234.432954093705 | 173.395370400371 | 211.104243881644 | 190.291185322482 |
|          | 177.428161690048 | 169.674931517111 | 186.591941221632 | 203.777944180067 |
|          | 179.100368312505 |                  |                  |                  |
| AMPD1    | 127.011594171986 | 129.366567668463 | 123.709293439934 | 126.734835642553 |
|          | 121.886886059038 | 133.412452607155 | 120.138014822486 | 140.471953101887 |
|          | 131.93683726912  | 120.827732270626 | 130.639974588163 | 115.775525016883 |
| AMPD2    | 116.280157890082 | 114.771585411255 | 114.255733119076 | 114.400185930969 |
|          | 107.863971340407 | 112.219585614955 | 115.545558600232 | 112.428707152237 |
|          | 124.042153387391 | 114.405811161631 | 122.368581795931 | 108.118551275778 |
| AMPD3    | 135.325617701062 | 130.856249657101 | 128.827129738041 | 133.66893163718  |
|          | 134.46179453106  | 134.753783025994 | 136.240503841228 | 135.784481523923 |
|          | 135.212715912271 | 147.715160308036 | 136.68056120003  | 128.356453959987 |
| AMPH     | 188.39062571513  | 172.46311371589  | 181.803275243281 | 139.450788315602 |
|          | 129.767878283811 | 139.204218271711 | 124.033766796333 | 138.136901441896 |
|          | 142.596113491002 | 142.191569406599 | 140.692586715322 | 134.381042390464 |
| AMT      | 575.060457772307 | 549.162299481184 | 826.771587455122 | 590.849222581206 |
|          | 225.75155298452  | 367.439588680092 | 382.630113452429 | 277.000882284125 |
|          | 417.731815310276 | 306.387898121409 | 681.810927901806 | 627.066031322234 |
| AMTN     | 118.731960910224 | 124.815853677553 | 117.436119533535 | 116.029201658798 |
|          | 130.92186531563  | 121.803676441059 | 111.152235113722 | 121.824805374887 |
|          | 130.402496960735 | 118.442856984861 | 132.780055030907 | 117.909050015516 |
| AMY1A    | 251.472556189141 | 262.671819506189 | 203.19299227665  | 257.706904467657 |
|          | 467.90388853336  | 511.374117402707 | 758.517101659762 | 411.968307579588 |
|          | 295.893482074241 | 817.529344685717 | 1028.80076860235 | 1181.97868824758 |
| AMY1B    | 185.31769184805  | 170.430478598594 | 178.955938825556 | 172.578252260002 |
|          | 212.545989139388 | 233.71520737817  | 257.573614085223 | 203.298764374262 |
|          | 178.488874074222 | 274.179232297038 | 305.325519265387 | 266.395569467956 |
| AMY1C    | 3504.77617298452 | 4425.66777919789 | 3298.73393277409 | 4246.19983955771 |
|          | 7406.86318549013 | 6384.66090426598 | 7292.0342195035  | 5759.5586948816  |
|          | 5032.66681917478 | 7122.07276863122 | 6028.67062754577 | 5543.71998558526 |

|         |                  |                  |                  |                  |
|---------|------------------|------------------|------------------|------------------|
| AMY2A   | 198.681190016247 | 173.459008248696 | 179.198164545975 | 178.496344474999 |
|         | 140.155861157819 | 151.852294315212 | 165.947514372877 | 186.268881719287 |
|         | 177.204172894028 | 150.509710470354 | 195.185025611945 | 142.501655618849 |
| AMY2B   | 187.784865705837 | 168.538117820213 | 210.218440444631 | 204.877041314502 |
|         | 150.117906461237 | 159.41078351918  | 174.498521167568 | 203.436527043293 |
|         | 173.839053227554 | 179.286187825363 | 192.848268768579 | 162.308297940279 |
| AMZ1    | 110.068122112671 | 115.933805625814 | 121.492896642899 | 122.337240239463 |
|         | 115.863243613121 | 121.898921780569 | 111.178024950204 | 117.893918180502 |
|         | 115.76177719261  | 116.061356450855 | 121.107979534361 | 109.416512252532 |
| AMZ2    | 741.689442253375 | 661.390308090982 | 921.546033242474 | 668.127527385348 |
|         | 685.080426814888 | 1071.83063260499 | 1280.57297272231 | 1044.00217726486 |
|         | 847.276523445973 | 606.38343657878  | 710.228463443265 | 998.157643452741 |
| ANAPC1  | 262.488050186425 | 232.801257700571 | 272.01602406899  |                  |
|         | 275.888299685521 | 244.5675215931   | 348.300300174924 | 262.452869676209 |
|         | 283.701987275608 | 250.911817769829 | 276.434192872962 | 245.042781391047 |
|         | 330.005950459958 |                  |                  |                  |
| ANAPC10 | 246.389203940944 | 246.95071325085  | 290.954496559897 |                  |
|         | 237.492603094091 | 319.812293134357 | 404.618867159141 | 374.268489263941 |
|         | 307.264586007015 | 324.25775261173  | 466.777454704543 | 271.004741629789 |
|         | 402.366797969833 |                  |                  |                  |
| ANAPC11 | 280.558463661137 | 294.033003779363 | 266.347965690851 |                  |
|         | 351.934158805882 | 600.264940641426 | 520.761305892651 | 565.97975389646  |
|         | 619.380514697732 | 609.939982655706 | 447.182566890086 | 303.184785797741 |
|         | 560.602047253306 |                  |                  |                  |
| ANAPC13 | 1615.60472592991 | 1646.76016031831 | 2622.87486749984 |                  |
|         | 1089.16489859253 | 1190.62010668045 | 1724.22121078776 | 1660.70040058102 |
|         | 1752.50728312967 | 3168.27825058989 | 1381.07447204233 | 1990.94596595493 |
|         | 2330.60389526686 |                  |                  |                  |
| ANAPC2  | 151.059401217656 | 151.511808301993 | 146.328876892698 |                  |
|         | 161.419873271162 | 184.462286724102 | 150.449621353865 | 151.411708598688 |
|         | 157.148880624381 | 149.410729709855 | 147.777050372032 | 142.419777428399 |
|         | 148.470120335761 |                  |                  |                  |
| ANAPC4  | 770.632068590053 | 707.048754700047 | 850.882404546093 |                  |
|         | 765.333633142088 | 402.473870771741 | 641.774812292709 | 644.97200337335  |
|         | 573.244735292944 | 687.494132125365 | 553.615252472149 | 1182.50261323518 |
|         | 678.937151822411 |                  |                  |                  |
| ANAPC5  | 1211.94273385872 | 1201.82026045778 | 1124.67710585154 |                  |
|         | 1273.6393529108  | 1279.15873231449 | 2096.25803773108 | 1309.7660860424  |
|         | 1392.89422203207 | 1863.96986643676 | 1204.32784721885 | 1629.32740709526 |
|         | 1555.28458491244 |                  |                  |                  |
| ANAPC7  | 146.586879656174 | 134.094231940612 | 165.274189050141 |                  |
|         | 136.461182044855 | 148.185056724262 | 251.347519777204 | 197.02284475852  |
|         | 219.619022209985 | 216.24497587588  | 212.147155923729 | 166.842970309527 |
|         | 227.144441241869 |                  |                  |                  |
| ANG     | 694.429144766435 | 597.459920611726 | 846.425467119342 | 541.460843251764 |
|         | 198.954254778846 | 194.374817778819 | 261.89195025254  | 200.84691030169  |
|         | 204.470661830972 | 803.133619199479 | 189.070238523683 | 171.216275057884 |
| ANGEL1  | 255.435582426271 | 274.01377986185  | 249.292766428035 |                  |
|         | 281.49247863022  | 455.21285026588  | 206.845306095447 | 213.652091843896 |
|         | 230.546762514966 | 203.616580991715 | 181.578228610334 | 249.737588031219 |
|         | 209.887047474042 |                  |                  |                  |
| ANGEL2  | 751.077307018319 | 901.197085099854 | 743.510369438587 |                  |
|         | 846.084919104262 | 348.98762709818  | 987.564350211893 | 873.256632365737 |

525.920873434688 665.602699607102 391.706404954357 740.973440818582  
 983.777608766079  
 ANGPT1 268.328002606268 254.517135747445 284.940858938629  
 238.823244541016 164.647634120888 180.096239155058 159.094117857743  
 213.847316974717 179.841665686703 224.824362819477 163.059196519365  
 192.640717683236  
 ANGPT2 165.904887259203 195.123919692348 133.905162024888  
 172.446482096058 153.600132368924 223.84997313236 195.474525582555  
 197.47340234886 184.148058872585 315.615758089471 165.085010975035  
 192.848268768579  
 ANGPT4 122.94737290641 115.277302351501 103.826308328446  
 103.240215392215 113.963798749897 117.264555636952 117.856184272322  
 105.221735747452 105.859916438163 108.697696080014 112.198629213643  
 106.491867793742  
 ANGPTL1 139.767216030715 150.015696417249 137.907709799074  
 150.822586904738 126.606163970149 127.699226067847 135.673080643346  
 125.915689078001 126.748906552086 128.466244127634 123.728481007459  
 128.580625868379  
 ANGPTL2 2799.0487754899 1904.39962279504 2346.47361943533  
 2114.9754128463 229.443064589306 250.885949055834 216.290279815413  
 250.376178742476 616.014975366684 680.509421043347 214.714726648332  
 198.191669030952  
 ANGPTL3 152.461930328923 142.722227179256 158.541906931082  
 151.183847738922 158.521812954982 155.906054212876 149.725422365342  
 143.172744119235 148.478570934155 155.824409540332 130.211247943634  
 158.058346079359  
 ANGPTL4 194.029961195972 274.281532397691 177.96452209396  
 191.365014963729 587.654093308465 453.282973743379 1261.61611961272  
 639.011144305614 383.182507425579 516.577357935963 199.53455266342  
 408.510567121592  
 ANGPTL5 137.342348963288 148.204194003593 176.980780681976  
 128.575364985954 140.765231611948 150.70383460714 126.53466470733  
 147.751554743466 146.425476034368 137.342348963288 125.982423431253  
 141.908791151061  
 ANGPTL6 136.011474063229 171.314681729657 144.019824700027  
 146.923382271905 149.511776997149 141.632147679743 137.352231982942  
 142.142633050256 143.836637098747 130.073005698714 129.86336717605  
 149.668587078867  
 ANGPTL7 250.84781675544 234.980382243116 279.070493043898  
 305.16668987495 116.744048998494 117.829228895897 124.178483414968  
 116.902574164498 130.392575279055 119.29304762171 125.136745288071  
 119.097521397712  
 ANK1 121.723964989551 123.22295112139 128.266906202941 123.072413274454  
 115.639101191444 125.40172813004 123.219903763265 121.632494500096  
 118.983932995126 121.752481757054 137.025625133986 122.460829835477  
 ANK2 211.22652563815 176.27969404442 188.685460181066 220.896363324634  
 124.503016568677 124.528206512938 119.640086587188 124.35721327773  
 135.227424713702 131.414690782328 129.707421699091 127.159947766922  
 ANK3 178.551434222154 175.679405338399 191.830711714844 165.607095120227  
 167.030667499538 182.833961304079 212.33360547376 171.759102794108  
 164.048326497989 158.263657373911 245.317436234586 214.8478629277  
 ANKAR 169.132693907633 156.213421099137 176.214950733324 184.294172429054  
 159.534017722536 142.836229345273 147.169765031208 142.153830345183  
 146.609485664113 139.664055668127 168.763640193219 166.187099519035

ANKDD1A 1227.36706427754 948.734577648136 755.79669622705  
1195.07608384189 274.934292929666 193.261343922604 507.236601481067  
314.486603134656 313.351441953859 189.708396835236 436.834825721843  
390.501797367707  
ANKFN1 111.137519376499 126.832182961671 122.287535209629  
129.049273337631 124.646093292382 122.65547320922 124.451718955086  
125.166940410459 123.612648219993 130.066177538896 143.036006001419  
129.777173431404  
ANKFY1 438.03648998391 434.176007498693 442.12886967939  
438.611973005212 221.512905853031 286.376638135463 231.981501596284  
287.084253886676 268.930428617695 301.546624239855 322.778260588465  
410.216584967666  
ANKH 129.365004129784 145.690634269858 119.594962686756 123.638001112969  
129.145457341484 139.435000959919 121.400652285172 113.644993086829  
124.313901870563 127.908872828095 140.855078775719 120.26749529985  
ANKHD1 202.568071395884 184.071078414327 208.914498369991  
173.790848780011 165.411052799773 220.9384439772 232.918330930051  
211.118308738617 168.437049123012 260.888612454097 213.123453925578  
224.547982731402  
ANKHD1-EIF4EBP3 174.615694779386 177.500110974116 150.660106369128  
179.914070416793 173.10229478279 162.140112952434 170.951009118578  
175.891947478891 160.32812671237 177.812335593522 187.389039221193  
207.076364103755  
ANKIB1 684.428198622716 630.176145684641 705.529158880221  
475.833242673151 579.493790910006 930.704688414069 880.140852200235  
754.97177863997 714.052063877292 867.369315017411 451.718912714608  
1295.27257578314  
ANKK1 134.648780131578 132.01588294465 130.907879150229 130.979513420888  
161.972922129453 132.796961054534 130.268322464805 145.534520042669  
137.934850241054 127.372242892513 187.15740398852 132.151765465534  
ANKLE1 134.233014993992 134.125038192486 140.857793157932  
127.086470811408 125.160161268474 140.726084514407 121.919799968293  
138.896595888876 145.967685593635 134.896349513392 133.075748695526  
136.101501973431  
ANKLE2 371.552970811499 302.809011218879 380.514553097613  
276.830814061474 371.693808540758 382.562403424855 431.974037914233  
260.278595572575 451.985108262982 422.23268864343 310.426513884979  
431.861762635568  
ANKMY1 154.420795931034 163.18585933431 160.449911844008  
144.30519737569 158.157097243342 142.722227179256 181.54273463264  
190.098509544816 165.932628858503 190.138730960643 238.745953695925  
232.778488697337  
ANKMY2 526.896146537814 463.488995330457 526.182262872235  
390.372738176917 359.099750692694 294.069353373633 476.917496749381  
456.201998988891 450.120868656638 269.831616158113 610.070236234299  
537.06835963726  
ANKRA2 477.626693328013 430.94199035855 498.812823949508  
358.654569870431 322.099431638246 477.489368828457 865.435843446989  
391.500696444149 412.202049714695 326.417021307859 660.535644289024  
730.988069115919  
ANKRD1 154.2433882385 148.932696684374 148.034899103241  
169.417764098848 154.555255038453 173.260348096238 144.914015211747  
138.178987367473 156.043994260248 194.500222559978 141.652000792271  
152.789338329505

ANKRD10 619.380514697732 547.202354339933 735.8141982568  
451.210172051464 263.183010631644 839.662936279727 351.395760651605  
498.334266735594 466.909037277853 353.078842299761 543.001249586573  
528.650794915616

ANKRD11 449.408793796673 513.428413503031 463.754869412768  
600.264940641426 408.993744895434 303.986544460218 512.895335481876  
392.430873293903 651.675427664911 513.292377117011 506.659740456829  
564.056592672374

ANKRD12 581.54874141672 569.656573915709 680.743052197025  
469.333357789149 278.274343962656 378.920456227378 373.189809737885  
472.793332506369 390.897464546943 367.567681162661 430.94199035855  
436.834825721843

ANKRD13A 1632.84261181074 1268.73280473728 1497.32522786098  
1726.15788525017 455.124190541055 632.565736446505 641.645855499704  
486.524284354103 1064.12835214671 815.045148478814 616.701037274509  
574.6506349984

ANKRD13B 170.646233722767 167.976680048356 152.390371614602  
202.357989894268 175.101284960252 165.41729888767 163.552608805894  
180.619956937489 163.175801793143 174.787077606165 151.054834307689  
147.772490977392

ANKRD13C 179.46936343225 184.451469623426 220.362946606131  
193.336246844237 212.78038645414 248.643311972844 206.77605957523  
195.333029746339 223.941946219233 248.085349787686 169.003310163058  
212.396522888943

ANKRD13D 170.05799929575 180.070209705044 154.528396813382  
182.77693508164 205.260673843294 239.277801396834 183.280853265083  
163.104822161892 162.096065738375 169.257035030405 185.570062118736  
186.951061159734

ANKRD16 214.38058301395 214.200081541057 210.245551279259  
236.548439331855 337.22646304739 315.615758089471 238.509970054862  
259.316557834724 197.72068061775 170.602603155092 200.342786450248  
253.186749111526

ANKRD17 269.981476129439 274.371523790341 285.172001915966  
242.269784551092 300.150235383065 263.058972886829 294.871848467326  
292.366934378643 307.020265874666 368.466518140043 350.46078795627  
326.640168906375

ANKRD18A 147.036768856136 139.306122448857 136.384308041001  
136.406132339187 138.230197299262 134.582098893327 141.5739152922  
148.532339759414 132.423043364573 146.792951584868 143.063345350253  
142.01454627498

ANKRD18B 126.127630885864 129.777173431404 138.981712781568  
133.875667250136 135.503338987971 135.774569629738 133.555814326103  
127.935614145702 132.813199199389 135.227424713702 138.83304645915  
132.283682066898

ANKRD19 109.625579596864 114.818898581401 110.794219964997  
115.053039576143 144.992993261203 161.514651272858 105.771723307783  
504.275299381356 235.822266856967 158.425950902309 134.325520377207  
109.044879188971

ANKRD2 148.327340543504 156.96934803556 155.303903514061  
179.30729544595 157.57914268719 159.49930229951 146.261164125255  
152.101695555105 151.2639801322 151.543678860049 140.398923642686  
150.137061170632

ANKRD20A1 250.406775889932 241.320049298228 219.940167815376  
251.546290552828 161.451253146578 295.330307669482 364.678403892354

280.798003990849 195.447966116819 158.186816609641 224.118739978257  
212.545989139388  
ANKRD20A2 118.276198592775 109.176852761745 120.042717248207  
124.033766796333 114.048136176142 125.290320836648 124.256773437346  
125.193729067011 111.299115402008 121.36708642226 126.75720720361  
122.226875707253  
ANKRD20A3 132.570225520163 138.899292894875 136.904851056919  
134.102929804129 128.05898686833 140.113334247294 144.110544384466  
135.25734629146 126.762116571216 127.706499722854 129.329521415816  
137.853137973756  
ANKRD20A4 119.275061991187 154.296467085914 145.954700424725  
150.303703193967 149.77596374205 125.189588215659 144.505072819693  
138.546549217819 128.994977935861 143.812863334832 133.857996630836  
141.449119281888  
ANKRD20B 129.707421699091 131.221105247771 132.137634927459  
133.12904935533 126.34649262976 117.897556445952 118.091125088778  
121.556331561879 127.466779212194 123.031945101045 125.94880312094  
121.141432480683  
ANKRD21 138.142193489481 142.822594215168 151.632801137039  
145.997380100999 158.819151102054 140.878935632862 150.126627487419  
141.306418675404 138.625680450198 152.660373241584 140.510889880872  
132.645196037302  
ANKRD22 175.363223521128 186.975609955892 194.702974020747  
174.375388013694 199.423120300557 474.378918787006 464.812091712746  
393.264726588522 280.085692727562 354.705553237406 389.853534237748  
393.796356067403  
ANKRD23 156.911538642765 173.97085982677 171.426334687626  
161.795378938402 171.465178761171 158.034418043685 170.376620730856  
175.084729757407 162.431674335726 158.275283892632 153.494456800685  
158.967160833334  
ANKRD24 137.840396641618 145.029298288869 138.30326146769  
153.140087873773 139.299062352035 143.939522733945 143.628147237159  
142.52234368939 147.870549240703 128.009286101341 137.757902615328  
130.423465505321  
ANKRD26 185.591700082272 170.892319361167 191.507657960386  
157.541796722309 172.774914399844 176.456539071735 182.300628120658  
155.728609337723 166.263781040251 193.753062958207 178.584378959369  
189.758013811338  
ANKRD27 316.524115715585 306.43742010208 346.996310517446  
273.668871896558 274.202831856221 247.111032124864 251.09230266334  
228.100112133941 261.065986251886 239.572670410818 207.467591256549  
199.756584044664  
ANKRD28 211.059870865354 208.507486041165 273.106088088825  
208.628626112623 179.687464522203 300.314088267108 210.392662092721  
280.007569817323 220.098071755353 200.831877950718 237.01460308334  
227.715558644326  
ANKRD29 237.473927775823 215.967319486874 252.138168292964  
250.626556981376 131.374680878107 130.378441113977 135.697550878438  
128.705587172572 145.666712006532 212.531329857909 139.826273596452  
122.932745723044  
ANKRD30A 130.878694881324 119.083957999725 123.905462079972  
125.081880303992 115.473431881597 117.590393673861 121.464383202986  
125.347442446239 116.043095688871 125.367386907897 129.57551086282  
120.122719226116



ANKRD30B 7815.98936145067 6793.99737496637 7969.0710242842  
7016.12801650552 2000.47497636965 7656.97151002785 4367.38154535901  
7144.3257417116 5947.89821087362 3807.16206340771 5382.31371568106  
4793.22133852447

ANKRD31 152.935963398921 142.51308872439 149.070750686003  
142.942021904533 149.968749911496 145.401101974736 158.226547375305  
132.70442458261 140.295307451188 142.363309192458 130.57903858574  
157.221008210698

ANKRD32 155.91493956251 143.0235772247 152.486212022518  
140.57567768682 170.212679845194 166.277960843095 153.545086287929  
186.430014478919 163.661196423902 164.708712337156 154.774977482202  
168.783725505491

ANKRD33 283.27806319488 314.708587131145 317.904396212359  
317.600728351694 1649.46398639795 369.906476027936 875.7694907383  
379.102958448288 437.601814037248 707.173691257322 995.812184456562  
369.78624104057

ANKRD34A 169.417764098848 194.161930642068 153.829636228764  
216.805365763069 145.569870279379 147.257773507186 133.487774861252  
140.377179372804 172.222262910052 150.261107471642 160.446191353364  
147.51773051441

ANKRD34B 107.74537523456 117.824694297846 105.348008821162  
108.818976813708 116.773599713111 103.36057518781 107.013012418356  
108.167670899938 115.264104392064 108.669141498627 117.137027732123  
103.594872791657

ANKRD34C 148.789295862953 137.412952822912 164.084737224884  
131.626173473789 160.019067307733 150.593928635647 146.198331189991  
168.813895764991 169.158049136321 154.455641374384 145.52979050795  
165.545136704242

ANKRD35 603.569635276204 597.651682540611 629.97342429259  
695.595965352335 173.919504730673 175.186435016433 213.432084172541  
164.991522994763 205.305702209672 248.887522059485 186.975609955892  
189.693218759349

ANKRD36 139.446914318877 145.235087732482 153.848852170776  
133.103403333542 130.735223763219 132.566074764755 124.452631766045  
158.07640654075 132.890396520305 146.479009988445 137.698423468762  
136.899405404096

ANKRD36B 220.633692394229 200.342786450248 225.64288602828  
151.621024295494 143.637018777217 162.494429648551 148.096551269076  
169.488652117125 159.374355553219 190.291185322482 164.1720847111099  
141.310253828965

ANKRD37 259.252807304272 291.167223094542 296.657844888195  
244.486311003619 571.64723305848 133.810472192646 441.578261054602  
311.157764305033 306.716682293251 2240.33212242003 368.134303229682  
286.856346704286

ANKRD38 199.53455266342 209.417052464583 154.096542063701  
166.932757191847 127.972708116366 134.134810805413 132.287326702468  
151.573920235798 151.345630073141 417.191960489528 160.411218029114  
160.297609596399

ANKRD39 251.062649517773 257.075088169589 295.507504000509  
288.481981529558 316.955298948771 356.84281623052 277.946395491073  
264.955939320296 190.520750756082 263.352118305612 205.011514211101  
328.680312364877

ANKRD40 243.308625792448 256.424415389574 277.314675225943  
264.158648784101 281.618175110153 238.037110997575 291.683896942007

396.212732639272 304.636618563775 280.595515386655 289.257002046658  
265.43897208356  
ANKRD41 130.056727701826 131.910285685889 131.08389186558  
147.079157199448 135.474834181228 136.19083681188 131.436176224725  
159.282348516052 130.097543328456 137.306031826007 141.082569618216  
130.231160879338  
ANKRD42 127.146101490884 115.718600552187 129.058085094891  
124.093412630817 126.969504644414 115.247223837316 118.924317138158  
122.506058130261 123.833219705499 120.702740607924 136.381058433385  
138.675023495021  
ANKRD43 143.530190096012 140.603933807629 143.188958538221  
141.964796033176 155.319717753912 140.971253689199 147.653573379877  
146.785478478701 167.599784887933 135.809383370957 164.571974509529  
134.517774302213  
ANKRD44 317.353318759931 294.871848467326 306.193157874683  
284.043349407812 131.228779762508 313.828943866034 193.704510912321  
229.116153948948 193.275162354467 170.910998705968 285.798047501616  
221.359331823286  
ANKRD45 160.265389854694 150.868712184357 165.257737836487  
163.298729857831 137.491366243256 140.005968571997 135.663734178125  
148.977202433511 151.308872564827 171.465178761171 145.423022762916  
135.275284142536  
ANKRD46 558.934004505074 499.544050752036 580.474775712828  
400.472835504879 403.657727266403 421.384700184923 416.861099188252  
345.732364434125 487.358720934063 294.697622870418 393.375554593484  
363.445110627483  
ANKRD47 158.573561336755 161.657344146676 158.221595000183  
159.182533998843 173.334154083555 155.952902855994 165.225475655526  
166.784804508647 160.17208299932 160.822287037366 154.539367933684  
151.032389358279  
ANKRD49 303.483515328621 272.193578770314 293.692083555844  
215.931781291835 265.068532248682 272.927830312746 260.715580924916  
313.351441953859 254.812605074045 206.469040492609 344.379733302418  
255.945470052489  
ANKRD5 125.475308885588 128.914885412263 130.150998843383  
128.662680062294 212.443407602682 140.177708471199 137.902953501634  
137.253971514177 141.378381097266 139.868714816245 135.455283504668  
137.002473710189  
ANKRD50 476.383294794912 463.754869412768 367.983166440977  
396.212732639272 211.692743811486 401.189904619902 546.841563406813  
232.621526025603 213.754156680604 312.961981998512 705.311256840178  
1075.3328563531  
ANKRD52 195.033792280119 195.831574717135 165.757295630254  
255.198862778405 200.08007665693 180.060096787617 152.054874792646  
181.467708718758 182.560363283264 155.960886801091 187.65716654049  
161.408318705503  
ANKRD53 141.404832197192 150.031863363697 145.968884703737  
139.687574432387 132.446406243531 151.663203772586 150.596350682411  
153.263883774915 143.987296454585 141.668101962049 155.780657091484  
150.534608517044  
ANKRD54 387.711471687237 436.982960786839 357.006610037663  
613.846166856328 418.772484676858 277.946395491073 245.426639190893  
237.312766830206 236.933960698783 227.806050911154 314.610979086485  
252.851164967726

ANKRD55 111.7529190597 108.646136431909 112.645720918926  
114.213405341709 113.791585365477 106.900679222135 118.731960910224  
118.9803314875 118.025603140924 113.347609066395 144.544001385895  
103.09089100768

ANKRD56 129.307025798583 143.103779196037 147.995991912855  
166.958831664154 186.430014478919 161.510497517852 161.979914539039  
173.017662861015 169.999692055871 151.26137860684 139.435000959919  
164.423960071908

ANKRD57 1044.52286986369 1085.92360670051 1116.95795024994  
855.415038498392 1296.10827265334 3282.73711809465 1430.20038077595  
961.931130189779 1136.76110352875 969.811933814244 875.7694907383  
1328.38230265655

ANKRD58 144.762006548375 135.105147647223 156.375876454394  
179.880812358974 153.853856339585 148.67584969749 155.896065329825  
150.367927843529 149.91705328815 167.961390966538 148.216605879958  
144.32655838488

ANKRD6 258.348298226232 242.019489058244 267.222762759781  
280.007569817323 193.945494721138 175.350734537491 321.049000153127  
183.397833894087 177.72965427263 247.528753010193 180.315825600347  
177.708263037199

ANKRD7 150.224472335504 146.867740388881 137.440295223749  
148.231928963878 147.606311227037 146.29600238749 149.744358230709  
147.236728188605 140.916876460413 147.400734637481 136.575784685895  
138.401406375804

ANKRD9 435.796737132969 478.699172220804 430.833137328233  
558.051041108282 1149.3250945792 389.381039495553 719.628501451187  
547.681206272188 397.861172312706 1497.32522786098 717.419388886784  
738.579262579782

ANKS1A 1583.79384467611 1821.08523647593 2645.72125268628  
2482.27419621925 2850.98525554116 625.544719251096 1379.95968831696  
2273.12164779441 1563.71477584676 520.962651968997 1010.23703166498  
555.607185132941

ANKS1B 224.724262742427 243.080229016932 226.565823278767  
273.550544349798 135.05209575317 150.942078067308 144.868337748544  
143.48729871068 144.895601314903 142.806728419652 140.934844668435  
157.126460242995

ANKS3 213.301947003462 201.913709602894 251.665539319612 218.773153183388  
190.809584998617 218.000351930307 198.522123898437 212.016247864691  
179.060189557496 183.302479730653 179.687464522203 189.37832342197

ANKS4B 136.421163870578 141.253030949701 141.340452225686  
147.306549450597 136.176688025337 136.755975832051 135.937066152894  
136.211694310501 140.42579083092 131.724061631389 124.193603137858  
160.861929142249

ANKS6 150.250193889942 139.984102798711 140.152177370089 138.175538905334  
128.867710054234 132.535722328813 128.482976013813 142.073529553425  
125.165254272421 142.981967333546 133.99226161886 138.709991561675

ANKZF1 182.02250582556 191.170105307944 206.845306095447  
192.69687837782 176.183165494563 160.880152014981 224.62335524729  
178.106013202731 189.070238523683 205.821101661022 222.051005238856  
192.655899720909

ANLN 128.0805889548 140.829927714838 121.476730561812 135.548042190047  
408.201232787978 355.14024238296 183.64389891975 309.5988292104  
297.332272659995 334.443733461841 197.378801636702 417.528353577952

|        |                  |                  |                  |                  |
|--------|------------------|------------------|------------------|------------------|
| ANO1   | 169.815053752464 | 214.355086255855 | 175.585857393085 | 168.314966639178 |
|        | 467.04976953755  | 314.780899041937 | 141.21138348075  | 164.886944426276 |
|        | 162.063689419737 | 187.586093248437 | 177.001637712889 | 204.453822958077 |
| ANO10  | 261.286548990435 | 289.667302610069 | 249.263194321516 | 271.858059712406 |
|        | 495.769802520637 | 321.177982468322 | 253.867947800583 | 198.659595851481 |
|        | 244.219585315024 | 324.067396271281 | 225.142823691625 | 226.701637237203 |
| ANO2   | 141.777089987975 | 145.112399373761 | 145.414563914801 | 139.917662338546 |
|        | 135.286686011087 | 164.223990197735 | 150.471558219667 | 149.836491640473 |
|        | 145.428297145967 | 138.041411135053 | 156.916784141484 | 156.018200674475 |
| ANO3   | 117.824694297846 | 128.354163132392 | 112.026113831896 | 129.420716653358 |
|        | 135.875595614483 | 129.246884010589 | 183.115511373872 | 118.480344364831 |
|        | 125.746184969983 | 120.413468119484 | 131.523538461751 | 130.928718312512 |
| ANO4   | 143.455941298415 | 123.781002620866 | 131.099004325598 | 124.597605631582 |
|        | 124.847325289068 | 130.40517506216  | 120.006982591236 | 122.714122084817 |
|        | 123.019430618632 | 114.822700007686 | 132.018833785059 | 120.488694213288 |
| ANO5   | 110.1278204598   | 110.273174147374 | 115.840266274696 | 113.644993086829 |
|        | 112.10312035128  | 127.052618800004 | 104.248226402465 | 108.589444216106 |
|        | 119.598216955485 | 121.45175516842  | 125.621467040793 | 120.470801825675 |
| ANO6   | 1364.1224589383  | 1040.73829397913 | 1680.25851465727 | 788.244353085369 |
|        | 352.303782547593 | 729.202002368627 | 805.120147618984 | 883.702573960415 |
|        | 897.958748317315 | 606.162976359615 | 817.342172321486 | 1025.27246494218 |
| ANO7   | 139.178245419517 | 135.348086420636 | 132.508133846896 | 141.469818222503 |
|        | 139.545451634208 | 135.832454000859 | 132.762755202326 | 127.633362302159 |
|        | 134.48825480809  | 136.77666893627  | 144.182891591399 | 139.125340284813 |
| ANO8   | 154.455641374384 | 172.002600588279 | 144.796089646941 | 152.042744996136 |
|        | 165.659978250378 | 158.911404625381 | 190.682392100564 | 187.494677180331 |
|        | 167.713268780664 | 220.959843573708 | 219.564603776774 | 196.378888436237 |
| ANO9   | 140.833666276568 | 151.330035086652 | 152.479402912801 | 143.175483349968 |
|        | 239.941641600769 | 171.229729917612 | 168.427124752461 | 174.953232190285 |
|        | 177.752497164503 | 204.1974438819   | 220.876114717642 | 192.244413515864 |
| ANP32A | 250.25959091612  | 215.698924670416 | 244.280971257965 |                  |
|        | 206.571433405844 | 267.800523478098 | 228.820894086914 | 290.090495047722 |
|        | 189.2642795052   | 200.146843808423 | 247.340470321453 | 271.989060206794 |
|        | 274.371523790341 |                  |                  |                  |
| ANP32B | 5314.0635307876  | 6077.64695330731 | 5932.37714987741 |                  |
|        | 5670.70220800096 | 5149.78271096158 | 2708.20624364471 | 2850.98525554116 |
|        | 3862.57980488881 | 4437.40805296517 | 5947.89821087362 | 4246.19983955771 |
|        | 3251.62784659994 |                  |                  |                  |
| ANP32C | 155.478383896934 | 159.946124520038 | 147.8838487685   |                  |
|        | 145.180346905484 | 174.09267813338  | 139.636177212128 | 171.884800118791 |
|        | 146.081940883446 | 151.360575274272 | 147.373174160478 | 181.215046876308 |
|        | 183.247396324425 |                  |                  |                  |
| ANP32D | 153.667355714857 | 135.638156623519 | 149.390481900424 |                  |
|        | 143.521510363933 | 143.937726155116 | 145.226278521493 | 138.829793136954 |
|        | 133.465593684519 | 155.762890407496 | 153.095594614683 | 118.115015846489 |
|        | 155.598586699376 |                  |                  |                  |
| ANP32E | 157.997750997487 | 152.397984799517 | 151.535177950367 |                  |
|        | 162.208028489943 | 155.683727621475 | 141.132694466739 | 153.916313595581 |
|        | 146.887506793665 | 139.297276687352 | 140.395662148924 | 154.431051053529 |
|        | 156.680734054531 |                  |                  |                  |
| ANPEP  | 232.519482087835 | 210.590774758661 | 180.290887733427 | 187.978627462391 |
|        | 163.718595974283 | 168.958694643382 | 159.922627970233 | 166.674240866931 |
|        | 170.169402943662 | 205.728673153914 | 144.78971417658  | 155.04585737344  |

ANRIL 149.714982846365 140.975056186954 143.325710305008 176.267796612066  
156.732595223778 151.148295679242 173.599961799334 157.535792192753  
210.043556816529 161.498785105514 138.601616246182 159.393410854649  
ANTXR1 1455.75693295732 1071.00507864299 957.54149804446  
852.436775264873 478.38361571213 290.037325939883 348.111872425949  
278.219561902233 384.641319423853 688.915534194306 379.476768908492  
250.085444708918  
ANTXR2 4397.32311216672 4000.45196171119 4892.17875938832  
4022.23000497332 192.07791693203 309.0578543424 385.379119927642  
281.792602269388 471.315730378641 330.850098426464 301.087947101876  
434.943371634824  
ANTXR3 145.442914818456 154.645353009618 148.067562465748  
124.466986821169 117.995551728392 136.344248873826 141.277227483198  
130.682112236817 147.322622473251 141.752031758589 126.279119798177  
143.438417529799  
ANUBL1 131.436176224725 132.387242907281 137.360220389719  
124.160433356046 147.019460117987 123.887740029279 125.488511939819  
129.548491595432 122.928863588006 119.539713878832 134.758222337831  
129.01094835739  
ANXA1 2242.73511149559 2081.45603839306 1750.21700780511 1699.8374761666  
2267.0818302379 824.070046083713 1177.01310527577 711.166793546075  
959.897744425251 13247.3528304243 1345.8970795036 624.825216056495  
ANXA10 162.728630453745 201.676984786688 180.610891208146  
151.382199195953 154.173439471404 794.165408266062 2399.88695085752  
1231.37475540937 165.249658565871 145.314204192565 3403.37530051435  
7617.316805798  
ANXA11 715.638378711433 641.12919339861 707.715412321304  
652.429025114523 259.426050921239 364.191263843897 387.908774438461  
264.429717032654 468.496972957503 260.955030428944 585.721610434501  
592.613689704907  
ANXA13 137.339511714364 139.271829906127 136.743659350798  
132.504264154139 131.619951110473 130.179742057015 126.042731009527  
129.697584673736 128.775477649887 130.571827557149 136.020600085547  
125.777193592751  
ANXA2 2068.04582900231 1934.30779703747 1464.04124596264 1875.21979956596  
1301.18893681695 1141.13648305827 1219.36024606325 1031.59140059071  
1789.51979173209 7342.79622458743 1548.09554827056 3073.40543048878  
ANXA2P1 1776.38646235135 1883.74008471233 915.579581760396  
1447.07989164988 913.22732386079 623.888568444132 809.362464219294  
651.998433127992 1091.69584249713 4866.98027226798 2596.43650409044  
1789.51979173209  
ANXA2P2 28530.8435957612 31402.6950316226 27667.4034204988  
27028.8951412615 26082.8089351205 29532.7890259497 27501.6698286039  
28095.1627766565 31402.6950316226 28193.3833726673 18220.6383250956  
29868.1819370827  
ANXA2P3 184.306452616482 160.180961887686 156.316333575406  
191.740596601895 160.055242985219 152.382558543399 158.157097243342  
156.830156083795 158.48793705795 355.14024238296 176.486551181451  
201.913709602894  
ANXA3 146.160188002433 170.257439890277 174.737828693216 156.191659799142  
269.495247190598 226.315173823168 211.438615793742 146.056723380149  
188.557113298055 2462.87034563426 237.266455875982 172.491604217899

|         |                  |                  |                  |                  |
|---------|------------------|------------------|------------------|------------------|
| ANXA4   | 175.210232663606 | 183.779065928447 | 167.941671074236 | 138.377628971966 |
|         | 357.431640917696 | 307.81941988503  | 263.994460303088 | 372.94852645418  |
|         | 1054.47292895417 | 317.244256751418 | 345.38424761963  | 181.364325529405 |
| ANXA5   | 2723.55722258794 | 2313.56743052616 | 2760.57475805426 | 2779.89882032092 |
|         | 309.318403417731 | 511.547907091166 | 323.149792143481 | 542.883453307    |
|         | 1206.59866455529 | 3455.20639616159 | 331.464977124667 | 519.564563632951 |
| ANXA6   | 301.369680426563 | 286.376638135463 | 339.252515920242 | 433.11536069928  |
|         | 148.049570580734 | 144.30519737569  | 148.482530949134 | 156.210423316722 |
|         | 166.411219327671 | 149.182972268104 | 144.853868519575 | 144.402160347818 |
| ANXA7   | 695.595965352335 | 623.409211766224 | 659.673052713372 | 475.403662030875 |
|         | 321.627969147543 | 339.54582149284  | 381.971539806271 | 433.11536069928  |
|         | 407.244564912365 | 418.163219634152 | 292.524552445564 | 447.779854598556 |
| ANXA8   | 148.00952002903  | 227.736106796551 | 165.67554738735  | 142.61573330083  |
|         | 633.401624753368 | 811.564396886535 | 1076.09385014053 | 360.053590374552 |
|         | 537.510539142248 | 2358.46955614953 | 1402.14708471728 | 1057.1528284934  |
| ANXA8L1 | 146.235832275574 | 135.229197100212 | 131.144774362059 |                  |
|         | 134.483162806498 | 175.442400672352 | 237.854774190873 | 246.552713031445 |
|         | 158.325554470875 | 176.121563444364 | 480.22496056277  | 244.162496497466 |
|         | 299.29004204677  |                  |                  |                  |
| ANXA8L2 | 128.692917766138 | 138.98468042464  | 123.482626777491 |                  |
|         | 117.928456234796 | 190.871696848118 | 435.037306125887 | 336.5543056115   |
|         | 224.92725876841  | 263.204269632206 | 1074.96415574964 | 273.911741951291 |
|         | 652.654673756838 |                  |                  |                  |
| ANXA9   | 114.999628959921 | 122.607404698857 | 115.427201752401 | 124.381674909742 |
|         | 262.954856857756 | 138.452698593232 | 257.989863290786 | 213.178648382852 |
|         | 348.171901445232 | 116.456170659686 | 249.379605914827 | 178.619580818758 |
| AOAH    | 140.543382412084 | 139.841822983821 | 120.626155234319 | 131.097598299707 |
|         | 130.027227278931 | 137.183566882805 | 137.536053775531 | 145.540872377507 |
|         | 162.285199080777 | 131.12953085854  | 163.480722123193 | 131.136073942692 |
| AOC2    | 163.170983091116 | 151.234397206563 | 149.883237874886 | 144.240470871638 |
|         | 157.932243807202 | 164.509354377985 | 155.233830396052 | 190.534176839652 |
|         | 159.994376562272 | 153.649235507812 | 151.98710761363  | 157.809081184874 |
| AOC3    | 1366.06309834426 | 1858.12855367119 | 1136.76110352875 | 2979.27692778783 |
|         | 154.193086881801 | 193.084818760857 | 149.133055368147 | 218.559622620349 |
|         | 177.802767772786 | 148.547259731346 | 158.058346079359 | 147.463822782303 |
| AOF2    | 615.254768508691 | 758.517101659762 | 558.621429366984 | 681.810927901806 |
|         | 1314.62071412501 | 1306.20183851747 | 1260.50387106816 | 1311.34904760947 |
|         | 885.927972780392 | 775.382397816601 | 1566.65825409044 | 1123.93087912174 |
| AOX1    | 322.837446618323 | 204.596753034535 | 394.73732350607  | 176.312626750427 |
|         | 109.209241676429 | 113.905364405553 | 117.667611937195 | 116.280157890082 |
|         | 137.006917665541 | 121.771891473027 | 125.525241361472 | 118.783904603368 |
| AOX2P   | 142.720769329396 | 142.752536416014 | 128.96181458192  | 124.86699236406  |
|         | 147.1476865809   | 131.999299893526 | 139.380610974147 | 135.285224699704 |
|         | 135.841309719081 | 142.01454627498  | 150.907594445048 | 143.543607779991 |
| AP1B1   | 271.196028302639 | 345.494740481759 | 279.969975697164 | 383.033242143031 |
|         | 838.93563319979  | 617.833194119379 | 588.334329592604 | 422.973606694449 |
|         | 685.080426814888 | 414.888512708716 | 462.888171502285 | 624.978351618077 |
| AP1G1   | 337.271784551586 | 275.203046536524 | 357.191675549592 | 251.09230266334  |
|         | 254.9636051363   | 431.304147578425 | 317.493387040816 | 449.598181155897 |
|         | 503.285430318683 | 390.573484082597 | 458.218913259336 | 458.782864873657 |
| AP1G2   | 184.900027626401 | 192.465510013851 | 180.392337212428 | 167.67952650068  |
|         | 496.697565640162 | 248.761038207278 | 437.049581919144 | 331.999693230194 |
|         | 298.706655333472 | 355.879841671975 | 873.879064183441 | 516.177596584059 |

|         |                  |                  |                  |                  |
|---------|------------------|------------------|------------------|------------------|
| AP1GBP1 | 136.762273376313 | 137.752238510249 | 136.181791404331 |                  |
|         | 135.508803488048 | 154.728941096647 | 159.012011848781 | 158.989652405732 |
|         | 176.410016510249 | 167.822075935474 | 157.631978594005 | 160.265389854694 |
|         | 186.420541099902 |                  |                  |                  |
| AP1M1   | 824.070046083713 | 936.560290736127 | 846.084919104262 | 1328.38230265655 |
|         | 759.058176862524 | 619.635734567779 | 691.397238677552 | 739.085574858917 |
|         | 625.374595058488 | 860.688314783077 | 837.872187194784 | 696.650617523899 |
| AP1M2   | 155.176714087209 | 174.624446035895 | 149.007288765628 | 146.753212022975 |
|         | 798.1490651671   | 364.265100349672 | 281.168898910065 | 404.618867159141 |
|         | 258.4424008891   | 237.249949461085 | 459.068582584181 | 308.621688157016 |
| AP1S1   | 198.135240691225 | 201.931760074628 | 193.689806171113 | 204.031081842809 |
|         | 802.304294140514 | 535.861738240441 | 500.848273432862 | 349.485727214325 |
|         | 292.746711619565 | 436.222568287601 | 625.699971780258 | 890.121325723286 |
| AP1S2   | 809.729160605727 | 834.537908087672 | 885.713964813911 | 849.158029646233 |
|         | 189.816900281053 | 421.459312180809 | 216.485113690708 | 326.703488388966 |
|         | 389.260166168847 | 438.431160975498 | 262.019779752857 | 212.073472189229 |
| AP1S3   | 145.632060621034 | 140.711699577809 | 124.857461801227 | 137.990806386929 |
|         | 133.216489794592 | 148.082026641671 | 161.035985824654 | 164.820007934887 |
|         | 181.865456674829 | 141.524239210761 | 149.400244837133 | 145.229637715814 |
| AP2A1   | 186.794165469219 | 188.981391266203 | 173.272062328378 | 221.424451092316 |
|         | 403.208138816247 | 239.941641600769 | 163.175801793143 | 223.128108720503 |
|         | 237.358925391616 | 182.798526632723 | 230.770036998466 | 207.488522933448 |
| AP2A2   | 307.363302726074 | 317.244256751418 | 308.208276315292 | 369.78624104057  |
|         | 283.918434443669 | 188.797908601851 | 178.270849389719 | 193.148369507405 |
|         | 168.124936529582 | 200.790119570144 | 206.376365685112 | 164.231281729415 |
| AP2B1   | 201.676984786688 | 234.484787292284 | 162.240414467004 | 308.679189788554 |
|         | 293.018282386003 | 237.692959394487 | 167.746786642066 | 144.474814266475 |
|         | 149.029275579026 | 140.738977175997 | 344.529927973082 | 166.440530119785 |
| AP2M1   | 922.877217016704 | 1098.20033709043 | 941.065508539108 | 1566.65825409044 |
|         | 1440.14449872047 | 771.694853062033 | 818.761934233826 | 609.665323786904 |
|         | 861.119262963015 | 795.720196538039 | 1017.09497861942 | 1011.14472068314 |
| AP2S1   | 2712.07480130502 | 3038.02573182546 | 2328.65814406636 | 3876.04966263281 |
|         | 14798.1358474998 | 5175.17279574945 | 4276.70912292877 | 4190.38366101529 |
|         | 6384.66090426598 | 5281.353685715   | 2642.24374855334 | 3354.38704439295 |
| AP3B1   | 955.604404066769 | 969.811933814244 | 1172.96121022579 | 1053.09915077366 |
|         | 687.269774217064 | 1587.84395475807 | 1272.14273680177 | 927.137881369911 |
|         | 1041.58583268313 | 1432.93880448974 | 1119.23362648056 | 1466.08446530283 |
| AP3B2   | 156.642441706727 | 134.703474191011 | 130.613760017864 | 133.077760160486 |
|         | 201.748876422401 | 137.747088378131 | 155.237180851323 | 140.242272149424 |
|         | 134.553754121862 | 140.326012404526 | 122.746185691827 | 135.6149724596   |
| AP3D1   | 290.541184606565 | 313.773476049783 | 303.09499683953  | 408.361368902627 |
|         | 424.665056900526 | 314.486603134656 | 320.097510212422 | 276.284517459626 |
|         | 306.387898121409 | 303.555333002419 | 309.0578543424   | 335.790909130243 |
| AP3M1   | 284.595024875896 | 262.53374754047  | 322.778260588465 | 268.148673257455 |
|         | 237.456245064363 | 292.185246573643 | 346.566241319814 | 334.377352542623 |
|         | 369.275635424092 | 269.072221443403 | 466.691191261997 | 364.022018936132 |
| AP3M2   | 495.655170027296 | 505.560841055884 | 362.849380477089 | 501.863855158062 |
|         | 376.007938436483 | 825.034504959272 | 563.490027149224 | 337.728737393381 |
|         | 387.305348482856 | 325.80154888448  | 792.634423781309 | 570.916936074747 |
| AP3S1   | 574.779350011402 | 505.404271675438 | 719.766799746895 | 404.445038343721 |
|         | 278.555009982029 | 375.407747753058 | 925.009157785129 | 583.314509855875 |
|         | 421.583441056026 | 1871.91894530722 | 495.769802520637 | 613.279465441319 |

|         |                  |                  |                  |                  |
|---------|------------------|------------------|------------------|------------------|
| AP3S2   | 177.652022895288 | 193.064450357153 | 208.983138060317 | 212.443407602682 |
|         | 173.681078272467 | 153.67215573765  | 170.129558603697 | 168.982086590306 |
|         | 166.040918339519 | 153.256208333775 | 184.709768457405 | 143.447768653042 |
| AP4B1   | 417.36454228858  | 429.812058546782 | 440.579262120451 | 484.658140651032 |
|         | 338.129250886594 | 454.34729744062  | 374.56251861444  | 432.088303693555 |
|         | 497.53605530806  | 436.891409783298 | 320.812909889014 | 311.966971734249 |
| AP4E1   | 303.555333002419 | 312.601510033941 | 324.56043349882  | 338.326304736048 |
|         | 251.704037951295 | 244.401472859026 | 234.626574390973 | 243.65518489122  |
|         | 245.240006198482 | 313.888035511709 | 260.787104931135 | 281.369059516242 |
| AP4M1   | 158.344330353326 | 157.419333185365 | 151.406384541297 | 162.10411532202  |
|         | 196.076386020815 | 125.347442446239 | 144.636277619886 | 145.076068630259 |
|         | 144.231539210695 | 130.495294897642 | 170.326474367867 | 155.158028043823 |
| AP4S1   | 141.59046197203  | 147.562757301251 | 147.238896426423 | 162.439052954676 |
|         | 140.145470073979 | 131.865164933746 | 156.62031503525  | 141.521742442341 |
|         | 149.348231806916 | 147.743331160624 | 144.008961720971 | 132.554328715753 |
| APAF1   | 207.467591256549 | 235.704824490397 | 242.299252896647 | 206.042395282286 |
|         | 205.226635237992 | 197.24751449599  | 301.087947101876 | 242.019489058244 |
|         | 244.990374822652 | 238.588762326319 | 352.945088028205 | 301.139737613279 |
| APBA1   | 122.320966091375 | 125.579970155301 | 136.159825652148 | 128.708956947928 |
|         | 140.796641921516 | 133.216489794592 | 131.665421461826 | 130.12638520846  |
|         | 128.69455713173  | 126.372374084002 | 125.170874841845 | 132.934955542743 |
| APBA2   | 124.263901299025 | 119.9414421871   | 120.09801164252  | 123.084040312047 |
|         | 143.078022283871 | 116.519527499611 | 121.855752708908 | 114.704831217037 |
|         | 118.841699953612 | 114.755442050481 | 144.675182563174 | 119.711070285785 |
| APBA2BP | 152.495540563792 | 161.027590226123 | 165.048922660581 |                  |
|         | 150.560305000601 | 196.638594797353 | 132.832556359483 | 151.40067812803  |
|         | 154.558968826495 | 148.09868976776  | 144.83363420705  | 162.484777758676 |
|         | 146.431166706908 |                  |                  |                  |
| APBA3   | 285.214585324341 | 282.101714660307 | 298.085365348496 | 325.387193207414 |
|         | 423.152420192284 | 276.184421402511 | 428.959561932229 | 378.24336892367  |
|         | 314.4408959517   | 360.90109922539  | 270.568660560796 | 307.665281863258 |
| APBB1   | 138.354300118735 | 138.455086062782 | 129.299810898979 | 141.486042999328 |
|         | 129.185514320138 | 122.742891063864 | 128.066043751951 | 130.818181991958 |
|         | 123.446714388901 | 130.219888837397 | 128.867710054234 | 127.174074003712 |
| APBB1IP | 305.096320805078 | 244.440857688518 | 246.428746807313 |                  |
|         | 271.287767448621 | 225.96618659877  | 1397.84878368705 | 182.152956182443 |
|         | 463.488995330457 | 475.403662030875 | 184.542232315662 | 183.302479730653 |
|         | 146.513643172496 |                  |                  |                  |
| APBB2   | 130.545285774056 | 133.617501101389 | 136.824357247954 | 133.895547281411 |
|         | 123.538037290702 | 131.839890565869 | 142.709768829207 | 133.391421497441 |
|         | 131.963419175907 | 151.243948028303 | 146.457939801041 | 133.733674016447 |
| APBB3   | 542.121375354644 | 483.845891531326 | 677.802147190757 | 559.899430596368 |
|         | 311.04252785157  | 239.24587884234  | 587.54075434249  | 546.274050902567 |
|         | 363.89527566597  | 1222.014210447   | 445.348044448953 | 482.466736153026 |
| APC     | 152.137669424501 | 139.755211300398 | 138.110317032494 | 158.263657373911 |
|         | 132.751406897891 | 133.608461289137 | 148.263293819238 | 144.96021415188  |
|         | 138.764834713216 | 134.11753210296  | 146.166710487448 | 138.055909969804 |
| APC2    | 118.955314417914 | 124.33863635868  | 119.32696696175  | 123.817878562971 |
|         | 127.003974141317 | 120.276236447255 | 116.031631038289 | 117.873333897609 |
|         | 116.572001618531 | 123.081299769162 | 123.949411804458 | 124.952026709219 |
| APCDD1  | 584.813665097407 | 535.20662670885  | 345.897250519387 |                  |
|         | 358.152044880733 | 211.505504834207 | 285.594100976705 | 239.845747958475 |
|         | 326.83982672544  | 400.924914238052 | 625.374595058488 | 218.529160053398 |
|         | 244.18714778846  |                  |                  |                  |



|         |                  |                  |                  |                  |
|---------|------------------|------------------|------------------|------------------|
| APCDD1L | 1181.97868824758 | 756.390518977556 | 499.321667633972 |                  |
|         | 526.182262872235 | 131.986590029726 | 125.890941441352 | 119.466200987489 |
|         | 118.724348027528 | 133.123444023892 | 171.373932115412 | 152.095584118603 |
|         | 123.635470154191 |                  |                  |                  |
| APCS    | 124.652072110334 | 116.412881235587 | 127.893555451807 | 112.817015523662 |
|         | 134.341489592504 | 119.221976571036 | 121.219323788324 | 122.414781975236 |
|         | 111.010889276873 | 124.977046954694 | 139.244051199144 | 133.069347559741 |
| APEG1   | 616.995114856023 | 690.246312542011 | 642.934824227327 | 1230.00744483191 |
|         | 165.244616507084 | 145.958718601763 | 159.909121784808 | 156.702300398105 |
|         | 145.770601609392 | 151.522526161299 | 163.93199635496  | 203.524150518033 |
| APEH    | 800.739422189427 | 928.672013047007 | 760.272612245092 | 1080.95725397659 |
|         | 4945.87677849967 | 1548.09554827056 | 1394.31467757456 | 862.669120338424 |
|         | 1566.65825409044 | 1189.11053680293 | 1849.21906428944 | 1551.90775589919 |
| APEX1   | 704.448123154868 | 715.93836911426  | 1171.62361359992 | 694.644744547412 |
|         | 1226.10881264804 | 975.315904185938 | 1626.34607278613 | 1601.19401366685 |
|         | 1001.35912007916 | 990.206369590236 | 1372.63540073207 | 1722.26954281876 |
| APEX2   | 260.52593414721  | 279.879377933144 | 240.465165615601 | 291.720204789005 |
|         | 1421.72388964898 | 489.260272645085 | 958.005138077899 | 1140.40904196731 |
|         | 601.640387246951 | 574.262112643403 | 399.963640581639 | 679.191060100076 |
| APH1A   | 460.089380701982 | 492.534183006883 | 392.13175568099  | 450.99430272315  |
|         | 2944.63971819193 | 1005.62130301653 | 924.630951485299 | 795.720196538039 |
|         | 659.900771633223 | 571.136519973808 | 968.548243081111 | 1008.43888926584 |
| APH1B   | 224.851680313689 | 216.05364037271  | 193.744461104128 | 221.719848707318 |
|         | 496.218605366298 | 214.968589907686 | 290.582957824549 | 201.383739902873 |
|         | 240.814860403562 | 290.954496559897 | 243.732074437237 | 253.049869714368 |
| API5    | 724.777166238211 | 671.134356672693 | 884.248568386012 | 605.21685916883  |
|         | 741.433093896472 | 544.580311371212 | 484.568420044471 | 558.051041108282 |
|         | 653.047570485109 | 724.777166238211 | 981.313778685019 | 412.415549375221 |
| APIP    | 286.431013744652 | 269.495247190598 | 532.235193634196 | 239.109163320417 |
|         | 235.933451977398 | 291.167223094542 | 265.148061007894 | 310.598930734244 |
|         | 402.965083947376 | 273.197814995543 | 305.768201359278 | 233.496804016764 |
| APITD1  | 176.912121142015 | 178.939268046323 | 234.432954093705 |                  |
|         | 189.324370290702 | 281.570685561526 | 223.666832044186 | 250.139061165593 |
|         | 402.213774592085 | 327.480268032814 | 225.005311517365 | 236.651601701157 |
|         | 264.476846259384 |                  |                  |                  |
| APLF    | 133.505261458701 | 133.311212623667 | 144.767233774942 | 141.37694311902  |
|         | 144.199054675488 | 151.64806573742  | 128.189685312596 | 138.950197595669 |
|         | 143.388028226208 | 126.557869929234 | 119.511962218143 | 144.411176964424 |
| APLN    | 144.346988809708 | 138.145677924612 | 128.213678179359 | 142.007066214472 |
|         | 159.824012085212 | 131.866599432062 | 150.046300135261 | 135.618562468776 |
|         | 135.116985816353 | 214.331491507489 | 157.891350650633 | 149.160808104789 |
| APLNR   | 223.184064606222 | 381.4054004349   | 213.674150322581 | 493.715108157171 |
|         | 247.454326301069 | 175.158180187883 | 138.548983773386 | 188.070213212057 |
|         | 340.728888109597 | 159.166059518117 | 171.39347085745  | 201.731223995887 |
| APLP1   | 153.711354087243 | 148.649619242172 | 152.990523860831 | 133.031431118772 |
|         | 147.191114491117 | 142.285486339143 | 145.929907161493 | 139.850892808592 |
|         | 142.478528530514 | 131.085965122946 | 144.273011517032 | 150.0674092434   |
| APLP2   | 527.294087043601 | 539.008286968106 | 564.749082802433 | 531.555532787504 |
|         | 589.409235971915 | 298.519371102278 | 535.354724252178 | 454.34729744062  |
|         | 367.518273773904 | 360.756455184184 | 605.040026490154 | 389.381039495553 |
| APM-1   | 181.715992480635 | 197.112749959833 | 154.270034951209 | 179.230909178397 |
|         | 360.812953749077 | 321.627969147543 | 237.989479738133 | 540.190808200264 |
|         | 547.202354339933 | 175.313689069815 | 472.793332506369 | 581.37957221282  |

APOA1 155.55288776049 150.945167884077 155.379116566097 159.730925830278  
199.149959995133 143.780803045394 169.534469894464 145.597134236583  
149.280480796544 163.181323768362 144.092864444802 167.125830254039  
APOA1BP 871.528156184927 933.408902924063 975.315904185938  
1129.76078220457 4198.61471038267 1277.0921553877 1600.10235468018  
2269.44503773126 824.070046083713 1312.75601392984 1143.0779222425  
1903.13326109546  
APOA2 130.590195477461 124.853659050216 125.013839352291 162.828844182372  
143.262810933054 133.864612785572 147.777050372032 143.574584852426  
133.272540012108 128.429007921588 133.014551645069 134.086301127594  
APOA4 138.953926269905 148.57301274812 148.431101051574 147.400082178491  
129.835713633923 129.92319548307 139.752845127584 133.355353808577  
130.651062724029 135.810476921749 139.408234219133 142.988500173397  
APOA5 126.925982415892 147.52403424052 125.843089077365 126.083599163604  
150.655359765209 133.397734409167 133.095245865663 133.944538335319  
125.435268901131 129.797601100832 102.932013031511 124.602474178438  
APOB 124.460064642088 123.843823256462 124.717079082023 120.365602682311  
115.157321350379 115.639101191444 118.230408871812 121.334882368464  
119.60356559838 118.816986517698 138.768904143023 110.662552491706  
APOB48R 134.087875547168 123.383334044683 130.822330736013  
119.275061991187 144.413210364148 154.947359473187 146.879019367939  
126.075528093376 164.811120992602 128.36121178972 215.744552410805  
158.312614511836  
APOBEC1 121.924036463998 125.761205967344 121.381365873873  
120.039031290299 124.095340478326 124.267394371656 126.941650500751  
121.406758670435 118.859745315302 122.362585067453 145.267225993057  
128.182419321978  
APOBEC2 125.517076778344 136.513942889781 122.466276478613  
133.143695166498 119.103219740679 119.658703392877 116.514299377365  
113.163651806803 117.386273592501 130.204571771396 126.470239371932  
116.241531823869  
APOBEC3A 147.572660963285 112.528908277828 135.25734629146  
131.114995025516 136.74788009263 146.035731780312 138.202872275661  
184.569063297206 150.046300135261 216.427103365727 147.994386096925  
141.863234980537  
APOBEC3B 128.96181458192 121.341177395499 122.447154928139  
133.707285280448 341.43511159996 199.408907117764 138.897393621114  
478.180723959397 262.296456281666 144.986655090517 171.595724119779  
137.232722233042  
APOBEC3C 227.774354299962 265.43897208356 255.527764534636  
283.527656956105 295.463118191589 332.599191067433 177.567833691547  
250.481442411876 214.229228850802 197.795275907042 233.272000923172  
270.679613997675  
APOBEC3D 205.162633740798 192.140442881209 144.896960245309  
157.233463720262 142.403121638265 156.040073232376 155.410704148925  
222.848935978648 182.588697551677 152.032418787633 185.046826969912  
133.35096649325  
APOBEC3F 212.571491543077 192.418895349837 198.205113187281  
219.687151891777 221.390817970859 219.422260093722 248.204358220728  
244.668813440638 243.861834405092 212.396522888943 253.124449721731  
251.472556189141  
APOBEC3G 185.727947276958 192.848268768579 188.836327151669  
173.10229478279 236.082185670774 362.019824026781 371.819911874273

|          |                  |                  |                  |                  |
|----------|------------------|------------------|------------------|------------------|
|          | 763.533962249076 | 630.894382644903 | 190.281570660806 | 398.971838949075 |
|          | 282.652193666078 |                  |                  |                  |
| APOBEC3H | 116.784024112826 | 114.062099086818 | 120.822923434486 |                  |
|          | 124.844481048039 | 162.484777758676 | 126.991140761102 | 130.949405011154 |
|          | 154.912576362196 | 177.468210189888 | 114.200099628087 | 164.836381332774 |
|          | 137.779607093226 |                  |                  |                  |
| APOBEC4  | 134.655842662899 | 127.215777044942 | 146.218767446679 |                  |
|          | 142.848438163322 | 139.263602290256 | 125.124011798043 | 145.704057360697 |
|          | 121.146511496024 | 140.833666276568 | 147.946236579299 | 130.204571771396 |
|          | 152.915692742755 |                  |                  |                  |
| APOC1    | 199.776140037612 | 220.567951704044 | 174.383193885933 | 170.140610481718 |
|          | 806.591035100794 | 378.728516779744 | 354.840474468573 | 740.527607312565 |
|          | 864.908449769749 | 233.572055978465 | 333.049612399093 | 392.6758818959   |
| APOC2    | 142.288110423886 | 132.811368246405 | 146.323776429268 | 158.330403004116 |
|          | 138.972789382679 | 152.935963398921 | 148.031899566208 | 176.155413809391 |
|          | 155.243643210534 | 168.302168350095 | 140.818413826758 | 163.319882002763 |
| APOC3    | 129.916677638819 | 131.800533523123 | 133.932594124721 | 121.640681916546 |
|          | 130.29531841096  | 131.08389186558  | 124.992439957206 | 130.288547755599 |
|          | 128.920313557255 | 132.200648560899 | 125.685852196342 | 128.455670598648 |
| APOC4    | 146.136820062093 | 138.850077456103 | 150.52625734893  | 146.343230597246 |
|          | 136.333928675403 | 138.69392148885  | 158.795335941084 | 136.874135348635 |
|          | 154.861507590906 | 134.335309757663 | 125.488511939819 | 141.640292723776 |
| APOD     | 4103.06565237121 | 2856.14739820295 | 2427.21100330388 | 2508.50428529255 |
|          | 274.831898505989 | 248.03801051527  | 455.486248388968 | 1091.69584249713 |
|          | 195.160353691349 | 117.718893827092 | 940.008438825765 | 135.29954024755  |
| APOE     | 626.857289492802 | 597.952909577121 | 211.736398352592 | 465.809961695043 |
|          | 1513.28088592885 | 254.722836822616 | 375.539588956213 | 790.561585641193 |
|          | 1545.71251527145 | 276.138650967632 | 407.760503937821 | 271.287767448621 |
| APOF     | 133.42964827086  | 138.237030685795 | 124.555847618988 | 126.686404772601 |
|          | 116.819107878692 | 130.770335966929 | 117.829228895897 | 122.35832958054  |
|          | 124.258412895333 | 128.901707304582 | 152.155760355248 | 111.127245394321 |
| APOH     | 106.341910466588 | 107.498500136859 | 101.149125916797 | 103.826308328446 |
|          | 110.61165787102  | 110.858201415824 | 100.04568139926  | 104.483909687253 |
|          | 111.810575716678 | 108.868679899494 | 116.989409891761 | 117.15886922795  |
| APOL1    | 129.013667813486 | 139.406427549733 | 132.313884627836 | 132.346363545288 |
|          | 207.298994298453 | 141.090356426567 | 411.359106929985 | 144.988803993714 |
|          | 213.556015518863 | 131.930814868433 | 196.363005912532 | 312.177191402945 |
| APOL2    | 186.961638857905 | 181.202396068658 | 166.998311158378 | 187.296479395462 |
|          | 301.188296465202 | 204.82244206816  | 746.777330152729 | 167.640645997754 |
|          | 272.571092944711 | 142.019263564073 | 950.818917078515 | 315.912220767901 |
| APOL3    | 201.139510041141 | 191.708350637714 | 186.089988569287 | 205.966111721195 |
|          | 162.748836971539 | 146.26936366452  | 157.425924587516 | 198.166270627544 |
|          | 285.83626978316  | 168.729301938015 | 189.758013811338 | 200.591916768948 |
| APOL4    | 139.080142195118 | 150.632724038845 | 135.509927917168 | 130.255689301211 |
|          | 146.306467130749 | 273.432712475089 | 241.019436415703 | 155.513572243604 |
|          | 166.430881793156 | 139.316189199729 | 156.441368290572 | 185.950131245699 |
| APOL5    | 119.297561749232 | 108.362609680556 | 102.725375719353 | 114.302645757446 |
|          | 118.673325109944 | 106.982655360194 | 118.871735074285 | 113.636570490048 |
|          | 115.066084565112 | 110.325803953516 | 136.394920983439 | 119.952108688414 |
| APOL6    | 125.868080230094 | 125.746184969983 | 125.493004972076 | 120.521509788705 |
|          | 134.239416179248 | 126.338676765473 | 142.553175839278 | 151.554352209634 |
|          | 150.547096071626 | 131.972669163481 | 168.384397488011 | 146.9554120076   |
| APOLD1   | 353.571106279836 | 525.6579615077   | 174.820064644203 |                  |
|          | 302.1846598234   | 205.026176598298 | 702.049571167356 | 190.077302802065 |

|        |                  |                  |                  |                  |
|--------|------------------|------------------|------------------|------------------|
|        | 260.554343693588 | 211.966139902562 | 208.476367897256 | 178.166289723365 |
|        | 229.881164774875 |                  |                  |                  |
| APOM   | 152.987939791009 | 141.640292723776 | 129.483116877682 | 147.610616423185 |
|        | 147.556482119673 | 143.096097305398 | 136.601220755282 | 123.547821639269 |
|        | 148.82892305156  | 137.790718305537 | 155.04585737344  | 164.509354377985 |
| APOO   | 267.696284751923 | 276.057101476947 | 309.75140197669  | 360.285027176918 |
|        | 392.824840252824 | 780.461254794127 | 435.037306125887 | 604.237898104299 |
|        | 468.339735327273 | 367.644907862372 | 431.546135503733 | 387.827718022473 |
| APOOL  | 172.370108210895 | 164.652795899742 | 208.816482659752 | 169.933706225406 |
|        | 231.819341041105 | 195.303469330682 | 196.053808536366 | 206.89716102989  |
|        | 168.911840239685 | 197.859546367676 | 182.810581377888 | 200.668298229815 |
| APP    | 584.548578914846 | 436.834825721843 | 440.495339027491 | 522.664475688419 |
|        | 325.252108402192 | 249.449151040445 | 277.596303701405 | 293.600165830839 |
|        | 318.690043546203 | 334.607533045929 | 419.690542859168 | 231.698163424706 |
| APPBP2 | 569.236322997211 | 518.17401959981  | 619.380514697732 |                  |
|        | 560.481802403627 | 239.503369457867 | 601.164127925014 | 576.10291008626  |
|        | 527.139476504986 | 455.21285026588  | 270.679613997675 | 435.69811966429  |
|        | 682.538709448692 |                  |                  |                  |
| APPL1  | 408.60092780174  | 373.760551592844 | 418.319283832879 | 484.131020584378 |
|        | 343.617417488962 | 359.493075382333 | 441.958777965408 | 344.992791638415 |
|        | 281.168898910065 | 491.290438575428 | 373.189809737885 | 338.510045856515 |
| APPL2  | 442.220572301795 | 367.732191251547 | 447.521645706162 | 380.393153331219 |
|        | 423.396271159345 | 526.416479408056 | 526.896146537814 | 637.695341427976 |
|        | 446.509863498357 | 412.048097766066 | 563.490027149224 | 422.434778100827 |
| APRIN  | 134.613036378054 | 146.353239460684 | 143.865717051998 | 143.844153373367 |
|        | 127.213640193364 | 139.329016874967 | 142.266177608209 | 127.947547987882 |
|        | 144.523620416439 | 164.164463389212 | 116.844361858869 | 114.28381541078  |
| APRT   | 400.550044186372 | 398.971838949075 | 369.592501881153 | 378.920456227378 |
|        | 2325.02143920169 | 638.393099392849 | 912.143424293236 | 635.37511798786  |
|        | 974.544773560873 | 1217.29687282094 | 703.587139938769 | 907.904780399957 |
| APTX   | 398.272713014637 | 394.35596596181  | 359.703969802888 | 415.388760988459 |
|        | 347.557792829093 | 342.245182599593 | 410.645457106122 | 386.679822751367 |
|        | 420.160939829121 | 455.486248388968 | 475.213525346293 | 269.141120401835 |
| AQP1   | 336.898462056187 | 278.651369597422 | 310.533399024851 | 292.037861000784 |
|        | 159.495272062735 | 153.191840013692 | 143.60570420943  | 157.295602588814 |
|        | 176.449549075475 | 165.139423820186 | 166.024236370752 | 153.731233276485 |
| AQP10  | 139.310309748986 | 138.694701349366 | 138.3792224631   | 130.639974588163 |
|        | 141.38612990166  | 129.616142780279 | 134.181819177347 | 136.041605158822 |
|        | 132.047328970556 | 132.996622574111 | 130.584348445667 | 122.99993610249  |
| AQP11  | 155.960886801091 | 144.049503774298 | 131.226834630025 | 159.26101905957  |
|        | 208.932692585748 | 137.15288362126  | 161.250520154112 | 136.133538781918 |
|        | 142.472724215037 | 132.855812035005 | 133.511698282195 | 126.816402300701 |
| AQP12A | 147.292241873554 | 136.769073515537 | 135.168792286819 |                  |
|        | 133.727447520255 | 170.091913791176 | 143.787766055379 | 142.896723827753 |
|        | 133.869867161978 | 139.995623005154 | 136.967408633308 | 143.449303333495 |
|        | 253.164596735793 |                  |                  |                  |
| AQP12B | 135.10155936286  | 163.245806772716 | 161.80922869659  |                  |
|        | 149.188357651896 | 153.758353103323 | 170.951009118578 | 181.823450464129 |
|        | 154.061101136889 | 145.286983999628 | 193.466377788318 | 176.289693941489 |
|        | 198.023465629218 |                  |                  |                  |
| AQP2   | 143.123983359386 | 157.449891798638 | 139.253721683078 | 139.654648891206 |
|        | 153.661632990172 | 136.513942889781 | 126.217702283708 | 134.970609100459 |
|        | 126.939543057414 | 151.132586978278 | 145.968884703737 | 127.478474451121 |

|        |                  |                  |                  |                  |
|--------|------------------|------------------|------------------|------------------|
| AQP3   | 149.941056059544 | 145.250076958551 | 133.590552542806 | 121.464383202986 |
|        | 316.081825144651 | 254.517135747445 | 165.491193869938 | 236.899421827427 |
|        | 193.95909424044  | 904.211195986553 | 293.018282386003 | 501.946140974776 |
| AQP4   | 121.583096465567 | 123.235136639469 | 122.706176540192 | 118.708644971927 |
|        | 115.607031940137 | 109.29279076901  | 117.923459503989 | 118.521075843163 |
|        | 116.360144963753 | 131.84454376953  | 139.049085468313 | 116.998277297063 |
| AQP5   | 110.212739445    | 107.170981307304 | 114.835386789236 | 116.746018509166 |
|        | 118.21084414402  | 116.20967792121  | 117.883635746379 | 111.299115402008 |
|        | 115.120702589487 | 120.507930710099 | 114.217867810848 | 113.680875214845 |
| AQP6   | 127.646032547296 | 121.425298866613 | 124.460064642088 | 124.940836122365 |
|        | 138.21083121895  | 120.447140228396 | 122.777544465711 | 130.938642792468 |
|        | 128.972276851419 | 126.76986764971  | 139.008854444223 | 129.116354997747 |
| AQP7   | 126.919867899174 | 139.332164436099 | 123.019430618632 | 128.421242037748 |
|        | 197.191648960563 | 124.329980024986 | 132.192775993078 | 131.430921437192 |
|        | 127.712004247155 | 133.768419410758 | 125.519298131694 | 124.375348764151 |
| AQP7P1 | 185.961822133346 | 174.979501466228 | 198.701991021316 |                  |
|        | 253.327404004524 | 153.78045746564  | 160.407690552027 | 159.368376366657 |
|        | 212.473610495213 | 181.635664531851 | 126.678746008577 | 158.039920243116 |
|        | 154.670631900834 |                  |                  |                  |
| AQP7P2 | 148.350919010575 | 147.345558455805 | 142.046082566177 |                  |
|        | 150.2214516849   | 188.20675818131  | 139.566124411099 | 137.555253894825 |
|        | 155.60532199001  | 143.423661752881 | 134.256243410916 | 156.248684477916 |
|        | 135.188445928844 |                  |                  |                  |
| AQP8   | 136.664500207966 | 118.850495684547 | 134.821778017915 | 125.18424162353  |
|        | 132.413527125434 | 142.066903301882 | 133.388533738482 | 144.748564682545 |
|        | 135.259226552938 | 144.375109087466 | 124.025104622631 | 137.165966740473 |
| AQP9   | 115.457121859064 | 122.133292722932 | 120.85013281321  | 113.192313147111 |
|        | 125.535877109652 | 151.0189104086   | 130.571827557149 | 182.958991847218 |
|        | 212.996456841785 | 268.034972830233 | 143.705475208192 | 126.295856316628 |
| AQR    | 256.795346052751 | 252.733973271584 | 280.414161197286 | 275.996693627151 |
|        | 201.383739902873 | 284.638865013916 | 245.378747269929 | 249.823314327355 |
|        | 260.356834114611 | 261.39435936661  | 266.534316786801 | 281.570685561526 |
| AR     | 212.607094117882 | 207.467591256549 | 197.191648960563 | 205.305702209672 |
|        | 174.727439318223 | 142.178467668037 | 137.320792454356 | 142.728311130348 |
|        | 139.577443171489 | 136.528123792599 | 144.649656552    | 213.26158748941  |
| ARAF   | 647.955521647635 | 756.618969995355 | 696.976036382401 | 844.462124058351 |
|        | 1163.13845502757 | 631.653707589221 | 713.832153334389 | 909.020708316287 |
|        | 764.137504481329 | 721.966539760341 | 894.100792722707 | 756.618969995355 |
| ARAP1  | 265.61506544085  | 352.121800955822 | 266.80383076887  | 424.025588636796 |
|        | 402.564148020948 | 223.408447580188 | 283.235844022826 | 212.545989139388 |
|        | 225.61275910008  | 235.063474370925 | 344.737964092526 | 239.621756857095 |
| ARAP2  | 153.202157381228 | 146.20679320119  | 144.907922949811 | 133.59686364883  |
|        | 161.603317039244 | 195.561296046507 | 240.306287921209 | 173.599961799334 |
|        | 177.401771322485 | 215.365809536522 | 266.316485802808 | 220.242344043437 |
| ARAP3  | 325.493177980483 | 379.292531644085 | 271.638179116269 | 314.646369385896 |
|        | 434.61711290583  | 546.274050902567 | 693.781708146282 | 364.678403892354 |
|        | 397.307515234646 | 315.752980521266 | 387.305348482856 | 1102.73689840572 |
| ARC    | 161.83241639654  | 141.751174078324 | 125.396523818173 | 137.096785940897 |
|        | 131.380387461901 | 138.510722755317 | 134.045938361221 | 121.344724993789 |
|        | 133.26167785455  | 129.953801496113 | 149.108582827136 | 145.306369509684 |
| ARCN1  | 1542.35486950856 | 1266.53539318831 | 1584.81089248914 | 1243.96721244424 |
|        | 1065.36715400306 | 847.863177169335 | 990.814111681408 | 1370.61156801632 |
|        | 1283.68791110988 | 837.023434916281 | 1944.15673951528 | 1437.5568316065  |

|         |                  |                  |                  |                  |
|---------|------------------|------------------|------------------|------------------|
| ARD1A   | 449.304281526081 | 371.767182305618 | 455.778776920897 | 502.063888359427 |
|         | 1127.89414462606 | 526.896146537814 | 411.285747588622 | 424.495400604335 |
|         | 458.047799748696 | 628.710901107436 | 337.652945958921 | 450.327710374141 |
| ARD1B   | 153.19516365535  | 148.732027660387 | 163.616115299926 | 135.829273398594 |
|         | 156.290018816692 | 141.882859092658 | 154.256214901103 | 147.348400730286 |
|         | 152.197327387252 | 152.79367157305  | 139.691470247318 | 153.626180103404 |
| AREG    | 109.003365273337 | 104.248226402465 | 107.365390754133 | 109.209241676429 |
|         | 124.01558540593  | 102.522925993233 | 112.046615825307 | 103.307703547649 |
|         | 106.629065516249 | 109.988237089025 | 114.27112025541  | 103.772221923105 |
| AREGB   | 128.105527466559 | 128.867710054234 | 114.664782541261 | 137.522792377933 |
|         | 123.491930765117 | 131.302225305148 | 127.377356715337 | 123.145830746127 |
|         | 125.974463216884 | 142.848438163322 | 118.239637776941 | 115.491262364277 |
| ARF1    | 819.887322757281 | 985.087150371964 | 909.388774224614 | 1057.1528284934  |
|         | 1682.64624665931 | 1220.30347076968 | 1181.97868824758 | 832.622843175217 |
|         | 1640.99641023476 | 1110.43791444289 | 1044.00217726486 | 1652.77814259264 |
| ARF3    | 538.872348151809 | 562.711562649704 | 527.498114662967 | 419.4017188518   |
|         | 858.742139354587 | 583.619362840814 | 412.801213309591 | 507.342877360289 |
|         | 691.205738835917 | 617.474181543858 | 436.731545612902 | 692.53483413403  |
| ARF4    | 1444.45946291517 | 1116.95795024994 | 1223.68146968716 | 997.460212152591 |
|         | 1639.76556136383 | 1800.25771851544 | 1665.14066952917 | 1535.27496251381 |
|         | 2630.78185410861 | 1629.32740709526 | 1549.30900090605 | 1738.96798001895 |
| ARF5    | 776.030689773414 | 909.388774224614 | 571.950858678221 | 923.130629121442 |
|         | 3152.64817044581 | 1103.81439809121 | 1255.02720867812 | 1273.6393529108  |
|         | 765.911113050543 | 1259.75918248468 | 1370.61156801632 | 1279.9555644913  |
| ARF6    | 142.763157232147 | 153.391895732807 | 141.587109176431 | 159.218886890035 |
|         | 162.739253457398 | 179.321622114583 | 146.968599872798 | 154.881797585583 |
|         | 159.166059518117 | 166.232856234879 | 185.002106079042 | 152.199095472082 |
| ARFGAP1 | 377.593087606046 | 458.282682131641 | 275.972447693982 |                  |
|         | 569.236322997211 | 633.762608454521 | 317.904396212359 | 434.855262284265 |
|         | 203.370353613423 | 266.61343130101  | 247.08460296705  | 260.955030428944 |
|         | 219.537335167901 |                  |                  |                  |
| ARFGAP2 | 344.604699562938 | 395.927222009721 | 466.777454704543 |                  |
|         | 458.953009417683 | 338.260976633501 | 245.153736298067 | 328.550286726543 |
|         | 332.599191067433 | 371.06697207449  | 471.816954259146 | 466.141717595301 |
|         | 252.015257713669 |                  |                  |                  |
| ARFGAP3 | 269.567704345075 | 231.146155346291 | 276.79778275734  |                  |
|         | 201.059635671301 | 271.568797887976 | 281.49247863022  | 294.280238648737 |
|         | 281.238656291587 | 263.183010631644 | 338.223462327622 | 201.913709602894 |
|         | 247.622351589081 |                  |                  |                  |
| ARFGEF1 | 305.669636871734 | 322.778260588465 | 363.594808277506 |                  |
|         | 266.918302307596 | 291.994364783888 | 616.339439383796 | 620.371912523332 |
|         | 563.648536446918 | 652.826023701545 | 528.098472417251 | 780.105135529728 |
|         | 541.764013317002 |                  |                  |                  |
| ARFGEF2 | 139.000870898001 | 139.219476681919 | 142.75592155869  |                  |
|         | 127.215777044942 | 223.0506375638   | 208.095384605737 | 313.773476049783 |
|         | 168.210416363286 | 186.321879879561 | 197.100205890532 | 191.961269585431 |
|         | 200.405532717305 |                  |                  |                  |
| ARFIP1  | 255.793823796456 | 231.044588483625 | 291.883157643902 |                  |
|         | 253.186749111526 | 201.517356610591 | 310.640107228956 | 298.209907157762 |
|         | 331.747622606378 | 369.434158443561 | 307.363302726074 | 313.322307299463 |
|         | 357.972320648217 |                  |                  |                  |
| ARFIP2  | 138.558300898079 | 169.043206258073 | 173.440596296333 |                  |
|         | 166.521472376759 | 160.090914414578 | 162.096065738375 | 161.895435127054 |

164.553511697702 153.920180168328 149.774162138829 163.863677822465  
 152.265624144393  
 ARFRP1 132.01588294465 145.832751296646 136.893392154262  
 141.123272165499 197.12840030662 135.313148180961 175.41089164969  
 142.082257952004 123.689439578326 129.210356735226 156.572774198042  
 130.052593375075  
 ARG1 144.931901042924 153.485731788293 175.040086358446 141.264096014725  
 133.446934298801 145.414563914801 143.292552892073 162.100547394235  
 139.361120875198 150.244284323504 125.822346524903 144.259643132933  
 ARG2 176.070695522397 180.680595239651 196.189101941489 177.214422668922  
 153.311705636864 215.453915231774 235.933451977398 166.272237117441  
 192.153420834889 165.890492422031 170.370934381883 247.746304138866  
 ARG99 161.382041789666 152.796423361971 139.096536887753 155.158028043823  
 128.975785280465 160.713790305656 136.271412363498 171.093611712143  
 133.886458291672 142.51308872439 155.511086289504 128.402511355513  
 ARGFX 116.828333047376 117.040953580545 118.070716076005 122.547842148486  
 135.744202879162 127.845259467015 111.020070405368 118.298444816712  
 112.922918499398 118.05386204863 118.034262386827 120.565485864499  
 ARGFXP2 158.325554470875 158.49220347186 152.791390145148  
 148.94765984808 144.400004730049 165.424516708502 154.140863428961  
 153.795665190439 161.655336107432 162.98885109088 152.179281925254  
 143.477670915091  
 ARGLU1 2877.92845389611 1810.68433539154 2586.87941889443  
 1402.14708471728 1274.39152410752 2418.66999907188 1830.56003081769  
 1479.69309189156 2330.60389526686 1377.75266942574 2728.04758874748  
 3348.7622174821  
 ARHGAP1 3115.11499025766 3474.0924656878 3468.14455177277  
 4690.93553472125 1120.3009282887 719.369561410372 1775.32632165475  
 975.315904185938 1067.30106203503 1391.89900758685 1713.93035637146  
 845.369108604819  
 ARHGAP10 1406.73270115373 1459.31031099055 1268.73280473728  
 1771.39155164347 250.737252834098 236.899421827427 239.109163320417  
 244.849563563729 255.3451781862 254.065327837176 357.140791982825  
 210.218440444631  
 ARHGAP11A 134.307941199626 129.031338314175 125.542301916791  
 136.229159638766 130.009322405768 141.937611082276 134.062423178775  
 138.976386995124 134.000363767958 127.193553054979 139.823017208731  
 134.441142158135  
 ARHGAP11B 112.590379042108 114.970485002776 124.176944998906  
 118.727279917776 115.734230176652 166.285052506316 137.908991199407  
 142.201672822989 146.165632086981 148.853877151493 156.396579029788  
 163.315865817864  
 ARHGAP12 274.047586063773 227.375773052577 244.18714778846  
 223.408447580188 240.631264915238 273.369722814068 276.184421402511  
 217.576547690525 216.9491329483 194.430896269275 266.652805624826  
 274.934292929666  
 ARHGAP15 388.416668785633 374.215345412947 327.251620296271  
 364.265100349672 176.874265462986 244.849563563729 180.047231265069  
 278.428310548805 389.800620731411 229.116153948948 217.074639597142  
 189.872997882033  
 ARHGAP17 374.337030706199 389.96566674501 345.135289739599  
 434.509391836336 302.113807121396 285.355815566148 261.988345506548  
 286.506419296679 326.45984882427 341.2887754025 270.727749014046  
 263.123584372086

ARHGAP18 177.438968923426 190.871696848118 138.546549217819  
175.186435016433 167.42476096854 181.193963616037 155.952902855994  
165.723126764006 164.458565398812 151.548865569913 190.754349388901  
165.549190801014

ARHGAP19 291.720204789005 281.996583337694 235.997227173296  
321.750495072759 280.170464338141 231.314944217099 247.971366020963  
278.469340236003 299.170431746759 190.204960255989 358.654569870431  
263.295012964476

ARHGAP20 264.429717032654 256.237185590901 229.483578414375  
238.946506103155 129.044445373107 150.275163835924 148.216605879958  
145.929907161493 135.9097041056 139.420025842675 147.946236579299  
147.022594294963

ARHGAP21 2656.38138490746 2165.41403521012 1808.26383618901  
2036.43904731226 920.840069938767 807.604205890244 582.062758687489  
620.163512570453 457.905741500454 833.430847243676 630.894382644903  
566.228690652783

ARHGAP22 196.583548193097 170.423881865022 131.474485888864  
151.06209123698 174.383193885933 120.967523586161 144.210698143215  
158.374760929273 163.686535888943 141.719556176029 165.41729888767  
144.643770374264

ARHGAP23 410.645457106122 391.400480065 351.395760651605  
383.503040287678 747.322544683874 1215.96648642927 1352.14737073174  
1478.09582385838 1355.07170485397 417.615521090665 610.591049634222  
1226.74043569231

ARHGAP24 229.805500520256 238.946506103155 246.676401619881  
229.729195963667 136.899405404096 148.401698825687 149.964827055916  
134.946677624454 168.232843307077 188.995551740427 142.810564324354  
139.803568564059

ARHGAP25 154.140863428961 159.13662975347 143.122278808091  
166.788336808924 144.129889080946 143.629760301493 141.484730939562  
155.358918578397 187.407526616724 152.14012587515 160.353649786837  
149.759516805355

ARHGAP26 153.189490068047 148.803188053248 128.147484804104  
135.958932745982 126.324771800638 132.595360509902 133.807992913171  
144.944095553004 147.238896426423 128.458132030921 157.499803444188  
129.431497372577

ARHGAP27 110.925532078514 134.304545258148 107.498500136859  
110.624328647003 285.63245179313 176.486551181451 218.031238893075  
235.961605948276 235.091443641056 189.61702125418 299.616447269111  
231.547654653783

ARHGAP28 180.63469438043 180.923089242255 151.855884026072  
145.06205326107 137.933122094638 142.612035986517 134.76586363177  
143.497909064641 136.790457887057 155.762890407496 138.813126946007  
143.184697704389

ARHGAP29 135.028746262383 133.642815510945 117.32734978289  
113.716741872499 124.555847618988 123.725998173975 118.283346939564  
125.513881890201 115.834056091815 112.75167046116 113.077691687266  
117.166509072455

ARHGAP30 180.747527895349 164.96631670799 163.432972512188  
183.744959461078 173.463983140514 310.142754559096 173.189465201573  
238.095599711942 275.39986964837 195.532022060219 176.516540713888  
241.383657414248

ARHGAP4 244.990374822652 222.332748220525 254.188830191845  
240.511797905018 287.455622143233 239.541516080716 191.38608906576



275.169415154893 329.660368915848 195.795728497916 207.104548555929  
243.402781509365  
ARHGAP5 197.308952757609 187.247062073247 184.844915350411  
237.045634416039 137.446745269821 205.728673153914 162.702767346393  
162.57736365619 164.332073056902 180.952017616136 164.000772606739  
173.964378226631  
ARHGAP6 164.99860393383 154.804753043168 166.8846964604  
153.066630483602 158.282899758551 157.078563342652 157.385256442734  
155.837866295709 152.377056383547 168.095061700814 142.043121538885  
156.497059936271  
ARHGAP8 134.883708339914 125.296240086615 121.327397317398  
128.42287610189 142.206016362038 130.973504803813 128.628637585951  
141.963297887448 145.096707533824 143.0235772247 132.300508985399  
125.290320836648  
ARHGAP9 167.250667092211 146.775403409562 135.664877050226  
145.751336115646 149.25240100689 148.109847175216 153.488903967311  
233.161848094769 389.051174954505 176.088449983147 176.355556618289  
135.647660756548  
ARHGDIA 1050.40488466179 1524.46745239811 611.772512110915  
1858.12855367119 2900.55309635211 966.731520471976 1254.19980463817  
1061.29067124163 970.166036472486 1309.01193284992 1551.90775589919  
1500.16816750361  
ARHGDIB 1628.24528041404 2708.20624364471 1007.7803477458  
1948.24432908972 3850.41246770812 3168.27825058989 5702.11995823367  
4095.76073123843 5479.24427823207 2032.50052162637 4663.03253705034  
4183.06379632713  
ARHGDIG 134.93814894432 139.97636570613 129.675420096163  
140.840895590527 140.020294940544 137.597788349982 131.657454325126  
126.049144107897 126.22472822166 136.70715656782 134.946677624454  
123.841366760069  
ARHGEF1 210.061754644824 196.031541155674 213.178648382852  
213.028568789661 271.287767448621 184.056274452194 183.988537525989  
181.898985277176 196.819022688128 203.436527043293 200.741234443918  
163.267148547147  
ARHGEF10 936.957730361063 654.305724263754 742.751664201272  
636.382696018633 186.999459152483 219.597808863947 311.449205777595  
190.002630382394 212.545989139388 543.001249586573 249.884250040189  
266.135477775641  
ARHGEF10L 157.688982037448 172.631499322646 162.500485773812  
184.577511730401 179.923966067226 185.743212726702 161.552475294424  
164.587657424569 161.510497517852 149.066522533956 198.489278156437  
165.491193869938  
ARHGEF11 171.190796424612 186.866029149035 152.948391119096  
212.016247864691 205.57572471694 162.739253457398 162.063689419737  
175.717830026564 157.394035451151 146.937052029619 185.432587490792  
172.175584707792  
ARHGEF12 359.099750692694 351.515059400947 314.337680575998  
359.776068595698 199.96834355685 221.930333726352 223.107391048316  
224.135228192655 191.651818696629 169.306573880401 233.59297160203  
249.953902454701  
ARHGEF15 124.595925483149 150.064179085845 121.423030266904  
130.112882549637 122.274656361883 116.248026336995 117.907840952685  
115.18875509198 123.557722415957 124.70219935334 115.939620871703  
117.688941284427

ARHGEF16 172.355215322173 225.189991540262 145.172776053  
153.028658323116 711.729857540712 344.247544510881 362.445813697676  
355.14024238296 510.659785046811 374.56251861444 1081.47077865393  
814.110601393539

ARHGEF17 306.111172289632 353.674560414317 255.59042517603  
482.048928546145 182.833961304079 115.305518560239 122.600274773736  
140.238423894192 141.649911527714 133.638664342783 158.224122084011  
120.876732151192

ARHGEF18 748.703265448403 938.918431240228 817.529344685717  
1421.72388964898 1948.24432908972 1195.6335460045 1821.08523647593  
1759.9632914516 1337.38160266788 1041.58583268313 1635.35544761095  
1314.62071412501

ARHGEF19 192.878416717298 183.50553222647 169.695658738618  
158.425950902309 635.819650434542 426.995700632434 363.963951509433  
548.686094748117 452.357898123926 224.089220507176 372.757091748175  
892.515788744891

ARHGEF2 1861.19763103381 1996.65760745757 1312.75601392984  
2149.13404212591 1385.28044421961 1042.40539020413 714.91842349236  
1240.4863200811 1024.95957828641 951.772948602094 930.25842384208  
1918.14260920544

ARHGEF3 916.836022395768 1045.49947183547 583.455617065556  
817.342172321486 489.022371276542 452.357898123926 468.339735327273  
468.060528109338 691.397238677552 787.615195903993 654.108318810728  
447.297590650141

ARHGEF4 248.465457421469 244.5675215931 195.776369840059  
368.548135194271 121.61143371132 109.274221164316 114.412739085949  
107.727848546225 110.586147059226 301.638918685657 112.649012857276  
127.997280639609

ARHGEF5 129.075693654369 130.70867409848 126.323649734972  
119.366599958278 316.590387560909 197.815264620906 217.576547690525  
122.087107663865 168.116928722035 344.992791638415 261.844708446856  
365.046815163035

ARHGEF5L 174.928155956396 210.266075382636 166.298554732581  
167.049197726715 532.786041960586 325.859917318516 494.538861626895  
229.835576260403 736.140249105836 928.672013047007 486.425387717472  
748.015452242839

ARHGEF6 990.206369590236 912.483177705931 736.332743195416  
866.765054377214 317.244256751418 418.420753332232 456.990425618007  
403.720036930931 636.970243888917 294.368406238222 354.783364481955  
810.396770151757

ARHGEF7 344.786541451395 337.728737393381 295.851459742115  
331.018914429561 279.704940529618 471.510683045651 265.919002666885  
282.47352481715 313.773476049783 314.90123632547 150.599425944486  
382.960724128105

ARHGEF9 236.651601701157 222.394280571312 262.577672828611  
269.424055734143 169.238325933605 161.906823008445 179.96623248843  
178.209994522672 169.475714234887 165.602175302848 182.77693508164  
167.491399614986

ARID1A 485.136339836897 521.30110104669 496.328898534802  
541.764013317002 761.32108609503 439.207122335648 526.625936680738  
760.070180572621 678.365575489532 492.637241687561 575.546802138889  
723.428294037428

ARID1B 141.599211622756 138.731957926247 147.635761512135  
145.606098951179 139.81502919163 144.331409179705 138.104527851969

140.481148289418 136.188868917386 132.109267393571 137.981446468611  
 131.81975648701  
 ARID2 213.966288689715 222.508914765788 211.609763150578 211.135364208221  
 165.638672456873 263.509066170434 218.70412656621 220.959843573708  
 214.261611197599 205.886398618369 229.729195963667 251.959823608766  
 ARID3A 280.127735578097 391.644649726254 266.652805624826  
 346.303862540751 554.800688991977 246.912159676595 215.47323777134  
 226.086733606951 277.596303701405 403.208138816247 253.385592447339  
 182.130970182242  
 ARID3B 196.974807677659 207.940596890723 227.847614397311  
 209.417052464583 212.147155923729 239.20206002 297.970735665595  
 231.180528071672 261.286548990435 296.375305136807 228.820894086914  
 453.875259610173  
 ARID3C 151.05681004513 143.030777754448 137.867263869936  
 165.570531605115 148.549257493128 145.28524062436 148.450023054885  
 145.756455015309 146.84403879162 133.043503979161 134.458958352588  
 151.064422836695  
 ARID4A 176.735168607281 174.332913952768 199.001860912128  
 173.816408146725 144.117964288763 163.500384982242 187.461448376593  
 193.843978773764 162.397078614596 189.971144220643 196.014841240142  
 216.485113690708  
 ARID4B 597.952909577121 535.758943850734 546.029974898225  
 449.523996620257 234.980382243116 564.41151411028 579.678635803225  
 582.527835746927 523.073926509865 327.951753740503 448.858580689107  
 696.976036382401  
 ARID5A 159.090982014161 136.126542897364 135.170925092209  
 139.306122448857 144.096624787142 135.056517225198 133.420267697961  
 133.378374710498 135.548042190047 133.274292647041 131.351303131574  
 125.765399556488  
 ARID5B 2974.04694562902 1659.80909859514 1563.71477584676  
 991.611982265221 379.983165400941 676.570119607984 526.726224327409  
 539.853394831917 1164.61390835016 492.780880796036 852.436775264873  
 842.567990276734  
 ARIH1 286.085833802132 234.925852373127 313.18989508207 235.407064742194  
 215.585089158905 206.35895739543 301.908667220208 200.242239130026  
 256.795346052751 397.985856484851 240.915496717526 259.426050921239  
 ARIH2 812.298381693378 749.220616713093 1076.09385014053 837.413261433363  
 545.026293696209 649.052806726591 748.703265448403 565.164961255054  
 967.123240442957 623.508710830895 444.584594376357 651.235249028924  
 ARL1 1191.88706134921 1086.8615735568 1262.96801072965 1007.7803477458  
 477.275332763887 1029.75852676191 997.460212152591 1141.49294161587  
 1161.39230511792 623.050854309724 692.729789121701 790.561585641193  
 ARL10 119.432201417811 111.985567835684 120.177385114315 116.615250922316  
 114.213405341709 124.300285428221 124.561511833959 122.312652834289  
 118.474291525263 109.416512252532 107.283814651497 116.831725094917  
 ARL11 134.614988219821 154.959217895243 158.335952927257 144.822943770596  
 140.447933562667 148.096551269076 143.272669418277 130.736466113571  
 142.922549076496 157.759149893048 147.057116881846 132.873213182775  
 ARL13A 149.37190049932 134.631638658586 154.021906399992  
 146.779054605199 150.328995030071 139.711696905287 134.78059811237  
 141.490911535087 131.138322527536 147.066582834257 143.582187466814  
 130.632096412204  
 ARL13B 158.98666068453 154.193086881801 146.233195164295  
 140.28485470716 138.981712781568 146.332425559689 144.904945833116

|         |                  |                  |                  |                  |
|---------|------------------|------------------|------------------|------------------|
|         | 154.916023131856 | 152.418315087218 | 158.751241730465 | 138.625185173046 |
|         | 138.374092984164 |                  |                  |                  |
| ARL14   | 136.77260462185  | 155.7441762827   | 139.119638136874 | 122.572634128442 |
|         | 438.231717096337 | 134.604565335211 | 173.70035122661  | 990.814111681408 |
|         | 127.137447808551 | 205.495823410422 | 762.182213353032 | 794.165408266062 |
| ARL15   | 181.412790232996 | 189.770558810153 | 190.098509544816 | 177.874821397216 |
|         | 199.170488640762 | 175.774461934758 | 198.90533452253  | 194.257024100927 |
|         | 167.67272339144  | 193.336246844237 | 181.681929801968 | 184.937088280378 |
| ARL16   | 12818.0509395717 | 10360.162704111  | 12368.1423473066 | 11150.5512437377 |
|         | 1154.86609813021 | 7573.69742026367 | 3615.76740804718 | 6244.58472720999 |
|         | 5582.64254130978 | 3765.25491426198 | 4892.17875938832 | 4690.93553472125 |
| ARL17B  | 228.560346647306 | 170.091913791176 | 195.160353691349 |                  |
|         | 164.337486856997 | 169.642188114285 | 203.475080163804 | 173.182013165174 |
|         | 169.975329631607 | 214.4829383264   | 157.663460168247 | 183.081450609516 |
|         | 194.055394488452 |                  |                  |                  |
| ARL17P1 | 409.743899750699 | 236.401834189942 | 305.542978609337 |                  |
|         | 241.105817192695 | 152.79367157305  | 302.272304483941 | 201.702688815038 |
|         | 181.400788152988 | 346.691690520054 | 167.190857452131 | 220.242344043437 |
|         | 203.693188114912 |                  |                  |                  |
| ARL2    | 2444.835635949   | 2910.00269086567 | 2523.91287654539 | 3727.70199176703 |
|         | 3277.24948092771 | 1270.76282064793 | 1701.43479420427 | 1011.9675459648  |
|         | 748.940715378564 | 1164.22995893381 | 776.411045078049 | 1058.55850972326 |
| ARL2BP  | 1344.87842417496 | 1332.82617944131 | 1480.52638217173 |                  |
|         | 1260.50387106816 | 727.814681346494 | 607.805002786409 | 912.483177705931 |
|         | 780.734359041347 | 622.561634660589 | 1309.7660860424  | 694.907086612929 |
|         | 798.943242964857 |                  |                  |                  |
| ARL3    | 231.0814970959   | 202.819949307954 | 231.287362732197 | 213.990575186237 |
|         | 138.546549217819 | 151.506013510204 | 128.191959554459 | 149.696766215866 |
|         | 161.968835903764 | 129.382242021964 | 204.103018614608 | 134.629996026323 |
| ARL4A   | 211.869300324471 | 188.53221484746  | 234.041863839123 | 167.093409692227 |
|         | 166.681646517413 | 172.197077149985 | 202.178451227304 | 201.016287924499 |
|         | 167.284724396943 | 212.854068610681 | 189.784608429624 | 145.985223908092 |
| ARL4C   | 151.976432805924 | 149.020824600931 | 122.115925891088 | 117.024039521425 |
|         | 141.436235043864 | 123.077592992679 | 136.022614387461 | 135.068883036882 |
|         | 143.569894807386 | 148.04206955657  | 193.336246844237 | 140.709981878311 |
| ARL4D   | 251.993821914623 | 273.911741951291 | 246.912159676595 | 315.828726297864 |
|         | 196.974807677659 | 192.69687837782  | 243.441938832251 | 180.680595239651 |
|         | 180.315825600347 | 357.514919818489 | 232.276667029184 | 178.096998157452 |
| ARL5A   | 2091.73580292332 | 2051.45788386541 | 1916.46158204806 | 1782.2498613913  |
|         | 1316.31088187364 | 2010.57142784228 | 1085.92360670051 | 1126.46241487062 |
|         | 1191.88706134921 | 1531.54387233661 | 1062.749459378   | 1227.94401191112 |
| ARL5B   | 163.753434774656 | 166.526875572556 | 149.574353706911 | 159.775479686193 |
|         | 235.680462167404 | 190.66473033826  | 192.96586114861  | 178.542247857251 |
|         | 175.030373805031 | 201.81649023518  | 166.289763097913 | 210.620764703468 |
| ARL5C   | 144.271920003815 | 157.615017085961 | 171.051948060796 | 165.537853089052 |
|         | 156.813992534584 | 158.411846122784 | 146.411873503163 | 134.46743016543  |
|         | 142.34956863109  | 157.108043150259 | 155.798048652444 | 143.105974876327 |
| ARL6    | 129.289216846128 | 126.178476831007 | 120.479270037091 | 129.029151164978 |
|         | 123.30960025689  | 120.351217130679 | 129.808590871788 | 127.640525889316 |
|         | 124.851025681014 | 133.902707525069 | 124.786029449452 | 115.485515429446 |
| ARL6IP1 | 682.315322994357 | 886.157279090932 | 847.863177169335 |                  |
|         | 575.722713461982 | 1854.11328962023 | 4579.62296570302 | 3188.90202907403 |
|         | 4592.14655702906 | 2944.63971819193 | 1671.82101590797 | 2127.22258112242 |
|         | 2736.98692493933 |                  |                  |                  |

ARL6IP4 683.655205499779 675.596864001032 578.947889414387  
 791.840531191783 922.009043194023 364.113665301598 360.475989559226  
 288.481981529558 404.54681330209 354.263934274937 329.604568691377  
 352.354687089427  
 ARL6IP5 3413.39994653641 3744.5666678861 3810.98043907046  
 2910.00269086567 1102.73689840572 2426.2098937241 2900.55309635211  
 1562.9779683714 3712.67025366957 1006.03677177164 3106.94181270197  
 3024.62888503536  
 ARL6IP6 182.545896049446 183.545741265706 228.184535093641  
 197.947433984294 280.798003990849 346.917113326564 385.888395433066  
 271.945851739635 314.708587131145 382.806570442504 265.572253407219  
 435.796737132969  
 ARL8A 135.161667673191 129.637555509848 121.039678049579 117.279162323013  
 132.885515958081 124.959873714884 129.483116877682 131.406366653787  
 136.660600727111 127.167918433035 142.211357324461 133.340152756136  
 ARL8B 1010.05884008623 1001.65849130836 1317.1258783404 909.020708316287  
 1025.88559245013 738.892511276134 1258.16519121331 808.300067805897  
 1423.02563792293 1767.70023790753 1359.63626195826 1038.93733638848  
 ARL9 141.150016212967 138.861385127242 131.31716158922 124.138036007288  
 114.970485002776 127.681662711369 125.217733034761 119.486895914055  
 243.10297424873 131.326536951329 122.763138007612 137.163699337032  
 ARMC1 1117.77397620221 1174.0922389136 869.937761943249 1139.76755449089  
 475.686805714298 769.009371389327 699.800360892516 673.824770556885  
 773.330948077036 590.515758538373 624.825216056495 532.235193634196  
 ARMC10 274.534901548678 266.61343130101 371.941204080246  
 240.07282016658 707.173691257322 397.2528907311 591.189034068137  
 458.047799748696 461.722481634933 637.457322054293 474.750156829195  
 844.462124058351  
 ARMC2 135.186880148352 128.10679682685 130.847215795313 140.659276788384  
 129.567701626404 126.05295868521 133.45690661612 128.309602266886  
 130.613760017864 145.259981479761 133.028789808654 122.65547320922  
 ARMC3 104.633603136988 113.78644620959 113.133798430215 113.694351010121  
 119.780654293448 118.45291712775 123.766373146588 126.25011972597  
 122.634741242406 114.39161822971 128.184708916755 123.395897439193  
 ARMC4 146.565265415908 131.963419175907 144.89062965996 113.857477830423  
 112.916256784817 113.083678884076 114.528407572496 108.21185649774  
 114.441223528256 122.287535209629 133.850733997442 117.546508214236  
 ARMC5 170.748911334847 167.817232948801 127.462293158337 185.961822133346  
 238.482863150124 160.6823824476 141.914966520049 136.952914053358  
 156.277567608825 153.795665190439 161.708130705995 130.666781754635  
 ARMC6 156.605568633665 172.175584707792 150.498954408708 183.023316857537  
 300.83667045718 231.572677616684 221.916075811355 198.783034238774  
 208.713555471888 179.973655632636 213.046162847735 201.49630027392  
 ARMC7 221.594737497504 238.654367531982 188.53221484746 293.692083555844  
 317.550000625189 237.492603094091 252.138168292964 216.903719298575  
 332.138346958671 196.287131027947 298.301504581296 218.735620596634  
 ARMC8 166.600109853461 160.769011617127 177.204172894028 152.767228183775  
 152.945550129539 191.3765085801 170.410704499804 178.976116597291  
 185.984938124891 170.585366369563 164.870860592068 180.619956937489  
 ARMC9 156.998563448664 147.341597963918 158.439409064812 151.59613008133  
 143.180247878507 136.130027137459 143.340685579645 140.457002126576  
 134.176925491721 140.613151527886 152.346098251128 143.750656408155  
 ARMCX1 447.579975492958 359.776068595698 815.388288623756  
 345.565843875296 145.801228425692 818.761934233826 143.363002903815

161.817609920327 299.986758612161 183.294526267593 154.740395921562  
 155.699649538664  
 ARMCX2 764.137504481329 699.800360892516 888.371107987343  
 546.399972543938 575.060457772307 385.678901612324 1014.63777151551  
 204.959164579011 782.746481112316 369.78624104057 244.219585315024  
 312.224309341171  
 ARMCX3 215.81995779019 205.047145898929 265.260411490697  
 213.510783808898 180.501409705275 246.049729366987 235.822266856967  
 174.116797337377 243.336550161566 166.958831664154 233.635876830148  
 188.864388750448  
 ARMCX4 235.48876511325 216.077955163344 295.153786338687  
 206.164058935215 178.339211170442 230.424145472916 198.659595851481  
 161.559920910487 179.923966067226 171.202766078337 206.845306095447  
 183.545741265706  
 ARMCX5 186.257814752354 204.584643964409 202.97197145851  
 188.924084292126 275.972447693982 327.164773632634 253.049869714368  
 258.109876262342 232.276667029184 234.5655184349 274.343238288436  
 277.561376169965  
 ARMCX6 278.385151185788 262.691387377392 313.708197191587  
 266.756647182704 386.16563750478 529.854965483609 433.928818077527  
 256.022057262325 444.479355480138 314.810001770583 382.701467158304  
 420.248838397618  
 ARMET 1285.54492194393 1043.14253624883 826.314416168552 1002.44383771056  
 4913.55892033682 2376.52728883131 3122.71790981947 2718.440149645  
 3237.94149351627 1518.13775377335 2567.4299860517 3298.73393277409  
 ARMS2 121.067907968175 112.904318310632 120.721341479615 130.941645638407  
 124.883575464443 121.628827418997 117.634514818946 119.899649497032  
 117.467618148107 129.148634038268 154.462766419353 117.889524670597  
 ARNT 284.351529744475 260.921177985439 218.644953001365 296.24781576525  
 167.365850007748 178.222120802125 182.67941458824 170.243136294537  
 170.590817818414 177.257355909681 232.321454436688 180.008152341531  
 ARNT2 353.385210690169 339.379250332987 413.398641688413 518.17401959981  
 209.623583937962 238.482863150124 230.893665210918 276.714748212739  
 291.369577397743 148.08870546717 163.248980088946 214.595639477696  
 ARNTL 187.686326872667 145.43470695949 172.065593177758 137.627338682823  
 136.278361222532 129.455347273068 131.380387461901 139.00736252716  
 145.608087633951 151.747595672228 171.784981874184 137.728163622673  
 ARNTL2 132.128418409996 139.741862925156 125.859158049343  
 121.792573534134 124.106971897779 131.249240371529 132.987389721592  
 124.840101287634 122.160459795959 140.805322576253 148.808928892047  
 141.362627556137  
 ARP11 146.231937458616 155.756074127526 141.858928084825 150.272153646712  
 172.667770359278 276.284517459626 201.152639979358 174.775676782795  
 212.363151537303 171.759102794108 169.238325933605 290.090495047722  
 ARPC1A 1092.33328323944 1294.18114559128 1089.58643309156  
 1508.24281455057 2856.14739820295 1339.83170225337 2153.17165155392  
 2154.00589005104 1980.4589291261 1411.2586496281 1493.90578573732  
 2273.12164779441  
 ARPC1B 186.007710175103 202.524668687686 211.183499580683  
 187.710185880162 353.078842299761 356.05426191171 385.978867521533  
 536.609777988581 427.084392965651 506.562512021352 268.660078500783  
 618.437282203498

|         |                  |                  |                  |                  |
|---------|------------------|------------------|------------------|------------------|
| ARPC2   | 1788.35884039549 | 1910.08485008041 | 1718.80498208397 | 1663.71411325131 |
|         | 1899.94714976387 | 1596.33832632698 | 2139.42448145954 | 1534.21175984308 |
|         | 2124.12760841901 | 2845.0377634896  | 3073.40543048878 | 2988.45928881468 |
| ARPC3   | 740.527607312565 | 657.058213650454 | 1062.749459378   | 549.047065540118 |
|         | 1288.3346537369  | 2926.06746795504 | 3359.62015747752 | 3222.23985545506 |
|         | 3173.14004739767 | 3688.68740405322 | 2532.82545752082 | 3963.40575974446 |
| ARPC4   | 499.683188662742 | 517.993093601127 | 514.922742487521 | 586.642581067137 |
|         | 1871.91894530722 | 809.729160605727 | 892.868661511516 | 877.598505913096 |
|         | 952.724512915813 | 817.036222521723 | 845.369108604819 | 971.170460915918 |
| ARPC5   | 2715.55326746591 | 2500.07677977147 | 1662.51399707484 | 2277.60839052397 |
|         | 3798.89743803968 | 2330.60389526686 | 2433.83421295012 | 3712.67025366957 |
|         | 3954.24763752814 | 3575.60827968852 | 3328.99028463277 | 4441.92485662082 |
| ARPC5L  | 482.226889092547 | 428.850337327605 | 401.461825804111 |                  |
|         | 535.20662670885  | 901.644194512187 | 433.928818077527 | 414.888512708716 |
|         | 510.659785046811 | 689.271009631393 | 774.180202250076 | 553.615252472149 |
|         | 462.437471715008 |                  |                  |                  |
| ARPM1   | 123.727239584489 | 138.587686193555 | 132.245217686793 | 125.247402280272 |
|         | 112.943630133093 | 125.539199863559 | 137.267307036807 | 148.347642424885 |
|         | 143.745594527046 | 122.149756212115 | 142.313725116274 | 147.138814313885 |
| ARPM2   | 153.315309202016 | 160.006185904123 | 153.647343267295 | 164.032302455558 |
|         | 159.683695366575 | 155.078035506545 | 195.185025611945 | 157.013200713587 |
|         | 160.066390229416 | 152.340010735322 | 137.726769003181 | 148.317958829244 |
| ARPP-21 | 131.470883854661 | 134.53861441495  | 132.941478943584 |                  |
|         | 122.706176540192 | 127.144291519133 | 129.231455282441 | 134.241917425247 |
|         | 131.310537960214 | 137.907709799074 | 135.071400668179 | 134.501410126169 |
|         | 126.895669261503 |                  |                  |                  |
| ARPP19  | 1341.78081782818 | 1176.01058971561 | 1398.60850048351 |                  |
|         | 1113.59310757948 | 643.468308027006 | 993.774175699873 | 927.478050257292 |
|         | 656.009451448101 | 965.673699120049 | 859.547169028149 | 1193.82799849555 |
|         | 1072.37500318471 |                  |                  |                  |
| ARR3    | 134.469653093466 | 149.073650082048 | 154.537240112989 | 128.486896700405 |
|         | 135.9097041056   | 147.085006263446 | 141.038721816572 | 159.98205335759  |
|         | 139.097764484641 | 151.690538050817 | 130.249430984172 | 161.031148038478 |
| ARRB1   | 300.765518378297 | 353.243400332397 | 258.145539382199 | 367.229293432041 |
|         | 178.819486867379 | 184.278213908263 | 206.972440734038 | 168.873282919232 |
|         | 192.891507272665 | 155.07594431078  | 217.327543190687 | 140.286870147975 |
| ARRB2   | 126.340955733062 | 115.435942397626 | 124.802639338573 | 120.682485578097 |
|         | 134.972933635542 | 137.00397800873  | 126.902441495413 | 124.526220300907 |
|         | 131.651851665521 | 130.388530183353 | 151.092066533546 | 124.958287100852 |
| ARRDC1  | 128.009286101341 | 123.219903763265 | 121.274997609378 |                  |
|         | 127.500754400224 | 278.061498892643 | 120.724926760252 | 138.899292894875 |
|         | 145.906601611338 | 148.700297908071 | 156.040073232376 | 216.859640534581 |
|         | 128.781123194219 |                  |                  |                  |
| ARRDC2  | 190.716424123036 | 176.874265462986 | 159.317429821638 |                  |
|         | 180.733673680261 | 215.143973502566 | 194.753955100069 | 220.010399552402 |
|         | 199.714647839712 | 202.849544035436 | 191.861598059182 | 194.979795724712 |
|         | 190.471158323247 |                  |                  |                  |
| ARRDC3  | 177.478925091583 | 184.041062308263 | 155.710272937386 |                  |
|         | 158.631298154353 | 150.489651880905 | 190.825209733575 | 173.929353266244 |
|         | 154.722895261876 | 168.000247148058 | 405.766055310869 | 161.906823008445 |
|         | 224.528190554963 |                  |                  |                  |
| ARRDC4  | 296.24781576525  | 253.327404004524 | 214.229228850802 |                  |
|         | 258.964323941464 | 156.957578703389 | 167.817232948801 | 184.437810305792 |

|        |                  |                  |                  |                  |
|--------|------------------|------------------|------------------|------------------|
|        | 175.121069571371 | 148.585224298375 | 147.314091141313 | 229.511643376643 |
|        | 233.07015384759  |                  |                  |                  |
| ARRDC5 | 153.348110626071 | 145.819198235878 | 146.9069812014   |                  |
|        | 157.745805838008 | 144.148833164952 | 172.28937151007  | 147.500009766324 |
|        | 164.423960071908 | 173.225064625094 | 158.514079887374 | 146.863611516518 |
|        | 144.997833436737 |                  |                  |                  |
| ARS2   | 896.625415670455 | 871.913035811066 | 925.205399154409 | 916.026216386031 |
|        | 1451.64055568759 | 1343.2623011534  | 1217.29687282094 | 1573.03248861784 |
|        | 1414.95226752155 | 930.704688414069 | 1144.53002508973 | 1561.10217536347 |
| ARSA   | 220.959843573708 | 193.704510912321 | 202.129153259445 | 233.635876830148 |
|        | 288.313931067158 | 211.483693299981 | 226.989201461085 | 237.641190133427 |
|        | 225.890195278753 | 255.374689750672 | 277.285526811736 | 266.032134528055 |
| ARSB   | 191.405362404386 | 172.599654598668 | 170.844002412425 | 172.175584707792 |
|        | 147.893916750136 | 153.860039535598 | 148.594322264158 | 154.273953018148 |
|        | 157.032746784217 | 160.073510173041 | 169.713585775118 | 169.649251828199 |
| ARSD   | 234.301520483864 | 274.564508105177 | 248.965394617795 | 281.278843600876 |
|        | 400.783945471037 | 543.170902795966 | 301.188296465202 | 521.30110104669  |
|        | 343.767393640683 | 253.833756857339 | 390.752579014611 | 322.684910198242 |
| ARSE   | 107.655624022312 | 109.851507510788 | 110.068122112671 | 111.895279866421 |
|        | 109.947300629824 | 103.660742045068 | 102.343275379164 | 109.067239220744 |
|        | 110.764586138261 | 107.07609243233  | 114.740948266517 | 105.450273343324 |
| ARSF   | 123.689439578326 | 114.942849575931 | 106.066897223031 | 111.962852412774 |
|        | 119.427342766092 | 121.636361281148 | 125.45936959544  | 124.563594928763 |
|        | 120.174672871542 | 114.334059060506 | 122.615852682436 | 117.532063783977 |
| ARSG   | 137.310014841869 | 158.181316170382 | 145.286983999628 | 143.063345350253 |
|        | 146.619846538124 | 152.386986818959 | 149.582406567077 | 144.621077658674 |
|        | 149.717739166461 | 144.373226011578 | 153.366677608026 | 137.513315427454 |
| ARSH   | 140.462651395483 | 135.395071593072 | 134.671840308041 | 130.628967781841 |
|        | 129.394359810841 | 114.711310011993 | 118.902823494379 | 140.833666276568 |
|        | 131.717160947964 | 123.7421178083   | 125.724143659093 | 125.150706047419 |
| ARSI   | 119.746227888415 | 127.247764390727 | 123.182903611854 | 116.784024112826 |
|        | 106.341910466588 | 112.936472036608 | 115.496108000499 | 99.26400442869   |
|        | 115.624167024067 | 132.398041172151 | 131.688038068545 | 110.408301129053 |
| ARSJ   | 206.257167235126 | 180.501409705275 | 177.874821397216 | 174.832495287192 |
|        | 164.708712337156 | 149.888719320368 | 151.340728221261 | 151.561151654372 |
|        | 151.803707178383 | 193.609985124825 | 141.541355091514 | 149.010477279209 |
| ARSK   | 169.963805688413 | 145.938780249776 | 166.135707525987 | 149.133055368147 |
|        | 147.958483355783 | 147.694098231655 | 163.116334434429 | 145.709172732805 |
|        | 153.913513669361 | 170.079723856247 | 136.814736808725 | 136.852403978525 |
| ART1   | 171.784981874184 | 171.880470629305 | 165.619206216088 | 176.390014020936 |
|        | 166.97270256697  | 152.099431258333 | 162.9279134169   | 170.775283924087 |
|        | 148.245974323625 | 155.313873664923 | 191.616483214712 | 161.937384157098 |
| ART3   | 147.584176709986 | 149.717739166461 | 157.512561489621 | 123.905462079972 |
|        | 119.387459594521 | 114.234369421536 | 125.77343813277  | 119.886433564236 |
|        | 117.05536677976  | 114.644722005728 | 130.935922915902 | 114.042914237667 |
| ART4   | 132.712573198794 | 136.251820364823 | 134.61114877396  | 145.043494048779 |
|        | 160.655929233978 | 133.473140653666 | 141.683298500736 | 152.317890573534 |
|        | 144.258128917228 | 140.191954630636 | 150.833523101057 | 147.428180649939 |
| ART5   | 115.619116556625 | 120.727504500018 | 122.924017262559 | 114.927420605185 |
|        | 144.364319564075 | 111.7529190597   | 117.172431931323 | 113.432757764419 |
|        | 108.362609680556 | 111.010889276873 | 122.830376253922 | 123.968639555673 |
| ARTN   | 122.789656787728 | 124.267394371656 | 115.242526386551 | 120.231559540009 |
|        | 132.881693683384 | 127.863583325139 | 118.666654333368 | 134.725434838052 |
|        | 126.439948611449 | 132.291759474331 | 134.769926504916 | 122.075440298074 |



|          |                  |                  |                  |                  |
|----------|------------------|------------------|------------------|------------------|
| ARV1     | 341.761516859319 | 318.297819854586 | 417.191960489528 | 305.343879847672 |
|          | 309.658122422202 | 592.957842630046 | 468.93543246394  | 396.459213999636 |
|          | 551.823767223086 | 414.333324610267 | 391.326200093611 | 811.362219801362 |
| ARVCF    | 136.967408633308 | 145.08246303652  | 146.709967739596 | 135.797170561599 |
|          | 156.073428882485 | 154.2228051929   | 123.625734357908 | 138.580264357741 |
|          | 133.120273569229 | 123.603972078897 | 155.590197324062 | 155.371772547395 |
| ARVP6125 | 139.459975305985 | 130.304743083321 | 129.566451901256 |                  |
|          | 129.802596741962 | 129.92319548307  | 146.290334865039 | 137.048292841566 |
|          | 136.575784685895 | 134.514251897045 | 140.083495854322 | 149.962143642332 |
|          | 134.239416179248 |                  |                  |                  |
| ARX      | 137.728163622673 | 133.680691168661 | 122.89752183991  | 122.295222990408 |
|          | 131.319783710908 | 119.480037559953 | 123.035401501279 | 121.006569103388 |
|          | 123.015371659847 | 122.438438464097 | 145.641373616866 | 122.809241232029 |
| AS3MT    | 189.0608798771   | 201.365457496683 | 173.782474972742 | 212.420616436137 |
|          | 167.190857452131 | 168.538117820213 | 164.601022396674 | 150.479320779862 |
|          | 155.124158030085 | 177.549330396268 | 141.440563159897 | 161.972922129453 |
| ASAH1    | 189.136114953249 | 193.609985124825 | 218.470365730283 | 191.018168651394 |
|          | 204.862387642573 | 251.414717011661 | 411.160709628865 | 211.269041187154 |
|          | 213.914599384797 | 253.124449721731 | 190.281570660806 | 346.118765910093 |
| ASAH2    | 147.570734399004 | 133.406312157375 | 140.922678400415 | 136.635413632094 |
|          | 143.239666389592 | 146.851307767958 | 153.829636228764 | 143.868962478182 |
|          | 138.062345982865 | 143.59105195427  | 144.266864839344 | 145.256660345252 |
| ASAH2B   | 126.5929421833   | 124.873289279767 | 128.168460083895 |                  |
|          | 121.448671447499 | 126.934059693116 | 131.872583529419 | 125.029516472944 |
|          | 134.002424083826 | 131.970514300585 | 130.455560026617 | 144.411176964424 |
|          | 126.555972138115 |                  |                  |                  |
| ASAH2C   | 171.161297672182 | 159.374355553219 | 172.008994980259 |                  |
|          | 162.342112922504 | 157.08300736206  | 178.425137262105 | 201.320381706496 |
|          | 168.560093633607 | 164.96631670799  | 189.37832342197  | 194.430896269275 |
|          | 168.232843307077 |                  |                  |                  |
| ASAM     | 436.331333134628 | 270.360397503276 | 223.666832044186 | 243.038392457584 |
|          | 127.990453128978 | 150.690143057308 | 118.410091682499 | 137.974323288786 |
|          | 150.860090477342 | 152.89366585726  | 133.985582992986 | 124.720004905439 |
| ASAP1    | 1103.13439876128 | 1137.42879398351 | 776.807656744828 | 861.516925304722 |
|          | 582.062758687489 | 820.249910349431 | 429.457884032977 | 783.755776589969 |
|          | 520.470790410856 | 557.868300839263 | 407.615019710707 | 333.533043832976 |
| ASAP1IT1 | 163.824878791966 | 179.048139035247 | 160.293522619371 |                  |
|          | 152.906352463546 | 129.532122459128 | 298.028932089399 | 149.786445079456 |
|          | 202.483493595704 | 159.495272062735 | 152.906352463546 | 135.784481523923 |
|          | 158.712241098927 |                  |                  |                  |
| ASAP2    | 362.65285317327  | 307.518881119091 | 324.713347085998 | 314.221257518059 |
|          | 402.026356201632 | 442.12886967939  | 267.747633122387 | 398.354212009426 |
|          | 319.223127076041 | 363.025385707747 | 425.229044880287 | 354.132752995385 |
| ASAP3    | 818.761934233826 | 687.269774217064 | 508.572981581855 | 639.011144305614 |
|          | 792.101559967381 | 360.285027176918 | 425.708048519408 | 339.32415558339  |
|          | 314.182403961681 | 323.95355217044  | 644.11603826131  | 286.703712311781 |
| ASB1     | 610.591049634222 | 620.371912523332 | 601.018867455333 | 873.879064183441 |
|          | 240.147082836599 | 190.614236149496 | 238.482863150124 | 247.307128520272 |
|          | 247.622351589081 | 249.737588031219 | 397.985856484851 | 251.039117540764 |
| ASB10    | 145.858537779106 | 146.025781495177 | 141.284962125757 | 134.891736344801 |
|          | 132.390330703084 | 163.621658579697 | 130.630504666374 | 143.818379692331 |
|          | 158.138862054715 | 151.473239782301 | 144.096624787142 | 155.483400816946 |

|       |                  |                  |                  |                  |
|-------|------------------|------------------|------------------|------------------|
| ASB11 | 132.762755202326 | 130.084202182014 | 129.018088749395 | 131.470883854661 |
|       | 123.643292039274 | 126.308622415913 | 126.176505541577 | 133.392934239554 |
|       | 132.393669306489 | 134.115085057026 | 137.824985884649 | 124.959873714884 |
| ASB12 | 111.603221942108 | 122.329290563769 | 118.988269692812 | 127.558034562151 |
|       | 128.634431242405 | 112.78323842342  | 119.125002207396 | 115.988180787152 |
|       | 107.863971340407 | 112.987890650593 | 121.294366964074 | 127.299853592344 |
| ASB13 | 210.33390115739  | 207.440700355457 | 198.659595851481 | 207.338645756456 |
|       | 330.758879244143 | 344.604699562938 | 243.95334982553  | 329.722135361491 |
|       | 238.183096218311 | 159.120172969378 | 371.127480221666 | 270.945325305492 |
| ASB14 | 128.588822671032 | 127.678512375099 | 124.238319768621 | 126.872912960681 |
|       | 128.064189008549 | 120.979417552159 | 128.244549276386 | 126.080780033301 |
|       | 122.959518532165 | 124.777895136212 | 129.838790698396 | 129.108534267222 |
| ASB15 | 107.316786994369 | 113.611651901331 | 110.419222236698 | 100.216750525986 |
|       | 112.081127853476 | 112.198629213643 | 120.043811428091 | 114.133473556359 |
|       | 103.99234480919  | 117.67638166062  | 114.524341239889 | 106.854721604889 |
| ASB16 | 140.391753835434 | 151.367402326399 | 163.996649606636 | 143.756242843438 |
|       | 143.365976841902 | 156.06439656393  | 149.490064894136 | 164.601022396674 |
|       | 167.040031488406 | 159.344044864557 | 158.573561336755 | 139.619076126267 |
| ASB17 | 145.409722106953 | 147.761965925044 | 147.763017438098 | 126.796253980623 |
|       | 151.081339000609 | 130.555405606993 | 149.166635189875 | 138.079494235456 |
|       | 143.461785113446 | 141.102274192049 | 149.133055368147 | 153.257097727888 |
| ASB18 | 126.100454068838 | 134.410706628655 | 134.060214479265 | 126.862274244977 |
|       | 126.5764774133   | 136.987403767185 | 133.964163727962 | 123.76900858347  |
|       | 131.444734367396 | 127.802645313091 | 126.134393447943 | 129.511465164539 |
| ASB2  | 236.032288046282 | 224.851680313689 | 287.041585684111 | 286.085833802132 |
|       | 132.47775411384  | 137.251513843314 | 135.582230137515 | 135.268963938932 |
|       | 133.243679173608 | 135.920830568556 | 153.636804025106 | 140.616811333466 |
| ASB3  | 313.077481033093 | 332.343558229873 | 335.533053221675 | 303.638516587721 |
|       | 258.695920967489 | 344.992791638415 | 275.584858082096 | 282.101714660307 |
|       | 277.685488726472 | 310.301616266762 | 307.982260548106 | 237.078644686891 |
| ASB4  | 141.453255692229 | 137.514952067562 | 134.579005092929 | 147.236728188605 |
|       | 143.152993168137 | 143.207187847583 | 139.638617433372 | 139.092075947067 |
|       | 138.246963115014 | 144.2753860947   | 144.41489969974  | 149.31020447459  |
| ASB5  | 700.601917911532 | 830.684999498776 | 773.330948077036 | 864.161191021297 |
|       | 135.488155152648 | 140.127379332918 | 151.020903727566 | 142.763157232147 |
|       | 144.368355737187 | 139.39442529119  | 130.085138325818 | 137.200433808907 |
| ASB6  | 166.88833169342  | 185.961822133346 | 145.665155500862 | 214.785381549181 |
|       | 229.116153948948 | 132.589411973628 | 131.434121613176 | 133.486155360266 |
|       | 149.831566330214 | 129.875986080057 | 158.565676210997 | 132.597481743242 |
| ASB7  | 125.055545087871 | 134.691038011706 | 126.349403754775 | 123.318763391117 |
|       | 149.505323932806 | 136.316003989725 | 144.266864839344 | 135.349868925415 |
|       | 141.369723386494 | 135.47852126603  | 150.792065744902 | 132.539585717666 |
| ASB8  | 402.366797969833 | 388.002365247498 | 520.470790410856 | 440.404188514231 |
|       | 219.996410908721 | 293.17183601265  | 377.083379021079 | 383.939800422489 |
|       | 377.593087606046 | 321.84712975195  | 450.688800547981 | 365.541609015117 |
| ASB9  | 146.398454169593 | 147.450681897766 | 139.739448838436 | 134.78059811237  |
|       | 149.016767620428 | 168.10131060526  | 142.282861913548 | 177.379186278216 |
|       | 188.952730860801 | 147.635761512135 | 131.089811472017 | 166.576768836782 |
| ASCC1 | 589.722914993267 | 627.335757721489 | 630.473042320288 | 720.214044399108 |
|       | 345.291295192574 | 483.845891531326 | 605.040026490154 | 390.372738176917 |
|       | 394.35596596181  | 421.836020491624 | 401.102586700919 | 593.990687449346 |
| ASCC2 | 1052.553421812   | 1083.26599217847 | 1183.82018168635 | 1146.3535752748  |
|       | 2574.74962955426 | 1929.52146517699 | 1908.81864728547 | 4671.10203385528 |
|       | 3219.27851139047 | 1379.95968831696 | 4222.55224241399 | 2518.88171283899 |

|        |                  |                  |                  |                  |
|--------|------------------|------------------|------------------|------------------|
| ASCC3  | 202.230920499592 | 193.641927801805 | 188.708596785144 | 200.790119570144 |
|        | 220.362946606131 | 235.933451977398 | 261.775269058607 | 214.546528079149 |
|        | 233.300864925399 | 318.850765099332 | 252.197271817794 | 281.996583337694 |
| ASCL1  | 114.644722005728 | 159.784369379077 | 120.276236447255 | 112.036753245281 |
|        | 119.949050292223 | 118.126133973555 | 116.723991721647 | 108.131097605872 |
|        | 117.740022708444 | 122.777544465711 | 131.730758460802 | 190.66473033826  |
| ASCL2  | 174.881557472722 | 219.729169245025 | 154.38209765671  | 156.34272729153  |
|        | 797.28465621772  | 303.795701960506 | 736.603605876572 | 374.56251861444  |
|        | 682.075583857856 | 199.555406967021 | 572.262848718437 | 159.138344477256 |
| ASCL3  | 135.237042337721 | 138.446492794924 | 148.94765984808  | 151.226242696197 |
|        | 136.907453440141 | 142.563762845657 | 138.13987378399  | 141.917318809044 |
|        | 148.842322753916 | 150.856917125736 | 144.235298492095 | 134.793399942417 |
| ASCL4  | 114.062099086818 | 106.182551369456 | 111.949644842971 | 105.179281694336 |
|        | 108.007762863766 | 108.868679899494 | 113.432757764419 | 112.75167046116  |
|        | 106.701716475947 | 105.193775204124 | 116.046983032621 | 110.966212705086 |
| ASCL5  | 136.249621724093 | 122.00079209554  | 144.70348930646  | 128.16147857336  |
|        | 125.929743286163 | 142.892198239879 | 132.796961054534 | 124.551603326682 |
|        | 127.486697506397 | 146.785478478701 | 137.237089899964 | 131.086904662241 |
| ASF1A  | 230.855806094267 | 226.020769172424 | 280.453895029319 | 196.922837906592 |
|        | 185.627515956848 | 252.514569129392 | 275.794847140407 | 265.61506544085  |
|        | 216.615694348945 | 217.307872538386 | 244.251315474587 | 274.974304050999 |
| ASF1B  | 149.127963327999 | 170.505553609318 | 139.162076054072 | 200.065184172871 |
|        | 755.79669622705  | 369.018856220394 | 268.370347292603 | 420.502251256406 |
|        | 296.20443113482  | 220.010399552402 | 178.445384902129 | 321.177982468322 |
| ASFMR1 | 146.805832438977 | 150.343825300998 | 138.295019395552 |                  |
|        | 134.851757252167 | 153.97869518398  | 133.800111596565 | 136.508969220268 |
|        | 133.143695166498 | 135.697550878438 | 153.613110881454 | 158.249743182741 |
|        | 150.820808770853 |                  |                  |                  |
| ASGR1  | 151.538112896642 | 156.763364462534 | 130.231160879338 | 140.254665008195 |
|        | 142.819669471009 | 172.774914399844 | 121.425298866613 | 148.825790628891 |
|        | 175.313689069815 | 151.503307004675 | 155.694213876736 | 135.701041557713 |
| ASGR2  | 132.634538733205 | 128.99859423584  | 132.375905857023 | 129.596851280135 |
|        | 139.117776552573 | 131.347213356457 | 133.201157825808 | 130.392575279055 |
|        | 131.121343131082 | 129.79093244374  | 135.381131982323 | 121.107979534361 |
| ASH1L  | 151.663203772586 | 178.804669910283 | 151.377932495104 | 143.533725135227 |
|        | 154.161892545061 | 153.346972639134 | 184.937088280378 | 153.348110626071 |
|        | 138.938546468136 | 156.290018816692 | 168.805630890928 | 146.828099826146 |
| ASH2L  | 611.36406319509  | 633.762608454521 | 821.862271569917 | 696.131296166255 |
|        | 3391.3005983725  | 1387.90327883679 | 723.428294037428 | 842.22767901391  |
|        | 830.455793617181 | 964.093668483033 | 625.544719251096 | 825.781627776577 |
| ASIP   | 109.128394735532 | 115.35376992547  | 102.851152421943 | 119.673343767067 |
|        | 111.260486045985 | 110.594755513247 | 110.003750007057 | 97.8058879269165 |
|        | 117.423704591303 | 106.746545626069 | 112.179019393947 | 110.935688075738 |
| ASL    | 139.293775885106 | 150.746423638097 | 140.626181314061 | 146.975258859244 |
|        | 186.758038665014 | 146.858292465699 | 148.074494928651 | 175.055634340766 |
|        | 150.19577351885  | 146.929717840755 | 163.02140155858  | 169.246302492166 |
| ASMT   | 117.084984190461 | 120.060776752215 | 111.794102015354 | 123.743971147401 |
|        | 112.252555403121 | 114.942849575931 | 111.7529190597   | 124.783306383852 |
|        | 116.751145098777 | 113.852849454448 | 125.547399456656 | 105.952640312359 |
| ASMTL  | 354.840474468573 | 353.826834642154 | 387.908774438461 | 402.213774592085 |
|        | 386.544913399837 | 295.935625475189 | 162.876684781936 | 244.280971257965 |
|        | 207.960802948119 | 220.791884858764 | 280.798003990849 | 262.60377731258  |

|         |                  |                  |                  |                  |
|---------|------------------|------------------|------------------|------------------|
| ASNA1   | 172.222262910052 | 148.624135810148 | 149.226700202481 | 174.526176588454 |
|         | 198.191669030952 | 143.098246338022 | 164.981665344298 | 142.126620107418 |
|         | 139.00736252716  | 154.388776919015 | 165.186696781985 | 150.802312408483 |
| ASNS    | 609.100385482325 | 561.609211243027 | 513.292377117011 | 699.270931701696 |
|         | 343.121661664987 | 683.019502027271 | 621.354393918348 | 771.059329972125 |
|         | 460.941286124613 | 972.468110850466 | 472.669956708398 | 417.36454228858  |
| ASNSD1  | 751.896334334052 | 595.270107963842 | 1033.03719406038 |                  |
|         | 521.625146077176 | 411.71606840872  | 1202.74869573717 | 685.620637807134 |
|         | 654.108318810728 | 714.91842349236  | 823.297606185721 | 822.88742008931  |
|         | 669.330078861673 |                  |                  |                  |
| ASPA    | 232.444867422559 | 177.450674276588 | 145.632060621034 | 153.267549449395 |
|         | 136.939603341076 | 150.394483608039 | 132.402255281009 | 150.423586547273 |
|         | 165.283700641161 | 147.823552813852 | 144.523620416439 | 159.182533998843 |
| ASPG    | 163.922353493317 | 170.169402943662 | 173.182013165174 | 173.964378226631 |
|         | 139.334552725255 | 125.27625242915  | 131.662585510218 | 151.360575274272 |
|         | 141.950778601653 | 349.99912485533  | 163.407360509803 | 131.533378871062 |
| ASPH    | 147.702785358046 | 157.067264221207 | 172.80265044721  | 154.881797585583 |
|         | 233.914433380121 | 208.080089376299 | 243.10297424873  | 176.725347194807 |
|         | 179.273936200852 | 166.400162299835 | 165.757295630254 | 217.45700166961  |
| ASPHD1  | 131.879526177089 | 128.324383749931 | 136.380523452336 |                  |
|         | 122.615852682436 | 172.008994980259 | 141.079317977197 | 150.557982810339 |
|         | 129.231455282441 | 131.38692240237  | 130.782296492278 | 126.908123260394 |
|         | 148.927040248436 |                  |                  |                  |
| ASPHD2  | 121.668166378914 | 137.27827836407  | 132.300508985399 |                  |
|         | 124.88118767481  | 235.905788497166 | 182.470538043064 | 140.02337095267  |
|         | 146.666759322506 | 158.946177055546 | 137.194467539969 | 182.292947734054 |
|         | 166.001279428607 |                  |                  |                  |
| ASPM    | 151.364528898537 | 201.865955150869 | 157.800913051929 | 160.970946091146 |
|         | 426.364663722264 | 525.287367366192 | 324.177924877233 | 737.650963292668 |
|         | 363.963951509433 | 415.388760988459 | 220.633692394229 | 603.061485415867 |
| ASPN    | 114.987285062108 | 101.713609383766 | 106.772581387455 | 108.807891863679 |
|         | 99.0767996209245 | 106.667175621971 | 117.74682797375  | 110.003750007057 |
|         | 108.910588012315 | 109.506450285923 | 116.625518828978 | 107.544568250154 |
| ASPRV1  | 138.508015596135 | 147.530719472217 | 128.122197525844 |                  |
|         | 156.339564110766 | 152.247504238261 | 140.639012372681 | 127.3079781139   |
|         | 156.71199811686  | 137.303701514064 | 126.711037295629 | 126.067296703905 |
|         | 133.318665755015 |                  |                  |                  |
| ASPSCR1 | 359.162549472301 | 372.81255844018  | 417.262521411065 |                  |
|         | 466.392151902286 | 899.336817124312 | 612.06231165648  | 584.919615953457 |
|         | 1035.0797237176  | 664.343553341563 | 393.98210915852  | 411.451612988791 |
|         | 617.833194119379 |                  |                  |                  |
| ASRGL1  | 149.642946071295 | 155.064761390765 | 154.156272284591 |                  |
|         | 158.854659281803 | 145.432667767652 | 159.227123133854 | 157.77047742735  |
|         | 220.896363324634 | 165.752558888845 | 142.765490244223 | 146.351622020606 |
|         | 143.596530151289 |                  |                  |                  |
| ASS1    | 468.82816089485  | 680.250735532287 | 428.782703561238 | 572.913714991136 |
|         | 2200.94974896771 | 306.232249422327 | 1165.05055932899 | 864.547109080675 |
|         | 1023.29995420518 | 416.715760038095 | 1403.09138858507 | 216.903719298575 |
| ASTE1   | 213.324226314713 | 215.057917795456 | 190.889832855403 | 224.805404798696 |
|         | 189.324370290702 | 232.250434241457 | 250.647644543963 | 290.037325939883 |
|         | 243.589099648895 | 232.960832410426 | 273.303240462047 | 261.251965523684 |
| ASTL    | 128.381433897602 | 142.318709347082 | 130.450930089722 | 125.689884251847 |
|         | 132.84666796678  | 125.008209861774 | 127.786141874218 | 137.5954358221   |
|         | 130.083266044947 | 139.606654715326 | 153.178934750919 | 125.83678485646  |

|        |                  |                  |                  |                  |
|--------|------------------|------------------|------------------|------------------|
| ASTN1  | 145.56468363155  | 133.228074579352 | 128.346598756853 | 139.783725419023 |
|        | 131.599370671279 | 131.202090507576 | 136.84840505336  | 132.227561632637 |
|        | 133.054453517834 | 140.714455864886 | 137.627338682823 | 133.76515446791  |
| ASTN2  | 151.739221728872 | 168.882806817001 | 158.507624756588 | 160.778296470857 |
|        | 266.057472924341 | 143.370698101204 | 141.596078062845 | 159.102070980047 |
|        | 139.432567336814 | 137.353149614081 | 182.275998840116 | 150.452467115669 |
| ASXL1  | 326.570967321756 | 318.196134631178 | 414.114051645565 | 315.963526790659 |
|        | 282.282663608264 | 348.067061666237 | 354.132752995385 | 242.787656836745 |
|        | 280.453895029319 | 264.955939320296 | 277.726756691133 | 267.483886037099 |
| ASXL2  | 497.916883763059 | 453.17378995737  | 543.001249586573 | 417.731815310276 |
|        | 436.982960786839 | 725.443026984982 | 509.618968665191 | 811.362219801362 |
|        | 523.591472915151 | 718.449150898903 | 642.484527246259 | 547.202354339933 |
| ASXL3  | 149.912481263284 | 146.626517077288 | 131.774882989257 | 140.938442055097 |
|        | 130.038936315246 | 131.267177634269 | 137.198654302648 | 115.285392699073 |
|        | 118.256000539093 | 149.190528937822 | 127.949413503055 | 119.774204444899 |
| ASZ1   | 128.499303407596 | 114.999628959921 | 121.212521750566 | 128.975785280465 |
|        | 118.572988141773 | 127.302714624905 | 117.084984190461 | 130.205764567934 |
|        | 124.924794564647 | 122.452541100946 | 121.311836944721 | 132.257989841046 |
| ATAD1  | 368.711718874343 | 342.315456386729 | 431.093544964576 | 270.33685210971  |
|        | 220.772387104223 | 309.5988292104   | 350.308420518351 | 271.287767448621 |
|        | 303.762967437478 | 348.640185950469 | 367.229293432041 | 458.047799748696 |
| ATAD2  | 162.333158524811 | 147.502116289881 | 187.461448376593 | 145.610045243277 |
|        | 266.534316786801 | 425.001043358831 | 257.5097052677   | 451.985108262982 |
|        | 459.068582584181 | 283.163770658619 | 195.946096353894 | 300.602422224047 |
| ATAD2B | 176.622758931306 | 187.097765940131 | 169.45559708224  |                  |
|        | 198.226525986857 | 175.601912488918 | 230.263678910356 | 154.056660680872 |
|        | 189.160454951382 | 158.679903271595 | 186.257814752354 | 170.818182800759 |
|        | 207.467591256549 |                  |                  |                  |
| ATAD3A | 323.462252156562 | 250.139061165593 | 276.184421402511 |                  |
|        | 321.794887577351 | 761.89271251455  | 413.983821839274 | 318.423602671236 |
|        | 251.511405838796 | 307.945884504629 | 362.849380477089 | 232.344545356395 |
|        | 269.831616158113 |                  |                  |                  |
| ATAD3B | 131.755881982599 | 126.573673878042 | 148.356726939122 |                  |
|        | 140.820807603291 | 154.302619274576 | 154.534605635191 | 135.175806654971 |
|        | 149.000760379976 | 156.576585764311 | 165.055636629118 | 118.988269692812 |
|        | 145.566861062922 |                  |                  |                  |
| ATAD3C | 137.429832103492 | 144.690880401712 | 167.958792571511 |                  |
|        | 157.507108643575 | 146.604519441812 | 148.744599622165 | 158.344330353326 |
|        | 167.949422301257 | 150.115482378938 | 171.278489808694 | 137.546487338984 |
|        | 150.809693773343 |                  |                  |                  |
| ATAD5  | 138.785538575745 | 116.186846885411 | 143.247977741752 | 123.259322051795 |
|        | 130.827726862159 | 138.89354244296  | 153.93249158209  | 142.783159341229 |
|        | 134.474466007553 | 146.016920431468 | 140.772074031028 | 155.026276988302 |
| ATCAY  | 122.793816135585 | 125.048770476506 | 129.3513576591   | 118.514618614167 |
|        | 126.148379057536 | 116.335864439545 | 121.094060100325 | 115.524441144063 |
|        | 122.809241232029 | 107.714294216913 | 137.132095345234 | 117.270320709161 |
| ATE1   | 137.907709799074 | 131.153457976248 | 132.7284396337   | 133.606068125828 |
|        | 133.522714111034 | 131.123149002831 | 141.263207601393 | 138.717541782317 |
|        | 132.952355710395 | 143.242308032336 | 141.571389983164 | 141.194900058799 |
| ATF1   | 226.086733606951 | 217.074639597142 | 234.996704304673 | 180.549865708041 |
|        | 204.219197797869 | 185.525760847281 | 218.209523110843 | 222.285940575778 |
|        | 206.391403266202 | 219.129781831192 | 194.734255772365 | 250.376178742476 |

|         |                  |                  |                  |                  |
|---------|------------------|------------------|------------------|------------------|
| ATF2    | 144.082452235267 | 133.857996630836 | 185.627515956848 | 130.892302357045 |
|         | 131.992186668019 | 159.513465644268 | 142.351705613006 | 149.754842928462 |
|         | 161.019770036957 | 164.824914851636 | 167.025336068642 | 175.442400672352 |
| ATF3    | 768.053694275398 | 356.770158430601 | 395.049127927637 | 229.594081405784 |
|         | 148.192121257421 | 399.620724969771 | 133.408354896584 | 153.620767586182 |
|         | 148.195611015135 | 534.083703564903 | 145.45768403614  | 191.708350637714 |
| ATF4    | 7446.59106452583 | 6105.64727031051 | 6091.9840719327  | 7802.25987814138 |
|         | 2406.67187918735 | 1309.01193284992 | 2853.14759681683 | 2023.92614092273 |
|         | 2822.48671794913 | 2962.11407134162 | 2183.18692530644 | 1881.90353127141 |
| ATF5    | 635.37511798786  | 558.051041108282 | 409.743899750699 | 492.05680879106  |
|         | 1597.53010317504 | 676.293399523316 | 1133.22524345111 | 986.972987865318 |
|         | 903.503768217033 | 986.441377365124 | 463.488995330457 | 771.694853062033 |
| ATF6    | 373.033658917608 | 359.024299091145 | 349.248144552634 | 321.977549744483 |
|         | 476.076903428247 | 744.523059417351 | 655.094843900848 | 589.722914993267 |
|         | 496.560127152436 | 662.781145703653 | 433.491835341321 | 962.559482864549 |
| ATF6B   | 154.764283765316 | 163.956894843504 | 122.355409068882 | 170.18781660707  |
|         | 270.945325305492 | 143.050004021764 | 151.68523937819  | 149.076146942797 |
|         | 157.216793735479 | 148.980330875743 | 223.154771092064 | 166.346572488391 |
| ATF7    | 158.608479354755 | 153.54898879562  | 161.26917182967  | 161.475694690038 |
|         | 147.511569289425 | 152.155760355248 | 150.303703193967 | 162.077455145261 |
|         | 155.140371265225 | 147.491439949088 | 152.074017988748 | 175.529441666151 |
| ATF7IP  | 159.479962316199 | 172.355215322173 | 193.336246844237 |                  |
|         | 196.990867962546 | 174.866036336378 | 159.166059518117 | 173.624709850889 |
|         | 169.257035030405 | 163.612347715773 | 189.324370290702 | 165.642728895682 |
|         | 161.903016201041 |                  |                  |                  |
| ATF7IP2 | 211.995890899864 | 213.145460679531 | 245.978723809154 |                  |
|         | 183.130891975122 | 185.485858719975 | 421.140525880287 | 275.252966071473 |
|         | 327.010503005631 | 398.673582680257 | 173.624709850889 | 535.861738240441 |
|         | 233.300864925399 |                  |                  |                  |
| ATG10   | 673.824770556885 | 690.582550537485 | 529.854965483609 | 732.040299742444 |
|         | 237.734385188542 | 443.444024128516 | 358.654569870431 | 359.329520507158 |
|         | 335.858047332641 | 352.897241809959 | 452.517134370928 | 342.403428822464 |
| ATG12   | 1131.22418479945 | 1244.67453201339 | 873.010676463707 | 1387.90327883679 |
|         | 242.253995801882 | 400.924914238052 | 577.33849844574  | 544.669441360594 |
|         | 395.588345893987 | 819.151876775691 | 438.231717096337 | 506.659740456829 |
| ATG16L1 | 588.334329592604 | 601.164127925014 | 650.0804221227   |                  |
|         | 775.781735108886 | 356.530530468568 | 411.160709628865 | 339.012225830929 |
|         | 310.690317681243 | 422.12964420709  | 438.340341490622 | 425.59810308048  |
|         | 370.678040372273 |                  |                  |                  |
| ATG16L2 | 269.468453936818 | 270.847923557176 | 212.210383398591 |                  |
|         | 244.440857688518 | 191.023813502294 | 192.627266049516 | 180.265418365803 |
|         | 189.662974464847 | 191.445291899108 | 226.565823278767 | 196.908612360694 |
|         | 232.127996106421 |                  |                  |                  |
| ATG2A   | 271.638179116269 | 304.636618563775 | 276.284517459626 | 380.821355948507 |
|         | 787.615195903993 | 295.367125961621 | 335.013713757031 | 283.46492196692  |
|         | 257.643855420381 | 304.152390210727 | 303.380479700334 | 267.451611731669 |
| ATG2B   | 183.657525723012 | 180.798671424395 | 225.438177833064 | 177.246890307643 |
|         | 169.31618330657  | 161.740466814881 | 174.09267813338  | 171.086559024882 |
|         | 165.808660192901 | 192.737713851863 | 171.022976593689 | 169.355185349431 |
| ATG3    | 280.848426993226 | 305.096320805078 | 317.659548748735 | 313.077481033093 |
|         | 319.352940751688 | 389.177193459    | 353.385210690169 | 433.019478861638 |
|         | 479.138177792954 | 575.857954264295 | 322.837446618323 | 425.471195039676 |

|       |                  |                  |                  |                  |
|-------|------------------|------------------|------------------|------------------|
| ATG4A | 231.698163424706 | 242.657224881824 | 252.197271817794 | 255.71113398292  |
|       | 207.764456828813 | 251.588748783592 | 221.171478972931 | 210.392662092721 |
|       | 250.30085097088  | 230.893665210918 | 207.850956786183 | 236.899421827427 |
| ATG4B | 149.586651393588 | 141.809577413906 | 190.22021453133  | 129.637555509848 |
|       | 190.66473033826  | 232.641965649602 | 264.8472508692   | 210.218440444631 |
|       | 219.597808863947 | 305.669636871734 | 192.580288063603 | 325.252108402192 |
| ATG4C | 166.46473789699  | 166.411219327671 | 181.758545723241 | 157.099868633958 |
|       | 147.325222091872 | 167.491399614986 | 175.350734537491 | 169.147351642004 |
|       | 186.420541099902 | 180.142758394321 | 183.583432296209 | 161.305860691151 |
| ATG4D | 159.257221624668 | 159.806221777332 | 153.500478301079 | 175.111460651956 |
|       | 220.458449424062 | 186.263348153627 | 184.414609874199 | 176.183165494563 |
|       | 164.423960071908 | 176.420075374686 | 196.169988112042 | 182.410688592378 |
| ATG5  | 455.930204471585 | 485.309521583972 | 522.17701271254  | 461.822629852953 |
|       | 227.236255752375 | 328.200548902445 | 314.486603134656 | 285.931444518474 |
|       | 269.345125874858 | 289.09614335372  | 515.158921349383 | 322.263925912805 |
| ATG7  | 300.482945704017 | 335.698400607132 | 300.443499140896 | 397.861172312706 |
|       | 804.362909579005 | 303.483515328621 | 365.650071660806 | 535.354724252178 |
|       | 507.040326298457 | 550.434931878586 | 277.817786943873 | 373.033658917608 |
| ATG9A | 298.403224729528 | 350.166837086936 | 282.719121652073 | 473.529519031797 |
|       | 360.124745133393 | 223.339132121796 | 257.740674565975 | 185.876046259727 |
|       | 225.238369884803 | 265.712482648121 | 265.470314691221 | 229.076507182239 |
| ATG9B | 113.879459563492 | 117.343165720552 | 109.044879188971 | 117.652693591865 |
|       | 115.713909155043 | 118.04359489354  | 118.93828679356  | 120.36718185387  |
|       | 119.802832736435 | 112.666812944192 | 117.910259090745 | 120.85013281321  |
| ATHL1 | 284.534369213195 | 227.64196401771  | 166.570606752678 | 180.022646625687 |
|       | 160.853480692082 | 130.005909892804 | 144.763700813057 | 194.014764659513 |
|       | 220.742788129847 | 167.993851183401 | 278.598913464804 | 318.850765099332 |
| ATIC  | 1656.02721259517 | 1516.97921112926 | 1628.24528041404 | 1727.7144253077  |
|       | 1727.7144253077  | 1776.38646235135 | 1054.47292895417 | 1222.59895569348 |
|       | 2141.855356411   | 1191.26028342929 | 830.455793617181 | 1720.14021303639 |
| ATL1  | 286.035428568826 | 233.496804016764 | 313.773476049783 | 267.069665000047 |
|       | 141.054587977578 | 153.118492567137 | 151.463200570499 | 178.035700298977 |
|       | 178.304914997023 | 177.524818593325 | 202.129153259445 | 208.72873686638  |
| ATL2  | 232.344545356395 | 234.661864595717 | 362.795691170335 | 220.258804437828 |
|       | 234.484787292284 | 212.78038645414  | 243.65518489122  | 237.396466740419 |
|       | 210.316431648335 | 389.686045618228 | 193.16411905957  | 202.324795686879 |
| ATL3  | 279.790257881254 | 310.465070184707 | 241.557810100265 | 283.416246133873 |
|       | 625.374595058488 | 304.985269874607 | 507.710604451713 | 277.75958501062  |
|       | 250.406775889932 | 2470.86113150126 | 315.565349831797 | 336.5543056115   |
| ATM   | 294.323621186916 | 254.036619126409 | 387.305348482856 | 233.690524419327 |
|       | 168.790464803746 | 231.955750250711 | 239.363511706064 | 318.930960243303 |
|       | 297.466255000163 | 205.987280015028 | 315.912220767901 | 244.766289564524 |
| ATMIN | 289.956528242564 | 299.851173200352 | 271.113617350982 | 264.741946816665 |
|       | 219.228720772236 | 269.495247190598 | 219.519896184851 | 270.679613997675 |
|       | 276.184421402511 | 195.438353051306 | 280.170464338141 | 292.28857006885  |
| ATN1  | 277.129985959184 | 296.20443113482  | 266.756647182704 | 391.782120640025 |
|       | 249.737588031219 | 173.552535486766 | 182.495117800073 | 192.680681636018 |
|       | 207.417884407459 | 173.063002566542 | 212.531329857909 | 167.941671074236 |
| ATOH1 | 122.120307446003 | 109.947300629824 | 113.38168751499  | 108.955761698524 |
|       | 128.675527226161 | 119.26921157552  | 112.736231367296 | 109.613208767992 |
|       | 106.982655360194 | 104.544792793756 | 115.927914533359 | 111.381427322188 |
| ATOH7 | 155.268650584431 | 158.085935267091 | 162.660027294291 | 164.264079172779 |
|       | 156.546769952772 | 165.673535349675 | 155.313873664923 | 159.327764602722 |
|       | 143.125454748996 | 152.001155788544 | 157.200582422961 | 168.000247148058 |

ATOH8 277.459328083162 369.726867521935 236.326943078666 262.171775165261  
1042.40539020413 207.785320401354 411.451612988791 147.882530392424  
167.380798617981 147.079157199448 408.263886786123 201.893722965557  
ATOX1 967.123240442957 971.170460915918 798.1490651671 1471.01897242089  
959.532977061027 1003.36623972843 824.070046083713 1001.92763014266  
935.423045210635 1408.08614963928 681.429327723794 846.425467119342  
ATP10A 170.18781660707 158.23884088767 147.491439949088  
152.265624144393 145.217261514886 153.879427186342 170.784229026842  
157.058912028958 153.903993884123 175.236826554583 182.152956182443  
154.499313851756  
ATP10B 172.604689611475 178.045931314857 192.353768499582  
163.586549438955 239.541516080716 223.872330412144 214.86995782548  
333.745543022749 357.259935567823 808.837225580351 481.86545778383  
464.577839898252  
ATP10D 128.886008923268 129.487458179949 119.475462713424  
110.093565974873 105.551878332786 122.659174808512 112.832122823829  
129.819820730239 118.438942370745 137.881776548665 149.585616718523  
114.805810485989  
ATP11A 132.164132609317 137.222125237171 128.099484678519  
128.032141013681 123.817878562971 133.585425721984 139.00736252716  
140.341589053972 133.027592711375 121.71538073735 125.915689078001  
140.490023670841  
ATP11B 289.517820913799 305.577166690215 301.428024926428  
247.942904862478 215.698924670416 325.082620845425 295.778154263981  
307.16835174775 259.796092536601 681.810927901806 539.008286968106  
344.604699562938  
ATP11C 238.375823012603 241.527811817146 229.046153362151  
233.71520737817 271.858059712406 307.480644393018 280.990656342284  
210.925203743958 242.037132958656 172.002600588279 248.965394617795  
243.080229016932  
ATP12A 127.712004247155 159.660564323984 165.926301648161  
145.517559593811 145.27890423835 145.632060621034 148.062245676711  
141.987635042691 134.551054564417 144.102872001089 154.627270742193  
141.86836086844  
ATP13A1 223.918931440768 251.09230266334 240.591548171052  
295.935625475189 683.655205499779 300.482945704017 495.89837457901  
320.936905584424 279.325065941252 224.766155406229 315.47473326786  
302.601458409102  
ATP13A2 205.362816362477 217.013533525724 175.7330682766  
249.633252091596 681.591028334969 266.756647182704 242.410260751835  
253.833756857339 210.448904052352 277.75958501062 330.321113875647  
239.363511706064  
ATP13A3 142.747793303346 147.547944397578 140.435724944447  
138.758688249557 152.188770978528 152.957297648595 154.617462666847  
149.110300099889 155.655771857361 157.309058982117 148.209164900319  
156.519196335454  
ATP13A4 135.879975973882 133.875667250136 126.617737577634  
123.865424155099 151.198928680018 155.603263242813 156.026806913759  
146.370084152094 145.42029807396 140.772074031028 134.533551900843  
161.019770036957  
ATP13A5 142.664793323255 117.423704591303 101.713609383766  
104.633603136988 119.01990099776 107.221547998974 115.845468537936  
113.924310293916 122.578170988039 111.708970469189 120.964862799634  
118.419311800417



ATP1A1 989.77058497525 1071.47374315822 748.38293089716  
891.637685856145 3424.65126200697 1715.51071085304 1737.57015396357  
1132.27988339924 1690.96371604294 2986.6208659209 977.227184625781  
1271.46608195833

ATP1A2 523.216537391852 472.030150842569 703.587139938769  
653.264945856916 121.116206210402 124.811760828557 119.594962686756  
121.871105084095 122.670689386332 120.329105003959 125.091038614268  
122.35832958054

ATP1A3 162.57736365619 171.545695383454 156.511202150773  
202.300293733922 171.426334687626 190.204960255989 188.973595445056  
195.674128236589 167.212960569538 156.865049786218 163.558869203898  
181.840985962045

ATP1A4 116.029201658798 112.999642731096 125.885715928839  
113.22850386845 144.526140751381 123.219903763265 152.821735300697  
162.649092834422 121.71538073735 113.22850386845 160.268754786532  
175.111460651956

ATP1B1 594.92419264579 765.532997390972 710.228463443265  
481.453770150269 1144.53002508973 693.781708146282 1083.26599217847  
1297.25632532536 2698.5455305009 799.132592914065 2847.42635118026  
2648.41012401723

ATP1B2 177.151218006672 173.507835230243 141.249687936867  
149.435684626505 124.641892391159 134.094231940612 141.513636348978  
148.096551269076 128.463982896081 124.842426851438 129.155804800869  
138.389976620532

ATP1B3 713.832153334389 826.771587455122 490.269418483997  
719.766799746895 745.482863218223 1057.1528284934 956.153239481189  
736.140249105836 768.334658920971 1704.25279485563 913.684449305965  
978.389902096994

ATP1B4 131.051711775229 127.095347480109 120.135349166633  
122.484351696828 136.90636489391 114.182798672347 115.450352881048  
111.722827315911 117.008277388399 120.565485864499 122.914680091926  
118.226036680442

ATP2A1 134.968848574511 130.970694919879 139.606654715326  
132.782967735893 140.728126380228 126.127630885864 142.64161581553  
136.446877465751 126.326609619996 134.394503574535 128.135216461862  
135.583556015955

ATP2A2 1289.56069670699 1377.75266942574 1565.64079526732  
1868.82736251524 825.345092964844 624.978351618077 644.11603826131  
712.433345978749 877.255923473532 864.908449769749 636.970243888917  
713.832153334389

ATP2A3 166.917552275021 185.140211988926 154.455641374384  
210.882890077598 152.898148619937 135.915960609269 137.615027659126  
139.927773713324 172.120772549791 125.830917527594 165.67554738735  
179.663258610881

ATP2B1 234.041863839123 212.798133015556 179.96623248843  
206.113290588613 257.032174266905 273.75192868583 214.662648581622  
512.895335481876 173.387549650592 174.873893094923 211.395593720534  
181.771654391653

ATP2B2 126.209426865327 128.626051185037 125.556444423391  
127.685469299406 124.507958339495 128.568463697992 126.48691003872  
127.427014611349 126.153806511702 125.08580835258 130.928718312512  
119.168045349254

ATP2B3 130.754320787628 126.978144285534 129.221482161409  
125.822346524903 138.953926269905 125.761205967344 136.478114537536

128.0366252162 132.119370332298 127.736712231221 138.684070773064  
130.905135502296  
ATP2B4 2558.91648313228 1797.65684760558 2733.68308784024  
2213.1043022626 315.306271141071 259.868701878844 393.375554593484  
179.048139035247 272.639413442579 464.907454552364 332.343558229873  
506.430593289427  
ATP2C1 190.057030596611 184.672330560677 232.492398623889  
164.96631670799 270.787490294555 345.627266482686 311.715351215263  
329.535023880129 376.276954313674 337.077153882632 275.343591424586  
366.961565952239  
ATP2C2 141.743873995642 147.335403843539 167.003917876371  
140.217243202557 263.426870776148 194.072260528037 399.364160668615  
158.085935267091 214.082408290757 244.797792477941 324.177924877233  
266.057472924341  
ATP4A 127.871445879091 119.48998115497 118.117957479382 114.790717658188  
125.256339476772 142.633121727277 114.27112025541 110.304102941202  
137.240806191881 121.871105084095 140.815807483203 119.870661213608  
ATP4B 131.965184111199 132.94603323912 133.94206203396 135.421804561804  
136.674553275255 127.615631240096 127.464485396039 128.36121178972  
126.262349005661 127.440987506769 130.677737553727 131.970514300585  
ATP5A1 4743.19967685595 5213.40342339233 6500.1854485891  
5981.08862268291 3757.39261544326 6233.78489807054 4359.98094976179  
7656.97151002785 6670.51138785163 5714.36902486392 6851.54963413886  
8649.07367196998  
ATP5B 11360.2921551609 12171.1997841553 12493.2940668467 13944.7649147227  
12577.0915543468 14454.6736124756 11809.4804843301 18061.615487998  
16230.8346205808 12577.0915543468 14544.3732040823 16230.8346205808  
ATP5C1 967.797017108447 945.830852603704 1641.70484603137  
918.162638134305 1527.87148052149 4759.17973319588 1780.97169244555  
2166.68174726155 1146.84239258543 1405.2134783352 1834.08657010335  
2462.87034563426  
ATP5D 1374.92806285803 1537.71464618832 1596.33832632698 2050.34883263932  
2334.97297889593 1267.5716872154 1139.14730341921 1125.95664591686  
684.715981522999 1248.69137283095 1504.15682715484 1184.88559645917  
ATP5E 1408.08614963928 1626.34607278613 1925.60246708149 1710.60409578293  
7733.95252458705 2915.72823797537 3822.05744774919 2206.7447886564  
1728.86115695979 2753.89649259242 2316.49886419499 2539.87833317526  
ATP5EP2 8292.04796307133 8864.70614223459 8649.07367196998  
9636.32818474581 23190.7842325067 13645.150201952 13013.8166277495  
11360.2921551609 11360.2921551609 10632.4185569238 14417.2696849334  
10988.2836796736  
ATP5F1 1071.83063260499 1163.13845502757 1798.5819962261  
1038.34611017219 1466.08446530283 2677.17579532816 2741.71904421456  
3066.69261114251 2328.65814406636 2715.55326746591 1986.81354260292  
3136.27991502603  
ATP5G1 737.650963292668 730.988069115919 592.822841077599  
992.744093752678 801.702878226247 1035.98574557331 504.617795280805  
974.007008568051 907.904780399957 723.250763797522 616.339439383796  
774.180202250076  
ATP5G2 1099.80705776268 1102.38234645327 1461.64901688125  
1181.1611856364 967.797017108447 1248.69137283095 1948.24432908972  
1797.65684760558 1838.18547839898 1434.1439428394 1356.43255022363  
1865.44709751822

ATP5G3 139.714198638713 153.82440233533 150.129367314696  
 140.899799480834 143.514848892447 212.836093887552 145.652246303142  
 200.944865673409 158.716575777014 171.16807372519 177.333305785248  
 295.099840299681  
 ATP5H 4875.22637286719 5032.66681917478 5589.21471380445 5688.84918819457  
 2174.62979843528 5759.5586948816 4938.42484385053 7681.48027081818  
 5314.0635307876 5965.21815409254 3843.07094386605 7190.89891723932  
 ATP5I 2970.34597432588 3090.52810501797 2770.7811954029 3615.76740804718  
 2350.01764791897 3463.23822434026 3334.16277752222 3140.51157972795  
 3727.70199176703 2653.47752512393 2449.76376608893 3463.23822434026  
 ATP5J 3173.14004739767 2947.51998516453 5955.10816224456 2965.38280248519  
 1195.6335460045 3468.14455177277 2819.92361643968 4318.50925204407  
 4682.62607750437 2799.0487754899 2255.92551080483 4009.22206756187  
 ATP5J2 1386.56788941677 1669.97250023755 1297.25632532536  
 1880.35608492553 5073.27433952351 3237.94149351627 2877.92845389611  
 3807.16206340771 3246.86605825129 3103.4192907748 3481.90072759183  
 4404.79209330918  
 ATP5L 1894.14699530855 2012.36542989953 2811.84191700516 1996.65760745757  
 2845.0377634896 2171.00457877604 2346.47361943533 2660.39990175415  
 1975.83062789692 1640.99641023476 1766.15001427132 3608.10730106542  
 ATP5O 3501.86788138647 3515.36256599555 4592.14655702906 3052.86038628748  
 1552.69879081022 4965.25728333142 3757.39261544326 4901.41175228982  
 4811.88424516272 3954.24763752814 4073.21075791737 4134.02613649483  
 ATP5S 212.473610495213 187.112176929485 248.16594076495 185.876046259727  
 306.111172289632 181.747090380435 309.861048237742 225.209315195163  
 200.518684601283 361.082957133644 310.174932137546 351.934158805882  
 ATP5SL 710.003412772888 921.140932799223 949.789710063337  
 1347.75629878765 788.693133735893 536.067857235731 705.529158880221  
 646.117381960716 775.781735108886 661.545179083009 589.240581642145  
 486.653672099699  
 ATP6AP1 2553.92770795014 2913.2685312165 2482.27419621925  
 2615.07927836881 13902.1067272762 5932.37714987741 5382.31371568106  
 3989.14883668905 6244.58472720999 2938.06458269406 4621.99241522677  
 5094.53287522452  
 ATP6AP1L 211.692743811486 157.619627711954 215.506175859782  
 201.954167006591 129.672284417918 166.157713072213 284.272977025491  
 159.701028026285 181.889592946523 154.302619274576 201.865955150869  
 155.198503964295  
 ATP6AP2 2642.24374855334 2770.7811954029 2804.99820187198  
 2129.84680802619 3211.2719052157 4491.96934862425 3712.67025366957  
 6358.5018930218 2736.98692493933 3008.43964505208 2527.99279063127  
 3744.5666678861  
 ATP6V0A1 1606.01395227661 1423.02563792293 1485.776977235  
 1708.87666406131 1286.55103838368 844.778755052304 966.281849197568  
 1198.53117439169 1029.75852676191 966.731520471976 588.863382995875  
 832.911633923496  
 ATP6V0A2 234.020419732787 236.326943078666 230.91747428831  
 247.643123415644 297.862653495715 259.064601204239 218.896760804208  
 229.373686092654 262.093405224922 217.778414825515 221.82340413039  
 245.850813387241  
 ATP6V0A4 128.247871411825 135.455283504668 137.144001915831  
 131.785745489382 145.681968019851 132.737464610403 129.147246809319  
 128.499303407596 151.604093626944 129.86336717605 129.384531576943  
 131.536457148878

ATP6V0B 605.583144451322 688.464980326689 509.292779821787  
584.813665097407 5396.55955971617 2240.33212242003 1350.87073284396  
1427.70292953827 1651.68171717875 1106.75785702993 885.713964813911  
1255.62991601665  
ATP6V0C 1431.52979384867 1649.46398639795 1175.27165286568  
1580.27059464289 4377.59943975549 1493.90578573732 1806.24732793591  
1925.60246708149 2321.41228376157 2255.92551080483 2537.90501983425  
1980.4589291261  
ATP6V0D1 472.793332506369 553.368945998847 500.132469062228  
632.565736446505 1576.21727854603 410.731869154912 444.663812851378  
341.015631528464 464.128022170285 762.584280908728 493.492348317616  
538.156335788156  
ATP6V0D2 184.414609874199 165.602175302848 178.878444404192  
169.052101570616 172.438141471784 181.412790232996 206.321272734099  
172.652645920958 165.692508737757 185.525760847281 169.391557085902  
174.136806313142  
ATP6V0E1 2811.84191700516 2801.66917828364 2615.07927836881  
2770.7811954029 1996.65760745757 2285.86163259073 4141.8682669995  
2395.75453574049 2653.47752512393 4081.13406129846 3655.63669142687  
3510.24464112094  
ATP6V0E2 662.373189001788 848.154015576436 1066.25208226214  
1135.49876948815 1305.2232532959 1634.20135156938 1785.92695250894  
1789.51979173209 1503.2049371911 348.300300174924 340.966515437272  
1460.24985399013  
ATP6V1A 728.176339659082 789.043948009585 725.216684507759  
648.38049615541 698.086166782221 1762.09874961415 1273.6393529108  
1566.65825409044 1731.62376348283 1846.61430264854 1026.61404215739  
1717.09434498876  
ATP6V1B1 150.380814008952 139.054140295282 127.048605625519  
160.143443392509 338.46332239699 423.607299503704 344.379733302418  
142.587032407457 152.987939791009 137.13615301204 141.040862279633  
133.032905765836  
ATP6V1B2 1356.43255022363 1385.28044421961 1459.31031099055  
1525.24196488688 684.866405921987 1091.69584249713 1093.21579738952  
1129.15018335354 1481.24705642453 2437.63566094439 1100.81588201714  
1237.56662467492  
ATP6V1C1 252.404931238338 242.871915060884 209.464347017443  
239.079352337243 175.562070915794 218.862705238592 237.312766830206  
180.231462528702 226.449705559354 192.113217321485 232.465880700217  
204.137195524755  
ATP6V1C2 120.538535752185 120.633217745524 131.464229237662  
130.416957431512 122.038534506506 122.610529927104 127.018746030517  
125.334995649504 133.327778635672 126.242935839683 117.193620642373  
128.800907223807  
ATP6V1D 1248.69137283095 1458.13354165836 1868.82736251524  
1495.04587558545 1257.00798908017 698.086166782221 1164.22995893381  
969.360864006371 1131.96129284658 2637.62596741408 1272.14273680177  
1440.14449872047  
ATP6V1E1 2525.90466050731 2459.05558915812 3211.2719052157  
2819.92361643968 1011.9675459648 2080.47567326037 1720.14021303639  
1592.29734618345 2051.45788386541 2388.03256067711 1437.5568316065  
1685.33737186733  
ATP6V1E2 149.460660195293 161.408318705503 162.050520530297  
151.384762644292 196.245297362955 171.629605754643 271.615621030842

202.718428167217 157.468934439452 148.916981164664 192.418895349837  
159.133905701536  
ATP6V1F 2114.9754128463 1992.71224011906 2168.58813300343  
2007.0121037284 3441.9805896226 3294.92439159154 3807.16206340771  
3618.9385126441 2905.12297639092 2801.66917828364 1570.39362935859  
4503.01240138314  
ATP6V1G1 1671.82101590797 1840.14350831655 1503.2049371911  
1329.90419210779 1846.61430264854 2430.70635781622 2642.24374855334  
1792.35343044443 3757.39261544326 2970.34597432588 3518.84173951107  
2403.42261883515  
ATP6V1G2 155.386226046894 151.406384541297 167.164675439456  
141.416706868124 142.833025633146 128.492142236807 129.596851280135  
136.03581843125 122.153996665065 123.804039963953 128.936628289974  
131.119810851017  
ATP6V1G3 151.76341973891 149.747347428419 143.976395954528  
138.600017737884 137.183566882805 160.423982411027 148.953720017484  
146.830752309354 149.613701531197 141.006540481119 142.116311513299  
139.423432468886  
ATP6V1H 350.803378042804 333.349203784021 438.533112511098  
373.545629693667 509.988617641229 431.861762635568 357.140791982825  
304.479999301061 476.168679880357 433.82566459288 405.183882455109  
340.608165077422  
ATP7A 141.644521617419 145.61758790738 141.296574431203 121.468398802591  
170.561596645385 183.513101761782 161.456727894848 148.585224298375  
156.548858402702 169.496129800444 185.984938124891 147.040759979063  
ATP7B 154.998011079046 161.636411303968 181.889592946523 153.888212689508  
167.057202756618 153.54898879562 146.846301957637 146.484364264513  
147.868721324602 145.843639385175 171.093611712143 133.392934239554  
ATP8A1 155.108146847158 151.71942719041 162.547569833931  
143.733505359106 141.937611082276 163.290050020756 148.96493117884  
141.717466442384 145.03221570575 143.397823965608 122.729918525032  
145.813437992703  
ATP8A2 149.974080577906 152.221694141976 142.64161581553  
150.142724640067 131.700854556022 136.065134838221 141.259186690966  
138.458816023289 141.462379822312 134.801507994667 155.974463324915  
143.331929080227  
ATP8B1 167.365850007748 174.526176588454 161.849023343715  
151.87495966414 325.859917318516 263.005303710717 322.576886792502  
290.688850193983 243.402781509365 197.565122821625 363.539983343859  
239.419200107721  
ATP8B2 298.664864578349 245.351459157365 242.996248524203  
283.048002376743 132.611864316181 145.844961942581 143.990328432869  
161.951996906162 178.425137262105 152.277810621542 157.108043150259  
152.842777535666  
ATP8B3 125.45936959544 112.699674279523 115.491262364277  
112.357261386644 111.497241941203 119.613985826308 107.365390754133  
115.184395637553 116.902574164498 112.3786222545 167.653412908384  
113.22850386845  
ATP8B4 405.183882455109 401.631377313065 457.779218916808  
360.605223912114 182.152956182443 223.89854167651 178.035700298977  
230.399207047948 212.460476372263 184.437810305792 205.495823410422  
193.37618381669

|         |                  |                  |                  |                  |
|---------|------------------|------------------|------------------|------------------|
| ATP9A   | 1100.17618574297 | 1182.50261323518 | 1037.00025848491 | 1085.92360670051 |
|         | 1016.18143428327 | 837.413261433363 | 1455.75693295732 | 521.83794739314  |
|         | 507.342877360289 | 618.140160251927 | 1270.76282064793 | 673.176084400831 |
| ATP9B   | 196.117609477292 | 195.474525582555 | 181.747090380435 | 201.256649338315 |
|         | 184.724071110756 | 167.304721591124 | 200.424975825325 | 233.36028792331  |
|         | 173.204163917896 | 190.754349388901 | 216.522992914538 | 181.803275243281 |
| ATPAF1  | 417.731815310276 | 390.098830270926 | 491.906642849373 |                  |
|         | 449.859227376918 | 588.863382995875 | 397.153801851621 | 508.302878624289 |
|         | 520.761305892651 | 367.898258897888 | 362.742120043509 | 447.182566890086 |
|         | 408.361368902627 |                  |                  |                  |
| ATPAF2  | 165.103398617203 | 169.815053752464 | 173.082167545676 |                  |
|         | 209.913460781088 | 203.586310608403 | 144.206259414981 | 150.746423638097 |
|         | 141.461435494985 | 145.491525555916 | 156.490654498766 | 167.139257044999 |
|         | 133.978783899572 |                  |                  |                  |
| ATPBD1B | 654.881990232975 | 670.097523566652 | 607.499206410372 |                  |
|         | 774.180202250076 | 361.620362526358 | 583.697431061521 | 583.619362840814 |
|         | 447.779854598556 | 447.059120541009 | 314.845965872164 | 639.184296110069 |
|         | 382.233826557803 |                  |                  |                  |
| ATPBD3  | 152.737177514149 | 155.172667450053 | 129.075693654369 |                  |
|         | 169.607072855818 | 255.945470052489 | 204.031081842809 | 185.493554506958 |
|         | 181.229308386808 | 207.940596890723 | 155.129304059037 | 204.299375966441 |
|         | 166.825501664231 |                  |                  |                  |
| ATPBD4  | 181.110403721353 | 189.509062639279 | 163.315865817864 |                  |
|         | 183.513101761782 | 170.684848540493 | 155.942609847585 | 201.555964610849 |
|         | 166.257275241937 | 174.357336296554 | 167.658560306884 | 174.680918805036 |
|         | 193.315380090713 |                  |                  |                  |
| ATPGD1  | 151.210814209064 | 147.164348704012 | 149.31422191209  |                  |
|         | 153.230304322351 | 142.744045151046 | 145.597134236583 | 138.733717670748 |
|         | 149.119815471009 | 134.145771195572 | 134.865577264797 | 138.706520278166 |
|         | 146.830752309354 |                  |                  |                  |
| ATPIF1  | 487.358720934063 | 486.047284379068 | 477.741216640575 |                  |
|         | 491.906642849373 | 916.4187683687   | 999.658013198849 | 732.352357321273 |
|         | 767.861763134136 | 564.41151411028  | 643.660739343159 | 995.263014856158 |
|         | 791.402660066193 |                  |                  |                  |
| ATR     | 131.000186898437 | 138.361149460093 | 128.771367080039 | 129.906744036052 |
|         | 134.590666885938 | 132.492444216154 | 141.353084959289 | 134.838366830668 |
|         | 131.805798804895 | 142.56910547147  | 139.657182434153 | 136.907453440141 |
| ATRIP   | 215.094633380547 | 248.129640673859 | 229.689010178622 | 290.090495047722 |
|         | 337.87475687838  | 246.250251445835 | 232.519482087835 | 235.530986541549 |
|         | 255.12306184224  | 193.084818760857 | 204.113356572343 | 193.892810132985 |
| ATRN    | 182.929326147069 | 184.332299740724 | 178.394895649664 | 179.338652960181 |
|         | 239.827648772906 | 253.789045068884 | 222.332748220525 | 209.596792486876 |
|         | 202.061887608293 | 214.396920524803 | 210.751430486845 | 212.915949933033 |
| ATRNLI  | 149.339492984504 | 131.041996482401 | 158.10628865476  |                  |
|         | 148.126745515891 | 142.970256312313 | 157.919709478746 | 147.108661317945 |
|         | 142.613654158833 | 139.959629641771 | 159.48526814715  | 136.635413632094 |
|         | 141.278654291193 |                  |                  |                  |
| ATRX    | 143.397823965608 | 135.463385553776 | 143.393174544776 | 145.206796089128 |
|         | 135.968346417524 | 156.433603187722 | 145.07503221134  | 142.301581642006 |
|         | 148.556161762978 | 142.221542344035 | 157.759149893048 | 144.231539210695 |
| ATXN1   | 680.509421043347 | 660.535644289024 | 658.746224115551 | 664.19083888799  |
|         | 190.031339775209 | 212.396522888943 | 301.369680426563 | 263.426870776148 |
|         | 236.651601701157 | 392.13175568099  | 271.154246147262 | 229.483578414375 |

ATXN10 207.581907737176 200.633009710701 241.799709160815  
 190.993590849624 178.035700298977 227.715558644326 202.369905673351  
 202.162432624505 192.331142672469 210.550995170071 268.224669588188  
 244.73233791067  
 ATXN1L 224.89911221799 233.103476996669 226.640323471375  
 220.816812192169 248.927790738447 185.717123241832 191.418673767345  
 201.365457496683 252.138168292964 208.016730103629 242.614881095485  
 195.16856673253  
 ATXN2 1908.81864728547 2470.86113150126 1989.38201206555 2712.07480130502  
 1047.2693539616 1253.05700051015 1218.05434595121 1013.60354455825  
 1614.00098175383 1103.81439809121 854.224454791713 1392.89422203207  
 ATXN2L 155.899547877596 151.488973553441 146.65668813596  
 146.996442729408 181.966110264509 170.490099282436 153.731233276485  
 157.848456517169 149.471240458766 147.668990552874 160.254101852355  
 156.61494867164  
 ATXN3 360.991542429346 461.314247041387 331.464977124667 521.512936372701  
 210.960900130785 178.997098204457 210.085329463347 195.547320133122  
 191.554396977588 312.406286993239 234.339913501761 207.440700355457  
 ATXN3L 132.021249712589 120.020781939389 150.384559054133  
 130.827726862159 120.906553066296 143.383697128285 130.661695937728  
 144.743281367797 142.825203517688 159.887898257218 115.789536577324  
 135.390226050803  
 ATXN7 135.335107344583 132.909653744628 127.49352469919 129.589056071463  
 124.857461801227 130.724642809645 133.004765428575 111.010889276873  
 115.194730717797 136.368258257435 125.41744801003 126.103561089901  
 ATXN7L1 132.133226620105 122.414781975236 127.233439204926  
 114.452922529209 108.061315311823 126.37749112514 106.393497890486  
 116.241531823869 123.884643288534 120.493082096235 120.944267930809  
 134.327229861635  
 ATXN7L2 154.277670551775 162.606273401226 133.56263739203  
 161.548130965486 231.796421262015 198.681190016247 200.915806094193  
 201.893722965557 196.734037460218 141.91067228913 201.954167006591  
 177.874821397216  
 ATXN7L3 381.253673759781 403.405544395163 356.268960813032  
 542.379137999196 759.802694618208 538.647888236878 550.566402986082  
 540.359249705821 581.191693771646 316.524115715585 440.495339027491  
 465.29290512169  
 ATXN8OS 108.446988282853 116.378552206652 116.031631038289  
 112.916256784817 105.816457443844 111.253743009588 121.472885562857  
 106.147993332294 123.671944323239 118.636694749194 113.422559344178  
 116.445184223804  
 AUH 229.907632927358 204.337844243869 238.344676327918 198.815448428294  
 234.214191437687 219.351080515508 223.89854167651 227.736106796551  
 259.184713471619 371.224296589448 309.5988292104 219.753039699136  
 AUP1 290.389345090634 266.057472924341 262.832376198119 315.615758089471  
 540.946852709312 369.198837083585 403.208138816247 407.152764702613  
 333.676803661366 420.871349359404 411.359106929985 361.218491712891  
 AURKA 141.468076901305 178.696562301918 129.360773522498 183.280853265083  
 916.836022395768 749.859130465356 448.858580689107 578.084277076692  
 481.453770150269 390.501797367707 203.223604138192 414.267332328081  
 AURKAIP1 2767.77385345718 3371.24667467952 2913.2685312165  
 4847.77258830631 9470.58919937464 4081.13406129846 3450.46728258139  
 3905.35300751401 3618.9385126441 3581.36347643133 2511.04500638697  
 3378.126661761

|          |                  |                  |                  |                  |
|----------|------------------|------------------|------------------|------------------|
| AURKAPS1 | 130.98982984989  | 136.506347083926 | 146.934990457666 |                  |
|          | 162.825380100343 | 138.285325970867 | 146.146800933028 | 146.345451252228 |
|          | 138.756638791139 | 141.914966520049 | 125.065813262416 | 146.840735518984 |
|          | 151.592787806315 |                  |                  |                  |
| AURKB    | 111.196610704726 | 125.768053724055 | 107.930325780047 | 123.643292039274 |
|          | 681.810927901806 | 495.769802520637 | 173.520662003159 | 459.388390392518 |
|          | 291.476113017794 | 274.891033696257 | 192.441337304606 | 251.20133703465  |
| AURKC    | 123.100949494673 | 128.864822736402 | 121.246967460178 | 125.243735617266 |
|          | 120.384210318    | 120.571074646092 | 131.268454024753 | 118.047978285706 |
|          | 125.309861084957 | 121.164978896057 | 124.654146040634 | 130.542451540402 |
| AUTS2    | 895.114975754684 | 1017.09497861942 | 751.269009484639 | 1159.44907165386 |
|          | 521.625146077176 | 442.590987372759 | 661.390308090982 | 866.413995755699 |
|          | 295.607161318725 | 223.551813819581 | 355.990908506973 | 421.836020491624 |
| AVEN     | 319.966785546419 | 290.090495047722 | 285.258824662946 | 329.406649846151 |
|          | 245.850813387241 | 206.376365685112 | 191.59400638652  | 163.873355370767 |
|          | 188.641397688261 | 395.716879127149 | 179.711363255355 | 214.86995782548  |
| AVIL     | 145.368059425439 | 169.920799931309 | 134.125038192486 | 160.549597620339 |
|          | 158.670835881902 | 165.932628858503 | 160.923897048848 | 173.147311624838 |
|          | 177.011776399483 | 160.419358656559 | 172.251953149975 | 134.255021727555 |
| AVL9     | 160.338146803754 | 139.866536599877 | 151.134466830828 | 142.348246621217 |
|          | 290.914381066573 | 137.674025476238 | 188.847480174391 | 174.396061906109 |
|          | 167.206513789165 | 237.113813706224 | 174.820064644203 | 239.762135294506 |
| AVP      | 152.593934787262 | 143.815682887538 | 165.890492422031 | 141.360125377949 |
|          | 164.777719508421 | 152.317890573534 | 167.173670781451 | 149.141033677244 |
|          | 155.376656335974 | 153.88383201628  | 150.148902196995 | 148.692602243778 |
| AVPI1    | 1195.07608384189 | 1168.3174645384  | 1012.44277312494 | 1125.95664591686 |
|          | 570.130804179186 | 843.936924659514 | 1159.44907165386 | 368.220523234399 |
|          | 536.805979562807 | 747.804958601763 | 442.590987372759 | 775.5664718389   |
| AVPR1A   | 121.44564199541  | 111.366283149236 | 117.962188157317 |                  |
|          | 117.270320709161 | 123.195738824794 | 117.137027732123 | 108.318510762416 |
|          | 118.527464364564 | 110.068122112671 | 117.980052938167 | 136.220324225816 |
|          | 118.951526834915 |                  |                  |                  |
| AVPR1B   | 123.814841047589 | 114.01599035448  | 107.655624022312 |                  |
|          | 116.552626146967 | 105.521320791331 | 106.341910466588 | 115.242526386551 |
|          | 120.14201542563  | 117.343165720552 | 105.900294919664 | 136.589250394236 |
|          | 111.568329540016 |                  |                  |                  |
| AVPR2    | 204.942500423413 | 184.135651836627 | 200.810204162831 | 220.242344043437 |
|          | 184.900027626401 | 178.12073430094  | 218.487334022128 | 201.987081022654 |
|          | 177.306794546105 | 196.615914367563 | 166.803359138942 | 190.787437782456 |
| AWAT2    | 105.976284291356 | 101.530900217921 | 110.190708230962 | 117.539640414775 |
|          | 105.450273343324 | 112.365278258185 | 112.476111928742 | 99.5148073333731 |
|          | 108.530158480237 | 111.217595631623 | 103.448244268961 | 108.697696080014 |
| AXIN1    | 282.244214637625 | 339.32415558339  | 336.898462056187 | 386.598037190663 |
|          | 553.123179808258 | 312.961981998512 | 405.322847383739 | 367.289651112346 |
|          | 240.915496717526 | 370.877260088621 | 337.077153882632 | 337.271784551586 |
| AXIN2    | 606.38343657878  | 880.140852200235 | 763.263858769038 | 994.213397985121 |
|          | 186.482547532546 | 403.405544395163 | 208.385295246155 | 225.803528238368 |
|          | 1449.33679383001 | 232.046814892685 | 215.802713097166 | 220.047563627558 |
| AXL      | 1208.9240215109  | 1243.11900823259 | 1034.2217095753  | 1389.93393245455 |
|          | 201.676984786688 | 199.96834355685  | 185.140211988926 | 244.162496497466 |
|          | 241.418016203544 | 253.495214569632 | 205.630948393225 | 178.464811133    |
| AXUD1    | 1564.8868894162  | 1778.73916100529 | 645.438835606933 | 846.985164747386 |
|          | 911.340266389071 | 1222.014210447   | 481.630922092112 | 308.803322140241 |
|          | 475.686805714298 | 785.290353402444 | 518.17401959981  | 469.714826990063 |



AYP1p1 418.889972660958 453.593585032712 433.594928641214  
 552.790706181938 1037.97124386242 390.897464546943 526.970555181851  
 291.369577397743 305.16668987495 331.464977124667 244.486311003619  
 404.618867159141  
 AZGP1 120.857635836068 135.417519318028 127.289269745461 119.029186503752  
 166.214167530158 134.270043564053 119.288554466773 118.095936088242  
 143.061415008831 116.029201658798 144.283716416188 150.544779197947  
 AZI1 226.387465899611 256.202924421798 230.284216427158 297.757657398146  
 589.240581642145 356.770158430601 196.269193578525 387.068276379114  
 359.991823789356 228.125521373477 238.482863150124 1022.11537745428  
 AZI2 347.081036934975 287.889774984754 333.745543022749 290.288001750744  
 210.061754644824 241.734804013256 249.339449789861 242.871915060884  
 286.774606295106 274.736124442229 304.058158731957 243.622678182687  
 AZIN1 651.235249028924 570.916936074747 899.667912542118 558.810095726517  
 421.836020491624 749.220616713093 668.286400833485 789.971871940893  
 953.099915501575 702.460234202652 608.959089074987 582.062758687489  
 AZU1 124.288632450364 144.970383956581 149.808222023726 157.615017085961  
 155.097300548684 142.379120254855 151.604093626944 139.805930686563  
 145.503718833974 163.81485578613 132.431566491955 165.424516708502  
 B2M 10930.6720259935 9349.76443528011 8617.2437024568 6324.87600301793  
 6560.30885074315 9852.51412359574 8581.41617729997 15561.8923517816  
 22035.2646000952 13324.7465248375 22182.4877079778 16925.9167115963  
 B3GALNT1 215.247472744419 244.544473246593 197.231408726321  
 208.164674386141 376.791876040886 613.846166856328 364.443097338814  
 345.627266482686 206.469040492609 182.608712782878 760.572409199179  
 799.423640530777  
 B3GALNT2 195.414464905232 204.103018614608 192.709473588165  
 198.191669030952 185.830435830545 164.571974509529 173.082167545676  
 190.96184674871 177.267145265362 233.953994677015 168.116928722035  
 221.171478972931  
 B3GALT1 122.696382705233 157.623092996114 130.520275539672  
 131.604121223902 130.832462487806 126.430816528764 131.377361030122  
 113.521599852465 120.812738312059 133.161552914595 167.293320986716  
 127.511638455985  
 B3GALT2 141.076652697698 181.968650082343 143.165150890885  
 156.806407903626 138.796257513868 176.75095377028 141.392661314737  
 158.610249594568 146.431166706908 136.783974483005 157.631978594005  
 144.736213465651  
 B3GALT3 126.029431525943 131.996032643928 128.232091717966  
 124.113451627593 141.033948839613 178.445384902129 140.36425603453  
 157.524049610272 157.729732484131 127.152744243038 140.545351041252  
 213.556015518863  
 B3GALT4 225.095016600703 229.046153362151 189.389457481768  
 237.191866335979 373.033658917608 201.320381706496 345.291295192574  
 188.231614694297 257.168308311848 191.961269585431 251.61451602376  
 277.86338481075  
 B3GALT5 115.559551514777 118.871735074285 112.365278258185  
 107.976233194926 119.249084967945 114.977135060317 112.987890650593  
 116.934457270701 118.226036680442 112.449662536973 119.525701528869  
 116.810827219571  
 B3GALT6 254.552034511333 306.632103708321 215.115324454215  
 351.079435946154 733.195136251155 209.090788790449 248.260998007814  
 230.079664410595 343.833659987063 174.854570705 372.54091392596  
 312.705458415152

B3GALTL 195.513703253634 177.19138801548 182.478971050701  
143.625188247966 169.705236302448 202.60339529874 169.590101694098  
165.553581848949 168.183542846746 295.778154263981 212.171281020103  
198.374163029174  
B3GAT1 140.785337524953 139.465935832583 129.750835425023  
134.307336063739 205.403820910921 125.870730238298 135.48250324478  
136.77666893627 134.27783583528 142.924854393401 224.298067319406  
189.971144220643  
B3GAT2 120.964862799634 126.394032757479 121.942777234608  
111.743461522689 126.391083453973 126.00744446299 101.149125916797  
113.557349524174 114.099623939954 119.01236045062 129.485710719291  
129.675420096163  
B3GAT3 189.575681012578 183.64389891975 148.680794815584  
241.058691798484 257.292125083248 166.47851613068 176.650953513413  
136.837430157894 141.616920429839 134.673861365626 183.545741265706  
138.207553349985  
B3Gn-T6 139.039276904833 140.997594159186 137.731390340708  
124.840101287634 142.995274641765 150.294432623474 146.110545700163  
141.589470439145 153.801971958265 147.443560923128 158.221595000183  
141.344034069373  
B3GNT1 785.599211190431 677.9972761887 759.802694618208  
800.739422189427 323.667189206453 280.127735578097 410.002817143111  
258.632372536866 206.68694753419 222.943046618742 338.934501259414  
254.517135747445  
B3GNT2 169.631386764054 164.841156516242 152.356731704094  
162.192879711747 175.236826554583 290.802509012089 201.517356610591  
246.061496821699 202.483493595704 326.176058036757 180.1204762193  
260.591336959281  
B3GNT3 138.21083121895 149.430396727944 157.406969627689  
174.177944561595 387.908774438461 213.891435492914 330.321113875647  
219.2695037071 179.198164545975 153.602842380788 388.002365247498  
296.088938872643  
B3GNT4 142.480203661104 140.750004067571 136.016912147651  
135.088149158147 175.891947478891 140.301945597122 152.910433120981  
146.90847051471 155.516697616637 221.253717494488 151.736824723671  
145.783320434143  
B3GNT5 106.36673326724 125.979152567959 107.48180681159  
104.091301211096 146.59366188125 160.382971629272 133.889858322181  
139.685629122498 136.916286605302 222.646371492347 188.322853571195  
150.28508305615  
B3GNT6 279.921244070981 288.913660405191 348.808646570544  
290.638110977807 217.327543190687 187.993907528473 199.597685421675  
133.584361509362 161.490941000872 187.325542100762 186.420541099902  
154.170007083026  
B3GNT7 137.419835194075 125.331215990597 148.245974323625  
151.998942684339 145.106362864355 155.358918578397 151.794243108455  
156.448355269561 143.650172124086 157.215331288102 132.245217686793  
135.015161451899  
B3GNT8 172.568852318369 184.819937046061 148.215172022129  
213.382179917193 229.805500520256 150.059862107155 186.089988569287  
131.785053503951 147.469101571149 298.926727289387 199.597685421675  
184.873459141947  
B3GNT9 149.207481665265 157.309058982117 137.513315427454  
141.236939351298 143.888318202599 130.066177538896 155.078035506545

157.293090577042 149.274901871663 173.082167545676 153.505155981348  
149.861776884844  
B3GNTL1 143.41350503793 175.774461934758 158.049286838471  
199.423120300557 157.528409294029 160.085325256991 171.722839172783  
166.842970309527 172.888455552446 164.661445411833 168.389069732474  
232.046814892685  
B4GALNT1 152.265624144393 141.488910091973 128.023203858837  
139.251886500377 129.928047362701 120.693808603805 125.962178569021  
196.955723006838 127.997280639609 118.646119379542 140.487887891414  
122.284431229917  
B4GALNT2 106.719519490874 117.48427100606 110.624328647003  
115.524441144063 111.837468699281 103.307703547649 114.078271807864  
109.599589420575 113.025793645043 116.939471420419 119.993313087183  
110.735199684144  
B4GALNT3 143.984222627806 131.081793789906 156.756159786366  
133.050798832332 141.884995734267 127.727311123825 147.091280396135  
144.683260413888 144.892454033336 127.121068682846 120.07404952486  
131.397850276558  
B4GALNT4 148.274122690409 140.477307701027 115.995309578182  
127.481689955317 382.744523022686 225.890195278753 197.068795788491  
201.530921073488 154.71904132098 155.080900277147 184.056274452194  
170.825161347825  
B4GALT1 325.751369001105 378.4377409749 226.763252784108  
340.193863653875 541.764013317002 415.497783305278 424.855168311509  
285.05846406041 405.322847383739 287.967349876429 404.172535442156  
336.490076158135  
B4GALT2 179.220691178402 184.278213908263 161.408318705503  
195.694473533356 213.484986945295 177.401771322485 150.218643705925  
157.907190910755 149.196539425588 200.264756078778 157.14512525321  
147.41591291423  
B4GALT3 322.684910198242 428.462270756201 386.917038897322  
391.252450588331 1484.32547474275 1169.43742964112 830.455793617181  
1103.13439876128 1053.09915077366 515.929937825133 625.374595058488  
1033.03719406038  
B4GALT4 261.251965523684 280.798003990849 239.20206002  
231.338258067616 563.011988279542 544.30845362168 448.95671696823  
438.03648998391 583.314509855875 243.038392457584 497.916883763059  
600.635914090365  
B4GALT5 1169.43742964112 1142.09977159958 1388.91423772335  
1137.42879398351 767.377380800066 2316.49886419499 3396.40593844715  
1174.69701182094 1632.84261181074 734.71562355687 1223.68146968716  
1344.1288416533  
B4GALT6 136.508969220268 157.863585655333 145.339287846271  
144.019824700027 147.799806976046 165.698527470382 131.582231577364  
195.755450324985 220.791884858764 141.758827837244 136.882429810263  
155.603263242813  
B4GALT7 369.156887999872 451.718912714608 388.638095539186  
525.138476928759 674.571475335107 300.985037429772 1112.4055726239  
565.059609779245 437.049581919144 716.420861490714 425.708048519408  
597.795856268827  
B9D1 182.335981256243 169.984859264412 173.939159471022 186.215602572358  
350.741303038926 162.642344529383 159.74220366735 185.974598267418  
171.238423077347 147.338615809214 145.980929136129 142.071492722749

|       |                  |                  |                  |                  |
|-------|------------------|------------------|------------------|------------------|
| B9D2  | 193.190059954084 | 249.524956682907 | 223.551813819581 | 256.614964511846 |
|       | 700.601917911532 | 381.121621815163 | 451.621888586656 | 421.836020491624 |
|       | 452.077434390612 | 205.200459980187 | 336.120322555703 | 279.495192828873 |
| BAALC | 155.346805606742 | 148.927040248436 | 144.879364072868 | 136.707951572916 |
|       | 136.865340099645 | 132.227561632637 | 136.952914053358 | 135.90207451581  |
|       | 147.943844184702 | 135.489000274316 | 150.313058722346 | 146.743260100643 |
| BAAT  | 114.3172128566   | 123.98775110588  | 120.322292418128 | 109.140708667012 |
|       | 119.583378101838 | 116.810827219571 | 115.871151134713 | 107.961322525982 |
|       | 113.460835359833 | 118.144109564626 | 100.966979609222 | 109.760525674874 |
| BACE1 | 184.135651836627 | 170.298291784762 | 159.961729971624 | 152.821735300697 |
|       | 141.117659724704 | 123.275246170603 | 123.524952603672 | 127.588907178652 |
|       | 133.70941349665  | 137.920724602098 | 141.066106476109 | 134.991379445799 |
| BACE2 | 384.883635849576 | 400.180574613078 | 322.614169214764 | 467.681480781925 |
|       | 367.518273773904 | 304.811116024094 | 344.604699562938 | 308.679189788554 |
|       | 387.068276379114 | 710.999354960979 | 289.09614335372  | 475.686805714298 |
| BACH1 | 123.379461430902 | 128.135216461862 | 129.055874691136 | 126.288011849541 |
|       | 133.871685084945 | 125.868080230094 | 126.715300671036 | 133.284873295487 |
|       | 133.411087000196 | 144.81077501446  | 143.242308032336 | 130.138945493943 |
| BACH2 | 150.021512237553 | 148.632332840817 | 148.344941331885 | 145.190896872008 |
|       | 134.202497785854 | 132.913891550054 | 137.731390340708 | 137.024230648861 |
|       | 146.669620721254 | 133.065366727222 | 138.940564112156 | 142.093180304661 |
| BAD   | 237.216435972201 | 232.231236745251 | 227.668046559074 | 256.174286655796 |
|       | 437.489929507567 | 289.164969943385 | 290.135914275115 | 201.256649338315 |
|       | 198.356420768703 | 297.466255000163 | 260.314440448486 | 239.924227955313 |
| BAG1  | 145.654559623732 | 141.093532330708 | 123.413596815384 | 122.629146433216 |
|       | 140.190234214948 | 166.730974538475 | 170.108500366942 | 133.640832782576 |
|       | 144.994931561779 | 140.876577029209 | 198.244854812728 | 154.066939372379 |
| BAG2  | 1186.23169583595 | 840.276501350383 | 733.86133557115  | 1024.59845685519 |
|       | 173.182013165174 | 160.70138318726  | 148.635174393031 | 167.087850057037 |
|       | 163.632148441668 | 185.41739522833  | 145.358431402568 | 171.433001048839 |
| BAG3  | 1038.34611017219 | 849.784051720996 | 1064.85152398919 | 858.524630425687 |
|       | 446.819873986024 | 398.971838949075 | 692.359779743985 | 569.353661326724 |
|       | 665.936368667321 | 1054.47292895417 | 504.617795280805 | 718.449150898903 |
| BAG4  | 251.869781014029 | 246.061496821699 | 203.456296907031 | 221.975219056555 |
|       | 653.047570485109 | 361.26540006942  | 265.754141836026 | 219.8511043213   |
|       | 192.258863431747 | 215.931781291835 | 230.749601687217 | 220.710324965453 |
| BAG5  | 374.9555524303   | 328.550286726543 | 320.525885538523 | 324.177924877233 |
|       | 284.574888587832 | 254.83131041241  | 310.026522549372 | 341.564749445905 |
|       | 267.622579012917 | 301.591430919567 | 311.157764305033 | 395.645016679312 |
| BAGE  | 152.47429737104  | 160.628894266843 | 152.741229289112 | 153.308956040034 |
|       | 156.16485596016  | 166.89884215297  | 151.770791549511 | 132.825240485239 |
|       | 156.090871391873 | 165.703810120915 | 151.484420979498 | 150.059862107155 |
| BAGE2 | 154.286043402527 | 152.082927731045 | 180.047231265069 | 163.632148441668 |
|       | 156.525347260458 | 170.198508633417 | 150.835044630002 | 156.191659799142 |
|       | 159.466972602203 | 149.202628825354 | 143.631345956176 | 164.836381332774 |
| BAGE3 | 130.586509996354 | 136.632837717704 | 134.189023892662 | 121.681261213422 |
|       | 127.440987506769 | 159.289148392284 | 121.084348994747 | 141.191500203423 |
|       | 124.738217731488 | 122.816049839521 | 162.312313953026 | 127.150222504237 |
| BAGE4 | 126.430816528764 | 137.513315427454 | 155.516697616637 | 151.081339000609 |
|       | 135.736764623155 | 137.701271351806 | 148.049570580734 | 130.326980619676 |
|       | 137.871870950302 | 139.166537591866 | 107.949834974369 | 142.889911562811 |
| BAGE5 | 229.373686092654 | 223.918931440768 | 287.145105895235 | 189.0608798771   |
|       | 176.497706091676 | 314.126706052299 | 238.183096218311 | 213.791379190359 |
|       | 169.713585775118 | 198.885004378065 | 223.573080955095 | 238.724909152512 |

|          |                  |                  |                  |                  |
|----------|------------------|------------------|------------------|------------------|
| BAHCC1   | 140.730085305185 | 144.96670085147  | 138.899292894875 |                  |
|          | 135.253713075341 | 146.290334865039 | 126.98588570464  | 126.259029676691 |
|          | 131.162118170837 | 128.434301921433 | 150.843975804117 | 124.625603721372 |
|          | 139.667714422309 |                  |                  |                  |
| BAHD1    | 149.518870320398 | 168.460095116205 | 137.668179813327 | 153.731233276485 |
|          | 198.568180234676 | 133.345143691828 | 169.482586449402 | 144.731299077209 |
|          | 173.497575259833 | 138.21083121895  | 199.191065549132 | 164.61921356441  |
| BAI1     | 143.752697178913 | 144.685707282641 | 148.005500924157 | 149.3567486207   |
|          | 157.672378669483 | 155.883386742315 | 145.698637908482 | 145.349023185855 |
|          | 138.735156909846 | 145.090639086338 | 138.42216862811  | 147.81143020317  |
| BAI2     | 118.186426364551 | 129.466612376702 | 117.928456234796 | 131.597937570173 |
|          | 140.201501710276 | 118.797046082278 | 120.800764735081 | 120.193580405229 |
|          | 123.281489592543 | 123.45004246675  | 118.486195373059 | 129.493805009651 |
| BAI3     | 214.241635800083 | 193.629237856758 | 264.306927596371 | 234.399431238026 |
|          | 135.078198678379 | 142.019263564073 | 141.791001213681 | 144.623222072851 |
|          | 157.759149893048 | 145.686092190716 | 137.00397800873  | 145.637807142732 |
| BAIAP2   | 193.37618381669  | 192.046442148183 | 207.269530621176 |                  |
|          | 223.722742062251 | 233.690524419327 | 162.9279134169   | 173.951605889009 |
|          | 174.149718758884 | 224.92725876841  | 305.768201359278 | 161.700258550244 |
|          | 203.475080163804 |                  |                  |                  |
| BAIAP2L1 | 145.850605495564 | 190.754349388901 | 144.30519737569  |                  |
|          | 124.391225837909 | 818.445501500731 | 308.088967616175 | 928.151632070573 |
|          | 881.15414246017  | 453.457361487577 | 1126.46241487062 | 653.879734066271 |
|          | 1224.49891389348 |                  |                  |                  |
| BAIAP2L2 | 128.905042692431 | 158.784190231286 | 146.361128670362 |                  |
|          | 175.28261759639  | 680.509421043347 | 160.082087242964 | 135.259226552938 |
|          | 195.618369827396 | 393.115606440229 | 120.65473121078  | 168.000247148058 |
|          | 476.249239197777 |                  |                  |                  |
| BAIAP3   | 143.733505359106 | 125.634045420702 | 129.343440464729 |                  |
|          | 169.257035030405 | 138.345393524161 | 144.328571856869 | 152.337631025368 |
|          | 152.204730003016 | 142.29309119138  | 134.086301127594 | 169.293852989203 |
|          | 168.27980269501  |                  |                  |                  |
| BAK1     | 176.397715825653 | 141.941814923705 | 142.14116448528  | 147.463822782303 |
|          | 345.433025456954 | 232.519482087835 | 151.826103919919 | 164.063104872636 |
|          | 178.429953283621 | 219.753039699136 | 307.81941988503  | 256.614964511846 |
| BAMBI    | 4246.19983955771 | 2867.63319136936 | 2344.11548437508 | 1879.08108720938 |
|          | 8633.71708020651 | 4299.06288109563 | 4651.384971332   | 5233.72882607795 |
|          | 8368.88320476021 | 988.297682407351 | 1744.58410715956 | 1450.44557173645 |
| BANF1    | 728.930140593418 | 729.499296070289 | 987.564350211893 | 797.28465621772  |
|          | 1427.27262061653 | 1390.95426299323 | 803.840404197117 | 825.034504959272 |
|          | 925.205399154409 | 823.658996207582 | 734.97763567765  | 1105.10063745656 |
| BANF2    | 170.866433766203 | 160.290104492275 | 167.900071375885 | 164.548505132213 |
|          | 141.432461374482 | 172.491604217899 | 182.633773540249 | 159.820341130737 |
|          | 164.641508485461 | 171.298701141684 | 161.837272617767 | 185.691922436569 |
| BANK1    | 134.168381235167 | 133.305679931132 | 132.683594640696 | 143.376817049362 |
|          | 149.390481900424 | 127.107223387937 | 160.695913747601 | 162.609829456486 |
|          | 175.176693060261 | 127.977782260866 | 204.031081842809 | 149.910521500364 |
| BANP     | 660.315285709317 | 735.165830487162 | 603.569635276204 | 739.251974981981 |
|          | 756.618969995355 | 482.677635089583 | 790.321331435096 | 856.74270641707  |
|          | 906.886423608706 | 642.255110250493 | 415.178470246749 | 662.04757187541  |
| BAP1     | 222.794196053536 | 253.098839084408 | 229.017256104437 | 317.457588721567 |
|          | 382.701467158304 | 241.418016203544 | 281.119138040097 | 234.996704304673 |
|          | 272.277433294605 | 302.768870633398 | 257.24481414803  | 226.871028543248 |

|        |                  |                  |                  |                  |
|--------|------------------|------------------|------------------|------------------|
| BAPX1  | 137.500310477851 | 158.933097712363 | 171.373932115412 | 175.774461934758 |
|        | 135.897498591391 | 156.626742111441 | 190.371287639453 | 161.285587312115 |
|        | 153.985529457122 | 183.397833894087 | 135.422822065599 | 136.884799902348 |
| BARD1  | 406.900412510895 | 410.845034795716 | 231.314944217099 | 438.958573676953 |
|        | 258.532432007328 | 305.93974940209  | 168.861884032201 | 261.922485502971 |
|        | 219.103510284905 | 177.32104138164  | 180.733673680261 | 254.812605074045 |
| BARHL1 | 114.452922529209 | 127.055165613236 | 106.36673326724  |                  |
|        | 112.114933398547 | 119.044902525459 | 103.772221923105 | 115.834056091815 |
|        | 118.9428715545   | 115.384304932365 | 114.133473556359 | 113.492900106468 |
|        | 109.886197655915 |                  |                  |                  |
| BARHL2 | 113.064645688715 | 135.830453690107 | 113.891385601095 |                  |
|        | 118.505980204837 | 121.893446546512 | 117.455432751161 | 128.860744370967 |
|        | 123.135918415235 | 109.886197655915 | 126.067296703905 | 124.88118767481  |
|        | 125.658396221949 |                  |                  |                  |
| BARX1  | 143.082880435412 | 143.59105195427  | 138.114938404796 | 130.150998843383 |
|        | 154.24500773656  | 138.434347257063 | 128.074531806621 | 136.638141963514 |
|        | 138.56436658053  | 141.693224578298 | 152.760855359297 | 155.741507341843 |
| BARX2  | 113.256481034259 | 110.807605625125 | 114.479886899622 | 113.620070198869 |
|        | 132.141918502025 | 132.011199659803 | 115.944280729914 | 119.29304762171  |
|        | 113.301733735994 | 133.659475650376 | 129.408282688425 | 124.103321614841 |
| BASE   | 133.92485496581  | 119.558626216818 | 122.494779505958 | 121.031695489398 |
|        | 131.601823550269 | 131.523538461751 | 125.783265980169 | 125.997109913348 |
|        | 126.635105491524 | 135.518752716008 | 128.651081092914 | 126.090985925439 |
| BASP1  | 2493.5484556802  | 2583.46653460894 | 2649.39312662326 | 1381.07447204233 |
|        | 6021.68798558746 | 2230.45015969936 | 4124.03779111916 | 2236.73950603157 |
|        | 1349.84215478798 | 932.862030475849 | 1918.14260920544 | 1619.67820476414 |
| BAT1   | 843.545962045705 | 913.684449305965 | 722.399669963921 | 1087.69177809384 |
|        | 739.085574858917 | 789.971871940893 | 716.229989890801 | 769.009371389327 |
|        | 732.352357321273 | 594.38228123675  | 793.501244347257 | 818.225731093346 |
| BAT2   | 375.407747753058 | 501.738490253982 | 283.874600697211 | 607.979208454176 |
|        | 899.667912542118 | 285.83626978316  | 306.838596239511 | 254.936706344174 |
|        | 265.536429548886 | 294.653534388707 | 406.638419179213 | 279.026742408164 |
| BAT2D1 | 651.759589129833 | 567.143102792772 | 614.775559038663 |                  |
|        | 508.572981581855 | 723.807658768693 | 1172.4103691525  | 779.340880980422 |
|        | 1190.62010668045 | 1213.06007305892 | 744.808064061459 | 837.413261433363 |
|        | 1698.08853832248 |                  |                  |                  |
| BAT2L  | 393.914413372142 | 386.85874184746  | 411.285747588622 | 424.37437028833  |
|        | 330.143103381406 | 240.814860403562 | 242.440966395613 | 235.091443641056 |
|        | 316.895545640437 | 222.709720471134 | 508.449904285771 | 227.926444925478 |
| BAT3   | 419.4017188518   | 496.03509813734  | 438.03648998391  | 663.214972254236 |
|        | 686.445635754196 | 325.493177980483 | 371.224296589448 | 275.509805464276 |
|        | 400.353795948162 | 396.04031733841  | 411.505580458401 | 362.581768268116 |
| BAT4   | 155.641860356683 | 162.28074297013  | 156.176537862398 | 142.142633050256 |
|        | 186.103491222924 | 126.732121894377 | 159.113259830623 | 136.265972909993 |
|        | 156.866867371872 | 129.707421699091 | 171.731395791818 | 136.832494876249 |
| BAT5   | 361.516275756449 | 358.52459123416  | 329.023836559229 | 430.412897698085 |
|        | 640.255747986724 | 357.259935567823 | 357.835334661098 | 301.087947101876 |
|        | 379.788696204016 | 319.018213637357 | 368.825190022937 | 370.798852361374 |
| BATF   | 151.144521344129 | 164.223990197735 | 123.518170356322 | 134.501410126169 |
|        | 298.776176246196 | 199.637257550762 | 288.370985514978 | 237.045634416039 |
|        | 312.845219991659 | 143.340685579645 | 622.834462068316 | 493.715108157171 |
| BATF2  | 152.526785074182 | 154.812587513407 | 128.282999719959 | 168.878645908397 |
|        | 146.20679320119  | 129.023206862713 | 147.428180649939 | 129.353536603449 |
|        | 149.774162138829 | 146.160188002433 | 221.768507175814 | 132.442771000976 |

|       |                  |                  |                  |                  |
|-------|------------------|------------------|------------------|------------------|
| BATF3 | 142.744045151046 | 158.216790540415 | 129.92319548307  | 124.582577275358 |
|       | 133.443807124822 | 131.296518221093 | 133.486155360266 | 145.572363722788 |
|       | 175.9219991997   | 142.41737138634  | 142.133238886052 | 128.521380879209 |
| BAX   | 193.95909424044  | 187.30908753142  | 211.135364208221 | 182.919385608842 |
|       | 448.260934224454 | 253.098839084408 | 263.379982742085 | 245.997705723007 |
|       | 288.072720517427 | 223.279017022443 | 224.335742510577 | 262.671819506189 |
| BAZ1A | 254.668502187945 | 224.707455448421 | 209.5184563244   | 184.085616342099 |
|       | 332.978350226738 | 892.515788744891 | 455.313553278155 | 488.249967208882 |
|       | 363.025385707747 | 392.824840252824 | 472.961857076681 | 655.094843900848 |
| BAZ1B | 297.805768288377 | 298.573180660083 | 277.561376169965 | 357.191675549592 |
|       | 312.129861040709 | 242.948136060281 | 264.805236346895 | 254.83131041241  |
|       | 270.33685210971  | 208.045210163121 | 215.967319486874 | 284.13865992802  |
| BAZ2A | 151.115031304764 | 158.528301072565 | 160.53152291979  | 169.403422185018 |
|       | 164.534790315992 | 184.530853446688 | 168.071171406779 | 181.783275804424 |
|       | 162.716712951629 | 185.342353172151 | 154.443360208399 | 171.545695383454 |
| BAZ2B | 859.113541787323 | 905.233241047678 | 875.38834441246  | 1116.19403476786 |
|       | 279.598585549004 | 444.826775824095 | 433.405369327168 | 440.404188514231 |
|       | 439.122658719747 | 499.436680354749 | 696.650617523899 | 699.270931701696 |
| BBC3  | 229.542259738438 | 231.915272112361 | 229.660838239474 | 223.184064606222 |
|       | 272.500572765647 | 236.164692035094 | 251.138401278632 | 191.405362404386 |
|       | 202.524668687686 | 227.177100762395 | 229.483578414375 | 241.987100712218 |
| BBOX1 | 122.682761393215 | 119.312201620247 | 117.386273592501 | 114.314425748312 |
|       | 119.180033382937 | 151.829217512763 | 117.532063783977 | 127.233439204926 |
|       | 116.321559000405 | 153.059432055089 | 168.682307349713 | 133.290168428696 |
| BBS1  | 452.843213944986 | 385.584224833836 | 489.403061697031 | 401.960630197091 |
|       | 250.542405852865 | 232.200025766422 | 234.738241125899 | 235.595194918187 |
|       | 232.344545356395 | 214.968589907686 | 365.362177671146 | 252.514569129392 |
| BBS10 | 163.73339229802  | 158.463444189819 | 205.765822478178 | 142.683117062711 |
|       | 140.40754434058  | 187.893420010787 | 202.849544035436 | 169.642188114285 |
|       | 189.044966519228 | 174.526176588454 | 188.952730860801 | 176.874265462986 |
| BBS12 | 148.644800418517 | 141.741892403029 | 145.556318940043 | 153.563839578065 |
|       | 139.157088843803 | 125.951927536494 | 131.722397988741 | 127.881498149714 |
|       | 135.800997202323 | 129.143168240589 | 172.451128796055 | 128.635684412304 |
| BBS2  | 481.86545778383  | 471.315730378641 | 539.720389702148 | 433.314881387431 |
|       | 270.069634610818 | 250.718986968076 | 469.714826990063 | 328.14373061894  |
|       | 339.490955270138 | 487.696347726467 | 351.665934915634 | 397.577760464197 |
| BBS4  | 472.108893832845 | 438.146919555296 | 566.417354841707 | 420.743637858421 |
|       | 180.599150102184 | 360.124745133393 | 314.4408959517   | 300.443499140896 |
|       | 328.826483579278 | 380.514553097613 | 251.787648609546 | 327.062810389635 |
| BBS5  | 150.235026770931 | 145.304050333309 | 142.000874773182 | 140.18668846839  |
|       | 148.463566046951 | 144.856801451884 | 155.622257285651 | 156.437949042181 |
|       | 141.015441854424 | 147.799806976046 | 142.661504601445 | 152.957297648595 |
| BBS7  | 217.684410907748 | 198.023465629218 | 206.391403266202 | 209.840035045167 |
|       | 164.011683602245 | 197.72068061775  | 174.840923772532 | 163.262893278578 |
|       | 181.215046876308 | 171.51411661213  | 157.162523271165 | 157.874624979775 |
| BBS9  | 187.443940151794 | 165.985885671398 | 176.440625367948 | 178.717719615544 |
|       | 151.159145294127 | 144.78971417658  | 178.404791189835 | 144.032779435658 |
|       | 157.697168349028 | 166.182850621447 | 172.521737547052 | 159.588575526536 |
| BBX   | 1490.02976786379 | 1400.81554054664 | 1685.33737186733 | 1232.66885974069 |
|       | 397.861172312706 | 919.165331064155 | 1021.25947613827 | 723.250763797522 |
|       | 892.038018567941 | 787.425941491281 | 677.265576269103 | 924.040923247227 |
| BCAM  | 130.900049359243 | 131.968781256081 | 127.211469322857 | 135.792966926642 |
|       | 146.586879656174 | 133.117701703454 | 131.196196319523 | 121.080413308265 |
|       | 131.460388562433 | 126.992697289075 | 160.644747532952 | 142.774449777424 |

|         |                  |                  |                  |                  |
|---------|------------------|------------------|------------------|------------------|
| BCAN    | 137.018521754443 | 144.824087631654 | 143.129945647647 | 138.541779821934 |
|         | 138.807031587657 | 148.649619242172 | 146.434716985396 | 154.546460872415 |
|         | 143.501380161409 | 135.449044827893 | 157.58224826673  | 154.847114601403 |
| BCAP29  | 220.92105843037  | 199.746775121317 | 213.412498914309 |                  |
|         | 193.48293264444  | 232.735767435327 | 228.025383952578 | 236.617896560938 |
|         | 232.023739004791 | 181.261666651301 | 305.451247405518 | 183.979513272793 |
|         | 246.369521698487 |                  |                  |                  |
| BCAP31  | 2037.96470181871 | 2395.75453574049 | 1845.87311313269 |                  |
|         | 2500.07677977147 | 11874.9808592281 | 4465.66734676111 | 3810.98043907046 |
|         | 3359.62015747752 | 3983.37592132018 | 2018.81730267601 | 2833.30537635103 |
|         | 4047.99200599472 |                  |                  |                  |
| BCAR1   | 257.941367816557 | 299.463563393179 | 187.15740398852  | 277.539110964815 |
|         | 596.076764072945 | 171.809717138613 | 234.693846527867 | 205.341121539273 |
|         | 234.020419732787 | 244.401472859026 | 275.755038921952 | 231.981501596284 |
| BCAR3   | 302.219514290905 | 288.631429069336 | 398.354212009426 | 275.642882589307 |
|         | 562.387692458382 | 412.648926259488 | 582.527835746927 | 557.702374840532 |
|         | 370.617422894068 | 276.089623957012 | 323.04019262387  | 217.847954914851 |
| BCAR4   | 154.94587631386  | 175.96841318924  | 147.991572632747 | 171.660157220703 |
|         | 4175.70090899755 | 142.368601917778 | 156.519196335454 | 171.190796424612 |
|         | 162.317084707395 | 153.534763364558 | 130.143953880391 | 167.871703133182 |
| BCAS1   | 153.028658323116 | 168.323141675824 | 202.741211613885 | 125.029516472944 |
|         | 784.412433571927 | 231.698163424706 | 1044.00217726486 | 417.615521090665 |
|         | 417.442660073269 | 145.566861062922 | 1620.7954553764  | 649.438995824208 |
| BCAS2   | 161.371477511362 | 172.438141471784 | 167.243544185778 | 158.565676210997 |
|         | 183.513101761782 | 160.010501226517 | 194.941454173896 | 192.532222258033 |
|         | 185.896304740844 | 196.470718183575 | 201.383739902873 | 179.203783335674 |
| BCAS3   | 129.061316880624 | 126.086991456747 | 113.112450527382 | 118.991494185841 |
|         | 122.258432948151 | 117.420765321056 | 122.989642938474 | 122.636980845207 |
|         | 131.177396785633 | 117.760045671142 | 166.64535048582  | 123.055210862247 |
| BCAS4   | 309.5988292104   | 276.79778275734  | 307.518881119091 | 344.45331938267  |
|         | 708.534025308731 | 283.326226944158 | 431.413030534188 | 270.181005097697 |
|         | 342.487952136318 | 184.223623297663 | 268.52833723726  | 165.031678768564 |
| BCAT1   | 248.643311972844 | 237.854774190873 | 194.86492119218  | 183.998458233995 |
|         | 134.397255719047 | 182.02250582556  | 134.265479018173 | 163.582678113215 |
|         | 185.405774238391 | 250.577945492981 | 163.413365060063 | 133.892661981648 |
| BCAT2   | 363.025385707747 | 421.303580698397 | 425.471195039676 | 446.948699651916 |
|         | 8401.40370474392 | 2069.70335195314 | 2141.855356411   | 1896.69856822105 |
|         | 4222.55224241399 | 574.496860164135 | 1145.35733270036 | 907.306121257236 |
| BCCIP   | 348.067061666237 | 323.462252156562 | 430.728137105601 | 330.908743070095 |
|         | 281.740495452842 | 375.651196211048 | 485.026081242201 | 399.364160668615 |
|         | 389.588346573823 | 379.911829623463 | 409.380002417794 | 511.996883507889 |
| BCDIN3D | 314.221257518059 | 315.912220767901 | 379.016207754533 |                  |
|         | 341.2887754025   | 353.98839683842  | 301.49286558088  | 506.898635822094 |
|         | 506.430593289427 | 601.800326895295 | 241.353916553991 | 386.679822751367 |
|         | 374.033009122079 |                  |                  |                  |
| BCHE    | 572.049540360134 | 583.455617065556 | 551.206833852215 | 458.282682131641 |
|         | 140.11211854056  | 140.617663657037 | 143.802883430376 | 167.451782810394 |
|         | 142.697827839203 | 152.447978675887 | 137.742393475755 | 159.544710238172 |
| BCKDHA  | 356.376890469558 | 419.532420763449 | 412.582051585078 |                  |
|         | 458.33221423434  | 1247.02514044778 | 532.063437013967 | 527.597948979568 |
|         | 546.181615768667 | 710.003412772888 | 314.386320310898 | 417.262521411065 |
|         | 332.464176231219 |                  |                  |                  |
| BCKDHB  | 182.897563195019 | 178.647726085678 | 213.194154171149 |                  |
|         | 161.813099560175 | 241.105817192695 | 383.503040287678 | 337.22646304739  |



217.165036362034 214.803167803712 187.443940151794 263.295012964476  
289.21739941764  
BCKDK 976.782815449208 1347.10650016064 1140.40904196731 2026.85580212422  
2421.87041217217 1027.96306543235 1724.22121078776 1453.88161495484  
1227.94401191112 1496.0924333403 976.782815449208 1207.11788506001  
BCL10 140.497181450706 146.079727388849 146.580787463084 137.423810400996  
160.374491283254 180.392337212428 164.89597889259 157.990467804353  
156.731291756066 177.759729226623 180.986305037222 165.200303470106  
BCL11A 206.502189514795 305.200911653347 257.075088169589  
393.375554593484 149.374282007673 140.453219944445 206.68694753419  
414.333324610267 283.123157828849 351.934158805882 315.752980521266  
207.940596890723  
BCL11B 140.605866597575 136.284283129801 124.272447276746  
122.35832958054 163.451063547847 161.424105316969 149.589901372799  
143.030777754448 174.068974937318 249.680729921602 210.245551279259  
255.493109705211  
BCL2 264.8472508692 278.737944234055 249.858562350415 254.936706344174  
151.164936050256 164.000772606739 155.694213876736 171.022976593689  
179.854800301573 155.018009545475 170.111653122193 158.023626712181  
BCL2A1 138.570150372729 152.095584118603 138.640919060725  
145.934643000545 148.501654210579 127.740057874561 139.293775885106  
129.151767489346 150.971453664961 163.175801793143 151.727603285205  
151.72544764489  
BCL2L1 509.14726076246 691.205738835917 436.586158384666  
763.880957432979 1505.09908072606 919.626220838414 1283.68791110988  
717.270096456387 1536.52218968817 763.263858769038 702.049571167356  
749.515603904233  
BCL2L10 148.560326703328 145.131215503044 143.587562550004  
135.830453690107 180.113222861966 144.665869508406 123.745824514261  
133.269658133558 155.368204597287 157.688982037448 159.773576221107  
154.207656926108  
BCL2L11 140.914966429342 141.304791640723 127.139903623331  
136.643481414354 146.554017952963 152.296774123599 148.660440219589  
138.035272644139 151.226242696197 160.960599932898 144.534143943252  
137.324247703318  
BCL2L12 234.550692915716 245.426639190893 230.469548500304  
292.145553580042 1822.14935116363 449.408793796673 544.222458349696  
820.249910349431 824.427857809495 477.275332763887 252.851164967726  
360.185005480216  
BCL2L13 1146.84239258543 1021.81988990874 1323.05745869565  
1115.53524128833 912.483177705931 543.710330214344 740.196934996626  
1013.03054571763 812.298381693378 812.75075757351 1288.3346537369  
710.76653239801  
BCL2L14 144.850211439338 143.739231124536 146.425476034368  
140.190234214948 138.199559519849 144.428776560885 138.529160075977  
146.937052029619 145.852430082228 145.650356702429 153.601918768668  
148.941194457652  
BCL2L15 126.235567899449 118.215641556163 114.785989868306  
120.148189532583 120.220156455352 125.063596569451 118.256000539093  
126.128597459065 259.935831886014 123.019430618632 148.911306526869  
122.514826802737  
BCL2L2 1944.15673951528 1989.38201206555 1931.16906839143  
2677.17579532816 379.862305342147 349.128741707506 489.022371276542

|        |                  |                  |                  |                  |
|--------|------------------|------------------|------------------|------------------|
|        | 366.788087591332 | 375.131728190867 | 640.255747986724 | 754.97177863997  |
|        | 715.93836911426  |                  |                  |                  |
| BCL3   | 308.564935340635 | 450.851711160136 | 210.41046499545  | 350.46078795627  |
|        | 950.144166422001 | 461.482735533799 | 312.286788541158 | 266.71318061066  |
|        | 528.921893077914 | 518.478990211753 | 343.121661664987 | 301.955019831714 |
| BCL6   | 1000.48723872058 | 977.999660785113 | 688.247581763352 | 802.643357549193 |
|        | 611.088604425595 | 527.930077857945 | 933.408902924063 | 1023.94850651125 |
|        | 748.703265448403 | 427.98782239715  | 790.561585641193 | 622.692834629555 |
| BCL6B  | 261.592512762969 | 302.847274046748 | 149.380733719756 | 257.989863290786 |
|        | 176.245698601389 | 197.378801636702 | 139.748733350375 | 179.122374556365 |
|        | 207.977817300376 | 168.45157400976  | 162.457778455279 | 148.012353232918 |
| BCL7A  | 148.670562837021 | 141.002002397727 | 143.984222627806 | 146.735616237082 |
|        | 148.25001336038  | 135.159590925066 | 140.912921321622 | 152.067897082883 |
|        | 166.9499656083   | 146.416318806523 | 146.830752309354 | 140.752616434418 |
| BCL7B  | 361.768552564027 | 310.640107228956 | 456.530337997907 | 372.024884481775 |
|        | 315.3930052781   | 232.621526025603 | 295.935625475189 | 306.716682293251 |
|        | 251.665539319612 | 307.906312092805 | 284.715092831843 | 389.588346573823 |
| BCL7C  | 372.475112554793 | 344.379733302418 | 424.495400604335 | 372.894376776771 |
|        | 588.197697799448 | 455.21285026588  | 408.201232787978 | 330.908743070095 |
|        | 274.235001739215 | 405.570281788901 | 340.860684371038 | 466.083451075744 |
| BCL8   | 124.327827104244 | 111.127245394321 | 140.245786278057 | 156.173099025259 |
|        | 121.30744400137  | 131.464229237662 | 157.454558821261 | 143.644862018676 |
|        | 122.176811388389 | 133.647637744785 | 144.011792962785 | 143.88649412841  |
| BCL9   | 438.146919555296 | 489.118864124059 | 449.103432410618 | 602.141151173094 |
|        | 406.998800177456 | 392.430873293903 | 359.577827010792 | 415.178470246749 |
|        | 288.968909550533 | 277.539110964815 | 303.858574395969 | 496.426739836535 |
| BCL9L  | 263.352118305612 | 289.911635155481 | 261.775269058607 | 455.124190541055 |
|        | 413.502150181875 | 204.802810257516 | 206.825575257029 | 184.62149494522  |
|        | 168.838723365068 | 188.891032176388 | 231.796421262015 | 223.601312199935 |
| BCLAF1 | 624.106546150735 | 674.571475335107 | 655.665164535648 |                  |
|        | 491.034395489684 | 320.390351199433 | 691.916554922896 | 707.048754700047 |
|        | 685.354305381323 | 573.074116810032 | 580.347496467173 | 800.373159084181 |
|        | 889.6617510875   |                  |                  |                  |
| BCMO1  | 128.23910347716  | 131.045970236632 | 136.214432257698 | 151.004738508108 |
|        | 135.641355114263 | 138.016275878607 | 153.667355714857 | 227.689356258276 |
|        | 264.273245283343 | 134.066948803697 | 159.701028026285 | 121.492896642899 |
| BCO2   | 119.573635447638 | 127.740057874561 | 127.816596414779 | 122.120307446003 |
|        | 121.441901286752 | 119.511962218143 | 119.492844191924 | 112.357261386644 |
|        | 116.576896337786 | 118.029258839619 | 136.973804637915 | 118.743966166637 |
| BCOR   | 244.219585315024 | 251.20133703465  | 202.504840299605 | 224.824362819477 |
|        | 278.142283306934 | 253.186749111526 | 208.164674386141 | 222.415704486709 |
|        | 212.119922561453 | 165.813771791917 | 281.071129128589 | 259.146673652222 |
| BCORL1 | 179.663258610881 | 202.343343669937 | 171.329984719612 |                  |
|        | 235.162439885207 | 170.931788192825 | 142.681626890547 | 156.373163373309 |
|        | 143.780803045394 | 156.173099025259 | 168.753660955229 | 161.441613587571 |
|        | 153.263883774915 |                  |                  |                  |
| BCORL2 | 110.935688075738 | 124.982744176925 | 110.925532078514 |                  |
|        | 136.039076665712 | 113.112450527382 | 130.37544152572  | 123.551225884748 |
|        | 124.436549041911 | 133.058788697693 | 134.70848693317  | 122.351186755611 |
|        | 118.095936088242 |                  |                  |                  |
| BCR    | 151.524197474057 | 153.597557478169 | 147.053391763304 | 156.856149172225 |
|        | 174.491551019128 | 149.039132756817 | 151.766607453172 | 149.147411595596 |
|        | 157.490138425943 | 146.880440100898 | 156.901209828741 | 156.986053534635 |

|         |                  |                  |                  |                  |
|---------|------------------|------------------|------------------|------------------|
| BCS1L   | 275.888299685521 | 272.456310079164 | 264.654879741889 | 303.762967437478 |
|         | 248.965394617795 | 232.023739004791 | 251.546290552828 | 237.754067231793 |
|         | 290.420307322101 | 323.276514394119 | 295.420691959792 | 253.754869975548 |
| BCYRN1  | 3608.10730106542 | 4246.19983955771 | 3391.3005983725  |                  |
|         | 4749.69040198959 | 2601.89405525276 | 3042.88425356552 | 1250.58586679251 |
|         | 1932.39418448203 | 1367.19652160532 | 1632.07671492041 | 1995.6000523628  |
|         | 1319.3522488218  |                  |                  |                  |
| BDH1    | 132.680140469504 | 132.721469335671 | 138.094719587545 | 134.08270035062  |
|         | 180.80811429888  | 164.935120145905 | 155.979380606594 | 152.074017988748 |
|         | 161.338215647108 | 191.241000498118 | 140.474338177948 | 148.437676259828 |
| BDH2    | 153.705394500855 | 136.751654856807 | 120.089228795888 | 118.662030856474 |
|         | 120.006982591236 | 131.676609824921 | 119.618176258524 | 133.619092072157 |
|         | 133.810472192646 | 125.889860278265 | 123.615802924067 | 126.856038484436 |
| BDKRB1  | 172.599654598668 | 168.027892518772 | 130.01207836961  |                  |
|         | 126.497472087036 | 134.441142158135 | 125.331215990597 | 120.003095000297 |
|         | 126.902441495413 | 122.659174808512 | 144.004831360797 | 142.664793323255 |
|         | 123.692366307662 |                  |                  |                  |
| BDKRB2  | 237.906142045719 | 201.517356610591 | 178.347708009405 |                  |
|         | 162.638805580226 | 178.939268046323 | 156.830156083795 | 143.893751699551 |
|         | 156.361037318986 | 174.406779990708 | 173.176900454904 | 153.044682186978 |
|         | 174.149718758884 |                  |                  |                  |
| BDNF    | 197.699100346967 | 144.227440632196 | 148.00952002903  | 135.416008633632 |
|         | 127.874934513708 | 134.688504981603 | 134.312156667838 | 130.749763860615 |
|         | 134.541606996118 | 134.819406064011 | 145.483667452136 | 136.047032834863 |
| BDNFOS  | 128.620852653765 | 134.943005383277 | 134.096283448464 |                  |
|         | 128.556280049403 | 131.342562516383 | 131.659187927328 | 140.837360719964 |
|         | 140.401508808129 | 126.25011972597  | 130.131800537628 | 144.900785401228 |
|         | 135.229197100212 |                  |                  |                  |
| BDP1    | 217.910445051307 | 194.352807599399 | 221.171478972931 | 226.960024551778 |
|         | 168.878645908397 | 215.769986055534 | 198.374163029174 | 173.995889755792 |
|         | 177.716742595321 | 186.904126552483 | 189.082778234831 | 198.088834624665 |
| BEAN    | 144.145612985703 | 149.968749911496 | 151.484420979498 | 160.43939815269  |
|         | 137.85552865361  | 146.526744516344 | 144.54895913821  | 148.821942578396 |
|         | 137.704257049203 | 138.227082687797 | 141.560424984281 | 148.499207368959 |
| BECN1   | 547.681206272188 | 412.941907828617 | 824.070046083713 | 449.745016106912 |
|         | 493.492348317616 | 892.868661511516 | 1016.18143428327 | 1468.50184641042 |
|         | 1131.22418479945 | 807.604205890244 | 849.158029646233 | 875.7694907383   |
| BECN1L1 | 141.649911527714 | 142.461941376108 | 125.250900940748 |                  |
|         | 162.574338133241 | 121.939618902165 | 137.445344116574 | 145.045633612194 |
|         | 134.130913969327 | 134.688504981603 | 140.626181314061 | 141.035566928475 |
|         | 141.143572141958 |                  |                  |                  |
| BEGAIN  | 129.404017329613 | 134.85590586532  | 121.462385497795 |                  |
|         | 125.588401196232 | 184.954673605577 | 129.467792559297 | 129.971670681199 |
|         | 132.369872013432 | 133.796029401157 | 133.42964827086  | 190.947996918605 |
|         | 132.118118271944 |                  |                  |                  |
| BEND2   | 143.120621855946 | 146.06054700771  | 130.355969431473 | 143.370698101204 |
|         | 146.692827583525 | 152.385014030957 | 137.485252316816 | 124.998601194756 |
|         | 140.14062775887  | 150.602976963975 | 138.525131957094 | 137.677396262152 |
| BEND3   | 142.200427602461 | 136.931476050688 | 134.491232148834 | 135.134213292186 |
|         | 180.34788837703  | 176.070695522397 | 170.361237529247 | 161.877378749103 |
|         | 160.75642485037  | 147.738146185884 | 163.042083189818 | 152.241060990474 |
| BEND4   | 146.686192012988 | 138.625680450198 | 139.718721422663 | 144.496429994489 |
|         | 136.051070946954 | 136.480458837869 | 145.597134236583 | 140.541925660368 |
|         | 135.613240463445 | 133.707285280448 | 142.505050582588 | 137.09814291566  |

|       |                  |                  |                  |                  |
|-------|------------------|------------------|------------------|------------------|
| BEND5 | 565.97975389646  | 665.341859712345 | 792.247301083075 | 689.821785472506 |
|       | 293.746733527346 | 424.751154004399 | 516.755267232127 | 572.049540360134 |
|       | 467.187222441283 | 224.167511918105 | 595.120528902501 | 609.665323786904 |
| BEND6 | 167.416417895159 | 175.717830026564 | 160.261708910517 | 175.543924200429 |
|       | 136.489566741917 | 138.35738548449  | 131.732416355002 | 133.814720785534 |
|       | 134.109051944736 | 154.617462666847 | 144.968459820523 | 128.858923585925 |
| BEND7 | 216.929969034881 | 211.916602665089 | 239.789994201722 | 235.183590602209 |
|       | 218.735620596634 | 433.189221987242 | 232.986366625889 | 172.245089970803 |
|       | 154.159124458167 | 172.120772549791 | 145.686092190716 | 172.521737547052 |
| BEST1 | 182.397795261147 | 176.371404525626 | 161.614426723521 | 154.312374306932 |
|       | 144.510062568989 | 166.330001480033 | 153.853856339585 | 152.435416154284 |
|       | 151.801558435863 | 142.829099538363 | 149.106615763242 | 129.873110494826 |
| BEST2 | 140.694993778394 | 130.09050436943  | 137.264095379365 | 139.657182434153 |
|       | 140.632573759426 | 138.239251358245 | 143.879597098414 | 138.161690144518 |
|       | 134.161664663192 | 138.620617643924 | 141.006540481119 | 139.993960054847 |
| BEST3 | 123.318763391117 | 126.897804011992 | 123.195738824794 | 124.275741099764 |
|       | 132.699715693605 | 126.800718471804 | 127.814109293214 | 122.007909794484 |
|       | 122.982686879394 | 114.913534674899 | 122.955724972547 | 125.945916345628 |
| BEST4 | 177.401771322485 | 183.013090662119 | 161.956032597813 | 181.098584949344 |
|       | 177.793860516896 | 192.709473588165 | 160.473772347376 | 167.219062918573 |
|       | 203.206743799353 | 160.117742879282 | 156.632939064629 | 189.575681012578 |
| BET1  | 219.2695037071   | 234.063633889254 | 224.361277033882 | 210.912629986133 |
|       | 224.027605834751 | 204.695311233073 | 381.740838644647 | 305.398934391579 |
|       | 315.912220767901 | 277.946395491073 | 271.468939477052 | 239.24587884234  |
| BET1L | 210.729945718068 | 219.192900411543 | 228.901579068997 | 197.91325268683  |
|       | 204.770742504612 | 203.983168778488 | 176.088449983147 | 175.573400981771 |
|       | 197.605208310432 | 186.951061159734 | 219.2695037071   | 180.304585602206 |
| BET3L | 132.502153153826 | 141.577373924378 | 136.254966566424 | 147.284005815059 |
|       | 142.399253818882 | 128.213678179359 | 154.725484895098 | 146.157459765796 |
|       | 135.645439440707 | 139.912325578837 | 123.132178371802 | 147.619451225526 |
| BEX1  | 248.993716339029 | 282.137282466192 | 304.590636814607 | 226.824313642101 |
|       | 453.17378995737  | 241.168936008174 | 366.007451523992 | 232.830038701628 |
|       | 321.568127272161 | 185.544411160039 | 235.407064742194 | 453.926991868451 |
| BEX2  | 259.900447705311 | 255.793823796456 | 309.423768054614 | 207.545424360094 |
|       | 1929.52146517699 | 1119.23362648056 | 866.147379099606 | 501.005898087825 |
|       | 703.587139938769 | 299.986758612161 | 222.365208637146 | 504.617795280805 |
| BEX4  | 519.112018353676 | 448.95671696823  | 825.034504959272 | 402.366797969833 |
|       | 1067.80176606977 | 499.683188662742 | 691.916554922896 | 315.786908578669 |
|       | 395.521241316058 | 195.218005582618 | 246.533813165981 | 536.805979562807 |
| BEX5  | 150.000345076364 | 167.330860677012 | 157.142101889337 | 134.302726684539 |
|       | 144.826861308997 | 132.989846726946 | 152.142909854773 | 148.44261900795  |
|       | 162.453586139402 | 150.065275447769 | 132.639070127232 | 160.482734190577 |
| BEXL1 | 1076.62597781124 | 1009.42265467472 | 1550.61855325662 | 1045.49947183547 |
|       | 1518.13775377335 | 732.877169346979 | 1050.40488466179 | 459.171226689178 |
|       | 578.297031096292 | 261.171723011396 | 393.013539328766 | 622.834462068316 |
| BEYLA | 138.938546468136 | 138.281188275319 | 143.974551393951 | 143.920134762902 |
|       | 139.236217474885 | 141.054587977578 | 136.332399354517 | 131.882887826338 |
|       | 142.272117655292 | 141.652000792271 | 131.373012256275 | 158.408494909763 |
| BFAR  | 456.990425618007 | 402.965083947376 | 515.929937825133 | 423.966625351913 |
|       | 383.407365952689 | 431.799795646414 | 559.0867397858   | 445.214621023114 |
|       | 349.99912485533  | 379.476768908492 | 442.220572301795 | 428.569462312363 |
| BFSP1 | 145.861217875066 | 147.559983285261 | 141.927204640355 | 149.758215028408 |
|       | 149.422357654247 | 157.288308753975 | 135.715745768179 | 128.411138850655 |
|       | 129.151767489346 | 143.360311218423 | 147.069488043503 | 153.647343267295 |

|         |                  |                  |                  |                  |
|---------|------------------|------------------|------------------|------------------|
| BFSP2   | 124.001295849091 | 116.225440873023 | 125.593595066736 | 110.804248212067 |
|         | 124.327827104244 | 120.29173510435  | 116.408126010926 | 115.427201752401 |
|         | 132.671227062948 | 123.406144497577 | 133.827296071709 | 112.558241320112 |
| BGLAP   | 180.968659614238 | 167.713268780664 | 180.658930225735 | 183.152005135504 |
|         | 173.132747018514 | 168.813895764991 | 158.48793705795  | 179.220691178402 |
|         | 182.633773540249 | 165.424516708502 | 156.748330788367 | 167.858490180471 |
| BGN     | 5655.12135336698 | 6720.10473881011 | 1863.96986643676 | 8514.94395408164 |
|         | 3598.30438198858 | 2456.36776585765 | 738.892511276134 | 2828.97255380291 |
|         | 4377.59943975549 | 6670.51138785163 | 1168.3174645384  | 1474.70984232307 |
| BHLHA15 | 128.280225530201 | 140.38936578649  | 125.945916345628 |                  |
|         | 126.626904958599 | 131.473001455317 | 127.548070199148 | 124.646093292382 |
|         | 134.152586955217 | 119.040642659337 | 122.125746529725 | 137.225659453984 |
|         | 141.420747583126 |                  |                  |                  |
| BHLHB2  | 1554.16120123599 | 2309.63504858248 | 1321.17236442448 |                  |
|         | 1845.87311313269 | 1255.02720867812 | 1421.72388964898 | 1484.32547474275 |
|         | 861.786094902013 | 1931.16906839143 | 3504.77617298452 | 910.982557417978 |
|         | 2863.51286169094 |                  |                  |                  |
| BHLHB3  | 233.757965816721 | 351.188086838653 | 202.778539118009 |                  |
|         | 470.308610828825 | 236.191384383802 | 407.052451784773 | 367.983166440977 |
|         | 335.059844742031 | 147.608094270078 | 123.09149124559  | 402.694564608582 |
|         | 508.127470400078 |                  |                  |                  |
| BHLHB4  | 149.133055368147 | 133.165893710176 | 131.397850276558 |                  |
|         | 130.898067924686 | 132.369872013432 | 147.713967317159 | 131.800533523123 |
|         | 131.092140169861 | 127.58382536792  | 137.731390340708 | 121.438875373878 |
|         | 126.185560760543 |                  |                  |                  |
| BHLHB9  | 256.590289281076 | 255.156682699288 | 253.754869975548 |                  |
|         | 228.45211887819  | 307.665281863258 | 207.764456828813 | 271.989060206794 |
|         | 193.028341755594 | 252.697160031025 | 178.563665283267 | 225.275049011909 |
|         | 183.168629351124 |                  |                  |                  |
| BHLHE22 | 218.644953001365 | 198.113398073968 | 170.046856179083 |                  |
|         | 198.113398073968 | 150.580133889656 | 157.907190910755 | 168.582192754233 |
|         | 182.515302191173 | 173.761036260869 | 175.044940252247 | 127.560308850342 |
|         | 160.990868498842 |                  |                  |                  |
| BHMT    | 185.706228572019 | 299.568830444875 | 279.879377933144 | 183.056707813352 |
|         | 1136.76110352875 | 1524.46745239811 | 270.181005097697 | 1383.68977267418 |
|         | 3287.37172778474 | 181.098584949344 | 178.542247857251 | 360.812953749077 |
| BHMT2   | 247.307128520272 | 204.770742504612 | 295.678097392123 | 277.501071684448 |
|         | 136.13751015238  | 140.839056652898 | 131.255028381669 | 144.193756031386 |
|         | 143.349486755648 | 140.907889482107 | 132.767474034305 | 145.777778096701 |
| BICC1   | 145.203083375014 | 131.340453291188 | 139.023486014525 | 139.6492947529   |
|         | 137.639342727211 | 121.377666938052 | 130.306478656159 | 124.885950473434 |
|         | 131.067958183644 | 138.654301345398 | 133.964163727962 | 127.585851003779 |
| BICD1   | 150.3259737066   | 157.570298634172 | 148.155692596378 | 161.134322621805 |
|         | 149.135934269866 | 154.347332766547 | 151.976432805924 | 150.303703193967 |
|         | 163.432972512188 | 146.482652762374 | 141.722817732641 | 143.67880977119  |
| BICD2   | 487.901310664037 | 495.89837457901  | 601.997464467917 | 421.056268094661 |
|         | 377.27961559752  | 296.657844888195 | 440.579262120451 | 388.573321838751 |
|         | 371.168752104821 | 1540.71556891815 | 651.43207839949  | 362.195903246495 |
| BID     | 168.720694813918 | 166.085469368498 | 169.124088593549 | 146.6886556805   |
|         | 255.3451781862   | 350.46078795627  | 266.918302307596 | 279.113984512619 |
|         | 392.539157974899 | 192.314484368435 | 440.203336761263 | 384.296190598736 |
| BIK     | 103.99234480919  | 106.102093734748 | 116.764795914545 | 123.02546895475  |
|         | 235.372592051464 | 130.736466113571 | 137.897243684023 | 145.599152743156 |
|         | 144.81320329947  | 159.487615985875 | 165.602175302848 | 130.411849432351 |

|         |                  |                  |                  |                  |
|---------|------------------|------------------|------------------|------------------|
| BIN1    | 3073.40543048878 | 4009.22206756187 | 2915.72823797537 | 6339.16392696068 |
|         | 373.656487297238 | 197.262062021667 | 174.698724064671 | 238.310077556167 |
|         | 346.118765910093 | 274.01377986185  | 214.050918459805 | 225.96618659877  |
| BIN2    | 103.94864861172  | 105.49491265382  | 110.113844434493 | 119.735807506447 |
|         | 116.112013454335 | 113.536570797896 | 115.305518560239 | 108.715328458556 |
|         | 126.097544650407 | 103.550817366724 | 123.058261039164 | 109.176852761745 |
| BIN3    | 209.304654633004 | 234.531140131763 | 184.306452616482 | 229.26243866226  |
|         | 222.134519361117 | 230.284216427158 | 164.520247586053 | 163.091280469234 |
|         | 178.563665283267 | 180.113222861966 | 248.729653566598 | 214.785381549181 |
| BIRC1   | 177.831718771025 | 148.125665833072 | 158.098055917452 | 166.396160626179 |
|         | 146.721207920553 | 166.692386207143 | 146.052153515494 | 144.214589452164 |
|         | 168.861884032201 | 165.267693285882 | 134.147586627141 | 139.939863187181 |
| BIRC2   | 507.710604451713 | 492.377642058095 | 406.998800177456 | 455.778776920897 |
|         | 534.083703564903 | 449.859227376918 | 441.435444003241 | 533.893360199271 |
|         | 406.638419179213 | 482.344514972063 | 601.800326895295 | 486.047284379068 |
| BIRC3   | 1390.95426299323 | 1424.79466712859 | 1099.80705776268 | 1313.89440013246 |
|         | 302.945860276233 | 1427.70292953827 | 783.755776589969 | 959.897744425251 |
|         | 932.076509242794 | 566.813343200268 | 1120.3009282887  | 660.315285709317 |
| BIRC5   | 137.71280215369  | 160.203521879896 | 132.628358688595 | 140.377179372804 |
|         | 471.510683045651 | 266.468621734455 | 219.661502916874 | 413.555310697751 |
|         | 428.09583118349  | 241.019436415703 | 157.982146236108 | 216.680795762761 |
| BIRC6   | 360.185005480216 | 342.611951034707 | 378.891597719939 | 333.868818855397 |
|         | 275.755038921952 | 289.911635155481 | 260.098788125373 | 283.807827536147 |
|         | 255.677315946354 | 263.123584372086 | 351.854828413334 | 302.272304483941 |
| BIRC7   | 118.797046082278 | 119.352995485911 | 124.940836122365 | 126.501648842366 |
|         | 121.979059173287 | 118.537378726617 | 116.305011582033 | 121.116206210402 |
|         | 122.35832958054  | 113.672605838627 | 131.794065532001 | 120.672291867109 |
| BIRC8   | 113.740942665269 | 121.603608840998 | 120.272964182307 | 111.794102015354 |
|         | 115.409568875238 | 123.762963668211 | 122.430140354831 | 116.294180301039 |
|         | 118.75237770613  | 118.249148086655 | 118.104763610751 | 121.087514445827 |
| BIVM    | 479.761165832339 | 439.852826905352 | 532.596772298766 | 389.800620731411 |
|         | 228.125521373477 | 527.139476504986 | 512.184962338131 | 301.304268871606 |
|         | 340.301980622308 | 379.670492165938 | 509.01330998156  | 550.24496459253  |
| BLCAP   | 1067.30106203503 | 1364.1224589383  | 924.312051919404 | 1528.49457104932 |
|         | 1890.86868383409 | 1000.48723872058 | 4009.22206756187 | 555.259469428492 |
|         | 462.144334719146 | 512.312880441098 | 1607.52029676299 | 1273.6393529108  |
| BLID    | 159.055956234445 | 154.539367933684 | 167.298438019561 | 147.716353308549 |
|         | 140.429462488271 | 142.059921012561 | 143.874735808114 | 136.937327692084 |
|         | 143.795399778897 | 154.847114601403 | 153.850588492326 | 154.637740117457 |
| BLK     | 118.486195373059 | 121.48867035121  | 115.142111396055 | 111.041656398985 |
|         | 110.966212705086 | 110.475453268997 | 108.266328505986 | 148.96493117884  |
|         | 219.080383154432 | 126.948090173876 | 119.720132373023 | 111.7529190597   |
| BLM     | 118.465111174212 | 113.644993086829 | 107.605526304445 | 107.221547998974 |
|         | 169.246302492166 | 195.438353051306 | 139.159510392614 | 195.353512458837 |
|         | 180.418707740532 | 130.005909892804 | 137.20509387214  | 167.701284424049 |
| BLMH    | 363.343480850598 | 372.088129459528 | 336.434368527549 | 456.201998988891 |
|         | 354.922901990615 | 274.01377986185  | 343.617417488962 | 410.533157400023 |
|         | 289.82072316082  | 390.979822976551 | 313.412131722189 | 288.370985514978 |
| BLNK    | 139.505864135281 | 154.869171648942 | 152.73588666971  | 173.751615672365 |
|         | 157.77047742735  | 178.014057622594 | 177.851689709807 | 133.975526667571 |
|         | 146.96155692518  | 154.47187360425  | 148.641780441227 | 177.910104644497 |
| BLOC1S1 | 859.860994525775 | 1189.69730508119 | 808.300067805897 |                  |
|         | 1336.75600604068 | 1255.62991601665 | 821.265710686098 | 595.593867616527 |

|         |                  |                  |                  |                  |
|---------|------------------|------------------|------------------|------------------|
|         | 1063.5903770389  | 712.433345978749 | 601.164127925014 | 697.97116981445  |
|         | 786.160002434066 |                  |                  |                  |
| BLOC1S2 | 159.544710238172 | 157.733042033549 | 163.799748670842 |                  |
|         | 162.397078614596 | 150.815117344434 | 153.767488352037 | 176.214950733324 |
|         | 156.248684477916 | 163.672213020803 | 156.508428796592 | 152.520828479026 |
|         | 164.870860592068 |                  |                  |                  |
| BLOC1S3 | 115.142111396055 | 117.166509072455 | 114.533677697026 |                  |
|         | 115.485515429446 | 118.060781901686 | 114.084543168359 | 117.32734978289  |
|         | 120.757288533244 | 116.647291878845 | 112.624137732184 | 131.705912986393 |
|         | 114.673517800886 |                  |                  |                  |
| BLR1    | 112.166192839859 | 113.301733735994 | 112.851805868467 | 105.771723307783 |
|         | 115.30786313391  | 119.98864381644  | 117.045020667394 | 121.85247363239  |
|         | 108.43334699667  | 113.256481034259 | 116.378552206652 | 102.661440700541 |
| BLVRA   | 1116.95795024994 | 1129.76078220457 | 1313.89440013246 | 1251.15912264225 |
|         | 395.049127927637 | 325.525450750788 | 986.441377365124 | 745.153336165802 |
|         | 607.805002786409 | 1223.68146968716 | 706.759905439674 | 856.74270641707  |
| BLVRB   | 599.208370337812 | 609.665323786904 | 582.382786876656 | 769.34961339184  |
|         | 683.179460779062 | 522.664475688419 | 534.745066397679 | 361.768552564027 |
|         | 305.252666831522 | 454.492780042353 | 823.297606185721 | 328.200548902445 |
| BLZF1   | 8496.2506227676  | 8401.40370474392 | 7491.93659373205 | 8581.41617729997 |
|         | 1098.78649254838 | 6601.004284244   | 3328.99028463277 | 5776.63686968234 |
|         | 4043.28299602858 | 2895.71836177599 | 5965.21815409254 | 3954.24763752814 |
| BMF     | 149.078664825533 | 153.494456800685 | 149.661929885679 | 161.948033313443 |
|         | 138.235127932016 | 142.081013617671 | 165.523150623132 | 140.42579083092  |
|         | 154.564478911791 | 133.666244052469 | 178.976116597291 | 137.919253591105 |
| BMI1    | 1032.11574332305 | 1035.0797237176  | 1288.3346537369  | 919.165331064155 |
|         | 1318.3633082502  | 1184.88559645917 | 992.320202251161 | 817.342172321486 |
|         | 787.425941491281 | 669.124699103132 | 1045.49947183547 | 1085.92360670051 |
| BMP1    | 170.731358903019 | 173.488272345038 | 168.773340961473 | 177.393812005949 |
|         | 161.229621453539 | 149.710337205986 | 151.70035428516  | 151.674143983846 |
|         | 152.769931978291 | 196.429685815196 | 159.58125728432  | 153.891667472876 |
| BMP10   | 138.810236692956 | 145.830916005206 | 158.723133891017 | 147.939682463235 |
|         | 149.609501725707 | 139.238936770274 | 130.363516180139 | 156.402578892869 |
|         | 149.453103369806 | 133.120273569229 | 134.452938571435 | 143.245660951425 |
| BMP15   | 121.834248129933 | 118.064858133264 | 118.757973008463 | 115.392989580183 |
|         | 115.933805625814 | 113.177330690612 | 114.182798672347 | 118.708644971927 |
|         | 115.16087297104  | 110.977904932371 | 126.877293296185 | 116.5272207025   |
| BMP2    | 202.324795686879 | 303.986544460218 | 215.057917795456 | 164.38282966938  |
|         | 1189.11053680293 | 345.494740481759 | 519.564563632951 | 307.866499851733 |
|         | 182.68965110437  | 622.142195892701 | 821.020339593525 | 317.949646885539 |
| BMP2K   | 146.20028051948  | 137.675597243706 | 132.772085211553 | 127.806138997958 |
|         | 136.942583515174 | 142.706708823143 | 132.973551954067 | 145.165443106042 |
|         | 152.331011756244 | 267.747633122387 | 154.400124981573 | 142.524413202292 |
| BMP2KL  | 139.921002429353 | 152.099431258333 | 141.74792000689  |                  |
|         | 171.145909843389 | 133.570075399424 | 155.511086289504 | 129.088718286391 |
|         | 132.86879723151  | 136.413745926388 | 154.153249796248 | 163.373180928181 |
|         | 143.327234875417 |                  |                  |                  |
| BMP3    | 118.689408983786 | 117.30724482798  | 122.982686879394 | 122.600274773736 |
|         | 131.099004325598 | 205.65398844108  | 174.624446035895 | 246.355720496468 |
|         | 118.601228886344 | 118.07991087231  | 216.836094088131 | 137.017882995262 |
| BMP4    | 506.029788151779 | 451.380376296813 | 226.989201461085 | 233.36028792331  |
|         | 137.258429777402 | 144.219104742099 | 149.77596374205  | 178.045931314857 |
|         | 1123.93087912174 | 187.365807314802 | 163.284853420896 | 172.045843691642 |

|        |                  |                  |                  |                  |
|--------|------------------|------------------|------------------|------------------|
| BMP5   | 223.013753785002 | 240.12078342024  | 146.823157886228 | 169.158049136321 |
|        | 136.240503841228 | 266.842778974988 | 168.702991603656 | 194.212177449077 |
|        | 170.602603155092 | 147.858339902055 | 173.010799217261 | 225.423403713718 |
| BMP6   | 194.724219884752 | 166.489436134841 | 138.950197595669 | 128.402511355513 |
|        | 121.668166378914 | 129.798965780918 | 120.740986472733 | 163.51024840263  |
|        | 150.173766182317 | 135.085039737228 | 138.015301767961 | 127.04953162892  |
| BMP7   | 147.043228493047 | 208.321765801227 | 128.695126347193 | 125.666013736767 |
|        | 233.71520737817  | 274.736124442229 | 309.0578543424   | 146.649944669876 |
|        | 277.026538720417 | 135.151438845363 | 728.176339659082 | 688.684644604218 |
| BMP8A  | 124.119104345119 | 133.879079395215 | 127.407418037777 | 119.755151432304 |
|        | 142.043121538885 | 136.362761829761 | 120.35956894661  | 135.730331297139 |
|        | 128.075865243385 | 130.240366272285 | 134.85809559975  | 120.371374172279 |
| BMP8B  | 296.088938872643 | 288.182388699147 | 258.964323941464 | 278.687780705367 |
|        | 181.425012248539 | 277.86338481075  | 238.847091900666 | 251.869781014029 |
|        | 219.151144724168 | 181.215046876308 | 246.850599569231 | 222.526610842047 |
| BMPER  | 137.361967082029 | 126.893023101449 | 118.533346268154 | 126.462522391125 |
|        | 117.642441794442 | 123.598210440312 | 122.821563586744 | 117.024039521425 |
|        | 126.839037497031 | 131.782007636511 | 147.476805635744 | 124.22833964472  |
| BMPR1A | 392.365008240567 | 267.028096234702 | 330.641230715217 |                  |
|        | 253.933478547515 | 168.254689624696 | 190.125009931628 | 216.9491329483   |
|        | 184.294172429054 | 185.886737029845 | 190.76537287329  | 194.86492119218  |
|        | 235.32095278846  |                  |                  |                  |
| BMPR1B | 147.009325721272 | 148.991357883449 | 149.693559841189 |                  |
|        | 141.512008928271 | 158.604431001643 | 130.804850476451 | 146.698766621345 |
|        | 135.732616463819 | 138.89579816122  | 154.252727576218 | 126.848211027661 |
|        | 145.875240619257 |                  |                  |                  |
| BMPR2  | 674.905270154355 | 719.13080264227  | 653.500279510032 | 546.274050902567 |
|        | 258.311739685895 | 942.41077071058  | 451.887564294551 | 484.028175202673 |
|        | 371.00603789759  | 262.452869676209 | 398.193129265416 | 658.202765061937 |
| BMS1   | 522.050619657197 | 458.33221423434  | 576.636077770998 | 477.275332763887 |
|        | 310.465070184707 | 497.759125486158 | 558.810095726517 | 495.769802520637 |
|        | 522.899203071911 | 481.037647470809 | 601.640387246951 | 827.157920721418 |
| BMS1P5 | 13809.2057928642 | 14108.0461617941 | 12046.9345159347 |                  |
|        | 12818.0509395717 | 1561.10217536347 | 11190.1778174002 | 4635.42002659719 |
|        | 9450.52572756597 | 7406.86318549013 | 4592.14655702906 | 8016.1652884418  |
|        | 6427.33783376005 |                  |                  |                  |
| BMX    | 158.770502070553 | 160.469645948225 | 166.964057265095 | 158.446840764515 |
|        | 152.021576565132 | 160.261708910517 | 155.507030276749 | 152.945550129539 |
|        | 153.010339525816 | 144.842687993057 | 152.175423676063 | 151.360575274272 |
| BNC1   | 142.368601917778 | 150.035890574132 | 147.588213090285 | 153.108902978819 |
|        | 140.184082384548 | 142.043121538885 | 147.978039160763 | 143.320787131532 |
|        | 130.766401858384 | 364.766154056243 | 148.173215617922 | 146.075794515889 |
| BNC2   | 571.838717184447 | 502.935749606918 | 640.029195821436 | 550.566402986082 |
|        | 123.418266047461 | 132.219652920061 | 124.17231659571  | 118.641431192759 |
|        | 130.749763860615 | 139.096536887753 | 116.179625689647 | 117.962188157317 |
| BNIP1  | 174.635853531194 | 179.44023315251  | 172.259627777465 | 191.961269585431 |
|        | 163.926432479673 | 152.528571776589 | 182.118544602205 | 194.475822533231 |
|        | 159.036647992998 | 208.42712014566  | 171.561940747015 | 191.59400638652  |
| BNIP2  | 531.217306770605 | 523.591472915151 | 529.700356666006 | 450.566031840493 |
|        | 348.575690346536 | 475.403662030875 | 664.343553341563 | 497.629319581786 |
|        | 525.287367366192 | 534.276129011237 | 643.660739343159 | 744.225336494008 |
| BNIP3  | 993.774175699873 | 907.610179738644 | 1182.50261323518 | 887.147199303294 |
|        | 657.231047829537 | 348.111872425949 | 2715.55326746591 | 373.760551592844 |
|        | 523.717949503639 | 4491.96934862425 | 858.742139354587 | 689.271009631393 |



|        |                  |                  |                  |                  |
|--------|------------------|------------------|------------------|------------------|
| BNIP3L | 511.779988437654 | 520.962651968997 | 598.449359425056 |                  |
|        | 389.96566674501  | 309.0578543424   | 504.617795280805 | 834.788058321257 |
|        | 294.746622369436 | 336.279209908669 | 903.503768217033 | 913.934874451961 |
|        | 497.110852407681 |                  |                  |                  |
| BNIPL  | 146.97334315047  | 162.18174589792  | 150.971453664961 | 142.184249919621 |
|        | 145.391496022306 | 146.621996129313 | 177.023536553193 | 232.556667737827 |
|        | 326.379855547052 | 396.526590512521 | 335.790909130243 | 186.077477713775 |
| BOAT   | 146.775403409562 | 147.939682463235 | 158.902676384853 | 157.756885980217 |
|        | 156.157567405927 | 130.42746492878  | 147.633793743254 | 141.045379969014 |
|        | 152.772177215856 | 193.190059954084 | 145.924751649542 | 147.818956338752 |
| BOC    | 221.961758403614 | 224.335742510577 | 215.931781291835 | 256.648540685098 |
|        | 124.802639338573 | 115.847063825599 | 115.120702589487 | 119.730174479044 |
|        | 116.5272207025   | 113.249267122926 | 126.858621735156 | 125.609542142983 |
| BOK    | 502.731019454502 | 526.182262872235 | 443.444024128516 | 821.465895280454 |
|        | 495.655170027296 | 252.810636571566 | 285.172001915966 | 207.254220247481 |
|        | 223.453776362112 | 370.798852361374 | 283.048002376743 | 319.018213637357 |
| BOLA1  | 147.452986308926 | 165.103398617203 | 165.143417235314 | 172.707821624271 |
|        | 283.377663208926 | 172.297698667311 | 172.050718136571 | 220.742788129847 |
|        | 149.288034848931 | 150.468392290279 | 159.344044864557 | 166.863589702453 |
| BOLA2  | 416.861099188252 | 536.805979562807 | 379.292531644085 | 568.040362658955 |
|        | 2782.94647782764 | 3441.9805896226  | 1292.13921040404 | 1577.15895478896 |
|        | 1671.82101590797 | 888.371107987343 | 998.157643452741 | 1084.95095717937 |
| BOLA2B | 136.94525817342  | 139.268942501979 | 135.880955433228 |                  |
|        | 138.116568200293 | 134.364838071696 | 143.628147237159 | 155.70645844794  |
|        | 147.150063462728 | 129.334217858282 | 126.87882572904  | 134.354215877283 |
|        | 141.261150586614 |                  |                  |                  |
| BOLA3  | 546.841563406813 | 544.462032960964 | 571.64723305848  | 648.161646065464 |
|        | 1092.74905085695 | 1228.89116158868 | 1227.36706427754 | 1630.1630053946  |
|        | 842.22767901391  | 1231.37475540937 | 547.367381020623 | 1264.90442763788 |
| BOLL   | 130.760835441776 | 129.728266017061 | 136.742206779136 | 124.977046954694 |
|        | 131.907246423067 | 137.163699337032 | 132.553445658347 | 125.549968985241 |
|        | 130.607857562345 | 130.191876914166 | 127.097605337434 | 132.91094012928  |
| BOP1   | 650.679096367632 | 660.907502776003 | 698.358285634451 | 1039.92160906839 |
|        | 1903.13326109546 | 886.157279090932 | 695.086203058575 | 1087.69177809384 |
|        | 1169.43742964112 | 1235.75946952752 | 604.453803994875 | 785.599211190431 |
| BP75   | 167.341759854203 | 162.056622258216 | 167.658560306884 | 150.019181654237 |
|        | 177.955579729463 | 166.061891147234 | 184.611146047556 | 154.408875182219 |
|        | 204.862387642573 | 216.559563381808 | 183.115511373872 | 196.839016616283 |
| BPESC1 | 160.368226341458 | 148.907136936731 | 164.641508485461 |                  |
|        | 141.579159431339 | 152.993555372242 | 170.892319361167 | 154.814400491704 |
|        | 135.32160992961  | 148.863297062269 | 133.113581756557 | 140.158309892319 |
|        | 156.626742111441 |                  |                  |                  |
| BPGM   | 155.362503575715 | 154.537240112989 | 158.467572658719 | 146.050714008913 |
|        | 164.299585578035 | 165.411052799773 | 424.201556056759 | 320.097510212422 |
|        | 383.259887828605 | 173.863373934746 | 269.892633574243 | 187.796440205485 |
| BPHL   | 382.744523022686 | 382.233826557803 | 380.821355948507 | 392.198487606534 |
|        | 541.258721278882 | 461.088572554864 | 389.051174954505 | 533.784151495549 |
|        | 543.389747823877 | 383.182507425579 | 413.398641688413 | 583.938727139698 |
| BPI    | 140.42579083092  | 146.343230597246 | 148.927040248436 | 137.260359343758 |
|        | 139.2454524913   | 150.799400717425 | 142.524413202292 | 137.464914919148 |
|        | 132.651922794567 | 162.117224868654 | 123.554769032715 | 145.733828447934 |
| BPIL1  | 130.306478656159 | 135.659271030454 | 138.028813480968 | 149.696766215866 |
|        | 168.33854702953  | 140.416247564103 | 163.726898336284 | 152.543005423742 |
|        | 146.00443946108  | 155.180238551547 | 121.30744400137  | 143.114384950467 |

|        |                  |                  |                  |                  |
|--------|------------------|------------------|------------------|------------------|
| BPIL2  | 124.611144621071 | 119.842470751496 | 129.031338314175 | 132.937942776777 |
|        | 124.372963874507 | 129.450089922519 | 126.401145439668 | 122.408016372747 |
|        | 124.446264376282 | 133.269658133558 | 125.318166919844 | 136.297963196301 |
| BPIL3  | 130.211247943634 | 135.068883036882 | 138.313519292093 | 143.31590446076  |
|        | 155.785933672918 | 150.650926518959 | 143.354858193994 | 139.271829906127 |
|        | 130.317604643904 | 133.794524856909 | 132.404879616886 | 134.142423026264 |
| BPNT1  | 175.891947478891 | 151.081339000609 | 248.927790738447 | 136.948039394935 |
|        | 161.335677383485 | 173.708509414674 | 169.417764098848 | 182.235490620172 |
|        | 226.25694727283  | 247.899467998443 | 201.235056368151 | 247.845708587624 |
| BPTF   | 192.224242967539 | 176.802886129341 | 207.488522933448 | 161.968835903764 |
|        | 153.159425380743 | 153.853856339585 | 160.707290343231 | 154.170007083026 |
|        | 153.219954133957 | 163.385727569154 | 175.010849510711 | 152.148784410501 |
| BPY2   | 140.177708471199 | 137.367390177293 | 156.695440330379 | 133.804489975068 |
|        | 141.137459291428 | 146.493927564338 | 142.910616700526 | 134.541606996118 |
|        | 137.210805338701 | 139.914034708144 | 132.461730873857 | 140.45860949168  |
| BPY2B  | 150.126627487419 | 139.045162550699 | 140.946368538661 | 189.434597063058 |
|        | 158.445124076906 | 153.276938815536 | 178.027417594263 | 140.615078497305 |
|        | 160.70138318726  | 140.52997588229  | 134.487476333464 | 139.101471810467 |
| BPY2C  | 112.219585614955 | 116.793408204625 | 131.514114515895 | 119.859508630454 |
|        | 108.683531606889 | 133.106005881815 | 134.362834437771 | 116.425301253959 |
|        | 114.350596695469 | 107.802792435066 | 120.527518013376 | 121.297234504922 |
| BRAF   | 124.086902599543 | 151.440732942734 | 113.192313147111 | 128.2409378561   |
|        | 273.252023367028 | 155.878493935166 | 177.874821397216 | 160.277755404001 |
|        | 174.035835206078 | 149.204816953404 | 161.997058981786 | 141.356127724777 |
| BRAP   | 105.952640312359 | 130.535859816562 | 125.704264033102 | 125.208803405105 |
|        | 120.819163462986 | 113.597215383696 | 113.769815606191 | 123.02879683948  |
|        | 119.643417329571 | 125.313515459103 | 135.654614839107 | 124.057369016694 |
| BRCA1  | 159.891562221587 | 167.237705290905 | 151.224289879776 | 174.941551089279 |
|        | 179.30729544595  | 208.125844007298 | 195.414464905232 | 333.822167152866 |
|        | 202.44778603643  | 178.819486867379 | 172.888455552446 | 210.103974340881 |
| BRCA2  | 109.978693735206 | 113.891385601095 | 104.091301211096 | 113.479382235297 |
|        | 123.202829470888 | 123.513588004371 | 112.999642731096 | 123.271452939936 |
|        | 119.06600048679  | 123.716400094852 | 130.526673128214 | 117.104945989023 |
| BRCC3  | 152.849810441802 | 183.255119298602 | 179.460777888284 | 170.290455446376 |
|        | 199.662592246931 | 195.269099451599 | 139.476234663488 | 198.94325874493  |
|        | 175.810411923013 | 221.82340413039  | 217.607230767028 | 160.742365719929 |
| BRD1   | 204.078331021637 | 225.4575611466   | 254.9636051363   | 265.754141836026 |
|        | 238.124340832815 | 254.63506290698  | 228.616558999054 | 227.065194522692 |
|        | 232.105867345662 | 269.141120401835 | 229.157389498775 | 266.286483421453 |
| BRD2   | 2358.46955614953 | 2736.98692493933 | 2189.53914329263 | 3015.70954394585 |
|        | 2547.53445585552 | 1569.13457493554 | 1846.61430264854 | 1753.58770316818 |
|        | 2414.22821062457 | 1752.50728312967 | 3184.98944679038 | 1586.00600118477 |
| BRD3   | 978.389902096994 | 1050.90881385623 | 839.324324662619 | 1296.10827265334 |
|        | 1159.44907165386 | 383.10686624119  | 402.824964079515 | 398.512947526406 |
|        | 443.259619455624 | 437.049581919144 | 658.068932688816 | 302.462763120177 |
| BRD4   | 135.628411578541 | 138.296933822299 | 134.239416179248 | 138.576978828316 |
|        | 167.73288535728  | 137.342348963288 | 136.931476050688 | 127.690860707933 |
|        | 137.832597613423 | 147.510848198689 | 175.717830026564 | 139.841039854404 |
| BRD7   | 516.755267232127 | 510.061974830525 | 483.699436940387 | 650.494111214312 |
|        | 509.01330998156  | 370.798852361374 | 450.220658078322 | 436.834825721843 |
|        | 620.371912523332 | 572.548647437438 | 717.270096456387 | 506.80969228563  |
| BRD7P2 | 260.41082304175  | 258.998065427002 | 259.767151797583 |                  |
|        | 267.869879189095 | 319.090371885653 | 235.742017851879 | 238.430350258686 |

|        |                  |                  |                  |                  |
|--------|------------------|------------------|------------------|------------------|
|        | 221.975219056555 | 300.443499140896 | 302.408563830315 | 284.043349407812 |
|        | 258.109876262342 |                  |                  |                  |
| BRD7P3 | 140.36602776806  | 139.205887721493 | 145.633647856775 |                  |
|        | 140.92066676704  | 133.277326912499 | 145.219057535246 | 153.368006275096 |
|        | 137.335501759561 | 147.150063462728 | 143.303309656177 | 151.627496656808 |
|        | 134.606126134531 |                  |                  |                  |
| BRD8   | 308.621688157016 | 304.713434036642 | 363.706789137022 | 278.555009982029 |
|        | 221.093229309411 | 252.249994170536 | 325.387193207414 | 305.16668987495  |
|        | 246.552713031445 | 341.501397478593 | 321.627969147543 | 253.867947800583 |
| BRD9   | 636.970243888917 | 776.807656744828 | 572.548647437438 | 958.005138077899 |
|        | 624.638115878703 | 707.048754700047 | 737.193295872614 | 843.075879568455 |
|        | 562.089999265955 | 546.399972543938 | 635.038752622494 | 902.394410348792 |
| BRDG1  | 142.236565028336 | 118.718048764985 | 129.150574563997 | 130.66863243733  |
|        | 122.03508430361  | 134.381042390464 | 124.86699236406  | 154.076216899447 |
|        | 141.216869032251 | 133.191797029676 | 126.056493244568 | 124.904518221898 |
| BRDT   | 109.29279076901  | 109.454483612299 | 117.628564992187 | 115.113000553093 |
|        | 115.619116556625 | 109.806338826826 | 105.900294919664 | 112.449662536973 |
|        | 107.622342073167 | 115.594489123676 | 119.472410874778 | 113.064645688715 |
| BRE    | 348.711663415777 | 372.54091392596  | 423.966625351913 | 427.98782239715  |
|        | 465.029298672645 | 336.067655676466 | 308.441120735095 | 680.743052197025 |
|        | 417.103816140912 | 358.355621069787 | 331.32397534437  | 379.862305342147 |
| BREA2  | 124.275741099764 | 137.11719450122  | 119.330439721904 | 138.584190903303 |
|        | 122.333765477428 | 113.427848757112 | 136.413745926388 | 131.741688265764 |
|        | 134.237133546276 | 115.34945441214  | 129.455347273068 | 128.878051599968 |
| BRF1   | 149.584582050615 | 153.734347607222 | 140.487887891414 | 154.79534193124  |
|        | 185.30916081621  | 130.316282003711 | 136.575784685895 | 141.216205703466 |
|        | 135.583556015955 | 137.4552565025   | 161.04173806448  | 136.670253859184 |
| BRF2   | 252.249994170536 | 297.12411625104  | 303.638516587721 | 342.878522959461 |
|        | 1415.67109281133 | 383.74357557363  | 266.468621734455 | 215.866644799363 |
|        | 203.370353613423 | 239.789994201722 | 248.761038207278 | 233.029655807246 |
| BRI3   | 1046.65224316733 | 953.861218000678 | 1022.55215097491 | 1041.58583268313 |
|        | 1581.06548216423 | 851.633522004342 | 1220.30347076968 | 663.668537495345 |
|        | 976.360310504918 | 1442.11349373764 | 784.170983714588 | 1663.71411325131 |
| BRI3BP | 179.601348561497 | 190.45739385453  | 168.412162365467 |                  |
|        | 180.315825600347 | 462.144334719146 | 363.777212750779 | 358.52459123416  |
|        | 341.973002478932 | 314.949772661046 | 329.48021621087  | 284.473085899219 |
|        | 355.443758121675 |                  |                  |                  |
| BRI3P1 | 850.125434374005 | 904.733257358133 | 770.19255305977  |                  |
|        | 936.221322010828 | 1208.25171673432 | 561.609211243027 | 836.235700891687 |
|        | 486.197269936713 | 700.601917911532 | 1142.09977159958 | 1085.38819961412 |
|        | 1100.17618574297 |                  |                  |                  |
| BRIP1  | 130.033927910392 | 133.236084190243 | 135.057847490193 | 140.381386314817 |
|        | 139.823017208731 | 142.570182389682 | 133.106005881815 | 133.271506838359 |
|        | 139.214589768245 | 163.234966251618 | 125.400741907779 | 129.666957539624 |
| BRIX1  | 484.658140651032 | 459.171226689178 | 606.851072672402 | 340.239348689005 |
|        | 720.077057619735 | 1285.54492194393 | 845.369108604819 | 1890.86868383409 |
|        | 1033.48252432603 | 759.534249620343 | 908.352265585374 | 1229.47460924638 |
| BRMS1  | 512.723592291378 | 524.855915371246 | 478.909308632726 | 477.056706273413 |
|        | 1908.81864728547 | 1067.30106203503 | 793.071192619058 | 733.195136251155 |
|        | 686.679573646733 | 665.602699607102 | 714.052063877292 | 656.009451448101 |
| BRMS1L | 203.389294254141 | 204.509884908059 | 226.796825544749 |                  |
|        | 198.055877414824 | 168.183542846746 | 238.847091900666 | 180.902950045351 |
|        | 184.387409077972 | 158.770502070553 | 212.749668083641 | 188.891032176388 |
|        | 182.608712782878 |                  |                  |                  |

|         |                  |                  |                  |                  |
|---------|------------------|------------------|------------------|------------------|
| BRP44   | 601.997464467917 | 658.968318349334 | 654.663838918786 | 585.721610434501 |
|         | 1724.22121078776 | 1151.89087953837 | 1000.05896885496 | 1931.16906839143 |
|         | 717.270096456387 | 732.877169346979 | 1254.19980463817 | 1033.48252432603 |
| BRP44L  | 1342.29111510713 | 1171.62361359992 | 1545.71251527145 |                  |
|         | 1014.63777151551 | 593.320132696649 | 902.822697602452 | 718.142991571468 |
|         | 699.550347374567 | 605.040026490154 | 864.547109080675 | 860.688314783077 |
|         | 1050.90881385623 |                  |                  |                  |
| BRPF1   | 671.134356672693 | 787.874585290601 | 605.583144451322 | 850.562379837947 |
|         | 1081.47077865393 | 759.802694618208 | 776.030689773414 | 732.352357321273 |
|         | 986.004777675332 | 708.779490017407 | 581.54874141672  | 674.742955681908 |
| BRPF3   | 498.05778289794  | 464.128022170285 | 506.430593289427 | 478.847650837714 |
|         | 401.584032365337 | 355.048838683854 | 533.37609065123  | 386.067573158514 |
|         | 486.947380524463 | 467.512355593598 | 576.636077770998 | 390.021666378804 |
| BRS3    | 122.494779505958 | 117.969576809288 | 115.400592594965 | 116.19219007097  |
|         | 120.628904050564 | 117.412956162665 | 113.209569103727 | 113.249267122926 |
|         | 116.196676877996 | 123.02167644694  | 119.312201620247 | 115.738984899365 |
| BRSK1   | 439.023181761356 | 479.469659712246 | 407.152764702613 | 661.826149512811 |
|         | 330.505633088656 | 234.5655184349   | 171.247946863662 | 177.96452209396  |
|         | 249.09278446472  | 166.558080305926 | 156.365413649149 | 263.707476735938 |
| BRSK2   | 262.691387377392 | 261.922485502971 | 299.170431746759 | 298.625127845168 |
|         | 175.874387612235 | 160.865949438448 | 151.106858426994 | 141.308299074832 |
|         | 122.646850766733 | 135.028746262383 | 140.82351325907  | 136.142380560596 |
| BRUNOL4 | 152.778732614944 | 146.388285560372 | 143.807102980397 |                  |
|         | 143.056098955473 | 140.971253689199 | 138.171858105728 | 144.850211439338 |
|         | 147.925744210234 | 146.579930401696 | 157.761231106669 | 144.627784383455 |
|         | 148.263293819238 |                  |                  |                  |
| BRUNOL5 | 164.787637367264 | 158.726115143818 | 149.949425756405 |                  |
|         | 154.996829706812 | 154.764283765316 | 168.37043566813  | 152.495540563792 |
|         | 172.973175988757 | 153.209409960324 | 155.147962740503 | 147.26204590693  |
|         | 139.15175079191  |                  |                  |                  |
| BRUNOL6 | 186.939168482155 | 178.563665283267 | 238.310077556167 |                  |
|         | 189.840366340622 | 155.069048442532 | 148.274122690409 | 161.585555680663 |
|         | 142.579346058088 | 151.423936838934 | 162.411156818437 | 179.026308021985 |
|         | 155.191446350891 |                  |                  |                  |
| BRWD1   | 212.33360547376  | 220.345184229077 | 239.148333781084 | 223.389795643722 |
|         | 179.551640851353 | 304.292209676095 | 338.223462327622 | 446.601751145647 |
|         | 262.913054904154 | 207.400490077106 | 196.144420005021 | 282.926325589238 |
| BRWD2   | 271.858059712406 | 247.340470321453 | 271.791126011275 | 273.369722814068 |
|         | 163.726898336284 | 201.748876422401 | 300.247304779062 | 232.778488697337 |
|         | 256.820546409632 | 199.916301659113 | 324.203537490975 | 297.419034136005 |
| BRWD3   | 124.297848065172 | 137.423810400996 | 122.111982327877 | 123.122705969332 |
|         | 144.850211439338 | 136.978738825445 | 127.745801270205 | 131.628021008753 |
|         | 126.497472087036 | 140.086978441723 | 161.543072816738 | 148.390417679848 |
| BSCL2   | 739.52947559669  | 801.52891824571  | 837.413261433363 | 972.468110850466 |
|         | 833.198511430615 | 1443.68785521063 | 1174.69701182094 | 1114.10687039922 |
|         | 1187.62490367696 | 848.620986404914 | 839.662936279727 | 1168.3174645384  |
| BSDC1   | 1134.64039256323 | 1242.61637859159 | 1001.65849130836 | 1293.70593826709 |
|         | 998.631321857182 | 1331.18605673705 | 944.92617668298  | 868.86246684338  |
|         | 947.766127685083 | 595.593867616527 | 661.545179083009 | 646.704226815099 |
| BSG     | 1074.19589851599 | 1141.13648305827 | 849.784051720996 | 1357.48791782399 |
|         | 3688.68740405322 | 1071.00507864299 | 799.423640530777 | 664.60530723006  |
|         | 613.279465441319 | 625.152889992949 | 887.471553448641 | 768.334658920971 |

|        |                  |                  |                  |                  |
|--------|------------------|------------------|------------------|------------------|
| BSN    | 119.972337070176 | 136.248506185974 | 118.360186663758 | 128.184708916755 |
|        | 155.545904088857 | 125.470172259885 | 144.192623511374 | 121.164978896057 |
|        | 110.865668451601 | 113.740942665269 | 138.424464248567 | 121.116206210402 |
| BSND   | 117.503848306325 | 123.791515424464 | 119.213217733213 | 123.21732068638  |
|        | 127.305306470493 | 115.834056091815 | 116.934457270701 | 111.43827410589  |
|        | 126.542112891953 | 127.451155926679 | 146.882746173951 | 114.209249333221 |
| BSPH1  | 147.502116289881 | 142.586051173329 | 144.961976523279 | 155.91493956251  |
|        | 135.041687549769 | 140.402944266863 | 144.895601314903 | 140.067809125008 |
|        | 155.828962183804 | 143.951756384507 | 152.823566129571 | 164.603403251634 |
| BSPRY  | 144.898770838913 | 173.484307104751 | 148.665627690915 | 177.371157649894 |
|        | 278.651369597422 | 200.558971047462 | 188.605328108654 | 193.744461104128 |
|        | 188.378996128521 | 221.635333304767 | 198.863347487219 | 165.919497521143 |
| BST1   | 151.540744107423 | 142.329137800558 | 137.800512046163 | 134.458958352588 |
|        | 258.075566417241 | 118.465111174212 | 132.591496435822 | 140.244052740397 |
|        | 125.079330440615 | 126.969504644414 | 136.587165242663 | 128.363331337379 |
| BST2   | 894.100792722707 | 932.076509242794 | 245.675725760577 | 448.95671696823  |
|        | 2114.9754128463  | 467.681480781925 | 2684.69013589621 | 361.26540006942  |
|        | 1641.70484603137 | 600.430996779799 | 312.845219991659 | 2786.35558271661 |
| BSX    | 137.220718873614 | 150.534608517044 | 141.36525744062  | 125.861564323476 |
|        | 144.32655838488  | 137.890006487904 | 147.161720770972 | 130.669539169739 |
|        | 138.760800146167 | 134.178733595096 | 148.437676259828 | 134.655842662899 |
| BTAF1  | 935.423045210635 | 736.603605876572 | 775.5664718389   | 761.097992055119 |
|        | 280.595515386655 | 471.598175637494 | 603.764427348016 | 747.077451281453 |
|        | 410.731869154912 | 406.369889501135 | 553.198321853202 | 655.431236290512 |
| BTBD1  | 252.432175363972 | 233.029655807246 | 322.889296658955 | 243.159062832085 |
|        | 319.927209914181 | 391.644649726254 | 408.444629429553 | 307.316241247336 |
|        | 339.448524400708 | 399.724529998085 | 332.666916002481 | 417.191960489528 |
| BTBD10 | 466.777454704543 | 392.282956362735 | 589.953707188378 |                  |
|        | 430.728137105601 | 261.671277686467 | 447.372026268156 | 395.521241316058 |
|        | 438.146919555296 | 380.888728347647 | 645.183207984114 | 497.53605530806  |
|        | 456.530337997907 |                  |                  |                  |
| BTBD11 | 123.551225884748 | 135.353539458856 | 121.154389729409 |                  |
|        | 128.280225530201 | 282.742833166843 | 173.879952136931 | 202.909188070184 |
|        | 176.198555355383 | 185.063870458561 | 428.959561932229 | 194.125840053843 |
|        | 173.919504730673 |                  |                  |                  |
| BTBD12 | 266.347965690851 | 308.767036855508 | 317.802633831405 |                  |
|        | 397.064325578854 | 282.561381978659 | 263.74335003375  | 394.73732350607  |
|        | 374.033009122079 | 345.732364434125 | 319.417555901733 | 328.486476842582 |
|        | 266.252875242286 |                  |                  |                  |
| BTBD15 | 366.240941980786 | 363.343480850598 | 355.879841671975 |                  |
|        | 342.717252404581 | 209.417052464583 | 207.920724788669 | 304.844121431627 |
|        | 241.251507026982 | 237.492603094091 | 190.939726271153 | 451.887564294551 |
|        | 277.406445570925 |                  |                  |                  |
| BTBD16 | 265.791342287571 | 295.241644408321 | 256.590289281076 |                  |
|        | 122.557981210434 | 363.963951509433 | 1301.18893681695 | 2374.1382412432  |
|        | 909.727616721285 | 362.795691170335 | 119.062611098235 | 2233.00694575483 |
|        | 6560.30885074315 |                  |                  |                  |
| BTBD17 | 136.089888639987 | 146.378522944864 | 138.875827888646 |                  |
|        | 134.041098536814 | 140.588811000948 | 145.131215503044 | 148.695212949639 |
|        | 144.610341215903 | 149.579428189895 | 151.635752404534 | 141.929924728222 |
|        | 165.074983746785 |                  |                  |                  |
| BTBD2  | 1620.7954553764  | 2183.18692530644 | 2132.90676194993 | 3255.91703674439 |
|        | 4800.99572384569 | 2468.47687203968 | 2567.4299860517  | 2426.2098937241  |
|        | 1796.26091584668 | 2340.90990677253 | 2043.73482086765 | 2157.50118108142 |

|        |                  |                  |                  |                  |
|--------|------------------|------------------|------------------|------------------|
| BTBD3  | 392.430873293903 | 386.679822751367 | 464.577839898252 | 346.566241319814 |
|        | 270.181005097697 | 578.084277076692 | 315.130912368929 | 320.597495751519 |
|        | 281.846246549202 | 235.961605948276 | 647.955521647635 | 368.711718874343 |
| BTBD6  | 1002.44383771056 | 981.781076110568 | 928.672013047007 | 1000.91520225219 |
|        | 1281.9073569335  | 588.076436392983 | 880.719593734606 | 908.352265585374 |
|        | 950.144166422001 | 1103.13439876128 | 1099.37392456694 | 974.007008568051 |
| BTBD7  | 212.710910778949 | 226.841838641151 | 213.833894542292 | 229.284931844047 |
|        | 180.523458795412 | 170.350891928203 | 200.518684601283 | 211.419445018736 |
|        | 183.416437587938 | 184.577511730401 | 307.768302846647 | 197.341423434688 |
| BTBD8  | 138.150616787218 | 135.675570204709 | 135.622888091037 | 140.051904905695 |
|        | 136.783974483005 | 133.820936825552 | 150.203281104753 | 134.45677772672  |
|        | 147.457193565877 | 143.349486755648 | 129.294026995663 | 136.135223482208 |
| BTBD9  | 177.023536553193 | 159.0794075765   | 155.997210529742 | 157.919709478746 |
|        | 164.48570046081  | 154.104321553472 | 157.353493980339 | 163.004844049672 |
|        | 155.158028043823 | 174.807363753172 | 158.679903271595 | 167.325227483198 |
| BTC    | 279.879377933144 | 285.172001915966 | 205.728673153914 | 364.766154056243 |
|        | 408.10780961711  | 186.04763660516  | 209.74583569369  | 190.809584998617 |
|        | 198.390247605355 | 168.197255166255 | 195.740661051834 | 188.490807652188 |
| BTD    | 138.528083984177 | 184.25384366282  | 207.384408045502 | 166.335294339013 |
|        | 186.813888805838 | 157.604224004016 | 143.298218989451 | 210.043556816529 |
|        | 152.612116997575 | 138.952082680577 | 215.897620927751 | 172.686798187142 |
| BTF3   | 3757.39261544326 | 3522.61692270848 | 5361.3600315322  | 2867.63319136936 |
|        | 2804.99820187198 | 3474.0924656878  | 6560.30885074315 | 3455.20639616159 |
|        | 3222.23985545506 | 5361.3600315322  | 4009.22206756187 | 5859.56559124843 |
| BTFL1  | 132.671227062948 | 140.482728188987 | 133.62358240645  |                  |
|        | 138.706520278166 | 124.740700441589 | 140.36278240974  | 141.436235043864 |
|        | 132.363645381743 | 128.939572714685 | 140.04612725812  | 150.513804134588 |
|        | 142.475646565816 |                  |                  |                  |
| BTFL4  | 276.867974638972 | 280.246711704036 | 393.375554593484 |                  |
|        | 230.053292316517 | 243.732074437237 | 913.934874451961 | 444.082440002333 |
|        | 569.866002248352 | 404.172535442156 | 576.997804865103 | 615.058712877418 |
|        | 552.790706181938 |                  |                  |                  |
| BTG1   | 3188.90202907403 | 2995.42172749615 | 2698.5455305009  | 1756.88092410303 |
|        | 1219.36024606325 | 2684.69013589621 | 3136.27991502603 | 3784.59114921916 |
|        | 4569.44477073589 | 5589.21471380445 | 2756.22069438696 | 1832.35076992253 |
| BTG2   | 379.983165400941 | 604.047164856689 | 640.90860274227  | 343.767393640683 |
|        | 671.134356672693 | 1191.26028342929 | 2627.12900283627 | 827.400420888645 |
|        | 739.251974981981 | 358.897128592042 | 979.761537450366 | 1455.75693295732 |
| BTG3   | 393.707031354025 | 337.22646304739  | 302.768870633398 | 290.213039891361 |
|        | 274.627303114477 | 346.862322263052 | 580.474775712828 | 593.990687449346 |
|        | 681.591028334969 | 853.314313182949 | 338.406266073063 | 415.178470246749 |
| BTG4   | 113.680875214845 | 130.59670974887  | 142.888281750232 | 131.249240371529 |
|        | 130.582210755516 | 143.188958538221 | 176.420075374686 | 122.97487285065  |
|        | 133.473140653666 | 138.274057264688 | 124.964977322158 | 133.355353808577 |
| BTK    | 211.012142461725 | 185.673549367125 | 175.363223521128 | 155.938283930571 |
|        | 131.894919149666 | 140.688570032068 | 148.04206955657  | 173.726420791056 |
|        | 282.926325589238 | 142.372470063444 | 161.490941000872 | 152.439608473915 |
| BTLA   | 138.263361518905 | 129.063617408979 | 133.372231702721 | 135.015161451899 |
|        | 140.615078497305 | 135.565256045133 | 147.44463861207  | 145.768857553634 |
|        | 181.157738347957 | 128.284564251279 | 143.21411610625  | 129.029151164978 |
| BTN1A1 | 152.511331178337 | 122.84779238795  | 134.516390697561 |                  |
|        | 154.493246900289 | 136.423161205425 | 141.323417580648 | 127.650229552084 |
|        | 147.985843605585 | 133.165893710176 | 137.736771579507 | 131.326536951329 |
|        | 123.58727715816  |                  |                  |                  |

BTN2A1 372.894376776771 367.130155304037 439.727046291381  
 467.90388853336 217.560691345072 360.684900316265 299.669394721682  
 297.022984365795 329.333236839082 284.272977025491 348.241471067257  
 376.124744806171  
 BTN2A2 128.705587172572 140.073208365817 124.541257225826  
 132.786500984297 127.269672881591 127.729912390394 124.15094220181  
 132.496547953595 146.840735518984 134.719531559829 152.422690241301  
 135.527445907621  
 BTN2A3 165.767629164724 170.87247413028 162.178410412809  
 167.040031488406 159.470818285679 155.896065329825 159.41705570719  
 153.018378403144 148.332750352364 167.43630698726 123.156154667242  
 154.001258677199  
 BTN3A1 206.376365685112 196.345065354654 167.100039749329  
 190.506201184419 151.971337856271 144.36033726557 176.121563444364  
 185.088667707155 247.454326301069 177.11682975342 459.388390392518  
 172.077522197357  
 BTN3A2 239.20206002 199.813528853649 182.009471368798  
 209.130260450131 152.045391611927 150.971453664961 213.240181616274  
 241.706645643141 438.533112511098 252.514569129392 370.945254716657  
 283.191303666907  
 BTN3A3 180.986305037222 178.920528149177 164.448110885609  
 153.171822092714 132.66318177913 130.807596523171 157.760190496427  
 179.94333102877 319.966785546419 155.694213876736 264.563741039382  
 219.0221768576  
 BTNL2 124.857461801227 130.43775024291 129.672284417918 120.721341479615  
 123.45004246675 134.493062923443 116.919109599361 125.879198238067  
 132.310147451479 123.629279569085 126.784243009941 120.204469421484  
 BTNL3 137.469177072831 135.509365701442 143.558088035758 140.976675511847  
 144.19473076362 145.363692072132 145.368059425439 141.079317977197  
 142.236565028336 142.768691899824 143.695901115673 142.633121727277  
 BTNL8 121.624218243474 133.871685084945 125.435268901131 126.619475852751  
 130.601241656346 120.887938517877 125.08580835258 121.483610947845  
 129.180990946063 138.712529531951 113.064645688715 122.881793230233  
 BTNL9 129.358112503486 128.606360476298 127.777945516765 108.715328458556  
 112.832122823829 128.354163132392 118.850495684547 133.096984735092  
 108.589444216106 126.798976470472 131.681566829159 121.736056336879  
 BTRC 153.219954133957 166.12184890921 177.055023182887 171.552010365305  
 137.048292841566 130.224324464992 141.606501859513 141.811563725942  
 146.524138043215 129.246066890078 163.104822161892 163.004844049672  
 BUB1 115.713909155043 131.215202712283 117.274977920103 118.81294782091  
 379.911829623463 493.715108157171 208.932692585748 489.403061697031  
 259.064601204239 283.191303666907 227.52352046188 314.610979086485  
 BUB1B 136.815411937352 136.984172424718 136.049167597016 139.229351251973  
 201.969002368045 248.594000664466 167.011846920792 195.218005582618  
 216.53417734069 171.433001048839 193.261343922604 204.89842561202  
 BUB3 640.029195821436 636.781477235579 739.251974981981 656.32782132983  
 655.094843900848 699.06539333455 808.300067805897 778.639512538949  
 819.488546995594 677.023591987179 1039.46136549795 950.144166422001  
 BUD13 290.288001750744 283.326226944158 322.263925912805 292.23287968517  
 429.992169596618 266.217879616686 298.664864578349 301.369680426563  
 263.295012964476 226.43414383055 369.974231530826 379.476768908492  
 BUD31 1093.21579738952 1191.26028342929 1015.63768413332 1318.3633082502  
 1787.32566525551 1323.05745869565 1986.81354260292 1859.88000417483  
 1862.88548451154 1582.0221231161 1645.05161227372 2141.855356411

BVES 260.999345837027 257.880331012233 313.322307299463 301.250189051376  
137.911816180518 137.550607284001 140.760983862166 134.203949774763  
142.56910547147 134.623264303227 139.746733428525 140.307931763353  
BYSL 228.968779778407 228.797912452429 186.309367281625 270.973600107882  
550.24496459253 459.53652431464 337.39574303968 295.678097392123  
299.80615152845 280.033528476199 315.689865927834 361.687156919012  
BZRAP1 272.500572765647 254.393421265604 217.969738417693  
302.905840432998 153.072429774613 148.996601285688 157.944355564411  
144.333945716394 130.672586991186 122.917915232153 132.566074764755  
144.975882336334  
BZRPL1 161.182901898379 163.284853420896 141.315230997077  
173.176900454904 148.782907912893 157.306022722324 151.369387642458  
145.072924262206 132.541420804792 167.719651771357 154.681604647652  
141.25089277145  
BZW1 135.501192996538 132.442771000976 133.944538335319 133.069347559741  
144.876300850115 140.374644951491 145.491525555916 153.095594614683  
136.185953087697 181.803275243281 158.503284955019 161.979914539039  
BZW2 886.517088614968 922.50743596248 1149.3250945792 1070.4597488302  
1617.44377452783 1790.53556140959 1722.26954281876 1557.00226259883  
912.878077940014 774.997895985917 1286.55103838368 2258.30916111153  
C10orf10 344.737964092526 788.693133735893 400.98290237416  
447.182566890086 177.001637712889 477.626693328013 303.051124835907  
196.16056297158 363.777212750779 167.226663395855 188.53221484746  
292.911761762431  
C10orf104 485.731287873723 460.807117177285 513.518424350159  
413.330906392915 204.1974438819 248.129640673859 318.348505551265  
224.062024091915 305.854543429221 186.551385094902 420.871349359404  
342.037040881785  
C10orf105 144.00214898009 132.390330703084 139.338384535905  
148.560326703328 130.784802403934 152.654938328424 153.165872773973  
154.675189522146 139.856251508283 143.560065338939 152.142909854773  
142.637421204193  
C10orf107 134.640783050966 103.307703547649 123.170639180926  
102.255408120852 117.805556408194 115.107214937219 105.839106819841  
110.033746435328 111.328185454541 112.292129754508 121.643036773773  
111.43827410589  
C10orf108 160.72009357092 170.684848540493 148.424970450231  
172.783430414523 142.916274989816 180.047231265069 146.934990457666  
148.590732065459 149.211214631561 340.668473351494 172.677083810424  
172.20451139581  
C10orf11 154.973990421257 170.164668347783 145.371273337639  
178.606255846041 202.643624039869 182.608712782878 386.679822751367  
180.113222861966 290.867822301134 183.556662533396 278.88183549759  
435.332573825425  
C10orf110 145.036719629525 131.300342835696 129.846685899183  
135.68605915552 145.733828447934 149.675363177375 159.646538408414  
149.188357651896 139.864176113337 143.434571922656 145.906601611338  
139.706279455371  
C10orf111 114.43491928161 117.718893827092 102.166449349339  
115.120702589487 116.258629237662 115.914842445934 124.35374445763  
107.48180681159 108.21185649774 113.938636269013 128.466244127634  
118.521075843163  
C10orf112 135.839123867443 144.071652839025 130.020743385543  
125.83521710721 116.769106223472 133.97321873161 142.221542344035



131.734429913106 129.394359810841 125.587057468028 143.760519659724  
117.740022708444  
C10orf113 123.798513338021 111.232274546928 109.599589420575  
109.760525674874 110.266032635568 117.585207821853 116.746018509166  
108.036254606246 115.933805625814 126.37749112514 103.550817366724  
123.145830746127  
C10orf114 151.81754291846 154.079355899056 146.764908249803  
143.703367582367 195.10410545445 148.435419356331 143.449303333495  
148.668081483434 156.254944793402 141.063156289206 169.544515294662  
141.626504154989  
C10orf115 122.35832958054 122.317877997527 127.548070199148  
125.777193592751 132.383542877819 124.720004905439 126.820834043224  
130.689272423595 120.53428198263 136.72715888684 143.718210650338  
119.767154020462  
C10orf116 3490.77593331727 5094.53287522452 3359.62015747752  
2539.87833317526 15194.4972103372 20381.3859535625 16642.71853486  
17496.0674176329 27284.7333124039 2037.96470181871 18665.5217411582  
18720.0460735814  
C10orf118 177.874821397216 170.024833610695 211.505504834207  
171.636121363019 145.440471538068 174.136806313142 192.224242967539  
197.651165059354 203.071186284148 195.776369840059 189.83433085782  
208.348515119045  
C10orf119 169.089896796513 173.161152247499 134.160100276452  
153.713298074917 154.524588318927 192.113217321485 138.230197299262  
136.91078498126 143.419034484087 131.497454038525 184.591789011195  
179.905809470907  
C10orf12 185.382647297259 193.753062958207 198.753297290444  
220.578790067967 205.765822478178 208.666760987764 205.546628064296  
208.690347128273 188.062732621031 225.095016600703 186.185055364718  
235.216589534371  
C10orf120 131.482553251516 125.77343813277 129.428950259722  
153.202157381228 121.031695489398 144.741063866547 129.618097261902  
134.451423371791 124.174140125309 147.473875763319 144.018198451676  
135.286686011087  
C10orf122 150.854580568572 151.627496656808 147.54950981909  
132.140547119679 159.7197697044 140.885012530186 136.11588777718  
134.233014993992 146.915247627846 151.727603285205 127.440987506769  
146.311966562883  
C10orf125 143.52474218953 141.536073061736 125.558877611499  
118.186426364551 279.790257881254 128.72727523654 148.821942578396  
129.417232210341 185.46843333826 120.270397272069 143.481112776388  
153.477432230141  
C10orf128 172.973175988757 167.612577768782 170.731358903019  
186.653791045656 163.275138097131 168.763640193219 161.234304237838  
203.17525411575 156.562197068687 159.660564323984 174.515815532892  
178.179238056905  
C10orf129 128.407968177242 136.067657949844 129.785078660064  
131.77099316122 127.350368333088 137.601181150371 137.881776548665  
138.428527640896 130.804850476451 124.106971897779 153.811165696928  
128.144653206398  
C10orf131 138.687013437904 156.638070437044 140.782522936146  
146.047948193303 154.13120950189 160.17208299932 145.374923175872  
138.655815405894 131.965184111199 141.882859092658 143.812863334832  
139.147327302581

C10orf136 157.81327663167 167.389632521521 156.237282338037  
158.002906093899 243.246632667118 204.999796322451 177.990274115348  
152.534482748598 162.173506492562 161.402322405903 248.16594076495  
234.693846527867  
C10orf137 348.171901445232 276.925017614147 350.926679856514  
318.561557474749 215.84044779962 313.025250337353 368.548135194271  
272.500572765647 411.603820288919 251.347519777204 291.839070398338  
383.033242143031  
C10orf140 226.936810012475 292.60467054075 256.093363520707  
359.991823789356 134.522715664256 133.080437161283 135.562700479444  
141.528115502473 133.465593684519 131.162118170837 148.646699255797  
130.867819112143  
C10orf141 131.328478053136 125.642282323003 120.485138937899  
126.798976470472 118.81294782091 129.301839663122 118.406487008528  
126.972399784537 124.375348764151 112.321396616213 132.105929230517  
124.066239570648  
C10orf18 150.065275447769 159.951697830252 157.841520434044  
146.854523122404 144.783770949511 169.568915494577 160.227729155903  
147.761374187766 146.633627492419 147.925744210234 149.76931674417  
135.989816139218  
C10orf2 195.66091457697 194.941454173896 186.167877791105  
214.888126361789 264.936739264566 176.397715825653 171.86363382331  
183.013090662119 204.438365139666 166.192990554427 154.533544838819  
260.443814523694  
C10orf21 158.020651857664 146.861981788662 144.769824608083  
160.136209944279 149.836491640473 148.216605879958 151.72544764489  
134.748177388398 171.528350399075 148.773558380167 139.963969716386  
145.281074767624  
C10orf25 133.559082256772 138.078214837785 123.607412609763  
126.159880038854 136.297963196301 118.180919555585 117.123891785437  
116.576896337786 116.742079521048 127.416912237613 157.15947600423  
125.746184969983  
C10orf26 217.148957110623 270.679613997675 260.52593414721  
278.651369597422 236.676029292922 187.325542100762 216.05364037271  
192.07791693203 257.292125083248 255.793823796456 410.645457106122  
252.761035334279  
C10orf27 121.468398802591 126.948090173876 123.921903967493  
121.010811158088 113.154880173167 115.337592860132 121.838802846453  
117.980052938167 124.783306383852 124.466986821169 134.32174235533  
126.274585491044  
C10orf28 207.815226999953 233.047541132048 194.22713184875  
248.729653566598 202.041958613989 219.441959146815 237.825857080173  
200.591916768948 217.684410907748 185.295480519718 260.715580924916  
217.050602253281  
C10orf30 119.673343767067 134.452938571435 135.023594109361  
132.162948517239 122.917915232153 113.163651806803 125.331215990597  
115.624167024067 124.821581853501 129.073750290924 149.548900791507  
121.770043509503  
C10orf31 125.859158049343 153.700168798494 142.478528530514  
144.388851371784 140.510889880872 133.363883851093 134.95842832877  
156.423687034312 134.005402534879 134.089308635893 134.936025073531  
149.717739166461  
C10orf32 334.52685347521 276.138650967632 403.812520074723  
275.509805464276 188.74403596953 323.04019262387 400.845137156678

247.145700155364 361.768552564027 343.121661664987 515.597523880328  
404.21236980164  
C10orf33 321.84712975195 307.866499851733 342.878522959461  
423.045329000756 259.511314588868 140.892250639524 217.560691345072  
175.476184387338 193.522811257085 125.861564323476 364.443097338814  
263.005303710717  
C10orf35 299.568830444875 318.487401106209 347.3483417873  
319.868227988842 383.74357557363 379.102958448288 455.665927568395  
427.151797273226 357.006610037663 179.297628357211 343.417041721907  
519.829743770022  
C10orf37 142.011019998327 143.426053070219 134.880138942756  
139.642457979496 154.433679792749 142.290253129837 140.815807483203  
132.057808599068 150.231063426302 141.302647488314 134.897958140444  
149.193437559422  
C10orf39 207.453490385508 212.33360547376 244.251315474587  
268.034972830233 179.55905250703 164.773489952844 166.305219348008  
152.129092774005 162.161282071736 156.961070790639 173.260348096238  
178.684992551017  
C10orf4 136.882429810263 135.535020220081 149.061464748604  
133.800111596565 140.82351325907 141.653917856148 142.222833574043  
136.679405220947 138.121905080822 142.039943511086 150.555125135002  
139.153897381147  
C10orf40 126.310788291075 134.698857213208 144.408426565541  
138.873925577739 125.104229604098 131.975248488461 143.519786615253  
129.135985676046 136.319655432311 135.458682745495 127.581332110857  
135.264074941678  
C10orf41 154.153249796248 147.405050592353 157.237147919803  
161.325409589612 134.399228996542 142.635015113687 198.597176657619  
148.47415004128 185.801540278924 175.452986514346 165.870621884073  
145.862497313025  
C10orf46 131.173355686001 140.664303738113 143.252983617945  
130.322436253881 123.547821639269 146.681183890181 137.748443205818  
152.60462513339 133.032905765836 140.009593108693 152.052084712417  
138.521952850632  
C10orf47 152.26903721278 166.77329045424 150.929236917651  
141.383975990479 222.118666699301 269.567704345075 201.221839281282  
199.191065549132 173.10229478279 194.112534914308 180.219813240126  
187.572517928061  
C10orf50 129.935532080325 131.367075440559 132.257989841046  
135.978826529736 115.137475087954 135.196797030404 137.687480242109  
132.807755600683 133.773427881651 143.543607779991 110.148555045276  
127.453866279181  
C10orf51 166.47851613068 145.950701448912 165.443069511115  
189.539458686123 159.29430824799 171.869472272081 177.065616871886  
173.526005872207 149.595375008252 162.739253457398 129.732352495012  
171.155660467037  
C10orf53 132.106673891288 134.237133546276 131.157702791998  
123.096995744616 122.679628839976 123.82555184043 136.735930829008  
132.450954427876 136.878656455606 137.478556403046 128.200531810126  
137.681280789305  
C10orf54 346.118765910093 323.276514394119 174.66966623557  
277.073510273425 217.491746961471 149.4401812 179.230909178397  
288.542264120468 371.693808540758 187.700723296295 336.212224495877  
220.312301059818

C1orf55 126.217702283708 115.002176041974 119.785062256421  
122.083357581665 130.156775178934 129.904942554979 127.84589484404  
122.846912279427 117.348231147283 128.84676695859 146.781221728543  
124.242539075734  
C1orf57 323.841518852386 363.963951509433 493.492348317616  
331.62124160152 447.779854598556 517.993093601127 698.358285634451  
724.607317443904 1332.82617944131 501.600329334497 446.601751145647  
592.387650564803  
C1orf58 7753.61594300904 8666.41250683965 8163.29201165065  
7038.48958943724 2398.71483410593 9514.74328718935 5748.57645553386  
7601.58151657937 7433.03226979876 4520.84412831414 6500.1854485891  
12046.9345159347  
C1orf59 157.631978594005 159.476343366991 153.354921961854  
152.511331178337 155.7441762827 145.304050333309 161.481227197715  
181.758545723241 195.69447353356 170.998961353556 178.751706380632  
193.777175793218  
C1orf6 779.022508413529 902.089561157715 719.369561410372  
1151.30600388403 205.821101661022 271.791126011275 350.077206368839  
350.46078795627 364.840751972169 249.029098902357 504.436992949763  
380.754569467715  
C1orf61 189.693218759349 179.896659891106 169.408892048115  
162.223175359454 194.281839133887 209.464347017443 237.078644686891  
183.385868234361 192.680681636018 200.810204162831 237.492603094091  
212.210383398591  
C1orf62 128.099484678519 125.157459724842 125.566982723725  
119.937665469629 121.522634801124 130.985360700521 119.308345676905  
126.134393447943 129.801342433836 117.324368138398 124.422548323449  
116.881212516879  
C1orf64 166.754995454382 165.634117939571 172.531836863525  
186.813888805838 158.829144564361 154.445840992357 161.525131363333  
164.625407872446 160.180961887686 167.206513789165 165.274189050141  
182.042104888745  
C1orf65 155.890403934674 140.790450703097 176.312626750427  
157.032746784217 169.541411677993 201.041792159394 240.376851873817  
174.192898940601 183.181125586276 147.545667896282 126.640141760199  
212.890259409988  
C1orf67 147.553953240464 140.855078775719 137.522792377933  
159.452527363763 145.909456876796 149.899789105328 157.259599894923  
156.05583229359 146.879019367939 148.216605879958 141.855655600443  
162.289781945582  
C1orf68 140.281512754823 157.604224004016 138.752600540409  
148.470120335761 149.88598449818 154.632563476364 142.77817647952  
154.744065805492 145.821544099585 150.75878820215 140.616811333466  
156.748330788367  
C1orf71 114.265920150451 108.543795408713 118.148476979319  
115.420810993676 114.77964341895 111.616460084889 103.09089100768  
119.449118660481 116.412881235587 108.910588012315 125.029516472944  
107.316786994369  
C1orf72 174.323881548679 173.260348096238 154.366071635971  
187.132496910208 133.070896773384 145.393431956588 140.964208731587  
141.533138525284 148.47676851933 148.560326703328 134.582098893327  
145.112399373761  
C1orf73 166.872332652008 211.160781061336 201.059635671301  
178.035700298977 144.568417378353 169.466129742085 191.754626760061

199.756584044664 155.63671938031 137.435736170779 275.437030326768  
262.259969786927  
C10orf75 164.870860592068 143.548858367002 172.657668514226  
142.002145315543 124.940836122365 425.59810308048 143.653452869664  
130.99564079691 131.470883854661 138.552423514249 157.419333185365  
146.944628763232  
C10orf76 280.085692727562 280.595515386655 330.908743070095  
360.756455184184 187.784865705837 190.889832855403 211.22652563815  
178.488874074222 208.164674386141 232.321454436688 205.765822478178  
246.428746807313  
C10orf78 148.859129298141 158.670835881902 186.925138700818  
152.667721542507 147.28750335168 158.665476708054 155.798048652444  
168.007337847195 174.149718758884 174.890624803452 163.22059466037  
199.191065549132  
C10orf79 153.528429414138 138.242983316259 155.176714087209  
151.338765231607 160.399059317919 149.726968520487 150.374573177474  
147.547944397578 148.707332454527 144.114177076352 130.728465509213  
144.292679144059  
C10orf81 131.093917654245 155.317754378283 135.571239294086  
138.230197299262 157.668307146391 130.909388246758 195.447966116819  
159.89988762842 141.609037401299 132.629453540571 215.558688906165  
137.77107995457  
C10orf82 131.827899207029 124.657687121111 158.14434287956  
147.366877428537 138.985778947618 147.666724626127 134.660181775674  
139.94624507228 148.825790628891 145.992883153161 136.654902685184  
125.224197852606  
C10orf84 163.85327708023 163.704616231638 157.66595229182  
169.502103689662 128.833756478439 139.065849548762 132.189426012448  
136.214432257698 134.208537331186 132.089375920534 153.93249158209  
142.678267012725  
C10orf85 129.719122724699 132.836513637574 126.561067704708  
122.996616773523 119.432201417811 122.068058346443 129.7137422914  
127.101752724954 129.434594784981 132.263954832097 150.28169442832  
133.486155360266  
C10orf88 192.804447792672 210.900056977861 177.862368731138  
226.678503956411 157.960172706254 149.181838320838 248.129640673859  
166.570606752678 175.044940252247 172.961115357569 223.975677959345  
185.295480519718  
C10orf90 113.416743649576 117.112667504781 114.567609871292  
117.392898601408 115.502679218125 114.880348648147 119.673343767067  
111.66210002202 123.974409226349 111.549719888905 123.868848032411  
114.598636725763  
C10orf91 131.702788057359 114.539671934155 133.040952285855  
134.264584077125 147.117286738537 125.674471551099 132.047328970556  
128.2409378561 131.794065532001 128.473834314632 127.130769263811  
125.990762414974  
C10orf92 124.710368327189 134.446758753426 128.763176477983  
122.095978653755 122.557981210434 127.806138997958 127.163025822368  
121.168550902281 118.269780903508 134.477081392474 130.881629774224  
115.687997771921  
C10orf93 133.218742606195 141.215542377796 135.434853296628  
138.611074796816 134.408846338374 130.095585254401 140.861849838223  
129.878330410179 130.584348445667 137.677396262152 127.675206134992  
131.76272538453

C10orf95 111.584425166104 110.707755436868 104.406314027414  
111.62514398781 118.783904603368 114.10470841717 118.486195373059  
120.118873350459 112.520199390427 120.246240734668 152.921328522953  
121.556331561879  
C10orf96 147.576533768761 150.629932241703 157.130045415943  
158.459129254226 154.778726823719 148.692602243778 149.749660071593  
150.269618125943 134.803612821519 135.047546966745 124.345320343901  
151.243948028303  
C10orf99 157.759149893048 270.727749014046 212.190707408572  
154.037622223246 831.610501402173 371.00603789759 2736.98692493933  
3143.77161008321 4359.98094976179 1346.53215685106 2666.06582231934  
2995.42172749615  
C11orf1 240.005943851098 247.504198063293 271.196028302639  
215.47323777134 405.032674307193 264.109049504585 372.255208814622  
331.32397534437 265.919002666885 199.353823724989 382.630113452429  
470.308610828825  
C11orf10 3403.37530051435 3093.38255333143 3328.99028463277  
3000.46298223166 8140.6363797934 7699.37963536892 5800.06300826802  
6253.84268792816 7733.95252458705 3608.10730106542 3618.9385126441  
6601.004284244  
C11orf16 114.567609871292 118.249148086655 112.179019393947  
112.502812746669 116.615250922316 115.242526386551 108.021898335735  
109.282814458761 119.952108688414 122.456286448252 111.349642316073  
109.471542280224  
C11orf17 322.443089373063 321.794887577351 349.99912485533  
365.650071660806 246.594244983507 208.776711004753 231.600532144945  
224.167511918105 258.311739685895 246.80306998812 270.231637012624  
218.334273320319  
C11orf2 1305.2232532959 1484.32547474275 1681.54485582868  
1787.32566525551 2441.05534211996 1002.88224342342 1316.31088187364  
809.729160605727 733.86133557115 1114.10687039922 888.04996477314  
1025.88559245013  
C11orf20 117.017844025726 117.417112053842 119.627380812035  
122.711143209444 123.168787977805 120.897228878841 104.505454151012  
122.860898886143 117.455432751161 139.499652059557 133.680691168661  
116.850851308701  
C11orf21 129.668506092785 131.031639119149 116.483432723207  
129.707421699091 128.499303407596 126.825785762925 138.424464248567  
124.606795061928 130.70867409848 132.17294083844 127.966883271903  
130.907879150229  
C11orf24 250.626556981376 206.098534554876 191.795952536469  
259.72035004624 291.883157643902 226.114369645703 236.35479928448  
185.485858719975 185.717123241832 221.127492253636 182.886100305943  
210.803130108618  
C11orf30 129.150574563997 154.657316209848 166.635366968851  
141.18490443471 147.610616423185 135.205434173702 151.266352916239  
150.250193889942 138.361149460093 138.706520278166 157.776321544382  
137.048292841566  
C11orf31 116.746018509166 136.178501890585 127.532665057083  
127.075899925865 126.455271988029 140.538020869886 145.301551442388  
115.907902010701 142.019263564073 130.052593375075 167.984051648058  
146.392657608076  
C11orf34 132.365002835934 137.188849160569 134.845202154446  
143.62103263895 132.48841450242 142.819669471009 128.368669716591

136.565191271943 126.464893786922 127.7962242731 123.081299769162  
137.567384694894  
C11orf35 144.896960245309 117.990622156287 125.40832206502  
140.216148769999 202.193338797533 150.031863363697 144.122748003206  
142.671190279415 140.960907353937 138.259512736404 171.826623289946  
150.144977373708  
C11orf36 118.836387680022 139.086498524774 135.51506573405  
135.479300698192 130.603837917984 131.575356402693 144.120106441052  
132.539585717666 131.597937570173 125.493004972076 136.566588903194  
131.18368961955  
C11orf37 107.976233194926 112.590379042108 128.251087452744  
126.086991456747 127.442587366678 119.894737403889 123.281489592543  
104.977794653504 126.503135702506 133.138744413911 129.55573546861  
126.115828232308  
C11orf39 127.560308850342 128.077692981235 143.532014058535  
129.201101445773 131.423918669689 132.081286801266 158.76356962428  
131.87052926802 145.017264740722 113.083678884076 125.815256068004  
148.821942578396  
C11orf40 140.702685210277 130.069789939568 133.864612785572  
128.972276851419 131.354275252104 129.758303592589 122.300069045533  
155.386226046894 141.478253058549 125.358906118533 114.953328013917  
133.841519663164  
C11orf41 143.258488502799 135.095095470362 143.066552389513  
150.215811815246 147.856285290748 160.778296470857 146.632312874102  
160.014635964846 161.072844903925 165.436881839632 225.438177833064  
160.584760930779  
C11orf42 112.666812944192 114.41737808857 120.585506729733  
120.806180547422 120.693808603805 120.514672572565 118.631771242606  
114.441223528256 119.168045349254 117.470731811595 137.7872481668  
119.717408713154  
C11orf44 123.654787271088 134.332550221597 126.520909083643  
127.323157914914 135.306127055224 129.151767489346 136.580363776109  
134.28095064513 128.099484678519 124.469415593643 132.514706165018  
128.075865243385  
C11orf45 127.56862018147 119.427342766092 123.692366307662  
113.734280863323 130.672586991186 113.209569103727 109.924867620862  
129.161305053472 116.046983032621 116.678969343492 141.112047881014  
136.879615833565  
C11orf46 314.292700455545 287.656436278551 415.322560616847  
278.737944234055 209.229537873706 280.337475979102 258.21341068758  
320.979443123471 314.221257518059 293.600165830839 255.71113398292  
203.436527043293  
C11orf47 149.160808104789 150.003399000079 155.851264092344  
135.399032687551 137.243175880462 141.865758685796 135.807494668545  
137.220718873614 137.127587786536 138.609972011765 152.961475450751  
147.893916750136  
C11orf48 282.963958072528 296.088938872643 296.24781576525  
310.142754559096 827.157920721418 667.693216401836 718.670564185576  
718.670564185576 539.125423322738 422.688531130043 387.711471687237  
616.523853569261  
C11orf49 148.73620012231 158.181316170382 157.58224826673  
153.339992195184 159.79463502085 163.081050585097 190.002630382394  
163.153676643372 169.598493862848 168.919352453652 165.411052799773  
163.899808733609

C11orf51 348.300300174924 326.908959531021 445.95114929414  
435.69811966429 394.101052511043 472.405334652317 257.813193543819  
280.337475979102 277.101000223971 303.423450627377 224.008253365957  
405.469705787631  
C11orf52 157.130045415943 146.934990457666 152.857278986877  
144.143692745479 231.572677616684 150.417169156755 230.332652534446  
211.595513743111 159.443697452694 157.838771553729 170.05799929575  
186.679199600379  
C11orf53 127.476819912992 123.513588004371 125.5449326311  
129.856994052591 144.540174041867 126.222105816959 114.364953312191  
126.209426865327 125.301602026407 117.503848306325 128.966514855818  
129.140978620864  
C11orf54 301.638918685657 300.985037429772 382.744523022686  
302.809011218879 225.783771938969 257.44230597145 240.511797905018  
285.172001915966 252.919704128539 235.795627549799 380.754569467715  
237.601064742453  
C11orf55 136.824357247954 131.074021609161 141.016596301267  
131.859204862396 132.287326702468 143.258488502799 141.137459291428  
135.208478510375 140.21908493941 125.431735524937 140.983230581181  
131.298129667973  
C11orf57 292.693830444839 281.405355165228 356.413190087706  
301.955019831714 254.235762677639 293.281098275134 314.095043876244  
288.88486628661 281.740495452842 250.542405852865 380.888728347647  
283.416246133873  
C11orf58 281.278843600876 251.546290552828 332.749676505218  
233.272000923172 194.212177449077 287.145105895235 228.542423012958  
225.095016600703 200.302384864371 241.917371866481 231.769926214655  
188.780089746036  
C11orf59 662.213423011533 758.863418917419 684.866405921987  
860.688314783077 2307.82327595071 1147.33034082693 1247.02514044778  
953.549801897112 822.88742008931 1096.10636044885 1128.60314361459  
1159.44907165386  
C11orf60 200.22145130696 231.517412929077 217.86728342043  
203.852316712377 272.41397350779 136.415734370763 189.205724390913  
173.353648927895 195.963361515546 174.991941844263 211.720536220806  
173.879952136931  
C11orf61 192.789886894821 182.693963066543 213.602504580364  
188.118989395838 159.317429821638 150.166324293431 162.756185479013  
186.640167849568 182.410688592378 164.191906588579 208.080089376299  
197.262062021667  
C11orf63 348.457808063307 316.237519859859 298.979106293393  
293.12968694683 173.640326140494 278.687780705367 210.852300463808  
249.590923098575 220.661922683143 226.221973502783 317.839512360245  
217.811099067262  
C11orf64 142.907969322845 128.011387527117 157.692519370734  
148.577336081778 144.476157581998 141.145419751161 136.959011188915  
133.830860948014 143.437546532782 142.914863449833 123.591078216224  
154.645353009618  
C11orf65 121.322817570375 122.35832958054 110.562310620515  
117.889524670597 126.617737577634 109.680532131035 121.723964989551  
124.22833964472 119.062611098235 117.445284668654 138.909419415137  
125.596067857941  
C11orf66 123.777133327569 124.387133895009 122.232732968363  
121.508233749444 118.677203713024 126.471321085803 128.907618218883



127.527378949803 128.348910964448 128.578494940165 149.712320986646  
108.830525786872  
C11orf67 725.216684507759 636.970243888917 1164.61390835016  
611.088604425595 275.696829424061 439.33566689752 622.561634660589  
435.69811966429 403.720036930931 614.775559038663 535.758943850734  
293.17183601265  
C11orf68 481.453770150269 395.386242257877 423.562598841704  
609.309339417625 345.38424761963 217.148957110623 235.742017851879  
226.841838641151 219.78041403077 237.396466740419 245.582279957584  
226.595006724068  
C11orf70 191.507657960386 175.767556472012 178.416969664816  
188.268774618164 232.105867345662 151.327544435847 146.442734810495  
184.873459141947 491.709723745226 159.257221624668 160.031506612501  
184.557630172634  
C11orf71 160.379168489216 155.147962740503 201.49630027392  
179.15284184774 187.625536724681 156.768976123975 182.919385608842  
151.747595672228 168.824578400555 151.418316929551 155.496190048502  
167.057202756618  
C11orf72 121.224389883994 124.405905157157 127.086470811408  
123.725998173975 117.264555636952 116.718099363329 115.128667174745  
115.834056091815 116.476747183738 120.488694213288 124.757229519631  
117.392898601408  
C11orf73 317.904396212359 279.413335686746 412.202049714695  
263.352118305612 297.921617748468 305.200911653347 365.441289363381  
320.648966489586 292.429831186609 411.221560795912 352.22815095475  
424.025588636796  
C11orf74 456.530337997907 429.595453454621 753.389428590366  
454.030083521756 265.43897208356 230.079664410595 238.946506103155  
206.010481981919 406.816482069141 377.661589835101 247.971366020963  
189.61702125418  
C11orf75 313.641656294638 283.123157828849 251.869781014029  
335.623336587396 468.569725051459 170.243136294537 253.975577255772  
639.38881853171 678.684323057327 388.573321838751 296.333944172375  
300.401370666633  
C11orf76 152.06044555622 143.635367691412 141.836648910979  
139.62718946833 151.554352209634 149.874424976813 152.620244087653  
145.245316640391 149.166635189875 170.430478598594 113.76411537952  
148.85250180736  
C11orf80 156.704278982517 173.761036260869 184.414609874199  
150.902548360746 299.616447269111 153.273568880305 239.73396414153  
284.321253087512 218.917357155289 674.905270154355 246.389203940944  
239.109163320417  
C11orf82 178.294972422671 173.063002566542 150.632724038845  
155.07594431078 406.54518900348 349.910535555712 229.483578414375  
624.825216056495 356.530530468568 271.858059712406 198.437113196596  
334.377352542623  
C11orf83 202.01798254763 199.579818754014 245.426639190893  
232.879578820053 490.464012303239 314.845965872164 307.570405241182  
210.605864685448 256.924134409998 234.661864595717 189.603621918298  
231.47915227815  
C11orf84 174.221939793486 191.59400638652 187.016569445646  
229.835576260403 239.871536598083 211.891710626953 172.583615020042  
205.765822478178 163.899808733609 160.176567985923 173.440596296333  
175.744275464701

C11orf85 133.680691168661 136.01865173754 126.819413901915  
117.449306773025 143.234195669431 126.760835666143 120.616979607398  
126.931328660501 120.015436934157 123.681353449198 143.672118850295  
128.372225487481  
C11orf86 137.4552565025 136.823008283157 132.016944935305  
139.792313018728 156.040073232376 136.037555727438 133.120273569229  
134.703474191011 154.959217895243 140.800226245569 131.062360037777  
133.526213647686  
C11orf87 117.404906698431 114.638254225216 118.88525116298  
117.49013401175 119.562180492359 115.927914533359 133.032905765836  
122.472909598385 129.900540030251 126.462522391125 131.404001006643  
123.720229113779  
C11orf88 139.13396769999 131.556892859203 137.550607284001  
140.947852529815 130.425809387444 143.881744063934 137.076766238637  
134.033751039071 139.427216913809 146.460464282676 134.996443685544  
137.994334667126  
C11orf9 129.284384810812 139.229351251973 138.953926269905  
123.275246170603 133.738587139139 132.014213378179 132.128418409996  
133.800111596565 138.123754096875 122.20752192519 120.006982591236  
165.48594766783  
C11orf91 145.520832968878 142.883466086309 132.765942975939  
137.747088378131 143.752697178913 141.70844587896 138.56436658053  
141.725882943927 146.856133875296 134.423260547727 134.250052775987  
133.860077101582  
C11orf92 147.905406818238 156.774097885381 155.598586699376  
142.514794686932 200.322334039458 122.516192906386 159.384480972135  
143.727514442914 121.036054511761 114.342980656214 214.331491507489  
103.99234480919  
C12orf10 872.512754090023 933.723483173584 1282.38953612054  
1206.09815575399 1488.37146754184 783.373390305885 1080.95725397659  
1055.79590411506 930.25842384208 942.41077071058 699.984140389009  
873.879064183441  
C12orf11 253.580286414227 254.188830191845 272.666435295288  
267.483886037099 198.390247605355 239.827648772906 262.389583658305  
226.449705559354 230.770036998466 300.53017771156 253.327404004524  
226.824313642101  
C12orf12 130.807596523171 124.766436060041 139.166537591866  
128.259909378964 165.654773882752 147.841960346835 142.49005761699  
131.252368756892 143.144153021901 149.869314204354 121.961568081299  
144.785852437305  
C12orf23 373.290426793366 297.609793563225 252.733973271584  
283.952604729032 175.832474809232 193.052112923573 296.141012087256  
210.502556087175 236.401834189942 189.235998474945 272.117599603586  
160.92643755328  
C12orf24 243.622678182687 244.251315474587 271.522696252995  
256.237185590901 185.661496988658 185.984938124891 182.263724979519  
144.090047165489 190.787437782456 243.308625792448 150.412929574507  
168.269075560636  
C12orf26 283.048002376743 259.979459472217 289.037033338975  
276.351810999317 224.186573847185 200.114704018645 283.123157828849  
599.208370337812 302.696004448559 220.288758600588 367.567681162661  
242.81187187788  
C12orf27 120.988749021323 123.086596566142 133.517685144186  
124.958287100852 126.129564039673 139.268497466017 126.464893786922

202.061887608293 153.332110179758 124.672483602517 128.835216648178  
136.506347083926  
C12orf28 133.970510683179 126.089217853289 134.32174235533  
129.741644654541 118.66946078241 125.98519427755 130.467450968785  
177.793860516896 144.458829225668 129.740166478951 110.093565974873  
121.85247363239  
C12orf29 358.732947927445 342.147414141627 402.473870771741  
269.831616158113 286.310923582432 429.457884032977 303.380479700334  
579.493790910006 338.866471651692 464.577839898252 303.608918161742  
299.463563393179  
C12orf30 258.695920967489 264.8472508692 226.919545367682  
272.571092944711 196.990867962546 325.751369001105 270.92671642109  
257.338950719432 280.494088228226 197.308952757609 189.434597063058  
257.685284145848  
C12orf31 266.252875242286 230.723142236623 368.825190022937  
220.079379312889 203.487137264 1294.74864310494 299.568830444875  
999.658013198849 387.711471687237 451.317592236192 386.817736004263  
281.53843450593  
C12orf32 240.147082836599 285.46340356157 263.509066170434  
268.406778092906 386.679822751367 298.301504581296 413.398641688413  
689.590642377619 414.713379367927 309.937351755502 364.022018936132  
438.431160975498  
C12orf33 130.92186531563 130.516632662261 130.716570410608  
135.223957492606 118.912989775436 131.328478053136 127.220812636148  
121.543207264598 123.033673289024 136.135223482208 131.204616536341  
131.095431530473  
C12orf34 147.060637536615 141.490911535087 134.534815676852  
150.331324340476 176.11287574658 148.907136936731 130.810353054091  
164.357373919714 146.029647001623 144.20764300349 133.611588728019  
136.927274496451  
C12orf35 350.392951395182 310.8725368426 382.327656839936  
248.185148749493 271.064405562085 432.726040933545 402.140437036706  
561.379619105609 503.967725251906 294.115163083721 359.493075382333  
361.516275756449  
C12orf36 141.016596301267 155.319717753912 157.328404229451  
140.292132023262 181.922907273871 145.906601611338 177.32104138164  
166.655585160657 142.049776668507 154.173439471404 150.534608517044  
126.497472087036  
C12orf37 152.581729298159 148.482530949134 138.469997677004  
142.09146795308 151.004738508108 161.790909578234 150.870830294349  
156.901209828741 151.81754291846 140.895053453126 161.618479762188  
157.058912028958  
C12orf39 122.982686879394 115.14883090249 114.504409331018  
124.317870455205 112.166192839859 122.160459795959 115.933805625814  
124.103321614841 113.283359026655 123.271452939936 128.576310682958  
111.538651711074  
C12orf4 212.460476372263 223.975677959345 251.704037951295  
232.127996106421 171.216275057884 275.543576337502 203.652936507291  
227.774354299962 254.235762677639 265.332196877456 232.801257700571  
212.291528248457  
C12orf40 137.246089511045 150.51537512828 138.02757574324  
143.449303333495 138.496366637658 137.110908101966 140.709981878311  
148.883263903527 141.760529549196 136.249621724093 132.028327486943  
135.663734178125

C12orf41 780.105135529728 765.128667448261 840.623505494489  
688.684644604218 465.29290512169 888.371107987343 749.220616713093  
968.548243081111 1235.02626456572 744.225336494008 948.150767619765  
811.912727084669  
C12orf42 107.187035835972 106.685578858702 108.861243071977  
113.680875214845 115.830631252469 105.25877906031 101.981823814699  
111.820208385514 108.226917034591 110.296425545476 123.312000381122  
109.978693735206  
C12orf43 232.590542016298 231.39684528494 252.32907388173  
263.800363357443 204.415267938007 178.780662099615 219.597808863947  
204.740183832461 222.177290763736 218.529160053398 194.413759761549  
184.742960975938  
C12orf44 508.449904285771 541.351092873522 434.176007498693  
501.166869173253 907.904780399957 467.512355593598 468.712260193746  
557.868300839263 620.614820117452 454.64556253724 380.821355948507  
500.343476678562  
C12orf45 231.547654653783 249.489170536758 306.486275677467  
279.495192828873 317.353318759931 316.237519859859 305.398934391579  
462.025126897013 256.590289281076 331.164053277361 232.105867345662  
309.538690289233  
C12orf47 897.958748317315 959.897744425251 908.352265585374  
1111.88018487186 490.631757904175 849.389818300305 922.877217016704  
787.017214032692 1172.96121022579 650.679096367632 1006.24899131914  
701.847905027147  
C12orf48 157.5032461329 163.262893278578 141.064086298948  
142.948238172973 344.298510200653 309.098519056843 240.836979012241  
336.212224495877 242.752995772995 192.340135076104 192.314484368435  
230.447203571825  
C12orf49 132.75673287656 144.522461545204 123.654787271088  
122.914680091926 217.227441947056 193.801858215025 186.127543877065  
162.173506492562 247.779718065751 173.979001863717 210.165098572428  
202.300293733922  
C12orf5 193.858884443593 191.25724234927 218.2454853526  
205.871133967588 186.077477713775 228.284236550547 222.243523614518  
221.471811658459 182.851203073653 497.916883763059 249.09278446472  
272.885527139137  
C12orf50 123.111192189217 128.655549652719 134.169645445889  
132.263954832097 126.233395051706 131.22473774325 123.632031112507  
138.698178321535 124.876226351169 143.594003495859 136.353051841792  
127.833653828539  
C12orf51 526.625936680738 469.407481002198 550.24496459253  
640.90860274227 285.172001915966 340.800632878807 390.897464546943  
336.434368527549 362.65285317327 293.080122239022 380.393153331219  
340.860684371038  
C12orf52 266.032134528055 293.746733527346 291.444155562134  
364.191263843897 669.731546951281 456.656123023446 478.606567465979  
456.817057099146 453.17378995737 375.767528676937 278.651369597422  
369.198837083585  
C12orf53 134.992686224944 133.299599411025 116.087696503753  
128.354163132392 136.470025638057 125.350567304651 129.904942554979  
125.899200544217 119.613985826308 119.717408713154 144.490452173336  
122.051473363557  
C12orf54 145.424827607383 158.495606141226 141.631165634373  
148.492328039604 141.494666823639 150.822586904738 143.08841562593

148.594322264158 139.875260384886 170.725486814469 163.704616231638  
134.744175117719  
C12orf55 152.68344738009 144.032779435658 139.837616209536  
145.61758790738 152.459041674768 144.102872001089 140.844007965202  
156.373163373309 140.689631427359 146.188193301627 144.873034900013  
153.913513669361  
C12orf56 125.315736755156 113.184495948936 138.645156942894  
121.356731684516 210.353341004865 145.635453468646 216.929969034881  
260.370285504512 244.689936990021 339.663295617139 122.531675048414  
229.74418058711  
C12orf57 3052.86038628748 2988.45928881468 3253.76017336684  
2653.47752512393 2330.60389526686 2137.44704613378 2620.17683549005  
2172.89794460273 2135.04382065446 2390.41825815872 2334.97297889593  
2982.80580616089  
C12orf59 136.158508521357 140.222121251146 134.624322761212  
141.528115502473 144.210698143215 138.848119273081 135.931715324468  
141.362627556137 133.264245969185 161.305860691151 136.978738825445  
153.369334953677  
C12orf60 131.17119492692 130.975606477621 142.467552395104  
131.590180562108 133.975526667571 132.950480329605 133.213697351807  
151.256546638599 142.815817738837 140.608266389167 147.196687432745  
136.737964237109  
C12orf61 117.093818506721 111.260486045985 111.722827315911  
123.554769032715 122.751674866182 104.977794653504 112.699674279523  
110.266032635568 110.636713168363 112.41270361848 113.799997627317  
114.470670941078  
C12orf62 768.67030514096 611.36406319509 828.276436883306  
662.213423011533 579.678635803225 935.423045210635 843.545962045705  
841.944755849006 863.738809424958 400.783945471037 922.50743596248  
775.781735108886  
C12orf63 127.644315207178 145.766684470184 132.283682066898  
131.601823550269 159.443697452694 134.56763097313 149.151791028837  
171.689722533849 147.299872426498 143.950279111815 136.907453440141  
127.802645313091  
C12orf64 150.093684245826 142.305484770249 132.211379936941  
155.53992663898 139.59941545613 143.340685579645 141.059033576475  
161.543072816738 147.064543281269 151.449690439424 143.692305478191  
139.374278310041  
C12orf65 287.967349876429 336.067655676466 265.402310598892  
318.487401106209 246.457698183615 182.711318507496 298.827660296715  
197.146035305296 283.807827536147 238.617228632505 287.967349876429  
193.629237856758  
C12orf66 140.357427912361 136.625136565562 145.437544062449  
140.127379332918 244.440857688518 143.279331050175 151.403431105471  
350.22221782412 173.109461200603 131.856313046545 185.295480519718  
147.305679046765  
C12orf67 158.445124076906 130.619624347751 128.597272557033  
143.351341716363 145.223648967115 148.16526158216 150.021512237553  
156.852187451794 130.394687030464 151.981708806765 136.841506794489  
121.863062638551  
C12orf68 174.02138265758 183.879114762264 151.449690439424  
189.472541628897 140.775447163954 136.087702679172 145.754504160436  
146.882746173951 143.616189776965 155.162310001164 177.039190810529  
167.07092218037

C12orf69 144.428776560885 139.715836473047 132.43999768718  
143.635367691412 131.49254872524 145.070927449969 146.361128670362  
140.983230581181 132.737464610403 128.521380879209 147.872625576731  
151.663203772586  
C12orf71 146.944628763232 141.378381097266 144.270828498856  
143.125454748996 134.387256336429 149.000760379976 150.998881139061  
141.474583706011 144.89062965996 141.653917856148 128.539969915702  
135.400054238597  
C12orf72 115.507474401239 111.867464669155 111.366283149236  
119.998260435095 111.196610704726 115.420810993676 119.112063328364  
112.133567992833 112.14768481333 119.590540166384 118.740346254406  
118.9428715545  
C12orf73 151.946691918521 166.515199732076 160.459100056689  
156.589829166493 156.224769056915 169.800006803362 145.987228759402  
161.678137139371 185.31769184805 169.246302492166 156.61494867164  
167.063762404009  
C12orf74 144.421572284568 122.251178920649 128.381433897602  
131.880438747579 136.384308041001 141.947478902603 152.808771946509  
131.318472643519 138.657241641263 128.72727523654 129.368045611894  
129.623601211364  
C12orf76 192.992546726522 179.663258610881 213.531307836195  
188.818012746123 203.983168778488 241.944581086483 244.689936990021  
195.630643168176 268.148673257455 243.936797286495 205.781486117242  
260.489744360233  
C12orf77 163.474261351901 154.229914729772 161.988082494464  
194.072260528037 147.75625228531 152.972779110762 155.851264092344  
152.371569700039 146.416318806523 163.926432479673 165.634117939571  
176.245698601389  
C12orf8 146.983646662811 121.483610947845 130.35985690876  
132.450954427876 123.977467396003 127.019978195283 127.337833551369  
136.142380560596 139.22543724535 124.042153387391 119.899649497032  
134.064206964444  
C13orf1 291.105673222859 229.373686092654 326.83982672544  
230.546762514966 216.209052148435 311.337303524912 184.577511730401  
214.100698312272 236.082185670774 386.598037190663 216.615694348945  
365.362177671146  
C13orf15 837.413261433363 742.751664201272 657.231047829537  
539.720389702148 431.413030534188 1854.11328962023 628.710901107436  
947.425912541091 821.020339593525 1701.43479420427 569.133295913677  
619.045921382959  
C13orf16 144.116298946718 146.351622020606 142.153830345183  
152.20173979854 138.393565473857 140.593510265137 141.359142214228  
167.536828038178 140.687016530974 151.27882940428 133.254663058352  
151.305201022012  
C13orf18 160.766121558583 158.221595000183 144.329979284786  
143.21411610625 152.778732614944 151.064422836695 139.404820141366  
137.902953501634 176.680708339236 145.799530970042 148.145136066071  
141.294094833197  
C13orf23 195.711047893396 195.438353051306 184.557630172634  
171.835438335216 213.028568789661 387.068276379114 246.912159676595  
270.33685210971 362.445813697676 251.511405838796 315.130912368929  
405.409668978569  
C13orf25 153.681775929182 142.41737138634 166.872332652008  
164.288645768576 180.610891208146 184.157941055948 186.57665470145

208.363905749882 172.387657419201 173.577723566555 171.410912120195  
187.216245895253  
C13orf26 149.255405438966 149.52880714343 150.098708715617  
155.578524031078 169.631386764054 164.801505601099 146.493927564338  
155.410704148925 162.10411532202 151.092066533546 139.128751917566  
152.6969498938  
C13orf27 240.663883443935 219.151144724168 273.75192868583  
220.362946606131 314.845965872164 444.584594376357 290.184801898828  
354.067771806542 378.24336892367 317.206754773681 216.559563381808  
264.306927596371  
C13orf28 120.853961156534 104.896224175106 115.827175143972  
121.47058227778 110.437728036347 109.495342943278 118.500956349352  
108.970432124412 117.203783530266 122.180428703208 122.176811388389  
124.381674909742  
C13orf29 156.798431595608 142.719216118914 143.512348693556  
140.083495854322 152.56002779985 156.65842876856 147.274945970072  
146.40033464957 161.543072816738 160.156127781701 141.980728956046  
170.007845523415  
C13orf3 129.89329138222 123.601413134287 137.101280421516  
139.871928127715 187.389039221193 163.245806772716 152.987939791009  
206.027235767232 183.201926323188 167.093409692227 177.84188738734  
206.650760711745  
C13orf30 113.214390213004 107.07609243233 117.49013401175  
114.45792163942 114.062099086818 115.725323816619 106.772581387455  
116.871350997346 110.707755436868 106.701716475947 106.41329572636  
113.529619135543  
C13orf31 250.443147156029 201.415695076278 199.555406967021  
213.602504580364 183.416437587938 178.200678423426 180.008152341531  
175.79375235478 192.314484368435 232.986366625889 166.879042308539  
237.01460308334  
C13orf33 231.146155346291 198.597176657619 156.502051001988  
260.888612454097 137.609831343223 149.41564356447 133.627389970495  
138.936872956065 142.046082566177 140.279222720709 145.466538006138  
139.161483596756  
C13orf34 176.940723174814 171.714973501563 166.433933349193  
178.863722055499 411.285747588622 408.263886786123 268.832884350157  
314.063025950327 317.659548748735 255.493109705211 230.469548500304  
364.597798667541  
C13orf35 128.202619705343 122.287535209629 129.165440930558  
127.036976462046 122.243585162452 125.060387518072 126.199219102601  
121.952255635669 122.733870240098 122.142323014287 140.518206716196  
134.253399256648  
C13orf36 142.170705049763 136.835889180879 137.091932621041  
140.857793157932 129.818020166075 141.521742442341 134.719531559829  
144.018198451676 136.897888440409 138.361149460093 152.368485416992  
149.742140955184  
C13orf37 167.500410857353 161.866405026758 189.283071231248  
177.60876237572 320.597495751519 367.229293432041 355.290621188435  
380.664528809678 456.038981546175 391.500696444149 261.89195025254  
645.806954296487  
C13orf39 109.384112020063 112.509731206295 116.300028266671  
113.913337223716 109.398997827329 107.02909139647 109.087574814292  
108.79453730066 102.166449349339 115.507474401239 123.089110282465  
109.932577444858

C13orf7 279.000687630846 290.389345090634 276.224613560582  
242.871915060884 204.183472655276 327.062810389635 220.487665103019  
243.95334982553 246.288681426405 218.615551704188 288.436880408624  
283.46492196692

C14orf1 112.476111928742 120.688909943167 124.528206512938  
121.843992693814 125.426018910517 121.583096465567 127.485734862624  
108.101686347192 111.826509343353 117.034228068173 135.467354817201  
112.977469350139

C14orf100 302.272304483941 310.598930734244 312.286788541158  
263.183010631644 339.32415558339 579.318912497928 487.19625805337  
365.82705202869 337.585502787016 494.347792360629 411.039234404499  
565.509446660206

C14orf101 163.066051106092 171.795878750365 178.606255846041  
175.38376293575 173.995889755792 245.489266602897 188.36361073603  
200.468804559127 166.214167530158 148.562200783472 189.461090469712  
202.129153259445

C14orf102 549.692164962653 644.449861831749 483.549698382115  
654.663838918786 252.280435525505 324.009703043876 413.172954892025  
356.770158430601 279.202256032476 380.664528809678 447.727229248315  
440.404188514231

C14orf104 168.03501792841 163.059196519365 171.202766078337  
144.767233774942 325.96632528242 186.231346659144 233.953994677015  
295.571900619972 205.08372943071 205.45079491218 227.774354299962  
240.511797905018

C14orf105 152.011551837951 140.78902818186 141.640292723776  
141.299677389827 140.597877909094 143.446317006075 150.99622088333  
261.322374889497 249.292766428035 138.221749464651 211.679799388351  
133.887927451362

C14orf106 292.366934378643 372.255208814622 262.629961694573  
307.570405241182 414.713379367927 586.867772838753 406.816482069141  
628.000860165888 435.901794650816 341.901565692251 448.371946119074  
502.731019454502

C14orf109 354.705553237406 317.309949792707 530.267835989435  
306.716682293251 409.477576085245 366.073387075385 385.522443482  
466.909037277853 378.862741410359 448.767690095033 401.750302347978  
586.366632966978

C14orf11 139.535490288426 148.549257493128 126.285743744314  
124.3501719829 153.432933930805 118.410091682499 127.137447808551  
128.816610738922 139.289968250444 144.456324230938 190.645917992472  
135.938590242744

C14orf112 524.855915371246 583.697431061521 574.262112643403  
448.54309632232 1436.577717111084 851.221199352646 1098.78649254838  
1109.79571066685 874.816697884109 1184.88559645917 976.050097371579  
1375.76915021882

C14orf115 143.338628928675 153.545086287929 159.710615852435  
143.662865541299 134.674554546711 142.122556679441 149.818888178632  
136.986022901377 150.279529635193 164.063104872636 144.562038493733  
142.394644827434

C14orf118 143.307838525991 136.015561289357 134.04235176608  
127.941584184869 127.336648342283 138.9878987332 141.168198348093  
146.861981788662 124.944563166658 133.717451195844 145.07503221134  
146.129805607031

C14orf119 132.926799887017 148.911306526869 133.820936825552  
143.080742311914 111.886543737378 120.524859681034 122.333765477428



113.78323485587 113.773684331489 123.25201993575 131.081793789906  
130.124601660028  
C14orf121 178.665552649698 165.500088159872 153.136863548105  
190.76537287329 166.70212615715 157.560117350562 162.728630453745  
151.538112896642 157.240466990977 179.601348561497 167.194306682927  
165.638672456873  
C14orf124 149.541917326637 153.776361241587 189.49408026215  
147.036768856136 160.752581271996 156.783896946556 198.753297290444  
177.457362387052 160.073510173041 155.091135297162 157.446725405803  
220.772387104223  
C14orf125 163.422877959747 167.645930148254 146.582858169664  
160.72962443421 168.890506147594 147.949560045212 154.623548525522  
171.504939477949 154.462766419353 152.520828479026 144.361871207081  
141.037217406848  
C14orf126 141.901382169334 148.272252953881 150.751386127903  
134.614988219821 154.826710617351 162.013164369593 141.735123971775  
160.469645948225 145.114382599368 157.419333185365 154.449058407217  
146.025781495177  
C14orf128 155.263513633703 144.4421922847 151.619329363527  
147.983937675946 146.227452269648 148.454344601562 148.919726992353  
132.402255281009 143.26896117546 132.956860864455 160.290104492275  
141.513636348978  
C14orf129 241.203521822269 225.238369884803 296.75326294587  
226.144012966486 259.472319994929 313.18989508207 284.195575802966  
312.339824919124 265.110264596425 441.435444003241 251.665539319612  
400.845137156678  
C14orf131 350.983969007868 410.138738410101 401.840794789616  
458.607367472574 327.749926183823 319.560819487616 441.001837510132  
554.800688991977 348.98762709818 504.275299381356 386.960778432157  
562.711562649704  
C14orf132 594.713185954954 482.466736153026 408.60092780174  
430.833137328233 191.912670416334 189.678680702271 150.029313080668  
165.731179108649 192.399146702036 176.256840061919 160.240052678401  
161.22761502968  
C14orf133 162.786351190659 182.67941458824 203.943245360496  
165.504532455205 221.796935051107 175.638328370133 213.097664319741  
224.981439707657 195.269099451599 200.603836348642 235.063474370925  
220.010399552402  
C14orf135 459.388390392518 429.096075419528 450.688800547981  
411.71606840872 230.855806094267 315.565349831797 363.150472154973  
346.635777358159 308.088967616175 505.302263971007 386.598037190663  
410.533157400023  
C14orf138 202.583967728957 182.32514927211 183.04531185589  
166.540134051424 150.191645194625 175.908645445479 196.819022688128  
193.641927801805 173.850390626782 220.330477277988 257.941367816557  
220.113261580385  
C14orf139 164.608496326181 155.235505614649 140.911080286243  
171.36717256867 131.910285685889 132.110906510601 131.373846564542  
133.249792744053 147.108661317945 130.049854901235 151.201263631883  
124.197397333928  
C14orf142 232.151020756625 232.879578820053 240.497413647633  
218.811490883852 251.61451602376 257.643855420381 208.080089376299  
345.433025456954 294.115163083721 248.643311972844 274.047586063773  
249.129943906228

C14orf143 185.507663455634 180.008152341531 184.451469623426  
185.027902485379 258.4424008891 195.447966116819 227.491667075987  
312.224309341171 202.643624039869 256.590289281076 211.505504834207  
218.997165156081

C14orf144 147.49720952988 144.064214573005 135.544048708523  
139.706279455371 144.665235198936 141.630183595813 136.649743237542  
150.893280574091 136.373761435722 153.46645509759 131.221105247771  
162.683665945044

C14orf145 178.43642939806 163.799748670842 178.270849389719  
199.947823264085 181.530767521222 147.743331160624 158.528301072565  
174.615694779386 173.829219279719 155.114892891737 149.188357651896  
145.843639385175

C14orf147 448.715938510132 423.966625351913 417.528353577952  
385.678901612324 235.32095278846 559.236012019639 337.077153882632  
246.748589597262 246.492735271771 633.401624753368 309.538690289233  
325.320888625297

C14orf148 118.757973008463 127.824005374202 117.264555636952  
121.961568081299 115.718600552187 131.074021609161 118.294324274616  
123.21112178671 116.95195122318 118.419311800417 130.792692240592  
117.642441794442

C14orf149 235.32095278846 192.022864170934 234.094722315007  
226.25694727283 190.825209733575 181.294497402507 151.308872564827  
169.87591929982 154.821960325589 224.547982731402 166.027988561421  
175.269675831824

C14orf153 4198.61471038267 4016.35381420598 4175.70090899755  
3581.36347643133 553.757847979529 3481.90072759183 1609.54149931375  
2542.44286642873 1984.47173096657 1526.66232186013 2328.65814406636  
1948.24432908972

C14orf156 3046.47354587949 3140.51157972795 4166.43837922103  
3294.92439159154 6585.34962362923 4150.8511719558 3850.41246770812  
6810.50193989514 4866.98027226798 5195.2087608308 4602.81651147558  
6021.68798558746

C14orf159 975.685771692095 1014.23822508445 1327.65573168233  
1414.95226752155 367.983166440977 274.047586063773 613.279465441319  
258.695920967489 429.595453454621 321.177982468322 1021.25947613827  
715.039905439621

C14orf162 147.405050592353 147.975551540256 165.430811083128  
143.537785553911 146.770267005869 147.995991912855 146.871145679651  
132.637443692683 148.660440219589 144.997250967317 139.127442770828  
133.284873295487

C14orf165 148.029259633449 137.185243517766 126.766964875664  
157.6790197503 134.501410126169 142.440344960504 146.431166706908  
121.049927973123 137.473779155388 139.654648891206 143.574584852426  
130.198147836925

C14orf166 1065.36715400306 1104.61581891596 1482.15461429206  
1133.87328758676 1379.95968831696 1013.03054571763 1680.25851465727  
1856.05025952611 1028.80076860235 1782.2498613913 1466.08446530283  
1600.10235468018

C14orf166B 128.84676695859 128.344679872625 129.289216846128  
126.368170959337 136.532168520039 129.466612376702 137.089392202166  
124.682396766302 132.213890220705 124.602474178438 139.276102596591  
126.88066987372

C14orf167 264.306927596371 274.427235605909 269.62298406345  
274.092048989484 263.321559283966 301.591430919567 252.056131165397

235.795627549799 239.050379187643 227.050629701762 326.354469134694  
372.594990024312  
C14orf169 283.874600697211 292.037861000784 248.562843471699  
310.465070184707 412.801213309591 215.167086358143 276.582734590058  
375.856200488667 207.204293555178 250.443147156029 335.239364345057  
313.077481033093  
C14orf173 673.502723625773 928.151632070573 721.31849915135  
1165.05055932899 2072.01578063404 628.939201051801 470.42403724799  
761.726829618132 845.369108604819 979.019125719101 1482.92498205315  
1381.07447204233  
C14orf174 196.470718183575 188.40383184521 192.286192329464  
214.904634494921 198.583407008317 184.758754197435 238.230110356671  
221.424451092316 200.443940449586 225.702629835215 201.139510041141  
222.848935978648  
C14orf176 130.354641020141 143.618454531431 136.557466007228  
124.752198904184 140.724541696229 137.96452133771 130.516632662261  
128.793186785667 128.209771391087 119.459625817735 128.108066199718  
137.179058645907  
C14orf177 116.388079393669 110.562310620515 115.417648857825  
109.29279076901 108.497209666203 121.843992693814 113.845770994796  
116.647291878845 105.771723307783 111.577400298092 126.741498575874  
113.963798749897  
C14orf178 131.081793789906 136.739754726714 136.708746582636  
146.069543494352 135.229197100212 142.351705613006 145.915129713165  
133.411087000196 129.43892498257 126.083599163604 124.22833964472  
129.580421464913  
C14orf179 705.737228226014 616.014975366684 735.449040059761  
763.263858769038 435.901794650816 422.23268864343 485.576566972696  
604.737834405874 459.388390392518 406.028724866233 535.20662670885  
558.621429366984  
C14orf180 126.494665743087 159.504327477065 147.77916610545  
148.030579593944 136.092086452096 141.294094833197 128.689465747173  
134.776714949136 147.515088047628 140.946008063839 143.25481667885  
142.234554325754  
C14orf181 119.83679981791 133.203064891923 134.642898234003  
130.368933537243 154.201375471487 138.737332306848 136.131453703981  
139.782152941027 140.330400168187 127.928195199945 171.444558905575  
148.81406900745  
C14orf182 141.992490695142 145.395883026207 142.798248249144  
136.86685787001 135.368203841678 141.560424984281 135.897498591391  
147.915337223934 126.484819755399 145.112399373761 131.747367613225  
147.638057399165  
C14orf183 122.841135364088 108.404733392914 114.498610080481  
116.780639688465 102.786517901308 104.714872508838 112.943630133093  
112.851805868467 114.528407572496 106.393497890486 116.87586240208  
105.712302595131  
C14orf184 142.637421204193 135.244303669342 137.613233533453  
150.476228905372 169.16155608071 165.607095120227 164.794626785115  
158.224122084011 140.110258415883 161.825134481279 139.955389033983  
148.361088792223  
C14orf19 166.360005474414 179.996590340102 214.86995782548  
143.896324094984 144.904945833116 160.399059317919 215.673878830563  
154.088770236213 150.927628184034 179.060189557496 274.736124442229  
181.54273463264

C14orf2 412.941907828617 386.817736004263 489.118864124059  
501.005898087825 690.246312542011 416.546844844021 509.01330998156  
476.917496749381 421.836020491624 398.796188440256 512.467731561858  
893.676600121113

C14orf21 151.66733314947 143.197131668608 141.321547895734  
151.971337856271 178.696562301918 149.615585907229 181.966110264509  
168.37043566813 137.170666175895 174.027190728107 166.076692502428  
155.358918578397

C14orf23 135.268963938932 122.777544465711 148.562200783472  
129.677874035481 127.966883271903 136.173596381385 127.625252349231  
137.639342727211 126.512613967438 133.233826283531 135.351344868436  
127.476819912992

C14orf28 449.103432410618 448.54309632232 594.38228123675  
481.630922092112 205.742386129597 214.662648581622 244.766289564524  
224.824362819477 184.085616342099 173.182013165174 190.057030596611  
217.969738417693

C14orf32 565.313436777992 461.581199513891 485.309521583972  
424.665056900526 334.772648743153 982.367000148189 383.182507425579  
591.763423878737 439.207122335648 381.4054004349 452.167674725454  
599.52440136406

C14orf37 168.854819201403 164.820007934887 169.927157878764  
168.295044843056 192.737713851863 166.88833169342 143.336538157639  
221.889331385023 195.353512458837 167.871703133182 172.961115357569  
199.01458214661

C14orf38 118.095936088242 115.409568875238 141.568970008164  
120.035437167539 118.173752075833 118.26427946535 122.232732968363  
130.808911605271 134.449083873514 128.83022039037 118.764650384561  
119.387459594521

C14orf39 134.683553037185 133.832462719784 142.669207969715  
133.711821318079 121.239461514704 132.610618885717 135.028746262383  
122.494779505958 134.128061214081 122.010855318111 132.584454429269  
137.669753723768

C14orf4 2730.50913686613 3099.71798305764 1890.86868383409  
4353.66854914351 4246.19983955771 1573.03248861784 1245.47421607111  
1416.93831202323 862.669120338424 705.737228226014 2012.36542989953  
1145.35733270036

C14orf43 328.14373061894 325.320888625297 292.839392578318  
328.269845211173 211.22652563815 205.679992893049 207.298994298453  
200.633009710701 183.779065928447 277.459328083162 234.063633889254  
246.492735271771

C14orf45 193.472317111841 185.432587490792 239.924227955313  
189.816900281053 167.976680048356 141.939368369872 148.967232828819  
199.305626149918 150.993910190626 151.102431192559 161.072844903925  
147.051399102374

C14orf48 133.617501101389 133.602870982718 129.859331207247  
126.780096523484 127.723052839953 136.520811697544 123.096995744616  
130.513071750123 129.594440309419 124.802639338573 155.683727621475  
133.369314179341

C14orf49 130.887769728442 119.819082491115 117.611606270124  
125.301602026407 122.095978653755 127.369456504277 125.328704545727  
117.962188157317 121.624218243474 122.460829835477 138.829793136954  
123.467227007155

C14orf50 104.826135297161 118.122186617611 110.804248212067  
112.488125161387 108.362609680556 118.816986517698 110.093565974873

118.578205738502 114.488760619745 116.437403962939 154.552605305297  
123.822571859503  
C14orf53 142.390243984362 129.7137422914 138.805103589625  
140.040420521312 140.02337095267 128.26423663004 145.296229550382  
136.653140842194 136.570817174009 148.326282600684 136.959011188915  
137.801899270172  
C14orf56 121.774697402171 133.281505040209 133.816601264067  
120.006982591236 120.93965087814 132.596941171401 122.392159083328  
115.863243613121 131.261903118177 119.890260409414 115.524441144063  
110.794219964997  
C14orf64 122.379537202709 125.840932898827 123.29908883119  
141.949098898957 137.803749343493 120.379393989882 142.729945734027  
119.842470751496 131.17119492692 127.419227292862 114.421383025971  
124.735542880811  
C14orf65 131.617027772841 118.192302821514 124.443643568527  
130.559515534303 126.941650500751 127.524310543779 134.011746666371  
125.596067857941 130.316282003711 122.629146433216 129.763063900493  
128.207440197765  
C14orf68 139.782152941027 143.403396831929 130.609596267168  
168.323141675824 143.442361602626 141.442825487243 161.115842628581  
164.332073056902 163.552608805894 178.680902599163 144.570725886413  
143.250386570155  
C14orf70 136.065134838221 136.489566741917 136.995197143668  
134.514251897045 123.629279569085 135.122770943076 159.874161198304  
145.852430082228 139.067516394141 138.846543789882 126.893023101449  
136.381593416533  
C14orf72 173.109461200603 161.299920355406 165.055636629118  
179.753400474369 174.775676782795 189.840366340622 176.465559710285  
181.003812824014 189.887788314879 177.235586767256 172.722177339418  
182.644319628554  
C14orf73 138.8603234411 137.493436771898 127.130769263811  
139.301435614165 135.009205742175 126.737230874367 117.847744476387  
127.382266838772 131.773304233929 130.176734524308 141.453255692229  
127.736712231221  
C14orf78 1602.63977096867 1461.64901688125 1184.3199328099  
2018.81730267601 143.080742311914 152.358795162474 145.556318940043  
151.137791721752 153.776361241587 2139.42448145954 161.331326682743  
154.7326161316  
C14orf79 192.627266049516 214.082408290757 199.275716402358  
219.597808863947 233.029655807246 173.986750195954 255.039661999732  
207.368252249039 202.421990203844 229.284931844047 255.225145197422  
246.112720011613  
C14orf80 196.777776509371 197.443711199904 155.255279503782  
166.47851613068 519.564563632951 173.044636575826 222.820391338687  
388.326080754063 234.588584245938 231.955750250711 246.263259852067  
284.236970342827  
C14orf82 605.21685916883 507.040326298457 603.338538383128  
517.993093601127 192.493439659184 494.604716660887 288.150694843614  
446.393631025049 288.823376348944 341.761516859319 522.17701271254  
455.313553278155  
C14orf85 15851.5830405813 17141.9934540963 15704.7314387339  
15851.5830405813 2116.39371296122 15463.4998494462 6691.04319670055  
12022.5515181682 11112.4298269818 7406.86318549013 13276.1713779481  
8918.58940386786

C14orf93 259.625943627223 346.566241319814 340.800632878807  
399.071041584646 321.910803473854 221.768507175814 336.002793042439  
326.908959531021 249.590923098575 265.29629764006 400.783945471037  
297.228563607097  
C15orf17 519.450899933049 452.357898123926 498.334266735594  
456.656123023446 329.535023880129 376.124744806171 567.465201338735  
340.728888109597 534.745066397679 451.380376296813 656.660582895703  
653.264945856916  
C15orf2 145.318539677981 152.142909854773 132.079255703621  
144.425214066833 142.694748293332 151.676232556697 131.246704975084  
145.82344959902 121.53632327554 144.738871562895 152.877058628512  
153.492072037266  
C15orf20 135.148723192316 141.137459291428 163.280786875496  
144.476157581998 155.114892891737 157.697168349028 131.089811472017  
134.178733595096 157.551854647702 140.16233428205 146.775403409562  
172.816477996646  
C15orf21 149.77596374205 151.9441336438 142.548833391567  
142.135495724286 147.294408903227 148.632332840817 148.697019570015  
142.431979387165 142.51308872439 140.092648878007 158.92538634742  
143.967197319361  
C15orf23 151.88244935494 168.594235675558 152.902458879101  
162.453586139402 216.154203111101 194.921021761976 234.432954093705  
211.289598823191 221.635333304767 248.613373429151 179.923966067226  
233.426170535227  
C15orf24 1209.56018864779 1063.5903770389 1607.52029676299  
921.140932799223 943.677679525947 1315.66699943181 1675.35431076885  
1115.34267967366 1721.20676889116 1713.93035637146 1204.7397215229  
1656.02721259517  
C15orf26 147.697973457776 147.519991961858 126.359440164601  
149.772157318769 148.082026641671 154.159124458167 131.269526665478  
124.873289279767 146.025781495177 135.155955441604 151.511808301993  
117.995551728392  
C15orf27 144.361871207081 143.349486755648 136.599305161841  
146.370084152094 141.233642252649 144.316475814221 147.412608079997  
137.012646671173 128.686425820835 152.729355306724 117.672645717508  
139.013404849037  
C15orf28 185.128661141884 202.44778603643 197.262062021667  
190.348359536057 174.357336296554 229.157389498775 217.684410907748  
202.369905673351 245.582279957584 174.454754564111 185.639696270808  
225.702629835215  
C15orf29 324.25775261173 286.587945301875 246.748589597262  
275.343591424586 221.869191666931 224.963277964548 244.486311003619  
249.554443204445 223.638850960288 270.604799126393 239.003718699156  
230.227432807772  
C15orf32 158.774910841987 133.065366727222 133.36168342199  
134.323365608463 153.918462601781 150.570540340126 144.4421922847  
166.360005474414 156.830156083795 149.196539425588 134.94189148503  
149.634975068742  
C15orf33 152.230489051339 148.16526158216 172.230528631803  
158.302977853133 141.449119281888 147.284005815059 137.760712896718  
150.582568022489 140.73456875677 158.053654524927 128.429007921588  
167.011846920792  
C15orf34 150.468392290279 140.083495854322 143.301399292539  
195.795728497916 137.575688681319 150.599425944486 148.530422089937

147.270369342438 154.354658146438 156.32137627012 160.399059317919  
145.540872377507  
C15orf37 103.398929051742 108.9291713877 112.817015523662  
112.714282429822 119.442114850181 104.544792793756 108.483284007316  
116.445184223804 112.875136585606 118.81294782091 132.446406243531  
116.331428876124  
C15orf38 223.042575796603 214.968589907686 218.269847477919  
238.461248099002 368.220523234399 164.458565398812 195.282045838381  
152.8810245209 188.891032176388 272.927830312746 179.191401472241  
181.247766545135  
C15orf39 313.18989508207 463.298781071364 259.643957326575  
658.068932688816 419.763812610671 213.602504580364 342.611951034707  
222.028626209166 229.157389498775 233.192751618176 221.050093964575  
231.462907786174  
C15orf40 193.275162354467 201.837695818264 272.770616373687  
214.968589907686 180.219813240126 211.844563155792 207.764456828813  
177.073245863872 212.239485199343 189.726075394359 247.340470321453  
206.446584387595  
C15orf41 412.129826478453 328.14373061894 400.783945471037  
322.443089373063 158.278496385543 201.593025256991 182.969563278473  
210.266075382636 178.130223302924 213.791379190359 230.263678910356  
189.082778234831  
C15orf42 131.237720549768 158.07640654075 125.353389826276  
147.205511952997 202.145180994821 166.606522485953 181.508873226705  
176.735168607281 166.285052506316 147.307419859572 143.475725571943  
157.768329108254  
C15orf43 141.370340242063 133.775716376056 128.739313105907  
129.916677638819 136.689064885984 138.414916506716 131.534097198718  
128.265571409546 136.821228481217 132.86879723151 144.203716525289  
140.138870925001  
C15orf44 174.454754564111 168.634534857593 178.166289723365  
176.300743660299 185.650862663633 237.01460308334 282.511614929917  
223.429738319185 242.570588364106 217.715143869654 221.471811658459  
254.393421265604  
C15orf48 141.416706868124 150.674189235105 139.962307072428  
131.310537960214 314.610979086485 175.251238431716 217.715143869654  
294.323621186916 618.058496806334 469.540421642173 236.707875629511  
191.112009690591  
C15orf49 127.202039384041 135.457871301652 157.668307146391  
140.201501710276 128.29486937905 140.055272520317 142.705504445895  
140.232244264861 141.432461374482 140.987694585232 132.137634927459  
133.150660840801  
C15orf5 202.421990203844 182.384190694142 145.63870792125  
148.242794464181 118.319950396126 144.20764300349 145.126091016414  
123.478896502015 128.001109846227 132.978746105877 165.51742391186  
127.938245853896  
C15orf51 145.36249226764 135.875595614483 137.330207626732  
121.583096465567 140.586497829504 127.206177583275 128.882160435252  
127.189310473419 130.504023268824 128.584707181857 134.044789094272  
140.829927714838  
C15orf52 1731.62376348283 1796.26091584668 2084.44431604433  
2828.97255380291 632.565736446505 286.310923582432 427.345809255426  
306.632103708321 1226.10881264804 262.416137698884 2486.24762158293  
1953.88327754946

C15orf53 160.518055978242 130.131800537628 147.79341726211  
129.369968549738 131.575356402693 141.639216893245 137.070864654394  
131.287142490322 134.024205981268 145.950701448912 131.556892859203  
134.361064431414

C15orf54 138.446492794924 146.666759322506 127.681662711369  
141.132694466739 149.387467833684 143.056098955473 143.197131668608  
133.396403868645 164.558875058199 152.274957846518 174.873893094923  
164.905467905433

C15orf55 120.003095000297 117.060696904303 119.184780023269  
117.628564992187 114.43491928161 122.646850766733 117.428152859221  
122.309041354217 109.599589420575 122.109009629395 125.5449326311  
113.840813583258

C15orf56 124.362182111222 119.301746097298 119.436922168376  
110.486191378104 113.077691687266 114.561836290349 123.738223146912  
116.46192274217 112.464951599416 113.370762349233 116.053859681399  
111.041656398985

C15orf57 403.043257175264 407.518324776453 457.130051460676  
475.686805714298 273.478372861114 367.382105696814 607.126514742951  
401.631377313065 439.394914369983 351.448985413528 411.160709628865  
541.896444696137

C15orf58 128.116394188709 122.436106757578 136.916286605302  
133.604705630582 125.227513212286 120.322292418128 131.741688265764  
135.244303669342 127.43866970659 115.775525016883 154.150568177135  
142.973444931373

C15orf59 318.244342364572 293.234972169244 249.171307797736  
377.083379021079 172.552923333095 167.586897846525 155.23152084421  
172.707821624271 163.203582580217 193.394225360968 150.476228905372  
179.914070416793

C15orf60 139.51836763472 146.479009988445 138.596430973865  
139.776830704087 146.781221728543 131.458411820485 136.60514429355  
136.202953030465 135.271290872348 137.052507691254 148.274122690409  
129.964666668421

C15orf62 164.773489952844 175.656204695951 147.100947801261  
152.713528089347 147.706402141169 171.602950766191 169.777032044409  
141.767311448808 152.429970809069 142.14116448528 172.376544221034  
160.399059317919

C15orf63 5425.58761099475 5175.17279574945 5115.14161559446  
4635.42002659719 767.861763134136 4875.22637286719 2154.00589005104  
3099.71798305764 2418.66999907188 1822.14935116363 4465.66734676111  
2639.60135568

C16orf10 111.568329540016 109.69466049307 123.140027043775  
129.171589574238 119.469328303796 140.379874810685 137.370670726978  
119.686859562393 110.753661013519 121.93549478261 122.619429537799  
120.882166798648

C16orf11 150.160004473338 135.4702891855 132.744261207073  
142.394644827434 140.946729014405 138.956057921718 142.745838888446  
149.237422245619 144.059368898969 137.249505738539 145.043494048779  
152.743680985848

C16orf13 360.39998507367 378.24336892367 396.861835715943  
416.475440894731 976.782815449208 522.400055538966 609.665323786904  
442.590987372759 401.542072222692 463.880793292701 357.928880740814  
402.213774592085

C16orf3 123.968639555673 140.730085305185 126.51808376464  
124.518818352113 129.272835188209 123.557722415957 123.225792525733



129.765440519589 114.191245210321 124.174140125309 146.629335531037  
117.517649866653  
C16orf30 274.371523790341 331.795832780176 170.758319048911  
250.82359383789 237.01460308334 294.280238648737 139.469148541078  
195.447966116819 185.639696270808 198.954254778846 205.4648759901  
190.389158930835  
C16orf33 558.251384152474 634.046843336128 562.089999265955  
809.545702751155 1275.43768532088 907.904780399957 717.886050056576  
925.656701707763 938.499337889075 698.882871686866 154.025625092599  
598.287431134037  
C16orf35 261.028644858795 247.407442038488 225.505978789388  
294.48534582475 532.950400370668 295.153786338687 392.6758818959  
339.54582149284 321.977549744483 312.903508201275 290.420307322101  
281.618175110153  
C16orf38 146.59366188125 136.124385992905 126.708817316134  
138.166546598846 134.413962468434 131.377361030122 141.221162787167  
140.914966429342 135.792966926642 129.281564491007 140.578378782903  
140.903091584884  
C16orf42 277.073510273425 303.005912224195 269.673122990604  
381.121621815163 413.172954892025 225.189991540262 274.371523790341  
242.971958493453 232.492398623889 284.638865013916 229.62164568989  
259.316557834724  
C16orf45 356.268960813032 371.552970811499 416.307629596091  
496.991561192565 116.087696503753 127.139903623331 146.455182336561  
137.20253329376 129.547309629132 133.545405737639 144.743281367797  
133.775716376056  
C16orf46 145.989546968117 142.826898321575 145.432667767652  
153.097557560333 152.629680152219 166.825501664231 149.110300099889  
144.071652839025 146.311966562883 162.100547394235 121.423030266904  
142.616603901398  
C16orf47 147.829502959865 141.082569618216 150.582568022489  
134.397255719047 149.343930487315 153.538565948453 148.794293762142  
133.654232991228 154.598520288855 156.511202150773 150.122035262873  
139.969155812688  
C16orf48 972.902937649492 1029.43177809276 1151.89087953837  
1257.00798908017 735.8141982568 420.647394044431 486.047284379068  
458.705688226305 677.503643398297 332.400086578723 702.460234202652  
542.740017003369  
C16orf5 204.877041314502 207.376329989942 220.098071755353  
276.582734590058 149.175458427847 144.858656365799 129.360773522498  
151.885992695789 146.890877830248 147.728018766726 133.233826283531  
226.203994206714  
C16orf50 134.361064431414 138.864844664017 156.293025312901  
133.138744413911 136.364830851128 133.308383825604 144.217621961908  
142.928920246687 139.178245419517 127.780567080732 143.13304460184  
135.730331297139  
C16orf52 162.599466021255 159.362293777146 185.405774238391  
172.091884817207 168.150270765792 189.0608798771 216.24497587588  
172.544504923991 176.410016510249 170.835513021958 186.831266888028  
234.841813258798  
C16orf53 520.962651968997 367.983166440977 471.598175637494  
332.749676505218 974.544773560873 418.062540009856 635.234445318087  
494.347792360629 432.088303693555 338.665115108128 256.237185590901  
353.912654262209

C16orf54 162.004803385891 163.794436953711 135.039901725369  
140.504486195539 134.483162806498 157.81831741292 149.225754384299  
153.891667472876 157.013200713587 146.681183890181 157.809081184874  
152.563532872898

C16orf55 158.819151102054 146.531692460121 157.553632802599  
157.121142139431 150.263578317272 175.832474809232 165.813771791917  
133.469323412904 138.988919994625 142.959890982885 125.556444423391  
135.571239294086

C16orf56 454.133372808458 457.650982600462 432.174413144791  
560.757496975779 384.780426529733 265.028512407839 259.742175498038  
279.232290927348 278.88183549759 313.412131722189 312.129861040709  
311.375563161772

C16orf57 608.816123736392 664.809419789814 572.913714991136  
882.429823267754 1172.4103691525 742.751664201272 421.056268094661  
617.185364180303 901.197085099854 541.764013317002 1228.89116158868  
607.499206410372

C16orf58 1194.42925868786 1286.55103838368 1535.27496251381  
1373.67062432073 2055.27692947656 1130.32966481315 1509.69760873558  
1850.98311401165 1873.84654908146 1031.59140059071 1332.82617944131  
1118.28423222707

C16orf59 109.342230674869 123.807693112932 110.465934808915  
124.821581853501 444.374521095495 208.321765801227 164.458565398812  
286.376638135463 204.260800563197 185.432587490792 161.055911120534  
195.078843867124

C16orf61 1556.41573079892 1297.25632532536 1109.08288440559  
1411.90426595229 2162.46602203822 1571.87128697931 1285.02292965374  
1470.23096656138 1897.92061704124 1167.72023351098 1034.68475089075  
2096.25803773108

C16orf62 195.816317534388 195.595275594235 182.938824846376  
210.448904052352 203.071186284148 154.908975734985 131.025725443485  
154.798287249541 159.203584692924 172.591885279428 186.925138700818  
158.536178747273

C16orf63 546.755305058958 610.337659723539 614.957397883514  
470.868288641048 442.220572301795 762.8576747113 796.699879495384  
754.607039665508 554.652979820908 593.639955546556 626.857289492802  
696.475639532595

C16orf65 104.861024325857 107.187035835972 109.167312436827  
103.594872791657 103.012774960061 104.826135297161 113.740942665269  
105.450273343324 105.450273343324 108.179513318734 115.473431881597  
111.336798977475

C16orf67 143.712450441816 155.129304059037 148.868265867275  
158.795335941084 168.854819201403 182.275998840116 172.783430414523  
166.754995454382 151.102431192559 141.968949222821 152.662446724781  
175.656204695951

C16orf68 363.255517622046 437.601814037248 497.629319581786  
622.692834629555 225.850439131864 232.363656167375 253.164596735793  
249.129943906228 246.616749748028 358.732947927445 201.221839281282  
227.375773052577

C16orf69 128.014092519305 141.478253058549 120.257886394616  
130.590195477461 133.94667806086 141.784881206191 147.681723355535  
132.300508985399 141.423474583567 134.005402534879 154.64077390011  
130.043904881142

C16orf7 264.355693070937 336.70893120135 225.480366837274  
403.043257175264 317.600728351694 179.828494168009 220.047563627558

182.907444581093 253.580286414227 233.047541132048 286.506419296679  
256.174286655796  
C16orf70 161.390489603929 160.010501226517 175.617504025145  
169.681582570965 169.095270479344 149.460660195293 179.060189557496  
180.265418365803 167.850516495529 194.388383297922 183.358807104988  
161.390489603929  
C16orf71 109.719356131043 114.143874572202 112.943630133093  
111.086170834553 113.40684693417 118.239637776941 116.576896337786  
107.187035835972 108.288420807873 111.632811186988 105.712302595131  
108.760780994582  
C16orf72 558.051041108282 492.207833630086 596.934339406636  
505.704957182936 279.26508919212 376.54010486682 412.863887464545  
386.544913399837 402.473870771741 380.310795921752 475.686805714298  
379.016207754533  
C16orf73 131.49254872524 142.285486339143 151.243948028303  
135.641355114263 157.541796722309 134.449083873514 156.763364462534  
137.180793826675 137.58025011566 138.934516083124 135.5237675623  
143.262288751967  
C16orf74 138.792521681771 150.235026770931 138.276865331434  
126.895669261503 265.754141836026 145.123008539369 287.656436278551  
165.827405735044 135.68605915552 382.701467158304 282.719121652073  
349.382889326613  
C16orf75 217.227441947056 218.334273320319 206.010481981919  
178.997098204457 677.9972761887 450.327710374141 268.698146407497  
491.496499481595 474.14051635531 289.616527814137 340.366016191232  
427.766660764042  
C16orf78 135.400054238597 154.218967720305 149.628421263062  
142.85695042665 170.099045774947 144.013615296685 142.274440538785  
143.481112776388 132.268445799639 143.331929080227 120.816130267055  
155.615655460277  
C16orf79 184.591789011195 195.645181575647 182.066922756289  
176.364184489318 163.769959129611 214.546528079149 130.085138325818  
279.879377933144 177.143397572907 133.78629612147 180.968659614238  
190.809584998617  
C16orf80 474.917507160629 488.505191823403 423.740836541835  
542.009873308344 772.399017166118 569.353661326724 517.529147171876  
495.438672949441 733.195136251155 545.566596665916 558.621429366984  
664.60530723006  
C16orf81 141.778060508776 122.716563069312 144.662545137915  
149.437212090587 125.587057468028 140.52059487958 145.886420087036  
139.449895159273 145.783320434143 129.294026995663 135.182524652868  
137.047288508371  
C16orf82 112.10312035128 120.031976318697 125.753852031496  
119.152881350581 112.046615825307 113.125349503734 97.8058879269165  
115.981530322377 113.268379270385 114.673517800886 132.227561632637  
110.003750007057  
C16orf85 160.584760930779 156.053517438255 152.805525883571  
160.543465620248 148.317958829244 152.689610196981 159.784369379077  
156.043994260248 162.994537815938 142.285486339143 136.378203924435  
144.302925948596  
C16orf86 173.979001863717 188.39062571513 206.68694753419  
216.903719298575 173.306283668215 133.480196904786 117.312094804205  
132.5377752987 130.304743083321 123.609527892227 178.872635061826  
124.657687121111

C16orf87 212.836093887552 195.50039162477 262.954856857756  
196.136080427522 226.35854874278 488.14606875418 349.722963659175  
353.621264641814 755.79669622705 297.176755638159 524.725307261999  
335.858047332641  
C16orf88 127.213640193364 127.675206134992 122.333765477428  
124.342911165267 148.069725041021 126.809252651352 153.989839987975  
168.942165573542 141.722817732641 132.891375982227 161.891809608511  
152.599052194143  
C16orf89 179.55905250703 165.919497521143 121.807661901776  
121.965131419551 122.561285351587 125.141185839817 115.734230176652  
120.235652849894 130.0140921487 122.002822875994 144.013615296685  
115.834056091815  
C16orf90 138.371873773284 143.331929080227 144.794806650252  
149.078664825533 142.167918879613 140.165450892713 140.490023670841  
140.245786278057 153.217287503221 136.837430157894 138.573829193205  
138.173547382901  
C16orf91 228.499052416183 267.069665000047 219.814706416471  
273.478372861114 357.672950588403 307.570405241182 317.121202656311  
298.519371102278 304.111808763793 302.532985701607 341.096072280715  
422.840163973614  
C16orf93 170.390200730789 164.276668889213 169.306573880401  
166.104915784875 280.246711704036 343.617417488962 295.241644408321  
407.518324776453 331.251075774227 195.400963839097 217.646777099512  
302.362619893594  
C17orf100 169.999692055871 173.959556466614 170.05799929575  
157.227118680396 193.148369507405 196.536086443884 193.641927801805  
184.278213908263 178.320732186309 181.832218001701 241.527811817146  
185.165469121763  
C17orf101 210.030846572444 203.87884605779 234.020419732787  
214.991170762327 255.374689750672 235.216589534371 302.788940260961  
221.390817970859 217.670330817769 205.852731236069 215.40037757604  
323.51769984082  
C17orf102 131.085965122946 149.863063160222 155.942609847585  
148.003041725027 141.196795654442 150.547096071626 154.402315635227  
150.301540078433 151.144521344129 154.445840992357 141.739299634007  
148.194450105682  
C17orf103 140.554684822646 121.197702744078 135.518752716008  
139.578603805852 161.657344146676 120.733009784454 128.736591902501  
137.790718305537 140.895053453126 157.841520434044 116.89487516867  
126.511314417328  
C17orf106 150.364511432468 159.7197697044 126.230887413874  
159.49930229951 241.494710905339 183.779065928447 211.289598823191  
180.096239155058 189.250846546817 187.978627462391 185.765000029242  
231.915272112361  
C17orf108 172.591885279428 163.422877959747 153.075594260208  
213.484986945295 157.58224826673 161.393953325115 132.407736899761  
168.6016897585 150.302621632309 145.621384219688 175.28261759639  
149.437212090587  
C17orf28 155.319717753912 151.905534823403 139.159510392614  
169.238325933605 459.53652431464 301.695991929957 295.153786338687  
284.13865992802 348.36178568457 155.283003653612 275.169415154893  
302.905840432998  
C17orf37 166.430881793156 179.191401472241 144.023798119335  
167.373416675264 192.353768499582 176.689683169567 197.72068061775

397.449905380349 211.183499580683 190.22021453133 194.60309399944  
204.057019122032  
C17orf38 174.491551019128 139.730999352036 146.96155692518  
136.570817174009 157.278791893435 142.505050582588 169.661107080542  
139.687574432387 148.22974445263 164.472980733552 139.991780068793  
152.524106827617  
C17orf39 249.449151040445 210.620764703468 333.822167152866  
263.426870776148 174.749832388791 187.057683141644 175.882911801581  
189.539458686123 180.667897257797 199.118281632221 190.993590849624  
183.294526267593  
C17orf41 157.180095329946 164.429483677715 152.755535408382  
163.487737425232 175.543924200429 178.676812740925 163.040823730286  
190.56172211779 162.531630234824 163.099009810658 153.097557560333  
164.302998010829  
C17orf42 184.724071110756 186.733394375839 215.365809536522  
164.811120992602 277.75958501062 199.149959995133 236.899421827427  
277.256341592701 245.811312606484 207.902853533132 230.447203571825  
234.339913501761  
C17orf44 188.580458613357 195.20398666139 150.663062131717  
196.429685815196 167.049197726715 190.787437782456 248.791254839869  
206.73292907905 221.594737497504 188.242091666446 261.721726664029  
234.550692915716  
C17orf45 4477.54806526552 4367.38154535901 5175.17279574945  
3304.82581034038 2728.04758874748 1967.82064011967 4246.19983955771  
2915.72823797537 2171.00457877604 5437.78386044638 9514.74328718935  
4836.4008757421  
C17orf46 148.197029306137 148.361088792223 128.257292171015  
132.081286801266 128.194171809998 137.981446468611 140.238423894192  
134.354215877283 130.290454258898 137.141081365469 145.599152743156  
129.278833426752  
C17orf47 155.187900101727 148.751755543817 143.488761023636  
156.94531513373 144.935571704834 141.497125111619 139.734784859495  
143.974551393951 127.344210958898 148.149216812602 157.765771942689  
133.413325516456  
C17orf48 230.770036998466 179.46936343225 169.022351348819  
158.396149470397 138.13987378399 157.878110410517 154.108689872903  
167.817232948801 159.040409182674 178.329946332806 172.836730741407  
139.361120875198  
C17orf49 396.988248940183 397.449905380349 398.423396126075  
544.956712516196 948.150767619765 817.529344685717 555.758485277905  
782.448692528135 553.615252472149 565.509446660206 611.36406319509  
475.927798702033  
C17orf50 149.589901372799 139.223480216048 157.016659994185  
142.25795237339 153.336395746742 150.500676225569 140.356164189622  
130.266601299194 153.875760529011 173.364586678954 152.957297648595  
148.029259633449  
C17orf51 150.878323882503 148.905860943967 153.734347607222  
153.723169560972 148.16526158216 142.596113491002 144.964084792568  
145.463105638655 151.698385134218 142.763157232147 139.334552725255  
145.660417208595  
C17orf53 142.175432631861 193.912456093767 162.122250419992  
182.786177632757 433.594928641214 510.285766295993 279.113984512619  
557.405157178952 375.958347293549 267.422232051733 164.548505132213  
338.866471651692

C17orf54 131.85737847837 137.465603365433 130.621860095981  
133.353762794271 134.904123162692 138.773042747912 134.158454639998  
128.112595697836 133.499361793303 135.956116718089 144.991442620483  
139.909719416938

C17orf55 138.712529531951 139.790098895306 137.504147221623  
126.230887413874 133.866011732878 134.57472034679 141.850952191423  
136.216577685046 141.418737063013 156.822477235844 169.612203020686  
158.708054164813

C17orf56 166.335294339013 168.180063344887 171.954184094677  
153.93249158209 180.240305360865 185.432587490792 194.112534914308  
197.962159288376 178.235281981508 156.349030617265 167.357570666817  
196.014841240142

C17orf57 135.583556015955 122.937281123348 120.599440204711  
120.452958447555 125.892022613725 115.400592594965 119.176139463015  
121.661141741782 120.78129870199 131.566892082703 158.8054811093  
125.2051300372

C17orf58 493.887026009442 366.961565952239 413.983821839274  
448.644778906048 279.202256032476 385.463209972694 462.888171502285  
435.796737132969 413.502150181875 430.94199035855 275.39986964837  
352.121800955822

C17orf59 205.630948393225 245.110761598207 202.214495168688  
338.739180103373 217.86728342043 155.198503964295 141.143572141958  
173.38031514498 156.301214161102 166.14867551435 183.64389891975  
154.886628987246

C17orf60 161.788118050564 153.258616843783 157.615017085961  
172.491604217899 166.89884215297 157.15947600423 152.853860043701  
147.022594294963 179.286187825363 145.09280363189 160.050872656883  
136.423161205425

C17orf61 1774.22769195939 2072.01578063404 1848.27927621606  
1965.13870083236 4055.40322213638 2441.05534211996 2372.26073354008  
2605.13680290987 1424.79466712859 1969.67552562117 2215.43744802035  
1006.69598892631

C17orf62 316.281469585496 329.023836559229 225.335753745598  
345.649572073924 844.187489702587 508.861268738074 838.267069860172  
680.94167651697 589.409235971915 328.269845211173 413.913442080187  
591.89966781883

C17orf63 322.576886792502 289.434186747703 350.803378042804  
289.09614335372 409.206158277764 359.776068595698 313.641656294638  
546.611519125021 415.011847890313 253.65959805538 369.646624431062  
397.660202059209

C17orf64 141.717466442384 129.645982978155 136.988519762443  
117.598778415488 126.750850861235 137.310014841869 124.028748209411  
117.986939058467 156.890299350025 132.765942975939 151.902352951251  
141.444958186793

C17orf65 141.272049404557 149.432744784716 155.550532734718  
144.772914483212 145.872258115708 133.026879831536 142.898851434337  
164.608496326181 156.293025312901 123.545404885618 176.761123480566  
146.59366188125

C17orf66 122.309041354217 117.227635924674 143.716377201615  
122.685360126599 115.048402956574 129.874235646816 128.972276851419  
147.082068348591 127.874934513708 125.77343813277 110.368392735494  
133.113581756557

C17orf67 173.563363508314 195.303469330682 192.399146702036  
225.480366837274 170.992074907355 171.180188911669 135.188445928844

268.885346595453 160.010501226517 153.843250142472 142.230934617475  
150.617039206311  
C17orf68 209.960795065047 225.927425596831 208.164674386141  
270.92671642109 164.063104872636 161.657344146676 159.749576166342  
199.423120300557 199.516043142784 238.978845152474 207.785320401354  
151.234397206563  
C17orf69 171.410912120195 172.28937151007 166.085469368498  
181.758545723241 138.748941735079 179.932404140099 150.513804134588  
203.704734790602 191.146276657897 152.465176508162 150.261107471642  
168.841313096346  
C17orf70 839.324324662619 994.213397985121 683.470866056244  
1246.2895253224 1432.93880448974 909.388774224614 1420.27222765071  
1434.1439428394 1139.14730341921 1195.6335460045 519.564563632951  
1479.69309189156  
C17orf71 242.253995801882 250.515579402334 274.77366169918  
253.65959805538 281.996583337694 345.565843875296 419.126814511305  
362.502631441716 442.590987372759 360.361719991381 369.198837083585  
364.895113721763  
C17orf72 117.417112053842 137.779607093226 130.142263689536  
132.211379936941 153.181097279473 134.53215156472 135.643341446691  
146.097201498811 124.530660958725 123.692366307662 139.889264227467  
130.593846004132  
C17orf73 129.108534267222 129.880696706381 123.798513338021  
144.096048197835 148.751755543817 137.945878061978 134.000363767958  
130.112882549637 136.409137464692 146.692827583525 137.549175595441  
146.404727168045  
C17orf74 150.540599489506 160.001115445038 179.687464522203  
150.531753446398 158.302977853133 179.74065086312 156.130224537288  
157.273309095198 156.433603187722 155.023934989559 176.603760647035  
167.206513789165  
C17orf75 209.385358804928 245.997705723007 235.650688823345  
264.355693070937 165.627852733455 246.88857694249 157.277051544704  
203.317264638828 234.661864595717 165.731179108649 159.452527363763  
135.654614839107  
C17orf76 148.861141988806 143.654677238911 139.796168741191  
148.986058473609 131.715579653796 141.494666823639 137.144001915831  
134.831550401848 131.412979573687 131.839206336057 124.650711299942  
142.58227004035  
C17orf77 114.613368640356 112.156010486085 114.067790137477  
113.924310293916 108.646136431909 109.947300629824 112.015423658372  
106.854721604889 117.089207321783 111.336798977475 104.091301211096  
109.74983281634  
C17orf78 153.358189612307 154.71904132098 139.432567336814  
154.847114601403 140.005968571997 136.764881711137 145.34332740863  
124.217337143269 143.212739422069 139.646026806298 168.139351579682  
159.762733951454  
C17orf79 1223.06438074895 1076.62597781124 1157.02365469464  
1164.61390835016 4386.83308119416 764.774225930479 971.99484515987  
1254.19980463817 873.408431189194 929.69741581954 558.810095726517  
611.36406319509  
C17orf80 175.626096716758 164.922193471904 197.873787638411  
163.284853420896 149.856041300199 200.712182818203 219.709231012465  
200.146843808423 193.974325897472 190.489530928259 196.889520085412  
232.465880700217

C17orf81 177.457362387052 176.497706091676 173.624709850889  
171.896929562022 169.722974413341 151.899063970777 163.37518739397  
170.585366369563 158.411846122784 151.411708598688 190.018871923219  
158.396149470397  
C17orf82 170.541689758579 176.183165494563 158.98007855379  
176.008711524598 307.570405241182 202.01798254763 246.263259852067  
174.657352858049 197.034073391478 154.277670551775 221.512905853031  
253.580286414227  
C17orf85 357.35857422585 317.949646885539 278.469340236003  
325.493177980483 198.285073991956 233.572055978465 163.48462232122  
225.438177833064 192.032080013216 212.571491543077 318.112626495401  
289.037033338975  
C17orf86 122.595766303833 154.928072022777 119.562180492359  
132.620474788855 138.651419539729 131.636779618185 133.422190038356  
129.846685899183 130.06068534054 123.129785564258 125.431735524937  
126.121516564343  
C17orf87 154.695060071104 154.87316176388 160.411218029114  
152.049243916141 146.83577460518 154.030432279825 145.734680574583  
150.295611829265 186.794165469219 146.428534132236 158.933097712363  
153.468933239223  
C17orf88 151.237088659409 168.552631639996 168.394330931524  
156.336425973696 151.690538050817 154.683723064797 146.210814568357  
153.350690419636 152.317890573534 169.434164890542 154.108689872903  
157.663460168247  
C17orf89 158.735283017367 163.773702843544 141.440563159897  
146.233195164295 180.392337212428 157.316941011117 194.36669779004  
186.496160803789 248.299149406938 157.607445509297 157.316941011117  
249.858562350415  
C17orf90 293.350292227077 327.480268032814 362.019824026781  
370.227329649269 896.625415670455 501.738490253982 616.701037274509  
561.858563298512 574.779350011402 376.189276074918 427.390091157726  
692.359779743985  
C17orf91 366.857139377277 271.638179116269 175.186435016433  
190.255797389524 159.665989587555 482.857203798212 236.985483155452  
211.395593720534 233.426170535227 367.327273578513 428.237210115667  
450.99430272315  
C17orf93 136.130027137459 145.604066669916 148.641780441227  
147.208176455806 146.162330544539 137.727466311162 130.543453631154  
129.894339927457 135.805294188016 140.541925660368 145.730054487572  
141.129013595331  
C17orf95 217.408824020423 222.943046618742 261.39435936661  
205.121123131992 253.009376944901 250.928804390353 361.327436394941  
340.668473351494 278.469340236003 347.487059316081 260.195256836955  
362.252813848151  
C17orf96 151.3362561751 189.567241599215 145.048033586779  
134.447878635716 1160.25775445193 586.642581067137 303.762967437478  
523.717949503639 316.623219008156 152.142909854773 296.553550946307  
239.73396414153  
C17orf97 263.845733455915 207.73395131954 311.481739745423  
217.435155984897 214.933911087009 241.890850719625 174.873893094923  
360.475989559226 304.713434036642 149.147411595596 435.183433729519  
383.939800422489  
C17orf98 114.691842968597 130.729989463558 113.416743649576  
120.574820369421 123.427366316096 130.205168168299 124.079109459437



140.790450703097 138.301397056664 170.941404165185 163.579282884905  
129.705735906962  
C18orf1 144.900785401228 138.717541782317 140.137435303984  
137.286331849749 118.134614195753 130.433405111592 112.841406363391  
125.780294378066 119.525701528869 115.646023142125 145.681968019851  
123.964042357475  
C18orf10 302.069236363626 281.570685561526 292.911761762431  
322.64731764456 642.255110250493 438.7446527797 329.263397240111  
456.038981546175 479.053300726301 372.689712716797 366.473258467746  
568.555967950896  
C18orf12 123.225792525733 127.177422395113 128.375390373307  
138.316043447788 126.848211027661 135.125414452178 126.141462782039  
121.6801373043 124.001295849091 141.052322220012 126.383238335161  
140.260053206523  
C18orf16 133.056659202188 120.246240734668 127.269672881591  
129.680406696779 126.893023101449 122.300069045533 125.768053724055  
125.176747824384 127.245190474707 120.744994574029 123.108694517244  
150.460618402778  
C18orf18 137.15288362126 153.551359970644 147.079157199448  
137.838096997956 124.077104101209 130.238231520218 114.428050500096  
121.895778599116 132.253450751554 139.067516394141 129.543069836687  
117.760045671142  
C18orf19 141.346722137248 134.623264303227 138.654301345398  
129.372522073479 127.6516565653 153.474566767304 145.383354200298  
154.634289463743 152.321890796527 411.451612988791 147.882530392424  
181.97372140367  
C18orf2 140.559553697317 140.288612271406 139.913180140881  
145.090639086338 163.566535828036 145.880661952783 138.446492794924  
154.140863428961 140.60741459333 146.808519947394 142.103519373191  
138.428527640896  
C18orf20 160.870390779084 147.442483242063 153.162313098346  
156.525347260458 143.905680376268 137.911816180518 149.042693712098  
149.505323932806 134.909230280708 148.434497641549 138.386391726042  
143.694412162756  
C18orf21 268.600782558985 245.811312606484 251.307020289291  
274.627303114477 282.604890044452 514.799179506754 499.964000319181  
414.403321220432 450.851711160136 451.985108262982 248.465457421469  
428.66614441422  
C18orf22 248.360540656183 250.626556981376 222.990586491219  
325.96632528242 268.930428617695 228.879434668972 240.182016388745  
217.628802427037 206.042395282286 206.650760711745 207.514489132778  
226.506852362359  
C18orf25 463.091387717305 423.396271159345 451.496617003797  
411.603820288919 266.80383076887 531.421912541822 421.836020491624  
605.437395034282 503.59466398882 450.327710374141 426.649095732979  
416.861099188252  
C18orf26 177.204172894028 176.612866969431 177.696849418064  
192.353768499582 155.014930599769 173.347463632976 170.05799929575  
168.358323243918 155.794309652357 162.57736365619 175.686248503777  
174.761105961773  
C18orf32 388.573321838751 352.741885295157 320.390351199433  
283.377663208926 363.195371577097 276.867974638972 456.530337997907  
553.198321853202 482.592481827722 412.941907828617 703.815551883635  
492.534183006883

C18orf34 194.403848868583 203.852316712377 167.850516495529  
180.850779069931 157.328404229451 163.753434774656 131.736694577111  
170.602603155092 157.192320902906 141.292421722594 136.423161205425  
216.880896769751  
C18orf45 197.947433984294 189.90406457741 136.660600727111  
182.747079625619 247.307128520272 133.065366727222 134.504873813959  
152.044068298273 141.356127724777 172.877947895827 180.01471631205  
155.651798065702  
C18orf51 135.364039983762 133.032905765836 135.182524652868  
135.283742166077 123.804039963953 136.77260462185 126.601395870533  
131.72852748835 134.53215156472 135.367261617271 129.490800177429  
129.802596741962  
C18orf54 172.698181201849 179.015669199358 170.23937234395  
189.74261433647 152.942824158634 228.243668453958 163.748692741999  
243.336550161566 203.752540576935 160.78368986036 159.170943469313  
171.791030104358  
C18orf55 703.587139938769 652.201948082657 960.775251871864  
754.607039665508 379.200576951933 644.97200337335 590.646248924596  
867.601542930533 707.173691257322 780.961416212309 607.979208454176  
776.030689773414  
C18orf56 151.392024228289 176.761123480566 132.179747646893  
136.03420235737 738.37559871635 349.99912485533 232.105867345662  
244.954917633904 313.077481033093 168.818595386221 189.389457481768  
290.541184606565  
C18orf58 157.592607345742 150.015696417249 150.374573177474  
139.157088843803 141.712693059287 152.122141650397 152.321890796527  
134.56134674893 122.514826802737 145.588981165456 156.654450436728  
161.061119536632  
C18orf62 126.705446263769 133.900005368973 127.827096314406  
111.253743009588 123.13812550459 130.491742824575 123.007103885415  
128.689465747173 128.557216790939 119.427342766092 133.692996980809  
126.146213417225  
C18orf8 427.766660764042 383.10686624119 460.651156484562  
346.476121089685 388.192984832638 528.275591281419 419.763812610671  
630.473042320288 501.301694626942 444.663812851378 420.502251256406  
452.167674725454  
C19orf10 445.214621023114 421.056268094661 423.045329000756  
464.907454552364 429.812058546782 1717.09434498876 1236.56870367797  
1160.78730097715 985.637230639964 671.134356672693 513.292377117011  
1103.81439809121  
C19orf12 326.417021307859 293.528601172819 262.913054904154  
320.214614455231 363.445110627483 326.525579400607 269.770777921703  
257.643855420381 320.214614455231 257.168308311848 268.264885392368  
267.372241661758  
C19orf15 146.984888309556 137.890006487904 151.461857714097  
142.52234368939 158.845174721328 163.380402251758 164.008063563113  
139.717662557602 132.249906289203 152.566490804809 135.356010814496  
154.229914729772  
C19orf16 139.263602290256 163.600888221193 155.287837763675  
155.83143112621 137.914673796317 153.941193682697 134.145771195572  
145.962664629275 149.524040913256 137.991642076355 120.235652849894  
157.841520434044  
C19orf18 140.007937555694 146.462544135666 138.206065640158  
151.976432805924 114.067790137477 121.919799968293 110.148555045276

150.962828147611 159.724824188037 114.042914237667 172.345201438148  
113.955459033122  
C19orf2 1246.2895253224 1196.34528225417 1400.81554054664  
1027.96306543235 1796.26091584668 1965.13870083236 1475.41920838384  
1471.01897242089 1376.84058291266 1227.94401191112 1666.80650105101  
1418.60088387728  
C19orf20 138.304793826214 142.579346058088 131.268454024753  
144.159316670264 196.189101941489 124.295334523889 129.03753569157  
130.135721123253 127.604087759266 123.195738824794 165.406452831375  
137.874370839801  
C19orf21 166.70212615715 175.832474809232 197.651165059354  
204.710203150526 217.778414825515 190.534176839652 187.645390502607  
178.854873582873 189.872997882033 177.666582096539 235.795627549799  
197.205792984885  
C19orf22 698.358285634451 785.008529077795 576.298671053238  
975.685771692095 2321.41228376157 737.42784787426 1080.42884514937  
932.505095432049 846.084919104262 1255.02720867812 1206.59866455529  
1122.92917004037  
C19orf23 131.308384127079 128.725044326566 114.906396746556  
125.617143363441 145.193296081527 126.089217853289 127.368207232723  
125.26492723752 123.237851647499 124.668658660052 150.053948736789  
128.440024330942  
C19orf24 215.585089158905 255.527764534636 242.538036654192  
296.428342247529 518.281245498542 509.618968665191 392.539157974899  
353.078842299761 335.3366819308 282.561381978659 311.337303524912  
366.857139377277  
C19orf25 189.971144220643 201.105520537151 170.941404165185  
219.228720772236 232.444867422559 195.16856673253 197.427788552936  
207.624240598841 205.765822478178 198.506786870804 234.182164952936  
168.71216652064  
C19orf26 121.997885377703 131.102996816222 132.085538520551  
155.542691937539 138.456465793474 136.144068118165 158.788210937339  
148.227581116046 148.927040248436 139.973692361771 146.290334865039  
129.246066890078  
C19orf28 148.692602243778 160.449911844008 145.146797807275  
164.063104872636 324.79327985156 174.205940911242 184.813094907887  
175.510160114891 177.772019227116 200.944865673409 189.324370290702  
187.881334544018  
C19orf29 209.54573978355 220.772387104223 194.979795724712  
259.252807304272 263.64863646012 213.301947003462 208.095384605737  
218.000351930307 205.560952959537 223.918931440768 211.118308738617  
207.531908382266  
C19orf29OS 128.580625868379 130.906507319074 127.368207232723  
130.085138325818 133.713275043978 127.661634554996 128.002822538671  
127.42914358124 133.441783287131 146.690308698414 139.987681290389  
139.936661244361  
C19orf30 186.127543877065 166.681646517413 165.131463797217  
197.762169504041 177.94501172269 185.295480519718 176.912121142015  
156.748330788367 177.582314734704 182.997980582218 166.671563123047  
176.612866969431  
C19orf31 13645.150201952 12457.6956682374 14544.3732040823  
15354.74541236 13324.7465248375 14181.1182110192 11360.2921551609  
13563.1694195379 13276.1713779481 11479.7406150358 6368.23123771343  
11809.4804843301

C19orf33 294.808980631295 435.983803453746 328.019503002384  
168.818595386221 1315.66699943181 1407.43503866211 644.741046498743  
1687.85201395597 708.534025308731 2841.96460830166 2187.3010896903  
1648.22531304741

C19orf34 115.76177719261 115.157321350379 111.286141277084  
120.883785696583 114.734439905052 122.187031504466 124.370381674692  
124.119104345119 127.146101490884 108.362609680556 131.601823550269  
122.944699010173

C19orf35 122.452541100946 114.428050500096 120.333487171575  
120.135349166633 117.017844025726 110.718864165172 127.130769263811  
126.845048064014 123.126240234396 119.915330116696 134.73970457131  
116.65880728655

C19orf36 144.339819009283 145.814268094808 150.513804134588  
146.011694647614 149.110300099889 140.347131743987 149.63291071048  
137.13615301204 136.468434653208 163.390929975591 147.348400730286  
134.880138942756

C19orf38 152.563532872898 141.652000792271 140.995418231627  
162.54567071663 138.800986934663 159.099495828517 154.586825710624  
163.661196423902 159.487615985875 139.932849289354 151.884221015031  
138.218392984717

C19orf39 134.94189148503 141.706292773073 133.998381302146  
134.646131480502 131.265594391542 140.655002540298 135.54708602175  
151.41546939633 137.938310376106 115.750690887988 157.729732484131  
144.046646189442

C19orf4 122.54127694717 112.520199390427 111.608386387842  
113.549098821204 100.637271902591 120.628904050564 123.839006667113  
115.766358387923 120.031976318697 124.563594928763 127.42914358124  
119.060186838239

C19orf40 173.240598306749 180.060096787617 167.474790447134  
164.553511697702 190.614236149496 205.036081947168 216.974834077975  
178.153527134452 217.89028736436 180.240305360865 173.315097944835  
189.83433085782

C19orf41 119.968081249475 124.247680699048 119.631847624882  
116.639787832302 112.036753245281 116.987471433258 112.404562115306  
107.431455226979 118.589392612801 124.253582884351 127.473812381059  
119.562180492359

C19orf42 708.056533282983 705.987531074737 675.480482223958  
722.399669963921 320.097510212422 420.248838397618 529.963453165714  
524.973621024573 583.938727139698 514.213675499369 542.544172683021  
575.060457772307

C19orf43 1145.96710556468 1165.95924778817 1190.62010668045  
1138.00644332379 1442.11349373764 1312.44215746801 1029.43177809276  
959.126054626181 915.579581760396 895.821578104681 1093.85316636801  
1069.93503700632

C19orf44 184.365354978005 209.023926358109 250.647644543963  
256.326661031361 153.068898842283 138.005168756932 187.852455291319  
191.616483214712 155.134796468704 138.444427173667 190.255797389524  
149.831566330214

C19orf45 128.0171233156 137.844113743956 137.607767467172  
147.570734399004 183.998458233995 197.848577663238 165.553581848949  
222.177290763736 165.066555355918 137.534079082878 151.110467345727  
204.959164579011

C19orf46 142.238908711402 154.912576362196 166.173429365582  
160.353649786837 1040.29664343743 499.048754087189 505.704957182936

543.810043433181 191.018168651394 169.844913799159 170.179304745674  
164.593531655305  
C19orf47 166.330001480033 165.964183460825 181.294497402507  
201.661941695238 219.638478100747 151.965103021638 175.262884960324  
165.890492422031 160.584760930779 150.132420238581 147.208176455806  
146.164093136588  
C19orf48 183.804849355341 223.220997990627 186.007710175103  
246.77831953556 934.173273294189 329.333236839082 630.670530516275  
461.088572554864 506.659740456829 371.552970811499 265.829122816166  
370.877260088621  
C19orf50 734.139557942719 944.47112348734 695.321886304133  
814.110601393539 906.886423608706 743.915675090182 748.940715378564  
824.746488539942 628.485648053393 617.318955611228 648.549890890375  
588.334329592604  
C19orf51 136.869117921313 136.330636532576 130.890314257211  
158.411846122784 163.81485578613 136.44218532882 129.594440309419  
151.002218995005 143.937726155116 168.996965070202 137.949215501559  
139.268052431476  
C19orf52 217.86728342043 209.960795065047 259.796092536601  
249.590923098575 301.871924474014 279.113984512619 278.428310548805  
291.056913909578 239.789994201722 262.061371466369 220.136131941508  
312.903508201275  
C19orf53 900.039744829725 1012.44277312494 835.834013018438  
1200.03423010236 1248.69137283095 1358.29475573637 1750.21700780511  
1153.5175534971 1038.34611017219 915.579581760396 912.878077940014  
1013.60354455825  
C19orf54 182.384190694142 204.137195524755 201.969002368045  
291.369577397743 261.426617866925 226.221973502783 230.053292316517  
207.338645756456 212.691702227442 159.287816317316 178.984409575632  
167.906766146651  
C19orf55 123.501843029993 117.089207321783 109.574386044714  
105.25877906031 131.01107240791 114.755442050481 106.701716475947  
120.333487171575 122.914680091926 116.983869766097 123.668707648172  
115.417648857825  
C19orf56 1813.79641422879 1978.95750795951 1861.19763103381  
2135.04382065446 2882.51330563735 2956.63335018838 2395.75453574049  
2470.86113150126 1881.90353127141 1534.21175984308 3905.35300751401  
2267.0818302379  
C19orf57 142.440344960504 141.398513269219 142.639587833858  
142.521260841187 155.883386742315 145.86855878099 141.071184297124  
135.814893730549 141.269923271838 139.684141478459 141.994082714379  
132.128418409996  
C19orf59 130.365804613342 149.247514768446 125.262445870212  
134.753783025994 140.435724944447 119.403831071089 140.502667595362  
137.728163622673 139.005788243703 196.226732738526 125.902015309754  
129.487458179949  
C19orf6 440.495339027491 430.728137105601 386.16563750478  
500.469781477166 583.938727139698 441.684169663552 469.333357789149  
466.777454704543 388.638095539186 421.303580698397 434.325609889068  
497.411169898778  
C19orf60 867.601542930533 991.611982265221 819.151876775691  
925.656701707763 1728.86115695979 778.846928848361 776.411045078049  
1092.33328323944 819.887322757281 602.86705608228 642.647554580301  
1121.87292339787

C19orf61 185.154876233931 202.458096827378 189.83433085782  
190.572712684622 380.562212796792 257.075088169589 273.073938260793  
257.602370597316 307.316241247336 179.048139035247 238.068308163643  
196.974807677659  
C19orf62 572.913714991136 616.188923504376 523.717949503639  
770.632068590053 855.415038498392 659.27672123763 526.416479408056  
552.298965378403 541.896444696137 511.779988437654 362.376153348015  
453.282973743379  
C19orf63 152.837739128546 161.096914295309 159.470818285679  
174.42996813062 254.879772480457 175.21512930507 194.831347257735  
162.373508183992 177.246890307643 157.58659226599 191.692830869809  
181.37137053478  
C19orf64 137.239088768176 149.987571884748 131.503936441405  
139.835983835267 156.763364462534 169.583355171423 137.689158155552  
160.98571841915 149.361498483705 147.04481509758 147.155738185574  
151.216992571364  
C19orf66 393.264726588522 307.597733293218 293.4021207271  
338.406266073063 200.98533822317 173.233357775898 281.278843600876  
223.918931440768 240.878804911613 256.873090834376 413.084646927035  
254.552034511333  
C19orf67 146.025781495177 154.16370087233 149.44788347071  
169.168869363848 168.925131238831 155.349728277626 150.756776447358  
165.430811083128 143.050004021764 151.40067812803 142.351705613006  
134.717258604899  
C19orf69 122.201293962463 136.553568679965 149.117224130576  
139.633941983246 137.736771579507 132.973551954067 133.14988092185  
135.531326977319 125.655823846115 134.642898234003 134.7552564959  
134.169645445889  
C19orf70 1931.16906839143 2099.85702995194 2166.68174726155  
2583.46653460894 3455.20639616159 2151.9395095819 2639.60135568  
2358.46955614953 1658.78888936164 2321.41228376157 1798.5819962261  
1995.6000523628  
C19orf71 129.537345537086 129.794293922951 134.024205981268  
129.964666668421 147.174977926293 134.11753210296 140.736051985112  
133.556805738801 127.665162524824 139.927773713324 158.906481816035  
134.132312782731  
C19orf73 117.662611650515 114.342980656214 116.59404046487  
115.085961282227 187.035957486928 130.874283538818 132.094446606227  
127.555954288973 138.925802905636 112.314595956147 139.041005010106  
118.895095992424  
C19orf75 133.353762794271 132.825240485239 125.165254272421  
141.738647095861 136.175268696202 129.307025798583 128.348910964448  
127.911258242431 133.930997975106 120.041623078295 134.331420680628  
127.333963230749  
C1D 125.324187741972 130.721987260546 121.580726825432 123.891115326934  
136.089888639987 128.186963138555 125.935071837868 128.593112520767  
118.553226856337 125.672285485643 133.486155360266 126.033673708286  
C1GALT1 192.493439659184 180.113222861966 164.880911221767  
200.094610104813 299.754985162237 192.767155566493 404.172535442156  
214.132445321197 238.270501389189 234.484787292284 272.994195639694  
265.829122816166  
C1GALT1C1 208.816482659752 229.85833221434 236.745054217055  
189.90406457741 401.461825804111 502.281584081805 334.350011399462

362.019824026781 360.475989559226 272.238922498583 374.033009122079  
421.056268094661  
Clorf100 134.796088225931 152.104170622003 142.058086679048  
142.058086679048 142.953661611418 139.404820141366 151.102431192559  
142.025834438974 139.051656180599 136.218750083407 130.637567221512  
155.52533851273  
Clorf101 169.888264971936 148.874533472738 166.007913607742  
140.475688390415 145.34533633425 173.121618125421 166.346572488391  
157.166379887259 161.37617568158 181.622689471026 183.482640529727  
156.126009063311  
Clorf102 135.609239096236 143.447768653042 154.025625092599  
143.410917415691 156.119899067238 121.177681858671 142.939578759097  
133.82390829608 140.557871626905 127.820096020782 124.768399055809  
122.494779505958  
Clorf103 139.62718946833 143.523051024982 139.22776505842  
122.501785735146 131.106613067333 146.927825526831 147.93088503956  
148.638400592682 145.154323430995 130.574019477669 157.895460674072  
135.212715912271  
Clorf104 167.083758835476 163.513162036251 155.846106540378  
160.254101852355 156.516250236679 144.975882336334 161.94312376726  
157.368974632451 154.804753043168 147.620511911043 175.158180187883  
169.607072855818  
Clorf105 166.071816427719 148.603077434646 166.784804508647  
148.484823275343 176.953099943185 182.222567053422 170.67334244323  
150.792065744902 152.470980074365 169.705236302448 158.8246699332  
183.018203688404  
Clorf106 220.9384439772 362.95684683529 274.974304050999  
196.716209382446 1690.96371604294 1470.23096656138 1747.33558205825  
1658.78888936164 1377.75266942574 851.633522004342 1923.19560386389  
2430.70635781622  
Clorf107 163.904137395349 157.293090577042 168.398366575579  
154.737117718424 148.785977829275 191.912670416334 189.887788314879  
155.207839370162 186.591941221632 150.552186000149 188.654966029389  
156.353914172996  
Clorf108 158.319248599976 137.995313285692 172.403953571339  
157.449891798638 139.654648891206 153.871893011106 137.074564265915  
154.630837508249 167.373416675264 149.303427221111 152.50843414723  
156.191659799142  
Clorf109 180.392337212428 200.127994198329 263.606930507829  
166.289763097913 246.912159676595 362.502631441716 366.240941980786  
343.833659987063 318.06081614151 265.536429548886 214.295260811046  
265.366632264085  
Clorf110 163.104822161892 173.995889755792 135.078198678379  
130.808911605271 100.477911152746 116.043095688871 113.857477830423  
115.785084044427 122.095978653755 116.814269969508 140.227863970629  
108.007762863766  
Clorf111 114.65036208773 127.876894098781 123.463861015933  
128.066043751951 124.484589975207 119.631847624882 114.048136176142  
121.021776527531 124.036907709461 117.193620642373 130.902319266342  
125.18424162353  
Clorf112 189.235998474945 186.482547532546 206.488530785667  
225.423403713718 340.366016191232 555.366765340014 232.667968049771  
374.657816575897 233.161848094769 236.292053621233 183.056707813352  
312.645778869254

Clorf113 146.479009988445 128.890685255595 136.444883411968  
133.71610564207 137.312488161187 142.05571112803 162.155834067128  
143.993611400272 129.896711442418 166.036553680319 152.733409144267  
124.217337143269  
Clorf114 132.695992860853 132.53122878527 130.738915341653  
126.893023101449 128.438401976279 137.757902615328 123.843823256462  
133.459221120979 120.39039576721 131.722397988741 129.095469955392  
125.870730238298  
Clorf115 388.002365247498 440.319777672273 214.413674287972  
381.808809625801 292.317998405609 208.955110569558 204.942500423413  
205.821101661022 361.969355316032 221.74200490054 144.779146672553  
323.628636799403  
Clorf116 162.15259972225 196.777776509371 174.593548891693  
163.102043862117 422.973606694449 190.700515036197 369.513420606401  
370.945254716657 532.235193634196 553.368945998847 683.655205499779  
881.15414246017  
Clorf117 139.427216913809 160.060406629689 160.48993837044  
145.296229550382 134.194555223935 151.479748626813 136.692495869097  
161.456727894848 146.559502785264 141.313482534472 134.929915732246  
146.565265415908  
Clorf118 123.96665768708 120.948246352846 117.335748689217  
127.088916295784 121.144174389418 104.442909315944 125.693321471759  
118.26427946535 114.498610080481 110.678680817471 120.447140228396  
115.646023142125  
Clorf120 125.016608289141 128.773129597793 161.456727894848  
136.824357247954 129.375772737722 135.102827224896 138.637735867167  
136.274199465472 141.245471037222 136.454911192129 125.331215990597  
134.485835304676  
Clorf122 403.907009699589 377.951523644306 399.071041584646  
407.615019710707 833.841469195516 445.505512764045 534.608644989102  
509.400965222318 463.99922423125 461.822629852953 511.547907091166  
476.917496749381  
Clorf123 1211.39534395597 1162.8644618472 1250.58586679251  
1752.50728312967 359.329520507158 603.569635276204 744.225336494008  
610.759447723026 666.204695328096 566.647927867646 559.0867397858  
494.604716660887  
Clorf124 148.624135810148 159.563866056798 155.731897985566  
150.160004473338 159.166059518117 189.758013811338 168.763640193219  
196.189101941489 171.014432075829 175.946843919065 165.370800097602  
191.3765085801  
Clorf125 137.938310376106 155.214638707046 157.759149893048  
137.697452180659 315.786908578669 138.728765780512 147.195127201893  
258.16437138327 150.134337895481 152.344248425416 158.550259547851  
160.695913747601  
Clorf126 135.532820436394 125.189588215659 142.288110423886  
128.878051599968 129.878330410179 143.864876796403 146.506263412584  
137.120973494952 142.01454627498 122.746185691827 130.491742824575  
156.373163373309  
Clorf127 173.09379121032 162.267841475739 138.416716745934  
142.566028652989 148.461172387171 160.79631681714 146.197678850188  
161.354014292373 150.820808770853 147.113541493157 143.284230032303  
159.130076733711  
Clorf128 1010.73988405469 965.031655021246 1482.92498205315  
1001.35912007916 798.943242964857 1255.02720867812 1175.27165286568



1501.18820017008 1281.1883621512 1505.90883940934 1200.03423010236  
1003.93455977232  
Clorf129 117.862532836494 123.998343902602 123.700076467648  
124.738217731488 125.687688416588 119.469328303796 132.146027935802  
125.645986634914 118.206034087145 129.642952083513 135.412051450659  
120.93965087814  
Clorf130 132.518394343751 122.763138007612 132.122273848715  
141.038721816572 137.248465324584 129.534721138679 143.791908191551  
150.573523216151 147.301909062399 124.116400777472 169.642188114285  
140.992801405088  
Clorf131 289.037033338975 277.101000223971 265.791342287571  
279.413335686746 392.13175568099 617.318955611228 449.598181155897  
549.359675306309 488.14606875418 430.590533290315 416.307629596091  
498.965895763801  
Clorf132 128.800907223807 131.630132952441 160.589575894314  
135.386650538345 154.889079187405 148.060086496148 157.702540365469  
149.76931674417 146.872432596594 140.149064156135 126.897804011992  
144.233097828078  
Clorf133 457.130051460676 367.229293432041 628.344122779625  
369.373283422151 139.934460900409 243.441938832251 167.500410857353  
142.493119780028 152.538048490265 155.535222310709 140.434086004204  
185.46843333826  
Clorf135 115.531710316716 122.793816135585 114.860437706855  
115.816156193574 361.969355316032 384.051170099325 154.479733759712  
246.457698183615 200.790119570144 159.199045715212 163.014903707857  
162.778480318754  
Clorf137 144.068734533254 136.051070946954 138.813126946007  
163.245806772716 141.855655600443 140.242272149424 138.409284761652  
147.576533768761 116.106772298898 149.964827055916 140.579839043912  
139.537865511933  
Clorf138 123.190757763412 131.287142490322 149.687372584136  
127.800634041606 125.990762414974 146.112388101621 119.735807506447  
129.780648518219 131.583841535781 134.231634410324 126.029431525943  
146.390223079987  
Clorf14 117.992729826121 135.603160096973 110.16174213285  
116.572001618531 130.235407859542 121.810767302322 123.442970398288  
128.751758311249 121.912927816178 120.355844117573 125.065813262416  
126.925982415892  
Clorf140 121.524679741065 124.291944151031 122.770033312519  
119.242880574306 130.440164900487 114.122395647516 111.949644842971  
122.773736159743 111.886543737378 121.057111457792 148.844916975586  
113.542803491215  
Clorf141 146.353239460684 143.287237534352 150.610633329908  
137.326796995017 139.082897743357 131.727533821438 143.931400351525  
135.81863662958 134.347898745664 147.056182807232 130.630504666374  
145.412368252632  
Clorf144 817.342172321486 894.734451279225 809.362464219294  
1044.52286986369 970.634736994313 625.152889992949 904.733257358133  
677.265576269103 1079.58110075176 907.904780399957 662.781145703653  
870.887539668967  
Clorf146 147.395335979341 130.374753524012 140.067809125008  
144.084441938143 133.581450824362 124.942701123337 132.154131623051  
139.825088162247 145.298109334141 141.597692730835 136.745596788338  
135.738699497293

Clorf147 134.062423178775 151.372219350291 138.1693725329  
145.71535210212 131.298129667973 149.280480796544 143.160281902098  
154.426605816862 150.549883779193 155.715728894101 129.792548588929  
150.082561726876  
Clorf149 247.145700155364 240.005943851098 326.525579400607  
253.124449721731 154.993784224548 198.15257384667 203.456296907031  
185.507663455634 187.997940126066 226.595006724068 193.008902902654  
182.515302191173  
Clorf150 155.683727621475 143.327730271099 146.873719524815  
148.260672564835 141.931274901572 123.908458472687 126.917669470999  
125.227513212286 131.780134634616 150.084909674721 124.436549041911  
138.317443162096  
Clorf151 201.555964610849 197.12840030662 181.364325529405  
207.902853533132 192.804447792672 194.352807599399 192.258863431747  
169.408892048115 185.186497037695 210.165098572428 179.996590340102  
188.767121505943  
Clorf152 168.061346742356 181.950658782069 167.51207060064  
155.091135297162 137.404525565336 151.245520459264 144.490452173336  
152.350537364705 140.888439624918 137.299908075811 145.261662166215  
157.40255559397  
Clorf156 152.660373241584 154.197254746757 151.126252768792  
136.341358916638 164.417770955805 167.057202756618 162.411156818437  
179.25743545231 161.096914295309 144.496429994489 167.719651771357  
161.585555680663  
Clorf157 133.308383825604 143.011042973347 118.426600479326  
145.024148458133 139.328340242696 140.061045085545 161.506431005203  
133.315888375614 136.051070946954 151.421099926743 148.206529935876  
125.176747824384  
Clorf158 147.748142622566 139.685629122498 143.655901618594  
150.401509081265 141.004467676795 154.336009472285 136.669003646622  
144.895601314903 141.657914155491 146.633627492419 143.250386570155  
135.957972463728  
Clorf159 149.228977421003 162.850128623401 131.212705319485  
164.236417852165 451.887564294551 227.065194522692 233.786136606682  
209.229537873706 241.782750858091 183.348764012358 251.09230266334  
227.350260241585  
Clorf161 150.421116058494 168.521601064374 175.626096716758  
152.845126167802 161.24755274554 174.02138265758 194.903531690239  
170.370934381883 159.074001164836 175.562070915794 158.48793705795  
168.139351579682  
Clorf162 388.192984832638 400.353795948162 366.317263094585  
364.443097338814 195.384273821324 402.425130776131 308.679189788554  
690.903797251841 988.788192022196 460.24741151155 277.359422005775  
235.905788497166  
Clorf163 189.61702125418 202.849544035436 198.456392063513  
183.115511373872 258.964323941464 245.01029221002 214.434355263652  
304.713434036642 209.112959748917 233.335353447342 220.330477277988  
243.793465720264  
Clorf165 221.491633607126 262.019779752857 264.383922859446  
225.142823691625 182.300628120658 194.584034984339 195.674128236589  
212.607094117882 193.428733288774 150.102853150151 202.927700504034  
203.265559787292  
Clorf166 329.406649846151 365.590174280114 298.706655333472  
418.645775576811 400.98290237416 261.541138637729 300.937118739654

253.327404004524 243.807038920733 300.401370666633 466.58966852405  
280.948704707655  
Clorf167 138.664401460739 152.309460630038 149.980924447339  
149.41357273704 147.972383728506 154.143331594812 134.978785580693  
142.167918879613 128.50733429744 134.824147038515 145.800379695397  
151.201263631883  
Clorf168 152.419714400591 131.975248488461 135.041687549769  
128.594951429021 143.047617455953 152.26903721278 163.231460026317  
149.541917326637 155.868109161417 126.960777504772 121.556331561879  
130.440164900487  
Clorf170 151.377932495104 147.910699446264 138.311892121437  
155.801832826848 142.079184950618 140.040420521312 151.946691918521  
155.820194280153 145.745466612541 147.505345299689 150.231063426302  
143.554726863556  
Clorf172 162.223175359454 167.484236948415 169.590101694098  
159.913028912492 353.50447714719 258.532432007328 265.110264596425  
259.025042304848 205.226635237992 220.458449424062 213.914599384797  
277.652851236546  
Clorf173 124.253582884351 130.423465505321 121.021776527531  
135.261561433405 126.676875319815 141.613898853625 129.816385177336  
123.952494134263 125.025064237439 125.639355645626 141.752031758589  
122.891946370542  
Clorf174 480.923468806193 397.861172312706 420.567884340705  
437.489929507567 602.86705608228 581.828502821435 683.365770196967  
671.134356672693 680.509421043347 550.124359517322 538.872348151809  
636.781477235579  
Clorf175 216.645552082667 222.919473675549 403.657727266403  
326.83982672544 130.879745244903 152.210867113591 154.932132950843  
156.040073232376 148.382228428693 159.534017722536 279.232290927348  
147.299872426498  
Clorf177 136.37481047902 134.341489592504 145.378779757104  
147.056182807232 138.89354244296 150.269618125943 146.309171902112  
153.07993334035 149.190528937822 160.272632590118 158.872962797815  
138.113751487484  
Clorf180 142.284050423299 144.419657674797 126.162713269943  
171.180188911669 175.372355078713 160.979182561773 137.803749343493  
153.929167381674 142.780100181736 138.03766128249 161.335677383485  
131.067958183644  
Clorf182 141.425393615228 129.982236484842 151.705219298578  
140.242272149424 140.004456934031 152.748807709142 149.839827383681  
153.299196905367 154.264142444882 128.580625868379 125.976052547953  
144.487533992157  
Clorf183 146.40904127542 158.319248599976 159.085639414089  
172.077522197357 141.880044424342 138.074645385322 143.759171254761  
147.922706629104 147.450681897766 143.982561564661 133.348510114432  
140.628614910068  
Clorf185 141.241717979079 171.345989796519 140.981666934622  
163.672213020803 165.041296694491 139.823017208731 143.951756384507  
156.241637687344 136.108500467418 156.546769952772 139.962307072428  
150.155154998981  
Clorf186 225.209315195163 180.710636205653 155.218336968191  
185.186497037695 138.883710791382 193.303987945242 158.459129254226  
159.346890686719 186.551385094902 135.247018354192 168.882806817001  
408.758021864761

Clorf187 131.709341771599 129.132523684894 141.719556176029  
129.511465164539 133.805991920905 139.818998514364 129.054577477882  
139.793683692104 133.728378162206 135.508803488048 130.924141812334  
133.614973477764  
Clorf188 168.906637816046 161.475694690038 210.989806933158  
141.710076413441 149.557833322995 174.854570705 161.735609436394  
182.357065848298 201.931760074628 131.780134634616 328.019503002384  
281.740495452842  
Clorf189 121.164978896057 128.630613404354 122.535728427528  
131.421663453164 129.278833426752 131.414690782328 126.991140761102  
127.177422395113 120.304037458526 118.351607868932 141.735123971775  
128.864822736402  
Clorf19 342.878522959461 321.049000153127 365.950612890149  
327.635520861099 295.571900619972 375.038561820137 648.161646065464  
618.140160251927 443.343806055858 421.690849282483 259.900447705311  
644.97200337335  
Clorf190 181.550597645633 202.483493595704 182.588697551677  
233.757965816721 254.188830191845 158.371599884762 175.030373805031  
170.052320640686 171.329984719612 152.778732614944 164.160608039304  
153.289258540668  
Clorf192 157.381401974279 143.368327095618 132.799355149191  
159.752644678596 142.809717801796 150.328995030071 151.536645416399  
128.41549156443 154.838407529853 146.278921849776 126.544685937984  
139.260868989409  
Clorf194 149.548900791507 155.368204597287 138.021559586328  
166.835922279372 144.185406500473 127.871445879091 129.625046507677  
146.763046352405 140.313216623427 140.081280065913 133.604705630582  
134.231634410324  
Clorf198 971.99484515987 753.007562127186 766.420275252501  
868.066644155313 585.075322115635 542.740017003369 368.0573385048  
589.070196307574 451.210172051464 435.796737132969 510.659785046811  
449.745016106912  
Clorf200 140.687016530974 135.233957017664 135.385133545332  
142.646570636529 155.259089547817 137.361967082029 136.227202534196  
135.717491814078 136.85323853426 144.145612985703 152.077204721895  
135.33941967076  
Clorf201 150.599425944486 162.683665945044 147.055213172078  
179.96623248843 166.360005474414 156.01406297447 162.240414467004  
155.201655653645 166.14867551435 152.829437376835 141.865758685796  
154.695060071104  
Clorf203 208.125844007298 222.820391338687 212.996456841785  
219.462274506333 249.554443204445 137.782648137869 186.640167849568  
183.302479730653 187.550461418888 174.635853531194 215.272800347166  
171.561940747015  
Clorf204 130.810353054091 136.937327692084 115.920514336615  
123.494412056415 140.047749881567 138.082870754768 114.798573331978  
116.86635524597 146.363991934916 141.256915527472 123.168787977805  
119.862037840843  
Clorf21 511.547907091166 499.776233241535 571.273512452931  
505.143815448613 141.685620602226 226.43414383055 224.92725876841  
209.33028918341 153.44628692569 164.160608039304 247.194197143562  
173.325724300712  
Clorf210 146.185931276053 137.968932080074 143.331929080227  
129.190900922265 151.747595672228 145.491525555916 134.203949774763

139.161483596756 144.83282018024 149.548900791507 152.109178223495  
146.318052064937  
Clorf212 225.61275910008 207.864808684047 177.508603290389  
251.039117540764 213.194154171149 283.499120551905 193.629237856758  
235.905788497166 231.180528071672 280.204167582951 218.433524126584  
296.20443113482  
Clorf213 148.323729699672 153.041407358576 137.310014841869  
147.710252756854 158.503284955019 149.622695843398 147.943844184702  
146.470444212748 141.316172207927 140.903091584884 130.217791888656  
156.237282338037  
Clorf215 135.273184185121 123.227904580467 125.806943645484  
135.634385846692 131.97938329944 130.882463936853 132.776236872246  
126.748906552086 130.411849432351 127.831950458406 146.179543599917  
125.021217009254  
Clorf216 267.285998701386 275.696829424061 297.805768288377  
326.758278851698 196.419891542139 192.441337304606 178.464811133  
183.280853265083 192.353768499582 172.152570321727 175.537039794925  
180.561514455864  
Clorf218 499.048754087189 566.813343200268 374.9555524303  
463.091387717305 509.14726076246 774.997895985917 562.232754247201  
846.985164747386 535.612000577004 438.870464403215 718.449150898903  
634.356322976353  
Clorf220 122.397727522442 123.498540254464 159.29430824799  
129.541049979717 132.197346228417 122.251178920649 116.363556872071  
122.153996665065 153.762995131216 128.890685255595 123.439897913722  
145.424827607383  
Clorf222 167.629008083436 170.313045875402 159.166059518117  
167.526798465556 168.813895764991 151.979221390032 158.660859266099  
144.145612985703 151.070654092886 161.73079180403 143.67880977119  
155.747694056319  
Clorf226 148.448349327493 147.407093814154 160.026178505749  
150.936747236094 154.043604150962 149.103778494524 146.025781495177  
163.470025318612 150.235026770931 144.595393134144 145.608087633951  
158.98666068453  
Clorf227 123.946808975704 134.307336063739 137.163699337032  
138.667081004369 138.792521681771 139.162076054072 132.639070127232  
124.164523121103 119.213217733213 133.229571269367 145.139966629363  
125.897190440417  
Clorf229 168.773340961473 160.466187961848 164.032302455558  
165.232545721733 146.824420102008 153.818325601312 151.379761514526  
149.675363177375 159.572851489665 148.155692596378 148.938822951404  
135.638156623519  
Clorf24 8342.70113690382 6571.35528952186 10836.7380675792  
7753.61594300904 202.662466141301 268.148673257455 300.709410518382  
611.208083466988 369.592501881153 819.887322757281 260.52593414721  
275.39986964837  
Clorf25 211.505504834207 208.067404132325 270.421697521366  
214.763232658841 223.339132121796 214.413674287972 275.298642145005  
259.643957326575 215.143973502566 208.776711004753 216.974834077975  
255.56301534833  
Clorf26 176.516540713888 176.355556618289 183.314276033531  
184.591789011195 179.460777888284 164.615113709166 171.449326065013  
197.827534617557 161.937384157098 170.342828808493 228.766847429517  
163.146581498065

Clorf27 180.304585602206 162.634670715627 152.217243924816  
184.414609874199 153.241806795134 156.7940590796 174.615694779386  
161.481227197715 165.411052799773 178.984409575632 173.147311624838  
151.316421810192

Clorf31 144.667638908504 146.500312499353 139.073785024092  
153.468933239223 158.809865241567 172.909795209733 201.913709602894  
206.303338709554 197.003657786247 235.133284525241 266.135477775641  
224.118739978257

Clorf35 276.79778275734 299.106362530855 291.720204789005  
328.826483579278 511.547907091166 376.627801547869 362.306819797508  
275.343591424586 336.898462056187 296.051639873628 367.289651112346  
454.984562256248

Clorf38 134.135748976546 150.815117344434 150.321059418799  
148.224587582189 158.756424011719 130.786835186349 143.774841336279  
137.77107995457 136.335679863251 143.281050499332 136.891612156271  
140.806935772116

Clorf41 295.507504000509 281.740495452842 411.221560795912  
227.32463765717 415.113340335205 683.470866056244 514.799179506754  
463.99922423125 313.18989508207 539.853394831917 346.566241319814  
438.817248820137

Clorf43 839.901173743755 770.19255305977 837.872187194784  
789.971871940893 891.637685856145 1096.61874892572 1454.94889750152  
1502.3444541735 1462.31151845458 934.173273294189 1301.61742965939  
1566.65825409044

Clorf49 147.966224814966 158.322477506517 181.70730090195  
147.211769989922 153.249834179388 155.561821955048 166.587100972754  
158.10628865476 150.596350682411 159.102070980047 146.185931276053  
159.074001164836

Clorf50 443.125195744202 457.292146759215 450.327710374141  
504.275299381356 453.593585032712 406.736165197168 554.950092776254  
506.029788151779 429.922530506572 626.857289492802 395.425715632302  
446.601751145647

Clorf51 158.536178747273 222.848935978648 175.128935809466  
274.77366169918 128.207440197765 137.835936352525 141.490911535087  
129.794293922951 132.913891550054 128.634431242405 132.813199199389  
132.683594640696

Clorf52 474.216057978384 455.564394647943 449.408793796673  
477.87583927675 414.596948083067 587.026042400878 552.662610888399  
497.110852407681 489.75389978732 472.279492678374 452.606433325387  
517.993093601127

Clorf53 147.232015056035 155.376656335974 150.227629690236  
134.074425424613 561.858563298512 279.495192828873 319.417555901733  
356.323554000768 263.800363357443 522.77407098992 265.148061007894  
534.083703564903

Clorf54 1177.70376288106 1022.55215097491 1200.03423010236  
1217.29687282094 328.969023478451 487.07860019179 293.17183601265  
352.418229893699 548.288640768746 488.3790571110543 363.963951509433  
341.128917971124

Clorf55 300.150235383065 269.238332581564 321.25076864104  
249.507062968243 230.399207047948 613.631311147328 342.935878735854  
277.86338481075 364.766154056243 353.243400332397 259.643957326575  
551.622587349813

Clorf56 158.890522392445 155.249688219254 159.728097053356  
143.506243892155 165.686655824416 220.876114717642 180.34788837703

234.399431238026 191.58185405868 167.817232948801 167.594414386475  
221.82340413039  
Clorf57 385.379119927642 452.843213944986 412.648926259488  
407.760503937821 549.359675306309 388.966303073519 519.450899933049  
524.245387973163 449.220056843562 634.774041584043 542.740017003369  
659.900771633223  
Clorf58 121.54835308632 107.126004317323 120.003095000297  
112.57049236673 139.067516394141 124.439917584199 124.989313193779  
117.953453145685 125.124011798043 129.992015202357 139.621016978072  
126.217702283708  
Clorf59 221.027562527572 273.353254857377 293.873921048642  
202.193338797533 1107.29687889378 1377.75266942574 816.266384662324  
1218.64951314553 905.751410113646 371.127480221666 560.481802403627  
532.063437013967  
Clorf61 147.096559685764 136.641140715439 138.990971069382  
142.376921410427 133.12641302705 139.871928127715 142.101865506094  
142.45047744931 153.974384951787 138.552423514249 141.746032519746  
122.679628839976  
Clorf62 114.805810485989 116.288113598488 125.390139830237  
114.618608815885 122.176811388389 133.096984735092 125.386545354096  
130.240366272285 116.625518828978 127.818137805569 120.644987579644  
124.313901870563  
Clorf63 399.537363692534 271.087125858775 396.04031733841  
384.780426529733 225.820503820866 341.197826517049 495.438672949441  
406.028724866233 501.600329334497 365.590174280114 679.191060100076  
558.440840319738  
Clorf64 129.507297276862 125.404043810022 125.189588215659  
128.883828419932 145.2572048057 149.485497080739 158.943005736645  
146.388285560372 136.059884933876 144.612549022264 120.998665308561  
138.227082687797  
Clorf65 154.401220304515 153.031479923324 186.563913311757  
165.808660192901 143.071933285651 171.449326065013 170.08485436731  
163.753434774656 140.965498009244 144.295556086504 149.166635189875  
161.417207801991  
Clorf66 259.742175498038 283.416246133873 264.741946816665  
268.328002606268 408.811415529922 200.964306455257 291.994364783888  
359.518199449791 333.970844203158 236.052008824688 293.482512212153  
304.590636814607  
Clorf68 133.001613667656 124.39748786803 138.62994237184  
136.734131465433 139.642457979496 128.150801169886 133.35096649325  
135.897498591391 129.851616807075 139.890519860289 130.452929012459  
133.725177339262  
Clorf69 159.115391667901 157.697168349028 164.231281729415  
165.919497521143 179.273936200852 167.315702949236 157.590017103385  
181.277683429417 177.742616962629 175.9510758779 163.326102597955  
158.127523362251  
Clorf70 137.82918941689 122.809241232029 133.592691897675  
143.444109491884 127.941584184869 135.664877050226 132.514706165018  
126.435928518593 146.188193301627 126.241307445165 149.876687693565  
129.189479305468  
Clorf71 1383.68977267418 1362.75971646355 1282.84159765715  
1054.47292895417 560.180656219785 858.524630425687 904.211195986553  
895.114975754684 584.919615953457 416.475440894731 658.202765061937  
459.30568829087

Clorf74 148.993620368781 162.481362579872 164.253219197128  
162.312313953026 203.317264638828 265.712482648121 217.847954914851  
197.068795788491 220.959843573708 242.410260751835 246.95071325085  
234.156713102803

Clorf75 116.360144963753 113.832885222354 116.969799327195  
103.691075663721 112.063713561549 116.053859681399 115.085961282227  
116.501174707117 110.428616140857 119.288554466773 110.688722702767  
114.927420605185

Clorf77 552.962676093514 557.026028810367 643.13571432061  
666.204695328096 905.233241047678 897.51782613323 726.346459754217  
924.630951485299 1018.80178630497 748.703265448403 539.125423322738  
927.137881369911

Clorf81 146.693573104487 160.122274989224 149.416411285088  
154.288075172115 197.51109998167 174.717158790668 173.001985500448  
361.390981655795 279.834616502591 148.895841777421 535.49374437073  
210.900056977861

Clorf83 234.980382243116 232.590542016298 258.075566417241  
235.650688823345 202.300293733922 217.165036362034 206.428618912264  
219.78041403077 186.6902304653 213.028568789661 231.146155346291  
202.01798254763

Clorf84 141.703410265546 150.993910190626 140.211016178402  
149.704586651832 145.787468865642 149.393022408213 145.608087633951  
153.443397882028 148.126745515891 142.96594961303 146.058477355527  
145.389721946046

Clorf85 576.636077770998 668.570984110088 549.162299481184  
712.433345978749 2337.64145466514 605.21685916883 1431.52979384867  
1412.56164938199 854.224454791713 1295.27257578314 771.294254795752  
1203.47834989609

Clorf86 456.126096817454 550.434931878586 398.673582680257  
795.464850398761 1170.88763035931 523.306451464643 442.86942574917  
366.857139377277 364.964572587289 370.617422894068 447.995213144892  
496.697565640162

Clorf87 140.798706399757 140.903091584884 133.745413210496  
145.267225993057 134.283467987991 145.426171336045 143.080742311914  
132.680140469504 136.543603346919 141.037217406848 145.432667767652  
145.027741086645

Clorf88 180.528296177577 160.419358656559 181.783275804424  
167.057202756618 198.338416756432 157.406969627689 177.478925091583  
187.955617187544 170.052320640686 138.054470878471 231.239126548656  
156.585665091824

Clorf89 146.431166706908 156.720090761933 145.152605166094  
153.051143478997 237.191866335979 110.113844434493 156.053517438255  
164.313238416498 129.717701654435 142.047828639169 156.779004465552  
143.987296454585

Clorf9 150.084909674721 153.354921961854 142.203367260558  
146.215459988012 167.43630698726 150.817922696097 155.883386742315  
150.208809981642 159.611551480901 155.496190048502 167.057202756618  
168.047136398816

Clorf91 154.789187466057 159.005459875338 182.042104888745  
189.37832342197 176.890596690798 154.24500773656 199.01458214661  
189.552385508772 182.470538043064 190.736796322054 179.973655632636  
225.850439131864

Clorf92 136.948039394935 138.880168623766 127.67121559907  
135.252082574955 133.43362126395 118.604395992281 120.060776752215



136.44218532882 131.590180562108 135.823975527501 142.663334893424  
 123.902047880095  
 Clorf93 221.253717494488 233.809899915394 201.041792159394  
 231.044588483625 585.371892598422 336.279209908669 252.548942594125  
 217.24573005272 231.018059960001 208.932692585748 426.995700632434  
 452.961307006622  
 Clorf94 121.168550902281 139.061072394426 119.13963074637  
 121.75662526451 126.209426865327 128.536721595589 115.53736269794  
 115.101971719657 126.330382425318 114.638254225216 135.122770943076  
 117.539640414775  
 Clorf95 141.130462286785 123.467227007155 160.72962443421  
 141.971207380159 141.052322220012 137.120973494952 153.374296511216  
 145.862497313025 133.827296071709 139.158299612941 142.274440538785  
 126.494665743087  
 Clorf96 126.814332513301 152.500670025483 133.608461289137  
 146.40904127542 158.558471586662 152.99686989829 147.009325721272  
 151.436802637988 157.675974692761 154.542190113901 146.90847051471  
 144.538528198113  
 Clorf97 208.348515119045 227.267783818298 189.092674335503  
 227.065194522692 285.659010982301 215.718714189719 283.163770658619  
 214.461773810376 230.447203571825 249.339449789861 385.135014083686  
 732.630306104841  
 Clorf99 137.210805338701 135.807494668545 140.258615682066  
 131.367075440559 142.712218120721 157.779441363536 137.812249316763  
 137.947606003247 131.257901340773 141.750316403249 130.590195477461  
 156.737219981981  
 ClQA 195.906137340918 181.783275804424 170.622615783608 164.000772606739  
 192.224242967539 236.855293143293 178.416969664816 271.430915699592  
 272.41397350779 194.921021761976 249.489170536758 153.93249158209  
 ClQB 675.480482223958 437.049581919144 345.062426573519 522.486866458783  
 797.501324589697 616.188923504376 378.38874489611 1355.66237447026  
 1630.1630053946 644.449861831749 843.075879568455 435.095843349921  
 ClQBP 708.779490017407 692.53483413403 943.23069404564 738.37559871635  
 1349.84215478798 2500.07677977147 1361.54107116915 2316.49886419499  
 1413.37062765856 1974.49672149862 1848.27927621606 2605.13680290987  
 ClQC 452.077434390612 383.802494922918 328.33387481068 456.038981546175  
 644.449861831749 572.049540360134 309.098519056843 814.471143753335  
 994.213397985121 586.366632966978 479.395948662331 447.182566890086  
 ClQL1 148.000706956532 166.001279428607 129.111259771449 128.785472881136  
 143.157807632147 126.268418132 129.694178995061 120.786630750686  
 124.933738341123 133.459221120979 137.476047500852 128.232091717966  
 ClQL2 153.891667472876 150.737888487925 150.642465826166 153.998849486363  
 155.272264997151 151.702809524494 150.936747236094 140.487887891414  
 147.001408450583 150.831554010122 144.892454033336 152.61583482402  
 ClQL3 127.765987130281 134.867806860993 125.398875527365 132.776236872246  
 139.195281937545 127.895989232696 128.29486937905 132.864861511517  
 130.321133400634 140.696326952077 138.159966250659 140.78902818186  
 ClQL4 114.726808450831 119.894737403889 114.76337651891 103.012774960061  
 118.983932995126 108.362609680556 111.196610704726 112.729141678141  
 109.654666772771 110.148555045276 128.521380879209 106.829040075772  
 ClQTNF1 204.299375966441 307.16835174775 194.186994486095  
 287.967349876429 166.135707525987 169.920799931309 156.119899067238  
 191.814634229865 208.816482659752 246.112720011613 157.038121210505  
 153.13384838492

C1QTNF2 154.431051053529 155.924471321076 142.960875909369  
140.664303738113 152.31268334586 144.724040494873 140.13515064896  
147.345558455805 144.762006548375 156.328454726363 146.512045729234  
153.068898842283  
C1QTNF3 169.895672129542 151.88244935494 165.370800097602  
154.475735552851 139.999298193212 140.968351978909 132.021249712589  
138.370241517025 135.51506573405 139.708303388546 145.128919984856  
134.512204051277  
C1QTNF4 123.518170356322 122.295222990408 114.880348648147  
110.033746435328 102.255408120852 116.934457270701 124.113451627593  
125.048770476506 106.876902604214 114.170354748872 126.256716138724  
121.215558351076  
C1QTNF5 747.322544683874 824.746488539942 256.370052241046  
445.348044448953 342.037040881785 243.425632941131 158.285003899913  
286.703712311781 367.382105696814 271.568797887976 194.80575419836  
226.763252784108  
C1QTNF6 154.661456780865 159.390531348676 154.695060071104  
156.759600627542 358.415933397099 188.910933952136 185.743212726702  
165.370800097602 171.722839172783 253.385592447339 168.854819201403  
166.830529779692  
C1QTNF7 346.635777358159 247.971366020963 262.416137698884  
181.889592946523 136.171728950893 156.437949042181 137.7872481668  
161.390489603929 158.814407805803 165.149464497921 130.323754933844  
168.753660955229  
C1QTNF8 120.212294184999 133.336063137966 128.368669716591  
130.698850298016 124.746457912284 116.273000405449 123.361179535626  
119.395894479869 126.931328660501 124.42974326791 123.420635380886  
126.988118823204  
C1QTNF9 131.257901340773 151.751963310212 135.100687929821  
160.28767775843 129.987548571478 137.717859035645 140.051904905695  
136.821228481217 150.003399000079 134.458958352588 120.110473925082  
144.892454033336  
C1QTNF9B 138.800986934663 143.569894807386 139.028620375206  
132.439176846818 133.771691580031 137.720747340105 135.873325130921  
135.391788614828 138.397152876585 140.36278240974 135.596007994731  
135.539516564142  
C1R 489.909407178594 311.481739745423 599.307072499899 218.917357155289  
176.340265963032 196.802641002079 224.361277033882 260.443814523694  
358.897128592042 337.119524477446 154.300058278533 195.645181575647  
C1RL 317.802633831405 266.80383076887 277.501071684448 238.149614104568  
223.84997313236 244.251315474587 275.013838208239 339.012225830929  
351.337287690674 231.180528071672 360.90109922539 296.721891842563  
C1S 1836.22560264874 1272.14273680177 1301.18893681695 927.137881369911  
203.524150518033 234.063633889254 174.149718758884 353.674560414317  
510.811470658575 412.863887464545 182.439945229388 201.415695076278  
C2 181.914505612128 171.740347129234 166.506602328929 191.912670416334  
168.166938045454 174.406779990708 161.142723532061 163.781674803361  
299.29004204677 168.547575047205 195.755450324985 161.683243808528  
C2orf100 1294.18114559128 1615.60472592991 1100.81588201714  
1100.81588201714 233.047541132048 427.766660764042 303.986544460218  
549.569374872629 653.879734066271 796.052115217208 217.227441947056  
275.908856196757  
C2orf103 125.107483348755 130.812309202831 116.871350997346  
132.059507616101 117.585207821853 123.042372128864 115.090463537716

120.36402353147 147.962721373177 243.402781509365 121.926377140115  
122.636980845207  
C20orf106 136.480458837869 135.028746262383 156.020996568814  
142.493119780028 137.497145594629 136.957209426823 155.080900277147  
138.586620636835 136.162938063831 151.024201732633 130.551216910933  
150.468392290279  
C20orf107 163.024215671479 154.705630035232 162.828844182372  
162.212442593001 164.423960071908 177.333305785248 160.676606760965  
166.932757191847 156.396579029788 154.524588318927 160.117742879282  
170.05799929575  
C20orf108 959.897744425251 869.937761943249 1020.19774509086  
791.402660066193 769.586135629964 1087.69177809384 1178.08490218853  
305.720812071583 441.331937921872 459.388390392518 1100.17618574297  
806.88003660673  
C20orf11 888.371107987343 999.658013198849 718.670564185576  
787.425941491281 1748.77270039774 1946.45172007314 2271.82656399253  
1065.36715400306 1189.69730508119 532.394088545421 1665.14066952917  
1029.75852676191  
C20orf111 722.399669963921 557.214020485204 1107.99131702522  
495.438672949441 500.469781477166 1179.42590997099 1525.24196488688  
546.399972543938 716.229989890801 761.89271251455 550.901056837273  
411.221560795912  
C20orf112 137.85150144918 127.346646117375 132.858424396011  
128.224742304889 126.796253980623 132.131378074469 131.759422682853  
144.266864839344 134.664652044646 130.726640485925 128.202619705343  
129.869363181125  
C20orf114 154.161892545061 152.467764730004 151.543678860049  
159.629232808787 202.524668687686 127.407418037777 189.589053840976  
143.46919253255 148.04206955657 135.395071593072 165.964183460825  
158.390337945372  
C20orf117 335.47484353322 337.585502787016 287.924891622962  
452.517134370928 209.398724613377 189.283071231248 207.785320401354  
166.472068379965 159.13662975347 158.322477506517 173.979001863717  
160.32812671237  
C20orf118 126.282575548237 117.445284668654 122.501785735146  
128.082956839709 113.184495948936 125.134516902118 111.11656427738  
107.395559299582 113.143436184959 124.062863592295 131.013719535992  
102.474380813907  
C20orf12 127.512733134453 136.852403978525 126.626904958599  
128.040201586267 129.489867764242 155.608876496443 139.06923394504  
126.253319664664 138.167369090026 124.246363878094 149.910521500364  
154.406369231962  
C20orf123 145.962664629275 135.351344868436 141.597692730835  
149.836491640473 142.863268359757 157.881569297409 172.045843691642  
145.643752002787 135.427985445559 143.294217840279 138.938546468136  
137.968932080074  
C20orf127 334.101619029105 374.56251861444 284.831817899986  
333.91440669951 156.834059922255 226.055406842613 179.828494168009  
167.559703634539 193.173703015873 772.061917233344 176.849238577762  
169.434164890542  
C20orf132 145.106362864355 142.046082566177 133.900005368973  
134.033751039071 135.433229702209 126.398884382537 128.213678179359  
130.820415610578 127.31790396929 131.142841840284 133.274292647041  
120.387275261633

C20orf133 172.430211711547 166.4983332269 182.235490620172  
150.079372712689 147.805819921429 153.031479923324 145.852430082228  
163.799748670842 150.038722708606 167.397758092427 148.598920567714  
149.513744292932  
C20orf134 150.058160923921 164.68600028429 153.184575380093  
148.96493117884 197.795275907042 142.154646805122 182.292947734054  
168.783725505491 156.978585870854 153.911165277809 167.243544185778  
176.019082929386  
C20orf135 135.542079867325 132.220398477217 148.466658640201  
161.498785105514 128.773129597793 138.706520278166 129.684916104674  
140.255768023269 142.173279109959 146.378522944864 136.468434653208  
136.923876486522  
C20orf141 169.349922114861 148.574661934068 167.791351000743  
162.500485773812 174.761105961773 164.448110885609 163.521095869383  
170.553940654493 160.72009357092 173.647320180498 156.053517438255  
168.111124820968  
C20orf144 130.342425029134 123.434963905308 128.81022558263  
114.999628959921 129.386300987308 131.260111979219 137.58025011566  
126.980375035189 116.65635246873 123.084040312047 129.878330410179  
111.137519376499  
C20orf151 119.029186503752 131.267177634269 115.594489123676  
116.445184223804 470.868288641048 185.507663455634 206.845306095447  
271.356289141017 275.929414239664 153.159425380743 234.980382243116  
217.307872538386  
C20orf152 129.956519535525 146.526744516344 156.346014084316  
136.005756600948 127.765987130281 154.218967720305 147.971492964243  
136.794860440446 147.502116289881 146.293735120772 142.991135981933  
144.581747568524  
C20orf160 193.502988612307 221.768507175814 138.42029331811  
224.724262742427 167.301579775842 147.532747354296 117.716094828779  
147.282520596449 171.212749388553 128.486896700405 139.543551482943  
120.473038066927  
C20orf165 149.402679897813 120.252164075308 143.354858193994  
143.219722736891 138.12651823109 127.507557925713 140.622130978368  
130.854818615966 134.367115858307 132.598022317288 120.78129870199  
157.431972439046  
C20orf166 123.809866652834 134.541606996118 119.418866166776  
133.423376063284 114.785989868306 115.619116556625 126.88329158544  
117.15886922795 123.687439699754 133.022848457361 135.283742166077  
120.094156375538  
C20orf173 129.513590304528 127.903393519351 115.68358702028  
115.914842445934 129.995417218564 127.9928491829 121.843992693814  
135.766466392056 123.256613702254 125.143281492089 117.965208293925  
131.722397988741  
C20orf175 138.940564112156 145.505223177269 145.34332740863  
161.142723532061 129.966755942173 135.976837152799 148.916981164664  
140.999877170481 145.449099891256 139.442091671938 161.412427590994  
149.547635666621  
C20orf177 439.122658719747 384.464383569801 644.301665020526  
374.406855727422 210.822216545773 557.513306351027 513.20896845398  
277.314675225943 328.33387481068 332.749676505218 229.373686092654  
365.199125315964  
C20orf179 103.826308328446 118.201092260839 118.372047967248  
124.606795061928 115.041324824728 109.832757716464 120.076742232995

111.867464669155 123.96665768708 111.743461522689 131.606765174514  
110.501341211051  
C20orf185 132.832556359483 132.799355149191 130.786835186349  
139.220877923507 136.874135348635 129.819820730239 132.99989565368  
126.294085960617 140.763592237598 145.208597795717 114.960460615926  
132.751406897891  
C20orf186 120.263659727964 125.798453479983 128.304919825754  
127.407418037777 122.355409068882 136.290486122369 141.70844587896  
123.351112976814 123.522738813733 119.934231033302 116.547306374097  
160.979182561773  
C20orf191 398.354212009426 416.215253990273 550.124359517322  
297.022984365795 451.496617003797 551.823767223086 611.540759532294  
418.062540009856 444.584594376357 563.011988279542 490.269418483997  
326.325210657599  
C20orf194 190.318957029666 182.209056248253 211.035617136177  
202.024504592763 147.73141408795 179.46936343225 165.731179108649  
151.423936838934 156.490654498766 159.89988762842 195.239829623017  
180.798671424395  
C20orf195 131.2360427855 138.497931380734 123.108694517244  
133.778595695007 152.673212084312 167.858490180471 150.942078067308  
148.927040248436 145.003900788534 130.965418847276 142.99844601139  
136.2727333616  
C20orf196 156.233573126063 161.543072816738 148.605816748229  
191.170105307944 160.72962443421 175.551853899221 151.645636946799  
152.993555372242 162.909468312298 143.802883430376 163.215507313506  
156.169405925094  
C20orf197 111.992738490468 110.925532078514 109.29279076901  
109.274221164316 117.773743603829 115.16087297104 116.802432258299  
121.402905161896 116.884397420467 134.76586363177 131.322008851059  
112.14768481333  
C20orf199 702.460234202652 698.086166782221 948.150767619765  
409.691865300362 639.184296110069 948.150767619765 4592.14655702906  
1059.80292026589 974.007008568051 1524.46745239811 1673.5387396582  
1845.87311313269  
C20orf20 622.142195892701 823.297606185721 575.060457772307  
839.901173743755 1028.39666838369 920.840069938767 1879.08108720938  
615.88518704181 633.401624753368 662.373189001788 696.277780670166  
906.359365544713  
C20orf200 131.554055357245 136.337076023706 158.420821486138  
153.474566767304 130.872296869843 122.941711366641 120.948246352846  
125.882246459692 114.585818507336 126.205931638442 137.208796872026  
126.730314982553  
C20orf201 128.007359083768 120.644987579644 123.294321716108  
121.121686280797 134.32174235533 146.482652762374 122.634741242406  
126.17133877948 116.540729581355 123.703840971923 132.86879723151  
132.245217686793  
C20orf24 1179.42590997099 1080.02576143033 1539.80266129509  
910.982557417978 4579.62296570302 4800.99572384569 5759.5586948816  
3188.90202907403 6091.9840719327 3501.86788138647 1580.27059464289  
4276.70912292877  
C20orf26 163.153676643372 158.185593294878 159.52833930625  
141.733840643889 148.951632781748 137.127587786536 148.655508303794  
133.929311295884 152.415752253205 149.975892236985 124.313901870563  
143.941358917251

C20orf27 666.570977208535 975.685771692095 1143.0779222425  
1245.47421607111 1353.61552261489 745.844395215451 461.581199513891  
490.464012303239 605.795439342384 426.896707161414 470.308610828825  
528.921893077914  
C20orf29 198.737421468412 191.029458520006 195.963361515546  
239.649306804266 306.838596239511 208.476367897256 247.407442038488  
212.33360547376 225.950750084197 306.716682293251 194.819597436776  
184.426874913406  
C20orf3 343.488356185437 357.431640917696 295.893482074241  
331.747622606378 802.643357549193 1145.35733270036 1071.47374315822  
658.068932688816 629.97342429259 385.522443482 947.425912541091  
575.857954264295  
C20orf30 1552.69879081022 1652.77814259264 2032.50052162637  
1373.08023518911 2105.87438782831 1756.88092410303 1263.64725236472  
1643.08061372695 2151.9395095819 1454.94889750152 2021.92898855142  
1889.05071563459  
C20orf38 155.393326732887 145.628239642187 128.329985147034  
153.432933930805 152.064982697394 193.843978773764 158.726115143818  
176.465559710285 156.218834695891 142.183154756458 142.599815022061  
164.098880989592  
C20orf4 426.032234135861 558.621429366984 562.711562649704  
698.086166782221 430.94199035855 514.213675499369 525.789451405743  
508.861268738074 489.403061697031 349.485727214325 474.14051635531  
330.590986934704  
C20orf43 2758.01526530661 3232.96611074938 2962.11407134162  
3552.78712528922 2979.27692778783 2486.24762158293 3093.38255333143  
1694.24232555141 2479.34567973462 1848.27927621606 1203.47834989609  
1673.5387396582  
C20orf45 224.528190554963 218.433524126584 253.385592447339  
210.729945718068 828.276436883306 1178.83933381069 736.332743195416  
529.529314022043 496.823662262772 535.354724252178 420.743637858421  
566.647927867646  
C20orf46 142.951829221947 163.319882002763 122.996616773523  
177.666582096539 1029.75852676191 641.645855499704 413.330906392915  
207.73395131954 266.101158071711 446.698665191047 280.723379809959  
771.294254795752  
C20orf51 135.879975973882 128.668672935791 172.108795190633  
133.028191258668 161.12121879514 137.303701514064 164.120602897751  
162.383584508358 150.456500446175 149.752188104803 161.534421340752  
156.043994260248  
C20orf52 2583.46653460894 2505.8565544797 1939.1525084845  
2877.92845389611 4811.88424516272 4901.41175228982 8768.32269645116  
6138.10904830456 4327.90939653054 5032.66681917478 3450.46728258139  
4592.14655702906  
C20orf54 146.184624424737 162.923734210933 144.565926379402  
144.154217446011 449.220056843562 186.215602572358 167.304721591124  
172.965746521132 209.362806125315 149.696766215866 291.369577397743  
201.865955150869  
C20orf55 246.77831953556 280.398987330256 295.727275232995  
295.047418816148 1534.21175984308 815.779445689417 506.430593289427  
466.58966852405 479.395948662331 592.079898463345 639.38881853171  
624.638115878703  
C20orf56 136.499228715856 134.840285218383 146.612602970963  
128.306607216705 131.649830934459 135.173464753848 126.153806511702

129.957292351968 141.613898853625 128.848008246639 129.029151164978  
129.127563278016  
C20orf62 173.497575259833 171.552010365305 211.269041187154  
182.929326147069 156.077604146143 190.489530928259 169.368090266817  
180.54209603289 153.600132368924 180.63469438043 169.067064352955  
170.390200730789  
C20orf66 134.441142158135 142.818122106598 141.035566928475  
145.758423590784 137.79714923769 133.449527627723 155.741507341843  
139.055892787717 147.799806976046 125.911259629489 139.184647003326  
156.328454726363  
C20orf7 289.434186747703 270.33685210971 270.201322204641  
311.670576741448 212.420616436137 295.187978994932 220.661922683143  
229.881164774875 235.563592256037 225.31216514083 234.550692915716  
314.063025950327  
C20orf70 142.833025633146 136.519697160267 157.070500065037  
165.890492422031 160.361025839456 151.81754291846 151.473239782301  
151.09974848374 151.758970249544 145.967685593635 133.0349214478  
154.978243057971  
C20orf71 122.449574852865 116.305011582033 114.466368742403  
119.375727296235 117.682034050478 120.857635836068 119.263824982583  
119.442114850181 117.943511615792 119.870661213608 121.267153348313  
117.47631318854  
C20orf72 250.515579402334 268.111403429364 324.25775261173  
302.570932942847 333.868818855397 746.777330152729 538.252273740419  
554.652979820908 628.939201051801 411.160709628865 574.779350011402  
705.987531074737  
C20orf75 150.936747236094 149.202628825354 143.477670915091  
150.396462763607 165.232545721733 147.2233876988 152.599052194143  
132.320536722841 140.091378604453 166.936975782665 144.143692745479  
143.063345350253  
C20orf77 108.557097186828 109.167312436827 102.563722570171  
116.695313319162 107.714294216913 105.450273343324 107.976233194926  
111.608386387842 110.148555045276 109.113476990309 139.541759919059  
107.07609243233  
C20orf79 116.925863450165 107.828378413233 113.680875214845  
112.41270361848 112.520199390427 112.747067417774 114.85602874727  
114.223991452083 118.761737418652 119.658703392877 145.660417208595  
113.362825181676  
C20orf85 123.446714388901 141.283042601932 131.119810851017  
139.08460576146 134.768694020981 120.345546077894 134.352155462211  
141.194900058799 132.475414208533 137.029726467523 129.075693654369  
132.681475162386  
C20orf86 137.961504178836 150.333572271902 158.869463014801  
149.219602109121 138.259512736404 146.335409183715 130.991496243273  
146.146800933028 134.95842832877 165.103398617203 157.612067634423  
138.802633518223  
C20orf91 144.664600892248 150.812739240232 131.273916869754  
167.536828038178 145.648810303756 144.829773937102 157.627490896581  
138.640919060725 142.551161883518 155.511086289504 147.624372080117  
148.139376772567  
C20orf94 350.22221782412 403.47026424469 248.690121805116  
341.973002478932 258.632372536866 307.410175748955 277.180850774168  
282.797367565702 257.477501542521 231.47915227815 322.956882599715  
300.675907594637

C20orf95 137.966987037709 146.508628678304 150.449621353865  
141.244589488591 137.282038401275 135.526248253492 172.698181201849  
164.078423844421 138.972789382679 148.340380102097 141.86370253437  
150.498954408708  
C20orf96 145.560904207183 147.085006263446 148.373866613126  
148.609721587632 165.84822009824 153.005366371425 165.977852973826  
142.097126256137 138.1774127311 159.524235332529 146.557058433232  
144.433543176593  
C21orf100 116.67463130093 121.065278765151 120.628904050564  
112.949643549398 119.301746097298 119.594962686756 118.060781901686  
107.976233194926 121.45175516842 105.952640312359 126.839037497031  
115.048402956574  
C21orf114 133.365793958118 142.419777428399 125.958139354095  
137.981446468611 139.919332373983 132.07268641595 127.918847837351  
130.430917518283 139.505864135281 150.173766182317 134.415163103911  
139.469148541078  
C21orf119 129.524056217383 143.365976841902 153.149523560021  
143.660679324057 158.216790540415 198.489278156437 147.75625228531  
135.127041919869 191.937607311711 129.386300987308 149.487167787687  
152.454414703534  
C21orf121 129.491732597331 146.094951139804 145.072924262206  
136.790457887057 165.731179108649 134.441142158135 139.925201225224  
132.661036963636 130.095585254401 140.569391362701 141.317113425046  
136.841506794489  
C21orf122 178.835679834487 252.015257713669 210.822216545773  
296.20443113482 139.78795317086 154.094285855743 162.072695554798  
133.18744841514 156.349030617265 140.968351978909 129.23899614612  
150.52625734893  
C21orf123 110.16174213285 115.963144087717 111.09179957013  
107.580425848009 111.188410935711 115.409568875238 120.752194675024  
130.651062724029 113.927168436775 122.013040475143 128.551335256123  
120.020781939389  
C21orf124 145.882793872634 153.231965895778 164.21464602746  
172.03919618445 171.80440912191 142.882391486465 203.87884605779  
305.854543429221 223.601312199935 241.867699338253 185.30916081621  
172.478461106269  
C21orf125 125.556444423391 144.70348930646 139.817493158675  
144.262612328341 155.379116566097 141.964796033176 157.519633258844  
151.852294315212 153.485731788293 154.197254746757 155.722314592388  
154.227433553131  
C21orf126 148.525224975266 151.445254181497 151.191822057706  
140.418010366997 157.971293294367 153.972471779464 158.541906931082  
152.599052194143 145.999823250463 165.898288304503 157.58659226599  
155.134796468704  
C21orf128 153.505155981348 148.069725041021 140.474338177948  
151.548865569913 158.429761055869 136.587165242663 165.337956130606  
153.389279691913 133.014551645069 146.781221728543 161.744366588564  
153.136863548105  
C21orf129 122.176811388389 114.099623939954 110.033746435328  
114.078271807864 118.725813963602 119.693318959661 112.714282429822  
127.91637627901 118.07991087231 119.866898356501 129.794293922951  
137.451687756052  
C21orf130 150.303703193967 146.231937458616 140.92377681377  
154.296467085914 140.656633546501 136.241569739318 139.790098895306



136.418105816557 135.609239096236 171.145909843389 126.992697289075  
136.575784685895  
C21orf131 118.855500322915 135.067056559409 122.679628839976  
125.130703953031 128.907618218883 130.165488538277 119.849895979393  
117.619337212037 125.410876867635 123.463861015933 123.657246099004  
121.613684281664  
C21orf136 131.519455635415 119.590540166384 130.983136465761  
129.756642179083 136.113421708277 130.900049359243 131.988591391373  
126.647643493986 137.623019849539 128.659393756477 139.253721683078  
126.242935839683  
C21orf2 355.990908506973 384.051170099325 339.753059801136  
399.537363692534 187.167255451988 156.238610152902 188.695527267631  
172.478461106269 258.384059994446 158.505363728431 177.919885012006  
146.557058433232  
C21orf24 6271.34208268488 7292.0342195035 6296.24208225227  
6601.004284244 1561.87054049124 7245.25086222102 3518.84173951107  
5688.84918819457 4882.16892310839 2926.06746795504 3566.89107958971  
3968.38723079061  
C21orf29 164.601022396674 150.449621353865 150.817922696097  
143.460361054254 139.096536887753 137.565050253948 152.925281215593  
139.760425990939 140.037379695961 138.53954980556 129.953801496113  
136.582137928022  
C21orf30 167.993851183401 169.101676908756 170.140610481718  
189.461090469712 170.12010526854 200.618080312379 194.125840053843  
177.851689709807 164.352366170527 237.078644686891 186.515784641119  
220.999383789474  
C21orf33 747.587723573212 781.790858580895 784.72162514331  
862.669120338424 489.909407178594 621.354393918348 850.562379837947  
757.066786599446 811.912727084669 650.263737836685 916.4187683687  
729.729297413233  
C21orf34 349.722963659175 313.077481033093 301.139737613279  
393.115606440229 151.479748626813 146.268073519544 138.206065640158  
137.42213762011 141.440563159897 148.199249855894 140.117644705946  
152.550031868259  
C21orf37 180.219813240126 164.302998010829 156.895079878556  
179.973655632636 177.538262133568 157.519633258844 177.204172894028  
165.333608076984 177.562561297777 161.129770392464 184.029968090084  
179.411426984263  
C21orf41 137.134190411005 135.945030816689 132.970515991525  
136.22416508552 133.203064891923 134.076865693417 139.706279455371  
136.83470470035 135.419628087842 136.724298878331 138.102654893864  
142.139331321085  
C21orf42 142.230934617475 152.840202260007 143.464614171516  
179.509758601636 146.639556437847 144.159316670264 192.286192329464  
154.466614452651 154.978243057971 147.452986308926 140.965498009244  
169.992657041967  
C21orf45 188.118989395838 218.794112567823 189.160454951382  
226.763252784108 225.927425596831 395.716879127149 260.787104931135  
439.727046291381 445.348044448953 248.729653566598 224.062024091915  
259.252807304272  
C21orf49 138.802633518223 137.068717031383 137.778033050658  
125.687688416588 127.681662711369 125.914267820741 130.564962937297  
126.462522391125 135.982797108848 122.670689386332 134.528971384442  
121.71538073735

C21orf51 237.940015617254 208.75656341402 292.23287968517  
222.709720471134 177.619101765848 261.251965523684 267.285998701386  
210.973303650385 247.971366020963 177.598422362298 209.5184563244  
260.157440518033  
C21orf54 152.169087619827 149.31020447459 144.785852437305  
142.041992878641 144.45968532565 162.364266549463 157.776321544382  
147.604213625382 154.843607752473 151.351938656508 151.224289879776  
155.011931456736  
C21orf55 23318.4614981217 21754.9904891312 22354.1731362334  
21650.9263365935 7468.70895916615 24731.0629964468 13360.9483836861  
20099.9833491654 19496.8914296296 11235.4970815873 15463.4998494462  
15354.74541236  
C21orf56 186.611870261871 234.550692915716 165.062129636008  
262.832376198119 245.915473236403 156.96934803556 236.032288046282  
156.62031503525 225.31216514083 157.519633258844 163.245806772716  
146.486480663438  
C21orf57 199.288100834476 247.08460296705 180.192015483309  
263.058972886829 194.22713184875 217.670330817769 203.410932496844  
208.914498369991 355.990908506973 230.589110372454 272.666435295288  
196.536086443884  
C21orf58 1466.82170436229 1255.02720867812 1309.01193284992  
1527.87148052149 428.569462312363 1279.9555644913 908.352265585374  
1050.40488466179 840.623505494489 654.881990232975 1046.65224316733  
1052.553421812  
C21orf59 234.063633889254 246.152798696993 275.468194644053  
218.369954323686 232.151020756625 439.616817413027 376.276954313674  
403.292651623365 492.930906036297 298.519371102278 278.385151185788  
347.73629731446  
C21orf62 135.668768914964 114.242056888286 130.601241656346  
118.201092260839 131.646121568612 134.064206964444 122.385508330707  
119.795945889846 122.355409068882 130.795318552623 135.36523178082  
131.001996509052  
C21orf63 438.611973005212 439.122658719747 577.250493023431  
318.423602671236 173.816408146725 212.210383398591 216.522992914538  
180.80811429888 178.153527134452 251.09230266334 151.459397907666  
155.007516124803  
C21orf66 275.696829424061 239.970202560698 299.390443444504  
250.25959091612 199.209279169496 422.12964420709 305.720812071583  
409.380002417794 335.389274425025 228.926077117474 263.606930507829  
301.250189051376  
C21orf67 135.168792286819 144.546597366629 120.288469716375  
138.199559519849 124.910390240995 120.757288533244 131.532660547328  
111.1002996982 118.93828679356 128.504026473695 135.416008633632  
114.790717658188  
C21orf69 148.742216703684 155.383166865192 139.898996725236  
138.885230982475 136.27621600731 125.475308885588 148.923977949304  
152.404186073033 147.664505309713 134.89415027205 146.025781495177  
147.937679308903  
C21orf7 217.778414825515 272.01602406899 259.229153662504  
274.70018535436 162.664254855131 193.892810132985 215.585089158905  
295.727275232995 275.609716327452 318.423602671236 226.334672545273  
310.426513884979  
C21orf70 220.047563627558 205.886398618369 230.227432807772  
250.647644543963 229.62164568989 176.641899861006 216.427103365727

178.304914997023 197.24751449599 202.622747952763 166.360005474414  
191.029458520006  
C21orf71 132.524377835171 153.039237274992 127.646032547296  
171.022976593689 122.664353374047 144.482364671273 141.533138525284  
143.438417529799 141.919263493165 137.73313146889 152.385014030957  
125.863969666806  
C21orf74 126.94941821459 147.805819921429 127.632566406664  
147.127908355066 131.811011266156 128.329985147034 125.342580368417  
142.163834995141 132.887701822875 139.962307072428 125.879198238067  
135.294664456623  
C21orf77 129.27634490676 145.70726782469 142.13191463827  
133.699547652179 136.545742688573 145.311964807443 132.641236788053  
119.780654293448 124.403662787819 134.160100276452 146.431166706908  
136.779180530712  
C21orf81 190.152824885328 215.335795337978 216.290279815413  
179.923966067226 161.817609920327 400.550044186372 651.235249028924  
527.707841428677 237.01460308334 155.323822771755 278.142283306934  
232.879578820053  
C21orf84 174.66966623557 168.161117444474 172.002600588279  
198.94325874493 165.565284723155 168.091278015885 175.199369463703  
188.543051108601 184.278213908263 183.168629351124 164.327140372968  
196.329602378007  
C21orf86 140.002249873656 144.579725208643 169.077657790409  
130.836079676477 146.257923971069 140.160349667726 137.77107995457  
126.924014801186 136.116468624715 158.758500675009 134.762169062357  
136.957209426823  
C21orf87 124.391225837909 129.179188863839 119.511962218143  
117.303671445328 119.759350702482 113.23302126254 116.092815232176  
115.277302351501 117.992729826121 124.571807093748 136.207420489201  
119.968081249475  
C21orf88 117.470731811595 129.891492052232 126.912226185444  
130.410584413031 131.662585510218 127.342017026873 125.398875527365  
123.275246170603 134.640783050966 124.74291205933 153.761061653202  
125.034243098087  
C21orf89 121.559477523123 132.383542877819 136.128092230238  
129.041254463346 129.104869596932 123.281489592543 140.84880167881  
125.500790447338 124.624046191085 132.815753681623 142.051259785804  
121.459780480915  
C21orf90 129.1829592305 127.193553054979 120.35956894661  
127.259038241163 120.944267930809 130.483765953389 133.638664342783  
122.766778018066 131.934680869554 125.926774314737 145.229637715814  
140.004456934031  
C21orf91 162.531630234824 157.385256442734 147.841960346835  
161.543072816738 155.933739693912 174.08222895937 172.222262910052  
186.420541099902 189.784608429624 175.874387612235 160.876228450608  
161.069535896864  
C21orf93 142.906227759701 158.911404625381 164.948785167149  
164.753886197136 155.680330654611 148.000706956532 144.235298492095  
160.353649786837 151.535177950367 149.166635189875 145.737361356678  
161.310855691717  
C21orf94 122.860898886143 114.358099210532 125.964335876018  
112.884916986215 118.725813963602 115.821231468312 124.995087711332  
113.031636180748 114.122395647516 121.124574985464 126.402405227897  
114.658668711121

C21orf96 125.481506166304 134.256243410916 128.872496485403  
146.176240539176 137.084488743415 141.50968031684 143.881744063934  
131.000186898437 138.161690144518 140.855078775719 143.35902319003  
145.635453468646  
C21orf99 107.91011371422 123.615802924067 122.389557272277  
114.734439905052 125.481506166304 110.333339548402 135.559535347364  
119.608334527504 133.872561340464 117.552229262461 131.076562651831  
123.22295112139  
C22orf13 1292.13921040404 1570.39362935859 1512.28202818467  
2496.17211592866 1245.47421607111 1053.65938651514 812.75075757351  
894.734451279225 1003.93455977232 943.23069404564 917.188039935737  
928.672013047007  
C22orf15 132.034701177759 114.39161822971 126.323649734972  
127.182067293944 113.557349524174 116.031631038289 112.332130647215  
121.286130275542 110.794219964997 117.883635746379 116.043095688871  
110.820329153348  
C22orf23 141.344034069373 138.197500836501 158.610249594568  
125.710199961297 109.416512252532 141.069243738242 137.445344116574  
130.219888837397 143.229240978574 116.485180988801 131.617027772841  
136.256456726841  
C22orf24 128.124456615525 136.19083681188 142.133238886052  
124.59097574481 139.687574432387 126.124937863679 135.803599969904  
143.04129238495 118.679664392666 115.687997771921 144.364319564075  
114.704831217037  
C22orf25 230.284216427158 246.77831953556 179.854800301573  
266.135477775641 296.24781576525 185.396765725228 188.623897093065  
186.167877791105 162.58152435515 146.71164737466 205.162633740798  
182.747079625619  
C22orf26 132.17294083844 159.572851489665 125.9888344762  
146.035731780312 130.944610173285 122.914680091926 158.163599942547  
137.426226808356 127.361974492821 139.136845089275 133.865312257398  
131.312580984876  
C22orf27 154.591116158776 123.82555184043 153.377182895472  
132.195666100325 179.785198362326 247.407442038488 179.048139035247  
269.006221210929 222.593554194453 171.813279175663 173.424541543058  
224.167511918105  
C22orf28 503.285430318683 467.187222441283 569.236322997211  
487.19625805337 646.933504790891 862.132582849511 511.25179427158  
767.377380800066 678.937151822411 680.743052197025 678.937151822411  
628.197839884392  
C22orf29 195.20398666139 227.092319765009 220.345184229077  
266.61343130101 315.615758089471 274.534901548678 249.633252091596  
242.848821222611 238.375823012603 170.622615783608 309.861048237742  
236.326943078666  
C22orf30 398.796188440256 383.407365952689 444.374521095495  
394.892918166519 489.118864124059 580.164288826741 718.449150898903  
824.427857809495 742.517302567436 507.95331185029 615.485984065221  
719.766799746895  
C22orf31 106.876902604214 119.746227888415 117.05536677976  
117.77708734157 111.549719888905 109.700513642061 112.298254005045  
117.461198576063 114.43491928161 119.057157701097 108.984922760455  
109.098105822556  
C22orf32 215.931781291835 209.93789387724 239.73396414153  
240.465165615601 169.815053752464 178.245841646175 154.118601977256

150.831554010122 176.100691355682 154.703521794209 200.22145130696  
175.7330682766  
C22orf33 146.247825342634 150.321059418799 161.877378749103  
163.400576719974 171.644710031098 154.395261192114 167.55209828062  
143.163083976105 157.04599638368 153.541193559658 145.28524062436  
146.929717840755  
C22orf34 115.37736249419 127.83967243279 121.150371270451  
134.384963577069 117.231243105897 123.582509531804 106.603674195422  
114.093935026467 137.612446150193 108.288420807873 120.918190840083  
119.349376960211  
C22orf36 339.448524400708 347.292438587205 243.893774595317  
440.916522871266 149.361498483705 123.807693112932 130.172041917023  
127.109798012351 119.498312996987 187.48055574295 154.124057382276  
136.180063437699  
C22orf37 126.934059693116 129.725706669166 129.305455204291  
136.522590104535 128.086493618022 111.837468699281 120.371374172279  
128.634431242405 121.053766591551 117.166509072455 142.543569032033  
120.971313945446  
C22orf39 203.487137264 174.663845688179 225.005311517365  
214.082408290757 188.36361073603 149.630481387506 175.585857393085  
167.906766146651 171.671895682052 166.944701842349 162.58152435515  
172.370108210895  
C22orf40 179.297628357211 174.866036336378 192.07791693203  
195.608619642038 178.606255846041 160.562164904057 165.074983746785  
186.866029149035 169.089896796513 159.074001164836 175.372355078713  
204.654489493854  
C22orf42 110.148555045276 103.826308328446 107.170981307304  
114.099623939954 112.675715371087 108.167670899938 110.419222236698  
103.202873534814 109.128394735532 107.431455226979 109.333276735523  
118.173752075833  
C22orf43 138.698178321535 134.21227169867 134.331420680628  
151.796986456254 138.820797333519 159.241573314833 154.248226423862  
158.312614511836 154.190469538568 144.288714958892 173.577723566555  
148.670562837021  
C22orf9 159.508223180752 157.454558821261 180.327051100611  
182.42088387266 144.604714612091 147.416991272497 147.457193565877  
153.156264091925 153.784923783551 183.50553222647 161.359609192977  
156.632939064629  
C2CD2 569.353661326724 585.721610434501 546.181615768667 574.035124314622  
433.928818077527 567.317223907142 913.22732386079 615.485984065221  
866.765054377214 360.551560710852 746.296354515617 614.514126276981  
C2CD2L 140.538020869886 134.772545694636 127.097605337434  
142.537484065487 171.69834783037 135.961724275921 120.26749529985  
120.649467083125 129.737882221259 125.256339476772 132.357517495246  
138.9878987332  
C2CD3 129.47419698487 128.572388808833 125.236926572282 115.409568875238  
121.188761627967 122.379537202709 120.702740607924 123.170639180926  
130.973504803813 117.212164526913 137.933122094638 118.945264994404  
C2CD4A 137.647282354299 118.597739444445 139.002932985183  
140.316066297536 145.176141415244 136.020600085547 158.085935267091  
137.58025011566 149.25240100689 141.494666823639 129.527271401014  
140.669947387892  
C2CD4B 225.050796356289 235.407064742194 144.968459820523  
325.320888625297 189.250846546817 144.578454791104 157.838771553729

160.994837128661 196.880135762817 158.23884088767 197.51109998167  
140.571143847885  
C2CD4C 139.907840403521 152.767228183775 131.391434131813  
140.914966429342 146.077082896858 144.39135701666 147.751554743466  
132.801619479245 139.138329217724 144.89403947454 157.484541464879  
155.346805606742  
C2CD4D 129.148634038268 129.780648518219 125.787353491408  
135.311980936088 140.543382412084 132.963761182049 136.16560274503  
141.284002360584 130.476322267589 135.860777386274 149.219602109121  
139.54738445816  
C2orf14 135.998087745992 134.371254010574 144.107029869771  
152.927956172463 126.132339293132 146.150048478173 149.675363177375  
129.852833137493 124.88118767481 133.080437161283 133.541333581593  
128.594951429021  
C2orf15 151.367402326399 148.444479022559 150.300108097623  
154.695060071104 166.187099519035 371.224296589448 257.24481414803  
207.692077301142 226.334672545273 181.715992480635 210.973303650385  
237.249949461085  
C2orf16 103.448244268961 116.71331256222 131.029333093048  
128.570067783535 119.407293854922 117.49013401175 128.963962067821  
132.183250916482 110.024815508703 117.343165720552 142.75592155869  
112.755143719255  
C2orf18 184.758754197435 169.520544329439 179.49202902995  
192.314484368435 347.985315257161 211.720536220806 200.179796117115  
169.089896796513 179.026308021985 198.631354372924 213.813667557079  
198.979744266277  
C2orf19 142.540433565262 129.785078660064 127.116637906391  
128.986795394842 128.054394154801 133.43194756868 135.894512504725  
160.082087242964 146.959154938248 143.92831903543 126.51808376464  
134.918496279185  
C2orf21 160.180961887686 153.511995286293 161.640122360448  
148.376194044247 152.11446058397 155.478383896934 154.070450565144  
160.903342063542 150.952264779196 163.824878791966 158.584934514596  
155.043017644694  
C2orf24 462.553267274302 549.359675306309 522.486866458783  
680.509421043347 610.070236234299 278.335289966805 283.014222473749  
227.288015854809 357.928880740814 336.70893120135 771.694853062033  
305.343879847672  
C2orf25 760.572409199179 675.480482223958 1402.14708471728  
540.359249705821 1040.73829397913 2208.49325118803 1286.55103838368  
1677.93424842267 1516.97921112926 1984.47173096657 1199.35864276583  
1790.53556140959  
C2orf27A 140.226586111216 139.326694135427 130.797498958616  
129.973380117841 133.957160768065 120.611442477736 130.513071750123  
128.927103442679 130.543453631154 130.705091244939 128.455670598648  
141.4587810296  
C2orf27B 148.130993521745 136.654902685184 150.176942469551  
147.809934374849 133.387065801837 142.639587833858 146.539196738195  
130.501010489883 140.630844296177 139.993960054847 136.05610450926  
140.025668085978  
C2orf28 2056.90127387648 1746.30519466572 2135.04382065446  
1443.68785521063 3876.04966263281 2360.87760349888 3222.23985545506  
2230.45015969936 1582.0221231161 1576.21727854603 2309.63504858248  
2410.32095582515

C2orf29 1138.00644332379 1276.14915305515 1168.68074786473  
1571.87128697931 1669.97250023755 2056.90127387648 1530.45813438919  
2203.82462320864 2005.76678571689 1166.86593572716 1937.83242524439  
2388.03256067711

C2orf3 157.350979071365 141.350135458015 142.157512965166  
149.260811184287 137.012646671173 125.533538277681 138.864844664017  
142.278523641008 138.62994237184 141.865758685796 152.217243924816  
150.815117344434

C2orf30 658.202765061937 677.023591987179 635.819650434542  
670.097523566652 675.083275037052 805.875557314697 756.618969995355  
870.887539668967 790.790236361922 579.049608568926 622.348802511009  
692.095005197252

C2orf32 329.82030842286 279.834616502591 288.182388699147  
242.299252896647 144.89403947454 147.004172510641 138.145677924612  
159.177303894223 175.139231359014 145.67389337654 152.030182228463  
138.48552149031

C2orf34 203.298764374262 185.591700082272 267.589020526148  
215.950811436427 237.420951138877 200.890547965585 183.033044475752  
212.443407602682 184.813094907887 275.755038921952 197.827534617557  
223.666832044186

C2orf37 168.734244316967 163.470025318612 164.841156516242  
188.836327151669 190.238332933452 178.665552649698 175.593421867771  
185.691922436569 176.650953513413 161.688125121941 150.367927843529  
161.172420368335

C2orf39 110.475453268997 121.764933633063 103.99234480919  
116.046983032621 106.701716475947 109.760525674874 112.321396616213  
110.935688075738 110.774802298005 108.768730405582 117.274977920103  
101.149125916797

C2orf40 1367.19652160532 1195.07608384189 1290.39741199701  
1050.90881385623 144.313841064968 126.839037497031 127.9575507576  
128.56000638844 140.171749368266 121.322817570375 131.067958183644  
140.995418231627

C2orf42 432.515970951769 405.469705787631 425.969575503375  
461.581199513891 395.645016679312 325.011269531407 378.24336892367  
485.373169494941 319.639103463458 309.181150342727 389.177193459  
315.786908578669

C2orf43 222.028626209166 178.394895649664 219.151144724168  
179.478756495687 195.740661051834 377.148528768679 240.814860403562  
195.114012321877 258.552964322998 248.360540656183 247.08460296705  
222.051005238856

C2orf44 362.019824026781 348.457808063307 400.353795948162  
458.047799748696 312.601510033941 329.779210536849 384.365878895439  
420.743637858421 312.484289357493 309.318403417731 351.395760651605  
249.925640256322

C2orf47 305.050933898691 314.751799003704 461.413469623811  
275.543576337502 463.99922423125 814.110601393539 614.094097408035  
1110.43791444289 782.448692528135 622.348802511009 395.927222009721  
827.400420888645

C2orf48 126.159880038854 132.23149173224 122.05954649985  
115.545558600232 122.841135364088 142.675752131935 143.071933285651  
125.535877109652 133.777238071968 113.529619135543 138.017249996128  
125.402714360058

C2orf49 236.108432603479 205.765822478178 254.447650810819  
199.235895708128 265.866465528654 222.484058975856 255.56301534833

220.510248260182 208.363905749882 333.970844203158 198.840533461525  
276.32528705384  
C2orf50 129.614692778261 126.05295868521 114.39161822971  
138.48552149031 131.963419175907 121.322817570375 128.324383749931  
128.501189288377 130.4631522533 132.175368142549 138.720489866687  
131.151578665754  
C2orf51 141.56459720769 143.853643511287 135.018710687313  
146.309171902112 155.91493956251 136.846912694371 139.912325578837  
143.496669740707 129.980354138975 138.814930200619 105.606964521964  
148.597346678768  
C2orf52 142.643027992419 130.056727701826 144.338069855334  
133.849237689264 129.1829592305 139.862403685817 143.347066447019  
137.25054616038 142.194507957661 138.376176600064 130.641217515008  
142.579346058088  
C2orf53 141.683298500736 126.970952206224 127.507557925713  
132.714532888989 125.358906118533 129.102182717009 123.010614051218  
127.476819912992 118.470400686096 121.391637838137 131.753135000312  
112.675715371087  
C2orf54 152.254519859308 126.305273697185 148.938822951404  
150.434376975922 144.339819009283 147.905406818238 140.809956497396  
147.407093814154 147.676279102364 147.108661317945 156.863232221623  
160.870390779084  
C2orf55 152.699431442817 175.121069571371 129.612536218578  
145.847629576886 322.36247485445 366.857139377277 251.307020289291  
360.812953749077 306.111172289632 283.701987275608 347.866264631778  
256.471672362567  
C2orf56 208.507486041165 216.559563381808 216.755681508811  
222.624150073858 284.195575802966 334.316711893654 311.10841853984  
269.770777921703 247.373571011712 237.146972312448 222.990586491219  
273.806452412737  
C2orf57 133.327778635672 147.585987099202 147.103340218488  
149.430396727944 141.104761546577 142.013370954791 163.704616231638  
157.702540365469 144.834448238435 149.274901871663 141.259186690966  
153.767488352037  
C2orf58 133.12641302705 133.012006684865 137.045772853855  
132.076865522593 136.799138736925 122.619429537799 116.806720503431  
135.499195435803 124.178483414968 128.689465747173 135.607537832704  
126.133366366356  
C2orf60 120.816130267055 113.416743649576 123.247698282967  
114.539671934155 113.832885222354 125.243735617266 122.320966091375  
121.30744400137 123.361179535626 119.305917403956 132.807755600683  
139.048016900762  
C2orf61 124.446264376282 130.268322464805 122.300069045533  
137.974323288786 120.13869466889 114.567609871292 141.503351545458  
121.464383202986 117.834484996559 128.771367080039 122.187031504466  
125.077260389449  
C2orf62 130.147848418265 119.233300586525 121.010811158088  
128.336332748047 125.034243098087 125.645986634914 131.050255325564  
117.995551728392 124.621381699241 131.934680869554 118.414329128347  
126.796253980623  
C2orf63 178.358003030064 200.486683704179 184.426874913406  
196.676479140094 175.529441666151 179.060189557496 204.453822958077  
193.704510912321 187.183762762259 216.929969034881 244.766289564524  
213.274106157675



C2orf64 600.264940641426 660.315285709317 794.165408266062  
641.338900241674 507.95331185029 653.749043828462 491.35949123223  
385.584224833836 644.97200337335 363.195371577097 654.663838918786  
482.344514972063

C2orf65 135.952202055637 150.452467115669 137.058578192268  
144.339819009283 141.982743538528 158.420821486138 140.460927375243  
122.158160927149 132.529247880813 146.975258859244 144.120106441052  
136.678188851101

C2orf66 120.148189532583 118.490642232641 110.475453268997  
118.677203713024 107.303126530947 121.344724993789 121.188761627967  
116.273000405449 122.989642938474 117.238968848218 127.284885819903  
114.607138204495

C2orf67 170.202597821861 159.286484253487 211.966139902562  
162.018860183534 138.59175751301 161.335677383485 158.130933580414  
142.617474507282 150.929236917651 153.389279691913 171.80440912191  
151.794243108455

C2orf68 212.420616436137 274.934292929666 269.530151236658  
283.556453980797 154.113228966411 228.766847429517 195.724873069362  
182.165681034082 198.885004378065 156.572774198042 252.32907388173  
200.767743455226

C2orf69 13142.4763966378 14228.7550296952 10704.4678928541  
11479.7406150358 2403.42261883515 13563.1694195379 6427.33783376005  
11326.5935775813 8958.34797715349 4929.26915002209 11432.8213906428  
7992.84111657183

C2orf7 379.862305342147 415.749051861123 448.715938510132  
450.327710374141 610.915977337787 430.505037012814 257.602370597316  
364.022018936132 280.127735578097 290.582957824549 261.922485502971  
358.298768623212

C2orf70 126.713610681382 136.052640679977 125.136745288071  
140.341589053972 187.965294229013 145.855671447779 143.558088035758  
136.067657949844 139.912325578837 142.086300138469 141.369723386494  
174.991941844263

C2orf71 141.882859092658 141.412317125776 140.603933807629  
145.612695657243 130.570050159191 126.245597154052 141.040862279633  
134.339535632463 130.363516180139 136.563471322998 134.239416179248  
135.15791174418

C2orf73 133.143695166498 150.573523216151 138.723149134933  
140.53597287752 134.682319733908 143.06806126472 129.549673572516  
141.209958892647 133.724656321495 137.485252316816 131.992186668019  
130.576944864484

C2orf76 253.495214569632 255.74096237558 243.308625792448  
253.098839084408 298.827660296715 274.092048989484 216.705908017858  
244.925472495705 255.462706428149 293.317880637519 206.127493726541  
220.876114717642

C2orf77 158.104336050835 155.62770968777 171.022976593689  
155.211976328553 164.185346950306 162.427505889157 138.544053540799  
157.350979071365 157.13859713415 153.165872773973 164.38282966938  
154.327065859051

C2orf78 152.22701178148 153.02549014611 152.327247552986  
181.354279096644 140.216148769999 140.277228495746 147.502116289881  
153.230304322351 154.352518161283 147.717748449017 142.960875909369  
160.748082658758

C2orf79 210.085329463347 218.96845208513 191.861598059182  
204.438365139666 550.671679318681 402.473870771741 450.120868656638

461.482735533799 299.513950278952 372.81255844018 485.309521583972  
480.923468806193  
C2orf80 136.522590104535 129.485710719291 130.12032144763  
137.871870950302 128.793186785667 125.353389826276 135.713266118447  
139.82050388626 123.260800590266 125.600500146679 141.647300896529  
129.797601100832  
C2orf82 145.247717878099 154.479733759712 134.076865693417  
136.960656707275 219.394500571586 140.678336884951 158.335952927257  
155.078035506545 166.346572488391 167.139257044999 147.870549240703  
154.153249796248  
C2orf83 105.665621968915 114.43491928161 106.701716475947  
115.033355516602 118.902823494379 112.57049236673 110.501341211051  
113.222264855561 119.094868654252 107.780763250481 128.339161042799  
100.04568139926  
C2orf86 124.815853677553 123.732299841696 128.501189288377  
129.725706669166 126.177491182442 124.019707408094 131.141668650877  
116.664031217378 122.490271802207 132.539585717666 133.743708220112  
118.816986517698  
C2orf88 137.372131049785 140.277228495746 153.181097279473  
133.571962238112 141.170937695272 134.506216147934 143.895399273595  
159.879600154928 140.347131743987 121.781562010645 139.367493349339  
144.54895913821  
C2orf89 125.367386907897 130.939543211439 135.982797108848  
133.44592405762 139.22543724535 144.292679144059 139.727248583626  
153.028658323116 151.142149775806 148.291518446423 130.443360119099  
126.569482909992  
C2orf90 119.083957999725 132.937942776777 126.845048064014  
132.275953817076 118.348153875356 118.93828679356 138.341918073941  
121.672811608791 130.797498958616 122.624828884731 130.822330736013  
124.710368327189  
C3 210.64483507528 167.746786642066 199.353823724989 153.703682621695  
127.712004247155 123.453048609213 306.773350448741 140.78902818186  
194.002075848131 136.653140842194 156.144934427609 150.211719786127  
C3AR1 156.856149172225 147.966224814966 154.771737131348 152.350537364705  
155.07594431078 180.113222861966 163.970187373891 191.58185405868  
183.804849355341 170.553940654493 143.629760301493 154.716750150891  
C3orf1 178.628885995439 194.702974020747 209.196695368783  
205.546628064296 155.971045744096 172.794570587596 183.294526267593  
162.072695554798 193.569894919176 168.611652451329 171.145909843389  
176.75095377028  
C3orf10 750.10819423982 680.743052197025 981.313778685019  
553.123179808258 586.366632966978 1093.85316636801 1084.10984365393  
1078.41947691758 1105.10063745656 741.433093896472 1124.67710585154  
943.677679525947  
C3orf14 227.64196401771 211.483693299981 260.370285504512  
234.841813258798 955.143610867351 423.740836541835 425.969575503375  
263.74335003375 820.249910349431 368.637819994033 580.474775712828  
821.862271569917  
C3orf15 229.157389498775 243.979769719186 240.631264915238  
245.426639190893 157.809081184874 206.391403266202 163.566535828036  
159.166059518117 258.807028561407 149.369418844044 140.347131743987  
140.16233428205  
C3orf16 121.61143371132 116.881212516879 128.354163132392  
133.889858322181 126.365153497568 150.769819282075 133.969054754299

124.469415593643 133.173541338355 126.978144285534 114.308806726044  
123.391298926957  
C3orf17 164.717809928624 157.635531050489 168.27980269501  
150.645487532549 139.188234030711 166.289763097913 170.596937075493  
142.066903301882 142.047828639169 141.059033576475 129.450937831864  
169.844913799159  
C3orf18 227.144441241869 216.805365763069 235.019573994855  
341.015631528464 178.657325741035 129.487458179949 121.846349358116  
132.131378074469 132.799355149191 125.384706864406 139.654648891206  
132.48841450242  
C3orf19 510.555184032017 547.516635695872 637.892677173103  
620.760947818536 374.033009122079 548.014025722956 571.439520427295  
796.439819579938 694.02978779693 348.848550937417 715.039905439621  
726.731270955732  
C3orf20 117.646963986512 114.561836290349 109.274221164316  
115.366496551426 138.598167973067 118.115015846489 123.75974844367  
116.90832995093 117.517649866653 132.576755070703 131.997666258618  
112.348094614855  
C3orf21 423.740836541835 454.854528472591 366.473258467746  
487.597040819879 486.947380524463 548.455251483009 365.950612890149  
484.903322308422 452.167674725454 742.128229715198 476.168679880357  
494.747087458483  
C3orf22 185.113098620798 204.078331021637 176.236140830355  
206.027235767232 156.543267949167 213.531307836195 222.565515020501  
189.647009287524 164.634694036993 192.375251343504 158.092775850886  
201.837695818264  
C3orf23 152.182968451691 153.675939908241 154.648806105422  
150.170712508944 162.208028489943 168.996965070202 201.256649338315  
171.791030104358 189.799091507686 183.071150926068 166.46473789699  
193.052112923573  
C3orf24 148.842322753916 136.085524091635 151.128838696891  
135.682971958096 152.09245741643 146.49022197174 137.913497715424  
148.42845062376 141.329559699056 149.88598449818 129.802596741962  
140.56526023628  
C3orf25 133.305679931132 137.022366035333 126.455271988029  
121.336932276232 126.539877052899 122.337240239463 124.961859983596  
126.555972138115 126.609398779757 130.761385822314 153.435218661228  
126.635105491524  
C3orf26 304.713434036642 347.620001353026 426.995700632434  
292.893332413185 360.361719991381 399.537363692534 352.945088028205  
451.210172051464 392.824840252824 549.359675306309 300.047728281275  
327.384671423687  
C3orf27 151.449690439424 136.357788670568 156.233573126063  
159.89988762842 156.375876454394 163.926432479673 149.734395134321  
165.634117939571 162.982557003317 145.915129713165 141.42859050659  
156.030794481734  
C3orf30 146.470444212748 141.204458186976 136.648306684974  
141.755954088275 148.263293819238 147.059096208832 151.459397907666  
145.741465098455 147.87699690647 157.600193849783 129.467792559297  
145.172776053  
C3orf31 219.996410908721 235.563592256037 241.944581086483  
192.418895349837 334.056545911557 366.240941980786 382.233826557803  
686.028214419557 350.077206368839 353.50447714719 230.589110372454  
387.224184063662

C3orf32 142.466067016788 143.574584852426 125.429085234515  
137.539385624206 140.443415669628 128.580625868379 120.031976318697  
117.078720392441 139.631165400881 119.233300586525 119.480037559953  
130.242779079309  
C3orf33 168.161117444474 155.058852833902 149.405118010893  
153.43000129811 176.77183598995 151.730862403472 132.069175779393  
157.604224004016 141.359142214228 121.018722403628 137.801205656422  
147.761965925044  
C3orf34 5894.79176478976 5382.31371568106 5981.08862268291  
5624.320626666666 1000.48723872058 4562.75659565027 1944.15673951528  
3463.23822434026 2608.95227456417 2180.31963682546 2639.60135568  
2468.47687203968  
C3orf35 137.391141254051 130.461084106455 130.883516197483  
136.993102884269 132.5377752987 137.383211680459 135.624881949214  
128.864822736402 135.857403020659 133.533718725309 145.544996009633  
137.336914480226  
C3orf36 158.679903271595 165.380225715852 169.607072855818  
196.819022688128 145.904866987074 198.94325874493 198.135240691225  
172.002600588279 157.929976848515 163.951459935477 152.93058803161  
179.923966067226  
C3orf37 299.463563393179 301.304268871606 359.776068595698  
310.174932137546 464.812091712746 394.576038252334 317.659548748735  
434.509391836336 406.458130553679 398.512947526406 286.469773081481  
315.47473326786  
C3orf38 179.358460170348 176.603760647035 224.92725876841  
161.17923997423 244.627091189503 281.694635436938 292.893332413185  
284.534369213195 322.956882599715 296.497100375888 213.097664319741  
338.934501259414  
C3orf39 425.229044880287 491.496499481595 374.718289636553  
569.866002248352 1172.96121022579 297.970735665595 388.002365247498  
293.825372123877 311.449205777595 229.347135478142 289.037033338975  
239.541516080716  
C3orf41 215.897620927751 143.577865527891 184.493681387276  
169.147351642004 214.331491507489 187.871017629994 156.01406297447  
159.620467672898 164.991522994763 151.815211341628 135.99579763634  
139.571752933877  
C3orf42 142.729945734027 140.826051635712 143.405079593778  
163.380402251758 132.793020446043 144.458829225668 152.713528089347  
145.744039709418 147.153129531937 147.397591251955 148.600270795407  
132.721469335671  
C3orf43 148.423303776817 141.696969082758 132.184217000689  
158.550259547851 139.765361891899 139.999298193212 148.553324405123  
138.068164255305 145.437544062449 143.403396831929 143.58555556787  
138.02757574324  
C3orf45 152.733409144267 138.461113585594 149.848740870148  
136.271412363498 133.452032750397 143.517327774456 151.563917522864  
147.441650320053 159.837102036755 143.707084981291 120.735176435195  
131.173355686001  
C3orf46 134.56314960832 155.810034593382 153.095594614683  
148.532339759414 145.414563914801 144.604714612091 142.305484770249  
126.649739818781 136.537117054998 144.667638908504 148.725162101789  
164.545596179262  
C3orf47 134.288349336742 123.389038274913 137.7724100594  
122.561285351587 115.00776048097 129.121598974852 136.337076023706

126.511314417328 139.303747021408 121.619593453259 117.251233255966  
137.59017685842  
C3orf48 126.085039271526 139.856251508283 122.682761393215  
120.01190102634 126.186758919929 122.089332300031 119.052729327147  
126.682913361149 123.582509531804 120.304037458526 130.300169316346  
131.583841535781  
C3orf49 138.079494235456 137.736771579507 126.711037295629  
129.242093568433 140.079516848788 147.745780820004 141.289009185018  
133.892661981648 138.594435323838 134.102929804129 143.643259003393  
129.205783382977  
C3orf50 226.35854874278 235.795627549799 234.063633889254  
227.558441474918 147.932875151331 292.893332413185 186.257814752354  
204.337844243869 186.276450732044 203.071186284148 257.622317771472  
228.926077117474  
C3orf51 136.040524807653 134.616051224668 140.763592237598  
132.271437329873 132.461730873857 162.743192424569 128.705587172572  
130.465221782084 148.47415004128 133.875667250136 122.042136913991  
131.785745489382  
C3orf52 160.778296470857 158.503284955019 169.417764098848  
157.353493980339 261.366143735074 212.987082617173 362.502631441716  
182.984076352185 198.863347487219 165.932628858503 367.644907862372  
237.961826989344  
C3orf54 223.551813819581 260.195256836955 211.844563155792  
239.31180635241 551.622587349813 272.770616373687 791.402660066193  
359.440639663655 306.011283364888 317.949646885539 766.710479603963  
605.21685916883  
C3orf55 155.752117896424 147.697973457776 150.324132011201  
161.24755274554 144.258128917228 157.12360611723 140.288612271406  
148.334425146129 152.303524109428 157.627490896581 131.269526665478  
144.143692745479  
C3orf56 140.762415240824 127.551486042435 124.13945833494  
143.589222264786 134.907397302852 145.329128512407 119.937665469629  
170.784229026842 133.788197693571 136.698189351878 132.306569548052  
142.663334893424  
C3orf57 159.184075293158 167.751604259111 148.482530949134  
153.853856339585 378.797952580504 299.170431746759 314.708587131145  
296.497100375888 201.81649023518 158.841505957036 433.314881387431  
316.237519859859  
C3orf58 273.478372861114 302.1846598234 234.550692915716  
212.643559782754 552.298965378403 557.026028810367 398.571054759451  
437.601814037248 227.806050911154 307.410175748955 357.35857422585  
235.133284525241  
C3orf59 417.615521090665 412.648926259488 358.975346234854  
385.050282185255 336.212224495877 356.699466789374 251.665539319612  
286.996908547553 419.047108206042 212.291528248457 359.329520507158  
333.91440669951  
C3orf60 157.259599894923 149.250205265163 146.402352419692  
172.020235319192 138.352562277336 134.628807679002 141.565599104245  
135.691862612951 149.082061203661 145.97330701968 149.898614923436  
141.102274192049  
C3orf62 163.416011199431 161.104993402456 186.447049658314  
181.070689877681 179.411426984263 199.579818754014 185.332215198617  
181.79418355897 202.178451227304 136.16560274503 205.728673153914  
167.526798465556

C3orf63 193.444080047879 166.780319723055 210.77489002666  
163.824878791966 158.617209794418 214.785381549181 160.748082658758  
167.125830254039 191.3765085801 185.783374935551 206.469040492609  
196.399050990244  
C3orf64 335.389274425025 286.996908547553 353.437466689101  
266.71318061066 189.114794029657 270.421697521366 241.293046687076  
216.582862850259 227.483999162038 248.299149406938 344.604699562938  
300.709410518382  
C3orf65 139.140647941752 144.935571704834 155.049051256459  
141.634246722965 124.710368327189 137.107621189522 138.685330935707  
145.150191397375 145.902572804249 136.959011188915 116.723991721647  
130.686857648764  
C3orf67 126.640141760199 124.672483602517 119.103219740679  
128.438401976279 126.925982415892 130.925881698601 130.213596986351  
148.112717810117 133.76515446791 126.780096523484 135.799692347002  
119.897193425305  
C3orf70 992.320202251161 856.424155671931 1329.3013039618  
1149.3250945792 209.362806125315 217.227441947056 144.534143943252  
181.148062201932 196.16056297158 163.102043862117 153.289258540668  
161.983987604  
C3orf71 137.919253591105 146.882746173951 131.965184111199  
137.054278745724 144.542320520523 142.886493948916 141.805028495425  
130.66863243733 139.623194916971 132.799355149191 127.242627779136  
145.858537779106  
C3orf72 155.400191634632 165.647471565959 161.510497517852  
160.799950553311 168.310680227156 183.406510146725 145.648810303756  
176.100691355682 156.768976123975 178.179238056905 150.096558906597  
147.338615809214  
C3orf74 144.785852437305 130.588481497083 140.784853736558  
127.545397354821 129.051642626091 128.967855397644 132.328948598599  
119.184780023269 150.378690719669 126.435928518593 119.455615461113  
136.944378905743  
C3orf75 361.390981655795 340.903961204211 393.579552385074  
386.379891865411 506.430593289427 412.582051585078 425.59810308048  
338.326304736048 445.505512764045 351.998551165704 351.585604465402  
496.991561192565  
C4A 154.459517779315 167.91761500242 172.583615020042 172.827288328708  
157.739526559807 142.910616700526 169.764014031526 151.766607453172  
150.687819649072 152.415752253205 172.552923333095 173.552535486766  
C4B 130.924141812334 129.007924852801 139.271829906127 148.297939240474  
143.716377201615 147.454902803231 150.35767254363 132.579323148839  
133.998381302146 136.964780183468 132.336431473522 125.193729067011  
C4BPA 109.74983281634 115.366496551426 115.277302351501 107.239841465534  
115.128667174745 113.199690522854 111.078930787656 114.191245210321  
110.988514718572 116.718099363329 109.209241676429 118.379914726645  
C4BPB 138.913591568111 118.572988141773 132.50027119027 126.061141885666  
120.288469716375 136.507961715591 126.796253980623 144.287786573389  
139.170102961407 133.789738760547 152.709021529522 132.425596223397  
C4orf10 169.206723147505 189.678680702271 182.109092947203  
183.50553222647 169.713585775118 155.228605554943 145.574725784632  
165.977852973826 162.739253457398 129.680406696779 159.870967387108  
150.346002924933  
C4orf11 157.659824861915 137.201149245092 158.56996905631  
148.673763368264 191.056705282378 375.131728190867 183.464897811105

181.313333665614 169.834078550805 159.771672778698 159.218886890035  
194.186994486095  
C4orf12 133.9382467268 144.476157581998 135.068883036882  
135.982797108848 128.879953205511 141.623851511993 140.882766779119  
135.400054238597 146.632312874102 138.62308708151 148.658678900932  
155.376656335974  
C4orf14 434.716530273383 428.569462312363 702.779943547386  
436.891409783298 647.273409499313 416.861099188252 805.600599570258  
605.795439342384 641.338900241674 699.270931701696 967.797017108447  
650.911886508922  
C4orf15 129.263794008537 137.372131049785 126.63730651721  
123.219903763265 129.792548588929 121.080413308265 153.051143478997  
141.781482381513 137.328370598183 122.557981210434 128.812729239283  
134.474466007553  
C4orf16 166.904990069484 161.678137139371 153.804419092743  
140.443415669628 150.657800679032 185.382647297259 181.453575300661  
181.070689877681 172.552923333095 155.801832826848 174.767697866801  
156.630366766924  
C4orf17 107.48180681159 114.488760619745 107.816312357067  
113.326628149066 113.734280863323 105.62620788923 111.608386387842  
112.916256784817 108.631224817901 106.263441906404 107.655624022312  
108.199628274798  
C4orf18 410.731869154912 322.684910198242 206.35895739543  
278.598913464804 196.819022688128 247.053215951505 186.961638857905  
248.850686917567 320.525885538523 246.263259852067 295.047418816148  
230.770036998466  
C4orf19 147.15999706579 149.984657985607 148.400915576999  
144.736213465651 228.713818522476 177.001637712889 324.25775261173  
215.115324454215 241.917371866481 214.100698312272 286.901115411673  
177.123497519231  
C4orf21 127.749992538985 127.291712212051 116.858439910319  
116.276003190171 114.44610607807 125.342580368417 109.482330324734  
116.288113598488 107.32960937124 125.579970155301 131.255028381669  
124.001295849091  
C4orf22 142.036037957345 130.768746032834 137.792806301902  
143.912136782374 137.981446468611 150.896076207161 152.274957846518  
165.103398617203 151.615675144083 172.03919618445 153.031479923324  
132.047328970556  
C4orf23 155.166786601813 151.497680466119 151.144521344129  
162.756185479013 154.94587631386 159.696443182844 150.79785758452  
149.225754384299 180.327051100611 161.852665901359 164.21464602746  
160.518055978242  
C4orf26 118.446703299916 115.999443701343 127.05677680446  
124.35374445763 128.150801169886 130.75707278606 133.180554954396  
126.349403754775 123.598210440312 121.188761627967 131.497454038525  
129.067538010904  
C4orf27 289.859695541999 312.406286993239 316.409887372431  
278.095939961034 237.825857080173 242.971958493453 304.058158731957  
268.698146407497 344.529927973082 327.566026396726 276.756415094228  
241.105817192695  
C4orf28 140.28485470716 124.469415593643 133.559082256772  
156.938149948126 115.43068422162 128.936628289974 132.560292119968  
129.369968549738 123.991249190444 130.255689301211 117.913545753709  
128.007359083768

C4orf29 208.713555471888 199.776140037612 263.058972886829  
214.8478629277 117.570749340011 258.552964322998 183.371103136697  
205.036081947168 199.288100834476 157.126460242995 211.183499580683  
223.496400038284  
C4orf3 139.754028208983 138.777120638896 145.799530970042  
135.388750095746 146.174492025087 138.643442050615 139.737748157901  
143.129945647647 153.587737758431 131.878155417065 145.885577577352  
150.798629148998  
C4orf31 364.964572587289 384.97980473847 151.78607484924  
166.162656500954 127.927232724978 156.733898702331 127.972708116366  
149.659505956629 139.188234030711 144.930066324767 126.952836653857  
127.104868352186  
C4orf32 215.84044779962 221.253717494488 197.762169504041  
220.288758600588 181.036375971015 428.340060893467 262.691387377392  
216.783051958345 188.543051108601 210.803130108618 224.6588173737  
163.833372505148  
C4orf33 170.465177938235 165.797170648964 142.121399383259  
151.174536186463 179.389797867379 251.138401278632 286.587945301875  
230.10433160008 234.996704304673 200.360518276784 369.78624104057  
327.749926183823  
C4orf34 2334.97297889593 2149.13404212591 2018.81730267601  
1910.08485008041 1164.61390835016 1492.15137418791 1266.53539318831  
2118.73410871718 2320.41293992992 1322.14570224119 2406.67187918735  
984.695710317818  
C4orf35 135.973752893694 144.062079886084 136.84488044614  
167.505381046729 136.659134200122 163.873355370767 155.368204597287  
143.669490888725 155.078035506545 139.482462221798 134.490327004118  
141.104761546577  
C4orf36 147.519991961858 161.548130965486 182.292947734054  
176.420075374686 165.866987051333 173.624709850889 162.642344529383  
148.614214326995 148.038291195414 168.314966639178 156.502051001988  
165.904887259203  
C4orf37 161.799743586569 140.588811000948 148.364138636002  
141.689210867136 152.08574341962 141.218832234405 148.124586158123  
152.219906297607 150.587882657674 146.716053772448 153.869144282319  
151.939710544553  
C4orf38 154.367285732964 144.769824608083 149.956759038516  
141.616920429839 129.372522073479 141.329559699056 132.71633377967  
140.347131743987 134.7552564959 134.686251400642 161.16688895179  
137.698423468762  
C4orf39 166.001279428607 174.840923772532 193.218266574099  
193.522811257085 158.062853087619 190.921283434627 153.964765831852  
173.050039480459 159.74220366735 171.254015232189 151.833386901811  
160.221974600577  
C4orf40 145.950701448912 130.465221782084 136.526706711584  
130.476322267589 134.463094391766 145.573544748919 130.760835441776  
132.928639483854 124.611144621071 137.556552701816 145.333097940759  
127.065518421996  
C4orf41 479.469659712246 422.23268864343 500.469781477166  
387.135002880995 253.186749111526 447.995213144892 494.175437345451  
433.491835341321 570.771089597761 498.534168389928 453.457361487577  
516.429067667758  
C4orf42 173.520662003159 152.654938328424 164.68600028429  
160.608674893418 198.437113196596 163.988099963018 178.045931314857



157.58659226599 168.460095116205 165.836534881802 164.109321257638  
174.873893094923  
C4orf43 151.153466809603 161.412427590994 163.495175710216  
161.557558028531 150.601874392926 147.736397115265 175.902751522861  
170.95650329595 178.766654213173 138.416716745934 158.467572658719  
169.691392833277  
C4orf44 119.50754902958 126.017158064032 122.260548647869  
125.212404794262 122.327353563917 121.203149121743 122.158160927149  
119.301746097298 118.21084414402 122.284431229917 133.768419410758  
125.107483348755  
C4orf45 118.945264994404 124.547559624623 129.03753569157  
112.578934972566 103.520748827831 119.709032462308 120.231559540009  
120.727504500018 118.820154030256 115.789536577324 118.492287441192  
118.871735074285  
C4orf46 159.235289396705 171.229729917612 186.377571176623  
191.861598059182 170.531713392258 302.809011218879 178.52221226882  
220.258804437828 216.077955163344 171.11282933168 179.821008257902  
209.090788790449  
C4orf47 123.703840971923 134.805239981342 136.366798516444  
135.864853829421 126.614876404146 120.688909943167 152.585572167313  
136.135223482208 143.333211390741 159.090982014161 109.52020660772  
124.88118767481  
C4orf48 137.874370839801 148.309872393 139.316189199729  
116.52455193626 433.82566459288 258.489608621438 253.65959805538  
241.453456707114 216.126000558319 260.224777636733 171.06385200256  
279.969975697164  
C4orf49 155.255279503782 176.410016510249 180.219813240126  
209.33028918341 134.025385181979 127.792241991414 121.687187898743  
123.089110282465 132.154131623051 120.210439163369 116.773599713111  
125.379842077431  
C4orf50 150.804810443235 159.874161198304 172.338509138759  
166.674240866931 165.45479542657 168.05687638693 153.136863548105  
151.043967734248 152.29434111068 141.533138525284 147.980827857138  
160.311096717492  
C4orf51 146.606442726047 127.377356715337 144.281217246178  
154.309257657136 152.81544746536 156.4687904356 150.547096071626  
140.071879210324 156.4687904356 143.149424892482 144.559193410932  
136.948039394935  
C4orf6 111.497241941203 108.697696080014 121.311836944721  
109.495342943278 115.845468537936 127.291712212051 112.142263331903  
118.05386204863 100.216750525986 126.037968297611 119.049388179929  
118.81294782091  
C4orf7 104.223476853877 118.397482835514 121.294366964074  
117.897556445952 107.74537523456 110.368392735494 114.589757401741  
136.807118099948 243.691004557778 193.723953003899 112.248047602652  
112.142263331903  
C5 333.822167152866 329.722135361491 419.846584903512 341.128917971124  
183.280853265083 168.269075560636 133.075748695526 171.660157220703  
170.758319048911 128.519448608754 213.833894542292 141.401480567426  
C5AR1 174.068974937318 178.632720545904 181.715992480635 171.06385200256  
166.863589702453 180.710636205653 174.663845688179 188.181647474317  
185.128661141884 185.128661141884 161.217964573491 156.852187451794  
C5orf13 691.916554922896 648.823677010146 505.704957182936  
1142.09977159958 205.886398618369 269.238332581564 132.066488589395

247.053215951505 269.053237303244 1918.14260920544 177.955579729463  
210.448904052352  
C5orf15 991.611982265221 1022.11537745428 869.245621105614  
990.814111681408 780.961416212309 1161.39230511792 1690.96371604294  
1744.58410715956 2132.90676194993 1873.84654908146 1728.86115695979  
2198.4268389426  
C5orf20 171.97578836712 161.359609192977 173.839053227554  
159.655362710407 171.202766078337 143.491142564838 176.11287574658  
162.599466021255 175.989742412417 155.595651896155 158.699778625671  
154.187420367647  
C5orf21 1244.67453201339 1133.87328758676 1466.82170436229  
1136.76110352875 437.836503489425 506.80969228563 956.76879975749  
440.038896046559 420.743637858421 409.743899750699 927.478050257292  
527.707841428677  
C5orf22 155.402421581195 151.833386901811 168.124936529582  
134.29036009792 143.475725571943 194.60309399944 174.23955831109  
243.772412032046 180.3779211444 204.35801867216 173.334154083555  
173.995889755792  
C5orf23 140.518206716196 140.40754434058 109.266533255266  
120.089228795888 115.914842445934 110.355493122568 106.746545626069  
109.832757716464 104.977794653504 107.450945262092 108.955761698524  
106.393497890486  
C5orf24 182.292947734054 181.036375971015 176.964088090133  
169.667751894226 142.027930009598 191.170105307944 193.660159482867  
164.870860592068 180.240305360865 235.43707989982 174.775676782795  
170.350891928203  
C5orf25 175.9510758779 166.533191390639 224.981439707657  
174.775676782795 165.134931755194 162.52512327258 187.561298131124  
200.72147365413 154.695060071104 186.66469040433 148.272252953881  
179.54034642468  
C5orf27 125.942455135541 130.886967265639 139.691470247318  
129.32466533596 184.223623297663 124.436549041911 127.245190474707  
142.62707251786 162.574338133241 146.882746173951 139.974586762939  
143.839170216353  
C5orf28 3103.4192907748 2811.84191700516 3363.51782842264  
2558.91648313228 884.248568386012 4103.06565237121 2446.31228564539  
2491.33490046283 2753.89649259242 1789.51979173209 3664.38955037715  
2127.22258112242  
C5orf30 186.089988569287 193.871324880919 210.14307111352  
209.60319248212 200.964306455257 237.113813706224 196.096936985479  
200.518684601283 181.364325529405 239.20206002 158.845174721328  
186.886677174192  
C5orf32 414.333324610267 472.793332506369 439.122658719747  
441.578261054602 634.356322976353 687.494132125365 870.887539668967  
600.430996779799 666.570977208535 369.646624431062 732.352357321273  
374.169744342352  
C5orf33 309.798246248863 325.252108402192 555.366765340014  
310.8725368426 237.045634416039 263.250833727291 208.838523729744  
395.588345893987 219.96819201774 199.53455266342 187.607426452073  
194.819597436776  
C5orf34 166.23609765059 162.627021719615 159.549936351002  
153.323666159436 163.125317704446 171.552010365305 151.660152977515  
214.050918459805 159.781313090489 134.640783050966 144.324313048777  
162.484777758676

C5orf35 176.497706091676 165.992542962911 240.706548931192  
186.420541099902 237.473927775823 267.028096234702 213.26158748941  
280.246711704036 167.645930148254 239.31180635241 225.75155298452  
245.240006198482

C5orf36 168.405786851399 152.702847643082 155.346805606742  
146.029647001623 155.575152212736 157.967824935915 162.237172404557  
166.404164069728 150.778292242313 163.495175710216 138.201164395948  
159.446705611995

C5orf37 234.588584245938 223.184064606222 276.714748212739  
211.869300324471 204.509884908059 344.298510200653 312.224309341171  
315.828726297864 245.640193659159 259.72035004624 269.261595558589  
402.140437036706

C5orf38 107.02909139647 106.772581387455 123.513588004371  
106.204350278634 109.719356131043 102.851152421943 114.084543168359  
109.242622591321 108.007762863766 110.966212705086 124.96926662367  
110.068122112671

C5orf39 248.43491649623 250.647644543963 220.633692394229  
248.465457421469 167.817232948801 180.408639020724 212.691702227442  
229.443064589306 273.106088088825 230.367251714289 206.027235767232  
213.382179917193

C5orf4 210.711890471222 187.4351946569 231.462907786174  
232.083160165968 128.449200385351 132.404879616886 137.920724602098  
129.386300987308 137.768666157176 134.679882781788 142.91818218442  
144.873034900013

C5orf40 148.700297908071 146.96472350529 136.386031133644  
128.140333650496 143.421288665418 149.04685599998 128.618422306397  
124.710368327189 136.87712607887 114.598636725763 114.880348648147  
139.340699808517

C5orf41 709.303384219887 708.534025308731 845.369108604819  
544.30845362168 193.813717161291 266.316485802808 364.265100349672  
277.817786943873 227.144441241869 264.233381434738 331.215872600406  
208.914498369991

C5orf42 161.874184077257 156.396579029788 158.179586948369  
147.077695919758 137.365567527202 143.303309656177 152.368485416992  
155.545904088857 131.536457148878 150.354401669138 129.76141737109  
129.547309629132

C5orf43 128.897493103888 125.547399456656 136.762273376313  
125.929743286163 127.665162524824 123.98775110588 135.453399741892  
112.891050337488 143.614075503775 131.773304233929 143.601057437842  
150.152613183213

C5orf44 172.20451139581 176.650953513413 259.374392296079  
162.595632367022 158.205235596076 256.648540685098 197.687858915757  
186.794165469219 196.922837906592 201.731223995887 183.168629351124  
272.456310079164

C5orf45 154.080778100852 145.142331981651 159.561431866706  
148.139376772567 137.038866196785 150.587882657674 143.440420261133  
149.661929885679 150.942078067308 143.667207351415 144.388851371784  
148.190696520521

C5orf46 132.105184573944 133.886458291672 135.5668267936  
143.868962478182 134.275773172492 129.966755942173 146.483508510944  
129.198366503027 130.066177538896 158.799917136119 109.454483612299  
129.018088749395

C5orf48 125.347442446239 129.935532080325 119.922676683808  
115.072622367144 107.727848546225 116.310166003024 112.252555403121

111.041656398985 127.786141874218 116.723991721647 138.594435323838  
117.178495957357  
C5orf49 140.84880167881 146.772611341214 136.097571072206  
140.244919506549 129.616142780279 131.668163693171 158.295583769612  
142.988500173397 141.010588053284 133.18744841514 148.176995739142  
138.263361518905  
C5orf5 1252.28642463619 1100.17618574297 1267.5716872154  
1099.80705776268 278.687780705367 415.011847890313 512.723592291378  
451.317592236192 384.780426529733 394.73732350607 886.517088614968  
548.138527647594  
C5orf51 566.914448800423 544.107739610054 655.431236290512  
445.905756082569 410.645457106122 714.052063877292 649.438995824208  
869.937761943249 469.794672718173 521.512936372701 532.394088545421  
535.354724252178  
C5orf53 838.267069860172 820.652972219658 796.052115217208  
931.325266360957 202.314814594735 258.998065427002 278.385151185788  
227.668046559074 262.832376198119 408.201232787978 414.333324610267  
275.755038921952  
C5orf54 226.678503956411 245.01029221002 288.823376348944  
262.79667156266 180.364089931995 187.586093248437 224.027605834751  
195.438353051306 185.432587490792 158.120079903425 199.746775121317  
203.642739476708  
C5orf56 165.411052799773 156.040073232376 148.835389500419  
171.768618884215 152.60462513339 140.446530307169 147.182394557583  
147.409936250284 151.411708598688 164.1572198075 149.516743790585  
152.095584118603  
C5orf60 115.502679218125 119.795945889846 148.065080664185  
137.419835194075 126.670227417269 131.007779278656 114.002925521932  
123.841366760069 122.285983209924 124.905889975958 130.450930089722  
123.327238774943  
C5orf62 220.312301059818 192.113217321485 193.245087824217  
179.985468369202 169.385340991747 178.745112514526 165.4474699807  
173.766372029062 182.929326147069 206.164058935215 154.34872021008  
167.194306682927  
C6 169.975329631607 149.783542909965 159.368376366657 164.593531655305  
149.585616718523 121.472885562857 139.570313872946 139.440415574681  
165.177036955944 152.185397218918 149.691340727994 152.222732770706  
C6orf1 148.242794464181 162.997720993338 160.131256419524  
165.003646188775 193.95909424044 160.882229345156 168.483273292464  
185.997327421952 172.403953571339 171.080373870373 169.33926580273  
164.084737224884  
C6orf10 126.98588570464 116.445184223804 122.182695593404  
115.450352881048 114.373370072994 110.586147059226 108.296042016208  
113.970633751086 120.55570440025 125.528638246486 114.278113876915  
112.635430248416  
C6orf100 147.454902803231 174.357336296554 150.126627487419  
158.841505957036 160.640160107693 145.146797807275 140.486376016494  
150.023791544584 147.425856984368 157.113536717393 168.538117820213  
165.570531605115  
C6orf103 170.12010526854 159.413535577361 178.027417594263  
192.046442148183 155.801832826848 148.840533233712 170.892319361167  
173.001985500448 150.863099494798 168.04198447141 151.237088659409  
155.566065673542

C6orf105 121.455843337023 115.184395637553 112.428707152237  
124.001295849091 113.799997627317 117.316790136526 116.653897702566  
136.755975832051 227.033342447929 136.541973790157 175.29178007783  
127.365142833355

C6orf106 325.320888625297 324.871248300476 207.104548555929  
410.845034795716 291.537725613819 195.724873069362 250.515579402334  
242.752995772995 185.233210060342 177.619101765848 195.831574717135  
164.784346867158

C6orf107 146.619846538124 139.684141478459 143.167719135403  
151.234397206563 172.568852318369 155.762890407496 155.475804754732  
142.521260841187 138.717541782317 162.500485773812 144.568417378353  
153.505155981348

C6orf108 453.926991868451 411.878556907186 428.959561932229  
528.275591281419 843.936924659514 430.649188209901 414.267332328081  
332.400086578723 352.897241809959 469.64693728427 373.545629693667  
438.340341490622

C6orf111 777.901979189395 563.490027149224 739.874432767734  
484.363052437459 247.407442038488 308.767036855508 490.464012303239  
325.173931553891 410.42088953434 384.051170099325 620.760947818536  
673.502723625773

C6orf114 125.783265980169 131.001996509052 120.880547922392  
120.365602682311 120.740986472733 126.667650990284 116.969799327195  
122.339819585312 108.266328505986 130.521731606987 135.849839822066  
111.992738490468

C6orf115 304.357050745605 323.841518852386 351.585604465402  
351.759100605991 1307.96033038529 1316.31088187364 1608.40826380713  
1364.83036157729 1110.43791444289 935.042067053226 1741.0131951509  
1526.66232186013

C6orf117 134.628807679002 147.343712869579 157.399880496076  
141.112047881014 213.338918839446 168.560093633607 185.661496988658  
155.319717753912 143.60570420943 157.103246263523 238.88138498771  
161.046418048832

C6orf118 166.263781040251 146.058477355527 125.789509802098  
143.349486755648 138.728765780512 139.923187410488 145.360466216324  
144.718507303105 144.068734533254 158.275283892632 127.125906877098  
141.901382169334

C6orf112 129.964666668421 142.984243805285 142.597110130872  
132.952355710395 133.783379558598 144.6567095695 130.624702758052  
136.459509901229 134.285191872099 129.825824640378 132.132474135959  
131.709341771599

C6orf120 193.744461104128 172.509081696309 196.001089662818  
161.189717452004 163.899808733609 168.437049123012 233.71520737817  
179.624208193114 178.179238056905 139.038389244329 176.506227858258  
235.019573994855

C6orf122 134.872654203921 158.509885816997 152.166586496729  
147.325222091872 139.361120875198 152.961475450751 157.172970235254  
148.739888930189 144.89403947454 151.848131897899 154.569432344392  
145.093913515812

C6orf123 135.085039737228 129.902965506953 154.183537565624  
157.776321544382 152.052084712417 140.010730572075 136.55090238808  
131.132508349222 130.535859816562 156.046085830566 118.578205738502  
159.055956234445

C6orf124 157.684694038023 145.576880854443 144.555718186987  
179.411426984263 156.001983149983 147.584176709986 126.155486659114

154.483828924645 160.105903942674 138.062345982865 121.248923222807  
145.584615439295  
C6orf125 711.166793546075 643.905401805862 595.752426322468  
673.824770556885 1235.02626456572 970.166036472486 1215.96648642927  
849.389818300305 863.086199215353 1192.47480377375 621.354393918348  
1346.53215685106  
C6orf126 115.656801309856 103.012774960061 114.987285062108  
108.66227817548 149.554174907798 116.588138374632 110.355493122568  
121.18490040448 113.840813583258 108.604763499678 108.530158480237  
121.945541820091  
C6orf127 125.280736217267 120.493082096235 144.55710963567  
120.910703698292 131.330974614437 155.023934989559 138.692057950694  
127.155818626031 131.419663282022 116.796995589816 125.728300338988  
136.603035996281  
C6orf129 210.605864685448 227.065194522692 183.894417745549  
324.009703043876 615.485984065221 525.789451405743 502.063888359427  
453.875259610173 500.469781477166 441.222346452864 300.314088267108  
452.24100098898  
C6orf130 432.372995789404 421.459312180809 617.67819271245  
390.979822976551 296.141012087256 242.471259857978 329.88790758321  
376.692422468905 458.607367472574 365.541609015117 410.954095610904  
326.908959531021  
C6orf132 126.359440164601 124.913645688325 125.892022613725  
132.074571281938 147.619451225526 152.629680152219 133.499361793303  
134.128061214081 167.604959895451 256.394563537658 147.006482557682  
145.126091016414  
C6orf134 134.744175117719 136.589250394236 139.585373400347  
136.589250394236 150.166324293431 149.857861968652 144.592987736094  
144.339819009283 155.23922239449 133.272540012108 170.661808797506  
157.328404229451  
C6orf136 435.48544637769 474.14051635531 531.217306770605  
567.869601934138 601.164127925014 600.635914090365 586.867772838753  
522.664475688419 651.43207839949 459.30568829087 464.196512015649  
833.198511430615  
C6orf138 154.755544586846 177.94501172269 194.753955100069  
181.976252906929 158.579717282881 187.955617187544 166.20327698517  
164.15288821931 159.561431866706 152.182968451691 166.784804508647  
165.103398617203  
C6orf140 158.859389972316 148.484823275343 140.271557921345  
143.650172124086 157.754622099874 164.066839397676 156.525347260458  
148.688413944868 139.715836473047 148.624135810148 149.871960981882  
158.8054811093  
C6orf141 149.551030995489 159.824012085212 160.78368986036  
190.66473033826 154.623548525522 151.885992695789 167.42476096854  
151.716042884808 158.545435407585 367.732191251547 129.813090345837  
174.417259650516  
C6orf142 126.788749235867 120.325985681299 122.223184326586  
119.034003473459 129.158212237299 130.041462255766 141.622592268163  
129.138035235415 123.431969470387 136.486261473545 137.286331849749  
135.166677520468  
C6orf145 211.609763150578 225.890195278753 174.568253693395  
210.245551279259 199.516043142784 139.213953275623 188.878770168595  
149.350630572336 165.169920299969 183.937484597232 178.496344474999  
167.298438019561

C6orf146 128.200531810126 126.730314982553 124.036907709461  
121.410606617535 126.439948611449 132.795064859079 130.465221782084  
120.15332480712 126.285743744314 120.560056224145 133.009854792992  
119.730174479044  
C6orf148 144.820843146628 149.805955402639 151.64806573742  
178.200678423426 121.267153348313 152.483240622367 144.883597913037  
132.955473649746 147.094123051131 148.750284842503 139.708303388546  
121.752481757054  
C6orf15 136.408314486465 142.948238172973 129.096939267543  
134.495938988321 129.543069836687 130.744788360182 135.68605915552  
146.384051525624 134.968848574511 123.237851647499 140.195820033314  
129.92319548307  
C6orf150 146.574656147816 126.553693803748 133.229571269367  
112.314595956147 138.959040014432 123.981053866137 155.945838519586  
129.257947818865 158.660859266099 183.545741265706 172.604689611475  
129.765440519589  
C6orf153 856.74270641707 842.87865208079 768.334658920971  
820.249910349431 719.628501451187 906.359365544713 1040.73829397913  
948.150767619765 826.771587455122 1175.27165286568 1027.96306543235  
1367.19652160532  
C6orf154 121.360822445187 117.652693591865 123.977467396003  
116.161473967382 144.727773039491 108.646136431909 121.705065573911  
116.89487516867 110.486191378104 114.812254477058 116.46192274217  
116.507315786826  
C6orf155 168.254689624696 158.380964047483 163.416011199431  
189.633348499854 156.373163373309 145.97512573326 149.684922983176  
144.643770374264 146.70298187005 154.675189522146 136.016912147651  
129.601234646954  
C6orf156 112.78323842342 107.802792435066 114.441223528256  
122.595766303833 115.450352881048 114.691842968597 105.976284291356  
118.912989775436 110.22624111837 116.168270198375 121.571579572958  
129.537345537086  
C6orf160 4061.24537355697 4520.84412831414 3222.23985545506  
5410.50736002544 600.430996779799 1503.2049371911 5636.26097921507  
965.673699120049 1849.21906428944 1270.76282064793 4641.8793590085  
1180.7055699511  
C6orf162 163.794436953711 163.446813963119 177.851689709807  
140.83570584033 124.995087711332 167.130843160309 138.313519292093  
135.367261617271 153.992763544073 132.813199199389 173.484307104751  
188.878770168595  
C6orf163 164.529828080312 150.193479279784 153.169450192935  
146.151639797173 156.130224537288 164.74234322574 207.218779485342  
157.394035451151 148.883263903527 157.713227527385 155.868109161417  
154.288075172115  
C6orf165 129.210356735226 134.683553037185 139.117776552573  
141.717466442384 139.175421159925 133.133892264995 163.534117903837  
137.717859035645 137.253971514177 133.757741295765 164.1572198075  
137.672798701643  
C6orf167 144.259643132933 136.618643817686 141.289009185018  
139.333282400639 152.024383072265 148.00952002903 145.358431402568  
151.26137860684 146.084461430546 145.737361356678 148.499207368959  
150.401509081265  
C6orf168 245.489266602897 196.287131027947 304.292209676095  
304.013547190343 114.849872458647 132.64813248505 125.634045420702

129.583916648999 128.176779923348 130.056727701826 139.140647941752  
120.530092530622  
C6orf170 740.973440818582 786.160002434066 588.863382995875  
685.080426814888 243.772412032046 664.343553341563 399.537363692534  
505.143815448613 394.892918166519 365.864755316163 807.92851898782  
445.661863626419  
C6orf173 245.399847987183 272.712242893937 260.314440448486  
308.441120735095 533.279122416818 584.199252444401 425.001043358831  
629.381791489871 469.64693728427 620.163512570453 267.839640412797  
523.435696794756  
C6orf174 128.438401976279 118.694037994926 115.949513659403  
124.480385254916 115.53736269794 116.850851308701 117.81168010976  
110.952108124186 123.501843029993 112.90900939264 126.359440164601  
119.218909479403  
C6orf176 138.649502040582 132.963761182049 140.321675137237  
138.440663763957 142.723175448765 149.25240100689 136.016912147651  
135.054931772725 141.639216893245 143.061415008831 132.605662484463  
137.033870931133  
C6orf182 173.70035122661 151.722405598425 146.75924072364  
161.359609192977 166.872332652008 155.397301207102 150.82596027483  
146.188193301627 140.206268652318 142.886493948916 162.500485773812  
157.6811998968  
C6orf184 134.264584077125 112.729141678141 128.163613794257  
134.623264303227 133.541333581593 134.637520371454 127.242627779136  
133.343243441383 137.944260488223 128.348910964448 137.767900781368  
135.43119649883  
C6orf185 135.5237675623 123.689439578326 118.773864607553  
122.631814400575 146.210814568357 144.004831360797 141.148849622103  
154.774977482202 131.104534164394 152.429970809069 141.778060508776  
141.067419336609  
C6orf186 149.076146942797 154.227433553131 158.312614511836  
147.670425834523 122.673596593654 123.403099206878 123.960761343425  
134.964619235561 129.995417218564 128.952986088886 131.568898109933  
114.421383025971  
C6orf188 150.384559054133 152.791390145148 156.324643994552  
142.372470063444 146.623313753608 145.934643000545 130.396593013401  
134.062423178775 143.290642777702 140.52059487958 135.281686411685  
129.969400693456  
C6orf190 125.932540615682 121.545189875973 117.186546702764  
111.484426481816 121.846349358116 128.599254558082 120.633217745524  
117.992729826121 133.847494826806 125.704264033102 141.923103467306  
111.683074830042  
C6orf191 164.726382689707 144.720594512581 149.272219727411  
136.468434653208 157.838771553729 141.763072120718 148.85250180736  
155.683727621475 154.627270742193 147.051399102374 141.368078865065  
152.021576565132  
C6orf192 306.716682293251 341.2887754025 238.400565506288  
368.948300262634 233.635876830148 216.353502371227 314.126706052299  
347.73629731446 423.826189747546 353.005548289786 511.670320118232  
533.893360199271  
C6orf195 133.892661981648 132.047328970556 122.878790127038  
121.406758670435 130.935922915902 117.682034050478 126.746388125956  
120.883785696583 125.010266083832 118.770061426689 148.356726939122  
126.388778582602



C6orf199 144.889019483712 125.422348389595 120.196595293401  
126.919867899174 132.085538520551 119.598216955485 134.673861365626  
120.669452856028 130.611233072509 102.094370876743 142.715449859191  
125.892022613725  
C6orf201 123.541709359809 140.239948346946 120.71782441569  
136.423161205425 138.304793826214 119.767154020462 127.949413503055  
131.49254872524 130.808911605271 138.252656818036 131.774882989257  
121.668166378914  
C6orf203 236.809829701921 260.787104931135 263.448958595597  
263.123584372086 228.212753830905 183.314276033531 226.893147371644  
243.10297424873 210.692705153337 204.990512488181 303.762967437478  
229.542259738438  
C6orf204 289.297370738382 192.331142672469 281.119138040097  
166.320461361356 143.839170216353 149.734395134321 185.063870458561  
146.227452269648 146.672270660899 132.714532888989 160.035282578603  
145.276745572405  
C6orf205 140.958277301476 141.1596293382 140.812334019209  
130.080728694308 143.727514442914 136.562662050767 132.057808599068  
130.836079676477 135.651829752462 128.22735290389 134.599629045981  
129.743808480368  
C6orf208 129.467202466655 141.963297887448 137.31708798874  
131.688038068545 129.703791330416 121.215558351076 124.075077123156  
120.054065939835 136.355319997318 123.946808975704 139.693261291326  
124.193603137858  
C6orf211 177.752497164503 172.276968413879 176.029791617989  
167.180406126438 212.363151537303 189.092674335503 254.909076658804  
227.441436540742 193.544035570799 220.217745732407 205.428900832926  
220.578790067967  
C6orf218 155.837866295709 137.314968268692 215.558688906165  
151.858466721347 160.031506612501 140.323425587628 157.878110410517  
146.416318806523 153.613110881454 144.902807664593 168.418529261977  
183.969897305028  
C6orf221 130.479845410716 126.34649262976 126.980375035189  
118.9803314875 131.84454376953 124.539006083936 127.030113960477  
131.067958183644 118.366859032979 122.309041354217 141.340452225686  
120.831070822199  
C6orf222 140.898380345452 145.34041912391 172.077522197357  
156.037150880384 146.229239731545 165.647471565959 153.072429774613  
172.794570587596 158.041568121766 155.343619434375 149.25240100689  
164.15288821931  
C6orf223 149.764447995426 133.895547281411 130.92186531563  
132.514706165018 137.641136471239 128.386309075038 137.493436771898  
125.293640452686 131.578042179715 137.907709799074 112.208950290962  
143.272669418277  
C6orf224 144.526499066594 139.238936770274 152.685860451112  
149.322537247388 149.651553512698 142.13191463827 158.425950902309  
144.380485359951 149.480971898888 138.213742418402 139.493025452991  
139.609751976657  
C6orf225 333.592915218163 334.350011399462 322.443089373063  
314.337680575998 123.794432024417 219.2695037071 163.456245724169  
179.509758601636 166.681646517413 145.39060898147 241.039766283972  
201.016287924499  
C6orf25 129.86336717605 131.13101959543 131.177396785633  
133.962129094978 129.653283053893 135.403206634483 127.0631494857

123.413596815384 136.539849534341 133.004765428575 145.020615552964  
141.857434100065  
C6orf26 135.802258952006 142.411117330429 133.238296113721  
137.388190728367 116.994216357989 121.607527525765 138.088712695622  
163.805257266374 140.471953101887 136.987403767185 152.91729346961  
136.316003989725  
C6orf27 123.629279569085 123.418266047461 131.832311911703  
152.377056383547 151.299425811105 146.081940883446 134.835962366555  
146.257923971069 140.754706171596 151.442463705271 134.384963577069  
130.249430984172  
C6orf35 149.437212090587 138.325950428197 142.853399942089  
137.27506604142 128.901707304582 119.094868654252 119.049388179929  
124.395047385025 127.845259467015 133.160197638474 118.567548265638  
120.485138937899  
C6orf47 535.758943850734 559.559921312181 542.883453307  
732.630306104841 537.216291942143 337.87475687838 566.813343200268  
350.741303038926 400.180574613078 340.800632878807 425.969575503375  
546.181615768667  
C6orf48 1484.32547474275 1136.14069801696 1347.10650016064  
838.63350090385 394.35596596181 469.206346008875 1798.5819962261  
559.668195903429 541.258721278882 929.198774489695 1086.33540858772  
1251.15912264225  
C6orf52 134.058035351684 147.955701866515 140.616811333466  
143.050004021764 189.758013811338 234.399431238026 163.256472113745  
176.704617691988 200.934618257908 141.079317977197 130.43775024291  
159.693019552703  
C6orf54 169.077657790409 157.374537572779 145.051794777243  
171.028432989066 154.368499839507 147.199961777192 151.979221390032  
146.421195733989 150.255511248598 160.078122267577 126.81140158672  
150.328995030071  
C6orf57 205.804144075374 176.839917795004 217.380892198811  
183.294526267593 353.385210690169 193.028341755594 221.050093964575  
224.186573847185 242.440966395613 232.519482087835 224.707455448421  
256.394563537658  
C6orf58 139.101471810467 133.847494826806 140.602170750673  
136.68056120003 160.001115445038 140.938442055097 140.617663657037  
142.052454741558 139.762998983487 147.145932651151 130.506708993193  
135.159590925066  
C6orf59 151.206697943841 165.314290446922 133.037138438863  
179.730694272916 135.565256045133 124.844481048039 130.166741978483  
125.000876313893 147.668990552874 134.619470709414 134.495938988321  
128.883828419932  
C6orf61 210.550995170071 202.504840299605 209.130260450131  
198.568180234676 165.424516708502 246.492735271771 219.940167815376  
196.144420005021 201.041792159394 184.915526626619 248.850686917567  
222.134519361117  
C6orf62 524.725307261999 509.400965222318 471.946284490029  
341.251360936154 643.13571432061 694.907086612929 1006.03677177164  
586.246004571452 662.781145703653 518.17401959981 643.468308027006  
608.816123736392  
C6orf64 238.037110997575 271.064405562085 244.849563563729  
274.179232297038 251.959823608766 241.599271777806 308.281798808746  
278.061498892643 265.260411490697 271.154246147262 233.496804016764  
285.258824662946

C6orf66 224.361277033882 206.825575257029 238.654367531982  
197.565122821625 262.832376198119 259.672238210968 288.481981529558  
304.900910626137 242.971958493453 265.260411490697 233.536023295039  
363.777212750779  
C6orf68 127.50624009248 126.259029676691 129.884064654761  
137.85618381155 153.228048041467 140.486376016494 135.571239294086  
129.213523302268 131.22473774325 146.999370190363 115.587874563785  
136.589250394236  
C6orf70 268.52833723726 285.882780066861 332.464176231219  
280.414161197286 302.570932942847 253.124449721731 398.075524915003  
346.173614351499 269.981476129439 252.10470581893 456.201998988891  
290.914381066573  
C6orf72 260.098788125373 195.724873069362 360.475989559226  
199.378179817518 195.364709354814 241.917371866481 356.770158430601  
232.641965649602 206.605699708924 420.446810988909 261.203388718689  
289.09614335372  
C6orf78 145.89801576671 149.035590153457 159.74220366735  
154.302619274576 191.754626760061 150.52625734893 141.954467306745  
140.574129695953 156.779004465552 142.406236920136 135.987450822209  
171.304896264805  
C6orf79 128.071379991958 143.307838525991 145.45768403614  
131.872583529419 129.910866236901 139.21825391822 129.758303592589  
132.161764435769 133.900005368973 122.176811388389 133.805991920905  
136.154522071917  
C6orf81 147.18948282156 147.673016541108 133.663595328149  
148.680794815584 146.411873503163 141.393814611166 139.593950393555  
135.412051450659 132.891375982227 141.453255692229 129.771073986855  
139.636177212128  
C6orf85 205.058210447711 224.008253365957 208.257420634745  
209.867189613436 472.030150842569 402.366797969833 551.206833852215  
309.0578543424 433.491835341321 1355.07170485397 449.523996620257  
303.483515328621  
C6orf89 202.545147073902 225.142823691625 187.769988580599  
213.274106157675 266.135477775641 132.677272839165 191.628693083169  
157.521230460545 171.161297672182 193.892810132985 175.874387612235  
186.460034745907  
C6orf94 131.77642590781 130.579954890389 136.356895672212  
119.655162437465 126.381288663037 116.969799327195 129.233595525585  
130.738915341653 140.840895590527 131.041996482401 128.322884322951  
131.615462296871  
C6orf97 137.745887988474 149.17029600091 157.901967487277  
154.406369231962 145.812607895325 142.68640844948 137.464914919148  
148.030579593944 140.750004067571 144.358535632993 144.087004064416  
146.112388101621  
C7 4055.40322213638 2681.48138915107 2441.05534211996 2856.14739820295  
119.696656494403 127.00963790814 126.50870982427 150.394483608039  
268.406778092906 118.825948323992 117.706795566317 114.067790137477  
C7orf10 255.039661999732 205.987280015028 274.564508105177  
190.5930909277 151.379761514526 138.338280468272 144.510062568989  
132.864861511517 155.259089547817 420.567884340705 171.373932115412  
136.390047634643  
C7orf11 246.327991259259 223.778708427552 266.99947481587  
217.380892198811 442.766704003254 255.305647212135 359.099750692694

284.891415492568 292.640251411131 409.380002417794 341.819090221654  
448.767690095033  
C7orf13 150.063082731931 145.453460204097 134.02083946631  
149.659505956629 204.89842561202 155.04585737344 148.344941331885  
139.217113811817 139.727248583626 175.902751522861 162.970595558845  
159.811778680604  
C7orf16 131.674409480919 122.517559025268 114.561836290349  
120.793974839773 126.667650990284 116.176068923513 119.168045349254  
120.78129870199 129.728266017061 121.599883734552 120.53428198263  
134.190511945944  
C7orf20 156.662150993832 170.446156541317 154.935741493562  
162.026757124868 392.909481887174 182.335981256243 224.67853219142  
194.388383297922 189.434597063058 169.332207863684 163.451063547847  
279.202256032476  
C7orf23 391.644649726254 362.899103657252 368.220523234399  
331.32397534437 992.320202251161 516.088776850623 773.803350315426  
574.035124314622 666.344430142655 350.46078795627 538.605085454393  
941.572186137467  
C7orf25 253.42022722564 241.917371866481 369.018856220394  
281.659653592151 294.368406238222 292.145553580042 341.501397478593  
344.915370555826 296.721891842563 310.598930734244 327.566026396726  
353.50447714719  
C7orf26 601.521068811063 596.076764072945 519.564563632951  
675.281131488524 987.564350211893 455.08515350006 512.467731561858  
567.869601934138 424.912426797488 403.984761333129 596.934339406636  
564.200165295159  
C7orf27 681.677841333095 879.809795251142 754.97177863997  
942.900963522948 1836.22560264874 619.045921382959 757.066786599446  
753.997560938003 649.052806726591 713.087392708048 780.461254794127  
1219.36024606325  
C7orf28A 197.47340234886 188.378996128521 249.354198174438  
174.012972901793 332.400086578723 263.845733455915 285.882780066861  
312.557093674533 278.192669077191 289.82072316082 289.474517971859  
385.050282185255  
C7orf28B 248.010317392179 288.313931067158 245.997705723007  
272.854435771465 506.80969228563 291.50783830983 256.964577037118  
618.437282203498 403.582461109859 441.001837510132 538.156335788156  
476.076903428247  
C7orf29 185.627515956848 182.665357598121 168.491878435329  
176.062665550409 172.186384820044 197.231408726321 291.020789939476  
186.215602572358 186.268881719287 177.379186278216 189.509062639279  
188.0434100445  
C7orf30 949.789710063337 1002.88224342342 1048.85768964657  
921.546033242474 1744.58410715956 1063.5903770389 1885.93146154931  
1646.76016031831 1440.14449872047 1419.4638331856 1099.80705776268  
1808.26383618901  
C7orf31 153.952788086758 138.084801633774 142.607578275494  
163.119211741255 168.018785514306 156.75308999904 137.823152565933  
144.098578955023 155.207839370162 146.846301957637 145.289151849318  
139.308325848216  
C7orf33 106.551076380988 115.247223837316 106.204350278634  
115.473431881597 110.678680817471 110.138220982557 115.468921844902  
115.520278378747 108.34997967774 120.988749021323 128.449200385351  
113.756115251188

C7orf34 122.543903508753 134.316859658338 137.127587786536  
148.678869698203 134.231634410324 132.834433153076 132.411757518105  
143.370698101204 115.072622367144 132.038012025708 132.518394343751  
131.705912986393  
C7orf36 281.570685561526 264.476846259384 289.001004912528  
234.322989368622 215.037122365095 288.823376348944 363.89527566597  
280.453895029319 318.004190156313 284.764628939128 274.14931964455  
374.268489263941  
C7orf38 391.185365567603 341.015631528464 376.791876040886  
347.932135290714 197.443711199904 333.049612399093 279.026742408164  
318.487401106209 249.763375041547 294.410833087913 310.989043012841  
282.076744753348  
C7orf4 128.988736837863 125.870730238298 142.997365080299  
132.820927638053 129.656088836537 141.567425892004 132.155877196474  
124.842426851438 133.829889099442 143.370698101204 130.043904881142  
134.176925491721  
C7orf40 352.811351813364 364.527677995774 358.780920910909  
298.519371102278 756.246712133116 625.699971780258 609.504365141529  
669.124699103132 429.268202514543 707.048754700047 455.08515350006  
709.303384219887  
C7orf41 3226.53426370323 3282.73711809465 4043.28299602858  
3655.63669142687 389.177193459 578.947889414387 429.268202514543  
325.082620845425 491.034395489684 350.658722333252 1006.69598892631  
524.973621024573  
C7orf42 339.753059801136 280.494088228226 270.360397503276  
263.321559283966 543.001249586573 260.85776723575 439.394914369983  
486.047284379068 394.294057009443 352.665030560239 405.975221091252  
513.292377117011  
C7orf43 177.94501172269 206.113290588613 199.96834355685  
212.933062534244 347.812754957414 191.881157918071 226.623172906957  
254.722836822616 255.198862778405 232.023739004791 221.961758403614  
249.193270428348  
C7orf44 440.579262120451 354.656612182522 461.581199513891  
319.490670412394 888.371107987343 688.247581763352 1091.12493937368  
576.451964662024 798.1490651671 769.586135629964 550.24496459253  
1031.38207659547  
C7orf45 130.641217515008 123.994188725172 124.873289279767  
123.02167644694 111.389873428517 123.665983073461 114.927420605185  
114.805810485989 118.360186663758 114.364953312191 135.634385846692  
115.923424095859  
C7orf46 128.803632055969 130.124601660028 137.194467539969  
121.113186311514 154.170007083026 157.385256442734 175.810411923013  
149.217191121377 185.830435830545 115.827175143972 169.574755162815  
208.257420634745  
C7orf47 320.097510212422 358.355621069787 421.303580698397  
351.02823853348 846.425467119342 526.625936680738 642.647554580301  
624.106546150735 331.795832780176 408.444629429553 539.853394831917  
866.413995755699  
C7orf49 249.171307797736 266.842778974988 260.715580924916  
283.235844022826 358.975346234854 230.399207047948 600.264940641426  
382.233826557803 332.543652462234 420.647394044431 409.073045356073  
590.3584324045  
C7orf50 3246.86605825129 3354.38704439295 2794.89048827025  
4323.76731419005 3793.02341602102 1236.56870367797 1355.66237447026

1466.08446530283 1590.87426068638 1694.24232555141 1137.42879398351  
2515.7035557541  
C7orf51 146.11669387238 130.808911605271 143.46919253255  
146.96472350529 132.568354349687 150.126627487419 146.14494790114  
144.917911601441 142.405569257901 129.284384810812 140.668597897404  
142.819669471009  
C7orf52 112.420505354139 126.539877052899 116.621735695217  
119.974853329265 115.907902010701 117.575009754326 118.397482835514  
118.04359489354 117.303671445328 125.215194276842 130.423465505321  
118.486195373059  
C7orf53 151.440732942734 149.453103369806 159.082447644277  
122.780453116176 118.882591201241 116.764795914545 121.124574985464  
147.804642251855 132.17211158061 118.527464364564 130.960045345375  
140.002249873656  
C7orf54 382.701467158304 363.706789137022 244.401472859026  
336.338518973032 191.679217737051 476.249239197777 304.013547190343  
428.569462312363 328.730722366546 225.238369884803 272.927830312746  
371.369895979832  
C7orf55 659.27672123763 599.307072499899 877.255923473532  
652.201948082657 658.746224115551 740.800822095116 431.093544964576  
433.189221987242 773.057095787974 385.978867521533 523.937128789616  
712.067161025165  
C7orf57 135.399032687551 146.846301957637 143.543607779991  
165.257737836487 150.241585041178 162.629257046871 164.848970268132  
149.300089212177 145.39813290003 160.221974600577 154.999192460283  
166.071816427719  
C7orf58 157.419333185365 156.307551403822 151.029785584386  
170.046856179083 133.423376063284 141.59046197203 143.434571922656  
149.331805754859 147.679233228201 138.336667434109 149.057388078138  
141.408545519654  
C7orf59 1434.1439428394 1480.52638217173 1368.91287156398  
1673.5387396582 3677.23129570773 1540.71556891815 1551.90775589919  
1549.30900090605 1302.54547114701 875.38834441246 984.695710317818  
1797.65684760558  
C7orf60 109.182623414389 103.691075663721 104.714872508838  
99.5148073333731 112.015423658372 115.718600552187 109.471542280224  
107.103635692135 110.718864165172 109.044879188971 125.402714360058  
117.829228895897  
C7orf61 148.960077949157 138.114938404796 172.622816559412  
146.515240633175 139.449895159273 143.065258692424 158.8054811093  
136.846912694371 165.586397236489 141.971207380159 117.045020667394  
136.249063953892  
C7orf63 205.341121539273 207.831299397177 289.667302610069  
219.49354518392 164.455111983634 214.595639477696 185.113098620798  
257.24481414803 213.028568789661 184.862871179765 161.720405760536  
179.432235153344  
C7orf64 115.157321350379 128.090665893885 131.460388562433  
149.000760379976 142.419777428399 134.909230280708 129.589056071463  
165.118167086792 141.994082714379 143.816567683093 135.65700435306  
131.336902822702  
C7orf65 136.718598487513 116.328330266803 123.56917054142  
129.111259771449 145.692644807799 134.20988291379 137.457453776513  
120.711150688559 133.382099379709 145.812607895325 146.406344338757  
132.027020683413

C7orf66 139.223480216048 112.126521532091 109.719356131043  
113.656820701744 115.25307661968 111.820208385514 107.559685467789  
121.076652800015 125.563646710294 110.602406076036 120.530092530622  
108.807891863679  
C7orf68 237.113813706224 332.885488115858 206.89716102989  
197.667299074218 597.459920611726 564.948126039762 2012.36542989953  
1401.67503392145 788.244353085369 1849.21906428944 605.583144451322  
966.731520471976  
C7orf69 106.829040075772 108.2359175332 111.603221942108  
117.028963434266 109.793568518462 99.5148073333731 98.4947439453387  
108.415715678948 102.932013031511 113.756115251188 132.359319280352  
105.583474813289  
C7orf70 388.887050777137 344.298510200653 374.657816575897  
320.360917595936 344.487982154705 252.851164967726 374.46180489079  
353.385210690169 312.557093674533 369.513420606401 272.770616373687  
310.815067427296  
C8A 116.742079521048 119.449118660481 118.66946078241 114.65036208773  
117.590393673861 111.608386387842 118.258886189283 118.279772712167  
114.841964705981 106.982655360194 109.318922864507 110.033746435328  
C8B 178.245841646175 161.126686827391 156.674411447713 169.541411677993  
165.752558888845 158.483006541613 156.085949215738 147.169765031208  
160.343551497512 158.56996905631 153.606787306076 157.885229749634  
C8G 149.068713925139 145.728370703165 154.591116158776 150.494260282384  
148.758316681306 131.454955038299 146.805832438977 144.246749835693  
148.272252953881 145.049387327924 129.365004129784 154.395261192114  
C8orf12 135.443856371548 141.052322220012 129.099780410063  
134.247361216412 135.428592324173 135.067056559409 130.812309202831  
129.511465164539 131.839890565869 146.274284557421 159.479962316199  
140.763592237598  
C8orf13 129.846685899183 138.082870754768 126.934059693116  
119.854401979951 134.354215877283 130.95176570982 115.299986138153  
128.440024330942 129.966755942173 139.858812885649 120.329105003959  
130.385747820089  
C8orf15 138.976386995124 154.161892545061 145.880661952783  
161.997058981786 146.378522944864 155.615655460277 155.140371265225  
142.459230639888 157.399880496076 144.331409179705 164.413893089607  
151.965103021638  
C8orf16 183.247396324425 188.864388750448 200.322334039458  
208.914498369991 141.895211025017 318.244342364572 225.664432111551  
185.591700082272 186.430014478919 136.381593416533 211.300733064951  
254.607324522225  
C8orf17 136.940275156257 143.292552892073 141.272049404557  
140.672863685822 140.960907353937 149.133055368147 154.354658146438  
146.16821907742 157.435995560423 146.018097597373 127.389942368953  
148.832461329713  
C8orf22 130.204571771396 147.270369342438 133.369314179341  
147.294408903227 133.685254707686 147.826950636822 138.338280468272  
121.47058227778 135.005591691192 135.335107344583 115.450352881048  
129.703791330416  
C8orf30A 138.728765780512 133.583297305219 142.248293068033  
141.241717979079 139.828781354865 134.371254010574 146.153528461264  
143.710449544388 139.654648891206 140.965498009244 143.107570838895  
147.366877428537

C8orf30B 143.322199505844 140.63666629522 171.180188911669  
149.199800895684 187.73896437823 184.672330560677 182.074569356713  
181.340312140534 189.01309885917 157.058912028958 170.931788192825  
218.896760804208  
C8orf31 158.200211812067 161.402322405903 155.164238647284  
165.459993078103 150.333572271902 170.18781660707 137.988325215021  
140.726084514407 138.715208319278 145.78573175226 144.80318019871  
146.97203173446  
C8orf33 459.652708187549 488.884511065882 456.656123023446  
527.498114662967 601.800326895295 444.192734921566 456.298408568636  
411.221560795912 893.676600121113 447.059120541009 379.200576951933  
447.579975492958  
C8orf34 143.488761023636 140.028169667777 134.149446827982  
130.532559074698 122.850678471084 121.174618503873 124.699127988314  
125.259164818744 125.701083319929 125.897190440417 170.866433766203  
129.150574563997  
C8orf37 9970.08052783908 9403.76665152182 9994.54490550759  
11509.9289491201 2500.07677977147 10329.1999331936 4995.96906061198  
7786.96143641382 6810.50193989514 4749.69040198959 5073.27433952351  
6214.77579017084  
C8orf38 188.695527267631 209.74583569369 193.428733288774  
184.672330560677 288.150694843614 330.241479004885 263.707476735938  
282.652193666078 321.84712975195 272.41397350779 233.426170535227  
210.085329463347  
C8orf4 828.683748921915 866.147379099606 615.88518704181  
423.562598841704 1054.47292895417 4190.38366101529 683.019502027271  
349.99912485533 160.454243375479 270.847923557176 537.982214580518  
193.786889748038  
C8orf40 724.103864917969 664.19083888799 940.008438825765  
634.774041584043 2219.71846304201 1453.88161495484 705.987531074737  
1266.53539318831 696.976036382401 686.445635754196 1263.64725236472  
897.51782613323  
C8orf41 327.951753740503 337.935183275743 340.239348689005  
341.901565692251 312.961981998512 352.354687089427 250.911817769829  
419.846584903512 368.276805218658 394.294057009443 286.818166898922  
319.417555901733  
C8orf42 167.278879415171 166.232856234879 164.736294372006  
152.56002779985 172.120772549791 142.394644827434 168.668125438154  
151.629999903069 163.93199635496 136.60514429355 149.915251958706  
174.807363753172  
C8orf44 188.53221484746 183.795632040455 240.814860403562  
169.332207863684 122.603226380439 146.775403409562 148.1283706199  
143.103779196037 180.408639020724 140.74208906156 173.169905329013  
147.666724626127  
C8orf45 7389.95365139168 7218.21759302518 6508.71638048514  
5932.37714987741 1151.30600388403 7555.47017983216 3570.21370790206  
6628.17856159198 5609.58233117244 3338.13980198211 5240.40795364202  
4280.66857663502  
C8orf46 128.554574566655 112.90900939264 125.489777118532  
123.756349408641 114.223991452083 120.517691208358 119.26921157552  
112.661607612444 114.812254477058 112.509731206295 129.493805009651  
115.954828435072  
C8orf47 139.311816781874 145.937733795336 139.406427549733  
145.453460204097 163.915489303508 173.532300173223 201.530921073488



217.607230767028 202.357989894268 122.922631510846 173.773876769683  
187.978627462391  
C8orf48 206.825575257029 191.348260799746 229.511643376643  
235.453139389486 190.700515036197 175.98210925643 253.933478547515  
201.954167006591 215.272800347166 213.891435492914 198.583407008317  
190.031339775209  
C8orf49 118.300797467864 120.371374172279 121.846349358116  
123.225792525733 113.422559344178 124.585675323305 116.943791343147  
123.357205547181 127.935614145702 129.305455204291 124.297848065172  
118.07991087231  
C8orf51 155.111346336412 149.760883745928 155.27707167384  
134.824147038515 203.17525411575 153.051143478997 190.843795579234  
177.500110974116 166.767004180603 151.899063970777 169.590101694098  
167.373416675264  
C8orf54 151.07661060324 169.349922114861 148.342114514468  
161.338215647108 142.059921012561 134.744175117719 138.152641686151  
146.854523122404 137.666849842576 137.890006487904 142.774449777424  
150.624740697168  
C8orf55 417.191960489528 534.083703564903 699.06539333455  
479.761165832339 5032.66681917478 4503.01240138314 3545.8833678963  
1525.24196488688 4410.68280125001 659.483452217461 2938.06458269406  
4437.40805296517  
C8orf58 166.20327698517 173.681078272467 152.06044555622  
195.513703253634 170.335930486215 139.430808017891 184.775001243453  
163.600888221193 155.365673279823 190.427022049167 174.587558727209  
179.753400474369  
C8orf59 1625.55754007235 1448.64875525408 1706.06615968622  
1142.44180956604 3363.51782842264 3436.32495553246 2799.0487754899  
3258.07532987071 2952.67114077688 2285.86163259073 2280.20302441765  
2449.76376608893  
C8orf62 119.213217733213 115.587874563785 147.570734399004  
131.419663282022 120.027996187915 129.625046507677 110.804248212067  
128.663320241092 128.649329515033 125.547399456656 138.562576783507  
133.545405737639  
C8orf71 142.802965008073 144.387375194186 134.086301127594  
133.21981037185 151.744902566627 126.110426731941 141.075421936212  
156.34272729153 131.181537219479 146.763046352405 144.974813243462  
136.788269716383  
C8orf73 125.894755032594 150.023791544584 130.128585442593  
144.986655090517 199.397633942623 145.34332740863 147.064543281269  
131.22473774325 137.398748156909 176.183165494563 151.442463705271  
122.387532784748  
C8orf74 120.035437167539 123.696942540314 122.868393258957  
128.766289767459 115.3611179192 128.402511355513 121.177681858671  
117.824694297846 126.680992733621 130.75707278606 123.557722415957  
127.239282651919  
C8orf76 445.089930641391 427.249733213787 517.42417250172  
411.359106929985 644.97200337335 1371.56635975955 1057.1528284934  
1067.30106203503 1403.90487313049 672.862678078975 715.638378711433  
956.153239481189  
C8orf77 149.039132756817 135.289246539398 168.634534857593  
165.67554738735 155.417694869593 152.692483731643 158.053654524927  
153.440952021924 161.530878860883 154.250656489421 166.70212615715  
174.255919030841

C8orf78 141.368078865065 137.956295878287 142.032814623366  
144.065554025603 128.79607493422 148.953720017484 142.528480882047  
144.056644468886 143.552343056702 143.098246338022 140.110258415883  
127.895989232696  
C8orf79 142.348246621217 149.117224130576 148.334425146129  
148.504996616452 147.103340218488 149.070750686003 152.705458417973  
144.808774137749 129.928047362701 137.365567527202 141.786962606666  
136.826606228323  
C8orf80 141.221162787167 134.089308635893 138.49309476462  
132.492444216154 133.519359066907 152.207601283271 135.682971958096  
152.479402912801 143.703367582367 147.734708927825 141.799236109474  
138.370241517025  
C8orf81 133.573744633212 131.919387743094 146.110545700163  
136.846912694371 128.870079563075 146.997906452598 129.845344493418  
124.183297351614 141.115539663314 132.848926011576 129.031338314175  
143.884263862698  
C8orf83 203.791916347213 214.684538620841 234.322989368622  
186.886677174192 172.345201438148 237.266455875982 260.888612454097  
204.031081842809 232.127996106421 184.377923161698 238.904826940476  
204.031081842809  
C8orf86 160.073510173041 148.22974445263 162.18174589792  
147.68047828662 151.965103021638 146.303959493672 144.70348930646  
138.988919994625 144.779146672553 166.001279428607 127.395094952914  
152.348210524663  
C8ORFK29 149.464962540085 152.853860043701 153.767488352037  
160.870390779084 138.810236692956 162.762473039474 150.751386127903  
163.636550341231 153.492072037266 161.581641777014 148.597346678768  
168.289492873475  
C8ORFK32 133.201157825808 122.142323014287 117.203783530266  
119.237802375552 128.548201588898 121.067907968175 118.540620928268  
124.837187124441 123.498540254464 115.37736249419 126.969504644414  
118.109991440011  
C8ORFK36 128.118223792086 134.501410126169 128.274326990056  
134.002424083826 134.273326732349 128.11006485185 129.216693566478  
130.949405011154 124.786029449452 132.28931085483 139.052898232393  
135.420780282429  
C9 111.217595631623 110.718864165172 120.55570440025 115.624167024067  
111.895279866421 113.071787850611 110.475453268997 107.605526304445  
107.697601478064 106.603674195422 114.835386789236 113.427848757112  
C9orf100 148.853877151493 149.138678142327 143.324235640446  
141.892214695902 179.400220328552 153.143706194386 148.49560238679  
155.741507341843 154.993784224548 146.894793774087 142.680136733947  
161.916155040522  
C9orf102 341.564749445905 348.300300174924 289.474517971859  
362.742120043509 169.036409026328 152.20173979854 169.619338456208  
164.066839397676 179.30729544595 192.767155566493 279.704940529618  
153.697775290962  
C9orf103 333.745543022749 295.678097392123 356.84281623052  
287.593221911064 249.292766428035 225.423403713718 217.287912825619  
316.364342983155 228.560346647306 269.053237303244 216.32785564297  
189.235998474945  
C9orf106 138.42216862811 158.160604786093 150.874014332213  
147.091280396135 181.364325529405 155.572357799741 158.404154056472

169.101676908756 156.328454726363 147.082068348591 149.6730835169  
155.911387663464  
C9orf109 152.961475450751 138.611074796816 140.548371692813  
154.768422926874 160.261708910517 136.515951031895 150.907594445048  
142.29309119138 144.654765322941 146.536055773073 139.147327302581  
133.672964925321  
C9orf100S 328.60529053804 318.244342364572 312.845219991659  
323.788197265954 387.477198908304 164.824914851636 111.389873428517  
247.72190598581 251.546290552828 241.077618798955 412.415549375221  
239.20206002  
C9orf11 122.527517633626 131.724061631389 125.052770277549  
121.942777234608 130.001889950186 127.694189114288 135.344498171119  
129.658488766089 121.414076245292 119.974853329265 153.085975710144  
127.601379088239  
C9orf110 135.141067086648 143.685368799972 150.016550610991  
152.199095472082 134.028626989933 138.343232981485 137.769431537236  
139.331046480528 143.48729871068 134.633286312653 128.488598467312  
150.261107471642  
C9orf114 302.532985701607 303.724140156439 319.490670412394  
379.476768908492 511.25179427158 415.388760988459 276.434192872962  
313.480307434343 524.973621024573 297.970735665595 371.457568934695  
250.82359383789  
C9orf116 142.338352884053 146.164093136588 143.589222264786  
147.15999706579 516.892850913889 227.64196401771 220.510248260182  
232.414763435965 284.13865992802 147.910699446264 280.531844086775  
179.026308021985  
C9orf117 147.638057399165 151.885992695789 148.592330216136  
148.179398287068 156.427158441352 158.594064857041 140.946008063839  
146.577524520274 153.326420485822 145.168031449425 147.502116289881  
153.996429870564  
C9orf119 577.33849844574 575.546802138889 548.869880723909  
553.757847979529 783.059427015955 377.951523644306 504.141861790903  
578.811908030805 834.537908087672 576.873245313776 407.442337662943  
401.189904619902  
C9orf122 132.151765465534 110.688722702767 120.767950825369  
127.520134825082 112.464951599416 122.323876787207 130.416957431512  
130.128585442593 137.636900130922 134.69274746407 140.088094614168  
125.110064579814  
C9orf123 483.312894744803 508.735412486964 584.199252444401  
647.439372562271 230.672056810885 304.713434036642 190.850639994777  
251.324685584062 297.921617748468 203.693188114912 302.847274046748  
178.12073430094  
C9orf125 166.061891147234 171.161297672182 182.02250582556  
162.904897605929 160.322541355391 130.632096412204 146.366013190845  
133.872561340464 157.78390301218 179.632562895905 226.796825544749  
195.906137340918  
C9orf126 126.837151457845 122.711143209444 127.500754400224  
128.675527226161 124.811760828557 123.22295112139 120.78129870199  
121.564626579011 120.257886394616 124.629877200816 126.072053958666  
124.334450753704  
C9orf127 464.128022170285 431.093544964576 433.491835341321  
571.950858678221 284.940858938629 263.352118305612 258.109876262342  
131.85737847837 172.03919618445 215.698924670416 225.335753745598  
243.038392457584

C9orf128 123.24533179875 115.678486138934 127.551486042435  
120.944267930809 116.961391747202 118.029258839619 117.467618148107  
126.718380351644 113.416743649576 117.703025026759 133.079097536801  
123.728481007459  
C9orf129 159.032710656826 154.390764802264 161.744366588564  
141.327299595068 165.82215325714 148.072816925413 134.750046135498  
149.039132756817 146.778156465138 137.570343435498 150.489651880905  
131.693923403533  
C9orf130 1202.74869573717 1348.80530206238 979.019125719101  
1160.78730097715 342.717252404581 859.860994525775 589.070196307574  
753.654626233604 686.923164688096 544.580311371212 834.788058321257  
584.199252444401  
C9orf131 112.875136585606 115.639101191444 116.363556872071  
118.593717189375 116.474771810965 120.871693555514 119.455615461113  
119.415822905251 108.04922729993 116.126923911804 120.418709541104  
115.277302351501  
C9orf135 140.616811333466 145.522435728191 147.78095608696  
137.416133786828 132.581499870494 131.630132952441 141.797497681512  
134.381042390464 144.96021415188 153.393651104539 136.560048419149  
155.890403934674  
C9orf139 111.716607815635 115.137475087954 99.26400442869  
116.456170659686 108.768730405582 108.2359175332 104.03442843396  
112.896360244636 110.448948495323 108.970432124412 110.242638217587  
109.564709878576  
C9orf14 147.818956338752 133.911650164508 136.44218532882  
145.131215503044 141.645906784244 145.378779757104 136.760382409185  
136.301442794928 140.356164189622 132.287326702468 140.13515064896  
126.976353967127  
C9orf140 136.478114537536 138.903450375532 129.956519535525  
146.357214078158 410.954095610904 226.565823278767 150.232470359841  
208.406980186223 226.114369645703 169.378422829858 188.079188251085  
203.777944180067  
C9orf142 717.686676823785 798.389385197471 650.911886508922  
896.625415670455 2253.7522632414 652.429025114523 654.52788411248  
784.412433571927 808.55123510297 682.730262408017 689.590642377619  
798.389385197471  
C9orf144 144.159316670264 146.920496801962 140.844007965202  
162.411156818437 145.060085149395 149.17029600091 151.171716392043  
139.811873260553 134.222453538421 149.4401812 144.930066324767  
142.431979387165  
C9orf144B 140.713537140957 118.161192318422 125.447209413787  
118.841699953612 131.892151111901 120.308260557986 122.679628839976  
127.869038038293 116.819107878692 113.568261995787 131.722397988741  
136.689064885984  
C9orf150 158.639313207233 184.989027770708 179.191401472241  
150.19577351885 137.28323311107 130.557209560361 134.464053009101  
210.960900130785 129.524056217383 149.687372584136 144.924212639731  
124.591873637605  
C9orf152 114.255733119076 130.14600240687 116.67463130093  
108.199628274798 227.092319765009 127.562924931536 114.00959999268  
136.981043383326 200.506615977654 110.820329153348 193.704510912321  
314.014654357569  
C9orf153 129.161305053472 124.558026853954 121.564626579011  
126.426212216646 123.603972078897 120.094156375538 127.575660581922

127.631770516132 124.595925483149 123.29908883119 145.560904207183  
124.507958339495  
C9orf156 264.563741039382 258.915802108562 228.058870735016  
224.008253365957 192.680681636018 184.085616342099 227.689356258276  
226.763252784108 247.280717385562 326.525579400607 340.608165077422  
205.403820910921  
C9orf16 220.710324965453 225.565045396166 200.486683704179  
240.994507285383 779.922653392712 253.30325545013 238.310077556167  
203.004815689972 274.281532397691 224.724262742427 479.761165832339  
178.766654213173  
C9orf163 119.931415360373 120.122719226116 122.992700222262  
124.124076599417 126.887989471803 120.441732791854 112.825399620524  
119.48998115497 117.048846466839 125.141185839817 154.362571105094  
116.346181133756  
C9orf164 143.296580629431 146.959154938248 120.110473925082  
124.306049555272 163.181323768362 118.366859032979 123.327238774943  
135.993598471576 146.569958732206 125.787353491408 149.432744784716  
117.499697378893  
C9orf167 149.813838004575 139.380610974147 192.532222258033  
171.994330847901 172.84784588171 176.714471790643 183.168629351124  
167.73288535728 173.790848780011 238.037110997575 211.809434609469  
181.3859695951  
C9orf169 143.954908055924 163.20714296121 198.15257384667  
159.046016068252 313.581986704048 191.59400638652 314.337680575998  
204.1974438819 267.149525812834 1894.14699530855 331.937313503755  
422.02217814979  
C9orf171 161.992141305029 134.208537331186 144.916193282062  
158.495606141226 148.742216703684 162.592306630033 146.249951130016  
158.92254744379 162.900556089071 156.907788377794 152.657649988502  
185.016336026382  
C9orf172 149.752188104803 152.746799687103 161.096914295309  
166.784804508647 170.13453211897 173.001985500448 140.225329742578  
142.655287071175 144.765051967884 136.826606228323 149.020824600931  
155.449724554217  
C9orf173 146.824420102008 137.72327986309 156.351734527745  
161.139253742858 179.985468369202 148.364138636002 151.641486303453  
152.247504238261 136.850940500212 144.389805078873 147.868721324602  
143.231806900648  
C9orf21 253.867947800583 264.383922859446 198.113398073968  
205.381840116054 165.376358421533 193.303987945242 167.842122798757  
177.055023182887 191.814634229865 455.08515350006 204.078331021637  
157.423242850568  
C9orf23 212.531329857909 240.306287921209 275.169415154893  
253.30325545013 462.779122987815 293.794745907663 286.642323413104  
261.671277686467 284.595024875896 237.734385188542 367.439588680092  
260.370285504512  
C9orf24 151.690538050817 162.909468312298 152.906352463546  
183.358807104988 144.432181150583 157.729732484131 136.614620534169  
144.736213465651 148.463566046951 137.048292841566 140.377179372804  
151.079500558067  
C9orf25 238.847091900666 237.396466740419 214.261611197599  
258.21341068758 211.300733064951 172.403953571339 191.912670416334  
201.837695818264 171.287186905764 188.20675818131 181.467708718758  
178.130223302924

C9orf27 139.56332664295 144.5368823731 129.31357600902  
145.885577577352 135.388750095746 131.49254872524 139.025598691696  
134.944488136297 139.140647941752 144.934103671894 132.629453540571  
149.091925032548  
C9orf29 119.305917403956 116.196676877996 128.773129597793  
121.492896642899 150.468392290279 133.713275043978 152.422690241301  
128.655549652719 152.689610196981 123.042372128864 167.645930148254  
125.902015309754  
C9orf3 484.131020584378 397.307515234646 552.790706181938  
446.393631025049 226.763252784108 191.692830869809 114.812254477058  
196.536086443884 281.881563164961 229.181725450534 200.618080312379  
162.351212914573  
C9orf30 372.54091392596 290.541184606565 317.206754773681  
263.250833727291 307.906312092805 281.168898910065 254.607324522225  
269.448201975645 248.850686917567 675.480482223958 269.853718252574  
273.550544349798  
C9orf31 172.412059174046 156.349030617265 135.954961086609  
160.361025839456 148.029259633449 152.435416154284 152.327247552986  
146.740694608146 134.10070984606 131.349297554112 133.638664342783  
165.131463797217  
C9orf36 161.636411303968 142.049776668507 151.989476683722  
147.338615809214 145.625205055601 149.500457158616 142.916274989816  
144.889019483712 151.863048206341 158.049286838471 147.15764785567  
149.876687693565  
C9orf37 199.88618355278 199.058972781223 160.466187961848  
271.064405562085 202.397972518715 150.267298097687 161.866405026758  
154.865107093653 174.549929320587 154.789187466057 179.985468369202  
174.045229095003  
C9orf38 145.418696807842 147.743331160624 171.636121363019  
141.064086298948 152.077204721895 176.53912635694 174.971350923613  
216.974834077975 168.991551886143 179.091917512822 146.808519947394  
159.79463502085  
C9orf4 123.084040312047 110.636713168363 122.724429060184  
128.276471459777 122.624828884731 119.308345676905 126.856038484436  
117.735411259153 122.996616773523 123.646558103253 125.513881890201  
121.645021899034  
C9orf40 219.661502916874 202.583967728957 184.724071110756  
194.388383297922 192.532222258033 139.962307072428 130.479845410716  
144.501995579502 185.359195899057 167.315702949236 147.412608079997  
144.634118305223  
C9orf41 140.14062775887 134.084602409011 138.730409717578  
144.551233687082 143.728569494708 152.030182228463 146.787927492706  
149.405118010893 148.242794464181 148.304863957659 140.356164189622  
158.653161314597  
C9orf43 131.659187927328 130.068063785009 127.434873844923  
128.244549276386 143.114384950467 128.244549276386 122.456286448252  
126.162713269943 130.449669345302 119.802832736435 135.968346417524  
126.713610681382  
C9orf45 171.751149502172 202.887417145119 184.437810305792  
215.635313821029 191.708350637714 207.960802948119 162.519642881848  
255.3451781862 237.473927775823 198.722993687455 188.543051108601  
166.223079895236  
C9orf46 373.656487297238 359.493075382333 521.512936372701  
347.985315257161 324.871248300476 442.493108530222 349.382889326613

1318.3633082502 488.249967208882 1108.61301774472 270.787490294555  
417.731815310276  
C9orf47 120.915108114673 116.363556872071 137.114604159523  
123.841366760069 122.941711366641 116.998277297063 113.083678884076  
104.03442843396 109.156349683299 110.900309203531 121.039678049579  
111.506345174435  
C9orf5 1160.78730097715 1020.19774509086 2089.82894186824  
843.075879568455 340.028737478082 646.461274173693 554.511983790164  
474.629173435475 1251.56853099362 445.214621023114 765.333633142088  
540.190808200264  
C9orf50 149.121894111871 157.259599894923 144.311620064675  
181.328458560967 168.394330931524 157.898632788579 156.611727364072  
161.603317039244 133.203064891923 163.794436953711 134.700543462375  
164.58158284856  
C9orf53 133.490805791504 139.159510392614 141.88777975766  
141.213588194832 138.407207709066 152.418315087218 143.868962478182  
133.061016674211 131.892151111901 150.531753446398 137.756209496729  
141.623851511993  
C9orf57 135.449919220607 130.898067924686 140.63666629522  
151.040909999868 144.946362772133 152.080057231881 142.964043764953  
143.725497952919 142.995274641765 140.814009587096 152.409211647994  
149.827791077797  
C9orf58 230.367251714289 193.974325897472 138.376176600064  
184.377923161698 137.68634745111 128.578494940165 120.686906898624  
115.755585907264 141.121364213272 125.296240086615 143.752697178913  
110.347631909888  
C9orf6 213.652091843896 207.850956786183 227.926444925478  
194.569325586241 253.098839084408 228.675099004411 238.654367531982  
266.101158071711 258.759507964221 359.991823789356 302.696004448559  
249.400820221233  
C9orf61 357.773949920377 361.160881334174 500.848273432862  
417.36454228858 173.532300173223 148.376194044247 155.15575204653  
144.592987736094 153.893753448473 144.54895913821 164.438724387992  
147.153129531937  
C9orf62 136.271412363498 153.169450192935 136.593346330215  
160.290104492275 129.931923954109 156.540165645256 142.194507957661  
151.167024833049 158.353171576491 144.927731613526 170.590817818414  
141.226901872221  
C9orf64 343.617417488962 309.937351755502 332.343558229873  
285.659010982301 227.144441241869 218.031238893075 246.676401619881  
243.691004557778 258.145539382199 270.231637012624 278.555009982029  
233.71520737817  
C9orf66 132.965467229606 146.608010450782 144.826861308997  
141.622592268163 181.681929801968 159.806221777332 163.280786875496  
212.959246855759 198.244854812728 178.680902599163 204.959164579011  
176.66175597182  
C9orf68 143.5709409749 153.492072037266 159.040409182674  
148.574661934068 142.780100181736 159.504327477065 139.356478232855  
147.428180649939 144.970383956581 143.13304460184 157.423242850568  
153.414185387669  
C9orf69 696.277780670166 831.08287594363 519.450899933049  
1344.87842417496 1509.69760873558 329.82030842286 416.715760038095  
328.730722366546 525.138476928759 580.859914041323 332.798130757632  
340.301980622308

C9orf7 204.681956301306 235.742017851879 212.272826965935  
267.372241661758 588.678767007017 248.360540656183 227.209630859635  
190.736796322054 211.160781061336 181.123571246557 325.493177980483  
202.622747952763

C9orf70 144.355348009294 138.828562311512 144.392522947899  
143.896324094984 136.494339004002 137.984988819967 125.280736217267  
137.497145594629 133.324531689254 135.973752893694 141.683298500736  
142.968008233583

C9orf71 118.628559951472 129.415078042622 119.01559016005  
121.54835308632 117.79844873842 124.466986821169 127.480717762966  
126.995207465164 114.072600760808 121.414076245292 127.79057041268  
125.637138636558

C9orf72 167.049197726715 151.788278519057 165.327972973978  
146.590495255969 145.245316640391 173.010799217261 143.198622036573  
151.790240553272 148.57301274812 172.552923333095 159.576585660511  
150.409919207059

C9orf75 197.326259802349 209.090788790449 212.591357254196  
200.867515935703 560.602047253306 234.738241125899 293.646275396425  
235.216589534371 205.45079491218 219.462274506333 378.509324619452  
219.78041403077

C9orf78 1479.69309189156 1597.53010317504 1806.24732793591  
1683.83803339436 830.684999498776 1082.00448164658 828.683748921915  
1396.4168898623 1559.26487922551 1617.44377452783 1564.8868894162  
967.123240442957

C9orf79 135.457059862669 141.5311434224 126.045231525329  
134.746175914762 142.978818998012 134.323365608463 128.702882993588  
125.364821583438 129.819820730239 138.267726309873 153.907737500104  
130.669539169739

C9orf80 9636.32818474581 8617.2437024568 8768.32269645116  
9514.74328718935 2004.19532096239 9820.93899217345 4448.67183518984  
7717.01422791837 6114.33638002734 5115.14161559446 6830.46932926077  
6188.04738762584

C9orf82 216.24497587588 205.821101661022 164.61921356441  
227.715558644326 161.37617568158 196.716209382446 145.773932754923  
181.566951620202 166.433933349193 198.470718196139 235.162439885207  
159.009211991511

C9orf84 153.415901281564 152.274957846518 145.005991300977  
158.325554470875 155.410704148925 155.690773461824 150.295611829265  
161.463042036376 155.878493935166 150.596350682411 150.176942469551  
145.587386656619

C9orf85 165.523150623132 166.192990554427 189.205724390913  
155.268650584431 203.475080163804 168.180063344887 232.321454436688  
183.979513272793 169.184111483933 280.398987330256 284.891415492568  
185.432587490792

C9orf86 291.779980648289 298.706655333472 266.468621734455  
408.7151485563 701.208391798006 257.706904467657 200.371280127668  
225.4575611466 301.428024926428 272.01602406899 396.345382600445  
252.789376168324

C9orf89 290.502085667398 259.742175498038 272.994195639694  
260.129513331703 391.911768848267 205.305702209672 124.180511991605  
219.422260093722 206.825575257029 338.822464893411 249.524956682907  
261.366143735074

C9orf9 175.21512930507 212.272826965935 267.970798709017  
260.41082304175 188.308588359317 143.152993168137 150.227629690236



166.135707525987 201.059635671301 142.266177608209 148.919726992353  
 132.788102310611  
 C9orf90 249.858562350415 253.789045068884 257.44230597145  
 311.449205777595 551.823767223086 230.855806094267 300.985037429772  
 279.921244070981 303.483515328621 271.989060206794 257.075088169589  
 320.097510212422  
 C9orf91 237.456245064363 223.601312199935 243.35880641566  
 284.940858938629 228.820894086914 153.371065247493 183.04531185589  
 180.437648146588 228.270158363878 195.816317534388 200.915806094193  
 179.369845168822  
 C9orf93 141.71400004456 146.96155692518 145.431393142782  
 139.621016978072 125.081880303992 132.211379936941 136.103088234442  
 139.314945862113 142.446514275674 131.489715975987 144.736213465651  
 133.601133679159  
 C9orf95 282.101714660307 316.524115715585 357.431640917696  
 253.164596735793 269.530151236658 269.673122990604 261.814227719605  
 302.637859140061 244.162496497466 244.544473246593 613.279465441319  
 232.023739004791  
 C9orf96 149.929454280702 146.574656147816 154.273953018148  
 187.645390502607 143.021435512861 145.383354200298 169.33926580273  
 152.11956441072 162.168246402027 139.178245419517 144.66675420575  
 159.41078351918  
 C9orf98 145.793794049657 164.000772606739 159.021304119265  
 135.52861375119 163.632148441668 143.836637098747 131.193538235053  
 141.327299595068 153.261002653668 130.478834977547 150.542478166361  
 151.266352916239  
 CA1 122.153996665065 108.118551275778 114.14858855653 119.188446525733  
 132.94603323912 112.999642731096 119.899649497032 344.128576341892  
 116.335864439545 111.43827410589 132.744261207073 109.274221164316  
 CA10 138.967080709927 120.14201542563 121.771891473027 143.227410286571  
 177.32104138164 142.804411455413 140.10798818623 151.717558541683  
 129.985797334276 138.304793826214 143.451080466172 150.922279808832  
 CA11 180.761100930677 172.8993416872 176.11287574658 160.865949438448  
 164.268280525424 146.863611516518 145.369791572077 130.657342262492  
 145.272073426254 121.722412245175 139.750281709938 129.242093568433  
 CA12 308.767036855508 324.56043349882 362.95684683529 284.831817899986  
 715.039905439621 1307.19490564658 639.011144305614 366.636754272029  
 430.505037012814 2149.13404212591 735.165830487162 1508.24281455057  
 CA13 132.313884627836 145.058110060639 142.234554325754 147.183141990315  
 129.822926691091 153.363629311799 148.317958829244 162.466301774088  
 199.53455266342 152.175423676063 178.083311435916 173.782474972742  
 CA14 138.114938404796 133.796029401157 133.911650164508 167.521700144143  
 117.555999801887 117.417112053842 118.691723466789 129.515390475589  
 106.147993332294 126.388778582602 148.038291195414 117.48427100606  
 CA2 139.071908528327 153.941193682697 181.941224633917 196.226732738526  
 336.434368527549 351.292682758926 377.89330639683 1885.93146154931  
 200.867515935703 3798.89743803968 415.113340335205 434.073729807058  
 CA3 126.3539479619 137.172030225913 137.823152565933 172.961115357569  
 125.250900940748 124.889829874126 129.127563278016 127.524310543779  
 129.179188863839 132.184217000689 121.991692204056 121.619593453259  
 CA4 220.113261580385 261.366143735074 200.712182818203 260.356834114611  
 161.694109087893 285.214585324341 188.941900997781 1184.3199328099  
 408.10780961711 186.222567239198 163.086539217826 196.001089662818

|         |                  |                  |                  |                  |
|---------|------------------|------------------|------------------|------------------|
| CA5A    | 121.336932276232 | 104.780306305981 | 121.134305707234 | 112.904318310632 |
|         | 112.495783269169 | 111.568329540016 | 115.310953814885 | 105.859916438163 |
|         | 112.642429076777 | 116.5272207025   | 121.505178996279 | 108.530158480237 |
| CA5B    | 234.484787292284 | 202.622747952763 | 171.595724119779 | 190.204960255989 |
|         | 161.094103878416 | 173.408784502027 | 166.335294339013 | 169.940177050294 |
|         | 147.590189238316 | 187.73896437823  | 172.310673499572 | 165.703810120915 |
| CA5BP   | 139.166537591866 | 142.543569032033 | 145.241301006518 | 149.490064894136 |
|         | 151.183847738922 | 139.440415574681 | 145.217261514886 | 142.474762834848 |
|         | 149.703317565769 | 133.681703350531 | 124.291944151031 | 141.062226285596 |
| CA6     | 122.868393258957 | 125.107483348755 | 115.933805625814 | 115.316430915446 |
|         | 122.708102546276 | 128.0171233156   | 130.309092946921 | 119.112063328364 |
|         | 120.74273444647  | 129.743808480368 | 150.856917125736 | 136.511669406292 |
| CA7     | 111.086170834553 | 112.875136585606 | 108.007762863766 | 110.977904932371 |
|         | 118.924317138158 | 114.874358180801 | 117.969576809288 | 108.604763499678 |
|         | 115.656801309856 | 114.849872458647 | 115.949513659403 | 108.179513318734 |
| CA8     | 118.9952230535   | 119.315932907373 | 113.756115251188 | 113.529619135543 |
|         | 135.283742166077 | 113.913337223716 | 104.780306305981 | 112.742895297124 |
|         | 107.91011371422  | 126.544685937984 | 114.512028664352 | 107.385565665491 |
| CA9     | 111.962852412774 | 122.735376540421 | 119.135701239571 | 118.918962530408 |
|         | 144.631407964232 | 123.657246099004 | 462.025126897013 | 194.240372898704 |
|         | 129.299810898979 | 811.144838166905 | 231.728984785324 | 388.573321838751 |
| CAB39   | 2344.11548437508 | 2093.67403119512 | 2853.14759681683 | 1671.82101590797 |
|         | 910.982557417978 | 1279.15873231449 | 1643.08061372695 | 1840.14350831655 |
|         | 1792.35343044443 | 2369.233048505   | 2249.8123426309  | 1936.88813111969 |
| CAB39L  | 205.930921729192 | 208.42712014566  | 223.408447580188 |                  |
|         | 163.319882002763 | 210.218440444631 | 354.336462793628 | 186.925138700818 |
|         | 263.058972886829 | 459.652708187549 | 178.245841646175 | 278.775971122032 |
|         | 438.958573676953 |                  |                  |                  |
| CABC1   | 1106.21439150501 | 1586.00600118477 | 1589.70261092241 | 2311.05587511258 |
|         | 951.371815352591 | 517.020259129974 | 473.529519031797 | 487.07860019179  |
|         | 612.61438059983  | 236.592839463278 | 453.760162338163 | 343.121661664987 |
| CABIN1  | 394.73732350607  | 388.096183735126 | 282.392419584508 |                  |
|         | 578.084277076692 | 382.401290201025 | 298.403224729528 | 228.100112133941 |
|         | 240.306287921209 | 241.856820205666 | 199.170488640762 | 325.859917318516 |
|         | 234.126500054945 |                  |                  |                  |
| CABLES1 | 262.389583658305 | 284.236970342827 | 201.555964610849 |                  |
|         | 200.944865673409 | 457.779218916808 | 151.669421563954 | 188.131876231735 |
|         | 282.511614929917 | 140.82351325907  | 166.341564850299 | 285.83626978316  |
|         | 134.55255098289  |                  |                  |                  |
| CABLES2 | 174.364798143068 | 185.639696270808 | 167.526798465556 |                  |
|         | 193.098116087792 | 316.237519859859 | 205.058210447711 | 309.36704220687  |
|         | 141.622592268163 | 183.937484597232 | 148.525224975266 | 168.27980269501  |
|         | 182.066922756289 |                  |                  |                  |
| CABP1   | 139.113675690483 | 152.247504238261 | 131.345038923753 | 160.060406629689 |
|         | 137.85552865361  | 130.479845410716 | 131.774882989257 | 134.044789094272 |
|         | 130.892302357045 | 123.256613702254 | 125.321968563987 | 127.167918433035 |
| CABP2   | 146.318052064937 | 144.751413348459 | 153.206468539619 | 157.623092996114 |
|         | 144.142765177298 | 151.573920235798 | 138.687013437904 | 155.908951665928 |
|         | 140.03443832328  | 148.450023054885 | 142.095289977576 | 148.562200783472 |
| CABP4   | 160.853480692082 | 179.810507975486 | 149.244970309131 | 182.109092947203 |
|         | 189.61702125418  | 193.974325897472 | 182.736067431579 | 179.648479201164 |
|         | 175.251238431716 | 185.258354905314 | 178.425137262105 | 201.256649338315 |

CABP5 138.639410179404 155.452842883109 156.88782735706 170.361237529247  
146.398454169593 148.80452641061 132.253450751554 149.353072778508  
149.057388078138 154.562761981868 140.89390566467 145.326803807448  
CABP7 145.821544099585 160.632809953993 154.938900278679 133.085476994246  
133.753999983813 144.043818335414 134.044789094272 136.694143268855  
222.605195861218 136.80943340993 173.468958175014 163.239195865198  
CABYR 141.597692730835 145.539731152955 130.501010489883 140.010730572075  
174.985831291764 142.079184950618 167.100039749329 273.303240462047  
176.128369308989 152.207601283271 179.551640851353 173.586160103539  
CACHD1 198.583407008317 176.5588805282 150.920224503051  
141.541355091514 132.28931085483 133.12641302705 135.588132669957  
125.04327844782 129.854478528455 132.606735652984 146.194467350201  
125.04327844782  
CACNA1A 145.025703051661 135.497033143331 135.028746262383  
157.607445509297 144.942289590793 148.302775746627 137.049677918041  
134.275773172492 136.440671408022 158.325554470875 134.038213827843  
152.035992124554  
CACNA1B 145.392463986225 130.659631155616 135.114900669781  
129.222714748528 156.007630568494 131.514114515895 129.067538010904  
143.728569494708 140.784853736558 152.890239929335 138.444427173667  
147.491439949088  
CACNA1C 342.998459706966 377.083379021079 413.913442080187  
580.859914041323 136.563471322998 139.00736252716 145.020615552964  
145.351662473858 147.281035392817 157.466686487471 144.387375194186  
139.034940762344  
CACNA1D 152.56002779985 135.32730674455 137.463764193883  
157.960172706254 166.289763097913 147.113541493157 153.423579724911  
157.113536717393 156.957578703389 146.96155692518 176.317805247749  
165.333608076984  
CACNA1E 142.700311964178 138.333435927107 135.391788614828  
125.899200544217 152.719997757291 151.406384541297 168.323141675824  
140.334331111538 147.459385142695 136.638141963514 135.190698960212  
129.83316008718  
CACNA1F 111.032156655273 110.024815508703 102.932013031511  
101.597648528389 111.949644842971 107.884870799936 99.0767996209245  
111.10737497653 104.248226402465 114.41737808857 111.538651711074  
107.638492587723  
CACNA1G 129.165440930558 126.362418476129 129.466612376702  
128.297879410629 130.25146185271 127.377356715337 127.344210958898  
127.291712212051 124.672483602517 126.743579586052 116.769106223472  
127.856634523494  
CACNA1H 1421.04485772969 1879.08108720938 2061.9164323309  
2992.18604022433 163.982415393606 152.547558436703 126.151017944639  
144.195705502443 161.520362399369 182.588697551677 417.987533397449  
443.259619455624  
CACNA1I 145.159572111039 142.132576760619 132.297716337104  
138.041411135053 218.350166753833 191.322056430728 137.012646671173  
183.764215745794 138.69392148885 146.569958732206 143.945039636839  
325.751369001105  
CACNA1S 155.997210529742 160.331940529151 140.845958602151  
174.284268998257 152.805525883571 143.141852982371 164.227134687088  
147.463822782303 155.669470674985 160.537464426971 183.033044475752  
139.130560988108

CACNA2D1 138.609972011765 147.879286704 131.138322527536  
134.182902752156 132.677272839165 141.434699050015 134.32174235533  
133.018406625714 126.784243009941 141.412317125776 137.014698467096  
115.734230176652

CACNA2D2 142.956870642583 140.009593108693 142.734103971267  
146.223880979601 163.558869203898 143.256590560776 143.461785113446  
141.492458250787 139.08460576146 134.683553037185 139.22543724535  
143.497909064641

CACNA2D3 132.834433153076 121.85247363239 119.192893408873  
114.062099086818 112.825399620524 120.95428135683 108.895922800601  
125.160161268474 113.716741872499 149.717739166461 136.3615279557  
122.682761393215

CACNA2D4 141.168198348093 144.102872001089 139.163958829511  
135.098343717085 139.268052431476 136.472404812817 134.89415027205  
137.838096997956 131.827899207029 146.128066033346 143.114384950467  
134.961156870831

CACNB1 141.196795654442 143.401971479167 141.996233801459  
142.939578759097 133.951322753098 133.805991920905 136.028011201077  
131.460388562433 139.706279455371 136.093473732174 137.916872642522  
126.029431525943

CACNB2 192.69687837782 180.994249258457 221.82340413039  
201.865955150869 131.305785417254 132.74579603362 129.765440519589  
126.292433523959 125.04156726504 127.333963230749 126.308622415913  
133.590552542806

CACNB3 539.853394831917 580.996071040561 395.521241316058  
444.945078908489 636.56692204969 860.315938621256 675.083275037052  
891.194779815063 600.162650426961 604.453803994875 970.634736994313  
1277.0921553877

CACNB4 133.085476994246 136.147810636915 127.030113960477  
142.331050242704 130.429076594441 131.400031203603 123.182903611854  
125.377377116057 128.179293878252 140.138870925001 135.273694626342  
124.075077123156

CACNG1 129.728266017061 150.290025009187 123.446714388901  
138.824082857747 150.093684245826 134.534815676852 133.564350740049  
109.398997827329 129.719122724699 126.924014801186 147.364301916733  
136.241569739318

CACNG2 120.951365231971 117.207266754941 114.115609163126  
106.102093734748 111.743461522689 123.796657561057 121.353233207209  
121.181654892305 121.88070274109 117.101933186269 135.708804956764  
113.199690522854

CACNG3 136.13751015238 133.11040099808 128.939572714685  
127.760995691556 136.66358267095 137.171348199209 124.347680638586  
128.528510920423 129.956519535525 122.102644097132 158.359440014674  
126.515480612924

CACNG4 154.688685142904 150.741291526753 144.604714612091  
179.211502448703 157.353493980339 155.143752422033 157.885229749634  
161.44729973777 142.865320802784 164.126980102525 143.370698101204  
138.618761382177

CACNG5 121.643036773773 131.141668650877 127.006746526023  
136.044670179122 128.890685255595 123.58727715816 125.600500146679  
128.116795372698 123.665983073461 127.588907178652 150.78145177853  
130.512057032369

CACNG6 143.292552892073 138.724959677368 134.475296383752  
134.517774302213 138.760800146167 132.937942776777 135.711590400394

|          |                  |                  |                  |                  |
|----------|------------------|------------------|------------------|------------------|
|          | 139.061072394426 | 132.340183565771 | 131.87052926802  | 143.061415008831 |
|          | 140.818413826758 |                  |                  |                  |
| CACNG7   | 115.242526386551 | 119.034003473459 | 109.700513642061 |                  |
|          | 119.645983822002 | 113.487357534546 | 119.608334527504 | 115.463150857002 |
|          | 122.460829835477 | 114.290611267606 | 119.636334259263 | 124.059778432167 |
|          | 119.305917403956 |                  |                  |                  |
| CACNG8   | 126.37572518012  | 125.404043810022 | 129.020356016653 |                  |
|          | 122.944699010173 | 122.051473363557 | 128.451788292588 | 138.279087298069 |
|          | 124.889829874126 | 131.595868226775 | 120.957197551997 | 132.197346228417 |
|          | 138.582427155109 |                  |                  |                  |
| CACYBP   | 178.476483428474 | 182.77693508164  | 265.366632264085 |                  |
|          | 146.649944669876 | 265.670643951648 | 334.056545911557 | 279.790257881254 |
|          | 491.112594297928 | 451.317592236192 | 399.364160668615 | 226.824313642101 |
|          | 394.35596596181  |                  |                  |                  |
| CAD      | 196.802641002079 | 195.561296046507 | 204.396576475753 | 301.188296465202 |
|          | 616.701037274509 | 273.197814995543 | 215.84044779962  | 279.541294184609 |
|          | 218.2454853526   | 242.695286989672 | 204.183472655276 | 203.510106134882 |
| CADM1    | 527.930077857945 | 598.924339094496 | 640.255747986724 | 523.216537391852 |
|          | 179.421854100287 | 161.968835903764 | 274.281532397691 | 263.448958595597 |
|          | 176.953099943185 | 229.443064589306 | 258.807028561407 | 408.811415529922 |
| CADM2    | 153.920180168328 | 152.91729346961  | 166.917552275021 | 141.380276932556 |
|          | 122.042136913991 | 123.547821639269 | 117.910259090745 | 137.463764193883 |
|          | 153.46645509759  | 131.92059356875  | 127.453866279181 | 131.863018503922 |
| CADM3    | 307.480644393018 | 261.541138637729 | 214.546528079149 | 258.25658838015  |
|          | 152.910433120981 | 143.562164660825 | 149.545278163222 | 138.409284761652 |
|          | 157.841520434044 | 143.094799968981 | 138.825961991209 | 145.077517845584 |
| CADM4    | 226.315173823168 | 236.191384383802 | 239.277801396834 | 311.848379951974 |
|          | 436.331333134628 | 284.438411011954 | 271.770138565186 | 235.183590602209 |
|          | 193.336246844237 | 311.806908624308 | 162.056622258216 | 211.34069504665  |
| CADPS    | 133.737573120711 | 150.384559054133 | 156.806407903626 | 139.941724115063 |
|          | 135.877646659023 | 138.086270564406 | 131.540436531741 | 144.134485888258 |
|          | 143.922878410438 | 139.503902205317 | 148.8870854102   | 145.241301006518 |
| CADPS2   | 255.225145197422 | 247.307128520272 | 229.85833221434  |                  |
|          | 217.013533525724 | 319.128582107184 | 242.269784551092 | 212.460476372263 |
|          | 188.40383184521  | 264.936739264566 | 162.090585987836 | 169.110693867431 |
|          | 153.752502094283 |                  |                  |                  |
| CAGE1    | 135.233957017664 | 144.914015211747 | 145.041430440608 | 157.225479764928 |
|          | 143.410917415691 | 141.721829342179 | 150.724359913994 | 145.514859606031 |
|          | 131.800533523123 | 142.81401345781  | 148.913181799692 | 150.25322837689  |
| CALB1    | 119.894737403889 | 117.682034050478 | 111.837468699281 | 111.949644842971 |
|          | 114.721282552636 | 115.995309578182 | 103.202873534814 | 146.70774472499  |
|          | 110.875112640101 | 111.484426481816 | 122.053867525393 | 110.952108124186 |
| CALB2    | 164.593531655305 | 159.629232808787 | 158.928949614338 | 161.126686827391 |
|          | 195.963361515546 | 144.210698143215 | 162.904897605929 | 139.938739652347 |
|          | 160.72962443421  | 165.863118584978 | 192.140442881209 | 142.14116448528  |
| CALCA    | 131.796941315992 | 140.299459596491 | 131.849442776642 | 138.701871179502 |
|          | 137.47514052942  | 139.589612144962 | 146.114159600635 | 146.608010450782 |
|          | 137.675597243706 | 143.607579034109 | 127.678512375099 | 141.797497681512 |
| CALCB    | 124.121555438466 | 143.354858193994 | 117.77708734157  | 123.601413134287 |
|          | 111.161283080299 | 126.573673878042 | 128.659393756477 | 127.2369420721   |
|          | 134.867806860993 | 124.933738341123 | 134.986030185477 | 107.126004317323 |
| CALCOCO1 | 367.567681162661 | 379.476768908492 | 483.429488817674 |                  |
|          | 449.220056843562 | 181.991820141929 | 152.445022409208 | 153.398587738216 |

195.595275594235 193.412827246366 164.377227860031 291.167223094542  
 160.390564881326  
 CALCOCO2 293.600165830839 271.897511879509 218.209523110843  
 243.979769719186 209.840035045167 196.363005912532 289.257002046658  
 239.827648772906 262.577672828611 213.240181616274 346.917113326564  
 221.152973486208  
 CALCR 118.655954393594 112.693431140524 112.684334910243 116.625518828978  
 120.470801825675 115.871151134713 123.545404885618 111.788481822686  
 110.286187184448 114.122395647516 122.410340121549 119.26921157552  
 CALCRL 162.274094333189 134.345387934995 125.008209861774  
 126.539877052899 129.031338314175 258.830885826237 126.839037497031  
 150.587882657674 177.083095120017 219.151144724168 151.159145294127  
 133.141683141696  
 CALD1 14938.5975217303 13190.4826009741 13809.2057928642 14499.7866852901  
 202.778539118009 694.02978779693 233.884660128222 481.933386283351  
 541.642309122976 1259.38111177521 232.414763435965 272.712242893937  
 CALHM1 130.410584413031 132.100026388604 138.145677924612  
 138.532916327009 126.910075365358 126.925982415892 140.770705453805  
 127.808579455383 128.635684412304 124.295334523889 119.548432046443  
 130.40517506216  
 CALHM2 285.63245179313 358.843277491684 320.979443123471  
 365.046815163035 193.858884443593 177.831718771025 175.148318011395  
 196.450308368198 220.079379312889 207.977817300376 187.145134088286  
 230.263678910356  
 CALHM3 124.578552584603 112.404562115306 132.99989565368  
 147.844734028193 155.535222310709 130.890314257211 135.792966926642  
 115.619116556625 126.755389668637 114.902673141786 120.120796272896  
 129.930888107958  
 CALM1 6990.13809515289 7433.03226979876 7815.98936145067 9881.69734721233  
 1050.40488466179 1792.35343044443 1197.00004043747 1699.17470788219  
 2525.90466050731 1018.80178630497 1875.21979956596 2041.03024136014  
 CALM2 9433.53967760357 9793.92604780228 9671.66667662331 10988.2836796736  
 6720.10473881011 9323.53099359448 3560.23794634993 6044.78942014135  
 6919.4226838505 4682.62607750437 3909.47437917608 5759.5586948816  
 CALM3 7717.01422791837 8532.46059476152 9070.86397918429 11281.201625198  
 7433.03226979876 5776.63686968234 4956.21683075884 6830.46932926077  
 8342.70113690382 3321.1350545346 5636.26097921507 5558.51089816921  
 CALML3 140.648918459179 140.227863970629 123.45004246675  
 190.174729017089 151.78607484924 819.151876775691 211.085778902367  
 125.803854387512 230.053292316517 3241.23835624706 182.055718892894  
 130.2867846895  
 CALML4 163.451063547847 168.091278015885 187.833356349429  
 161.911468506919 152.812142230375 169.852769679312 149.52880714343  
 149.582406567077 161.359609192977 157.04599638368 163.134784474437  
 167.993851183401  
 CALML5 177.182321788711 155.043017644694 173.907933001446  
 159.282348516052 203.87884605779 175.704031930103 178.200678423426  
 160.937256625847 196.378888436237 1418.60088387728 161.061119536632  
 167.984051648058  
 CALML6 120.721341479615 136.109975252514 119.815258991448  
 124.530660958725 106.900679222135 118.432307370605 113.905364405553  
 116.810827219571 122.664353374047 109.30275288389 143.725497952919  
 118.006338536085

|         |                  |                  |                  |                  |
|---------|------------------|------------------|------------------|------------------|
| CALN1   | 181.261666651301 | 189.985520850855 | 180.747527895349 | 199.70041209487  |
|         | 177.428161690048 | 174.540209145695 | 189.74261433647  | 179.389797867379 |
|         | 167.500410857353 | 191.628693083169 | 169.527424356913 | 182.095387488796 |
| CALR    | 809.545702751155 | 864.547109080675 | 498.965895763801 | 1076.09385014053 |
|         | 3712.67025366957 | 648.823677010146 | 1741.0131951509  | 1473.70433292382 |
|         | 1120.3009282887  | 1001.65849130836 | 1348.80530206238 | 1080.42884514937 |
| CALR3   | 112.41270361848  | 119.845508281414 | 121.613684281664 | 114.68345964966  |
|         | 122.543903508753 | 119.252737868132 | 118.492287441192 | 111.260486045985 |
|         | 117.672645717508 | 111.691973758042 | 128.666652639862 | 116.621735695217 |
| CALU    | 1694.24232555141 | 1113.59310757948 | 1371.56635975955 | 1274.39152410752 |
|         | 455.08515350006  | 418.574045635945 | 475.927798702033 | 439.928008927647 |
|         | 496.426739836535 | 635.234445318087 | 489.528040775004 | 477.626693328013 |
| CALY    | 119.9414421871   | 132.359319280352 | 142.934869757362 | 138.047487233711 |
|         | 136.68056120003  | 122.909152047474 | 122.917915232153 | 126.089217853289 |
|         | 134.885883559391 | 141.099781722697 | 130.425809387444 | 135.899595115146 |
| CAMK1   | 384.780426529733 | 404.073802241516 | 366.007451523992 | 472.793332506369 |
|         | 313.248029961291 | 196.226732738526 | 181.003812824014 | 242.614881095485 |
|         | 183.358807104988 | 203.642739476708 | 150.694215349678 | 169.332207863684 |
| CAMK1D  | 185.027902485379 | 166.452651396293 | 203.524150518033 |                  |
|         | 175.019580368717 | 168.398366575579 | 221.849661343124 | 177.752497164503 |
|         | 167.100039749329 | 173.879952136931 | 171.791030104358 | 162.134726710448 |
|         | 204.219197797869 |                  |                  |                  |
| CAMK1G  | 146.274284557421 | 159.98636352484  | 137.322392546784 |                  |
|         | 137.634298014431 | 157.848456517169 | 153.008756051525 | 145.200638964782 |
|         | 421.384700184923 | 350.392951395182 | 157.643461899964 | 163.799748670842 |
|         | 182.698275130489 |                  |                  |                  |
| CAMK2A  | 220.010399552402 | 242.141362101262 | 223.253794809571 |                  |
|         | 332.599191067433 | 129.090955637629 | 116.87586240208  | 110.575582352222 |
|         | 116.700397932007 | 120.220156455352 | 128.798413084891 | 122.716563069312 |
|         | 131.690417323838 |                  |                  |                  |
| CAMK2B  | 129.52578899011  | 139.414912158809 | 132.883408554592 |                  |
|         | 138.97776257708  | 130.443360119099 | 136.188868917386 | 133.911650164508 |
|         | 129.925548182204 | 136.846912694371 | 134.61114877396  | 139.023486014525 |
|         | 145.387562372871 |                  |                  |                  |
| CAMK2D  | 200.065184172871 | 173.38031514498  | 217.353396632732 |                  |
|         | 175.476184387338 | 155.211976328553 | 144.023798119335 | 154.38209765671  |
|         | 149.952762225731 | 153.734347607222 | 253.975577255772 | 144.064884297748 |
|         | 137.996291911198 |                  |                  |                  |
| CAMK2G  | 899.336817124312 | 916.836022395768 | 1280.57297272231 |                  |
|         | 1331.18605673705 | 250.481442411876 | 443.964363178742 | 431.861762635568 |
|         | 363.343480850598 | 365.82705202869  | 222.565515020501 | 604.687265229902 |
|         | 498.180196203245 |                  |                  |                  |
| CAMK2N1 | 1632.07671492041 | 1848.27927621606 | 2208.49325118803 |                  |
|         | 1257.32413345748 | 14983.8256502293 | 11709.9785619141 | 9908.59593023839 |
|         | 4124.03779111916 | 6652.21610967461 | 1387.90327883679 | 4206.37667440908 |
|         | 7753.61594300904 |                  |                  |                  |
| CAMK2N2 | 108.697696080014 | 107.697601478064 | 111.299115402008 |                  |
|         | 106.854721604889 | 117.718893827092 | 111.409447323674 | 110.885714048075 |
|         | 94.3531468700382 | 105.839106819841 | 109.586955365611 | 128.458132030921 |
|         | 116.969799327195 |                  |                  |                  |
| CAMK4   | 130.143953880391 | 132.887701822875 | 134.455623159793 | 142.116311513299 |
|         | 135.325617701062 | 135.455283504668 | 133.425151103622 | 142.639587833858 |
|         | 144.940119680152 | 144.920107068083 | 141.363863974586 | 143.881744063934 |

CAMKK1 133.491963477649 148.758316681306 142.495333453346  
 132.557945249016 132.697727983601 136.81406168343 132.508133846896  
 130.091692689423 128.755697083014 140.349431258812 143.393174544776  
 138.494266722799  
 CAMKK2 284.638865013916 236.141982516399 281.740495452842  
 317.00629920068 216.353502371227 189.94130405123 161.359609192977  
 213.412498914309 164.429483677715 177.16711492983 179.753400474369  
 157.881569297409  
 CAMKV 112.977469350139 122.373400988227 112.776764215618 111.506345174435  
 110.594755513247 111.876915242732 127.356622898971 113.66416989856  
 118.514618614167 121.248923222807 116.252227301161 113.334665910428  
 CAMLG 3552.78712528922 3896.49785254733 4602.81651147558 3463.23822434026  
 1444.45946291517 1536.52218968817 3195.71436046397 2014.48411650613  
 1314.62071412501 2639.60135568 2518.88171283899 1535.27496251381  
 CAMP 108.984922760455 114.314425748312 107.961322525982 112.891050337488  
 110.847680175669 121.353233207209 108.730058525654 109.978693735206  
 107.961322525982 116.501174707117 130.720097323382 105.348008821162  
 CAMSAP1 388.326080754063 328.826483579278 379.102958448288  
 356.770158430601 277.219796733134 253.933478547515 245.454945056317  
 286.310923582432 281.238656291587 417.103816140912 325.907037744936  
 269.927694984528  
 CAMSAP1L1 1082.75419087929 1013.60354455825 738.37559871635  
 835.284130042504 401.840794789616 618.058496806334 513.518424350159  
 479.983368253935 373.189809737885 378.151202933526 563.339837352678  
 503.285430318683  
 CAMTA1 182.066922756289 195.776369840059 161.129770392464  
 160.277755404001 216.427103365727 186.831266888028 183.744959461078  
 155.7441762827 135.096321258167 182.118544602205 149.747347428419  
 153.222807811478  
 CAMTA2 137.22727238555 139.537865511933 135.106072664488  
 140.711699577809 125.682297697017 114.812254477058 124.334450753704  
 126.585679159459 125.166940410459 117.976107125982 147.400082178491  
 129.89329138222  
 CAND1 341.819090221654 347.812754957414 362.195903246495 300.094509257518  
 357.063270015318 4222.55224241399 528.650794915616 2200.94974896771  
 425.826693178023 400.621427274425 437.601814037248 424.134483971176  
 CAND2 328.431289733169 273.303240462047 298.573180660083 336.279209908669  
 167.301579775842 139.642457979496 124.873289279767 141.990639998829  
 151.998942684339 140.02337095267 130.665947823977 140.051904905695  
 CANT1 279.495192828873 309.36704220687 247.942904862478 256.370052241046  
 756.068695265118 471.069295685718 658.202765061937 413.983821839274  
 558.934004505074 446.07651799079 486.947380524463 542.379137999196  
 CANX 415.642099109855 356.413190087706 452.732079010502 370.390323116113  
 236.141982516399 302.847274046748 351.854828413334 462.553267274302  
 364.113665301598 353.187829498591 357.063270015318 403.984761333129  
 CAP1 4965.25728333142 4793.22133852447 5558.51089816921 4811.88424516272  
 3413.39994653641 5955.10816224456 4222.55224241399 5373.2173152906  
 4836.4008757421 6358.5018930218 4214.83058308503 4938.42484385053  
 CAP2 1932.39418448203 1603.87451959083 2479.34567973462 1818.92700816112  
 194.941454173896 215.40037757604 272.770616373687 159.994376562272  
 211.34069504665 526.182262872235 222.544542998356 228.212753830905  
 CAPG 228.125521373477 262.954856857756 206.340478393262 195.160353691349  
 832.335328912437 256.370052241046 481.037647470809 334.709049890042  
 339.98018551524 605.795439342384 659.900771633223 310.989043012841



CAPN1 734.469481390593 836.613819700658 812.75075757351 1010.23703166498  
2639.60135568 2736.98692493933 2583.46653460894 1532.47920327769  
1492.83354014907 2703.76111776248 3976.40140405628 2965.38280248519  
CAPN10 138.685330935707 141.306418675404 144.898770838913  
142.456527359961 148.764956861822 141.059033576475 147.125005489393  
134.325520377207 138.483436753942 137.09814291566 134.932416370825  
144.321757243275  
CAPN11 166.730974538475 170.154539416255 157.172970235254  
170.350891928203 147.225911875196 155.513572243604 145.165443106042  
159.399804351771 163.153676643372 160.277755404001 197.191648960563  
149.200848439601  
CAPN12 155.820194280153 164.991522994763 146.666759322506  
147.436408919939 368.418553384965 157.646948327818 174.66966623557  
212.798133015556 191.754626760061 169.568915494577 575.722713461982  
271.468939477052  
CAPN13 125.220416203903 154.938900278679 125.894755032594  
115.76177719261 146.099555861577 234.301520483864 153.059432055089  
802.643357549193 128.229729571899 109.128394735532 943.677679525947  
142.528480882047  
CAPN14 142.558109812638 150.445647133244 139.268052431476  
129.272835188209 146.865904106038 159.393410854649 231.338258067616  
189.887788314879 152.925281215593 145.404469340821 182.907444581093  
159.683695366575  
CAPN2 302.735372807236 261.39435936661 231.39684528494 299.106362530855  
145.684294398911 158.973872644973 201.016287924499 155.578524031078  
175.704031930103 308.517561840596 212.78038645414 184.148058872585  
CAPN3 157.713227527385 151.619329363527 174.012972901793 143.814798097425  
132.024244263352 131.015519445322 145.831833648039 138.934516083124  
149.131218007756 169.113439729353 161.172420368335 149.17029600091  
CAPN5 580.859914041323 629.97342429259 435.983803453746 507.040326298457  
1261.61611961272 837.023434916281 388.638095539186 1720.14021303639  
1834.08657010335 195.019706886336 2282.94927629821 1126.46241487062  
CAPN6 162.841318222066 156.095520355029 161.02075528415 192.224242967539  
155.828962183804 136.90421956457 144.662545137915 138.088712695622  
150.655359765209 157.256812907353 173.189465201573 147.606311227037  
CAPN7 184.505279093688 178.863722055499 251.588748783592 164.491207767654  
196.486499238623 255.066583469964 214.175691239597 256.873090834376  
204.637887777803 218.997165156081 197.169703621888 207.036293322882  
CAPN8 129.471713415228 128.054394154801 115.520278378747 114.818898581401  
129.621296567128 114.987285062108 123.756349408641 127.242627779136  
139.117776552573 123.524952603672 136.253264628863 161.769370009823  
CAPN9 139.576852399535 131.288785100733 138.633019006784 130.803561448083  
195.333029746339 134.27783583528 214.200081541057 149.622695843398  
186.222567239198 121.344724993789 317.600728351694 140.225329742578  
CAPNS1 1549.30900090605 1782.2498613913 1472.54829263217  
2089.82894186824 4773.62220024088 1435.4236709581 1367.92869625376  
1226.74043569231 1478.09582385838 1708.87666406131 1453.88161495484  
1355.07170485397  
CAPNS2 144.065554025603 187.407526616724 153.485731788293  
135.704986104812 199.53455266342 563.011988279542 617.185364180303  
284.351529744475 145.941674563997 337.434882771953 850.882404546093  
681.810927901806  
CAPRIN1 298.827660296715 270.894153548841 311.157764305033  
283.123157828849 333.676803661366 330.505633088656 327.749926183823

281.53843450593 337.39574303968 373.545629693667 263.845733455915  
 265.174306663185  
 CAPRIN2 352.303782547593 258.489608621438 411.784922368377  
 277.314675225943 184.542232315662 307.264586007015 315.912220767901  
 311.449205777595 214.162670073541 522.17701271254 574.496860164135  
 275.101766414328  
 CAPS 244.797792477941 309.229066204308 347.620001353026 295.893482074241  
 2390.41825815872 1914.96285167893 1936.88813111969 1602.63977096867  
 941.936830901588 184.148058872585 909.727616721285 1160.78730097715  
 CAPS2 262.671819506189 255.992494620859 248.761038207278 263.204269632206  
 178.235281981508 231.239126548656 211.966139902562 214.499670852615  
 193.098116087792 191.297539967707 201.555964610849 226.678503956411  
 CAPSL 147.270369342438 143.432889871079 137.974323288786 151.532859494021  
 144.2753860947 145.493977576106 145.636906369786 153.056369304663  
 144.68114486527 143.125454748996 136.142380560596 143.082880435412  
 CAPZA1 212.749668083641 206.571433405844 190.506201184419  
 187.852455291319 235.595194918187 319.639103463458 299.170431746759  
 271.638179116269 268.186156177622 325.011269531407 549.569374872629  
 306.632103708321  
 CAPZA2 3277.24948092771 3342.8737952486 2841.96460830166  
 4061.24537355697 2069.70335195314 1742.84803427086 1513.28088592885  
 1524.46745239811 1286.55103838368 1093.85316636801 1299.4782626583  
 1812.07394646463  
 CAPZA3 142.630563791102 144.155591092387 132.976977898242  
 139.238936770274 134.639151701327 125.796438432905 130.616175018332  
 128.753623886188 124.15094220181 132.461730873857 136.769073515537  
 139.388484543482  
 CAPZB 1091.69584249713 1259.75918248468 1027.11849332495 1934.30779703747  
 1660.70040058102 1100.81588201714 952.724512915813 839.662936279727  
 783.991448771818 932.076509242794 1366.06309834426 877.598505913096  
 CARD10 202.024504592763 271.430915699592 226.173501275026  
 276.653753970476 430.590533290315 301.304268871606 223.722742062251  
 182.861900982333 206.845306095447 588.678767007017 266.71318061066  
 454.235121917464  
 CARD11 213.123453925578 196.802641002079 213.028568789661  
 194.212177449077 1004.6207350158 478.847650837714 747.804958601763  
 523.591472915151 426.132037075477 216.582862850259 793.071192619058  
 1742.84803427086  
 CARD14 175.686248503777 165.627852733455 175.832474809232  
 142.215285988753 195.185025611945 177.011776399483 203.983168778488  
 175.832474809232 174.006516433854 186.112835637689 205.08372943071  
 198.701991021316  
 CARD16 149.570242115956 152.404186073033 141.468076901305  
 139.576261630082 146.838547724148 137.539385624206 143.209289043824  
 147.378228560979 150.148902196995 156.808992920564 156.239937979051  
 146.421195733989  
 CARD17 138.730409717578 142.64421300687 138.307574579062  
 137.660051943656 162.863781294205 154.428779374984 151.839306445341  
 137.258429777402 154.479733759712 166.662801900754 129.867246424399  
 135.697550878438  
 CARD18 121.59661598908 117.361778263056 113.726931741236  
 118.167740643871 117.953453145685 114.960460615926 120.957197551997  
 120.060776752215 114.002925521932 122.098850053347 124.486701452062  
 124.00806841872

|         |                  |                  |                  |                  |
|---------|------------------|------------------|------------------|------------------|
| CARD6   | 149.394952856085 | 149.689071018094 | 157.353493980339 | 140.058153633802 |
|         | 156.638070437044 | 153.500478301079 | 162.664254855131 | 150.283447275981 |
|         | 141.284962125757 | 183.152005135504 | 156.119899067238 | 151.76341973891  |
| CARD8   | 193.394225360968 | 216.154203111101 | 169.434164890542 | 232.250434241457 |
|         | 151.210814209064 | 234.339913501761 | 205.509515144263 | 265.028512407839 |
|         | 286.282132382462 | 169.649251828199 | 213.274106157675 | 171.373932115412 |
| CARD9   | 164.48570046081  | 157.390513637267 | 142.663334893424 | 185.627515956848 |
|         | 364.895113721763 | 126.409995188106 | 232.879578820053 | 212.915949933033 |
|         | 271.397087928135 | 150.885460975199 | 340.301980622308 | 148.79958121087  |
| CARHSP1 | 554.950092776254 | 566.543765584009 | 391.644649726254 |                  |
|         | 422.590112942156 | 1473.70433292382 | 776.030689773414 | 1125.95664591686 |
|         | 1115.53524128833 | 1021.25947613827 | 3757.39261544326 | 730.673649872205 |
|         | 1265.88446775977 |                  |                  |                  |
| CARKD   | 585.552940765069 | 566.647927867646 | 657.562129888446 | 619.75986112089  |
|         | 348.808646570544 | 600.919152191636 | 444.945078908489 | 379.292531644085 |
|         | 615.662993833692 | 475.833242673151 | 660.907502776003 | 639.688482258192 |
| CARM1   | 1772.75453735112 | 2200.94974896771 | 2080.47567326037 | 2986.6208659209  |
|         | 1207.11788506001 | 1460.24985399013 | 816.823443819069 | 1196.34528225417 |
|         | 778.639512538949 | 1482.92498205315 | 656.867138022837 | 1101.66868138797 |
| CARS    | 524.640879446426 | 441.684169663552 | 411.968307579588 | 592.284071247642 |
|         | 266.563990988678 | 303.423450627377 | 282.47352481715  | 289.956528242564 |
|         | 305.669636871734 | 379.788696204016 | 294.368406238222 | 276.089623957012 |
| CARS2   | 288.261250589513 | 273.668871896558 | 294.922183826144 | 309.283897272661 |
|         | 278.385151185788 | 328.550286726543 | 234.243977361232 | 246.710233781784 |
|         | 218.96845208513  | 323.04019262387  | 302.381946749711 | 355.14024238296  |
| CART1   | 143.574584852426 | 125.687688416588 | 137.808307749725 | 150.521719129181 |
|         | 138.677282903963 | 136.108500467418 | 130.100501333725 | 134.519697269443 |
|         | 136.448045428081 | 129.3513576591   | 132.466796864599 | 131.552276774901 |
| CARTPT  | 128.765369834041 | 131.237720549768 | 127.229854957588 |                  |
|         | 137.314968268692 | 126.957335244119 | 129.541049979717 | 120.839256811295 |
|         | 127.6078497227   | 114.217867810848 | 131.693923403533 | 147.905406818238 |
|         | 123.622533094122 |                  |                  |                  |
| CASC1   | 141.655169779627 | 168.73918684069  | 136.423161205425 | 137.565050253948 |
|         | 110.148555045276 | 122.002822875994 | 126.832182961671 | 126.182856027765 |
|         | 116.814269969508 | 120.452958447555 | 130.309092946921 | 114.755442050481 |
| CASC2   | 130.680629893396 | 133.814720785534 | 134.504873813959 | 141.056924917269 |
|         | 118.743966166637 | 126.828097770667 | 135.005591691192 | 136.201103852785 |
|         | 120.799317509529 | 130.985360700521 | 113.840813583258 | 132.475414208533 |
| CASC3   | 831.289724465877 | 884.747476952289 | 1000.05896885496 | 1103.13439876128 |
|         | 675.281131488524 | 489.022371276542 | 378.088675670786 | 629.97342429259  |
|         | 535.758943850734 | 386.305638633172 | 377.951523644306 | 319.685597963267 |
| CASC4   | 186.04763660516  | 181.722373730185 | 223.058699622386 | 151.064422836695 |
|         | 153.217287503221 | 232.960832410426 | 260.129513331703 | 207.023221559302 |
|         | 260.999345837027 | 191.179662650057 | 224.766155406229 | 260.41082304175  |
| CASC5   | 132.937942776777 | 137.731390340708 | 124.248997533959 | 116.497714896018 |
|         | 143.851670859917 | 131.84454376953  | 124.507958339495 | 136.649743237542 |
|         | 136.317978146216 | 128.26423663004  | 132.998223400178 | 134.427601777639 |
| CASD1   | 181.425012248539 | 184.923312649584 | 192.752224665459 | 184.071078414327 |
|         | 161.102731941183 | 206.303338709554 | 162.199381540369 | 160.618586213311 |
|         | 168.295044843056 | 179.250373572781 | 202.797135825668 | 259.868701878844 |
| CASK    | 203.510106134882 | 194.617252921731 | 209.60319248212  | 230.424145472916 |
|         | 246.369521698487 | 406.133430120039 | 322.263925912805 | 266.286483421453 |
|         | 261.028644858795 | 362.445813697676 | 173.761036260869 | 393.579552385074 |

CASKIN1 125.172189715764 121.796519488793 124.387133895009  
 122.804934452095 118.988269692812 118.424520312293 136.617105945904  
 135.596007994731 121.607527525765 125.000876313893 130.402496960735  
 128.383541329939  
 CASKIN2 146.301300103564 146.580787463084 122.699993989189  
 136.762273376313 133.728378162206 118.655954393594 139.963969716386  
 119.180033382937 116.787791109549 124.35721327773 128.699441450952  
 143.036006001419  
 CASP1 232.250434241457 218.70412656621 165.186696781985 156.727153398506  
 136.327014189932 180.952017616136 196.450308368198 270.973600107882  
 385.888395433066 633.104379362137 360.852730026133 435.48544637769  
 CASP10 138.883710791382 133.446429177254 134.29036009792  
 133.984078167807 142.137885203233 140.420815852109 143.123131081201  
 141.666394024363 130.182320154521 152.961475450751 150.378690719669  
 136.459509901229  
 CASP12 148.930073905413 141.97908047949 140.456277147131  
 148.511059836029 138.576978828316 141.043668963717 126.652197216347  
 139.168307371516 124.561511833959 140.074024949157 146.06717772919  
 125.707228291312  
 CASP14 128.611740835252 133.324531689254 122.002822875994  
 137.850437814788 118.792612926619 124.859984709406 128.517315006019  
 130.105800581241 130.383001462828 205.08372943071 130.374065525934  
 129.946925636595  
 CASP2 306.193157874683 383.259887828605 274.047586063773 415.113340335205  
 463.187551361986 917.646958427824 607.26455470867 783.991448771818  
 735.8141982568 554.115756730498 448.54309632232 930.25842384208  
 CASP3 314.845965872164 335.3366819308 337.935183275743 316.590387560909  
 612.758976723556 1018.38836615952 814.110601393539 700.353187874339  
 890.507257588957 500.132469062228 653.264945856916 525.515169794593  
 CASP4 190.165771406362 196.269193578525 163.582678113215 158.07640654075  
 160.429643729685 192.891507272665 233.536023295039 210.900056977861  
 249.737588031219 679.822276398569 398.673582680257 355.990908506973  
 CASP5 113.051381310122 111.837468699281 116.86635524597 106.629065516249  
 122.789656787728 117.47631318854 120.524859681034 117.47631318854  
 127.180743851077 123.379461430902 133.773427881651 105.521320791331  
 CASP6 217.811099067262 203.831047867731 278.88183549759 217.307872538386  
 201.616302398819 545.566596665916 438.611973005212 725.216684507759  
 442.766704003254 346.635777358159 363.150472154973 378.24336892367  
 CASP7 143.349486755648 149.911501378622 141.130462286785 142.633121727277  
 145.051794777243 141.752031758589 157.003367685421 154.350107666084  
 176.070695522397 147.064543281269 202.524668687686 190.489530928259  
 CASP8 117.969576809288 120.672291867109 113.76411537952 118.08607083874  
 115.992487254175 134.569883788949 125.725832564087 140.978511668091  
 135.186880148352 135.634385846692 142.613654158833 140.796641921516  
 CASP8AP2 118.122186617611 129.192326574697 113.822580779824  
 119.436922168376 122.180428703208 120.082391311921 117.003205777245  
 121.624218243474 110.266032635568 117.432860005907 126.673587174832  
 116.983869766097  
 CASP9 200.890547965585 205.546628064296 212.545989139388 207.718619151226  
 258.605188272761 260.356834114611 254.83131041241 241.203521822269  
 212.915949933033 180.456659320226 206.042395282286 220.415211013843  
 CASQ1 168.801737310947 198.135240691225 174.364798143068 248.531972733475  
 184.056274452194 140.171749368266 215.219246394594 328.019503002384  
 165.570531605115 152.648490300617 262.233918187791 170.622615783608

|            |                  |                  |                  |                  |
|------------|------------------|------------------|------------------|------------------|
| CASQ2      | 2794.89048827025 | 2350.01764791897 | 3463.23822434026 | 2580.98143004019 |
|            | 140.036463888037 | 147.51773051441  | 153.639559509292 | 148.22974445263  |
|            | 155.70645844794  | 143.320787131532 | 137.536053775531 | 148.124586158123 |
| CASR       | 110.764586138261 | 110.553759711075 | 96.0426636429757 | 106.772581387455 |
|            | 112.436972452838 | 108.631224817901 | 113.78644620959  | 108.655415285806 |
|            | 98.4947439453387 | 102.522925993233 | 120.551603446364 | 122.005340508177 |
| CASRL1     | 159.611551480901 | 149.262900833177 | 147.875855077738 |                  |
|            | 148.284412570438 | 139.089444892187 | 126.230887413874 | 145.158039427157 |
|            | 144.472969298036 | 141.023875058322 | 141.255406288178 | 145.168031449425 |
|            | 152.401204710292 |                  |                  |                  |
| CASS4      | 109.176852761745 | 115.631414599991 | 117.47631318854  | 118.206034087145 |
|            | 113.339155126202 | 115.587874563785 | 119.612288460361 | 99.7487411813724 |
|            | 113.582654469735 | 105.49491265382  | 126.924014801186 | 109.425878885118 |
| CAST       | 1006.24899131914 | 916.026216386031 | 1259.75918248468 | 812.75075757351  |
|            | 223.279017022443 | 381.4054004349   | 530.267835989435 | 357.773949920377 |
|            | 280.749681050778 | 774.442392607873 | 704.653073777277 | 628.344122779625 |
| CASZ1      | 473.947538805454 | 555.109005518622 | 493.209107049493 | 854.224454791713 |
|            | 442.698000781597 | 256.687384001447 | 219.422260093722 | 301.428024926428 |
|            | 241.648044508699 | 311.715351215263 | 264.054997398621 | 193.609985124825 |
| CAT        | 524.392279804734 | 616.995114856023 | 945.830852603704 | 463.802270256246 |
|            | 840.276501350383 | 814.471143753335 | 605.21685916883  | 1159.44907165386 |
|            | 1214.16777512885 | 605.583144451322 | 1079.58110075176 | 617.318955611228 |
| CATSPER1   | 138.343232981485 | 147.818956338752 | 128.56495182759  |                  |
|            | 130.257242615762 | 201.800357785022 | 153.778409339975 | 162.723310549554 |
|            | 143.028618831382 | 135.024750597761 | 125.315736755156 | 150.0512732245   |
|            | 333.049612399093 |                  |                  |                  |
| CATSPER2   | 6508.71638048514 | 5981.08862268291 | 6281.01687932005 |                  |
|            | 5521.74673982411 | 720.907992182476 | 5396.55955971617 | 2300.9407349072  |
|            | 4043.28299602858 | 3235.38149926838 | 2608.95227456417 | 4956.21683075884 |
|            | 2905.12297639092 |                  |                  |                  |
| CATSPER2P1 | 184.398672994943 | 183.314276033531 | 185.016336026382 |                  |
|            | 199.077893147154 | 150.105503384881 | 210.448904052352 | 222.118666699301 |
|            | 192.804447792672 | 190.045156046541 | 171.880470629305 | 145.152605166094 |
|            | 211.357321758564 |                  |                  |                  |
| CATSPER3   | 135.81863662958  | 137.68634745111  | 118.838332117453 |                  |
|            | 127.213640193364 | 119.943408501009 | 132.257989841046 | 114.242056888286 |
|            | 118.45291712775  | 128.389494971858 | 132.610618885717 | 145.677477231455 |
|            | 116.412881235587 |                  |                  |                  |
| CATSPER4   | 145.120347147471 | 149.725422365342 | 142.45047744931  |                  |
|            | 144.895601314903 | 149.560505078257 | 136.099663831028 | 164.352366170527 |
|            | 143.804903119745 | 148.702473828167 | 149.570242115956 | 147.754489751457 |
|            | 139.223480216048 |                  |                  |                  |
| CATSPERB   | 111.708970469189 | 117.104945989023 | 104.798333931019 |                  |
|            | 102.725375719353 | 121.85247363239  | 120.711150688559 | 107.580425848009 |
|            | 118.08607083874  | 116.465213348716 | 106.551076380988 | 130.30561086685  |
|            | 122.046901607713 |                  |                  |                  |
| CAV1       | 5040.35379681644 | 4037.15442268836 | 5058.57872936027 | 4663.03253705034 |
|            | 239.363511706064 | 440.319777672273 | 236.470206707351 | 363.594808277506 |
|            | 427.452114719877 | 2670.9151276786  | 342.769825986756 | 318.690043546203 |
| CAV2       | 507.827473844576 | 462.437471715008 | 562.387692458382 | 412.736636437651 |
|            | 174.149718758884 | 230.053292316517 | 205.630948393225 | 246.989526028884 |
|            | 218.896760804208 | 1314.62071412501 | 431.304147578425 | 263.321559283966 |

|         |                  |                  |                  |                  |
|---------|------------------|------------------|------------------|------------------|
| CAV3    | 139.201122725213 | 126.912226185444 | 125.450077160575 | 129.428950259722 |
|         | 119.702874945404 | 117.040953580545 | 122.891946370542 | 130.477824552202 |
|         | 112.166192839859 | 129.493805009651 | 129.305455204291 | 128.460750472464 |
| CBARA1  | 426.649095732979 | 433.594928641214 | 505.404271675438 |                  |
|         | 659.483452217461 | 190.572712684622 | 179.624208193114 | 219.638478100747 |
|         | 186.831266888028 | 229.62164568989  | 182.02250582556  | 271.238736772408 |
|         | 215.094633380547 |                  |                  |                  |
| CBFA2T2 | 181.135519188216 | 183.416437587938 | 171.093611712143 |                  |
|         | 199.118281632221 | 163.919426088318 | 159.110614190088 | 192.61436632814  |
|         | 176.256840061919 | 155.43699805497  | 152.609055890822 | 186.722842989058 |
|         | 161.26917182967  |                  |                  |                  |
| CBFA2T3 | 137.754373055094 | 133.834423222601 | 138.962649407431 |                  |
|         | 143.338628928675 | 132.282903926191 | 133.028789808654 | 141.016596301267 |
|         | 139.278366709094 | 134.192409943723 | 130.450930089722 | 145.997380100999 |
|         | 143.103779196037 |                  |                  |                  |
| CBFB    | 240.706548931192 | 244.280971257965 | 227.689356258276 | 193.394225360968 |
|         | 251.993821914623 | 376.082040863747 | 298.403224729528 | 263.123584372086 |
|         | 335.142319387164 | 317.802633831405 | 375.958347293549 | 405.975221091252 |
| CBL     | 307.124331101976 | 266.918302307596 | 244.219585315024 | 282.47352481715  |
|         | 207.440700355457 | 209.684346388892 | 163.41031443893  | 241.917371866481 |
|         | 219.192900411543 | 186.06425658259  | 216.645552082667 | 240.147082836599 |
| CBLB    | 1084.95095717937 | 1255.62991601665 | 1544.45026075974 | 1168.68074786473 |
|         | 348.300300174924 | 596.934339406636 | 583.192225756596 | 656.660582895703 |
|         | 633.762608454521 | 435.183433729519 | 877.598505913096 | 422.338508598153 |
| CBLC    | 146.795608819024 | 156.194996994993 | 142.14654303591  | 127.101752724954 |
|         | 1212.55338792557 | 232.830038701628 | 284.891415492568 | 425.708048519408 |
|         | 490.022369664024 | 330.553659265085 | 558.051041108282 | 273.984715370774 |
| CBLL1   | 241.944581086483 | 248.229468372363 | 250.217137496422 | 219.441959146815 |
|         | 323.086368767924 | 253.601378730911 | 297.368197598038 | 301.695991929957 |
|         | 279.413335686746 | 268.148673257455 | 280.204167582951 | 322.099431638246 |
| CBLN1   | 146.531692460121 | 157.58224826673  | 144.038859705973 | 171.85890372225  |
|         | 135.237042337721 | 152.467764730004 | 156.466728833063 | 156.460374293022 |
|         | 144.419657674797 | 136.460345970481 | 132.928639483854 | 129.878330410179 |
| CBLN2   | 142.594553057288 | 128.478724185042 | 134.831550401848 | 129.623601211364 |
|         | 151.037282417145 | 188.580458613357 | 117.417112053842 | 1827.03179366146 |
|         | 133.233826283531 | 118.505980204837 | 138.687013437904 | 137.260359343758 |
| CBLN3   | 275.794847140407 | 217.748916080172 | 224.298067319406 | 223.107391048316 |
|         | 190.534176839652 | 150.489651880905 | 217.491746961471 | 181.550597645633 |
|         | 189.403934838648 | 183.033044475752 | 206.548878646452 | 191.830711714844 |
| CBLN4   | 130.195234920895 | 131.144774362059 | 122.842463675109 | 126.800718471804 |
|         | 127.478474451121 | 126.877293296185 | 115.072622367144 | 122.079685222733 |
|         | 109.318922864507 | 115.524441144063 | 131.551085224112 | 122.89752183991  |
| CBR1    | 177.355210393749 | 204.1974438819   | 183.138955445765 | 219.246271924313 |
|         | 194.819597436776 | 222.646371492347 | 261.639437655633 | 190.152824885328 |
|         | 184.056274452194 | 262.53374754047  | 167.505381046729 | 172.707821624271 |
| CBR3    | 402.866491417369 | 514.002313819685 | 396.781827940009 | 688.464980326689 |
|         | 170.040914594182 | 158.325554470875 | 306.896732729554 | 272.351487980415 |
|         | 234.925852373127 | 217.607230767028 | 214.413674287972 | 164.520247586053 |
| CBR4    | 274.494074082359 | 323.149792143481 | 330.457534783492 | 265.972387419683 |
|         | 164.513371267476 | 486.947380524463 | 340.903961204211 | 385.678901612324 |
|         | 303.241375487319 | 181.491120129045 | 302.735372807236 | 355.609033348692 |
| CBS     | 272.41397350779  | 248.330154701293 | 246.327991259259 | 243.336550161566 |
|         | 308.088967616175 | 317.353318759931 | 212.037224737798 | 223.220997990627 |
|         | 796.936154737659 | 225.050796356289 | 199.681103910705 | 300.150235383065 |

|        |                  |                  |                  |                  |
|--------|------------------|------------------|------------------|------------------|
| CBWD1  | 148.797226586765 | 150.346002924933 | 157.378317015602 | 149.057388078138 |
|        | 143.30977386038  | 147.772490977392 | 152.348210524663 | 152.197327387252 |
|        | 148.649619242172 | 141.474583706011 | 158.911404625381 | 147.371905597494 |
| CBWD2  | 129.294026995663 | 145.000523037022 | 123.042372128864 | 122.917915232153 |
|        | 129.900540030251 | 127.676859244344 | 119.297561749232 | 136.108500467418 |
|        | 119.436922168376 | 131.419663282022 | 111.328185454541 | 120.649467083125 |
| CBWD3  | 155.410704148925 | 137.328370598183 | 153.435218661228 | 143.893751699551 |
|        | 176.382377784553 | 225.850439131864 | 178.984409575632 | 196.207631868755 |
|        | 185.220017451419 | 152.587331888423 | 163.726898336284 | 147.526701500887 |
| CBWD5  | 203.553696099031 | 187.205674045893 | 285.214585324341 | 190.754349388901 |
|        | 223.220997990627 | 331.937313503755 | 350.22221782412  | 381.971539806271 |
|        | 302.069236363626 | 328.826483579278 | 383.407365952689 | 354.531898366438 |
| CBWD6  | 133.125084506877 | 126.991140761102 | 131.597937570173 | 128.194171809998 |
|        | 133.579067514064 | 122.079685222733 | 132.584454429269 | 121.826474059574 |
|        | 116.46192274217  | 125.025064237439 | 110.501341211051 | 123.571641517019 |
| CBWD7  | 141.999730335668 | 130.073005698714 | 134.808485735121 | 139.505864135281 |
|        | 136.841506794489 | 170.483686891321 | 140.743917481548 | 145.562772839517 |
|        | 166.104915784875 | 137.125637347852 | 145.621384219688 | 180.418707740532 |
| CBX1   | 318.73799597811  | 241.039766283972 | 354.579728909336 | 215.967319486874 |
|        | 232.023739004791 | 150.573523216151 | 194.529045934216 | 240.497413647633 |
|        | 249.489170536758 | 265.572253407219 | 195.160353691349 | 229.347135478142 |
| CBX2   | 128.318545300038 | 140.074841537258 | 136.801338583441 | 140.206268652318 |
|        | 455.486248388968 | 245.522497675754 | 139.898996725236 | 201.913709602894 |
|        | 172.667770359278 | 169.927157878764 | 153.875760529011 | 159.379420001197 |
| CBX3   | 351.028238533348 | 386.379891865411 | 311.715351215263 | 370.066087375401 |
|        | 447.297590650141 | 425.229044880287 | 395.425715632302 | 384.296190598736 |
|        | 410.533157400023 | 453.593585032712 | 487.537691131703 | 664.809419789814 |
| CBX4   | 270.231637012624 | 258.532432007328 | 251.833571288967 | 207.581907737176 |
|        | 470.308610828825 | 796.936154737659 | 360.285027176918 | 434.792010353541 |
|        | 578.465753476561 | 688.464980326689 | 445.089930641391 | 525.789451405743 |
| CBX5   | 340.860684371038 | 400.98290237416  | 274.01377986185  | 272.314332734711 |
|        | 375.255445179952 | 200.486683704179 | 220.567951704044 | 270.462865174106 |
|        | 295.935625475189 | 266.395569467956 | 288.728608411903 | 419.4017188518   |
| CBX6   | 1726.15788525017 | 2426.2098937241  | 2033.67956299225 | 3510.24464112094 |
|        | 2399.88695085752 | 895.114975754684 | 449.220056843562 | 1302.54547114701 |
|        | 837.413261433363 | 283.048002376743 | 1677.93424842267 | 483.429488817674 |
| CBX7   | 1982.3154578939  | 2065.51724858579 | 2285.86163259073 | 2328.65814406636 |
|        | 410.216584967666 | 338.46332239699  | 336.490076158135 | 378.797952580504 |
|        | 343.488356185437 | 208.095384605737 | 507.56875910742  | 257.706904467657 |
| CBX8   | 138.611074796816 | 128.736591902501 | 130.659631155616 | 121.18490040448  |
|        | 161.997058981786 | 140.474338177948 | 160.903342063542 | 160.322541355391 |
|        | 145.106362864355 | 135.715745768179 | 164.337486856997 | 152.633139090274 |
| CBY1   | 377.538276846051 | 372.94852645418  | 442.334886941795 | 442.86942574917  |
|        | 262.296456281666 | 292.28857006885  | 223.184064606222 | 206.845306095447 |
|        | 238.482863150124 | 228.212753830905 | 240.306287921209 | 266.842778974988 |
| CBY3   | 166.23609765059  | 157.967824935915 | 151.369387642458 | 172.677083810424 |
|        | 156.114825514646 | 131.846160346403 | 167.219062918573 | 165.186696781985 |
|        | 153.408890091225 | 143.602039774312 | 158.127523362251 | 171.444558905575 |
| CC2D1A | 178.270849389719 | 213.178648382852 | 187.903298116031 |                  |
|        | 233.964929444112 | 325.751369001105 | 236.35479928448  | 245.351459157365 |
|        | 198.701991021316 | 180.747527895349 | 215.585089158905 | 285.30221551106  |
|        | 215.167086358143 |                  |                  |                  |
| CC2D1B | 193.218266574099 | 157.126460242995 | 190.331589656379 |                  |
|        | 177.123497519231 | 141.272049404557 | 168.790464803746 | 185.544411160039 |

168.790464803746 164.092847913322 159.368376366657 167.350290326189  
184.832531598928  
CC2D2A 276.476790719416 286.901115411673 364.191263843897  
307.363302726074 181.695203523798 162.212442593001 163.805257266374  
155.080900277147 188.36361073603 157.779441363536 139.834535091869  
171.924364939807  
CC2D2B 123.991249190444 126.970952206224 121.118933682515  
119.249084967945 109.355444907633 117.060696904303 104.714872508838  
115.053039576143 118.708644971927 106.522641798274 112.999642731096  
106.667175621971  
CCAR1 167.219062918573 157.368974632451 172.084184539157 173.272062328378  
161.683243808528 154.133723492173 229.511643376643 160.35668299062  
173.250350363688 178.464811133 181.081050726043 185.560737176115  
CCBE1 4030.42725798136 3575.60827968852 4068.18567686753 3354.38704439295  
441.958777965408 5213.40342339233 1892.8338612507 2525.90466050731  
2305.11856249143 1702.68441407727 4198.61471038267 2269.44503773126  
CCBL1 240.915496717526 229.77428612216 291.261765585473 280.204167582951  
194.724219884752 188.45479937455 206.340478393262 188.981391266203  
251.833571288967 222.243523614518 290.867822301134 187.48055574295  
CCBL2 218.314136992677 217.435155984897 237.940015617254 201.458970969685  
257.477501542521 352.180110869664 274.534901548678 323.149792143481  
233.20900339048 287.503594820801 332.543652462234 294.746622369436  
CCBP2 181.048789688798 181.876635968785 148.704917490429 155.441190892146  
971.170460915918 142.570182389682 601.521068811063 158.188039933865  
176.497706091676 145.830916005206 143.572668991313 135.930107381894  
CCDC101 247.779718065751 272.41397350779 274.316982298975  
328.019503002384 334.916875239616 245.607130404306 219.832904615582  
233.103476996669 198.90533452253 179.551640851353 218.997165156081  
210.015199832609  
CCDC102A 654.663838918786 763.880957432979 927.478050257292  
1080.02576143033 236.855293143293 170.430478598594 182.897563195019  
164.660269016695 174.593548891693 239.079352337243 169.089896796513  
150.765477999064  
CCDC102B 133.666244052469 138.852212944492 140.190234214948  
132.395993254065 129.216693566478 125.729079191033 118.988269692812  
144.559193410932 120.456817031716 116.947370388179 133.161552914595  
127.028640787946  
CCDC103 163.400576719974 147.710252756854 141.444958186793  
161.090443294391 135.134213292186 169.956827727468 182.335981256243  
150.42705284743 141.473218014605 144.629350188283 144.277263594387  
125.443242860371  
CCDC104 309.098519056843 309.658122422202 360.285027176918  
275.203046536524 217.910445051307 280.558463661137 317.244256751418  
298.827660296715 221.930333726352 252.280435525505 308.088967616175  
246.95071325085  
CCDC105 122.174036435094 128.251087452744 127.79057041268  
141.444958186793 131.973896985615 135.745821200254 120.843429388102  
120.024235522682 123.389038274913 116.378552206652 143.913625824599  
135.07697911271  
CCDC106 544.669441360594 563.907454700224 616.995114856023  
692.359779743985 1401.67503392145 468.93543246394 569.236322997211  
324.713347085998 660.096727566678 331.32397534437 571.136519973808  
440.916522871266



CCDC107 405.843083758177 343.121661664987 458.440488401029  
410.42088953434 174.680918805036 127.6078497227 138.98468042464  
160.713790305656 153.38494705081 186.359770878343 172.750926094884  
140.311843829601

CCDC108 119.005230164124 121.154389729409 119.669441891401  
115.954828435072 130.047353911148 129.711973013336 126.875483714734  
120.846789922177 118.622346984257 125.444541266623 125.744408397808  
122.817695619508

CCDC109A 342.555640222963 341.251360936154 371.369895979832  
426.896707161414 192.022864170934 161.708130705995 215.300064529551  
192.565733545715 214.461773810376 228.766847429517 473.260534978556  
235.530986541549

CCDC109B 473.151324002277 446.698665191047 462.779122987815  
397.577760464197 358.780920910909 452.606433325387 313.322307299463  
743.915675090182 811.144838166905 1975.83062789692 375.407747753058  
257.477501542521

CCDC11 119.312201620247 134.991379445799 119.052729327147  
119.890260409414 135.776154891006 127.215777044942 131.755881982599  
139.948097704949 123.843823256462 122.68719599986 139.537865511933  
125.999595008166

CCDC110 164.136551371866 152.422690241301 179.663258610881  
140.678336884951 135.017196494069 137.666849842576 128.44311762955  
135.781190598068 125.199837162105 158.872962797815 141.463324155943  
121.472885562857

CCDC111 183.371103136697 190.549084022965 212.78038645414  
168.180063344887 168.570133927038 202.909188070184 195.645181575647  
175.974598536074 177.508603290389 175.28261759639 177.582314734704  
161.849023343715

CCDC112 191.445291899108 188.45479937455 204.802810257516  
191.725728813959 152.238845270993 181.914505612128 163.215507313506  
194.724219884752 174.761105961773 227.288015854809 179.624208193114  
162.970595558845

CCDC113 138.409284761652 154.916023131856 180.304585602206  
143.68613742378 159.90466743683 168.552631639996 160.811051590991  
153.02127620577 157.259599894923 144.798664281991 154.420795931034  
164.092847913322

CCDC114 107.283814651497 119.387459594521 108.631224817901  
114.143874572202 106.876902604214 117.856184272322 108.199628274798  
114.740948266517 109.586955365611 109.318922864507 119.596589810052  
106.088807114602

CCDC115 444.082440002333 454.235121917464 609.504365141529  
429.992169596618 481.453770150269 683.861021234927 486.334840298921  
493.492348317616 463.802270256246 399.537363692534 736.332743195416  
837.023434916281

CCDC116 153.658747612827 157.237147919803 140.169200413643  
142.38097037888 128.99859423584 133.281505040209 160.511688319771  
137.510586346207 158.931023649818 162.885054245809 133.310323593945  
169.502103689662

CCDC117 368.276805218658 339.448524400708 339.32415558339  
270.421697521366 230.367251714289 279.75914135192 196.990867962546  
322.153713097778 305.200911653347 247.015574724901 238.400565506288  
175.711836112986

CCDC12 698.590134238302 803.840404197117 702.049571167356  
948.734577648136 991.081498002429 818.225731093346 699.270931701696

575.23272138912 991.081498002429 747.077451281453 790.321331435096  
928.151632070573  
CCDC120 199.746775121317 211.786963444117 231.439252571168  
216.859640534581 369.974231530826 335.3366819308 299.80615152845  
321.25076864104 231.547654653783 306.333710880618 419.846584903512  
324.949988230276  
CCDC121 182.833961304079 171.967974673053 177.500110974116  
166.368623023308 186.733394375839 167.526798465556 174.510523238374  
177.562561297777 169.771005675296 153.461396593156 183.764215745794  
166.385492585683  
CCDC122 138.090158433822 134.399228996542 135.071400668179  
136.450062043587 136.627904756283 134.748177388398 136.705326991088  
139.646026806298 136.140327952231 143.618454531431 144.917911601441  
137.910618360623  
CCDC123 215.037122365095 212.223906015932 241.734804013256  
229.62164568989 206.68694753419 196.990867962546 224.981439707657  
209.811693771836 187.247062073247 190.389158930835 165.581217879395  
197.003657786247  
CCDC124 222.315451077459 209.727089546377 222.394280571312  
288.166541335652 360.39998507367 178.542247857251 190.716424123036  
193.660159482867 172.457165477145 217.24573005272 220.113261580385  
175.313689069815  
CCDC125 4923.36698713285 5489.19362780613 4457.64479507833  
4291.1724030909 815.045148478814 4892.17875938832 2482.27419621925  
4280.66857663502 2965.38280248519 2074.29945034697 3789.1316515671  
2645.72125268628  
CCDC126 148.717545103261 151.55925331302 158.747029092329  
118.622346984257 174.603285240228 199.798533722581 163.290050020756  
164.865846124876 180.164353124488 176.810979494826 189.971144220643  
249.234065130083  
CCDC127 215.866644799363 257.573614085223 231.955750250711  
282.137282466192 241.599271777806 160.567934923347 225.423403713718  
300.047728281275 194.212177449077 159.461778054423 214.639374741553  
207.204293555178  
CCDC128 749.220616713093 695.595965352335 676.293399523316  
796.936154737659 306.277823025572 419.4017188518 360.551560710852  
398.892968579918 333.745543022749 419.763812610671 230.161369375718  
376.692422468905  
CCDC129 119.459625817735 124.899019467557 129.976540483758  
126.693235227579 133.63668145135 128.994977935861 125.313515459103  
123.410467384598 113.249267122926 125.976052547953 146.619846538124  
125.162662242842  
CCDC13 131.188208693139 158.584934514596 138.104527851969  
161.37617568158 147.098474227445 143.100436913184 138.730409717578  
153.787447416111 147.236728188605 160.0697586671 145.396723478249  
146.979988781462  
CCDC130 1172.4103691525 1303.33810980467 1552.69879081022  
1406.73270115373 945.403379196643 1582.0221231161 1194.42925868786  
1589.70261092241 1157.02365469464 1243.96721244424 1102.38234645327  
1505.09908072606  
CCDC132 163.010527914347 164.008063563113 163.982415393606  
150.088034336851 155.803946849495 153.318678468245 160.035282578603  
165.896420029269 157.463122989559 175.128935809466 176.176392369178  
179.250373572781

CCDC134 107.559685467789 130.93033679281 120.957197551997  
115.5765427629 191.937607311711 129.150574563997 130.266601299194  
126.580227722115 125.951927536494 126.987002259013 133.892661981648  
137.834158814913  
CCDC135 159.154102271517 140.372463604232 159.487615985875  
147.145932651151 160.73807125195 157.256812907353 161.12121879514  
160.648791273795 148.953720017484 163.773702843544 148.818562911616  
147.213616261735  
CCDC136 985.087150371964 815.388288623756 1493.90578573732  
1155.4487861163 171.161297672182 233.335353447342 220.772387104223  
237.456245064363 185.650862663633 183.863365305103 169.368090266817  
243.65518489122  
CCDC137 160.039086963419 173.892380305166 150.544779197947  
188.417078622503 172.7330526128 210.803130108618 215.744552410805  
325.859917318516 217.778414825515 188.724274062294 176.587559615019  
207.138680369683  
CCDC138 151.889644436875 159.335990863027 154.683723064797  
145.176141415244 196.777776509371 250.18189549573 158.735283017367  
212.531329857909 184.102171963542 187.784865705837 161.143782746501  
164.801505601099  
CCDC14 681.429327723794 659.900771633223 616.701037274509  
572.407760064901 470.746477818201 1084.95095717937 739.085574858917  
1333.73334006986 1220.30347076968 587.654093308465 756.390518977556  
888.706978062337  
CCDC140 156.808992920564 162.741222929067 137.286331849749  
137.360220389719 149.495077381649 138.376176600064 132.913891550054  
149.339492984504 137.642858036384 132.23149173224 137.27506604142  
140.550044737476  
CCDC141 123.586359806158 123.588194516972 111.639177843969  
119.023688551496 121.113186311514 126.50870982427 123.240482782331  
120.050548624975 123.657246099004 117.567991653999 129.033433971346  
124.76274408368  
CCDC142 139.305220220411 121.350491314441 123.161953011069  
139.150209111606 124.561511833959 129.452826518288 156.923675862035  
147.994386096925 130.746465595759 122.873661677648 132.748478264583  
135.907702243922  
CCDC144A 123.156154667242 117.724353829377 125.798453479983  
122.144209450757 122.412141495264 125.45936959544 125.569364049349  
122.333765477428 120.957197551997 126.967212770393 139.421753451936  
129.891492052232  
CCDC144B 132.50027119027 128.303046695142 124.516264338772  
131.861469782134 126.442999559539 138.412022634224 129.34905533265  
136.378203924435 116.566190779365 131.809235171629 146.764908249803  
127.398873370484  
CCDC144C 136.654902685184 125.00254973945 129.930888107958  
149.505323932806 137.675597243706 137.683228179974 129.099780410063  
136.585541662028 118.558673085303 127.648224668964 144.4421922847  
139.628966306048  
CCDC144NL 125.019064287385 145.371926271034 151.930565620382  
133.004765428575 142.13191463827 162.056622258216 150.809693773343  
140.531789506024 147.697973457776 142.29309119138 137.663038788415  
134.161664663192  
CCDC146 226.221973502783 216.974834077975 304.713434036642  
212.5119818331 149.879951192667 161.189717452004 188.924084292126

180.578528984075 180.456659320226 194.702974020747 260.489744360233  
207.815226999953  
CCDC147 149.143087870963 150.503278880269 138.972789382679  
149.77596374205 140.946008063839 145.054873480806 151.788278519057  
141.698329968978 136.984172424718 146.900087470856 145.237221169839  
138.701871179502  
CCDC148 106.437660157036 111.794102015354 118.176124626025  
108.079149792796 117.900892627473 110.014935095391 114.960460615926  
116.106772298898 118.918962530408 113.38168751499 108.868679899494  
111.484426481816  
CCDC149 249.823314327355 222.134519361117 220.816812192169  
227.499335248402 156.502051001988 204.1974438819 171.80440912191  
181.3859695951 164.773489952844 141.784881206191 157.337193457189  
148.883263903527  
CCDC15 163.668476670167 169.541411677993 181.966110264509  
168.594235675558 211.208937901871 219.044271073282 179.15284184774  
204.415267938007 178.657325741035 176.631604815669 191.179662650057  
204.318316638312  
CCDC150 139.826273596452 130.880795616911 135.046003135933  
123.386622160181 148.188717941032 167.887047631073 149.717739166461  
164.678646890649 141.442825487243 139.97636570613 133.699547652179  
141.281116867082  
CCDC151 138.192550945411 139.667714422309 153.072429774613  
134.756377802151 210.245551279259 144.518132543976 155.673532440475  
143.969566798989 135.303322290834 115.619116556625 139.685629122498  
138.651419539729  
CCDC152 167.842122798757 155.219860096943 153.273568880305  
169.107948050094 142.334338599752 142.937182720493 145.096707533824  
136.071856104688 156.534634574244 155.906054212876 156.511202150773  
137.540275229889  
CCDC153 116.787791109549 118.859745315302 113.734280863323  
124.904518221898 121.212521750566 125.093376753408 120.148189532583  
120.114423236962 125.682297697017 119.466200987489 134.418976976995  
123.470830748348  
CCDC155 148.922537778634 138.990971069382 142.810564324354  
144.975882336334 162.117224868654 133.067237748129 134.395879639746  
139.353080958675 142.798248249144 146.720204808211 149.525115175915  
145.726651022813  
CCDC158 117.069094451283 110.829107724132 107.976233194926  
116.031631038289 130.513071750123 106.450154495663 112.547907748842  
100.841352336505 111.788481822686 118.239637776941 111.232274546928  
107.239841465534  
CCDC16 568.701661112562 519.829743770022 521.30110104669  
442.493108530222 363.343480850598 402.866491417369 573.509780150018  
643.468308027006 635.038752622494 428.340060893467 460.089380701982  
427.345809255426  
CCDC17 134.949572471421 136.039076665712 134.356796881432  
130.119313219923 123.896578371318 134.216088147701 118.859745315302  
151.367402326399 138.745560049251 143.783078837501 143.390971600678  
119.049388179929  
CCDC18 148.461172387171 148.594322264158 142.379120254855  
140.798706399757 144.393688888553 171.924364939807 163.51024840263  
214.888126361789 169.293852989203 157.742948919213 155.405519023053  
162.188509438986

CCDC19 132.854945224697 128.014092519305 128.339161042799  
123.45581374935 159.334165651951 142.481897141275 144.464071397369  
149.995272585012 153.579955370444 139.82050388626 140.321675137237  
140.668597897404

CCDC21 147.543411823657 174.347451984066 161.12121879514  
179.358460170348 269.379272725008 268.454310218604 239.079352337243  
430.728137105601 225.142823691625 283.918434443669 201.616302398819  
209.5184563244

CCDC22 178.200678423426 171.36717256867 181.110403721353  
199.490190715307 450.851711160136 213.914599384797 169.984859264412  
204.564770370164 179.220691178402 152.864765895508 223.638850960288  
181.97372140367

CCDC23 1000.91520225219 929.69741581954 1071.47374315822  
771.294254795752 1145.35733270036 1238.11700377838 1082.00448164658  
975.685771692095 860.315938621256 760.272612245092 556.31484498921  
1170.88763035931

CCDC24 226.334672545273 278.192669077191 306.333710880618  
266.101158071711 780.105135529728 585.721610434501 520.120193442648  
517.42417250172 405.843083758177 259.575461599189 473.529519031797  
456.656123023446

CCDC25 491.635435224507 481.751102333172 490.022369664024  
578.811908030805 285.131244588624 408.811415529922 445.905756082569  
300.401370666633 308.767036855508 446.819873986024 457.292146759215  
422.590112942156

CCDC26 134.717258604899 149.939035476611 145.304050333309  
149.6730835169 141.350135458015 164.593531655305 139.864176113337  
152.987939791009 142.600685998678 150.227629690236 135.139676303901  
136.939603341076

CCDC27 142.815817738837 135.390226050803 164.072443259668  
150.238582112636 157.374537572779 140.471953101887 152.331011756244  
160.096507818256 155.813740201987 142.064680109047 155.43577761798  
151.423936838934

CCDC28A 542.883453307 667.156197045748 732.877169346979  
651.998433127992 379.615659443164 341.901565692251 590.142817130684  
517.529147171876 669.330078861673 516.429067667758 791.402660066193  
301.695991929957

CCDC28B 238.230110356671 232.127996106421 241.845941562418  
283.191303666907 242.787656836745 232.699786290509 201.81649023518  
205.546628064296 200.127994198329 207.73395131954 176.138621462315  
230.508733145583

CCDC29 131.019345449516 138.150616787218 138.221749464651  
134.728594388428 135.592128081677 147.491439949088 140.687016530974  
128.563180697606 130.253372129786 125.18424162353 128.040201586267  
132.297716337104

CCDC3 491.496499481595 469.107624227456 450.120868656638 352.121800955822  
141.056924917269 146.658048787833 147.463822782303 165.964183460825  
198.840533461525 218.269847477919 262.861105654051 142.690911343704

CCDC33 150.536178574986 175.019580368717 165.647471565959  
163.600888221193 158.859389972316 145.034179171835 152.188770978528  
152.390371614602 156.110073009771 152.952479729682 155.592219571564  
152.393260140571

CCDC34 278.942695435238 313.708197191587 243.468673768141  
305.906480933354 349.65350886897 333.439929772897 370.301819403832

409.477576085245 469.107624227456 465.029298672645 484.903322308422  
309.75140197669  
CCDC35 171.49930976135 163.542848861552 166.305219348008  
150.182173149394 159.48526814715 143.903216264503 168.897620634337  
156.990325995053 156.674411447713 163.432972512188 167.536828038178  
150.856917125736  
CCDC36 160.493314658788 149.990378213915 178.707066209511  
155.515134922269 150.711857623087 165.558963147657 187.216245895253  
151.522526161299 162.308297940279 136.627904756283 120.379393989882  
134.867806860993  
CCDC37 112.428707152237 125.549968985241 126.019246614944  
114.768639931659 118.486195373059 115.120702589487 120.786630750686  
118.258886189283 119.198789189881 113.339155126202 124.443643568527  
123.357205547181  
CCDC38 131.330974614437 157.83121828793 139.131857948357  
146.291932367254 141.968949222821 149.712320986646 147.029988235786  
152.382558543399 144.5368823731 149.343930487315 136.095753586495  
145.107068919893  
CCDC39 137.222125237171 125.021217009254 132.469190523971  
144.36575644625 147.928629511539 135.305147371641 134.340512608931  
135.707354953722 127.959474148217 129.278833426752 131.692626563078  
140.726084514407  
CCDC4 156.437949042181 153.636804025106 144.32655838488 161.956032597813  
156.254944793402 149.480971898888 156.61494867164 154.954906872501  
154.528396813382 145.909456876796 141.919263493165 146.986891588172  
CCDC40 141.611712747368 136.386031133644 140.578378782903  
152.980843102933 154.634289463743 142.948238172973 144.36033726557  
147.543411823657 135.744202879162 134.946677624454 141.86836086844  
149.432744784716  
CCDC41 174.136806313142 179.794718712964 164.587657424569  
157.195967361907 188.53221484746 206.321272734099 159.046016068252  
173.773876769683 188.780089746036 169.502103689662 182.478971050701  
164.541417588646  
CCDC42 136.66358267095 127.827096314406 139.205887721493  
139.805930686563 128.447393268611 140.264060906597 134.08270035062  
139.87715485885 123.561016079801 156.994265858123 135.296271683847  
124.858723248944  
CCDC43 295.367125961621 307.728083981504 318.850765099332  
304.636618563775 259.643957326575 352.811351813364 481.238450505207  
442.334886941795 385.798784913201 432.604462607037 344.298510200653  
322.443089373063  
CCDC45 561.251860964966 506.898635822094 647.666334416707  
541.642309122976 245.351459157365 523.216537391852 564.948126039762  
700.877661166739 578.084277076692 392.909481887174 626.298707790229  
868.066644155313  
CCDC46 178.707066209511 166.835922279372 169.541411677993  
145.500011956699 115.766358387923 130.022574966461 124.302581985661  
121.003207135942 124.474221706022 126.359440164601 126.115828232308  
117.131720092783  
CCDC47 247.236004734567 226.43414383055 271.897511879509  
212.987082617173 253.933478547515 319.927209914181 359.822784070765  
344.786541451395 262.019779752857 260.443814523694 379.862305342147  
454.133372808458

CCDC48 223.601312199935 255.903775525554 186.831266888028  
203.004815689972 163.582678113215 155.964242240771 161.922462797736  
181.695203523798 160.839277476397 156.949439724914 135.713266118447  
150.203281104753  
CCDC49 293.986292438714 300.443499140896 311.670576741448  
258.998065427002 186.231346659144 318.850765099332 339.917319653382  
616.523853569261 396.345382600445 256.964577037118 297.176755638159  
329.333236839082  
CCDC5 173.233357775898 156.727153398506 193.261343922604 166.360005474414  
171.145909843389 262.061371466369 197.443711199904 230.469548500304  
216.783051958345 234.895245871534 187.461448376593 206.715020025609  
CCDC50 342.147414141627 286.673016219195 385.750371084  
341.361299896997 273.402804140541 221.390817970859 274.564508105177  
325.751369001105 366.073387075385 493.492348317616 242.695286989672  
254.133112176024  
CCDC51 219.96819201774 243.283375388645 267.342817344746  
273.959220003188 309.36704220687 255.56301534833 280.170464338141  
258.21341068758 320.877897822963 308.877027622691 247.015574724901  
288.631429069336  
CCDC52 151.855884026072 128.247871411825 149.393022408213  
144.71955090408 141.547112973262 142.339740800356 155.463400179872  
121.084348994747 144.321757243275 131.630132952441 135.372516179244  
146.019622621809  
CCDC53 787.615195903993 856.039380523678 917.188039935737  
871.528156184927 631.653707589221 594.713185954954 648.549890890375  
729.202002368627 762.8576747113 783.755776589969 674.571475335107  
498.334266735594  
CCDC54 131.897352210959 140.323425587628 153.962758393332  
163.07139884152 153.464360995071 146.388285560372 157.067264221207  
148.840533233712 148.501654210579 131.984467471242 137.556552701816  
139.607944722497  
CCDC55 296.051639873628 248.299149406938 339.172031360524  
267.67093646012 208.476367897256 211.609763150578 259.979459472217  
342.611951034707 289.911635155481 271.004741629789 250.718986968076  
230.546762514966  
CCDC56 878.167149313285 970.166036472486 839.901173743755  
1158.88528996131 1379.26881813339 1081.47077865393 1161.39230511792  
1581.06548216423 1290.39741199701 984.695710317818 961.355625338687  
977.999660785113  
CCDC57 142.179197020805 164.043866642712 155.6299578128  
168.6016897585 157.089650890944 158.175138008678 151.992112109698  
155.371772547395 153.248199842194 153.066630483602 150.974364125849  
166.46473789699  
CCDC58 173.741466458636 182.042104888745 165.085010975035  
157.646948327818 355.80042210486 551.622587349813 448.260934224454  
231.239126548656 373.452370692334 472.405334652317 324.481229901658  
604.047164856689  
CCDC59 732.040299742444 593.639955546556 900.039744829725  
546.841563406813 708.268962600305 917.188039935737 1231.37475540937  
2421.87041217217 1100.81588201714 977.227184625781 907.610179738644  
807.92851898782  
CCDC6 1920.16520804856 2618.64973582507 2334.97297889593 2763.86550710042  
927.478050257292 1436.57771711084 1527.87148052149 1178.83933381069  
977.227184625781 845.150147618462 1840.14350831655 1599.12034906314

CCDC60 286.996908547553 218.997165156081 356.05426191171  
282.244214637625 209.196695368783 177.083095120017 154.170007083026  
144.78971417658 146.402352419692 145.997380100999 176.830879422227  
154.503958858173

CCDC61 157.541796722309 149.763038696374 147.659772694732  
194.789918629905 135.892248893607 157.244026506342 163.086539217826  
139.524233960073 171.589889474122 149.941056059544 145.449099891256  
180.035652063942

CCDC62 112.916256784817 115.920514336615 120.565485864499  
123.22295112139 127.585851003779 132.772085211553 118.773864607553  
121.045367784918 125.008209861774 123.53212786736 120.606354515072  
130.792692240592

CCDC63 117.112667504781 117.523834738903 115.718600552187  
118.965055790274 110.419222236698 102.094370876743 109.274221164316  
117.930665298163 121.850967084709 116.95195122318 116.802432258299  
118.488997046932

CCDC64 135.041687549769 135.437227744668 139.582054825147  
140.706490845379 136.258073395013 115.053039576143 131.967245387861  
129.411734209444 132.623563631011 132.251093122058 130.114464233633  
148.065080664185

CCDC64B 151.59613008133 130.644937322186 132.496547953595  
131.099004325598 241.845941562418 164.185346950306 220.330477277988  
322.263925912805 266.842778974988 192.465510013851 346.303862540751  
244.849563563729

CCDC65 144.402160347818 133.731500722599 143.774841336279  
127.779401352802 126.686404772601 127.918847837351 119.036965883266  
139.765361891899 148.895841777421 114.77964341895 132.681475162386  
140.254665008195

CCDC66 231.955750250711 201.085046871333 271.087125858775  
216.705908017858 158.23884088767 207.204293555178 213.028568789661  
197.775397831129 224.466829629468 197.191648960563 160.906550609416  
180.986305037222

CCDC67 105.712302595131 119.168045349254 115.914842445934  
114.494394548044 114.161540771427 110.081964209973 117.48427100606  
114.200099628087 110.510191137073 117.706795566317 120.045351920348  
112.509731206295

CCDC68 162.890650672747 147.70193890965 146.885404321622  
153.187148832063 151.007812189859 163.205362761005 162.923734210933  
146.402352419692 149.839827383681 152.163489631563 156.448355269561  
160.949030247406

CCDC69 588.458314503034 525.287367366192 538.252273740419  
832.622843175217 135.607537832704 143.572668991313 133.070896773384  
144.384287335249 171.51411661213 144.654765322941 172.973175988757  
144.868337748544

CCDC7 154.033776287398 153.088710298368 148.644800418517 146.156634581799  
148.504996616452 154.645353009618 158.594064857041 153.574068503306  
146.798444724408 148.686975104375 148.219406063533 164.848970268132

CCDC70 128.583503171594 128.803632055969 119.849895979393  
111.908965758799 122.54127694717 119.442114850181 121.942777234608  
118.379914726645 125.800508653231 123.762963668211 137.550607284001  
117.172431931323

CCDC71 133.478829770103 142.792294709664 130.069789939568  
135.993598471576 588.076436392983 129.055874691136 158.299765118221



144.103622373381 154.33224999163 144.342905860503 271.196028302639  
130.582210755516  
CCDC72 2828.97255380291 2334.97297889593 2567.4299860517  
1932.39418448203 5894.79176478976 7433.03226979876 6271.34208268488  
4819.85672511343 7468.70895916615 4030.42725798136 5207.37974585707  
6691.04319670055  
CCDC73 141.803250679131 144.368355737187 167.604959895451  
179.648479201164 139.044150521333 140.441521267218 153.305679563467  
138.359423363142 150.218643705925 141.828740140733 141.239354296152  
152.921328522953  
CCDC74A 302.905840432998 256.795346052751 365.199125315964  
303.986544460218 146.728881202697 182.938824846376 141.834582245454  
157.844617425219 162.916978850245 141.746032519746 134.364838071696  
175.955932037011  
CCDC74B 190.871696848118 186.309367281625 228.45211887819  
163.239195865198 139.503902205317 124.347680638586 134.675247731364  
137.923852688695 143.53550972177 129.495680232567 141.497125111619  
138.399665664034  
CCDC75 134.490327004118 143.541810469447 129.151767489346  
135.345616014558 136.843164021899 133.638664342783 131.734429913106  
129.564482772168 137.867263869936 141.950778601653 153.261002653668  
143.442361602626  
CCDC76 263.058972886829 252.697160031025 251.787648609546  
177.759729226623 196.566937667522 365.590174280114 332.138346958671  
324.79327985156 296.290104133844 197.298982267459 253.42022722564  
312.129861040709  
CCDC77 311.157764305033 310.989043012841 353.826834642154  
348.300300174924 312.406286993239 434.716530273383 365.286234166621  
576.873245313776 526.970555181851 376.54010486682 361.327436394941  
311.449205777595  
CCDC78 114.880348648147 111.559325333192 112.565341690522  
120.379393989882 125.095999326598 125.021217009254 117.097159106043  
120.452958447555 119.795945889846 121.515872228716 129.658488766089  
114.3172128566  
CCDC79 115.605206174867 122.115925891088 125.405373274081  
115.417648857825 121.065278765151 117.15886922795 135.348086420636  
125.621467040793 129.058085094891 122.133292722932 115.194730717797  
126.63730651721  
CCDC8 145.195065312551 148.074494928651 116.939471420419 138.581345752206  
117.296972688814 113.031636180748 119.720132373023 115.366496551426  
122.327353563917 117.428152859221 116.787791109549 120.138014822486  
CCDC80 288.182388699147 202.662466141301 217.684410907748  
253.42022722564 127.646032547296 122.503984297406 119.023688551496  
122.111982327877 127.299853592344 129.034770823878 139.065849548762  
112.015423658372  
CCDC81 181.313333665614 156.69025356689 144.084441938143  
163.805257266374 133.79868477192 123.960761343425 128.895325544109  
138.566954604414 127.150222504237 127.206177583275 135.842090777339  
128.5581535393  
CCDC82 123.30960025689 122.389557272277 126.245597154052  
113.005774989833 111.312348806957 118.578205738502 123.491930765117  
119.83679981791 121.54835308632 120.387275261633 136.884799902348  
117.199217938531

CCDC83 110.286187184448 111.188410935711 98.1433670546536  
112.771141378159 107.385565665491 107.559685467789 102.421174406474  
106.437660157036 103.202873534814 124.712789674509 115.180659017144  
112.088944448944

CCDC84 393.796356067403 319.560819487616 461.143361255467  
285.214585324341 245.269004485826 352.562711030848 471.069295685718  
355.372836460906 369.513420606401 224.118739978257 478.847650837714  
371.280926727395

CCDC85A 140.127379332918 149.004343851423 129.153882779488  
140.865990571023 137.151210946281 141.094578556895 131.310537960214  
130.009322405768 124.717079082023 121.356731684516 131.244759170642  
130.98982984989

CCDC85B 246.369521698487 277.459328083162 277.073510273425  
307.316241247336 264.805236346895 217.24573005272 209.146021798649  
183.556662533396 191.507657960386 239.503369457867 186.377571176623  
201.702688815038

CCDC86 347.147961254829 380.310795921752 340.728888109597  
368.418553384965 661.826149512811 918.162638134305 429.595453454621  
331.523536427527 746.523071806534 391.326200093611 283.807827536147  
657.058213650454

CCDC87 162.850128623401 154.270034951209 192.113217321485  
173.161152247499 162.364266549463 182.958991847218 173.986750195954  
148.145136066071 157.172970235254 171.844483419604 142.700311964178  
179.265395910119

CCDC88A 169.541411677993 162.140112952434 138.230197299262  
188.995551740427 115.858924428037 119.806933383138 119.502758763438  
121.353233207209 117.900892627473 134.449083873514 148.484823275343  
133.99226161886

CCDC88B 167.751604259111 136.659134200122 150.471558219667  
149.747347428419 191.445291899108 150.790155351217 156.906285133852  
154.340042518983 161.234304237838 179.841665686703 164.231281729415  
161.382041789666

CCDC88C 236.141982516399 295.153786338687 274.891033696257  
328.919401925375 243.979769719186 163.010527914347 178.751706380632  
223.778708427552 191.861598059182 228.616558999054 206.620708230452  
195.303469330682

CCDC89 168.223865801948 169.598493862848 189.575681012578  
189.575681012578 143.231806900648 145.465589138345 211.369442150136  
159.23414970379 143.594003495859 178.313238745665 146.531692460121  
186.321879879561

CCDC9 134.364838071696 136.380523452336 117.356389952799 163.02140155858  
217.45700166961 131.290698895743 133.590552542806 120.626155234319  
130.396593013401 120.606354515072 156.123528587917 119.188446525733

CCDC90A 339.917319653382 368.548135194271 317.273940108333  
418.062540009856 505.704957182936 328.14373061894 392.430873293903  
383.74357557363 374.718289636553 615.254768508691 495.438672949441  
326.354469134694

CCDC90B 547.202354339933 535.49374437073 555.758485277905  
562.089999265955 766.420275252501 419.902534806131 820.249910349431  
646.704226815099 632.565736446505 681.591028334969 725.621153262924  
875.38834441246

CCDC91 290.688850193983 262.233918187791 383.182507425579  
252.138168292964 189.74261433647 170.335930486215 213.412498914309

229.933577323411 217.811099067262 265.43897208356 188.268774618164  
182.453722105813  
CCDC92 1031.38207659547 1025.88559245013 1011.9675459648  
1286.55103838368 438.958573676953 417.36454228858 597.651682540611  
568.040362658955 445.95114929414 818.761934233826 590.515758538373  
643.660739343159  
CCDC93 692.095005197252 637.892677173103 644.97200337335  
893.264940736694 342.611951034707 475.833242673151 359.703969802888  
500.246996975 446.819873986024 515.432065049838 380.310795921752  
358.60777927888  
CCDC94 161.021740537372 173.586160103539 153.76202838917  
171.16807372519 190.645917992472 172.750926094884 143.554726863556  
143.040254576088 175.222531098958 147.182394557583 153.008756051525  
166.173429365582  
CCDC96 150.573523216151 143.979760385364 172.387657419201  
136.290486122369 167.526798465556 155.926739769177 158.92254744379  
154.051705030348 130.770335966929 152.152106138031 145.070927449969  
158.95714101556  
CCDC97 399.476401949891 431.019896339435 335.938170230765  
395.588345893987 777.901979189395 377.538276846051 466.909037277853  
487.537691131703 448.54309632232 298.625127845168 503.466550870577  
272.351487980415  
CCDC99 147.378228560979 161.781529659549 137.652358744527  
140.496058408953 165.757295630254 160.748082658758 206.937770272939  
313.708197191587 187.264411519101 244.514230664694 196.536086443884  
206.89716102989  
CCHCR1 168.150270765792 176.289693941489 147.612454763666  
216.974834077975 199.459711023907 140.096717188376 171.629605754643  
168.144811084102 163.54669668396 152.57905274438 141.872426752329  
158.459129254226  
CCIN 143.252983617945 145.259981479761 126.27024495428 155.405519023053  
143.653452869664 132.897554980037 136.396579126676 153.432933930805  
141.331397551086 140.163936299053 121.815538475678 122.274656361883  
CCK 145.730054487572 133.125084506877 142.294922363188 131.071614211431  
191.297539967707 156.949439724914 139.414912158809 140.281512754823  
187.729071402782 150.933724024651 125.364821583438 175.989742412417  
CCKAR 140.232244264861 140.138870925001 137.235469802064 143.945039636839  
147.368455727098 159.2488784104 156.994265858123 138.601616246182  
146.599636794606 145.980929136129 155.343619434375 136.041605158822  
CCKBR 157.521230460545 155.061749542085 144.064214573005 155.964242240771  
152.492163303139 158.660859266099 149.202628825354 134.57472034679  
147.570734399004 144.170287726456 130.795318552623 162.397078614596  
CCL1 145.650356702429 128.312170913496 161.142723532061 150.73248190848  
146.176240539176 129.852833137493 141.013392458859 134.606126134531  
135.766466392056 135.797170561599 144.713108022551 133.358701657264  
CCL11 169.752525994991 186.679199600379 156.353914172996 165.158465031363  
151.285933600303 177.223953859764 161.182901898379 147.024759173313  
139.238936770274 161.475694690038 127.305306470493 140.826051635712  
CCL13 231.846509449829 201.289402228512 122.531675048414 128.990911924499  
240.439368352772 189.509062639279 315.689865927834 293.317880637519  
430.728137105601 389.588346573823 343.307036883726 188.891032176388  
CCL14 528.478292835214 694.288215755716 257.24481414803 524.973621024573  
140.806935772116 158.07640654075 140.123348569709 200.322334039458  
325.999687273862 140.634047988278 382.562403424855 134.206518622834

CCL15 287.503594820801 323.788197265954 178.43642939806 254.424207773566  
141.150016212967 144.771457221413 151.327544435847 162.774716879847  
190.506201184419 137.974323288786 208.914498369991 140.722297244564  
CCL16 145.235087732482 135.29954024755 135.309431186017 136.832494876249  
129.446928016147 138.743505629497 140.730085305185 129.707421699091  
138.20899000519 131.218141814078 165.041296694491 152.254519859308  
CCL17 106.667175621971 121.54835308632 102.421174406474 112.424606178394  
132.137634927459 130.937742379689 168.180063344887 127.218362452043  
152.459041674768 121.303696898208 164.652795899742 125.055545087871  
CCL18 128.421242037748 134.821778017915 144.227440632196 147.333142209628  
145.276745572405 133.59686364883 156.801189586018 153.500478301079  
314.610979086485 137.988325215021 183.226294747874 144.968459820523  
CCL19 164.763269377973 172.364618542922 137.754373055094 135.43939472868  
145.526941881413 145.064773625365 151.833386901811 417.528353577952  
1565.64079526732 135.704067249674 187.824032557194 161.212598761378  
CCL2 635.234445318087 1889.05071563459 193.472317111841 354.579728909336  
221.322724563472 364.597798667541 255.527764534636 253.789045068884  
474.517750753745 761.32108609503 208.64349688412 206.042395282286  
CCL20 112.867662941811 130.408519735001 121.006569103388 121.157614971438  
148.538400348149 147.260260687975 129.069366041625 152.500670025483  
233.36028792331 912.483177705931 240.410292351169 155.951509643078  
CCL21 284.995098167431 192.153420834889 250.718986968076 257.132618311227  
131.820842728171 130.199581370385 127.361974492821 166.97270256697  
367.130155304037 126.617737577634 150.936747236094 127.171331062578  
CCL22 114.504409331018 145.311964807443 115.605206174867 127.135199316758  
251.787648609546 111.204065131669 225.480366837274 162.464201058576  
223.975677959345 117.710502693638 316.590387560909 127.884750925048  
CCL23 152.916493104088 196.189101941489 171.410912120195 309.5988292104  
134.877046981678 125.687688416588 127.7962242731 140.689100728713  
150.639235242268 138.530236176135 155.30926640293 127.03153185998  
CCL24 128.089328553242 134.418976976995 129.732352495012 120.967523586161  
136.935498266723 137.229871801676 139.987681290389 141.789840190632  
138.469997677004 135.880955433228 123.277867938275 132.317972465689  
CCL25 138.325950428197 122.969215709433 130.418739793498 132.361106053517  
124.757229519631 121.207040901483 132.269567096683 133.519359066907  
126.501648842366 130.697999379259 132.481710681317 131.946302885243  
CCL26 159.29430824799 164.1572198075 162.739253457398 195.474525582555  
144.20764300349 143.550908565401 156.077604146143 146.696029753123  
148.299945894738 156.296046600921 140.724541696229 128.775477649887  
CCL27 140.429462488271 127.75729795293 125.596067857941 147.512290383685  
140.248610391566 135.802258952006 137.620843137286 138.197500836501  
152.77616981167 134.769926504916 113.568261995787 133.467092274663  
CCL28 131.089811472017 131.907246423067 140.669947387892 135.803599969904  
135.122770943076 133.689255383855 127.560308850342 147.405050592353  
135.508803488048 145.245316640391 145.416733388652 140.443415669628  
CCL3 168.840018225742 170.05799929575 146.838547724148 178.542247857251  
205.509515144263 331.795832780176 182.77693508164 180.747527895349  
193.930569647995 395.927222009721 162.47662918768 247.550312458738  
CCL3L1 138.818492907643 145.524305076788 146.014790698087  
137.663941989772 150.778292242313 212.730163981978 136.811620595243  
146.59366188125 163.558869203898 258.695920967489 156.114825514646  
193.16411905957  
CCL3L3 141.86370253437 157.468934439452 160.140509175287  
167.782882015229 210.043556816529 438.533112511098 166.076692502428

|          |                  |                  |                  |                  |
|----------|------------------|------------------|------------------|------------------|
|          | 144.281217246178 | 225.189991540262 | 502.170430910893 | 184.542232315662 |
|          | 282.561381978659 |                  |                  |                  |
| CCL4     | 132.808559892154 | 132.322618637842 | 118.432307370605 | 141.831596320865 |
|          | 145.183463058696 | 130.630504666374 | 135.264074941678 | 133.327778635672 |
|          | 142.180927190578 | 127.661634554996 | 129.127563278016 | 129.846685899183 |
| CCL4L1   | 174.941551089279 | 166.540134051424 | 149.831566330214 |                  |
|          | 152.581729298159 | 181.941224633917 | 299.986758612161 | 164.665907233149 |
|          | 168.018785514306 | 303.724140156439 | 420.248838397618 | 165.972090075204 |
|          | 236.219981978324 |                  |                  |                  |
| CCL4L2   | 146.777258330572 | 150.95033946042  | 140.890227770353 |                  |
|          | 133.231066635063 | 151.705219298578 | 255.866847225916 | 154.698312173556 |
|          | 154.686025022972 | 212.037224737798 | 241.383657414248 | 161.735609436394 |
|          | 178.166289723365 |                  |                  |                  |
| CCL5     | 563.490027149224 | 531.217306770605 | 291.056913909578 | 289.576706584644 |
|          | 285.594100976705 | 329.023836559229 | 363.195371577097 | 682.315322994357 |
|          | 1197.58205444449 | 524.725307261999 | 436.155731212592 | 327.480268032814 |
| CCL7     | 111.041656398985 | 106.603674195422 | 110.670057121283 | 106.685578858702 |
|          | 118.604395992281 | 116.007006375993 | 112.773952761845 | 113.451566510208 |
|          | 118.442856984861 | 118.220555783444 | 118.039780360151 | 112.005939063045 |
| CCL8     | 194.584034984339 | 254.768537214795 | 135.93352186143  | 157.50873249647  |
|          | 216.9491329483   | 161.499923812379 | 149.707357499252 | 150.132420238581 |
|          | 313.536451935268 | 292.429831186609 | 213.26158748941  | 155.335777680002 |
| CCM2     | 426.249411635589 | 509.880640462    | 416.215253990273 | 617.474181543858 |
|          | 705.311256840178 | 333.131139447511 | 445.763740779039 | 413.757630469808 |
|          | 406.224345292389 | 595.120528902501 | 384.641319423853 | 615.88518704181  |
| CCNA1    | 123.61956613951  | 123.02546895475  | 110.61165787102  | 120.748910864064 |
|          | 109.228587997052 | 122.158160927149 | 115.766358387923 | 114.249891266241 |
|          | 117.980052938167 | 125.058165131184 | 114.412739085949 | 107.283814651497 |
| CCNA2    | 185.396765725228 | 196.486499238623 | 203.999142031297 | 194.724219884752 |
|          | 441.112782197591 | 372.54091392596  | 279.598585549004 | 443.343806055858 |
|          | 529.963453165714 | 462.025126897013 | 232.735767435327 | 377.593087606046 |
| CCNB1    | 157.328404229451 | 166.182850621447 | 163.22480684222  | 166.46473789699  |
|          | 391.782120640025 | 448.95671696823  | 309.798246248863 | 520.470790410856 |
|          | 284.321253087512 | 324.346723939622 | 210.41046499545  | 330.281193038198 |
| CCNB1IP1 | 502.281584081805 | 401.267425721838 | 472.108893832845 |                  |
|          | 383.802494922918 | 213.990575186237 | 255.225145197422 | 316.237519859859 |
|          | 264.054997398621 | 196.519125510368 | 316.409887372431 | 455.486248388968 |
|          | 348.808646570544 |                  |                  |                  |
| CCNB2    | 126.155486659114 | 175.485672103348 | 138.83304645915  | 140.02337095267  |
|          | 748.015452242839 | 551.350758868377 | 380.562212796792 | 896.185223980593 |
|          | 771.512332113075 | 658.746224115551 | 341.251360936154 | 665.602699607102 |
| CCNB3    | 121.197702744078 | 127.026168862919 | 120.843429388102 | 119.312201620247 |
|          | 124.045745662173 | 133.07218865002  | 117.207266754941 | 128.429007921588 |
|          | 124.897463208595 | 118.122186617611 | 118.220555783444 | 123.182903611854 |
| CCNC     | 180.850779069931 | 192.353768499582 | 248.010317392179 | 162.427505889157 |
|          | 310.640107228956 | 422.688531130043 | 587.388038484307 | 405.409668978569 |
|          | 348.111872425949 | 572.913714991136 | 254.393421265604 | 392.282956362735 |
| CCND1    | 3055.80298721424 | 3083.98169220838 | 2691.41389079777 | 3789.1316515671  |
|          | 5846.17594234628 | 2627.12900283627 | 1840.14350831655 | 1459.31031099055 |
|          | 18562.671630167  | 1184.3199328099  | 5032.66681917478 | 7771.28016059011 |
| CCND2    | 4520.84412831414 | 3989.14883668905 | 5195.2087608308  | 5589.21471380445 |
|          | 189.589053840976 | 310.917191279571 | 198.338416756432 | 395.261210769232 |
|          | 715.638378711433 | 1584.81089248914 | 1646.76016031831 | 209.93789387724  |

|         |                  |                  |                  |                  |
|---------|------------------|------------------|------------------|------------------|
| CCND3   | 1397.84878368705 | 1554.16120123599 | 1305.2232532959  | 1692.01248523526 |
|         | 2099.85702995194 | 1388.91423772335 | 1251.15912264225 | 1201.82026045778 |
|         | 1744.58410715956 | 938.049312229961 | 955.604404066769 | 1206.59866455529 |
| CCNDBP1 | 514.799179506754 | 494.347792360629 | 729.499296070289 |                  |
|         | 435.983803453746 | 543.710330214344 | 793.071192619058 | 1120.3009282887  |
|         | 782.746481112316 | 1048.85768964657 | 841.944755849006 | 936.560290736127 |
|         | 980.67040349547  |                  |                  |                  |
| CCNE1   | 161.424105316969 | 164.917470819096 | 164.50490221903  | 170.342828808493 |
|         | 422.23268864343  | 552.962676093514 | 216.582862850259 | 450.327710374141 |
|         | 205.871133967588 | 172.866517097198 | 195.123919692348 | 261.39435936661  |
| CCNE2   | 113.529619135543 | 116.609122768341 | 113.58962177275  | 122.664353374047 |
|         | 143.747664482225 | 165.177036955944 | 137.022366035333 | 184.989027770708 |
|         | 182.109092947203 | 168.323141675824 | 147.017958916908 | 177.333305785248 |
| CCNF    | 198.338416756432 | 213.813667557079 | 196.615914367563 | 202.583967728957 |
|         | 1502.3444541735  | 645.806954296487 | 469.107624227456 | 736.332743195416 |
|         | 621.825622897512 | 421.384700184923 | 378.967410725775 | 583.022090879298 |
| CCNG1   | 628.485648053393 | 612.06231165648  | 840.276501350383 | 443.732580517751 |
|         | 610.591049634222 | 780.105135529728 | 1436.57771711084 | 790.321331435096 |
|         | 582.062758687489 | 717.686676823785 | 826.08372791138  | 1093.85316636801 |
| CCNG2   | 218.433524126584 | 225.96618659877  | 189.816900281053 | 178.878444404192 |
|         | 334.443733461841 | 258.348298226232 | 626.104755496369 | 345.291295192574 |
|         | 326.703488388966 | 371.693808540758 | 491.034395489684 | 277.314675225943 |
| CCNH    | 226.25694727283  | 233.192751618176 | 241.527811817146 | 218.269847477919 |
|         | 262.171775165261 | 292.746711619565 | 286.194197552489 | 206.753993163216 |
|         | 227.375773052577 | 349.054741747798 | 289.517820913799 | 248.927790738447 |
| CCNI    | 12221.7819812315 | 11150.5512437377 | 13090.0615116619 | 8918.58940386786 |
|         | 5106.27623905309 | 5138.28186306948 | 7656.97151002785 | 6021.68798558746 |
|         | 9070.86397918429 | 6960.46610781696 | 11971.1664283024 | 7218.21759302518 |
| CCNI2   | 150.914644894869 | 137.266420259287 | 132.342063356763 | 151.958818313561 |
|         | 160.039086963419 | 150.653030597808 | 137.378528742953 | 156.293025312901 |
|         | 163.315865817864 | 138.833677916752 | 132.845116298605 | 175.462290891421 |
| CCNJ    | 161.557558028531 | 150.019181654237 | 140.581943144813 | 147.314687795555 |
|         | 152.780908985916 | 170.439725847568 | 160.293522619371 | 167.226663395855 |
|         | 160.042251279235 | 153.528429414138 | 161.17923997423  | 204.695311233073 |
| CCNJL   | 159.801315111886 | 139.378915474473 | 141.473218014605 | 136.988519762443 |
|         | 201.415695076278 | 138.936872956065 | 195.929328710358 | 188.475801713801 |
|         | 150.166324293431 | 151.181422205549 | 279.070493043898 | 207.581907737176 |
| CCNK    | 672.862678078975 | 697.97116981445  | 481.630922092112 | 648.823677010146 |
|         | 977.227184625781 | 414.200068430184 | 608.611927946607 | 596.934339406636 |
|         | 575.722713461982 | 628.197839884392 | 714.6859666834   | 601.640387246951 |
| CCNL1   | 421.140525880287 | 315.3930052781   | 352.945088028205 | 258.807028561407 |
|         | 270.462865174106 | 453.457361487577 | 633.104379362137 | 571.950858678221 |
|         | 498.534168389928 | 680.250735532287 | 505.302263971007 | 661.096668635469 |
| CCNL2   | 139.856251508283 | 138.494266722799 | 155.741507341843 | 136.995866452787 |
|         | 146.29600238749  | 159.932941342403 | 192.580288063603 | 152.733409144267 |
|         | 165.496065029161 | 155.295464263911 | 160.695913747601 | 180.336623146341 |
| CCNO    | 174.161146689117 | 169.771005675296 | 170.028047334267 | 136.480458837869 |
|         | 370.678040372273 | 256.471672362567 | 461.413469623811 | 1239.13016938378 |
|         | 876.783710734594 | 241.494710905339 | 303.241375487319 | 251.138401278632 |
| CCNT1   | 212.959246855759 | 203.276353321185 | 180.710636205653 | 174.576132939661 |
|         | 163.521095869383 | 204.787016443123 | 185.128661141884 | 166.223079895236 |
|         | 175.462290891421 | 154.883309503689 | 176.953099943185 | 193.753062958207 |

|        |                  |                  |                  |                  |
|--------|------------------|------------------|------------------|------------------|
| CCNT2  | 187.881334544018 | 191.160340745501 | 194.388383297922 | 156.010027635627 |
|        | 170.465177938235 | 233.536023295039 | 171.844483419604 | 234.432954093705 |
|        | 207.104548555929 | 204.959164579011 | 219.103510284905 | 226.086733606951 |
| CCNY   | 732.630306104841 | 619.045921382959 | 738.892511276134 | 562.543347322063 |
|        | 699.270931701696 | 574.399909181723 | 497.411169898778 | 367.025117016472 |
|        | 422.840163973614 | 408.361368902627 | 447.909277144896 | 560.180656219785 |
| CCNYL1 | 151.508738608925 | 161.144841967903 | 181.467708718758 |                  |
|        | 159.138344477256 | 158.167384416968 | 296.333944172375 | 167.357570666817 |
|        | 227.884445686928 | 170.878962027347 | 388.477382640003 | 154.388776919015 |
|        | 182.209056248253 |                  |                  |                  |
| CCNYL2 | 141.772724512502 | 137.789611340925 | 132.698721834882 |                  |
|        | 135.673080643346 | 135.509927917168 | 148.57301274812  | 153.114065147266 |
|        | 130.754320787628 | 135.810476921749 | 138.471894596606 | 129.007924852801 |
|        | 135.028746262383 |                  |                  |                  |
| CCNYL3 | 148.74881415573  | 139.679681813932 | 135.781190598068 |                  |
|        | 132.998223400178 | 135.368203841678 | 130.457981404612 | 120.406577236405 |
|        | 135.311980936088 | 140.06989960847  | 142.821131835602 | 135.592128081677 |
|        | 134.434198188045 |                  |                  |                  |
| CCPG1  | 451.496617003797 | 378.695635790714 | 481.933386283351 | 400.180574613078 |
|        | 184.085616342099 | 208.690347128273 | 175.805472275887 | 188.654966029389 |
|        | 186.140970908638 | 198.456392063513 | 196.839016616283 | 151.073257114127 |
| CCR1   | 129.680406696779 | 137.720747340105 | 155.114892891737 | 149.88598449818  |
|        | 131.138322527536 | 138.916830356763 | 161.564505054217 | 134.140533647509 |
|        | 167.933231844271 | 159.59942312149  | 163.165374495635 | 149.899789105328 |
| CCR10  | 159.424105896749 | 157.631978594005 | 148.713747597311 | 148.100508271232 |
|        | 148.47415004128  | 140.826051635712 | 154.288075172115 | 160.164327420125 |
|        | 143.528208105237 | 173.440596296333 | 142.097126256137 | 167.341759854203 |
| CCR2   | 139.063209125209 | 138.62308708151  | 140.239948346946 | 137.76307316083  |
|        | 138.652735298338 | 140.110258415883 | 135.221786448517 | 142.452409969639 |
|        | 157.358696886078 | 139.023486014525 | 144.769824608083 | 138.792521681771 |
| CCR3   | 119.915330116696 | 121.51208055933  | 119.122305582754 | 114.749597426757 |
|        | 121.997885377703 | 113.716741872499 | 118.718048764985 | 117.879058520659 |
|        | 112.747067417774 | 118.93828679356  | 130.532559074698 | 110.61165787102  |
| CCR4   | 120.182787241888 | 118.604395992281 | 109.342230674869 | 141.139737175648 |
|        | 135.878996521596 | 136.654902685184 | 128.108066199718 | 129.127563278016 |
|        | 142.38097037888  | 115.072622367144 | 144.603401904061 | 134.814082968113 |
| CCR5   | 140.036463888037 | 144.231539210695 | 131.87404363664  | 134.405155876727 |
|        | 129.434594784981 | 131.362128083159 | 122.412141495264 | 134.247361216412 |
|        | 124.124076599417 | 142.869595099569 | 102.522925993233 | 128.720517906732 |
| CCR6   | 9994.54490550759 | 9852.51412359574 | 11598.65499235   | 11071.0448447818 |
|        | 5965.21815409254 | 11598.65499235   | 7491.93659373205 | 10329.1999331936 |
|        | 10106.8225600705 | 7771.28016059011 | 4732.31591164752 | 8140.6363797934  |
| CCR7   | 125.371128588617 | 130.698850298016 | 108.21185649774  | 115.34945441214  |
|        | 460.742037437298 | 218.96845208513  | 245.522497675754 | 351.934158805882 |
|        | 1610.38263368771 | 141.180647782041 | 224.135228192655 | 185.447093292348 |
| CCR8   | 176.964088090133 | 135.961724275921 | 164.665907233149 | 175.245611094434 |
|        | 165.122737166322 | 158.845174721328 | 176.964088090133 | 172.438141471784 |
|        | 157.944355564411 | 149.659505956629 | 150.968998243223 | 169.321832528939 |
| CCR9   | 132.100026388604 | 136.584199831088 | 137.968932080074 | 140.251168248117 |
|        | 127.445199722147 | 137.669753723768 | 135.17827963343  | 131.159946917777 |
|        | 133.524698103972 | 138.215708514725 | 141.950778601653 | 137.639342727211 |
| CCRK   | 380.888728347647 | 370.390323116113 | 493.071213662125 | 500.643499051523 |
|        | 286.818166898922 | 221.889331385023 | 214.684538620841 | 213.833894542292 |
|        | 245.454945056317 | 214.824908522393 | 211.844563155792 | 206.21848253717  |

|        |                  |                  |                  |                  |
|--------|------------------|------------------|------------------|------------------|
| CCRL1  | 135.915252483475 | 133.31378749951  | 135.085039737228 | 143.881744063934 |
|        | 137.902953501634 | 132.908367372426 | 136.400959554698 | 147.535225305685 |
|        | 161.104993402456 | 160.766121558583 | 134.298521475727 | 143.644862018676 |
| CCRL2  | 143.969566798989 | 142.043121538885 | 143.705475208192 | 143.839170216353 |
|        | 191.170105307944 | 179.863096463897 | 156.543267949167 | 173.225064625094 |
|        | 189.027594735456 | 167.796474464069 | 209.398724613377 | 158.104336050835 |
| CCRN4L | 150.371716899336 | 156.399808270033 | 152.230489051339 |                  |
|        | 155.150904036206 | 288.728608411903 | 240.591548171052 | 222.005022189667 |
|        | 172.7330526128   | 185.17273221366  | 340.301980622308 | 168.634534857593 |
|        | 193.466377788318 |                  |                  |                  |
| CCS    | 284.574888587832 | 273.106088088825 | 318.971509860209 | 329.926864732606 |
|        | 306.946103334814 | 269.424055734143 | 255.677315946354 | 238.375823012603 |
|        | 218.735620596634 | 276.830814061474 | 204.584643964409 | 236.548439331855 |
| CCT2   | 769.34961339184  | 648.38049615541  | 970.166036472486 | 618.058496806334 |
|        | 814.110601393539 | 16533.5738137081 | 1127.89414462606 | 9139.73212514992 |
|        | 1774.22769195939 | 1439.37593006882 | 1131.96129284658 | 1605.2454230722  |
| CCT3   | 773.330948077036 | 724.777166238211 | 1024.59845685519 | 922.50743596248  |
|        | 900.839073800181 | 1362.75971646355 | 1074.19589851599 | 1300.40889834984 |
|        | 1165.95924778817 | 1051.98943987926 | 1243.96721244424 | 1504.15682715484 |
| CCT4   | 173.260348096238 | 173.611295051326 | 189.082778234831 | 169.136919982294 |
|        | 215.47323777134  | 239.12905945808  | 205.362816362477 | 226.173501275026 |
|        | 170.212679845194 | 210.117033165026 | 236.809829701921 | 164.181915898563 |
| CCT5   | 240.054164412429 | 264.109049504585 | 237.01460308334  | 236.933960698783 |
|        | 304.713434036642 | 499.176926371542 | 192.680681636018 | 400.676876982655 |
|        | 220.92105843037  | 158.429761055869 | 230.723142236623 | 246.850599569231 |
| CCT6A  | 529.04238100948  | 494.604716660887 | 652.201948082657 | 494.175437345451 |
|        | 422.338508598153 | 583.455617065556 | 627.526008812413 | 872.320823993033 |
|        | 626.298707790229 | 773.803350315426 | 655.094843900848 | 865.800709006332 |
| CCT6B  | 202.887417145119 | 192.188662949149 | 211.679799388351 | 204.161375686761 |
|        | 261.469732730752 | 195.711047893396 | 226.936810012475 | 219.814706416471 |
|        | 189.985520850855 | 193.629237856758 | 224.466829629468 | 192.375251343504 |
| CCT6P1 | 413.687046868111 | 408.7151485563   | 637.30300219673  |                  |
|        | 352.945088028205 | 394.576038252334 | 413.330906392915 | 482.048928546145 |
|        | 562.711562649704 | 408.7151485563   | 588.197697799448 | 550.434931878586 |
|        | 648.549890890375 |                  |                  |                  |
| CCT7   | 1024.59845685519 | 1139.76755449089 | 1301.61742965939 | 1163.13845502757 |
|        | 2300.9407349072  | 2139.42448145954 | 1514.53784631689 | 2063.42824094932 |
|        | 1293.38808483663 | 2101.93705983383 | 1255.02720867812 | 1472.54829263217 |
| CCT8   | 1401.67503392145 | 1323.91781040143 | 1592.29734618345 | 986.65554605455  |
|        | 1143.0779222425  | 3270.88476148156 | 2956.63335018838 | 3890.14358014877 |
|        | 4457.64479507833 | 2414.22821062457 | 2433.83421295012 | 2941.69058596077 |
| CCT8L1 | 141.085111670206 | 152.080057231881 | 122.978576290038 |                  |
|        | 128.446229320855 | 141.94585838352  | 145.204870282027 | 124.558026853954 |
|        | 126.333814565085 | 138.407207709066 | 143.857385585662 | 142.806728419652 |
|        | 144.829773937102 |                  |                  |                  |
| CCT8L2 | 159.820341130737 | 159.148717478277 | 159.7197697044   |                  |
|        | 142.487424651482 | 147.040759979063 | 139.109712542702 | 150.073816271065 |
|        | 130.760835441776 | 152.204730003016 | 144.087004064416 | 158.854659281803 |
|        | 142.475646565816 |                  |                  |                  |
| CD109  | 121.23469201559  | 141.119491147925 | 125.642282323003 | 127.310437599803 |
|        | 124.876226351169 | 118.076139318165 | 113.913337223716 | 112.962180108363 |
|        | 114.174153178166 | 146.014790698087 | 136.366798516444 | 118.342067845126 |



|         |                  |                  |                  |                  |
|---------|------------------|------------------|------------------|------------------|
| CD14    | 999.159652508318 | 838.93563319979  | 601.800326895295 | 1022.55215097491 |
|         | 902.822697602452 | 672.348723983535 | 461.143361255467 | 688.464980326689 |
|         | 1520.59210521859 | 2305.11856249143 | 867.601542930533 | 710.228463443265 |
| CD151   | 3251.62784659994 | 3850.41246770812 | 2891.03258768937 | 5846.17594234628 |
|         | 3643.11229751348 | 1637.66306286151 | 1563.71477584676 | 1738.96798001895 |
|         | 1830.56003081769 | 2261.31473132315 | 2684.69013589621 | 1519.38642390142 |
| CD160   | 125.241484840139 | 133.031431118772 | 121.103620738719 | 127.905616521853 |
|         | 122.517559025268 | 121.553107861517 | 106.182551369456 | 119.746227888415 |
|         | 124.705614182596 | 111.596690019694 | 143.47200560038  | 122.042136913991 |
| CD163   | 180.902950045351 | 174.313718712035 | 168.314966639178 | 172.310673499572 |
|         | 198.840533461525 | 301.087947101876 | 167.474790447134 | 365.362177671146 |
|         | 401.750302347978 | 214.434355263652 | 306.632103708321 | 167.817232948801 |
| CD163L1 | 146.828099826146 | 140.936204899093 | 128.287127680554 |                  |
|         | 157.248117633013 | 170.516743115762 | 154.831307586538 | 143.953043041292 |
|         | 193.008902902654 | 167.620915011868 | 168.384397488011 | 177.103802332144 |
|         | 182.222567053422 |                  |                  |                  |
| CD164   | 375.651196211048 | 311.157764305033 | 325.320888625297 | 256.590289281076 |
|         | 311.375563161772 | 433.314881387431 | 471.720496000839 | 298.347201056937 |
|         | 271.004741629789 | 341.714401872192 | 772.776364492813 | 434.716530273383 |
| CD164L2 | 160.315029612814 | 161.530878860883 | 157.83121828793  |                  |
|         | 157.067264221207 | 176.27969404442  | 141.548272427617 | 196.889520085412 |
|         | 167.416417895159 | 146.318052064937 | 170.212679845194 | 126.100454068838 |
|         | 153.088710298368 |                  |                  |                  |
| CD177   | 125.058165131184 | 116.806720503431 | 126.428284589412 | 119.346574301289 |
|         | 118.117957479382 | 130.653971083035 | 126.766964875664 | 121.743701509981 |
|         | 127.26820735867  | 136.630678899513 | 122.793816135585 | 129.322481607056 |
| CD180   | 162.592306630033 | 162.022232949254 | 163.02140155858  | 175.562070915794 |
|         | 152.341361646984 | 160.773510498005 | 150.235026770931 | 164.227134687088 |
|         | 150.091854035356 | 166.014450044695 | 156.920867019849 | 159.49930229951  |
| CD19    | 119.498312996987 | 129.297217956843 | 117.724353829377 | 130.156775178934 |
|         | 126.185560760543 | 119.131613164405 | 141.874188629438 | 161.877378749103 |
|         | 354.579728909336 | 116.507315786826 | 123.135918415235 | 113.582654469735 |
| CD1A    | 131.256325361974 | 141.085111670206 | 159.686279002456 | 141.686945908315 |
|         | 148.510023599641 | 179.985468369202 | 278.335289966805 | 176.506227858258 |
|         | 168.818595386221 | 169.321832528939 | 163.203582580217 | 161.441613587571 |
| CD1B    | 157.108043150259 | 160.395053149199 | 147.661748633455 | 163.340435089911 |
|         | 150.866204945762 | 159.848342125486 | 160.975741751317 | 187.389039221193 |
|         | 172.276968413879 | 179.432235153344 | 138.244585395561 | 155.507030276749 |
| CD1C    | 153.126111237668 | 153.38494705081  | 125.861564323476 | 148.641780441227 |
|         | 128.599254558082 | 144.968459820523 | 141.558927907067 | 154.574826922632 |
|         | 161.050438117555 | 149.520911664673 | 143.49969914174  | 145.630497368137 |
| CD1D    | 127.320624058583 | 125.899200544217 | 124.452631766045 | 137.519771130707 |
|         | 134.712040258989 | 131.136073942692 | 133.141683141696 | 144.159316670264 |
|         | 145.090639086338 | 140.545351041252 | 133.581450824362 | 136.267313223808 |
| CD1E    | 138.116568200293 | 140.014167357286 | 141.431172407792 | 134.489421865495 |
|         | 138.386391726042 | 150.439715066903 | 148.797226586765 | 175.7330682766   |
|         | 148.286700314107 | 149.547635666621 | 155.290648078877 | 135.409613764459 |
| CD2     | 185.17273221366  | 197.947433984294 | 169.895672129542 | 173.714940254592 |
|         | 186.640167849568 | 185.41739522833  | 256.590289281076 | 331.795832780176 |
|         | 565.313436777992 | 278.005620372937 | 300.247304779062 | 204.337844243869 |
| CD200   | 196.363005912532 | 163.234966251618 | 177.182321788711 | 160.272632590118 |
|         | 134.166297738657 | 130.607857562345 | 134.544368736184 | 132.786500984297 |
|         | 140.74035966401  | 143.574584852426 | 136.623658204558 | 132.622032754473 |

CD200R1 168.000247148058 151.655854407186 148.883263903527  
 158.429761055869 168.000247148058 145.07503221134 163.741411769369  
 150.601874392926 151.846610656503 174.107661206415 141.216869032251  
 161.886342770305  
 CD200R1L 138.852212944492 129.946925636595 147.057116881846  
 153.579955370444 131.067958183644 139.316189199729 140.881084272745  
 136.19725093985 139.423432468886 142.238908711402 132.081286801266  
 141.59046197203  
 CD207 146.6306281408 149.294728629784 154.499313851756 150.931114848235  
 188.231614694297 147.681723355535 187.425086057782 154.999192460283  
 147.585081901818 435.983803453746 146.362705590778 145.492751560845  
 CD209 164.241874094897 170.198508633417 143.262288751967 203.244917049745  
 178.262619516994 160.035282578603 124.88118767481 179.663258610881  
 195.400963839097 158.660859266099 227.350260241585 154.935741493562  
 CD22 149.744358230709 161.948033313443 171.795878750365 157.436513275737  
 162.923734210933 161.77611826709 141.597692730835 147.006482557682  
 166.12184890921 148.729753117861 164.281196089736 154.818414925242  
 CD226 113.122185375734 111.161283080299 111.253743009588 129.307025798583  
 120.257886394616 117.628564992187 121.505178996279 113.184495948936  
 123.267817390796 123.488418655586 124.275741099764 114.68345964966  
 CD24 508.127470400078 642.647554580301 319.812293134357 226.020769172424  
 8787.57716309558 7144.3257417116 6470.73189429877 4335.76831372031  
 6358.5018930218 5800.06300826802 5138.28186306948 2093.67403119512  
 CD244 135.840528665314 124.121555438466 168.289492873475 127.099995420363  
 132.17294083844 128.582520754296 121.215558351076 134.86940314824  
 138.773042747912 129.213523302268 158.809865241567 143.873048967535  
 CD247 201.256649338315 194.998142472864 155.842195370853 186.529656751005  
 365.199125315964 159.693019552703 194.063827325017 327.324711245289  
 546.399972543938 167.273378118452 269.100400678077 177.524818593325  
 CD248 2311.05587511258 1801.74467005923 769.958422740085 2444.835635949  
 305.93974940209 215.365809536522 157.499803444188 195.185025611945  
 428.569462312363 592.822841077599 185.560737176115 227.884445686928  
 CD27 142.960875909369 142.914863449833 129.658488766089 139.318078285343  
 160.010501226517 125.887854850942 133.507865919719 202.278323489515  
 347.411500022053 126.702705908175 158.650226303456 132.074571281938  
 CD274 119.000436602325 103.594872791657 107.02909139647 105.179281694336  
 120.853961156534 122.083357581665 115.649568330705 110.753661013519  
 115.672307128514 118.470400686096 136.472404812817 121.320750074882  
 CD276 277.101000223971 270.973600107882 239.24587884234 366.564822549834  
 434.073729807058 299.851173200352 266.347965690851 233.029655807246  
 232.465880700217 242.971958493453 287.195290301363 250.037172478288  
 CD28 142.988500173397 150.484823814674 149.927773276383 139.367493349339  
 134.06996703302 152.077204721895 156.390982134534 140.275942067561  
 186.854553034865 148.02460124587 152.021576565132 145.852430082228  
 CD2AP 172.8993416872 189.662974464847 164.548505132213 141.950778601653  
 315.513423195489 682.538709448692 763.533962249076 590.849222581206  
 589.541347392215 328.60529053804 618.140160251927 802.304294140514  
 CD2BP2 1332.11815966955 1420.27222765071 1405.2134783352  
 1312.75601392984 1445.72064343302 1581.06548216423 1912.2369374258  
 1168.3174645384 1355.66237447026 1323.91781040143 1367.19652160532  
 1830.56003081769  
 CD300A 137.744318243173 121.657744897668 109.087574814292  
 131.159946917777 123.554769032715 132.196506161702 132.783958633333

150.297422529071 152.834894011142 141.505120938773 150.102853150151  
123.347836436966  
CD300C 144.007071548045 142.584504912189 133.336063137966  
163.504122327429 150.911524755251 153.713298074917 142.461941376108  
145.459919416288 156.187809481625 149.712320986646 147.422656909557  
139.577443171489  
CD300E 180.549865708041 143.937726155116 149.149858208397  
152.182968451691 121.455843337023 134.919972250554 126.413124995943  
124.818436949131 142.079184950618 132.125545886181 119.466200987489  
125.533538277681  
CD300LB 145.487783396345 154.011708696954 130.820415610578  
125.79193748535 130.191876914166 130.068063785009 136.195555442748  
128.848008246639 129.856994052591 123.809866652834 128.329985147034  
137.071402810983  
CD300LD 140.199334790854 135.409613764459 126.652197216347  
135.840528665314 141.141047405344 139.875260384886 137.890006487904  
135.961724275921 145.958718601763 143.925616978401 139.219476681919  
158.645402461996  
CD300LF 114.042914237667 124.207200622684 113.043089777907  
119.920097823022 135.950465168457 114.749597426757 130.520275539672  
125.661697165943 134.084602409011 152.54039461337 135.767818903328  
129.496473527496  
CD300LG 160.724319010751 168.244523461915 148.614214326995  
178.636555178682 141.297629157305 151.09974848374 151.142149775806  
135.965779958403 142.07664288788 132.311344653106 140.779962389412  
143.942810095867  
CD302 244.897869154624 219.597808863947 233.786136606682 179.177884962513  
138.021559586328 161.548130965486 150.989202517615 172.46311371589  
156.146154578237 157.547814187442 144.448503894295 153.07993334035  
CD320 254.812605074045 274.120234926832 218.896760804208 279.452819132461  
1142.44180956604 520.218545108099 342.096409626768 285.214585324341  
208.555506929113 216.991823988763 165.919497521143 197.049616858296  
CD33 152.459041674768 139.334552725255 135.878996521596 139.3465236423  
120.679474100322 122.885879294532 133.367085445965 142.963036923104  
144.924212639731 133.489068665353 131.481679396553 128.473834314632  
CD34 948.734577648136 866.765054377214 735.165830487162 1030.56836625083  
201.004491067972 249.400820221233 201.593025256991 216.645552082667  
257.813193543819 229.74418058711 179.35113214277 183.115511373872  
CD36 185.519000961898 231.47915227815 156.934589811742 284.13865992802  
130.231160879338 174.461487057542 161.534421340752 198.244854812728  
141.092486112278 276.925017614147 136.184427467391 116.14662237541  
CD37 150.843975804117 139.931092990984 141.308299074832 137.052507691254  
165.169920299969 137.398748156909 147.768191157163 171.051948060796  
316.663128947813 161.655336107432 158.751241730465 139.128751917566  
CD38 168.437049123012 162.71020036416 156.144934427609 144.985280401441  
141.457040042276 142.406904585501 157.28429690041 187.016569445646  
230.855806094267 148.73620012231 159.966729941991 144.636277619886  
CD3D 173.169905329013 169.681582570965 142.071492722749 133.932594124721  
161.031148038478 171.130215858803 200.618080312379 339.843776738468  
572.548647437438 225.275049011909 299.935166870211 173.766372029062  
CD3E 152.14012587515 141.225533609907 135.589211439847 142.101865506094  
142.625414022199 134.831550401848 138.497931380734 154.094285855743  
187.93380542729 138.161690144518 179.61374889626 144.845726048937

|        |                  |                  |                  |                   |
|--------|------------------|------------------|------------------|-------------------|
| CD3EAP | 129.246066890078 | 141.904041228678 | 127.509583634884 |                   |
|        | 140.692586715322 | 171.212749388553 | 145.646191500321 | 142.747793303346  |
|        | 127.349190705235 | 147.178598908199 | 147.942495862714 | 154.096542063701  |
|        | 141.746032519746 |                  |                  |                   |
| CD3G   | 134.330234316896 | 141.482344048665 | 144.546597366629 | 147.202510900548  |
|        | 148.840533233712 | 136.532168520039 | 154.620194499553 | 151.083551412109  |
|        | 178.476483428474 | 140.216148769999 | 160.525939340745 | 142.217762896203  |
| CD4    | 126.910075365358 | 142.354731066206 | 123.379461430902 | 131.141668650877  |
|        | 135.753430034183 | 121.492896642899 | 136.285410546751 | 144.946362772133  |
|        | 165.009696356892 | 128.69455713173  | 163.868129628544 | 137.138266859156  |
| CD40   | 196.839016616283 | 174.603285240228 | 169.733427590141 | 163.558869203898  |
|        | 227.418630852215 | 166.305219348008 | 393.013539328766 | 182.181756507598  |
|        | 206.303338709554 | 155.243643210534 | 147.642693777383 | 217.684410907748  |
| CD40LG | 146.693573104487 | 147.096559685764 | 125.624661345169 |                   |
|        | 123.625734357908 | 145.015434711984 | 130.776213987522 | 131.202090507576  |
|        | 133.702845956639 | 142.968008233583 | 121.201267751612 | 136.357788670568  |
|        | 135.842090777339 |                  |                  |                   |
| CD44   | 1994.00516809361 | 1561.10217536347 | 2055.27692947656 | 1144.07896461196  |
|        | 302.532985701607 | 701.481003619067 | 551.350758868377 | 485.731287873723  |
|        | 993.774175699873 | 1359.63626195826 | 699.550347374567 | 784.170983714588  |
| CD46   | 437.344765185802 | 400.621427274425 | 527.597948979568 | 264.936739264566  |
|        | 624.106546150735 | 1803.06322760249 | 1796.26091584668 | 742.751664201272  |
|        | 1047.78978081493 | 712.067161025165 | 1650.77281891596 | 2116.39371296122  |
| CD47   | 569.967953318205 | 564.588706307423 | 551.350758868377 | 496.03509813734   |
|        | 191.525291860022 | 554.800688991977 | 408.263886786123 | 270.021093158885  |
|        | 347.081036934975 | 682.075583857856 | 354.205670284123 | 319.090371885653  |
| CD48   | 202.129153259445 | 147.720061897962 | 123.132178371802 | 119.612288460361  |
|        | 125.689884251847 | 165.003646188775 | 155.121309543738 | 286.774606295106  |
|        | 508.127470400078 | 136.269445455239 | 206.113290588613 | 125.234097725749  |
| CD5    | 111.515588041012 | 108.557097186828 | 99.9173294438729 | 104.36042819601   |
|        | 111.867464669155 | 117.760045671142 | 116.678969343492 | 117.760045671142  |
|        | 131.185836673529 | 102.786517901308 | 142.03837243998  | 107.76497424356   |
| CD52   | 237.71636970719  | 226.678503956411 | 239.762135294506 | 226.701637237203  |
|        | 194.529045934216 | 284.798325549665 | 269.673122990604 | 551.086785904249  |
|        | 1170.07851727046 | 291.261765585473 | 305.343879847672 | 293.482512212153  |
| CD53   | 157.519633258844 | 157.435477846812 | 140.554684822646 | 141.40690581885   |
|        | 145.267225993057 | 167.451782810394 | 148.874533472738 | 201.517356610591  |
|        | 254.607324522225 | 180.54209603289  | 179.389797867379 | 152.648490300617  |
| CD55   | 196.096936985479 | 218.862705238592 | 278.274343962656 | 160.243405030742  |
|        | 361.429760858441 | 208.611557959861 | 323.20628717764  | 221.18757533703   |
|        | 239.388546850124 | 305.096320805078 | 687.494132125365 | 175.417320301614  |
| CD58   | 201.569913451219 | 182.181756507598 | 206.071709262227 | 162.15259972225   |
|        | 256.873090834376 | 379.200576951933 | 335.142319387164 | 294.17588071297   |
|        | 265.829122816166 | 461.722481634933 | 343.200277800027 | 386.817736004263  |
| CD59   | 260.443814523694 | 271.468939477052 | 244.440857688518 | 227.267783818298  |
|        | 174.375388013694 | 225.480366837274 | 234.041863839123 | 232.892635502424  |
|        | 217.491746961471 | 347.081036934975 | 361.620362526358 | 255.225145197422  |
| CD5L   | 113.644993086829 | 118.650091706226 | 150.173766182317 | 140.288612271406  |
|        | 156.001983149983 | 132.84666796678  | 140.212048180435 | 132.478801067837  |
|        | 139.711696905287 | 120.530092530622 | 132.419898122309 | 136.425263391752  |
| CD6    | 151.831627236638 | 149.661929885679 | 120.329105003959 | 117.619337212037  |
|        | 188.242091666446 | 129.058085094891 | 136.524640445539 | 196.839016616283  |
|        | 330.080428155378 | 130.022574966461 | 284.638865013916 | 134.2267111030456 |

|       |                  |                  |                  |                  |
|-------|------------------|------------------|------------------|------------------|
| CD63  | 4457.64479507833 | 3757.39261544326 | 3693.4058156307  | 4457.64479507833 |
|       | 4465.66734676111 | 3149.26998719015 | 3455.20639616159 | 3237.94149351627 |
|       | 3905.35300751401 | 2172.89794460273 | 4377.59943975549 | 3570.21370790206 |
| CD68  | 1175.27165286568 | 1088.25132365974 | 897.0125616892   | 1109.08288440559 |
|       | 537.828979447378 | 1196.34528225417 | 1809.58702081877 | 1099.37392456694 |
|       | 1277.0921553877  | 2217.82628612929 | 1018.80178630497 | 783.373390305885 |
| CD69  | 182.439945229388 | 196.014841240142 | 151.374665021513 | 166.341564850299 |
|       | 181.003812824014 | 225.99848688881  | 146.606442726047 | 187.978627462391 |
|       | 219.288597751645 | 197.427788552936 | 156.453108485249 | 143.207187847583 |
| CD7   | 156.698856643638 | 160.042251279235 | 136.722636695506 | 146.204122329465 |
|       | 197.651165059354 | 162.203570429542 | 152.503159091556 | 206.669783013221 |
|       | 379.476768908492 | 170.18781660707  | 164.253219197128 | 157.546123603057 |
| CD70  | 152.146033353926 | 144.311620064675 | 152.796423361971 | 153.214696479001 |
|       | 139.943915452851 | 154.64077390011  | 147.52178512946  | 148.504996616452 |
|       | 155.752117896424 | 144.710613442383 | 163.396651801661 | 145.333097940759 |
| CD72  | 135.493053871272 | 124.368438691944 | 131.449370465834 | 125.463718280745 |
|       | 150.311274161073 | 127.712004247155 | 125.26492723752  | 146.345451252228 |
|       | 183.482640529727 | 125.299513989334 | 165.350777445902 | 118.047978285706 |
| CD74  | 1011.9675459648  | 1324.56751399862 | 436.834825721843 | 972.902937649492 |
|       | 1189.69730508119 | 541.351092873522 | 848.620986404914 | 1973.20689165831 |
|       | 3765.25491426198 | 721.11578916385  | 1373.08023518911 | 942.900963522948 |
| CD79A | 140.603933807629 | 143.222342904886 | 133.080437161283 | 139.39112068213  |
|       | 149.508432746895 | 147.49720952988  | 143.442361602626 | 210.103974340881 |
|       | 354.263934274937 | 150.297422529071 | 153.792925101459 | 142.07664288788  |
| CD79B | 196.759802659759 | 214.241635800083 | 177.919885012006 | 215.897620927751 |
|       | 181.308852106289 | 227.236255752375 | 176.874265462986 | 201.337186768645 |
|       | 440.916522871266 | 164.525784478026 | 193.052112923573 | 194.445463745418 |
| CD80  | 143.385915173392 | 150.72835989269  | 146.032456391441 | 142.427198128376 |
|       | 166.232856234879 | 153.633095853017 | 147.870549240703 | 150.376234759097 |
|       | 169.192327500032 | 174.059172465573 | 147.401387099359 | 182.77693508164  |
| CD81  | 17917.7303120499 | 18338.3001930708 | 19087.9532735841 | 21110.9013462062 |
|       | 23053.5660790052 | 10048.4260790604 | 9715.20127757161 | 12109.3049135906 |
|       | 15990.893941344  | 8368.88320476021 | 12690.801964606  | 9514.74328718935 |
| CD82  | 223.722742062251 | 204.990512488181 | 235.563592256037 | 232.667968049771 |
|       | 340.903961204211 | 214.132445321197 | 353.285905782951 | 225.99848688881  |
|       | 268.52833723726  | 460.651156484562 | 306.068269136821 | 215.585089158905 |
| CD83  | 224.186573847185 | 234.301520483864 | 189.708396835236 | 210.852300463808 |
|       | 201.105520537151 | 248.729653566598 | 240.005943851098 | 232.083160165968 |
|       | 301.695991929957 | 223.601312199935 | 204.057019122032 | 286.818166898922 |
| CD84  | 157.21132653949  | 155.417694869593 | 162.127697884504 | 184.25384366282  |
|       | 133.482237631013 | 146.57274511202  | 158.064409011013 | 173.408784502027 |
|       | 172.030687707578 | 152.272198017355 | 149.364498870469 | 147.694098231655 |
| CD86  | 141.925012927873 | 142.759452994928 | 140.096717188376 | 142.156488113764 |
|       | 165.39758732     | 177.666582096539 | 165.613274361543 | 184.954673605577 |
|       | 208.914498369991 | 209.887047474042 | 171.722839172783 | 153.653453808799 |
| CD8A  | 172.909795209733 | 165.82215325714  | 144.621077658674 | 134.41693612969  |
|       | 134.061318824472 | 147.096559685764 | 138.30402764483  | 200.890547965585 |
|       | 255.74096237558  | 171.751149502172 | 149.730467498266 | 145.539731152955 |
| CD8B  | 129.910866236901 | 124.025104622631 | 133.14988092185  | 129.023206862713 |
|       | 133.022848457361 | 122.985117824212 | 124.66386961898  | 128.972276851419 |
|       | 132.66318177913  | 126.37572518012  | 130.352674121108 | 131.572485018063 |
| CD9   | 762.8576747113   | 692.095005197252 | 951.772948602094 | 526.625936680738 |
|       | 1329.3013039618  | 2153.17165155392 | 1794.82283439196 | 3474.0924656878  |
|       | 2639.60135568    | 1337.38160266788 | 2124.12760841901 | 2026.85580212422 |

|        |                  |                  |                  |                  |
|--------|------------------|------------------|------------------|------------------|
| CD93   | 560.180656219785 | 779.340880980422 | 302.113807121396 | 551.350758868377 |
|        | 288.68376542946  | 771.059329972125 | 206.376365685112 | 613.279465441319 |
|        | 774.774214696342 | 451.210172051464 | 517.881547706391 | 381.971539806271 |
| CD96   | 175.148318011395 | 183.26554404668  | 142.61573330083  | 134.759283147919 |
|        | 184.029968090084 | 160.090914414578 | 238.823244541016 | 292.746711619565 |
|        | 413.757630469808 | 177.696849418064 | 482.592481827722 | 453.058639550475 |
| CD97   | 832.335328912437 | 889.054356462993 | 930.704688414069 | 949.260897408911 |
|        | 352.562711030848 | 410.337491313251 | 305.499194075747 | 383.033242143031 |
|        | 396.781827940009 | 282.392419584508 | 217.491746961471 | 394.892918166519 |
| CD99   | 1856.05025952611 | 1491.05501052706 | 1582.0221231161  | 1231.92253664482 |
|        | 1775.32632165475 | 756.068695265118 | 673.824770556885 | 328.078808625906 |
|        | 834.187014201026 | 650.911886508922 | 372.689712716797 | 676.570119607984 |
| CD99L2 | 1584.81089248914 | 1850.98311401165 | 1558.22238167317 |                  |
|        | 2154.00589005104 | 402.425130776131 | 306.632103708321 | 394.576038252334 |
|        | 398.423396126075 | 388.966303073519 | 388.638095539186 | 277.406445570925 |
|        | 304.237479317271 |                  |                  |                  |
| CDA    | 149.294728629784 | 152.601626526117 | 146.503431281242 | 182.810581377888 |
|        | 160.441879289883 | 183.963578322984 | 161.803438841859 | 157.878110410517 |
|        | 158.104336050835 | 198.15257384667  | 158.735283017367 | 143.484004107893 |
| CDADC1 | 159.276726310525 | 160.399059317919 | 184.682478530334 |                  |
|        | 171.465178761171 | 117.003205777245 | 144.818492604488 | 144.188147197178 |
|        | 168.347445148881 | 149.927773276383 | 147.471494294543 | 136.44218532882  |
|        | 134.455623159793 |                  |                  |                  |
| CDAN1  | 5912.48904507462 | 5688.84918819457 | 5479.24427823207 | 5373.2173152906  |
|        | 1569.13457493554 | 5601.24254062491 | 3536.14527317085 | 4602.81651147558 |
|        | 4150.8511719558  | 3173.14004739767 | 4061.24537355697 | 3784.59114921916 |
| CDC123 | 324.401611136662 | 305.398934391579 | 322.36247485445  |                  |
|        | 359.493075382333 | 569.656573915709 | 1508.24281455057 | 471.946284490029 |
|        | 414.200068430184 | 511.779988437654 | 451.147418314412 | 747.077451281453 |
|        | 681.677841333095 |                  |                  |                  |
| CDC14A | 138.733717670748 | 152.748807709142 | 141.466287523861 |                  |
|        | 134.072912593456 | 147.630900093277 | 149.233023751582 | 142.974541687789 |
|        | 156.642441706727 | 171.982071800592 | 135.800997202323 | 145.387562372871 |
|        | 138.325950428197 |                  |                  |                  |
| CDC14B | 243.225815954365 | 222.415704486709 | 283.048002376743 |                  |
|        | 241.168936008174 | 202.741211613885 | 201.913709602894 | 239.452559981542 |
|        | 225.238369884803 | 202.145180994821 | 191.897449038297 | 316.409887372431 |
|        | 211.160781061336 |                  |                  |                  |
| CDC14C | 155.777281781161 | 148.967232828819 | 172.214433016685 |                  |
|        | 149.563405421366 | 141.557420268382 | 139.706279455371 | 137.702802090925 |
|        | 166.12184890921  | 159.970332650101 | 160.482734190577 | 165.673535349675 |
|        | 151.433634564939 |                  |                  |                  |
| CDC16  | 1505.09908072606 | 1421.72388964898 | 1665.14066952917 | 1408.08614963928 |
|        | 691.916554922896 | 1559.26487922551 | 1242.61637859159 | 949.789710063337 |
|        | 1313.89440013246 | 1411.90426595229 | 1611.58245311122 | 2137.44704613378 |
| CDC2   | 126.908123260394 | 148.022287939066 | 136.08040874432  | 135.923022674367 |
|        | 423.740836541835 | 453.926991868451 | 282.101714660307 | 421.303580698397 |
|        | 408.361368902627 | 264.526189799049 | 206.098534554876 | 537.982214580518 |
| CDC20  | 131.566892082703 | 259.826625866106 | 167.121623035375 | 219.080383154432 |
|        | 4621.99241522677 | 1889.05071563459 | 750.494286476465 | 2819.92361643968 |
|        | 1577.15895478896 | 1931.16906839143 | 337.87475687838  | 1206.09815575399 |
| CDC20B | 142.656762407774 | 150.292858985795 | 136.522590104535 |                  |
|        | 146.181764812924 | 142.661504601445 | 139.186416741431 | 149.113794439994 |

141.995158253845 142.036037957345 137.832597613423 131.009425832936  
 139.652974659584  
 CDC23 572.262848718437 570.533103778482 566.914448800423 576.873245313776  
 392.746574862867 445.661863626419 518.925188630246 624.638115878703  
 465.29290512169 757.406530000489 657.77730563722 427.98782239715  
 CDC25A 127.132970760907 135.556943919872 133.561188057423  
 137.652358744527 284.595024875896 218.917357155289 144.283716416188  
 170.561596645385 210.925203743958 159.177303894223 141.815571093975  
 208.895657507883  
 CDC25B 389.260166168847 358.092809491843 307.597733293218  
 354.45785837703 547.042461070351 326.354469134694 179.297628357211  
 217.45700166961 307.363302726074 837.413261433363 207.123420880185  
 214.4829383264  
 CDC25C 134.966883985611 137.244552699212 134.479828866339  
 126.523201566273 189.01309885917 218.134101819445 163.843143947012  
 197.859546367676 176.791758333054 178.416969664816 164.509354377985  
 176.839917795004  
 CDC26 1388.91423772335 1218.05434595121 1209.56018864779 1084.95095717937  
 1106.75785702993 814.759191652981 945.830852603704 951.772948602094  
 1201.82026045778 883.140984728615 1538.78070281348 831.610501402173  
 CDC27 110.794219964997 123.76900858347 121.764933633063 123.294321716108  
 113.913337223716 136.201103852785 127.699226067847 111.860763079995  
 118.871735074285 115.545558600232 146.349773982488 119.735807506447  
 CDC2L1 183.50553222647 175.044940252247 229.542259738438  
 210.692705153337 189.0608798771 230.620456579897 199.353823724989  
 180.968659614238 196.076386020815 187.472028627511 180.060096787617  
 209.702683803624  
 CDC2L2 522.17701271254 493.715108157171 445.214621023114  
 545.760623858473 249.129943906228 304.058158731957 271.897511879509  
 268.111403429364 289.001004912528 212.822328466993 184.267958772058  
 282.742833166843  
 CDC2L5 370.555627307623 351.395760651605 347.932135290714  
 353.912654262209 336.981561928411 298.979106293393 377.225452025984  
 322.506898833351 342.611951034707 302.219514290905 374.169744342352  
 412.582051585078  
 CDC2L6 680.94167651697 765.911113050543 767.377380800066  
 818.761934233826 668.127527385348 520.470790410856 694.644744547412  
 573.074116810032 544.852019338212 561.858563298512 1106.21439150501  
 500.848273432862  
 CDC34 468.496972957503 523.717949503639 413.863345223345 839.324324662619  
 894.100792722707 522.050619657197 406.638419179213 373.803772983872  
 323.391456630794 369.838429521168 493.209107049493 370.945254716657  
 CDC37 4956.21683075884 4956.21683075884 5624.32062666666 5489.19362780613  
 6776.11712291246 5122.60899285635 4159.96851384358 5955.10816224456  
 6427.33783376005 5789.71932579854 5094.53287522452 7245.25086222102  
 CDC37L1 129.431497372577 125.386545354096 122.072091994548  
 126.180714796187 127.174074003712 133.604705630582 124.815853677553  
 121.267153348313 125.455347031878 130.467450968785 150.507308901391  
 117.580122770251  
 CDC40 420.361583975644 411.221560795912 477.275332763887 375.856200488667  
 322.684910198242 547.817028243811 634.556887178869 504.838017072725  
 485.026081242201 469.206346008875 123.25201993575 662.958637409597

CDC42 216.32785564297 261.96528977292 235.372592051464 228.797912452429  
463.754869412768 364.527677995774 394.414934831535 349.054741747798  
312.177191402945 360.852730026133 702.981741565482 329.535023880129  
CDC42BPA 387.355661073935 369.513420606401 406.54518900348  
490.022369664024 176.008711524598 174.229093061024 160.53152291979  
168.418529261977 175.417320301614 177.371157649894 203.888365494623  
204.564770370164  
CDC42BPB 469.930860750773 536.253405705975 359.099750692694  
683.019502027271 419.126814511305 204.237952297239 246.369521698487  
241.383657414248 229.076507182239 333.439929772897 338.260976633501  
232.276667029184  
CDC42BPG 125.318166919844 122.883806494491 131.825172822888  
135.928428484011 169.475714234887 151.349739492368 135.137615432923  
131.595868226775 133.640832782576 127.449028221682 144.007071548045  
127.545397354821  
CDC42EP1 172.622816559412 153.62335478774 145.513333676569  
161.683243808528 255.56301534833 171.216275057884 155.295464263911  
142.228042097379 162.629257046871 191.679217737051 172.214433016685  
170.553940654493  
CDC42EP2 342.403428822464 325.570839576032 229.62164568989  
369.018856220394 171.247946863662 163.758054869675 171.212749388553  
163.69172577831 254.065327837176 189.74261433647 211.135364208221  
167.130843160309  
CDC42EP3 149.791777262424 164.58158284856 235.350819745387  
146.96155692518 120.748910864064 145.107068919893 149.693559841189  
155.762890407496 130.172041917023 130.201635099678 143.962842383778  
129.171589574238  
CDC42EP4 1551.90775589919 1932.39418448203 1336.15622439522  
1600.10235468018 2033.67956299225 2065.51724858579 2365.99940149374  
1762.09874961415 2782.94647782764 1378.40627876546 1439.37593006882  
3115.11499025766  
CDC42EP5 765.911113050543 894.100792722707 719.628501451187  
565.843200661721 1927.467713716 865.800709006332 4866.98027226798  
385.798784913201 426.464641742092 339.598452080917 6571.35528952186  
2166.68174726155  
CDC42SE1 191.725728813959 183.556662533396 165.355764467096  
142.830950036054 284.351529744475 427.542390397986 284.764628939128  
279.495192828873 282.335582153109 236.401834189942 401.461825804111  
418.889972660958  
CDC42SE2 278.142283306934 246.676401619881 240.971675534641  
206.236303011662 183.130891975122 281.570685561526 483.429488817674  
329.023836559229 328.14373061894 354.783364481955 462.144334719146  
360.605223912114  
CDC45L 113.356070669308 134.203949774763 113.184495948936  
120.638330368388 606.679284487803 677.023591987179 249.029098902357  
574.399909181723 746.296354515617 425.348619281876 206.257167235126  
489.260272645085  
CDC5L 367.289651112346 278.469340236003 331.62124160152 270.201322204641  
247.504198063293 313.536451935268 408.7151485563 330.590986934704  
310.598930734244 392.004079531068 378.088675670786 330.241479004885  
CDC6 150.333572271902 157.979749139651 136.300195727908 149.247514768446  
156.392603045231 153.02127620577 141.194900058799 164.981665344298  
157.148880624381 140.692586715322 147.060637536615 148.060086496148



|        |                  |                  |                  |                  |
|--------|------------------|------------------|------------------|------------------|
| CDC7   | 166.97270256697  | 177.065616871886 | 154.354658146438 | 151.0189104086   |
|        | 305.906480933354 | 315.430399077266 | 196.076386020815 | 357.431640917696 |
|        | 388.326080754063 | 244.73233791067  | 190.152824885328 | 279.704940529618 |
| CDC73  | 128.05898686833  | 148.450023054885 | 139.902610126952 | 123.981053866137 |
|        | 128.626051185037 | 130.742940708861 | 126.355699811531 | 127.159947766922 |
|        | 136.561852783331 | 135.317796804151 | 154.657316209848 | 121.531401500498 |
| CDCA1  | 100.477911152746 | 109.932577444858 | 123.582509531804 | 108.861243071977 |
|        | 118.07991087231  | 257.622317771472 | 120.041623078295 | 161.017267304159 |
|        | 142.853399942089 | 123.582509531804 | 121.653754668804 | 175.073595611435 |
| CDCA2  | 114.790717658188 | 124.317870455205 | 112.133567992833 | 111.137519376499 |
|        | 187.673748059596 | 147.970243979273 | 133.079097536801 | 152.11446058397  |
|        | 168.963976596839 | 174.168079247768 | 149.117224130576 | 155.988447182637 |
| CDCA3  | 118.480344364831 | 137.765042156434 | 114.093935026467 | 132.697727983601 |
|        | 542.009873308344 | 208.793650722271 | 175.222531098958 | 259.146673652222 |
|        | 292.802762636861 | 184.029968090084 | 145.762724663455 | 202.458096827378 |
| CDCA4  | 168.156002330441 | 178.209994522672 | 168.310680227156 | 187.183762762259 |
|        | 337.973433871323 | 212.037224737798 | 229.443064589306 | 244.011434605133 |
|        | 231.890885094917 | 370.227329649269 | 226.531255313921 | 334.316711893654 |
| CDCA5  | 153.494456800685 | 222.675370226786 | 133.348510114432 | 203.223604138192 |
|        | 1249.89496565284 | 995.263014856158 | 484.363052437459 | 868.40984928812  |
|        | 635.37511798786  | 563.779294315901 | 267.747633122387 | 594.180861801958 |
| CDCA7  | 162.096065738375 | 183.201926323188 | 170.866433766203 | 195.724873069362 |
|        | 326.758278851698 | 421.056268094661 | 242.787656836745 | 327.062810389635 |
|        | 458.705688226305 | 591.763423878737 | 247.622351589081 | 406.133430120039 |
| CDCA7L | 151.72544764489  | 175.711836112986 | 182.725987056391 |                  |
|        | 178.684992551017 | 263.250833727291 | 158.36796888959  | 153.774548290902 |
|        | 174.820064644203 | 182.77693508164  | 180.913502162011 | 149.842326869644 |
|        | 192.032080013216 |                  |                  |                  |
| CDCA8  | 138.081268025435 | 171.39347085745  | 144.189175238177 | 154.248226423862 |
|        | 541.351092873522 | 392.909481887174 | 227.715558644326 | 397.153801851621 |
|        | 277.75958501062  | 242.382534384155 | 171.130215858803 | 278.192669077191 |
| CDCP1  | 156.239937979051 | 164.231281729415 | 159.544710238172 | 157.142101889337 |
|        | 234.370850809531 | 218.209523110843 | 242.188218870393 | 190.843795579234 |
|        | 216.522992914538 | 345.135289739599 | 179.460777888284 | 229.157389498775 |
| CDCP2  | 144.727773039491 | 165.803549113373 | 159.23414970379  | 148.927040248436 |
|        | 156.942156078314 | 148.291518446423 | 152.344248425416 | 151.421099926743 |
|        | 142.999526950651 | 162.678619800767 | 157.341422939225 | 156.942156078314 |
| CDGAP  | 139.925201225224 | 148.702473828167 | 134.403789206552 | 134.698857213208 |
|        | 122.793816135585 | 126.362418476129 | 140.191264837331 | 125.789509802098 |
|        | 121.838802846453 | 121.271403807802 | 116.597352307016 | 120.590654346066 |
| CDH1   | 186.496160803789 | 478.180723959397 | 320.648966489586 | 146.256076936456 |
|        | 4847.77258830631 | 2698.5455305009  | 4198.61471038267 | 4866.98027226798 |
|        | 4857.3155917904  | 2586.87941889443 | 2325.02143920169 | 4612.81760689869 |
| CDH10  | 152.309460630038 | 133.296200563657 | 157.390513637267 | 151.137791721752 |
|        | 149.213990424575 | 147.684875777977 | 151.345630073141 | 152.942824158634 |
|        | 144.011792962785 | 134.441142158135 | 122.578170988039 | 140.812334019209 |
| CDH11  | 1235.02626456572 | 1169.43742964112 | 679.191060100076 | 1118.28423222707 |
|        | 170.720018572735 | 260.715580924916 | 156.437949042181 | 316.081825144651 |
|        | 392.004079531068 | 514.002313819685 | 162.427505889157 | 215.98963200839  |
| CDH12  | 152.78638215326  | 141.255406288178 | 149.925051977052 | 139.557059245431 |
|        | 139.938739652347 | 155.108146847158 | 127.03153185998  | 170.725486814469 |
|        | 141.996233801459 | 147.939682463235 | 149.423230365631 | 144.456324230938 |
| CDH12P | 132.324630056168 | 129.561012565141 | 169.147351642004 |                  |
|        | 139.595986615703 | 136.858037332222 | 155.086559474139 | 132.661036963636 |

|       |                  |                  |                  |                  |
|-------|------------------|------------------|------------------|------------------|
|       | 145.42392518235  | 137.15288362126  | 139.113675690483 | 125.666013736767 |
|       | 150.191645194625 |                  |                  |                  |
| CDH13 | 185.485858719975 | 166.12695134858  | 147.164348704012 | 141.340452225686 |
|       | 111.398760606544 | 130.213596986351 | 118.039780360151 | 133.866011732878 |
|       | 122.466276478613 | 235.407064742194 | 123.524952603672 | 120.304037458526 |
| CDH15 | 133.891337645936 | 141.198692540628 | 132.933035878334 | 127.578272480621 |
|       | 156.702300398105 | 132.249906289203 | 130.24527031028  | 127.665162524824 |
|       | 133.090474303043 | 133.125084506877 | 150.566842106244 | 141.186913979346 |
| CDH16 | 119.422996538444 | 119.530214079037 | 124.942701123337 | 140.05012958679  |
|       | 127.507557925713 | 137.58025011566  | 134.943005383277 | 126.305273697185 |
|       | 131.723229807439 | 145.522435728191 | 164.641508485461 | 129.654234837398 |
| CDH17 | 164.917470819096 | 149.808222023726 | 161.04173806448  | 161.430219824313 |
|       | 164.357373919714 | 155.43577761798  | 175.784250947874 | 151.362686497226 |
|       | 155.899547877596 | 165.092451754065 | 127.745801270205 | 153.276938815536 |
| CDH18 | 165.682617337317 | 145.711007027894 | 152.56002779985  | 148.340380102097 |
|       | 150.981208776163 | 145.741465098455 | 141.822974252935 | 150.112549201892 |
|       | 145.912712700067 | 150.920224503051 | 138.275371291639 | 148.82034800623  |
| CDH19 | 194.60309399944  | 172.973175988757 | 197.405472374722 | 176.245698601389 |
|       | 135.485867373592 | 149.153827025981 | 139.679681813932 | 142.49005761699  |
|       | 155.820194280153 | 138.466136108202 | 137.973211667003 | 147.838660813476 |
| CDH2  | 332.666916002481 | 282.742833166843 | 704.653073777277 | 203.317264638828 |
|       | 127.354826381656 | 139.380610974147 | 134.877046981678 | 124.503016568677 |
|       | 139.358218798638 | 180.80811429888  | 156.043994260248 | 155.542691937539 |
| CDH20 | 147.169765031208 | 155.04585737344  | 166.1677526      | 164.1572198075   |
|       | 147.292241873554 | 140.460927375243 | 156.262515148436 | 130.201635099678 |
|       | 149.110300099889 | 171.449326065013 | 163.380402251758 | 154.177340021162 |
| CDH22 | 122.051473363557 | 120.126700838056 | 122.323876787207 | 120.300291760091 |
|       | 120.170269310738 | 131.241878941749 | 120.835207882788 | 126.056493244568 |
|       | 123.072413274454 | 122.860898886143 | 141.486042999328 | 124.080382291282 |
| CDH23 | 147.216303852902 | 150.134337895481 | 133.419239158866 | 144.746134643761 |
|       | 183.815810733176 | 162.233096422572 | 187.586093248437 | 145.889336010424 |
|       | 166.735962853075 | 129.828896822571 | 332.296938254329 | 194.637233028442 |
| CDH24 | 133.757741295765 | 133.095245865663 | 129.408282688425 | 128.626051185037 |
|       | 140.074841537258 | 133.877857711552 | 139.981905225845 | 137.198654302648 |
|       | 135.63604256516  | 129.549673572516 | 141.043668963717 | 134.57472034679  |
| CDH26 | 146.457939801041 | 161.072844903925 | 145.635453468646 | 146.526744516344 |
|       | 356.05426191171  | 351.02823853348  | 612.61438059983  | 407.442337662943 |
|       | 196.676479140094 | 138.56812029378  | 311.04252785157  | 192.130214856642 |
| CDH29 | 123.173506315166 | 134.04235176608  | 136.596127228365 | 121.977373818244 |
|       | 119.735807506447 | 133.238296113721 | 136.659134200122 | 128.113966507586 |
|       | 132.297716337104 | 143.647714966406 | 136.205702793983 | 116.118745494794 |
| CDH3  | 148.16526158216  | 175.199369463703 | 131.907246423067 | 133.365793958118 |
|       | 705.987531074737 | 235.183590602209 | 403.582461109859 | 201.850932289186 |
|       | 177.955579729463 | 944.47112348734  | 203.475080163804 | 421.929674562786 |
| CDH4  | 135.455283504668 | 132.647152200128 | 123.916497557628 | 116.331428876124 |
|       | 131.873313581009 | 138.880168623766 | 115.002176041974 | 128.591292689996 |
|       | 115.309408464043 | 123.56917054142  | 115.51493368527  | 129.935532080325 |
| CDH5  | 271.238736772408 | 373.656487297238 | 182.736067431579 | 473.057488824363 |
|       | 176.883702717029 | 210.41046499545  | 134.751916364581 | 206.275885047321 |
|       | 225.99848688881  | 179.711363255355 | 193.428733288774 | 150.851504454247 |
| CDH6  | 182.633773540249 | 175.372355078713 | 177.267145265362 | 165.262738484387 |
|       | 158.536178747273 | 163.495175710216 | 139.573371281569 | 165.500088159872 |
|       | 151.971337856271 | 164.816672737691 | 143.349486755648 | 147.457193565877 |

|          |                  |                  |                  |                  |
|----------|------------------|------------------|------------------|------------------|
| CDH7     | 120.894583222813 | 130.454496708632 | 125.371128588617 | 127.484178603011 |
|          | 122.027632589515 | 124.574323079707 | 125.519298131694 | 122.751674866182 |
|          | 126.856038484436 | 118.589392612801 | 136.762273376313 | 123.375592272781 |
| CDH8     | 126.806537241253 | 137.326796995017 | 138.902097203056 | 143.793506250131 |
|          | 137.734887788912 | 132.5377752987   | 148.288798428149 | 164.098880989592 |
|          | 130.135721123253 | 138.316043447788 | 154.746081871718 | 133.78629612147  |
| CDH9     | 145.887262601586 | 125.416113646128 | 149.99203906203  | 162.096065738375 |
|          | 151.497680466119 | 173.306283668215 | 144.159316670264 | 149.712320986646 |
|          | 127.398873370484 | 157.546123603057 | 139.131857948357 | 131.146604635155 |
| CDIPT    | 303.300028849873 | 315.47473326786  | 337.271784551586 | 309.937351755502 |
|          | 476.495282784602 | 381.182514249587 | 330.080428155378 | 289.911635155481 |
|          | 288.261250589513 | 213.754156680604 | 256.093363520707 | 261.426617866925 |
| CDK10    | 255.3451781862   | 251.138401278632 | 284.748764120614 | 282.282663608264 |
|          | 316.125364442611 | 219.96819201774  | 269.194172034595 | 235.453139389486 |
|          | 320.360917595936 | 310.426513884979 | 248.594000664466 | 363.963951509433 |
| CDK2     | 284.831817899986 | 272.238922498583 | 231.670761847089 | 221.45275440794  |
|          | 593.090436323333 | 681.810927901806 | 350.926679856514 | 538.156335788156 |
|          | 735.449040059761 | 377.27961559752  | 323.51769984082  | 349.722963659175 |
| CDK2AP1  | 4280.66857663502 | 4124.03779111916 | 3290.27308365921 |                  |
|          | 3784.59114921916 | 7144.3257417116  | 5149.78271096158 | 5479.24427823207 |
|          | 2708.20624364471 | 6691.04319670055 | 4134.02613649483 | 2277.60839052397 |
|          | 5800.06300826802 |                  |                  |                  |
| CDK2AP2  | 216.102897582821 | 246.710233781784 | 222.20526515049  |                  |
|          | 351.998551165704 | 659.900771633223 | 358.780920910909 | 222.544542998356 |
|          | 230.672056810885 | 242.996248524203 | 184.591789011195 | 223.311817085871 |
|          | 258.998065427002 |                  |                  |                  |
| CDK3     | 154.483828924645 | 155.780657091484 | 134.93814894432  | 140.604900199281 |
|          | 149.691340727994 | 152.348210524663 | 144.718507303105 | 172.583615020042 |
|          | 157.021010130169 | 185.140211988926 | 164.766295057217 | 182.397795261147 |
| CDK4     | 981.781076110568 | 1076.09385014053 | 942.41077071058  | 1166.86593572716 |
|          | 2482.27419621925 | 1832.35076992253 | 1903.13326109546 | 3575.60827968852 |
|          | 2261.31473132315 | 1174.0922389136  | 1374.92806285803 | 1611.58245311122 |
| CDK5     | 191.128539630621 | 206.257167235126 | 192.640717683236 | 216.836094088131 |
|          | 460.514672966125 | 369.513420606401 | 327.164773632634 | 282.335582153109 |
|          | 236.985483155452 | 304.402066421813 | 256.394563537658 | 320.774102343889 |
| CDK5R1   | 127.833653828539 | 150.042173991463 | 137.561067667054 |                  |
|          | 131.200042525339 | 249.953902454701 | 171.350620456505 | 157.14512525321  |
|          | 237.78482574225  | 204.453822958077 | 357.431640917696 | 149.127963327999 |
|          | 140.890227770353 |                  |                  |                  |
| CDK5R2   | 120.906553066296 | 157.227118680396 | 128.533900744619 |                  |
|          | 134.628807679002 | 150.924948809354 | 118.540620928268 | 145.485453268383 |
|          | 139.923187410488 | 130.443360119099 | 135.628982370682 | 124.310436914027 |
|          | 149.353072778508 |                  |                  |                  |
| CDK5RAP1 | 256.495848662843 | 259.868701878844 | 270.973600107882 |                  |
|          | 297.419034136005 | 322.576886792502 | 359.363523948825 | 370.140588087649 |
|          | 351.665934915634 | 298.165097953983 | 278.168897504985 | 307.728083981504 |
|          | 269.770777921703 |                  |                  |                  |
| CDK5RAP2 | 441.684169663552 | 422.688531130043 | 386.738154577763 |                  |
|          | 477.489368828457 | 282.836518011311 | 233.161848094769 | 197.341423434688 |
|          | 255.945470052489 | 304.402066421813 | 293.12968694683  | 289.368511254335 |
|          | 199.70041209487  |                  |                  |                  |
| CDK5RAP3 | 512.895335481876 | 531.711823481265 | 618.058496806334 |                  |
|          | 503.093655556038 | 497.916883763059 | 765.911113050543 | 765.532997390972 |

|          |                  |                  |                  |                  |
|----------|------------------|------------------|------------------|------------------|
|          | 591.641325402032 | 862.132582849511 | 534.608644989102 | 758.863418917419 |
|          | 777.651238374269 |                  |                  |                  |
| CDK6     | 490.153210371094 | 433.189221987242 | 570.26564132238  | 470.746477818201 |
|          | 139.010652831798 | 159.633987751501 | 262.913054904154 | 269.673122990604 |
|          | 907.306121257236 | 504.617795280805 | 279.541294184609 | 148.723165059122 |
| CDK7     | 404.21236980164  | 431.974037914233 | 535.49374437073  | 378.4377409749   |
|          | 471.720496000839 | 565.97975389646  | 943.23069404564  | 550.434931878586 |
|          | 468.82816089485  | 1183.1601379136  | 738.087203930249 | 776.807656744828 |
| CDK8     | 187.082082429597 | 138.265155903051 | 178.863722055499 | 142.750432197016 |
|          | 134.420446702459 | 164.87433908877  | 136.497295707149 | 139.733149319736 |
|          | 132.059507616101 | 168.674809329231 | 162.997720993338 | 188.45479937455  |
| CDK9     | 479.638653311025 | 537.510539142248 | 507.040326298457 | 498.05778289794  |
|          | 536.067857235731 | 282.604890044452 | 241.599271777806 | 324.615093103582 |
|          | 312.019603761673 | 442.334886941795 | 469.107624227456 | 307.363302726074 |
| CDKAL1   | 145.416733388652 | 133.891337645936 | 148.158062155247 |                  |
|          | 131.255028381669 | 125.304045138994 | 142.294922363188 | 136.415734370763 |
|          | 134.835962366555 | 154.594339065082 | 150.059862107155 | 147.202510900548 |
|          | 162.373508183992 |                  |                  |                  |
| CDKL1    | 151.679534447228 | 140.856864690669 | 155.673532440475 | 148.120968141789 |
|          | 130.445920648705 | 134.35958389775  | 129.558589108727 | 132.005753222789 |
|          | 130.772410329685 | 126.421148348261 | 216.353502371227 | 134.376870769669 |
| CDKL2    | 128.056668224393 | 162.689415085423 | 165.500088159872 | 190.291185322482 |
|          | 142.89427871125  | 135.508803488048 | 146.785478478701 | 151.76341973891  |
|          | 142.440344960504 | 146.164093136588 | 128.4702079007   | 151.679534447228 |
| CDKL3    | 204.89842561202  | 190.189217962555 | 216.929969034881 | 169.619338456208 |
|          | 162.914301705151 | 171.816841286562 | 180.968659614238 | 188.027848008991 |
|          | 172.992936821292 | 161.434331154045 | 175.908645445479 | 155.777281781161 |
| CDKL4    | 115.855948612544 | 134.178733595096 | 129.315412536491 | 124.749727939593 |
|          | 135.291264978088 | 120.355844117573 | 137.719257499747 | 131.933026690056 |
|          | 123.442970398288 | 139.271829906127 | 147.508817393901 | 125.935071837868 |
| CDKL5    | 123.351112976814 | 110.501341211051 | 115.184395637553 | 121.231939494619 |
|          | 119.873844587252 | 117.692662275393 | 118.195512252508 | 119.75069850668  |
|          | 114.143874572202 | 119.655162437465 | 122.243585162452 | 114.539671934155 |
| CDKN1A   | 879.301932542031 | 1456.76683429755 | 653.047570485109 |                  |
|          | 515.597523880328 | 1359.63626195826 | 1564.8868894162  | 2426.2098937241  |
|          | 1007.41624313399 | 2828.97255380291 | 3232.96611074938 | 1949.60516542965 |
|          | 2891.03258768937 |                  |                  |                  |
| CDKN1B   | 514.463945278314 | 654.881990232975 | 697.774882173237 |                  |
|          | 572.049540360134 | 485.309521583972 | 445.089930641391 | 471.598175637494 |
|          | 608.611927946607 | 477.741216640575 | 321.910803473854 | 442.12886967939  |
|          | 508.735412486964 |                  |                  |                  |
| CDKN1C   | 400.924914238052 | 430.100415399881 | 486.947380524463 |                  |
|          | 400.676876982655 | 182.028675726969 | 188.941900997781 | 187.183762762259 |
|          | 181.914505612128 | 263.888891822857 | 314.751799003704 | 186.021181691517 |
|          | 181.813812621767 |                  |                  |                  |
| CDKN2A   | 127.6078497227   | 139.480361732772 | 129.642952083513 |                  |
|          | 128.689465747173 | 156.66832364923  | 148.286700314107 | 128.351235762192 |
|          | 167.139257044999 | 201.269380130546 | 137.915773215037 | 163.143613079037 |
|          | 132.367155914392 |                  |                  |                  |
| CDKN2AIP | 306.896732729554 | 309.997909440664 | 386.221302830248 |                  |
|          | 313.828943866034 | 218.156162474715 | 336.338518973032 | 336.639473916174 |
|          | 292.068293167526 | 264.456926651554 | 329.660368915848 | 242.971958493453 |
|          | 308.517561840596 |                  |                  |                  |

CDKN2AIPNL 13526.3170858629 13423.8921651885 14499.7866852901  
 13902.1067272762 1848.27927621606 14592.6308255978 6571.35528952186  
 12283.9915232122 10900.1783397368 7082.28969354712 5572.23400804004  
 9044.54885739666  
 CDKN2B 181.288519308219 177.023536553193 174.680918805036  
 165.39758732 167.67952650068 170.108500366942 153.992763544073  
 174.187510325385 285.131244588624 170.335930486215 185.886737029845  
 163.516075721791  
 CDKN2BAS 123.615802924067 120.581554457723 116.961391747202  
 129.362793087439 115.247223837316 110.212739445 119.242880574306  
 119.480037559953 140.839056652898 121.531401500498 150.911524755251  
 124.031916322066  
 CDKN2C 168.327600230929 165.808660192901 272.885527139137  
 150.685245572093 125.9888344762 130.242779079309 142.573662441786  
 136.612903661685 141.344034069373 145.08853313195 131.12953085854  
 181.288519308219  
 CDKN2D 200.424975825325 193.315380090713 199.597685421675  
 207.993943398697 199.597685421675 235.76573393374 173.735045816949  
 181.215046876308 194.488249052694 205.026176598298 170.646233722767  
 191.365014963729  
 CDKN3 135.928428484011 151.839306445341 126.37749112514 141.198692540628  
 440.657747083721 611.772512110915 195.303469330682 425.826693178023  
 269.468453936818 337.728737393381 162.100547394235 316.663128947813  
 CDNF 140.617663657037 152.721146962124 138.724959677368 134.91697121091  
 143.351341716363 157.494596757446 157.736101691222 135.379284233708  
 148.498352529396 142.510745106328 150.775805918537 135.934976183762  
 CDO1 326.246702537465 270.945325305492 397.153801851621 228.086256222312  
 136.735930829008 139.469148541078 130.772410329685 137.846463796994  
 141.855655600443 139.375386456759 151.248365605631 127.859873416515  
 CDON 140.77762487941 127.424848301217 128.413213851142 134.292099546804  
 118.918962530408 118.095936088242 121.316836274255 124.530660958725  
 123.709293439934 112.348094614855 126.143886553557 119.391213033544  
 CDR1 115.80656409185 113.708683868028 116.746018509166 118.457573670556  
 109.586955365611 117.392898601408 116.700397932007 115.468921844902  
 116.615250922316 119.603565559838 124.66386961898 110.286187184448  
 CDR2 2004.19532096239 927.137881369911 1279.15873231449 830.455793617181  
 493.715108157171 689.590642377619 813.034056288861 1095.52349352502  
 619.635734567779 318.73799597811 711.491528818004 478.909308632726  
 CDR2L 746.296354515617 711.729857540712 600.430996779799 745.482863218223  
 1311.34904760947 1207.11788506001 800.013123376748 1379.95968831696  
 2491.33490046283 483.174262289559 574.6506349984 783.991448771818  
 CDRT1 148.112717810117 160.892163220381 145.276745572405 145.789840511876  
 150.498954408708 147.870549240703 153.200153031275 175.372355078713  
 160.006185904123 151.930565620382 155.140371265225 144.935571704834  
 CDRT15 147.268006631005 127.661634554996 129.127563278016  
 133.743708220112 147.022594294963 142.637421204193 152.654938328424  
 150.35767254363 150.626826756019 145.079450753969 140.646946425036  
 147.230113868203  
 CDRT15L2 141.037217406848 117.77708734157 128.451788292588  
 116.90832995093 120.733009784454 139.835983835267 131.930814868433  
 140.152177370089 125.172189715764 141.822974252935 126.588382665802  
 138.836422729663  
 CDRT15P 109.30275288389 109.760525674874 115.3611179192  
 110.024815508703 111.794102015354 109.098105822556 108.768730405582

|          |                  |                  |                  |                  |
|----------|------------------|------------------|------------------|------------------|
|          | 106.000943456483 | 111.584425166104 | 124.248997533959 | 118.45291712775  |
|          | 118.474291525263 |                  |                  |                  |
| CDRT4    | 216.209052148435 | 228.675099004411 | 231.63127072986  | 167.811412309356 |
|          | 157.86653024793  | 217.89028736436  | 202.421990203844 | 228.125521373477 |
|          | 194.500222559978 | 203.317264638828 | 303.483515328621 | 153.649235507812 |
| CDS1     | 193.786889748038 | 242.695286989672 | 154.990319019521 | 132.091532692048 |
|          | 485.87138934376  | 786.62709337246  | 625.544719251096 | 751.568940762011 |
|          | 838.267069860172 | 757.877066703516 | 899.667912542118 | 479.638653311025 |
| CDS2     | 361.160881334174 | 315.752980521266 | 289.368511254335 | 269.892633574243 |
|          | 307.982260548106 | 287.455622143233 | 262.488050186425 | 235.350819745387 |
|          | 231.47915227815  | 254.607324522225 | 185.220017451419 | 296.603054615145 |
| CDSN     | 124.075077123156 | 115.559551514777 | 130.617505834747 | 124.837187124441 |
|          | 122.706176540192 | 122.194493542073 | 116.604371744082 | 127.792241991414 |
|          | 125.637138636558 | 163.778790431064 | 137.483830932387 | 124.933738341123 |
| CDT1     | 102.851152421943 | 154.055550115498 | 122.989642938474 | 142.06907380533  |
|          | 602.480822390671 | 341.2887754025   | 184.682478530334 | 338.822464893411 |
|          | 304.152390210727 | 239.762135294506 | 169.422015793848 | 331.747622606378 |
| CDV3     | 463.754869412768 | 416.546844844021 | 542.121375354644 | 404.073802241516 |
|          | 327.480268032814 | 398.673582680257 | 424.751154004399 | 473.853999833395 |
|          | 479.261755380872 | 532.950400370668 | 393.115606440229 | 437.489929507567 |
| CDX1     | 119.52150378372  | 152.088488171996 | 130.368933537243 | 134.825699448987 |
|          | 147.118987674809 | 147.153129531937 | 149.88598449818  | 138.548983773386 |
|          | 140.66266106824  | 162.996129396867 | 134.241917425247 | 144.940119680152 |
| CDX2     | 119.95666716163  | 120.862516074358 | 122.149756212115 | 124.02280670421  |
|          | 125.701083319929 | 207.298994298453 | 119.709032462308 | 123.857527555048 |
|          | 118.220555783444 | 112.809629077555 | 141.457040042276 | 128.725044326566 |
| CDX4     | 114.902673141786 | 114.526374388145 | 107.07609243233  | 108.79453730066  |
|          | 120.272964182307 | 116.263405190786 | 120.325985681299 | 109.793568518462 |
|          | 113.919529047225 | 122.087107663865 | 107.780763250481 | 107.013012418356 |
| CDY1     | 141.152406037213 | 126.310788291075 | 132.20764558027  | 135.741404460897 |
|          | 133.301527400458 | 130.982011094627 | 140.113334247294 | 128.23910347716  |
|          | 133.634886800037 | 137.848546040474 | 133.71965790848  | 137.555903296788 |
| CDY1B    | 148.739888930189 | 147.875855077738 | 143.867013358737 | 147.73141408795  |
|          | 146.550421651378 | 147.73141408795  | 145.666712006532 | 152.514455788489 |
|          | 144.165277164871 | 147.446381217887 | 145.873038603155 | 152.990523860831 |
| CDY2A    | 107.239841465534 | 108.061315311823 | 114.818898581401 | 114.161540771427 |
|          | 106.953841653951 | 123.141928612324 | 121.79022464086  | 116.20008794813  |
|          | 114.129044806825 | 109.760525674874 | 125.114303270024 | 117.137027732123 |
| CDY2B    | 120.337241026338 | 116.572001618531 | 117.65847906412  | 125.093376753408 |
|          | 125.798453479983 | 120.507930710099 | 121.968807253639 | 118.737244693366 |
|          | 114.452922529209 | 114.874358180801 | 141.424950841838 | 120.050548624975 |
| CDYL     | 162.488819873513 | 164.319378349317 | 160.478519202775 | 163.306853098724 |
|          | 183.61611813765  | 145.534520042669 | 173.761036260869 | 157.142101889337 |
|          | 167.365850007748 | 158.356964958885 | 218.031238893075 | 179.94333102877  |
| CDYL2    | 170.439725847568 | 173.782474972742 | 159.973758408655 | 172.521737547052 |
|          | 191.241000498118 | 183.951404362826 | 211.269041187154 | 184.518666956721 |
|          | 167.43630698726  | 183.115511373872 | 153.315309202016 | 190.825209733575 |
| CEACAM1  | 151.431513447721 | 176.208206282902 | 139.172437503442 |                  |
|          | 142.898851434337 | 382.630113452429 | 437.931339781992 | 691.205738835917 |
|          | 285.980446338971 | 961.931130189779 | 277.219796733134 | 715.43295523922  |
|          | 521.512936372701 |                  |                  |                  |
| CEACAM16 | 143.16930809425  | 140.762415240824 | 133.554822920765 |                  |
|          | 148.503282415207 | 150.880818951088 | 133.370488470007 | 142.248293068033 |

142.230934617475 132.941478943584 127.488853386792 132.628358688595  
152.805525883571  
CEACAM18 123.336074100984 127.344210958898 115.299986138153  
117.773743603829 130.867819112143 124.885950473434 115.321501844663  
115.687997771921 114.874358180801 119.01559016005 139.331046480528  
120.384210318  
CEACAM19 130.949405011154 139.130560988108 118.930792960643  
129.636135486593 134.572552391307 124.408996713299 131.367075440559  
132.011199659803 126.796253980623 138.438792881135 131.797936395014  
126.606163970149  
CEACAM20 115.25307661968 115.775525016883 110.651971902576  
107.07609243233 108.247365868673 103.826308328446 109.113476990309  
112.90900939264 104.714872508838 107.126004317323 119.01559016005  
103.734303632543  
CEACAM21 156.516250236679 170.18781660707 162.453586139402  
162.769643886845 154.347332766547 155.63328143658 171.982071800592  
185.140211988926 163.262893278578 146.135269553731 157.78390301218  
167.330860677012  
CEACAM3 114.561836290349 122.174036435094 123.893768254549  
117.60787142216 116.282988576774 116.449064666763 114.302645757446  
121.599883734552 123.463861015933 117.986939058467 138.054470878471  
112.38543517651  
CEACAM4 160.382971629272 158.020651857664 150.831554010122  
165.737618983611 162.997720993338 142.299535614113 131.069515666204  
136.60514429355 148.704917490429 137.493436771898 150.931114848235  
149.233023751582  
CEACAM5 135.521802085177 134.455623159793 152.315376022976  
147.491439949088 240.283918204202 139.953572663277 143.712450441816  
168.398366575579 158.390337945372 222.544542998356 172.491604217899  
134.060214479265  
CEACAM6 156.576585764311 314.4408959517 133.717451195844  
147.77916610545 922.50743596248 143.407371444437 268.930428617695  
549.047065540118 156.114825514646 985.637230639964 1090.20254511452  
155.383166865192  
CEACAM7 113.620070198869 127.712004247155 118.650091706226  
122.10489926804 137.176144667253 128.205022859019 104.861024325857  
114.598636725763 122.84603217721 111.788481822686 230.079664410595  
114.902673141786  
CEACAM8 118.694037994926 125.950365319029 133.103403333542  
125.025064237439 127.669334230458 114.452922529209 119.334967856721  
125.765399556488 128.785472881136 121.003207135942 125.865974180252  
132.446406243531  
CEBPA 317.273940108333 424.912426797488 303.005912224195 304.937584086529  
9596.10781313429 3592.7878705048 2605.13680290987 2249.8123426309  
4386.83308119416 455.930204471585 1464.04124596264 802.017244099902  
CEBPA 3294.92439159154 4979.31150268741 2124.12760841901 2031.01186679713  
5521.74673982411 3712.67025366957 3734.705550862 1639.76556136383  
6156.29203791697 4628.04544865227 3253.76017336684 2399.88695085752  
CEBPD 5240.40795364202 5965.21815409254 1873.84654908146 1436.57771711084  
3989.14883668905 1896.69856822105 1573.03248861784 1362.75971646355  
2406.67187918735 3693.4058156307 1871.91894530722 1896.69856822105  
CEBPE 105.096927149239 115.907902010701 120.543881800775 112.248047602652  
110.304102941202 112.005939063045 113.268379270385 117.231243105897  
122.144209450757 128.591292689996 120.538535752185 112.081127853476

|        |                  |                  |                  |                  |
|--------|------------------|------------------|------------------|------------------|
| CEBPG  | 866.147379099606 | 685.848203651889 | 562.543347322063 | 539.27766384282  |
|        | 688.915534194306 | 1175.27165286568 | 792.634423781309 | 948.734577648136 |
|        | 964.473774310687 | 675.596864001032 | 745.153336165802 | 624.264994653057 |
| CEBPZ  | 1818.92700816112 | 1875.21979956596 | 1788.35884039549 | 1634.20135156938 |
|        | 1222.014210447   | 1510.77099418802 | 1792.35343044443 | 2131.68478964427 |
|        | 1357.48791782399 | 1477.10828981572 | 1865.44709751822 | 2295.16438420175 |
| CECR1  | 244.011434605133 | 220.288758600588 | 166.595529296463 | 147.138814313885 |
|        | 1047.78978081493 | 159.282348516052 | 196.136080427522 | 440.495339027491 |
|        | 293.080122239022 | 138.903450375532 | 528.650794915616 | 1118.86225415732 |
| CECR2  | 143.818379692331 | 128.986795394842 | 127.50624009248  | 151.61049450647  |
|        | 130.408519735001 | 153.415901281564 | 130.998637545686 | 129.845344493418 |
|        | 127.065518421996 | 122.262664384198 | 137.086936444421 | 140.597877909094 |
| CECR4  | 141.990639998829 | 159.990561741675 | 172.916234073981 | 158.282899758551 |
|        | 155.734509841719 | 226.623172906957 | 150.570540340126 | 151.96843908074  |
|        | 154.248226423862 | 138.308965237491 | 159.438084699061 | 155.612543356905 |
| CECR5  | 374.872358131797 | 358.217145707718 | 410.42088953434  | 396.781827940009 |
|        | 1153.5175534971  | 704.448123154868 | 580.164288826741 | 642.484527246259 |
|        | 464.436380568216 | 510.061974830525 | 450.220658078322 | 546.399972543938 |
| CECR6  | 145.112399373761 | 131.335344547051 | 124.395047385025 | 131.773304233929 |
|        | 142.201672822989 | 126.205931638442 | 122.587545171646 | 140.812334019209 |
|        | 129.201101445773 | 128.40650280096  | 147.297163685914 | 140.842305941666 |
| CECR7  | 630.473042320288 | 740.800822095116 | 668.127527385348 | 1182.50261323518 |
|        | 249.171307797736 | 324.949988230276 | 271.397087928135 | 272.41397350779  |
|        | 260.045018348182 | 209.196695368783 | 270.360397503276 | 293.794745907663 |
| CEL    | 143.765257998859 | 198.979744266277 | 178.636555178682 | 152.72717701452  |
|        | 325.999687273862 | 172.276968413879 | 268.600782558985 | 272.666435295288 |
|        | 211.869300324471 | 182.084333814175 | 206.446584387595 | 171.11282933168  |
| CELA2B | 123.004137408444 | 123.427366316096 | 115.224011128183 |                  |
|        | 122.03508430361  | 121.760488406107 | 127.202039384041 | 127.086470811408 |
|        | 119.150626141327 | 125.290320836648 | 121.886886059038 | 130.112882549637 |
|        | 125.761205967344 |                  |                  |                  |
| CELA3B | 147.52178512946  | 136.27621600731  | 151.507376053438 |                  |
|        | 160.261708910517 | 152.47429737104  | 147.854171854456 | 159.327764602722 |
|        | 148.764956861822 | 147.4182675362   | 152.993555372242 | 152.935963398921 |
|        | 150.580133889656 |                  |                  |                  |
| CELP   | 151.992112109698 | 132.973551954067 | 127.404415477384 | 148.975112606364 |
|        | 130.798254041597 | 134.336279655683 | 147.87699690647  | 154.475735552851 |
|        | 135.52861375119  | 129.914077170794 | 123.122705969332 | 138.544053540799 |
| CELSR1 | 135.56878810365  | 139.400521576978 | 140.248610391566 |                  |
|        | 142.12808103815  | 154.079355899056 | 145.873819094778 | 155.962564511907 |
|        | 130.257242615762 | 134.522715664256 | 139.615706918035 | 127.261349543394 |
|        | 133.12904935533  |                  |                  |                  |
| CELSR2 | 189.647009287524 | 208.214764518526 | 237.906142045719 |                  |
|        | 280.595515386655 | 355.990908506973 | 200.468804559127 | 261.541138637729 |
|        | 210.5689532432   | 198.285073991956 | 398.272713014637 | 182.698275130489 |
|        | 335.623336587396 |                  |                  |                  |
| CELSR3 | 146.709967739596 | 179.525651423361 | 125.506466437764 |                  |
|        | 137.199718376452 | 882.037055216609 | 517.23393716516  | 653.749043828462 |
|        | 147.70836747108  | 369.198837083585 | 204.787016443123 | 767.662367310672 |
|        | 211.995890899864 |                  |                  |                  |
| CEMP1  | 120.606354515072 | 133.599098708818 | 124.193603137858 | 124.095340478326 |
|        | 144.077080621909 | 117.343165720552 | 121.665157726433 | 120.07404952486  |
|        | 116.977202125093 | 121.526724715417 | 165.947514372877 | 123.02167644694  |



|         |                  |                  |                  |                  |
|---------|------------------|------------------|------------------|------------------|
| CEND1   | 168.052288484172 | 157.948814637726 | 177.802767772786 | 182.665357598121 |
|         | 183.081450609516 | 176.347535860374 | 151.010493695217 | 173.964378226631 |
|         | 174.635853531194 | 162.61434899634  | 148.953720017484 | 157.519633258844 |
| CENPA   | 117.078720392441 | 121.497645719165 | 113.627435441258 | 124.374156313613 |
|         | 348.241471067257 | 180.20999937977  | 155.558839375761 | 255.59042517603  |
|         | 211.505504834207 | 220.379186481273 | 144.660095230819 | 201.969002368045 |
| CENPB   | 2227.70654174379 | 2274.75133434566 | 2355.29862638453 | 2792.13364570755 |
|         | 4663.03253705034 | 1995.6000523628  | 1327.65573168233 | 1033.03719406038 |
|         | 1430.20038077595 | 967.123240442957 | 1726.15788525017 | 1759.9632914516  |
| CENPBD1 | 182.810581377888 | 203.816305810343 | 180.478294414245 |                  |
|         | 200.342786450248 | 206.669783013221 | 140.014167357286 | 207.940596890723 |
|         | 181.876635968785 | 158.072347847051 | 184.672330560677 | 176.440625367948 |
|         | 169.881866987359 |                  |                  |                  |
| CENPC1  | 147.351826045609 | 158.665476708054 | 141.964796033176 |                  |
|         | 138.763250836766 | 159.524235332529 | 135.758133410577 | 140.579839043912 |
|         | 156.737219981981 | 158.185593294878 | 142.192934622228 | 172.395805302715 |
|         | 177.582314734704 |                  |                  |                  |
| CENPE   | 149.94715601106  | 161.035985824654 | 162.850128623401 | 147.932875151331 |
|         | 204.161375686761 | 394.35596596181  | 229.660838239474 | 394.73732350607  |
|         | 246.88857694249  | 289.037033338975 | 195.16856673253  | 291.537725613819 |
| CENPF   | 151.354187593773 | 165.213327555428 | 153.610428214886 | 186.140970908638 |
|         | 335.858047332641 | 302.637859140061 | 181.048789688798 | 312.484289357493 |
|         | 451.496617003797 | 250.18189549573  | 176.300743660299 | 378.308562999445 |
| CENPH   | 150.931114848235 | 140.804008584006 | 145.320945010364 | 156.361037318986 |
|         | 205.560952959537 | 160.20843950503  | 182.515302191173 | 152.131804134092 |
|         | 169.107948050094 | 185.396765725228 | 150.28508305615  | 182.181756507598 |
| CENPI   | 128.756818133357 | 147.552635527742 | 127.539091409962 | 128.910261453632 |
|         | 146.70298187005  | 147.561362873855 | 135.27739087376  | 152.601626526117 |
|         | 149.941056059544 | 143.429394097222 | 133.62358240645  | 142.924854393401 |
| CENPJ   | 297.332272659995 | 243.807038920733 | 316.663128947813 | 254.552034511333 |
|         | 197.848577663238 | 403.812520074723 | 302.601458409102 | 313.099028594073 |
|         | 239.704459251571 | 239.474937674583 | 274.77366169918  | 282.836518011311 |
| CENPK   | 153.882081780197 | 168.969180646603 | 154.2228051929   | 162.748836971539 |
|         | 180.070209705044 | 223.154771092064 | 196.378888436237 | 215.300064529551 |
|         | 243.772412032046 | 216.53417734069  | 185.46843333826  | 271.004741629789 |
| CENPL   | 178.584378959369 | 163.593106951255 | 210.803130108618 | 161.155280539113 |
|         | 178.542247857251 | 241.706645643141 | 204.438365139666 | 281.881563164961 |
|         | 223.81987303579  | 207.440700355457 | 189.403934838648 | 227.065194522692 |
| CENPM   | 119.252737868132 | 130.991496243273 | 121.965131419551 | 133.040952285855 |
|         | 514.124012546829 | 274.343238288436 | 183.764215745794 | 308.621688157016 |
|         | 333.131139447511 | 211.766884719761 | 173.347463632976 | 269.495247190598 |
| CENPN   | 183.83720937589  | 178.496344474999 | 171.221972336784 | 183.397833894087 |
|         | 452.077434390612 | 391.782120640025 | 340.608165077422 | 390.573484082597 |
|         | 297.12411625104  | 456.038981546175 | 255.903775525554 | 400.353795948162 |
| CENPO   | 135.711590400394 | 134.464053009101 | 129.155804800869 | 133.74741832303  |
|         | 149.230226445583 | 187.920789153124 | 139.730999352036 | 164.901810642726 |
|         | 155.108146847158 | 147.457193565877 | 151.954389699615 | 147.183889426843 |
| CENPP   | 123.330142002791 | 129.015422924366 | 130.807596523171 | 132.712573198794 |
|         | 156.277567608825 | 143.444109491884 | 147.821639002833 | 135.928428484011 |
|         | 136.400959554698 | 150.674189235105 | 145.739537463907 | 126.872912960681 |
| CENPQ   | 130.024546949158 | 138.616719975373 | 135.616911926164 | 136.865340099645 |
|         | 212.669156800241 | 169.725534829981 | 161.160974998803 | 173.520662003159 |
|         | 173.690008681514 | 171.49930976135  | 167.260319361746 | 139.615706918035 |

CENPT 406.028724866233 416.861099188252 338.46332239699 530.267835989435  
368.276805218658 258.012234458166 230.947339143332 275.203046536524  
253.009376944901 316.281469585496 286.703712311781 243.936797286495  
CENPV 332.138346958671 339.54582149284 319.768792196774 426.464641742092  
687.700356531038 874.348941257592 314.610979086485 502.063888359427  
236.833653794223 170.596937075493 668.127527385348 208.321765801227  
CENTA1 735.8141982568 464.577839898252 988.788192022196  
461.413469623811 1865.44709751822 897.0125616892 1231.92253664482  
696.277780670166 867.601542930533 469.714826990063 799.132592914065  
2203.82462320864  
CENTB2 215.698924670416 206.605699708924 238.617228632505  
192.009562635198 184.451469623426 329.604568691377 243.732074437237  
304.547738011742 298.664864578349 297.022984365795 255.12306184224  
256.022057262325  
CENTD1 132.681475162386 120.696557306298 125.655823846115  
125.071387239411 119.213217733213 130.355969431473 142.617474507282  
129.397378057767 134.8745127454 139.418394104487 131.17119492692  
128.556280049403  
CENTD2 210.218440444631 209.398724613377 153.541193559658  
234.156713102803 245.607130404306 151.338765231607 194.724219884752  
174.840923772532 167.817232948801 158.73040336393 208.270622752385  
173.839053227554  
CENTG2 542.544172683021 460.742037437298 478.040234382488  
635.37511798786 390.573484082597 313.641656294638 458.953009417683  
294.922183826144 332.749676505218 468.712260193746 266.162244070031  
395.521241316058  
CENTG3 412.736636437651 387.355661073935 325.751369001105  
430.220363263561 644.741046498743 535.758943850734 470.154677948419  
449.523996620257 327.749926183823 272.854435771465 272.712242893937  
631.106334754678  
CEP110 188.40383184521 192.565733545715 205.403820910921  
219.940167815376 183.905926269285 206.73292907905 179.273936200852  
231.517412929077 217.435155984897 202.662466141301 288.823376348944  
207.864808684047  
CEP120 134.509830749072 131.48517604564 147.626071601072  
138.880168623766 126.766964875664 151.431513447721 143.985850833974  
183.247396324425 158.322477506517 173.387549650592 149.227646026658  
151.479748626813  
CEP135 251.731327363027 229.181725450534 228.926077117474  
265.260411490697 221.561252012695 271.823243396395 303.724140156439  
508.127470400078 294.17588071297 343.617417488962 258.384059994446  
352.418229893699  
CEP152 158.193008411967 156.460374293022 169.764014031526  
147.968104627262 160.496585125233 170.818182800759 178.440907093913  
207.104548555929 205.162633740798 187.561298131124 176.86489466512  
196.908612360694  
CEP164 286.774606295106 340.193863653875 222.484058975856  
444.192734921566 282.392419584508 146.979988781462 188.836327151669  
188.36361073603 176.167129202773 165.100811808026 245.351459157365  
172.502036705114  
CEP170 149.331805754859 146.447745446317 157.765771942689  
153.184575380093 151.148295679242 152.395272857974 159.424105896749  
146.84891312893 153.664503112778 157.507108643575 141.083966525597  
157.203304477454

CEP170L 136.587165242663 132.793020446043 139.860093278582  
 138.401406375804 134.487476333464 134.81595608984 138.758688249557  
 140.641956393993 141.541355091514 140.752616434418 122.305514440939  
 140.142884879106  
 CEP192 239.541516080716 222.990586491219 289.297370738382  
 242.221324619171 177.073245863872 450.120868656638 324.346723939622  
 431.019896339435 322.889296658955 280.798003990849 331.62124160152  
 392.430873293903  
 CEP250 139.502856192876 135.085039737228 140.608266389167  
 140.772074031028 160.786907816025 148.605816748229 162.762473039474  
 146.054535585464 148.104173238606 153.171822092714 149.606576415873  
 136.149732574763  
 CEP27 2496.17211592866 2639.60135568 2618.64973582507 2398.71483410593  
 522.400055538966 2446.31228564539 1505.90883940934 1828.66165670455  
 1519.38642390142 1280.57297272231 1946.45172007314 1307.96033038529  
 CEP290 214.4829383264 196.566937667522 218.156162474715  
 198.620777452192 167.46432961654 167.106870400592 242.269784551092  
 323.51769984082 175.543924200429 141.778060508776 239.704459251571  
 208.611557959861  
 CEP350 587.54075434249 595.593867616527 626.104755496369  
 436.731545612902 549.96567374713 903.824331691969 789.401526545277  
 583.697431061521 408.811415529922 441.785666261936 956.76879975749  
 730.673649872205  
 CEP55 129.938723074546 161.16688895179 125.379842077431 132.213890220705  
 423.045329000756 426.548994267836 217.670330817769 479.761165832339  
 336.786227017391 277.726756691133 242.096692715029 439.492285515997  
 CEP57 193.522811257085 201.49630027392 206.164058935215 151.345630073141  
 193.064450357153 156.75001042701 161.581641777014 193.052112923573  
 177.639351778834 157.468934439452 328.200548902445 176.631604815669  
 CEP63 216.181417552574 215.272800347166 247.145700155364 204.842791081358  
 185.843639043466 202.300293733922 252.432175363972 234.947745514175  
 244.668813440638 199.275716402358 230.508733145583 249.823314327355  
 CEP68 180.008152341531 199.209279169496 227.884445686928 186.66469040433  
 155.752117896424 139.199446543251 127.540848073484 165.244616507084  
 131.423918669689 146.035731780312 158.080749926756 148.996601285688  
 CEP70 218.2454853526 184.542232315662 199.947823264085 187.352655464866  
 224.424524191566 205.08372943071 179.794718712964 312.406286993239  
 245.01029221002 138.358404420064 358.52459123416 228.499052416183  
 CEP72 177.825648107126 175.948959885759 180.493406236326 182.02250582556  
 217.748916080172 226.086733606951 205.026176598298 182.57496767012  
 172.686798187142 196.802641002079 150.333572271902 193.641927801805  
 CEP76 141.028377381019 154.384766720753 153.974384951787 145.365935017728  
 135.689889081912 157.944355564411 145.404469340821 159.495272062735  
 131.081793789906 161.965270932582 130.393631150485 155.957570398118  
 CEP78 183.385868234361 172.020235319192 167.46432961654 170.661808797506  
 271.196028302639 276.224613560582 191.961269585431 247.407442038488  
 204.113356572343 188.952730860801 190.389158930835 185.706228572019  
 CEP97 153.843250142472 144.364319564075 157.881569297409 151.933078262284  
 147.959740692766 160.876228450608 153.655778377717 141.29868389128  
 146.362705590778 142.071492722749 112.126521532091 139.073785024092  
 CEPT1 359.256193328366 291.537725613819 368.637819994033 254.065327837176  
 365.140886302762 347.620001353026 375.407747753058 318.778978094743  
 424.751154004399 344.737964092526 374.46180489079 293.234972169244

|        |                  |                  |                  |                  |
|--------|------------------|------------------|------------------|------------------|
| CER1   | 126.595668758744 | 125.98519427755  | 137.237089899964 | 123.926293128246 |
|        | 138.088712695622 | 146.359038260378 | 131.519455635415 | 140.316066297536 |
|        | 132.200648560899 | 127.080149144234 | 145.841028932318 | 125.9888344762   |
| CERCAM | 400.23671843715  | 382.069677030369 | 278.651369597422 |                  |
|        | 485.373169494941 | 380.243136469602 | 156.336425973696 | 172.568852318369 |
|        | 157.841520434044 | 162.850128623401 | 353.826834642154 | 163.262893278578 |
|        | 157.348475799643 |                  |                  |                  |
| CERK   | 458.218913259336 | 421.255522475862 | 370.390323116113 | 429.268202514543 |
|        | 163.053121879323 | 210.989806933158 | 167.599784887933 | 200.405532717305 |
|        | 251.869781014029 | 286.194197552489 | 217.013533525724 | 274.281532397691 |
| CERKL  | 133.866011732878 | 126.217702283708 | 134.369532556726 | 141.466287523861 |
|        | 135.526248253492 | 136.705326991088 | 131.510494315469 | 134.978785580693 |
|        | 134.915900729865 | 138.050999864689 | 144.181359740481 | 138.233799607706 |
| CES1   | 701.481003619067 | 753.654626233604 | 463.880793292701 | 929.198774489695 |
|        | 132.439176846818 | 141.808122700968 | 158.73040336393  | 155.911387663464 |
|        | 158.92538634742  | 144.210698143215 | 131.850952248545 | 137.662135592983 |
| CES2   | 378.151202933526 | 462.553267274302 | 447.779854598556 | 492.377642058095 |
|        | 348.711663415777 | 372.81255844018  | 457.292146759215 | 341.501397478593 |
|        | 378.695635790714 | 1099.37392456694 | 513.428413503031 | 550.434931878586 |
| CES3   | 138.510722755317 | 147.728018766726 | 140.06989960847  | 135.458682745495 |
|        | 160.150336334888 | 144.419657674797 | 151.632801137039 | 145.881727908814 |
|        | 153.39738748803  | 141.097257687941 | 148.816369706133 | 151.522526161299 |
| CES4   | 142.997365080299 | 140.115154069602 | 144.848839185565 | 143.030777754448 |
|        | 135.886859004208 | 135.766466392056 | 139.073785024092 | 131.023892409073 |
|        | 133.45690661612  | 142.358754646258 | 123.182903611854 | 133.337863400762 |
| CES7   | 129.976540483758 | 142.311108110185 | 158.531514776098 | 135.798387504219 |
|        | 130.66511389864  | 161.930142040623 | 135.810476921749 | 161.755290291637 |
|        | 149.089067389266 | 147.278236958386 | 129.281564491007 | 144.311620064675 |
| CES8   | 150.786618560854 | 159.781313090489 | 136.249621724093 | 147.488635834397 |
|        | 221.411372022459 | 175.656204695951 | 176.317805247749 | 187.472028627511 |
|        | 181.3859695951   | 169.043206258073 | 202.061887608293 | 217.89028736436  |
| CETN1  | 151.104891644466 | 147.195127201893 | 143.347066447019 | 154.507721014473 |
|        | 151.252137441251 | 138.242983316259 | 145.326803807448 | 150.105503384881 |
|        | 138.22823004719  | 146.750774496317 | 143.260448301109 | 150.914644894869 |
| CETN2  | 2853.14759681683 | 2782.94647782764 | 3570.21370790206 | 3298.73393277409 |
|        | 1758.7809492929  | 2217.82628612929 | 2165.41403521012 | 1841.63015706195 |
|        | 1978.12229412176 | 1727.7144253077  | 1505.09908072606 | 1667.86825735893 |
| CETN3  | 471.069295685718 | 504.502047826003 | 401.631377313065 | 455.486248388968 |
|        | 350.166837086936 | 343.488356185437 | 534.083703564903 | 264.563741039382 |
|        | 311.715351215263 | 282.244214637625 | 560.757496975779 | 403.720036930931 |
| CETP   | 148.272252953881 | 149.230226445583 | 144.345080865349 | 151.178586065066 |
|        | 157.227118680396 | 161.079169854907 | 153.658747612827 | 149.019120812629 |
|        | 162.61434899634  | 156.373163373309 | 155.824409540332 | 163.697117248984 |
| CFB    | 612.374364731095 | 442.493108530222 | 369.78624104057  | 391.569187190375 |
|        | 345.897250519387 | 163.265020898999 | 296.830999357172 | 265.110264596425 |
|        | 1867.55140010155 | 203.913123559942 | 435.983803453746 | 262.954856857756 |
| CFC1   | 145.320945010364 | 145.924751649542 | 154.104321553472 | 177.825648107126 |
|        | 150.35767254363  | 153.393651104539 | 157.891350650633 | 155.176714087209 |
|        | 142.392860474555 | 147.78847662997  | 134.819406064011 | 157.466686487471 |
| CFC1B  | 137.194467539969 | 144.402160347818 | 137.570343435498 | 164.914114315732 |
|        | 149.357617406983 | 142.296446144179 | 137.53070284697  | 144.595393134144 |
|        | 157.990467804353 | 143.526983440589 | 154.600966693059 | 135.057847490193 |

|       |                  |                  |                  |                  |
|-------|------------------|------------------|------------------|------------------|
| CFD   | 21956.7541751958 | 15561.8923517816 | 14592.6308255978 | 13142.4763966378 |
|       | 392.6758818959   | 1021.81988990874 | 416.215253990273 | 1046.13353853089 |
|       | 1680.25851465727 | 494.747087458483 | 394.414934831535 | 630.473042320288 |
| CFDP1 | 861.516925304722 | 783.755776589969 | 898.877732360841 | 863.738809424958 |
|       | 513.292377117011 | 481.751102333172 | 801.051513639714 | 290.582957824549 |
|       | 479.983368253935 | 886.157279090932 | 782.139151423572 | 856.039380523678 |
| CFH   | 1070.4597488302  | 667.421612441201 | 746.777330152729 | 342.555640222963 |
|       | 139.936661244361 | 231.146155346291 | 479.469659712246 | 378.695635790714 |
|       | 312.601510033941 | 255.59042517603  | 445.505512764045 | 434.390613381746 |
| CFHR1 | 127.811923445503 | 119.876835248732 | 119.229322984564 | 109.092840191351 |
|       | 127.979574243743 | 120.862516074358 | 124.641892391159 | 129.969400693456 |
|       | 114.067790137477 | 125.199837162105 | 156.923675862035 | 116.011005504201 |
| CFHR2 | 165.692508737757 | 166.355086055404 | 174.515815532892 | 170.701964358516 |
|       | 153.776361241587 | 179.250373572781 | 161.021740537372 | 163.778790431064 |
|       | 168.73918684069  | 159.110614190088 | 166.22013573342  | 157.293090577042 |
| CFHR3 | 117.261443445891 | 120.521509788705 | 130.466571969657 | 114.373370072994 |
|       | 120.590654346066 | 125.364821583438 | 138.275371291639 | 119.583378101838 |
|       | 126.235567899449 | 119.492844191924 | 123.427366316096 | 150.019181654237 |
| CFHR4 | 115.440152891339 | 110.624328647003 | 112.239647575661 | 105.583474813289 |
|       | 118.438942370745 | 105.606964521964 | 114.43491928161  | 128.635684412304 |
|       | 118.500956349352 | 103.307703547649 | 124.395047385025 | 130.314247368361 |
| CFHR5 | 126.606163970149 | 125.324187741972 | 131.275712196961 | 125.704264033102 |
|       | 130.902319266342 | 122.176811388389 | 123.45956380046  | 122.262664384198 |
|       | 121.942777234608 | 129.23899614612  | 144.029891756677 | 120.809659457873 |
| CFI   | 270.490971664802 | 249.925640256322 | 185.088667707155 | 240.410292351169 |
|       | 163.833372505148 | 198.023465629218 | 178.676812740925 | 216.154203111101 |
|       | 249.524956682907 | 542.121375354644 | 233.975864722289 | 180.867208892996 |
| CFL1  | 2863.51286169094 | 3706.41283595794 | 2932.64120183406 | 4892.17875938832 |
|       | 12690.801964606  | 6793.99737496637 | 3989.14883668905 | 5022.15374558514 |
|       | 4711.21389812942 | 5058.57872936027 | 7555.47017983216 | 5846.17594234628 |
| CFL2  | 179.794718712964 | 185.950131245699 | 199.837938317725 | 206.257167235126 |
|       | 144.206259414981 | 148.09868976776  | 139.646026806298 | 140.646946425036 |
|       | 140.279222720709 | 151.019907064794 | 131.148926523383 | 138.887159625058 |
| CFLAR | 1808.26383618901 | 1589.70261092241 | 1562.9779683714  | 1645.05161227372 |
|       | 272.666435295288 | 967.123240442957 | 573.846138124455 | 1004.6207350158  |
|       | 913.22732386079  | 681.172359997071 | 1098.20033709043 | 537.510539142248 |
| CFP   | 147.2233876988   | 137.161065320948 | 147.805819921429 | 162.337707154123 |
|       | 153.762995131216 | 152.08574341962  | 151.130401750721 | 157.765771942689 |
|       | 150.261107471642 | 136.390047634643 | 151.679534447228 | 134.493062923443 |
| CFTR  | 145.03221570575  | 135.129656281091 | 139.336891718408 | 139.340699808517 |
|       | 163.643554173995 | 149.204816953404 | 134.378951325825 | 150.629932241703 |
|       | 145.414563914801 | 134.881854036527 | 158.408494909763 | 152.538048490265 |
| CGA   | 138.102654893864 | 135.141067086648 | 129.740166478951 | 127.218362452043 |
|       | 145.154323430995 | 142.272117655292 | 138.753419730571 | 127.612859839494 |
|       | 111.65024009102  | 159.633987751501 | 141.389330839189 | 144.148833164952 |
| CGB   | 164.423960071908 | 151.293676705634 | 163.81485578613  | 153.577349107512 |
|       | 153.448882783807 | 165.108876136738 | 155.801832826848 | 162.447903830131 |
|       | 159.070355781276 | 163.54669668396  | 153.363629311799 | 171.62327142765  |
| CGB1  | 138.345393524161 | 133.998381302146 | 131.393633337276 | 144.216394153095 |
|       | 142.243866937888 | 153.846723846716 | 146.286319248569 | 139.462804363695 |
|       | 146.271180025157 | 145.34041912391  | 133.032905765836 | 138.367321366804 |
| CGB2  | 165.686655824416 | 156.208747691032 | 139.422592957883 | 159.203584692924 |
|       | 164.15288821931  | 128.545699891734 | 152.842777535666 | 146.00443946108  |
|       | 150.380814008952 | 171.967974673053 | 141.91067228913  | 161.781529659549 |

|        |                  |                  |                  |                  |
|--------|------------------|------------------|------------------|------------------|
| CGB5   | 134.787564568352 | 138.328508662816 | 130.854818615966 | 157.103246263523 |
|        | 160.98571841915  | 142.863268359757 | 138.091795130567 | 142.101865506094 |
|        | 133.206919058442 | 127.161975533812 | 143.06806126472  | 142.928920246687 |
| CGB7   | 138.308965237491 | 132.245217686793 | 138.667081004369 | 137.961504178836 |
|        | 142.058086679048 | 140.238423894192 | 134.20988291379  | 128.39171386085  |
|        | 138.870636101334 | 131.848213704003 | 148.28101912019  | 132.657106732366 |
| CGB8   | 139.957560460935 | 152.954944775793 | 138.173547382901 | 145.870135196037 |
|        | 152.251128595777 | 146.595540577994 | 142.594553057288 | 160.695913747601 |
|        | 157.035739033122 | 132.004294377032 | 135.212715912271 | 136.995197143668 |
| CGGBP1 | 515.158921349383 | 513.816017871024 | 539.008286968106 |                  |
|        | 416.638529499878 | 469.407481002198 | 678.937151822411 | 645.183207984114 |
|        | 635.234445318087 | 696.475639532595 | 616.339439383796 | 583.938727139698 |
|        | 615.485984065221 |                  |                  |                  |
| CGI-96 | 149.147411595596 | 150.442821494908 | 152.129092774005 |                  |
|        | 163.451063547847 | 255.74096237558  | 151.635752404534 | 181.340312140534 |
|        | 186.778334749551 | 179.067275037015 | 188.515336186633 | 162.464201058576 |
|        | 205.08372943071  |                  |                  |                  |
| CGN    | 189.389457481768 | 302.570932942847 | 226.623172906957 | 136.103088234442 |
|        | 1492.83354014907 | 1198.53117439169 | 1955.96772733047 | 2320.41293992992 |
|        | 1421.72388964898 | 206.391403266202 | 2101.93705983383 | 2300.9407349072  |
| CGNL1  | 1834.08657010335 | 2078.76377557352 | 2491.33490046283 | 4228.5490138553  |
|        | 149.792368068107 | 193.777175793218 | 204.82244206816  | 179.109090120497 |
|        | 314.810001770583 | 250.602978521808 | 260.278595572575 | 160.415807880532 |
| CGREF1 | 145.117574928189 | 137.478556403046 | 143.061415008831 |                  |
|        | 138.071335383596 | 136.020600085547 | 129.385416279101 | 139.104796184094 |
|        | 128.626051185037 | 130.548611758921 | 139.423432468886 | 139.59941545613  |
|        | 130.883516197483 |                  |                  |                  |
| CGRRF1 | 374.46180489079  | 301.139737613279 | 418.968095159939 |                  |
|        | 279.325065941252 | 271.615621030842 | 542.121375354644 | 320.774102343889 |
|        | 316.457274749526 | 254.991678321253 | 408.993744895434 | 296.375305136807 |
|        | 353.437466689101 |                  |                  |                  |
| CH25H  | 249.524956682907 | 285.980446338971 | 163.889522525848 | 193.218266574099 |
|        | 151.363607695078 | 158.756424011719 | 148.704917490429 | 181.202396068658 |
|        | 169.527424356913 | 171.304896264805 | 135.589211439847 | 167.237705290905 |
| CHAC1  | 129.452826518288 | 121.322817570375 | 113.919529047225 | 114.528407572496 |
|        | 126.503135702506 | 123.090300758271 | 112.800733398209 | 113.572326615571 |
|        | 126.752999657665 | 139.241145027974 | 128.748663215466 | 121.212521750566 |
| CHAC2  | 131.421663453164 | 122.5651974076   | 121.88070274109  | 119.972337070176 |
|        | 134.842877075983 | 123.865424155099 | 127.171331062578 | 153.226604317177 |
|        | 140.019540869992 | 140.063142443074 | 116.369395555451 | 134.27783583528  |
| CHAD   | 112.943630133093 | 110.753661013519 | 131.362128083159 | 108.333135424315 |
|        | 110.465934808915 | 111.11656427738  | 109.947300629824 | 120.272964182307 |
|        | 111.632811186988 | 112.520199390427 | 131.828902700702 | 122.804934452095 |
| CHADL  | 170.602603155092 | 173.552535486766 | 151.051672692659 | 171.610742435469 |
|        | 297.022984365795 | 164.120602897751 | 166.988725688589 | 141.015441854424 |
|        | 154.417731984391 | 142.367003292264 | 181.193963616037 | 163.053121879323 |
| CHAF1A | 124.697283474333 | 129.573520898314 | 127.075899925865 |                  |
|        | 115.507474401239 | 291.167223094542 | 157.932243807202 | 136.821228481217 |
|        | 203.960838492793 | 179.250373572781 | 148.052222389368 | 167.817232948801 |
|        | 161.142723532061 |                  |                  |                  |
| CHAF1B | 137.367390177293 | 149.666293193219 | 132.937942776777 |                  |
|        | 134.294287947795 | 232.986366625889 | 282.282663608264 | 205.058210447711 |
|        | 363.89527566597  | 275.298642145005 | 230.424145472916 | 190.331589656379 |
|        | 204.113356572343 |                  |                  |                  |

CHAT 141.040862279633 140.2533871084 137.13615301204 143.873048967535  
138.289361041588 148.927040248436 141.561769570516 144.700955682048  
141.902711692778 146.579073345319 140.527521345097 143.877226672663  
CHCHD1 210.666799498141 197.565122821625 204.183472655276  
223.89854167651 307.480644393018 264.563741039382 375.255445179952  
271.713695056313 268.600782558985 257.602370597316 394.186683910377  
329.023836559229  
CHCHD10 1904.39962279504 2246.89876694944 1999.10320742823  
2698.5455305009 1503.2049371911 830.455793617181 593.639955546556  
1270.76282064793 527.498114662967 509.988617641229 1764.53168329081  
2355.29862638453  
CHCHD2 5291.83393775761 6427.33783376005 5300.67886821231  
6233.78489807054 10790.3738999898 7802.25987814138 8739.02966610274  
7082.28969354712 8558.70496234991 6296.24208225227 6460.4291301245  
9596.10781313429  
CHCHD3 354.132752995385 317.719381113816 425.708048519408  
357.431640917696 291.616195651001 253.463871742303 290.802509012089  
341.761516859319 314.386320310898 341.973002478932 195.69447353356  
343.946831770916  
CHCHD4 719.13080264227 775.5664718389 1144.07896461196  
949.789710063337 626.298707790229 524.973621024573 432.372995789404  
897.0125616892 658.202765061937 616.995114856023 589.953707188378  
690.903797251841  
CHCHD5 306.838596239511 310.718449468465 349.128741707506  
294.595972099366 784.170983714588 444.374521095495 379.862305342147  
355.609033348692 403.104188866804 399.476401949891 318.778978094743  
623.050854309724  
CHCHD6 203.693188114912 249.292766428035 267.149525812834  
292.693830444839 491.034395489684 297.022984365795 383.583234619781  
264.741946816665 300.358738353443 287.83303360511 213.178648382852  
239.970202560698  
CHCHD7 323.737610506003 283.014222473749 374.268489263941  
325.642275889649 211.626970008102 329.660368915848 280.085692727562  
318.297819854586 317.719381113816 266.442565636226 279.000687630846  
378.037190077449  
CHCHD8 181.247766545135 171.071893074072 181.247766545135  
234.693846527867 244.596233138747 276.351810999317 309.580750386386  
248.204358220728 209.146021798649 229.230239609291 272.01602406899  
251.347519777204  
CHCHD9 1466.08446530283 1403.90487313049 1897.92061704124  
1401.67503392145 2874.43919426772 2921.59274577877 3143.77161008321  
2332.98074920207 2385.5958396359 2452.1304336603 2426.2098937241  
3363.51782842264  
CHD1 646.933504790891 532.394088545421 535.354724252178 491.709723745226  
269.072221443403 573.644925180854 659.900771633223 516.177596584059  
370.798852361374 594.180861801958 487.696347726467 687.700356531038  
CHD1L 280.007569817323 266.563990988678 202.909188070184 277.256341592701  
314.90123632547 290.135914275115 238.617228632505 262.60377731258  
249.633252091596 306.111172289632 301.747788416496 298.979106293393  
CHD2 141.202092246048 147.713967317159 136.420062669039 130.253372129786  
146.6886556805 149.200848439601 154.645353009618 147.469101571149  
147.78847662997 168.27980269501 150.308048500142 161.762768590193

|        |                  |                  |                  |                  |
|--------|------------------|------------------|------------------|------------------|
| CHD3   | 162.351212914573 | 183.83720937589  | 142.049776668507 | 174.246705740225 |
|        | 153.435218661228 | 165.370800097602 | 149.341736870692 | 155.249688219254 |
|        | 158.049286838471 | 159.966729941991 | 219.192900411543 | 151.625248091441 |
| CHD4   | 1063.5903770389  | 1199.35864276583 | 976.360310504918 | 1284.19937294949 |
|        | 1061.79595707572 | 950.144166422001 | 827.157920721418 | 785.290353402444 |
|        | 1172.4103691525  | 598.449359425056 | 1239.66725147648 | 900.839073800181 |
| CHD5   | 195.364709354814 | 189.693218759349 | 203.17525411575  | 186.460034745907 |
|        | 148.045391886623 | 168.394330931524 | 156.986053534635 | 155.162310001164 |
|        | 154.201375471487 | 146.819830256127 | 146.782830477983 | 171.287186905764 |
| CHD6   | 264.741946816665 | 252.32907388173  | 302.847274046748 | 255.3451781862   |
|        | 233.300864925399 | 355.443758121675 | 393.500781010617 | 273.651114834013 |
|        | 265.470314691221 | 217.560691345072 | 294.410833087913 | 236.855293143293 |
| CHD7   | 231.018059960001 | 233.464856303761 | 226.701637237203 | 242.253995801882 |
|        | 487.597040819879 | 321.367338145787 | 371.168752104821 | 404.54681330209  |
|        | 397.064325578854 | 266.681711962236 | 465.29290512169  | 366.240941980786 |
| CHD8   | 1183.1601379136  | 1432.93880448974 | 846.985164747386 | 1753.58770316818 |
|        | 764.137504481329 | 607.979208454176 | 729.729297413233 | 596.076764072945 |
|        | 498.812823949508 | 508.861268738074 | 309.580750386386 | 642.484527246259 |
| CHD9   | 1701.43479420427 | 1731.62376348283 | 1348.80530206238 | 1507.39761667421 |
|        | 638.393099392849 | 964.473774310687 | 856.424155671931 | 479.638653311025 |
|        | 594.38228123675  | 751.896334334052 | 1753.58770316818 | 1096.61874892572 |
| CHDH   | 127.887666721519 | 140.462651395483 | 131.121343131082 | 139.138329217724 |
|        | 156.511202150773 | 142.930903395131 | 138.746987455826 | 150.687819649072 |
|        | 163.104822161892 | 136.566588903194 | 131.719227272527 | 144.110544384466 |
| CHEK1  | 132.273354705213 | 134.260779370821 | 130.224324464992 | 129.256138453675 |
|        | 266.316485802808 | 185.46843333826  | 165.30072618497  | 276.5177779623   |
|        | 215.426918011158 | 221.411372022459 | 184.923312649584 | 268.698146407497 |
| CHEK2  | 157.474913177177 | 148.755559144241 | 138.207553349985 | 146.432468585736 |
|        | 206.042395282286 | 264.526189799049 | 158.285003899913 | 224.869569455052 |
|        | 192.827534610486 | 169.552424961465 | 178.045931314857 | 205.852731236069 |
| CHERP  | 239.277801396834 | 277.219796733134 | 261.366143735074 | 311.481739745423 |
|        | 408.263886786123 | 255.839878446312 | 268.961643716282 | 271.823243396395 |
|        | 261.89195025254  | 197.827534617557 | 350.658722333252 | 242.5085895186   |
| CHES1  | 4386.83308119416 | 4022.23000497332 | 3671.86460903374 | 4486.35687688252 |
|        | 716.420861490714 | 637.30300219673  | 862.669120338424 | 938.499337889075 |
|        | 706.292905820227 | 789.971871940893 | 833.841469195516 | 520.218545108099 |
| CHFR   | 659.483452217461 | 686.801358367968 | 654.881990232975 | 897.958748317315 |
|        | 1109.08288440559 | 686.923164688096 | 852.926365088632 | 853.314313182949 |
|        | 1102.38234645327 | 1078.41947691758 | 1112.4055726239  | 903.503768217033 |
| CHGA   | 162.945789604505 | 175.210232663606 | 179.582086214179 | 163.010527914347 |
|        | 147.70836747108  | 154.904424749528 | 158.104336050835 | 171.61704153463  |
|        | 161.724388995749 | 165.30072618497  | 151.221783750989 | 214.739818213164 |
| CHGB   | 116.214857935694 | 119.288554466773 | 117.218616752346 | 107.91011371422  |
|        | 112.624137732184 | 118.312891459156 | 116.007006375993 | 110.486191378104 |
|        | 117.766156390814 | 112.133567992833 | 115.775525016883 | 132.028327486943 |
| CHI3L1 | 168.753660955229 | 159.592581700976 | 159.724824188037 |                  |
|        | 163.880402141404 | 160.353649786837 | 138.395943168158 | 137.559204418819 |
|        | 192.827534610486 | 369.906476027936 | 199.459711023907 | 143.307838525991 |
|        | 139.779754416105 |                  |                  |                  |
| CHI3L2 | 129.925548182204 | 118.930792960643 | 116.425301253959 |                  |
|        | 116.969799327195 | 120.297848408451 | 120.114423236962 | 122.736882859231 |
|        | 133.229571269367 | 148.350919010575 | 123.247698282967 | 138.299629744589 |
|        | 115.002176041974 |                  |                  |                  |



|        |                  |                  |                  |                  |
|--------|------------------|------------------|------------------|------------------|
| CHIA   | 144.991442620483 | 126.94941821459  | 141.412317125776 | 133.181855719499 |
|        | 134.89031458837  | 158.859389972316 | 129.992015202357 | 127.687299576139 |
|        | 138.078214837785 | 135.622888091037 | 144.145612985703 | 137.916872642522 |
| CHIC1  | 151.305201022012 | 136.450062043587 | 141.202092246048 | 147.245636620228 |
|        | 147.278236958386 | 130.240366272285 | 137.514952067562 | 138.808591995741 |
|        | 144.931901042924 | 132.883408554592 | 149.836491640473 | 132.975603230163 |
| CHIC2  | 605.040026490154 | 606.38343657878  | 480.923468806193 | 462.833644033427 |
|        | 816.266384662324 | 649.438995824208 | 806.290662664708 | 663.214972254236 |
|        | 913.684449305965 | 1225.33666840349 | 503.093655556038 | 864.908449769749 |
| CHID1  | 115.097376525707 | 151.823845684041 | 134.52098220054  | 130.619624347751 |
|        | 121.908945872994 | 141.289009185018 | 122.793816135585 | 134.238642042323 |
|        | 127.251594986725 | 137.146961654597 | 158.483006541613 | 129.895388481159 |
| CHIT1  | 132.719730606922 | 131.792339956719 | 127.125906877098 | 139.372441366224 |
|        | 129.077660633761 | 134.250052775987 | 134.772545694636 | 129.360773522498 |
|        | 126.214166842097 | 130.282212339065 | 125.287738115754 | 129.436712663487 |
| CHKA   | 232.621526025603 | 222.365208637146 | 267.696284751923 | 249.953902454701 |
|        | 328.33387481068  | 250.737252834098 | 281.659653592151 | 342.555640222963 |
|        | 275.468194644053 | 153.420392741659 | 207.298994298453 | 161.704966315183 |
| CHKB   | 286.703712311781 | 274.77366169918  | 313.025250337353 | 316.457274749526 |
|        | 199.980312703646 | 222.332748220525 | 245.553138677866 | 232.879578820053 |
|        | 282.190861594303 | 321.524921332256 | 241.890850719625 | 327.164773632634 |
| CHL1   | 148.275939659102 | 131.252368756892 | 142.487424651482 | 134.970609100459 |
|        | 131.200042525339 | 132.206133020786 | 115.923424095859 | 136.569250038372 |
|        | 134.483162806498 | 142.846100831941 | 135.071400668179 | 126.969504644414 |
| CHM    | 237.78482574225  | 244.054469051058 | 248.204358220728 | 230.079664410595 |
|        | 198.023465629218 | 249.064573038094 | 206.275885047321 | 181.813812621767 |
|        | 224.118739978257 | 261.96528977292  | 203.510106134882 | 259.643957326575 |
| CHML   | 153.500478301079 | 172.152570321727 | 153.189490068047 | 183.406510146725 |
|        | 180.1204762193   | 164.661445411833 | 204.057019122032 | 172.764511709731 |
|        | 156.745051321143 | 162.134726710448 | 177.132361355899 | 170.577057395536 |
| CHMP1A | 693.339946866196 | 885.713964813911 | 510.811470658575 |                  |
|        | 1157.02365469464 | 1357.48791782399 | 599.735180191091 | 542.740017003369 |
|        | 495.099443245153 | 633.594811068524 | 536.805979562807 | 786.160002434066 |
|        | 540.005877322817 |                  |                  |                  |
| CHMP1B | 397.153801851621 | 434.073729807058 | 581.37957221282  |                  |
|        | 321.524921332256 | 322.889296658955 | 866.147379099606 | 650.679096367632 |
|        | 900.233783407148 | 998.157643452741 | 1615.60472592991 | 602.371843434907 |
|        | 721.966539760341 |                  |                  |                  |
| CHMP2A | 572.548647437438 | 583.619362840814 | 666.570977208535 |                  |
|        | 605.795439342384 | 999.159652508318 | 725.216684507759 | 934.546444634669 |
|        | 1002.88224342342 | 936.957730361063 | 1059.80292026589 | 737.650963292668 |
|        | 877.255923473532 |                  |                  |                  |
| CHMP2B | 389.96566674501  | 348.640185950469 | 448.858580689107 |                  |
|        | 263.005303710717 | 892.515788744891 | 753.007562127186 | 940.008438825765 |
|        | 970.166036472486 | 792.101559967381 | 749.859130465356 | 924.312051919404 |
|        | 779.340880980422 |                  |                  |                  |
| CHMP4A | 1213.06007305892 | 1092.74905085695 | 1331.18605673705 |                  |
|        | 1133.22524345111 | 702.265884752474 | 495.655170027296 | 556.863361789449 |
|        | 845.646455991008 | 646.704226815099 | 618.058496806334 | 984.181272274704 |
|        | 834.537908087672 |                  |                  |                  |
| CHMP4B | 1442.11349373764 | 1223.06438074895 | 1650.77281891596 |                  |
|        | 1383.68977267418 | 812.75075757351  | 1003.93455977232 | 1186.23169583595 |
|        | 926.670867201327 | 847.564628337955 | 527.597948979568 | 1146.84239258543 |
|        | 867.601542930533 |                  |                  |                  |

|           |                  |                  |                  |                  |
|-----------|------------------|------------------|------------------|------------------|
| CHMP4C    | 158.554429311951 | 185.661496988658 | 152.8810245209   |                  |
|           | 146.824420102008 | 354.205670284123 | 444.945078908489 | 601.800326895295 |
|           | 485.87138934376  | 563.140382824149 | 506.80969228563  | 846.084919104262 |
|           | 454.492780042353 |                  |                  |                  |
| CHMP5     | 707.404709303506 | 606.003956839826 | 887.147199303294 | 490.849163737598 |
|           | 932.862030475849 | 1746.30519466572 | 1214.77298621465 | 1100.81588201714 |
|           | 1576.21727854603 | 1416.93831202323 | 1029.75852676191 | 830.684999498776 |
| CHMP6     | 203.524150518033 | 205.185206972064 | 175.176693060261 | 236.833653794223 |
|           | 335.3366819308   | 169.16155608071  | 293.825372123877 | 263.379982742085 |
|           | 222.315451077459 | 208.456472621593 | 212.073472189229 | 298.347201056937 |
| CHMP7     | 220.136131941508 | 226.387465899611 | 195.608619642038 | 251.268669431283 |
|           | 175.084729757407 | 139.363571392476 | 184.655641182839 | 140.802033706122 |
|           | 168.582192754233 | 143.356999170877 | 217.408824020423 | 163.794436953711 |
| CHN1      | 210.77489002666  | 199.001860912128 | 163.373180928181 | 164.816672737691 |
|           | 125.038427667173 | 144.082452235267 | 117.461198576063 | 157.940873610797 |
|           | 181.941224633917 | 279.325065941252 | 142.432995657729 | 174.006516433854 |
| CHN2      | 261.203388718689 | 313.480307434343 | 301.087947101876 | 435.037306125887 |
|           | 159.784369379077 | 223.094496588657 | 286.856346704286 | 169.744100665038 |
|           | 193.777175793218 | 155.3016514732   | 183.193029399643 | 291.683896942007 |
| CHODL     | 168.674809329231 | 151.351938656508 | 189.61702125418  | 148.567630572897 |
|           | 137.685104040843 | 134.698857213208 | 126.793778645808 | 145.483667452136 |
|           | 132.712573198794 | 147.118987674809 | 138.060245284993 | 131.573729430926 |
| CHORDC1   | 176.579096613849 | 161.821372157067 | 195.447966116819 |                  |
|           | 171.287186905764 | 221.050093964575 | 183.472290949588 | 237.692959394487 |
|           | 223.107391048316 | 214.019190624184 | 217.202541167691 | 186.033093285894 |
|           | 213.028568789661 |                  |                  |                  |
| CHP       | 873.256632365737 | 775.781735108886 | 1127.07858210156 | 609.665323786904 |
|           | 1012.44277312494 | 791.840531191783 | 1753.58770316818 | 1074.19589851599 |
|           | 1405.2134783352  | 1119.71228054585 | 1822.14935116363 | 1294.18114559128 |
| CHP2      | 136.811620595243 | 152.640683776403 | 149.625528206375 | 145.7202993771   |
|           | 422.12964420709  | 589.953707188378 | 1332.82617944131 | 529.700356666006 |
|           | 129.642952083513 | 134.307336063739 | 178.854873582873 | 136.162938063831 |
| CHPF      | 391.706404954357 | 465.41233536979  | 343.571296297462 | 476.917496749381 |
|           | 778.639512538949 | 301.955019831714 | 387.224184063662 | 304.590636814607 |
|           | 274.14931964455  | 311.208703262497 | 367.983166440977 | 299.170431746759 |
| CHPF2     | 163.284853420896 | 189.633348499854 | 174.761105961773 | 204.584643964409 |
|           | 364.265100349672 | 192.848268768579 | 244.73233791067  | 187.920789153124 |
|           | 192.244413515864 | 213.26158748941  | 197.740912476527 | 237.71636970719  |
| CHPT1     | 631.408955630318 | 537.06835963726  | 761.097992055119 | 420.160939829121 |
|           | 382.233826557803 | 828.683748921915 | 410.216584967666 | 1002.44383771056 |
|           | 855.415038498392 | 242.188218870393 | 623.050854309724 | 345.209128382239 |
| CHR415SYT | 121.344724993789 | 145.498372398845 | 151.089328533476 |                  |
|           | 145.658251059524 | 158.726115143818 | 127.800634041606 | 164.347168837655 |
|           | 131.690417323838 | 137.581659385375 | 168.013310840048 | 128.141725976839 |
|           | 122.265071206163 |                  |                  |                  |
| CHRA1     | 188.45479937455  | 183.937484597232 | 195.532022060219 |                  |
|           | 209.112959748917 | 131.981505236332 | 149.551030995489 | 144.30519737569  |
|           | 158.625060605976 | 189.136114953249 | 180.641419603362 | 204.616225498655 |
|           | 186.961638857905 |                  |                  |                  |
| CHRD      | 152.643087608513 | 155.762890407496 | 132.399633003253 | 131.761564745495 |
|           | 119.525701528869 | 116.305011582033 | 112.90900939264  | 114.479886899622 |
|           | 112.758617084341 | 124.574323079707 | 121.884067622971 | 119.308345676905 |
| CHRD1     | 142.745838888446 | 135.434853296628 | 142.081013617671 |                  |
|           | 129.95138839192  | 117.967392531385 | 122.144209450757 | 122.213445520365 |

124.207200622684 123.853588042292 118.773864607553 120.039031290299  
129.76141737109  
CHRD2L2 226.43414383055 226.454107654372 283.377663208926  
320.097510212422 164.448110885609 143.101750222256 161.951996906162  
156.228039404029 264.476846259384 159.926719599391 157.826457203706  
128.066043751951  
CHRFAM7A 139.779754416105 132.514706165018 138.308965237491  
142.19015013243 139.744142223177 135.943252855457 143.038248313305  
131.604121223902 142.211357324461 144.845726048937 127.320624058583  
133.278923716119  
CHRM1 127.900901613784 116.621735695217 121.04331582508 111.837468699281  
115.366496551426 119.036965883266 120.182787241888 115.734230176652  
121.599883734552 114.830474086443 127.779401352802 108.43334699667  
CHRM2 139.926488041421 143.051871940423 143.830319259804 140.439698763808  
138.864844664017 136.403353223002 136.348252715447 135.434853296628  
129.77374228644 138.778496466408 129.477908941439 131.004145546364  
CHRM3 637.457322054293 560.602047253306 541.764013317002 720.907992182476  
135.17827963343 174.635853531194 129.661073814998 122.962219297463  
122.063996556575 192.032080013216 132.887701822875 110.486191378104  
CHRM4 145.374923175872 148.196320158939 166.068489027866 144.806478328053  
142.316441155937 148.320310040998 140.496058408953 151.836705989155  
151.486362260537 150.45404183949 138.442378791712 135.866980620144  
CHRM5 122.498794845416 111.111969531957 119.218909479403 107.544568250154  
117.766156390814 112.714282429822 115.048402956574 113.209569103727  
109.552501987529 112.825399620524 111.299115402008 108.061315311823  
CHRNA1 126.695387748732 123.935072913078 125.010266083832  
132.137634927459 128.574419295906 130.738915341653 128.545699891734  
129.767878283811 130.788557333561 138.850077456103 129.636845496276  
132.395993254065  
CHRNA10 141.547112973262 139.166537591866 134.46743016543  
128.650205300992 138.93292293598 139.17480484652 148.720181793879  
138.953926269905 142.338352884053 142.428578698775 153.865702787334  
141.872426752329  
CHRNA2 181.783275804424 168.861884032201 201.893722965557  
175.040086358446 181.823450464129 170.602603155092 180.798671424395  
194.22713184875 165.055636629118 191.84511431253 186.496160803789  
165.467462247066  
CHRNA3 141.97908047949 163.134784474437 172.245089970803  
187.30908753142 166.879042308539 161.651643789597 147.454902803231  
152.713528089347 157.28429690041 162.586012723045 144.224287382131  
157.619627711954  
CHRNA4 120.345546077894 116.14662237541 115.981530322377  
117.008277388399 131.447941902406 113.184495948936 124.207200622684  
118.631771242606 115.25307661968 116.186846885411 131.023892409073  
116.316845829267  
CHRNA5 2539.87833317526 2303.0998502001 2379.15291239548  
2116.39371296122 358.092809491843 1969.67552562117 986.004777675332  
1455.75693295732 1145.96710556468 877.598505913096 1003.93455977232  
1230.63920848575  
CHRNA6 140.327799236005 139.880733465536 135.379284233708  
143.262288751967 131.540436531741 139.97127025207 132.976977898242  
131.989955864584 126.531502877517 133.206919058442 153.748035612441  
136.786462547129

CHRNA7 164.274491958161 155.548684011748 129.452826518288  
131.260111979219 134.066948803697 136.585541662028 160.331940529151  
121.803676441059 131.347213356457 142.959890982885 134.751916364581  
131.816989019024  
CHRNA9 135.429199205506 127.422129210789 134.064206964444  
135.304167695152 132.994716261577 132.634538733205 142.678267012725  
134.936025073531 129.247701136266 141.232464220879 130.953237161257  
133.792673129743  
CHRNB1 201.105520537151 204.959164579011 221.869191666931  
220.458449424062 218.314136992677 207.890408761692 191.507657960386  
202.583967728957 189.307823427362 210.973303650385 230.947339143332  
192.827534610486  
CHRNB2 107.993707827557 113.38168751499 116.507315786826  
114.849872458647 116.850851308701 104.483909687253 125.9713489569  
112.404562115306 109.680532131035 116.118745494794 141.261150586614  
108.604763499678  
CHRNB3 119.442114850181 126.877293296185 136.071856104688  
124.446264376282 124.291944151031 116.445184223804 129.123522999226  
120.015436934157 124.1819046638 132.363645381743 123.893768254549  
140.014167357286  
CHRNB4 128.346598756853 134.060214479265 118.597739444445  
141.119491147925 156.774097885381 136.278361222532 143.514848892447  
125.498081339586 161.456727894848 138.159966250659 155.625320865565  
124.546520456419  
CHRND 110.113844434493 114.325967923393 101.530900217921 116.947370388179  
121.356731684516 110.651971902576 114.170354748872 108.318510762416  
112.41270361848 114.488760619745 137.141081365469 115.848659135231  
CHRNE 162.678619800767 151.41546939633 146.937052029619 197.827534617557  
140.743917481548 158.347972566681 152.035992124554 147.579672274205  
149.461747964498 167.858490180471 160.127254444487 161.559920910487  
CHRNG 127.595574823053 121.580726825432 114.624259793353 128.113966507586  
122.460829835477 144.612549022264 125.461701282922 124.190161132628  
116.236538651031 123.190757763412 140.171749368266 118.841699953612  
CHST1 170.622615783608 167.698883940638 148.776470607859 163.039564280484  
181.747090380435 175.93459327917 137.567384694894 166.001279428607  
162.664254855131 174.615694779386 159.856190281237 157.313737338264  
CHST10 204.453822958077 261.775269058607 206.571433405844  
298.706655333472 149.538429805372 213.710058427654 145.692644807799  
119.161972571516 131.330974614437 130.189958197332 135.143532936828  
148.949829934611  
CHST11 135.621035941292 114.479886899622 134.499588539919  
127.494672751434 142.326319895395 121.150371270451 143.477670915091  
131.028469461315 135.93352186143 141.763072120718 145.610045243277  
144.262612328341  
CHST12 359.363523948825 343.946831770916 321.367338145787  
389.051174954505 275.169415154893 205.630948393225 260.642170838161  
289.667302610069 217.607230767028 234.156713102803 201.661941695238  
185.661496988658  
CHST13 160.060406629689 143.614075503775 189.784608429624  
149.361498483705 161.755290291637 157.963634535239 146.245915271213  
133.524698103972 188.242091666446 158.138862054715 170.079723856247  
162.47662918768  
CHST14 224.981439707657 237.473927775823 178.142393629606  
235.091443641056 201.837695818264 153.585849286113 214.763232658841

|        |                  |                  |                  |                  |
|--------|------------------|------------------|------------------|------------------|
|        | 162.54008293513  | 166.526875572556 | 147.208176455806 | 241.648044508699 |
|        | 201.167206950576 |                  |                  |                  |
| CHST15 | 346.065746911798 | 490.153210371094 | 183.863365305103 |                  |
|        | 750.10819423982  | 215.365809536522 | 176.670752486376 | 172.03919618445  |
|        | 233.671878221507 | 291.261765585473 | 487.19625805337  | 159.390531348676 |
|        | 161.891809608511 |                  |                  |                  |
| CHST2  | 150.0674092434   | 160.941804737367 | 154.159124458167 | 144.526499066594 |
|        | 269.194172034595 | 128.16147857336  | 266.563990988678 | 178.89423690001  |
|        | 160.592404712197 | 219.814706416471 | 213.364858759772 | 153.613110881454 |
| CHST3  | 493.622989939072 | 399.664121956178 | 395.588345893987 | 555.366765340014 |
|        | 220.345184229077 | 195.618369827396 | 183.50553222647  | 224.027605834751 |
|        | 229.729195963667 | 219.441959146815 | 237.312766830206 | 226.25694727283  |
| CHST4  | 123.431969470387 | 134.584076788979 | 138.224383646894 | 139.246945739764 |
|        | 157.742948919213 | 128.952986088886 | 137.853137973756 | 129.891492052232 |
|        | 133.962129094978 | 147.351826045609 | 141.132694466739 | 135.253713075341 |
| CHST5  | 125.150706047419 | 127.969833368917 | 126.741498575874 | 142.043121538885 |
|        | 119.26921157552  | 135.068883036882 | 132.8310947234   | 132.591496435822 |
|        | 122.371715108957 | 124.857461801227 | 133.067237748129 | 131.757695616207 |
| CHST6  | 119.854401979951 | 138.444427173667 | 133.599098708818 | 125.439033142431 |
|        | 135.227424713702 | 134.623264303227 | 128.2409378561   | 126.446675008883 |
|        | 126.711037295629 | 140.890227770353 | 139.877953680967 | 138.53403492914  |
| CHST7  | 369.838429521168 | 339.753059801136 | 291.50783830983  | 370.466403181536 |
|        | 226.701637237203 | 198.205113187281 | 196.16056297158  | 269.261595558589 |
|        | 292.037861000784 | 188.308588359317 | 202.483493595704 | 172.230528631803 |
| CHST8  | 151.613134875009 | 148.253612913109 | 144.669509071181 | 133.929311295884 |
|        | 163.714231827866 | 144.762006548375 | 137.427338867944 | 139.286592412216 |
|        | 154.291717784335 | 149.117224130576 | 145.360466216324 | 156.84104238878  |
| CHST9  | 137.861973133557 | 139.987681290389 | 132.224831869802 | 127.003974141317 |
|        | 123.240482782331 | 123.681353449198 | 118.646119379542 | 128.436499050769 |
|        | 125.130703953031 | 122.418378964982 | 137.047288508371 | 125.398875527365 |
| CHSY1  | 1069.25265476373 | 1301.18893681695 | 470.95418656881  | 776.807656744828 |
|        | 566.417354841707 | 965.673699120049 | 770.632068590053 | 680.509421043347 |
|        | 688.247581763352 | 1042.40539020413 | 676.570119607984 | 690.246312542011 |
| CHSY3  | 205.861932396193 | 268.660078500783 | 134.216088147701 | 163.704616231638 |
|        | 133.94206203396  | 133.939847853073 | 121.696353230886 | 144.0534341937   |
|        | 149.427217345037 | 199.991077347491 | 124.924794564647 | 126.995207465164 |
| CHTF18 | 187.389039221193 | 179.821008257902 | 198.257497903131 |                  |
|        | 214.355086255855 | 403.47026424469  | 205.804144075374 | 220.533113603343 |
|        | 321.910803473854 | 178.946928223991 | 216.9491329483   | 169.956827727468 |
|        | 218.559622620349 |                  |                  |                  |
| CHTF8  | 137.324247703318 | 141.645906784244 | 153.784923783551 | 146.539196738195 |
|        | 161.310855691717 | 148.684855678535 | 154.515091049526 | 145.03804642447  |
|        | 155.734509841719 | 152.72717701452  | 167.106870400592 | 158.224122084011 |
| CHUK   | 360.361719991381 | 286.230656780335 | 295.047418816148 | 319.639103463458 |
|        | 247.053215951505 | 317.802633831405 | 344.529927973082 | 307.363302726074 |
|        | 317.457588721567 | 278.219561902233 | 316.722160860531 | 315.3930052781   |
| CHURC1 | 762.182213353032 | 596.934339406636 | 900.233783407148 |                  |
|        | 399.248044997427 | 365.046815163035 | 693.339946866196 | 901.644194512187 |
|        | 312.019603761673 | 608.351527783086 | 378.797952580504 | 572.913714991136 |
|        | 1284.19937294949 |                  |                  |                  |
| CHX10  | 119.693318959661 | 117.862532836494 | 128.548201588898 | 135.800997202323 |
|        | 120.504814127237 | 112.891050337488 | 129.391376518208 | 106.204350278634 |
|        | 115.816156193574 | 116.58452862953  | 135.310766630401 | 124.992439957206 |

|           |                   |                  |                  |                  |
|-----------|-------------------|------------------|------------------|------------------|
| CIAO1     | 887.471553448641  | 871.528156184927 | 932.862030475849 | 930.25842384208  |
|           | 338.739180103373  | 1108.61301774472 | 611.208083466988 | 907.610179738644 |
|           | 795.720196538039  | 410.954095610904 | 889.054356462993 | 894.100792722707 |
| CIAPIN1   | 213.364858759772  | 211.736398352592 | 191.365014963729 |                  |
|           | 205.612579504495  | 279.452819132461 | 306.068269136821 | 238.149614104568 |
|           | 229.77428612216   | 258.868119227979 | 252.138168292964 | 238.095599711942 |
|           | 292.524552445564  |                  |                  |                  |
| CIB1      | 2041.03024136014  | 2449.76376608893 | 1971.42527720714 | 2684.69013589621 |
|           | 6793.99737496637  | 3130.30693451802 | 4979.31150268741 | 5058.57872936027 |
|           | 4134.02613649483  | 3876.04966263281 | 4318.50925204407 | 4995.96906061198 |
| CIB2      | 306.59090554099   | 308.330044958513 | 198.489278156437 | 354.783364481955 |
|           | 494.175437345451  | 183.676020826291 | 199.101099226668 | 156.557792402376 |
|           | 142.416237823488  | 139.921002429353 | 231.890885094917 | 210.392662092721 |
| CIB3      | 113.222264855561  | 117.149781437983 | 111.467722538327 | 109.851507510788 |
|           | 107.48180681159   | 110.910693353871 | 108.604763499678 | 108.543795408713 |
|           | 117.74682797375   | 116.046983032621 | 115.545558600232 | 114.378420394004 |
| CIB4      | 152.97753810644   | 149.223102493474 | 163.181323768362 | 139.127442770828 |
|           | 132.379706531581  | 146.531692460121 | 150.914644894869 | 145.821544099585 |
|           | 136.01865173754   | 142.073529553425 | 128.29486937905  | 144.031305845388 |
| CIC       | 277.652851236546  | 344.021696764791 | 238.588762326319 | 479.395948662331 |
|           | 450.688800547981  | 190.255797389524 | 272.712242893937 | 202.622747952763 |
|           | 244.897869154624  | 188.39062571513  | 263.800363357443 | 203.727455875381 |
| CICE      | 203.265559787292  | 196.450308368198 | 289.164969943385 | 206.203717450138 |
|           | 298.209907157762  | 304.013547190343 | 385.463209972694 | 326.570967321756 |
|           | 365.140886302762  | 415.957832362051 | 270.069634610818 | 364.766154056243 |
| CICK0721Q | 1170.129558603697 | 158.330403004116 | 174.192898940601 |                  |
|           | 161.066226957782  | 158.882535865069 | 148.493435517221 | 148.219406063533 |
|           | 142.984243805285  | 149.52880714343  | 161.37617568158  | 167.965981130329 |
|           | 150.272153646712  |                  |                  |                  |
| CIDEA     | 153.485731788293  | 153.519207482423 | 146.539196738195 | 153.832132196284 |
|           | 143.766249538352  | 143.870849001074 | 146.495845282846 | 151.148295679242 |
|           | 144.972694558182  | 153.261002653668 | 139.238936770274 | 152.346098251128 |
| CIDEB     | 145.245316640391  | 151.27882940428  | 157.463122989559 | 146.768631086088 |
|           | 112.371497988132  | 170.784229026842 | 118.034262386827 | 156.06439656393  |
|           | 148.224587582189  | 260.129513331703 | 230.399207047948 | 146.95272087759  |
| CIDEC     | 169.475714234887  | 147.958483355783 | 201.507971833902 | 183.604011732066 |
|           | 132.179747646893  | 132.413527125434 | 140.543382412084 | 138.907036194384 |
|           | 134.642898234003  | 140.213080190065 | 145.650356702429 | 130.191876914166 |
| CIDECP    | 217.45700166961   | 194.775234425687 | 237.641190133427 |                  |
|           | 222.675370226786  | 190.291185322482 | 194.445463745418 | 171.909358721737 |
|           | 183.32467147543   | 177.343586047942 | 189.90406457741  | 130.033927910392 |
|           | 198.753297290444  |                  |                  |                  |
| CIITA     | 135.079944196457  | 142.166650343224 | 160.322541355391 | 149.799681364551 |
|           | 145.338156577438  | 135.135834717193 | 167.713268780664 | 175.647878042257 |
|           | 171.795878750365  | 124.985249190127 | 145.690634269858 | 161.035985824654 |
| CILP      | 1973.20689165831  | 1841.63015706195 | 1980.4589291261  | 3111.50508060882 |
|           | 142.851432926979  | 152.315376022976 | 135.166677520468 | 149.227646026658 |
|           | 163.099009810658  | 211.183499580683 | 150.048431572712 | 144.007071548045 |
| CILP2     | 125.130703953031  | 134.436423298225 | 139.979025013908 | 137.864637728155 |
|           | 240.497413647633  | 145.331858938535 | 130.657342262492 | 117.523834738903 |
|           | 135.945030816689  | 129.899391127479 | 108.404733392914 | 130.083266044947 |
| CINP      | 146.421195733989  | 152.738468369498 | 130.444766583917 | 144.606963457243 |
|           | 173.408784502027  | 129.933228671483 | 131.273916869754 | 135.061176512365 |
|           | 136.071856104688  | 278.88183549759  | 157.466686487471 | 182.810581377888 |

|        |                  |                  |                  |                  |
|--------|------------------|------------------|------------------|------------------|
| CIP29  | 1673.5387396582  | 1715.51071085304 | 1699.17470788219 | 1665.14066952917 |
|        | 1586.00600118477 | 2246.89876694944 | 1554.16120123599 | 2018.81730267601 |
|        | 1903.13326109546 | 1532.47920327769 | 2198.4268389426  | 2217.82628612929 |
| CIR1   | 363.445110627483 | 374.718289636553 | 456.038981546175 | 326.703488388966 |
|        | 174.568253693395 | 281.341452463344 | 364.766154056243 | 278.775971122032 |
|        | 325.011269531407 | 285.882780066861 | 412.648926259488 | 307.597733293218 |
| CIRBP  | 3258.07532987071 | 3655.63669142687 | 6358.5018930218  | 2666.06582231934 |
|        | 4009.22206756187 | 2288.63508719706 | 4299.06288109563 | 3810.98043907046 |
|        | 1682.64624665931 | 2618.64973582507 | 4441.92485662082 | 4410.68280125001 |
| CIRH1A | 934.173273294189 | 821.862271569917 | 1107.29687889378 |                  |
|        | 731.284098301795 | 898.877732360841 | 1362.1486006778  | 999.159652508318 |
|        | 1876.64079464928 | 2423.84327263111 | 957.54149804446  | 852.926365088632 |
|        | 1366.06309834426 |                  |                  |                  |
| CISD1  | 2099.85702995194 | 2041.03024136014 | 2470.86113150126 | 2427.21100330388 |
|        | 826.08372791138  | 1095.52349352502 | 1301.18893681695 | 1200.03423010236 |
|        | 875.7694907383   | 1035.98574557331 | 1139.76755449089 | 1200.03423010236 |
| CISD2  | 195.981555981238 | 223.638850960288 | 199.980312703646 | 195.20398666139  |
|        | 189.633348499854 | 309.36704220687  | 293.350292227077 | 340.608165077422 |
|        | 287.041585684111 | 297.609793563225 | 330.590986934704 | 235.183590602209 |
| CISD3  | 144.958176005711 | 140.842305941666 | 125.631073476381 | 136.261907928796 |
|        | 156.783896946556 | 138.700301754711 | 156.830156083795 | 143.001661958814 |
|        | 141.453255692229 | 148.758316681306 | 128.211076776316 | 148.412895185127 |
| CISH   | 144.240470871638 | 167.293320986716 | 149.899789105328 | 151.196713920345 |
|        | 194.475822533231 | 168.805630890928 | 171.650247980576 | 144.278830378899 |
|        | 153.181097279473 | 136.069631519097 | 150.904618960507 | 149.689071018094 |
| CIT    | 111.1002996982   | 110.662552491706 | 117.399753685854 | 114.691842968597 |
|        | 116.126923911804 | 106.393497890486 | 115.058061620379 | 123.400143662218 |
|        | 117.602986362773 | 113.479382235297 | 121.908945872994 | 128.574419295906 |
| CITED1 | 115.995309578182 | 111.336798977475 | 114.77964341895  |                  |
|        | 111.312348806957 | 113.005774989833 | 121.743701509981 | 109.067239220744 |
|        | 114.574362093931 | 104.36042819601  | 114.65036208773  | 139.576261630082 |
|        | 112.916256784817 |                  |                  |                  |
| CITED2 | 766.710479603963 | 605.795439342384 | 786.160002434066 |                  |
|        | 499.048754087189 | 1751.22580157752 | 655.665164535648 | 909.727616721285 |
|        | 1179.42590997099 | 683.861021234927 | 960.775251871864 | 824.427857809495 |
|        | 900.039744829725 |                  |                  |                  |
| CITED4 | 323.788197265954 | 302.219514290905 | 213.652091843896 |                  |
|        | 265.536429548886 | 1627.02882286283 | 529.04238100948  | 404.95944990868  |
|        | 196.638594797353 | 244.440857688518 | 598.095370768587 | 281.846246549202 |
|        | 242.382534384155 |                  |                  |                  |
| CIZ1   | 172.758230728437 | 165.682617337317 | 160.644747532952 | 206.186324475847 |
|        | 183.013090662119 | 127.445199722147 | 123.561016079801 | 135.144220487117 |
|        | 132.224831869802 | 146.70298187005  | 163.899808733609 | 131.913786256215 |
| CKAP2  | 169.720414035325 | 168.314966639178 | 180.408639020724 | 189.362958041175 |
|        | 319.018213637357 | 422.590112942156 | 203.244917049745 | 320.812909889014 |
|        | 274.974304050999 | 302.847274046748 | 295.330307669482 | 351.759100605991 |
| CKAP2L | 107.498500136859 | 134.403789206552 | 111.178024950204 |                  |
|        | 110.475453268997 | 245.640193659159 | 388.002365247498 | 177.132361355899 |
|        | 412.582051585078 | 309.5988292104   | 337.87475687838  | 175.593421867771 |
|        | 334.607533045929 |                  |                  |                  |
| CKAP4  | 1264.90442763788 | 1164.61390835016 | 936.221322010828 | 1283.68791110988 |
|        | 2452.1304336603  | 1297.25632532536 | 1929.52146517699 | 823.297606185721 |
|        | 1203.47834989609 | 1187.62490367696 | 1810.68433539154 | 1218.64951314553 |

|        |                  |                  |                             |                  |
|--------|------------------|------------------|-----------------------------|------------------|
| CKAP5  | 490.464012303239 | 533.893360199271 | 573.244735292944            | 577.801009921199 |
|        | 433.751675703425 | 657.77730563722  | 572.262848718437            | 566.417354841707 |
|        | 618.829716818725 | 627.335757721489 | 311.208703262497            | 425.826693178023 |
| CKB    | 4527.53010866974 | 6585.34962362923 | 5347.78127066964            | 10048.4260790604 |
|        | 1601.19401366685 | 191.740596601895 | 192.980781927122            | 661.096668635469 |
|        | 192.655899720909 | 266.918302307596 | 1147.33034082693            | 137.803749343493 |
| CKLF   | 377.353441970543 | 383.74357557363  | 396.126485121994            | 313.351441953859 |
|        | 685.620637807134 | 1046.13353853089 | 869.245621105614            | 986.65554605455  |
|        | 1255.02720867812 | 724.442411170786 | 1142.44180956604            | 1426.56252600395 |
| CKM    | 122.190734676247 | 183.693300680495 | 134.378951325825            | 285.594100976705 |
|        | 166.59781955922  | 115.142111396055 | 120.853961156534            | 119.905127545336 |
|        | 156.880120259304 | 111.020070405368 | 136.783974483005            | 116.572001618531 |
| CKMT1A | 146.321713521846 | 168.124936529582 | 167.173670781451            |                  |
|        | 152.832573288735 | 476.383294794912 | 470.746477818201            | 422.434778100827 |
|        | 282.442528230519 | 619.487800014979 | 704.653073777277            | 258.532432007328 |
|        | 1125.95664591686 |                  |                             |                  |
| CKMT1B | 140.684066288019 | 146.044279076949 | 140.870849757111            |                  |
|        | 119.843989506832 | 395.786295710815 | 261.844708446856            | 273.369722814068 |
|        | 196.117609477292 | 365.362177671146 | 426.649095732979            | 206.650760711745 |
|        | 614.957397883514 |                  |                             |                  |
| CKMT2  | 256.237185590901 | 259.575461599189 | 340.366016191232            | 307.81941988503  |
|        | 139.826273596452 | 169.992657041967 | 152.845126167802            | 165.808660192901 |
|        | 167.063762404009 | 141.553465481789 | 149.808222023726            | 176.650953513413 |
| CKS1B  | 366.705048374078 | 351.759100605991 | 378.585058475083            | 309.098519056843 |
|        | 1347.10650016064 | 1744.58410715956 | 638.77182631975             | 2500.07677977147 |
|        | 1441.29676998365 | 983.777608766079 | 664.809419789814            | 1699.17470788219 |
| CKS2   | 211.660148497276 | 274.494074082359 | 209.867189613436            | 200.767743455226 |
|        | 2074.29945034697 | 1243.11900823259 | 502.731019454502            | 1578.87371296418 |
|        | 1010.05884008623 | 1071.83063260499 | 770.632068590053            | 716.229989890801 |
| CLASP1 | 826.08372791138  | 918.742625270041 | 678.684323057327            |                  |
|        | 956.153239481189 | 321.492900106953 | 406.224345292389            | 325.80154888448  |
|        | 345.686640885419 | 312.406286993239 | 353.385210690169            | 489.022371276542 |
|        | 349.773289724658 |                  |                             |                  |
| CLASP2 | 172.631499322646 | 159.655362710407 | 215.453915231774            |                  |
|        | 155.924471321076 | 184.041062308263 | 275.437030326768            | 187.997940126066 |
|        | 175.989742412417 | 252.789376168324 | 249.263194321516            | 187.997940126066 |
|        | 227.418630852215 |                  |                             |                  |
| CLC    | 146.411873503163 | 141.064086298948 | 147.818956338752            | 153.719751724358 |
|        | 174.396061906109 | 157.099868633958 | 166.1677526241.782750858091 |                  |
|        | 219.129781831192 | 149.188357651896 | 152.73588666971             | 156.843997723699 |
| CLCA1  | 131.543439103033 | 146.090291252325 | 157.517955771507            | 136.049167597016 |
|        | 140.895053453126 | 135.48250324478  | 122.10489926804             | 135.433229702209 |
|        | 150.885460975199 | 144.763700813057 | 124.927989289122            | 134.66169946771  |
| CLCA2  | 109.140708667012 | 362.581768268116 | 108.296042016208            | 133.345143691828 |
|        | 358.355621069787 | 401.267425721838 | 1783.8031212092             | 111.448871835514 |
|        | 113.995301093609 | 5846.17594234628 | 216.485113690708            | 219.878230463206 |
| CLCA3  | 120.883785696583 | 135.049657594221 | 121.387799881297            | 119.005230164124 |
|        | 125.574201687659 | 114.200099628087 | 126.162713269943            | 120.493082096235 |
|        | 121.492896642899 | 117.870230005125 | 119.079680805247            | 119.819082491115 |
| CLCA4  | 174.100921524023 | 256.924134409998 | 268.698146407497            | 157.277051544704 |
|        | 348.111872425949 | 2508.50428529255 | 3938.94050658589            | 383.259887828605 |
|        | 241.856820205666 | 377.538276846051 | 1662.51399707484            | 631.819659701092 |



CLCC1 185.661496988658 183.42877315644 174.587558727209 194.921021761976  
245.042781391047 214.229228850802 201.480444219547 273.668871896558  
228.713818522476 427.766660764042 182.028675726969 236.985483155452  
CLCF1 177.123497519231 180.658930225735 141.264096014725 172.197077149985  
203.276353321185 194.257024100927 122.742891063864 123.61956613951  
133.266524623338 272.994195639694 161.451253146578 148.776470607859  
CLCN1 150.775805918537 142.534195262988 130.416957431512 148.326282600684  
136.301442794928 126.948090173876 140.274655651173 147.8838487685  
135.862790395984 133.507865919719 155.63671938031 141.775100066311  
CLCN2 144.787836177147 159.479962316199 143.741676966126 147.666724626127  
189.90406457741 180.354899434843 170.111653122193 159.138344477256  
136.781417098789 148.470120335761 148.492328039604 159.98205335759  
CLCN3 240.07282016658 254.552034511333 261.251965523684 236.052008824688  
285.768837438859 349.623729591612 447.297590650141 377.083379021079  
499.048754087189 400.23671843715 427.452114719877 657.77730563722  
CLCN4 143.129945647647 117.883635746379 162.267841475739 130.694506122253  
123.275246170603 130.838350486331 133.617501101389 134.53861441495  
140.509950286228 146.484364264513 123.198873421356 142.707913210557  
CLCN5 166.355086055404 157.028963417138 171.006582229921 204.137195524755  
180.590215659031 161.172420368335 185.727947276958 180.035652063942  
145.97330701968 188.623897093065 146.26304624648 161.948033313443  
CLCN6 289.257002046658 276.714748212739 319.685597963267 313.967636827811  
205.65398844108 200.944865673409 208.983138060317 220.242344043437  
214.739818213164 195.906137340918 208.611557959861 191.467626362851  
CLCN7 1327.65573168233 1699.17470788219 1255.62991601665 2222.16226526877  
4291.1724030909 1181.1611856364 1452.63736288691 1600.10235468018  
2068.04582900231 1605.2454230722 1301.18893681695 929.198774489695  
CLCNKA 139.980504765791 164.525784478026 139.404820141366  
141.66312605042 176.128369308989 136.489566741917 133.423376063284  
131.342562516383 136.290486122369 127.859873416515 142.675752131935  
155.759861336991  
CLCNKB 135.790955294639 144.902807664593 124.001295849091  
124.652072110334 142.221542344035 127.336648342283 119.866898356501  
128.63301490285 121.231939494619 120.465934391246 144.511488474344  
127.874934513708  
CLDN1 184.187847236508 349.330629649093 273.353254857377 131.832311911703  
775.382397816601 3055.80298721424 1374.92806285803 3046.47354587949  
1116.95795024994 1240.4863200811 2583.46653460894 423.562598841704  
CLDN10 128.102787239877 134.412129843957 138.079494235456  
120.551603446364 119.612288460361 139.123489349026 124.269446398587  
123.086596566142 130.033927910392 132.079255703621 139.793683692104  
139.687574432387  
CLDN11 1171.62361359992 837.603727062008 687.987647193563  
384.051170099325 179.764260117544 247.622351589081 235.091443641056  
936.221322010828 284.831817899986 144.725650040212 154.816213491233  
175.767556472012  
CLDN12 367.382105696814 368.276805218658 338.822464893411  
330.457534783492 337.487980551006 459.652708187549 525.138476928759  
369.646624431062 359.493075382333 723.807658768693 478.38361571213  
706.628675634893  
CLDN14 235.372592051464 242.614881095485 224.062024091915  
274.281532397691 222.484058975856 209.44506543433 621.489906442001  
259.796092536601 288.596513753617 211.844563155792 319.868227988842  
296.24781576525

CLDN15 196.703794742237 190.534176839652 178.728925255163  
175.902751522861 175.199369463703 190.45739385453 205.908052642222  
311.848379951974 257.100909006193 161.744366588564 204.438365139666  
287.751093664085

CLDN16 151.178586065066 136.332399354517 134.371254010574  
134.730275384832 148.288798428149 145.760577027524 143.070170783764  
150.648444878067 139.387445141015 128.147484804104 137.539385624206  
138.700301754711

CLDN17 112.714282429822 107.67395123577 119.112063328364  
108.415715678948 117.22284971665 117.024039521425 110.707755436868  
108.34997967774 111.152235113722 110.501341211051 136.511669406292  
112.565341690522

CLDN18 132.5130209643 129.205783382977 128.134246199718  
133.801549026691 128.717719117128 132.164132609317 133.284873295487  
150.058160923921 134.487476333464 130.850419527271 134.658664100744  
134.623264303227

CLDN19 159.223980639045 146.136820062093 161.769370009823  
147.60284257326 148.789295862953 145.346970289157 160.562164904057  
155.129304059037 148.577336081778 154.703521794209 141.670426206169  
144.896960245309

CLDN2 143.061415008831 149.565725707356 151.532859494021 144.145612985703  
138.020031233095 158.434048174501 142.013370954791 140.616811333466  
140.456277147131 122.664353374047 133.069347559741 148.126745515891

CLDN20 165.932628858503 164.603403251634 152.680068580858  
151.739221728872 140.26206122305 151.914252332792 148.678869698203  
139.693261291326 153.815239954928 151.92638745703 166.097952462607  
141.730912072471

CLDN22 155.30926640293 153.592819860747 158.163599942547  
158.446840764515 144.662545137915 156.481871341275 149.593135821045  
165.880071298733 163.516075721791 145.671099346237 154.515091049526  
145.835240952992

CLDN23 216.154203111101 221.45275440794 179.973655632636  
146.624631389743 1910.08485008041 1652.77814259264 760.272612245092  
1332.82617944131 522.400055538966 258.384059994446 1738.96798001895  
2172.89794460273

CLDN24 149.645548888832 145.152605166094 136.528123792599  
131.000186898437 132.74579603362 145.163084967499 142.179197020805  
136.355319997318 134.273326732349 133.587927144452 139.195281937545  
141.59474425685

CLDN3 124.526220300907 133.420267697961 126.737230874367 124.29420915051  
404.618867159141 143.245660951425 117.602986362773 226.458509834965  
268.454310218604 138.021559586328 184.602704530362 131.12775424877

CLDN4 135.800997202323 148.227581116046 146.940545711162 160.932913244423  
305.615423200097 194.655710454472 186.185055364718 163.024215671479  
182.275998840116 150.294432623474 180.761100930677 169.220974415101

CLDN5 471.15333189869 1111.47772523331 282.511614929917 787.615195903993  
167.782882015229 207.977817300376 141.722817732641 264.383922859446  
272.077877821339 119.972337070176 147.459385142695 132.956860864455

CLDN6 108.850992642446 109.425878885118 103.888971448792 105.408689610638  
116.784024112826 107.466184687811 103.826308328446 111.632811186988  
115.427201752401 103.826308328446 114.774530966446 111.985567835684

CLDN7 158.175138008678 249.763375041547 174.075670633438 134.329334422886  
2760.57475805426 1395.63393859192 1084.5920943349 978.389902096994  
906.359365544713 309.75140197669 3140.51157972795 825.345092964844

CLDN8 130.912137250515 149.772157318769 130.935922915902 129.884064654761  
137.46978401237 136.701400398129 135.155955441604 136.042982529628  
132.769455423385 136.432109029368 136.904851056919 138.645156942894  
CLDN9 136.330636532576 130.433405111592 120.679474100322 131.179786925029  
147.604213625382 124.821581853501 136.135223482208 128.950308413612  
130.790872334222 128.2409378561 157.709832297666 130.562422910426  
CLDND1 1284.19937294949 1114.85422895959 1609.54149931375  
777.651238374269 392.004079531068 955.604404066769 729.499296070289  
689.821785472506 977.999660785113 1287.3125466789 679.822276398569  
964.093668483033  
CLDND2 301.695991929957 294.280238648737 587.388038484307  
298.827660296715 261.286548990435 296.375305136807 177.524818593325  
191.651818696629 239.277801396834 154.143331594812 206.340478393262  
184.611146047556  
CLEC10A 154.086510608016 140.840895590527 149.032116392457  
146.495845282846 145.754504160436 140.573285987781 144.772914483212  
149.026243159195 152.071081175788 147.688664545959 135.641355114263  
143.537785553911  
CLEC11A 404.073802241516 404.95944990868 244.117082987416  
419.047108206042 410.138738410101 349.330629649093 201.085046871333  
195.282045838381 212.147155923729 339.172031360524 155.023934989559  
225.505978789388  
CLEC12A 143.713962738562 143.867013358737 135.603160096973  
144.92594578882 138.62308708151 146.894793774087 137.225659453984  
142.819669471009 157.252701277198 146.11669387238 135.797170561599  
143.587562550004  
CLEC12B 124.924794564647 132.924341641217 118.24368469845  
120.799317509529 113.845770994796 118.283346939564 121.508233749444  
112.649012857276 124.248997533959 121.113186311514 130.509415570889  
127.720117789235  
CLEC14A 457.905741500454 649.052806726591 289.82072316082  
691.205738835917 234.947745514175 424.578659172414 201.987081022654  
400.472835504879 412.941907828617 265.791342287571 330.080428155378  
221.45275440794  
CLEC16A 525.789451405743 507.342877360289 540.005877322817  
655.665164535648 372.255208814622 402.824964079515 553.198321853202  
566.914448800423 569.236322997211 555.109005518622 547.817028243811  
571.64723305848  
CLEC17A 157.821491577808 162.026757124868 151.877035446575  
168.21856603538 144.853868519575 149.18603646016 170.734355440231  
161.17923997423 156.65842876856 156.61494867164 146.64835267642  
148.130993521745  
CLEC18C 115.002176041974 126.848211027661 117.040953580545  
120.922042875444 117.443721637362 115.194730717797 119.315932907373  
109.087574814292 136.72715888684 135.758133410577 142.709768829207  
121.330383384978  
CLEC1A 166.85671415475 169.147351642004 140.202762690515  
151.318320077986 127.829001155781 162.808270845998 123.689439578326  
160.407690552027 164.625407872446 127.278117740813 139.781351410748  
127.781732819297  
CLEC1B 122.610529927104 111.568329540016 124.285969778268  
117.244895482991 128.678484452077 112.488125161387 115.631414599991  
116.305011582033 117.770032157393 115.299986138153 116.828333047376  
112.268518171041

CLEC2A 121.871105084095 136.817517693076 139.039276904833  
147.192815700248 132.720599968449 129.338551879984 150.602976963975  
137.744318243173 128.922269289649 136.790457887057 123.889427666612  
146.039797334426

CLEC2B 200.668298229815 189.575681012578 155.438218501542  
196.860228537112 147.301909062399 143.62315472858 131.917194849285  
148.030579593944 163.004844049672 308.088967616175 182.495117800073  
144.179880084235

CLEC2D 1643.08061372695 1614.00098175383 2365.99940149374  
1307.96033038529 954.488185198006 1500.16816750361 2099.85702995194  
1614.00098175383 1531.54387233661 2605.13680290987 1628.24528041404  
2014.48411650613

CLEC2L 122.989642938474 138.152641686151 138.858138379065  
135.946808893146 138.647667867725 132.089375920534 150.247639459773  
149.262900833177 113.504670764963 127.398873370484 139.755211300398  
135.399032687551

CLEC3A 168.091278015885 197.938447651153 220.217745732407  
189.971144220643 138.43301474649 134.09920571607 134.10707191601  
131.164778405297 131.83430682495 129.485710719291 135.605541734293  
126.470239371932

CLEC3B 3205.74787769881 1706.06615968622 1226.74043569231  
1762.09874961415 163.661196423902 188.53221484746 151.755205401737  
154.616279878492 180.658930225735 145.463105638655 166.767004180603  
150.48236051337

CLEC4A 149.636887782574 151.81754291846 163.119211741255  
152.885721101687 146.392657608076 146.692827583525 154.076216899447  
171.410912120195 201.152639979358 233.975864722289 154.218967720305  
158.292581724934

CLEC4C 149.740404686695 138.873925577739 136.888915439473  
155.587018319981 133.351623142435 145.338156577438 144.581747568524  
140.980119908597 146.574656147816 139.070571230254 138.789908033669  
154.831307586538

CLEC4D 134.58933109001 133.16973309664 129.985797334276  
135.665577776938 145.043494048779 131.17119492692 119.449118660481  
121.778756075848 140.232244264861 152.81544746536 147.910699446264  
147.962721373177

CLEC4E 151.484420979498 170.035994634371 178.284294783418  
153.379118228796 186.268881719287 157.81327663167 170.079723856247  
157.216793735479 169.403422185018 164.415832011273 155.018009545475  
170.54511631708

CLEC4F 131.210866639392 130.231160879338 122.174036435094  
138.664401460739 138.424464248567 141.695537669891 124.297848065172  
127.675206134992 125.884565343075 115.605206174867 134.504873813959  
128.322884322951

CLEC4G 161.189717452004 136.415734370763 159.099495828517  
149.929454280702 159.245344068037 154.466614452651 141.685620602226  
160.010501226517 154.2228051929 151.167024833049 132.425596223397  
149.772157318769

CLEC4GP1 135.647660756548 142.768691899824 130.110413621436  
135.031430487047 124.215466523555 120.387275261633 130.004329307977  
122.405469833024 128.978197156274 119.192893408873 134.022324496729  
133.94667806086

CLEC4M 144.792035839249 135.516856254532 150.566842106244  
129.573520898314 169.963805688413 147.565485281003 135.781190598068

150.639235242268 147.169765031208 153.658747612827 136.2336179571  
 154.449058407217  
 CLEC5A 109.044879188971 107.841100741858 113.370762349233  
 94.3531468700382 104.934718065476 109.342230674869 119.312201620247  
 122.165046954625 123.518170356322 141.082569618216 136.508969220268  
 113.177330690612  
 CLEC6A 171.816841286562 151.010493695217 170.290455446376  
 150.694215349678 169.022351348819 153.085975710144 149.726968520487  
 158.784190231286 160.435789207464 168.773340961473 163.170983091116  
 165.262738484387  
 CLEC7A 118.593717189375 118.673325109944 113.315182274675  
 109.91537150286 118.366859032979 119.590540166384 111.802672864815  
 121.150371270451 126.37572518012 134.986030185477 125.439033142431  
 117.404906698431  
 CLEC9A 150.754492902512 147.034021626893 150.906106695444  
 142.017169259522 143.416816860089 150.663062131717 138.455775926409  
 142.151209745109 163.915489303508 142.255657518926 162.147989253357  
 149.511776997149  
 CLECL1 107.344825308293 116.839796680107 119.717408713154  
 129.221482161409 111.785821053048 112.661607612444 111.876915242732  
 130.797498958616 153.507553306723 119.48998115497 128.669887479835  
 114.072600760808  
 CLGN 119.172965618216 124.69564501518 124.012439490264 124.592771536872  
 122.531675048414 126.450300907283 129.369968549738 126.910075365358  
 120.135349166633 123.974409226349 113.879459563492 126.086991456747  
 CLIC1 2032.50052162637 2217.82628612929 1918.14260920544 1937.83242524439  
 3468.14455177277 3253.76017336684 3408.6535437109 1843.76920134139  
 2574.74962955426 3235.38149926838 6179.86800320807 3905.35300751401  
 CLIC2 179.451637129672 189.027594735456 143.978912435831 158.25554353787  
 122.005340508177 134.318290950377 132.297716337104 144.199054675488  
 145.695402948337 119.859508630454 150.508851767517 127.787890405862  
 CLIC3 195.595275594235 183.894417745549 134.633286312653 147.760782452857  
 1564.8868894162 130.073005698714 297.862653495715 241.019436415703  
 716.420861490714 2932.64120183406 687.700356531038 178.885625009973  
 CLIC4 2046.64499507352 1593.49895307361 2129.84680802619 1601.19401366685  
 216.805365763069 399.963640581639 223.638850960288 251.939696394174  
 287.374706071354 822.129234065933 185.783374935551 195.776369840059  
 CLIC5 135.304167695152 154.046550866249 132.034701177759 131.552276774901  
 133.004765428575 112.977469350139 113.78323485587 114.734439905052  
 125.895972730616 113.636570490048 110.024815508703 114.441223528256  
 CLIC6 212.730163981978 371.941204080246 294.997671630798 174.471304281502  
 151.865924163231 165.496065029161 132.164132609317 1883.74008471233  
 224.062024091915 193.945494721138 1573.03248861784 260.787104931135  
 CLINT1 874.816697884109 653.047570485109 1130.32966481315  
 637.695341427976 459.30568829087 653.264945856916 1253.05700051015  
 1018.80178630497 693.339946866196 1388.91423772335 932.862030475849  
 878.520681466946  
 CLIP1 873.879064183441 701.481003619067 871.528156184927 736.603605876572  
 355.714202328378 390.284689962661 441.873247266342 410.645457106122  
 504.141861790903 670.856008549143 416.215253990273 362.376153348015  
 CLIP2 266.71318061066 258.807028561407 201.616302398819 326.45984882427  
 199.077893147154 158.353171576491 195.595275594235 172.698181201849  
 165.576758218571 151.852294315212 174.027190728107 192.980781927122

|         |                  |                  |                  |                  |
|---------|------------------|------------------|------------------|------------------|
| CLIP3   | 5207.37974585707 | 5410.50736002544 | 6214.77579017084 | 7342.79622458743 |
|         | 208.385295246155 | 185.002106079042 | 183.130891975122 | 251.993821914623 |
|         | 324.481229901658 | 307.16835174775  | 166.097952462607 | 155.938283930571 |
| CLIP4   | 354.067771806542 | 308.281798808746 | 696.475639532595 | 255.225145197422 |
|         | 156.296046600921 | 223.918931440768 | 246.88857694249  | 184.260835471542 |
|         | 177.896726792666 | 413.000072500071 | 147.362120584524 | 218.917357155289 |
| CLK1    | 857.55777793754  | 759.534249620343 | 1311.34904760947 | 621.173315178959 |
|         | 255.462706428149 | 498.812823949508 | 472.030150842569 | 522.400055538966 |
|         | 521.215655189324 | 745.153336165802 | 552.494327858264 | 502.281584081805 |
| CLK2    | 238.654367531982 | 254.424207773566 | 239.871536598083 | 259.472319994929 |
|         | 316.409887372431 | 283.048002376743 | 306.632103708321 | 345.649572073924 |
|         | 278.005620372937 | 259.316557834724 | 355.714202328378 | 350.983969007868 |
| CLK2P   | 151.619329363527 | 151.083551412109 | 148.094036534405 | 163.926432479673 |
|         | 151.167024833049 | 152.353494489233 | 153.687536747147 | 150.247639459773 |
|         | 150.412929574507 | 141.857434100065 | 153.653453808799 | 155.91493956251  |
| CLK3    | 286.282132382462 | 320.597495751519 | 326.758278851698 | 410.216584967666 |
|         | 331.937313503755 | 256.729891423908 | 334.916875239616 | 252.697160031025 |
|         | 321.31562287169  | 365.727197088581 | 284.831817899986 | 388.477382640003 |
| CLK4    | 230.546762514966 | 239.050379187643 | 316.524115715585 | 228.968779778407 |
|         | 136.691865286093 | 161.084088366981 | 178.854873582873 | 181.530767521222 |
|         | 164.865846124876 | 196.566937667522 | 217.45700166961  | 160.227729155903 |
| CLLU1   | 136.466367853188 | 163.22480684222  | 152.54039461337  | 162.464201058576 |
|         | 140.254665008195 | 150.933724024651 | 173.97085982677  | 141.512008928271 |
|         | 137.070326499918 | 151.632801137039 | 137.899291413431 | 147.77916610545  |
| CLLU1OS | 114.242056888286 | 100.216750525986 | 109.680532131035 |                  |
|         | 112.747067417774 | 115.920514336615 | 117.069094451283 | 107.949834974369 |
|         | 115.80245224388  | 111.876915242732 | 111.886543737378 | 109.274221164316 |
|         | 122.549274599774 |                  |                  |                  |
| CLMN    | 150.156865995098 | 149.471240458766 | 141.292421722594 | 131.973896985615 |
|         | 185.583997792931 | 140.583804906052 | 157.301617257941 | 137.745887988474 |
|         | 147.638057399165 | 135.773386496434 | 165.890492422031 | 137.877756077011 |
| CLN3    | 226.960024551778 | 270.490971664802 | 206.825575257029 | 305.768201359278 |
|         | 599.52440136406  | 306.677271064305 | 353.243400332397 | 296.088938872643 |
|         | 273.61337724143  | 223.638850960288 | 417.442660073269 | 229.567444213626 |
| CLN5    | 328.969023478451 | 338.510045856515 | 320.812909889014 | 281.44159425243  |
|         | 215.019239034819 | 391.185365567603 | 307.124331101976 | 287.889774984754 |
|         | 273.432712475089 | 275.509805464276 | 486.334840298921 | 334.52685347521  |
| CLN6    | 148.25001336038  | 140.678336884951 | 125.500790447338 | 140.099069486005 |
|         | 330.850098426464 | 163.432972512188 | 174.075670633438 | 154.190469538568 |
|         | 174.461487057542 | 170.164668347783 | 188.973595445056 | 164.202554380274 |
| CLN8    | 158.263657373911 | 157.997750997487 | 159.41078351918  | 138.936872956065 |
|         | 140.323425587628 | 139.025598691696 | 188.952730860801 | 170.452989060697 |
|         | 144.675182563174 | 157.410205523901 | 171.69834783037  | 155.608876496443 |
| CLNK    | 139.260868989409 | 137.006917665541 | 138.810236692956 | 149.483826392464 |
|         | 134.172033051676 | 121.85247363239  | 144.007071548045 | 143.093156971372 |
|         | 133.419753427423 | 129.780648518219 | 151.546908501054 | 137.570343435498 |
| CLNS1A  | 866.413995755699 | 921.546033242474 | 952.357976050712 |                  |
|         | 825.034504959272 | 1426.56252600395 | 1120.87534972745 | 1923.19560386389 |
|         | 1072.37500318471 | 1361.54107116915 | 1326.95332435394 | 1569.13457493554 |
|         | 1456.76683429755 |                  |                  |                  |
| CLOCK   | 240.75934760601  | 272.500572765647 | 266.964673763497 | 262.671819506189 |
|         | 186.167877791105 | 231.600532144945 | 252.015257713669 | 261.251965523684 |
|         | 254.036619126409 | 274.235001739215 | 261.117845544884 | 257.100909006193 |

|         |                  |                  |                  |                  |
|---------|------------------|------------------|------------------|------------------|
| CLP1    | 197.618757939729 | 201.441808401878 | 217.940575516933 | 219.129781831192 |
|         | 228.414049417352 | 292.965109701719 | 260.921177985439 | 228.713818522476 |
|         | 240.341031437493 | 251.869781014029 | 222.005022189667 | 258.727309442475 |
| CLPB    | 143.093156971372 | 131.263641389894 | 116.038950886552 | 127.150222504237 |
|         | 125.528638246486 | 131.904624845305 | 134.27783583528  | 141.463324155943 |
|         | 124.796876920269 | 136.2727333616   | 122.679628839976 | 131.879526177089 |
| CLPP    | 328.486476842582 | 381.323457262383 | 326.570967321756 | 372.81255844018  |
|         | 1084.95095717937 | 634.774041584043 | 468.82816089485  | 514.799179506754 |
|         | 337.271784551586 | 460.408628542721 | 341.973002478932 | 426.649095732979 |
| CLPS    | 149.004343851423 | 157.248117633013 | 146.775403409562 | 135.038195181839 |
|         | 135.596007994731 | 146.440630638891 | 157.901967487277 | 144.321757243275 |
|         | 139.572562105377 | 145.988387859158 | 135.313148180961 | 130.33205883588  |
| CLPTM1  | 512.184962338131 | 585.371892598422 | 365.82705202869  |                  |
|         | 756.390518977556 | 3008.43964505208 | 858.020739710943 | 708.056533282983 |
|         | 665.602699607102 | 717.025533065694 | 499.683188662742 | 584.433155497378 |
|         | 572.049540360134 |                  |                  |                  |
| CLPTM1L | 965.673699120049 | 990.55038742453  | 868.066644155313 |                  |
|         | 1013.03054571763 | 2596.43650409044 | 1307.96033038529 | 1448.64875525408 |
|         | 1465.2419150392  | 883.702573960415 | 838.267069860172 | 169.077657790409 |
|         | 985.637230639964 |                  |                  |                  |
| CLPX    | 235.091443641056 | 255.198862778405 | 257.813193543819 | 232.105867345662 |
|         | 288.370985514978 | 354.067771806542 | 376.791876040886 | 300.83667045718  |
|         | 418.163219634152 | 436.482580413523 | 254.552034511333 | 350.22221782412  |
| CLRN1   | 151.780459290205 | 153.350690419636 | 165.480489678822 | 161.12121879514  |
|         | 162.274094333189 | 163.41031443893  | 159.346890686719 | 149.467626202395 |
|         | 160.91894600916  | 165.274189050141 | 162.574338133241 | 171.254015232189 |
| CLRN1OS | 139.991780068793 | 119.75069850668  | 140.904883114871 |                  |
|         | 146.306467130749 | 141.606501859513 | 129.165440930558 | 135.725202462502 |
|         | 141.691135410429 | 129.421772713718 | 138.557464672111 | 121.44564199541  |
|         | 126.127630885864 |                  |                  |                  |
| CLRN2   | 127.183924911179 | 139.932849289354 | 140.123348569709 | 135.003236040032 |
|         | 124.164523121103 | 125.609542142983 | 134.331420680628 | 137.850437814788 |
|         | 135.776154891006 | 137.79714923769  | 132.186120302011 | 128.788443476759 |
| CLRN3   | 135.651829752462 | 131.532660547328 | 120.979417552159 | 119.352995485911 |
|         | 122.996616773523 | 129.334217858282 | 121.53632327554  | 124.533543270311 |
|         | 117.923459503989 | 118.724348027528 | 141.059033576475 | 124.772219140795 |
| CLSPN   | 107.930325780047 | 107.239841465534 | 118.875640081461 | 117.22284971665  |
|         | 120.727504500018 | 122.68719599986  | 106.341910466588 | 111.409447323674 |
|         | 113.822580779824 | 115.097376525707 | 117.598778415488 | 122.773736159743 |
| CLSTN1  | 723.250763797522 | 962.559482864549 | 576.10291008626  |                  |
|         | 941.572186137467 | 826.314416168552 | 517.881547706391 | 591.641325402032 |
|         | 448.260934224454 | 362.095074331893 | 816.266384662324 | 523.717949503639 |
|         | 708.056533282983 |                  |                  |                  |
| CLSTN2  | 141.719556176029 | 146.16821907742  | 122.320966091375 |                  |
|         | 118.836387680022 | 127.077668562103 | 116.839796680107 | 116.421771593211 |
|         | 118.558673085303 | 118.126133973555 | 147.285764611006 | 148.090431893307 |
|         | 123.058261039164 |                  |                  |                  |
| CLSTN3  | 160.482734190577 | 146.306467130749 | 162.519642881848 |                  |
|         | 167.468390483999 | 189.915720614467 | 163.67719444924  | 199.87003105816  |
|         | 157.5032461329   | 159.245344068037 | 147.309245779031 | 156.594337089784 |
|         | 202.024504592763 |                  |                  |                  |
| CLTA    | 607.499206410372 | 614.514126276981 | 671.387334588652 | 642.934824227327 |
|         | 1399.41653736746 | 636.382696018633 | 683.655205499779 | 722.399669963921 |
|         | 708.779490017407 | 1224.49891389348 | 1096.10636044885 | 549.460612060753 |

|        |                  |                  |                  |                  |
|--------|------------------|------------------|------------------|------------------|
| CLTB   | 1445.72064343302 | 1331.18605673705 | 1231.37475540937 | 1724.22121078776 |
|        | 1562.9779683714  | 660.096727566678 | 821.862271569917 | 502.731019454502 |
|        | 484.568420044471 | 3073.40543048878 | 825.034504959272 | 1257.00798908017 |
| CLTC   | 228.45211887819  | 266.99947481587  | 188.277563426829 | 205.244843885276 |
|        | 228.675099004411 | 337.119524477446 | 396.212732639272 | 318.06081614151  |
|        | 336.380724981693 | 303.762967437478 | 279.495192828873 | 370.140588087649 |
| CLTCL1 | 146.800324349321 | 148.49560238679  | 144.839170491334 |                  |
|        | 151.267897610115 | 155.397301207102 | 164.057147728625 | 166.085469368498 |
|        | 132.890396520305 | 152.826356673175 | 162.841318222066 | 135.175806654971 |
|        | 155.104697146664 |                  |                  |                  |
| CLU    | 134.031960707639 | 133.401620574886 | 135.033601686007 | 129.34905533265  |
|        | 129.689855810051 | 133.906867716171 | 129.822926691091 | 130.659631155616 |
|        | 131.212705319485 | 126.520909083643 | 131.736694577111 | 131.97938329944  |
| CLUAP1 | 5558.51089816921 | 5300.67886821231 | 6919.4226838505  |                  |
|        | 5912.48904507462 | 4690.93553472125 | 6114.33638002734 | 4882.16892310839 |
|        | 4749.69040198959 | 5195.2087608308  | 4690.93553472125 | 3093.38255333143 |
|        | 4819.85672511343 |                  |                  |                  |
| CLUL1  | 134.517774302213 | 130.669085802748 | 134.992686224944 | 134.555873832434 |
|        | 130.016401638936 | 131.961236721149 | 130.052593375075 | 135.348086420636 |
|        | 130.185134787768 | 136.398521726896 | 140.682757521394 | 135.940629737073 |
| CLVS2  | 150.870830294349 | 169.000137586852 | 137.835936352525 | 157.797222258336 |
|        | 141.131578372349 | 153.566080603874 | 150.754492902512 | 150.531753446398 |
|        | 160.19942770666  | 135.915252483475 | 134.592495777159 | 157.878110410517 |
| CLYBL  | 297.862653495715 | 341.973002478932 | 325.96632528242  | 443.623904480087 |
|        | 166.640325848102 | 152.017655364287 | 167.330860677012 | 192.59376129133  |
|        | 163.41031443893  | 320.097510212422 | 190.138730960643 | 212.987082617173 |
| CMA1   | 130.173734963758 | 142.848438163322 | 165.314290446922 | 137.398748156909 |
|        | 142.478528530514 | 137.894482933806 | 132.637443692683 | 135.938590242744 |
|        | 143.572668991313 | 141.373059612034 | 129.358112503486 | 138.514356748249 |
| CMAH   | 188.952730860801 | 164.066839397676 | 192.059255232313 | 165.992542962911 |
|        | 139.949563856936 | 160.543465620248 | 145.351662473858 | 172.355215322173 |
|        | 177.065616871886 | 154.049004176595 | 142.187694439611 | 152.898148619937 |
| CMAS   | 553.198321853202 | 542.009873308344 | 624.264994653057 | 508.735412486964 |
|        | 647.955521647635 | 737.843412273272 | 929.69741581954  | 1037.46485756166 |
|        | 818.225731093346 | 1125.28599595312 | 687.987647193563 | 1109.08288440559 |
| CMBL   | 655.431236290512 | 487.696347726467 | 617.474181543858 | 585.371892598422 |
|        | 211.891710626953 | 239.33642662112  | 273.303240462047 | 284.574888587832 |
|        | 266.652805624826 | 243.979769719186 | 357.514919818489 | 285.659010982301 |
| CMC1   | 208.476367897256 | 205.830321788612 | 236.508498739509 | 221.635333304767 |
|        | 509.618968665191 | 367.289651112346 | 330.281193038198 | 323.244664586314 |
|        | 552.662610888399 | 465.809961695043 | 248.993716339029 | 316.281469585496 |
| CMIP   | 505.704957182936 | 675.083275037052 | 394.962978677736 | 600.162650426961 |
|        | 607.979208454176 | 466.777454704543 | 618.140160251927 | 588.076436392983 |
|        | 827.157920721418 | 1312.44215746801 | 759.802694618208 | 685.620637807134 |
| CMKLR1 | 138.909419415137 | 127.392877191785 | 112.219585614955 |                  |
|        | 121.865696440776 | 124.222529964098 | 114.768639931659 | 114.913534674899 |
|        | 117.445284668654 | 136.659134200122 | 118.60878652724  | 133.778595695007 |
|        | 112.054379249781 |                  |                  |                  |
| CMPK1  | 1110.43791444289 | 922.877217016704 | 1253.05700051015 | 649.906677394861 |
|        | 740.196934996626 | 937.375361806971 | 1032.11574332305 | 1038.34611017219 |
|        | 925.656701707763 | 922.009043194023 | 736.140249105836 | 621.173315178959 |
| CMPK2  | 148.396148091332 | 124.359615295938 | 145.217261514886 | 156.402578892869 |
|        | 152.717642489582 | 143.1288704752   | 176.236140830355 | 154.843607752473 |
|        | 159.570288565855 | 134.73970457131  | 133.236084190243 | 146.462544135666 |



|       |                  |                  |                  |                  |
|-------|------------------|------------------|------------------|------------------|
| CMTM1 | 128.570067783535 | 134.30624644595  | 137.280933631075 | 139.568610307888 |
|       | 136.152827218905 | 145.578721432709 | 135.504526903482 | 133.365793958118 |
|       | 142.191569406599 | 139.449895159273 | 139.39442529119  | 135.56878810365  |
| CMTM2 | 124.436549041911 | 130.890314257211 | 119.739204799544 | 128.303046695142 |
|       | 121.099290122973 | 149.007288765628 | 126.068445507098 | 152.863035012564 |
|       | 133.223310036542 | 150.52625734893  | 120.333487171575 | 130.639974588163 |
| CMTM3 | 345.565843875296 | 335.142319387164 | 211.357321758564 | 287.924891622962 |
|       | 195.929328710358 | 225.142823691625 | 266.681711962236 | 233.71520737817  |
|       | 256.687384001447 | 254.133112176024 | 416.546844844021 | 284.891415492568 |
| CMTM4 | 184.260835471542 | 181.79418355897  | 181.081050726043 | 188.910933952136 |
|       | 270.520229426015 | 221.45275440794  | 242.096692715029 | 300.602422224047 |
|       | 361.26540006942  | 244.054469051058 | 272.193578770314 | 230.015981563049 |
| CMTM5 | 158.390337945372 | 148.665627690915 | 181.976252906929 | 167.620915011868 |
|       | 134.719531559829 | 133.777238071968 | 150.893280574091 | 158.23562423217  |
|       | 158.039920243116 | 135.261561433405 | 168.477388641982 | 143.019052979243 |
| CMTM6 | 455.313553278155 | 489.528040775004 | 415.113340335205 | 321.049000153127 |
|       | 664.809419789814 | 1144.07896461196 | 879.809795251142 | 950.818917078515 |
|       | 1316.31088187364 | 741.689442253375 | 1424.79466712859 | 858.742139354587 |
| CMTM7 | 312.406286993239 | 334.916875239616 | 268.406778092906 | 261.96528977292  |
|       | 1992.71224011906 | 550.566402986082 | 1411.2586496281  | 760.572409199179 |
|       | 1597.53010317504 | 370.945254716657 | 896.185223980593 | 625.932910814208 |
| CMTM8 | 188.605328108654 | 216.427103365727 | 141.753560518393 | 165.530397739051 |
|       | 992.744093752678 | 610.915977337787 | 715.93836911426  | 293.925995360234 |
|       | 1537.71464618832 | 345.649572073924 | 194.961531388323 | 302.381946749711 |
| CMYA3 | 109.740801301993 | 124.02280670421  | 144.217621961908 | 117.30724482798  |
|       | 126.912226185444 | 132.647152200128 | 133.146347243168 | 131.473001455317 |
|       | 126.561067704708 | 141.147683040881 | 132.570225520163 | 130.452929012459 |
| CMYA5 | 230.975434289172 | 205.560952959537 | 215.40037757604  | 183.314276033531 |
|       | 183.795632040455 | 161.525131363333 | 533.893360199271 | 165.149464497921 |
|       | 366.473258467746 | 121.799209715087 | 195.776369840059 | 164.458565398812 |
| CNBD1 | 138.017249996128 | 129.564482772168 | 135.959893035019 | 135.452340998039 |
|       | 139.109712542702 | 133.744560712587 | 142.05571112803  | 130.091692689423 |
|       | 132.637443692683 | 131.849442776642 | 134.149446827982 | 133.195030751476 |
| CNBP  | 1129.76078220457 | 932.862030475849 | 1713.93035637146 | 685.848203651889 |
|       | 574.035124314622 | 882.037055216609 | 1206.59866455529 | 930.704688414069 |
|       | 1467.50846948144 | 1608.40826380713 | 818.761934233826 | 1093.21579738952 |
| CNDP1 | 128.375390373307 | 121.441901286752 | 115.137475087954 | 124.203250865069 |
|       | 134.457932303561 | 127.424848301217 | 108.118551275778 | 120.971313945446 |
|       | 126.782805974059 | 127.3079781139   | 139.47828235176  | 118.572988141773 |
| CNDP2 | 1153.5175534971  | 1623.92991386706 | 1239.13016938378 | 1106.75785702993 |
|       | 3149.26998719015 | 2979.27692778783 | 4166.43837922103 | 6522.27232911897 |
|       | 8163.29201165065 | 4404.79209330918 | 10862.3952192141 | 3103.4192907748  |
| CNFN  | 165.493629431627 | 197.762169504041 | 148.421611987655 | 156.674411447713 |
|       | 818.225731093346 | 305.16668987495  | 249.064573038094 | 229.483578414375 |
|       | 458.953009417683 | 4276.70912292877 | 198.456392063513 | 197.526492324088 |
| CNGA1 | 114.334059060506 | 132.873213182775 | 119.9414421871   | 110.1278204598   |
|       | 139.125340284813 | 121.278346729876 | 213.791379190359 | 387.908774438461 |
|       | 236.592839463278 | 144.896960245309 | 212.591357254196 | 206.571433405844 |
| CNGA2 | 126.089217853289 | 126.670227417269 | 119.308345676905 | 118.488997046932 |
|       | 125.470172259885 | 128.436499050769 | 129.213523302268 | 126.279119798177 |
|       | 126.895669261503 | 122.751674866182 | 150.778292242313 | 120.748910864064 |
| CNGA3 | 158.10628865476  | 151.342902631318 | 159.029406517237 | 159.446705611995 |
|       | 150.939877261936 | 157.172970235254 | 149.207481665265 | 154.552605305297 |
|       | 146.877475544399 | 162.683665945044 | 159.082447644277 | 157.684694038023 |

|        |                  |                  |                  |                  |
|--------|------------------|------------------|------------------|------------------|
| CNGA4  | 141.248526020456 | 140.655002540298 | 147.036768856136 | 152.134895623504 |
|        | 135.665577776938 | 152.752870674108 | 139.607944722497 | 142.143709425075 |
|        | 147.882530392424 | 136.013989349192 | 131.261903118177 | 145.810213943313 |
| CNGB1  | 135.391788614828 | 143.519786615253 | 130.75707278606  | 140.009593108693 |
|        | 132.175368142549 | 139.697477263244 | 146.298733090986 | 139.497253870412 |
|        | 142.703116372162 | 135.375268329248 | 154.818414925242 | 135.634385846692 |
| CNGB3  | 132.221351364892 | 136.859366444351 | 115.992487254175 | 143.277771142501 |
|        | 141.649911527714 | 126.501648842366 | 133.396403868645 | 148.219406063533 |
|        | 127.159947766922 | 150.911524755251 | 129.547309629132 | 122.673596593654 |
| CNIH   | 511.996883507889 | 442.766704003254 | 949.260897408911 | 327.251620296271 |
|        | 568.040362658955 | 1097.60805874165 | 942.900963522948 | 631.106334754678 |
|        | 706.759905439674 | 1144.92109214621 | 731.284098301795 | 872.512754090023 |
| CNIH2  | 138.93292293598  | 141.150016212967 | 140.132816040735 | 141.870640394206 |
|        | 133.773427881651 | 144.908551199481 | 136.607783800741 | 141.862767428244 |
|        | 142.367003292264 | 145.150191397375 | 141.222884136243 | 144.853868519575 |
| CNIH3  | 153.653453808799 | 147.395335979341 | 148.353927712013 | 169.583355171423 |
|        | 178.847858667374 | 132.005753222789 | 128.168460083895 | 139.503902205317 |
|        | 141.793216038882 | 144.619374612317 | 147.659772694732 | 142.305484770249 |
| CNIH4  | 1204.7397215229  | 978.389902096994 | 1037.97124386242 | 765.532997390972 |
|        | 3122.71790981947 | 2410.32095582515 | 2325.02143920169 | 1389.93393245455 |
|        | 2007.0121037284  | 2544.58522979036 | 455.778776920897 | 2452.1304336603  |
| CNKSR1 | 117.367470441908 | 122.821563586744 | 126.185560760543 |                  |
|        | 122.773736159743 | 171.39347085745  | 155.004104153679 | 165.085010975035 |
|        | 191.310372695208 | 159.349719495214 | 166.714793209109 | 192.96586114861  |
|        | 153.579955370444 |                  |                  |                  |
| CNKSR2 | 159.120172969378 | 143.451080466172 | 147.684875777977 |                  |
|        | 161.331326682743 | 144.019824700027 | 147.15999706579  | 162.841318222066 |
|        | 156.68541512214  | 158.665476708054 | 134.329334422886 | 157.130045415943 |
|        | 140.650987394155 |                  |                  |                  |
| CNKSR3 | 1247.02514044778 | 521.714719320355 | 593.462634352052 |                  |
|        | 465.029298672645 | 145.875240619257 | 243.772412032046 | 342.878522959461 |
|        | 275.929414239664 | 171.924364939807 | 299.513950278952 | 261.469732730752 |
|        | 238.548578086943 |                  |                  |                  |
| CNN1   | 15667.6576521981 | 14983.8256502293 | 10862.3952192141 | 24377.1316448061 |
|        | 119.412461116903 | 131.02157879562  | 103.550817366724 | 120.501697624977 |
|        | 159.620467672898 | 133.226542641174 | 118.850495684547 | 119.573635447638 |
| CNN2   | 463.880793292701 | 512.467731561858 | 536.609777988581 | 581.37957221282  |
|        | 934.546444634669 | 787.017214032692 | 771.294254795752 | 446.819873986024 |
|        | 495.655170027296 | 1033.03719406038 | 537.216291942143 | 599.735180191091 |
| CNN3   | 4913.55892033682 | 3822.05744774919 | 2736.98692493933 | 3029.07443443457 |
|        | 1548.09554827056 | 1632.07671492041 | 891.194779815063 | 2578.85391480563 |
|        | 1183.82018168635 | 1370.61156801632 | 1181.1611856364  | 775.382397816601 |
| CNNM1  | 206.753993163216 | 240.814860403562 | 206.620708230452 | 244.849563563729 |
|        | 115.927914533359 | 113.862790983655 | 128.597272557033 | 116.043095688871 |
|        | 125.612670947405 | 121.246967460178 | 139.286592412216 | 116.196676877996 |
| CNNM2  | 140.550044737476 | 128.83022039037  | 137.485252316816 | 138.872536475067 |
|        | 136.121873179928 | 131.268454024753 | 141.860850603561 | 133.453702113571 |
|        | 133.722739936347 | 133.695284981677 | 142.00857631537  | 129.938723074546 |
| CNNM3  | 263.321559283966 | 363.539983343859 | 279.325065941252 | 412.344820823968 |
|        | 451.147418314412 | 264.905947922753 | 250.003965480779 | 286.194197552489 |
|        | 229.907632927358 | 204.489837323989 | 287.503594820801 | 229.406012088782 |
| CNNM4  | 154.057771254252 | 144.361871207081 | 136.040524807653 | 148.406031732776 |
|        | 223.373877165342 | 169.733427590141 | 159.961729971624 | 145.203083375014 |
|        | 146.040995022257 | 141.139737175648 | 179.764260117544 | 147.982280671798 |

|        |                  |                  |                  |                  |
|--------|------------------|------------------|------------------|------------------|
| CNO    | 324.009703043876 | 373.096629378654 | 300.199170426996 | 381.253673759781 |
|        | 769.958422740085 | 368.466518140043 | 646.117381960716 | 426.464641742092 |
|        | 536.9324595176   | 416.638529499878 | 612.06231165648  | 556.863361789449 |
| CNOT1  | 535.041545916303 | 568.935113269368 | 537.982214580518 | 535.354724252178 |
|        | 544.107739610054 | 526.726224327409 | 638.287221212947 | 583.022090879298 |
|        | 518.281245498542 | 498.05778289794  | 885.104778820041 | 737.42784787426  |
| CNOT10 | 177.371157649894 | 181.479652131104 | 187.097765940131 |                  |
|        | 191.405362404386 | 331.164053277361 | 290.184801898828 | 194.775234425687 |
|        | 251.138401278632 | 356.62074247786  | 201.289402228512 | 237.601064742453 |
|        | 233.953994677015 |                  |                  |                  |
| CNOT2  | 557.026028810367 | 620.614820117452 | 743.915675090182 | 452.843213944986 |
|        | 352.811351813364 | 781.461780481171 | 747.077451281453 | 3184.98944679038 |
|        | 871.268905562551 | 1029.75852676191 | 823.658996207582 | 779.022508413529 |
| CNOT3  | 224.027605834751 | 231.728984785324 | 179.321622114583 | 232.444867422559 |
|        | 693.180345649331 | 183.201926323188 | 247.643123415644 | 215.426918011158 |
|        | 274.316982298975 | 183.613051401168 | 253.463871742303 | 180.437648146588 |
| CNOT4  | 303.762967437478 | 266.032134528055 | 284.574888587832 | 306.838596239511 |
|        | 260.016906472407 | 206.521761031181 | 259.472319994929 | 253.186749111526 |
|        | 274.371523790341 | 267.800523478098 | 265.028512407839 | 280.170464338141 |
| CNOT6  | 411.039234404499 | 445.089930641391 | 455.930204471585 | 482.344514972063 |
|        | 216.929969034881 | 427.345809255426 | 395.927222009721 | 386.379891865411 |
|        | 285.768837438859 | 584.199252444401 | 484.028175202673 | 480.101253056873 |
| CNOT6L | 182.851203073653 | 174.221939793486 | 166.22013573342  |                  |
|        | 169.87591929982  | 196.470718183575 | 176.890596690798 | 193.190059954084 |
|        | 174.136806313142 | 172.657668514226 | 178.657325741035 | 162.895923745031 |
|        | 173.082167545676 |                  |                  |                  |
| CNOT7  | 318.196134631178 | 277.685488726472 | 377.225452025984 | 236.676029292922 |
|        | 279.070493043898 | 551.92688162618  | 561.609211243027 | 575.060457772307 |
|        | 473.529519031797 | 484.028175202673 | 517.42417250172  | 569.133295913677 |
| CNOT8  | 314.646369385896 | 320.707687986324 | 344.128576341892 | 262.093405224922 |
|        | 236.833653794223 | 434.073729807058 | 504.436992949763 | 445.905756082569 |
|        | 334.101619029105 | 474.14051635531  | 649.906677394861 | 542.544172683021 |
| CNP    | 162.364266549463 | 164.084737224884 | 147.955701866515 | 164.910911528819 |
|        | 139.399195840117 | 140.217243202557 | 132.425596223397 | 162.560758971445 |
|        | 140.301945597122 | 139.931092990984 | 129.497266827284 | 139.510764003291 |
| CNPY1  | 142.876069462608 | 143.544139742002 | 148.539881077647 | 152.657649988502 |
|        | 145.385816618728 | 145.711007027894 | 136.176688025337 | 136.092086452096 |
|        | 141.127519700052 | 130.198147836925 | 136.041605158822 | 142.948238172973 |
| CNPY2  | 742.517302567436 | 861.786094902013 | 653.264945856916 | 706.292905820227 |
|        | 1870.52504853779 | 1592.29734618345 | 2144.52984392647 | 1949.60516542965 |
|        | 1948.24432908972 | 888.706978062337 | 1838.18547839898 | 1316.31088187364 |
| CNPY3  | 181.85552254233  | 192.475309217696 | 186.625452120269 | 212.190707408572 |
|        | 535.20662670885  | 271.638179116269 | 373.452370692334 | 240.631264915238 |
|        | 237.045634416039 | 185.896304740844 | 271.858059712406 | 295.420691959792 |
| CNPY4  | 287.145105895235 | 246.389203940944 | 249.489170536758 | 279.159925913207 |
|        | 201.059635671301 | 249.09278446472  | 177.306794546105 | 204.283030911897 |
|        | 186.296882059398 | 188.490807652188 | 165.70840218273  | 195.88263399968  |
| CNR1   | 167.893596681867 | 190.152824885328 | 197.775397831129 | 170.910998705968 |
|        | 175.810411923013 | 174.663845688179 | 191.25724234927  | 152.286545050749 |
|        | 170.95650329595  | 151.382199195953 | 259.767151797583 | 166.360005474414 |
| CNR2   | 129.132523684894 | 131.185836673529 | 128.963962067821 | 120.816130267055 |
|        | 124.897463208595 | 124.847325289068 | 126.730314982553 | 124.927989289122 |
|        | 123.410467384598 | 115.520278378747 | 131.282765307273 | 121.239461514704 |

|          |                  |                  |                  |                  |
|----------|------------------|------------------|------------------|------------------|
| CNRIP1   | 496.426739836535 | 466.4890990178   | 432.372995789404 |                  |
|          | 428.462270756201 | 148.247826830556 | 173.611295051326 | 134.519697269443 |
|          | 165.851677392967 | 190.682392100564 | 166.910561772689 | 134.066948803697 |
|          | 149.12669444179  |                  |                  |                  |
| CNTD1    | 124.116400777472 | 134.460035654795 | 135.281686411685 | 130.905135502296 |
|          | 128.052753068991 | 122.290822230565 | 137.75060150486  | 127.887666721519 |
|          | 129.785078660064 | 137.744318243173 | 123.908458472687 | 139.180086017033 |
| CNTD2    | 127.224081416987 | 143.08841562593  | 132.220398477217 | 133.108094159933 |
|          | 127.229854957588 | 125.296240086615 | 118.312891459156 | 134.257928609741 |
|          | 128.383541329939 | 126.619475852751 | 145.463105638655 | 124.723519607109 |
| CNTF     | 120.39039576721  | 114.265920150451 | 110.810963139914 | 110.286187184448 |
|          | 120.371374172279 | 112.096627288813 | 111.243322115126 | 117.343165720552 |
|          | 106.470524594239 | 112.054379249781 | 127.709638375626 | 104.321352818065 |
| CNTFR    | 138.760800146167 | 141.191500203423 | 130.564962937297 | 141.016596301267 |
|          | 132.75673287656  | 131.849442776642 | 125.35643274458  | 130.586509996354 |
|          | 122.460829835477 | 127.951403055054 | 129.621296567128 | 127.07186140748  |
| CNTLN    | 148.01816554072  | 146.875733210901 | 148.936888662374 | 159.012011848781 |
|          | 139.073785024092 | 122.472909598385 | 128.927103442679 | 120.07034081564  |
|          | 123.07559417607  | 133.032905765836 | 156.01406297447  | 127.314089756429 |
| CNTN1    | 188.0434100445   | 185.342353172151 | 289.859695541999 | 183.443006525616 |
|          | 128.344679872625 | 123.059971161711 | 121.099290122973 | 127.681662711369 |
|          | 121.640681916546 | 251.731327363027 | 132.595360509902 | 122.883806494491 |
| CNTN2    | 141.923103467306 | 153.962758393332 | 145.459919416288 | 186.007710175103 |
|          | 144.806478328053 | 143.950279111815 | 146.654925456132 | 148.779043570204 |
|          | 140.197487078987 | 143.984222627806 | 128.994977935861 | 170.844002412425 |
| CNTN3    | 194.569325586241 | 174.717158790668 | 198.470718196139 | 156.47237266917  |
|          | 185.063870458561 | 147.264690436042 | 192.273528391588 | 185.128661141884 |
|          | 193.871324880919 | 142.000874773182 | 228.317527475322 | 167.532512839891 |
| CNTN4    | 114.673517800886 | 120.843429388102 | 122.928863588006 | 117.770032157393 |
|          | 115.692324946633 | 123.857527555048 | 112.875136585606 | 110.651971902576 |
|          | 111.286141277084 | 118.372047967248 | 127.903393519351 | 116.425301253959 |
| CNTN5    | 145.700589723224 | 141.541355091514 | 142.635015113687 | 145.754504160436 |
|          | 136.390047634643 | 138.213742418402 | 149.8035588048   | 142.750432197016 |
|          | 147.051399102374 | 148.408616955694 | 147.635761512135 | 144.400004730049 |
| CNTN6    | 146.506263412584 | 158.58863949084  | 155.603263242813 | 138.956057921718 |
|          | 180.132104305583 | 128.191959554459 | 177.379186278216 | 157.874624979775 |
|          | 140.216148769999 | 163.946569217706 | 142.305484770249 | 155.214638707046 |
| CNTNAP1  | 338.739180103373 | 281.44159425243  | 298.460273458181 |                  |
|          | 356.376890469558 | 150.843975804117 | 164.274491958161 | 159.455596750304 |
|          | 202.761449711661 | 215.167086358143 | 200.558971047462 | 192.258863431747 |
|          | 176.761123480566 |                  |                  |                  |
| CNTNAP2  | 123.347836436966 | 138.728765780512 | 109.37466528113  |                  |
|          | 140.861849838223 | 108.79453730066  | 105.665621968915 | 106.522641798274 |
|          | 101.530900217921 | 135.722938102035 | 351.079435946154 | 137.962542261072 |
|          | 161.77611826709  |                  |                  |                  |
| CNTNAP3  | 119.01559016005  | 129.524056217383 | 133.627890571828 |                  |
|          | 117.05536677976  | 122.985117824212 | 124.025104622631 | 129.828896822571 |
|          | 135.930107381894 | 142.866874321248 | 127.50624009248  | 127.6078497227   |
|          | 114.255733119076 |                  |                  |                  |
| CNTNAP3B | 147.019460117987 | 143.802883430376 | 148.327340543504 |                  |
|          | 155.319717753912 | 136.83883055114  | 150.508851767517 | 134.799648755296 |
|          | 151.511808301993 | 141.86836086844  | 142.674671804361 | 132.539585717666 |
|          | 154.661456780865 |                  |                  |                  |

CNTNAP4 124.513891912986 126.260691770282 140.704317015307  
 130.161889021281 141.811563725942 136.91779948054 135.417519318028  
 136.572645314012 129.368045611894 123.482626777491 136.799138736925  
 131.265594391542  
 CNTNAP5 135.920830568556 148.446949168794 131.662585510218  
 134.883708339914 139.016274575854 127.585851003779 127.512733134453  
 136.871568211946 137.248465324584 135.771423315597 156.187809481625  
 138.45137517137  
 CNTROB 145.076793236112 178.270849389719 149.827791077797  
 162.914301705151 149.6730835169 130.288547755599 133.760183242137  
 154.993784224548 136.032310569127 126.404523759643 163.773702843544  
 116.288113598488  
 COASY 422.434778100827 490.631757904175 386.067573158514 466.257158794525  
 903.824331691969 765.532997390972 775.382397816601 1107.29687889378  
 1166.86593572716 642.057106241761 603.061485415867 544.30845362168  
 COBL 264.936739264566 245.454945056317 188.695527267631 290.754210152709  
 171.504939477949 171.121834829333 142.858554460651 167.149578610266  
 177.94501172269 174.979501466228 139.979025013908 145.787468865642  
 COBLL1 1550.61855325662 1667.86825735893 1127.89414462606  
 1444.45946291517 1181.97868824758 705.311256840178 1556.41573079892  
 1129.76078220457 3921.67860557329 806.290662664708 1746.30519466572  
 1096.10636044885  
 COBRA1 366.317263094585 385.379119927642 321.794887577351  
 492.780880796036 794.165408266062 256.924134409998 237.358925391616  
 242.695286989672 273.252023367028 370.678040372273 358.298768623212  
 221.594737497504  
 COCH 149.387467833684 157.341422939225 145.835240952992 149.925051977052  
 146.153528461264 147.77916610545 162.743192424569 194.998142472864  
 165.389652763451 136.939603341076 138.259512736404 143.828909773599  
 COG1 210.41046499545 207.902853533132 249.449151040445 200.22145130696  
 203.616580991715 194.212177449077 212.987082617173 217.86728342043  
 232.385176936256 190.825209733575 210.061754644824 238.310077556167  
 COG2 373.760551592844 398.354212009426 403.292651623365 465.41233536979  
 331.464977124667 411.603820288919 470.95418656881 486.653672099699  
 402.299165610893 349.382889326613 321.119758814618 468.170972478717  
 COG3 263.707476735938 230.179200974631 248.330154701293 222.332748220525  
 174.657352858049 264.936739264566 166.741762854246 211.966139902562  
 252.10470581893 246.457698183615 278.942695435238 295.607161318725  
 COG4 290.754210152709 317.600728351694 311.337303524912 378.797952580504  
 323.149792143481 304.636618563775 335.47484353322 276.79778275734  
 343.571296297462 279.26508919212 258.964323941464 276.224613560582  
 COG5 221.45275440794 181.364325529405 220.9384439772 171.537040561599  
 193.912456093767 248.260998007814 271.196028302639 244.251315474587  
 224.766155406229 256.924134409998 188.708596785144 266.217879616686  
 COG6 294.595972099366 297.708113541379 290.213039891361 246.594244983507  
 250.085444708918 389.686045618228 306.011283364888 241.494710905339  
 351.079435946154 392.282956362735 326.570967321756 366.788087591332  
 COG7 239.148333781084 193.892810132985 218.298791348295 212.531329857909  
 186.653791045656 194.702974020747 264.201932544662 228.270158363878  
 204.959164579011 203.456296907031 171.304896264805 198.356420768703  
 COG8 180.867208892996 167.500410857353 174.615694779386 180.219813240126  
 186.778334749551 186.66469040433 184.187847236508 170.169402943662  
 193.028341755594 181.695203523798 169.136919982294 176.27969404442

COIL 442.027630433527 493.071213662125 429.096075419528 435.332573825425  
402.824964079515 644.868034665476 781.790858580895 705.737228226014  
646.933504790891 485.87138934376 594.38228123675 634.556887178869  
COL10A1 109.471542280224 108.751654061536 109.924867620862  
118.510960607141 105.010952544907 107.828378413233 111.260486045985  
111.848472437543 113.347609066395 834.788058321257 116.902574164498  
115.3611179192  
COL11A1 128.44311762955 128.888149939072 133.99046926032  
133.883527462382 132.071099697667 126.029431525943 126.134393447943  
127.215777044942 126.875483714734 306.277823025572 132.70888569469  
135.966929064294  
COL11A2 150.590611246086 144.073739611496 141.115539663314  
156.756159786366 144.102872001089 146.602252563413 137.966987037709  
140.84880167881 141.42859050659 145.793794049657 149.14863489698  
139.47828235176  
COL12A1 356.154842959851 209.60319248212 180.667897257797  
199.87003105816 198.411812737082 199.170488640762 155.355051932357  
198.285073991956 197.068795788491 613.846166856328 187.625536724681  
166.232856234879  
COL13A1 266.681711962236 194.143649677822 145.117574928189  
152.680068580858 147.196687432745 150.163801964104 137.562157262928  
150.138643811727 153.38260557666 203.206743799353 160.562164904057  
142.964043764953  
COL14A1 429.457884032977 247.643123415644 310.815067427296  
223.84997313236 150.902548360746 187.700723296295 151.26137860684  
173.892380305166 217.125327913156 147.661748633455 160.469645948225  
152.767228183775  
COL15A1 815.045148478814 549.96567374713 379.670492165938  
623.888568444132 192.032080013216 194.998142472864 124.897463208595  
206.413554839865 388.782774926005 231.670761847089 191.207048581306  
146.402352419692  
COL16A1 2171.00457877604 1704.25279485563 1442.11349373764  
2091.73580292332 201.731223995887 238.461248099002 214.38058301395  
269.567704345075 315.615758089471 763.880957432979 176.901042102323  
236.933960698783  
COL17A1 167.645930148254 239.109163320417 204.470661830972  
146.136820062093 163.758054869675 145.002309193867 209.229537873706  
203.19299227665 167.173670781451 4246.19983955771 1737.57015396357  
872.320823993033  
COL18A1 890.507257588957 816.823443819069 662.781145703653  
1067.80176606977 200.486683704179 144.342905860503 127.612859839494  
184.021010234322 279.668007824988 393.198813167839 189.633348499854  
139.188234030711  
COL19A1 144.954595802474 153.557991189227 150.756776447358  
156.768976123975 143.188958538221 140.343790129071 129.375772737722  
152.657649988502 133.680691168661 141.115539663314 128.833756478439  
133.329392986316  
COL1A1 2801.66917828364 2874.43919426772 1114.10687039922  
4425.66777919789 1514.53784631689 664.60530723006 317.353318759931  
721.603421985572 1273.6393529108 9139.73212514992 408.10780961711  
870.409935772423  
COL1A2 5636.26097921507 3528.62443098065 2539.87833317526  
3200.61067185412 981.781076110568 1136.76110352875 450.688800547981

1607.52029676299 2311.05587511258 9192.8966763778 579.493790910006  
1382.12750708801  
COL20A1 170.23937234395 166.485040297098 180.060096787617  
190.427022049167 179.100368312505 185.128661141884 193.589480577091  
167.776363541939 161.948033313443 177.246890307643 166.422360032182  
166.027988561421  
COL21A1 226.595006724068 223.747350951099 238.270501389189  
179.421854100287 136.265972909993 148.045391886623 156.4687904356  
147.049287475127 140.903091584884 143.383697128285 149.513744292932  
132.695992860853  
COL22A1 144.619374612317 146.188193301627 127.787890405862  
137.805895248174 200.72147365413 319.090371885653 899.336817124312  
139.356478232855 126.566165822427 147.153129531937 619.045921382959  
622.142195892701  
COL23A1 145.513333676569 143.776637809106 149.103778494524  
146.00443946108 144.405191855684 151.71942719041 138.76667538162  
150.72835989269 151.054834307689 147.310807346272 173.526005872207  
153.0141888126  
COL24A1 211.844563155792 203.791916347213 245.240006198482  
153.085975710144 150.419668144913 165.71382076724 137.524968609776  
153.56082876276 142.80027343095 156.411563412665 148.544887355857  
161.735609436394  
COL25A1 124.062863592295 129.958065173006 127.610304071204  
121.734873711651 119.603565559838 122.351186755611 122.65547320922  
126.383238335161 125.107483348755 120.883785696583 133.959208066964  
132.796961054534  
COL27A1 148.367132982373 144.834448238435 125.914267820741  
139.089444892187 145.770601609392 112.578934972566 124.103321614841  
129.391376518208 120.460433297007 196.889520085412 178.676812740925  
162.411156818437  
COL28 146.986891588172 144.40361834862 127.517446456116 148.334425146129  
153.358189612307 136.220324225816 140.628614910068 139.138329217724  
160.73807125195 149.070750686003 131.202090507576 135.664877050226  
COL28A1 178.3652866131 165.337956130606 170.342828808493  
185.544411160039 162.47662918768 136.216577685046 145.542888937635  
175.537039794925 149.227646026658 171.014432075829 153.563839578065  
155.023934989559  
COL29A1 184.989027770708 158.396149470397 127.055165613236  
144.585120811896 131.345038923753 162.606273401226 144.32655838488  
142.288110423886 127.302714624905 140.238423894192 141.264096014725  
139.273651128094  
COL2A1 136.317978146216 132.119370332298 143.427721577372  
134.034970203523 140.043256690184 139.926488041421 128.137646789236  
126.479964493857 137.024230648861 137.764057655114 128.221548195595  
132.642931022024  
COL3A1 4819.85672511343 4255.59773503364 2263.73444150082  
4569.44477073589 744.225336494008 1657.72357544205 398.796188440256  
1485.776977235 1978.95750795951 7601.58151657937 586.867772838753  
1023.29995420518  
COL4A1 7656.97151002785 5609.58233117244 5122.60899285635  
7930.82679738435 1704.25279485563 1658.78888936164 548.014025722956  
1899.94714976387 2023.92614092273 3481.90072759183 903.144845227364  
1355.66237447026

COL4A2 844.462124058351 833.198511430615 759.058176862524  
1413.37062765856 299.669394721682 219.0221768576 152.692483731643  
281.694635436938 328.200548902445 374.761007556839 155.490897312915  
188.593378315122

COL4A3 135.159590925066 128.451788292588 134.35958389775  
130.370405378213 123.665983073461 124.119104345119 133.802898895457  
123.745824514261 126.690066353698 129.906744036052 130.380766252137  
120.337241026338

COL4A3BP 625.544719251096 500.469781477166 526.726224327409  
341.501397478593 308.208276315292 401.584032365337 332.798130757632  
291.221427744817 284.272977025491 380.053166305637 440.579262120451  
306.59090554099

COL4A4 219.564603776774 189.0608798771 152.074017988748  
208.713555471888 112.133567992833 109.128394735532 123.207402172696  
120.835207882788 124.899019467557 120.922042875444 118.161192318422  
123.762963668211

COL4A5 1513.28088592885 1343.2623011534 2010.57142784228  
1312.44215746801 448.371946119074 624.638115878703 689.821785472506  
208.713555471888 224.724262742427 530.387315639095 646.461274173693  
940.716682221364

COL4A6 571.64723305848 538.156335788156 821.020339593525  
593.090436323333 151.301484852387 132.926799887017 284.351529744475  
131.950295185477 134.748177388398 184.530853446688 183.472290949588  
383.682951666155

COL5A1 1699.17470788219 1774.22769195939 776.411045078049  
2300.9407349072 522.77407098992 357.972320648217 260.554343693588  
530.122419830951 713.525134497596 3592.7878705048 247.145700155364  
356.05426191171

COL5A2 1312.75601392984 1233.27155759407 733.49038042129  
1154.1046856215 372.374101464689 335.47484353322 164.558875058199  
473.260534978556 533.140740560189 2965.38280248519 267.970798709017  
339.843776738468

COL5A3 143.94902198632 187.700723296295 147.43089976575  
246.710233781784 141.760529549196 149.756512110538 136.420062669039  
136.207420489201 144.505072819693 226.796825544749 136.032310569127  
133.396403868645

COL6A1 5489.19362780613 5670.70220800096 3706.41283595794  
7446.59106452583 268.224669588188 264.604297630839 225.61275910008  
349.816819166182 398.892968579918 1748.77270039774 194.143649677822  
229.230239609291

COL6A2 2132.90676194993 2116.39371296122 1597.53010317504  
2385.5958396359 198.722993687455 196.117609477292 161.17923997423  
239.541516080716 250.647644543963 691.632061537999 157.010145291837  
159.524235332529

COL6A3 5226.05969701201 4732.31591164752 3093.38255333143  
6571.35528952186 367.439588680092 574.262112643403 326.325210657599  
926.283018664897 1439.37593006882 3177.80599774525 237.575788579215  
508.572981581855

COL6A6 124.904518221898 119.52150378372 139.684141478459  
129.697584673736 122.236134282757 135.647660756548 119.984301761327  
127.942759794556 134.624322761212 150.263578317272 112.714282429822  
119.926169902322

COL7A1 559.236012019639 550.671679318681 233.997642139328  
366.636754272029 604.237898104299 765.128667448261 858.524630425687



410.42088953434 470.95418656881 3522.61692270848 723.640113902925  
1932.39418448203  
COL8A1 772.399017166118 735.8141982568 361.429760858441  
433.82566459288 206.113290588613 234.925852373127 211.572396862776  
355.048838683854 487.19625805337 493.715108157171 190.572712684622  
257.408058436941  
COL8A2 529.854965483609 450.566031840493 483.067471841953  
547.367381020623 197.02284475852 189.434597063058 182.747079625619  
199.149959995133 187.352655464866 258.727309442475 185.485858719975  
191.200215655114  
COL9A1 126.775180133301 132.074571281938 123.609527892227  
121.884067622971 138.365589511693 133.037138438863 130.128585442593  
123.687439699754 127.030113960477 126.355699811531 141.090356426567  
142.358754646258  
COL9A2 195.795728497916 193.843978773764 165.424516708502  
155.397301207102 241.293046687076 120.944267930809 162.638805580226  
177.825648107126 389.109250187902 123.998343902602 267.451611731669  
248.993716339029  
COL9A3 159.420533375725 142.22515098612 147.077695919758  
147.15764785567 145.924751649542 133.633281583673 152.823566129571  
149.066522533956 136.935498266723 136.678188851101 132.261161069329  
177.780479906048  
COLEC10 114.470670941078 112.365278258185 137.239088768176  
127.107223387937 107.949834974369 123.660836177932 147.382177739631  
120.65473121078 117.710502693638 128.536721595589 130.742940708861  
119.407293854922  
COLEC11 280.170464338141 207.581907737176 169.33926580273  
218.134101819445 146.64560446484 151.015243921984 161.667782505656  
173.532300173223 177.592497020798 136.156548919515 129.499283650632  
143.399877326927  
COLEC12 583.619362840814 427.98782239715 514.213675499369  
376.374248850987 132.873213182775 154.051705030348 140.05419835434  
146.011694647614 178.222120802125 277.685488726472 167.887047631073  
142.459230639888  
COLQ 178.007364708903 173.121618125421 157.076284096905 180.599150102184  
158.287108069245 151.877035446575 167.157420848604 155.883386742315  
167.73288535728 157.77047742735 166.239339129505 148.987672562273  
COMMD1 1008.875250028 1143.0779222425 906.886423608706  
1497.32522786098 920.083835296898 716.229989890801 957.54149804446  
901.644194512187 708.056533282983 1329.3013039618 614.775559038663  
748.703265448403  
COMMD10 265.174306663185 266.19823384117 346.065746911798  
251.472556189141 212.223906015932 288.913660405191 324.79327985156  
300.709410518382 235.76573393374 581.828502821435 227.144441241869  
398.512947526406  
COMMD2 229.26243866226 199.88618355278 198.597176657619  
173.532300173223 340.098306132634 230.770036998466 293.482512212153  
348.171901445232 385.522443482 553.123179808258 240.971675534641  
244.401472859026  
COMMD3 1567.89763050645 1419.4638331856 1992.71224011906  
1418.60088387728 3328.99028463277 2388.03256067711 1932.39418448203  
1790.53556140959 1957.48508632607 1174.69701182094 1978.95750795951  
2051.45788386541

COMMD4 345.135289739599 427.542390397986 334.377352542623  
 477.741216640575 800.373159084181 657.058213650454 675.596864001032  
 428.237210115667 634.046843336128 731.513306289481 365.590174280114  
 528.767644181119  
 COMMD5 267.069665000047 242.070630946726 232.363656167375  
 259.868701878844 357.191675549592 271.522696252995 239.31180635241  
 293.873921048642 327.324711245289 279.026742408164 313.248029961291  
 284.831817899986  
 COMMD6 2299.23805014176 2473.22803972431 3417.22292085668  
 2039.55802107872 2046.64499507352 2553.92770795014 2847.42635118026  
 1771.39155164347 2018.81730267601 2352.01196541874 2151.9395095819  
 3338.13980198211  
 COMMD7 1596.33832632698 1600.10235468018 1652.77814259264  
 1793.75125318113 2180.31963682546 2459.05558915812 3693.4058156307  
 1863.96986643676 2346.47361943533 1385.28044421961 1955.96772733047  
 1846.61430264854  
 COMMD8 181.607253339427 194.500222559978 218.08515867102  
 208.363905749882 251.011148303246 330.758879244143 359.329520507158  
 364.527677995774 362.306819797508 484.903322308422 297.862653495715  
 361.904370514991  
 COMMD9 365.864755316163 346.996310517446 388.710465457313  
 421.303580698397 433.019478861638 391.039114500903 349.540558521616  
 369.275635424092 430.220363263561 598.287431134037 314.557323400201  
 277.129985959184  
 COMP 200.094610104813 177.562561297777 130.867819112143 146.316145173343  
 156.901209828741 120.201521341263 116.925863450165 154.236652966294  
 179.15284184774 137.599810249536 126.845048064014 126.732121894377  
 COMT 545.026293696209 491.906642849373 567.715714233608 450.468410589415  
 2193.376951552 1419.4638331856 1698.08853832248 1066.25208226214  
 1336.15622439522 924.312051919404 955.143610867351 2309.63504858248  
 COMTD1 240.306287921209 235.216589534371 187.893420010787  
 245.675725760577 516.755267232127 250.217137496422 243.772412032046  
 232.735767435327 316.524115715585 346.691690520054 243.425632941131  
 343.666488527549  
 COPA 1727.7144253077 1505.09908072606 2039.55802107872 1306.20183851747  
 1623.92991386706 3200.61067185412 2508.50428529255 2947.51998516453  
 3737.57754066891 2537.90501983425 2139.42448145954 3119.93811557461  
 COPB1 884.747476952289 780.961416212309 885.104778820041 678.684323057327  
 734.139557942719 1211.94273385872 861.786094902013 906.886423608706  
 1184.3199328099 1072.82323999638 687.789976218334 763.533962249076  
 COPB2 510.061974830525 492.05680879106 514.799179506754 472.669956708398  
 719.766799746895 807.3257139219 1013.03054571763 1213.61170930345  
 1459.31031099055 995.263014856158 558.251384152474 866.147379099606  
 COPE 554.511983790164 583.022090879298 513.816017871024 704.152296359463  
 1916.46158204806 1026.61404215739 819.151876775691 945.830852603704  
 781.208872924532 974.007008568051 487.07860019179 852.099019968701  
 COPG 565.843200661721 522.17701271254 394.576038252334 523.937128789616  
 1024.95957828641 521.83794739314 712.94845413251 562.089999265955  
 953.549801897112 511.113083958771 881.15414246017 484.363052437459  
 COPG2 248.204358220728 243.691004557778 193.723953003899 205.45079491218  
 378.509324619452 236.745054217055 178.790758444269 204.396576475753  
 167.180406126438 195.674128236589 231.819341041105 260.921177985439  
 COPG2IT1 147.617354114584 140.708683675555 144.592987736094  
 150.456500446175 153.714902281332 153.310330832285 152.872139211415

|        |                  |                  |                  |                  |
|--------|------------------|------------------|------------------|------------------|
|        | 137.519771130707 | 152.045391611927 | 132.249906289203 | 153.412469512967 |
|        | 176.029791617989 |                  |                  |                  |
| COPS2  | 205.950347620158 | 189.915720614467 | 258.830885826237 | 169.568915494577 |
|        | 213.833894542292 | 174.953232190285 | 242.019489058244 | 164.955263076598 |
|        | 191.418673767345 | 246.369521698487 | 277.459328083162 | 194.921021761976 |
| COPS3  | 1286.55103838368 | 1123.93087912174 | 1344.87842417496 | 1097.60805874165 |
|        | 636.970243888917 | 1586.00600118477 | 629.97342429259  | 1203.47834989609 |
|        | 789.401526545277 | 1331.18605673705 | 941.572186137467 | 938.499337889075 |
| COPS4  | 461.088572554864 | 466.392151902286 | 634.906566690042 | 411.221560795912 |
|        | 620.371912523332 | 1004.97723186946 | 657.231047829537 | 566.813343200268 |
|        | 512.541205235935 | 552.298965378403 | 615.662993833692 | 574.496860164135 |
| COPS5  | 1044.91923772265 | 1055.79590411506 | 1362.1486006778  | 963.343120586863 |
|        | 996.999238316991 | 1687.85201395597 | 1378.40627876546 | 1849.21906428944 |
|        | 1995.6000523628  | 1437.5568316065  | 1544.45026075974 | 1348.80530206238 |
| COPS6  | 542.267204956846 | 559.236012019639 | 642.647554580301 | 658.47864958685  |
|        | 569.47446215213  | 405.570281788901 | 513.428413503031 | 599.52440136406  |
|        | 414.114051645565 | 425.969575503375 | 283.377663208926 | 714.052063877292 |
| COPS7A | 1605.2454230722  | 2076.51786803222 | 1843.76920134139 |                  |
|        | 2642.24374855334 | 1403.90487313049 | 1100.17618574297 | 1827.03179366146 |
|        | 2234.85920641661 | 2255.92551080483 | 1899.94714976387 | 1813.79641422879 |
|        | 2091.73580292332 |                  |                  |                  |
| COPS7B | 395.386242257877 | 420.871349359404 | 551.823767223086 |                  |
|        | 543.584413650467 | 344.786541451395 | 377.661589835101 | 407.875393458322 |
|        | 291.994364783888 | 512.723592291378 | 359.099750692694 | 408.037874667173 |
|        | 591.437752991512 |                  |                  |                  |
| COPS8  | 381.808809625801 | 385.678901612324 | 381.867665449509 | 316.722160860531 |
|        | 238.724909152512 | 275.996693627151 | 308.330044958513 | 229.284931844047 |
|        | 326.417021307859 | 462.948429969719 | 291.444155562134 | 345.897250519387 |
| COPZ1  | 487.19625805337  | 527.226517960073 | 454.64556253724  | 555.607185132941 |
|        | 618.140160251927 | 957.54149804446  | 704.448123154868 | 836.613819700658 |
|        | 1162.8644618472  | 896.625415670455 | 684.428198622716 | 737.193295872614 |
| COPZ2  | 345.38424761963  | 337.434882771953 | 262.756237406794 | 360.684900316265 |
|        | 153.871893011106 | 145.372579207362 | 128.400741751903 | 151.054834307689 |
|        | 165.451132663092 | 250.060734219351 | 153.690189121681 | 150.300108097623 |
| COQ10A | 302.637859140061 | 270.568660560796 | 301.955019831714 |                  |
|        | 278.775971122032 | 209.051768656607 | 225.275049011909 | 184.709768457405 |
|        | 214.162670073541 | 238.095599711942 | 235.530986541549 | 246.186104432792 |
|        | 199.077893147154 |                  |                  |                  |
| COQ10B | 1245.47421607111 | 1032.4540300024  | 1162.8644618472  |                  |
|        | 989.77058497525  | 552.790706181938 | 1317.1258783404  | 711.166793546075 |
|        | 1082.75419087929 | 809.362464219294 | 993.34112647221  | 1113.59310757948 |
|        | 1046.65224316733 |                  |                  |                  |
| COQ2   | 272.571092944711 | 253.186749111526 | 265.972387419683 | 230.227432807772 |
|        | 482.344514972063 | 403.47026424469  | 491.112594297928 | 362.252813848151 |
|        | 538.605085454393 | 778.639512538949 | 482.965800108538 | 380.146996799549 |
| COQ3   | 424.025588636796 | 399.248044997427 | 468.339735327273 | 493.492348317616 |
|        | 367.025117016472 | 330.457534783492 | 423.396271159345 | 450.120868656638 |
|        | 426.548994267836 | 570.916936074747 | 378.695635790714 | 454.030083521756 |
| COQ4   | 144.4421922847   | 153.187148832063 | 139.674001912099 | 157.58224826673  |
|        | 145.212306927438 | 129.801342433836 | 128.580625868379 | 165.286724415145 |
|        | 135.916668738753 | 136.526706711584 | 216.783051958345 | 144.237691418911 |
| COQ5   | 627.335757721489 | 625.699971780258 | 763.880957432979 | 604.047164856689 |
|        | 741.875751347917 | 663.214972254236 | 795.037968409957 | 1003.36623972843 |
|        | 1116.19403476786 | 657.058213650454 | 356.154842959851 | 729.202002368627 |

|        |                  |                  |                  |                  |
|--------|------------------|------------------|------------------|------------------|
| COQ6   | 245.378747269929 | 239.452559981542 | 243.732074437237 | 275.101766414328 |
|        | 240.253944604431 | 213.274106157675 | 231.239126548656 | 229.31486399741  |
|        | 185.727947276958 | 224.027605834751 | 211.966139902562 | 259.229153662504 |
| COQ7   | 226.506852362359 | 217.969738417693 | 223.703371558666 | 232.986366625889 |
|        | 174.593548891693 | 178.946928223991 | 235.350819745387 | 211.208937901871 |
|        | 199.149959995133 | 178.358003030064 | 180.719868519867 | 252.733973271584 |
| COQ9   | 1274.39152410752 | 1435.4236709581  | 1707.09830463606 | 2171.00457877604 |
|        | 688.464980326689 | 526.285114043212 | 713.23381913235  | 647.273409499313 |
|        | 745.153336165802 | 761.586663689579 | 943.23069404564  | 811.144838166905 |
| CORIN  | 164.429483677715 | 138.883097077879 | 119.651470884046 | 111.716607815635 |
|        | 115.572088632106 | 110.662552491706 | 109.318922864507 | 120.53428198263  |
|        | 105.62620788923  | 114.400185930969 | 113.301733735994 | 116.082361389405 |
| CORO1A | 237.989479738133 | 179.914070416793 | 156.448355269561 |                  |
|        | 186.222567239198 | 449.952497751758 | 630.473042320288 | 229.200570583629 |
|        | 458.33221423434  | 903.824331691969 | 232.918330930051 | 347.147961254829 |
|        | 237.575788579215 |                  |                  |                  |
| CORO1B | 285.659010982301 | 324.177924877233 | 279.000687630846 |                  |
|        | 388.966303073519 | 2273.12164779441 | 611.088604425595 | 720.364080505785 |
|        | 328.919401925375 | 433.594928641214 | 346.173614351499 | 743.510369438587 |
|        | 621.489906442001 |                  |                  |                  |
| CORO1C | 3106.94181270197 | 2637.62596741408 | 2154.00589005104 |                  |
|        | 3490.77593331727 | 290.241064926886 | 275.203046536524 | 344.575967665039 |
|        | 247.845708587624 | 307.410175748955 | 663.668537495345 | 614.957397883514 |
|        | 266.918302307596 |                  |                  |                  |
| CORO2A | 163.876218743322 | 164.61921356441  | 148.388093331273 |                  |
|        | 151.043967734248 | 237.88097138936  | 257.032174266905 | 397.2528907311   |
|        | 348.921877633633 | 375.189005729903 | 368.0573385048   | 387.908774438461 |
|        | 242.996248524203 |                  |                  |                  |
| CORO2B | 185.258354905314 | 172.073751088968 | 156.043994260248 |                  |
|        | 157.729732484131 | 140.091378604453 | 141.950778601653 | 141.444958186793 |
|        | 129.894339927457 | 145.793794049657 | 138.301397056664 | 134.349043119219 |
|        | 149.574353706911 |                  |                  |                  |
| CORO6  | 359.577827010792 | 311.375563161772 | 411.451612988791 | 460.408628542721 |
|        | 192.168634727505 | 169.695658738618 | 153.258616843783 | 181.54273463264  |
|        | 156.285963197762 | 158.208998509937 | 143.669490888725 | 135.393901125889 |
| CORO7  | 238.270501389189 | 239.621756857095 | 207.920724788669 | 281.881563164961 |
|        | 423.607299503704 | 257.477501542521 | 204.842791081358 | 263.183010631644 |
|        | 234.738241125899 | 213.432084172541 | 254.287838845201 | 277.817786943873 |
| CORT   | 131.023892409073 | 140.083495854322 | 137.393871430276 | 141.508424382665 |
|        | 132.295937828888 | 138.145677924612 | 134.423260547727 | 136.614620534169 |
|        | 123.891115326934 | 129.315412536491 | 124.837187124441 | 138.956057921718 |
| COTL1  | 217.125327913156 | 212.730163981978 | 173.520662003159 | 250.139061165593 |
|        | 387.305348482856 | 153.346972639134 | 217.513118676535 | 180.923089242255 |
|        | 174.364798143068 | 171.784981874184 | 210.620764703468 | 238.847091900666 |
| COX10  | 484.028175202673 | 572.262848718437 | 652.654673756838 | 746.777330152729 |
|        | 307.945884504629 | 498.180196203245 | 406.458130553679 | 496.426739836535 |
|        | 423.562598841704 | 472.961857076681 | 256.687384001447 | 376.867306473426 |
| COX11  | 150.261107471642 | 149.609501725707 | 152.395272857974 | 130.242779079309 |
|        | 114.191245210321 | 117.965208293925 | 128.816610738922 | 128.967855397644 |
|        | 139.781351410748 | 131.045970236632 | 143.341711274401 | 115.35376992547  |
| COX11P | 142.613654158833 | 150.434376975922 | 154.816213491233 |                  |
|        | 136.214432257698 | 132.941478943584 | 162.122250419992 | 155.669470674985 |
|        | 159.724824188037 | 154.239755912437 | 160.349557404154 | 136.111569529393 |
|        | 146.366013190845 |                  |                  |                  |

COX15 219.171591031864 205.305702209672 269.567704345075 282.836518011311  
184.832531598928 166.2468445883 210.882890077598 188.166168428752  
186.951061159734 157.361421272816 177.32104138164 214.763232658841  
COX16 144.587253120884 129.391376518208 138.842935439006 140.238423894192  
170.79303550487 140.357427912361 133.71610564207 136.077039612526  
131.338853426561 140.471953101887 135.531326977319 154.011708696954  
COX17 2009.21931102311 1949.60516542965 2144.52984392647 2023.92614092273  
2567.4299860517 2574.74962955426 2905.12297639092 2618.64973582507  
5670.70220800096 3083.98169220838 1207.11788506001 2660.39990175415  
COX18 126.195222228248 116.252227301161 122.646850766733 124.28033876033  
131.967245387861 124.310436914027 118.783904603368 121.912927816178  
127.202039384041 121.157614971438 140.440610012557 118.902823494379  
COX19 825.781627776577 741.255013151687 613.631311147328 792.101559967381  
263.707476735938 562.232754247201 397.064325578854 745.482863218223  
476.641032594868 341.128917971124 659.483452217461 497.53605530806  
COX4I1 8532.46059476152 9881.69734721233 8958.34797715349  
11971.1664283024 10632.4185569238 7585.47289520004 8182.20106181946  
6877.52553567598 8401.40370474392 7585.47289520004 9016.04641569485  
10953.6229702446  
COX4I2 166.981212790122 187.796440205485 127.511638455985  
203.456296907031 163.463191619941 168.594235675558 130.311471059267  
148.16526158216 169.285901212492 134.064206964444 138.758688249557  
125.876114993687  
COX4NB 256.424415389574 219.171591031864 323.086368767924  
282.926325589238 277.685488726472 269.892633574243 244.797792477941  
232.801257700571 234.484787292284 233.914433380121 244.350562866593  
308.974786799114  
COX5A 2021.92898855142 2083.02482378721 2388.03256067711 2236.73950603157  
5240.40795364202 4367.38154535901 4373.91897463938 4353.66854914351  
4527.53010866974 4055.40322213638 3688.68740405322 4929.26915002209  
COX5B 5609.58233117244 5008.4888270731 6105.64727031051 5250.88041666757  
8416.19700892758 8918.58940386786 6091.9840719327 6691.04319670055  
5894.79176478976 7733.95252458705 7873.0525548049 8581.41617729997  
COX6A1 1293.70593826709 1527.87148052149 1442.94175124818  
1532.47920327769 4404.79209330918 2527.99279063127 2403.42261883515  
2753.89649259242 2666.06582231934 2288.63508719706 2574.74962955426  
2649.39312662326  
COX6A2 145.864902319111 148.763098715961 137.832597613423  
140.885012530186 144.501995579502 154.209689403188 146.709967739596  
127.799190369808 142.625414022199 163.039564280484 152.026310884327  
137.666849842576  
COX6B1 3219.27851139047 3309.66193624859 3677.23129570773  
3684.05513498098 9070.86397918429 8581.41617729997 5992.92384160188  
8096.28093399619 9403.76665152182 4548.5418978622 4628.04544865227  
6522.27232911897  
COX6B2 135.143532936828 144.329979284786 134.686251400642  
135.713266118447 118.966992191892 129.869363181125 132.602336133471  
130.892302357045 159.936703616817 128.255141263975 140.949367846425  
144.559193410932  
COX6BP1 173.432960318793 161.585555680663 162.216377983292  
144.534143943252 156.557792402376 154.281674854552 159.775479686193  
177.306794546105 153.092864798642 137.024230648861 140.702685210277  
168.594235675558

|         |                  |                  |                  |                  |
|---------|------------------|------------------|------------------|------------------|
| COX6C   | 6877.52553567598 | 7815.98936145067 | 8581.41617729997 | 8416.19700892758 |
|         | 7902.9189607838  | 7617.316805798   | 6368.23123771343 | 9759.87403504619 |
|         | 11190.1778174002 | 6214.77579017084 | 6296.24208225227 | 8261.82420896892 |
| COX7A1  | 3989.14883668905 | 3403.37530051435 | 4251.82554412383 |                  |
|         | 3938.94050658589 | 190.348359536057 | 335.790909130243 | 175.165305179665 |
|         | 252.249994170536 | 261.426617866925 | 289.474517971859 | 189.192494970145 |
|         | 183.863365305103 |                  |                  |                  |
| COX7A2  | 5165.90865799172 | 4901.41175228982 | 5532.93454600454 |                  |
|         | 4511.9116742833  | 10417.5218406801 | 9970.08052783908 | 8030.19731415448 |
|         | 8666.41250683965 | 9560.32907282993 | 7992.84111657183 | 8982.75408120297 |
|         | 10765.0336035748 |                  |                  |                  |
| COX7A2L | 1461.64901688125 | 1224.49891389348 | 1671.82101590797 |                  |
|         | 990.55038742453  | 1667.86825735893 | 2016.52142068599 | 2388.03256067711 |
|         | 1908.81864728547 | 1475.41920838384 | 1364.83036157729 | 2046.64499507352 |
|         | 1427.70292953827 |                  |                  |                  |
| COX7B   | 1742.84803427086 | 1939.1525084845  | 2000.47497636965 | 1854.11328962023 |
|         | 2841.96460830166 | 3298.73393277409 | 2076.51786803222 | 1774.22769195939 |
|         | 2014.48411650613 | 2525.90466050731 | 3122.71790981947 | 2583.46653460894 |
| COX7B2  | 134.553754121862 | 135.210887148305 | 135.798387504219 |                  |
|         | 122.063996556575 | 136.506347083926 | 189.082778234831 | 124.461997520222 |
|         | 267.589020526148 | 448.106077184152 | 125.2051300372   | 135.031430487047 |
|         | 142.677386111317 |                  |                  |                  |
| COX7C   | 9323.53099359448 | 9044.54885739666 | 11709.9785619141 | 8401.40370474392 |
|         | 9820.93899217345 | 9099.13956219312 | 11071.0448447818 | 9908.59593023839 |
|         | 9272.37780151073 | 10397.3656932566 | 12457.6956682374 | 12654.3779830648 |
| COX8A   | 3810.98043907046 | 4214.83058308503 | 4183.06379632713 | 4491.96934862425 |
|         | 14499.7866852901 | 9403.76665152182 | 6894.63087357693 | 6652.21610967461 |
|         | 5532.93454600454 | 6652.21610967461 | 4000.45196171119 | 9219.38828280399 |
| COX8C   | 123.296382913131 | 132.450954427876 | 116.428373788459 | 117.820996523337 |
|         | 125.513881890201 | 113.292688210897 | 126.435928518593 | 118.426600479326 |
|         | 119.281300456243 | 120.085340927108 | 123.860747215706 | 127.407418037777 |
| CP      | 119.150626141327 | 126.516782182087 | 122.167669805597 | 109.342230674869 |
|         | 108.118551275778 | 112.509731206295 | 143.318291243905 | 108.751654061536 |
|         | 115.524441144063 | 118.076139318165 | 143.999000471746 | 117.710502693638 |
| CP110   | 606.851072672402 | 580.474775712828 | 542.009873308344 | 521.215655189324 |
|         | 435.603911474926 | 1344.1288416533  | 589.953707188378 | 590.646248924596 |
|         | 477.489368828457 | 390.194764817385 | 373.893428804488 | 869.937761943249 |
| CPA1    | 136.783974483005 | 126.470239371932 | 125.628281846465 | 122.941711366641 |
|         | 128.202619705343 | 130.93033679281  | 135.531326977319 | 115.789536577324 |
|         | 119.176139463015 | 118.802030418792 | 132.043196381009 | 124.003914369077 |
| CPA2    | 131.806645427543 | 119.480037559953 | 140.983230581181 | 133.252140649104 |
|         | 144.940119680152 | 131.421663453164 | 126.834926242799 | 124.661088039427 |
|         | 135.803599969904 | 146.574656147816 | 117.461198576063 | 143.188958538221 |
| CPA3    | 1083.26599217847 | 515.597523880328 | 712.699853328955 | 387.305348482856 |
|         | 186.185055364718 | 658.47864958685  | 171.221972336784 | 382.744523022686 |
|         | 654.108318810728 | 216.05364037271  | 174.491551019128 | 205.495823410422 |
| CPA4    | 136.398521726896 | 130.672586991186 | 154.205877662428 | 149.193437559422 |
|         | 150.610633329908 | 147.253919952267 | 144.423509403938 | 166.143084832472 |
|         | 140.319851351329 | 228.852495818211 | 157.57914268719  | 146.225422797118 |
| CPA5    | 134.533551900843 | 149.125425566378 | 144.619374612317 | 143.917152377544 |
|         | 151.891318080151 | 149.977924522553 | 134.52098220054  | 129.111259771449 |
|         | 131.662585510218 | 151.461857714097 | 138.192550945411 | 140.831508792119 |

|        |                  |                  |                  |                  |
|--------|------------------|------------------|------------------|------------------|
| CPA6   | 137.675597243706 | 136.44218532882  | 135.725202462502 | 149.615585907229 |
|        | 147.79501373062  | 136.295523520203 | 149.068713925139 | 121.322817570375 |
|        | 145.938780249776 | 137.725329029129 | 128.678484452077 | 144.333945716394 |
| CPAMD8 | 186.999459152483 | 184.844915350411 | 180.837420957945 |                  |
|        | 187.824032557194 | 176.940723174814 | 186.794165469219 | 176.284693922048 |
|        | 173.919504730673 | 152.954944775793 | 159.354364289526 | 173.024402954772 |
|        | 197.667299074218 |                  |                  |                  |
| CPB1   | 162.127697884504 | 137.561067667054 | 144.165277164871 | 154.264142444882 |
|        | 140.682757521394 | 146.266350809492 | 161.348562186667 | 140.160349667726 |
|        | 132.918979842076 | 141.123272165499 | 149.867541008113 | 149.749660071593 |
| CPB2   | 121.130837254861 | 138.440663763957 | 129.449242018727 | 137.462720784077 |
|        | 143.481112776388 | 134.47218436552  | 143.635367691412 | 140.738977175997 |
|        | 133.552141086987 | 132.767474034305 | 127.646032547296 | 131.958760372325 |
| CPD    | 424.285848583977 | 462.144334719146 | 361.160881334174 | 383.407365952689 |
|        | 1479.69309189156 | 868.066644155313 | 1702.68441407727 | 1467.50846948144 |
|        | 892.868661511516 | 543.810043433181 | 652.826023701545 | 522.050619657197 |
| CPE    | 603.061485415867 | 718.670564185576 | 297.466255000163 | 474.629173435475 |
|        | 207.384408045502 | 413.687046868111 | 243.080229016932 | 260.715580924916 |
|        | 257.775569674531 | 541.258721278882 | 166.311421907434 | 242.141362101262 |
| CPEB1  | 210.900056977861 | 203.17525411575  | 261.721726664029 | 212.607094117882 |
|        | 124.597605631582 | 134.641840638331 | 137.418345713224 | 135.10155936286  |
|        | 135.296271683847 | 131.099004325598 | 119.031594964239 | 126.65748100631  |
| CPEB2  | 278.168897504985 | 219.422260093722 | 225.4575611466   | 220.010399552402 |
|        | 149.734395134321 | 185.727947276958 | 156.756159786366 | 173.761036260869 |
|        | 150.648444878067 | 273.959220003188 | 162.466301774088 | 140.717348834454 |
| CPEB3  | 360.475989559226 | 376.443086293235 | 377.89330639683  | 424.201556056759 |
|        | 154.395261192114 | 158.127523362251 | 183.853381322135 | 160.315029612814 |
|        | 161.825134481279 | 157.575902297677 | 183.719279448844 | 164.673579538023 |
| CPEB4  | 255.992494620859 | 215.673878830563 | 265.536429548886 | 207.150354734189 |
|        | 148.356726939122 | 189.2642795052   | 167.532512839891 | 173.552535486766 |
|        | 159.301581158613 | 233.997642139328 | 163.951459935477 | 225.803528238368 |
| CPLX1  | 176.410016510249 | 190.975263192006 | 146.31980311926  | 157.81327663167  |
|        | 254.936706344174 | 152.746799687103 | 133.810472192646 | 159.752644678596 |
|        | 160.395053149199 | 121.646971898731 | 137.974323288786 | 195.513703253634 |
| CPLX2  | 143.839170216353 | 137.93067182632  | 155.46017572591  | 140.120051507626 |
|        | 149.300089212177 | 164.442400539653 | 149.303427221111 | 148.665627690915 |
|        | 150.265385257579 | 151.540744107423 | 145.259981479761 | 154.737117718424 |
| CPLX3  | 124.809739073169 | 117.728410015076 | 116.310166003024 | 116.155949676272 |
|        | 113.740942665269 | 122.365693072105 | 125.048770476506 | 114.774530966446 |
|        | 107.283814651497 | 112.268518171041 | 122.885879294532 | 113.440171712791 |
| CPLX4  | 122.554760526767 | 136.718598487513 | 136.285410546751 | 143.840979923821 |
|        | 147.450681897766 | 133.056659202188 | 129.858162624661 | 122.746185691827 |
|        | 144.170287726456 | 132.361106053517 | 133.736252068443 | 139.318078285343 |
| CPM    | 149.457761307441 | 141.898948675823 | 142.986412837634 | 143.421288665418 |
|        | 173.109461200603 | 152.158269344693 | 155.249688219254 | 150.645487532549 |
|        | 156.077604146143 | 157.572446865749 | 160.511688319771 | 150.269618125943 |
| CPN1   | 143.185372109165 | 136.468434653208 | 141.76964678852  | 146.619846538124 |
|        | 162.212442593001 | 153.315309202016 | 148.564655847496 | 152.44293820056  |
|        | 145.768857553634 | 159.856190281237 | 135.391788614828 | 147.668990552874 |
| CPN2   | 163.77183097588  | 176.783978625103 | 155.830196650117 | 161.748547772524 |
|        | 163.67719444924  | 179.996590340102 | 173.611295051326 | 159.097020087275 |
|        | 161.148734808267 | 190.993590849624 | 171.869472272081 | 167.662761175661 |

|        |                  |                  |                  |                  |
|--------|------------------|------------------|------------------|------------------|
| CPNE1  | 365.286234166621 | 365.140886302762 | 336.786227017391 | 471.069295685718 |
|        | 670.571106793204 | 738.579262579782 | 783.991448771818 | 408.10780961711  |
|        | 299.568830444875 | 346.411586524655 | 331.684298221133 | 449.408793796673 |
| CPNE2  | 147.066582834257 | 144.863617174741 | 155.801832826848 | 152.842777535666 |
|        | 163.336324451735 | 135.695576019185 | 125.882246459692 | 153.869144282319 |
|        | 155.326276840738 | 164.423960071908 | 114.00959999268  | 142.41737138634  |
| CPNE3  | 1239.13016938378 | 1212.55338792557 | 1475.41920838384 | 857.090339943417 |
|        | 1005.62130301653 | 3164.55070502403 | 2135.04382065446 | 2285.86163259073 |
|        | 1912.2369374258  | 1766.15001427132 | 1858.12855367119 | 1671.82101590797 |
| CPNE4  | 122.480000773859 | 117.503848306325 | 115.343251487944 | 111.467722538327 |
|        | 173.599961799334 | 118.918962530408 | 126.025161261042 | 119.658703392877 |
|        | 123.566522075398 | 113.051381310122 | 134.166297738657 | 110.636713168363 |
| CPNE5  | 124.342911165267 | 119.052729327147 | 115.468921844902 | 117.923459503989 |
|        | 111.922007318017 | 122.572634128442 | 121.027465953657 | 121.45175516842  |
|        | 121.06219555903  | 119.806933383138 | 121.197702744078 | 119.150626141327 |
| CPNE6  | 134.983884722607 | 150.494260282384 | 131.643633737316 | 163.910041674646 |
|        | 126.017158064032 | 116.501174707117 | 123.711828013052 | 115.157321350379 |
|        | 109.859878974527 | 120.551603446364 | 117.207266754941 | 120.148189532583 |
| CPNE7  | 146.370084152094 | 141.066106476109 | 140.460927375243 | 141.278654291193 |
|        | 140.624437508178 | 138.407207709066 | 144.958176005711 | 136.438788088263 |
|        | 143.643259003393 | 141.466287523861 | 137.194467539969 | 139.127442770828 |
| CPNE8  | 351.585604465402 | 320.154891655397 | 259.426050921239 | 259.229153662504 |
|        | 229.907632927358 | 200.08007665693  | 150.606329295069 | 158.665476708054 |
|        | 215.365809536522 | 696.475639532595 | 156.866867371872 | 148.49288177738  |
| CPNE9  | 121.825639714374 | 118.025603140924 | 113.799997627317 | 112.664210248256 |
|        | 114.607138204495 | 109.886197655915 | 109.003365273337 | 120.606354515072 |
|        | 118.060781901686 | 115.321501844663 | 110.465934808915 | 112.993452506946 |
| CPO    | 151.625248091441 | 122.921245774755 | 164.164463389212 | 146.488402397597 |
|        | 135.65700435306  | 156.740412695351 | 145.726651022813 | 138.584190903303 |
|        | 126.245597154052 | 142.68640844948  | 106.701716475947 | 139.432567336814 |
| CPOX   | 306.550948766362 | 354.705553237406 | 335.301103690781 | 367.327273578513 |
|        | 380.754569467715 | 312.177191402945 | 384.216141843863 | 336.639473916174 |
|        | 295.367125961621 | 576.636077770998 | 444.945078908489 | 332.666916002481 |
| CPPED1 | 185.165469121763 | 169.992657041967 | 175.744275464701 |                  |
|        | 176.587559615019 | 161.354014292373 | 168.04198447141  | 156.349030617265 |
|        | 159.806221777332 | 162.347140552869 | 178.790758444269 | 145.732814287289 |
|        | 161.26201213997  |                  |                  |                  |
| CPS1   | 200.915806094193 | 167.250667092211 | 155.759861336991 | 172.877947895827 |
|        | 128.331867822629 | 142.609678462615 | 132.061436165754 | 126.049144107897 |
|        | 172.370108210895 | 395.261210769232 | 138.62308708151  | 137.000868503792 |
| CPSF1  | 472.514017604645 | 408.201232787978 | 550.434931878586 | 561.379619105609 |
|        | 507.342877360289 | 420.017044147123 | 443.444024128516 | 507.827473844576 |
|        | 702.779943547386 | 392.582612044755 | 388.416668785633 | 383.10686624119  |
| CPSF2  | 227.884445686928 | 244.219585315024 | 269.927694984528 | 265.61506544085  |
|        | 219.441959146815 | 193.412827246366 | 223.128108720503 | 239.050379187643 |
|        | 220.010399552402 | 274.494074082359 | 266.347965690851 | 222.243523614518 |
| CPSF3  | 642.057106241761 | 707.715412321304 | 623.050854309724 | 788.693133735893 |
|        | 2808.78353621111 | 1583.79384467611 | 903.144845227364 | 1398.60850048351 |
|        | 858.742139354587 | 751.077307018319 | 1465.2419150392  | 897.958748317315 |
| CPSF3L | 357.514919818489 | 355.519647649551 | 383.939800422489 |                  |
|        | 449.408793796673 | 455.392133846517 | 328.826483579278 | 313.967636827811 |
|        | 268.832884350157 | 302.532985701607 | 271.770138565186 | 354.705553237406 |
|        | 260.314440448486 |                  |                  |                  |



|        |                  |                  |                  |                  |
|--------|------------------|------------------|------------------|------------------|
| CPSF4  | 520.218545108099 | 565.843200661721 | 473.60579090007  | 655.431236290512 |
|        | 1217.29687282094 | 685.354305381323 | 746.523071806534 | 874.348941257592 |
|        | 644.868034665476 | 522.050619657197 | 501.005898087825 | 907.610179738644 |
| CPSF4L | 149.013011292165 | 139.909719416938 | 134.81595608984  |                  |
|        | 182.861900982333 | 138.487657776553 | 152.258389962    | 162.026757124868 |
|        | 161.475694690038 | 149.758215028408 | 152.356731704094 | 152.673212084312 |
|        | 146.533374238616 |                  |                  |                  |
| CPSF6  | 132.381685434931 | 137.586032396204 | 130.049854901235 | 127.361974492821 |
|        | 142.922549076496 | 188.242091666446 | 146.235832275574 | 159.491388998564 |
|        | 145.063062479224 | 129.625046507677 | 146.044279076949 | 139.369815367465 |
| CPT1A  | 160.11539252042  | 164.708712337156 | 169.725534829981 | 171.573342518254 |
|        | 146.129805607031 | 161.027590226123 | 153.498332327444 | 144.738871562895 |
|        | 149.576563410584 | 148.160350542849 | 154.96616957771  | 157.58224826673  |
| CPT1B  | 163.175801793143 | 157.570298634172 | 132.611864316181 | 134.364838071696 |
|        | 153.681775929182 | 133.552141086987 | 159.539320132392 | 184.682478530334 |
|        | 169.095270479344 | 145.195065312551 | 253.009376944901 | 166.099940078284 |
| CPT1C  | 173.773876769683 | 195.740661051834 | 136.755975832051 | 168.838723365068 |
|        | 165.942761337382 | 128.879953205511 | 126.617737577634 | 140.288612271406 |
|        | 153.658747612827 | 123.434963905308 | 128.445065383646 | 129.902965506953 |
| CPT2   | 320.774102343889 | 339.252515920242 | 407.442337662943 | 367.825328832492 |
|        | 660.535644289024 | 705.987531074737 | 714.274201838067 | 964.093668483033 |
|        | 525.6579615077   | 583.314509855875 | 548.686094748117 | 824.070046083713 |
| CPVL   | 583.314509855875 | 396.459213999636 | 540.078145038497 | 260.85776723575  |
|        | 171.414869677333 | 305.615423200097 | 243.589099648895 | 378.728516779744 |
|        | 558.621429366984 | 580.996071040561 | 311.715351215263 | 181.823450464129 |
| CPXCR1 | 148.94765984808  | 148.424970450231 | 148.189707227474 |                  |
|        | 139.736465430177 | 149.76931674417  | 163.858222964048 | 148.109847175216 |
|        | 146.164093136588 | 138.098165515898 | 153.507553306723 | 142.101865506094 |
|        | 158.503284955019 |                  |                  |                  |
| CPXM1  | 196.226732738526 | 215.532132200821 | 179.54034642468  | 256.795346052751 |
|        | 208.611557959861 | 167.157420848604 | 228.766847429517 | 208.793650722271 |
|        | 221.471811658459 | 289.517820913799 | 265.219444616245 | 303.795701960506 |
| CPXM2  | 1825.10168716051 | 1825.10168716051 | 2816.29814823646 | 2741.71904421456 |
|        | 154.710000519109 | 149.941056059544 | 153.879427186342 | 196.096936985479 |
|        | 255.435582426271 | 187.425086057782 | 166.17959304455  | 133.599098708818 |
| CPZ    | 301.591430919567 | 203.317264638828 | 204.019377262081 | 184.937088280378 |
|        | 471.946284490029 | 146.374656140032 | 247.145700155364 | 150.899664887945 |
|        | 153.626180103404 | 172.442311733494 | 167.226663395855 | 134.664652044646 |
| CR1    | 137.476047500852 | 130.803561448083 | 140.197487078987 | 137.353149614081 |
|        | 136.526706711584 | 135.735535533738 | 132.958521136    | 138.42029331811  |
|        | 131.406366653787 | 131.498890334548 | 131.330974614437 | 135.814893730549 |
| CR1L   | 159.452527363763 | 144.767233774942 | 167.629008083436 | 163.108825245937 |
|        | 170.818182800759 | 153.044682186978 | 163.668476670167 | 158.509885816997 |
|        | 158.10628865476  | 149.432744784716 | 143.484004107893 | 160.395053149199 |
| CR2    | 151.428283279424 | 154.483828924645 | 161.237544868191 | 160.975741751317 |
|        | 163.504122327429 | 144.494401248678 | 155.255279503782 | 159.218886890035 |
|        | 249.064573038094 | 154.630837508249 | 148.527528612375 | 158.085935267091 |
| CRABP1 | 175.93459327917  | 137.365567527202 | 135.465076459043 |                  |
|        | 146.192761134077 | 131.429247528936 | 143.105974876327 | 137.742393475755 |
|        | 158.153875553171 | 146.897528834303 | 138.887159625058 | 128.495276191943 |
|        | 154.316929706697 |                  |                  |                  |
| CRABP2 | 273.61337724143  | 586.642581067137 | 274.494074082359 |                  |
|        | 343.270642449751 | 3949.19206005238 | 1074.96415574964 | 479.866450988091 |

|         |                  |                  |                  |                  |
|---------|------------------|------------------|------------------|------------------|
|         | 358.843277491684 | 4047.99200599472 | 1429.25367024696 | 889.26314145856  |
|         | 1177.70376288106 |                  |                  |                  |
| CRADD   | 324.346723939622 | 279.159925913207 | 349.65350886897  | 359.256193328366 |
|         | 264.383922859446 | 320.979443123471 | 401.750302347978 | 317.904396212359 |
|         | 345.565843875296 | 382.902151239988 | 234.243977361232 | 377.538276846051 |
| CRAMP1L | 263.64863646012  | 317.802633831405 | 293.746733527346 |                  |
|         | 367.518273773904 | 272.314332734711 | 240.631264915238 | 272.01602406899  |
|         | 302.905840432998 | 261.639437655633 | 240.561105692347 | 248.43491649623  |
|         | 322.36247485445  |                  |                  |                  |
| CRAT    | 173.532300173223 | 181.425012248539 | 169.201608999937 | 198.338416756432 |
|         | 287.195290301363 | 162.147989253357 | 174.406779990708 | 166.503112149416 |
|         | 164.534790315992 | 146.321713521846 | 182.997980582218 | 153.448882783807 |
| CRB1    | 142.027930009598 | 138.986877479278 | 147.937679308903 | 139.168307371516 |
|         | 150.596350682411 | 148.107004870598 | 157.134782748175 | 147.088665779406 |
|         | 148.21588894931  | 165.022029012505 | 151.839306445341 | 147.23376282233  |
| CRB2    | 115.624167024067 | 123.557722415957 | 118.414329128347 | 121.556331561879 |
|         | 137.75060150486  | 133.807992913171 | 121.036054511761 | 113.083678884076 |
|         | 118.424520312293 | 123.260800590266 | 129.180990946063 | 135.511902377219 |
| CRB3    | 138.745560049251 | 144.318556353673 | 142.573662441786 | 145.039617860588 |
|         | 961.355625338687 | 521.30110104669  | 625.374595058488 | 389.109250187902 |
|         | 264.805236346895 | 323.841518852386 | 316.895545640437 | 505.143815448613 |
| CRBN    | 741.875751347917 | 722.725186727796 | 1161.39230511792 | 650.263737836685 |
|         | 462.948429969719 | 560.913732951675 | 612.374364731095 | 417.103816140912 |
|         | 562.232754247201 | 591.641325402032 | 491.496499481595 | 471.720496000839 |
| CRCP    | 2605.13680290987 | 2187.3010896903  | 3106.94181270197 | 2586.87941889443 |
|         | 713.087392708048 | 3618.9385126441  | 1421.04485772969 | 2274.75133434566 |
|         | 1994.00516809361 | 1472.54829263217 | 2234.85920641661 | 1635.35544761095 |
| CRCT1   | 148.609721587632 | 145.559419404453 | 177.151218006672 | 141.362627556137 |
|         | 185.332215198617 | 132.721469335671 | 133.34207595093  | 208.587188476069 |
|         | 144.883597913037 | 1751.22580157752 | 209.623583937962 | 144.604714612091 |
| CREB1   | 6427.33783376005 | 6324.87600301793 | 5947.89821087362 | 6358.5018930218  |
|         | 1482.92498205315 | 6628.17856159198 | 3391.3005983725  | 5382.31371568106 |
|         | 4612.81760689869 | 3354.38704439295 | 2867.63319136936 | 3883.05620256963 |
| CREB3   | 178.976116597291 | 152.948391119096 | 148.118705147238 | 173.782474972742 |
|         | 165.84822009824  | 136.468434653208 | 154.947359473187 | 122.914680091926 |
|         | 152.124910935545 | 130.839508306116 | 202.369905673351 | 119.998260435095 |
| CREB3L1 | 143.234195669431 | 140.036463888037 | 135.336754997434 |                  |
|         | 164.865846124876 | 163.988099963018 | 147.397591251955 | 164.948785167149 |
|         | 168.753660955229 | 143.222342904886 | 152.834894011142 | 142.409003426775 |
|         | 138.395943168158 |                  |                  |                  |
| CREB3L2 | 1589.70261092241 | 1127.89414462606 | 1432.93880448974 |                  |
|         | 1110.43791444289 | 819.488546995594 | 994.802763887989 | 1012.44277312494 |
|         | 1120.87534972745 | 1317.1258783404  | 634.046843336128 | 1421.72388964898 |
|         | 823.297606185721 |                  |                  |                  |
| CREB3L3 | 112.239647575661 | 109.832757716464 | 133.469323412904 |                  |
|         | 126.676875319815 | 113.87024833117  | 113.170014668758 | 102.563722570171 |
|         | 114.342980656214 | 121.877276961306 | 106.285472845323 | 110.061459744714 |
|         | 123.442970398288 |                  |                  |                  |
| CREB3L4 | 111.949644842971 | 134.06834346533  | 129.966755942173 |                  |
|         | 125.321968563987 | 197.91325268683  | 156.813992534584 | 161.83241639654  |
|         | 152.842777535666 | 166.582931148846 | 126.583342262489 | 178.339211170442 |
|         | 179.996590340102 |                  |                  |                  |

CREB5 217.847954914851 178.147960295054 138.1774127311 151.65364467801  
126.080780033301 130.363516180139 131.099004325598 124.946064096174  
125.879198238067 139.87715485885 138.104527851969 125.806943645484  
CREBBP 378.862741410359 455.665927568395 443.125195744202  
478.180723959397 334.607533045929 330.553659265085 291.313681141442  
361.429760858441 387.355661073935 355.443758121675 324.009703043876  
360.756455184184  
CREBL1 167.018380617832 165.100811808026 142.151209745109  
169.124088593549 206.446584387595 153.379118228796 169.31618330657  
149.599523779175 167.077669654786 180.327051100611 244.849563563729  
142.079184950618  
CREBL2 228.001046173405 208.932692585748 187.247062073247  
200.712182818203 144.007071548045 163.977562404508 196.942880967705  
193.203053225456 169.31618330657 184.655641182839 299.986758612161  
157.86653024793  
CREBZF 230.749601687217 223.013753785002 265.29629764006  
181.37137053478 225.4575611466 221.322724563472 324.56043349882  
212.210383398591 219.519896184851 276.714748212739 371.693808540758  
397.387054218873  
CREG1 1174.0922389136 903.503768217033 1813.79641422879 761.32108609503  
1355.66237447026 2271.82656399253 1858.12855367119 1912.2369374258  
1389.93393245455 1271.46608195833 979.019125719101 1409.42016970226  
CREG2 132.611864316181 152.516485296644 124.288632450364 134.669763149268  
143.574584852426 129.953801496113 125.450077160575 134.10070984606  
122.68719599986 134.814082968113 152.853860043701 155.669470674985  
CRELD1 333.200230327106 290.241064926886 368.711718874343  
330.321113875647 302.219514290905 163.205362761005 310.640107228956  
249.737588031219 199.597685421675 209.727089546377 246.80306998812  
217.560691345072  
CRELD2 716.229989890801 759.058176862524 561.062594540005  
975.315904185938 1192.72383754851 909.020708316287 585.234286698678  
1058.55850972326 931.325266360957 736.140249105836 477.626693328013  
1168.68074786473  
CREM 145.354740501503 141.168198348093 132.382614153117 124.992439957206  
171.298701141684 134.237133546276 128.504026473695 132.703034017237  
136.718598487513 128.050677475339 118.134614195753 126.700147643  
CRH 145.944809232038 140.149064156135 147.121049266117 140.762415240824  
1504.15682715484 5226.05969701201 3798.89743803968 601.521068811063  
274.343238288436 124.638075441482 442.766704003254 138.186616955926  
CRHBP 159.06002608158 145.150191397375 139.000248033373 141.350135458015  
153.293125258215 145.610045243277 140.946729014405 145.449099891256  
142.19015013243 140.682757521394 142.625414022199 138.411148122407  
CRHR1 134.166297738657 140.943732564849 145.198638080646 132.435409278702  
136.862764950361 133.254663058352 137.322392546784 131.666137651694  
133.213697351807 132.16600019449 150.685245572093 134.378951325825  
CRHR2 131.050255325564 130.844272373448 131.261903118177 126.580227722115  
124.396267620543 125.861564323476 124.542879928448 136.394920983439  
134.93814894432 141.649911527714 138.688881393504 144.986655090517  
CRIM1 325.011269531407 200.405532717305 255.74096237558 155.575152212736  
160.180961887686 410.138738410101 289.761702484888 351.292682758926  
226.203994206714 207.173653740239 247.72190598581 232.830038701628  
CRIM2 132.135448831967 148.943735606315 141.071184297124 140.36278240974  
133.370488470007 118.636694749194 135.892248893607 124.897463208595  
136.575784685895 133.280418227922 142.669207969715 117.380281099932

|          |                   |                  |                  |                  |
|----------|-------------------|------------------|------------------|------------------|
| CRIP1    | 2859.94396089224  | 2833.30537635103 | 1098.78649254838 | 2804.99820187198 |
|          | 536.609777988581  | 353.243400332397 | 336.898462056187 | 621.354393918348 |
|          | 1036.40082234884  | 433.928818077527 | 773.057095787974 | 519.672796004691 |
| CRIP2    | 1429.25367024696  | 1625.55754007235 | 1057.1528284934  | 1967.82064011967 |
|          | 642.484527246259  | 355.213322760505 | 163.326102597955 | 360.124745133393 |
|          | 504.275299381356  | 312.286788541158 | 794.165408266062 | 1061.29067124163 |
| CRIP3    | 128.626051185037  | 145.514859606031 | 130.63591305094  | 117.104945989023 |
|          | 125.396523818173  | 136.951350782053 | 138.993251266382 | 147.75625228531  |
|          | 126.780096523484  | 135.679481480408 | 112.371497988132 | 128.492142236807 |
| CRIPAK   | 267.622579012917  | 251.869781014029 | 510.555184032017 |                  |
|          | 318.1961346311178 | 214.461773810376 | 291.369577397743 | 320.812909889014 |
|          | 287.558897878375  | 364.265100349672 | 291.839070398338 | 251.731327363027 |
|          | 236.052008824688  |                  |                  |                  |
| CRIPT    | 365.650071660806  | 355.879841671975 | 565.509446660206 | 354.531898366438 |
|          | 278.335289966805  | 292.60467054075  | 453.760162338163 | 418.889972660958 |
|          | 499.436680354749  | 525.6579615077   | 313.18989508207  | 336.434368527549 |
| CRISP1   | 118.820154030256  | 116.850851308701 | 119.755151432304 |                  |
|          | 132.069175779393  | 117.820996523337 | 116.421771593211 | 123.510413258172 |
|          | 120.308260557986  | 119.207503310618 | 114.888157310977 | 122.989642938474 |
|          | 121.519309043513  |                  |                  |                  |
| CRISP2   | 136.84840505336   | 138.525131957094 | 147.066582834257 |                  |
|          | 131.911579676047  | 129.487458179949 | 130.697148466042 | 147.004172510641 |
|          | 137.597788349982  | 147.751220590539 | 134.00361847288  | 166.489436134841 |
|          | 130.119313219923  |                  |                  |                  |
| CRISP3   | 115.613348109569  | 104.861024325857 | 108.868679899494 |                  |
|          | 109.96017424123   | 123.833219705499 | 108.079149792796 | 117.367470441908 |
|          | 110.315549501241  | 100.746407116143 | 112.547907748842 | 342.096409626768 |
|          | 105.900294919664  |                  |                  |                  |
| CRISPLD1 | 130.374065525934  | 130.99288239869  | 149.79295887612  |                  |
|          | 129.940297696849  | 122.955724972547 | 129.372522073479 | 124.095340478326 |
|          | 130.814702312493  | 127.524310543779 | 147.679233228201 | 130.642810886161 |
|          | 126.381288663037  |                  |                  |                  |
| CRISPLD2 | 3949.19206005238  | 3119.93811557461 | 1206.59866455529 |                  |
|          | 1398.60850048351  | 263.606930507829 | 587.654093308465 | 217.778414825515 |
|          | 562.232754247201  | 639.38881853171  | 416.933146258428 | 236.855293143293 |
|          | 353.98839683842   |                  |                  |                  |
| CRK      | 487.537691131703  | 411.71606840872  | 580.996071040561 | 397.660202059209 |
|          | 218.862705238592  | 563.648536446918 | 315.786908578669 | 430.94199035855  |
|          | 376.692422468905  | 600.919152191636 | 365.950612890149 | 526.970555181851 |
| CRKL     | 1361.54107116915  | 1418.60088387728 | 1254.19980463817 | 1450.44557173645 |
|          | 977.999660785113  | 1472.54829263217 | 1295.27257578314 | 984.181272274704 |
|          | 1662.51399707484  | 1310.60610806797 | 1452.63736288691 | 1251.56853099362 |
| CRKRS    | 178.920528149177  | 178.707066209511 | 152.853860043701 | 154.661456780865 |
|          | 254.393421265604  | 263.606930507829 | 196.955723006838 | 565.97975389646  |
|          | 418.889972660958  | 208.587188476069 | 264.8472508692   | 220.487665103019 |
| CRLF1    | 169.36029946801   | 170.725486814469 | 183.963578322984 | 177.491294133515 |
|          | 163.54669668396   | 197.12840030662  | 169.321832528939 | 157.010145291837 |
|          | 174.873893094923  | 185.507663455634 | 167.273378118452 | 183.50553222647  |
| CRLF2    | 141.38749436393   | 143.265532486512 | 145.09909498449  | 140.556631658219 |
|          | 138.659387475119  | 137.192570825063 | 150.25322837689  | 132.01588294465  |
|          | 150.593928635647  | 141.691135410429 | 147.485960802692 | 141.649911527714 |
| CRLF3    | 185.493554506958  | 176.088449983147 | 184.157941055948 | 177.001637712889 |
|          | 221.685824197352  | 230.697077917675 | 220.345184229077 | 286.431013744652 |
|          | 259.338947392465  | 287.242697383558 | 204.161375686761 | 216.805365763069 |

|         |                  |                  |                  |                  |
|---------|------------------|------------------|------------------|------------------|
| CRLS1   | 589.070196307574 | 612.374364731095 | 816.823443819069 | 509.14726076246  |
|         | 7082.28969354712 | 2018.81730267601 | 1331.18605673705 | 1197.58205444449 |
|         | 2086.15449885278 | 1360.24752587939 | 1065.74382494535 | 1518.13775377335 |
| CRMP1   | 144.219104742099 | 142.763157232147 | 126.88066987372  | 147.174977926293 |
|         | 142.434356144925 | 128.009286101341 | 123.535803027153 | 123.650702461773 |
|         | 119.612288460361 | 128.314990390649 | 133.249792744053 | 132.04032925495  |
| CRNKL1  | 164.466332705334 | 154.428779374984 | 152.021576565132 |                  |
|         | 135.148723192316 | 127.83967243279  | 188.654966029389 | 141.784881206191 |
|         | 143.275056599274 | 153.255318944823 | 132.28010415054  | 153.756213924949 |
|         | 128.76720970745  |                  |                  |                  |
| CRNN    | 126.649739818781 | 125.924219382375 | 133.917283965036 | 141.649911527714 |
|         | 140.397184813186 | 135.185283076286 | 134.584076788979 | 136.858037332222 |
|         | 140.856864690669 | 405.975221091252 | 152.612116997575 | 135.603160096973 |
| CROCC   | 250.003965480779 | 279.704940529618 | 216.903719298575 | 312.601510033941 |
|         | 220.816812192169 | 184.954673605577 | 169.101676908756 | 172.364618542922 |
|         | 155.686889874806 | 167.46432961654  | 210.666799498141 | 178.878444404192 |
| CROCCL1 | 139.450788315602 | 151.663203772586 | 148.337793323867 |                  |
|         | 134.57472034679  | 143.347066447019 | 131.68571824487  | 132.263954832097 |
|         | 147.804642251855 | 139.530196462344 | 134.491232148834 | 146.854523122404 |
|         | 162.134726710448 |                  |                  |                  |
| CROCCL2 | 163.014903707857 | 169.927157878764 | 227.587590278412 |                  |
|         | 183.556662533396 | 132.275953817076 | 165.654773882752 | 167.830629616121 |
|         | 153.38260557666  | 161.525131363333 | 149.726968520487 | 155.15575204653  |
|         | 155.417694869593 |                  |                  |                  |
| CROP    | 750.494286476465 | 593.320132696649 | 725.065727257421 | 519.564563632951 |
|         | 273.959220003188 | 411.878556907186 | 524.640879446426 | 563.339837352678 |
|         | 538.647888236878 | 305.720812071583 | 560.015499136193 | 547.516635695872 |
| CROT    | 397.2528907311   | 543.584413650467 | 434.716530273383 | 314.557323400201 |
|         | 856.74270641707  | 1578.87371296418 | 2332.98074920207 | 1031.38207659547 |
|         | 868.86246684338  | 215.967319486874 | 1843.76920134139 | 780.461254794127 |
| CRP     | 129.045934344719 | 122.365693072105 | 126.383238335161 | 119.535267326862 |
|         | 140.694993778394 | 141.143572141958 | 129.108534267222 | 127.987449338817 |
|         | 133.142689150296 | 124.35374445763  | 131.395959781477 | 131.12953085854  |
| CRSP2   | 151.064422836695 | 158.06129717954  | 170.748911334847 | 162.519642881848 |
|         | 145.983627592197 | 148.404000406948 | 142.772680460689 | 147.9084767638   |
|         | 147.89884142817  | 151.234397206563 | 136.328447182666 | 153.601918768668 |
| CRSP6   | 130.579954890389 | 116.86635524597  | 124.340773743603 | 125.531371673679 |
|         | 134.475296383752 | 127.765987130281 | 128.623302491798 | 142.063338490772 |
|         | 126.583342262489 | 121.915043935246 | 154.634289463743 | 128.886008923268 |
| CRSP9   | 200.790119570144 | 198.94325874493  | 198.795112039249 | 177.84188738734  |
|         | 216.457866890673 | 193.522811257085 | 213.301947003462 | 211.995890899864 |
|         | 164.917470819096 | 240.410292351169 | 274.281532397691 | 205.149094703318 |
| CRTAC1  | 321.492900106953 | 559.0867397858   | 519.672796004691 |                  |
|         | 145.395042579024 | 430.833137328233 | 481.238450505207 | 3630.80752744347 |
|         | 223.474531516972 | 665.341859712345 | 121.815538475678 | 18421.818380318  |
|         | 4979.31150268741 |                  |                  |                  |
| CRTAM   | 120.696557306298 | 139.488057371254 | 139.984102798711 | 135.839123867443 |
|         | 116.082361389405 | 127.161975533812 | 143.182399285928 | 127.146101490884 |
|         | 136.450062043587 | 130.924141812334 | 126.118745937997 | 132.675172817752 |
| CRTAP   | 487.696347726467 | 419.126814511305 | 780.105135529728 | 466.777454704543 |
|         | 193.275162354467 | 209.258707976348 | 309.318403417731 | 191.170105307944 |
|         | 236.235744374476 | 313.581986704048 | 169.933706225406 | 241.039766283972 |

CRTC1 168.942165573542 166.2468445883 143.760519659724 225.189991540262  
182.009471368798 176.912121142015 184.029968090084 176.849238577762  
161.12121879514 154.443360208399 158.509885816997 180.164353124488  
CRTC2 258.384059994446 279.026742408164 211.419445018736 269.194172034595  
432.088303693555 240.497413647633 188.079188251085 267.696284751923  
212.749668083641 181.229308386808 290.326832430372 258.868119227979  
CRTC3 1415.67109281133 1530.45813438919 1559.26487922551 2105.87438782831  
510.226374558703 524.855915371246 597.189355986293 560.757496975779  
585.933822585718 456.817057099146 521.512936372701 580.996071040561  
CRX 120.979417552159 123.260800590266 114.302645757446 115.128667174745  
128.779829252045 130.917269984571 119.341806810441 123.077592992679  
120.827732270626 108.895922800601 134.432461986523 113.627435441258  
CRY1 520.761305892651 274.343238288436 299.513950278952 272.238922498583  
278.737944234055 283.952604729032 219.228720772236 256.237185590901  
266.982073722644 233.36028792331 186.167877791105 261.171723011396  
CRY2 771.059329972125 980.120729515821 671.821418586421 1379.26881813339  
347.866264631778 231.257543784864 338.075238647592 239.621756857095  
232.641965649602 269.448201975645 390.194764817385 188.444498848767  
CRYAA 155.699649538664 156.543267949167 170.251197850968 163.280786875496  
141.528115502473 157.003367685421 160.127254444487 166.214167530158  
165.347173283335 168.634534857593 146.04584032214 170.335930486215  
CRYAB 3518.84173951107 2756.22069438696 2385.5958396359 3136.27991502603  
149.198753359122 160.311096717492 144.892454033336 159.19183334563  
201.530921073488 351.854828413334 142.948238172973 125.889860278265  
CRYBA1 126.750850861235 157.932243807202 152.317890573534  
155.287837763675 144.277263594387 151.500282404318 159.110614190088  
158.514079887374 137.086936444421 150.544779197947 123.306499698566  
136.463867598256  
CRYBA2 154.760697311395 149.393022408213 148.698658730008  
159.820341130737 133.599098708818 148.038291195414 126.037968297611  
164.777719508421 148.534143255537 152.131804134092 154.390764802264  
143.804903119745  
CRYBA4 126.124937863679 152.173055053184 136.649743237542  
137.235469802064 132.626349611404 124.418295003824 142.650451413991  
130.962368929833 141.941814923705 140.469508410073 138.412897151567  
118.991494185841  
CRYBB1 132.651922794567 126.077945699709 118.816986517698  
117.423704591303 109.495342943278 128.41549156443 116.825172441325  
117.539640414775 120.822923434486 114.078271807864 130.257242615762  
111.810575716678  
CRYBB2 158.167384416968 170.079723856247 149.089067389266  
148.065080664185 164.313238416498 168.942165573542 144.574566623882  
148.448349327493 150.203281104753 145.144401160102 201.059635671301  
180.354899434843  
CRYBB3 125.672285485643 114.607138204495 136.959011188915  
140.323425587628 150.283447275981 135.603160096973 151.431513447721  
140.687016530974 130.10852948682 137.011595584638 123.9744092226349  
134.425483661043  
CRYBG3 132.469190523971 155.865540894526 131.999299893526  
131.498890334548 149.808222023726 153.996429870564 159.102070980047  
137.784270510433 143.874735808114 146.817659734182 137.884051774657  
144.988803993714

|        |                  |                  |                  |                  |
|--------|------------------|------------------|------------------|------------------|
| CRYGA  | 118.426600479326 | 142.047828639169 | 127.720117789235 | 120.901639342731 |
|        | 143.528208105237 | 138.544053540799 | 139.166537591866 | 141.059033576475 |
|        | 128.112595697836 | 133.975526667571 | 158.953705937936 | 133.502176289023 |
| CRYGB  | 163.758054869675 | 161.229621453539 | 151.148295679242 | 145.793794049657 |
|        | 147.345558455805 | 143.675696734051 | 146.476960694197 | 145.812607895325 |
|        | 147.10214400501  | 156.301214161102 | 160.042251279235 | 163.170983091116 |
| CRYGC  | 126.620889938532 | 118.497920969001 | 137.830435972191 | 137.773960847088 |
|        | 150.82596027483  | 142.765490244223 | 133.452032750397 | 135.571239294086 |
|        | 134.256243410916 | 139.291775075915 | 142.215285988753 | 140.688570032068 |
| CRYGD  | 129.645982978155 | 151.625248091441 | 141.463324155943 | 136.573928520456 |
|        | 132.373302367869 | 124.922004609558 | 134.9404536551   | 130.031303483631 |
|        | 129.654234837398 | 129.051642626091 | 135.501192996538 | 133.490805791504 |
| CRYGN  | 126.635105491524 | 146.110545700163 | 110.718864165172 | 119.305917403956 |
|        | 125.794788766462 | 111.082550752119 | 133.995928435022 | 146.06054700771  |
|        | 120.633217745524 | 126.755389668637 | 138.348160604288 | 139.717662557602 |
| CRYGS  | 177.468210189888 | 176.347535860374 | 177.281197832647 | 150.896076207161 |
|        | 146.063554646851 | 166.472068379965 | 170.052320640686 | 194.775234425687 |
|        | 185.673549367125 | 143.446317006075 | 189.726075394359 | 155.55288776049  |
| CRYL1  | 362.445813697676 | 302.069236363626 | 371.00603789759  | 342.611951034707 |
|        | 341.2887754025   | 321.910803473854 | 255.793823796456 | 247.194197143562 |
|        | 202.114480291084 | 285.594100976705 | 204.415267938007 | 224.466829629468 |
| CRYM   | 203.704734790602 | 212.497773003032 | 271.397087928135 | 250.928804390353 |
|        | 141.600833670693 | 136.2336179571   | 138.968690339299 | 161.534421340752 |
|        | 141.518491890811 | 141.137459291428 | 168.830344627025 | 133.544149685358 |
| CRYZ   | 882.429823267754 | 800.013123376748 | 1193.82799849555 | 585.075322115635 |
|        | 398.61164689194  | 378.509324619452 | 576.298671053238 | 651.675427664911 |
|        | 691.916554922896 | 642.484527246259 | 1934.30779703747 | 1521.61996270758 |
| CRYZL1 | 416.307629596091 | 378.862741410359 | 512.312880441098 |                  |
|        | 331.523536427527 | 171.528350399075 | 395.521241316058 | 271.087125858775 |
|        | 359.493075382333 | 265.366632264085 | 248.330154701293 | 297.419034136005 |
|        | 306.277823025572 |                  |                  |                  |
| CS     | 1044.00217726486 | 1080.95725397659 | 1347.75629878765 | 1429.25367024696 |
|        | 989.396074034945 | 1239.66725147648 | 930.25842384208  | 1561.87054049124 |
|        | 1248.69137283095 | 964.473774310687 | 1111.47772523331 | 1407.43503866211 |
| CSAD   | 312.080864996592 | 223.84997313236  | 361.327436394941 | 232.735767435327 |
|        | 182.929326147069 | 266.395569467956 | 322.443089373063 | 343.346755862776 |
|        | 397.577760464197 | 367.025117016472 | 285.931444518474 | 281.119138040097 |
| CSAG1  | 124.310436914027 | 132.560292119968 | 131.470883854661 | 132.220398477217 |
|        | 149.260811184287 | 478.699172220804 | 129.226815062589 | 167.871703133182 |
|        | 134.786678978467 | 121.884067622971 | 137.815541222457 | 144.460541430705 |
| CSAG2  | 110.977904932371 | 117.335748689217 | 118.655954393594 | 109.167312436827 |
|        | 183.26554404668  | 153.703682621695 | 116.045039344469 | 115.445219455559 |
|        | 111.837468699281 | 109.242622591321 | 123.833219705499 | 121.919799968293 |
| CSAG3  | 114.325967923393 | 120.616979607398 | 121.480455781173 | 125.227513212286 |
|        | 135.52861375119  | 153.140087873773 | 117.386273592501 | 122.777544465711 |
|        | 120.497796762933 | 126.17133877948  | 116.373841472226 | 120.922042875444 |
| CSAG3A | 132.514706165018 | 140.055272520317 | 133.370488470007 |                  |
|        | 141.019494314354 | 221.916075811355 | 250.003965480779 | 129.788395150404 |
|        | 162.439052954676 | 131.144774362059 | 145.423022762916 | 145.749887769807 |
|        | 134.292099546804 |                  |                  |                  |
| CSAG3B | 117.270320709161 | 129.570960882942 | 117.051541123239 |                  |
|        | 119.666650919579 | 189.887788314879 | 287.656436278551 | 114.880348648147 |
|        | 140.603933807629 | 128.729687597908 | 132.881693683384 | 124.59937620719  |
|        | 130.274288258599 |                  |                  |                  |

|            |                  |                  |                  |                  |
|------------|------------------|------------------|------------------|------------------|
| CSDA       | 6894.63087357693 | 6214.77579017084 | 7122.07276863122 | 6188.04738762584 |
|            | 4190.38366101529 | 3615.76740804718 | 4682.62607750437 | 3671.86460903374 |
|            | 3784.59114921916 | 8709.2221371432  | 4437.40805296517 | 4945.87677849967 |
| CSDC2      | 421.056268094661 | 368.134303229682 | 338.129250886594 | 400.353795948162 |
|            | 127.618913664155 | 146.559502785264 | 131.486917325752 | 129.005211657936 |
|            | 149.55916919466  | 146.332425559689 | 125.45936959544  | 136.543603346919 |
| CSDE1      | 294.697622870418 | 319.090371885653 | 310.718449468465 | 301.798676825176 |
|            | 185.275787562938 | 298.664864578349 | 260.52593414721  | 237.171424222756 |
|            | 218.000351930307 | 239.109163320417 | 288.313931067158 | 280.558463661137 |
| CSE1L      | 663.214972254236 | 721.603421985572 | 777.410297605252 | 717.886050056576 |
|            | 1087.69177809384 | 1973.20689165831 | 1445.72064343302 | 1015.63768413332 |
|            | 1003.36623972843 | 1072.37500318471 | 707.048754700047 | 838.93563319979  |
| CSF1       | 138.093181144173 | 136.965972077733 | 137.089392202166 | 144.649656552    |
|            | 124.132215738502 | 130.63591305094  | 133.504078347324 | 132.899305777714 |
|            | 129.195962576953 | 135.137615432923 | 125.780294378066 | 131.373012256275 |
| CSF1R      | 816.823443819069 | 762.8576747113   | 559.559921312181 | 859.547169028149 |
|            | 416.075109522039 | 444.712990986138 | 327.951753740503 | 710.531876484467 |
|            | 922.009043194023 | 402.824964079515 | 675.281131488524 | 287.195290301363 |
| CSF2       | 136.897888440409 | 137.691870502653 | 135.102827224896 | 149.586651393588 |
|            | 168.618667871117 | 148.306990501663 | 161.002880798225 | 152.910433120981 |
|            | 154.24500773656  | 197.873787638411 | 146.606442726047 | 197.112749959833 |
| CSF2RA     | 2572.01353724341 | 2590.80821234237 | 2162.46602203822 |                  |
|            | 2187.3010896903  | 676.293399523316 | 2900.55309635211 | 1467.50846948144 |
|            | 2258.30916111153 | 1581.06548216423 | 1482.15461429206 | 2649.39312662326 |
|            | 1689.00127592755 |                  |                  |                  |
| CSF2RB     | 157.032746784217 | 147.799806976046 | 143.275056599274 |                  |
|            | 144.040342300793 | 172.03919618445  | 136.855445270531 | 135.455283504668 |
|            | 146.247825342634 | 155.572357799741 | 144.937697857147 | 126.630787911053 |
|            | 130.788557333561 |                  |                  |                  |
| CSF3       | 124.749727939593 | 131.464229237662 | 122.160459795959 | 119.511962218143 |
|            | 120.691810909148 | 121.699702849509 | 124.955676894776 | 122.396214045451 |
|            | 127.135199316758 | 122.888626394154 | 133.927844489731 | 122.083357581665 |
| CSF3R      | 143.245660951425 | 139.128751917566 | 136.754116864655 | 155.926739769177 |
|            | 137.916872642522 | 152.526785074182 | 147.248053518914 | 231.338258067616 |
|            | 206.321272734099 | 249.064573038094 | 142.68640844948  | 132.437234970375 |
| CSGALNACT1 | 316.004332524937 | 302.362619893594 | 294.280238648737 |                  |
|            | 216.53417734069  | 137.356539213081 | 159.724824188037 | 126.84966022925  |
|            | 135.465076459043 | 142.215285988753 | 154.402315635227 | 139.258468432364 |
|            | 130.607857562345 |                  |                  |                  |
| CSGALNACT2 | 136.267313223808 | 134.514251897045 | 144.423509403938 |                  |
|            | 115.858924428037 | 115.053039576143 | 148.479865869644 | 122.531675048414 |
|            | 130.066177538896 | 142.589312139207 | 146.197678850188 | 138.409284761652 |
|            | 137.020473156363 |                  |                  |                  |
| CSH1       | 148.11536596061  | 136.949403128211 | 156.151075965844 | 147.074807267102 |
|            | 139.925844631843 | 156.243337414127 | 144.94824685435  | 140.588811000948 |
|            | 150.421116058494 | 141.332402615602 | 126.112672816035 | 131.500591219916 |
| CSH2       | 130.128585442593 | 125.915689078001 | 130.119313219923 | 126.045231525329 |
|            | 129.57551086282  | 133.408354896584 | 140.018786803502 | 132.809364188497 |
|            | 136.16560274503  | 135.726760147904 | 133.532323053215 | 129.24482916531  |
| CSHL1      | 153.391895732807 | 147.185378560761 | 147.006482557682 | 157.639688257892 |
|            | 150.962828147611 | 143.833057210822 | 147.701092466105 | 153.008756051525 |
|            | 150.650926518959 | 140.571143847885 | 157.668307146391 | 144.345080865349 |



CSK 458.875979229339 551.086785904249 377.951523644306 480.712219116621  
2656.38138490746 876.288248962843 1138.00644332379 1011.14472068314  
1638.72366638732 900.839073800181 1219.36024606325 1198.53117439169  
CSMD1 138.464793389999 151.921235758457 149.682150633146 145.502055020513  
137.15571320152 149.219602109121 140.398923642686 139.56332664295  
133.106005881815 135.188445928844 149.17815859943 133.376631703373  
CSMD2 150.016550610991 143.262810933054 154.207656926108 152.08574341962  
155.290648078877 146.070871543153 152.222213455455 155.595651896155  
172.214433016685 207.488522933448 159.706443636973 172.578252260002  
CSMD3 130.63591305094 121.937556824952 130.354641020141 130.147848418265  
122.287535209629 125.542301916791 123.501843029993 141.363863974586  
132.245217686793 132.063395162855 146.719445835497 130.865693081945  
CSN1S1 130.004329307977 135.108420614547 138.461113585594  
138.144085131733 146.056723380149 135.99579763634 134.371254010574  
130.66511389864 149.070750686003 141.715307041887 132.109267393571  
140.719388544476  
CSN1S2A 144.400004730049 137.555253894825 124.217337143269  
134.166297738657 133.839554874862 142.589312139207 128.463982896081  
138.371873773284 137.406420101257 143.681220324074 131.356437247149  
131.649830934459  
CSN1S2B 138.67221078031 127.954231630338 131.142841840284  
131.322008851059 138.224383646894 135.5668267936 139.798940929781  
132.956860864455 127.000175858468 127.41463780496 134.47218436552  
129.898242234869  
CSN2 150.542478166361 130.778164962583 135.817028661429 122.512587751135  
150.794680375075 135.377118045038 127.895989232696 132.813199199389  
131.001996509052 125.259164818744 131.641435734821 128.717719117128  
CSN3 122.287535209629 125.381865040574 110.382724813928 119.822587087968  
117.089207321783 113.644993086829 124.901759819007 124.378096177801  
112.298254005045 120.447140228396 135.508803488048 127.55397077248  
CSNK1A1 301.428024926428 284.891415492568 337.728737393381  
231.728984785324 175.437651670246 291.221427744817 294.410833087913  
248.927790738447 225.169110687004 599.926717145115 291.105673222859  
380.821355948507  
CSNK1A1L 144.934103671894 143.410917415691 166.024236370752  
141.908791151061 161.83241639654 148.534143255537 145.029298288869  
169.391557085902 145.889336010424 173.109461200603 150.711857623087  
153.850588492326  
CSNK1A1P 129.065491477375 121.094060100325 132.021249712589  
131.423918669689 133.704706615071 139.805930686563 136.491140756702  
133.404671629495 131.562345881038 142.013370954791 126.690066353698  
123.219903763265  
CSNK1D 299.80615152845 354.405235378302 271.004741629789  
528.098472417251 867.601542930533 558.621429366984 917.188039935737  
824.070046083713 591.641325402032 668.286400833485 559.899430596368  
809.068563907145  
CSNK1E 696.475639532595 1038.34611017219 769.009371389327  
1017.09497861942 1272.14273680177 718.142991571468 765.333633142088  
561.062594540005 696.131296166255 783.373390305885 779.623566217277  
606.851072672402  
CSNK1G1 216.427103365727 220.079379312889 218.134101819445  
225.803528238368 220.791884858764 212.571491543077 277.073510273425  
226.796825544749 253.789045068884 216.680795762761 297.12411625104  
247.194197143562

CSNK1G2 1951.69651954627 2168.58813300343 1362.75971646355  
2120.14463347544 6339.16392696068 3930.2841381915 3552.78712528922  
3334.16277752222 2811.84191700516 2502.72913594103 3334.16277752222  
3552.78712528922

CSNK1G3 176.631604815669 176.830879422227 184.135651836627  
158.747029092329 165.031678768564 191.297539967707 252.789376168324  
188.503673684625 176.830879422227 266.468621734455 202.397972518715  
216.991823988763

CSNK2A1 185.602093266907 175.030373805031 213.364858759772  
177.065616871886 347.73629731446 368.220523234399 268.454310218604  
259.511314588868 341.361299896997 300.314088267108 230.201464318433  
308.679189788554

CSNK2A1P 208.237011955037 239.827648772906 197.795275907042  
272.885527139137 266.964673763497 262.691387377392 243.501083338279  
215.81995779019 248.887522059485 279.834616502591 204.470661830972  
250.515579402334

CSNK2A2 583.192225756596 653.879734066271 857.090339943417  
716.420861490714 437.122373082112 381.253673759781 530.561387049511  
326.962330523237 436.586158384666 349.722963659175 438.340341490622  
294.595972099366

CSNK2B 944.47112348734 1028.39666838369 983.094485868275  
1032.11574332305 2222.16226526877 1053.09915077366 1129.15018335354  
838.93563319979 1212.55338792557 1581.06548216423 1015.63768413332  
1187.62490367696

CSPG4 1396.4168898623 1548.09554827056 1089.16489859253 2246.89876694944  
197.699100346967 191.365014963729 130.628967781841 142.485427762372  
182.152956182443 169.179630363359 144.258128917228 141.450800126786

CSPG4LYP1 135.728336465002 134.449083873514 139.633941983246  
144.227440632196 141.453255692229 127.412539650291 146.268073519544  
143.576177625265 153.318678468245 158.455783755247 134.527165454543  
143.539741029895

CSPG4LYP2 144.338069855334 129.098408596418 153.044682186978  
141.067419336609 155.221833416673 153.075594260208 149.223102493474  
166.485040297098 143.579660352652 144.155591092387 140.971253689199  
159.52147764862

CSPG5 154.865107093653 125.889860278265 148.797226586765 150.655359765209  
156.923675862035 145.428297145967 158.650226303456 140.590802695412  
151.073257114127 156.602240897907 140.837360719964 145.758423590784

CSPP1 235.867149024041 224.274329367512 268.52833723726 216.731618532814  
205.244843885276 288.728608411903 247.236004734567 270.293807247372  
278.274343962656 218.369954323686 210.960900130785 245.082816415008

CSRNP2 318.850765099332 268.224669588188 296.375305136807  
262.954856857756 250.30085097088 298.165097953983 317.163768837813  
440.579262120451 390.573484082597 236.899421827427 327.951753740503  
321.25076864104

CSRNP3 169.434164890542 179.753400474369 171.304896264805  
227.177100762395 127.604087759266 132.941478943584 125.315736755156  
135.638156623519 128.699441450952 142.331050242704 138.088712695622  
139.860093278582

CSRP1 23878.0022344804 24731.0629964468 21409.4415798676 29532.7890259497  
1086.33540858772 720.907992182476 409.691865300362 424.37437028833  
1027.11849332495 1192.72383754851 810.769136227155 1252.28642463619

|         |                  |                  |                  |                  |
|---------|------------------|------------------|------------------|------------------|
| CSRP2   | 723.807658768693 | 987.564350211893 | 802.017244099902 | 900.839073800181 |
|         | 500.132469062228 | 843.545962045705 | 325.173931553891 | 1052.553421812   |
|         | 895.463355957918 | 1876.64079464928 | 228.243668453958 | 302.021033686056 |
| CSRP2BP | 217.646777099512 | 215.365809536522 | 239.970202560698 |                  |
|         | 215.98963200839  | 223.154771092064 | 243.893774595317 | 282.282663608264 |
|         | 210.353341004865 | 199.275716402358 | 293.825372123877 | 214.396920524803 |
|         | 231.287362732197 |                  |                  |                  |
| CSRP3   | 112.509731206295 | 114.466368742403 | 103.550817366724 | 104.714872508838 |
|         | 106.36673326724  | 109.255470590389 | 114.696935316053 | 114.078271807864 |
|         | 116.973126196102 | 113.400050190315 | 124.905889975958 | 111.860763079995 |
| CST1    | 114.498610080481 | 134.860896462638 | 109.128394735532 | 110.501341211051 |
|         | 172.836730741407 | 122.436106757578 | 134.475296383752 | 221.411372022459 |
|         | 1063.5903770389  | 910.982557417978 | 146.063554646851 | 137.734887788912 |
| CST11   | 131.859204862396 | 136.925645302362 | 142.206016362038 | 127.890438577754 |
|         | 132.657106732366 | 128.588822671032 | 133.957160768065 | 129.966755942173 |
|         | 128.044165393924 | 139.672652347877 | 137.803749343493 | 126.750850861235 |
| CST2    | 105.375878824562 | 107.76497424356  | 115.559551514777 | 116.186846885411 |
|         | 115.878861991823 | 107.841100741858 | 110.988514718572 | 112.800733398209 |
|         | 109.038182799871 | 112.248047602652 | 145.383354200298 | 101.597648528389 |
| CST3    | 13090.0615116619 | 13142.4763966378 | 12406.7143043992 | 14300.8562978211 |
|         | 17324.7697569598 | 12615.8332290932 | 10506.1271023809 | 8787.57716309558 |
|         | 7717.01422791837 | 6006.01682776552 | 9970.08052783908 | 8633.71708020651 |
| CST4    | 137.079479050963 | 143.572668991313 | 148.16526158216  | 161.552475294424 |
|         | 138.261506562904 | 160.72009357092  | 137.756209496729 | 145.280485286937 |
|         | 150.508080332477 | 149.223102493474 | 145.09280363189  | 149.795655754301 |
| CST5    | 139.420025842675 | 138.049846456876 | 129.365004129784 | 146.105844205919 |
|         | 120.880547922392 | 148.654099017805 | 125.405373274081 | 157.410205523901 |
|         | 129.83316008718  | 143.250386570155 | 149.879951192667 | 142.605816057276 |
| CST6    | 144.964084792568 | 128.115993005977 | 138.121905080822 | 131.143808097612 |
|         | 262.233918187791 | 169.089896796513 | 171.093611712143 | 157.484541464879 |
|         | 217.628802427037 | 578.465753476561 | 183.657525723012 | 263.183010631644 |
| CST7    | 196.536086443884 | 173.986750195954 | 188.767121505943 | 199.991077347491 |
|         | 160.628894266843 | 172.758230728437 | 192.640717683236 | 199.353823724989 |
|         | 226.173501275026 | 198.004357069446 | 180.035652063942 | 153.974384951787 |
| CST8    | 123.182903611854 | 127.048605625519 | 133.760183242137 | 117.692662275393 |
|         | 118.034262386827 | 128.396326753926 | 116.045039344469 | 113.832885222354 |
|         | 115.830631252469 | 112.015423658372 | 144.079935036119 | 113.268379270385 |
| CST9    | 120.660349211375 | 130.99564079691  | 147.032210333966 | 144.492756323647 |
|         | 132.418902141838 | 152.323927317575 | 138.12651823109  | 141.96771965623  |
|         | 132.748478264583 | 146.499065641095 | 128.331867822629 | 133.419239158866 |
| CST9L   | 108.910588012315 | 109.52020660772  | 113.388450168062 | 115.631414599991 |
|         | 111.785821053048 | 107.949834974369 | 118.527464364564 | 103.594872791657 |
|         | 123.797585446062 | 111.475394003575 | 121.462385497795 | 110.586147059226 |
| CSTA    | 124.518818352113 | 154.091431691072 | 130.98982984989  | 128.499303407596 |
|         | 266.681711962236 | 145.478233255862 | 196.839016616283 | 165.590892262736 |
|         | 136.751654856807 | 1037.00025848491 | 190.534176839652 | 136.001505582342 |
| CSTB    | 2234.85920641661 | 2376.52728883131 | 2300.9407349072  | 1732.52466021178 |
|         | 15354.74541236   | 9349.76443528011 | 29162.1093037754 | 14181.1182110192 |
|         | 21409.4415798676 | 30573.5859783923 | 17404.1167486753 | 8211.38792799248 |
| CSTF1   | 132.751406897891 | 131.232417654705 | 134.344021502031 | 130.89594032962  |
|         | 133.862203806529 | 136.384308041001 | 149.331805754859 | 140.52997588229  |
|         | 132.973551954067 | 134.294287947795 | 139.101471810467 | 137.729777643977 |

CSTF2 210.942865876533 255.839878446312 210.925203743958 246.912159676595  
645.438835606933 436.586158384666 336.338518973032 348.111872425949  
402.366797969833 455.392133846517 402.866491417369 305.669636871734  
CSTF2T 145.108281984556 173.09379121032 154.47187360425  
147.271220791722 144.741063866547 149.730467498266 138.4303531022  
118.117957479382 155.542691937539 133.651203764842 222.268494113686  
153.231965895778  
CSTF3 303.380479700334 271.238736772408 274.595218795127 259.767151797583  
304.479999301061 481.453770150269 340.098306132634 396.781827940009  
382.233826557803 278.142283306934 419.593558001947 372.54091392596  
CSTL1 120.481712066062 122.978576290038 119.872252889863 125.114303270024  
131.548634017902 128.312170913496 121.915043935246 137.701271351806  
117.399753685854 121.810767302322 134.264584077125 115.037340101655  
CT45-2 125.215194276842 130.420753247797 120.433080754232  
130.247700541716 138.997524526643 131.593705080542 132.881693683384  
127.723052839953 124.682396766302 117.943511615792 117.781804727205  
118.126133973555  
CT45A1 123.671944323239 118.655954393594 130.161889021281  
124.048926099805 132.855812035005 127.358616953147 134.530516701271  
124.93629294955 125.685852196342 129.361783301027 129.80429516198  
127.977782260866  
CT45A4 134.777979170126 134.696571019896 139.437073790935  
145.372579207362 145.126091016414 157.848456517169 137.981446468611  
132.851791525098 147.027904536486 144.736213465651 131.029333093048  
144.331409179705  
CT45A5 137.225659453984 128.76720970745 135.668768914964  
136.716554749722 128.862699779871 135.75568942028 128.585911203394  
132.550022967297 131.741688265764 129.969400693456 125.121517583946  
129.045934344719  
CT45A6 147.138814313885 144.117964288763 135.349868925415  
149.791777262424 152.783534456473 148.913181799692 142.889911562811  
141.380276932556 128.783262618114 149.560505078257 154.408875182219  
140.548371692813  
CT47A1 132.088335186716 138.098165515898 149.678629612616  
137.182323015758 127.040027125755 135.991630745082 135.598709185334  
135.343380336913 131.000186898437 127.453866279181 127.277128410056  
132.848926011576  
CT47A6 137.045772853855 130.410584413031 130.782296492278  
133.131953362455 125.839101611277 136.333928675403 120.465934391246  
121.57069706238 128.363331337379 129.436712663487 134.922488718676  
126.5764774133  
CT47A7 167.830629616121 146.621996129313 157.717145014769  
166.600109853461 153.748035612441 153.709230037306 162.54567071663  
157.244026506342 146.062050819539 151.923356524322 142.650451413991  
159.282348516052  
CTAG1A 144.86271068967 143.212739422069 148.486946087388  
152.017655364287 1378.40627876546 153.907737500104 145.389721946046  
150.346002924933 138.889999702313 154.904424749528 142.514794686932  
147.333142209628  
CTAG1B 143.277771142501 145.86855878099 137.16842164453  
132.781725233271 172.888455552446 133.324531689254 125.815256068004  
128.738746025289 128.803632055969 137.702802090925 137.575688681319  
137.25679451567

CTAG2 137.891372981851 141.628203045085 134.187456260969 135.918590725404  
1058.55850972326 136.724298878331 135.013075032671 138.733717670748  
131.198284945008 133.392934239554 129.195047484888 135.893380694453  
CTAGE1 113.262357892613 118.547605249191 128.765369834041  
126.305273697185 118.480344364831 124.101111442605 124.345320343901  
130.63390061855 127.374600506681 126.383238335161 123.484987952263  
119.535267326862  
CTAGE4 121.854113159619 127.997280639609 128.179293878252  
134.675247731364 128.002822538671 128.407235487011 139.555322603323  
118.497920969001 124.02280670421 126.695387748732 118.838332117453  
126.413124995943  
CTAGE5 142.474762834848 150.73248190848 143.147325939994  
146.812248482145 138.530236176135 142.348246621217 135.057847490193  
142.191569406599 136.86685787001 152.628220216104 161.419873271162  
134.968848574511  
CTAGE6 182.529167529936 168.398366575579 162.6762533989  
157.565633456909 193.502988612307 191.467626362851 225.169110687004  
198.15257384667 203.852316712377 185.639696270808 194.352807599399  
217.353396632732  
CTBP1 433.314881387431 462.686385881492 421.255522475862 583.938727139698  
643.660739343159 329.48021621087 446.509863498357 400.924914238052  
483.312894744803 411.603820288919 541.642309122976 399.872401268958  
CTBP2 216.033564783918 220.791884858764 222.508914765788 215.769986055534  
172.544504923991 190.291185322482 176.167129202773 157.659824861915  
157.374537572779 178.734634888773 193.466377788318 190.427022049167  
CTBS 264.628012152168 273.959220003188 251.011148303246 208.348515119045  
348.413827101046 258.25658838015 351.585604465402 302.601458409102  
263.084557246752 318.487401106209 283.527656956105 314.182403961681  
CTCF 264.805236346895 278.775971122032 351.079435946154 273.402804140541  
296.915883082902 302.462763120177 279.413335686746 268.264885392368  
439.852826905352 222.415704486709 292.037861000784 370.066087375401  
CTCFL 120.975542702338 131.150252587865 115.967513057229 123.25201993575  
121.837571435384 113.568261995787 125.185929751363 123.498540254464  
111.928204694188 125.396523818173 118.622346984257 116.793408204625  
CTDP1 192.980781927122 201.800357785022 199.756584044664 233.964929444112  
243.807038920733 181.37137053478 183.676020826291 205.162633740798  
195.256498208339 188.444498848767 219.080383154432 187.389039221193  
CTDSP1 748.38293089716 897.958748317315 544.462032960964  
1112.4055726239 748.940715378564 336.639473916174 616.523853569261  
348.640185950469 540.584471920486 492.207833630086 915.015154168627  
623.508710830895  
CTDSP2 1936.88813111969 2291.40912229281 1929.52146517699  
2639.60135568 725.443026984982 681.429327723794 1196.34528225417  
1231.92253664482 1386.56788941677 734.139557942719 1392.89422203207  
886.517088614968  
CTDSPL 1493.90578573732 1772.75453735112 1453.88161495484  
2462.87034563426 596.54904286299 563.339837352678 663.668537495345  
595.752426322468 915.015154168627 801.051513639714 680.94167651697  
791.840531191783  
CTDSPL2 218.209523110843 205.162633740798 236.707875629511  
197.034073391478 195.269099451599 285.562276640039 330.553659265085  
230.723142236623 241.944581086483 328.919401925375 245.153736298067  
285.768837438859

CTF1 173.714940254592 167.724233915361 174.274996381853 200.045606111354  
174.338440780636 149.980924447339 161.498785105514 135.562700479444  
136.167141767484 132.908367372426 170.390200730789 151.998942684339  
CTGF 8261.82420896892 3321.1350545346 1812.07394646463 1806.24732793591  
339.069385816411 2118.73410871718 365.864755316163 605.21685916883  
425.229044880287 3749.80462365748 264.273245283343 536.9324595176  
CTGLF1 158.829144564361 157.423242850568 171.545695383454  
133.628391175037 135.015161451899 145.126091016414 153.541193559658  
200.127994198329 159.798024189461 141.463324155943 181.635664531851  
184.322250984457  
CTGLF3 987.564350211893 1044.52286986369 1197.58205444449  
1204.32784721885 319.490670412394 705.737228226014 755.79669622705  
1164.61390835016 914.654262296682 617.67819271245 1146.3535752748  
1427.27262061653  
CTGLF5 160.565049887783 153.320911882529 144.129889080946  
180.164353124488 172.002600588279 159.588575526536 148.446949168794  
159.122382721225 142.09146795308 136.591299462104 135.638156623519  
165.085010975035  
CTGLF6 114.099623939954 116.070254821073 121.575942603856  
129.505139430366 117.048846466839 137.73313146889 133.915830295107  
127.453866279181 127.284885819903 125.410876867635 110.16174213285  
124.528206512938  
CTGLF7 1139.76755449089 1214.77298621465 964.473774310687  
1213.06007305892 860.688314783077 1274.39152410752 3103.4192907748  
1442.94175124818 1706.06615968622 913.684449305965 1821.08523647593  
1309.7660860424  
CTH 150.51056917809 145.500011956699 154.316929706697 145.371273337639  
155.516697616637 154.849264978968 146.660826209767 140.515996180923  
159.09825795308 166.382301680189 146.370084152094 140.03202338666  
CTHRC1 710.76653239801 466.909037277853 659.900771633223  
490.269418483997 288.182388699147 221.18757533703 217.531179216305  
387.827718022473 479.866450988091 1493.90578573732 180.336623146341  
242.221324619171  
CTLA4 131.074021609161 129.295956874012 122.295222990408 120.470801825675  
129.422854634791 140.256871047018 136.960656707275 186.185055364718  
253.833756857339 137.161065320948 163.885645883066 135.356010814496  
CTNNA1 2850.98525554116 2553.92770795014 2775.84742592713  
2733.68308784024 1512.28202818467 1681.54485582868 2255.92551080483  
2363.50330960038 1865.44709751822 3983.37592132018 2988.45928881468  
2505.8565544797  
CTNNA2 153.51550202829 143.823368276815 121.957155610892  
125.157459724842 137.782648137869 142.579346058088 131.483427112288  
141.603532965962 140.804008584006 132.7284396337 154.037622223246  
129.583916648999  
CTNNA3 128.251087452744 145.08853313195 135.894512504725  
135.159590925066 120.935863853101 134.008118774075 136.913957413224  
133.97321873161 136.547868436335 133.537552829999 133.70941349665  
126.862274244977  
CTNNAL1 561.379619105609 428.782703561238 558.810095726517  
446.194196064909 249.884250040189 216.381643581705 209.960795065047  
269.379272725008 644.449861831749 233.426170535227 202.97197145851  
199.714647839712  
CTNNB1 176.714471790643 178.404791189835 190.809584998617  
160.186527465164 179.61374889626 327.324711245289 245.640193659159

|          |                  |                  |                  |                  |
|----------|------------------|------------------|------------------|------------------|
|          | 225.75155298452  | 232.519482087835 | 219.878230463206 | 208.690347128273 |
|          | 241.168936008174 |                  |                  |                  |
| CTNNBIP1 | 181.088268167074 | 181.922907273871 | 156.477249817844 |                  |
|          | 209.54573978355  | 324.25775261173  | 276.756415094228 | 241.648044508699 |
|          | 210.822216545773 | 176.347535860374 | 222.005022189667 | 308.148212607944 |
|          | 178.790758444269 |                  |                  |                  |
| CTNNBL1  | 632.278924237678 | 675.281131488524 | 793.891277937782 |                  |
|          | 731.513306289481 | 595.593867616527 | 891.194779815063 | 778.639512538949 |
|          | 571.838717184447 | 607.26455470867  | 581.37957221282  | 626.104755496369 |
|          | 517.529147171876 |                  |                  |                  |
| CTNND1   | 185.233210060342 | 181.088268167074 | 201.913709602894 |                  |
|          | 179.996590340102 | 171.035391211596 | 243.501083338279 | 183.023316857537 |
|          | 170.878962027347 | 173.024402954772 | 217.435155984897 | 186.6902304653   |
|          | 213.324226314713 |                  |                  |                  |
| CTNND2   | 110.138220982557 | 119.682747854629 | 115.053039576143 |                  |
|          | 113.209569103727 | 116.736174147084 | 119.144128641393 | 115.738984899365 |
|          | 167.764352429391 | 108.697696080014 | 114.528407572496 | 132.140547119679 |
|          | 110.496084922302 |                  |                  |                  |
| CTNS     | 226.531255313921 | 225.130011390856 | 200.902123076244 | 254.63506290698  |
|          | 287.287337931982 | 209.213115976788 | 200.360518276784 | 237.249949461085 |
|          | 224.335742510577 | 298.573180660083 | 240.341031437493 | 211.844563155792 |
| CTPS     | 992.744093752678 | 646.933504790891 | 866.147379099606 | 810.396770151757 |
|          | 599.735180191091 | 566.228690652783 | 260.016906472407 | 365.286234166621 |
|          | 394.962978677736 | 373.096629378654 | 267.422232051733 | 414.538237455116 |
| CTPS2    | 349.054741747798 | 342.717252404581 | 392.06522028189  | 334.056545911557 |
|          | 229.660838239474 | 403.582461109859 | 336.786227017391 | 485.136339836897 |
|          | 283.499120551905 | 202.797135825668 | 421.583441056026 | 369.156887999872 |
| CTR9     | 185.843639043466 | 176.912121142015 | 179.079061789059 | 158.126480180017 |
|          | 170.941404165185 | 175.585857393085 | 172.877947895827 | 205.011514211101 |
|          | 214.132445321197 | 221.849661343124 | 242.948136060281 | 184.900027626401 |
| CTRB1    | 127.959474148217 | 111.217595631623 | 126.134393447943 | 126.656077572961 |
|          | 125.444541266623 | 131.789877096016 | 122.514826802737 | 125.603448542611 |
|          | 128.097206000942 | 127.358616953147 | 152.650867743471 | 116.844361858869 |
| CTRB2    | 138.775095929764 | 142.383723965616 | 137.752238510249 | 143.94902198632  |
|          | 127.527378949803 | 132.526286141997 | 129.785078660064 | 139.3465236423   |
|          | 143.881744063934 | 136.831280469398 | 140.538813908652 | 132.287326702468 |
| CTRC     | 156.802353238128 | 160.168654167074 | 163.141010815086 | 185.843639043466 |
|          | 157.003367685421 | 206.571433405844 | 146.353239460684 | 189.915720614467 |
|          | 163.306853098724 | 184.056274452194 | 129.529372508883 | 157.049773524382 |
| CTRL     | 145.608087633951 | 138.30326146769  | 135.892248893607 | 132.74579603362  |
|          | 128.327528039933 | 133.99046926032  | 125.374764771516 | 145.855671447779 |
|          | 152.57040089034  | 131.85737847837  | 170.941404165185 | 140.10798818623  |
| CTSA     | 413.757630469808 | 483.549698382115 | 429.992169596618 | 544.107739610054 |
|          | 873.256632365737 | 478.38361571213  | 923.383014892221 | 419.047108206042 |
|          | 509.618968665191 | 716.229989890801 | 277.219796733134 | 287.656436278551 |
| CTSB     | 2505.8565544797  | 2493.5484556802  | 2580.98143004019 | 2271.82656399253 |
|          | 847.863177169335 | 1561.87054049124 | 1897.92061704124 | 1328.38230265655 |
|          | 2139.42448145954 | 2596.43650409044 | 2346.47361943533 | 1266.53539318831 |
| CTSC     | 240.561105692347 | 229.200570583629 | 222.134519361117 | 213.215996114827 |
|          | 227.441436540742 | 1062.749459378   | 1123.93087912174 | 1279.9555644913  |
|          | 524.855915371246 | 1562.9779683714  | 571.439520427295 | 541.258721278882 |
| CTSD     | 519.672796004691 | 522.899203071911 | 638.393099392849 | 407.711669482083 |
|          | 4520.84412831414 | 717.270096456387 | 1583.79384467611 | 690.582550537485 |
|          | 956.76879975749  | 1168.3174645384  | 3342.8737952486  | 682.730262408017 |

|           |                  |                  |                  |                  |
|-----------|------------------|------------------|------------------|------------------|
| CTSE      | 152.28262533486  | 171.504939477949 | 152.215146681655 | 158.675960205792 |
|           | 1052.553421812   | 199.714647839712 | 233.426170535227 | 195.230219990395 |
|           | 1904.39962279504 | 179.582086214179 | 5058.57872936027 | 1975.83062789692 |
| CTSF      | 1029.75852676191 | 972.468110850466 | 1029.09818399518 | 705.987531074737 |
|           | 1322.14570224119 | 527.294087043601 | 799.132592914065 | 204.681956301306 |
|           | 199.037998955485 | 227.144441241869 | 194.161930642068 | 170.655648004461 |
| CTSG      | 793.501244347257 | 658.202765061937 | 701.208391798006 | 1488.37146754184 |
|           | 129.099780410063 | 241.494710905339 | 141.523470346891 | 205.950347620158 |
|           | 510.434895296759 | 142.839077978518 | 127.442587366678 | 141.482344048665 |
| CTSH      | 610.759447723026 | 1062.03157932144 | 693.516351173476 | 408.510567121592 |
|           | 4410.68280125001 | 5233.72882607795 | 7802.25987814138 | 3384.19521857242 |
|           | 4536.46344538492 | 569.353661326724 | 4866.98027226798 | 6409.23524786095 |
| CTSK      | 2222.16226526877 | 1514.53784631689 | 2009.21931102311 | 1028.39666838369 |
|           | 207.417884407459 | 497.53605530806  | 250.626556981376 | 632.031410234577 |
|           | 1066.25208226214 | 2165.41403521012 | 298.028932089399 | 284.473085899219 |
| CTSL1     | 2045.24382334506 | 1965.13870083236 | 3119.93811557461 | 2708.20624364471 |
|           | 1317.1258783404  | 793.501244347257 | 1209.56018864779 | 1548.09554827056 |
|           | 2176.59445919725 | 4811.88424516272 | 1391.89900758685 | 419.272193677273 |
| CTSL2     | 123.881658891576 | 136.742206779136 | 111.765812595638 | 120.324139035544 |
|           | 176.001771318766 | 160.553214127047 | 192.095235288818 | 426.995700632434 |
|           | 161.310855691717 | 1424.04009914668 | 198.15257384667  | 137.607767467172 |
| CTSL3     | 158.483006541613 | 144.396774242135 | 131.984467471242 | 140.004456934031 |
|           | 143.94902198632  | 150.46669393448  | 145.34533633425  | 139.293775885106 |
|           | 154.816213491233 | 137.938310376106 | 168.03501792841  | 159.213940274232 |
| CTSO      | 361.26540006942  | 399.071041584646 | 323.225475312396 | 275.972447693982 |
|           | 240.878804911613 | 303.555333002419 | 339.663295617139 | 381.57978490093  |
|           | 415.642099109855 | 299.33156125224  | 603.569635276204 | 242.72424280444  |
| CTSS      | 126.601395870533 | 143.931400351525 | 112.208950290962 | 117.65847906412  |
|           | 143.763292219833 | 131.050255325564 | 175.327597807738 | 225.362253409428 |
|           | 194.430896269275 | 115.884253217495 | 265.332196877456 | 161.027590226123 |
| CTSW      | 186.529656751005 | 182.958991847218 | 169.992657041967 | 315.306271141071 |
|           | 199.637257550762 | 123.494412056415 | 135.349868925415 | 135.028746262383 |
|           | 188.20675818131  | 134.289354713568 | 195.547320133122 | 168.73918684069  |
| CTSZ      | 430.220363263561 | 298.625127845168 | 253.164596735793 | 257.685284145848 |
|           | 969.811933814244 | 315.306271141071 | 467.777995124655 | 245.042781391047 |
|           | 225.664432111551 | 204.019377262081 | 397.387054218873 | 460.941286124613 |
| CTTN      | 625.152889992949 | 548.014025722956 | 580.859914041323 | 590.142817130684 |
|           | 896.185223980593 | 838.63350090385  | 1034.68475089075 | 365.199125315964 |
|           | 623.409211766224 | 835.284130042504 | 1115.34267967366 | 1135.49876948815 |
| CTTNBP2   | 143.552343056702 | 127.859873416515 | 179.211502448703 |                  |
|           | 163.346402397924 | 129.719122724699 | 128.734694496357 | 122.909152047474 |
|           | 136.931476050688 | 145.773932754923 | 140.101511236793 | 128.368669716591 |
|           | 141.249687936867 |                  |                  |                  |
| CTTNBP2NL | 153.664503112778 | 155.826394389322 | 143.614075503775 |                  |
|           | 126.839037497031 | 136.869117921313 | 223.058699622386 | 210.620764703468 |
|           | 184.085616342099 | 183.545741265706 | 213.077884261943 | 193.744461104128 |
|           | 226.387465899611 |                  |                  |                  |
| CTU2      | 178.12073430094  | 163.407360509803 | 167.568776552757 | 178.166289723365 |
|           | 228.879434668972 | 177.103802332144 | 172.364618542922 | 171.671895682052 |
|           | 165.103398617203 | 167.776363541939 | 177.011776399483 | 161.44729973777  |
| CTXN1     | 1578.87371296418 | 1473.70433292382 | 1484.32547474275 | 2267.0818302379  |
|           | 908.352265585374 | 504.275299381356 | 221.869191666931 | 292.468585109951 |
|           | 407.957436380989 | 198.311821616128 | 255.305647212135 | 438.03648998391  |



|        |                  |                  |                  |                  |
|--------|------------------|------------------|------------------|------------------|
| CTXN2  | 137.085712588455 | 137.071402810983 | 139.515794685984 | 149.595375008252 |
|        | 146.271180025157 | 125.634045420702 | 153.474566767304 | 150.964506212368 |
|        | 147.351826045609 | 140.464476678448 | 139.372441366224 | 141.29868389128  |
| CTXN3  | 122.022611139895 | 131.657454325126 | 124.66386961898  | 116.678969343492 |
|        | 121.197702744078 | 124.297848065172 | 127.476819912992 | 120.547683754604 |
|        | 123.434963905308 | 122.268560536152 | 117.335748689217 | 115.299986138153 |
| CUBN   | 148.054367166566 | 139.310309748986 | 157.57914268719  | 141.289009185018 |
|        | 139.748733350375 | 131.933026690056 | 144.224287382131 | 143.810050834214 |
|        | 144.754401731628 | 158.7912155022   | 140.706490845379 | 138.546549217819 |
| CUEDC1 | 1887.82245931444 | 2421.87041217217 | 1901.97972168836 |                  |
|        | 3222.23985545506 | 988.788192022196 | 396.861835715943 | 614.775559038663 |
|        | 570.130804179186 | 731.848844821402 | 357.835334661098 | 634.046843336128 |
|        | 457.292146759215 |                  |                  |                  |
| CUEDC2 | 646.117381960716 | 690.010326122574 | 836.235700891687 |                  |
|        | 904.733257358133 | 1007.41624313399 | 553.198321853202 | 585.552940765069 |
|        | 413.330906392915 | 591.763423878737 | 365.650071660806 | 499.436680354749 |
|        | 544.852019338212 |                  |                  |                  |
| CUGBP1 | 209.623583937962 | 181.550597645633 | 195.724873069362 |                  |
|        | 188.40383184521  | 204.283030911897 | 173.147311624838 | 198.437113196596 |
|        | 190.444387031552 | 177.103802332144 | 206.548878646452 | 202.162432624505 |
|        | 198.113398073968 |                  |                  |                  |
| CUGBP2 | 207.651142295123 | 192.932285494022 | 269.379272725008 |                  |
|        | 189.662974464847 | 129.34905533265  | 128.045931477827 | 132.928639483854 |
|        | 151.650777127117 | 158.919340819357 | 130.212422459695 | 136.421163870578 |
|        | 126.482660154852 |                  |                  |                  |
| CUL1   | 819.488546995594 | 683.365770196967 | 834.187014201026 | 803.60413590137  |
|        | 489.75389978732  | 617.185364180303 | 583.938727139698 | 539.125423322738 |
|        | 616.523853569261 | 607.805002786409 | 350.926679856514 | 741.255013151687 |
| CUL2   | 631.819659701092 | 558.934004505074 | 697.299604049748 | 543.810043433181 |
|        | 567.143102792772 | 693.180345649331 | 495.769802520637 | 493.071213662125 |
|        | 524.725307261999 | 458.047799748696 | 648.38049615541  | 541.642309122976 |
| CUL3   | 148.927040248436 | 163.885645883066 | 158.536178747273 | 155.878493935166 |
|        | 135.033601686007 | 149.805955402639 | 124.985249190127 | 151.567693140302 |
|        | 152.600339354701 | 122.007909794484 | 136.888915439473 | 134.675247731364 |
| CUL4A  | 547.817028243811 | 481.86545778383  | 644.449861831749 | 478.606567465979 |
|        | 349.816819166182 | 495.241179224412 | 358.897128592042 | 396.708183244581 |
|        | 490.153210371094 | 616.014975366684 | 511.25179427158  | 677.265576269103 |
| CUL4B  | 249.400820221233 | 264.805236346895 | 286.901115411673 | 244.990374822652 |
|        | 195.981555981238 | 267.800523478098 | 210.590774758661 | 176.008711524598 |
|        | 185.396765725228 | 189.092674335503 | 241.675251479835 | 204.509884908059 |
| CUL5   | 679.557656724243 | 682.315322994357 | 758.517101659762 | 545.200687301057 |
|        | 496.991561192565 | 634.906566690042 | 708.268962600305 | 754.406896156858 |
|        | 648.161646065464 | 489.909407178594 | 641.645855499704 | 915.579581760396 |
| CUL7   | 163.504122327429 | 156.540165645256 | 144.016137459279 | 157.77398996415  |
|        | 237.146972312448 | 174.587558727209 | 234.301520483864 | 143.837402372008 |
|        | 181.003812824014 | 139.834535091869 | 212.223906015932 | 176.547853494057 |
| CUL9   | 234.626574390973 | 285.768837438859 | 269.141120401835 | 312.645778869254 |
|        | 240.12078342024  | 196.519125510368 | 243.979769719186 | 224.335742510577 |
|        | 230.975434289172 | 258.807028561407 | 256.495848662843 | 247.08460296705  |
| CUTA   | 1033.48252432603 | 1002.44383771056 | 1102.38234645327 | 971.99484515987  |
|        | 2819.92361643968 | 1601.19401366685 | 1271.46608195833 | 877.255923473532 |
|        | 1114.10687039922 | 769.34961339184  | 1064.12835214671 | 1415.67109281133 |

|         |                  |                  |                  |                  |
|---------|------------------|------------------|------------------|------------------|
| CUTC    | 568.935113269368 | 491.709723745226 | 523.435696794756 | 352.741885295157 |
|         | 166.81024151246  | 227.614623963331 | 267.028096234702 | 203.125568980238 |
|         | 235.680462167404 | 257.880331012233 | 250.602978521808 | 230.672056810885 |
| CUTL1   | 781.208872924532 | 923.130629121442 | 793.501244347257 | 955.604404066769 |
|         | 466.691191261997 | 378.088675670786 | 543.001249586573 | 441.785666261936 |
|         | 388.096183735126 | 624.978351618077 | 303.986544460218 | 588.863382995875 |
| CUX1    | 155.119146797226 | 156.779004465552 | 160.713790305656 | 155.515134922269 |
|         | 161.788118050564 | 142.264536484668 | 152.743680985848 | 136.256456726841 |
|         | 138.618761382177 | 151.340728221261 | 156.037150880384 | 155.488346781292 |
| CUX2    | 162.624786423084 | 145.572363722788 | 142.469353808346 | 131.749403497912 |
|         | 129.668506092785 | 141.374831983971 | 122.550707067805 | 136.321816321193 |
|         | 142.757327296852 | 126.734835642553 | 123.586359806158 | 138.158400190671 |
| CUZD1   | 147.856285290748 | 129.073750290924 | 143.397823965608 | 151.783090997855 |
|         | 151.819220292189 | 140.051904905695 | 159.115391667901 | 154.533544838819 |
|         | 159.43317827517  | 138.098165515898 | 147.572660963285 | 162.9279134169   |
| CWC15   | 648.161646065464 | 662.373189001788 | 895.463355957918 | 692.945420109927 |
|         | 489.260272645085 | 743.023225859813 | 927.137881369911 | 838.63350090385  |
|         | 790.561585641193 | 1208.9240215109  | 806.591035100794 | 956.76879975749  |
| CWC22   | 203.19299227665  | 187.784865705837 | 192.418895349837 | 156.698856643638 |
|         | 146.632312874102 | 170.01557699913  | 152.748807709142 | 175.908645445479 |
|         | 158.541906931082 | 176.704617691988 | 175.704031930103 | 158.604431001643 |
| CWF19L1 | 719.766799746895 | 850.882404546093 | 748.015452242839 |                  |
|         | 806.290662664708 | 836.613819700658 | 733.86133557115  | 807.604205890244 |
|         | 524.392279804734 | 894.100792722707 | 699.984140389009 | 693.781708146282 |
|         | 668.853969513382 |                  |                  |                  |
| CWF19L2 | 390.809169896009 | 387.711471687237 | 461.088572554864 |                  |
|         | 344.070947256963 | 257.989863290786 | 228.713818522476 | 232.778488697337 |
|         | 219.753039699136 | 212.171281020103 | 236.164692035094 | 302.532985701607 |
|         | 224.361277033882 |                  |                  |                  |
| CX3CL1  | 1126.46241487062 | 1518.13775377335 | 1488.37146754184 |                  |
|         | 2410.32095582515 | 225.095016600703 | 250.30085097088  | 185.886737029845 |
|         | 200.179796117115 | 464.323065038265 | 210.960900130785 | 232.519482087835 |
|         | 176.347535860374 |                  |                  |                  |
| CX3CR1  | 142.41737138634  | 148.823805841381 | 130.201635099678 |                  |
|         | 138.74117178479  | 142.510745106328 | 131.089811472017 | 140.934144636302 |
|         | 154.710000519109 | 150.584633044901 | 137.701271351806 | 163.570018900148 |
|         | 141.779801021888 |                  |                  |                  |
| CXADR   | 214.499670852615 | 493.347308943133 | 288.728608411903 | 131.381189141974 |
|         | 1584.81089248914 | 3829.87905458534 | 2662.43181510326 | 2355.29862638453 |
|         | 8864.70614223459 | 1548.09554827056 | 2525.90466050731 | 1978.95750795951 |
| CXADRP2 | 145.365935017728 | 123.150299476109 | 129.265788005518 |                  |
|         | 126.690066353698 | 146.590495255969 | 126.468167800414 | 132.811368246405 |
|         | 138.924820359912 | 129.828896822571 | 121.347339077474 | 123.720229113779 |
|         | 132.998223400178 |                  |                  |                  |
| CXADRP3 | 133.788197693571 | 146.798444724408 | 141.492458250787 |                  |
|         | 151.431513447721 | 155.40832015652  | 128.597272557033 | 151.893573927407 |
|         | 136.268379335353 | 128.289680999565 | 134.81595608984  | 144.829773937102 |
|         | 141.334394187941 |                  |                  |                  |
| CXCL1   | 139.959629641771 | 177.549330396268 | 126.259029676691 | 153.165872773973 |
|         | 181.202396068658 | 151.024201732633 | 244.849563563729 | 293.692083555844 |
|         | 622.692834629555 | 827.863789600981 | 200.944865673409 | 221.74200490054  |
| CXCL10  | 169.067064352955 | 217.670330817769 | 142.617474507282 |                  |
|         | 163.099009810658 | 236.401834189942 | 256.538195034956 | 329.660368915848 |

669.731546951281 1487.12201643008 404.21236980164 598.095370768587  
317.061815822659  
CXCL11 117.445284668654 135.193659028591 123.306499698566  
124.63978985808 122.284431229917 129.589056071463 131.560971848628  
139.104796184094 134.350054065624 124.791221329502 130.163574198827  
123.833219705499  
CXCL12 810.396770151757 756.246712133116 575.857954264295  
735.449040059761 157.994474909749 153.639559509292 137.20253329376  
172.502036705114 231.146155346291 154.162796706044 161.89906072679  
152.826356673175  
CXCL13 142.080099281203 135.87026484074 142.777235931165  
147.808262170269 160.939530665541 140.518206716196 160.180961887686  
378.967410725775 643.306565600931 160.72009357092 130.266601299194  
150.112549201892  
CXCL14 517.020259129974 391.569187190375 416.075109522039  
548.686094748117 217.013533525724 518.478990211753 392.909481887174  
796.699879495384 443.964363178742 2166.68174726155 787.874585290601  
476.641032594868  
CXCL16 255.527764534636 264.273245283343 163.607125532236  
231.314944217099 535.041545916303 385.050282185255 340.966515437272  
419.126814511305 301.188296465202 356.530530468568 260.045018348182  
330.908743070095  
CXCL17 168.139351579682 170.12010526854 162.28074297013  
150.870830294349 164.491207767654 172.364618542922 231.846509449829  
169.568915494577 420.647394044431 158.07640654075 402.140437036706  
182.009471368798  
CXCL2 187.519053043173 209.196695368783 171.835438335216 214.241635800083  
151.836705989155 166.068489027866 137.72327986309 141.410953064267  
160.786907816025 243.691004557778 141.5068665919 157.36568754472  
CXCL3 124.794260959228 147.854171854456 150.489651880905 141.858928084825  
122.182695593404 142.354731066206 142.736148814019 137.843244642235  
143.351341716363 132.70888569469 151.503307004675 129.21974206851  
CXCL5 131.926504315744 145.123845983625 137.77107995457 141.08625682411  
168.27980269501 136.356895672212 144.507230362869 145.026722065573  
213.364858759772 203.616580991715 131.463081749448 133.192757350144  
CXCL6 135.381131982323 138.478911439144 145.85414203374 134.947657801444  
147.561362873855 141.730912072471 192.188662949149 171.444558905575  
189.726075394359 183.236087954054 175.350734537491 155.878493935166  
CXCL9 124.424565172377 147.238896426423 127.512733134453 112.332130647215  
189.283071231248 159.620467672898 112.642429076777 433.751675703425  
523.306451464643 179.55905250703 239.24587884234 182.861900982333  
CXCR1 148.751755543817 150.294432623474 140.347131743987 149.300089212177  
152.334669286305 148.209164900319 145.34041912391 142.416237823488  
151.663203772586 202.718428167217 158.670835881902 146.982584024102  
CXCR3 127.096476403758 126.333814565085 119.931415360373 114.405811161631  
145.675032688915 109.988237089025 118.945264994404 142.669207969715  
181.294497402507 126.292433523959 178.946928223991 129.026732674277  
CXCR4 161.657344146676 147.208176455806 118.912989775436 127.177422395113  
128.011387527117 184.260835471542 134.4380641709 239.871536598083  
329.214958614925 209.684346388892 133.613988293895 155.23152084421  
CXCR5 133.929311295884 131.956481591804 136.685430908977 135.407536491819  
127.951403055054 124.551603326682 139.583514773196 138.980079440205  
181.747090380435 138.588751758469 146.616041788595 120.342513393659

CXCR6 122.535728427528 112.547907748842 123.344450694117 115.242526386551  
126.601395870533 119.774204444899 120.337241026338 145.804420322848  
173.001985500448 119.107992692097 173.766372029062 128.152956417755  
CXCR7 2261.31473132315 1665.14066952917 1759.9632914516 1302.54547114701  
856.039380523678 402.965083947376 217.408824020423 438.231717096337  
244.251315474587 478.699172220804 327.89660021611 460.24741151155  
CXorf1 133.274292647041 145.169804325334 135.286686011087  
131.643633737316 140.466612569756 139.732074331751 136.545742688573  
129.483116877682 138.308965237491 145.437544062449 139.505864135281  
138.97776257708  
CXorf12 179.779007442837 207.624240598841 224.67853219142  
179.624208193114 497.110852407681 232.667968049771 192.752224665459  
222.20526515049 217.094085829328 233.496804016764 228.616558999054  
222.605195861218  
CXorf15 117.943511615792 122.575357101038 129.116354997747  
115.463150857002 128.697647007046 141.611712747368 131.473743669996  
137.702802090925 125.9888344762 142.495333453346 160.914009756867  
151.619329363527  
CXorf18 123.786227856015 135.467354817201 135.141067086648  
131.02157879562 131.573729430926 134.491232148834 120.831070822199  
134.041098536814 134.717258604899 129.267923706188 131.239986488033  
122.699993989189  
CXorf20 132.177829138863 131.568898109933 132.109267393571  
126.013957128603 126.680992733621 126.497472087036 133.054453517834  
137.123016784819 132.300508985399 142.299535614113 128.705587172572  
128.850480964163  
CXorf21 132.739435456445 139.399195840117 116.685023927951  
129.750835425023 143.62103263895 127.797666392002 135.884635448277  
138.76667538162 127.595574823053 126.141462782039 136.022614387461  
130.374065525934  
CXorf22 121.027465953657 122.236134282757 131.617027772841  
140.36425603453 119.346574301289 130.824958143557 136.737964237109  
136.444883411968 127.310437599803 136.614620534169 126.777633512781  
130.402496960735  
CXorf23 175.019580368717 161.102731941183 171.579123521304  
155.183210738478 166.606522485953 148.791182443623 185.717123241832  
205.560952959537 154.273953018148 152.393260140571 186.999459152483  
160.625367261779  
CXorf24 138.023752854109 145.612695657243 124.003914369077  
130.969085716681 136.540568915609 129.38021642675 143.694412162756  
131.601823550269 142.179197020805 128.02595294499 126.298187538812  
134.842877075983  
CXorf26 822.88742008931 736.332743195416 657.058213650454  
620.899414581162 537.698489904622 616.014975366684 876.783710734594  
667.892385395063 690.903797251841 1080.42884514937 1190.62010668045  
1010.73988405469  
CXorf27 144.2753860947 145.621384219688 152.872139211415  
146.792951584868 139.000248033373 155.140371265225 147.420580715112  
154.725484895098 152.915692742755 151.72544764489 138.970853057174  
144.492756323647  
CXorf30 139.153897381147 132.407736899761 134.58799530734  
124.253582884351 131.215202712283 143.897248922317 151.104891644466  
137.029726467523 155.249688219254 117.539640414775 137.435736170779  
127.595574823053

CXorf36 146.192761134077 125.439033142431 132.464205461991  
136.903588075134 141.198692540628 135.800997202323 140.307931763353  
135.310766630401 126.314233529267 139.155456340488 132.875314170399  
141.393814611166  
CXorf38 198.456392063513 199.637257550762 195.69447353356  
139.517413585211 300.886032768166 490.022369664024 440.203336761263  
663.782083028745 446.601751145647 335.790909130243 416.475440894731  
600.919152191636  
CXorf39 159.845890841215 157.77398996415 156.863232221623  
159.324816814876 359.991823789356 181.202396068658 215.506175859782  
217.89028736436 203.149001616967 218.839681873515 196.777776509371  
225.362253409428  
CXorf40A 248.129640673859 221.424451092316 223.89854167651  
231.372316734945 583.314509855875 406.900412510895 521.83794739314  
366.317263094585 421.459312180809 294.746622369436 393.500781010617  
393.198813167839  
CXorf40B 241.105817192695 193.084818760857 205.509515144263  
169.940177050294 451.380376296813 357.140791982825 471.15333189869  
328.33387481068 377.225452025984 287.334035234496 385.522443482  
339.252515920242  
CXorf41 113.238466329843 127.694189114288 113.262357892613  
109.74983281634 111.928204694188 121.141432480683 125.787353491408  
112.239647575661 116.263405190786 109.552501987529 119.98864381644  
117.261443445891  
CXorf42 136.265972909993 145.733828447934 139.579764449867  
147.385714746214 134.301187092088 147.414834563852 148.711943433557  
139.153897381147 139.041005010106 135.985358106767 155.957570398118  
131.712745388563  
CXorf45 194.637233028442 171.97578836712 233.029655807246  
161.960392594363 177.598422362298 188.062732621031 183.951404362826  
175.236826554583 209.984545596312 205.341121539273 193.786889748038  
179.49202902995  
CXorf48 138.18056202179 137.550607284001 143.673778816953  
144.599578905334 137.790718305537 134.972933635542 140.699287635171  
152.071081175788 143.031909545902 146.286319248569 133.298480558419  
140.922678400415  
CXorf50 136.627904756283 141.059033576475 146.83577460518  
137.068717031383 143.119405329718 140.073208365817 125.181327386534  
111.253743009588 144.193756031386 124.168162885295 126.017158064032  
137.187640876289  
CXorf52 125.876114993687 129.733935614802 123.383334044683  
134.331420680628 131.282091618102 115.080736217256 118.679664392666  
137.495288670441 129.649043291997 119.176139463015 118.424520312293  
125.617143363441  
CXorf55 145.658251059524 132.651922794567 142.466067016788  
130.37544152572 132.671227062948 138.215708514725 138.005168756932  
137.77601089414 111.398760606544 117.119533897652 131.267177634269  
121.722412245175  
CXorf56 144.095471610836 131.519455635415 160.122274989224  
127.116637906391 226.936810012475 190.520750756082 146.512045729234  
181.607253339427 158.87755965229 167.500410857353 128.513011425662  
143.004090696463  
CXorf57 159.461778054423 229.116153948948 160.853480692082  
137.586032396204 966.731520471976 2482.27419621925 826.314416168552

801.051513639714 1257.00798908017 364.678403892354 920.342429282889  
389.500591134279  
CXorf58 122.329290563769 130.165488538277 118.544870925791  
125.2051300372 124.469415593643 136.08297876405 116.685023927951  
126.132339293132 128.413213851142 121.425298866613 126.05295868521  
119.9414421871  
CXorf59 140.475688390415 142.981967333546 132.854078420045  
126.775180133301 164.172084711099 181.022635001204 148.435419356331  
137.372131049785 151.796986456254 156.098240321674 141.535381351126  
153.219954133957  
CXorf61 118.838332117453 113.071787850611 116.335864439545  
110.16174213285 103.240215392215 113.356070669308 115.097376525707  
112.464951599416 116.445184223804 111.497241941203 138.476953078729  
106.147993332294  
CXorf64 141.555366493541 131.748753064488 147.932875151331  
150.746423638097 191.924177620803 186.563913311757 226.919545367682  
182.384190694142 199.620978536397 245.522497675754 160.261708910517  
225.783771938969  
CXorf65 135.873325130921 138.759744193844 116.331428876124  
126.826941761528 123.265810024678 128.685065364693 133.805991920905  
126.763282018991 129.11843197744 122.382304966782 141.935435502163  
135.336754997434  
CXorf67 148.932696684374 142.85695042665 143.26896117546  
153.38260557666 140.043256690184 135.168792286819 145.385816618728  
126.288011849541 148.367132982373 140.802033706122 117.270320709161  
142.635015113687  
CXXC1 787.425941491281 868.86246684338 922.009043194023 987.564350211893  
2468.47687203968 1001.65849130836 1992.71224011906 1747.33558205825  
1797.65684760558 1106.21439150501 1300.40889834984 1099.80705776268  
CXXC4 145.180346905484 167.121623035375 158.63432604978 151.492236411757  
139.593950393555 127.773292289242 138.600017737884 156.411563412665  
134.29036009792 124.270946828609 185.801540278924 142.163834995141  
CXXC5 1637.66306286151 1450.44557173645 765.333633142088 1512.28202818467  
2473.22803972431 921.140932799223 2072.01578063404 864.161191021297  
1505.90883940934 1495.04587558545 2751.75479578587 794.636255515909  
CXXC6 165.48594766783 161.382041789666 152.224281847792 191.445291899108  
147.094123051131 146.404727168045 164.763269377973 164.520247586053  
173.035013611377 172.677083810424 145.919359461744 162.702767346393  
CXYorf2 129.190900922265 120.711150688559 189.603621918298  
129.89329138222 134.381042390464 144.64136816491 140.688570032068  
154.701413581915 148.791182443623 147.751220590539 125.661697165943  
146.832797779597  
CYB561 224.62335524729 231.180528071672 219.044271073282  
237.88097138936 393.375554593484 379.292531644085 423.152420192284  
454.854528472591 490.631757904175 320.024259346646 383.033242143031  
615.662993833692  
CYB561D1 337.119524477446 331.999693230194 372.088129459528  
404.366325262322 593.462634352052 409.206158277764 439.023181761356  
554.950092776254 577.250493023431 322.837446618323 559.559921312181  
363.89527566597  
CYB561D2 184.709768457405 196.16056297158 142.187694439611  
150.311274161073 1282.38953612054 304.152390210727 424.578659172414  
376.54010486682 521.512936372701 257.372740535895 310.917191279571  
367.327273578513

|         |                  |                  |                  |                  |
|---------|------------------|------------------|------------------|------------------|
| CYB5A   | 1100.81588201714 | 1051.98943987926 | 1549.30900090605 | 992.320202251161 |
|         | 2444.835635949   | 4183.06379632713 | 2691.41389079777 | 6384.66090426598 |
|         | 4938.42484385053 | 1081.47077865393 | 4255.59773503364 | 2553.92770795014 |
| CYB5B   | 1622.17491781572 | 1856.05025952611 | 1411.2586496281  | 1620.7954553764  |
|         | 1522.87703817058 | 2578.85391480563 | 3575.60827968852 | 3111.50508060882 |
|         | 2756.22069438696 | 1769.6386910047  | 2444.835635949   | 2433.83421295012 |
| CYB5D1  | 355.372836460906 | 327.062810389635 | 409.380002417794 |                  |
|         | 416.392874553797 | 147.100947801261 | 447.579975492958 | 205.781486117242 |
|         | 402.425130776131 | 199.459711023907 | 315.963526790659 | 207.977817300376 |
|         | 187.132496910208 |                  |                  |                  |
| CYB5D2  | 269.770777921703 | 258.21341068758  | 269.981476129439 |                  |
|         | 243.95334982553  | 256.174286655796 | 310.758803815671 | 266.61343130101  |
|         | 358.298768623212 | 246.031568259337 | 181.37137053478  | 369.275635424092 |
|         | 305.200911653347 |                  |                  |                  |
| CYB5R1  | 922.50743596248  | 1027.96306543235 | 910.541650889451 |                  |
|         | 1019.627634011   | 936.957730361063 | 790.321331435096 | 2225.59207490574 |
|         | 367.229293432041 | 737.193295872614 | 1569.13457493554 | 1149.90248188644 |
|         | 1282.84159765715 |                  |                  |                  |
| CYB5R2  | 227.558441474918 | 224.724262742427 | 163.074919710259 |                  |
|         | 157.878110410517 | 486.047284379068 | 402.564148020948 | 274.77366169918  |
|         | 248.993716339029 | 278.335289966805 | 426.769986378276 | 290.288001750744 |
|         | 400.621427274425 |                  |                  |                  |
| CYB5R3  | 4929.26915002209 | 5582.64254130978 | 5008.4888270731  |                  |
|         | 6628.17856159198 | 3775.41389938231 | 2986.6208659209  | 2340.90990677253 |
|         | 2012.36542989953 | 2926.06746795504 | 2476.51542420593 | 2493.5484556802  |
|         | 2466.36457617864 |                  |                  |                  |
| CYB5R4  | 219.78041403077  | 180.231462528702 | 255.305647212135 |                  |
|         | 208.067404132325 | 269.238332581564 | 335.623336587396 | 384.733313349438 |
|         | 349.910535555712 | 294.48534582475  | 398.571054759451 | 371.168752104821 |
|         | 255.770193180874 |                  |                  |                  |
| CYB5RL  | 142.674671804361 | 149.207481665265 | 138.489443610941 |                  |
|         | 152.470980074365 | 138.639410179404 | 148.484823275343 | 140.842305941666 |
|         | 126.077945699709 | 145.954700424725 | 132.774127230452 | 136.066396388185 |
|         | 132.801619479245 |                  |                  |                  |
| CYBA    | 692.359779743985 | 630.670530516275 | 401.189904619902 | 350.166837086936 |
|         | 14938.5975217303 | 1557.00226259883 | 2046.64499507352 | 2441.05534211996 |
|         | 3833.73632806344 | 2744.77453865893 | 4110.76546218806 | 5992.92384160188 |
| CYBASC3 | 298.706655333472 | 324.79327985156  | 309.997909440664 |                  |
|         | 402.564148020948 | 753.007562127186 | 416.307629596091 | 552.962676093514 |
|         | 360.852730026133 | 389.500591134279 | 331.848516303011 | 400.621427274425 |
|         | 372.024884481775 |                  |                  |                  |
| CYBB    | 176.289693941489 | 172.916234073981 | 157.381401974279 | 176.155413809391 |
|         | 159.438084699061 | 189.603621918298 | 178.636555178682 | 229.542259738438 |
|         | 346.476121089685 | 172.909795209733 | 227.033342447929 | 183.3378528327   |
| CYBRD1  | 3237.94149351627 | 2240.33212242003 | 3338.13980198211 |                  |
|         | 1350.87073284396 | 167.505381046729 | 309.423768054614 | 197.205792984885 |
|         | 260.67310907387  | 373.361263985383 | 570.130804179186 | 163.298729857831 |
|         | 169.132693907633 |                  |                  |                  |
| CYC1    | 1687.06111969368 | 1708.87666406131 | 1809.58702081877 | 2590.80821234237 |
|         | 5226.05969701201 | 1880.35608492553 | 1810.68433539154 | 3215.41238464601 |
|         | 3012.49794349837 | 2225.59207490574 | 2217.82628612929 | 2444.835635949   |
| CYCS    | 379.670492165938 | 338.260976633501 | 486.334840298921 | 363.025385707747 |
|         | 190.506201184419 | 303.005912224195 | 170.007845523415 | 189.450316943845 |
|         | 210.353341004865 | 190.850639994777 | 273.353254857377 | 423.489441909617 |

CYCSL1 970.166036472486 937.375361806971 1120.3009282887  
 933.408902924063 368.134303229682 1144.92109214621 688.915534194306  
 1134.64039256323 945.403379196643 1014.63777151551 1051.98943987926  
 1382.95068105649  
 CYCSP52 136.913957413224 150.566842106244 133.106005881815  
 149.589901372799 133.889858322181 146.075794515889 142.892198239879  
 135.395071593072 142.878258542775 143.175483349968 162.586012723045  
 154.928072022777  
 CYFIP1 230.015981563049 213.468420853218 249.953902454701  
 203.265559787292 383.939800422489 229.805500520256 314.063025950327  
 237.734385188542 330.005950459958 428.462270756201 330.758879244143  
 322.778260588465  
 CYFIP2 644.449861831749 787.425941491281 400.472835504879  
 1578.87371296418 205.871133967588 311.966971734249 360.185005480216  
 316.663128947813 287.703569453502 187.461448376593 241.867699338253  
 294.323621186916  
 CYGB 1072.82323999638 1177.01310527577 431.546135503733 631.819659701092  
 317.309949792707 329.146025181674 230.508733145583 274.736124442229  
 363.706789137022 261.775269058607 231.572677616684 321.367338145787  
 CYHR1 210.353341004865 199.191065549132 224.963277964548 217.607230767028  
 225.065765924246 167.373416675264 191.777253122672 158.359440014674  
 164.043866642712 159.124592503759 190.318957029666 165.932628858503  
 CYLC1 142.452409969639 136.263658288289 130.433405111592 134.239416179248  
 126.931328660501 121.053766591551 133.439077726411 130.083266044947  
 134.361949431678 130.720097323382 147.313494489487 124.17231659571  
 CYLC2 116.328330266803 110.602406076036 118.80458302894 113.773684331489  
 112.114933398547 118.006338536085 119.285026330891 102.166449349339  
 104.739307327595 109.482330324734 114.589757401741 106.437660157036  
 CYLD 195.547320133122 186.708059183893 189.324370290702 173.010799217261  
 136.631948656268 180.610891208146 159.399804351771 161.108249802467  
 171.267907653007 187.167255451988 177.538262133568 167.713268780664  
 CYLN2 396.708183244581 446.948699651916 236.401834189942 421.255522475862  
 272.277433294605 148.192121257421 242.902900881585 179.067275037015  
 169.355185349431 160.592404712197 184.157941055948 159.696443182844  
 CYMP 134.275773172492 141.115539663314 138.701871179502 124.679444852938  
 126.421148348261 130.803561448083 123.168787977805 141.603532965962  
 122.010855318111 129.405749374776 137.128849888863 134.268075583733  
 CYorf14 190.939726271153 167.395369670065 216.381643581705  
 175.847256673734 170.676752248138 138.805103589625 148.388093331273  
 153.104072845043 157.248117633013 156.243337414127 168.753660955229  
 228.284236550547  
 CYorf15A 246.112720011613 221.491633607126 224.588225855066  
 172.741890316331 362.252813848151 128.616121042106 153.308956040034  
 573.509780150018 383.10686624119 140.77762487941 422.688531130043  
 748.38293089716  
 CYorf15B 199.135932984641 164.202554380274 175.686248503777  
 167.961390966538 180.867208892996 141.362627556137 151.619329363527  
 255.793823796456 209.130260450131 155.615655460277 210.761398461329  
 350.741303038926  
 CYP11A1 165.118167086792 167.850516495529 168.261511797218  
 183.619184925353 220.312301059818 177.379186278216 168.173803952157  
 173.21291920566 162.769643886845 167.91761500242 160.786907816025  
 180.994249258457



CYP11B1 121.472885562857 117.436119533535 136.344248873826  
124.180511991605 128.458132030921 121.294366964074 108.939608619532  
131.141668650877 126.100454068838 120.867408760075 122.498794845416  
130.42746492878  
CYP11B2 106.797707723826 118.32560379073 118.60878652724  
117.284724854784 125.00254973945 119.645983822002 119.802832736435  
110.202982683256 118.465111174212 114.01599035448 147.040759979063  
119.297561749232  
CYP17A1 112.534864678892 112.813322240155 116.497714896018  
111.515588041012 121.657744897668 106.102093734748 107.103635692135  
118.9952230535 126.578035793406 115.224011128183 119.502758763438  
111.908965758799  
CYP19A1 127.108510693625 129.493805009651 128.197031700084  
129.835713633923 130.611233072509 124.568534983277 128.17223916536  
130.838350486331 120.711150688559 133.455138380277 133.921012946195  
134.541606996118  
CYP1A1 170.801761175916 188.166168428752 585.933822585718  
135.58042404479 111.253743009588 120.288469716375 116.688949603376  
133.906867716171 109.182623414389 162.769643886845 143.461785113446  
119.281300456243  
CYP1A2 127.271423859953 135.079944196457 123.881658891576  
125.720102558499 133.985582992986 126.899985772157 118.154953746492  
138.57506931811 133.278923716119 119.275061991187 135.343380336913  
125.940081665592  
CYP1B1 641.774812292709 503.967725251906 696.003998372271  
343.666488527549 157.643461899964 143.427721577372 166.910561772689  
185.359195899057 167.07092218037 284.748764120614 148.139376772567  
135.976837152799  
CYP20A1 250.30085097088 213.028568789661 250.085444708918  
202.01798254763 220.010399552402 340.487850009685 183.937484597232  
321.794887577351 208.793650722271 286.541028896473 226.144012966486  
279.598585549004  
CYP21A2 154.634289463743 158.56996905631 139.310309748986  
185.088667707155 132.324630056168 133.249792744053 128.179293878252  
140.719388544476 138.117916412819 142.609678462615 150.021512237553  
143.449303333495  
CYP24A1 112.809629077555 150.590611246086 114.428050500096  
111.276543583667 930.704688414069 130.429076594441 339.172031360524  
125.147444382537 1288.3346537369 127.535214313797 461.413469623811  
121.207040901483  
CYP26A1 136.79732903972 133.805991920905 138.588751758469  
137.402567669086 134.922488718676 132.518394343751 136.251820364823  
132.891375982227 127.442587366678 131.811011266156 143.090886224647  
130.262411213764  
CYP26B1 257.372740535895 248.643311972844 222.764568757453  
296.051639873628 150.841261270382 149.72025962797 163.356993518952  
173.250350363688 178.847858667374 260.715580924916 150.642465826166  
142.914863449833  
CYP26C1 121.508233749444 128.611740835252 118.974727968283  
107.205247133938 132.168821720799 125.976052547953 115.999443701343  
128.005043478952 117.442158626871 120.020781939389 146.518478800271  
125.780294378066  
CYP27A1 696.650617523899 702.981741565482 774.180202250076  
588.334329592604 203.816305810343 199.837938317725 157.742948919213

200.558971047462 443.623904480087 197.526492324088 176.328994356625  
187.336349390012  
CYP27B1 141.73248778957 159.59942312149 169.441789096441  
143.085022888434 203.125568980238 238.654367531982 168.911840239685  
249.680729921602 205.57572471694 256.99019407912 172.741890316331  
179.985468369202  
CYP27C1 190.045156046541 191.507657960386 167.077669654786  
168.116928722035 155.942609847585 159.970332650101 156.487049947247  
145.206796089128 146.31468639383 192.512661648653 269.981476129439  
159.154102271517  
CYP2A13 157.499803444188 151.519845657755 158.092775850886  
143.383697128285 150.677852949794 137.453705355364 145.967685593635  
145.143366567189 139.650726173186 148.31140879454 146.421195733989  
137.773960847088  
CYP2A6 109.91537150286 113.845770994796 109.067239220744  
109.156349683299 103.202873534814 112.404562115306 111.559325333192  
103.09089100768 104.321352818065 119.67745324922 114.696935316053  
115.02681415256  
CYP2A7 126.722212054469 126.242935839683 133.762141373091  
135.325617701062 123.338921824167 128.548201588898 131.181537219479  
135.787323859105 134.78059811237 132.906201428703 127.310437599803  
138.003440266411  
CYP2B6 136.543603346919 131.04482088126 120.706421084476  
129.210356735226 133.307149027384 137.048292841566 128.788443476759  
138.005168756932 133.665206343648 137.792150225149 132.320536722841  
144.421572284568  
CYP2B7P1 119.993313087183 130.005909892804 127.121068682846  
120.599440204711 126.265475477399 115.43068422162 128.730649233876  
106.066897223031 115.858924428037 115.080736217256 117.754181884939  
114.501509669035  
CYP2C18 141.971207380159 150.034029031033 140.754706171596  
137.157492354617 288.542264120468 278.219561902233 193.753062958207  
283.191303666907 512.895335481876 281.926552464214 213.556015518863  
297.022984365795  
CYP2C19 136.324020406359 143.438417529799 143.931400351525  
126.719205774829 143.626857507866 142.318709347082 133.994376985194  
133.384498169568 132.916608405637 137.103879676652 138.880168623766  
137.383211680459  
CYP2C8 131.48517604564 129.32466533596 124.661088039427  
118.553226856337 125.887854850942 132.146027935802 143.552343056702  
151.026905311756 135.894512504725 116.433239116749 235.019573994855  
226.640323471375  
CYP2C9 108.386545220984 97.8058879269165 110.234403581151  
125.963257217901 137.893630842968 117.303671445328 122.095978653755  
140.123348569709 291.779980648289 115.435942397626 182.095387488796  
132.918979842076  
CYP2D6 136.008118769513 142.372470063444 135.330241638301  
139.111604268732 134.299575239865 138.319321806028 133.606068125828  
148.057700860759 134.584076788979 142.788848338402 154.252727576218  
131.829906202014  
CYP2D7P1 151.917359928516 139.293775885106 137.91121726927  
153.02549014611 150.863099494798 150.484823814674 146.349773982488  
151.889644436875 152.032418787633 138.023752854109 162.199381540369  
158.092775850886

CYP2E1 178.676812740925 177.478925091583 211.289598823191  
189.482046688226 255.839878446312 174.338440780636 157.600193849783  
143.488761023636 153.661632990172 137.269267022826 174.313718712035  
155.049051256459  
CYP2F1 130.621860095981 126.643229085068 131.747367613225  
136.300195727908 132.381685434931 128.570067783535 129.687743133943  
123.865424155099 126.492058851464 124.077104101209 115.107214937219  
127.251594986725  
CYP2J2 202.357989894268 313.641656294638 323.462252156562  
199.53455266342 1410.58825009446 861.786094902013 2863.51286169094  
1032.11574332305 2213.1043022626 404.876478833713 2944.63971819193  
1638.72366638732  
CYP2R1 281.881563164961 238.270501389189 234.484787292284  
250.911817769829 184.414609874199 213.26158748941 230.855806094267  
215.635313821029 182.950456188966 250.737252834098 315.828726297864  
152.890239929335  
CYP2S1 125.584202037776 141.278654291193 122.339819585312  
124.00806841872 127.146101490884 119.103219740679 124.528206512938  
133.680691168661 320.467139255533 127.690860707933 151.939710544553  
131.339653356438  
CYP2U1 232.960832410426 214.566711351899 254.101184686036  
215.453915231774 153.528429414138 144.318556353673 213.145460679531  
173.260348096238 178.284294783418 151.604093626944 152.088488171996  
155.622257285651  
CYP2W1 134.053685488055 121.255814891176 121.526724715417  
127.006746526023 121.71538073735 117.335748689217 127.723052839953  
121.747622617011 124.253582884351 116.519527499611 119.894737403889  
118.963119420175  
CYP39A1 155.295464263911 162.728630453745 190.921283434627  
135.810476921749 133.093234861388 141.685620602226 145.180346905484  
173.142436025281 136.301442794928 154.861507590906 137.697452180659  
151.815211341628  
CYP3A4 140.903091584884 134.066948803697 136.353051841792  
130.110413621436 122.821563586744 125.321968563987 139.652974659584  
129.865581506307 131.383113302567 147.420580715112 151.492236411757  
137.697452180659  
CYP3A43 130.316282003711 130.217791888656 126.484819755399  
132.699715693605 133.722739936347 137.408247668043 127.601379088239  
133.52271411034 134.356796881432 127.327765407459 130.656206845965  
127.488853386792  
CYP3A5 278.005620372937 304.811116024094 331.062744782933  
210.605864685448 153.888212689508 207.488522933448 920.083835296898  
803.133619199479 517.42417250172 157.78390301218 3090.52810501797  
2053.71550326011  
CYP3A7 134.819406064011 126.620889938532 135.296271683847  
149.6036366066 135.038195181839 138.391203321266 174.795822188504  
167.976680048356 149.990378213915 134.018379799826 123.418266047461  
132.454025879177  
CYP46A1 165.789846154721 156.102877632001 141.980728956046  
178.476483428474 133.36168342199 140.047749881567 141.306418675404  
148.803188053248 144.665869508406 130.967476533254 142.036037957345  
133.99046926032  
CYP4A11 117.580122770251 124.408996713299 121.334882368464  
111.260486045985 137.324247703318 124.800221241981 125.526744092256

121.316836274255 125.606269267903 112.684334910243 154.947359473187  
122.517559025268  
CYP4A22 117.907840952685 120.465934391246 118.836387680022  
125.013839352291 120.094156375538 120.679474100322 126.830269821364  
122.863612588759 124.079109459437 120.835207882788 132.695992860853  
124.985249190127  
CYP4B1 193.084818760857 218.298791348295 174.483233557264  
151.508738608925 1788.35884039549 1505.90883940934 1381.07447204233  
2053.71550326011 2219.71846304201 192.059255232313 1846.61430264854  
499.776233241535  
CYP4F11 129.265788005518 140.383646018409 133.682715540066  
130.579954890389 308.330044958513 305.906480933354 696.277780670166  
393.198813167839 137.331864485838 145.165443106042 323.788197265954  
152.56002779985  
CYP4F12 440.203336761263 374.337030706199 403.720036930931  
270.231637012624 694.429144766435 1181.97868824758 522.77407098992  
814.110601393539 332.798130757632 147.123477579978 1978.12229412176  
932.076509242794  
CYP4F2 146.257923971069 143.897248922317 163.566535828036  
150.707113487334 172.142411008084 155.243643210534 178.745112514526  
272.770616373687 152.840202260007 155.253032078086 150.606329295069  
160.001115445038  
CYP4F22 149.848740870148 185.583997792931 189.250846546817  
117.662611650515 1803.06322760249 616.995114856023 181.695203523798  
929.198774489695 570.533103778482 207.204293555178 713.087392708048  
767.861763134136  
CYP4F3 154.360558958914 155.651798065702 145.872258115708  
153.415901281564 172.214433016685 283.123157828849 227.774354299962  
232.699786290509 183.115511373872 151.70035428516 208.194788326109  
189.509062639279  
CYP4F8 128.990911924499 139.785767470943 125.589744938813  
119.876835248732 196.908612360694 193.753062958207 437.344765185802  
250.003965480779 185.088667707155 133.452032750397 132.113317893587  
146.97334315047  
CYP4V2 753.007562127186 692.359779743985 690.582550537485  
434.855262284265 201.893722965557 432.969886744613 396.345382600445  
1226.10881264804 481.630922092112 292.839392578318 345.291295192574  
247.971366020963  
CYP4X1 166.558080305926 180.719868519867 139.757191608836  
155.333294650676 150.324132011201 234.020419732787 214.355086255855  
135.521802085177 163.889522525848 130.445920648705 226.595006724068  
194.36669779004  
CYP4Z1 124.883575464443 125.060387518072 120.006982591236  
122.789656787728 123.98775110588 135.913632939299 134.465488237877  
124.982744176925 124.246363878094 124.313901870563 151.669421563954  
127.135199316758  
CYP4Z2P 131.693923403533 138.4303531022 138.030842581932  
132.683594640696 145.741465098455 154.539367933684 150.599425944486  
143.21411610625 139.890519860289 136.028011201077 156.010027635627  
142.097126256137  
CYP51A1 306.43742010208 280.848426993226 220.896363324634  
233.300864925399 329.660368915848 191.029458520006 333.131139447511  
353.285905782951 246.989526028884 519.564563632951 348.921877633633  
333.349203784021

CYP7A1 102.786517901308 108.515401509039 110.347631909888  
 101.981823814699 104.896224175106 109.016991399605 103.888971448792  
 102.024765473404 107.816312357067 113.470356909765 112.858669660245  
 102.255408120852  
 CYP7B1 137.53070284697 141.332402615602 154.691783046492  
 153.293125258215 150.46224324459 137.745887988474 137.79714923769  
 147.829502959865 148.63131331279 149.250205265163 151.115031304764  
 137.358139652612  
 CYP8B1 119.355650892262 127.302714624905 116.061356450855  
 126.176505541577 126.191057198995 118.148476979319 118.677203713024  
 133.027236270978 116.126923911804 127.856634523494 128.232091717966  
 122.258432948151  
 CYR61 2321.41228376157 2311.05587511258 967.797017108447 922.009043194023  
 306.387898121409 1115.34267967366 266.652805624826 346.917113326564  
 231.257543784864 2505.8565544797 168.295044843056 246.552713031445  
 CYS1 124.39748786803 125.846029991447 122.469113037809 122.005340508177  
 120.054065939835 124.190161132628 120.551603446364 120.204469421484  
 126.629012619208 129.415078042622 141.84653748835 122.449574852865  
 CYSLTR1 196.990867962546 215.40037757604 175.055634340766  
 188.708596785144 156.293025312901 203.276353321185 171.345989796519  
 180.599150102184 206.669783013221 160.997179739138 184.813094907887  
 184.387409077972  
 CYSLTR2 136.104965836123 122.243585162452 121.113186311514  
 130.083266044947 126.182856027765 139.201122725213 123.336074100984  
 119.01990099776 119.036965883266 124.222529964098 146.276706674761  
 124.807244018373  
 CYTH1 264.233381434738 275.841929188802 169.661107080542 268.568824794145  
 223.872330412144 280.531844086775 247.683819429859 290.090495047722  
 367.025117016472 347.557792829093 498.965895763801 392.13175568099  
 CYTH2 184.672330560677 257.477501542521 174.635853531194 175.946843919065  
 551.92688162618 792.247301083075 473.057488824363 1706.06615968622  
 1085.92360670051 201.349209185128 544.956712516196 302.113807121396  
 CYTH3 274.120234926832 273.478372861114 227.065194522692 273.514200733343  
 151.043967734248 167.806420483187 153.363629311799 168.095061700814  
 171.791030104358 204.740183832461 171.465178761171 172.297698667311  
 CYTH4 170.590817818414 166.071816427719 164.39557148282 160.20843950503  
 178.455966482206 149.959767051801 153.348110626071 163.066051106092  
 218.997165156081 168.027892518772 157.313737338264 148.906498938982  
 CYTIP 137.927403204849 139.644701550661 127.8514513762 133.465593684519  
 125.717328918165 133.340152756136 122.423561732526 138.116568200293  
 144.664600892248 126.908123260394 131.099004325598 137.744318243173  
 CYTL1 185.997327421952 199.305626149918 152.972779110762 166.746037983859  
 131.568898109933 197.087015414039 129.854478528455 179.369845168822  
 171.006582229921 157.463122989559 141.874188629438 137.644942697483  
 CYTSA 1021.81988990874 1129.15018335354 924.630951485299 1364.1224589383  
 517.020259129974 407.711669482083 364.895113721763 467.512355593598  
 479.638653311025 442.220572301795 435.037306125887 382.562403424855  
 CYTSB 146.550421651378 141.587109176431 135.767818903328 143.759171254761  
 306.716682293251 147.009325721272 139.675292022085 136.935498266723  
 148.212445624699 166.22013573342 148.534143255537 139.782152941027  
 CYYR1 274.092048989484 310.815067427296 174.941551089279 241.453456707114  
 158.414776465951 235.32095278846 147.512290383685 183.482640529727  
 195.618369827396 150.28169442832 181.898985277176 148.450023054885

D21S2056E 114.585818507336 131.736694577111 147.679233228201  
130.874283538818 110.368392735494 129.075693654369 118.75237770613  
123.913203953936 127.026168862919 131.271979461703 142.612035986517  
126.972399784537  
D2HGDH 844.187489702587 811.564396886535 879.809795251142  
923.383014892221 799.423640530777 346.78158577526 1129.76078220457  
549.162299481184 734.139557942719 446.601751145647 753.007562127186  
1272.14273680177  
D4S234E 175.767556472012 204.161375686761 172.750926094884  
142.628296442123 157.990467804353 348.711663415777 426.995700632434  
181.261666651301 197.795275907042 663.782083028745 941.065508539108  
1442.11349373764  
DAAM1 813.772804994191 789.401526545277 532.063437013967 595.409419899436  
330.405026390912 362.581768268116 441.684169663552 338.510045856515  
270.181005097697 771.059329972125 532.063437013967 426.249411635589  
DAAM2 338.822464893411 238.461248099002 297.285037835812 224.027605834751  
158.98007855379 175.767556472012 158.31771109146 156.994265858123  
152.454414703534 189.307823427362 144.746134643761 142.942021904533  
DAB1 118.740346254406 124.505487429568 115.624167024067 113.432757764419  
119.122305582754 116.695313319162 115.211731367278 122.854722097864  
126.428284589412 118.909153405102 129.735862775199 107.450945262092  
DAB2 1304.37930719411 963.343120586863 1023.29995420518 879.301932542031  
534.920870202582 413.000072500071 283.084102918359 1053.65938651514  
1539.80266129509 490.849163737598 483.312894744803 289.297370738382  
DAB2IP 150.279529635193 153.620767586182 132.548259643258  
187.494677180331 158.622993108149 129.508990861362 140.251168248117  
127.996535708833 132.203310946961 127.562924931536 203.370353613423  
132.793020446043  
DACH1 188.093450717857 219.8511043213 143.127795310829 159.374355553219  
152.11956441072 154.564478911791 133.728378162206 143.464614171516  
149.073650082048 131.706721548422 143.816567683093 139.801108744526  
DACH2 148.773558380167 143.05872558805 148.760280320258 178.819486867379  
155.548684011748 140.702685210277 195.863843860549 165.545136704242  
150.188128594079 160.459100056689 165.932628858503 156.671252606074  
DACT1 280.398987330256 233.20900339048 216.033564783918 215.143973502566  
143.703367582367 155.945838519586 143.265532486512 145.493977576106  
152.148784410501 202.849544035436 149.874424976813 144.386968241512  
DACT2 153.088710298368 157.739526559807 129.771073986855 154.33224999163  
126.199219102601 124.93629294955 123.905462079972 128.533900744619  
124.857461801227 120.839256811295 158.89305345139 122.535728427528  
DACT3 3211.2719052157 3338.13980198211 2744.77453865893 5532.93454600454  
182.181756507598 157.709832297666 139.353080958675 146.890877830248  
205.121123131992 194.819597436776 180.430425314885 159.362293777146  
DAD1 2476.51542420593 2069.70335195314 2833.30537635103 1890.86868383409  
2921.59274577877 2105.87438782831 3237.94149351627 4276.70912292877  
3862.57980488881 3822.05744774919 2320.41293992992 3684.05513498098  
DAD1L 127.706499722854 132.62551190584 125.794788766462 128.324383749931  
121.118933682515 129.971670681199 124.924794564647 122.75516501062  
127.799190369808 117.399753685854 119.802832736435 115.858924428037  
DAG1 433.928818077527 499.683188662742 410.954095610904 645.438835606933  
1382.95068105649 618.437282203498 600.635914090365 379.200576951933  
544.222458349696 323.737610506003 439.394914369983 376.276954313674

|        |                  |                  |                  |                  |
|--------|------------------|------------------|------------------|------------------|
| DAGLA  | 152.238845270993 | 159.046016068252 | 181.048789688798 | 167.456481678813 |
|        | 254.991678321253 | 184.148058872585 | 162.342112922504 | 160.799950553311 |
|        | 150.324132011201 | 149.556644928013 | 145.270140096768 | 193.134414137433 |
| DAGLB  | 304.844121431627 | 327.164773632634 | 318.73799597811  | 367.289651112346 |
|        | 539.125423322738 | 436.834825721843 | 442.12886967939  | 444.945078908489 |
|        | 575.546802138889 | 509.880640462    | 375.651196211048 | 512.467731561858 |
| DAK    | 134.768694020981 | 158.753832849946 | 142.365009028839 | 139.350622585937 |
|        | 518.478990211753 | 202.162432624505 | 225.64288602828  | 171.775741648309 |
|        | 187.425086057782 | 140.45860949168  | 182.608712782878 | 197.191648960563 |
| DALRD3 | 142.42442972908  | 146.64560446484  | 147.396463611334 |                  |
|        | 145.237221169839 | 151.889644436875 | 144.368355737187 | 157.189041157784 |
|        | 146.155809402461 | 145.599152743156 | 180.192015483309 | 148.723165059122 |
|        | 160.822287037366 |                  |                  |                  |
| DAND5  | 116.95195122318  | 118.319950396126 | 112.635430248416 | 116.793408204625 |
|        | 119.355650892262 | 113.326628149066 | 116.736174147084 | 125.951927536494 |
|        | 114.927420605185 | 109.274221164316 | 126.862274244977 | 113.311132067152 |
| DAO    | 141.115539663314 | 156.65842876856  | 149.231475480618 | 145.917220112846 |
|        | 146.362705590778 | 143.275056599274 | 130.069789939568 | 150.184863108453 |
|        | 147.75625228531  | 153.345834660643 | 160.478519202775 | 123.551225884748 |
| DAOA   | 113.274668934773 | 128.695695565175 | 112.809629077555 | 116.328330266803 |
|        | 131.062360037777 | 114.726808450831 | 125.609542142983 | 120.394220715157 |
|        | 113.043089777907 | 112.142263331903 | 130.842257229979 | 117.770032157393 |
| DAP    | 354.45785837703  | 379.615659443164 | 294.697622870418 | 376.627801547869 |
|        | 722.974310297586 | 608.129959758538 | 636.970243888917 | 682.075583857856 |
|        | 654.663838918786 | 257.477501542521 | 1092.33328323944 | 441.435444003241 |
| DAP3   | 640.568342662067 | 717.686676823785 | 891.194779815063 | 656.009451448101 |
|        | 929.198774489695 | 1111.47772523331 | 910.087388930485 | 1497.32522786098 |
|        | 776.030689773414 | 856.74270641707  | 467.04976953755  | 1622.17491781572 |
| DAPK1  | 263.204269632206 | 255.56301534833  | 342.998459706966 | 255.677315946354 |
|        | 520.962651968997 | 429.351447428661 | 451.985108262982 | 616.014975366684 |
|        | 561.062594540005 | 226.25694727283  | 642.934824227327 | 329.779210536849 |
| DAPK2  | 180.035652063942 | 153.393651104539 | 152.071081175788 | 161.335677383485 |
|        | 145.777778096701 | 141.901382169334 | 147.52403424052  | 144.883597913037 |
|        | 147.635761512135 | 154.869171648942 | 152.042744996136 | 153.643157329902 |
| DAPK3  | 466.691191261997 | 397.387054218873 | 265.712482648121 | 533.279122416818 |
|        | 316.364342983155 | 196.053808536366 | 225.362253409428 | 178.872635061826 |
|        | 166.622070620588 | 186.640167849568 | 193.134414137433 | 156.920867019849 |
| DAPL1  | 128.137646789236 | 140.232244264861 | 130.642810886161 | 111.935554828717 |
|        | 109.471542280224 | 114.512028664352 | 113.862790983655 | 114.559189149447 |
|        | 114.200099628087 | 107.385565665491 | 114.624259793353 | 158.882535865069 |
| DAPP1  | 8840.92490099301 | 8261.82420896892 | 7786.96143641382 | 8211.38792799248 |
|        | 1859.88000417483 | 8121.54750071211 | 4527.53010866974 | 6156.29203791697 |
|        | 5572.23400804004 | 4280.66857663502 | 6585.34962362923 | 5734.76405709934 |
| DARC   | 822.545007054668 | 1408.08614963928 | 451.718912714608 | 1161.39230511792 |
|        | 125.443242860371 | 228.184535093641 | 132.113317893587 | 404.21236980164  |
|        | 817.913210743023 | 114.234369421536 | 210.529782898493 | 121.505178996279 |
| DARS   | 4486.35687688252 | 5106.27623905309 | 5080.63091497522 | 4938.42484385053 |
|        | 2101.93705983383 | 4068.18567686753 | 3371.24667467952 | 2385.5958396359  |
|        | 3042.88425356552 | 3712.67025366957 | 3298.73393277409 | 3855.33040541264 |
| DARS2  | 146.418147447541 | 174.471304281502 | 130.226993687215 | 166.12695134858  |
|        | 439.122658719747 | 321.25076864104  | 258.384059994446 | 316.004332524937 |
|        | 242.096692715029 | 225.927425596831 | 276.830814061474 | 336.002793042439 |

|        |                  |                  |                  |                  |
|--------|------------------|------------------|------------------|------------------|
| DAXX   | 230.672056810885 | 258.552964322998 | 189.589053840976 | 275.169415154893 |
|        | 362.849380477089 | 211.660148497276 | 210.529782898493 | 185.31769184805  |
|        | 183.081450609516 | 205.381840116054 | 204.710203150526 | 204.914390718161 |
| DAZ1   | 113.05681175258  | 122.160459795959 | 109.384112020063 | 118.076139318165 |
|        | 127.430408113725 | 106.000943456483 | 110.586147059226 | 112.565341690522 |
|        | 111.10737497653  | 117.580122770251 | 114.68345964966  | 113.422559344178 |
| DAZ2   | 137.94246602811  | 143.093156971372 | 142.900756181761 | 146.70774472499  |
|        | 142.749568012703 | 143.07651558428  | 142.711117470317 | 144.940119680152 |
|        | 147.04481509758  | 143.20823844185  | 139.383528389668 | 143.759171254761 |
| DAZ3   | 162.122250419992 | 152.401204710292 | 146.470444212748 | 155.960886801091 |
|        | 140.496058408953 | 140.954264409241 | 150.769819282075 | 152.650867743471 |
|        | 140.722297244564 | 153.681775929182 | 144.201723591119 | 155.326276840738 |
| DAZ4   | 149.31020447459  | 148.216605879958 | 147.230113868203 | 148.012353232918 |
|        | 153.633095853017 | 149.760883745928 | 153.118492567137 | 149.786445079456 |
|        | 168.365262340217 | 148.715065348779 | 142.819669471009 | 148.304863957659 |
| DAZAP1 | 359.991823789356 | 367.289651112346 | 338.026161865853 |                  |
|        | 401.267425721838 | 652.654673756838 | 413.084646927035 | 461.088572554864 |
|        | 374.106258053201 | 432.92947962962  | 399.620724969771 | 413.687046868111 |
|        | 460.742037437298 |                  |                  |                  |
| DAZAP2 | 3000.46298223166 | 2915.72823797537 | 3615.76740804718 |                  |
|        | 1978.95750795951 | 2751.75479578587 | 3384.19521857242 | 5314.0635307876  |
|        | 6409.23524786095 | 7342.79622458743 | 4159.96851384358 | 5789.71932579854 |
|        | 4425.66777919789 |                  |                  |                  |
| DAZL   | 129.425699141995 | 137.976533193418 | 141.25089277145  | 137.412952822912 |
|        | 132.675172817752 | 137.618447592489 | 140.603933807629 | 135.907702243922 |
|        | 148.1283706199   | 131.097598299707 | 127.416912237613 | 142.236565028336 |
| DBC1   | 143.692305478191 | 133.561188057423 | 130.233769058693 | 138.677282903963 |
|        | 135.928428484011 | 135.675570204709 | 142.719216118914 | 126.88329158544  |
|        | 131.111930163369 | 149.211214631561 | 229.284931844047 | 149.113794439994 |
| DBF4   | 155.43577761798  | 164.981665344298 | 152.346098251128 | 151.09670688533  |
|        | 160.368226341458 | 158.87755965229  | 145.938780249776 | 157.976810829398 |
|        | 151.518116154483 | 160.557818466874 | 146.503431281242 | 163.788418732315 |
| DBF4B  | 116.126923911804 | 117.517649866653 | 121.024572716324 | 122.607404698857 |
|        | 122.013040475143 | 114.638254225216 | 115.755585907264 | 122.063996556575 |
|        | 121.194138394375 | 118.366859032979 | 139.168307371516 | 116.029201658798 |
| DBH    | 132.118118271944 | 133.252140649104 | 126.662329971897 | 118.176124626025 |
|        | 121.792573534134 | 114.191245210321 | 131.601823550269 | 116.126923911804 |
|        | 121.103620738719 | 118.342067845126 | 131.582231577364 | 111.975027473284 |
| DBI    | 1147.33034082693 | 1360.85309203233 | 1082.75419087929 | 1029.09818399518 |
|        | 4457.64479507833 | 6006.01682776552 | 3869.12225821096 | 5894.79176478976 |
|        | 3883.05620256963 | 3552.78712528922 | 2116.39371296122 | 3983.37592132018 |
| DBN1   | 731.284098301795 | 673.502723625773 | 571.136519973808 | 917.188039935737 |
|        | 190.270819689158 | 185.186497037695 | 147.208176455806 | 165.752558888845 |
|        | 173.919504730673 | 326.908959531021 | 170.844002412425 | 242.752995772995 |
| DBNDD1 | 198.244854812728 | 182.827395663312 | 224.547982731402 |                  |
|        | 204.237952297239 | 725.065727257421 | 378.24336892367  | 296.24781576525  |
|        | 348.457808063307 | 419.763812610671 | 737.42784787426  | 273.152907354565 |
|        | 417.103816140912 |                  |                  |                  |
| DBNDD2 | 2915.72823797537 | 3173.14004739767 | 3232.96611074938 |                  |
|        | 5049.57929757135 | 398.971838949075 | 424.495400604335 | 292.640251411131 |
|        | 366.473258467746 | 543.170902795966 | 516.177596584059 | 724.103864917969 |
|        | 1153.5175534971  |                  |                  |                  |



|          |                   |                  |                  |                  |
|----------|-------------------|------------------|------------------|------------------|
| DBNL     | 871.913035811066  | 996.240188311002 | 803.133619199479 | 1545.71251527145 |
|          | 1366.06309834426  | 426.132037075477 | 960.491731797061 | 759.058176862524 |
|          | 761.726829618132  | 991.611982265221 | 859.547169028149 | 1584.81089248914 |
| DBP      | 171.504939477949  | 289.001004912528 | 243.807038920733 | 402.425130776131 |
|          | 286.194197552489  | 180.132104305583 | 210.692705153337 | 162.056622258216 |
|          | 157.792868983503  | 282.076744753348 | 172.84784588171  | 152.837739128546 |
| DBR1     | 195.831574717135  | 196.470718183575 | 189.872997882033 | 186.296882059398 |
|          | 219.129781831192  | 209.840035045167 | 210.711890471222 | 256.174286655796 |
|          | 225.702629835215  | 208.270622752385 | 211.438615793742 | 217.287912825619 |
| DBT      | 602.86705608228   | 607.126514742951 | 789.752781067888 | 584.433155497378 |
|          | 237.754067231793  | 801.702878226247 | 595.270107963842 | 839.324324662619 |
|          | 558.051041108282  | 495.438672949441 | 531.555532787504 | 396.212732639272 |
| DBX1     | 119.168045349254  | 118.527464364564 | 118.486195373059 | 118.161192318422 |
|          | 122.093290585838  | 108.386545220984 | 116.609122768341 | 123.081299769162 |
|          | 111.232274546928  | 115.305518560239 | 130.317604643904 | 113.913337223716 |
| DBX2     | 139.021552573529  | 133.070896773384 | 137.955289723046 | 138.42029331811  |
|          | 122.736882859231  | 134.703474191011 | 127.070677267233 | 125.195549796301 |
|          | 130.410584413031  | 125.683334853039 | 128.967855397644 | 118.32560379073  |
| DC36     | 143.094799968981  | 129.775280076365 | 143.368327095618 | 137.984988819967 |
|          | 133.816601264067  | 172.214433016685 | 153.408890091225 | 153.187148832063 |
|          | 170.283532007581  | 153.217287503221 | 181.622689471026 | 181.183277133224 |
| DCAF10   | 353.774297577869  | 313.18989508207  | 337.585502787016 |                  |
|          | 366.857139377277  | 206.813941353924 | 211.035617136177 | 220.458449424062 |
|          | 193.98814423456   | 269.892633574243 | 267.372241661758 | 228.560346647306 |
|          | 184.482849019679  |                  |                  |                  |
| DCAF12L2 | 105.284300851422  | 109.067239220744 | 118.312891459156 |                  |
|          | 112.776764215618  | 120.984641102879 | 118.298444816712 | 115.457121859064 |
|          | 115.507474401239  | 126.370252616961 | 119.873844587252 | 142.469353808346 |
|          | 117.445284668654  |                  |                  |                  |
| DCAF15   | 192.418895349837  | 195.513703253634 | 194.312315077985 |                  |
|          | 248.887522059485  | 323.737610506003 | 232.590542016298 | 181.607253339427 |
|          | 216.277178481058  | 186.679199600379 | 208.793650722271 | 179.177884962513 |
|          | 215.335795337978  |                  |                  |                  |
| DCAF16   | 246.912159676595  | 200.322334039458 | 335.389274425025 |                  |
|          | 162.254062646631  | 164.661445411833 | 207.023221559302 | 197.827534617557 |
|          | 178.3652866131    | 243.732074437237 | 199.837938317725 | 183.385868234361 |
|          | 195.218005582618  |                  |                  |                  |
| DCAF4L1  | 137.033870931133  | 147.826950636822 | 135.837733533444 |                  |
|          | 134.955823960889  | 143.141852982371 | 137.853137973756 | 146.129805607031 |
|          | 149.100294463597  | 139.914034708144 | 132.686915065196 | 158.260676113325 |
|          | 124.3501719829    |                  |                  |                  |
| DCAF6    | 639.184296110069  | 526.285114043212 | 693.180345649331 | 528.767644181119 |
|          | 593.990687449346  | 418.968095159939 | 487.993796425035 | 572.753294955207 |
|          | 344.298510200653  | 519.672796004691 | 581.828502821435 | 370.555627307623 |
| DCAF7    | 897.51782613323   | 844.778755052304 | 715.43295523922  | 920.083835296898 |
|          | 682.538709448692  | 1085.92360670051 | 1179.42590997099 | 1191.88706134921 |
|          | 1436.577717111084 | 603.569635276204 | 1175.27165286568 | 1538.78070281348 |
| DCAF8L1  | 122.389557272277  | 111.708970469189 | 116.604371744082 |                  |
|          | 119.598216955485  | 108.021898335735 | 121.760488406107 | 126.013957128603 |
|          | 123.538037290702  | 114.14858855653  | 111.196610704726 | 110.355493122568 |
|          | 117.692662275393  |                  |                  |                  |
| DCAKD    | 1144.92109214621  | 1222.014210447   | 1251.56853099362 | 1534.21175984308 |
|          | 1565.64079526732  | 825.781627776577 | 802.017244099902 | 1139.14730341921 |
|          | 1010.23703166498  | 356.413190087706 | 805.600599570258 | 782.139151423572 |

DCAMKL3 136.742206779136 133.346626315812 130.588481497083  
132.428675012593 136.411722212312 129.553282780541 127.859873416515  
117.386273592501 138.376176600064 135.58042404479 133.610143526954  
132.885515958081  
DCBLD1 203.675655444583 223.666832044186 140.447933562667  
156.375876454394 198.311821616128 184.505279093688 245.269004485826  
168.384397488011 174.702891494074 361.768552564027 195.256498208339  
247.942904862478  
DCBLD2 937.375361806971 909.020708316287 806.88003660673  
937.375361806971 372.594990024312 662.213423011533 263.568160216149  
175.593421867771 398.512947526406 608.351527783086 164.905467905433  
186.156006020985  
DCC 119.810421687953 111.086170834553 111.1002996982 119.01990099776  
122.115925891088 124.507958339495 111.286141277084 106.982655360194  
119.11586630281 119.709032462308 129.515390475589 118.372047967248  
DCD 139.954480845683 169.590101694098 154.250656489421 162.422173095045  
141.418737063013 160.331940529151 152.516485296644 151.676232556697  
138.584190903303 144.562038493733 138.709991561675 298.165097953983  
DCDC1 162.289781945582 144.393688888553 139.963969716386 150.49183794045  
147.60284257326 156.62031503525 140.29803170157 171.262412981612  
142.379120254855 127.898533598679 119.097521397712 136.013989349192  
DCDC2 137.844113743956 140.77762487941 142.179197020805 143.59105195427  
139.297276687352 152.709021529522 144.934103671894 157.733042033549  
146.413845130977 137.734887788912 125.410876867635 159.102070980047  
DCDC2B 144.079935036119 131.294930860752 168.982086590306  
140.142884879106 120.031976318697 131.903632821793 145.193296081527  
141.292421722594 156.126009063311 168.10131060526 123.100949494673  
147.640100078933  
DCDC5 145.00699763203 135.041687549769 126.326609619996 143.215828010442  
142.007066214472 133.357385559881 132.224831869802 143.258488502799  
140.443415669628 136.299079457533 136.05434446747 133.074027423549  
DCHS1 290.867822301134 408.263886786123 215.950811436427 634.906566690042  
152.933230159216 130.698850298016 123.646558103253 129.52578899011  
151.921235758457 141.666394024363 143.407371444437 123.940632366675  
DCHS2 125.426018910517 125.810756286648 149.196539425588 132.823333905679  
132.555211779043 134.178733595096 126.895669261503 138.506569544482  
127.488853386792 135.281686411685 133.213697351807 147.745780820004  
DCI 379.911829623463 557.868300839263 557.868300839263 693.180345649331  
523.216537391852 512.895335481876 386.067573158514 848.620986404914  
491.35949123223 460.514672966125 677.023591987179 416.638529499878  
DCK 162.975988989106 149.714982846365 194.637233028442 158.87755965229  
317.719381113816 279.834616502591 232.621526025603 264.456926651554  
277.817786943873 267.069665000047 180.142758394321 234.094722315007  
DCLK1 246.186104432792 222.243523614518 251.546290552828 282.561381978659  
178.06221214103 169.674931517111 165.257737836487 161.525131363333  
180.070209705044 311.481739745423 154.548286860883 160.066390229416  
DCLK2 227.418630852215 198.681190016247 177.306794546105 242.614881095485  
117.251233255966 125.220416203903 116.355027746922 121.031695489398  
141.37694311902 109.495342943278 125.256339476772 115.914842445934  
DCLK3 118.743966166637 124.76274408368 142.324077852852 121.657744897668  
124.048926099805 130.661695937728 149.532459719175 139.691470247318  
142.090009728666 146.256076936456 139.650726173186 148.87690497281  
DCLRE1A 174.406779990708 178.186273279101 179.810507975486  
194.529045934216 184.398672994943 163.106823691633 188.431244390961

|         |                  |                  |                  |                  |
|---------|------------------|------------------|------------------|------------------|
|         | 205.260673843294 | 204.544266331066 | 159.334165651951 | 218.70412656621  |
|         | 200.964306455257 |                  |                  |                  |
| DCLRE1B | 125.433502200592 | 128.082956839709 | 117.965208293925 |                  |
|         | 122.347696497767 | 142.772680460689 | 158.58863949084  | 109.182623414389 |
|         | 126.784243009941 | 128.886008923268 | 138.093181144173 | 140.24988931401  |
|         | 147.187681416171 |                  |                  |                  |
| DCLRE1C | 618.140160251927 | 591.189034068137 | 538.647888236878 |                  |
|         | 592.613689704907 | 238.037110997575 | 682.730262408017 | 385.050282185255 |
|         | 465.41233536979  | 348.457808063307 | 305.499194075747 | 510.285766295993 |
|         | 328.14373061894  |                  |                  |                  |
| DCN     | 10862.3952192141 | 7969.0710242842  | 11112.4298269818 | 7433.03226979876 |
|         | 281.071129128589 | 1974.49672149862 | 445.089930641391 | 1207.11788506001 |
|         | 2392.93562797606 | 3671.86460903374 | 334.709049890042 | 391.400480065    |
| DCP1A   | 381.484062427466 | 373.361263985383 | 352.811351813364 | 367.130155304037 |
|         | 247.971366020963 | 345.897250519387 | 240.439368352772 | 202.887417145119 |
|         | 302.905840432998 | 234.399431238026 | 266.681711962236 | 265.791342287571 |
| DCP1B   | 231.600532144945 | 232.699786290509 | 245.582279957584 | 222.315451077459 |
|         | 183.937484597232 | 166.780319723055 | 195.816317534388 | 190.787437782456 |
|         | 204.842791081358 | 155.069048442532 | 151.219051767056 | 209.7558663154   |
| DCP2    | 496.697565640162 | 512.895335481876 | 415.642099109855 | 408.758021864761 |
|         | 376.443086293235 | 485.026081242201 | 563.011988279542 | 551.823767223086 |
|         | 551.92688162618  | 484.230510636533 | 645.183207984114 | 511.891269255193 |
| DCPS    | 221.664431984861 | 212.545989139388 | 200.146843808423 | 286.945784387294 |
|         | 536.253405705975 | 262.389583658305 | 264.685862877779 | 276.653753970476 |
|         | 211.809434609469 | 201.167206950576 | 259.511314588868 | 260.195256836955 |
| DCST1   | 155.6299578128   | 139.904952662852 | 148.396148091332 | 151.823845684041 |
|         | 153.132559737356 | 150.696963699371 | 147.83240038699  | 167.011846920792 |
|         | 143.127795310829 | 151.273261581765 | 159.113259830623 | 153.018378403144 |
| DCST2   | 127.866992108488 | 123.488418655586 | 119.920097823022 | 127.869038038293 |
|         | 109.988237089025 | 119.415822905251 | 118.601228886344 | 138.149037534929 |
|         | 133.082433951922 | 123.822571859503 | 129.932576311158 | 123.893768254549 |
| DCT     | 136.489566741917 | 144.166567293421 | 138.050999864689 | 125.353389826276 |
|         | 117.335748689217 | 122.115925891088 | 125.940081665592 | 131.748753064488 |
|         | 128.381433897602 | 123.845504986626 | 148.592330216136 | 108.970432124412 |
| DCTD    | 525.287367366192 | 534.745066397679 | 499.683188662742 | 551.823767223086 |
|         | 584.919615953457 | 642.255110250493 | 654.881990232975 | 517.020259129974 |
|         | 891.194779815063 | 665.341859712345 | 910.541650889451 | 723.250763797522 |
| DCTN1   | 698.086166782221 | 762.182213353032 | 702.460234202652 | 968.157701932137 |
|         | 623.409211766224 | 480.22496056277  | 319.090371885653 | 305.669636871734 |
|         | 322.213266293148 | 603.338538383128 | 439.023181761356 | 293.692083555844 |
| DCTN2   | 2515.7035557541  | 2648.41012401723 | 2532.82545752082 | 2801.66917828364 |
|         | 2246.89876694944 | 2198.4268389426  | 2217.82628612929 | 2111.32236867229 |
|         | 2063.42824094932 | 2728.04758874748 | 1996.65760745757 | 2036.43904731226 |
| DCTN3   | 554.800688991977 | 554.652979820908 | 654.108318810728 | 683.655205499779 |
|         | 556.725550806207 | 622.348802511009 | 396.126485121994 | 376.962937292973 |
|         | 448.644778906048 | 702.265884752474 | 343.946831770916 | 392.06522028189  |
| DCTN4   | 593.090436323333 | 595.752426322468 | 474.14051635531  | 499.964000319181 |
|         | 276.79778275734  | 342.147414141627 | 429.096075419528 | 409.691865300362 |
|         | 309.658122422202 | 578.650614747598 | 571.950858678221 | 432.174413144791 |
| DCTN5   | 833.430847243676 | 819.488546995594 | 858.742139354587 | 947.425912541091 |
|         | 578.811908030805 | 855.415038498392 | 731.284098301795 | 580.347496467173 |
|         | 686.198351821711 | 615.88518704181  | 694.429144766435 | 586.246004571452 |

|         |                  |                  |                  |                  |
|---------|------------------|------------------|------------------|------------------|
| DCTN6   | 380.562212796792 | 364.597798667541 | 473.529519031797 | 356.530530468568 |
|         | 223.253794809571 | 333.533043832976 | 421.303580698397 | 275.609716327452 |
|         | 392.282956362735 | 554.511983790164 | 543.810043433181 | 558.810095726517 |
| DCTPP1  | 505.560841055884 | 628.939201051801 | 569.353661326724 |                  |
|         | 681.591028334969 | 3093.38255333143 | 3789.1316515671  | 1586.00600118477 |
|         | 2382.87910783088 | 1629.32740709526 | 1048.85768964657 | 1547.16936835284 |
|         | 1780.97169244555 |                  |                  |                  |
| DCUN1D1 | 175.537039794925 | 168.729301938015 | 218.559622620349 |                  |
|         | 165.972090075204 | 180.798671424395 | 228.9901869793   | 179.841665686703 |
|         | 213.652091843896 | 195.561296046507 | 198.088834624665 | 166.521472376759 |
|         | 205.4648759901   |                  |                  |                  |
| DCUN1D2 | 151.228823957828 | 144.757068610657 | 159.005459875338 |                  |
|         | 139.038389244329 | 133.737573120711 | 167.830629616121 | 151.277511331109 |
|         | 146.361128670362 | 145.324499089416 | 147.174977926293 | 148.574661934068 |
|         | 154.030432279825 |                  |                  |                  |
| DCUN1D3 | 643.905401805862 | 390.501797367707 | 332.032371697186 |                  |
|         | 360.124745133393 | 262.53374754047  | 316.457274749526 | 286.376638135463 |
|         | 324.25775261173  | 276.830814061474 | 468.569725051459 | 300.83667045718  |
|         | 269.673122990604 |                  |                  |                  |
| DCUN1D4 | 827.400420888645 | 746.777330152729 | 774.442392607873 |                  |
|         | 798.943242964857 | 252.056131165397 | 284.675990197899 | 339.32415558339  |
|         | 301.051775938853 | 261.39435936661  | 348.575690346536 | 314.126706052299 |
|         | 255.12306184224  |                  |                  |                  |
| DCUN1D5 | 292.746711619565 | 250.060734219351 | 285.63245179313  |                  |
|         | 250.085444708918 | 565.059609779245 | 381.014521577291 | 572.407760064901 |
|         | 541.351092873522 | 542.379137999196 | 811.362219801362 | 406.224345292389 |
|         | 623.409211766224 |                  |                  |                  |
| DCX     | 124.646093292382 | 133.389930962407 | 124.222529964098 | 129.231455282441 |
|         | 137.85150144918  | 127.419227292862 | 127.83967243279  | 123.554769032715 |
|         | 135.489000274316 | 132.554328715753 | 132.624674205566 | 138.030842581932 |
| DCXR    | 373.189809737885 | 427.390091157726 | 509.880640462    | 356.05426191171  |
|         | 1169.43742964112 | 750.10819423982  | 1032.4540300024  | 1278.30505902957 |
|         | 933.723483173584 | 641.774812292709 | 712.433345978749 | 1092.74905085695 |
| DDA1    | 786.62709337246  | 896.185223980593 | 721.603421985572 | 1114.85422895959 |
|         | 1994.00516809361 | 1645.05161227372 | 1505.09908072606 | 1456.76683429755 |
|         | 1167.26555140613 | 928.151632070573 | 1158.88528996131 | 1514.53784631689 |
| DDAH1   | 617.833194119379 | 601.800326895295 | 732.630306104841 | 605.583144451322 |
|         | 577.98969050409  | 688.684644604218 | 405.570281788901 | 887.471553448641 |
|         | 647.273409499313 | 184.414609874199 | 314.949772661046 | 342.878522959461 |
| DDAH2   | 650.494111214312 | 625.932910814208 | 426.769986378276 | 712.067161025165 |
|         | 253.65959805538  | 188.36361073603  | 228.058870735016 | 183.181125586276 |
|         | 230.10433160008  | 287.455622143233 | 177.065616871886 | 143.31117188259  |
| DDB1    | 1017.6969123529  | 1069.93503700632 | 1097.60805874165 | 1015.10079945997 |
|         | 1873.84654908146 | 1712.47877322331 | 1503.2049371911  | 1080.42884514937 |
|         | 949.260897408911 | 1092.33328323944 | 1278.30505902957 | 1214.16777512885 |
| DDB2    | 213.240181616274 | 193.522811257085 | 179.100368312505 | 175.647878042257 |
|         | 142.739686751422 | 143.533725135227 | 187.824032557194 | 166.77329045424  |
|         | 186.886677174192 | 146.04584032214  | 253.30325545013  | 202.421990203844 |
| DDC     | 96.8261937365062 | 112.867662941811 | 107.187035835972 | 107.884870799936 |
|         | 109.770126492743 | 103.09089100768  | 106.36673326724  | 107.344825308293 |
|         | 109.333276735523 | 103.09089100768  | 126.698158279472 | 111.497241941203 |
| DDEF2   | 460.807117177285 | 441.331937921872 | 344.604699562938 | 400.924914238052 |
|         | 549.460612060753 | 551.206833852215 | 332.978350226738 | 466.4890990178   |
|         | 381.625983354158 | 444.945078908489 | 542.379137999196 | 463.622673539254 |

|        |                  |                  |                  |                  |
|--------|------------------|------------------|------------------|------------------|
| DDHD1  | 137.037299675471 | 157.821491577808 | 142.726324048628 | 146.940545711162 |
|        | 144.801071221985 | 146.460464282676 | 160.374491283254 | 152.291176493005 |
|        | 151.81251450855  | 136.284283129801 | 150.601874392926 | 143.727514442914 |
| DDHD2  | 245.675725760577 | 240.94056877904  | 308.679189788554 | 244.401472859026 |
|        | 674.101599637653 | 600.264940641426 | 359.935451429371 | 326.246702537465 |
|        | 246.912159676595 | 342.555640222963 | 233.394506254045 | 250.342080183479 |
| DDI1   | 118.000757530896 | 130.74794199972  | 132.825240485239 | 135.676854553162 |
|        | 138.023752854109 | 123.766373146588 | 140.53597287752  | 120.09801164252  |
|        | 138.3792224631   | 122.431337063053 | 140.05012958679  | 141.81391138301  |
| DDI2   | 127.354826381656 | 132.70888569469  | 128.367370419533 | 128.812729239283 |
|        | 128.568463697992 | 123.431969470387 | 124.958287100852 | 133.301527400458 |
|        | 121.668166378914 | 134.897958140444 | 132.074571281938 | 134.61114877396  |
| DDIT3  | 466.141717595301 | 372.374101464689 | 399.762451559805 | 294.535979194434 |
|        | 181.607253339427 | 158.272071464923 | 456.817057099146 | 264.158648784101 |
|        | 252.851164967726 | 452.732079010502 | 190.371287639453 | 206.303338709554 |
| DDIT4  | 1051.98943987926 | 2363.50330960038 | 939.213447046823 | 582.382786876656 |
|        | 1321.17236442448 | 581.54874141672  | 2947.51998516453 | 1951.69651954627 |
|        | 1285.02292965374 | 4651.384971332   | 3447.19587767281 | 4743.19967685595 |
| DDIT4L | 245.317436234586 | 320.525885538523 | 289.517820913799 |                  |
|        | 393.264726588522 | 156.307551403822 | 136.569250038372 | 159.26101905957  |
|        | 252.514569129392 | 178.551434222154 | 173.726420791056 | 181.508873226705 |
|        | 166.315369318355 |                  |                  |                  |
| DDN    | 144.708780756278 | 140.03443832328  | 143.980608339892 | 136.858037332222 |
|        | 147.483379646393 | 155.917655560227 | 143.290642777702 | 140.655002540298 |
|        | 141.500790455788 | 136.978738825445 | 140.145470073979 | 147.925744210234 |
| DDO    | 151.094682146074 | 157.481645415121 | 158.053654524927 | 158.863516051439 |
|        | 149.369418844044 | 151.461857714097 | 157.028963417138 | 144.191491000257 |
|        | 160.6823824476   | 145.517559593811 | 132.057808599068 | 154.918405633244 |
| DDOST  | 1512.28202818467 | 1609.54149931375 | 1291.12004949379 | 1570.39362935859 |
|        | 4491.96934862425 | 4175.70090899755 | 4103.06565237121 | 3391.3005983725  |
|        | 2962.11407134162 | 1912.2369374258  | 2615.07927836881 | 3618.9385126441  |
| DDR1   | 187.871017629994 | 236.219981978324 | 220.258804437828 | 206.413554839865 |
|        | 790.561585641193 | 435.48544637769  | 747.322544683874 | 338.260976633501 |
|        | 428.66614441422  | 383.033242143031 | 593.090436323333 | 523.216537391852 |
| DDR2   | 696.131296166255 | 568.310800941091 | 400.060972573122 | 528.650794915616 |
|        | 142.508525378171 | 154.183537565624 | 145.628239642187 | 147.485960802692 |
|        | 161.788118050564 | 162.595632367022 | 149.25705328406  | 144.964084792568 |
| DDRGK1 | 322.36247485445  | 355.990908506973 | 441.873247266342 |                  |
|        | 317.719381113816 | 1528.49457104932 | 476.782624160552 | 623.888568444132 |
|        | 612.374364731095 | 542.544172683021 | 647.439372562271 | 776.98412594767  |
|        | 603.764427348016 |                  |                  |                  |
| DDT    | 1980.4589291261  | 2271.82656399253 | 2681.48138915107 | 2372.26073354008 |
|        | 5361.3600315322  | 4592.14655702906 | 3403.37530051435 | 3592.7878705048  |
|        | 2542.44286642873 | 3570.21370790206 | 3700.75770419386 | 3765.25491426198 |
| DDTL   | 148.466658640201 | 161.496700767073 | 142.199182392836 | 160.773510498005 |
|        | 160.042251279235 | 146.550421651378 | 152.064982697394 | 161.965270932582 |
|        | 124.533543270311 | 148.868265867275 | 168.52952604693  | 164.032302455558 |
| DDX1   | 1785.92695250894 | 1783.8031212092  | 2403.42261883515 | 1750.21700780511 |
|        | 2296.30423509176 | 2618.64973582507 | 1392.89422203207 | 1929.52146517699 |
|        | 1611.58245311122 | 2127.22258112242 | 1349.84215478798 | 1806.24732793591 |
| DDX10  | 444.945078908489 | 447.059120541009 | 459.652708187549 | 439.928008927647 |
|        | 449.859227376918 | 345.209128382239 | 335.059844742031 | 488.57622466019  |
|        | 403.984761333129 | 281.49247863022  | 405.130899553871 | 442.493108530222 |

|              |                  |                  |                  |                  |
|--------------|------------------|------------------|------------------|------------------|
| DDX11        | 137.212568398657 | 140.010730572075 | 145.651301499721 | 136.459509901229 |
|              | 185.374745525698 | 142.866874321248 | 148.391885541349 | 168.958694643382 |
|              | 160.742365719929 | 150.639235242268 | 157.81831741292  | 162.629257046871 |
| DDX12        | 147.607202745865 | 145.128919984856 | 144.059368898969 | 156.146154578237 |
|              | 152.173055053184 | 158.23884088767  | 148.468389477892 | 158.738932073809 |
|              | 151.316421810192 | 147.385714746214 | 144.599578905334 | 149.292552957665 |
| DDX17        | 1221.58522138654 | 1178.83933381069 | 945.403379196643 | 1151.89087953837 |
|              | 536.9324595176   | 759.058176862524 | 833.430847243676 | 541.896444696137 |
|              | 680.94167651697  | 684.180060287047 | 1076.62597781124 | 817.036222521723 |
| DDX18        | 990.814111681408 | 1006.69598892631 | 1178.83933381069 | 905.751410113646 |
|              | 560.362502519639 | 1646.76016031831 | 882.037055216609 | 1104.61581891596 |
|              | 922.50743596248  | 1170.07851727046 | 822.129234065933 | 1475.41920838384 |
| DDX19-DDX19L | 140.35175858015  | 163.661196423902 | 190.947996918605 |                  |
|              | 165.283700641161 | 169.101676908756 | 149.082061203661 | 163.516075721791 |
|              | 172.631499322646 | 174.012972901793 | 177.500110974116 | 184.694741621812 |
|              | 191.543371466252 |                  |                  |                  |
| DDX19A       | 514.354512083591 | 481.933386283351 | 507.95331185029  |                  |
|              | 579.923640505245 | 263.888891822857 | 289.368511254335 | 307.597733293218 |
|              | 239.503369457867 | 331.32397534437  | 311.966971734249 | 297.022984365795 |
|              | 305.499194075747 |                  |                  |                  |
| DDX19B       | 272.712242893937 | 277.359422005775 | 327.566026396726 |                  |
|              | 323.391456630794 | 293.794745907663 | 296.553550946307 | 323.841518852386 |
|              | 337.585502787016 | 333.868818855397 | 459.771019162573 | 338.46332239699  |
|              | 408.60092780174  |                  |                  |                  |
| DDX20        | 150.948076715456 | 140.595496714752 | 132.751406897891 | 146.070871543153 |
|              | 146.451918215469 | 133.99226161886  | 130.786835186349 | 135.057847490193 |
|              | 137.805895248174 | 126.290840923683 | 183.863365305103 | 144.461999591223 |
| DDX21        | 327.324711245289 | 259.511314588868 | 356.770158430601 | 257.408058436941 |
|              | 391.400480065    | 777.901979189395 | 499.321667633972 | 594.180861801958 |
|              | 656.009451448101 | 599.52440136406  | 476.782624160552 | 1001.92763014266 |
| DDX23        | 462.948429969719 | 520.120193442648 | 522.400055538966 | 471.720496000839 |
|              | 570.533103778482 | 495.438672949441 | 523.591472915151 | 628.344122779625 |
|              | 705.529158880221 | 397.449905380349 | 542.883453307    | 553.123179808258 |
| DDX24        | 1190.62010668045 | 1176.62418139379 | 1411.90426595229 | 1189.11053680293 |
|              | 501.863855158062 | 444.479355480138 | 500.469781477166 | 552.790706181938 |
|              | 484.131020584378 | 564.41151411028  | 424.751154004399 | 580.474775712828 |
| DDX25        | 142.56910547147  | 135.003236040032 | 136.507961715591 | 140.447933562667 |
|              | 144.333945716394 | 139.099483279141 | 147.191114491117 | 125.962178569021 |
|              | 131.451173463405 | 140.675094228846 | 132.550022967297 | 137.704257049203 |
| DDX26B       | 166.411219327671 | 158.675960205792 | 152.22701178148  |                  |
|              | 176.506227858258 | 162.140112952434 | 168.37850726499  | 204.219197797869 |
|              | 164.39910609636  | 152.386986818959 | 154.159124458167 | 190.56172211779  |
|              | 161.817609920327 |                  |                  |                  |
| DDX27        | 677.9972761887   | 712.433345978749 | 482.857203798212 | 663.782083028745 |
|              | 450.566031840493 | 546.181615768667 | 741.255013151687 | 365.046815163035 |
|              | 480.593729033799 | 440.319777672273 | 403.984761333129 | 492.207833630086 |
| DDX28        | 223.253794809571 | 243.772412032046 | 264.526189799049 | 264.306927596371 |
|              | 353.674560414317 | 299.234482744038 | 329.406649846151 | 284.104619768635 |
|              | 264.383922859446 | 212.223906015932 | 365.286234166621 | 309.36704220687  |
| DDX31        | 163.146581498065 | 164.558875058199 | 166.709393547104 | 167.817232948801 |
|              | 195.595275594235 | 170.111653122193 | 168.183542846746 | 168.295044843056 |
|              | 165.954266127697 | 176.940723174814 | 170.892319361167 | 172.794570587596 |

|       |                  |                  |                  |                  |
|-------|------------------|------------------|------------------|------------------|
| DDX39 | 434.792010353541 | 479.866450988091 | 348.413827101046 | 482.739666411407 |
|       | 1356.43255022363 | 1192.47480377375 | 855.415038498392 | 1032.4540300024  |
|       | 803.133619199479 | 750.10819423982  | 598.647226284738 | 874.816697884109 |
| DDX3X | 766.176882605175 | 790.790236361922 | 790.790236361922 | 523.717949503639 |
|       | 573.644925180854 | 1367.92869625376 | 839.324324662619 | 843.545962045705 |
|       | 741.255013151687 | 938.918431240228 | 992.744093752678 | 793.891277937782 |
| DDX3Y | 195.88263399968  | 182.275998840116 | 159.563866056798 | 185.519000961898 |
|       | 186.939168482155 | 167.442950045855 | 233.82434521462  | 203.265559787292 |
|       | 168.05687638693  | 132.86711707789  | 172.138554350738 | 222.565515020501 |
| DDX4  | 137.464914919148 | 134.442947822188 | 146.554017952963 | 135.215356532498 |
|       | 135.899595115146 | 130.74794199972  | 146.999370190363 | 137.144001915831 |
|       | 148.179398287068 | 123.700076467648 | 142.724123724574 | 160.364644321965 |
| DDX41 | 306.946103334814 | 396.345382600445 | 284.675990197899 | 414.797416270335 |
|       | 419.532420763449 | 258.695920967489 | 391.326200093611 | 317.949646885539 |
|       | 255.273375146278 | 694.02978779693  | 389.588346573823 | 379.102958448288 |
| DDX42 | 707.173691257322 | 740.527607312565 | 971.170460915918 | 773.803350315426 |
|       | 381.57978490093  | 612.61438059983  | 623.508710830895 | 459.771019162573 |
|       | 614.094097408035 | 345.686640885419 | 548.288640768746 | 887.471553448641 |
| DDX43 | 174.116797337377 | 166.754995454382 | 193.704510912321 | 201.337186768645 |
|       | 167.293320986716 | 147.769702509047 | 183.226294747874 | 225.927425596831 |
|       | 144.924212639731 | 181.453575300661 | 122.82388804774  | 156.402578892869 |
| DDX46 | 339.252515920242 | 324.671490117952 | 359.162549472301 | 314.095043876244 |
|       | 167.640645997754 | 356.530530468568 | 316.801725268792 | 293.448046685909 |
|       | 287.656436278551 | 274.934292929666 | 270.490971664802 | 462.779122987815 |
| DDX47 | 911.782783698439 | 803.60413590137  | 1100.17618574297 | 710.228463443265 |
|       | 929.69741581954  | 1069.93503700632 | 1320.74943817958 | 1361.54107116915 |
|       | 1243.11900823259 | 846.084919104262 | 1375.76915021882 | 1394.31467757456 |
| DDX49 | 169.764014031526 | 198.737421468412 | 215.897620927751 | 258.759507964221 |
|       | 386.85874184746  | 262.196293231028 | 268.660078500783 | 213.26158748941  |
|       | 198.681190016247 | 191.418673767345 | 213.674150322581 | 181.593291870136 |
| DDX5  | 4892.17875938832 | 3481.90072759183 | 3630.80752744347 | 3042.88425356552 |
|       | 1897.92061704124 | 6427.33783376005 | 3677.23129570773 | 4425.66777919789 |
|       | 5396.55955971617 | 3024.62888503536 | 3528.62443098065 | 6548.65498784806 |
| DDX50 | 753.389428590366 | 650.911886508922 | 1003.93455977232 | 622.348802511009 |
|       | 296.962992349662 | 438.870464403215 | 524.245387973163 | 365.541609015117 |
|       | 388.192984832638 | 483.699436940387 | 631.819659701092 | 478.040234382488 |
| DDX51 | 5233.72882607795 | 4938.42484385053 | 5327.13051940508 | 4759.17973319588 |
|       | 696.976036382401 | 5748.57645553386 | 2511.04500638697 | 4068.18567686753 |
|       | 3359.62015747752 | 2599.421026133   | 3822.05744774919 | 2921.59274577877 |
| DDX52 | 273.959220003188 | 291.50783830983  | 231.018059960001 | 303.858574395969 |
|       | 283.123157828849 | 310.174932137546 | 347.292438587205 | 619.995008098949 |
|       | 361.516275756449 | 326.640168906375 | 405.409668978569 | 332.749676505218 |
| DDX53 | 150.132420238581 | 154.740395921562 | 141.436235043864 | 159.495272062735 |
|       | 149.432744784716 | 155.02097482487  | 146.229239731545 | 142.536450265886 |
|       | 154.684874039602 | 170.807514224412 | 138.60849268758  | 150.639235242268 |
| DDX54 | 141.770977101211 | 142.910616700526 | 123.748788684337 | 147.52403424052  |
|       | 266.468621734455 | 207.417884407459 | 156.47237266917  | 272.927830312746 |
|       | 233.786136606682 | 149.60803906364  | 191.040134068942 | 207.368252249039 |
| DDX55 | 542.009873308344 | 545.200687301057 | 807.604205890244 | 588.458314503034 |
|       | 473.370240289761 | 635.536499281829 | 822.129234065933 | 846.425467119342 |
|       | 1000.05896885496 | 728.176339659082 | 564.41151411028  | 977.227184625781 |
| DDX56 | 463.298781071364 | 507.56875910742  | 392.282956362735 | 579.493790910006 |
|       | 1003.36623972843 | 610.070236234299 | 584.813665097407 | 601.401329244185 |
|       | 568.701661112562 | 599.735180191091 | 290.389345090634 | 824.427857809495 |

|        |                  |                  |                  |                  |
|--------|------------------|------------------|------------------|------------------|
| DDX58  | 240.836979012241 | 176.791758333054 | 210.590774758661 | 179.241385747152 |
|        | 141.609037401299 | 153.911165277809 | 199.288100834476 | 172.992936821292 |
|        | 176.138621462315 | 182.130970182242 | 242.070630946726 | 168.161117444474 |
| DDX59  | 214.684538620841 | 200.558971047462 | 266.19823384117  | 211.160781061336 |
|        | 189.2642795052   | 212.016247864691 | 227.884445686928 | 222.820391338687 |
|        | 212.669156800241 | 236.326943078666 | 220.415211013843 | 284.748764120614 |
| DDX6   | 158.244741207036 | 172.370108210895 | 155.056545639862 | 160.598186999524 |
|        | 186.831266888028 | 141.37694311902  | 179.730694272916 | 151.488973553441 |
|        | 154.999192460283 | 142.13191463827  | 194.112534914308 | 180.850779069931 |
| DDX60  | 211.555248754731 | 187.035957486928 | 218.031238893075 | 217.050602253281 |
|        | 179.996590340102 | 208.067404132325 | 259.025042304848 | 233.536023295039 |
|        | 305.577166690215 | 227.64196401771  | 288.370985514978 | 211.438615793742 |
| DDX60L | 167.260319361746 | 134.076865693417 | 146.019622621809 |                  |
|        | 129.421772713718 | 131.899614022767 | 136.689064885984 | 204.89842561202  |
|        | 180.667897257797 | 186.57665470145  | 165.500088159872 | 167.92409473064  |
|        | 234.063633889254 |                  |                  |                  |
| DEADC1 | 136.959011188915 | 126.045231525329 | 118.465111174212 |                  |
|        | 114.174153178166 | 119.787925356307 | 125.732389000341 | 123.094324479352 |
|        | 128.72727523654  | 124.777895136212 | 120.322292418128 | 151.148295679242 |
|        | 121.271403807802 |                  |                  |                  |
| DEAF1  | 193.544035570799 | 177.742616962629 | 174.498521167568 | 221.322724563472 |
|        | 198.15257384667  | 171.221972336784 | 162.140112952434 | 159.784369379077 |
|        | 166.187099519035 | 179.54034642468  | 189.0608798771   | 156.119899067238 |
| DEC1   | 146.359038260378 | 161.17923997423  | 154.949840064881 | 144.662545137915 |
|        | 139.410739260343 | 158.047112652223 | 129.452826518288 | 134.730275384832 |
|        | 143.976395954528 | 151.629999903069 | 133.789738760547 | 145.409722106953 |
| DECR1  | 1303.33810980467 | 1497.32522786098 | 1306.20183851747 | 1491.05501052706 |
|        | 1840.14350831655 | 2608.95227456417 | 1689.00127592755 | 4118.58682247781 |
|        | 3668.19307488953 | 2016.52142068599 | 3575.60827968852 | 4214.83058308503 |
| DECR2  | 270.92671642109  | 291.883157643902 | 318.778978094743 | 330.405026390912 |
|        | 461.722481634933 | 309.181150342727 | 315.863232876382 | 432.515970951769 |
|        | 283.048002376743 | 360.39998507367  | 378.037190077449 | 445.089930641391 |
| DEDD   | 291.476113017794 | 298.347201056937 | 259.979459472217 | 310.917191279571 |
|        | 308.803322140241 | 310.465070184707 | 241.890850719625 | 265.260411490697 |
|        | 245.675725760577 | 208.164674386141 | 320.024259346646 | 295.571900619972 |
| DEDD2  | 498.812823949508 | 611.540759532294 | 618.437282203498 | 566.417354841707 |
|        | 1500.16816750361 | 727.814681346494 | 1383.68977267418 | 1060.24125879951 |
|        | 1427.27262061653 | 745.844395215451 | 1230.63920848575 | 725.621153262924 |
| DEF6   | 200.179796117115 | 186.231346659144 | 166.20327698517  | 190.031339775209 |
|        | 370.390323116113 | 221.411372022459 | 427.390091157726 | 368.825190022937 |
|        | 379.200576951933 | 403.582461109859 | 833.198511430615 | 317.719381113816 |
| DEF8   | 400.060972573122 | 380.562212796792 | 391.400480065    | 517.676093149981 |
|        | 442.493108530222 | 332.082749517913 | 379.016207754533 | 270.520229426015 |
|        | 345.062426573519 | 452.517134370928 | 239.924227955313 | 361.082957133644 |
| DEFA1  | 108.079149792796 | 120.880547922392 | 108.118551275778 | 122.317877997527 |
|        | 115.174678745401 | 121.334882368464 | 113.989682635964 | 111.137519376499 |
|        | 114.704831217037 | 120.547683754604 | 112.635430248416 | 216.077955163344 |
| DEFA1B | 137.971108694323 | 135.601916560736 | 136.90636489391  |                  |
|        | 143.307838525991 | 142.783159341229 | 146.094951139804 | 149.730467498266 |
|        | 135.697550878438 | 141.106863165059 | 131.260111979219 | 136.760382409185 |
|        | 185.639696270808 |                  |                  |                  |
| DEFA3  | 106.263441906404 | 103.09089100768  | 102.522925993233 | 106.030441145334 |
|        | 119.711070285785 | 101.316813921703 | 108.226917034591 | 110.093565974873 |
|        | 120.565485864499 | 114.798573331978 | 130.388530183353 | 174.471304281502 |



DEFA4 120.992440100307 129.428950259722 122.396214045451 120.53428198263  
124.15094220181 117.716094828779 118.510960607141 131.015519445322  
130.143953880391 126.045231525329 146.709967739596 131.269526665478  
DEFA5 144.840218312168 135.521802085177 143.473523258521 139.693261291326  
128.714459781294 155.187900101727 144.417333931582 124.654146040634  
130.124601660028 141.775100066311 145.709172732805 156.423687034312  
DEFA6 134.4380641709 133.978783899572 120.325985681299 148.309872393  
129.4807689399 149.833346575446 155.05329654089 133.048720362039  
127.622397233692 122.517559025268 114.255733119076 131.666853845458  
DEFB1 311.10841853984 194.86492119218 185.886737029845 155.756074127526  
174.059172465573 458.282682131641 446.698665191047 203.831047867731  
183.152005135504 3396.40593844715 346.476121089685 191.651818696629  
DEFB103A 142.719216118914 140.435724944447 135.728336465002  
131.025725443485 135.346501914337 133.026094667212 129.495680232567  
136.2336179571 133.301527400458 1313.89440013246 181.783275804424  
133.720904256137  
DEFB103B 155.490897312915 137.824985884649 159.110614190088  
163.552608805894 140.875923123766 147.225911875196 160.850840925561  
139.067516394141 141.999730335668 8445.36695108418 242.410260751835  
153.636804025106  
DEFB104A 124.899019467557 148.391885541349 158.937341335707  
147.362120584524 136.728067043351 122.696382705233 124.375348764151  
135.381131982323 127.520134825082 141.294094833197 145.732814287289  
141.170937695272  
DEFB104B 152.142909854773 146.097201498811 145.314204192565  
153.07993334035 146.390223079987 139.242481781927 147.78847662997  
141.5739152922 141.906474266389 182.969563278473 140.03202338666  
160.159630699959  
DEFB105A 101.316813921703 116.331428876124 116.437403962939  
107.780763250481 113.283359026655 108.101686347192 110.61165787102  
106.701716475947 113.87024833117 111.608386387842 120.871693555514  
105.132185249959  
DEFB105B 108.970432124412 126.211525910631 119.845508281414  
120.74273444647 120.29173510435 134.341489592504 123.671944323239  
113.199690522854 113.492900106468 134.367115858307 107.697601478064  
126.159880038854  
DEFB106A 163.942131559267 144.754401731628 161.651643789597  
152.566490804809 132.535722328813 153.762995131216 151.169283505727  
153.600132368924 137.605244950708 152.20173979854 129.83316008718  
141.91067228913  
DEFB106B 167.698883940638 150.845846206549 157.58659226599  
141.431172407792 178.476483428474 150.590611246086 145.085091507228  
152.104170622003 139.211746200839 147.592770523507 158.459129254226  
154.686025022972  
DEFB107A 119.859508630454 114.691842968597 124.666487633365  
114.182798672347 115.257318321108 123.45956380046 126.828097770667  
118.230408871812 115.366496551426 140.127379332918 127.123123583856  
118.663847950696  
DEFB107B 120.160652344221 131.428466882762 121.991692204056  
127.490889148422 142.22515098612 135.666278507269 124.145492642453  
121.728711587014 118.974727968283 136.556183079815 113.78323485587  
131.354275252104  
DEFB108B 126.629012619208 125.334995649504 127.488853386792  
130.238231520218 132.211379936941 126.48691003872 124.555847618988

131.973896985615 126.791714564926 128.576310682958 144.505072819693  
122.387532784748  
DEFB109 115.821231468312 114.200099628087 101.981823814699  
111.876915242732 117.60787142216 107.780763250481 105.816457443844  
107.07609243233 103.307703547649 118.820154030256 119.107992692097  
113.740942665269  
DEFB109P1 126.868970616955 119.198789189881 131.878155417065  
128.992837936606 129.305455204291 128.748663215466 112.558241320112  
117.611606270124 122.716563069312 115.963144087717 127.490889148422  
119.845508281414  
DEFB110 125.589744938813 125.67874617392 124.638075441482  
134.691038011706 130.095585254401 129.297217956843 126.17133877948  
135.832454000859 125.379842077431 129.537345537086 137.840396641618  
135.723554819107  
DEFB112 129.269919529415 128.282999719959 154.496005175117  
140.085359251038 135.1951749488 156.32137627012 146.929717840755  
133.602002328114 141.311749168934 127.745801270205 118.276198592775  
155.153328022432  
DEFB113 131.04482088126 133.9382467268 137.593577427321  
124.641892391159 131.717160947964 128.368669716591 132.383542877819  
140.149064156135 142.674671804361 125.572299527276 126.333814565085  
123.159407368236  
DEFB114 122.089332300031 125.513881890201 136.591299462104  
127.827096314406 126.37749112514 136.378203924435 126.159880038854  
131.426355444136 129.931923954109 128.941490662452 121.021776527531  
128.895325544109  
DEFB115 129.360773522498 130.914932329297 132.087183382523  
124.959873714884 116.507315786826 120.325985681299 125.911259629489  
126.557869929234 127.352386363217 120.276236447255 128.287127680554  
125.461701282922  
DEFB116 151.226242696197 159.41705570719 140.021640936288  
167.568776552757 146.912751127571 141.555366493541 147.60284257326  
159.572851489665 157.530573508003 152.612116997575 162.879707592164  
149.17815859943  
DEFB117 128.835216648178 133.59686364883 136.881724888516  
129.507297276862 122.659174808512 114.358099210532 130.92093805204  
133.617501101389 129.098408596418 124.180511991605 116.653897702566  
130.872296869843  
DEFB118 112.198629213643 114.574362093931 118.56332995149  
110.113844434493 111.802672864815 121.815538475678 114.41737808857  
113.852849454448 122.917915232153 116.070254821073 121.048673869836  
116.046983032621  
DEFB119 128.36121178972 130.960045345375 131.910285685889  
142.412731964179 129.653283053893 131.83430682495 122.888626394154  
134.337249560706 138.555443236183 134.805239981342 117.773743603829  
129.808590871788  
DEFB121 121.103620738719 113.125349503734 113.440171712791  
106.341910466588 116.65880728655 111.62514398781 115.172427482285  
109.988237089025 100.841352336505 115.954828435072 116.136849683574  
114.995889945366  
DEFB122 155.945838519586 169.168869363848 159.633987751501  
137.997756995882 156.411563412665 170.326474367867 161.874184077257  
163.22059466037 160.469645948225 153.989839987975 151.92638745703  
147.885769870843

DEFB123 157.293090577042 160.338146803754 173.995889755792  
150.046300135261 159.286484253487 162.188509438986 163.045605069267  
147.274945970072 152.563532872898 150.809693773343 140.345652629553  
163.72257517759

DEFB124 134.06996703302 127.478474451121 128.011387527117  
130.268322464805 125.321968563987 121.734873711651 123.07559417607  
115.113000553093 117.270320709161 131.93683726912 146.151639797173  
121.915043935246

DEFB125 161.646807806182 154.962835391567 154.2433882385  
141.830432745537 143.10996074311 166.611809859059 175.551853899221  
164.000772606739 153.969493052468 162.294114485312 157.170136439095  
154.98147307591

DEFB126 110.465934808915 110.202982683256 116.092815232176  
106.491867793742 157.348475799643 140.123348569709 115.389934936253  
161.126686827391 133.012692824038 118.276198592775 125.606269267903  
112.317996234709

DEFB127 144.12742465348 151.174536186463 157.797222258336  
169.441789096441 166.061891147234 150.082561726876 156.346014084316  
152.89366585726 158.396149470397 137.27298184582 148.812015298003  
141.229805348717

DEFB128 159.824012085212 154.507721014473 157.12360611723  
163.991378703958 155.603263242813 178.766654213173 158.7912155022  
176.77183598995 155.964242240771 161.451253146578 142.334338599752  
169.417764098848

DEFB129 123.141928612324 131.924162435354 134.260779370821  
123.291258843371 140.567565996849 148.551340840517 133.003743285746  
131.148926523383 143.342736976496 116.416896654975 136.71278398686  
119.092335265325

DEFB130 143.473523258521 136.897888440409 128.131324375789  
130.786835186349 145.496033735748 137.190593489949 131.615462296871  
123.235136639469 132.256047602234 128.840466579373 113.025793645043  
124.731056918418

DEFB131 137.331864485838 128.411138850655 142.063338490772  
135.194416986571 129.990534497026 135.553183871663 139.128751917566  
132.051614319023 130.773945967285 134.136687154241 134.666505160831  
141.765004355609

DEFB132 121.248923222807 130.205764567934 129.532122459128  
130.754320787628 121.36708642226 110.325803953516 124.842426851438  
133.984078167807 135.659271030454 130.991496243273 119.172965618216  
141.70123350351

DEFB133 124.261531006131 130.742940708861 149.538429805372  
123.807693112932 124.393008692801 135.929267930361 123.065355919378  
130.991496243273 135.285224699704 136.596127228365 142.379120254855  
136.829137120584

DEFB134 137.706893763747 127.869038038293 148.821942578396  
128.19878174316 138.119788738226 150.471558219667 137.232722233042  
129.208429861964 131.025725443485 145.526941881413 134.062423178775  
125.815256068004

DEFB135 118.342067845126 121.826474059574 109.398997827329  
118.442856984861 125.584202037776 115.235444833856 113.440171712791  
114.158566522557 112.858669660245 116.71331256222 115.830631252469  
113.938636269013

DEFB137 101.713609383766 102.166449349339 113.077691687266  
98.1433670546536 112.41270361848 113.470356909765 111.691973758042

117.05536677976 112.227434965199 106.923686318112 121.598249850839  
 105.164790181452  
 DEFB32 137.668179813327 131.76272538453 123.323528039848  
 136.173596381385 118.308102542942 131.732416355002 129.095469955392  
 127.876894098781 132.168821720799 129.971670681199 126.724973604103  
 128.093945009882  
 DEFB4 150.460618402778 139.490103923544 155.569733738768 160.099731578122  
 128.853089272901 146.132506246152 169.355185349431 148.124586158123  
 122.226875707253 1023.29995420518 134.378951325825 130.195234920895  
 DEGS1 1638.72366638732 1232.66885974069 1338.83705469394 1399.41653736746  
 230.975434289172 577.98969050409 397.307515234646 381.121621815163  
 1024.59845685519 902.822697602452 243.225815954365 539.471166362469  
 DEGS2 120.530092530622 127.401551376191 126.279119798177 111.525984720592  
 160.251996476232 126.452500728601 128.314990390649 139.577443171489  
 123.857527555048 130.621860095981 206.715020025609 165.386056999339  
 DEK 1001.65849130836 1296.10827265334 1275.43768532088 914.654262296682  
 1041.58583268313 995.812184456562 951.371815352591 837.872187194784  
 1130.32966481315 1086.33540858772 940.716682221364 1120.3009282887  
 DEM1 1984.47173096657 1651.68171717875 2001.92441724356 1607.52029676299  
 311.612118247493 1766.15001427132 740.800822095116 1260.50387106816  
 918.162638134305 764.774225930479 1248.69137283095 883.702573960415  
 DENND1A 143.045416067967 148.317958829244 142.318709347082  
 151.387150218354 232.556667737827 126.94941821459 133.164566694394  
 134.992686224944 154.183537565624 149.31020447459 148.888698484378  
 133.491963477649  
 DENND1B 140.699287635171 134.06996703302 119.415822905251  
 132.499182058275 115.34945441214 136.261907928796 125.165254272421  
 122.554760526767 131.809235171629 140.906421938377 117.580122770251  
 141.66312605042  
 DENND1C 167.542332146706 159.997580819443 188.580458613357  
 161.397788731595 170.473956720945 163.165374495635 155.699649538664  
 139.650726173186 157.57914268719 152.452246595937 135.544048708523  
 140.949367846425  
 DENND2A 907.610179738644 887.471553448641 642.255110250493  
 932.862030475849 277.314675225943 189.770558810153 165.511561121012  
 187.407526616724 186.529656751005 201.49630027392 120.177385114315  
 157.792868983503  
 DENND2C 172.707821624271 189.758013811338 170.326474367867  
 153.893753448473 176.214950733324 167.114291248266 232.363656167375  
 199.854728619468 175.562070915794 454.984562256248 215.98963200839  
 149.029275579026  
 DENND2D 183.863365305103 183.397833894087 232.385176936256  
 173.850390626782 771.059329972125 615.662993833692 909.020708316287  
 781.790858580895 713.832153334389 338.510045856515 2895.71836177599  
 1120.87534972745  
 DENND3 164.337486856997 155.837866295709 150.215811815246  
 158.320863045015 131.036225888592 137.990806386929 127.121068682846  
 148.302775746627 152.28262533486 116.346181133756 153.326420485822  
 139.847813838017  
 DENND4A 184.530853446688 170.568719982587 181.991820141929  
 183.988537525989 165.027938535393 189.90406457741 199.058972781223  
 165.131463797217 185.016336026382 177.862368731138 208.214764518526  
 188.567747377006

DENND4B 579.049608568926 585.933822585718 367.130155304037  
751.077307018319 713.23381913235 261.775269058607 366.961565952239  
360.185005480216 422.434778100827 268.111403429364 463.880793292701  
406.900412510895  
DENND4C 901.644194512187 941.065508539108 850.562379837947  
1006.69598892631 292.429831186609 591.763423878737 701.208391798006  
594.713185954954 574.262112643403 488.14606875418 631.408955630318  
405.64711132293  
DENND5A 1527.87148052149 1119.71228054585 1144.92109214621  
1431.52979384867 257.643855420381 283.874600697211 286.506419296679  
359.256193328366 522.486866458783 326.962330523237 407.875393458322  
194.903531690239  
DENND5B 271.823243396395 239.419200107721 339.490955270138  
240.341031437493 153.308956040034 187.686326872667 155.957570398118  
169.933706225406 173.552535486766 130.613760017864 150.981208776163  
147.001408450583  
DENR 2086.15449885278 1953.88327754946 1774.22769195939 1759.9632914516  
761.097992055119 1937.83242524439 1482.15461429206 1936.88813111969  
1622.17491781572 1231.92253664482 1470.23096656138 1197.00004043747  
DEPDC1 126.355699811531 133.307149027384 122.631814400575  
130.657342262492 173.010799217261 160.050872656883 138.970853057174  
188.145154995617 153.128027266281 145.431393142782 127.824005374202  
157.858267778665  
DEPDC1B 147.657151780506 138.924820359912 140.865990571023  
137.904786382385 211.809434609469 220.510248260182 178.946928223991  
206.340478393262 179.048139035247 183.708917501519 145.304050333309  
224.497348027469  
DEPDC4 143.427721577372 124.491884305455 145.889336010424  
140.132816040735 133.333067546558 145.750611940928 140.581943144813  
133.584361509362 139.048016900762 141.585172896047 138.962649407431  
134.160100276452  
DEPDC5 155.475804754732 159.227123133854 150.46669393448  
169.33926580273 154.207656926108 144.904021527125 149.25705328406  
151.351938656508 151.201263631883 144.882207209439 161.581641777014  
149.722442994599  
DEPDC6 208.164674386141 168.873282919232 181.439775614781  
168.763640193219 226.796825544749 205.149094703318 221.74200490054  
259.72035004624 165.634117939571 153.008756051525 264.233381434738  
176.810979494826  
DEPDC7 133.998381302146 138.227082687797 140.668597897404  
137.944260488223 133.175265384038 134.624322761212 136.779180530712  
138.882483367088 141.8268805463 155.211976328553 127.601379088239  
139.907840403521  
DERA 733.49038042129 713.087392708048 907.610179738644 747.077451281453  
824.427857809495 709.778171909457 1089.16489859253 1131.96129284658  
1099.80705776268 1879.08108720938 981.781076110568 785.008529077795  
DERL1 634.046843336128 498.812823949508 710.003412772888 392.6758818959  
498.812823949508 1064.12835214671 594.713185954954 774.997895985917  
1119.23362648056 502.499539192864 341.2887754025 729.499296070289  
DERL2 297.419034136005 252.249994170536 265.43897208356 202.129153259445  
415.957832362051 460.514672966125 393.707031354025 431.413030534188  
309.538690289233 353.621264641814 399.537363692534 513.036729214095

|         |                  |                  |                  |                  |
|---------|------------------|------------------|------------------|------------------|
| DERL3   | 133.146347243168 | 159.515698265424 | 138.156430188312 | 145.958718601763 |
|         | 142.013370954791 | 149.836491640473 | 140.306808081269 | 151.641486303453 |
|         | 160.234704406302 | 157.446725405803 | 143.496669740707 | 146.039797334426 |
| DERPC   | 115.085961282227 | 120.549643584553 | 119.95959059725  | 113.980716384814 |
|         | 145.698637908482 | 126.837151457845 | 142.324077852852 | 122.846912279427 |
|         | 139.089444892187 | 125.170874841845 | 136.638141963514 | 132.550022967297 |
| DES     | 14417.2696849334 | 17009.4268910772 | 9908.59593023839 | 25295.5071561111 |
|         | 125.879198238067 | 128.678484452077 | 127.990453128978 | 114.638254225216 |
|         | 139.042034301544 | 114.841964705981 | 109.482330324734 | 117.790593990682 |
| DET1    | 285.102778078056 | 244.18714778846  | 318.112626495401 | 293.825372123877 |
|         | 239.762135294506 | 180.747527895349 | 280.453895029319 | 167.599784887933 |
|         | 227.715558644326 | 161.225608630791 | 184.62149494522  | 203.149001616967 |
| DEXI    | 931.598413783099 | 1046.65224316733 | 902.089561157715 | 1465.2419150392  |
|         | 947.425912541091 | 617.474181543858 | 737.650963292668 | 598.287431134037 |
|         | 702.049571167356 | 720.907992182476 | 772.061917233344 | 948.734577648136 |
| DFFA    | 453.760162338163 | 437.836503489425 | 529.228238133018 | 501.738490253982 |
|         | 355.290621188435 | 462.779122987815 | 518.281245498542 | 514.922742487521 |
|         | 381.57978490093  | 357.584458526365 | 381.014521577291 | 355.80042210486  |
| DFFB    | 177.083095120017 | 155.243643210534 | 178.696562301918 | 168.248982292489 |
|         | 172.877947895827 | 199.327939161502 | 181.215046876308 | 210.666799498141 |
|         | 163.538862303362 | 157.166379887259 | 179.593817076317 | 196.734037460218 |
| DFNA5   | 857.090339943417 | 795.720196538039 | 572.262848718437 | 726.556553101727 |
|         | 162.850128623401 | 245.110761598207 | 727.425595270342 | 214.229228850802 |
|         | 204.031081842809 | 702.779943547386 | 239.277801396834 | 1106.75785702993 |
| DFNB31  | 206.236303011662 | 191.38608906576  | 188.181647474317 |                  |
|         | 217.125327913156 | 146.879019367939 | 182.143506470859 | 158.260676113325 |
|         | 167.049197726715 | 167.42476096854  | 153.256208333775 | 162.317084707395 |
|         | 158.400572147671 |                  |                  |                  |
| DFNB59  | 178.955938825556 | 168.33854702953  | 217.227441947056 |                  |
|         | 181.277683429417 | 161.678137139371 | 191.418673767345 | 150.624740697168 |
|         | 154.792156982219 | 173.656241217331 | 149.355389396683 | 184.832531598928 |
|         | 164.513371267476 |                  |                  |                  |
| DGAT1   | 273.984715370774 | 259.094411953361 | 246.88857694249  | 351.515059400947 |
|         | 501.600329334497 | 254.235762677639 | 329.214958614925 | 277.406445570925 |
|         | 282.604890044452 | 326.83982672544  | 309.75140197669  | 324.79327985156  |
| DGAT2   | 116.179625689647 | 129.289216846128 | 118.184571821176 | 136.357788670568 |
|         | 313.708197191587 | 159.452527363763 | 194.337080066417 | 140.579839043912 |
|         | 156.448355269561 | 128.351235762192 | 299.851173200352 | 206.071709262227 |
| DGAT2L3 | 117.65847906412  | 106.285472845323 | 119.937665469629 |                  |
|         | 119.297561749232 | 119.32696696175  | 113.726931741236 | 115.624167024067 |
|         | 100.746407116143 | 113.886420801388 | 136.016912147651 | 119.603565559838 |
|         | 114.888157310977 |                  |                  |                  |
| DGAT2L6 | 136.930523377107 | 140.616811333466 | 133.16868415814  |                  |
|         | 130.265055842999 | 138.006973261364 | 128.137646789236 | 123.357205547181 |
|         | 124.28313315915  | 130.022574966461 | 127.187020441742 | 145.155989928336 |
|         | 124.238319768621 |                  |                  |                  |
| DGCR10  | 121.219323788324 | 139.503902205317 | 126.494665743087 |                  |
|         | 128.79607493422  | 131.312580984876 | 127.8514513762   | 142.920939571001 |
|         | 136.864106181375 | 134.811625739766 | 137.871870950302 | 133.871685084945 |
|         | 145.677477231455 |                  |                  |                  |
| DGCR11  | 202.643624039869 | 210.061754644824 | 211.160781061336 |                  |
|         | 234.895245871534 | 215.635313821029 | 210.529782898493 | 214.499670852615 |
|         | 203.943245360496 | 214.86995782548  | 254.9636051363   | 229.130679600654 |
|         | 212.239485199343 |                  |                  |                  |

|        |                  |                  |                  |                  |
|--------|------------------|------------------|------------------|------------------|
| DGCR14 | 209.785886171295 | 224.805404798696 | 228.100112133941 |                  |
|        | 222.943046618742 | 227.32463765717  | 198.390247605355 | 184.974347306539 |
|        | 196.486499238623 | 187.700723296295 | 191.310372695208 | 160.143443392509 |
|        | 195.384273821324 |                  |                  |                  |
| DGCR2  | 408.10780961711  | 577.250493023431 | 465.54817048856  | 628.710901107436 |
|        | 664.19083888799  | 382.744523022686 | 415.388760988459 | 306.277823025572 |
|        | 387.224184063662 | 349.128741707506 | 628.710901107436 | 408.444629429553 |
| DGCR5  | 138.188522429661 | 120.846789922177 | 140.639012372681 | 127.58382536792  |
|        | 116.609122768341 | 153.214696479001 | 139.959629641771 | 143.100436913184 |
|        | 133.215151497536 | 129.072173761566 | 131.015519445322 | 142.858554460651 |
| DGCR6  | 418.772484676858 | 470.868288641048 | 404.21236980164  | 617.67819271245  |
|        | 986.65554605455  | 1018.80178630497 | 553.615252472149 | 498.812823949508 |
|        | 451.621888586656 | 762.182213353032 | 394.810886122555 | 537.828979447378 |
| DGCR6L | 564.200165295159 | 632.843164522867 | 503.466550870577 |                  |
|        | 815.779445689417 | 935.423045210635 | 972.468110850466 | 537.828979447378 |
|        | 479.395948662331 | 362.899103657252 | 628.939201051801 | 376.54010486682  |
|        | 448.644778906048 |                  |                  |                  |
| DGCR8  | 373.545629693667 | 507.95331185029  | 270.33685210971  | 621.946994961864 |
|        | 326.525579400607 | 377.353441970543 | 311.966971734249 | 381.625983354158 |
|        | 395.133831206474 | 454.854528472591 | 560.180656219785 | 399.248044997427 |
| DGCR9  | 132.555211779043 | 124.63978985808  | 134.57472034679  | 123.344450694117 |
|        | 143.692305478191 | 134.725434838052 | 134.628807679002 | 131.244759170642 |
|        | 131.635641515901 | 125.865974180252 | 147.75625228531  | 149.619141707962 |
| DGKA   | 150.653030597808 | 157.759149893048 | 146.814457904682 | 138.624689897665 |
|        | 162.494429648551 | 209.568066932367 | 255.273375146278 | 196.657475905674 |
|        | 221.719848707318 | 241.039766283972 | 320.390351199433 | 341.714401872192 |
| DGKB   | 162.802392115386 | 167.260319361746 | 143.04129238495  | 183.82450756022  |
|        | 132.653795458388 | 136.18698517676  | 126.398884382537 | 128.066043751951 |
|        | 133.495243957927 | 134.952584272187 | 132.439176846818 | 126.603552416008 |
| DGKD   | 195.218005582618 | 202.545147073902 | 169.067064352955 | 251.307020289291 |
|        | 226.531255313921 | 168.061346742356 | 160.349557404154 | 165.885072907195 |
|        | 180.304585602206 | 142.452409969639 | 190.939726271153 | 164.822461375001 |
| DGKE   | 149.393022408213 | 151.188412354358 | 131.897352210959 | 139.762998983487 |
|        | 155.826394389322 | 133.965220820813 | 146.64560446484  | 153.267549449395 |
|        | 146.660826209767 | 135.325617701062 | 140.073208365817 | 126.523201566273 |
| DGKG   | 192.752224665459 | 199.854728619468 | 191.018168651394 | 237.940015617254 |
|        | 132.271437329873 | 125.358906118533 | 125.455347031878 | 138.213742418402 |
|        | 134.078506829054 | 131.266386010519 | 141.123272165499 | 152.194337248455 |
| DGKH   | 119.375727296235 | 135.576975868985 | 131.838522109796 | 128.155080148958 |
|        | 144.694679571377 | 150.247639459773 | 134.56134674893  | 135.693520183014 |
|        | 130.941645638407 | 137.500310477851 | 149.41357273704  | 153.801971958265 |
| DGKI   | 109.266533255266 | 113.356070669308 | 111.788481822686 | 119.658703392877 |
|        | 121.480455781173 | 125.509221735447 | 108.655415285806 | 122.072091994548 |
|        | 120.394220715157 | 111.935554828717 | 123.383334044683 | 108.850992642446 |
| DGKK   | 110.688722702767 | 108.266328505986 | 112.332130647215 | 114.249891266241 |
|        | 105.62620788923  | 107.863971340407 | 125.093376753408 | 113.22850386845  |
|        | 118.757973008463 | 117.084984190461 | 114.28381541078  | 120.581554457723 |
| DGKQ   | 296.290104133844 | 336.639473916174 | 203.816305810343 | 361.516275756449 |
|        | 678.937151822411 | 394.73732350607  | 418.645775576811 | 685.080426814888 |
|        | 457.650982600462 | 449.220056843562 | 546.611519125021 | 697.299604049748 |
| DGKZ   | 131.409796639443 | 133.008120853618 | 131.442186260672 | 136.284283129801 |
|        | 131.111930163369 | 136.539130156863 | 136.612903661685 | 128.335132315812 |
|        | 132.518394343751 | 129.192326574697 | 139.204218271711 | 138.343232981485 |

|        |                  |                  |                  |                  |
|--------|------------------|------------------|------------------|------------------|
| DGUOK  | 605.437395034282 | 581.54874141672  | 539.125423322738 | 581.191693771646 |
|        | 1244.67453201339 | 1054.47292895417 | 1035.98574557331 | 1093.85316636801 |
|        | 911.340266389071 | 677.9972761887   | 785.008529077795 | 1147.33034082693 |
| DHCR24 | 161.80922869659  | 255.039661999732 | 145.864902319111 |                  |
|        | 225.31216514083  | 1011.14472068314 | 241.675251479835 | 936.221322010828 |
|        | 337.973433871323 | 603.338538383128 | 1100.81588201714 | 395.716879127149 |
|        | 367.025117016472 |                  |                  |                  |
| DHCR7  | 220.999383789474 | 262.171775165261 | 197.740912476527 | 252.761035334279 |
|        | 1141.49294161587 | 327.89660021611  | 331.937313503755 | 335.698400607132 |
|        | 343.270642449751 | 527.226517960073 | 232.641965649602 | 321.31562287169  |
| DHDDS  | 239.503369457867 | 264.779154931102 | 258.552964322998 | 266.19823384117  |
|        | 405.843083758177 | 216.559563381808 | 232.845268785472 | 249.925640256322 |
|        | 284.236970342827 | 240.147082836599 | 268.328002606268 | 205.930921729192 |
| DHDH   | 127.699226067847 | 139.703304553486 | 124.847325289068 | 118.521075843163 |
|        | 335.623336587396 | 147.955701866515 | 131.676609824921 | 351.079435946154 |
|        | 191.38608906576  | 546.274050902567 | 143.868962478182 | 114.585818507336 |
| DHFR   | 157.615017085961 | 152.22701178148  | 194.125840053843 | 143.271346378958 |
|        | 155.790759250672 | 197.049616858296 | 153.554159360954 | 166.722369066673 |
|        | 147.813170436139 | 155.590197324062 | 144.096624787142 | 205.742386129597 |
| DHFRL1 | 242.096692715029 | 298.979106293393 | 277.359422005775 |                  |
|        | 280.531844086775 | 174.812134675989 | 179.49202902995  | 182.810581377888 |
|        | 211.809434609469 | 270.894153548841 | 165.041296694491 | 198.257497903131 |
|        | 189.250846546817 |                  |                  |                  |
| DHH    | 125.861564323476 | 117.244895482991 | 117.847744476387 | 137.350851760173 |
|        | 114.174153178166 | 133.353762794271 | 127.068313862984 | 139.175421159925 |
|        | 116.769106223472 | 119.555954372381 | 122.508761687823 | 123.865424155099 |
| DHODH  | 146.557058433232 | 142.126620107418 | 168.235729347406 | 159.926719599391 |
|        | 158.356964958885 | 136.092086452096 | 153.966815534288 | 152.488480322526 |
|        | 148.816369706133 | 151.459397907666 | 141.657914155491 | 157.838771553729 |
| DHPS   | 639.38881853171  | 613.279465441319 | 769.586135629964 | 660.315285709317 |
|        | 318.778978094743 | 539.125423322738 | 525.6579615077   | 498.965895763801 |
|        | 526.726224327409 | 636.970243888917 | 482.048928546145 | 761.097992055119 |
| DHRS1  | 633.762608454521 | 664.025683218037 | 915.015154168627 | 780.105135529728 |
|        | 907.610179738644 | 523.591472915151 | 493.071213662125 | 474.917507160629 |
|        | 460.514672966125 | 2758.01526530661 | 1027.11849332495 | 876.288248962843 |
| DHRS11 | 219.441959146815 | 238.482863150124 | 247.08460296705  |                  |
|        | 247.550312458738 | 544.956712516196 | 429.812058546782 | 287.145105895235 |
|        | 996.240188311002 | 423.396271159345 | 325.642275889649 | 320.154891655397 |
|        | 547.681206272188 |                  |                  |                  |
| DHRS12 | 174.549929320587 | 170.590817818414 | 186.496160803789 |                  |
|        | 185.31769184805  | 161.72730923536  | 172.827288328708 | 166.001279428607 |
|        | 164.82904652634  | 169.777032044409 | 193.37618381669  | 177.752497164503 |
|        | 193.428733288774 |                  |                  |                  |
| DHRS13 | 157.225479764928 | 183.168629351124 | 154.515091049526 |                  |
|        | 156.392603045231 | 1036.40082234884 | 279.790257881254 | 566.228690652783 |
|        | 406.816482069141 | 448.371946119074 | 154.449058407217 | 386.544913399837 |
|        | 297.12411625104  |                  |                  |                  |
| DHRS2  | 715.93836911426  | 1146.84239258543 | 1277.0921553877  | 245.378747269929 |
|        | 6522.27232911897 | 10862.3952192141 | 8053.22070239424 | 10836.7380675792 |
|        | 12283.9915232122 | 339.98018551524  | 10135.7800994367 | 3789.1316515671  |
| DHRS3  | 1014.23822508445 | 932.505095432049 | 763.533962249076 | 888.371107987343 |
|        | 1362.75971646355 | 761.097992055119 | 2801.66917828364 | 1211.94273385872 |
|        | 679.557656724243 | 844.778755052304 | 1302.54547114701 | 1324.56751399862 |



|         |                  |                  |                  |                  |
|---------|------------------|------------------|------------------|------------------|
| DHRS4   | 721.966539760341 | 785.290353402444 | 711.166793546075 | 850.125434374005 |
|         | 999.658013198849 | 371.941204080246 | 488.746614111382 | 307.518881119091 |
|         | 412.801213309591 | 674.742955681908 | 574.896304593109 | 496.328898534802 |
| DHRS4L1 | 156.420501464224 | 147.535225305685 | 168.132172570809 |                  |
|         | 154.528396813382 | 158.039920243116 | 147.108661317945 | 156.328454726363 |
|         | 162.825380100343 | 150.670783991982 | 151.423936838934 | 157.986640251147 |
|         | 156.759600627542 |                  |                  |                  |
| DHRS4L2 | 224.224264678645 | 236.108432603479 | 269.726397478364 |                  |
|         | 174.26780796802  | 440.495339027491 | 178.928873342925 | 233.671878221507 |
|         | 181.578228610334 | 200.094610104813 | 328.550286726543 | 257.477501542521 |
|         | 244.307627077001 |                  |                  |                  |
| DHRS7   | 1214.16777512885 | 1174.69701182094 | 1447.07989164988 | 813.034056288861 |
|         | 763.533962249076 | 947.425912541091 | 1355.07170485397 | 1699.8374761666  |
|         | 871.913035811066 | 2871.34694522381 | 2114.9754128463  | 2193.376951552   |
| DHRS7B  | 257.168308311848 | 304.590636814607 | 290.090495047722 |                  |
|         | 295.507504000509 | 1023.29995420518 | 452.732079010502 | 275.642882589307 |
|         | 483.845891531326 | 251.959823608766 | 308.621688157016 | 392.004079531068 |
|         | 270.293807247372 |                  |                  |                  |
| DHRS7C  | 161.385691765316 | 140.020294940544 | 133.733674016447 |                  |
|         | 135.108420614547 | 147.387754442307 | 137.20253329376  | 132.989846726946 |
|         | 128.101371225192 | 156.179501567984 | 146.105844205919 | 134.770852936106 |
|         | 132.752401872376 |                  |                  |                  |
| DHRS8   | 155.333294650676 | 148.406031732776 | 163.967616022079 | 150.507308901391 |
|         | 141.681266095578 | 184.462286724102 | 145.536260846052 | 159.276726310525 |
|         | 158.374760929273 | 166.173429365582 | 162.223175359454 | 152.640683776403 |
| DHRS9   | 137.522792377933 | 146.743260100643 | 132.755256423863 | 154.025625092599 |
|         | 129.701347789845 | 128.08497128067  | 127.818137805569 | 137.416133786828 |
|         | 145.136075215082 | 386.221302830248 | 136.169525758215 | 121.076652800015 |
| DHRSX   | 208.587188476069 | 186.778334749551 | 192.827534610486 | 202.00431685587  |
|         | 206.488530785667 | 196.676479140094 | 191.335616210093 | 174.881557472722 |
|         | 194.029961195972 | 163.858222964048 | 169.744100665038 | 249.263194321516 |
| DHTKD1  | 177.708263037199 | 169.909886347082 | 170.381897441659 |                  |
|         | 178.358003030064 | 277.406445570925 | 388.326080754063 | 175.121069571371 |
|         | 170.646233722767 | 189.74261433647  | 163.422877959747 | 225.480366837274 |
|         | 220.079379312889 |                  |                  |                  |
| DHX15   | 1509.69760873558 | 1200.94425675913 | 1513.28088592885 | 1039.46136549795 |
|         | 1614.00098175383 | 2837.36293710422 | 2288.63508719706 | 2482.27419621925 |
|         | 2427.21100330388 | 1602.63977096867 | 1421.04485772969 | 2032.50052162637 |
| DHX16   | 645.438835606933 | 519.450899933049 | 684.715981522999 | 624.467319041884 |
|         | 661.096668635469 | 628.485648053393 | 642.255110250493 | 647.955521647635 |
|         | 629.707646271678 | 602.703887178113 | 503.285430318683 | 505.302263971007 |
| DHX29   | 514.213675499369 | 449.745016106912 | 649.052806726591 | 432.92947962962  |
|         | 287.503594820801 | 445.348044448953 | 461.822629852953 | 801.702878226247 |
|         | 408.993744895434 | 523.435696794756 | 447.579975492958 | 563.907454700224 |
| DHX30   | 325.907037744936 | 395.425715632302 | 308.726328440723 | 469.64693728427  |
|         | 951.772948602094 | 331.32397534437  | 310.533399024851 | 260.41082304175  |
|         | 373.096629378654 | 246.389203940944 | 315.411701623527 | 310.075815009404 |
| DHX32   | 506.659740456829 | 464.323065038265 | 585.552940765069 | 484.480643763982 |
|         | 385.798784913201 | 598.449359425056 | 787.017214032692 | 467.187222441283 |
|         | 473.947538805454 | 648.161646065464 | 537.06835963726  | 994.213397985121 |
| DHX33   | 309.47429862515  | 315.786908578669 | 343.946831770916 | 342.096409626768 |
|         | 241.917371866481 | 486.425387717472 | 280.749681050778 | 386.461076717316 |
|         | 262.691387377392 | 347.224999246223 | 366.705048374078 | 433.928818077527 |

|        |                  |                  |                  |                  |
|--------|------------------|------------------|------------------|------------------|
| DHX34  | 194.903531690239 | 191.795952536469 | 215.167086358143 | 206.68694753419  |
|        | 341.819090221654 | 237.641190133427 | 256.093363520707 | 259.064601204239 |
|        | 222.675370226786 | 175.810411923013 | 195.66091457697  | 221.231455446574 |
| DHX35  | 397.064325578854 | 307.982260548106 | 392.909481887174 | 395.645016679312 |
|        | 167.330860677012 | 269.448201975645 | 224.497348027469 | 213.584269089596 |
|        | 184.414609874199 | 191.018168651394 | 213.145460679531 | 245.378747269929 |
| DHX36  | 299.669394721682 | 270.021093158885 | 320.774102343889 | 287.656436278551 |
|        | 367.567681162661 | 332.032371697186 | 347.932135290714 | 437.836503489425 |
|        | 378.797952580504 | 337.935183275743 | 353.187829498591 | 373.189809737885 |
| DHX37  | 214.162670073541 | 250.82359383789  | 203.004815689972 | 284.351529744475 |
|        | 601.018867455333 | 280.246711704036 | 335.938170230765 | 273.073938260793 |
|        | 294.368406238222 | 268.186156177622 | 323.462252156562 | 285.30221551106  |
| DHX38  | 317.457588721567 | 303.762967437478 | 307.906312092805 | 349.382889326613 |
|        | 301.250189051376 | 221.253717494488 | 260.443814523694 | 247.643123415644 |
|        | 232.556667737827 | 218.334273320319 | 262.954856857756 | 237.989479738133 |
| DHX40  | 266.057472924341 | 273.864293250688 | 365.441289363381 | 277.86338481075  |
|        | 242.019489058244 | 438.146919555296 | 379.102958448288 | 402.866491417369 |
|        | 429.680602294138 | 336.639473916174 | 263.352118305612 | 317.493387040816 |
| DHX40P | 118.383317097375 | 119.144128641393 | 127.527378949803 |                  |
|        | 125.277002586952 | 136.351332391315 | 120.231559540009 | 129.486584446672 |
|        | 127.001546144286 | 134.70636200986  | 132.094446606227 | 139.318078285343 |
|        | 137.670655293096 |                  |                  |                  |
| DHX57  | 156.460374293022 | 145.104173410801 | 154.051705030348 | 138.098165515898 |
|        | 147.211769989922 | 169.043206258073 | 153.505155981348 | 162.756185479013 |
|        | 144.351763882823 | 149.736837985314 | 147.978039160763 | 156.000732564221 |
| DHX58  | 203.727455875381 | 174.690052785405 | 143.893751699551 | 185.493554506958 |
|        | 172.451128796055 | 145.780927034516 | 313.412131722189 | 289.164969943385 |
|        | 293.794745907663 | 146.266350809492 | 202.504840299605 | 175.245611094434 |
| DHX8   | 163.67719444924  | 183.3378528327   | 154.900676756492 | 202.324795686879 |
|        | 169.301498852556 | 190.018871923219 | 153.929167381674 | 195.946096353894 |
|        | 193.801858215025 | 172.310673499572 | 201.931760074628 | 165.797170648964 |
| DHX9   | 171.080373870373 | 164.659092629962 | 208.080089376299 | 185.485858719975 |
|        | 187.586093248437 | 228.739556788924 | 210.117033165026 | 239.12905945808  |
|        | 205.908052642222 | 206.203717450138 | 192.209344004015 | 266.534316786801 |
| DIABLO | 692.53483413403  | 733.648333788712 | 587.893636997642 |                  |
|        | 713.23381913235  | 908.704610877319 | 837.872187194784 | 866.413995755699 |
|        | 749.220616713093 | 1075.3328563531  | 624.825216056495 | 734.139557942719 |
|        | 837.413261433363 |                  |                  |                  |
| DIAPH1 | 413.172954892025 | 421.140525880287 | 266.217879616686 |                  |
|        | 353.243400332397 | 430.329437928013 | 410.645457106122 | 408.993744895434 |
|        | 458.875979229339 | 368.0573385048   | 798.389385197471 | 600.162650426961 |
|        | 607.979208454176 |                  |                  |                  |
| DIAPH2 | 374.718289636553 | 389.051174954505 | 259.472319994929 |                  |
|        | 280.990656342284 | 186.388067641269 | 359.991823789356 | 147.297163685914 |
|        | 168.091278015885 | 167.900071375885 | 202.483493595704 | 178.43642939806  |
|        | 172.965746521132 |                  |                  |                  |
| DIAPH3 | 138.74117178479  | 142.321476446203 | 134.434198188045 |                  |
|        | 138.003440266411 | 170.706932460836 | 172.120772549791 | 143.444109491884 |
|        | 158.845174721328 | 168.132172570809 | 160.010501226517 | 148.297939240474 |
|        | 167.284724396943 |                  |                  |                  |
| DICER1 | 260.045018348182 | 236.548439331855 | 273.369722814068 |                  |
|        | 232.699786290509 | 190.138730960643 | 222.051005238856 | 225.4575611466   |
|        | 273.044064077    | 221.272872023413 | 279.879377933144 | 353.385210690169 |
|        | 336.380724981693 |                  |                  |                  |

|        |                  |                  |                  |                  |
|--------|------------------|------------------|------------------|------------------|
| DIDO1  | 195.724873069362 | 182.851203073653 | 226.506852362359 | 190.489530928259 |
|        | 159.848342125486 | 243.936797286495 | 316.125364442611 | 166.447510782568 |
|        | 202.691507273819 | 160.992494552269 | 221.18757533703  | 257.880331012233 |
| DIMT1L | 1426.56252600395 | 1208.25171673432 | 1407.43503866211 |                  |
|        | 1361.54107116915 | 696.475639532595 | 930.25842384208  | 1051.45401327176 |
|        | 722.974310297586 | 800.373159084181 | 1025.88559245013 | 740.527607312565 |
|        | 1329.90419210779 |                  |                  |                  |
| DIO1   | 150.042173991463 | 140.067809125008 | 140.605866597575 | 141.533138525284 |
|        | 138.111242936657 | 141.522701487198 | 148.609721587632 | 151.577450119302 |
|        | 140.374644951491 | 137.014698467096 | 129.195047484888 | 144.979749941424 |
| DIO2   | 188.131876231735 | 176.714471790643 | 186.215602572358 | 202.761449711661 |
|        | 188.981391266203 | 157.313737338264 | 136.630678899513 | 152.429970809069 |
|        | 162.923734210933 | 238.461248099002 | 175.073595611435 | 168.047136398816 |
| DIO3   | 178.885625009973 | 160.215396651606 | 201.81649023518  | 178.304914997023 |
|        | 150.208809981642 | 148.510023599641 | 156.511202150773 | 145.71535210212  |
|        | 155.172667450053 | 149.173121214851 | 144.240470871638 | 155.61996871093  |
| DIO3OS | 293.925995360234 | 248.360540656183 | 291.577778800314 |                  |
|        | 195.981555981238 | 146.201445857452 | 139.503902205317 | 142.963036923104 |
|        | 145.432667767652 | 147.368455727098 | 124.275741099764 | 135.782158269978 |
|        | 137.524968609776 |                  |                  |                  |
| DIP2A  | 147.106355591496 | 146.112388101621 | 137.613233533453 | 143.728569494708 |
|        | 158.33974431499  | 140.552143090027 | 151.891318080151 | 161.640122360448 |
|        | 154.156272284591 | 179.828494168009 | 176.631604815669 | 151.019907064794 |
| DIP2B  | 321.049000153127 | 355.80042210486  | 276.414209660023 | 362.899103657252 |
|        | 397.660202059209 | 484.764806127211 | 438.870464403215 | 525.138476928759 |
|        | 502.063888359427 | 571.273512452931 | 481.453770150269 | 409.743899750699 |
| DIP2C  | 497.759125486158 | 546.029974898225 | 719.13080264227  | 705.311256840178 |
|        | 218.470365730283 | 269.530151236658 | 184.482849019679 | 185.396765725228 |
|        | 194.637233028442 | 159.683695366575 | 178.284294783418 | 229.97640195632  |
| DIPAS  | 134.04235176608  | 129.461160777216 | 133.004765428575 | 134.565199667396 |
|        | 139.231340020014 | 134.161664663192 | 126.402405227897 | 136.249621724093 |
|        | 136.120813399579 | 143.697931551096 | 130.355969431473 | 135.200049257744 |
| DIRAS1 | 141.693224578298 | 134.808485735121 | 120.184782039538 |                  |
|        | 134.399228996542 | 117.404906698431 | 120.78129870199  | 107.884870799936 |
|        | 116.403106568357 | 124.359615295938 | 128.844026422327 | 105.952640312359 |
|        | 118.591554881375 |                  |                  |                  |
| DIRAS2 | 153.600132368924 | 139.078162119733 | 153.996429870564 |                  |
|        | 159.094117857743 | 170.069291215013 | 141.873307688149 | 164.066839397676 |
|        | 173.010799217261 | 171.629605754643 | 145.998177732093 | 169.963805688413 |
|        | 154.426605816862 |                  |                  |                  |
| DIRAS3 | 169.834078550805 | 150.831554010122 | 164.690739760426 |                  |
|        | 154.212927357622 | 147.125005489393 | 154.491373296392 | 145.906601611338 |
|        | 142.930903395131 | 151.506013510204 | 174.471304281502 | 147.441650320053 |
|        | 145.476377346532 |                  |                  |                  |
| DIRC1  | 148.444479022559 | 127.855167644203 | 147.829502959865 | 144.692900548503 |
|        | 144.00214898009  | 140.782522936146 | 146.609485664113 | 126.026938396257 |
|        | 137.823152565933 | 155.278984760268 | 141.622592268163 | 161.564505054217 |
| DIRC2  | 297.609793563225 | 309.0578543424   | 320.305852961452 | 257.292125083248 |
|        | 726.731270955732 | 573.244735292944 | 897.958748317315 | 523.937128789616 |
|        | 641.645855499704 | 537.216291942143 | 683.861021234927 | 470.868288641048 |
| DIS3   | 161.010206405916 | 152.864765895508 | 167.612577768782 | 162.61434899634  |
|        | 163.516075721791 | 206.548878646452 | 162.895923745031 | 169.095270479344 |
|        | 175.573400981771 | 154.291717784335 | 158.295583769612 | 245.01029221002  |

DIS3L 911.340266389071 1023.29995420518 1119.71228054585 1095.52349352502  
503.757797957538 622.834462068316 763.263858769038 600.919152191636  
508.449904285771 550.671679318681 720.710754387733 797.73902873919  
DIS3L2 221.171478972931 230.079664410595 238.685014863143  
238.310077556167 193.832033192375 220.079379312889 214.8478629277  
193.134414137433 205.036081947168 238.183096218311 191.777253122672  
219.792171863015  
DISC1 133.792673129743 132.695992860853 133.875667250136 132.475414208533  
131.665421461826 125.617143363441 123.505435008269 122.583461806645  
131.856313046545 125.780294378066 139.162076054072 129.52578899011  
DISC2 161.979914539039 155.031272695335 167.575968906119 188.724274062294  
153.577349107512 145.965900441953 138.529160075977 152.342712570625  
148.448349327493 150.105503384881 141.147683040881 148.44261900795  
DISP1 499.544050752036 705.737228226014 672.862678078975 929.69741581954  
186.625452120269 214.739818213164 247.942904862478 191.284275676256  
220.136131941508 199.933148219784 314.063025950327 266.71318061066  
DISP2 144.349602838518 149.290007708698 139.048016900762 136.704018446388  
206.502189514795 133.537552829999 146.557058433232 139.119638136874  
132.014213378179 131.215202712283 174.155599133789 145.983627592197  
DIXDC1 330.553659265085 298.085365348496 556.863361789449  
265.219444616245 118.239637776941 136.649743237542 120.649467083125  
132.751406897891 138.891642304194 144.062079886084 134.121026382437  
132.697727983601  
dJ222E13.2 129.549673572516 141.486042999328 130.902319266342  
124.449679223202 130.874283538818 131.257901340773 135.654614839107  
138.79473329684 158.604431001643 120.727504500018 154.722895261876  
128.071379991958  
dJ341D10.1 227.267783818298 215.094633380547 233.192751618176  
192.375251343504 174.202069525223 195.532022060219 194.014764659513  
185.984938124891 170.784229026842 229.62164568989 200.790119570144  
176.890596690798  
DKC1 825.345092964844 882.798927428142 837.603727062008 768.67030514096  
2269.44503773126 2086.15449885278 1410.58825009446 1717.09434498876  
1327.65573168233 1213.61170930345 1581.06548216423 1582.0221231161  
DKFZP434A062 128.002822538671 130.142263689536 125.117333434527  
134.425483661043 128.76720970745 124.998601194756 117.567991653999  
141.585172896047 129.7137422914 136.001505582342 121.905741525277  
139.602168254761  
DKFZP434B061 135.760578586004 139.912325578837 143.185372109165  
142.326319895395 138.114938404796 126.349403754775 148.060086496148  
134.897958140444 140.021640936288 144.769824608083 140.447933562667  
140.457727109762  
DKFZp434E1119 138.215708514725 135.693520183014 143.028618831382  
149.630481387506 137.788504385206 148.715065348779 131.383113302567  
128.583503171594 131.523538461751 138.746987455826 136.497295707149  
134.029984991385  
DKFZP434I0714 161.761125440228 178.130223302924 154.066939372379  
180.34788837703 155.30926640293 152.837739128546 178.245841646175  
172.562162872242 181.37137053478 153.56082876276 144.458829225668  
171.06385200256  
DKFZp434I1020 150.822586904738 135.767818903328 140.936204899093  
151.416893156246 142.470799054068 153.485731788293 141.374831983971  
144.669509071181 138.776108280637 151.282370273189 148.922537778634  
143.669490888725

DKFZp434J1015 125.342580368417 126.563876945046 155.355051932357  
150.267298097687 157.659824861915 129.015422924366 151.392024228289  
147.905406818238 142.268018184723 147.370836610849 128.620852653765  
148.932696684374  
DKFZp434K191 586.642581067137 561.858563298512 459.171226689178  
519.672796004691 329.926864732606 688.464980326689 521.512936372701  
1649.46398639795 483.067471841953 339.490955270138 443.964363178742  
611.540759532294  
DKFZP434L187 144.474814266475 142.09146795308 152.321890796527  
140.16233428205 148.605816748229 136.906909165944 139.217113811817  
138.940564112156 148.376194044247 141.205975588506 147.803464591663  
138.261506562904  
DKFZp434M131 142.732625557628 145.272073426254 146.160188002433  
141.050384368733 148.132450240784 142.928920246687 143.543607779991  
161.084088366981 140.01151290873 153.655778377717 138.349773531218  
152.042744996136  
DKFZp434N035 142.709768829207 145.574725784632 145.873819094778  
144.136328845967 163.470025318612 160.742365719929 150.452467115669  
154.924190468067 152.247504238261 157.619627711954 149.657951204528  
159.365070384451  
DKFZP434P211 148.590732065459 153.056369304663 153.972471779464  
159.990561741675 162.033909093358 149.100294463597 138.266328639467  
152.760855359297 145.139966629363 144.708780756278 142.833025633146  
154.771737131348  
DKFZp451A211 159.166059518117 172.961115357569 151.563917522864  
177.073245863872 133.692996980809 140.833666276568 134.819406064011  
135.232878188098 139.696266471271 140.482728188987 129.321346185566  
135.1951749488  
DKFZp451M2119 157.221008210698 154.661456780865 161.922462797736  
153.095594614683 123.61956613951 129.295956874012 158.14434287956  
153.589626253969 149.740404686695 163.37518739397 147.079157199448  
151.758970249544  
DKFZp547K054 154.838407529853 150.661584243174 158.36796888959  
160.449911844008 180.923089242255 141.505120938773 159.716066475442  
136.515951031895 132.582062079623 134.572552391307 146.287161912291  
153.843250142472  
DKFZP547L112 134.140533647509 144.954595802474 155.957570398118  
140.667415746111 146.528945049588 164.820007934887 133.113581756557  
132.820927638053 129.203236898198 124.391225837909 127.095347480109  
140.156797128045  
DKFZP564C196 132.282125790062 143.078022283871 154.027862576708  
131.655316312379 154.091431691072 130.51901676405 128.79724400425  
138.541779821934 140.818413826758 142.469353808346 130.836079676477  
132.817645625115  
DKFZP564J102 212.171281020103 223.429738319185 301.188296465202  
292.429831186609 129.642952083513 159.835577644136 148.302775746627  
222.315451077459 266.057472924341 142.796371223204 170.394088019518  
133.849237689264  
DKFZp564N2472 127.171331062578 126.997614441981 120.220156455352  
129.647514123731 134.76586363177 140.190234214948 132.23149173224  
128.517315006019 118.000757530896 127.620377473963 164.659092629962  
124.176944998906  
DKFZP564O0523 169.544515294662 146.395248696835 160.608674893418  
151.72544764489 161.841975820372 153.258616843783 169.826068012389

178.058616028026 186.033093285894 170.158189150422 163.846242743377  
163.474261351901  
DKFZP586I1420 213.097664319741 226.531255313921 226.824313642101  
213.194154171149 170.596937075493 282.392419584508 298.165097953983  
265.791342287571 203.791916347213 315.064477782052 406.736165197168  
320.597495751519  
DKFZp667F0711 132.934955542743 123.410467384598 140.089210795507  
136.625136565562 134.46743016543 129.088718286391 135.275284142536  
120.931585398914 129.318409053566 128.020911959353 119.459625817735  
131.648308760913  
DKFZp667M2411 167.984051648058 163.159571059471 263.74335003375  
176.995049477843 181.340312140534 210.822216545773 217.013533525724  
211.609763150578 169.583355171423 188.166168428752 180.354899434843  
194.734255772365  
DKFZp686A1627 126.416290818296 120.065876525792 127.084267631845  
126.635105491524 144.152325539824 126.557869929234 145.487783396345  
133.780423932326 136.670253859184 148.844916975586 134.507558495307  
124.578552584603  
DKFZP686C2281 139.306122448857 150.122035262873 159.730925830278  
121.531401500498 116.465213348716 157.58659226599 150.286277647569  
130.189958197332 138.820797333519 140.665332203898 131.734429913106  
144.104372749581  
DKFZp686D0972 113.947948541258 109.113476990309 113.249267122926  
114.77964341895 113.980716384814 111.010889276873 115.582048644075  
120.521509788705 122.631814400575 121.807661901776 111.765812595638  
112.714282429822  
DKFZP686E2158 133.465593684519 126.338676765473 123.571641517019  
123.285059856341 132.440818532628 133.951322753098 139.237360556305  
143.88649412841 128.545699891734 126.394032757479 150.168496148941  
149.642946071295  
DKFZp686E2433 123.860747215706 153.43000129811 151.936543085044  
131.349297554112 161.799743586569 163.521095869383 155.731897985566  
148.090431893307 131.497454038525 124.01558540593 173.907933001446  
162.808270845998  
DKFZp686I15217 182.698275130489 187.63609695026 258.489608621438  
202.178451227304 163.748692741999 185.31769184805 182.275998840116  
174.587558727209 171.145909843389 179.49202902995 177.549330396268  
195.269099451599  
DKFZp686J0529 162.06940121135 148.347642424885 146.481298877242  
145.646191500321 147.449186980143 149.364498870469 154.183537565624  
164.057147728625 142.024171830924 145.615291241733 143.521510363933  
141.473218014605  
DKFZp686K1684 164.525784478026 162.439052954676 164.836381332774  
148.660440219589 157.108043150259 148.720181793879 152.112177721714  
155.441190892146 146.286319248569 172.169129806643 153.885582272269  
152.772177215856  
DKFZp686O1327 135.596007994731 152.758653228708 123.998343902602  
153.143706194386 133.666244052469 151.293676705634 148.585224298375  
151.59613008133 152.074017988748 181.783275804424 134.30624644595  
158.232100962615  
DKFZp686O24166 217.940575516933 219.441959146815 260.016906472407  
211.289598823191 175.010849510711 172.008994980259 202.397972518715  
186.975609955892 189.2642795052 212.33360547376 170.257439890277  
180.837420957945

DKFZp761E198 161.402322405903 130.262411213764 132.059507616101  
121.855752708908 129.290542121353 126.439948611449 127.731816003312  
161.514651272858 139.503902205317 137.419835194075 139.380610974147  
143.470181156799

DKFZp761O2018 162.494429648551 167.243544185778 151.669421563954  
161.441613587571 149.647926859169 172.521737547052 164.302998010829  
174.646321871605 159.758196845781 148.112717810117 135.627840788802  
147.994386096925

DKFZp761P0423 177.716742595321 171.444558905575 171.216275057884  
150.629932241703 364.191263843897 266.71318061066 233.047541132048  
240.915496717526 348.921877633633 511.374117402707 233.232319881243  
336.639473916174

DKFZp779B1634 145.870135196037 149.65417821994 138.301397056664  
139.564898998489 136.966690353637 230.749601687217 154.027862576708  
188.864388750448 163.326102597955 145.728370703165 133.601133679159  
126.310788291075

DKFZp779L1853 154.127346849182 146.720204808211 137.742393475755  
132.725232102483 144.321757243275 128.978197156274 142.508525378171  
135.980886879513 141.071184297124 129.226815062589 140.78902818186  
136.311902195562

DKFZp779M0652 142.38097037888 143.381277901138 160.429643729685  
155.483400816946 127.361974492821 145.250076958551 152.812142230375  
142.89427871125 138.455086062782 155.358918578397 152.713528089347  
143.521510363933

DKFZp781G0119 148.785977829275 143.458937009197 147.125005489393  
156.481871341275 153.46645509759 156.136962310077 146.527844778835  
150.155154998981 156.381599544223 145.924751649542 145.52979050795  
150.339554736141

DKFZp781N1041 156.866867371872 167.640645997754 160.423982411027  
155.608876496443 158.233862587586 158.308558656144 154.804753043168  
157.507108643575 157.142101889337 153.128027266281 140.245786278057  
151.121293928309

DKK1 148.686975104375 175.902751522861 141.879359965317 135.153588830407  
706.628675634893 233.953994677015 151.305201022012 169.733427590141  
163.066051106092 159.561431866706 232.778488697337 162.61434899634

DKK2 168.302168350095 158.704425428694 170.4583554058 173.02970820174  
173.810080280732 167.70368494182 165.932628858503 158.6953558198  
159.765585531442 166.988725688589 137.75060150486 173.299643109576

DKK3 1720.14021303639 1205.45751308367 699.800360892516 414.267332328081  
270.231637012624 463.091387717305 273.651114834013 439.852826905352  
505.560841055884 1095.52349352502 311.966971734249 350.58427958432

DKK4 124.726035027951 113.582654469735 115.002176041974 121.619593453259  
122.878790127038 124.365185583133 154.618685493541 111.178024950204  
601.401329244185 122.587545171646 111.949644842971 143.868962478182

DKKL1 135.550882872661 135.286686011087 130.539632182729 146.681183890181  
146.309171902112 147.333142209628 137.172030225913 141.099781722697  
131.556892859203 127.6516565653 162.244691888031 132.966873990501

DLAT 271.522696252995 257.602370597316 330.703588385626 265.572253407219  
264.905947922753 283.46492196692 221.272872023413 297.636316709322  
264.233381434738 241.418016203544 233.953994677015 275.013838208239

DLC1 484.903322308422 555.758485277905 276.476790719416 367.644907862372  
172.783430414523 289.09614335372 530.819778703194 134.503552797411  
186.06425658259 136.884799902348 307.410175748955 125.384706864406

|        |                  |                  |                  |                  |
|--------|------------------|------------------|------------------|------------------|
| DLD    | 468.170972478717 | 487.537691131703 | 715.039905439621 | 468.93543246394  |
|        | 628.000860165888 | 606.162976359615 | 651.998433127992 | 835.284130042504 |
|        | 527.930077857945 | 602.371843434907 | 610.759447723026 | 1189.11053680293 |
| DLEC1  | 136.333928675403 | 140.42579083092  | 135.025907096066 | 140.704317015307 |
|        | 142.00857631537  | 134.477081392474 | 140.074841537258 | 137.581659385375 |
|        | 138.909419415137 | 152.323927317575 | 144.104372749581 | 137.832597613423 |
| DLEU1  | 173.408784502027 | 157.927709922368 | 154.417731984391 | 148.79958121087  |
|        | 144.310362660942 | 141.794898246882 | 124.153063838817 | 141.052322220012 |
|        | 190.947996918605 | 161.534421340752 | 146.146800933028 | 270.92671642109  |
| DLEU2  | 169.933706225406 | 171.320653882424 | 177.393812005949 | 175.29178007783  |
|        | 181.722373730185 | 264.983729290122 | 169.206723147505 | 202.343343669937 |
|        | 178.394895649664 | 195.711047893396 | 172.951567541592 | 234.947745514175 |
| DLEU2L | 119.578240680666 | 116.89487516867  | 108.895922800601 |                  |
|        | 111.409447323674 | 103.307703547649 | 115.605206174867 | 112.198629213643 |
|        | 109.003365273337 | 104.861024325857 | 112.565341690522 | 130.110413621436 |
|        | 115.80656409185  |                  |                  |                  |
| DLEU7  | 139.817493158675 | 141.779801021888 | 149.000760379976 | 143.973464003036 |
|        | 136.582137928022 | 143.839170216353 | 132.197346228417 | 146.530318748416 |
|        | 156.543267949167 | 149.99203906203  | 137.229871801676 | 154.683723064797 |
| DLG1   | 174.461487057542 | 182.798526632723 | 191.58185405868  | 178.464811133    |
|        | 149.630481387506 | 158.76356962428  | 187.48055574295  | 182.410688592378 |
|        | 211.609763150578 | 220.113261580385 | 178.707066209511 | 171.589889474122 |
| DLG2   | 164.541417588646 | 171.212749388553 | 141.062226285596 | 158.8246699332   |
|        | 127.382266838772 | 129.672284417918 | 121.168550902281 | 122.456286448252 |
|        | 129.105655010455 | 141.999730335668 | 132.69067627743  | 116.902574164498 |
| DLG3   | 194.686527131656 | 211.844563155792 | 188.070213212057 | 230.447203571825 |
|        | 176.155413809391 | 196.169988112042 | 166.489436134841 | 152.957297648595 |
|        | 164.455111983634 | 139.642457979496 | 202.024504592763 | 195.10410545445  |
| DLG4   | 277.539110964815 | 474.216057978384 | 212.915949933033 | 650.679096367632 |
|        | 366.788087591332 | 176.312626750427 | 141.474583706011 | 147.245636620228 |
|        | 168.007337847195 | 135.894512504725 | 159.099495828517 | 175.585857393085 |
| DLG5   | 216.05364037271  | 218.644953001365 | 199.776140037612 | 213.7326050342   |
|        | 210.751430486845 | 173.299643109576 | 237.88097138936  | 167.293320986716 |
|        | 210.729945718068 | 188.291563792748 | 260.224777636733 | 196.076386020815 |
| DLGAP1 | 126.66432941518  | 129.462319953515 | 127.951403055054 |                  |
|        | 121.774697402171 | 128.131324375789 | 141.719556176029 | 125.005019889478 |
|        | 127.545397354821 | 120.160652344221 | 128.069504716124 | 136.222421297872 |
|        | 137.018521754443 |                  |                  |                  |
| DLGAP2 | 122.295222990408 | 126.798976470472 | 119.096195018596 |                  |
|        | 125.672285485643 | 112.456644814178 | 112.239647575661 | 132.22974656114  |
|        | 135.383585408897 | 134.045938361221 | 112.710573586525 | 140.624437508178 |
|        | 124.551603326682 |                  |                  |                  |
| DLGAP3 | 147.891442774921 | 129.329521415816 | 124.647992480694 |                  |
|        | 129.992015202357 | 145.090639086338 | 129.854478528455 | 144.096624787142 |
|        | 142.175432631861 | 150.51537512828  | 134.599629045981 | 126.732121894377 |
|        | 135.098343717085 |                  |                  |                  |
| DLGAP4 | 324.713347085998 | 364.766154056243 | 250.406775889932 |                  |
|        | 515.432065049838 | 284.995098167431 | 201.81649023518  | 220.92105843037  |
|        | 182.633773540249 | 211.208937901871 | 161.930142040623 | 197.341423434688 |
|        | 178.28963352311  |                  |                  |                  |
| DLGAP5 | 127.736712231221 | 152.504620068655 | 131.169769031768 |                  |
|        | 137.044079235724 | 335.47484353322  | 721.966539760341 | 186.321879879561 |
|        | 261.065986251886 | 257.685284145848 | 314.337680575998 | 184.989027770708 |
|        | 341.973002478932 |                  |                  |                  |



|        |                  |                  |                  |                  |
|--------|------------------|------------------|------------------|------------------|
| DLK1   | 109.425878885118 | 125.997109913348 | 113.791585365477 | 116.397855001959 |
|        | 118.540620928268 | 113.879459563492 | 112.684334910243 | 110.234403581151 |
|        | 114.524341239889 | 116.533361070234 | 131.593705080542 | 158.183045411298 |
| DLK2   | 144.393688888553 | 154.420795931034 | 144.926838698422 | 142.108805047729 |
|        | 159.307394610466 | 143.801139839773 | 162.351212914573 | 146.586879656174 |
|        | 136.755975832051 | 262.233918187791 | 149.315684447787 | 140.870849757111 |
| DLL1   | 342.315456386729 | 329.926864732606 | 175.327597807738 | 225.730739636442 |
|        | 156.445294524594 | 315.47473326786  | 306.277823025572 | 232.492398623889 |
|        | 210.14307111352  | 288.770330002807 | 277.539110964815 | 224.766155406229 |
| DLL3   | 125.882246459692 | 122.97229333908  | 123.643292039274 | 130.955161943331 |
|        | 152.373931758229 | 135.918590725404 | 139.22543724535  | 116.969799327195 |
|        | 120.894583222813 | 131.892151111901 | 121.150371270451 | 140.081280065913 |
| DLL4   | 137.025625133986 | 137.725329029129 | 126.022145004164 | 137.225659453984 |
|        | 142.259196792767 | 141.486042999328 | 134.516390697561 | 133.412452607155 |
|        | 140.245786278057 | 138.354300118735 | 143.209289043824 | 141.997165490755 |
| DLST   | 279.070493043898 | 321.977549744483 | 192.980781927122 | 386.305638633172 |
|        | 309.47429862515  | 142.575382559357 | 161.16688895179  | 163.988099963018 |
|        | 158.653161314597 | 162.06940121135  | 327.696359071012 | 170.290455446376 |
| DLX1   | 153.311705636864 | 145.958718601763 | 153.492072037266 | 157.423242850568 |
|        | 148.022287939066 | 151.285933600303 | 146.748572532267 | 148.408616955694 |
|        | 142.082257952004 | 172.245089970803 | 156.085949215738 | 139.494962965774 |
| DLX2   | 150.117906461237 | 162.55521875551  | 134.834641868502 | 149.4401812      |
|        | 126.515480612924 | 134.420446702459 | 172.774914399844 | 158.200211812067 |
|        | 140.985432994867 | 143.082880435412 | 164.74234322574  | 167.55209828062  |
| DLX3   | 152.346098251128 | 146.792951584868 | 161.755290291637 | 144.287786573389 |
|        | 248.690121805116 | 205.560952959537 | 191.924177620803 | 165.491193869938 |
|        | 199.408907117764 | 246.710233781784 | 170.531713392258 | 184.306452616482 |
| DLX4   | 139.723117427543 | 139.872976072847 | 151.567693140302 | 143.403396831929 |
|        | 138.216926722025 | 137.368211928541 | 140.644800545854 | 138.789908033669 |
|        | 140.497181450706 | 153.191840013692 | 141.666394024363 | 143.501380161409 |
| DLX5   | 134.125038192486 | 141.112047881014 | 132.91094012928  | 121.271403807802 |
|        | 243.10297424873  | 170.233084517898 | 253.42022722564  | 333.676803661366 |
|        | 545.362650746876 | 754.97177863997  | 411.71606840872  | 170.974759483946 |
| DLX6   | 143.554726863556 | 135.968346417524 | 121.159593382017 | 125.528638246486 |
|        | 152.364417528975 | 129.79093244374  | 131.924162435354 | 129.692578787988 |
|        | 130.593846004132 | 113.154880173167 | 141.513636348978 | 127.144291519133 |
| DLX6AS | 133.496922906874 | 134.688504981603 | 134.616051224668 |                  |
|        | 140.374644951491 | 221.471811658459 | 142.688809469455 | 189.633348499854 |
|        | 154.01988200569  | 159.854639082837 | 156.126009063311 | 178.416969664816 |
|        | 150.593928635647 |                  |                  |                  |
| DMAP1  | 523.591472915151 | 631.653707589221 | 466.257158794525 | 773.330948077036 |
|        | 632.843164522867 | 497.629319581786 | 550.671679318681 | 540.078145038497 |
|        | 544.30845362168  | 473.260534978556 | 620.899414581162 | 544.669441360594 |
| DMBT1  | 129.051642626091 | 145.919359461744 | 139.491769969541 | 130.844272373448 |
|        | 138.142193489481 | 131.510494315469 | 142.440344960504 | 132.135448831967 |
|        | 137.926193455157 | 127.466779212194 | 143.182399285928 | 141.628203045085 |
| DMBX1  | 134.036236880951 | 142.589312139207 | 140.655002540298 | 149.604507483606 |
|        | 143.861970001207 | 158.726115143818 | 136.91779948054  | 174.767697866801 |
|        | 139.851678406637 | 152.545261723881 | 162.026757124868 | 153.46645509759  |
| DMC1   | 8958.34797715349 | 10506.1271023809 | 8261.82420896892 | 9671.66667662331 |
|        | 1659.80909859514 | 10135.7800994367 | 4697.94415026712 | 7902.9189607838  |
|        | 6203.08085790474 | 3810.98043907046 | 8292.04796307133 | 5636.26097921507 |

|        |                  |                  |                  |                  |
|--------|------------------|------------------|------------------|------------------|
| DMD    | 203.852316712377 | 184.557630172634 | 214.684538620841 | 195.316077537716 |
|        | 132.224831869802 | 130.955161943331 | 134.033751039071 | 125.942455135541 |
|        | 130.198147836925 | 126.601395870533 | 134.624322761212 | 124.45782375705  |
| DMGDH  | 132.851791525098 | 120.235652849894 | 135.68605915552  | 133.613988293895 |
|        | 111.708970469189 | 124.975454733084 | 126.279119798177 | 125.717328918165 |
|        | 127.749992538985 | 126.097544650407 | 139.342430217926 | 132.439176846818 |
| DMKN   | 168.643026828823 | 175.874387612235 | 155.98413216883  | 151.083551412109 |
|        | 277.652851236546 | 2952.67114077688 | 177.333305785248 | 224.67853219142  |
|        | 188.268774618164 | 1762.09874961415 | 308.281798808746 | 421.255522475862 |
| DMP1   | 132.845116298605 | 120.450111018432 | 133.028789808654 | 119.583378101838 |
|        | 124.869732867761 | 120.691810909148 | 126.216519704249 | 117.682034050478 |
|        | 125.247402280272 | 123.571641517019 | 119.040642659337 | 131.633827974141 |
| DMPK   | 285.30221551106  | 320.467139255533 | 250.963601187362 | 561.609211243027 |
|        | 137.767900781368 | 135.673080643346 | 126.837151457845 | 127.247764390727 |
|        | 142.25795237339  | 126.294085960617 | 161.371477511362 | 130.729989463558 |
| DMRT1  | 126.589865262427 | 113.274668934773 | 115.293844461817 | 147.740657356905 |
|        | 130.770335966929 | 141.990639998829 | 147.449186980143 | 137.971108694323 |
|        | 128.917399281607 | 133.834423222601 | 139.180086017033 | 129.23899614612  |
| DMRT2  | 123.391298926957 | 135.823975527501 | 134.000363767958 | 131.483427112288 |
|        | 128.729687597908 | 137.008110557038 | 128.738746025289 | 132.975603230163 |
|        | 136.584199831088 | 132.871179509995 | 182.02250582556  | 121.316836274255 |
| DMRT3  | 104.896224175106 | 113.970633751086 | 109.471542280224 | 112.977469350139 |
|        | 121.567879358508 | 120.106270603148 | 111.985567835684 | 122.102644097132 |
|        | 103.36057518781  | 114.749597426757 | 110.003750007057 | 110.093565974873 |
| DMRTA1 | 137.581659385375 | 139.297276687352 | 146.624631389743 |                  |
|        | 130.009322405768 | 125.243735617266 | 135.978826529736 | 125.752962155179 |
|        | 128.087991226561 | 122.098850053347 | 120.967523586161 | 154.426605816862 |
|        | 155.233830396052 |                  |                  |                  |
| DMRTA2 | 142.991135981933 | 145.983627592197 | 140.975056186954 |                  |
|        | 145.000523037022 | 166.958831664154 | 147.26204590693  | 143.260448301109 |
|        | 137.054278745724 | 143.546629073997 | 161.740466814881 | 154.783699020901 |
|        | 141.550553034455 |                  |                  |                  |
| DMRTB1 | 132.113317893587 | 127.800634041606 | 116.403106568357 |                  |
|        | 115.118170902045 | 127.097605337434 | 125.065813262416 | 125.478878240473 |
|        | 122.075440298074 | 119.830261862805 | 125.362754088168 | 164.319378349317 |
|        | 122.94937342991  |                  |                  |                  |
| DMRTC1 | 150.874014332213 | 136.621173927187 | 129.89329138222  |                  |
|        | 132.478801067837 | 127.295532954648 | 132.354503055131 | 125.443242860371 |
|        | 135.6149724596   | 126.381288663037 | 138.858138379065 | 109.69466049307  |
|        | 128.0366252162   |                  |                  |                  |
| DMRTC2 | 104.739307327595 | 121.752481757054 | 110.392617179163 |                  |
|        | 130.339214643083 | 120.280241193135 | 112.675715371087 | 113.400050190315 |
|        | 112.776764215618 | 112.07238018581  | 122.187031504466 | 124.130599753093 |
|        | 118.176124626025 |                  |                  |                  |
| DMTF1  | 529.529314022043 | 448.260934224454 | 531.421912541822 | 421.384700184923 |
|        | 292.145553580042 | 383.802494922918 | 357.773949920377 | 437.248311551717 |
|        | 338.026161865853 | 303.300028849873 | 414.403321220432 | 426.995700632434 |
| DMWD   | 464.436380568216 | 666.570977208535 | 372.255208814622 | 934.546444634669 |
|        | 474.917507160629 | 365.541609015117 | 262.954856857756 | 304.058158731957 |
|        | 355.714202328378 | 265.219444616245 | 234.484787292284 | 277.073510273425 |
| DMXL1  | 164.777719508421 | 182.725987056391 | 183.005535466221 | 166.780319723055 |
|        | 138.861385127242 | 161.463042036376 | 180.569583206488 | 159.738700107615 |
|        | 137.677396262152 | 171.504939477949 | 171.589889474122 | 134.432461986523 |

DMXL2 159.399804351771 152.910433120981 151.282370273189 167.698883940638  
187.112176929485 224.186573847185 253.580286414227 191.754626760061  
238.149614104568 199.597685421675 186.951061159734 222.820391338687  
DNA2 134.637520371454 138.5833090264 136.922282125029 135.079944196457  
158.374760929273 171.768618884215 149.029275579026 151.831627236638  
158.064409011013 136.83883055114 168.71216652064 160.331940529151  
DNAH1 192.441337304606 201.850932289186 202.369905673351 248.43491649623  
144.373226011578 194.500222559978 194.655710454472 204.89842561202  
238.745953695925 188.567747377006 186.653791045656 156.239937979051  
DNAH10 130.161889021281 136.908861280856 138.687013437904  
143.909501365162 137.290687951485 137.243175880462 138.810236692956  
139.430808017891 142.664793323255 129.7536873083 138.044751228397  
139.089444892187  
DNAH11 146.227452269648 134.160100276452 154.854538639035  
146.303959493672 140.120051507626 161.225608630791 159.199045715212  
157.425924587516 151.87495966414 146.336371857755 121.834248129933  
144.408426565541  
DNAH12L 126.532293165932 113.083678884076 115.734230176652  
119.221976571036 111.639177843969 112.227434965199 116.46192274217  
111.497241941203 118.991494185841 122.232732968363 112.943630133093  
115.5765427629  
DNAH14 138.370241517025 139.517413585211 141.200676699805  
137.00532429734 137.683228179974 137.607767467172 143.085022888434  
141.640292723776 136.067657949844 133.738587139139 137.016495611111  
141.968949222821  
DNAH17 104.798333931019 111.078930787656 113.656820701744  
117.907840952685 123.004137408444 115.608857734241 113.773684331489  
116.118745494794 115.118170902045 175.663960113118 127.269672881591  
131.40880014672  
DNAH2 150.098708715617 158.788210937339 144.685707282641 148.294870328642  
178.647726085678 230.367251714289 146.808519947394 153.02549014611  
155.468848105615 148.582022536314 147.216303852902 152.435416154284  
DNAH3 130.856249657101 156.611727364072 131.200042525339 149.515244034237  
156.732595223778 132.200648560899 142.843882404269 141.722817732641  
142.034369454643 140.184082384548 141.490911535087 142.110469428644  
DNAH5 112.348094614855 146.416318806523 127.709638375626 110.212739445  
119.636334259263 122.418378964982 120.77691423934 119.544004279354  
113.845770994796 117.312094804205 141.018087546273 112.747067417774  
DNAH6 134.676039394438 126.00304757051 130.497405221273 141.644521617419  
141.1699083353507 128.806964077824 143.185372109165 132.822351718257  
141.840858913807 125.914267820741 136.823008283157 132.450954427876  
DNAH7 140.892250639524 122.053867525393 123.551225884748 127.372242892513  
133.56263739203 131.336902822702 121.771891473027 124.072512083237  
133.374199939042 132.332128706656 144.468333012278 129.090955637629  
DNAH8 129.687743133943 141.858928084825 149.541917326637 146.832797779597  
150.831554010122 158.770502070553 147.019460117987 146.290334865039  
139.768555796264 141.797497681512 150.371716899336 164.120602897751  
DNAH9 135.531326977319 130.0140921487 123.98384416057 133.122174596886  
148.074494928651 136.337076023706 161.632610858756 128.383541329939  
125.358906118533 128.368669716591 126.553693803748 129.320210774045  
DNAHL1 134.05596537871 139.161483596756 122.873661677648  
123.237851647499 137.623019849539 142.358754646258 135.196797030404  
149.863063160222 130.680629893396 129.208429861964 109.654666772771  
137.410687900298

DNAI1 160.001115445038 130.288547755599 141.793216038882 141.15458637181  
136.03420235737 138.436029489092 143.733505359106 141.749118200005  
151.619329363527 132.755256423863 125.396523818173 144.008961720971  
DNAI2 136.348252715447 150.056508971921 119.517021355598 150.399313562031  
152.146033353926 152.832573288735 135.491412261604 129.103133449097  
129.661073814998 119.125002207396 128.116795372698 143.672118850295  
DNAJA1 1508.24281455057 1197.00004043747 1385.28044421961  
1128.60314361459 2449.76376608893 3111.50508060882 2681.48138915107  
2586.87941889443 4819.85672511343 2511.04500638697 3560.23794634993  
1879.08108720938  
DNAJA2 2240.33212242003 2215.43744802035 1456.76683429755  
2547.53445585552 1474.70984232307 1482.15461429206 1226.10881264804  
1561.10217536347 1592.29734618345 1281.1883621512 1582.0221231161  
1520.59210521859  
DNAJA3 1016.18143428327 1055.22233969473 1233.27155759407  
1271.46608195833 1273.6393529108 1084.5920943349 1362.1486006778  
1648.22531304741 1871.91894530722 1176.01058971561 1378.40627876546  
1623.92991386706  
DNAJA4 494.747087458483 420.743637858421 439.928008927647  
355.80042210486 771.694853062033 931.598413783099 1641.70484603137  
1542.35486950856 1908.81864728547 748.940715378564 1584.81089248914  
2165.41403521012  
DNAJB1 704.653073777277 573.074116810032 689.590642377619  
516.088776850623 701.847905027147 779.340880980422 964.093668483033  
932.076509242794 604.237898104299 1681.54485582868 818.445501500731  
476.383294794912  
DNAJB11 925.656701707763 878.520681466946 673.824770556885  
762.584280908728 2233.00694575483 1322.14570224119 1429.25367024696  
1727.7144253077 2215.43744802035 1307.96033038529 321.84712975195  
1994.00516809361  
DNAJB12 196.486499238623 210.392662092721 216.880896769751  
217.074639597142 201.269380130546 189.348690353874 206.502189514795  
197.947433984294 196.990867962546 184.709768457405 220.533113603343  
218.592402813219  
DNAJB13 121.613684281664 125.010266083832 122.69021100699  
126.324771800638 121.838802846453 125.019064287385 120.384210318  
125.234097725749 125.101995710829 119.475462713424 140.24988931401  
122.503984297406  
DNAJB14 236.427507270325 199.135932984641 237.146972312448  
175.93459327917 167.893596681867 304.479999301061 263.295012964476  
242.570588364106 230.947339143332 257.740674565975 197.618757939729  
325.173931553891  
DNAJB2 901.197085099854 951.772948602094 797.501324589697  
1006.03677177164 577.56891124468 480.36420271348 708.534025308731  
504.502047826003 600.757699463777 776.030689773414 1329.90419210779  
587.54075434249  
DNAJB3 123.403099206878 119.278231442871 129.121598974852  
125.843089077365 125.308318672456 137.729777643977 128.460750472464  
133.571962238112 119.249084967945 112.10312035128 150.645487532549  
131.676609824921  
DNAJB4 306.632103708321 227.236255752375 244.307627077001  
200.127994198329 159.14477373952 171.835438335216 169.061364889307  
190.921283434627 182.644319628554 207.718619151226 163.36682525399  
152.910433120981

DNAJB5 517.881547706391 405.032674307193 326.176058036757  
642.057106241761 143.787766055379 145.463105638655 137.858371717399  
140.421945574721 143.827500301207 163.20714296121 145.280485286937  
138.553151063218

DNAJB6 1025.88559245013 1004.97723186946 1504.15682715484  
1289.56069670699 546.755305058958 796.699879495384 650.911886508922  
1027.96306543235 801.52891824571 1040.73829397913 514.61297221467  
663.782083028745

DNAJB7 121.810767302322 118.792612926619 108.199628274798  
116.987471433258 117.946664604751 120.988749021323 126.209426865327  
116.884397420467 121.539958110688 120.29173510435 128.50733429744  
120.039031290299

DNAJB8 116.196676877996 127.419227292862 119.312201620247  
128.449200385351 119.233300586525 117.149781437983 110.829107724132  
127.484178603011 123.303143302526 124.075077123156 139.170794914815  
122.90702157852

DNAJB9 368.637819994033 331.684298221133 308.564935340635  
306.486275677467 333.592915218163 288.505502880424 381.808809625801  
349.65350886897 399.963640581639 374.268489263941 388.966303073519  
251.61451602376

DNAJC1 247.454326301069 247.845708587624 313.099028594073  
233.335353447342 209.385358804928 174.690052785405 204.237952297239  
190.238332933452 178.106013202731 212.050953977485 194.847305068008  
196.676479140094

DNAJC10 375.038561820137 353.571106279836 347.985315257161  
327.811191081135 229.567444213626 537.828979447378 291.50783830983  
412.415549375221 451.718912714608 397.861172312706 431.019896339435  
368.220523234399

DNAJC11 128.785472881136 129.933228671483 120.270397272069  
121.381365873873 188.40383184521 172.175584707792 156.144934427609  
151.751963310212 166.111496598928 150.053948736789 149.213990424575  
155.666943703002

DNAJC12 172.175584707792 173.147311624838 184.167124143272  
188.973595445056 130.647944268116 137.956975047909 138.158400190671  
142.090009728666 147.213616261735 192.399146702036 135.461112284848  
136.886677060418

DNAJC13 360.243484271891 306.232249422327 427.249733213787  
435.796737132969 254.63506290698 264.476846259384 299.616447269111  
240.591548171052 336.067655676466 334.52685347521 401.960630197091  
382.186095123659

DNAJC14 212.5119818331 206.68694753419 183.226294747874  
186.077477713775 283.235844022826 220.896363324634 253.124449721731  
222.456810024193 260.098788125373 224.135228192655 303.423450627377  
212.312154721246

DNAJC15 563.648536446918 578.650614747598 626.582864105324  
793.501244347257 155.820194280153 189.816900281053 165.108876136738  
335.533053221675 386.221302830248 166.735962853075 170.614129599775  
451.985108262982

DNAJC16 130.031303483631 135.260393988134 131.026665636006  
140.978511668091 141.632147679743 134.528971384442 141.002002397727  
135.279197125157 134.963301368391 127.503849690009 175.442400672352  
137.792806301902

DNAJC17 196.703794742237 187.016569445646 160.861929142249  
195.963361515546 183.744959461078 218.2454853526 258.868119227979

219.288597751645 210.590774758661 230.546762514966 256.202924421798  
265.712482648121  
DNAJC18 229.729195963667 223.941946219233 284.764628939128  
214.050918459805 170.394088019518 190.189217962555 223.042575796603  
162.337707154123 169.612203020686 178.142393629606 150.384559054133  
168.963976596839  
DNAJC19 182.665357598121 176.198555355383 193.843978773764  
152.429970809069 171.677654793775 191.335616210093 222.943046618742  
222.544542998356 247.942904862478 178.055019987648 222.8766610624  
165.51742391186  
DNAJC2 150.685245572093 147.354535468933 126.330382425318  
132.045595972712 162.247608931408 124.157302365291 153.22516060649  
160.113042196058 149.518870320398 151.761369162723 179.15284184774  
156.34272729153  
DNAJC21 172.214433016685 174.42996813062 201.569913451219  
173.907933001446 147.491439949088 193.641927801805 163.165374495635  
186.406439948242 165.530397739051 151.073257114127 180.478294414245  
158.531514776098  
DNAJC22 133.322752419739 155.734509841719 122.786030993629  
135.465076459043 135.695576019185 125.393848851951 131.249240371529  
137.528342105233 131.119810851017 132.828179725129 144.339819009283  
135.68605915552  
DNAJC24 221.561252012695 210.478088018501 253.833756857339  
202.343343669937 147.479390172796 148.709795687391 204.103018614608  
173.939159471022 180.501409705275 227.441436540742 165.225475655526  
144.36033726557  
DNAJC25 296.497100375888 305.16668987495 324.481229901658  
246.616749748028 231.728984785324 193.930569647995 181.771654391653  
238.724909152512 209.887047474042 249.234065130083 303.724140156439  
169.211708954329  
DNAJC25-GNG10 135.959893035019 136.645091356305 135.904163043783  
144.873034900013 136.077039612526 143.296580629431 140.590802695412  
150.421116058494 146.194467350201 153.922713834296 160.690442125281  
142.737537206204  
DNAJC27 407.711669482083 382.562403424855 430.329437928013  
372.594990024312 189.482046688226 365.362177671146 295.678097392123  
303.724140156439 223.279017022443 172.84784588171 246.031568259337  
304.844121431627  
DNAJC28 137.20253329376 139.188234030711 134.901659808633  
137.53070284697 131.528729642144 130.975606477621 137.867263869936  
132.651922794567 128.336332748047 138.394923932916 143.747664482225  
136.290486122369  
DNAJC3 161.564505054217 151.573920235798 145.498372398845  
138.416716745934 183.693300680495 171.093611712143 178.928873342925  
214.824908522393 175.121069571371 211.609763150578 151.316421810192  
190.357437485436  
DNAJC30 177.132361355899 198.437113196596 203.752540576935  
190.057030596611 204.137195524755 206.715020025609 227.092319765009  
201.221839281282 181.550597645633 144.507230362869 181.971189935628  
216.582862850259  
DNAJC4 287.656436278551 319.639103463458 350.308420518351  
405.183882455109 404.366325262322 227.033342447929 304.590636814607  
245.489266602897 232.801257700571 263.250833727291 386.379891865411  
296.830999357172

DNAJC5 189.90406457741 174.417259650516 169.642188114285  
193.98814423456 425.348619281876 235.063474370925 357.063270015318  
161.704966315183 209.684346388892 220.60173086462 230.053292316517  
196.802641002079  
DNAJC5B 133.849237689264 140.354508398385 163.977562404508  
139.757191608836 147.405050592353 140.978511668091 153.811165696928  
145.56468363155 158.49220347186 144.724040494873 124.153063838817  
159.346890686719  
DNAJC5G 156.986053534635 155.041173289759 142.480203661104  
140.451465188624 150.038722708606 137.563246867433 173.741466458636  
159.148717478277 146.418147447541 161.397788731595 142.734103971267  
138.359423363142  
DNAJC6 144.570725886413 133.123444023892 148.1283706199  
134.389518389888 143.396264354814 150.011603347578 135.353539458856  
144.258128917228 138.068164255305 150.845846206549 129.884064654761  
150.034029031033  
DNAJC7 449.745016106912 452.517134370928 411.505580458401  
508.302878624289 393.115606440229 521.512936372701 444.374521095495  
448.106077184152 537.350891960682 432.372995789404 473.370240289761  
404.54681330209  
DNAJC8 2856.14739820295 2847.42635118026 3301.98381607571  
3246.86605825129 2129.84680802619 2532.82545752082 1727.7144253077  
2084.44431604433 1561.10217536347 1149.3250945792 1897.92061704124  
2242.73511149559  
DNAJC9 475.686805714298 565.97975389646 554.800688991977  
494.604716660887 544.30845362168 778.639512538949 723.640113902925  
775.781735108886 1040.73829397913 869.542306259337 879.144005147183  
1300.40889834984  
DNAL1 190.238332933452 176.516540713888 175.350734537491 205.495823410422  
215.167086358143 184.62149494522 165.647471565959 171.768618884215  
169.482586449402 184.387409077972 174.568253693395 173.773876769683  
DNAL4 503.967725251906 635.038752622494 540.946852709312 603.338538383128  
1632.84261181074 1015.63768413332 1072.37500318471 964.473774310687  
1249.89496565284 694.907086612929 924.040923247227 969.360864006371  
DNALI1 412.582051585078 387.617166711971 467.187222441283  
431.019896339435 147.366877428537 363.343480850598 147.272072245929  
162.9279134169 251.138401278632 146.446922196868 140.644800545854  
162.267841475739  
DNASE1 150.650926518959 138.471894596606 126.00304757051  
128.115993005977 163.119211741255 132.651922794567 161.195562296834  
159.79463502085 140.35175858015 138.216926722025 146.002585729701  
142.650451413991  
DNASE1L1 144.631407964232 147.691011072898 152.169087619827  
151.905534823403 202.061887608293 167.100039749329 223.573080955095  
178.347708009405 175.019580368717 196.519125510368 179.067275037015  
190.002630382394  
DNASE1L2 108.955761698524 115.473431881597 109.69466049307  
121.730973193225 126.386738502885 123.687439699754 118.930792960643  
141.874188629438 142.669207969715 113.78644620959 137.640239596303  
113.326628149066  
DNASE1L3 151.655854407186 145.692644807799 126.090985925439  
115.649568330705 130.557209560361 123.875478428652 136.19083681188  
177.679330300381 195.438353051306 130.258087965663 165.213327555428  
166.04965258862

|         |                  |                  |                  |                  |
|---------|------------------|------------------|------------------|------------------|
| DNASE2  | 641.645855499704 | 674.742955681908 | 681.172359997071 |                  |
|         | 689.04773343291  | 659.483452217461 | 1133.87328758676 | 1438.33289891548 |
|         | 1023.29995420518 | 658.068932688816 | 641.12919339861  | 1196.34528225417 |
|         | 522.77407098992  |                  |                  |                  |
| DNASE2B | 116.670491972948 | 120.995697049378 | 121.53632327554  |                  |
|         | 123.813766735115 | 121.968807253639 | 122.410340121549 | 118.963119420175 |
|         | 120.177385114315 | 113.609215169397 | 119.845508281414 | 126.069594320759 |
|         | 114.749597426757 |                  |                  |                  |
| DNCL1   | 6522.27232911897 | 6059.74270502037 | 5291.83393775761 | 6560.30885074315 |
|         | 11235.4970815873 | 4913.55892033682 | 5894.79176478976 | 6548.65498784806 |
|         | 7332.15849011291 | 7969.0710242842  | 7054.92270618408 | 5396.55955971617 |
| DNCL2A  | 144.019824700027 | 126.796253980623 | 141.599211622756 |                  |
|         | 172.794570587596 | 149.091925032548 | 163.37518739397  | 146.731584143625 |
|         | 174.274996381853 | 130.024546949158 | 157.269049853539 | 125.08580835258  |
|         | 142.796371223204 |                  |                  |                  |
| DND1    | 164.509354377985 | 151.606932937644 | 159.997580819443 | 151.538112896642 |
|         | 163.385727569154 | 160.848201202361 | 143.812863334832 | 163.141010815086 |
|         | 150.623182458747 | 164.870860592068 | 129.869363181125 | 141.703410265546 |
| DNER    | 183.556662533396 | 154.277670551775 | 175.452986514346 | 147.734708927825 |
|         | 186.886677174192 | 123.344450694117 | 120.329105003959 | 140.345652629553 |
|         | 128.820757822782 | 186.529656751005 | 133.368199807997 | 131.379640556636 |
| DNHD1   | 153.545086287929 | 167.049197726715 | 155.091135297162 | 157.474913177177 |
|         | 119.184780023269 | 129.260551359984 | 114.524341239889 | 163.045605069267 |
|         | 142.058086679048 | 122.005340508177 | 145.636906369786 | 129.413729619216 |
| DNHD2   | 136.162938063831 | 133.902707525069 | 133.587927144452 | 127.442587366678 |
|         | 150.799400717425 | 124.395047385025 | 145.97512573326  | 137.593577427321 |
|         | 119.849895979393 | 132.562090247233 | 125.044092929562 | 131.521311288114 |
| DNHL1   | 209.7558663154   | 234.738241125899 | 192.767155566493 | 209.004374703564 |
|         | 158.477017294725 | 176.138621462315 | 169.800006803362 | 165.480489678822 |
|         | 155.379116566097 | 146.00443946108  | 171.320653882424 | 160.435789207464 |
| DNLZ    | 486.524284354103 | 473.370240289761 | 798.758496171493 | 504.141861790903 |
|         | 1218.05434595121 | 407.760503937821 | 289.517820913799 | 779.623566217277 |
|         | 527.597948979568 | 417.528353577952 | 375.539588956213 | 373.545629693667 |
| DNM1    | 177.598422362298 | 166.382301680189 | 145.487783396345 | 178.696562301918 |
|         | 119.237802375552 | 126.025161261042 | 111.366283149236 | 112.987890650593 |
|         | 122.408016372747 | 130.672586991186 | 136.218750083407 | 119.583378101838 |
| DNM1L   | 342.769825986756 | 292.640251411131 | 513.662594875431 | 325.252108402192 |
|         | 260.888612454097 | 413.555310697751 | 442.590987372759 | 480.712219116621 |
|         | 406.736165197168 | 426.364663722264 | 397.737702926328 | 410.42088953434  |
| DNM1P35 | 136.180063437699 | 132.399633003253 | 148.638400592682 |                  |
|         | 137.832597613423 | 134.964619235561 | 141.536764775726 | 138.121905080822 |
|         | 131.856313046545 | 119.229322984564 | 123.522738813733 | 137.446745269821 |
|         | 136.473948855498 |                  |                  |                  |
| DNM2    | 273.432712475089 | 306.011283364888 | 259.146673652222 | 329.779210536849 |
|         | 977.450397042213 | 364.443097338814 | 430.505037012814 | 330.850098426464 |
|         | 306.550948766362 | 242.570588364106 | 508.127470400078 | 280.337475979102 |
| DNM3    | 161.683243808528 | 176.670752486376 | 174.979501466228 | 164.009873572691 |
|         | 165.333608076984 | 165.022029012505 | 165.619206216088 | 168.897620634337 |
|         | 156.053517438255 | 155.035727630756 | 149.267019532847 | 157.77047742735  |
| DNMBP   | 169.301498852556 | 165.355764467096 | 189.509062639279 | 195.481680273686 |
|         | 168.801737310947 | 159.990561741675 | 191.040134068942 | 186.257814752354 |
|         | 177.478925091583 | 165.545136704242 | 153.181097279473 | 168.248982292489 |



DNMT1 1084.5920943349 986.65554605455 859.547169028149 1044.00217726486  
 2249.8123426309 2055.27692947656 1174.0922389136 2459.05558915812  
 2365.99940149374 1925.60246708149 951.772948602094 1937.83242524439  
 DNMT3A 137.524968609776 136.195555442748 138.777120638896  
 146.278921849776 140.802033706122 156.603904756947 135.315732654507  
 135.539516564142 137.471563342956 129.356401843185 138.777120638896  
 142.143709425075  
 DNMT3B 147.034021626893 153.191840013692 149.193437559422  
 154.98147307591 187.607426452073 199.813528853649 205.381840116054  
 180.867208892996 180.867208892996 168.437049123012 203.389294254141  
 164.442400539653  
 DNMT3L 135.417519318028 138.159966250659 140.960907353937  
 136.161633283029 136.448045428081 141.689210867136 131.328478053136  
 127.949413503055 128.165775629664 138.299629744589 141.939368369872  
 130.140958819402  
 DNPEP 334.377352542623 301.955019831714 360.852730026133 355.519647649551  
 415.497783305278 276.5177779623 288.770330002807 268.224669588188  
 277.539110964815 376.374248850987 351.292682758926 358.732947927445  
 DNTT 132.820927638053 129.737882221259 126.682913361149 132.69067627743  
 137.307786147787 124.638075441482 125.885715928839 129.001192144163  
 133.125084506877 125.67874617392 128.400741751903 130.226993687215  
 DNTTIP1 518.478990211753 520.218545108099 726.000622725287  
 549.692164962653 637.695341427976 752.585744322608 742.128229715198  
 404.95944990868 522.664475688419 466.392151902286 407.052451784773  
 463.802270256246  
 DNTTIP2 166.32555285213 166.430881793156 141.369723386494  
 136.580363776109 136.743659350798 146.97203173446 175.210232663606  
 145.980929136129 148.450023054885 153.551359970644 208.406980186223  
 164.365630106697  
 DOC2A 151.833386901811 145.015434711984 150.623182458747 149.904691068054  
 143.730966588794 161.997058981786 153.345834660643 142.810564324354  
 146.486480663438 150.0084730766 152.28262533486 142.194507957661  
 DOC2B 147.017958916908 149.386285571937 142.272117655292 151.629999903069  
 162.373508183992 158.716575777014 131.507618414676 133.517685144186  
 141.261150586614 162.304178370233 142.464394555901 138.57506931811  
 DOCK1 391.911768848267 320.979443123471 364.964572587289 308.974786799114  
 155.368204597287 158.767439363085 198.506786870804 164.61921356441  
 173.306283668215 192.69687837782 180.008152341531 223.107391048316  
 DOCK10 244.054469051058 229.933577323411 215.094633380547  
 225.387674139093 183.988537525989 237.71636970719 225.702629835215  
 285.83626978316 367.983166440977 276.5177779623 205.341121539273  
 230.947339143332  
 DOCK11 597.459920611726 528.767644181119 697.581541438891  
 508.127470400078 258.348298226232 213.077884261943 166.223079895236  
 211.720536220806 324.346723939622 271.791126011275 184.102171963542  
 147.088665779406  
 DOCK2 265.366632264085 218.917357155289 173.424541543058 214.739818213164  
 183.583432296209 198.583407008317 207.453490385508 306.011283364888  
 512.467731561858 235.680462167404 219.753039699136 234.980382243116  
 DOCK3 204.031081842809 200.810204162831 259.316557834724 262.53374754047  
 212.739915809291 187.65716654049 184.832531598928 207.960802948119  
 202.369905673351 195.645181575647 194.475822533231 146.274284557421

|        |                  |                  |                  |                  |
|--------|------------------|------------------|------------------|------------------|
| DOCK4  | 131.200042525339 | 127.966883271903 | 154.016622581204 | 134.797624902585 |
|        | 118.909153405102 | 137.176144667253 | 154.537240112989 | 126.958366599622 |
|        | 136.978738825445 | 133.921012946195 | 116.839796680107 | 126.426212216646 |
| DOCK5  | 146.105009838122 | 147.725396196054 | 147.925744210234 | 150.632724038845 |
|        | 151.655854407186 | 140.216148769999 | 146.227452269648 | 138.438792881135 |
|        | 135.289246539398 | 159.688862680139 | 164.562302265155 | 135.472135601859 |
| DOCK6  | 262.832376198119 | 310.23294370018  | 213.93763684072  | 348.36178568457  |
|        | 454.030083521756 | 281.846246549202 | 248.729653566598 | 258.552964322998 |
|        | 226.678503956411 | 291.369577397743 | 299.80615152845  | 251.161789722751 |
| DOCK7  | 260.715580924916 | 219.878230463206 | 326.354469134694 | 236.35479928448  |
|        | 253.049869714368 | 509.988617641229 | 315.014639682046 | 326.525579400607 |
|        | 292.60467054075  | 284.831817899986 | 273.197814995543 | 389.177193459    |
| DOCK8  | 164.748676009072 | 156.497059936271 | 137.53234136613  | 133.583297305219 |
|        | 168.460095116205 | 207.545424360094 | 166.917552275021 | 300.886032768166 |
|        | 272.238922498583 | 168.161117444474 | 379.911829623463 | 254.879772480457 |
| DOCK9  | 158.400572147671 | 185.650862663633 | 166.272237117441 | 130.63390061855  |
|        | 137.927403204849 | 243.35880641566  | 174.985831291764 | 161.596086502946 |
|        | 151.293676705634 | 208.690347128273 | 210.14307111352  | 209.023926358109 |
| DOHH   | 208.793650722271 | 197.543089645432 | 200.98533822317  | 221.297127685676 |
|        | 222.544542998356 | 196.860228537112 | 179.400220328552 | 213.215996114827 |
|        | 185.240692860387 | 183.879114762264 | 173.161152247499 | 190.736796322054 |
| DOK1   | 190.309453030884 | 151.717558541683 | 147.553953240464 | 150.942078067308 |
|        | 164.886944426276 | 155.979380606594 | 134.304545258148 | 147.530719472217 |
|        | 135.413840160615 | 165.283700641161 | 137.650917262528 | 149.88598449818  |
| DOK2   | 130.226993687215 | 126.501648842366 | 123.706910388724 | 119.455615461113 |
|        | 130.772410329685 | 124.15094220181  | 124.857461801227 | 133.64938083537  |
|        | 139.607944722497 | 128.886008923268 | 134.397255719047 | 120.574820369421 |
| DOK3   | 119.686859562393 | 121.057111457792 | 111.935554828717 | 112.971776964469 |
|        | 123.513588004371 | 116.403106568357 | 113.184495948936 | 117.404906698431 |
|        | 131.915864620669 | 139.997245010492 | 122.97229333908  | 119.603565559838 |
| DOK4   | 291.167223094542 | 287.084253886676 | 221.635333304767 | 320.597495751519 |
|        | 308.281798808746 | 240.915496717526 | 160.865949438448 | 145.407517107023 |
|        | 166.376907377447 | 204.637887777803 | 225.890195278753 | 208.838523729744 |
| DOK5   | 140.968351978909 | 166.868688936939 | 143.209289043824 | 167.993851183401 |
|        | 134.253399256648 | 152.426527124644 | 139.406427549733 | 139.558611792069 |
|        | 151.671024612136 | 145.758423590784 | 142.872683795338 | 149.557833322995 |
| DOK6   | 242.221324619171 | 280.033528476199 | 219.901025447571 | 335.3366819308   |
|        | 147.155738185574 | 147.508817393901 | 162.494429648551 | 152.334669286305 |
|        | 143.954908055924 | 167.893596681867 | 140.898380345452 | 133.367085445965 |
| DOK7   | 127.2369420721   | 133.917283965036 | 122.075440298074 | 136.720837676326 |
|        | 200.831877950718 | 137.627338682823 | 152.657649988502 | 139.894559834783 |
|        | 132.807755600683 | 125.463718280745 | 172.370108210895 | 150.255511248598 |
| DOLK   | 194.374817778819 | 226.763252784108 | 170.18781660707  | 212.915949933033 |
|        | 414.797416270335 | 203.370353613423 | 214.295260811046 | 204.453822958077 |
|        | 196.429685815196 | 201.480444219547 | 232.892635502424 | 170.941404165185 |
| DOLPP1 | 175.400802387403 | 192.61436632814  | 162.656951764783 |                  |
|        | 214.396920524803 | 411.039234404499 | 261.721726664029 | 216.859640534581 |
|        | 275.101766414328 | 340.860684371038 | 314.610979086485 | 289.616527814137 |
|        | 229.62164568989  |                  |                  |                  |
| DOM3Z  | 207.368252249039 | 206.548878646452 | 201.016287924499 | 220.567951704044 |
|        | 314.4408959517   | 180.590215659031 | 262.60377731258  | 189.603621918298 |
|        | 189.915720614467 | 202.145180994821 | 231.600532144945 | 239.12905945808  |
| DONSON | 149.857861968652 | 132.431566491955 | 142.02169810999  |                  |
|        | 126.435928518593 | 163.396651801661 | 239.845747958475 | 182.873752254411 |

|        |                  |                  |                  |                  |
|--------|------------------|------------------|------------------|------------------|
|        | 287.83303360511  | 249.449151040445 | 221.050093964575 | 150.536178574986 |
|        | 177.011776399483 |                  |                  |                  |
| DOPEY1 | 233.272000923172 | 200.668298229815 | 228.9901869793   |                  |
|        | 185.765000029242 | 134.474466007553 | 180.54209603289  | 190.389158930835 |
|        | 161.470611189347 | 171.455216889348 | 163.741411769369 | 208.628626112623 |
|        | 199.991077347491 |                  |                  |                  |
| DOPEY2 | 646.704226815099 | 682.075583857856 | 578.650614747598 |                  |
|        | 610.070236234299 | 351.188086838653 | 947.766127685083 | 554.282040414368 |
|        | 692.729789121701 | 560.757496975779 | 504.9864660689   | 615.88518704181  |
|        | 439.928008927647 |                  |                  |                  |
| DOT1L  | 147.103340218488 | 138.156430188312 | 131.378893655618 | 153.44628692569  |
|        | 168.238615437246 | 165.257737836487 | 183.193029399643 | 145.517559593811 |
|        | 156.654450436728 | 152.950227635138 | 174.323881548679 | 151.632801137039 |
| DPAGT1 | 369.513420606401 | 337.271784551586 | 395.645016679312 |                  |
|        | 345.291295192574 | 700.877661166739 | 454.492780042353 | 510.061974830525 |
|        | 558.621429366984 | 495.89837457901  | 342.611951034707 | 398.354212009426 |
|        | 620.163512570453 |                  |                  |                  |
| DPCR1  | 160.949030247406 | 143.207187847583 | 163.125317704446 | 168.358323243918 |
|        | 145.522435728191 | 159.406462604758 | 152.173055053184 | 130.67342529187  |
|        | 146.384051525624 | 161.325409589612 | 155.518807026156 | 159.848342125486 |
| DPEP1  | 124.251699375036 | 115.097376525707 | 125.67874617392  | 123.467227007155 |
|        | 114.888157310977 | 121.939618902165 | 124.121555438466 | 124.786029449452 |
|        | 130.293492553638 | 122.093290585838 | 140.626181314061 | 123.696942540314 |
| DPEP2  | 164.545596179262 | 164.438724387992 | 157.43824048982  | 161.00635457883  |
|        | 159.572851489665 | 187.247062073247 | 174.727439318223 | 179.96623248843  |
|        | 186.309367281625 | 155.664126780859 | 756.618969995355 | 149.867541008113 |
| DPEP3  | 119.469328303796 | 125.166940410459 | 120.669452856028 | 116.742079521048 |
|        | 119.815258991448 | 122.763138007612 | 114.479886899622 | 111.992738490468 |
|        | 115.53736269794  | 116.764795914545 | 142.964043764953 | 117.873333897609 |
| DPF1   | 146.198331189991 | 145.640156204495 | 156.961070790639 | 155.383166865192 |
|        | 155.298546821687 | 160.026178505749 | 154.924190468067 | 156.205127163263 |
|        | 142.81401345781  | 146.090291252325 | 153.108902978819 | 147.236728188605 |
| DPF2   | 761.586663689579 | 915.579581760396 | 922.877217016704 | 1067.30106203503 |
|        | 808.837225580351 | 647.273409499313 | 579.923640505245 | 475.038389500056 |
|        | 717.686676823785 | 670.347447480331 | 791.840531191783 | 646.461274173693 |
| DPF3   | 158.92254744379  | 144.700955682048 | 146.075794515889 | 153.78045746564  |
|        | 139.437073790935 | 145.459919416288 | 143.512348693556 | 144.243598691782 |
|        | 143.015905927379 | 143.733505359106 | 151.406384541297 | 139.29087166025  |
| DPH1   | 122.00079209554  | 115.619116556625 | 121.419301042072 | 117.199217938531 |
|        | 129.116354997747 | 136.341358916638 | 139.892371997205 | 147.064543281269 |
|        | 139.429008129291 | 128.39171386085  | 146.857213166531 | 128.680762033378 |
| DPH2   | 218.298791348295 | 211.720536220806 | 222.285940575778 | 242.019489058244 |
|        | 519.829743770022 | 469.794672718173 | 328.431289733169 | 435.603911474926 |
|        | 372.81255844018  | 263.64863646012  | 307.480644393018 | 283.377663208926 |
| DPH3   | 187.586093248437 | 179.551640851353 | 187.4351946569   | 172.667770359278 |
|        | 301.747788416496 | 224.824362819477 | 280.246711704036 | 266.217879616686 |
|        | 218.672831303767 | 312.601510033941 | 188.475801713801 | 288.150694843614 |
| DPH5   | 264.654879741889 | 259.146673652222 | 332.543652462234 | 305.577166690215 |
|        | 215.40037757604  | 262.171775165261 | 377.27961559752  | 404.366325262322 |
|        | 351.188086838653 | 278.651369597422 | 261.96528977292  | 301.747788416496 |
| DPM1   | 644.301665020526 | 564.056592672374 | 832.911633923496 | 515.327420453564 |
|        | 1034.68475089075 | 1764.53168329081 | 2491.33490046283 | 920.083835296898 |
|        | 1127.07858210156 | 1055.79590411506 | 1071.83063260499 | 1449.33679383001 |

|         |                  |                  |                  |                  |
|---------|------------------|------------------|------------------|------------------|
| DPM2    | 187.529556428609 | 192.209344004015 | 196.908612360694 | 195.353512458837 |
|         | 409.592855687405 | 194.055394488452 | 222.675370226786 | 214.52087460757  |
|         | 225.820503820866 | 260.52593414721  | 203.675655444583 | 193.48293264444  |
| DPM3    | 590.142817130684 | 610.070236234299 | 723.428294037428 | 566.813343200268 |
|         | 3164.55070502403 | 1821.08523647593 | 709.303384219887 | 1156.19575610918 |
|         | 1138.00644332379 | 413.330906392915 | 621.825622897512 | 1090.20254511452 |
| DPP10   | 143.962842383778 | 150.471558219667 | 156.365413649149 | 152.166586496729 |
|         | 142.892198239879 | 146.204122329465 | 142.123716536843 | 151.68523937819  |
|         | 144.741063866547 | 147.476805635744 | 146.559502785264 | 147.294408903227 |
| DPP3    | 157.50873249647  | 160.319687451789 | 151.796986456254 | 191.830711714844 |
|         | 649.052806726591 | 361.904370514991 | 276.057101476947 | 274.564508105177 |
|         | 247.504198063293 | 255.435582426271 | 263.058972886829 | 326.246702537465 |
| DPP4    | 171.262412981612 | 172.430211711547 | 183.50553222647  | 174.448910958935 |
|         | 168.702991603656 | 165.139423820186 | 158.760577365464 | 165.926301648161 |
|         | 180.641419603362 | 187.997940126066 | 157.431972439046 | 168.890506147594 |
| DPP6    | 149.05280915667  | 141.5068665919   | 147.314687795555 | 157.619627711954 |
|         | 145.185902174023 | 149.881708604156 | 153.585849286113 | 150.0512732245   |
|         | 141.879359965317 | 136.982719190537 | 145.123845983625 | 145.385816618728 |
| DPP7    | 388.710465457313 | 340.366016191232 | 426.464641742092 | 344.786541451395 |
|         | 870.887539668967 | 352.121800955822 | 342.487952136318 | 361.082957133644 |
|         | 364.678403892354 | 390.098830270926 | 254.936706344174 | 359.822784070765 |
| DPP8    | 245.153736298067 | 247.280717385562 | 277.129985959184 | 212.33360547376  |
|         | 170.590817818414 | 265.068532248682 | 251.472556189141 | 212.073472189229 |
|         | 235.961605948276 | 243.538374440134 | 202.00431685587  | 250.443147156029 |
| DPP9    | 536.805979562807 | 646.117381960716 | 344.992791638415 | 871.268905562551 |
|         | 640.568342662067 | 414.888512708716 | 442.027630433527 | 499.891000749138 |
|         | 323.244664586314 | 361.429760858441 | 389.109250187902 | 379.788696204016 |
| DPPA2   | 142.759452994928 | 128.069504716124 | 129.346063085291 | 128.312170913496 |
|         | 139.108656684059 | 128.112595697836 | 132.983739057264 | 130.207485841284 |
|         | 134.013748718539 | 139.660641694206 | 139.807421433384 | 117.990622156287 |
| DPPA3   | 147.393178410954 | 137.685104040843 | 135.735535533738 | 148.779043570204 |
|         | 143.451080466172 | 146.515240633175 | 141.88072888667  | 147.863198012238 |
|         | 152.673212084312 | 149.851792558427 | 140.588811000948 | 148.090431893307 |
| DPPA4   | 111.448871835514 | 114.902673141786 | 118.308102542942 | 115.224011128183 |
|         | 109.564709878576 | 110.688722702767 | 110.368392735494 | 120.131839791515 |
|         | 114.209249333221 | 104.861024325857 | 131.503936441405 | 108.655415285806 |
| DPPA5   | 110.347631909888 | 118.308102542942 | 111.928204694188 | 110.273174147374 |
|         | 130.204571771396 | 114.574362093931 | 128.594951429021 | 115.914842445934 |
|         | 113.879459563492 | 112.252555403121 | 118.770061426689 | 119.943408501009 |
| DPRX    | 138.62994237184  | 138.859261763075 | 131.371129237005 | 132.926799887017 |
|         | 130.114464233633 | 121.476730561812 | 129.320210774045 | 124.899019467557 |
|         | 131.85737847837  | 129.777173431404 | 118.05386204863  | 143.305848051593 |
| DPRXP4  | 135.573170189235 | 155.388752614336 | 146.443313598482 |                  |
|         | 155.207839370162 | 174.840923772532 | 144.896960245309 | 159.227123133854 |
|         | 151.88244935494  | 142.26998944788  | 142.799260836457 | 154.954906872501 |
|         | 138.773042747912 |                  |                  |                  |
| DPT     | 2691.41389079777 | 1863.96986643676 | 1986.81354260292 | 2144.52984392647 |
|         | 139.82050388626  | 148.012353232918 | 133.631676386591 | 132.140547119679 |
|         | 151.171716392043 | 194.475822533231 | 143.141852982371 | 130.816301920872 |
| DPY19L1 | 516.088776850623 | 422.973606694449 | 491.290438575428 |                  |
|         | 419.126814511305 | 302.696004448559 | 442.220572301795 | 434.792010353541 |
|         | 442.12886967939  | 357.063270015318 | 466.083451075744 | 637.892677173103 |
|         | 919.165331064155 |                  |                  |                  |

DPY19L2 191.525291860022 168.139351579682 180.54598082867  
 138.655815405894 121.294366964074 127.229854957588 114.452922529209  
 127.023543953724 121.341177395499 125.98519427755 108.386545220984  
 120.517691208358  
 DPY19L2P1 124.203250865069 129.299810898979 157.182954894643  
 144.329979284786 125.472342351466 145.948772123142 134.367115858307  
 136.513942889781 134.682319733908 142.470799054068 127.947547987882  
 123.9209907098  
 DPY19L2P2 160.979182561773 155.694213876736 146.927825526831  
 135.503338987971 144.629350188283 172.26834556696 156.75308999904  
 148.396148091332 152.262147284452 145.968884703737 153.613110881454  
 177.223953859764  
 DPY19L2P4 140.229267364503 154.94587631386 146.26304624648  
 154.969503835593 126.00744446299 141.913001976093 146.763046352405  
 128.521380879209 143.990328432869 170.590817818414 133.460655803085  
 144.787836177147  
 DPY19L3 134.58933109001 114.44610607807 116.850851308701  
 115.208555742308 137.445344116574 171.521579011287 159.182533998843  
 140.595496714752 179.509758601636 129.233595525585 138.883710791382  
 144.949897872252  
 DPY19L4 224.167511918105 237.734385188542 212.710910778949  
 191.418673767345 332.749676505218 227.587590278412 336.434368527549  
 244.5675215931 297.708113541379 255.56301534833 261.541138637729  
 306.946103334814  
 DPY30 510.285766295993 461.482735533799 733.648333788712 391.911768848267  
 597.651682540611 1164.61390835016 1050.90881385623 1145.35733270036  
 878.167149313285 887.471553448641 584.199252444401 733.648333788712  
 DPYD 268.148673257455 221.635333304767 279.790257881254 199.001860912128  
 174.313718712035 157.895460674072 193.16411905957 194.847305068008  
 181.277683429417 215.115324454215 190.444387031552 199.620978536397  
 DPYS 113.184495948936 118.514618614167 119.704436785439 118.636694749194  
 123.153925912632 106.263441906404 112.675715371087 111.055738573603  
 112.987890650593 118.438942370745 127.342017026873 114.913534674899  
 DPYSL2 4206.37667440908 3921.67860557329 3195.71436046397  
 3744.5666678861 326.1109406486 742.128229715198 386.305638633172  
 621.489906442001 1039.92160906839 878.167149313285 476.076903428247  
 347.557792829093  
 DPYSL3 11071.0448447818 11709.9785619141 9636.32818474581  
 16818.1954169657 234.550692915716 301.428024926428 202.253560413436  
 315.615758089471 551.086785904249 783.991448771818 200.831877950718  
 316.457274749526  
 DPYSL4 125.682297697017 217.24573005272 140.146894533044  
 454.854528472591 904.733257358133 108.557097186828 428.782703561238  
 251.731327363027 110.190708230962 115.766358387923 390.021666378804  
 520.120193442648  
 DPYSL5 140.347131743987 134.591581328442 132.47775411384  
 141.557420268382 128.174382934295 134.503552797411 126.324771800638  
 117.417112053842 139.285128128996 141.695537669891 158.049286838471  
 141.917318809044  
 DQX1 137.885506916098 155.660302399877 142.45411401883 160.73807125195  
 171.373932115412 169.422015793848 272.16090053595 187.046760972666  
 150.792065744902 277.596303701405 219.228720772236 158.6953558198

|         |                  |                  |                  |                  |
|---------|------------------|------------------|------------------|------------------|
| DR1     | 275.929414239664 | 258.036064876416 | 271.154246147262 | 204.318316638312 |
|         | 249.763375041547 | 544.462032960964 | 373.860920943049 | 283.499120551905 |
|         | 367.644907862372 | 378.088675670786 | 318.487401106209 | 376.007938436483 |
| DRAM1   | 507.137104111742 | 429.351447428661 | 340.193863653875 | 384.641319423853 |
|         | 206.391403266202 | 294.48534582475  | 293.794745907663 | 280.292616101827 |
|         | 492.377642058095 | 263.321559283966 | 296.290104133844 | 205.728673153914 |
| DRAP1   | 1090.20254511452 | 1337.38160266788 | 1021.25947613827 | 1789.51979173209 |
|         | 3253.76017336684 | 1328.38230265655 | 984.695710317818 | 801.52891824571  |
|         | 772.061917233344 | 2189.53914329263 | 730.988069115919 | 1031.59140059071 |
| DRD1    | 118.88525116298  | 131.22421475185  | 126.260691770282 | 131.065633574494 |
|         | 127.473812381059 | 166.89285636895  | 137.647282354299 | 126.386738502885 |
|         | 124.3501719829   | 125.682297697017 | 151.354187593773 | 124.611144621071 |
| DRD1IP  | 129.564482772168 | 123.391298926957 | 129.208429861964 |                  |
|         | 114.191245210321 | 131.440195723963 | 131.208112906919 | 114.421383025971 |
|         | 122.817695619508 | 123.145830746127 | 122.042136913991 | 144.252481420079 |
|         | 126.686404772601 |                  |                  |                  |
| DRD2    | 145.517559593811 | 138.976386995124 | 134.830021570666 | 132.357517495246 |
|         | 131.185836673529 | 136.625136565562 | 132.885515958081 | 133.012692824038 |
|         | 131.312580984876 | 127.605805815475 | 137.683228179974 | 127.818137805569 |
| DRD3    | 143.46919253255  | 149.308475163534 | 127.91637627901  | 138.813126946007 |
|         | 138.136901441896 | 133.41548225025  | 127.681662711369 | 132.733821031511 |
|         | 124.449679223202 | 137.215025712057 | 160.176567985923 | 129.70974867852  |
| DRD4    | 188.503673684625 | 288.436880408624 | 345.627266482686 | 368.134303229682 |
|         | 159.476343366991 | 153.929167381674 | 146.550421651378 | 213.877482604185 |
|         | 185.071775840607 | 160.648791273795 | 217.89028736436  | 146.450806121927 |
| DRD5    | 150.724359913994 | 128.020374599828 | 143.370698101204 | 138.628169506372 |
|         | 143.589222264786 | 121.865696440776 | 129.733935614802 | 141.775100066311 |
|         | 136.111569529393 | 125.489777118532 | 123.227904580467 | 128.284564251279 |
| DRG1    | 627.526008812413 | 576.451964662024 | 814.110601393539 | 525.287367366192 |
|         | 484.568420044471 | 916.026216386031 | 645.438835606933 | 683.655205499779 |
|         | 690.246312542011 | 880.140852200235 | 669.602939159192 | 669.731546951281 |
| DRG2    | 338.510045856515 | 429.992169596618 | 330.944203807675 | 488.249967208882 |
|         | 339.753059801136 | 309.47429862515  | 236.855293143293 | 291.839070398338 |
|         | 245.042781391047 | 279.000687630846 | 248.299149406938 | 245.522497675754 |
| DRGX    | 143.287237534352 | 150.048431572712 | 143.737021989907 | 137.03111066852  |
|         | 145.843639385175 | 129.190900922265 | 155.76860362365  | 129.517511177852 |
|         | 128.440024330942 | 153.500478301079 | 147.913148020331 | 140.174087049513 |
| DRP2    | 114.364953312191 | 117.32734978289  | 113.716741872499 | 106.066897223031 |
|         | 118.731960910224 | 108.970432124412 | 116.011005504201 | 116.742079521048 |
|         | 114.953328013917 | 121.668166378914 | 134.955823960889 | 106.982655360194 |
| DSC1    | 133.54741488531  | 149.964827055916 | 152.748807709142 | 143.821269460523 |
|         | 138.401406375804 | 137.045772853855 | 133.26167785455  | 149.387467833684 |
|         | 137.987255649072 | 136.22416508552  | 139.907840403521 | 149.467626202395 |
| DSC2    | 147.123477579978 | 156.437949042181 | 145.950701448912 | 159.133905701536 |
|         | 158.650226303456 | 225.005311517365 | 152.109178223495 | 204.318316638312 |
|         | 163.621658579697 | 4875.22637286719 | 340.239348689005 | 153.464360995071 |
| DSC3    | 185.570062118736 | 177.223953859764 | 184.900027626401 | 185.258354905314 |
|         | 175.210232663606 | 223.81987303579  | 162.06940121135  | 221.171478972931 |
|         | 181.654319266685 | 1410.58825009446 | 207.920724788669 | 176.267796612066 |
| DSCAM   | 141.652000792271 | 139.430808017891 | 134.569883788949 | 145.369791572077 |
|         | 143.497909064641 | 137.734887788912 | 140.150884219813 | 128.372225487481 |
|         | 140.946729014405 | 141.156434225355 | 156.642441706727 | 138.237030685795 |
| DSCAML1 | 121.076652800015 | 145.656767712617 | 158.278496385543 |                  |
|         | 141.592180897595 | 136.758262322199 | 148.492328039604 | 133.444865587023 |

|          |                  |                  |                  |                  |
|----------|------------------|------------------|------------------|------------------|
|          | 139.817493158675 | 137.683228179974 | 144.181359740481 | 117.602986362773 |
|          | 130.485988201308 |                  |                  |                  |
| DSCC1    | 197.357728220717 | 197.72068061775  | 156.130224537288 | 206.488530785667 |
|          | 287.374706071354 | 277.101000223971 | 203.004815689972 | 351.585604465402 |
|          | 341.973002478932 | 217.910445051307 | 208.555506929113 | 257.24481414803  |
| DSCR10   | 175.341310423897 | 181.003812824014 | 206.303338709554 |                  |
|          | 163.873355370767 | 156.050585687098 | 176.810979494826 | 210.77489002666  |
|          | 187.035957486928 | 167.965981130329 | 173.260348096238 | 161.475694690038 |
|          | 173.050039480459 |                  |                  |                  |
| DSCR11L1 | 155.979380606594 | 147.228812647235 | 138.43190460314  |                  |
|          | 128.950308413612 | 175.41089164969  | 137.185243517766 | 143.523051024982 |
|          | 148.717545103261 | 206.753993163216 | 147.745780820004 | 176.650953513413 |
|          | 140.29803170157  |                  |                  |                  |
| DSCR3    | 398.512947526406 | 379.200576951933 | 529.04238100948  | 414.333324610267 |
|          | 257.573614085223 | 491.112594297928 | 458.218913259336 | 390.752579014611 |
|          | 566.228690652783 | 461.143361255467 | 523.435696794756 | 457.548150688248 |
| DSCR4    | 118.308102542942 | 142.807799847935 | 139.418394104487 | 140.177708471199 |
|          | 140.83570584033  | 133.74051512341  | 129.583916648999 | 130.425809387444 |
|          | 148.160350542849 | 140.281512754823 | 117.815045605383 | 129.072173761566 |
| DSCR5    | 143.378998368344 | 153.882081780197 | 146.639556437847 | 134.30624644595  |
|          | 128.645334554749 | 130.559515534303 | 136.563471322998 | 140.081280065913 |
|          | 131.260111979219 | 135.872060352476 | 162.481362579872 | 128.191959554459 |
| DSCR6    | 132.047328970556 | 158.36796888959  | 120.686906898624 | 129.900540030251 |
|          | 666.204695328096 | 1111.88018487186 | 244.219585315024 | 356.530530468568 |
|          | 498.05778289794  | 132.593747375239 | 395.327097512479 | 687.987647193563 |
| DSCR8    | 119.184780023269 | 127.144291519133 | 120.465934391246 | 121.497645719165 |
|          | 128.692917766138 | 367.644907862372 | 122.676368520743 | 123.354093930164 |
|          | 121.843992693814 | 119.285026330891 | 140.826051635712 | 125.029516472944 |
| DSCR9    | 151.181422205549 | 140.49969612403  | 156.528649383827 | 139.943915452851 |
|          | 153.108902978819 | 153.610428214886 | 173.563363508314 | 158.434048174501 |
|          | 141.102274192049 | 168.911840239685 | 149.280480796544 | 150.798629148998 |
| DSE      | 238.548578086943 | 202.162432624505 | 183.657525723012 | 181.202396068658 |
|          | 151.627496656808 | 142.980393157113 | 142.900756181761 | 152.983678871668 |
|          | 178.780662099615 | 265.148061007894 | 152.772177215856 | 142.03837243998  |
| DSEL     | 216.582862850259 | 195.447966116819 | 160.256877369493 | 186.1961391235   |
|          | 141.880044424342 | 140.511988097197 | 133.340152756136 | 140.839056652898 |
|          | 138.204611862656 | 147.971492964243 | 164.757907224537 | 137.77601089414  |
| DSG1     | 114.441223528256 | 128.992837936606 | 137.871870950302 | 118.567548265638 |
|          | 127.881498149714 | 133.94206203396  | 117.873333897609 | 156.638070437044 |
|          | 127.507557925713 | 1906.81344236287 | 157.70581824787  | 116.615250922316 |
| DSG2     | 196.657475905674 | 356.699466789374 | 285.798047501616 | 156.316333575406 |
|          | 649.906677394861 | 1133.22524345111 | 485.373169494941 | 1530.45813438919 |
|          | 552.167699318911 | 1315.66699943181 | 351.337287690674 | 1274.39152410752 |
| DSG3     | 141.934351226006 | 131.166819048309 | 161.874184077257 | 134.053685488055 |
|          | 142.705504445895 | 138.30326146769  | 138.831297375659 | 127.114560076444 |
|          | 132.786500984297 | 7245.25086222102 | 170.684848540493 | 139.08460576146  |
| DSG4     | 118.144109564626 | 126.492058851464 | 142.474762834848 | 145.466538006138 |
|          | 122.201293962463 | 130.374065525934 | 142.851432926979 | 155.119146797226 |
|          | 128.158605637751 | 133.271506838359 | 125.296240086615 | 132.484079454476 |
| DSN1     | 207.298994298453 | 208.776711004753 | 269.238332581564 | 218.350166753833 |
|          | 225.209315195163 | 347.147961254829 | 315.430399077266 | 390.670702155192 |
|          | 284.534369213195 | 282.926325589238 | 224.547982731402 | 220.742788129847 |

|        |                  |                  |                  |                  |
|--------|------------------|------------------|------------------|------------------|
| DSP    | 160.598186999524 | 159.082447644277 | 167.341759854203 | 154.675189522146 |
|        | 209.785886171295 | 254.287838845201 | 241.494710905339 | 187.097765940131 |
|        | 208.095384605737 | 3119.93811557461 | 234.661864595717 | 200.065184172871 |
| DSPP   | 137.09814291566  | 131.836036241459 | 137.408247668043 | 130.187833435052 |
|        | 115.293844461817 | 133.70941349665  | 126.090985925439 | 131.271979461703 |
|        | 126.222105816959 | 131.911579676047 | 124.317870455205 | 139.943915452851 |
| DST    | 188.378996128521 | 171.626438561923 | 171.086559024882 | 152.601626526117 |
|        | 139.974586762939 | 192.860161535869 | 227.288015854809 | 152.492163303139 |
|        | 145.562772839517 | 209.7558663154   | 279.921244070981 | 153.59485367224  |
| DSTN   | 8416.19700892758 | 8182.20106181946 | 8558.70496234991 | 9192.8966763778  |
|        | 1566.65825409044 | 2172.89794460273 | 2127.22258112242 | 1662.51399707484 |
|        | 2016.52142068599 | 2215.43744802035 | 2192.17997650999 | 1484.32547474275 |
| DSTYK  | 299.29004204677  | 316.663128947813 | 282.101714660307 | 335.013713757031 |
|        | 199.620978536397 | 207.651142295123 | 232.590542016298 | 191.335616210093 |
|        | 234.768591315095 | 238.270501389189 | 208.587188476069 | 254.768537214795 |
| DTD1   | 253.186749111526 | 248.085349787686 | 226.144012966486 | 289.761702484888 |
|        | 371.280926727395 | 578.465753476561 | 339.98018551524  | 327.566026396726 |
|        | 312.339824919124 | 599.307072499899 | 259.672238210968 | 394.101052511043 |
| DTL    | 126.755389668637 | 137.961504178836 | 138.16337207876  | 131.434121613176 |
|        | 185.220017451419 | 243.691004557778 | 148.938822951404 | 173.879952136931 |
|        | 213.194154171149 | 225.065765924246 | 179.220691178402 | 230.179200974631 |
| DTNA   | 300.401370666633 | 258.4424008891   | 411.160709628865 | 288.166541335652 |
|        | 145.221594295772 | 157.348475799643 | 154.675189522146 | 152.840202260007 |
|        | 157.182954894643 | 286.945784387294 | 135.441550832737 | 150.891358590974 |
| DTNB   | 122.343979874508 | 140.557871626905 | 123.991249190444 | 121.065278765151 |
|        | 155.343619434375 | 117.051541123239 | 125.696434307671 | 140.411200873743 |
|        | 135.268963938932 | 123.341568893224 | 186.222567239198 | 117.119533897652 |
| DTNBPL | 176.802886129341 | 165.327972973978 | 188.864388750448 |                  |
|        | 169.860061216981 | 169.434164890542 | 153.787447416111 | 171.660157220703 |
|        | 155.734509841719 | 157.723341862468 | 153.075594260208 | 149.098381037466 |
|        | 156.94531513373  |                  |                  |                  |
| DTWD1  | 215.272800347166 | 219.044271073282 | 293.482512212153 | 203.752540576935 |
|        | 224.274329367512 | 160.604195264968 | 195.050834479424 | 172.120772549791 |
|        | 204.378245089766 | 207.023221559302 | 163.256472113745 | 184.204036882642 |
| DTWD2  | 4690.93553472125 | 4913.55892033682 | 3909.47437917608 | 3921.67860557329 |
|        | 668.853969513382 | 3833.73632806344 | 1797.65684760558 | 2853.14759681683 |
|        | 2153.17165155392 | 1577.15895478896 | 3363.51782842264 | 2208.49325118803 |
| DTX1   | 158.928949614338 | 166.315369318355 | 134.669763149268 | 143.582187466814 |
|        | 145.204870282027 | 127.144291519133 | 128.300838927918 | 138.675023495021 |
|        | 139.87715485885  | 137.344198938623 | 140.079516848788 | 134.81595608984  |
| DTX2   | 289.164969943385 | 347.487059316081 | 316.895545640437 | 378.38874489611  |
|        | 686.028214419557 | 295.678097392123 | 506.290241222253 | 524.640879446426 |
|        | 449.523996620257 | 368.276805218658 | 428.340060893467 | 389.96566674501  |
| DTX3   | 475.540659315339 | 476.495282784602 | 476.168679880357 | 743.915675090182 |
|        | 207.940596890723 | 145.374923175872 | 189.2642795052   | 349.722963659175 |
|        | 229.230239609291 | 140.36602776806  | 157.385256442734 | 233.842749683689 |
| DTX3L  | 149.322537247388 | 151.237088659409 | 163.091280469234 | 165.333608076984 |
|        | 160.695913747601 | 197.489903263216 | 159.970332650101 | 190.975263192006 |
|        | 197.962159288376 | 170.257439890277 | 197.605208310432 | 231.0814970959   |
| DTX4   | 161.968835903764 | 128.007359083768 | 130.839508306116 | 144.546597366629 |
|        | 136.432109029368 | 124.486701452062 | 146.70774472499  | 145.034179171835 |
|        | 133.423376063284 | 133.556805738801 | 136.91078498126  | 140.374644951491 |



|         |                  |                  |                  |                  |
|---------|------------------|------------------|------------------|------------------|
| DTYMK   | 132.587392944892 | 115.656801309856 | 143.745594527046 | 158.872962797815 |
|         | 169.417764098848 | 145.349023185855 | 150.072005848234 | 147.651620353593 |
|         | 137.950955473086 | 151.492236411757 | 120.397683153445 | 145.311964807443 |
| DUB3    | 126.421148348261 | 136.37481047902  | 125.497317360782 | 137.282038401275 |
|         | 125.621467040793 | 117.374025543149 | 121.438875373878 | 119.704436785439 |
|         | 132.446406243531 | 122.343979874508 | 117.962188157317 | 128.87498876738  |
| DUB4    | 136.689064885984 | 122.020405846301 | 134.748177388398 | 133.160197638474 |
|         | 134.374551571013 | 124.69564501518  | 119.696656494403 | 128.601885372662 |
|         | 132.359319280352 | 143.015905927379 | 129.263794008537 | 128.714459781294 |
| DULLARD | 294.746622369436 | 346.691690520054 | 252.894371238554 |                  |
|         | 416.546844844021 | 338.866471651692 | 276.925017614147 | 253.754869975548 |
|         | 235.48876511325  | 232.892635502424 | 240.341031437493 | 319.018213637357 |
|         | 236.164692035094 |                  |                  |                  |
| DUOX1   | 146.672270660899 | 164.690739760426 | 148.01816554072  | 132.600208090551 |
|         | 188.277563426829 | 151.690538050817 | 224.062024091915 | 170.233084517898 |
|         | 152.89366585726  | 352.180110869664 | 244.440857688518 | 193.358728044565 |
| DUOX2   | 109.728809191027 | 114.704831217037 | 111.328185454541 | 105.952640312359 |
|         | 111.935554828717 | 119.845508281414 | 130.450930089722 | 110.942138645171 |
|         | 123.896578371318 | 119.432201417811 | 219.246271924313 | 115.235444833856 |
| DUOXA1  | 158.723133891017 | 145.274345879987 | 166.803359138942 |                  |
|         | 149.155345369055 | 167.125830254039 | 162.244691888031 | 250.928804390353 |
|         | 223.094496588657 | 154.8975607055   | 337.342034950908 | 345.565843875296 |
|         | 175.199369463703 |                  |                  |                  |
| DUOXA2  | 151.41546939633  | 157.891350650633 | 167.662761175661 |                  |
|         | 146.740694608146 | 152.395272857974 | 173.647320180498 | 152.007436762651 |
|         | 161.930142040623 | 179.674744176904 | 187.231049280818 | 192.009562635198 |
|         | 152.219906297607 |                  |                  |                  |
| DUPD1   | 159.320692108734 | 128.669887479835 | 145.999823250463 | 154.218967720305 |
|         | 131.148926523383 | 148.120968141789 | 142.785631812039 | 142.180927190578 |
|         | 126.515480612924 | 147.995991912855 | 126.678746008577 | 145.005991300977 |
| DUS1L   | 254.133112176024 | 289.576706584644 | 200.468804559127 | 264.476846259384 |
|         | 492.377642058095 | 402.140437036706 | 350.983969007868 | 558.810095726517 |
|         | 391.185365567603 | 244.011434605133 | 329.82030842286  | 503.093655556038 |
| DUS2L   | 275.39986964837  | 261.814227719605 | 250.060734219351 | 329.660368915848 |
|         | 537.350891960682 | 369.156887999872 | 382.960724128105 | 403.907009699589 |
|         | 455.665927568395 | 334.857690525582 | 435.901794650816 | 361.390981655795 |
| DUS3L   | 299.717935831288 | 316.364342983155 | 333.868818855397 | 369.434158443561 |
|         | 594.38228123675  | 447.182566890086 | 413.084646927035 | 482.466736153026 |
|         | 292.185246573643 | 293.986292438714 | 329.779210536849 | 382.401290201025 |
| DUS4L   | 216.290279815413 | 209.130260450131 | 239.109163320417 | 227.418630852215 |
|         | 295.153786338687 | 271.238736772408 | 455.21285026588  | 379.476768908492 |
|         | 295.571900619972 | 246.850599569231 | 257.685284145848 | 381.740838644647 |
| DUSP1   | 4009.22206756187 | 6044.78942014135 | 3424.65126200697 | 2578.85391480563 |
|         | 381.867665449509 | 3757.39261544326 | 451.317592236192 | 1339.83170225337 |
|         | 795.464850398761 | 9070.86397918429 | 618.829716818725 | 1000.48723872058 |
| DUSP10  | 211.766884719761 | 175.341310423897 | 179.593817076317 |                  |
|         | 173.306283668215 | 160.870390779084 | 204.637887777803 | 251.039117540764 |
|         | 162.351212914573 | 172.764511709731 | 261.671277686467 | 203.335012796883 |
|         | 186.033093285894 |                  |                  |                  |
| DUSP11  | 286.194197552489 | 262.389583658305 | 280.246711704036 |                  |
|         | 216.381643581705 | 417.36454228858  | 570.26564132238  | 533.54045706916  |
|         | 536.805979562807 | 400.783945471037 | 623.888568444132 | 460.742037437298 |
|         | 449.304281526081 |                  |                  |                  |

DUSP12 554.652979820908 500.848273432862 637.695341427976  
412.277592266475 654.108318810728 1206.59866455529 840.276501350383  
815.388288623756 772.399017166118 647.273409499313 692.945420109927  
1214.77298621465

DUSP13 143.298218989451 135.872692740227 149.902420337518  
143.68613742378 144.188147197178 145.233055765001 146.265518481456  
144.781438651649 140.014167357286 140.949367846425 148.166340306996  
139.741862925156

DUSP14 616.523853569261 397.153801851621 423.607299503704  
398.075524915003 271.522696252995 339.012225830929 261.671277686467  
423.152420192284 257.032174266905 589.240581642145 195.414464905232  
218.314136992677

DUSP15 144.690880401712 154.778726823719 151.694193636313  
142.41737138634 138.613373798613 139.545451634208 147.060637536615  
140.599584289987 137.354782768068 141.015441854424 151.712097221291  
143.864036545717

DUSP16 212.669156800241 194.637233028442 190.66473033826  
199.477350542491 222.268494113686 224.851680313689 331.888150158628  
319.223127076041 268.78904911703 213.194154171149 357.006610037663  
250.406775889932

DUSP18 213.93763684072 237.420951138877 225.702629835215  
273.984715370774 249.234065130083 276.653753970476 271.430915699592  
293.234972169244 323.95355217044 199.250680260804 306.896732729554  
255.839878446312

DUSP19 11554.7330886956 10608.0671430066 9937.36968397141  
10280.5093368677 1144.07896461196 8140.6363797934 3474.0924656878  
6484.36742084268 5425.58761099475 4009.22206756187 4811.88424516272  
4353.66854914351

DUSP2 171.384487293154 189.94130405123 328.200548902445 163.326102597955  
468.339735327273 374.872358131797 308.517561840596 193.723953003899  
237.420951138877 201.059635671301 434.176007498693 315.828726297864

DUSP21 149.492550066785 144.203716525289 128.23432652395  
154.321219471319 144.487533992157 134.69274746407 140.976675511847  
158.56996905631 147.973274498131 142.791015845309 140.456277147131  
146.050714008913

DUSP22 924.630951485299 888.706978062337 824.427857809495  
959.897744425251 381.971539806271 445.95114929414 639.688482258192  
318.850765099332 424.201556056759 827.400420888645 414.538237455116  
496.560127152436

DUSP23 786.160002434066 1001.92763014266 718.449150898903  
847.863177169335 4000.45196171119 2135.04382065446 1488.37146754184  
2051.45788386541 1464.04124596264 1445.72064343302 1410.58825009446  
1775.32632165475

DUSP26 175.236826554583 166.396160626179 145.212306927438  
167.273378118452 131.023892409073 134.372560968918 137.440295223749  
158.499787920522 167.093409692227 144.116298946718 137.537197575152  
146.735616237082

DUSP27 140.385509382606 135.730331297139 139.621016978072  
131.397850276558 135.999030570565 132.855812035005 139.171486871664  
126.205931638442 124.961859983596 139.739448838436 154.758831302515  
138.199559519849

DUSP28 261.322374889497 260.591336959281 309.861048237742  
281.304989265608 245.317436234586 281.037762232619 267.622579012917

|        |                  |                  |                  |                  |
|--------|------------------|------------------|------------------|------------------|
|        | 274.316982298975 | 286.194197552489 | 243.732074437237 | 317.493387040816 |
|        | 413.172954892025 |                  |                  |                  |
| DUSP3  | 7371.9761952537  | 6628.17856159198 | 4923.36698713285 | 9527.86367804896 |
|        | 982.367000148189 | 1273.6393529108  | 1087.69177809384 | 1167.26555140613 |
|        | 1257.32413345748 | 1862.88548451154 | 908.704610877319 | 722.725186727796 |
| DUSP4  | 133.670967970136 | 138.22823004719  | 124.766436060041 | 121.939618902165 |
|        | 160.882229345156 | 156.748330788367 | 137.510586346207 | 132.54577436954  |
|        | 125.720102558499 | 128.680762033378 | 158.188039933865 | 140.74208906156  |
| DUSP5  | 1035.98574557331 | 853.314313182949 | 419.763812610671 | 625.152889992949 |
|        | 463.091387717305 | 1008.875250028   | 535.041545916303 | 291.261765585473 |
|        | 339.843776738468 | 817.342172321486 | 1176.62418139379 | 480.22496056277  |
| DUSP5P | 122.68719599986  | 126.899985772157 | 117.856184272322 |                  |
|        | 110.820329153348 | 119.952108688414 | 110.266032635568 | 114.308806726044 |
|        | 111.794102015354 | 112.649012857276 | 120.767950825369 | 138.383183017683 |
|        | 119.922676683808 |                  |                  |                  |
| DUSP6  | 446.948699651916 | 621.354393918348 | 283.163770658619 | 465.102234374389 |
|        | 594.713185954954 | 1193.82799849555 | 624.638115878703 | 1181.1611856364  |
|        | 332.296938254329 | 1456.76683429755 | 864.908449769749 | 602.480822390671 |
| DUSP7  | 136.80943340993  | 153.922713834296 | 156.808992920564 | 147.736397115265 |
|        | 164.914114315732 | 141.296574431203 | 145.254692995502 | 141.391508027714 |
|        | 153.78976320015  | 227.499335248402 | 133.800111596565 | 156.061579024549 |
| DUSP8  | 527.498114662967 | 402.564148020948 | 351.188086838653 | 433.491835341321 |
|        | 192.340135076104 | 243.038392457584 | 182.938824846376 | 170.748911334847 |
|        | 199.70041209487  | 155.255279503782 | 201.969002368045 | 205.45079491218  |
| DUSP9  | 143.35902319003  | 145.133151090252 | 175.245611094434 | 154.395261192114 |
|        | 177.896726792666 | 138.152641686151 | 147.294408903227 | 157.856019979644 |
|        | 152.088488171996 | 149.160808104789 | 124.723519607109 | 160.648791273795 |
| DUT    | 240.283918204202 | 227.847614397311 | 245.082816415008 | 197.068795788491 |
|        | 349.722963659175 | 354.783364481955 | 327.207408852474 | 289.474517971859 |
|        | 430.100415399881 | 304.844121431627 | 447.372026268156 | 378.695635790714 |
| DUX1   | 140.50127034921  | 138.094719587545 | 164.991522994763 | 142.37457375182  |
|        | 153.545086287929 | 143.301399292539 | 134.631638658586 | 150.063082731931 |
|        | 138.616719975373 | 139.195281937545 | 142.232918684259 | 141.828740140733 |
| DUX2   | 121.154389729409 | 111.1002996982   | 111.525984720592 | 109.333276735523 |
|        | 127.736712231221 | 119.06600048679  | 122.527517633626 | 117.642441794442 |
|        | 111.078930787656 | 132.375905857023 | 146.59366188125  | 122.187031504466 |
| DUX3   | 155.737364431382 | 164.929445749888 | 148.320310040998 | 161.874184077257 |
|        | 138.716375045891 | 159.05213637758  | 149.040720727554 | 159.479962316199 |
|        | 149.262900833177 | 154.064184525311 | 145.954700424725 | 168.697565122105 |
| DUX4   | 142.866874321248 | 151.040909999868 | 147.449186980143 | 145.320945010364 |
|        | 152.418315087218 | 146.879019367939 | 173.790848780011 | 153.320911882529 |
|        | 149.343930487315 | 154.916023131856 | 153.56082876276  | 151.503307004675 |
| DUX4C  | 155.608876496443 | 150.531753446398 | 163.899808733609 | 181.110403721353 |
|        | 148.846121873401 | 166.570606752678 | 157.108043150259 | 153.488903967311 |
|        | 144.785852437305 | 147.875855077738 | 153.832132196284 | 157.646948327818 |
| DUX5   | 104.780306305981 | 108.910588012315 | 106.667175621971 | 104.154182930018 |
|        | 108.404733392914 | 124.895023786422 | 107.91011371422  | 110.148555045276 |
|        | 113.963798749897 | 111.703224727793 | 122.667593730152 | 110.988514718572 |
| DUXA   | 138.254479653425 | 123.122705969332 | 116.491342107103 | 130.334622987505 |
|        | 137.77107995457  | 146.528945049588 | 162.870317933909 | 136.691234705997 |
|        | 136.411722212312 | 132.94603323912  | 163.758054869675 | 163.48462232122  |
| DUXAP3 | 8633.71708020651 | 9671.66667662331 | 7266.3946293904  |                  |
|        | 8368.88320476021 | 1634.20135156938 | 8864.70614223459 | 4335.76831372031 |

|          |                  |                  |                  |                  |
|----------|------------------|------------------|------------------|------------------|
|          | 6312.36452724398 | 5467.84611694564 | 3468.14455177277 | 6441.13602696535 |
|          | 5022.15374558514 |                  |                  |                  |
| DVL1     | 160.748082658758 | 157.524049610272 | 160.446191353364 | 158.647814364392 |
|          | 197.277310409328 | 161.951996906162 | 155.576838112772 | 160.6823824476   |
|          | 151.914252332792 | 180.250420976613 | 158.598999414864 | 154.688685142904 |
| DVL2     | 292.145553580042 | 272.117599603586 | 222.315451077459 | 306.111172289632 |
|          | 276.057101476947 | 163.910041674646 | 218.672831303767 | 213.966288689715 |
|          | 176.029791617989 | 213.710058427654 | 215.167086358143 | 172.073751088968 |
| DVL3     | 535.354724252178 | 427.345809255426 | 647.439372562271 | 524.392279804734 |
|          | 360.991542429346 | 411.784922368377 | 470.868288641048 | 445.95114929414  |
|          | 462.888171502285 | 517.020259129974 | 364.113665301598 | 563.648536446918 |
| DYDC1    | 141.681266095578 | 123.482626777491 | 154.443360208399 | 148.112717810117 |
|          | 156.534634574244 | 142.126620107418 | 135.52861375119  | 134.420446702459 |
|          | 132.811368246405 | 137.999190557332 | 125.299513989334 | 141.67550758321  |
| DYDC2    | 164.553511697702 | 156.813992534584 | 157.507108643575 | 162.237172404557 |
|          | 151.751963310212 | 187.710185880162 | 168.996965070202 | 171.059849459102 |
|          | 160.031506612501 | 186.231346659144 | 165.71382076724  | 159.307394610466 |
| DYM      | 620.614820117452 | 598.449359425056 | 803.840404197117 | 638.77182631975  |
|          | 414.267332328081 | 384.97980473847  | 426.896707161414 | 406.369889501135 |
|          | 414.200068430184 | 672.637760135254 | 578.297031096292 | 399.963640581639 |
| DYNC1H1  | 1803.06322760249 | 1654.58270183167 | 1605.2454230722  |                  |
|          | 1946.45172007314 | 1332.82617944131 | 846.084919104262 | 911.782783698439 |
|          | 1172.96121022579 | 969.811933814244 | 1169.43742964112 | 896.625415670455 |
|          | 890.507257588957 |                  |                  |                  |
| DYNC1I1  | 689.271009631393 | 594.38228123675  | 1244.67453201339 |                  |
|          | 746.296354515617 | 182.42088387266  | 255.12306184224  | 198.390247605355 |
|          | 218.997165156081 | 262.980079074599 | 158.319248599976 | 258.4424008891   |
|          | 195.239829623017 |                  |                  |                  |
| DYNC1I2  | 1045.49947183547 | 989.77058497525  | 1531.54387233661 |                  |
|          | 1072.37500318471 | 732.877169346979 | 1727.7144253077  | 753.654626233604 |
|          | 911.782783698439 | 944.92617668298  | 1512.28202818467 | 1242.61637859159 |
|          | 1297.25632532536 |                  |                  |                  |
| DYNC1LI1 | 147.357032438442 | 166.330001480033 | 144.610341215903 |                  |
|          | 125.712260481294 | 148.791182443623 | 142.720769329396 | 133.239703270008 |
|          | 142.981967333546 | 140.694993778394 | 158.963726206466 | 172.578252260002 |
|          | 124.251699375036 |                  |                  |                  |
| DYNC1LI2 | 5138.28186306948 | 4923.36698713285 | 5250.88041666757 |                  |
|          | 7122.07276863122 | 1477.10828981572 | 2068.04582900231 | 2344.11548437508 |
|          | 2311.05587511258 | 3371.24667467952 | 2398.71483410593 | 3949.19206005238 |
|          | 2574.74962955426 |                  |                  |                  |
| DYNC2H1  | 295.935625475189 | 253.867947800583 | 324.401611136662 |                  |
|          | 266.892524131545 | 170.753615127089 | 180.437648146588 | 183.3378528327   |
|          | 154.98147307591  | 201.676984786688 | 253.327404004524 | 219.044271073282 |
|          | 190.238332933452 |                  |                  |                  |
| DYNC2LI1 | 154.728941096647 | 157.50873249647  | 164.365630106697 |                  |
|          | 159.344044864557 | 175.693873820963 | 214.068044241507 | 236.164692035094 |
|          | 253.098839084408 | 183.130891975122 | 196.759802659759 | 227.418630852215 |
|          | 223.872330412144 |                  |                  |                  |
| DYNLL1   | 2952.67114077688 | 2733.68308784024 | 3012.49794349837 |                  |
|          | 2947.51998516453 | 6006.01682776552 | 2365.99940149374 | 3015.70954394585 |
|          | 2910.00269086567 | 4175.70090899755 | 4923.36698713285 | 4291.1724030909  |
|          | 2789.67986601883 |                  |                  |                  |
| DYNLL2   | 264.685862877779 | 286.469773081481 | 235.48876511325  |                  |
|          | 275.013838208239 | 667.892385395063 | 482.226889092547 | 582.382786876656 |

584.199252444401 565.164961255054 347.620001353026 223.918931440768  
806.290662664708  
DYNLRB1 1115.53524128833 1204.32784721885 1492.15137418791  
1314.62071412501 958.63560158343 1223.06438074895 1397.84878368705  
992.744093752678 1280.57297272231 1002.44383771056 927.137881369911  
910.087388930485  
DYNLRB2 137.138266859156 177.379186278216 137.669753723768  
138.265155903051 167.575968906119 156.638070437044 190.625250757654  
136.623658204558 150.471558219667 126.647643493986 150.500676225569  
126.529763042574  
DYNLT1 1160.25775445193 1046.13353853089 1016.18143428327  
1032.4540300024 1162.8644618472 1788.35884039549 1369.89073267996  
1341.78081782818 1259.75918248468 1093.21579738952 1537.71464618832  
1682.64624665931  
DYNLT3 268.724338967108 293.925995360234 295.278972023002  
242.141362101262 403.043257175264 397.307515234646 270.604799126393  
603.338538383128 327.696359071012 420.502251256406 251.546290552828  
258.695920967489  
DYRK1A 347.292438587205 299.616447269111 447.297590650141  
253.601378730911 198.055877414824 452.167674725454 332.599191067433  
391.706404954357 442.698000781597 322.028360309592 278.498278821829  
390.284689962661  
DYRK1B 151.87495966414 180.392337212428 158.594064857041  
194.903531690239 264.604297630839 187.824032557194 171.731395791818  
171.784981874184 174.820064644203 144.448503894295 194.584034984339  
152.404186073033  
DYRK2 501.946140974776 429.680602294138 329.214958614925 356.323554000768  
390.809169896009 1094.67740173529 417.442660073269 1806.24732793591  
362.195903246495 353.285905782951 408.993744895434 332.082749517913  
DYRK3 142.914863449833 141.73248778957 140.958277301476 136.366798516444  
132.087183382523 131.719227272527 137.907709799074 137.801899270172  
129.514490386931 156.704278982517 138.731957926247 137.944260488223  
DYRK4 598.095370768587 548.869880723909 699.984140389009 654.108318810728  
760.070180572621 240.253944604431 148.423303776817 485.309521583972  
376.54010486682 565.97975389646 179.663258610881 412.648926259488  
DYSF 688.684644604218 672.13164205724 605.040026490154 1092.74905085695  
253.463871742303 212.959246855759 153.899573902499 150.434376975922  
227.065194522692 218.773153183388 187.352655464866 162.047249964859  
DYSFIP1 145.503718833974 153.423579724911 175.28261759639  
152.197327387252 162.422173095045 148.176995739142 140.145470073979  
158.841505957036 140.794929983858 148.930073905413 151.453985465369  
143.401971479167  
DYTN 139.993960054847 152.194337248455 140.202762690515 156.259214645427  
134.994013668445 138.166546598846 131.185836673529 128.462674862751  
136.563471322998 136.287909668938 121.252042151856 138.760800146167  
DYX1C1 144.046646189442 152.315376022976 141.191500203423  
157.809081184874 156.585665091824 129.413729619216 149.601145171769  
148.00952002903 148.74881415573 149.283495832731 133.647637744785  
128.436499050769  
DZIP1 179.25743545231 165.71382076724 184.041062308263 170.028047334267  
153.690189121681 148.027464692171 147.854171854456 143.207187847583  
155.502363062633 144.233097828078 136.077039612526 148.510023599641  
DZIP1L 177.93138555339 183.988537525989 188.268774618164  
174.979501466228 197.582402276079 187.494677180331 172.120772549791

|       |                  |                  |                  |                  |
|-------|------------------|------------------|------------------|------------------|
|       | 193.218266574099 | 157.049773524382 | 184.989027770708 | 173.233357775898 |
|       | 164.757907224537 |                  |                  |                  |
| DZIP3 | 168.27980269501  | 149.899789105328 | 161.079169854907 | 165.108876136738 |
|       | 138.256765189241 | 156.662150993832 | 146.132506246152 | 148.838294770082 |
|       | 154.764283765316 | 156.141123407905 | 145.329128512407 | 151.823845684041 |
| E2F1  | 166.662801900754 | 172.091884817207 | 176.641899861006 | 169.534469894464 |
|       | 188.818012746123 | 177.023536553193 | 209.54573978355  | 198.257497903131 |
|       | 182.118544602205 | 204.654489493854 | 101.597648528389 | 231.63127072986  |
| E2F2  | 173.450023117394 | 186.625452120269 | 149.18603646016  | 174.787077606165 |
|       | 592.613689704907 | 513.518424350159 | 233.914433380121 | 640.255747986724 |
|       | 533.893360199271 | 281.618175110153 | 235.742017851879 | 454.34729744062  |
| E2F3  | 345.897250519387 | 389.500591134279 | 291.683896942007 | 381.740838644647 |
|       | 519.940347384877 | 717.025533065694 | 524.973621024573 | 577.801009921199 |
|       | 489.528040775004 | 320.707687986324 | 537.350891960682 | 1049.52258147141 |
| E2F4  | 507.236601481067 | 524.640879446426 | 558.051041108282 | 603.906237227931 |
|       | 624.264994653057 | 582.642500194997 | 583.697431061521 | 511.891269255193 |
|       | 632.031410234577 | 634.356322976353 | 766.176882605175 | 894.734451279225 |
| E2F5  | 184.832531598928 | 189.37832342197  | 214.52087460757  | 205.781486117242 |
|       | 297.466255000163 | 267.869879189095 | 228.739556788924 | 333.131139447511 |
|       | 437.836503489425 | 208.628626112623 | 215.769986055534 | 327.010503005631 |
| E2F6  | 230.620456579897 | 212.119922561453 | 224.008253365957 | 238.770586150777 |
|       | 336.120322555703 | 298.625127845168 | 263.058972886829 | 241.320049298228 |
|       | 239.24587884234  | 201.637540930213 | 210.882890077598 | 319.490670412394 |
| E2F7  | 146.885404321622 | 160.590990297027 | 169.784837251279 | 155.187900101727 |
|       | 174.807363753172 | 198.863347487219 | 188.062732621031 | 178.12073430094  |
|       | 202.397972518715 | 229.017256104437 | 192.565733545715 | 244.486311003619 |
| E2F8  | 108.939608619532 | 144.63774603725  | 122.673596593654 | 118.909153405102 |
|       | 165.642728895682 | 158.92254744379  | 137.093170378295 | 159.42746786085  |
|       | 161.618479762188 | 136.478114537536 | 149.939035476611 | 147.483379646393 |
| E4F1  | 663.668537495345 | 655.431236290512 | 779.623566217277 | 821.862271569917 |
|       | 884.747476952289 | 926.283018664897 | 796.936154737659 | 1014.23822508445 |
|       | 829.126529857044 | 801.52891824571  | 646.704226815099 | 861.119262963015 |
| EAf1  | 280.531844086775 | 276.5177779623   | 294.368406238222 | 251.869781014029 |
|       | 354.705553237406 | 325.320888625297 | 356.84281623052  | 476.641032594868 |
|       | 447.995213144892 | 434.855262284265 | 274.120234926832 | 348.300300174924 |
| EAf2  | 166.868688936939 | 171.954184094677 | 144.801071221985 | 179.674744176904 |
|       | 194.789918629905 | 227.467161919443 | 198.285073991956 | 235.76573393374  |
|       | 246.186104432792 | 198.583407008317 | 212.119922561453 | 179.687464522203 |
| EAPP  | 455.486248388968 | 451.147418314412 | 565.609400092543 | 380.146996799549 |
|       | 474.750156829195 | 268.186156177622 | 426.548994267836 | 513.428413503031 |
|       | 410.645457106122 | 606.679284487803 | 666.344430142655 | 503.757797957538 |
| EARS2 | 243.191238594142 | 215.931781291835 | 272.854435771465 | 239.148333781084 |
|       | 247.528753010193 | 281.792602269388 | 343.666488527549 | 375.539588956213 |
|       | 283.27806319488  | 243.893774595317 | 292.317998405609 | 304.811116024094 |
| EBAG9 | 414.596948083067 | 367.567681162661 | 463.622673539254 | 337.119524477446 |
|       | 364.443097338814 | 310.598930734244 | 484.764806127211 | 397.387054218873 |
|       | 520.218545108099 | 464.436380568216 | 542.121375354644 | 394.576038252334 |
| EBF1  | 617.185364180303 | 825.034504959272 | 511.996883507889 | 751.896334334052 |
|       | 125.926774314737 | 141.263207601393 | 111.928204694188 | 142.456527359961 |
|       | 187.336349390012 | 151.829217512763 | 128.0171233156   | 119.184780023269 |
| EBF2  | 154.24500773656  | 151.705219298578 | 147.029988235786 | 142.367003292264 |
|       | 136.169525758215 | 149.181838320838 | 143.035245560484 | 140.779962389412 |
|       | 131.058360514673 | 146.70594914192  | 136.821228481217 | 148.888698484378 |

|          |                  |                  |                   |                  |
|----------|------------------|------------------|-------------------|------------------|
| EBF3     | 233.59297160203  | 273.044064077    | 241.706645643141  | 341.096072280715 |
|          | 143.242308032336 | 156.221773628832 | 141.176376265078  | 139.025598691696 |
|          | 137.109541758085 | 129.532122459128 | 145.36249226764   | 138.279775054156 |
| EBF4     | 218.269847477919 | 229.157389498775 | 193.912456093767  | 253.463871742303 |
|          | 148.556161762978 | 155.530415929059 | 150.082561726876  | 138.970853057174 |
|          | 148.052222389368 | 143.211127738941 | 148.635174393031  | 161.720405760536 |
| EBI2     | 228.086256222312 | 238.617228632505 | 265.068532248682  | 249.680729921602 |
|          | 141.602233757588 | 249.234065130083 | 161.548130965486  | 210.030846572444 |
|          | 253.867947800583 | 212.037224737798 | 195.608619642038  | 172.544504923991 |
| EBI3     | 109.947300629824 | 118.966992191892 | 118.338713846941  | 117.48427100606  |
|          | 120.460433297007 | 125.689884251847 | 139.765361891899  | 169.132693907633 |
|          | 172.951567541592 | 114.479886899622 | 190.921283434627  | 133.177460728749 |
| EBNA1BP2 | 994.802763887989 | 970.634736994313 | 1202.74869573717  |                  |
|          | 1078.41947691758 | 2427.21100330388 | 2982.80580616089  | 2116.39371296122 |
|          | 2468.47687203968 | 1687.85201395597 | 2379.15291239548  | 1292.13921040404 |
|          | 2050.34883263932 |                  |                   |                  |
| EBP      | 167.114291248266 | 204.544266331066 | 194.002075848131  | 192.475309217696 |
|          | 569.236322997211 | 604.453803994875 | 354.922901990615  | 652.201948082657 |
|          | 411.505580458401 | 684.866405921987 | 318.196134631178  | 369.838429521168 |
| EBPL     | 252.810636571566 | 264.456926651554 | 333.270203737291  | 208.456472621593 |
|          | 580.645924062301 | 501.434722063309 | 326.908959531021  | 456.990425618007 |
|          | 720.710754387733 | 956.76879975749  | 457.548150688248  | 841.944755849006 |
| ECAT1    | 148.149216812602 | 148.577336081778 | 130.582210755516  | 151.676232556697 |
|          | 149.929454280702 | 142.566028652989 | 143.330025840618  | 130.49338418515  |
|          | 145.329128512407 | 151.821324922628 | 140.916876460413  | 147.826950636822 |
| ECAT8    | 159.344044864557 | 152.342712570625 | 161.534421340752  | 152.743680985848 |
|          | 136.149732574763 | 133.659475650376 | 141.035566928475  | 177.065616871886 |
|          | 150.445647133244 | 163.936973279176 | 146.904354404095  | 173.21291920566  |
| ECD      | 236.326943078666 | 218.735620596634 | 278.095939961034  | 234.661864595717 |
|          | 203.370353613423 | 278.88183549759  | 275.072079692264  | 251.161789722751 |
|          | 284.104619768635 | 232.845268785472 | 307.906312092805  | 342.096409626768 |
| ECE1     | 159.854639082837 | 179.96623248843  | 141.380276932556  | 174.635853531194 |
|          | 159.331110936668 | 151.086688327023 | 136.767307268217  | 155.104697146664 |
|          | 153.140087873773 | 140.774304412579 | 138.090158433822  | 148.000706956532 |
| ECE2     | 137.499290547619 | 132.133979108537 | 135.221786448517  | 130.351302840602 |
|          | 285.931444518474 | 155.162310001164 | 164.652795899742  | 165.695518076741 |
|          | 161.229621453539 | 162.013164369593 | 157.713227527385  | 141.130462286785 |
| ECEL1    | 117.231243105897 | 118.393203921859 | 110.900309203531  | 117.546508214236 |
|          | 125.707228291312 | 115.072622367144 | 112.000309477972  | 111.975027473284 |
|          | 115.457121859064 | 108.34997967774  | 124.876226351169  | 138.603793282123 |
| ECGF1    | 601.164127925014 | 562.387692458382 | 209.051768656607  | 411.968307579588 |
|          | 1618.64901092072 | 491.496499481595 | 787.425941491281  | 1009.42265467472 |
|          | 1444.45946291517 | 4190.38366101529 | 844.778755052304  | 549.692164962653 |
| ECH1     | 1741.0131951509  | 2295.16438420175 | 2525.90466050731  | 2530.00219297102 |
|          | 4166.43837922103 | 1659.80909859514 | 1606.01395227661  | 2456.36776585765 |
|          | 2280.20302441765 | 1218.05434595121 | 1708.87666406131  | 1583.79384467611 |
| ECHDC1   | 249.953902454701 | 269.853718252574 | 330.505633088656  |                  |
|          | 215.84044779962  | 185.639696270808 | 250.542405852865  | 316.004332524937 |
|          | 237.71636970719  | 202.761449711661 | 245.110761598207  | 322.576886792502 |
|          | 267.222762759781 |                  |                   |                  |
| ECHDC2   | 3536.14527317085 | 3000.46298223166 | 3490.77593331727  |                  |
|          | 2767.77385345718 | 2642.24374855334 | 2547.53445585552  | 2648.41012401723 |
|          | 2715.55326746591 | 2059.09598012857 | 1436.577717111084 | 3468.14455177277 |
|          | 2081.45603839306 |                  |                   |                  |

|         |                  |                  |                  |                  |
|---------|------------------|------------------|------------------|------------------|
| ECHDC3  | 233.232319881243 | 255.59042517603  | 276.653753970476 |                  |
|         | 220.098071755353 | 331.251075774227 | 124.503016568677 | 128.152956417755 |
|         | 141.168198348093 | 123.179986410723 | 128.488598467312 | 140.870849757111 |
|         | 137.20253329376  |                  |                  |                  |
| ECHS1   | 997.460212152591 | 1168.68074786473 | 1191.26028342929 | 1305.2232532959  |
|         | 2328.65814406636 | 1210.40302822121 | 1555.28458491244 | 1547.16936835284 |
|         | 2421.87041217217 | 1134.64039256323 | 1750.21700780511 | 2521.58055221647 |
| ECM1    | 394.962978677736 | 412.863887464545 | 243.793465720264 | 445.505512764045 |
|         | 191.348260799746 | 177.457362387052 | 153.159425380743 | 184.348894461271 |
|         | 203.642739476708 | 1502.3444541735  | 182.130970182242 | 169.948277715908 |
| ECM2    | 353.187829498591 | 271.356289141017 | 281.659653592151 | 226.287196839644 |
|         | 131.114995025516 | 149.35848619832  | 127.195619567384 | 139.282741110499 |
|         | 138.708304921088 | 191.881157918071 | 127.339018771488 | 131.796941315992 |
| ECOP    | 193.871324880919 | 170.692146255416 | 213.877482604185 | 176.397715825653 |
|         | 239.970202560698 | 198.795112039249 | 170.725486814469 | 199.001860912128 |
|         | 223.765583953184 | 175.79375235478  | 202.778539118009 | 290.326832430372 |
| ECSCR   | 459.771019162573 | 506.80969228563  | 259.094411953361 | 534.505132658177 |
|         | 175.585857393085 | 243.807038920733 | 200.831877950718 | 220.458449424062 |
|         | 295.678097392123 | 184.25384366282  | 204.283030911897 | 183.853381322135 |
| ECSIT   | 237.078644686891 | 278.385151185788 | 250.30085097088  | 346.356312668445 |
|         | 252.957489543915 | 194.569325586241 | 208.214764518526 | 198.205113187281 |
|         | 167.025336068642 | 194.655710454472 | 216.154203111101 | 189.01309885917  |
| ECT2    | 201.865955150869 | 236.082185670774 | 186.06425658259  | 251.20133703465  |
|         | 581.828502821435 | 770.19255305977  | 280.127735578097 | 674.742955681908 |
|         | 607.979208454176 | 431.861762635568 | 243.893774595317 | 401.750302347978 |
| ECT2L   | 160.520677267863 | 154.908975734985 | 152.348210524663 | 149.267019532847 |
|         | 138.905709709063 | 160.415807880532 | 167.850516495529 | 151.327544435847 |
|         | 149.388974859453 | 163.582678113215 | 146.446922196868 | 153.083451626042 |
| EDA     | 138.020031233095 | 143.160281902098 | 127.172702525749 | 137.440295223749 |
|         | 140.36602776806  | 131.973896985615 | 129.469949305913 | 127.137447808551 |
|         | 130.917269984571 | 131.034010150362 | 127.855167644203 | 128.292627005614 |
| EDA2R   | 142.514794686932 | 141.585172896047 | 160.082087242964 | 132.86711707789  |
|         | 134.442947822188 | 144.787836177147 | 162.168246402027 | 153.871893011106 |
|         | 153.829636228764 | 152.56002779985  | 136.408314486465 | 137.120973494952 |
| EDAR    | 195.963361515546 | 181.607253339427 | 177.355210393749 | 172.108795190633 |
|         | 148.503282415207 | 180.837420957945 | 161.079169854907 | 170.731358903019 |
|         | 133.969054754299 | 156.695440330379 | 140.57567768682  | 154.849264978968 |
| EDARADD | 159.177303894223 | 200.964306455257 | 147.285764611006 |                  |
|         | 147.460432992291 | 248.260998007814 | 466.141717595301 | 760.070180572621 |
|         | 302.362619893594 | 290.688850193983 | 177.780479906048 | 473.73182675469  |
|         | 504.275299381356 |                  |                  |                  |
| EDC3    | 191.486717579847 | 183.023316857537 | 165.108876136738 | 231.819341041105 |
|         | 202.887417145119 | 156.233573126063 | 188.277563426829 | 146.771439168861 |
|         | 183.979513272793 | 162.919656039331 | 206.802308105224 | 168.477388641982 |
| EDC4    | 767.662367310672 | 821.265710686098 | 567.143102792772 | 1016.18143428327 |
|         | 1397.84878368705 | 467.777995124655 | 581.191693771646 | 703.815551883635 |
|         | 690.010326122574 | 596.076764072945 | 938.918431240228 | 616.701037274509 |
| EDEM1   | 251.307020289291 | 218.106150021482 | 216.05364037271  | 190.809584998617 |
|         | 448.715938510132 | 497.269957926657 | 531.711823481265 | 309.720081933252 |
|         | 617.833194119379 | 529.529314022043 | 710.999354960979 | 554.950092776254 |
| EDEM2   | 265.402310598892 | 282.190861594303 | 227.736106796551 | 334.377352542623 |
|         | 663.214972254236 | 543.933989965705 | 666.204695328096 | 533.37609065123  |
|         | 347.147961254829 | 296.20443113482  | 385.750371084    | 317.273940108333 |



|         |                  |                  |                  |                  |
|---------|------------------|------------------|------------------|------------------|
| EDEM3   | 213.077884261943 | 210.751430486845 | 189.853136769155 | 216.783051958345 |
|         | 210.502556087175 | 216.645552082667 | 211.104243881644 | 234.895245871534 |
|         | 206.376365685112 | 178.394895649664 | 253.697419495959 | 241.494710905339 |
| EDF1    | 2459.05558915812 | 2703.76111776248 | 2360.87760349888 | 2841.96460830166 |
|         | 4068.18567686753 | 1830.56003081769 | 1904.39962279504 | 1868.82736251524 |
|         | 2288.63508719706 | 2583.46653460894 | 2470.86113150126 | 1732.52466021178 |
| EDG1    | 201.320381706496 | 253.697419495959 | 192.860161535869 | 210.529782898493 |
|         | 194.430896269275 | 222.526610842047 | 173.353648927895 | 182.644319628554 |
|         | 196.598810934837 | 190.357437485436 | 218.672831303767 | 168.668125438154 |
| EDG4    | 202.622747952763 | 235.595194918187 | 173.071892362758 | 168.801737310947 |
|         | 1495.04587558545 | 1103.13439876128 | 949.260897408911 | 923.383014892221 |
|         | 556.725550806207 | 464.812091712746 | 868.066644155313 | 628.710901107436 |
| EDG7    | 115.270544506813 | 117.499697378893 | 108.167670899938 | 107.283814651497 |
|         | 206.915239638443 | 116.552626146967 | 116.844361858869 | 126.620889938532 |
|         | 124.548598801497 | 254.393421265604 | 159.513465644268 | 120.060776752215 |
| EDIL3   | 151.043967734248 | 138.620617643924 | 154.108689872903 | 152.670691262738 |
|         | 128.186963138555 | 178.872635061826 | 141.229805348717 | 154.537240112989 |
|         | 142.064680109047 | 143.007237184254 | 130.191876914166 | 128.51523581959  |
| EDN1    | 195.057830521304 | 329.779210536849 | 141.168198348093 | 244.054469051058 |
|         | 153.916313595581 | 385.978867521533 | 265.402310598892 | 245.766885283797 |
|         | 786.160002434066 | 425.826693178023 | 299.669394721682 | 139.56332664295  |
| EDN2    | 176.839917795004 | 169.022351348819 | 169.844913799159 | 155.376656335974 |
|         | 202.99342484328  | 184.451469623426 | 159.374355553219 | 159.49930229951  |
|         | 172.531836863525 | 215.335795337978 | 173.959556466614 | 187.494677180331 |
| EDN3    | 110.61165787102  | 115.120702589487 | 111.078930787656 | 118.230408871812 |
|         | 114.658668711121 | 106.772581387455 | 106.854721604889 | 115.692324946633 |
|         | 111.935554828717 | 114.027244455291 | 129.84933846313  | 112.817015523662 |
| EDNRA   | 1149.3250945792  | 1487.12201643008 | 751.077307018319 | 2069.70335195314 |
|         | 130.260174841484 | 179.674744176904 | 115.531710316716 | 137.666849842576 |
|         | 170.918584418153 | 282.870785313621 | 159.040409182674 | 136.794860440446 |
| EDNRB   | 167.741556663724 | 161.129770392464 | 151.295855278218 | 139.094167748687 |
|         | 133.101674466013 | 203.125568980238 | 130.551216910933 | 132.780055030907 |
|         | 144.724040494873 | 135.521802085177 | 133.906867716171 | 133.266524623338 |
| EEA1    | 166.182850621447 | 153.846723846716 | 151.342902631318 | 131.272948162154 |
|         | 153.044682186978 | 148.463566046951 | 233.394506254045 | 153.371065247493 |
|         | 171.740347129234 | 157.399880496076 | 161.499923812379 | 168.773340961473 |
| EED     | 217.165036362034 | 192.69687837782  | 198.549047189499 | 187.082082429597 |
|         | 231.287362732197 | 182.209056248253 | 210.666799498141 | 213.046162847735 |
|         | 201.221839281282 | 196.839016616283 | 226.712995229189 | 238.183096218311 |
| EEF1A1  | 21754.9904891312 | 21409.4415798676 | 25558.9005130606 |                  |
|         | 19356.3155476146 | 9099.13956219312 | 20887.0399135573 | 18862.7632438112 |
|         | 19496.8914296296 | 18146.8167991873 | 19889.8233042542 | 12615.8332290932 |
|         | 23427.4695172122 |                  |                  |                  |
| EEF1A2  | 145.431393142782 | 260.67310907387  | 205.011514211101 |                  |
|         | 154.499313851756 | 5714.36902486392 | 3184.98944679038 | 1045.49947183547 |
|         | 2195.41077320434 | 324.177924877233 | 334.772648743153 | 559.668195903429 |
|         | 2970.34597432588 |                  |                  |                  |
| EEF1A17 | 18338.3001930708 | 17067.0086403248 | 20099.9833491654 |                  |
|         | 13758.4768543075 | 6358.5018930218  | 9044.54885739666 | 15463.4998494462 |
|         | 9070.86397918429 | 8840.92490099301 | 15194.4972103372 | 15116.95436573   |
|         | 14651.3379687477 |                  |                  |                  |
| EEF1B2  | 2263.73444150082 | 2344.11548437508 | 2599.421026133   |                  |
|         | 2141.855356411   | 1225.33666840349 | 3222.23985545506 | 3008.43964505208 |

2786.35558271661 1953.88327754946 4141.8682669995 3671.86460903374  
 3501.86788138647  
 EEF1D 2139.42448145954 1920.16520804856 2325.02143920169 1925.60246708149  
 2016.52142068599 1040.73829397913 1571.87128697931 1047.78978081493  
 1482.92498205315 1790.53556140959 1095.04571025381 1401.67503392145  
 EEF1E1 231.517412929077 249.737588031219 247.340470321453  
 186.377571176623 536.805979562807 587.388038484307 428.09583118349  
 445.348044448953 557.868300839263 379.983165400941 398.512947526406  
 581.54874141672  
 EEF1G 4651.384971332 5543.71998558526 5022.15374558514 4397.32311216672  
 9192.8966763778 7308.57540715512 9514.74328718935 6091.9840719327  
 4491.96934862425 10741.3064142855 8401.40370474392 6776.11712291246  
 EEF2 11281.201625198 11235.4970815873 9514.74328718935 12334.7921691489  
 12457.6956682374 4246.19983955771 8514.94395408164 5300.67886821231  
 4763.89426388268 8514.94395408164 8121.54750071211 5572.23400804004  
 EEF2K 1600.10235468018 1601.19401366685 1708.87666406131 2146.4265920569  
 524.640879446426 546.399972543938 453.926991868451 571.273512452931  
 420.95713139384 523.937128789616 528.098472417251 491.635435224507  
 EEFSEC 127.453866279181 137.803749343493 120.094156375538  
 129.508990861362 172.20451139581 110.885714048075 123.067278658698  
 125.687688416588 133.820936825552 120.724926760252 127.132970760907  
 117.071585083051  
 EEPD1 208.932692585748 190.22021453133 183.556662533396 174.66966623557  
 148.258850340107 127.224081416987 123.323528039848 140.928627507036  
 139.885054845153 110.942138645171 161.385691765316 136.133538781918  
 EFCAB1 179.582086214179 183.82450756022 174.221939793486  
 139.963969716386 168.365262340217 145.852430082228 162.466301774088  
 146.482652762374 150.36160186175 155.815785551964 144.117964288763  
 157.765771942689  
 EFCAB2 164.659092629962 148.635174393031 140.010730572075  
 139.880733465536 132.421863261746 105.348008821162 130.656206845965  
 145.068061371609 128.563180697606 122.651702760414 135.218648235324  
 132.411757518105  
 EFCAB3 126.800718471804 118.56332995149 120.77691423934  
 118.05386204863 118.636694749194 124.381674909742 129.013667813486  
 141.147683040881 128.05898686833 137.360220389719 153.305679563467  
 128.262195551255  
 EFCAB4A 202.041958613989 211.941623411369 181.3859695951  
 194.655710454472 416.638529499878 204.654489493854 180.354899434843  
 547.042461070351 309.181150342727 168.470685171939 507.342877360289  
 286.774606295106  
 EFCAB4B 128.356453959987 143.376817049362 131.395959781477  
 135.86149691566 135.067056559409 128.513011425662 128.966514855818  
 117.60787142216 127.898533598679 127.551486042435 134.531334130512  
 130.63591305094  
 EFCAB5 137.990806386929 131.246704975084 127.663578933727  
 134.640783050966 130.829825154842 126.049905221996 129.665507668047  
 131.700854556022 132.608622131443 132.608622131443 134.463094391766  
 139.566124411099  
 EFCAB6 151.930565620382 149.402679897813 160.277755404001  
 150.468392290279 141.592180897595 135.987450822209 136.682172321984  
 148.179398287068 150.283447275981 140.334331111538 148.983182193411  
 138.764834713216

EFCAB7 152.54039461337 158.130933580414 178.684992551017  
 157.952018720438 153.606787306076 153.541193559658 180.437648146588  
 151.78607484924 157.736101691222 162.766038656637 164.268280525424  
 167.653412908384  
 EFCBP1 159.012011848781 148.326282600684 211.438615793742  
 151.466689967666 118.816986517698 117.084984190461 120.255081121925  
 116.342242990651 122.900675062181 121.739219824085 110.437728036347  
 121.499802749899  
 EFEMP1 1315.66699943181 624.106546150735 888.706978062337  
 638.129080224049 144.170287726456 172.169129806643 137.318442197233  
 200.902123076244 219.878230463206 195.043838688467 139.768555796264  
 151.747595672228  
 EFEMP2 1302.54547114701 1279.15873231449 908.704610877319  
 1535.27496251381 856.424155671931 212.050953977485 266.964673763497  
 288.182388699147 356.376890469558 464.323065038265 204.82244206816  
 326.525579400607  
 EFHA1 601.640387246951 604.737834405874 523.591472915151 517.23393716516  
 552.494327858264 582.527835746927 552.298965378403 528.098472417251  
 654.305724263754 797.501324589697 613.631311147328 913.934874451961  
 EFHA2 164.520247586053 160.833948531272 167.125830254039 169.447827110558  
 126.714455673392 130.052593375075 130.788557333561 118.167740643871  
 129.111259771449 131.198284945008 145.806935833967 130.06068534054  
 EFHB 153.700168798494 150.587882657674 132.149864626575 156.043994260248  
 142.211357324461 161.781529659549 135.010937737018 156.285963197762  
 143.05872558805 143.234195669431 143.175483349968 137.52653395793  
 EFHC1 191.830711714844 174.396061906109 188.995551740427 144.266108481571  
 181.098584949344 208.406980186223 204.787016443123 184.008405576875  
 194.445463745418 166.440530119785 210.199788806189 191.207048581306  
 EFHC2 161.73079180403 199.991077347491 139.209080672396 171.071893074072  
 133.760183242137 124.955676894776 120.342513393659 269.853718252574  
 130.812309202831 121.764933633063 131.001996509052 126.620889938532  
 EFHD1 516.892850913889 662.958637409597 488.379057110543 634.556887178869  
 276.925017614147 182.545896049446 129.699765645519 175.51767355303  
 232.083160165968 216.755681508811 169.052101570616 159.887898257218  
 EFHD2 1127.07858210156 1438.33289891548 972.468110850466 1391.89900758685  
 8322.20177173035 2808.78353621111 2841.96460830166 3328.99028463277  
 2274.75133434566 1032.4540300024 3384.19521857242 4246.19983955771  
 EFNA1 385.978867521533 562.891241563711 342.403428822464 318.778978094743  
 1411.90426595229 1177.01310527577 1713.93035637146 654.663838918786  
 1265.88446775977 1083.26599217847 619.223672253014 408.201232787978  
 EFNA2 143.365976841902 131.676609824921 139.044150521333 133.026879831536  
 146.351622020606 136.730623822061 131.338853426561 147.508817393901  
 138.846543789882 135.852591930882 135.271290872348 127.50624009248  
 EFNA3 147.968104627262 143.211127738941 140.593510265137 137.42213762011  
 150.49183794045 136.207420489201 133.345885001759 148.874533472738  
 144.065554025603 156.646803208934 124.873289279767 140.214475962177  
 EFNA4 154.637740117457 168.71216652064 144.242034773232 148.057700860759  
 581.37957221282 214.434355263652 275.203046536524 318.561557474749  
 250.376178742476 230.723142236623 250.30085097088 245.399847987183  
 EFNA5 126.647643493986 121.18490040448 105.050093408041 119.29304762171  
 120.184782039538 109.113476990309 113.955459033122 115.605206174867  
 117.965208293925 112.635430248416 113.862790983655 113.077691687266

|        |                  |                  |                  |                  |
|--------|------------------|------------------|------------------|------------------|
| EFNB1  | 254.991678321253 | 319.927209914181 | 183.676020826291 | 347.292438587205 |
|        | 621.825622897512 | 321.977549744483 | 277.101000223971 | 195.513703253634 |
|        | 192.340135076104 | 308.441120735095 | 403.812520074723 | 396.708183244581 |
| EFNB2  | 336.845908630493 | 319.812293134357 | 151.615675144083 | 241.944581086483 |
|        | 321.119758814618 | 627.526008812413 | 232.127996106421 | 538.647888236878 |
|        | 273.303240462047 | 703.29965727829  | 373.656487297238 | 783.059427015955 |
| EFNB3  | 126.523201566273 | 124.411213807179 | 114.032874859062 | 122.708102546276 |
|        | 138.476953078729 | 184.387409077972 | 122.20752192519  | 123.752109790056 |
|        | 122.042136913991 | 245.240006198482 | 126.416290818296 | 134.266373965186 |
| EFR3A  | 1948.24432908972 | 1861.19763103381 | 2246.89876694944 | 1889.05071563459 |
|        | 553.90008440429  | 956.153239481189 | 817.529344685717 | 897.51782613323  |
|        | 1174.0922389136  | 951.371815352591 | 1060.24125879951 | 834.788058321257 |
| EFR3B  | 162.620593985693 | 151.563917522864 | 146.763046352405 | 130.860938463815 |
|        | 163.773702843544 | 136.643481414354 | 124.652072110334 | 132.568354349687 |
|        | 158.6067091347   | 134.835962366555 | 152.356731704094 | 147.44463861207  |
| EFS    | 242.657224881824 | 241.734804013256 | 183.406510146725 | 276.756415094228 |
|        | 408.037874667173 | 169.844913799159 | 189.872997882033 | 171.426334687626 |
|        | 211.438615793742 | 195.033792280119 | 220.258804437828 | 219.192900411543 |
| EFTUD1 | 213.531307836195 | 218.2454853526   | 254.879772480457 |                  |
|        | 240.182016388745 | 209.867189613436 | 224.766155406229 | 213.556015518863 |
|        | 179.015669199358 | 207.05325577114  | 259.900447705311 | 242.440966395613 |
|        | 228.852495818211 |                  |                  |                  |
| EFTUD2 | 505.83860711693  | 524.245387973163 | 416.933146258428 |                  |
|        | 593.462634352052 | 1481.24705642453 | 1020.19774509086 | 980.67040349547  |
|        | 1008.875250028   | 1098.78649254838 | 644.741046498743 | 835.284130042504 |
|        | 739.874432767734 |                  |                  |                  |
| EGF    | 126.141462782039 | 137.419835194075 | 127.740057874561 | 125.621467040793 |
|        | 119.005230164124 | 116.664031217378 | 137.410687900298 | 127.04953162892  |
|        | 122.170662903259 | 116.670491972948 | 137.356539213081 | 122.423561732526 |
| EGFL10 | 139.701504237962 | 127.389942368953 | 132.466796864599 |                  |
|        | 137.16842164453  | 139.768555796264 | 133.82548013342  | 135.950465168457 |
|        | 141.318353848615 | 132.338144393918 | 139.750281709938 | 146.162330544539 |
|        | 133.689255383855 |                  |                  |                  |
| EGFL6  | 186.57665470145  | 189.971144220643 | 198.285073991956 | 218.70412656621  |
|        | 161.530878860883 | 178.734634888773 | 132.871179509995 | 478.040234382488 |
|        | 212.643559782754 | 256.174286655796 | 207.718619151226 | 205.908052642222 |
| EGFL7  | 176.019082929386 | 190.572712684622 | 144.402160347818 | 185.374745525698 |
|        | 179.220691178402 | 160.822287037366 | 143.331929080227 | 147.009325721272 |
|        | 148.538400348149 | 154.865107093653 | 156.488852212628 | 147.909588100857 |
| EGFL8  | 140.481148289418 | 142.780100181736 | 147.274945970072 | 128.504026473695 |
|        | 135.164117176127 | 122.333765477428 | 142.281657284178 | 123.98384416057  |
|        | 146.937052029619 | 128.182419321978 | 127.152744243038 | 132.560292119968 |
| EGFLAM | 193.064450357153 | 206.071709262227 | 193.444080047879 |                  |
|        | 263.52595855321  | 159.765585531442 | 157.568150431884 | 152.074017988748 |
|        | 170.401653214867 | 198.191669030952 | 249.953902454701 | 155.911387663464 |
|        | 174.075670633438 |                  |                  |                  |
| EGFR   | 185.876046259727 | 168.897620634337 | 175.400802387403 | 158.404154056472 |
|        | 174.635853531194 | 142.266177608209 | 164.276668889213 | 149.283495832731 |
|        | 140.490023670841 | 502.598518192729 | 178.394895649664 | 159.021304119265 |
| EGLN1  | 174.690052785405 | 159.52147764862  | 171.941887376462 | 166.89285636895  |
|        | 291.476113017794 | 171.16807372519  | 248.531972733475 | 193.569894919176 |
|        | 194.388383297922 | 302.809011218879 | 172.03919618445  | 225.095016600703 |

|         |                  |                  |                  |                  |
|---------|------------------|------------------|------------------|------------------|
| EGLN2   | 1111.88018487186 | 1305.2232532959  | 1339.83170225337 | 2012.36542989953 |
|         | 1640.99641023476 | 823.658996207582 | 824.746488539942 | 871.528156184927 |
|         | 1167.72023351098 | 597.795856268827 | 672.348723983535 | 628.939201051801 |
| EGLN3   | 337.652945958921 | 342.096409626768 | 273.651114834013 | 398.193129265416 |
|         | 321.977549744483 | 147.238896426423 | 326.570967321756 | 164.276668889213 |
|         | 135.817028661429 | 411.968307579588 | 279.325065941252 | 178.28963352311  |
| EGOT    | 153.532954370572 | 148.989286668424 | 142.321476446203 | 144.188147197178 |
|         | 152.385014030957 | 139.872976072847 | 152.270617606866 | 140.419686138586 |
|         | 161.202844994203 | 155.91493956251  | 194.337080066417 | 161.299920355406 |
| EGR1    | 4000.45196171119 | 4118.58682247781 | 2093.67403119512 | 3177.80599774525 |
|         | 351.292682758926 | 1650.77281891596 | 222.484058975856 | 1292.13921040404 |
|         | 357.35857422585  | 3334.16277752222 | 585.933822585718 | 351.079435946154 |
| EGR2    | 190.96184674871  | 232.519482087835 | 141.069243738242 | 201.105520537151 |
|         | 155.846106540378 | 203.308014296113 | 139.776830704087 | 164.784346867158 |
|         | 178.262619516994 | 337.822337721287 | 156.061579024549 | 134.762169062357 |
| EGR3    | 172.097502416776 | 151.16261275916  | 132.478801067837 | 138.928287624746 |
|         | 129.360773522498 | 160.632809953993 | 126.678746008577 | 131.246704975084 |
|         | 129.375772737722 | 164.562302265155 | 148.803188053248 | 127.893555451807 |
| EGR4    | 120.36718185387  | 114.10470841717  | 122.644105247178 | 127.453866279181 |
|         | 129.813090345837 | 115.3611179192   | 131.766114156138 | 126.372374084002 |
|         | 116.919109599361 | 127.811923445503 | 115.785084044427 | 112.3786222545   |
| EHBP1   | 1497.32522786098 | 1213.61170930345 | 1561.10217536347 | 1222.014210447   |
|         | 336.002793042439 | 522.17701271254  | 463.754869412768 | 547.817028243811 |
|         | 408.037874667173 | 1092.74905085695 | 408.7151485563   | 371.224296589448 |
| EHBP1L1 | 2421.87041217217 | 2808.78353621111 | 2350.01764791897 |                  |
|         | 3700.75770419386 | 1075.3328563531  | 428.569462312363 | 465.41233536979  |
|         | 324.671490117952 | 515.597523880328 | 1808.26383618901 | 1459.31031099055 |
|         | 936.560290736127 |                  |                  |                  |
| EHD1    | 1816.3719976564  | 2416.49806112207 | 1477.10828981572 | 3149.26998719015 |
|         | 1439.37593006882 | 960.775251871864 | 846.985164747386 | 698.882871686866 |
|         | 1155.4487861163  | 855.112210714686 | 914.654262296682 | 850.882404546093 |
| EHD2    | 879.809795251142 | 1006.24899131914 | 491.112594297928 | 1536.52218968817 |
|         | 395.133831206474 | 181.467708718758 | 240.792557915987 | 170.046856179083 |
|         | 197.02284475852  | 385.135014083686 | 297.071121022183 | 160.026178505749 |
| EHD3    | 165.262738484387 | 167.542332146706 | 182.508415915215 | 160.557818466874 |
|         | 195.019706886336 | 183.115511373872 | 226.678503956411 | 160.806678614325 |
|         | 158.598999414864 | 146.376149543438 | 175.327597807738 | 182.300628120658 |
| EHD4    | 372.255208814622 | 502.281584081805 | 311.612118247493 | 369.592501881153 |
|         | 551.350758868377 | 680.509421043347 | 710.999354960979 | 528.767644181119 |
|         | 710.228463443265 | 588.863382995875 | 682.538709448692 | 540.946852709312 |
| EHF     | 127.824005374202 | 156.883255634126 | 141.97478198531  | 127.080149144234 |
|         | 257.44230597145  | 576.873245313776 | 596.076764072945 | 683.179460779062 |
|         | 837.023434916281 | 558.051041108282 | 727.814681346494 | 595.409419899436 |
| EHHADH  | 149.383429241903 | 135.99579763634  | 160.353649786837 |                  |
|         | 158.294082740156 | 162.841318222066 | 189.575681012578 | 162.18174589792  |
|         | 285.882780066861 | 353.285905782951 | 236.108432603479 | 153.795665190439 |
|         | 213.93763684072  |                  |                  |                  |
| EHMT1   | 172.478461106269 | 161.997058981786 | 162.683665945044 | 158.335952927257 |
|         | 157.83460319212  | 160.28767775843  | 151.855884026072 | 156.490654498766 |
|         | 159.588575526536 | 148.816369706133 | 157.821491577808 | 153.551359970644 |
| EHMT2   | 165.993897306927 | 178.717719615544 | 157.446725405803 | 180.63469438043  |
|         | 229.77428612216  | 145.791950392049 | 168.969180646603 | 155.014930599769 |
|         | 157.940873610797 | 152.08574341962  | 184.530853446688 | 158.053654524927 |

|         |                  |                  |                  |                  |
|---------|------------------|------------------|------------------|------------------|
| EI24    | 864.161191021297 | 885.104778820041 | 955.604404066769 | 843.545962045705 |
|         | 1293.70593826709 | 1264.90442763788 | 1485.776977235   | 1776.38646235135 |
|         | 1394.31467757456 | 1102.38234645327 | 2550.08769415478 | 1858.12855367119 |
| EID1    | 204.544266331066 | 233.997642139328 | 252.514569129392 | 227.483999162038 |
|         | 174.795822188504 | 166.595529296463 | 198.470718196139 | 179.230909178397 |
|         | 171.449326065013 | 207.920724788669 | 179.358460170348 | 194.702974020747 |
| EID2    | 167.157420848604 | 164.018470368389 | 160.806678614325 | 170.505553609318 |
|         | 258.21341068758  | 262.019779752857 | 215.81995779019  | 209.568066932367 |
|         | 191.322056430728 | 187.769988580599 | 223.359785518285 | 176.783978625103 |
| EID2B   | 7771.28016059011 | 7016.12801650552 | 6203.08085790474 | 7585.47289520004 |
|         | 933.723483173584 | 6409.23524786095 | 2837.36293710422 | 4651.384971332   |
|         | 4166.43837922103 | 3195.71436046397 | 4793.22133852447 | 3455.20639616159 |
| EID3    | 234.768591315095 | 184.021010234322 | 270.12941437975  | 181.735072060023 |
|         | 120.688909943167 | 121.588054040961 | 127.979574243743 | 138.064951932825 |
|         | 127.763186950161 | 157.990467804353 | 122.634741242406 | 129.4807689399   |
| EIF1    | 6281.01687932005 | 5233.72882607795 | 5912.48904507462 | 4030.42725798136 |
|         | 1969.67552562117 | 4280.66857663502 | 3232.96611074938 | 5624.32062666666 |
|         | 6253.84268792816 | 4043.28299602858 | 4141.8682669995  | 3188.90202907403 |
| EIF1AD  | 130.185134787768 | 147.679233228201 | 150.396462763607 |                  |
|         | 150.072005848234 | 166.422360032182 | 138.456465793474 | 160.090914414578 |
|         | 144.077080621909 | 159.368376366657 | 151.379761514526 | 174.698724064671 |
|         | 145.185902174023 |                  |                  |                  |
| EIF1AX  | 318.778978094743 | 315.863232876382 | 301.695991929957 |                  |
|         | 249.858562350415 | 301.087947101876 | 854.224454791713 | 374.106258053201 |
|         | 774.180202250076 | 322.684910198242 | 435.037306125887 | 364.766154056243 |
|         | 369.373283422151 |                  |                  |                  |
| EIF1AY  | 451.147418314412 | 419.902534806131 | 683.365770196967 |                  |
|         | 431.093544964576 | 445.95114929414  | 149.520911664673 | 181.803275243281 |
|         | 679.191060100076 | 572.407760064901 | 211.572396862776 | 459.171226689178 |
|         | 748.161769171818 |                  |                  |                  |
| EIF1B   | 1055.22233969473 | 878.167149313285 | 1144.53002508973 | 732.352357321273 |
|         | 1071.47374315822 | 853.314313182949 | 970.166036472486 | 773.330948077036 |
|         | 1042.40539020413 | 1047.2693539616  | 831.08287594363  | 937.593129242257 |
| EIF2A   | 1049.52258147141 | 737.193295872614 | 1326.95332435394 | 809.729160605727 |
|         | 484.131020584378 | 1017.09497861942 | 1235.75946952752 | 902.822697602452 |
|         | 951.371815352591 | 1329.90419210779 | 1183.82018168635 | 1349.84215478798 |
| EIF2AK1 | 732.352357321273 | 838.63350090385  | 739.52947559669  |                  |
|         | 779.922653392712 | 1391.89900758685 | 992.744093752678 | 1870.52504853779 |
|         | 1518.13775377335 | 1742.84803427086 | 1091.69584249713 | 1179.42590997099 |
|         | 1627.02882286283 |                  |                  |                  |
| EIF2AK2 | 2466.36457617864 | 1776.38646235135 | 1185.70008959602 |                  |
|         | 1832.35076992253 | 878.986106116952 | 1337.38160266788 | 1427.70292953827 |
|         | 1174.0922389136  | 844.462124058351 | 826.314416168552 | 1634.20135156938 |
|         | 1073.40463823132 |                  |                  |                  |
| EIF2AK3 | 195.230219990395 | 183.181125586276 | 168.687845035401 |                  |
|         | 201.837695818264 | 263.448958595597 | 269.141120401835 | 259.900447705311 |
|         | 288.770330002807 | 256.471672362567 | 186.794165469219 | 250.963601187362 |
|         | 201.569913451219 |                  |                  |                  |
| EIF2AK4 | 2269.44503773126 | 2437.63566094439 | 1567.89763050645 |                  |
|         | 2072.01578063404 | 427.345809255426 | 1793.75125318113 | 1027.11849332495 |
|         | 1484.32547474275 | 1078.41947691758 | 953.549801897112 | 1417.76295714364 |
|         | 1163.13845502757 |                  |                  |                  |
| EIF2B1  | 413.502150181875 | 410.533157400023 | 568.701661112562 |                  |
|         | 491.635435224507 | 375.038561820137 | 453.760162338163 | 524.392279804734 |

355.714202328378 549.460612060753 526.896146537814 390.979822976551  
488.746614111382  
EIF2B2 521.512936372701 413.757630469808 527.294087043601  
370.877260088621 384.051170099325 443.343806055858 661.826149512811  
544.222458349696 495.438672949441 655.431236290512 351.02823853348  
572.913714991136  
EIF2B3 381.740838644647 442.698000781597 382.960724128105  
493.347308943133 337.585502787016 393.98210915852 266.135477775641  
363.255517622046 376.189276074918 303.724140156439 336.380724981693  
282.137282466192  
EIF2B4 833.198511430615 802.304294140514 916.836022395768  
894.100792722707 874.348941257592 941.936830901588 737.843412273272  
961.355625338687 618.140160251927 866.765054377214 782.448692528135  
645.183207984114  
EIF2B5 474.378918787006 498.05778289794 453.593585032712  
534.083703564903 513.816017871024 505.560841055884 552.167699318911  
638.393099392849 665.106631364961 438.611973005212 605.437395034282  
671.134356672693  
EIF2C1 286.376638135463 338.866471651692 292.746711619565  
383.259887828605 324.615093103582 323.667189206453 257.032174266905  
250.139061165593 308.679189788554 238.149614104568 260.591336959281  
224.724262742427  
EIF2C2 1257.00798908017 1251.15912264225 911.340266389071  
1377.75266942574 1037.46485756166 1098.20033709043 671.821418586421  
823.658996207582 1031.59140059071 598.924339094496 587.181357555703  
653.500279510032  
EIF2C3 149.675363177375 144.266864839344 148.192121257421  
127.040027125755 171.086559024882 148.527528612375 133.206919058442  
142.694748293332 137.854873498783 141.66312605042 135.659271030454  
142.96594961303  
EIF2C4 185.199972151831 191.543371466252 185.525760847281  
223.253794809571 146.264686158155 140.021640936288 164.413893089607  
137.539385624206 153.488903967311 145.628239642187 189.142295015168  
147.808262170269  
EIF2S1 458.782864873657 483.174262289559 517.23393716516  
509.618968665191 381.484062427466 400.783945471037 348.36178568457  
360.90109922539 305.615423200097 265.972387419683 459.973764138144  
347.081036934975  
EIF2S2 213.674150322581 232.276667029184 206.605699708924  
266.316485802808 169.482586449402 264.158648784101 237.420951138877  
185.199972151831 235.997227173296 168.882806817001 208.776711004753  
193.07463429041  
EIF2S3 1505.90883940934 1301.61742965939 2399.88695085752  
1126.46241487062 726.556553101727 2107.99357083999 2043.73482086765  
1223.68146968716 1117.77397620221 1561.10217536347 1161.39230511792  
1166.86593572716  
EIF3A 1660.70040058102 1540.71556891815 1320.74943817958 1309.7660860424  
1006.69598892631 714.274201838067 1086.8615735568 871.268905562551  
1209.56018864779 868.40984928812 1752.50728312967 1212.55338792557  
EIF3B 1748.77270039774 2195.41077320434 2063.42824094932 2850.98525554116  
3749.80462365748 1336.75600604068 1526.66232186013 1550.61855325662  
1990.94596595493 1657.72357544205 1224.49891389348 2236.73950603157

EIF3C 212.643559782754 228.901579068997 226.25694727283 247.845708587624  
208.690347128273 154.648806105422 230.723142236623 155.76568091161  
164.02617650236 220.578790067967 199.933148219784 200.84691030169  
EIF3CL 163.407360509803 180.667897257797 233.335353447342  
171.014432075829 197.762169504041 205.930921729192 262.019779752857  
202.849544035436 172.599654598668 279.070493043898 187.196424491482  
305.768201359278  
EIF3D 1875.21979956596 1971.42527720714 2127.22258112242 2225.59207490574  
1783.8031212092 1704.25279485563 1708.87666406131 1571.87128697931  
1660.70040058102 1707.09830463606 2135.04382065446 1718.80498208397  
EIF3E 10790.3738999898 10075.6573898939 10280.5093368677 9251.21629832018  
9349.76443528011 7038.48958943724 11874.9808592281 8292.04796307133  
9715.20127757161 10417.5218406801 9560.32907282993 8840.92490099301  
EIF3F 1608.40826380713 1867.55140010155 2392.93562797606 1675.35431076885  
2081.45603839306 1304.37930719411 1752.50728312967 1538.78070281348  
1710.60409578293 3149.26998719015 2149.13404212591 1192.47480377375  
EIF3G 2096.25803773108 2197.44189747261 2293.05058904656 2185.46850787298  
2165.41403521012 1542.35486950856 2151.9395095819 1721.20676889116  
1312.44215746801 1863.96986643676 1627.02882286283 1416.93831202323  
EIF3H 1724.22121078776 1522.87703817058 2200.94974896771 1701.43479420427  
704.653073777277 1034.68475089075 2104.59597571915 1503.2049371911  
1798.5819962261 1724.22121078776 1754.99663827472 1643.08061372695  
EIF3I 1319.3522488218 1208.9240215109 1618.64901092072 1267.5716872154  
1103.13439876128 2406.67187918735 1901.97972168836 2176.59445919725  
2166.68174726155 2118.73410871718 1198.53117439169 1940.42283070543  
EIF3IP1 146.174492025087 153.761061653202 137.044079235724  
137.683228179974 140.750004067571 144.501995579502 142.13436730069  
158.8054811093 140.52997588229 137.401137659118 149.366554238043  
150.173766182317  
EIF3J 267.535469518664 226.35854874278 307.866499851733 227.736106796551  
215.094633380547 274.77366169918 313.18989508207 259.672238210968  
314.292700455545 388.096183735126 239.73396414153 315.430399077266  
EIF3K 2662.43181510326 2979.27692778783 2708.20624364471 3481.90072759183  
3417.22292085668 2941.69058596077 2770.7811954029 3012.49794349837  
2730.50913686613 2530.00219297102 2741.71904421456 2792.13364570755  
EIF3L 6793.99737496637 6138.10904830456 7038.48958943724 5947.89821087362  
3436.32495553246 4612.81760689869 4892.17875938832 4527.53010866974  
3938.94050658589 4763.89426388268 4749.69040198959 5175.17279574945  
EIF3M 941.065508539108 807.92851898782 1302.54547114701 644.868034665476  
1203.47834989609 1183.82018168635 1742.84803427086 1258.16519121331  
1027.48490028905 1958.96627327952 2041.03024136014 1142.44180956604  
EIF4A1 3168.27825058989 3396.40593844715 2611.61260614408  
2988.45928881468 4088.12910138929 6585.34962362923 4511.9116742833  
5032.66681917478 4214.83058308503 6244.58472720999 5373.2173152906  
3810.98043907046  
EIF4A2 9908.59593023839 9099.13956219312 9852.51412359574  
10704.4678928541 2605.13680290987 4651.384971332 7539.6945050098  
3949.19206005238 5489.19362780613 4198.61471038267 7406.86318549013  
5437.78386044638  
EIF4A3 1038.93733638848 1131.96129284658 1021.81988990874  
907.306121257236 2542.44286642873 2720.83642320419 2105.87438782831  
2452.1304336603 2913.2685312165 2630.78185410861 1801.74467005923  
2246.89876694944



EIF4B 4711.21389812942 4150.8511719558 6810.50193989514 3688.68740405322  
1100.17618574297 1732.52466021178 2728.04758874748 2208.49325118803  
2938.06458269406 3793.02341602102 4134.02613649483 2744.77453865893  
EIF4E 144.87013280941 143.175483349968 134.751916364581 146.763046352405  
142.263088069997 147.055213172078 140.52997588229 149.818888178632  
146.278921849776 153.39738748803 159.89988762842 145.789840511876  
EIF4E1B 134.986030185477 149.066522533956 155.463400179872  
156.053517438255 139.699189528879 131.773304233929 157.221008210698  
157.182954894643 158.400572147671 135.594186066942 146.40904127542  
131.578042179715  
EIF4E2 523.937128789616 559.668195903429 534.083703564903  
569.656573915709 796.699879495384 882.798927428142 680.743052197025  
681.429327723794 896.625415670455 1401.67503392145 897.958748317315  
910.982557417978  
EIF4E3 694.644744547412 545.026293696209 839.662936279727  
488.884511065882 205.322733011516 284.195575802966 286.085833802132  
228.675099004411 301.087947101876 401.267425721838 264.905947922753  
350.077206368839  
EIF4EBP1 171.121834829333 161.916155040522 178.045931314857  
189.985520850855 571.950858678221 237.601064742453 186.758038665014  
156.179501567984 166.803359138942 253.697419495959 174.540209145695  
152.864765895508  
EIF4EBP2 592.957842630046 600.162650426961 711.491528818004  
509.400965222318 412.415549375221 250.577945492981 401.960630197091  
339.448524400708 504.709613434391 284.236970342827 665.602699607102  
458.440488401029  
EIF4EBP3 170.878962027347 177.759729226623 162.168246402027  
202.369905673351 159.515698265424 135.594186066942 156.654450436728  
160.297609596399 151.459397907666 176.874265462986 185.961822133346  
153.606787306076  
EIF4ENIF1 392.746574862867 334.140757209353 523.073926509865  
419.272193677273 332.464176231219 330.080428155378 252.957489543915  
280.033528476199 251.011148303246 295.153786338687 335.389274425025  
354.336462793628  
EIF4G1 686.198351821711 640.255747986724 567.465201338735  
902.394410348792 1470.23096656138 646.117381960716 525.287367366192  
597.189355986293 799.759250503507 702.0495711167356 583.455617065556  
596.54904286299  
EIF4G2 3807.16206340771 3712.67025366957 3954.24763752814  
3474.0924656878 3968.38723079061 4793.22133852447 4190.38366101529  
4457.64479507833 4945.87677849967 5601.24254062491 5800.06300826802  
3441.9805896226  
EIF4G3 807.92851898782 776.411045078049 819.887322757281  
720.364080505785 720.364080505785 716.420861490714 672.637760135254  
788.244353085369 756.390518977556 698.086166782221 921.140932799223  
611.088604425595  
EIF4H 1566.65825409044 1509.69760873558 2159.2992548378 1531.54387233661  
2031.01186679713 1293.38808483663 1787.32566525551 1766.15001427132  
1677.93424842267 2337.64145466514 1435.4236709581 2344.11548437508  
EIF5 239.845747958475 240.410292351169 367.439588680092 201.555964610849  
224.062024091915 342.315456386729 436.331333134628 417.262521411065  
270.651318838953 387.305348482856 402.299165610893 371.767182305618

|         |                  |                  |                  |                  |
|---------|------------------|------------------|------------------|------------------|
| EIF5A   | 768.334658920971 | 1121.87292339787 | 1212.55338792557 | 1285.54492194393 |
|         | 3664.38955037715 | 1625.55754007235 | 1133.87328758676 | 1475.41920838384 |
|         | 1037.97124386242 | 3078.76695443407 | 3241.23835624706 | 1461.64901688125 |
| EIF5A2  | 239.388546850124 | 217.327543190687 | 201.773745532242 |                  |
|         | 209.258707976348 | 164.50490221903  | 187.833356349429 | 137.740497848238 |
|         | 155.842195370853 | 158.147502554814 | 182.478971050701 | 131.249240371529 |
|         | 141.232464220879 |                  |                  |                  |
| EIF5AL1 | 158.73040336393  | 162.732574014686 | 171.455216889348 |                  |
|         | 162.634670715627 | 153.38260557666  | 160.78368986036  | 165.537853089052 |
|         | 169.752525994991 | 160.816803370151 | 152.780908985916 | 146.609485664113 |
|         | 158.120079903425 |                  |                  |                  |
| EIF5B   | 482.965800108538 | 438.7446527797   | 558.934004505074 | 498.812823949508 |
|         | 304.402066421813 | 364.964572587289 | 359.493075382333 | 369.838429521168 |
|         | 395.786295710815 | 494.604716660887 | 478.180723959397 | 487.993796425035 |
| EIF6    | 472.961857076681 | 529.04238100948  | 491.034395489684 | 555.259469428492 |
|         | 1200.94425675913 | 1608.40826380713 | 1536.52218968817 | 885.713964813911 |
|         | 1121.87292339787 | 802.304294140514 | 1053.65938651514 | 1269.67110104843 |
| ELA1    | 110.392617179163 | 114.155592351175 | 112.3786222545   | 100.637271902591 |
|         | 111.603221942108 | 104.03442843396  | 111.992738490468 | 106.393497890486 |
|         | 102.851152421943 | 104.03442843396  | 117.49013401175  | 114.953328013917 |
| ELA2A   | 139.099483279141 | 145.395883026207 | 179.297628357211 | 149.647926859169 |
|         | 126.734835642553 | 142.796371223204 | 147.581827861592 | 133.211362932569 |
|         | 140.354508398385 | 154.00005407707  | 153.464360995071 | 128.978197156274 |
| ELA3A   | 126.064311640223 | 129.265788005518 | 132.804216633852 | 129.859331207247 |
|         | 127.783892576352 | 130.532559074698 | 125.874313058552 | 132.23149173224  |
|         | 130.552037435735 | 137.77107995457  | 147.241136598626 | 122.799487123057 |
| ELAC1   | 167.92409473064  | 137.497145594629 | 158.411846122784 | 172.329225247019 |
|         | 173.484307104751 | 172.531836863525 | 147.921826551905 | 174.635853531194 |
|         | 177.151218006672 | 174.075670633438 | 161.084088366981 | 173.751615672365 |
| ELAC2   | 274.627303114477 | 271.823243396395 | 296.290104133844 | 360.243484271891 |
|         | 213.710058427654 | 361.429760858441 | 182.545896049446 | 292.893332413185 |
|         | 200.98533822317  | 228.901579068997 | 223.551813819581 | 177.742616962629 |
| ELANE   | 194.212177449077 | 161.94312376726  | 150.093684245826 | 147.78847662997  |
|         | 140.692586715322 | 148.589330990191 | 136.855445270531 | 131.534097198718 |
|         | 127.209043595332 | 140.844007965202 | 130.674263597931 | 162.007384919302 |
| ELAVL1  | 194.789918629905 | 208.456472621593 | 187.784865705837 |                  |
|         | 239.836698194959 | 140.518206716196 | 287.751093664085 | 212.190707408572 |
|         | 223.184064606222 | 153.377182895472 | 154.792156982219 | 202.324795686879 |
|         | 229.835576260403 |                  |                  |                  |
| ELAVL2  | 119.205234864031 | 132.291759474331 | 118.500956349352 |                  |
|         | 122.5651974076   | 125.780294378066 | 129.636135486593 | 123.470830748348 |
|         | 127.080149144234 | 123.207402172696 | 126.94941821459  | 133.832462719784 |
|         | 128.289680999565 |                  |                  |                  |
| ELAVL3  | 141.655169779627 | 136.962442874268 | 145.387562372871 |                  |
|         | 138.704839659727 | 140.898380345452 | 124.68729078792  | 126.762116571216 |
|         | 125.287738115754 | 134.509830749072 | 137.826458479398 | 134.519697269443 |
|         | 130.812309202831 |                  |                  |                  |
| ELAVL4  | 118.724348027528 | 115.949513659403 | 115.600308687778 |                  |
|         | 115.646023142125 | 123.881658891576 | 114.373370072994 | 117.718893827092 |
|         | 113.177330690612 | 108.604763499678 | 116.161473967382 | 133.75142055959  |
|         | 134.105941085621 |                  |                  |                  |
| ELF1    | 783.755776589969 | 763.263858769038 | 761.32108609503  | 599.735180191091 |
|         | 525.920873434688 | 1105.10063745656 | 617.318955611228 | 1080.02576143033 |
|         | 1332.11815966955 | 1102.73689840572 | 1957.48508632607 | 1841.63015706195 |

|        |                  |                  |                  |                  |
|--------|------------------|------------------|------------------|------------------|
| ELF2   | 392.198487606534 | 393.264726588522 | 426.132037075477 | 398.423396126075 |
|        | 226.678503956411 | 372.757091748175 | 305.200911653347 | 305.325519265387 |
|        | 287.924891622962 | 289.956528242564 | 347.73629731446  | 345.565843875296 |
| ELF3   | 286.133496092533 | 424.201556056759 | 468.82816089485  | 160.150336334888 |
|        | 2938.06458269406 | 1728.86115695979 | 2048.13524244516 | 1671.82101590797 |
|        | 1949.60516542965 | 940.716682221364 | 1999.10320742823 | 2153.17165155392 |
| ELF4   | 233.786136606682 | 257.706904467657 | 216.126000558319 | 229.933577323411 |
|        | 1482.15461429206 | 899.667912542118 | 1172.4103691525  | 791.402660066193 |
|        | 601.164127925014 | 369.592501881153 | 475.927798702033 | 959.532977061027 |
| ELF5   | 133.70941349665  | 146.690308698414 | 142.481897141275 | 119.036965883266 |
|        | 169.321832528939 | 322.263925912805 | 148.908758741034 | 336.981561928411 |
|        | 156.050585687098 | 130.584348445667 | 214.617852048151 | 235.795627549799 |
| ELFN1  | 138.5270206057   | 153.920180168328 | 130.894384800009 | 126.077945699709 |
|        | 119.279765939686 | 143.229240978574 | 140.980119908597 | 129.015422924366 |
|        | 134.403789206552 | 138.986877479278 | 134.479828866339 | 122.109009629395 |
| ELFN2  | 120.638330368388 | 112.825399620524 | 101.597648528389 | 116.810827219571 |
|        | 128.662039886682 | 110.61165787102  | 119.498312996987 | 115.37736249419  |
|        | 104.826135297161 | 109.087574814292 | 122.937281123348 | 111.000303209442 |
| ELK1   | 486.334840298921 | 527.707841428677 | 325.082620845425 | 517.42417250172  |
|        | 1253.05700051015 | 659.900771633223 | 471.315730378641 | 726.346459754217 |
|        | 540.005877322817 | 467.681480781925 | 401.542072222692 | 410.002817143111 |
| ELK3   | 168.244523461915 | 150.255511248598 | 131.797936395014 | 162.876684781936 |
|        | 173.272062328378 | 139.155456340488 | 140.092648878007 | 144.167857433516 |
|        | 153.311705636864 | 177.478925091583 | 151.548865569913 | 141.964796033176 |
| ELK4   | 133.99226161886  | 128.659393756477 | 135.054931772725 | 131.132508349222 |
|        | 141.739299634007 | 135.291264978088 | 141.088456756806 | 133.414198431469 |
|        | 134.307336063739 | 148.260672564835 | 150.088034336851 | 143.290642777702 |
| ELL    | 282.137282466192 | 293.17183601265  | 306.550948766362 | 318.73799597811  |
|        | 349.054741747798 | 305.252666831522 | 285.931444518474 | 285.768837438859 |
|        | 207.023221559302 | 259.796092536601 | 345.977609212137 | 287.041585684111 |
| ELL2   | 376.443086293235 | 223.453776362112 | 205.08372943071  | 226.712995229189 |
|        | 205.305702209672 | 254.036619126409 | 310.718449468465 | 222.134519361117 |
|        | 226.595006724068 | 821.265710686098 | 255.435582426271 | 225.050796356289 |
| ELL3   | 189.362958041175 | 165.480489678822 | 174.491551019128 | 192.532222258033 |
|        | 149.089067389266 | 167.397758092427 | 155.187900101727 | 147.991572632747 |
|        | 178.200678423426 | 200.688465653117 | 151.020903727566 | 177.500110974116 |
| ELMO1  | 167.304721591124 | 164.417770955805 | 143.523051024982 | 152.454414703534 |
|        | 172.934156790775 | 162.531630234824 | 152.680068580858 | 171.16807372519  |
|        | 173.810080280732 | 139.510764003291 | 159.98636352484  | 151.026905311756 |
| ELMO2  | 257.740674565975 | 237.641190133427 | 242.5085895186   | 268.370347292603 |
|        | 219.687151891777 | 256.897177822238 | 239.541516080716 | 200.387623661458 |
|        | 209.74583569369  | 214.803167803712 | 207.254220247481 | 218.470365730283 |
| ELMO3  | 165.131463797217 | 177.582314734704 | 191.348260799746 | 155.664126780859 |
|        | 481.751102333172 | 277.685488726472 | 427.084392965651 | 321.977549744483 |
|        | 347.73629731446  | 476.495282784602 | 406.133430120039 | 370.390323116113 |
| ELMOD1 | 138.285325970867 | 157.765771942689 | 151.829217512763 |                  |
|        | 154.740395921562 | 151.312853764675 | 162.756185479013 | 150.042173991463 |
|        | 155.097300548684 | 159.289148392284 | 156.330571337475 | 135.407536491819 |
|        | 161.202844994203 |                  |                  |                  |
| ELMOD2 | 175.752091217351 | 177.001637712889 | 159.765585531442 |                  |
|        | 220.330477277988 | 304.058158731957 | 195.577739376082 | 264.054997398621 |
|        | 212.710910778949 | 275.509805464276 | 263.295012964476 | 222.848935978648 |
|        | 252.628516068724 |                  |                  |                  |

ELMOD3 177.851689709807 157.328404229451 154.778726823719  
 130.616175018332 160.949030247406 150.602976963975 156.448355269561  
 170.007845523415 147.553953240464 149.103778494524 174.749832388791  
 157.81327663167  
 ELN 244.307627077001 212.987082617173 161.916155040522 297.176755638159  
 153.412469512967 172.599654598668 152.73588666971 155.061749542085  
 156.280701500421 156.723502568908 146.845170370268 149.37190049932  
 ELOF1 364.527677995774 377.148528768679 379.788696204016 438.817248820137  
 444.663812851378 479.866450988091 374.033009122079 331.062744782933  
 315.513423195489 445.089930641391 306.550948766362 343.617417488962  
 ELOVL1 246.63579788514 252.10470581893 233.07015384759  
 233.572055978465 941.572186137467 661.826149512811 486.425387717472  
 503.967725251906 396.04031733841 415.497783305278 565.164961255054  
 626.857289492802  
 ELOVL2 123.413596815384 129.85040048805 119.636334259263  
 119.122305582754 123.323528039848 134.686251400642 132.622032754473  
 126.956303896995 122.449574852865 123.615802924067 135.758133410577  
 127.265211069837  
 ELOVL3 136.660600727111 168.37043566813 158.895584550655  
 153.178934750919 151.034392433934 156.487049947247 140.845958602151  
 157.322594990954 163.821142892643 161.903016201041 131.945667475797  
 162.161282071736  
 ELOVL4 295.678097392123 303.051124835907 283.084102918359  
 271.5226962522995 162.599466021255 252.365946808078 193.472317111841  
 133.318665755015 166.335294339013 384.296190598736 157.555410977564  
 139.883360543042  
 ELOVL5 377.462793982812 287.558897878375 335.858047332641  
 285.30221551106 431.686900474971 341.361299896997 408.361368902627  
 420.647394044431 319.768792196774 341.43511159996 234.399431238026  
 351.854828413334  
 ELOVL6 216.805365763069 248.887522059485 226.893147371644  
 221.471811658459 375.131728190867 467.347509383673 456.038981546175  
 659.900771633223 567.317223907142 393.707031354025 1091.69584249713  
 725.443026984982  
 ELOVL7 150.927628184034 152.395272857974 134.928967716193  
 151.459397907666 152.733409144267 161.735609436394 158.120079903425  
 147.872625576731 158.859389972316 207.150354734189 152.415752253205  
 169.168869363848  
 ELP2 570.916936074747 476.249239197777 793.300636780035 517.529147171876  
 482.592481827722 609.504365141529 734.139557942719 637.892677173103  
 726.346459754217 614.094097408035 1008.875250028 662.58366387795  
 ELP2P 135.098343717085 158.287108069245 135.441550832737 133.470643135354  
 154.455641374384 136.603035996281 127.6516565653 154.627270742193  
 130.14600240687 158.039920243116 142.124876403709 128.147484804104  
 ELP3 804.800251415824 757.066786599446 717.686676823785 979.019125719101  
 385.584224833836 427.151797273226 502.170430910893 311.544429285897  
 1022.55215097491 509.01330998156 601.018867455333 536.253405705975  
 ELP4 179.460777888284 206.164058935215 195.906137340918 236.470206707351  
 215.81995779019 140.82351325907 164.043866642712 156.385100395531  
 170.179304745674 219.901025447571 205.57572471694 133.906867716171  
 ELSBPB1 115.299986138153 117.05536677976 119.894737403889  
 110.17590675298 110.829107724132 118.712730897987 117.513523498725  
 113.627435441258 107.802792435066 103.398929051742 106.551076380988  
 118.625070307695

|         |                  |                  |                  |                  |
|---------|------------------|------------------|------------------|------------------|
| ELTD1   | 222.118666699301 | 194.281839133887 | 161.485353443949 | 166.70212615715  |
|         | 140.446530307169 | 331.164053277361 | 153.836520485018 | 200.22145130696  |
|         | 204.137195524755 | 177.94501172269  | 150.763810844645 | 194.352807599399 |
| EMB     | 121.402905161896 | 129.845344493418 | 132.576755070703 | 126.391083453973 |
|         | 144.032779435658 | 128.202619705343 | 145.718019736542 | 135.417519318028 |
|         | 129.072173761566 | 133.827296071709 | 127.407418037777 | 140.343790129071 |
| EMCN    | 193.134414137433 | 201.748876422401 | 145.700589723224 | 185.41739522833  |
|         | 147.710252756854 | 244.011434605133 | 124.00806841872  | 153.577349107512 |
|         | 170.298291784762 | 127.093255830978 | 154.812587513407 | 132.580937663749 |
| EMD     | 2309.63504858248 | 2114.9754128463  | 2511.04500638697 | 1971.42527720714 |
|         | 2718.440149645   | 1321.17236442448 | 1142.44180956604 | 1029.09818399518 |
|         | 1109.08288440559 | 1375.76915021882 | 861.516925304722 | 1071.00507864299 |
| EME1    | 148.847472886691 | 140.999877170481 | 158.999305963902 | 137.123016784819 |
|         | 173.761036260869 | 182.055718892894 | 149.664506761117 | 200.506615977654 |
|         | 171.759102794108 | 162.002221893617 | 152.495540563792 | 151.248365605631 |
| EME2    | 139.273651128094 | 141.196795654442 | 137.374784875444 | 135.784481523923 |
|         | 129.788395150404 | 138.331509117817 | 144.112401069818 | 130.863753083296 |
|         | 131.911579676047 | 129.023206862713 | 145.612695657243 | 135.764392116216 |
| EMG1    | 393.013539328766 | 467.777995124655 | 434.855262284265 | 389.177193459    |
|         | 563.490027149224 | 501.005898087825 | 883.140984728615 | 977.999660785113 |
|         | 707.048754700047 | 777.410297605252 | 745.482863218223 | 737.843412273272 |
| EMID1   | 145.971656491073 | 144.937697857147 | 124.646093292382 | 121.110498703017 |
|         | 151.453985465369 | 139.161483596756 | 141.152406037213 | 139.921002429353 |
|         | 147.512290383685 | 115.371180170291 | 123.179986410723 | 124.901759819007 |
| EMID2   | 121.181654892305 | 120.757288533244 | 126.199219102601 | 125.839101611277 |
|         | 151.508738608925 | 121.723964989551 | 129.185514320138 | 153.219954133957 |
|         | 117.193620642373 | 122.941711366641 | 140.093412995935 | 121.377666938052 |
| EMILIN1 | 724.607317443904 | 1082.75419087929 | 650.494111214312 |                  |
|         | 1969.67552562117 | 142.498280938736 | 120.594874820899 | 123.868848032411 |
|         | 144.120106441052 | 158.562631157512 | 167.751604259111 | 138.436029489092 |
|         | 116.547306374097 |                  |                  |                  |
| EMILIN2 | 418.163219634152 | 358.897128592042 | 243.772412032046 |                  |
|         | 455.21285026588  | 214.904634494921 | 461.822629852953 | 556.725550806207 |
|         | 412.863887464545 | 518.760142491104 | 249.292766428035 | 226.678503956411 |
|         | 469.64693728427  |                  |                  |                  |
| EMILIN3 | 123.150299476109 | 113.694351010121 | 121.47058227778  |                  |
|         | 117.706795566317 | 112.666812944192 | 115.277302351501 | 103.168665937677 |
|         | 108.296042016208 | 117.642441794442 | 109.003365273337 | 96.8261937365062 |
|         | 109.242622591321 |                  |                  |                  |
| EML1    | 617.474181543858 | 554.115756730498 | 667.693216401836 | 694.907086612929 |
|         | 223.128108720503 | 170.910998705968 | 146.683594365673 | 150.191645194625 |
|         | 190.389158930835 | 248.562843471699 | 153.992763544073 | 151.372219350291 |
| EML2    | 238.724909152512 | 211.438615793742 | 248.643311972844 | 243.772412032046 |
|         | 362.445813697676 | 195.863843860549 | 228.384686248604 | 234.661864595717 |
|         | 180.20999937977  | 220.999383789474 | 304.292209676095 | 255.74096237558  |
| EML3    | 797.73902873919  | 849.389818300305 | 586.867772838753 | 859.113541787323 |
|         | 1323.05745869565 | 748.940715378564 | 1037.00025848491 | 509.988617641229 |
|         | 685.848203651889 | 648.38049615541  | 983.777608766079 | 844.778755052304 |
| EML4    | 647.439372562271 | 576.636077770998 | 633.104379362137 | 504.436992949763 |
|         | 509.512410867348 | 1185.70008959602 | 1072.82323999638 | 1102.73689840572 |
|         | 784.170983714588 | 576.298671053238 | 1001.65849130836 | 981.781076110568 |
| EML5    | 131.347213356457 | 127.229854957588 | 138.887159625058 | 121.438875373878 |
|         | 130.844272373448 | 132.021249712589 | 132.198536906752 | 142.859971805867 |
|         | 133.446934298801 | 154.778726823719 | 140.750004067571 | 129.176532377543 |

|        |                   |                  |                  |                  |
|--------|-------------------|------------------|------------------|------------------|
| EMP1   | 1558.22238167317  | 1559.26487922551 | 647.955521647635 | 1390.95426299323 |
|        | 303.005912224195  | 1314.62071412501 | 367.518273773904 | 494.875547886209 |
|        | 525.920873434688  | 3046.47354587949 | 359.256193328366 | 396.781827940009 |
| EMP2   | 109.333276735523  | 108.895922800601 | 108.830525786872 | 115.445219455559 |
|        | 130.473842500245  | 121.027465953657 | 114.498610080481 | 116.19219007097  |
|        | 100.966979609222  | 130.878694881324 | 126.737230874367 | 126.305273697185 |
| EMP3   | 2845.0377634896   | 2261.31473132315 | 2112.84348677276 | 2197.44189747261 |
|        | 444.712990986138  | 316.081825144651 | 265.536429548886 | 431.974037914233 |
|        | 899.336817124312  | 796.439819579938 | 299.29004204677  | 280.414161197286 |
| EMR1   | 112.268518171041  | 112.758617084341 | 114.334059060506 | 107.993707827557 |
|        | 118.091125088778  | 108.779204939177 | 121.381365873873 | 115.072622367144 |
|        | 111.62514398781   | 132.902437860565 | 119.949050292223 | 120.436408685057 |
| EMR2   | 169.619338456208  | 147.696506705909 | 151.092066533546 | 152.486212022518 |
|        | 144.930066324767  | 165.436881839632 | 150.409919207059 | 218.350166753833 |
|        | 240.706548931192  | 223.765583953184 | 190.357437485436 | 172.652645920958 |
| EMR3   | 118.215641556163  | 115.975794003391 | 116.373841472226 | 115.766358387923 |
|        | 121.865696440776  | 121.464383202986 | 119.636334259263 | 122.941711366641 |
|        | 131.641435734821  | 122.89752183991  | 129.896711442418 | 119.455615461113 |
| EMR4   | 131.532660547328  | 135.037385686705 | 146.550421651378 | 137.911816180518 |
|        | 128.864822736402  | 138.399665664034 | 140.36278240974  | 140.605866597575 |
|        | 134.993349945063  | 141.836648910979 | 133.490805791504 | 143.061415008831 |
| EMR4P  | 129.228874611916  | 139.530196462344 | 126.573673878042 | 121.526724715417 |
|        | 124.001295849091  | 130.792692240592 | 146.231937458616 | 121.294366964074 |
|        | 118.783904603368  | 124.130599753093 | 135.323341505875 | 116.816688899055 |
| EMX1   | 135.849839822066  | 144.00214898009  | 146.755803731358 | 139.989830921287 |
|        | 134.2267111030456 | 158.610249594568 | 161.441613587571 | 147.476805635744 |
|        | 151.702809524494  | 144.836902182737 | 130.410584413031 | 154.615097099186 |
| EMX2   | 227.467161919443  | 208.816482659752 | 238.149614104568 | 183.081450609516 |
|        | 302.768870633398  | 174.068974937318 | 185.639696270808 | 258.964323941464 |
|        | 179.55905250703   | 155.813740201987 | 290.582957824549 | 149.657951204528 |
| EMX2OS | 244.766289564524  | 256.093363520707 | 334.607533045929 |                  |
|        | 294.746622369436  | 225.169110687004 | 222.943046618742 | 239.12905945808  |
|        | 281.846246549202  | 201.235056368151 | 234.370850809531 | 247.504198063293 |
|        | 221.635333304767  |                  |                  |                  |
| EN1    | 123.545404885618  | 119.029186503752 | 116.670491972948 | 122.284431229917 |
|        | 123.551225884748  | 121.360822445187 | 121.830137285032 | 124.405905157157 |
|        | 120.897228878841  | 118.991494185841 | 139.291775075915 | 136.446877465751 |
| EN2    | 118.180919555585  | 120.979417552159 | 118.689408983786 | 125.000876313893 |
|        | 114.598636725763  | 132.115817176834 | 138.508015596135 | 125.489777118532 |
|        | 130.073005698714  | 124.362182111222 | 138.152641686151 | 122.714122084817 |
| ENAH   | 892.868661511516  | 700.877661166739 | 730.988069115919 | 811.564396886535 |
|        | 155.83143112621   | 274.14931964455  | 182.453722105813 | 147.143407224469 |
|        | 161.852665901359  | 163.451063547847 | 196.583548193097 | 193.813717161291 |
| ENAM   | 123.875478428652  | 141.954467306745 | 138.572054821151 | 165.813771791917 |
|        | 176.47556448977   | 171.39347085745  | 177.652022895288 | 154.277670551775 |
|        | 155.511086289504  | 165.71382076724  | 135.862790395984 | 148.578688042147 |
| ENC1   | 426.548994267836  | 465.029298672645 | 186.033093285894 | 201.123529130035 |
|        | 305.542978609337  | 347.557792829093 | 312.903508201275 | 323.95355217044  |
|        | 671.821418586421  | 315.828726297864 | 464.128022170285 | 359.493075382333 |
| ENDOD1 | 339.663295617139  | 384.365878895439 | 337.434882771953 |                  |
|        | 274.534901548678  | 165.406452831375 | 197.526492324088 | 341.361299896997 |
|        | 212.119922561453  | 180.690409026809 | 743.023225859813 | 207.815226999953 |
|        | 206.203717450138  |                  |                  |                  |

|        |                  |                  |                  |                  |
|--------|------------------|------------------|------------------|------------------|
| ENDOG  | 172.338509138759 | 189.647009287524 | 192.009562635198 | 198.925776755081 |
|        | 720.710754387733 | 237.906142045719 | 164.587657424569 | 208.270622752385 |
|        | 233.671878221507 | 264.201932544662 | 382.233826557803 | 253.697419495959 |
| ENG    | 457.779218916808 | 574.896304593109 | 247.280717385562 | 700.353187874339 |
|        | 564.749082802433 | 290.288001750744 | 210.043556816529 | 274.202831856221 |
|        | 357.835334661098 | 275.609716327452 | 242.570588364106 | 264.233381434738 |
| ENHO   | 154.834679562341 | 157.66595229182  | 140.03443832328  | 170.516743115762 |
|        | 168.552631639996 | 155.522274777451 | 156.609370182062 | 153.448882783807 |
|        | 150.645487532549 | 149.678629612616 | 163.053121879323 | 155.76860362365  |
| ENKUR  | 153.519207482423 | 146.856133875296 | 137.717859035645 | 132.425596223397 |
|        | 136.436762791912 | 141.356127724777 | 140.012295249756 | 131.804952187685 |
|        | 140.40754434058  | 144.748564682545 | 137.53152210411  | 140.222121251146 |
| ENO1   | 4882.16892310839 | 6179.86800320807 | 4875.22637286719 | 7815.98936145067 |
|        | 18287.6015702456 | 9470.58919937464 | 9820.93899217345 | 11017.1478502767 |
|        | 11392.4189359453 | 13700.8527522612 | 6244.58472720999 | 9099.13956219312 |
| ENO2   | 932.076509242794 | 850.125434374005 | 843.545962045705 | 1001.92763014266 |
|        | 326.325210657599 | 186.021181691517 | 550.434931878586 | 166.422360032182 |
|        | 221.231455446574 | 918.162638134305 | 222.709720471134 | 298.209907157762 |
| ENO3   | 239.109163320417 | 238.344676327918 | 217.050602253281 | 315.064477782052 |
|        | 155.896065329825 | 192.96586114861  | 153.589626253969 | 164.525784478026 |
|        | 161.035985824654 | 154.834679562341 | 178.476483428474 | 165.602175302848 |
| ENOPH1 | 411.968307579588 | 373.860920943049 | 442.766704003254 |                  |
|        | 357.063270015318 | 687.494132125365 | 501.946140974776 | 888.706978062337 |
|        | 767.054576874115 | 1030.97051104597 | 745.482863218223 | 650.263737836685 |
|        | 516.577357935963 |                  |                  |                  |
| ENOSF1 | 385.888395433066 | 419.4017188518   | 722.725186727796 |                  |
|        | 333.349203784021 | 410.337491313251 | 607.499206410372 | 654.305724263754 |
|        | 910.541650889451 | 635.234445318087 | 1018.38836615952 | 468.569725051459 |
|        | 765.128667448261 |                  |                  |                  |
| ENOX1  | 160.105903942674 | 141.831596320865 | 144.804829253992 | 157.736101691222 |
|        | 117.65847906412  | 106.576058729493 | 116.397855001959 | 119.202966460612 |
|        | 120.862516074358 | 115.830631252469 | 135.855243915966 | 104.544792793756 |
| ENOX2  | 159.005459875338 | 163.915489303508 | 171.038941092587 | 162.620593985693 |
|        | 153.647343267295 | 173.839053227554 | 149.390481900424 | 164.717809928624 |
|        | 161.77611826709  | 142.548833391567 | 145.369791572077 | 145.813437992703 |
| ENPEP  | 164.299585578035 | 182.42088387266  | 164.748676009072 | 202.114480291084 |
|        | 168.911840239685 | 148.695212949639 | 166.582931148846 | 153.893753448473 |
|        | 158.282899758551 | 221.685824197352 | 185.071775840607 | 157.77398996415  |
| ENPP1  | 199.70041209487  | 201.637540930213 | 207.902853533132 | 206.585387130993 |
|        | 140.381386314817 | 144.252481420079 | 144.377501600001 | 130.495294897642 |
|        | 132.579323148839 | 144.73389393695  | 167.67952650068  | 130.09958025354  |
| ENPP2  | 454.492780042353 | 365.286234166621 | 193.832033192375 | 252.655315526015 |
|        | 167.559703634539 | 224.528190554963 | 491.709723745226 | 310.426513884979 |
|        | 274.595218795127 | 175.693873820963 | 286.945784387294 | 164.126980102525 |
| ENPP3  | 141.503351545458 | 127.263061874385 | 128.591292689996 | 118.388993232718 |
|        | 132.236355533277 | 123.711828013052 | 118.578205738502 | 119.094868654252 |
|        | 118.777105073561 | 118.039780360151 | 138.261506562904 | 120.13937451914  |
| ENPP4  | 181.54273463264  | 173.334154083555 | 210.33390115739  | 149.919344933814 |
|        | 197.554105926359 | 205.546628064296 | 292.965109701719 | 249.489170536758 |
|        | 197.740912476527 | 224.335742510577 | 213.652091843896 | 249.680729921602 |
| ENPP5  | 399.664121956178 | 354.067771806542 | 360.991542429346 | 360.185005480216 |
|        | 180.231462528702 | 157.055133233709 | 373.925939492544 | 254.133112176024 |
|        | 221.297127685676 | 195.740661051834 | 242.221324619171 | 223.747350951099 |

|        |                  |                  |                  |                  |
|--------|------------------|------------------|------------------|------------------|
| ENPP6  | 149.467626202395 | 169.124088593549 | 175.693873820963 | 144.214589452164 |
|        | 127.088916295784 | 113.78323485587  | 136.83470470035  | 123.943080151532 |
|        | 146.722211039754 | 129.724604278515 | 123.267817390796 | 120.571074646092 |
| ENPP7  | 141.645906784244 | 147.500009766324 | 143.096097305398 | 160.035282578603 |
|        | 149.339492984504 | 143.086872363116 | 158.691830524781 | 149.498020676126 |
|        | 123.847186739627 | 156.813992534584 | 157.885229749634 | 164.284396793834 |
| ENSA   | 251.61451602376  | 252.514569129392 | 311.375563161772 | 254.607324522225 |
|        | 511.374117402707 | 624.825216056495 | 492.534183006883 | 542.740017003369 |
|        | 416.392874553797 | 362.899103657252 | 551.92688162618  | 621.354393918348 |
| ENTHD1 | 114.528407572496 | 122.079685222733 | 118.011195631598 |                  |
|        | 115.702900810606 | 107.828378413233 | 114.441223528256 | 120.910703698292 |
|        | 118.731960910224 | 117.186546702764 | 108.461141538047 | 127.926270257252 |
|        | 120.006982591236 |                  |                  |                  |
| ENTPD1 | 383.682951666155 | 367.644907862372 | 410.533157400023 |                  |
|        | 405.570281788901 | 142.956870642583 | 174.526176588454 | 154.24500773656  |
|        | 239.941641600769 | 270.727749014046 | 229.130679600654 | 175.363223521128 |
|        | 174.441287575034 |                  |                  |                  |
| ENTPD2 | 129.025000034273 | 132.983739057264 | 126.640141760199 |                  |
|        | 127.274768398849 | 136.893392154262 | 140.784853736558 | 124.126715773068 |
|        | 133.44592405762  | 128.765369834041 | 131.338853426561 | 143.728569494708 |
|        | 131.076562651831 |                  |                  |                  |
| ENTPD3 | 205.149094703318 | 237.113813706224 | 245.153736298067 |                  |
|        | 201.365457496683 | 510.811470658575 | 358.152044880733 | 1193.82799849555 |
|        | 252.32907388173  | 294.323621186916 | 307.316241247336 | 2007.0121037284  |
|        | 711.729857540712 |                  |                  |                  |
| ENTPD4 | 169.705236302448 | 172.783430414523 | 174.332913952768 |                  |
|        | 184.204036882642 | 170.266415287865 | 227.774354299962 | 322.302219773624 |
|        | 165.972090075204 | 210.266075382636 | 220.446775597113 | 273.402804140541 |
|        | 301.638918685657 |                  |                  |                  |
| ENTPD5 | 187.264411519101 | 175.28261759639  | 193.974325897472 |                  |
|        | 173.063002566542 | 191.335616210093 | 180.008152341531 | 242.971958493453 |
|        | 326.176058036757 | 187.494677180331 | 178.425137262105 | 218.350166753833 |
|        | 192.752224665459 |                  |                  |                  |
| ENTPD6 | 244.280971257965 | 246.616749748028 | 244.117082987416 |                  |
|        | 253.580286414227 | 403.984761333129 | 443.732580517751 | 357.35857422585  |
|        | 282.870785313621 | 294.808980631295 | 269.567704345075 | 228.001046173405 |
|        | 310.917191279571 |                  |                  |                  |
| ENTPD7 | 180.231462528702 | 169.642188114285 | 152.439608473915 |                  |
|        | 142.436624546651 | 203.19299227665  | 235.563592256037 | 296.428342247529 |
|        | 179.250373572781 | 252.514569129392 | 209.130260450131 | 277.75958501062  |
|        | 177.379186278216 |                  |                  |                  |
| ENTPD8 | 128.463982896081 | 130.34939602913  | 121.260355515095 |                  |
|        | 125.683334853039 | 124.749727939593 | 122.568743478314 | 123.908458472687 |
|        | 121.71538073735  | 120.050548624975 | 123.45956380046  | 128.419406507915 |
|        | 125.199837162105 |                  |                  |                  |
| ENY2   | 1025.27246494218 | 1000.05896885496 | 1029.43177809276 | 873.408431189194 |
|        | 1940.42283070543 | 1648.22531304741 | 1547.16936835284 | 2096.25803773108 |
|        | 2050.34883263932 | 1706.06615968622 | 1184.3199328099  | 1417.76295714364 |
| EOMES  | 153.132559737356 | 186.515784641119 | 126.129564039673 | 114.785989868306 |
|        | 136.556183079815 | 133.736252068443 | 119.097521397712 | 172.857643600385 |
|        | 199.798533722581 | 138.307574579062 | 140.242272149424 | 122.297401003756 |
| EP300  | 244.596233138747 | 246.186104432792 | 299.851173200352 | 258.075566417241 |
|        | 229.31486399741  | 304.402066421813 | 233.300864925399 | 245.522497675754 |
|        | 249.354198174438 | 264.456926651554 | 337.973433871323 | 274.595218795127 |



|          |                  |                  |                  |                  |
|----------|------------------|------------------|------------------|------------------|
| EP400    | 574.399909181723 | 589.070196307574 | 530.819778703194 | 608.351527783086 |
|          | 304.844121431627 | 486.334840298921 | 447.579975492958 | 418.420753332232 |
|          | 516.892850913889 | 341.197826517049 | 432.604462607037 | 493.887026009442 |
| EP400NL  | 133.654232991228 | 130.949405011154 | 127.358616953147 |                  |
|          | 130.095585254401 | 126.237900397603 | 134.30624644595  | 123.974409226349 |
|          | 134.85809559975  | 123.875478428652 | 130.270184521521 | 133.944538335319 |
|          | 134.553754121862 |                  |                  |                  |
| EPAS1    | 1373.08023518911 | 1690.96371604294 | 953.861218000678 | 1106.21439150501 |
|          | 3103.4192907748  | 3536.14527317085 | 1458.13354165836 | 1492.15137418791 |
|          | 1434.1439428394  | 1475.41920838384 | 1285.02292965374 | 1133.87328758676 |
| EPB41    | 136.591299462104 | 131.336902822702 | 138.519129384809 | 126.00744446299  |
|          | 139.913180140881 | 170.95650329595  | 157.11867820027  | 158.779261405573 |
|          | 166.637846390031 | 141.567425892004 | 158.205235596076 | 163.36682525399  |
| EPB41L1  | 173.66499836293  | 179.923966067226 | 176.056306041601 |                  |
|          | 174.909258852845 | 206.071709262227 | 171.014432075829 | 229.116153948948 |
|          | 174.603285240228 | 153.505155981348 | 156.144934427609 | 190.077302802065 |
|          | 168.660907237558 |                  |                  |                  |
| EPB41L2  | 487.07860019179  | 426.649095732979 | 382.069677030369 |                  |
|          | 365.362177671146 | 198.549047189499 | 182.346834032145 | 201.676984786688 |
|          | 192.992546726522 | 194.143649677822 | 195.269099451599 | 224.869569455052 |
|          | 217.227441947056 |                  |                  |                  |
| EPB41L3  | 257.132618311227 | 219.687151891777 | 201.517356610591 |                  |
|          | 200.668298229815 | 171.650247980576 | 163.239195865198 | 141.725882943927 |
|          | 162.656951764783 | 208.257420634745 | 461.581199513891 | 174.603285240228 |
|          | 133.048720362039 |                  |                  |                  |
| EPB41L4A | 180.315825600347 | 193.052112923573 | 225.130011390856 |                  |
|          | 202.397972518715 | 191.25724234927  | 189.662974464847 | 229.62164568989  |
|          | 192.96586114861  | 196.031541155674 | 222.285940575778 | 202.357989894268 |
|          | 192.891507272665 |                  |                  |                  |
| EPB41L4B | 133.190147746722 | 134.299575239865 | 140.89390566467  |                  |
|          | 130.644937322186 | 169.656238760589 | 143.750656408155 | 150.974364125849 |
|          | 165.467462247066 | 171.909358721737 | 143.686906051698 | 166.47851613068  |
|          | 140.794929983858 |                  |                  |                  |
| EPB41L5  | 209.60319248212  | 210.550995170071 | 245.522497675754 |                  |
|          | 191.628693083169 | 159.862252588012 | 183.26554404668  | 169.720414035325 |
|          | 204.470661830972 | 162.723310549554 | 143.942810095867 | 171.121834829333 |
|          | 162.244691888031 |                  |                  |                  |
| EPB42    | 126.388778582602 | 109.770126492743 | 117.48427100606  | 132.762755202326 |
|          | 124.053190169486 | 118.802030418792 | 121.113186311514 | 119.297561749232 |
|          | 121.699702849509 | 128.883828419932 | 115.101971719657 | 115.639101191444 |
| EPB49    | 144.55710963567  | 166.47851613068  | 150.075738752092 | 144.731299077209 |
|          | 205.52620827767  | 130.763957515652 | 164.942652212218 | 136.734131465433 |
|          | 123.111192189217 | 139.312636530887 | 168.347445148881 | 183.181125586276 |
| EPC1     | 224.707455448421 | 180.276082632155 | 177.772019227116 | 131.704192327287 |
|          | 164.520247586053 | 151.891318080151 | 137.21916902421  | 126.315423596685 |
|          | 137.540275229889 | 126.84966022925  | 167.011846920792 | 145.900272803108 |
| EPC2     | 182.222567053422 | 183.193029399643 | 163.102043862117 | 201.702688815038 |
|          | 143.555987405898 | 131.261903118177 | 140.634047988278 | 148.454344601562 |
|          | 130.491742824575 | 131.563719927798 | 181.088268167074 | 138.861385127242 |
| EPCAM    | 145.152605166094 | 233.71520737817  | 164.603403251634 | 139.59941545613  |
|          | 2036.43904731226 | 1870.52504853779 | 864.547109080675 | 1507.39761667421 |
|          | 1718.80498208397 | 588.458314503034 | 832.014011481807 | 2183.18692530644 |

|        |                  |                  |                  |                  |
|--------|------------------|------------------|------------------|------------------|
| EPDR1  | 1123.93087912174 | 800.373159084181 | 1003.36623972843 | 865.800709006332 |
|        | 321.750495072759 | 142.33269270703  | 145.551717838423 | 662.958637409597 |
|        | 454.984562256248 | 287.084253886676 | 185.41739522833  | 138.201164395948 |
| EPGN   | 139.709959820327 | 111.032156655273 | 128.327528039933 | 130.760835441776 |
|        | 127.806138997958 | 125.598828334465 | 129.161305053472 | 126.830269821364 |
|        | 136.022614387461 | 404.54681330209  | 139.444577046509 | 126.899985772157 |
| EPHA1  | 162.513107496558 | 177.457362387052 | 172.128489882364 | 153.453969224725 |
|        | 878.520681466946 | 983.777608766079 | 504.709613434391 | 356.921627358141 |
|        | 399.071041584646 | 612.06231165648  | 213.531307836195 | 763.880957432979 |
| EPHA10 | 137.958714945718 | 140.890227770353 | 140.026918871291 |                  |
|        | 137.263202517233 | 163.248980088946 | 149.869314204354 | 147.017958916908 |
|        | 143.096097305398 | 141.36525744062  | 148.794293762142 | 164.914114315732 |
|        | 138.842935439006 |                  |                  |                  |
| EPHA2  | 163.809967446414 | 203.298764374262 | 156.265168005937 | 179.067275037015 |
|        | 486.524284354103 | 421.836020491624 | 205.403820910921 | 220.633692394229 |
|        | 320.305852961452 | 422.520372346993 | 319.090371885653 | 331.684298221133 |
| EPHA3  | 229.567444213626 | 243.246632667118 | 167.887047631073 | 218.839681873515 |
|        | 143.655901618594 | 154.701413581915 | 135.726760147904 | 147.174977926293 |
|        | 140.946008063839 | 133.985582992986 | 129.417232210341 | 140.898380345452 |
| EPHA4  | 187.035957486928 | 192.914362049985 | 206.502189514795 | 189.192494970145 |
|        | 174.587558727209 | 435.183433729519 | 237.601064742453 | 188.959655155629 |
|        | 219.171591031864 | 299.669394721682 | 292.429831186609 | 286.587945301875 |
| EPHA5  | 121.952255635669 | 127.174074003712 | 114.405811161631 | 119.135701239571 |
|        | 115.840266274696 | 121.846349358116 | 114.893462783007 | 116.019123495537 |
|        | 110.475453268997 | 115.923424095859 | 132.956860864455 | 120.948246352846 |
| EPHA6  | 138.48552149031  | 133.78629612147  | 133.259321087534 | 136.274199465472 |
|        | 134.888404433315 | 136.645091356305 | 139.099483279141 | 137.748443205818 |
|        | 133.478829770103 | 134.66169946771  | 130.083266044947 | 134.418976976995 |
| EPHA7  | 117.442158626871 | 117.218616752346 | 128.463982896081 | 113.370762349233 |
|        | 117.77708734157  | 114.849872458647 | 120.944267930809 | 128.36533737469  |
|        | 123.086596566142 | 119.463337435512 | 125.013839352291 | 119.631847624882 |
| EPHA8  | 145.588981165456 | 145.929907161493 | 154.996829706812 | 163.946569217706 |
|        | 141.329559699056 | 144.840218312168 | 161.144841967903 | 143.494511683426 |
|        | 150.72835989269  | 149.016767620428 | 154.160508495401 | 140.319851351329 |
| EPHB1  | 374.106258053201 | 307.945884504629 | 132.024244263352 | 135.676854553162 |
|        | 125.800508653231 | 119.701313125748 | 131.617027772841 | 124.328903559955 |
|        | 122.955724972547 | 122.317877997527 | 136.522590104535 | 121.327397317398 |
| EPHB2  | 149.423230365631 | 134.932416370825 | 130.962368929833 | 142.690911343704 |
|        | 199.947823264085 | 150.215811815246 | 147.606311227037 | 141.239354296152 |
|        | 140.251168248117 | 134.087875547168 | 166.635366968851 | 134.312156667838 |
| EPHB3  | 157.809081184874 | 135.465076459043 | 142.765490244223 | 163.858222964048 |
|        | 247.111032124864 | 135.860057860699 | 143.167719135403 | 135.338077911839 |
|        | 150.096558906597 | 210.015199832609 | 149.574353706911 | 115.821231468312 |
| EPHB4  | 292.23287968517  | 281.119138040097 | 175.562070915794 | 229.74418058711  |
|        | 1061.29067124163 | 225.4575611466   | 286.282132382462 | 289.761702484888 |
|        | 170.410704499804 | 344.298510200653 | 297.285037835812 | 196.363005912532 |
| EPHB6  | 219.687151891777 | 240.994507285383 | 179.648479201164 | 251.011148303246 |
|        | 501.301694626942 | 558.934004505074 | 335.239364345057 | 290.802509012089 |
|        | 178.083311435916 | 142.61573330083  | 387.827718022473 | 1205.45751308367 |
| EPHX1  | 706.292905820227 | 839.662936279727 | 712.433345978749 | 902.089561157715 |
|        | 791.402660066193 | 261.426617866925 | 258.915802108562 | 298.028932089399 |
|        | 372.475112554793 | 210.882890077598 | 250.25959091612  | 201.041792159394 |

|          |                  |                  |                  |                  |
|----------|------------------|------------------|------------------|------------------|
| EPHX2    | 552.662610888399 | 532.063437013967 | 1035.98574557331 | 689.590642377619 |
|          | 258.552964322998 | 196.615914367563 | 253.327404004524 | 158.7912155022   |
|          | 221.18757533703  | 232.385176936256 | 169.534469894464 | 479.866450988091 |
| EPM2A    | 277.596303701405 | 280.656087497806 | 323.628636799403 | 318.348505551265 |
|          | 134.828360289676 | 142.825203517688 | 147.893916750136 | 168.027892518772 |
|          | 150.272153646712 | 153.02549014611  | 168.05687638693  | 157.099868633958 |
| EPM2AIP1 | 588.678767007017 | 650.0804221227   | 619.635734567779 |                  |
|          | 606.679284487803 | 271.989060206794 | 570.533103778482 | 398.354212009426 |
|          | 292.524552445564 | 399.664121956178 | 252.655315526015 | 509.292779821787 |
|          | 414.403321220432 |                  |                  |                  |
| EPN1     | 1853.20812924694 | 2635.31067044245 | 1923.19560386389 | 3396.40593844715 |
|          | 6203.08085790474 | 2141.855356411   | 2859.94396089224 | 1623.92991386706 |
|          | 3111.50508060882 | 2508.50428529255 | 1698.08853832248 | 2192.17997650999 |
| EPN2     | 279.202256032476 | 319.283603277754 | 292.317998405609 | 374.215345412947 |
|          | 203.510106134882 | 195.316077537716 | 185.830435830545 | 214.968589907686 |
|          | 176.735168607281 | 234.996704304673 | 206.68694753419  | 170.283532007581 |
| EPN3     | 136.962442874268 | 146.537204621419 | 126.611663427876 | 138.279087298069 |
|          | 558.051041108282 | 352.50679573356  | 487.901310664037 | 882.037055216609 |
|          | 772.776364492813 | 368.418553384965 | 570.771089597761 | 474.517750753745 |
| EPO      | 119.403831071089 | 121.459780480915 | 114.314425748312 | 110.333339548402 |
|          | 113.529619135543 | 122.494779505958 | 109.859878974527 | 119.739204799544 |
|          | 106.204350278634 | 114.084543168359 | 116.241531823869 | 115.29099102455  |
| EPOR     | 155.358918578397 | 155.942609847585 | 130.928718312512 | 138.573829193205 |
|          | 170.497804969996 | 143.263333116046 | 134.265479018173 | 147.635761512135 |
|          | 130.883516197483 | 124.461997520222 | 178.186273279101 | 117.467618148107 |
| EPPB9    | 144.340734361996 | 157.474913177177 | 140.648918459179 | 132.978746105877 |
|          | 305.768201359278 | 127.55397077248  | 132.848926011576 | 159.74220366735  |
|          | 140.971253689199 | 131.792339956719 | 150.902548360746 | 123.916497557628 |
| EPPK1    | 144.352987324713 | 141.639216893245 | 142.804411455413 | 192.032080013216 |
|          | 147.691011072898 | 152.72717701452  | 134.268075583733 | 146.326067008478 |
|          | 149.300089212177 | 179.950904921667 | 142.278523641008 | 151.440732942734 |
| EPR1     | 122.621839614189 | 134.803612821519 | 117.461198576063 | 121.815538475678 |
|          | 139.792313018728 | 131.218141814078 | 144.316475814221 | 144.464071397369 |
|          | 137.466291815166 | 144.801071221985 | 131.911579676047 | 147.330897105911 |
| EPRS     | 985.637230639964 | 998.157643452741 | 1192.72383754851 | 868.40984928812  |
|          | 749.220616713093 | 1590.87426068638 | 1213.61170930345 | 1227.94401191112 |
|          | 1580.27059464289 | 1806.24732793591 | 1385.28044421961 | 1509.69760873558 |
| EPS15    | 330.005950459958 | 303.138041758745 | 316.165926273381 | 338.223462327622 |
|          | 189.027594735456 | 346.118765910093 | 246.95071325085  | 236.651601701157 |
|          | 243.225815954365 | 316.081825144651 | 335.623336587396 | 276.961847241646 |
| EPS15L1  | 153.059432055089 | 151.585818981801 | 183.181125586276 |                  |
|          | 154.892452237027 | 181.668090319293 | 193.064450357153 | 166.311421907434 |
|          | 182.851203073653 | 156.62031503525  | 147.416991272497 | 157.768329108254 |
|          | 158.87755965229  |                  |                  |                  |
| EPS8     | 556.31484498921  | 503.093655556038 | 486.653672099699 | 415.497783305278 |
|          | 264.456926651554 | 450.851711160136 | 565.313436777992 | 439.616817413027 |
|          | 310.174932137546 | 178.166289723365 | 423.256021602613 | 323.462252156562 |
| EPS8L1   | 121.320750074882 | 132.440818532628 | 125.18424162353  |                  |
|          | 126.589865262427 | 240.376851873817 | 131.90169441925  | 176.631604815669 |
|          | 138.760800146167 | 171.784981874184 | 159.973758408655 | 168.244523461915 |
|          | 144.298011270428 |                  |                  |                  |
| EPS8L2   | 153.263883774915 | 160.73807125195  | 157.264673452646 |                  |
|          | 165.163490032007 | 158.975786937923 | 155.018009545475 | 152.397984799517 |

|            |                  |                  |                  |                  |
|------------|------------------|------------------|------------------|------------------|
|            | 171.97578836712  | 152.158269344693 | 178.606255846041 | 145.928643520352 |
|            | 186.185055364718 |                  |                  |                  |
| EPS8L3     | 151.338765231607 | 147.28750335168  | 153.440952021924 |                  |
|            | 146.994103804515 | 144.107029869771 | 159.438084699061 | 151.051672692659 |
|            | 155.855564068891 | 159.06002608158  | 147.18948282156  | 177.343586047942 |
|            | 149.339492984504 |                  |                  |                  |
| EPSTI1     | 628.344122779625 | 250.443147156029 | 156.259214645427 |                  |
|            | 187.519053043173 | 218.839681873515 | 168.007337847195 | 272.854435771465 |
|            | 439.394914369983 | 1119.71228054585 | 523.306451464643 | 481.933386283351 |
|            | 385.888395433066 |                  |                  |                  |
| EPX        | 114.174153178166 | 112.179019393947 | 114.913534674899 | 117.261443445891 |
|            | 107.655624022312 | 106.315801001506 | 113.091739139626 | 115.211731367278 |
|            | 115.435942397626 | 116.053859681399 | 155.438218501542 | 109.384112020063 |
| EPYC       | 118.558673085303 | 108.04922729993  | 113.609215169397 | 107.520000793184 |
|            | 108.868679899494 | 111.515588041012 | 108.515401509039 | 108.955761698524 |
|            | 108.415715678948 | 117.361778263056 | 144.752418965039 | 116.609122768341 |
| ERAL1      | 443.732580517751 | 577.56891124468  | 472.669956708398 | 735.8141982568   |
|            | 1939.1525084845  | 938.049312229961 | 1195.6335460045  | 1673.5387396582  |
|            | 1120.87534972745 | 798.943242964857 | 473.60579090007  | 717.025533065694 |
| ERAP1      | 149.725422365342 | 151.07661060324  | 150.682964448325 | 146.781221728543 |
|            | 136.02474314035  | 152.729355306724 | 172.457165477145 | 139.273651128094 |
|            | 138.916830356763 | 164.092847913322 | 161.514651272858 | 171.350620456505 |
| ERAP2      | 396.781827940009 | 341.64890727921  | 200.668298229815 | 284.272977025491 |
|            | 194.374817778819 | 358.298768623212 | 186.406439948242 | 511.374117402707 |
|            | 346.996310517446 | 597.651682540611 | 721.966539760341 | 1259.75918248468 |
| ERAS       | 129.033433971346 | 126.009358591395 | 150.224472335504 | 163.459718635161 |
|            | 141.536764775726 | 144.4421922847   | 141.102274192049 | 138.796257513868 |
|            | 130.062015525637 | 138.158400190671 | 127.361974492821 | 140.531789506024 |
| ERBB2      | 308.679189788554 | 379.016207754533 | 296.497100375888 | 320.467139255533 |
|            | 1254.19980463817 | 879.809795251142 | 920.840069938767 | 2372.26073354008 |
|            | 1153.5175534971  | 433.405369327168 | 1002.44383771056 | 515.929937825133 |
| ERBB2IP    | 147.178598908199 | 144.699084515687 | 168.071171406779 |                  |
|            | 131.460388562433 | 136.818557078622 | 169.441789096441 | 158.371599884762 |
|            | 150.799400717425 | 156.420501464224 | 150.031863363697 | 161.85913459364  |
|            | 164.146345008398 |                  |                  |                  |
| ERBB3      | 201.167206950576 | 219.709231012465 | 198.979744266277 | 183.493455947795 |
|            | 648.823677010146 | 974.544773560873 | 1184.88559645917 | 954.488185198006 |
|            | 1445.72064343302 | 398.423396126075 | 1109.79571066685 | 642.057106241761 |
| ERBB4      | 122.095978653755 | 122.503984297406 | 114.249891266241 | 117.097159106043 |
|            | 100.216750525986 | 134.629996026323 | 125.143281492089 | 108.446988282853 |
|            | 126.298187538812 | 132.994716261577 | 124.378096177801 | 114.01599035448  |
| ERC1       | 208.385295246155 | 235.822266856967 | 237.692959394487 | 256.394563537658 |
|            | 148.533241504738 | 143.063345350253 | 148.16526158216  | 153.711354087243 |
|            | 143.589222264786 | 173.552535486766 | 156.961070790639 | 146.157459765796 |
| ERC2       | 103.36057518781  | 109.182623414389 | 109.228587997052 | 116.685023927951 |
|            | 125.498081339586 | 123.692366307662 | 111.639177843969 | 106.576058729493 |
|            | 122.405469833024 | 124.980683327416 | 114.805810485989 | 111.962852412774 |
| ERCC-00002 | 124.635917999969 | 108.199628274798 | 112.348094614855 |                  |
|            | 115.371180170291 | 109.506450285923 | 113.799997627317 | 121.85247363239  |
|            | 105.712302595131 | 117.101933186269 | 114.561836290349 | 121.919799968293 |
|            | 111.559325333192 |                  |                  |                  |
| ERCC-00003 | 116.540729581355 | 120.241528853563 | 116.280157890082 |                  |
|            | 117.728410015076 | 115.058061620379 | 111.802672864815 | 118.021169080914 |

110.392617179163 115.440152891339 112.394223360492 131.345038923753  
110.575582352222  
ERCC-00004 111.810575716678 111.860763079995 114.68345964966  
101.431474941041 105.193775204124 112.904318310632 107.466184687811  
113.726931741236 113.077691687266 106.41329572636 114.888157310977  
107.884870799936  
ERCC-00009 127.718341524417 119.608334527504 120.672291867109  
131.210866639392 107.02909139647 123.478896502015 122.719785082196  
118.951526834915 121.997885377703 116.566190779365 136.578058206829  
120.78129870199  
ERCC-00012 103.772221923105 106.41329572636 113.209569103727  
101.713609383766 111.616460084889 108.061315311823 108.079149792796  
114.45792163942 105.665621968915 107.816312357067 113.773684331489  
104.091301211096  
ERCC-00013 124.003914369077 115.51493368527 113.521599852465  
114.350596695469 119.057157701097 104.223476853877 123.372689985035  
110.014935095391 120.114423236962 120.688909943167 119.974853329265  
104.223476853877  
ERCC-00014 142.191569406599 129.405749374776 126.158204790885  
138.56812029378 137.134190411005 125.945916345628 128.019837242559  
124.851025681014 136.08297876405 130.674263597931 146.077082896858  
125.429085234515  
ERCC-00016 125.902015309754 131.302225305148 127.604087759266  
113.816165294487 147.790720062226 125.964335876018 119.237802375552  
125.170874841845 122.816049839521 138.634814756987 145.372579207362  
127.941584184869  
ERCC-00017 111.639177843969 114.373370072994 122.719785082196  
121.330383384978 116.46192274217 119.915330116696 116.987471433258  
111.467722538327 112.332130647215 120.36402353147 113.726931741236  
123.004137408444  
ERCC-00019 123.571641517019 123.004137408444 121.898921780569  
109.30275288389 127.42914358124 125.215194276842 126.129564039673  
117.22284971665 122.027632589515 124.825103464238 142.442450622311  
118.650091706226  
ERCC-00022 116.825172441325 108.970432124412 111.783160346742  
112.90900939264 117.897556445952 113.572326615571 105.551878332786  
109.700513642061 113.479382235297 112.962180108363 120.456817031716  
108.515401509039  
ERCC-00024 100.966979609222 109.087574814292 113.238466329843  
113.810645407837 112.07238018581 119.870661213608 115.594489123676  
111.127245394321 106.285472845323 111.086170834553 108.036254606246  
112.891050337488  
ERCC-00025 110.651971902576 113.995301093609 105.521320791331  
109.176852761745 113.568261995787 108.333135424315 112.449662536973  
114.129044806825 108.830525786872 107.156457065853 108.131097605872  
110.688722702767  
ERCC-00028 116.007006375993 117.79844873842 131.426355444136  
134.653131708903 125.405373274081 117.928456234796 133.050798832332  
127.558034562151 118.712730897987 137.406420101257 124.145492642453  
122.796362813922  
ERCC-00031 108.101686347192 107.559685467789 101.431474941041  
115.848659135231 109.016991399605 108.861243071977 121.583096465567  
102.343275379164 118.891276329399 105.132185249959 114.10470841717  
104.681530703922

ERCC-00033 108.266328505986 100.637271902591 111.538651711074  
110.544044723728 106.470524594239 121.926377140115 109.96017424123  
96.0426636429757 105.010952544907 110.636713168363 112.565341690522  
114.664782541261

ERCC-00034 113.38168751499 118.372047967248 113.274668934773  
116.204882835742 123.389038274913 115.321501844663 105.375878824562  
105.551878332786 117.930665298163 132.066488589395 120.897228878841  
117.60787142216

ERCC-00035 132.686915065196 116.282988576774 133.509538648848  
111.989153105684 120.873985900666 118.625070307695 112.464951599416  
115.949513659403 117.420765321056 127.972708116366 133.707285280448  
114.032874859062

ERCC-00039 105.816457443844 117.289037817013 108.79453730066  
107.365390754133 94.3531468700382 107.32960937124 111.616460084889  
110.368392735494 119.375727296235 111.000303209442 118.957512510094  
116.305011582033

ERCC-00040 128.197031700084 112.114933398547 118.578205738502  
125.195549796301 114.867454554206 110.17590675298 118.148476979319  
121.580726825432 118.684077097437 115.180659017144 135.33941967076  
113.091739139626

ERCC-00041 133.192757350144 134.374551571013 129.32466533596  
129.353536603449 146.185931276053 131.543439103033 144.46549577902  
132.99989565368 123.420635380886 129.301839663122 138.730409717578  
121.843992693814

ERCC-00042 115.608857734241 121.294366964074 112.90900939264  
116.425301253959 111.722827315911 115.878861991823 110.910693353871  
115.858924428037 115.392989580183 100.637271902591 138.231715814115  
108.779204939177

ERCC-00043 99.5148073333731 110.437728036347 103.36057518781  
111.922007318017 104.861024325857 99.26400442869 105.467761348787  
106.41329572636 103.734303632543 102.255408120852 118.902823494379  
116.588138374632

ERCC-00044 119.998260435095 120.786630750686 127.466779212194  
120.100672968415 115.440152891339 116.437403962939 128.568463697992  
120.241528853563 123.801380911257 136.05610450926 114.995889945366  
119.315932907373

ERCC-00046 119.122305582754 118.833188167696 120.786630750686  
115.235444833856 123.638001112969 126.526489290128 118.820154030256  
112.520199390427 112.993452506946 111.603221942108 139.157088843803  
112.78323842342

ERCC-00048 109.282814458761 106.876902604214 110.437728036347  
98.6941019230576 113.927168436775 112.321396616213 109.209241676429  
101.761615925097 116.604371744082 104.681530703922 112.675715371087  
106.36673326724

ERCC-00051 130.820415610578 117.532063783977 120.126700838056  
136.410841327254 134.498439965049 125.301602026407 134.102929804129  
126.233395051706 127.189310473419 132.119370332298 141.141047405344  
116.540729581355

ERCC-00053 116.074423050416 119.346574301289 115.834056091815  
109.740801301993 126.786434897401 122.05954649985 115.47716627378  
113.018985316061 111.639177843969 118.21084414402 113.536570797896  
119.806933383138

ERCC-00054 123.273349540679 121.905741525277 116.958052905168  
115.963144087717 122.84603217721 118.025603140924 107.07609243233

112.282839763467 116.305011582033 114.10470841717 125.908576249439  
110.304102941202  
ERCC-00057 109.66209172615 102.725375719353 105.284300851422  
105.221735747452 103.772221923105 116.397855001959 102.166449349339  
112.65454329872 106.066897223031 110.113844434493 115.68358702028  
109.016991399605  
ERCC-00058 144.904021527125 126.115828232308 125.674471551099  
122.153996665065 129.779076484273 123.051777473512 128.258600768314  
122.711143209444 122.770033312519 134.731687541347 138.778496466408  
129.054577477882  
ERCC-00059 111.055738573603 118.679664392666 121.014538677616  
118.578205738502 136.511669406292 117.296972688814 116.793408204625  
121.53632327554 112.904318310632 125.163958250922 136.348252715447  
122.201293962463  
ERCC-00060 125.937660544107 125.091038614268 134.952584272187  
120.276236447255 123.943080151532 119.530214079037 121.567879358508  
133.559082256772 129.933228671483 127.524310543779 142.765490244223  
129.32466533596  
ERCC-00061 119.658703392877 110.1278204598 132.049224908868  
126.837151457845 122.220327032799 129.462319953515 129.121598974852  
118.712730897987 113.440171712791 118.070716076005 112.642429076777  
128.375390373307  
ERCC-00062 113.177330690612 116.784024112826 113.177330690612  
110.935688075738 116.647291878845 109.96017424123 121.860428893248  
106.900679222135 109.167312436827 117.380281099932 124.019707408094  
109.29279076901  
ERCC-00067 112.371497988132 113.734280863323 109.669517182289  
121.679013405559 114.906396746556 108.79453730066 116.20967792121  
118.544870925791 120.184782039538 117.289037817013 129.272835188209  
111.078930787656  
ERCC-00069 115.981530322377 108.669141498627 110.296425545476  
115.68358702028 111.065596151792 111.082550752119 100.477911152746  
117.207266754941 106.797707723826 110.510191137073 116.397855001959  
112.292129754508  
ERCC-00071 140.370626016794 131.326536951329 123.732299841696  
145.632060621034 134.73970457131 126.87882572904 136.381593416533  
138.684070773064 131.679566454851 135.120878931851 138.712529531951  
142.713318779614  
ERCC-00073 124.684937344502 113.620070198869 111.506345174435  
124.106971897779 117.399753685854 123.813766735115 120.387275261633  
117.511162285879 127.095347480109 134.499588539919 148.326282600684  
132.86711707789  
ERCC-00074 128.837901660985 115.16087297104 117.580122770251  
126.750850861235 116.328330266803 112.699674279523 129.725706669166  
120.80221197797 120.027996187915 128.96181458192 138.867555269076  
122.412141495264  
ERCC-00075 110.17590675298 107.103635692135 102.661440700541  
112.000309477972 113.549098821204 105.49491265382 104.091301211096  
102.094370876743 102.094370876743 125.809027384863 122.682761393215  
96.0426636429757  
ERCC-00076 123.839006667113 117.101933186269 118.480344364831  
125.497317360782 121.406758670435 118.724348027528 113.708683868028  
99.0767996209245 109.016991399605 103.240215392215 126.585679159459  
124.61344300674

ERCC-00077 116.810827219571 114.618608815885 108.43334699667  
116.225440873023 108.483284007316 103.012774960061 117.069094451283  
106.522641798274 116.136849683574 105.284300851422 111.055738573603  
116.604371744082

ERCC-00078 107.260023460914 105.665621968915 116.136849683574  
113.512670856029 105.284300851422 111.743461522689 109.282814458761  
109.886197655915 112.081127853476 106.030441145334 113.822580779824  
115.321501844663

ERCC-00079 109.438965262717 106.854721604889 108.984922760455  
116.112013454335 119.135701239571 113.154880173167 120.365602682311  
112.026113831896 114.849872458647 104.248226402465 110.694256186941  
110.925532078514

ERCC-00081 129.865581506307 124.974113630014 114.91722828113  
125.937660544107 136.330636532576 126.401775332213 123.055210862247  
133.576812299149 113.163651806803 120.543881800775 126.435928518593  
124.42974326791

ERCC-00083 103.594872791657 108.288420807873 130.186484104417  
109.564709878576 107.961322525982 110.966212705086 108.2359175332  
112.036753245281 98.6941019230576 116.998277297063 137.443463471483  
123.231397809701

ERCC-00084 118.521075843163 107.580425848009 123.22295112139  
119.192893408873 131.719227272527 111.895279866421 111.497241941203  
112.675715371087 122.621839614189 120.054065939835 126.680992733621  
122.878790127038

ERCC-00085 115.827175143972 111.253743009588 112.309528593741  
112.987890650593 111.1002996982 106.470524594239 107.802792435066  
117.593226427794 112.771141378159 113.071787850611 112.502812746669  
99.9173294438729

ERCC-00086 129.208429861964 117.696262292883 117.585207821853  
119.806933383138 112.340161674529 118.689408983786 122.68719599986  
122.139832263188 112.896360244636 117.480506535399 128.713131994442  
124.786029449452

ERCC-00092 124.995087711332 128.023203858837 113.886420801388  
117.408465686218 116.844361858869 111.055738573603 108.43334699667  
125.426018910517 119.459625817735 117.623103460369 115.890431424899  
111.178024950204

ERCC-00095 109.113476990309 110.694256186941 96.8261937365062  
103.734303632543 103.09089100768 98.4947439453387 117.619337212037  
109.274221164316 109.471542280224 104.934718065476 110.068122112671  
115.907902010701

ERCC-00096 122.575357101038 112.629266772219 118.663847950696  
117.930665298163 118.797046082278 125.720102558499 119.135701239571  
122.719785082196 115.337592860132 112.404562115306 127.404415477384  
117.264555636952

ERCC-00097 116.514299377365 113.492900106468 121.059923601223  
119.613985826308 118.537378726617 124.641892391159 141.38749436393  
129.148634038268 117.546508214236 118.117957479382 139.103395748894  
124.418295003824

ERCC-00098 120.235652849894 114.867454554206 112.264005988662  
111.559325333192 121.021776527531 118.414329128347 116.378552206652  
112.629266772219 110.242638217587 114.452922529209 134.034970203523  
120.131839791515

ERCC-00099 132.066488589395 119.261305304165 126.042731009527  
120.085340927108 115.194730717797 113.492900106468 129.888444399067



125.848597767733 120.126700838056 131.897352210959 123.654787271088  
118.011195631598  
ERCC-00104 107.580425848009 102.786517901308 109.978693735206  
118.348153875356 112.747067417774 103.594872791657 102.474380813907  
109.654666772771 107.655624022312 113.125349503734 135.058525398122  
113.970633751086  
ERCC-00108 115.863243613121 111.703224727793 107.303126530947  
114.906396746556 118.201092260839 114.278113876915 110.925532078514  
123.336074100984 116.90832995093 112.790552379447 110.753661013519  
107.580425848009  
ERCC-00109 124.130599753093 127.006746526023 120.727504500018  
116.736174147084 116.236538651031 117.67638166062 111.810575716678  
123.922817231917 125.027095330593 122.139832263188 119.418866166776  
126.780096523484  
ERCC-00111 121.640681916546 125.696434307671 114.768639931659  
118.474291525263 121.99477069153 123.804039963953 130.119313219923  
129.971670681199 126.279119798177 116.89487516867 131.027605835275  
122.167669805597  
ERCC-00112 129.049273337631 130.684569384626 116.456170659686  
124.501262458393 116.225440873023 120.822923434486 120.85013281321  
134.21363751173 115.468921844902 136.02474314035 151.293676705634  
123.574319348191  
ERCC-00113 119.036965883266 124.705614182596 110.935688075738  
114.334059060506 116.0999658586 109.69466049307 119.382151435379  
110.496084922302 105.221735747452 118.201092260839 142.826898321575  
108.543795408713  
ERCC-00116 114.078271807864 117.015097017246 117.467618148107  
122.843792000493 120.216999784094 110.148555045276 116.597352307016  
109.342230674869 119.029186503752 118.514618614167 131.136073942692  
117.186546702764  
ERCC-00117 110.942138645171 107.714294216913 119.795945889846  
119.159078990339 115.463150857002 111.975027473284 103.240215392215  
109.91537150286 109.176852761745 101.713609383766 100.477911152746  
102.786517901308  
ERCC-00120 118.294324274616 106.204350278634 104.154182930018  
108.850992642446 107.450945262092 111.577400298092 118.505980204837  
109.817705421158 106.685578858702 111.584425166104 113.154880173167  
114.812254477058  
ERCC-00123 105.467761348787 99.9173294438729 109.113476990309  
116.021343227054 110.764586138261 110.694256186941 109.988237089025  
108.818976813708 106.126202301438 112.851805868467 106.923686318112  
106.551076380988  
ERCC-00126 115.939620871703 137.700110923212 132.204721976343  
139.429008129291 145.847629576886 126.865622462379 121.57069706238  
123.059971161711 121.991692204056 124.998601194756 154.021906399992  
136.418105816557  
ERCC-00130 118.126133973555 120.270397272069 118.708644971927  
118.126133973555 109.91537150286 111.956783714784 131.454955038299  
112.081127853476 108.730058525654 130.718729445329 113.61408868553  
114.161540771427  
ERCC-00131 115.293844461817 122.051473363557 106.719519490874  
107.02909139647 131.672014089487 117.270320709161 103.448244268961  
114.290611267606 99.7487411813724 109.924867620862 122.94937342991  
110.536316697732

ERCC-00134 118.816986517698 124.365185583133 119.144128641393  
116.723991721647 122.676368520743 115.734230176652 125.034243098087  
123.182903611854 122.714122084817 106.36673326724 141.524239210761  
115.270544506813

ERCC-00136 121.903115540516 117.590393673861 127.675206134992  
122.158160927149 117.141089194822 127.900901613784 119.603565559838  
127.83654093961 120.255081121925 119.079680805247 138.076501233454  
119.886433564236

ERCC-00137 126.737230874367 136.779180530712 132.295937828888  
124.947565043721 127.769405736754 127.535214313797 129.171589574238  
135.516856254532 122.396214045451 129.069366041625 154.509924503184  
126.828097770667

ERCC-00138 128.798413084891 135.48250324478 119.998260435095  
126.544685937984 135.208478510375 119.355650892262 129.208429861964  
123.781002620866 124.031916322066 133.681703350531 130.760835441776  
127.918847837351

ERCC-00142 110.858201415824 107.930325780047 113.018985316061  
107.638492587723 121.274997609378 107.205247133938 102.024765473404  
106.603674195422 115.085961282227 105.450273343324 112.046615825307  
116.981243525714

ERCC-00143 119.06600048679 119.01236045062 121.643036773773  
117.356389952799 113.334665910428 118.697969266426 124.327827104244  
118.56332995149 113.857477830423 118.480344364831 138.264258708067  
115.68358702028

ERCC-00144 122.631814400575 121.138461509096 113.334665910428  
120.679474100322 115.400592594965 125.621467040793 116.225440873023  
125.010266083832 119.360478719424 118.875640081461 131.924162435354  
127.972708116366

ERCC-00145 111.09179957013 114.027244455291 108.148715413122  
116.5272207025 116.839796680107 107.520000793184 119.517021355598  
113.315182274675 114.790717658188 115.310953814885 114.504409331018  
108.404733392914

ERCC-00147 105.859916438163 105.450273343324 109.728809191027  
107.303126530947 118.841699953612 116.65880728655 106.876902604214  
109.52020660772 111.703224727793 105.375878824562 120.208584170364  
125.802001118545

ERCC-00148 112.081127853476 107.884870799936 109.355444907633  
105.467761348787 108.939608619532 110.735199684144 115.400592594965  
107.520000793184 100.04568139926 107.187035835972 113.888903174188  
107.816312357067

ERCC-00150 119.366599958278 114.470670941078 117.662611650515  
108.497209666203 123.696942540314 119.492844191924 112.314595956147  
113.891385601095 125.215194276842 124.530660958725 119.746227888415  
116.043095688871

ERCC-00154 116.939471420419 112.340161674529 119.862037840843  
116.136849683574 125.940081665592 119.330439721904 118.011195631598  
123.368137868951 115.496108000499 123.24533179875 128.372225487481  
115.827175143972

ERCC-00156 115.316430915446 113.672605838627 117.623103460369  
112.742895297124 110.810963139914 118.951526834915 120.441732791854  
113.416743649576 102.786517901308 115.3611179192 103.772221923105  
112.340161674529

ERCC-00157 128.126354569418 126.820834043224 121.297234504922  
125.9888344762 137.264814431548 123.843823256462 125.584202037776

119.9652990395 119.934231033302 117.071585083051 160.766121558583  
132.110906510601  
ERCC-00158 106.953841653951 111.73388372572 112.624137732184  
112.675715371087 111.848472437543 117.251233255966 118.81294782091  
114.76337651891 106.102093734748 109.654666772771 115.53736269794  
110.448948495323  
ERCC-00160 118.148476979319 132.249906289203 127.182067293944  
109.471542280224 114.936648783324 118.154953746492 113.822580779824  
118.32560379073 110.315549501241 109.067239220744 132.471014832851  
111.603221942108  
ERCC-00162 113.955459033122 111.66210002202 123.822571859503  
105.284300851422 116.67463130093 110.501341211051 115.778736387131  
116.483432723207 116.947370388179 110.865668451601 112.14768481333  
114.740948266517  
ERCC-00163 124.551603326682 121.381365873873 123.716400094852  
116.825172441325 113.09980008288 125.195549796301 121.150371270451  
120.410307377977 124.68729078792 120.216999784094 139.220877923507  
129.330592465123  
ERCC-00164 134.255021727555 120.418709541104 123.88619164923  
126.63730651721 133.517685144186 132.395993254065 137.246089511045  
119.352995485911 121.18490040448 123.551225884748 115.848659135231  
125.293640452686  
ERCC-00165 109.700513642061 113.840813583258 114.798573331978  
115.264104392064 123.364999283696 119.802832736435 111.708970469189  
104.798333931019 120.283706459738 125.371128588617 108.646136431909  
111.448871835514  
ERCC-00168 113.091739139626 122.072091994548 105.408689610638  
109.128394735532 121.519309043513 107.74537523456 107.714294216913  
104.223476853877 124.116400777472 114.85602874727 121.792573534134  
113.568261995787  
ERCC-00170 115.871151134713 118.186426364551 124.989313193779  
114.364953312191 119.198789189881 123.190757763412 118.655954393594  
116.897299691798 126.544685937984 130.09958025354 140.307931763353  
107.780763250481  
ERCC-00171 120.511896155396 121.871105084095 126.606163970149  
114.067790137477 117.790593990682 121.497645719165 120.473038066927  
122.190734676247 128.020911959353 121.441901286752 136.72715888684  
109.680532131035  
ERCC1 314.386320310898 370.678040372273 271.858059712406 450.220658078322  
731.513306289481 256.614964511846 433.751675703425 288.823376348944  
298.573180660083 302.381946749711 245.607130404306 333.868818855397  
ERCC2 260.129513331703 283.527656956105 221.471811658459 375.539588956213  
308.974786799114 191.056705282378 250.037172478288 196.287131027947  
214.662648581622 209.984545596312 205.381840116054 223.359785518285  
ERCC3 361.969355316032 340.800632878807 429.268202514543 341.761516859319  
303.09499683953 405.130899553871 295.047418816148 298.085365348496  
330.321113875647 301.250189051376 435.095843349921 296.553550946307  
ERCC4 138.000714797563 137.448412532999 162.778480318754 137.27298184582  
131.566892082703 130.497405221273 142.543569032033 144.417333931582  
143.180247878507 142.124876403709 144.935571704834 142.266177608209  
ERCC5 845.150147618462 935.423045210635 855.415038498392 910.541650889451  
280.337475979102 614.957397883514 570.916936074747 597.651682540611  
592.957842630046 647.666334416707 1031.59140059071 889.054356462993

ERCC6 138.428527640896 169.132693907633 168.223865801948 196.329602378007  
 170.150889760372 145.281664250703 151.705219298578 146.455182336561  
 141.198692540628 152.755535408382 142.336164180947 158.125437004665  
 ERCC6L 141.577373924378 149.032116392457 148.390417679848  
 173.919504730673 188.605328108654 183.804849355341 171.644710031098  
 172.980441569522 164.50490221903 152.204730003016 148.247826830556  
 156.411563412665  
 ERCC8 131.193538235053 135.895945142328 128.434301921433 134.391386851101  
 144.699084515687 134.06996703302 142.385902610309 137.401137659118  
 130.270184521521 160.319687451789 135.51506573405 146.501559368223  
 EREG 161.099805358232 137.198654302648 151.770791549511 147.135640862542  
 154.205877662428 172.866517097198 150.924948809354 143.383697128285  
 147.401387099359 267.535469518664 161.979914539039 150.494260282384  
 ERF 365.199125315964 445.661863626419 253.697419495959 369.513420606401  
 950.818917078515 415.178470246749 344.128576341892 232.363656167375  
 260.224777636733 319.927209914181 372.088129459528 274.14931964455  
 ERG 136.403353223002 135.582230137515 145.766684470184 139.2454524913  
 136.003277940379 126.378952839132 136.173596381385 135.862790395984  
 134.961156870831 146.994103804515 126.260691770282 135.790168628803  
 ERGIC1 426.364663722264 439.928008927647 374.761007556839  
 463.99922423125 279.879377933144 271.713695056313 229.933577323411  
 227.418630852215 199.933148219784 254.909076658804 548.455251483009  
 270.421697521366  
 ERGIC2 502.063888359427 466.141717595301 459.973764138144  
 348.921877633633 366.961565952239 354.840474468573 595.752426322468  
 526.896146537814 436.155731212592 506.430593289427 597.189355986293  
 612.61438059983  
 ERGIC3 1189.69730508119 1239.13016938378 1220.30347076968  
 1299.4782626583 3342.8737952486 2863.51286169094 3430.76532174701  
 1867.55140010155 1619.67820476414 1389.93393245455 1261.61611961272  
 2131.68478964427  
 ERH 1099.37392456694 1336.75600604068 1281.9073569335 1023.94850651125  
 760.572409199179 1484.32547474275 1298.60552708737 1420.27222765071  
 997.460212152591 925.009157785129 1362.75971646355 1565.64079526732  
 ERI1 277.561376169965 283.499120551905 287.967349876429 335.858047332641  
 244.73233791067 358.654569870431 304.237479317271 414.797416270335  
 352.811351813364 297.757657398146 321.31562287169 316.623219008156  
 ERI2 165.781667492391 154.634289463743 178.245841646175 140.434086004204  
 193.261343922604 188.708596785144 187.389039221193 190.549084022965  
 179.94333102877 175.302832015761 189.90406457741 195.755450324985  
 ERI3 234.895245871534 248.403014089812 215.300064529551 314.810001770583  
 427.542390397986 314.610979086485 332.885488115858 283.27806319488  
 282.870785313621 233.757965816721 239.621756857095 235.997227173296  
 ERICH1 275.101766414328 256.471672362567 308.621688157016  
 237.601064742453 238.461248099002 272.456310079164 292.60467054075  
 344.487982154705 329.068463281182 388.887050777137 273.668871896558  
 357.835334661098  
 ERLIN1 172.980441569522 179.593817076317 149.138678142327  
 181.635664531851 205.630948393225 163.889522525848 211.419445018736  
 180.549865708041 209.596792486876 163.982415393606 349.485727214325  
 226.623172906957  
 ERLIN2 218.592402813219 226.086733606951 209.004374703564  
 228.588693548447 1259.38111177521 414.596948083067 285.30221551106

|        |                  |                  |                  |                  |
|--------|------------------|------------------|------------------|------------------|
|        | 266.252875242286 | 191.207048581306 | 217.094085829328 | 208.983138060317 |
|        | 297.708113541379 |                  |                  |                  |
| ERMAP  | 182.68965110437  | 181.508873226705 | 195.239829623017 | 158.06915048955  |
|        | 201.256649338315 | 167.43630698726  | 176.839917795004 | 210.803130108618 |
|        | 210.761398461329 | 166.730974538475 | 263.47760086159  | 227.467161919443 |
| ERMN   | 120.65473121078  | 117.735411259153 | 111.312348806957 | 117.703025026759 |
|        | 122.937281123348 | 121.837571435384 | 116.373841472226 | 114.960460615926 |
|        | 116.59404046487  | 117.642441794442 | 133.76515446791  | 118.401963042662 |
| ERMP1  | 307.945884504629 | 459.068582584181 | 318.487401106209 | 326.379855547052 |
|        | 900.233783407148 | 727.425595270342 | 944.47112348734  | 900.039744829725 |
|        | 1151.89087953837 | 779.623566217277 | 2193.376951552   | 482.592481827722 |
| ERN1   | 188.079188251085 | 209.867189613436 | 166.12695134858  | 178.429953283621 |
|        | 206.303338709554 | 244.440857688518 | 220.169099923628 | 187.686326872667 |
|        | 260.591336959281 | 213.966288689715 | 173.544556426164 | 225.546125484563 |
| ERN2   | 151.16261275916  | 133.593569062647 | 135.073449743301 | 143.802883430376 |
|        | 143.496669740707 | 149.94715601106  | 163.876218743322 | 248.965394617795 |
|        | 165.985885671398 | 145.169804325334 | 298.926727289387 | 288.770330002807 |
| ERO1L  | 196.053808536366 | 249.884250040189 | 214.803167803712 | 191.795952536469 |
|        | 355.609033348692 | 266.057472924341 | 826.08372791138  | 515.597523880328 |
|        | 291.839070398338 | 1838.18547839898 | 522.899203071911 | 704.653073777277 |
| ERO1LB | 143.650172124086 | 132.958521136    | 137.4552565025   |                  |
|        | 132.533234335153 | 142.64421300687  | 140.349431258812 | 149.398118078302 |
|        | 140.36602776806  | 151.716042884808 | 124.375348764151 | 139.314945862113 |
|        | 133.307149027384 |                  |                  |                  |
| ERP27  | 183.988537525989 | 320.024259346646 | 248.791254839869 | 152.93058803161  |
|        | 408.510567121592 | 234.550692915716 | 1204.7397215229  | 889.054356462993 |
|        | 1746.30519466572 | 147.370836610849 | 1419.4638331856  | 378.4377409749   |
| ERP29  | 1407.43503866211 | 1569.13457493554 | 1527.26678152732 | 1458.13354165836 |
|        | 2051.45788386541 | 1996.65760745757 | 2677.17579532816 | 2476.51542420593 |
|        | 2956.63335018838 | 1804.63762008613 | 2392.93562797606 | 1145.96710556468 |
| ERP44  | 183.348764012358 | 172.128489882364 | 192.140442881209 | 175.363223521128 |
|        | 154.661456780865 | 179.048139035247 | 150.875392181869 | 164.429483677715 |
|        | 172.157660228549 | 168.963976596839 | 177.802767772786 | 154.755544586846 |
| ERRFI1 | 1574.65731564294 | 1030.97051104597 | 1155.4487861163  |                  |
|        | 688.915534194306 | 1594.05763963363 | 2111.32236867229 | 1385.28044421961 |
|        | 762.8576747113   | 623.68308750251  | 1030.97051104597 | 1213.61170930345 |
|        | 757.066786599446 |                  |                  |                  |
| ERV3   | 117.917454674671 | 119.517021355598 | 117.112667504781 | 123.959050197189 |
|        | 145.553219709768 | 154.21623304309  | 142.032814623366 | 242.902900881585 |
|        | 188.74403596953  | 146.215459988012 | 204.318316638312 | 137.391141254051 |
| ERVK6  | 130.176734524308 | 130.955161943331 | 154.64077390011  | 132.243900762936 |
|        | 139.369815367465 | 127.959474148217 | 127.310437599803 | 125.517076778344 |
|        | 137.927403204849 | 123.588194516972 | 121.130837254861 | 136.254966566424 |
| ERVWE1 | 163.704616231638 | 172.457165477145 | 150.945167884077 |                  |
|        | 152.28262533486  | 171.97578836712  | 147.309245779031 | 144.064214573005 |
|        | 151.178586065066 | 161.992141305029 | 128.872496485403 | 165.45479542657  |
|        | 145.193296081527 |                  |                  |                  |
| ESAM   | 305.398934391579 | 401.750302347978 | 208.194788326109 | 371.941204080246 |
|        | 356.376890469558 | 275.841929188802 | 230.91747428831  | 266.756647182704 |
|        | 292.145553580042 | 268.660078500783 | 257.775569674531 | 196.598810934837 |
| ESCO1  | 199.714647839712 | 180.035652063942 | 195.513703253634 | 184.482849019679 |
|        | 187.686326872667 | 241.019436415703 | 215.897620927751 | 247.806371601734 |
|        | 189.61702125418  | 214.739818213164 | 233.997642139328 | 209.662262708551 |

|         |                  |                  |                  |                  |
|---------|------------------|------------------|------------------|------------------|
| ESCO2   | 122.719785082196 | 115.01682934323  | 119.01990099776  | 120.571074646092 |
|         | 125.005019889478 | 131.823019555685 | 125.052770277549 | 130.169291786693 |
|         | 133.236084190243 | 120.160652344221 | 130.894384800009 | 136.71484425521  |
| ESD     | 1362.1486006778  | 1250.58586679251 | 2037.96470181871 | 1122.92917004037 |
|         | 458.705688226305 | 958.005138077899 | 501.166869173253 | 677.802147190757 |
|         | 823.297606185721 | 1619.67820476414 | 633.104379362137 | 1309.01193284992 |
| ESF1    | 137.760712896718 | 133.82390829608  | 135.536810684197 | 128.781123194219 |
|         | 147.891442774921 | 132.966873990501 | 131.792339956719 | 128.888149939072 |
|         | 134.06996703302  | 131.290698895743 | 128.314990390649 | 119.152881350581 |
| ESM1    | 146.162330544539 | 153.360382235409 | 145.237221169839 | 152.213746577124 |
|         | 223.638850960288 | 393.707031354025 | 263.204269632206 | 209.417052464583 |
|         | 185.905819051223 | 443.444024128516 | 267.149525812834 | 403.104188866804 |
| ESP33   | 125.905785653648 | 131.683942368268 | 121.400652285172 | 133.52971984184  |
|         | 135.357424384319 | 126.237900397603 | 127.961153369579 | 128.877218650072 |
|         | 133.984078167807 | 135.889764019762 | 137.089392202166 | 137.393871430276 |
| ESPL1   | 140.099069486005 | 149.704586651832 | 138.323567041191 | 143.011042973347 |
|         | 299.513950278952 | 250.481442411876 | 186.1961391235   | 193.912456093767 |
|         | 180.022646625687 | 173.416999972133 | 144.019824700027 | 173.281506912652 |
| ESPN    | 130.988294699995 | 120.41188773836  | 123.501843029993 | 121.628827418997 |
|         | 158.347972566681 | 118.383317097375 | 120.998665308561 | 137.973211667003 |
|         | 161.402322405903 | 281.304989265608 | 126.899985772157 | 132.146027935802 |
| ESPNL   | 180.478294414245 | 283.048002376743 | 175.989742412417 | 365.864755316163 |
|         | 152.528571776589 | 141.229805348717 | 143.576177625265 | 150.626826756019 |
|         | 158.089922688997 | 147.547944397578 | 135.799692347002 | 159.289148392284 |
| ESPNP   | 129.322481607056 | 130.209752198964 | 133.872561340464 | 136.788269716383 |
|         | 140.678336884951 | 141.884995734267 | 119.395894479869 | 140.964208731587 |
|         | 132.216453078716 | 126.676875319815 | 124.749727939593 | 120.862516074358 |
| ESR1    | 240.465165615601 | 250.676092725829 | 203.586310608403 | 221.127492253636 |
|         | 230.201464318433 | 178.358003030064 | 176.001771318766 | 272.277433294605 |
|         | 147.433388299999 | 147.959740692766 | 140.938442055097 | 148.302775746627 |
| ESR2    | 137.650917262528 | 145.802944788548 | 136.029898048127 | 137.033502466562 |
|         | 145.335830265052 | 133.892661981648 | 141.576177844986 | 132.458764637407 |
|         | 132.664379033058 | 129.171589574238 | 118.091125088778 | 129.233595525585 |
| ESRP2   | 106.746545626069 | 106.576058729493 | 112.922918499398 | 110.325803953516 |
|         | 116.382348831504 | 103.550817366724 | 111.041656398985 | 115.033355516602 |
|         | 114.084543168359 | 111.568329540016 | 121.419301042072 | 109.067239220744 |
| ESRRA   | 270.421697521366 | 280.292616101827 | 307.570405241182 | 381.867665449509 |
|         | 615.058712877418 | 360.053590374552 | 401.189904619902 | 286.469773081481 |
|         | 260.489744360233 | 329.023836559229 | 462.265785715695 | 398.354212009426 |
| ESRRAP2 | 378.308562999445 | 376.627801547869 | 435.603911474926 |                  |
|         | 550.901056837273 | 822.88742008931  | 507.342877360289 | 595.882696498804 |
|         | 401.542072222692 | 287.83303360511  | 435.603911474926 | 769.34961339184  |
|         | 606.162976359615 |                  |                  |                  |
| ESRRB   | 117.706795566317 | 138.685330935707 | 115.975794003391 | 121.294366964074 |
|         | 114.704831217037 | 131.597937570173 | 135.200049257744 | 119.229322984564 |
|         | 120.951365231971 | 121.846349358116 | 140.667415746111 | 128.462674862751 |
| ESRRG   | 159.946124520038 | 155.965426559332 | 158.434048174501 | 149.269417496936 |
|         | 145.169804325334 | 151.043967734248 | 141.164985468046 | 141.797497681512 |
|         | 144.384287335249 | 145.932170561687 | 147.483379646393 | 172.251953149975 |
| ESX1    | 124.837187124441 | 118.060781901686 | 118.497920969001 | 113.708683868028 |
|         | 119.709032462308 | 121.942777234608 | 112.026113831896 | 115.409568875238 |
|         | 106.315801001506 | 116.919109599361 | 114.115609163126 | 114.936648783324 |

|       |                  |                  |                  |                  |
|-------|------------------|------------------|------------------|------------------|
| ESYT1 | 2479.34567973462 | 2748.51360874099 | 1871.91894530722 | 3528.62443098065 |
|       | 3188.90202907403 | 946.273229715791 | 1813.79641422879 | 1021.25947613827 |
|       | 1643.08061372695 | 981.781076110568 | 1243.11900823259 | 1092.33328323944 |
| ETAA1 | 132.371165851333 | 141.66312605042  | 129.580421464913 | 123.692366307662 |
|       | 122.644105247178 | 127.333963230749 | 142.183154756458 | 138.333435927107 |
|       | 115.639101191444 | 128.383541329939 | 169.561657768387 | 126.372374084002 |
| ETF1  | 1170.88763035931 | 981.313778685019 | 1009.42265467472 | 1036.40082234884 |
|       | 508.449904285771 | 706.628675634893 | 790.561585641193 | 664.809419789814 |
|       | 633.104379362137 | 1033.48252432603 | 936.957730361063 | 909.020708316287 |
| ETFA  | 802.017244099902 | 781.208872924532 | 1104.61581891596 | 705.737228226014 |
|       | 1059.19317548869 | 2521.58055221647 | 1989.38201206555 | 1879.08108720938 |
|       | 1374.92806285803 | 1612.79779117655 | 935.784743413185 | 1961.26255930192 |
| ETFB  | 590.515758538373 | 708.268962600305 | 872.512754090023 | 827.863789600981 |
|       | 1746.30519466572 | 626.298707790229 | 604.737834405874 | 678.684323057327 |
|       | 1015.63768413332 | 733.86133557115  | 571.273512452931 | 684.715981522999 |
| ETFDH | 361.429760858441 | 345.897250519387 | 469.540421642173 | 327.324711245289 |
|       | 194.88319590729  | 295.607161318725 | 350.392951395182 | 454.492780042353 |
|       | 367.439588680092 | 283.235844022826 | 238.430350258686 | 394.294057009443 |
| ETHE1 | 140.477307701027 | 136.438788088263 | 128.069504716124 | 142.934869757362 |
|       | 235.997227173296 | 151.561151654372 | 152.303524109428 | 161.019770036957 |
|       | 173.088291472857 | 160.085325256991 | 228.524222740306 | 180.070209705044 |
| ETNK1 | 140.624437508178 | 141.999730335668 | 137.591469499374 | 133.292854943218 |
|       | 216.24497587588  | 172.552923333095 | 170.522853717911 | 182.495117800073 |
|       | 202.504840299605 | 174.08222895937  | 162.117224868654 | 161.510497517852 |
| ETNK2 | 148.02460124587  | 173.024402954772 | 139.801108744526 | 162.975988989106 |
|       | 310.815067427296 | 168.702991603656 | 207.581907737176 | 145.146797807275 |
|       | 159.113259830623 | 163.643554173995 | 178.000672046849 | 225.438177833064 |
| ETS1  | 972.468110850466 | 1159.44907165386 | 605.795439342384 | 939.213447046823 |
|       | 705.737228226014 | 797.73902873919  | 959.897744425251 | 1238.11700377838 |
|       | 1230.00744483191 | 753.997560938003 | 2068.04582900231 | 949.260897408911 |
| ETS2  | 703.815551883635 | 813.034056288861 | 474.629173435475 | 487.901310664037 |
|       | 332.082749517913 | 1567.89763050645 | 767.861763134136 | 752.142287661845 |
|       | 1061.79595707572 | 541.351092873522 | 530.122419830951 | 659.27672123763  |
| ETV1  | 113.748724650063 | 115.180659017144 | 112.578934972566 | 100.966979609222 |
|       | 106.576058729493 | 111.691973758042 | 105.25877906031  | 108.570463496052 |
|       | 103.012774960061 | 110.624328647003 | 104.154182930018 | 102.094370876743 |
| ETV2  | 128.368669716591 | 138.889999702313 | 132.865704994046 | 128.144653206398 |
|       | 177.825648107126 | 148.143367490426 | 150.508851767517 | 148.597346678768 |
|       | 162.505305538911 | 188.070213212057 | 192.286192329464 | 166.396160626179 |
| ETV3  | 175.395900648455 | 159.2488784104   | 148.85250180736  | 152.052084712417 |
|       | 169.072574423443 | 246.152798696993 | 231.202047619476 | 306.838596239511 |
|       | 190.871696848118 | 184.322250984457 | 210.605864685448 | 259.900447705311 |
| ETV3L | 116.653897702566 | 129.290542121353 | 122.317877997527 | 128.23432652395  |
|       | 137.58025011566  | 119.281300456243 | 121.138461509096 | 127.095347480109 |
|       | 120.644987579644 | 110.1278204598   | 138.096262211809 | 116.635455849571 |
| ETV4  | 139.328340242696 | 147.748142622566 | 140.671406418004 | 159.148717478277 |
|       | 337.521614253267 | 210.218440444631 | 193.04138438685  | 272.117599603586 |
|       | 204.283030911897 | 156.466728833063 | 168.013310840048 | 179.509758601636 |
| ETV5  | 206.972440734038 | 237.940015617254 | 167.637638693195 | 213.833894542292 |
|       | 309.720081933252 | 241.293046687076 | 184.758754197435 | 149.202628825354 |
|       | 163.215507313506 | 158.87755965229  | 171.426334687626 | 177.688568435599 |
| ETV6  | 624.467319041884 | 751.896334334052 | 597.651682540611 | 852.649997188692 |
|       | 445.763740779039 | 520.120193442648 | 809.545702751155 | 1332.11815966955 |
|       | 829.992212133165 | 256.326661031361 | 1233.99503576308 | 776.98412594767  |

|       |                  |                  |                  |                  |
|-------|------------------|------------------|------------------|------------------|
| ETV7  | 136.032310569127 | 144.760229351772 | 137.745887988474 | 151.2639801322   |
|       | 151.577450119302 | 137.962542261072 | 212.443407602682 | 152.548795147468 |
|       | 165.376358421533 | 133.532323053215 | 181.803275243281 | 156.731291756066 |
| EVC   | 219.878230463206 | 197.277310409328 | 211.692743811486 | 211.085778902367 |
|       | 131.539170756533 | 134.914830257315 | 133.666244052469 | 125.974463216884 |
|       | 128.745737514912 | 150.711857623087 | 144.772914483212 | 136.633726784926 |
| EVC2  | 128.184708916755 | 126.87100632595  | 124.533543270311 | 125.868080230094 |
|       | 121.438875373878 | 111.423140302983 | 109.898406285895 | 113.716741872499 |
|       | 123.541709359809 | 114.631759839092 | 111.596690019694 | 128.591292689996 |
| EVI1  | 563.779294315901 | 870.409935772423 | 469.407481002198 | 392.582612044755 |
|       | 1407.43503866211 | 3019.57419253979 | 2084.44431604433 | 1657.72357544205 |
|       | 2033.67956299225 | 201.865955150869 | 2344.11548437508 | 2313.56743052616 |
| EVI2A | 131.367075440559 | 130.953237161257 | 127.987449338817 | 133.443807124822 |
|       | 131.72852748835  | 139.205887721493 | 133.337863400762 | 149.457761307441 |
|       | 160.01685162095  | 133.841519663164 | 161.569793476847 | 132.07268641595  |
| EVI2B | 158.07640654075  | 156.420501464224 | 141.170937695272 | 152.038902807701 |
|       | 132.693707848508 | 151.178586065066 | 156.003233745771 | 206.203717450138 |
|       | 227.614623963331 | 175.767556472012 | 159.199045715212 | 155.129304059037 |
| EVI5  | 1325.77498031227 | 1247.02514044778 | 1118.28423222707 | 1147.33034082693 |
|       | 349.330629649093 | 1106.75785702993 | 702.460234202652 | 1061.79595707572 |
|       | 719.369561410372 | 562.711562649704 | 787.425941491281 | 725.216684507759 |
| EVI5L | 484.764806127211 | 534.276129011237 | 580.164288826741 | 858.742139354587 |
|       | 750.494286476465 | 347.411500022053 | 544.580311371212 | 392.824840252824 |
|       | 272.712242893937 | 593.990687449346 | 514.213675499369 | 457.411248351795 |
| EVL   | 2926.06746795504 | 2779.89882032092 | 2986.6208659209  | 3807.16206340771 |
|       | 902.394410348792 | 942.900963522948 | 1474.70984232307 | 1822.14935116363 |
|       | 2369.233048505   | 1607.52029676299 | 1856.05025952611 | 1771.39155164347 |
| EVPL  | 167.55209828062  | 212.571491543077 | 205.52620827767  | 159.473580802408 |
|       | 861.786094902013 | 992.320202251161 | 924.312051919404 | 1474.70984232307 |
|       | 1089.58643309156 | 1840.14350831655 | 850.125434374005 | 1268.73280473728 |
| EVX1  | 136.529820456592 | 128.455670598648 | 143.107570838895 | 128.179293878252 |
|       | 142.303654405005 | 128.116795372698 | 115.507474401239 | 128.265571409546 |
|       | 121.747622617011 | 131.850952248545 | 141.758827837244 | 138.936872956065 |
| EVX2  | 137.28323311107  | 130.772410329685 | 138.328508662816 | 123.069963218224 |
|       | 130.677737553727 | 125.851611268218 | 140.509950286228 | 132.634538733205 |
|       | 124.160433356046 | 130.380766252137 | 123.077592992679 | 138.058404474114 |
| EWSR1 | 960.491731797061 | 1029.09818399518 | 976.782815449208 | 1190.62010668045 |
|       | 1009.42265467472 | 1082.75419087929 | 771.512332113075 | 911.340266389071 |
|       | 1156.19575610918 | 851.221199352646 | 1061.29067124163 | 1051.98943987926 |
| EXD1  | 133.11040099808  | 158.249743182741 | 143.712450441816 | 150.748298569951 |
|       | 152.265624144393 | 147.393178410954 | 154.475735552851 | 145.485453268383 |
|       | 141.278654291193 | 121.278346729876 | 122.592960588642 | 136.996535765175 |
| EXD2  | 446.819873986024 | 368.879825610754 | 461.940616438547 | 348.808646570544 |
|       | 305.577166690215 | 271.430915699592 | 419.593558001947 | 372.594990024312 |
|       | 302.768870633398 | 427.452114719877 | 384.296190598736 | 397.153801851621 |
| EXD3  | 189.082778234831 | 188.605328108654 | 205.679992893049 | 213.364858759772 |
|       | 152.961475450751 | 147.463822782303 | 141.125248464806 | 133.345885001759 |
|       | 145.03804642447  | 140.628614910068 | 203.149001616967 | 139.534014289993 |
| EXO1  | 127.545397354821 | 139.147327302581 | 131.848213704003 | 133.239703270008 |
|       | 168.116928722035 | 168.963976596839 | 145.783320434143 | 215.247472744419 |
|       | 183.138955445765 | 163.125317704446 | 147.87699690647  | 184.451469623426 |
| EXOC1 | 194.734255772365 | 196.615914367563 | 222.086635504858 | 173.424541543058 |
|       | 194.979795724712 | 253.754869975548 | 298.519371102278 | 283.556453980797 |
|       | 296.497100375888 | 324.56043349882  | 367.732191251547 | 295.778154263981 |



|         |                  |                  |                  |                  |
|---------|------------------|------------------|------------------|------------------|
| EXOC2   | 324.79327985156  | 264.233381434738 | 302.637859140061 | 262.691387377392 |
|         | 202.324795686879 | 219.171591031864 | 245.082816415008 | 226.678503956411 |
|         | 255.225145197422 | 294.323621186916 | 201.987081022654 | 275.696829424061 |
| EXOC3   | 415.82312615045  | 449.523996620257 | 514.354512083591 | 491.35949123223  |
|         | 472.108893832845 | 323.788197265954 | 393.264726588522 | 321.627969147543 |
|         | 309.229066204308 | 379.862305342147 | 307.518881119091 | 304.751330890753 |
| EXOC3L  | 152.585572167313 | 163.432972512188 | 177.11682975342  |                  |
|         | 162.494429648551 | 170.381897441659 | 138.780488114634 | 146.432468585736 |
|         | 158.770502070553 | 170.198508633417 | 152.088488171996 | 145.079450753969 |
|         | 161.657344146676 |                  |                  |                  |
| EXOC3L2 | 128.539969915702 | 142.924854393401 | 139.85010721496  |                  |
|         | 128.5581535393   | 137.091932621041 | 131.04767483614  | 138.093181144173 |
|         | 125.121517583946 | 119.83679981791  | 131.185836673529 | 129.831076624826 |
|         | 125.091038614268 |                  |                  |                  |
| EXOC4   | 358.975346234854 | 435.095843349921 | 357.928880740814 | 523.306451464643 |
|         | 310.174932137546 | 335.389274425025 | 401.87674893993  | 410.845034795716 |
|         | 369.373283422151 | 340.966515437272 | 348.711663415777 | 402.866491417369 |
| EXOC5   | 205.821101661022 | 202.97197145851  | 222.268494113686 | 226.640323471375 |
|         | 182.397795261147 | 213.877482604185 | 207.204293555178 | 185.717123241832 |
|         | 183.863365305103 | 271.945851739635 | 188.847480174391 | 226.334672545273 |
| EXOC6   | 222.456810024193 | 208.363905749882 | 231.698163424706 | 218.592402813219 |
|         | 170.320777845496 | 175.128935809466 | 168.783725505491 | 176.390014020936 |
|         | 185.046826969912 | 165.027938535393 | 207.902853533132 | 194.403848868583 |
| EXOC6B  | 126.110426731941 | 130.150998843383 | 124.378096177801 |                  |
|         | 136.030538642815 | 120.131839791515 | 130.473842500245 | 135.783125948784 |
|         | 127.350368333088 | 135.991630745082 | 142.259196792767 | 155.371772547395 |
|         | 128.074531806621 |                  |                  |                  |
| EXOC7   | 791.402660066193 | 847.564628337955 | 772.061917233344 | 1145.35733270036 |
|         | 765.128667448261 | 819.887322757281 | 932.505095432049 | 821.465895280454 |
|         | 920.083835296898 | 425.471195039676 | 829.992212133165 | 1127.89414462606 |
| EXOC8   | 148.688413944868 | 147.78095608696  | 139.555322603323 | 125.384706864406 |
|         | 149.34605615699  | 146.181764812924 | 137.381470768186 | 140.559553697317 |
|         | 135.351344868436 | 160.773510498005 | 183.294526267593 | 132.562090247233 |
| EXOD1   | 153.56082876276  | 153.126111237668 | 170.223509007961 | 193.832033192375 |
|         | 147.882530392424 | 180.493406236326 | 137.462720784077 | 196.942880967705 |
|         | 160.975741751317 | 153.45050352117  | 150.191645194625 | 177.802767772786 |
| EXOG    | 146.873719524815 | 143.865717051998 | 144.822943770596 | 122.850678471084 |
|         | 139.799467834109 | 144.139062513587 | 150.439715066903 | 142.272117655292 |
|         | 143.259468398603 | 140.730085305185 | 143.899201949317 | 141.422441104854 |
| EXOSC1  | 371.369895979832 | 348.711663415777 | 449.598181155897 |                  |
|         | 363.445110627483 | 328.269845211173 | 420.502251256406 | 528.478292835214 |
|         | 458.782864873657 | 409.883222213537 | 423.826189747546 | 475.540659315339 |
|         | 593.320132696649 |                  |                  |                  |
| EXOSC10 | 635.536499281829 | 639.688482258192 | 707.173691257322 |                  |
|         | 668.570984110088 | 542.740017003369 | 745.153336165802 | 894.46029531926  |
|         | 766.420275252501 | 921.140932799223 | 894.46029531926  | 802.643357549193 |
|         | 829.126529857044 |                  |                  |                  |
| EXOSC2  | 269.448201975645 | 253.495214569632 | 302.1846598234   |                  |
|         | 236.899421827427 | 277.073510273425 | 242.538036654192 | 237.249949461085 |
|         | 298.664864578349 | 251.993821914623 | 264.273245283343 | 180.34788837703  |
|         | 271.087125858775 |                  |                  |                  |
| EXOSC3  | 431.019896339435 | 412.415549375221 | 452.077434390612 |                  |
|         | 382.806570442504 | 712.94845413251  | 560.362502519639 | 576.636077770998 |

|        |                  |                  |                  |                  |
|--------|------------------|------------------|------------------|------------------|
|        | 674.905270154355 | 703.29965727829  | 775.5664718389   | 664.60530723006  |
|        | 502.170430910893 |                  |                  |                  |
| EXOSC4 | 214.434355263652 | 219.246271924313 | 207.960802948119 |                  |
|        | 257.5097052677   | 832.911633923496 | 455.564394647943 | 407.518324776453 |
|        | 340.193863653875 | 447.909277144896 | 297.805768288377 | 322.614169214764 |
|        | 337.935183275743 |                  |                  |                  |
| EXOSC5 | 220.896363324634 | 232.344545356395 | 289.911635155481 |                  |
|        | 299.463563393179 | 998.157643452741 | 564.056592672374 | 588.863382995875 |
|        | 511.779988437654 | 563.907454700224 | 323.244664586314 | 290.184801898828 |
|        | 267.342817344746 |                  |                  |                  |
| EXOSC6 | 398.892968579918 | 405.183882455109 | 284.534369213195 |                  |
|        | 377.951523644306 | 790.790236361922 | 314.90123632547  | 424.025588636796 |
|        | 297.285037835812 | 448.260934224454 | 714.052063877292 | 472.279492678374 |
|        | 483.549698382115 |                  |                  |                  |
| EXOSC7 | 456.656123023446 | 430.505037012814 | 587.026042400878 |                  |
|        | 477.160464512705 | 972.468110850466 | 630.670530516275 | 784.72162514331  |
|        | 376.189276074918 | 661.545179083009 | 479.761165832339 | 402.213774592085 |
|        | 575.722713461982 |                  |                  |                  |
| EXOSC8 | 372.81255844018  | 386.598037190663 | 390.098830270926 |                  |
|        | 376.189276074918 | 246.355720496468 | 579.678635803225 | 394.810886122555 |
|        | 445.763740779039 | 433.405369327168 | 502.281584081805 | 573.846138124455 |
|        | 632.031410234577 |                  |                  |                  |
| EXOSC9 | 347.620001353026 | 330.193132765826 | 340.42197893246  |                  |
|        | 344.128576341892 | 288.88486628661  | 449.745016106912 | 413.000072500071 |
|        | 470.95418656881  | 502.935749606918 | 558.621429366984 | 399.872401268958 |
|        | 443.623904480087 |                  |                  |                  |
| EXPH5  | 141.857434100065 | 128.56495182759  | 132.71633377967  | 126.700147643    |
|        | 146.320758317435 | 132.409582164007 | 122.773736159743 | 151.248365605631 |
|        | 130.150998843383 | 132.357517495246 | 148.199249855894 | 124.183297351614 |
| EXT1   | 550.671679318681 | 446.07651799079  | 429.595453454621 | 445.95114929414  |
|        | 309.181150342727 | 259.625943627223 | 337.434882771953 | 272.571092944711 |
|        | 313.412131722189 | 376.082040863747 | 282.742833166843 | 354.840474468573 |
| EXT2   | 347.411500022053 | 304.679197422439 | 251.511405838796 | 286.774606295106 |
|        | 527.294087043601 | 259.146673652222 | 450.851711160136 | 234.182164952936 |
|        | 234.531140131763 | 292.640251411131 | 248.03801051527  | 300.482945704017 |
| EXTL1  | 136.504438803108 | 159.218886890035 | 138.514356748249 | 142.812521349963 |
|        | 154.183537565624 | 119.755151432304 | 129.1829592305   | 135.092226300609 |
|        | 123.994188725172 | 122.079685222733 | 141.145419751161 | 128.23432652395  |
| EXTL2  | 308.330044958513 | 289.09614335372  | 313.077481033093 | 279.921244070981 |
|        | 187.50236021149  | 374.657816575897 | 255.435582426271 | 237.692959394487 |
|        | 234.041863839123 | 244.897869154624 | 329.660368915848 | 284.715092831843 |
| EXTL3  | 420.248838397618 | 496.426739836535 | 369.434158443561 | 690.010326122574 |
|        | 346.065746911798 | 272.01602406899  | 342.315456386729 | 264.526189799049 |
|        | 237.78482574225  | 273.478372861114 | 358.897128592042 | 261.721726664029 |
| EYA1   | 140.447933562667 | 137.46978401237  | 130.257242615762 | 130.543453631154 |
|        | 126.476866025397 | 127.416912237613 | 129.114161128113 | 133.554822920765 |
|        | 123.735827460404 | 130.365804613342 | 129.980354138975 | 132.490323093932 |
| EYA2   | 132.119370332298 | 136.118702626862 | 138.032265227728 | 127.295532954648 |
|        | 203.410932496844 | 162.828844182372 | 337.728737393381 | 189.37832342197  |
|        | 163.764600217347 | 128.517315006019 | 180.518621542868 | 131.08389186558  |
| EYA3   | 135.461112284848 | 130.226993687215 | 132.615324904193 | 129.930888107958 |
|        | 133.883527462382 | 143.658600740177 | 140.48372620406  | 142.866874321248 |
|        | 128.700516033555 | 141.74792000689  | 132.421863261746 | 148.143367490426 |

|       |                  |                  |                  |                  |
|-------|------------------|------------------|------------------|------------------|
| EYA4  | 143.879597098414 | 142.397433929092 | 136.585541662028 | 133.611588728019 |
|       | 123.725998173975 | 134.885883559391 | 128.090665893885 | 128.723261477217 |
|       | 123.038646914863 | 128.720517906732 | 129.088718286391 | 115.545558600232 |
| EYS   | 188.166168428752 | 191.335616210093 | 172.965746521132 | 207.674249122047 |
|       | 151.051672692659 | 201.517356610591 | 174.953232190285 | 189.678680702271 |
|       | 180.561514455864 | 158.109836032481 | 196.759802659759 | 176.964088090133 |
| EZH1  | 164.072443259668 | 155.02097482487  | 163.248980088946 | 158.089922688997 |
|       | 149.419308407564 | 161.73079180403  | 153.018378403144 | 150.45404183949  |
|       | 149.586651393588 | 166.788336808924 | 165.307808075027 | 161.463042036376 |
| EZH2  | 141.784881206191 | 137.449776383224 | 138.336667434109 | 149.795655754301 |
|       | 184.819937046061 | 229.97640195632  | 173.204163917896 | 237.940015617254 |
|       | 233.975864722289 | 221.424451092316 | 174.441287575034 | 236.707875629511 |
| EZR   | 4811.88424516272 | 5955.10816224456 | 5382.31371568106 | 4527.53010866974 |
|       | 16974.4822983201 | 6877.52553567598 | 10741.3064142855 | 8016.1652884418  |
|       | 8211.38792799248 | 7038.48958943724 | 2185.46850787298 | 6670.51138785163 |
| F10   | 440.657747083721 | 301.250189051376 | 236.108432603479 | 210.117033165026 |
|       | 108.715328458556 | 120.809659457873 | 113.886420801388 | 118.201092260839 |
|       | 124.238319768621 | 111.985567835684 | 118.206034087145 | 114.143874572202 |
| F11   | 159.735182155088 | 163.863677822465 | 163.407360509803 | 186.321879879561 |
|       | 161.046418048832 | 167.456481678813 | 156.866867371872 | 161.614426723521 |
|       | 159.781313090489 | 155.014930599769 | 149.912481263284 | 164.690739760426 |
| F11R  | 221.849661343124 | 283.556453980797 | 199.991077347491 | 173.281506912652 |
|       | 532.235193634196 | 694.644744547412 | 852.436775264873 | 832.014011481807 |
|       | 437.122373082112 | 718.871732206362 | 1367.92869625376 | 892.868661511516 |
| F12   | 135.916668738753 | 139.835983835267 | 144.235298492095 | 157.295602588814 |
|       | 296.497100375888 | 259.252807304272 | 214.595639477696 | 183.130891975122 |
|       | 163.82704877497  | 1282.38953612054 | 214.684538620841 | 499.048754087189 |
| F13A1 | 237.312766830206 | 216.457866890673 | 198.954254778846 | 223.778708427552 |
|       | 172.980441569522 | 323.391456630794 | 148.868265867275 | 316.895545640437 |
|       | 277.561376169965 | 274.77366169918  | 312.224309341171 | 205.047145898929 |
| F13B  | 120.682485578097 | 108.79453730066  | 109.209241676429 | 99.26400442869   |
|       | 107.013012418356 | 113.321454160244 | 117.048846466839 | 114.39161822971  |
|       | 112.088944448944 | 115.389934936253 | 112.420505354139 | 113.249267122926 |
| F2    | 134.70636200986  | 135.750578960284 | 124.033766796333 | 144.924212639731 |
|       | 131.928871107722 | 145.058110060639 | 128.723261477217 | 121.792573534134 |
|       | 139.609751976657 | 117.251233255966 | 140.149064156135 | 134.522715664256 |
| F2R   | 15354.74541236   | 15053.7547401937 | 18953.8127741918 | 17917.7303120499 |
|       | 14108.0461617941 | 17975.1602090863 | 12690.801964606  | 14798.1358474998 |
|       | 15354.74541236   | 12368.1423473066 | 9715.20127757161 | 14544.3732040823 |
| F2RL1 | 147.595573192579 | 180.80811429888  | 180.952017616136 | 140.864196804152 |
|       | 194.388383297922 | 172.509081696309 | 480.712219116621 | 190.281570660806 |
|       | 162.047249964859 | 708.268962600305 | 512.723592291378 | 414.333324610267 |
| F2RL2 | 138.082870754768 | 119.072213573568 | 126.776406817106 | 126.784243009941 |
|       | 133.345143691828 | 133.771691580031 | 134.961156870831 | 131.416923875254 |
|       | 127.265211069837 | 125.077260389449 | 129.43892498257  | 127.242627779136 |
| F2RL3 | 133.702845956639 | 141.801472885127 | 129.578488688293 | 137.778033050658 |
|       | 136.891612156271 | 150.272153646712 | 132.620474788855 | 131.83430682495  |
|       | 131.268454024753 | 138.489443610941 | 132.526286141997 | 141.13343407335  |
| F3    | 409.883222213537 | 393.707031354025 | 178.320732186309 | 201.773745532242 |
|       | 160.537464426971 | 306.333710880618 | 159.207567680134 | 245.01029221002  |
|       | 205.509515144263 | 1116.95795024994 | 193.275162354467 | 232.250434241457 |
| F5    | 140.434086004204 | 143.926968000575 | 139.557059245431 | 122.65547320922  |
|       | 151.687402863648 | 147.722646851008 | 126.88066987372  | 177.955579729463 |
|       | 157.410205523901 | 140.83570584033  | 150.468392290279 | 130.076926011271 |

|         |                  |                  |                  |                  |
|---------|------------------|------------------|------------------|------------------|
| F7      | 145.698637908482 | 136.394920983439 | 144.985280401441 | 142.19728670565  |
|         | 127.975441922402 | 137.687480242109 | 144.043818335414 | 139.871928127715 |
|         | 142.783159341229 | 138.469997677004 | 153.821728151219 | 138.903450375532 |
| F8      | 137.354782768068 | 138.963864375073 | 140.29803170157  | 138.988919994625 |
|         | 127.927232724978 | 137.650917262528 | 126.728375196449 | 128.019837242559 |
|         | 130.385747820089 | 140.377179372804 | 131.132508349222 | 133.587927144452 |
| F8A1    | 232.105867345662 | 220.379186481273 | 260.888612454097 | 287.455622143233 |
|         | 569.133295913677 | 226.960024551778 | 229.130679600654 | 263.005303710717 |
|         | 207.254220247481 | 305.577166690215 | 262.061371466369 | 292.429831186609 |
| F8A2    | 130.430917518283 | 144.515002122324 | 136.908157358689 | 139.779754416105 |
|         | 154.2433882385   | 139.984102798711 | 126.178476831007 | 149.860490620507 |
|         | 132.17211158061  | 156.75308999904  | 135.959893035019 | 141.038721816572 |
| F8A3    | 143.464614171516 | 154.954906872501 | 154.861507590906 | 152.925281215593 |
|         | 159.801315111886 | 144.863617174741 | 140.804008584006 | 190.520750756082 |
|         | 158.528301072565 | 161.979914539039 | 154.843607752473 | 177.752497164503 |
| F9      | 155.756074127526 | 140.861849838223 | 139.628966306048 | 157.40255559397  |
|         | 143.1288704752   | 152.56002779985  | 150.687819649072 | 159.199045715212 |
|         | 139.708303388546 | 150.109192774079 | 147.89884142817  | 149.331805754859 |
| FA2H    | 113.656820701744 | 108.589444216106 | 114.927420605185 | 119.746227888415 |
|         | 201.458970969685 | 117.390049487174 | 119.32696696175  | 123.964042357475 |
|         | 128.400741751903 | 129.083756379376 | 208.016730103629 | 125.887854850942 |
| FAAH    | 156.68541512214  | 177.567833691547 | 160.035282578603 | 156.998563448664 |
|         | 574.262112643403 | 262.671819506189 | 217.380892198811 | 202.60339529874  |
|         | 242.848821222611 | 223.408447580188 | 332.032371697186 | 359.329520507158 |
| FAAH2   | 158.163599942547 | 151.219051767056 | 169.940177050294 | 155.259089547817 |
|         | 189.678680702271 | 173.432960318793 | 213.382179917193 | 203.777944180067 |
|         | 194.072260528037 | 195.481680273686 | 227.965783945702 | 240.224826736571 |
| FABP1   | 138.363553671822 | 119.005230164124 | 151.020903727566 | 151.554352209634 |
|         | 139.15175079191  | 144.589482298525 | 145.841028932318 | 149.280480796544 |
|         | 141.186913979346 | 155.516697616637 | 124.140880678888 | 131.346126135605 |
| FABP12  | 130.962368929833 | 119.176139463015 | 129.176532377543 |                  |
|         | 128.407968177242 | 116.346181133756 | 136.162285671867 | 122.268560536152 |
|         | 118.486195373059 | 124.501262458393 | 129.45936538019  | 125.26492723752  |
|         | 135.304167695152 |                  |                  |                  |
| FABP2   | 134.310685502031 | 124.555847618988 | 126.086991456747 | 136.164270397912 |
|         | 127.093255830978 | 127.030113960477 | 127.167918433035 | 123.991249190444 |
|         | 120.470801825675 | 129.365004129784 | 146.229239731545 | 125.800508653231 |
| FABP3   | 207.204293555178 | 222.736706411035 | 171.722839172783 | 310.533399024851 |
|         | 211.916602665089 | 121.157614971438 | 129.873110494826 | 123.434963905308 |
|         | 123.439897913722 | 112.78323842342  | 142.77817647952  | 126.752999657665 |
| FABP4   | 1007.7803477458  | 1744.58410715956 | 1136.14069801696 | 1427.70292953827 |
|         | 178.313238745665 | 340.193863653875 | 270.069634610818 | 7733.95252458705 |
|         | 226.871028543248 | 260.746952459282 | 15745.699731183  | 12171.1997841553 |
| FABP5   | 223.107391048316 | 307.083179338165 | 254.83131041241  | 250.676092725829 |
|         | 827.863789600981 | 1291.12004949379 | 2423.84327263111 | 2867.63319136936 |
|         | 363.195371577097 | 9293.35991367953 | 2730.50913686613 | 2637.62596741408 |
| FABP5L2 | 515.432065049838 | 958.005138077899 | 584.919615953457 |                  |
|         | 634.356322976353 | 3262.24877138481 | 3504.77617298452 | 6324.87600301793 |
|         | 7948.88765120294 | 1093.85316636801 | 18146.8167991873 | 5981.08862268291 |
|         | 7144.3257417116  |                  |                  |                  |
| FABP5L3 | 119.603565559838 | 128.341887728118 | 120.773552653073 |                  |
|         | 128.870079563075 | 127.560308850342 | 126.728375196449 | 129.153882779488 |
|         | 137.365567527202 | 119.315932907373 | 224.274329367512 | 161.002880798225 |
|         | 128.50733429744  |                  |                  |                  |

|         |                  |                  |                  |                  |
|---------|------------------|------------------|------------------|------------------|
| FABP5L7 | 135.975265059269 | 132.416618775337 | 160.584760930779 |                  |
|         | 149.408530395745 | 137.534079082878 | 138.846543789882 | 148.490236128772 |
|         | 133.367085445965 | 135.509927917168 | 134.074425424613 | 146.247825342634 |
|         | 143.313605534609 |                  |                  |                  |
| FABP6   | 117.77708734157  | 126.995207465164 | 119.161972571516 | 113.582654469735 |
|         | 202.024504592763 | 374.718289636553 | 301.638918685657 | 576.997804865103 |
|         | 169.067064352955 | 189.174957940401 | 465.54817048856  | 683.365770196967 |
| FABP7   | 129.45936538019  | 128.032141013681 | 137.157492354617 | 134.772545694636 |
|         | 122.442590463781 | 130.306478656159 | 131.528729642144 | 122.254824223167 |
|         | 122.03508430361  | 119.525701528869 | 150.73248190848  | 138.76667538162  |
| FABP9   | 127.099995420363 | 132.47775411384  | 128.671626815639 | 131.218141814078 |
|         | 123.259322051795 | 132.99989565368  | 134.301187092088 | 126.812867041543 |
|         | 131.200042525339 | 120.325985681299 | 122.959518532165 | 130.054105892394 |
| FADD    | 324.615093103582 | 367.439588680092 | 370.617422894068 | 344.856199123543 |
|         | 805.875557314697 | 512.312880441098 | 688.464980326689 | 446.948699651916 |
|         | 475.213525346293 | 431.546135503733 | 671.821418586421 | 735.165830487162 |
| FADS1   | 317.719381113816 | 300.314088267108 | 231.372316734945 | 271.397087928135 |
|         | 490.269418483997 | 187.016569445646 | 231.314944217099 | 254.036619126409 |
|         | 269.495247190598 | 208.555506929113 | 183.779065928447 | 189.985520850855 |
| FADS2   | 165.154844613899 | 152.334669286305 | 149.308475163534 | 189.092674335503 |
|         | 172.583615020042 | 150.498954408708 | 146.311966562883 | 172.412059174046 |
|         | 178.751706380632 | 167.629008083436 | 160.454243375479 | 153.169450192935 |
| FADS3   | 159.603586227897 | 161.708130705995 | 152.890239929335 | 168.668125438154 |
|         | 157.631978594005 | 153.033582154882 | 166.998311158378 | 150.489651880905 |
|         | 154.088770236213 | 147.512290383685 | 136.534812980964 | 158.23884088767  |
| FADS6   | 155.566065673542 | 114.3172128566   | 121.336932276232 | 127.422129210789 |
|         | 130.052593375075 | 134.024205981268 | 116.58452862953  | 117.667611937195 |
|         | 160.724319010751 | 119.229322984564 | 151.226242696197 | 164.986006226427 |
| FAF1    | 406.133430120039 | 450.99430272315  | 447.182566890086 | 576.451964662024 |
|         | 342.555640222963 | 358.975346234854 | 378.797952580504 | 364.840751972169 |
|         | 385.678901612324 | 412.582051585078 | 370.301819403832 | 472.279492678374 |
| FAF2    | 947.425912541091 | 975.315904185938 | 904.733257358133 | 1033.03719406038 |
|         | 580.347496467173 | 817.036222521723 | 1172.96121022579 | 1076.62597781124 |
|         | 755.42757464615  | 1097.18236659974 | 1534.21175984308 | 1239.66725147648 |
| FAH     | 251.161789722751 | 253.164596735793 | 233.426170535227 | 247.528753010193 |
|         | 329.406649846151 | 433.491835341321 | 336.120322555703 | 185.493554506958 |
|         | 243.839402991061 | 230.399207047948 | 197.357728220717 | 313.322307299463 |
| FAHD1   | 396.526590512521 | 350.308420518351 | 427.766660764042 | 374.761007556839 |
|         | 281.037762232619 | 283.645434184168 | 529.368609163949 | 379.016207754533 |
|         | 372.757091748175 | 516.892850913889 | 432.088303693555 | 378.088675670786 |
| FAHD2A  | 189.708396835236 | 191.912670416334 | 195.050834479424 |                  |
|         | 219.537335167901 | 225.480366837274 | 173.334154083555 | 166.692386207143 |
|         | 151.231685705236 | 184.482849019679 | 211.104243881644 | 196.450308368198 |
|         | 174.332913952768 |                  |                  |                  |
| FAHD2B  | 481.238450505207 | 471.946284490029 | 381.57978490093  |                  |
|         | 585.234286698678 | 694.02978779693  | 296.603054615145 | 269.100400678077 |
|         | 401.189904619902 | 297.022984365795 | 311.544429285897 | 225.950750084197 |
|         | 272.927830312746 |                  |                  |                  |
| FAIM    | 159.495272062735 | 148.1283706199   | 160.742365719929 | 149.364498870469 |
|         | 169.888264971936 | 179.376968970326 | 194.686527131656 | 196.734037460218 |
|         | 189.603621918298 | 193.275162354467 | 221.74200490054  | 207.920724788669 |
| FAIM2   | 350.077206368839 | 279.495192828873 | 263.352118305612 | 345.897250519387 |
|         | 136.633726784926 | 165.836534881802 | 162.013164369593 | 134.750046135498 |
|         | 156.808992920564 | 135.063259138429 | 159.2488784104   | 146.34029698108  |

FAM1M3 113.726931741236 131.22421475185 108.446988282853 119.730174479044  
124.76274408368 124.851025681014 123.940632366675 210.478088018501  
422.23268864343 153.846723846716 213.791379190359 181.79418355897  
FALZ 143.877226672663 122.297401003756 134.887143990464 118.60878652724  
118.597739444445 152.791390145148 136.801338583441 140.222121251146  
131.335344547051 125.034243098087 136.987403767185 165.686655824416  
FAM100A 308.031816782343 336.279209908669 278.942695435238  
436.982960786839 439.492285515997 220.258804437828 247.111032124864  
221.253717494488 195.414464905232 190.152824885328 266.918302307596  
183.071150926068  
FAM100B 170.335930486215 198.390247605355 204.851374931284  
210.502556087175 493.347308943133 377.462793982812 338.822464893411  
317.659548748735 414.596948083067 200.302384864371 442.027630433527  
356.699466789374  
FAM101A 115.600308687778 132.540503258053 122.514826802737  
128.994977935861 124.090268443064 123.21732068638 120.55570440025  
143.942810095867 115.041324824728 124.666487633365 132.739435456445  
169.583355171423  
FAM101B 162.6762533989 163.290050020756 178.872635061826  
171.924364939807 156.396579029788 160.833948531272 149.639835429332  
158.98007855379 167.806420483187 161.713311969291 167.698883940638  
154.193086881801  
FAM102A 318.561557474749 314.182403961681 228.243668453958  
350.926679856514 290.090495047722 177.246890307643 184.204036882642  
211.135364208221 239.109163320417 193.052112923573 241.353916553991  
152.81544746536  
FAM102B 373.925939492544 379.911829623463 312.961981998512  
315.47473326786 196.922837906592 231.338258067616 338.866471651692  
213.710058427654 185.583997792931 214.068044241507 266.286483421453  
289.82072316082  
FAM103A1 319.417555901733 345.686640885419 280.558463661137  
291.167223094542 350.983969007868 415.113340335205 517.676093149981  
359.822784070765 457.548150688248 461.314247041387 409.282410265733  
398.892968579918  
FAM104A 805.875557314697 835.284130042504 656.32782132983  
773.057095787974 542.121375354644 756.246712133116 837.413261433363  
890.507257588957 813.454826901794 754.406896156858 808.55123510297  
1051.45401327176  
FAM104B 369.373283422151 388.710465457313 314.063025950327  
463.298781071364 241.782750858091 308.679189788554 251.915179734134  
302.735372807236 236.35479928448 182.042104888745 317.659548748735  
243.246632667118  
FAM105A 188.864388750448 182.57496767012 171.896929562022  
162.735609734946 174.205940911242 217.45700166961 220.379186481273  
307.945884504629 186.460034745907 194.488249052694 246.061496821699  
223.765583953184  
FAM105B 203.983168778488 203.616580991715 215.219246394594  
206.098534554876 301.369680426563 263.936023499588 330.908743070095  
351.448985413528 281.996583337694 256.538195034956 255.493109705211  
241.599271777806  
FAM106A 131.12775424877 135.689889081912 157.293090577042  
135.607537832704 141.076652697698 130.782296492278 132.780890129463  
134.155655670103 140.234485088845 144.931901042924 130.047353911148  
123.58727715816

FAM107A 1311.34904760947 1091.69584249713 312.339824919124  
290.954496559897 128.517315006019 325.12056698785 143.681220324074  
290.754210152709 207.368252249039 115.949513659403 139.583514773196  
118.388993232718

FAM107B 694.288215755716 958.63560158343 402.140437036706  
392.13175568099 1185.70008959602 1451.64055568759 1205.45751308367  
524.541494680558 1046.13353853089 329.214958614925 1223.06438074895  
589.722914993267

FAM108A1 121.679013405559 130.564962937297 127.997280639609  
126.00304757051 142.566028652989 130.445343615035 135.609239096236  
136.473948855498 122.362585067453 131.328478053136 125.846029991447  
130.009322405768

FAM108A2 362.376153348015 359.256193328366 411.878556907186  
407.957436380989 803.60413590137 568.555967950896 430.833137328233  
359.577827010792 390.021666378804 500.643499051523 385.463209972694  
407.518324776453

FAM108A3 177.306794546105 182.608712782878 178.628885995439  
172.251953149975 304.937584086529 228.901579068997 219.832904615582  
213.432084172541 203.335012796883 244.954917633904 202.718428167217  
239.789994201722

FAM108B1 161.640122360448 195.906137340918 177.752497164503  
158.320863045015 269.448201975645 267.696284751923 242.141362101262  
306.946103334814 224.805404798696 200.456087759904 388.638095539186  
201.441808401878

FAM108C1 567.869601934138 1147.96742431386 610.337659723539  
1223.68146968716 1648.22531304741 1258.16519121331 2267.0818302379  
1230.00744483191 1712.47877322331 1118.28423222707 2111.32236867229  
2043.73482086765

FAM109A 199.378179817518 187.216245895253 210.392662092721  
212.749668083641 279.834616502591 229.835576260403 201.167206950576  
205.226635237992 184.294172429054 202.99342484328 183.708917501519  
210.756414415156

FAM109B 203.752540576935 206.469040492609 146.978110148492  
236.707875629511 242.996248524203 155.686889874806 118.348153875356  
129.499283650632 142.892198239879 158.946177055546 146.040995022257  
173.497575259833

FAM10A4 498.641091757363 514.213675499369 661.826149512811  
460.24741151155 322.213266293148 324.25775261173 421.140525880287  
395.645016679312 392.909481887174 531.421912541822 496.426739836535  
457.905741500454

FAM10A6 108.362609680556 121.505178996279 114.155592351175  
108.318510762416 113.504670764963 120.177385114315 116.161473967382  
132.471014832851 125.212404794262 120.345546077894 131.839890565869  
112.07238018581

FAM10A7 220.816812192169 216.705908017858 340.860684371038  
205.162633740798 189.567241599215 279.159925913207 232.960832410426  
254.909076658804 246.676401619881 285.562276640039 239.789994201722  
293.317880637519

FAM110A 158.795335941084 178.222120802125 154.086510608016  
155.710272937386 894.734451279225 446.07651799079 348.241471067257  
312.645778869254 281.304989265608 330.281193038198 299.717935831288  
349.330629649093

FAM110B 419.047108206042 346.862322263052 299.717935831288  
367.025117016472 134.201392031199 149.560505078257 129.461160777216

132.782967735893 145.799530970042 119.922676683808 129.086186239653  
126.233395051706  
FAM110C 138.388749930671 148.983182193411 145.329128512407  
145.591320521493 236.772907994543 169.238325933605 185.560737176115  
147.125005489393 167.764352429391 205.630948393225 159.539320132392  
185.233210060342  
FAM111A 574.035124314622 539.720389702148 414.713379367927  
423.826189747546 542.544172683021 799.132592914065 675.480482223958  
681.810927901806 849.158029646233 559.236012019639 862.669120338424  
792.247301083075  
FAM111B 120.413468119484 112.239647575661 125.484453841158  
118.731960910224 139.372441366224 121.895778599116 115.656801309856  
130.666781754635 125.672285485643 133.621325902558 140.271557921345  
127.486216183602  
FAM113A 246.457698183615 242.538036654192 223.601312199935  
188.797908601851 322.614169214764 209.385358804928 304.292209676095  
217.013533525724 297.757657398146 227.774354299962 311.449205777595  
314.557323400201  
FAM113B 343.833659987063 351.934158805882 378.797952580504  
332.138346958671 443.732580517751 243.468673768141 361.26540006942  
500.848273432862 547.681206272188 333.592915218163 602.480822390671  
660.096727566678  
FAM114A1 191.897449038297 159.735182155088 210.043556816529  
154.051705030348 131.102996816222 127.028640787946 139.708303388546  
152.038902807701 172.057586741925 210.14307111352 155.63328143658  
132.712573198794  
FAM114A2 146.900087470856 139.696266471271 145.104173410801  
133.860077101582 121.402905161896 130.749763860615 129.946925636595  
145.941674563997 129.527271401014 162.652929339533 164.423960071908  
115.755585907264  
FAM115A 16123.3486890049 15809.9561036761 18862.7632438112  
19087.9532735841 6500.1854485891 16742.6286866851 10360.162704111  
15238.4097431619 13700.8527522612 10135.7800994367 8182.20106181946  
12406.7143043992  
FAM115B 139.63811945162 136.520811697544 127.961153369579  
139.623194916971 144.159316670264 140.194414869595 135.622888091037  
135.281686411685 127.401551376191 141.730912072471 140.49969612403  
146.728881202697  
FAM115C 150.529257416176 147.307419859572 133.742490937191  
139.959629641771 144.266864839344 142.053649707364 129.70974867852  
137.206961927035 139.316189199729 142.155463269751 142.757327296852  
135.621035941292  
FAM116A 729.202002368627 726.731270955732 692.359779743985  
684.866405921987 736.332743195416 623.050854309724 558.934004505074  
507.710604451713 460.651156484562 571.64723305848 172.421637564661  
437.931339781992  
FAM116B 259.935831886014 255.770193180874 240.511797905018  
286.703712311781 317.206754773681 252.056131165397 251.731327363027  
295.187978994932 287.558897878375 374.718289636553 288.481981529558  
491.709723745226  
FAM117A 171.967974673053 196.245297362955 181.098584949344  
232.590542016298 142.643027992419 144.018198451676 150.434376975922  
137.546487338984 166.157713072213 139.537865511933 145.095023408224  
125.974463216884



FAM117B 399.963640581639 527.498114662967 428.237210115667  
430.590533290315 320.648966489586 874.816697884109 422.590112942156  
705.311256840178 585.371892598422 300.765518378297 714.91842349236  
469.930860750773

FAM118A 162.411156818437 180.986305037222 279.452819132461  
150.72014060286 165.570531605115 175.341310423897 172.020235319192  
219.129781831192 225.480366837274 145.875240619257 720.907992182476  
183.998458233995

FAM118B 188.444498848767 192.580288063603 204.89842561202  
208.793650722271 162.039394839415 173.66499836293 180.913502162011  
168.427124752461 177.182321788711 171.287186905764 176.612866969431  
173.97085982677

FAM119A 3195.71436046397 2921.59274577877 3536.14527317085  
3115.11499025766 505.83860711693 2756.22069438696 1443.68785521063  
2437.63566094439 1759.9632914516 1687.85201395597 1904.39962279504  
1706.06615968622

FAM119B 294.033003779363 316.457274749526 336.212224495877  
327.566026396726 287.084253886676 261.322374889497 377.024120035829  
345.38424761963 265.754141836026 284.715092831843 346.173614351499  
344.128576341892

FAM120A 2905.12297639092 3052.86038628748 2756.22069438696  
3994.64569045702 2313.56743052616 1466.82170436229 193.098116087792  
2532.82545752082 2816.29814823646 2786.35558271661 2263.73444150082  
1992.71224011906

FAM120AOS 896.185223980593 823.658996207582 827.863789600981  
830.684999498776 779.022508413529 319.128582107184 140.911080286243  
471.15333189869 567.143102792772 459.068582584181 635.536499281829  
456.298408568636

FAM120B 796.936154737659 888.04996477314 1044.52286986369  
1042.40539020413 684.428198622716 594.38228123675 1191.88706134921  
776.411045078049 1175.27165286568 912.878077940014 1340.79810963983  
1127.07858210156

FAM120C 138.889999702313 146.803549606737 139.844984829379  
150.751386127903 133.226542641174 124.59937620719 129.142073426086  
140.350144438462 134.750046135498 130.666781754635 114.860437706855  
134.301187092088

FAM122A 199.980312703646 188.070213212057 177.16711492983  
181.558764396201 159.977528879208 177.355210393749 174.202069525223  
165.70840218273 191.628693083169 182.074569356713 188.671807443641  
163.686535888943

FAM122B 311.04252785157 271.004741629789 275.252966071473  
244.925472495705 441.684169663552 735.8141982568 339.252515920242  
394.962978677736 354.45785837703 251.787648609546 445.214621023114  
388.416668785633

FAM122C 153.918462601781 154.542190113901 176.397715825653  
166.692386207143 145.862497313025 157.006278815282 161.031148038478  
174.593548891693 154.792156982219 161.44729973777 157.635531050489  
154.433679792749

FAM123A 142.61573330083 142.45411401883 135.779516940893  
138.474429223902 135.301844382418 145.619570216377 134.087875547168  
144.259643132933 135.400054238597 145.444483891989 137.540275229889  
139.55065372881

FAM123B 150.981208776163 153.83891040723 163.227953876329  
142.33269270703 133.329392986316 147.760782452857 138.701871179502

142.993401965852 125.556444423391 126.832182961671 137.801205656422  
139.648187461906  
FAM123C 152.042744996136 153.165872773973 154.804753043168  
144.523620416439 161.585555680663 147.013598868335 143.53550972177  
161.708130705995 157.155105022743 163.942131559267 146.112388101621  
151.196713920345  
FAM124A 161.490941000872 164.442400539653 156.336425973696  
176.714471790643 132.081286801266 143.942810095867 127.488853386792  
154.091431691072 147.863198012238 128.244549276386 115.624167024067  
135.679481480408  
FAM124B 146.698766621345 159.90466743683 127.979574243743  
173.640326140494 117.672645717508 123.756349408641 122.247130087475  
125.666013736767 136.826606228323 123.330142002791 135.723554819107  
127.769405736754  
FAM125A 513.428413503031 556.863361789449 599.52440136406  
604.737834405874 1307.19490564658 623.508710830895 988.297682407351  
859.113541787323 545.760623858473 1013.60354455825 812.298381693378  
753.389428590366  
FAM125B 211.916602665089 239.474937674583 191.708350637714  
272.077877821339 235.133284525241 156.69025356689 182.084333814175  
181.747090380435 167.91761500242 148.960077949157 229.443064589306  
184.923312649584  
FAM126A 145.068754246476 141.166605868578 151.132586978278  
139.13396769999 135.311980936088 141.321547895734 157.195967361907  
143.752697178913 147.648020819059 165.851677392967 129.806104966617  
154.710000519109  
FAM126B 190.843795579234 181.37137053478 200.127994198329  
176.670752486376 138.055190422262 220.578790067967 189.142295015168  
229.200570583629 191.467626362851 244.132645171301 199.714647839712  
186.591941221632  
FAM127A 1481.24705642453 1681.54485582868 1632.84261181074  
1999.10320742823 1297.25632532536 727.114956464515 856.039380523678  
466.257158794525 758.863418917419 1105.10063745656 528.921893077914  
685.354305381323  
FAM127B 341.251360936154 371.369895979832 363.963951509433  
456.990425618007 476.641032594868 396.345382600445 334.709049890042  
282.190861594303 279.070493043898 330.405026390912 222.736706411035  
308.031816782343  
FAM127C 206.669783013221 202.741211613885 234.182164952936  
196.450308368198 213.364858759772 220.242344043437 191.3765085801  
208.385295246155 193.37618381669 231.698163424706 174.301952147167  
192.465510013851  
FAM128A 194.413759761549 236.508498739509 186.112835637689  
219.792171863015 286.703712311781 214.162670073541 235.650688823345  
153.774548290902 171.69834783037 333.868818855397 190.975263192006  
181.238505183667  
FAM128B 119.13963074637 130.383001462828 115.871151134713  
124.486701452062 145.09909498449 129.171589574238 113.656820701744  
118.537378726617 117.513523498725 125.488511939819 115.992487254175  
119.036965883266  
FAM129A 6460.4291301245 4866.98027226798 6691.04319670055  
5080.63091497522 187.824032557194 176.317805247749 259.064601204239  
467.04976953755 310.075815009404 668.127527385348 213.847316974717  
222.365208637146

FAM129B 912.483177705931 862.132582849511 1010.05884008623  
767.662367310672 3019.57419253979 1165.05055932899 1312.44215746801  
1082.00448164658 2544.58522979036 4527.53010866974 1416.93831202323  
1065.36715400306

FAM129C 139.60494712939 149.848740870148 146.660826209767  
152.971429120739 149.08527298577 147.213616261735 144.951973735763  
144.107029869771 174.898012759712 169.184111483933 143.537785553911  
153.500478301079

FAM12A 130.570050159191 127.073045558761 121.110498703017  
121.723964989551 124.093412630817 128.363331337379 123.413596815384  
130.434497375903 133.789738760547 118.871735074285 153.159425380743  
131.356437247149

FAM12B 113.568261995787 117.392898601408 118.895095992424  
132.510116371195 130.541449457342 117.203783530266 124.503016568677  
121.06219555903 118.034262386827 113.879459563492 139.237360556305  
120.135349166633

FAM131A 614.775559038663 475.213525346293 420.502251256406  
598.449359425056 150.845846206549 278.061498892643 278.192669077191  
264.654879741889 192.286192329464 436.834825721843 258.552964322998  
296.333944172375

FAM131B 157.66595229182 138.13987378399 124.985249190127  
145.815454490804 130.639974588163 142.815817738837 139.163958829511  
130.406895174038 128.557216790939 154.598520288855 123.662678397678  
118.974727968283

FAM131C 141.25089277145 134.011746666371 150.691815494794  
149.419308407564 155.035727630756 140.137435303984 140.292132023262  
131.338853426561 145.619570216377 147.54950981909 138.377628971966  
176.183165494563

FAM132A 132.647152200128 127.781732819297 132.472505035111  
122.447154928139 141.021723049782 136.392389842232 125.304045138994  
138.887159625058 132.263954832097 130.565474957655 151.694193636313  
200.915806094193

FAM132B 118.117957479382 136.951350782053 121.406758670435  
138.42216862811 137.146961654597 131.552276774901 135.457059862669  
136.03420235737 130.905135502296 133.889858322181 144.715167331434  
126.48691003872

FAM133A 136.540568915609 138.269955723817 129.558589108727  
128.788443476759 136.62213567467 132.983739057264 120.922042875444  
127.57284871013 127.961153369579 128.407968177242 124.35374445763  
138.171858105728

FAM133B 779.623566217277 751.077307018319 543.933989965705  
687.700356531038 322.263925912805 438.431160975498 617.833194119379  
554.282040414368 385.463209972694 411.71606840872 553.757847979529  
584.813665097407

FAM134A 195.316077537716 226.506852362359 226.020769172424  
237.692959394487 284.891415492568 197.341423434688 241.251507026982  
197.034073391478 196.716209382446 219.422260093722 266.101158071711  
211.535720730612

FAM134B 185.41739522833 171.254015232189 168.210416363286  
161.972922129453 145.024925752814 170.079723856247 160.567934923347  
138.341918073941 146.65668813596 143.860092956392 132.848926011576  
137.03111066852

FAM134C 169.385340991747 228.649073045499 234.243977361232  
230.672056810885 224.724262742427 215.057917795456 285.980446338971

239.109163320417 231.819341041105 163.922353493317 285.46340356157  
198.338416756432  
FAM135A 187.145134088286 197.341423434688 202.061887608293  
179.35113214277 176.704617691988 186.430014478919 226.25694727283  
218.672831303767 168.763640193219 317.457588721567 198.815448428294  
221.975219056555  
FAM135B 185.071775840607 163.67719444924 153.178934750919  
152.834894011142 153.0141888126 147.066582834257 148.767517078508  
151.846610656503 136.387904287903 146.590495255969 148.02460124587  
151.356975600962  
FAM136A 562.089999265955 573.644925180854 660.907502776003  
494.067878734396 1539.80266129509 1229.47460924638 694.429144766435  
1232.66885974069 741.689442253375 696.003998372271 1147.96742431386  
658.746224115551  
FAM136B 163.091280469234 148.435419356331 155.043017644694  
139.957560460935 306.632103708321 225.065765924246 203.17525411575  
243.861834405092 193.641927801805 211.22652563815 199.662592246931  
188.654966029389  
FAM139A 122.160459795959 125.796438432905 118.547605249191  
118.294324274616 138.250288796456 133.165893710176 130.49338418515  
132.257989841046 130.260174841484 157.512561489621 132.685098573183  
138.677282903963  
FAM13A 217.513118676535 238.068308163643 247.683819429859  
242.971958493453 225.583966894864 325.999687273862 386.917038897322  
275.841929188802 221.027562527572 172.370108210895 588.678767007017  
246.533813165981  
FAM13AOS 139.246945739764 147.103340218488 145.208597795717  
151.397068235685 124.59937620719 161.744366588564 152.755535408382  
148.776470607859 146.20679320119 156.030794481734 181.328458560967  
170.198508633417  
FAM13B 2274.75133434566 2124.12760841901 2153.17165155392  
2340.90990677253 359.776068595698 632.843164522867 725.216684507759  
625.152889992949 605.21685916883 558.251384152474 994.213397985121  
815.388288623756  
FAM13C1 141.232464220879 139.286592412216 130.800427334056  
146.563078818674 137.926193455157 135.268963938932 133.006192351471  
143.526983440589 134.002424083826 130.058902161953 134.950905279775  
129.730685860688  
FAM149A 394.65807885612 410.731869154912 386.461076717316  
624.825216056495 154.691783046492 201.931760074628 191.679217737051  
356.154842959851 441.958777965408 154.193086881801 195.019706886336  
185.199972151831  
FAM149B1 395.261210769232 375.856200488667 434.792010353541  
381.484062427466 226.43414383055 205.226635237992 404.21236980164  
257.775569674531 338.406266073063 217.670330817769 451.380376296813  
354.922901990615  
FAM14B 155.893018702615 151.96843908074 173.112439658454  
172.222262910052 158.639313207233 142.381669157145 141.972403120632  
148.632332840817 155.710272937386 178.665552649698 176.579096613849  
143.764266466204  
FAM150A 155.612543356905 160.454243375479 193.544035570799  
147.920946479942 199.327939161502 242.382534384155 279.969975697164  
288.370985514978 342.555640222963 159.040409182674 176.038123840296  
330.758879244143

FAM150B 285.355815566148 275.013838208239 154.309257657136  
153.159425380743 156.630366766924 174.787077606165 156.745051321143  
173.063002566542 139.278366709094 145.25198093836 142.047828639169  
134.008118774075  
FAM151A 127.715766031466 128.554574566655 126.905235161069  
123.922817231917 134.140533647509 125.908576249439 130.768746032834  
126.872912960681 134.57472034679 132.168821720799 140.232244264861  
137.345542507421  
FAM151B 115.43068422162 120.255081121925 120.246240734668  
119.172965618216 136.492892469272 118.497920969001 114.191245210321  
119.594962686756 126.394032757479 122.543903508753 132.062415660672  
115.725323816619  
FAM153A 128.455670598648 119.586157804692 120.577995272053  
138.530236176135 133.334314509183 131.986590029726 127.155818626031  
141.076652697698 120.786630750686 127.930072902878 140.656633546501  
130.450930089722  
FAM153B 595.882696498804 635.536499281829 511.547907091166  
540.190808200264 248.330154701293 560.481802403627 391.185365567603  
457.905741500454 417.528353577952 363.89527566597 577.250493023431  
406.736165197168  
FAM153C 119.278231442871 118.945264994404 127.745801270205  
127.458099438957 128.289680999565 129.976540483758 119.558626216818  
124.242539075734 123.413596815384 124.210840121525 128.182419321978  
131.169769031768  
FAM154A 138.936872956065 151.123104810793 129.368045611894  
133.441783287131 133.505261458701 134.927386619223 127.898533598679  
126.708817316134 125.293640452686 128.029736384348 139.720343780228  
127.369456504277  
FAM154B 129.672284417918 160.887121295848 165.496065029161  
161.402322405903 166.335294339013 157.609756554916 142.46680970401  
139.295597388725 142.007066214472 145.371273337639 141.537578081123  
140.05419835434  
FAM155A 116.70650322987 119.972337070176 118.122186617611  
121.274997609378 116.355027746922 127.036976462046 117.251233255966  
112.936472036608 124.625603721372 128.29486937905 121.723964989551  
111.956783714784  
FAM155B 143.305848051593 143.434571922656 139.055892787717  
130.355969431473 147.255680306221 138.186616955926 143.528208105237  
144.182891591399 135.32730674455 135.708804956764 166.910561772689  
150.962828147611  
FAM156A 271.989060206794 232.363656167375 289.434186747703  
243.861834405092 251.731327363027 304.937584086529 305.050933898691  
368.0573385048 433.928818077527 255.3451781862 326.1109406486  
264.805236346895  
FAM156B 504.436992949763 446.819873986024 501.301694626942  
449.304281526081 517.23393716516 632.031410234577 686.198351821711  
844.187489702587 937.375361806971 506.659740456829 649.052806726591  
565.164961255054  
FAM158A 253.30325545013 245.640193659159 237.312766830206  
339.379250332987 469.107624227456 211.916602665089 248.643311972844  
242.657224881824 196.486499238623 223.107391048316 300.094509257518  
250.84781675544  
FAM159A 117.81168010976 110.061459744714 110.202982683256  
112.198629213643 120.473038066927 108.697696080014 104.321352818065

116.176068923513 128.643539098937 108.515401509039 120.80221197797  
112.156010486085  
FAM159B 141.84490608317 124.215466523555 132.002835547397  
123.198873421356 128.0805889548 137.068717031383 141.580944960818  
132.930042559647 130.37185420347 136.805379739087 132.412642318813  
133.425151103622  
FAM160A1 117.585207821853 137.192570825063 129.842252702648  
130.804850476451 120.883785696583 134.130913969327 123.122705969332  
137.042097702398 137.618447592489 124.110446144763 146.176240539176  
133.985582992986  
FAM160A2 216.522992914538 253.754869975548 222.794196053536  
299.33156125224 259.252807304272 157.521230460545 178.186273279101  
172.065593177758 201.555964610849 319.223127076041 240.75934760601  
161.956032597813  
FAM160B1 583.455617065556 635.819650434542 630.670530516275  
717.270096456387 210.729945718068 267.451611731669 285.562276640039  
222.593554194453 246.327991259259 200.668298229815 337.935183275743  
319.868227988842  
FAM160B2 398.571054759451 385.317560758502 360.90109922539  
506.029788151779 336.380724981693 239.762135294506 335.389274425025  
192.709473588165 256.99019407912 327.635520861099 424.37437028833  
322.576886792502  
FAM161A 156.423687034312 149.6036366066 160.839277476397  
135.585648980469 147.006482557682 149.016767620428 151.922296137689  
152.767228183775 155.558839375761 157.792868983503 151.836705989155  
147.04481509758  
FAM161B 123.977467396003 129.6505724783 138.4303531022  
132.066488589395 129.307025798583 136.147810636915 154.959217895243  
121.734873711651 130.009322405768 136.359189516452 119.463337435512  
149.760883745928  
FAM162A 443.853458865556 488.746614111382 455.486248388968  
374.169744342352 1348.80530206238 781.790858580895 1479.69309189156  
839.901173743755 454.492780042353 861.119262963015 692.095005197252  
514.61297221467  
FAM162B 493.347308943133 546.181615768667 191.335616210093  
281.740495452842 230.546762514966 282.926325589238 170.825161347825  
270.651318838953 224.6588173737 223.429738319185 178.153527134452  
218.96845208513  
FAM163A 125.143281492089 117.261443445891 134.517774302213  
119.198789189881 130.336466131215 121.984179437382 123.801380911257  
121.930362099901 125.280736217267 123.004137408444 121.799209715087  
128.032141013681  
FAM163B 145.61758790738 139.186416741431 136.923876486522  
147.473875763319 141.801472885127 143.468123097363 137.634298014431  
133.699547652179 126.423739360894 139.158299612941 145.96012463103  
139.831964368637  
FAM164A 563.339837352678 580.347496467173 494.604716660887  
440.319777672273 302.408563830315 867.369315017411 457.650982600462  
409.883222213537 339.663295617139 290.184801898828 416.075109522039  
323.896313343796  
FAM164C 158.179586948369 174.92026613834 155.259089547817  
174.08222895937 162.774716879847 137.897243684023 154.209689403188  
168.412162365467 152.409211647994 130.290454258898 164.164463389212  
186.66469040433

FAM165B 296.428342247529 245.522497675754 482.739666411407  
241.675251479835 185.169100632101 537.350891960682 375.316610221279  
322.028360309592 461.940616438547 236.082185670774 299.390443444504  
495.655170027296

FAM166A 159.68134949161 147.359279533039 154.978243057971  
150.786618560854 163.868129628544 156.269957530519 166.688771186254  
171.994330847901 154.229914729772 157.944355564411 144.825231501747  
143.025570700585

FAM166B 129.725706669166 142.888281750232 142.545823714168  
131.747367613225 131.076562651831 125.876114993687 130.038936315246  
158.536178747273 135.06498850776 130.563756903074 149.520911664673  
135.784481523923

FAM167A 132.122273848715 126.737230874367 151.164936050256  
111.66210002202 138.50032459657 118.544870925791 130.485988201308  
122.883806494491 115.033355516602 125.224197852606 118.912989775436  
120.979417552159

FAM167B 158.788210937339 148.538400348149 132.596941171401  
135.915252483475 137.890689733185 136.438788088263 129.984214994811  
136.131453703981 124.807244018373 129.150574563997 157.592607345742  
143.426053070219

FAM168A 115.734230176652 116.769106223472 110.688722702767  
125.055545087871 128.803632055969 120.501697624977 115.01682934323  
116.112013454335 116.871350997346 129.27634490676 135.078198678379  
117.937856116492

FAM168B 568.310800941091 585.552940765069 617.318955611228  
829.740755449333 336.490076158135 287.967349876429 236.745054217055  
296.375305136807 274.831898505989 270.945325305492 273.252023367028  
236.251507822415

FAM169A 143.383697128285 147.541437871615 128.118223792086  
158.8054811093 144.104372749581 151.325068155715 149.327794670124  
141.348548071751 140.782522936146 141.204458186976 148.096551269076  
155.243643210534

FAM169B 119.759350702482 114.830474086443 109.564709878576  
110.586147059226 120.857635836068 118.100611964852 116.497714896018  
120.585506729733 113.031636180748 113.656820701744 135.52861375119  
107.91011371422

FAM170A 156.32137627012 154.01988200569 137.037299675471  
151.176697752603 146.434716985396 146.256076936456 136.557466007228  
144.513730107393 148.194450105682 149.226700202481 133.804489975068  
149.915251958706

FAM171A1 878.986106116952 926.283018664897 666.204695328096  
821.020339593525 160.997179739138 231.846509449829 152.939759795631  
302.570932942847 298.827660296715 188.40383184521 188.252507246148  
212.473610495213

FAM171B 117.238968848218 125.724143659093 121.59661598908  
117.623103460369 126.555972138115 133.699547652179 122.139832263188  
129.194132399305 122.038534506506 116.639787832302 120.131839791515  
115.559551514777

FAM172A 382.630113452429 377.538276846051 466.58966852405  
342.769825986756 184.482849019679 209.74583569369 315.963526790659  
190.716424123036 180.528296177577 216.485113690708 251.939696394174  
199.88618355278

FAM173A 390.098830270926 414.403321220432 422.23268864343  
522.050619657197 944.92617668298 334.709049890042 423.826189747546

611.540759532294 437.489929507567 375.189005729903 430.505037012814  
555.758485277905  
FAM173B 194.475822533231 201.731223995887 253.098839084408  
181.941224633917 237.492603094091 317.273940108333 254.768537214795  
340.860684371038 222.134519361117 201.913709602894 289.859695541999  
279.75914135192  
FAM174A 194.941454173896 206.010481981919 264.685862877779  
189.235998474945 296.830999357172 231.462907786174 354.783364481955  
267.342817344746 225.730739636442 461.229315272354 274.235001739215  
505.560841055884  
FAM174B 269.238332581564 342.998459706966 348.300300174924  
216.615694348945 1625.55754007235 603.906237227931 2253.7522632414  
531.555532787504 587.654093308465 130.169291786693 1510.77099418802  
1567.89763050645  
FAM175A 9070.86397918429 9272.37780151073 7446.59106452583  
8649.07367196998 808.300067805897 7190.89891723932 3000.46298223166  
6324.87600301793 4335.76831372031 2915.72823797537 5688.84918819457  
3876.04966263281  
FAM175B 495.89837457901 512.723592291378 519.829743770022  
431.974037914233 244.18714778846 359.577827010792 567.143102792772  
419.4017188518 489.909407178594 373.925939492544 578.947889414387  
565.059609779245  
FAM176A 134.084602409011 136.944378905743 130.541449457342  
135.9489027281 135.59027155522 130.621860095981 135.098343717085  
127.866992108488 138.544053540799 140.885915460425 141.350135458015  
124.858723248944  
FAM176B 259.672238210968 284.638865013916 200.342786450248  
255.992494620859 333.533043832976 225.31216514083 221.18757533703  
210.41046499545 214.175691239597 243.95334982553 172.80265044721  
218.134101819445  
FAM177A1 10075.6573898939 10024.4662743012 11918.214537866  
11918.214537866 7873.0525548049 11071.0448447818 8140.6363797934  
9793.92604780228 10741.3064142855 8633.71708020651 5601.24254062491  
9671.66667662331  
FAM177B 134.28095064513 129.507297276862 157.394035451151  
149.556644928013 159.241573314833 133.526213647686 131.395959781477  
152.685860451112 152.06044555622 141.935435502163 138.136901441896  
138.418604660734  
FAM178A 268.660078500783 239.941641600769 272.238922498583  
295.851459742115 151.09974848374 186.103491222924 162.879707592164  
183.853381322135 179.079061789059 182.786177632757 215.335795337978  
197.146035305296  
FAM178B 168.560093633607 185.002106079042 205.4648759901  
267.622579012917 390.284689962661 149.402679897813 155.655771857361  
135.627840788802 140.719388544476 147.221425204534 146.090291252325  
142.812521349963  
FAM179A 150.144977373708 173.647320180498 163.203582580217  
185.359195899057 111.041656398985 125.029516472944 125.754741914111  
140.762415240824 157.713227527385 132.801619479245 134.299575239865  
130.700175060255  
FAM179B 463.488995330457 447.579975492958 394.35596596181  
445.214621023114 255.638433159437 229.31486399741 294.997671630798  
293.17183601265 212.890259409988 259.935831886014 680.509421043347  
416.475440894731



FAM180A 206.845306095447 168.783725505491 221.424451092316  
178.43642939806 131.917194849285 124.080382291282 123.30960025689  
124.140880678888 125.121517583946 123.660836177932 125.937660544107  
121.723964989551

FAM181A 116.839796680107 123.687439699754 120.100672968415  
114.048136176142 117.040953580545 111.66210002202 118.9428715545  
133.725177339262 116.019123495537 111.204065131669 114.893462783007  
116.449064666763

FAM181B 173.790848780011 208.64349688412 150.737888487925  
161.799743586569 900.039744829725 134.751916364581 864.908449769749  
324.481229901658 285.355815566148 141.879359965317 210.015199832609  
162.994537815938

FAM183A 129.867246424399 143.481112776388 147.1476865809  
147.103340218488 125.785388817819 173.387549650592 147.620511911043  
203.586310608403 150.359906271672 157.316941011117 156.110073009771  
154.760697311395

FAM183B 145.928643520352 140.145470073979 151.758970249544  
142.088243118644 138.780488114634 123.601413134287 132.70888569469  
128.486896700405 157.494596757446 141.063156289206 128.599254558082  
131.029333093048

FAM184A 248.791254839869 250.003965480779 322.099431638246  
296.290104133844 143.895399273595 154.695060071104 194.734255772365  
187.965294229013 180.837420957945 156.037150880384 153.146646647258  
174.909258852845

FAM184B 169.806644442071 146.122816653035 129.228874611916  
147.034021626893 138.35738548449 157.844617425219 151.758970249544  
129.449242018727 150.841261270382 149.6036366066 137.462720784077  
151.453985465369

FAM186B 106.576058729493 114.91722828113 114.078271807864  
116.961391747202 108.850992642446 110.764586138261 109.454483612299  
113.913337223716 114.893462783007 107.605526304445 120.342513393659  
109.781334128478

FAM187B 142.412731964179 133.333067546558 149.984657985607  
146.863611516518 137.950955473086 143.180247878507 147.476805635744  
141.956996308304 150.029313080668 139.925201225224 144.377501600001  
142.007066214472

FAM188A 743.915675090182 757.877066703516 783.059427015955  
643.306565600931 438.7446527797 974.007008568051 328.200548902445  
301.250189051376 378.920456227378 335.301103690781 418.163219634152  
458.33221423434

FAM188B 259.979459472217 310.690317681243 242.657224881824  
339.069385816411 219.044271073282 173.088291472857 180.698727334322  
224.274329367512 188.708596785144 178.584378959369 191.486717579847  
211.609763150578

FAM189A1 127.79057041268 145.745466612541 135.367261617271  
137.00397800873 202.691507273819 139.166537591866 129.176532377543  
124.110446144763 142.37457375182 135.975265059269 138.586620636835  
126.423739360894

FAM189B 416.546844844021 418.889972660958 544.580311371212  
536.609777988581 695.086203058575 487.901310664037 571.64723305848  
477.741216640575 406.133430120039 436.331333134628 444.712990986138  
554.115756730498

FAM18A 140.085359251038 116.939471420419 120.188885479773  
136.85323853426 129.775280076365 121.118933682515 136.211694310501

134.509830749072 140.746062850603 129.029151164978 119.442114850181  
127.727311123825  
FAM18B 210.245551279259 229.230239609291 306.068269136821  
222.593554194453 232.641965649602 621.825622897512 356.921627358141  
488.746614111382 412.863887464545 482.466736153026 310.365203383647  
409.691865300362  
FAM18B2 158.915858403237 159.570288565855 164.433462115832  
148.452947427498 137.401137659118 218.70412656621 194.702974020747  
185.41739522833 196.470718183575 231.517412929077 174.100921524023  
180.814610631281  
FAM190B 624.638115878703 566.914448800423 1095.04571025381  
497.411169898778 143.974551393951 233.426170535227 260.85776723575  
222.156471143857 234.5655184349 285.30221551106 288.913660405191  
243.691004557778  
FAM193A 338.585771590234 316.590387560909 346.303862540751  
373.189809737885 302.637859140061 222.005022189667 320.979443123471  
299.754985162237 347.224999246223 277.129985959184 393.198813167839  
284.940858938629  
FAM193B 182.997980582218 174.549929320587 170.878962027347  
200.360518276784 169.408892048115 165.70840218273 198.088834624665  
177.083095120017 167.629008083436 191.128539630621 166.411219327671  
176.256840061919  
FAM194A 109.898406285895 110.900309203531 119.535267326862  
106.450154495663 113.572326615571 122.99993610249 112.904318310632  
115.066084565112 100.637271902591 113.76411537952 117.051541123239  
113.071787850611  
FAM195A 330.405026390912 303.907003535357 423.489441909617  
343.307036883726 1188.08712008638 348.413827101046 571.838717184447  
432.969886744613 376.007938436483 357.006610037663 392.13175568099  
427.084392965651  
FAM195B 561.761160223609 592.079898463345 499.048754087189  
811.362219801362 941.065508539108 400.23671843715 480.22496056277  
424.285848583977 326.758278851698 245.082816415008 338.822464893411  
321.049000153127  
FAM197Y2 121.207040901483 122.659174808512 149.34605615699  
139.54738445816 145.25198093836 132.37450516592 142.229488350074  
128.492142236807 147.216303852902 133.686850910378 128.692917766138  
144.122748003206  
FAM19A1 108.021898335735 106.088807114602 105.193775204124  
100.477911152746 102.094370876743 109.067239220744 113.995301093609  
105.132185249959 110.61165787102 99.5148073333731 121.271403807802  
111.949644842971  
FAM19A2 136.653140842194 144.195705502443 133.008120853618  
127.440987506769 133.495243957927 146.252974508529 137.801899270172  
139.59941545613 132.817645625115 126.182856027765 132.291759474331  
128.398711525305  
FAM19A3 134.728594388428 139.587192809431 129.728266017061  
142.217762896203 140.768926302035 137.641136471239 132.336431473522  
136.151754558226 138.649502040582 141.162443312437 133.365793958118  
142.066903301882  
FAM19A4 141.360125377949 137.045772853855 139.038389244329  
145.42029807396 142.124876403709 144.417333931582 136.357788670568  
138.889999702313 138.363553671822 134.237133546276 149.450921195838  
150.769819282075

FAM19A5 134.881854036527 125.016608289141 125.297877027282  
118.650091706226 124.491884305455 120.910703698292 138.159966250659  
133.720904256137 118.115015846489 133.152523054305 136.625136565562  
146.197678850188

FAM20A 167.201570648434 150.409919207059 153.843250142472  
158.708054164813 156.010027635627 177.582314734704 144.116298946718  
132.524377835171 163.607125532236 147.211769989922 154.87316176388  
146.633627492419

FAM20B 1599.12034906314 1478.09582385838 1973.20689165831  
1682.64624665931 732.630306104841 1050.40488466179 1305.2232532959  
1772.75453735112 1488.37146754184 850.562379837947 1055.22233969473  
1904.39962279504

FAM20C 242.382534384155 273.252023367028 177.688568435599  
300.793542873709 150.829439012542 133.857996630836 134.755817147859  
149.213990424575 173.520662003159 157.130045415943 151.776232847515  
135.5668267936

FAM21A 136.599305161841 139.711696905287 143.607579034109  
124.796876920269 141.577373924378 134.668233738635 128.23910347716  
133.220878146063 148.410647472149 134.93814894432 156.265168005937  
139.280151859534

FAM21B 162.347140552869 150.821697835175 165.972090075204  
160.664407431261 164.146345008398 168.166938045454 166.788336808924  
155.759861336991 160.625367261779 167.298438019561 159.346890686719  
167.91761500242

FAM21C 153.985529457122 153.643157329902 156.787932134605  
153.568321662387 146.71868686671 151.06209123698 155.836471680447  
147.171090285223 149.821848101995 161.788118050564 146.755803731358  
157.280532261425

FAM21D 278.498278821829 208.270622752385 253.933478547515  
214.461773810376 189.403934838648 202.129153259445 204.564770370164  
188.45479937455 176.704617691988 194.998142472864 215.931781291835  
201.458970969685

FAM22A 168.958694643382 166.655585160657 169.777032044409  
174.749832388791 157.457468761338 174.075670633438 147.469101571149  
150.038722708606 161.160974998803 161.960392594363 154.080778100852  
149.25705328406

FAM22B 146.157459765796 155.686889874806 152.152106138031  
157.768329108254 159.133905701536 156.957578703389 172.304496150036  
146.079727388849 161.144841967903 156.095520355029 155.615655460277  
165.74458564887

FAM22C 157.126460242995 157.971293294367 160.945886507456  
156.098240321674 150.227629690236 144.826861308997 151.338765231607  
154.329176514501 146.824420102008 148.143367490426 151.879398444495  
157.113536717393

FAM22D 148.415036326153 161.720405760536 151.858466721347  
133.891337645936 132.50027119027 133.804489975068 119.229322984564  
154.354658146438 147.057116881846 135.088149158147 143.224678017244  
131.943014970855

FAM22E 136.438788088263 105.712302595131 129.384531576943  
132.294365151614 121.68422452 119.278231442871 130.808911605271  
134.266373965186 123.563243360247 129.477908941439 122.452541100946  
135.039901725369

FAM22F 129.015422924366 138.89579816122 134.711144967036  
148.450023054885 161.525131363333 156.704278982517 154.969503835593

131.657454325126 147.191965093225 136.101501973431 157.221008210698  
156.487049947247  
FAM22G 112.208950290962 119.920097823022 112.675715371087  
112.096627288813 109.454483612299 116.029201658798 119.785062256421  
120.138014822486 120.473038066927 109.37466528113 121.924036463998  
109.700513642061  
FAM23A 131.853183159267 128.42287610189 122.260548647869  
125.746184969983 121.381365873873 139.502068079466 129.561012565141  
132.739435456445 121.320750074882 129.596851280135 107.930325780047  
136.44218532882  
FAM23B 145.358431402568 133.412452607155 127.723052839953  
142.17773831901 152.552277008504 161.627546190964 158.322477506517  
142.524413202292 147.949560045212 141.035566928475 154.209689403188  
148.898587505337  
FAM24A 145.938780249776 138.428527640896 142.560797028716  
140.655002540298 145.133151090252 136.965972077733 140.309394542299  
143.351341716363 135.393901125889 150.580133889656 129.765440519589  
147.238896426423  
FAM24B 156.316333575406 180.418707740532 166.440530119785  
164.018470368389 175.537039794925 166.388683552371 216.615694348945  
187.645390502607 184.008405576875 151.877035446575 193.203053225456  
273.709160508205  
FAM25A 130.814702312493 151.151297821117 142.583098605144  
132.028327486943 146.460464282676 153.903993884123 177.267145265362  
145.335830265052 152.600339354701 519.829743770022 142.64161581553  
146.798444724408  
FAM25C 157.237147919803 155.569733738768 151.950883677297  
157.15947600423 137.779607093226 164.541417588646 149.141033677244  
151.958818313561 154.080778100852 183.247396324425 166.595529296463  
147.595573192579  
FAM25G 158.726115143818 157.182954894643 136.499228715856  
139.080142195118 144.290286088611 153.285830139349 142.307520290692  
137.642858036384 139.783725419023 159.42746786085 147.389892239448  
128.689465747173  
FAM26A 151.676232556697 134.756377802151 131.615462296871  
159.932941342403 175.111460651956 167.776363541939 175.395900648455  
159.245344068037 143.974551393951 156.916784141484 141.550553034455  
185.359195899057  
FAM26C 138.021559586328 121.353233207209 126.935731176024  
138.246963115014 122.490271802207 151.26137860684 134.994013668445  
129.507297276862 140.873210629865 134.072912593456 135.25734629146  
128.029736384348  
FAM26D 150.521719129181 174.787077606165 179.109090120497  
177.500110974116 175.476184387338 154.509924503184 164.231281729415  
160.676606760965 143.165150890885 158.704425428694 139.404820141366  
170.490099282436  
FAM26E 194.014764659513 194.686527131656 163.873355370767  
248.03801051527 147.015427944761 129.70974867852 141.18490443471  
132.179747646893 137.165966740473 138.149037534929 153.962758393332  
141.565599104245  
FAM26F 158.06915048955 152.344248425416 164.247251507109  
156.71199811686 353.285905782951 163.256472113745 193.723953003899  
255.374689750672 249.80160363144 179.821008257902 228.901579068997  
230.10433160008

FAM27A 135.105147647223 145.261662166215 138.154799037807  
153.798367953373 143.16930809425 141.949098898957 138.204611862656  
145.294665838127 140.105675520432 132.37450516592 131.093917654245  
149.086836205064  
FAM27L 150.423586547273 151.377932495104 166.722369066673  
154.469132478321 139.888008605915 145.105268133449 146.517645037071  
151.070654092886 167.408314067262 152.913814113632 144.298011270428  
135.37120759813  
FAM30A 152.217243924816 154.455641374384 157.15729049829  
169.733427590141 162.304178370233 159.674396591041 155.360711066715  
176.612866969431 170.67334244323 147.185378560761 148.11536596061  
167.764352429391  
FAM32A 668.127527385348 778.846928848361 900.839073800181  
986.441377365124 547.516635695872 1286.55103838368 924.040923247227  
1146.3535752748 743.915675090182 839.662936279727 805.120147618984  
767.662367310672  
FAM35A 233.635876830148 217.940575516933 257.477501542521  
211.22652563815 190.45739385453 233.671878221507 203.357914242777  
214.763232658841 247.08460296705 226.763252784108 286.194197552489  
251.665539319612  
FAM36A 811.564396886535 783.373390305885 946.640841062802  
832.911633923496 228.616558999054 540.078145038497 343.121661664987  
523.435696794756 332.599191067433 326.45984882427 579.678635803225  
594.713185954954  
FAM38A 1897.92061704124 2558.91648313228 1830.56003081769  
3706.41283595794 1982.3154578939 499.436680354749 634.906566690042  
800.373159084181 535.20662670885 1443.68785521063 1041.58583268313  
1209.56018864779  
FAM38B 378.38874489611 267.222762759781 274.534901548678  
195.10410545445 166.944701842349 212.996456841785 182.439945229388  
165.496065029161 188.145154995617 154.999192460283 345.494740481759  
436.222568287601  
FAM39DP 778.639512538949 761.89271251455 771.694853062033  
895.821578104681 947.766127685083 1992.71224011906 493.209107049493  
1887.82245931444 631.819659701092 549.460612060753 605.795439342384  
595.593867616527  
FAM39E 3408.6535437109 3450.46728258139 3905.35300751401  
4159.96851384358 3789.1316515671 8739.02966610274 2558.91648313228  
9099.13956219312 3822.05744774919 2748.51360874099 3226.53426370323  
3237.94149351627  
FAM3A 1797.65684760558 1916.46158204806 1752.50728312967 2486.24762158293  
4073.21075791737 1288.3346537369 1971.42527720714 1394.31467757456  
1199.35864276583 1097.60805874165 1525.24196488688 1298.60552708737  
FAM3B 148.938822951404 190.825209733575 174.059172465573 148.486946087388  
490.022369664024 1045.49947183547 1195.07608384189 1092.74905085695  
1008.43888926584 146.731584143625 1202.74869573717 1131.22418479945  
FAM3C 178.780662099615 184.742960975938 169.496129800444 154.079355899056  
200.915806094193 413.172954892025 502.935749606918 334.857690525582  
289.037033338975 301.428024926428 338.585771590234 383.583234619781  
FAM3D 132.976977898242 142.510745106328 130.304743083321 122.051473363557  
1109.79571066685 128.949103967865 135.114056458478 127.758381206968  
293.018282386003 147.93442757931 1966.09691567857 294.871848467326  
FAM40A 223.339132121796 232.492398623889 242.382534384155  
248.403014089812 280.453895029319 207.902853533132 228.901579068997

192.340135076104 231.239126548656 216.077955163344 183.201926323188  
241.293046687076  
FAM40B 1131.96129284658 1006.03677177164 808.837225580351  
951.371815352591 274.14931964455 922.009043194023 528.921893077914  
690.246312542011 522.050619657197 443.125195744202 982.367000148189  
487.537691131703  
FAM41AY2 120.910703698292 140.914966429342 140.354508398385  
137.504147221623 144.246749835693 129.205783382977 135.648906382608  
129.428950259722 131.782007636511 127.509583634884 143.028618831382  
135.30767047671  
FAM41C 135.503338987971 132.829401072883 137.584340154725  
144.562038493733 126.301178976594 147.971492964243 130.142263689536  
135.767818903328 137.748443205818 135.433229702209 118.572988141773  
128.168460083895  
FAM43A 749.859130465356 878.986106116952 234.461229199142  
344.247544510881 173.70035122661 193.336246844237 133.231066635063  
182.084333814175 219.537335167901 443.964363178742 170.439725847568  
134.819406064011  
FAM43B 165.493629431627 188.891032176388 133.495243957927  
210.316431648335 163.704616231638 142.667173697017 139.010652831798  
154.737117718424 143.849399031223 149.912481263284 150.091854035356  
162.285199080777  
FAM44A 146.1289358176 143.730966588794 142.470799054068  
150.144977373708 146.748572532267 141.348548071751 133.866011732878  
140.898380345452 132.815753681623 137.260359343758 162.9279134169  
133.198832503062  
FAM44B 1000.05896885496 915.015154168627 797.28465621772  
983.777608766079 777.651238374269 641.12919339861 1018.38836615952  
602.141151173094 508.302878624289 843.075879568455 933.408902924063  
947.425912541091  
FAM45A 523.717949503639 529.228238133018 591.89966781883  
496.218605366298 371.552970811499 496.697565640162 841.623780229898  
584.548578914846 550.901056837273 685.620637807134 609.665323786904  
641.774812292709  
FAM45B 130.965418847276 154.564478911791 152.861304149219  
152.660373241584 144.068734533254 141.261150586614 149.879951192667  
162.565576110247 158.171302275984 202.568071395884 154.617462666847  
146.443892388756  
FAM46A 3304.82581034038 2944.63971819193 2505.8565544797  
2358.46955614953 948.734577648136 1480.52638217173 1182.50261323518  
852.926365088632 576.636077770998 1205.45751308367 1097.60805874165  
597.459920611726  
FAM46B 1159.44907165386 1152.50523614436 747.322544683874  
1625.55754007235 182.633773540249 136.473948855498 135.952202055637  
126.549876718792 136.222421297872 1099.80705776268 140.906421938377  
113.479382235297  
FAM46C 538.252273740419 446.509863498357 357.140791982825  
474.14051635531 276.582734590058 194.734255772365 181.364325529405  
665.936368667321 659.106229917309 179.421854100287 422.23268864343  
225.142823691625  
FAM46D 152.074017988748 169.583355171423 142.62707251786  
151.617989938924 164.365630106697 133.020551937677 165.350777445902  
138.652077417473 153.09926854747 175.647878042257 162.793214727475  
152.052084712417

FAM47A 127.377356715337 134.572552391307 133.113581756557  
119.95666716163 118.379914726645 138.685330935707 124.455340203012  
126.806537241253 122.508761687823 125.287738115754 147.354535468933  
122.5651974076

FAM47B 138.449057377027 129.108534267222 134.719531559829  
134.658664100744 139.291775075915 137.151210946281 143.036006001419  
143.281050499332 130.154756165574 126.614876404146 130.957441406855  
138.466136108202

FAM47C 124.334450753704 137.861973133557 142.930903395131  
137.288653308858 141.503351545458 133.369314179341 137.451687756052  
137.586032396204 120.538535752185 132.788102310611 127.299853592344  
143.481112776388

FAM47E 151.351938656508 138.386391726042 149.73250641246  
138.986877479278 151.459397907666 147.863198012238 138.211845785985  
198.023465629218 184.862871179765 134.924082270115 154.71904132098  
132.772085211553

FAM48A 170.636731478608 162.297999435613 189.685949591531  
165.803549113373 152.908358615016 184.332299740724 175.040086358446  
165.570531605115 187.586093248437 171.610742435469 178.377461551319  
216.731618532814

FAM48B1 149.477373469387 144.258128917228 124.536322123442  
139.768555796264 151.833386901811 135.628982370682 145.09909498449  
145.10302792449 143.401971479167 139.936661244361 148.185056724262  
143.215828010442

FAM48B2 152.045391611927 143.378998368344 128.141725976839  
110.858201415824 127.115598987172 114.170354748872 143.294217840279  
132.950480329605 133.286702819953 138.383183017683 138.802633518223  
135.54708602175

FAM49A 204.842791081358 197.068795788491 171.080373870373  
194.60309399944 283.163770658619 190.405863264717 159.706443636973  
185.602093266907 199.378179817518 253.580286414227 177.759729226623  
163.612347715773

FAM49B 186.831266888028 193.744461104128 181.412790232996  
169.220974415101 266.71318061066 358.732947927445 367.732191251547  
407.760503937821 391.706404954357 307.768302846647 415.388760988459  
378.797952580504

FAM50A 1927.467713716 2135.04382065446 2236.73950603157  
2550.08769415478 2877.92845389611 1394.31467757456 1671.82101590797  
1418.60088387728 1596.33832632698 2033.67956299225 1432.93880448974  
1291.12004949379

FAM50B 273.550544349798 257.740674565975 354.336462793628  
268.698146407497 164.347168837655 130.260174841484 139.974586762939  
122.490271802207 138.643442050615 174.795822188504 191.128539630621  
200.242239130026

FAM53A 144.507230362869 149.408530395745 155.456077670662  
184.493681387276 304.152390210727 147.595573192579 206.715020025609  
192.752224665459 148.570769470645 161.099805358232 164.057147728625  
137.864637728155

FAM53B 293.794745907663 317.550000625189 262.452869676209  
427.452114719877 497.53605530806 202.253560413436 299.33156125224  
260.157440518033 300.53017771156 232.444867422559 563.011988279542  
280.453895029319

FAM53C 868.86246684338 617.833194119379 730.673649872205  
753.997560938003 526.285114043212 450.468410589415 726.556553101727

640.029195821436 531.217306770605 697.97116981445 494.747087458483  
533.54045706916  
FAM54A 154.049004176595 158.819151102054 139.293775885106  
159.588575526536 202.943987922418 194.413759761549 160.499355902773  
213.301947003462 175.819983804497 175.847256673734 150.610633329908  
173.810080280732  
FAM54B 347.557792829093 357.35857422585 408.201232787978  
452.732079010502 197.378801636702 190.357437485436 254.359737178714  
199.813528853649 198.311821616128 187.754968096521 214.175691239597  
231.819341041105  
FAM55A 132.981346767415 139.646026806298 127.419227292862  
132.291759474331 116.397855001959 127.720117789235 122.751674866182  
117.965208293925 132.985645792864 122.423561732526 117.412956162665  
118.308102542942  
FAM55B 121.239461514704 118.712730897987 128.112595697836  
117.034228068173 109.282814458761 117.123891785437 117.227635924674  
121.977373818244 610.759447723026 127.445199722147 124.16920280673  
126.553693803748  
FAM55C 175.874387612235 144.12472003202 225.546125484563  
137.31708798874 122.634741242406 124.324855155055 125.682297697017  
136.859366444351 128.432188632218 119.640086587188 125.0723702213  
133.161552914595  
FAM55D 117.628564992187 119.50754902958 123.004137408444  
118.070716076005 123.507963359911 114.174153178166 117.404906698431  
116.225440873023 116.501174707117 124.297848065172 128.36533737469  
117.251233255966  
FAM57A 275.072079692264 374.268489263941 213.382179917193  
272.41397350779 508.302878624289 375.856200488667 463.298781071364  
397.861172312706 511.891269255193 502.731019454502 536.46884541183  
400.783945471037  
FAM57B 138.605661097886 144.603401904061 137.248465324584  
131.560971848628 130.357913155625 138.504398858454 150.560305000601  
139.399195840117 137.639342727211 143.954908055924 158.950169226637  
143.62315472858  
FAM58A 397.985856484851 383.939800422489 405.183882455109  
398.673582680257 871.268905562551 563.907454700224 482.677635089583  
387.617166711971 396.708183244581 449.103432410618 335.47484353322  
509.988617641229  
FAM58B 184.071078414327 149.999838961906 170.390200730789  
161.720405760536 152.199095472082 168.744610747563 165.757295630254  
154.778726823719 153.545086287929 143.730966588794 128.497571151343  
151.181422205549  
FAM59A 175.7330682766 187.769988580599 162.994537815938  
174.301952147167 229.406012088782 278.651369597422 311.208703262497  
378.151202933526 241.453456707114 201.850932289186 337.521614253267  
399.537363692534  
FAM59B 169.940177050294 180.20999937977 190.489530928259  
188.062732621031 220.92105843037 181.400788152988 179.896659891106  
180.315825600347 174.795822188504 195.929328710358 142.524413202292  
215.718714189719  
FAM5B 126.168223112165 127.449028221682 131.310537960214 118.537378726617  
136.256456726841 128.255141263975 134.755817147859 130.980885733161  
127.123123583856 133.491963477649 142.825203517688 150.767158077219



FAM5C 155.211976328553 160.281830914755 168.552631639996 162.082166316002  
157.316941011117 166.20327698517 148.624135810148 162.304178370233  
153.643157329902 154.417731984391 144.528360135884 147.681723355535  
FAM60A 327.010503005631 341.361299896997 287.503594820801  
254.9636051363 426.896707161414 1022.55215097491 462.948429969719  
627.066031322234 837.872187194784 467.90388853336 519.112018353676  
631.653707589221  
FAM62B 5811.97916044218 4882.16892310839 4562.75659565027  
5636.26097921507 772.061917233344 2053.71550326011 2069.70335195314  
1329.3013039618 1420.27222765071 1508.24281455057 2299.23805014176  
1973.20689165831  
FAM62C 169.574755162815 150.91730768674 171.671895682052  
143.198622036573 147.633793743254 147.543411823657 147.257773507186  
124.699127988314 133.99226161886 156.176537862398 131.104534164394  
144.718507303105  
FAM63A 1208.25171673432 1144.53002508973 1217.29687282094  
1091.12493937368 369.275635424092 959.897744425251 581.828502821435  
737.843412273272 680.250735532287 499.321667633972 698.086166782221  
695.595965352335  
FAM63B 251.915179734134 266.468621734455 220.330477277988  
246.676401619881 149.516743790585 182.357065848298 201.931760074628  
173.678096732903 194.055394488452 192.095235288818 226.701637237203  
216.705908017858  
FAM64A 124.164523121103 130.863753083296 124.291944151031  
125.475308885588 261.844708446856 323.086368767924 140.081280065913  
311.612118247493 202.214495168688 175.857952663383 158.353171576491  
202.869364962231  
FAM65A 977.999660785113 1057.80846320642 881.15414246017  
1214.16777512885 765.911113050543 438.340341490622 507.827473844576  
369.156887999872 384.97980473847 562.543347322063 562.711562649704  
664.025683218037  
FAM65B 194.831347257735 180.889946069121 180.761100930677  
152.021576565132 134.569883788949 170.858049313581 136.463867598256  
207.920724788669 266.918302307596 152.301556397498 165.163490032007  
168.327600230929  
FAM65C 217.969738417693 188.952730860801 155.041173289759  
147.713967317159 141.678529125136 129.669484303621 127.756214708077  
133.320865155329 150.809693773343 153.818325601312 149.225754384299  
129.735862775199  
FAM66E 161.891809608511 165.752558888845 152.158269344693  
153.371065247493 162.728630453745 143.007237184254 150.134337895481  
160.30784625946 165.857032207991 157.754622099874 138.651419539729  
151.971337856271  
FAM69A 528.275591281419 469.333357789149 457.905741500454  
497.629319581786 351.585604465402 187.729071402782 312.080864996592  
199.477350542491 183.071150926068 214.617852048151 164.986006226427  
173.867252292026  
FAM69B 174.107661206415 214.546528079149 156.402578892869  
250.376178742476 158.459129254226 148.347642424885 122.955724972547  
133.647637744785 148.373866613126 123.9209907098 145.804420322848  
154.398416018484  
FAM70A 186.904126552483 161.506431005203 164.406564594296  
146.654925456132 137.350851760173 141.760529549196 140.659276788384

143.712450441816 142.744045151046 139.969155812688 147.83240038699  
137.848546040474  
FAM70B 160.843325877861 149.490064894136 160.096507818256  
159.79463502085 162.267841475739 165.085010975035 171.410912120195  
167.491399614986 154.949840064881 159.43317827517 153.263883774915  
159.159106382346  
FAM71A 139.72868421672 144.019824700027 141.233642252649  
131.841436867483 159.867178630115 150.741291526753 160.79631681714  
159.446705611995 142.342811880173 147.348400730286 140.479321382192  
156.307551403822  
FAM71B 142.607578275494 147.813170436139 129.895388481159  
145.139966629363 146.750774496317 143.558088035758 142.143709425075  
134.21363751173 134.711144967036 137.567384694894 142.373521903746  
143.127795310829  
FAM71C 157.800913051929 129.45936538019 160.520677267863  
158.639313207233 139.246945739764 142.706708823143 150.48744233923  
134.47218436552 147.86104992164 153.044682186978 144.342905860503  
140.762415240824  
FAM71D 123.02879683948 107.863971340407 109.625579596864  
122.793816135585 111.373854978307 117.12833256636 119.725487374119  
111.949644842971 114.032874859062 108.543795408713 129.508990861362  
108.955761698524  
FAM71E1 112.790552379447 128.816610738922 126.121516564343  
124.859984709406 346.996310517446 149.416411285088 265.174306663185  
154.637740117457 192.992546726522 133.414198431469 167.764352429391  
136.781417098789  
FAM71E2 144.769824608083 145.070927449969 136.645091356305  
151.992881963981 131.48517604564 133.511698282195 130.721987260546  
139.338384535905 134.169645445889 142.594553057288 133.672964925321  
144.520435611318  
FAM71F1 135.434853296628 124.28033876033 132.764150075465  
130.832462487806 146.150048478173 135.778099658349 125.439033142431  
145.877943006533 136.824357247954 136.162938063831 132.291157461345  
138.416716745934  
FAM71F2 111.549719888905 112.565341690522 120.975542702338  
116.814269969508 107.884870799936 118.88525116298 105.49491265382  
117.008277388399 112.635430248416 116.929398630733 120.085340927108  
108.939608619532  
FAM72A 170.918584418153 163.718595974283 155.91493956251  
163.829218786716 184.294172429054 200.603836348642 164.986006226427  
174.059172465573 218.433524126584 166.521472376759 161.627546190964  
185.525760847281  
FAM72B 171.031912064945 159.236429097777 154.408875182219  
182.384190694142 172.387657419201 183.056707813352 151.655854407186  
217.531179216305 199.756584044664 188.145154995617 167.822075935474  
173.440596296333  
FAM72D 137.345542507421 138.496366637658 127.449028221682  
122.816049839521 254.447650810819 175.902751522861 145.09280363189  
245.640193659159 256.495848662843 135.795717307603 144.69686018715  
188.242091666446  
FAM73A 1535.27496251381 1577.15895478896 1637.66306286151  
1565.64079526732 267.622579012917 1918.14260920544 878.167149313285  
1375.76915021882 1072.37500318471 795.464850398761 1481.24705642453  
1036.40082234884

FAM73B 290.420307322101 301.908667220208 256.326661031361  
438.03648998391 497.269957926657 194.22713184875 186.679199600379  
233.300864925399 242.614881095485 198.783034238774 293.4021207271  
170.099045774947

FAM74A3 132.268445799639 117.923459503989 140.377179372804  
125.882246459692 132.703034017237 131.305785417254 131.716370298507  
126.839037497031 126.890841187249 152.77616981167 117.958297137758  
125.435268901131

FAM74A4 125.600500146679 121.821868944354 133.962129094978  
123.364999283696 133.74741832303 115.473431881597 122.460829835477  
137.625415175495 123.30960025689 125.929743286163 143.94902198632  
112.547907748842

FAM75A1 148.364138636002 148.835389500419 150.508851767517  
145.210787864362 153.962758393332 142.470799054068 155.42165869714  
147.81143020317 166.32555285213 151.755205401737 153.033582154882  
152.780908985916

FAM75A2 146.105009838122 128.941490662452 154.483828924645  
145.25774926819 135.071400668179 133.52271411034 155.043017644694  
151.635752404534 144.175551691291 152.650867743471 128.738746025289  
146.795608819024

FAM75A3 154.38209765671 152.347154384235 177.438968923426  
155.835077077665 145.241301006518 174.962380276394 172.46311371589  
137.386308389265 148.253612913109 138.384797779855 137.100207190052  
147.364301916733

FAM75A4 126.025161261042 139.611455791957 144.031305845388  
130.052593375075 130.957441406855 133.762141373091 117.757113741542  
129.875986080057 135.338077911839 141.362627556137 121.580726825432  
132.421863261746

FAM75A5 134.00481287258 125.859158049343 131.38881091292  
142.063338490772 167.698883940638 133.53523683945 154.820187615267  
140.451465188624 128.482976013813 124.995087711332 142.780100181736  
129.541049979717

FAM75A6 142.167918879613 146.528945049588 140.760983862166  
141.695537669891 129.737882221259 155.091135297162 144.807626228351  
142.157512965166 141.927204640355 145.498372398845 144.601370216162  
147.077695919758

FAM75A7 128.229729571899 117.770032157393 134.91697121091  
121.036054511761 122.829218352947 124.752198904184 132.277920991504  
122.399241018147 126.322527679273 130.557209560361 112.495783269169  
137.971108694323

FAM75B 153.626180103404 160.960599932898 143.951756384507  
161.979914539039 162.606273401226 149.394952856085 158.863516051439  
194.281839133887 161.83241639654 159.815932985135 153.136863548105  
163.181323768362

FAM75C1 146.96472350529 153.219954133957 153.238678313147  
148.094036534405 155.268650584431 132.140547119679 168.697565122105  
152.832573288735 157.639688257892 168.180063344887 148.941194457652  
148.879605388902

FAM76A 183.583432296209 177.598422362298 146.231937458616  
149.500457158616 168.897620634337 156.430981244063 161.85913459364  
167.653412908384 148.986058473609 158.023626712181 160.001115445038  
141.874188629438

FAM76B 239.789994201722 220.113261580385 236.032288046282  
173.979001863717 223.107391048316 270.181005097697 181.37137053478

216.859640534581 195.608619642038 211.208937901871 235.530986541549  
240.306287921209  
FAM78A 128.883828419932 141.343125513329 160.975741751317  
156.123528587917 170.251197850968 148.367132982373 168.150270765792  
158.6067091347 163.248980088946 124.477586539576 143.803893271515  
160.76044995335  
FAM78B 158.208998509937 165.118167086792 148.492328039604  
188.623897093065 245.240006198482 286.818166898922 150.71435300188  
181.294497402507 165.342790388607 164.736294372006 160.211460008777  
156.803516898875  
FAM7A1 152.957297648595 148.930073905413 152.009494286376  
161.764411756848 140.102266035804 139.353080958675 150.549883779193  
167.822075935474 145.787468865642 145.641373616866 147.558603709566  
150.19577351885  
FAM7A2 141.876237297525 140.553613300431 150.434376975922  
139.972797966319 143.546629073997 146.04584032214 144.101376910581  
137.976533193418 152.741229289112 140.522470775478 140.174087049513  
146.303959493672  
FAM7A3 145.386689493179 146.660826209767 162.513107496558  
142.910616700526 138.873925577739 155.651798065702 151.079500558067  
140.895053453126 150.731093808891 157.172970235254 145.684294398911  
151.379761514526  
FAM80A 121.807661901776 134.356796881432 133.12904935533  
144.510062568989 156.926617030752 132.985645792864 210.973303650385  
133.976997391944 131.630132952441 142.063338490772 134.821778017915  
138.940564112156  
FAM80B 181.431827312784 165.504532455205 179.94333102877  
161.382041789666 117.81168010976 114.28381541078 118.336654504789  
130.411849432351 117.149781437983 136.103088234442 114.249891266241  
124.833659452957  
FAM81A 120.679474100322 123.577138762427 111.886543737378  
129.425699141995 133.402515225624 115.090463537716 117.585207821853  
122.042136913991 121.188761627967 122.54127694717 129.116354997747  
116.230993734675  
FAM81B 153.320911882529 142.348246621217 158.631298154353  
156.961070790639 146.281429685059 146.052153515494 164.857465272302  
148.709795687391 136.099663831028 151.221783750989 153.969493052468  
149.710337205986  
FAM82A1 128.950308413612 125.077260389449 126.992697289075  
131.77642590781 129.79093244374 124.00806841872 124.546520456419  
125.481506166304 113.112450527382 128.247871411825 122.05954649985  
125.328704545727  
FAM82A2 571.439520427295 484.764806127211 651.675427664911  
496.560127152436 415.749051861123 421.583441056026 659.27672123763  
511.547907091166 926.670867201327 732.630306104841 622.142195892701  
738.892511276134  
FAM82B 142.531683761072 143.028618831382 174.02138265758  
136.952914053358 129.343440464729 209.887047474042 146.861981788662  
164.472980733552 176.27969404442 167.746786642066 160.520677267863  
176.431477850092  
FAM83A 127.612859839494 128.460750472464 146.432468585736  
125.682297697017 173.001985500448 329.88790758321 217.607230767028  
121.170340423391 208.776711004753 676.293399523316 189.49408026215  
151.285933600303

FAM83B 141.730912072471 150.602976963975 131.430921437192  
132.956860864455 164.558875058199 192.168634727505 282.836518011311  
196.378888436237 156.934589811742 449.859227376918 268.370347292603  
172.591885279428

FAM83C 150.902548360746 152.60462513339 161.618479762188  
159.120172969378 227.483999162038 224.089220507176 278.555009982029  
143.473523258521 159.085639414089 499.544050752036 277.000882284125  
244.689936990021

FAM83D 1442.94175124818 384.641319423853 582.062758687489  
409.883222213537 743.023225859813 388.477382640003 222.134519361117  
384.641319423853 341.901565692251 304.479999301061 172.430211711547  
277.946395491073

FAM83E 116.814269969508 129.369968549738 116.236538651031  
118.32560379073 133.544149685358 119.01990099776 149.019120812629  
138.990971069382 125.666013736767 303.241375487319 169.791616021987  
123.400143662218

FAM83F 182.055718892894 186.033093285894 215.532132200821  
217.811099067262 345.209128382239 226.919545367682 288.313931067158  
205.322733011516 207.890408761692 295.851459742115 221.359331823286  
230.749601687217

FAM83G 154.843607752473 133.403409882362 132.071099697667  
138.970853057174 144.421572284568 134.776714949136 147.805819921429  
134.119276589666 131.580226088647 140.909875639658 140.981666934622  
128.312170913496

FAM83H 149.211214631561 210.803130108618 150.593928635647  
129.888444399067 1834.08657010335 755.42757464615 778.28014337938  
692.095005197252 964.093668483033 1069.25265476373 924.630951485299  
881.561688713557

FAM84A 130.116771999391 130.406895174038 117.420765321056  
140.372463604232 358.843277491684 171.636121363019 271.356289141017  
170.430478598594 166.741762854246 146.70774472499 178.329946332806  
140.569391362701

FAM84B 174.347451984066 211.679799388351 149.180704382192  
151.029785584386 535.354724252178 619.995008098949 742.751664201272  
706.292905820227 843.936924659514 288.370985514978 317.550000625189  
535.612000577004

FAM86A 178.657325741035 179.230909178397 182.608712782878  
188.878770168595 216.645552082667 188.695527267631 187.965294229013  
214.38058301395 182.439945229388 182.747079625619 193.723953003899  
195.194505906435

FAM86B1 180.096239155058 160.557818466874 183.83720937589  
195.303469330682 185.405774238391 186.460034745907 196.310746973798  
202.819949307954 182.919385608842 173.70035122661 164.513371267476  
178.696562301918

FAM86B2 120.871693555514 137.103879676652 144.259643132933  
133.408354896584 133.028789808654 141.29868389128 131.636779618185  
135.661131815375 130.571827557149 130.93033679281 130.697148466042  
122.583461806645

FAM86C 143.662865541299 171.035391211596 165.682617337317  
205.728673153914 226.387465899611 156.008829097457 159.524235332529  
175.711836112986 162.895923745031 134.451423371791 179.841665686703  
145.08853313195

FAM86D 172.562162872242 192.878416717298 203.11015591813  
169.881866987359 221.594737497504 198.506786870804 203.510106134882

199.077893147154 172.486839924297 168.422826952385 212.643559782754  
174.383193885933  
FAM87A 167.268645224361 143.899201949317 165.017178571218  
159.824012085212 126.94941821459 133.988494850477 161.424105316969  
155.343619434375 138.304793826214 152.254519859308 135.484360570738  
134.051756243089  
FAM87B 138.83304645915 144.55710963567 121.224389883994  
152.385014030957 149.18603646016 146.056723380149 138.712529531951  
141.408545519654 133.133892264995 149.390481900424 133.324531689254  
155.588607813902  
FAM89A 202.114480291084 230.770036998466 158.455783755247  
153.885582272269 289.297370738382 369.838429521168 690.010326122574  
212.363151537303 176.300743660299 651.759589129833 169.844913799159  
247.643123415644  
FAM89B 851.633522004342 1024.95957828641 774.774214696342  
1615.60472592991 1681.54485582868 886.517088614968 601.997464467917  
425.59810308048 442.493108530222 789.043948009585 450.120868656638  
534.745066397679  
FAM8A1 363.195371577097 332.138346958671 475.403662030875  
284.321253087512 180.814610631281 218.298791348295 242.614881095485  
195.019706886336 235.350819745387 253.009376944901 288.88486628661  
221.390817970859  
FAM90A1 126.34649262976 132.885515958081 112.005939063045  
125.331215990597 182.810581377888 143.733505359106 127.395094952914  
123.323528039848 136.151754558226 117.990622156287 116.20008794813  
133.008120853618  
FAM90A10 152.599052194143 153.891667472876 136.598215718877  
155.427282703527 140.169200413643 138.442378791712 146.101547300741  
146.065491816894 145.793794049657 136.712083407769 157.061602966797  
138.449057377027  
FAM90A11P 131.319783710908 144.004831360797 141.269923271838  
133.619092072157 166.868688936939 141.78867917709 140.223599881961  
133.951322753098 147.772490977392 131.095431530473 133.384498169568  
157.919709478746  
FAM90A12 149.952762225731 134.591581328442 129.247701136266  
172.057586741925 126.5929421833 139.3864057463 125.884565343075  
171.813279175663 136.831280469398 149.326216726716 126.503135702506  
136.858037332222  
FAM90A13 118.015175851934 114.785989868306 121.356731684516  
130.646956516128 123.129785564258 110.286187184448 115.789536577324  
125.833649377492 119.558626216818 128.895325544109 113.199690522854  
121.170340423391  
FAM90A14 131.025725443485 124.477586539576 118.510960607141  
116.558752619296 124.116400777472 125.374764771516 131.285279061742  
124.859984709406 116.408126010926 126.308622415913 142.431979387165  
117.112667504781  
FAM90A15 118.9803314875 114.960460615926 147.476805635744  
127.758381206968 130.674263597931 127.475316138156 136.764881711137  
128.637470206958 129.153882779488 121.632494500096 141.180647782041  
118.249148086655  
FAM90A16 149.984657985607 148.597346678768 126.969504644414  
141.730912072471 130.430917518283 144.713108022551 139.263602290256  
128.490341173553 148.412895185127 138.474429223902 140.713537140957  
142.937182720493

FAM90A17 122.619429537799 124.892438890234 133.473140653666  
127.354826381656 138.79473329684 129.614692778261 146.782830477983  
132.686915065196 140.747967724586 127.492376657284 142.272117655292  
133.864612785572

FAM90A18 139.217113811817 133.788197693571 140.338622198206  
135.054931772725 133.296200563657 151.567693140302 123.817878562971  
157.649902282769 137.702802090925 141.334394187941 144.520435611318  
150.985061659285

FAM90A19 132.958521136 128.922269289649 122.84779238795  
138.633019006784 113.170014668758 150.657800679032 123.798513338021  
125.331215990597 134.074425424613 116.421771593211 121.903115540516  
119.32696696175

FAM90A20 130.574019477669 145.077517845584 133.215151497536  
128.0171233156 127.333963230749 139.543551482943 144.752418965039  
138.947760022173 136.68056120003 151.61049450647 131.741688265764  
145.581755438161

FAM90A2P 145.574725784632 152.407614042236 141.976051648478  
148.435419356331 160.099731578122 153.238678313147 141.553465481789  
142.590631181358 158.425950902309 151.188412354358 145.241301006518  
152.964940071133

FAM90A3 219.462274506333 221.719848707318 203.335012796883  
222.544542998356 238.183096218311 222.315451077459 197.981112645168  
189.307823427362 210.061754644824 195.946096353894 199.423120300557  
214.229228850802

FAM90A5 118.527464364564 129.942594772751 138.352562277336  
125.124011798043 111.538651711074 132.493888285566 121.973581817041  
118.895095992424 129.23899614612 125.154784284706 136.764881711137  
123.756349408641

FAM90A6P 136.965972077733 145.517559593811 143.59105195427  
154.928072022777 149.645548888832 146.739552899981 147.446381217887  
139.328340242696 141.670426206169 143.416816860089 135.760578586004  
146.26936366452

FAM90A7 115.738984899365 132.895500657638 132.458764637407  
136.022614387461 124.625603721372 127.977782260866 132.84268776659  
140.295307451188 106.182551369456 122.97229333908 143.071052031994  
125.189588215659

FAM90A8 140.980119908597 126.473768158566 137.358139652612  
138.359423363142 140.936204899093 159.337816095012 145.768857553634  
148.697019570015 133.416938451465 139.981905225845 122.414781975236  
145.371273337639

FAM90A9 131.759422682853 126.988118823204 135.173464753848  
137.760712896718 128.359034755228 130.546471770588 117.480506535399  
132.642931022024 131.876061826583 132.845116298605 138.233799607706  
141.317113425046

FAM91A1 138.717541782317 144.460541430705 149.666293193219  
162.403942351933 217.125327913156 213.754156680604 208.713555471888  
186.904126552483 212.210383398591 215.47323777134 165.066555355918  
183.951404362826

FAM91A2 154.990319019521 143.101750222256 164.309588213547  
165.686655824416 132.823333905679 140.251168248117 141.836648910979  
146.64835267642 141.348548071751 139.372441366224 128.029736384348  
149.255405438966

FAM92A1 177.60876237572 172.604689611475 257.372740535895  
152.547558436703 167.357570666817 195.50039162477 192.69687837782

177.281197832647 199.058972781223 166.760758231104 129.964666668421  
214.52087460757  
FAM92A3 117.561878567749 128.306607216705 127.637319802339  
117.205525129664 142.228042097379 122.265071206163 124.905889975958  
122.786030993629 105.164790181452 121.924036463998 115.907902010701  
126.948090173876  
FAM92B 147.734708927825 151.682386885888 150.708102506794  
153.687536747147 136.472404812817 150.694215349678 164.791545858875  
150.384559054133 140.78582131501 151.625248091441 145.487783396345  
146.11669387238  
FAM96A 292.965109701719 311.337303524912 336.120322555703  
271.004741629789 1093.85316636801 1167.72023351098 1373.67062432073  
1105.80735904293 1509.69760873558 963.343120586863 893.676600121113  
1810.68433539154  
FAM96B 723.428294037428 700.353187874339 670.571106793204  
667.892385395063 1046.13353853089 959.532977061027 789.752781067888  
626.582864105324 1318.3633082502 986.65554605455 664.19083888799  
932.862030475849  
FAM98A 1704.25279485563 1718.80498208397 1226.10881264804  
1980.4589291261 1138.00644332379 1142.44180956604 885.104778820041  
1163.13845502757 1076.62597781124 1025.27246494218 1016.18143428327  
931.325266360957  
FAM98B 152.591091223395 140.805322576253 152.93058803161  
154.548286860883 143.011042973347 163.704616231638 146.370084152094  
149.689071018094 153.440952021924 147.52178512946 145.751336115646  
159.005459875338  
FAM98C 228.926077117474 222.484058975856 210.882890077598  
280.848426993226 411.160709628865 293.350292227077 262.79667156266  
257.706904467657 259.511314588868 207.076364103755 220.458449424062  
244.954917633904  
FAM99A 151.191822057706 129.672284417918 133.067237748129  
139.966813133326 125.506466437764 158.604431001643 120.01190102634  
148.492328039604 139.997245010492 129.38021642675 145.217261514886  
139.866536599877  
FAM9A 135.458682745495 128.381433897602 156.890299350025 145.45097990828  
147.694098231655 140.132816040735 155.587018319981 153.853856339585  
152.137669424501 135.750578960284 120.413468119484 132.875314170399  
FAM9B 124.66386961898 130.317604643904 115.963144087717 127.245190474707  
117.567991653999 119.184780023269 121.898921780569 116.939471420419  
117.12833256636 119.704436785439 115.923424095859 121.252042151856  
FAM9C 139.089444892187 123.527903217158 141.378381097266 140.680326850085  
133.211362932569 137.82918941689 138.340652133783 128.872496485403  
142.747793303346 145.250076958551 137.260359343758 151.712097221291  
FANCA 149.560505078257 141.5739152922 149.788558681761 147.784078315091  
162.52512327258 143.705475208192 129.719122724699 142.480203661104  
142.745838888446 151.902352951251 146.565265415908 160.446191353364  
FANCB 140.750004067571 144.988803993714 129.880696706381 135.991630745082  
179.432235153344 161.00635457883 141.08625682411 201.167206950576  
146.755803731358 145.544996009633 153.697775290962 150.244284323504  
FANCC 173.001985500448 159.133905701536 127.540848073484 142.988500173397  
179.137734914428 144.466914388684 148.956326355381 151.794243108455  
163.566535828036 159.26101905957 178.966169998125 137.195906276069  
FANCD2 125.822346524903 138.97443063851 118.294324274616  
124.851025681014 251.268669431283 213.447886742681 158.56996905631



|        |                  |                  |                  |                  |
|--------|------------------|------------------|------------------|------------------|
|        | 228.560346647306 | 215.300064529551 | 184.365354978005 | 185.602093266907 |
|        | 219.394500571586 |                  |                  |                  |
| FANCE  | 281.405355165228 | 369.373283422151 | 290.135914275115 | 418.420753332232 |
|        | 535.612000577004 | 287.889774984754 | 359.024299091145 | 213.123453925578 |
|        | 321.794887577351 | 924.630951485299 | 249.925640256322 | 276.284517459626 |
| FANCF  | 104.934718065476 | 107.303126530947 | 115.639101191444 | 100.325215581101 |
|        | 119.48998115497  | 127.706499722854 | 125.67874617392  | 118.064858133264 |
|        | 118.825948323992 | 104.714872508838 | 135.923022674367 | 122.379537202709 |
| FANCG  | 267.800523478098 | 332.749676505218 | 282.963958072528 | 342.147414141627 |
|        | 761.726829618132 | 463.880793292701 | 293.281098275134 | 594.92419264579  |
|        | 459.53652431464  | 461.088572554864 | 285.980446338971 | 287.703569453502 |
| FANCI  | 121.843992693814 | 136.140327952231 | 128.195916531413 | 123.722744366103 |
|        | 325.43977732888  | 372.088129459528 | 286.541028896473 | 335.389274425025 |
|        | 411.968307579588 | 290.688850193983 | 212.669156800241 | 386.067573158514 |
| FANCL  | 167.430767074847 | 169.705236302448 | 183.056707813352 | 165.30072618497  |
|        | 199.813528853649 | 242.657224881824 | 255.638433159437 | 247.942904862478 |
|        | 221.512905853031 | 214.4829383264   | 286.774606295106 | 331.018914429561 |
| FANCM  | 124.975454733084 | 120.131839791515 | 121.194138394375 | 120.270397272069 |
|        | 115.16087297104  | 108.760780994582 | 119.590540166384 | 113.816165294487 |
|        | 110.113844434493 | 114.953328013917 | 131.085965122946 | 114.999628959921 |
| FANK1  | 138.02757574324  | 120.748910864064 | 120.862516074358 | 123.518170356322 |
|        | 130.749763860615 | 120.93965087814  | 132.960708384399 | 129.603952706231 |
|        | 133.890597982015 | 130.49338418515  | 159.670815631794 | 122.309041354217 |
| FAP    | 174.383193885933 | 172.934156790775 | 172.816477996646 | 220.379186481273 |
|        | 167.842122798757 | 146.16821907742  | 172.345201438148 | 180.710636205653 |
|        | 194.921021761976 | 578.811908030805 | 148.616543842015 | 183.556662533396 |
| FAR1   | 613.846166856328 | 739.52947559669  | 744.808064061459 | 649.052806726591 |
|        | 308.877027622691 | 915.015154168627 | 355.609033348692 | 547.516635695872 |
|        | 617.67819271245  | 362.502631441716 | 1304.37930719411 | 390.809169896009 |
| FAR2   | 173.892380305166 | 157.742948919213 | 166.232856234879 | 160.50439457257  |
|        | 211.289598823191 | 321.119758814618 | 158.573561336755 | 479.261755380872 |
|        | 245.850813387241 | 180.814610631281 | 183.82450756022  | 211.736398352592 |
| FARP1  | 372.94852645418  | 369.974231530826 | 280.656087497806 | 478.040234382488 |
|        | 209.74583569369  | 275.343591424586 | 209.568066932367 | 355.443758121675 |
|        | 375.539588956213 | 221.796935051107 | 369.838429521168 | 328.826483579278 |
| FARP2  | 186.747375844319 | 195.141733146452 | 209.090788790449 | 213.791379190359 |
|        | 161.911468506919 | 166.099940078284 | 180.590215659031 | 171.629605754643 |
|        | 190.318957029666 | 173.951605889009 | 343.048904374136 | 197.47340234886  |
| FARS2  | 403.47026424469  | 438.533112511098 | 482.226889092547 | 542.267204956846 |
|        | 300.199170426996 | 394.294057009443 | 355.990908506973 | 350.926679856514 |
|        | 373.290426793366 | 372.894376776771 | 229.046153362151 | 418.319283832879 |
| FARSA  | 206.605699708924 | 187.978627462391 | 176.208206282902 | 261.988345506548 |
|        | 478.180723959397 | 256.99019407912  | 240.591548171052 | 252.789376168324 |
|        | 202.01798254763  | 204.802810257516 | 238.124340832815 | 228.184535093641 |
| FARSB  | 141.466287523861 | 136.935498266723 | 129.640303191006 | 128.729687597908 |
|        | 114.405811161631 | 127.001546144286 | 122.351186755611 | 124.168162885295 |
|        | 121.113186311514 | 126.259029676691 | 127.000175858468 | 127.979574243743 |
| FARSLB | 29532.7890259497 | 30573.5859783923 | 31402.6950316226 |                  |
|        | 29868.1819370827 | 17830.1333276624 | 29868.1819370827 | 21110.9013462062 |
|        | 30573.5859783923 | 30573.5859783923 | 20887.0399135573 | 28530.8435957612 |
|        | 25808.3502428915 |                  |                  |                  |
| FAS    | 172.774914399844 | 155.951509643078 | 141.518491890811 | 142.122556679441 |
|        | 125.79193748535  | 144.81320329947  | 136.541973790157 | 146.11669387238  |
|        | 149.8919086368   | 166.472068379965 | 156.695440330379 | 151.577450119302 |

|         |                  |                  |                  |                  |
|---------|------------------|------------------|------------------|------------------|
| FASLG   | 114.818898581401 | 104.091301211096 | 124.889829874126 | 114.421383025971 |
|         | 110.875112640101 | 114.704831217037 | 112.488125161387 | 113.756115251188 |
|         | 118.100611964852 | 111.794102015354 | 125.962178569021 | 117.003205777245 |
| FASN    | 463.622673539254 | 593.090436323333 | 722.974310297586 | 785.290353402444 |
|         | 15809.9561036761 | 2004.19532096239 | 3510.24464112094 | 5195.2087608308  |
|         | 5373.2173152906  | 2249.8123426309  | 993.774175699873 | 3093.38255333143 |
| FASTK   | 459.53652431464  | 488.379057110543 | 456.298408568636 | 656.867138022837 |
|         | 823.297606185721 | 565.509446660206 | 748.38293089716  | 696.003998372271 |
|         | 579.923640505245 | 501.946140974776 | 674.338740875512 | 766.176882605175 |
| FASTKD1 | 202.869364962231 | 183.302479730653 | 189.482046688226 |                  |
|         | 205.65398844108  | 255.677315946354 | 258.964323941464 | 204.161375686761 |
|         | 225.546125484563 | 204.237952297239 | 252.789376168324 | 343.571296297462 |
|         | 210.852300463808 |                  |                  |                  |
| FASTKD2 | 175.679405338399 | 186.406439948242 | 243.283375388645 |                  |
|         | 198.737421468412 | 166.472068379965 | 362.899103657252 | 200.668298229815 |
|         | 267.285998701386 | 222.243523614518 | 196.734037460218 | 213.93763684072  |
|         | 258.830885826237 |                  |                  |                  |
| FASTKD3 | 171.660157220703 | 164.03801002919  | 193.502988612307 |                  |
|         | 175.601912488918 | 188.322853571195 | 325.907037744936 | 253.463871742303 |
|         | 351.02823853348  | 245.317436234586 | 232.465880700217 | 187.796440205485 |
|         | 260.52593414721  |                  |                  |                  |
| FASTKD5 | 278.469340236003 | 265.572253407219 | 255.039661999732 |                  |
|         | 272.639413442579 | 341.361299896997 | 567.869601934138 | 372.894376776771 |
|         | 457.292146759215 | 462.948429969719 | 333.533043832976 | 368.466518140043 |
|         | 410.337491313251 |                  |                  |                  |
| FAT1    | 716.420861490714 | 766.420275252501 | 563.648536446918 | 656.660582895703 |
|         | 852.436775264873 | 1345.8970795036  | 1502.3444541735  | 1165.95924778817 |
|         | 1287.3125466789  | 1465.2419150392  | 2078.76377557352 | 1492.15137418791 |
| FAT2    | 145.122171099946 | 156.964080041261 | 124.408996713299 | 129.83316008718  |
|         | 138.634814756987 | 131.351303131574 | 179.191401472241 | 141.476041451832 |
|         | 141.550553034455 | 1080.95725397659 | 191.297539967707 | 255.71113398292  |
| FAT3    | 578.084277076692 | 497.269957926657 | 558.251384152474 | 603.061485415867 |
|         | 167.791351000743 | 169.158049136321 | 174.657352858049 | 181.715992480635 |
|         | 157.594038046897 | 178.262619516994 | 192.737713851863 | 164.048326497989 |
| FAT4    | 223.573080955095 | 170.646233722767 | 165.45479542657  | 188.685460181066 |
|         | 141.644521617419 | 153.162313098346 | 141.097257687941 | 138.188522429661 |
|         | 139.524233960073 | 148.168587884369 | 141.139737175648 | 141.727639388452 |
| FATE1   | 131.204616536341 | 139.369815367465 | 124.892438890234 | 129.733935614802 |
|         | 140.36425603453  | 136.799138736925 | 137.586032396204 | 130.597786455581 |
|         | 135.691862612951 | 127.696578575874 | 131.369177333568 | 146.875733210901 |
| FAU     | 10106.8225600705 | 9433.53967760357 | 10661.2216586049 | 8121.54750071211 |
|         | 11281.201625198  | 10474.0047946187 | 8982.75408120297 | 8532.46059476152 |
|         | 9016.04641569485 | 8864.70614223459 | 5265.74259211695 | 10704.4678928541 |
| FBF1    | 150.176942469551 | 146.428534132236 | 133.775716376056 | 137.793462381778 |
|         | 143.322199505844 | 138.428527640896 | 149.933919274985 | 138.746987455826 |
|         | 136.461182044855 | 129.13353785479  | 140.493975416335 | 143.373932371335 |
| FBL     | 1611.58245311122 | 1753.58770316818 | 1530.45813438919 | 1695.26858186096 |
|         | 4793.22133852447 | 2131.68478964427 | 2712.07480130502 | 2004.19532096239 |
|         | 1899.94714976387 | 1552.69879081022 | 2792.13364570755 | 1944.15673951528 |
| FBLIM1  | 162.229052648595 | 171.086559024882 | 162.955366577418 |                  |
|         | 160.713790305656 | 147.330897105911 | 191.241000498118 | 136.93893152919  |
|         | 148.624135810148 | 143.028618831382 | 234.28146549561  | 153.972471779464 |
|         | 179.704370382771 |                  |                  |                  |

|        |                  |                  |                  |                  |
|--------|------------------|------------------|------------------|------------------|
| FBLN1  | 7003.06505884735 | 4875.22637286719 | 3700.75770419386 | 3712.67025366957 |
|        | 5250.88041666757 | 3408.6535437109  | 3413.39994653641 | 2962.11407134162 |
|        | 4073.21075791737 | 249.400820221233 | 1706.06615968622 | 396.04031733841  |
| FBLN2  | 3130.30693451802 | 2104.59597571915 | 1109.79571066685 | 2421.87041217217 |
|        | 1371.56635975955 | 178.984409575632 | 265.470314691221 | 179.009510246709 |
|        | 306.59090554099  | 575.23272138912  | 196.990867962546 | 172.245089970803 |
| FBLN5  | 1504.15682715484 | 890.810315261602 | 1001.92763014266 | 895.463355957918 |
|        | 164.21464602746  | 203.704734790602 | 156.852187451794 | 215.673878830563 |
|        | 220.362946606131 | 182.42088387266  | 164.901810642726 | 170.158189150422 |
| FBLN7  | 159.973758408655 | 181.400788152988 | 125.576103876855 | 142.919910421524 |
|        | 128.667662783862 | 131.265594391542 | 127.466779212194 | 135.088149158147 |
|        | 140.907889482107 | 137.244552699212 | 165.277935422113 | 131.273916869754 |
| FBN1   | 204.237952297239 | 187.519053043173 | 148.25001336038  | 260.921177985439 |
|        | 116.983869766097 | 113.38168751499  | 120.644987579644 | 123.929180327423 |
|        | 136.923079303455 | 140.309394542299 | 141.724442944322 | 122.133292722932 |
| FBN2   | 165.880071298733 | 174.389706515542 | 174.576132939661 | 155.896065329825 |
|        | 380.146996799549 | 167.421776383056 | 146.919110530891 | 217.408824020423 |
|        | 214.200081541057 | 1144.07896461196 | 167.325227483198 | 176.77183598995  |
| FBN3   | 146.927825526831 | 147.319360896679 | 149.821848101995 | 142.311108110185 |
|        | 149.824791474186 | 144.961976523279 | 159.2488784104   | 147.038700869156 |
|        | 137.17370871536  | 154.996829706812 | 145.741465098455 | 145.407517107023 |
| FBP1   | 336.70893120135  | 552.962676093514 | 599.926717145115 | 188.641397688261 |
|        | 4043.28299602858 | 2309.63504858248 | 168.521601064374 | 2352.01196541874 |
|        | 1732.52466021178 | 296.088938872643 | 1736.03342040646 | 1696.69982157582 |
| FBP2   | 136.788269716383 | 147.218415065692 | 128.782192901724 | 133.387065801837 |
|        | 119.418866166776 | 145.799530970042 | 143.137158027738 | 151.826103919919 |
|        | 142.372470063444 | 148.08870546717  | 146.070871543153 | 173.577723566555 |
| FBRS   | 397.737702926328 | 457.130051460676 | 434.509391836336 | 566.914448800423 |
|        | 697.97116981445  | 541.460843251764 | 484.658140651032 | 478.847650837714 |
|        | 642.057106241761 | 445.348044448953 | 532.786041960586 | 443.444024128516 |
| FBS1   | 186.722842989058 | 207.218779485342 | 181.036375971015 | 204.260800563197 |
|        | 220.242344043437 | 178.606255846041 | 200.264756078778 | 187.296479395462 |
|        | 192.640717683236 | 192.627266049516 | 222.156471143857 | 182.929326147069 |
| FBXL10 | 578.465753476561 | 624.467319041884 | 472.793332506369 |                  |
|        | 643.468308027006 | 907.306121257236 | 643.306565600931 | 563.648536446918 |
|        | 648.38049615541  | 743.510369438587 | 504.141861790903 | 302.570932942847 |
|        | 600.757699463777 |                  |                  |                  |
| FBXL11 | 664.343553341563 | 651.998433127992 | 472.279492678374 |                  |
|        | 889.6617510875   | 634.046843336128 | 542.883453307    | 472.279492678374 |
|        | 401.461825804111 | 564.588706307423 | 399.664121956178 | 137.519771130707 |
|        | 428.09583118349  |                  |                  |                  |
| FBXL12 | 359.493075382333 | 336.380724981693 | 333.200230327106 |                  |
|        | 339.172031360524 | 277.129985959184 | 365.864755316163 | 357.972320648217 |
|        | 319.966785546419 | 269.831616158113 | 343.346755862776 | 370.140588087649 |
|        | 419.126814511305 |                  |                  |                  |
| FBXL13 | 153.551359970644 | 155.502363062633 | 145.640156204495 |                  |
|        | 158.098055917452 | 148.215172022129 | 150.405715534245 | 148.176995739142 |
|        | 145.662818023154 | 139.217113811817 | 141.557420268382 | 147.526701500887 |
|        | 142.616603901398 |                  |                  |                  |
| FBXL14 | 187.65716654049  | 176.155413809391 | 212.420616436137 |                  |
|        | 181.79418355897  | 174.962380276394 | 187.30908753142  | 183.998458233995 |
|        | 154.371946675862 | 159.696443182844 | 177.508603290389 | 155.904257649751 |
|        | 176.11287574658  |                  |                  |                  |

FBXL15 361.082957133644 391.185365567603 338.866471651692  
 486.653672099699 359.935451429371 201.637540930213 249.449151040445  
 207.940596890723 226.712995229189 209.960795065047 330.241479004885  
 320.467139255533  
 FBXL16 142.939578759097 139.936661244361 145.726651022813  
 139.008854444223 147.841960346835 148.11536596061 137.391141254051  
 156.873097743717 167.67952650068 155.368204597287 150.218643705925  
 168.210416363286  
 FBXL17 164.022021048626 141.033948839613 125.416113646128  
 135.4702891855 142.866874321248 165.249658565871 155.243643210534  
 125.27625242915 132.011199659803 171.350620456505 171.358746749715  
 165.003646188775  
 FBXL18 229.200570583629 283.235844022826 278.168897504985  
 374.337030706199 546.181615768667 212.531329857909 256.291984914927  
 387.224184063662 324.009703043876 297.419034136005 223.474531516972  
 262.577672828611  
 FBXL19 132.197346228417 147.766043861937 150.231063426302  
 129.116354997747 143.298218989451 153.626180103404 157.04599638368  
 153.457715729768 153.719751724358 137.685104040843 141.628203045085  
 135.493053871272  
 FBXL2 252.957489543915 260.098788125373 257.408058436941 255.770193180874  
 155.837866295709 199.854728619468 181.491120129045 169.720414035325  
 171.190796424612 200.867515935703 201.349209185128 240.915496717526  
 FBXL20 299.616447269111 263.005303710717 318.348505551265  
 332.082749517913 275.584858082096 229.230239609291 407.442337662943  
 601.800326895295 366.857139377277 307.480644393018 210.925203743958  
 245.489266602897  
 FBXL21 176.214950733324 142.663334893424 148.454344601562  
 146.782830477983 153.519207482423 140.092648878007 141.302075343586  
 154.618685493541 130.161889021281 129.884064654761 138.875827888646  
 155.673532440475  
 FBXL22 421.690849282483 607.805002786409 505.83860711693  
 837.872187194784 142.745838888446 156.737219981981 166.036553680319  
 122.624828884731 149.73250641246 129.737882221259 128.077692981235  
 149.070750686003  
 FBXL3 153.350690419636 177.88534558205 201.593025256991 149.651553512698  
 152.585572167313 177.491294133515 151.330035086652 160.640160107693  
 169.332207863684 196.245297362955 180.528296177577 189.853136769155  
 FBXL4 104.544792793756 111.111969531957 115.409568875238 111.577400298092  
 108.861243071977 112.07238018581 110.718864165172 113.905364405553  
 116.839796680107 107.40922161073 117.12833256636 116.294180301039  
 FBXL5 317.659548748735 267.622579012917 424.855168311509 293.350292227077  
 212.190707408572 402.299165610893 299.106362530855 282.742833166843  
 297.544216175512 289.667302610069 322.64731764456 319.560819487616  
 FBXL6 189.37832342197 193.569894919176 208.555506929113 215.426918011158  
 243.159062832085 246.63579788514 181.183277133224 276.184421402511  
 272.117599603586 294.280238648737 281.369059516242 276.582734590058  
 FBXL7 395.716879127149 333.592915218163 288.68376542946 433.751675703425  
 130.042683562719 121.260355515095 119.06600048679 133.891337645936  
 148.89180107448 130.735223763219 161.841975820372 133.43362126395  
 FBXL8 121.384582834956 129.171589574238 125.661697165943 140.579839043912  
 140.779962389412 120.602818832247 117.841844605128 134.448481253264  
 118.144109564626 123.7615105541 142.588013648337 125.208803405105

FBXO10 139.847813838017 142.674671804361 151.451443480833  
158.126480180017 138.104527851969 133.496922906874 134.619470709414  
131.525916493834 129.320210774045 136.13751015238 119.9414421871  
126.77232818113

FBXO11 537.698489904622 516.577357935963 523.216537391852  
502.499539192864 396.781827940009 489.528040775004 439.33566689752  
463.802270256246 370.390323116113 457.779218916808 444.826775824095  
443.853458865556

FBXO15 131.988591391373 144.214589452164 144.853868519575  
130.613760017864 171.287186905764 138.994054501048 137.388190728367  
162.208028489943 155.247452081206 127.887666721519 132.236355533277  
142.324077852852

FBXO16 137.779607093226 141.25089277145 124.738217731488  
156.602240897907 154.037622223246 167.811412309356 134.949572471421  
139.736465430177 154.197254746757 146.637799077812 143.419034484087  
138.571102593669

FBXO17 174.168079247768 182.066922756289 176.725347194807  
187.280334341504 130.049854901235 134.432461986523 136.126542897364  
121.841080387875 145.801228425692 146.077082896858 133.544777710022  
133.9382467268

FBXO18 582.062758687489 587.388038484307 464.323065038265  
650.911886508922 636.781477235579 594.92419264579 443.853458865556  
464.812091712746 435.183433729519 358.780920910909 572.548647437438  
435.69811966429

FBXO2 150.968998243223 173.10229478279 139.403087367992 140.52997588229  
167.149578610266 222.8766610624 194.961531388323 219.228720772236  
204.802810257516 212.987082617173 236.401834189942 200.424975825325

FBXO21 787.017214032692 846.985164747386 965.031655021246  
769.009371389327 665.602699607102 1055.79590411506 907.904780399957  
888.706978062337 1053.65938651514 674.571475335107 976.360310504918  
917.188039935737

FBXO22 153.655778377717 155.702330867056 165.158465031363  
159.918778562802 166.368623023308 169.895672129542 210.015199832609  
183.081450609516 183.371103136697 237.01460308334 186.077477713775  
213.602504580364

FBXO22OS 147.243263182654 142.06907380533 187.978627462391  
160.066390229416 137.018521754443 144.81689330206 153.832132196284  
145.787468865642 148.294870328642 150.613624696604 143.180247878507  
142.444072809204

FBXO24 122.501785735146 123.111192189217 117.716094828779  
117.856184272322 121.483610947845 117.969576809288 124.794260959228  
113.479382235297 124.190161132628 114.664782541261 132.952355710395  
116.718099363329

FBXO25 154.003862874241 135.381131982323 150.021512237553  
151.194282143046 148.120968141789 143.140502042489 138.220016828327  
137.884051774657 143.653452869664 164.109321257638 143.791908191551  
148.227581116046

FBXO27 125.768053724055 121.116206210402 111.62514398781  
131.532660547328 182.292947734054 136.058527150792 161.870389635266  
172.073751088968 155.648782851696 133.846275669922 169.87591929982  
118.631771242606

FBXO28 285.83626978316 283.807827536147 229.805500520256  
239.970202560698 269.006221210929 462.025126897013 333.676803661366

259.338947392465 359.329520507158 428.66614441422 246.63579788514  
463.754869412768  
FBXO3 191.937607311711 180.590215659031 243.402781509365 166.095964870713  
160.876228450608 194.979795724712 197.91325268683 177.151218006672  
182.665357598121 259.146673652222 229.347135478142 177.415756020166  
FBXO30 579.923640505245 510.434895296759 706.628675634893  
470.154677948419 247.194197143562 256.237185590901 254.552034511333  
270.490971664802 186.127543877065 269.379272725008 201.085046871333  
211.595513743111  
FBXO31 1370.61156801632 1607.52029676299 1413.37062765856  
2061.9164323309 447.059120541009 297.071121022183 336.279209908669  
394.294057009443 328.431289733169 335.142319387164 337.487980551006  
330.641230715217  
FBXO32 1116.19403476786 1145.35733270036 2430.70635781622  
1420.27222765071 251.665539319612 206.257167235126 254.036619126409  
310.075815009404 245.351459157365 338.585771590234 225.96618659877  
164.281196089736  
FBXO33 392.909481887174 466.691191261997 414.333324610267  
441.958777965408 372.149771075286 464.196512015649 534.920870202582  
454.030083521756 383.682951666155 372.54091392596 331.747622606378  
440.319777672273  
FBXO34 291.683896942007 306.946103334814 303.138041758745  
246.327991259259 264.685862877779 446.509863498357 418.244376024741  
334.101619029105 316.364342983155 398.673582680257 513.816017871024  
350.658722333252  
FBXO36 110.501341211051 117.312094804205 107.385565665491  
110.368392735494 102.725375719353 108.850992642446 110.602406076036  
112.005939063045 106.854721604889 124.387133895009 131.670601860412  
112.987890650593  
FBXO38 272.770616373687 265.754141836026 303.184785797741  
274.120234926832 227.52352046188 310.365203383647 378.037190077449  
283.377663208926 267.372241661758 367.229293432041 348.111872425949  
354.656612182522  
FBXO39 110.304102941202 116.759526220736 103.202873534814  
102.661440700541 106.147993332294 106.629065516249 114.249891266241  
112.166192839859 117.028963434266 104.977794653504 99.9173294438729  
123.227904580467  
FBXO4 167.51207060064 165.262738484387 171.775741648309 161.021740537372  
211.085778902367 235.650688823345 174.42996813062 245.378747269929  
179.785198362326 149.584582050615 182.074569356713 193.394225360968  
FBXO40 107.780763250481 98.6941019230576 111.672450681359  
109.806338826826 113.083678884076 102.421174406474 112.809629077555  
109.781334128478 99.5148073333731 112.896360244636 120.003095000297  
112.026113831896  
FBXO41 141.859889340936 160.265389854694 159.668402591441  
137.280933631075 180.179981672095 210.316431648335 197.947433984294  
203.675655444583 158.325554470875 149.959767051801 156.609370182062  
174.454754564111  
FBXO42 201.441808401878 205.4648759901 166.001279428607  
212.710910778949 210.711890471222 141.114148695402 177.11682975342  
182.248178961707 188.252507246148 194.257024100927 214.991170762327  
179.137734914428  
FBXO43 130.416957431512 136.682172321984 129.719122724699  
130.346150829949 136.085524091635 137.885506916098 133.122174596886

142.577102697682 135.743159681223 139.771342253058 145.274345879987  
137.592523459311  
FBXO44 123.692366307662 124.885950473434 122.834017529045  
129.935532080325 124.415058391979 135.007473769551 140.234485088845  
137.443463471483 140.864196804152 125.019064287385 151.730862403472  
138.53179773391  
FBXO45 185.617936412633 160.949030247406 190.572712684622  
188.515336186633 179.905809470907 200.902123076244 196.329602378007  
204.35801867216 271.356289141017 190.5930909277 173.432960318793  
179.286187825363  
FBXO46 249.633252091596 311.04252785157 273.303240462047  
344.575967665039 662.958637409597 458.218913259336 372.374101464689  
351.188086838653 431.182384100794 266.652805624826 377.89330639683  
275.437030326768  
FBXO47 130.548611758921 159.994376562272 145.948772123142  
148.597346678768 149.902420337518 151.32179802686 133.834423222601  
147.595573192579 154.552605305297 141.683298500736 132.240470270795  
135.10155936286  
FBXO48 162.259941098076 152.79367157305 153.426409060413  
155.018009545475 141.54943189147 157.067264221207 140.892250639524  
157.643461899964 156.930119977809 143.537785553911 144.682202635712  
154.681604647652  
FBXO5 174.749832388791 185.396765725228 153.165872773973 173.87113073582  
224.167511918105 240.283918204202 235.162439885207 281.49247863022  
236.745054217055 219.394500571586 167.278879415171 296.75326294587  
FBXO6 183.482640529727 158.356964958885 194.819597436776 182.633773540249  
711.491528818004 334.377352542623 500.246996975 541.258721278882  
417.262521411065 318.930960243303 382.069677030369 271.858059712406  
FBXO7 344.915370555826 273.651114834013 334.316711893654 310.989043012841  
332.194163016646 338.934501259414 279.75914135192 279.452819132461  
296.141012087256 323.628636799403 350.166837086936 334.916875239616  
FBXO8 499.176926371542 409.380002417794 817.913210743023 434.716530273383  
259.094411953361 347.985315257161 767.662367310672 371.224296589448  
611.772512110915 662.58366387795 468.339735327273 459.53652431464  
FBXO9 138.28374062778 133.766199453456 132.769455423385 129.322481607056  
139.886499402506 130.642810886161 142.566028652989 137.340844554597  
142.752536416014 143.423661752881 150.620603731907 145.039617860588  
FBXW10 140.149064156135 141.968949222821 141.949098898957  
139.951275828765 161.096914295309 139.843416673512 163.799748670842  
152.486212022518 148.204194003593 148.235495611248 135.403206634483  
149.844677055508  
FBXW11 346.78158577526 353.005548289786 409.282410265733  
318.930960243303 229.74418058711 261.500728878974 328.60529053804  
279.75914135192 254.133112176024 374.337030706199 286.642323413104  
401.840794789616  
FBXW12 132.987389721592 147.357032438442 133.122174596886  
140.590802695412 152.222732770706 154.928072022777 145.187490179166  
149.035590153457 134.096283448464 140.194414869595 142.14116448528  
146.666759322506  
FBXW2 203.317264638828 208.72873686638 198.023465629218 235.595194918187  
215.607567127195 167.900071375885 194.979795724712 170.655648004461  
195.230219990395 218.896760804208 188.941900997781 173.044636575826

|        |                  |                  |                  |                  |
|--------|------------------|------------------|------------------|------------------|
| FBXW4  | 729.729297413233 | 858.524630425687 | 968.157701932137 | 935.784743413185 |
|        | 573.846138124455 | 347.812754957414 | 560.015499136193 | 327.384671423687 |
|        | 360.852730026133 | 422.02217814979  | 675.083275037052 | 620.899414581162 |
| FBXW5  | 267.869879189095 | 278.555009982029 | 263.845733455915 | 359.329520507158 |
|        | 403.292651623365 | 179.241385747152 | 179.593817076317 | 174.928155956396 |
|        | 208.628626112623 | 226.458509834965 | 288.026656721827 | 193.008902902654 |
| FBXW7  | 216.126000558319 | 220.896363324634 | 186.733394375839 | 212.291528248457 |
|        | 209.702683803624 | 223.429738319185 | 223.389795643722 | 211.160781061336 |
|        | 224.439293045835 | 255.039661999732 | 221.869191666931 | 242.657224881824 |
| FBXW8  | 145.020615552964 | 158.157097243342 | 150.927628184034 | 151.885992695789 |
|        | 161.019770036957 | 148.386249316173 | 144.273011517032 | 158.020651857664 |
|        | 160.32111439724  | 152.28262533486  | 158.915858403237 | 159.324816814876 |
| FBXW9  | 215.453915231774 | 213.93763684072  | 211.300733064951 | 235.795627549799 |
|        | 331.062744782933 | 470.868288641048 | 341.973002478932 | 287.593221911064 |
|        | 339.012225830929 | 347.812754957414 | 282.652193666078 | 304.402066421813 |
| FCAMR  | 141.561769570516 | 148.859129298141 | 133.177950880393 | 139.092075947067 |
|        | 134.580526467375 | 135.501192996538 | 144.182891591399 | 141.652959320966 |
|        | 152.972779110762 | 132.6175371563   | 137.033134002983 | 134.648780131578 |
| FCAR   | 1989.38201206555 | 1508.24281455057 | 1638.72366638732 | 1722.26954281876 |
|        | 265.61506544085  | 756.618969995355 | 463.99922423125  | 520.962651968997 |
|        | 411.784922368377 | 409.073045356073 | 547.202354339933 | 448.715938510132 |
| FCER1A | 351.934158805882 | 269.981476129439 | 184.021010234322 |                  |
|        | 208.869189492052 | 131.525916493834 | 268.034972830233 | 340.028737478082 |
|        | 193.16411905957  | 147.937679308903 | 161.552475294424 | 166.526875572556 |
|        | 163.042083189818 |                  |                  |                  |
| FCER1G | 233.572055978465 | 222.118666699301 | 179.932404140099 |                  |
|        | 217.576547690525 | 194.702974020747 | 266.286483421453 | 203.777944180067 |
|        | 391.400480065    | 648.549890890375 | 402.299165610893 | 258.695920967489 |
|        | 231.202047619476 |                  |                  |                  |
| FCER2  | 109.167312436827 | 111.243322115126 | 124.992439957206 | 119.107992692097 |
|        | 111.09179957013  | 118.553226856337 | 121.248923222807 | 121.472885562857 |
|        | 184.694741621812 | 115.878861991823 | 142.248293068033 | 115.184395637553 |
| FCF1   | 319.639103463458 | 266.756647182704 | 446.393631025049 | 238.588762326319 |
|        | 204.695311233073 | 195.66091457697  | 212.239485199343 | 300.358738353443 |
|        | 201.123529130035 | 336.898462056187 | 199.250680260804 | 229.85833221434  |
| FCGBP  | 141.236939351298 | 167.55209828062  | 131.816989019024 | 151.121293928309 |
|        | 718.449150898903 | 146.238333981318 | 263.845733455915 | 160.791355483048 |
|        | 246.457698183615 | 280.414161197286 | 280.990656342284 | 184.260835471542 |
| FCGR1A | 117.048846466839 | 131.077814710839 | 117.829228895897 |                  |
|        | 117.12833256636  | 134.460035654795 | 124.05019986924  | 132.804216633852 |
|        | 129.318409053566 | 144.610341215903 | 134.678445085174 | 162.333158524811 |
|        | 117.227635924674 |                  |                  |                  |
| FCGR1B | 122.615852682436 | 117.688941284427 | 117.270320709161 |                  |
|        | 118.833188167696 | 128.488598467312 | 116.118745494794 | 121.121686280797 |
|        | 138.175538905334 | 157.130045415943 | 157.560117350562 | 156.540165645256 |
|        | 126.533083459283 |                  |                  |                  |
| FCGR1C | 133.473140653666 | 138.654301345398 | 136.647239621513 |                  |
|        | 144.769824608083 | 140.010730572075 | 150.531753446398 | 139.936661244361 |
|        | 152.22701178148  | 168.384397488011 | 161.585555680663 | 161.870389635266 |
|        | 139.205887721493 |                  |                  |                  |
| FCGR2A | 159.563866056798 | 159.032710656826 | 154.79534193124  |                  |
|        | 148.934593102452 | 166.452651396293 | 164.991522994763 | 168.890506147594 |
|        | 199.555406967021 | 256.897177822238 | 307.597733293218 | 200.322334039458 |
|        | 167.442950045855 |                  |                  |                  |



FCGR2B 194.775234425687 165.619206216088 178.572212478544  
 176.725347194807 172.338509138759 158.554429311951 180.952017616136  
 188.836327151669 180.733673680261 185.275787562938 155.904257649751  
 161.581641777014  
 FCGR2C 109.770126492743 109.574386044714 115.208555742308  
 104.58424134098 107.316786994369 118.303150165804 111.448871835514  
 110.735199684144 112.867662941811 110.753661013519 144.961976523279  
 115.30786313391  
 FCGR3A 227.736106796551 202.778539118009 223.638850960288  
 227.689356258276 140.332045911008 215.143973502566 168.289492873475  
 187.65716654049 175.601912488918 174.284268998257 169.598493862848  
 182.439945229388  
 FCGR3B 187.754968096521 182.810581377888 183.397833894087  
 191.486717579847 189.603621918298 182.263724979519 207.890408761692  
 195.88263399968 215.506175859782 249.171307797736 200.424975825325  
 168.687845035401  
 FCGR3C 1197.00004043747 1105.10063745656 815.045148478814 976.782815449208  
 2720.83642320419 977.227184625781 941.065508539108 676.293399523316  
 1010.73988405469 364.964572587289 363.445110627483 738.37559871635  
 FCHO1 119.819082491115 120.387275261633 115.332409360957 120.252164075308  
 578.084277076692 246.80306998812 160.060406629689 154.834679562341  
 153.13384838492 120.050548624975 190.809584998617 187.754968096521  
 FCHO2 262.756237406794 309.861048237742 262.861105654051 250.406775889932  
 241.418016203544 251.731327363027 242.382534384155 192.512661648653  
 181.758545723241 266.80383076887 217.125327913156 251.833571288967  
 FCHSD1 156.650388509656 162.955366577418 155.272264997151  
 174.646321871605 173.017662861015 172.338509138759 174.941551089279  
 159.182533998843 147.436408919939 159.678281513591 154.236652966294  
 169.695658738618  
 FCHSD2 383.10686624119 366.007451523992 267.939624375137  
 375.255445179952 225.803528238368 220.169099923628 220.959843573708  
 219.441959146815 254.909076658804 175.757588503244 256.614964511846  
 197.2893692747  
 FCN1 199.305626149918 201.059635671301 173.459008248696 205.830321788612  
 166.330001480033 247.746304138866 216.880896769751 237.358925391616  
 411.878556907186 235.76573393374 156.200313064999 194.60309399944  
 FCN2 130.485988201308 117.199217938531 126.828097770667 127.104097294238  
 127.797666392002 125.937660544107 120.163286072512 127.325087202483  
 125.528638246486 134.558435781672 133.467092274663 114.182798672347  
 FCN3 130.766401858384 142.024171830924 131.554055357245 130.647944268116  
 179.191401472241 178.429953283621 160.543465620248 176.11287574658  
 168.594235675558 166.850279817976 187.132496910208 147.624372080117  
 FCRL1 125.674471551099 136.970505971671 134.285191872099 137.834158814913  
 137.793462381778 135.513494853742 146.276706674761 135.419628087842  
 132.595360509902 138.79473329684 122.149756212115 131.22473774325  
 FCRL2 136.366798516444 130.824958143557 142.173279109959 139.155456340488  
 140.782522936146 142.939578759097 148.166340306996 141.102274192049  
 145.212306927438 130.89594032962 134.835962366555 141.248526020456  
 FCRL3 142.671190279415 139.458529687684 138.440663763957 140.782085233573  
 138.951140134927 131.48517604564 137.59017685842 146.595540577994  
 181.110403721353 139.016274575854 137.640239596303 137.861973133557  
 FCRL4 118.011195631598 137.307786147787 143.455941298415 133.384498169568  
 122.900675062181 131.212705319485 136.113421708277 125.826111950648  
 132.069175779393 122.368581795931 117.420765321056 127.665162524824

|         |                  |                  |                  |                  |
|---------|------------------|------------------|------------------|------------------|
| FCRL5   | 156.880120259304 | 169.301498852556 | 164.048326497989 | 172.568852318369 |
|         | 156.417000271727 | 174.795822188504 | 167.719651771357 | 158.767439363085 |
|         | 178.12073430094  | 179.905809470907 | 151.606932937644 | 168.188793271919 |
| FCRL6   | 148.027464692171 | 154.904424749528 | 140.779962389412 | 154.24500773656  |
|         | 162.096065738375 | 145.733828447934 | 130.532559074698 | 147.681723355535 |
|         | 173.056715623574 | 170.05799929575  | 144.92594578882  | 142.259196792767 |
| FCRLA   | 113.891385601095 | 118.039780360151 | 108.386545220984 | 108.543795408713 |
|         | 299.80615152845  | 124.327827104244 | 275.468194644053 | 161.079169854907 |
|         | 330.850098426464 | 114.249891266241 | 134.11753210296  | 120.276236447255 |
| FCRLB   | 169.293852989203 | 212.107842040568 | 165.545136704242 | 178.657325741035 |
|         | 7555.47017983216 | 817.913210743023 | 2992.18604022433 | 453.593585032712 |
|         | 948.734577648136 | 251.61451602376  | 1885.93146154931 | 598.924339094496 |
| FDFT1   | 948.150767619765 | 1042.40539020413 | 1215.96648642927 | 896.185223980593 |
|         | 2225.59207490574 | 1432.93880448974 | 2756.22069438696 | 4892.17875938832 |
|         | 2107.99357083999 | 2036.43904731226 | 2845.0377634896  | 2171.00457877604 |
| FDPS    | 341.714401872192 | 356.530530468568 | 310.174932137546 | 374.657816575897 |
|         | 409.073045356073 | 441.435444003241 | 359.518199449791 | 484.230510636533 |
|         | 422.688531130043 | 478.040234382488 | 483.549698382115 | 440.657747083721 |
| FDPSL2A | 157.454558821261 | 166.285052506316 | 177.630246034993 |                  |
|         | 185.830435830545 | 137.03111066852  | 171.650247980576 | 178.707066209511 |
|         | 171.521579011287 | 153.996429870564 | 163.396651801661 | 166.8846964604   |
|         | 173.526005872207 |                  |                  |                  |
| FDX1    | 164.848970268132 | 182.439945229388 | 190.625250757654 | 169.012926546641 |
|         | 196.329602378007 | 182.248178961707 | 196.657475905674 | 183.619184925353 |
|         | 164.185346950306 | 174.364798143068 | 180.747527895349 | 160.039086963419 |
| FDX1L   | 344.070947256963 | 370.301819403832 | 331.888150158628 | 462.144334719146 |
|         | 403.812520074723 | 379.387095129725 | 380.754569467715 | 287.287337931982 |
|         | 213.531307836195 | 347.3483417873   | 200.633009710701 | 293.018282386003 |
| FDXACB1 | 138.054470878471 | 145.416733388652 | 143.272669418277 |                  |
|         | 148.618327213374 | 169.206723147505 | 156.923675862035 | 142.953661611418 |
|         | 143.446317006075 | 152.017655364287 | 154.150568177135 | 163.504122327429 |
|         | 169.568915494577 |                  |                  |                  |
| FDXR    | 129.394359810841 | 142.039943511086 | 131.347213356457 | 139.265915951162 |
|         | 139.002213373439 | 138.079494235456 | 115.68358702028  | 134.576622528874 |
|         | 134.008118774075 | 149.65417821994  | 137.157492354617 | 126.659859384257 |
| FECH    | 232.845268785472 | 228.349507726225 | 269.495247190598 | 258.012234458166 |
|         | 154.985781979984 | 177.742616962629 | 152.454414703534 | 199.916301659113 |
|         | 143.373932371335 | 181.747090380435 | 197.231408726321 | 173.892380305166 |
| FEM1A   | 647.273409499313 | 725.621153262924 | 611.540759532294 | 834.537908087672 |
|         | 869.937761943249 | 631.819659701092 | 815.388288623756 | 741.255013151687 |
|         | 766.420275252501 | 611.286068355939 | 721.31849915135  | 601.401329244185 |
| FEM1B   | 161.552475294424 | 171.465178761171 | 131.013719535992 | 138.745560049251 |
|         | 167.586897846525 | 154.066939372379 | 189.853136769155 | 147.294408903227 |
|         | 147.823552813852 | 284.995098167431 | 158.287108069245 | 161.988082494464 |
| FEM1C   | 929.69741581954  | 911.340266389071 | 808.55123510297  | 784.72162514331  |
|         | 261.065986251886 | 610.591049634222 | 505.143815448613 | 590.3584324045   |
|         | 313.480307434343 | 558.440840319738 | 510.555184032017 | 468.060528109338 |
| FEN1    | 225.783771938969 | 265.670643951648 | 237.266455875982 | 275.929414239664 |
|         | 683.470866056244 | 668.853969513382 | 410.731869154912 | 691.632061537999 |
|         | 572.049540360134 | 429.812058546782 | 314.4408959517   | 569.656573915709 |
| FER     | 215.40037757604  | 208.476367897256 | 243.691004557778 | 191.348260799746 |
|         | 165.459993078103 | 171.98820121502  | 172.502036705114 | 151.895142552067 |
|         | 162.056622258216 | 507.040326298457 | 163.463191619941 | 177.11682975342  |

FER1L3 941.572186137467 760.572409199179 1084.95095717937  
 831.08287594363 650.263737836685 586.246004571452 1243.11900823259  
 623.68308750251 1178.08490218853 664.809419789814 1025.27246494218  
 756.068695265118  
 FER1L4 204.183472655276 250.718986968076 267.869879189095  
 179.46936343225 595.120528902501 1887.82245931444 3184.98944679038  
 2045.24382334506 943.677679525947 166.88833169342 1595.22997714906  
 1969.67552562117  
 FER1L5 147.633793743254 145.146797807275 146.04584032214  
 158.452089329714 139.677109265241 140.311843829601 137.826458479398  
 140.78582131501 147.387754442307 154.558968826495 158.171302275984  
 155.641860356683  
 FER1L6 137.048292841566 125.653011880654 130.59670974887  
 135.627840788802 107.580425848009 128.276471459777 106.126202301438  
 144.845726048937 126.365861978893 136.497295707149 151.761369162723  
 119.040642659337  
 FERD3L 128.005043478952 134.891736344801 131.330974614437  
 136.19725093985 131.367075440559 119.382151435379 115.440152891339  
 122.603226380439 123.913203953936 126.980375035189 157.675974692761  
 121.838802846453  
 FERMT1 158.509885816997 169.417764098848 160.799950553311  
 149.565725707356 1289.56069670699 433.11536069928 504.275299381356  
 386.85874184746 504.502047826003 462.437471715008 370.227329649269  
 501.301694626942  
 FERMT2 9099.13956219312 7406.86318549013 6670.51138785163  
 9820.93899217345 460.651156484562 459.973764138144 247.550312458738  
 325.387193207414 431.413030534188 473.057488824363 244.596233138747  
 246.676401619881  
 FERMT3 161.408318705503 151.214631373344 131.626173473789  
 145.615291241733 207.173653740239 153.440078723527 147.866909109733  
 201.123529130035 263.936023499588 148.905860943967 195.481680273686  
 142.480203661104  
 FES 291.020789939476 279.790257881254 243.10297424873 264.233381434738  
 468.170972478717 228.270158363878 252.365946808078 450.851711160136  
 250.542405852865 163.143613079037 240.376851873817 293.281098275134  
 FETUB 131.739418639854 145.7202993771 170.505553609318 128.882160435252  
 158.95714101556 132.059507616101 139.421753451936 143.426053070219  
 137.933122094638 141.710076413441 157.216793735479 146.384051525624  
 FEV 140.792400101142 155.187900101727 145.193296081527 178.939268046323  
 145.783320434143 166.182850621447 175.372355078713 153.405052909585  
 159.470818285679 164.247251507109 156.336425973696 136.087702679172  
 FEZ1 485.309521583972 417.442660073269 448.767690095033 443.444024128516  
 267.372241661758 156.852187451794 184.377923161698 195.561296046507  
 172.604689611475 209.279164243868 183.023316857537 148.086979061158  
 FEZ2 1350.87073284396 1344.1288416533 1229.47460924638 1319.3522488218  
 809.729160605727 701.847905027147 795.464850398761 802.304294140514  
 752.585744322608 1130.32966481315 909.388774224614 820.249910349431  
 FEZF1 159.515698265424 139.804518460303 156.707737817443 183.779065928447  
 138.637735867167 149.586651393588 149.049931380459 142.886493948916  
 144.905870145004 154.854538639035 140.864196804152 157.761231106669  
 FEZF2 137.876234091056 145.904866987074 132.966873990501 127.385776388242  
 140.767270136561 120.041623078295 136.454911192129 145.281664250703  
 140.427188241455 129.70974867852 144.450810504499 151.403431105471

|       |                  |                  |                  |                  |
|-------|------------------|------------------|------------------|------------------|
| FFAR1 | 126.76986764971  | 149.160808104789 | 138.855454645579 | 156.740412695351 |
|       | 126.561067704708 | 134.565199667396 | 130.314247368361 | 139.595986615703 |
|       | 137.919253591105 | 135.503338987971 | 156.385100395531 | 131.071614211431 |
| FFAR2 | 118.988269692812 | 111.196610704726 | 114.512028664352 | 107.049865500702 |
|       | 116.007006375993 | 116.221426977629 | 108.007762863766 | 112.693431140524 |
|       | 125.940081665592 | 149.898614923436 | 121.113186311514 | 109.613208767992 |
| FFAR3 | 123.650702461773 | 127.818137805569 | 130.689272423595 | 134.436423298225 |
|       | 119.475462713424 | 128.282999719959 | 127.740057874561 | 125.576103876855 |
|       | 128.56000638844  | 128.523703756493 | 151.106858426994 | 133.610143526954 |
| FGA   | 131.456697863268 | 132.385096888962 | 127.019978195283 | 135.823975527501 |
|       | 131.479997342133 | 128.341887728118 | 133.42964827086  | 130.055416790504 |
|       | 130.004329307977 | 128.99859423584  | 136.349603320553 | 130.074786642758 |
| FGB   | 137.415158613413 | 135.208478510375 | 140.545351041252 | 128.717719117128 |
|       | 137.901317305531 | 139.97636570613  | 140.000880942015 | 141.819762045169 |
|       | 135.229197100212 | 145.815454490804 | 140.590802695412 | 142.003414252064 |
| FGD1  | 213.990575186237 | 228.542423012958 | 203.791916347213 | 252.473612525884 |
|       | 357.584458526365 | 249.171307797736 | 206.620708230452 | 227.558441474918 |
|       | 153.464360995071 | 212.933062534244 | 114.607138204495 | 179.969944022261 |
| FGD2  | 196.676479140094 | 180.968659614238 | 170.807514224412 | 172.951567541592 |
|       | 136.587165242663 | 162.786351190659 | 185.016336026382 | 220.415211013843 |
|       | 332.400086578723 | 162.494429648551 | 245.240006198482 | 292.468585109951 |
| FGD3  | 270.568660560796 | 269.770777921703 | 286.703712311781 | 204.787016443123 |
|       | 1176.62418139379 | 498.05778289794  | 196.566937667522 | 904.733257358133 |
|       | 1754.99663827472 | 549.047065540118 | 1862.88548451154 | 386.461076717316 |
| FGD4  | 118.859745315302 | 120.212294184999 | 109.586955365611 | 113.557349524174 |
|       | 107.559685467789 | 119.920097823022 | 103.398929051742 | 114.631759839092 |
|       | 114.658668711121 | 124.844481048039 | 129.125709963326 | 112.710573586525 |
| FGD5  | 371.767182305618 | 394.962978677736 | 182.084333814175 | 338.129250886594 |
|       | 757.406530000489 | 199.288100834476 | 687.269774217064 | 152.528571776589 |
|       | 234.895245871534 | 139.282741110499 | 635.37511798786  | 315.615758089471 |
| FGD6  | 133.131953362455 | 144.940119680152 | 130.751522895053 | 126.097544650407 |
|       | 131.734429913106 | 136.754116864655 | 134.679882781788 | 147.706402141169 |
|       | 133.601133679159 | 177.772019227116 | 131.950295185477 | 120.413468119484 |
| FGF1  | 127.395094952914 | 133.040952285855 | 133.175265384038 | 132.626349611404 |
|       | 138.233799607706 | 136.511669406292 | 139.606654715326 | 133.731500722599 |
|       | 138.72219653692  | 127.943935415045 | 140.960907353937 | 129.25124636593  |
| FGF10 | 125.653011880654 | 117.296972688814 | 123.122705969332 | 107.622342073167 |
|       | 114.805810485989 | 114.099623939954 | 116.019123495537 | 108.021898335735 |
|       | 116.533361070234 | 118.192302821514 | 112.599970121166 | 113.460835359833 |
| FGF11 | 118.572988141773 | 117.907840952685 | 103.168665937677 | 118.773864607553 |
|       | 236.251507822415 | 147.808262170269 | 284.473085899219 | 144.876300850115 |
|       | 129.591396165575 | 407.589300080181 | 290.213039891361 | 124.258412895333 |
| FGF12 | 145.07503221134  | 133.994376985194 | 137.09814291566  | 131.148926523383 |
|       | 138.370241517025 | 129.775280076365 | 130.939543211439 | 162.274094333189 |
|       | 150.570540340126 | 136.475652722007 | 131.2360427855   | 123.709293439934 |
| FGF13 | 153.405052909585 | 152.152106138031 | 148.541832125061 | 142.598106777707 |
|       | 132.712573198794 | 129.603952706231 | 131.282091618102 | 121.591962855513 |
|       | 131.532660547328 | 134.728594388428 | 133.42964827086  | 125.299513989334 |
| FGF14 | 116.136849683574 | 115.389934936253 | 110.885714048075 | 114.129044806825 |
|       | 116.547306374097 | 117.255496552581 | 113.301733735994 | 108.697696080014 |
|       | 109.625579596864 | 122.320966091375 | 116.258629237662 | 116.126923911804 |
| FGF16 | 129.366567668463 | 147.844734028193 | 133.913578037255 | 139.981905225845 |
|       | 131.001996509052 | 143.541810469447 | 140.290598244169 | 140.856864690669 |
|       | 128.539969915702 | 122.636980845207 | 154.113228966411 | 141.855655600443 |

|        |                  |                  |                  |                  |
|--------|------------------|------------------|------------------|------------------|
| FGF17  | 136.506347083926 | 160.039086963419 | 144.377501600001 | 139.442091671938 |
|        | 147.962721373177 | 157.863585655333 | 147.562757301251 | 150.244284323504 |
|        | 150.899664887945 | 141.721829342179 | 149.190528937822 | 154.865107093653 |
| FGF18  | 162.825380100343 | 158.963726206466 | 153.19516365535  | 159.74220366735  |
|        | 149.997047695778 | 172.457165477145 | 155.326276840738 | 154.286043402527 |
|        | 143.544671705984 | 174.274996381853 | 149.628421263062 | 153.181097279473 |
| FGF19  | 143.874735808114 | 134.607501073433 | 132.014213378179 | 122.937281123348 |
|        | 137.907709799074 | 120.413468119484 | 132.257989841046 | 133.727447520255 |
|        | 130.355969431473 | 126.185560760543 | 145.844961942581 | 134.027006076154 |
| FGF2   | 295.973370766318 | 267.869879189095 | 299.29004204677  | 251.704037951295 |
|        | 134.66169946771  | 134.952584272187 | 129.318409053566 | 138.028813480968 |
|        | 139.611455791957 | 125.107483348755 | 134.524644163286 | 127.259038241163 |
| FGF20  | 135.122770943076 | 129.189479305468 | 132.66318177913  | 129.794293922951 |
|        | 138.444427173667 | 130.59886317117  | 133.978783899572 | 131.230501496659 |
|        | 164.008063563113 | 136.428826558493 | 134.57472034679  | 131.364187047583 |
| FGF21  | 132.955473649746 | 136.387904287903 | 140.583804906052 | 138.679545821015 |
|        | 145.669033804967 | 143.390971600678 | 136.444883411968 | 129.47419698487  |
|        | 131.951649373072 | 135.624881949214 | 144.270828498856 | 136.044670179122 |
| FGF22  | 115.224011128183 | 133.303201646987 | 117.348231147283 | 118.144109564626 |
|        | 123.45956380046  | 119.391213033544 | 112.07238018581  | 112.832122823829 |
|        | 116.363556872071 | 116.310166003024 | 126.512613967438 | 117.754181884939 |
| FGF23  | 154.705630035232 | 152.251128595777 | 157.256812907353 | 136.19083681188  |
|        | 134.897958140444 | 145.208597795717 | 138.39424470172  | 149.962143642332 |
|        | 140.154925193842 | 134.045938361221 | 164.497445195378 | 148.497497694754 |
| FGF3   | 109.680532131035 | 120.984641102879 | 114.812254477058 | 113.832885222354 |
|        | 118.679664392666 | 113.66416989856  | 111.66210002202  | 110.838647534175 |
|        | 105.467761348787 | 110.784682137658 | 120.714981493593 | 110.392617179163 |
| FGF4   | 123.943080151532 | 123.827771590213 | 116.112013454335 | 120.740986472733 |
|        | 116.552626146967 | 118.117957479382 | 124.003914369077 | 124.411213807179 |
|        | 122.133292722932 | 136.649743237542 | 125.739946257697 | 122.985117824212 |
| FGF5   | 131.753135000312 | 138.275371291639 | 138.220016828327 | 134.235164622221 |
|        | 131.510494315469 | 132.611864316181 | 138.381508741146 | 136.925645302362 |
|        | 142.528480882047 | 133.040952285855 | 146.11669387238  | 132.978746105877 |
| FGF6   | 125.863969666806 | 129.816385177336 | 118.47752077032  | 120.530092530622 |
|        | 125.010266083832 | 119.730174479044 | 117.348231147283 | 122.371715108957 |
|        | 127.774702462567 | 131.796941315992 | 137.154298404093 | 118.764650384561 |
| FGF7   | 189.589053840976 | 241.453456707114 | 229.200570583629 | 166.917552275021 |
|        | 146.814457904682 | 147.121049266117 | 130.092881020271 | 145.999823250463 |
|        | 157.306022722324 | 128.549768412962 | 136.670253859184 | 131.404001006643 |
| FGF8   | 122.418378964982 | 110.465934808915 | 111.975027473284 | 110.419222236698 |
|        | 111.584425166104 | 108.415715678948 | 108.830525786872 | 111.985567835684 |
|        | 131.525916493834 | 109.932577444858 | 122.519746599387 | 109.003365273337 |
| FGF9   | 654.305724263754 | 567.869601934138 | 476.641032594868 | 294.871848467326 |
|        | 162.100547394235 | 214.763232658841 | 220.098071755353 | 182.32514927211  |
|        | 182.786177632757 | 192.980781927122 | 163.22480684222  | 177.091809538824 |
| FGFBP1 | 135.497033143331 | 163.004844049672 | 121.961568081299 |                  |
|        | 142.864294577585 | 137.80710149367  | 139.034940762344 | 149.073650082048 |
|        | 140.115154069602 | 135.980886879513 | 4397.32311216672 | 171.880470629305 |
|        | 132.206133020786 |                  |                  |                  |
| FGFBP2 | 152.609055890822 | 153.273568880305 | 150.058160923921 |                  |
|        | 137.386308389265 | 120.196595293401 | 116.369395555451 | 115.30786313391  |
|        | 108.910588012315 | 113.321454160244 | 114.512028664352 | 120.864962392459 |
|        | 109.438965262717 |                  |                  |                  |

|          |                  |                  |                  |                  |
|----------|------------------|------------------|------------------|------------------|
| FGFBP3   | 157.170136439095 | 132.113317893587 | 157.374537572779 |                  |
|          | 152.371569700039 | 153.568321662387 | 164.276668889213 | 152.563532872898 |
|          | 124.611144621071 | 147.865114383296 | 148.87242524521  | 148.082026641671 |
|          | 180.456659320226 |                  |                  |                  |
| FGFR1    | 150.845846206549 | 147.745780820004 | 158.73040336393  | 136.518409978222 |
|          | 133.74051512341  | 129.566451901256 | 133.074027423549 | 119.815258991448 |
|          | 127.125906877098 | 126.262349005661 | 120.748910864064 | 129.034770823878 |
| FGFR1OP  | 132.602336133471 | 136.607783800741 | 137.426226808356 |                  |
|          | 123.738223146912 | 193.428733288774 | 147.024759173313 | 152.983678871668 |
|          | 132.062415660672 | 179.551640851353 | 174.962380276394 | 193.522811257085 |
|          | 158.193008411967 |                  |                  |                  |
| FGFR1OP2 | 338.129250886594 | 269.831616158113 | 351.759100605991 |                  |
|          | 260.157440518033 | 243.589099648895 | 275.929414239664 | 274.627303114477 |
|          | 256.614964511846 | 280.656087497806 | 365.82705202869  | 293.17183601265  |
|          | 305.93974940209  |                  |                  |                  |
| FGFR2    | 115.649568330705 | 112.884916986215 | 120.724926760252 | 106.470524594239 |
|          | 114.01599035448  | 112.436972452838 | 116.670491972948 | 126.561067704708 |
|          | 117.65847906412  | 116.397855001959 | 135.715745768179 | 107.40922161073  |
| FGFR3    | 313.967636827811 | 568.701661112562 | 407.518324776453 | 225.362253409428 |
|          | 1152.50523614436 | 1329.90419210779 | 5361.3600315322  | 1875.21979956596 |
|          | 3734.705550862   | 6233.78489807054 | 4068.18567686753 | 5811.97916044218 |
| FGFR4    | 160.469645948225 | 155.773639092819 | 118.567548265638 | 125.887854850942 |
|          | 127.758381206968 | 121.572462089942 | 122.005340508177 | 118.100611964852 |
|          | 121.316836274255 | 117.261443445891 | 128.781123194219 | 119.355650892262 |
| FGFRL1   | 245.723316636363 | 210.353341004865 | 200.633009710701 |                  |
|          | 209.279164243868 | 292.60467054075  | 166.071816427719 | 197.191648960563 |
|          | 201.186963432715 | 200.810204162831 | 174.417259650516 | 160.945886507456 |
|          | 175.010849510711 |                  |                  |                  |
| FGG      | 122.438438464097 | 117.15886922795  | 129.216693566478 | 124.883575464443 |
|          | 122.211000410541 | 121.886886059038 | 129.257947818865 | 138.348160604288 |
|          | 123.315362903961 | 114.613368640356 | 117.820996523337 | 121.260355515095 |
| FGGY     | 205.966111721195 | 202.691507273819 | 225.850439131864 | 170.553940654493 |
|          | 295.330307669482 | 376.276954313674 | 243.468673768141 | 395.521241316058 |
|          | 352.562711030848 | 252.548942594125 | 307.124331101976 | 362.306819797508 |
| FGL1     | 152.872139211415 | 151.007812189859 | 150.132420238581 | 159.611551480901 |
|          | 160.903342063542 | 155.194521954405 | 149.419308407564 | 159.207567680134 |
|          | 151.089328533476 | 158.653161314597 | 159.854639082837 | 153.78976320015  |
| FGL2     | 2107.99357083999 | 1643.08061372695 | 2486.24762158293 | 1060.24125879951 |
|          | 192.140442881209 | 245.317436234586 | 256.424415389574 | 330.193132765826 |
|          | 410.138738410101 | 254.63506290698  | 366.961565952239 | 249.80160363144  |
| FGR      | 185.432587490792 | 187.881334544018 | 150.218643705925 | 165.908756485356 |
|          | 184.008405576875 | 201.865955150869 | 216.680795762761 | 295.330307669482 |
|          | 261.988345506548 | 218.134101819445 | 215.84044779962  | 304.547738011742 |
| FH       | 1381.07447204233 | 1521.61996270758 | 1325.77498031227 | 1870.52504853779 |
|          | 878.167149313285 | 1881.90353127141 | 1000.91520225219 | 1659.80909859514 |
|          | 1142.09977159958 | 1233.99503576308 | 949.260897408911 | 1681.54485582868 |
| FHAD1    | 152.385014030957 | 145.079450753969 | 150.549883779193 | 145.756455015309 |
|          | 147.866011743792 | 143.681220324074 | 151.231685705236 | 137.286331849749 |
|          | 148.859129298141 | 160.887121295848 | 146.184624424737 | 148.423303776817 |
| FHDC1    | 162.895923745031 | 164.160608039304 | 131.319783710908 | 162.6762533989   |
|          | 128.936628289974 | 191.937607311711 | 133.935910746769 | 172.686798187142 |
|          | 191.725728813959 | 169.201608999937 | 184.204036882642 | 133.039045348692 |

|        |                  |                  |                  |                  |
|--------|------------------|------------------|------------------|------------------|
| FHIT   | 154.71904132098  | 175.693873820963 | 188.252507246148 | 161.424105316969 |
|        | 223.765583953184 | 156.061579024549 | 168.124936529582 | 137.874370839801 |
|        | 142.431979387165 | 133.602870982718 | 157.702540365469 | 160.265389854694 |
| FHL1   | 8445.36695108418 | 5811.97916044218 | 5965.21815409254 | 5992.92384160188 |
|        | 138.688881393504 | 205.966111721195 | 161.331326682743 | 195.645181575647 |
|        | 260.642170838161 | 162.732574014686 | 150.439715066903 | 143.78994470501  |
| FHL2   | 1111.47772523331 | 1078.41947691758 | 820.249910349431 | 862.132582849511 |
|        | 1078.41947691758 | 725.065727257421 | 1094.67740173529 | 1334.69145271749 |
|        | 3744.5666678861  | 976.360310504918 | 1816.3719976564  | 570.130804179186 |
| FHL3   | 590.3584324045   | 667.892385395063 | 448.95671696823  | 759.802694618208 |
|        | 280.033528476199 | 157.901967487277 | 169.852769679312 | 162.427505889157 |
|        | 164.295628750438 | 250.676092725829 | 138.504398858454 | 212.147155923729 |
| FHL5   | 126.87100632595  | 147.428180649939 | 118.505980204837 | 132.568354349687 |
|        | 121.564626579011 | 122.305514440939 | 114.378420394004 | 132.243900762936 |
|        | 133.502176289023 | 143.114384950467 | 128.191959554459 | 131.570358580547 |
| FHOD1  | 282.076744753348 | 256.326661031361 | 187.167255451988 | 340.301980622308 |
|        | 341.714401872192 | 202.369905673351 | 138.605661097886 | 171.229729917612 |
|        | 181.578228610334 | 306.486275677467 | 194.903531690239 | 162.879707592164 |
| FHOD3  | 607.26455470867  | 582.382786876656 | 480.484639351046 | 1034.68475089075 |
|        | 153.929167381674 | 208.628626112623 | 283.048002376743 | 284.831817899986 |
|        | 151.148295679242 | 156.976539870288 | 220.60173086462  | 227.614623963331 |
| FIBCD1 | 138.242983316259 | 161.713311969291 | 168.254689624696 |                  |
|        | 199.798533722581 | 157.189041157784 | 145.193296081527 | 147.322622473251 |
|        | 161.37617568158  | 148.490236128772 | 172.387657419201 | 155.431833398023 |
|        | 159.801315111886 |                  |                  |                  |
| FIBIN  | 179.338652960181 | 153.850588492326 | 152.789338329505 | 150.555125135002 |
|        | 126.256716138724 | 147.354535468933 | 140.125575976708 | 147.014513403704 |
|        | 147.441650320053 | 142.997365080299 | 137.79714923769  | 148.32201986048  |
| FIBP   | 300.83667045718  | 335.301103690781 | 261.988345506548 | 435.095843349921 |
|        | 1010.23703166498 | 577.250493023431 | 500.643499051523 | 405.322847383739 |
|        | 374.761007556839 | 488.505191823403 | 430.728137105601 | 433.405369327168 |
| FICD   | 254.315783394932 | 235.063474370925 | 178.717719615544 | 252.171420358437 |
|        | 202.343343669937 | 189.726075394359 | 199.980312703646 | 237.420951138877 |
|        | 250.25959091612  | 204.057019122032 | 169.752525994991 | 178.606255846041 |
| FIG4   | 319.223127076041 | 322.956882599715 | 332.296938254329 | 430.94199035855  |
|        | 324.56043349882  | 365.650071660806 | 435.983803453746 | 323.667189206453 |
|        | 381.808809625801 | 194.961531388323 | 394.35596596181  | 358.217145707718 |
| FIGF   | 239.924227955313 | 201.337186768645 | 278.598913464804 | 259.826625866106 |
|        | 137.824985884649 | 141.797497681512 | 136.248506185974 | 152.329129642988 |
|        | 133.849237689264 | 147.272072245929 | 169.834078550805 | 128.608401533371 |
| FIGLA  | 118.07991087231  | 122.603226380439 | 120.255081121925 | 114.325967923393 |
|        | 108.669141498627 | 114.39161822971  | 114.400185930969 | 107.303126530947 |
|        | 110.678680817471 | 110.428616140857 | 123.336074100984 | 120.054065939835 |
| FIGN   | 122.992700222262 | 137.163699337032 | 147.400082178491 | 125.4408430419   |
|        | 117.12833256636  | 124.63978985808  | 115.332409360957 | 130.953237161257 |
|        | 112.661607612444 | 117.244895482991 | 139.209080672396 | 124.972772541334 |
| FIGNL1 | 143.195338329759 | 132.149015697532 | 148.840533233712 |                  |
|        | 132.297716337104 | 175.161742647546 | 204.161375686761 | 166.360005474414 |
|        | 215.967319486874 | 189.174957940401 | 185.240692860387 | 151.449690439424 |
|        | 195.630643168176 |                  |                  |                  |
| FIGNL2 | 159.683695366575 | 138.667081004369 | 175.417320301614 |                  |
|        | 134.676039394438 | 159.994376562272 | 180.986305037222 | 138.374092984164 |
|        | 140.236618351922 | 161.331326682743 | 157.180095329946 | 169.552424961465 |
|        | 161.806144472744 |                  |                  |                  |

FILIP1 1635.35544761095 769.34961339184 811.564396886535  
 809.362464219294 139.159510392614 136.937327692084 131.525916493834  
 153.068898842283 140.293431620804 150.815117344434 158.130933580414  
 146.094951139804  
 FILIP1L 1812.07394646463 703.587139938769 727.425595270342  
 635.038752622494 153.088710298368 238.978845152474 147.079157199448  
 188.252507246148 226.144012966486 299.80615152845 159.504327477065  
 169.806644442071  
 FIP1L1 261.500728878974 238.685014863143 253.538171006307  
 226.919545367682 234.182164952936 213.145460679531 246.748589597262  
 263.47760086159 277.000882284125 231.63127072986 185.396765725228  
 256.291984914927  
 FIS 144.472969298036 146.321713521846 165.763459146818 144.110544384466  
 142.527422462824 157.507108643575 146.40904127542 142.401333414583  
 142.679201870274 138.783017264895 134.190511945944 166.095964870713  
 FIS1 1250.58586679251 1192.72383754851 1528.49457104932 1394.31467757456  
 1867.55140010155 948.734577648136 1081.47077865393 651.235249028924  
 762.584280908728 799.423640530777 761.097992055119 1471.01897242089  
 FIT1 169.681582570965 171.537040561599 185.382647297259 182.275998840116  
 158.092775850886 158.396149470397 172.138554350738 157.761231106669  
 168.588120398433 167.083758835476 178.745112514526 163.529157756197  
 FITM2 120.724926760252 123.231397809701 117.943511615792 107.531907287727  
 148.624135810148 106.204350278634 119.952108688414 121.239461514704  
 109.416512252532 116.449064666763 131.354275252104 125.484453841158  
 FIZ1 239.363511706064 282.335582153109 259.672238210968 324.067396271281  
 376.627801547869 225.950750084197 241.134385745554 206.620708230452  
 265.332196877456 224.805404798696 262.671819506189 249.292766428035  
 FJX1 168.111124820968 181.715992480635 170.568719982587 186.309367281625  
 274.494074082359 210.392662092721 276.756415094228 183.708917501519  
 238.724909152512 375.958347293549 253.933478547515 197.795275907042  
 FKBP10 167.756465178715 171.358746749715 124.958287100852  
 225.783771938969 226.919545367682 118.139487760542 126.585679159459  
 126.705446263769 127.954231630338 125.789509802098 151.96843908074  
 131.074021609161  
 FKBP11 379.016207754533 329.660368915848 224.186573847185  
 266.563990988678 298.403224729528 436.155731212592 403.47026424469  
 713.832153334389 1039.46136549795 941.936830901588 570.916936074747  
 566.813343200268  
 FKBP14 5094.53287522452 4266.92715355342 5314.0635307876  
 3671.86460903374 648.161646065464 4749.69040198959 1957.48508632607  
 3363.51782842264 2056.90127387648 1673.5387396582 2801.66917828364  
 2154.00589005104  
 FKBP15 228.9901869793 247.194197143562 263.994460303088  
 280.085692727562 215.247472744419 186.747375844319 221.594737497504  
 194.569325586241 211.844563155792 312.484289357493 267.800523478098  
 175.040086358446  
 FKBP1A 438.533112511098 456.990425618007 482.965800108538  
 514.61297221467 1387.90327883679 961.355625338687 615.662993833692  
 662.213423011533 930.704688414069 860.315938621256 432.174413144791  
 949.789710063337  
 FKBP1B 164.74234322574 169.806644442071 171.338371572269  
 149.462835741621 147.454902803231 156.144934427609 124.025104622631  
 140.479321382192 173.573412346985 173.761036260869 136.580363776109  
 204.596753034535



|         |                  |                  |                  |                  |
|---------|------------------|------------------|------------------|------------------|
| FKBP1P1 | 222.177290763736 | 242.752995772995 | 220.242344043437 |                  |
|         | 267.149525812834 | 144.700955682048 | 221.127492253636 | 175.79375235478  |
|         | 175.882911801581 | 170.251197850968 | 165.134931755194 | 179.25743545231  |
|         | 187.625536724681 |                  |                  |                  |
| FKBP2   | 354.405235378302 | 310.758803815671 | 371.457568934695 | 356.921627358141 |
|         | 525.138476928759 | 429.992169596618 | 360.605223912114 | 299.616447269111 |
|         | 344.128576341892 | 397.064325578854 | 360.361719991381 | 503.967725251906 |
| FKBP3   | 428.959561932229 | 431.799795646414 | 487.993796425035 | 408.444629429553 |
|         | 388.887050777137 | 386.679822751367 | 560.362502519639 | 569.47446215213  |
|         | 365.286234166621 | 759.058176862524 | 699.06539333455  | 618.829716818725 |
| FKBP4   | 373.860920943049 | 362.095074331893 | 425.59810308048  | 417.262521411065 |
|         | 942.41077071058  | 529.700356666006 | 658.968318349334 | 875.38834441246  |
|         | 983.777608766079 | 543.933989965705 | 662.958637409597 | 513.662594875431 |
| FKBP5   | 661.545179083009 | 714.494228450456 | 1145.35733270036 | 691.632061537999 |
|         | 333.049612399093 | 841.285351463894 | 380.664528809678 | 1142.44180956604 |
|         | 499.176926371542 | 1823.53870218167 | 439.492285515997 | 346.303862540751 |
| FKBP6   | 118.646119379542 | 109.156349683299 | 119.9652990395   | 114.27112025541  |
|         | 127.512733134453 | 123.031945101045 | 111.409447323674 | 116.751145098777 |
|         | 124.749727939593 | 118.792612926619 | 118.597739444445 | 127.524310543779 |
| FKBP7   | 125.617143363441 | 123.809866652834 | 134.978785580693 | 127.729912390394 |
|         | 125.865974180252 | 124.491884305455 | 126.588382665802 | 129.806104966617 |
|         | 122.517559025268 | 119.451099896048 | 117.517649866653 | 122.472909598385 |
| FKBP8   | 183.193029399643 | 226.989201461085 | 170.198508633417 | 244.514230664694 |
|         | 235.063474370925 | 165.062129636008 | 162.536009333787 | 153.756213924949 |
|         | 161.646807806182 | 162.536009333787 | 249.234065130083 | 173.035013611377 |
| FKBP9   | 147.15764785567  | 131.319783710908 | 137.000868503792 | 143.705475208192 |
|         | 158.06915048955  | 147.442483242063 | 141.275667354541 | 141.970301370404 |
|         | 137.773960847088 | 136.450062043587 | 138.150616787218 | 142.336164180947 |
| FKBP9L  | 1084.10984365393 | 867.369315017411 | 783.991448771818 |                  |
|         | 881.561688713557 | 375.767528676937 | 417.987533397449 | 631.653707589221 |
|         | 397.577760464197 | 335.623336587396 | 717.025533065694 | 524.245387973163 |
|         | 621.946994961864 |                  |                  |                  |
| FKBPL   | 143.31117188259  | 154.546460872415 | 157.723341862468 | 155.478383896934 |
|         | 193.218266574099 | 171.731395791818 | 167.370030272847 | 173.056715623574 |
|         | 155.494095135266 | 162.127697884504 | 167.206513789165 | 175.93459327917  |
| FKRP    | 215.950811436427 | 250.406775889932 | 190.152824885328 | 293.528601172819 |
|         | 249.379605914827 | 177.235586767256 | 203.089661928125 | 185.617936412633 |
|         | 223.359785518285 | 210.218440444631 | 202.909188070184 | 159.620467672898 |
| FKSG2   | 109.635825046436 | 110.847680175669 | 118.239637776941 | 99.0767996209245 |
|         | 131.12775424877  | 114.841964705981 | 108.461141538047 | 102.563722570171 |
|         | 102.725375719353 | 112.07238018581  | 108.939608619532 | 116.142650095476 |
| FKSG29  | 151.451443480833 | 147.978039160763 | 152.042744996136 |                  |
|         | 155.379116566097 | 145.601922576321 | 134.239416179248 | 140.934144636302 |
|         | 141.048882618651 | 151.188412354358 | 154.774977482202 | 141.970301370404 |
|         | 138.820797333519 |                  |                  |                  |
| FKSG30  | 3309.66193624859 | 3195.71436046397 | 4929.26915002209 |                  |
|         | 4081.13406129846 | 1914.96285167893 | 1038.34611017219 | 2249.8123426309  |
|         | 1405.2134783352  | 1245.47421607111 | 4477.54806526552 | 1827.03179366146 |
|         | 2018.81730267601 |                  |                  |                  |
| FKSG44  | 113.470356909765 | 113.521599852465 | 116.074423050416 |                  |
|         | 112.142263331903 | 109.140708667012 | 104.739307327595 | 105.741092375243 |
|         | 113.963798749897 | 107.580425848009 | 109.947300629824 | 116.881212516879 |
|         | 108.333135424315 |                  |                  |                  |

FKSG49 134.010031592003 129.665507668047 132.155877196474  
 144.825231501747 133.82390829608 134.109051944736 140.453219944445  
 132.923237903246 117.598778415488 151.848131897899 130.41429837092  
 126.599418127637  
 FKSG83 150.031863363697 152.045391611927 135.395071593072  
 171.714973501563 138.274057264688 138.596430973865 162.100547394235  
 143.004090696463 151.990794390998 136.720837676326 151.790240553272  
 141.018087546273  
 FKTN 10900.1783397368 11432.8213906428 11554.7330886956 10953.6229702446  
 3575.60827968852 11971.1664283024 6628.17856159198 10024.4662743012  
 9139.73212514992 6156.29203791697 7838.92787031423 8163.29201165065  
 FLAD1 259.826625866106 290.037325939883 257.775569674531 347.224999246223  
 596.743397794872 620.760947818536 341.096072280715 854.815394943219  
 490.849163737598 301.304268871606 376.962937292973 589.953707188378  
 FLCN 153.366677608026 156.911538642765 153.893753448473 150.960096893517  
 174.23955831109 152.890239929335 152.080057231881 156.75308999904  
 138.216926722025 154.87316176388 151.615675144083 153.675939908241  
 FLG 110.273174147374 106.315801001506 108.655415285806 110.753661013519  
 110.138220982557 108.199628274798 107.049865500702 104.544792793756  
 96.0426636429757 223.872330412144 125.058165131184 103.36057518781  
 FLG2 118.871735074285 118.963119420175 128.29486937905 125.35643274458  
 125.848597767733 130.880795616911 134.19455223935 128.304919825754  
 141.685620602226 125.136745288071 137.165966740473 133.305679931132  
 FLI1 206.999289979742 212.363151537303 204.990512488181 231.547654653783  
 140.800226245569 148.700297908071 158.946177055546 209.180298459605  
 219.0221768576 159.730925830278 192.532222258033 166.558080305926  
 FLII 577.98969050409 502.063888359427 410.845034795716 611.540759532294  
 431.304147578425 336.981561928411 218.334273320319 336.338518973032  
 228.100112133941 440.745866155629 456.298408568636 270.520229426015  
 FLJ00312 135.741404460897 141.533138525284 144.224287382131  
 144.760229351772 145.551717838423 140.018786803502 143.307838525991  
 145.556318940043 141.391508027714 139.853333847856 142.739686751422  
 146.885404321622  
 FLJ10081 890.810315261602 783.059427015955 961.931130189779  
 771.694853062033 321.696082249696 513.816017871024 469.794672718173  
 432.372995789404 442.12886967939 459.53652431464 561.251860964966  
 460.651156484562  
 FLJ10088 148.618327213374 163.198834359304 136.338683078123  
 148.87242524521 140.13515064896 138.196640512429 140.195820033314  
 145.594378536072 130.983136465761 131.800533523123 148.863297062269  
 147.882530392424  
 FLJ10120 178.339211170442 177.214422668922 166.415922313464  
 166.627372924295 141.434699050015 176.86489466512 162.10411532202  
 137.578516107502 153.804419092743 175.882911801581 151.059401217656  
 164.811120992602  
 FLJ10213 348.413827101046 348.36178568457 340.487850009685  
 280.494088228226 256.764450748941 480.593729033799 448.371946119074  
 311.966971734249 340.668473351494 299.234482744038 541.764013317002  
 408.993744895434  
 FLJ10246 181.771654391653 162.212442593001 163.396651801661  
 133.215151497536 167.741556663724 214.714726648332 144.942289590793  
 212.78038645414 171.247946863662 164.352366170527 161.424105316969  
 152.99686989829

FLJ10324 199.662592246931 209.051768656607 206.098534554876  
179.273936200852 132.683594640696 144.669509071181 143.21411610625  
137.391141254051 147.60284257326 131.104534164394 145.938780249776  
137.15571320152  
FLJ10357 170.568719982587 201.81649023518 174.454754564111  
184.426874913406 159.227123133854 158.963726206466 159.133905701536  
148.082026641671 153.850588492326 159.245344068037 171.602950766191  
144.603401904061  
FLJ10374 306.677271064305 388.573321838751 419.690542859168  
416.715760038095 378.862741410359 389.853534237748 349.330629649093  
420.95713139384 395.425715632302 367.382105696814 342.998459706966  
397.064325578854  
FLJ10489 139.613193302406 139.140647941752 120.387275261633  
131.820842728171 125.75980494927 121.619593453259 116.91470505098  
120.488694213288 135.118955626451 139.691470247318 120.020781939389  
132.714532888989  
FLJ10661 141.840253068921 139.582054825147 138.661548678191  
138.35738548449 143.279331050175 131.563719927798 137.460936879873  
141.839647226623 135.313148180961 140.870849757111 126.578035793406  
130.501010489883  
FLJ10781 339.490955270138 200.712182818203 232.960832410426  
260.045018348182 184.322250984457 144.834448238435 128.753623886188  
122.634741242406 136.293084080479 135.682971958096 127.777945516765  
136.783974483005  
FLJ10803 140.277228495746 134.814082968113 134.786678978467  
130.176734524308 126.814332513301 138.541779821934 146.937052029619  
149.944351491364 145.758423590784 138.638573020758 143.665359343809  
133.104560685558  
FLJ10916 643.468308027006 762.584280908728 514.002313819685  
674.338740875512 181.354279096644 239.572670410818 157.70581824787  
206.391403266202 550.124359517322 237.521746704115 874.348941257592  
389.686045618228  
FLJ10986 297.757657398146 307.316241247336 372.475112554793  
227.774354299962 499.964000319181 871.528156184927 478.699172220804  
595.270107963842 600.635914090365 329.779210536849 540.190808200264  
754.406896156858  
FLJ10996 169.488652117125 165.545136704242 174.962380276394  
200.810204162831 157.499803444188 186.140970908638 164.497445195378  
194.753955100069 164.61921356441 206.915239638443 155.669470674985  
165.118167086792  
FLJ11235 164.910911528819 150.082561726876 143.284230032303  
146.094951139804 229.130679600654 149.547635666621 162.364266549463  
138.017249996128 170.079723856247 167.937451406243 149.247514768446  
164.816672737691  
FLJ11292 202.691507273819 185.743212726702 209.180298459605  
195.674128236589 187.519053043173 195.630643168176 207.044774373302  
223.253794809571 178.072538529634 193.203053225456 184.148058872585  
178.488874074222  
FLJ11783 204.564770370164 216.880896769751 164.48570046081  
195.776369840059 212.073472189229 184.974347306539 184.742960975938  
174.761105961773 163.280786875496 167.100039749329 182.470538043064  
186.939168482155  
FLJ11795 116.977202125093 120.406577236405 115.435942397626  
115.02681415256 113.726931741236 109.817705421158 120.488694213288

129.940297696849 128.620852653765 123.118724072534 121.526724715417  
114.400185930969  
FLJ11827 144.916193282062 136.5680632044 139.995623005154  
143.296580629431 154.055550115498 148.757112903673 156.585665091824  
148.938822951404 135.598709185334 155.134796468704 145.34332740863  
132.807755600683  
FLJ12078 389.686045618228 478.040234382488 309.318403417731  
651.759589129833 199.88618355278 299.568830444875 374.761007556839  
263.509066170434 220.242344043437 206.303338709554 334.52685347521  
256.687384001447  
FLJ12331 131.04767483614 147.230113868203 154.924190468067  
157.979749139651 117.829228895897 143.252983617945 147.679233228201  
146.366013190845 128.090665893885 121.61143371132 134.383024487323  
144.188147197178  
FLJ12334 151.276193269421 148.376194044247 145.428297145967  
154.489459651566 147.238896426423 135.583556015955 139.696266471271  
138.28745132277 144.450810504499 151.259426521768 115.097376525707  
162.212442593001  
FLJ12355 177.88534558205 177.955579729463 164.057147728625  
205.886398618369 469.64693728427 159.41705570719 310.23294370018  
214.355086255855 236.191384383802 151.043967734248 195.303469330682  
175.51767355303  
FLJ12529 139.372441366224 148.222477811166 131.601823550269  
139.482462221798 133.41548225025 143.737021989907 141.66312605042  
137.320792454356 143.070170783764 137.994334667126 164.820007934887  
141.42859050659  
FLJ12684 116.497714896018 112.420505354139 106.470524594239  
103.36057518781 171.314681729657 144.405191855684 195.400963839097  
163.575300618666 204.877041314502 209.180298459605 196.691380885508  
123.427366316096  
FLJ12688 152.296774123599 143.834501071806 178.676812740925  
150.042173991463 156.976539870288 160.055242985219 172.128489882364  
156.46322298175 143.814798097425 170.223509007961 146.018097597373  
155.463400179872  
FLJ12949 217.560691345072 233.635876830148 226.203994206714  
251.347519777204 238.847091900666 226.712995229189 241.557810100265  
249.354198174438 188.7348696188 238.654367531982 219.519896184851  
232.892635502424  
FLJ13197 196.860228537112 215.247472744419 283.326226944158  
212.239485199343 142.785631812039 132.891375982227 128.23432652395  
137.687480242109 123.609527892227 142.383723965616 154.352518161283  
189.362958041175  
FLJ13224 144.523620416439 137.212568398657 138.1342592966  
141.97478198531 143.340685579645 138.224383646894 147.292241873554  
149.593135821045 143.787766055379 141.363863974586 134.86940314824  
146.072585331002  
FLJ13305 194.617252921731 223.81987303579 187.380064367869  
191.241000498118 153.703682621695 158.10628865476 149.520911664673  
158.232100962615 160.76044995335 196.136080427522 153.891667472876  
139.617608585463  
FLJ13611 130.452929012459 123.766373146588 116.71331256222  
113.09980008288 120.060776752215 137.704257049203 122.852700267837  
115.944280729914 125.060387518072 115.468921844902 137.052507691254  
125.535877109652

FLJ13614 110.496084922302 122.410340121549 122.773736159743  
116.486929280635 109.128394735532 109.038182799871 126.168223112165  
123.035401501279 117.32734978289 121.826474059574 135.899595115146  
119.373287155621  
FLJ14082 135.375268329248 144.848839185565 164.497445195378  
150.927628184034 135.783125948784 144.131743978192 135.736764623155  
157.264673452646 140.779962389412 145.368059425439 146.225422797118  
176.145076825955  
FLJ14100 139.526241501184 142.639587833858 139.358218798638  
137.782648137869 139.77436722364 138.201164395948 142.771243742561  
146.990660831392 142.851432926979 151.796986456254 140.047749881567  
137.954283575143  
FLJ14107 139.073785024092 149.039132756817 150.822586904738  
150.854580568572 164.625407872446 158.390337945372 147.301909062399  
147.28750335168 142.970256312313 169.488652117125 147.815673580657  
153.062710222618  
FLJ14166 148.991357883449 142.071492722749 160.923897048848  
144.70348930646 157.907190910755 147.23376282233 139.834535091869  
177.103802332144 152.11446058397 194.202977693583 151.0189104086  
152.163489631563  
FLJ14186 136.745596788338 155.873969001251 149.31184788671  
148.603077434646 164.726382689707 158.617209794418 151.687402863648  
154.256214901103 151.245520459264 149.863063160222 144.839170491334  
154.003862874241  
FLJ14213 191.881157918071 176.382377784553 121.207040901483  
126.924014801186 131.267177634269 121.327397317398 122.619429537799  
125.889860278265 162.411156818437 174.707059022891 168.124936529582  
127.712004247155  
FLJ14712 121.699702849509 130.444766583917 147.407093814154  
146.474228901408 139.22776505842 135.726760147904 128.647790058795  
156.546769952772 137.267307036807 159.213940274232 126.94941821459  
137.891372981851  
FLJ14816 122.136861827049 127.642215862573 124.526220300907  
129.96280577492 124.347680638586 123.839006667113 129.786941565218  
125.964335876018 135.930911350803 122.449574852865 134.626371781978  
123.132178371802  
FLJ16124 113.192313147111 114.734439905052 111.10737497653  
111.448871835514 122.472909598385 122.84603217721 122.27785621724  
113.460835359833 118.08607083874 106.685578858702 108.760780994582  
106.953841653951  
FLJ16126 145.274345879987 129.061316880624 133.389930962407  
129.125709963326 134.298521475727 124.815853677553 122.506058130261  
121.771891473027 116.52455193626 122.115925891088 128.765369834041  
128.901707304582  
FLJ16165 138.341918073941 122.469113037809 130.836079676477  
140.82351325907 125.724143659093 142.737537206204 152.951353678265  
145.952759497544 167.811412309356 165.4474699807 125.783265980169  
140.408989128575  
FLJ16171 151.486362260537 144.944095553004 159.838626443912  
142.126620107418 157.615017085961 172.251953149975 166.714793209109  
155.272264997151 152.393260140571 160.970946091146 108.318510762416  
155.625320865565  
FLJ16323 158.308558656144 148.757112903673 162.47662918768  
153.996429870564 169.368090266817 152.28262533486 156.895079878556

146.181764812924 141.560424984281 160.6823824476 161.916155040522  
161.208713751942  
FLJ16331 146.787927492706 141.647300896529 151.507376053438  
140.397184813186 148.919726992353 147.16778072296 159.932941342403  
155.582036890436 156.243337414127 133.363883851093 157.463122989559  
156.895079878556  
FLJ16369 146.222195387635 122.568743478314 143.281050499332  
132.37450516592 137.429832103492 127.464485396039 147.588213090285  
134.227796103219 149.198753359122 133.65688823581 123.935072913078  
133.216489794592  
FLJ16686 153.289258540668 133.337863400762 143.437546532782  
132.197346228417 146.079727388849 134.608734423113 151.086688327023  
139.517413585211 135.730331297139 152.552277008504 138.071335383596  
157.484541464879  
FLJ16734 136.258073395013 135.2979041294 135.027715094704  
132.119370332298 117.367470441908 181.607253339427 160.19942770666  
137.897243684023 145.07503221134 132.074571281938 190.098509544816  
145.578721432709  
FLJ16779 132.306569548052 139.706279455371 125.073353210914  
138.733717670748 150.929236917651 131.102996816222 131.744454088995  
144.350683356627 126.713610681382 137.982667022604 124.174140125309  
122.153996665065  
FLJ16793 166.521472376759 137.876234091056 175.529441666151  
165.177036955944 147.195127201893 160.140509175287 173.892380305166  
185.113098620798 189.678680702271 137.318442197233 171.629605754643  
176.735168607281  
FLJ20021 300.937118739654 313.828943866034 339.069385816411  
440.657747083721 350.22221782412 200.652195873026 312.339824919124  
216.522992914538 199.980312703646 234.214191437687 242.848821222611  
181.500222423634  
FLJ20125 196.429685815196 185.46843333826 221.594737497504  
188.242091666446 168.763640193219 153.354921961854 163.529157756197  
181.803275243281 163.102043862117 200.017741240426 185.691922436569  
170.858049313581  
FLJ20184 145.335830265052 147.75188889715 144.201723591119  
129.645982978155 151.409290231274 148.977202433511 130.147848418265  
151.409290231274 155.988447182637 148.683761948082 153.620767586182  
140.089210795507  
FLJ20209 142.705504445895 155.798048652444 144.774621469452  
165.723126764006 179.593817076317 195.608619642038 148.42845062376  
143.381277901138 164.109321257638 147.52403424052 186.231346659144  
162.737431585974  
FLJ20254 378.4377409749 395.049127927637 303.380479700334  
479.983368253935 598.647226284738 304.111808763793 310.8725368426  
243.283375388645 261.775269058607 241.168936008174 307.570405241182  
223.81987303579  
FLJ20273 138.659387475119 177.831718771025 135.075759558051  
126.988118823204 443.343806055858 401.631377313065 482.466736153026  
581.828502821435 663.782083028745 226.387465899611 674.905270154355  
261.814227719605  
FLJ20297 140.801129972945 142.750432197016 160.055242985219  
140.802033706122 154.854538639035 167.993851183401 137.914673796317  
148.278828579424 156.873097743717 172.128489882364 128.860744370967  
151.308872564827

FLJ20309 145.352802493486 137.15571320152 136.149732574763  
137.641136471239 140.286870147975 138.944595164363 133.495243957927  
134.545983176488 125.609542142983 124.145492642453 153.687536747147  
135.803599969904  
FLJ20397 137.159781458748 145.117574928189 142.93332947113  
139.430808017891 139.430808017891 144.00214898009 184.267958772058  
138.119788738226 153.636804025106 148.764956861822 142.222833574043  
191.056705282378  
FLJ20444 193.912456093767 191.961269585431 185.30916081621  
193.843978773764 165.789846154721 226.841838641151 231.819341041105  
190.489530928259 203.410932496844 160.136209944279 183.348764012358  
170.706932460836  
FLJ20464 146.858292465699 142.577102697682 138.986877479278  
143.185372109165 148.668081483434 135.32160992961 146.00443946108  
134.907397302852 136.124385992905 145.103600666515 137.331864485838  
132.969187044132  
FLJ20489 296.962992349662 314.646369385896 354.783364481955  
332.543652462234 592.284071247642 185.199972151831 247.528753010193  
175.9510758779 194.961531388323 191.040134068942 280.414161197286  
242.269784551092  
FLJ20518 149.272219727411 160.140509175287 140.007937555694  
151.829217512763 143.831294912255 155.639666182376 156.301214161102  
147.734708927825 144.346988809708 146.411873503163 143.618454531431  
151.921235758457  
FLJ20581 147.228812647235 151.153466809603 154.003862874241  
159.576585660511 167.620915011868 177.065616871886 152.935963398921  
155.444668113276 148.757112903673 146.948261640482 165.504532455205  
170.040914594182  
FLJ20628 211.369442150136 197.191648960563 168.33854702953  
190.45739385453 236.809829701921 297.12411625104 284.13865992802  
238.509970054862 245.522497675754 206.845306095447 260.999345837027  
266.61343130101  
FLJ20674 166.503112149416 162.885054245809 159.874161198304  
165.995251661994 222.764568757453 260.045018348182 277.256341592701  
162.15259972225 233.572055978465 151.833386901811 182.545896049446  
217.380892198811  
FLJ20699 328.019503002384 338.406266073063 399.724529998085  
479.866450988091 262.756237406794 275.755038921952 231.146155346291  
222.624150073858 230.508733145583 273.550544349798 214.763232658841  
226.960024551778  
FLJ20712 139.342430217926 160.30784625946 149.815494316469  
162.560758971445 157.096799934494 154.978243057971 140.717348834454  
156.083002868004 154.118601977256 161.569793476847 149.055493714692  
133.259321087534  
FLJ20718 294.280238648737 259.767151797583 293.018282386003  
256.964577037118 484.480643763982 509.400965222318 365.199125315964  
323.086368767924 320.390351199433 439.122658719747 287.145105895235  
449.859227376918  
FLJ20850 153.477432230141 144.507230362869 146.731584143625  
155.237180851323 180.968659614238 161.870389635266 179.624208193114  
168.611652451329 155.386226046894 148.386249316173 146.57274511202  
160.903342063542  
FLJ20920 243.732074437237 254.991678321253 221.74200490054  
232.892635502424 498.05778289794 515.729905361375 687.700356531038

393.115606440229 642.647554580301 187.196424491482 452.077434390612  
305.252666831522  
FLJ20972 145.291984088491 138.734437288431 142.436624546651  
117.017844025726 145.704057360697 129.661073814998 150.677852949794  
149.198753359122 137.076766238637 143.327730271099 126.233395051706  
145.331858938535  
FLJ21511 125.658396221949 115.090463537716 120.212294184999  
124.148194572004 139.166537591866 116.07902130325 108.362609680556  
131.362128083159 152.221694141976 246.031568259337 140.975056186954  
114.826501559828  
FLJ21687 159.196987090991 168.841313096346 190.843795579234  
158.080749926756 264.201932544662 287.242697383558 275.972447693982  
217.491746961471 371.369895979832 173.09379121032 282.926325589238  
241.353916553991  
FLJ21767 151.067819234238 148.185056724262 162.312313953026  
147.89884142817 155.191446350891 132.32633643811 151.423936838934  
148.962593686337 140.875923123766 137.846463796994 133.619092072157  
153.687536747147  
FLJ21839 123.273349540679 130.526673128214 143.899201949317  
136.436762791912 148.983182193411 130.272086123019 153.597557478169  
144.112401069818 129.045934344719 121.289159587394 143.541810469447  
121.406758670435  
FLJ21865 212.591357254196 211.891710626953 182.300628120658  
192.954269340616 304.292209676095 193.098116087792 249.80160363144  
334.199307788576 462.686385881492 228.879434668972 417.191960489528  
240.706548931192  
FLJ21986 2210.67250954072 2206.7447886564 1927.467713716  
2369.233048505 163.873355370767 249.489170536758 136.829137120584  
190.947996918605 199.101099226668 150.343825300998 130.150998843383  
160.17208299932  
FLJ22184 138.993251266382 171.080373870373 150.417169156755  
154.443360208399 370.945254716657 511.996883507889 295.507504000509  
300.675907594637 169.888264971936 141.870640394206 325.43977732888  
252.894371238554  
FLJ22222 212.691702227442 202.061887608293 178.329946332806  
230.947339143332 183.32467147543 176.256840061919 195.20398666139  
201.661941695238 243.080229016932 155.660302399877 208.507486041165  
196.860228537112  
FLJ22269 155.064761390765 136.841506794489 143.449303333495  
124.895023786422 142.586051173329 143.216903218928 118.625070307695  
124.942701123337 145.468654174037 140.711699577809 137.239088768176  
128.551335256123  
FLJ22447 138.525131957094 144.568417378353 159.406462604758  
149.274901871663 140.242272149424 136.734131465433 147.856285290748  
147.338615809214 136.420062669039 143.141852982371 128.39171386085  
145.003900788534  
FLJ22531 163.262893278578 164.497445195378 171.494975393562  
165.380225715852 162.022232949254 160.644747532952 174.928155956396  
166.70212615715 162.695319777455 185.027902485379 158.244741207036  
178.235281981508  
FLJ22536 274.595218795127 216.102897582821 248.085349787686  
194.257024100927 200.424975825325 192.059255232313 133.615958668897  
199.170488640762 226.796825544749 188.797908601851 139.400521576978  
147.734708927825



FLJ22639 197.962159288376 133.004765428575 149.668587078867  
131.001996509052 118.891276329399 148.074494928651 126.191057198995  
129.741644654541 131.540436531741 124.918089223417 139.949563856936  
141.712693059287  
FLJ22662 667.693216401836 523.937128789616 521.625146077176  
453.926991868451 940.716682221364 740.527607312565 900.233783407148  
1846.61430264854 842.87865208079 1279.15873231449 4022.23000497332  
746.296354515617  
FLJ22675 139.061072394426 122.578170988039 136.669003646622  
151.81251450855 141.36525744062 136.05610450926 142.06162974139  
129.665507668047 129.477908941439 130.300169316346 126.268418132  
139.171486871664  
FLJ22795 252.593574250965 270.787490294555 242.410260751835  
284.764628939128 388.573321838751 233.757965816721 401.631377313065  
360.991542429346 431.304147578425 582.642500194997 647.273409499313  
437.122373082112  
FLJ23152 160.150336334888 140.242272149424 157.14512525321  
151.245520459264 159.584350289413 140.793616429174 144.731299077209  
150.874014332213 159.909121784808 169.903088388196 152.301556397498  
150.290025009187  
FLJ23172 129.859331207247 121.23469201559 126.362418476129  
132.965467229606 142.461941376108 121.084348994747 140.765231611948  
118.294324274616 114.412739085949 117.824694297846 128.0805889548  
115.113000553093  
FLJ23356 145.643752002787 152.821735300697 146.291932367254  
146.528945049588 142.678267012725 154.462766419353 157.237147919803  
139.837616209536 139.150209111606 151.224289879776 122.223184326586  
153.658747612827  
FLJ23584 192.848268768579 239.363511706064 215.037122365095  
265.174306663185 173.635827398273 158.98666068453 167.237705290905  
174.100921524023 169.681582570965 167.421776383056 193.48293264444  
166.842970309527  
FLJ23754 143.861970001207 168.611652451329 191.093283411655  
181.865456674829 178.751706380632 166.311421907434 169.052101570616  
184.493681387276 171.202766078337 163.066051106092 146.384051525624  
168.261511797218  
FLJ23834 137.858371717399 110.003750007057 129.562747657036  
130.642810886161 122.746185691827 113.980716384814 114.255733119076  
117.803508098322 119.319884675074 121.429270259367 128.504661404607  
127.898533598679  
FLJ23865 129.76141737109 122.109009629395 136.229159638766  
120.316950428535 139.459975305985 139.213953275623 141.189008902155  
137.565050253948 143.873048967535 138.525131957094 134.036236880951  
128.920313557255  
FLJ25006 164.603403251634 167.858490180471 154.362571105094  
147.985843605585 163.799748670842 202.741211613885 179.456207450779  
393.796356067403 174.168079247768 136.24103678923 175.055634340766  
203.544294328395  
FLJ25037 140.156797128045 137.742393475755 168.365262340217  
144.46549577902 131.853183159267 146.450806121927 170.028047334267  
145.89593390936 140.300833590056 129.442111153737 124.439917584199  
159.286484253487  
FLJ25076 150.35767254363 144.185406500473 138.452698593232  
147.121049266117 138.336667434109 142.249715102513 134.218867540274

143.603022117503 140.496058408953 146.421195733989 135.5668267936  
134.066948803697  
FLJ25169 138.537763477627 137.940675746397 134.949572471421  
145.079450753969 126.069594320759 137.416133786828 137.549175595441  
133.879079395215 146.192761134077 140.041977349982 141.137459291428  
143.818379692331  
FLJ25328 113.521599852465 120.590654346066 109.988237089025  
109.266533255266 116.90832995093 110.230322274208 112.3786222545  
112.971776964469 106.576058729493 114.161540771427 107.520000793184  
109.654666772771  
FLJ25363 1730.30703463073 1617.44377452783 1349.84215478798  
1423.02563792293 399.664121956178 1867.55140010155 900.039744829725  
1263.64725236472 941.065508539108 837.603727062008 1558.22238167317  
990.206369590236  
FLJ25404 135.682971958096 147.891442774921 143.047617455953  
133.355353808577 149.31184788671 178.083311435916 143.685368799972  
141.494666823639 147.28750335168 133.297361715205 145.350342823866  
156.866867371872  
FLJ25439 159.241573314833 157.654040469774 158.779261405573  
169.31618330657 152.957297648595 168.173803952157 140.381386314817  
160.039086963419 155.550532734718 159.879600154928 167.776363541939  
144.30699572795  
FLJ25715 142.459230639888 149.997047695778 144.724040494873  
166.209190082084 142.791015845309 142.658562927154 156.187809481625  
154.449058407217 149.589901372799 170.198508633417 136.446877465751  
139.411792975474  
FLJ25758 143.88649412841 143.552343056702 127.325087202483  
142.997365080299 123.678365506247 132.439176846818 146.252974508529  
138.956057921718 141.821550320574 139.557059245431 137.947606003247  
148.543359732604  
FLJ25996 133.087166272749 123.470830748348 125.997109913348  
115.47716627378 140.616811333466 126.305273697185 159.942971344216  
233.07015384759 169.147351642004 111.065596151792 221.231455446574  
185.801540278924  
FLJ26056 130.564962937297 140.28485470716 130.616175018332  
136.181791404331 137.994334667126 133.365793958118 160.664407431261  
138.331509117817 124.35374445763 140.595496714752 140.608266389167  
129.390398431836  
FLJ26850 155.143752422033 135.860057860699 137.172030225913  
143.108765786014 137.235469802064 145.036719629525 135.923022674367  
141.619432083003 144.507230362869 146.033591220134 141.431172407792  
143.04129238495  
FLJ27243 127.03153185998 133.238296113721 130.770335966929  
126.87100632595 133.875667250136 123.847186739627 126.396385337235  
135.936021164312 108.333135424315 132.760567403706 117.071585083051  
119.598216955485  
FLJ27255 143.00521196918 157.787233338636 152.001155788544  
149.138678142327 149.801573181126 158.919340819357 137.042097702398  
145.221594295772 135.346501914337 165.225475655526 132.23149173224  
153.320911882529  
FLJ27354 159.446705611995 165.972090075204 185.743212726702  
159.300198352916 156.259214645427 166.12184890921 164.593531655305  
143.360311218423 153.178934750919 175.350734537491 150.517832812714  
165.041296694491

FLJ27365 172.345201438148 170.866433766203 160.628894266843  
169.695658738618 190.057030596611 237.754067231793 161.208713751942  
161.424105316969 177.371157649894 197.357728220717 163.62582285753  
163.400576719974

FLJ27465 145.980929136129 135.592128081677 142.508525378171  
135.544048708523 148.286700314107 147.155738185574 144.056644468886  
142.185903088074 135.976051103762 153.834326325003 159.74220366735  
150.193479279784

FLJ30058 121.580726825432 133.93015463284 136.973804637915  
134.650161382949 129.502730573463 128.755697083014 134.459497002613  
121.448671447499 131.340453291188 130.418739793498 131.48517604564  
149.108582827136

FLJ30092 192.009562635198 178.416969664816 195.569517538477  
207.298994298453 167.077669654786 184.414609874199 162.58152435515  
161.530878860883 164.223990197735 163.336324451735 159.110614190088  
177.696849418064

FLJ30375 130.991496243273 159.611551480901 145.036719629525  
160.604195264968 149.754842928462 155.6299578128 169.428195354763  
153.836520485018 150.606329295069 148.704917490429 146.081940883446  
143.00521196918

FLJ30428 150.431052959951 143.874735808114 135.607537832704  
135.609239096236 161.208713751942 148.614214326995 167.91761500242  
135.56878810365 134.620896927473 122.619429537799 125.884565343075  
130.150998843383

FLJ30430 159.633987751501 154.827746791634 180.850779069931  
175.585857393085 157.006278815282 156.759600627542 162.652929339533  
152.321890796527 163.030275835038 236.427507270325 165.613274361543  
154.798287249541

FLJ30594 129.684916104674 139.54021659275 134.555873832434  
137.685725744573 153.571517567657 129.099780410063 131.155117105954  
125.876114993687 128.077692981235 135.664877050226 144.572485418264  
134.487476333464

FLJ30679 176.267796612066 148.408616955694 149.348231806916  
171.099675679944 172.421637564661 159.301581158613 153.972471779464  
146.20679320119 151.059401217656 147.598602877625 135.928428484011  
171.644710031098

FLJ30719 150.367927843529 153.616692588396 161.694109087893  
138.684070773064 139.476234663488 156.567519536997 141.181931072161  
147.584176709986 147.407093814154 135.950465168457 155.641860356683  
136.08297876405

FLJ30851 124.306049555272 122.94937342991 134.362834437771  
132.256047602234 156.187809481625 125.884565343075 140.904883114871  
128.44311762955 123.45956380046 120.901639342731 124.408996713299  
129.058085094891

FLJ31132 145.70726782469 154.760697311395 127.295532954648  
128.398711525305 159.41705570719 161.89906072679 166.232856234879  
159.344044864557 142.334338599752 128.292627005614 162.622690190878  
154.277670551775

FLJ31222 117.15886922795 139.595986615703 130.009322405768  
145.549126188292 122.829218352947 146.355229778997 127.773292289242  
110.678680817471 135.010937737018 118.383317097375 133.399632102473  
147.172440755724

FLJ31306 405.322847383739 314.014654357569 341.197826517049  
304.811116024094 219.96819201774 248.690121805116 328.486476842582

411.71606840872 310.8725368426 250.963601187362 758.517101659762  
431.304147578425  
FLJ31401 126.997614441981 127.560308850342 136.565191271943  
128.002822538671 121.130837254861 138.246963115014 140.300833590056  
137.811304134207 128.232091717966 121.072192130078 113.644993086829  
143.161623642178  
FLJ31568 145.549126188292 146.709967739596 138.466136108202  
137.232722233042 144.80318019871 141.401480567426 175.704031930103  
139.969155812688 136.381593416533 153.140087873773 151.151297821117  
133.638664342783  
FLJ31813 149.366554238043 138.215708514725 153.02127620577  
132.832556359483 146.858292465699 146.077082896858 144.820843146628  
145.885577577352 151.65364467801 143.562164660825 120.894583222813  
147.357032438442  
FLJ31945 146.481298877242 131.507618414676 149.813838004575  
142.421913396368 143.594003495859 142.365009028839 142.545823714168  
132.251093122058 144.917911601441 132.84268776659 139.966813133326  
144.513730107393  
FLJ32011 156.157567405927 146.824420102008 178.209994522672  
142.589312139207 145.150191397375 151.002218995005 169.311264420133  
144.450810504499 160.778296470857 163.686535888943 144.338069855334  
151.051672692659  
FLJ32063 137.114604159523 130.041462255766 140.336479395866  
143.074187168031 137.306031826007 137.882914156968 125.346526762316  
126.66432941518 144.69686018715 141.215542377796 140.605866597575  
140.13515064896  
FLJ32065 146.675159409376 142.428578698775 138.367321366804  
153.039237274992 165.213327555428 150.184863108453 142.326319895395  
142.729945734027 141.644521617419 158.967160833334 146.101547300741  
149.492550066785  
FLJ32154 154.627270742193 119.472410874778 133.191797029676  
145.968884703737 130.698850298016 135.573170189235 130.905135502296  
147.098474227445 148.82034800623 147.029988235786 132.213890220705  
139.138329217724  
FLJ32214 132.709845352383 122.312652834289 121.607527525765  
132.903959880979 138.405215507471 117.015097017246 138.538656638714  
135.425518707018 118.902823494379 127.368207232723 115.058061620379  
133.74741832303  
FLJ32252 133.238296113721 146.128066033346 125.682297697017  
135.212715912271 129.806104966617 138.4303531022 137.632470240792  
154.816213491233 141.733840643889 141.198692540628 146.664285015996  
340.728888109597  
FLJ32255 144.499680685194 179.079061789059 141.659197251282  
179.376968970326 164.665907233149 146.582858169664 203.791916347213  
157.041481397151 197.443711199904 203.727455875381 174.635853531194  
199.662592246931  
FLJ32310 129.104084188187 136.244995503799 134.140533647509  
140.264060906597 138.076501233454 145.256660345252 147.85133493803  
121.939618902165 158.200211812067 159.693019552703 120.433080754232  
154.627270742193  
FLJ32569 146.652641667543 141.544454931788 157.368974632451  
144.461999591223 204.654489493854 316.004332524937 543.584413650467  
499.683188662742 184.591789011195 146.199305851486 286.310923582432  
206.669783013221

FLJ32575 125.201152760148 141.026045918091 132.553445658347  
124.825103464238 168.173803952157 131.045970236632 142.06162974139  
131.202090507576 128.959487155628 116.248026336995 131.412979573687  
139.727248583626  
FLJ32658 171.042491047256 153.405052909585 150.496616601699  
168.03501792841 171.835438335216 141.992490695142 152.237183848896  
149.634975068742 160.525939340745 161.079169854907 135.254996386778  
163.143613079037  
FLJ32679 142.421913396368 137.379558348782 137.709120153505  
140.281512754823 136.120813399579 142.047828639169 157.264673452646  
134.022324496729 128.83022039037 146.222195387635 138.478911439144  
146.033591220134  
FLJ32682 120.473038066927 121.583096465567 124.415058391979  
129.195962576953 129.366567668463 126.013957128603 136.214432257698  
128.314990390649 122.636980845207 127.233439204926 123.943080151532  
133.611588728019  
FLJ32784 145.78573175226 142.869595099569 150.863099494798  
157.425924587516 150.023791544584 143.635367691412 156.930119977809  
138.959040014432 140.113334247294 141.236939351298 144.02511523177  
152.861304149219  
FLJ32790 135.582230137515 130.119313219923 145.566861062922  
141.004467676795 148.945466917496 137.794858639838 127.532665057083  
130.165488538277 127.104482822627 129.049273337631 144.496429994489  
129.515390475589  
FLJ32810 145.889336010424 150.870830294349 148.076841184769  
154.373739162815 156.609370182062 158.517778100137 144.233097828078  
154.086510608016 131.723229807439 146.395248696835 153.998849486363  
157.805871400914  
FLJ32867 138.367321366804 152.979190595761 150.792065744902  
148.686975104375 149.061464748604 124.961859983596 115.14883090249  
132.653795458388 147.140771901106 154.046550866249 148.406031732776  
149.390481900424  
FLJ32955 149.842326869644 149.548900791507 142.390243984362  
162.484777758676 166.936975782665 158.414776465951 150.819365726571  
148.446949168794 150.371716899336 160.828718858381 161.83241639654  
157.358696886078  
FLJ33360 142.385902610309 135.369146072643 124.74291205933  
142.586051173329 133.594446233378 121.632494500096 123.375592272781  
123.722744366103 122.75516501062 110.935688075738 124.17231659571  
121.021776527531  
FLJ33387 137.350851760173 129.842252702648 144.032779435658  
141.753560518393 138.670077127324 143.837402372008 143.804903119745  
160.461846976268 138.044751228397 140.05419835434 130.980885733161  
137.381470768186  
FLJ33534 156.046085830566 164.198494818485 151.226242696197  
153.485731788293 190.357437485436 153.219954133957 138.399665664034  
170.179304745674 228.125521373477 148.046961712162 144.482364671273  
167.250667092211  
FLJ33544 180.590215659031 164.608496326181 148.789295862953  
189.528686948872 170.05799929575 145.177195093247 184.819937046061  
176.328994356625 168.660907237558 160.066390229416 151.858466721347  
189.887788314879  
FLJ33590 175.158180187883 160.459100056689 154.524588318927  
180.392337212428 138.643442050615 167.756465178715 147.505345299689

157.723341862468 163.146581498065 166.007913607742 161.285587312115  
148.582022536314  
FLJ33630 256.326661031361 235.019573994855 240.792557915987  
259.277693314055 171.954184094677 187.472028627511 189.575681012578  
168.890506147594 172.169129806643 157.259599894923 177.976550224863  
184.530853446688  
FLJ33651 114.200099628087 137.09814291566 124.616629956864  
131.486917325752 142.802965008073 121.965131419551 141.541355091514  
120.043811428091 117.356389952799 128.007359083768 120.26749529985  
126.488299049827  
FLJ33706 136.074837228096 154.768422926874 146.326067008478  
138.643442050615 139.00736252716 144.107029869771 131.789877096016  
148.027464692171 137.73313146889 150.51660396548 133.849237689264  
121.640681916546  
FLJ33708 116.369395555451 124.752198904184 149.147411595596  
134.918496279185 117.432860005907 127.824005374202 124.800221241981  
133.707285280448 140.831508792119 122.165046954625 120.288469716375  
138.592943322694  
FLJ33996 164.352366170527 161.960392594363 173.850390626782  
171.086559024882 148.437676259828 171.278489808694 160.415807880532  
204.616225498655 157.067264221207 153.762995131216 172.657668514226  
164.571974509529  
FLJ34047 319.352940751688 364.113665301598 312.019603761673  
304.985269874607 180.641419603362 307.316241247336 210.448904052352  
234.339913501761 187.784865705837 195.69447353356 246.88857694249  
271.064405562085  
FLJ34306 135.017196494069 127.525844737562 155.007516124803  
114.470670941078 126.547883999721 134.407776033032 127.842177770276  
132.464205461991 138.818492907643 117.513523498725 142.093180304661  
133.088758771353  
FLJ34503 145.998177732093 140.775447163954 149.435684626505  
135.745821200254 138.783017264895 145.968884703737 131.08389186558  
148.79958121087 144.36575644625 135.25734629146 130.920010795017  
145.89593390936  
FLJ34690 168.925131238831 153.952788086758 180.276082632155  
152.461930328923 143.984222627806 174.727439318223 166.533191390639  
148.732027660387 152.555437272666 140.659276788384 130.661695937728  
163.326102597955  
FLJ34870 142.088243118644 130.473842500245 137.024230648861  
128.856640014006 138.661548678191 122.928863588006 132.498092935232  
129.058085094891 115.5765427629 154.087640417973 114.520066232155  
129.614692778261  
FLJ34969 166.640325848102 133.685254707686 139.340699808517  
154.539367933684 154.959217895243 157.180095329946 143.279331050175  
154.13120950189 148.832461329713 150.331324340476 127.282374513433  
154.856345114916  
FLJ35024 155.981989040279 146.155809402461 141.218832234405  
151.690538050817 126.499257771192 148.770315933249 139.872976072847  
138.446492794924 137.307786147787 153.43000129811 152.057315195367  
141.825162897153  
FLJ35220 224.424524191566 181.157738347957 173.573412346985  
215.057917795456 135.51506573405 120.560056224145 123.100949494673  
128.840466579373 129.397378057767 135.803599969904 147.585987099202  
121.792573534134

FLJ35258 1140.40904196731 1223.68146968716 669.330078861673  
1555.28458491244 135.409613764459 139.080142195118 164.433462115832  
146.96155692518 182.907444581093 179.914070416793 144.516274148451  
190.549084022965  
FLJ35282 176.167129202773 169.482586449402 191.987301954927  
169.039807608035 139.804518460303 160.078122267577 141.004467676795  
143.514848892447 143.799113486767 146.669620721254 145.177195093247  
220.510248260182  
FLJ35379 134.182902752156 124.288632450364 127.442587366678  
141.86836086844 127.209043595332 127.475316138156 117.343165720552  
128.725044326566 122.834017529045 126.158204790885 125.005019889478  
124.699127988314  
FLJ35390 6670.51138785163 7371.9761952537 6441.13602696535  
6271.34208268488 1396.4168898623 6508.71638048514 3501.86788138647  
4965.25728333142 4228.5490138553 3188.90202907403 5776.63686968234  
3712.67025366957  
FLJ35409 126.279119798177 117.706795566317 120.80221197797  
121.501959818928 111.559325333192 120.027996187915 128.26957712082  
119.119693776276 120.272964182307 120.975542702338 134.189023892662  
117.585207821853  
FLJ35424 133.011320549232 135.005591691192 135.723554819107  
139.711696905287 133.610143526954 136.271412363498 147.106355591496  
141.685620602226 120.984641102879 133.962129094978 130.449669345302  
137.356539213081  
FLJ35429 171.093611712143 161.77611826709 144.905870145004  
168.911840239685 131.362128083159 157.301617257941 153.402227428787  
149.577995793381 149.848740870148 163.788418732315 129.336402686549  
147.949560045212  
FLJ35740 137.450774903611 125.576103876855 148.660440219589  
141.727639388452 141.719556176029 140.067809125008 121.410606617535  
138.216926722025 137.185243517766 125.707228291312 148.100508271232  
129.689855810051  
FLJ35767 163.039564280484 153.600132368924 165.122737166322  
180.3779211444 174.26780796802 166.411219327671 151.790240553272  
153.545086287929 169.441789096441 165.009696356892 144.384287335249  
190.572712684622  
FLJ35776 157.12360611723 166.606522485953 173.299643109576  
156.904781904311 166.311421907434 145.481279504679 157.874624979775  
160.176567985923 166.162656500954 152.769931978291 167.521700144143  
157.507108643575  
FLJ35785 141.079317977197 156.000732564221 153.202157381228  
151.604093626944 141.56459720769 151.409290231274 157.960172706254  
148.401698825687 149.554174907798 157.142101889337 139.310309748986  
154.267020640428  
FLJ35801 143.085022888434 151.629999903069 189.539458686123  
142.26998944788 189.348690353874 255.793823796456 197.938447651153  
298.776176246196 229.835576260403 186.276450732044 216.277178481058  
235.704824490397  
FLJ35816 128.72727523654 139.56332664295 129.544594679212  
146.501559368223 142.734103971267 161.911468506919 180.850779069931  
140.486376016494 142.623106544789 147.387754442307 128.008322588928  
166.988725688589  
FLJ35848 142.527422462824 144.181359740481 155.072752529178  
138.106499370074 144.774621469452 145.870135196037 153.85854399897

146.779054605199 134.036236880951 137.363483527372 138.119788738226  
142.268018184723  
FLJ35880 179.163748161358 147.043228493047 138.79473329684  
142.339046840513 153.326420485822 155.413300826229 156.731291756066  
133.627389970495 136.903588075134 138.106499370074 153.934872807607  
129.558589108727  
FLJ35894 113.283359026655 116.871350997346 114.494394548044  
108.404733392914 103.36057518781 118.47752077032 106.102093734748  
106.746545626069 113.177330690612 113.995301093609 135.111066946207  
115.058061620379  
FLJ35934 152.713528089347 139.204218271711 154.080778100852  
146.746669300049 138.411148122407 147.70836747108 133.378374710498  
161.172420368335 144.145612985703 155.400191634632 123.094324479352  
136.901107766796  
FLJ35946 136.181791404331 116.483432723207 125.277752749246  
133.319765450636 126.355699811531 131.360310497851 138.216926722025  
124.568534983277 128.22735290389 119.346574301289 106.204350278634  
119.418866166776  
FLJ36031 136.618643817686 142.036037957345 129.338551879984  
126.549876718792 119.297561749232 147.422656909557 137.846463796994  
134.504873813959 140.439698763808 136.762273376313 111.286141277084  
135.691862612951  
FLJ36032 147.121049266117 145.730054487572 141.418737063013  
142.89427871125 132.680140469504 139.001493765421 148.901723851925  
151.84373370805 138.112168847027 144.110544384466 146.164093136588  
140.244052740397  
FLJ36070 162.464201058576 180.837420957945 168.861884032201  
251.324685584062 257.813193543819 142.088243118644 194.092089507551  
154.760697311395 158.863516051439 166.027988561421 145.549126188292  
170.08485436731  
FLJ36116 143.356999170877 145.971656491073 130.004329307977  
139.001493765421 138.227082687797 146.781221728543 132.576755070703  
133.550008967009 144.958176005711 156.399808270033 138.106499370074  
155.397301207102  
FLJ36131 4425.66777919789 4276.70912292877 4697.94415026712  
3905.35300751401 454.854528472591 3648.38765465889 1449.33679383001  
2574.74962955426 2031.01186679713 1669.97250023755 2703.76111776248  
1890.86868383409  
FLJ36144 139.541759919059 150.311274161073 143.652009342522  
137.022366035333 149.010477279209 131.748753064488 144.649656552  
140.586497829504 150.423586547273 142.945392802281 153.974384951787  
143.766249538352  
FLJ36157 130.12032144763 122.204249636472 123.7421178083  
130.917269984571 131.587987756056 128.22735290389 134.914830257315  
134.840285218383 124.213104788426 136.263658288289 139.671302796695  
130.176734524308  
FLJ36166 157.006278815282 138.132390735567 149.939035476611  
121.699702849509 155.639666182376 143.052799804962 140.321675137237  
128.324383749931 119.658703392877 124.697283474333 108.604763499678  
131.041996482401  
FLJ36492 142.810564324354 160.014635964846 161.490941000872  
142.851432926979 131.702788057359 157.40255559397 134.828360289676  
145.159572111039 138.341918073941 138.603793282123 122.333765477428  
147.268006631005



FLJ36644 148.941194457652 166.521472376759 182.384190694142  
149.143087870963 149.547635666621 139.579764449867 169.136919982294  
162.748836971539 159.49930229951 169.072574423443 155.842195370853  
155.548684011748  
FLJ36701 146.238333981318 148.908758741034 135.279197125157  
152.175423676063 139.462804363695 163.22480684222 144.853868519575  
153.4392054301 143.036006001419 141.016596301267 127.58382536792  
159.337816095012  
FLJ36777 131.215202712283 134.521848929606 139.677109265241  
122.624828884731 131.065633574494 133.62358240645 126.580227722115  
125.20712393273 129.143168240589 125.130703953031 135.360087349634  
111.161283080299  
FLJ36848 206.68694753419 181.635664531851 297.12411625104  
196.014841240142 156.846991384413 207.150354734189 186.591941221632  
199.378179817518 184.915526626619 178.728925255163 163.416011199431  
171.320653882424  
FLJ37078 157.604224004016 166.422360032182 122.251178920649  
141.738647095861 289.667302610069 182.130970182242 192.709473588165  
134.255021727555 164.955263076598 139.075537402658 162.565576110247  
259.374392296079  
FLJ37201 144.96670085147 133.054453517834 176.038123840296  
148.466658640201 155.280897870265 168.682307349713 145.594378536072  
153.613110881454 132.395993254065 140.117644705946 124.424565172377  
132.171282327983  
FLJ37228 149.087951792991 155.101850847148 125.08580835258  
172.857643600385 142.431979387165 162.664254855131 144.65238608866  
138.4303531022 149.013011292165 128.800907223807 149.813838004575  
140.258615682066  
FLJ37307 158.120079903425 143.560065338939 184.25384366282  
160.022481227931 130.824958143557 168.974155750959 144.68114486527  
162.327039624723 158.297624312257 146.891471907784 149.791777262424  
163.203582580217  
FLJ37396 191.987301954927 199.327939161502 225.96618659877  
198.753297290444 155.988447182637 188.981391266203 176.066680490625  
163.053121879323 161.285587312115 176.890596690798 158.886786960196  
161.094103878416  
FLJ37453 166.472068379965 166.091736766853 167.746786642066  
183.371103136697 186.722842989058 156.46322298175 137.25679451567  
147.910699446264 166.8846964604 142.567737460006 136.91512200431  
128.686425820835  
FLJ37512 150.602976963975 132.346363545288 148.423303776817  
145.86855878099 136.823008283157 124.995087711332 140.40754434058  
124.555847618988 134.527165454543 127.769405736754 134.825699448987  
135.452340998039  
FLJ37543 134.653131708903 131.798931481549 138.414916506716  
133.061016674211 148.284412570438 130.2867846895 142.331050242704  
135.802258952006 135.105147647223 154.256214901103 146.777258330572  
134.711144967036  
FLJ37587 117.131720092783 149.586651393588 137.992477770842  
135.15791174418 124.449679223202 134.033751039071 135.25734629146  
128.666652639862 145.236154447244 135.43119649883 104.285022032604  
127.9575507576  
FLJ37644 164.38282966938 142.658562927154 164.717809928624  
150.279529635193 153.328585916625 162.294114485312 144.627784383455

150.034029031033 136.19481894871 133.257477196196 155.058852833902  
141.082569618216  
FLJ37673 165.908756485356 150.011603347578 168.323141675824  
149.213990424575 149.004343851423 160.402220755071 159.443697452694  
171.080373870373 157.668307146391 159.570288565855 142.50631960137  
162.55521875551  
FLJ37786 138.903450375532 134.251843621261 126.603552416008  
133.733674016447 135.961724275921 135.054931772725 155.8871985642  
135.86149691566 127.816596414779 139.658932672049 132.94603323912  
146.660826209767  
FLJ38377 148.780775862239 144.746134643761 140.35175858015  
143.953043041292 133.895547281411 148.288798428149 143.093156971372  
131.693923403533 152.054874792646 140.421945574721 121.984179437382  
143.976395954528  
FLJ38379 141.426756696799 144.78971417658 148.863297062269  
152.337631025368 143.576177625265 143.710449544388 138.53403492914  
130.363516180139 143.271346378958 139.488057371254 131.726540162023  
142.726324048628  
FLJ38482 197.815264620906 181.654319266685 245.640193659159  
141.884995734267 200.618080312379 260.224777636733 381.182514249587  
289.82072316082 404.95944990868 250.25959091612 254.63506290698  
326.962330523237  
FLJ38576 162.519642881848 145.544996009633 145.315875226867  
173.507835230243 127.023543953724 140.372463604232 161.397788731595  
127.642215862573 149.551030995489 148.245974323625 119.544004279354  
147.379741260871  
FLJ38717 506.562512021352 487.597040819879 416.546844844021  
497.110852407681 203.999142031297 344.786541451395 329.604568691377  
286.541028896473 317.163768837813 230.079664410595 319.128582107184  
278.555009982029  
FLJ38723 121.968807253639 123.752109790056 123.159407368236  
115.299986138153 113.38168751499 114.470670941078 122.578170988039  
122.708102546276 118.527464364564 130.277107538053 127.954231630338  
124.327827104244  
FLJ38773 144.456324230938 146.633627492419 148.654099017805  
135.005591691192 136.561852783331 143.756242843438 166.784804508647  
139.404820141366 147.70836747108 153.532954370572 135.458682745495  
154.291717784335  
FLJ38969 151.747595672228 157.960172706254 149.77596374205  
162.919656039331 167.858490180471 172.478461106269 142.737537206204  
156.365413649149 166.447510782568 170.298291784762 158.100395482569  
155.535222310709  
FLJ38973 184.008405576875 183.853381322135 152.768580075051  
167.087850057037 160.209949749785 216.783051958345 171.561940747015  
192.130214856642 139.484551562098 171.573342518254 198.113398073968  
160.338146803754  
FLJ39061 136.674553275255 140.765231611948 145.358431402568  
138.868641301709 137.537197575152 139.181131600753 137.629855378016  
136.657107363796 143.519786615253 139.59941545613 134.381042390464  
136.946137446743  
FLJ39080 157.273309095198 147.784078315091 144.863617174741  
138.121905080822 142.826898321575 135.728336465002 152.624623171797  
137.476047500852 145.168031449425 144.757068610657 137.920724602098  
151.059401217656

FLJ39632 139.532508621268 156.557792402376 151.032389358279  
149.013011292165 262.79667156266 302.021033686056 624.825216056495  
161.112906953532 315.430399077266 207.651142295123 175.139231359014  
773.803350315426  
FLJ39639 172.108795190633 189.61702125418 186.515784641119  
229.443064589306 145.455411983653 152.801801823442 166.767004180603  
167.830629616121 163.582678113215 160.861929142249 167.51207060064  
159.629232808787  
FLJ39653 223.638850960288 188.013181859196 269.053237303244  
226.449705559354 147.854171854456 198.631354372924 208.793650722271  
297.12411625104 212.959246855759 152.219906297607 215.673878830563  
199.209279169496  
FLJ39660 148.211354898758 167.629008083436 146.637799077812  
145.581755438161 146.190750749851 225.335753745598 161.960392594363  
166.558080305926 170.87247413028 155.214638707046 153.568321662387  
163.843143947012  
FLJ39739 143.639894909386 146.781221728543 147.118987674809  
144.071652839025 146.451918215469 140.975056186954 146.98903251354  
146.31980311926 149.511776997149 139.099483279141 143.410917415691  
142.321476446203  
FLJ39827 351.079435946154 417.191960489528 360.39998507367  
451.985108262982 288.261250589513 292.068293167526 245.195406638979  
294.595972099366 247.528753010193 237.492603094091 232.151020756625  
213.215996114827  
FLJ40039 133.921012946195 130.858419819734 135.866980620144  
123.706910388724 127.323157914914 129.543069836687 128.755697083014  
129.775280076365 130.838350486331 128.736591902501 139.06923394504  
136.104965836123  
FLJ40113 152.861304149219 151.208728458188 160.254101852355  
158.316173597874 153.051143478997 156.445294524594 153.738794649373  
147.182394557583 158.23884088767 173.87113073582 157.155105022743  
157.976810829398  
FLJ40125 154.908975734985 158.193008411967 163.718595974283  
132.615324904193 164.274491958161 165.244616507084 411.221560795912  
166.803359138942 182.67941458824 162.308297940279 187.729071402782  
184.085616342099  
FLJ40194 152.783534456473 137.81819274774 171.39347085745  
151.645636946799 155.330215726109 147.679233228201 146.554017952963  
152.152106138031 151.993651822163 144.954595802474 139.005788243703  
154.679076303046  
FLJ40244 115.174678745401 110.820329153348 112.884916986215  
100.04568139926 113.886420801388 109.176852761745 110.838647534175  
112.590379042108 101.981823814699 115.107214937219 116.825172441325  
100.746407116143  
FLJ40288 117.889524670597 109.564709878576 114.999628959921  
121.997885377703 112.57049236673 118.220555783444 115.678486138934  
116.335864439545 114.00959999268 120.174672871542 140.194414869595  
119.334967856721  
FLJ40292 143.118188813831 141.834582245454 163.010527914347  
149.019120812629 148.807422049327 149.066522533956 135.594186066942  
155.211976328553 149.437212090587 135.494894933583 124.606795061928  
161.603317039244  
FLJ40296 141.779801021888 139.844984829379 146.252974508529  
145.566861062922 143.821269460523 140.981666934622 131.500591219916

142.945392802281 142.321476446203 138.333435927107 134.163388748526  
145.724294862079  
FLJ40330 154.452964510369 158.147502554814 152.077204721895  
160.315029612814 155.400191634632 169.806644442071 162.002221893617  
153.633095853017 155.194521954405 161.441613587571 150.208809981642  
162.895923745031  
FLJ40411 147.045944019838 145.226278521493 127.597601325212  
141.272049404557 143.331929080227 145.117574928189 143.431389389919  
140.192644427334 141.611712747368 138.50252234048 143.50323531501  
127.373421694142  
FLJ40434 155.317754378283 150.557982810339 126.401145439668  
141.553465481789 124.682396766302 137.920724602098 136.049167597016  
141.838206951224 143.021435512861 134.509830749072 117.829228895897  
130.379603677874  
FLJ40448 124.740700441589 120.106270603148 125.208803405105  
131.342562516383 124.657687121111 131.77099316122 117.193620642373  
120.355844117573 120.906553066296 127.174074003712 131.648308760913  
130.99564079691  
FLJ40453 148.592330216136 141.580944960818 137.812249316763  
149.480971898888 160.446191353364 141.21138348075 159.68134949161  
149.133055368147 153.005366371425 159.563866056798 140.319851351329  
135.592128081677  
FLJ40473 160.79631681714 179.091917512822 166.32555285213  
149.666293193219 148.868265867275 171.051948060796 159.674396591041  
154.080778100852 145.409722106953 153.051143478997 146.261164125255  
163.824878791966  
FLJ40504 192.046442148183 372.757091748175 203.87884605779  
150.99622088333 4255.59773503364 1501.18820017008 1332.11815966955  
1176.01058971561 2921.59274577877 316.623219008156 2542.44286642873  
1211.94273385872  
FLJ40606 139.034940762344 144.595393134144 141.730912072471  
146.580787463084 159.968531285904 130.854818615966 124.261531006131  
120.857635836068 135.504526903482 125.220416203903 138.248708129528  
124.942701123337  
FLJ40672 121.926377140115 125.277002586952 132.387242907281  
130.029719192412 127.447218258785 136.712083407769 127.551486042435  
121.347339077474 133.412452607155 121.646971898731 129.189479305468  
132.871179509995  
FLJ40712 127.918847837351 145.855671447779 141.023875058322  
148.201649039381 134.89415027205 126.17342715006 136.366798516444  
130.521731606987 129.353536603449 129.247701136266 140.311843829601  
139.878752507646  
FLJ40722 1162.8644618472 1139.14730341921 944.92617668298  
971.170460915918 300.793542873709 1259.75918248468 670.571106793204  
970.634736994313 622.142195892701 559.0867397858 1850.98311401165  
825.034504959272  
FLJ40852 176.680708339236 170.998961353556 182.851203073653  
178.06221214103 157.273309095198 175.711836112986 191.897449038297  
172.877947895827 158.95714101556 192.140442881209 173.225064625094  
168.205277839471  
FLJ41046 125.885715928839 122.706176540192 112.464951599416  
118.256000539093 128.967855397644 116.476747183738 121.459780480915  
124.160433356046 126.50870982427 127.107223387937 146.450806121927  
136.408314486465

FLJ41047 135.508025612102 150.799400717425 144.30699572795  
143.961467163406 122.903428611669 147.461480849333 153.679479224178  
142.198234546084 141.241717979079 145.505223177269 148.945466917496  
123.100949494673  
FLJ41170 167.906766146651 138.657241641263 150.507308901391  
138.467624450885 132.183250916482 154.665212863369 134.432461986523  
149.18603646016 142.221542344035 152.19583231051 115.417648857825  
147.373174160478  
FLJ41200 143.099341621411 137.047288508371 150.815117344434  
161.849023343715 140.318155161909 148.94765984808 157.394035451151  
146.395248696835 140.359796538887 142.33269270703 172.412059174046  
152.294341111068  
FLJ41327 140.40754434058 139.14544832776 159.374355553219  
152.401204710292 155.355051932357 151.770791549511 149.004343851423  
144.165277164871 141.739299634007 156.061579024549 135.16316100494  
150.28169442832  
FLJ41352 131.878155417065 135.643341446691 150.939877261936  
135.535020220081 136.625136565562 138.562576783507 148.245974323625  
138.196640512429 133.814720785534 136.231747456996 137.821010169859  
138.267726309873  
FLJ41423 146.803549606737 127.43866970659 132.151765465534  
122.018200592563 120.822923434486 131.034010150362 130.325073627151  
138.015301767961 135.292532783991 123.877609932461 123.051777473512  
123.998343902602  
FLJ41481 161.397788731595 154.499313851756 143.810050834214  
146.090291252325 164.824914851636 156.210423316722 141.079317977197  
171.449326065013 145.917220112846 161.485353443949 146.875733210901  
141.966490100288  
FLJ41484 169.403422185018 178.835679834487 143.256590560776  
236.592839463278 138.175538905334 163.416011199431 204.113356572343  
161.397788731595 206.972440734038 132.721469335671 219.49354518392  
401.359711029934  
FLJ41562 135.59027155522 137.658183450715 134.109051944736  
133.689255383855 120.711150688559 131.956481591804 118.628559951472  
134.335309757663 135.964630862223 133.615958668897 117.144778357339  
136.156548919515  
FLJ41603 433.019478861638 565.164961255054 560.602047253306  
679.557656724243 187.529556428609 201.221839281282 191.170105307944  
179.46936343225 214.068044241507 402.366797969833 166.872332652008  
209.684346388892  
FLJ41649 118.351607868932 112.10312035128 111.243322115126  
122.603226380439 114.953328013917 123.135918415235 113.321454160244  
114.00959999268 112.624137732184 119.407293854922 127.068313862984  
119.842470751496  
FLJ41733 142.121399383259 156.632939064629 144.443844205426  
133.631676386591 131.85737847837 126.823886603295 133.311212623667  
129.606271613463 133.452032750397 142.21279866857 148.065080664185  
147.78095608696  
FLJ41766 184.482849019679 188.268774618164 247.899467998443  
199.305626149918 142.919910421524 143.864876796403 187.796440205485  
163.529157756197 137.408247668043 146.404727168045 163.456245724169  
145.987228759402  
FLJ41821 153.261002653668 154.312374306932 176.506227858258  
148.516653846017 154.166668493152 144.436358527414 141.755954088275

161.764411756848 163.331424612891 154.722895261876 143.737021989907  
159.592581700976  
FLJ41841 150.290025009187 141.67277923437 138.553151063218  
136.618643817686 151.473239782301 153.173746756225 139.39112068213  
146.229239731545 141.259186690966 142.64161581553 141.281116867082  
148.326282600684  
FLJ41856 154.856345114916 132.492444216154 133.269658133558  
143.31117188259 150.549883779193 141.604832186257 154.520935683104  
147.15764785567 139.981905225845 168.111124820968 140.38686070363  
143.094799968981  
FLJ41941 148.907136936731 142.744045151046 152.219906297607  
168.365262340217 162.06940121135 137.016495611111 135.666278507269  
147.121049266117 149.772157318769 152.964940071133 146.871145679651  
149.320667417893  
FLJ42102 108.79453730066 112.684334910243 114.488760619745  
116.796995589816 107.365390754133 112.624137732184 115.840266274696  
104.681530703922 118.792612926619 102.166449349339 125.374764771516  
110.602406076036  
FLJ42133 133.160197638474 137.408247668043 136.946137446743  
125.908576249439 118.757973008463 125.717328918165 132.137634927459  
121.668166378914 129.386300987308 125.163958250922 119.366599958278  
119.122305582754  
FLJ42177 121.330383384978 125.463718280745 117.172431931323  
127.287538993899 111.032156655273 118.438942370745 127.289269745461  
110.061459744714 126.162713269943 122.868393258957 137.243864288111  
122.300069045533  
FLJ42220 160.608674893418 153.603765998461 142.282861913548  
148.823805841381 135.594186066942 157.77047742735 150.566842106244  
152.780908985916 165.597236278435 142.126620107418 128.986795394842  
138.523677181131  
FLJ42258 156.296046600921 166.85671415475 181.971189935628  
173.863373934746 162.018860183534 163.331424612891 179.265395910119  
173.299643109576 163.726898336284 173.810080280732 160.311096717492  
163.153676643372  
FLJ42280 142.22515098612 141.076652697698 146.464937541891  
143.999000471746 135.18026749895 134.394503574535 138.956057921718  
144.579725208643 125.739946257697 135.513494853742 130.613760017864  
139.000248033373  
FLJ42289 152.612116997575 141.239354296152 141.480793979634  
133.757741295765 158.708054164813 140.531789506024 139.767216030715  
136.176688025337 141.980728956046 133.645044060866 135.778099658349  
141.719556176029  
FLJ42291 145.832751296646 140.89390566467 174.127444395862  
144.064214573005 150.817922696097 152.511331178337 150.629932241703  
147.52403424052 159.106269972346 152.44293820056 150.464468573079  
148.02460124587  
FLJ42393 179.96623248843 160.240052678401 172.20451139581  
155.981989040279 134.805239981342 178.235281981508 152.342712570625  
151.625248091441 136.485034823945 148.534143255537 130.037840598918  
146.70774472499  
FLJ42418 129.601234646954 114.213405341709 121.599883734552  
118.641431192759 122.702175900246 128.87498876738 127.04217189075  
126.800718471804 129.493805009651 134.992686224944 125.362754088168  
129.618097261902

FLJ42562 135.90207451581 139.119638136874 133.935910746769  
139.47828235176 153.891667472876 135.433229702209 167.542332146706  
143.589222264786 146.616041788595 131.601823550269 170.452989060697  
134.848210768603  
FLJ42627 205.987280015028 209.362806125315 164.241874094897  
262.233918187791 216.506914782226 151.159145294127 181.668090319293  
201.480444219547 241.557810100265 173.839053227554 304.900910626137  
179.854800301573  
FLJ42709 126.830269821364 143.844153373367 133.281505040209  
129.553282780541 128.736591902501 118.694037994926 125.489777118532  
120.280241193135 132.733821031511 143.287237534352 121.154389729409  
126.84966022925  
FLJ42842 149.687372584136 134.686251400642 166.162656500954  
145.887262601586 150.144977373708 149.34605615699 143.787766055379  
141.91067228913 132.320536722841 145.387562372871 134.408846338374  
154.600966693059  
FLJ42875 177.592497020798 165.249658565871 169.428195354763  
185.46843333826 165.665796569389 166.1677526172.152570321727  
154.600966693059 154.371946675862 156.053517438255 157.927709922368  
165.70840218273  
FLJ42953 116.273000405449 114.598636725763 119.000436602325  
122.262664384198 123.827771590213 117.706795566317 112.729141678141  
112.07238018581 117.580122770251 112.578934972566 121.895778599116  
115.343251487944  
FLJ42957 126.748906552086 156.296046600921 130.674263597931  
148.195611015135 118.372047967248 134.883708339914 134.176925491721  
141.216205703466 126.398884382537 140.688570032068 117.48427100606  
129.47419698487  
FLJ42986 114.589757401741 118.677203713024 130.584348445667  
113.025793645043 116.89487516867 121.764933633063 119.631847624882  
124.76274408368 125.861564323476 132.317972465689 121.400652285172  
127.019978195283  
FLJ43080 123.849651946683 133.190147746722 146.204122329465  
135.930107381894 126.143886553557 125.655823846115 142.878258542775  
133.634886800037 133.838032323605 140.071879210324 146.67875644027  
141.739299634007  
FLJ43093 161.724388995749 161.83241639654 146.421195733989  
174.694388371236 145.671099346237 143.074187168031 137.788504385206  
134.696571019896 152.077204721895 153.679479224178 138.062345982865  
156.768976123975  
FLJ43276 136.643481414354 135.699583036042 135.388750095746  
140.604900199281 138.880168623766 135.367261617271 140.875923123766  
132.823333905679 134.292099546804 141.393814611166 135.151438845363  
137.499290547619  
FLJ43390 132.582062079623 121.414076245292 145.68886453261  
129.176532377543 115.785084044427 141.028377381019 131.921799405427  
129.044445373107 131.364187047583 122.351186755611 137.961504178836  
138.771088752839  
FLJ43663 186.276450732044 161.142723532061 216.457866890673  
154.627270742193 130.12032144763 165.471587934831 150.952264779196  
140.343790129071 165.866987051333 127.274768398849 149.831566330214  
138.499293816467  
FLJ43681 6296.24208225227 6114.33638002734 5776.63686968234  
3630.80752744347 9908.59593023839 4318.50925204407 11554.7330886956

12690.801964606 8261.82420896892 4979.31150268741 8532.46059476152  
7389.95365139168  
FLJ43752 132.966873990501 129.353536603449 122.327353563917  
126.139188586523 123.434963905308 121.539958110688 130.326980619676  
126.567824355343 129.964666668421 129.033433971346 148.556161762978  
128.56000638844  
FLJ43763 119.725487374119 113.119021336236 123.762963668211  
120.998665308561 136.543603346919 119.057157701097 120.204469421484  
119.168045349254 120.252164075308 119.682747854629 128.895325544109  
118.015175851934  
FLJ43806 160.303394115537 149.866592541235 126.656077572961  
128.478724185042 151.676232556697 150.998881139061 144.292679144059  
142.358754646258 128.645334554749 143.778327403708 143.354858193994  
136.639637503571  
FLJ43826 145.063062479224 153.865702787334 152.601626526117  
151.102431192559 143.467053670148 141.84490608317 126.899985772157  
126.939543057414 132.54577436954 129.802596741962 113.66416989856  
147.302953100995  
FLJ43859 134.719531559829 134.46179453106 126.523201566273  
133.337863400762 127.235190626458 125.794788766462 121.588054040961  
134.91213977595 130.795318552623 155.673532440475 122.382304966782  
142.763157232147  
FLJ43860 153.402227428787 140.397184813186 142.759452994928  
143.491142564838 143.710449544388 144.964084792568 146.59366188125  
154.783699020901 137.973211667003 151.032389358279 141.019494314354  
151.126252768792  
FLJ43870 152.479402912801 146.030484284194 135.294664456623  
174.107661206415 150.265385257579 140.857328923536 150.691815494794  
142.865320802784 142.590631181358 151.463200570499 149.759516805355  
162.716712951629  
FLJ43879 140.66266106824 145.247717878099 148.370331097467  
131.288785100733 139.783725419023 132.450954427876 161.046418048832  
140.545351041252 137.940675746397 137.020473156363 143.506243892155  
134.728594388428  
FLJ43950 144.190203286506 136.511669406292 145.784526088216  
146.128066033346 148.493435517221 142.007066214472 146.690308698414  
138.076501233454 146.218767446679 148.479865869644 142.024171830924  
143.951756384507  
FLJ43980 108.34997967774 111.765812595638 113.362825181676  
119.415822905251 121.080413308265 119.451099896048 116.769106223472  
108.266328505986 108.061315311823 114.217867810848 120.14201542563  
113.822580779824  
FLJ43987 134.23001942966 145.432667767652 127.144291519133  
128.905042692431 149.763038696374 136.095753586495 135.233417601805  
128.482976013813 132.450954427876 150.896076207161 139.313456284725  
122.629146433216  
FLJ44005 167.484236948415 160.78368986036 182.810581377888  
173.09379121032 165.67554738735 169.541411677993 181.865456674829  
168.013310840048 172.980441569522 155.522274777451 156.073428882485  
158.869463014801  
FLJ44006 141.284962125757 140.36425603453 135.017196494069  
139.244051199144 129.072173761566 138.328508662816 148.861141988806  
134.983884722607 133.581450824362 138.478911439144 123.247698282967  
151.702809524494



FLJ44048 138.462826342765 134.711144967036 130.430917518283  
146.790059505709 143.207187847583 177.93138555339 137.404525565336  
171.267907653007 135.699583036042 140.868946922293 190.204960255989  
175.093007163166  
FLJ44054 210.620764703468 204.740183832461 231.600532144945  
216.427103365727 189.83433085782 237.940015617254 197.100205890532  
213.274106157675 198.470718196139 203.586310608403 180.680595239651  
187.63609695026  
FLJ44060 114.00959999268 122.418378964982 120.78129870199  
121.915043935246 119.107992692097 122.201293962463 118.32560379073  
117.051541123239 120.384210318 119.418866166776 120.846789922177  
116.280157890082  
FLJ44076 125.924219382375 127.409603645289 119.780654293448  
112.282839763467 112.599970121166 127.31283918221 118.115015846489  
121.138461509096 122.00079209554 107.559685467789 129.442111153737  
120.992440100307  
FLJ44082 142.041992878641 122.587545171646 143.287237534352  
143.401971479167 127.938245853896 127.05677680446 136.986713332541  
116.678969343492 118.677203713024 138.972789382679 136.294479720968  
135.971507823633  
FLJ44112 155.76568091161 158.975786937923 156.098240321674  
159.678281513591 144.63774603725 145.630497368137 152.377056383547  
142.487424651482 134.160100276452 158.536178747273 138.771088752839  
149.42148494796  
FLJ44124 15924.2167735021 17658.0552091534 14228.7550296952  
14983.8256502293 3309.66193624859 18061.615487998 7681.48027081818  
14037.2575989329 11432.8213906428 6628.17856159198 12654.3779830648  
9970.08052783908  
FLJ44186 132.850601603567 136.948039394935 152.11956441072  
140.806935772116 136.294479720968 136.158508521357 145.503718833974  
140.759006929593 152.024383072265 140.641308444844 131.263641389894  
144.212231875922  
FLJ44216 151.515460040167 169.441789096441 154.98147307591  
139.178245419517 154.912576362196 153.467694163404 154.496005175117  
161.806144472744 170.522853717911 153.687536747147 173.810080280732  
149.714982846365  
FLJ44290 155.365673279823 154.821960325589 138.743505629497  
141.968949222821 132.69067627743 161.139253742858 143.943676099522  
132.158817539201 136.214432257698 135.738699497293 138.322109975426  
156.733898702331  
FLJ44313 145.695402948337 156.748330788367 163.991378703958  
153.816782770382 125.606269267903 110.875112640101 134.013748718539  
136.470025638057 139.356478232855 146.231937458616 154.373739162815  
146.495845282846  
FLJ44342 190.5930909277 181.668090319293 206.446584387595  
181.467708718758 130.576944864484 290.867822301134 181.840985962045  
288.596513753617 200.045606111354 179.94333102877 224.396933003452  
215.019239034819  
FLJ44379 190.348359536057 169.466129742085 182.873752254411  
162.100547394235 162.919656039331 150.542478166361 154.003862874241  
157.635531050489 156.026806913759 148.89180107448 134.051756243089  
175.774461934758  
FLJ44385 158.299765118221 148.993620368781 139.943915452851  
150.576660798865 191.200215655114 170.655648004461 169.422015793848

165.062129636008 154.01988200569 143.823368276815 153.176268095608  
159.820341130737  
FLJ44450 148.656917603142 138.807031587657 136.432109029368  
134.224781719944 139.576261630082 139.81502919163 156.602240897907  
136.280653079814 144.988803993714 137.188849160569 146.832797779597  
156.622993107052  
FLJ44451 144.46549577902 124.15094220181 149.760883745928  
144.675182563174 142.707913210557 144.977958320895 149.272219727411  
146.21362402936 141.350135458015 136.74788009263 148.027464692171  
148.076841184769  
FLJ44477 147.027904536486 138.144085131733 158.085935267091  
165.080825814849 149.125425566378 131.878155417065 143.421288665418  
136.705326991088 143.368327095618 156.589829166493 155.444668113276  
157.555410977564  
FLJ44606 156.895079878556 160.243405030742 158.738932073809  
166.936975782665 175.840639511966 164.82904652634 207.400490077106  
170.768398273919 155.507030276749 184.900027626401 156.890299350025  
214.888126361789  
FLJ44635 147.164348704012 127.70306883967 146.119700458464  
141.342216963124 139.714198638713 135.705904966172 137.593577427321  
135.803599969904 142.785631812039 130.242779079309 149.974080577906  
148.983182193411  
FLJ44653 127.036976462046 133.783379558598 135.27739087376  
130.782296492278 124.210840121525 131.526532700651 128.685065364693  
121.905741525277 124.551603326682 129.116354997747 137.334548525575  
130.022574966461  
FLJ44674 138.755173333171 150.405715534245 146.101547300741  
168.982086590306 135.90207451581 174.576132939661 157.381401974279  
143.094799968981 157.516278302035 169.206723147505 177.562561297777  
151.519845657755  
FLJ44790 163.331424612891 167.822075935474 160.724319010751  
162.364266549463 152.071081175788 166.111496598928 171.051948060796  
147.301909062399 146.986891588172 145.212306927438 167.442950045855  
149.63291071048  
FLJ44817 124.103321614841 140.796641921516 141.370957100324  
142.737537206204 136.9834458057 146.536055773073 146.616041788595  
147.128805198619 145.36249226764 135.864853829421 136.264815594226  
130.898067924686  
FLJ44861 152.179281925254 145.82344959902 172.46311371589  
152.68344738009 118.930792960643 143.874735808114 137.369033684705  
147.060637536615 147.257773507186 155.569733738768 129.265788005518  
154.091431691072  
FLJ44881 130.027227278931 146.97334315047 130.89594032962  
134.253399256648 128.040201586267 126.722212054469 142.253826696208  
137.21916902421 136.764881711137 161.548130965486 127.016845640004  
130.836079676477  
FLJ44955 113.112450527382 116.819107878692 111.448871835514  
115.871151134713 118.492287441192 118.430401197079 119.373287155621  
105.839106819841 115.463150857002 130.354641020141 117.703025026759  
117.883635746379  
FLJ45032 165.857032207991 157.81831741292 173.635827398273  
175.350734537491 198.737421468412 161.44729973777 163.20714296121  
163.996649606636 162.592306630033 183.988537525989 152.379441401583  
167.958792571511

FLJ45079 134.619470709414 150.303703193967 146.64835267642  
166.192990554427 133.236084190243 147.552635527742 132.487362867399  
143.260448301109 152.337631025368 163.02140155858 134.485835304676  
149.211214631561  
FLJ45121 111.260486045985 109.988237089025 112.790552379447  
117.893918180502 113.78323485587 109.564709878576 111.962852412774  
106.923686318112 119.164791441052 113.40684693417 125.243735617266  
116.597352307016  
FLJ45139 115.400592594965 126.00744446299 114.696935316053  
108.04922729993 115.224011128183 122.97487285065 125.334995649504  
116.321559000405 109.760525674874 116.258629237662 121.668166378914  
108.557097186828  
FLJ45202 139.771342253058 153.206468539619 172.774914399844  
139.444577046509 162.732574014686 145.606098951179 143.191095552619  
162.472783116487 142.656762407774 141.21138348075 166.315369318355  
152.60462513339  
FLJ45244 206.113290588613 233.786136606682 256.394563537658  
267.901632267999 181.622689471026 160.419358656559 216.991823988763  
199.837938317725 166.637846390031 157.541796722309 183.988537525989  
174.698724064671  
FLJ45248 151.766607453172 150.073816271065 129.436712663487  
146.101547300741 140.533704857854 135.05209575317 138.090158433822  
144.046646189442 140.199334790854 146.481298877242 147.416991272497  
133.592691897675  
FLJ45256 189.603621918298 177.11682975342 174.107661206415  
191.3765085801 144.043818335414 158.831813796522 154.499313851756  
164.103306492559 157.600193849783 156.365413649149 158.863516051439  
166.162656500954  
FLJ45300 148.600270795407 131.179786925029 128.398711525305  
140.195820033314 141.174971007547 129.073750290924 123.629279569085  
131.750053934548 124.370381674692 161.035985824654 136.541973790157  
137.765042156434  
FLJ45337 198.568180234676 176.456539071735 197.02284475852  
238.400565506288 171.768618884215 176.631604815669 209.090788790449  
234.370850809531 200.652195873026 414.267332328081 182.633773540249  
209.180298459605  
FLJ45340 146.351622020606 144.991442620483 147.16778072296  
142.745838888446 129.140978620864 141.879359965317 139.746733428525  
135.05209575317 141.180647782041 133.365793958118 161.338215647108  
164.39733878009  
FLJ45422 142.090009728666 150.376234759097 162.411156818437  
156.508428796592 147.784078315091 145.904866987074 153.787447416111  
155.530415929059 138.202872275661 150.924948809354 147.691011072898  
148.585224298375  
FLJ45445 111.596690019694 116.95195122318 118.091125088778  
112.624137732184 117.990622156287 120.918190840083 120.160652344221  
119.717408713154 111.467722538327 125.04156726504 121.402905161896  
117.149781437983  
FLJ45455 124.291944151031 131.46193427125 120.227386958188  
137.217104547797 145.971656491073 137.149156133537 131.015519445322  
133.141683141696 123.625734357908 134.978785580693 140.464476678448  
126.640141760199  
FLJ45513 155.413300826229 130.116771999391 126.635105491524  
143.177915754998 141.555366493541 138.35538364303 140.010161839229

228.820894086914 140.527521345097 136.355319997318 155.035727630756  
145.226278521493  
FLJ45537 141.302647488314 130.42746492878 132.642931022024  
131.12775424877 135.943252855457 124.452631766045 135.521802085177  
132.440818532628 137.710725379804 125.398875527365 154.615097099186  
133.003743285746  
FLJ45684 163.004844049672 148.130993521745 139.374278310041  
155.933739693912 164.991522994763 128.523703756493 162.422173095045  
163.647306551474 142.848438163322 135.267015629083 113.810645407837  
153.423579724911  
FLJ45721 128.259909378964 141.422441104854 136.734131465433  
139.715836473047 122.312652834289 149.831566330214 183.416437587938  
128.986795394842 131.528729642144 123.02879683948 126.433146708506  
126.51808376464  
FLJ45831 118.95971064289 114.405811161631 116.476747183738  
118.104763610751 122.662260070778 128.738746025289 124.539006083936  
116.95195122318 117.803508098322 110.419222236698 120.744994574029  
121.468398802591  
FLJ45832 130.217791888656 131.292195405993 140.750004067571  
136.313623567821 134.292099546804 143.521510363933 126.205931638442  
119.693318959661 132.294365151614 132.548259643258 141.693224578298  
132.897554980037  
FLJ45872 143.326739481448 129.483116877682 135.618562468776  
135.880955433228 128.583503171594 137.435736170779 154.493246900289  
144.992993261203 135.59027155522 136.015561289357 131.498890334548  
140.09417711803  
FLJ45964 119.795945889846 125.525241361472 124.310436914027  
117.962188157317 120.918190840083 116.858439910319 118.841699953612  
116.161473967382 119.355650892262 114.539671934155 147.171765518924  
119.636334259263  
FLJ45966 156.191659799142 151.78607484924 146.181764812924  
152.738468369498 144.101376910581 156.179501567984 161.530878860883  
156.806407903626 142.836229345273 154.316929706697 156.723502568908  
142.566028652989  
FLJ45974 149.239390385906 143.284230032303 147.868721324602  
154.076216899447 135.16316100494 152.368485416992 141.469818222503  
151.971337856271 154.938900278679 157.612067634423 134.033751039071  
158.404154056472  
FLJ45983 137.381470768186 136.826606228323 124.922004609558  
133.022848457361 177.716742595321 134.483162806498 135.28448343086  
128.765369834041 129.561012565141 140.574129695953 181.308852106289  
137.689158155552  
FLJ45994 144.510062568989 148.85250180736 127.486697506397  
125.146558509674 143.993611400272 143.685368799972 129.194132399305  
143.917152377544 135.05209575317 136.106596229215 138.158400190671  
125.236926572282  
FLJ46010 151.528377719344 137.27506604142 135.643341446691  
150.213657393257 142.633121727277 145.259981479761 155.865540894526  
131.552276774901 139.397282021664 154.051705030348 124.190161132628  
131.261903118177  
FLJ46020 156.030794481734 154.177340021162 130.211247943634  
140.78902818186 133.780423932326 125.73560975196 149.91705328815  
160.192540519103 147.526701500887 147.537691509156 150.962828147611  
150.931114848235

FLJ46026 124.731056918418 134.191460941478 132.425596223397  
138.506569544482 126.3539479619 122.27785621724 135.81863662958  
139.856251508283 141.363863974586 134.222453538421 113.734280863323  
119.412461116903  
FLJ46109 125.121517583946 135.346501914337 137.73313146889  
161.559920910487 134.527165454543 143.730966588794 136.08297876405  
128.245734702114 134.489421865495 129.408282688425 125.929743286163  
135.446072698039  
FLJ46154 126.585679159459 132.02259465879 157.990467804353  
144.564250008106 153.085975710144 139.494962965774 139.664055668127  
126.315423596685 137.198654302648 127.302714624905 145.255676667046  
143.035245560484  
FLJ46156 132.283682066898 138.434347257063 142.697827839203  
158.536178747273 164.922193471904 141.233642252649 148.754725272846  
137.549175595441 149.609501725707 141.809577413906 145.437544062449  
142.527422462824  
FLJ46210 116.989409891761 121.072192130078 125.091038614268  
132.976977898242 126.832182961671 131.633827974141 132.767474034305  
124.215466523555 136.520811697544 127.709638375626 129.063617408979  
121.834248129933  
FLJ46230 157.337193457189 147.284885210407 165.48594766783  
179.297628357211 131.092140169861 140.964208731587 145.734680574583  
144.206259414981 144.377501600001 148.466658640201 133.419239158866  
153.031479923324  
FLJ46257 140.456277147131 121.572462089942 151.65364467801  
135.317796804151 127.995790782392 148.358847576281 147.51773051441  
132.631819830347 141.565599104245 138.825961991209 138.471894596606  
129.904942554979  
FLJ46284 158.882535865069 140.307931763353 128.992837936606  
132.596941171401 154.804753043168 150.364511432468 130.443360119099  
159.603586227897 120.688909943167 135.559535347364 145.505223177269  
138.336667434109  
FLJ46300 141.457040042276 146.223880979601 138.161690144518  
157.838771553729 164.02617650236 128.322884322951 140.82351325907  
151.181422205549 126.308622415913 152.748807709142 157.745805838008  
147.145932651151  
FLJ46309 8581.41617729997 9293.35991367953 8982.75408120297  
9139.73212514992 1472.54829263217 9378.87287299048 4022.23000497332  
6960.46610781696 6077.64695330731 4175.70090899755 6960.46610781696  
5314.0635307876  
FLJ46321 122.937281123348 119.651470884046 127.088916295784  
118.115015846489 125.967294930279 124.113451627593 114.143874572202  
123.974409226349 122.013040475143 128.23432652395 133.829889099442  
122.736882859231  
FLJ46347 105.925737068775 115.264104392064 119.567911704298  
116.360144963753 107.103635692135 117.766156390814 106.066897223031  
111.381427322188 111.66210002202 118.269780903508 127.167918433035  
114.818898581401  
FLJ46358 141.36525744062 149.869314204354 144.090047165489  
134.251843621261 147.688664545959 146.128066033346 161.299920355406  
147.057116881846 129.704763615045 152.169087619827 137.971108694323  
157.394035451151  
FLJ46361 152.337631025368 142.434356144925 140.793616429174  
146.880440100898 141.259186690966 149.294728629784 155.417694869593

140.652086055776 142.331050242704 141.931274901572 138.558300898079  
149.419308407564  
FLJ46363 131.528729642144 150.075738752092 155.737364431382  
138.751781355083 164.126980102525 150.460618402778 134.132312782731  
147.2233876988 135.719702250709 132.310147451479 138.76667538162  
135.515960991334  
FLJ46380 135.807494668545 134.7552564959 138.434347257063  
131.540436531741 146.235832275574 152.432477504097 145.815454490804  
169.466129742085 144.079935036119 149.995272585012 171.85890372225  
181.022635001204  
FLJ46446 120.246240734668 142.558109812638 133.056659202188  
210.043556816529 113.680875214845 113.005774989833 127.74861041569  
123.657246099004 126.058167594519 118.360186663758 120.283706459738  
122.706176540192  
FLJ46552 171.006582229921 150.724359913994 144.277263594387  
150.409919207059 152.350537364705 155.134796468704 162.812665683603  
168.3523504179 144.114177076352 186.103491222924 221.272872023413  
179.376968970326  
FLJ46836 138.962649407431 131.159946917777 147.416991272497  
127.675206134992 128.501189288377 133.704706615071 134.498439965049  
141.799236109474 136.044670179122 128.850480964163 140.343790129071  
136.434045183143  
FLJ46838 135.139676303901 120.628904050564 139.097764484641  
123.403099206878 129.750835425023 134.158454639998 121.039678049579  
114.28381541078 117.575009754326 113.687931899298 127.104097294238  
118.393203921859  
FLJ46906 181.202396068658 172.214433016685 135.916668738753  
166.655585160657 211.012142461725 162.560758971445 170.046856179083  
193.609985124825 197.262062021667 142.234554325754 167.087850057037  
166.061891147234  
FLJ77644 125.498081339586 122.438438464097 131.933026690056  
116.053859681399 133.830860948014 125.250900940748 126.146213417225  
134.034970203523 131.140263788783 113.09980008288 111.691973758042  
130.467450968785  
FLJ90036 132.998223400178 141.971207380159 147.970243979273  
133.869867161978 137.812249316763 149.361498483705 146.112388101621  
147.679233228201 159.633987751501 147.053391763304 130.609596267168  
145.154323430995  
FLJ90086 199.46853058821 184.260835471542 183.416437587938  
183.735201125198 282.511614929917 225.583966894864 209.051768656607  
220.136131941508 237.396466740419 245.915473236403 269.62298406345  
233.59297160203  
FLJ90231 142.924854393401 139.817493158675 152.520828479026  
147.550385608773 139.62718946833 146.772611341214 145.150191397375  
158.882535865069 137.586032396204 153.5256657638 134.885883559391  
146.792951584868  
FLJ90650 178.790758444269 173.044636575826 165.139423820186  
168.310680227156 169.391557085902 143.655901618594 180.468984099647  
163.119211741255 144.352987324713 193.689806171113 150.653030597808  
152.097609803404  
FLJ90680 148.868265867275 159.384480972135 149.096182775507  
138.525131957094 132.593747375239 133.360017767635 141.632147679743  
142.709768829207 139.828781354865 145.372579207362 128.645334554749  
157.021010130169

FLJ90757 188.847480174391 194.584034984339 193.609985124825  
 188.348499229585 164.000772606739 158.56996905631 186.904126552483  
 179.411426984263 174.510523238374 174.338440780636 156.78124246844  
 242.971958493453  
 FLNA 3024.62888503536 3789.1316515671 2874.43919426772 5165.90865799172  
 185.507663455634 156.420501464224 215.802713097166 160.887121295848  
 222.086635504858 438.231717096337 188.557113298055 170.298291784762  
 FLNB 2473.22803972431 2132.90676194993 2433.83421295012 2703.76111776248  
 1920.16520804856 1444.45946291517 1301.61742965939 999.159652508318  
 1470.23096656138 1787.32566525551 3024.62888503536 1650.77281891596  
 FLNC 19189.4835303597 15704.7314387339 16230.8346205808 22543.625434682  
 140.413503801467 252.761035334279 132.024244263352 186.156006020985  
 239.649306804266 190.002630382394 135.90207451581 189.915720614467  
 FLOT1 790.561585641193 917.646958427824 734.71562355687 1145.96710556468  
 842.87865208079 417.528353577952 640.029195821436 358.355621069787  
 501.738490253982 675.083275037052 426.132037075477 513.20896845398  
 FLOT2 2666.06582231934 3869.12225821096 3143.77161008321 3843.07094386605  
 13360.9483836861 3430.76532174701 3168.27825058989 7003.06505884735  
 4749.69040198959 1491.05501052706 2758.01526530661 3727.70199176703  
 FLRT1 146.541890150631 145.365935017728 142.42442972908 142.843006238215  
 139.06923394504 164.288645768576 139.2454524913 153.597557478169  
 138.000714797563 161.573975848093 137.495288670441 143.197131668608  
 FLRT2 292.317998405609 309.798246248863 309.0578543424 403.812520074723  
 128.554574566655 153.159425380743 156.540165645256 147.113541493157  
 169.87591929982 151.019907064794 192.188662949149 156.589829166493  
 FLRT3 247.08460296705 266.162244070031 296.333944172375 263.295012964476  
 560.757496975779 711.166793546075 515.158921349383 246.428746807313  
 477.275332763887 247.683819429859 749.515603904233 276.351810999317  
 FLT1 113.334665910428 101.431474941041 109.932577444858 108.118551275778  
 114.691842968597 124.526220300907 116.52455193626 110.437728036347  
 121.157614971438 111.232274546928 143.440420261133 107.303126530947  
 FLT3 114.342980656214 120.118873350459 114.048136176142 110.952108124186  
 118.619176257622 136.222421297872 133.849237689264 126.00304757051  
 118.731960910224 119.759350702482 141.209958892647 123.413596815384  
 FLT3LG 222.508914765788 199.170488640762 148.742216703684  
 187.264411519101 171.265160295274 115.468921844902 140.45860949168  
 126.88066987372 165.092451754065 128.755697083014 151.826103919919  
 133.280418227922  
 FLT4 116.987471433258 118.360186663758 121.939618902165 128.282999719959  
 121.619593453259 121.146511496024 123.959050197189 119.603565559838  
 127.512733134453 119.172965618216 119.057157701097 125.393848851951  
 FLVCR1 160.234704406302 157.535792192753 157.649902282769  
 134.149446827982 175.744275464701 186.496160803789 148.034899103241  
 157.838771553729 152.552277008504 148.648159241815 144.064884297748  
 148.185056724262  
 FLVCR2 231.890885094917 230.332652534446 250.602978521808  
 271.989060206794 298.165097953983 229.26243866226 268.148673257455  
 289.859695541999 297.176755638159 359.935451429371 267.67093646012  
 282.511614929917  
 FLYWCH1 160.975741751317 170.966588957686 166.835922279372  
 201.004491067972 174.441287575034 144.738871562895 133.008987820479  
 143.877226672663 130.588481497083 150.399313562031 155.690773461824  
 137.522792377933

|         |                  |                  |                  |                  |
|---------|------------------|------------------|------------------|------------------|
| FLYWCH2 | 200.08007665693  | 205.908052642222 | 194.724219884752 |                  |
|         | 248.791254839869 | 421.056268094661 | 207.254220247481 | 239.941641600769 |
|         | 265.148061007894 | 216.805365763069 | 236.985483155452 | 189.01309885917  |
|         | 188.070213212057 |                  |                  |                  |
| FMN1    | 131.732416355002 | 129.436712663487 | 128.777337552038 | 136.685430908977 |
|         | 128.878051599968 | 122.557981210434 | 126.862274244977 | 131.093917654245 |
|         | 130.541449457342 | 128.666652639862 | 120.71782441569  | 131.774882989257 |
| FMN2    | 139.048016900762 | 119.870661213608 | 147.056182807232 | 136.823008283157 |
|         | 135.348086420636 | 155.648782851696 | 122.418378964982 | 128.473834314632 |
|         | 142.750432197016 | 141.329559699056 | 126.791714564926 | 142.878258542775 |
| FMNL1   | 140.041977349982 | 127.05677680446  | 143.739231124536 | 137.44909445642  |
|         | 136.534812980964 | 133.75142055959  | 130.336466131215 | 148.046961712162 |
|         | 138.970853057174 | 153.4392054301   | 131.328478053136 | 129.85040048805  |
| FMNL2   | 250.481442411876 | 193.689806171113 | 242.902900881585 | 192.640717683236 |
|         | 154.288075172115 | 163.02140155858  | 143.402684153777 | 145.000523037022 |
|         | 164.438724387992 | 328.730722366546 | 171.161297672182 | 132.352268262631 |
| FMNL3   | 142.025834438974 | 128.280225530201 | 129.867246424399 | 133.195030751476 |
|         | 135.781190598068 | 136.83470470035  | 132.310147451479 | 139.737748157901 |
|         | 140.067809125008 | 135.65700435306  | 139.388484543482 | 133.62358240645  |
| FMO1    | 176.761123480566 | 163.390929975591 | 183.853381322135 | 175.989742412417 |
|         | 151.243948028303 | 159.752644678596 | 156.043994260248 | 161.441613587571 |
|         | 171.414869677333 | 374.9555524303   | 140.462651395483 | 171.896929562022 |
| FMO2    | 208.270622752385 | 232.892635502424 | 267.839640412797 | 296.603054615145 |
|         | 156.085949215738 | 180.478294414245 | 157.08300736206  | 171.238423077347 |
|         | 165.613274361543 | 165.808660192901 | 172.091884817207 | 165.992542962911 |
| FMO3    | 153.047317528007 | 150.354401669138 | 136.470025638057 | 130.539632182729 |
|         | 119.9652990395   | 134.17351030102  | 128.030938693369 | 145.440471538068 |
|         | 151.266352916239 | 145.03221570575  | 136.313623567821 | 145.172776053    |
| FMO4    | 143.333211390741 | 154.594339065082 | 132.70109232982  | 145.442914818456 |
|         | 148.635174393031 | 128.054394154801 | 144.413210364148 | 147.891442774921 |
|         | 163.709174813901 | 144.119035360928 | 165.103398617203 | 157.192320902906 |
| FMO5    | 145.542888937635 | 160.752581271996 | 142.354731066206 | 143.438417529799 |
|         | 179.067275037015 | 182.929326147069 | 186.377571176623 | 173.044636575826 |
|         | 199.991077347491 | 146.604519441812 | 162.127697884504 | 153.528429414138 |
| FMO6P   | 131.866599432062 | 146.084461430546 | 135.499195435803 | 137.58025011566  |
|         | 135.116985816353 | 140.922678400415 | 134.335309757663 | 136.682172321984 |
|         | 133.52271411034  | 131.633827974141 | 155.993849743656 | 129.420716653358 |
| FMO9P   | 158.670835881902 | 286.818166898922 | 226.712995229189 | 192.59376129133  |
|         | 1032.4540300024  | 1033.48252432603 | 836.613819700658 | 4711.21389812942 |
|         | 1812.07394646463 | 189.840366340622 | 623.508710830895 | 344.247544510881 |
| FMOD    | 643.13571432061  | 449.859227376918 | 296.428342247529 | 394.73732350607  |
|         | 173.463983140514 | 173.109461200603 | 148.23392074197  | 174.214747421898 |
|         | 229.046153362151 | 258.868119227979 | 165.938009275308 | 163.922353493317 |
| FMR1    | 118.355532305846 | 129.233595525585 | 110.138220982557 | 121.429270259367 |
|         | 114.696935316053 | 108.036254606246 | 127.213640193364 | 121.067907968175 |
|         | 129.372522073479 | 109.680532131035 | 138.058404474114 | 121.121686280797 |
| FMR1NB  | 119.525701528869 | 117.467618148107 | 120.93965087814  |                  |
|         | 115.840266274696 | 124.791221329502 | 123.510413258172 | 118.9952230535   |
|         | 116.796995589816 | 116.053859681399 | 117.47631318854  | 116.621735695217 |
|         | 115.16087297104  |                  |                  |                  |
| FN1     | 153.748035612441 | 137.345542507421 | 165.789846154721 | 141.408545519654 |
|         | 130.973504803813 | 131.252368756892 | 132.629453540571 | 133.257477196196 |
|         | 130.314247368361 | 147.135640862542 | 129.664016819143 | 119.666650919579 |



|        |                  |                  |                  |                  |
|--------|------------------|------------------|------------------|------------------|
| FN3K   | 134.825699448987 | 133.504078347324 | 134.71514094826  | 127.706499722854 |
|        | 123.9209907098   | 120.53428198263  | 123.129785564258 | 127.962546712222 |
|        | 128.662680062294 | 133.711821318079 | 161.417207801991 | 133.439077726411 |
| FN3KRP | 774.442392607873 | 744.225336494008 | 1222.59895569348 |                  |
|        | 764.493610798958 | 684.180060287047 | 1080.02576143033 | 1248.69137283095 |
|        | 1296.10827265334 | 1214.77298621465 | 1896.69856822105 | 663.214972254236 |
|        | 1249.89496565284 |                  |                  |                  |
| FNBP1  | 6138.10904830456 | 6919.4226838505  | 6253.84268792816 | 8982.75408120297 |
|        | 539.853394831917 | 268.568824794145 | 420.160939829121 | 644.301665020526 |
|        | 907.610179738644 | 691.397238677552 | 550.124359517322 | 303.638516587721 |
| FNBP1L | 249.554443204445 | 284.13865992802  | 213.484986945295 |                  |
|        | 234.301520483864 | 421.384700184923 | 850.882404546093 | 667.421612441201 |
|        | 815.779445689417 | 608.611927946607 | 388.966303073519 | 632.565736446505 |
|        | 529.368609163949 |                  |                  |                  |
| FNBP4  | 1344.1288416533  | 941.936830901588 | 1373.67062432073 | 900.039744829725 |
|        | 409.691865300362 | 1117.77397620221 | 1480.52638217173 | 2255.92551080483 |
|        | 1093.21579738952 | 894.734451279225 | 1447.07989164988 | 955.604404066769 |
| FNDC1  | 140.57567768682  | 137.354782768068 | 115.180659017144 | 121.480455781173 |
|        | 121.434713764246 | 116.736174147084 | 119.511962218143 | 117.144778357339 |
|        | 132.369872013432 | 164.665907233149 | 113.87024833117  | 113.845770994796 |
| FNDC3A | 276.184421402511 | 277.314675225943 | 309.658122422202 |                  |
|        | 244.011434605133 | 186.309367281625 | 294.115163083721 | 147.07272598888  |
|        | 228.542423012958 | 245.723316636363 | 227.668046559074 | 306.43742010208  |
|        | 390.979822976551 |                  |                  |                  |
| FNDC3B | 861.119262963015 | 773.330948077036 | 675.281131488524 |                  |
|        | 574.779350011402 | 613.631311147328 | 787.874585290601 | 1324.56751399862 |
|        | 786.160002434066 | 868.066644155313 | 692.095005197252 | 882.037055216609 |
|        | 1085.38819961412 |                  |                  |                  |
| FNDC4  | 204.584643964409 | 217.353396632732 | 201.105520537151 | 204.990512488181 |
|        | 192.932285494022 | 198.257497903131 | 213.531307836195 | 181.85552254233  |
|        | 186.345823604119 | 193.008902902654 | 153.336395746742 | 176.198555355383 |
| FNDC5  | 411.451612988791 | 316.801725268792 | 357.514919818489 | 554.950092776254 |
|        | 299.935166870211 | 158.92538634742  | 158.049286838471 | 171.528350399075 |
|        | 141.189008902155 | 139.089444892187 | 144.046646189442 | 151.989476683722 |
| FNDC7  | 144.342905860503 | 151.613134875009 | 139.792313018728 | 149.995272585012 |
|        | 129.143168240589 | 146.434716985396 | 149.173121214851 | 123.603972078897 |
|        | 150.163801964104 | 150.601874392926 | 146.087596132093 | 135.670409501435 |
| FNDC8  | 118.201092260839 | 113.66416989856  | 116.20008794813  | 115.890431424899 |
|        | 116.597352307016 | 117.511162285879 | 115.559551514777 | 117.837894438834 |
|        | 114.421383025971 | 115.587874563785 | 131.038758046782 | 108.101686347192 |
| FNIP1  | 240.878804911613 | 249.823314327355 | 318.930960243303 | 237.216435972201 |
|        | 167.521700144143 | 208.507486041165 | 269.853718252574 | 193.084818760857 |
|        | 175.908645445479 | 363.777212750779 | 177.091809538824 | 245.723316636363 |
| FNIP2  | 242.269784551092 | 220.330477277988 | 249.823314327355 | 207.960802948119 |
|        | 141.850952191423 | 141.758827837244 | 178.684992551017 | 179.810507975486 |
|        | 170.54511631708  | 210.751430486845 | 177.812335593522 | 179.358460170348 |
| FNTA   | 460.408628542721 | 422.12964420709  | 616.014975366684 | 401.102586700919 |
|        | 660.096727566678 | 1245.47421607111 | 717.686676823785 | 647.439372562271 |
|        | 401.584032365337 | 901.644194512187 | 698.590134238302 | 658.47864958685  |
| FNTB   | 347.73629731446  | 315.963526790659 | 392.824840252824 | 374.872358131797 |
|        | 311.269750643358 | 257.408058436941 | 363.777212750779 | 309.658122422202 |
|        | 328.60529053804  | 357.773949920377 | 309.423768054614 | 274.235001739215 |

|        |                  |                  |                  |                  |
|--------|------------------|------------------|------------------|------------------|
| FOLH1  | 127.358616953147 | 127.856634523494 | 117.045020667394 | 115.944280729914 |
|        | 117.112667504781 | 119.562180492359 | 121.360822445187 | 118.457573670556 |
|        | 119.060186838239 | 127.144291519133 | 138.733717670748 | 119.95959059725  |
| FOLH1B | 134.664652044646 | 137.252742673245 | 146.050714008913 |                  |
|        | 146.787927492706 | 162.244691888031 | 150.079372712689 | 140.796641921516 |
|        | 145.928643520352 | 151.727603285205 | 153.440952021924 | 133.882126180703 |
|        | 160.113042196058 |                  |                  |                  |
| FOLR1  | 131.715579653796 | 140.105675520432 | 134.963301368391 | 136.60514429355  |
|        | 137.581659385375 | 130.539632182729 | 137.017882995262 | 128.377928524315 |
|        | 133.692996980809 | 134.410706628655 | 132.283682066898 | 129.033433971346 |
| FOLR2  | 197.687858915757 | 169.408892048115 | 136.194082458655 | 174.491551019128 |
|        | 204.942500423413 | 160.127254444487 | 144.675182563174 | 166.396160626179 |
|        | 222.624150073858 | 158.758500675009 | 199.579818754014 | 166.9499656083   |
| FOLR3  | 130.105800581241 | 127.500754400224 | 121.71538073735  | 117.212164526913 |
|        | 132.780055030907 | 129.077660633761 | 115.343251487944 | 122.351186755611 |
|        | 115.594489123676 | 242.848821222611 | 152.272198017355 | 129.806104966617 |
| FOLR4  | 136.93893152919  | 138.29167712246  | 142.403121638265 | 136.603035996281 |
|        | 139.138329217724 | 137.093170378295 | 136.507961715591 | 143.188958538221 |
|        | 137.391141254051 | 145.832751296646 | 134.436423298225 | 139.679681813932 |
| FOS    | 1710.60409578293 | 3954.24763752814 | 3976.40140405628 | 1622.17491781572 |
|        | 674.742955681908 | 6188.04738762584 | 780.105135529728 | 2932.64120183406 |
|        | 437.248311551717 | 6830.46932926077 | 1762.09874961415 | 2244.6916226146  |
| FOSB   | 1125.95664591686 | 2004.19532096239 | 976.050097371579 | 559.0867397858   |
|        | 282.244214637625 | 6253.84268792816 | 142.42442972908  | 1295.27257578314 |
|        | 231.981501596284 | 2242.73511149559 | 179.94333102877  | 433.594928641214 |
| FOSL1  | 166.533191390639 | 153.758353103323 | 181.308852106289 | 167.941671074236 |
|        | 222.508914765788 | 217.491746961471 | 160.382971629272 | 169.158049136321 |
|        | 164.962201718762 | 369.070376276471 | 163.125317704446 | 190.45739385453  |
| FOSL2  | 233.842749683689 | 213.097664319741 | 204.942500423413 | 215.037122365095 |
|        | 400.23671843715  | 306.111172289632 | 264.526189799049 | 257.292125083248 |
|        | 221.070448906398 | 355.372836460906 | 274.316982298975 | 199.96834355685  |
| FOXA1  | 144.051468970593 | 374.9555524303   | 188.348499229585 | 124.368438691944 |
|        | 3737.57754066891 | 2530.00219297102 | 2416.49806112207 | 2639.60135568    |
|        | 2532.82545752082 | 179.321622114583 | 2515.7035557541  | 3000.46298223166 |
| FOXA2  | 124.49814598066  | 123.841366760069 | 120.106270603148 | 118.034262386827 |
|        | 119.06600048679  | 130.563756903074 | 124.625603721372 | 121.124574985464 |
|        | 119.873844587252 | 119.830261862805 | 119.192893408873 | 127.373421694142 |
| FOXA3  | 120.177385114315 | 131.87404363664  | 117.097159106043 | 120.14201542563  |
|        | 145.534520042669 | 108.483284007316 | 116.831725094917 | 112.252555403121 |
|        | 122.329290563769 | 118.761737418652 | 119.968081249475 | 120.397683153445 |
| FOXB1  | 122.578170988039 | 131.573729430926 | 132.028327486943 | 119.83679981791  |
|        | 126.938068475032 | 127.997280639609 | 127.239282651919 | 128.155080148958 |
|        | 123.330142002791 | 134.56314960832  | 120.511896155396 | 130.06441029462  |
| FOXB2  | 118.727279917776 | 125.892022613725 | 126.473768158566 | 119.32696696175  |
|        | 125.932540615682 | 114.818898581401 | 117.992729826121 | 122.97229333908  |
|        | 118.544870925791 | 115.713909155043 | 123.752109790056 | 118.601228886344 |
| FOXC1  | 430.728137105601 | 934.546444634669 | 325.387193207414 | 467.04976953755  |
|        | 1095.52349352502 | 951.371815352591 | 2203.82462320864 | 2240.33212242003 |
|        | 717.886050056576 | 1177.01310527577 | 1336.75600604068 | 2390.41825815872 |
| FOXC2  | 193.04138438685  | 181.238505183667 | 203.389294254141 | 217.513118676535 |
|        | 139.313456284725 | 134.243435358729 | 127.913463809158 | 143.519786615253 |
|        | 139.948097704949 | 131.241878941749 | 142.993401965852 | 126.290840923683 |

FOXD1 135.504526903482 144.892454033336 110.368392735494 140.911080286243  
150.031863363697 153.457715729768 133.610143526954 146.672270660899  
140.664303738113 308.974786799114 132.634538733205 134.17351030102  
FOXD2 166.741762854246 170.807514224412 148.130993521745 155.40832015652  
156.456332386608 165.896420029269 220.9384439772 183.879114762264  
155.237180851323 158.886786960196 183.83720937589 192.61436632814  
FOXD3 122.472909598385 129.532122459128 118.712730897987 130.031303483631  
116.540729581355 113.018985316061 120.873985900666 113.427848757112  
114.265920150451 124.96926662367 111.1002996982 111.577400298092  
FOXD4 141.329559699056 139.674001912099 136.135223482208 129.758303592589  
146.198331189991 171.426334687626 145.335830265052 197.112749959833  
211.941623411369 137.084488743415 185.332215198617 155.061749542085  
FOXD4L1 153.176268095608 152.628220216104 152.461930328923  
146.418147447541 164.066839397676 202.849544035436 161.412427590994  
215.98963200839 243.246632667118 143.512348693556 177.666582096539  
158.963726206466  
FOXD4L2 140.923227606022 146.016920431468 149.907472831817  
140.441521267218 139.720343780228 147.027904536486 146.824420102008  
152.573063322741 146.885404321622 142.655287071175 134.642898234003  
144.335732650795  
FOXD4L3 118.100611964852 123.929180327423 103.398929051742  
109.282814458761 108.167670899938 119.567911704298 111.716607815635  
126.0944894315 121.294366964074 112.675715371087 148.431101051574  
113.734280863323  
FOXD4L4 166.714793209109 180.941090529551 214.904634494921  
194.029961195972 148.190696520521 205.765822478178 183.583432296209  
177.752497164503 164.701183249762 164.241874094897 171.714973501563  
158.928949614338  
FOXD4L5 127.6516565653 123.81177057082 154.617462666847  
127.727311123825 130.521731606987 134.262346867514 141.478253058549  
137.000868503792 139.205887721493 135.673080643346 147.420580715112  
131.556892859203  
FOXD4L6 131.892151111901 138.127899706873 131.558842131826  
121.874296836854 131.2360427855 125.899200544217 150.070213543579  
126.732121894377 136.425263391752 125.631073476381 122.405469833024  
130.705091244939  
FOXE1 118.81294782091 125.486324819682 122.109009629395 121.926377140115  
129.455347273068 129.47419698487 111.467722538327 135.651829752462  
135.952202055637 133.473140653666 129.083756379376 120.241528853563  
FOXE3 121.515872228716 124.847325289068 120.300291760091 123.260800590266  
120.831070822199 125.367386907897 125.247402280272 139.488057371254  
127.818137805569 121.377666938052 131.709341771599 126.784243009941  
FOXF1 1265.88446775977 1389.93393245455 889.054356462993 1191.26028342929  
141.941814923705 177.696849418064 124.738217731488 155.603263242813  
167.536828038178 141.305605155722 172.667770359278 150.399313562031  
FOXF2 288.596513753617 261.592512762969 167.447964370395 131.023892409073  
128.651081092914 165.131463797217 207.269530621176 160.898061905021  
131.850952248545 143.766249538352 160.861929142249 235.453139389486  
FOXG1 168.323141675824 133.692025039613 145.924751649542 131.298129667973  
142.900756181761 171.916201289104 134.648780131578 134.096283448464  
119.370219299491 148.763098715961 143.825062714273 145.610045243277  
FOXH1 126.614876404146 142.301581642006 134.237133546276 144.219104742099  
142.37457375182 126.81140158672 145.724294862079 138.206065640158  
140.145470073979 142.724123724574 113.504670764963 130.370405378213

|       |                  |                  |                  |                  |
|-------|------------------|------------------|------------------|------------------|
| FOXI1 | 129.242093568433 | 129.213523302268 | 145.463105638655 | 135.852591930882 |
|       | 133.864612785572 | 130.430917518283 | 128.541715437188 | 136.611670766233 |
|       | 126.988118823204 | 131.500591219916 | 143.53550972177  | 132.881693683384 |
| FOXI2 | 143.204058393718 | 147.863198012238 | 129.96280577492  | 148.551340840517 |
|       | 151.169283505727 | 141.561769570516 | 133.775716376056 | 135.899595115146 |
|       | 151.132586978278 | 136.948039394935 | 134.160100276452 | 160.880152014981 |
| FOXI3 | 161.115842628581 | 155.46017572591  | 170.646233722767 | 148.356726939122 |
|       | 164.529828080312 | 150.557982810339 | 156.720090761933 | 163.542848861552 |
|       | 145.233055765001 | 161.046418048832 | 172.583615020042 | 170.306241656131 |
| FOXJ1 | 118.833188167696 | 132.197941566244 | 126.780096523484 | 125.176747824384 |
|       | 498.641091757363 | 315.3930052781   | 115.16087297104  | 145.136075215082 |
|       | 132.883408554592 | 119.931415360373 | 139.036978052242 | 127.713286292101 |
| FOXJ2 | 1581.06548216423 | 1812.07394646463 | 1569.13457493554 | 2244.6916226146  |
|       | 566.914448800423 | 667.421612441201 | 719.766799746895 | 952.357976050712 |
|       | 598.095370768587 | 728.485195792194 | 549.460612060753 | 630.894382644903 |
| FOXJ3 | 1091.12493937368 | 1070.4597488302  | 805.875557314697 | 1080.42884514937 |
|       | 743.510369438587 | 732.630306104841 | 896.185223980593 | 778.846928848361 |
|       | 775.382397816601 | 690.582550537485 | 767.054576874115 | 750.10819423982  |
| FOXK1 | 284.321253087512 | 358.298768623212 | 358.298768623212 | 473.73182675469  |
|       | 418.889972660958 | 199.135932984641 | 281.037762232619 | 271.196028302639 |
|       | 249.263194321516 | 245.607130404306 | 336.490076158135 | 332.978350226738 |
| FOXK2 | 143.265532486512 | 133.41548225025  | 135.16316100494  | 139.536677895126 |
|       | 138.246963115014 | 152.725025539491 | 157.446725405803 | 157.457468761338 |
|       | 142.579346058088 | 149.595375008252 | 141.275667354541 | 156.62031503525  |
| FOXL1 | 147.882530392424 | 139.273651128094 | 139.034940762344 | 137.339511714364 |
|       | 129.247701136266 | 144.895601314903 | 141.091421265404 | 141.649911527714 |
|       | 128.245734702114 | 143.799113486767 | 144.876300850115 | 152.274957846518 |
| FOXL2 | 134.700543462375 | 136.03117924052  | 149.44520146627  | 146.162330544539 |
|       | 139.923187410488 | 142.771243742561 | 139.057572927874 | 140.397184813186 |
|       | 150.098708715617 | 142.12808103815  | 133.594446233378 | 141.907307422968 |
| FOXM1 | 164.959415532174 | 152.360670942951 | 149.350630572336 | 171.689722533849 |
|       | 399.071041584646 | 224.497348027469 | 190.645917992472 | 240.465165615601 |
|       | 243.65518489122  | 186.563913311757 | 167.55209828062  | 202.357989894268 |
| FOXN1 | 121.497645719165 | 141.216869032251 | 133.672964925321 | 137.546487338984 |
|       | 117.186546702764 | 128.947211021681 | 122.053867525393 | 137.936605651724 |
|       | 128.478724185042 | 134.10707191601  | 117.716094828779 | 131.305785417254 |
| FOXN2 | 638.129080224049 | 631.408955630318 | 658.202765061937 | 560.602047253306 |
|       | 487.993796425035 | 606.851072672402 | 437.248311551717 | 544.462032960964 |
|       | 349.540558521616 | 587.893636997642 | 378.862741410359 | 372.088129459528 |
| FOXN3 | 140.416247564103 | 134.222453538421 | 139.650726173186 | 133.839554874862 |
|       | 130.083266044947 | 142.334338599752 | 143.195338329759 | 130.646956516128 |
|       | 142.376921410427 | 138.250288796456 | 134.102929804129 | 136.861019517134 |
| FOXN4 | 123.877609932461 | 134.268075583733 | 124.121555438466 | 127.139903623331 |
|       | 126.737230874367 | 130.520275539672 | 131.447941902406 | 160.778296470857 |
|       | 121.239461514704 | 121.968807253639 | 125.828998007608 | 117.696262292883 |
| FOXO1 | 674.101599637653 | 646.461274173693 | 669.602939159192 | 764.137504481329 |
|       | 289.517820913799 | 422.973606694449 | 332.082749517913 | 419.690542859168 |
|       | 329.023836559229 | 560.602047253306 | 529.963453165714 | 571.273512452931 |
| FOXO3 | 1040.73829397913 | 1096.10636044885 | 867.601542930533 | 795.720196538039 |
|       | 428.66614441422  | 687.789976218334 | 730.988069115919 | 600.264940641426 |
|       | 428.237210115667 | 1003.93455977232 | 532.950400370668 | 358.975346234854 |
| FOXO4 | 1109.79571066685 | 1179.42590997099 | 1487.12201643008 | 1382.12750708801 |
|       | 506.165100641525 | 532.786041960586 | 518.478990211753 | 374.718289636553 |
|       | 784.72162514331  | 291.616195651001 | 429.992169596618 | 279.325065941252 |

|         |                  |                  |                  |                  |
|---------|------------------|------------------|------------------|------------------|
| FOXO6   | 146.748572532267 | 143.149424892482 | 159.016247993816 | 153.19516365535  |
|         | 129.442111153737 | 146.912751127571 | 140.120051507626 | 141.038721816572 |
|         | 130.249430984172 | 142.169951083733 | 134.477081392474 | 126.080780033301 |
| FOXP1   | 318.690043546203 | 292.693830444839 | 248.594000664466 | 329.023836559229 |
|         | 197.815264620906 | 195.414464905232 | 199.077893147154 | 166.795671029174 |
|         | 184.923312649584 | 155.70645844794  | 215.194909819764 | 184.462286724102 |
| FOXP2   | 177.639351778834 | 154.300058278533 | 192.095235288818 | 149.788558681761 |
|         | 153.206468539619 | 135.274205069488 | 149.552704503066 | 139.955389033983 |
|         | 143.452992974333 | 138.456465793474 | 133.427561208907 | 139.234549949916 |
| FOXP3   | 119.608334527504 | 124.83124879272  | 133.143695166498 | 123.07559417607  |
|         | 139.31967261371  | 142.700311964178 | 137.199718376452 | 134.4380641709   |
|         | 129.502730573463 | 141.213588194832 | 137.340844554597 | 115.01682934323  |
| FOXP4   | 132.626349611404 | 131.604121223902 | 136.394920983439 | 133.037138438863 |
|         | 136.973804637915 | 146.34029698108  | 144.861804210272 | 136.349603320553 |
|         | 139.60494712939  | 135.531326977319 | 147.799806976046 | 145.210787864362 |
| FOXQ1   | 538.484170364629 | 1346.53215685106 | 965.673699120049 | 194.979795724712 |
|         | 870.409935772423 | 3664.38955037715 | 4929.26915002209 | 4206.37667440908 |
|         | 2886.92690692502 | 871.913035811066 | 4030.42725798136 | 6470.73189429877 |
| FOXR1   | 144.64757514198  | 144.972694558182 | 142.421913396368 | 147.1476865809   |
|         | 138.934516083124 | 142.581441480371 | 149.147411595596 | 152.407614042236 |
|         | 146.624631389743 | 134.296645422941 | 137.220718873614 | 139.491769969541 |
| FOXR2   | 119.062611098235 | 114.520066232155 | 115.855948612544 | 122.27785621724  |
|         | 105.348008821162 | 111.484426481816 | 120.565485864499 | 105.952640312359 |
|         | 115.582048644075 | 110.774802298005 | 123.260800590266 | 125.500790447338 |
| FOXRED1 | 337.728737393381 | 413.398641688413 | 338.665115108128 |                  |
|         | 553.90008440429  | 890.810315261602 | 324.871248300476 | 274.14931964455  |
|         | 516.088776850623 | 297.609793563225 | 252.628516068724 | 238.978845152474 |
|         | 305.096320805078 |                  |                  |                  |
| FOXRED2 | 231.47915227815  | 228.852495818211 | 226.114369645703 |                  |
|         | 230.855806094267 | 389.500591134279 | 298.706655333472 | 269.981476129439 |
|         | 250.963601187362 | 228.184535093641 | 178.035700298977 | 190.291185322482 |
|         | 183.795632040455 |                  |                  |                  |
| FOXSI   | 150.924948809354 | 162.638805580226 | 146.919110530891 | 181.340312140534 |
|         | 158.953705937936 | 127.199124606827 | 121.330383384978 | 138.003440266411 |
|         | 131.031639119149 | 132.596941171401 | 148.376194044247 | 137.823152565933 |
| FPGS    | 128.213678179359 | 128.576310682958 | 131.287142490322 | 128.389494971858 |
|         | 140.981666934622 | 128.814967091609 | 125.154784284706 | 127.961153369579 |
|         | 132.8615886934   | 130.09050436943  | 143.814798097425 | 140.435724944447 |
| FPGT    | 118.578205738502 | 132.475414208533 | 125.887854850942 | 119.125002207396 |
|         | 130.555405606993 | 112.729141678141 | 137.065315360321 | 125.371128588617 |
|         | 122.863612588759 | 124.263901299025 | 114.223991452083 | 118.276198592775 |
| FPR1    | 156.859539612504 | 153.062710222618 | 165.860075368566 | 153.776361241587 |
|         | 165.389652763451 | 212.607094117882 | 166.925695810781 | 240.005943851098 |
|         | 231.955750250711 | 254.424207773566 | 182.32514927211  | 149.964827055916 |
| FPR2    | 138.240874738649 | 131.436176224725 | 131.40880014672  | 124.22833964472  |
|         | 134.130913969327 | 130.592061896237 | 127.003974141317 | 127.333963230749 |
|         | 139.036978052242 | 134.803612821519 | 131.168294031745 | 122.232732968363 |
| FPR3    | 166.014450044695 | 160.695913747601 | 138.150616787218 | 152.158269344693 |
|         | 159.2488784104   | 140.946729014405 | 145.10302792449  | 176.382377784553 |
|         | 223.573080955095 | 184.286192995915 | 179.54034642468  | 148.242794464181 |
| FRAG1   | 488.884511065882 | 545.362650746876 | 549.460612060753 | 579.049608568926 |
|         | 774.774214696342 | 540.946852709312 | 549.047065540118 | 847.276523445973 |
|         | 850.562379837947 | 998.631321857182 | 1217.29687282094 | 584.919615953457 |

|        |                  |                  |                  |                  |
|--------|------------------|------------------|------------------|------------------|
| FRAP1  | 565.509446660206 | 491.112594297928 | 536.805979562807 | 536.805979562807 |
|        | 405.570281788901 | 578.297031096292 | 459.652708187549 | 590.515758538373 |
|        | 570.26564132238  | 590.142817130684 | 400.676876982655 | 509.880640462    |
| FRAS1  | 141.5068665919   | 157.792868983503 | 150.084909674721 | 152.173055053184 |
|        | 197.947433984294 | 201.800357785022 | 207.815226999953 | 204.637887777803 |
|        | 177.073245863872 | 167.769114519774 | 289.21739941764  | 186.611870261871 |
| FRAT1  | 139.130560988108 | 137.914085754617 | 139.408234219133 | 141.177522313723 |
|        | 182.042104888745 | 139.423432468886 | 145.78573175226  | 145.049387327924 |
|        | 158.080749926756 | 142.688809469455 | 170.251197850968 | 147.192815700248 |
| FRAT2  | 256.538195034956 | 345.832589037442 | 367.732191251547 | 312.903508201275 |
|        | 1165.05055932899 | 599.926717145115 | 651.43207839949  | 670.571106793204 |
|        | 796.699879495384 | 329.333236839082 | 1007.41624313399 | 518.281245498542 |
| FREM1  | 228.414049417352 | 261.469732730752 | 209.417052464583 | 483.845891531326 |
|        | 158.208998509937 | 140.553613300431 | 188.242091666446 | 157.565633456909 |
|        | 165.370800097602 | 163.438043894189 | 163.346402397924 | 156.907788377794 |
| FREM2  | 145.476377346532 | 144.190203286506 | 131.917194849285 | 138.242983316259 |
|        | 174.615694779386 | 194.529045934216 | 142.474762834848 | 169.881866987359 |
|        | 202.300293733922 | 134.381042390464 | 184.462286724102 | 144.258128917228 |
| FREM3  | 135.784481523923 | 123.571641517019 | 122.837807905774 | 131.267177634269 |
|        | 128.580625868379 | 115.664551127497 | 121.803676441059 | 118.015175851934 |
|        | 120.577995272053 | 119.221976571036 | 110.113844434493 | 118.900338956203 |
| FREQ   | 2350.01764791897 | 2596.43650409044 | 1984.47173096657 | 4503.01240138314 |
|        | 468.712260193746 | 260.52593414721  | 271.287767448621 | 246.389203940944 |
|        | 309.75140197669  | 300.793542873709 | 379.983165400941 | 263.47760086159  |
| FRG1   | 921.546033242474 | 1028.80076860235 | 822.129234065933 | 1185.70008959602 |
|        | 374.46180489079  | 736.603605876572 | 587.181357555703 | 654.305724263754 |
|        | 797.73902873919  | 953.099915501575 | 1022.11537745428 | 633.762608454521 |
| FRG1B  | 147.288282361079 | 142.524413202292 | 133.252140649104 | 126.452500728601 |
|        | 144.822943770596 | 140.146894533044 | 135.664877050226 | 142.137885203233 |
|        | 135.753430034183 | 144.78971417658  | 127.964855970099 | 134.633286312653 |
| FRG2   | 115.896463925125 | 129.203236898198 | 123.61956613951  | 128.368669716591 |
|        | 122.226875707253 | 128.002822538671 | 128.551335256123 | 126.042731009527 |
|        | 124.752198904184 | 122.953869661977 | 143.31590446076  | 124.940836122365 |
| FRG2B  | 139.484551562098 | 137.975369568585 | 133.862203806529 | 144.316475814221 |
|        | 143.837402372008 | 146.920496801962 | 127.893555451807 | 138.038446102921 |
|        | 136.131453703981 | 138.836422729663 | 130.182320154521 | 143.954908055924 |
| FRG2C  | 147.994386096925 | 129.642952083513 | 150.367927843529 | 133.399632102473 |
|        | 132.433109154079 | 132.171282327983 | 133.067237748129 | 132.610618885717 |
|        | 132.70888569469  | 130.960045345375 | 130.161889021281 | 129.818020166075 |
| FRK    | 168.6016897585   | 164.377227860031 | 152.657649988502 | 161.310855691717 |
|        | 190.22021453133  | 159.902277514765 | 230.546762514966 | 202.927700504034 |
|        | 163.500384982242 | 183.900171917391 | 217.86728342043  | 190.534176839652 |
| FRMD1  | 94.3531468700382 | 104.798333931019 | 112.832122823829 | 105.976284291356 |
|        | 109.700513642061 | 111.810575716678 | 111.860763079995 | 109.760525674874 |
|        | 108.818976813708 | 105.408689610638 | 119.530214079037 | 113.470356909765 |
| FRMD3  | 245.766885283797 | 249.263194321516 | 203.888365494623 | 206.73292907905  |
|        | 187.920789153124 | 219.753039699136 | 159.344044864557 | 162.634670715627 |
|        | 168.289492873475 | 180.881464829981 | 637.695341427976 | 174.646321871605 |
| FRMD4A | 233.536023295039 | 271.154246147262 | 189.94130405123  |                  |
|        | 271.238736772408 | 172.8993416872   | 282.836518011311 | 160.402220755071 |
|        | 219.687151891777 | 198.701991021316 | 169.31618330657  | 304.679197422439 |
|        | 199.477350542491 |                  |                  |                  |
| FRMD4B | 132.891375982227 | 130.838350486331 | 142.577102697682 |                  |
|        | 125.136745288071 | 123.53212786736  | 134.810212106122 | 132.446406243531 |

|          |                  |                  |                  |                  |
|----------|------------------|------------------|------------------|------------------|
|          | 134.891736344801 | 135.554736716321 | 131.583841535781 | 129.140978620864 |
|          | 139.375386456759 |                  |                  |                  |
| FRMD5    | 127.389942368953 | 139.574895021783 | 123.809866652834 | 135.883119645931 |
|          | 131.486917325752 | 125.815256068004 | 126.931328660501 | 124.964977322158 |
|          | 122.749182465923 | 127.824005374202 | 128.78647242525  | 131.973896985615 |
| FRMD6    | 497.53605530806  | 418.163219634152 | 480.36420271348  | 445.763740779039 |
|          | 230.947339143332 | 337.652945958921 | 336.981561928411 | 282.963958072528 |
|          | 196.144420005021 | 725.065727257421 | 446.509863498357 | 474.917507160629 |
| FRMD7    | 137.11719450122  | 123.129785564258 | 145.749887769807 | 135.046003135933 |
|          | 126.656077572961 | 133.509538648848 | 133.382099379709 | 131.606765174514 |
|          | 125.5109819304   | 149.541917326637 | 125.720102558499 | 143.397823965608 |
| FRMD8    | 343.200277800027 | 410.216584967666 | 385.135014083686 | 457.905741500454 |
|          | 1187.62490367696 | 911.782783698439 | 1000.48723872058 | 738.37559871635  |
|          | 706.628675634893 | 1658.78888936164 | 1323.05745869565 | 1626.34607278613 |
| FRMPD1   | 109.242622591321 | 110.315549501241 | 106.450154495663 |                  |
|          | 113.521599852465 | 112.590379042108 | 114.00959999268  | 122.469113037809 |
|          | 112.156010486085 | 114.01599035448  | 109.038182799871 | 123.323528039848 |
|          | 120.793974839773 |                  |                  |                  |
| FRMPD2   | 125.410876867635 | 120.549643584553 | 124.602474178438 |                  |
|          | 126.715300671036 | 129.222714748528 | 128.300838927918 | 128.986795394842 |
|          | 125.202468372015 | 126.103561089901 | 128.113966507586 | 127.781732819297 |
|          | 131.35955406222  |                  |                  |                  |
| FRMPD2L1 | 121.138461509096 | 130.882463936853 | 141.588478913204 |                  |
|          | 136.008118769513 | 122.362585067453 | 129.77374228644  | 130.34939602913  |
|          | 130.471929699923 | 133.028789808654 | 127.829001155781 | 140.882766779119 |
|          | 136.106596229215 |                  |                  |                  |
| FRMPD2L2 | 119.451099896048 | 126.277165320165 | 126.762116571216 |                  |
|          | 121.687187898743 | 125.172189715764 | 121.059923601223 | 122.646850766733 |
|          | 126.921925660996 | 122.216479103528 | 130.526673128214 | 133.667852983262 |
|          | 125.587057468028 |                  |                  |                  |
| FRMPD3   | 151.356975600962 | 148.387171320858 | 138.889999702313 |                  |
|          | 131.261903118177 | 190.427022049167 | 164.784346867158 | 187.057683141644 |
|          | 145.606098951179 | 151.325068155715 | 159.466972602203 | 162.022232949254 |
|          | 138.496366637658 |                  |                  |                  |
| FRMPD4   | 125.489777118532 | 126.191057198995 | 127.562924931536 |                  |
|          | 127.473812381059 | 132.005753222789 | 126.279119798177 | 124.717079082023 |
|          | 123.327238774943 | 125.531371673679 | 125.531371673679 | 153.310330832285 |
|          | 126.061141885666 |                  |                  |                  |
| FRRS1    | 142.958906063186 | 156.351734527745 | 158.495606141226 | 154.951136632863 |
|          | 170.410704499804 | 169.271175460047 | 212.591357254196 | 189.250846546817 |
|          | 157.751477529076 | 172.237115475147 | 150.677852949794 | 163.880402141404 |
| FRS2     | 133.841519663164 | 131.17119492692  | 131.580226088647 | 138.000714797563 |
|          | 133.550008967009 | 147.920946479942 | 136.152827218905 | 152.097609803404 |
|          | 137.899291413431 | 136.529820456592 | 139.165248204716 | 133.379872189405 |
| FRS3     | 291.313681141442 | 323.04019262387  | 479.469659712246 | 410.954095610904 |
|          | 250.676092725829 | 261.592512762969 | 298.979106293393 | 289.517820913799 |
|          | 240.734451149197 | 293.482512212153 | 282.335582153109 | 348.413827101046 |
| FRY      | 191.467626362851 | 178.89423690001  | 232.414763435965 | 154.993784224548 |
|          | 161.720405760536 | 181.428419748662 | 169.332207863684 | 156.046085830566 |
|          | 159.549936351002 | 132.047328970556 | 222.646371492347 | 188.033890834418 |
| FRYL     | 222.20526515049  | 189.142295015168 | 210.5689532432   | 206.446584387595 |
|          | 177.16711492983  | 244.596233138747 | 251.268669431283 | 270.568660560796 |
|          | 234.063633889254 | 233.59297160203  | 203.206743799353 | 252.404931238338 |

|         |                  |                  |                  |                  |
|---------|------------------|------------------|------------------|------------------|
| FRZB    | 432.604462607037 | 605.040026490154 | 268.111403429364 | 330.505633088656 |
|         | 221.253717494488 | 368.418553384965 | 157.75304980664  | 266.652805624826 |
|         | 560.481802403627 | 213.382179917193 | 332.400086578723 | 218.773153183388 |
| F SBP   | 158.053654524927 | 168.547575047205 | 197.687858915757 | 166.671563123047 |
|         | 166.64535048582  | 161.499923812379 | 169.920799931309 | 155.114892891737 |
|         | 172.8993416872   | 139.310309748986 | 155.488346781292 | 166.611809859059 |
| F SCB   | 164.89597889259  | 159.730925830278 | 195.384273821324 | 171.602950766191 |
|         | 151.845172175463 | 158.841505957036 | 154.079355899056 | 140.477307701027 |
|         | 147.872625576731 | 157.717145014769 | 142.970256312313 | 148.861141988806 |
| F SCN1  | 1382.95068105649 | 1632.84261181074 | 639.184296110069 | 1561.10217536347 |
|         | 1309.7660860424  | 2567.4299860517  | 3684.05513498098 | 1871.91894530722 |
|         | 1783.8031212092  | 10280.5093368677 | 3391.3005983725  | 8787.57716309558 |
| F SCN2  | 130.824958143557 | 132.177829138863 | 116.751145098777 | 119.567911704298 |
|         | 127.255966406144 | 123.048352070915 | 119.188446525733 | 113.582654469735 |
|         | 118.593717189375 | 123.104790590045 | 118.26427946535  | 111.086170834553 |
| F SCN3  | 136.85323853426  | 151.532859494021 | 133.483766053954 | 152.379441401583 |
|         | 154.746081871718 | 145.71535210212  | 136.657107363796 | 165.342790388607 |
|         | 151.289464845626 | 149.437212090587 | 139.324006489527 | 150.123784990646 |
| F SD1   | 134.449083873514 | 137.537197575152 | 138.12651823109  | 139.949563856936 |
|         | 196.583548193097 | 153.731233276485 | 146.639556437847 | 146.072585331002 |
|         | 142.363309192458 | 142.409003426775 | 140.796641921516 | 147.43089976575  |
| F SD1CL | 114.849872458647 | 120.660349211375 | 113.636570490048 |                  |
|         | 119.590540166384 | 114.749597426757 | 111.381427322188 | 106.030441145334 |
|         | 110.113844434493 | 117.428152859221 | 126.00304757051  | 130.340819826224 |
|         | 111.596690019694 |                  |                  |                  |
| F SD1L  | 129.327645260099 | 137.546487338984 | 137.398748156909 | 131.093917654245 |
|         | 130.128585442593 | 133.191797029676 | 140.856864690669 | 144.699084515687 |
|         | 144.116298946718 | 137.681280789305 | 142.45411401883  | 153.308956040034 |
| F SD2   | 126.853028093579 | 120.220156455352 | 131.85737847837  | 118.66946078241  |
|         | 122.80785489118  | 124.944563166658 | 120.322292418128 | 121.23469201559  |
|         | 125.761205967344 | 111.765812595638 | 123.56917054142  | 115.427201752401 |
| F SHB   | 124.222529964098 | 138.349773531218 | 117.766156390814 | 118.694037994926 |
|         | 126.834926242799 | 126.404523759643 | 123.351112976814 | 121.107979534361 |
|         | 120.406577236405 | 124.070171664904 | 126.492058851464 | 118.75237770613  |
| F SHR   | 112.65454329872  | 110.355493122568 | 115.687997771921 | 108.461141538047 |
|         | 112.476111928742 | 113.769815606191 | 113.644993086829 | 108.779204939177 |
|         | 118.117957479382 | 115.473431881597 | 116.65880728655  | 107.828378413233 |
| F SIP1  | 174.680918805036 | 150.211719786127 | 158.573561336755 | 161.010206405916 |
|         | 157.295602588814 | 154.969503835593 | 194.312315077985 | 184.267958772058 |
|         | 150.888616811881 | 170.007845523415 | 192.680681636018 | 163.346402397924 |
| F SIP2  | 139.510764003291 | 136.265972909993 | 146.29600238749  | 134.793399942417 |
|         | 123.21732068638  | 150.763810844645 | 155.330215726109 | 159.771672778698 |
|         | 147.485960802692 | 153.571517567657 | 141.023875058322 | 149.508432746895 |
| F ST    | 200.387623661458 | 252.404931238338 | 137.700110923212 | 145.476377346532 |
|         | 133.353762794271 | 150.105503384881 | 141.70123350351  | 136.303510503231 |
|         | 136.648306684974 | 305.906480933354 | 176.890596690798 | 145.318539677981 |
| F STL1  | 2760.57475805426 | 2162.46602203822 | 2217.82628612929 | 2756.22069438696 |
|         | 398.571054759451 | 498.965895763801 | 270.973600107882 | 384.216141843863 |
|         | 773.803350315426 | 728.930140593418 | 243.35880641566  | 273.651114834013 |
| F STL3  | 621.173315178959 | 348.808646570544 | 219.246271924313 | 345.832589037442 |
|         | 177.93138555339  | 125.35643274458  | 180.63469438043  | 155.228605554943 |
|         | 175.679405338399 | 469.107624227456 | 207.864808684047 | 172.992936821292 |



|        |                  |                  |                  |                  |
|--------|------------------|------------------|------------------|------------------|
| FSTL4  | 143.546629073997 | 147.446381217887 | 146.26936366452  | 149.160808104789 |
|        | 150.255511248598 | 148.417929733447 | 172.157660228549 | 155.972754525145 |
|        | 151.55925331302  | 131.928871107722 | 138.899292894875 | 150.870830294349 |
| FSTL5  | 120.333487171575 | 115.988180787152 | 113.091739139626 | 113.071787850611 |
|        | 109.669517182289 | 115.128667174745 | 122.075440298074 | 104.826135297161 |
|        | 135.125414452178 | 114.174153178166 | 121.225996958339 | 103.888971448792 |
| FTCD   | 145.481279504679 | 151.043967734248 | 136.162938063831 | 154.400124981573 |
|        | 131.794065532001 | 125.048770476506 | 134.769926504916 | 141.870640394206 |
|        | 130.238231520218 | 133.412452607155 | 124.053190169486 | 122.405469833024 |
| FTH1   | 1353.61552261489 | 1200.03423010236 | 1846.61430264854 | 1113.05943954513 |
|        | 550.566402986082 | 692.359779743985 | 2468.47687203968 | 1175.27165286568 |
|        | 795.037968409957 | 1332.11815966955 | 1160.78730097715 | 889.26314145856  |
| FTHL11 | 3765.25491426198 | 3855.33040541264 | 4016.35381420598 |                  |
|        | 3417.22292085668 | 4979.31150268741 | 3177.80599774525 | 6522.27232911897 |
|        | 3315.21586182496 | 2767.77385345718 | 3721.86725798812 | 4448.67183518984 |
|        | 3033.50962589321 |                  |                  |                  |
| FTHL12 | 6944.90824302953 | 7573.69742026367 | 8292.04796307133 |                  |
|        | 6470.73189429877 | 11777.9172529698 | 6296.24208225227 | 13976.0448927093 |
|        | 7389.95365139168 | 6760.37324850804 | 8053.22070239424 | 9251.21629832018 |
|        | 6760.37324850804 |                  |                  |                  |
| FTHL16 | 7539.6945050098  | 8163.29201165065 | 9970.08052783908 |                  |
|        | 7491.93659373205 | 13190.4826009741 | 9793.92604780228 | 12406.7143043992 |
|        | 11150.5512437377 | 10250.645112753  | 10474.0047946187 | 5734.76405709934 |
|        | 9881.69734721233 |                  |                  |                  |
| FTHL17 | 151.372219350291 | 126.743579586052 | 137.920724602098 |                  |
|        | 146.29600238749  | 232.892635502424 | 128.753623886188 | 142.495333453346 |
|        | 126.578035793406 | 134.850260739685 | 147.15999706579  | 132.686915065196 |
|        | 126.704076078563 |                  |                  |                  |
| FTHL19 | 132.310147451479 | 113.740942665269 | 118.646119379542 |                  |
|        | 120.473038066927 | 125.293640452686 | 127.075899925865 | 120.15332480712  |
|        | 117.740022708444 | 118.655954393594 | 105.583474813289 | 119.972337070176 |
|        | 115.678486138934 |                  |                  |                  |
| FTHL2  | 2882.51330563735 | 2684.69013589621 | 3149.26998719015 | 2459.05558915812 |
|        | 4150.8511719558  | 2466.36457617864 | 5040.35379681644 | 2344.11548437508 |
|        | 2048.13524244516 | 2819.92361643968 | 2992.18604022433 | 2311.05587511258 |
| FTHL3  | 2093.67403119512 | 2141.855356411   | 2305.11856249143 | 1800.25771851544 |
|        | 3481.90072759183 | 1466.08446530283 | 3727.70199176703 | 1477.10828981572 |
|        | 1307.19490564658 | 1695.26858186096 | 1704.25279485563 | 1452.63736288691 |
| FTHL7  | 5776.63686968234 | 5314.0635307876  | 7573.69742026367 | 5233.72882607795 |
|        | 10360.162704111  | 7815.98936145067 | 10862.3952192141 | 8416.19700892758 |
|        | 7354.94071109106 | 8401.40370474392 | 5281.353685715   | 7539.6945050098  |
| FTHL8  | 3481.90072759183 | 3560.23794634993 | 4291.1724030909  | 2672.77147589342 |
|        | 4866.98027226798 | 3424.65126200697 | 7446.59106452583 | 3447.19587767281 |
|        | 3195.71436046397 | 4612.81760689869 | 3850.41246770812 | 3447.19587767281 |
| FTL    | 20381.3859535625 | 19661.6741558107 | 21754.9904891312 | 20887.0399135573 |
|        | 29868.1819370827 | 15851.5830405813 | 29532.7890259497 | 21551.9994556128 |
|        | 29162.1093037754 | 28730.9248954575 | 13423.8921651885 | 9560.32907282993 |
| FTMT   | 154.904424749528 | 139.927773713324 | 140.696326952077 | 142.480203661104 |
|        | 145.114382599368 | 156.411563412665 | 169.107948050094 | 150.156865995098 |
|        | 149.813838004575 | 142.296446144179 | 135.556943919872 | 141.191500203423 |
| FTO    | 281.926552464214 | 300.401370666633 | 299.106362530855 | 310.026522549372 |
|        | 189.647009287524 | 155.890403934674 | 199.135932984641 | 152.791390145148 |
|        | 171.028432989066 | 185.519000961898 | 183.937484597232 | 182.235490620172 |

|          |                  |                  |                  |                  |
|----------|------------------|------------------|------------------|------------------|
| FTSJ1    | 183.493455947795 | 190.444387031552 | 194.445463745418 | 168.33854702953  |
|          | 234.841813258798 | 293.317880637519 | 229.046153362151 | 290.502085667398 |
|          | 216.485113690708 | 294.069353373633 | 263.204269632206 | 229.200570583629 |
| FTSJ2    | 177.630246034993 | 173.624709850889 | 165.954266127697 | 177.401771322485 |
|          | 207.560911665319 | 175.236826554583 | 218.058543664561 | 225.130011390856 |
|          | 228.879434668972 | 174.012972901793 | 247.280717385562 | 268.961643716282 |
| FTSJ3    | 214.8478629277   | 227.441436540742 | 237.216435972201 | 254.393421265604 |
|          | 257.408058436941 | 227.884445686928 | 251.011148303246 | 280.595515386655 |
|          | 246.263259852067 | 214.019190624184 | 231.338258067616 | 245.915473236403 |
| FTSJD1   | 176.689683169567 | 173.416999972133 | 178.766654213173 |                  |
|          | 149.974080577906 | 203.389294254141 | 279.879377933144 | 249.379605914827 |
|          | 259.625943627223 | 250.481442411876 | 228.243668453958 | 276.32528705384  |
|          | 272.994195639694 |                  |                  |                  |
| FTSJD2   | 452.606433325387 | 451.621888586656 | 414.538237455116 |                  |
|          | 554.652979820908 | 432.174413144791 | 382.806570442504 | 399.476401949891 |
|          | 282.392419584508 | 346.356312668445 | 342.769825986756 | 374.215345412947 |
|          | 299.390443444504 |                  |                  |                  |
| FUBP1    | 138.882483367088 | 138.944595164363 | 126.168223112165 | 131.414690782328 |
|          | 181.85552254233  | 145.148058824491 | 151.178586065066 | 174.66966623557  |
|          | 169.927157878764 | 164.057147728625 | 175.693873820963 | 177.72965427263  |
| FUBP3    | 444.374521095495 | 395.327097512479 | 535.758943850734 | 392.282956362735 |
|          | 310.8725368426   | 316.801725268792 | 320.390351199433 | 334.916875239616 |
|          | 444.374521095495 | 472.030150842569 | 301.304268871606 | 355.714202328378 |
| FUCA1    | 562.543347322063 | 591.437752991512 | 635.038752622494 | 415.749051861123 |
|          | 1360.24752587939 | 1364.1224589383  | 2430.70635781622 | 2337.64145466514 |
|          | 1562.9779683714  | 772.399017166118 | 3354.38704439295 | 2427.21100330388 |
| FUCA2    | 215.143973502566 | 208.983138060317 | 222.177290763736 | 188.166168428752 |
|          | 407.244564912365 | 323.20628717764  | 305.451247405518 | 299.039192744355 |
|          | 280.170464338141 | 274.371523790341 | 356.323554000768 | 378.920456227378 |
| FUK      | 316.125364442611 | 328.680312364877 | 334.443733461841 | 394.414934831535 |
|          | 1277.0921553877  | 326.379855547052 | 447.182566890086 | 346.411586524655 |
|          | 463.298781071364 | 321.492900106953 | 472.030150842569 | 309.997909440664 |
| FUNDC1   | 248.594000664466 | 266.252875242286 | 290.541184606565 |                  |
|          | 279.704940529618 | 490.153210371094 | 527.226517960073 | 544.852019338212 |
|          | 671.821418586421 | 377.353441970543 | 353.674560414317 | 537.510539142248 |
|          | 621.825622897512 |                  |                  |                  |
| FUNDC2   | 132.454025879177 | 130.790872334222 | 129.949894903048 |                  |
|          | 133.601133679159 | 136.695790688466 | 125.013839352291 | 121.231939494619 |
|          | 116.421771593211 | 143.94902198632  | 130.624702758052 | 152.241060990474 |
|          | 118.757973008463 |                  |                  |                  |
| FURIN    | 190.45739385453  | 201.480444219547 | 170.54511631708  | 202.662466141301 |
|          | 401.359711029934 | 186.6902304653   | 289.911635155481 | 168.547575047205 |
|          | 216.929969034881 | 203.335012796883 | 254.83131041241  | 221.961758403614 |
| FUS      | 166.635366968851 | 184.915526626619 | 160.395053149199 | 179.785198362326 |
|          | 178.377461551319 | 153.784923783551 | 176.641899861006 | 151.540744107423 |
|          | 164.244562778996 | 178.130223302924 | 194.637233028442 | 189.192494970145 |
| FUSSEL18 | 153.328585916625 | 131.782007636511 | 152.624623171797 |                  |
|          | 143.801139839773 | 144.902807664593 | 127.542288885184 | 156.324643994552 |
|          | 125.280736217267 | 133.602870982718 | 132.454025879177 | 137.854873498783 |
|          | 132.692027897739 |                  |                  |                  |
| FUT1     | 109.781334128478 | 116.011005504201 | 111.497241941203 | 128.074531806621 |
|          | 135.864853829421 | 128.505296338657 | 114.504409331018 | 107.930325780047 |
|          | 125.321968563987 | 125.674471551099 | 126.17342715006  | 119.198789189881 |

|       |                  |                  |                  |                  |
|-------|------------------|------------------|------------------|------------------|
| FUT10 | 136.730623822061 | 136.692495869097 | 130.844272373448 | 130.270184521521 |
|       | 127.631770516132 | 136.258073395013 | 131.22473774325  | 130.721987260546 |
|       | 127.259038241163 | 142.082257952004 | 133.502176289023 | 141.801472885127 |
| FUT11 | 151.546908501054 | 140.005968571997 | 157.233463720262 | 146.332425559689 |
|       | 146.706846930708 | 149.949425756405 | 194.569325586241 | 157.070500065037 |
|       | 166.071816427719 | 250.406775889932 | 199.305626149918 | 157.361421272816 |
| FUT2  | 150.538541347453 | 132.016944935305 | 150.741291526753 | 144.013615296685 |
|       | 130.142263689536 | 139.969155812688 | 153.231965895778 | 134.849235750248 |
|       | 170.069291215013 | 226.824313642101 | 147.943844184702 | 128.860744370967 |
| FUT3  | 137.601181150371 | 154.816213491233 | 120.473038066927 | 131.838522109796 |
|       | 338.406266073063 | 153.741061283101 | 210.14307111352  | 173.690008681514 |
|       | 203.704734790602 | 386.738154577763 | 226.221973502783 | 488.57622466019  |
| FUT4  | 188.070213212057 | 188.027848008991 | 190.031339775209 | 159.384480972135 |
|       | 182.439945229388 | 142.719216118914 | 135.968346417524 | 161.021740537372 |
|       | 176.725347194807 | 135.68605915552  | 135.399032687551 | 147.579672274205 |
| FUT5  | 122.170662903259 | 112.38543517651  | 111.820208385514 | 112.809629077555 |
|       | 123.089110282465 | 102.563722570171 | 109.416512252532 | 114.042914237667 |
|       | 114.428050500096 | 119.391213033544 | 133.507865919719 | 127.58382536792  |
| FUT6  | 257.292125083248 | 256.687384001447 | 249.80160363144  | 269.072221443403 |
|       | 145.06736850005  | 212.107842040568 | 167.278879415171 | 193.261343922604 |
|       | 184.709768457405 | 178.696562301918 | 200.365899129972 | 257.740674565975 |
| FUT7  | 118.047978285706 | 123.53212786736  | 126.332299789266 | 133.063422581428 |
|       | 140.002249873656 | 127.622397233692 | 116.136849683574 | 118.308102542942 |
|       | 121.855752708908 | 136.879615833565 | 158.374760929273 | 117.461198576063 |
| FUT8  | 218.839681873515 | 183.583432296209 | 163.463191619941 | 147.019460117987 |
|       | 169.909886347082 | 163.106823691633 | 157.709832297666 | 170.720018572735 |
|       | 139.153897381147 | 134.97514790642  | 152.194337248455 | 147.915337223934 |
| FUT9  | 130.262411213764 | 137.473779155388 | 150.606329295069 | 138.434347257063 |
|       | 157.028963417138 | 178.847858667374 | 151.613134875009 | 163.438043894189 |
|       | 171.221972336784 | 135.92712081285  | 164.116142541038 | 153.041407358576 |
| FUZ   | 166.22013573342  | 181.578228610334 | 171.36717256867  | 184.873459141947 |
|       | 222.675370226786 | 161.688125121941 | 195.532022060219 | 171.11282933168  |
|       | 190.572712684622 | 149.684922983176 | 157.944355564411 | 153.82440233533  |
| FVT1  | 1185.70008959602 | 1095.52349352502 | 1303.33810980467 | 823.658996207582 |
|       | 493.887026009442 | 654.663838918786 | 683.470866056244 | 622.834462068316 |
|       | 624.638115878703 | 754.607039665508 | 768.334658920971 | 644.449861831749 |
| FXC1  | 192.827534610486 | 209.662262708551 | 271.238736772408 | 194.961531388323 |
|       | 183.764215745794 | 180.179981672095 | 212.291528248457 | 181.971189935628 |
|       | 195.033792280119 | 206.340478393262 | 191.029458520006 | 212.607094117882 |
| FXN   | 127.74861041569  | 136.280653079814 | 136.428826558493 | 131.693274981709 |
|       | 129.094667159621 | 131.364187047583 | 125.908576249439 | 137.940675746397 |
|       | 125.738320262644 | 147.405050592353 | 135.192181609947 | 141.670426206169 |
| FXR1  | 583.938727139698 | 507.137104111742 | 715.93836911426  | 468.82816089485  |
|       | 296.051639873628 | 407.615019710707 | 548.288640768746 | 506.659740456829 |
|       | 480.797281489891 | 586.246004571452 | 461.940616438547 | 412.277592266475 |
| FXR2  | 279.232290927348 | 316.722160860531 | 315.752980521266 | 312.286788541158 |
|       | 298.706655333472 | 284.473085899219 | 202.622747952763 | 223.89854167651  |
|       | 190.645917992472 | 252.894371238554 | 372.374101464689 | 189.2642795052   |
| FXYD1 | 301.908667220208 | 287.83303360511  | 235.961605948276 | 277.026538720417 |
|       | 129.294026995663 | 139.049085468313 | 132.645196037302 | 128.525769531728 |
|       | 148.012353232918 | 131.356437247149 | 152.746799687103 | 137.360220389719 |
| FXYD2 | 128.729687597908 | 123.386622160181 | 134.367115858307 | 129.918038866006 |
|       | 130.169291786693 | 127.938245853896 | 123.24533179875  | 124.33863635868  |
|       | 123.395897439193 | 125.746184969983 | 134.407776033032 | 130.829825154842 |

|        |                  |                  |                  |                  |
|--------|------------------|------------------|------------------|------------------|
| FXYD3  | 138.252656818036 | 146.506263412584 | 131.436176224725 | 127.471479301983 |
|        | 311.449205777595 | 437.489929507567 | 910.982557417978 | 789.752781067888 |
|        | 722.725186727796 | 348.067061666237 | 1025.88559245013 | 637.695341427976 |
| FXYD4  | 121.215558351076 | 126.724973604103 | 108.818976813708 | 114.209249333221 |
|        | 180.035652063942 | 131.037491961571 | 122.770033312519 | 721.31849915135  |
|        | 333.439929772897 | 120.85013281321  | 174.296028319781 | 132.155877196474 |
| FXYD5  | 629.381791489871 | 672.862678078975 | 363.150472154973 | 599.926717145115 |
|        | 389.051174954505 | 673.502723625773 | 518.17401959981  | 452.961307006622 |
|        | 674.101599637653 | 1122.92917004037 | 1038.93733638848 | 1410.58825009446 |
| FXYD6  | 1762.09874961415 | 2127.22258112242 | 2508.50428529255 | 2837.36293710422 |
|        | 121.157614971438 | 131.255028381669 | 120.402155551818 | 122.828060462887 |
|        | 173.647320180498 | 130.43775024291  | 133.412452607155 | 141.043668963717 |
| FXYD7  | 128.052753068991 | 126.931328660501 | 113.995301093609 | 125.027095330593 |
|        | 120.193580405229 | 116.828333047376 | 129.806104966617 | 124.210840121525 |
|        | 135.173464753848 | 118.974727968283 | 139.736465430177 | 118.351607868932 |
| FYB    | 142.534195262988 | 137.503405573817 | 123.875478428652 | 121.645021899034 |
|        | 124.387133895009 | 127.171331062578 | 126.017158064032 | 182.310140388705 |
|        | 230.806950763402 | 152.467764730004 | 181.558764396201 | 129.049273337631 |
| FYCO1  | 1801.74467005923 | 1789.51979173209 | 3042.88425356552 | 2059.09598012857 |
|        | 480.484639351046 | 379.788696204016 | 497.110852407681 | 529.854965483609 |
|        | 494.747087458483 | 580.164288826741 | 512.541205235935 | 398.673582680257 |
| FYN    | 519.940347384877 | 459.30568829087  | 515.729905361375 | 566.543765584009 |
|        | 174.767697866801 | 234.461229199142 | 182.950456188966 | 189.044966519228 |
|        | 260.41082304175  | 172.562162872242 | 166.89884215297  | 158.774910841987 |
| FYTTD1 | 569.47446215213  | 506.290241222253 | 596.743397794872 |                  |
|        | 554.282040414368 | 420.361583975644 | 518.760142491104 | 388.887050777137 |
|        | 421.140525880287 | 425.001043358831 | 473.853999833395 | 377.024120035829 |
|        | 403.582461109859 |                  |                  |                  |
| FZD1   | 184.25384366282  | 189.552385508772 | 174.624446035895 | 156.407166112409 |
|        | 219.661502916874 | 213.028568789661 | 164.309588213547 | 171.602950766191 |
|        | 159.356121576029 | 175.040086358446 | 189.887788314879 | 162.237172404557 |
| FZD10  | 145.333097940759 | 142.540433565262 | 142.185345091219 | 144.988803993714 |
|        | 135.168792286819 | 159.016247993816 | 144.384287335249 | 136.621173927187 |
|        | 146.087596132093 | 142.45047744931  | 152.538048490265 | 150.374573177474 |
| FZD2   | 205.52620827767  | 210.960900130785 | 126.76986764971  | 162.178410412809 |
|        | 557.513306351027 | 150.948076715456 | 295.727275232995 | 144.487533992157 |
|        | 202.193338797533 | 188.767121505943 | 160.53152291979  | 121.61143371132  |
| FZD3   | 238.978845152474 | 209.568066932367 | 317.309949792707 | 274.831898505989 |
|        | 208.666760987764 | 400.621427274425 | 286.818166898922 | 246.80306998812  |
|        | 271.087125858775 | 245.378747269929 | 202.583967728957 | 298.403224729528 |
| FZD4   | 667.421612441201 | 761.586663689579 | 489.260272645085 | 1003.93455977232 |
|        | 568.555967950896 | 1201.82026045778 | 943.677679525947 | 225.890195278753 |
|        | 324.203537490975 | 195.88263399968  | 284.272977025491 | 216.353502371227 |
| FZD5   | 155.835077077665 | 147.642693777383 | 153.655778377717 | 171.304896264805 |
|        | 306.333710880618 | 191.725728813959 | 219.351080515508 | 194.529045934216 |
|        | 174.454754564111 | 151.801558435863 | 179.810507975486 | 180.468984099647 |
| FZD6   | 312.286788541158 | 302.381946749711 | 325.011269531407 | 261.922485502971 |
|        | 405.409668978569 | 563.490027149224 | 668.570984110088 | 361.327436394941 |
|        | 559.899430596368 | 447.909277144896 | 498.05778289794  | 443.732580517751 |
| FZD7   | 733.648333788712 | 623.68308750251  | 593.990687449346 | 641.12919339861  |
|        | 219.246271924313 | 179.96623248843  | 187.196424491482 | 195.740661051834 |
|        | 185.938983266802 | 174.680918805036 | 198.94325874493  | 177.592497020798 |

|           |                  |                  |                  |                  |
|-----------|------------------|------------------|------------------|------------------|
| FZD8      | 169.771005675296 | 160.923897048848 | 153.700168798494 | 164.562302265155 |
|           | 154.296467085914 | 153.807525239478 | 176.506227858258 | 157.901967487277 |
|           | 144.818492604488 | 163.198834359304 | 132.57219914253  | 154.43808450305  |
| FZD9      | 124.585675323305 | 133.827296071709 | 124.116400777472 | 135.975265059269 |
|           | 412.736636437651 | 129.033433971346 | 119.530214079037 | 129.491732597331 |
|           | 123.059971161711 | 120.616979607398 | 128.745737514912 | 123.046069309901 |
| FZR1      | 150.584633044901 | 157.55776414649  | 149.423230365631 | 169.844913799159 |
|           | 172.108795190633 | 142.851432926979 | 130.408519735001 | 136.998259410887 |
|           | 156.698856643638 | 141.038721816572 | 153.703682621695 | 133.446934298801 |
| G0S2      | 177.281197832647 | 193.098116087792 | 136.728975205893 | 191.074428905553 |
|           | 139.353080958675 | 141.164985468046 | 143.402684153777 | 141.630183595813 |
|           | 144.474814266475 | 206.010481981919 | 130.651062724029 | 139.59941545613  |
| G3BP1     | 350.658722333252 | 289.517820913799 | 249.064573038094 | 246.850599569231 |
|           | 382.902151239988 | 326.962330523237 | 399.620724969771 | 511.670320118232 |
|           | 311.848379951974 | 636.048536814356 | 479.983368253935 | 418.968095159939 |
| G3BP2     | 433.594928641214 | 384.566987097657 | 530.122419830951 | 346.173614351499 |
|           | 433.491835341321 | 703.29965727829  | 559.559921312181 | 642.057106241761 |
|           | 592.284071247642 | 467.777995124655 | 453.282973743379 | 543.001249586573 |
| G6PC      | 153.075594260208 | 140.129882333528 | 149.895214204184 | 142.623106544789 |
|           | 154.938900278679 | 154.267020640428 | 141.840858913807 | 141.229805348717 |
|           | 138.53179773391  | 146.425476034368 | 149.609501725707 | 133.131953362455 |
| G6PC2     | 134.601565799073 | 138.911993471119 | 132.994716261577 | 134.469653093466 |
|           | 137.190593489949 | 135.127041919869 | 135.022438246099 | 134.73970457131  |
|           | 139.113675690483 | 137.25679451567  | 136.879615833565 | 136.895650862562 |
| G6PC3     | 295.099840299681 | 345.38424761963  | 233.161848094769 | 354.336462793628 |
|           | 1342.29111510713 | 286.133496092533 | 384.883635849576 | 380.310795921752 |
|           | 396.212732639272 | 190.45739385453  | 357.431640917696 | 270.727749014046 |
| G6PD      | 365.441289363381 | 399.872401268958 | 363.343480850598 | 591.763423878737 |
|           | 1096.10636044885 | 354.45785837703  | 625.932910814208 | 259.252807304272 |
|           | 290.638110977807 | 345.732364434125 | 260.921177985439 | 255.59042517603  |
| GAA       | 238.430350258686 | 291.261765585473 | 229.881164774875 | 261.203388718689 |
|           | 739.874432767734 | 157.248117633013 | 345.732364434125 | 304.402066421813 |
|           | 178.416969664816 | 148.057700860759 | 369.513420606401 | 151.054834307689 |
| GAB1      | 148.823805841381 | 153.238678313147 | 144.178210824181 | 142.613654158833 |
|           | 126.019246614944 | 130.290454258898 | 143.281050499332 | 132.937942776777 |
|           | 137.06192448185  | 149.902420337518 | 133.158570377793 | 131.730758460802 |
| GAB2      | 274.14931964455  | 262.832376198119 | 231.819341041105 | 281.792602269388 |
|           | 155.104697146664 | 156.026806913759 | 159.738700107615 | 181.558764396201 |
|           | 159.58125728432  | 183.998458233995 | 162.560758971445 | 144.683260413888 |
| GAB3      | 160.861929142249 | 157.768329108254 | 143.785769607842 | 146.604519441812 |
|           | 139.752845127584 | 133.647637744785 | 141.758827837244 | 135.341892490559 |
|           | 143.980608339892 | 143.971152352313 | 120.733009784454 | 133.537552829999 |
| GAB4      | 137.237089899964 | 140.381386314817 | 152.654938328424 | 153.941193682697 |
|           | 138.071335383596 | 129.346063085291 | 135.210887148305 | 134.631638658586 |
|           | 135.571239294086 | 147.085006263446 | 113.687931899298 | 150.874014332213 |
| GABARAP   | 214.991170762327 | 229.406012088782 | 205.705962405954 |                  |
|           | 251.161789722751 | 211.555248754731 | 244.162496497466 | 198.979744266277 |
|           | 213.145460679531 | 157.203304477454 | 243.246632667118 | 247.307128520272 |
|           | 188.671807443641 |                  |                  |                  |
| GABARAPL1 | 1577.15895478896 | 1321.17236442448 | 1603.87451959083 |                  |
|           | 1388.91423772335 | 329.722135361491 | 350.22221782412  | 478.909308632726 |
|           | 431.861762635568 | 494.175437345451 | 346.065746911798 | 374.872358131797 |
|           | 244.668813440638 |                  |                  |                  |

GABARAPL2 903.824331691969 754.406896156858 1129.15018335354  
701.481003619067 852.099019968701 891.637685856145 1009.42265467472  
759.534249620343 1304.37930719411 1111.47772523331 939.213447046823  
1059.19317548869

GABBR1 266.892524131545 227.288015854809 244.897869154624  
235.063474370925 128.382487609446 148.353927712013 144.794806650252  
140.774304412579 135.904163043783 169.271175460047 145.82344959902  
235.063474370925

GABBR2 148.641780441227 135.061176512365 154.264142444882  
142.984243805285 195.630643168176 134.631638658586 153.875760529011  
156.481871341275 156.05583229359 151.206697943841 205.930921729192  
139.875260384886

GABPA 145.392463986225 149.710337205986 147.879286704 135.722321387765  
129.55573546861 197.443711199904 166.70212615715 178.657325741035  
173.766372029062 160.140509175287 162.54008293513 193.472317111841

GABPAP 147.024759173313 139.157088843803 144.476157581998  
140.630844296177 148.484823275343 151.88244935494 147.138814313885  
146.202611204712 143.675696734051 147.301909062399 141.836648910979  
139.951275828765

GABPB1 159.870967387108 149.350630572336 160.402220755071  
150.445647133244 163.407360509803 166.746037983859 176.617812881115  
166.835922279372 165.327972973978 194.22713184875 172.157660228549  
164.14265547147

GABPB2 7631.6124232898 7468.70895916615 8072.83367137971  
8072.83367137971 3052.86038628748 8666.41250683965 5058.57872936027  
6990.13809515289 6585.34962362923 5233.72882607795 3921.67860557329  
5932.37714987741

GABRA1 132.253450751554 126.085039271526 119.159078990339  
113.292688210897 125.117333434527 114.242056888286 122.624828884731  
115.30786313391 113.199690522854 113.549098821204 129.846685899183  
108.570463496052

GABRA2 129.57551086282 125.345611085082 136.438788088263  
118.604395992281 125.914267820741 131.436176224725 123.662678397678  
116.566190779365 117.953453145685 116.514299377365 141.755954088275  
120.686906898624

GABRA3 144.96021415188 135.797170561599 158.645402461996  
136.935498266723 156.068308349225 162.55521875551 138.706520278166  
150.182173149394 168.254689624696 152.709924336348 139.339542167402  
159.98636352484

GABRA4 127.483420376792 111.632811186988 113.22850386845  
125.802001118545 115.923424095859 116.134550788966 119.795945889846  
107.580425848009 115.755585907264 140.89390566467 128.297879410629  
110.202982683256

GABRA5 122.969215709433 146.160188002433 151.629999903069  
138.436029489092 142.487424651482 148.74881415573 135.472135601859  
140.439698763808 139.847813838017 139.055892787717 128.83022039037  
143.180247878507

GABRA6 108.861243071977 118.176124626025 119.373287155621  
107.40922161073 120.602818832247 110.753661013519 116.87586240208  
118.24368469845 117.555999801887 116.685023927951 131.393633337276  
118.718048764985

GABRB1 130.71040889651 120.574820369421 132.582062079623  
136.169525758215 127.132970760907 138.154799037807 130.110413621436

116.925863450165 133.268239762624 133.526213647686 133.720904256137  
 132.088335186716  
 GABRB2 112.599970121166 133.274292647041 134.503552797411  
 138.952082680577 126.700147643 128.488598467312 132.74579603362  
 135.495964034239 121.434713764246 128.773129597793 132.103084472404  
 125.060387518072  
 GABRB3 145.176141415244 144.898770838913 138.116568200293  
 143.182399285928 170.283532007581 142.099541115973 156.572774198042  
 147.191114491117 131.215202712283 136.623658204558 159.646538408414  
 137.244552699212  
 GABRD 116.89487516867 145.212306927438 119.395894479869 125.631073476381  
 145.99474597064 132.334666750573 121.455843337023 119.578240680666  
 129.910866236901 114.999628959921 143.138613573764 129.272835188209  
 GABRE 192.737713851863 194.257024100927 168.095061700814 149.25240100689  
 182.109092947203 273.651114834013 467.387427864242 138.657241641263  
 201.289402228512 229.77428612216 161.77611826709 140.401508808129  
 GABRG1 109.454483612299 106.719519490874 105.665621968915  
 119.418866166776 106.923686318112 113.051381310122 115.137475087954  
 104.36042819601 106.36673326724 112.436972452838 115.211731367278  
 111.253743009588  
 GABRG2 129.589056071463 130.425809387444 134.774591679724  
 142.581441480371 135.154441560264 131.292195405993 134.122776198036  
 142.846100831941 124.668658660052 133.951322753098 132.878638378328  
 126.435928518593  
 GABRG3 123.29908883119 131.013719535992 129.995417218564  
 126.199219102601 134.811625739766 119.502758763438 116.176068923513  
 118.95971064289 113.334665910428 111.672450681359 129.108534267222  
 127.990453128978  
 GABRP 149.262900833177 145.801228425692 142.825203517688 186.388067641269  
 164.241874094897 140.53597287752 140.395662148924 160.549597620339  
 143.056098955473 155.548684011748 145.428297145967 149.980924447339  
 GABRQ 140.120051507626 138.692057950694 138.023752854109 148.645749834125  
 130.207485841284 143.438417529799 134.932416370825 131.177396785633  
 136.184427467391 125.765399556488 132.322618637842 130.029719192412  
 GABRR1 144.271920003815 155.176714087209 146.67875644027  
 137.844113743956 173.790848780011 155.496190048502 163.422877959747  
 156.280701500421 158.699778625671 143.635367691412 134.490327004118  
 143.431389389919  
 GABRR2 122.592960588642 122.083357581665 120.497796762933  
 123.240482782331 125.982423431253 125.272796155561 120.975542702338  
 122.789656787728 125.785388817819 128.119556520151 117.112667504781  
 119.67745324922  
 GABRR3 145.566861062922 151.3362561751 145.885577577352  
 145.542888937635 139.519321690754 141.015441854424 148.600270795407  
 133.691053105482 140.688570032068 175.960788330149 116.635455849571  
 134.56134674893  
 GAD1 138.033668840392 144.683260413888 139.06923394504 138.244585395561  
 139.265915951162 148.029259633449 134.340512608931 180.085975596327  
 161.066226957782 155.298546821687 159.413535577361 232.105867345662  
 GAD2 122.629146433216 140.833666276568 129.356401843185 121.30744400137  
 135.976837152799 158.007926822094 119.202966460612 124.466986821169  
 121.36708642226 131.521311288114 144.059368898969 128.44311762955  
 GADD45A 655.665164535648 511.996883507889 541.642309122976  
 311.375563161772 518.17401959981 537.06835963726 916.836022395768

1210.40302822121 437.931339781992 1252.28642463619 977.999660785113  
 1022.55215097491  
 GADD45B 592.079898463345 479.638653311025 277.285526811736  
 363.195371577097 211.34069504665 527.597948979568 256.924134409998  
 198.583407008317 201.139510041141 540.078145038497 199.620978536397  
 239.704459251571  
 GADD45G 380.243136469602 361.768552564027 446.601751145647  
 376.962937292973 297.285037835812 149.057388078138 166.746037983859  
 203.223604138192 173.147311624838 207.036293322882 166.850279817976  
 146.731584143625  
 GADD45GIP1 175.908645445479 174.576132939661 157.410205523901  
 212.959246855759 245.426639190893 202.343343669937 183.693300680495  
 172.230528631803 164.313238416498 190.921283434627 197.565122821625  
 158.523941833883  
 GADL1 115.845468537936 106.629065516249 111.43827410589 113.791585365477  
 114.441223528256 102.725375719353 106.088807114602 116.958052905168  
 124.647992480694 111.72835538405 111.820208385514 122.561285351587  
 GAFA1 138.032265227728 136.541973790157 132.881693683384 137.987255649072  
 133.670967970136 136.418105816557 135.168792286819 140.949367846425  
 137.788504385206 146.363991934916 139.199446543251 134.29036009792  
 GAFA2 149.829363505519 149.492550066785 135.244303669342 153.044682186978  
 134.451423371791 152.237183848896 139.39442529119 144.20764300349  
 144.64136816491 144.355348009294 141.488910091973 141.870640394206  
 GAFA3 149.712320986646 151.993651822163 138.603793282123 132.582062079623  
 134.48825480809 148.065080664185 144.99221793877 134.931263946202  
 125.513881890201 142.272117655292 142.973444931373 145.352802493486  
 GAGE1 126.532293165932 136.599305161841 138.354300118735 133.507865919719  
 132.631819830347 145.352802493486 132.50027119027 137.161065320948  
 132.948096807634 131.151578665754 130.909388246758 134.507558495307  
 GAGE10 128.723261477217 113.542803491215 117.503848306325  
 125.467668442298 127.866992108488 116.746018509166 124.811760828557  
 131.181537219479 128.205022859019 130.069789939568 122.007909794484  
 117.953453145685  
 GAGE12B 131.092140169861 145.861217875066 137.94246602811  
 128.523703756493 185.128661141884 648.161646065464 137.778033050658  
 135.353539458856 131.981505236332 132.99989565368 132.587392944892  
 125.589744938813  
 GAGE12C 119.774204444899 146.698766621345 136.967408633308  
 126.935731176024 217.89028736436 808.300067805897 128.840466579373  
 152.088488171996 124.883575464443 122.804934452095 124.077104101209  
 133.834423222601  
 GAGE12D 115.664551127497 128.194171809998 125.431735524937  
 133.976997391944 128.122197525844 156.585665091824 149.696766215866  
 136.282608531191 124.959873714884 123.344450694117 135.548042190047  
 120.724926760252  
 GAGE12E 129.400895994387 142.253826696208 121.263939656119  
 130.795318552623 150.694215349678 224.424524191566 140.63666629522  
 136.66358267095 132.930042559647 138.708304921088 130.543453631154  
 154.38977085744  
 GAGE12F 131.560971848628 141.448017858785 131.510494315469  
 143.899201949317 211.118308738617 572.913714991136 149.797850183848  
 136.862764950361 125.689884251847 126.87100632595 128.96181458192  
 138.717541782317



GAGE12G 146.179543599917 135.800997202323 126.825785762925  
 119.11586630281 218.269847477919 1319.3522488218 139.984102798711  
 149.44788347071 136.582137928022 148.065080664185 120.507930710099  
 149.85385474029  
 GAGE12H 141.484730939562 159.811778680604 131.717160947964  
 135.781190598068 195.776369840059 761.32108609503 136.2336179571  
 149.604507483606 144.853868519575 135.196797030404 141.277227483198  
 147.256726902984  
 GAGE12I 136.572645314012 135.338077911839 126.526489290128  
 143.045416067967 201.81649023518 747.804958601763 125.079330440615  
 134.533551900843 129.189479305468 131.872583529419 125.048770476506  
 123.777133327569  
 GAGE12J 143.440420261133 155.622257285651 151.0189104086  
 131.87404363664 200.712182818203 890.507257588957 160.272632590118  
 150.837717923505 149.628421263062 145.636906369786 121.027465953657  
 155.086559474139  
 GAGE2A 128.519448608754 137.426226808356 136.515951031895  
 129.586337068199 138.399665664034 345.732364434125 123.338921824167  
 128.182419321978 130.59886317117 116.958052905168 110.718864165172  
 128.620852653765  
 GAGE2B 142.973444931373 159.606633817645 133.148442269517  
 129.615417777242 291.914408947328 1375.76915021882 153.187148832063  
 166.611809859059 151.950883677297 144.490452173336 144.368355737187  
 156.460374293022  
 GAGE2C 134.712935556892 122.392159083328 125.683334853039  
 120.160652344221 119.608334527504 124.624046191085 122.615852682436  
 125.212404794262 117.962188157317 128.944295118239 123.678365506247  
 119.432201417811  
 GAGE2E 123.804039963953 120.871693555514 123.662678397678  
 118.492287441192 150.137061170632 397.449905380349 124.533543270311  
 129.431497372577 127.449028221682 125.785388817819 122.087107663865  
 112.179019393947  
 GAGE4 139.898996725236 154.548286860883 140.665332203898 131.440195723963  
 225.189991540262 1349.84215478798 146.694318629238 149.929454280702  
 133.65688823581 132.411757518105 146.501559368223 145.959421614703  
 GAGE5 142.331050242704 143.754105312957 157.231166272318 145.070927449969  
 230.227432807772 915.579581760396 133.97321873161 150.241585041178  
 133.97321873161 138.117916412819 136.695790688466 140.500483234415  
 GAGE6 125.243735617266 131.970514300585 124.518818352113 135.446072698039  
 162.155834067128 408.10780961711 135.068883036882 135.679481480408  
 124.574323079707 119.763020707899 123.646558103253 130.902319266342  
 GAGE7 136.957209426823 140.634047988278 138.775095929764 127.011594171986  
 186.515784641119 206.669783013221 133.0349214478 129.997181739652  
 141.535381351126 137.893630842968 137.065315360321 132.748478264583  
 GAGE8 100.216750525986 110.382724813928 114.673517800886 115.048402956574  
 114.325967923393 231.981501596284 111.515588041012 113.422559344178  
 115.750690887988 114.721282552636 139.174188535843 116.925863450165  
 GAK 377.083379021079 402.694564608582 400.550044186372 466.58966852405  
 692.729789121701 384.16579891756 502.598518192729 418.772484676858  
 590.849222581206 431.413030534188 468.82816089485 460.514672966125  
 GAL 102.024765473404 111.467722538327 100.966979609222 108.036254606246  
 174.832495287192 121.679013405559 110.875112640101 109.574386044714  
 109.255470590389 119.352995485911 105.49491265382 112.904318310632

GAL3ST1 138.322109975426 135.275284142536 110.486191378104  
 117.436119533535 118.631771242606 116.14662237541 122.924017262559  
 120.13937451914 128.628637585951 127.350368333088 133.666244052469  
 122.247130087475  
 GAL3ST2 136.621173927187 124.528206512938 141.758827837244  
 144.203716525289 147.815673580657 133.061016674211 137.260359343758  
 124.153063838817 125.802001118545 140.557871626905 125.658396221949  
 117.567991653999  
 GAL3ST3 137.636900130922 142.097126256137 145.308548379215  
 136.504438803108 131.915864620669 137.642858036384 145.924751649542  
 135.603160096973 126.741498575874 126.566165822427 140.091378604453  
 134.668233738635  
 GAL3ST4 355.290621188435 349.910535555712 278.192669077191  
 336.639473916174 211.160781061336 201.773745532242 194.445463745418  
 202.214495168688 248.791254839869 267.222762759781 185.186497037695  
 222.285940575778  
 GALC 276.057101476947 309.155070674445 282.836518011311 241.251507026982  
 323.244664586314 330.005950459958 400.924914238052 319.639103463458  
 250.718986968076 311.337303524912 443.343806055858 433.314881387431  
 GALE 150.046300135261 145.980929136129 145.412368252632 137.369033684705  
 353.243400332397 178.339211170442 355.714202328378 300.765518378297  
 223.058699622386 206.620708230452 196.378888436237 309.720081933252  
 GALIG 201.221839281282 171.384487293154 188.847480174391 162.870317933909  
 160.608674893418 315.064477782052 212.545989139388 211.786963444117  
 174.903798946103 217.811099067262 183.804849355341 183.472290949588  
 GALK1 642.934824227327 626.104755496369 589.070196307574 771.512332113075  
 1880.35608492553 653.879734066271 833.841469195516 1037.97124386242  
 723.428294037428 2382.87910783088 556.863361789449 756.246712133116  
 GALK2 203.335012796883 203.071186284148 198.390247605355 206.845306095447  
 169.403422185018 242.096692715029 232.641965649602 205.781486117242  
 245.766885283797 239.827648772906 192.640717683236 241.077618798955  
 GALM 242.81187187788 247.454326301069 269.831616158113 307.945884504629  
 285.562276640039 371.06697207449 376.962937292973 382.562403424855  
 369.726867521935 159.082447644277 207.545424360094 213.301947003462  
 GALNS 195.674128236589 183.969897305028 209.258707976348 195.057830521304  
 243.225815954365 252.611044555689 218.156162474715 196.777776509371  
 197.308952757609 275.468194644053 270.520229426015 253.789045068884  
 GALNT1 179.109090120497 185.507663455634 172.578252260002  
 153.6855881767 355.519647649551 555.259469428492 489.260272645085  
 514.213675499369 293.528601172819 330.505633088656 596.3549500121  
 492.780880796036  
 GALNT10 173.395370400371 152.624623171797 175.476184387338  
 170.12010526854 146.31468639383 139.793683692104 152.350537364705  
 159.539320132392 152.14012587515 204.103018614608 165.82215325714  
 146.67875644027  
 GALNT11 1095.04571025381 952.357976050712 1091.69584249713  
 953.861218000678 798.758496171493 1342.29111510713 1564.8868894162  
 941.065508539108 718.670564185576 792.101559967381 1011.14472068314  
 1385.28044421961  
 GALNT12 282.742833166843 191.861598059182 301.250189051376  
 209.5184563244 192.789886894821 139.437073790935 207.173653740239  
 216.033564783918 160.122274989224 247.373571011712 339.663295617139  
 297.466255000163

GALNT13 164.03801002919 147.056182807232 158.799917136119  
155.129304059037 145.34332740863 142.002145315543 138.322109975426  
135.511902377219 146.861981788662 143.090886224647 145.054873480806  
163.20714296121

GALNT14 120.29173510435 125.785388817819 114.325967923393  
117.953453145685 202.458096827378 138.393565473857 141.698329968978  
197.2893692747 130.450930089722 129.487458179949 230.227432807772  
147.905406818238

GALNT17 114.223991452083 112.14768481333 121.980744551615  
118.424520312293 105.236768436069 118.185499089226 116.230993734675  
112.394223360492 116.437403962939 108.807891863679 126.823886603295  
111.743461522689

GALNT2 163.181323768362 161.463042036376 187.112176929485  
173.513108409372 205.728673153914 188.252507246148 172.248521526206  
169.246302492166 156.466728833063 185.193234472203 243.589099648895  
209.867189613436

GALNT3 527.597948979568 560.757496975779 446.698665191047  
503.967725251906 213.602504580364 689.821785472506 330.405026390912  
466.691191261997 331.383533814347 286.818166898922 498.534168389928  
354.45785837703

GALNT4 171.718906292137 175.585857393085 179.122374556365  
119.926169902322 135.479300698192 214.52087460757 243.35880641566  
1025.27246494218 218.350166753833 324.79327985156 300.675907594637  
234.996704304673

GALNT5 138.546549217819 139.318078285343 133.613988293895  
139.708303388546 121.877276961306 133.327778635672 155.147962740503  
134.817665153925 140.429462488271 142.029398672217 141.67550758321  
132.602336133471

GALNT6 153.44628692569 150.231063426302 135.639558187703  
132.245217686793 130.890314257211 131.354275252104 125.898195488305  
135.040794634617 135.434853296628 187.082082429597 149.645548888832  
125.416113646128

GALNT7 111.484426481816 135.144908040903 110.727742629085  
112.07238018581 131.051711775229 124.048926099805 125.413619056436  
121.22760405399 120.485138937899 113.845770994796 155.147962740503  
136.494339004002

GALNT8 124.961859983596 128.663320241092 124.522974214212  
114.056147008769 121.926377140115 123.004137408444 142.211357324461  
123.111192189217 130.732397679661 135.717491814078 142.367003292264  
132.328948598599

GALNT9 151.751963310212 143.272669418277 148.003041725027  
142.095289977576 146.675159409376 143.151478156897 139.828781354865  
151.330035086652 143.681220324074 141.753560518393 149.464962540085  
135.033601686007

GALNTL1 219.537335167901 213.240181616274 191.665827345888  
306.677271064305 151.214631373344 141.368078865065 142.680136733947  
154.496005175117 152.93058803161 148.327340543504 143.607579034109  
143.625188247966

GALNTL2 233.496804016764 185.100455193182 326.1109406486  
130.939543211439 108.589444216106 126.820834043224 107.638492587723  
114.818898581401 114.182798672347 120.394220715157 133.099175110023  
114.278113876915

GALNTL4 382.327656839936 269.261595558589 256.924134409998  
257.477501542521 214.684538620841 164.630705813584 142.095289977576

|         |                  |                  |                  |                  |
|---------|------------------|------------------|------------------|------------------|
|         | 176.874265462986 | 163.946569217706 | 370.066087375401 | 176.53912635694  |
|         | 140.418010366997 |                  |                  |                  |
| GALNTL5 | 159.758196845781 | 160.251996476232 | 148.81406900745  |                  |
|         | 143.405079593778 | 152.617507769717 | 152.06044555622  | 146.893429874574 |
|         | 134.799648755296 | 158.477017294725 | 161.663893432522 | 122.527517633626 |
|         | 143.338628928675 |                  |                  |                  |
| GALNTL6 | 172.03919618445  | 158.943005736645 | 148.049570580734 |                  |
|         | 148.227581116046 | 151.05681004513  | 146.425476034368 | 147.882530392424 |
|         | 141.432461374482 | 140.290598244169 | 153.092864798642 | 142.084294087481 |
|         | 156.720090761933 |                  |                  |                  |
| GALP    | 128.033383607545 | 124.183297351614 | 124.563594928763 | 126.77232818113  |
|         | 127.58382536792  | 134.218867540274 | 127.987449338817 | 124.045745662173 |
|         | 132.47775411384  | 124.539006083936 | 142.411117330429 | 128.368669716591 |
| GALR1   | 123.400143662218 | 118.783904603368 | 120.402155551818 | 124.072512083237 |
|         | 129.942594772751 | 127.822440239962 | 129.610980807708 | 123.696942540314 |
|         | 123.491930765117 | 130.33205883588  | 122.362585067453 | 136.990610254852 |
| GALR2   | 120.450111018432 | 118.614641349402 | 106.629065516249 | 110.408301129053 |
|         | 128.69455713173  | 122.339819585312 | 105.450273343324 | 137.629855378016 |
|         | 122.99993610249  | 118.88525116298  | 115.687997771921 | 135.753430034183 |
| GALR3   | 121.874296836854 | 125.815256068004 | 123.745824514261 | 123.153925912632 |
|         | 143.195338329759 | 129.940297696849 | 125.050945917101 | 120.571074646092 |
|         | 120.517691208358 | 128.134246199718 | 138.67221078031  | 121.603608840998 |
| GALT    | 220.415211013843 | 213.382179917193 | 242.348427307994 | 232.621526025603 |
|         | 227.587590278412 | 172.073751088968 | 254.879772480457 | 222.943046618742 |
|         | 250.139061165593 | 273.152907354565 | 194.702974020747 | 213.7326050342   |
| GAMT    | 242.299252896647 | 261.322374889497 | 285.83626978316  | 300.247304779062 |
|         | 161.614426723521 | 145.043494048779 | 145.847629576886 | 160.026178505749 |
|         | 148.996601285688 | 259.868701878844 | 143.200939506995 | 230.697077917675 |
| GAN     | 138.221749464651 | 136.572645314012 | 133.951322753098 | 139.282741110499 |
|         | 152.286545050749 | 131.747367613225 | 139.429908070687 | 143.114384950467 |
|         | 156.144934427609 | 125.393848851951 | 151.9441336438   | 139.008854444223 |
| GANAB   | 626.582864105324 | 625.544719251096 | 645.806954296487 | 766.176882605175 |
|         | 990.206369590236 | 750.494286476465 | 844.187489702587 | 564.41151411028  |
|         | 575.23272138912  | 649.052806726591 | 544.852019338212 | 713.525134497596 |
| GANC    | 119.159078990339 | 129.987548571478 | 113.810645407837 | 118.614641349402 |
|         | 118.195512252508 | 125.958139354095 | 116.814269969508 | 109.669517182289 |
|         | 105.132185249959 | 114.942849575931 | 113.487357534546 | 122.941711366641 |
| GAP43   | 167.395369670065 | 165.880071298733 | 145.615291241733 | 192.848268768579 |
|         | 155.979380606594 | 137.6160344044   | 147.552635527742 | 150.029313080668 |
|         | 148.717545103261 | 151.334463063946 | 147.745780820004 | 151.130401750721 |
| GAPDH   | 5300.67886821231 | 5636.26097921507 | 6585.34962362923 | 8016.1652884418  |
|         | 8918.58940386786 | 4262.23145131525 | 7601.58151657937 | 7555.47017983216 |
|         | 6737.97308530049 | 15924.2167735021 | 6990.13809515289 | 8416.19700892758 |
| GAPDHL6 | 234.094722315007 | 170.901599088282 | 153.366677608026 |                  |
|         | 149.055493714692 | 230.508733145583 | 309.318403417731 | 325.43977732888  |
|         | 143.265532486512 | 151.451443480833 | 158.708054164813 | 161.799743586569 |
|         | 338.46332239699  |                  |                  |                  |
| GAPDHS  | 132.641236788053 | 125.707228291312 | 128.878051599968 |                  |
|         | 121.991692204056 | 140.63666629522  | 135.16316100494  | 141.765004355609 |
|         | 134.160882467542 | 131.863018503922 | 125.628281846465 | 130.101422420432 |
|         | 133.964163727962 |                  |                  |                  |
| GAPT    | 145.968884703737 | 136.344248873826 | 133.749271961438 | 121.980744551615 |
|         | 121.632494500096 | 125.481506166304 | 140.226586111216 | 151.224289879776 |
|         | 181.701252112196 | 128.122197525844 | 130.231160879338 | 132.733821031511 |

|        |                  |                  |                  |                  |
|--------|------------------|------------------|------------------|------------------|
| GAPVD1 | 759.534249620343 | 678.684323057327 | 696.277780670166 |                  |
|        | 661.096668635469 | 481.630922092112 | 421.929674562786 | 479.053300726301 |
|        | 470.308610828825 | 514.002313819685 | 612.374364731095 | 547.681206272188 |
|        | 333.200230327106 |                  |                  |                  |
| GAR1   | 386.817736004263 | 405.130899553871 | 404.366325262322 | 411.878556907186 |
|        | 556.568221094639 | 599.208370337812 | 558.251384152474 | 621.946994961864 |
|        | 797.28465621772  | 545.200687301057 | 428.959561932229 | 522.17701271254  |
| GARNL3 | 275.996693627151 | 262.296456281666 | 376.276954313674 |                  |
|        | 322.614169214764 | 164.791545858875 | 166.688771186254 | 162.077455145261 |
|        | 149.606576415873 | 163.113457178357 | 152.358795162474 | 178.130223302924 |
|        | 157.180095329946 |                  |                  |                  |
| GARNL4 | 152.386986818959 | 152.011551837951 | 144.237691418911 |                  |
|        | 146.692827583525 | 216.705908017858 | 181.530767521222 | 165.597236278435 |
|        | 277.073510273425 | 182.833961304079 | 247.454326301069 | 249.064573038094 |
|        | 226.315173823168 |                  |                  |                  |
| GARS   | 1452.63736288691 | 1386.56788941677 | 964.093668483033 | 1472.54829263217 |
|        | 1333.73334006986 | 981.781076110568 | 1333.73334006986 | 1285.02292965374 |
|        | 1652.77814259264 | 2672.77147589342 | 1115.53524128833 | 1862.88548451154 |
| GART   | 247.340470321453 | 226.173501275026 | 274.627303114477 | 225.095016600703 |
|        | 294.595972099366 | 597.459920611726 | 366.705048374078 | 389.588346573823 |
|        | 515.729905361375 | 399.762451559805 | 428.850337327605 | 434.509391836336 |
| GAS1   | 938.918431240228 | 910.541650889451 | 1505.90883940934 | 1052.553421812   |
|        | 166.85671415475  | 179.794718712964 | 148.773558380167 | 175.964600718395 |
|        | 200.890547965585 | 522.300029971277 | 147.657151780506 | 144.256029338053 |
| GAS2   | 142.726324048628 | 133.367085445965 | 138.897393621114 | 136.254966566424 |
|        | 144.011792962785 | 164.529828080312 | 134.786678978467 | 261.814227719605 |
|        | 138.962649407431 | 144.338069855334 | 152.768580075051 | 140.182150393054 |
| GAS2L1 | 144.375109087466 | 142.798248249144 | 141.840858913807 |                  |
|        | 141.170937695272 | 168.412162365467 | 130.666781754635 | 134.074425424613 |
|        | 143.561114996045 | 123.288028185949 | 131.138322527536 | 146.035731780312 |
|        | 130.977864137459 |                  |                  |                  |
| GAS2L2 | 117.829228895897 | 138.240874738649 | 125.830917527594 |                  |
|        | 158.244741207036 | 128.40650280096  | 129.647514123731 | 131.2360427855   |
|        | 127.028640787946 | 141.226901872221 | 128.655549652719 | 135.790955294639 |
|        | 138.322109975426 |                  |                  |                  |
| GAS2L3 | 149.103778494524 | 151.972509608956 | 130.140958819402 |                  |
|        | 140.626181314061 | 157.301617257941 | 165.286724415145 | 134.250052775987 |
|        | 187.15740398852  | 155.465250172768 | 140.256871047018 | 247.236004734567 |
|        | 143.816567683093 |                  |                  |                  |
| GAS5   | 155.666943703002 | 151.515460040167 | 146.720204808211 | 152.291176493005 |
|        | 148.81406900745  | 141.468076901305 | 156.311009595629 | 159.895303363094 |
|        | 164.820007934887 | 145.773932754923 | 165.896420029269 | 172.46311371589  |
| GAS6   | 2388.03256067711 | 2586.87941889443 | 1646.76016031831 | 2970.34597432588 |
|        | 177.919885012006 | 196.839016616283 | 150.610633329908 | 212.291528248457 |
|        | 306.232249422327 | 305.252666831522 | 195.10410545445  | 249.354198174438 |
| GAS7   | 287.084253886676 | 301.369680426563 | 210.316431648335 | 383.939800422489 |
|        | 129.505139430366 | 128.014092519305 | 125.704264033102 | 123.518170356322 |
|        | 134.239029110227 | 128.814967091609 | 130.25146185271  | 118.703108284564 |
| GAS8   | 221.869191666931 | 278.142283306934 | 292.037861000784 | 302.735372807236 |
|        | 310.142754559096 | 270.33685210971  | 199.149959995133 | 244.054469051058 |
|        | 255.374689750672 | 218.156162474715 | 244.5675215931   | 302.696004448559 |
| GAST   | 107.961322525982 | 113.214390213004 | 115.587874563785 | 120.280241193135 |
|        | 120.96098661114  | 119.525701528869 | 129.222714748528 | 121.961568081299 |
|        | 124.697283474333 | 116.881212516879 | 140.258615682066 | 127.055165613236 |

|         |                  |                  |                  |                  |
|---------|------------------|------------------|------------------|------------------|
| GATA1   | 131.911579676047 | 151.794243108455 | 140.165450892713 | 148.691132137188 |
|         | 133.762141373091 | 166.257275241937 | 134.691038011706 | 147.161720770972 |
|         | 129.763063900493 | 161.155280539113 | 131.99470265134  | 133.286702819953 |
| GATA2   | 180.085975596327 | 190.255797389524 | 174.953232190285 | 137.636900130922 |
|         | 926.670867201327 | 279.668007824988 | 333.970844203158 | 171.589889474122 |
|         | 1163.13845502757 | 131.926504315744 | 511.891269255193 | 387.068276379114 |
| GATA3   | 181.654319266685 | 244.766289564524 | 213.510783808898 | 146.099555861577 |
|         | 872.320823993033 | 989.77058497525  | 940.716682221364 | 958.63560158343  |
|         | 153.511995286293 | 159.301581158613 | 1051.45401327176 | 1074.19589851599 |
| GATA4   | 115.954828435072 | 121.952255635669 | 111.7529190597   | 122.022611139895 |
|         | 113.620070198869 | 121.021776527531 | 122.317877997527 | 119.341806810441 |
|         | 115.566303449363 | 110.17590675298  | 108.118551275778 | 116.977202125093 |
| GATA5   | 503.757797957538 | 725.443026984982 | 543.170902795966 | 1301.18893681695 |
|         | 114.528407572496 | 124.783306383852 | 116.273000405449 | 132.828179725129 |
|         | 125.396523818173 | 112.476111928742 | 131.887778588005 | 119.669441891401 |
| GATA6   | 156.949439724914 | 172.304496150036 | 159.775479686193 | 156.798431595608 |
|         | 140.347131743987 | 138.640919060725 | 140.968351978909 | 124.451718955086 |
|         | 138.877999126533 | 150.0674092434   | 149.898614923436 | 135.283742166077 |
| GATAD1  | 241.734804013256 | 232.667968049771 | 295.099840299681 |                  |
|         | 204.616225498655 | 193.689806171113 | 167.640645997754 | 276.653753970476 |
|         | 177.132361355899 | 179.985468369202 | 167.67952650068  | 313.828943866034 |
|         | 286.996908547553 |                  |                  |                  |
| GATAD2A | 847.564628337955 | 793.071192619058 | 698.086166782221 |                  |
|         | 965.031655021246 | 1752.50728312967 | 767.377380800066 | 879.301932542031 |
|         | 765.911113050543 | 754.97177863997  | 1067.30106203503 | 1125.28599595312 |
|         | 767.054576874115 |                  |                  |                  |
| GATAD2B | 340.193863653875 | 322.889296658955 | 378.967410725775 |                  |
|         | 288.370985514978 | 243.861834405092 | 251.307020289291 | 194.403848868583 |
|         | 246.237243726748 | 218.592402813219 | 213.274106157675 | 227.065194522692 |
|         | 271.196028302639 |                  |                  |                  |
| GATC    | 158.041568121766 | 142.866874321248 | 150.748298569951 | 136.216577685046 |
|         | 201.221839281282 | 167.018380617832 | 212.710910778949 | 171.473538842796 |
|         | 195.84531580224  | 228.100112133941 | 144.763700813057 | 177.851689709807 |
| GATM    | 214.050918459805 | 190.716424123036 | 358.654569870431 | 184.223623297663 |
|         | 198.783034238774 | 126.288011849541 | 337.521614253267 | 297.757657398146 |
|         | 191.074428905553 | 117.078720392441 | 148.25001336038  | 108.9291713877   |
| GATS    | 553.90008440429  | 604.453803994875 | 577.33849844574  | 748.703265448403 |
|         | 262.671819506189 | 381.57978490093  | 289.09614335372  | 226.936810012475 |
|         | 543.001249586573 | 137.936605651724 | 240.283918204202 | 256.495848662843 |
| GBA     | 326.640168906375 | 324.401611136662 | 307.768302846647 | 308.517561840596 |
|         | 741.689442253375 | 326.055727207966 | 473.853999833395 | 622.142195892701 |
|         | 360.285027176918 | 347.411500022053 | 295.099840299681 | 432.92947962962  |
| GBA2    | 198.023465629218 | 196.691380885508 | 194.488249052694 | 284.748764120614 |
|         | 168.071171406779 | 164.103306492559 | 152.617507769717 | 177.652022895288 |
|         | 174.540209145695 | 171.130215858803 | 198.954254778846 | 172.26834556696  |
| GBA3    | 128.853089272901 | 130.224324464992 | 130.173734963758 | 132.550022967297 |
|         | 399.620724969771 | 131.526532700651 | 132.671227062948 | 135.639558187703 |
|         | 130.965418847276 | 119.502758763438 | 134.853253781256 | 133.604705630582 |
| GBAP    | 162.134726710448 | 169.061364889307 | 176.420075374686 | 180.493406236326 |
|         | 171.140106467064 | 162.945789604505 | 156.978585870854 | 161.911468506919 |
|         | 158.027935395289 | 178.186273279101 | 155.233830396052 | 175.955932037011 |
| GBAS    | 546.029974898225 | 618.661249163439 | 713.832153334389 | 662.781145703653 |
|         | 375.651196211048 | 399.762451559805 | 529.854965483609 | 658.746224115551 |
|         | 355.443758121675 | 382.069677030369 | 670.097523566652 | 647.439372562271 |

|       |                  |                  |                  |                  |
|-------|------------------|------------------|------------------|------------------|
| GBE1  | 298.926727289387 | 296.428342247529 | 357.584458526365 | 297.805768288377 |
|       | 294.280238648737 | 282.190861594303 | 412.344820823968 | 331.251075774227 |
|       | 345.494740481759 | 729.202002368627 | 321.696082249696 | 399.071041584646 |
| GBF1  | 241.383657414248 | 273.402804140541 | 194.029961195972 | 368.374002925137 |
|       | 241.987100712218 | 145.681968019851 | 164.696616863082 | 156.003233745771 |
|       | 190.111477641308 | 141.855655600443 | 252.697160031025 | 190.625250757654 |
| GBGT1 | 204.637887777803 | 219.49354518392  | 170.684848540493 | 169.349922114861 |
|       | 217.607230767028 | 167.604959895451 | 179.674744176904 | 184.332299740724 |
|       | 222.919473675549 | 237.854774190873 | 159.005459875338 | 218.058543664561 |
| GBP1  | 398.075524915003 | 289.859695541999 | 275.929414239664 | 250.84781675544  |
|       | 250.376178742476 | 312.406286993239 | 416.638529499878 | 578.465753476561 |
|       | 940.716682221364 | 518.281245498542 | 781.461780481171 | 332.400086578723 |
| GBP2  | 3008.43964505208 | 3290.27308365921 | 3334.16277752222 | 4150.8511719558  |
|       | 2198.4268389426  | 2203.82462320864 | 4251.82554412383 | 1937.83242524439 |
|       | 3608.10730106542 | 1048.26872286983 | 2974.04694562902 | 1801.74467005923 |
| GBP3  | 174.274996381853 | 178.606255846041 | 139.268942501979 | 142.759452994928 |
|       | 175.417320301614 | 134.136687154241 | 226.841838641151 | 283.982575660968 |
|       | 281.570685561526 | 129.391376518208 | 581.37957221282  | 181.85552254233  |
| GBP4  | 340.028737478082 | 382.186095123659 | 261.065986251886 | 429.457884032977 |
|       | 204.82244206816  | 247.971366020963 | 396.861835715943 | 685.848203651889 |
|       | 1612.79779117655 | 265.992741398183 | 842.22767901391  | 331.62124160152  |
| GBP5  | 145.97330701968  | 141.537578081123 | 130.297203474319 | 124.28313315915  |
|       | 145.200638964782 | 151.194282143046 | 169.246302492166 | 227.715558644326 |
|       | 349.054741747798 | 412.801213309591 | 223.253794809571 | 135.025907096066 |
| GBP6  | 127.913463809158 | 133.022848457361 | 125.905785653648 | 138.720489866687 |
|       | 134.648780131578 | 125.088717405087 | 134.21227169867  | 143.250386570155 |
|       | 135.648906382608 | 953.861218000678 | 134.623264303227 | 138.897393621114 |
| GBP7  | 148.499207368959 | 116.46192274217  | 139.708303388546 | 138.02757574324  |
|       | 141.623851511993 | 128.611740835252 | 141.132694466739 | 139.484551562098 |
|       | 130.48231275063  | 148.888698484378 | 130.941645638407 | 142.086300138469 |
| GBX1  | 131.846160346403 | 136.545742688573 | 132.820927638053 | 126.089217853289 |
|       | 129.405749374776 | 131.288785100733 | 125.231476412101 | 130.582210755516 |
|       | 130.420753247797 | 146.464937541891 | 154.686025022972 | 133.416938451465 |
| GBX2  | 118.457573670556 | 115.834056091815 | 121.252042151856 | 133.527906709491 |
|       | 131.876061826583 | 126.086991456747 | 126.301178976594 | 127.781732819297 |
|       | 121.778756075848 | 120.193580405229 | 136.610566158577 | 118.139487760542 |
| GC    | 137.434039024162 | 141.917318809044 | 154.277670551775 | 131.086904662241 |
|       | 137.450774903611 | 140.704317015307 | 138.834309377225 | 150.769819282075 |
|       | 155.099575681229 | 136.733225604928 | 149.65417821994  | 139.771342253058 |
| GCA   | 216.903719298575 | 214.803167803712 | 197.827534617557 | 175.752091217351 |
|       | 427.084392965651 | 428.09583118349  | 480.484639351046 | 728.485195792194 |
|       | 539.27766384282  | 393.264726588522 | 448.95671696823  | 347.866264631778 |
| GCAT  | 204.318316638312 | 255.225145197422 | 223.778708427552 | 316.237519859859 |
|       | 438.146919555296 | 401.359711029934 | 314.292700455545 | 311.208703262497 |
|       | 282.797367565702 | 419.272193677273 | 189.647009287524 | 188.641397688261 |
| GCC1  | 392.282956362735 | 404.445038343721 | 324.067396271281 | 378.695635790714 |
|       | 354.656612182522 | 320.936905584424 | 486.778046640624 | 478.606567465979 |
|       | 382.069677030369 | 429.922530506572 | 540.078145038497 | 499.321667633972 |
| GCC2  | 158.658110539162 | 156.407166112409 | 154.33224999163  | 145.971656491073 |
|       | 146.054535585464 | 171.080373870373 | 172.531836863525 | 159.365070384451 |
|       | 155.883386742315 | 157.649902282769 | 170.410704499804 | 161.501062527272 |
| GCDH  | 209.44506543433  | 228.384686248604 | 267.622579012917 | 286.996908547553 |
|       | 357.259935567823 | 293.746733527346 | 279.070493043898 | 235.933451977398 |
|       | 271.287767448621 | 247.971366020963 | 200.767743455226 | 252.056131165397 |

|        |                  |                  |                  |                  |
|--------|------------------|------------------|------------------|------------------|
| GCET2  | 156.611727364072 | 147.299872426498 | 152.660373241584 | 170.720018572735 |
|        | 145.873819094778 | 147.241136598626 | 156.423687034312 | 162.168246402027 |
|        | 156.083002868004 | 170.046856179083 | 171.221972336784 | 157.826457203706 |
| GCG    | 140.296609941747 | 143.756242843438 | 131.516100334597 | 155.494095135266 |
|        | 142.175432631861 | 143.699398679866 | 152.951353678265 | 154.239755912437 |
|        | 134.241917425247 | 144.694679571377 | 130.716570410608 | 145.612695657243 |
| GCGR   | 109.209241676429 | 115.058061620379 | 102.474380813907 | 121.648921929686 |
|        | 104.544792793756 | 112.340161674529 | 116.282988576774 | 112.977469350139 |
|        | 116.20008794813  | 105.712302595131 | 113.919529047225 | 104.739307327595 |
| GCH1   | 122.90702157852  | 126.775180133301 | 124.403662787819 | 113.339155126202 |
|        | 135.582230137515 | 199.477350542491 | 140.146894533044 | 151.908841481413 |
|        | 141.522701487198 | 144.445496145045 | 186.04763660516  | 154.094285855743 |
| GCHFR  | 215.300064529551 | 227.467161919443 | 221.889331385023 | 188.033890834418 |
|        | 702.981741565482 | 385.379119927642 | 351.448985413528 | 290.954496559897 |
|        | 382.562403424855 | 185.447093292348 | 292.60467054075  | 531.421912541822 |
| GCK    | 129.733935614802 | 126.484819755399 | 122.053867525393 | 121.076652800015 |
|        | 114.099623939954 | 122.460829835477 | 128.56495182759  | 125.579970155301 |
|        | 122.843792000493 | 117.992729826121 | 123.117923525539 | 124.503016568677 |
| GCKR   | 140.326012404526 | 160.050872656883 | 150.870830294349 | 161.592528958127 |
|        | 143.00932329728  | 142.301581642006 | 162.732574014686 | 148.539881077647 |
|        | 156.540165645256 | 150.166324293431 | 149.103778494524 | 150.070213543579 |
| GCLC   | 269.673122990604 | 325.12056698785  | 428.09583118349  | 282.511614929917 |
|        | 315.130912368929 | 625.932910814208 | 508.572981581855 | 852.436775264873 |
|        | 303.555333002419 | 322.684910198242 | 763.880957432979 | 325.387193207414 |
| GCLM   | 332.032371697186 | 317.659548748735 | 396.212732639272 | 281.341452463344 |
|        | 340.301980622308 | 490.269418483997 | 352.665030560239 | 482.857203798212 |
|        | 436.731545612902 | 280.494088228226 | 366.636754272029 | 305.577166690215 |
| GCM1   | 161.603317039244 | 168.295044843056 | 176.631604815669 | 177.143397572907 |
|        | 168.156002330441 | 171.740347129234 | 176.810979494826 | 198.795112039249 |
|        | 159.660564323984 | 172.065593177758 | 167.421776383056 | 198.863347487219 |
| GCM2   | 159.838626443912 | 144.352987324713 | 182.197625235191 | 138.842935439006 |
|        | 161.870389635266 | 154.854538639035 | 142.446514275674 | 140.804008584006 |
|        | 129.495680232567 | 160.159630699959 | 139.287871460674 | 141.842919268688 |
| GCN1L1 | 1376.84058291266 | 1358.29475573637 | 1159.44907165386 |                  |
|        | 1681.54485582868 | 2293.05058904656 | 1612.79779117655 | 1853.20812924694 |
|        | 1612.79779117655 | 2677.17579532816 | 1037.97124386242 | 1663.71411325131 |
|        | 1580.27059464289 |                  |                  |                  |
| GCNT1  | 134.85590586532  | 135.023594109361 | 130.406895174038 | 146.381147992719 |
|        | 130.219888837397 | 135.036576196425 | 144.388851371784 | 145.442914818456 |
|        | 139.374278310041 | 157.010145291837 | 158.658110539162 | 135.073449743301 |
| GCNT2  | 149.355389396683 | 148.567630572897 | 141.865758685796 | 143.653452869664 |
|        | 134.830021570666 | 141.259186690966 | 139.804518460303 | 137.984988819967 |
|        | 139.77436722364  | 134.955823960889 | 146.264686158155 | 129.831076624826 |
| GCNT3  | 113.852849454448 | 117.937856116492 | 122.813441348997 | 111.848472437543 |
|        | 112.962180108363 | 113.347609066395 | 118.351607868932 | 135.079944196457 |
|        | 118.945264994404 | 128.411138850655 | 121.110498703017 | 122.129348411763 |
| GCNT4  | 127.987449338817 | 121.286130275542 | 125.955431094455 | 146.904354404095 |
|        | 135.395071593072 | 142.64161581553  | 142.285486339143 | 134.475296383752 |
|        | 129.906744036052 | 139.028620375206 | 144.038859705973 | 128.543460982378 |
| GCNT6  | 119.349376960211 | 134.425483661043 | 122.90702157852  | 136.929570710155 |
|        | 132.232444196227 | 129.018088749395 | 156.622993107052 | 139.121639005366 |
|        | 131.608580511282 | 134.23001942966  | 118.226036680442 | 124.895023786422 |



|         |                  |                  |                  |                  |
|---------|------------------|------------------|------------------|------------------|
| GCNT7   | 120.252164075308 | 139.097764484641 | 124.484589975207 | 117.834484996559 |
|         | 126.702705908175 | 129.995417218564 | 123.968639555673 | 135.306127055224 |
|         | 136.489566741917 | 132.566074764755 | 122.828060462887 | 127.327765407459 |
| Gcom1   | 228.058870735016 | 213.274106157675 | 463.488995330457 | 226.387465899611 |
|         | 153.738794649373 | 149.666293193219 | 171.473538842796 | 159.997580819443 |
|         | 163.51024840263  | 151.144521344129 | 154.2433882385   | 163.487737425232 |
| GCSH    | 195.333029746339 | 187.145134088286 | 212.749668083641 | 191.093283411655 |
|         | 303.423450627377 | 272.854435771465 | 233.997642139328 | 220.362946606131 |
|         | 193.689806171113 | 256.370052241046 | 185.140211988926 | 215.802713097166 |
| GDA     | 123.81177057082  | 148.302775746627 | 130.440164900487 | 135.023594109361 |
|         | 142.883466086309 | 139.377027955744 | 129.847481170604 | 137.483830932387 |
|         | 148.13657736444  | 129.57551086282  | 127.990453128978 | 134.840285218383 |
| GDAP1   | 143.2438241778   | 140.304810288752 | 146.983646662811 | 144.482364671273 |
|         | 142.822594215168 | 143.376817049362 | 155.259089547817 | 164.458565398812 |
|         | 148.211354898758 | 151.191822057706 | 153.655778377717 | 161.992141305029 |
| GDAP1L1 | 132.466796864599 | 125.672285485643 | 127.941584184869 |                  |
|         | 128.440024330942 | 134.592495777159 | 128.077692981235 | 124.76274408368  |
|         | 126.737230874367 | 121.419301042072 | 117.602986362773 | 140.765231611948 |
|         | 122.659174808512 |                  |                  |                  |
| GDAP2   | 155.587018319981 | 167.337624316172 | 154.564478911791 | 157.6811998968   |
|         | 208.456472621593 | 153.492072037266 | 166.192990554427 | 153.5256657638   |
|         | 171.644710031098 | 148.364138636002 | 232.127996106421 | 171.035391211596 |
| GDE1    | 426.896707161414 | 464.812091712746 | 342.717252404581 | 691.397238677552 |
|         | 306.677271064305 | 491.034395489684 | 431.019896339435 | 374.215345412947 |
|         | 300.314088267108 | 252.056131165397 | 424.855168311509 | 498.641091757363 |
| GDEP    | 154.884821436554 | 136.540568915609 | 146.286319248569 | 139.010652831798 |
|         | 157.073850948746 | 174.357336296554 | 164.959415532174 | 182.736067431579 |
|         | 146.135269553731 | 172.686798187142 | 171.740347129234 | 154.384766720753 |
| GDF1    | 129.831076624826 | 129.138035235415 | 133.155925118245 | 133.692996980809 |
|         | 140.149064156135 | 130.818181991958 | 131.628021008753 | 133.106005881815 |
|         | 127.04953162892  | 135.238301951626 | 140.426489534449 | 124.15094220181  |
| GDF10   | 161.841975820372 | 169.671341667693 | 154.16370087233  | 191.679217737051 |
|         | 146.725123303782 | 137.079479050963 | 148.82892305156  | 141.204458186976 |
|         | 142.195764444916 | 141.937611082276 | 134.226711030456 | 152.908358615016 |
| GDF11   | 172.057586741925 | 164.548505132213 | 158.175138008678 | 161.608941774391 |
|         | 163.104822161892 | 193.173703015873 | 155.143752422033 | 152.185397218918 |
|         | 160.861929142249 | 152.845126167802 | 162.756185479013 | 162.748836971539 |
| GDF15   | 392.582612044755 | 589.722914993267 | 424.025588636796 | 151.641486303453 |
|         | 4763.89426388268 | 1399.41653736746 | 2532.82545752082 | 2645.72125268628 |
|         | 1228.89116158868 | 238.230110356671 | 582.062758687489 | 832.622843175217 |
| GDF2    | 111.389873428517 | 119.366599958278 | 115.646023142125 | 116.416896654975 |
|         | 100.966979609222 | 115.491262364277 | 110.437728036347 | 113.347609066395 |
|         | 113.989682635964 | 108.386545220984 | 116.273000405449 | 104.58424134098  |
| GDF3    | 114.867454554206 | 115.285392699073 | 115.896463925125 | 129.013667813486 |
|         | 113.315182274675 | 111.848472437543 | 113.05681175258  | 122.022611139895 |
|         | 121.099290122973 | 126.939543057414 | 130.59670974887  | 123.312000381122 |
| GDF5    | 114.539671934155 | 111.041656398985 | 119.640086587188 | 115.725323816619 |
|         | 112.096627288813 | 113.479382235297 | 115.600308687778 | 113.840813583258 |
|         | 116.897299691798 | 115.613348109569 | 131.599370671279 | 123.843823256462 |
| GDF5OS  | 137.195906276069 | 140.672863685822 | 129.835713633923 |                  |
|         | 134.914830257315 | 132.953762692926 | 136.578058206829 | 134.768694020981 |
|         | 139.522018789485 | 125.493004972076 | 136.152827218905 | 147.78095608696  |
|         | 140.21908493941  |                  |                  |                  |

|        |                  |                  |                  |                  |
|--------|------------------|------------------|------------------|------------------|
| GDF6   | 121.930362099901 | 132.089375920534 | 125.979152567959 | 120.447140228396 |
|        | 125.277752749246 | 121.905741525277 | 116.342242990651 | 125.98519427755  |
|        | 126.242935839683 | 120.39039576721  | 132.786500984297 | 108.318510762416 |
| GDF7   | 111.152235113722 | 122.27785621724  | 116.276003190171 | 123.185652476312 |
|        | 121.45175516842  | 112.248047602652 | 120.436408685057 | 120.660349211375 |
|        | 114.826501559828 | 121.792573534134 | 143.793506250131 | 115.649568330705 |
| GDF9   | 158.297624312257 | 140.326012404526 | 162.55521875551  | 135.013075032671 |
|        | 141.213588194832 | 144.380485359951 | 147.808262170269 | 158.160604786093 |
|        | 158.095373931016 | 140.264060906597 | 148.594322264158 | 145.830916005206 |
| GDI1   | 720.077057619735 | 797.28465621772  | 487.07860019179  | 1055.79590411506 |
|        | 647.439372562271 | 288.631429069336 | 414.596948083067 | 333.970844203158 |
|        | 402.564148020948 | 465.102234374389 | 503.757797957538 | 343.417041721907 |
| GDI2   | 2544.58522979036 | 2414.22821062457 | 2642.24374855334 | 1785.92695250894 |
|        | 3042.88425356552 | 4343.46317176151 | 2132.90676194993 | 3078.76695443407 |
|        | 2244.6916226146  | 1634.20135156938 | 2941.69058596077 | 2227.70654174379 |
| GDNF   | 126.905235161069 | 135.281686411685 | 126.471321085803 | 133.146347243168 |
|        | 127.419227292862 | 134.673861365626 | 132.697727983601 | 130.258933321051 |
|        | 130.416957431512 | 132.580937663749 | 133.289175078053 | 127.964855970099 |
| GDPD1  | 591.641325402032 | 523.435696794756 | 655.094843900848 | 464.812091712746 |
|        | 162.58152435515  | 388.096183735126 | 234.895245871534 | 357.006610037663 |
|        | 248.360540656183 | 242.221324619171 | 312.286788541158 | 287.455622143233 |
| GDPD2  | 156.208747691032 | 154.493246900289 | 143.795399778897 | 146.838547724148 |
|        | 161.061119536632 | 156.077604146143 | 158.645402461996 | 151.04846635538  |
|        | 143.655901618594 | 159.185616602396 | 237.171424222756 | 201.81649023518  |
| GDPD3  | 168.897620634337 | 175.476184387338 | 138.13987378399  | 145.594378536072 |
|        | 616.995114856023 | 829.740755449333 | 216.077955163344 | 945.403379196643 |
|        | 589.240581642145 | 349.540558521616 | 199.275716402358 | 142.215285988753 |
| GDPD4  | 176.138621462315 | 171.022976593689 | 161.525131363333 | 171.671895682052 |
|        | 165.763459146818 | 162.085813676373 | 163.198834359304 | 156.357126871243 |
|        | 162.756185479013 | 160.022481227931 | 162.629257046871 | 162.096065738375 |
| GDPD5  | 360.756455184184 | 308.679189788554 | 227.806050911154 | 263.47760086159  |
|        | 148.490236128772 | 130.700175060255 | 133.796029401157 | 119.759350702482 |
|        | 137.042097702398 | 129.771073986855 | 140.675094228846 | 144.898770838913 |
| GEFT   | 137.17370871536  | 169.184111483933 | 135.423839577038 | 217.86728342043  |
|        | 125.393848851951 | 122.35832958054  | 121.327397317398 | 121.784166691545 |
|        | 125.114303270024 | 129.103133449097 | 131.300342835696 | 125.104229604098 |
| GEM    | 449.952497751758 | 377.89330639683  | 661.096668635469 | 305.200911653347 |
|        | 143.973464003036 | 181.865456674829 | 144.492756323647 | 149.31422191209  |
|        | 163.976361576383 | 203.244917049745 | 144.358535632993 | 152.769931978291 |
| GEMIN4 | 437.049581919144 | 526.625936680738 | 580.347496467173 |                  |
|        | 597.459920611726 | 839.662936279727 | 606.003956839826 | 522.664475688419 |
|        | 732.040299742444 | 539.471166362469 | 574.779350011402 | 516.429067667758 |
|        | 529.04238100948  |                  |                  |                  |
| GEMIN5 | 162.173506492562 | 170.720018572735 | 202.357989894268 |                  |
|        | 179.079061789059 | 175.79375235478  | 173.507835230243 | 220.079379312889 |
|        | 173.315097944835 | 180.430425314885 | 217.86728342043  | 174.717158790668 |
|        | 205.804144075374 |                  |                  |                  |
| GEMIN6 | 289.911635155481 | 286.431013744652 | 382.806570442504 |                  |
|        | 313.099028594073 | 642.934824227327 | 642.057106241761 | 626.857289492802 |
|        | 562.891241563711 | 421.303580698397 | 431.019896339435 | 395.588345893987 |
|        | 391.706404954357 |                  |                  |                  |
| GEMIN7 | 145.660417208595 | 140.651536723893 | 137.734887788912 |                  |
|        | 135.817028661429 | 129.301839663122 | 149.995272585012 | 143.720044122451 |

|        |                  |                   |                  |                  |
|--------|------------------|-------------------|------------------|------------------|
|        | 133.834423222601 | 140.061045085545  | 137.50266393001  | 146.286319248569 |
|        | 142.675752131935 |                   |                  |                  |
| GEMIN8 | 206.010481981919 | 201.349209185128  | 214.331491507489 |                  |
|        | 208.214764518526 | 214.200081541057  | 293.482512212153 | 185.186497037695 |
|        | 233.496804016764 | 194.831347257735  | 164.791545858875 | 226.449705559354 |
|        | 196.889520085412 |                   |                  |                  |
| GEN1   | 147.619451225526 | 141.480793979634  | 136.118702626862 | 146.235832275574 |
|        | 153.613110881454 | 147.357032438442  | 145.610045243277 | 161.16688895179  |
|        | 146.637799077812 | 145.039617860588  | 156.277567608825 | 150.075738752092 |
| GFAP   | 119.135701239571 | 111.389873428517  | 109.91537150286  | 113.315182274675 |
|        | 119.795945889846 | 114.14858855653   | 122.868393258957 | 117.045020667394 |
|        | 115.285392699073 | 120.894583222813  | 126.964621107029 | 118.500956349352 |
| GFER   | 142.566028652989 | 142.677386111317  | 117.324368138398 | 145.060085149395 |
|        | 153.171822092714 | 141.336866031027  | 148.512096079648 | 158.347972566681 |
|        | 130.935922915902 | 150.763810844645  | 152.798927898416 | 137.049677918041 |
| GFI1   | 161.618479762188 | 157.288308753975  | 147.696506705909 | 141.947478902603 |
|        | 142.688809469455 | 145.864902319111  | 137.372131049785 | 159.470818285679 |
|        | 173.372949622338 | 159.115391667901  | 162.536009333787 | 152.798927898416 |
| GFI1B  | 160.311096717492 | 156.423687034312  | 156.000732564221 | 170.430478598594 |
|        | 148.012353232918 | 185.783374935551  | 155.349728277626 | 158.175138008678 |
|        | 153.934872807607 | 145.395042579024  | 147.539226876636 | 151.581593330224 |
| GFM1   | 794.636255515909 | 895.463355957918  | 705.987531074737 | 781.790858580895 |
|        | 747.077451281453 | 635.37511798786   | 622.142195892701 | 755.42757464615  |
|        | 631.106334754678 | 462.888171502285  | 517.020259129974 | 724.103864917969 |
| GFM2   | 165.737618983611 | 158.408494909763  | 163.805257266374 | 166.533191390639 |
|        | 166.850279817976 | 198.753297290444  | 240.994507285383 | 171.644710031098 |
|        | 184.387409077972 | 202.819949307954  | 164.373697447004 | 207.692077301142 |
| GFOD1  | 974.544773560873 | 1157.02365469464  | 662.958637409597 | 1248.69137283095 |
|        | 178.43642939806  | 494.347792360629  | 203.675655444583 | 280.913748398876 |
|        | 232.735767435327 | 573.074116810032  | 172.20451139581  | 211.626970008102 |
| GFOD2  | 193.336246844237 | 207.985880193245  | 197.427788552936 | 209.684346388892 |
|        | 310.598930734244 | 262.349315496653  | 297.544216175512 | 275.972447693982 |
|        | 378.088675670786 | 306.232249422327  | 277.596303701405 | 329.88790758321  |
| GFPT1  | 272.193578770314 | 238.183096218311  | 223.531323159808 | 219.8511043213   |
|        | 836.235700891687 | 375.767528676937  | 440.745866155629 | 578.297031096292 |
|        | 595.593867616527 | 426.464641742092  | 416.933146258428 | 313.888035511709 |
| GFPT2  | 260.642170838161 | 225.850439131864  | 172.376544221034 | 175.670738308809 |
|        | 120.263659727964 | 132.994716261577  | 116.082361389405 | 114.512028664352 |
|        | 122.554760526767 | 151.992112109698  | 119.937665469629 | 108.131097605872 |
| GFRA1  | 146.110545700163 | 148.794293762142  | 134.010031592003 | 134.445893291422 |
|        | 135.934249020651 | 131.540436531741  | 130.754320787628 | 131.255028381669 |
|        | 137.30143217822  | 136.0317444903648 | 137.114604159523 | 132.53122878527  |
| GFRA2  | 305.615423200097 | 382.960724128105  | 239.363511706064 | 505.404271675438 |
|        | 254.287838845201 | 166.936975782665  | 153.184575380093 | 202.691507273819 |
|        | 188.995551740427 | 152.188770978528  | 207.674249122047 | 172.531836863525 |
| GFRA3  | 219.151144724168 | 236.707875629511  | 195.831574717135 | 319.560819487616 |
|        | 167.961390966538 | 130.370405378213  | 128.984613946021 | 131.702788057359 |
|        | 142.709768829207 | 126.868970616955  | 125.326393776938 | 143.774841336279 |
| GFRA4  | 133.504078347324 | 135.75568942028   | 122.568743478314 | 137.605244950708 |
|        | 136.971869448818 | 132.606735652984  | 130.74794199972  | 130.551216910933 |
|        | 122.799487123057 | 126.214166842097  | 147.78847662997  | 127.797666392002 |
| GFRAL  | 131.18368961955  | 132.657106732366  | 130.590195477461 | 129.446084290637 |
|        | 140.013231300392 | 128.0366252162    | 130.829825154842 | 123.219903763265 |
|        | 131.968781256081 | 118.95971064289   | 133.198832503062 | 129.940297696849 |

|        |                  |                  |                  |                  |
|--------|------------------|------------------|------------------|------------------|
| GGA1   | 5543.71998558526 | 5040.35379681644 | 6601.004284244   | 6944.90824302953 |
|        | 3200.61067185412 | 6203.08085790474 | 5532.93454600454 | 5207.37974585707 |
|        | 5846.17594234628 | 4901.41175228982 | 2733.68308784024 | 5532.93454600454 |
| GGA2   | 445.348044448953 | 476.168679880357 | 346.862322263052 | 442.766704003254 |
|        | 258.16437138327  | 278.555009982029 | 489.403061697031 | 397.985856484851 |
|        | 335.938170230765 | 259.742175498038 | 553.123179808258 | 326.703488388966 |
| GGA3   | 218.811490883852 | 207.545424360094 | 208.270622752385 | 207.05325577114  |
|        | 200.242239130026 | 193.609985124825 | 216.783051958345 | 225.664432111551 |
|        | 219.228720772236 | 211.505504834207 | 233.335353447342 | 276.434192872962 |
| GGCT   | 323.086368767924 | 412.277592266475 | 408.811415529922 | 335.239364345057 |
|        | 1071.83063260499 | 595.270107963842 | 604.687265229902 | 896.625415670455 |
|        | 832.911633923496 | 1172.96121022579 | 690.010326122574 | 1032.4540300024  |
| GGCX   | 181.238505183667 | 186.321879879561 | 166.868688936939 | 148.454344601562 |
|        | 405.322847383739 | 199.235895708128 | 317.273940108333 | 296.553550946307 |
|        | 300.247304779062 | 236.470206707351 | 238.344676327918 | 219.171591031864 |
| GGH    | 185.447093292348 | 202.145180994821 | 175.974598536074 | 192.580288063603 |
|        | 665.936368667321 | 1357.48791782399 | 422.688531130043 | 1366.06309834426 |
|        | 796.439819579938 | 635.37511798786  | 251.138401278632 | 325.525450750788 |
| GGN    | 116.300028266671 | 118.622346984257 | 120.853961156534 | 110.347631909888 |
|        | 114.350596695469 | 118.338713846941 | 114.830474086443 | 115.963144087717 |
|        | 120.696557306298 | 119.83679981791  | 107.714294216913 | 116.408126010926 |
| GGNBP1 | 130.01207836961  | 139.168307371516 | 140.868946922293 |                  |
|        | 152.921328522953 | 147.056182807232 | 136.607783800741 | 130.114464233633 |
|        | 132.819726980184 | 149.556644928013 | 155.798048652444 | 132.582062079623 |
|        | 152.413389525982 |                  |                  |                  |
| GGNBP2 | 782.448692528135 | 734.97763567765  | 821.265710686098 |                  |
|        | 657.562129888446 | 454.984562256248 | 805.600599570258 | 884.747476952289 |
|        | 1257.32413345748 | 1528.49457104932 | 737.193295872614 | 946.640841062802 |
|        | 843.545962045705 |                  |                  |                  |
| GGPS1  | 422.688531130043 | 403.043257175264 | 432.515970951769 | 369.070376276471 |
|        | 242.188218870393 | 291.839070398338 | 357.431640917696 | 499.544050752036 |
|        | 377.083379021079 | 435.095843349921 | 434.855262284265 | 495.438672949441 |
| GGT1   | 141.950778601653 | 138.618761382177 | 140.42579083092  | 136.026302491961 |
|        | 142.656762407774 | 144.386561289985 | 138.59175751301  | 223.339132121796 |
|        | 143.626857507866 | 137.473779155388 | 135.346501914337 | 140.096717188376 |
| GGT2   | 141.162443312437 | 145.241301006518 | 147.017958916908 | 137.701271351806 |
|        | 135.883119645931 | 138.409284761652 | 136.522590104535 | 179.996590340102 |
|        | 139.136845089275 | 138.938546468136 | 147.488635834397 | 142.630563791102 |
| GGT3   | 148.683761948082 | 151.382199195953 | 151.88244935494  | 158.6953558198   |
|        | 162.961792330623 | 158.691830524781 | 138.395943168158 | 178.606255846041 |
|        | 147.07272598888  | 140.611071681667 | 132.576755070703 | 127.346646117375 |
| GGT3P  | 150.784262878145 | 136.981043383326 | 150.639235242268 | 133.106005881815 |
|        | 137.185243517766 | 140.149064156135 | 150.981208776163 | 177.60876237572  |
|        | 155.283003653612 | 136.171728950893 | 173.09379121032  | 135.925813154268 |
| GGT5   | 173.353648927895 | 149.41564356447  | 119.943408501009 | 147.605262422483 |
|        | 128.196474114536 | 121.968807253639 | 121.278346729876 | 126.678746008577 |
|        | 127.945144368504 | 122.226875707253 | 131.381189141974 | 123.178049594968 |
| GGT6   | 130.33205883588  | 160.441879289883 | 149.233023751582 | 110.594755513247 |
|        | 568.935113269368 | 384.296190598736 | 334.140757209353 | 507.236601481067 |
|        | 344.575967665039 | 150.584633044901 | 711.166793546075 | 551.92688162618  |
| GGT7   | 147.038700869156 | 142.179197020805 | 129.148634038268 | 134.367115858307 |
|        | 113.536570797896 | 128.890685255595 | 136.093473732174 | 127.052618800004 |
|        | 138.386391726042 | 122.472909598385 | 137.493436771898 | 148.370331097467 |

|        |                  |                  |                  |                  |
|--------|------------------|------------------|------------------|------------------|
| GGT8P  | 121.059923601223 | 135.971507823633 | 117.917454674671 | 120.308260557986 |
|        | 127.07186140748  | 125.208803405105 | 117.137027732123 | 123.198873421356 |
|        | 122.423561732526 | 124.012439490264 | 136.209796259197 | 128.827129738041 |
| GGTA1  | 158.135321157995 | 143.035625780446 | 132.624674205566 | 147.928629511539 |
|        | 128.257292171015 | 145.06736850005  | 154.834679562341 | 126.365861978893 |
|        | 141.401480567426 | 138.537763477627 | 145.836613334985 | 143.455941298415 |
| GGTL3  | 166.526875572556 | 163.248980088946 | 158.960488862727 | 159.592581700976 |
|        | 141.294094833197 | 169.447827110558 | 172.599654598668 | 152.30599498619  |
|        | 152.327247552986 | 145.07503221134  | 132.383542877819 | 182.827395663312 |
| GGTLC1 | 135.553183871663 | 147.643985046683 | 133.801549026691 |                  |
|        | 135.774569629738 | 130.980199575227 | 135.453399741892 | 131.503936441405 |
|        | 130.321133400634 | 134.678445085174 | 138.096262211809 | 152.768580075051 |
|        | 132.741859397511 |                  |                  |                  |
| GGTLC2 | 133.022848457361 | 123.865424155099 | 122.379537202709 |                  |
|        | 128.922269289649 | 124.627339426244 | 114.161540771427 | 112.624137732184 |
|        | 119.530214079037 | 122.136861827049 | 127.540848073484 | 128.386309075038 |
|        | 113.521599852465 |                  |                  |                  |
| GH1    | 128.76720970745  | 131.592172917738 | 122.274656361883 | 128.126354569418 |
|        | 132.456945758174 | 122.373400988227 | 125.367386907897 | 118.875640081461 |
|        | 131.12953085854  | 126.825785762925 | 128.671626815639 | 135.281686411685 |
| GH2    | 143.512348693556 | 135.618562468776 | 137.181558419086 | 150.731093808891 |
|        | 138.936872956065 | 135.975265059269 | 141.248526020456 | 148.199249855894 |
|        | 134.10707191601  | 141.770977101211 | 140.123348569709 | 144.035936160694 |
| GHDC   | 294.22752955801  | 331.937313503755 | 295.935625475189 | 340.487850009685 |
|        | 526.970555181851 | 221.093229309411 | 277.459328083162 | 299.80615152845  |
|        | 266.347965690851 | 258.964323941464 | 325.96632528242  | 223.918931440768 |
| GHITM  | 3592.7878705048  | 3504.77617298452 | 4536.46344538492 | 3342.8737952486  |
|        | 2316.49886419499 | 2325.02143920169 | 2670.9151276786  | 2794.89048827025 |
|        | 2808.78353621111 | 2811.84191700516 | 2712.07480130502 | 3417.22292085668 |
| GHR    | 628.939201051801 | 517.529147171876 | 441.958777965408 | 487.07860019179  |
|        | 107.498500136859 | 142.238908711402 | 104.826135297161 | 168.582192754233 |
|        | 113.170014668758 | 148.503282415207 | 125.609542142983 | 110.753661013519 |
| GHRH   | 120.514672572565 | 118.540620928268 | 116.723991721647 | 115.778736387131 |
|        | 115.896463925125 | 109.728809191027 | 116.221426977629 | 109.30275288389  |
|        | 117.856184272322 | 111.65024009102  | 120.345546077894 | 129.023206862713 |
| GHRHR  | 135.966929064294 | 138.519129384809 | 131.648308760913 | 132.928639483854 |
|        | 128.074531806621 | 135.210887148305 | 140.132816040735 | 141.143572141958 |
|        | 134.182902752156 | 131.823019555685 | 131.208112906919 | 128.486023696636 |
| GHRL   | 141.537578081123 | 118.45291712775  | 126.295856316628 | 122.667593730152 |
|        | 123.609527892227 | 116.20008794813  | 115.664551127497 | 122.232732968363 |
|        | 129.733935614802 | 110.014935095391 | 147.463822782303 | 124.977046954694 |
| GHRLOS | 128.510903178542 | 126.952836653857 | 127.605805815475 |                  |
|        | 124.288632450364 | 149.904691068054 | 121.980744551615 | 122.258432948151 |
|        | 151.325068155715 | 132.659196898439 | 141.499192356469 | 151.089328533476 |
|        | 121.952255635669 |                  |                  |                  |
| GHSR   | 124.480385254916 | 129.153882779488 | 130.957441406855 | 129.365004129784 |
|        | 127.245190474707 | 128.634431242405 | 127.490889148422 | 128.458132030921 |
|        | 131.49254872524  | 127.412539650291 | 129.70974867852  | 124.539006083936 |
| GIF    | 120.543881800775 | 129.35944300615  | 123.782746527199 | 119.13963074637  |
|        | 111.608386387842 | 124.077104101209 | 116.751145098777 | 124.546520456419 |
|        | 787.874585290601 | 131.051711775229 | 132.7284396337   | 130.48231275063  |
| GIGYF1 | 197.91325268683  | 201.954167006591 | 203.563098303937 |                  |
|        | 203.370353613423 | 194.686527131656 | 178.584378959369 | 202.643624039869 |

163.858222964048 179.015669199358 173.635827398273 175.96841318924  
 192.580288063603  
 GIGYF2 149.927773276383 146.539196738195 143.394704760983  
 147.44463861207 147.863198012238 138.02757574324 138.150616787218  
 138.925802905636 146.04584032214 159.52833930625 143.405079593778  
 137.504147221623  
 GIMAP1 156.88782735706 199.798533722581 125.134516902118  
 236.508498739509 121.049927973123 121.567879358508 121.926377140115  
 153.111226896983 186.758038665014 110.575582352222 168.21856603538  
 123.513588004371  
 GIMAP2 169.285901212492 167.505381046729 155.064761390765  
 170.13453211897 152.317890573534 161.090443294391 189.61702125418  
 184.672330560677 227.926444925478 149.387467833684 191.160340745501  
 180.902950045351  
 GIMAP4 435.69811966429 675.978379566859 357.972320648217  
 595.882696498804 228.542423012958 413.398641688413 256.471672362567  
 474.750156829195 727.814681346494 263.707476735938 338.129250886594  
 263.568160216149  
 GIMAP5 202.819949307954 226.640323471375 148.211354898758  
 245.01029221002 186.156006020985 190.716424123036 150.364511432468  
 204.113356572343 308.726328440723 141.397046998678 228.926077117474  
 144.278830378899  
 GIMAP6 150.831554010122 159.966729941991 142.024171830924  
 141.882859092658 147.171090285223 158.704425428694 130.753266976637  
 166.850279817976 198.94325874493 125.04327844782 173.513108409372  
 135.013075032671  
 GIMAP7 317.600728351694 390.284689962661 250.737252834098  
 373.096629378654 141.971207380159 235.961605948276 163.398614249033  
 280.531844086775 402.824964079515 146.897528834303 239.109163320417  
 167.173670781451  
 GIMAP8 311.670576741448 518.281245498542 275.298642145005  
 520.218545108099 205.036081947168 213.123453925578 223.496400038284  
 251.09230266334 355.609033348692 188.74403596953 234.895245871534  
 187.472028627511  
 GIN1 235.216589534371 285.63245179313 254.359737178714 423.256021602613  
 140.78902818186 157.733042033549 182.725987056391 148.400132332444  
 156.803516898875 160.724319010751 220.791884858764 146.658048787833  
 GINS1 139.242481781927 135.336754997434 165.590892262736 187.561298131124  
 152.593934787262 166.22013573342 136.118702626862 158.869463014801  
 144.782706468281 152.601626526117 158.147502554814 130.776213987522  
 GINS2 130.729989463558 174.680918805036 134.932416370825 164.164463389212  
 623.68308750251 418.319283832879 300.047728281275 260.045018348182  
 359.518199449791 446.393631025049 199.135932984641 450.566031840493  
 GINS3 149.987571884748 153.528429414138 144.507230362869 163.18585933431  
 286.431013744652 283.084102918359 240.12078342024 262.171775165261  
 237.456245064363 232.830038701628 273.709160508205 256.127197303751  
 GINS4 129.675420096163 149.42148494796 115.664551127497 129.095469955392  
 208.72873686638 209.93789387724 141.169908353507 194.055394488452  
 149.88598449818 137.03111066852 152.207601283271 136.071856104688  
 GIP 119.144128641393 136.716554749722 115.157321350379 111.020070405368  
 119.330439721904 115.502679218125 122.170662903259 117.303671445328  
 130.445920648705 115.128667174745 136.70715656782 121.770043509503

|       |                  |                  |                  |                  |
|-------|------------------|------------------|------------------|------------------|
| GIPC1 | 601.800326895295 | 829.740755449333 | 601.401329244185 | 987.78377957731  |
|       | 3515.36256599555 | 1424.04009914668 | 1223.68146968716 | 987.78377957731  |
|       | 776.807656744828 | 1186.96351738518 | 1420.27222765071 | 1371.56635975955 |
| GIPC2 | 137.714430743204 | 132.05513812578  | 124.213104788426 | 118.855500322915 |
|       | 139.640918572569 | 131.369177333568 | 136.074837228096 | 136.975775196224 |
|       | 137.296790373528 | 129.995417218564 | 119.023688551496 | 138.452698593232 |
| GIPC3 | 126.176505541577 | 128.683044953833 | 124.348926304504 | 117.688941284427 |
|       | 124.012439490264 | 121.543207264598 | 115.118170902045 | 108.984922760455 |
|       | 119.415822905251 | 112.264005988662 | 110.562310620515 | 116.268259618103 |
| GIPR  | 106.701716475947 | 110.727742629085 | 114.226028611171 | 106.667175621971 |
|       | 117.412956162665 | 112.282839763467 | 112.858669660245 | 107.02909139647  |
|       | 111.895279866421 | 110.355493122568 | 128.485150698799 | 108.589444216106 |
| GIT1  | 232.046814892685 | 258.109876262342 | 175.882911801581 | 295.778154263981 |
|       | 827.400420888645 | 222.624150073858 | 231.572677616684 | 275.996693627151 |
|       | 208.016730103629 | 174.903798946103 | 239.20206002     | 216.154203111101 |
| GIT2  | 176.256840061919 | 154.710000519109 | 176.27969404442  | 143.830319259804 |
|       | 144.937697857147 | 175.744275464701 | 160.042251279235 | 152.191393042132 |
|       | 187.296479395462 | 200.72147365413  | 159.320692108734 | 162.10411532202  |
| GIYD1 | 171.85890372225  | 180.528296177577 | 153.846723846716 | 184.102171963542 |
|       | 363.150472154973 | 466.58966852405  | 309.937351755502 | 289.21739941764  |
|       | 272.351487980415 | 213.674150322581 | 344.021696764791 | 217.748916080172 |
| GIYD2 | 123.827771590213 | 125.114303270024 | 124.511674561183 | 118.777105073561 |
|       | 178.955938825556 | 206.042395282286 | 148.514806562804 | 176.890596690798 |
|       | 163.438043894189 | 153.206468539619 | 165.590892262736 | 148.525224975266 |
| GJA1  | 717.270096456387 | 668.853969513382 | 583.192225756596 | 388.477382640003 |
|       | 331.747622606378 | 1235.75946952752 | 865.800709006332 | 1610.38263368771 |
|       | 528.275591281419 | 2886.92690692502 | 180.192015483309 | 237.266455875982 |
| GJA10 | 127.028640787946 | 151.092066533546 | 144.994931561779 | 129.485710719291 |
|       | 140.477307701027 | 164.753886197136 | 152.346098251128 | 143.943676099522 |
|       | 153.412469512967 | 144.610341215903 | 132.484079454476 | 148.100508271232 |
| GJA3  | 126.877293296185 | 118.631771242606 | 123.959050197189 | 126.314233529267 |
|       | 123.260800590266 | 126.103561089901 | 129.436712663487 | 121.61143371132  |
|       | 121.336932276232 | 150.642465826166 | 133.44592405762  | 127.551486042435 |
| GJA4  | 227.177100762395 | 351.998551165704 | 173.829219279719 | 255.156682699288 |
|       | 176.839917795004 | 195.963361515546 | 145.505223177269 | 173.97085982677  |
|       | 196.974807677659 | 172.794570587596 | 175.974598536074 | 156.702300398105 |
| GJA5  | 162.774716879847 | 174.08222895937  | 165.960176666275 | 178.072538529634 |
|       | 141.849319373594 | 161.874184077257 | 164.50490221903  | 174.347451984066 |
|       | 169.238325933605 | 159.640027194076 | 160.277755404001 | 165.942761337382 |
| GJA8  | 116.428373788459 | 121.476730561812 | 123.635470154191 | 119.517021355598 |
|       | 127.773292289242 | 130.018928906449 | 118.206034087145 | 114.226028611171 |
|       | 117.034228068173 | 126.839037497031 | 145.902572804249 | 113.451566510208 |
| GJA9  | 116.053859681399 | 129.257947818865 | 124.186557690235 | 114.638254225216 |
|       | 116.501174707117 | 109.898406285895 | 113.283359026655 | 105.236768436069 |
|       | 117.907840952685 | 119.780654293448 | 135.116985816353 | 110.977904932371 |
| GJB1  | 121.327397317398 | 126.806537241253 | 125.195549796301 | 122.216479103528 |
|       | 134.412129843957 | 131.140263788783 | 111.895279866421 | 147.598602877625 |
|       | 147.803464591663 | 120.964862799634 | 157.178048352017 | 126.715300671036 |
| GJB2  | 149.505323932806 | 194.22713184875  | 146.011084331925 | 177.428161690048 |
|       | 538.872348151809 | 904.211195986553 | 691.632061537999 | 386.305638633172 |
|       | 271.154246147262 | 10506.1271023809 | 1250.58586679251 | 3630.80752744347 |
| GJB3  | 130.749763860615 | 148.060086496148 | 149.801573181126 | 135.884635448277 |
|       | 206.999289979742 | 176.008711524598 | 146.743260100643 | 138.052032298683 |
|       | 155.803946849495 | 373.860920943049 | 191.3765085801   | 169.541411677993 |

|       |                  |                  |                  |                  |
|-------|------------------|------------------|------------------|------------------|
| GJB4  | 146.132506246152 | 181.491120129045 | 156.330571337475 | 137.996291911198 |
|       | 199.235895708128 | 249.925640256322 | 143.589222264786 | 153.075594260208 |
|       | 159.856190281237 | 578.084277076692 | 276.224613560582 | 439.727046291381 |
| GJB5  | 133.486155360266 | 124.451718955086 | 113.311132067152 | 119.815258991448 |
|       | 197.087015414039 | 174.603285240228 | 184.157941055948 | 138.880168623766 |
|       | 169.574755162815 | 464.196512015649 | 208.164674386141 | 296.141012087256 |
| GJB6  | 152.566490804809 | 188.079188251085 | 156.576585764311 | 158.249743182741 |
|       | 801.52891824571  | 1044.52286986369 | 509.988617641229 | 405.570281788901 |
|       | 319.417555901733 | 4569.44477073589 | 1427.70292953827 | 1563.71477584676 |
| GJB7  | 127.101752724954 | 132.809364188497 | 151.05681004513  | 154.8975607055   |
|       | 138.67221078031  | 146.418147447541 | 198.411812737082 | 135.100687929821 |
|       | 161.748547772524 | 129.135985676046 | 200.668298229815 | 154.821960325589 |
| GJC1  | 15194.4972103372 | 14798.1358474998 | 16588.0599171804 | 15603.3490258675 |
|       | 5138.28186306948 | 15924.2167735021 | 9323.53099359448 | 13423.8921651885 |
|       | 12493.2940668467 | 7930.82679738435 | 8633.71708020651 | 10741.3064142855 |
| GJC2  | 526.182262872235 | 544.222458349696 | 518.281245498542 | 757.877066703516 |
|       | 156.973511952828 | 159.207567680134 | 125.579970155301 | 142.505050582588 |
|       | 158.712241098927 | 196.676479140094 | 167.575968906119 | 169.520544329439 |
| GJC3  | 132.637443692683 | 147.494937826597 | 148.302775746627 | 147.863198012238 |
|       | 140.025668085978 | 129.130212375815 | 145.168031449425 | 128.543460982378 |
|       | 142.185624089373 | 131.221105247771 | 146.920496801962 | 144.351763882823 |
| GJD2  | 127.344210958898 | 126.763282018991 | 115.097376525707 | 121.53632327554  |
|       | 117.494422663086 | 116.615250922316 | 117.316790136526 | 124.186557690235 |
|       | 122.80785489118  | 116.87586240208  | 142.863268359757 | 134.97514790642  |
| GJD3  | 140.890227770353 | 141.448017858785 | 121.031695489398 | 127.842177770276 |
|       | 213.652091843896 | 373.290426793366 | 383.939800422489 | 134.222453538421 |
|       | 192.954269340616 | 127.019978195283 | 659.106229917309 | 168.37850726499  |
| GJD4  | 115.128667174745 | 115.605206174867 | 115.848659135231 | 114.774530966446 |
|       | 127.982696242304 | 119.207503310618 | 119.67745324922  | 126.730314982553 |
|       | 122.830376253922 | 115.975794003391 | 119.551741097918 | 112.282839763467 |
| GK    | 139.878752507646 | 148.067562465748 | 144.175551691291 | 130.863753083296 |
|       | 227.715558644326 | 282.797367565702 | 246.428746807313 | 374.169744342352 |
|       | 349.248144552634 | 222.848935978648 | 198.885004378065 | 217.940575516933 |
| GK2   | 126.233395051706 | 117.238968848218 | 121.197702744078 | 132.642931022024 |
|       | 123.344450694117 | 118.866073031304 | 125.381865040574 | 143.340685579645 |
|       | 119.9414421871   | 129.940297696849 | 123.275246170603 | 117.718893827092 |
| GK5   | 230.91747428831  | 205.011514211101 | 294.323621186916 | 186.06425658259  |
|       | 167.421776383056 | 280.948704707655 | 236.933960698783 | 285.507315916663 |
|       | 184.041062308263 | 206.446584387595 | 211.786963444117 | 280.398987330256 |
| GKAP1 | 265.028512407839 | 234.895245871534 | 348.067061666237 | 247.145700155364 |
|       | 163.36682525399  | 142.390243984362 | 157.565633456909 | 152.017655364287 |
|       | 158.554429311951 | 142.211357324461 | 155.257184514112 | 156.18389905051  |
| GKN1  | 143.956726538569 | 151.276193269421 | 185.447093292348 | 152.207601283271 |
|       | 139.733149319736 | 142.34956863109  | 137.910618360623 | 198.885004378065 |
|       | 158.937341335707 | 136.378203924435 | 5437.78386044638 | 145.152605166094 |
| GKN2  | 120.935863853101 | 122.672142981381 | 116.831725094917 | 119.759350702482 |
|       | 121.723964989551 | 117.386273592501 | 128.477342430713 | 116.7299185256   |
|       | 118.406487008528 | 119.583378101838 | 201.837695818264 | 127.562924931536 |
| GLA   | 358.217145707718 | 393.500781010617 | 325.999687273862 | 322.506898833351 |
|       | 1549.30900090605 | 2154.00589005104 | 542.121375354644 | 635.536499281829 |
|       | 991.611982265221 | 424.201556056759 | 769.586135629964 | 565.843200661721 |
| GLB1  | 393.98210915852  | 390.670702155192 | 344.45331938267  | 350.58427958432  |
|       | 1409.42016970226 | 604.237898104299 | 976.050097371579 | 713.23381913235  |
|       | 657.058213650454 | 568.310800941091 | 585.371892598422 | 629.197022551069 |



GLB1L 170.350891928203 161.769370009823 172.355215322173 141.082569618216  
151.397068235685 126.964621107029 134.076865693417 137.634298014431  
159.23414970379 133.559082256772 159.665989587555 145.768857553634  
GLB1L2 156.806407903626 182.984076352185 124.959873714884  
226.086733606951 367.289651112346 155.837866295709 209.33028918341  
127.492376657284 144.498245098592 110.475453268997 152.925281215593  
149.593135821045  
GLB1L3 126.037968297611 128.174382934295 143.314754993075  
129.061316880624 153.426409060413 116.136849683574 135.281686411685  
129.964666668421 123.190757763412 133.771691580031 120.089228795888  
137.804977813144  
GLCCII 122.010855318111 117.270320709161 120.857635836068  
112.3786222545 200.302384864371 142.91818218442 168.116928722035  
170.212679845194 123.418266047461 133.94206203396 154.368499839507  
131.759422682853  
GLCE 422.338508598153 432.174413144791 331.795832780176 335.389274425025  
344.45331938267 288.150694843614 638.129080224049 275.013838208239  
377.148528768679 427.249733213787 213.028568789661 316.895545640437  
GLDC 133.331037738063 124.00806841872 119.733311319912 124.546520456419  
513.036729214095 774.442392607873 851.633522004342 143.577865527891  
120.039031290299 115.30786313391 153.39738748803 107.655624022312  
GLDN 179.704370382771 188.671807443641 136.355319997318 167.46432961654  
124.558026853954 127.604087759266 130.763957515652 166.099940078284  
122.382304966782 174.383193885933 186.244764337256 142.403121638265  
GLE1 541.351092873522 668.127527385348 624.825216056495 767.377380800066  
477.489368828457 480.101253056873 353.774297577869 585.933822585718  
391.569187190375 639.38881853171 707.715412321304 310.533399024851  
GLG1 3184.98944679038 3111.50508060882 2786.35558271661 3501.86788138647  
1995.6000523628 1065.36715400306 1825.10168716051 1397.84878368705  
1398.60850048351 2258.309161111153 1694.24232555141 1963.23068846837  
GLI1 207.764456828813 188.580458613357 169.713585775118 155.23922239449  
171.826623289946 167.594414386475 155.728609337723 151.833386901811  
133.913578037255 154.768422926874 137.912656945408 147.697973457776  
GLI2 200.342786450248 171.338371572269 137.850437814788 151.362686497226  
120.530092530622 110.230322274208 117.580122770251 111.336798977475  
116.378552206652 110.804248212067 112.977469350139 113.927168436775  
GLI3 229.230239609291 237.989479738133 196.734037460218 234.925852373127  
182.950456188966 182.42088387266 184.638141004171 171.254015232189  
164.696616863082 189.292740365891 175.711836112986 182.950456188966  
GLI4 158.608479354755 159.320692108734 154.400124981573 198.15257384667  
168.483273292464 133.886458291672 128.118223792086 182.698275130489  
164.553511697702 131.750053934548 168.6016897585 135.497033143331  
GLIPR1 238.782040902727 205.679992893049 214.763232658841  
165.277935422113 136.859366444351 173.714940254592 165.985885671398  
170.326474367867 204.990512488181 256.237185590901 146.885404321622  
158.809865241567  
GLIPR1L1 112.38543517651 129.386300987308 117.455432751161  
120.606354515072 120.721341479615 117.847744476387 132.359319280352  
123.668707648172 114.470670941078 113.726931741236 144.446903878863  
122.281263517691  
GLIPR1L2 131.464229237662 145.754504160436 138.136901441896  
139.631165400881 129.985797334276 158.448557470725 132.50676380992  
137.872742675806 148.530422089937 153.879427186342 134.52098220054  
136.109975252514

|        |                  |                  |                  |                  |
|--------|------------------|------------------|------------------|------------------|
| GLIPR2 | 3798.89743803968 | 3734.705550862   | 2550.08769415478 |                  |
|        | 5543.71998558526 | 206.521761031181 | 236.108432603479 | 217.050602253281 |
|        | 322.956882599715 | 608.959089074987 | 441.222346452864 | 230.672056810885 |
|        | 186.57665470145  |                  |                  |                  |
| GLIS1  | 124.913645688325 | 137.079479050963 | 122.620634570073 | 146.476960694197 |
|        | 137.528342105233 | 143.122278808091 | 132.906201428703 | 128.580625868379 |
|        | 145.267225993057 | 157.874624979775 | 117.990622156287 | 124.484589975207 |
| GLIS2  | 141.378381097266 | 136.359189516452 | 146.501559368223 | 148.742216703684 |
|        | 148.076841184769 | 156.731291756066 | 142.995274641765 | 141.508424382665 |
|        | 145.559419404453 | 141.706292773073 | 133.286702819953 | 144.944095553004 |
| GLIS3  | 162.634670715627 | 167.003917876371 | 150.109192774079 | 158.59135215074  |
|        | 139.652974659584 | 141.67550758321  | 145.827592345054 | 164.406564594296 |
|        | 160.419358656559 | 148.130993521745 | 143.399877326927 | 144.692900548503 |
| GLMN   | 247.280717385562 | 205.930921729192 | 237.575788579215 | 243.283375388645 |
|        | 311.10841853984  | 357.773949920377 | 248.16594076495  | 343.488356185437 |
|        | 233.842749683689 | 243.425632941131 | 280.749681050778 | 269.300548648755 |
| GLO1   | 734.71562355687  | 773.057095787974 | 1199.35864276583 | 642.484527246259 |
|        | 1332.11815966955 | 1414.95226752155 | 2296.30423509176 | 1356.43255022363 |
|        | 1412.56164938199 | 2096.25803773108 | 697.581541438891 | 1326.95332435394 |
| GLOD4  | 867.369315017411 | 925.009157785129 | 882.429823267754 | 956.76879975749  |
|        | 611.208083466988 | 920.083835296898 | 690.246312542011 | 856.424155671931 |
|        | 675.281131488524 | 814.110601393539 | 1048.85768964657 | 1095.52349352502 |
| GLOD5  | 120.050548624975 | 126.939543057414 | 124.13945833494  | 119.052729327147 |
|        | 106.854721604889 | 123.561016079801 | 119.873844587252 | 119.278231442871 |
|        | 126.132339293132 | 127.401551376191 | 145.010108826238 | 120.479270037091 |
| GLP1R  | 112.896360244636 | 119.360478719424 | 112.916256784817 | 115.51493368527  |
|        | 116.061356450855 | 112.046615825307 | 122.780453116176 | 111.549719888905 |
|        | 116.074423050416 | 112.904318310632 | 124.752198904184 | 114.217867810848 |
| GLP2R  | 144.743281367797 | 143.837402372008 | 141.750316403249 | 123.615802924067 |
|        | 146.499065641095 | 139.628966306048 | 142.96594961303  | 135.527445907621 |
|        | 139.498452959831 | 140.051904905695 | 137.350851760173 | 134.58799530734  |
| GLRA1  | 126.00304757051  | 137.089392202166 | 127.490889148422 | 126.643229085068 |
|        | 137.347554578171 | 124.650711299942 | 123.809866652834 | 128.669887479835 |
|        | 119.567911704298 | 124.958287100852 | 120.196595293401 | 119.882472552083 |
| GLRA2  | 133.239703270008 | 133.449527627723 | 139.574895021783 | 136.251820364823 |
|        | 142.290253129837 | 131.782007636511 | 130.590195477461 | 118.773864607553 |
|        | 132.850601603567 | 142.717436384151 | 118.544870925791 | 136.470025638057 |
| GLRA3  | 138.047487233711 | 140.260053206523 | 134.947657801444 | 132.941478943584 |
|        | 136.229159638766 | 148.859129298141 | 145.739537463907 | 146.355229778997 |
|        | 143.421288665418 | 139.032275257901 | 137.578516107502 | 143.772376623996 |
| GLRA4  | 137.298549014192 | 117.766156390814 | 133.88072491369  | 127.289269745461 |
|        | 120.649467083125 | 115.775525016883 | 123.7421178083   | 122.631814400575 |
|        | 116.118745494794 | 128.071379991958 | 117.923459503989 | 117.060696904303 |
| GLRB   | 140.552143090027 | 136.077039612526 | 154.170007083026 | 138.088712695622 |
|        | 125.828998007608 | 128.075865243385 | 120.394220715157 | 110.081964209973 |
|        | 174.568253693395 | 127.822440239962 | 121.377666938052 | 117.361778263056 |
| GLRX   | 475.927798702033 | 408.361368902627 | 401.87674893993  | 362.376153348015 |
|        | 279.413335686746 | 555.959424692051 | 494.604716660887 | 476.383294794912 |
|        | 787.017214032692 | 400.550044186372 | 1454.94889750152 | 553.615252472149 |
| GLRX2  | 219.753039699136 | 224.67853219142  | 208.932692585748 | 209.487240895674 |
|        | 238.068308163643 | 209.004374703564 | 270.33685210971  | 275.755038921952 |
|        | 209.54573978355  | 303.907003535357 | 214.434355263652 | 277.219796733134 |

|         |                  |                  |                  |                  |
|---------|------------------|------------------|------------------|------------------|
| GLRX3   | 297.708113541379 | 302.462763120177 | 435.901794650816 | 246.989526028884 |
|         | 418.319283832879 | 888.706978062337 | 818.445501500731 | 711.491528818004 |
|         | 682.315322994357 | 884.747476952289 | 546.274050902567 | 1034.2217095753  |
| GLRX5   | 3441.9805896226  | 3055.80298721424 | 3938.94050658589 | 3338.13980198211 |
|         | 5080.63091497522 | 2116.39371296122 | 3287.37172778474 | 3518.84173951107 |
|         | 2877.92845389611 | 3055.80298721424 | 2748.51360874099 | 3655.63669142687 |
| GLS     | 682.538709448692 | 491.034395489684 | 710.999354960979 | 541.896444696137 |
|         | 194.617252921731 | 416.392874553797 | 219.246271924313 | 438.958573676953 |
|         | 251.224369831275 | 346.476121089685 | 227.668046559074 | 514.922742487521 |
| GLS2    | 146.326067008478 | 147.028946382445 | 127.650229552084 | 141.488910091973 |
|         | 160.865949438448 | 170.040914594182 | 173.726420791056 | 171.795878750365 |
|         | 143.915205639368 | 145.000523037022 | 147.679233228201 | 158.799917136119 |
| GLT1D1  | 139.997245010492 | 123.887740029279 | 100.216750525986 |                  |
|         | 115.718600552187 | 118.457573670556 | 117.494422663086 | 115.473431881597 |
|         | 124.712789674509 | 107.841100741858 | 116.136849683574 | 138.783017264895 |
|         | 120.39039576721  |                  |                  |                  |
| GLT25D1 | 1097.18236659974 | 1192.47480377375 | 947.766127685083 |                  |
|         | 1816.3719976564  | 1646.76016031831 | 954.488185198006 | 863.086199215353 |
|         | 1106.21439150501 | 644.301665020526 | 1138.44837250274 | 716.229989890801 |
|         | 543.170902795966 |                  |                  |                  |
| GLT25D2 | 153.104072845043 | 157.231166272318 | 159.668402591441 |                  |
|         | 162.812665683603 | 142.736148814019 | 124.095340478326 | 159.14477373952  |
|         | 165.219393390909 | 130.721987260546 | 133.82548013342  | 127.631770516132 |
|         | 139.871928127715 |                  |                  |                  |
| GLT6D1  | 157.58224826673  | 141.315230997077 | 139.717662557602 |                  |
|         | 150.998881139061 | 156.490654498766 | 143.123983359386 | 188.641397688261 |
|         | 145.143366567189 | 147.199961777192 | 142.937182720493 | 142.14654303591  |
|         | 156.551925771312 |                  |                  |                  |
| GLT8D1  | 233.192751618176 | 229.26243866226  | 213.447886742681 |                  |
|         | 199.756584044664 | 288.505502880424 | 286.085833802132 | 432.969886744613 |
|         | 270.727749014046 | 263.448958595597 | 237.045634416039 | 338.665115108128 |
|         | 262.019779752857 |                  |                  |                  |
| GLT8D2  | 500.848273432862 | 384.296190598736 | 394.101052511043 |                  |
|         | 337.822337721287 | 162.994537815938 | 227.558441474918 | 173.38031514498  |
|         | 222.086635504858 | 238.88138498771  | 361.390981655795 | 160.949030247406 |
|         | 197.034073391478 |                  |                  |                  |
| GLTP    | 1571.87128697931 | 2033.67956299225 | 1792.35343044443 | 1608.40826380713 |
|         | 3090.52810501797 | 5347.78127066964 | 4118.58682247781 | 3664.38955037715 |
|         | 7446.59106452583 | 6044.78942014135 | 4743.19967685595 | 4030.42725798136 |
| GLTPD1  | 147.032210333966 | 179.61374889626  | 155.592219571564 |                  |
|         | 185.100455193182 | 355.14024238296  | 189.37832342197  | 199.037998955485 |
|         | 181.247766545135 | 193.134414137433 | 180.501409705275 | 197.034073391478 |
|         | 180.80811429888  |                  |                  |                  |
| GLTPD2  | 143.363002903815 | 138.255457081996 | 136.368258257435 |                  |
|         | 134.703474191011 | 145.581755438161 | 132.128418409996 | 147.441650320053 |
|         | 147.526701500887 | 150.494260282384 | 136.633726784926 | 125.75980494927  |
|         | 138.402890124039 |                  |                  |                  |
| GLTSCR1 | 227.847614397311 | 238.310077556167 | 292.28857006885  |                  |
|         | 323.628636799403 | 739.52947559669  | 215.506175859782 | 341.43511159996  |
|         | 264.983729290122 | 305.325519265387 | 242.299252896647 | 240.734451149197 |
|         | 261.117845544884 |                  |                  |                  |
| GLTSCR2 | 11598.65499235   | 13013.8166277495 | 11360.2921551609 |                  |
|         | 12654.3779830648 | 10222.4435857673 | 3693.4058156307  | 9636.32818474581 |

|         |                  |                  |                  |                  |
|---------|------------------|------------------|------------------|------------------|
|         | 6427.33783376005 | 7555.47017983216 | 4711.21389812942 | 10953.6229702446 |
|         | 8096.28093399619 |                  |                  |                  |
| GLUD1   | 2508.50428529255 | 2433.83421295012 | 2462.87034563426 | 2441.05534211996 |
|         | 967.123240442957 | 1667.86825735893 | 1386.56788941677 | 934.546444634669 |
|         | 2648.41012401723 | 1142.44180956604 | 2141.855356411   | 1554.16120123599 |
| GLUD2   | 152.379441401583 | 126.282575548237 | 142.305484770249 | 127.874934513708 |
|         | 125.055545087871 | 134.494167613686 | 146.981521393075 | 143.909501365162 |
|         | 132.353385654164 | 128.197031700084 | 159.990561741675 | 136.641140715439 |
| GLUL    | 146.014790698087 | 155.933739693912 | 151.613134875009 | 148.197029306137 |
|         | 140.730085305185 | 153.679479224178 | 150.775805918537 | 149.577995793381 |
|         | 150.155154998981 | 142.027930009598 | 148.757112903673 | 152.54039461337  |
| GLYAT   | 125.470172259885 | 132.28010415054  | 130.548611758921 | 123.929180327423 |
|         | 124.246363878094 | 121.93549478261  | 125.318166919844 | 126.832182961671 |
|         | 134.01566484034  | 121.146511496024 | 136.461182044855 | 120.345546077894 |
| GLYATL1 | 147.75625228531  | 142.573662441786 | 159.491388998564 |                  |
|         | 160.050872656883 | 151.879398444495 | 152.643087608513 | 158.658110539162 |
|         | 144.288714958892 | 139.001493765421 | 157.675974692761 | 149.233023751582 |
|         | 138.719480482945 |                  |                  |                  |
| GLYATL2 | 121.53632327554  | 130.06441029462  | 107.32960937124  |                  |
|         | 116.263405190786 | 108.530158480237 | 104.36042819601  | 107.40922161073  |
|         | 107.239841465534 | 118.572988141773 | 100.325215581101 | 113.769815606191 |
|         | 121.201267751612 |                  |                  |                  |
| GlyBP   | 155.680330654611 | 153.457715729768 | 173.577723566555 | 166.563411635721 |
|         | 169.852769679312 | 158.943005736645 | 154.569432344392 | 163.331424612891 |
|         | 163.575300618666 | 154.65319127051  | 149.833346575446 | 155.798048652444 |
| GLYCAM1 | 135.013075032671 | 134.191460941478 | 139.530196462344 |                  |
|         | 143.320787131532 | 131.395959781477 | 139.42531690926  | 139.260868989409 |
|         | 137.509100088226 | 132.74579603362  | 135.159590925066 | 133.874468336025 |
|         | 142.652939807341 |                  |                  |                  |
| GLYCTK  | 157.826457203706 | 164.769320792025 | 147.04481509758  |                  |
|         | 155.035727630756 | 303.300028849873 | 160.105903942674 | 186.611870261871 |
|         | 163.764600217347 | 205.987280015028 | 151.216992571364 | 177.990274115348 |
|         | 189.461090469712 |                  |                  |                  |
| gm127   | 174.375388013694 | 156.176537862398 | 184.348894461271 | 156.626742111441 |
|         | 147.658462231804 | 164.347168837655 | 167.003917876371 | 157.805871400914 |
|         | 168.261511797218 | 168.511517285223 | 144.954595802474 | 168.33854702953  |
| GM2A    | 262.093405224922 | 257.5097052677   | 343.767393640683 | 222.134519361117 |
|         | 210.085329463347 | 243.308625792448 | 314.014654357569 | 297.419034136005 |
|         | 288.68376542946  | 1171.62361359992 | 243.839402991061 | 226.144012966486 |
| GMCL1   | 210.529782898493 | 233.536023295039 | 250.443147156029 | 191.310372695208 |
|         | 432.515970951769 | 514.922742487521 | 375.131728190867 | 343.617417488962 |
|         | 345.135289739599 | 357.259935567823 | 278.168897504985 | 318.561557474749 |
| GMCL1L  | 129.093864368842 | 121.176150171592 | 127.543729713161 |                  |
|         | 128.539969915702 | 127.401551376191 | 131.530256606799 | 125.500790447338 |
|         | 121.926377140115 | 120.948246352846 | 130.325073627151 | 134.132312782731 |
|         | 130.746465595759 |                  |                  |                  |
| GMDS    | 317.949646885539 | 376.374248850987 | 291.221427744817 | 402.694564608582 |
|         | 1097.18236659974 | 553.90008440429  | 889.054356462993 | 643.13571432061  |
|         | 699.800360892516 | 803.60413590137  | 789.752781067888 | 1106.21439150501 |
| GMEB1   | 190.993590849624 | 191.924177620803 | 175.543924200429 | 165.118167086792 |
|         | 221.719848707318 | 225.050796356289 | 161.80922869659  | 195.577739376082 |
|         | 188.767121505943 | 212.073472189229 | 210.33390115739  | 202.041958613989 |

|       |                  |                  |                  |                  |
|-------|------------------|------------------|------------------|------------------|
| GMEB2 | 450.99430272315  | 571.273512452931 | 446.509863498357 | 722.974310297586 |
|       | 970.166036472486 | 603.061485415867 | 653.879734066271 | 469.794672718173 |
|       | 569.47446215213  | 367.898258897888 | 470.578335285993 | 434.176007498693 |
| GMFB  | 1165.05055932899 | 1031.38207659547 | 832.014011481807 | 878.167149313285 |
|       | 904.211195986553 | 1692.01248523526 | 666.344430142655 | 922.009043194023 |
|       | 765.532997390972 | 1136.76110352875 | 1318.3633082502  | 851.221199352646 |
| GMFG  | 325.642275889649 | 375.407747753058 | 273.668871896558 | 307.866499851733 |
|       | 206.376365685112 | 370.678040372273 | 412.736636437651 | 479.053300726301 |
|       | 589.953707188378 | 309.997909440664 | 837.023434916281 | 1629.32740709526 |
| GMIP  | 147.327675057481 | 142.80027343095  | 108.570463496052 | 119.627380812035 |
|       | 569.967953318205 | 235.453139389486 | 217.264041781337 | 295.778154263981 |
|       | 200.831877950718 | 135.223957492606 | 209.984545596312 | 209.487240895674 |
| GML   | 119.586157804692 | 114.644722005728 | 110.081964209973 | 108.62191665589  |
|       | 104.03442843396  | 111.935554828717 | 110.081964209973 | 112.57049236673  |
|       | 116.416896654975 | 110.266032635568 | 123.389038274913 | 108.461141538047 |
| GMNN  | 160.322541355391 | 177.793860516896 | 165.686655824416 | 130.483765953389 |
|       | 287.967349876429 | 836.613819700658 | 424.285848583977 | 777.410297605252 |
|       | 602.703887178113 | 451.496617003797 | 478.699172220804 | 456.126096817454 |
| GMPPA | 279.541294184609 | 286.856346704286 | 250.18189549573  | 438.7446527797   |
|       | 441.578261054602 | 197.277310409328 | 252.10470581893  | 252.197271817794 |
|       | 304.985269874607 | 302.905840432998 | 238.823244541016 | 229.046153362151 |
| GMPPB | 178.512206531256 | 173.810080280732 | 184.398672994943 | 187.50236021149  |
|       | 296.657844888195 | 195.906137340918 | 227.965783945702 | 274.047586063773 |
|       | 220.258804437828 | 235.091443641056 | 191.220064414876 | 280.085692727562 |
| GMPR  | 197.582402276079 | 203.983168778488 | 220.533113603343 | 229.97640195632  |
|       | 169.124088593549 | 141.075421936212 | 171.916201289104 | 158.495606141226 |
|       | 159.110614190088 | 164.231281729415 | 157.86653024793  | 173.708509414674 |
| GMPR2 | 426.464641742092 | 426.548994267836 | 501.863855158062 | 422.338508598153 |
|       | 323.276514394119 | 318.930960243303 | 618.829716818725 | 510.972389503051 |
|       | 402.140437036706 | 547.042461070351 | 657.058213650454 | 707.048754700047 |
| GMPS  | 300.047728281275 | 284.798325549665 | 407.711669482083 | 240.878804911613 |
|       | 543.584413650467 | 554.115756730498 | 572.753294955207 | 925.205399154409 |
|       | 737.650963292668 | 632.278924237678 | 439.616817413027 | 574.896304593109 |
| GNA11 | 1065.74382494535 | 1241.59946353857 | 997.460212152591 | 1731.62376348283 |
|       | 980.67040349547  | 561.761160223609 | 441.785666261936 | 436.982960786839 |
|       | 398.272713014637 | 384.641319423853 | 396.40172043456  | 412.048097766066 |
| GNA12 | 328.269845211173 | 343.666488527549 | 310.640107228956 | 451.496617003797 |
|       | 209.54573978355  | 175.7330682766   | 172.376544221034 | 194.584034984339 |
|       | 164.491207767654 | 170.775283924087 | 170.108500366942 | 204.396576475753 |
| GNA13 | 487.597040819879 | 538.484170364629 | 592.957842630046 | 382.701467158304 |
|       | 378.967410725775 | 671.134356672693 | 710.228463443265 | 710.003412772888 |
|       | 582.527835746927 | 395.386242257877 | 565.97975389646  | 561.858563298512 |
| GNA14 | 197.087015414039 | 182.118544602205 | 237.358925391616 | 197.112749959833 |
|       | 186.215602572358 | 165.586397236489 | 165.71382076724  | 218.334273320319 |
|       | 162.192879711747 | 161.632610858756 | 173.38031514498  | 158.072347847051 |
| GNA15 | 179.896659891106 | 245.042781391047 | 159.820341130737 | 156.859539612504 |
|       | 1174.0922389136  | 845.646455991008 | 908.704610877319 | 665.106631364961 |
|       | 694.644744547412 | 2374.1382412432  | 1325.77498031227 | 1064.85152398919 |
| GNAI1 | 304.013547190343 | 271.713695056313 | 304.479999301061 | 227.965783945702 |
|       | 178.222120802125 | 187.046760972666 | 207.674249122047 | 165.364935913232 |
|       | 143.956726538569 | 262.671819506189 | 211.160781061336 | 197.169703621888 |
| GNAI2 | 1782.2498613913  | 2021.92898855142 | 1690.96371604294 | 2332.98074920207 |
|       | 4030.42725798136 | 1137.42879398351 | 872.320823993033 | 832.911633923496 |
|       | 1274.39152410752 | 1301.18893681695 | 2026.85580212422 | 1435.4236709581  |

|        |                  |                  |                  |                  |
|--------|------------------|------------------|------------------|------------------|
| GNAI3  | 307.518881119091 | 257.775569674531 | 240.182016388745 | 261.89195025254  |
|        | 292.366934378643 | 265.866465528654 | 315.182134426778 | 395.927222009721 |
|        | 260.85776723575  | 546.841563406813 | 259.229153662504 | 305.906480933354 |
| GNAL   | 167.373416675264 | 164.673579538023 | 156.269957530519 | 170.410704499804 |
|        | 149.995272585012 | 146.484364264513 | 143.144153021901 | 145.026722065573 |
|        | 146.867740388881 | 154.329176514501 | 149.180704382192 | 135.120878931851 |
| GNAO1  | 209.487240895674 | 239.541516080716 | 182.275998840116 | 359.099750692694 |
|        | 136.48748813417  | 130.947003916049 | 136.90636489391  | 130.532559074698 |
|        | 139.336891718408 | 134.038213827843 | 118.727279917776 | 136.749771286979 |
| GNAQ   | 203.357914242777 | 189.01309885917  | 388.782774926005 | 162.188509438986 |
|        | 200.741234443918 | 192.353768499582 | 177.582314734704 | 186.591941221632 |
|        | 190.405863264717 | 199.70041209487  | 173.741466458636 | 209.398724613377 |
| GNAS   | 3384.19521857242 | 3636.59530016939 | 3598.30438198858 | 3757.39261544326 |
|        | 6214.77579017084 | 4682.62607750437 | 3843.07094386605 | 2891.03258768937 |
|        | 3468.14455177277 | 3294.92439159154 | 2789.67986601883 | 3436.32495553246 |
| GNASAS | 134.584076788979 | 141.03218895811  | 119.432201417811 |                  |
|        | 140.462651395483 | 139.008854444223 | 136.097571072206 | 140.545351041252 |
|        | 135.68481384332  | 136.770515182612 | 137.070326499918 | 131.846160346403 |
|        | 115.142111396055 |                  |                  |                  |
| GNAT1  | 146.840735518984 | 136.781417098789 | 154.452964510369 | 146.242897296397 |
|        | 146.318052064937 | 175.41089164969  | 147.16778072296  | 156.65842876856  |
|        | 133.085476994246 | 146.608010450782 | 150.578023008958 | 151.761369162723 |
| GNAT2  | 118.154953746492 | 127.975441922402 | 130.285187693932 | 117.532063783977 |
|        | 126.446675008883 | 128.975785280465 | 118.514618614167 | 122.20752192519  |
|        | 117.503848306325 | 118.100611964852 | 122.153996665065 | 121.334882368464 |
| GNAT3  | 125.189588215659 | 128.963962067821 | 141.537578081123 | 140.925705285169 |
|        | 137.000868503792 | 140.579839043912 | 131.943014970855 | 140.782522936146 |
|        | 131.811011266156 | 127.926270257252 | 109.29279076901  | 137.81819274774  |
| GNAZ   | 181.876635968785 | 198.795112039249 | 160.272632590118 | 233.884660128222 |
|        | 137.459095066272 | 127.964855970099 | 127.57284871013  | 128.730649233876 |
|        | 124.362182111222 | 119.558626216818 | 143.589222264786 | 115.37736249419  |
| GNB1   | 4448.67183518984 | 4929.26915002209 | 4569.44477073589 | 5800.06300826802 |
|        | 3119.93811557461 | 3807.16206340771 | 3436.32495553246 | 4262.23145131525 |
|        | 4800.99572384569 | 4255.59773503364 | 3211.2719052157  | 4397.32311216672 |
| GNB1L  | 176.382377784553 | 173.520662003159 | 130.306478656159 | 224.981439707657 |
|        | 429.096075419528 | 185.938983266802 | 177.371157649894 | 154.267020640428 |
|        | 181.722373730185 | 143.638456836103 | 179.828494168009 | 178.946928223991 |
| GNB2   | 262.629961694573 | 319.352940751688 | 187.673748059596 | 272.277433294605 |
|        | 1139.14730341921 | 244.925472495705 | 284.438411011954 | 243.936797286495 |
|        | 218.811490883852 | 321.119758814618 | 488.249967208882 | 310.301616266762 |
| GNB2L1 | 21225.306360484  | 23318.4614981217 | 20764.6732139063 |                  |
|        | 21315.9767866977 | 20217.6497214386 | 16925.9167115963 | 28095.1627766565 |
|        | 23318.4614981217 | 18421.818380318  | 28930.8933474342 | 26010.7684336005 |
|        | 23190.7842325067 |                  |                  |                  |
| GNB3   | 168.867373925372 | 127.453866279181 | 146.023710941284 | 130.784802403934 |
|        | 113.891385601095 | 119.11586630281  | 108.697696080014 | 125.754741914111 |
|        | 109.495342943278 | 112.208950290962 | 117.561878567749 | 113.87024833117  |
| GNB4   | 239.24587884234  | 211.626970008102 | 206.321272734099 | 197.582402276079 |
|        | 138.049846456876 | 185.016336026382 | 159.452527363763 | 175.485672103348 |
|        | 168.173803952157 | 201.337186768645 | 193.609985124825 | 168.570133927038 |
| GNB5   | 252.733973271584 | 238.904826940476 | 290.754210152709 | 223.058699622386 |
|        | 168.594235675558 | 191.200215655114 | 196.860228537112 | 158.505363728431 |
|        | 180.814610631281 | 298.301504581296 | 161.73079180403  | 182.873752254411 |

|       |                  |                  |                  |                  |
|-------|------------------|------------------|------------------|------------------|
| GNE   | 602.371843434907 | 646.704226815099 | 628.197839884392 | 593.320132696649 |
|       | 297.970735665595 | 353.774297577869 | 363.445110627483 | 660.315285709317 |
|       | 938.049312229961 | 330.321113875647 | 582.642500194997 | 253.327404004524 |
| GNG10 | 302.381946749711 | 256.897177822238 | 418.244376024741 | 193.938032040991 |
|       | 239.277801396834 | 473.60579090007  | 398.193129265416 | 380.514553097613 |
|       | 425.708048519408 | 791.402660066193 | 479.053300726301 | 407.244564912365 |
| GNG11 | 1958.96627327952 | 1531.54387233661 | 2120.14463347544 | 1812.07394646463 |
|       | 277.256341592701 | 802.643357549193 | 261.922485502971 | 492.05680879106  |
|       | 515.158921349383 | 519.450899933049 | 303.907003535357 | 349.128741707506 |
| GNG12 | 196.819022688128 | 169.052101570616 | 315.182134426778 | 146.347213904792 |
|       | 114.65036208773  | 165.995251661994 | 189.49408026215  | 183.033044475752 |
|       | 210.103974340881 | 536.9324595176   | 171.610742435469 | 295.851459742115 |
| GNG13 | 159.811778680604 | 176.312626750427 | 164.678646890649 | 174.068974937318 |
|       | 148.216605879958 | 168.547575047205 | 182.624130582754 | 165.471587934831 |
|       | 154.710000519109 | 154.691783046492 | 145.472859089272 | 161.195562296834 |
| GNG2  | 123.794432024417 | 152.204730003016 | 120.514672572565 | 132.018833785059 |
|       | 114.027244455291 | 127.633362302159 | 119.144128641393 | 130.298686386894 |
|       | 148.962593686337 | 131.027605835275 | 148.347642424885 | 118.988269692812 |
| GNG3  | 132.149864626575 | 131.662585510218 | 130.408519735001 | 137.601181150371 |
|       | 123.22295112139  | 144.520435611318 | 116.759526220736 | 134.494167613686 |
|       | 125.231476412101 | 126.775180133301 | 139.336891718408 | 130.773945967285 |
| GNG4  | 165.665796569389 | 161.295030274012 | 162.638805580226 | 156.437949042181 |
|       | 144.54895913821  | 149.410729709855 | 151.561151654372 | 146.875733210901 |
|       | 143.47200560038  | 149.377153449536 | 141.772724512502 | 149.231475480618 |
| GNG5  | 221.322724563472 | 242.902900881585 | 222.624150073858 | 222.268494113686 |
|       | 669.330078861673 | 648.38049615541  | 536.067857235731 | 525.789451405743 |
|       | 450.99430272315  | 511.996883507889 | 658.968318349334 | 557.702374840532 |
| GNG7  | 505.302263971007 | 557.405157178952 | 717.270096456387 | 552.298965378403 |
|       | 183.963578322984 | 174.928155956396 | 178.455966482206 | 164.726382689707 |
|       | 188.623897093065 | 139.573371281569 | 168.611652451329 | 151.889644436875 |
| GNG8  | 168.805630890928 | 164.886944426276 | 172.992936821292 | 196.419891542139 |
|       | 179.211502448703 | 186.420541099902 | 181.479652131104 | 164.58158284856  |
|       | 162.728630453745 | 165.471587934831 | 152.643087608513 | 169.815053752464 |
| GNGT1 | 153.46645509759  | 146.099555861577 | 123.632031112507 | 140.36602776806  |
|       | 144.991442620483 | 119.603565559838 | 194.637233028442 | 170.446156541317 |
|       | 132.762755202326 | 181.898985277176 | 160.979182561773 | 262.196293231028 |
| GNGT2 | 141.696969082758 | 145.393431956588 | 173.599961799334 | 158.704425428694 |
|       | 124.717079082023 | 155.180238551547 | 175.93459327917  | 173.656241217331 |
|       | 170.335930486215 | 151.961811748754 | 166.263781040251 | 176.194292036542 |
| GNL1  | 428.66614441422  | 514.354512083591 | 396.708183244581 | 467.387427864242 |
|       | 770.632068590053 | 465.41233536979  | 552.494327858264 | 396.40172043456  |
|       | 388.002365247498 | 477.626693328013 | 752.142287661845 | 554.652979820908 |
| GNL2  | 1413.37062765856 | 1340.79810963983 | 1379.26881813339 | 1179.42590997099 |
|       | 1111.47772523331 | 2681.48138915107 | 2080.47567326037 | 2374.1382412432  |
|       | 2486.24762158293 | 2114.9754128463  | 1477.10828981572 | 2369.233048505   |
| GNL3  | 355.714202328378 | 320.305852961452 | 356.921627358141 | 286.506419296679 |
|       | 776.807656744828 | 1978.12229412176 | 2093.67403119512 | 1357.48791782399 |
|       | 1525.24196488688 | 577.56891124468  | 957.54149804446  | 1424.04009914668 |
| GNL3L | 417.103816140912 | 439.207122335648 | 375.189005729903 | 387.617166711971 |
|       | 528.556049506759 | 655.431236290512 | 490.631757904175 | 686.679573646733 |
|       | 467.512355593598 | 369.018856220394 | 406.900412510895 | 458.705688226305 |
| GNL4  | 152.274957846518 | 152.581729298159 | 137.082234284426 | 141.645906784244 |
|       | 148.179398287068 | 133.789738760547 | 143.229240978574 | 160.949030247406 |
|       | 182.997980582218 | 170.290455446376 | 167.850516495529 | 141.941814923705 |

|          |                  |                  |                  |                  |
|----------|------------------|------------------|------------------|------------------|
| GNMT     | 122.673596593654 | 114.032874859062 | 116.552626146967 | 112.005939063045 |
|          | 125.269726165403 | 118.743966166637 | 109.654666772771 | 112.858669660245 |
|          | 123.545404885618 | 115.343251487944 | 118.66946078241  | 119.733311319912 |
| GNPAT    | 515.729905361375 | 563.011988279542 | 603.764427348016 | 565.609400092543 |
|          | 306.59090554099  | 598.647226284738 | 476.782624160552 | 576.298671053238 |
|          | 603.569635276204 | 410.645457106122 | 478.606567465979 | 569.353661326724 |
| GNPDA1   | 804.362909579005 | 1015.10079945997 | 994.802763887989 |                  |
|          | 1212.55338792557 | 1129.76078220457 | 903.144845227364 | 3905.35300751401 |
|          | 1461.64901688125 | 1118.28423222707 | 1198.53117439169 | 1953.88327754946 |
|          | 1750.21700780511 |                  |                  |                  |
| GNPDA2   | 241.293046687076 | 218.470365730283 | 278.555009982029 |                  |
|          | 229.31486399741  | 181.3859695951   | 162.337707154123 | 222.8766610624   |
|          | 190.270819689158 | 194.552533397944 | 233.536023295039 | 229.689010178622 |
|          | 206.753993163216 |                  |                  |                  |
| GNPNAT1  | 406.369889501135 | 338.934501259414 | 338.510045856515 |                  |
|          | 369.906476027936 | 376.082040863747 | 329.068463281182 | 386.16563750478  |
|          | 372.894376776771 | 319.868227988842 | 346.118765910093 | 466.777454704543 |
|          | 302.637859140061 |                  |                  |                  |
| GNPTAB   | 200.242239130026 | 177.091809538824 | 243.936797286495 |                  |
|          | 189.01309885917  | 205.4648759901   | 253.538171006307 | 225.75155298452  |
|          | 265.332196877456 | 235.183590602209 | 237.754067231793 | 258.348298226232 |
|          | 263.426870776148 |                  |                  |                  |
| GNPTG    | 643.660739343159 | 581.828502821435 | 720.907992182476 | 629.197022551069 |
|          | 401.267425721838 | 502.598518192729 | 431.182384100794 | 587.388038484307 |
|          | 550.24496459253  | 621.489906442001 | 411.878556907186 | 692.729789121701 |
| GNRH1    | 277.285526811736 | 251.472556189141 | 283.760131847707 | 259.643957326575 |
|          | 161.992141305029 | 230.447203571825 | 190.904614772409 | 170.577057395536 |
|          | 196.014841240142 | 172.980441569522 | 211.035617136177 | 187.183762762259 |
| GNRH2    | 129.421772713718 | 131.840663714409 | 123.330142002791 | 122.924017262559 |
|          | 121.628827418997 | 119.682747854629 | 126.391083453973 | 121.696353230886 |
|          | 116.294180301039 | 121.657744897668 | 132.641236788053 | 124.449679223202 |
| GNRHR    | 108.333135424315 | 113.568261995787 | 122.238996815745 | 109.886197655915 |
|          | 119.492844191924 | 111.43827410589  | 110.966212705086 | 106.667175621971 |
|          | 96.8261937365062 | 135.747939020471 | 115.878861991823 | 106.746545626069 |
| GNRHR2   | 112.957395064957 | 119.968081249475 | 108.715328458556 |                  |
|          | 120.971313945446 | 116.421771593211 | 117.990622156287 | 109.635825046436 |
|          | 113.238466329843 | 107.559685467789 | 115.718600552187 | 110.212739445    |
|          | 111.196610704726 |                  |                  |                  |
| GNS      | 4047.99200599472 | 4291.1724030909  | 3855.33040541264 | 4009.22206756187 |
|          | 3963.40575974446 | 4386.83308119416 | 7555.47017983216 | 14699.3902364192 |
|          | 5912.48904507462 | 3270.88476148156 | 5479.24427823207 | 5149.78271096158 |
| GOLGA1   | 269.495247190598 | 278.005620372937 | 312.645778869254 |                  |
|          | 347.11449748201  | 194.584034984339 | 220.010399552402 | 188.475801713801 |
|          | 214.200081541057 | 217.227441947056 | 207.890408761692 | 358.843277491684 |
|          | 172.065593177758 |                  |                  |                  |
| GOLGA2   | 365.046815163035 | 288.370985514978 | 326.325210657599 |                  |
|          | 349.540558521616 | 298.625127845168 | 252.894371238554 | 247.280717385562 |
|          | 221.635333304767 | 253.164596735793 | 310.174932137546 | 268.111403429364 |
|          | 230.620456579897 |                  |                  |                  |
| GOLGA2L1 | 132.930042559647 | 142.211357324461 | 121.815538475678 |                  |
|          | 118.619176257622 | 126.662329971897 | 133.838032323605 | 124.690141443832 |
|          | 123.007103885415 | 137.20509387214  | 123.738223146912 | 155.756074127526 |
|          | 121.146511496024 |                  |                  |                  |



GOLGA2LY1 113.822580779824 127.999820474468 124.062863592295  
113.845770994796 119.830261862805 114.421383025971 118.249148086655  
115.305518560239 112.809629077555 105.010952544907 118.655954393594  
116.947370388179  
GOLGA2LY2 141.480793979634 121.402905161896 147.962721373177  
150.922279808832 139.161483596756 132.109267393571 145.279694760493  
143.245660951425 138.560399473164 131.76272538453 137.858371717399  
128.336332748047  
GOLGA3 2203.82462320864 2048.13524244516 1822.14935116363  
2728.04758874748 1521.61996270758 1089.58643309156 1601.19401366685  
1250.58586679251 2069.70335195314 1029.43177809276 1259.38111177521  
1182.50261323518  
GOLGA4 297.12411625104 246.457698183615 264.8472508692  
240.12078342024 224.89911221799 219.537335167901 267.696284751923  
199.327939161502 348.067061666237 272.456310079164 330.505633088656  
261.322374889497  
GOLGA5 473.853999833395 463.802270256246 516.892850913889  
443.853458865556 439.33566689752 435.69811966429 556.31484498921  
543.584413650467 454.64556253724 664.19083888799 796.052115217208  
591.641325402032  
GOLGA6 137.757902615328 138.233799607706 143.650172124086  
139.703304553486 140.288612271406 142.528480882047 138.859261763075  
141.043668963717 146.094951139804 133.608461289137 139.699189528879  
145.079450753969  
GOLGA6A 147.920946479942 128.087991226561 152.91729346961  
126.730314982553 128.860744370967 143.686906051698 157.528409294029  
150.667001746475 151.436802637988 142.62707251786 145.768857553634  
140.878935632862  
GOLGA6B 163.446813963119 136.60514429355 170.490099282436  
133.346626315812 131.119810851017 152.609055890822 181.914505612128  
170.892319361167 170.099045774947 212.669156800241 170.091913791176  
200.342786450248  
GOLGA7 560.913732951675 576.298671053238 641.338900241674  
474.378918787006 635.234445318087 880.719593734606 452.357898123926  
486.947380524463 444.192734921566 677.265576269103 569.47446215213  
406.224345292389  
GOLGA7B 136.764881711137 130.471929699923 149.119815471009  
134.029984991385 136.202953030465 140.762415240824 136.306727083526  
139.013404849037 130.738915341653 135.736764623155 125.008209861774  
163.41031443893  
GOLGA8A 410.954095610904 340.608165077422 596.3549500121  
260.67310907387 179.880812358974 238.230110356671 353.437466689101  
207.204293555178 206.340478393262 501.434722063309 178.027417594263  
300.83667045718  
GOLGA8B 1031.59140059071 716.420861490714 1029.75852676191  
646.117381960716 319.560819487616 690.582550537485 1046.65224316733  
564.749082802433 657.77730563722 1117.77397620221 484.764806127211  
915.015154168627  
GOLGA8E 137.460936879873 142.999526950651 142.385902610309  
143.823368276815 145.122171099946 133.334314509183 125.843089077365  
129.522339467532 144.295556086504 143.025570700585 128.643539098937  
136.480458837869  
GOLGA8F 164.21464602746 149.386285571937 145.997380100999  
154.496005175117 138.684070773064 145.573544748919 163.718595974283

136.948039394935 167.125830254039 158.92538634742 148.288798428149  
164.256764783784  
GOLGA8G 151.96843908074 144.339819009283 156.62031503525  
154.390764802264 141.518491890811 153.494456800685 147.129702047639  
136.278361222532 136.862764950361 141.794898246882 140.548371692813  
145.904866987074  
GOLGA9P 205.886398618369 211.419445018736 201.530921073488  
211.468099571442 136.313623567821 157.449891798638 164.917470819096  
174.075670633438 155.810034593382 142.348246621217 187.439567353342  
145.826955036113  
GOLGB1 608.129959758538 615.254768508691 562.891241563711  
592.822841077599 492.534183006883 950.818917078515 1053.65938651514  
965.031655021246 702.981741565482 817.913210743023 1344.1288416533  
869.542306259337  
GOLIM4 206.585387130993 249.680729921602 201.289402228512  
330.005950459958 239.003718699156 179.663258610881 176.5588805282  
202.797135825668 192.475309217696 194.072260528037 289.297370738382  
214.714726648332  
GOLM1 162.140112952434 177.630246034993 162.110943457969 144.361104234288  
191.38608906576 164.848970268132 185.17273221366 171.869472272081  
169.844913799159 195.364709354814 266.842778974988 147.891442774921  
GOLPH3 855.112210714686 723.250763797522 781.790858580895  
615.662993833692 631.819659701092 812.298381693378 628.000860165888  
1246.2895253224 732.040299742444 617.833194119379 975.315904185938  
736.963699775724  
GOLPH3L 245.110761598207 238.978845152474 264.476846259384  
241.648044508699 277.101000223971 226.387465899611 349.816819166182  
412.801213309591 318.73799597811 224.89911221799 302.637859140061  
259.72035004624  
GOLPH4 341.197826517049 330.553659265085 265.866465528654  
328.431289733169 267.696284751923 278.469340236003 191.348260799746  
228.384686248604 293.4021207271 211.483693299981 282.076744753348  
212.107842040568  
GOLSYN 187.978627462391 199.837938317725 172.03919618445  
180.641419603362 111.810575716678 121.821868944354 118.95971064289  
160.57963709333 121.472885562857 144.139062513587 171.62327142765  
111.065596151792  
GOLT1A 193.777175793218 226.893147371644 192.891507272665  
162.447903830131 617.474181543858 327.207408852474 809.068563907145  
335.142319387164 677.9972761887 147.439303942026 646.117381960716  
1502.3444541735  
GOLT1B 311.806908624308 295.099840299681 302.272304483941  
234.041863839123 294.808980631295 351.079435946154 321.31562287169  
373.189809737885 397.387054218873 349.330629649093 307.16835174775  
275.642882589307  
GON4L 250.18189549573 275.972447693982 253.975577255772 330.193132765826  
217.050602253281 277.817786943873 278.095939961034 320.214614455231  
275.642882589307 237.456245064363 177.257355909681 276.653753970476  
GOPC 334.140757209353 284.574888587832 387.711471687237 281.926552464214  
203.244917049745 238.88138498771 277.285526811736 224.6588173737  
197.651165059354 256.093363520707 364.895113721763 259.338947392465  
GORASP1 642.255110250493 634.774041584043 541.896444696137  
801.051513639714 872.512754090023 511.25179427158 577.98969050409

|         |                  |                  |                  |                  |
|---------|------------------|------------------|------------------|------------------|
|         | 465.683139139622 | 555.366765340014 | 356.05426191171  | 824.070046083713 |
|         | 497.916883763059 |                  |                  |                  |
| GORASP2 | 629.97342429259  | 637.457322054293 | 598.287431134037 |                  |
|         | 732.877169346979 | 965.031655021246 | 686.445635754196 | 577.250493023431 |
|         | 528.275591281419 | 736.332743195416 | 583.022090879298 | 799.423640530777 |
|         | 701.481003619067 |                  |                  |                  |
| GOSR1   | 177.223953859764 | 164.905467905433 | 187.035957486928 | 173.635827398273 |
|         | 169.784837251279 | 180.994249258457 | 173.798554769204 | 230.697077917675 |
|         | 210.620764703468 | 150.951302116738 | 177.428161690048 | 176.167129202773 |
| GOSR2   | 159.539320132392 | 157.216793735479 | 147.129702047639 | 151.765013587671 |
|         | 171.449326065013 | 182.181756507598 | 205.45079491218  | 199.637257550762 |
|         | 222.820391338687 | 155.911387663464 | 164.970438494223 | 179.674744176904 |
| GOT1    | 569.866002248352 | 581.37957221282  | 568.555967950896 | 660.535644289024 |
|         | 454.492780042353 | 487.993796425035 | 452.732079010502 | 537.510539142248 |
|         | 615.254768508691 | 630.894382644903 | 610.337659723539 | 707.715412321304 |
| GOT1L1  | 140.154925193842 | 126.941650500751 | 148.551340840517 |                  |
|         | 139.858812885649 | 130.317604643904 | 149.260811184287 | 143.045416067967 |
|         | 131.709341771599 | 127.855167644203 | 138.248708129528 | 144.035936160694 |
|         | 121.75662526451  |                  |                  |                  |
| GOT2    | 1645.05161227372 | 1618.64901092072 | 1635.35544761095 | 1822.14935116363 |
|         | 3046.47354587949 | 1675.35431076885 | 1883.74008471233 | 1544.45026075974 |
|         | 1605.2454230722  | 1168.68074786473 | 1561.10217536347 | 1894.14699530855 |
| GP1BA   | 194.312315077985 | 170.67334244323  | 147.638057399165 | 173.364586678954 |
|         | 216.485113690708 | 211.679799388351 | 224.424524191566 | 197.357728220717 |
|         | 209.229537873706 | 187.035957486928 | 197.859546367676 | 184.591789011195 |
| GP2     | 142.363309192458 | 158.631298154353 | 137.702802090925 | 148.47415004128  |
|         | 144.073739611496 | 135.206755687105 | 148.803188053248 | 143.07651558428  |
|         | 142.495333453346 | 140.393624985807 | 139.117053855066 | 145.640156204495 |
| GP5     | 145.493977576106 | 129.362793087439 | 149.962143642332 | 159.113259830623 |
|         | 149.99203906203  | 142.324077852852 | 153.97869518398  | 138.576978828316 |
|         | 139.63811945162  | 160.880152014981 | 127.640525889316 | 138.1342592966   |
| GP6     | 165.239214141562 | 166.89285636895  | 154.783699020901 | 166.376907377447 |
|         | 148.986058473609 | 170.167035629256 | 170.661808797506 | 163.704616231638 |
|         | 152.379441401583 | 144.266864839344 | 153.293125258215 | 157.344758285153 |
| GP9     | 141.544454931788 | 141.038721816572 | 146.586879656174 | 131.212705319485 |
|         | 131.954310449801 | 133.044969965784 | 138.773042747912 | 138.952082680577 |
|         | 143.078022283871 | 137.927403204849 | 133.675029107803 | 143.206100064821 |
| GPA33   | 144.738871562895 | 151.863048206341 | 191.754626760061 | 172.245089970803 |
|         | 176.431477850092 | 171.759102794108 | 151.846610656503 | 157.982146236108 |
|         | 155.702330867056 | 150.751386127903 | 158.463444189819 | 170.661808797506 |
| GPAA1   | 369.726867521935 | 336.786227017391 | 347.224999246223 | 380.243136469602 |
|         | 1577.15895478896 | 483.549698382115 | 464.577839898252 | 524.725307261999 |
|         | 591.189034068137 | 432.088303693555 | 385.678901612324 | 586.867772838753 |
| GPAM    | 265.29629764006  | 246.850599569231 | 277.946395491073 | 265.29629764006  |
|         | 207.076364103755 | 322.153713097778 | 251.833571288967 | 657.058213650454 |
|         | 217.513118676535 | 186.515784641119 | 213.510783808898 | 184.602704530362 |
| GPAT2   | 153.38260557666  | 157.528409294029 | 152.344248425416 | 177.562561297777 |
|         | 431.974037914233 | 172.961115357569 | 155.756074127526 | 153.222807811478 |
|         | 148.310640591781 | 137.784270510433 | 144.66675420575  | 140.943732564849 |
| GPATC4  | 129.977863589097 | 146.326067008478 | 156.453108485249 |                  |
|         | 153.191840013692 | 134.772545694636 | 143.618454531431 | 142.342811880173 |
|         | 150.46224324459  | 137.693410133625 | 146.184624424737 | 123.035401501279 |
|         | 142.397433929092 |                  |                  |                  |

GPATCH1 155.147962740503 168.327600230929 161.402322405903  
 157.635531050489 131.628021008753 131.432729794636 157.568150431884  
 149.615585907229 162.237172404557 155.223806761489 143.971152352313  
 147.62157260418  
 GPATCH2 166.440530119785 161.44729973777 167.559703634539  
 150.065275447769 183.100286716683 228.797912452429 208.237011955037  
 148.82892305156 214.050918459805 224.707455448421 252.249994170536  
 254.909076658804  
 GPATCH3 187.247062073247 227.668046559074 211.660148497276  
 250.060734219351 334.52685347521 211.289598823191 244.596233138747  
 224.851680313689 182.42088387266 188.252507246148 186.611870261871  
 169.744100665038  
 GPATCH4 260.787104931135 253.30325545013 247.622351589081  
 265.712482648121 261.721726664029 288.968909550533 212.531329857909  
 341.096072280715 298.301504581296 238.509970054862 255.56301534833  
 330.850098426464  
 GPATCH8 178.153527134452 172.065593177758 170.129558603697  
 180.15338103 158.602687876661 149.535008475427 192.860161535869  
 160.482734190577 154.205877662428 173.459008248696 188.145154995617  
 163.863677822465  
 GPBAR1 283.701987275608 251.161789722751 165.977852973826  
 306.632103708321 139.94624507228 139.527577649638 137.562157262928  
 149.048057509964 164.389447533163 148.139376772567 147.52403424052  
 144.361871207081  
 GPBP1 375.958347293549 365.199125315964 439.33566689752 303.051124835907  
 263.123584372086 359.024299091145 502.281584081805 455.486248388968  
 414.403321220432 423.396271159345 566.647927867646 499.544050752036  
 GPBP1L1 314.708587131145 346.78158577526 315.3930052781  
 350.22221782412 264.654879741889 303.762967437478 291.616195651001  
 330.005950459958 316.125364442611 312.177191402945 437.122373082112  
 285.507315916663  
 GPC1 177.793860516896 227.177100762395 188.973595445056 210.912629986133  
 621.946994961864 237.191866335979 301.871924474014 193.098116087792  
 232.444867422559 326.703488388966 413.502150181875 550.124359517322  
 GPC2 164.373697447004 158.445124076906 166.850279817976 170.376620730856  
 214.068044241507 215.744552410805 177.19138801548 242.141362101262  
 209.258707976348 197.169703621888 155.964242240771 328.431289733169  
 GPC3 265.829122816166 267.285998701386 161.683243808528 159.257221624668  
 909.727616721285 2662.43181510326 730.673649872205 243.979769719186  
 183.056707813352 125.467668442298 410.42088953434 127.7962242731  
 GPC4 630.176145684641 447.779854598556 765.911113050543 428.569462312363  
 308.031816782343 296.141012087256 317.550000625189 177.874821397216  
 234.182164952936 173.790848780011 250.139061165593 200.387623661458  
 GPC5 146.915965807149 150.25322837689 156.540165645256 166.558080305926  
 149.918199106603 145.105268133449 157.66470622511 138.722672835109  
 135.708804956764 143.891725249061 150.166324293431 146.975258859244  
 GPC6 379.476768908492 514.799179506754 396.492900824907 469.540421642173  
 214.355086255855 205.495823410422 222.315451077459 196.031541155674  
 236.052008824688 267.483886037099 220.487665103019 224.851680313689  
 GPD1 149.087951792991 174.136806313142 161.072844903925 170.748911334847  
 146.007311764212 143.00521196918 144.026432356249 129.561012565141  
 161.636411303968 147.740657356905 146.694318629238 153.563839578065

|         |                  |                  |                  |                  |
|---------|------------------|------------------|------------------|------------------|
| GPD1L   | 3111.50508060882 | 3468.14455177277 | 4009.22206756187 | 3618.9385126441  |
|         | 3744.5666678861  | 2891.03258768937 | 3954.24763752814 | 2799.0487754899  |
|         | 866.413995755699 | 424.134483971176 | 1388.91423772335 | 1230.00744483191 |
| GPD2    | 143.942810095867 | 147.135640862542 | 151.645636946799 | 142.864294577585 |
|         | 181.400788152988 | 203.17525411575  | 178.3652866131   | 182.263724979519 |
|         | 163.919426088318 | 155.427282703527 | 159.957371011316 | 213.990575186237 |
| GPER    | 382.186095123659 | 518.478990211753 | 344.915370555826 | 703.815551883635 |
|         | 130.240366272285 | 140.368070973566 | 136.355319997318 | 161.83241639654  |
|         | 145.78573175226  | 156.548858402702 | 142.652939807341 | 143.324235640446 |
| GPHA2   | 135.164117176127 | 139.041519654872 | 127.31283918221  | 130.513071750123 |
|         | 129.03753569157  | 129.52578899011  | 131.271979461703 | 131.674409480919 |
|         | 118.60878652724  | 125.806943645484 | 155.108146847158 | 135.904163043783 |
| GPHB5   | 162.723310549554 | 158.946177055546 | 160.70138318726  | 166.714793209109 |
|         | 160.91894600916  | 164.202554380274 | 186.447049658314 | 162.904897605929 |
|         | 159.399804351771 | 182.292947734054 | 167.201570648434 | 167.542332146706 |
| GPHN    | 228.542423012958 | 221.272872023413 | 270.568660560796 | 211.183499580683 |
|         | 174.707059022891 | 205.987280015028 | 200.045606111354 | 272.994195639694 |
|         | 179.648479201164 | 203.544294328395 | 202.193338797533 | 263.800363357443 |
| GPI     | 929.198774489695 | 1037.46485756166 | 1172.4103691525  | 1742.84803427086 |
|         | 3205.74787769881 | 819.488546995594 | 1838.18547839898 | 1160.25775445193 |
|         | 1200.94425675913 | 1690.96371604294 | 522.664475688419 | 1007.41624313399 |
| GPIHBP1 | 171.350620456505 | 206.845306095447 | 151.379761514526 |                  |
|         | 163.967616022079 | 142.960875909369 | 148.26621607986  | 145.837985729893 |
|         | 133.483766053954 | 135.943252855457 | 133.829889099442 | 150.809693773343 |
|         | 129.835713633923 |                  |                  |                  |
| GPKOW   | 314.751799003704 | 306.896732729554 | 354.45785837703  | 329.88790758321  |
|         | 523.937128789616 | 438.231717096337 | 547.367381020623 | 393.98210915852  |
|         | 561.251860964966 | 386.067573158514 | 481.037647470809 | 376.374248850987 |
| GPLD1   | 138.281188275319 | 128.09266452749  | 132.782967735893 | 134.629996026323 |
|         | 128.336332748047 | 186.167877791105 | 135.06498850776  | 127.482662155082 |
|         | 125.413619056436 | 121.483610947845 | 125.060387518072 | 130.858419819734 |
| GPM6A   | 132.780055030907 | 125.783265980169 | 136.48748813417  | 132.303506517431 |
|         | 142.183154756458 | 138.952082680577 | 136.149732574763 | 130.473842500245 |
|         | 137.188849160569 | 126.673587174832 | 160.567934923347 | 130.644937322186 |
| GPM6B   | 313.536451935268 | 299.986758612161 | 269.261595558589 | 264.983729290122 |
|         | 137.593577427321 | 162.274094333189 | 131.477589792769 | 134.166297738657 |
|         | 136.341358916638 | 198.549047189499 | 140.781647532361 | 127.959474148217 |
| GPN1    | 406.736165197168 | 445.905756082569 | 497.110852407681 | 427.084392965651 |
|         | 647.666334416707 | 1075.3328563531  | 780.461254794127 | 966.731520471976 |
|         | 751.269009484639 | 793.300636780035 | 607.26455470867  | 683.470866056244 |
| GPN2    | 369.434158443561 | 387.068276379114 | 306.946103334814 | 447.059120541009 |
|         | 1019.627634011   | 536.9324595176   | 893.676600121113 | 780.961416212309 |
|         | 423.045329000756 | 767.054576874115 | 472.108893832845 | 677.023591987179 |
| GPN3    | 236.082185670774 | 220.876114717642 | 282.076744753348 | 193.008902902654 |
|         | 233.572055978465 | 329.535023880129 | 295.851459742115 | 297.970735665595 |
|         | 318.196134631178 | 305.200911653347 | 224.89911221799  | 268.186156177622 |
| GPNMB   | 1423.02563792293 | 1037.00025848491 | 1455.75693295732 | 873.256632365737 |
|         | 544.852019338212 | 322.64731764456  | 225.96618659877  | 1144.07896461196 |
|         | 889.6617510875   | 1887.82245931444 | 719.766799746895 | 162.155834067128 |
| GPR1    | 1352.14737073174 | 1849.21906428944 | 1387.90327883679 | 1188.08712008638 |
|         | 327.062810389635 | 1509.69760873558 | 773.057095787974 | 957.54149804446  |
|         | 873.879064183441 | 736.963699775724 | 763.263858769038 | 666.570977208535 |
| GPR101  | 127.209043595332 | 129.940297696849 | 128.217078449064 |                  |
|         | 142.369661737453 | 156.402578892869 | 141.319594283071 | 135.467354817201 |

146.332425559689 129.114161128113 127.265211069837 147.530719472217  
135.205434173702  
GPR103 185.295480519718 160.903342063542 167.737220954468  
199.579818754014 174.255919030841 196.974807677659 169.844913799159  
164.309588213547 173.281506912652 167.637638693195 138.405215507471  
163.039564280484  
GPR107 142.737537206204 129.973380117841 143.823368276815  
136.698600389364 142.650451413991 138.483436753942 135.151438845363  
145.737361356678 155.058852833902 158.226547375305 138.440663763957  
131.643633737316  
GPR108 265.260411490697 314.292700455545 369.726867521935  
316.524115715585 452.843213944986 340.366016191232 307.480644393018  
307.020265874666 256.093363520707 336.212224495877 240.631264915238  
321.84712975195  
GPR109A 128.929244741296 142.476530302265 133.439077726411  
126.488299049827 137.074564265915 139.029404397979 187.871017629994  
144.774621469452 142.013370954791 234.841813258798 134.93455083142  
138.530236176135  
GPR109B 133.008120853618 137.120973494952 143.947729578484  
142.749568012703 155.906054212876 137.358139652612 162.505305538911  
147.376482709004 151.573920235798 158.49220347186 134.20988291379  
144.715167331434  
GPR110 137.493436771898 169.975329631607 136.261907928796  
129.848276446896 212.933062534244 136.348252715447 520.585319342817  
213.077884261943 165.763459146818 146.609485664113 292.468585109951  
564.588706307423  
GPR111 120.054065939835 120.931585398914 127.195619567384  
127.263061874385 123.059971161711 123.02167644694 128.363331337379  
120.304037458526 121.387799881297 119.608334527504 135.067056559409  
124.142882936234  
GPR112 184.915526626619 157.176001400747 179.674744176904  
135.360087349634 147.391535316043 171.954184094677 131.17119492692  
137.812249316763 145.540872377507 153.178934750919 145.526941881413  
136.758262322199  
GPR113 132.213890220705 120.384210318 133.423376063284  
125.269726165403 147.373174160478 137.410687900298 135.839826264562  
136.499228715856 128.497571151343 141.164985468046 142.053649707364  
130.506708993193  
GPR114 155.438218501542 142.536450265886 136.957209426823  
157.756885980217 146.716053772448 142.169951083733 158.562631157512  
188.878770168595 209.279164243868 167.456481678813 166.192990554427  
143.419034484087  
GPR115 117.923459503989 116.007006375993 115.217608555334  
121.248923222807 122.552733780528 144.384287335249 199.854728619468  
134.045938361221 118.355532305846 166.360005474414 205.65398844108  
236.592839463278  
GPR116 612.758976723556 883.140984728615 343.121661664987  
622.834462068316 302.381946749711 683.655205499779 364.191263843897  
529.368609163949 510.226374558703 449.408793796673 347.3483417873  
330.143103381406  
GPR119 108.669141498627 109.924867620862 111.457176315964  
114.556542069712 114.488760619745 106.923686318112 116.236538651031  
105.467761348787 112.063713561549 115.582048644075 116.540729581355  
117.766156390814

GPR12 122.268560536152 130.521731606987 125.068362001087 116.142650095476  
130.818181991958 117.261443445891 116.621735695217 123.294321716108  
119.651470884046 125.347442446239 134.983884722607 116.328330266803  
GPR120 116.321559000405 125.929743286163 107.40922161073  
110.190708230962 117.270320709161 113.064645688715 120.767950825369  
110.17590675298 104.934718065476 116.576896337786 119.436922168376  
114.91722828113  
GPR123 127.382266838772 125.154784284706 133.065366727222  
132.344296085487 123.141928612324 128.445065383646 148.347642424885  
140.28485470716 133.585425721984 142.440344960504 129.338551879984  
134.620896927473  
GPR124 730.988069115919 936.221322010828 575.23272138912  
1582.0221231161 184.611146047556 133.640832782576 137.513315427454  
157.36568754472 168.611652451329 173.334154083555 177.246890307643  
147.706402141169  
GPR125 181.508873226705 165.789846154721 176.689683169567  
185.650862663633 160.992494552269 200.322334039458 178.920528149177  
186.529656751005 175.891947478891 153.011923016494 147.54950981909  
151.214631373344  
GPR126 158.933097712363 186.276450732044 174.045229095003  
178.872635061826 286.587945301875 306.193157874683 429.922530506572  
395.425715632302 193.358728044565 186.1961391235 527.139476504986  
659.483452217461  
GPR128 146.252974508529 149.457761307441 144.818492604488  
145.23242365333 138.734437288431 1271.46608195833 142.047828639169  
146.101547300741 166.192990554427 146.235832275574 152.609055890822  
137.128849888863  
GPR132 125.929743286163 117.264555636952 114.384296185446  
108.557097186828 108.807891863679 112.314595956147 113.597215383696  
135.18026749895 134.703474191011 108.296042016208 139.886499402506  
124.395047385025  
GPR133 120.925930409474 116.176068923513 116.769106223472  
116.134550788966 128.141725976839 122.575357101038 117.770032157393  
121.289159587394 116.507315786826 119.886433564236 137.191582153943  
122.466276478613  
GPR135 134.119276589666 138.600017737884 129.608034744581  
141.817230824364 148.614214326995 129.1829592305 127.713286292101  
133.921012946195 132.86711707789 134.904123162692 134.238642042323  
129.664016819143  
GPR137 676.293399523316 805.600599570258 765.532997390972  
1131.96129284658 2120.14463347544 1109.79571066685 1116.95795024994  
749.859130465356 828.683748921915 495.099443245153 688.684644604218  
839.901173743755  
GPR137B 289.667302610069 289.297370738382 318.561557474749  
292.640251411131 314.063025950327 333.349203784021 527.226517960073  
295.420691959792 478.38361571213 361.160881334174 340.903961204211  
384.566987097657  
GPR137C 140.680326850085 144.448503894295 140.481148289418  
158.735283017367 150.460618402778 178.045931314857 171.376976179465  
144.212231875922 152.628220216104 149.007288765628 143.961467163406  
155.6299578128  
GPR139 138.418604660734 116.700397932007 131.968781256081  
142.071492722749 132.807755600683 131.106613067333 132.744261207073

126.791714564926 137.545063966957 142.142633050256 129.436712663487  
127.018746030517  
GPR141 139.567367353959 134.516390697561 144.743281367797  
143.603022117503 132.981346767415 130.092881020271 130.182320154521  
149.045654499682 132.175368142549 142.466067016788 114.350596695469  
138.670077127324  
GPR142 151.216992571364 147.069488043503 137.901317305531  
129.005211657936 148.084844579881 129.493805009651 129.165440930558  
132.297716337104 142.232918684259 134.226711030456 139.577443171489  
165.480489678822  
GPR143 143.053727675518 142.342811880173 144.154217446011  
143.195338329759 178.863722055499 158.799917136119 157.907190910755  
163.18585933431 158.68792959603 164.295628750438 178.647726085678  
167.273378118452  
GPR144 129.994160770036 146.813353189258 141.543147273205  
163.362182585182 129.7642522046 149.485497080739 136.981043383326  
133.666244052469 154.011708696954 147.973274498131 156.160899295182  
132.518394343751  
GPR146 164.302998010829 190.002630382394 171.784981874184  
189.678680702271 182.074569356713 154.737117718424 149.936366672592  
152.548795147468 154.537240112989 160.853480692082 152.910433120981  
160.543465620248  
GPR148 126.316613675316 117.60787142216 124.277983696239  
112.922918499398 122.216479103528 129.21974206851 113.694351010121  
118.21084414402 120.649467083125 117.123891785437 139.941724115063  
115.785084044427  
GPR149 127.727311123825 121.846349358116 118.75237770613  
116.437403962939 130.383001462828 121.849460555655 117.331280455759  
113.292688210897 118.104763610751 116.043095688871 125.41744801003  
123.835583753941  
GPR15 153.181097279473 150.038722708606 138.033668840392 146.26304624648  
143.980608339892 160.240052678401 164.608496326181 152.386986818959  
150.629932241703 153.620767586182 147.091280396135 163.647306551474  
GPR150 123.145830746127 114.68345964966 112.65454329872  
122.452541100946 129.828896822571 132.448602065824 119.427342766092  
114.867454554206 132.14412512622 116.20008794813 139.792313018728  
113.222264855561  
GPR151 136.561852783331 144.787836177147 146.264686158155  
147.303997146992 140.492715555674 141.018087546273 149.795655754301  
147.973274498131 145.183463058696 153.95855605751 128.882160435252  
143.937726155116  
GPR152 114.226028611171 119.643417329571 126.178476831007  
108.768730405582 117.962188157317 120.633217745524 111.381427322188  
109.167312436827 113.799997627317 110.810963139914 116.925863450165  
123.259322051795  
GPR153 171.869472272081 170.326474367867 171.573342518254  
168.687845035401 177.582314734704 156.745051321143 170.866433766203  
160.735428753783 167.958792571511 158.584934514596 166.272237117441  
159.870967387108  
GPR155 138.201164395948 136.66358267095 138.123754096875  
134.95842832877 134.29036009792 147.359279533039 141.127519700052  
139.888008605915 132.303506517431 133.122174596886 140.688570032068  
157.639688257892



GPR156 164.043866642712 169.211708954329 168.974155750959  
169.211708954329 158.967160833334 156.353914172996 174.707059022891  
169.999692055871 160.243405030742 168.03501792841 164.541417588646  
184.62149494522

GPR157 124.885950473434 134.086301127594 138.866469244936  
126.106777865128 118.718048764985 150.513804134588 139.067516394141  
135.585648980469 131.468537312778 149.668587078867 128.482976013813  
135.735535533738

GPR158 141.939368369872 137.500310477851 136.807118099948  
129.977863589097 148.773558380167 134.060214479265 124.657687121111  
145.360466216324 126.359440164601 133.403409882362 147.77916610545  
138.731957926247

GPR158L1 139.168307371516 156.916784141484 152.122141650397  
153.420392741659 151.403431105471 163.821142892643 146.67875644027  
157.155105022743 145.407517107023 146.873719524815 143.562164660825  
152.14012587515

GPR160 136.94525817342 138.48552149031 111.484426481816  
121.146511496024 404.21236980164 188.567747377006 487.358720934063  
485.026081242201 419.126814511305 166.64535048582 400.353795948162  
188.818012746123

GPR161 150.42705284743 155.979380606594 152.705458417973  
160.265389854694 142.495333453346 141.108383815109 135.025907096066  
137.821010169859 126.928328902507 155.530415929059 143.470181156799  
131.839890565869

GPR162 199.854728619468 206.127493726541 202.114480291084  
230.723142236623 142.96594961303 155.158028043823 145.010108826238  
155.041173289759 152.217243924816 145.787468865642 134.465488237877  
147.225911875196

GPR17 150.311274161073 139.276102596591 146.787927492706 147.140771901106  
142.598106777707 141.222884136243 138.110317032494 142.282861913548  
137.499290547619 146.34029698108 158.499787920522 151.450566957592

GPR171 131.146604635155 150.672985449063 142.139331321085  
152.131804134092 154.8975607055 142.736148814019 141.119491147925  
148.511059836029 134.427601777639 125.486324819682 124.306049555272  
140.48372620406

GPR172A 310.365203383647 317.904396212359 225.583966894864  
338.510045856515 1862.88548451154 719.766799746895 496.426739836535  
695.086203058575 1125.95664591686 669.602939159192 479.866450988091  
745.153336165802

GPR172B 139.54021659275 146.536055773073 146.658048787833  
157.590017103385 162.237172404557 210.960900130785 152.395272857974  
167.250667092211 133.44592405762 134.285191872099 142.837688062688  
163.668476670167

GPR173 139.421753451936 133.944538335319 132.240470270795  
136.537117054998 137.546487338984 128.771367080039 124.682396766302  
135.645439440707 129.608034744581 128.692917766138 142.978818998012  
135.457059862669

GPR174 126.667650990284 130.555405606993 130.66511389864  
126.614876404146 133.369314179341 132.01588294465 135.837733533444  
132.098421212796 129.867246424399 125.293640452686 125.04327844782  
128.79607493422

GPR175 299.234482744038 319.490670412394 304.237479317271  
311.04252785157 704.152296359463 276.089623957012 320.024259346646

282.561381978659 350.308420518351 312.808044035117 279.879377933144  
 271.397087928135  
 GPR176 152.104170622003 156.808992920564 151.794243108455  
 144.464071397369 151.946691918521 152.327247552986 167.637638693195  
 145.306369509684 152.51547053919 145.03804642447 138.902097203056  
 155.846106540378  
 GPR177 784.72162514331 681.810927901806 1135.49876948815  
 591.013515828247 305.252666831522 188.39062571513 447.674610082872  
 281.926552464214 524.541494680558 509.400965222318 179.091917512822  
 172.568852318369  
 GPR179 153.39738748803 142.863268359757 139.071908528327  
 136.519697160267 147.473875763319 143.647714966406 143.218850583533  
 139.714198638713 138.116568200293 136.19555442748 142.551161883518  
 147.461480849333  
 GPR18 120.998665308561 130.49338418515 107.828378413233 117.943511615792  
 121.874296836854 132.551989498706 120.208584170364 117.946664604751  
 164.630705813584 123.317063135818 139.395743826525 124.918089223417  
 GPR180 290.241064926886 260.999345837027 260.554343693588  
 259.146673652222 288.481981529558 396.781827940009 310.598930734244  
 311.10841853984 301.369680426563 318.778978094743 250.376178742476  
 281.304989265608  
 GPR182 159.110614190088 136.560048419149 134.401733295755  
 132.269567096683 126.067296703905 141.102274192049 139.582054825147  
 159.58125728432 132.956860864455 128.753623886188 157.374537572779  
 131.464229237662  
 GPR183 151.208728458188 152.680068580858 151.073257114127  
 160.486513643798 140.89666990854 166.001279428607 141.368078865065  
 146.867740388881 160.399059317919 139.086498524774 141.241717979079  
 159.788143847569  
 GPR19 136.124385992905 143.512348693556 125.5109819304 140.74035966401  
 139.061072394426 140.918728758975 129.253638326633 163.456245724169  
 141.750316403249 145.148058824491 131.590180562108 150.180037731272  
 GPR20 163.69172577831 174.149718758884 172.951567541592 188.0434100445  
 153.418095627352 183.033044475752 142.664793323255 152.222732770706  
 146.805832438977 176.245698601389 155.731897985566 179.841665686703  
 GPR21 134.483162806498 138.883097077879 132.198536906752 152.097609803404  
 125.025064237439 139.3465236423 121.480455781173 134.604565335211  
 156.942156078314 139.54021659275 123.789035728194 131.148926523383  
 GPR22 146.978110148492 152.11956441072 141.401480567426 157.259599894923  
 154.750512277909 143.167719135403 144.324313048777 147.591479875268  
 149.867541008113 134.42983422342 150.063082731931 149.004343851423  
 GPR25 122.484351696828 126.056493244568 130.191876914166 114.479886899622  
 133.372231702721 126.137627769256 124.449679223202 114.849872458647  
 112.693431140524 121.22760405399 122.170662903259 120.085340927108  
 GPR26 105.221735747452 118.740346254406 118.740346254406 114.226028611171  
 119.072213573568 116.023563001039 103.012774960061 104.633603136988  
 103.888971448792 108.43334699667 112.528908277828 116.155949676272  
 GPR27 141.539503634005 139.564898998489 137.141081365469 158.814407805803  
 166.320461361356 143.575381236637 167.063762404009 145.560904207183  
 144.342905860503 141.104761546577 130.396593013401 161.22761502968  
 GPR3 153.363629311799 156.907788377794 152.197327387252 161.04173806448  
 229.933577323411 191.348260799746 167.958792571511 156.154079736651  
 152.498222035534 175.158180187883 145.485453268383 173.907933001446

|         |                  |                  |                  |                  |
|---------|------------------|------------------|------------------|------------------|
| GPR31   | 152.635792342068 | 126.741498575874 | 136.175268696202 | 147.369767631957 |
|         | 131.988591391373 | 137.15571320152  | 147.183889426843 | 144.954595802474 |
|         | 143.215828010442 | 156.06439656393  | 136.306727083526 | 125.117333434527 |
| GPR32   | 129.898242234869 | 139.345434097957 | 148.23392074197  | 148.695212949639 |
|         | 137.830435972191 | 156.964080041261 | 133.254663058352 | 154.691783046492 |
|         | 129.864474336459 | 133.742490937191 | 138.370241517025 | 129.740166478951 |
| GPR34   | 154.220886444667 | 145.276745572405 | 132.454025879177 | 141.283042601932 |
|         | 146.303959493672 | 171.338371572269 | 150.2214516849   | 157.809081184874 |
|         | 156.033897758869 | 143.844153373367 | 144.073739611496 | 144.774621469452 |
| GPR35   | 150.476228905372 | 151.604093626944 | 151.783090997855 | 154.515091049526 |
|         | 162.629257046871 | 150.809693773343 | 128.773129597793 | 142.77817647952  |
|         | 137.352231982942 | 133.966277922005 | 153.474566767304 | 136.130027137459 |
| GPR37   | 161.37617568158  | 163.336324451735 | 206.73292907905  | 168.52952604693  |
|         | 119.144128641393 | 119.092335265325 | 110.753661013519 | 111.525984720592 |
|         | 123.277867938275 | 166.767004180603 | 145.029298288869 | 106.450154495663 |
| GPR37L1 | 125.955431094455 | 120.894583222813 | 131.04767483614  |                  |
|         | 121.141432480683 | 123.668707648172 | 125.666013736767 | 125.637138636558 |
|         | 124.625603721372 | 115.00776048097  | 122.153996665065 | 124.474221706022 |
|         | 109.37466528113  |                  |                  |                  |
| GPR39   | 128.582520754296 | 147.796610216375 | 143.363002903815 | 139.650726173186 |
|         | 148.85250180736  | 153.882081780197 | 159.177303894223 | 156.973511952828 |
|         | 141.209958892647 | 140.460927375243 | 124.711578994973 | 141.233642252649 |
| GPR4    | 138.393565473857 | 200.915806094193 | 119.096195018596 | 137.666849842576 |
|         | 179.177884962513 | 223.722742062251 | 121.021776527531 | 149.410729709855 |
|         | 167.568776552757 | 141.431172407792 | 162.634670715627 | 144.612549022264 |
| GPR42   | 133.932594124721 | 133.499361793303 | 130.546471770588 | 144.30699572795  |
|         | 128.112595697836 | 144.346988809708 | 136.645091356305 | 143.766249538352 |
|         | 136.480458837869 | 156.083002868004 | 133.94667806086  | 161.079169854907 |
| GPR44   | 117.900892627473 | 123.285059856341 | 103.594872791657 | 110.774802298005 |
|         | 112.851805868467 | 104.091301211096 | 109.932577444858 | 113.78644620959  |
|         | 122.702175900246 | 104.780306305981 | 109.947300629824 | 110.355493122568 |
| GPR45   | 165.055636629118 | 161.079169854907 | 147.530719472217 | 182.938824846376 |
|         | 168.091278015885 | 165.30072618497  | 148.439740062804 | 160.215396651606 |
|         | 159.539320132392 | 160.335043636423 | 147.469101571149 | 136.593346330215 |
| GPR50   | 123.7421178083   | 126.65748100631  | 117.131720092783 | 120.714981493593 |
|         | 125.644134465307 | 112.742895297124 | 127.58382536792  | 117.264555636952 |
|         | 116.179625689647 | 127.921209207879 | 157.607445509297 | 111.820208385514 |
| GPR52   | 139.316189199729 | 139.353080958675 | 148.096551269076 | 139.297276687352 |
|         | 133.697364081712 | 140.650987394155 | 144.090047165489 | 145.937733795336 |
|         | 131.237720549768 | 143.093156971372 | 141.013392458859 | 141.954467306745 |
| GPR55   | 156.567519536997 | 148.01816554072  | 142.945392802281 | 136.561852783331 |
|         | 144.013615296685 | 138.548983773386 | 145.444483891989 | 153.468933239223 |
|         | 142.428578698775 | 145.298109334141 | 141.5311434224   | 144.12742465348  |
| GPR56   | 264.476846259384 | 392.746574862867 | 272.456310079164 | 205.476230849391 |
|         | 1858.12855367119 | 1537.71464618832 | 1706.06615968622 | 1168.68074786473 |
|         | 1659.80909859514 | 1618.64901092072 | 1608.40826380713 | 1951.69651954627 |
| GPR6    | 124.654146040634 | 131.498890334548 | 119.176139463015 | 120.227386958188 |
|         | 126.899985772157 | 124.222529964098 | 123.849651946683 | 125.253637835638 |
|         | 123.773753287854 | 113.87024833117  | 143.650172124086 | 113.748724650063 |
| GPR61   | 147.310807346272 | 133.348510114432 | 139.303747021408 | 139.320621744553 |
|         | 135.866980620144 | 136.995197143668 | 135.375268329248 | 117.348231147283 |
|         | 136.643481414354 | 130.238231520218 | 143.667207351415 | 137.183566882805 |

|        |                  |                  |                  |                  |
|--------|------------------|------------------|------------------|------------------|
| GPR62  | 112.90900939264  | 128.949103967865 | 115.939620871703 | 114.860437706855 |
|        | 132.553445658347 | 114.067790137477 | 109.613208767992 | 117.069094451283 |
|        | 112.282839763467 | 125.79193748535  | 118.011195631598 | 116.934457270701 |
| GPR63  | 135.247018354192 | 125.9713489569   | 119.686859562393 | 121.760488406107 |
|        | 122.696382705233 | 117.781804727205 | 114.265920150451 | 115.608857734241 |
|        | 113.356070669308 | 142.053649707364 | 139.082897743357 | 113.283359026655 |
| GPR64  | 145.814268094808 | 132.034701177759 | 139.583514773196 | 133.541333581593 |
|        | 191.112009690591 | 127.430408113725 | 131.498890334548 | 129.290542121353 |
|        | 134.28095064513  | 133.749271961438 | 129.253638326633 | 143.298218989451 |
| GPR65  | 195.532022060219 | 190.809584998617 | 176.53912635694  | 177.619101765848 |
|        | 176.062665550409 | 167.521700144143 | 173.325724300712 | 173.810080280732 |
|        | 203.276353321185 | 174.483233557264 | 174.389706515542 | 153.162313098346 |
| GPR68  | 249.925640256322 | 206.236303011662 | 140.569391362701 | 143.436675541053 |
|        | 127.485734862624 | 127.7962242731   | 120.514672572565 | 136.86685787001  |
|        | 172.002600588279 | 563.140382824149 | 151.002218995005 | 112.624137732184 |
| GPR75  | 147.556482119673 | 149.821848101995 | 130.937742379689 | 127.171331062578 |
|        | 130.265055842999 | 147.553953240464 | 120.227386958188 | 135.056517225198 |
|        | 148.789295862953 | 128.862699779871 | 124.401083237195 | 144.708780756278 |
| GPR77  | 130.166741978483 | 143.766249538352 | 133.602870982718 | 138.154799037807 |
|        | 139.522018789485 | 143.378998368344 | 127.302714624905 | 127.365142833355 |
|        | 132.103084472404 | 125.739133257542 | 124.3501719829   | 135.417519318028 |
| GPR78  | 125.945916345628 | 128.618422306397 | 122.158160927149 | 115.845468537936 |
|        | 134.389518389888 | 124.263901299025 | 130.617505834747 | 133.281505040209 |
|        | 126.81140158672  | 131.659187927328 | 150.301540078433 | 127.699226067847 |
| GPR81  | 121.877276961306 | 140.256871047018 | 137.801899270172 | 136.566588903194 |
|        | 411.784922368377 | 201.480444219547 | 226.458509834965 | 173.850390626782 |
|        | 300.150235383065 | 128.986795394842 | 231.981501596284 | 165.71382076724  |
| GPR82  | 128.572388808833 | 130.520275539672 | 132.681475162386 | 120.329105003959 |
|        | 123.582509531804 | 129.442111153737 | 132.490323093932 | 129.859331207247 |
|        | 124.811760828557 | 124.661088039427 | 132.850601603567 | 130.768746032834 |
| GPR83  | 134.049094181433 | 133.63668145135  | 126.619475852751 | 135.028746262383 |
|        | 146.334446516009 | 136.85323853426  | 135.43119649883  | 139.117776552573 |
|        | 134.361949431678 | 123.720229113779 | 127.8514513762   | 123.338921824167 |
| GPR84  | 163.463191619941 | 166.958831664154 | 163.926432479673 | 181.431827312784 |
|        | 151.445254181497 | 155.468848105615 | 173.675115244522 | 169.168869363848 |
|        | 165.803549113373 | 166.135707525987 | 193.444080047879 | 175.437651670246 |
| GPR85  | 120.126700838056 | 112.624137732184 | 114.734439905052 | 112.875136585606 |
|        | 111.65024009102  | 106.854721604889 | 122.368581795931 | 116.961391747202 |
|        | 120.170269310738 | 111.188410935711 | 124.910390240995 | 108.021898335735 |
| GPR87  | 135.025907096066 | 155.207839370162 | 138.700301754711 | 126.87882572904  |
|        | 263.936023499588 | 154.412506915569 | 310.758803815671 | 208.72873686638  |
|        | 183.513101761782 | 322.889296658955 | 314.751799003704 | 217.264041781337 |
| GPR88  | 118.983932995126 | 133.682715540066 | 120.748910864064 | 118.838332117453 |
|        | 121.675007387533 | 124.541257225826 | 139.568610307888 | 129.637555509848 |
|        | 121.930362099901 | 123.657246099004 | 127.712004247155 | 119.079680805247 |
| GPR89A | 134.537123332992 | 137.832597613423 | 146.506263412584 |                  |
|        | 124.76274408368  | 159.749576166342 | 339.490955270138 | 242.037132958656 |
|        | 262.913054904154 | 201.969002368045 | 233.671878221507 | 156.339564110766 |
|        | 309.423768054614 |                  |                  |                  |
| GPR89B | 213.178648382852 | 197.049616858296 | 246.186104432792 |                  |
|        | 192.095235288818 | 232.321454436688 | 514.61297221467  | 317.839512360245 |
|        | 439.023181761356 | 304.751330890753 | 315.912220767901 | 201.773745532242 |
|        | 377.27961559752  |                  |                  |                  |

GPR89C 164.736294372006 187.461448376593 207.036293322882  
160.01685162095 183.181125586276 415.322560616847 297.921617748468  
336.70893120135 252.222481637238 237.71636970719 216.381643581705  
382.744523022686  
GPR97 139.47828235176 140.878935632862 141.306418675404 139.353080958675  
142.180927190578 139.660641694206 139.146387811999 133.88072491369  
136.241569739318 143.791908191551 139.034940762344 138.467624450885  
GPR98 124.197397333928 143.508657511633 132.061436165754 116.751145098777  
213.26158748941 316.125364442611 360.361719991381 227.587590278412  
168.347445148881 257.941367816557 568.310800941091 365.286234166621  
GPRASP1 204.616225498655 193.261343922604 256.291984914927  
193.704510912321 188.995551740427 147.313494489487 165.857032207991  
179.177884962513 158.872962797815 163.141010815086 152.629680152219  
169.800006803362  
GPRASP2 288.481981529558 265.829122816166 291.369577397743  
247.015574724901 188.671807443641 167.949422301257 177.457362387052  
163.679104694139 169.541411677993 184.157941055948 171.795878750365  
154.021906399992  
GPRC5A 165.003646188775 166.46473789699 139.841822983821  
115.231121959397 380.393153331219 193.569894919176 153.767488352037  
155.40832015652 189.450316943845 270.973600107882 238.770586150777  
132.271437329873  
GPRC5B 158.531514776098 165.654773882752 197.489903263216  
154.681604647652 143.363002903815 188.7348696188 151.819220292189  
164.634694036993 137.961504178836 174.149718758884 171.16807372519  
177.96452209396  
GPRC5C 206.620708230452 282.076744753348 200.371280127668  
203.816305810343 1326.95332435394 845.369108604819 995.812184456562  
384.16579891756 944.47112348734 213.914599384797 626.582864105324  
848.620986404914  
GPRC5D 124.285969778268 112.675715371087 120.633217745524  
111.10737497653 130.062015525637 121.57069706238 121.661141741782  
119.720132373023 121.014538677616 119.349376960211 137.020473156363  
120.611442477736  
GPRC6A 160.707290343231 141.494666823639 145.131215503044  
154.701413581915 146.909471248864 158.125437004665 166.440530119785  
160.941804737367 156.883255634126 173.681078272467 172.152570321727  
146.20679320119  
GPRIN1 113.970633751086 116.514299377365 115.678486138934  
117.193620642373 128.800907223807 118.909153405102 133.155925118245  
120.257886394616 110.033746435328 138.667081004369 142.329137800558  
128.96181458192  
GPRIN2 144.031305845388 124.629877200816 113.119021336236  
123.406144497577 161.569793476847 125.528638246486 142.826050917117  
134.356796881432 125.224197852606 130.779805222363 139.473459411633  
127.560308850342  
GPRIN3 108.2359175332 118.419311800417 122.554760526767  
114.170354748872 108.21185649774 110.636713168363 109.625579596864  
123.30960025689 125.826111950648 107.67395123577 131.427686241226  
124.49814598066  
GPS1 597.189355986293 652.826023701545 622.561634660589 738.087203930249  
1430.20038077595 743.510369438587 705.020444579319 935.784743413185  
702.460234202652 564.056592672374 387.355661073935 741.875751347917

|         |                  |                  |                  |                  |
|---------|------------------|------------------|------------------|------------------|
| GPS2    | 459.854279050269 | 441.001837510132 | 476.495282784602 | 522.300029971277 |
|         | 306.486275677467 | 318.06081614151  | 142.024171830924 | 382.630113452429 |
|         | 259.826625866106 | 403.47026424469  | 308.877027622691 | 224.981439707657 |
| GPSP1   | 379.200576951933 | 351.448985413528 | 285.30221551106  | 443.964363178742 |
|         | 340.860684371038 | 242.848821222611 | 196.226732738526 | 238.149614104568 |
|         | 214.763232658841 | 319.868227988842 | 168.588120398433 | 232.699786290509 |
| GPSP2   | 175.41089164969  | 180.814610631281 | 166.760758231104 | 159.584350289413 |
|         | 243.501083338279 | 263.707476735938 | 223.551813819581 | 459.068582584181 |
|         | 253.186749111526 | 909.388774224614 | 197.91325268683  | 318.244342364572 |
| GPSP3   | 166.404164069728 | 164.777719508421 | 139.648187461906 | 129.448507622171 |
|         | 208.045210163121 | 144.871396308673 | 233.842749683689 | 243.538374440134 |
|         | 342.998459706966 | 182.453722105813 | 317.309949792707 | 409.282410265733 |
| GPT     | 130.40770745199  | 121.599883734552 | 131.21740780848  | 139.597493526257 |
|         | 146.291932367254 | 129.366567668463 | 122.932745723044 | 125.563646710294 |
|         | 153.149523560021 | 120.793974839773 | 154.604363252526 | 127.473812381059 |
| GPT2    | 256.202924421798 | 310.142754559096 | 254.552034511333 | 340.098306132634 |
|         | 1358.29475573637 | 988.297682407351 | 478.180723959397 | 786.62709337246  |
|         | 1722.26954281876 | 366.857139377277 | 532.235193634196 | 310.718449468465 |
| GPX1    | 894.46029531926  | 976.782815449208 | 864.547109080675 | 1000.05896885496 |
|         | 4323.76731419005 | 2340.90990677253 | 2753.89649259242 | 1508.24281455057 |
|         | 2000.47497636965 | 2316.49886419499 | 1487.12201643008 | 1632.07671492041 |
| GPX2    | 458.151323130855 | 1299.4782626583  | 986.65554605455  | 194.161930642068 |
|         | 4159.96851384358 | 5636.26097921507 | 9937.36968397141 | 5094.53287522452 |
|         | 10608.0671430066 | 301.087947101876 | 11190.1778174002 | 6652.21610967461 |
| GPX3    | 4569.44477073589 | 3348.7622174821  | 3829.87905458534 | 1754.99663827472 |
|         | 370.798852361374 | 235.867149024041 | 183.619184925353 | 276.961847241646 |
|         | 436.331333134628 | 213.877482604185 | 176.088449983147 | 220.288758600588 |
| GPX4    | 4037.15442268836 | 4159.96851384358 | 5049.57929757135 | 4183.06379632713 |
|         | 9560.32907282993 | 5702.11995823367 | 5240.40795364202 | 5049.57929757135 |
|         | 2871.34694522381 | 3441.9805896226  | 2956.63335018838 | 3246.86605825129 |
| GPX5    | 147.581827861592 | 138.1342592966   | 146.171094379173 | 147.178598908199 |
|         | 134.346754381858 | 138.570150372729 | 139.690093593646 | 137.376602654929 |
|         | 139.333282400639 | 134.10070984606  | 136.952914053358 | 136.929570710155 |
| GPX6    | 149.881708604156 | 148.224587582189 | 138.639410179404 | 148.155692596378 |
|         | 142.796371223204 | 155.319717753912 | 182.410688592378 | 160.72009357092  |
|         | 152.179281925254 | 128.421242037748 | 162.723310549554 | 142.588013648337 |
| GPX7    | 312.019603761673 | 300.150235383065 | 305.768201359278 | 269.530151236658 |
|         | 340.800632878807 | 461.413469623811 | 320.648966489586 | 329.333236839082 |
|         | 219.792171863015 | 343.946831770916 | 201.004491067972 | 466.141717595301 |
| GPX8    | 906.886423608706 | 806.290662664708 | 516.577357935963 | 804.362909579005 |
|         | 183.168629351124 | 244.668813440638 | 203.524150518033 | 227.32463765717  |
|         | 303.423450627377 | 477.741216640575 | 221.849661343124 | 227.806050911154 |
| GRAMD1A | 542.740017003369 | 573.509780150018 | 648.549890890375 |                  |
|         | 738.579262579782 | 242.471259857978 | 344.070947256963 | 454.235121917464 |
|         | 376.791876040886 | 1129.15018335354 | 328.486476842582 | 521.83794739314  |
|         | 269.194172034595 |                  |                  |                  |
| GRAMD1B | 131.750053934548 | 131.688038068545 | 134.56134674893  |                  |
|         | 125.318166919844 | 132.897554980037 | 132.132474135959 | 127.019978195283 |
|         | 125.932540615682 | 140.933444607646 | 113.170014668758 | 137.288653308858 |
|         | 135.624881949214 |                  |                  |                  |
| GRAMD1C | 121.821868944354 | 123.161953011069 | 116.678969343492 |                  |
|         | 117.862532836494 | 131.873313581009 | 141.550553034455 | 202.278323489515 |
|         | 171.86363382331  | 153.952788086758 | 132.011199659803 | 178.055019987648 |
|         | 173.416999972133 |                  |                  |                  |

|        |                  |                  |                  |                  |
|--------|------------------|------------------|------------------|------------------|
| GRAMD2 | 137.066799877341 | 143.373932371335 | 161.382041789666 |                  |
|        | 166.223079895236 | 185.154876233931 | 142.288110423886 | 147.022594294963 |
|        | 157.099868633958 | 162.013164369593 | 205.226635237992 | 157.976810829398 |
|        | 156.441368290572 |                  |                  |                  |
| GRAMD3 | 291.261765585473 | 285.102778078056 | 305.325519265387 |                  |
|        | 230.589110372454 | 330.944203807675 | 462.888171502285 | 732.630306104841 |
|        | 652.654673756838 | 316.457274749526 | 326.1109406486   | 382.485769373364 |
|        | 647.666334416707 |                  |                  |                  |
| GRAMD4 | 212.798133015556 | 223.253794809571 | 195.10410545445  |                  |
|        | 223.339132121796 | 203.791916347213 | 213.194154171149 | 273.432712475089 |
|        | 185.830435830545 | 215.558688906165 | 310.075815009404 | 255.462706428149 |
|        | 323.086368767924 |                  |                  |                  |
| GRAP   | 154.774977482202 | 157.076284096905 | 144.352987324713 | 165.954266127697 |
|        | 144.555718186987 | 155.542691937539 | 148.87242524521  | 152.044068298273 |
|        | 174.107661206415 | 169.791616021987 | 147.07272598888  | 149.427217345037 |
| GRAP2  | 118.410091682499 | 122.610529927104 | 108.318510762416 | 115.293844461817 |
|        | 122.170662903259 | 125.612670947405 | 123.488418655586 | 128.668672935791 |
|        | 126.853028093579 | 109.384112020063 | 142.099541115973 | 114.524341239889 |
| GRASP  | 180.569583206488 | 217.45700166961  | 131.377361030122 | 168.27980269501  |
|        | 120.894583222813 | 136.372712400493 | 132.303506517431 | 140.447933562667 |
|        | 150.573523216151 | 150.456500446175 | 162.904897605929 | 136.807118099948 |
| GRB10  | 298.256131536504 | 265.29629764006  | 321.492900106953 | 308.088967616175 |
|        | 168.05687638693  | 199.53455266342  | 157.979749139651 | 190.331589656379 |
|        | 181.467708718758 | 160.28767775843  | 244.18714778846  | 199.746775121317 |
| GRB14  | 152.465176508162 | 151.936543085044 | 142.920939571001 | 149.464962540085 |
|        | 148.547259731346 | 151.330035086652 | 149.300089212177 | 158.100395482569 |
|        | 142.991135981933 | 166.70212615715  | 144.621077658674 | 152.504620068655 |
| GRB2   | 299.33156125224  | 331.888150158628 | 324.346723939622 | 397.387054218873 |
|        | 366.007451523992 | 323.896313343796 | 361.768552564027 | 368.879825610754 |
|        | 444.826775824095 | 333.200230327106 | 333.533043832976 | 356.268960813032 |
| GRB7   | 130.399501479248 | 142.365009028839 | 130.628967781841 | 135.434853296628 |
|        | 452.24100098898  | 270.945325305492 | 301.139737613279 | 704.152296359463 |
|        | 325.525450750788 | 195.185025611945 | 335.938170230765 | 234.895245871534 |
| GREB1  | 142.964043764953 | 142.617474507282 | 129.57551086282  | 152.498222035534 |
|        | 143.647714966406 | 144.927731613526 | 141.193081790037 | 142.095289977576 |
|        | 135.940629737073 | 135.535020220081 | 135.701041557713 | 138.440663763957 |
| GREM1  | 167.713268780664 | 161.761125440228 | 143.662865541299 | 138.783017264895 |
|        | 158.098055917452 | 152.796423361971 | 131.747367613225 | 160.203521879896 |
|        | 466.083451075744 | 577.98969050409  | 144.988803993714 | 129.707421699091 |
| GREM2  | 179.369845168822 | 183.531156021887 | 153.726935957906 | 150.328995030071 |
|        | 138.967080709927 | 155.731897985566 | 141.686945908315 | 136.639637503571 |
|        | 140.451465188624 | 143.937726155116 | 127.804392143587 | 151.9565369062   |
| GRHL1  | 135.153588830407 | 143.147325939994 | 138.538656638714 | 126.058167594519 |
|        | 252.628516068724 | 239.704459251571 | 221.027562527572 | 182.77693508164  |
|        | 180.968659614238 | 265.919002666885 | 199.149959995133 | 246.989526028884 |
| GRHL2  | 145.28524062436  | 155.582036890436 | 134.541606996118 | 120.413468119484 |
|        | 235.822266856967 | 298.256131536504 | 172.888455552446 | 206.071709262227 |
|        | 244.797792477941 | 161.354014292373 | 341.761516859319 | 311.10841853984  |
| GRHL3  | 133.443807124822 | 145.773932754923 | 139.399195840117 | 133.599098708818 |
|        | 442.12886967939  | 392.746574862867 | 285.46340356157  | 520.120193442648 |
|        | 663.214972254236 | 425.229044880287 | 415.322560616847 | 398.796188440256 |
| GRHPR  | 348.848550937417 | 350.58427958432  | 460.742037437298 | 425.229044880287 |
|        | 437.248311551717 | 286.469773081481 | 332.24505665756  | 288.68376542946  |
|        | 296.962992349662 | 512.723592291378 | 401.584032365337 | 262.233918187791 |

GRIA1 120.204469421484 113.504670764963 108.589444216106 102.024765473404  
 112.054379249781 113.192313147111 109.29279076901 114.999628959921  
 109.806338826826 107.303126530947 116.981243525714 121.416038813102  
 GRIA2 129.580421464913 125.12823219142 134.28095064513 134.208537331186  
 147.369767631957 124.758906471654 127.91637627901 132.695992860853  
 139.125340284813 125.172189715764 123.119524624735 146.777258330572  
 GRIA3 154.665212863369 142.112120308118 146.753212022975 166.730974538475  
 141.84490608317 163.919426088318 151.488973553441 155.471795004237  
 154.350107666084 170.410704499804 144.071652839025 157.454558821261  
 GRIA4 115.35376992547 120.039031290299 112.088944448944 114.084543168359  
 119.261305304165 109.471542280224 113.479382235297 109.333276735523  
 114.056147008769 104.285022032604 114.032874859062 113.416743649576  
 GRID1 119.75069850668 124.329980024986 113.570294287496 113.726931741236  
 121.965131419551 111.286141277084 118.544870925791 114.658668711121  
 120.998665308561 124.963418643156 126.446675008883 111.312348806957  
 GRID2 153.577349107512 150.610633329908 162.327039624723 159.286484253487  
 136.238646974312 151.687402863648 141.432461374482 133.857996630836  
 158.287108069245 129.501028506432 149.327794670124 126.148379057536  
 GRIK1 148.155692596378 145.027741086645 148.87242524521 127.669334230458  
 131.789877096016 138.014046365103 133.087166272749 136.048100211752  
 135.576975868985 131.479997342133 133.628391175037 133.602870982718  
 GRIK2 143.073060222403 140.870849757111 137.018521754443 133.645044060866  
 140.941447663862 138.064951932825 138.719480482945 138.158400190671  
 137.984988819967 141.455841055881 140.18668846839 137.161065320948  
 GRIK3 144.540174041867 151.029785584386 150.014842228372 154.607214750531  
 144.620226132989 135.784481523923 154.327065859051 152.845126167802  
 141.426756696799 156.077604146143 145.744039709418 143.756242843438  
 GRIK4 121.297234504922 111.935554828717 111.260486045985 121.88070274109  
 119.854401979951 119.446359837504 119.535267326862 115.371180170291  
 109.96017424123 108.415715678948 124.539006083936 111.608386387842  
 GRIK5 172.722177339418 176.440625367948 161.514651272858 238.88138498771  
 149.255405438966 146.151639797173 153.255318944823 154.7326161316  
 147.983937675946 136.949403128211 159.182533998843 162.769643886845  
 GRIN1 132.595360509902 148.373866613126 134.273326732349 139.042034301544  
 138.206065640158 135.217240511902 142.234554325754 140.539606951892  
 148.096551269076 142.431979387165 139.350622585937 150.387906232396  
 GRIN2A 148.760280320258 149.85385474029 165.347173283335  
 182.67941458824 151.557004418682 165.2045030333 189.235998474945  
 166.12695134858 149.639835429332 164.332073056902 159.887898257218  
 162.447903830131  
 GRIN2B 119.704436785439 122.144209450757 121.801291293249  
 115.967513057229 126.724973604103 119.301746097298 125.509221735447  
 128.651081092914 116.397855001959 121.260355515095 139.817493158675  
 115.502679218125  
 GRIN2C 141.356127724777 136.238646974312 135.48250324478  
 144.217621961908 141.904041228678 142.34471764492 121.849460555655  
 132.399633003253 144.599578905334 128.324383749931 124.913645688325  
 142.551161883518  
 GRIN2D 116.19219007097 127.822440239962 130.59886317117  
 119.040642659337 134.038213827843 125.287738115754 124.501262458393  
 120.433080754232 115.963144087717 112.599970121166 134.060214479265  
 114.302645757446  
 GRIN3A 168.289492873475 168.801737310947 156.221773628832  
 163.170983091116 166.4983332269 149.241358552148 174.127444395862



|         |                  |                  |                  |                  |
|---------|------------------|------------------|------------------|------------------|
|         | 155.55288776049  | 168.166938045454 | 156.745051321143 | 157.468934439452 |
|         | 182.495117800073 |                  |                  |                  |
| GRIN3B  | 129.664016819143 | 132.86711707789  | 135.425518707018 |                  |
|         | 140.78582131501  | 156.890299350025 | 138.586620636835 | 131.959998540928 |
|         | 139.140647941752 | 120.082391311921 | 197.443711199904 | 138.864844664017 |
|         | 126.877293296185 |                  |                  |                  |
| GRINA   | 455.564394647943 | 477.489368828457 | 513.20896845398  | 479.053300726301 |
|         | 1347.75629878765 | 467.387427864242 | 712.699853328955 | 632.565736446505 |
|         | 682.730262408017 | 519.112018353676 | 779.340880980422 | 504.9864660689   |
| GRINL1A | 142.537484065487 | 132.642931022024 | 141.819762045169 |                  |
|         | 129.477908941439 | 142.592455241752 | 132.50027119027  | 136.944378905743 |
|         | 132.626349611404 | 131.996032643928 | 149.219602109121 | 129.067538010904 |
|         | 135.959893035019 |                  |                  |                  |
| GRIP1   | 126.290840923683 | 129.093864368842 | 126.089217853289 | 126.952836653857 |
|         | 131.046822533615 | 129.446928016147 | 129.400895994387 | 151.067819234238 |
|         | 121.648921929686 | 129.165440930558 | 123.256613702254 | 138.444427173667 |
| GRIP2   | 139.008854444223 | 136.518409978222 | 140.225329742578 | 136.428826558493 |
|         | 138.848119273081 | 135.148723192316 | 134.703474191011 | 132.623563631011 |
|         | 147.838660813476 | 144.380485359951 | 134.579005092929 | 139.321570881862 |
| GRIPAP1 | 2330.60389526686 | 2086.15449885278 | 2258.30916111153 |                  |
|         | 1989.38201206555 | 378.920456227378 | 1741.0131951509  | 776.807656744828 |
|         | 1118.28423222707 | 940.008438825765 | 834.187014201026 | 1387.90327883679 |
|         | 958.63560158343  |                  |                  |                  |
| GRK1    | 117.166509072455 | 127.001546144286 | 131.249240371529 | 132.419400131137 |
|         | 119.176139463015 | 121.103620738719 | 135.695576019185 | 127.490889148422 |
|         | 125.400741907779 | 115.608857734241 | 135.264074941678 | 135.722321387765 |
| GRK4    | 145.604066669916 | 140.912921321622 | 142.719216118914 | 140.774304412579 |
|         | 147.93088503956  | 126.730314982553 | 130.257242615762 | 141.383975990479 |
|         | 128.019837242559 | 137.246089511045 | 129.916677638819 | 134.4380641709   |
| GRK5    | 799.759250503507 | 681.591028334969 | 615.662993833692 | 759.534249620343 |
|         | 210.605864685448 | 237.473927775823 | 237.78482574225  | 243.225815954365 |
|         | 385.135014083686 | 224.588225855066 | 308.679189788554 | 210.942865876533 |
| GRK6    | 152.840202260007 | 159.932941342403 | 140.579839043912 | 165.074983746785 |
|         | 245.723316636363 | 147.327675057481 | 165.406452831375 | 169.33926580273  |
|         | 164.373697447004 | 174.624446035895 | 171.202766078337 | 170.818182800759 |
| GRK7    | 149.408530395745 | 144.474814266475 | 142.342811880173 | 133.499361793303 |
|         | 127.385776388242 | 155.535222310709 | 133.069347559741 | 165.619206216088 |
|         | 135.335107344583 | 137.06192448185  | 140.199334790854 | 150.888616811881 |
| GRLF1   | 129.079917151186 | 134.465488237877 | 137.00397800873  | 133.953303801604 |
|         | 134.85809559975  | 124.103321614841 | 133.576812299149 | 130.233769058693 |
|         | 131.798931481549 | 129.813090345837 | 137.11719450122  | 127.116637906391 |
| GRM1    | 118.091125088778 | 132.834433153076 | 117.692662275393 | 113.334665910428 |
|         | 128.44311762955  | 121.024572716324 | 118.104763610751 | 118.206034087145 |
|         | 126.800718471804 | 118.944068268432 | 129.366567668463 | 116.421771593211 |
| GRM2    | 157.70581824787  | 185.30916081621  | 174.161146689117 | 147.085006263446 |
|         | 173.082167545676 | 194.847305068008 | 168.477388641982 | 199.88618355278  |
|         | 189.235998474945 | 168.477388641982 | 172.030687707578 | 166.104915784875 |
| GRM3    | 131.212705319485 | 140.223599881961 | 135.131890100292 | 144.302925948596 |
|         | 136.957209426823 | 258.311739685895 | 163.495175710216 | 262.416137698884 |
|         | 146.222195387635 | 130.975606477621 | 155.785933672918 | 155.413300826229 |
| GRM4    | 133.378374710498 | 136.952914053358 | 143.853643511287 | 134.376870769669 |
|         | 137.495288670441 | 154.264142444882 | 156.981921830638 | 137.575688681319 |
|         | 141.596078062845 | 148.448349327493 | 130.122672154144 | 149.995272585012 |

|        |                  |                  |                  |                  |
|--------|------------------|------------------|------------------|------------------|
| GRM5   | 153.675939908241 | 138.5833090264   | 162.297999435613 | 143.120621855946 |
|        | 155.908951665928 | 137.210805338701 | 138.950197595669 | 144.178210824181 |
|        | 141.544454931788 | 153.156264091925 | 148.692602243778 | 149.308475163534 |
| GRM6   | 120.157438564977 | 117.611606270124 | 131.095431530473 | 116.943791343147 |
|        | 119.822587087968 | 121.414076245292 | 106.263441906404 | 112.348094614855 |
|        | 109.988237089025 | 118.32560379073  | 115.066084565112 | 120.283706459738 |
| GRM7   | 143.951756384507 | 144.738871562895 | 147.28750335168  | 140.26206122305  |
|        | 140.086978441723 | 139.517413585211 | 136.529820456592 | 128.057827541114 |
|        | 138.582427155109 | 141.135840314665 | 137.070326499918 | 140.916876460413 |
| GRM8   | 162.050520530297 | 149.833346575446 | 166.382301680189 | 117.238968848218 |
|        | 115.890431424899 | 122.426568507144 | 124.258412895333 | 123.609527892227 |
|        | 153.293125258215 | 121.888886996534 | 138.656528521745 | 133.71610564207  |
| GRN    | 538.369868115137 | 610.591049634222 | 503.093655556038 | 675.978379566859 |
|        | 2527.99279063127 | 857.090339943417 | 2050.34883263932 | 994.213397985121 |
|        | 1344.87842417496 | 1865.44709751822 | 1539.80266129509 | 945.830852603704 |
| GRP    | 109.988237089025 | 284.595024875896 | 116.0999658586   | 155.317754378283 |
|        | 118.589392612801 | 120.196595293401 | 110.061459744714 | 109.454483612299 |
|        | 119.469328303796 | 147.463822782303 | 121.36708642226  | 752.142287661845 |
| GRPEL1 | 314.126706052299 | 311.715351215263 | 293.646275396425 |                  |
|        | 309.861048237742 | 435.183433729519 | 528.767644181119 | 544.956712516196 |
|        | 508.302878624289 | 571.950858678221 | 442.027630433527 | 259.277693314055 |
|        | 634.774041584043 |                  |                  |                  |
| GRPEL2 | 362.849380477089 | 333.822167152866 | 367.518273773904 |                  |
|        | 364.964572587289 | 325.320888625297 | 432.174413144791 | 575.857954264295 |
|        | 435.901794650816 | 310.026522549372 | 660.096727566678 | 348.300300174924 |
|        | 445.905756082569 |                  |                  |                  |
| GRPR   | 145.371273337639 | 144.619374612317 | 137.367390177293 | 154.412506915569 |
|        | 149.055493714692 | 143.993611400272 | 147.942495862714 | 149.294728629784 |
|        | 124.676743480622 | 148.863297062269 | 129.861693025157 | 146.740694608146 |
| GRRP1  | 211.104243881644 | 259.252807304272 | 161.046418048832 | 226.315173823168 |
|        | 181.193963616037 | 275.642882589307 | 148.547259731346 | 173.109461200603 |
|        | 192.932285494022 | 138.276865331434 | 157.350979071365 | 159.624341769644 |
| GRSF1  | 626.104755496369 | 645.438835606933 | 720.214044399108 | 622.142195892701 |
|        | 1747.33558205825 | 757.877066703516 | 937.593129242257 | 798.389385197471 |
|        | 1148.80141486692 | 787.874585290601 | 1329.3013039618  | 842.22767901391  |
| GRTP1  | 174.761105961773 | 164.865846124876 | 178.083311435916 | 149.997047695778 |
|        | 205.08372943071  | 216.077955163344 | 208.257420634745 | 238.124340832815 |
|        | 221.424451092316 | 225.546125484563 | 223.666832044186 | 393.264726588522 |
| GRWD1  | 386.917038897322 | 515.729905361375 | 289.09614335372  | 491.112594297928 |
|        | 1520.59210521859 | 395.049127927637 | 388.192984832638 | 403.47026424469  |
|        | 469.206346008875 | 424.665056900526 | 389.96566674501  | 385.678901612324 |
| GRXCR1 | 150.168496148941 | 146.281429685059 | 128.184708916755 |                  |
|        | 139.508029141287 | 128.628637585951 | 118.650091706226 | 131.58537948771  |
|        | 149.200848439601 | 127.226937898225 | 148.79958121087  | 119.221976571036 |
|        | 136.489566741917 |                  |                  |                  |
| GRXCR2 | 135.242328667085 | 127.251594986725 | 130.761936205169 |                  |
|        | 131.749403497912 | 120.300291760091 | 129.111259771449 | 129.735862775199 |
|        | 128.195916531413 | 117.703025026759 | 129.621296567128 | 132.871179509995 |
|        | 120.89590604359  |                  |                  |                  |
| GS85   | 132.024244263352 | 112.208950290962 | 137.134190411005 | 128.568463697992 |
|        | 133.281505040209 | 140.815807483203 | 135.966929064294 | 125.08580835258  |
|        | 130.49338418515  | 139.057572927874 | 115.713909155043 | 120.669452856028 |

|       |                  |                  |                  |                  |
|-------|------------------|------------------|------------------|------------------|
| GSC   | 170.140610481718 | 145.464640276742 | 166.330001480033 | 173.044636575826 |
|       | 184.473198008234 | 164.03801002919  | 147.561362873855 | 167.42476096854  |
|       | 166.027988561421 | 160.006185904123 | 165.813771791917 | 157.032746784217 |
| GSC2  | 123.868848032411 | 115.550587451456 | 144.199054675488 | 150.945167884077 |
|       | 127.04217189075  | 133.213697351807 | 117.47631318854  | 123.344450694117 |
|       | 116.994216357989 | 135.591199815271 | 141.583936153499 | 141.38612990166  |
| GSDM1 | 124.324855155055 | 125.143281492089 | 137.782648137869 | 130.584348445667 |
|       | 197.357728220717 | 129.385416279101 | 146.75924072364  | 131.814528687104 |
|       | 144.784835438567 | 164.136551371866 | 146.65668813596  | 135.067056559409 |
| GSDMA | 149.113794439994 | 145.989546968117 | 150.626826756019 | 144.101376910581 |
|       | 152.829437376835 | 153.566080603874 | 160.168654167074 | 158.946177055546 |
|       | 161.632610858756 | 215.143973502566 | 155.228605554943 | 185.591700082272 |
| GSDMB | 335.790909130243 | 339.663295617139 | 340.903961204211 | 270.520229426015 |
|       | 206.972440734038 | 457.292146759215 | 620.614820117452 | 1995.6000523628  |
|       | 636.56692204969  | 267.285998701386 | 964.473774310687 | 1116.95795024994 |
| GSDMC | 136.5680632044   | 146.215459988012 | 134.310685502031 | 123.45004246675  |
|       | 151.431513447721 | 153.498332327444 | 159.487615985875 | 150.25322837689  |
|       | 157.5032461329   | 770.632068590053 | 160.482734190577 | 146.689482187129 |
| GSDMD | 608.959089074987 | 577.801009921199 | 620.899414581162 | 631.408955630318 |
|       | 671.563789496889 | 723.250763797522 | 501.434722063309 | 803.840404197117 |
|       | 841.623780229898 | 505.704957182936 | 664.343553341563 | 555.259469428492 |
| GSG1  | 133.691053105482 | 148.844916975586 | 147.004172510641 | 143.939522733945 |
|       | 142.589312139207 | 139.502068079466 | 143.432889871079 | 150.198869833614 |
|       | 138.252656818036 | 144.339819009283 | 152.832573288735 | 148.80452641061  |
| GSG1L | 125.958139354095 | 112.371497988132 | 121.146511496024 | 116.300028266671 |
|       | 109.599589420575 | 115.988180787152 | 114.734439905052 | 127.494672751434 |
|       | 109.69466049307  | 106.797707723826 | 120.822923434486 | 110.875112640101 |
| GSG2  | 99.26400442869   | 114.888157310977 | 115.80656409185  | 122.010855318111 |
|       | 136.061992660698 | 134.244658505187 | 111.632811186988 | 136.978738825445 |
|       | 118.383317097375 | 119.550086560732 | 111.837468699281 | 127.527378949803 |
| GSK3A | 136.016912147651 | 131.202090507576 | 126.630787911053 | 130.98982984989  |
|       | 145.476377346532 | 128.69455713173  | 146.105844205919 | 137.954283575143 |
|       | 128.708956947928 | 120.308260557986 | 127.931887647108 | 150.367927843529 |
| GSK3B | 344.298510200653 | 328.269845211173 | 265.219444616245 | 385.584224833836 |
|       | 585.552940765069 | 456.990425618007 | 395.588345893987 | 458.151323130855 |
|       | 492.534183006883 | 665.106631364961 | 292.185246573643 | 547.042461070351 |
| GSN   | 2563.02488807613 | 2010.57142784228 | 2527.99279063127 | 2900.55309635211 |
|       | 344.737964092526 | 167.984051648058 | 160.322541355391 | 176.456539071735 |
|       | 197.169703621888 | 264.604297630839 | 238.782040902727 | 182.886100305943 |
| GSPT1 | 1974.49672149862 | 1899.94714976387 | 1883.74008471233 | 1777.29626660109 |
|       | 6028.67062754577 | 2856.14739820295 | 3258.07532987071 | 3298.73393277409 |
|       | 3149.26998719015 | 3090.52810501797 | 2033.67956299225 | 2974.04694562902 |
| GSPT2 | 362.095074331893 | 321.426100243434 | 437.836503489425 | 338.866471651692 |
|       | 274.047586063773 | 200.424975825325 | 176.312626750427 | 190.371287639453 |
|       | 213.602504580364 | 183.443006525616 | 203.276353321185 | 344.529927973082 |
| GSR   | 201.616302398819 | 193.930569647995 | 237.045634416039 | 226.221973502783 |
|       | 261.96528977292  | 228.616558999054 | 306.387898121409 | 252.655315526015 |
|       | 219.49354518392  | 282.797367565702 | 229.406012088782 | 256.538195034956 |
| GSS   | 226.458509834965 | 239.572670410818 | 219.792171863015 | 293.646275396425 |
|       | 548.869880723909 | 539.853394831917 | 505.404271675438 | 475.213525346293 |
|       | 311.481739745423 | 458.218913259336 | 329.88790758321  | 401.461825804111 |
| GSTA1 | 126.473768158566 | 138.891642304194 | 124.768399055809 | 133.850733997442 |
|       | 167.201570648434 | 249.029098902357 | 245.723316636363 | 241.987100712218 |
|       | 159.926719599391 | 136.306727083526 | 179.950904921667 | 141.634246722965 |

|        |                  |                  |                  |                  |
|--------|------------------|------------------|------------------|------------------|
| GSTA2  | 134.226711030456 | 129.001192144163 | 138.67221078031  | 141.021723049782 |
|        | 142.139331321085 | 160.203521879896 | 174.454754564111 | 216.457866890673 |
|        | 146.395248696835 | 137.267307036807 | 156.638070437044 | 136.238646974312 |
| GSTA3  | 160.131256419524 | 147.545667896282 | 150.552186000149 | 148.046961712162 |
|        | 144.529801006864 | 147.607202745865 | 149.4401812      | 160.105903942674 |
|        | 140.616811333466 | 143.897248922317 | 133.631676386591 | 148.13657736444  |
| GSTA4  | 448.767690095033 | 469.64693728427  | 567.869601934138 | 439.023181761356 |
|        | 190.549084022965 | 290.754210152709 | 173.459008248696 | 305.906480933354 |
|        | 209.051768656607 | 515.729905361375 | 175.111460651956 | 223.389795643722 |
| GSTA5  | 110.678680817471 | 119.103219740679 | 114.658668711121 | 114.428050500096 |
|        | 117.706795566317 | 108.570463496052 | 112.661607612444 | 127.3079781139   |
|        | 110.575582352222 | 114.607138204495 | 137.109541758085 | 116.273000405449 |
| GSTCD  | 144.972694558182 | 152.987939791009 | 165.932628858503 | 146.666759322506 |
|        | 148.853877151493 | 157.83121828793  | 154.483828924645 | 158.420821486138 |
|        | 157.15947600423  | 141.420747583126 | 144.287786573389 | 151.61049450647  |
| GSTK1  | 1243.11900823259 | 1210.40302822121 | 1168.3174645384  | 1240.4863200811  |
|        | 1375.76915021882 | 2660.39990175415 | 2208.49325118803 | 2244.6916226146  |
|        | 2154.00589005104 | 1750.21700780511 | 2539.87833317526 | 4037.15442268836 |
| GSTM1  | 1838.18547839898 | 2120.14463347544 | 2372.26073354008 | 1438.33289891548 |
|        | 270.360397503276 | 24098.0251582624 | 17496.0674176329 | 18220.6383250956 |
|        | 756.068695265118 | 194.734255772365 | 604.237898104299 | 15924.2167735021 |
| GSTM1L | 143.222342904886 | 137.176144667253 | 136.152827218905 |                  |
|        | 141.919263493165 | 140.57567768682  | 132.817645625115 | 143.152993168137 |
|        | 155.42165869714  | 142.577102697682 | 150.566842106244 | 129.452826518288 |
|        | 136.444883411968 |                  |                  |                  |
| GSTM2  | 2346.47361943533 | 2799.0487754899  | 2952.67114077688 | 1776.38646235135 |
|        | 185.984938124891 | 17830.1333276624 | 12968.2945749    | 16328.5991894287 |
|        | 1007.41624313399 | 208.385295246155 | 336.067655676466 | 13360.9483836861 |
| GSTM3  | 1883.74008471233 | 1367.19652160532 | 1284.19937294949 | 974.544773560873 |
|        | 167.395369670065 | 1110.43791444289 | 192.209344004015 | 148.511059836029 |
|        | 408.263886786123 | 149.292552957665 | 397.660202059209 | 815.779445689417 |
| GSTM4  | 197.034073391478 | 185.727947276958 | 218.839681873515 | 193.190059954084 |
|        | 145.493977576106 | 257.813193543819 | 453.282973743379 | 268.52833723726  |
|        | 182.32514927211  | 134.648780131578 | 202.869364962231 | 294.410833087913 |
| GSTM5  | 589.953707188378 | 539.853394831917 | 484.764806127211 | 711.729857540712 |
|        | 140.083495854322 | 152.054874792646 | 121.207040901483 | 141.368078865065 |
|        | 144.298011270428 | 141.619432083003 | 133.900005368973 | 156.208747691032 |
| GSTO1  | 1863.96986643676 | 1832.35076992253 | 1978.12229412176 | 1559.26487922551 |
|        | 1137.42879398351 | 1690.96371604294 | 2166.68174726155 | 1505.09908072606 |
|        | 1738.96798001895 | 2068.04582900231 | 2601.89405525276 | 4882.16892310839 |
| GSTO2  | 212.037224737798 | 325.859917318516 | 207.831299397177 | 155.715728894101 |
|        | 722.399669963921 | 680.250735532287 | 887.471553448641 | 699.984140389009 |
|        | 666.847934976479 | 786.62709337246  | 1153.5175534971  | 1327.65573168233 |
| GSTP1  | 4373.91897463938 | 5361.3600315322  | 3949.19206005238 | 6670.51138785163 |
|        | 11598.65499235   | 7902.9189607838  | 5776.63686968234 | 5714.36902486392 |
|        | 7771.28016059011 | 19087.9532735841 | 10765.0336035748 | 9527.86367804896 |
| GSTT1  | 633.594811068524 | 591.013515828247 | 1329.90419210779 | 139.324006489527 |
|        | 167.822075935474 | 1334.69145271749 | 878.986106116952 | 141.15458637181  |
|        | 796.052115217208 | 161.514651272858 | 122.262664384198 | 714.274201838067 |
| GSTT2  | 168.071171406779 | 178.235281981508 | 151.839306445341 | 206.149539851803 |
|        | 145.00699763203  | 163.07139884152  | 151.973681370675 | 141.739299634007 |
|        | 138.323567041191 | 189.027594735456 | 140.903091584884 | 156.456332386608 |
| GSTT2B | 164.327140372968 | 144.470642732973 | 127.177422395113 |                  |
|        | 169.999692055871 | 137.416133786828 | 128.155080148958 | 137.954283575143 |

135.75568942028 119.48998115497 196.974807677659 124.595925483149  
 148.353927712013  
 GSTTP1 148.649619242172 134.291229819546 131.649830934459  
 132.834433153076 141.064086298948 146.108551647446 141.587109176431  
 138.962649407431 125.707228291312 129.856994052591 130.772410329685  
 139.191746593825  
 GSTTP2 312.645778869254 267.535469518664 285.46340356157  
 287.287337931982 167.645930148254 328.33387481068 218.529160053398  
 245.082816415008 211.572396862776 201.954167006591 280.913748398876  
 224.6588173737  
 GSTZ1 152.371569700039 157.269049853539 138.317443162096 176.355556618289  
 187.881334544018 147.691011072898 156.114825514646 218.70412656621  
 164.890716656336 185.560737176115 179.163748161358 184.844915350411  
 GSX1 134.964619235561 126.359440164601 116.07902130325 119.469328303796  
 123.952494134263 141.533138525284 127.354826381656 116.977202125093  
 130.351302840602 122.583461806645 133.04222812639 116.263405190786  
 GSX2 116.437403962939 125.079330440615 112.036753245281 107.316786994369  
 99.7487411813724 107.260023460914 103.594872791657 115.194730717797  
 104.406314027414 112.219585614955 103.520748827831 115.392989580183  
 GTDC1 180.437648146588 166.692386207143 179.177884962513 163.426663985855  
 182.143506470859 168.830344627025 172.84784588171 171.314681729657  
 167.186780161168 206.802308105224 172.562162872242 172.509081696309  
 GTF2A1 134.46743016543 134.70848693317 128.097206000942  
 139.287871460674 125.739946257697 131.342562516383 135.023594109361  
 132.322618637842 134.42983422342 127.339018771488 133.115543233699  
 150.909559587354  
 GTF2A1L 181.500222423634 164.665907233149 136.115306932124  
 160.415807880532 120.767950825369 133.686850910378 130.66863243733  
 122.176811388389 125.04327844782 130.822330736013 134.06996703302  
 134.741781820234  
 GTF2A2 946.273229715791 937.593129242257 1230.00744483191  
 781.208872924532 1151.89087953837 1296.10827265334 1778.73916100529  
 1682.64624665931 2039.55802107872 1630.1630053946 1238.11700377838  
 1821.08523647593  
 GTF2B 302.1846598234 281.792602269388 361.082957133644 232.276667029184  
 324.401611136662 704.653073777277 511.113083958771 751.077307018319  
 650.0804221227 520.585319342817 462.779122987815 516.755267232127  
 GTF2E1 171.731395791818 180.733673680261 161.172420368335  
 160.17208299932 196.429685815196 277.219796733134 208.816482659752  
 244.401472859026 212.854068610681 174.761105961773 219.814706416471  
 197.938447651153  
 GTF2E2 1176.62418139379 1067.30106203503 1273.6393529108  
 1199.35864276583 1045.49947183547 1025.27246494218 1424.04009914668  
 703.29965727829 1387.90327883679 1492.83354014907 942.41077071058  
 1492.83354014907  
 GTF2F1 375.131728190867 499.964000319181 437.344765185802  
 567.143102792772 617.67819271245 565.112283062121 448.106077184152  
 452.606433325387 449.408793796673 544.30845362168 698.358285634451  
 518.925188630246  
 GTF2F2 783.373390305885 723.807658768693 1047.78978081493  
 825.781627776577 407.442337662943 619.75986112089 290.213039891361  
 580.474775712828 776.411045078049 994.213397985121 421.303580698397  
 919.626220838414

GTF2H1 266.563990988678 242.096692715029 259.826625866106  
249.064573038094 170.98312926 183.937484597232 219.792171863015  
195.078843867124 198.522123898437 211.736398352592 238.654367531982  
178.43642939806

GTF2H2 117.499697378893 119.469328303796 117.445284668654  
107.930325780047 116.011005504201 106.285472845323 136.238646974312  
119.859508630454 115.35376992547 120.665520347481 130.209752198964  
127.535214313797

GTF2H2B 234.947745514175 183.100286716683 231.728984785324  
200.204064462384 186.951061159734 217.576547690525 299.717935831288  
230.284216427158 229.130679600654 287.402339322061 262.488050186425  
357.140791982825

GTF2H2D 120.633217745524 139.038389244329 137.72327986309  
129.419280058541 135.10155936286 113.609215169397 132.651922794567  
118.091125088778 133.425151103622 129.705735906962 117.312094804205  
128.23910347716

GTF2H3 198.659595851481 178.684992551017 228.025383952578  
214.200081541057 226.506852362359 306.59090554099 352.741885295157  
332.978350226738 327.010503005631 394.892918166519 234.461229199142  
315.064477782052

GTF2H4 282.926325589238 323.628636799403 305.252666831522  
469.206346008875 598.449359425056 251.161789722751 318.06081614151  
244.897869154624 229.85833221434 275.888299685521 309.937351755502  
286.469773081481

GTF2H5 1228.89116158868 1219.36024606325 1640.99641023476  
1243.11900823259 1178.83933381069 1303.33810980467 2379.15291239548  
1946.45172007314 1395.63393859192 1628.24528041404 2004.19532096239  
1958.96627327952

GTF2I 163.362182585182 153.574068503306 158.058346079359 146.713861499546  
190.5930909277 190.850639994777 209.362806125315 228.616558999054  
194.186994486095 187.572517928061 185.905819051223 287.242697383558

GTF2IP1 401.542072222692 376.791876040886 537.510539142248  
353.826834642154 621.354393918348 754.97177863997 867.369315017411  
1050.90881385623 1028.39666838369 517.993093601127 687.269774217064  
1040.73829397913

GTF2IRD1 209.702683803624 208.237011955037 180.881464829981  
221.390817970859 304.751330890753 202.145180994821 243.246632667118  
209.662262708551 210.605864685448 224.424524191566 258.036064876416  
240.631264915238

GTF2IRD2 176.431477850092 158.25554353787 228.675099004411  
158.221595000183 157.915292037378 157.619627711954 164.529828080312  
186.653791045656 173.121618125421 172.827288328708 153.418095627352  
172.604689611475

GTF2IRD2B 233.884660128222 224.766155406229 353.674560414317  
223.918931440768 463.622673539254 309.580750386386 455.08515350006  
274.627303114477 266.71318061066 420.361583975644 264.306927596371  
651.43207839949

GTF2IRD2P 212.545989139388 192.399146702036 321.177982468322  
251.915179734134 169.201608999937 158.653161314597 163.284853420896  
174.323881548679 171.080373870373 141.858928084825 176.689683169567  
171.080373870373

GTF3A 1752.50728312967 1961.26255930192 1500.16816750361 2648.41012401723  
1978.95750795951 1944.15673951528 1500.16816750361 997.460212152591  
1607.52029676299 1249.89496565284 1323.91781040143 1306.20183851747

GTF3C1 292.185246573643 339.172031360524 252.473612525884  
407.152764702613 580.164288826741 287.374706071354 263.183010631644  
257.941367816557 306.896732729554 228.820894086914 206.605699708924  
229.511643376643

GTF3C2 357.835334661098 394.576038252334 397.737702926328  
365.286234166621 865.435843446989 785.008529077795 669.731546951281  
813.034056288861 611.208083466988 491.496499481595 733.49038042129  
698.086166782221

GTF3C3 370.466403181536 360.991542429346 469.714826990063  
339.917319653382 346.476121089685 771.512332113075 544.462032960964  
734.97763567765 533.54045706916 692.359779743985 749.220616713093  
346.476121089685

GTF3C4 157.078563342652 131.587987756056 140.181179402328  
128.525769531728 163.736324784234 145.301551442388 144.346988809708  
134.134810805413 145.27890423835 147.530719472217 133.874468336025  
143.2438241778

GTF3C5 296.915883082902 370.617422894068 302.601458409102  
407.518324776453 706.292905820227 370.301819403832 249.354198174438  
290.638110977807 336.212224495877 318.628084728596 290.241064926886  
202.943987922418

GTF3C6 243.65518489122 249.449151040445 294.22752955801  
255.435582426271 320.979443123471 370.877260088621 259.252807304272  
385.135014083686 286.541028896473 465.683139139622 356.84281623052  
543.710330214344

GTPBP1 142.434356144925 152.552277008504 134.599629045981  
163.045605069267 173.544556426164 120.727504500018 145.42029807396  
137.049677918041 137.80436357695 137.908991199407 152.353494489233  
133.36168342199

GTPBP10 155.61996871093 159.443697452694 187.264411519101  
137.5954358221 141.218832234405 163.566535828036 156.269957530519  
177.524818593325 169.791616021987 156.210423316722 159.311949668403  
206.620708230452

GTPBP2 117.024039521425 118.708644971927 118.540620928268  
128.753623886188 149.712320986646 127.961153369579 152.385014030957  
122.226875707253 135.513494853742 141.117659724704 182.747079625619  
129.751916520201

GTPBP3 238.400565506288 236.933960698783 230.447203571825  
260.642170838161 317.457588721567 297.636316709322 258.759507964221  
286.085833802132 246.594244983507 303.005912224195 204.770742504612  
307.316241247336

GTPBP4 920.342429282889 804.800251415824 917.646958427824  
716.229989890801 1694.24232555141 3008.43964505208 1279.9555644913  
1793.75125318113 1329.3013039618 945.830852603704 1260.50387106816  
1942.08859727404

GTPBP5 141.066106476109 160.496585125233 130.998637545686  
115.217608555334 141.426756696799 124.401083237195 125.025064237439  
126.124937863679 127.593764897583 129.020356016653 143.870849001074  
125.712260481294

GTPBP6 1728.86115695979 1682.64624665931 2004.19532096239  
2418.66999907188 3843.07094386605 2041.03024136014 1617.44377452783  
1751.22580157752 1626.34607278613 1013.03054571763 1601.19401366685  
2493.5484556802

GTPBP8 197.740912476527 198.055877414824 212.836093887552  
196.076386020815 190.152824885328 217.327543190687 237.906142045719

231.915272112361 241.105817192695 338.739180103373 243.402781509365  
228.879434668972  
GTSCR1 161.866405026758 144.114177076352 153.744962185987  
150.51056917809 163.134784474437 183.302479730653 169.691392833277  
163.081050585097 157.43824048982 163.809967446414 146.197678850188  
170.342828808493  
GTSE1 122.733870240098 125.253637835638 117.696262292883 129.838790698396  
203.298764374262 174.127444395862 160.35668299062 191.961269585431  
179.663258610881 209.146021798649 170.361237529247 199.353823724989  
GTSF1 145.799530970042 179.286187825363 158.120079903425 147.772490977392  
547.202354339933 168.223865801948 150.52625734893 242.5085895186  
159.199045715212 170.825161347825 146.093387013881 161.573975848093  
GTSF1L 119.696656494403 119.498312996987 115.14883090249  
123.716400094852 106.088807114602 112.993452506946 125.742631850732  
118.593717189375 117.480506535399 113.644993086829 138.365589511693  
122.410340121549  
GUCA1A 143.787766055379 146.359038260378 147.670425834523  
152.122141650397 141.91067228913 144.63774603725 130.321133400634  
130.445920648705 143.707084981291 136.104965836123 157.113536717393  
140.684066288019  
GUCA1B 159.082447644277 163.340435089911 160.001115445038  
157.189041157784 139.162076054072 144.358535632993 142.452409969639  
162.289781945582 149.824791474186 150.000345076364 150.403702679274  
141.53717142784  
GUCA1C 179.905809470907 227.32463765717 124.561511833959  
121.57069706238 114.400185930969 119.558626216818 124.418295003824  
114.470670941078 112.314595956147 113.460835359833 142.034369454643  
120.003095000297  
GUCA2A 143.965049742993 151.134466830828 148.711943433557  
141.436235043864 480.593729033799 188.444498848767 185.627515956848  
155.612543356905 167.397758092427 150.746423638097 150.655359765209  
155.056545639862  
GUCA2B 144.143692745479 167.114291248266 133.443807124822  
152.57040089034 198.470718196139 153.748035612441 164.357373919714  
166.640325848102 149.483826392464 183.795632040455 124.031916322066  
157.736101691222  
GUCY1A2 132.894049694258 132.550022967297 139.699189528879  
166.12184890921 135.790955294639 143.532014058535 153.818325601312  
135.943252855457 160.261708910517 153.675939908241 150.336115779606  
148.463566046951  
GUCY1A3 257.685284145848 287.503594820801 173.647320180498  
275.584858082096 159.815932985135 278.775971122032 178.072538529634  
192.475309217696 222.764568757453 344.786541451395 151.869928694006  
147.676279102364  
GUCY1B2 136.229159638766 160.303394115537 135.195985987169  
155.247452081206 149.200848439601 164.545596179262 140.732618320154  
165.169920299969 150.578023008958 148.421611987655 135.771423315597  
183.416437587938  
GUCY1B3 157.530573508003 160.293522619371 167.139257044999  
161.16688895179 142.635015113687 157.821491577808 137.438984175012  
153.279026396412 137.172030225913 159.68134949161 153.752502094283  
139.408234219133  
GUCY2C 140.338622198206 136.378203924435 131.202090507576  
132.308358487671 123.98384416057 147.079157199448 124.222529964098



131.497454038525 125.892022613725 133.318665755015 124.959873714884  
 132.216453078716  
 GUCY2D 151.730862403472 145.159572111039 156.548858402702  
 161.640122360448 156.698856643638 157.126460242995 142.004558968904  
 163.904137395349 164.274491958161 174.155599133789 149.331805754859  
 161.17923997423  
 GUCY2E 136.335679863251 134.327229861635 137.674025476238  
 171.706534562905 139.42531690926 127.26820735867 143.764266466204  
 156.311009595629 146.740694608146 143.616189776965 146.157459765796  
 137.432492568789  
 GUCY2F 143.06806126472 153.051143478997 169.87591929982  
 179.632562895905 155.358918578397 187.132496910208 159.324816814876  
 169.574755162815 164.136551371866 168.878645908397 140.301945597122  
 165.022029012505  
 GUCY2G 141.121364213272 141.602233757588 145.389721946046  
 132.122273848715 119.370219299491 135.504526903482 140.646946425036  
 138.35738548449 136.256456726841 134.465488237877 140.909875639658  
 143.785769607842  
 GUF1 191.692830869809 205.495823410422 259.72035004624 210.085329463347  
 231.338258067616 250.82359383789 213.813667557079 223.359785518285  
 280.558463661137 379.102958448288 197.895094054577 244.5675215931  
 GUK1 2374.1382412432 2320.41293992992 1828.66165670455 2352.01196541874  
 3490.77593331727 2129.84680802619 1790.53556140959 1025.88559245013  
 2076.51786803222 2992.18604022433 1609.54149931375 2952.67114077688  
 GULP1 164.281196089736 157.81327663167 170.825161347825 131.364187047583  
 120.325985681299 123.591078216224 114.826501559828 123.247698282967  
 122.254824223167 139.907840403521 112.693431140524 123.25201993575  
 GUSB 457.548150688248 434.325609889068 489.528040775004 438.533112511098  
 1034.2217095753 461.143361255467 782.448692528135 836.235700891687  
 609.100385482325 609.665323786904 661.826149512811 781.790858580895  
 GUSBL1 458.705688226305 360.124745133393 833.198511430615  
 279.070493043898 314.646369385896 551.086785904249 402.694564608582  
 500.132469062228 451.147418314412 481.86545778383 461.482735533799  
 612.758976723556  
 GUSBL2 294.997671630798 269.726397478364 252.222481637238  
 373.860920943049 295.778154263981 329.406649846151 326.45984882427  
 341.43511159996 226.960024551778 261.366143735074 236.191384383802  
 271.770138565186  
 GVIN1 344.487982154705 390.752579014611 212.5119818331 282.963958072528  
 202.819949307954 392.582612044755 222.848935978648 410.138738410101  
 493.209107049493 190.238332933452 207.73395131954 166.958831664154  
 GXYLT1 252.10470581893 249.80160363144 254.424207773566  
 250.718986968076 193.522811257085 273.353254857377 314.386320310898  
 315.752980521266 266.19823384117 186.268881719287 287.287337931982  
 278.687780705367  
 GXYLT2 152.199095472082 149.419308407564 162.351212914573  
 136.514946957145 115.566303449363 135.600312863552 160.493314658788  
 133.348510114432 136.432109029368 134.094231940612 136.104965836123  
 145.048033586779  
 GYG1 2962.11407134162 2305.11856249143 4276.70912292877 2601.89405525276  
 1162.09529660662 844.187489702587 873.879064183441 1029.75852676191  
 889.054356462993 1017.6969123529 986.65554605455 994.802763887989

|         |                  |                  |                  |                  |
|---------|------------------|------------------|------------------|------------------|
| GYG2    | 205.476230849391 | 193.98814423456  | 206.469040492609 | 224.062024091915 |
|         | 177.592497020798 | 465.926873285563 | 177.151218006672 | 146.215459988012 |
|         | 178.955938825556 | 130.342425029134 | 135.68605915552  | 140.525013926642 |
| GYLTL1B | 147.371905597494 | 119.207503310618 | 140.493975416335 |                  |
|         | 142.179197020805 | 146.164093136588 | 146.366013190845 | 159.701028026285 |
|         | 142.052454741558 | 148.866229889479 | 140.016122996485 | 138.184717352015 |
|         | 146.686192012988 |                  |                  |                  |
| GYPA    | 122.002822875994 | 112.476111928742 | 115.863243613121 | 110.256771079797 |
|         | 107.841100741858 | 109.318922864507 | 115.293844461817 | 116.282988576774 |
|         | 106.088807114602 | 113.091739139626 | 114.143874572202 | 117.303671445328 |
| GYPB    | 119.072213573568 | 128.488598467312 | 121.45175516842  | 122.676368520743 |
|         | 111.448871835514 | 111.137519376499 | 121.065278765151 | 117.862532836494 |
|         | 106.341910466588 | 116.884397420467 | 120.660349211375 | 125.121517583946 |
| GYPC    | 1093.85316636801 | 1080.42884514937 | 1026.61404215739 | 1367.92869625376 |
|         | 161.94312376726  | 195.400963839097 | 148.211354898758 | 203.475080163804 |
|         | 312.286788541158 | 187.046760972666 | 172.502036705114 | 152.532083511961 |
| GYPE    | 146.1289358176   | 139.59941545613  | 146.235832275574 | 153.726935957906 |
|         | 140.714455864886 | 146.619846538124 | 135.1951749488   | 140.327799236005 |
|         | 139.917662338546 | 136.278361222532 | 134.327229861635 | 137.068717031383 |
| GYS1    | 166.315369318355 | 168.773340961473 | 155.298546821687 | 181.135519188216 |
|         | 357.835334661098 | 166.335294339013 | 207.076364103755 | 165.642728895682 |
|         | 173.395370400371 | 186.167877791105 | 174.161146689117 | 193.569894919176 |
| GYS2    | 124.944563166658 | 137.430389116025 | 122.751674866182 | 115.327402810793 |
|         | 121.04331582508  | 119.198789189881 | 118.572988141773 | 116.186846885411 |
|         | 120.201521341263 | 128.118223792086 | 138.213742418402 | 130.317604643904 |
| GZFI    | 128.927103442679 | 145.540872377507 | 143.519786615253 | 138.661548678191 |
|         | 144.513730107393 | 184.813094907887 | 129.95138839192  | 139.200284631709 |
|         | 135.134213292186 | 120.076742232995 | 136.251820364823 | 138.394923932916 |
| GZMA    | 177.450674276588 | 177.679330300381 | 130.268322464805 | 131.017355402204 |
|         | 145.296229550382 | 169.349922114861 | 136.353051841792 | 220.113261580385 |
|         | 334.772648743153 | 190.444387031552 | 393.264726588522 | 152.635792342068 |
| GZMB    | 123.981053866137 | 143.234195669431 | 114.378420394004 | 121.177681858671 |
|         | 137.654833215154 | 139.997245010492 | 132.926799887017 | 200.536814571322 |
|         | 523.435696794756 | 201.507971833902 | 179.048139035247 | 132.649409216699 |
| GZMH    | 183.226294747874 | 160.045715314465 | 138.685330935707 | 154.783699020901 |
|         | 138.158400190671 | 155.70645844794  | 146.242897296397 | 157.787233338636 |
|         | 201.415695076278 | 155.741507341843 | 134.9404536551   | 152.356731704094 |
| GZMK    | 187.046760972666 | 158.316173597874 | 127.137447808551 | 143.658600740177 |
|         | 117.692662275393 | 202.99342484328  | 162.122250419992 | 345.135289739599 |
|         | 305.499194075747 | 152.488480322526 | 189.575681012578 | 158.521812954982 |
| GZMM    | 164.288645768576 | 154.98147307591  | 144.903414594588 | 154.569432344392 |
|         | 159.909121784808 | 168.824578400555 | 167.268645224361 | 164.690739760426 |
|         | 177.812335593522 | 149.831566330214 | 143.830319259804 | 164.000772606739 |
| H19     | 2816.29814823646 | 3615.76740804718 | 1969.67552562117 | 7054.92270618408 |
|         | 462.686385881492 | 6156.29203791697 | 269.62298406345  | 302.272304483941 |
|         | 248.229468372363 | 20099.9833491654 | 691.205738835917 | 250.25959091612  |
| H1F0    | 1399.41653736746 | 1966.09691567857 | 1106.75785702993 | 2291.40912229281 |
|         | 5811.97916044218 | 2168.58813300343 | 1566.65825409044 | 2871.34694522381 |
|         | 2449.76376608893 | 1567.89763050645 | 1129.15018335354 | 1978.12229412176 |
| H1FNT   | 167.468390483999 | 154.371946675862 | 184.029968090084 | 168.415345783635 |
|         | 175.313689069815 | 161.390489603929 | 162.484777758676 | 157.891350650633 |
|         | 166.452651396293 | 152.317890573534 | 149.541917326637 | 171.49930976135  |

|        |                  |                  |                  |                  |
|--------|------------------|------------------|------------------|------------------|
| H1FOO  | 137.53234136613  | 144.41489969974  | 154.831307586538 | 150.737888487925 |
|        | 165.547163740218 | 157.792868983503 | 148.614214326995 | 160.382971629272 |
|        | 151.342902631318 | 162.505305538911 | 138.652735298338 | 169.293852989203 |
| H1FX   | 627.803400871547 | 761.726829618132 | 481.037647470809 | 803.840404197117 |
|        | 1726.15788525017 | 414.713379367927 | 454.133372808458 | 422.23268864343  |
|        | 750.494286476465 | 646.704226815099 | 499.891000749138 | 459.652708187549 |
| H2AFB1 | 130.799009128937 | 131.730758460802 | 148.832461329713 |                  |
|        | 145.172776053    | 141.139737175648 | 134.89415027205  | 131.707530115415 |
|        | 134.56314960832  | 123.129785564258 | 134.635645106042 | 136.805379739087 |
|        | 141.65642171417  |                  |                  |                  |
| H2AFB2 | 113.886420801388 | 113.879459563492 | 109.30275288389  |                  |
|        | 123.782746527199 | 131.04482088126  | 115.713909155043 | 109.700513642061 |
|        | 134.530516701271 | 120.089228795888 | 117.790593990682 | 115.384304932365 |
|        | 128.840466579373 |                  |                  |                  |
| H2AFB3 | 123.119524624735 | 132.329892644992 | 145.741465098455 |                  |
|        | 130.40517506216  | 147.889486635135 | 158.675960205792 | 148.975112606364 |
|        | 139.593950393555 | 121.675007387533 | 128.914885412263 | 116.71331256222  |
|        | 142.090009728666 |                  |                  |                  |
| H2AFJ  | 620.760947818536 | 742.128229715198 | 632.031410234577 | 596.076764072945 |
|        | 4266.92715355342 | 1391.89900758685 | 1596.33832632698 | 1582.0221231161  |
|        | 2515.7035557541  | 1066.25208226214 | 1281.9073569335  | 1195.6335460045  |
| H2AFV  | 168.682307349713 | 161.310855691717 | 180.265418365803 | 171.51411661213  |
|        | 194.352807599399 | 165.48594766783  | 172.631499322646 | 172.319604146201 |
|        | 170.775283924087 | 149.675363177375 | 145.165443106042 | 172.387657419201 |
| H2AFX  | 157.358696886078 | 184.493681387276 | 167.421776383056 | 175.908645445479 |
|        | 660.315285709317 | 253.697419495959 | 212.571491543077 | 306.333710880618 |
|        | 398.423396126075 | 219.78041403077  | 239.541516080716 | 300.358738353443 |
| H2AFY  | 1154.1046856215  | 1202.74869573717 | 1153.5175534971  | 935.423045210635 |
|        | 1780.97169244555 | 2242.73511149559 | 2527.99279063127 | 2649.39312662326 |
|        | 2200.94974896771 | 3403.37530051435 | 2061.9164323309  | 2979.27692778783 |
| H2AFY2 | 824.746488539942 | 799.132592914065 | 745.482863218223 |                  |
|        | 881.15414246017  | 1258.16519121331 | 934.546444634669 | 961.931130189779 |
|        | 1008.43888926584 | 1149.3250945792  | 657.562129888446 | 1460.24985399013 |
|        | 2005.76678571689 |                  |                  |                  |
| H2AFZ  | 3693.4058156307  | 3566.89107958971 | 4995.96906061198 | 3255.91703674439 |
|        | 6830.46932926077 | 10280.5093368677 | 5250.88041666757 | 10222.4435857673 |
|        | 9852.51412359574 | 5932.37714987741 | 2910.00269086567 | 6508.71638048514 |
| H2BFM  | 153.603765998461 | 141.473218014605 | 128.65678873939  | 138.113751487484 |
|        | 149.113794439994 | 140.92377681377  | 144.167857433516 | 145.641373616866 |
|        | 138.726894569892 | 139.888008605915 | 142.495333453346 | 179.321622114583 |
| H2BFWT | 117.207266754941 | 117.847744476387 | 113.672605838627 |                  |
|        | 105.450273343324 | 115.545558600232 | 101.431474941041 | 113.529619135543 |
|        | 127.451155926679 | 112.495783269169 | 102.563722570171 | 108.779204939177 |
|        | 123.484987952263 |                  |                  |                  |
| H2BFXP | 147.93088503956  | 126.793778645808 | 142.49005761699  |                  |
|        | 139.81502919163  | 127.699226067847 | 126.330382425318 | 137.757902615328 |
|        | 134.966883985611 | 130.661695937728 | 134.85590586532  | 149.508432746895 |
|        | 134.616051224668 |                  |                  |                  |
| H3F3A  | 6044.78942014135 | 7491.93659373205 | 6179.86800320807 | 6793.99737496637 |
|        | 17067.0086403248 | 15809.9561036761 | 9852.51412359574 | 9596.10781313429 |
|        | 16077.1585881362 | 7656.97151002785 | 10048.4260790604 | 15809.9561036761 |
| H3F3B  | 1885.93146154931 | 2741.71904421456 | 1426.56252600395 | 1973.20689165831 |
|        | 416.546844844021 | 3455.20639616159 | 976.360310504918 | 1149.3250945792  |
|        | 1226.74043569231 | 655.094843900848 | 343.833659987063 | 1593.49895307361 |

|       |                  |                  |                  |                  |
|-------|------------------|------------------|------------------|------------------|
| H6PD  | 165.386056999339 | 159.801315111886 | 171.61704153463  | 167.640645997754 |
|       | 146.019622621809 | 141.980728956046 | 162.37762946664  | 156.157567405927 |
|       | 144.774621469452 | 135.036576196425 | 157.639688257892 | 154.38977085744  |
| HAAO  | 177.267145265362 | 197.100205890532 | 194.847305068008 | 171.791030104358 |
|       | 175.757588503244 | 163.72257517759  | 171.791030104358 | 173.233357775898 |
|       | 162.55521875551  | 165.459993078103 | 168.173803952157 | 168.061346742356 |
| HABP2 | 109.355444907633 | 110.486191378104 | 98.6941019230576 | 123.538037290702 |
|       | 111.962852412774 | 116.236538651031 | 104.58424134098  | 119.334967856721 |
|       | 109.564709878576 | 120.300291760091 | 116.507315786826 | 113.388450168062 |
| HABP4 | 453.282973743379 | 416.307629596091 | 478.479988875208 | 461.088572554864 |
|       | 199.933148219784 | 150.962828147611 | 158.747029092329 | 166.4983332269   |
|       | 172.237115475147 | 169.16155608071  | 172.108795190633 | 137.188849160569 |
| HACE1 | 167.536828038178 | 155.259089547817 | 181.622689471026 | 154.808798024399 |
|       | 173.850390626782 | 167.658560306884 | 179.985468369202 | 166.04965258862  |
|       | 164.89597889259  | 181.431827312784 | 197.205792984885 | 184.241640200823 |
| HACL1 | 421.836020491624 | 430.329437928013 | 465.809961695043 | 392.004079531068 |
|       | 628.485648053393 | 574.6506349984   | 510.659785046811 | 1247.02514044778 |
|       | 814.759191652981 | 436.731545612902 | 496.328898534802 | 465.029298672645 |
| HADH  | 1650.77281891596 | 1590.87426068638 | 2114.9754128463  | 1629.32740709526 |
|       | 1364.1224589383  | 1490.02976786379 | 3277.24948092771 | 2293.05058904656 |
|       | 5382.31371568106 | 887.147199303294 | 1969.67552562117 | 1287.3125466789  |
| HADH2 | 228.852495818211 | 206.669783013221 | 168.71216652064  | 261.426617866925 |
|       | 459.388390392518 | 358.897128592042 | 262.53374754047  | 367.898258897888 |
|       | 310.690317681243 | 364.113665301598 | 227.467161919443 | 330.553659265085 |
| HADHA | 444.584594376357 | 476.383294794912 | 399.664121956178 | 573.644925180854 |
|       | 391.500696444149 | 360.605223912114 | 360.243484271891 | 444.479355480138 |
|       | 273.073938260793 | 363.343480850598 | 240.561105692347 | 318.73799597811  |
| HADHB | 470.746477818201 | 463.99922423125  | 716.420861490714 | 536.067857235731 |
|       | 669.124699103132 | 928.151632070573 | 692.945420109927 | 1464.04124596264 |
|       | 694.907086612929 | 458.151323130855 | 867.369315017411 | 765.333633142088 |
| HAGH  | 581.828502821435 | 548.288640768746 | 740.196934996626 | 640.568342662067 |
|       | 732.040299742444 | 597.651682540611 | 602.86705608228  | 586.366632966978 |
|       | 522.300029971277 | 479.261755380872 | 413.000072500071 | 398.272713014637 |
| HAGHL | 144.101376910581 | 145.560904207183 | 145.830916005206 | 135.313148180961 |
|       | 152.738468369498 | 160.019067307733 | 147.576533768761 | 148.034899103241 |
|       | 149.108582827136 | 163.764600217347 | 150.452467115669 | 151.148295679242 |
| HAL   | 147.592770523507 | 148.544887355857 | 144.242034773232 | 164.185346950306 |
|       | 155.502363062633 | 150.924948809354 | 153.100979553727 | 154.648806105422 |
|       | 158.625060605976 | 150.904618960507 | 129.705735906962 | 145.265512354674 |
| HAMP  | 145.261662166215 | 143.526983440589 | 138.625680450198 | 164.347168837655 |
|       | 161.331326682743 | 170.918584418153 | 167.408314067262 | 157.915292037378 |
|       | 168.3523504179   | 169.124088593549 | 196.638594797353 | 164.678646890649 |
| HAND1 | 920.083835296898 | 996.999238316991 | 1801.74467005923 | 1887.82245931444 |
|       | 119.087972087745 | 110.273174147374 | 118.875640081461 | 118.505980204837 |
|       | 120.297848408451 | 128.742617750403 | 127.935614145702 | 116.52455193626  |
| HAND2 | 259.064601204239 | 275.298642145005 | 393.707031354025 | 309.997909440664 |
|       | 144.114177076352 | 148.635174393031 | 143.567488854011 | 151.169283505727 |
|       | 152.733409144267 | 153.363629311799 | 151.742938010671 | 145.841028932318 |
| HAO1  | 137.794858639838 | 146.392657608076 | 142.01454627498  | 140.52059487958  |
|       | 131.722397988741 | 143.107570838895 | 148.054367166566 | 142.724123724574 |
|       | 145.804420322848 | 154.076216899447 | 136.969124414576 | 139.522018789485 |
| HAO2  | 135.281686411685 | 137.027334042585 | 140.73456875677  | 150.642465826166 |
|       | 134.415163103911 | 144.946362772133 | 127.43866970659  | 133.651203764842 |
|       | 141.353084959289 | 138.698178321535 | 126.085039271526 | 140.232244264861 |

|        |                  |                  |                  |                  |
|--------|------------------|------------------|------------------|------------------|
| HAP1   | 120.322292418128 | 118.855500322915 | 126.578035793406 | 128.65678873939  |
|        | 130.912137250515 | 129.664016819143 | 122.696382705233 | 127.980776299586 |
|        | 129.618097261902 | 125.443242860371 | 142.744045151046 | 127.12451522286  |
| HAPLN1 | 146.266350809492 | 142.792294709664 | 141.626504154989 |                  |
|        | 133.209211811498 | 142.964043764953 | 127.242627779136 | 153.485731788293 |
|        | 159.334165651951 | 168.729301938015 | 156.934589811742 | 142.163834995141 |
|        | 149.874424976813 |                  |                  |                  |
| HAPLN2 | 174.177944561595 | 167.194306682927 | 158.371599884762 |                  |
|        | 190.165771406362 | 160.35668299062  | 189.362958041175 | 179.091917512822 |
|        | 170.622615783608 | 146.332425559689 | 172.836730741407 | 160.75642485037  |
|        | 183.905926269285 |                  |                  |                  |
| HAPLN3 | 125.379842077431 | 144.725650040212 | 121.945541820091 |                  |
|        | 130.75707278606  | 164.276668889213 | 123.949411804458 | 125.189588215659 |
|        | 131.373012256275 | 198.226525986857 | 139.191746593825 | 159.094117857743 |
|        | 134.964619235561 |                  |                  |                  |
| HAPLN4 | 122.254824223167 | 133.017537400068 | 114.143874572202 |                  |
|        | 122.182695593404 | 131.430921437192 | 120.925930409474 | 116.087696503753 |
|        | 128.075865243385 | 122.281263517691 | 122.281263517691 | 127.202039384041 |
|        | 131.326536951329 |                  |                  |                  |
| HAR1A  | 135.491412261604 | 156.445294524594 | 155.993849743656 | 125.979152567959 |
|        | 136.284283129801 | 149.625528206375 | 148.47415004128  | 142.650451413991 |
|        | 130.659631155616 | 126.902441495413 | 136.420062669039 | 143.931400351525 |
| HAR1B  | 122.561285351587 | 146.484364264513 | 135.047546966745 | 152.074017988748 |
|        | 132.098421212796 | 129.846685899183 | 141.772724512502 | 134.534815676852 |
|        | 149.921414617149 | 142.690911343704 | 159.724824188037 | 135.840528665314 |
| HARBI1 | 143.444109491884 | 141.88777975766  | 147.919058170753 |                  |
|        | 132.741859397511 | 141.482344048665 | 142.605816057276 | 148.782907912893 |
|        | 140.955772094739 | 146.501559368223 | 132.554328715753 | 146.402352419692 |
|        | 128.957236136715 |                  |                  |                  |
| HARS   | 964.473774310687 | 1027.11849332495 | 871.913035811066 | 1493.90578573732 |
|        | 485.576566972696 | 730.673649872205 | 844.778755052304 | 637.457322054293 |
|        | 512.184962338131 | 1200.03423010236 | 657.231047829537 | 700.353187874339 |
| HARS2  | 669.330078861673 | 647.439372562271 | 643.468308027006 | 675.480482223958 |
|        | 361.082957133644 | 590.142817130684 | 1003.93455977232 | 924.312051919404 |
|        | 475.927798702033 | 992.320202251161 | 1010.05884008623 | 1112.4055726239  |
| HAS1   | 122.724429060184 | 119.943408501009 | 130.326980619676 | 115.194730717797 |
|        | 112.612099135361 | 117.873333897609 | 117.178495957357 | 115.00776048097  |
|        | 118.924317138158 | 114.734439905052 | 130.268322464805 | 119.551741097918 |
| HAS2   | 141.842919268688 | 137.666849842576 | 135.659271030454 | 140.267351731167 |
|        | 122.436106757578 | 138.930413256469 | 136.929570710155 | 130.920010795017 |
|        | 136.817517693076 | 138.388749930671 | 143.626857507866 | 137.782648137869 |
| HAS2AS | 166.143084832472 | 153.159425380743 | 133.625358030199 |                  |
|        | 160.374491283254 | 179.009510246709 | 150.866204945762 | 129.476648077532 |
|        | 151.418316929551 | 149.286184588967 | 142.461941376108 | 150.244284323504 |
|        | 164.615113709166 |                  |                  |                  |
| HAS3   | 157.874624979775 | 245.766885283797 | 135.693520183014 | 130.233769058693 |
|        | 852.926365088632 | 1168.68074786473 | 1022.55215097491 | 1520.59210521859 |
|        | 768.053694275398 | 399.872401268958 | 1577.15895478896 | 761.726829618132 |
| HAT1   | 330.241479004885 | 334.316711893654 | 341.2887754025   | 258.384059994446 |
|        | 631.106334754678 | 636.781477235579 | 346.476121089685 | 491.635435224507 |
|        | 384.296190598736 | 434.509391836336 | 455.313553278155 | 443.005424069211 |
| HAUS4  | 383.802494922918 | 410.002817143111 | 504.9864660689   | 429.351447428661 |
|        | 315.014639682046 | 218.269847477919 | 280.595515386655 | 348.711663415777 |
|        | 236.676029292922 | 338.934501259414 | 288.968909550533 | 381.253673759781 |

|            |                  |                  |                  |                  |
|------------|------------------|------------------|------------------|------------------|
| HAUS5      | 137.614020921217 | 133.517685144186 | 127.976612086284 | 125.855451679929 |
|            | 141.420747583126 | 132.475414208533 | 143.508657511633 | 139.574895021783 |
|            | 149.103778494524 | 125.517076778344 | 145.210787864362 | 141.311749168934 |
| HAUS6      | 127.640525889316 | 125.79193748535  | 132.622032754473 | 124.786029449452 |
|            | 131.349297554112 | 125.073353210914 | 129.16337177104  | 127.107223387937 |
|            | 127.787890405862 | 139.287871460674 | 127.687299576139 | 123.11447940203  |
| HAUS8      | 159.775479686193 | 174.749832388791 | 170.212679845194 | 154.831307586538 |
|            | 221.424451092316 | 273.073938260793 | 171.190796424612 | 281.037762232619 |
|            | 192.848268768579 | 187.796440205485 | 196.955723006838 | 218.811490883852 |
| HAVCR1     | 131.447941902406 | 119.720132373023 | 125.617143363441 |                  |
|            | 118.154953746492 | 143.874735808114 | 125.160161268474 | 117.303671445328 |
|            | 178.551434222154 | 127.090219286772 | 112.590379042108 | 180.113222861966 |
|            | 125.818432070199 |                  |                  |                  |
| HAVCR2     | 271.430915699592 | 308.208276315292 | 262.488050186425 |                  |
|            | 323.04019262387  | 232.465880700217 | 318.690043546203 | 321.627969147543 |
|            | 495.89837457901  | 822.545007054668 | 402.965083947376 | 320.214614455231 |
|            | 287.084253886676 |                  |                  |                  |
| HAX1       | 382.233826557803 | 332.082749517913 | 453.17378995737  | 362.306819797508 |
|            | 373.803772983872 | 402.213774592085 | 390.021666378804 | 464.128022170285 |
|            | 387.617166711971 | 358.092809491843 | 297.805768288377 | 444.945078908489 |
| HBA1       | 3342.8737952486  | 1211.39534395597 | 675.083275037052 | 981.313778685019 |
|            | 477.056706273413 | 1285.02292965374 | 2414.22821062457 | 1152.50523614436 |
|            | 4759.17973319588 | 3371.24667467952 | 243.501083338279 | 578.084277076692 |
| HBA2       | 8401.40370474392 | 4386.83308119416 | 1419.4638331856  | 5425.58761099475 |
|            | 1243.11900823259 | 2828.97255380291 | 5073.27433952351 | 2521.58055221647 |
|            | 10329.1999331936 | 7292.0342195035  | 357.773949920377 | 1246.2895253224  |
| HBB        | 11809.4804843301 | 4359.98094976179 | 2225.59207490574 | 3403.37530051435 |
|            | 767.662367310672 | 5437.78386044638 | 9378.87287299048 | 4511.9116742833  |
|            | 13013.8166277495 | 12022.5515181682 | 550.566402986082 | 1856.05025952611 |
| HBBP1      | 157.195967361907 | 170.401653214867 | 152.411545237204 | 150.36160186175  |
|            | 146.101547300741 | 155.587018319981 | 164.991522994763 | 157.203304477454 |
|            | 171.022976593689 | 166.681646517413 | 154.856345114916 | 153.414185387669 |
| HBD        | 151.606932937644 | 142.541728149687 | 163.21153580549  | 159.765585531442 |
|            | 137.702036719238 | 134.801507994667 | 142.45411401883  | 134.994013668445 |
|            | 139.328340242696 | 158.080749926756 | 125.558877611499 | 150.160004473338 |
| HBE1       | 108.543795408713 | 127.239282651919 | 112.114933398547 | 111.475394003575 |
|            | 104.505454151012 | 103.168665937677 | 107.32960937124  | 103.660742045068 |
|            | 108.655415285806 | 103.94864861172  | 107.126004317323 | 112.605287278882 |
| HBEGF      | 297.228563607097 | 296.553550946307 | 163.331424612891 | 372.54091392596  |
|            | 184.591789011195 | 764.493610798958 | 153.4392054301   | 248.531972733475 |
|            | 215.037122365095 | 946.273229715791 | 204.396576475753 | 213.145460679531 |
| HBG1       | 168.594235675558 | 132.782967735893 | 134.828360289676 | 143.962842383778 |
|            | 126.98588570464  | 144.842687993057 | 146.649944669876 | 145.139112683819 |
|            | 165.244616507084 | 147.121049266117 | 116.897299691798 | 137.332729889295 |
| HBG2       | 212.987082617173 | 168.418529261977 | 162.808270845998 | 167.226663395855 |
|            | 163.380402251758 | 147.439303942026 | 163.612347715773 | 144.685707282641 |
|            | 201.569913451219 | 175.819983804497 | 141.604832186257 | 153.524100996368 |
| HBII-52-45 | 127.593764897583 | 127.112296857923 | 150.51056917809  |                  |
|            | 136.438788088263 | 122.35832958054  | 134.455623159793 | 132.526286141997 |
|            | 126.143886553557 | 137.7872481668   | 140.150884219813 | 127.352386363217 |
|            | 141.18490443471  |                  |                  |                  |
| HBM        | 118.879931299016 | 118.9803314875   | 112.893705259844 | 111.639177843969 |
|            | 110.651971902576 | 113.78644620959  | 116.994216357989 | 119.787925356307 |
|            | 111.722827315911 | 110.594755513247 | 108.861243071977 | 105.193775204124 |

|         |                  |                  |                  |                  |
|---------|------------------|------------------|------------------|------------------|
| HBP1    | 466.58966852405  | 554.800688991977 | 684.180060287047 | 530.122419830951 |
|         | 383.503040287678 | 386.960778432157 | 428.340060893467 | 380.754569467715 |
|         | 461.314247041387 | 521.714719320355 | 557.214020485204 | 320.936905584424 |
| HBQ1    | 151.877035446575 | 132.608622131443 | 158.622993108149 | 161.852665901359 |
|         | 156.336425973696 | 147.805819921429 | 137.240806191881 | 144.361871207081 |
|         | 160.290104492275 | 156.085949215738 | 131.058360514673 | 157.6790197503   |
| HBS1L   | 146.366013190845 | 155.523806637546 | 166.70212615715  | 153.571517567657 |
|         | 134.514251897045 | 150.751386127903 | 162.61434899634  | 157.654040469774 |
|         | 157.038121210505 | 140.11211854056  | 161.596086502946 | 161.73079180403  |
| HBXIP   | 789.401526545277 | 769.009371389327 | 805.120147618984 | 650.0804221227   |
|         | 1184.3199328099  | 1912.2369374258  | 1777.29626660109 | 1966.09691567857 |
|         | 1934.30779703747 | 1547.16936835284 | 1087.69177809384 | 1730.30703463073 |
| HBZ     | 121.71538073735  | 124.952026709219 | 115.507474401239 | 104.826135297161 |
|         | 118.521075843163 | 106.066897223031 | 105.521320791331 | 118.727279917776 |
|         | 113.832885222354 | 107.828378413233 | 107.961322525982 | 105.408689610638 |
| HCCA2   | 619.223672253014 | 717.886050056576 | 709.136137559152 | 1044.91923772265 |
|         | 360.475989559226 | 283.556453980797 | 284.995098167431 | 263.295012964476 |
|         | 272.927830312746 | 282.137282466192 | 258.16437138327  | 230.079664410595 |
| HCCS    | 228.766847429517 | 201.221839281282 | 223.042575796603 | 200.591916768948 |
|         | 193.315380090713 | 245.978723809154 | 205.871133967588 | 295.367125961621 |
|         | 258.727309442475 | 221.664431984861 | 231.846509449829 | 219.996410908721 |
| HCFC1   | 1692.01248523526 | 1845.87311313269 | 1580.27059464289 | 2382.87910783088 |
|         | 3282.73711809465 | 1525.24196488688 | 1377.75266942574 | 1590.87426068638 |
|         | 2061.9164323309  | 1004.97723186946 | 1343.2623011534  | 1557.00226259883 |
| HCFC1R1 | 2197.44189747261 | 2144.52984392647 | 1272.14273680177 |                  |
|         | 2760.57475805426 | 773.330948077036 | 521.215655189324 | 731.848844821402 |
|         | 532.786041960586 | 511.113083958771 | 1002.88224342342 | 638.393099392849 |
|         | 376.54010486682  |                  |                  |                  |
| HCFC2   | 253.049869714368 | 231.769926214655 | 279.413335686746 | 230.367251714289 |
|         | 134.657787366869 | 177.182321788711 | 205.185206972064 | 181.110403721353 |
|         | 179.354796119133 | 210.590774758661 | 168.897620634337 | 172.304496150036 |
| HCG18   | 160.592404712197 | 163.373180928181 | 149.547635666621 | 163.758054869675 |
|         | 158.044938495884 | 168.919352453652 | 185.673549367125 | 173.325724300712 |
|         | 165.870621884073 | 172.568852318369 | 137.303701514064 | 176.364184489318 |
| HCG22   | 133.195030751476 | 149.687372584136 | 145.027741086645 | 151.451443480833 |
|         | 138.221749464651 | 138.903450375532 | 131.190238038695 | 139.591231478841 |
|         | 133.743708220112 | 133.885725703056 | 136.261907928796 | 138.352562277336 |
| HCG26   | 129.127563278016 | 138.289361041588 | 138.358404420064 | 141.970301370404 |
|         | 140.54700821058  | 144.649656552    | 145.442914818456 | 131.391434131813 |
|         | 155.933739693912 | 133.465593684519 | 160.473772347376 | 143.50323531501  |
| HCG27   | 152.821735300697 | 165.773929204209 | 155.253032078086 | 166.803359138942 |
|         | 138.915185051749 | 128.284564251279 | 161.700258550244 | 143.307838525991 |
|         | 152.99686989829  | 129.059722322306 | 138.841385034636 | 153.511995286293 |
| HCG2P7  | 11326.5935775813 | 10135.7800994367 | 9596.10781313429 |                  |
|         | 11809.4804843301 | 1738.96798001895 | 9560.32907282993 | 4965.25728333142 |
|         | 7753.61594300904 | 6894.63087357693 | 4318.50925204407 | 5425.58761099475 |
|         | 5601.24254062491 |                  |                  |                  |
| HCG3    | 175.128935809466 | 145.383354200298 | 139.153897381147 | 139.699189528879 |
|         | 134.896349513392 | 160.640160107693 | 167.250667092211 | 120.944267930809 |
|         | 145.308548379215 | 142.274440538785 | 124.975454733084 | 137.220718873614 |
| HCG4    | 355.879841671975 | 414.114051645565 | 309.720081933252 | 406.998800177456 |
|         | 418.968095159939 | 299.463563393179 | 452.517134370928 | 443.125195744202 |
|         | 937.593129242257 | 678.937151822411 | 773.803350315426 | 1149.90248188644 |

|        |                  |                  |                  |                  |
|--------|------------------|------------------|------------------|------------------|
| HCG4P6 | 143.891725249061 | 148.644800418517 | 157.277051544704 |                  |
|        | 121.255814891176 | 152.834894011142 | 146.20028051948  | 158.679903271595 |
|        | 146.271180025157 | 135.353539458856 | 144.63774603725  | 136.779180530712 |
|        | 153.761061653202 |                  |                  |                  |
| HCG8   | 125.974463216884 | 137.00397800873  | 136.566588903194 | 138.747964592012 |
|        | 151.936543085044 | 129.391376518208 | 129.471713415228 | 131.104534164394 |
|        | 127.433203229267 | 123.427366316096 | 135.697550878438 | 133.229571269367 |
| HCG9   | 116.087696503753 | 137.641136471239 | 112.666812944192 | 107.466184687811 |
|        | 119.000436602325 | 128.257292171015 | 121.402905161896 | 115.545558600232 |
|        | 115.738984899365 | 110.586147059226 | 135.507247740621 | 127.289269745461 |
| HCK    | 191.179662650057 | 188.543051108601 | 205.45079491218  | 199.037998955485 |
|        | 200.114704018645 | 203.563098303937 | 201.773745532242 | 200.204064462384 |
|        | 242.948136060281 | 212.591357254196 | 196.031541155674 | 197.859546367676 |
| HCLS1  | 229.689010178622 | 226.960024551778 | 149.518870320398 | 174.898012759712 |
|        | 262.093405224922 | 245.454945056317 | 1343.2623011534  | 1438.33289891548 |
|        | 1049.52258147141 | 709.778171909457 | 494.175437345451 | 214.050918459805 |
| HCN1   | 145.791950392049 | 162.007384919302 | 158.064409011013 | 144.477267427347 |
|        | 182.066922756289 | 141.147683040881 | 153.649235507812 | 143.10996074311  |
|        | 158.157097243342 | 183.100286716683 | 138.69392148885  | 138.654301345398 |
| HCN2   | 131.696834332724 | 139.776830704087 | 133.012006684865 | 136.372712400493 |
|        | 123.75974844367  | 139.987681290389 | 128.944295118239 | 139.157088843803 |
|        | 134.549628985766 | 129.409899416034 | 124.990876565715 | 137.899291413431 |
| HCN3   | 179.57046217355  | 181.813812621767 | 178.976116597291 | 193.028341755594 |
|        | 220.113261580385 | 239.419200107721 | 171.610742435469 | 192.493439659184 |
|        | 197.565122821625 | 189.662974464847 | 205.950347620158 | 223.778708427552 |
| HCN4   | 154.512619892977 | 161.365443930448 | 152.913814113632 | 164.39910609636  |
|        | 185.113098620798 | 160.290104492275 | 169.45559708224  | 154.261443597434 |
|        | 155.896065329825 | 175.543924200429 | 167.370030272847 | 156.508428796592 |
| HCP5   | 401.87674893993  | 583.938727139698 | 199.459711023907 | 439.207122335648 |
|        | 671.387334588652 | 268.961643716282 | 245.978723809154 | 636.781477235579 |
|        | 2642.24374855334 | 924.040923247227 | 1818.92700816112 | 1596.33832632698 |
| HCRP1  | 130.624702758052 | 147.46607538135  | 153.415901281564 | 129.532122459128 |
|        | 118.289405191861 | 160.618586213311 | 147.579672274205 | 146.894793774087 |
|        | 162.199381540369 | 164.701183249762 | 143.038248313305 | 183.201926323188 |
| HCRT   | 147.717748449017 | 153.916313595581 | 159.223980639045 | 169.661107080542 |
|        | 153.857048476879 | 148.594322264158 | 159.620467672898 | 151.198928680018 |
|        | 151.976432805924 | 153.111226896983 | 142.722227179256 | 146.06717772919  |
| HCRTR1 | 164.284396793834 | 163.042083189818 | 158.185593294878 |                  |
|        | 144.446903878863 | 149.464962540085 | 157.195967361907 | 153.709230037306 |
|        | 160.70138318726  | 149.815494316469 | 160.625367261779 | 153.985529457122 |
|        | 167.030667499538 |                  |                  |                  |
| HCRTR2 | 131.644877647087 | 131.434121613176 | 133.724135305758 |                  |
|        | 135.453399741892 | 137.086936444421 | 126.915338864323 | 134.805239981342 |
|        | 134.950905279775 | 134.759283147919 | 140.999877170481 | 153.457715729768 |
|        | 135.618562468776 |                  |                  |                  |
| HCST   | 274.235001739215 | 219.318938396989 | 182.074569356713 | 193.674681547989 |
|        | 253.164596735793 | 266.563990988678 | 227.736106796551 | 345.977609212137 |
|        | 616.188923504376 | 259.643957326575 | 254.036619126409 | 193.522811257085 |
| HDAC1  | 1978.12229412176 | 2372.26073354008 | 2635.31067044245 | 2193.376951552   |
|        | 4503.01240138314 | 3062.22499714914 | 3883.05620256963 | 4520.84412831414 |
|        | 4183.06379632713 | 2622.87486749984 | 3287.37172778474 | 4628.04544865227 |
| HDAC10 | 114.032874859062 | 114.170354748872 | 115.47716627378  |                  |
|        | 109.113476990309 | 128.372225487481 | 130.069789939568 | 114.027244455291 |



|        |                  |                  |                  |                  |
|--------|------------------|------------------|------------------|------------------|
|        | 126.788749235867 | 121.065278765151 | 123.833219705499 | 157.11867820027  |
|        | 130.524630778991 |                  |                  |                  |
| HDAC11 | 184.056274452194 | 182.009471368798 | 157.457468761338 |                  |
|        | 200.618080312379 | 357.928880740814 | 202.024504592763 | 195.10410545445  |
|        | 187.529556428609 | 144.273011517032 | 194.80575419836  | 230.284216427158 |
|        | 191.018168651394 |                  |                  |                  |
| HDAC2  | 748.015452242839 | 620.899414581162 | 768.67030514096  | 530.561387049511 |
|        | 1089.16489859253 | 1011.9675459648  | 1154.1046856215  | 1047.2693539616  |
|        | 1080.95725397659 | 765.911113050543 | 1107.99131702522 | 1320.74943817958 |
| HDAC3  | 543.584413650467 | 591.763423878737 | 498.05778289794  | 682.730262408017 |
|        | 638.129080224049 | 600.162650426961 | 745.844395215451 | 652.429025114523 |
|        | 423.489441909617 | 1032.11574332305 | 945.403379196643 | 747.587723573212 |
| HDAC4  | 611.540759532294 | 551.622587349813 | 631.408955630318 | 739.52947559669  |
|        | 208.291714758548 | 146.301300103564 | 167.180406126438 | 162.606273401226 |
|        | 176.145076825955 | 178.885625009973 | 268.454310218604 | 140.292132023262 |
| HDAC5  | 183.406510146725 | 174.971350923613 | 179.996590340102 | 209.398724613377 |
|        | 141.750316403249 | 132.155877196474 | 137.478556403046 | 137.641136471239 |
|        | 142.274440538785 | 145.665155500862 | 154.524588318927 | 137.654833215154 |
| HDAC6  | 316.663128947813 | 315.615758089471 | 281.238656291587 | 405.130899553871 |
|        | 361.829819621662 | 254.879772480457 | 221.471811658459 | 230.015981563049 |
|        | 218.529160053398 | 220.136131941508 | 302.945860276233 | 206.972440734038 |
| HDAC7  | 201.702688815038 | 203.960838492793 | 173.97085982677  | 219.394500571586 |
|        | 259.72035004624  | 153.146646647258 | 184.322250984457 | 158.829144564361 |
|        | 184.260835471542 | 166.12695134858  | 229.181725450534 | 196.777776509371 |
| HDAC7A | 202.60339529874  | 216.033564783918 | 185.876046259727 |                  |
|        | 247.779718065751 | 228.349507726225 | 166.104915784875 | 174.690052785405 |
|        | 166.709393547104 | 175.847256673734 | 171.677654793775 | 223.84997313236  |
|        | 182.109092947203 |                  |                  |                  |
| HDAC8  | 169.136919982294 | 149.888719320368 | 191.112009690591 | 198.90533452253  |
|        | 140.687016530974 | 177.19138801548  | 164.708712337156 | 163.19340939648  |
|        | 174.274996381853 | 163.108825245937 | 199.756584044664 | 174.161146689117 |
| HDAC9  | 125.639355645626 | 127.416912237613 | 127.220812636148 | 125.967294930279 |
|        | 123.960761343425 | 117.992729826121 | 126.256716138724 | 121.903115540516 |
|        | 126.029431525943 | 129.013667813486 | 133.909219998872 | 130.457981404612 |
| HDC    | 400.180574613078 | 308.564935340635 | 252.365946808078 | 356.268960813032 |
|        | 152.877058628512 | 166.863589702453 | 138.846543789882 | 168.248982292489 |
|        | 243.936797286495 | 131.757695616207 | 142.246864759311 | 137.058578192268 |
| HDCC2  | 1946.45172007314 | 2210.67250954072 | 1787.32566525551 | 2282.94927629821 |
|        | 1082.75419087929 | 1336.15622439522 | 1548.09554827056 | 1100.17618574297 |
|        | 1406.73270115373 | 2344.11548437508 | 2010.57142784228 | 1875.21979956596 |
| HDCC3  | 193.974325897472 | 203.913123559942 | 197.087015414039 | 209.727089546377 |
|        | 512.541205235935 | 249.80160363144  | 437.931339781992 | 274.934292929666 |
|        | 340.487850009685 | 252.404931238338 | 241.494710905339 | 320.707687986324 |
| HDGF   | 422.02217814979  | 473.260534978556 | 389.109250187902 | 471.315730378641 |
|        | 2104.59597571915 | 908.352265585374 | 674.905270154355 | 867.369315017411 |
|        | 761.32108609503  | 744.523059417351 | 894.46029531926  | 899.667912542118 |
| HDGF2  | 232.127996106421 | 262.913054904154 | 245.269004485826 | 365.199125315964 |
|        | 384.216141843863 | 217.408824020423 | 185.783374935551 | 198.90533452253  |
|        | 178.542247857251 | 207.453490385508 | 205.560952959537 | 201.383739902873 |
| HDGFL1 | 157.83121828793  | 136.858037332222 | 155.018009545475 |                  |
|        | 143.071933285651 | 139.295597388725 | 140.626181314061 | 133.391421497441 |
|        | 138.633019006784 | 137.782648137869 | 144.792035839249 | 130.758707848676 |
|        | 145.892876412762 |                  |                  |                  |

HDGFRP3 432.174413144791 411.039234404499 390.021666378804  
337.22646304739 230.053292316517 234.947745514175 439.928008927647  
327.696359071012 360.185005480216 262.861105654051 361.26540006942  
221.297127685676  
HDHD1A 217.531179216305 247.72190598581 258.4424008891  
263.379982742085 273.369722814068 464.323065038265 375.958347293549  
442.766704003254 320.979443123471 264.306927596371 469.64693728427  
484.568420044471  
HDHD2 766.420275252501 887.147199303294 832.335328912437 970.634736994313  
372.54091392596 443.853458865556 537.06835963726 622.692834629555  
714.274201838067 510.555184032017 1257.32413345748 686.445635754196  
HDHD3 364.597798667541 352.354687089427 518.478990211753 505.83860711693  
763.880957432979 239.050379187643 407.711669482083 452.732079010502  
484.903322308422 295.420691959792 786.62709337246 284.321253087512  
HDLBP 135.385133545332 134.013748718539 138.657241641263 133.959208066964  
137.971108694323 134.193482579542 129.798965780918 128.152956417755  
135.16316100494 142.051259785804 155.981989040279 136.682172321984  
HDX 148.304863957659 142.802965008073 136.406132339187 142.594553057288  
141.943910304145 134.762169062357 141.198692540628 149.108582827136  
133.491963477649 144.39135701666 155.6299578128 129.534721138679  
HEATR1 306.011283364888 337.822337721287 379.387095129725  
343.571296297462 374.56251861444 751.077307018319 472.669956708398  
610.915977337787 529.04238100948 654.52788411248 368.948300262634  
852.649997188692  
HEATR2 259.72035004624 248.613373429151 339.598452080917  
304.402066421813 562.089999265955 263.568160216149 285.798047501616  
339.069385816411 296.088938872643 330.241479004885 357.672950588403  
395.716879127149  
HEATR3 181.277683429417 192.827534610486 196.053808536366  
176.145076825955 204.489837323989 196.691380885508 173.432960318793  
167.186780161168 172.108795190633 196.990867962546 164.959415532174  
181.508873226705  
HEATR4 105.839106819841 113.060728652796 117.870230005125  
115.321501844663 119.164791441052 109.355444907633 113.924310293916  
112.309528593741 112.891050337488 112.239647575661 129.446928016147  
110.518806964366  
HEATR5A 234.738241125899 185.046826969912 264.233381434738  
162.140112952434 164.181915898563 184.682478530334 172.214433016685  
217.287912825619 178.676812740925 209.702683803624 188.641397688261  
175.543924200429  
HEATR5B 356.921627358141 337.973433871323 406.736165197168  
345.135289739599 292.911761762431 609.100385482325 404.366325262322  
487.597040819879 361.218491712891 386.917038897322 464.323065038265  
447.521645706162  
HEATR6 273.044064077 259.643957326575 345.649572073924  
371.224296589448 184.241640200823 209.362806125315 312.406286993239  
319.812293134357 246.428746807313 300.886032768166 301.139737613279  
340.193863653875  
HEATR7A 139.476234663488 132.661036963636 132.32633643811  
137.954283575143 204.596753034535 136.185190275407 134.91213977595  
145.369791572077 157.986640251147 136.041605158822 139.690093593646  
148.327340543504  
HEATR7B2 135.511902377219 134.378951325825 130.872296869843  
136.91078498126 145.219057535246 139.995623005154 132.085538520551

|        |                  |                  |                  |                  |
|--------|------------------|------------------|------------------|------------------|
|        | 139.834535091869 | 132.346363545288 | 137.830435972191 | 145.773932754923 |
|        | 143.643259003393 |                  |                  |                  |
| HEBP1  | 1537.71464618832 | 1439.37593006882 | 1417.76295714364 | 1300.40889834984 |
|        | 1148.80141486692 | 1368.91287156398 | 2180.31963682546 | 1454.94889750152 |
|        | 852.436775264873 | 919.626220838414 | 1557.00226259883 | 811.564396886535 |
| HEBP2  | 2026.85580212422 | 2172.89794460273 | 2183.18692530644 | 2189.53914329263 |
|        | 5265.74259211695 | 2379.15291239548 | 5688.84918819457 | 1804.63762008613 |
|        | 3968.38723079061 | 3829.87905458534 | 5624.32062666666 | 4763.89426388268 |
| HECA   | 300.985037429772 | 296.141012087256 | 314.014654357569 | 307.665281863258 |
|        | 246.428746807313 | 179.810507975486 | 409.073045356073 | 281.278843600876 |
|        | 303.051124835907 | 288.313931067158 | 446.698665191047 | 279.113984512619 |
| HECTD1 | 1233.99503576308 | 974.007008568051 | 1189.69730508119 |                  |
|        | 965.673699120049 | 778.28014337938  | 826.314416168552 | 859.860994525775 |
|        | 1084.5920943349  | 799.423640530777 | 1196.34528225417 | 1253.05700051015 |
|        | 1161.39230511792 |                  |                  |                  |
| HECTD2 | 195.929328710358 | 185.382647297259 | 197.582402276079 |                  |
|        | 170.08485436731  | 127.07186140748  | 180.761100930677 | 147.362120584524 |
|        | 157.061602966797 | 148.016402654687 | 149.157934946623 | 171.884800118791 |
|        | 151.089328533476 |                  |                  |                  |
| HECTD3 | 261.117845544884 | 280.558463661137 | 293.448046685909 |                  |
|        | 347.557792829093 | 341.564749445905 | 285.30221551106  | 287.751093664085 |
|        | 346.691690520054 | 303.907003535357 | 331.795832780176 | 430.220363263561 |
|        | 242.440966395613 |                  |                  |                  |
| HECW1  | 145.7202993771   | 130.441808139335 | 138.883710791382 | 142.650451413991 |
|        | 162.55521875551  | 136.566588903194 | 151.318320077986 | 130.173734963758 |
|        | 132.16600019449  | 158.06129717954  | 153.299196905367 | 146.536055773073 |
| HECW2  | 152.550031868259 | 165.286724415145 | 122.456286448252 | 132.589411973628 |
|        | 163.456245724169 | 245.582279957584 | 133.571962238112 | 186.388067641269 |
|        | 153.228048041467 | 172.468440317443 | 158.98007855379  | 150.843975804117 |
| HEG1   | 574.496860164135 | 369.838429521168 | 356.62074247786  | 378.037190077449 |
|        | 219.878230463206 | 252.222481637238 | 173.468958175014 | 259.767151797583 |
|        | 270.679613997675 | 211.626970008102 | 254.668502187945 | 217.491746961471 |
| HELB   | 125.908576249439 | 133.439077726411 | 140.726084514407 | 116.449064666763 |
|        | 111.484426481816 | 143.176699547317 | 123.354093930164 | 150.997551005337 |
|        | 155.176714087209 | 129.001192144163 | 157.195967361907 | 115.958740595234 |
| HELLS  | 165.642728895682 | 158.854659281803 | 140.954264409241 | 161.781529659549 |
|        | 206.203717450138 | 201.256649338315 | 188.348499229585 | 221.796935051107 |
|        | 203.17525411575  | 192.441337304606 | 162.342112922504 | 211.572396862776 |
| HELQ   | 204.82244206816  | 187.920789153124 | 191.651818696629 | 186.406439948242 |
|        | 163.487737425232 | 188.20675818131  | 179.648479201164 | 204.103018614608 |
|        | 192.627266049516 | 163.19340939648  | 169.826068012389 | 179.525651423361 |
| HELT   | 166.485040297098 | 164.755896698569 | 162.732574014686 | 154.562761981868 |
|        | 159.942971344216 | 168.847039069786 | 159.588575526536 | 155.592219571564 |
|        | 164.406564594296 | 154.343424387068 | 158.7912155022   | 162.6762533989   |
| HELZ   | 501.863855158062 | 570.771089597761 | 508.861268738074 | 500.132469062228 |
|        | 235.091443641056 | 589.070196307574 | 369.838429521168 | 334.350011399462 |
|        | 430.649188209901 | 280.292616101827 | 303.555333002419 | 417.987533397449 |
| HEMGN  | 125.139029579691 | 119.669441891401 | 122.351186755611 | 121.624218243474 |
|        | 121.289159587394 | 116.989409891761 | 118.88525116298  | 122.592960588642 |
|        | 124.546520456419 | 120.36718185387  | 121.239461514704 | 116.806720503431 |
| HEMK1  | 198.954254778846 | 181.803275243281 | 183.201926323188 | 234.461229199142 |
|        | 141.208106961875 | 162.15259972225  | 198.15257384667  | 191.59400638652  |
|        | 196.657475905674 | 135.491412261604 | 171.314681729657 | 152.555437272666 |

HEPACAM 123.716400094852 129.992015202357 123.185652476312  
 129.628859533303 122.11049596959 129.910866236901 132.322618637842  
 134.537123332992 129.514490386931 119.95666716163 128.168460083895  
 129.546119539687  
 HEPACAM2 120.524859681034 120.280241193135 117.22284971665  
 120.272964182307 123.247698282967 122.051473363557 122.592960588642  
 118.446703299916 124.486701452062 113.980716384814 134.292099546804  
 117.034228068173  
 HEPH 302.696004448559 307.768302846647 260.921177985439 414.114051645565  
 133.074027423549 127.595574823053 124.403662787819 136.332399354517  
 143.763292219833 130.272086123019 128.556280049403 123.700076467648  
 HEPHL1 129.656088836537 130.4631522533 122.142323014287  
 120.786630750686 129.741644654541 128.060612106762 130.701801496564  
 139.986119754908 135.301844382418 130.088408942008 133.154004369076  
 129.780648518219  
 HEPN1 137.572574328004 138.279431175685 163.910041674646 140.525013926642  
 168.37043566813 132.748478264583 141.294094833197 135.185283076286  
 139.127442770828 159.266921692363 135.250379276888 149.851792558427  
 HERC1 395.521241316058 360.39998507367 534.920870202582 400.060972573122  
 238.904826940476 275.013838208239 322.36247485445 267.839640412797  
 350.803378042804 331.062744782933 278.095939961034 316.801725268792  
 HERC2 299.986758612161 296.962992349662 306.677271064305 351.665934915634  
 430.412897698085 230.91747428831 279.834616502591 204.82244206816  
 308.877027622691 274.831898505989 307.316241247336 244.054469051058  
 HERC2P2 155.198503964295 139.524233960073 152.492163303139  
 157.162523271165 146.873719524815 159.036647992998 161.365443930448  
 153.100979553727 151.259426521768 170.483686891321 158.712241098927  
 148.364138636002  
 HERC2P4 127.018746030517 133.854760285591 133.310323593945  
 127.41463780496 148.948744887393 129.802596741962 133.133892264995  
 130.470034945295 124.132215738502 136.18698517676 127.349190705235  
 123.179986410723  
 HERC3 187.833356349429 175.847256673734 230.975434289172 137.680019787902  
 144.754401731628 193.554028681854 177.592497020798 170.320777845496  
 166.298554732581 274.281532397691 166.173429365582 181.668090319293  
 HERC4 248.085349787686 233.161848094769 266.534316786801 199.714647839712  
 191.777253122672 196.880135762817 253.538171006307 223.601312199935  
 233.335353447342 235.019573994855 265.29629764006 309.937351755502  
 HERC5 1186.96351738518 796.936154737659 728.743541467167 688.247581763352  
 188.864388750448 229.406012088782 858.020739710943 253.124449721731  
 445.763740779039 231.981501596284 169.777032044409 164.935120145905  
 HERC6 628.710901107436 256.614964511846 277.685488726472 238.068308163643  
 175.186435016433 203.544294328395 511.779988437654 288.505502880424  
 398.61164689194 335.533053221675 277.256341592701 278.061498892643  
 HERPUD1 632.565736446505 588.334329592604 663.214972254236  
 551.622587349813 670.856008549143 984.695710317818 751.896334334052  
 1101.66868138797 1223.68146968716 750.494286476465 600.635914090365  
 593.462634352052  
 HERPUD2 241.867699338253 213.324226314713 230.015981563049  
 209.7558663154 196.207631868755 206.428618912264 229.157389498775  
 218.08515867102 196.536086443884 247.622351589081 242.72424280444  
 262.488050186425  
 HERV-FRD 127.818137805569 121.771891473027 129.158212237299  
 135.499195435803 112.661607612444 122.072091994548 115.51493368527

|        |                  |                  |                  |                  |
|--------|------------------|------------------|------------------|------------------|
|        | 116.360144963753 | 112.357261386644 | 112.420505354139 | 121.124574985464 |
|        | 113.512670856029 |                  |                  |                  |
| HES1   | 244.401472859026 | 297.970735665595 | 257.5097052677   | 222.456810024193 |
|        | 501.434722063309 | 811.362219801362 | 535.20662670885  | 775.382397816601 |
|        | 469.407481002198 | 670.097523566652 | 1113.05943954513 | 935.423045210635 |
| HES2   | 132.192775993078 | 132.146027935802 | 131.734429913106 | 134.776714949136 |
|        | 136.699011428085 | 131.741688265764 | 140.174087049513 | 140.002249873656 |
|        | 189.94130405123  | 588.334329592604 | 134.85590586532  | 144.615156175885 |
| HES3   | 139.067516394141 | 137.881776548665 | 152.699431442817 | 153.38494705081  |
|        | 147.462651811169 | 148.507598818039 | 143.793506250131 | 152.030182228463 |
|        | 139.241145027974 | 132.825240485239 | 150.160004473338 | 140.154925193842 |
| HES4   | 1251.56853099362 | 1030.56836625083 | 958.63560158343  | 1116.95795024994 |
|        | 1099.37392456694 | 4811.88424516272 | 3909.47437917608 | 2261.31473132315 |
|        | 2580.98143004019 | 2010.57142784228 | 7519.94306346326 | 2255.92551080483 |
| HES5   | 134.024205981268 | 168.188793271919 | 210.061754644824 | 174.338440780636 |
|        | 149.408530395745 | 216.9491329483   | 167.243544185778 | 183.583432296209 |
|        | 170.541689758579 | 180.179981672095 | 293.448046685909 | 207.05325577114  |
| HES6   | 188.033890834418 | 239.277801396834 | 166.563411635721 | 255.56301534833  |
|        | 683.861021234927 | 513.20896845398  | 306.068269136821 | 253.049869714368 |
|        | 270.973600107882 | 261.426617866925 | 222.243523614518 | 531.711823481265 |
| HES7   | 109.067239220744 | 107.48180681159  | 103.307703547649 | 109.038182799871 |
|        | 106.437660157036 | 111.000303209442 | 111.065596151792 | 120.208584170364 |
|        | 110.273174147374 | 116.445184223804 | 109.242622591321 | 109.832757716464 |
| HESX1  | 115.231121959397 | 114.078271807864 | 112.742895297124 | 107.74537523456  |
|        | 116.91470505098  | 114.314425748312 | 124.132215738502 | 121.834248129933 |
|        | 129.054577477882 | 116.497714896018 | 118.015175851934 | 118.446703299916 |
| HEXA   | 171.826623289946 | 150.072005848234 | 145.435794613203 | 146.97203173446  |
|        | 126.33556674738  | 113.549098821204 | 155.058852833902 | 121.121686280797 |
|        | 136.737964237109 | 127.855167644203 | 149.535008475427 | 145.063062479224 |
| HEXB   | 3015.70954394585 | 2662.43181510326 | 3038.02573182546 | 1823.53870218167 |
|        | 2012.36542989953 | 1438.33289891548 | 2748.51360874099 | 1881.90353127141 |
|        | 2074.29945034697 | 3019.57419253979 | 2104.59597571915 | 2479.34567973462 |
| HEXDC  | 263.74335003375  | 231.257543784864 | 304.058158731957 | 252.894371238554 |
|        | 250.060734219351 | 185.830435830545 | 246.533813165981 | 353.50447714719  |
|        | 329.535023880129 | 214.050918459805 | 281.405355165228 | 331.251075774227 |
| HEXIM1 | 192.96586114861  | 197.873787638411 | 173.281506912652 |                  |
|        | 170.069291215013 | 173.782474972742 | 153.875760529011 | 190.56172211779  |
|        | 182.919385608842 | 172.142411008084 | 145.455411983653 | 253.164596735793 |
|        | 163.967616022079 |                  |                  |                  |
| HEXIM2 | 176.328994356625 | 197.169703621888 | 225.927425596831 |                  |
|        | 221.512905853031 | 256.127197303751 | 160.676606760965 | 232.151020756625 |
|        | 176.312626750427 | 221.253717494488 | 173.850390626782 | 226.458509834965 |
|        | 186.06425658259  |                  |                  |                  |
| HEY1   | 209.362806125315 | 304.357050745605 | 197.357728220717 | 205.185206972064 |
|        | 261.592512762969 | 269.853718252574 | 313.708197191587 | 317.802633831405 |
|        | 183.735201125198 | 198.390247605355 | 412.863887464545 | 192.96586114861  |
| HEY2   | 153.795665190439 | 203.223604138192 | 131.173355686001 | 167.500410857353 |
|        | 142.637421204193 | 142.711117470317 | 116.268259618103 | 142.09146795308  |
|        | 159.012011848781 | 235.216589534371 | 129.583916648999 | 140.574129695953 |
| HEYL   | 368.220523234399 | 465.683139139622 | 230.947339143332 | 393.013539328766 |
|        | 274.77366169918  | 267.097999873387 | 173.281506912652 | 222.394280571312 |
|        | 263.994460303088 | 375.651196211048 | 171.216275057884 | 205.612579504495 |

|        |                  |                  |                  |                  |
|--------|------------------|------------------|------------------|------------------|
| HFE    | 143.50323531501  | 134.896349513392 | 126.442999559539 | 130.092881020271 |
|        | 140.793616429174 | 132.765942975939 | 133.567630962178 | 127.993841618875 |
|        | 141.763072120718 | 133.613988293895 | 135.810476921749 | 139.286592412216 |
| HFE2   | 116.929398630733 | 118.336654504789 | 119.261305304165 | 123.868848032411 |
|        | 116.831725094917 | 119.739204799544 | 114.638254225216 | 127.991651150332 |
|        | 114.644722005728 | 121.219323788324 | 125.413619056436 | 117.480506535399 |
| HFM1   | 150.896076207161 | 138.071335383596 | 141.348548071751 | 146.932655562613 |
|        | 149.524040913256 | 147.052395429464 | 142.669207969715 | 131.794065532001 |
|        | 151.364528898537 | 169.631386764054 | 138.516066340784 | 145.42029807396  |
| HGD    | 154.716750150891 | 149.876687693565 | 154.818414925242 | 164.634694036993 |
|        | 156.179501567984 | 149.738621325385 | 149.231475480618 | 167.192582058634 |
|        | 156.262515148436 | 161.506431005203 | 157.293090577042 | 148.729753117861 |
| HGF    | 127.576966524587 | 127.884750925048 | 140.038295509875 | 126.378952839132 |
|        | 123.687439699754 | 123.814841047589 | 129.260551359984 | 124.256773437346 |
|        | 129.669484303621 | 120.157438564977 | 135.651829752462 | 118.875640081461 |
| HGFAC  | 128.029736384348 | 147.373174160478 | 120.138014822486 | 119.492844191924 |
|        | 120.524859681034 | 121.834248129933 | 133.07218865002  | 124.342911165267 |
|        | 126.917669470999 | 122.724429060184 | 133.012692824038 | 123.82555184043  |
| HGS    | 1080.42884514937 | 1303.94157493616 | 1367.92869625376 | 1550.61855325662 |
|        | 2032.50052162637 | 1934.30779703747 | 2061.9164323309  | 3115.11499025766 |
|        | 1927.467713716   | 1965.13870083236 | 1206.09815575399 | 2376.52728883131 |
| HGSNAT | 159.203584692924 | 148.570769470645 | 170.483686891321 |                  |
|        | 158.627416752905 | 174.454754564111 | 228.588693548447 | 196.287131027947 |
|        | 168.116928722035 | 157.350979071365 | 182.907444581093 | 171.660157220703 |
|        | 172.468440317443 |                  |                  |                  |
| HHAT   | 134.389518389888 | 175.989742412417 | 140.160349667726 | 145.628239642187 |
|        | 141.398513269219 | 133.463464118897 | 157.697168349028 | 137.555253894825 |
|        | 170.636731478608 | 126.433146708506 | 195.043838688467 | 160.882229345156 |
| HHATL  | 161.027590226123 | 151.766607453172 | 164.857465272302 | 155.974463324915 |
|        | 164.39910609636  | 153.066630483602 | 173.109461200603 | 133.886091996863 |
|        | 161.295030274012 | 142.737537206204 | 156.911538642765 | 189.74261433647  |
| HHCM   | 137.48217464385  | 127.816596414779 | 136.639637503571 | 135.286686011087 |
|        | 127.112296857923 | 136.430232926793 | 128.274326990056 | 142.528480882047 |
|        | 136.732319750425 | 135.212715912271 | 145.034179171835 | 134.113464449375 |
| HHEX   | 279.704940529618 | 273.197814995543 | 226.458509834965 | 277.685488726472 |
|        | 171.06385200256  | 179.067275037015 | 141.801472885127 | 142.861359851088 |
|        | 194.202977693583 | 136.009969058857 | 159.801315111886 | 137.984988819967 |
| HHIP   | 171.994330847901 | 176.953099943185 | 143.330025840618 | 158.809865241567 |
|        | 132.428675012593 | 131.466580723837 | 136.327014189932 | 141.296574431203 |
|        | 131.354275252104 | 146.29600238749  | 142.902838068479 | 143.284230032303 |
| HHIPL1 | 139.730999352036 | 131.481679396553 | 137.125637347852 |                  |
|        | 151.635752404534 | 136.691865286093 | 139.365595511181 | 128.303046695142 |
|        | 132.024244263352 | 138.934516083124 | 132.851791525098 | 137.77107995457  |
|        | 150.026314061051 |                  |                  |                  |
| HHIPL2 | 116.412881235587 | 124.126715773068 | 136.524640445539 |                  |
|        | 112.736231367296 | 119.517021355598 | 112.90900939264  | 120.07034081564  |
|        | 115.337592860132 | 115.775525016883 | 111.152235113722 | 116.425301253959 |
|        | 120.01190102634  |                  |                  |                  |
| HHLA1  | 127.419227292862 | 140.992801405088 | 139.932849289354 | 150.241585041178 |
|        | 129.436712663487 | 138.334626498686 | 138.020031233095 | 144.087004064416 |
|        | 141.497125111619 | 128.933672074497 | 139.684141478459 | 135.741404460897 |
| HHLA2  | 157.512561489621 | 121.087514445827 | 150.405715534245 | 140.750004067571 |
|        | 137.728163622673 | 136.436762791912 | 139.611455791957 | 127.478474451121 |
|        | 135.930911350803 | 136.923876486522 | 139.805930686563 | 152.823566129571 |

HHLA3 138.030842581932 134.981272056795 147.720061897962 154.489459651566  
157.572446865749 139.338384535905 142.259196792767 151.243948028303  
143.710449544388 147.86104992164 141.644521617419 142.157512965166  
HIAT1 240.182016388745 216.929969034881 287.889774984754 233.20900339048  
228.766847429517 400.676876982655 356.05426191171 325.570839576032  
354.336462793628 320.979443123471 275.509805464276 406.816482069141  
HIATL1 229.483578414375 218.592402813219 280.033528476199  
202.622747952763 349.382889326613 339.172031360524 212.749668083641  
242.440966395613 288.505502880424 344.856199123543 255.066583469964  
307.264586007015  
HIATL2 11741.7473778842 11971.1664283024 9378.87287299048  
10765.0336035748 1715.51071085304 10900.1783397368 4309.86375945008  
7771.28016059011 5811.97916044218 3528.62443098065 5825.9968524214  
5291.83393775761  
HIBADH 1402.14708471728 1170.88763035931 1578.87371296418  
1344.1288416533 894.46029531926 674.338740875512 720.907992182476  
909.388774224614 701.481003619067 498.965895763801 792.247301083075  
974.544773560873  
HIBCH 427.872407051254 452.732079010502 569.656573915709 511.374117402707  
441.435444003241 858.742139354587 565.164961255054 734.469481390593  
417.865461351681 539.125423322738 716.731984660463 900.233783407148  
HIC1 175.165305179665 198.088834624665 184.482849019679 234.814109965002  
147.309245779031 153.519207482423 134.728594388428 141.302647488314  
169.520544329439 159.227123133854 152.591091223395 147.919058170753  
HIC2 223.419092696074 223.094496588657 201.837695818264 220.533113603343  
262.577672828611 684.428198622716 197.582402276079 302.768870633398  
634.556887178869 178.404791189835 360.991542429346 512.895335481876  
HIF1A 274.974304050999 303.09499683953 191.616483214712 209.229537873706  
264.158648784101 298.347201056937 316.663128947813 230.770036998466  
267.222762759781 742.517302567436 350.741303038926 251.588748783592  
HIF1AN 310.690317681243 342.245182599593 286.085833802132  
447.995213144892 268.52833723726 203.149001616967 267.869879189095  
250.602978521808 230.893665210918 223.84997313236 253.049869714368  
214.100698312272  
HIF3A 139.783725419023 146.274284557421 137.438984175012 137.241991031057  
131.863018503922 123.722744366103 126.260691770282 138.525131957094  
129.920586100555 131.885529813944 136.867987890996 130.182320154521  
HIGD1A 968.548243081111 986.972987865318 1074.96415574964  
844.778755052304 3038.02573182546 2639.60135568 1715.51071085304  
1421.72388964898 1762.09874961415 2093.67403119512 1478.09582385838  
2756.22069438696  
HIGD1B 152.291176493005 162.766038656637 116.382348831504  
137.853137973756 123.288028185949 184.398672994943 112.635430248416  
142.183154756458 126.76986764971 122.849235421041 112.817015523662  
110.465934808915  
HIGD1C 126.413124995943 124.869732867761 142.599815022061  
126.705446263769 130.626965797365 138.43301474649 128.933672074497  
131.065633574494 135.906115546805 128.574419295906 137.491366243256  
137.320792454356  
HIGD2A 2635.31067044245 2938.06458269406 3019.57419253979  
3168.27825058989 1390.95426299323 1532.47920327769 2586.87941889443  
1989.38201206555 1465.2419150392 3447.19587767281 4651.384971332  
2944.63971819193

|          |                  |                  |                  |                  |
|----------|------------------|------------------|------------------|------------------|
| HIGD2B   | 135.217240511902 | 138.399665664034 | 147.81143020317  |                  |
|          | 137.011595584638 | 141.954467306745 | 142.29309119138  | 144.215491799806 |
|          | 135.129656281091 | 145.812607895325 | 138.601616246182 | 142.02169810999  |
|          | 146.994103804515 |                  |                  |                  |
| HILS1    | 118.338713846941 | 113.913337223716 | 118.438942370745 | 115.37736249419  |
|          | 116.373841472226 | 106.953841653951 | 122.452541100946 | 112.046615825307 |
|          | 115.128667174745 | 127.9928491829   | 137.430946130817 | 120.300291760091 |
| HINFP    | 185.088667707155 | 181.70730090195  | 199.798533722581 | 192.548337508559 |
|          | 190.471158323247 | 146.240060512152 | 162.147989253357 | 195.84531580224  |
|          | 183.214922844221 | 155.699649538664 | 206.77605957523  | 156.13331481937  |
| HINT1    | 2886.92690692502 | 2622.87486749984 | 4055.40322213638 | 2063.42824094932 |
|          | 4732.31591164752 | 6851.54963413886 | 9470.58919937464 | 4773.62220024088 |
|          | 3793.02341602102 | 9759.87403504619 | 4262.23145131525 | 7082.28969354712 |
| HINT2    | 617.67819271245  | 730.042712083388 | 746.523071806534 | 851.221199352646 |
|          | 1364.83036157729 | 516.429067667758 | 398.512947526406 | 723.807658768693 |
|          | 641.774812292709 | 476.641032594868 | 560.913732951675 | 420.361583975644 |
| HINT3    | 210.290500215377 | 178.339211170442 | 394.810886122555 | 187.625536724681 |
|          | 214.52087460757  | 188.878770168595 | 208.067404132325 | 198.135240691225 |
|          | 217.074639597142 | 256.495848662843 | 175.98210925643  | 174.898012759712 |
| HIP1     | 197.895094054577 | 203.586310608403 | 179.241385747152 | 197.191648960563 |
|          | 191.897449038297 | 206.937770272939 | 155.263513633703 | 189.708396835236 |
|          | 206.89716102989  | 174.23955831109  | 170.12010526854  | 207.104548555929 |
| HIP1R    | 133.625358030199 | 145.601922576321 | 137.094814176566 | 133.762141373091 |
|          | 228.184535093641 | 168.052288484172 | 165.169920299969 | 143.116451998409 |
|          | 206.275885047321 | 152.868787961804 | 196.053808536366 | 173.929353266244 |
| HIP2     | 211.395593720534 | 195.863843860549 | 195.618369827396 | 207.173653740239 |
|          | 248.594000664466 | 240.306287921209 | 297.466255000163 | 338.223462327622 |
|          | 289.164969943385 | 309.580750386386 | 279.026742408164 | 273.959220003188 |
| HIPK1    | 137.344198938623 | 127.887666721519 | 132.665590728755 | 128.939572714685 |
|          | 137.212568398657 | 130.829825154842 | 134.863223806176 | 129.502730573463 |
|          | 137.229871801676 | 140.007937555694 | 130.991496243273 | 133.403409882362 |
| HIPK2    | 455.778776920897 | 535.354724252178 | 373.361263985383 | 473.151324002277 |
|          | 331.383533814347 | 291.577778800314 | 264.355693070937 | 355.290621188435 |
|          | 286.469773081481 | 358.60777927888  | 299.568830444875 | 344.856199123543 |
| HIPK3    | 120.060776752215 | 122.554760526767 | 124.621381699241 | 120.15332480712  |
|          | 115.656801309856 | 127.818137805569 | 118.749046585251 | 113.734280863323 |
|          | 121.588054040961 | 157.147002927578 | 134.096283448464 | 115.902030217102 |
| HIPK4    | 106.204350278634 | 111.276543583667 | 101.915858150866 | 111.867464669155 |
|          | 115.775525016883 | 115.18875509198  | 110.774802298005 | 114.504409331018 |
|          | 111.178024950204 | 108.818976813708 | 108.557097186828 | 119.802832736435 |
| HIRA     | 150.696963699371 | 149.77596374205  | 140.256871047018 | 139.377027955744 |
|          | 159.854639082837 | 138.783017264895 | 164.717809928624 | 147.439303942026 |
|          | 152.503159091556 | 151.026905311756 | 144.642042956057 | 132.322618637842 |
| HIRIP3   | 456.298408568636 | 469.930860750773 | 634.556887178869 |                  |
|          | 637.457322054293 | 305.343879847672 | 428.237210115667 | 357.672950588403 |
|          | 387.403502892897 | 379.615659443164 | 356.84281623052  | 295.893482074241 |
|          | 326.055727207966 |                  |                  |                  |
| HISPPD1  | 110.575582352222 | 129.315412536491 | 115.485515429446 |                  |
|          | 119.830261862805 | 116.342242990651 | 114.226028611171 | 107.450945262092 |
|          | 115.097376525707 | 113.274668934773 | 120.897228878841 | 135.096321258167 |
|          | 113.125349503734 |                  |                  |                  |
| HISPPD2A | 186.854553034865 | 185.923374274306 | 206.236303011662 |                  |
|          | 204.914390718161 | 168.095061700814 | 175.417320301614 | 171.97578836712  |



179.525651423361 187.057683141644 177.065616871886 191.708350637714  
197.687858915757  
HIST1H1A 170.775283924087 153.108902978819 171.267907653007  
164.202554380274 160.773510498005 188.475801713801 172.175584707792  
184.557630172634 155.680330654611 159.52147764862 161.348562186667  
163.07139884152  
HIST1H1B 154.496005175117 144.454141873387 145.724294862079  
151.09974848374 155.007516124803 174.26780796802 144.301577198126  
158.356964958885 142.64421300687 148.380555606786 135.892248893607  
156.351734527745  
HIST1H1C 350.46078795627 407.052451784773 276.138650967632  
293.234972169244 798.389385197471 1856.05025952611 384.641319423853  
652.826023701545 3789.1316515671 1535.27496251381 868.40984928812  
458.875979229339  
HIST1H1D 139.711696905287 141.457040042276 125.27625242915  
132.70643154246 149.317146997809 139.834535091869 138.28745132277  
132.203310946961 140.850680024381 158.98666068453 137.968932080074  
145.108281984556  
HIST1H1E 129.949894903048 131.106613067333 122.373400988227  
124.61344300674 136.261907928796 112.612099135361 118.457573670556  
118.235640920527 115.734230176652 145.766684470184 116.388079393669  
112.063713561549  
HIST1H1T 114.021546689428 113.209569103727 112.142263331903  
106.315801001506 111.826509343353 119.785062256421 108.955761698524  
114.68345964966 122.69021100699 111.448871835514 124.558026853954  
100.966979609222  
HIST1H2AA 125.384706864406 131.882887826338 115.392989580183  
124.232144678947 132.294365151614 123.035401501279 125.990762414974  
125.979152567959 128.2409378561 138.872536475067 141.750316403249  
121.04331582508  
HIST1H2AB 128.495276191943 134.85809559975 141.359142214228  
132.411757518105 157.590017103385 162.900556089071 124.907788504503  
123.629279569085 146.508628678304 150.931114848235 136.121873179928  
137.957654220875  
HIST1H2AC 182.109092947203 180.437648146588 189.419941381565  
130.935922915902 175.93459327917 356.323554000768 153.871893011106  
186.359770878343 1132.27988339924 1843.76920134139 198.631354372924  
228.560346647306  
HIST1H2AD 153.774548290902 151.92638745703 163.951459935477  
149.698664700146 143.318291243905 161.359609192977 149.628421263062  
153.759707372298 168.45157400976 170.844002412425 149.799681364551  
159.273225917177  
HIST1H2AE 152.340010735322 136.338683078123 160.227729155903  
139.432567336814 157.898632788579 151.073257114127 141.712693059287  
139.660641694206 184.306452616482 270.201322204641 130.838350486331  
148.231928963878  
HIST1H2AG 142.793573585472 140.051904905695 134.961156870831  
141.929924728222 144.004831360797 143.294217840279 151.385956426616  
137.47514052942 141.484730939562 150.272153646712 146.335409183715  
147.140771901106  
HIST1H2AH 113.301733735994 102.343275379164 110.212739445  
114.76337651891 113.970633751086 118.974727968283 112.268518171041  
112.456644814178 105.976284291356 111.559325333192 111.041656398985  
106.238539254093

HIST1H2AI 126.319103548711 130.726640485925 133.533718725309  
142.780100181736 137.719257499747 138.12651823109 131.142841840284  
135.892248893607 142.427198128376 153.996429870564 143.548858367002  
134.860896462638  
HIST1H2AJ 126.446675008883 126.595668758744 120.082391311921  
117.227635924674 135.377118045038 121.014538677616 109.680532131035  
117.442158626871 112.565341690522 122.027632589515 138.548983773386  
118.88525116298  
HIST1H2AK 124.090268443064 116.230993734675 130.131800537628  
118.419311800417 114.880348648147 118.372047967248 111.328185454541  
113.680875214845 116.934457270701 113.955459033122 130.925881698601  
123.561016079801  
HIST1H2AL 138.647667867725 120.319621393685 119.060186838239  
139.365595511181 125.093376753408 130.682112236817 124.378096177801  
124.922004609558 134.458958352588 121.99477069153 131.638954862848  
145.780927034516  
HIST1H2AM 166.655585160657 151.639515017015 149.066522533956  
170.531713392258 165.30072618497 160.992494552269 189.552385508772  
145.478233255862 155.298546821687 139.904952662852 144.796089646941  
154.555255038453  
HIST1H2BA 147.174977926293 146.276706674761 160.778296470857  
131.798931481549 140.196653553673 148.04206955657 149.353072778508  
148.656917603142 148.124586158123 160.742365719929 147.04481509758  
141.253030949701  
HIST1H2BB 142.446514275674 155.035727630756 149.912481263284  
141.584554523423 170.257439890277 148.725162101789 150.056508971921  
158.025633316671 133.63022526522 150.334844020375 130.748852926994  
141.947478902603  
HIST1H2BC 140.665332203898 145.968884703737 137.838096997956  
160.742365719929 161.748547772524 174.767697866801 140.03202338666  
157.436513275737 236.235744374476 290.420307322101 154.143331594812  
146.526744516344  
HIST1H2BD 173.225064625094 206.937770272939 144.368355737187  
141.537578081123 308.148212607944 213.833894542292 165.545136704242  
208.983138060317 498.965895763801 906.886423608706 229.230239609291  
202.909188070184  
HIST1H2BE 110.510191137073 123.156154667242 115.107214937219  
123.315362903961 143.038248313305 136.862764950361 124.899019467557  
125.386545354096 177.333305785248 208.321765801227 144.154217446011  
117.436119533535  
HIST1H2BF 119.663182347566 120.238706364491 107.91011371422  
114.01599035448 140.462651395483 125.979152567959 132.502153153826  
120.691810909148 129.001192144163 152.067897082883 128.978197156274  
120.995697049378  
HIST1H2BG 131.338853426561 141.152406037213 137.999190557332  
132.895500657638 159.19183334563 201.269380130546 137.709120153505  
142.674671804361 198.113398073968 500.848273432862 145.320945010364  
143.086872363116  
HIST1H2BH 154.281674854552 140.630844296177 163.516075721791  
187.754968096521 179.711363255355 259.426050921239 167.397758092427  
151.004738508108 189.840366340622 213.584269089596 151.211710155053  
243.159062832085  
HIST1H2BI 110.694256186941 114.631759839092 114.242056888286  
113.184495948936 110.325803953516 118.419311800417 110.847680175669

111.703224727793 117.611606270124 122.959518532165 118.457573670556  
124.815853677553  
HIST1H2BJ 138.250288796456 138.467624450885 143.08841562593  
137.508097741526 181.467708718758 159.115391667901 129.397378057767  
132.218907367109 199.579818754014 194.88319590729 125.677019190255  
138.516066340784  
HIST1H2BK 619.045921382959 859.860994525775 547.202354339933  
550.24496459253 1718.80498208397 1989.38201206555 675.281131488524  
648.549890890375 4628.04544865227 1946.45172007314 1110.43791444289  
628.485648053393  
HIST1H2BL 123.059971161711 111.000303209442 117.178495957357  
113.862790983655 124.251699375036 121.855752708908 114.129044806825  
123.439897913722 110.562310620515 125.634045420702 128.729687597908  
118.331237160995  
HIST1H2BM 131.176413983785 141.308299074832 152.14012587515  
149.103778494524 147.544539855657 131.87404363664 128.530540860266  
147.029988235786 130.326980619676 146.361128670362 140.714455864886  
144.384287335249  
HIST1H2BN 133.507865919719 131.878155417065 149.91705328815  
141.453255692229 125.065813262416 130.506708993193 142.919910421524  
138.367321366804 154.818414925242 126.468167800414 125.593595066736  
124.863832760607  
HIST1H2BO 171.636121363019 146.681183890181 174.26780796802  
173.147311624838 157.592607345742 168.935348409102 180.923089242255  
164.962201718762 144.555718186987 171.426334687626 153.072429774613  
169.113439729353  
HIST1H3A 127.247764390727 134.905760222839 117.30724482798  
119.252737868132 128.029736384348 130.800427334056 129.221482161409  
137.805895248174 122.414781975236 145.89801576671 141.819762045169  
122.909152047474  
HIST1H3B 145.306369509684 147.980827857138 151.718492863169  
152.778732614944 154.431051053529 148.022287939066 142.046082566177  
139.049085468313 156.61494867164 158.205235596076 132.402255281009  
136.584199831088  
HIST1H3C 113.23302126254 109.700513642061 108.515401509039  
112.371497988132 126.81140158672 138.89579816122 110.315549501241  
112.943630133093 118.312891459156 119.000436602325 121.553107861517  
113.656820701744  
HIST1H3D 146.114159600635 134.14147833356 133.213697351807  
140.117644705946 181.840985962045 145.815454490804 145.985223908092  
127.144291519133 193.190059954084 296.915883082902 151.486362260537  
140.434086004204  
HIST1H3E 159.7197697044 142.505050582588 136.62213567467  
154.205877662428 183.138955445765 150.815117344434 168.007337847195  
168.674809329231 162.216377983292 193.801858215025 178.619580818758  
159.276726310525  
HIST1H3F 140.379874810685 141.568970008164 152.088488171996  
150.28169442832 178.3652866131 205.52620827767 170.4583554058  
145.314204192565 265.148061007894 214.8478629277 160.713790305656  
178.083311435916  
HIST1H3G 112.962180108363 116.58452862953 123.400143662218  
110.885714048075 158.928949614338 130.988294699995 118.622346984257  
116.092815232176 142.68640844948 120.951365231971 130.983136465761  
128.137646789236

HIST1H3H 125.269726165403 129.96280577492 131.454955038299  
128.597272557033 141.913001976093 130.562422910426 118.303150165804  
138.69392148885 198.023465629218 168.183542846746 135.294664456623  
125.016608289141  
HIST1H3I 126.573673878042 125.621467040793 121.44564199541  
120.238706364491 125.27625242915 126.191057198995 124.59937620719  
121.980744551615 127.422129210789 132.560292119968 145.700589723224  
125.868080230094  
HIST1H3J 147.513689209024 144.669509071181 152.673212084312  
141.725882943927 153.767488352037 152.224281847792 146.624631389743  
139.858812885649 150.788386945666 145.662818023154 149.595375008252  
139.97127025207  
HIST1H4A 114.624259793353 107.316786994369 106.126202301438  
108.895922800601 111.672450681359 113.283359026655 111.506345174435  
115.496108000499 115.02681415256 123.294321716108 94.3531468700382  
99.7487411813724  
HIST1H4B 148.49560238679 141.249687936867 146.30781951018  
146.119700458464 152.741229289112 148.42845062376 160.164327420125  
141.088456756806 143.780803045394 140.357427912361 116.186846885411  
137.620843137286  
HIST1H4C 8053.22070239424 8881.86480594052 7104.65816621275  
7902.9189607838 29162.1093037754 20217.6497214386 9881.69734721233  
14108.0461617941 12334.7921691489 6585.34962362923 7389.95365139168  
13190.4826009741  
HIST1H4D 147.879286704 152.317890573534 132.428675012593  
151.821324922628 145.985223908092 150.536178574986 138.060245284993  
160.655929233978 174.775676782795 136.022614387461 115.954828435072  
147.49720952988  
HIST1H4E 132.504264154139 142.331050242704 153.690189121681  
155.63328143658 185.876046259727 142.919910421524 160.898061905021  
163.668476670167 170.326474367867 212.497773003032 150.292858985795  
147.07272598888  
HIST1H4F 166.998311158378 152.54413356964 153.865702787334  
183.795632040455 148.512096079648 171.40549153673 157.66470622511  
148.955023180732 151.010493695217 149.270818605598 124.452631766045  
175.341310423897  
HIST1H4G 137.314968268692 145.411264691728 143.423661752881  
142.468453098878 135.946808893146 142.137885203233 154.954906872501  
142.130797378448 117.069094451283 143.05872558805 133.984078167807  
138.231715814115  
HIST1H4H 150.231063426302 158.545435407585 139.123489349026  
130.278980631435 199.746775121317 148.808928892047 125.796438432905  
138.393565473857 350.46078795627 171.414869677333 152.191393042132  
138.175538905334  
HIST1H4I 143.909501365162 130.272086123019 132.446406243531  
135.732616463819 135.061176512365 130.454496708632 142.363309192458  
130.40517506216 139.843416673512 148.492328039604 124.530660958725  
120.422401793885  
HIST1H4J 151.243948028303 145.041430440608 156.901209828741  
143.434571922656 231.698163424706 192.789886894821 137.471563342956  
154.362571105094 202.99342484328 191.924177620803 222.593554194453  
192.627266049516  
HIST1H4K 163.315865817864 172.097502416776 196.450308368198  
170.01557699913 499.544050752036 468.496972957503 164.185346950306

155.130745957603 434.61711290583 392.746574862867 339.843776738468  
353.078842299761  
HIST1H4L 127.771225410866 124.372963874507 154.179891883612  
144.713108022551 154.462766419353 167.599784887933 154.296467085914  
130.555405606993 139.925201225224 149.764447995426 129.138035235415  
157.572446865749  
HIST2H2AA3 356.62074247786 423.045329000756 313.581986704048  
213.813667557079 762.182213353032 760.070180572621 228.560346647306  
463.622673539254 2758.01526530661 1885.93146154931 555.607185132941  
386.544913399837  
HIST2H2AA4 409.206158277764 400.924914238052 331.383533814347  
239.388546850124 1066.25208226214 958.63560158343 221.889331385023  
567.465201338735 2995.42172749615 2072.01578063404 570.130804179186  
419.763812610671  
HIST2H2AB 122.909152047474 134.064206964444 118.446703299916  
121.367086422226 182.084333814175 146.735616237082 116.540729581355  
130.579954890389 228.212753830905 193.064450357153 154.932132950843  
133.44592405762  
HIST2H2AC 378.797952580504 414.713379367927 261.286548990435  
276.138650967632 1306.20183851747 777.410297605252 238.588762326319  
426.769986378276 1648.22531304741 1336.15622439522 428.782703561238  
366.408565514304  
HIST2H2BE 435.901794650816 369.070376276471 443.964363178742  
331.684298221133 401.87674893993 349.722963659175 152.578091976678  
199.980312703646 1522.87703817058 569.236322997211 389.686045618228  
267.622579012917  
HIST2H2BF 171.267907653007 183.963578322984 166.681646517413  
172.478461106269 164.377227860031 169.285901212492 175.717830026564  
146.900087470856 176.883702717029 254.036619126409 168.873282919232  
200.810204162831  
HIST2H3A 115.594489123676 112.578934972566 123.190757763412  
131.811011266156 148.400132332444 151.384762644292 135.323341505875  
115.316430915446 125.345611085082 131.305785417254 106.491867793742  
123.796657561057  
HIST2H3C 112.547907748842 119.202966460612 110.544044723728  
120.871693555514 135.548042190047 118.514618614167 114.613368640356  
125.019064287385 124.477586539576 135.976837152799 136.850940500212  
112.629266772219  
HIST2H3D 126.285743744314 129.38021642675 126.103561089901  
142.697827839203 144.448503894295 138.902097203056 139.897320032723  
151.10837100314 145.864902319111 151.639515017015 151.436802637988  
144.199054675488  
HIST2H4A 168.460095116205 167.219062918573 184.974347306539  
171.545695383454 201.167206950576 172.612152484322 184.260835471542  
177.039190810529 420.248838397618 181.479652131104 163.474261351901  
175.784250947874  
HIST2H4B 135.86149691566 142.956870642583 132.659196898439  
134.427601777639 136.952914053358 150.049852391879 149.752188104803  
155.873969001251 251.787648609546 157.751477529076 166.404164069728  
161.755290291637  
HIST3H2A 196.734037460218 192.804447792672 149.910521500364  
158.59135215074 457.292146759215 639.688482258192 436.731545612902  
214.904634494921 1223.06438074895 409.691865300362 349.816819166182  
289.956528242564

HIST3H2BB 138.709991561675 141.743873995642 129.450937831864  
127.398873370484 155.598586699376 129.546119539687 126.63730651721  
128.118223792086 132.628358688595 156.123528587917 166.533191390639  
128.163613794257  
HIST3H3 132.416618775337 127.814109293214 136.005756600948  
131.892151111901 122.727385599754 143.951756384507 141.901382169334  
143.555987405898 131.623527073985 142.412731964179 124.777895136212  
149.272219727411  
HIST4H4 140.820807603291 130.156775178934 148.512096079648  
133.333067546558 129.601234646954 132.521681289019 143.827500301207  
139.21331678591 156.365413649149 146.122816653035 145.107068919893  
146.256076936456  
HIT-40 169.447827110558 161.557558028531 204.260800563197  
157.273309095198 155.295464263911 243.402781509365 184.530853446688  
225.730739636442 171.093611712143 142.329137800558 165.003646188775  
164.68600028429  
HIVEP1 206.915239638443 199.077893147154 183.464897811105  
220.446775597113 147.285764611006 156.460374293022 146.574656147816  
156.704278982517 173.424541543058 157.81831741292 174.727439318223  
157.333615322941  
HIVEP2 335.301103690781 312.177191402945 240.306287921209  
274.736124442229 195.863843860549 245.240006198482 402.965083947376  
248.010317392179 231.698163424706 240.497413647633 441.001837510132  
369.726867521935  
HIVEP3 145.748174062159 152.124910935545 148.484823275343  
139.811873260553 151.96843908074 163.066051106092 133.277326912499  
151.449690439424 156.01406297447 122.292692083352 168.412162365467  
159.106269972346  
HJURP 121.993231438082 148.288798428149 127.879723100698 148.327340543504  
376.374248850987 226.893147371644 184.306452616482 242.538036654192  
298.625127845168 210.529782898493 185.974598267418 302.735372807236  
HK1 1127.89414462606 1349.84215478798 1337.38160266788 1780.97169244555  
924.630951485299 699.800360892516 1085.38819961412 615.662993833692  
793.300636780035 816.823443819069 1094.67740173529 1042.40539020413  
HK2 169.052101570616 206.21848253717 185.843639043466 167.637638693195  
505.302263971007 282.870785313621 653.047570485109 460.514672966125  
234.980382243116 1654.58270183167 873.256632365737 756.390518977556  
HK3 164.811120992602 149.322537247388 144.505072819693 171.320653882424  
153.457715729768 159.146745596683 135.904163043783 150.079372712689  
162.6762533989 168.50246276469 151.891318080151 141.019494314354  
HKDC1 136.413745926388 133.138744413911 153.405052909585 125.685852196342  
139.524233960073 136.841506794489 129.564482772168 154.539367933684  
151.219051767056 140.804008584006 135.594186066942 150.072005848234  
HKR1 242.538036654192 207.376329989942 204.031081842809 222.285940575778  
169.568915494577 170.410704499804 205.728673153914 203.276353321185  
189.589053840976 175.417320301614 378.920456227378 217.013533525724  
HLA-A 5195.2087608308 5655.12135336698 4255.59773503364 4309.86375945008  
5175.17279574945 2965.38280248519 4095.76073123843 6188.04738762584  
13479.8546809758 7699.37963536892 9596.10781313429 10048.4260790604  
HLA-A29.1 775.382397816601 870.887539668967 818.761934233826  
587.893636997642 133.834423222601 342.611951034707 1603.87451959083  
2198.4268389426 2859.94396089224 2863.51286169094 4404.79209330918  
2828.97255380291

HLA-B 2001.92441724356 2005.76678571689 772.776364492813 1102.73689840572  
4335.76831372031 1065.74382494535 2547.53445585552 4175.70090899755  
11741.7473778842 4417.98524179686 8053.22070239424 4222.55224241399  
HLA-C 185.220017451419 163.960242712692 143.070170783764 174.483233557264  
839.324324662619 207.993943398697 338.406266073063 319.417555901733  
418.968095159939 212.996456841785 899.336817124312 309.155070674445  
HLA-DMA 891.637685856145 908.704610877319 444.584594376357  
669.602939159192 1507.39761667421 599.52440136406 1071.00507864299  
1967.82064011967 3152.64817044581 790.321331435096 731.513306289481  
573.846138124455  
HLA-DMB 718.142991571468 828.276436883306 397.387054218873  
615.88518704181 442.334886941795 516.577357935963 547.516635695872  
1462.31151845458 2882.51330563735 589.541347392215 819.887322757281  
441.785666261936  
HLA-DOA 197.277310409328 215.769986055534 147.225911875196  
200.603836348642 228.588693548447 169.332207863684 157.176001400747  
240.07282016658 319.018213637357 169.881866987359 202.568071395884  
155.176714087209  
HLA-DOB 162.018860183534 145.599152743156 153.592819860747  
151.831627236638 165.613274361543 142.402227523617 140.429462488271  
184.148058872585 276.756415094228 153.38260557666 150.939877261936  
135.809383370957  
HLA-DPA1 1172.96121022579 903.824331691969 478.293220151258  
612.374364731095 597.189355986293 1002.44383771056 912.878077940014  
2770.7811954029 4465.66734676111 1053.09915077366 1101.66868138797  
466.691191261997  
HLA-DPB1 136.307646393792 146.686192012988 121.164978896057  
122.841135364088 120.638330368388 148.916981164664 127.146101490884  
155.861829925386 192.465510013851 122.796362813922 165.995251661994  
114.048136176142  
HLA-DPB2 140.401508808129 141.520125030042 141.544454931788  
145.374923175872 146.238333981318 140.10798818623 135.360087349634  
122.644105247178 147.268006631005 143.868962478182 129.522339467532  
136.843164021899  
HLA-DQA1 247.194197143562 215.143973502566 147.643985046683  
207.368252249039 191.507657960386 322.576886792502 311.481739745423  
1184.88559645917 2026.85580212422 256.729891423908 383.802494922918  
328.60529053804  
HLA-DQA2 137.280933631075 141.121364213272 129.049273337631  
134.796088225931 144.792035839249 130.176734524308 130.189958197332  
129.054577477882 123.170639180926 131.712745388563 139.62718946833  
136.184427467391  
HLA-DQB1 195.256498208339 213.077884261943 148.326282600684  
166.8846964604 151.345630073141 184.923312649584 215.635313821029  
154.548286860883 331.62124160152 299.851173200352 139.353080958675  
181.425012248539  
HLA-DQB2 157.166379887259 150.138643811727 165.565284723155  
143.62315472858 186.1961391235 139.276102596591 329.926864732606  
171.221972336784 217.531179216305 164.50490221903 326.525579400607  
177.235586767256  
HLA-DRA 2244.6916226146 2139.42448145954 1065.74382494535  
1141.49294161587 1010.73988405469 2630.78185410861 2063.42824094932  
5981.08862268291 10533.5868398404 2346.47361943533 2105.87438782831  
1914.96285167893

HLA-DRB1 283.760131847707 247.746304138866 286.856346704286  
 172.612152484322 928.151632070573 401.960630197091 151.0189104086  
 761.097992055119 1810.68433539154 164.659092629962 134.06834346533  
 544.956712516196  
 HLA-DRB3 573.074116810032 547.681206272188 432.726040933545  
 452.167674725454 668.570984110088 424.025588636796 451.210172051464  
 667.693216401836 980.120729515821 414.114051645565 545.200687301057  
 439.023181761356  
 HLA-DRB4 353.243400332397 380.393153331219 286.194197552489  
 268.832884350157 303.762967437478 510.972389503051 298.573180660083  
 994.802763887989 1914.96285167893 415.113340335205 253.754869975548  
 353.005548289786  
 HLA-DRB5 338.326304736048 312.080864996592 117.513523498725  
 141.560424984281 825.781627776577 134.796088225931 128.50733429744  
 1545.71251527145 3636.59530016939 149.772157318769 131.575356402693  
 564.41151411028  
 HLA-DRB6 417.987533397449 332.194163016646 217.202541167691  
 333.822167152866 416.215253990273 325.252108402192 553.757847979529  
 1055.22233969473 1004.6207350158 482.965800108538 583.022090879298  
 360.124745133393  
 HLA-E 2316.49886419499 2744.77453865893 2104.59597571915 1881.90353127141  
 5008.4888270731 2093.67403119512 2611.61260614408 4548.5418978622  
 6470.73189429877 3775.41389938231 5195.2087608308 3090.52810501797  
 HLA-F 692.729789121701 792.247301083075 516.755267232127 441.001837510132  
 975.315904185938 427.637083424453 606.851072672402 917.188039935737  
 3188.90202907403 1682.64624665931 4088.12910138929 1949.60516542965  
 HLA-G 402.564148020948 389.381039495553 249.737588031219 265.470314691221  
 377.951523644306 212.171281020103 387.068276379114 351.854828413334  
 679.191060100076 559.668195903429 2547.53445585552 718.670564185576  
 HLA-H 1500.16816750361 1662.51399707484 1013.60354455825 864.908449769749  
 2515.7035557541 752.142287661845 1477.10828981572 2141.855356411  
 6720.10473881011 3436.32495553246 7681.48027081818 3757.39261544326  
 HLCS 182.736067431579 171.941887376462 167.536828038178 177.862368731138  
 158.455783755247 225.505978789388 194.998142472864 190.077302802065  
 213.93763684072 171.051948060796 216.53417734069 192.314484368435  
 HLF 320.877897822963 374.761007556839 423.256021602613 366.961565952239  
 138.755173333171 148.278828579424 153.171822092714 159.476343366991  
 156.609370182062 146.287161912291 162.57736365619 160.122274989224  
 HLTF 326.379855547052 280.723379809959 398.61164689194 300.765518378297  
 201.016287924499 412.736636437651 431.686900474971 366.961565952239  
 421.255522475862 312.645778869254 328.550286726543 405.032674307193  
 HLX 220.533113603343 267.589020526148 195.141733146452 337.585502787016  
 182.209056248253 150.084909674721 145.68886453261 161.585555680663  
 177.001637712889 166.835922279372 156.243337414127 162.383584508358  
 HLXB9 140.923227606022 142.282861913548 140.04612725812 131.300342835696  
 130.09958025354 152.974593669153 136.560048419149 146.238333981318  
 138.530236176135 163.315865817864 154.321219471319 148.993620368781  
 HM13 164.103306492559 165.67554738735 193.008902902654 149.199800895684  
 211.438615793742 257.24481414803 259.796092536601 215.167086358143  
 231.439252571168 243.336550161566 175.847256673734 207.624240598841  
 HMBOX1 457.650982600462 386.16563750478 373.925939492544  
 303.423450627377 219.2695037071 351.395760651605 303.608918161742  
 259.575461599189 311.208703262497 324.671490117952 381.182514249587  
 301.908667220208



|         |                  |                  |                  |                  |
|---------|------------------|------------------|------------------|------------------|
| HMBS    | 188.973595445056 | 198.522123898437 | 174.323881548679 | 219.192900411543 |
|         | 498.334266735594 | 222.394280571312 | 213.178648382852 | 246.492735271771 |
|         | 252.280435525505 | 238.068308163643 | 191.525291860022 | 314.095043876244 |
| HMCN1   | 124.042153387391 | 126.433146708506 | 113.542803491215 | 107.32960937124  |
|         | 119.207503310618 | 118.192302821514 | 114.65036208773  | 121.356731684516 |
|         | 110.325803953516 | 122.702175900246 | 108.007762863766 | 106.126202301438 |
| HMG20A  | 248.229468372363 | 254.668502187945 | 296.141012087256 |                  |
|         | 264.779154931102 | 200.405532717305 | 228.542423012958 | 244.990374822652 |
|         | 218.269847477919 | 209.702683803624 | 242.037132958656 | 235.48876511325  |
|         | 268.406778092906 |                  |                  |                  |
| HMG20B  | 1069.93503700632 | 1240.4863200811  | 1037.46485756166 |                  |
|         | 1794.82283439196 | 2712.07480130502 | 1481.24705642453 | 1029.09818399518 |
|         | 1399.41653736746 | 774.442392607873 | 958.005138077899 | 1293.70593826709 |
|         | 976.360310504918 |                  |                  |                  |
| HMGA1   | 158.138862054715 | 171.869472272081 | 150.560305000601 | 158.130933580414 |
|         | 845.150147618462 | 278.005620372937 | 334.772648743153 | 364.331860640225 |
|         | 300.793542873709 | 316.457274749526 | 355.879841671975 | 485.731287873723 |
| HMGA2   | 139.21825391822  | 136.135223482208 | 136.80943340993  | 134.8745127454   |
|         | 136.071856104688 | 131.643633737316 | 140.434086004204 | 138.156430188312 |
|         | 131.655316312379 | 132.328948598599 | 143.787766055379 | 134.624322761212 |
| HMGB1   | 338.075238647592 | 404.618867159141 | 372.689712716797 | 338.46332239699  |
|         | 265.29629764006  | 565.313436777992 | 251.939696394174 | 278.598913464804 |
|         | 269.194172034595 | 186.244764337256 | 284.321253087512 | 375.131728190867 |
| HMGB1L1 | 1055.79590411506 | 1103.13439876128 | 952.724512915813 |                  |
|         | 664.809419789814 | 553.368945998847 | 1327.65573168233 | 785.290353402444 |
|         | 838.267069860172 | 924.630951485299 | 898.877732360841 | 1513.28088592885 |
|         | 1607.52029676299 |                  |                  |                  |
| HMGB2   | 604.687265229902 | 615.662993833692 | 492.377642058095 | 507.342877360289 |
|         | 662.58366387795  | 1031.59140059071 | 633.762608454521 | 1388.91423772335 |
|         | 1323.91781040143 | 797.73902873919  | 438.533112511098 | 987.564350211893 |
| HMGB3   | 147.471494294543 | 171.304896264805 | 151.846610656503 | 136.244995503799 |
|         | 544.669441360594 | 548.869880723909 | 354.45785837703  | 447.579975492958 |
|         | 317.121202656311 | 161.992141305029 | 353.005548289786 | 304.937584086529 |
| HMGB3L1 | 162.982557003317 | 150.198869833614 | 149.964827055916 |                  |
|         | 161.195562296834 | 139.123489349026 | 150.888616811881 | 141.290905146249 |
|         | 141.418737063013 | 137.330207626732 | 136.611670766233 | 140.009593108693 |
|         | 168.460095116205 |                  |                  |                  |
| HMGB4   | 116.87586240208  | 115.821231468312 | 113.557349524174 | 110.496084922302 |
|         | 113.76411537952  | 119.636334259263 | 119.161972571516 | 114.217867810848 |
|         | 118.095936088242 | 108.333135424315 | 117.724353829377 | 118.777105073561 |
| HMGCL   | 261.426617866925 | 276.476790719416 | 310.301616266762 | 352.665030560239 |
|         | 553.615252472149 | 310.426513884979 | 305.325519265387 | 371.767182305618 |
|         | 389.96566674501  | 254.188830191845 | 426.364663722264 | 240.994507285383 |
| HMGCLL1 | 143.865717051998 | 140.590802695412 | 141.600833670693 |                  |
|         | 138.1342592966   | 142.553175839278 | 140.370626016794 | 138.639410179404 |
|         | 145.155989928336 | 126.482660154852 | 145.63870792125  | 138.0249543452   |
|         | 134.877046981678 |                  |                  |                  |
| HMGCR   | 348.111872425949 | 436.731545612902 | 315.513423195489 | 437.836503489425 |
|         | 436.155731212592 | 576.451964662024 | 782.746481112316 | 543.170902795966 |
|         | 650.263737836685 | 1291.12004949379 | 824.746488539942 | 728.930140593418 |
| HMGCS1  | 798.943242964857 | 873.879064183441 | 589.240581642145 |                  |
|         | 841.285351463894 | 959.897744425251 | 683.179460779062 | 668.853969513382 |
|         | 2466.36457617864 | 2770.7811954029  | 2299.23805014176 | 845.150147618462 |
|         | 711.491528818004 |                  |                  |                  |

|        |                  |                  |                  |                  |
|--------|------------------|------------------|------------------|------------------|
| HMGCS2 | 225.99848688881  | 644.97200337335  | 398.796188440256 |                  |
|        | 207.940596890723 | 8649.07367196998 | 13526.3170858629 | 4327.90939653054 |
|        | 17749.5685495445 | 14037.2575989329 | 396.345382600445 | 7631.6124232898  |
|        | 7733.95252458705 |                  |                  |                  |
| HMGN1  | 1563.71477584676 | 1696.69982157582 | 1838.18547839898 | 1492.83354014907 |
|        | 2084.44431604433 | 4417.98524179686 | 4417.98524179686 | 5106.27623905309 |
|        | 8140.6363797934  | 4238.41681589316 | 3545.8833678963  | 7104.65816621275 |
| HMGN2  | 1082.00448164658 | 987.78377957731  | 1315.66699943181 | 807.3257139219   |
|        | 1813.79641422879 | 1682.64624665931 | 1282.84159765715 | 2410.32095582515 |
|        | 2388.03256067711 | 1792.35343044443 | 1174.69701182094 | 1778.73916100529 |
| HMGN3  | 156.519196335454 | 152.067897082883 | 146.393953146723 | 157.04599638368  |
|        | 163.764600217347 | 155.280897870265 | 154.47187360425  | 160.454243375479 |
|        | 154.368499839507 | 170.179304745674 | 163.960242712692 | 155.873969001251 |
| HMGN4  | 1432.93880448974 | 1360.24752587939 | 1645.05161227372 | 937.593129242257 |
|        | 672.13164205724  | 1897.92061704124 | 1372.63540073207 | 1536.52218968817 |
|        | 1300.40889834984 | 1135.49876948815 | 1887.82245931444 | 2056.90127387648 |
| HMGXB4 | 183.693300680495 | 179.648479201164 | 199.933148219784 |                  |
|        | 187.871017629994 | 181.157738347957 | 230.469548500304 | 198.023465629218 |
|        | 203.999142031297 | 198.088834624665 | 210.085329463347 | 184.294172429054 |
|        | 222.456810024193 |                  |                  |                  |
| HMHA1  | 298.776176246196 | 262.452869676209 | 290.420307322101 | 277.129985959184 |
|        | 291.577778800314 | 239.31180635241  | 244.132645171301 | 221.961758403614 |
|        | 201.661941695238 | 164.14265547147  | 204.219197797869 | 179.593817076317 |
| HMHB1  | 146.425476034368 | 134.14147833356  | 145.677477231455 | 146.226437529862 |
|        | 146.443892388756 | 139.228558152937 | 136.428826558493 | 152.158269344693 |
|        | 118.338713846941 | 140.899799480834 | 150.822586904738 | 153.941193682697 |
| HMMR   | 151.312853764675 | 151.917359928516 | 133.158570377793 | 138.186616955926 |
|        | 312.224309341171 | 419.846584903512 | 235.453139389486 | 583.619362840814 |
|        | 332.978350226738 | 249.823314327355 | 218.470365730283 | 469.333357789149 |
| HMOX1  | 189.853136769155 | 196.226732738526 | 157.83460319212  | 183.719279448844 |
|        | 430.505037012814 | 208.456472621593 | 165.938009275308 | 315.513423195489 |
|        | 244.5675215931   | 252.957489543915 | 196.001089662818 | 150.822586904738 |
| HMOX2  | 182.827395663312 | 175.327597807738 | 169.475714234887 | 232.465880700217 |
|        | 151.736824723671 | 147.598602877625 | 162.620593985693 | 135.481300250507 |
|        | 173.939159471022 | 161.142723532061 | 180.902950045351 | 151.289464845626 |
| HMP19  | 149.609501725707 | 162.06940121135  | 155.343619434375 | 165.581217879395 |
|        | 140.38936578649  | 152.780908985916 | 162.774716879847 | 143.533725135227 |
|        | 152.397984799517 | 152.071081175788 | 164.791545858875 | 154.205877662428 |
| HMSD   | 140.976675511847 | 140.648918459179 | 128.05898686833  | 136.381593416533 |
|        | 130.732397679661 | 141.453255692229 | 138.023752854109 | 134.648780131578 |
|        | 139.793683692104 | 139.517413585211 | 133.579067514064 | 131.239986488033 |
| HMX1   | 122.476178620771 | 117.494422663086 | 113.214390213004 | 116.718099363329 |
|        | 122.399241018147 | 114.533677697026 | 120.13937451914  | 111.876915242732 |
|        | 111.559325333192 | 114.155592351175 | 131.597937570173 | 115.778736387131 |
| HMX2   | 148.570769470645 | 149.502132524093 | 159.994376562272 | 162.007384919302 |
|        | 135.931715324468 | 155.933739693912 | 146.087596132093 | 145.267225993057 |
|        | 147.049287475127 | 138.829793136954 | 129.994160770036 | 148.461172387171 |
| HMX3   | 135.991630745082 | 134.519697269443 | 129.46430369977  | 131.930814868433 |
|        | 156.678686363755 | 146.462544135666 | 144.364319564075 | 137.587917564413 |
|        | 135.170925092209 | 135.860777386274 | 118.792612926619 | 151.70035428516  |
| HN1    | 162.254062646631 | 184.937088280378 | 145.161116298118 | 155.488346781292 |
|        | 437.344765185802 | 873.879064183441 | 623.050854309724 | 776.807656744828 |
|        | 866.147379099606 | 618.829716818725 | 401.359711029934 | 1097.18236659974 |

|           |                  |                  |                  |                  |
|-----------|------------------|------------------|------------------|------------------|
| HN1L      | 229.77428612216  | 239.12905945808  | 266.563990988678 | 302.381946749711 |
|           | 204.113356572343 | 293.925995360234 | 256.237185590901 | 279.704940529618 |
|           | 247.194197143562 | 226.173501275026 | 302.021033686056 | 245.900840732668 |
| HNF1A     | 131.095431530473 | 120.649467083125 | 135.203507726561 | 126.141462782039 |
|           | 125.677019190255 | 148.255769084026 | 152.514455788489 | 137.448412532999 |
|           | 130.778164962583 | 131.568898109933 | 136.087702679172 | 134.48825480809  |
| HNF1B     | 155.801832826848 | 148.423303776817 | 141.353084959289 | 134.725434838052 |
|           | 320.024259346646 | 252.171420358437 | 248.850686917567 | 402.824964079515 |
|           | 385.238961394234 | 133.743708220112 | 289.001004912528 | 258.16437138327  |
| HNF4A     | 145.389721946046 | 143.920134762902 | 137.383211680459 | 130.390722272955 |
|           | 131.582231577364 | 129.958065173006 | 136.814736808725 | 136.745596788338 |
|           | 129.788395150404 | 126.199219102601 | 131.792339956719 | 133.617501101389 |
| HNF4G     | 119.511962218143 | 122.002822875994 | 125.280736217267 | 118.220555783444 |
|           | 120.13869466889  | 119.312201620247 | 118.461037435114 | 131.566892082703 |
|           | 129.108534267222 | 119.562180492359 | 127.26820735867  | 128.545699891734 |
| HNMT      | 246.049729366987 | 284.438411011954 | 273.514200733343 | 243.936797286495 |
|           | 220.446775597113 | 390.098830270926 | 543.933989965705 | 290.389345090634 |
|           | 297.805768288377 | 177.214422668922 | 448.644778906048 | 425.59810308048  |
| HNRNPA0   | 862.132582849511 | 942.900963522948 | 1013.03054571763 |                  |
|           | 723.428294037428 | 694.288215755716 | 1037.00025848491 | 977.999660785113 |
|           | 1271.46608195833 | 882.429823267754 | 1000.05896885496 | 1068.63350031223 |
|           | 1197.58205444449 |                  |                  |                  |
| HNRNPA1   | 170.725486814469 | 175.960788330149 | 185.332215198617 |                  |
|           | 153.22516060649  | 154.496005175117 | 177.759729226623 | 220.710324965453 |
|           | 256.471672362567 | 218.314136992677 | 275.543576337502 | 175.601912488918 |
|           | 217.327543190687 |                  |                  |                  |
| HNRNPA1L2 | 167.298438019561 | 156.901209828741 | 185.617936412633 |                  |
|           | 148.688413944868 | 136.937327692084 | 155.3394927753   | 163.385727569154 |
|           | 153.568321662387 | 161.673818303367 | 140.177708471199 | 166.305219348008 |
|           | 176.47556448977  |                  |                  |                  |
| HNRNPA2B1 | 1275.43768532088 | 859.113541787323 | 1086.8615735568  |                  |
|           | 748.940715378564 | 388.326080754063 | 598.287431134037 | 746.296354515617 |
|           | 1144.53002508973 | 780.961416212309 | 549.569374872629 | 817.036222521723 |
|           | 1491.05501052706 |                  |                  |                  |
| HNRNPA3   | 187.903298116031 | 175.38376293575  | 173.189465201573 |                  |
|           | 212.210383398591 | 315.752980521266 | 285.768837438859 | 210.5689532432   |
|           | 254.235762677639 | 306.068269136821 | 192.565733545715 | 422.12964420709  |
|           | 280.656087497806 |                  |                  |                  |
| HNRNPA3P1 | 169.984859264412 | 185.717123241832 | 161.299920355406 |                  |
|           | 179.593817076317 | 191.987301954927 | 181.578228610334 | 184.387409077972 |
|           | 167.192582058634 | 183.443006525616 | 173.959556466614 | 253.833756857339 |
|           | 176.289693941489 |                  |                  |                  |
| HNRNPAB   | 1480.52638217173 | 1248.69137283095 | 1606.01395227661 |                  |
|           | 1333.73334006986 | 2493.5484556802  | 2112.84348677276 | 1828.66165670455 |
|           | 3029.07443443457 | 1823.53870218167 | 2311.05587511258 | 1442.11349373764 |
|           | 2542.44286642873 |                  |                  |                  |
| HNRNPC    | 414.888512708716 | 455.392133846517 | 402.965083947376 |                  |
|           | 357.35857422585  | 307.866499851733 | 815.388288623756 | 492.207833630086 |
|           | 581.37957221282  | 529.854965483609 | 533.784151495549 | 622.692834629555 |
|           | 809.729160605727 |                  |                  |                  |
| HNRNPCL1  | 144.927731613526 | 134.57472034679  | 140.615078497305 |                  |
|           | 133.64938083537  | 146.06717772919  | 139.302591312993 | 144.20764300349  |
|           | 144.806478328053 | 147.951996191313 | 140.556631658219 | 138.293242905081 |
|           | 147.796610216375 |                  |                  |                  |

HNRNPD 4763.89426388268 4299.06288109563 4690.93553472125  
3833.73632806344 4309.86375945008 3232.96611074938 4047.99200599472  
4228.5490138553 6508.71638048514 3157.98451877581 3636.59530016939  
3581.36347643133  
HNRNPF 156.349030617265 157.751477529076 144.501995579502  
152.503889578356 187.561298131124 202.483493595704 193.203053225456  
176.029791617989 175.537039794925 137.717859035645 194.655710454472  
177.679330300381  
HNRNPH1 1206.09815575399 852.649997188692 1258.7730046784  
628.344122779625 728.930140593418 2037.96470181871 1296.10827265334  
1750.21700780511 1618.64901092072 1914.96285167893 1502.3444541735  
2662.43181510326  
HNRNPH2 264.456926651554 224.224264678645 314.708587131145  
212.272826965935 315.430399077266 457.779218916808 291.720204789005  
224.724262742427 354.783364481955 348.36178568457 322.302219773624  
342.315456386729  
HNRNPH3 741.433093896472 618.140160251927 933.408902924063  
518.925188630246 260.554343693588 390.372738176917 460.941286124613  
537.350891960682 543.584413650467 340.42197893246 430.833137328233  
381.182514249587  
HNRNPK 544.462032960964 407.589300080181 704.448123154868  
364.597798667541 681.677841333095 938.918431240228 623.68308750251  
748.940715378564 834.788058321257 882.037055216609 797.501324589697  
819.887322757281  
HNRNPL 366.788087591332 332.24505665756 300.886032768166  
378.585058475083 698.358285634451 474.216057978384 514.002313819685  
291.914408947328 429.457884032977 386.960778432157 322.36247485445  
343.833659987063  
HNRNPM 1629.32740709526 1595.22997714906 1771.39155164347  
1651.68171717875 3246.86605825129 2233.00694575483 1978.12229412176  
2822.48671794913 2720.83642320419 1854.11328962023 1870.52504853779  
2346.47361943533  
HNRNPR 780.461254794127 624.264994653057 766.710479603963  
569.133295913677 823.658996207582 1521.61996270758 974.544773560873  
1229.47460924638 1176.62418139379 1006.69598892631 1141.49294161587  
1282.38953612054  
HNRNPU 2390.41825815872 2285.86163259073 2910.00269086567  
1920.16520804856 286.901115411673 1747.33558205825 733.648333788712  
1253.05700051015 945.830852603704 753.007562127186 1227.94401191112  
898.877732360841  
HNRNPUL1 159.470818285679 148.779043570204 142.255657518926  
156.423687034312 168.882806817001 148.408616955694 177.011776399483  
153.415901281564 150.724359913994 147.8838487685 149.552704503066  
163.045605069267  
HNRNPUL2 1098.20033709043 1181.1611856364 1087.69177809384  
1539.80266129509 815.388288623756 681.172359997071 803.133619199479  
510.811470658575 681.677841333095 683.019502027271 892.868661511516  
797.28465621772  
HNRPA1L-2 1066.25208226214 964.473774310687 1213.61170930345  
845.369108604819 786.62709337246 1275.43768532088 1707.09830463606  
1810.68433539154 1231.92253664482 1211.39534395597 1472.54829263217  
1726.15788525017  
HNRPA1P4 1707.09830463606 1503.2049371911 2174.62979843528  
1518.13775377335 1280.57297272231 2363.50330960038 2622.87486749984

3570.21370790206 2316.49886419499 2307.82327595071 1589.70261092241  
3219.27851139047  
HNRPA2B1 3869.12225821096 3430.76532174701 3581.36347643133  
3143.77161008321 5022.15374558514 5080.63091497522 4641.8793590085  
5992.92384160188 7802.25987814138 3668.19307488953 5506.81944079182  
7003.06505884735  
HNRPC 533.140740560189 554.950092776254 629.381791489871 396.40172043456  
555.259469428492 734.71562355687 619.75986112089 716.731984660463  
754.406896156858 919.165331064155 1298.60552708737 924.312051919404  
HNRPDL 767.861763134136 679.191060100076 1000.48723872058  
597.189355986293 212.119922561453 426.464641742092 452.167674725454  
593.462634352052 670.856008549143 660.907502776003 538.369868115137  
596.934339406636  
HNRPH1 280.798003990849 203.704734790602 360.684900316265  
198.659595851481 252.197271817794 363.150472154973 342.245182599593  
343.200277800027 337.822337721287 375.131728190867 464.436380568216  
521.83794739314  
HNRPH3 620.371912523332 486.425387717472 607.126514742951  
396.861835715943 228.9901869793 305.542978609337 395.261210769232  
370.301819403832 383.033242143031 274.427235605909 321.750495072759  
349.910535555712  
HNRPK 728.485195792194 662.04757187541 981.781076110568 509.292779821787  
669.602939159192 1072.37500318471 728.176339659082 1282.38953612054  
1271.46608195833 1423.02563792293 1211.94273385872 1143.0779222425  
HNRPLL 246.710233781784 284.473085899219 261.541138637729  
243.308625792448 413.000072500071 504.141861790903 325.011269531407  
307.570405241182 315.565349831797 318.297819854586 316.004332524937  
325.011269531407  
HNRPM 1669.97250023755 1650.77281891596 1853.20812924694 1846.61430264854  
2992.18604022433 1963.23068846837 2021.92898855142 2877.92845389611  
2662.43181510326 1973.20689165831 1980.4589291261 2210.67250954072  
HNRPR 1758.7809492929 1629.32740709526 1648.22531304741 1295.27257578314  
1599.12034906314 2799.0487754899 2146.4265920569 2672.77147589342  
2332.98074920207 1728.86115695979 1800.25771851544 3055.80298721424  
HNRPUL1 1187.62490367696 1440.14449872047 1115.34267967366  
1662.51399707484 2374.1382412432 1381.07447204233 1464.04124596264  
1279.15873231449 1698.08853832248 971.170460915918 1151.30600388403  
1361.54107116915  
HNRPUL2 814.471143753335 711.491528818004 737.193295872614  
888.04996477314 295.278972023002 556.568221094639 567.715714233608  
456.530337997907 364.597798667541 466.4890990178 480.36420271348  
480.484639351046  
HOM-TE5-103 146.750774496317 130.524630778991 142.56910547147  
141.600833670693 127.962546712222 120.241528853563 124.548598801497  
128.922269289649 132.760567403706 142.121399383259 124.521130036013  
118.622346984257  
HOMER1 135.91276813517 133.659475650376 113.879459563492  
123.30960025689 146.042460762767 172.446482096058 163.298729857831  
130.592061896237 137.012646671173 168.269075560636 150.331324340476  
156.597497458992  
HOMER2 137.118488157416 137.017882995262 143.378998368344  
143.967197319361 247.015574724901 162.656951764783 145.455411983653  
138.883710791382 268.885346595453 466.691191261997 142.719216118914  
148.448349327493

HOMER3 207.488522933448 194.88319590729 205.950347620158  
 268.454310218604 379.546197364027 304.844121431627 223.84997313236  
 243.080229016932 173.315097944835 356.376890469558 292.839392578318  
 279.879377933144  
 HOMEZ 141.03218895811 128.152956417755 142.483308497682 153.610428214886  
 157.28429690041 148.406031732776 139.367493349339 147.83240038699  
 161.667782505656 156.654450436728 185.727947276958 179.30729544595  
 HOOK1 147.354535468933 200.603836348642 146.932655562613 119.952108688414  
 422.688531130043 695.595965352335 436.891409783298 551.350758868377  
 386.817736004263 870.409935772423 300.709410518382 427.542390397986  
 HOOK2 245.997705723007 249.029098902357 190.002630382394 242.5085895186  
 582.527835746927 324.56043349882 562.711562649704 414.888512708716  
 334.443733461841 360.185005480216 536.805979562807 357.514919818489  
 HOOK3 179.94333102877 179.163748161358 174.795822188504 181.898985277176  
 197.034073391478 246.95071325085 182.209056248253 174.26780796802  
 162.304178370233 207.269530621176 167.456481678813 163.534117903837  
 HOPX 351.854828413334 302.905840432998 361.390981655795 370.555627307623  
 623.888568444132 348.457808063307 414.797416270335 808.837225580351  
 535.861738240441 653.264945856916 309.47429862515 169.368090266817  
 HORMAD1 131.324822348301 121.736056336879 125.472342351466  
 135.582230137515 131.608580511282 167.532512839891 146.010474018786  
 173.497575259833 136.55090238808 178.045931314857 123.195738824794  
 139.174188535843  
 HORMAD2 145.873819094778 133.692025039613 148.598920567714  
 167.243544185778 139.837616209536 147.614293127043 150.682964448325  
 158.089922688997 146.526744516344 134.565199667396 147.995991912855  
 153.67215573765  
 HOTAIR 156.630366766924 138.43301474649 130.452929012459  
 134.109051944736 120.043811428091 131.071614211431 110.242638217587  
 124.952026709219 131.619951110473 134.316859658338 132.84268776659  
 139.804518460303  
 HOXA1 144.892454033336 144.871396308673 148.695212949639 140.419686138586  
 150.456500446175 139.400521576978 151.981708806765 136.601220755282  
 140.005968571997 132.697727983601 148.714406471586 144.450810504499  
 HOXA10 330.281193038198 409.691865300362 444.826775824095  
 406.900412510895 310.026522549372 127.104097294238 208.456472621593  
 298.706655333472 282.836518011311 180.354899434843 273.651114834013  
 452.732079010502  
 HOXA11 141.943910304145 173.979001863717 149.545278163222  
 167.900071375885 120.551603446364 131.919387743094 110.014935095391  
 112.054379249781 114.860437706855 116.011005504201 132.917794118568  
 113.40684693417  
 HOXA11AS 329.88790758321 464.436380568216 431.019896339435  
 623.050854309724 173.741466458636 144.214589452164 141.777089987975  
 141.626504154989 169.903088388196 143.521510363933 157.643461899964  
 196.207631868755  
 HOXA13 256.614964511846 253.975577255772 440.038896046559  
 283.084102918359 276.184421402511 174.698724064671 196.363005912532  
 289.368511254335 161.983987604 143.436675541053 177.793860516896  
 202.849544035436  
 HOXA2 191.554396977588 180.304585602206 227.614623963331 181.654319266685  
 178.284294783418 163.315865817864 164.955263076598 176.300743660299  
 221.45275440794 161.139253742858 183.255119298602 187.4351946569

|        |                  |                  |                  |                  |
|--------|------------------|------------------|------------------|------------------|
| HOXA3  | 153.574068503306 | 149.826291268485 | 147.024759173313 | 150.364511432468 |
|        | 136.832494876249 | 133.579067514064 | 127.123123583856 | 135.844983721014 |
|        | 141.397046998678 | 129.121598974852 | 147.955701866515 | 136.19725093985  |
| HOXA4  | 173.115418167551 | 163.275138097131 | 179.74065086312  | 183.905926269285 |
|        | 181.566951620202 | 147.86104992164  | 163.570018900148 | 169.909886347082 |
|        | 166.981212790122 | 174.246705740225 | 150.42705284743  | 162.732574014686 |
| HOXA5  | 759.802694618208 | 1172.4103691525  | 1316.31088187364 | 967.123240442957 |
|        | 502.281584081805 | 592.284071247642 | 775.5664718389   | 531.711823481265 |
|        | 1370.61156801632 | 438.7446527797   | 1141.13648305827 | 1259.38111177521 |
| HOXA6  | 286.945784387294 | 344.247544510881 | 380.754569467715 | 404.726926716133 |
|        | 214.38058301395  | 253.833756857339 | 192.009562635198 | 240.410292351169 |
|        | 253.124449721731 | 225.96618659877  | 297.368197598038 | 267.028096234702 |
| HOXA7  | 123.247698282967 | 139.607944722497 | 118.900338956203 | 128.618422306397 |
|        | 124.961859983596 | 122.00079209554  | 132.821639676246 | 133.592691897675 |
|        | 133.86835278231  | 122.339819585312 | 131.198284945008 | 126.982340580909 |
| HOXA9  | 301.051775938853 | 386.738154577763 | 393.796356067403 | 424.495400604335 |
|        | 134.333679772065 | 129.228874611916 | 124.35721327773  | 134.241917425247 |
|        | 149.048057509964 | 141.644521617419 | 163.141010815086 | 153.366677608026 |
| HOXB1  | 128.899712906082 | 126.404523759643 | 121.61143371132  | 128.647790058795 |
|        | 135.036576196425 | 143.727514442914 | 114.749597426757 | 142.26998944788  |
|        | 129.327645260099 | 129.511465164539 | 138.393565473857 | 127.532665057083 |
| HOXB13 | 134.455623159793 | 147.858339902055 | 159.345467769285 |                  |
|        | 144.858656365799 | 145.835240952992 | 155.902461107328 | 147.113541493157 |
|        | 141.457040042276 | 141.262319193649 | 139.205887721493 | 108.730058525654 |
|        | 138.213742418402 |                  |                  |                  |
| HOXB2  | 191.25724234927  | 178.166289723365 | 199.477350542491 | 196.399050990244 |
|        | 132.674061422332 | 197.112749959833 | 174.448910958935 | 302.809011218879 |
|        | 264.604297630839 | 293.018282386003 | 543.584413650467 | 500.469781477166 |
| HOXB3  | 129.297217956843 | 147.425856984368 | 138.391203321266 | 145.889336010424 |
|        | 144.064214573005 | 153.169450192935 | 150.292858985795 | 182.833961304079 |
|        | 164.472980733552 | 144.829773937102 | 234.996704304673 | 238.745953695925 |
| HOXB4  | 151.734683227196 | 161.26917182967  | 135.323341505875 | 141.094578556895 |
|        | 196.716209382446 | 159.065612005442 | 175.946843919065 | 153.985529457122 |
|        | 193.084818760857 | 172.758230728437 | 225.238369884803 | 163.718595974283 |
| HOXB5  | 242.614881095485 | 297.071121022183 | 297.636316709322 | 224.963277964548 |
|        | 287.703569453502 | 311.157764305033 | 377.800067476868 | 916.4187683687   |
|        | 653.500279510032 | 218.298791348295 | 2213.1043022626  | 1724.22121078776 |
| HOXB6  | 150.287472248483 | 153.156264091925 | 138.85328409337  | 145.672496354689 |
|        | 146.548348470748 | 143.313605534609 | 154.466614452651 | 173.182013165174 |
|        | 152.783534456473 | 167.380798617981 | 292.965109701719 | 192.932285494022 |
| HOXB7  | 190.204960255989 | 233.36028792331  | 172.961115357569 | 196.245297362955 |
|        | 650.494111214312 | 525.515169794593 | 760.572409199179 | 510.061974830525 |
|        | 856.039380523678 | 509.14726076246  | 848.154015576436 | 876.783710734594 |
| HOXB8  | 142.095289977576 | 138.036876466521 | 129.522339467532 | 134.013748718539 |
|        | 124.726035027951 | 148.079107235035 | 123.706910388724 | 187.673748059596 |
|        | 152.107025120177 | 123.364999283696 | 1360.85309203233 | 683.861021234927 |
| HOXB9  | 123.927736719427 | 113.557349524174 | 120.793974839773 | 112.664210248256 |
|        | 104.798333931019 | 107.385565665491 | 125.589744938813 | 116.825172441325 |
|        | 104.505454151012 | 108.79453730066  | 117.980052938167 | 109.52020660772  |
| HOXC10 | 141.958902715369 | 139.545451634208 | 125.911259629489 |                  |
|        | 150.394483608039 | 141.028377381019 | 136.923876486522 | 126.143886553557 |
|        | 141.905641114703 | 132.021249712589 | 135.388750095746 | 111.826509343353 |
|        | 138.269955723817 |                  |                  |                  |

HOXC11 130.396593013401 105.551878332786 114.704831217037  
 130.766401858384 164.935120145905 119.002833359088 128.606360476298  
 126.856038484436 132.387242907281 103.691075663721 113.133798430215  
 131.471942650725  
 HOXC12 120.196595293401 102.661440700541 122.281263517691  
 118.07991087231 118.689408983786 104.505454151012 109.167312436827  
 114.174153178166 105.375878824562 111.949644842971 115.738984899365  
 109.586955365611  
 HOXC13 147.9084767638 152.11446058397 152.495540563792  
 143.427721577372 370.617422894068 269.981476129439 334.101619029105  
 182.209056248253 257.740674565975 216.457866890673 190.700515036197  
 213.097664319741  
 HOXC4 148.215172022129 146.500312499353 138.628169506372 154.324955232468  
 232.879578820053 197.873787638411 205.560952959537 221.869191666931  
 201.256649338315 170.052320640686 147.70836747108 248.129640673859  
 HOXC5 109.495342943278 108.830525786872 128.075198523268 131.652854369619  
 120.967523586161 127.047679628867 119.972337070176 115.613348109569  
 118.816986517698 114.624259793353 131.592172917738 117.255496552581  
 HOXC6 160.415807880532 163.926432479673 148.224587582189 181.288519308219  
 178.665552649698 211.135364208221 237.521746704115 253.975577255772  
 206.071709262227 208.125844007298 158.631298154353 257.132618311227  
 HOXC8 163.616115299926 193.394225360968 139.295597388725 161.182901898379  
 150.896076207161 196.429685815196 169.028519464989 159.504327477065  
 127.610304071204 212.190707408572 146.014790698087 241.890850719625  
 HOXC9 121.760488406107 120.436408685057 123.30960025689 128.207440197765  
 160.567934923347 176.5588805282 135.976837152799 148.02460124587  
 150.799400717425 174.214747421898 145.956477465634 243.336550161566  
 HOXD1 133.241744350369 161.694109087893 133.180554954396 126.05295868521  
 190.975263192006 322.684910198242 756.068695265118 159.05213637758  
 157.787233338636 128.445065383646 465.102234374389 189.027594735456  
 HOXD10 172.376544221034 169.355185349431 211.626970008102  
 175.711836112986 145.45768403614 166.741762854246 186.854553034865  
 162.127697884504 164.562302265155 462.265785715695 132.709845352383  
 161.877378749103  
 HOXD11 157.187894260746 148.530422089937 167.756465178715  
 131.514114515895 167.756465178715 144.456324230938 144.170287726456  
 136.526706711584 159.19183334563 711.166793546075 154.630837508249  
 142.693337885596  
 HOXD12 147.978039160763 141.616920429839 126.659859384257  
 131.975248488461 142.383723965616 137.736771579507 146.996442729408  
 127.575660581922 143.440420261133 147.241136598626 110.670057121283  
 138.116568200293  
 HOXD13 139.214589768245 129.3513576591 136.430232926793  
 121.796519488793 151.826103919919 120.790536146461 133.9382467268  
 125.598828334465 136.959011188915 124.190161132628 130.973504803813  
 123.905462079972  
 HOXD3 155.664126780859 161.419873271162 173.024402954772 157.765771942689  
 152.54039461337 175.874387612235 159.798024189461 178.339211170442  
 156.417000271727 177.281197832647 181.412790232996 192.353768499582  
 HOXD4 151.885992695789 140.213080190065 146.122816653035 152.47429737104  
 204.347931209047 198.004357069446 199.96834355685 152.155760355248  
 154.798287249541 140.09417711803 189.348690353874 147.284005815059



|        |                  |                  |                  |                  |
|--------|------------------|------------------|------------------|------------------|
| HOXD8  | 141.602233757588 | 134.853253781256 | 142.299535614113 | 128.635684412304 |
|        | 149.97218338771  | 153.047317528007 | 138.188522429661 | 150.391286215189 |
|        | 128.468978498871 | 176.622758931306 | 148.67584969749  | 124.086902599543 |
| HOXD9  | 136.428826558493 | 154.683723064797 | 120.752194675024 | 128.329985147034 |
|        | 205.830321788612 | 158.374760929273 | 162.825380100343 | 172.446482096058 |
|        | 154.954906872501 | 158.380964047483 | 147.174977926293 | 130.682112236817 |
| HP     | 134.529744040637 | 132.699715693605 | 147.971492964243 | 143.388028226208 |
|        | 144.417333931582 | 140.861849838223 | 122.216479103528 | 145.758423590784 |
|        | 148.454344601562 | 131.786437478446 | 148.504996616452 | 131.230501496659 |
| HP1BP3 | 198.760049629983 | 183.472290949588 | 212.607094117882 |                  |
|        | 191.554396977588 | 163.821142892643 | 255.435582426271 | 210.266075382636 |
|        | 226.114369645703 | 234.339913501761 | 199.001860912128 | 148.930073905413 |
|        | 201.637540930213 |                  |                  |                  |
| HPCA   | 140.82351325907  | 136.735930829008 | 144.738871562895 | 143.641777655752 |
|        | 157.200582422961 | 152.503159091556 | 158.041568121766 | 148.466658640201 |
|        | 153.574068503306 | 145.185902174023 | 152.463553409903 | 140.441521267218 |
| HPCAL1 | 282.282663608264 | 330.908743070095 | 264.158648784101 |                  |
|        | 355.609033348692 | 923.130629121442 | 334.350011399462 | 263.005303710717 |
|        | 321.524921332256 | 376.082040863747 | 296.721891842563 | 220.896363324634 |
|        | 392.539157974899 |                  |                  |                  |
| HPCAL4 | 140.36425603453  | 141.426756696799 | 154.698312173556 |                  |
|        | 155.873969001251 | 168.611652451329 | 163.516075721791 | 160.769011617127 |
|        | 158.639313207233 | 155.6299578128   | 142.34471764492  | 155.086559474139 |
|        | 157.748641658052 |                  |                  |                  |
| HPD    | 180.501409705275 | 179.674744176904 | 204.637887777803 | 193.609985124825 |
|        | 154.657316209848 | 145.96012463103  | 154.528396813382 | 166.925695810781 |
|        | 155.55288776049  | 153.219954133957 | 149.696766215866 | 162.358237198517 |
| HPDL   | 122.804934452095 | 114.805810485989 | 120.964862799634 | 119.795945889846 |
|        | 157.176001400747 | 132.398041172151 | 120.606354515072 | 119.612288460361 |
|        | 120.714981493593 | 119.746227888415 | 138.859261763075 | 120.177385114315 |
| HPGD   | 284.473085899219 | 455.124190541055 | 450.220658078322 | 283.27806319488  |
|        | 1108.61301774472 | 4404.79209330918 | 2149.13404212591 | 6441.13602696535 |
|        | 1906.81344236287 | 189.647009287524 | 3810.98043907046 | 2253.7522632414  |
| HPGDS  | 145.079450753969 | 156.609370182062 | 129.511465164539 | 152.717642489582 |
|        | 135.841309719081 | 154.758831302515 | 138.464793389999 | 146.915247627846 |
|        | 141.97478198531  | 158.085935267091 | 135.237042337721 | 155.62770968777  |
| HPN    | 125.326393776938 | 121.855752708908 | 117.207266754941 | 123.762963668211 |
|        | 123.347836436966 | 120.835207882788 | 122.174036435094 | 127.011594171986 |
|        | 125.170874841845 | 119.312201620247 | 128.806964077824 | 115.51493368527  |
| HPR    | 142.342811880173 | 147.132625797946 | 149.865644080359 | 141.393814611166 |
|        | 136.249621724093 | 143.794453011397 | 133.324531689254 | 143.572668991313 |
|        | 135.666278507269 | 146.007311764212 | 152.134895623504 | 149.712320986646 |
| HPRT1  | 355.519647649551 | 365.541609015117 | 352.897241809959 | 300.83667045718  |
|        | 1070.4597488302  | 831.08287594363  | 681.172359997071 | 935.423045210635 |
|        | 596.076764072945 | 1181.1611856364  | 487.597040819879 | 912.143424293236 |
| HPS1   | 172.667770359278 | 157.547814187442 | 165.181215117323 | 162.047249964859 |
|        | 209.180298459605 | 178.3652866131   | 168.552631639996 | 198.522123898437 |
|        | 179.091917512822 | 202.230920499592 | 153.111226896983 | 191.692830869809 |
| HPS3   | 155.974463324915 | 174.375388013694 | 221.070448906398 | 187.145134088286 |
|        | 211.135364208221 | 221.869191666931 | 249.858562350415 | 251.062649517773 |
|        | 220.379186481273 | 210.729945718068 | 201.676984786688 | 222.736706411035 |
| HPS4   | 138.317443162096 | 135.589211439847 | 142.356747337127 | 138.325950428197 |
|        | 129.344834474578 | 140.943732564849 | 139.287871460674 | 140.613151527886 |
|        | 140.892250639524 | 149.91705328815  | 154.537240112989 | 138.129281196474 |

|         |                  |                  |                  |                  |
|---------|------------------|------------------|------------------|------------------|
| HPS5    | 200.127994198329 | 188.836327151669 | 191.38608906576  | 193.938032040991 |
|         | 142.558109812638 | 185.997327421952 | 167.887047631073 | 203.206743799353 |
|         | 208.385295246155 | 214.714726648332 | 184.187847236508 | 164.562302265155 |
| HPSE6   | 424.134483971176 | 518.925188630246 | 561.251860964966 | 497.269957926657 |
|         | 1628.24528041404 | 664.19083888799  | 1411.90426595229 | 798.1490651671   |
|         | 876.288248962843 | 666.344430142655 | 975.685771692095 | 1286.55103838368 |
| HPSE    | 154.47187360425  | 142.853399942089 | 161.960392594363 | 152.57905274438  |
|         | 166.904990069484 | 172.091884817207 | 154.539367933684 | 163.042083189818 |
|         | 169.428195354763 | 210.605864685448 | 138.363553671822 | 152.79367157305  |
| HPSE2   | 187.63609695026  | 169.895672129542 | 175.537039794925 | 196.470718183575 |
|         | 184.923312649584 | 153.187148832063 | 160.589575894314 | 168.521601064374 |
|         | 141.724442944322 | 159.58125728432  | 125.631073476381 | 166.944701842349 |
| HPVC1   | 133.517685144186 | 132.002835547397 | 128.495276191943 | 136.919702354166 |
|         | 129.130212375815 | 138.397152876585 | 134.288349336742 | 139.526241501184 |
|         | 142.365009028839 | 143.776637809106 | 150.360754064321 | 139.646026806298 |
| HPX     | 165.41729888767  | 142.19728670565  | 163.143613079037 | 177.72965427263  |
|         | 139.825088162247 | 128.63301490285  | 141.882859092658 | 140.683411903185 |
|         | 138.212860360467 | 140.876577029209 | 139.378915474473 | 139.72868421672  |
| HPYR1   | 124.176944998906 | 131.879526177089 | 130.342425029134 | 132.223321299997 |
|         | 137.7724100594   | 130.590195477461 | 129.935532080325 | 123.347836436966 |
|         | 128.447393268611 | 125.202468372015 | 137.054278745724 | 125.926774314737 |
| HR      | 136.614620534169 | 145.378779757104 | 134.524644163286 | 138.566954604414 |
|         | 131.773304233929 | 128.071379991958 | 141.842919268688 | 138.695481214267 |
|         | 150.314462939164 | 135.349868925415 | 146.669620721254 | 133.948997488604 |
| HRAS    | 233.997642139328 | 275.929414239664 | 221.719848707318 | 282.392419584508 |
|         | 420.017044147123 | 251.869781014029 | 296.657844888195 | 252.919704128539 |
|         | 258.489608621438 | 495.655170027296 | 377.800067476868 | 254.722836822616 |
| HRASLS  | 142.051259785804 | 150.417169156755 | 151.409290231274 |                  |
|         | 166.825501664231 | 311.966971734249 | 194.686527131656 | 152.99686989829  |
|         | 145.085091507228 | 154.491373296392 | 184.742960975938 | 126.704076078563 |
|         | 153.338193960419 |                  |                  |                  |
| HRASLS2 | 154.291717784335 | 147.870549240703 | 177.246890307643 |                  |
|         | 157.096799934494 | 167.07092218037  | 153.756213924949 | 168.720694813918 |
|         | 164.256764783784 | 174.491551019128 | 160.435789207464 | 151.004738508108 |
|         | 158.477017294725 |                  |                  |                  |
| HRASLS3 | 930.704688414069 | 985.637230639964 | 1023.94850651125 |                  |
|         | 1077.95929298567 | 355.443758121675 | 428.66614441422  | 1010.05884008623 |
|         | 368.374002925137 | 340.098306132634 | 178.304914997023 | 221.930333726352 |
|         | 267.901632267999 |                  |                  |                  |
| HRASLS5 | 139.948097704949 | 148.005500924157 | 144.035936160694 |                  |
|         | 126.37749112514  | 112.771141378159 | 148.970251898527 | 127.424848301217 |
|         | 151.27882940428  | 139.72868421672  | 156.179501567984 | 119.370219299491 |
|         | 139.941724115063 |                  |                  |                  |
| HRB     | 177.508603290389 | 191.616483214712 | 201.167206950576 | 178.984409575632 |
|         | 187.205674045893 | 178.106013202731 | 201.954167006591 | 164.236417852165 |
|         | 185.876046259727 | 220.633692394229 | 183.951404362826 | 204.770742504612 |
| HRC     | 158.63432604978  | 220.362946606131 | 151.625248091441 | 207.624240598841 |
|         | 162.900556089071 | 158.179586948369 | 134.11753210296  | 139.885054845153 |
|         | 145.048710455772 | 148.361088792223 | 153.187148832063 | 147.384050169545 |
| HRCT1   | 154.187420367647 | 139.631165400881 | 127.3079781139   | 144.393688888553 |
|         | 129.161305053472 | 111.276543583667 | 126.800718471804 | 117.834484996559 |
|         | 131.148926523383 | 114.115609163126 | 140.611071681667 | 111.922007318017 |

HRES1 159.615233521257 157.344758285153 159.758196845781 145.932170561687  
154.420795931034 161.683243808528 153.551359970644 145.017264740722  
144.606963457243 163.709174813901 161.988082494464 152.024383072265  
HRG 125.693321471759 143.912136782374 131.552276774901 127.593764897583  
128.300838927918 123.07559417607 131.652854369619 141.40690581885  
128.113966507586 146.264686158155 129.808590871788 136.351332391315  
HRH1 198.411812737082 180.240305360865 166.819234137224 165.192945734166  
174.909258852845 156.763364462534 154.187420367647 182.588697551677  
163.407360509803 201.221839281282 185.447093292348 187.082082429597  
HRH2 112.054379249781 109.30275288389 114.556542069712 106.238539254093  
107.466184687811 106.522641798274 111.055738573603 103.168665937677  
109.74983281634 107.949834974369 109.574386044714 112.10312035128  
HRH3 118.08607083874 102.474380813907 110.977904932371 115.277302351501  
115.120702589487 106.030441145334 106.629065516249 108.288420807873  
109.740801301993 113.311132067152 122.522978939399 121.110498703017  
HRH4 124.705614182596 124.749727939593 123.336074100984 129.527271401014  
128.020911959353 121.194138394375 134.668233738635 120.481712066062  
131.269526665478 124.63978985808 136.649743237542 129.920586100555  
HRIHFB2122 172.276968413879 169.107948050094 158.150949554785  
153.992763544073 193.203053225456 185.961822133346 207.514489132778  
185.801540278924 163.495175710216 176.317805247749 168.365262340217  
203.831047867731  
HRK 131.415807324048 128.06233429201 122.031894952046 148.370331097467  
133.59686364883 130.112882549637 133.604705630582 129.745892720738  
133.645044060866 160.989242461839 121.95061962467 123.198873421356  
HRNBP3 131.069515666204 141.830432745537 141.278654291193  
151.792921211607 132.466796864599 132.8310947234 138.436029489092  
129.854478528455 121.462385497795 124.501262458393 129.945543636232  
127.442587366678  
HRNR 108.9291713877 114.711310011993 108.021898335735 120.994068563884  
113.177330690612 108.715328458556 116.491342107103 111.196610704726  
116.20967792121 125.749024723383 138.199559519849 114.644722005728  
HRSP12 182.57496767012 184.008405576875 224.224264678645  
188.654966029389 252.404931238338 248.791254839869 246.355720496468  
282.719121652073 290.502085667398 243.159062832085 229.660838239474  
168.358323243918  
HS1BP3 618.437282203498 732.877169346979 653.879734066271  
1008.43888926584 610.337659723539 241.039766283972 278.942695435238  
368.637819994033 221.127492253636 364.895113721763 399.071041584646  
171.384487293154  
HS2ST1 219.422260093722 241.987100712218 237.754067231793  
217.531179216305 240.341031437493 386.16563750478 322.956882599715  
296.603054615145 245.399847987183 180.719868519867 333.270203737291  
243.468673768141  
HS3ST1 178.404791189835 190.077302802065 152.66513184083  
160.6823824476 226.565823278767 264.456926651554 386.379891865411  
265.068532248682 362.581768268116 260.85776723575 549.96567374713  
512.312880441098  
HS3ST2 119.060186838239 121.807661901776 114.209249333221  
121.945541820091 122.268560536152 118.393203921859 121.679013405559  
116.615250922316 134.614988219821 111.328185454541 128.163613794257  
118.442856984861  
HS3ST3A1 192.032080013216 201.569913451219 177.450674276588  
175.717830026564 148.457872807838 149.589901372799 190.018871923219

150.79785758452 173.176900454904 360.812953749077 152.262147284452  
166.754995454382  
HS3ST3B1 122.339819585312 140.206268652318 143.967197319361  
137.102353661381 135.461112284848 149.068713925139 140.802033706122  
128.649329515033 144.0534341937 139.736465430177 122.431337063053  
144.528360135884  
HS3ST4 124.477586539576 129.666957539624 124.955676894776  
123.159407368236 134.147586627141 117.639216182057 149.651553512698  
116.433239116749 126.899985772157 125.269726165403 147.450681897766  
130.465221782084  
HS3ST5 129.906744036052 124.602474178438 126.87882572904  
121.103620738719 145.351662473858 136.62213567467 137.222125237171  
129.334217858282 118.351607868932 116.288113598488 234.5655184349  
138.349773531218  
HS3ST6 150.180037731272 152.952479729682 153.231965895778  
136.130027137459 140.831508792119 143.554726863556 150.412929574507  
162.695319777455 153.500478301079 152.532083511961 152.107025120177  
141.552315273863  
HS6ST1 153.579955370444 145.956477465634 177.123497519231  
180.569583206488 159.213940274232 179.841665686703 171.809717138613  
182.725987056391 189.770558810153 161.115842628581 169.771005675296  
212.223906015932  
HS6ST2 122.900675062181 131.430921437192 123.877609932461  
119.049388179929 366.073387075385 462.686385881492 246.63579788514  
223.722742062251 151.128838696891 154.362571105094 214.803167803712  
310.690317681243  
HS6ST3 108.830525786872 115.337592860132 114.021546689428  
113.356070669308 103.99234480919 111.584425166104 110.138220982557  
119.67745324922 106.450154495663 109.69466049307 131.879526177089  
117.623103460369  
HSBP1 1398.60850048351 1427.70292953827 1293.38808483663 1549.30900090605  
995.812184456562 3106.94181270197 1920.16520804856 1923.19560386389  
1646.76016031831 1201.82026045778 1974.49672149862 2007.0121037284  
HSCB 720.907992182476 687.789976218334 619.75986112089 683.470866056244  
270.679613997675 636.048536814356 421.255522475862 471.598175637494  
476.917496749381 400.924914238052 529.700356666006 458.151323130855  
HSD11B1 228.649073045499 180.096239155058 164.962201718762  
160.496585125233 125.843089077365 133.161552914595 123.601413134287  
142.722227179256 160.409454280874 126.658670189701 136.390047634643  
123.065355919378  
HSD11B1L 203.888365494623 213.891435492914 196.536086443884  
228.713818522476 227.614623963331 180.968659614238 186.708059183893  
171.320653882424 170.4583554058 189.482046688226 160.989242461839  
194.143649677822  
HSD11B2 151.397068235685 140.485102148597 126.294085960617  
148.320310040998 290.037325939883 139.530196462344 139.631165400881  
141.331397551086 126.528589411462 152.049243916141 182.300628120658  
129.507297276862  
HSD17B1 137.899291413431 129.055874691136 116.736174147084  
129.45936538019 314.557323400201 309.720081933252 132.521681289019  
159.961729971624 237.312766830206 503.59466398882 153.114065147266  
145.329128512407  
HSD17B10 240.341031437493 247.550312458738 201.676984786688  
245.153736298067 529.368609163949 533.784151495549 296.962992349662

518.760142491104 313.888035511709 491.35949123223 227.499335248402  
396.459213999636  
HSD17B11 302.809011218879 270.293807247372 602.703887178113  
221.74200490054 218.559622620349 1302.54547114701 622.348802511009  
1576.21727854603 590.142817130684 350.077206368839 1154.1046856215  
613.846166856328  
HSD17B12 1561.10217536347 1485.776977235 1117.77397620221  
1064.12835214671 1341.78081782818 971.99484515987 2309.63504858248  
1259.38111177521 1004.97723186946 2233.00694575483 1214.16777512885  
923.130629121442  
HSD17B13 139.693261291326 143.204058393718 157.301617257941  
140.125575976708 140.556631658219 140.806935772116 142.066903301882  
134.487476333464 142.406904585501 134.339535632463 132.591496435822  
134.608734423113  
HSD17B14 214.019190624184 211.104243881644 213.324226314713  
157.83460319212 1171.62361359992 321.750495072759 417.615521090665  
224.251136332123 233.029655807246 130.309092946921 223.453776362112  
147.056649843798  
HSD17B2 491.034395489684 511.25179427158 195.84531580224  
131.507618414676 446.393631025049 2007.0121037284 1466.08446530283  
1395.63393859192 1396.4168898623 306.011283364888 3237.94149351627  
3029.07443443457  
HSD17B3 140.101511236793 144.627784383455 171.155660467037  
129.522339467532 144.243598691782 139.715836473047 143.611930851914  
164.253219197128 132.551989498706 137.871870950302 122.841135364088  
160.592404712197  
HSD17B4 964.093668483033 910.087388930485 1139.14730341921  
780.734359041347 968.157701932137 1748.77270039774 1462.31151845458  
1111.88018487186 1152.50523614436 1468.50184641042 1825.10168716051  
1641.70484603137  
HSD17B6 945.403379196643 707.404709303506 2056.90127387648  
544.462032960964 161.906823008445 188.079188251085 195.50039162477  
176.355556618289 166.825501664231 147.103340218488 137.265533487496  
141.38749436393  
HSD17B7 9715.20127757161 9820.93899217345 8322.20177173035  
9349.76443528011 1559.26487922551 8840.92490099301 4183.06379632713  
7342.79622458743 6312.36452724398 3615.76740804718 6427.33783376005  
4875.22637286719  
HSD17B7P2 156.324643994552 138.858138379065 160.469645948225  
161.667782505656 155.303903514061 164.084737224884 155.561821955048  
182.950456188966 164.529828080312 161.408318705503 165.232545721733  
153.028658323116  
HSD17B8 284.675990197899 247.053215951505 409.206158277764  
300.985037429772 478.293220151258 284.321253087512 499.436680354749  
569.967953318205 253.697419495959 1011.14472068314 443.125195744202  
459.973764138144  
HSD3B1 157.848456517169 137.243175880462 142.052454741558  
136.925645302362 243.080229016932 139.595986615703 209.596792486876  
171.376976179465 148.057700860759 135.791961106915 151.973681370675  
145.801228425692  
HSD3B2 125.443242860371 114.826501559828 126.569482909992  
116.507315786826 126.262349005661 131.326536951329 108.807891863679  
122.320966091375 121.010811158088 118.047978285706 133.396403868645  
122.115925891088

|          |                  |                  |                  |                  |
|----------|------------------|------------------|------------------|------------------|
| HSD3B7   | 261.469732730752 | 257.941367816557 | 172.486839924297 |                  |
|          | 313.025250337353 | 249.09278446472  | 221.685824197352 | 161.112906953532 |
|          | 161.408318705503 | 168.161117444474 | 281.168898910065 | 183.998458233995 |
|          | 139.113675690483 |                  |                  |                  |
| HSDL1    | 264.905947922753 | 231.439252571168 | 245.454945056317 | 233.786136606682 |
|          | 157.649902282769 | 184.694741621812 | 184.923312649584 | 188.567747377006 |
|          | 188.959655155629 | 154.491373296392 | 220.169099923628 | 185.485858719975 |
| HSDL2    | 581.37957221282  | 643.468308027006 | 683.861021234927 | 502.935749606918 |
|          | 313.322307299463 | 506.430593289427 | 299.986758612161 | 880.719593734606 |
|          | 844.187489702587 | 314.126706052299 | 980.67040349547  | 238.375823012603 |
| HSF1     | 136.891612156271 | 123.706910388724 | 119.854401979951 | 143.167719135403 |
|          | 153.415901281564 | 127.802645313091 | 134.682319733908 | 139.799467834109 |
|          | 146.476960694197 | 131.310537960214 | 183.815810733176 | 137.339511714364 |
| HSF2     | 264.273245283343 | 262.60377731258  | 347.147961254829 | 273.152907354565 |
|          | 203.943245360496 | 289.434186747703 | 244.514230664694 | 268.568824794145 |
|          | 206.999289979742 | 213.833894542292 | 194.88319590729  | 210.266075382636 |
| HSF2BP   | 109.924867620862 | 123.595133376092 | 121.48867035121  |                  |
|          | 105.050093408041 | 150.384559054133 | 124.74291205933  | 143.901267937876 |
|          | 122.90702157852  | 132.975603230163 | 124.025104622631 | 131.473001455317 |
|          | 120.998665308561 |                  |                  |                  |
| HSF4     | 188.308588359317 | 167.73288535728  | 230.589110372454 | 178.572212478544 |
|          | 145.67389337654  | 143.62103263895  | 133.369314179341 | 159.832405510505 |
|          | 158.943005736645 | 149.41357273704  | 154.402315635227 | 136.317978146216 |
| HSF5     | 135.536810684197 | 136.16560274503  | 131.356437247149 | 141.166605868578 |
|          | 141.255406288178 | 124.561511833959 | 131.290698895743 | 140.290598244169 |
|          | 135.86149691566  | 137.201149245092 | 121.628827418997 | 142.169951083733 |
| HSFX1    | 133.216489794592 | 128.425838805072 | 140.279222720709 | 141.685620602226 |
|          | 128.377928524315 | 137.4552565025   | 138.889999702313 | 134.66169946771  |
|          | 132.428675012593 | 136.452338158252 | 136.903588075134 | 135.129656281091 |
| HSFY1    | 161.916155040522 | 142.858554460651 | 139.720343780228 | 150.617039206311 |
|          | 149.756512110538 | 144.5368823731   | 143.365976841902 | 154.886628987246 |
|          | 144.313841064968 | 142.995274641765 | 139.54021659275  | 134.626371781978 |
| HSFY2    | 139.834535091869 | 132.216453078716 | 140.413503801467 | 140.286870147975 |
|          | 144.868337748544 | 143.812863334832 | 142.493119780028 | 159.977528879208 |
|          | 160.898061905021 | 131.820842728171 | 127.323157914914 | 143.281050499332 |
| HSFY1P1  | 153.815239954928 | 153.311705636864 | 152.465176508162 |                  |
|          | 154.7326161316   | 162.940190224943 | 156.808992920564 | 173.656241217331 |
|          | 153.474566767304 | 145.658251059524 | 154.637740117457 | 153.913513669361 |
|          | 169.022351348819 |                  |                  |                  |
| HSGT1    | 176.927500850631 | 181.048789688798 | 227.236255752375 | 184.989027770708 |
|          | 149.881708604156 | 190.56172211779  | 189.509062639279 | 171.967974673053 |
|          | 203.586310608403 | 183.963578322984 | 215.532132200821 | 243.191238594142 |
| HSH2D    | 113.963798749897 | 115.257318321108 | 113.427848757112 | 106.797707723826 |
|          | 139.987681290389 | 129.767878283811 | 233.496804016764 | 221.050093964575 |
|          | 189.348690353874 | 109.425878885118 | 271.064405562085 | 181.193963616037 |
| HSN2     | 181.813812621767 | 166.024236370752 | 188.599353117244 | 163.331424612891 |
|          | 142.858554460651 | 201.004491067972 | 165.565284723155 | 145.185902174023 |
|          | 155.280897870265 | 204.564770370164 | 136.001505582342 | 194.86492119218  |
| HSP90AA1 | 3896.49785254733 | 4134.02613649483 | 4110.76546218806 |                  |
|          | 3648.38765465889 | 4923.36698713285 | 4945.87677849967 | 5149.78271096158 |
|          | 9378.87287299048 | 6628.17856159198 | 5688.84918819457 | 4150.8511719558  |
|          | 6281.01687932005 |                  |                  |                  |
| HSP90AB1 | 3122.71790981947 | 3188.90202907403 | 3648.38765465889 |                  |
|          | 2956.63335018838 | 6156.29203791697 | 3417.22292085668 | 3655.63669142687 |

3387.5366256957 3501.86788138647 2532.82545752082 4965.25728333142  
4043.28299602858  
HSP90AB2P 149.797850183848 141.874188629438 138.968690339299  
160.096507818256 145.56468363155 133.372231702721 133.954514563283  
138.82269002406 147.059096208832 130.898067924686 157.878110410517  
142.379120254855  
HSP90AB4P 129.007924852801 142.68640844948 132.664379033058  
124.433114779288 133.903934769355 159.629232808787 147.545667896282  
144.185406500473 145.968884703737 124.031916322066 165.131463797217  
156.779004465552  
HSP90AB6P 133.53523683945 141.8268805463 140.085359251038  
126.566165822427 135.997144927956 158.477017294725 153.46645509759  
134.401733295755 124.582577275358 126.658670189701 101.530900217921  
138.182987173284  
HSP90B1 3298.73393277409 2792.13364570755 3184.98944679038  
2775.84742592713 4299.06288109563 4141.8682669995 6114.33638002734  
7122.07276863122 7003.06505884735 3890.14358014877 4373.91897463938  
6006.01682776552  
HSP90B3P 122.142323014287 117.203783530266 108.807891863679  
103.09089100768 112.776764215618 106.603674195422 120.887938517877  
114.255733119076 116.773599713111 111.922007318017 117.662611650515  
110.670057121283  
HSPA12A 425.59810308048 371.280926727395 270.021093158885  
398.971838949075 137.826458479398 138.202872275661 142.299535614113  
138.442378791712 145.636906369786 138.000714797563 126.936899820148  
131.956481591804  
HSPA12B 314.90123632547 377.800067476868 205.630948393225  
491.290438575428 135.57577294564 150.324132011201 122.327353563917  
137.908991199407 150.073816271065 118.393203921859 145.172776053  
123.577138762427  
HSPA13 161.359609192977 150.874014332213 159.455596750304  
143.313605534609 133.108094159933 164.158913914661 155.98413216883  
145.250076958551 144.858656365799 205.011514211101 150.180037731272  
150.134337895481  
HSPA14 241.648044508699 249.554443204445 266.61343130101  
224.497348027469 813.772804994191 1487.12201643008 380.821355948507  
339.172031360524 318.487401106209 276.961847241646 329.146025181674  
451.210172051464  
HSPA1A 3522.61692270848 3294.92439159154 5702.11995823367  
3152.64817044581 1516.97921112926 1602.63977096867 224.089220507176  
2539.87833317526 721.31849915135 3545.8833678963 748.940715378564  
1171.62361359992  
HSPA1B 3235.38149926838 3688.68740405322 6409.23524786095  
3073.40543048878 5558.51089816921 2213.1043022626 4291.1724030909  
1767.70023790753 4103.06565237121 2365.99940149374 4335.76831372031  
1737.57015396357  
HSPA1L 186.708059183893 184.611146047556 201.458970969685  
197.526492324088 156.173099025259 132.508133846896 165.314290446922  
146.129805607031 164.413893089607 129.845344493418 198.191669030952  
134.76397845723  
HSPA2 1174.69701182094 638.129080224049 748.161769171818 500.848273432862  
248.129640673859 159.286484253487 150.213657393257 424.751154004399  
257.622317771472 223.975677959345 316.955298948771 221.127492253636

|         |                  |                  |                  |                  |
|---------|------------------|------------------|------------------|------------------|
| HSPA4   | 416.475440894731 | 393.115606440229 | 417.731815310276 | 416.075109522039 |
|         | 479.638653311025 | 542.009873308344 | 724.607317443904 | 771.294254795752 |
|         | 465.809961695043 | 773.057095787974 | 617.185364180303 | 762.8576747113   |
| HSPA4L  | 131.241878941749 | 137.4552565025   | 161.764411756848 |                  |
|         | 118.375739674144 | 134.109051944736 | 140.174087049513 | 127.494672751434 |
|         | 145.690634269858 | 149.734395134321 | 223.359785518285 | 149.164469334038 |
|         | 140.295307451188 |                  |                  |                  |
| HSPA5   | 517.23393716516  | 454.492780042353 | 271.356289141017 | 457.130051460676 |
|         | 348.848550937417 | 484.363052437459 | 333.91440669951  | 499.048754087189 |
|         | 625.932910814208 | 255.945470052489 | 529.228238133018 | 600.162650426961 |
| HSPA6   | 195.384273821324 | 185.088667707155 | 220.60173086462  | 200.98533822317  |
|         | 256.924134409998 | 217.778414825515 | 199.681103910705 | 187.264411519101 |
|         | 303.795701960506 | 283.499120551905 | 160.293522619371 | 192.69687837782  |
| HSPA7   | 182.32514927211  | 157.717145014769 | 167.408314067262 | 189.136114953249 |
|         | 206.257167235126 | 208.214764518526 | 172.973175988757 | 144.777043589925 |
|         | 216.353502371227 | 225.75155298452  | 179.122374556365 | 175.752091217351 |
| HSPA8   | 3430.76532174701 | 3130.30693451802 | 3807.16206340771 | 3424.65126200697 |
|         | 7332.15849011291 | 7292.0342195035  | 6105.64727031051 | 8958.34797715349 |
|         | 7992.84111657183 | 5467.84611694564 | 8368.88320476021 | 6919.4226838505  |
| HSPA9   | 1561.87054049124 | 1594.05763963363 | 1657.72357544205 | 1400.81554054664 |
|         | 1213.06007305892 | 1610.38263368771 | 2001.92441724356 | 2253.7522632414  |
|         | 1415.67109281133 | 2350.01764791897 | 1696.69982157582 | 2328.65814406636 |
| HSPB1   | 22035.2646000952 | 23656.0669757593 | 20887.0399135573 | 28095.1627766565 |
|         | 21110.9013462062 | 15745.699731183  | 18953.8127741918 | 22182.4877079778 |
|         | 19087.9532735841 | 25002.6870134094 | 13944.7649147227 | 18287.6015702456 |
| HSPB2   | 314.4408959517   | 341.096072280715 | 252.789376168324 | 312.808044035117 |
|         | 117.480506535399 | 133.594446233378 | 131.739418639854 | 136.511669406292 |
|         | 141.547112973262 | 133.264245969185 | 129.647514123731 | 120.201521341263 |
| HSPB3   | 447.909277144896 | 288.261250589513 | 282.797367565702 | 256.471672362567 |
|         | 159.735182155088 | 148.680794815584 | 150.048431572712 | 164.478006648035 |
|         | 163.85327708023  | 157.390513637267 | 163.794436953711 | 172.259627777465 |
| HSPB6   | 4068.18567686753 | 4819.85672511343 | 3566.89107958971 | 9323.53099359448 |
|         | 139.348494759948 | 155.323822771755 | 127.6078497227   | 133.749271961438 |
|         | 225.387674139093 | 123.561016079801 | 147.230113868203 | 121.053766591551 |
| HSPB7   | 1859.88000417483 | 2282.94927629821 | 860.688314783077 | 4562.75659565027 |
|         | 119.899649497032 | 137.360220389719 | 118.239637776941 | 130.812309202831 |
|         | 148.370331097467 | 119.263824982583 | 134.972933635542 | 126.793778645808 |
| HSPB8   | 5396.55955971617 | 4641.8793590085  | 5149.78271096158 | 7371.9761952537  |
|         | 643.905401805862 | 336.212224495877 | 696.976036382401 | 149.131218007756 |
|         | 487.901310664037 | 163.262893278578 | 300.358738353443 | 123.431969470387 |
| HSPB9   | 116.621735695217 | 120.876732151192 | 123.964042357475 | 124.915772594451 |
|         | 130.905135502296 | 127.758381206968 | 129.003317344469 | 141.587109176431 |
|         | 128.530540860266 | 124.83124879272  | 114.785989868306 | 136.524640445539 |
| HSPBAP1 | 223.747350951099 | 224.981439707657 | 229.74418058711  |                  |
|         | 260.591336959281 | 212.497773003032 | 209.304654633004 | 225.505978789388 |
|         | 242.348427307994 | 249.953902454701 | 209.93789387724  | 238.149614104568 |
|         | 176.355556618289 |                  |                  |                  |
| HSPBL2  | 1472.54829263217 | 1785.92695250894 | 1364.83036157729 |                  |
|         | 2392.93562797606 | 1685.33737186733 | 1000.05896885496 | 1793.75125318113 |
|         | 1513.28088592885 | 1014.63777151551 | 3560.23794634993 | 1867.55140010155 |
|         | 1556.41573079892 |                  |                  |                  |
| HSPBP1  | 147.79341726211  | 162.494429648551 | 152.030182228463 |                  |
|         | 163.647306551474 | 316.895545640437 | 202.178451227304 | 174.168079247768 |



175.065781438801 204.942500423413 192.286192329464 163.37518739397  
 205.509515144263  
 HSPC047 201.186963432715 228.713818522476 228.524222740306  
 202.214495168688 156.248684477916 281.071129128589 184.694741621812  
 149.007288765628 176.761123480566 179.109090120497 163.438043894189  
 216.277178481058  
 HSPC072 108.631224817901 118.81294782091 119.75069850668  
 123.9209907098 128.382487609446 108.34997967774 110.050374895171  
 114.607138204495 118.930792960643 119.415822905251 126.235567899449  
 114.249891266241  
 HSPC111 191.38608906576 205.65398844108 218.811490883852  
 233.029655807246 259.672238210968 355.609033348692 370.066087375401  
 340.966515437272 274.891033696257 391.911768848267 245.997705723007  
 418.420753332232  
 HSPC157 256.394563537658 215.167086358143 303.762967437478  
 204.183472655276 266.61343130101 224.135228192655 225.850439131864  
 259.184713471619 192.580288063603 159.413535577361 173.816408146725  
 226.221973502783  
 HSPC159 165.985885671398 154.600966693059 162.274094333189  
 167.70368494182 167.769114519774 218.18756955522 210.803130108618  
 185.843639043466 157.623092996114 2253.7522632414 172.774914399844  
 186.653791045656  
 HSPC171 343.417041721907 361.969355316032 311.208703262497  
 330.553659265085 699.800360892516 417.024088698182 593.990687449346  
 504.9864660689 871.528156184927 756.618969995355 827.400420888645  
 638.393099392849  
 HSPC268 5073.27433952351 5149.78271096158 4836.4008757421  
 5022.15374558514 522.664475688419 3921.67860557329 1789.51979173209  
 2979.27692778783 2195.41077320434 1776.38646235135 2311.05587511258  
 1999.10320742823  
 HSPCAL3 164.865846124876 162.397078614596 163.51024840263  
 163.37518739397 143.754105312957 148.707332454527 165.480489678822  
 170.350891928203 154.288075172115 158.034418043685 173.281506912652  
 160.281830914755  
 HSPD1 1300.40889834984 1368.91287156398 1396.4168898623 1264.90442763788  
 1608.40826380713 2518.88171283899 1969.67552562117 2988.45928881468  
 1861.19763103381 1514.53784631689 1440.14449872047 2120.14463347544  
 HSPE1 842.87865208079 780.105135529728 807.92851898782 540.005877322817  
 1793.75125318113 2728.04758874748 1881.90353127141 3441.9805896226  
 1845.87311313269 1561.87054049124 3436.32495553246 2720.83642320419  
 HSPG2 134.805239981342 154.509924503184 131.265594391542 197.605208310432  
 162.547569833931 122.629146433216 126.806537241253 129.061316880624  
 128.202619705343 138.700301754711 147.49720952988 124.548598801497  
 HSPH1 1142.44180956604 899.667912542118 1370.61156801632 708.534025308731  
 1431.52979384867 2642.24374855334 1619.67820476414 2596.43650409044  
 2208.49325118803 2580.98143004019 1769.6386910047 3184.98944679038  
 HSZFP36 275.609716327452 299.935166870211 261.469732730752  
 280.246711704036 646.461274173693 697.97116981445 842.22767901391  
 880.140852200235 505.83860711693 228.058870735016 832.911633923496  
 453.17378995737  
 HTA 143.30977386038 134.97514790642 145.326803807448 139.809114250476  
 136.118702626862 131.907246423067 145.005991300977 146.979988781462  
 139.652974659584 130.457981404612 132.615324904193 129.404017329613

|         |                  |                  |                  |                  |
|---------|------------------|------------------|------------------|------------------|
| HTATIP2 | 410.337491313251 | 426.995700632434 | 527.930077857945 |                  |
|         | 424.285848583977 | 434.716530273383 | 478.909308632726 | 568.310800941091 |
|         | 590.142817130684 | 731.284098301795 | 892.868661511516 | 662.04757187541  |
|         | 635.038752622494 |                  |                  |                  |
| HTATSF1 | 135.86924353735  | 125.945916345628 | 132.100026388604 |                  |
|         | 139.013404849037 | 136.654902685184 | 123.072413274454 | 139.125340284813 |
|         | 147.77916610545  | 128.878051599968 | 137.747088378131 | 142.984243805285 |
|         | 143.62103263895  |                  |                  |                  |
| HTN1    | 110.486191378104 | 100.841352336505 | 109.46255295836  | 118.215641556163 |
|         | 125.379842077431 | 103.520748827831 | 104.977794653504 | 103.734303632543 |
|         | 108.101686347192 | 110.437728036347 | 117.199217938531 | 109.30275288389  |
| HTN3    | 146.08320115156  | 148.610537244399 | 137.290687951485 | 137.982667022604 |
|         | 133.478829770103 | 149.657951204528 | 136.209796259197 | 140.427188241455 |
|         | 146.64835267642  | 142.858554460651 | 144.944095553004 | 133.836390935612 |
| HTR1A   | 109.37466528113  | 119.663182347566 | 113.025793645043 | 115.566303449363 |
|         | 122.514826802737 | 117.428152859221 | 110.510191137073 | 114.520066232155 |
|         | 117.238968848218 | 101.981823814699 | 124.119104345119 | 114.223991452083 |
| HTR1B   | 130.779805222363 | 133.550008967009 | 170.108500366942 | 131.670601860412 |
|         | 124.317870455205 | 137.012646671173 | 140.038295509875 | 150.613624696604 |
|         | 142.829099538363 | 127.966883271903 | 124.961859983596 | 138.28745132277  |
| HTR1D   | 120.493082096235 | 115.914842445934 | 123.031945101045 | 108.34997967774  |
|         | 118.470400686096 | 119.551741097918 | 109.255470590389 | 122.426568507144 |
|         | 119.387459594521 | 112.282839763467 | 146.00443946108  | 124.585675323305 |
| HTR1E   | 169.408892048115 | 155.253032078086 | 141.416706868124 | 154.533544838819 |
|         | 208.348515119045 | 173.592875508663 | 185.876046259727 | 186.321879879561 |
|         | 164.160608039304 | 152.898148619937 | 182.665357598121 | 173.010799217261 |
| HTR1F   | 128.354163132392 | 138.411148122407 | 122.543903508753 | 129.150574563997 |
|         | 154.273953018148 | 128.224742304889 | 125.195549796301 | 131.261903118177 |
|         | 146.252974508529 | 138.17454314053  | 122.512587751135 | 135.377118045038 |
| HTR2A   | 168.52952604693  | 158.95714101556  | 139.858812885649 | 148.493435517221 |
|         | 128.643539098937 | 152.538048490265 | 130.074786642758 | 133.374199939042 |
|         | 146.557058433232 | 143.47200560038  | 141.033948839613 | 148.334425146129 |
| HTR2B   | 234.339913501761 | 190.291185322482 | 190.682392100564 | 166.640325848102 |
|         | 149.563405421366 | 147.314687795555 | 148.82034800623  | 150.936747236094 |
|         | 156.407166112409 | 141.513636348978 | 166.341564850299 | 145.770601609392 |
| HTR2C   | 134.909230280708 | 121.865696440776 | 119.859508630454 | 125.293640452686 |
|         | 135.725202462502 | 125.512431901925 | 133.008987820479 | 133.608461289137 |
|         | 120.581554457723 | 133.713275043978 | 130.351302840602 | 125.181327386534 |
| HTR3A   | 141.890803125137 | 148.922537778634 | 142.729945734027 | 133.352279794853 |
|         | 139.736465430177 | 135.638156623519 | 138.566954604414 | 133.812639120892 |
|         | 139.457084084368 | 132.342063356763 | 141.008604646743 | 133.185908839766 |
| HTR3B   | 138.592943322694 | 147.835936450126 | 138.231715814115 | 146.010474018786 |
|         | 141.565599104245 | 152.635792342068 | 136.194082458655 | 122.038534506506 |
|         | 149.995272585012 | 145.912712700067 | 138.659387475119 | 160.79631681714  |
| HTR3C   | 152.295451313545 | 137.102353661381 | 178.304914997023 | 147.835936450126 |
|         | 160.914009756867 | 155.233830396052 | 153.943227610765 | 153.93927752488  |
|         | 158.109836032481 | 143.874735808114 | 153.169450192935 | 143.52474218953  |
| HTR3D   | 142.510745106328 | 122.924017262559 | 143.836637098747 | 135.154441560264 |
|         | 132.484079454476 | 143.796699867588 | 128.184708916755 | 122.924017262559 |
|         | 129.808590871788 | 138.831297375659 | 130.965418847276 | 137.176144667253 |
| HTR3E   | 107.828378413233 | 111.506345174435 | 115.29099102455  | 117.316790136526 |
|         | 116.936964318685 | 119.578240680666 | 118.432307370605 | 113.58962177275  |
|         | 111.506345174435 | 124.723519607109 | 119.866898356501 | 114.191245210321 |

|       |                  |                  |                  |                  |
|-------|------------------|------------------|------------------|------------------|
| HTR4  | 126.825785762925 | 125.801254883675 | 126.673587174832 | 130.293492553638 |
|       | 121.429270259367 | 128.473834314632 | 125.73560975196  | 122.917915232153 |
|       | 126.938068475032 | 128.606360476298 | 139.897320032723 | 123.129785564258 |
| HTR5A | 125.526744092256 | 149.740404686695 | 147.642693777383 | 150.471558219667 |
|       | 133.592691897675 | 129.236471271181 | 127.622397233692 | 142.656762407774 |
|       | 142.388076341254 | 140.702685210277 | 133.775716376056 | 137.876234091056 |
| HTR6  | 115.692324946633 | 127.372242892513 | 116.793408204625 | 111.381427322188 |
|       | 107.816312357067 | 125.826111950648 | 115.435942397626 | 119.937665469629 |
|       | 118.154953746492 | 138.196640512429 | 133.329392986316 | 127.358616953147 |
| HTR7  | 127.447218258785 | 127.218362452043 | 112.10312035128  | 118.047978285706 |
|       | 167.662761175661 | 127.551486042435 | 138.903450375532 | 133.792673129743 |
|       | 116.718099363329 | 130.944610173285 | 179.009510246709 | 147.858339902055 |
| HTR7P | 144.774621469452 | 152.024383072265 | 156.073428882485 | 157.891350650633 |
|       | 146.851307767958 | 158.041568121766 | 145.452220050902 | 138.192550945411 |
|       | 140.466612569756 | 150.301540078433 | 151.273261581765 | 136.90636489391  |
| HTRA1 | 3338.13980198211 | 3387.5366256957  | 2261.31473132315 | 2715.55326746591 |
|       | 344.128576341892 | 432.604462607037 | 278.168897504985 | 464.577839898252 |
|       | 547.516635695872 | 1525.24196488688 | 295.278972023002 | 453.760162338163 |
| HTRA2 | 229.181725450534 | 212.016247864691 | 235.704824490397 | 236.082185670774 |
|       | 275.996693627151 | 224.466829629468 | 256.729891423908 | 229.511643376643 |
|       | 197.815264620906 | 226.960024551778 | 209.60319248212  | 216.033564783918 |
| HTRA3 | 183.905926269285 | 162.002221893617 | 147.272072245929 | 178.347708009405 |
|       | 122.583461806645 | 118.684077097437 | 118.56332995149  | 118.636694749194 |
|       | 117.760045671142 | 132.008330288281 | 130.850419527271 | 122.708102546276 |
| HTRA4 | 159.43317827517  | 153.996429870564 | 166.104915784875 | 153.943227610765 |
|       | 159.646538408414 | 165.480489678822 | 144.767233774942 | 161.061119536632 |
|       | 154.64077390011  | 149.18603646016  | 165.885072907195 | 165.370800097602 |
| HTT   | 213.710058427654 | 252.222481637238 | 215.967319486874 | 349.485727214325 |
|       | 195.057830521304 | 195.384273821324 | 195.316077537716 | 162.013164369593 |
|       | 207.150354734189 | 180.761100930677 | 202.278323489515 | 171.494975393562 |
| HULC  | 149.742140955184 | 122.153996665065 | 125.065813262416 | 134.69274746407  |
|       | 146.013430937168 | 137.552979154943 | 137.519771130707 | 137.306031826007 |
|       | 152.796423361971 | 133.074027423549 | 125.025064237439 | 132.595360509902 |
| HUNK  | 148.204194003593 | 145.180346905484 | 140.385509382606 | 151.770791549511 |
|       | 129.618097261902 | 135.254996386778 | 138.081268025435 | 126.058167594519 |
|       | 138.206065640158 | 154.066939372379 | 141.996233801459 | 138.994857740356 |
| HUS1  | 136.589250394236 | 128.675527226161 | 133.208065430037 | 138.384797779855 |
|       | 140.292132023262 | 129.896711442418 | 136.886677060418 | 131.523538461751 |
|       | 141.38612990166  | 133.511698282195 | 151.87495966414  | 128.955241553429 |
| HUS1B | 197.003657786247 | 175.010849510711 | 193.813717161291 | 176.75095377028  |
|       | 181.500222423634 | 205.705962405954 | 205.322733011516 | 179.35113214277  |
|       | 176.486551181451 | 202.343343669937 | 177.598422362298 | 182.42088387266  |
| HUWE1 | 371.457568934695 | 376.189276074918 | 393.013539328766 | 493.071213662125 |
|       | 321.84712975195  | 293.646275396425 | 263.606930507829 | 312.961981998512 |
|       | 291.616195651001 | 275.072079692264 | 502.935749606918 | 236.191384383802 |
| HVCN1 | 157.113536717393 | 155.890403934674 | 137.232722233042 | 151.945412775776 |
|       | 147.978039160763 | 147.129702047639 | 147.79341726211  | 138.848119273081 |
|       | 169.649251828199 | 145.440471538068 | 151.60113116166  | 145.754504160436 |
| HYAL1 | 178.166289723365 | 193.358728044565 | 157.553632802599 | 219.171591031864 |
|       | 131.868557613642 | 141.750316403249 | 132.357517495246 | 145.256660345252 |
|       | 160.459100056689 | 136.712083407769 | 149.717739166461 | 139.348494759948 |
| HYAL2 | 175.593421867771 | 174.761105961773 | 170.423881865022 | 165.797170648964 |
|       | 471.15333189869  | 223.373877165342 | 202.99342484328  | 197.762169504041 |
|       | 201.49630027392  | 184.071078414327 | 173.714940254592 | 200.127994198329 |

|        |                  |                  |                  |                  |
|--------|------------------|------------------|------------------|------------------|
| HYAL3  | 162.077455145261 | 157.952018720438 | 113.487357534546 | 150.168496148941 |
|        | 432.726040933545 | 188.291563792748 | 149.108582827136 | 165.602175302848 |
|        | 161.212598761378 | 137.459095066272 | 151.479748626813 | 126.997614441981 |
| HYAL4  | 177.011776399483 | 156.007630568494 | 184.542232315662 | 171.298701141684 |
|        | 135.226240774124 | 168.156002330441 | 150.079372712689 | 143.912136782374 |
|        | 143.04129238495  | 145.810213943313 | 162.397078614596 | 161.614426723521 |
| HYALP1 | 153.964765831852 | 170.622615783608 | 151.27882940428  |                  |
|        | 133.724135305758 | 180.569583206488 | 167.121623035375 | 205.476230849391 |
|        | 162.122250419992 | 152.26903721278  | 177.716742595321 | 190.66473033826  |
|        | 163.306853098724 |                  |                  |                  |
| HYDIN  | 145.812607895325 | 142.232918684259 | 151.911494020123 | 145.748174062159 |
|        | 145.076068630259 | 147.272072245929 | 143.669490888725 | 142.30928744202  |
|        | 146.981521393075 | 143.188958538221 | 141.334394187941 | 142.986412837634 |
| HYI    | 198.701991021316 | 209.146021798649 | 205.781486117242 | 212.473610495213 |
|        | 208.895657507883 | 139.723117427543 | 170.516743115762 | 146.035731780312 |
|        | 154.518641757391 | 122.220327032799 | 178.819486867379 | 164.822461375001 |
| HYLS1  | 192.59376129133  | 189.324370290702 | 219.619022209985 | 185.063870458561 |
|        | 335.790909130243 | 248.465457421469 | 200.810204162831 | 301.546624239855 |
|        | 227.288015854809 | 161.700258550244 | 224.089220507176 | 216.381643581705 |
| HYMAI  | 173.816408146725 | 167.958792571511 | 158.157097243342 | 166.173429365582 |
|        | 146.345451252228 | 146.198331189991 | 133.103403333542 | 150.109192774079 |
|        | 140.274655651173 | 168.37043566813  | 129.421772713718 | 135.388750095746 |
| HYOU1  | 231.462907786174 | 269.673122990604 | 194.500222559978 | 276.925017614147 |
|        | 656.32782132983  | 218.644953001365 | 229.181725450534 | 253.218123990428 |
|        | 259.252807304272 | 195.963361515546 | 328.919401925375 | 268.600782558985 |
| HYPB   | 139.367493349339 | 144.597060118959 | 139.466683069609 | 128.517315006019 |
|        | 144.41489969974  | 147.75188889715  | 148.89180107448  | 142.772680460689 |
|        | 153.616692588396 | 137.929082565223 | 132.141918502025 | 155.30926640293  |
| IAH1   | 700.353187874339 | 597.189355986293 | 852.436775264873 | 590.515758538373 |
|        | 1086.8615735568  | 864.161191021297 | 734.97763567765  | 704.448123154868 |
|        | 574.399909181723 | 863.738809424958 | 443.444024128516 | 776.411045078049 |
| IAPP   | 117.950058826379 | 153.966815534288 | 149.675363177375 | 140.311843829601 |
|        | 130.535859816562 | 163.422877959747 | 145.880661952783 | 137.093170378295 |
|        | 137.282038401275 | 136.409960447884 | 130.411849432351 | 151.219051767056 |
| IARS   | 228.713818522476 | 234.28146549561  | 298.664864578349 | 236.032288046282 |
|        | 293.234972169244 | 309.658122422202 | 279.921244070981 | 262.954856857756 |
|        | 330.405026390912 | 444.192734921566 | 362.195903246495 | 248.204358220728 |
| IARS2  | 924.040923247227 | 968.548243081111 | 1050.40488466179 | 784.412433571927 |
|        | 960.491731797061 | 1660.70040058102 | 1371.56635975955 | 883.140984728615 |
|        | 1247.91041567746 | 1364.1224589383  | 1231.37475540937 | 1895.72330348767 |
| IBSP   | 158.364031234356 | 143.008280236963 | 160.618586213311 | 159.570288565855 |
|        | 140.909875639658 | 164.808139478109 | 146.421195733989 | 147.553953240464 |
|        | 136.393655406964 | 149.019120812629 | 153.126111237668 | 163.885645883066 |
| IBTK   | 808.55123510297  | 738.579262579782 | 613.063954859056 | 786.160002434066 |
|        | 686.923164688096 | 462.437471715008 | 774.997895985917 | 571.439520427295 |
|        | 500.643499051523 | 573.244735292944 | 796.439819579938 | 686.198351821711 |
| ICA1   | 895.821578104681 | 806.88003660673  | 941.572186137467 | 717.025533065694 |
|        | 412.941907828617 | 736.140249105836 | 598.647226284738 | 708.534025308731 |
|        | 542.883453307    | 403.907009699589 | 842.567990276734 | 777.410297605252 |
| ICA1L  | 149.508432746895 | 151.113342302947 | 171.212749388553 | 146.49022197174  |
|        | 136.211694310501 | 144.227440632196 | 131.298129667973 | 145.401101974736 |
|        | 141.70123350351  | 128.186963138555 | 144.678895821726 | 133.211362932569 |

|        |                  |                  |                  |                  |
|--------|------------------|------------------|------------------|------------------|
| ICAM1  | 141.21138348075  | 150.203281104753 | 123.857527555048 | 121.803676441059 |
|        | 144.954595802474 | 140.427188241455 | 128.680762033378 | 135.501192996538 |
|        | 172.652645920958 | 168.854819201403 | 131.724061631389 | 122.010855318111 |
| ICAM2  | 362.742120043509 | 462.948429969719 | 236.141982516399 | 425.59810308048  |
|        | 202.568071395884 | 222.118666699301 | 221.768507175814 | 282.604890044452 |
|        | 413.983821839274 | 178.872635061826 | 327.207408852474 | 985.087150371964 |
| ICAM3  | 288.823376348944 | 287.402339322061 | 271.945851739635 | 295.099840299681 |
|        | 436.222568287601 | 581.191693771646 | 393.198813167839 | 633.594811068524 |
|        | 618.437282203498 | 300.675907594637 | 429.812058546782 | 338.326304736048 |
| ICAM4  | 135.513494853742 | 143.587562550004 | 141.891508908764 | 136.812841133892 |
|        | 138.82269002406  | 138.990971069382 | 138.050999864689 | 132.555211779043 |
|        | 144.425214066833 | 131.528729642144 | 147.640100078933 | 146.442734810495 |
| ICAM5  | 160.17208299932  | 140.182150393054 | 149.829363505519 | 157.337193457189 |
|        | 148.052222389368 | 147.132625797946 | 146.225422797118 | 138.521952850632 |
|        | 147.93088503956  | 148.323729699672 | 136.040524807653 | 151.037282417145 |
| ICF45  | 163.203582580217 | 172.008994980259 | 184.241640200823 | 166.868688936939 |
|        | 140.348718082786 | 143.744075931566 | 158.171302275984 | 148.538400348149 |
|        | 153.4392054301   | 162.289781945582 | 163.074919710259 | 151.727603285205 |
| ICK    | 205.65398844108  | 219.080383154432 | 243.622678182687 | 213.584269089596 |
|        | 173.416999972133 | 188.378996128521 | 207.850956786183 | 180.658930225735 |
|        | 163.636550341231 | 172.531836863525 | 200.72147365413  | 176.214950733324 |
| ICMT   | 330.758879244143 | 324.25775261173  | 299.754985162237 | 391.400480065    |
|        | 522.050619657197 | 362.95684683529  | 290.914381066573 | 267.901632267999 |
|        | 356.699466789374 | 304.111808763793 | 288.542264120468 | 308.564935340635 |
| ICOS   | 171.880470629305 | 165.553581848949 | 162.919656039331 | 160.676606760965 |
|        | 171.40549153673  | 161.700258550244 | 215.335795337978 | 204.438365139666 |
|        | 256.648540685098 | 170.858049313581 | 219.709231012465 | 166.209190082084 |
| ICOSLG | 163.582678113215 | 160.192540519103 | 158.208998509937 |                  |
|        | 149.897440750742 | 167.350290326189 | 166.533191390639 | 171.384487293154 |
|        | 182.152956182443 | 153.154592981962 | 146.091822904705 | 166.209190082084 |
|        | 165.169920299969 |                  |                  |                  |
| ICT1   | 373.452370692334 | 415.011847890313 | 483.845891531326 | 530.387315639095 |
|        | 467.347509383673 | 795.720196538039 | 595.409419899436 | 696.475639532595 |
|        | 778.28014337938  | 473.73182675469  | 530.969825236996 | 709.136137559152 |
| ID1    | 554.115756730498 | 746.523071806534 | 764.493610798958 | 246.492735271771 |
|        | 5347.78127066964 | 4251.82554412383 | 6281.01687932005 | 2189.53914329263 |
|        | 3251.62784659994 | 1698.08853832248 | 3876.04966263281 | 3598.30438198858 |
| ID2    | 831.08287594363  | 817.342172321486 | 708.534025308731 | 479.638653311025 |
|        | 2479.34567973462 | 2421.87041217217 | 2174.62979843528 | 696.131296166255 |
|        | 1159.44907165386 | 281.037762232619 | 1747.33558205825 | 1713.93035637146 |
| ID2B   | 172.583615020042 | 173.735045816949 | 170.725486814469 | 180.889946069121 |
|        | 172.491604217899 | 166.830529779692 | 174.898012759712 | 170.335930486215 |
|        | 174.26780796802  | 157.909530751723 | 145.724294862079 | 184.102171963542 |
| ID3    | 1080.02576143033 | 1399.41653736746 | 1038.34611017219 | 481.86545778383  |
|        | 6894.63087357693 | 2225.59207490574 | 7122.07276863122 | 822.129234065933 |
|        | 2285.86163259073 | 784.72162514331  | 4536.46344538492 | 1769.6386910047  |
| ID4    | 342.245182599593 | 277.539110964815 | 213.791379190359 | 176.874265462986 |
|        | 187.893420010787 | 122.777544465711 | 211.059870865354 | 129.090955637629 |
|        | 147.393178410954 | 122.00079209554  | 347.292438587205 | 140.388212037661 |
| IDE    | 152.209234189672 | 157.519633258844 | 192.69687837782  | 153.541193559658 |
|        | 214.295260811046 | 270.021093158885 | 203.913123559942 | 256.127197303751 |
|        | 229.805500520256 | 204.89842561202  | 202.114480291084 | 328.401537339876 |

|         |                  |                  |                  |                  |
|---------|------------------|------------------|------------------|------------------|
| IDH1    | 447.372026268156 | 613.846166856328 | 738.087203930249 | 436.586158384666 |
|         | 1942.08859727404 | 11326.5935775813 | 3348.7622174821  | 6460.4291301245  |
|         | 4773.62220024088 | 1057.1528284934  | 1659.80909859514 | 2197.44189747261 |
| IDH2    | 737.193295872614 | 830.455793617181 | 685.620637807134 | 1524.46745239811 |
|         | 1271.46608195833 | 611.540759532294 | 693.180345649331 | 591.437752991512 |
|         | 835.834013018438 | 868.066644155313 | 473.057488824363 | 654.52788411248  |
| IDH3A   | 312.177191402945 | 295.330307669482 | 411.039234404499 | 326.354469134694 |
|         | 226.449705559354 | 350.58427958432  | 266.057472924341 | 243.038392457584 |
|         | 262.139211406599 | 250.30085097088  | 217.380892198811 | 335.389274425025 |
| IDH3B   | 863.086199215353 | 890.121325723286 | 1123.93087912174 | 895.114975754684 |
|         | 1089.58643309156 | 1199.35864276583 | 681.429327723794 | 777.651238374269 |
|         | 800.013123376748 | 1144.53002508973 | 683.019502027271 | 1076.09385014053 |
| IDH3G   | 328.826483579278 | 371.127480221666 | 374.215345412947 | 403.104188866804 |
|         | 575.546802138889 | 299.616447269111 | 310.174932137546 | 265.866465528654 |
|         | 289.576706584644 | 269.927694984528 | 262.53374754047  | 338.075238647592 |
| IDI1    | 283.416246133873 | 301.798676825176 | 249.680729921602 | 278.88183549759  |
|         | 367.644907862372 | 406.458130553679 | 303.300028849873 | 380.821355948507 |
|         | 361.390981655795 | 497.411169898778 | 370.798852361374 | 326.83982672544  |
| IDI2    | 146.838547724148 | 155.111346336412 | 171.238423077347 | 149.668587078867 |
|         | 180.952017616136 | 168.027892518772 | 162.127697884504 | 166.024236370752 |
|         | 155.603263242813 | 168.124936529582 | 156.585665091824 | 175.805472275887 |
| IDO1    | 151.858466721347 | 136.214432257698 | 132.069175779393 | 139.457084084368 |
|         | 176.355556618289 | 173.132747018514 | 227.668046559074 | 255.71113398292  |
|         | 299.935166870211 | 161.490941000872 | 173.675115244522 | 154.199534276226 |
| IDO2    | 148.317958829244 | 151.002218995005 | 145.730927308023 | 156.492488946383 |
|         | 149.141033677244 | 156.200313064999 | 148.065080664185 | 164.986006226427 |
|         | 150.292858985795 | 147.138814313885 | 149.14863489698  | 148.67584969749  |
| IDS     | 400.621427274425 | 300.358738353443 | 383.802494922918 | 336.845908630493 |
|         | 394.892918166519 | 330.590986934704 | 349.773289724658 | 250.342080183479 |
|         | 270.360397503276 | 252.697160031025 | 293.12968694683  | 242.948136060281 |
| IDUA    | 257.775569674531 | 269.300548648755 | 199.490190715307 | 230.697077917675 |
|         | 733.648333788712 | 201.530921073488 | 439.207122335648 | 313.581986704048 |
|         | 256.764450748941 | 178.000672046849 | 320.305852961452 | 340.487850009685 |
| IER2    | 231.796421262015 | 288.150694843614 | 224.396933003452 | 254.768537214795 |
|         | 412.048097766066 | 426.649095732979 | 274.343238288436 | 256.795346052751 |
|         | 216.154203111101 | 401.750302347978 | 292.746711619565 | 210.756414415156 |
| IER3    | 565.609400092543 | 1316.31088187364 | 744.225336494008 | 553.198321853202 |
|         | 1095.04571025381 | 1816.3719976564  | 671.134356672693 | 509.512410867348 |
|         | 540.946852709312 | 4327.90939653054 | 155.62770968777  | 935.042067053226 |
| IER3IP1 | 331.523536427527 | 270.462865174106 | 245.042781391047 |                  |
|         | 208.14618424983  | 425.826693178023 | 473.151324002277 | 569.133295913677 |
|         | 605.583144451322 | 659.483452217461 | 497.629319581786 | 396.708183244581 |
|         | 513.816017871024 |                  |                  |                  |
| IER5    | 217.264041781337 | 236.676029292922 | 177.759729226623 | 184.260835471542 |
|         | 410.42088953434  | 445.763740779039 | 387.403502892897 | 275.696829424061 |
|         | 356.154842959851 | 809.729160605727 | 569.866002248352 | 345.649572073924 |
| IER5L   | 208.955110569558 | 246.355720496468 | 169.791616021987 | 210.5689532432   |
|         | 994.213397985121 | 278.598913464804 | 205.428900832926 | 173.161152247499 |
|         | 313.641656294638 | 265.670643951648 | 390.284689962661 | 166.014450044695 |
| IFFO1   | 580.164288826741 | 507.827473844576 | 525.138476928759 | 634.046843336128 |
|         | 180.690409026809 | 195.981555981238 | 170.145574727175 | 219.080383154432 |
|         | 278.428310548805 | 233.272000923172 | 282.797367565702 | 183.988537525989 |

|         |                  |                  |                  |                  |
|---------|------------------|------------------|------------------|------------------|
| IFFO2   | 316.237519859859 | 283.760131847707 | 256.648540685098 | 358.732947927445 |
|         | 314.949772661046 | 554.282040414368 | 447.059120541009 | 228.926077117474 |
|         | 348.413827101046 | 506.290241222253 | 215.718714189719 | 226.449705559354 |
| IFI16   | 388.966303073519 | 404.876478833713 | 338.585771590234 | 298.926727289387 |
|         | 153.468933239223 | 279.704940529618 | 515.432065049838 | 313.18989508207  |
|         | 408.60092780174  | 947.766127685083 | 386.461076717316 | 572.262848718437 |
| IFI27   | 2159.2992548378  | 1391.89900758685 | 513.428413503031 | 1071.83063260499 |
|         | 8739.02966610274 | 726.556553101727 | 2350.01764791897 | 513.036729214095 |
|         | 1260.50387106816 | 6138.10904830456 | 449.220056843562 | 6460.4291301245  |
| IFI27L1 | 307.866499851733 | 355.048838683854 | 334.772648743153 |                  |
|         | 432.726040933545 | 227.499335248402 | 240.994507285383 | 192.475309217696 |
|         | 349.382889326613 | 276.79778275734  | 474.216057978384 | 209.44506543433  |
|         | 238.400565506288 |                  |                  |                  |
| IFI27L2 | 563.907454700224 | 622.142195892701 | 408.758021864761 |                  |
|         | 672.637760135254 | 200.767743455226 | 291.537725613819 | 346.173614351499 |
|         | 260.356834114611 | 318.244342364572 | 779.340880980422 | 222.134519361117 |
|         | 800.013123376748 |                  |                  |                  |
| IFI30   | 153.857048476879 | 167.451782810394 | 140.597877909094 | 162.774716879847 |
|         | 184.775001243453 | 177.619101765848 | 197.378801636702 | 300.150235383065 |
|         | 409.206158277764 | 317.904396212359 | 233.029655807246 | 203.19299227665  |
| IFI35   | 594.180861801958 | 466.083451075744 | 355.714202328378 | 475.927798702033 |
|         | 271.004741629789 | 248.16594076495  | 656.660582895703 | 639.184296110069 |
|         | 698.882871686866 | 362.795691170335 | 573.244735292944 | 350.926679856514 |
| IFI44   | 850.562379837947 | 299.29004204677  | 233.884660128222 | 291.313681141442 |
|         | 186.377571176623 | 234.895245871534 | 811.362219801362 | 275.39986964837  |
|         | 445.905756082569 | 384.883635849576 | 278.335289966805 | 664.343553341563 |
| IFI44L  | 1285.02292965374 | 259.025042304848 | 181.566951620202 |                  |
|         | 242.070630946726 | 129.497266827284 | 216.755681508811 | 639.184296110069 |
|         | 264.805236346895 | 413.687046868111 | 141.972403120632 | 223.872330412144 |
|         | 174.680918805036 |                  |                  |                  |
| IFI6    | 3749.80462365748 | 1262.96801072965 | 726.731270955732 | 1119.71228054585 |
|         | 2285.86163259073 | 593.639955546556 | 4000.45196171119 | 977.227184625781 |
|         | 1447.07989164988 | 830.455793617181 | 1479.69309189156 | 690.582550537485 |
| IFIH1   | 281.618175110153 | 195.577739376082 | 172.438141471784 | 182.997980582218 |
|         | 204.438365139666 | 155.166786601813 | 244.280971257965 | 230.161369375718 |
|         | 339.917319653382 | 278.192669077191 | 318.561557474749 | 193.689806171113 |
| IFIT1   | 600.757699463777 | 319.768792196774 | 347.292438587205 | 328.550286726543 |
|         | 152.221694141976 | 182.633773540249 | 377.951523644306 | 174.338440780636 |
|         | 199.170488640762 | 185.691922436569 | 199.980312703646 | 164.48570046081  |
| IFIT1L  | 113.832885222354 | 112.015423658372 | 111.559325333192 |                  |
|         | 116.321559000405 | 116.897299691798 | 112.264005988662 | 114.466368742403 |
|         | 114.314425748312 | 117.841844605128 | 105.839106819841 | 126.837151457845 |
|         | 122.716563069312 |                  |                  |                  |
| IFIT2   | 467.387427864242 | 280.990656342284 | 315.565349831797 | 297.636316709322 |
|         | 200.065184172871 | 142.178467668037 | 290.037325939883 | 202.397972518715 |
|         | 288.182388699147 | 203.704734790602 | 363.594808277506 | 199.597685421675 |
| IFIT3   | 294.410833087913 | 172.750926094884 | 192.96586114861  | 185.128661141884 |
|         | 146.323776429268 | 141.181931072161 | 231.044588483625 | 161.906823008445 |
|         | 244.596233138747 | 168.37850726499  | 200.045606111354 | 202.741211613885 |
| IFIT5   | 172.934156790775 | 163.416011199431 | 152.838970689314 | 139.493025452991 |
|         | 134.936025073531 | 140.522470775478 | 149.606576415873 | 131.01107240791  |
|         | 144.916193282062 | 131.503936441405 | 180.549865708041 | 157.844617425219 |
| IFITM1  | 2340.90990677253 | 1312.75601392984 | 499.964000319181 |                  |
|         | 1046.13353853089 | 384.464383569801 | 399.724529998085 | 529.04238100948  |

617.833194119379 1102.73689840572 624.467319041884 373.760551592844  
227.32463765717  
IFITM2 7354.94071109106 5734.76405709934 4238.41681589316  
6203.08085790474 1673.5387396582 1840.14350831655 1285.54492194393  
2021.92898855142 3348.7622174821 3424.65126200697 872.512754090023  
1055.22233969473  
IFITM3 7733.95252458705 6006.01682776552 3608.10730106542  
5609.58233117244 1570.39362935859 1254.19980463817 1109.08288440559  
1345.8970795036 2267.0818302379 2662.43181510326 633.401624753368  
654.663838918786  
IFITM4P 132.54577436954 137.962542261072 124.251699375036  
124.197397333928 132.850601603567 124.96926662367 130.784802403934  
120.925930409474 138.743505629497 139.092075947067 136.311902195562  
120.027996187915  
IFITM5 108.807891863679 116.635455849571 113.083678884076  
113.283359026655 121.679013405559 121.483610947845 120.880547922392  
112.714282429822 114.39161822971 118.737244693366 122.996616773523  
124.132215738502  
IFLTD1 135.862790395984 130.388530183353 175.21512930507  
153.807525239478 149.450921195838 164.264079172779 167.858490180471  
156.646803208934 150.552186000149 155.608876496443 143.144153021901  
150.968998243223  
IFNA1 127.511638455985 151.374665021513 157.166379887259 145.684294398911  
168.223865801948 164.268280525424 161.790909578234 148.823805841381  
148.567630572897 134.676039394438 138.070353990356 151.245520459264  
IFNA10 155.444668113276 140.593510265137 151.617989938924  
156.448355269561 148.594322264158 130.593846004132 144.201723591119  
141.152406037213 137.902953501634 149.113794439994 128.533900744619  
137.170666175895  
IFNA13 145.428297145967 126.165220332132 132.213890220705  
138.442378791712 127.9928491829 132.553445658347 138.5270206057  
129.421772713718 129.583916648999 140.678336884951 135.980886879513  
132.125545886181  
IFNA14 131.198284945008 120.196595293401 128.604270382206  
126.381288663037 132.834433153076 131.215202712283 133.526213647686  
125.593595066736 124.297848065172 135.776154891006 127.654130155446  
126.37749112514  
IFNA16 133.34207595093 148.678869698203 135.215356532498  
135.99579763634 130.546471770588 135.29954024755 133.12641302705  
122.167669805597 128.850480964163 140.689631427359 136.128092230238  
142.42442972908  
IFNA17 100.325215581101 98.1433670546536 106.41329572636  
110.829107724132 96.8261937365062 103.398929051742 110.428616140857  
104.321352818065 105.583474813289 102.421174406474 102.094370876743  
94.3531468700382  
IFNA2 160.085325256991 150.374573177474 156.307551403822 166.111496598928  
160.75642485037 168.991551886143 170.775283924087 138.471894596606  
151.248365605631 155.064761390765 137.27827836407 139.757191608836  
IFNA21 154.518641757391 155.335777680002 162.289781945582  
154.384766720753 138.376176600064 171.80440912191 152.217243924816  
161.289708941062 167.278879415171 161.359609192977 159.688862680139  
191.58185405868



|        |                  |                  |                  |                  |
|--------|------------------|------------------|------------------|------------------|
| IFNA4  | 131.181537219479 | 135.013075032671 | 131.373012256275 | 137.639342727211 |
|        | 133.268239762624 | 143.643259003393 | 128.914885412263 | 127.729912390394 |
|        | 132.50027119027  | 131.68571824487  | 137.074564265915 | 138.950197595669 |
| IFNA5  | 103.520748827831 | 104.154182930018 | 108.079149792796 | 101.530900217921 |
|        | 116.95195122318  | 114.85602874727  | 101.915858150866 | 105.606964521964 |
|        | 110.014935095391 | 108.118551275778 | 122.662260070778 | 122.072091994548 |
| IFNA6  | 117.32734978289  | 126.364445020215 | 127.814109293214 | 128.575364985954 |
|        | 121.648921929686 | 118.703108284564 | 114.704831217037 | 126.62990026202  |
|        | 119.427342766092 | 128.777337552038 | 133.228074579352 | 118.863150637476 |
| IFNA7  | 136.461182044855 | 120.702740607924 | 125.768053724055 | 125.342580368417 |
|        | 133.500750738061 | 139.515794685984 | 132.118118271944 | 128.671626815639 |
|        | 127.685469299406 | 132.509125105338 | 115.310953814885 | 137.298549014192 |
| IFNA8  | 145.128919984856 | 141.356127724777 | 134.514251897045 | 152.104170622003 |
|        | 136.453821861379 | 141.422441104854 | 144.578454791104 | 148.216605879958 |
|        | 138.50032459657  | 138.064951932825 | 133.101674466013 | 138.076501233454 |
| IFNAR1 | 372.757091748175 | 422.02217814979  | 418.062540009856 |                  |
|        | 495.89837457901  | 249.029098902357 | 301.638918685657 | 329.068463281182 |
|        | 308.441120735095 | 422.590112942156 | 228.086256222312 | 392.06522028189  |
|        | 277.000882284125 |                  |                  |                  |
| IFNAR2 | 183.619184925353 | 199.281908522212 | 172.251953149975 |                  |
|        | 182.545896049446 | 214.785381549181 | 204.544266331066 | 239.827648772906 |
|        | 227.926444925478 | 226.315173823168 | 170.531713392258 | 387.403502892897 |
|        | 234.041863839123 |                  |                  |                  |
| IFNB1  | 118.703108284564 | 107.520000793184 | 117.017844025726 | 108.167670899938 |
|        | 114.942849575931 | 113.512670856029 | 104.798333931019 | 114.14858855653  |
|        | 109.506450285923 | 110.333339548402 | 113.177330690612 | 110.315549501241 |
| IFNE   | 158.902676384853 | 156.430981244063 | 135.097332483841 | 129.257947818865 |
|        | 140.581943144813 | 136.627904756283 | 144.736213465651 | 141.374831983971 |
|        | 148.167464091421 | 140.146894533044 | 299.234482744038 | 168.37043566813  |
| IFNE1  | 147.341597963918 | 148.412895185127 | 149.387467833684 | 140.431591727649 |
|        | 127.887666721519 | 135.724378638305 | 138.907036194384 | 144.292679144059 |
|        | 144.219104742099 | 141.301503201175 | 210.711890471222 | 147.600825146067 |
| IFNG   | 132.786500984297 | 121.957155610892 | 125.809027384863 | 125.955431094455 |
|        | 128.200531810126 | 119.972337070176 | 122.180428703208 | 130.729989463558 |
|        | 160.92643755328  | 125.311403516443 | 151.577450119302 | 124.272447276746 |
| IFNGR1 | 895.463355957918 | 851.633522004342 | 790.321331435096 |                  |
|        | 582.527835746927 | 964.093668483033 | 1477.10828981572 | 2328.65814406636 |
|        | 1170.07851727046 | 1333.73334006986 | 1758.7809492929  | 2271.82656399253 |
|        | 1774.22769195939 |                  |                  |                  |
| IFNGR2 | 1526.66232186013 | 1501.18820017008 | 1205.45751308367 |                  |
|        | 1470.23096656138 | 2166.68174726155 | 2215.43744802035 | 2236.73950603157 |
|        | 2048.13524244516 | 3581.36347643133 | 2334.97297889593 | 2775.84742592713 |
|        | 2672.77147589342 |                  |                  |                  |
| IFNK   | 132.963761182049 | 127.484178603011 | 137.966987037709 | 132.407736899761 |
|        | 139.174188535843 | 132.113317893587 | 132.75673287656  | 129.687743133943 |
|        | 134.058035351684 | 141.03218895811  | 106.147993332294 | 118.833188167696 |
| IFNW1  | 134.32174235533  | 138.829793136954 | 147.301909062399 | 139.524233960073 |
|        | 140.481148289418 | 142.472724215037 | 139.991780068793 | 141.426756696799 |
|        | 135.416008633632 | 143.229240978574 | 155.598586699376 | 152.733409144267 |
| IFP38  | 744.808064061459 | 767.861763134136 | 892.868661511516 | 874.348941257592 |
|        | 875.7694907383   | 474.517750753745 | 729.202002368627 | 643.905401805862 |
|        | 543.933989965705 | 991.081498002429 | 966.281849197568 | 386.85874184746  |

|        |                  |                  |                  |                  |
|--------|------------------|------------------|------------------|------------------|
| IFRD1  | 344.379733302418 | 274.179232297038 | 306.277823025572 | 241.134385745554 |
|        | 233.671878221507 | 215.607567127195 | 210.103974340881 | 240.147082836599 |
|        | 208.611557959861 | 273.514200733343 | 192.914362049985 | 224.424524191566 |
| IFRD2  | 259.184713471619 | 212.291528248457 | 261.322374889497 | 300.314088267108 |
|        | 734.71562355687  | 308.517561840596 | 261.251965523684 | 251.61451602376  |
|        | 311.04252785157  | 382.233826557803 | 269.567704345075 | 305.854543429221 |
| IFRG15 | 137.192570825063 | 112.252555403121 | 118.249148086655 |                  |
|        | 111.820208385514 | 134.485835304676 | 120.565485864499 | 131.672014089487 |
|        | 134.633286312653 | 126.230887413874 | 169.920799931309 | 125.12823219142  |
|        | 123.361179535626 |                  |                  |                  |
| IFT122 | 202.797135825668 | 216.903719298575 | 213.754156680604 |                  |
|        | 255.462706428149 | 183.226294747874 | 163.681014961332 | 169.556358586336 |
|        | 160.865949438448 | 178.854873582873 | 175.752091217351 | 159.891562221587 |
|        | 159.655362710407 |                  |                  |                  |
| IFT140 | 154.201375471487 | 154.309257657136 | 154.760697311395 |                  |
|        | 134.335309757663 | 227.177100762395 | 141.244589488591 | 143.494511683426 |
|        | 152.752870674108 | 144.861804210272 | 129.570960882942 | 408.60092780174  |
|        | 197.91325268683  |                  |                  |                  |
| IFT172 | 207.123420880185 | 226.565823278767 | 234.895245871534 |                  |
|        | 234.020419732787 | 200.371280127668 | 163.538862303362 | 226.763252784108 |
|        | 157.172970235254 | 166.746037983859 | 158.8054811093   | 167.42476096854  |
|        | 156.361037318986 |                  |                  |                  |
| IFT20  | 294.368406238222 | 265.260411490697 | 329.722135361491 | 244.251315474587 |
|        | 663.782083028745 | 373.361263985383 | 555.959424692051 | 521.714719320355 |
|        | 599.926717145115 | 396.708183244581 | 438.431160975498 | 346.691690520054 |
| IFT52  | 183.214922844221 | 184.377923161698 | 213.813667557079 | 196.908612360694 |
|        | 200.204064462384 | 232.986366625889 | 287.195290301363 | 187.430140289193 |
|        | 199.01458214661  | 207.960802948119 | 200.688465653117 | 214.639374741553 |
| IFT57  | 344.529927973082 | 354.132752995385 | 298.403224729528 | 345.062426573519 |
|        | 160.520677267863 | 300.709410518382 | 186.388067641269 | 177.491294133515 |
|        | 212.710910778949 | 158.795335941084 | 174.549929320587 | 176.371404525626 |
| IFT74  | 563.011988279542 | 577.33849844574  | 680.509421043347 | 554.800688991977 |
|        | 292.965109701719 | 391.252450588331 | 324.949988230276 | 445.661863626419 |
|        | 380.146996799549 | 378.728516779744 | 513.518424350159 | 283.27806319488  |
| IFT80  | 147.461480849333 | 137.814391189269 | 144.942289590793 | 143.092021593505 |
|        | 140.421945574721 | 139.103395748894 | 145.25774926819  | 139.442091671938 |
|        | 142.858554460651 | 143.301399292539 | 149.856041300199 | 143.647714966406 |
| IFT81  | 150.911524755251 | 139.117776552573 | 149.597396040729 | 130.354641020141 |
|        | 117.028963434266 | 130.385747820089 | 129.566451901256 | 129.413729619216 |
|        | 137.504147221623 | 121.416038813102 | 147.319360896679 | 137.79714923769  |
| IFT88  | 193.660159482867 | 195.384273821324 | 193.801858215025 | 155.413300826229 |
|        | 162.909468312298 | 170.024833610695 | 155.30926640293  | 148.1283706199   |
|        | 174.749832388791 | 144.886005815977 | 172.338509138759 | 186.747375844319 |
| IGBP1  | 705.987531074737 | 583.314509855875 | 821.465895280454 | 459.53652431464  |
|        | 440.916522871266 | 580.474775712828 | 1239.66725147648 | 519.450899933049 |
|        | 574.6506349984   | 624.264994653057 | 1406.73270115373 | 627.526008812413 |
| IGDCC3 | 125.08580835258  | 115.400592594965 | 121.539958110688 |                  |
|        | 127.382266838772 | 202.545147073902 | 139.844984829379 | 127.104868352186 |
|        | 118.553226856337 | 141.067419336609 | 128.359034755228 | 125.710199961297 |
|        | 120.891023626809 |                  |                  |                  |
| IGDCC4 | 351.337287690674 | 268.78904911703  | 210.751430486845 |                  |
|        | 225.890195278753 | 131.972669163481 | 135.693520183014 | 124.735542880811 |
|        | 151.07661060324  | 181.715992480635 | 173.142436025281 | 126.462522391125 |
|        | 137.27506604142  |                  |                  |                  |

IGF1 258.16437138327 224.497348027469 176.735168607281 215.300064529551  
136.504438803108 132.198536906752 137.752238510249 129.400895994387  
161.217964573491 137.17370871536 137.082234284426 133.727447520255  
IGF1R 137.253971514177 135.127041919869 122.94937342991 141.150016212967  
140.299459596491 100.841352336505 117.652693591865 104.248226402465  
123.9209907098 124.892438890234 147.471494294543 110.190708230962  
IGF2 155.494095135266 155.280897870265 131.711193516482 134.880138942756  
133.198832503062 173.863373934746 134.70636200986 134.89031458837  
136.353051841792 136.338683078123 377.462793982812 1336.15622439522  
IGF2AS 144.490452173336 129.176532377543 146.347213904792  
138.546549217819 130.370405378213 137.823152565933 138.494266722799  
152.646642492666 134.415163103911 151.788278519057 163.686535888943  
153.379118228796  
IGF2BP1 122.368581795931 138.997524526643 121.278346729876  
132.50676380992 106.000943456483 135.9097041056 133.922855125616  
121.391637838137 131.805798804895 129.931923954109 166.12184890921  
130.322436253881  
IGF2BP2 540.797164107185 626.857289492802 337.119524477446  
485.309521583972 204.318316638312 621.946994961864 410.42088953434  
428.782703561238 322.099431638246 976.050097371579 362.795691170335  
379.983165400941  
IGF2BP3 137.176144667253 129.508990861362 134.081308836364  
129.422854634791 129.86336717605 121.311836944721 147.074807267102  
182.624130582754 122.204249636472 291.779980648289 141.639216893245  
120.74273444647  
IGF2R 1349.84215478798 1325.77498031227 1240.4863200811 1441.29676998365  
1497.32522786098 690.010326122574 1225.33666840349 966.281849197568  
1264.90442763788 1448.64875525408 1136.76110352875 1352.14737073174  
IGFALS 124.494727558127 137.973211667003 136.425263391752  
129.228874611916 129.971670681199 139.607944722497 136.671602668186  
136.687813884132 123.467227007155 139.103395748894 127.786141874218  
131.324822348301  
IGFBP1 124.563594928763 125.628281846465 124.63978985808  
123.227904580467 132.502153153826 145.591320521493 124.606795061928  
127.075899925865 132.642931022024 127.687299576139 130.839508306116  
119.739204799544  
IGFBP2 394.810886122555 527.294087043601 364.265100349672  
252.222481637238 461.088572554864 200.387623661458 236.219981978324  
588.197697799448 200.558971047462 609.939982655706 2048.13524244516  
317.206754773681  
IGFBP3 762.584280908728 1722.26954281876 441.578261054602  
996.999238316991 10988.2836796736 4511.9116742833 5022.15374558514  
3636.59530016939 7873.0525548049 1732.52466021178 9908.59593023839  
2476.51542420593  
IGFBP4 1555.28458491244 2166.68174726155 1076.62597781124  
3205.74787769881 2210.67250954072 1754.99663827472 1342.29111510713  
1282.84159765715 1969.67552562117 393.115606440229 1480.52638217173  
1293.70593826709  
IGFBP5 5115.14161559446 5800.06300826802 3348.7622174821  
5455.91604383389 1699.17470788219 314.292700455545 221.796935051107  
657.562129888446 1699.8374761666 523.073926509865 2586.87941889443  
256.202924421798  
IGFBP6 6059.74270502037 4198.61471038267 4299.06288109563  
4682.62607750437 241.168936008174 165.813771791917 139.325478877749

143.215828010442 263.352118305612 789.401526545277 184.569063297206  
 968.157701932137  
 IGFBP7 6253.84268792816 4773.62220024088 6156.29203791697  
 5265.74259211695 1229.47460924638 2072.01578063404 667.693216401836  
 2215.43744802035 2656.38138490746 2982.80580616089 1133.22524345111  
 1130.32966481315  
 IGFBPL1 135.373824773008 130.653971083035 141.194900058799  
 138.855454645579 148.347642424885 136.425263391752 130.161889021281  
 126.072053958666 127.070677267233 153.93927752488 156.71199811686  
 132.994716261577  
 IGFL1 152.8810245209 180.913502162011 132.247611790269 130.166741978483  
 380.053166305637 1148.80141486692 150.731093808891 311.715351215263  
 196.638594797353 4110.76546218806 227.32463765717 160.67285689491  
 IGFL2 138.104527851969 139.106442824079 136.638141963514 144.134485888258  
 139.326694135427 136.916286605302 129.413729619216 131.892151111901  
 146.378522944864 223.154771092064 124.072512083237 157.891350650633  
 IGFL3 145.383354200298 145.726651022813 133.736252068443 135.736764623155  
 125.259164818744 151.619329363527 136.732319750425 151.299425811105  
 135.068883036882 142.385902610309 164.357373919714 148.104173238606  
 IGFL4 138.197070673796 139.048016900762 124.863832760607 154.924190468067  
 132.591496435822 148.139376772567 140.574129695953 140.434086004204  
 141.342216963124 138.731957926247 117.367470441908 151.524197474057  
 IGFN1 104.406314027414 116.576896337786 114.585818507336 122.362585067453  
 106.030441145334 120.208584170364 103.520748827831 104.091301211096  
 109.209241676429 142.024171830924 114.226028611171 122.619429537799  
 IGHMBP2 162.237172404557 171.278489808694 162.58152435515  
 175.222531098958 198.979744266277 140.619606039582 144.825231501747  
 133.204793127029 146.398454169593 145.904866987074 172.934156790775  
 145.058110060639  
 IGJ 170.169402943662 160.937256625847 129.189479305468 127.464485396039  
 167.114291248266 337.342034950908 212.854068610681 2567.4299860517  
 1424.04009914668 172.276968413879 141.568970008164 219.246271924313  
 IGLL1 353.437466689101 574.399909181723 134.626371781978 228.879434668972  
 1168.3174645384 427.872407051254 690.582550537485 9293.35991367953  
 8666.41250683965 891.194779815063 169.211708954329 859.113541787323  
 IGLL3 136.457424070709 133.027236270978 126.865622462379 126.228513847262  
 232.363656167375 141.876237297525 136.128092230238 1197.00004043747  
 842.567990276734 139.62718946833 133.392934239554 140.581943144813  
 IGSF1 124.408996713299 126.858621735156 118.945264994404 122.265071206163  
 124.197397333928 121.170340423391 126.777633512781 123.22295112139  
 119.608334527504 119.422996538444 136.258073395013 118.505980204837  
 IGSF10 206.876572583814 185.974598267418 186.975609955892  
 179.794718712964 144.972694558182 140.888439624918 150.314462939164  
 148.130993521745 153.97869518398 138.877999126533 124.347680638586  
 150.667001746475  
 IGSF11 161.134322621805 154.586825710624 159.44089105118  
 159.13662975347 152.680068580858 167.206513789165 155.686889874806  
 148.996601285688 165.972090075204 152.371569700039 161.365443930448  
 159.257221624668  
 IGSF2 114.785989868306 116.074423050416 119.663182347566 129.223872979789  
 124.217337143269 122.370148442415 115.619116556625 125.990762414974  
 115.107214937219 122.817695619508 131.437847958077 114.977135060317  
 IGSF21 219.792171863015 213.531307836195 207.368252249039  
 252.056131165397 113.905364405553 94.3531468700382 117.199217938531

|        |                  |                  |                  |                  |
|--------|------------------|------------------|------------------|------------------|
|        | 101.149125916797 | 112.239647575661 | 124.484589975207 | 109.128394735532 |
|        | 123.104790590045 |                  |                  |                  |
| IGSF22 | 110.242638217587 | 134.613036378054 | 118.951526834915 |                  |
|        | 112.190904058889 | 133.71610564207  | 128.593112520767 | 118.636694749194 |
|        | 121.942777234608 | 117.716094828779 | 126.603552416008 | 145.989546968117 |
|        | 119.005230164124 |                  |                  |                  |
| IGSF3  | 186.975609955892 | 261.286548990435 | 205.305702209672 | 214.617852048151 |
|        | 338.822464893411 | 769.586135629964 | 596.743397794872 | 1033.48252432603 |
|        | 695.595965352335 | 787.017214032692 | 739.251974981981 | 647.955521647635 |
| IGSF5  | 121.689416823766 | 139.108656684059 | 124.676743480622 | 131.539170756533 |
|        | 150.011603347578 | 116.282988576774 | 135.956116718089 | 112.578934972566 |
|        | 117.928456234796 | 112.943630133093 | 174.396061906109 | 115.128667174745 |
| IGSF6  | 127.723052839953 | 129.389420352857 | 120.62139061084  | 129.334217858282 |
|        | 134.13812854554  | 130.278980631435 | 135.907702243922 | 172.816477996646 |
|        | 206.585387130993 | 140.383646018409 | 159.832405510505 | 129.007924852801 |
| IGSF8  | 165.350777445902 | 173.726420791056 | 193.522811257085 | 196.638594797353 |
|        | 267.869879189095 | 204.470661830972 | 196.638594797353 | 194.637233028442 |
|        | 175.186435016433 | 180.164353124488 | 193.858884443593 | 225.890195278753 |
| IGSF9  | 120.452958447555 | 142.906227759701 | 122.822725811743 | 124.003914369077 |
|        | 398.423396126075 | 393.013539328766 | 265.992741398183 | 374.268489263941 |
|        | 276.351810999317 | 170.446156541317 | 177.60876237572  | 321.794887577351 |
| IGSF9B | 385.317560758502 | 456.817057099146 | 438.7446527797   |                  |
|        | 640.029195821436 | 189.225893411944 | 167.093409692227 | 176.579096613849 |
|        | 149.879951192667 | 150.833523101057 | 188.013181859196 | 155.498580125421 |
|        | 154.634289463743 |                  |                  |                  |
| IHH    | 131.744454088995 | 138.723149134933 | 136.169525758215 | 124.791221329502 |
|        | 148.373866613126 | 127.566369352079 | 129.43892498257  | 143.538763288573 |
|        | 157.170136439095 | 133.988494850477 | 130.598863171117 | 143.541810469447 |
| IHPK3  | 157.709832297666 | 160.150336334888 | 154.727212986222 | 180.336623146341 |
|        | 140.306808081269 | 151.234397206563 | 145.496033735748 | 157.994474909749 |
|        | 132.348603553752 | 157.83121828793  | 177.630246034993 | 139.781351410748 |
| IIP45  | 139.232893342069 | 133.117701703454 | 131.354275252104 | 119.785062256421 |
|        | 139.484551562098 | 138.659387475119 | 121.419301042072 | 138.921608664788 |
|        | 130.399501479248 | 133.345143691828 | 135.335107344583 | 134.076865693417 |
| IK     | 793.300636780035 | 647.666334416707 | 992.320202251161 | 779.022508413529 |
|        | 316.281469585496 | 456.126096817454 | 641.774812292709 | 607.126514742951 |
|        | 498.641091757363 | 844.187489702587 | 941.936830901588 | 623.68308750251  |
| IKBIP  | 164.886944426276 | 163.239195865198 | 146.861981788662 | 152.340010735322 |
|        | 150.521719129181 | 169.385340991747 | 161.799743586569 | 161.035985824654 |
|        | 160.941804737367 | 217.264041781337 | 171.671895682052 | 171.145909843389 |
| IKBKAP | 139.252804088704 | 132.738450029766 | 144.346988809708 |                  |
|        | 129.966755942173 | 130.773945967285 | 132.313884627836 | 137.522792377933 |
|        | 134.376870769669 | 141.577373924378 | 146.10417547509  | 151.239879652761 |
|        | 131.310537960214 |                  |                  |                  |
| IKBKB  | 303.423450627377 | 304.900910626137 | 288.436880408624 | 307.768302846647 |
|        | 388.416668785633 | 501.301694626942 | 328.969023478451 | 337.39574303968  |
|        | 291.683896942007 | 282.511614929917 | 353.078842299761 | 359.024299091145 |
| IKBKE  | 182.042104888745 | 191.651818696629 | 167.442950045855 | 175.452986514346 |
|        | 280.749681050778 | 171.775741648309 | 213.602504580364 | 183.613051401168 |
|        | 204.654489493854 | 176.062665550409 | 221.411372022459 | 233.103476996669 |
| IKBKG  | 448.95671696823  | 427.872407051254 | 511.25179427158  | 509.988617641229 |
|        | 1201.82026045778 | 616.523853569261 | 592.822841077599 | 447.182566890086 |
|        | 599.52440136406  | 610.759447723026 | 522.050619657197 | 616.014975366684 |

|         |                  |                  |                  |                  |
|---------|------------------|------------------|------------------|------------------|
| IKZF1   | 185.063870458561 | 170.099045774947 | 147.488635834397 | 149.048057509964 |
|         | 144.597060118959 | 159.154102271517 | 153.741061283101 | 186.077477713775 |
|         | 226.763252784108 | 184.758754197435 | 167.724233915361 | 143.712450441816 |
| IKZF2   | 147.085006263446 | 147.937679308903 | 152.194337248455 | 138.618761382177 |
|         | 156.324643994552 | 180.501409705275 | 174.962380276394 | 158.528301072565 |
|         | 158.244741207036 | 158.6067091347   | 188.605328108654 | 179.950904921667 |
| IKZF3   | 136.524640445539 | 134.918496279185 | 132.43999768718  | 128.221548195595 |
|         | 131.757695616207 | 133.602870982718 | 129.580421464913 | 201.49630027392  |
|         | 157.273309095198 | 139.106442824079 | 162.188509438986 | 164.548505132213 |
| IKZF4   | 237.641190133427 | 256.495848662843 | 195.078843867124 | 262.577672828611 |
|         | 143.537785553911 | 153.962758393332 | 157.021010130169 | 140.74035966401  |
|         | 173.907933001446 | 142.715449859191 | 189.307823427362 | 135.007473769551 |
| IKZF5   | 145.665155500862 | 142.013370954791 | 155.3016514732   | 134.936025073531 |
|         | 159.738700107615 | 167.751604259111 | 144.092864444802 | 153.899573902499 |
|         | 147.73141408795  | 157.437376880409 | 169.192327500032 | 149.583494304891 |
| IL10    | 6188.04738762584 | 5373.2173152906  | 5543.71998558526 | 4612.81760689869 |
|         | 1223.68146968716 | 6281.01687932005 | 3055.80298721424 | 4663.03253705034 |
|         | 3630.80752744347 | 2568.95060767776 | 6409.23524786095 | 3749.80462365748 |
| IL10RA  | 166.104915784875 | 160.493314658788 | 145.349023185855 |                  |
|         | 161.951996906162 | 131.436176224725 | 130.221351857959 | 127.951403055054 |
|         | 178.429953283621 | 223.496400038284 | 131.649830934459 | 167.756465178715 |
|         | 117.773743603829 |                  |                  |                  |
| IL10RB  | 517.676093149981 | 478.38361571213  | 485.136339836897 |                  |
|         | 448.260934224454 | 373.545629693667 | 571.950858678221 | 725.065727257421 |
|         | 741.433093896472 | 748.38293089716  | 748.161769171818 | 1319.3522488218  |
|         | 799.132592914065 |                  |                  |                  |
| IL11    | 146.355229778997 | 146.595540577994 | 136.008118769513 | 138.818492907643 |
|         | 159.23414970379  | 149.250205265163 | 148.327340543504 | 156.077604146143 |
|         | 157.344758285153 | 146.108551647446 | 138.885230982475 | 144.48495176385  |
| IL11RA  | 747.804958601763 | 734.469481390593 | 682.730262408017 |                  |
|         | 958.63560158343  | 169.933706225406 | 237.734385188542 | 161.104993402456 |
|         | 199.87003105816  | 189.971144220643 | 173.21291920566  | 188.181647474317 |
|         | 158.565676210997 |                  |                  |                  |
| IL12A   | 139.508029141287 | 120.135349166633 | 114.805810485989 | 106.437660157036 |
|         | 113.356070669308 | 120.479270037091 | 125.157459724842 | 124.679444852938 |
|         | 121.438875373878 | 119.739204799544 | 140.373554273624 | 125.549968985241 |
| IL12B   | 105.741092375243 | 121.799209715087 | 109.156349683299 | 112.635430248416 |
|         | 121.076652800015 | 110.033746435328 | 107.48180681159  | 112.528908277828 |
|         | 116.796995589816 | 106.667175621971 | 148.380555606786 | 113.005774989833 |
| IL12RB1 | 125.065813262416 | 123.786227856015 | 133.101674466013 |                  |
|         | 124.359615295938 | 117.803508098322 | 127.83967243279  | 122.535728427528 |
|         | 134.076865693417 | 135.36523178082  | 124.796876920269 | 135.779516940893 |
|         | 132.149864626575 |                  |                  |                  |
| IL12RB2 | 144.938908763591 | 132.817645625115 | 134.477081392474 |                  |
|         | 142.900756181761 | 145.378779757104 | 152.898148619937 | 145.190896872008 |
|         | 145.393431956588 | 153.114065147266 | 158.179586948369 | 155.747694056319 |
|         | 145.505223177269 |                  |                  |                  |
| IL13    | 120.300291760091 | 115.242526386551 | 106.263441906404 | 112.520199390427 |
|         | 115.316430915446 | 122.830376253922 | 130.033927910392 | 117.089207321783 |
|         | 111.820208385514 | 111.276543583667 | 123.072413274454 | 115.101971719657 |
| IL13RA1 | 705.020444579319 | 796.439819579938 | 650.679096367632 |                  |
|         | 562.891241563711 | 1077.33874251157 | 1205.45751308367 | 1290.39741199701 |
|         | 1034.68475089075 | 1353.61552261489 | 1622.17491781572 | 850.562379837947 |
|         | 849.158029646233 |                  |                  |                  |

IL13RA2 141.075421936212 145.632060621034 137.354782768068  
133.449527627723 148.235495611248 158.241349852419 160.27511502306  
159.43317827517 182.263724979519 159.798024189461 112.036753245281  
158.287108069245  
IL15 165.613274361543 159.926719599391 152.543005423742 153.241806795134  
148.922537778634 139.818998514364 152.225646808517 157.927709922368  
159.461778054423 179.35113214277 141.587109176431 149.959767051801  
IL15RA 137.975369568585 143.281050499332 131.679566454851  
126.887989471803 124.362182111222 124.02280670421 121.492896642899  
125.435268901131 128.720517906732 139.234549949916 132.579323148839  
129.875986080057  
IL16 146.223880979601 135.880955433228 129.808590871788 137.047288508371  
134.512204051277 121.164978896057 128.082956839709 128.5581535393  
140.955772094739 126.910075365358 135.25612528874 128.229729571899  
IL17A 148.507598818039 158.919340819357 136.846912694371 149.964827055916  
149.467626202395 154.798287249541 131.911579676047 161.00635457883  
170.243136294537 150.820808770853 154.990319019521 163.396651801661  
IL17B 133.845056524142 139.934460900409 139.607944722497 159.327764602722  
122.881793230233 117.790593990682 118.180919555585 112.78323842342  
119.275061991187 109.978693735206 120.883785696583 120.355844117573  
IL17C 142.379120254855 156.368487784719 143.080742311914 155.813740201987  
130.962368929833 122.180428703208 142.036037957345 134.888404433315  
163.647306551474 141.604832186257 131.934680869554 134.931263946202  
IL17D 445.95114929414 324.203537490975 327.89660021611 317.163768837813  
187.48055574295 263.448958595597 136.678188851101 144.498245098592  
163.380402251758 174.698724064671 167.003917876371 135.27739087376  
IL17F 115.118170902045 117.028963434266 116.346181133756 122.436106757578  
111.217595631623 115.371180170291 122.133292722932 131.724061631389  
122.535728427528 121.134305707234 146.770267005869 128.251087452744  
IL17RA 203.223604138192 186.296882059398 159.203584692924  
197.02284475852 211.966139902562 192.565733545715 172.552923333095  
175.452986514346 192.565733545715 193.292596471113 191.170105307944  
217.202541167691  
IL17RB 146.378522944864 145.363692072132 155.648782851696  
154.900676756492 181.288519308219 176.901042102323 150.313058722346  
194.941454173896 235.372592051464 137.700110923212 138.576978828316  
169.927157878764  
IL17RC 166.305219348008 176.167129202773 153.092864798642  
185.673549367125 200.001438979007 147.164348704012 159.576585660511  
152.812142230375 147.26204590693 156.010027635627 161.761125440228  
160.140509175287  
IL17RD 2076.51786803222 2328.65814406636 1710.60409578293  
1957.48508632607 426.464641742092 2059.09598012857 925.656701707763  
1323.05745869565 1040.29664343743 885.927972780392 1731.62376348283  
1111.47772523331  
IL17RE 127.090219286772 128.367370419533 125.217733034761  
124.602474178438 131.827899207029 129.114161128113 126.314233529267  
129.190900922265 124.563594928763 128.837901660985 133.802898895457  
140.125575976708  
IL17REL 118.510960607141 131.261903118177 119.459625817735  
130.022574966461 126.629012619208 125.199837162105 121.274997609378  
122.696382705233 115.914842445934 121.583096465567 136.19083681188  
114.860437706855

IL18 24098.0251582624 25002.6870134094 23427.4695172122 23427.4695172122  
7753.61594300904 25558.9005130606 12916.6904389018 20510.096303537  
20887.0399135573 11392.4189359453 16588.0599171804 16742.6286866851  
IL18BP 164.753886197136 171.722839172783 154.679076303046  
165.565284723155 147.581827861592 153.934872807607 163.340435089911  
189.027594735456 189.708396835236 163.873355370767 177.696849418064  
157.909530751723  
IL18R1 184.819937046061 166.988725688589 130.778164962583  
180.881464829981 139.308325848216 151.259426521768 143.040254576088  
236.292053621233 186.388067641269 168.365262340217 170.052320640686  
141.180647782041  
IL18RAP 152.769931978291 138.316043447788 134.537123332992  
137.731390340708 139.404820141366 167.850516495529 136.647239621513  
184.029968090084 177.990274115348 161.849023343715 157.04599638368  
143.603022117503  
IL19 119.01236045062 127.808579455383 125.982423431253 117.575009754326  
124.650711299942 116.973126196102 128.421242037748 126.019246614944  
127.471479301983 122.290822230565 138.274057264688 126.578035793406  
IL1A 123.577138762427 140.487887891414 134.025385181979 129.260551359984  
165.896420029269 175.428000742222 153.457715729768 194.413759761549  
215.866644799363 1978.95750795951 485.87138934376 473.853999833395  
IL1B 110.829107724132 126.589865262427 110.553759711075 115.827175143972  
117.015097017246 142.752536416014 171.579123521304 132.20887307183  
985.087150371964 3384.19521857242 175.044940252247 239.003718699156  
IL1F10 123.042372128864 122.197625748146 124.927989289122  
130.576944864484 122.682761393215 129.532122459128 130.878000486351  
127.251594986725 127.490889148422 173.520662003159 116.810827219571  
123.952494134263  
IL1F5 121.410606617535 130.33205883588 124.466986821169 125.253637835638  
123.062390088305 118.258886189283 123.45004246675 122.770033312519  
130.564962937297 363.150472154973 122.005340508177 118.850495684547  
IL1F6 142.153830345183 145.076068630259 144.131743978192 151.210814209064  
146.320758317435 129.471713415228 149.350630572336 138.386391726042  
128.280225530201 144.994931561779 134.413962468434 132.233396667074  
IL1F7 131.865164933746 130.63490683087 141.767311448808 134.888404433315  
129.320210774045 135.803599969904 135.628982370682 132.714532888989  
134.13812854554 138.480633738745 126.98588570464 137.353149614081  
IL1F8 144.148833164952 151.423936838934 141.33919297402 146.042460762767  
152.166586496729 154.584367902971 145.107068919893 145.686092190716  
147.341597963918 160.50439457257 147.973274498131 145.296229550382  
IL1F9 117.773743603829 134.275773172492 116.664031217378 126.322527679273  
108.760780994582 114.734439905052 123.069963218224 121.336932276232  
126.978144285534 862.132582849511 124.74291205933 110.885714048075  
IL1R1 324.871248300476 259.625943627223 171.97578836712 177.919885012006  
224.251136332123 219.661502916874 155.878493935166 252.473612525884  
285.63245179313 208.257420634745 385.050282185255 138.67221078031  
IL1R2 136.171728950893 139.955389033983 136.7766893627 135.463385553776  
146.755803731358 152.624623171797 132.91094012928 184.819937046061  
158.380964047483 535.49374437073 155.582036890436 145.576880854443  
IL1RAP 135.697550878438 130.854818615966 133.274292647041  
124.062863592295 135.835518477299 145.010108826238 135.08927101395  
150.2214516849 143.047617455953 268.52833723726 184.322250984457  
147.086734464001



IL1RAPL1 406.816482069141 403.208138816247 296.088938872643  
276.476790719416 148.673763368264 172.065593177758 155.569733738768  
150.046300135261 153.000232171457 167.021858307031 139.515794685984  
157.089650890944  
IL1RAPL2 155.313873664923 139.388484543482 133.807992913171  
139.027836356854 135.598709185334 137.599810249536 142.157512965166  
135.889764019762 149.636887782574 136.705326991088 134.387256336429  
154.533544838819  
IL1RL1 141.494666823639 145.665155500862 142.793573585472  
141.555366493541 138.891642304194 141.914966520049 143.962842383778  
146.750774496317 142.480203661104 419.690542859168 132.674061422332  
141.905641114703  
IL1RL2 127.496885890349 129.195962576953 139.195281937545  
141.850952191423 157.83121828793 144.2753860947 160.628894266843  
148.423303776817 147.378228560979 149.628421263062 159.611551480901  
147.679233228201  
IL1RN 127.585851003779 139.859453080651 125.863969666806 124.327827104244  
200.790119570144 155.595651896155 193.930569647995 275.468194644053  
341.714401872192 1133.87328758676 315.306271141071 340.800632878807  
IL2 137.075665247855 138.825961991209 150.690143057308 139.256416415149  
151.239879652761 130.416957431512 151.961811748754 122.187031504466  
129.802596741962 132.739435456445 142.736148814019 137.53070284697  
IL20 165.581217879395 183.152005135504 154.143331594812 173.287859527767  
156.986053534635 175.199369463703 166.64535048582 144.470642732973  
144.708780756278 200.934618257908 144.992993261203 134.810212106122  
IL20RA 134.044789094272 142.436624546651 135.937066152894  
129.640303191006 183.545741265706 219.519896184851 292.185246573643  
194.337080066417 251.307020289291 190.520750756082 364.265100349672  
255.866847225916  
IL20RB 184.462286724102 178.976116597291 154.856345114916  
203.616580991715 157.58659226599 152.148784410501 174.02138265758  
160.343551497512 156.630366766924 1120.3009282887 168.443386067427  
164.50490221903  
IL21 135.343380336913 136.767307268217 137.423810400996 140.904883114871  
174.698724064671 134.025385181979 143.814798097425 152.329129642988  
145.971656491073 150.648444878067 143.040254576088 126.766964875664  
IL21R 132.657106732366 141.689210867136 132.306569548052 137.323320121918  
142.12808103815 126.388778582602 129.568951363607 134.330234316896  
151.121293928309 139.699189528879 150.401509081265 133.890597982015  
IL22 130.215290990406 136.22416508552 126.791714564926 135.518752716008  
126.402405227897 120.812738312059 144.278830378899 129.382242021964  
123.720229113779 135.32730674455 129.290542121353 132.628358688595  
IL22RA1 124.641892391159 125.160161268474 120.436408685057  
113.627435441258 122.619429537799 128.093945009882 123.577138762427  
126.877293296185 147.808262170269 202.00431685587 142.907969322845  
139.6492947529  
IL22RA2 145.562772839517 140.446530307169 131.70505265403  
137.593577427321 139.14544832776 134.397255719047 136.101501973431  
135.141067086648 136.047032834863 139.871928127715 136.335679863251  
135.303322290834  
IL23A 137.773960847088 136.507961715591 142.368601917778 121.61143371132  
131.941069239017 134.122776198036 225.387674139093 140.672863685822  
182.608712782878 144.895601314903 139.841822983821 175.693873820963

|        |                  |                  |                  |                  |
|--------|------------------|------------------|------------------|------------------|
| IL23R  | 120.706421084476 | 123.535803027153 | 138.557464672111 | 132.668344126625 |
|        | 120.55570440025  | 122.903428611669 | 115.981530322377 | 131.086434891752 |
|        | 116.221426977629 | 123.007103885415 | 139.452773383624 | 129.365004129784 |
| IL24   | 150.629932241703 | 146.376149543438 | 145.773932754923 | 144.387375194186 |
|        | 150.672985449063 | 145.553219709768 | 159.311949668403 | 138.237030685795 |
|        | 166.415922313464 | 186.377571176623 | 144.738871562895 | 148.329635131296 |
| IL25   | 169.368090266817 | 166.007913607742 | 170.531713392258 | 178.628885995439 |
|        | 204.031081842809 | 165.737618983611 | 198.244854812728 | 175.262884960324 |
|        | 176.267796612066 | 186.747375844319 | 180.265418365803 | 187.15740398852  |
| IL26   | 124.59937620719  | 122.281263517691 | 117.980052938167 | 121.888886996534 |
|        | 123.09149124559  | 117.65847906412  | 115.520278378747 | 121.072192130078 |
|        | 133.069347559741 | 110.212739445    | 125.452973441746 | 113.609215169397 |
| IL27   | 126.086991456747 | 123.117923525539 | 122.519746599387 | 118.372047967248 |
|        | 127.052618800004 | 124.876226351169 | 121.30744400137  | 119.95666716163  |
|        | 124.710368327189 | 113.542803491215 | 113.440171712791 | 125.405373274081 |
| IL27RA | 176.347535860374 | 177.182321788711 | 148.012353232918 |                  |
|        | 181.771654391653 | 177.742616962629 | 169.744100665038 | 170.748911334847 |
|        | 197.049616858296 | 232.699786290509 | 237.171424222756 | 182.958991847218 |
|        | 161.608941774391 |                  |                  |                  |
| IL28A  | 130.758707848676 | 122.512587751135 | 116.802432258299 | 110.304102941202 |
|        | 123.21112178671  | 115.29099102455  | 116.572001618531 | 113.529619135543 |
|        | 126.913782515341 | 117.408465686218 | 142.688809469455 | 115.327402810793 |
| IL28B  | 137.42213762011  | 121.181654892305 | 138.708304921088 | 132.399633003253 |
|        | 139.785767470943 | 134.319316977485 | 125.506466437764 | 139.232893342069 |
|        | 134.796088225931 | 130.110413621436 | 125.390139830237 | 145.372579207362 |
| IL28RA | 123.835583753941 | 141.186913979346 | 127.799190369808 |                  |
|        | 134.607501073433 | 194.240372898704 | 185.765000029242 | 206.413554839865 |
|        | 187.812436252228 | 154.487546030444 | 314.182403961681 | 223.89854167651  |
|        | 250.718986968076 |                  |                  |                  |
| IL29   | 130.06068534054  | 130.613760017864 | 124.321503368855 | 149.135934269866 |
|        | 126.619475852751 | 132.024244263352 | 138.280481662932 | 124.080382291282 |
|        | 126.699152957332 | 136.904851056919 | 125.132610413051 | 129.642952083513 |
| IL2RA  | 149.980924447339 | 154.250656489421 | 149.874424976813 | 160.825408895349 |
|        | 150.51056917809  | 164.836381332774 | 154.400124981573 | 170.858049313581 |
|        | 179.163748161358 | 175.111460651956 | 157.240466990977 | 155.715728894101 |
| IL2RB  | 137.947606003247 | 162.127697884504 | 119.701313125748 | 167.776363541939 |
|        | 188.118989395838 | 192.532222258033 | 148.28101912019  | 242.221324619171 |
|        | 435.983803453746 | 239.277801396834 | 286.996908547553 | 185.332215198617 |
| IL2RG  | 154.645353009618 | 164.553511697702 | 148.816369706133 | 166.440530119785 |
|        | 139.057572927874 | 168.911840239685 | 156.911538642765 | 154.947359473187 |
|        | 159.895303363094 | 165.960176666275 | 154.43808450305  | 162.216377983292 |
| IL3    | 138.12651823109  | 152.61583482402  | 132.492444216154 | 146.775403409562 |
|        | 141.25089277145  | 156.173099025259 | 151.744902566627 | 151.632801137039 |
|        | 152.660373241584 | 138.582427155109 | 137.029726467523 | 146.099555861577 |
| IL31   | 121.722412245175 | 111.09179957013  | 122.089332300031 | 105.606964521964 |
|        | 121.95061962467  | 107.156457065853 | 111.596690019694 | 108.768730405582 |
|        | 122.292692083352 | 106.576058729493 | 124.918089223417 | 109.255470590389 |
| IL31RA | 123.598210440312 | 126.132339293132 | 130.097543328456 |                  |
|        | 128.653335099674 | 127.514381389109 | 124.321503368855 | 133.685254707686 |
|        | 128.0805889548   | 125.126100642395 | 128.984613946021 | 142.888281750232 |
|        | 122.120307446003 |                  |                  |                  |
| IL32   | 206.321272734099 | 207.254220247481 | 144.219104742099 | 214.803167803712 |
|        | 249.590923098575 | 167.260319361746 | 215.607567127195 | 238.344676327918 |
|        | 606.162976359615 | 328.33387481068  | 289.956528242564 | 195.019706886336 |

|        |                  |                  |                  |                  |
|--------|------------------|------------------|------------------|------------------|
| IL33   | 261.844708446856 | 234.789040617681 | 300.675907594637 | 245.454945056317 |
|        | 119.094868654252 | 135.719702250709 | 137.947606003247 | 131.050255325564 |
|        | 157.997750997487 | 152.129092774005 | 152.373931758229 | 118.838332117453 |
| IL34   | 166.040918339519 | 153.505155981348 | 151.40067812803  | 221.889331385023 |
|        | 138.667081004369 | 139.256416415149 | 141.191500203423 | 140.518206716196 |
|        | 152.729355306724 | 151.051672692659 | 139.872976072847 | 141.805028495425 |
| IL3RA  | 147.476805635744 | 167.46432961654  | 125.563646710294 | 161.299920355406 |
|        | 133.063422581428 | 140.756898474665 | 140.548371692813 | 134.423260547727 |
|        | 174.881557472722 | 141.391508027714 | 173.204163917896 | 153.694557276814 |
| IL4    | 130.304743083321 | 140.003353399494 | 137.497145594629 | 132.54355871539  |
|        | 130.311471059267 | 123.732299841696 | 139.374278310041 | 143.13304460184  |
|        | 129.869363181125 | 127.424848301217 | 132.02259465879  | 132.529247880813 |
| IL4I1  | 141.266129417042 | 146.923382271905 | 142.537484065487 | 159.455596750304 |
|        | 158.147502554814 | 151.403431105471 | 137.466291815166 | 161.799743586569 |
|        | 178.684992551017 | 142.771243742561 | 156.494323415504 | 149.453103369806 |
| IL4R   | 614.957397883514 | 814.110601393539 | 581.828502821435 | 786.62709337246  |
|        | 287.242697383558 | 255.198862778405 | 665.341859712345 | 287.145105895235 |
|        | 394.73732350607  | 401.189904619902 | 579.923640505245 | 295.893482074241 |
| IL5    | 137.416133786828 | 125.234097725749 | 127.883124527039 | 131.676609824921 |
|        | 124.679444852938 | 132.760567403706 | 135.542079867325 | 134.664652044646 |
|        | 136.603035996281 | 121.88070274109  | 132.038012025708 | 128.135216461862 |
| IL5RA  | 178.878444404192 | 175.948959885759 | 172.050718136571 | 189.49408026215  |
|        | 172.329225247019 | 162.536009333787 | 184.085616342099 | 172.197077149985 |
|        | 178.885625009973 | 189.816900281053 | 172.142411008084 | 161.285587312115 |
| IL6    | 137.658183450715 | 331.747622606378 | 163.54669668396  | 204.396576475753 |
|        | 160.240052678401 | 244.766289564524 | 148.272252953881 | 145.881727908814 |
|        | 156.273445355976 | 222.990586491219 | 142.865320802784 | 173.315097944835 |
| IL6R   | 163.996649606636 | 161.510497517852 | 147.889486635135 | 154.988494760267 |
|        | 147.868721324602 | 150.875392181869 | 210.030846572444 | 167.900071375885 |
|        | 150.417169156755 | 184.260835471542 | 147.875855077738 | 148.94765984808  |
| IL6ST  | 136.432109029368 | 133.897397228615 | 129.549673572516 | 128.56495182759  |
|        | 123.681353449198 | 132.688531077861 | 128.893208935783 | 125.345611085082 |
|        | 131.87404363664  | 126.22472822166  | 123.031945101045 | 123.526427901605 |
| IL7    | 133.836390935612 | 136.308565710257 | 134.058035351684 | 130.220620345623 |
|        | 128.888149939072 | 137.070326499918 | 130.282212339065 | 132.683594640696 |
|        | 139.282741110499 | 134.361064431414 | 148.73620012231  | 150.188128594079 |
| IL7R   | 182.410688592378 | 177.039190810529 | 131.879526177089 | 142.49005761699  |
|        | 153.062710222618 | 308.281798808746 | 248.562843471699 | 455.392133846517 |
|        | 635.536499281829 | 392.6758818959   | 339.32415558339  | 212.272826965935 |
| IL8    | 172.073751088968 | 265.470314691221 | 162.586012723045 | 156.430981244063 |
|        | 533.54045706916  | 472.669956708398 | 397.449905380349 | 228.499052416183 |
|        | 769.009371389327 | 5624.32062666666 | 303.300028849873 | 429.812058546782 |
| IL8RB  | 125.416113646128 | 123.271452939936 | 128.611740835252 | 136.207420489201 |
|        | 135.049657594221 | 141.382096896508 | 160.979182561773 | 125.9713489569   |
|        | 141.050384368733 | 146.174492025087 | 135.982797108848 | 153.377182895472 |
| IL8RBP | 134.580526467375 | 126.749878702933 | 130.420753247797 |                  |
|        | 138.609972011765 | 131.08389186558  | 136.059884933876 | 136.278361222532 |
|        | 137.706893763747 | 153.044682186978 | 162.422173095045 | 134.896349513392 |
|        | 140.802033706122 |                  |                  |                  |
| IL9    | 136.355319997318 | 143.096097305398 | 151.110467345727 | 149.518870320398 |
|        | 142.804411455413 | 151.794243108455 | 142.91818218442  | 140.482728188987 |
|        | 147.314687795555 | 162.077455145261 | 140.736051985112 | 155.572357799741 |

|        |                  |                  |                  |                  |
|--------|------------------|------------------|------------------|------------------|
| IL9R   | 170.483686891321 | 159.561431866706 | 173.468958175014 | 163.091280469234 |
|        | 165.100811808026 | 174.820064644203 | 153.711354087243 | 134.329334422886 |
|        | 158.356964958885 | 174.690052785405 | 146.948261640482 | 185.968210090666 |
| ILDR1  | 249.193270428348 | 254.936706344174 | 259.868701878844 | 264.383922859446 |
|        | 463.802270256246 | 331.684298221133 | 395.716879127149 | 457.548150688248 |
|        | 432.726040933545 | 254.936706344174 | 413.172954892025 | 373.096629378654 |
| ILDR2  | 143.844153373367 | 150.173766182317 | 125.701083319929 | 144.876300850115 |
|        | 136.871568211946 | 139.690093593646 | 147.604213625382 | 139.698333393438 |
|        | 142.948238172973 | 142.339740800356 | 141.278654291193 | 135.776154891006 |
| ILF2   | 875.7694907383   | 851.221199352646 | 863.086199215353 | 696.475639532595 |
|        | 1853.20812924694 | 3226.53426370323 | 1772.75453735112 | 4255.59773503364 |
|        | 2476.51542420593 | 1753.58770316818 | 1658.78888936164 | 2859.94396089224 |
| ILF3   | 353.285905782951 | 419.047108206042 | 342.555640222963 | 526.896146537814 |
|        | 423.562598841704 | 553.123179808258 | 423.045329000756 | 463.091387717305 |
|        | 415.497783305278 | 369.156887999872 | 433.751675703425 | 434.792010353541 |
| ILK    | 3905.35300751401 | 4353.66854914351 | 4477.54806526552 | 6059.74270502037 |
|        | 742.751664201272 | 534.608644989102 | 546.029974898225 | 537.828979447378 |
|        | 594.180861801958 | 950.144166422001 | 1029.43177809276 | 419.593558001947 |
| ILKAP  | 345.433025456954 | 285.05846406041  | 348.98762709818  | 375.958347293549 |
|        | 250.515579402334 | 248.887522059485 | 249.737588031219 | 205.495823410422 |
|        | 228.243668453958 | 266.252875242286 | 249.633252091596 | 247.504198063293 |
| ILVBL  | 695.086203058575 | 663.782083028745 | 724.442411170786 | 520.120193442648 |
|        | 4037.15442268836 | 895.821578104681 | 1168.3174645384  | 1195.6335460045  |
|        | 594.713185954954 | 878.986106116952 | 1144.07896461196 | 1070.4597488302  |
| IMAA   | 8812.91092406563 | 8709.2221371432  | 10632.4185569238 | 10312.8407173696 |
|        | 8864.70614223459 | 11017.1478502767 | 7753.61594300904 | 8918.58940386786 |
|        | 9192.8966763778  | 7717.01422791837 | 4417.98524179686 | 8596.90650022148 |
| IMMP1L | 157.316941011117 | 132.439176846818 | 163.73339229802  |                  |
|        | 127.756214708077 | 178.12073430094  | 136.612903661685 | 153.756213924949 |
|        | 138.405215507471 | 147.688664545959 | 163.668476670167 | 162.678619800767 |
|        | 154.479733759712 |                  |                  |                  |
| IMMP2L | 315.565349831797 | 271.945851739635 | 427.084392965651 |                  |
|        | 270.787490294555 | 381.121621815163 | 197.357728220717 | 350.166837086936 |
|        | 305.451247405518 | 224.167511918105 | 258.25658838015  | 263.509066170434 |
|        | 448.54309632232  |                  |                  |                  |
| IMMT   | 1389.93393245455 | 1344.87842417496 | 1350.87073284396 | 1733.96382719909 |
|        | 1227.36706427754 | 1361.54107116915 | 736.963699775724 | 1495.04587558545 |
|        | 971.99484515987  | 1121.87292339787 | 1135.49876948815 | 1281.1883621512  |
| IMP3   | 1268.73280473728 | 1451.64055568759 | 1319.3522488218  | 1102.38234645327 |
|        | 2611.61260614408 | 2718.440149645   | 3896.49785254733 | 2446.31228564539 |
|        | 4000.45196171119 | 3684.05513498098 | 3677.23129570773 | 3693.4058156307  |
| IMP4   | 1138.44837250274 | 1374.92806285803 | 1218.05434595121 | 1986.81354260292 |
|        | 1782.2498613913  | 1437.5568316065  | 1170.88763035931 | 1798.5819962261  |
|        | 1253.05700051015 | 1286.55103838368 | 830.684999498776 | 1411.2586496281  |
| IMP5   | 129.356401843185 | 124.612293808606 | 130.842257229979 | 129.615417777242 |
|        | 142.160941592768 | 121.657744897668 | 127.905616521853 | 138.055909969804 |
|        | 126.277165320165 | 124.217337143269 | 150.156865995098 | 125.563646710294 |
| IMPA1  | 235.680462167404 | 271.522696252995 | 233.690524419327 | 223.013753785002 |
|        | 242.221324619171 | 479.469659712246 | 295.463118191589 | 395.049127927637 |
|        | 447.297590650141 | 447.995213144892 | 585.075322115635 | 444.192734921566 |
| IMPA2  | 1646.76016031831 | 1542.35486950856 | 2352.01196541874 | 1775.32632165475 |
|        | 479.983368253935 | 405.64711132293  | 243.861834405092 | 865.435843446989 |
|        | 322.576886792502 | 1574.65731564294 | 185.938983266802 | 232.231236745251 |

|        |                  |                  |                  |                  |
|--------|------------------|------------------|------------------|------------------|
| IMPACT | 143.982561564661 | 144.482364671273 | 162.879707592164 |                  |
|        | 157.986640251147 | 140.123348569709 | 154.507721014473 | 146.692827583525 |
|        | 156.534634574244 | 144.750407738866 | 162.026757124868 | 144.178210824181 |
|        | 146.052153515494 |                  |                  |                  |
| IMPAD1 | 256.764450748941 | 237.71636970719  | 277.75958501062  |                  |
|        | 274.371523790341 | 540.359249705821 | 346.996310517446 | 368.948300262634 |
|        | 380.393153331219 | 379.387095129725 | 279.598585549004 | 201.49630027392  |
|        | 306.232249422327 |                  |                  |                  |
| IMPDH1 | 205.4648759901   | 215.019239034819 | 195.674128236589 |                  |
|        | 249.507062968243 | 357.773949920377 | 194.961531388323 | 157.225479764928 |
|        | 220.791884858764 | 217.646777099512 | 288.823376348944 | 185.31769184805  |
|        | 227.092319765009 |                  |                  |                  |
| IMPDH2 | 1359.63626195826 | 1656.02721259517 | 1720.14021303639 |                  |
|        | 1515.38811502277 | 2974.04694562902 | 1622.17491781572 | 3917.05893989806 |
|        | 2444.835635949   | 1620.7954553764  | 2660.39990175415 | 3177.80599774525 |
|        | 2681.48138915107 |                  |                  |                  |
| IMPG1  | 137.448412532999 | 136.977435235496 | 143.40955339735  | 134.11753210296  |
|        | 135.678138913772 | 130.37185420347  | 136.109975252514 | 135.229197100212 |
|        | 136.859366444351 | 149.108582827136 | 122.860898886143 | 141.681266095578 |
| IMPG2  | 151.445254181497 | 154.336009472285 | 168.897620634337 | 157.528409294029 |
|        | 149.657951204528 | 141.099781722697 | 141.719556176029 | 151.70035428516  |
|        | 150.138643811727 | 142.934869757362 | 157.003367685421 | 153.267549449395 |
| INA    | 135.518752716008 | 157.982146236108 | 138.778496466408 | 126.702705908175 |
|        | 845.369108604819 | 1019.627634011   | 581.37957221282  | 580.859914041323 |
|        | 1362.75971646355 | 189.250846546817 | 1499.07462479938 | 584.433155497378 |
| INADL  | 224.963277964548 | 237.249949461085 | 257.168308311848 | 210.33390115739  |
|        | 173.063002566542 | 437.122373082112 | 368.276805218658 | 276.925017614147 |
|        | 211.995890899864 | 274.14931964455  | 304.357050745605 | 359.577827010792 |
| INCA1  | 160.735428753783 | 165.283700641161 | 189.348690353874 | 192.737713851863 |
|        | 179.704370382771 | 164.429483677715 | 164.448110885609 | 160.19942770666  |
|        | 160.806678614325 | 154.826710617351 | 139.490103923544 | 145.308548379215 |
| INCENP | 135.27739087376  | 147.457193565877 | 135.420780282429 |                  |
|        | 142.324077852852 | 290.389345090634 | 171.006582229921 | 155.902461107328 |
|        | 157.986640251147 | 160.045715314465 | 158.625060605976 | 159.241573314833 |
|        | 157.967824935915 |                  |                  |                  |
| INDO   | 126.460390022632 | 134.865577264797 | 119.281300456243 | 128.914885412263 |
|        | 159.218886890035 | 146.609485664113 | 191.310372695208 | 223.975677959345 |
|        | 286.035428568826 | 146.626517077288 | 174.812134675989 | 136.48748813417  |
| INE1   | 152.251128595777 | 130.680629893396 | 167.653412908384 | 169.077657790409 |
|        | 141.634246722965 | 149.286184588967 | 140.826051635712 | 153.097557560333 |
|        | 146.231937458616 | 156.169405925094 | 121.472885562857 | 155.166786601813 |
| INE2   | 131.548634017902 | 142.412731964179 | 136.351332391315 | 138.263361518905 |
|        | 131.269526665478 | 132.839431368337 | 137.537197575152 | 136.116468624715 |
|        | 147.508817393901 | 124.132215738502 | 134.534815676852 | 135.659271030454 |
| INF2   | 212.854068610681 | 240.878804911613 | 196.598810934837 | 326.640168906375 |
|        | 524.392279804734 | 197.895094054577 | 173.347463632976 | 201.289402228512 |
|        | 224.274329367512 | 205.362816362477 | 348.848550937417 | 299.986758612161 |
| ING1   | 132.887701822875 | 149.756512110538 | 151.546908501054 | 135.589211439847 |
|        | 160.17208299932  | 151.210814209064 | 131.312580984876 | 146.223880979601 |
|        | 152.129092774005 | 140.759006929593 | 152.221694141976 | 161.234304237838 |
| ING2   | 275.584858082096 | 271.615621030842 | 360.605223912114 | 258.915802108562 |
|        | 318.423602671236 | 291.476113017794 | 454.34729744062  | 335.938170230765 |
|        | 378.308562999445 | 696.277780670166 | 367.327273578513 | 463.99922423125  |

|        |                  |                  |                  |                  |
|--------|------------------|------------------|------------------|------------------|
| ING3   | 188.818012746123 | 174.323881548679 | 203.983168778488 | 145.161116298118 |
|        | 149.364498870469 | 152.710827148511 | 174.761105961773 | 181.308852106289 |
|        | 158.150949554785 | 173.161152247499 | 206.876572583814 | 200.486683704179 |
| ING4   | 184.148058872585 | 186.06425658259  | 222.028626209166 | 228.001046173405 |
|        | 176.725347194807 | 193.37618381669  | 218.944052733757 | 179.61374889626  |
|        | 203.298764374262 | 184.813094907887 | 257.132618311227 | 180.761100930677 |
| ING5   | 150.998881139061 | 146.486480663438 | 150.267298097687 | 139.472008268541 |
|        | 141.987635042691 | 149.65417821994  | 145.03221570575  | 142.427198128376 |
|        | 152.545261723881 | 143.722135315998 | 151.958818313561 | 154.675189522146 |
| INGX   | 132.688531077861 | 128.593112520767 | 126.910075365358 | 134.168381235167 |
|        | 138.818492907643 | 132.031693838834 | 118.424520312293 | 135.040794634617 |
|        | 125.905785653648 | 120.316950428535 | 147.127908355066 | 134.970609100459 |
| INHHA  | 145.100964170053 | 135.484360570738 | 142.534195262988 | 150.952264779196 |
|        | 142.153830345183 | 146.639556437847 | 136.934313990609 | 151.007812189859 |
|        | 138.855454645579 | 132.283682066898 | 129.822926691091 | 158.167384416968 |
| INHBA  | 122.768405654503 | 116.248026336995 | 123.865424155099 | 123.338921824167 |
|        | 123.341568893224 | 115.559551514777 | 121.067907968175 | 124.464941711781 |
|        | 129.675420096163 | 128.152956417755 | 127.657961561231 | 118.679664392666 |
| INHBB  | 170.676752248138 | 265.866465528654 | 152.099431258333 | 157.631978594005 |
|        | 151.70035428516  | 185.856755885891 | 154.555255038453 | 164.164463389212 |
|        | 150.788386945666 | 188.53221484746  | 305.252666831522 | 204.299375966441 |
| INHBC  | 158.911404625381 | 155.8871985642   | 154.675189522146 | 147.52178512946  |
|        | 141.018087546273 | 148.15920634463  | 153.719751724358 | 167.350290326189 |
|        | 141.953114738413 | 150.452467115669 | 136.585541662028 | 155.592219571564 |
| INHBE  | 139.121639005366 | 157.702540365469 | 161.799743586569 | 155.853414065788 |
|        | 149.076146942797 | 154.637740117457 | 128.827129738041 | 145.524305076788 |
|        | 156.622993107052 | 138.424464248567 | 158.185593294878 | 157.717145014769 |
| INMT   | 1026.61404215739 | 651.759589129833 | 399.872401268958 | 950.818917078515 |
|        | 143.517327774456 | 124.818436949131 | 136.37481047902  | 157.358696886078 |
|        | 153.6855881767   | 120.371374172279 | 140.60741459333  | 132.161764435769 |
| INO80  | 290.802509012089 | 297.834209533939 | 306.387898121409 | 339.663295617139 |
|        | 212.107842040568 | 217.050602253281 | 239.704459251571 | 241.418016203544 |
|        | 244.401472859026 | 250.626556981376 | 255.74096237558  | 264.741946816665 |
| INO80B | 172.329225247019 | 181.976252906929 | 195.946096353894 |                  |
|        | 214.068044241507 | 344.529927973082 | 196.014841240142 | 264.955939320296 |
|        | 205.026176598298 | 181.971189935628 | 181.247766545135 | 221.127492253636 |
|        | 231.180528071672 |                  |                  |                  |
| INO80C | 215.769986055534 | 250.911817769829 | 259.900447705311 |                  |
|        | 228.560346647306 | 381.014521577291 | 533.140740560189 | 532.950400370668 |
|        | 471.816954259146 | 515.929937825133 | 565.609400092543 | 667.693216401836 |
|        | 632.843164522867 |                  |                  |                  |
| INO80D | 592.613689704907 | 590.3584324045   | 686.445635754196 |                  |
|        | 598.924339094496 | 246.616749748028 | 811.912727084669 | 341.64890727921  |
|        | 482.592481827722 | 369.838429521168 | 564.200165295159 | 221.685824197352 |
|        | 545.760623858473 |                  |                  |                  |
| INO80E | 435.983803453746 | 433.314881387431 | 513.036729214095 |                  |
|        | 588.197697799448 | 589.541347392215 | 672.13164205724  | 379.983165400941 |
|        | 570.916936074747 | 417.024088698182 | 453.875259610173 | 440.319777672273 |
|        | 445.214621023114 |                  |                  |                  |
| INPP1  | 571.950858678221 | 554.511983790164 | 493.715108157171 | 480.484639351046 |
|        | 354.45785837703  | 623.409211766224 | 522.17701271254  | 755.79669622705  |
|        | 539.008286968106 | 808.55123510297  | 1028.39666838369 | 1359.63626195826 |
| INPP4A | 134.646131480502 | 126.503135702506 | 132.823333905679 |                  |
|        | 130.441808139335 | 151.201263631883 | 135.503338987971 | 130.031303483631 |

125.533538277681 140.318155161909 124.235958498969 138.22823004719  
127.931887647108  
INPP4B 193.554028681854 240.224826736571 191.029458520006  
189.61702125418 369.018856220394 383.939800422489 651.675427664911  
417.865461351681 481.751102333172 312.339824919124 569.353661326724  
345.732364434125  
INPP5A 484.568420044471 592.387650564803 451.147418314412  
808.55123510297 268.264885392368 205.428900832926 229.406012088782  
201.637540930213 210.41046499545 203.17525411575 234.041863839123  
270.651318838953  
INPP5B 239.941641600769 229.542259738438 284.351529744475  
224.118739978257 192.399146702036 162.347140552869 148.544887355857  
159.009211991511 159.806221777332 165.504532455205 160.256877369493  
152.89366585726  
INPP5D 198.840533461525 187.15740398852 148.692602243778  
145.85414203374 181.313333665614 133.083877012766 256.687384001447  
176.533058719908 287.751093664085 219.564603776774 362.095074331893  
391.911768848267  
INPP5E 274.831898505989 267.097999873387 339.843776738468  
286.282132382462 284.236970342827 173.176900454904 175.363223521128  
261.426617866925 276.961847241646 298.347201056937 292.145553580042  
197.068795788491  
INPP5F 159.74220366735 159.346890686719 166.521472376759  
160.79631681714 165.885072907195 167.139257044999 150.837717923505  
158.344330353326 160.117742879282 155.228605554943 177.19138801548  
162.743192424569  
INPP5J 146.818744991143 155.091135297162 146.418147447541  
139.534014289993 156.856149172225 128.803632055969 151.522526161299  
144.665869508406 138.267726309873 135.762603711262 124.640841120186  
135.699583036042  
INPP5K 252.32907388173 219.129781831192 231.572677616684  
273.106088088825 271.945851739635 221.070448906398 157.293090577042  
216.615694348945 171.099675679944 201.616302398819 220.999383789474  
170.725486814469  
INPPL1 977.227184625781 1239.66725147648 954.488185198006  
1766.15001427132 969.360864006371 576.636077770998 677.9972761887  
482.965800108538 463.187551361986 448.715938510132 531.711823481265  
627.803400871547  
INS 157.940873610797 155.140371265225 152.368485416992 164.231281729415  
155.582036890436 147.056182807232 175.010849510711 163.552608805894  
185.525760847281 140.646946425036 157.963634535239 154.423801637411  
INS-IGF2 118.21084414402 123.748788684337 113.708683868028  
119.060186838239 115.090463537716 111.178024950204 112.264005988662  
111.7529190597 110.355493122568 113.326628149066 276.138650967632  
464.196512015649  
INSC 161.084088366981 149.962143642332 158.014017648839 149.125425566378  
139.497253870412 144.270828498856 164.641508485461 143.59105195427  
156.221773628832 165.737618983611 137.368211928541 145.139966629363  
INSIG1 311.337303524912 332.599191067433 295.463118191589  
240.631264915238 294.997671630798 419.047108206042 313.536451935268  
482.048928546145 353.621264641814 722.974310297586 333.349203784021  
399.476401949891  
INSIG2 352.180110869664 341.128917971124 384.051170099325  
296.962992349662 251.414717011661 477.87583927675 409.743899750699

|        |                  |                  |                  |                  |
|--------|------------------|------------------|------------------|------------------|
|        | 288.261250589513 | 390.284689962661 | 701.208391798006 | 426.464641742092 |
|        | 407.589300080181 |                  |                  |                  |
| INSL3  | 122.167669805597 | 114.65036208773  | 112.314595956147 | 123.640123613529 |
|        | 118.584773788416 | 116.793408204625 | 108.543795408713 | 108.868679899494 |
|        | 121.632494500096 | 117.688941284427 | 133.289175078053 | 116.0999658586   |
| INSL4  | 134.222453538421 | 144.408426565541 | 136.612287212568 | 152.191393042132 |
|        | 159.185616602396 | 135.497033143331 | 145.315875226867 | 148.294870328642 |
|        | 144.623222072851 | 141.927204640355 | 151.27882940428  | 151.191822057706 |
| INSL5  | 123.267817390796 | 126.976353967127 | 133.606068125828 | 134.731687541347 |
|        | 147.983937675946 | 135.164117176127 | 135.596007994731 | 135.190698960212 |
|        | 126.205931638442 | 123.400143662218 | 117.503848306325 | 134.372560968918 |
| INSL6  | 132.895500657638 | 134.457932303561 | 120.337241026338 | 133.236084190243 |
|        | 132.146027935802 | 131.196196319523 | 129.187574143637 | 126.033673708286 |
|        | 123.195738824794 | 133.504078347324 | 123.748788684337 | 126.022145004164 |
| INSM1  | 142.208987267497 | 157.607445509297 | 148.925418133902 | 155.826394389322 |
|        | 153.492072037266 | 136.040524807653 | 129.051642626091 | 145.476377346532 |
|        | 138.440663763957 | 152.479402912801 | 164.433462115832 | 165.376358421533 |
| INSM2  | 101.149125916797 | 105.193775204124 | 112.502812746669 | 110.448948495323 |
|        | 106.772581387455 | 109.851507510788 | 120.74273444647  | 112.999642731096 |
|        | 110.900309203531 | 114.726808450831 | 121.917596225576 | 112.971776964469 |
| INSR   | 129.267923706188 | 123.265810024678 | 117.511162285879 | 119.150626141327 |
|        | 149.725422365342 | 139.847813838017 | 142.01454627498  | 132.943957535655 |
|        | 145.99474597064  | 124.869732867761 | 166.662801900754 | 125.598828334465 |
| INSRR  | 146.713861499546 | 135.159590925066 | 154.686025022972 | 140.38936578649  |
|        | 177.772019227116 | 155.62770968777  | 140.372463604232 | 156.720090761933 |
|        | 148.132450240784 | 137.429832103492 | 143.004090696463 | 145.259981479761 |
| INTS1  | 393.198813167839 | 486.334840298921 | 417.442660073269 | 613.631311147328 |
|        | 1198.53117439169 | 290.241064926886 | 446.194196064909 | 388.638095539186 |
|        | 492.05680879106  | 490.022369664024 | 404.21236980164  | 487.696347726467 |
| INTS10 | 776.98412594767  | 600.919152191636 | 896.185223980593 |                  |
|        | 782.139151423572 | 452.517134370928 | 808.837225580351 | 734.469481390593 |
|        | 494.538861626895 | 676.570119607984 | 672.13164205724  | 857.090339943417 |
|        | 747.804958601763 |                  |                  |                  |
| INTS12 | 354.579728909336 | 366.408565514304 | 436.331333134628 |                  |
|        | 441.331937921872 | 276.284517459626 | 512.541205235935 | 464.436380568216 |
|        | 455.124190541055 | 539.720389702148 | 523.591472915151 | 323.667189206453 |
|        | 401.87674893993  |                  |                  |                  |
| INTS2  | 280.246711704036 | 270.231637012624 | 257.338950719432 | 270.293807247372 |
|        | 199.275716402358 | 331.215872600406 | 380.393153331219 | 395.133831206474 |
|        | 301.139737613279 | 315.014639682046 | 254.133112176024 | 348.171901445232 |
| INTS3  | 1168.68074786473 | 1081.47077865393 | 1096.61874892572 | 1307.19490564658 |
|        | 747.587723573212 | 767.861763134136 | 991.611982265221 | 629.707646271678 |
|        | 457.411248351795 | 467.387427864242 | 906.886423608706 | 1014.63777151551 |
| INTS4  | 233.690524419327 | 223.531323159808 | 266.135477775641 | 278.942695435238 |
|        | 224.528190554963 | 252.32907388173  | 234.28146549561  | 283.416246133873 |
|        | 252.761035334279 | 290.754210152709 | 213.338918839446 | 251.062649517773 |
| INTS5  | 199.408907117764 | 239.003718699156 | 183.604011732066 | 255.527764534636 |
|        | 519.112018353676 | 228.926077117474 | 257.44230597145  | 199.53455266342  |
|        | 220.487665103019 | 200.405532717305 | 235.650688823345 | 199.305626149918 |
| INTS6  | 369.275635424092 | 393.796356067403 | 332.138346958671 | 356.413190087706 |
|        | 246.989526028884 | 297.757657398146 | 227.52352046188  | 287.503594820801 |
|        | 331.215872600406 | 340.860684371038 | 381.867665449509 | 395.927222009721 |



|       |                  |                  |                  |                  |
|-------|------------------|------------------|------------------|------------------|
| INTS7 | 172.387657419201 | 175.805472275887 | 158.507624756588 | 166.842970309527 |
|       | 155.61996871093  | 211.269041187154 | 177.696849418064 | 193.173703015873 |
|       | 223.220997990627 | 281.369059516242 | 202.230920499592 | 263.936023499588 |
| INTS8 | 424.912426797488 | 438.870464403215 | 367.382105696814 | 391.644649726254 |
|       | 484.363052437459 | 393.796356067403 | 432.088303693555 | 535.861738240441 |
|       | 514.463945278314 | 342.403428822464 | 368.276805218658 | 353.774297577869 |
| INTS9 | 544.580311371212 | 609.309339417625 | 664.19083888799  | 683.365770196967 |
|       | 592.957842630046 | 592.822841077599 | 715.638378711433 | 466.083451075744 |
|       | 593.320132696649 | 581.54874141672  | 804.362909579005 | 649.906677394861 |
| INTU  | 178.647726085678 | 155.247452081206 | 194.961531388323 | 164.332073056902 |
|       | 160.493314658788 | 150.038722708606 | 183.32467147543  | 165.386056999339 |
|       | 191.740596601895 | 189.450316943845 | 185.743212726702 | 195.795728497916 |
| INVS  | 160.833948531272 | 164.801505601099 | 159.515698265424 | 168.394330931524 |
|       | 176.267796612066 | 144.492756323647 | 152.601626526117 | 193.629237856758 |
|       | 174.441287575034 | 202.691507273819 | 176.183165494563 | 158.425950902309 |
| IP6K1 | 456.817057099146 | 573.846138124455 | 456.201998988891 | 715.93836911426  |
|       | 841.285351463894 | 358.52459123416  | 447.521645706162 | 353.912654262209 |
|       | 538.369868115137 | 377.024120035829 | 376.791876040886 | 335.3366819308   |
| IP6K2 | 146.474228901408 | 154.412506915569 | 177.073245863872 | 139.411792975474 |
|       | 408.758021864761 | 256.820546409632 | 273.514200733343 | 243.441938832251 |
|       | 293.646275396425 | 222.028626209166 | 277.685488726472 | 364.964572587289 |
| IP6K3 | 134.682319733908 | 128.217078449064 | 138.528083984177 | 153.315309202016 |
|       | 130.545285774056 | 133.722739936347 | 127.231647068635 | 126.724973604103 |
|       | 147.241136598626 | 140.380630560717 | 126.670227417269 | 141.360125377949 |
| IPF1  | 142.825203517688 | 149.317146997809 | 129.852833137493 | 134.512204051277 |
|       | 133.171854425031 | 131.444734367396 | 124.530660958725 | 120.688909943167 |
|       | 133.099175110023 | 122.821563586744 | 144.798664281991 | 124.170242736875 |
| IPMK  | 123.094324479352 | 118.521075843163 | 125.107483348755 | 124.443643568527 |
|       | 125.111993560078 | 130.865693081945 | 122.236134282757 | 144.433543176593 |
|       | 129.442111153737 | 135.200049257744 | 143.559076683944 | 122.10489926804  |
| IPO11 | 709.778171909457 | 717.419388886784 | 524.541494680558 | 734.139557942719 |
|       | 361.327436394941 | 679.557656724243 | 510.434895296759 | 352.121800955822 |
|       | 404.876478833713 | 580.645924062301 | 436.586158384666 | 559.668195903429 |
| IPO13 | 478.699172220804 | 540.797164107185 | 431.799795646414 | 687.269774217064 |
|       | 434.855262284265 | 318.112626495401 | 276.925017614147 | 257.5097052677   |
|       | 258.830885826237 | 257.032174266905 | 253.601378730911 | 237.171424222756 |
| IPO4  | 209.229537873706 | 210.711890471222 | 213.274106157675 | 282.190861594303 |
|       | 538.605085454393 | 222.177290763736 | 249.234065130083 | 235.704824490397 |
|       | 190.843795579234 | 282.652193666078 | 234.947745514175 | 301.188296465202 |
| IPO5  | 414.538237455116 | 350.741303038926 | 537.698489904622 | 325.751369001105 |
|       | 183.385868234361 | 408.037874667173 | 230.975434289172 | 199.681103910705 |
|       | 215.219246394594 | 312.019603761673 | 220.567951704044 | 291.476113017794 |
| IPO7  | 175.462290891421 | 146.119700458464 | 216.522992914538 | 130.957441406855 |
|       | 140.553613300431 | 150.034029031033 | 145.172776053    | 144.871396308673 |
|       | 145.606098951179 | 157.006278815282 | 192.789886894821 | 136.003277940379 |
| IPO8  | 425.969575503375 | 417.731815310276 | 503.967725251906 | 495.769802520637 |
|       | 267.839640412797 | 309.937351755502 | 248.43491649623  | 250.060734219351 |
|       | 434.792010353541 | 459.973764138144 | 248.260998007814 | 204.470661830972 |
| IPO9  | 297.970735665595 | 269.100400678077 | 284.104619768635 | 233.161848094769 |
|       | 247.845708587624 | 380.053166305637 | 293.986292438714 | 238.685014863143 |
|       | 317.839512360245 | 321.627969147543 | 249.263194321516 | 364.265100349672 |
| IPP   | 701.847905027147 | 568.040362658955 | 795.464850398761 | 561.251860964966 |
|       | 242.070630946726 | 449.304281526081 | 318.487401106209 | 414.596948083067 |
|       | 358.298768623212 | 309.5988292104   | 360.124745133393 | 353.243400332397 |

|        |                  |                  |                  |                  |
|--------|------------------|------------------|------------------|------------------|
| IPPK   | 137.065315360321 | 132.828179725129 | 133.866011732878 | 150.034029031033 |
|        | 154.701413581915 | 119.125002207396 | 130.452929012459 | 131.853183159267 |
|        | 165.350777445902 | 338.129250886594 | 170.95650329595  | 128.501189288377 |
| IPW    | 186.215602572358 | 164.406564594296 | 200.387623661458 | 176.456539071735 |
|        | 128.354163132392 | 121.212521750566 | 142.700311964178 | 131.641435734821 |
|        | 133.353762794271 | 145.45768403614  | 166.592366578462 | 127.164076119599 |
| IQCA1  | 145.08246303652  | 141.565599104245 | 137.890006487904 | 142.090009728666 |
|        | 155.587018319981 | 137.102353661381 | 138.97776257708  | 137.504147221623 |
|        | 149.492550066785 | 161.735609436394 | 125.342580368417 | 218.615551704188 |
| IQCB1  | 209.74583569369  | 200.065184172871 | 236.35479928448  | 173.690008681514 |
|        | 250.25959091612  | 506.898635822094 | 312.019603761673 | 379.788696204016 |
|        | 392.6758818959   | 298.776176246196 | 249.193270428348 | 337.585502787016 |
| IQCC   | 215.426918011158 | 255.945470052489 | 251.062649517773 | 298.301504581296 |
|        | 299.29004204677  | 245.850813387241 | 272.117599603586 | 413.687046868111 |
|        | 266.316485802808 | 259.672238210968 | 256.291984914927 | 292.965109701719 |
| IQCD   | 111.876915242732 | 118.294324274616 | 124.998601194756 | 121.144174389418 |
|        | 114.798573331978 | 113.938636269013 | 118.909153405102 | 117.238968848218 |
|        | 116.0999658586   | 118.924317138158 | 116.031631038289 | 119.415822905251 |
| IQCE   | 141.659197251282 | 136.364830851128 | 123.484987952263 | 145.378779757104 |
|        | 122.629146433216 | 114.995889945366 | 131.287142490322 | 128.168460083895 |
|        | 118.660213790078 | 125.693321471759 | 135.535020220081 | 129.044445373107 |
| IQCF1  | 112.675715371087 | 120.035437167539 | 112.825399620524 | 127.271423859953 |
|        | 122.578170988039 | 112.156010486085 | 122.274656361883 | 106.450154495663 |
|        | 115.400592594965 | 106.238539254093 | 117.532063783977 | 119.612288460361 |
| IQCF2  | 115.53736269794  | 105.839106819841 | 113.989682635964 | 120.212294184999 |
|        | 111.683074830042 | 106.238539254093 | 111.423140302983 | 115.485515429446 |
|        | 111.196610704726 | 114.835386789236 | 124.358414281035 | 105.551878332786 |
| IQCF3  | 135.884635448277 | 136.151754558226 | 128.748663215466 | 131.593705080542 |
|        | 136.108500467418 | 133.111791289725 | 131.176413983785 | 134.614988219821 |
|        | 141.822974252935 | 134.062423178775 | 131.342562516383 | 124.422548323449 |
| IQCG   | 204.509884908059 | 193.173703015873 | 181.425012248539 | 201.676984786688 |
|        | 180.77686098195  | 156.346014084316 | 211.995890899864 | 207.417884407459 |
|        | 202.583967728957 | 210.925203743958 | 217.670330817769 | 183.963578322984 |
| IQCH   | 133.303201646987 | 135.125414452178 | 140.370626016794 | 123.383334044683 |
|        | 119.730174479044 | 128.375390373307 | 125.942455135541 | 131.726540162023 |
|        | 134.595090783504 | 132.899305777714 | 127.206177583275 | 128.41549156443  |
| IQCJ   | 131.065633574494 | 128.824243581806 | 134.803612821519 | 140.49145570631  |
|        | 129.198366503027 | 131.12775424877  | 142.596113491002 | 142.122556679441 |
|        | 138.237030685795 | 143.931400351525 | 131.142841840284 | 129.914077170794 |
| IQCK   | 316.590387560909 | 301.638918685657 | 319.283603277754 | 276.057101476947 |
|        | 206.845306095447 | 278.274343962656 | 294.17588071297  | 339.98018551524  |
|        | 284.473085899219 | 291.313681141442 | 351.759100605991 | 291.313681141442 |
| IQGAP1 | 969.360864006371 | 883.702573960415 | 1332.82617944131 |                  |
|        | 799.132592914065 | 368.466518140043 | 728.743541467167 | 587.893636997642 |
|        | 493.209107049493 | 536.067857235731 | 1141.13648305827 | 1189.11053680293 |
|        | 664.19083888799  |                  |                  |                  |
| IQGAP2 | 165.30072618497  | 162.188509438986 | 141.901382169334 |                  |
|        | 174.603285240228 | 121.915043935246 | 149.541917326637 | 117.611606270124 |
|        | 154.555255038453 | 154.127346849182 | 131.613738869093 | 145.574725784632 |
|        | 121.23469201559  |                  |                  |                  |
| IQGAP3 | 146.448568700393 | 144.400004730049 | 148.590732065459 |                  |
|        | 158.364031234356 | 150.25322837689  | 184.071078414327 | 156.200313064999 |
|        | 145.108281984556 | 152.990523860831 | 152.633139090274 | 159.443697452694 |
|        | 149.79295887612  |                  |                  |                  |

|          |                  |                  |                  |                  |
|----------|------------------|------------------|------------------|------------------|
| IQSEC1   | 411.784922368377 | 418.968095159939 | 320.214614455231 |                  |
|          | 396.708183244581 | 303.858574395969 | 241.799709160815 | 218.134101819445 |
|          | 246.533813165981 | 293.986292438714 | 226.315173823168 | 204.35801867216  |
|          | 252.222481637238 |                  |                  |                  |
| IQSEC2   | 171.835438335216 | 173.204163917896 | 174.471304281502 |                  |
|          | 183.013090662119 | 204.584643964409 | 193.858884443593 | 176.689683169567 |
|          | 193.786889748038 | 175.101284960252 | 171.982071800592 | 170.998961353556 |
|          | 163.582678113215 |                  |                  |                  |
| IQSEC3   | 137.790718305537 | 133.830860948014 | 130.572923512809 |                  |
|          | 129.898242234869 | 136.908861280856 | 127.282374513433 | 142.007066214472 |
|          | 136.406132339187 | 131.02157879562  | 143.839170216353 | 149.460660195293 |
|          | 134.56763097313  |                  |                  |                  |
| IQUB     | 127.931887647108 | 145.267225993057 | 128.87498876738  | 133.254663058352 |
|          | 136.612903661685 | 114.91722828113  | 146.541890150631 | 137.663941989772 |
|          | 147.412608079997 | 133.046435968561 | 126.936899820148 | 143.565597315289 |
| IRAK1    | 864.908449769749 | 857.55777793754  | 672.637760135254 | 1035.98574557331 |
|          | 3636.59530016939 | 1376.84058291266 | 1297.25632532536 | 1323.91781040143 |
|          | 1218.64951314553 | 980.120729515821 | 1036.40082234884 | 929.69741581954  |
| IRAK1BP1 | 206.446584387595 | 259.796092536601 | 178.984409575632 |                  |
|          | 200.017741240426 | 174.155599133789 | 186.222567239198 | 178.819486867379 |
|          | 172.509081696309 | 171.552010365305 | 197.775397831129 | 147.034021626893 |
|          | 188.39062571513  |                  |                  |                  |
| IRAK2    | 249.029098902357 | 347.081036934975 | 336.5543056115   | 259.575461599189 |
|          | 667.693216401836 | 575.386048896223 | 950.818917078515 | 890.121325723286 |
|          | 936.221322010828 | 293.528601172819 | 1172.96121022579 | 822.545007054668 |
| IRAK3    | 197.981112645168 | 218.209523110843 | 183.005535466221 | 166.526875572556 |
|          | 153.998849486363 | 226.144012966486 | 158.774910841987 | 214.082408290757 |
|          | 182.143506470859 | 206.605699708924 | 152.049243916141 | 159.660564323984 |
| IRAK4    | 168.996965070202 | 137.572574328004 | 163.72257517759  | 138.719480482945 |
|          | 134.558435781672 | 160.446191353364 | 161.027590226123 | 207.718619151226 |
|          | 170.108500366942 | 142.505050582588 | 217.969738417693 | 175.044940252247 |
| IREB2    | 168.830344627025 | 148.145136066071 | 175.757588503244 | 157.021010130169 |
|          | 152.566490804809 | 262.577672828611 | 252.197271817794 | 214.595639477696 |
|          | 244.18714778846  | 242.752995772995 | 163.586549438955 | 259.979459472217 |
| IRF1     | 412.648926259488 | 602.141151173094 | 416.638529499878 | 382.327656839936 |
|          | 522.17701271254  | 326.758278851698 | 662.781145703653 | 861.119262963015 |
|          | 1747.33558205825 | 904.733257358133 | 1612.79779117655 | 1646.76016031831 |
| IRF2     | 161.673818303367 | 165.703810120915 | 168.027892518772 | 174.795822188504 |
|          | 150.741291526753 | 151.936543085044 | 168.660907237558 | 155.694213876736 |
|          | 170.585366369563 | 158.224122084011 | 197.100205890532 | 163.385727569154 |
| IRF2BP1  | 182.275998840116 | 211.809434609469 | 167.491399614986 |                  |
|          | 285.355815566148 | 478.606567465979 | 145.472859089272 | 157.952018720438 |
|          | 141.255406288178 | 177.88534558205  | 139.744142223177 | 187.710185880162 |
|          | 159.539320132392 |                  |                  |                  |
| IRF2BP2  | 623.508710830895 | 648.161646065464 | 776.030689773414 |                  |
|          | 585.933822585718 | 379.476768908492 | 596.3549500121   | 408.037874667173 |
|          | 239.704459251571 | 583.022090879298 | 444.584594376357 | 280.337475979102 |
|          | 421.690849282483 |                  |                  |                  |
| IRF3     | 358.52459123416  | 408.037874667173 | 327.749926183823 | 461.482735533799 |
|          | 1403.09138858507 | 374.337030706199 | 498.534168389928 | 472.669956708398 |
|          | 527.294087043601 | 344.45331938267  | 399.248044997427 | 466.4890990178   |
| IRF4     | 151.418316929551 | 146.675159409376 | 145.756455015309 | 182.886100305943 |
|          | 155.626515272084 | 140.158309892319 | 163.315865817864 | 186.999459152483 |
|          | 207.815226999953 | 166.503112149416 | 161.886342770305 | 151.228823957828 |

|      |                  |                  |                  |                  |
|------|------------------|------------------|------------------|------------------|
| IRF5 | 151.965103021638 | 156.218834695891 | 165.118167086792 | 172.7330526128   |
|      | 325.525450750788 | 147.896919205072 | 243.402781509365 | 332.666916002481 |
|      | 165.863118584978 | 202.545147073902 | 200.536814571322 | 179.785198362326 |
| IRF6 | 152.524106827617 | 176.927500850631 | 145.45097990828  | 143.783078837501 |
|      | 439.727046291381 | 408.444629429553 | 532.596772298766 | 226.623172906957 |
|      | 308.621688157016 | 769.958422740085 | 499.544050752036 | 414.114051645565 |
| IRF7 | 243.468673768141 | 166.788336808924 | 144.181359740481 | 163.579282884905 |
|      | 156.269957530519 | 170.992074907355 | 284.321253087512 | 220.567951704044 |
|      | 252.733973271584 | 382.186095123659 | 230.332652534446 | 174.881557472722 |
| IRF8 | 218.917357155289 | 198.338416756432 | 173.766372029062 | 207.104548555929 |
|      | 181.062188174871 | 204.219197797869 | 228.797912452429 | 372.757091748175 |
|      | 840.276501350383 | 225.209315195163 | 345.686640885419 | 225.927425596831 |
| IRF9 | 1841.63015706195 | 1041.58583268313 | 928.151632070573 | 938.918431240228 |
|      | 871.528156184927 | 587.181357555703 | 1867.55140010155 | 1348.80530206238 |
|      | 2045.24382334506 | 1320.74943817958 | 2913.2685312165  | 1396.4168898623  |
| IRG1 | 124.345320343901 | 126.711037295629 | 123.296382913131 | 136.607783800741 |
|      | 135.849839822066 | 129.95138839192  | 132.175368142549 | 142.240333104987 |
|      | 125.506466437764 | 135.423839577038 | 139.847813838017 | 133.346626315812 |
| IRGC | 137.363483527372 | 138.154799037807 | 138.916830356763 | 127.908872828095 |
|      | 119.544004279354 | 142.726324048628 | 127.527378949803 | 124.441699369614 |
|      | 136.390047634643 | 149.524040913256 | 148.362613706275 | 153.371065247493 |
| IRGM | 132.440818532628 | 132.760567403706 | 129.680406696779 | 142.757327296852 |
|      | 124.269446398587 | 117.642441794442 | 122.804934452095 | 127.449028221682 |
|      | 129.336402686549 | 128.779829252045 | 140.671406418004 | 128.83022039037  |
| IRGQ | 146.528945049588 | 129.838790698396 | 134.352155462211 | 146.912751127571 |
|      | 142.793573585472 | 148.539881077647 | 165.232545721733 | 141.830432745537 |
|      | 137.97889661868  | 143.442361602626 | 128.941490662452 | 144.182891591399 |
| IRS1 | 310.23294370018  | 378.797952580504 | 375.767528676937 | 365.950612890149 |
|      | 285.05846406041  | 213.634295832535 | 349.65350886897  | 215.718714189719 |
|      | 493.347308943133 | 241.527811817146 | 401.631377313065 | 544.462032960964 |
| IRS2 | 383.939800422489 | 378.308562999445 | 572.049540360134 | 312.224309341171 |
|      | 222.943046618742 | 226.796825544749 | 227.491667075987 | 192.188662949149 |
|      | 162.997720993338 | 302.021033686056 | 222.20526515049  | 218.433524126584 |
| IRS4 | 147.545667896282 | 156.243337414127 | 137.260359343758 | 149.147411595596 |
|      | 145.578721432709 | 149.511776997149 | 156.901209828741 | 150.287472248483 |
|      | 145.335830265052 | 154.978243057971 | 151.440732942734 | 161.866405026758 |
| IRX1 | 255.198862778405 | 259.229153662504 | 299.463563393179 | 293.018282386003 |
|      | 260.591336959281 | 237.358925391616 | 312.845219991659 | 267.190228116903 |
|      | 256.424415389574 | 280.246711704036 | 305.499194075747 | 267.839640412797 |
| IRX2 | 137.923852688695 | 124.197397333928 | 139.065849548762 | 139.191746593825 |
|      | 141.706292773073 | 136.324020406359 | 134.69274746407  | 140.29803170157  |
|      | 132.725232102483 | 124.321503368855 | 144.55710963567  | 131.592172917738 |
| IRX3 | 295.893482074241 | 307.124331101976 | 146.826292449698 | 158.160604786093 |
|      | 130.865693081945 | 829.126529857044 | 915.579581760396 | 509.702881232139 |
|      | 173.640326140494 | 2236.73950603157 | 524.392279804734 | 722.399669963921 |
| IRX4 | 120.740986472733 | 138.010385979692 | 123.981053866137 | 142.34471764492  |
|      | 126.404523759643 | 287.084253886676 | 138.047487233711 | 137.282635754873 |
|      | 135.661131815375 | 140.553613300431 | 128.635684412304 | 123.038646914863 |
| IRX5 | 150.500676225569 | 152.185397218918 | 155.824409540332 | 151.660152977515 |
|      | 146.495845282846 | 152.364417528975 | 177.88534558205  | 155.960886801091 |
|      | 150.431052959951 | 162.778480318754 | 155.548684011748 | 192.188662949149 |
| IRX6 | 147.1476865809   | 141.557420268382 | 137.627338682823 | 135.663734178125 |
|      | 140.281512754823 | 142.89427871125  | 138.576978828316 | 141.758827837244 |
|      | 144.129889080946 | 143.347066447019 | 147.556482119673 | 127.642215862573 |

|         |                  |                  |                  |                  |
|---------|------------------|------------------|------------------|------------------|
| ISCA1   | 328.919401925375 | 317.00629920068  | 446.948699651916 | 288.728608411903 |
|         | 294.697622870418 | 340.860684371038 | 282.719121652073 | 326.354469134694 |
|         | 304.357050745605 | 441.873247266342 | 282.190861594303 | 248.260998007814 |
| ISCA1L  | 183.735201125198 | 208.406980186223 | 248.03801051527  |                  |
|         | 195.218005582618 | 246.061496821699 | 223.279017022443 | 215.558688906165 |
|         | 226.960024551778 | 216.974834077975 | 324.009703043876 | 244.668813440638 |
|         | 196.136080427522 |                  |                  |                  |
| ISCA2   | 166.415922313464 | 173.829219279719 | 163.748692741999 | 163.769959129611 |
|         | 209.130260450131 | 137.629855378016 | 190.809584998617 | 187.183762762259 |
|         | 161.596086502946 | 154.118601977256 | 191.507657960386 | 197.24751449599  |
| ISCU    | 1539.80266129509 | 1355.07170485397 | 1816.3719976564  | 1434.1439428394  |
|         | 709.778171909457 | 1017.6969123529  | 891.637685856145 | 914.654262296682 |
|         | 1477.10828981572 | 804.800251415824 | 1001.35912007916 | 1257.32413345748 |
| ISG15   | 2372.26073354008 | 701.847905027147 | 408.037874667173 | 840.623505494489 |
|         | 6244.58472720999 | 2944.63971819193 | 2137.44704613378 | 2938.06458269406 |
|         | 2390.41825815872 | 1119.23362648056 | 1531.54387233661 | 2083.02482378721 |
| ISG20   | 310.718449468465 | 263.379982742085 | 188.74403596953  | 191.897449038297 |
|         | 449.103432410618 | 339.98018551524  | 430.329437928013 | 892.868661511516 |
|         | 1096.10636044885 | 530.267835989435 | 408.811415529922 | 235.742017851879 |
| ISG20L1 | 346.476121089685 | 350.658722333252 | 277.000882284125 |                  |
|         | 266.252875242286 | 413.687046868111 | 305.325519265387 | 364.597798667541 |
|         | 287.374706071354 | 395.386242257877 | 291.537725613819 | 306.677271064305 |
|         | 385.463209972694 |                  |                  |                  |
| ISG20L2 | 448.858580689107 | 458.705688226305 | 436.482580413523 |                  |
|         | 474.517750753745 | 454.732029358748 | 595.752426322468 | 474.517750753745 |
|         | 525.515169794593 | 472.405334652317 | 462.686385881492 | 499.321667633972 |
|         | 567.465201338735 |                  |                  |                  |
| ISL1    | 205.509515144263 | 311.10841853984  | 156.179501567984 | 186.640167849568 |
|         | 155.335777680002 | 169.888264971936 | 153.562334163034 | 151.902352951251 |
|         | 169.211708954329 | 307.665281863258 | 169.311264420133 | 312.484289357493 |
| ISL2    | 115.16087297104  | 112.449662536973 | 113.840813583258 | 117.81168010976  |
|         | 134.08270035062  | 131.679566454851 | 126.759554774012 | 130.10852948682  |
|         | 150.28169442832  | 119.862037840843 | 167.599784887933 | 139.459975305985 |
| ISLR    | 537.419316887523 | 479.983368253935 | 362.252813848151 | 460.807117177285 |
|         | 144.139062513587 | 128.692917766138 | 120.300291760091 | 131.356437247149 |
|         | 141.781482381513 | 176.364184489318 | 135.159590925066 | 127.377356715337 |
| ISLR2   | 148.247826830556 | 152.983678871668 | 136.109975252514 | 178.339211170442 |
|         | 130.886164807755 | 164.063104872636 | 129.46430369977  | 136.335679863251 |
|         | 146.828099826146 | 137.991642076355 | 131.876061826583 | 125.742631850732 |
| ISM1    | 152.538048490265 | 165.108876136738 | 154.057771254252 | 156.787932134605 |
|         | 149.869314204354 | 153.711354087243 | 151.70917316194  | 162.090585987836 |
|         | 166.936975782665 | 163.053121879323 | 158.160604786093 | 151.532859494021 |
| ISM2    | 142.675752131935 | 139.023486014525 | 146.129805607031 | 144.450810504499 |
|         | 124.885950473434 | 136.728975205893 | 153.83891040723  | 148.744599622165 |
|         | 149.55916919466  | 149.477373469387 | 149.707357499252 | 144.518132543976 |
| ISOC1   | 440.745866155629 | 504.617795280805 | 503.59466398882  | 411.784922368377 |
|         | 656.867138022837 | 985.087150371964 | 1023.94850651125 | 1139.76755449089 |
|         | 627.335757721489 | 1080.02576143033 | 500.246996975    | 901.644194512187 |
| ISOC2   | 317.244256751418 | 397.737702926328 | 219.996410908721 | 669.124699103132 |
|         | 1424.79466712859 | 381.625983354158 | 420.567884340705 | 259.935831886014 |
|         | 334.607533045929 | 199.490190715307 | 461.229315272354 | 309.5988292104   |
| ISX     | 116.552626146967 | 115.840266274696 | 125.741289047045 | 110.296425545476 |
|         | 118.025603140924 | 122.204249636472 | 112.054379249781 | 119.459625817735 |
|         | 110.392617179163 | 114.43491928161  | 125.0723702213   | 127.945144368504 |

|        |                  |                  |                  |                  |
|--------|------------------|------------------|------------------|------------------|
| ISY1   | 348.98762709818  | 363.195371577097 | 458.151323130855 | 394.294057009443 |
|        | 273.550544349798 | 380.562212796792 | 400.180574613078 | 379.911829623463 |
|        | 405.766055310869 | 482.048928546145 | 391.911768848267 | 415.113340335205 |
| ISYNA1 | 164.455111983634 | 202.00431685587  | 144.464783586439 |                  |
|        | 153.393651104539 | 275.543576337502 | 405.843083758177 | 229.729195963667 |
|        | 223.453776362112 | 192.767155566493 | 133.733674016447 | 214.229228850802 |
|        | 305.325519265387 |                  |                  |                  |
| ITCH   | 322.506898833351 | 314.337680575998 | 320.597495751519 | 327.062810389635 |
|        | 248.03801051527  | 488.249967208882 | 362.095074331893 | 261.117845544884 |
|        | 212.933062534244 | 242.269784551092 | 295.935625475189 | 298.085365348496 |
| ITFG1  | 331.848516303011 | 274.627303114477 | 343.488356185437 | 249.80160363144  |
|        | 357.514919818489 | 353.187829498591 | 428.850337327605 | 328.431289733169 |
|        | 358.732947927445 | 447.779854598556 | 355.80042210486  | 473.947538805454 |
| ITFG2  | 375.856200488667 | 426.464641742092 | 437.489929507567 | 464.196512015649 |
|        | 415.642099109855 | 233.047541132048 | 354.205670284123 | 241.648044508699 |
|        | 559.559921312181 | 220.362946606131 | 477.275332763887 | 484.658140651032 |
| ITFG3  | 919.165331064155 | 1282.84159765715 | 822.88742008931  | 2183.18692530644 |
|        | 1675.35431076885 | 509.01330998156  | 714.052063877292 | 682.538709448692 |
|        | 539.853394831917 | 410.731869154912 | 499.176926371542 | 448.260934224454 |
| ITGA1  | 438.870464403215 | 372.024884481775 | 451.985108262982 | 495.655170027296 |
|        | 127.279107079261 | 137.460936879873 | 117.399753685854 | 143.303309656177 |
|        | 160.53152291979  | 187.812436252228 | 162.093325839949 | 132.419898122309 |
| ITGA10 | 205.244843885276 | 214.261611197599 | 205.185206972064 |                  |
|        | 231.572677616684 | 170.646233722767 | 190.348359536057 | 158.503284955019 |
|        | 196.245297362955 | 176.714471790643 | 158.33974431499  | 157.454558821261 |
|        | 182.263724979519 |                  |                  |                  |
| ITGA11 | 218.96845208513  | 199.53455266342  | 173.919504730673 |                  |
|        | 199.662592246931 | 147.049287475127 | 143.539741029895 | 133.599098708818 |
|        | 149.927773276383 | 143.161623642178 | 195.230219990395 | 146.40033464957  |
|        | 141.246352591355 |                  |                  |                  |
| ITGA2  | 198.113398073968 | 215.585089158905 | 209.785886171295 | 170.825161347825 |
|        | 192.465510013851 | 273.402804140541 | 570.771089597761 | 338.585771590234 |
|        | 287.084253886676 | 869.245621105614 | 770.19255305977  | 924.630951485299 |
| ITGA2B | 134.060214479265 | 135.022438246099 | 154.324955232468 |                  |
|        | 155.98413216883  | 146.672270660899 | 169.257035030405 | 160.243405030742 |
|        | 151.531667383273 | 147.592770523507 | 172.214433016685 | 142.752536416014 |
|        | 156.026806913759 |                  |                  |                  |
| ITGA3  | 304.937584086529 | 379.546197364027 | 302.408563830315 | 399.963640581639 |
|        | 437.931339781992 | 866.765054377214 | 656.32782132983  | 293.646275396425 |
|        | 481.86545778383  | 1008.43888926584 | 797.73902873919  | 988.297682407351 |
| ITGA4  | 153.966815534288 | 140.774304412579 | 135.437227744668 | 148.776470607859 |
|        | 184.306452616482 | 178.790758444269 | 149.541917326637 | 162.488819873513 |
|        | 159.874161198304 | 161.338215647108 | 158.928949614338 | 166.97270256697  |
| ITGA5  | 4800.99572384569 | 4486.35687688252 | 3073.40543048878 | 7969.0710242842  |
|        | 367.732191251547 | 325.570839576032 | 185.801540278924 | 219.192900411543 |
|        | 265.219444616245 | 980.67040349547  | 181.715992480635 | 244.162496497466 |
| ITGA6  | 158.23884088767  | 175.469375624274 | 147.150063462728 | 144.501995579502 |
|        | 170.202597821861 | 209.811693771836 | 193.084818760857 | 209.398724613377 |
|        | 174.832495287192 | 303.986544460218 | 454.64556253724  | 170.111653122193 |
| ITGA7  | 239.621756857095 | 227.418630852215 | 210.085329463347 | 332.219608862536 |
|        | 157.948814637726 | 167.547551072373 | 192.130214856642 | 171.494975393562 |
|        | 165.896420029269 | 184.801068553988 | 160.76044995335  | 188.378996128521 |

|          |                  |                  |                  |                  |
|----------|------------------|------------------|------------------|------------------|
| ITGA8    | 1218.05434595121 | 1034.2217095753  | 256.99019407912  | 774.442392607873 |
|          | 157.986640251147 | 223.638850960288 | 178.429953283621 | 184.862871179765 |
|          | 196.777776509371 | 157.221008210698 | 193.945494721138 | 173.513108409372 |
| ITGA9    | 234.28146549561  | 204.942500423413 | 189.307823427362 | 280.398987330256 |
|          | 163.362182585182 | 201.49630027392  | 185.275787562938 | 184.322250984457 |
|          | 181.308852106289 | 190.057030596611 | 163.778790431064 | 171.521579011287 |
| ITGAD    | 112.046615825307 | 117.703025026759 | 110.325803953516 | 114.358099210532 |
|          | 125.796438432905 | 103.448244268961 | 126.921925660996 | 116.486929280635 |
|          | 124.982744176925 | 128.168460083895 | 141.73799456072  | 116.89487516867  |
| ITGAE    | 566.647927867646 | 522.77407098992  | 586.246004571452 | 461.229315272354 |
|          | 450.220658078322 | 789.401526545277 | 445.348044448953 | 850.562379837947 |
|          | 530.387315639095 | 537.06835963726  | 497.629319581786 | 739.52947559669  |
| ITGAL    | 147.761965925044 | 145.556318940043 | 138.29167712246  | 131.846160346403 |
|          | 143.458937009197 | 146.944628763232 | 132.034701177759 | 168.974155750959 |
|          | 216.033564783918 | 132.50027119027  | 143.191095552619 | 137.070326499918 |
| ITGAM    | 200.146843808423 | 188.36361073603  | 179.501659253141 | 181.3859695951   |
|          | 185.186497037695 | 156.096880332427 | 164.820007934887 | 166.592366578462 |
|          | 183.693300680495 | 176.267796612066 | 145.444483891989 | 136.227202534196 |
| ITGAV    | 557.214020485204 | 528.014268424539 | 671.563789496889 | 441.873247266342 |
|          | 366.473258467746 | 1107.29687889378 | 564.749082802433 | 771.512332113075 |
|          | 497.916883763059 | 956.153239481189 | 1001.92763014266 | 724.607317443904 |
| ITGAX    | 126.27024495428  | 124.452631766045 | 116.780639688465 | 121.643036773773 |
|          | 133.402515225624 | 125.299513989334 | 122.153996665065 | 132.233396667074 |
|          | 157.195967361907 | 149.480971898888 | 125.876114993687 | 126.359440164601 |
| ITGB1    | 2307.82327595071 | 1951.69651954627 | 2036.43904731226 | 2112.84348677276 |
|          | 1687.85201395597 | 1576.21727854603 | 1418.60088387728 | 1067.80176606977 |
|          | 1077.33874251157 | 1474.70984232307 | 1733.96382719909 | 1634.20135156938 |
| ITGB1BP1 | 548.686094748117 | 486.778046640624 | 646.117381960716 |                  |
|          | 479.138177792954 | 507.56875910742  | 573.846138124455 | 624.467319041884 |
|          | 535.758943850734 | 473.260534978556 | 809.068563907145 | 467.512355593598 |
|          | 530.122419830951 |                  |                  |                  |
| ITGB1BP2 | 161.485353443949 | 179.358460170348 | 144.008961720971 |                  |
|          | 173.017662861015 | 127.137447808551 | 135.842090777339 | 129.25124636593  |
|          | 138.316043447788 | 135.920830568556 | 136.824357247954 | 144.417333931582 |
|          | 151.538112896642 |                  |                  |                  |
| ITGB1BP3 | 134.774591679724 | 130.872296869843 | 122.452541100946 |                  |
|          | 124.621381699241 | 129.958065173006 | 125.558877611499 | 136.728975205893 |
|          | 138.159966250659 | 124.134916773123 | 133.201157825808 | 136.108500467418 |
|          | 131.102996816222 |                  |                  |                  |
| ITGB2    | 671.563789496889 | 570.130804179186 | 384.883635849576 | 611.208083466988 |
|          | 609.100385482325 | 574.496860164135 | 722.725186727796 | 1858.12855367119 |
|          | 2550.08769415478 | 1178.08490218853 | 738.892511276134 | 541.351092873522 |
| ITGB3    | 146.763046352405 | 142.96594961303  | 153.226604317177 | 149.17029600091  |
|          | 133.096984735092 | 136.003277940379 | 150.552186000149 | 126.675231236654 |
|          | 137.790718305537 | 139.701504237962 | 135.689889081912 | 132.28010415054  |
| ITGB3BP  | 155.280897870265 | 170.376620730856 | 153.041407358576 |                  |
|          | 152.327247552986 | 312.286788541158 | 354.656612182522 | 294.069353373633 |
|          | 314.751799003704 | 240.12078342024  | 180.867208892996 | 229.116153948948 |
|          | 291.221427744817 |                  |                  |                  |
| ITGB4    | 155.383166865192 | 188.847480174391 | 150.188128594079 | 159.300198352916 |
|          | 507.236601481067 | 383.259887828605 | 539.27766384282  | 214.639374741553 |
|          | 264.563741039382 | 700.877661166739 | 489.75389978732  | 529.228238133018 |
| ITGB4BP  | 1102.38234645327 | 1193.82799849555 | 1283.68791110988 |                  |
|          | 1144.92109214621 | 3235.38149926838 | 4527.53010866974 | 3890.14358014877 |

|        |                  |                  |                  |                  |
|--------|------------------|------------------|------------------|------------------|
|        | 2895.71836177599 | 3700.75770419386 | 2482.27419621925 | 2672.77147589342 |
|        | 3869.12225821096 |                  |                  |                  |
| ITGB5  | 1075.3328563531  | 949.260897408911 | 937.593129242257 | 1134.64039256323 |
|        | 730.673649872205 | 658.068932688816 | 633.401624753368 | 398.193129265416 |
|        | 681.172359997071 | 1307.19490564658 | 379.292531644085 | 616.188923504376 |
| ITGB6  | 122.274656361883 | 115.755585907264 | 107.559685467789 | 109.859878974527 |
|        | 116.070254821073 | 136.047032834863 | 175.562070915794 | 133.570075399424 |
|        | 136.436762791912 | 163.042083189818 | 142.169951083733 | 169.834078550805 |
| ITGB7  | 211.357321758564 | 182.508415915215 | 195.019706886336 | 177.598422362298 |
|        | 188.013181859196 | 197.962159288376 | 193.871324880919 | 320.707687986324 |
|        | 354.531898366438 | 240.75934760601  | 185.405774238391 | 279.26508919212  |
| ITGB8  | 130.443360119099 | 132.493888285566 | 121.459780480915 | 119.949050292223 |
|        | 132.332128706656 | 113.440171712791 | 128.820757822782 | 131.369177333568 |
|        | 119.257387524365 | 119.755151432304 | 123.665983073461 | 126.355699811531 |
| ITGBL1 | 247.528753010193 | 161.00635457883  | 184.322250984457 |                  |
|        | 129.591396165575 | 124.232144678947 | 124.464941711781 | 126.182856027765 |
|        | 148.109847175216 | 134.613036378054 | 133.930997975106 | 162.358237198517 |
|        | 126.626904958599 |                  |                  |                  |
| ITIH1  | 141.664271607079 | 167.083758835476 | 166.368623023308 | 146.54504551183  |
|        | 172.355215322173 | 153.836520485018 | 182.763057221385 | 159.455596750304 |
|        | 156.237282338037 | 130.800427334056 | 158.053654524927 | 151.09670688533  |
| ITIH2  | 140.299459596491 | 146.932655562613 | 154.199534276226 | 145.599152743156 |
|        | 145.773932754923 | 134.9404536551   | 149.066522533956 | 138.831297375659 |
|        | 135.516856254532 | 136.335679863251 | 147.968104627262 | 156.576585764311 |
| ITIH3  | 115.332409360957 | 144.338069855334 | 137.720747340105 | 129.187574143637 |
|        | 136.60514429355  | 128.950308413612 | 130.354641020141 | 156.756159786366 |
|        | 127.918847837351 | 139.497253870412 | 125.506466437764 | 130.368933537243 |
| ITIH4  | 148.329635131296 | 173.929353266244 | 153.108902978819 | 168.289492873475 |
|        | 113.22850386845  | 127.509583634884 | 114.726808450831 | 195.66091457697  |
|        | 116.810827219571 | 116.360144963753 | 150.812739240232 | 126.237900397603 |
| ITIH5  | 5981.08862268291 | 5912.48904507462 | 7308.57540715512 | 7190.89891723932 |
|        | 4353.66854914351 | 6560.30885074315 | 5138.28186306948 | 5859.56559124843 |
|        | 5543.71998558526 | 5314.0635307876  | 3270.88476148156 | 5455.91604383389 |
| ITIH5L | 137.981446468611 | 141.346722137248 | 145.594378536072 |                  |
|        | 148.767517078508 | 166.819234137224 | 150.45404183949  | 135.296271683847 |
|        | 154.166668493152 | 150.902548360746 | 144.486242872235 | 133.869109970003 |
|        | 155.313873664923 |                  |                  |                  |
| ITK    | 147.118987674809 | 148.421611987655 | 129.257947818865 | 135.068883036882 |
|        | 129.797601100832 | 173.035013611377 | 141.665332811746 | 200.831877950718 |
|        | 278.142283306934 | 136.534812980964 | 173.488272345038 | 141.222884136243 |
| ITLN1  | 152.648490300617 | 142.12808103815  | 329.779210536849 | 138.371873773284 |
|        | 124.408996713299 | 122.716563069312 | 123.247698282967 | 120.744994574029 |
|        | 130.346150829949 | 124.597605631582 | 127.524310543779 | 128.045931477827 |
| ITLN2  | 133.544149685358 | 130.054105892394 | 175.810411923013 | 119.763020707899 |
|        | 117.517649866653 | 115.01682934323  | 113.791585365477 | 120.387275261633 |
|        | 131.141668650877 | 117.49013401175  | 138.753419730571 | 126.049905221996 |
| ITM2A  | 2291.40912229281 | 1246.2895253224  | 893.676600121113 | 710.999354960979 |
|        | 181.758545723241 | 503.285430318683 | 173.66499836293  | 302.219514290905 |
|        | 420.567884340705 | 172.583615020042 | 215.866644799363 | 185.088667707155 |
| ITM2B  | 1677.93424842267 | 1547.16936835284 | 2028.67873136046 | 1154.86609813021 |
|        | 1611.58245311122 | 2615.07927836881 | 1403.90487313049 | 2859.94396089224 |
|        | 5734.76405709934 | 2574.74962955426 | 3164.55070502403 | 4175.70090899755 |



|          |                  |                  |                  |                  |
|----------|------------------|------------------|------------------|------------------|
| ITM2C    | 1403.09138858507 | 1611.58245311122 | 1420.27222765071 | 1593.49895307361 |
|          | 876.783710734594 | 1068.63350031223 | 1895.72330348767 | 1379.26881813339 |
|          | 1168.3174645384  | 661.096668635469 | 4251.82554412383 | 5073.27433952351 |
| ITPA     | 280.948704707655 | 317.163768837813 | 296.051639873628 | 287.751093664085 |
|          | 1027.48490028905 | 1010.05884008623 | 550.124359517322 | 587.181357555703 |
|          | 694.288215755716 | 824.746488539942 | 745.844395215451 | 981.313778685019 |
| ITPK1    | 691.632061537999 | 834.788058321257 | 570.771089597761 | 1208.25171673432 |
|          | 604.453803994875 | 166.192990554427 | 188.291563792748 | 191.486717579847 |
|          | 169.642188114285 | 198.411812737082 | 259.426050921239 | 186.496160803789 |
| ITPKA    | 182.624130582754 | 172.667770359278 | 200.045606111354 | 159.05213637758  |
|          | 169.279866966079 | 164.043866642712 | 183.921173538112 | 162.994537815938 |
|          | 169.168869363848 | 179.863096463897 | 142.783159341229 | 167.243544185778 |
| ITPKB    | 1295.27257578314 | 1973.20689165831 | 1557.00226259883 | 3235.38149926838 |
|          | 247.340470321453 | 174.680918805036 | 195.831574717135 | 163.487737425232 |
|          | 255.71113398292  | 218.794112567823 | 193.871324880919 | 233.997642139328 |
| ITPKC    | 155.42165869714  | 175.158180187883 | 159.801315111886 | 213.710058427654 |
|          | 284.748764120614 | 203.071186284148 | 243.225815954365 | 184.591789011195 |
|          | 218.156162474715 | 199.980312703646 | 176.449549075475 | 194.941454173896 |
| ITPR1    | 836.235700891687 | 686.445635754196 | 1593.49895307361 | 687.494132125365 |
|          | 175.245611094434 | 211.34069504665  | 173.250350363688 | 252.138168292964 |
|          | 271.770138565186 | 211.720536220806 | 152.57040089034  | 160.010501226517 |
| ITPR2    | 147.946236579299 | 173.372949622338 | 134.142423026264 | 133.401620574886 |
|          | 141.892214695902 | 181.135519188216 | 130.770335966929 | 174.576132939661 |
|          | 164.959415532174 | 158.359440014674 | 159.05213637758  | 135.790168628803 |
| ITPR3    | 945.830852603704 | 682.730262408017 | 569.967953318205 | 677.503643398297 |
|          | 2295.16438420175 | 1182.50261323518 | 1039.46136549795 | 1046.65224316733 |
|          | 1339.83170225337 | 3737.57754066891 | 1405.2134783352  | 1923.19560386389 |
| ITPRIP   | 536.609777988581 | 684.715981522999 | 430.505037012814 |                  |
|          | 667.156197045748 | 223.311817085871 | 379.615659443164 | 209.662262708551 |
|          | 266.842778974988 | 310.533399024851 | 990.55038742453  | 187.016569445646 |
|          | 297.636316709322 |                  |                  |                  |
| ITPRIPL1 | 147.985843605585 | 136.099663831028 | 138.670077127324 |                  |
|          | 129.236471271181 | 140.416247564103 | 138.349773531218 | 146.713861499546 |
|          | 138.866469244936 | 140.156797128045 | 139.902610126952 | 140.829927714838 |
|          | 134.000363767958 |                  |                  |                  |
| ITPRIPL2 | 1899.94714976387 | 2105.87438782831 | 1374.92806285803 |                  |
|          | 1696.69982157582 | 1458.13354165836 | 2144.52984392647 | 2055.27692947656 |
|          | 2267.0818302379  | 1139.76755449089 | 1075.3328563531  | 844.462124058351 |
|          | 796.052115217208 |                  |                  |                  |
| ITSN1    | 553.615252472149 | 473.151324002277 | 526.416479408056 | 665.936368667321 |
|          | 198.522123898437 | 287.924891622962 | 192.493439659184 | 217.264041781337 |
|          | 237.113813706224 | 222.624150073858 | 233.07015384759  | 215.272800347166 |
| ITSN2    | 166.606522485953 | 152.689610196981 | 174.136806313142 | 173.353648927895 |
|          | 153.719751724358 | 158.48793705795  | 156.441368290572 | 157.256812907353 |
|          | 161.506431005203 | 155.456077670662 | 161.651643789597 | 160.70138318726  |
| IVD      | 236.985483155452 | 227.689356258276 | 314.126706052299 | 281.996583337694 |
|          | 212.396522888943 | 219.462274506333 | 376.692422468905 | 237.601064742453 |
|          | 237.191866335979 | 180.77686098195  | 173.532300173223 | 292.317998405609 |
| IVL      | 137.123016784819 | 131.023892409073 | 121.360822445187 | 136.115306932124 |
|          | 176.587559615019 | 135.108420614547 | 238.037110997575 | 145.61758790738  |
|          | 135.148723192316 | 360.124745133393 | 433.189221987242 | 223.474531516972 |
| IVNS1ABP | 269.006221210929 | 243.038392457584 | 248.299149406938 |                  |
|          | 202.691507273819 | 281.792602269388 | 364.331860640225 | 366.564822549834 |

|         |                  |                  |                  |                  |
|---------|------------------|------------------|------------------|------------------|
|         | 363.025385707747 | 359.440639663655 | 313.099028594073 | 323.20628717764  |
|         | 474.378918787006 |                  |                  |                  |
| IWS1    | 395.327097512479 | 359.440639663655 | 372.894376776771 | 384.883635849576 |
|         | 295.935625475189 | 395.645016679312 | 355.048838683854 | 382.485769373364 |
|         | 411.451612988791 | 403.657727266403 | 419.902534806131 | 462.025126897013 |
| IYD     | 117.348231147283 | 111.525984720592 | 119.901358778161 | 121.917596225576 |
|         | 194.734255772365 | 120.157438564977 | 118.802030418792 | 129.802596741962 |
|         | 120.163286072512 | 121.965131419551 | 174.657352858049 | 157.070500065037 |
| IZUMO1  | 142.900756181761 | 143.639894909386 | 139.923187410488 |                  |
|         | 159.951697830252 | 146.54504551183  | 145.992883153161 | 153.393651104539 |
|         | 137.374784875444 | 136.692495869097 | 148.648159241815 | 144.879364072868 |
|         | 142.688809469455 |                  |                  |                  |
| JAG1    | 682.730262408017 | 755.42757464615  | 365.046815163035 | 740.527607312565 |
|         | 314.708587131145 | 519.672796004691 | 287.924891622962 | 249.171307797736 |
|         | 458.33221423434  | 646.933504790891 | 636.382696018633 | 463.880793292701 |
| JAG2    | 169.612203020686 | 211.035617136177 | 151.604093626944 | 170.561596645385 |
|         | 219.080383154432 | 179.914070416793 | 166.803359138942 | 207.384408045502 |
|         | 183.226294747874 | 346.356312668445 | 247.111032124864 | 180.698727334322 |
| JAGN1   | 226.114369645703 | 228.560346647306 | 222.709720471134 | 237.456245064363 |
|         | 212.33360547376  | 226.334672545273 | 228.317527475322 | 195.481680273686 |
|         | 197.947433984294 | 222.736706411035 | 237.641190133427 | 234.432954093705 |
| JAK1    | 248.531972733475 | 227.587590278412 | 350.46078795627  | 199.555406967021 |
|         | 193.358728044565 | 336.898462056187 | 326.417021307859 | 370.066087375401 |
|         | 368.637819994033 | 444.479355480138 | 376.374248850987 | 363.706789137022 |
| JAK2    | 186.112835637689 | 173.839053227554 | 171.85890372225  | 145.806935833967 |
|         | 109.680532131035 | 123.368137868951 | 119.886433564236 | 175.847256673734 |
|         | 132.836513637574 | 148.446949168794 | 159.977528879208 | 120.252164075308 |
| JAK3    | 155.253032078086 | 144.574566623882 | 124.142882936234 | 131.46193427125  |
|         | 138.850077456103 | 130.768746032834 | 148.000706956532 | 131.879526177089 |
|         | 135.047546966745 | 121.917596225576 | 145.99474597064  | 131.089811472017 |
| JAKMIP1 | 121.849460555655 | 117.74682797375  | 138.611074796816 |                  |
|         | 131.967245387861 | 120.702740607924 | 119.233300586525 | 134.929915732246 |
|         | 127.380083832809 | 121.252042151856 | 133.44592405762  | 115.582048644075 |
|         | 118.117957479382 |                  |                  |                  |
| JAKMIP2 | 130.865693081945 | 150.653030597808 | 135.185283076286 |                  |
|         | 126.826941761528 | 133.508702281664 | 125.802001118545 | 138.562576783507 |
|         | 131.722397988741 | 119.349376960211 | 132.615324904193 | 141.890803125137 |
|         | 134.658664100744 |                  |                  |                  |
| JAKMIP3 | 136.878656455606 | 124.810749946769 | 147.335403843539 |                  |
|         | 139.128751917566 | 131.841436867483 | 130.302829773323 | 134.407776033032 |
|         | 121.497645719165 | 141.88072888667  | 118.397482835514 | 124.066239570648 |
|         | 134.408846338374 |                  |                  |                  |
| JAM2    | 446.698665191047 | 427.766660764042 | 401.102586700919 | 427.542390397986 |
|         | 150.691815494794 | 146.959154938248 | 159.41078351918  | 167.887047631073 |
|         | 221.411372022459 | 157.385256442734 | 168.095061700814 | 152.465176508162 |
| JAM3    | 3354.38704439295 | 3211.2719052157  | 3140.51157972795 | 4697.94415026712 |
|         | 150.542478166361 | 218.350166753833 | 170.801761175916 | 209.023926358109 |
|         | 265.068532248682 | 293.692083555844 | 186.1961391235   | 177.214422668922 |
| JARID1A | 615.88518704181  | 678.365575489532 | 644.741046498743 |                  |
|         | 595.120528902501 | 438.533112511098 | 589.409235971915 | 813.772804994191 |
|         | 752.585744322608 | 808.300067805897 | 708.534025308731 | 807.3257139219   |
|         | 595.270107963842 |                  |                  |                  |
| JARID1C | 134.91213977595  | 139.081519962413 | 130.204571771396 |                  |
|         | 140.548371692813 | 189.450316943845 | 142.826898321575 | 125.822346524903 |

145.09280363189 157.745805838008 142.278523641008 163.741411769369  
 143.653452869664  
 JARID1D 470.154677948419 354.922901990615 585.371892598422  
 459.30568829087 241.453456707114 140.391753835434 163.846242743377  
 680.250735532287 344.070947256963 182.095387488796 386.067573158514  
 568.040362658955  
 JARID2 338.665115108128 321.25076864104 296.603054615145  
 330.703588385626 289.911635155481 368.711718874343 369.974231530826  
 440.657747083721 380.664528809678 701.481003619067 110.636713168363  
 441.578261054602  
 JAZF1 909.020708316287 705.529158880221 1001.35912007916 669.731546951281  
 172.965746521132 169.113439729353 158.531514776098 189.872997882033  
 196.363005912532 250.766180970907 180.63469438043 231.239126548656  
 JCLN 134.21500333869 144.143692745479 141.021723049782 142.937182720493  
 151.535177950367 140.163936299053 137.296790373528 133.41621034887  
 134.56763097313 132.692027897739 135.598709185334 138.16337207876  
 JDP2 277.314675225943 234.432954093705 237.191866335979 249.182288871072  
 168.491878435329 184.306452616482 155.550532734718 167.121623035375  
 179.411426984263 182.897563195019 171.035391211596 195.364709354814  
 JHDM1D 205.765822478178 195.66091457697 238.068308163643  
 240.224826736571 184.348894461271 202.797135825668 189.708396835236  
 223.703371558666 184.569063297206 256.764450748941 182.833961304079  
 188.605328108654  
 JMJD1A 389.051174954505 375.316610221279 564.41151411028  
 409.477576085245 458.151323130855 378.585058475083 726.000622725287  
 480.484639351046 360.684900316265 662.04757187541 613.063954859056  
 440.495339027491  
 JMJD1C 296.75326294587 285.258824662946 295.241644408321  
 286.230656780335 183.294526267593 248.993716339029 218.559622620349  
 235.822266856967 205.381840116054 229.31486399741 257.740674565975  
 281.44159425243  
 JMJD2A 169.826068012389 219.792171863015 202.583967728957  
 182.055718892894 190.331589656379 246.061496821699 185.923374274306  
 232.986366625889 167.149578610266 186.925138700818 213.447886742681  
 197.087015414039  
 JMJD2B 175.055634340766 174.116797337377 155.76860362365  
 188.557113298055 214.763232658841 177.780479906048 180.719868519867  
 159.788143847569 164.284396793834 164.043866642712 161.956032597813  
 172.030687707578  
 JMJD2C 194.921021761976 179.389797867379 227.483999162038  
 182.763057221385 155.091135297162 174.471304281502 178.89423690001  
 196.860228537112 170.381897441659 183.619184925353 182.515302191173  
 179.880812358974  
 JMJD4 169.661107080542 177.919885012006 162.464201058576 201.731223995887  
 301.139737613279 173.751615672365 234.339913501761 182.066922756289  
 202.00431685587 165.031678768564 181.85552254233 232.344545356395  
 JMJD5 175.485672103348 163.513162036251 187.48055574295 161.385691765316  
 168.470685171939 179.211502448703 170.835513021958 153.08734299815  
 151.403431105471 156.47237266917 148.005500924157 156.218834695891  
 JMJD6 158.999305963902 159.615233521257 143.365976841902 167.871703133182  
 155.981989040279 157.70581824787 149.42148494796 135.096321258167  
 140.416247564103 138.670077127324 153.320911882529 143.58555556787

|       |                  |                  |                  |                  |
|-------|------------------|------------------|------------------|------------------|
| JMJD7 | 158.359440014674 | 147.85133493803  | 144.772914483212 | 147.032210333966 |
|       | 175.96841318924  | 140.590802695412 | 176.390014020936 | 132.71633377967  |
|       | 162.586012723045 | 186.679199600379 | 171.775741648309 | 174.100921524023 |
| JMJD8 | 2833.30537635103 | 3143.77161008321 | 2728.04758874748 | 3643.11229751348 |
|       | 2789.67986601883 | 2273.12164779441 | 1918.14260920544 | 2748.51360874099 |
|       | 1876.64079464928 | 1372.63540073207 | 709.778171909457 | 1982.3154578939  |
| JMY   | 232.699786290509 | 222.005022189667 | 317.550000625189 | 205.705962405954 |
|       | 171.455216889348 | 168.310680227156 | 203.487137264    | 153.947717667689 |
|       | 165.451132663092 | 164.673579538023 | 180.240305360865 | 151.87495966414  |
| JOSD1 | 512.541205235935 | 459.388390392518 | 429.680602294138 | 460.742037437298 |
|       | 458.953009417683 | 314.386320310898 | 369.156887999872 | 336.380724981693 |
|       | 337.935183275743 | 306.773350448741 | 502.170430910893 | 318.487401106209 |
| JOSD2 | 186.231346659144 | 216.32785564297  | 179.451637129672 | 251.414717011661 |
|       | 932.505095432049 | 244.280971257965 | 259.625943627223 | 191.554396977588 |
|       | 220.217745732407 | 193.843978773764 | 237.754067231793 | 194.753955100069 |
| JPH1  | 167.149578610266 | 152.957297648595 | 154.584367902971 | 144.940119680152 |
|       | 156.083002868004 | 132.48841450242  | 127.742948876822 | 119.517021355598 |
|       | 166.095964870713 | 134.058035351684 | 165.844762875582 | 135.515960991334 |
| JPH2  | 423.396271159345 | 468.060528109338 | 476.917496749381 | 669.330078861673 |
|       | 172.758230728437 | 149.628421263062 | 185.974598267418 | 169.948277715908 |
|       | 163.373180928181 | 168.394330931524 | 159.570288565855 | 168.861884032201 |
| JPH3  | 120.628904050564 | 112.464951599416 | 107.697601478064 | 128.563180697606 |
|       | 180.290887733427 | 113.61408868553  | 115.863243613121 | 117.203783530266 |
|       | 124.885950473434 | 118.006338536085 | 113.572326615571 | 118.185499089226 |
| JPH4  | 131.711193516482 | 144.136328845967 | 133.141683141696 | 128.686425820835 |
|       | 133.788197693571 | 146.782830477983 | 144.710613442383 | 133.233826283531 |
|       | 129.187574143637 | 130.630504666374 | 148.973277994329 | 138.149037534929 |
| JRK   | 137.299908075811 | 135.114056458478 | 134.337249560706 | 138.050999864689 |
|       | 139.782152941027 | 152.646642492666 | 138.588751758469 | 140.717348834454 |
|       | 138.968690339299 | 136.835889180879 | 141.052322220012 | 139.583514773196 |
| JRKL  | 132.399633003253 | 122.498794845416 | 125.220416203903 | 124.452631766045 |
|       | 125.176747824384 | 113.76411537952  | 128.217078449064 | 144.423509403938 |
|       | 136.423161205425 | 128.725044326566 | 151.573920235798 | 134.948615133037 |
| JSRP1 | 124.723519607109 | 116.977202125093 | 114.849872458647 | 124.625603721372 |
|       | 160.478519202775 | 124.01558540593  | 114.936648783324 | 239.31180635241  |
|       | 245.110761598207 | 129.173772079264 | 123.059971161711 | 123.716400094852 |
| JTB   | 2913.2685312165  | 2891.03258768937 | 2730.50913686613 | 2537.90501983425 |
|       | 13013.8166277495 | 6044.78942014135 | 5582.64254130978 | 8072.83367137971 |
|       | 7491.93659373205 | 3905.35300751401 | 4520.84412831414 | 7815.98936145067 |
| JUB   | 155.026276988302 | 152.277810621542 | 145.514859606031 | 145.270140096768 |
|       | 158.224122084011 | 143.013801508709 | 168.347445148881 | 142.501655618849 |
|       | 141.340452225686 | 160.567934923347 | 153.360382235409 | 157.952018720438 |
| JUN   | 3706.41283595794 | 2611.61260614408 | 2187.3010896903  | 2263.73444150082 |
|       | 343.488356185437 | 1046.65224316733 | 470.308610828825 | 512.312880441098 |
|       | 608.816123736392 | 3784.59114921916 | 947.766127685083 | 610.591049634222 |
| JUNB  | 316.409887372431 | 579.923640505245 | 377.083379021079 | 254.879772480457 |
|       | 1178.08490218853 | 1000.91520225219 | 761.586663689579 | 587.654093308465 |
|       | 366.961565952239 | 936.560290736127 | 1106.75785702993 | 821.265710686098 |
| JUND  | 14037.2575989329 | 13700.8527522612 | 7433.03226979876 | 10741.3064142855 |
|       | 9251.21629832018 | 8016.1652884418  | 3963.40575974446 | 4061.24537355697 |
|       | 4956.21683075884 | 4913.55892033682 | 4359.98094976179 | 3334.16277752222 |
| JUP   | 233.671878221507 | 359.329520507158 | 262.296456281666 | 241.734804013256 |
|       | 2137.44704613378 | 1402.14708471728 | 1461.64901688125 | 1350.87073284396 |
|       | 1437.5568316065  | 2590.80821234237 | 742.751664201272 | 783.755776589969 |

KAAG1 161.543072816738 140.434086004204 142.416237823488 129.561012565141  
144.546597366629 128.528510920423 146.165632086981 140.061045085545  
135.734075990932 144.246749835693 134.455623159793 140.132816040735  
KAL1 128.108066199718 139.85010721496 116.576896337786 125.729079191033  
113.256481034259 120.212294184999 117.131720092783 120.819163462986  
119.876835248732 151.613134875009 155.191446350891 129.838790698396  
KALRN 151.577450119302 129.003317344469 150.006621336954 134.066948803697  
136.998259410887 147.835936450126 138.560399473164 146.194467350201  
144.625105340312 144.705559511075 139.589612144962 137.271702725819  
KANK1 720.710754387733 552.494327858264 809.068563907145 641.774812292709  
186.975609955892 159.966729941991 190.238332933452 336.786227017391  
252.365946808078 345.627266482686 334.916875239616 174.448910958935  
KANK2 1213.61170930345 1127.07858210156 1769.6386910047 1738.96798001895  
177.831718771025 187.965294229013 152.834894011142 173.829219279719  
208.194788326109 194.552533397944 177.355210393749 173.204163917896  
KANK3 139.938739652347 172.758230728437 136.108500467418 166.606522485953  
142.75592155869 146.448568700393 148.835389500419 127.226937898225  
155.61996871093 135.004413860474 134.28095064513 140.951031275943  
KANK4 170.901599088282 180.468984099647 143.747664482225 158.014017648839  
122.670689386332 127.327765407459 124.058332474379 133.11040099808  
135.241029533819 367.289651112346 128.217078449064 119.144128641393  
KARS 381.182514249587 400.23671843715 469.107624227456 434.61711290583  
409.380002417794 420.95713139384 395.786295710815 418.244376024741  
456.817057099146 593.462634352052 666.204695328096 485.136339836897  
KAT2A 1089.16489859253 986.441377365124 890.121325723286 1037.00025848491  
795.464850398761 910.541650889451 1264.90442763788 2390.41825815872  
1015.10079945997 865.800709006332 1283.68791110988 918.162638134305  
KAT2B 904.211195986553 764.137504481329 848.154015576436 690.903797251841  
477.160464512705 654.108318810728 727.114956464515 670.097523566652  
768.67030514096 706.628675634893 611.540759532294 342.245182599593  
KAT5 195.10410545445 178.320732186309 212.890259409988 211.059870865354  
193.16411905957 166.842970309527 175.341310423897 163.769959129611  
174.971350923613 158.400572147671 181.123571246557 187.607426452073  
KATNAL 379.788696204016 346.303862540751 384.641319423853  
332.978350226738 307.316241247336 306.716682293251 320.214614455231  
350.166837086936 276.714748212739 436.982960786839 346.065746911798  
363.255517622046  
KATNAL1 336.120322555703 309.720081933252 300.765518378297  
392.365008240567 125.019064287385 121.774697402171 116.258629237662  
118.697969266426 123.748788684337 182.439945229388 143.001661958814  
125.426018910517  
KATNAL2 138.519129384809 127.979574243743 140.125575976708  
133.94206203396 141.378381097266 126.566165822427 120.679474100322  
126.614876404146 124.809739073169 137.911816180518 108.697696080014  
135.137615432923  
KATNB1 199.516043142784 255.273375146278 231.044588483625  
314.486603134656 527.930077857945 385.798784913201 285.507315916663  
279.413335686746 439.616817413027 406.900412510895 257.534293550585  
310.598930734244  
KAZALD1 297.071121022183 240.734451149197 190.871696848118  
200.179796117115 163.474261351901 129.640303191006 149.010477279209  
151.029785584386 139.809114250476 144.946362772133 122.944699010173  
131.132508349222

KBTBD10 434.61711290583 375.131728190867 481.453770150269  
 425.471195039676 146.681183890181 137.591469499374 147.875855077738  
 141.150016212967 144.214589452164 134.391386851101 141.321547895734  
 133.52971984184  
 KBTBD11 343.767393640683 292.524552445564 246.492735271771  
 225.169110687004 120.406577236405 167.842122798757 312.705458415152  
 146.007311764212 156.402578892869 128.341887728118 139.470557140547  
 187.247062073247  
 KBTBD12 139.77436722364 145.126091016414 139.31967261371  
 193.412827246366 151.067819234238 126.680992733621 118.879931299016  
 116.236538651031 127.979574243743 120.672291867109 131.646121568612  
 205.362816362477  
 KBTBD2 1020.19774509086 1087.69177809384 925.656701707763  
 1183.82018168635 529.700356666006 804.362909579005 733.86133557115  
 766.176882605175 785.290353402444 908.352265585374 1194.42925868786  
 1215.96648642927  
 KBTBD3 150.667001746475 143.637018777217 153.818325601312  
 152.913814113632 151.500282404318 136.942583515174 142.694748293332  
 143.252983617945 143.163083976105 143.760519659724 157.898632788579  
 142.053649707364  
 KBTBD4 174.035835206078 170.784229026842 196.889520085412  
 175.9219991997 185.258354905314 177.039190810529 196.486499238623  
 234.814109965002 190.471158323247 181.966110264509 193.245087824217  
 177.716742595321  
 KBTBD5 142.222833574043 141.908791151061 153.860039535598  
 142.07664288788 150.992951055381 125.304045138994 149.477373469387  
 151.546908501054 127.617449871137 157.955606242401 110.428616140857  
 154.312374306932  
 KBTBD6 183.464897811105 179.273936200852 178.404791189835  
 169.752525994991 158.322477506517 200.045606111354 148.275939659102  
 158.554429311951 160.039086963419 183.921173538112 169.502103689662  
 197.231408726321  
 KBTBD7 196.076386020815 206.35895739543 247.971366020963  
 159.504327477065 187.871017629994 240.706548931192 158.467572658719  
 198.722993687455 188.878770168595 182.248178961707 317.121202656311  
 201.850932289186  
 KBTBD8 261.96528977292 209.33028918341 262.53374754047  
 240.283918204202 152.746799687103 171.660157220703 142.571259316029  
 142.780100181736 173.714940254592 138.572054821151 165.763459146818  
 133.272540012108  
 KBTBD9 213.891435492914 204.318316638312 181.37137053478  
 210.666799498141 180.437648146588 260.554343693588 206.999289979742  
 235.43707989982 178.000672046849 185.727947276958 302.1846598234  
 215.143973502566  
 KC6 163.134784474437 160.461846976268 153.674047811298 162.173506492562  
 150.578023008958 147.919058170753 158.523941833883 155.756074127526  
 147.552635527742 157.881569297409 151.137791721752 152.629680152219  
 KCMF1 173.071892362758 169.544515294662 171.994330847901 161.694109087893  
 160.557818466874 181.081050726043 149.508432746895 156.114825514646  
 154.321219471319 160.20843950503 165.686655824416 176.328994356625  
 KCNA1 133.077760160486 124.585675323305 126.599418127637 139.926488041421  
 135.020690381988 132.045595972712 123.82555184043 122.295222990408  
 114.234369421536 131.662585510218 134.255021727555 125.418782388128

|        |                  |                  |                  |                  |
|--------|------------------|------------------|------------------|------------------|
| KCNA10 | 135.078198678379 | 156.259214645427 | 169.583355171423 |                  |
|        | 174.035835206078 | 135.379284233708 | 184.542232315662 | 159.461778054423 |
|        | 135.834000569736 | 163.474261351901 | 150.072005848234 | 118.957512510094 |
|        | 159.13662975347  |                  |                  |                  |
| KCNA2  | 139.966813133326 | 142.711117470317 | 139.597493526257 | 149.582406567077 |
|        | 147.717748449017 | 147.4182675362   | 129.85040048805  | 142.680136733947 |
|        | 135.377118045038 | 153.453969224725 | 133.92485496581  | 153.273568880305 |
| KCNA3  | 117.766156390814 | 118.797046082278 | 120.015436934157 | 115.457121859064 |
|        | 125.126100642395 | 128.189685312596 | 110.789450948689 | 117.570749340011 |
|        | 118.249148086655 | 120.481712066062 | 113.292688210897 | 126.364445020215 |
| KCNA4  | 145.217261514886 | 143.530190096012 | 143.611930851914 | 151.744902566627 |
|        | 130.528198937596 | 132.243900762936 | 128.920313557255 | 139.589612144962 |
|        | 131.294930860752 | 140.941447663862 | 135.875595614483 | 145.423022762916 |
| KCNA5  | 218.944052733757 | 286.673016219195 | 219.49354518392  | 217.969738417693 |
|        | 167.018380617832 | 144.032779435658 | 161.010206405916 | 158.109836032481 |
|        | 193.472317111841 | 167.599784887933 | 130.672586991186 | 157.528409294029 |
| KCNA6  | 132.84666796678  | 152.207601283271 | 131.77099316122  | 162.850128623401 |
|        | 139.87715485885  | 138.512938877774 | 146.014790698087 | 149.020824600931 |
|        | 135.423839577038 | 145.770601609392 | 163.306853098724 | 152.382558543399 |
| KCNA7  | 136.01865173754  | 149.759516805355 | 147.051399102374 | 149.764447995426 |
|        | 134.243435358729 | 155.191446350891 | 154.321219471319 | 143.635367691412 |
|        | 149.584582050615 | 141.357668647617 | 139.980504765791 | 146.440630638891 |
| KCNAB1 | 154.918405633244 | 173.432960318793 | 150.99622088333  |                  |
|        | 173.798554769204 | 133.173541338355 | 141.870640394206 | 142.715449859191 |
|        | 138.203742066422 | 142.240333104987 | 147.676279102364 | 141.301503201175 |
|        | 126.075528093376 |                  |                  |                  |
| KCNAB2 | 157.436513275737 | 163.936973279176 | 158.550259547851 |                  |
|        | 173.611295051326 | 172.926288703434 | 158.85003890975  | 170.758319048911 |
|        | 162.110943457969 | 158.523941833883 | 161.002880798225 | 156.433603187722 |
|        | 158.85003890975  |                  |                  |                  |
| KCNAB3 | 107.949834974369 | 116.507315786826 | 104.442909315944 |                  |
|        | 117.803508098322 | 111.73388372572  | 123.145830746127 | 124.464941711781 |
|        | 135.678138913772 | 124.96926662367  | 124.176944998906 | 123.07559417607  |
|        | 126.88329158544  |                  |                  |                  |
| KCNB1  | 335.533053221675 | 400.845137156678 | 498.534168389928 | 511.779988437654 |
|        | 155.386226046894 | 128.303046695142 | 152.082927731045 | 156.277567608825 |
|        | 154.826710617351 | 147.766043861937 | 150.434376975922 | 157.13859713415  |
| KCNB2  | 145.003900788534 | 147.93442757931  | 147.108661317945 | 167.130843160309 |
|        | 157.410205523901 | 146.476960694197 | 138.616719975373 | 128.790166506932 |
|        | 151.852294315212 | 149.198753359122 | 150.144977373708 | 153.929167381674 |
| KCNC1  | 108.21185649774  | 115.491262364277 | 114.217867810848 | 126.158204790885 |
|        | 113.938636269013 | 120.450111018432 | 116.316845829267 | 115.53736269794  |
|        | 113.091739139626 | 112.693431140524 | 109.044879188971 | 121.441901286752 |
| KCNC2  | 135.554736716321 | 142.872683795338 | 149.241358552148 | 142.483308497682 |
|        | 127.482662155082 | 155.147962740503 | 146.790059505709 | 139.005788243703 |
|        | 138.12651823109  | 138.293242905081 | 134.840285218383 | 148.697019570015 |
| KCNC3  | 124.180511991605 | 115.789536577324 | 112.957395064957 | 103.772221923105 |
|        | 116.858439910319 | 120.76311889397  | 113.460835359833 | 121.177681858671 |
|        | 110.1278204598   | 113.268379270385 | 134.227796103219 | 101.530900217921 |
| KCNC4  | 129.386300987308 | 124.989313193779 | 130.410584413031 | 127.2369420721   |
|        | 123.76900858347  | 129.362793087439 | 127.040027125755 | 125.216463649367 |
|        | 127.742948876822 | 123.051777473512 | 129.729475933233 | 124.93629294955  |

|        |                  |                  |                  |                  |
|--------|------------------|------------------|------------------|------------------|
| KCND1  | 171.287186905764 | 186.244764337256 | 177.896726792666 | 188.36361073603  |
|        | 161.385691765316 | 177.60876237572  | 138.777120638896 | 225.189991540262 |
|        | 173.236978003496 | 143.491142564838 | 161.289708941062 | 158.025633316671 |
| KCND2  | 126.617737577634 | 115.224011128183 | 124.93629294955  | 118.673325109944 |
|        | 173.798554769204 | 146.937052029619 | 147.537691509156 | 127.926270257252 |
|        | 133.218742606195 | 132.049224908868 | 161.090443294391 | 121.246967460178 |
| KCND3  | 147.532747354296 | 148.166340306996 | 135.241029533819 | 147.561362873855 |
|        | 146.025781495177 | 137.513315427454 | 143.665359343809 | 147.187681416171 |
|        | 150.582568022489 | 148.692602243778 | 151.971337856271 | 158.602687876661 |
| KCNE1  | 111.743461522689 | 105.925737068775 | 115.384304932365 | 122.053867525393 |
|        | 115.18875509198  | 111.860763079995 | 112.896360244636 | 109.96017424123  |
|        | 109.635825046436 | 109.438965262717 | 116.0999658586   | 107.498500136859 |
| KCNE1L | 152.692483731643 | 155.011931456736 | 148.104173238606 |                  |
|        | 197.326259802349 | 138.675023495021 | 168.697565122105 | 149.813838004575 |
|        | 151.792921211607 | 169.124088593549 | 155.290648078877 | 153.498332327444 |
|        | 156.883255634126 |                  |                  |                  |
| KCNE2  | 139.748733350375 | 123.794432024417 | 134.045938361221 | 122.543903508753 |
|        | 122.883806494491 | 118.144109564626 | 113.840813583258 | 118.139487760542 |
|        | 123.372689985035 | 135.343380336913 | 139.715836473047 | 117.67638166062  |
| KCNE3  | 130.736466113571 | 136.423161205425 | 163.066051106092 | 181.593291870136 |
|        | 152.974593669153 | 150.134337895481 | 141.976051648478 | 153.169450192935 |
|        | 148.493435517221 | 157.301617257941 | 129.754376995879 | 150.314462939164 |
| KCNE4  | 143.784022884904 | 135.54708602175  | 140.388212037661 | 155.214638707046 |
|        | 138.913591568111 | 125.631073476381 | 114.545476919992 | 142.830950036054 |
|        | 126.964621107029 | 129.522339467532 | 151.129620221785 | 131.968781256081 |
| KCNF1  | 206.186324475847 | 188.767121505943 | 131.358797630945 | 136.627904756283 |
|        | 1129.15018335354 | 137.426226808356 | 123.170639180926 | 170.676752248138 |
|        | 177.11682975342  | 139.621016978072 | 164.615113709166 | 248.03801051527  |
| KCNG1  | 125.810756286648 | 131.794065532001 | 125.358906118533 | 127.229854957588 |
|        | 751.269009484639 | 184.638141004171 | 288.261250589513 | 229.406012088782 |
|        | 227.884445686928 | 135.621035941292 | 337.822337721287 | 139.641688273911 |
| KCNG2  | 128.972276851419 | 128.620852653765 | 126.623026026721 | 135.400054238597 |
|        | 133.70941349665  | 140.260053206523 | 138.149037534929 | 119.52150378372  |
|        | 129.636135486593 | 130.222698914337 | 134.994013668445 | 134.719531559829 |
| KCNG3  | 127.997280639609 | 124.844481048039 | 123.235136639469 | 129.656088836537 |
|        | 118.426600479326 | 131.58537948771  | 126.253319664664 | 125.674471551099 |
|        | 127.03153185998  | 123.991249190444 | 128.071379991958 | 127.068313862984 |
| KCNG4  | 117.324368138398 | 120.819163462986 | 128.631814147997 | 123.051777473512 |
|        | 124.930303940168 | 124.88118767481  | 118.641431192759 | 113.025793645043 |
|        | 126.75720720361  | 128.601885372662 | 122.80785489118  | 119.436922168376 |
| KCNH1  | 136.22416508552  | 139.54738445816  | 139.868714816245 | 139.211746200839 |
|        | 141.698329968978 | 147.006482557682 | 148.247826830556 | 140.827965102541 |
|        | 144.80318019871  | 132.526286141997 | 146.892065987724 | 141.269923271838 |
| KCNH2  | 184.426874913406 | 201.139510041141 | 180.022646625687 | 225.702629835215 |
|        | 137.752238510249 | 122.854722097864 | 123.202829470888 | 130.970694919879 |
|        | 120.867408760075 | 126.295856316628 | 141.048882618651 | 123.482626777491 |
| KCNH3  | 135.296271683847 | 145.528676983944 | 132.996622574111 | 150.43722766614  |
|        | 127.189310473419 | 149.149858208397 | 140.264060906597 | 139.708303388546 |
|        | 144.772914483212 | 131.140263788783 | 126.294085960617 | 148.501654210579 |
| KCNH4  | 142.143709425075 | 145.294665838127 | 174.347451984066 | 165.491193869938 |
|        | 154.449058407217 | 140.624437508178 | 200.633009710701 | 171.935132459373 |
|        | 148.635174393031 | 152.109178223495 | 252.171420358437 | 158.49220347186  |



KCNH5 128.047981250943 117.897556445952 109.552501987529 108.984922760455  
123.400143662218 112.896360244636 114.906396746556 109.506450285923  
113.708683868028 117.008277388399 131.68571824487 117.423704591303  
KCNH6 8558.70496234991 8368.88320476021 10024.4662743012 9715.20127757161  
1662.51399707484 9994.54490550759 4945.87677849967 7815.98936145067  
6776.11712291246 5073.27433952351 5589.21471380445 6312.36452724398  
KCNH7 114.545476919992 110.17590675298 116.268259618103 105.900294919664  
105.096927149239 110.408301129053 117.093818506721 108.179513318734  
110.333339548402 113.133798430215 123.478896502015 113.769815606191  
KCNH8 162.072695554798 160.811051590991 171.414869677333 144.505072819693  
151.768699486923 172.230528631803 163.681014961332 164.660269016695  
174.953232190285 158.098055917452 142.239620906411 178.984409575632  
KCNIP1 142.005703694973 129.722382881611 131.423918669689  
136.508969220268 137.082234284426 134.038213827843 135.203507726561  
138.97443063851 128.504026473695 130.062015525637 137.82918941689  
127.876894098781  
KCNIP2 132.269567096683 137.847504914802 131.153457976248  
140.934844668435 141.619432083003 143.752697178913 144.685707282641  
140.092648878007 138.250288796456 142.42442972908 133.845056524142  
142.919910421524  
KCNIP3 203.149001616967 186.089988569287 182.143506470859  
207.269530621176 118.547605249191 117.815045605383 115.992487254175  
119.622243247836 121.95061962467 128.635684412304 125.224197852606  
120.118873350459  
KCNIP4 142.879705723262 160.690442125281 136.561852783331  
165.364935913232 134.349043119219 137.058578192268 141.550553034455  
133.028789808654 134.601565799073 134.364838071696 138.808591995741  
139.737748157901  
KCNJ1 129.034770823878 132.956860864455 133.271506838359 131.649830934459  
136.095753586495 136.349603320553 132.471014832851 133.475605284211  
126.547883999721 134.53215156472 133.167635227902 140.784853736558  
KCNJ10 174.296028319781 169.036409026328 173.372949622338  
206.071709262227 158.325554470875 183.979513272793 166.430881793156  
161.208713751942 181.313333665614 160.91894600916 171.140106467064  
182.665357598121  
KCNJ11 123.56917054142 108.21185649774 118.703108284564  
116.806720503431 113.955459033122 113.334665910428 110.518806964366  
114.798573331978 99.9173294438729 107.976233194926 109.176852761745  
113.879459563492  
KCNJ12 155.337635216544 135.5668267936 151.2639801322  
135.622888091037 141.535381351126 155.400191634632 152.648490300617  
153.118492567137 139.640918572569 127.527378949803 121.414076245292  
146.345451252228  
KCNJ13 177.001637712889 173.907933001446 153.574068503306  
170.818182800759 161.148734808267 161.592528958127 162.267841475739  
174.540209145695 156.130224537288 159.588575526536 160.992494552269  
165.908756485356  
KCNJ14 126.680992733621 129.344834474578 133.334314509183  
126.049905221996 133.717451195844 130.470034945295 130.095585254401  
131.65084896906 124.1819046638 121.636361281148 140.191264837331  
129.906744036052  
KCNJ15 141.123272165499 138.980079440205 133.054453517834  
131.081793789906 170.655648004461 166.04965258862 245.675725760577

260.016906472407 156.626742111441 163.85327708023 224.186573847185  
197.565122821625  
KCNJ16 162.893396525252 143.88649412841 138.677282903963  
140.319851351329 139.862403685817 139.180086017033 137.123016784819  
139.170102961407 143.733505359106 139.650726173186 161.530878860883  
141.119491147925  
KCNJ2 151.712097221291 164.295628750438 161.781529659549 157.180095329946  
165.314290446922 145.940227399711 147.401387099359 164.948785167149  
164.857465272302 209.33028918341 151.259426521768 177.759729226623  
KCNJ3 131.419663282022 127.161975533812 131.285279061742 127.814109293214  
131.606765174514 120.831070822199 127.028640787946 127.715766031466  
122.494779505958 127.354826381656 158.034418043685 121.387799881297  
KCNJ4 128.714459781294 137.086936444421 135.273184185121 132.106673891288  
141.488910091973 129.315412536491 145.777778096701 149.704586651832  
138.322109975426 145.447695228075 165.062129636008 138.136901441896  
KCNJ5 142.195764444916 131.708435940392 142.122556679441 134.946677624454  
140.402944266863 129.878330410179 136.520811697544 140.881084272745  
132.164132609317 134.929915732246 149.405118010893 140.49145570631  
KCNJ6 167.447964370395 162.223175359454 188.291563792748 171.278489808694  
142.330094018419 138.775095929764 147.117286738537 149.393022408213  
146.146800933028 155.865540894526 134.031960707639 141.929924728222  
KCNJ8 437.770841893227 614.239716118509 560.481802403627 920.840069938767  
149.574353706911 183.556662533396 161.24755274554 169.888264971936  
194.775234425687 176.47556448977 150.660106369128 175.847256673734  
KCNJ9 117.523834738903 124.697283474333 120.675356009213 133.554822920765  
128.882160435252 123.728481007459 140.063142443074 120.29173510435  
120.122719226116 116.476747183738 116.759526220736 116.19219007097  
KCNK1 189.840366340622 206.488530785667 177.582314734704 174.694388371236  
334.377352542623 420.743637858421 489.909407178594 583.938727139698  
302.809011218879 621.173315178959 226.960024551778 583.192225756596  
KCNK10 128.751758311249 124.690141443832 128.518381802959  
135.041687549769 133.527906709491 127.015086299437 130.598863171117  
122.212222959338 127.706499722854 139.941724115063 140.559553697317  
125.701083319929  
KCNK12 156.873097743717 157.684694038023 139.049085468313  
148.863297062269 277.946395491073 225.209315195163 164.836381332774  
200.618080312379 200.22145130696 330.758879244143 129.969400693456  
161.250520154112  
KCNK13 148.541832125061 158.000456937922 149.398118078302  
126.946305561543 167.484236948415 158.224122084011 147.728018766726  
142.869595099569 156.964080041261 155.578524031078 161.046418048832  
177.296424297967  
KCNK15 114.14858855653 125.865974180252 120.316950428535  
112.710573586525 119.455615461113 104.633603136988 118.025603140924  
127.125906877098 120.992440100307 124.528206512938 128.972276851419  
119.176139463015  
KCNK16 134.458958352588 140.269160279333 141.193081790037  
137.767900781368 126.27814255539 129.436712663487 121.146511496024  
139.701504237962 145.904866987074 142.042557207642 127.040027125755  
120.465934391246  
KCNK17 135.645439440707 125.59966423779 115.310953814885  
128.455670598648 121.924036463998 122.211000410541 114.350596695469  
119.06600048679 133.56263739203 117.348231147283 146.343230597246  
136.454911192129

KCNK18 161.126686827391 157.838771553729 164.929445749888  
 162.762473039474 162.223175359454 160.131256419524 144.630379072598  
 150.275163835924 165.139423820186 161.365443930448 143.376817049362  
 150.993910190626  
 KCNK2 146.923382271905 141.256915527472 126.205931638442 125.313515459103  
 126.27024495428 122.243585162452 125.566982723725 130.839508306116  
 124.503016568677 128.044165393924 121.320750074882 124.29420915051  
 KCNK3 311.715351215263 404.172535442156 391.185365567603 651.675427664911  
 187.4351946569 186.263348153627 159.650116062266 166.036553680319  
 160.520677267863 166.085469368498 167.73288535728 150.279529635193  
 KCNK4 153.633095853017 163.726898336284 152.247504238261 154.061101136889  
 154.239755912437 142.763157232147 145.681968019851 134.580526467375  
 140.469508410073 146.787927492706 142.258574581718 143.100436913184  
 KCNK5 163.41031443893 153.875760529011 139.182623417751 145.915129713165  
 214.714726648332 186.1961391235 135.351344868436 239.277801396834  
 209.568066932367 148.171225002967 192.095235288818 174.313718712035  
 KCNK6 478.040234382488 547.367381020623 591.013515828247 729.499296070289  
 258.489608621438 296.497100375888 237.456245064363 241.557810100265  
 239.503369457867 608.611927946607 248.927790738447 269.448201975645  
 KCNK7 156.768976123975 155.815785551964 161.155280539113 161.34427428845  
 154.928072022777 148.751755543817 154.98147307591 148.291518446423  
 149.498020676126 179.163748161358 152.163489631563 154.698312173556  
 KCNK9 139.591231478841 144.642717750351 130.706882659433 151.577450119302  
 145.36249226764 151.433634564939 136.08040874432 139.038389244329  
 137.379558348782 127.404415477384 178.222120802125 130.495294897642  
 KCNMA1 1005.62130301653 1044.00217726486 937.375361806971  
 1442.11349373764 128.462674862751 136.526706711584 130.51901676405  
 135.5237675623 142.110469428644 126.964621107029 161.795378938402  
 129.11843197744  
 KCNMB1 4159.96851384358 5589.21471380445 6006.01682776552  
 7354.94071109106 180.493406236326 197.981112645168 147.666724626127  
 199.516043142784 223.408447580188 221.719848707318 162.007384919302  
 150.348608467097  
 KCNMB2 144.468333012278 142.713318779614 143.759171254761  
 145.154323430995 149.73250641246 133.841519663164 131.104534164394  
 142.379120254855 142.705504445895 133.927844489731 146.719445835497  
 130.878694881324  
 KCNMB3 146.395248696835 144.83282018024 140.174087049513  
 148.818562911616 145.591320521493 149.013011292165 150.308048500142  
 184.204036882642 162.819608252826 152.796423361971 141.166605868578  
 150.456500446175  
 KCNMB4 195.123919692348 199.235895708128 172.934156790775  
 198.311821616128 187.15740398852 195.755450324985 141.536764775726  
 560.913732951675 151.694193636313 209.623583937962 146.590495255969  
 139.404820141366  
 KCNN1 113.031636180748 112.747067417774 122.696382705233 129.961042190085  
 131.595868226775 133.382099379709 139.923187410488 131.951649373072  
 122.251178920649 117.264555636952 141.127519700052 125.828998007608  
 KCNN2 172.486839924297 165.74458564887 178.294972422671 194.430896269275  
 130.364660391719 140.211016178402 127.073045558761 133.241744350369  
 129.616142780279 131.08389186558 131.809235171629 131.635641515901  
 KCNN3 224.6588173737 244.925472495705 170.376620730856 259.338947392465  
 124.563594928763 140.881084272745 124.821581853501 130.25146185271  
 131.062360037777 126.362418476129 139.320621744553 123.791515424464

|          |                  |                  |                  |                  |
|----------|------------------|------------------|------------------|------------------|
| KCNN4    | 142.406904585501 | 168.974155750959 | 157.333615322941 | 143.754105312957 |
|          | 546.841563406813 | 504.9864660689   | 600.919152191636 | 239.789994201722 |
|          | 475.540659315339 | 140.423711213355 | 485.373169494941 | 423.607299503704 |
| KCNQ1    | 137.00397800873  | 133.12904935533  | 141.513636348978 | 145.235087732482 |
|          | 146.71164737466  | 143.35902319003  | 151.905534823403 | 143.632325018964 |
|          | 140.277228495746 | 130.689272423595 | 154.336009472285 | 148.607885635446 |
| KCNQ1DN  | 151.823845684041 | 154.173439471404 | 133.713275043978 |                  |
|          | 141.86370253437  | 137.698423468762 | 144.997250967317 | 144.565926379402 |
|          | 152.73588666971  | 139.691470247318 | 164.181915898563 | 132.365002835934 |
|          | 136.751654856807 |                  |                  |                  |
| KCNQ1OT1 | 231.180528071672 | 217.531179216305 | 145.962664629275 |                  |
|          | 200.536814571322 | 170.784229026842 | 184.742960975938 | 149.6730835169   |
|          | 157.105644688583 | 236.108432603479 | 207.560911665319 | 163.970187373891 |
|          | 197.357728220717 |                  |                  |                  |
| KCNQ2    | 148.120968141789 | 145.768857553634 | 144.077080621909 | 141.03218895811  |
|          | 137.199718376452 | 135.57577294564  | 140.712618356383 | 136.428826558493 |
|          | 140.256871047018 | 146.038599656417 | 137.348951314875 | 135.058525398122 |
| KCNQ3    | 132.141918502025 | 123.833219705499 | 127.620377473963 | 133.327778635672 |
|          | 128.966514855818 | 129.001192144163 | 120.571074646092 | 131.041996482401 |
|          | 128.897493103888 | 131.829906202014 | 161.496700767073 | 132.177829138863 |
| KCNQ4    | 131.789877096016 | 124.272447276746 | 133.97321873161  | 132.70888569469  |
|          | 134.034970203523 | 129.628859533303 | 126.185560760543 | 129.329521415816 |
|          | 132.024244263352 | 159.23414970379  | 129.173772079264 | 138.038446102921 |
| KCNQ5    | 144.675182563174 | 140.29803170157  | 130.698850298016 | 153.231965895778 |
|          | 144.065554025603 | 145.789840511876 | 138.086270564406 | 136.607783800741 |
|          | 141.173167283016 | 141.725882943927 | 143.388028226208 | 153.311705636864 |
| KCNRG    | 147.013598868335 | 140.60741459333  | 135.393901125889 | 129.161305053472 |
|          | 142.49005761699  | 167.149578610266 | 132.737464610403 | 150.663062131717 |
|          | 163.970187373891 | 135.9097041056   | 144.754401731628 | 180.493406236326 |
| KCNS1    | 160.0697586671   | 155.897806593986 | 167.505381046729 | 151.543678860049 |
|          | 167.599784887933 | 180.518621542868 | 169.791616021987 | 174.246705740225 |
|          | 172.050718136571 | 142.571259316029 | 162.018860183534 | 188.131876231735 |
| KCNS2    | 126.656077572961 | 126.332299789266 | 114.350596695469 | 120.031976318697 |
|          | 119.746227888415 | 125.915689078001 | 116.280157890082 | 125.947359725013 |
|          | 121.448671447499 | 111.802672864815 | 134.185202200317 | 113.924310293916 |
| KCNS3    | 379.546197364027 | 278.274343962656 | 289.724297749772 | 290.502085667398 |
|          | 268.186156177622 | 385.522443482    | 288.68376542946  | 220.661922683143 |
|          | 176.874265462986 | 268.454310218604 | 269.141120401835 | 285.562276640039 |
| KCNT1    | 129.806104966617 | 123.491930765117 | 108.683531606889 | 109.724082559234 |
|          | 120.538535752185 | 111.683074830042 | 126.718380351644 | 103.012774960061 |
|          | 121.722412245175 | 123.507963359911 | 121.492896642899 | 114.452922529209 |
| KCNT2    | 155.40832015652  | 149.647926859169 | 144.12472003202  | 135.022438246099 |
|          | 120.871693555514 | 129.977863589097 | 138.30402764483  | 140.216148769999 |
|          | 136.508969220268 | 133.103982008292 | 127.822440239962 | 132.418902141838 |
| KCNU1    | 129.794293922951 | 130.705091244939 | 128.686425820835 | 125.488511939819 |
|          | 426.132037075477 | 229.443064589306 | 122.714122084817 | 129.664016819143 |
|          | 135.231458421096 | 126.643229085068 | 127.448123237021 | 130.204571771396 |
| KCNV1    | 152.974593669153 | 152.435416154284 | 149.068713925139 | 163.863677822465 |
|          | 145.444483891989 | 158.249743182741 | 152.66513184083  | 135.509927917168 |
|          | 154.277670551775 | 145.882793872634 | 138.603793282123 | 134.084602409011 |
| KCNV2    | 152.587331888423 | 143.720044122451 | 162.188509438986 | 149.286184588967 |
|          | 165.192945734166 | 151.355581590948 | 151.954389699615 | 152.705458417973 |
|          | 152.650867743471 | 148.288798428149 | 154.912576362196 | 131.185836673529 |

KCTD1 143.217978435486 149.911501378622 148.720181793879 142.528480882047  
140.009593108693 133.027592711375 141.639216893245 139.748733350375  
137.816691265242 221.491633607126 165.698527470382 138.805103589625  
KCTD10 876.288248962843 956.153239481189 907.306121257236  
913.22732386079 400.180574613078 319.018213637357 292.911761762431  
500.469781477166 285.258824662946 777.901979189395 465.809961695043  
311.481739745423  
KCTD11 170.818182800759 182.292947734054 170.306241656131  
181.229308386808 270.490971664802 168.801737310947 214.261611197599  
156.173099025259 152.842777535666 229.933577323411 265.866465528654  
187.380064367869  
KCTD12 693.516351173476 663.668537495345 528.478292835214  
585.552940765069 158.163599942547 263.64863646012 200.84691030169  
332.798130757632 271.196028302639 253.789045068884 267.696284751923  
254.359737178714  
KCTD13 257.24481414803 273.550544349798 250.515579402334  
315.863232876382 431.019896339435 508.127470400078 245.01029221002  
401.584032365337 335.790909130243 279.541294184609 265.110264596425  
255.435582426271  
KCTD14 147.949560045212 154.030432279825 141.15458637181  
128.44311762955 157.244026506342 169.940177050294 162.955366577418  
152.772177215856 140.652086055776 213.468420853218 140.849966309018  
193.674681547989  
KCTD15 255.71113398292 313.322307299463 282.926325589238  
443.259619455624 187.852455291319 202.778539118009 145.203083375014  
136.01865173754 147.1476865809 144.498245098592 181.566951620202  
177.204172894028  
KCTD16 127.524310543779 123.195738824794 125.463718280745  
123.170639180926 121.796519488793 127.356622898971 125.621467040793  
128.150801169886 126.51808376464 125.612670947405 191.418673767345  
123.595133376092  
KCTD17 183.604011732066 214.991170762327 191.297539967707  
272.16090053595 249.193270428348 189.450316943845 164.962201718762  
158.604431001643 179.421854100287 178.270849389719 183.921173538112  
192.399146702036  
KCTD18 201.269380130546 172.057586741925 238.745953695925  
187.069074575776 172.764511709731 203.389294254141 200.790119570144  
184.241640200823 181.668090319293 194.637233028442 230.697077917675  
212.016247864691  
KCTD19 127.128042857811 115.713909155043 137.748443205818  
141.849319373594 126.134393447943 134.330234316896 131.809235171629  
139.480361732772 140.402944266863 127.871445879091 121.164978896057  
125.160161268474  
KCTD2 204.260800563197 223.765583953184 190.291185322482 242.752995772995  
176.506227858258 170.622615783608 183.708917501519 174.971350923613  
172.84784588171 159.2488784104 175.313689069815 180.478294414245  
KCTD20 594.38228123675 638.77182631975 601.521068811063  
663.668537495345 212.5119818331 328.431289733169 478.293220151258  
276.756415094228 443.005424069211 413.687046868111 310.718449468465  
423.256021602613  
KCTD21 210.803130108618 205.57572471694 234.693846527867  
260.195256836955 187.046760972666 195.795728497916 176.066680490625  
183.3378528327 161.002880798225 177.592497020798 191.924177620803  
186.722842989058

|        |                  |                  |                  |                  |
|--------|------------------|------------------|------------------|------------------|
| KCTD3  | 608.611927946607 | 598.095370768587 | 775.781735108886 | 617.833194119379 |
|        | 273.651114834013 | 710.003412772888 | 405.032674307193 | 325.80154888448  |
|        | 403.208138816247 | 582.382786876656 | 463.99922423125  | 715.638378711433 |
| KCTD4  | 107.450945262092 | 107.466184687811 | 105.375878824562 | 112.896360244636 |
|        | 111.568329540016 | 100.216750525986 | 102.094370876743 | 113.268379270385 |
|        | 99.0767996209245 | 100.966979609222 | 112.464951599416 | 108.861243071977 |
| KCTD5  | 284.438411011954 | 318.778978094743 | 304.152390210727 | 323.896313343796 |
|        | 533.37609065123  | 561.379619105609 | 525.920873434688 | 499.776233241535 |
|        | 573.244735292944 | 737.650963292668 | 384.883635849576 | 512.723592291378 |
| KCTD6  | 312.557093674533 | 319.868227988842 | 309.47429862515  | 319.090371885653 |
|        | 247.08460296705  | 257.740674565975 | 256.495848662843 | 224.089220507176 |
|        | 228.820894086914 | 222.332748220525 | 234.214191437687 | 234.789040617681 |
| KCTD7  | 210.852300463808 | 231.572677616684 | 180.096239155058 | 238.230110356671 |
|        | 143.607579034109 | 168.365262340217 | 140.860339862967 | 150.891358590974 |
|        | 148.938822951404 | 142.307520290692 | 181.070689877681 | 143.260448301109 |
| KCTD8  | 149.630481387506 | 161.520362399369 | 167.030667499538 | 138.35538364303  |
|        | 167.273378118452 | 158.16210235723  | 173.766372029062 | 148.8870854102   |
|        | 170.844002412425 | 163.010527914347 | 138.756638791139 | 175.148318011395 |
| KCTD9  | 360.90109922539  | 357.773949920377 | 399.537363692534 | 315.513423195489 |
|        | 188.475801713801 | 244.101521795539 | 214.241635800083 | 200.652195873026 |
|        | 171.106189029362 | 482.677635089583 | 211.208937901871 | 232.492398623889 |
| KDELC1 | 186.244764337256 | 181.288519308219 | 153.402227428787 |                  |
|        | 165.576758218571 | 172.909795209733 | 155.91493956251  | 180.304585602206 |
|        | 159.257221624668 | 167.447964370395 | 176.486551181451 | 157.901967487277 |
|        | 144.625105340312 |                  |                  |                  |
| KDELC2 | 1081.47077865393 | 959.126054626181 | 910.087388930485 |                  |
|        | 897.51782613323  | 365.82705202869  | 293.528601172819 | 260.746952459282 |
|        | 442.698000781597 | 302.113807121396 | 204.710203150526 | 207.993943398697 |
|        | 371.00603789759  |                  |                  |                  |
| KDELR1 | 1559.26487922551 | 1671.82101590797 | 1908.81864728547 |                  |
|        | 1630.1630053946  | 8473.21873478131 | 2372.26073354008 | 2649.39312662326 |
|        | 2398.71483410593 | 3408.6535437109  | 2009.21931102311 | 2261.31473132315 |
|        | 2072.01578063404 |                  |                  |                  |
| KDELR2 | 359.703969802888 | 338.026161865853 | 266.442565636226 |                  |
|        | 261.251965523684 | 1774.22769195939 | 492.534183006883 | 959.532977061027 |
|        | 873.256632365737 | 886.517088614968 | 1112.4055726239  | 546.399972543938 |
|        | 834.187014201026 |                  |                  |                  |
| KDELR3 | 202.397972518715 | 176.53912635694  | 174.807363753172 |                  |
|        | 176.820928772968 | 331.888150158628 | 173.353648927895 | 202.230920499592 |
|        | 228.45211887819  | 189.292740365891 | 295.678097392123 | 165.692508737757 |
|        | 183.358807104988 |                  |                  |                  |
| KDM1B  | 145.172776053    | 138.1693725329   | 159.13662975347  | 142.886493948916 |
|        | 159.420533375725 | 137.179926233547 | 154.978243057971 | 149.797850183848 |
|        | 150.709091532746 | 164.880911221767 | 153.582185523361 | 162.110943457969 |
| KDM2B  | 168.210416363286 | 184.954673605577 | 159.170943469313 | 166.2468445883   |
|        | 146.666759322506 | 179.400220328552 | 164.491207767654 | 182.747079625619 |
|        | 144.370811043456 | 161.89906072679  | 157.754622099874 | 159.611551480901 |
| KDM3B  | 616.188923504376 | 689.271009631393 | 841.623780229898 | 599.208370337812 |
|        | 341.251360936154 | 389.260166168847 | 408.811415529922 | 509.14726076246  |
|        | 422.520372346993 | 568.701661112562 | 920.840069938767 | 424.855168311509 |
| KDM4D  | 127.215777044942 | 148.437676259828 | 166.076692502428 | 146.160188002433 |
|        | 123.7615105541   | 139.714198638713 | 123.700076467648 | 128.890685255595 |
|        | 146.328876892698 | 133.563494063292 | 145.692644807799 | 148.47676851933  |

KDM5A 159.113259830623 142.737537206204 138.383183017683 135.48250324478  
136.499228715856 146.981521393075 157.631978594005 140.309394542299  
138.224383646894 147.701092466105 115.242526386551 144.725650040212  
KDM5B 641.338900241674 846.425467119342 622.834462068316 727.114956464515  
877.598505913096 1243.96721244424 1406.73270115373 597.795856268827  
1052.553421812 1409.42016970226 1576.21727854603 1373.67062432073  
KDM6B 157.922718487881 174.66966623557 153.943227610765 188.767121505943  
177.802767772786 159.624341769644 159.848342125486 174.498521167568  
165.286724415145 138.57506931811 182.335981256243 147.121049266117  
KDR 126.693235227579 124.924794564647 124.842426851438 113.170014668758  
130.135721123253 119.819082491115 124.915772594451 119.682747854629  
132.283682066898 130.57903858574 148.162914253981 129.677874035481  
KDSR 448.644778906048 377.462793982812 384.16579891756 430.505037012814  
133.874468336025 213.791379190359 203.943245360496 200.065184172871  
178.347708009405 191.348260799746 179.854800301573 175.139231359014  
KEAP1 316.722160860531 361.429760858441 413.502150181875 453.058639550475  
427.872407051254 353.50447714719 436.586158384666 352.945088028205  
308.330044958513 406.816482069141 387.068276379114 347.620001353026  
KEL 142.370721565016 131.454955038299 152.620244087653 143.614075503775  
133.489068665353 118.342067845126 141.67550758321 125.324187741972  
150.78145177853 138.60849268758 136.87712607887 168.3523504179  
KENAE 142.200427602461 162.961792330623 174.23955831109 153.836520485018  
185.432587490792 164.423960071908 167.226663395855 154.395261192114  
163.416011199431 145.442914818456 168.73918684069 163.416011199431  
KERA 133.773427881651 133.915830295107 146.84891312893 151.360575274272  
135.715745768179 150.494260282384 137.5954358221 142.481897141275  
144.02847768185 147.488635834397 137.704257049203 144.522461545204  
KGFLP1 136.679405220947 129.977863589097 140.976675511847  
144.54895913821 139.801108744526 133.460655803085 146.157459765796  
131.381189141974 139.260868989409 149.647926859169 136.501159644992  
144.848839185565  
KGFLP2 122.843792000493 126.090985925439 132.960708384399  
148.973277994329 139.534014289993 139.249869918235 133.322752419739  
132.14412512622 131.853183159267 140.122611763254 124.602474178438  
134.30854633824  
KHDC1 137.550607284001 138.756638791139 141.425393615228 145.941674563997  
137.053393215628 112.590379042108 115.995309578182 117.32734978289  
120.935863853101 115.981530322377 116.919109599361 116.700397932007  
KHDC1L 147.777050372032 136.587165242663 150.232470359841  
138.976386995124 148.925418133902 128.912199634685 137.669753723768  
138.13987378399 134.9404536551 158.14434287956 160.010501226517  
138.548983773386  
KHDRBS1 2053.71550326011 2234.85920641661 2926.06746795504  
1955.96772733047 2715.55326746591 3157.98451877581 3387.5366256957  
3688.68740405322 3869.12225821096 3106.94181270197 3012.49794349837  
3371.24667467952  
KHDRBS2 136.835889180879 126.917669470999 140.081280065913  
132.598022317288 129.845344493418 146.271180025157 143.275056599274  
131.146604635155 141.623851511993 132.071099697667 123.689439578326  
116.576896337786  
KHDRBS3 699.800360892516 514.61297221467 452.167674725454  
404.618867159141 262.488050186425 316.663128947813 142.999526950651  
381.253673759781 168.753660955229 194.831347257735 170.561596645385  
141.106863165059

KHK 150.227629690236 149.625528206375 145.804420322848 152.641885687726  
153.391895732807 150.283447275981 155.962564511907 150.580133889656  
146.353239460684 149.860490620507 141.401480567426 153.051143478997  
KHNYN 245.269004485826 282.561381978659 235.867149024041 268.52833723726  
328.680312364877 165.803549113373 317.206754773681 328.680312364877  
217.847954914851 211.289598823191 255.677315946354 285.882780066861  
KHSRP 394.35596596181 510.811470658575 372.757091748175 590.3584324045  
1064.12835214671 596.076764072945 607.805002786409 681.172359997071  
530.561387049511 551.823767223086 617.318955611228 576.451964662024  
KIAA0020 485.87138934376 396.40172043456 396.611050163857  
401.840794789616 361.687156919012 504.502047826003 353.98839683842  
609.939982655706 540.359249705821 560.180656219785 482.466736153026  
490.269418483997  
KIAA0040 151.083551412109 159.331110936668 137.556552701816  
157.035739033122 144.087004064416 147.52403424052 131.265594391542  
142.726324048628 143.796699867588 137.082234284426 167.612577768782  
170.768398273919  
KIAA0082 164.225562434885 163.119211741255 154.070450565144  
160.843325877861 172.152570321727 156.018200674475 149.237422245619  
132.28010415054 138.548983773386 130.497405221273 179.74065086312  
143.138613573764  
KIAA0087 125.506466437764 124.735542880811 132.502153153826  
120.827732270626 120.565485864499 116.547306374097 114.953328013917  
127.884750925048 123.7615105541 131.894919149666 120.297848408451  
130.849201993866  
KIAA0090 324.203537490975 333.676803661366 245.766885283797  
310.690317681243 456.126096817454 363.025385707747 335.790909130243  
245.195406638979 285.30221551106 288.182388699147 331.848516303011  
321.492900106953  
KIAA0100 202.145180994821 257.622317771472 204.999796322451  
274.564508105177 385.750371084 230.975434289172 291.105673222859  
324.067396271281 228.317527475322 256.614964511846 307.083179338165  
242.037132958656  
KIAA0101 9596.10781313429 9070.86397918429 11150.5512437377  
10608.0671430066 6944.90824302953 11281.201625198 8322.20177173035  
9403.76665152182 10836.7380675792 8121.54750071211 5314.0635307876  
9450.52572756597  
KIAA0114 371.168752104821 423.607299503704 602.141151173094  
286.310923582432 579.049608568926 1113.05943954513 953.099915501575  
451.147418314412 887.471553448641 278.428310548805 1218.64951314553  
727.814681346494  
KIAA0125 128.597272557033 136.246543311291 139.94624507228  
136.601220755282 137.5954358221 139.781351410748 134.185202200317  
150.534608517044 166.674240866931 143.579660352652 140.028169667777  
141.218832234405  
KIAA0133 204.787016443123 183.443006525616 175.647878042257  
198.954254778846 242.440966395613 238.904826940476 221.253717494488  
222.332748220525 206.010481981919 186.447049658314 193.544035570799  
235.595194918187  
KIAA0141 362.306819797508 340.098306132634 369.156887999872  
405.64711132293 257.706904467657 229.046153362151 370.798852361374  
335.301103690781 252.015257713669 381.014521577291 668.286400833485  
421.303580698397



KIAA0146 242.141362101262 223.89854167651 272.500572765647  
254.013921962363 305.398934391579 451.887564294551 411.878556907186  
383.10686624119 426.364663722264 268.328002606268 417.615521090665  
345.627266482686

KIAA0174 2016.52142068599 2137.44704613378 1726.15788525017  
1883.74008471233 1434.1439428394 1666.80650105101 1816.3719976564  
1640.99641023476 2468.47687203968 1396.4168898623 3066.69261114251  
2099.85702995194

KIAA0182 616.014975366684 555.607185132941 515.597523880328  
644.301665020526 327.384671423687 368.276805218658 374.406855727422  
193.190059954084 449.103432410618 320.305852961452 272.077877821339  
266.563990988678

KIAA0194 467.187222441283 424.751154004399 403.47026424469  
412.648926259488 381.808809625801 401.102586700919 590.3584324045  
418.163219634152 470.308610828825 836.613819700658 498.180196203245  
768.67030514096

KIAA0195 247.407442038488 327.749926183823 214.068044241507  
422.973606694449 641.774812292709 240.182016388745 307.945884504629  
252.810636571566 210.550995170071 202.761449711661 284.351529744475  
274.316982298975

KIAA0196 467.512355593598 403.720036930931 555.259469428492  
440.203336761263 392.539157974899 711.729857540712 537.350891960682  
491.906642849373 785.008529077795 603.061485415867 544.107739610054  
623.888568444132

KIAA0226 151.500282404318 164.208044717557 161.338215647108  
171.093611712143 130.302829773323 166.315369318355 158.408494909763  
155.194521954405 164.302998010829 141.696969082758 161.866405026758  
156.957578703389

KIAA0232 163.059196519365 152.657649988502 145.01322767825  
149.272219727411 133.299599411025 232.801257700571 179.44023315251  
186.04763660516 149.977924522553 152.432477504097 189.225893411944  
206.340478393262

KIAA0240 873.408431189194 955.604404066769 797.73902873919  
959.532977061027 329.146025181674 308.38513924253 332.400086578723  
329.604568691377 360.124745133393 342.245182599593 489.909407178594  
378.862741410359

KIAA0247 319.128582107184 341.501397478593 234.370850809531  
342.037040881785 267.422232051733 195.364709354814 209.887047474042  
243.622678182687 262.53374754047 248.993716339029 334.443733461841  
216.32785564297

KIAA0251 135.855243915966 131.705912986393 148.678869698203  
143.67880977119 136.507961715591 169.378422829858 153.616692588396  
161.956032597813 155.993849743656 151.905534823403 142.480203661104  
167.43630698726

KIAA0258 174.26780796802 172.237115475147 154.632563476364  
178.551434222154 192.113217321485 142.607578275494 195.050834479424  
141.86370253437 169.963805688413 156.662150993832 150.868712184357  
150.626826756019

KIAA0261 246.850599569231 234.693846527867 236.251507822415  
200.302384864371 184.694741621812 295.507504000509 254.668502187945  
212.171281020103 242.382534384155 164.784346867158 314.014654357569  
318.297819854586

KIAA0284 149.066522533956 146.245915271213 144.997250967317  
164.886944426276 208.793650722271 133.185908839766 126.722212054469

145.728370703165 144.073739611496 135.680872395032 181.889592946523  
156.96934803556  
KIAA0317 131.915864620669 167.468390483999 133.079097536801  
169.232677769521 139.871928127715 158.263657373911 141.094578556895  
132.448602065824 148.758316681306 130.661695937728 133.016668180102  
132.189426012448  
KIAA0319 110.718864165172 129.895388481159 125.638247136202  
126.917669470999 108.288420807873 117.101933186269 116.90832995093  
114.721282552636 118.743966166637 116.597352307016 129.729475933233  
120.216999784094  
KIAA0319L 175.647878042257 175.139231359014 171.916201289104  
174.854570705 204.544266331066 176.019082929386 265.866465528654  
189.142295015168 201.987081022654 200.127994198329 204.544266331066  
207.73395131954  
KIAA0355 793.071192619058 759.802694618208 612.06231165648  
764.774225930479 419.846584903512 753.389428590366 600.757699463777  
644.741046498743 821.862271569917 714.274201838067 549.162299481184  
568.310800941091  
KIAA0363 398.193129265416 387.477198908304 343.200277800027  
376.692422468905 147.624372080117 137.848546040474 154.218967720305  
139.725987763226 155.53992663898 147.125005489393 130.773945967285  
143.660679324057  
KIAA0367 3850.41246770812 3024.62888503536 4486.35687688252  
3636.59530016939 135.190698960212 148.538400348149 134.759283147919  
150.868712184357 149.593135821045 140.796641921516 152.42111372681  
130.036744891822  
KIAA0368 621.489906442001 540.946852709312 751.568940762011  
583.192225756596 377.024120035829 344.915370555826 352.50679573356  
279.668007824988 357.672950588403 506.029788151779 728.485195792194  
314.646369385896  
KIAA0391 263.295012964476 315.064477782052 269.448201975645  
286.818166898922 377.800067476868 925.009157785129 415.178470246749  
515.327420453564 337.077153882632 556.568221094639 616.995114856023  
674.905270154355  
KIAA0406 198.90533452253 189.482046688226 180.733673680261  
224.167511918105 243.839402991061 196.566937667522 328.078808625906  
210.117033165026 291.50783830983 216.974834077975 192.827534610486  
166.879042308539  
KIAA0408 455.392133846517 519.672796004691 538.872348151809  
505.560841055884 188.145154995617 386.917038897322 272.666435295288  
300.314088267108 250.217137496422 274.092048989484 396.459213999636  
269.053237303244  
KIAA0415 141.892214695902 165.2958475168 134.635645106042  
173.050039480459 255.992494620859 133.911650164508 142.41737138634  
139.071908528327 146.392657608076 139.566124411099 159.097020087275  
141.767311448808  
KIAA0427 885.713964813911 800.739422189427 694.288215755716  
1205.45751308367 231.239126548656 232.127996106421 209.7558663154  
220.446775597113 222.990586491219 192.860161535869 297.636316709322  
208.75656341402  
KIAA0430 1923.19560386389 1836.22560264874 2656.38138490746  
1452.63736288691 587.181357555703 878.167149313285 1142.09977159958  
1158.057104827 1113.59310757948 768.67030514096 1682.64624665931  
798.1490651671

KIAA0460 251.939696394174 274.736124442229 228.879434668972  
282.101714660307 213.7326050342 163.593106951255 161.704966315183  
176.27969404442 147.491439949088 141.765004355609 184.873459141947  
167.900071375885  
KIAA0467 150.079372712689 131.876061826583 131.65084896906  
138.158400190671 167.063762404009 135.252082574955 135.144908040903  
128.318545300038 138.256765189241 150.769819282075 148.81406900745  
153.474566767304  
KIAA0492 209.464347017443 231.796421262015 184.577511730401  
187.380064367869 204.396576475753 435.796737132969 215.698924670416  
277.459328083162 199.327939161502 182.181756507598 243.336550161566  
228.649073045499  
KIAA0494 1077.95929298567 1065.36715400306 1034.68475089075  
916.4187683687 489.528040775004 1455.75693295732 1210.40302822121  
1257.00798908017 1328.38230265655 845.646455991008 1341.78081782818  
1247.91041567746  
KIAA0495 288.505502880424 294.069353373633 340.608165077422  
371.127480221666 153.315309202016 152.470980074365 156.237282338037  
160.441879289883 164.777719508421 144.188147197178 122.139832263188  
184.542232315662  
KIAA0513 433.751675703425 416.075109522039 510.972389503051  
560.015499136193 165.476670465739 177.630246034993 177.94501172269  
197.667299074218 174.202069525223 153.741061283101 164.708712337156  
178.429953283621  
KIAA0514 145.958718601763 137.677396262152 136.949403128211  
142.474762834848 234.996704304673 128.608401533371 153.068898842283  
148.344941331885 151.110467345727 146.501559368223 133.148442269517  
150.71435300188  
KIAA0527 132.606735652984 140.987694585232 150.364511432468  
141.382096896508 136.81406168343 154.869171648942 150.178490092437  
140.21908493941 149.65417821994 134.964619235561 141.198692540628  
145.821544099585  
KIAA0528 1010.23703166498 839.901173743755 1006.03677177164  
964.093668483033 456.298408568636 644.449861831749 791.840531191783  
886.517088614968 884.248568386012 490.269418483997 1047.78978081493  
683.019502027271  
KIAA0556 306.068269136821 362.795691170335 342.935878735854  
447.674610082872 330.080428155378 331.464977124667 355.80042210486  
525.287367366192 439.928008927647 342.935878735854 483.429488817674  
349.540558521616  
KIAA0562 218.393783552484 213.877482604185 165.698527470382  
249.763375041547 336.338518973032 188.503673684625 243.936797286495  
254.287838845201 238.588762326319 201.987081022654 250.647644543963  
179.711363255355  
KIAA0564 186.185055364718 180.619956937489 205.226635237992  
187.407526616724 178.072538529634 265.791342287571 154.798287249541  
176.145076825955 177.910104644497 197.326259802349 284.748764120614  
358.415933397099  
KIAA0565 138.814930200619 141.229805348717 140.792400101142  
139.057572927874 140.849966309018 140.227863970629 150.660106369128  
134.344021502031 136.823008283157 139.959629641771 132.948096807634  
134.53861441495  
KIAA0586 287.195290301363 260.016906472407 320.877897822963  
332.798130757632 183.719279448844 208.869189492052 330.241479004885

262.259969786927 195.185025611945 270.360397503276 331.164053277361  
276.414209660023  
KIAA0649 186.563913311757 192.737713851863 153.318678468245  
232.231236745251 294.323621186916 162.007384919302 181.500222423634  
157.663460168247 171.39347085745 164.302998010829 262.259969786927  
166.627372924295  
KIAA0652 178.89423690001 175.7330682766 173.892380305166  
134.584919596742 154.491373296392 154.080778100852 179.914070416793  
160.975741751317 158.675960205792 172.973175988757 155.465250172768  
147.710252756854  
KIAA0664 431.546135503733 529.854965483609 456.990425618007  
741.433093896472 812.298381693378 479.138177792954 298.347201056937  
534.276129011237 394.810886122555 311.612118247493 449.745016106912  
446.948699651916  
KIAA0672 273.353254857377 288.026656721827 289.956528242564  
320.525885538523 272.854435771465 166.506602328929 154.630837508249  
152.026310884327 165.781667492391 148.497497694754 155.253032078086  
142.719216118914  
KIAA0692 135.787323859105 143.260448301109 134.658664100744  
145.324499089416 135.621035941292 140.145470073979 139.986119754908  
136.759322361584 144.699084515687 143.909501365162 142.135495724286  
148.107004870598  
KIAA0738 137.038866196785 149.754842928462 136.91779948054  
158.179586948369 158.631298154353 135.114900669781 125.068362001087  
150.500676225569 159.932941342403 149.791777262424 152.101695555105  
139.912325578837  
KIAA0748 150.188128594079 149.541917326637 160.28767775843  
151.428283279424 156.768976123975 182.042104888745 155.40832015652  
145.604066669916 154.281674854552 133.067237748129 142.290253129837  
159.298815559223  
KIAA0753 230.079664410595 224.92725876841 253.186749111526  
213.26158748941 206.35895739543 237.825857080173 194.789918629905  
213.914599384797 208.291714758548 201.555964610849 258.727309442475  
189.662974464847  
KIAA0754 132.334666750573 124.825103464238 132.413527125434  
128.485150698799 131.704192327287 130.684569384626 141.59046197203  
132.606735652984 139.109712542702 125.321968563987 134.768694020981  
141.193081790037  
KIAA0773 164.098880989592 153.257097727888 168.890506147594  
181.003812824014 141.253030949701 150.023791544584 157.162523271165  
157.885229749634 144.270828498856 154.501338425995 129.606271613463  
139.211746200839  
KIAA0776 153.507553306723 168.906637816046 218.350166753833  
166.709393547104 156.441368290572 205.011514211101 246.152798696993  
194.789918629905 187.824032557194 211.035617136177 191.543371466252  
235.650688823345  
KIAA0802 131.013719535992 153.589626253969 155.111346336412  
161.506431005203 157.454558821261 137.020473156363 172.816477996646  
191.146276657897 144.935571704834 136.067657949844 174.23955831109  
195.831574717135  
KIAA0831 664.60530723006 717.025533065694 889.6617510875  
769.958422740085 348.921877633633 524.245387973163 440.404188514231  
373.290426793366 330.457534783492 479.469659712246 455.930204471585  
413.983821839274

KIAA0853 155.061749542085 133.864612785572 143.689257983705  
153.675939908241 114.520066232155 145.652246303142 137.973211667003  
144.179880084235 139.057572927874 131.702788057359 121.774697402171  
142.436624546651  
KIAA0888 148.452947427498 152.411545237204 154.889079187405  
147.661748633455 147.44463861207 164.763269377973 151.524197474057  
130.71040889651 137.587917564413 159.710615852435 145.346970289157  
156.990325995053  
KIAA0889 180.179981672095 188.322853571195 195.740661051834  
175.663960113118 156.745051321143 175.840639511966 175.428000742222  
164.14265547147 152.849810441802 144.669509071181 150.63456320644  
179.009510246709  
KIAA0892 290.090495047722 264.526189799049 391.252450588331  
349.248144552634 252.249994170536 486.653672099699 382.744523022686  
487.358720934063 438.03648998391 335.938170230765 387.224184063662  
435.183433729519  
KIAA0895 187.893420010787 157.729732484131 185.063870458561  
136.501159644992 144.335732650795 151.532859494021 167.568776552757  
163.134784474437 142.956870642583 166.257275241937 143.821269460523  
139.399195840117  
KIAA0895L 142.124876403709 167.491399614986 144.900785401228  
149.645548888832 136.173596381385 142.372470063444 142.603436693587  
138.715208319278 160.949030247406 152.849810441802 150.707113487334  
180.290887733427  
KIAA0907 880.140852200235 686.028214419557 934.173273294189  
674.742955681908 493.209107049493 799.423640530777 1026.61404215739  
916.836022395768 983.094485868275 569.967953318205 1162.8644618472  
1368.91287156398  
KIAA0913 988.788192022196 1144.92109214621 1040.73829397913  
1294.74864310494 682.075583857856 383.182507425579 459.388390392518  
407.875393458322 549.96567374713 563.339837352678 796.699879495384  
607.26455470867  
KIAA0922 334.350011399462 342.555640222963 400.180574613078  
407.244564912365 207.624240598841 215.673878830563 209.93789387724  
218.529160053398 276.582734590058 387.711471687237 166.741762854246  
187.65716654049  
KIAA0947 190.76537287329 183.247396324425 202.524668687686  
173.726420791056 175.617504025145 181.238505183667 200.146843808423  
187.769988580599 179.191401472241 167.791351000743 175.989742412417  
179.037397826592  
KIAA0953 108.007762863766 117.22284971665 111.703224727793  
127.305306470493 106.393497890486 121.908945872994 125.794788766462  
116.718099363329 125.136745288071 121.130837254861 107.395559299582  
122.900675062181  
KIAA1009 184.801068553988 191.146276657897 217.125327913156  
220.047563627558 170.974759483946 170.290455446376 202.357989894268  
189.509062639279 191.830711714844 197.91325268683 170.636731478608  
167.180406126438  
KIAA1012 576.298671053238 546.611519125021 656.660582895703  
497.53605530806 385.238961394234 733.648333788712 504.502047826003  
858.020739710943 770.632068590053 696.131296166255 781.208872924532  
764.137504481329  
KIAA1024 132.983739057264 116.408126010926 130.562422910426  
112.534864678892 118.684077097437 108.461141538047 126.506749037908

122.514826802737 115.713909155043 127.665162524824 119.780654293448  
120.082391311921  
KIAA1024L 143.760519659724 123.132178371802 126.364445020215  
126.118745937997 140.028169667777 127.218362452043 124.248997533959  
127.56862018147 121.181654892305 140.743917481548 139.232893342069  
136.039076665712  
KIAA1026 167.764352429391 156.077604146143 155.960886801091  
145.89593390936 212.016247864691 172.816477996646 161.748547772524  
155.091135297162 156.551925771312 185.617936412633 158.175138008678  
165.476670465739  
KIAA1033 193.48293264444 170.818182800759 151.954389699615  
141.471127716868 162.982557003317 157.83460319212 155.76568091161  
146.713861499546 173.735045816949 191.507657960386 188.131876231735  
153.836520485018  
KIAA1045 143.765257998859 127.189310473419 126.237900397603  
149.340614923384 139.510764003291 132.247611790269 132.70442458261  
142.05571112803 133.372231702721 139.048551183511 134.671840308041  
129.661073814998  
KIAA1086 170.052320640686 163.529157756197 154.01988200569  
157.524049610272 161.338215647108 148.504996616452 148.492328039604  
163.390929975591 163.267148547147 171.896929562022 156.210423316722  
181.922907273871  
KIAA1107 146.361128670362 164.14265547147 175.462290891421  
129.869363181125 190.174729017089 161.755290291637 175.476184387338  
179.632562895905 154.091431691072 148.022287939066 149.335288055732  
162.723310549554  
KIAA1109 157.6811998968 169.574755162815 147.195127201893  
151.282370273189 161.217964573491 146.634383964797 145.844961942581  
157.6790197503 145.180346905484 160.769011617127 146.533374238616  
165.581217879395  
KIAA1128 642.647554580301 489.75389978732 977.450397042213  
529.854965483609 176.622758931306 270.12941437975 242.471259857978  
241.675251479835 228.649073045499 270.651318838953 399.620724969771  
255.793823796456  
KIAA1143 175.717830026564 167.42476096854 148.842322753916  
143.514848892447 190.850639994777 189.027594735456 195.630643168176  
160.932913244423 180.63469438043 200.242239130026 130.647944268116  
204.489837323989  
KIAA1147 324.56043349882 318.423602671236 347.081036934975  
288.221041179309 268.698146407497 306.946103334814 380.888728347647  
419.272193677273 305.343879847672 303.608918161742 356.05426191171  
411.603820288919  
KIAA1160 303.907003535357 287.041585684111 353.078842299761  
310.598930734244 242.348427307994 262.60377731258 312.601510033941  
257.408058436941 301.638918685657 323.086368767924 348.36178568457  
295.973370766318  
KIAA1161 113.597215383696 130.240366272285 131.570358580547  
152.179281925254 131.093917654245 131.310537960214 128.52473663996  
125.243735617266 122.285983209924 140.980119908597 169.488652117125  
130.416957431512  
KIAA1191 1176.01058971561 1059.80292026589 1294.18114559128  
1048.85768964657 504.617795280805 842.567990276734 1097.60805874165  
857.090339943417 620.760947818536 1536.52218968817 1008.43888926584  
918.742625270041

KIAA1199 123.711828013052 131.177396785633 117.432860005907  
135.336754997434 222.365208637146 151.548865569913 191.241000498118  
228.649073045499 488.57622466019 264.109049504585 262.691387377392  
122.854722097864  
KIAA1202 196.329602378007 169.791616021987 191.241000498118  
170.251197850968 170.158189150422 165.169920299969 161.569793476847  
177.538262133568 179.432235153344 154.043604150962 175.495965414493  
176.100691355682  
KIAA1210 168.969180646603 141.397046998678 159.788143847569  
140.338622198206 144.785852437305 145.665155500862 151.159145294127  
147.397591251955 135.6149724596 137.835047580854 130.290454258898  
143.897248922317  
KIAA1211 170.490099282436 156.228039404029 164.910911528819  
156.460374293022 166.091736766853 149.518870320398 154.562761981868  
179.593817076317 161.498785105514 165.320977593677 148.435419356331  
146.321713521846  
KIAA1217 214.132445321197 252.365946808078 229.594081405784  
256.873090834376 218.18756955522 193.786889748038 236.191384383802  
194.002075848131 209.417052464583 192.878416717298 326.055727207966  
260.356834114611  
KIAA1239 134.782388051531 139.282741110499 138.496366637658  
144.212231875922 142.088243118644 137.065315360321 137.509100088226  
137.451687756052 130.205764567934 143.530190096012 126.828097770667  
139.406427549733  
KIAA1244 147.910699446264 162.970595558845 144.525782437057  
124.972772541334 237.78482574225 273.252023367028 418.420753332232  
271.897511879509 273.550544349798 219.171591031864 507.137104111742  
324.009703043876  
KIAA1245 145.219057535246 135.452340998039 146.968599872798  
144.920107068083 134.793399942417 157.166379887259 158.058346079359  
144.617654961472 144.28597792625 139.798940929781 147.608094270078  
139.427216913809  
KIAA1257 128.066043751951 130.669085802748 120.967523586161  
131.079066781806 140.211016178402 125.101995710829 137.195906276069  
132.021249712589 121.771891473027 121.207040901483 134.105941085621  
130.962368929833  
KIAA1267 821.465895280454 854.815394943219 745.844395215451  
1006.24899131914 511.996883507889 504.436992949763 641.338900241674  
643.660739343159 609.309339417625 410.845034795716 672.862678078975  
545.200687301057  
KIAA1271 182.095387488796 173.115418167551 248.403014089812  
184.742960975938 136.609461559853 153.326420485822 162.192879711747  
173.450023117394 166.472068379965 156.392603045231 170.01557699913  
175.210232663606  
KIAA1274 248.761038207278 241.557810100265 181.491120129045  
235.680462167404 177.223953859764 185.485858719975 176.680708339236  
200.371280127668 187.15740398852 214.082408290757 181.607253339427  
192.331142672469  
KIAA1276 171.494975393562 162.565576110247 174.663845688179  
181.54273463264 157.016659994185 171.795878750365 168.091278015885  
165.863118584978 157.368974632451 159.365070384451 157.659824861915  
161.911468506919  
KIAA1279 233.103476996669 213.447886742681 310.23294370018  
204.5274881834 194.921021761976 200.146843808423 235.76573393374

228.184535093641 207.514489132778 207.123420880185 301.798676825176  
245.553138677866  
KIAA1285 271.397087928135 242.382534384155 308.517561840596  
330.758879244143 286.469773081481 190.281570660806 230.179200974631  
191.861598059182 200.242239130026 214.684538620841 205.362816362477  
209.811693771836  
KIAA1310 3455.20639616159 3328.99028463277 3111.50508060882  
3976.40140405628 825.034504959272 1359.63626195826 1382.95068105649  
1249.89496565284 1385.28044421961 1341.78081782818 1790.53556140959  
1464.04124596264  
KIAA1324 124.072512083237 129.095469955392 128.255141263975  
121.515872228716 134.410706628655 118.631771242606 123.833219705499  
130.883516197483 137.384815877899 113.862790983655 109.851507510788  
123.29908883119  
KIAA1324L 203.071186284148 188.252507246148 214.132445321197  
174.928155956396 369.592501881153 326.176058036757 358.843277491684  
247.622351589081 209.385358804928 257.132618311227 408.510567121592  
592.822841077599  
KIAA1328 209.279164243868 211.468099571442 186.904126552483  
223.765583953184 134.850260739685 143.669490888725 137.68634745111  
158.371599884762 147.640100078933 143.912136782374 157.530573508003  
147.452986308926  
KIAA1333 140.875923123766 139.150209111606 128.528510920423  
122.796362813922 130.321133400634 145.005991300977 133.204793127029  
153.992763544073 153.271518348258 139.236217474885 143.774841336279  
135.313148180961  
KIAA1345 158.260676113325 123.700076467648 151.993651822163  
136.507961715591 126.37572518012 151.121293928309 133.727447520255  
137.082234284426 139.621016978072 183.371103136697 114.170354748872  
146.992289167283  
KIAA1370 290.582957824549 312.961981998512 469.64693728427  
259.900447705311 446.509863498357 309.75140197669 765.128667448261  
433.314881387431 479.761165832339 334.056545911557 282.101714660307  
326.176058036757  
KIAA1377 155.518807026156 166.433933349193 152.599052194143  
143.470181156799 139.350622585937 136.788269716383 137.636900130922  
146.506263412584 126.5764774133 142.434356144925 139.420025842675  
131.440195723963  
KIAA1383 138.57506931811 153.267549449395 156.723502568908  
167.003917876371 163.346402397924 150.95033946042 170.701964358516  
153.46645509759 141.449119281888 159.629232808787 165.027938535393  
170.87247413028  
KIAA1407 164.433462115832 158.774910841987 164.126980102525  
154.884821436554 150.560305000601 152.578091976678 161.764411756848  
179.079061789059 216.102897582821 146.722211039754 205.026176598298  
166.415922313464  
KIAA1409 142.986412837634 127.525844737562 131.296518221093  
131.608580511282 145.830916005206 126.426212216646 147.954079022076  
135.292532783991 130.839508306116 151.169283505727 120.212294184999  
142.683117062711  
KIAA1429 301.188296465202 296.290104133844 326.962330523237  
305.499194075747 224.298067319406 281.405355165228 250.406775889932  
264.306927596371 294.653534388707 282.442528230519 242.657224881824  
236.032288046282



KIAA1430 170.951009118578 191.365014963729 178.939268046323  
171.426334687626 139.499652059557 175.485672103348 174.881557472722  
155.664126780859 163.059196519365 178.339211170442 171.759102794108  
190.255797389524  
KIAA1432 159.106269972346 162.422173095045 152.532083511961  
149.844677055508 154.340042518983 155.058852833902 161.126686827391  
165.009696356892 167.741556663724 157.952018720438 145.42029807396  
162.18174589792  
KIAA1462 198.205113187281 200.001438979007 255.793823796456  
224.851680313689 179.026308021985 147.205511952997 142.531683761072  
159.611551480901 163.074919710259 157.86653024793 165.570531605115  
173.761036260869  
KIAA1467 142.483308497682 158.886786960196 143.912136782374  
153.13384838492 214.566711351899 549.047065540118 378.585058475083  
344.379733302418 241.987100712218 157.878110410517 313.773476049783  
188.981391266203  
KIAA1468 236.164692035094 220.242344043437 226.936810012475  
186.112835637689 304.111808763793 356.62074247786 326.055727207966  
427.390091157726 348.300300174924 524.973621024573 369.906476027936  
468.339735327273  
KIAA1486 175.350734537491 161.335677383485 168.969180646603  
167.173670781451 170.858049313581 191.018168651394 176.183165494563  
162.007384919302 153.206468539619 154.030432279825 148.204194003593  
166.681646517413  
KIAA1522 222.8766610624 249.590923098575 227.499335248402  
241.599271777806 1589.70261092241 898.877732360841 1187.62490367696  
1069.93503700632 663.451243037105 430.833137328233 1587.84395475807  
751.077307018319  
KIAA1524 139.781351410748 128.377928524315 148.329635131296  
130.763957515652 130.63390061855 153.926214082991 140.007937555694  
137.559204418819 152.155760355248 138.090158433822 129.623601211364  
144.87013280941  
KIAA1529 122.111982327877 109.859878974527 120.501697624977  
118.465111174212 109.067239220744 114.027244455291 126.976353967127  
121.174618503873 111.475394003575 117.32734978289 122.843792000493  
109.087574814292  
KIAA1530 209.146021798649 214.434355263652 227.52352046188  
212.730163981978 191.418673767345 201.702688815038 231.439252571168  
180.814610631281 198.753297290444 163.718595974283 188.910933952136  
201.676984786688  
KIAA1539 305.252666831522 328.60529053804 258.109876262342  
413.502150181875 300.765518378297 231.670761847089 183.406510146725  
174.549929320587 207.036293322882 376.124744806171 372.149771075286  
193.801858215025  
KIAA1543 115.29099102455 120.527518013376 118.08607083874  
114.223991452083 330.457534783492 147.43089976575 157.909530751723  
167.692053273833 138.093181144173 147.725396196054 156.262515148436  
145.324499089416  
KIAA1545 320.154891655397 471.15333189869 329.146025181674  
522.17701271254 180.994249258457 190.809584998617 202.869364962231  
211.679799388351 203.436527043293 139.696266471271 232.830038701628  
242.410260751835  
KIAA1549 154.98147307591 152.648490300617 128.377928524315  
136.285410546751 146.11669387238 134.081308836364 158.224122084011

134.679882781788 144.134485888258 126.139188586523 124.494727558127  
151.698385134218  
KIAA1553 166.910561772689 144.934103671894 138.201164395948  
132.149864626575 142.350637118038 154.354658146438 162.857083430123  
155.417694869593 146.345451252228 186.722842989058 133.524698103972  
159.012011848781  
KIAA1571 143.759171254761 146.26304624648 151.9441336438  
170.23937234395 149.297012645798 155.756074127526 135.805294188016  
137.466291815166 131.917194849285 150.279529635193 148.763098715961  
150.514589629384  
KIAA1586 175.573400981771 176.070695522397 249.234065130083  
199.916301659113 176.371404525626 170.423881865022 174.461487057542  
167.114291248266 164.264079172779 173.306283668215 179.421854100287  
156.316333575406  
KIAA1598 265.219444616245 232.151020756625 161.790909578234  
177.508603290389 223.722742062251 203.752540576935 186.625452120269  
161.430219824313 195.946096353894 479.138177792954 235.704824490397  
161.951996906162  
KIAA1600 979.019125719101 1007.41624313399 1077.95929298567  
1025.88559245013 297.176755638159 476.641032594868 344.915370555826  
327.207408852474 342.096409626768 259.229153662504 341.197826517049  
472.961857076681  
KIAA1602 326.1109406486 352.811351813364 243.65518489122  
488.57622466019 510.659785046811 233.914433380121 214.714726648332  
201.349209185128 200.902123076244 187.881334544018 225.095016600703  
224.089220507176  
KIAA1609 145.259981479761 140.423711213355 141.054587977578  
134.58799530734 137.556552701816 142.655287071175 156.964080041261  
149.8035588048 135.632298302036 181.288519308219 180.710636205653  
257.292125083248  
KIAA1614 141.849319373594 146.996442729408 121.053766591551  
142.720769329396 133.736252068443 125.326393776938 138.598167973067  
121.526724715417 118.303150165804 126.890841187249 128.872496485403  
122.770033312519  
KIAA1618 254.83131041241 222.624150073858 207.764456828813  
216.403542903805 377.462793982812 183.531156021887 297.636316709322  
325.252108402192 306.838596239511 243.080229016932 201.480444219547  
384.780426529733  
KIAA1632 159.570288565855 175.176693060261 160.825408895349  
176.783978625103 136.22416508552 159.862252588012 154.056660680872  
154.343424387068 159.640027194076 161.019770036957 159.106269972346  
160.898061905021  
KIAA1641 162.560758971445 161.046418048832 175.019580368717  
172.097502416776 138.440663763957 155.98413216883 149.076146942797  
146.694318629238 147.818956338752 155.349728277626 152.543005423742  
150.292858985795  
KIAA1644 832.622843175217 897.51782613323 651.998433127992  
1279.15873231449 138.802633518223 141.474583706011 139.510764003291  
134.403789206552 143.013801508709 158.497697017082 154.33224999163  
129.816385177336  
KIAA1648 133.950160115805 126.526489290128 132.894049694258  
138.248708129528 120.163286072512 117.05536677976 139.888008605915  
126.98588570464 132.714532888989 123.418266047461 119.627380812035  
133.158570377793

KIAA1660 180.408639020724 152.182968451691 143.560065338939  
181.715992480635 147.395335979341 185.220017451419 167.949422301257  
164.018470368389 166.396160626179 189.83433085782 155.8871985642  
158.445124076906  
KIAA1666 158.645402461996 156.551925771312 146.032456391441  
145.096707533824 159.099495828517 160.281830914755 214.331491507489  
171.014432075829 231.846509449829 153.085975710144 218.058543664561  
155.702330867056  
KIAA1671 699.550347374567 989.396074034945 609.100385482325  
1453.88161495484 374.406855727422 370.466403181536 361.620362526358  
430.329437928013 402.026356201632 1124.67710585154 285.172001915966  
371.168752104821  
KIAA1683 197.605208310432 192.258863431747 155.283003653612  
177.011776399483 129.507297276862 160.343551497512 161.708130705995  
184.844915350411 172.521737547052 125.843089077365 256.924134409998  
150.610633329908  
KIAA1688 173.204163917896 196.329602378007 146.198331189991  
217.646777099512 426.995700632434 317.309949792707 267.222762759781  
285.594100976705 294.22752955801 288.542264120468 264.476846259384  
278.274343962656  
KIAA1704 152.933230159216 145.997380100999 140.930897231705  
141.195847853439 138.724959677368 152.964940071133 129.982236484842  
143.399877326927 145.621384219688 143.373932371335 166.563411635721  
155.63328143658  
KIAA1712 401.102586700919 419.272193677273 479.983368253935  
440.745866155629 219.151144724168 306.43742010208 942.41077071058  
298.403224729528 389.177193459 425.001043358831 384.16579891756  
296.051639873628  
KIAA1715 304.547738011742 263.250833727291 292.145553580042  
252.810636571566 171.238423077347 344.856199123543 321.367338145787  
202.114480291084 254.393421265604 337.39574303968 164.126980102525  
207.890408761692  
KIAA1731 508.572981581855 520.761305892651 494.747087458483  
565.059609779245 291.779980648289 406.998800177456 381.57978490093  
592.822841077599 318.778978094743 378.037190077449 509.702881232139  
507.95331185029  
KIAA1737 913.22732386079 831.289724465877 1195.07608384189  
1227.94401191112 267.535469518664 304.679197422439 352.811351813364  
497.53605530806 381.740838644647 324.949988230276 427.98782239715  
414.713379367927  
KIAA1751 2630.78185410861 2895.71836177599 2660.39990175415  
2274.75133434566 335.389274425025 2050.34883263932 937.375361806971  
1522.87703817058 1219.36024606325 884.248568386012 2230.45015969936  
1114.10687039922  
KIAA1755 120.465934391246 124.521130036013 118.303150165804  
148.049570580734 115.435942397626 110.024815508703 120.71782441569  
117.636865477015 117.207266754941 107.103635692135 125.539199863559  
114.874358180801  
KIAA1772 126.178476831007 132.435409278702 122.284431229917  
113.38168751499 141.882859092658 112.133567992833 114.755442050481  
115.217608555334 115.247223837316 121.06219555903 145.572363722788  
107.395559299582  
KIAA1797 253.164596735793 201.773745532242 263.005303710717  
252.280435525505 186.021181691517 206.488530785667 171.11282933168

236.855293143293 191.040134068942 276.184421402511 259.064601204239  
173.714940254592  
KIAA1804 134.352155462211 137.910618360623 126.25011972597  
119.810421687953 135.43119649883 139.897320032723 135.886859004208  
156.445294524594 136.654902685184 149.023962828426 140.502667595362  
143.322199505844  
KIAA1826 437.931339781992 392.539157974899 405.975221091252  
312.019603761673 283.048002376743 249.554443204445 243.283375388645  
258.25658838015 271.113617350982 286.587945301875 316.237519859859  
274.01377986185  
KIAA1841 145.440471538068 121.124574985464 148.227581116046  
140.929026135235 137.239088768176 130.924141812334 143.047617455953  
138.452698593232 129.699765645519 121.919799968293 127.597601325212  
147.004172510641  
KIAA1843 134.678445085174 137.011595584638 149.269417496936  
152.056094989111 145.89801576671 137.345542507421 145.265512354674  
146.266350809492 139.744142223177 154.746081871718 142.573662441786  
159.094117857743  
KIAA1862 174.338440780636 182.969563278473 176.75095377028  
190.270819689158 216.859640534581 166.868688936939 188.181647474317  
178.072538529634 150.845846206549 167.304721591124 179.905809470907  
179.632562895905  
KIAA1875 146.579073345319 149.133055368147 147.558603709566  
141.604832186257 155.651798065702 148.779043570204 147.858339902055  
180.63469438043 197.087015414039 160.343551497512 178.696562301918  
167.568776552757  
KIAA1881 1514.53784631689 2325.02143920169 2059.09598012857  
3545.8833678963 292.524552445564 299.390443444504 269.261595558589  
817.529344685717 349.330629649093 173.656241217331 395.645016679312  
169.385340991747  
KIAA1906 133.228822922258 145.511473738224 134.907397302852  
139.320621744553 140.888439624918 132.385096888962 142.017169259522  
141.135840314665 153.415901281564 133.175265384038 148.372098844766  
148.171225002967  
KIAA1908 137.469177072831 157.195967361907 138.393565473857  
166.904990069484 183.61611813765 129.994160770036 132.659196898439  
148.437676259828 147.121049266117 149.939035476611 131.419663282022  
125.522498880785  
KIAA1919 117.303671445328 108.167670899938 116.625518828978  
112.957395064957 114.182798672347 120.481712066062 132.887701822875  
110.885714048075 116.403106568357 124.160433356046 117.897556445952  
115.120702589487  
KIAA1920 118.331237160995 120.901639342731 114.027244455291  
112.65454329872 121.053766591551 118.276198592775 115.848659135231  
102.474380813907 137.149156133537 120.527518013376 132.069175779393  
110.296425545476  
KIAA1922 141.668101962049 136.528123792599 137.251513843314  
152.082927731045 149.990378213915 138.150616787218 162.739253457398  
133.789738760547 142.791015845309 141.58244054926 133.137299889323  
143.737021989907  
KIAA1949 479.866450988091 538.647888236878 574.779350011402  
588.076436392983 320.360917595936 324.401611136662 304.751330890753  
427.542390397986 703.815551883635 872.320823993033 460.941286124613  
693.180345649331

KIAA1957 128.458132030921 137.948410750056 157.776321544382  
136.593346330215 130.467450968785 137.68634745111 155.522274777451  
141.156434225355 143.131495116356 138.397152876585 126.362418476129  
129.687743133943  
KIAA1958 170.758319048911 176.001771318766 206.21848253717  
148.879605388902 191.543371466252 179.44023315251 196.470718183575  
188.818012746123 173.21291920566 170.376620730856 161.295030274012  
166.635366968851  
KIAA1967 258.868119227979 274.14931964455 221.930333726352  
316.125364442611 383.626469817252 279.000687630846 283.377663208926  
229.046153362151 250.515579402334 240.814860403562 334.140757209353  
288.481981529558  
KIAA1975 167.658560306884 133.728378162206 139.422592957883  
164.057147728625 160.026178505749 150.555125135002 131.556892859203  
140.922678400415 152.808771946509 171.795878750365 133.083877012766  
160.143443392509  
KIAA1984 129.845344493418 123.872097378045 123.488418655586  
137.347554578171 153.07993334035 120.744994574029 153.952788086758  
159.106269972346 255.839878446312 140.29803170157 193.064450357153  
146.563078818674  
KIAA2010 365.950612890149 309.75140197669 390.752579014611  
270.568660560796 351.337287690674 336.434368527549 362.95684683529  
396.04031733841 312.903508201275 453.058639550475 361.516275756449  
470.746477818201  
KIAA2013 639.011144305614 769.958422740085 674.101599637653  
826.314416168552 1283.68791110988 644.11603826131 702.049571167356  
562.543347322063 542.740017003369 566.914448800423 400.060972573122  
529.963453165714  
KIAA2018 145.27890423835 127.125906877098 123.852299272249  
146.738411200698 150.452467115669 149.25705328406 145.214575855337  
136.850940500212 132.105184573944 141.305605155722 120.887938517877  
149.09398454596  
KIAA2022 155.842195370853 152.237183848896 150.778292242313  
153.661632990172 138.319321806028 150.208809981642 138.032967032276  
149.941056059544 150.204636832734 144.46549577902 151.351938656508  
164.525784478026  
KIAA2026 233.129544542265 204.35801867216 260.356834114611  
206.999289979742 152.155760355248 204.596753034535 171.216275057884  
258.012234458166 186.021181691517 228.649073045499 205.058210447711  
164.022021048626  
KIDINS220 842.567990276734 747.322544683874 681.591028334969  
616.188923504376 347.411500022053 601.521068811063 423.256021602613  
386.16563750478 429.992169596618 585.371892598422 471.315730378641  
662.213423011533  
KIF11 137.082234284426 154.302619274576 131.500591219916 145.09909498449  
218.811490883852 355.519647649551 210.218440444631 317.839512360245  
266.217879616686 219.192900411543 189.362958041175 371.819911874273  
KIF12 110.050374895171 116.718099363329 111.161283080299 114.841964705981  
112.394223360492 112.534864678892 111.204065131669 106.285472845323  
111.802672864815 107.013012418356 111.000303209442 116.632612170106  
KIF13A 127.831950458406 150.767158077219 140.722297244564  
144.011792962785 143.526983440589 138.521952850632 141.4587810296  
137.926798328677 134.302726684539 194.374817778819 136.520811697544  
143.971152352313

KIF13B 387.908774438461 422.434778100827 469.930860750773  
 538.647888236878 356.62074247786 241.383657414248 322.778260588465  
 261.469732730752 300.709410518382 313.641656294638 717.886050056576  
 334.140757209353  
 KIF14 171.051948060796 171.059849459102 173.986750195954 187.48055574295  
 202.869364962231 369.070376276471 209.867189613436 442.220572301795  
 250.84781675544 272.077877821339 189.205724390913 366.073387075385  
 KIF15 160.828718858381 171.093611712143 186.653791045656 174.205940911242  
 281.49247863022 348.36178568457 229.881164774875 298.979106293393  
 260.278595572575 192.848268768579 165.467462247066 248.360540656183  
 KIF16B 197.827534617557 176.641899861006 223.429738319185  
 172.030687707578 183.071150926068 225.820503820866 187.264411519101  
 180.336623146341 164.478006648035 259.025042304848 199.408907117764  
 180.34788837703  
 KIF17 133.651203764842 134.168381235167 118.601228886344 129.994160770036  
 128.274326990056 129.806104966617 124.486701452062 122.365693072105  
 126.87882572904 123.062390088305 129.788395150404 111.032156655273  
 KIF18A 136.390047634643 142.500537230642 132.580130403836  
 132.002835547397 146.563078818674 148.861141988806 136.229159638766  
 149.207481665265 164.417770955805 151.070654092886 146.242897296397  
 151.849653154534  
 KIF18B 112.629266772219 109.016991399605 110.942138645171  
 108.446988282853 113.143436184959 119.984301761327 123.56917054142  
 116.773599713111 116.388079393669 117.815045605383 115.468921844902  
 111.708970469189  
 KIF19 136.895650862562 125.308318672456 147.232015056035 136.557466007228  
 144.154217446011 136.434045183143 126.492058851464 124.869732867761  
 111.956783714784 124.522974214212 136.264815594226 137.7724100594  
 KIF1A 135.036576196425 175.529441666151 137.567384694894 153.636804025106  
 220.710324965453 163.616115299926 122.05954649985 115.920514336615  
 126.845048064014 122.992700222262 147.971492964243 225.31216514083  
 KIF1B 644.741046498743 670.347447480331 495.241179224412 777.901979189395  
 293.317880637519 367.898258897888 326.640168906375 305.343879847672  
 234.841813258798 380.821355948507 255.59042517603 293.925995360234  
 KIF1C 301.955019831714 327.010503005631 300.094509257518 401.189904619902  
 342.315456386729 184.241640200823 145.041430440608 171.706534562905  
 173.169905329013 270.894153548841 313.025250337353 230.332652534446  
 KIF20A 139.936661244361 156.13331481937 134.241917425247  
 176.901042102323 395.521241316058 392.539157974899 287.83303360511  
 528.556049506759 353.078842299761 567.317223907142 244.101521795539  
 362.795691170335  
 KIF20B 217.380892198811 242.221324619171 228.560346647306  
 231.670761847089 228.284236550547 346.303862540751 263.352118305612  
 338.739180103373 348.640185950469 350.392951395182 227.050629701762  
 335.533053221675  
 KIF21A 461.940616438547 392.13175568099 490.631757904175  
 475.213525346293 343.200277800027 348.241471067257 369.78624104057  
 269.141120401835 293.281098275134 469.407481002198 478.040234382488  
 411.039234404499  
 KIF21B 128.221548195595 126.199219102601 119.150626141327  
 119.308345676905 134.52098220054 128.468978498871 126.87100632595  
 135.550882872661 129.80429516198 126.386738502885 142.392860474555  
 137.969750384554

|        |                  |                  |                  |                  |
|--------|------------------|------------------|------------------|------------------|
| KIF22  | 490.022369664024 | 586.246004571452 | 620.760947818536 | 619.487800014979 |
|        | 1730.30703463073 | 2009.21931102311 | 688.684644604218 | 936.560290736127 |
|        | 749.859130465356 | 520.470790410856 | 602.141151173094 | 635.234445318087 |
| KIF23  | 144.595393134144 | 163.54669668396  | 171.791030104358 | 164.558875058199 |
|        | 211.059870865354 | 270.231637012624 | 176.830879422227 | 231.287362732197 |
|        | 229.200570583629 | 204.299375966441 | 157.519633258844 | 224.963277964548 |
| KIF24  | 126.305273697185 | 133.666244052469 | 125.606269267903 | 138.014046365103 |
|        | 166.355086055404 | 140.313216623427 | 121.286130275542 | 139.587192809431 |
|        | 140.947852529815 | 134.653131708903 | 144.700955682048 | 138.123754096875 |
| KIF25  | 140.091378604453 | 131.019345449516 | 139.537865511933 | 134.319316977485 |
|        | 130.147848418265 | 140.983230581181 | 136.862764950361 | 138.859261763075 |
|        | 135.267015629083 | 139.545451634208 | 140.402944266863 | 133.009854792992 |
| KIF26A | 149.308475163534 | 162.285199080777 | 132.712573198794 |                  |
|        | 158.890522392445 | 139.383528389668 | 140.768926302035 | 140.002249873656 |
|        | 129.933228671483 | 137.561067667054 | 143.247977741752 | 169.784837251279 |
|        | 159.26101905957  |                  |                  |                  |
| KIF26B | 153.326420485822 | 142.531683761072 | 145.23179154441  |                  |
|        | 155.255279503782 | 143.52228069239  | 149.467626202395 | 165.74458564887  |
|        | 139.796168741191 | 142.635015113687 | 171.629605754643 | 147.985843605585 |
|        | 145.934643000545 |                  |                  |                  |
| KIF27  | 151.126252768792 | 159.203584692924 | 167.620915011868 | 154.125702106953 |
|        | 155.747694056319 | 160.35668299062  | 155.007516124803 | 164.529828080312 |
|        | 164.753886197136 | 157.885229749634 | 159.090982014161 | 155.513572243604 |
| KIF2A  | 239.33642662112  | 238.230110356671 | 237.396466740419 | 230.10433160008  |
|        | 258.109876262342 | 252.611044555689 | 304.357050745605 | 266.61343130101  |
|        | 276.224613560582 | 296.657844888195 | 212.607094117882 | 306.550948766362 |
| KIF2B  | 124.96926662367  | 122.65547320922  | 124.29420915051  | 127.898533598679 |
|        | 119.403831071089 | 135.531326977319 | 139.1434049136   | 121.197702744078 |
|        | 119.180033382937 | 127.780567080732 | 130.939543211439 | 126.747647332766 |
| KIF2C  | 133.509538648848 | 163.552608805894 | 135.795717307603 | 144.018198451676 |
|        | 349.485727214325 | 486.197269936713 | 222.508914765788 | 397.064325578854 |
|        | 354.981966077502 | 269.726397478364 | 225.546125484563 | 302.532985701607 |
| KIF3A  | 141.521742442341 | 116.7299185256   | 129.848276446896 | 119.539713878832 |
|        | 115.277302351501 | 113.274668934773 | 123.716400094852 | 122.780453116176 |
|        | 114.673517800886 | 120.876732151192 | 114.734439905052 | 114.528407572496 |
| KIF3B  | 313.099028594073 | 284.351529744475 | 334.916875239616 | 324.949988230276 |
|        | 300.443499140896 | 362.795691170335 | 479.983368253935 | 352.180110869664 |
|        | 349.65350886897  | 336.067655676466 | 397.577760464197 | 303.005912224195 |
| KIF3C  | 137.556552701816 | 179.451637129672 | 125.016608289141 | 149.100294463597 |
|        | 204.564770370164 | 219.192900411543 | 133.478829770103 | 137.089392202166 |
|        | 149.398118078302 | 124.901759819007 | 149.198753359122 | 148.764956861822 |
| KIF4A  | 121.144174389418 | 121.144174389418 | 116.844361858869 | 119.319884675074 |
|        | 252.810636571566 | 285.258824662946 | 157.076284096905 | 154.665212863369 |
|        | 204.710203150526 | 149.353072778508 | 139.308325848216 | 181.354279096644 |
| KIF4B  | 129.278833426752 | 126.080780033301 | 132.817645625115 | 128.890685255595 |
|        | 123.501843029993 | 147.412608079997 | 125.98519427755  | 116.639787832302 |
|        | 137.438984175012 | 128.011387527117 | 136.130740418851 | 120.182787241888 |
| KIF5A  | 153.934872807607 | 156.361037318986 | 130.639974588163 | 168.582192754233 |
|        | 144.744603095605 | 141.046537113211 | 136.949403128211 | 145.223648967115 |
|        | 135.589211439847 | 134.650161382949 | 137.235469802064 | 143.961467163406 |
| KIF5B  | 315.064477782052 | 287.374706071354 | 476.782624160552 | 283.46492196692  |
|        | 428.959561932229 | 400.060972573122 | 292.839392578318 | 309.47429862515  |
|        | 353.571106279836 | 392.539157974899 | 286.431013744652 | 455.564394647943 |

|          |                  |                  |                  |                  |
|----------|------------------|------------------|------------------|------------------|
| KIF5C    | 214.595639477696 | 206.203717450138 | 183.071150926068 | 203.983168778488 |
|          | 177.083095120017 | 365.441289363381 | 259.868701878844 | 208.067404132325 |
|          | 185.002106079042 | 139.837616209536 | 188.695527267631 | 213.046162847735 |
| KIF6     | 147.297163685914 | 160.748082658758 | 156.191659799142 | 144.116298946718 |
|          | 158.58863949084  | 143.739231124536 | 136.2727333616   | 149.173121214851 |
|          | 139.174188535843 | 136.539130156863 | 154.620194499553 | 146.819830256127 |
| KIF7     | 276.32528705384  | 190.174729017089 | 202.849544035436 | 246.369521698487 |
|          | 185.396765725228 | 236.032288046282 | 259.511314588868 | 176.940723174814 |
|          | 176.670752486376 | 166.674240866931 | 161.112906953532 | 174.012972901793 |
| KIF9     | 134.356796881432 | 135.218648235324 | 135.730331297139 | 125.668463983985 |
|          | 135.170925092209 | 129.956519535525 | 129.906744036052 | 135.807494668545 |
|          | 133.155925118245 | 148.901723851925 | 146.192761134077 | 127.416912237613 |
| KIFAP3   | 659.106229917309 | 532.950400370668 | 570.533103778482 |                  |
|          | 604.687265229902 | 419.902534806131 | 543.810043433181 | 388.710465457313 |
|          | 929.69741581954  | 363.255517622046 | 488.249967208882 | 334.350011399462 |
|          | 297.332272659995 |                  |                  |                  |
| KIFC1    | 127.077668562103 | 146.185931276053 | 112.547907748842 | 141.306418675404 |
|          | 703.815551883635 | 253.975577255772 | 192.827534610486 | 242.070630946726 |
|          | 229.74418058711  | 255.156682699288 | 184.775001243453 | 245.607130404306 |
| KIFC2    | 315.912220767901 | 270.181005097697 | 302.696004448559 | 210.353341004865 |
|          | 404.172535442156 | 431.413030534188 | 487.597040819879 | 530.969825236996 |
|          | 543.810043433181 | 604.687265229902 | 569.967953318205 | 739.251974981981 |
| KIFC3    | 116.897299691798 | 133.171854425031 | 125.746184969983 | 154.558968826495 |
|          | 125.935071837868 | 137.77601089414  | 116.695313319162 | 143.647714966406 |
|          | 130.647944268116 | 121.53632327554  | 130.138945493943 | 129.417232210341 |
| KILLIN   | 136.022614387461 | 136.413745926388 | 129.752997624387 |                  |
|          | 149.432744784716 | 189.142295015168 | 141.65642171417  | 156.890299350025 |
|          | 130.626965797365 | 144.461999591223 | 148.104173238606 | 163.736324784234 |
|          | 163.438043894189 |                  |                  |                  |
| KIN      | 117.149781437983 | 122.176811388389 | 126.083599163604 | 124.907788504503 |
|          | 130.579954890389 | 127.368207232723 | 127.980776299586 | 126.563876945046 |
|          | 121.371348717752 | 130.37185420347  | 127.164076119599 | 127.597601325212 |
| KIR2DL1  | 147.348400730286 | 143.185372109165 | 150.261107471642 |                  |
|          | 164.02617650236  | 149.551030995489 | 162.595632367022 | 145.709172732805 |
|          | 157.932243807202 | 141.076037315613 | 156.277567608825 | 126.404523759643 |
|          | 155.031272695335 |                  |                  |                  |
| KIR2DL2  | 131.017355402204 | 150.856917125736 | 132.352268262631 |                  |
|          | 137.799764345121 | 147.942495862714 | 120.384210318    | 139.420025842675 |
|          | 115.725323816619 | 128.675527226161 | 129.132523684894 | 134.734429133481 |
|          | 128.247871411825 |                  |                  |                  |
| KIR2DL3  | 115.816156193574 | 109.398997827329 | 111.577400298092 |                  |
|          | 113.091739139626 | 111.10737497653  | 110.437728036347 | 115.502679218125 |
|          | 116.268259618103 | 139.086498524774 | 134.452938571435 | 131.35955406222  |
|          | 115.157321350379 |                  |                  |                  |
| KIR2DL4  | 118.660213790078 | 128.445065383646 | 122.005340508177 |                  |
|          | 122.136861827049 | 133.929311295884 | 123.817878562971 | 127.610304071204 |
|          | 134.314636524922 | 134.455623159793 | 139.752845127584 | 127.551486042435 |
|          | 132.933035878334 |                  |                  |                  |
| KIR2DL5A | 133.731500722599 | 133.524698103972 | 126.241307445165 |                  |
|          | 132.437234970375 | 137.452696552006 | 139.074661210615 | 130.63591305094  |
|          | 136.061992660698 | 133.249792744053 | 134.991379445799 | 131.179786925029 |
|          | 132.744261207073 |                  |                  |                  |
| KIR2DL5B | 141.002002397727 | 129.375772737722 | 130.351302840602 |                  |
|          | 134.950905279775 | 126.678746008577 | 139.644701550661 | 140.943732564849 |



122.438438464097 135.33941967076 133.277326912499 139.785767470943  
141.440563159897  
KIR2DS1 141.304791640723 131.38881091292 134.607501073433  
127.416912237613 129.547309629132 139.534014289993 138.108184983014  
130.799009128937 135.503338987971 130.260174841484 128.952986088886  
130.128585442593  
KIR2DS2 133.372231702721 133.906867716171 147.568851471771  
143.187539073659 135.971507823633 159.344044864557 142.416237823488  
148.980330875743 146.198331189991 122.903428611669 149.634975068742  
139.709959820327  
KIR2DS3 129.623601211364 119.150626141327 119.50754902958  
123.510413258172 118.622346984257 117.634514818946 128.957236136715  
118.393203921859 130.574019477669 128.626051185037 130.326980619676  
123.240482782331  
KIR2DS4 118.737244693366 126.155486659114 117.60787142216  
120.581554457723 123.716400094852 112.015423658372 126.450300907283  
125.455347031878 115.687997771921 129.640303191006 134.176925491721  
120.740986472733  
KIR2DS5 180.164353124488 168.697565122105 165.380225715852  
190.471158323247 159.393410854649 184.267958772058 187.247062073247  
149.897440750742 164.21464602746 200.536814571322 146.890877830248  
160.423982411027  
KIR3DL1 152.088488171996 146.225422797118 132.791529812877  
152.563532872898 137.591469499374 143.00932329728 155.228605554943  
150.564099989221 137.31708798874 150.212688586568 138.055909969804  
158.353171576491  
KIR3DL2 143.21411610625 169.179630363359 154.828782972852  
155.773639092819 160.825408895349 176.66175597182 163.558869203898  
159.909121784808 154.312374306932 163.889522525848 144.188147197178  
155.648782851696  
KIR3DL3 123.902047880095 126.466530783073 130.874283538818  
124.66386961898 126.089217853289 129.061316880624 134.624322761212  
131.035118014794 130.470034945295 135.945030816689 131.93683726912  
121.391637838137  
KIR3DP1 124.588594750916 112.227434965199 112.268518171041  
129.515390475589 109.038182799871 125.418782388128 111.349642316073  
117.48427100606 116.031631038289 125.826111950648 129.505139430366  
121.036054511761  
KIR3DS1 129.599661790972 124.66386961898 135.57577294564  
119.459625817735 118.655954393594 134.091723054647 122.051473363557  
124.368438691944 135.928428484011 123.93800397666 121.657744897668  
127.255966406144  
KIR3DX1 148.883263903527 153.271518348258 141.248526020456  
142.889911562811 143.665359343809 137.609831343223 143.484004107893  
142.382367938838 133.517685144186 159.218886890035 150.765477999064  
132.263954832097  
KIRREL 214.331491507489 207.338645756456 164.02617650236  
210.14307111352 122.05954649985 121.747622617011 125.732389000341  
128.336332748047 124.913645688325 166.872332652008 142.869595099569  
137.246089511045  
KIRREL2 117.186546702764 114.421383025971 115.048402956574  
121.134305707234 116.936964318685 112.957395064957 119.845508281414  
115.649568330705 119.492844191924 121.44564199541 116.889373249017  
127.507557925713

|         |                   |                  |                  |                  |
|---------|-------------------|------------------|------------------|------------------|
| KIRREL3 | 132.419898122309  | 130.452929012459 | 128.425838805072 |                  |
|         | 109.425878885118  | 124.933738341123 | 125.531371673679 | 113.879459563492 |
|         | 119.092335265325  | 121.278346729876 | 132.809364188497 | 121.912927816178 |
|         | 127.320624058583  |                  |                  |                  |
| KISS1   | 161.066226957782  | 158.044938495884 | 141.653917856148 | 172.774914399844 |
|         | 303.795701960506  | 157.575902297677 | 159.334165651951 | 156.846991384413 |
|         | 182.57496767012   | 149.511776997149 | 164.529828080312 | 209.464347017443 |
| KISS1R  | 145.154323430995  | 151.747595672228 | 154.562761981868 |                  |
|         | 148.391885541349  | 185.493554506958 | 149.678629612616 | 144.81320329947  |
|         | 165.277935422113  | 146.110545700163 | 181.467708718758 | 167.532512839891 |
|         | 142.073529553425  |                  |                  |                  |
| KIT     | 591.763423878737  | 443.732580517751 | 303.483515328621 | 350.658722333252 |
|         | 257.132618311227  | 206.605699708924 | 269.567704345075 | 279.070493043898 |
|         | 279.969975697164  | 163.769959129611 | 193.813717161291 | 266.19823384117  |
| KITLG   | 273.651114834013  | 273.984715370774 | 306.011283364888 | 243.501083338279 |
|         | 147.766043861937  | 159.070355781276 | 140.025668085978 | 181.439775614781 |
|         | 184.801068553988  | 200.767743455226 | 150.790155351217 | 146.128066033346 |
| KL      | 259.338947392465  | 213.847316974717 | 191.207048581306 | 224.869569455052 |
|         | 151.089328533476  | 144.249339611941 | 124.59097574481  | 123.062390088305 |
|         | 123.159407368236  | 123.118724072534 | 130.99288239869  | 127.824005374202 |
| KLB     | 158.872962797815  | 158.723133891017 | 200.688465653117 | 182.32514927211  |
|         | 170.768398273919  | 167.087850057037 | 168.744610747563 | 165.942761337382 |
|         | 162.732574014686  | 185.154876233931 | 156.562197068687 | 154.648806105422 |
| KLC1    | 514.61297221467   | 497.629319581786 | 461.314247041387 | 576.636077770998 |
|         | 386.461076717316  | 326.83982672544  | 438.431160975498 | 303.09499683953  |
|         | 327.384671423687  | 482.857203798212 | 354.405235378302 | 579.493790910006 |
| KLC2    | 146.482652762374  | 135.594186066942 | 141.275667354541 | 162.58152435515  |
|         | 170.998961353556  | 133.63022526522  | 140.379874810685 | 138.299629744589 |
|         | 134.922488718676  | 147.178598908199 | 142.059921012561 | 147.164348704012 |
| KLC3    | 118.377827181989  | 119.618176258524 | 125.426018910517 | 129.132523684894 |
|         | 145.424827607383  | 148.592330216136 | 136.059884933876 | 131.176413983785 |
|         | 124.4649417111781 | 246.049729366987 | 139.197364191101 | 125.9713489569   |
| KLC4    | 129.811504562622  | 130.253372129786 | 129.654234837398 | 130.173734963758 |
|         | 138.299629744589  | 139.074661210615 | 132.647152200128 | 129.982236484842 |
|         | 127.503849690009  | 130.0140921487   | 142.363309192458 | 127.943935415045 |
| KLF1    | 126.162713269943  | 149.297012645798 | 134.084602409011 | 136.089888639987 |
|         | 135.323341505875  | 141.473218014605 | 136.047032834863 | 134.9404536551   |
|         | 132.328948598599  | 146.181764812924 | 146.753212022975 | 140.892250639524 |
| KLF10   | 143.183548490547  | 137.811304134207 | 152.142909854773 | 136.611670766233 |
|         | 138.580264357741  | 144.311620064675 | 137.685104040843 | 167.370030272847 |
|         | 143.491142564838  | 182.235490620172 | 158.859389972316 | 148.538400348149 |
| KLF11   | 616.701037274509  | 623.508710830895 | 827.400420888645 | 592.957842630046 |
|         | 642.057106241761  | 397.064325578854 | 326.176058036757 | 472.961857076681 |
|         | 265.670643951648  | 337.973433871323 | 265.366632264085 | 338.260976633501 |
| KLF12   | 211.966139902562  | 216.991823988763 | 196.691380885508 | 243.793465720264 |
|         | 131.934680869554  | 133.788197693571 | 126.786434897401 | 135.956116718089 |
|         | 144.30699572795   | 137.320792454356 | 152.913814113632 | 164.769320792025 |
| KLF13   | 565.164961255054  | 545.566596665916 | 419.902534806131 | 550.671679318681 |
|         | 193.801858215025  | 278.142283306934 | 225.99848688881  | 278.005620372937 |
|         | 346.065746911798  | 705.987531074737 | 436.222568287601 | 341.901565692251 |
| KLF14   | 101.530900217921  | 99.5148073333731 | 124.720004905439 | 119.000436602325 |
|         | 105.467761348787  | 107.976233194926 | 111.161283080299 | 114.533677697026 |
|         | 108.868679899494  | 105.164790181452 | 121.768195574022 | 114.084543168359 |

|         |                  |                  |                  |                  |
|---------|------------------|------------------|------------------|------------------|
| KLF15   | 161.212598761378 | 191.241000498118 | 200.741234443918 | 150.547096071626 |
|         | 273.864293250688 | 206.186324475847 | 184.844915350411 | 139.868714816245 |
|         | 171.660157220703 | 142.002145315543 | 211.692743811486 | 140.217243202557 |
| KLF16   | 102.343275379164 | 110.266032635568 | 119.005230164124 | 112.436972452838 |
|         | 126.42955055275  | 114.002925521932 | 112.773952761845 | 112.875136585606 |
|         | 114.539671934155 | 119.876835248732 | 126.825785762925 | 113.315182274675 |
| KLF17   | 150.391286215189 | 149.813838004575 | 157.754622099874 | 152.124910935545 |
|         | 127.987449338817 | 119.854401979951 | 136.982719190537 | 128.257292171015 |
|         | 126.913782515341 | 129.891492052232 | 127.226937898225 | 124.844481048039 |
| KLF2    | 4465.66734676111 | 5932.37714987741 | 3793.02341602102 | 6508.71638048514 |
|         | 802.017244099902 | 1069.25265476373 | 458.607367472574 | 1286.55103838368 |
|         | 1702.68441407727 | 896.185223980593 | 2627.12900283627 | 458.218913259336 |
| KLF3    | 135.345616014558 | 147.608094270078 | 126.274585491044 | 124.012439490264 |
|         | 152.057315195367 | 140.864196804152 | 151.9441336438   | 153.832132196284 |
|         | 154.854538639035 | 172.698181201849 | 153.818325601312 | 135.385133545332 |
| KLF4    | 464.577839898252 | 389.588346573823 | 285.594100976705 | 306.068269136821 |
|         | 564.588706307423 | 199.459711023907 | 180.501409705275 | 242.996248524203 |
|         | 205.011514211101 | 765.128667448261 | 287.041585684111 | 190.645917992472 |
| KLF5    | 204.914390718161 | 324.949988230276 | 203.852316712377 | 180.456659320226 |
|         | 723.640113902925 | 856.74270641707  | 684.428198622716 | 653.264945856916 |
|         | 605.437395034282 | 800.013123376748 | 925.656701707763 | 1149.3250945792  |
| KLF6    | 1849.21906428944 | 1793.75125318113 | 1440.14449872047 | 1378.40627876546 |
|         | 498.180196203245 | 2258.30916111153 | 689.04773343291  | 850.125434374005 |
|         | 719.766799746895 | 2649.39312662326 | 1879.08108720938 | 1493.90578573732 |
| KLF7    | 151.819220292189 | 168.071171406779 | 185.46843333826  | 173.082167545676 |
|         | 148.329635131296 | 163.876218743322 | 168.925131238831 | 147.18948282156  |
|         | 172.186384820044 | 174.255919030841 | 169.257035030405 | 165.731179108649 |
| KLF8    | 137.182323015758 | 128.878051599968 | 121.687187898743 | 138.730409717578 |
|         | 136.074837228096 | 123.126240234396 | 122.265071206163 | 143.234195669431 |
|         | 129.049273337631 | 129.093864368842 | 147.46607538135  | 137.354782768068 |
| KLF9    | 2080.47567326037 | 2476.51542420593 | 2195.41077320434 | 1235.75946952752 |
|         | 202.01798254763  | 1096.10636044885 | 254.722836822616 | 487.19625805337  |
|         | 455.392133846517 | 825.034504959272 | 310.598930734244 | 303.380479700334 |
| KLHDC1  | 146.202611204712 | 131.814528687104 | 142.113150767261 |                  |
|         | 145.424827607383 | 126.217702283708 | 124.726035027951 | 128.853089272901 |
|         | 121.159593382017 | 127.320624058583 | 146.978110148492 | 134.231634410324 |
|         | 135.185283076286 |                  |                  |                  |
| KLHDC10 | 142.03837243998  | 147.600825146067 | 152.864765895508 |                  |
|         | 133.834423222601 | 151.26137860684  | 154.999192460283 | 152.864765895508 |
|         | 162.834961996238 | 145.206796089128 | 147.364301916733 | 165.638672456873 |
|         | 151.917359928516 |                  |                  |                  |
| KLHDC2  | 1614.00098175383 | 1442.94175124818 | 2137.44704613378 |                  |
|         | 1503.2049371911  | 1002.88224342342 | 646.704226815099 | 1276.14915305515 |
|         | 1367.19652160532 | 675.480482223958 | 914.654262296682 | 1496.0924333403  |
|         | 927.478050257292 |                  |                  |                  |
| KLHDC3  | 1314.62071412501 | 1528.49457104932 | 1312.44215746801 |                  |
|         | 1834.08657010335 | 2550.08769415478 | 1868.82736251524 | 1634.20135156938 |
|         | 1191.26028342929 | 1547.16936835284 | 1247.91041567746 | 1239.13016938378 |
|         | 986.004777675332 |                  |                  |                  |
| KLHDC4  | 281.071129128589 | 358.654569870431 | 348.171901445232 |                  |
|         | 362.65285317327  | 758.863418917419 | 310.989043012841 | 413.555310697751 |
|         | 260.955030428944 | 398.075524915003 | 244.101521795539 | 355.372836460906 |
|         | 438.7446527797   |                  |                  |                  |

KLHDC5 2574.74962955426 2645.72125268628 2666.06582231934  
3215.41238464601 365.864755316163 873.010676463707 591.89966781883  
855.415038498392 621.946994961864 418.968095159939 494.875547886209  
625.374595058488

KLHDC7A 138.145677924612 124.01558540593 124.215466523555  
150.677852949794 144.610341215903 146.249951130016 136.919702354166  
141.971207380159 144.316475814221 138.393565473857 159.102070980047  
128.513011425662

KLHDC7B 149.286184588967 139.220877923507 141.717466442384  
130.445920648705 148.866229889479 126.997614441981 148.478570934155  
137.449776383224 140.597877909094 152.22701178148 143.727514442914  
137.401137659118

KLHDC8A 117.255496552581 121.278346729876 127.545397354821  
137.303701514064 123.182903611854 129.717701654435 121.834248129933  
116.369395555451 122.295222990408 119.249084967945 145.861217875066  
109.988237089025

KLHDC8B 670.856008549143 837.023434916281 1115.53524128833  
1146.84239258543 1281.1883621512 720.710754387733 1423.02563792293  
294.368406238222 372.149771075286 925.656701707763 353.437466689101  
219.288597751645

KLHDC9 220.169099923628 229.017256104437 330.321113875647  
228.524222740306 263.800363357443 313.412131722189 199.209279169496  
352.897241809959 243.95334982553 160.001115445038 203.317264638828  
240.971675534641

KLHL1 163.788418732315 171.884800118791 149.921414617149 172.8993416872  
161.390489603929 159.213940274232 150.778292242313 145.23179154441  
165.553581848949 146.495845282846 152.67564185705 168.628947766217

KLHL10 134.753783025994 142.135495724286 120.819163462986  
145.354740501503 126.17342715006 126.921925660996 121.821868944354  
122.447154928139 116.061356450855 131.83430682495 121.841080387875  
116.625518828978

KLHL11 145.597134236583 147.420580715112 141.91067228913  
144.349602838518 151.604093626944 144.388851371784 147.345558455805  
150.95033946042 150.0512732245 146.155809402461 143.783078837501  
150.590611246086

KLHL12 386.461076717316 378.585058475083 457.650982600462  
370.678040372273 380.310795921752 312.601510033941 557.702374840532  
417.024088698182 461.088572554864 533.54045706916 544.222458349696  
595.752426322468

KLHL13 287.402339322061 259.338947392465 276.582734590058  
268.186156177622 148.678869698203 143.888318202599 154.316929706697  
145.631278992488 145.351662473858 141.825162897153 243.807038920733  
126.067296703905

KLHL14 139.883360543042 132.590454200629 151.094682146074  
151.10837100314 138.737332306848 141.588478913204 138.030842581932  
143.860092956392 148.145136066071 146.171094379173 130.513071750123  
146.725123303782

KLHL15 125.566982723725 123.081299769162 115.34945441214  
121.170340423391 126.298187538812 115.327402810793 107.930325780047  
117.976107125982 101.597648528389 116.742079521048 115.113000553093  
111.299115402008

KLHL17 163.198834359304 165.665796569389 150.378690719669  
198.681190016247 218.134101819445 151.780459290205 183.735201125198

158.463444189819 164.748676009072 160.752581271996 169.864628707043  
158.145922709296  
KLHL18 199.46853058821 214.8478629277 172.451128796055  
197.100205890532 212.272826965935 152.741229289112 170.024833610695  
181.354279096644 171.298701141684 185.113098620798 203.089661928125  
194.257024100927  
KLHL2 256.291984914927 238.430350258686 243.95334982553 226.43414383055  
217.715143869654 270.973600107882 330.944203807675 240.12078342024  
220.510248260182 258.4424008891 268.034972830233 232.845268785472  
KLHL20 214.639374741553 213.602504580364 251.324685584062  
184.915526626619 162.54008293513 225.61275910008 203.693188114912  
208.257420634745 210.989806933158 235.595194918187 189.678680702271  
350.803378042804  
KLHL21 330.703588385626 502.499539192864 530.387315639095  
635.536499281829 265.148061007894 171.254015232189 186.482547532546  
174.510523238374 198.722993687455 194.60309399944 174.510523238374  
137.536053775531  
KLHL22 714.91842349236 767.662367310672 838.63350090385  
1140.40904196731 768.67030514096 460.651156484562 545.026293696209  
504.436992949763 383.583234619781 444.712990986138 403.405544395163  
521.714719320355  
KLHL23 176.245698601389 177.896726792666 213.046162847735  
189.915720614467 145.022242996923 159.413535577361 129.958065173006  
147.720061897962 126.630787911053 126.573673878042 144.46549577902  
136.878656455606  
KLHL24 909.727616721285 1032.11574332305 1111.88018487186  
841.944755849006 558.440840319738 897.958748317315 1183.1601379136  
849.784051720996 813.034056288861 448.106077184152 1430.20038077595  
507.137104111742  
KLHL25 154.309257657136 168.405786851399 152.57905274438  
182.410688592378 167.594414386475 186.591941221632 165.062129636008  
171.924364939807 138.768904143023 165.803549113373 164.458565398812  
154.969503835593  
KLHL26 186.758038665014 200.242239130026 194.257024100927  
234.768591315095 189.853136769155 161.34427428845 179.663258610881  
170.381897441659 148.503282415207 169.279866966079 156.806407903626  
173.364586678954  
KLHL28 891.194779815063 774.774214696342 769.34961339184  
647.955521647635 207.890408761692 659.673052713372 397.387054218873  
626.857289492802 403.405544395163 434.176007498693 557.405157178952  
425.969575503375  
KLHL29 260.888612454097 246.369521698487 233.671878221507  
232.023739004791 241.320049298228 332.194163016646 323.51769984082  
344.247544510881 233.997642139328 220.510248260182 599.926717145115  
283.982575660968  
KLHL3 278.687780705367 255.305647212135 301.051775938853 328.200548902445  
178.329946332806 207.73395131954 444.192734921566 512.467731561858  
325.387193207414 257.338950719432 500.132469062228 688.464980326689  
KLHL30 149.760883745928 164.857465272302 134.572552391307  
181.70730090195 115.305518560239 120.085340927108 111.127245394321  
106.36673326724 114.65036208773 107.884870799936 113.40684693417  
117.65847906412  
KLHL31 131.057186121556 144.889019483712 120.873985900666  
133.315888375614 130.362378233288 116.19219007097 123.29908883119

128.702882993588 126.316613675316 121.48867035121 142.55463239891  
 126.980375035189  
 KLHL32 151.705219298578 163.689130813058 187.183762762259  
 161.305860691151 154.179891883612 166.872332652008 172.758230728437  
 183.998458233995 162.519642881848 173.088291472857 135.611239765082  
 177.491294133515  
 KLHL33 132.600208090551 141.290905146249 144.81689330206  
 135.106072664488 143.579660352652 149.606576415873 149.704586651832  
 132.223321299997 136.901107766796 138.150616787218 135.499195435803  
 150.42705284743  
 KLHL34 130.528198937596 141.67550758321 142.535416473783  
 136.764881711137 139.282741110499 148.084844579881 141.313482534472  
 127.224081416987 145.754504160436 137.112274459462 153.156264091925  
 112.166192839859  
 KLHL35 155.078035506545 135.106072664488 155.40832015652  
 138.586620636835 308.726328440723 192.493439659184 190.572712684622  
 153.305679563467 158.738932073809 181.922907273871 179.273936200852  
 166.257275241937  
 KLHL36 244.350562866593 264.158648784101 244.797792477941  
 274.235001739215 767.054576874115 322.213266293148 597.795856268827  
 403.582461109859 329.48021621087 507.827473844576 461.143361255467  
 523.591472915151  
 KLHL38 142.432995657729 156.866867371872 146.488402397597  
 141.722323536548 144.877789873062 134.746175914762 136.633726784926  
 168.773340961473 140.184082384548 154.037622223246 133.976997391944  
 132.94603323912  
 KLHL4 133.62358240645 127.305306470493 127.947547987882 129.391376518208  
 118.249148086655 117.623103460369 118.951526834915 118.488997046932  
 113.970633751086 122.891946370542 132.973551954067 116.388079393669  
 KLHL5 649.052806726591 580.164288826741 757.066786599446 646.704226815099  
 164.078423844421 229.200570583629 210.751430486845 243.893774595317  
 241.799709160815 298.979106293393 179.674744176904 199.250680260804  
 KLHL6 141.781482381513 142.664793323255 147.405050592353 141.913984244672  
 154.061101136889 163.125317704446 164.777719508421 174.909258852845  
 174.383193885933 135.455283504668 137.794858639838 138.50032459657  
 KLHL7 242.440966395613 211.269041187154 208.067404132325 215.607567127195  
 191.84511431253 199.305626149918 205.57572471694 203.089661928125  
 179.177884962513 215.057917795456 207.692077301142 223.013753785002  
 KLHL8 516.577357935963 456.201998988891 479.866450988091 533.37609065123  
 217.940575516933 536.253405705975 348.171901445232 441.578261054602  
 428.340060893467 352.811351813364 317.206754773681 309.0578543424  
 KLHL9 632.031410234577 665.602699607102 670.347447480331 449.952497751758  
 420.567884340705 713.23381913235 318.196134631178 496.560127152436  
 549.359675306309 780.105135529728 916.836022395768 534.608644989102  
 KLK1 207.417884407459 235.867149024041 171.49930976135 506.659740456829  
 130.104021521854 127.249679674312 130.302829773323 131.850952248545  
 126.814332513301 133.16868415814 153.44628692569 128.097206000942  
 KLK10 141.059033576475 143.669490888725 132.285835971705 137.134190411005  
 136.638141963514 133.86835278231 132.688531077861 124.904518221898  
 132.50676380992 232.778488697337 170.069291215013 126.499257771192  
 KLK11 161.285587312115 152.755535408382 152.026310884327 146.054535585464  
 146.011694647614 162.519642881848 170.298291784762 143.324235640446  
 147.980827857138 502.935749606918 132.243900762936 234.588584245938

|        |                  |                  |                  |                  |
|--------|------------------|------------------|------------------|------------------|
| KLK12  | 122.5651974076   | 121.464383202986 | 119.399971165857 | 117.467618148107 |
|        | 120.36402353147  | 119.288554466773 | 122.347696497767 | 114.405811161631 |
|        | 116.632612170106 | 227.32463765717  | 122.337240239463 | 134.950905279775 |
| KLK13  | 111.010889276873 | 122.194493542073 | 135.325617701062 | 115.902030217102 |
|        | 139.180086017033 | 125.26492723752  | 128.616121042106 | 130.763957515652 |
|        | 123.852299272249 | 147.294408903227 | 141.976051648478 | 128.486023696636 |
| KLK14  | 152.057315195367 | 138.730409717578 | 148.323729699672 | 156.865049786218 |
|        | 138.902097203056 | 173.488272345038 | 161.972922129453 | 156.392603045231 |
|        | 139.723117427543 | 133.640832782576 | 139.801108744526 | 140.599584289987 |
| KLK15  | 133.610143526954 | 137.271702725819 | 136.051070946954 | 133.802898895457 |
|        | 130.247700541716 | 133.211362932569 | 135.987450822209 | 126.05295868521  |
|        | 124.059778432167 | 133.384498169568 | 139.138329217724 | 126.652197216347 |
| KLK2   | 151.034392433934 | 132.137634927459 | 133.499361793303 | 147.78095608696  |
|        | 140.175724588255 | 131.753135000312 | 127.416912237613 | 136.566588903194 |
|        | 132.649409216699 | 133.860077101582 | 124.883575464443 | 133.397734409167 |
| KLK3   | 147.428180649939 | 148.975112606364 | 164.525784478026 | 135.025907096066 |
|        | 142.232918684259 | 137.93067182632  | 161.017267304159 | 140.431591727649 |
|        | 129.722382881611 | 140.293431620804 | 143.195338329759 | 139.880733465536 |
| KLK4   | 164.02617650236  | 164.433462115832 | 163.529157756197 | 159.554978842683 |
|        | 137.897243684023 | 137.47514052942  | 147.230113868203 | 150.731093808891 |
|        | 138.685330935707 | 165.074983746785 | 146.418147447541 | 147.664505309713 |
| KLK5   | 135.063259138429 | 127.427014611349 | 122.921245774755 | 124.176944998906 |
|        | 126.902441495413 | 118.388993232718 | 125.311403516443 | 128.206231522695 |
|        | 121.874296836854 | 165.723126764006 | 128.933672074497 | 128.259909378964 |
| KLK6   | 141.359142214228 | 146.242897296397 | 149.228977421003 | 141.482344048665 |
|        | 153.798367953373 | 154.518641757391 | 145.502055020513 | 148.260672564835 |
|        | 141.808122700968 | 220.816812192169 | 147.777050372032 | 143.265532486512 |
| KLK7   | 120.193580405229 | 123.877609932461 | 129.735862775199 | 120.027996187915 |
|        | 136.541973790157 | 123.418266047461 | 120.688909943167 | 125.439033142431 |
|        | 122.629146433216 | 139.995623005154 | 140.214475962177 | 128.490341173553 |
| KLK8   | 121.423030266904 | 119.717408713154 | 128.245734702114 | 122.651702760414 |
|        | 125.833649377492 | 116.58452862953  | 126.619475852751 | 125.393848851951 |
|        | 120.351217130679 | 119.469328303796 | 119.693318959661 | 121.434713764246 |
| KLK9   | 111.837468699281 | 105.132185249959 | 104.248226402465 | 102.522925993233 |
|        | 107.07609243233  | 103.202873534814 | 120.397683153445 | 124.59937620719  |
|        | 114.479886899622 | 117.570749340011 | 118.375739674144 | 107.531907287727 |
| KLKB1  | 172.641322197031 | 174.26780796802  | 163.326102597955 | 135.186880148352 |
|        | 125.212404794262 | 120.649467083125 | 125.111993560078 | 166.104915784875 |
|        | 132.535722328813 | 126.195222228248 | 144.818492604488 | 115.066084565112 |
| KLKBL4 | 134.181819177347 | 135.433229702209 | 137.253971514177 |                  |
|        | 140.413503801467 | 164.68600028429  | 153.974384951787 | 121.824805374887 |
|        | 134.42983422342  | 135.47852126603  | 142.719216118914 | 97.8058879269165 |
|        | 145.25774926819  |                  |                  |                  |
| KLKP1  | 117.511162285879 | 122.309041354217 | 129.171589574238 | 123.571641517019 |
|        | 124.00806841872  | 118.666654333368 | 130.933379257307 | 133.542620077059 |
|        | 120.599440204711 | 116.994216357989 | 153.941193682697 | 123.566522075398 |
| KLRA1  | 135.743159681223 | 140.641956393993 | 161.603317039244 | 133.957160768065 |
|        | 117.417112053842 | 148.835389500419 | 141.746032519746 | 182.346834032145 |
|        | 163.413365060063 | 129.699765645519 | 142.356747337127 | 146.464937541891 |
| KLRAQ1 | 707.048754700047 | 672.637760135254 | 756.390518977556 |                  |
|        | 783.991448771818 | 346.917113326564 | 463.187551361986 | 380.146996799549 |
|        | 421.690849282483 | 382.701467158304 | 423.740836541835 | 286.133496092533 |
|        | 383.182507425579 |                  |                  |                  |

|       |                  |                  |                  |                  |
|-------|------------------|------------------|------------------|------------------|
| KLRB1 | 206.275885047321 | 217.408824020423 | 191.59400638652  | 173.829219279719 |
|       | 207.05325577114  | 255.74096237558  | 209.398724613377 | 338.406266073063 |
|       | 399.724529998085 | 188.45479937455  | 267.622579012917 | 207.764456828813 |
| KLRC1 | 150.904618960507 | 143.956726538569 | 129.505139430366 | 139.660641694206 |
|       | 125.628281846465 | 132.435409278702 | 133.148442269517 | 142.765490244223 |
|       | 141.437891956239 | 139.036978052242 | 133.911650164508 | 129.155804800869 |
| KLRC2 | 123.265810024678 | 125.526744092256 | 127.496885890349 | 123.852299272249 |
|       | 140.013231300392 | 129.621296567128 | 127.79057041268  | 129.871985352583 |
|       | 132.22974656114  | 126.791714564926 | 136.282608531191 | 139.675292022085 |
| KLRC3 | 122.780453116176 | 116.497714896018 | 128.26423663004  | 125.576103876855 |
|       | 122.809241232029 | 121.159593382017 | 130.675745275992 | 121.893446546512 |
|       | 122.667593730152 | 124.090268443064 | 132.011199659803 | 121.219323788324 |
| KLRC4 | 128.383541329939 | 139.723117427543 | 130.887769728442 | 119.558626216818 |
|       | 128.771367080039 | 129.694178995061 | 134.801507994667 | 127.287538993899 |
|       | 121.242099666967 | 128.083964056229 | 139.459975305985 | 138.679545821015 |
| KLRD1 | 137.597788349982 | 140.651536723893 | 142.744045151046 | 129.47419698487  |
|       | 129.231455282441 | 150.687819649072 | 132.317972465689 | 142.734103971267 |
|       | 166.46473789699  | 135.32160992961  | 135.542079867325 | 141.471127716868 |
| KLRF1 | 168.347445148881 | 156.373163373309 | 140.687016530974 | 163.942131559267 |
|       | 148.755559144241 | 144.935571704834 | 157.337193457189 | 149.320667417893 |
|       | 170.01557699913  | 162.660027294291 | 140.316066297536 | 153.34166495223  |
| KLRG1 | 147.441650320053 | 141.218832234405 | 144.496429994489 | 139.510764003291 |
|       | 132.606735652984 | 135.627840788802 | 129.606271613463 | 136.987403767185 |
|       | 165.757295630254 | 126.982340580909 | 124.093412630817 | 125.682297697017 |
| KLRG2 | 127.709638375626 | 150.156865995098 | 112.875136585606 | 136.970505971671 |
|       | 169.179630363359 | 149.513744292932 | 132.54577436954  | 122.676368520743 |
|       | 121.850967084709 | 126.899985772157 | 134.596391166462 | 122.320966091375 |
| KLRK1 | 134.97514790642  | 133.939847853073 | 157.932243807202 | 148.245974323625 |
|       | 141.361376461507 | 141.002002397727 | 180.142758394321 | 141.304791640723 |
|       | 157.635531050489 | 174.66966623557  | 144.456324230938 | 140.336479395866 |
| KMO   | 147.26204590693  | 157.431972439046 | 145.528676983944 | 165.406452831375 |
|       | 152.57905274438  | 158.020651857664 | 161.44729973777  | 163.794436953711 |
|       | 160.353649786837 | 169.800006803362 | 151.477239868429 | 164.352366170527 |
| KNCN  | 176.100691355682 | 148.28101912019  | 147.396463611334 | 149.759516805355 |
|       | 133.322752419739 | 149.952762225731 | 130.626965797365 | 147.959740692766 |
|       | 142.694748293332 | 142.889911562811 | 158.445124076906 | 131.181537219479 |
| KNDC1 | 136.801338583441 | 128.244549276386 | 137.123016784819 | 136.821228481217 |
|       | 139.488057371254 | 138.274057264688 | 130.639974588163 | 134.671840308041 |
|       | 131.711969450237 | 132.433109154079 | 134.464053009101 | 135.25612528874  |
| KNG1  | 119.701313125748 | 112.710573586525 | 114.182798672347 | 113.61408868553  |
|       | 119.894737403889 | 113.680875214845 | 113.119021336236 | 119.330439721904 |
|       | 119.842470751496 | 116.831725094917 | 133.414198431469 | 117.040953580545 |
| KNTC1 | 223.941946219233 | 230.855806094267 | 255.156682699288 | 239.20206002     |
|       | 361.160881334174 | 499.321667633972 | 372.81255844018  | 588.863382995875 |
|       | 587.026042400878 | 368.134303229682 | 274.494074082359 | 447.995213144892 |
| KPNA1 | 405.409668978569 | 343.200277800027 | 404.073802241516 | 373.033658917608 |
|       | 288.596513753617 | 352.897241809959 | 359.162549472301 | 406.458130553679 |
|       | 337.487980551006 | 449.523996620257 | 349.722963659175 | 339.012225830929 |
| KPNA2 | 187.380064367869 | 185.233210060342 | 145.128919984856 | 163.22480684222  |
|       | 294.17588071297  | 601.800326895295 | 266.162244070031 | 712.699853328955 |
|       | 455.564394647943 | 372.149771075286 | 260.67310907387  | 409.380002417794 |
| KPNA3 | 669.731546951281 | 505.143815448613 | 745.153336165802 | 549.96567374713  |
|       | 293.448046685909 | 533.37609065123  | 195.69447353356  | 325.525450750788 |
|       | 311.337303524912 | 402.473870771741 | 344.070947256963 | 441.001837510132 |



|         |                  |                  |                  |                  |
|---------|------------------|------------------|------------------|------------------|
| KPNA4   | 1892.8338612507  | 1712.47877322331 | 1758.7809492929  | 1649.46398639795 |
|         | 1146.84239258543 | 871.913035811066 | 707.715412321304 | 1084.95095717937 |
|         | 764.774225930479 | 1344.1288416533  | 800.013123376748 | 721.31849915135  |
| KPNA5   | 136.687813884132 | 147.192815700248 | 141.703410265546 | 141.565599104245 |
|         | 121.286130275542 | 140.671406418004 | 136.543603346919 | 134.722574388775 |
|         | 128.597272557033 | 144.631407964232 | 166.415922313464 | 152.702847643082 |
| KPNA6   | 829.992212133165 | 1094.67740173529 | 872.320823993033 | 1160.25775445193 |
|         | 810.396770151757 | 927.137881369911 | 715.43295523922  | 791.840531191783 |
|         | 875.38834441246  | 635.038752622494 | 578.465753476561 | 748.940715378564 |
| KPNA7   | 128.341887728118 | 131.646121568612 | 122.708102546276 | 116.011005504201 |
|         | 128.551335256123 | 128.119556520151 | 133.257477196196 | 121.917596225576 |
|         | 126.967212770393 | 121.696353230886 | 124.840101287634 | 131.198284945008 |
| KPNB1   | 2433.83421295012 | 2189.53914329263 | 2476.51542420593 | 1963.23068846837 |
|         | 1612.79779117655 | 2039.55802107872 | 2550.08769415478 | 4000.45196171119 |
|         | 2974.04694562902 | 2833.30537635103 | 2295.16438420175 | 2611.61260614408 |
| KPRP    | 120.355844117573 | 133.223310036542 | 116.070254821073 | 120.897228878841 |
|         | 291.839070398338 | 119.275061991187 | 133.975526667571 | 213.813667557079 |
|         | 135.185283076286 | 175.551853899221 | 139.375386456759 | 127.733860645979 |
| KPTN    | 134.01566484034  | 156.602240897907 | 136.176688025337 | 154.2433882385   |
|         | 222.593554194453 | 152.295451313545 | 156.494323415504 | 165.870621884073 |
|         | 161.112906953532 | 149.17029600091  | 151.269442319766 | 153.251468534012 |
| KRAS    | 213.7326050342   | 237.492603094091 | 234.841813258798 | 227.236255752375 |
|         | 195.123919692348 | 218.997165156081 | 199.118281632221 | 275.642882589307 |
|         | 195.547320133122 | 244.849563563729 | 242.996248524203 | 221.685824197352 |
| KRBA1   | 367.130155304037 | 406.816482069141 | 366.408565514304 | 496.823662262772 |
|         | 624.978351618077 | 395.386242257877 | 437.122373082112 | 513.292377117011 |
|         | 420.446810988909 | 382.327656839936 | 336.786227017391 | 460.807117177285 |
| KRBA2   | 164.448110885609 | 148.336126836362 | 157.821491577808 | 137.391141254051 |
|         | 109.29279076901  | 117.980052938167 | 119.819082491115 | 123.902047880095 |
|         | 117.412956162665 | 121.087514445827 | 139.557059245431 | 124.248997533959 |
| KRCC1   | 791.840531191783 | 904.211195986553 | 696.131296166255 | 753.389428590366 |
|         | 679.557656724243 | 282.244214637625 | 250.18189549573  | 503.59466398882  |
|         | 499.891000749138 | 263.058972886829 | 662.58366387795  | 585.075322115635 |
| KREMEN1 | 146.904354404095 | 140.586497829504 | 142.372470063444 |                  |
|         | 143.336538157639 | 172.686798187142 | 152.524106827617 | 146.26304624648  |
|         | 159.443697452694 | 192.914362049985 | 163.426663985855 | 160.368226341458 |
|         | 183.314276033531 |                  |                  |                  |
| KREMEN2 | 141.528115502473 | 137.236279848623 | 137.719257499747 |                  |
|         | 140.036463888037 | 155.3016514732   | 134.947657801444 | 131.148926523383 |
|         | 136.578058206829 | 141.434699050015 | 140.916876460413 | 151.079500558067 |
|         | 136.131453703981 |                  |                  |                  |
| KRI1    | 141.143572141958 | 146.823157886228 | 144.101376910581 | 150.70383460714  |
|         | 143.999000471746 | 132.332128706656 | 132.433109154079 | 140.311843829601 |
|         | 149.151791028837 | 143.901267937876 | 179.211502448703 | 140.682757521394 |
| KRIT1   | 223.872330412144 | 215.453915231774 | 260.195256836955 | 198.979744266277 |
|         | 179.15284184774  | 236.082185670774 | 228.9901869793   | 264.201932544662 |
|         | 231.338258067616 | 212.107842040568 | 190.850639994777 | 266.681711962236 |
| KRR1    | 127.229854957588 | 142.358754646258 | 141.119491147925 | 116.787791109549 |
|         | 140.055272520317 | 212.119922561453 | 167.965981130329 | 161.099805358232 |
|         | 195.906137340918 | 143.523051024982 | 165.355764467096 | 178.966169998125 |
| KRT1    | 131.336902822702 | 126.555972138115 | 109.817705421158 | 128.463982896081 |
|         | 118.544870925791 | 115.80656409185  | 123.418266047461 | 119.590540166384 |
|         | 129.580421464913 | 255.225145197422 | 132.683594640696 | 116.695313319162 |

KRT10 555.607185132941 534.920870202582 488.746614111382 543.170902795966  
1166.86593572716 1059.80292026589 1507.39761667421 1818.92700816112  
1821.08523647593 1467.50846948144 239.050379187643 1542.35486950856  
KRT12 148.578688042147 153.366677608026 148.237980436128 151.908841481413  
169.168869363848 133.610143526954 146.084461430546 334.140757209353  
142.003414252064 152.543005423742 179.914070416793 134.130913969327  
KRT126P 160.019067307733 159.856190281237 149.734395134321  
170.401653214867 151.650777127117 164.227134687088 165.851677392967  
156.304678960663 154.932132950843 167.67272339144 155.158028043823  
166.917552275021  
KRT13 1107.29687889378 1694.24232555141 984.695710317818 284.534369213195  
135.467354817201 1782.2498613913 6484.36742084268 1094.67740173529  
176.256840061919 9994.54490550759 10988.2836796736 11235.4970815873  
KRT14 123.389038274913 132.529247880813 117.212164526913 121.024572716324  
114.265920150451 1671.82101590797 120.114423236962 120.089228795888  
133.467092274663 25558.9005130606 954.488185198006 147.561362873855  
KRT15 146.063554646851 160.311096717492 137.161065320948 147.125005489393  
148.760280320258 157.615017085961 1651.68171717875 239.20206002  
148.120968141789 1778.73916100529 199.170488640762 231.372316734945  
KRT16 152.049243916141 163.108825245937 125.528638246486 137.151210946281  
310.075815009404 3793.02341602102 316.895545640437 220.710324965453  
237.950921053386 23318.4614981217 708.268962600305 964.473774310687  
KRT17 697.299604049748 847.863177169335 288.770330002807 223.042575796603  
1211.94273385872 946.640841062802 2915.72823797537 1830.56003081769  
1460.24985399013 22872.0444589809 6138.10904830456 11360.2921551609  
KRT17P3 155.60532199001 162.117224868654 147.901594006094  
143.541810469447 274.595218795127 273.303240462047 537.216291942143  
349.773289724658 249.379605914827 9560.32907282993 663.668537495345  
1525.24196488688  
KRT18 135.452340998039 142.693337885596 141.500790455788 144.161672064561  
183.556662533396 210.14307111352 202.024504592763 205.630948393225  
203.831047867731 202.278323489515 167.083758835476 235.372592051464  
KRT18P13 134.592495777159 181.062188174871 137.208796872026  
127.946346172549 1429.25367024696 733.195136251155 628.485648053393  
584.433155497378 1057.1528284934 196.363005912532 633.762608454521  
647.273409499313  
KRT18P17 124.889829874126 146.184624424737 138.003440266411  
136.378203924435 386.379891865411 202.114480291084 217.125327913156  
175.21512930507 245.978723809154 137.981446468611 257.989863290786  
197.378801636702  
KRT18P19 138.580264357741 141.497125111619 137.012646671173  
142.167918879613 152.514455788489 132.622032754473 120.020781939389  
127.871445879091 149.138678142327 136.931476050688 125.450077160575  
130.09050436943  
KRT18P26 122.587545171646 134.09920571607 128.876385705559  
139.023486014525 131.324822348301 128.486896700405 131.227807192663  
135.461112284848 122.5651974076 127.806138997958 139.39112068213  
125.377377116057  
KRT18P28 130.937742379689 151.252137441251 129.982236484842  
124.927989289122 395.261210769232 219.080383154432 195.218005582618  
194.921021761976 272.770616373687 136.84488044614 316.125364442611  
172.980441569522  
KRT18P30 132.596941171401 134.273326732349 124.629877200816  
142.861359851088 142.888281750232 140.202762690515 127.182067293944

141.681266095578 150.244284323504 142.639587833858 148.306990501663  
 131.322008851059  
 KRT18P34 136.699011428085 137.463764193883 131.141668650877  
 157.203304477454 121.613684281664 149.303427221111 123.25201993575  
 132.361106053517 130.836079676477 139.435000959919 148.80452641061  
 127.077668562103  
 KRT18P40 136.971869448818 137.215025712057 132.639070127232  
 132.179747646893 128.032141013681 131.863018503922 126.649739818781  
 126.237900397603 127.128042857811 124.036907709461 127.382266838772  
 125.542301916791  
 KRT18P42 132.256047602234 122.676368520743 128.071379991958  
 125.234097725749 136.955651763743 137.264095379365 144.393688888553  
 138.555443236183 130.116771999391 130.199581370385 129.925548182204  
 135.627840788802  
 KRT18P44 136.440671408022 113.143436184959 119.830261862805  
 145.187490179166 129.758303592589 126.995207465164 131.18368961955  
 138.613373798613 134.76586363177 117.499697378893 124.516264338772  
 135.90207451581  
 KRT18P50 142.097126256137 134.008118774075 141.533138525284  
 156.849589396587 153.187148832063 152.555437272666 137.93067182632  
 131.608580511282 141.383975990479 132.981346767415 139.181131600753  
 135.068883036882  
 KRT19 511.891269255193 1689.00127592755 919.626220838414 304.713434036642  
 18338.3001930708 16480.781374867 15809.9561036761 20048.679735668  
 13360.9483836861 1487.12201643008 10900.1783397368 14417.2696849334  
 KRT2 117.22284971665 125.749024723383 115.656801309856 115.958740595234  
 116.947370388179 116.258629237662 115.692324946633 112.825399620524  
 117.361778263056 112.464951599416 141.442825487243 111.876915242732  
 KRT20 146.406344338757 181.110403721353 150.314462939164 156.976539870288  
 984.695710317818 697.581541438891 884.248568386012 5636.26097921507  
 655.665164535648 169.311264420133 1474.70984232307 832.335328912437  
 KRT222 148.417929733447 137.353149614081 135.562700479444  
 123.566522075398 113.989682635964 105.741092375243 116.897299691798  
 118.406487008528 119.618176258524 115.907902010701 122.142323014287  
 125.642282323003  
 KRT23 134.897958140444 143.961467163406 150.674189235105 145.054873480806  
 152.413389525982 152.6969498938 155.101850847148 185.816827784447  
 2249.8123426309 164.103306492559 141.016596301267 132.568354349687  
 KRT24 311.612118247493 188.118989395838 185.544411160039 155.71830087869  
 252.851164967726 345.291295192574 257.941367816557 210.852300463808  
 158.445124076906 433.751675703425 198.055877414824 197.981112645168  
 KRT25 140.071879210324 140.918728758975 135.810476921749 154.153249796248  
 137.499290547619 133.158570377793 135.383585408897 137.969750384554  
 131.992186668019 130.909388246758 130.601241656346 132.359319280352  
 KRT26 122.258432948151 131.077814710839 125.290320836648 131.753135000312  
 129.153882779488 123.801380911257 125.848597767733 129.422854634791  
 124.646093292382 126.795016307175 125.398875527365 120.925930409474  
 KRT27 162.879707592164 140.533704857854 160.707290343231 143.492758492895  
 149.44788347071 157.512561489621 137.038866196785 145.915129713165  
 168.521601064374 150.590611246086 127.213640193364 145.791950392049  
 KRT28 118.377827181989 119.399971165857 122.517559025268 105.49491265382  
 111.457176315964 114.27112025541 125.920663904983 105.583474813289  
 118.56332995149 103.168665937677 112.684334910243 114.638254225216

|        |                  |                  |                  |                  |
|--------|------------------|------------------|------------------|------------------|
| KRT3   | 118.777105073561 | 122.54127694717  | 128.090665893885 | 118.091125088778 |
|        | 132.079255703621 | 119.544004279354 | 117.820996523337 | 120.714981493593 |
|        | 123.841366760069 | 108.779204939177 | 124.256773437346 | 111.055738573603 |
| KRT31  | 127.182067293944 | 131.330974614437 | 119.285026330891 | 135.691862612951 |
|        | 149.398118078302 | 131.536457148878 | 132.413527125434 | 126.978144285534 |
|        | 133.150660840801 | 144.4421922847   | 148.773558380167 | 146.599636794606 |
| KRT32  | 96.0426636429757 | 107.450945262092 | 110.694256186941 | 114.524341239889 |
|        | 97.8058879269165 | 98.6941019230576 | 109.156349683299 | 113.077691687266 |
|        | 97.8058879269165 | 110.242638217587 | 119.763020707899 | 101.761615925097 |
| KRT33A | 127.55397077248  | 132.348603553752 | 125.553615182238 |                  |
|        | 128.949103967865 | 142.031106637522 | 126.529763042574 | 144.179880084235 |
|        | 137.195906276069 | 134.834641868502 | 139.338384535905 | 138.296933822299 |
|        | 140.163936299053 |                  |                  |                  |
| KRT33B | 127.179420421981 | 128.434301921433 | 121.709375771276 |                  |
|        | 127.395094952914 | 131.241878941749 | 128.274326990056 | 123.981053866137 |
|        | 151.589273633331 | 138.02757574324  | 121.014538677616 | 140.895053453126 |
|        | 121.144174389418 |                  |                  |                  |
| KRT34  | 129.558589108727 | 141.130462286785 | 141.664271607079 | 126.479964493857 |
|        | 140.708683675555 | 136.922282125029 | 138.760800146167 | 130.285187693932 |
|        | 136.348252715447 | 137.601181150371 | 138.367321366804 | 145.528676983944 |
| KRT35  | 119.899649497032 | 126.48691003872  | 123.807693112932 | 130.411849432351 |
|        | 122.347696497767 | 123.122705969332 | 119.926169902322 | 114.785989868306 |
|        | 128.734694496357 | 124.800221241981 | 132.085538520551 | 126.704076078563 |
| KRT36  | 116.566190779365 | 137.997756995882 | 122.842463675109 | 117.980052938167 |
|        | 123.615802924067 | 132.027020683413 | 124.772219140795 | 124.347680638586 |
|        | 114.308806726044 | 183.32467147543  | 136.013989349192 | 148.567630572897 |
| KRT37  | 118.533346268154 | 123.940632366675 | 117.976107125982 | 122.243585162452 |
|        | 135.075759558051 | 118.945264994404 | 123.294321716108 | 130.140958819402 |
|        | 118.26427946535  | 114.45792163942  | 152.397984799517 | 116.258629237662 |
| KRT38  | 136.639637503571 | 125.393848851951 | 123.598210440312 | 123.843823256462 |
|        | 132.011199659803 | 121.505178996279 | 123.434963905308 | 127.79057041268  |
|        | 122.333765477428 | 122.323876787207 | 141.640292723776 | 115.608857734241 |
| KRT39  | 119.285026330891 | 117.141089194822 | 124.684937344502 | 113.938636269013 |
|        | 119.535267326862 | 116.373841472226 | 132.375905857023 | 121.515872228716 |
|        | 120.100672968415 | 119.202966460612 | 111.722827315911 | 117.716094828779 |
| KRT4   | 163.632148441668 | 151.803707178383 | 133.978783899572 | 157.514419884865 |
|        | 160.234704406302 | 152.812142230375 | 164.630705813584 | 155.335777680002 |
|        | 139.625635881693 | 142.058086679048 | 145.08853313195  | 151.665244763743 |
| KRT40  | 108.199628274798 | 117.580122770251 | 113.905364405553 | 105.375878824562 |
|        | 105.221735747452 | 112.063713561549 | 117.917454674671 | 114.91722828113  |
|        | 109.932577444858 | 119.26921157552  | 111.260486045985 | 131.850952248545 |
| KRT5   | 115.427201752401 | 142.815817738837 | 116.328330266803 | 113.886420801388 |
|        | 101.530900217921 | 109.719356131043 | 123.853588042292 | 116.221426977629 |
|        | 116.939471420419 | 16818.1954169657 | 907.306121257236 | 385.798784913201 |
| KRT6A  | 146.55327386448  | 214.132445321197 | 145.553219709768 | 173.450023117394 |
|        | 143.577865527891 | 166.485040297098 | 137.934850241054 | 145.496033735748 |
|        | 280.595515386655 | 23190.7842325067 | 1172.4103691525  | 411.784922368377 |
| KRT6B  | 141.469818222503 | 159.470818285679 | 135.409613764459 | 145.221594295772 |
|        | 141.689210867136 | 137.94246602811  | 139.503902205317 | 129.447773229782 |
|        | 133.427561208907 | 12221.7819812315 | 614.514126276981 | 150.0512732245   |
| KRT6C  | 112.736231367296 | 121.059923601223 | 120.702740607924 | 111.457176315964 |
|        | 117.667611937195 | 113.955459033122 | 128.113966507586 | 120.027996187915 |
|        | 130.34939602913  | 20989.6494028551 | 370.390323116113 | 131.330974614437 |

|       |                  |                  |                  |                  |
|-------|------------------|------------------|------------------|------------------|
| KRT7  | 149.91705328815  | 303.184785797741 | 217.45700166961  | 145.114382599368 |
|       | 8768.32269645116 | 3727.70199176703 | 6384.66090426598 | 5558.51089816921 |
|       | 2789.67986601883 | 153.626180103404 | 5874.57722671552 | 4323.76731419005 |
| KRT71 | 112.036753245281 | 121.636361281148 | 119.257387524365 | 103.307703547649 |
|       | 110.286187184448 | 126.917669470999 | 113.963798749897 | 110.688722702767 |
|       | 112.428707152237 | 107.520000793184 | 125.889860278265 | 108.386545220984 |
| KRT72 | 133.905162024888 | 132.083532534267 | 134.54796737809  | 122.592960588642 |
|       | 134.860896462638 | 122.190734676247 | 130.588481497083 | 142.311108110185 |
|       | 141.002002397727 | 137.509100088226 | 164.777719508421 | 142.282861913548 |
| KRT73 | 142.388076341254 | 137.899291413431 | 155.498580125421 | 147.668990552874 |
|       | 152.849810441802 | 154.959217895243 | 138.83304645915  | 128.413213851142 |
|       | 149.31422191209  | 147.620511911043 | 149.502132524093 | 143.760519659724 |
| KRT74 | 107.303126530947 | 122.679628839976 | 108.415715678948 | 112.558241320112 |
|       | 108.955761698524 | 114.76337651891  | 113.339155126202 | 110.428616140857 |
|       | 105.49491265382  | 107.76497424356  | 124.859984709406 | 122.746185691827 |
| KRT75 | 101.915858150866 | 124.985249190127 | 120.594874820899 | 106.701716475947 |
|       | 124.693253194681 | 103.734303632543 | 130.985360700521 | 114.143874572202 |
|       | 118.895095992424 | 116.810827219571 | 140.554684822646 | 109.552501987529 |
| KRT76 | 138.516066340784 | 141.567425892004 | 134.883708339914 | 149.744358230709 |
|       | 135.794342110159 | 136.984172424718 | 142.658562927154 | 141.949098898957 |
|       | 141.130462286785 | 138.945855414918 | 136.855445270531 | 161.708130705995 |
| KRT77 | 112.817015523662 | 115.327402810793 | 114.631759839092 | 121.973581817041 |
|       | 125.000876313893 | 117.348231147283 | 118.660213790078 | 123.786227856015 |
|       | 119.645983822002 | 115.400592594965 | 134.145771195572 | 120.280241193135 |
| KRT78 | 149.432744784716 | 160.786907816025 | 166.754995454382 | 136.907453440141 |
|       | 143.236593995493 | 154.789187466057 | 156.834059922255 | 131.717160947964 |
|       | 155.255279503782 | 241.890850719625 | 146.932655562613 | 145.247717878099 |
| KRT79 | 126.670227417269 | 146.431166706908 | 128.492142236807 | 137.406420101257 |
|       | 124.69564501518  | 142.991135981933 | 141.923103467306 | 148.913181799692 |
|       | 138.003440266411 | 134.936025073531 | 133.550008967009 | 137.367390177293 |
| KRT8  | 358.152044880733 | 415.957832362051 | 386.817736004263 | 325.011269531407 |
|       | 7802.25987814138 | 2779.89882032092 | 1415.67109281133 | 1567.89763050645 |
|       | 3015.70954394585 | 183.138955445765 | 2720.83642320419 | 3164.55070502403 |
| KRT80 | 127.893555451807 | 158.150949554785 | 130.092881020271 | 140.818413826758 |
|       | 527.139476504986 | 172.138554350738 | 369.198837083585 | 244.219585315024 |
|       | 438.817248820137 | 885.104778820041 | 267.097999873387 | 270.12941437975  |
| KRT81 | 122.679628839976 | 161.34427428845  | 120.39039576721  | 127.9928491829   |
|       | 131.421663453164 | 116.653897702566 | 138.523677181131 | 119.511962218143 |
|       | 124.828626063272 | 135.997144927956 | 121.796519488793 | 156.114825514646 |
| KRT82 | 119.242880574306 | 114.278113876915 | 120.076742232995 | 115.3611179192   |
|       | 118.712730897987 | 116.7299185256   | 115.208555742308 | 114.466368742403 |
|       | 108.939608619532 | 120.906553066296 | 111.312348806957 | 110.784682137658 |
| KRT83 | 135.206755687105 | 125.905785653648 | 127.706499722854 | 126.279119798177 |
|       | 131.99470265134  | 123.233267210406 | 128.147484804104 | 123.29908883119  |
|       | 120.901639342731 | 135.90207451581  | 162.122250419992 | 135.562700479444 |
| KRT84 | 124.232144678947 | 113.339155126202 | 114.364953312191 | 121.059923601223 |
|       | 117.646963986512 | 116.983869766097 | 124.336297973344 | 124.295334523889 |
|       | 120.682485578097 | 114.00959999268  | 139.067516394141 | 126.230887413874 |
| KRT85 | 148.260672564835 | 128.17223916536  | 147.192815700248 | 143.864036545717 |
|       | 137.123016784819 | 129.278833426752 | 137.423810400996 | 145.967685593635 |
|       | 146.98903251354  | 149.698664700146 | 132.815753681623 | 150.956247643013 |
| KRT86 | 118.597739444445 | 146.795608819024 | 118.115015846489 | 121.846349358116 |
|       | 153.258616843783 | 127.352386363217 | 113.416743649576 | 134.558435781672 |
|       | 140.083495854322 | 190.809584998617 | 138.052032298683 | 120.329105003959 |

KRT8P15 148.970251898527 130.485988201308 132.057808599068  
141.499192356469 145.690634269858 133.909219998872 138.147658465394  
131.208112906919 136.491140756702 131.846160346403 126.033673708286  
130.69582728747  
KRT8P9 154.564478911791 148.962593686337 152.265624144393  
140.041977349982 783.373390305885 392.06522028189 237.045634416039  
281.618175110153 344.856199123543 133.181855719499 528.275591281419  
471.069295685718  
KRT9 129.114161128113 140.92377681377 145.391496022306 130.365804613342  
145.745466612541 141.213588194832 139.81502919163 146.256076936456  
143.603022117503 190.682392100564 153.02549014611 128.200531810126  
KRTAP1-3 119.01990099776 109.91537150286 120.37619371663  
113.249267122926 110.273174147374 125.553615182238 108.850992642446  
115.995309578182 108.807891863679 118.379914726645 134.202497785854  
124.947565043721  
KRTAP1-5 143.236593995493 133.088758771353 141.139737175648  
137.693410133625 135.54708602175 155.343619434375 151.716042884808  
128.16147857336 128.883828419932 157.295602588814 145.882793872634  
141.239354296152  
KRTAP10-1 131.31716158922 125.26492723752 142.163834995141  
147.213616261735 145.369791572077 145.662818023154 130.827726862159  
137.103879676652 135.315732654507 147.772490977392 134.944488136297  
138.715208319278  
KRTAP10-10 136.831280469398 141.727639388452 138.233799607706  
130.980885733161 142.630563791102 139.925201225224 135.212715912271  
139.276102596591 134.436423298225 143.978912435831 146.135269553731  
148.200449442782  
KRTAP10-11 144.522461545204 151.503307004675 161.506431005203  
157.514419884865 176.689683169567 151.841652724562 151.206697943841  
165.565284723155 170.150889760372 171.835438335216 161.024665355184  
158.545435407585  
KRTAP10-12 138.555443236183 160.473772347376 141.939368369872  
143.626857507866 140.03202338666 146.919110530891 146.146800933028  
132.762755202326 148.936888662374 141.58244054926 132.620474788855  
130.282212339065  
KRTAP10-2 141.29868389128 131.928871107722 144.136328845967  
128.634431242405 146.869927141655 129.267923706188 152.095584118603  
132.352268262631 137.244552699212 139.048551183511 151.698385134218  
141.490911535087  
KRTAP10-3 168.027892518772 166.89884215297 170.636731478608  
173.526005872207 164.630705813584 169.860061216981 177.246890307643  
172.595769895332 154.065561942688 148.13657736444 144.610341215903  
176.533058719908  
KRTAP10-4 115.725323816619 120.003095000297 120.799317509529  
114.726808450831 127.961153369579 108.818976813708 111.826509343353  
107.638492587723 121.799209715087 111.62514398781 126.165220332132  
115.208555742308  
KRTAP10-5 130.603837917984 123.372689985035 115.16087297104  
142.159597861804 134.629996026323 129.104084188187 131.724061631389  
137.632470240792 136.60514429355 131.615462296871 144.994931561779  
135.762603711262  
KRTAP10-7 113.504670764963 116.472796471694 119.622243247836  
115.180659017144 130.571827557149 115.981530322377 116.465213348716

109.016991399605 113.422559344178 118.461037435114 129.580421464913  
115.550587451456  
KRTAP10-8 112.825399620524 109.536381305315 108.036254606246  
112.239647575661 102.343275379164 113.542803491215 113.734280863323  
120.283706459738 106.263441906404 112.922918499398 120.09801164252  
109.793568518462  
KRTAP10-9 139.912325578837 138.872536475067 133.959208066964  
137.71280215369 125.334995649504 129.425699141995 129.861693025157  
137.537197575152 129.982236484842 131.268454024753 138.98468042464  
132.024244263352  
KRTAP11-1 169.667751894226 166.341564850299 171.099675679944  
199.209279169496 181.593291870136 163.091280469234 174.680918805036  
172.457165477145 162.634670715627 153.653453808799 130.571827557149  
160.525939340745  
KRTAP12-1 127.480717762966 137.331864485838 148.844916975586  
122.002822875994 168.3523504179 135.489000274316 144.289500521613  
134.683553037185 124.847325289068 147.248053518914 133.722739936347  
147.232015056035  
KRTAP12-2 167.212960569538 162.237172404557 156.61494867164  
164.208044717557 167.442950045855 153.719751724358 168.394330931524  
161.8627732644 164.48570046081 156.62031503525 157.28429690041  
153.118492567137  
KRTAP12-3 127.372242892513 140.583804906052 127.632566406664  
131.894919149666 126.87882572904 128.745737514912 124.395047385025  
143.195338329759 133.954514563283 155.507030276749 132.487362867399  
131.924162435354  
KRTAP12-4 122.667593730152 118.383317097375 120.14201542563  
123.896578371318 122.072091994548 126.479964493857 117.642441794442  
114.488760619745 119.188446525733 115.118170902045 142.829099538363  
114.768639931659  
KRTAP13-1 135.306127055224 136.728975205893 136.944378905743  
132.387242907281 131.890554636938 134.95842832877 132.593747375239  
126.394032757479 138.145677924612 131.878155417065 124.621381699241  
124.533543270311  
KRTAP13-2 114.405811161631 117.511162285879 107.344825308293  
112.088944448944 116.793408204625 112.817015523662 125.470172259885  
120.371374172279 110.952108124186 114.880348648147 115.29099102455  
113.708683868028  
KRTAP13-3 132.398041172151 148.466658640201 143.888318202599  
140.167274633872 124.277983696239 140.598731096952 136.319655432311  
143.628147237159 136.805379739087 138.231715814115 142.255657518926  
138.491922816359  
KRTAP13-4 161.072844903925 153.4392054301 175.551853899221  
163.977562404508 161.77611826709 165.225475655526 153.54898879562  
156.825157746082 160.143443392509 176.138621462315 154.469132478321  
158.747029092329  
KRTAP15-1 156.144934427609 151.355581590948 137.647282354299  
171.212749388553 144.779146672553 135.305147371641 144.908551199481  
133.463464118897 140.146894533044 149.244970309131 135.753430034183  
147.473875763319  
KRTAP17-1 157.881569297409 145.005991300977 135.804447076318  
137.177271162749 142.674671804361 133.682715540066 147.483379646393  
145.374923175872 132.469190523971 148.702473828167 136.781417098789  
142.882391486465

KRTAP19-1 140.513291662274 149.980924447339 157.207544072126  
171.579123521304 125.783265980169 131.674409480919 143.204058393718  
136.539130156863 133.280418227922 142.151209745109 136.047032834863  
157.108043150259

KRTAP19-2 150.880818951088 137.914085754617 141.947478902603  
131.40880014672 135.654614839107 141.825162897153 152.30599498619  
142.690911343704 134.516390697561 145.468654174037 138.250288796456  
142.356747337127

KRTAP19-3 152.67564185705 143.242308032336 154.774977482202  
129.775280076365 147.915337223934 150.346002924933 150.238582112636  
140.736051985112 125.139029579691 125.645986634914 143.754105312957  
132.799355149191

KRTAP19-4 118.792612926619 125.729079191033 124.317870455205  
123.998343902602 141.980728956046 127.003974141317 120.100672968415  
124.766436060041 115.002176041974 137.296790373528 145.31308449569  
127.2369420721

KRTAP19-5 127.108510693625 149.536681241497 133.737573120711  
122.873661677648 138.418604660734 140.840895590527 160.518055978242  
126.22472822166 145.641373616866 122.129348411763 140.014167357286  
149.05280915667

KRTAP19-6 142.099541115973 143.778327403708 155.183210738478  
151.301484852387 134.93814894432 156.262515148436 151.015243921984  
142.774449777424 173.236978003496 139.878752507646 149.682150633146  
144.877789873062

KRTAP19-7 129.931923954109 117.873333897609 125.402714360058  
119.792515907708 121.168550902281 130.511042322504 133.647637744785  
123.004137408444 127.380083832809 128.628637585951 144.748564682545  
132.913891550054

KRTAP2-1 136.185953087697 138.158400190671 129.904942554979  
145.39813290003 112.088944448944 129.34905533265 135.038195181839  
134.294287947795 127.962546712222 128.280225530201 125.099672022917  
129.077660633761

KRTAP2-2 139.237360556305 140.981666934622 136.770515182612  
128.966514855818 121.297234504922 131.619951110473 135.5668267936  
132.788102310611 134.86940314824 127.675206134992 106.719519490874  
137.5954358221

KRTAP20-1 154.312374306932 150.907594445048 146.53663019612  
136.337076023706 137.016495611111 153.257097727888 152.933230159216  
121.924036463998 138.104527851969 150.204636832734 143.953043041292  
182.833961304079

KRTAP20-2 114.048136176142 105.771723307783 117.74682797375  
111.389873428517 109.167312436827 107.013012418356 111.43827410589  
110.810963139914 116.828333047376 122.170662903259 111.467722538327  
107.02909139647

KRTAP20-3 160.786907816025 152.709021529522 157.898632788579  
150.231063426302 157.6790197503 159.365070384451 169.544515294662  
150.431052959951 162.54567071663 160.937256625847 159.79463502085  
140.079516848788

KRTAP21-1 141.67550758321 158.120079903425 136.178501890585  
173.573412346985 149.936366672592 160.066390229416 160.882229345156  
137.16842164453 140.588811000948 145.877943006533 132.508133846896  
136.698189351878

KRTAP21-2 134.799648755296 145.744039709418 156.720090761933  
149.76931674417 129.466612376702 140.002249873656 146.318052064937



147.642693777383 132.981346767415 133.115543233699 128.066043751951  
147.440477126372  
KRTAP21-3 118.930792960643 134.558435781672 123.650702461773  
127.04217189075 123.935072913078 141.596078062845 139.211746200839  
124.798549069922 124.985249190127 126.470780227711 135.405742719464  
129.578488688293  
KRTAP22-1 135.367261617271 130.300169316346 155.669470674985  
139.55065372881 135.417519318028 125.803854387512 122.711143209444  
139.089444892187 133.117701703454 131.464229237662 130.068063785009  
144.507230362869  
KRTAP22-2 120.479270037091 129.075693654369 118.298444816712  
121.021776527531 129.005211657936 124.116400777472 128.119556520151  
127.174074003712 129.125709963326 122.512587751135 118.331237160995  
119.984301761327  
KRTAP23-1 112.365278258185 113.572326615571 104.483909687253  
117.841844605128 103.94864861172 98.1433670546536 109.574386044714  
110.670057121283 108.247365868673 103.012774960061 117.399753685854  
110.437728036347  
KRTAP24-1 116.688949603376 137.539385624206 156.964080041261  
156.003233745771 141.86370253437 165.67554738735 144.152325539824  
151.923356524322 146.153528461264 155.335777680002 121.849460555655  
154.350107666084  
KRTAP26-1 103.660742045068 109.599589420575 105.450273343324  
109.482330324734 106.667175621971 109.793568518462 107.655624022312  
107.385565665491 107.170981307304 109.613208767992 132.971844952199  
104.505454151012  
KRTAP27-1 137.660051943656 135.65700435306 133.327778635672  
143.00932329728 127.787890405862 140.04612725812 139.229351251973  
138.519129384809 135.864853829421 144.908551199481 135.773386496434  
139.39112068213  
KRTAP3-1 138.383183017683 128.413213851142 132.517166202071  
127.199124606827 128.858923585925 142.025834438974 131.356437247149  
131.527148910356 140.728126380228 138.771088752839 124.321503368855  
130.887769728442  
KRTAP3-2 153.033582154882 139.664055668127 144.458829225668  
138.011154515216 143.756242843438 150.617039206311 143.976395954528  
139.197364191101 142.876069462608 146.493927564338 138.541779821934  
152.158269344693  
KRTAP4-1 147.257773507186 139.963969716386 151.98710761363  
163.19340939648 174.498521167568 150.680628549529 141.659197251282  
196.819022688128 171.967974673053 145.632060621034 140.804008584006  
151.436802637988  
KRTAP4-11 135.221786448517 160.816803370151 143.35902319003  
155.837866295709 140.918728758975 172.502036705114 155.951509643078  
159.452527363763 148.344941331885 148.707332454527 131.138322527536  
153.241806795134  
KRTAP4-12 161.520362399369 166.014450044695 139.568610307888  
154.379788206936 152.612116997575 157.713227527385 160.72009357092  
159.170943469313 157.971293294367 156.650388509656 160.903342063542  
134.981272056795  
KRTAP4-2 128.678484452077 149.055493714692 147.958483355783  
134.190511945944 152.407614042236 136.534812980964 135.829273398594  
152.921328522953 133.391421497441 141.592180897595 128.628637585951  
142.715449859191

KRTAP4-3 132.245217686793 105.284300851422 124.203250865069  
124.682396766302 120.148189532583 128.56495182759 129.715948793051  
125.088717405087 124.269446398587 145.180346905484 121.810767302322  
107.605526304445

KRTAP4-4 136.195555442748 133.197917412017 152.581729298159  
151.808767243647 133.769848328557 136.061992660698 143.451080466172  
144.173163762502 146.42288214248 144.28597792625 129.449242018727  
124.106971897779

KRTAP4-5 112.922918499398 106.900679222135 119.590540166384  
116.476747183738 104.826135297161 115.389934936253 115.954828435072  
100.325215581101 102.343275379164 105.976284291356 128.134246199718  
106.000943456483

KRTAP4-7 146.669620721254 143.217978435486 133.061016674211  
146.858292465699 147.608094270078 136.596127228365 143.925616978401  
135.707354953722 135.057847490193 134.05596537871 139.709959820327  
147.572660963285

KRTAP4-8 144.064214573005 148.776470607859 154.932132950843  
145.929907161493 154.856345114916 142.215285988753 156.13331481937  
137.53070284697 151.68523937819 159.749576166342 149.589901372799  
159.452527363763

KRTAP5-1 132.069175779393 131.099004325598 121.121686280797  
124.164523121103 127.028640787946 122.816049839521 121.826474059574  
114.302645757446 126.195222228248 127.713286292101 151.889644436875  
131.416923875254

KRTAP5-10 135.33941967076 141.391508027714 153.498332327444  
138.726894569892 120.246240734668 139.305220220411 141.082569618216  
139.234549949916 130.105800581241 146.303959493672 146.252974508529  
144.270828498856

KRTAP5-11 164.497445195378 146.010474018786 166.095964870713  
154.935741493562 168.963976596839 159.534017722536 166.061891147234  
148.645749834125 179.711363255355 146.065491816894 153.911165277809  
161.663893432522

KRTAP5-2 124.455340203012 136.575784685895 116.465213348716  
106.41329572636 122.860898886143 114.325967923393 175.9510758779  
134.56763097313 121.564626579011 104.505454151012 198.795112039249  
191.961269585431

KRTAP5-3 123.240482782331 124.86699236406 128.486896700405  
112.252555403121 107.605526304445 115.975794003391 124.164523121103  
118.463074287151 117.432860005907 129.421772713718 140.357427912361  
126.94941821459

KRTAP5-4 116.161473967382 104.826135297161 111.515588041012  
117.149781437983 113.051381310122 116.230993734675 109.886197655915  
117.312094804205 111.794102015354 114.574362093931 128.150801169886  
107.431455226979

KRTAP5-5 142.339740800356 126.033673708286 135.839123867443  
162.933658389727 160.766121558583 125.489777118532 142.397433929092  
135.842090777339 149.791777262424 183.951404362826 139.125340284813  
136.805379739087

KRTAP5-6 113.913337223716 108.850992642446 114.790717658188  
106.551076380988 113.840813583258 100.746407116143 107.74537523456  
113.549098821204 109.719356131043 102.932013031511 119.486895914055  
110.858201415824

KRTAP5-7 107.72107116838 116.456170659686 113.268379270385  
108.683531606889 122.763138007612 119.297561749232 124.385193388896

123.173506315166 110.784682137658 119.622243247836 126.368170959337  
119.233300586525  
KRTAP5-8 112.292129754508 105.521320791331 124.103321614841  
115.939620871703 117.552229262461 110.518806964366 113.125349503734  
124.752198904184 111.276543583667 111.716607815635 137.298549014192  
149.91705328815  
KRTAP5-9 125.025064237439 121.212521750566 122.102644097132  
113.154880173167 135.805294188016 114.308806726044 132.510116371195  
130.960045345375 127.931887647108 117.917454674671 160.6823824476  
118.970693476152  
KRTAP6-1 151.123104810793 127.615631240096 143.639894909386  
152.447978675887 144.623222072851 137.4962171294 155.63671938031  
131.404001006643 155.187900101727 146.257923971069 125.522498880785  
139.184647003326  
KRTAP6-2 116.998277297063 123.545404885618 138.681348536008  
136.303510503231 132.851791525098 143.368327095618 140.388212037661  
136.410841327254 131.681566829159 147.450681897766 111.549719888905  
119.263824982583  
KRTAP6-3 153.860039535598 151.477239868429 148.079107235035  
158.541906931082 140.659276788384 154.166668493152 141.180647782041  
140.865990571023 146.735616237082 166.611809859059 138.307574579062  
149.369418844044  
KRTAP7-1 162.756185479013 141.294094833197 162.208028489943  
141.865758685796 140.954264409241 152.667721542507 142.981967333546  
155.906054212876 144.472969298036 144.046646189442 144.522461545204  
154.64077390011  
KRTAP8-1 122.247130087475 108.386545220984 101.316813921703  
121.207040901483 111.204065131669 109.156349683299 102.255408120852  
112.710573586525 106.719519490874 109.016991399605 120.819163462986  
103.660742045068  
KRTAP9-3 120.07034081564 114.567609871292 119.525701528869  
116.196676877996 120.479270037091 115.992487254175 115.264104392064  
118.833188167696 122.944699010173 132.496547953595 113.163651806803  
117.735411259153  
KRTAP9-4 136.955651763743 151.067819234238 134.312156667838  
140.891239201308 138.694701349366 151.126252768792 144.615156175885  
147.401387099359 146.223880979601 144.572485418264 140.798706399757  
147.768191157163  
KRTAP9-5 130.902319266342 131.903632821793 142.472724215037  
128.122197525844 136.882429810263 136.335679863251 156.357126871243  
138.681348536008 137.734887788912 143.198622036573 115.337592860132  
145.056914913573  
KRTAP9-8 147.301909062399 149.856951631661 150.794680375075  
148.166340306996 149.153827025981 154.431051053529 145.875240619257  
138.466136108202 150.653030597808 143.324235640446 144.246749835693  
148.49288177738  
KRTCAP2 2165.41403521012 2670.9151276786 2072.01578063404  
2938.06458269406 7446.59106452583 2792.13364570755 2553.92770795014  
4047.99200599472 2910.00269086567 2031.01186679713 1597.53010317504  
3168.27825058989  
KRTCAP3 137.933122094638 179.432235153344 146.381147992719  
132.359319280352 127.661634554996 656.009451448101 548.455251483009  
777.901979189395 382.327656839936 292.524552445564 362.95684683529  
1064.12835214671

KRTDAP 117.034228068173 130.222698914337 112.063713561549  
 111.1002996982 128.781123194219 139.450341736722 118.047978285706  
 120.724926760252 107.544568250154 15809.9561036761 339.490955270138  
 115.371180170291  
 KRTHA5 112.114933398547 107.02909139647 104.505454151012  
 108.515401509039 118.432307370605 107.76497424356 125.426018910517  
 111.484426481816 117.449306773025 106.829040075772 129.501028506432  
 101.316813921703  
 KRTHB6 135.857403020659 138.223001481672 131.290698895743  
 137.819642907456 135.787323859105 132.148166773943 144.496429994489  
 136.162938063831 136.585541662028 126.365861978893 146.381147992719  
 136.969124414576  
 KSR1 115.963144087717 126.061141885666 119.67745324922 119.26921157552  
 119.555954372381 117.045020667394 115.639101191444 126.533083459283  
 122.962219297463 207.831299397177 124.995087711332 113.043089777907  
 KSR2 136.327014189932 151.299425811105 155.483400816946 148.499207368959  
 168.861884032201 157.643461899964 166.754995454382 157.195967361907  
 156.141123407905 157.333615322941 154.598520288855 152.970079142629  
 KTELC1 798.389385197471 815.779445689417 608.959089074987  
 743.510369438587 516.577357935963 1948.24432908972 768.334658920971  
 666.570977208535 741.433093896472 555.758485277905 665.341859712345  
 619.75986112089  
 KTI12 246.676401619881 256.174286655796 283.645434184168 238.509970054862  
 406.458130553679 323.628636799403 253.495214569632 305.768201359278  
 272.885527139137 273.432712475089 262.756237406794 283.235844022826  
 KTN1 757.406530000489 589.409235971915 1017.09497861942 538.369868115137  
 811.362219801362 2313.56743052616 1347.75629878765 672.13164205724  
 761.89271251455 1141.49294161587 1084.95095717937 1332.82617944131  
 KU-MEL-3 151.219051767056 152.566490804809 165.342790388607  
 163.290050020756 168.111124820968 155.981989040279 159.724824188037  
 160.234704406302 163.400576719974 159.094117857743 156.65842876856  
 168.013310840048  
 KY 140.668597897404 138.006973261364 133.318665755015 122.129348411763  
 125.410876867635 124.031916322066 127.900901613784 144.675182563174  
 125.999595008166 117.423704591303 115.305518560239 121.099290122973  
 KYNU 149.198753359122 153.697775290962 147.844734028193 133.666244052469  
 342.403428822464 257.168308311848 164.373697447004 359.991823789356  
 291.444155562134 771.294254795752 254.359737178714 144.185406500473  
 L1CAM 160.625367261779 142.623106544789 127.167918433035 149.326216726716  
 143.144153021901 132.034701177759 149.17815859943 140.005968571997  
 142.103519373191 132.221351364892 141.905641114703 139.890519860289  
 L1TD1 118.544870925791 127.610304071204 126.127630885864 117.480506535399  
 121.18490040448 128.331867822629 122.204249636472 119.9414421871  
 126.049905221996 125.079330440615 121.347339077474 115.366496551426  
 L2HGDH 319.018213637357 329.88790758321 351.934158805882  
 334.140757209353 345.686640885419 292.911761762431 282.076744753348  
 363.539983343859 273.044064077 275.642882589307 308.330044958513  
 323.149792143481  
 L3MBTL 152.319720089773 148.045391886623 162.147989253357  
 157.14512525321 137.462720784077 149.408530395745 149.959767051801  
 135.182524652868 150.311274161073 130.619624347751 154.146962684738  
 146.552529779774  
 L3MBTL2 315.306271141071 318.971509860209 301.591430919567  
 388.573321838751 434.943371634824 346.566241319814 249.524956682907

|         |                  |                  |                  |                  |
|---------|------------------|------------------|------------------|------------------|
|         | 255.435582426271 | 310.758803815671 | 262.296456281666 | 302.362619893594 |
|         | 286.310923582432 |                  |                  |                  |
| L3MBTL3 | 178.329946332806 | 179.369845168822 | 196.419891542139 |                  |
|         | 172.591885279428 | 151.384762644292 | 167.077669654786 | 176.100691355682 |
|         | 179.137734914428 | 178.496344474999 | 168.052288484172 | 175.485672103348 |
|         | 209.112959748917 |                  |                  |                  |
| L3MBTL4 | 159.046016068252 | 146.515240633175 | 155.494095135266 |                  |
|         | 170.892319361167 | 156.346014084316 | 139.499652059557 | 154.973990421257 |
|         | 154.854538639035 | 156.557792402376 | 183.482640529727 | 152.868787961804 |
|         | 148.255769084026 |                  |                  |                  |
| LACE1   | 111.349642316073 | 123.065355919378 | 127.560308850342 | 111.336798977475 |
|         | 123.25201993575  | 116.759526220736 | 120.094156375538 | 135.3969732106   |
|         | 123.312000381122 | 118.226036680442 | 135.937066152894 | 138.284533297052 |
| LACRT   | 121.039678049579 | 124.578552584603 | 122.944699010173 | 116.501174707117 |
|         | 122.636980845207 | 121.787875792887 | 130.621860095981 | 120.686906898624 |
|         | 112.699674279523 | 132.069175779393 | 136.537117054998 | 112.867662941811 |
| LACTB   | 205.403820910921 | 183.863365305103 | 224.724262742427 | 180.77686098195  |
|         | 303.608918161742 | 255.677315946354 | 422.02217814979  | 272.314332734711 |
|         | 264.741946816665 | 483.549698382115 | 196.345065354654 | 318.196134631178 |
| LACTB2  | 223.359785518285 | 250.481442411876 | 283.982575660968 |                  |
|         | 204.802810257516 | 371.127480221666 | 296.721891842563 | 342.717252404581 |
|         | 694.02978779693  | 781.461780481171 | 253.867947800583 | 266.61343130101  |
|         | 251.787648609546 |                  |                  |                  |
| LAD1    | 188.417078622503 | 329.604568691377 | 231.547654653783 | 162.294114485312 |
|         | 1555.28458491244 | 853.535700321202 | 1299.4782626583  | 944.92617668298  |
|         | 1663.71411325131 | 2403.42261883515 | 1501.18820017008 | 3481.90072759183 |
| LAG3    | 157.967824935915 | 152.47429737104  | 127.036976462046 | 145.921381300813 |
|         | 141.935435502163 | 130.914932329297 | 129.914077170794 | 155.007516124803 |
|         | 267.028096234702 | 132.712573198794 | 167.173670781451 | 129.086186239653 |
| LAGE3   | 665.341859712345 | 779.623566217277 | 673.176084400831 | 756.246712133116 |
|         | 4641.8793590085  | 1534.21175984308 | 2014.48411650613 | 1325.77498031227 |
|         | 1062.03157932144 | 1996.65760745757 | 1407.43503866211 | 866.765054377214 |
| LAIR1   | 13976.0448927093 | 15463.4998494462 | 17496.0674176329 | 18421.818380318  |
|         | 16123.3486890049 | 16974.4822983201 | 11918.214537866  | 14866.8264879369 |
|         | 15116.95436573   | 12916.6904389018 | 9881.69734721233 | 12022.5515181682 |
| LAIR2   | 149.657951204528 | 154.143331594812 | 153.45050352117  | 163.500384982242 |
|         | 155.926739769177 | 148.034899103241 | 170.423881865022 | 153.507553306723 |
|         | 162.110943457969 | 154.725484895098 | 137.861973133557 | 150.763810844645 |
| LALBA   | 159.629232808787 | 153.843250142472 | 142.498280938736 | 131.72852748835  |
|         | 150.374573177474 | 146.54504551183  | 156.69025356689  | 143.530190096012 |
|         | 138.295019395552 | 156.720090761933 | 140.726084514407 | 144.951973735763 |
| LAMA1   | 137.800512046163 | 134.524644163286 | 128.402511355513 | 130.887769728442 |
|         | 130.242779079309 | 132.496547953595 | 141.937611082276 | 125.685852196342 |
|         | 129.065491477375 | 130.262411213764 | 138.497931380734 | 126.690066353698 |
| LAMA2   | 331.999693230194 | 214.396920524803 | 341.096072280715 | 196.889520085412 |
|         | 129.171589574238 | 159.094117857743 | 126.089217853289 | 159.082447644277 |
|         | 178.404791189835 | 171.916201289104 | 142.221542344035 | 141.488910091973 |
| LAMA3   | 162.033909093358 | 161.434331154045 | 153.903993884123 | 145.909456876796 |
|         | 141.499192356469 | 144.224287382131 | 147.651620353593 | 137.552979154943 |
|         | 137.668179813327 | 367.518273773904 | 185.233210060342 | 181.229308386808 |
| LAMA4   | 1879.08108720938 | 1544.45026075974 | 1738.96798001895 | 1809.58702081877 |
|         | 183.023316857537 | 233.129544542265 | 144.013615296685 | 221.768507175814 |
|         | 248.129640673859 | 422.338508598153 | 177.023536553193 | 200.302384864371 |

|         |                  |                  |                  |                  |
|---------|------------------|------------------|------------------|------------------|
| LAMA5   | 3545.8833678963  | 3668.19307488953 | 4073.21075791737 | 4141.8682669995  |
|         | 9636.32818474581 | 4923.36698713285 | 4913.55892033682 | 2653.47752512393 |
|         | 3994.64569045702 | 3184.98944679038 | 5932.37714987741 | 5138.28186306948 |
| LAMB1   | 707.715412321304 | 688.915534194306 | 453.058639550475 | 494.747087458483 |
|         | 787.017214032692 | 610.759447723026 | 1176.62418139379 | 619.487800014979 |
|         | 487.07860019179  | 614.239716118509 | 1158.057104827   | 556.568221094639 |
| LAMB2   | 1594.05763963363 | 1766.15001427132 | 1152.50523614436 | 2028.67873136046 |
|         | 443.005424069211 | 343.200277800027 | 317.600728351694 | 185.240692860387 |
|         | 281.405355165228 | 337.22646304739  | 227.847614397311 | 187.519053043173 |
| LAMB2L  | 145.169804325334 | 167.599784887933 | 140.002249873656 |                  |
|         | 161.202844994203 | 142.119327380686 | 170.12010526854  | 132.271437329873 |
|         | 149.511776997149 | 144.396774242135 | 127.385776388242 | 143.497909064641 |
|         | 134.527165454543 |                  |                  |                  |
| LAMB3   | 135.875595614483 | 172.652645920958 | 138.212860360467 | 132.162948517239 |
|         | 207.138680369683 | 204.183472655276 | 422.23268864343  | 192.046442148183 |
|         | 210.165098572428 | 561.609211243027 | 546.181615768667 | 638.129080224049 |
| LAMB4   | 117.642441794442 | 114.913534674899 | 129.205783382977 | 124.910390240995 |
|         | 111.596690019694 | 126.442999559539 | 129.647514123731 | 124.391225837909 |
|         | 117.824694297846 | 128.150801169886 | 154.270034951209 | 135.532820436394 |
| LAMC1   | 7555.47017983216 | 6368.23123771343 | 6368.23123771343 | 7717.01422791837 |
|         | 1344.87842417496 | 1620.7954553764  | 1310.60610806797 | 1277.0921553877  |
|         | 2398.71483410593 | 2059.09598012857 | 2379.15291239548 | 2000.47497636965 |
| LAMC2   | 130.803561448083 | 144.278830378899 | 130.74794199972  | 133.542620077059 |
|         | 187.132496910208 | 143.307838525991 | 211.679799388351 | 183.071150926068 |
|         | 167.237705290905 | 638.129080224049 | 331.523536427527 | 297.805768288377 |
| LAMC3   | 1001.35912007916 | 1016.18143428327 | 406.900412510895 | 624.638115878703 |
|         | 163.843143947012 | 308.441120735095 | 193.544035570799 | 291.313681141442 |
|         | 343.666488527549 | 310.815067427296 | 149.377153449536 | 210.692705153337 |
| LAMP1   | 4309.86375945008 | 4602.81651147558 | 3294.92439159154 | 4800.99572384569 |
|         | 5759.5586948816  | 2816.29814823646 | 3309.66193624859 | 2728.04758874748 |
|         | 4448.67183518984 | 3989.14883668905 | 2166.68174726155 | 4255.59773503364 |
| LAMP2   | 662.58366387795  | 608.816123736392 | 614.514126276981 | 473.60579090007  |
|         | 696.277780670166 | 751.269009484639 | 603.061485415867 | 793.071192619058 |
|         | 424.665056900526 | 1427.70292953827 | 659.27672123763  | 669.124699103132 |
| LAMP3   | 171.433001048839 | 164.545596179262 | 166.688771186254 | 184.398672994943 |
|         | 185.801540278924 | 195.929328710358 | 333.349203784021 | 322.302219773624 |
|         | 372.894376776771 | 198.066837203458 | 228.879434668972 | 185.923374274306 |
| LANCL1  | 905.233241047678 | 895.821578104681 | 1208.25171673432 |                  |
|         | 890.810315261602 | 347.487059316081 | 762.182213353032 | 822.88742008931  |
|         | 685.620637807134 | 744.808064061459 | 1279.9555644913  | 1364.1224589383  |
|         | 833.841469195516 |                  |                  |                  |
| LANCL2  | 209.398724613377 | 180.327051100611 | 192.258863431747 |                  |
|         | 160.78368986036  | 184.505279093688 | 182.560363283264 | 170.941404165185 |
|         | 199.275716402358 | 198.979744266277 | 191.651818696629 | 271.638179116269 |
|         | 306.068269136821 |                  |                  |                  |
| LANCL3  | 138.27272971335  | 125.868080230094 | 134.20988291379  |                  |
|         | 125.172189715764 | 123.728481007459 | 130.285187693932 | 131.095431530473 |
|         | 136.48748813417  | 130.257242615762 | 130.140958819402 | 133.322752419739 |
|         | 130.49338418515  |                  |                  |                  |
| LAP3    | 431.974037914233 | 382.806570442504 | 494.538861626895 | 375.038561820137 |
|         | 413.863345223345 | 487.696347726467 | 669.602939159192 | 556.725550806207 |
|         | 978.389902096994 | 568.555967950896 | 795.037968409957 | 534.920870202582 |
| LAPTM4A | 830.455793617181 | 873.256632365737 | 910.982557417978 |                  |
|         | 806.88003660673  | 643.306565600931 | 815.045148478814 | 838.93563319979  |

|         |                  |                  |                  |                  |
|---------|------------------|------------------|------------------|------------------|
|         | 651.759589129833 | 643.905401805862 | 717.886050056576 | 1310.60610806797 |
|         | 1165.95924778817 |                  |                  |                  |
| LAPTM4B | 820.652972219658 | 829.992212133165 | 1146.84239258543 |                  |
|         | 694.288215755716 | 2446.31228564539 | 2282.94927629821 | 1632.84261181074 |
|         | 3090.52810501797 | 2473.22803972431 | 806.591035100794 | 1211.39534395597 |
|         | 2332.98074920207 |                  |                  |                  |
| LAPTM5  | 345.291295192574 | 313.581986704048 | 204.787016443123 |                  |
|         | 303.724140156439 | 281.304989265608 | 261.117845544884 | 243.622678182687 |
|         | 466.141717595301 | 811.362219801362 | 391.569187190375 | 518.281245498542 |
|         | 582.382786876656 |                  |                  |                  |
| LARGE   | 638.287221212947 | 626.582864105324 | 593.320132696649 | 878.986106116952 |
|         | 457.905741500454 | 282.561381978659 | 405.409668978569 | 306.068269136821 |
|         | 419.846584903512 | 147.024759173313 | 304.111808763793 | 263.64863646012  |
| LARP1   | 233.809899915394 | 242.410260751835 | 215.335795337978 | 250.443147156029 |
|         | 269.831616158113 | 217.264041781337 | 248.465457421469 | 211.916602665089 |
|         | 216.427103365727 | 276.224613560582 | 308.564935340635 | 292.802762636861 |
| LARP1B  | 233.07015384759  | 200.264756078778 | 196.638594797353 |                  |
|         | 177.696849418064 | 194.80575419836  | 279.969975697164 | 219.151144724168 |
|         | 254.607324522225 | 225.4575611466   | 254.83131041241  | 217.287912825619 |
|         | 184.377923161698 |                  |                  |                  |
| LARP4   | 443.964363178742 | 406.458130553679 | 361.904370514991 | 423.396271159345 |
|         | 282.335582153109 | 423.152420192284 | 364.113665301598 | 423.396271159345 |
|         | 383.626469817252 | 285.78344209704  | 451.210172051464 | 390.098830270926 |
| LARP4B  | 730.042712083388 | 737.42784787426  | 697.97116981445  |                  |
|         | 772.399017166118 | 1138.44837250274 | 1403.90487313049 | 851.221199352646 |
|         | 825.345092964844 | 1025.88559245013 | 574.896304593109 | 1252.28642463619 |
|         | 993.34112647221  |                  |                  |                  |
| LARP6   | 380.310795921752 | 391.326200093611 | 309.580750386386 | 349.816819166182 |
|         | 259.868701878844 | 228.100112133941 | 348.848550937417 | 182.929326147069 |
|         | 157.895460674072 | 217.165036362034 | 213.240181616274 | 241.453456707114 |
| LARP7   | 427.98782239715  | 403.812520074723 | 595.882696498804 | 339.490955270138 |
|         | 232.344545356395 | 420.871349359404 | 521.30110104669  | 458.218913259336 |
|         | 495.769802520637 | 501.863855158062 | 468.496972957503 | 501.434722063309 |
| LARS    | 714.274201838067 | 677.802147190757 | 1033.48252432603 | 666.344430142655 |
|         | 414.888512708716 | 535.041545916303 | 873.010676463707 | 715.93836911426  |
|         | 533.37609065123  | 1238.11700377838 | 869.542306259337 | 650.0804221227   |
| LARS2   | 172.866517097198 | 171.561940747015 | 151.87495966414  | 182.950456188966 |
|         | 247.683819429859 | 166.526875572556 | 208.776711004753 | 177.333305785248 |
|         | 241.134385745554 | 190.331589656379 | 217.684410907748 | 190.174729017089 |
| LAS1L   | 353.005548289786 | 342.403428822464 | 383.583234619781 | 371.280926727395 |
|         | 514.922742487521 | 436.891409783298 | 370.945254716657 | 511.996883507889 |
|         | 480.923468806193 | 358.52459123416  | 282.511614929917 | 343.488356185437 |
| LASP1   | 2007.0121037284  | 2518.88171283899 | 1796.26091584668 | 2871.34694522381 |
|         | 7104.65816621275 | 3905.35300751401 | 4536.46344538492 | 7585.47289520004 |
|         | 7753.61594300904 | 2763.86550710042 | 5655.12135336698 | 3668.19307488953 |
| LASS1   | 137.992477770842 | 124.944563166658 | 134.631638658586 | 134.534815676852 |
|         | 117.862532836494 | 114.999628959921 | 118.589392612801 | 113.125349503734 |
|         | 114.021546689428 | 112.776764215618 | 116.736174147084 | 115.217608555334 |
| LASS2   | 662.04757187541  | 556.568221094639 | 692.53483413403  | 515.929937825133 |
|         | 1406.73270115373 | 900.839073800181 | 702.981741565482 | 917.646958427824 |
|         | 760.070180572621 | 675.281131488524 | 802.304294140514 | 1055.79590411506 |
| LASS3   | 144.688515462537 | 148.417929733447 | 144.446903878863 | 134.608734423113 |
|         | 148.149216812602 | 152.035992124554 | 169.527424356913 | 132.887701822875 |
|         | 171.941887376462 | 362.95684683529  | 155.383166865192 | 180.913502162011 |

|          |                  |                  |                  |                  |
|----------|------------------|------------------|------------------|------------------|
| LASS4    | 183.181125586276 | 185.113098620798 | 151.237088659409 | 158.299765118221 |
|          | 134.655842662899 | 126.428284589412 | 120.971313945446 | 113.256481034259 |
|          | 128.032141013681 | 113.163651806803 | 148.444479022559 | 120.031976318697 |
| LASS5    | 422.840163973614 | 459.53652431464  | 362.581768268116 | 393.198813167839 |
|          | 326.962330523237 | 424.665056900526 | 371.00603789759  | 274.891033696257 |
|          | 264.628012152168 | 352.354687089427 | 269.673122990604 | 424.751154004399 |
| LASS6    | 938.049312229961 | 1084.5920943349  | 854.224454791713 | 819.488546995594 |
|          | 1000.91520225219 | 1227.65550420162 | 770.19255305977  | 1189.69730508119 |
|          | 1108.61301774472 | 776.807656744828 | 1610.38263368771 | 653.879734066271 |
| LAT      | 190.549084022965 | 168.394330931524 | 190.850639994777 | 188.079188251085 |
|          | 171.304896264805 | 155.465250172768 | 162.297999435613 | 162.890650672747 |
|          | 188.079188251085 | 151.511808301993 | 160.618586213311 | 156.123528587917 |
| LAT1-3TM | 207.269530621176 | 221.171478972931 | 215.769986055534 |                  |
|          | 231.796421262015 | 201.152639979358 | 265.148061007894 | 196.615914367563 |
|          | 200.668298229815 | 179.794718712964 | 193.477624805335 | 163.446813963119 |
|          | 178.854873582873 |                  |                  |                  |
| LAT2     | 139.574895021783 | 138.096262211809 | 130.941645638407 | 125.830917527594 |
|          | 123.048352070915 | 129.792548588929 | 126.381288663037 | 136.15916708516  |
|          | 165.908756485356 | 138.504398858454 | 140.814009587096 | 128.939572714685 |
| LATS1    | 117.770032157393 | 127.601379088239 | 118.737244693366 | 121.278346729876 |
|          | 128.137646789236 | 122.247130087475 | 121.344724993789 | 127.447218258785 |
|          | 119.622243247836 | 125.649525720177 | 125.010266083832 | 120.964862799634 |
| LATS2    | 289.724297749772 | 263.058972886829 | 201.661941695238 | 252.548942594125 |
|          | 140.343790129071 | 165.985885671398 | 143.05872558805  | 144.283716416188 |
|          | 153.391895732807 | 148.8870854102   | 139.564898998489 | 110.024815508703 |
| LAX1     | 190.787437782456 | 168.384397488011 | 173.979001863717 | 166.411219327671 |
|          | 148.388093331273 | 144.89062965996  | 155.516697616637 | 200.456087759904 |
|          | 246.533813165981 | 146.858292465699 | 148.1283706199   | 142.558109812638 |
| LAYN     | 289.761702484888 | 209.702683803624 | 244.514230664694 | 208.257420634745 |
|          | 173.863373934746 | 193.629237856758 | 161.053174595796 | 175.840639511966 |
|          | 185.507663455634 | 189.205724390913 | 136.685430908977 | 169.895672129542 |
| LBA1     | 386.598037190663 | 332.296938254329 | 448.371946119074 | 387.355661073935 |
|          | 177.500110974116 | 175.593421867771 | 235.48876511325  | 201.555964610849 |
|          | 259.868701878844 | 210.502556087175 | 293.873921048642 | 214.241635800083 |
| LBH      | 256.471672362567 | 231.819341041105 | 168.03501792841  | 186.563913311757 |
|          | 186.904126552483 | 175.269675831824 | 167.260319361746 | 223.154771092064 |
|          | 221.961758403614 | 185.905819051223 | 220.362946606131 | 176.340265963032 |
| LBP      | 130.172041917023 | 106.491867793742 | 112.699674279523 | 120.015436934157 |
|          | 124.621381699241 | 132.762755202326 | 123.609527892227 | 117.284724854784 |
|          | 128.591292689996 | 110.286187184448 | 115.827175143972 | 123.195738824794 |
| LBR      | 196.955723006838 | 183.358807104988 | 242.269784551092 | 190.138730960643 |
|          | 180.54209603289  | 230.161369375718 | 200.405532717305 | 177.16711492983  |
|          | 169.909886347082 | 173.507835230243 | 161.520362399369 | 292.037861000784 |
| LBX1     | 139.256416415149 | 125.455347031878 | 127.206177583275 | 126.555972138115 |
|          | 135.264074941678 | 132.631819830347 | 128.666652639862 | 133.625358030199 |
|          | 128.63301490285  | 140.453219944445 | 134.880138942756 | 135.65700435306  |
| LBX2     | 146.740694608146 | 145.320945010364 | 123.554769032715 | 124.624046191085 |
|          | 143.272669418277 | 130.35985690876  | 130.957441406855 | 132.310147451479 |
|          | 135.43119649883  | 131.945667475797 | 151.567693140302 | 134.599629045981 |
| LBXCOR1  | 138.458816023289 | 121.018722403628 | 122.885879294532 |                  |
|          | 124.905889975958 | 130.418739793498 | 121.04331582508  | 125.596067857941 |
|          | 126.988118823204 | 118.912989775436 | 125.088717405087 | 128.662039886682 |
|          | 125.262445870212 |                  |                  |                  |



|       |                  |                  |                  |                  |
|-------|------------------|------------------|------------------|------------------|
| LCA5  | 142.003414252064 | 131.715579653796 | 141.923103467306 | 121.743701509981 |
|       | 123.892441783641 | 132.685098573183 | 140.26557508894  | 136.824357247954 |
|       | 124.989313193779 | 133.883527462382 | 163.280786875496 | 131.846160346403 |
| LCA5L | 145.280485286937 | 135.916668738753 | 150.241585041178 | 145.904866987074 |
|       | 157.463122989559 | 158.967160833334 | 134.503552797411 | 147.556482119673 |
|       | 143.574584852426 | 150.396462763607 | 147.036768856136 | 140.590802695412 |
| LCAP  | 145.064773625365 | 146.210814568357 | 153.505155981348 | 159.633987751501 |
|       | 145.967685593635 | 153.366677608026 | 156.671252606074 | 144.48495176385  |
|       | 143.818379692331 | 143.376817049362 | 148.235495611248 | 145.569870279379 |
| LCAT  | 246.061496821699 | 202.024504592763 | 216.859640534581 | 224.274329367512 |
|       | 120.948246352846 | 120.333487171575 | 121.130837254861 | 123.586359806158 |
|       | 124.310436914027 | 148.522580898717 | 192.046442148183 | 125.859158049343 |
| LCE1A | 146.176240539176 | 131.08389186558  | 138.455086062782 | 146.184624424737 |
|       | 179.896659891106 | 130.905135502296 | 134.664652044646 | 169.206723147505 |
|       | 121.404831900877 | 130.185134787768 | 132.881693683384 | 143.895399273595 |
| LCE1B | 151.585818981801 | 174.338440780636 | 175.442400672352 | 155.666943703002 |
|       | 143.245660951425 | 141.370957100324 | 163.977562404508 | 168.818595386221 |
|       | 145.841028932318 | 180.578528984075 | 138.62994237184  | 145.148058824491 |
| LCE1C | 118.161192318422 | 125.828998007608 | 141.5311434224   | 133.564350740049 |
|       | 127.177422395113 | 126.310788291075 | 128.611740835252 | 125.224197852606 |
|       | 127.879723100698 | 143.451080466172 | 130.282212339065 | 139.718721422663 |
| LCE1D | 127.135199316758 | 108.683531606889 | 106.603674195422 | 123.303143302526 |
|       | 148.410647472149 | 116.576896337786 | 125.717328918165 | 138.855454645579 |
|       | 105.096927149239 | 107.727848546225 | 128.304919825754 | 126.676875319815 |
| LCE1E | 143.555987405898 | 131.349297554112 | 144.206259414981 | 137.890006487904 |
|       | 175.452986514346 | 133.058788697693 | 144.425214066833 | 153.189490068047 |
|       | 131.670601860412 | 131.380387461901 | 141.70123350351  | 144.370811043456 |
| LCE1F | 144.559193410932 | 132.310147451479 | 151.966771042034 | 148.592330216136 |
|       | 143.112205432731 | 132.637443692683 | 146.519312568214 | 152.241060990474 |
|       | 152.685860451112 | 144.907294702865 | 130.48231275063  | 132.557945249016 |
| LCE2A | 143.776637809106 | 143.839170216353 | 140.156797128045 | 124.045745662173 |
|       | 147.701092466105 | 139.583514773196 | 143.796699867588 | 131.004145546364 |
|       | 124.106971897779 | 129.299810898979 | 131.110018165002 | 136.591299462104 |
| LCE2B | 128.685065364693 | 142.167918879613 | 156.026806913759 | 136.400959554698 |
|       | 163.239195865198 | 139.811873260553 | 148.237980436128 | 144.262612328341 |
|       | 139.329693510525 | 157.038121210505 | 125.160161268474 | 142.717436384151 |
| LCE2C | 153.171822092714 | 145.44629057846  | 160.941804737367 | 152.752870674108 |
|       | 122.371715108957 | 153.062710222618 | 143.00932329728  | 146.569958732206 |
|       | 148.539881077647 | 132.48841450242  | 149.019120812629 | 141.431816889669 |
| LCE2D | 122.355409068882 | 120.925930409474 | 123.291258843371 | 127.951403055054 |
|       | 123.424145707079 | 116.241531823869 | 120.311723366684 | 123.872097378045 |
|       | 122.213445520365 | 121.575942603856 | 141.102274192049 | 128.56495182759  |
| LCE3A | 122.312652834289 | 121.242099666967 | 109.140708667012 | 117.754181884939 |
|       | 115.80245224388  | 109.282814458761 | 112.126521532091 | 101.597648528389 |
|       | 112.736231367296 | 140.623284238544 | 126.775180133301 | 115.18875509198  |
| LCE3B | 114.913534674899 | 116.19219007097  | 111.876915242732 | 112.156010486085 |
|       | 111.328185454541 | 111.639177843969 | 113.716741872499 | 108.2359175332   |
|       | 116.58633348811  | 110.486191378104 | 136.528123792599 | 106.315801001506 |
| LCE3C | 140.408989128575 | 141.805028495425 | 148.507598818039 | 137.401137659118 |
|       | 140.736051985112 | 138.142193489481 | 130.461084106455 | 143.971152352313 |
|       | 125.944185728694 | 134.590666885938 | 145.27890423835  | 127.694189114288 |
| LCE3D | 132.760567403706 | 142.379120254855 | 150.328995030071 | 166.515199732076 |
|       | 150.84999247088  | 142.414323129638 | 158.31771109146  | 137.876234091056 |
|       | 147.284005815059 | 1022.55215097491 | 146.416318806523 | 143.434571922656 |

|        |                  |                  |                  |                  |
|--------|------------------|------------------|------------------|------------------|
| LCE3E  | 141.389330839189 | 140.120051507626 | 142.142633050256 | 136.723467784393 |
|        | 132.668344126625 | 147.094123051131 | 142.768691899824 | 146.916683989962 |
|        | 137.00532429734  | 404.726926716133 | 137.867263869936 | 143.140502042489 |
| LCE4A  | 127.630514255051 | 131.395959781477 | 134.790410101679 | 130.088408942008 |
|        | 128.611740835252 | 125.463718280745 | 139.342430217926 | 117.870230005125 |
|        | 129.658488766089 | 116.91470505098  | 133.031431118772 | 131.234140286502 |
| LCE5A  | 135.369146072643 | 140.53597287752  | 138.50252234048  | 132.751406897891 |
|        | 134.176925491721 | 134.487865570214 | 143.326739481448 | 150.163801964104 |
|        | 169.895672129542 | 146.740694608146 | 129.24482916531  | 144.994931561779 |
| LCE6A  | 130.716570410608 | 139.925201225224 | 149.495077381649 | 135.125414452178 |
|        | 125.920663904983 | 123.491930765117 | 138.489443610941 | 121.36708642226  |
|        | 136.118702626862 | 143.162353807279 | 139.320621744553 | 122.621839614189 |
| LCK    | 129.301839663122 | 140.180208418327 | 128.755697083014 | 130.824958143557 |
|        | 140.985432994867 | 121.347339077474 | 128.023203858837 | 134.623264303227 |
|        | 147.400082178491 | 138.1693725329   | 163.919426088318 | 131.984467471242 |
| LCLAT1 | 250.139061165593 | 241.418016203544 | 215.718714189719 |                  |
|        | 222.605195861218 | 333.200230327106 | 470.95418656881  | 318.561557474749 |
|        | 414.267332328081 | 233.192751618176 | 329.604568691377 | 347.487059316081 |
|        | 298.926727289387 |                  |                  |                  |
| LCMT1  | 548.869880723909 | 569.47446215213  | 635.37511798786  | 651.235249028924 |
|        | 754.607039665508 | 680.743052197025 | 906.886423608706 | 720.364080505785 |
|        | 868.40984928812  | 854.815394943219 | 722.399669963921 | 680.94167651697  |
| LCMT2  | 231.981501596284 | 239.31180635241  | 233.914433380121 | 216.680795762761 |
|        | 240.306287921209 | 233.200877362755 | 307.363302726074 | 219.96819201774  |
|        | 276.653753970476 | 187.057683141644 | 226.43414383055  | 307.020265874666 |
| LCN1   | 158.704425428694 | 151.210814209064 | 143.945039636839 | 186.551385094902 |
|        | 158.63432604978  | 145.23179154441  | 149.678629612616 | 158.854659281803 |
|        | 166.521472376759 | 147.879286704    | 151.70917316194  | 135.708804956764 |
| LCN10  | 127.685469299406 | 110.885714048075 | 119.305917403956 | 120.060776752215 |
|        | 123.11447940203  | 116.59404046487  | 116.780639688465 | 124.001295849091 |
|        | 112.710573586525 | 124.786029449452 | 141.547112973262 | 115.816156193574 |
| LCN12  | 145.681968019851 | 156.154079736651 | 152.277810621542 | 153.0141888126   |
|        | 149.385103319547 | 159.29430824799  | 151.98710761363  | 143.665359343809 |
|        | 162.961792330623 | 149.929454280702 | 142.971972776388 | 159.891562221587 |
| LCN15  | 138.071335383596 | 121.271403807802 | 130.362378233288 | 139.953572663277 |
|        | 123.574319348191 | 125.727521491768 | 137.814391189269 | 149.741272818423 |
|        | 147.595573192579 | 139.717662557602 | 403.47026424469  | 139.310309748986 |
| LCN1L1 | 156.672832018932 | 174.364798143068 | 166.17959304455  |                  |
|        | 170.223509007961 | 194.552533397944 | 176.612866969431 | 215.866644799363 |
|        | 191.040134068942 | 168.919352453652 | 170.655648004461 | 191.814634229865 |
|        | 188.941900997781 |                  |                  |                  |
| LCN2   | 174.441287575034 | 353.98839683842  | 184.873459141947 | 193.124599671798 |
|        | 1961.26255930192 | 159.688862680139 | 1718.80498208397 | 183.348764012358 |
|        | 16818.1954169657 | 4457.64479507833 | 1434.1439428394  | 211.766884719761 |
| LCN6   | 123.153925912632 | 142.274440538785 | 124.76274408368  | 133.155925118245 |
|        | 107.344825308293 | 111.549719888905 | 110.820329153348 | 117.773743603829 |
|        | 115.559551514777 | 116.321559000405 | 117.760045671142 | 102.725375719353 |
| LCN8   | 107.802792435066 | 111.962852412774 | 114.970485002776 | 108.66227817548  |
|        | 117.561878567749 | 108.266328505986 | 107.303126530947 | 107.863971340407 |
|        | 105.741092375243 | 107.221547998974 | 113.112450527382 | 111.691973758042 |
| LCN9   | 115.30786313391  | 123.431969470387 | 114.618608815885 | 124.668658660052 |
|        | 117.967392531385 | 113.077691687266 | 116.881212516879 | 119.221976571036 |
|        | 124.451718955086 | 122.258432948151 | 126.563876945046 | 117.943511615792 |

|         |                  |                  |                  |                  |
|---------|------------------|------------------|------------------|------------------|
| LCNL1   | 133.76515446791  | 143.760519659724 | 158.322477506517 | 169.791616021987 |
|         | 163.143613079037 | 151.486362260537 | 156.046085830566 | 144.873034900013 |
|         | 160.876228450608 | 158.627416752905 | 163.356993518952 | 151.392024228289 |
| LCOR    | 870.887539668967 | 986.004777675332 | 632.278924237678 | 699.984140389009 |
|         | 552.662610888399 | 1125.28599595312 | 1065.36715400306 | 737.193295872614 |
|         | 802.643357549193 | 312.845219991659 | 1023.29995420518 | 1027.48490028905 |
| LCORL   | 120.62139061084  | 125.950365319029 | 117.992729826121 | 120.126700838056 |
|         | 130.850419527271 | 127.91637627901  | 123.277867938275 | 127.336648342283 |
|         | 118.505980204837 | 121.396223519559 | 130.646956516128 | 127.604087759266 |
| LCP1    | 430.505037012814 | 478.606567465979 | 254.668502187945 | 295.241644408321 |
|         | 316.004332524937 | 507.710604451713 | 717.025533065694 | 1435.4236709581  |
|         | 2313.56743052616 | 2733.68308784024 | 1443.68785521063 | 2084.44431604433 |
| LCP2    | 151.134466830828 | 153.202157381228 | 179.794718712964 | 176.958593931371 |
|         | 183.193029399643 | 163.407360509803 | 180.814610631281 | 159.273225917177 |
|         | 164.794626785115 | 165.257737836487 | 174.136806313142 | 185.41739522833  |
| LCT     | 134.551054564417 | 132.568354349687 | 137.914673796317 | 140.214475962177 |
|         | 131.774882989257 | 116.825172441325 | 133.016668180102 | 127.959474148217 |
|         | 128.322884322951 | 137.443463471483 | 127.911258242431 | 133.336063137966 |
| LCTL    | 124.190161132628 | 130.160236228857 | 112.340161674529 | 124.334450753704 |
|         | 120.76311889397  | 122.595766303833 | 116.5272207025   | 117.532063783977 |
|         | 107.450945262092 | 111.66210002202  | 125.979152567959 | 117.511162285879 |
| LDB1    | 144.736213465651 | 153.647343267295 | 156.277567608825 | 150.71435300188  |
|         | 147.966224814966 | 141.008604646743 | 140.798706399757 | 126.897804011992 |
|         | 139.684141478459 | 131.970514300585 | 177.716742595321 | 146.716053772448 |
| LDB2    | 1239.66725147648 | 1397.84878368705 | 747.077451281453 | 1120.3009282887  |
|         | 241.557810100265 | 568.935113269368 | 253.833756857339 | 450.220658078322 |
|         | 429.351447428661 | 364.022018936132 | 301.591430919567 | 283.807827536147 |
| LDB3    | 148.866229889479 | 144.201723591119 | 136.706241776393 | 144.120106441052 |
|         | 130.329453160478 | 138.940564112156 | 132.813199199389 | 136.330636532576 |
|         | 133.52971984184  | 130.226993687215 | 132.608622131443 | 135.509927917168 |
| LDHA    | 2403.42261883515 | 2392.93562797606 | 2720.83642320419 | 2203.82462320864 |
|         | 3219.27851139047 | 2758.01526530661 | 4134.02613649483 | 3262.24877138481 |
|         | 2992.18604022433 | 9450.52572756597 | 3246.86605825129 | 3211.2719052157  |
| LDHAL6A | 134.961156870831 | 155.379116566097 | 175.139231359014 |                  |
|         | 166.232856234879 | 160.525939340745 | 162.453586139402 | 143.211127738941 |
|         | 155.313873664923 | 164.116142541038 | 158.36796888959  | 160.150336334888 |
|         | 181.431827312784 |                  |                  |                  |
| LDHAL6B | 134.990075720145 | 135.423839577038 | 133.020551937677 |                  |
|         | 135.29954024755  | 131.766114156138 | 136.826606228323 | 124.944563166658 |
|         | 126.816402300701 | 130.998637545686 | 129.816385177336 | 131.868557613642 |
|         | 122.180428703208 |                  |                  |                  |
| LDHB    | 2871.34694522381 | 2672.77147589342 | 4228.5490138553  | 2635.31067044245 |
|         | 3348.7622174821  | 6760.37324850804 | 6244.58472720999 | 5165.90865799172 |
|         | 4929.26915002209 | 2615.07927836881 | 10397.3656932566 | 6059.74270502037 |
| LDHC    | 135.003236040032 | 144.283716416188 | 139.395743826525 | 132.085538520551 |
|         | 152.301556397498 | 138.624689897665 | 144.221488906376 | 143.388028226208 |
|         | 144.954595802474 | 138.613373798613 | 155.268650584431 | 138.858138379065 |
| LDHD    | 155.542691937539 | 151.459397907666 | 149.556644928013 | 152.217243924816 |
|         | 188.335102005839 | 148.530422089937 | 155.803946849495 | 154.771737131348 |
|         | 156.843997723699 | 155.172667450053 | 147.407093814154 | 151.252137441251 |
| LDLR    | 2059.09598012857 | 2360.87760349888 | 978.389902096994 | 1721.20676889116 |
|         | 801.051513639714 | 416.215253990273 | 560.180656219785 | 691.916554922896 |
|         | 720.077057619735 | 3251.62784659994 | 677.802147190757 | 1776.38646235135 |

LDLRAD1 140.578378782903 130.902319266342 132.110906510601  
 129.462319953515 133.120273569229 130.579954890389 140.348718082786  
 134.961156870831 136.351332391315 138.348160604288 155.05329654089  
 154.179891883612  
 LDLRAD2 127.507557925713 139.999298193212 175.711836112986  
 165.698527470382 134.222453538421 141.469818222503 140.242272149424  
 138.53179773391 134.821778017915 127.975441922402 132.524377835171  
 138.850077456103  
 LDLRAD3 139.868714816245 120.867408760075 122.265071206163  
 120.839256811295 117.104945989023 112.736231367296 121.888886996534  
 128.814967091609 112.38543517651 131.683942368268 158.014017648839  
 114.155592351175  
 LDLRAP1 180.814610631281 187.046760972666 145.017264740722  
 191.179662650057 265.332196877456 161.112906953532 176.66175597182  
 179.764260117544 171.121834829333 193.04138438685 160.752581271996  
 150.006621336954  
 LDOC1 453.17378995737 475.540659315339 532.950400370668 464.577839898252  
 217.380892198811 137.698423468762 390.670702155192 223.373877165342  
 151.88244935494 151.110467345727 270.92671642109 368.276805218658  
 LDOC1L 388.782774926005 355.14024238296 400.845137156678  
 368.220523234399 420.502251256406 285.798047501616 254.812605074045  
 270.847923557176 283.014222473749 214.639374741553 269.726397478364  
 278.942695435238  
 LEAP-2 149.082061203661 147.125005489393 155.988447182637  
 150.653030597808 129.935532080325 142.818122106598 160.411218029114  
 177.630246034993 154.533544838819 157.932243807202 160.045715314465  
 145.698637908482  
 LEAP2 231.769926214655 198.885004378065 372.81255844018 160.786907816025  
 165.347173283335 251.20133703465 321.119758814618 711.729857540712  
 405.570281788901 158.622993108149 489.118864124059 172.050718136571  
 LECT1 161.00635457883 153.630125822178 169.806644442071 152.390371614602  
 155.945838519586 157.457468761338 134.970609100459 150.812739240232  
 150.701579893607 149.536681241497 153.554159360954 151.010493695217  
 LECT2 126.22472822166 113.400050190315 108.362609680556 112.800733398209  
 118.628559951472 109.552501987529 120.706421084476 122.323876787207  
 124.225294244156 107.74537523456 132.328948598599 117.30724482798  
 LEF1 194.092089507551 177.96452209396 131.582231577364 143.978912435831  
 145.641373616866 207.718619151226 180.667897257797 256.764450748941  
 435.332573825425 216.290279815413 186.156006020985 180.060096787617  
 LEFTY1 158.044938495884 135.324479598682 129.940297696849  
 134.56314960832 140.45860949168 139.825088162247 159.021304119265  
 158.25554353787 138.537763477627 135.102827224896 133.64938083537  
 121.591962855513  
 LEFTY2 174.187510325385 174.593548891693 205.162633740798  
 195.333029746339 149.303427221111 166.70212615715 184.071078414327  
 168.73918684069 176.839917795004 200.486683704179 153.82440233533  
 174.491551019128  
 LEKR1 145.193296081527 142.652939807341 148.082026641671 153.907737500104  
 130.162731607326 144.513730107393 159.977528879208 148.989286668424  
 138.899292894875 154.627270742193 172.486839924297 155.826394389322  
 LELP1 139.606654715326 129.707421699091 136.919702354166 143.051871940423  
 146.34029698108 147.994386096925 162.513107496558 146.235832275574  
 135.907702243922 144.975882336334 137.912656945408 130.716570410608

|          |                  |                  |                  |                  |
|----------|------------------|------------------|------------------|------------------|
| LEMD1    | 131.117294275244 | 128.729687597908 | 138.56812029378  | 142.184249919621 |
|          | 137.245321102978 | 141.739299634007 | 139.701504237962 | 132.186120302011 |
|          | 153.289258540668 | 176.901042102323 | 144.964084792568 | 160.707290343231 |
| LEMD2    | 477.056706273413 | 502.731019454502 | 517.993093601127 | 527.597948979568 |
|          | 563.339837352678 | 426.249411635589 | 603.906237227931 | 478.293220151258 |
|          | 570.916936074747 | 405.322847383739 | 592.387650564803 | 515.327420453564 |
| LEMD3    | 761.097992055119 | 805.875557314697 | 627.526008812413 | 739.085574858917 |
|          | 665.106631364961 | 830.684999498776 | 627.335757721489 | 2056.90127387648 |
|          | 717.419388886784 | 554.950092776254 | 712.067161025165 | 678.365575489532 |
| LENEP    | 110.190708230962 | 110.575582352222 | 105.839106819841 | 96.8261937365062 |
|          | 101.149125916797 | 112.464951599416 | 110.900309203531 | 114.85602874727  |
|          | 115.080736217256 | 116.780639688465 | 121.053766591551 | 110.17590675298  |
| LENG1    | 188.981391266203 | 180.54209603289  | 178.12073430094  | 195.618369827396 |
|          | 246.80306998812  | 174.149718758884 | 199.001860912128 | 183.795632040455 |
|          | 182.545896049446 | 174.866036336378 | 186.007710175103 | 178.142393629606 |
| LENG8    | 173.766372029062 | 174.214747421898 | 160.454243375479 | 187.572517928061 |
|          | 153.118492567137 | 146.486480663438 | 149.078664825533 | 137.677396262152 |
|          | 165.703810120915 | 138.082870754768 | 173.21291920566  | 168.911840239685 |
| LENG9    | 135.303322290834 | 125.609542142983 | 126.890841187249 | 117.735411259153 |
|          | 186.6902304653   | 132.16600019449  | 138.311892121437 | 131.766114156138 |
|          | 125.304045138994 | 120.693808603805 | 143.0235772247   | 124.368438691944 |
| LEO1     | 184.775001243453 | 158.092775850886 | 202.60339529874  | 167.43630698726  |
|          | 265.536429548886 | 214.499670852615 | 276.5177779623   | 216.506914782226 |
|          | 238.978845152474 | 355.290621188435 | 237.940015617254 | 269.238332581564 |
| LEP      | 1592.29734618345 | 1488.37146754184 | 1195.6335460045  | 1516.97921112926 |
|          | 314.182403961681 | 1499.07462479938 | 686.028214419557 | 955.143610867351 |
|          | 730.673649872205 | 572.262848718437 | 1787.32566525551 | 739.085574858917 |
| LEPR     | 330.850098426464 | 330.005950459958 | 247.643123415644 | 272.456310079164 |
|          | 152.348210524663 | 156.351734527745 | 139.308325848216 | 151.645636946799 |
|          | 152.66513184083  | 244.486311003619 | 161.212598761378 | 147.182394557583 |
| LEPRE1   | 270.021093158885 | 279.232290927348 | 214.355086255855 |                  |
|          | 344.487982154705 | 322.64731764456  | 228.317527475322 | 239.20206002     |
|          | 234.214191437687 | 204.914390718161 | 270.12941437975  | 206.571433405844 |
|          | 204.740183832461 |                  |                  |                  |
| LEPREL1  | 893.264940736694 | 710.228463443265 | 529.368609163949 |                  |
|          | 817.529344685717 | 853.535700321202 | 261.922485502971 | 182.997980582218 |
|          | 287.041585684111 | 230.263678910356 | 531.217306770605 | 265.670643951648 |
|          | 241.734804013256 |                  |                  |                  |
| LEPREL2  | 614.514126276981 | 611.088604425595 | 383.74357557363  |                  |
|          | 659.900771633223 | 317.163768837813 | 148.547259731346 | 152.581729298159 |
|          | 186.57665470145  | 179.810507975486 | 189.915720614467 | 161.817609920327 |
|          | 161.83241639654  |                  |                  |                  |
| LEPROT   | 2023.92614092273 | 2219.71846304201 | 1762.09874961415 |                  |
|          | 1628.24528041404 | 818.761934233826 | 1710.60409578293 | 1610.38263368771 |
|          | 791.137867905579 | 1485.776977235   | 1466.08446530283 | 937.375361806971 |
|          | 1746.30519466572 |                  |                  |                  |
| LEPROTL1 | 751.269009484639 | 603.338538383128 | 754.607039665508 |                  |
|          | 609.504365141529 | 320.467139255533 | 613.279465441319 | 610.915977337787 |
|          | 436.482580413523 | 832.622843175217 | 640.90860274227  | 953.861218000678 |
|          | 713.087392708048 |                  |                  |                  |
| LEREPO4  | 166.722369066673 | 153.626180103404 | 146.069543494352 |                  |
|          | 155.762890407496 | 154.426605816862 | 159.605110015497 | 148.644800418517 |
|          | 153.582185523361 | 160.035282578603 | 163.36682525399  | 133.99046926032  |
|          | 162.505305538911 |                  |                  |                  |

LETM1 186.591941221632 168.674809329231 167.43630698726 187.336349390012  
291.720204789005 239.621756857095 246.389203940944 219.940167815376  
216.403542903805 214.162670073541 160.923897048848 204.378245089766  
LETM2 147.93442757931 146.548348470748 135.539516564142 138.076501233454  
148.327340543504 131.412979573687 150.376234759097 148.901723851925  
144.649656552 153.169450192935 140.918728758975 151.024201732633  
LETMD1 392.824840252824 326.703488388966 506.165100641525  
316.623219008156 227.736106796551 293.018282386003 515.327420453564  
402.473870771741 353.243400332397 370.555627307623 567.869601934138  
407.052451784773  
LFNG 193.052112923573 290.184801898828 189.292740365891 322.028360309592  
196.169988112042 150.096558906597 190.22021453133 199.991077347491  
215.931781291835 247.643123415644 491.709723745226 458.282682131641  
LGALS1 11647.9643290124 11918.214537866 8416.19700892758  
15297.9020958577 1742.84803427086 1736.03342040646 735.449040059761  
1775.32632165475 2144.52984392647 9596.10781313429 707.173691257322  
2416.49806112207  
LGALS12 152.796423361971 162.994537815938 156.646803208934  
144.191491000257 142.836229345273 144.610341215903 162.216377983292  
167.164675439456 150.517832812714 159.452527363763 152.173055053184  
153.494456800685  
LGALS13 112.07238018581 134.89031458837 142.192934622228  
122.733870240098 131.437847958077 126.611663427876 139.541759919059  
145.718019736542 128.124456615525 127.040027125755 120.402155551818  
128.40650280096  
LGALS14 129.158212237299 143.298218989451 140.496058408953  
163.059196519365 137.769431537236 134.97514790642 138.852212944492  
142.005703694973 152.67564185705 139.293775885106 137.835936352525  
137.17370871536  
LGALS2 164.313238416498 157.78390301218 159.446705611995  
169.612203020686 147.143407224469 150.507308901391 168.838723365068  
159.636846021745 185.591700082272 139.710828360107 157.333615322941  
159.374355553219  
LGALS3 1680.25851465727 1657.72357544205 1204.7397215229  
1482.92498205315 1022.55215097491 1606.01395227661 850.882404546093  
1204.32784721885 1057.80846320642 1319.3522488218 2363.50330960038  
628.000860165888  
LGALS3BP 674.571475335107 516.177596584059 406.369889501135  
462.265785715695 2340.90990677253 1208.9240215109 2406.67187918735  
1006.69598892631 640.90860274227 831.610501402173 1361.54107116915  
2176.59445919725  
LGALS4 145.329128512407 152.823566129571 192.046442148183  
132.186120302011 261.171723011396 143.763292219833 127.749992538985  
320.774102343889 251.704037951295 123.058261039164 709.303384219887  
145.804420322848  
LGALS7 128.205022859019 149.269417496936 127.75729795293  
126.630787911053 148.380555606786 126.543399408429 137.084488743415  
138.054470878471 149.119815471009 15667.6576521981 356.699466789374  
139.921002429353  
LGALS7B 133.602870982718 141.865758685796 126.997614441981  
136.248506185974 142.928920246687 143.868962478182 140.311843829601  
146.743260100643 156.208747691032 22750.0246358215 424.912426797488  
142.93332947113

|         |                  |                  |                  |                  |
|---------|------------------|------------------|------------------|------------------|
| LGALS8  | 256.648540685098 | 246.263259852067 | 245.553138677866 |                  |
|         | 212.119922561453 | 214.413674287972 | 216.277178481058 | 401.102586700919 |
|         | 318.971509860209 | 252.810636571566 | 447.674610082872 | 501.166869173253 |
|         | 477.87583927675  |                  |                  |                  |
| LGALS9  | 133.641824143083 | 142.03837243998  | 126.547883999721 |                  |
|         | 144.574566623882 | 173.611295051326 | 124.42747321736  | 207.977817300376 |
|         | 309.423768054614 | 269.770777921703 | 149.078664825533 | 267.901632267999 |
|         | 326.570967321756 |                  |                  |                  |
| LGALS9B | 204.596753034535 | 200.114704018645 | 189.2642795052   |                  |
|         | 223.373877165342 | 152.495540563792 | 143.464614171516 | 167.293320986716 |
|         | 182.055718892894 | 153.56082876276  | 151.839306445341 | 164.309588213547 |
|         | 164.264079172779 |                  |                  |                  |
| LGALS9C | 118.802030418792 | 109.342230674869 | 122.749182465923 |                  |
|         | 109.454483612299 | 108.266328505986 | 115.76177719261  | 121.643036773773 |
|         | 112.227434965199 | 120.793974839773 | 122.35832958054  | 108.04922729993  |
|         | 107.67395123577  |                  |                  |                  |
| LGI1    | 138.651419539729 | 137.361967082029 | 139.178245419517 | 138.778496466408 |
|         | 142.064680109047 | 143.031909545902 | 126.897804011992 | 133.190147746722 |
|         | 139.299062352035 | 139.721730597003 | 118.802030418792 | 137.75060150486  |
| LGI2    | 142.14654303591  | 147.772490977392 | 128.640202262896 | 145.26329339067  |
|         | 126.343040504566 | 133.802898895457 | 118.173752075833 | 124.863832760607 |
|         | 139.949563856936 | 139.856251508283 | 156.346014084316 | 118.655954393594 |
| LGI3    | 136.534812980964 | 148.490236128772 | 123.086596566142 | 134.233014993992 |
|         | 134.155655670103 | 140.767270136561 | 131.065633574494 | 134.206518622834 |
|         | 149.44520146627  | 141.264096014725 | 134.803612821519 | 126.670227417269 |
| LGI4    | 230.947339143332 | 300.047728281275 | 139.72868421672  | 326.1109406486   |
|         | 118.820154030256 | 114.589757401741 | 121.434713764246 | 131.358797630945 |
|         | 126.217702283708 | 123.598210440312 | 151.914252332792 | 108.818976813708 |
| LGMN    | 497.269957926657 | 537.419316887523 | 477.87583927675  | 451.317592236192 |
|         | 503.59466398882  | 404.95944990868  | 753.389428590366 | 1289.56069670699 |
|         | 749.515603904233 | 472.793332506369 | 1441.29676998365 | 501.005898087825 |
| LGR4    | 127.509583634884 | 128.800907223807 | 145.654559623732 | 129.792548588929 |
|         | 121.538140679525 | 133.160197638474 | 138.593689321259 | 148.587929928134 |
|         | 168.188793271919 | 133.470643135354 | 150.006621336954 | 123.235136639469 |
| LGR5    | 139.106442824079 | 145.636906369786 | 172.329225247019 | 133.579067514064 |
|         | 153.846723846716 | 137.575688681319 | 128.714459781294 | 139.55065372881  |
|         | 128.045931477827 | 140.475688390415 | 145.389721946046 | 139.699189528879 |
| LGR6    | 134.485835304676 | 145.045633612194 | 134.896349513392 | 138.773042747912 |
|         | 128.711308958929 | 129.020356016653 | 139.558611792069 | 128.367370419533 |
|         | 127.870241953024 | 127.515913913403 | 144.54895913821  | 144.088525606919 |
| LGR8    | 115.080736217256 | 113.963798749897 | 102.343275379164 | 114.567609871292 |
|         | 116.118745494794 | 117.619337212037 | 118.442856984861 | 113.321454160244 |
|         | 115.80245224388  | 110.22624111837  | 119.11586630281  | 104.977794653504 |
| LGSN    | 123.940632366675 | 121.377666938052 | 121.591962855513 | 122.405469833024 |
|         | 121.248923222807 | 119.161972571516 | 117.958297137758 | 113.857477830423 |
|         | 113.018985316061 | 119.968081249475 | 124.551603326682 | 119.278231442871 |
| LGTN    | 535.612000577004 | 510.285766295993 | 642.057106241761 | 627.526008812413 |
|         | 314.751799003704 | 340.608165077422 | 562.543347322063 | 258.727309442475 |
|         | 414.538237455116 | 360.475989559226 | 420.446810988909 | 552.962676093514 |
| LHB     | 144.70348930646  | 137.370670726978 | 134.56763097313  | 132.772085211553 |
|         | 146.266350809492 | 153.829636228764 | 147.766043861937 | 146.519312568214 |
|         | 145.10302792449  | 147.928629511539 | 120.280241193135 | 138.551695969102 |

|        |                  |                  |                  |                  |
|--------|------------------|------------------|------------------|------------------|
| LHCGR  | 118.966992191892 | 122.158160927149 | 129.231455282441 | 116.14662237541  |
|        | 118.514618614167 | 110.925532078514 | 122.89752183991  | 123.45956380046  |
|        | 120.488694213288 | 115.142111396055 | 106.797707723826 | 123.406144497577 |
| LHFP   | 825.034504959272 | 781.461780481171 | 731.284098301795 | 793.300636780035 |
|        | 216.974834077975 | 250.676092725829 | 228.713818522476 | 257.573614085223 |
|        | 315.863232876382 | 419.4017188518   | 231.018059960001 | 250.30085097088  |
| LHFPL1 | 152.219906297607 | 135.283742166077 | 136.841506794489 |                  |
|        | 146.442734810495 | 137.50609001002  | 147.335403843539 | 157.130045415943 |
|        | 131.427686241226 | 143.0235772247   | 130.311471059267 | 137.874370839801 |
|        | 128.773129597793 |                  |                  |                  |
| LHFPL2 | 714.494228450456 | 524.725307261999 | 376.082040863747 |                  |
|        | 420.95713139384  | 340.547010951537 | 570.130804179186 | 735.165830487162 |
|        | 362.445813697676 | 345.627266482686 | 632.031410234577 | 696.976036382401 |
|        | 619.995008098949 |                  |                  |                  |
| LHFPL3 | 121.865696440776 | 146.293735120772 | 129.661073814998 |                  |
|        | 142.531683761072 | 117.815045605383 | 122.153996665065 | 138.994857740356 |
|        | 128.42287610189  | 121.636361281148 | 124.164523121103 | 132.390330703084 |
|        | 143.860092956392 |                  |                  |                  |
| LHFPL4 | 137.999190557332 | 135.075759558051 | 136.83883055114  |                  |
|        | 126.865622462379 | 145.855671447779 | 146.135269553731 | 122.190734676247 |
|        | 137.240806191881 | 140.641308444844 | 150.767158077219 | 140.831508792119 |
|        | 146.984888309556 |                  |                  |                  |
| LHFPL5 | 158.756424011719 | 150.536178574986 | 161.470611189347 |                  |
|        | 143.275056599274 | 156.576585764311 | 156.151075965844 | 136.716554749722 |
|        | 163.579282884905 | 149.570242115956 | 159.701028026285 | 149.061464748604 |
|        | 141.923103467306 |                  |                  |                  |
| LHPP   | 635.038752622494 | 698.358285634451 | 718.142991571468 | 821.265710686098 |
|        | 327.635520861099 | 270.679613997675 | 274.831898505989 | 265.754141836026 |
|        | 328.919401925375 | 532.786041960586 | 374.761007556839 | 237.88097138936  |
| LHX1   | 130.150998843383 | 121.997885377703 | 121.675007387533 | 130.778164962583 |
|        | 114.726808450831 | 117.923459503989 | 130.555405606993 | 122.742891063864 |
|        | 125.236926572282 | 132.273354705213 | 144.210698143215 | 131.861469782134 |
| LHX2   | 122.018200592563 | 107.605526304445 | 110.061459744714 | 108.21185649774  |
|        | 152.129092774005 | 138.967080709927 | 124.551603326682 | 113.708683868028 |
|        | 116.252227301161 | 112.495783269169 | 126.058167594519 | 115.473431881597 |
| LHX3   | 123.505435008269 | 119.375727296235 | 123.368137868951 | 126.728375196449 |
|        | 130.074786642758 | 118.875640081461 | 121.539958110688 | 126.471321085803 |
|        | 120.397683153445 | 123.977467396003 | 133.738587139139 | 127.462293158337 |
| LHX4   | 124.486701452062 | 130.429076594441 | 115.738984899365 | 123.161953011069 |
|        | 143.713962738562 | 143.652009342522 | 129.049273337631 | 130.504023268824 |
|        | 140.36602776806  | 130.856249657101 | 144.131743978192 | 129.292284546767 |
| LHX5   | 159.966729941991 | 139.875260384886 | 148.729753117861 | 142.143709425075 |
|        | 156.351734527745 | 163.600888221193 | 182.470538043064 | 155.815785551964 |
|        | 143.324235640446 | 134.770852936106 | 137.680019787902 | 151.984619204523 |
| LHX6   | 145.591320521493 | 174.127444395862 | 144.99221793877  | 193.744461104128 |
|        | 142.279695592224 | 154.161892545061 | 143.831294912255 | 207.467591256549 |
|        | 172.509081696309 | 148.00952002903  | 147.284005815059 | 145.34533633425  |
| LHX8   | 106.629065516249 | 109.228587997052 | 106.746545626069 | 113.388450168062 |
|        | 124.329980024986 | 110.829107724132 | 104.223476853877 | 102.255408120852 |
|        | 108.515401509039 | 113.748724650063 | 114.818898581401 | 101.431474941041 |
| LHX9   | 130.541449457342 | 133.365793958118 | 134.70636200986  | 137.163699337032 |
|        | 137.869471689534 | 137.212568398657 | 138.972789382679 | 134.988545581219 |
|        | 139.155456340488 | 144.351763882823 | 129.701347789845 | 147.670425834523 |



|        |                  |                  |                  |                  |
|--------|------------------|------------------|------------------|------------------|
| LIAS   | 271.791126011275 | 282.244214637625 | 380.888728347647 | 315.752980521266 |
|        | 181.479652131104 | 211.692743811486 | 220.415211013843 | 254.517135747445 |
|        | 232.414763435965 | 226.640323471375 | 271.522696252995 | 228.384686248604 |
| LIF    | 164.208044717557 | 203.943245360496 | 141.246352591355 | 177.16711492983  |
|        | 164.433462115832 | 172.46311371589  | 153.162313098346 | 155.917655560227 |
|        | 146.814457904682 | 165.926301648161 | 153.408890091225 | 186.296882059398 |
| LIFR   | 228.588693548447 | 325.082620845425 | 256.202924421798 | 244.307627077001 |
|        | 162.147989253357 | 186.866029149035 | 156.141123407905 | 141.964796033176 |
|        | 155.449724554217 | 142.303654405005 | 140.041977349982 | 146.541890150631 |
| LIG1   | 191.056705282378 | 189.708396835236 | 198.191669030952 | 193.064450357153 |
|        | 927.137881369911 | 357.835334661098 | 292.23287968517  | 542.544172683021 |
|        | 481.933386283351 | 292.746711619565 | 259.472319994929 | 345.433025456954 |
| LIG3   | 191.093283411655 | 181.328458560967 | 162.026757124868 | 228.9901869793   |
|        | 204.959164579011 | 145.431393142782 | 192.375251343504 | 205.728673153914 |
|        | 172.7330526128   | 148.587929928134 | 180.070209705044 | 168.298606558886 |
| LIG4   | 165.480489678822 | 160.57963709333  | 155.468848105615 | 146.696029753123 |
|        | 161.795378938402 | 159.266921692363 | 148.057700860759 | 158.171302275984 |
|        | 157.547814187442 | 171.455216889348 | 151.819220292189 | 158.505363728431 |
| LILRA1 | 123.072413274454 | 123.891115326934 | 120.345546077894 |                  |
|        | 126.310788291075 | 112.248047602652 | 107.170981307304 | 121.289159587394 |
|        | 115.343251487944 | 121.021776527531 | 117.089207321783 | 121.448671447499 |
|        | 114.494394548044 |                  |                  |                  |
| LILRA2 | 111.820208385514 | 123.400143662218 | 116.881212516879 |                  |
|        | 122.236134282757 | 116.718099363329 | 118.446703299916 | 120.638330368388 |
|        | 138.605661097886 | 132.379706531581 | 128.093945009882 | 115.332409360957 |
|        | 111.632811186988 |                  |                  |                  |
| LILRA3 | 127.006746526023 | 127.763186950161 | 123.728481007459 |                  |
|        | 125.915689078001 | 136.158508521357 | 139.032275257901 | 128.445065383646 |
|        | 143.650172124086 | 145.776143302784 | 134.022324496729 | 129.483116877682 |
|        | 128.739880189022 |                  |                  |                  |
| LILRA4 | 119.682747854629 | 133.286702819953 | 120.201521341263 |                  |
|        | 134.202497785854 | 125.029516472944 | 127.026168862919 | 123.762963668211 |
|        | 123.595133376092 | 135.252082574955 | 133.550008967009 | 165.443069511115 |
|        | 126.100454068838 |                  |                  |                  |
| LILRA5 | 153.873826757907 | 139.377027955744 | 154.509924503184 |                  |
|        | 142.711117470317 | 146.437565098335 | 135.139676303901 | 140.569391362701 |
|        | 149.975892236985 | 155.121309543738 | 142.478528530514 | 147.330897105911 |
|        | 133.778595695007 |                  |                  |                  |
| LILRA6 | 153.308956040034 | 149.795655754301 | 148.171225002967 |                  |
|        | 138.838795320713 | 139.892371997205 | 147.387754442307 | 146.994103804515 |
|        | 140.443415669628 | 144.54895913821  | 140.356164189622 | 129.566451901256 |
|        | 143.112205432731 |                  |                  |                  |
| LILRB1 | 7292.0342195035  | 7631.6124232898  | 6460.4291301245  |                  |
|        | 7601.58151657937 | 2061.9164323309  | 8030.19731415448 | 4266.92715355342 |
|        | 6919.4226838505  | 5789.71932579854 | 4068.18567686753 | 6214.77579017084 |
|        | 5425.58761099475 |                  |                  |                  |
| LILRB2 | 144.345080865349 | 145.718019736542 | 142.540433565262 |                  |
|        | 147.642693777383 | 148.147294674218 | 148.758316681306 | 156.033897758869 |
|        | 158.295583769612 | 162.652929339533 | 150.367927843529 | 130.588481497083 |
|        | 140.05012958679  |                  |                  |                  |
| LILRB3 | 15809.9561036761 | 13809.2057928642 | 15851.5830405813 |                  |
|        | 15463.4998494462 | 5601.24254062491 | 14300.8562978211 | 9219.38828280399 |
|        | 13700.8527522612 | 13645.150201952  | 8596.90650022148 | 9671.66667662331 |
|        | 10474.0047946187 |                  |                  |                  |

LIIRB4 146.548348470748 133.742490937191 147.710252756854  
 159.515698265424 150.606329295069 151.972509608956 155.710272937386  
 160.459100056689 166.910561772689 140.211016178402 157.207544072126  
 146.202611204712  
 LIIRB5 197.651165059354 168.427124752461 187.325542100762  
 180.80811429888 162.308297940279 149.824791474186 156.265168005937  
 163.880402141404 189.283071231248 156.020996568814 162.695319777455  
 178.347708009405  
 LIIRP2 144.634118305223 127.849141499408 141.619432083003  
 132.033116673897 124.297848065172 139.880733465536 149.8919086368  
 125.612670947405 130.698850298016 119.530214079037 124.178483414968  
 127.492376657284  
 LIM2 107.884870799936 109.355444907633 113.549098821204 112.851805868467  
 119.859508630454 105.010952544907 111.975027473284 102.932013031511  
 111.188410935711 103.594872791657 117.718893827092 114.226028611171  
 LIMA1 789.971871940893 542.740017003369 478.847650837714 421.583441056026  
 346.691690520054 268.328002606268 716.731984660463 415.82312615045  
 592.387650564803 814.759191652981 1148.80141486692 359.363523948825  
 LIMCH1 1499.07462479938 1289.56069670699 1408.08614963928  
 1040.73829397913 386.817736004263 626.582864105324 3363.51782842264  
 607.979208454176 619.380514697732 234.243977361232 1780.97169244555  
 841.623780229898  
 LIMD1 112.729141678141 119.890260409414 118.80458302894 111.497241941203  
 112.219585614955 116.943791343147 115.485515429446 117.244895482991  
 104.58424134098 120.511896155396 131.371129237005 122.759905480504  
 LIMD2 149.851792558427 145.862497313025 162.624786423084 152.42111372681  
 163.942131559267 187.4351946569 173.147311624838 159.349719495214  
 156.441368290572 155.104697146664 152.633139090274 154.973990421257  
 LIME1 298.519371102278 308.031816782343 330.005950459958 380.310795921752  
 376.54010486682 589.722914993267 653.500279510032 609.309339417625  
 882.798927428142 291.50783830983 433.019478861638 509.618968665191  
 LIMK1 161.713311969291 152.026310884327 141.695537669891 156.218834695891  
 204.090674444834 141.94585838352 144.333945716394 143.41350503793  
 151.674143983846 145.416733388652 152.887471821971 153.770852731422  
 LIMK2 139.052898232393 144.910863590251 134.955823960889 135.226240774124  
 170.298291784762 180.528296177577 189.070238523683 147.001408450583  
 168.890506147594 201.269380130546 186.140970908638 173.147311624838  
 LIMS1 427.151797273226 441.435444003241 431.182384100794 391.185365567603  
 241.734804013256 481.933386283351 506.659740456829 438.533112511098  
 439.33566689752 645.806954296487 792.101559967381 854.815394943219  
 LIMS2 1966.09691567857 2074.29945034697 2172.89794460273 3321.1350545346  
 151.092066533546 145.698637908482 130.761936205169 141.121364213272  
 164.497445195378 124.895023786422 157.590017103385 118.660213790078  
 LIMS3 126.823886603295 133.096984735092 127.661634554996 126.370252616961  
 117.824694297846 116.961391747202 122.430140354831 114.624259793353  
 112.800733398209 117.461198576063 112.096627288813 121.912927816178  
 LIN28 125.542301916791 115.795989631016 127.480717762966 124.853659050216  
 122.873661677648 126.199219102601 125.019064287385 129.848276446896  
 121.263939656119 114.021546689428 124.134916773123 120.65473121078  
 LIN28B 112.758617084341 108.984922760455 119.375727296235  
 118.655954393594 110.242638217587 111.962852412774 115.967513057229  
 120.227386958188 122.615852682436 117.517649866653 137.894056887729  
 125.628281846465

|        |                  |                  |                  |                  |
|--------|------------------|------------------|------------------|------------------|
| LIN37  | 156.085949215738 | 159.354364289526 | 145.034179171835 | 142.047828639169 |
|        | 203.11015591813  | 141.898948675823 | 147.098474227445 | 156.254944793402 |
|        | 149.6730835169   | 133.389930962407 | 169.927157878764 | 123.994188725172 |
| LIN52  | 260.278595572575 | 225.095016600703 | 281.168898910065 | 255.273375146278 |
|        | 147.985843605585 | 290.914381066573 | 202.718428167217 | 232.127996106421 |
|        | 217.380892198811 | 223.531323159808 | 221.152973486208 | 226.989201461085 |
| LIN54  | 189.872997882033 | 214.904634494921 | 235.43707989982  | 223.666832044186 |
|        | 208.776711004753 | 388.638095539186 | 250.060734219351 | 379.546197364027 |
|        | 300.937118739654 | 292.893332413185 | 235.453139389486 | 311.208703262497 |
| LIN7A  | 149.661929885679 | 134.549628985766 | 144.12742465348  | 133.922855125616 |
|        | 159.670815631794 | 125.345611085082 | 161.72730923536  | 300.199170426996 |
|        | 127.167369897196 | 115.778736387131 | 126.0944894315   | 118.24368469845  |
| LIN7B  | 258.605188272761 | 239.649306804266 | 244.925472495705 | 233.842749683689 |
|        | 520.761305892651 | 220.791884858764 | 255.903775525554 | 189.693218759349 |
|        | 231.0814970959   | 225.664432111551 | 207.036293322882 | 191.486717579847 |
| LIN7C  | 163.396651801661 | 154.758831302515 | 199.423120300557 | 158.859389972316 |
|        | 135.643341446691 | 169.434164890542 | 140.626181314061 | 157.751477529076 |
|        | 172.916234073981 | 197.341423434688 | 184.954673605577 | 153.690189121681 |
| LIN9   | 181.865456674829 | 174.107661206415 | 168.818595386221 | 186.975609955892 |
|        | 200.867515935703 | 251.959823608766 | 184.135651836627 | 173.272062328378 |
|        | 186.406439948242 | 188.836327151669 | 149.286184588967 | 198.437113196596 |
| LINCR  | 140.493975416335 | 136.821228481217 | 148.534143255537 | 148.25001336038  |
|        | 178.790758444269 | 136.815411937352 | 139.000248033373 | 138.424464248567 |
|        | 236.707875629511 | 144.206259414981 | 161.37617568158  | 138.442378791712 |
| LINGO1 | 141.353084959289 | 162.373508183992 | 160.876228450608 |                  |
|        | 153.603765998461 | 171.784981874184 | 149.121894111871 | 155.680330654611 |
|        | 149.97218338771  | 156.392603045231 | 152.222732770706 | 138.3792224631   |
|        | 151.755205401737 |                  |                  |                  |
| LINGO2 | 139.984102798711 | 143.857385585662 | 123.67449826277  |                  |
|        | 133.736252068443 | 122.449574852865 | 116.082361389405 | 125.358906118533 |
|        | 125.187617901961 | 124.661088039427 | 301.871924474014 | 127.385776388242 |
|        | 126.285743744314 |                  |                  |                  |
| LINGO3 | 122.149756212115 | 112.054379249781 | 116.179625689647 |                  |
|        | 105.859916438163 | 134.840285218383 | 124.110446144763 | 132.051614319023 |
|        | 147.532747354296 | 129.792548588929 | 145.224963738352 | 135.943252855457 |
|        | 139.303747021408 |                  |                  |                  |
| LINGO4 | 119.301746097298 | 105.952640312359 | 107.103635692135 |                  |
|        | 107.655624022312 | 119.152881350581 | 112.758617084341 | 110.325803953516 |
|        | 118.75237770613  | 124.455340203012 | 114.278113876915 | 118.298444816712 |
|        | 106.204350278634 |                  |                  |                  |
| LINS1  | 172.521737547052 | 182.693963066543 | 151.06209123698  | 168.830344627025 |
|        | 179.250373572781 | 190.754349388901 | 189.174957940401 | 163.910041674646 |
|        | 191.924177620803 | 204.942500423413 | 189.816900281053 | 199.947823264085 |
| LIPA   | 513.816017871024 | 537.698489904622 | 448.644778906048 | 407.052451784773 |
|        | 579.923640505245 | 619.223672253014 | 1188.08712008638 | 995.263014856158 |
|        | 698.086166782221 | 779.922653392712 | 606.851072672402 | 903.824331691969 |
| LIPC   | 140.553613300431 | 141.048882618651 | 147.117286738537 | 140.550044737476 |
|        | 134.762169062357 | 145.120347147471 | 168.156002330441 | 140.92377681377  |
|        | 162.117224868654 | 145.204870282027 | 139.871928127715 | 161.534421340752 |
| LIPE   | 167.976680048356 | 170.541689758579 | 152.258389962    | 181.193963616037 |
|        | 250.037172478288 | 165.763459146818 | 180.276082632155 | 162.766038656637 |
|        | 195.384273821324 | 165.355764467096 | 187.205674045893 | 170.212679845194 |

|       |                   |                  |                  |                  |
|-------|-------------------|------------------|------------------|------------------|
| LIPF  | 148.936888662374  | 146.432468585736 | 153.097557560333 | 142.383723965616 |
|       | 155.669470674985  | 172.836730741407 | 141.528115502473 | 151.285933600303 |
|       | 155.114892891737  | 156.803516898875 | 161.704966315183 | 159.7197697044   |
| LIPG  | 130.788557333561  | 131.921799405427 | 136.241569739318 | 127.50624009248  |
|       | 169.4478271110558 | 137.25679451567  | 156.942156078314 | 197.326259802349 |
|       | 184.518666956721  | 222.086635504858 | 141.492458250787 | 161.148734808267 |
| LIPH  | 126.544685937984  | 132.709845352383 | 129.856994052591 | 122.408016372747 |
|       | 161.552475294424  | 125.639355645626 | 142.505050582588 | 141.923103467306 |
|       | 201.441808401878  | 120.581554457723 | 216.457866890673 | 134.676039394438 |
| LIPJ  | 111.559325333192  | 123.364999283696 | 112.436972452838 | 115.531710316716 |
|       | 125.262445870212  | 114.44610607807  | 109.770126492743 | 115.235444833856 |
|       | 113.133798430215  | 109.471542280224 | 108.589444216106 | 121.094060100325 |
| LIPK  | 143.978912435831  | 149.799681364551 | 148.361088792223 | 130.231160879338 |
|       | 167.370030272847  | 169.482586449402 | 164.146345008398 | 137.418345713224 |
|       | 147.826950636822  | 159.13662975347  | 147.333142209628 | 158.514079887374 |
| LIPK  | 123.13812550459   | 125.034243098087 | 118.206034087145 | 125.924219382375 |
|       | 125.720102558499  | 120.220156455352 | 120.365602682311 | 123.905462079972 |
|       | 121.124574985464  | 118.256000539093 | 139.927773713324 | 126.211525910631 |
| LIPL2 | 149.435684626505  | 145.245316640391 | 163.275138097131 | 145.407517107023 |
|       | 163.778790431064  | 159.646538408414 | 147.772490977392 | 155.542691937539 |
|       | 130.501010489883  | 140.085359251038 | 147.696506705909 | 154.417731984391 |
| LIPL3 | 175.608958881476  | 157.032746784217 | 143.971152352313 | 173.488272345038 |
|       | 141.825162897153  | 153.423579724911 | 155.086559474139 | 155.83143112621  |
|       | 155.223806761489  | 169.45559708224  | 153.532954370572 | 149.131218007756 |
| LIPL4 | 155.219860096943  | 144.240470871638 | 159.289148392284 | 158.937341335707 |
|       | 158.188039933865  | 170.516743115762 | 155.820194280153 | 157.344758285153 |
|       | 141.721829342179  | 152.717642489582 | 132.657106732366 | 161.16688895179  |
| LIPM  | 141.069243738242  | 125.661697165943 | 125.687688416588 | 126.55925846644  |
|       | 129.38021642675   | 145.435794613203 | 135.659271030454 | 144.520435611318 |
|       | 133.150660840801  | 138.968690339299 | 129.362793087439 | 136.147810636915 |
| LIPN  | 129.213523302268  | 117.602986362773 | 141.042265614693 | 125.150706047419 |
|       | 120.465934391246  | 126.875483714734 | 132.373302367869 | 122.600274773736 |
|       | 121.784166691545  | 131.865164933746 | 125.683334853039 | 126.205931638442 |
| LIPT1 | 195.239829623017  | 178.551434222154 | 187.550461418888 | 166.415922313464 |
|       | 163.968901692945  | 207.815226999953 | 207.440700355457 | 213.93763684072  |
|       | 193.589480577091  | 202.458096827378 | 210.290500215377 | 191.335616210093 |
| LITAF | 2267.0818302379   | 2620.17683549005 | 1966.09691567857 | 2137.44704613378 |
|       | 1411.2586496281   | 1098.78649254838 | 2672.77147589342 | 1390.95426299323 |
|       | 2672.77147589342  | 1361.54107116915 | 2816.29814823646 | 1548.09554827056 |
| LIX1  | 173.611295051326  | 157.096799934494 | 174.116797337377 | 164.466332705334 |
|       | 175.462290891421  | 178.728925255163 | 161.968835903764 | 179.273936200852 |
|       | 165.581217879395  | 170.150889760372 | 154.996829706812 | 175.350734537491 |
| LIX1L | 302.408563830315  | 273.806452412737 | 324.79327985156  | 280.798003990849 |
|       | 207.902853533132  | 134.022324496729 | 135.102827224896 | 178.531913384538 |
|       | 173.287859527767  | 213.412498914309 | 152.79367157305  | 135.883119645931 |
| LLGL1 | 432.726040933545  | 565.059609779245 | 550.671679318681 | 791.137867905579 |
|       | 789.401526545277  | 398.571054759451 | 292.693830444839 | 426.896707161414 |
|       | 289.257002046658  | 457.292146759215 | 330.005950459958 | 300.985037429772 |
| LLGL2 | 136.855445270531  | 140.877230937687 | 140.992801405088 | 139.065849548762 |
|       | 157.952018720438  | 154.990319019521 | 151.442463705271 | 148.549257493128 |
|       | 160.349557404154  | 142.991135981933 | 148.112717810117 | 150.359906271672 |
| LLPH  | 1667.86825735893  | 1361.54107116915 | 1424.04009914668 | 1323.05745869565 |
|       | 543.933989965705  | 3093.38255333143 | 1097.18236659974 | 2956.63335018838 |
|       | 1198.53117439169  | 997.460212152591 | 1333.73334006986 | 1044.00217726486 |

|        |                  |                  |                  |                  |
|--------|------------------|------------------|------------------|------------------|
| LMAN1  | 182.197625235191 | 211.059870865354 | 239.388546850124 | 242.72424280444  |
|        | 213.274106157675 | 251.224369831275 | 346.635777358159 | 270.421697521366 |
|        | 285.214585324341 | 354.405235378302 | 259.742175498038 | 271.897511879509 |
| LMAN1L | 115.678486138934 | 117.084984190461 | 118.430401197079 |                  |
|        | 113.970633751086 | 103.826308328446 | 107.450945262092 | 109.30275288389  |
|        | 108.497209666203 | 115.766358387923 | 98.6941019230576 | 112.736231367296 |
|        | 116.653897702566 |                  |                  |                  |
| LMAN2  | 222.646371492347 | 206.77605957523  | 184.223623297663 | 251.224369831275 |
|        | 259.575461599189 | 242.72424280444  | 334.52685347521  | 241.845941562418 |
|        | 206.164058935215 | 235.997227173296 | 189.539458686123 | 228.025383952578 |
| LMAN2L | 569.656573915709 | 626.298707790229 | 568.935113269368 |                  |
|        | 697.774882173237 | 340.487850009685 | 318.423602671236 | 455.564394647943 |
|        | 296.75326294587  | 275.996693627151 | 369.726867521935 | 399.664121956178 |
|        | 307.480644393018 |                  |                  |                  |
| LMBR1  | 317.061815822659 | 327.951753740503 | 391.911768848267 | 265.919002666885 |
|        | 338.665115108128 | 393.579552385074 | 522.899203071911 | 360.684900316265 |
|        | 317.206754773681 | 403.405544395163 | 183.26554404668  | 521.301110104669 |
| LMBR1L | 167.030667499538 | 175.784250947874 | 171.038941092587 |                  |
|        | 199.813528853649 | 186.257814752354 | 192.59376129133  | 173.225064625094 |
|        | 171.740347129234 | 181.439775614781 | 180.022646625687 | 166.1677526      |
|        | 174.389706515542 |                  |                  |                  |
| LMBRD1 | 1360.85309203233 | 1356.43255022363 | 2051.45788386541 |                  |
|        | 829.126529857044 | 1014.23822508445 | 1565.64079526732 | 2089.82894186824 |
|        | 1558.22238167317 | 1192.47480377375 | 1285.02292965374 | 1914.96285167893 |
|        | 2069.70335195314 |                  |                  |                  |
| LMBRD2 | 129.362793087439 | 137.339511714364 | 126.355699811531 |                  |
|        | 133.587927144452 | 157.547814187442 | 137.215025712057 | 146.450806121927 |
|        | 163.593106951255 | 158.014017648839 | 136.598215718877 | 142.793573585472 |
|        | 151.958818313561 |                  |                  |                  |
| LMCD1  | 1953.88327754946 | 1556.41573079892 | 1821.08523647593 | 1430.20038077595 |
|        | 237.961826989344 | 265.470314691221 | 136.561852783331 | 245.240006198482 |
|        | 307.768302846647 | 367.983166440977 | 210.77489002666  | 145.615291241733 |
| LMF1   | 136.189852861078 | 156.949439724914 | 125.272796155561 | 149.180704382192 |
|        | 176.791758333054 | 105.096927149239 | 128.501189288377 | 125.525241361472 |
|        | 119.407293854922 | 123.179986410723 | 169.385340991747 | 130.751522895053 |
| LMF2   | 494.538861626895 | 472.108893832845 | 380.243136469602 | 503.757797957538 |
|        | 626.582864105324 | 292.839392578318 | 240.663883443935 | 309.283897272661 |
|        | 309.937351755502 | 456.126096817454 | 410.002817143111 | 417.615521090665 |
| LMLN   | 128.844026422327 | 128.339161042799 | 132.113317893587 | 119.412461116903 |
|        | 122.522978939399 | 133.190147746722 | 156.695440330379 | 161.735609436394 |
|        | 139.242481781927 | 140.89666990854  | 150.51537512828  | 145.06736850005  |
| LMNA   | 938.499337889075 | 1082.00448164658 | 672.348723983535 | 1247.91041567746 |
|        | 1823.53870218167 | 793.300636780035 | 730.042712083388 | 611.772512110915 |
|        | 683.179460779062 | 1304.37930719411 | 653.500279510032 | 1012.44277312494 |
| LMNB1  | 139.97636570613  | 155.801832826848 | 162.923734210933 | 167.769114519774 |
|        | 204.787016443123 | 212.822328466993 | 198.356420768703 | 214.019190624184 |
|        | 169.179630363359 | 246.492735271771 | 158.000456937922 | 208.214764518526 |
| LMNB2  | 345.732364434125 | 381.253673759781 | 266.032134528055 | 442.698000781597 |
|        | 1443.68785521063 | 859.113541787323 | 549.96567374713  | 793.501244347257 |
|        | 725.443026984982 | 856.424155671931 | 559.236012019639 | 643.905401805862 |
| LMO1   | 149.704586651832 | 148.337793323867 | 136.27621600731  | 173.951605889009 |
|        | 132.450954427876 | 134.21227169867  | 148.758316681306 | 120.450111018432 |
|        | 142.02169810999  | 130.729227484165 | 146.268073519544 | 138.093181144173 |

|              |                  |                  |                  |                  |
|--------------|------------------|------------------|------------------|------------------|
| LMO2         | 352.22815095475  | 405.843083758177 | 247.528753010193 | 406.736165197168 |
|              | 539.471166362469 | 258.915802108562 | 334.056545911557 | 303.005912224195 |
|              | 425.13721408756  | 308.803322140241 | 458.33221423434  | 271.568797887976 |
| LMO3         | 1276.14915305515 | 1449.33679383001 | 1940.42283070543 | 2376.52728883131 |
|              | 123.379461430902 | 134.301956886107 | 129.327645260099 | 166.074254447178 |
|              | 130.141611252834 | 124.426019186373 | 147.442483242063 | 125.830917527594 |
| LMO4         | 1744.58410715956 | 2269.44503773126 | 1359.63626195826 | 2525.90466050731 |
|              | 576.298671053238 | 1385.28044421961 | 1140.40904196731 | 2107.99357083999 |
|              | 1000.48723872058 | 872.512754090023 | 557.513306351027 | 741.433093896472 |
| LMO7         | 145.502055020513 | 153.047317528007 | 135.745821200254 | 137.058578192268 |
|              | 138.3792224631   | 141.283042601932 | 135.24841020592  | 154.209689403188 |
|              | 137.594506621573 | 138.947760022173 | 152.071081175788 | 126.439948611449 |
| LMOD1        | 1777.29626660109 | 2053.71550326011 | 2165.41403521012 | 2845.0377634896  |
|              | 115.14883090249  | 118.249148086655 | 111.253743009588 | 127.696578575874 |
|              | 121.246967460178 | 111.783160346742 | 126.800718471804 | 119.057157701097 |
| LMOD2        | 145.096707533824 | 150.974364125849 | 129.404017329613 | 146.817659734182 |
|              | 156.381599544223 | 139.55065372881  | 151.212606106351 | 154.812587513407 |
|              | 157.028963417138 | 151.714420758741 | 141.811563725942 | 139.21331678591  |
| LMOD3        | 4562.75659565027 | 4457.64479507833 | 4417.98524179686 | 4110.76546218806 |
|              | 400.550044186372 | 3246.86605825129 | 1157.02365469464 | 2502.72913594103 |
|              | 1625.55754007235 | 1355.66237447026 | 2330.60389526686 | 1609.54149931375 |
| LMTK2        | 168.744610747563 | 154.469132478321 | 143.683545371898 | 143.508657511633 |
|              | 222.646371492347 | 181.695203523798 | 197.24751449599  | 181.622689471026 |
|              | 167.337624316172 | 202.887417145119 | 161.102731941183 | 158.208998509937 |
| LMTK3        | 199.250680260804 | 229.97640195632  | 204.681956301306 | 189.647009287524 |
|              | 990.814111681408 | 457.130051460676 | 1025.88559245013 | 540.005877322817 |
|              | 424.134483971176 | 416.307629596091 | 283.918434443669 | 669.602939159192 |
| LMX1A        | 136.332399354517 | 130.033927910392 | 127.433203229267 | 131.451173463405 |
|              | 130.491742824575 | 120.148189532583 | 128.060612106762 | 127.265211069837 |
|              | 123.048352070915 | 122.982686879394 | 131.479997342133 | 132.739435456445 |
| LMX1B        | 152.262147284452 | 139.374832382299 | 156.34272729153  | 138.605661097886 |
|              | 160.72009357092  | 155.272264997151 | 163.81485578613  | 162.188509438986 |
|              | 148.046961712162 | 151.41546939633  | 137.633384124577 | 139.063209125209 |
| LNP1         | 144.516274148451 | 154.996829706812 | 155.815785551964 | 154.838407529853 |
|              | 131.519455635415 | 151.917359928516 | 150.272153646712 | 142.444072809204 |
|              | 145.832751296646 | 146.298733090986 | 172.686798187142 | 156.427158441352 |
| LNPEP        | 170.223509007961 | 151.09974848374  | 156.609370182062 | 168.628947766217 |
|              | 166.746037983859 | 189.114794029657 | 174.035835206078 | 161.608941774391 |
|              | 166.70212615715  | 164.319378349317 | 159.746802905903 | 188.910933952136 |
| LNX1         | 132.265895156539 | 128.895325544109 | 105.31352471598  | 123.484987952263 |
|              | 132.720599968449 | 148.943735606315 | 158.125437004665 | 154.030432279825 |
|              | 125.029516472944 | 126.746388125956 | 181.865456674829 | 138.487657776553 |
| LNX2         | 245.195406638979 | 223.408447580188 | 252.280435525505 | 204.453822958077 |
|              | 271.154246147262 | 322.889296658955 | 302.408563830315 | 231.981501596284 |
|              | 295.778154263981 | 314.4408959517   | 305.720812071583 | 315.130912368929 |
| LOC100008588 | 9192.8966763778  | 10202.2226913537 | 6114.33638002734 |                  |
|              | 10790.3738999898 | 15238.4097431619 | 4206.37667440908 | 5874.57722671552 |
|              | 6776.11712291246 | 3949.19206005238 | 5532.93454600454 | 10506.1271023809 |
|              | 3474.0924656878  |                  |                  |                  |
| LOC100008589 | 2944.63971819193 | 5207.37974585707 | 2096.25803773108 |                  |
|              | 5138.28186306948 | 14454.6736124756 | 4276.70912292877 | 3862.57980488881 |
|              | 4214.83058308503 | 10135.7800994367 | 4150.8511719558  | 8881.86480594052 |
|              | 3262.24877138481 |                  |                  |                  |

LOC100009676 158.36796888959 170.768398273919 144.098578955023  
173.001985500448 157.717145014769 147.049287475127 187.65716654049  
153.922713834296 181.950658782069 164.022021048626 178.142393629606  
196.144420005021

LOC100034248 128.643539098937 123.07559417607 144.606963457243  
130.043904881142 134.528971384442 136.194082458655 141.552315273863  
130.265055842999 126.260691770282 143.122278808091 122.724429060184  
134.298521475727

LOC100049716 155.031272695335 147.823552813852 130.980885733161  
141.277227483198 154.861507590906 137.374784875444 168.878645908397  
141.056924917269 154.428779374984 140.964208731587 160.395053149199  
160.892163220381

LOC100093631 171.086559024882 170.775283924087 185.140211988926  
168.660907237558 151.10837100314 164.794626785115 160.17208299932  
160.690442125281 181.229308386808 161.299920355406 141.092486112278  
163.390929975591

LOC100101115 118.761737418652 133.995928435022 120.351217130679  
121.930362099901 124.452631766045 119.998260435095 129.297217956843  
123.225792525733 114.242056888286 113.238466329843 112.896360244636  
118.438942370745

LOC100101116 128.045931477827 115.845468537936 131.930814868433  
115.664551127497 117.546508214236 136.470025638057 135.825931047185  
119.218909479403 133.995928435022 131.106613067333 124.49814598066  
126.561067704708

LOC100101117 135.279197125157 128.988736837863 129.083756379376  
134.601565799073 128.591292689996 138.717541782317 148.158062155247  
128.959487155628 131.004145546364 135.10155936286 143.263333116046  
135.521802085177

LOC100101121 124.768399055809 142.920939571001 131.48517604564  
139.636177212128 141.88777975766 142.865320802784 147.055697988856  
123.513588004371 152.334669286305 136.971869448818 132.158817539201  
133.167635227902

LOC100101266 133.014551645069 134.301187092088 139.54021659275  
140.348718082786 160.466187961848 139.023486014525 141.619432083003  
185.856755885891 144.345080865349 136.19725093985 185.113098620798  
139.811873260553

LOC100124692 136.553568679965 132.744261207073 144.335732650795  
127.548070199148 131.800533523123 134.499588539919 144.970383956581  
125.493004972076 136.618643817686 143.495590708009 142.964043764953  
132.554328715753

LOC100125556 154.586825710624 163.643554173995 151.528377719344  
147.754489751457 174.737828693216 159.79463502085 163.362182585182  
167.284724396943 159.413535577361 158.545435407585 167.219062918573  
182.346834032145

LOC100126784 129.779076484273 116.52455193626 127.601379088239  
129.971670681199 129.675420096163 133.866011732878 119.717408713154  
123.817878562971 124.142882936234 123.98384416057 129.487458179949  
129.900540030251

LOC100127884 116.844361858869 124.646093292382 127.058373069911  
127.887666721519 134.914830257315 126.155486659114 123.657246099004  
124.672483602517 140.951031275943 112.867662941811 109.859878974527  
129.551260802518

LOC100127885 189.985520850855 183.633719048831 198.863347487219  
172.345201438148 135.271290872348 167.961390966538 149.374282007673

142.42442972908 138.783017264895 156.609370182062 122.789656787728  
154.096542063701  
LOC100127886 125.013839352291 141.248526020456 129.173772079264  
120.384210318 146.978110148492 146.552529779774 129.362793087439  
130.37185420347 138.199559519849 141.735123971775 118.064858133264  
127.195619567384  
LOC100127887 137.690514322424 135.86149691566 128.957236136715  
129.1829592305 135.784481523923 143.195338329759 148.197029306137  
134.23001942966 138.551695969102 140.768926302035 147.925744210234  
142.243866937888  
LOC100127888 163.647306551474 165.41729888767 130.293492553638  
138.374092984164 151.104891644466 135.463385553776 141.941814923705  
129.916677638819 152.511331178337 140.321675137237 126.786434897401  
155.410704148925  
LOC100127891 147.449186980143 132.595360509902 143.840979923821  
151.621024295494 147.199961777192 123.084040312047 162.390356943447  
135.421804561804 141.059033576475 134.113464449375 138.20827167572  
173.507835230243  
LOC100127893 138.841385034636 140.11211854056 141.999730335668  
141.917318809044 143.915205639368 158.439409064812 167.373416675264  
130.944610173285 151.024201732633 149.987571884748 168.37850726499  
148.641780441227  
LOC100127894 168.10131060526 155.498580125421 179.914070416793  
157.901967487277 183.531156021887 192.331142672469 168.52952604693  
157.463122989559 168.996965070202 160.039086963419 158.23884088767  
157.915292037378  
LOC100127899 137.491366243256 132.602336133471 126.946305561543  
128.085732447084 135.294664456623 127.325087202483 139.966813133326  
132.510116371195 148.231928963878 130.314247368361 136.705326991088  
130.080728694308  
LOC100127904 113.005774989833 120.174672871542 128.972276851419  
112.227434965199 130.309092946921 122.82388804774 127.287538993899  
121.224389883994 120.054065939835 125.999595008166 118.930792960643  
120.867408760075  
LOC100127905 139.462804363695 136.561852783331 143.454771158075  
144.80318019871 142.997365080299 135.937066152894 115.605206174867  
146.981521393075 139.679681813932 135.346501914337 137.5954358221  
138.605661097886  
LOC100127909 159.133905701536 171.247946863662 141.876237297525  
145.383354200298 209.887047474042 653.047570485109 243.038392457584  
565.609400092543 393.500781010617 178.06221214103 493.622989939072  
405.130899553871  
LOC100127910 134.235164622221 128.793186785667 117.900892627473  
112.699674279523 124.138036007288 115.231121959397 123.173506315166  
116.07902130325 122.813441348997 127.844624093148 127.895989232696  
123.929180327423  
LOC100127913 190.904614772409 180.265418365803 211.720536220806  
171.751149502172 172.942666836182 180.80811429888 178.294972422671  
169.527424356913 164.801505601099 184.482849019679 171.449326065013  
168.298606558886  
LOC100127915 154.675189522146 151.181422205549 147.983937675946  
145.874529855286 146.698766621345 141.152406037213 137.734887788912  
143.477670915091 134.05596537871 142.556535259086 153.461396593156  
145.751336115646



LOC100127918 268.454310218604 270.604799126393 345.494740481759  
246.061496821699 295.241644408321 555.758485277905 566.914448800423  
592.613689704907 582.642500194997 394.35596596181 449.859227376918  
771.512332113075  
LOC100127919 120.594874820899 135.985358106767 133.573744633212  
142.914863449833 138.83304645915 137.258429777402 129.272835188209  
129.614692778261 118.488997046932 125.658396221949 144.615156175885  
124.616629956864  
LOC100127920 136.001505582342 137.740497848238 140.208983238283  
126.51808376464 126.310788291075 134.391386851101 144.765051967884  
130.116771999391 133.070896773384 129.147246809319 137.81819274774  
130.800427334056  
LOC100127922 153.541193559658 156.224769056915 165.995251661994  
165.51742391186 160.811051590991 164.970438494223 172.992936821292  
177.450674276588 183.531156021887 175.41089164969 211.34069504665  
208.776711004753  
LOC100127923 137.914673796317 126.875483714734 127.104097294238  
134.130913969327 118.226036680442 127.756214708077 128.473834314632  
119.475462713424 127.104482822627 133.050798832332 105.132185249959  
123.498540254464  
LOC100127925 141.958902715369 141.722817732641 135.343380336913  
158.6067091347 158.138862054715 143.969566798989 154.552605305297  
142.483308497682 152.667721542507 146.515240633175 149.09398454596  
155.655771857361  
LOC100127930 132.873213182775 128.112595697836 117.428152859221  
125.077260389449 118.021169080914 129.203236898198 141.652000792271  
125.724143659093 123.615802924067 132.435409278702 121.170340423391  
136.05610450926  
LOC100127937 158.023626712181 130.732397679661 136.044670179122  
139.798414027439 137.599810249536 146.223880979601 146.633627492419  
139.166537591866 130.441808139335 142.697827839203 156.597497458992  
147.199961777192  
LOC100127944 142.019263564073 126.902441495413 130.776213987522  
122.125746529725 144.715167331434 135.670409501435 123.847186739627  
124.629877200816 141.606501859513 126.563876945046 132.562090247233  
131.904624845305  
LOC100127946 143.410917415691 144.525782437057 141.82958644061  
123.654787271088 127.398873370484 144.035936160694 135.018710687313  
135.073449743301 149.283495832731 148.404000406948 157.600193849783  
147.376482709004  
LOC100127951 122.531675048414 122.027632589515 135.596007994731  
126.967212770393 125.013839352291 109.506450285923 126.064311640223  
127.900901613784 130.102721964653 131.99470265134 138.719480482945  
129.318409053566  
LOC100127952 155.902461107328 144.842687993057 142.129680127408  
154.179891883612 147.813170436139 148.888698484378 135.906115546805  
133.082433951922 150.294432623474 158.483006541613 158.396149470397  
154.758831302515  
LOC100127953 124.70219935334 123.735827460404 130.880795616911  
132.664379033058 125.517076778344 132.825240485239 117.455432751161  
129.754376995879 126.265475477399 126.921925660996 148.479218400487  
128.478724185042  
LOC100127961 136.386031133644 133.122174596886 131.623527073985  
147.982280671798 134.683553037185 127.924195488323 137.944260488223

126.656077572961 120.887938517877 143.452992974333 137.379558348782  
128.974844672294  
LOC100127971 131.707530115415 136.087702679172 123.11447940203  
126.129564039673 120.003095000297 146.660826209767 133.101674466013  
178.676812740925 134.23001942966 137.333595298205 160.28767775843  
139.644701550661  
LOC100127974 142.55463239891 152.301556397498 185.240692860387  
137.176144667253 167.67272339144 148.090431893307 145.999823250463  
135.32730674455 147.228812647235 126.121516564343 171.97578836712  
126.319103548711  
LOC100127975 2578.85391480563 2572.01353724341 2856.14739820295  
2153.17165155392 405.64711132293 2369.233048505 1137.42879398351  
2144.52984392647 1346.53215685106 1120.87534972745 2395.75453574049  
1225.33666840349  
LOC100127982 146.877475544399 149.582406567077 146.871145679651  
142.276853170778 183.735201125198 202.278323489515 241.320049298228  
207.785320401354 236.617896560938 203.149001616967 202.44778603643  
273.252023367028  
LOC100127983 226.055406842613 205.226635237992 312.808044035117  
210.199788806189 120.998665308561 142.650451413991 131.820842728171  
135.420780282429 158.125437004665 135.095095470362 115.5765427629  
134.524644163286  
LOC100127984 135.670409501435 144.621077658674 139.804518460303  
143.365976841902 136.788269716383 134.182902752156 132.435409278702  
140.393624985807 131.060030943633 137.404525565336 137.956295878287  
121.30964045316  
LOC100127987 116.52455193626 118.226036680442 127.369456504277  
124.411213807179 126.189005734462 118.584773788416 129.269919529415  
137.378528742953 137.565050253948 126.526489290128 129.578488688293  
135.719702250709  
LOC100127988 127.407418037777 126.185560760543 129.446928016147  
136.222421297872 130.694506122253 134.105941085621 138.743505629497  
131.296518221093 131.49577981738 133.874468336025 157.134782748175  
124.415058391979  
LOC100127989 132.624674205566 130.362378233288 133.382099379709  
148.034899103241 150.599425944486 142.783159341229 127.712004247155  
137.208796872026 130.258933321051 137.799016648135 137.700110923212  
136.461182044855  
LOC100127993 5455.91604383389 6253.84268792816 5636.26097921507  
5314.0635307876 10930.6720259935 4635.42002659719 8881.86480594052  
5115.14161559446 6214.77579017084 7104.65816621275 7969.0710242842  
6810.50193989514  
LOC100127999 145.954700424725 159.49930229951 153.191840013692  
160.839277476397 203.206743799353 175.537039794925 193.502988612307  
167.408314067262 157.979749139651 186.321879879561 186.276450732044  
170.079723856247  
LOC100128002 142.351705613006 155.255279503782 149.752188104803  
160.57963709333 166.563411635721 156.650388509656 157.094001180073  
156.110073009771 151.239879652761 155.061749542085 160.039086963419  
142.752536416014  
LOC100128003 134.599629045981 127.786141874218 132.161764435769  
153.756213924949 139.305220220411 150.91730768674 134.580526467375  
146.347213904792 130.625825024195 135.010937737018 136.565191271943  
138.22823004719

LOC100128006 128.656169194563 127.8514513762 137.973211667003  
136.253264628863 137.744318243173 139.674001912099 143.287237534352  
132.57219914253 145.177195093247 137.11719450122 113.832885222354  
138.397152876585  
LOC100128007 146.242897296397 131.702788057359 143.941358917251  
135.985358106767 153.018378403144 160.50439457257 150.845846206549  
158.185593294878 160.640160107693 143.461785113446 152.247504238261  
153.541193559658  
LOC100128009 132.86711707789 125.285502203677 120.606354515072  
132.796961054534 119.739204799544 132.061436165754 123.400143662218  
130.06068534054 126.368170959337 121.335907318019 130.278044081378  
131.619951110473  
LOC100128010 129.637555509848 108.530158480237 138.792521681771  
118.04359489354 121.353233207209 115.967513057229 118.497920969001  
120.196595293401 130.056727701826 122.699993989189 118.873687561838  
136.975775196224  
LOC100128013 135.010937737018 122.863612588759 134.066948803697  
136.80943340993 129.003317344469 142.813267401938 148.989286668424  
135.08927101395 138.546549217819 138.704839659727 131.362128083159  
137.432492568789  
LOC100128016 185.275787562938 174.985831291764 199.662592246931  
155.865540894526 310.365203383647 300.765518378297 250.718986968076  
194.430896269275 170.505553609318 194.186994486095 204.842791081358  
190.291185322482  
LOC100128018 111.253743009588 112.314595956147 133.685254707686  
121.402905161896 105.665621968915 116.688949603376 115.566303449363  
118.226036680442 122.002822875994 126.720031203392 106.126202301438  
121.957155610892  
LOC100128023 138.848119273081 141.135840314665 147.552635527742  
147.354535468933 139.957560460935 137.864637728155 130.872296869843  
133.839554874862 141.040862279633 122.813441348997 137.736771579507  
134.330234316896  
LOC100128025 123.865424155099 135.241029533819 135.553183871663  
136.124385992905 138.374092984164 147.640100078933 152.883970401452  
125.081880303992 127.480717762966 129.990534497026 139.782152941027  
137.881776548665  
LOC100128028 129.415078042622 141.550553034455 153.408890091225  
132.890396520305 129.723501897231 131.456697863268 122.583461806645  
123.372689985035 126.462522391125 138.956057921718 125.463718280745  
154.159124458167  
LOC100128031 144.880785634179 152.54039461337 151.893573927407  
151.671024612136 133.34207595093 142.236565028336 143.165150890885  
145.924751649542 146.215459988012 161.577683729655 152.66513184083  
151.188412354358  
LOC100128035 136.862764950361 129.900540030251 127.969833368917  
133.201157825808 134.096283448464 129.558589108727 126.085039271526  
120.577995272053 140.150884219813 122.095978653755 120.371374172279  
137.340844554597  
LOC100128049 135.412051450659 137.369033684705 142.099541115973  
141.743873995642 141.653917856148 133.322752419739 130.698850298016  
128.745737514912 125.995374488153 124.138036007288 152.857278986877  
131.890554636938  
LOC100128055 139.543551482943 146.105844205919 134.128061214081  
141.348548071751 135.425518707018 142.690911343704 140.820807603291

125.358906118533 133.780423932326 119.567911704298 126.865622462379  
133.895547281411  
LOC100128056 262.954856857756 237.146972312448 295.420691959792  
269.379272725008 209.44506543433 219.878230463206 303.241375487319  
329.779210536849 262.671819506189 262.832376198119 274.202831856221  
262.349315496653  
LOC100128060 746.523071806534 713.832153334389 819.488546995594  
486.425387717472 1298.60552708737 1787.32566525551 2198.4268389426  
1086.8615735568 637.695341427976 1431.52979384867 3042.88425356552  
1254.19980463817  
LOC100128062 8666.41250683965 8840.92490099301 7003.06505884735  
7389.95365139168 1710.60409578293 9715.20127757161 4690.93553472125  
7539.6945050098 5981.08862268291 4335.76831372031 9323.53099359448  
5373.2173152906  
LOC100128063 139.010652831798 134.966883985611 136.362144891335  
125.272796155561 141.84653748835 131.371129237005 130.205764567934  
121.553107861517 136.507961715591 132.958521136 118.154953746492  
125.874313058552  
LOC100128064 139.886499402506 164.365630106697 132.131378074469  
163.407360509803 146.16821907742 140.195820033314 136.519697160267  
135.68605915552 136.18698517676 165.549190801014 151.204487316077  
143.376817049362  
LOC100128067 132.07268641595 127.514381389109 114.45792163942  
121.895778599116 130.882463936853 135.373824773008 146.437565098335  
122.142323014287 125.250900940748 135.161667673191 137.793462381778  
125.287738115754  
LOC100128074 145.536260846052 139.308325848216 134.136687154241  
140.648918459179 132.105184573944 141.112047881014 143.215828010442  
143.085022888434 137.969750384554 136.087702679172 153.051143478997  
139.517413585211  
LOC100128077 153.762995131216 155.228605554943 132.943957535655  
144.610341215903 155.143752422033 125.315736755156 132.952355710395  
146.002585729701 140.36278240974 145.760577027524 129.874235646816  
140.326012404526  
LOC100128081 148.794293762142 119.666650919579 124.345320343901  
135.592128081677 126.829183791366 129.916677638819 116.95195122318  
145.368059425439 129.222714748528 130.478834977547 128.050677475339  
142.064680109047  
LOC100128083 129.578488688293 144.98596774435 138.293242905081  
136.432109029368 138.512938877774 136.960656707275 111.398760606544  
132.600208090551 123.227904580467 125.863969666806 144.629350188283  
134.530516701271  
LOC100128084 21409.4415798676 18953.8127741918 18061.615487998  
20989.6494028551 3615.76740804718 20647.6275450554 9016.04641569485  
14983.8256502293 13976.0448927093 7573.69742026367 11874.9808592281  
11432.8213906428  
LOC100128086 273.514200733343 252.789376168324 467.387427864242  
243.691004557778 264.233381434738 280.723379809959 296.915883082902  
315.963526790659 374.657816575897 287.656436278551 289.724297749772  
224.67853219142  
LOC100128088 128.649329515033 124.807244018373 136.884799902348  
131.512174491572 135.925813154268 124.879018642505 123.330142002791  
137.814391189269 134.655842662899 143.330025840618 127.456181182121  
135.848022588175

LOC100128090 136.307646393792 136.48748813417 136.411722212312  
148.332750352364 147.15999706579 130.656206845965 136.300195727908  
133.15144076432 138.506569544482 133.52971984184 148.514806562804  
149.548900791507  
LOC100128093 130.247700541716 129.522339467532 132.963761182049  
124.058332474379 127.486697506397 134.676039394438 146.453030317456  
129.984214994811 135.997144927956 129.7137422914 137.419090451631  
125.285502203677  
LOC100128096 150.63456320644 138.074645385322 147.292241873554  
141.777089987975 146.635140441079 141.346722137248 142.137885203233  
131.056011738962 137.792150225149 150.026314061051 149.511776997149  
147.510848198689  
LOC100128098 3301.98381607571 3262.24877138481 3078.76695443407  
2962.11407134162 371.224296589448 2992.18604022433 1306.20183851747  
1982.3154578939 1606.01395227661 1179.42590997099 2877.92845389611  
1547.16936835284  
LOC100128100 136.463867598256 130.818181991958 130.732397679661  
144.178210824181 134.089308635893 136.708746582636 136.001505582342  
143.30977386038 141.117659724704 131.950295185477 140.029808783762  
135.779516940893  
LOC100128104 125.915689078001 124.256773437346 136.837430157894  
129.765440519589 149.675363177375 137.017882995262 130.066177538896  
137.20509387214 121.888886996534 115.18875509198 126.189005734462  
137.543128522665  
LOC100128105 130.24527031028 128.519448608754 139.615706918035  
125.525241361472 154.665212863369 140.40754434058 143.546629073997  
140.743917481548 134.094231940612 134.181819177347 135.666278507269  
137.146961654597  
LOC100128108 137.792150225149 135.58042404479 124.697283474333  
121.807661901776 120.174672871542 120.418709541104 124.110446144763  
120.644987579644 128.505296338657 125.945916345628 139.921002429353  
138.014046365103  
LOC100128115 167.408314067262 175.537039794925 166.540134051424  
171.384487293154 180.20999937977 165.100811808026 203.265559787292  
209.196695368783 185.154876233931 173.766372029062 183.371103136697  
197.962159288376  
LOC100128126 430.329437928013 360.185005480216 374.46180489079  
325.80154888448 165.4474699807 358.092809491843 230.589110372454  
266.347965690851 221.491633607126 207.467591256549 260.443814523694  
237.396466740419  
LOC100128130 152.772177215856 151.61049450647 167.811412309356  
175.551853899221 143.59105195427 143.036006001419 158.483006541613  
150.807308519367 159.026102446297 154.985781979984 140.26206122305  
153.964765831852  
LOC100128131 151.40067812803 137.556552701816 137.842375545994  
130.818181991958 152.152106138031 152.393260140571 145.428297145967  
132.948096807634 138.088712695622 126.820834043224 133.343243441383  
131.869543437146  
LOC100128139 142.609678462615 129.656088836537 136.039076665712  
137.792150225149 120.177385114315 127.034985265748 141.267715391739  
139.957560460935 135.30767047671 124.291944151031 127.509583634884  
136.181791404331  
LOC100128140 123.179986410723 132.179747646893 119.347975622523  
140.411200873743 143.284230032303 133.422190038356 140.402944266863

131.986590029726 130.89594032962 121.841080387875 142.249715102513  
122.850678471084  
LOC100128142 148.888698484378 147.764068958635 144.736213465651  
146.16821907742 146.664285015996 159.055956234445 149.856951631661  
146.105844205919 140.914966429342 148.67584969749 133.268239762624  
147.15999706579  
LOC100128156 125.818432070199 132.697727983601 137.48217464385  
152.032418787633 137.816691265242 128.517315006019 137.938310376106  
117.646963986512 139.291775075915 127.597601325212 139.457084084368  
129.382242021964  
LOC100128160 132.115817176834 141.374831983971 137.326796995017  
148.412895185127 135.434853296628 130.49338418515 124.39748786803  
126.969504644414 139.324006489527 126.606163970149 119.911515364639  
141.139737175648  
LOC100128163 145.758423590784 144.031305845388 139.798414027439  
139.969155812688 143.184697704389 130.827726862159 136.871568211946  
133.819095523687 149.355389396683 155.465250172768 142.21279866857  
134.024205981268  
LOC100128164 133.519359066907 122.139832263188 139.921002429353  
134.352155462211 145.686092190716 114.696935316053 118.955314417914  
121.603608840998 126.413124995943 140.004456934031 129.684916104674  
121.874296836854  
LOC100128168 119.631847624882 124.980683327416 123.129785564258  
121.607527525765 136.290486122369 122.751674866182 132.008330288281  
128.276471459777 139.572562105377 127.139903623331 133.935910746769  
122.670689386332  
LOC100128172 143.047617455953 127.558034562151 132.953762692926  
133.014551645069 137.06775845101 136.932895013297 123.156154667242  
130.786835186349 142.419777428399 150.72835989269 137.561067667054  
150.405715534245  
LOC100128174 151.188412354358 142.655287071175 137.536053775531  
138.717541782317 120.714981493593 138.841385034636 139.591231478841  
123.887740029279 136.631948656268 115.550587451456 131.060030943633  
137.395895014456  
LOC100128185 111.475394003575 124.436549041911 115.496108000499  
135.227424713702 145.968884703737 137.025625133986 112.75167046116  
124.980683327416 118.239637776941 132.735371358102 114.585818507336  
126.960777504772  
LOC100128186 124.093412630817 138.021559586328 136.643481414354  
118.825948323992 121.599883734552 120.590654346066 133.111791289725  
122.290822230565 126.902441495413 133.63022526522 132.855812035005  
126.262349005661  
LOC100128190 134.224781719944 126.662329971897 143.481112776388  
164.647634120888 125.021217009254 140.831508792119 141.455841055881  
152.163489631563 146.054535585464 130.425809387444 122.226875707253  
139.123489349026  
LOC100128191 134.78059811237 134.329334422886 134.233014993992  
134.580526467375 152.377056383547 143.185372109165 138.265155903051  
132.712573198794 187.231049280818 134.243435358729 136.492892469272  
152.520828479026  
LOC100128193 128.329985147034 140.763592237598 127.503849690009  
134.163388748526 129.297217956843 120.015436934157 133.874468336025  
128.354163132392 128.499303407596 135.306127055224 126.958366599622  
126.938068475032

LOC100128196 782.746481112316 706.628675634893 680.94167651697  
397.449905380349 278.498278821829 436.331333134628 1001.35912007916  
397.660202059209 355.519647649551 847.276523445973 693.180345649331  
561.761160223609  
LOC100128201 144.448503894295 134.00481287258 141.5068665919  
129.020356016653 140.138870925001 137.540275229889 124.69564501518  
141.340452225686 127.419227292862 131.747367613225 138.572054821151  
128.936628289974  
LOC100128202 144.36033726557 118.256000539093 137.348951314875  
134.769926504916 124.697283474333 150.170712508944 132.273354705213  
138.246963115014 127.995790782392 137.16842164453 157.535792192753  
128.236840746655  
LOC100128203 140.092648878007 124.536322123442 123.126240234396  
131.22473774325 135.491412261604 125.18424162353 136.171728950893  
134.777979170126 137.464339555312 131.249240371529 134.863223806176  
127.07186140748  
LOC100128208 115.68358702028 121.438875373878 120.867408760075  
134.613036378054 120.594874820899 121.709375771276 116.248026336995  
133.322752419739 115.491262364277 124.422548323449 121.327397317398  
125.324187741972  
LOC100128221 130.461084106455 136.874135348635 136.328447182666  
139.06923394504 181.328458560967 167.201570648434 164.901810642726  
135.014118238255 161.735609436394 131.711193516482 158.653161314597  
144.771457221413  
LOC100128223 127.265211069837 140.204023682096 124.530660958725  
139.049085468313 138.875827888646 130.06441029462 133.31378749951  
130.630504666374 138.541779821934 137.85618381155 137.438984175012  
142.005703694973  
LOC100128230 130.068926859425 130.346150829949 127.114560076444  
132.975603230163 143.705475208192 127.164076119599 133.436057118148  
130.018928906449 143.667207351415 132.275953817076 135.118955626451  
127.137447808551  
LOC100128239 113.857477830423 117.65847906412 125.081880303992  
113.262357892613 115.085961282227 117.976107125982 121.784166691545  
107.714294216913 117.051541123239 107.344825308293 119.405562450453  
124.494727558127  
LOC100128242 131.804952187685 136.922282125029 135.701041557713  
136.18698517676 142.464394555901 130.189958197332 137.002473710189  
134.626371781978 138.813126946007 142.709768829207 133.812639120892  
137.842375545994  
LOC100128244 128.680762033378 124.217337143269 131.414690782328  
131.216673806987 132.848926011576 119.315932907373 127.401551376191  
119.903068083658 134.777979170126 139.555322603323 130.563089905046  
134.197892075036  
LOC100128252 315.3930052781 261.671277686467 613.279465441319  
257.44230597145 201.085046871333 159.495272062735 135.539516564142  
259.426050921239 377.538276846051 165.41729888767 312.406286993239  
155.773639092819  
LOC100128253 133.412452607155 137.217104547797 141.73248778957  
134.799648755296 139.505864135281 136.977435235496 134.140533647509  
122.220327032799 136.176688025337 126.118745937997 148.26621607986  
138.899292894875  
LOC100128256 126.077945699709 110.368392735494 115.778736387131  
128.23910347716 128.417571004317 148.821942578396 121.303696898208

128.339161042799 120.594874820899 126.732121894377 114.027244455291  
132.47010267527  
LOC100128260 143.589222264786 147.657151780506 129.417232210341  
135.254996386778 145.409722106953 143.50323531501 160.435789207464  
129.842252702648 146.150048478173 130.66863243733 136.6729514905  
134.09920571607  
LOC100128264 134.817665153925 133.133892264995 134.022324496729  
141.567425892004 134.244658505187 121.330383384978 131.894919149666  
124.124076599417 127.774702462567 135.767818903328 114.498610080481  
134.091723054647  
LOC100128265 128.640202262896 128.186963138555 134.244658505187  
134.919972250554 135.068883036882 129.422854634791 130.545285774056  
136.779180530712 130.697148466042 131.967245387861 125.187617901961  
125.334995649504  
LOC100128266 522.486866458783 485.87138934376 811.144838166905  
485.576566972696 842.567990276734 1796.26091584668 1769.6386910047  
1527.87148052149 1769.6386910047 2770.7811954029 757.066786599446  
2114.9754128463  
LOC100128267 140.378255168229 128.042181036687 129.606271613463  
134.412129843957 141.960809148036 133.155925118245 137.698423468762  
133.185908839766 131.223691762533 127.799190369808 138.810236692956  
148.358847576281  
LOC100128269 147.218415065692 146.065491816894 152.08574341962  
135.208478510375 146.97203173446 143.292552892073 157.612067634423  
133.495243957927 144.694679571377 186.309367281625 140.976675511847  
147.970243979273  
LOC100128270 142.080099281203 127.924195488323 137.927403204849  
128.505296338657 125.247402280272 137.125637347852 132.031693838834  
129.505139430366 135.323341505875 129.497266827284 142.183154756458  
137.330207626732  
LOC100128274 649.906677394861 683.655205499779 473.057488824363  
546.181615768667 204.470661830972 679.191060100076 493.492348317616  
808.55123510297 294.697622870418 276.476790719416 1007.7803477458  
680.509421043347  
LOC100128276 130.659631155616 137.745887988474 138.93292293598  
151.730862403472 132.472505035111 130.222698914337 148.02460124587  
132.48841450242 145.158039427157 137.464914919148 129.888444399067  
140.192644427334  
LOC100128283 135.844983721014 127.9575507576 143.41350503793  
136.701400398129 144.772914483212 141.176376265078 138.763250836766  
146.311966562883 142.971972776388 141.174971007547 141.336866031027  
136.349603320553  
LOC100128288 8768.32269645116 8053.22070239424 7681.48027081818  
7656.97151002785 964.473774310687 6776.11712291246 2608.95227456417  
4929.26915002209 3615.76740804718 2822.48671794913 5106.27623905309  
3226.53426370323  
LOC100128291 172.091884817207 182.495117800073 197.938447651153  
158.928949614338 206.21848253717 157.915292037378 204.740183832461  
238.430350258686 202.343343669937 206.585387130993 215.635313821029  
301.087947101876  
LOC100128292 130.378441113977 138.033668840392 128.578494940165  
137.765042156434 158.353171576491 133.218742606195 121.164978896057  
142.700311964178 129.732352495012 136.811620595243 139.170794914815  
140.556631658219



LOC100128295 127.284885819903 136.524640445539 129.336402686549  
125.806943645484 135.762603711262 148.656917603142 132.828179725129  
140.533704857854 129.343440464729 150.772752327567 129.976540483758  
145.07503221134  
LOC100128300 149.31422191209 159.549936351002 178.035700298977  
154.854538639035 156.883255634126 169.168869363848 160.892163220381  
160.186527465164 158.113794378426 154.586825710624 163.538862303362  
149.788558681761  
LOC100128302 139.408234219133 140.667415746111 139.010652831798  
136.398521726896 131.739418639854 144.454141873387 135.790955294639  
132.490323093932 138.572054821151 132.478801067837 135.957972463728  
128.411138850655  
LOC100128304 125.402714360058 126.151017944639 134.238642042323  
129.715948793051 138.514356748249 147.362120584524 136.589250394236  
180.20999937977 126.391083453973 133.63668145135 155.790759250672  
133.441783287131  
LOC100128309 177.16711492983 162.039394839415 178.584378959369  
184.954673605577 140.227225039467 151.269442319766 141.043668963717  
143.461785113446 136.211694310501 156.351734527745 140.336479395866  
161.548130965486  
LOC100128310 124.269446398587 133.416938451465 113.492900106468  
124.188359398362 131.412979573687 140.790450703097 125.259164818744  
109.482330324734 121.988237521196 123.781002620866 115.821231468312  
129.369968549738  
LOC100128317 124.561511833959 130.396593013401 119.682747854629  
126.680992733621 126.76986764971 122.634741242406 136.805379739087  
130.055416790504 123.482626777491 134.46179453106 145.34533633425  
124.746457912284  
LOC100128319 131.302225305148 133.94206203396 110.286187184448  
136.674553275255 138.739176678465 142.376921410427 128.521380879209  
127.844624093148 127.456181182121 130.532559074698 120.37619371663  
125.674471551099  
LOC100128322 155.463400179872 149.742140955184 163.970187373891  
142.053649707364 162.168246402027 157.739526559807 155.648782851696  
153.244758030666 140.028169667777 136.607783800741 124.39748786803  
150.756776447358  
LOC100128326 180.327051100611 178.531913384538 197.12840030662  
184.306452616482 234.925852373127 216.522992914538 320.525885538523  
239.363511706064 256.873090834376 284.534369213195 218.644953001365  
275.072079692264  
LOC100128327 129.315412536491 130.886967265639 136.059884933876  
122.84603217721 134.319316977485 123.809866652834 129.756642179083  
120.514672572565 123.635470154191 120.238706364491 118.807135693934  
127.772258845875  
LOC100128328 155.513572243604 154.094285855743 160.319687451789  
170.452989060697 165.118167086792 145.190896872008 153.360382235409  
146.755803731358 145.962664629275 171.006582229921 155.355051932357  
132.639070127232  
LOC100128332 122.347696497767 125.637138636558 116.082361389405  
125.277002586952 129.801969586384 121.957155610892 129.79093244374  
124.798549069922 121.945541820091 131.709341771599 104.861024325857  
128.916142340807  
LOC100128334 133.266524623338 127.79057041268 134.449083873514  
136.184427467391 137.765042156434 136.413745926388 125.484453841158

133.070896773384 144.767233774942 135.781190598068 136.029898048127  
131.479997342133  
LOC100128336 145.82344959902 142.095289977576 153.871893011106  
144.774621469452 141.73799456072 159.26101905957 146.306467130749  
153.653453808799 141.404832197192 146.905667796876 151.05681004513  
153.744962185987  
LOC100128337 486.778046640624 473.60579090007 538.484170364629  
439.122658719747 219.103510284905 252.697160031025 266.19823384117  
263.321559283966 253.42022722564 378.967410725775 375.856200488667  
219.080383154432  
LOC100128340 146.979988781462 142.945392802281 142.906227759701  
156.534634574244 132.978746105877 136.396579126676 132.674061422332  
136.524640445539 136.03581843125 142.621019060798 149.860490620507  
140.304810288752  
LOC100128346 152.155760355248 131.583841535781 138.558300898079  
135.137615432923 134.541606996118 131.440195723963 149.682150633146  
132.047328970556 141.423474583567 113.064645688715 133.670967970136  
133.014551645069  
LOC100128353 966.731520471976 877.255923473532 1285.02292965374  
868.86246684338 1051.45401327176 1410.58825009446 1695.26858186096  
1243.11900823259 1497.32522786098 1379.26881813339 1029.09818399518  
2263.73444150082  
LOC100128354 139.734784859495 119.161972571516 130.726640485925  
125.426018910517 115.142111396055 134.626371781978 131.086904662241  
148.104173238606 136.569250038372 149.280480796544 139.933655092561  
136.167141767484  
LOC100128356 150.642465826166 173.513108409372 149.41357273704  
146.462544135666 142.560797028716 147.345558455805 147.706402141169  
130.304743083321 145.123845983625 160.014635964846 138.28374062778  
155.694213876736  
LOC100128361 136.144068118165 126.106777865128 138.870636101334  
129.063617408979 134.218867540274 133.801549026691 132.994716261577  
144.203716525289 128.713131994442 141.092486112278 135.9097041056  
134.572552391307  
LOC100128364 137.504147221623 126.139188586523 124.597605631582  
127.961153369579 141.492458250787 129.656088836537 134.891736344801  
125.444541266623 133.148442269517 137.603046125938 148.611352905643  
134.078506829054  
LOC100128366 139.657182434153 134.555873832434 137.170666175895  
146.359038260378 129.267923706188 128.099484678519 131.218141814078  
131.87404363664 126.37749112514 146.381147992719 149.157934946623  
130.616175018332  
LOC100128370 143.587562550004 154.360558958914 150.419668144913  
142.119327380686 140.812334019209 151.836705989155 143.271346378958  
139.204218271711 143.197131668608 141.630183595813 175.882911801581  
150.566842106244  
LOC100128371 127.291712212051 131.218141814078 135.474070994652  
137.976533193418 126.793778645808 139.311816781874 125.250900940748  
121.455843337023 121.709375771276 140.214475962177 127.520134825082  
131.981505236332  
LOC100128372 126.995207465164 133.7012683837 125.04156726504  
123.58053320223 125.077260389449 133.11040099808 136.087702679172  
137.159781458748 140.796641921516 134.041098536814 121.497645719165  
142.483308497682

LOC100128374 128.306607216705 154.64077390011 136.970505971671  
140.42579083092 136.539130156863 141.842919268688 142.922549076496  
138.032265227728 140.711699577809 130.473842500245 144.175551691291  
137.636900130922  
LOC100128382 125.099672022917 128.221548195595 124.306049555272  
130.342425029134 120.160652344221 135.697550878438 128.513011425662  
123.391298926957 130.138945493943 133.419239158866 128.473834314632  
136.897888440409  
LOC100128386 127.954231630338 128.671626815639 138.618761382177  
144.375109087466 129.362793087439 136.735930829008 145.210787864362  
136.27621600731 127.233439204926 141.239354296152 130.528198937596  
124.411213807179  
LOC100128389 145.96012463103 133.980792743661 139.117053855066  
132.5130209643 123.96665768708 147.716353308549 163.821142892643  
132.504264154139 155.60532199001 169.984859264412 141.370957100324  
161.397788731595  
LOC100128392 163.915489303508 180.3779211444 176.704617691988  
173.109461200603 167.547551072373 170.08485436731 175.101284960252  
162.885054245809 178.835679834487 169.695658738618 156.682781772069  
164.955263076598  
LOC100128398 159.124592503759 157.108043150259 176.364184489318  
166.447510782568 174.012972901793 157.016659994185 189.758013811338  
156.84104238878 166.780319723055 164.905467905433 156.926617030752  
151.327544435847  
LOC100128403 140.49969612403 115.816156193574 112.126521532091  
125.141185839817 122.165046954625 118.770061426689 118.727279917776  
109.29279076901 128.899712906082 123.624133715653 126.222105816959  
130.390722272955  
LOC100128404 127.433203229267 135.668768914964 125.088717405087  
136.87712607887 137.835936352525 135.353539458856 128.356453959987  
137.038866196785 123.010614051218 139.328340242696 128.630613404354  
130.240366272285  
LOC100128405 142.248293068033 152.868787961804 137.514952067562  
132.570225520163 141.359142214228 151.387150218354 152.78638215326  
140.435724944447 136.884799902348 152.61583482402 134.619470709414  
140.714455864886  
LOC100128406 131.004145546364 126.708817316134 121.087514445827  
125.727521491768 157.443127950708 138.688881393504 131.72852748835  
135.105147647223 127.890438577754 131.056011738962 123.424145707079  
134.576622528874  
LOC100128410 2120.14463347544 1881.90353127141 2970.34597432588  
1210.40302822121 1233.27155759407 1783.8031212092 2895.71836177599  
1992.71224011906 1767.70023790753 3850.41246770812 2462.87034563426  
3258.07532987071  
LOC100128416 137.639342727211 139.834535091869 138.712529531951  
127.320624058583 132.089375920534 138.945855414918 119.486895914055  
124.077104101209 139.897320032723 123.357205547181 126.939543057414  
121.599883734552  
LOC100128419 137.96452133771 132.233396667074 140.073208365817  
171.338371572269 150.109192774079 131.051711775229 122.860898886143  
121.434713764246 130.207485841284 128.052753068991 116.07902130325  
144.295556086504  
LOC100128423 176.486551181451 158.347972566681 156.66832364923  
148.067562465748 150.160004473338 161.886342770305 180.478294414245

184.426874913406 165.545136704242 150.417169156755 231.287362732197  
193.261343922604  
LOC100128425 158.946177055546 159.368376366657 153.694557276814  
147.389892239448 169.45559708224 142.133238886052 168.847039069786  
156.581569063195 159.331110936668 171.444558905575 173.364586678954  
152.221694141976  
LOC100128430 127.779401352802 151.178586065066 137.062807038518  
119.903068083658 146.016920431468 128.931946787934 130.529367177452  
137.091932621041 129.971670681199 127.03153185998 135.883119645931  
139.078162119733  
LOC100128432 127.483420376792 134.202497785854 123.601413134287  
126.897804011992 148.943735606315 131.599370671279 124.045745662173  
125.768053724055 123.094324479352 121.021776527531 140.762415240824  
135.448170440824  
LOC100128435 142.367003292264 141.755954088275 148.753891406126  
130.249430984172 133.559082256772 144.836902182737 136.769073515537  
126.121516564343 130.156775178934 141.73799456072 145.291984088491  
133.862203806529  
LOC100128440 158.098055917452 143.686906051698 142.971972776388  
145.967685593635 163.846242743377 133.43362126395 140.21669598521  
147.335403843539 145.374923175872 145.338156577438 165.39758732  
164.227134687088  
LOC100128454 139.671302796695 136.81406168343 136.623658204558  
132.839431368337 136.241569739318 146.188193301627 132.033116673897  
135.99579763634 144.688515462537 153.592819860747 127.31283918221  
156.75308999904  
LOC100128460 417.865461351681 446.194196064909 320.360917595936  
459.973764138144 256.648540685098 345.38424761963 290.954496559897  
355.879841671975 270.462865174106 229.97640195632 349.99912485533  
294.48534582475  
LOC100128461 126.956303896995 134.397255719047 141.344034069373  
139.241145027974 133.45690661612 137.423810400996 112.357261386644  
155.490897312915 141.450800126786 126.529763042574 142.195764444916  
123.474836673474  
LOC100128469 131.271979461703 139.336891718408 143.426053070219  
135.2979041294 148.908758741034 134.457932303561 138.818492907643  
149.250205265163 138.959040014432 137.047288508371 152.426527124644  
136.207420489201  
LOC100128474 141.739299634007 126.905235161069 141.135840314665  
126.503135702506 141.28700484445 131.294930860752 148.973277994329  
133.201157825808 125.870730238298 137.04010227318 126.364445020215  
154.16370087233  
LOC100128476 158.975786937923 134.885883559391 118.235640920527  
119.603565559838 149.730467498266 129.930888107958 124.090268443064  
127.277128410056 152.853860043701 150.241585041178 156.213421099137  
132.719730606922  
LOC100128477 148.668081483434 156.654450436728 134.776714949136  
146.919110530891 151.456702092528 155.801832826848 167.612577768782  
162.364266549463 145.254692995502 148.126745515891 147.849116400978  
154.528396813382  
LOC100128485 148.605816748229 145.385816618728 148.807422049327  
153.93927752488 130.729989463558 152.702847643082 139.289968250444  
145.654559623732 145.352802493486 137.128849888863 141.200676699805  
155.8871985642

LOC100128494 125.331215990597 125.271261151078 139.409685553177  
148.991357883449 133.389232348615 130.773945967285 122.817695619508  
134.216088147701 123.347836436966 131.608580511282 122.093290585838  
131.202090507576  
LOC100128496 116.305011582033 120.428171428188 127.166821363722  
133.550008967009 133.077760160486 135.798387504219 132.69067627743  
128.244549276386 121.821868944354 112.036753245281 116.514299377365  
116.20008794813  
LOC100128498 151.073257114127 153.738794649373 181.340312140534  
162.71020036416 165.919497521143 152.340010735322 164.99860393383  
176.049946762504 160.766121558583 147.001408450583 160.272632590118  
166.135707525987  
LOC100128505 27667.4034204988 27284.7333124039 26010.7684336005  
28344.4547971342 9323.53099359448 28193.3833726673 16818.1954169657  
25295.5071561111 24098.0251582624 15297.9020958577 23427.4695172122  
21110.9013462062  
LOC100128506 137.103879676652 111.484426481816 138.818492907643  
114.498610080481 121.636361281148 135.330241638301 125.685852196342  
119.934231033302 126.241307445165 128.492142236807 148.751755543817  
119.643417329571  
LOC100128507 166.311421907434 156.265168005937 152.752870674108  
148.42845062376 159.349719495214 149.619141707962 158.400572147671  
165.181215117323 155.926739769177 166.20327698517 152.78638215326  
133.829889099442  
LOC100128510 1663.71411325131 1853.20812924694 1466.08446530283  
1590.87426068638 313.025250337353 1475.41920838384 717.270096456387  
1409.42016970226 969.360864006371 815.388288623756 1377.75266942574  
867.369315017411  
LOC100128511 123.662678397678 116.268259618103 130.104021521854  
127.697902314999 124.975454733084 136.762273376313 132.752401872376  
143.791908191551 131.410793139723 130.124601660028 119.031594964239  
132.82284281106  
LOC100128516 145.017264740722 139.737748157901 141.42859050659  
144.856801451884 139.234549949916 142.732625557628 130.570050159191  
153.731233276485 149.35848619832 162.453586139402 171.042491047256  
155.660302399877  
LOC100128519 142.601556980614 124.597605631582 147.52178512946  
136.294479720968 138.395943168158 126.834926242799 126.708817316134  
143.707084981291 135.834000569736 127.116637906391 129.939510383312  
123.857527555048  
LOC100128525 209.196695368783 191.405362404386 202.545147073902  
207.417884407459 225.005311517365 195.84531580224 223.941946219233  
200.045606111354 176.088449983147 181.668090319293 241.987100712218  
225.189991540262  
LOC100128526 139.493025452991 131.256325361974 142.230934617475  
146.443892388756 141.067419336609 141.890803125137 128.835216648178  
141.741892403029 139.558611792069 152.362546746522 148.686975104375  
147.60284257326  
LOC100128528 152.166586496729 160.553214127047 144.713108022551  
138.023752854109 146.090291252325 147.891442774921 142.208987267497  
139.527577649638 144.671459266861 151.655854407186 165.476670465739  
157.11867820027  
LOC100128533 147.079157199448 152.902458879101 140.13515064896  
160.078122267577 159.606633817645 156.986053534635 156.650388509656

167.243544185778 156.324643994552 152.217243924816 159.476343366991  
173.640326140494  
LOC100128537 126.139188586523 129.862530097906 123.522738813733  
123.491930765117 147.590189238316 142.259196792767 136.450062043587  
114.77964341895 114.613368640356 124.051695010353 121.636361281148  
128.189685312596  
LOC100128542 132.683594640696 136.3615279557 117.815045605383  
128.304919825754 115.664551127497 133.113581756557 133.7012683837  
139.027836356854 129.272835188209 135.168792286819 124.469415593643  
124.627339426244  
LOC100128547 125.104229604098 135.539516564142 139.6492947529  
144.377501600001 132.002835547397 136.743659350798 132.595360509902  
131.237720549768 137.687480242109 132.161764435769 131.302225305148  
137.370670726978  
LOC100128548 146.875733210901 153.752502094283 152.768580075051  
141.642547489983 141.297629157305 132.428675012593 164.824914851636  
137.612446150193 145.915129713165 141.515788643986 144.173163762502  
154.954906872501  
LOC100128554 145.466538006138 132.557945249016 135.526248253492  
132.071893054425 120.085340927108 132.151765465534 138.684070773064  
127.422129210789 139.886499402506 134.029984991385 136.990610254852  
137.528342105233  
LOC100128556 122.928863588006 114.545476919992 127.179420421981  
139.948097704949 139.97127025207 133.419239158866 134.495938988321  
139.597493526257 139.378915474473 134.753783025994 140.964208731587  
144.840218312168  
LOC100128559 140.204023682096 140.016122996485 133.647637744785  
123.077592992679 139.560555361919 134.314636524922 146.402352419692  
140.906421938377 137.082234284426 138.188522429661 135.738699497293  
129.596851280135  
LOC100128562 152.232245164212 147.059096208832 138.076501233454  
159.58125728432 139.071908528327 140.865990571023 158.36796888959  
156.389361240637 135.379284233708 145.791950392049 117.296972688814  
143.204058393718  
LOC100128564 131.608580511282 121.429270259367 142.874797429568  
144.518132543976 125.165254272421 128.195916531413 128.888149939072  
131.730758460802 139.061072394426 130.253372129786 121.181654892305  
132.5377752987  
LOC100128572 111.161283080299 126.134393447943 126.972399784537  
126.396385337235 130.860938463815 128.556280049403 128.485150698799  
111.708970469189 128.99859423584 118.712730897987 107.303126530947  
118.558673085303  
LOC100128573 143.53550972177 115.107214937219 136.131453703981  
133.792673129743 135.08927101395 126.343040504566 136.390047634643  
166.46473789699 144.551233687082 140.154925193842 109.30275288389  
163.125317704446  
LOC100128574 143.073060222403 130.532559074698 144.958176005711  
149.827791077797 137.874370839801 133.839554874862 152.411545237204  
141.657914155491 146.070871543153 134.13812854554 140.89666990854  
132.015048158775  
LOC100128576 137.020473156363 131.162118170837 148.18197556044  
133.36168342199 129.069366041625 130.754320787628 134.842877075983  
130.062015525637 139.204218271711 129.491732597331 127.512733134453  
119.780654293448

LOC100128578 139.238936770274 137.728970630961 142.476530302265  
137.415158613413 130.811331124804 131.532660547328 133.453702113571  
139.690093593646 130.988294699995 134.658664100744 142.903851392611  
150.606329295069  
LOC100128585 157.838771553729 143.694412162756 148.443549012341  
135.886859004208 157.524049610272 157.162523271165 149.944351491364  
152.109178223495 152.27638422735 166.355086055404 158.946177055546  
185.374745525698  
LOC100128588 127.080149144234 115.392989580183 127.908872828095  
128.014092519305 123.660836177932 135.753430034183 139.619076126267  
119.422996538444 125.331215990597 120.574820369421 127.051075205085  
111.639177843969  
LOC100128591 190.174729017089 176.267796612066 152.528571776589  
158.312614511836 125.976052547953 183.226294747874 167.416417895159  
161.564505054217 154.716750150891 141.275667354541 150.138643811727  
150.971453664961  
LOC100128597 145.051794777243 127.690860707933 127.753065449769  
140.063142443074 147.552635527742 147.79341726211 134.575671434471  
140.624437508178 148.358847576281 134.629996026323 124.69169730955  
141.152406037213  
LOC100128598 145.633647856775 154.999192460283 148.027464692171  
157.969559105622 158.411846122784 144.727773039491 151.55925331302  
141.834582245454 143.917152377544 145.957934576055 148.076841184769  
156.707737817443  
LOC100128601 139.636177212128 139.246945739764 144.579725208643  
133.211362932569 141.717466442384 147.029988235786 137.118488157416  
142.403121638265 129.665507668047 125.870730238298 139.061072394426  
143.342736976496  
LOC100128610 130.052593375075 124.238319768621 134.688504981603  
132.268445799639 134.185202200317 120.80221197797 130.735223763219  
120.041623078295 134.066948803697 136.823008283157 134.447878635716  
137.225659453984  
LOC100128613 123.11447940203 149.040720727554 147.001408450583  
143.697931551096 143.290642777702 131.989955864584 136.799138736925  
129.86336717605 134.731687541347 129.320210774045 134.968848574511  
132.344296085487  
LOC100128615 128.635684412304 127.374600506681 125.111993560078  
133.125084506877 136.248506185974 130.235407859542 141.123272165499  
125.429085234515 131.649830934459 135.226240774124 141.225533609907  
133.915830295107  
LOC100128619 110.602406076036 100.477911152746 120.871693555514  
114.995889945366 114.021546689428 120.035437167539 131.643633737316  
123.406144497577 121.559477523123 128.195916531413 124.705614182596  
113.143436184959  
LOC100128626 153.258616843783 163.672213020803 162.447903830131  
162.678619800767 144.895601314903 150.029313080668 159.466972602203  
158.452089329714 154.831307586538 157.349727430526 144.355348009294  
160.98571841915  
LOC100128627 140.997594159186 140.089210795507 171.982071800592  
149.502132524093 186.854553034865 177.055023182887 221.45275440794  
178.52221226882 177.619101765848 152.191393042132 184.974347306539  
184.638141004171  
LOC100128640 133.944538335319 136.569250038372 141.073316497949  
136.316003989725 134.469653093466 148.89180107448 148.255769084026

145.733828447934 140.177708471199 135.639558187703 155.710272937386  
142.804411455413  
LOC100128641 129.813090345837 111.743461522689 147.657151780506  
124.96926662367 114.308806726044 125.139029579691 128.471437314295  
116.214857935694 128.685065364693 140.713537140957 136.178501890585  
128.36533737469  
LOC100128647 135.383585408897 141.746032519746 137.603046125938  
158.025633316671 144.411176964424 142.255657518926 128.451788292588  
130.872296869843 129.417232210341 128.936628289974 139.172437503442  
122.268560536152  
LOC100128648 132.819726980184 135.43119649883 130.892302357045  
133.651203764842 131.169769031768 127.637319802339 139.076978731572  
131.809235171629 132.793020446043 132.04032925495 136.485034823945  
137.185243517766  
LOC100128653 142.071492722749 150.580133889656 143.568691825659  
139.437073790935 148.112717810117 147.057116881846 148.605816748229  
139.15175079191 134.201392031199 148.1283706199 151.518116154483  
133.576812299149  
LOC100128655 140.85139374336 124.595925483149 140.684066288019  
128.623302491798 132.649409216699 128.51523581959 130.163574198827  
127.84589484404 118.483269832828 133.249792744053 130.856249657101  
146.571351915492  
LOC100128657 141.767311448808 136.020600085547 138.017249996128  
137.509100088226 142.93332947113 154.771737131348 132.027674083561  
135.164117176127 129.485710719291 138.902097203056 137.402567669086  
133.857996630836  
LOC100128666 131.151578665754 134.880138942756 141.78867917709  
145.020615552964 131.268454024753 126.00304757051 141.269923271838  
133.631676386591 133.455138380277 148.866229889479 144.86583288717  
138.83304645915  
LOC100128667 141.476041451832 140.798706399757 142.313725116274  
151.267897610115 156.611727364072 134.966883985611 140.571143847885  
145.060085149395 142.476530302265 137.627338682823 134.606126134531  
141.026045918091  
LOC100128672 158.092775850886 157.713227527385 149.076146942797  
149.597396040729 141.763072120718 141.139737175648 159.7197697044  
134.226711030456 166.627372924295 136.91078498126 158.665476708054  
153.43000129811  
LOC100128675 137.369033684705 130.987023228883 135.760578586004  
143.212739422069 131.543439103033 138.114344944865 130.29531841096  
136.683683776616 132.84268776659 129.434594784981 144.871396308673  
140.474338177948  
LOC100128682 143.388028226208 136.348252715447 131.674409480919  
138.934516083124 132.171282327983 132.407736899761 137.662135592983  
141.321547895734 136.501159644992 136.585541662028 152.60462513339  
125.94880312094  
LOC100128683 129.7137422914 135.349868925415 147.44463861207  
141.239354296152 143.857385585662 136.504438803108 130.425809387444  
128.445065383646 135.031430487047 142.973444931373 151.76341973891  
136.176688025337  
LOC100128688 118.04359489354 111.788481822686 132.369872013432  
127.816596414779 121.103620738719 129.89329138222 151.126252768792  
133.069347559741 128.893208935783 132.955473649746 154.201375471487  
137.565050253948



LOC100128689 166.285052506316 174.483233557264 202.622747952763  
152.890239929335 214.261611197599 306.838596239511 320.707687986324  
339.379250332987 290.326832430372 304.013547190343 268.724338967108  
374.9555524303

LOC100128691 160.73807125195 142.609678462615 158.946177055546  
137.451687756052 154.869171648942 149.042693712098 140.689631427359  
148.499207368959 137.681280789305 163.275138097131 152.122141650397  
145.802944788548

LOC100128693 129.058085094891 133.773427881651 137.210805338701  
132.469190523971 130.124601660028 127.67121559907 121.311836944721  
130.590195477461 129.564482772168 121.065278765151 112.10312035128  
132.620474788855

LOC100128695 141.811563725942 137.652358744527 134.13812854554  
140.283106734666 149.180704382192 140.911080286243 152.309460630038  
141.597692730835 140.982448755734 144.585120811896 153.996429870564  
140.405405916188

LOC100128701 127.404415477384 130.416957431512 127.261349543394  
132.192775993078 147.725396196054 117.30724482798 145.267225993057  
137.835936352525 127.545397354821 116.155949676272 142.928920246687  
130.444766583917

LOC100128714 139.799467834109 123.847186739627 125.287738115754  
113.955459033122 139.537865511933 127.080149144234 143.436675541053  
133.874468336025 130.653971083035 161.803438841859 156.768976123975  
133.181855719499

LOC100128717 127.401551376191 134.830021570666 124.441699369614  
131.092140169861 140.368070973566 133.167635227902 122.038534506506  
125.154784284706 132.37450516592 132.793020446043 126.381288663037  
122.431337063053

LOC100128728 138.43301474649 148.616543842015 125.110064579814  
143.108765786014 127.058373069911 138.818492907643 137.848546040474  
138.35538364303 141.5068665919 134.776714949136 157.070500065037  
130.224324464992

LOC100128729 178.394895649664 171.121834829333 173.879952136931  
161.965270932582 161.441613587571 171.487594589922 182.009471368798  
179.241385747152 162.861320877227 160.486513643798 174.92026613834  
201.616302398819

LOC100128731 3784.59114921916 3463.23822434026 3592.7878705048  
4190.38366101529 4016.35381420598 3994.64569045702 6138.10904830456  
5265.74259211695 4318.50925204407 4536.46344538492 3744.5666678861  
5748.57645553386

LOC100128737 139.432567336814 132.210100574787 142.514794686932  
120.538535752185 147.728018766726 141.727639388452 157.57914268719  
146.442734810495 146.880440100898 139.714198638713 133.018406625714  
149.035590153457

LOC100128744 135.022438246099 132.109267393571 127.453866279181  
129.294026995663 140.74035966401 145.368059425439 114.405811161631  
149.774162138829 142.266177608209 141.863234980537 125.768053724055  
162.774716879847

LOC100128746 124.989313193779 124.638075441482 127.811923445503  
130.947003916049 126.211525910631 125.04327844782 132.858424396011  
128.510903178542 125.789509802098 127.392877191785 120.160652344221  
123.067278658698

LOC100128747 146.293735120772 143.385915173392 139.871928127715  
135.779516940893 148.00952002903 148.564655847496 153.734347607222

167.278879415171 163.788418732315 149.110300099889 138.588751758469  
154.71904132098  
LOC100128750 140.443415669628 132.014213378179 129.875986080057  
132.282125790062 126.819413901915 141.36525744062 131.999299893526  
127.620377473963 128.224742304889 132.47775411384 133.14988092185  
136.065134838221  
LOC100128757 149.921414617149 153.534763364558 131.755881982599  
141.455841055881 152.254519859308 138.594435323838 159.317429821638  
136.598215718877 137.719257499747 149.962143642332 139.513752499004  
160.429643729685  
LOC100128760 134.08270035062 147.16778072296 147.309245779031  
136.556183079815 159.346890686719 146.669620721254 138.467624450885  
146.580787463084 149.05280915667 136.685430908977 145.498372398845  
145.718019736542  
LOC100128761 154.354658146438 158.104336050835 153.916313595581  
147.556482119673 138.328508662816 150.952264779196 141.925012927873  
138.838795320713 143.978912435831 136.897888440409 156.402578892869  
144.152325539824  
LOC100128765 135.65700435306 130.325073627151 125.517076778344  
131.785745489382 126.992697289075 141.542251179523 132.184217000689  
130.449669345302 139.685629122498 129.449242018727 124.267394371656  
135.082715974111  
LOC100128770 139.557059245431 142.201672822989 145.324499089416  
128.274326990056 136.353051841792 153.690189121681 137.728163622673  
132.6175371563 131.255028381669 131.636779618185 137.71280215369  
139.693261291326  
LOC100128771 263.994460303088 290.420307322101 291.616195651001  
248.613373429151 246.152798696993 195.160353691349 382.806570442504  
257.168308311848 235.48876511325 385.678901612324 318.297819854586  
303.762967437478  
LOC100128775 313.248029961291 300.886032768166 258.998065427002  
293.873921048642 275.072079692264 235.530986541549 295.367125961621  
301.908667220208 240.591548171052 359.024299091145 336.002793042439  
926.283018664897  
LOC100128781 143.937726155116 138.562576783507 137.804977813144  
144.098578955023 136.319655432311 151.282370273189 152.466470613591  
141.73799456072 175.757588503244 149.31184788671 159.918778562802  
152.030182228463  
LOC100128783 126.298187538812 117.965208293925 123.341568893224  
130.541449457342 144.450810504499 129.751916520201 134.457932303561  
134.867806860993 125.157459724842 141.426756696799 116.784024112826  
111.232274546928  
LOC100128788 127.532665057083 137.17370871536 132.504264154139  
122.90702157852 146.95272087759 149.815494316469 120.724926760252  
138.850077456103 137.874370839801 133.544149685358 137.572574328004  
144.883597913037  
LOC100128805 293.746733527346 302.945860276233 322.506898833351  
296.375305136807 204.914390718161 238.588762326319 257.880331012233  
227.144441241869 230.672056810885 211.809434609469 295.153786338687  
295.507504000509  
LOC100128809 113.905364405553 114.072600760808 131.483427112288  
121.018722403628 143.007237184254 132.263954832097 134.125038192486  
121.805145639822 118.483269832828 140.378255168229 124.588594750916  
114.533677697026

LOC100128811 128.339161042799 137.650917262528 141.141047405344  
138.89354244296 141.797497681512 133.922855125616 144.81077501446  
133.07218865002 141.056924917269 132.948096807634 133.15144076432  
136.173596381385  
LOC100128813 143.913625824599 148.245974323625 151.923356524322  
142.288110423886 144.678895821726 133.507865919719 139.757191608836  
152.049243916141 146.537204621419 137.517461260687 147.310807346272  
139.311816781874  
LOC100128816 147.064543281269 130.746465595759 131.556892859203  
139.927773713324 142.865320802784 146.050714008913 148.618327213374  
151.783090997855 147.885769870843 130.235407859542 150.193479279784  
141.616920429839  
LOC100128819 119.583378101838 118.070716076005 133.063422581428  
121.48867035121 121.423030266904 123.654787271088 124.05019986924  
128.300838927918 125.777193592751 125.496553386629 140.743917481548  
134.182902752156  
LOC100128822 134.737901773547 142.495333453346 134.623264303227  
149.959767051801 133.660514488153 156.895079878556 145.449099891256  
148.314248474411 148.903792383578 140.251168248117 149.919344933814  
139.429008129291  
LOC100128823 134.376870769669 139.654648891206 138.474429223902  
151.60113116166 126.205931638442 145.112399373761 125.729079191033  
137.15288362126 136.101501973431 144.364319564075 150.717996520257  
154.512619892977  
LOC100128825 147.77916610545 146.813353189258 137.95243466771  
148.717545103261 177.055023182887 137.936605651724 152.587331888423  
151.334463063946 144.727773039491 140.508390945342 130.116771999391  
140.439698763808  
LOC100128836 199.353823724989 177.257355909681 226.086733606951  
161.8627732644 187.336349390012 187.035957486928 225.438177833064  
233.757965816721 190.993590849624 219.996410908721 404.618867159141  
212.460476372263  
LOC100128838 135.663734178125 121.360822445187 137.976533193418  
128.582520754296 118.414329128347 130.59670974887 131.430921437192  
130.394687030464 114.520066232155 118.553226856337 136.55090238808  
125.058165131184  
LOC100128841 140.92066676704 137.476047500852 141.960809148036  
128.102787239877 132.016944935305 135.242328667085 144.889019483712  
129.896711442418 126.865622462379 133.953303801604 117.986939058467  
139.027836356854  
LOC100128842 144.520435611318 148.610537244399 146.98903251354  
150.096558906597 132.014213378179 143.1288704752 136.042982529628  
144.340734361996 142.284050423299 144.071652839025 146.326067008478  
149.606576415873  
LOC100128843 139.108656684059 139.628966306048 135.108420614547  
125.231476412101 123.132178371802 133.599098708818 129.527271401014  
125.649525720177 124.844481048039 125.091038614268 128.570067783535  
129.015422924366  
LOC100128853 142.625414022199 154.088770236213 144.139062513587  
141.259186690966 136.282608531191 148.171225002967 129.203236898198  
140.925705285169 141.425393615228 135.252082574955 150.576660798865  
133.762141373091  
LOC100128857 132.240470270795 143.13304460184 142.00857631537  
132.535722328813 146.524138043215 180.250420976613 146.190750749851

161.581641777014 145.730054487572 147.872625576731 155.810034593382  
147.556482119673  
LOC100128859 121.543207264598 135.358837968905 132.70888569469  
129.410816809488 119.810421687953 125.00254973945 133.642815510945  
117.017844025726 130.784802403934 132.573953444192 109.680532131035  
121.159593382017  
LOC100128862 112.309528593741 119.475462713424 121.810767302322  
129.450937831864 120.07034081564 124.393008692801 128.879953205511  
126.895669261503 128.451788292588 127.166821363722 115.608857734241  
120.675356009213  
LOC100128867 130.877306095063 110.875112640101 108.62191665589  
130.101422420432 114.364953312191 127.434873844923 119.669441891401  
108.530158480237 135.218648235324 118.572988141773 134.565199667396  
122.053867525393  
LOC100128869 140.747967724586 126.960777504772 136.832494876249  
122.258432948151 122.959518532165 122.031894952046 128.967855397644  
133.331037738063 126.178476831007 131.706721548422 137.358139652612  
124.393008692801  
LOC100128870 136.44218532882 127.646032547296 113.432757764419  
120.957197551997 123.650702461773 138.921608664788 116.533361070234  
126.964621107029 116.258629237662 132.517166202071 127.808579455383  
124.329980024986  
LOC100128881 137.412952822912 135.907702243922 135.252082574955  
138.930413256469 215.98963200839 148.260672564835 140.304810288752  
152.563532872898 147.004172510641 142.093180304661 152.011551837951  
154.496005175117  
LOC100128883 166.622070620588 163.612347715773 177.812335593522  
192.130214856642 169.975329631607 188.308588359317 179.421854100287  
182.109092947203 151.61049450647 147.70836747108 158.73040336393  
180.219813240126  
LOC100128888 275.343591424586 326.570967321756 308.330044958513  
312.177191402945 187.754968096521 214.8478629277 245.240006198482  
192.69687837782 195.20398666139 228.45211887819 226.565823278767  
168.867373925372  
LOC100128889 126.418295908353 131.421663453164 126.917669470999  
151.930565620382 140.244052740397 129.044445373107 135.778099658349  
138.212860360467 126.809252651352 147.640100078933 120.812738312059  
132.784949538167  
LOC100128892 271.064405562085 189.225893411944 318.244342364572  
237.146972312448 131.294930860752 126.952836653857 121.908945872994  
136.704018446388 175.41089164969 143.785769607842 110.050374895171  
130.25146185271  
LOC100128893 182.958991847218 171.80440912191 193.124599671798  
198.004357069446 121.803676441059 118.9803314875 137.151210946281  
138.462826342765 128.777337552038 132.668344126625 129.321346185566  
133.406312157375  
LOC100128895 142.669207969715 135.862790395984 136.582137928022  
151.939710544553 141.917318809044 160.499355902773 140.672863685822  
129.025000034273 160.954017627605 144.107029869771 137.401137659118  
130.266601299194  
LOC100128899 400.98290237416 308.517561840596 531.711823481265  
325.999687273862 149.286184588967 259.374392296079 252.249994170536  
213.097664319741 242.902900881585 300.602422224047 224.167511918105  
222.415704486709

LOC100128901 131.267177634269 134.302726684539 135.472135601859  
142.694748293332 138.868641301709 130.877306095063 134.848210768603  
134.8745127454 135.073449743301 126.134393447943 137.778033050658  
136.674553275255  
LOC100128904 131.459400187744 135.279197125157 142.215285988753  
133.52271411034 136.231747456996 130.020743385543 136.534812980964  
133.254663058352 128.329985147034 132.674061422332 138.123754096875  
125.321968563987  
LOC100128905 128.952986088886 142.916274989816 140.418010366997  
135.37120759813 135.550882872661 142.995274641765 138.19108838324  
135.97263035403 134.55255098289 139.640918572569 142.000874773182  
141.478253058549  
LOC100128907 132.20764558027 121.113186311514 131.527148910356  
131.956481591804 136.584199831088 129.564482772168 133.544149685358  
131.84454376953 131.674409480919 139.119638136874 128.988736837863  
141.244589488591  
LOC100128908 159.040409182674 156.010027635627 154.398416018484  
150.301540078433 144.040342300793 141.873307688149 139.72868421672  
150.508851767517 143.78994470501 144.942289590793 142.005703694973  
143.891725249061  
LOC100128909 143.558088035758 155.98413216883 157.572446865749  
152.758653228708 145.728370703165 154.449058407217 165.992542962911  
147.368455727098 140.405405916188 141.056924917269 128.944295118239  
150.354401669138  
LOC100128913 126.832182961671 131.285279061742 123.173506315166  
127.018746030517 115.520278378747 120.577995272053 136.097571072206  
125.75980494927 143.870849001074 124.405905157157 125.956785216996  
122.992700222262  
LOC100128916 151.411708598688 161.813099560175 161.8627732644  
170.522853717911 173.87113073582 162.695319777455 134.442947822188  
147.459385142695 154.433679792749 165.947514372877 158.263657373911  
162.975988989106  
LOC100128918 186.640167849568 188.695527267631 153.687536747147  
141.457040042276 356.154842959851 291.056913909578 233.757965816721  
241.890850719625 250.003965480779 450.566031840493 316.165926273381  
270.33685210971  
LOC100128922 125.377377116057 116.20008794813 118.104763610751  
116.403106568357 123.892441783641 121.400652285172 133.444865587023  
117.103439577957 117.331280455759 127.434873844923 122.258432948151  
133.296200563657  
LOC100128934 126.724973604103 121.942777234608 133.414198431469  
121.455843337023 122.379537202709 135.225099128546 141.518491890811  
128.163613794257 119.159078990339 129.272835188209 134.42983422342  
126.064311640223  
LOC100128935 130.89594032962 124.090268443064 131.256325361974  
138.909419415137 122.153996665065 124.989313193779 131.87404363664  
132.02259465879 131.792339956719 132.492444216154 137.507093872109  
131.104534164394  
LOC100128936 4441.92485662082 4327.90939653054 5655.12135336698  
3430.76532174701 2871.34694522381 3700.75770419386 6830.46932926077  
4291.1724030909 4055.40322213638 5207.37974585707 10632.4185569238  
6720.10473881011  
LOC100128942 112.949643549398 124.897463208595 130.399501479248  
120.020781939389 119.613985826308 131.519455635415 125.870730238298

120.628904050564 128.314990390649 118.578205738502 111.276543583667  
120.638330368388  
LOC100128943 141.035566928475 134.961156870831 128.978197156274  
141.216869032251 133.913578037255 121.884067622971 134.405155876727  
134.441142158135 133.050798832332 119.663182347566 142.108805047729  
117.667611937195  
LOC100128949 154.737117718424 144.523620416439 145.444483891989  
150.660106369128 135.5668267936 137.449776383224 133.783379558598  
135.063259138429 129.599661790972 130.852932147831 134.545983176488  
148.835389500419  
LOC100128956 139.872976072847 145.957934576055 127.361974492821  
140.236618351922 180.456659320226 158.100395482569 152.504620068655  
150.211719786127 139.338384535905 153.947717667689 184.426874913406  
178.572212478544  
LOC100128960 123.801380911257 130.860938463815 142.432995657729  
133.988494850477 131.709341771599 130.383001462828 138.74117178479  
138.242983316259 142.19728670565 136.312762878974 141.272049404557  
139.898996725236  
LOC100128973 152.737177514149 154.528396813382 137.884051774657  
138.897393621114 147.598602877625 145.180346905484 133.778595695007  
151.382199195953 138.755173333171 146.602252563413 143.969566798989  
133.614973477764  
LOC100128974 211.300733064951 243.191238594142 186.482547532546  
200.633009710701 137.53070284697 170.844002412425 188.53221484746  
184.694741621812 175.93459327917 184.493681387276 216.805365763069  
233.464856303761  
LOC100128975 168.824578400555 178.455966482206 203.777944180067  
158.716575777014 936.560290736127 192.640717683236 1309.01193284992  
498.05778289794 201.167206950576 228.317527475322 443.732580517751  
392.004079531068  
LOC100128977 137.549175595441 134.842877075983 125.889860278265  
144.877789873062 140.194414869595 157.182954894643 150.065275447769  
124.446264376282 135.638156623519 120.089228795888 132.559118679298  
134.027006076154  
LOC100128979 129.16337177104 133.544149685358 130.027227278931  
117.166509072455 129.603952706231 145.485453268383 134.946677624454  
146.606442726047 133.18744841514 142.067988549461 126.259029676691  
127.631770516132  
LOC100128988 116.465213348716 124.676743480622 117.893918180502  
131.056011738962 127.202039384041 118.660213790078 112.420505354139  
121.88070274109 141.094578556895 137.229871801676 120.543881800775  
123.285059856341  
LOC100128989 136.633726784926 116.814269969508 123.285059856341  
123.766373146588 121.821868944354 139.535490288426 119.184780023269  
130.311471059267 115.293844461817 133.722739936347 121.843992693814  
116.276003190171  
LOC100128993 125.231476412101 120.304037458526 128.054394154801  
122.662260070778 109.182623414389 140.958277301476 136.140327952231  
120.076742232995 122.89752183991 126.256716138724 107.976233194926  
132.348603553752  
LOC100128994 147.040759979063 157.130045415943 116.884397420467  
151.243948028303 242.382534384155 136.328447182666 217.24573005272  
167.575968906119 145.229637715814 200.424975825325 212.420616436137  
149.168758815526

LOC100128997 126.588382665802 125.241484840139 118.918962530408  
148.87690497281 126.009358591395 132.623563631011 129.263794008537  
130.697148466042 120.547683754604 125.712260481294 116.023563001039  
133.66893163718  
LOC100128998 128.155080148958 134.147586627141 130.810353054091  
131.825172822888 127.720117789235 130.850419527271 135.857403020659  
126.848211027661 138.279087298069 125.796438432905 129.625046507677  
133.742490937191  
LOC100129000 141.362627556137 139.408234219133 134.47218436552  
147.558603709566 153.726935957906 143.118188813831 135.413840160615  
147.626071601072 145.296229550382 142.180927190578 147.751554743466  
142.311108110185  
LOC100129002 134.128061214081 133.661553334004 141.356127724777  
138.891642304194 140.855078775719 136.80943340993 136.461182044855  
130.34939602913 136.368258257435 134.354215877283 137.248465324584  
139.265915951162  
LOC100129015 127.921209207879 121.886886059038 131.015519445322  
124.183297351614 120.204469421484 145.498372398845 132.975603230163  
135.25612528874 130.867819112143 140.349431258812 124.02280670421  
134.447878635716  
LOC100129021 138.596430973865 146.334446516009 134.998632527009  
139.602168254761 137.109541758085 142.749568012703 121.681261213422  
130.559515534303 131.429247528936 139.502856192876 131.545287070888  
127.368207232723  
LOC100129022 161.965270932582 157.394035451151 157.976810829398  
136.256456726841 169.752525994991 152.213746577124 186.430014478919  
177.780479906048 160.632809953993 157.457468761338 184.398672994943  
176.995049477843  
LOC100129026 131.81975648701 143.827500301207 133.161552914595  
130.632096412204 127.818137805569 130.619624347751 155.014930599769  
135.659271030454 147.606311227037 130.882463936853 135.576975868985  
142.590631181358  
LOC100129027 124.42974326791 125.738320262644 126.759554774012  
138.062345982865 157.688982037448 129.495680232567 126.698158279472  
138.231715814115 127.462293158337 118.708644971927 166.388683552371  
137.838096997956  
LOC100129028 12877.2152068971 12283.9915232122 9044.54885739666  
13423.8921651885 9139.73212514992 4866.98027226798 14181.1182110192  
6281.01687932005 8881.86480594052 10329.1999331936 17009.4268910772  
11918.214537866  
LOC100129030 120.216999784094 115.923424095859 130.40517506216  
126.976353967127 123.463861015933 117.028963434266 129.697584673736  
124.578552584603 128.211076776316 118.355532305846 117.770032157393  
123.364999283696  
LOC100129033 151.477239868429 158.6953558198 136.569250038372  
150.620603731907 148.888698484378 153.136863548105 145.226278521493  
147.043228493047 151.508738608925 161.241165533091 146.750774496317  
151.002218995005  
LOC100129034 474.750156829195 385.463209972694 316.457274749526  
423.740836541835 189.840366340622 143.176699547317 146.777258330572  
171.40549153673 205.852731236069 161.951996906162 152.429970809069  
141.553465481789  
LOC100129035 142.930903395131 126.222105816959 132.518394343751  
132.795064859079 133.675029107803 117.883635746379 133.697364081712

130.807596523171 127.392877191785 125.452973441746 136.859366444351  
113.644993086829  
LOC100129036 129.771073986855 123.61956613951 138.397152876585  
140.997594159186 123.646558103253 127.451155926679 124.443643568527  
124.178483414968 125.14833026167 124.710368327189 140.238423894192  
153.989839987975  
LOC100129038 147.713967317159 137.654833215154 131.097598299707  
130.969085716681 152.362546746522 139.268497466017 140.43729728368  
141.765004355609 155.198503964295 125.661697165943 113.549098821204  
120.456817031716  
LOC100129042 125.828998007608 124.345320343901 116.52455193626  
133.238296113721 125.299513989334 128.074531806621 138.102654893864  
122.568743478314 124.075077123156 129.904942554979 128.019837242559  
134.89031458837  
LOC100129053 134.089308635893 139.469148541078 128.788443476759  
130.467450968785 134.302726684539 138.352562277336 142.590631181358  
142.442450622311 139.545451634208 141.81391138301 143.947729578484  
135.333055517636  
LOC100129054 128.78647242525 138.345393524161 120.174672871542  
125.553615182238 125.885715928839 118.521075843163 123.574319348191  
126.146213417225 128.36533737469 145.858537779106 111.253743009588  
118.348153875356  
LOC100129055 240.253944604431 241.890850719625 191.937607311711  
229.805500520256 160.192540519103 234.789040617681 182.028675726969  
204.078331021637 179.54034642468 182.346834032145 237.473927775823  
214.295260811046  
LOC100129058 124.933738341123 130.788557333561 137.545063966957  
131.105573611743 124.439917584199 143.778327403708 131.256325361974  
126.416290818296 127.663578933727 127.56749476181 129.135985676046  
130.173734963758  
LOC100129060 137.387249555592 136.058527150792 131.22473774325  
131.410793139723 135.144908040903 146.743260100643 127.023543953724  
137.913497715424 135.493053871272 119.693318959661 145.679907578808  
140.464476678448  
LOC100129063 144.258128917228 138.942901099402 147.760782452857  
147.001408450583 154.969503835593 157.891350650633 162.660027294291  
149.63291071048 142.732625557628 149.125425566378 155.873969001251  
164.901810642726  
LOC100129064 149.000760379976 152.163489631563 165.2045030333  
123.877609932461 157.81831741292 156.938149948126 144.199054675488  
141.4587810296 152.680068580858 173.115418167551 148.186698759452  
155.7441762827  
LOC100129066 162.565576110247 154.133723492173 142.973444931373  
142.151209745109 153.807525239478 136.932895013297 142.882928785377  
142.540433565262 134.447878635716 145.553219709768 128.367370419533  
148.707332454527  
LOC100129067 155.715728894101 149.4401812 148.09868976776  
144.904021527125 157.702540365469 126.872912960681 172.544504923991  
172.108795190633 155.362503575715 227.715558644326 194.014764659513  
162.240414467004  
LOC100129070 120.371374172279 141.907307422968 132.404879616886  
128.655549652719 137.853137973756 129.918038866006 124.306049555272  
136.923876486522 129.680406696779 130.947003916049 126.715300671036  
122.651702760414



LOC100129076 154.252727576218 157.922718487881 151.730862403472  
166.061891147234 151.188412354358 149.8035588048 129.920586100555  
139.979025013908 152.585572167313 137.20509387214 167.811412309356  
140.702685210277  
LOC100129077 132.049224908868 128.184708916755 135.274205069488  
125.848597767733 133.229571269367 127.073045558761 119.459625817735  
134.298521475727 133.063422581428 122.469113037809 127.918847837351  
126.643229085068  
LOC100129081 128.398711525305 125.181327386534 128.116795372698  
137.794858639838 126.65748100631 131.349297554112 131.635641515901  
135.954961086609 136.178501890585 129.055874691136 123.357205547181  
127.548070199148  
LOC100129083 133.423376063284 123.722744366103 131.519455635415  
132.261161069329 137.393871430276 129.946925636595 133.268239762624  
125.802001118545 129.059722322306 132.088335186716 139.631165400881  
127.323157914914  
LOC100129085 132.975603230163 131.563719927798 123.524952603672  
130.99288239869 121.984179437382 120.465934391246 130.258933321051  
145.730054487572 143.354858193994 119.711070285785 135.693520183014  
135.508025612102  
LOC100129086 377.024120035829 398.796188440256 669.731546951281  
326.417021307859 1635.35544761095 1876.64079464928 1106.21439150501  
996.999238316991 1515.38811502277 1563.71477584676 1247.91041567746  
2482.27419621925  
LOC100129088 135.641355114263 130.322436253881 131.996032643928  
141.023875058322 133.239703270008 149.331805754859 126.682913361149  
138.114938404796 131.747367613225 136.993102884269 147.211769989922  
142.960875909369  
LOC100129093 168.394330931524 145.549126188292 157.643461899964  
168.942165573542 203.777944180067 166.4983332269 151.917359928516  
160.608674893418 160.906550609416 169.285901212492 182.009471368798  
175.452986514346  
LOC100129094 1405.2134783352 1245.47421607111 1164.22995893381  
1027.48490028905 222.285940575778 597.952909577121 365.82705202869  
482.226889092547 338.326304736048 404.172535442156 550.671679318681  
413.000072500071  
LOC100129095 136.491140756702 130.912137250515 124.786029449452  
125.431735524937 133.43194756868 124.238319768621 126.439948611449  
127.135199316758 129.228874611916 134.27783583528 144.212231875922  
124.847325289068  
LOC100129098 113.632002873855 116.746018509166 107.841100741858  
134.76586363177 137.206961927035 129.065491477375 136.631948656268  
107.67395123577 128.668672935791 136.274199465472 156.032346112587  
149.754842928462  
LOC100129101 145.764704553373 136.638141963514 131.076562651831  
136.995866452787 127.520134825082 131.548634017902 146.548348470748  
127.282374513433 140.165450892713 129.466612376702 148.153776704837  
131.110018165002  
LOC100129103 126.603552416008 135.317796804151 137.014698467096  
127.419227292862 150.484823814674 148.660440219589 153.78045746564  
142.914863449833 143.449303333495 136.328447182666 153.018378403144  
143.741676966126  
LOC100129104 167.811412309356 154.462766419353 151.214631373344  
182.066922756289 171.610742435469 170.720018572735 176.86489466512

191.725728813959 175.551853899221 133.420267697961 182.929326147069  
181.722373730185  
LOC100129112 136.973804637915 136.222421297872 147.439303942026  
165.851677392967 135.638156623519 117.119533897652 160.618586213311  
155.362503575715 131.051711775229 145.514859606031 133.496922906874  
149.41357273704  
LOC100129117 136.099663831028 143.793506250131 136.5680632044  
148.704917490429 165.992542962911 137.725329029129 141.141047405344  
158.113794378426 142.296446144179 143.078022283871 158.521812954982  
140.356164189622  
LOC100129118 183.937484597232 185.359195899057 217.094085829328  
190.921283434627 305.499194075747 229.594081405784 353.005548289786  
267.451611731669 274.427235605909 389.500591134279 267.285998701386  
316.081825144651  
LOC100129119 117.48427100606 123.108694517244 119.603565559838  
119.395894479869 127.161975533812 115.270544506813 138.242983316259  
130.238231520218 126.611663427876 117.511162285879 107.802792435066  
132.498092935232  
LOC100129121 106.147993332294 118.924317138158 126.724973604103  
140.624437508178 119.993313087183 136.284283129801 126.841836614341  
114.278113876915 119.780654293448 115.43068422162 133.257477196196  
124.905889975958  
LOC100129122 134.698857213208 137.288653308858 139.541759919059  
126.905235161069 143.146404911993 144.81077501446 133.511698282195  
137.165966740473 130.980885733161 131.604121223902 157.979749139651  
135.32730674455  
LOC100129129 135.264074941678 127.476819912992 128.606360476298  
132.393669306489 143.552343056702 144.784835438567 151.05681004513  
143.52474218953 132.70442458261 128.041191307652 133.204793127029  
144.490452173336  
LOC100129138 132.703034017237 138.870636101334 150.137061170632  
131.444734367396 150.000851192531 141.786962606666 138.376176600064  
155.70645844794 153.45050352117 154.665212863369 154.804753043168  
135.598709185334  
LOC100129139 133.020551937677 141.778060508776 133.24611329193  
136.739754726714 144.83282018024 140.724541696229 135.809383370957  
140.11211854056 135.75568942028 159.909121784808 137.21916902421  
136.011474063229  
LOC100129141 20764.6732139063 20764.6732139063 18421.818380318  
19496.8914296296 12334.7921691489 14699.3902364192 17141.9934540963  
12654.3779830648 15603.3490258675 16328.5991894287 18862.7632438112  
19496.8914296296  
LOC100129144 160.32812671237 151.671024612136 154.886628987246  
147.664505309713 182.335981256243 144.876300850115 199.662592246931  
191.525291860022 164.690739760426 190.947996918605 235.867149024041  
186.831266888028  
LOC100129146 123.524952603672 132.025632466084 128.994977935861  
126.209426865327 126.718380351644 129.417232210341 145.372579207362  
126.407313060022 135.954961086609 140.92066676704 153.784923783551  
143.637018777217  
LOC100129147 131.582231577364 140.860339862967 125.101995710829  
136.108500467418 137.09814291566 138.402890124039 135.215356532498  
146.281429685059 133.453702113571 139.039276904833 140.156797128045  
136.16560274503

LOC100129148 131.861469782134 145.56468363155 127.866992108488  
114.830474086443 143.583650664594 159.832405510505 133.524698103972  
117.706795566317 145.471090720048 138.207553349985 145.183463058696  
142.121399383259  
LOC100129149 126.782805974059 132.211379936941 135.594186066942  
152.155760355248 130.066177538896 132.7284396337 127.781732819297  
136.504438803108 136.705326991088 125.478878240473 139.697477263244  
141.588478913204  
LOC100129152 136.178501890585 147.651620353593 135.146767090951  
128.020911959353 132.610618885717 142.412731964179 139.932849289354  
129.730685860688 146.023710941284 135.348086420636 141.499192356469  
130.99288239869  
LOC100129158 15990.893941344 18501.379301537 16328.5991894287  
18501.379301537 17749.5685495445 12654.3779830648 17067.0086403248  
15532.9759169142 16974.4822983201 14499.7866852901 27667.4034204988  
16328.5991894287  
LOC100129159 136.720837676326 133.037138438863 145.502055020513  
141.513636348978 133.018406625714 152.721146962124 139.642457979496  
130.529367177452 138.504398858454 146.839641617491 150.035890574132  
144.587253120884  
LOC100129162 124.61344300674 126.921925660996 122.729918525032  
127.856634523494 136.518409978222 125.955431094455 129.151767489346  
138.98468042464 122.679628839976 125.374764771516 118.897717445414  
124.679444852938  
LOC100129165 149.944351491364 162.47662918768 160.203521879896  
140.26557508894 132.02259465879 136.560048419149 158.200211812067  
210.64483507528 140.815807483203 131.882887826338 126.599418127637  
125.000876313893  
LOC100129167 135.9097041056 124.842426851438 138.458816023289  
125.379842077431 136.591299462104 141.60153371241 141.363863974586  
135.193659028591 138.89354244296 132.22974656114 127.997280639609  
127.8514513762  
LOC100129169 121.024572716324 133.158570377793 129.725706669166  
124.193603137858 133.215151497536 136.669003646622 132.059507616101  
150.065275447769 145.09280363189 158.377396672742 135.095095470362  
124.235958498969  
LOC100129174 136.051070946954 123.145830746127 148.031899566208  
136.71278398686 136.032310569127 135.790955294639 137.779607093226  
139.437073790935 136.965972077733 145.077517845584 110.081964209973  
136.913957413224  
LOC100129186 129.442111153737 147.512290383685 131.322008851059  
131.294930860752 149.710337205986 141.968949222821 131.996032643928  
137.27827836407 121.049927973123 133.449527627723 137.337681987169  
135.928428484011  
LOC100129191 143.873048967535 152.587331888423 151.354187593773  
135.111066946207 155.666943703002 157.761231106669 143.760519659724  
147.633793743254 140.732618320154 149.441862883882 171.212749388553  
124.597605631582  
LOC100129193 128.445065383646 128.702882993588 133.964163727962  
134.54796737809 126.531502877517 131.967245387861 139.044150521333  
133.537552829999 133.376631703373 137.550607284001 136.101501973431  
138.276865331434  
LOC100129194 133.379872189405 128.616121042106 128.84676695859  
127.654130155446 164.327140372968 134.408846338374 137.157492354617

130.597786455581 132.265895156539 148.297939240474 150.691815494794  
133.866011732878  
LOC100129195 175.562070915794 160.078122267577 185.856755885891  
166.433933349193 166.376907377447 159.788143847569 173.690008681514  
148.353927712013 165.386056999339 244.350562866593 157.277051544704  
150.84999247088  
LOC100129196 129.96280577492 119.502758763438 129.77374228644  
128.460750472464 116.969799327195 134.206518622834 134.514251897045  
125.572299527276 132.211379936941 123.916497557628 119.252737868132  
130.870198462514  
LOC100129200 137.029726467523 137.020473156363 135.812301062763  
136.001505582342 123.058261039164 134.132312782731 158.919340819357  
132.941478943584 129.818020166075 137.271702725819 134.449083873514  
138.631273903053  
LOC100129201 164.820007934887 173.951605889009 205.036081947168  
153.770852731422 259.796092536601 255.374689750672 330.850098426464  
347.932135290714 278.498278821829 256.471672362567 298.706655333472  
281.49247863022  
LOC100129203 132.275953817076 138.363553671822 137.306031826007  
137.443463471483 133.331037738063 128.207440197765 144.669509071181  
130.842257229979 135.079944196457 139.008854444223 152.463553409903  
144.627784383455  
LOC100129206 145.932170561687 135.30767047671 125.876114993687  
123.067278658698 151.855884026072 139.427216913809 126.343040504566  
133.99046926032 125.470172259885 116.300028266671 119.517021355598  
138.864844664017  
LOC100129211 5361.3600315322 4682.62607750437 4773.62220024088  
4965.25728333142 531.711823481265 3843.07094386605 1940.42283070543  
3235.38149926838 2344.11548437508 1783.8031212092 4386.83308119416  
2274.75133434566  
LOC100129213 132.435409278702 120.599440204711 124.548598801497  
143.891725249061 131.360310497851 126.165220332132 137.81819274774  
132.966873990501 121.860428893248 144.190203286506 157.058912028958  
133.311212623667  
LOC100129214 136.346472365382 158.390337945372 130.803561448083  
150.0674092434 135.632298302036 129.305455204291 140.616811333466  
145.42392518235 119.767154020462 135.399032687551 139.377027955744  
137.027334042585  
LOC100129216 142.837688062688 131.280092370361 156.96934803556  
146.484364264513 142.677386111317 126.547883999721 149.387467833684  
156.798431595608 133.040952285855 156.043994260248 122.624828884731  
133.922855125616  
LOC100129218 164.673579538023 173.526005872207 171.190796424612  
170.417054311946 166.8846964604 156.349030617265 151.040909999868  
160.32812671237 160.331940529151 150.123784990646 164.534790315992  
159.775479686193  
LOC100129222 123.955819747616 116.053859681399 122.789656787728  
119.911515364639 110.865668451601 126.630787911053 131.041996482401  
139.981905225845 118.773864607553 124.347680638586 125.531371673679  
131.434121613176  
LOC100129226 128.074531806621 129.553282780541 124.451718955086  
120.297848408451 119.375727296235 136.032310569127 125.606269267903  
122.287535209629 121.130837254861 133.812639120892 141.119491147925  
124.203250865069

LOC100129231 126.112672816035 110.952108124186 110.22624111837  
130.742940708861 107.976233194926 127.733860645979 134.329334422886  
142.747793303346 130.041462255766 146.652641667543 121.71538073735  
136.13751015238  
LOC100129232 133.452032750397 134.053685488055 128.202619705343  
137.96452133771 122.20752192519 153.111226896983 163.442257036536  
161.72730923536 142.650451413991 130.603837917984 168.582192754233  
158.625060605976  
LOC100129236 130.555405606993 129.848276446896 132.693707848508  
135.526248253492 132.200648560899 127.259038241163 147.717748449017  
126.322527679273 145.06205326107 142.818122106598 133.080437161283  
143.857385585662  
LOC100129237 221.685824197352 202.01798254763 293.794745907663  
175.974598536074 188.623897093065 258.727309442475 355.372836460906  
267.800523478098 241.019436415703 516.088776850623 360.053590374552  
312.339824919124  
LOC100129238 129.743808480368 120.470801825675 121.668166378914  
136.327014189932 137.06192448185 127.610304071204 126.029431525943  
146.321713521846 126.997614441981 120.891023626809 118.319950396126  
115.090463537716  
LOC100129239 142.064680109047 131.897352210959 138.259512736404  
141.404832197192 117.917454674671 131.076562651831 130.222698914337  
136.832494876249 133.950160115805 135.832454000859 120.857635836068  
134.00481287258  
LOC100129243 165.376358421533 161.281195929918 139.934460900409  
142.839077978518 203.456296907031 152.818046945164 193.37618381669  
148.01816554072 148.175206259619 168.082591651722 244.954917633904  
162.652929339533  
LOC100129250 107.395559299582 124.225294244156 121.874296836854  
114.342980656214 121.014538677616 114.867454554206 117.186546702764  
118.743966166637 115.619116556625 126.137627769256 116.934457270701  
121.057111457792  
LOC100129261 119.767154020462 123.868848032411 117.255496552581  
121.094060100325 127.833653828539 144.092864444802 125.642282323003  
131.305785417254 120.918190840083 122.182695593404 120.891023626809  
132.776236872246  
LOC100129264 137.717859035645 135.324479598682 130.979513420888  
134.201392031199 135.711590400394 133.280418227922 134.595090783504  
135.223957492606 140.890227770353 140.101511236793 138.616719975373  
141.758827837244  
LOC100129267 141.342216963124 139.502856192876 131.434121613176  
132.983739057264 183.397833894087 214.175691239597 151.950883677297  
195.141733146452 155.214638707046 160.082087242964 152.547558436703  
190.057030596611  
LOC100129268 164.472980733552 152.476932186797 163.165374495635  
144.801071221985 133.286702819953 148.589330990191 160.055242985219  
171.161297672182 159.005459875338 145.562772839517 143.897248922317  
161.34427428845  
LOC100129269 1259.75918248468 1243.96721244424 1289.56069670699  
1193.82799849555 249.524956682907 1143.0779222425 514.213675499369  
718.142991571468 612.758976723556 519.940347384877 677.503643398297  
558.934004505074  
LOC100129272 127.683344133492 118.430401197079 130.607857562345  
135.413840160615 117.710502693638 129.608034744581 139.497253870412

123.096995744616 118.966992191892 124.558026853954 122.102644097132  
115.920514336615  
LOC100129273 156.511202150773 125.068362001087 143.526983440589  
153.323666159436 159.390531348676 145.658251059524 154.277670551775  
138.798959235723 146.763046352405 136.977435235496 157.435477846812  
168.906637816046  
LOC100129278 128.324383749931 121.336932276232 123.696942540314  
130.516632662261 125.822346524903 127.116637906391 124.883575464443  
126.110426731941 118.584773788416 132.804216633852 131.628021008753  
132.184217000689  
LOC100129282 120.819163462986 139.593950393555 122.098850053347  
119.943408501009 175.030373805031 132.602336133471 132.456945758174  
153.776361241587 145.944809232038 131.456697863268 131.466580723837  
125.956785216996  
LOC100129285 165.430811083128 153.033582154882 139.980504765791  
165.274189050141 165.977852973826 180.290887733427 160.43939815269  
162.923734210933 150.354401669138 146.094951139804 113.680875214845  
145.650356702429  
LOC100129291 133.995152707862 131.230501496659 129.386300987308  
126.912226185444 128.519448608754 122.226875707253 128.075865243385  
127.774702462567 129.534721138679 127.699226067847 123.766373146588  
127.392877191785  
LOC100129293 133.94667806086 145.97512573326 136.74788009263  
130.449669345302 144.625105340312 135.457059862669 141.809577413906  
144.820843146628 148.084844579881 123.817878562971 136.106596229215  
137.717859035645  
LOC100129295 137.890006487904 142.61284507038 142.780100181736  
150.573523216151 144.977958320895 150.148902196995 143.250386570155  
144.752418965039 145.015434711984 159.005459875338 153.377182895472  
148.713747597311  
LOC100129296 141.278654291193 131.80257432775 141.350135458015  
131.759422682853 145.411264691728 130.088408942008 129.76141737109  
145.576880854443 117.436119533535 116.142650095476 149.560505078257  
137.975369568585  
LOC100129297 173.513108409372 164.520247586053 153.601918768668  
164.458565398812 229.284931844047 212.798133015556 288.728608411903  
230.227432807772 189.205724390913 217.969738417693 177.72965427263  
210.030846572444  
LOC100129303 156.433603187722 148.898587505337 150.138643811727  
143.951756384507 144.016137459279 136.884799902348 140.089210795507  
143.543607779991 141.310253828965 148.434497641549 148.582022536314  
149.228977421003  
LOC100129305 125.287738115754 117.432860005907 124.96926662367  
132.622032754473 124.654146040634 134.52098220054 131.017355402204  
133.645044060866 120.85013281321 133.820936825552 127.987449338817  
128.671626815639  
LOC100129306 110.900309203531 122.99993610249 124.295334523889  
130.666781754635 125.855451679929 127.6516565653 135.399032687551  
120.428171428188 109.242622591321 120.74273444647 121.067907968175  
120.773552653073  
LOC100129307 144.388113281099 142.976123206776 144.436358527414  
150.479320779862 142.537484065487 155.026276988302 149.131218007756  
143.739231124536 142.951829221947 157.87020867396 155.530415929059  
138.506569544482

LOC100129315 134.824147038515 128.262195551255 136.436762791912  
133.074027423549 139.646026806298 143.912136782374 127.412539650291  
140.844007965202 125.111993560078 127.763186950161 130.416957431512  
144.660095230819  
LOC100129322 130.860938463815 140.52059487958 137.68634745111  
133.154004369076 135.233957017664 135.351344868436 140.347131743987  
144.997250967317 152.347154384235 133.62358240645 144.526499066594  
138.889999702313  
LOC100129323 154.978243057971 159.085639414089 147.87699690647  
159.738700107615 151.815211341628 173.979001863717 154.011708696954  
187.63609695026 154.469132478321 198.737421468412 161.237544868191  
153.934872807607  
LOC100129334 152.08574341962 143.340685579645 135.092226300609  
141.778060508776 138.841385034636 150.476228905372 145.393431956588  
143.47200560038 141.913001976093 135.835518477299 143.996350813566  
134.058035351684  
LOC100129335 135.129656281091 130.988294699995 136.297963196301  
140.295307451188 134.712040258989 134.664652044646 134.51101739494  
132.049224908868 128.76720970745 136.769073515537 157.909530751723  
134.463094391766  
LOC100129342 141.336866031027 130.763957515652 151.635752404534  
143.804903119745 172.138554350738 167.243544185778 192.655899720909  
181.735072060023 166.760758231104 196.399050990244 149.622695843398  
205.568338705555  
LOC100129343 141.125248464806 145.662818023154 152.199095472082  
143.245660951425 150.576660798865 158.579717282881 144.785343937043  
144.96670085147 148.725162101789 139.727248583626 147.183889426843  
147.108661317945  
LOC100129346 137.536053775531 133.455138380277 132.275953817076  
130.944610173285 135.494894933583 132.871179509995 148.980330875743  
120.979417552159 130.674263597931 128.549768412962 119.315932907373  
129.502730573463  
LOC100129354 132.871179509995 135.950465168457 145.003900788534  
145.1382587433 144.526140751381 139.219476681919 121.423030266904  
150.46669393448 138.4303531022 138.184717352015 146.119700458464  
127.753065449769  
LOC100129359 131.872583529419 127.535214313797 122.083357581665  
126.127630885864 115.702900810606 126.845048064014 126.068445507098  
125.526744092256 124.232144678947 134.788450164055 142.122556679441  
124.446264376282  
LOC100129361 162.586012723045 157.298181833321 170.553940654493  
171.059849459102 146.768631086088 145.841028932318 145.349023185855  
149.642946071295 165.459993078103 140.49969612403 143.837402372008  
144.12472003202  
LOC100129362 14866.8264879369 14592.6308255978 13013.8166277495  
14417.2696849334 2056.90127387648 12690.801964606 5543.71998558526  
9852.51412359574 9759.87403504619 6368.23123771343 12818.0509395717  
7332.15849011291  
LOC100129365 166.681646517413 132.855812035005 152.124910935545  
149.73250641246 216.991823988763 151.032389358279 207.993943398697  
172.050718136571 179.525651423361 149.398118078302 173.10229478279  
157.474913177177  
LOC100129375 136.353051841792 128.400741751903 139.499652059557  
127.261349543394 138.753419730571 139.046174587432 147.387754442307

147.818956338752 135.033601686007 142.215285988753 143.080742311914  
132.14412512622  
LOC100129376 131.155117105954 123.29908883119 126.680992733621  
138.223001481672 116.241531823869 128.723261477217 132.063395162855  
127.975441922402 127.930072902878 125.506466437764 128.412176346707  
131.377361030122  
LOC100129379 7969.0710242842 8445.36695108418 7468.70895916615  
4882.16892310839 18220.6383250956 8958.34797715349 12877.2152068971  
12493.2940668467 10397.3656932566 10222.4435857673 21409.4415798676  
14073.4649333964  
LOC100129381 132.70442458261 126.314233529267 132.864018034342  
131.489715975987 125.447209413787 134.46179453106 129.223872979789  
128.292627005614 134.464053009101 133.090474303043 130.073005698714  
134.42983422342  
LOC100129386 127.075899925865 120.09801164252 123.07559417607  
126.809252651352 133.796029401157 121.18490040448 141.539503634005  
129.513590304528 133.800111596565 120.110473925082 128.616121042106  
129.636135486593  
LOC100129387 139.823017208731 135.957972463728 126.416290818296  
143.628147237159 129.125709963326 126.5929421833 123.344450694117  
134.860896462638 139.519321690754 124.381674909742 142.311108110185  
124.33863635868  
LOC100129390 158.779261405573 124.313901870563 143.260448301109  
138.299629744589 145.159572111039 136.850940500212 141.584554523423  
143.730966588794 141.520125030042 135.232878188098 146.728881202697  
144.889019483712  
LOC100129391 143.67880977119 155.55288776049 151.113342302947  
139.886499402506 138.907036194384 144.098578955023 143.429394097222  
140.446530307169 144.718507303105 138.285325970867 143.385915173392  
146.915965807149  
LOC100129395 122.03508430361 128.604270382206 139.77436722364  
122.466276478613 125.099672022917 121.665157726433 130.073005698714  
118.816986517698 132.828179725129 131.965184111199 148.482530949134  
135.952202055637  
LOC100129396 146.256076936456 142.255657518926 153.703682621695  
131.153457976248 138.079494235456 166.735962853075 126.418295908353  
128.775477649887 143.444109491884 154.400124981573 140.904883114871  
131.436176224725  
LOC100129407 147.320976507643 143.116451998409 129.964666668421  
145.597134236583 124.815853677553 146.890877830248 143.577865527891  
136.065134838221 125.416113646128 139.421753451936 137.096785940897  
130.535859816562  
LOC100129410 147.579672274205 135.726760147904 146.351622020606  
136.90636489391 152.179281925254 142.553175839278 141.649911527714  
147.515088047628 137.966987037709 141.739299634007 138.50252234048  
142.036037957345  
LOC100129411 147.865114383296 137.77107995457 143.601057437842  
150.283447275981 153.399787997793 147.579672274205 152.067897082883  
152.890239929335 148.421611987655 162.488819873513 140.597877909094  
155.330215726109  
LOC100129412 133.453702113571 121.141432480683 123.219903763265  
123.789035728194 126.471321085803 133.414198431469 136.201103852785  
130.163574198827 138.808591995741 132.637443692683 120.957197551997  
142.124876403709



LOC100129413 123.67449826277 125.18424162353 124.101111442605  
130.712515995658 131.300342835696 127.620377473963 127.890438577754  
129.192326574697 123.275246170603 126.956303896995 120.220156455352  
131.308384127079  
LOC100129417 133.384498169568 132.098421212796 122.480000773859  
121.988237521196 137.693410133625 122.921245774755 128.309602266886  
123.072413274454 137.920724602098 125.982423431253 134.412129843957  
137.429832103492  
LOC100129424 4118.58682247781 4562.75659565027 4022.23000497332  
3989.14883668905 3671.86460903374 4353.66854914351 7054.92270618408  
7332.15849011291 4995.96906061198 4759.17973319588 4327.90939653054  
5122.60899285635  
LOC100129426 157.646948327818 153.972471779464 142.763157232147  
162.347140552869 173.21291920566 152.230489051339 157.151992792746  
144.765051967884 138.557464672111 156.237282338037 161.281195929918  
145.459919416288  
LOC100129427 155.780657091484 158.691830524781 164.1572198075  
166.305219348008 148.391885541349 153.545086287929 151.679534447228  
157.016659994185 150.168496148941 157.915292037378 149.6036366066  
149.881708604156  
LOC100129434 157.36568754472 155.158028043823 140.646946425036  
140.005968571997 141.809577413906 138.275371291639 150.115482378938  
147.745780820004 133.052615777603 149.361498483705 156.000732564221  
140.981666934622  
LOC100129436 147.303997146992 131.72852748835 139.765361891899  
133.680691168661 136.939603341076 136.381593416533 143.49969914174  
133.514843630183 141.982743538528 138.418604660734 136.185953087697  
145.744039709418  
LOC100129441 316.081825144651 279.325065941252 330.143103381406  
232.200025766422 183.04531185589 250.647644543963 214.396920524803  
189.092674335503 211.626970008102 189.389457481768 233.192751618176  
217.408824020423  
LOC100129443 143.294217840279 140.26206122305 123.351112976814  
112.758617084341 130.394687030464 132.573953444192 129.041254463346  
133.804489975068 134.758222337831 140.385509382606 128.683044953833  
119.890260409414  
LOC100129445 135.023594109361 146.135269553731 142.879705723262  
144.55710963567 192.752224665459 143.555987405898 147.085006263446  
129.450937831864 133.496922906874 149.327794670124 161.305860691151  
146.672270660899  
LOC100129448 143.730966588794 134.585762409782 137.534079082878  
142.403121638265 131.655316312379 110.202982683256 131.060030943633  
146.563078818674 128.81022558263 147.330897105911 142.268018184723  
134.002424083826  
LOC100129455 121.728711587014 128.536721595589 135.834000569736  
130.165488538277 129.551260802518 132.50676380992 140.239948346946  
123.524952603672 127.42914358124 130.378441113977 141.346722137248  
129.190900922265  
LOC100129461 133.567630962178 141.666394024363 137.597788349982  
137.376602654929 133.590552542806 130.701801496564 131.054302682707  
135.36523178082 131.193538235053 132.034701177759 131.814528687104  
135.475597372104  
LOC100129463 141.799236109474 137.450774903611 129.95138839192  
126.941650500751 134.963301368391 124.61344300674 130.016401638936

126.84966022925 135.208478510375 126.497472087036 137.872742675806  
130.973504803813  
LOC100129465 134.784568023655 128.651081092914 126.928328902507  
127.350368333088 124.375348764151 124.433114779288 127.107223387937  
133.117701703454 128.936628289974 127.512733134453 112.884916986215  
132.122273848715  
LOC100129466 134.808485735121 138.201164395948 138.970853057174  
131.429247528936 136.101501973431 137.222125237171 131.179786925029  
125.450077160575 131.232417654705 138.123754096875 137.513315427454  
134.119276589666  
LOC100129469 132.059507616101 147.088665779406 137.881776548665  
135.05209575317 185.743212726702 138.755173333171 145.956477465634  
152.796423361971 132.404879616886 155.518807026156 159.615233521257  
140.211016178402  
LOC100129478 152.980843102933 152.710827148511 141.934351226006  
135.274205069488 155.207839370162 125.863969666806 146.586879656174  
151.936543085044 142.153830345183 139.369815367465 148.400132332444  
139.508029141287  
LOC100129480 130.651062724029 138.091795130567 138.9183380982  
133.120273569229 115.5765427629 118.375739674144 135.849839822066  
124.132215738502 133.994376985194 135.940629737073 109.495342943278  
124.791221329502  
LOC100129482 138.512938877774 140.368070973566 141.164985468046  
156.346014084316 145.665155500862 135.264074941678 161.338215647108  
145.63870792125 146.443892388756 158.089922688997 141.323417580648  
130.953237161257  
LOC100129484 134.512204051277 150.155154998981 139.191746593825  
147.893916750136 161.761125440228 146.311966562883 150.263578317272  
129.1829592305 131.090975815768 140.242272149424 149.651553512698  
168.50246276469  
LOC100129486 157.944355564411 139.197364191101 143.658600740177  
143.47200560038 160.186527465164 150.724359913994 170.561596645385  
138.343232981485 150.48236051337 146.357214078158 140.925705285169  
154.025625092599  
LOC100129488 125.752962155179 121.267153348313 128.211076776316  
125.484453841158 112.208950290962 147.530719472217 127.442587366678  
119.144128641393 125.642282323003 132.642931022024 139.119638136874  
130.590195477461  
LOC100129489 119.391213033544 131.915864620669 128.78647242525  
130.325073627151 119.315932907373 124.126715773068 134.283467987991  
122.809241232029 122.909152047474 113.043089777907 125.887854850942  
122.962219297463  
LOC100129495 122.953869661977 132.755256423863 134.770852936106  
127.637319802339 132.478801067837 111.867464669155 131.119810851017  
118.176124626025 129.194132399305 116.019123495537 124.138036007288  
137.929082565223  
LOC100129499 143.528208105237 149.477373469387 135.732616463819  
147.838660813476 139.403087367992 158.377396672742 180.219813240126  
156.662150993832 156.756159786366 161.80922869659 154.153249796248  
151.543678860049  
LOC100129500 154.001258677199 131.308384127079 148.670562837021  
130.396593013401 142.370721565016 130.124601660028 140.283106734666  
146.919110530891 127.517446456116 137.654833215154 134.698857213208  
121.826474059574

LOC100129502 2822.48671794913 2882.51330563735 2446.31228564539  
2599.421026133 427.766660764042 2200.94974896771 1128.60314361459  
1939.1525084845 1409.42016970226 1154.1046856215 2568.95060767776  
1345.8970795036  
LOC100129503 136.281630801995 131.204616536341 153.062710222618  
144.368355737187 141.348548071751 152.821735300697 146.017509013234  
133.902707525069 159.966729941991 111.041656398985 146.879019367939  
149.057388078138  
LOC100129509 117.178495957357 119.849895979393 124.815853677553  
131.308384127079 133.209211811498 138.9878987332 130.334622987505  
123.45581374935 127.342017026873 120.679474100322 146.992289167283  
133.228074579352  
LOC100129513 133.191797029676 135.05209575317 125.937660544107  
133.269658133558 135.232878188098 143.579660352652 143.16930809425  
136.967408633308 135.452340998039 135.892248893607 130.521003571299  
135.678138913772  
LOC100129514 139.318078285343 137.465603365433 124.480385254916  
135.441550832737 138.541779821934 149.613701531197 142.951829221947  
135.744202879162 136.689064885984 137.476047500852 141.37694311902  
143.263333116046  
LOC100129518 171.376976179465 176.145076825955 153.176268095608  
167.645930148254 152.555437272666 194.775234425687 140.593510265137  
174.707059022891 160.461846976268 160.402220755071 181.70730090195  
141.021723049782  
LOC100129520 153.200153031275 138.079494235456 137.933122094638  
134.576622528874 119.242880574306 147.255680306221 129.334217858282  
151.730862403472 136.246543311291 136.841506794489 135.792966926642  
136.216577685046  
LOC100129522 206.937770272939 192.340135076104 205.282221255986  
235.822266856967 180.667897257797 162.320894555337 149.244970309131  
181.157738347957 183.493455947795 189.784608429624 214.461773810376  
186.276450732044  
LOC100129527 121.837571435384 130.363516180139 125.951927536494  
134.584919596742 111.243322115126 110.952108124186 122.595766303833  
127.43866970659 119.882472552083 117.172431931323 113.347609066395  
132.623563631011  
LOC100129531 140.086978441723 144.295556086504 150.112549201892  
144.283716416188 143.105974876327 137.537197575152 139.110658402501  
138.041411135053 125.533538277681 137.380514555157 167.559703634539  
122.382304966782  
LOC100129532 149.524040913256 149.353072778508 137.79714923769  
150.247639459773 149.726968520487 162.254062646631 158.751241730465  
144.619374612317 159.728097053356 156.324643994552 144.542320520523  
164.910911528819  
LOC100129534 138.737332306848 144.667638908504 146.664285015996  
139.159510392614 141.587109176431 149.032116392457 141.050384368733  
137.609831343223 141.786962606666 144.662545137915 145.502055020513  
134.78059811237  
LOC100129536 104.505454151012 135.738699497293 117.523834738903  
130.567443018832 114.234369421536 121.564626579011 126.997614441981  
117.688941284427 113.862790983655 132.624674205566 129.96280577492  
124.306049555272  
LOC100129538 127.261349543394 130.302829773323 131.146604635155  
138.12651823109 129.608034744581 131.190238038695 129.777173431404

147.614293127043 135.860057860699 126.841836614341 130.253372129786  
124.825103464238  
LOC100129539 311.916199912898 322.837446618323 373.656487297238  
332.666916002481 228.243668453958 296.088938872643 197.405472374722  
236.617896560938 228.797912452429 264.158648784101 242.787656836745  
230.91747428831  
LOC100129540 146.677241054745 149.895214204184 134.445893291422  
135.32730674455 154.177340021162 150.991991926229 143.151478156897  
142.049776668507 139.14544832776 147.901594006094 166.430881793156  
170.145574727175  
LOC100129541 136.934313990609 153.326420485822 128.324383749931  
144.206259414981 119.926169902322 151.459397907666 133.886458291672  
139.241145027974 145.483667452136 128.65678873939 133.602870982718  
126.649739818781  
LOC100129543 143.710449544388 127.395094952914 169.860061216981  
135.161667673191 231.372316734945 142.101865506094 144.907294702865  
170.835513021958 145.810213943313 149.888719320368 157.77047742735  
145.449099891256  
LOC100129547 147.679233228201 132.871179509995 142.648205566485  
142.046082566177 158.784190231286 146.557058433232 179.46936343225  
170.164668347783 150.403702679274 157.344758285153 178.52221226882  
156.654450436728  
LOC100129548 158.058346079359 129.356401843185 133.59686364883  
139.888008605915 125.139029579691 133.742490937191 146.063554646851  
128.504026473695 138.033668840392 138.97443063851 123.45581374935  
136.238646974312  
LOC100129550 338.406266073063 435.901794650816 412.048097766066  
472.108893832845 231.191287595191 537.216291942143 435.69811966429  
534.608644989102 336.981561928411 232.667968049771 432.515970951769  
300.314088267108  
LOC100129551 144.137695673296 144.310362660942 148.490236128772  
160.390564881326 147.988883293205 143.242308032336 144.470642732973  
139.421753451936 142.718326248758 149.763038696374 154.384766720753  
145.741465098455  
LOC100129552 221.359331823286 235.350819745387 182.453722105813  
241.987100712218 254.036619126409 225.546125484563 214.132445321197  
246.049729366987 233.809899915394 184.724071110756 439.928008927647  
188.079188251085  
LOC100129553 14592.6308255978 13758.4768543075 15297.9020958577  
11554.7330886956 18760.3823237058 18720.0460735814 30573.5859783923  
19661.6741558107 22750.0246358215 17211.1455384358 17568.5229948989  
21650.9263365935  
LOC100129555 142.886493948916 148.74881415573 132.590454200629  
159.479962316199 147.849116400978 142.097126256137 149.306122206718  
129.032386138506 141.923103467306 148.753891406126 159.824012085212  
143.965049742993  
LOC100129559 143.399877326927 156.46322298175 149.450921195838  
147.966224814966 146.574656147816 144.994931561779 151.9565369062  
153.557991189227 143.804903119745 154.079355899056 149.597396040729  
151.27882940428  
LOC100129566 210.973303650385 242.348427307994 245.900840732668  
208.72873686638 376.867306473426 463.754869412768 399.872401268958  
447.521645706162 357.191675549592 345.565843875296 304.547738011742  
383.74357557363

LOC100129571 151.64806573742 171.784981874184 154.064184525311  
159.670815631794 148.197029306137 159.461778054423 153.289258540668  
167.586897846525 152.933230159216 153.703682621695 163.85327708023  
151.459397907666  
LOC100129578 143.167719135403 144.090047165489 142.259196792767  
137.307786147787 146.42288214248 151.961811748754 137.09814291566  
140.475688390415 137.888195199363 148.005500924157 142.843006238215  
143.973464003036  
LOC100129580 142.403121638265 150.560305000601 142.597110130872  
137.161065320948 144.64757514198 150.235026770931 142.759452994928  
132.881693683384 143.625188247966 141.269923271838 140.007937555694  
142.584504912189  
LOC100129585 393.500781010617 371.457568934695 479.138177792954  
348.640185950469 382.327656839936 434.325609889068 476.076903428247  
468.496972957503 358.52459123416 447.372026268156 552.790706181938  
455.08515350006  
LOC100129588 162.216377983292 123.247698282967 130.09050436943  
128.604270382206 147.826950636822 140.717348834454 140.413503801467  
131.715579653796 135.705904966172 129.088718286391 137.13615301204  
134.464053009101  
LOC100129596 129.758303592589 130.207485841284 142.414323129638  
139.231340020014 134.091723054647 134.163388748526 126.643229085068  
129.534721138679 132.864018034342 144.771457221413 129.411734209444  
145.998177732093  
LOC100129599 640.90860274227 634.556887178869 616.339439383796  
434.325609889068 1456.76683429755 766.710479603963 1262.96801072965  
811.564396886535 697.299604049748 1115.53524128833 2137.44704613378  
1186.96351738518  
LOC100129602 138.864844664017 125.443242860371 139.001493765421  
137.888195199363 145.10302792449 132.100026388604 132.5130209643  
158.814407805803 133.419753427423 126.279119798177 154.34872021008  
147.585987099202  
LOC100129608 178.734634888773 185.128661141884 210.666799498141  
195.16856673253 210.666799498141 162.431674335726 218.470365730283  
184.135651836627 194.112534914308 218.18756955522 194.281839133887  
218.2454853526  
LOC100129619 137.183566882805 145.483667452136 144.636277619886  
136.446877465751 130.811331124804 115.785084044427 150.802312408483  
140.54700821058 135.333055517636 153.162313098346 120.806180547422  
154.402315635227  
LOC100129622 157.277051544704 149.511776997149 182.633773540249  
183.247396324425 148.597346678768 153.320911882529 147.368455727098  
144.792035839249 141.725882943927 153.563839578065 153.488903967311  
148.789295862953  
LOC100129623 125.170874841845 152.743680985848 147.592770523507  
133.058788697693 145.507330257603 131.054302682707 132.28931085483  
121.099290122973 114.042914237667 118.859745315302 136.557466007228  
127.00963790814  
LOC100129624 121.799209715087 133.841519663164 125.753852031496  
121.400652285172 122.688703494163 135.465076459043 135.875595614483  
120.065876525792 144.139062513587 128.751758311249 120.246240734668  
133.685254707686  
LOC100129626 133.717451195844 136.453821861379 135.872060352476  
139.409685553177 155.111346336412 137.13615301204 149.915251958706

149.968749911496 131.820842728171 136.780298810179 134.724004605822  
141.308299074832  
LOC100129630 129.748891462506 135.679481480408 137.466291815166  
134.991379445799 135.350606894914 144.161672064561 131.804952187685  
127.991651150332 150.232470359841 142.129680127408 143.071052031994  
135.3969732106  
LOC100129631 133.165893710176 142.772680460689 127.409603645289  
137.066799877341 142.266177608209 127.855167644203 147.373174160478  
138.102654893864 134.384963577069 142.288110423886 137.76307316083  
145.020615552964  
LOC100129633 140.692586715322 141.018087546273 130.485988201308  
134.06834346533 122.456286448252 137.296790373528 137.353149614081  
128.850480964163 134.915900729865 134.790410101679 116.437403962939  
149.659505956629  
LOC100129636 128.060612106762 132.8615886934 131.683942368268  
126.542112891953 130.080728694308 136.982719190537 128.389494971858  
124.876226351169 134.675247731364 132.425596223397 143.565597315289  
129.231455282441  
LOC100129637 167.293320986716 193.218266574099 183.023316857537  
188.981391266203 160.499355902773 143.598567970841 157.055133233709  
154.452964510369 184.638141004171 168.763640193219 186.904126552483  
180.77686098195  
LOC100129638 148.162914253981 137.129864761402 153.088710298368  
128.292627005614 150.945167884077 138.698178321535 138.572054821151  
131.887778588005 128.356453959987 132.976977898242 149.000760379976  
150.43722766614  
LOC100129643 140.271557921345 146.101547300741 148.380555606786  
146.519312568214 144.570725886413 153.798367953373 148.253612913109  
143.637018777217 148.171225002967 156.018200674475 143.045416067967  
143.814798097425  
LOC100129645 191.160340745501 186.222567239198 206.203717450138  
198.285073991956 293.825372123877 167.298438019561 223.094496588657  
176.603760647035 187.965294229013 207.254220247481 231.915272112361  
175.96841318924  
LOC100129650 1164.22995893381 1592.29734618345 1158.057104827  
1461.64901688125 1161.39230511792 999.159652508318 813.454826901794  
1387.90327883679 1392.89422203207 842.22767901391 2804.99820187198  
801.051513639714  
LOC100129652 142.427198128376 137.821010169859 145.233055765001  
131.12953085854 139.293775885106 137.349901534237 148.185877739583  
141.749118200005 142.45411401883 128.556280049403 141.892214695902  
141.349341762655  
LOC100129654 155.590197324062 157.058912028958 158.113794378426  
147.533986324788 138.381508741146 168.188793271919 154.938900278679  
162.050520530297 155.890403934674 147.022594294963 155.295464263911  
149.962143642332  
LOC100129656 117.513523498725 118.955314417914 143.920134762902  
120.371374172279 128.788443476759 126.482660154852 124.168162885295  
138.047487233711 130.430917518283 126.178476831007 123.330142002791  
129.995417218564  
LOC100129657 1041.58583268313 993.774175699873 1191.88706134921  
628.197839884392 757.066786599446 996.999238316991 1518.13775377335  
1290.39741199701 878.520681466946 1521.61996270758 3338.13980198211  
1281.9073569335

LOC100129660 136.167141767484 143.290642777702 134.85590586532  
138.681348536008 140.650987394155 149.97218338771 155.091135297162  
144.387375194186 138.28745132277 149.228977421003 135.08927101395  
153.795665190439  
LOC100129663 124.464941711781 112.635430248416 114.452922529209  
127.514381389109 123.312000381122 123.745824514261 112.629266772219  
122.305514440939 115.678486138934 119.188446525733 115.963144087717  
119.663182347566  
LOC100129665 144.994931561779 141.559676443695 141.461435494985  
126.748906552086 127.792241991414 132.085538520551 128.536721595589  
132.175368142549 135.359462657828 126.941650500751 134.717258604899  
137.20509387214  
LOC100129667 131.814528687104 121.347339077474 139.229351251973  
124.507958339495 154.483828924645 150.620603731907 136.253264628863  
124.96926662367 141.088456756806 143.987296454585 124.652072110334  
126.503135702506  
LOC100129668 379.102958448288 317.121202656311 461.229315272354  
217.45700166961 353.912654262209 175.302832015761 249.823314327355  
183.236087954054 197.231408726321 201.676984786688 181.439775614781  
220.446775597113  
LOC100129673 251.09230266334 217.050602253281 214.933911087009  
283.982575660968 315.912220767901 227.375773052577 205.742386129597  
178.058616028026 187.561298131124 160.598186999524 143.458937009197  
144.210698143215  
LOC100129674 157.406969627689 131.038758046782 140.343790129071  
138.504398858454 130.293492553638 149.574353706911 152.197327387252  
200.08007665693 158.100395482569 154.912576362196 223.058699622386  
167.003917876371  
LOC100129677 140.706490845379 125.172189715764 127.75729795293  
123.179986410723 128.700516033555 122.702175900246 145.128919984856  
121.886886059038 134.371254010574 127.797666392002 139.524233960073  
121.977373818244  
LOC100129680 126.222105816959 132.005753222789 123.389038274913  
150.687819649072 150.968998243223 144.889019483712 141.584554523423  
143.538763288573 130.555405606993 131.841436867483 121.188761627967  
128.165775629664  
LOC100129681 1040.29664343743 943.677679525947 277.86338481075  
506.290241222253 2141.855356411 547.681206272188 2660.39990175415  
473.529519031797 1692.01248523526 715.43295523922 356.530530468568  
3019.57419253979  
LOC100129685 681.810927901806 642.484527246259 1010.23703166498  
550.434931878586 537.510539142248 775.781735108886 1178.83933381069  
566.543765584009 740.196934996626 1155.4487861163 1306.20183851747  
1342.29111510713  
LOC100129686 134.446758753426 141.73799456072 139.067516394141  
135.393901125889 143.652009342522 147.243263182654 147.994386096925  
141.901382169334 135.244303669342 142.865320802784 145.965900441953  
151.604093626944  
LOC100129697 176.587559615019 163.970187373891 186.6902304653  
129.76141737109 161.80922869659 178.294972422671 146.483508510944  
159.374355553219 162.857083430123 151.766607453172 162.622690190878  
151.282370273189  
LOC100129699 146.818744991143 144.96021415188 139.872976072847  
150.875392181869 153.100979553727 158.302977853133 159.887898257218

136.618643817686 136.430232926793 155.02097482487 147.547944397578  
158.795335941084  
LOC100129700 116.445184223804 120.793974839773 130.516632662261  
150.082561726876 124.892438890234 137.800512046163 136.518409978222  
125.506466437764 132.493888285566 133.480196904786 118.124160279094  
145.26329339067  
LOC100129701 129.477908941439 115.033355516602 121.977373818244  
117.461198576063 108.131097605872 135.309431186017 124.61344300674  
134.181819177347 135.022438246099 142.974541687789 102.661440700541  
120.585506729733  
LOC100129702 131.423918669689 129.616142780279 137.624217507306  
134.606126134531 120.65473121078 141.772724512502 124.362182111222  
135.950465168457 141.129013595331 152.107025120177 136.444883411968  
123.077592992679  
LOC100129705 140.398923642686 143.825062714273 161.735609436394  
151.299425811105 143.961467163406 178.904696191996 142.839077978518  
174.229093061024 164.057147728625 149.057388078138 157.575902297677  
156.224769056915  
LOC100129707 140.796641921516 139.195281937545 134.415163103911  
132.934955542743 160.449911844008 141.301503201175 128.009286101341  
134.147586627141 146.858292465699 145.726651022813 153.815239954928  
151.110467345727  
LOC100129708 142.889911562811 147.932875151331 138.582427155109  
137.17370871536 162.54567071663 121.888886996534 145.912712700067  
142.531683761072 136.919702354166 139.767216030715 156.254944793402  
142.14654303591  
LOC100129711 118.256000539093 108.415715678948 116.95195122318  
130.867819112143 130.06068534054 138.934516083124 122.262664384198  
118.351607868932 121.919799968293 131.76829141949 126.750850861235  
118.070716076005  
LOC100129712 138.994857740356 127.548070199148 146.948261640482  
132.402255281009 127.261349543394 143.019052979243 128.954113816227  
132.224831869802 130.465221782084 144.998415908498 121.784166691545  
127.146101490884  
LOC100129716 179.648479201164 180.698727334322 162.117224868654  
165.239214141562 167.764352429391 151.78607484924 164.466332705334  
183.50553222647 153.443397882028 190.506201184419 160.429643729685  
181.308852106289  
LOC100129717 130.836079676477 128.721889684665 127.876894098781  
127.159947766922 126.746388125956 131.739418639854 130.606211166873  
118.660213790078 131.521311288114 127.084267631845 134.237133546276  
126.834926242799  
LOC100129719 146.14494790114 151.783090997855 159.629232808787  
156.399808270033 163.62582285753 147.710252756854 169.132693907633  
147.966224814966 146.6306281408 155.598586699376 148.404000406948  
153.869144282319  
LOC100129720 140.639012372681 152.538048490265 142.399253818882  
163.030275835038 147.066582834257 168.398366575579 144.135407364167  
157.134782748175 141.446916444258 157.692519370734 164.146345008398  
163.331424612891  
LOC100129722 138.956057921718 127.213640193364 135.648283568148  
146.245915271213 131.244759170642 132.733821031511 127.685469299406  
128.78647242525 144.991442620483 127.800634041606 141.775100066311  
130.219888837397



LOC100129726 155.290648078877 152.979190595761 154.727212986222  
137.049677918041 159.124592503759 138.18056202179 148.825790628891  
148.879605388902 136.788269716383 130.644937322186 139.633941983246  
137.587917564413  
LOC100129733 131.587987756056 122.664353374047 132.637443692683  
125.732389000341 130.736466113571 127.000175858468 123.999819867062  
119.949050292223 125.150706047419 141.066106476109 128.047981250943  
138.768904143023  
LOC100129737 125.976052547953 123.190757763412 122.201293962463  
126.484819755399 135.9489027281 119.13963074637 124.242539075734  
118.589392612801 122.854722097864 123.173506315166 134.045938361221  
120.379393989882  
LOC100129742 6601.004284244 7601.58151657937 5437.78386044638  
5702.11995823367 6253.84268792816 7054.92270618408 8649.07367196998  
5327.13051940508 5040.35379681644 5759.5586948816 12493.2940668467  
6156.29203791697  
LOC100129743 133.095245865663 126.33556674738 135.088149158147  
120.397683153445 131.911579676047 138.942901099402 134.491232148834  
130.388530183353 133.545405737639 140.882766779119 130.937742379689  
126.853028093579  
LOC100129744 115.687997771921 124.124076599417 123.566522075398  
130.054105892394 138.706520278166 140.11211854056 134.119276589666  
136.37481047902 131.910285685889 144.345080865349 140.110258415883  
136.563471322998  
LOC100129751 139.041005010106 149.400244837133 143.707084981291  
127.987449338817 130.941645638407 139.244051199144 143.506243892155  
128.071379991958 131.034010150362 136.957209426823 140.74208906156  
134.337249560706  
LOC100129758 24731.0629964468 26375.3000727296 26375.3000727296  
26522.0142925211 28730.9248954575 27284.7333124039 25558.9005130606  
28193.3833726673 28930.8933474342 24098.0251582624 24731.0629964468  
26719.5528617739  
LOC100129759 268.832884350157 280.337475979102 323.737610506003  
269.770777921703 358.479218923158 465.809961695043 417.36454228858  
354.263934274937 489.118864124059 762.8576747113 629.97342429259  
573.644925180854  
LOC100129767 133.040952285855 137.756209496729 145.339287846271  
128.112595697836 138.149037534929 140.774304412579 152.131804134092  
134.821778017915 131.166819048309 143.195338329759 142.703116372162  
130.443360119099  
LOC100129773 133.611588728019 115.871151134713 133.486155360266  
135.443856371548 120.316950428535 139.444577046509 127.947547987882  
124.715454831847 130.119313219923 128.640202262896 138.907036194384  
124.464941711781  
LOC100129778 147.562757301251 128.36533737469 138.930413256469  
134.56134674893 119.279765939686 146.038599656417 126.285743744314  
140.300833590056 143.583650664594 138.889999702313 138.553151063218  
147.274945970072  
LOC100129781 193.466377788318 190.904614772409 177.091809538824  
171.528350399075 185.002106079042 150.006621336954 171.161297672182  
148.367132982373 141.290905146249 377.593087606046 252.957489543915  
147.176801913145  
LOC100129785 131.01107240791 133.486155360266 127.855167644203  
137.103879676652 134.41693612969 138.416716745934 133.885725703056

130.242779079309 143.327234875417 131.38692240237 143.236593995493  
137.402567669086  
LOC100129786 129.111259771449 120.342513393659 117.923459503989  
126.667650990284 121.898921780569 125.777193592751 145.051794777243  
132.268445799639 130.991496243273 132.727133259694 121.771891473027  
139.543551482943  
LOC100129794 125.027095330593 135.309431186017 134.268075583733  
132.657106732366 125.141185839817 135.884635448277 138.044751228397  
137.81819274774 130.211247943634 137.237089899964 134.152586955217  
148.045391886623  
LOC100129795 138.276865331434 132.524377835171 134.613036378054  
137.517461260687 130.455560026617 127.245190474707 129.956519535525  
135.641355114263 128.997028325896 143.555987405898 147.954079022076  
134.731687541347  
LOC100129808 144.579725208643 147.572660963285 118.81294782091  
153.871893011106 162.808270845998 142.750432197016 147.532747354296  
147.813170436139 147.633793743254 150.929236917651 137.58025011566  
140.640160404077  
LOC100129826 149.899789105328 141.1596293382 158.127523362251  
142.459230639888 150.617039206311 151.570977428443 142.829099538363  
132.413527125434 133.778595695007 151.998942684339 150.933724024651  
147.129702047639  
LOC100129827 139.195281937545 125.880722339653 137.132095345234  
141.74792000689 147.885769870843 142.495333453346 140.572442284673  
140.669947387892 135.899595115146 133.12641302705 145.048033586779  
136.891612156271  
LOC100129828 756.618969995355 882.429823267754 621.354393918348  
1592.29734618345 252.593574250965 330.281193038198 311.337303524912  
215.143973502566 288.770330002807 230.053292316517 262.139211406599  
283.499120551905  
LOC100129831 130.112882549637 134.364838071696 130.24527031028  
130.603837917984 135.252082574955 129.887187837732 137.959775678716  
130.506708993193 125.28279436853 129.942594772751 136.931476050688  
133.645044060866  
LOC100129837 107.170981307304 130.592061896237 120.53428198263  
143.08841562593 115.795989631016 116.597352307016 123.077592992679  
129.740166478951 129.173772079264 121.024572716324 122.136861827049  
120.910703698292  
LOC100129842 134.314636524922 134.283467987991 142.594553057288  
125.783265980169 145.270140096768 137.71627781928 244.544473246593  
313.077481033093 166.485040297098 136.402156383599 198.311821616128  
169.16155608071  
LOC100129848 122.69021100699 135.27739087376 140.757952698181  
132.760567403706 138.988919994625 144.882207209439 153.675939908241  
138.006973261364 142.249715102513 124.657687121111 141.424950841838  
145.085091507228  
LOC100129849 154.611011734772 171.028432989066 153.713298074917  
138.972789382679 139.840256729373 152.032418787633 149.264997927508  
143.224678017244 148.808928892047 139.94624507228 138.735156909846  
139.449895159273  
LOC100129852 132.883408554592 121.74566204771 154.336009472285  
145.09280363189 127.921209207879 146.873719524815 144.460541430705  
143.747664482225 134.038213827843 129.01094835739 134.323365608463  
150.672985449063

LOC100129856 122.046901607713 121.330383384978 133.070896773384  
139.268942501979 126.566165822427 136.042982529628 118.331237160995  
131.662585510218 134.91213977595 132.920775987309 130.665947823977  
127.829001155781  
LOC100129857 138.907036194384 130.211247943634 139.273651128094  
161.646807806182 137.006917665541 132.57219914253 157.729732484131  
139.642457979496 137.698423468762 131.440195723963 117.028963434266  
141.934351226006  
LOC100129860 130.346150829949 145.679907578808 148.630293791756  
114.032874859062 130.656206845965 138.516066340784 132.16600019449  
123.267817390796 134.312156667838 138.12651823109 111.409447323674  
126.153806511702  
LOC100129865 119.669441891401 122.642077625035 129.914077170794  
132.464205461991 136.087702679172 122.837807905774 135.985358106767  
122.909152047474 123.681353449198 131.65084896906 121.679013405559  
132.381685434931  
LOC100129866 196.144420005021 208.257420634745 202.024504592763  
199.101099226668 292.185246573643 197.91325268683 235.407064742194  
233.232319881243 213.877482604185 212.607094117882 325.387193207414  
242.538036654192  
LOC100129869 139.2454524913 130.199581370385 121.353233207209  
122.568743478314 152.241060990474 142.469353808346 131.02157879562  
126.934059693116 136.109975252514 146.612602970963 129.652331277375  
132.899305777714  
LOC100129876 143.521510363933 126.678746008577 132.521681289019  
130.761936205169 120.706421084476 132.598022317288 115.5765427629  
127.578272480621 138.523677181131 138.544053540799 123.30960025689  
140.11211854056  
LOC100129878 131.296518221093 138.218392984717 116.540729581355  
122.438438464097 135.32160992961 128.898603000207 137.575688681319  
128.06233429201 123.588194516972 132.772085211553 143.149424892482  
139.238936770274  
LOC100129882 452.167674725454 528.921893077914 701.481003619067  
414.713379367927 717.419388886784 782.746481112316 938.049312229961  
1429.25367024696 353.826834642154 1538.78070281348 546.755305058958  
604.453803994875  
LOC100129887 133.885725703056 153.374296511216 141.997165490755  
144.625105340312 124.863832760607 135.212715912271 144.145612985703  
147.15999706579 150.746423638097 137.453705355364 149.243164419714  
148.003041725027  
LOC100129890 160.676606760965 186.925138700818 173.225064625094  
167.976680048356 231.600532144945 213.484986945295 420.95713139384  
333.91440669951 213.7326050342 164.615113709166 364.597798667541  
268.454310218604  
LOC100129901 134.755817147859 111.810575716678 130.213596986351  
114.574362093931 121.93549478261 132.287326702468 134.10070984606  
133.336063137966 115.048402956574 126.3539479619 141.653917856148  
123.190757763412  
LOC100129902 17568.5229948989 17568.5229948989 17211.1455384358  
14073.4649333964 26010.7684336005 22035.2646000952 23318.4614981217  
22543.625434682 21315.9767866977 20217.6497214386 19661.6741558107  
26082.8089351205  
LOC100129904 132.699715693605 134.872654203921 134.192409943723  
134.801507994667 137.650917262528 165.406452831375 134.777979170126

136.032310569127 150.170712508944 132.416618775337 122.982686879394  
144.220296819311  
LOC100129905 340.42197893246 338.822464893411 271.615621030842  
279.879377933144 154.892452237027 298.573180660083 148.587929928134  
204.999796322451 178.52221226882 163.967616022079 172.707821624271  
166.335294339013  
LOC100129906 165.092451754065 156.830156083795 169.933706225406  
155.124158030085 151.573920235798 149.091925032548 166.964057265095  
152.188770978528 169.45559708224 150.235026770931 172.084184539157  
174.866036336378  
LOC100129907 153.241806795134 152.942824158634 141.652000792271  
141.370957100324 160.589575894314 164.172084711099 189.044966519228  
192.168634727505 170.08485436731 178.027417594263 214.566711351899  
225.238369884803  
LOC100129908 154.515091049526 145.526941881413 150.989202517615  
131.119810851017 149.280480796544 158.445124076906 163.500384982242  
150.822586904738 146.68489318358 148.82034800623 155.211976328553  
144.073739611496  
LOC100129912 144.482364671273 131.954310449801 136.72715888684  
126.982340580909 120.15332480712 127.023543953724 142.153830345183  
134.741781820234 124.929146609285 151.557004418682 136.147096999442  
134.06834346533  
LOC100129913 138.915185051749 142.163834995141 130.449669345302  
143.596530151289 140.752616434418 133.541333581593 141.520125030042  
139.493025452991 129.549673572516 138.751781355083 127.977782260866  
134.227796103219  
LOC100129915 140.04612725812 131.741688265764 139.446914318877  
132.471014832851 138.852212944492 144.94824685435 139.694950277714  
127.018746030517 146.792951584868 145.34332740863 136.80943340993  
134.927386619223  
LOC100129916 132.864018034342 142.588013648337 164.74234322574  
130.378441113977 143.256590560776 139.197364191101 145.25198093836  
144.237691418911 144.94824685435 119.330439721904 151.010493695217  
138.323567041191  
LOC100129917 138.997524526643 144.191491000257 138.655815405894  
135.596007994731 115.264104392064 131.155117105954 154.286043402527  
136.184427467391 134.76397845723 134.140533647509 149.091925032548  
142.89427871125  
LOC100129924 138.677282903963 140.668597897404 139.737748157901  
148.913181799692 124.924794564647 140.381386314817 138.944595164363  
124.480385254916 134.446758753426 117.665111767293 138.824082857747  
133.519359066907  
LOC100129928 115.14883090249 141.808122700968 131.946938297748  
123.935072913078 137.969750384554 144.752418965039 124.267394371656  
122.327353563917 125.481506166304 113.018985316061 128.26957712082  
122.615852682436  
LOC100129929 131.683942368268 131.228779762508 125.870730238298  
114.44610607807 124.306049555272 145.391496022306 124.775529469869  
135.931715324468 129.990534497026 132.693707848508 137.677396262152  
130.539632182729  
LOC100129931 145.526941881413 136.669003646622 134.691038011706  
129.806104966617 141.97478198531 138.972789382679 135.385133545332  
136.342634691443 137.478556403046 127.727311123825 134.537123332992  
141.006540481119

LOC100129933 132.47775411384 113.133798430215 108.779204939177  
115.066084565112 174.221939793486 128.554574566655 117.442158626871  
139.752845127584 121.681261213422 128.046956360283 125.101995710829  
129.792548588929  
LOC100129934 155.023934989559 166.688771186254 159.951697830252  
144.338069855334 162.586012723045 176.964088090133 162.808270845998  
162.638805580226 151.747595672228 215.802713097166 226.25694727283  
176.791758333054  
LOC100129936 126.921925660996 138.250288796456 121.22760405399  
130.651062724029 134.717258604899 122.213445520365 130.195234920895  
132.419898122309 137.513315427454 121.23469201559 132.730924522748  
132.164132609317  
LOC100129942 130.336466131215 126.702705908175 134.653131708903  
119.968081249475 118.708644971927 129.517511177852 132.693707848508  
128.608401533371 121.575942603856 123.955819747616 126.214166842097  
123.015371659847  
LOC100129946 128.917399281607 119.854401979951 137.792806301902  
124.17231659571 127.314089756429 120.160652344221 122.111982327877  
115.750690887988 121.006569103388 126.080780033301 122.392159083328  
137.212568398657  
LOC100129950 139.659787180513 135.058525398122 134.06834346533  
134.372560968918 142.80027343095 126.690066353698 136.294479720968  
127.088916295784 147.056182807232 135.127041919869 146.54504551183  
132.781725233271  
LOC100129951 122.238996815745 125.584202037776 122.746185691827  
117.580122770251 120.255081121925 118.673325109944 119.040642659337  
117.65847906412 126.025161261042 132.579323148839 123.104790590045  
116.825172441325  
LOC100129952 191.861598059182 205.742386129597 197.277310409328  
204.999796322451 266.252875242286 234.588584245938 235.183590602209  
177.831718771025 187.461448376593 218.672831303767 198.620777452192  
206.488530785667  
LOC100129954 147.195127201893 133.542620077059 127.03153185998  
127.302714624905 131.2834389999 134.113464449375 130.112882549637  
129.869363181125 125.649525720177 124.516264338772 144.056644468886  
138.852212944492  
LOC100129958 137.374784875444 135.114900669781 128.655549652719  
133.720281080856 153.405052909585 140.398923642686 141.91067228913  
124.657687121111 133.691053105482 133.355353808577 147.439303942026  
148.215172022129  
LOC100129960 144.601370216162 145.810213943313 145.992883153161  
149.446542462474 132.628358688595 136.767307268217 153.368006275096  
148.049570580734 159.515698265424 189.160454951382 158.514079887374  
165.634117939571  
LOC100129966 128.867710054234 114.452922529209 143.298218989451  
124.207200622684 125.189588215659 133.45690661612 126.362418476129  
122.550707067805 133.180554954396 123.960761343425 122.501785735146  
135.640456648007  
LOC100129969 124.416676687377 126.88066987372 128.714459781294  
124.717079082023 123.007103885415 127.284885819903 117.803508098322  
122.201293962463 120.479270037091 120.406577236405 123.207402172696  
128.0805889548  
LOC100129975 174.717158790668 163.668476670167 175.891947478891  
153.440952021924 149.168758815526 222.605195861218 176.328994356625

165.45479542657 152.082927731045 192.244413515864 183.969897305028  
240.253944604431  
LOC100129977 142.365009028839 137.384815877899 141.710076413441  
135.27739087376 133.556805738801 136.878656455606 131.890554636938  
137.72327986309 123.235136639469 133.969054754299 140.728126380228  
133.027592711375  
LOC100129979 145.155989928336 140.978511668091 136.413745926388  
140.497181450706 141.425393615228 147.483379646393 151.436802637988  
142.829099538363 152.465176508162 128.329985147034 164.96631670799  
143.46919253255  
LOC100129982 220.217745732407 208.955110569558 227.441436540742  
192.827534610486 184.557630172634 153.222807811478 196.536086443884  
185.17273221366 176.533058719908 225.820503820866 415.82312615045  
201.152639979358  
LOC100129986 134.558435781672 135.100687929821 145.205833182385  
118.662030856474 130.022574966461 141.686945908315 127.779401352802  
135.153588830407 129.640303191006 126.075528093376 115.16087297104  
134.185202200317  
LOC100129988 138.944595164363 143.338628928675 124.00806841872  
129.583916648999 156.94531513373 144.216394153095 130.37185420347  
136.290486122369 153.792925101459 118.75237770613 145.606098951179  
137.180793826675  
LOC100129999 122.944699010173 120.80221197797 131.056011738962  
131.33321167357 129.998824457005 135.182524652868 144.713108022551  
116.070254821073 126.037968297611 125.995374488153 123.507963359911  
132.005753222789  
LOC100130000 188.654966029389 196.419891542139 241.917371866481  
158.545435407585 104.154182930018 145.830916005206 126.230887413874  
143.080742311914 152.426527124644 146.150048478173 133.473140653666  
148.665627690915  
LOC100130003 1747.33558205825 2153.17165155392 1540.71556891815  
1301.61742965939 12046.9345159347 8072.83367137971 3235.38149926838  
4759.17973319588 3798.89743803968 2808.78353621111 2421.87041217217  
4251.82554412383  
LOC100130005 105.521320791331 125.410876867635 120.297848408451  
123.418266047461 122.780453116176 127.385776388242 129.637555509848  
111.783160346742 110.925532078514 122.160459795959 109.886197655915  
150.878323882503  
LOC100130008 134.17351030102 139.796168741191 154.049004176595  
132.788102310611 148.879605388902 170.590817818414 138.39424470172  
154.818414925242 135.886859004208 144.900785401228 144.916193282062  
143.917152377544  
LOC100130009 125.493004972076 113.005774989833 120.547683754604  
111.65024009102 164.022021048626 136.152827218905 137.258429777402  
141.404832197192 120.752194675024 113.119021336236 131.324822348301  
157.50873249647  
LOC100130010 127.365142833355 130.839508306116 131.093917654245  
123.732299841696 126.528589411462 128.141725976839 135.511902377219  
119.586157804692 128.837901660985 125.052770277549 123.762963668211  
128.268241654928  
LOC100130015 132.472505035111 119.937665469629 134.30854633824  
133.570075399424 134.458958352588 132.804216633852 135.405742719464  
121.201267751612 119.785062256421 127.361974492821 126.76986764971  
126.158204790885

LOC100130017 141.323417580648 137.847504914802 154.390764802264  
138.825961991209 152.067897082883 131.712745388563 145.261662166215  
146.179543599917 129.914077170794 147.46607538135 146.181764812924  
156.068308349225  
LOC100130019 132.344296085487 120.076742232995 131.079066781806  
128.572388808833 129.485710719291 150.313058722346 136.685430908977  
130.29531841096 139.817493158675 124.142882936234 127.179420421981  
128.554574566655  
LOC100130037 152.099431258333 133.860077101582 116.046983032621  
110.847680175669 121.807661901776 134.458958352588 129.985797334276  
121.519309043513 123.822571859503 133.911650164508 133.278923716119  
123.007103885415  
LOC100130053 4404.79209330918 4222.55224241399 3413.39994653641  
3765.25491426198 696.650617523899 3677.23129570773 1927.467713716  
2763.86550710042 2277.60839052397 1499.07462479938 2763.86550710042  
2031.01186679713  
LOC100130054 126.578035793406 123.640123613529 131.292195405993  
128.39171386085 131.015519445322 129.173772079264 131.458411820485  
123.129785564258 125.828998007608 119.666650919579 126.788749235867  
139.60494712939  
LOC100130055 140.457727109762 135.911903336544 132.698721834882  
152.44293820056 169.311264420133 149.04685599998 139.621016978072  
154.586825710624 147.196687432745 132.385096888962 131.272948162154  
150.602976963975  
LOC100130065 138.588751758469 138.354300118735 136.253264628863  
124.800221241981 121.316836274255 142.508525378171 128.455670598648  
135.554736716321 144.007071548045 147.428180649939 134.08270035062  
133.422190038356  
LOC100130070 2105.87438782831 2018.81730267601 2332.98074920207  
1285.02292965374 2756.22069438696 1908.81864728547 3749.80462365748  
2210.67250954072 1632.07671492041 2081.45603839306 5115.14161559446  
2753.89649259242  
LOC100130071 167.337624316172 163.809967446414 161.806144472744  
187.057683141644 190.939726271153 165.232545721733 196.908612360694  
163.846242743377 174.615694779386 193.502988612307 175.752091217351  
187.852455291319  
LOC100130079 135.961724275921 137.850437814788 128.593112520767  
140.518206716196 146.569958732206 142.968008233583 127.629258006335  
137.605244950708 135.114056458478 135.391788614828 148.362613706275  
136.762273376313  
LOC100130082 146.486480663438 124.715454831847 120.992440100307  
119.717408713154 122.854722097864 132.642931022024 121.154389729409  
131.18368961955 120.571074646092 122.03508430361 130.556307580561  
121.526724715417  
LOC100130083 134.111348656261 148.367132982373 148.848823912244  
141.401480567426 119.395894479869 129.43892498257 160.640160107693  
128.9628883204 126.426212216646 146.087596132093 133.271506838359  
125.942455135541  
LOC100130084 156.942156078314 138.785538575745 131.919387743094  
137.06192448185 148.656917603142 147.125005489393 146.781221728543  
150.696963699371 145.487783396345 159.455596750304 131.312580984876  
151.893573927407  
LOC100130086 149.8035588048 140.142884879106 147.535225305685  
142.705504445895 155.824409540332 150.311274161073 143.686906051698

150.653030597808 152.983678871668 152.915692742755 145.136075215082  
142.406904585501  
LOC100130087 153.339992195184 152.382558543399 178.222120802125  
149.625528206375 140.383646018409 146.672270660899 125.364821583438  
129.825824640378 138.609972011765 155.690773461824 140.732618320154  
161.144841967903  
LOC100130092 282.511614929917 286.310923582432 316.722160860531  
306.946103334814 240.94056877904 334.916875239616 477.489368828457  
402.366797969833 304.900910626137 376.276954313674 320.707687986324  
348.067061666237  
LOC100130093 164.87433908877 190.018871923219 182.495117800073  
154.826710617351 193.786889748038 158.452089329714 161.217964573491  
151.808767243647 149.904691068054 143.641777655752 162.743192424569  
169.124088593549  
LOC100130097 133.541333581593 134.669763149268 127.55397077248  
137.947606003247 135.4702891855 129.689855810051 145.481279504679  
129.425699141995 126.830269821364 130.890314257211 154.534605635191  
128.112595697836  
LOC100130098 125.899200544217 133.872561340464 143.644862018676  
131.970514300585 116.263405190786 123.237851647499 126.288011849541  
134.499588539919 113.734280863323 141.336866031027 116.793408204625  
129.80429516198  
LOC100130100 135.632298302036 147.022594294963 130.278980631435  
142.428578698775 127.779401352802 148.607885635446 137.217104547797  
134.650161382949 136.745596788338 145.409722106953 143.901267937876  
137.82918941689  
LOC100130102 129.088718286391 129.201101445773 140.888439624918  
146.194467350201 116.902574164498 152.401204710292 142.613654158833  
143.959910170676 126.457337803727 129.286782862113 131.921799405427  
123.67449826277  
LOC100130107 129.741644654541 123.02879683948 145.485453268383  
135.920830568556 126.247378598596 134.418976976995 124.176944998906  
123.7615105541 130.173734963758 121.991692204056 115.619116556625  
121.448671447499  
LOC100130108 159.35787888191 144.182891591399 141.137459291428  
138.202872275661 132.028327486943 139.452773383624 122.837807905774  
139.557059245431 140.321675137237 141.468076901305 149.615585907229  
142.674671804361  
LOC100130109 133.7012683837 131.633827974141 139.171486871664  
120.733009784454 114.664782541261 134.05596537871 120.822923434486  
120.106270603148 136.749771286979 125.915689078001 130.816301920872  
126.845048064014  
LOC100130111 121.977373818244 132.240470270795 126.81140158672  
133.935910746769 128.63301490285 125.569364049349 128.683044953833  
136.732319750425 133.101674466013 132.32633643811 131.700854556022  
123.53212786736  
LOC100130112 129.102182717009 122.290822230565 137.337681987169  
125.579970155301 137.832597613423 120.551603446364 121.107979534361  
126.51808376464 134.389518389888 143.305848051593 106.953841653951  
126.536245975137  
LOC100130116 135.594186066942 142.934869757362 137.43751840683  
155.648782851696 130.816301920872 155.253032078086 129.573520898314  
129.931923954109 133.608461289137 132.518394343751 136.865340099645  
136.396579126676



LOC100130123 184.473198008234 175.084729757407 214.662648581622  
205.742386129597 164.757907224537 205.121123131992 179.525651423361  
168.254689624696 189.633348499854 219.709231012465 198.166270627544  
220.258804437828

LOC100130126 118.901581218802 125.460535433764 126.391083453973  
125.04156726504 136.235029743075 145.511473738224 126.925982415892  
129.155804800869 130.524630778991 137.697452180659 141.218832234405  
123.526427901605

LOC100130127 140.26206122305 127.245190474707 126.678746008577  
122.955724972547 123.227904580467 130.297203474319 143.639894909386  
131.483427112288 120.212294184999 136.039076665712 120.050548624975  
127.67121559907

LOC100130128 134.504873813959 145.485453268383 124.627339426244  
126.980375035189 127.346646117375 122.284431229917 141.16066528405  
112.365278258185 138.418604660734 139.710828360107 129.600448216577  
124.291944151031

LOC100130131 147.664505309713 137.840396641618 129.327645260099  
130.068063785009 154.683723064797 148.732027660387 147.598602877625  
136.984172424718 143.741676966126 138.785538575745 155.388752614336  
145.500011956699

LOC100130133 137.666849842576 140.405405916188 142.889911562811  
141.075421936212 148.309872393 144.411176964424 143.383697128285  
140.772074031028 137.957654220875 147.673016541108 158.420821486138  
142.671190279415

LOC100130134 146.416318806523 139.295597388725 131.419663282022  
142.246864759311 131.829906202014 147.325222091872 127.887666721519  
134.883708339914 129.589056071463 136.5680632044 138.458816023289  
135.695576019185

LOC100130135 138.165240772401 135.018710687313 146.11669387238  
137.30143217822 144.92594578882 140.598731096952 133.533718725309  
145.608087633951 133.216489794592 132.989846726946 143.92831903543  
137.85150144918

LOC100130138 175.111460651956 166.932757191847 162.885054245809  
179.432235153344 151.363607695078 151.930565620382 158.859389972316  
161.002880798225 142.444072809204 148.927040248436 173.552535486766  
139.334552725255

LOC100130141 135.747939020471 134.751916364581 136.468434653208  
142.406904585501 136.529820456592 130.998637545686 129.608034744581  
124.972772541334 130.818181991958 128.568463697992 126.995207465164  
138.528083984177

LOC100130148 131.144774362059 132.994716261577 133.564350740049  
134.206518622834 131.514114515895 133.533718725309 128.868894803208  
124.536322123442 132.908367372426 122.484351696828 143.403396831929  
127.26820735867

LOC100130154 461.482735533799 420.160939829121 337.973433871323  
424.751154004399 523.591472915151 576.10291008626 578.811908030805  
692.53483413403 710.999354960979 1818.92700816112 2611.61260614408  
649.052806726591

LOC100130155 133.570075399424 132.045595972712 133.308383825604  
130.452929012459 127.683344133492 126.209426865327 137.385562131555  
124.42974326791 135.738699497293 134.56134674893 135.013075032671  
124.672483602517

LOC100130157 139.411792975474 107.344825308293 122.063996556575  
121.787875792887 132.817645625115 132.712573198794 123.891115326934

118.66946078241 123.81177057082 134.314636524922 124.952026709219  
131.381189141974  
LOC100130166 129.329521415816 122.543903508753 133.697364081712  
120.394220715157 139.904952662852 173.573412346985 157.83121828793  
267.535469518664 180.01471631205 144.796089646941 116.977202125093  
188.952730860801  
LOC100130168 24377.1316448061 24098.0251582624 23878.0022344804  
23318.4614981217 6077.64695330731 22750.0246358215 10397.3656932566  
17324.7697569598 17211.1455384358 9636.32818474581 13324.7465248375  
14866.8264879369  
LOC100130171 129.151767489346 128.002822538671 121.838802846453  
126.246487873182 215.950811436427 211.160781061336 164.423960071908  
196.136080427522 191.987301954927 179.704370382771 172.230528631803  
190.348359536057  
LOC100130172 129.408282688425 144.107029869771 127.938245853896  
135.341892490559 134.350054065624 127.644315207178 134.596391166462  
140.283106734666 128.814967091609 135.509927917168 130.501010489883  
138.311892121437  
LOC100130174 123.227904580467 127.765987130281 125.693321471759  
129.46430369977 124.342911165267 130.004329307977 144.608882758506  
122.392159083328 134.545983176488 126.168223112165 134.203949774763  
127.193553054979  
LOC100130176 129.32466533596 134.768694020981 127.447218258785  
125.26492723752 119.083957999725 126.912226185444 129.267923706188  
125.00254973945 132.063395162855 124.491884305455 141.927204640355  
126.118745937997  
LOC100130178 403.657727266403 447.182566890086 448.106077184152  
472.279492678374 946.640841062802 647.439372562271 877.598505913096  
1268.73280473728 791.840531191783 629.707646271678 688.247581763352  
658.968318349334  
LOC100130179 129.029151164978 140.000880942015 145.61758790738  
139.885054845153 142.03837243998 153.209409960324 162.547569833931  
158.747029092329 146.984267484873 149.933919274985 133.954514563283  
147.89884142817  
LOC100130184 116.58452862953 139.585373400347 132.22974656114  
127.924195488323 136.647239621513 138.096262211809 135.798387504219  
144.274198800981 126.734835642553 129.46430369977 130.872296869843  
135.271290872348  
LOC100130187 150.97777780024 136.64902495937 159.52147764862  
157.761231106669 147.205511952997 143.40955339735 154.728941096647  
140.842305941666 147.174977926293 131.190238038695 148.47415004128  
145.669033804967  
LOC100130190 150.346002924933 157.361421272816 171.345989796519  
144.179880084235 170.541689758579 171.784981874184 185.046826969912  
172.20451139581 165.70840218273 160.964435028806 175.891947478891  
178.313238745665  
LOC100130195 145.000523037022 133.966277922005 145.733828447934  
134.981272056795 124.720004905439 143.769240322865 136.916286605302  
158.963726206466 138.628169506372 153.251468534012 139.311816781874  
145.396723478249  
LOC100130199 141.332402615602 132.801619479245 141.521742442341  
133.266524623338 136.467401249286 119.622243247836 138.323567041191  
128.329985147034 138.620617643924 138.798959235723 131.951649373072  
124.347680638586

LOC100130207 130.119313219923 133.962129094978 140.877230937687  
131.865164933746 118.578205738502 125.710199961297 124.676743480622  
134.29036009792 121.613684281664 142.656762407774 124.083648029911  
133.331037738063  
LOC100130208 145.34332740863 128.708956947928 134.316859658338  
157.572446865749 133.16868415814 145.522435728191 141.870640394206  
130.957441406855 124.539006083936 151.356975600962 123.955819747616  
131.334278105981  
LOC100130211 146.871145679651 121.778756075848 135.873325130921  
144.935571704834 138.528083984177 150.279529635193 163.936973279176  
135.886859004208 143.999000471746 130.541449457342 138.592943322694  
144.476157581998  
LOC100130214 135.691862612951 135.930107381894 131.904624845305  
127.822440239962 135.278293996444 138.010385979692 139.219476681919  
135.242328667085 138.293242905081 129.6505724783 142.185345091219  
122.216479103528  
LOC100130216 123.561016079801 130.185134787768 123.375592272781  
134.848210768603 123.789035728194 128.174382934295 138.792521681771  
141.440563159897 118.497920969001 140.652086055776 112.578934972566  
126.332299789266  
LOC100130217 140.419686138586 150.639235242268 138.755173333171  
140.018786803502 140.222121251146 135.701041557713 141.54943189147  
133.775716376056 140.487887891414 149.495077381649 145.78573175226  
147.754489751457  
LOC100130218 130.941645638407 113.980716384814 128.411138850655  
131.554055357245 129.461160777216 135.208478510375 130.054105892394  
126.203255277356 132.955473649746 124.232144678947 120.557880292561  
129.360773522498  
LOC100130220 129.130212375815 138.687013437904 133.686850910378  
136.118702626862 115.327402810793 137.384815877899 124.238319768621  
138.828562311512 129.382242021964 143.365976841902 127.792241991414  
142.843882404269  
LOC100130221 135.719702250709 132.057808599068 121.472885562857  
130.779805222363 136.332399354517 135.776154891006 136.711382832269  
136.448045428081 131.434121613176 126.370252616961 133.97321873161  
131.841436867483  
LOC100130224 127.648224668964 139.694950277714 135.4702891855  
134.346754381858 135.767818903328 141.830432745537 133.819095523687  
131.302225305148 137.546487338984 139.81502919163 129.394359810841  
130.724642809645  
LOC100130227 134.585762409782 101.149125916797 143.467053670148  
139.587192809431 119.720132373023 131.308384127079 135.096321258167  
120.188885479773 115.343251487944 122.561285351587 115.47716627378  
110.624328647003  
LOC100130228 128.933672074497 127.069495559614 135.588132669957  
130.42746492878 136.311902195562 137.082234284426 130.607857562345  
134.810212106122 130.920010795017 139.070571230254 144.705559511075  
126.009358591395  
LOC100130229 188.780089746036 162.096065738375 159.182533998843  
141.606501859513 120.422401793885 266.442565636226 136.942583515174  
222.8766610624 234.626574390973 220.533113603343 290.541184606565  
172.722177339418  
LOC100130230 140.599584289987 133.192757350144 156.102877632001  
150.75878820215 144.808774137749 159.824012085212 130.729989463558

156.745051321143 140.447933562667 138.805103589625 153.5256657638  
145.431393142782  
LOC100130233 137.282038401275 132.332128706656 134.361064431414  
132.539585717666 125.945916345628 134.675247731364 151.532859494021  
126.87882572904 129.176532377543 139.054140295282 127.993841618875  
141.266129417042  
LOC100130236 116.20967792121 125.139029579691 135.200049257744  
128.803632055969 115.76177719261 122.317877997527 121.739219824085  
131.946938297748 131.611842804029 115.247223837316 116.268259618103  
124.01558540593  
LOC100130238 127.166821363722 132.183250916482 140.457727109762  
126.260691770282 132.253450751554 123.706910388724 133.76515446791  
133.26167785455 117.264555636952 133.061016674211 116.983869766097  
130.860938463815  
LOC100130241 128.56000638844 134.580526467375 124.981713747923  
140.21908493941 123.598210440312 123.881658891576 129.358112503486  
138.317443162096 135.472135601859 127.458099438957 131.77642590781  
139.106442824079  
LOC100130245 124.22833964472 137.601181150371 123.622533094122  
123.703840971923 121.957155610892 123.474836673474 115.608857734241  
123.598210440312 120.065876525792 143.431389389919 130.199581370385  
115.242526386551  
LOC100130246 127.503849690009 136.008118769513 131.587987756056  
154.064184525311 127.026168862919 138.723149134933 133.777238071968  
133.788197693571 124.693253194681 130.491742824575 133.617501101389  
144.617654961472  
LOC100130247 128.742617750403 143.550908565401 131.707530115415  
129.381229220393 129.389420352857 148.739888930189 131.004145546364  
142.599815022061 125.005019889478 135.18026749895 146.877475544399  
121.508233749444  
LOC100130249 125.549968985241 124.001295849091 125.269726165403  
120.867408760075 114.129044806825 132.336431473522 120.131839791515  
125.290320836648 116.342242990651 126.310788291075 126.386738502885  
129.508990861362  
LOC100130255 149.698664700146 145.998177732093 148.212445624699  
146.31980311926 192.441337304606 139.979025013908 155.223806761489  
162.592306630033 150.63456320644 174.717158790668 185.342353172151  
157.264673452646  
LOC100130262 132.623563631011 128.955241553429 125.902015309754  
133.268239762624 127.998531115697 120.452958447555 137.068717031383  
137.370670726978 142.437605582605 132.183250916482 126.159880038854  
121.281990195113  
LOC100130263 166.162656500954 172.698181201849 156.671252606074  
151.865924163231 180.889946069121 177.812335593522 210.822216545773  
185.886737029845 167.201570648434 209.070372320593 196.329602378007  
200.98533822317  
LOC100130264 140.005968571997 124.682396766302 129.11843197744  
140.101511236793 127.03153185998 130.705091244939 137.832597613423  
132.367155914392 138.152641686151 140.928627507036 128.574419295906  
153.899573902499  
LOC100130267 127.935614145702 130.122672154144 129.508144066344  
131.314766140505 122.621839614189 127.114560076444 131.121343131082  
119.98864381644 126.115828232308 126.247378598596 119.13963074637  
141.895211025017

LOC100130269 102.563722570171 123.745824514261 129.599661790972  
120.773552653073 120.182787241888 128.997028325896 132.096095362238  
110.784682137658 128.029736384348 125.967294930279 122.631814400575  
132.597481743242

LOC100130274 107.049865500702 124.439917584199 136.269445455239  
127.242627779136 132.431566491955 133.243679173608 132.557945249016  
133.14988092185 122.642077625035 110.518806964366 118.718048764985  
127.558034562151

LOC100130276 930.25842384208 964.093668483033 690.903797251841  
959.126054626181 198.681190016247 798.943242964857 426.364663722264  
644.11603826131 461.143361255467 348.711663415777 837.603727062008  
486.197269936713

LOC100130285 144.629350188283 137.593577427321 148.376194044247  
128.093945009882 125.40832206502 132.854078420045 144.599578905334  
131.811011266156 125.021217009254 134.949572471421 151.979221390032  
157.352236520828

LOC100130288 143.681220324074 144.665869508406 136.101501973431  
128.510903178542 140.904883114871 133.665206343648 127.771225410866  
136.140327952231 134.569883788949 122.436106757578 141.432461374482  
137.47514052942

LOC100130289 171.521579011287 164.172084711099 157.612067634423  
153.67215573765 340.42197893246 238.149614104568 182.68965110437  
218.156162474715 185.617936412633 191.830711714844 224.528190554963  
187.586093248437

LOC100130291 267.149525812834 254.315783394932 264.429717032654  
272.770616373687 205.987280015028 173.959556466614 225.890195278753  
254.63506290698 209.7558663154 201.123529130035 234.322989368622  
174.375388013694

LOC100130293 140.264060906597 121.519309043513 135.364039983762  
147.170427656724 133.470643135354 131.497454038525 162.110943457969  
140.146894533044 124.461997520222 134.872654203921 132.379706531581  
154.140863428961

LOC100130297 140.058153633802 143.04129238495 142.902838068479  
130.63591305094 127.456181182121 140.904883114871 146.247825342634  
139.602168254761 148.527528612375 152.872139211415 146.97334315047  
136.556183079815

LOC100130298 134.549628985766 133.724135305758 139.957560460935  
139.796168741191 164.981665344298 136.949403128211 130.646956516128  
134.35958389775 149.217191121377 138.3792224631 150.297422529071  
147.278236958386

LOC100130301 118.749046585251 141.140392288975 127.412539650291  
132.576755070703 116.408126010926 120.283706459738 140.212048180435  
129.888444399067 135.715745768179 128.649329515033 129.995417218564  
123.30960025689

LOC100130308 666.344430142655 784.170983714588 789.971871940893  
639.38881853171 1722.26954281876 4073.21075791737 1800.25771851544  
2016.52142068599 1482.15461429206 1764.53168329081 1853.20812924694  
1836.22560264874

LOC100130311 128.824243581806 137.647282354299 128.468978498871  
126.235567899449 120.394220715157 125.010266083832 130.567443018832  
130.778164962583 130.562422910426 137.182323015758 137.103879676652  
121.607527525765

LOC100130312 152.500670025483 166.981212790122 182.346834032145  
200.242239130026 152.479402912801 136.089888639987 138.363553671822

136.83883055114 137.123016784819 150.324132011201 121.003207135942  
160.557818466874  
LOC100130320 131.977212025523 141.18490443471 128.348910964448  
132.727133259694 126.647643493986 130.728465509213 119.686859562393  
129.489867764242 124.070171664904 129.11843197744 125.117333434527  
120.208584170364  
LOC100130324 134.48825480809 146.559502785264 150.547096071626  
145.041430440608 158.774910841987 138.161690144518 141.29868389128  
137.113439304545 141.018087546273 139.625635881693 139.430808017891  
132.47775411384  
LOC100130325 144.988803993714 143.320787131532 127.769405736754  
128.858923585925 133.78629612147 128.790166506932 127.337833551369  
134.986030185477 125.729079191033 138.796257513868 129.375772737722  
125.304045138994  
LOC100130328 134.576622528874 135.866980620144 135.738699497293  
142.558109812638 134.503552797411 141.016596301267 142.728311130348  
133.854760285591 138.343232981485 144.096624787142 138.888049140099  
148.794293762142  
LOC100130332 219.044271073282 193.275162354467 213.847316974717  
193.813717161291 180.850779069931 205.185206972064 185.30916081621  
182.810581377888 170.998961353556 223.778708427552 187.231049280818  
201.480444219547  
LOC100130341 132.011199659803 136.84840505336 129.061316880624  
132.146027935802 129.984214994811 133.392934239554 149.76931674417  
133.103403333542 136.685430908977 142.459230639888 126.752999657665  
135.9489027281  
LOC100130344 135.166677520468 128.495276191943 152.547558436703  
138.295019395552 140.792400101142 145.776143302784 126.809252651352  
160.592404712197 142.543569032033 142.442450622311 146.462544135666  
145.131215503044  
LOC100130345 137.109541758085 137.033134002983 134.825699448987  
134.52098220054 133.499361793303 149.704586651832 131.716370298507  
129.01094835739 131.230501496659 145.597134236583 142.137885203233  
145.468654174037  
LOC100130348 121.939618902165 113.199690522854 127.575660581922  
119.873844587252 117.958297137758 115.224011128183 113.627435441258  
116.831725094917 132.600208090551 129.353536603449 113.748724650063  
131.566892082703  
LOC100130351 152.080057231881 161.89906072679 140.378255168229  
168.729301938015 137.929082565223 154.321219471319 137.957654220875  
152.295451313545 133.088758771353 133.634886800037 129.997181739652  
163.262893278578  
LOC100130353 561.609211243027 650.263737836685 421.929674562786  
607.499206410372 206.585387130993 427.084392965651 266.316485802808  
534.505132658177 270.069634610818 233.690524419327 366.788087591332  
337.487980551006  
LOC100130354 135.395071593072 118.636694749194 148.22974445263  
133.310323593945 143.877226672663 132.703034017237 142.22515098612  
121.874296836854 131.486917325752 134.758222337831 125.110064579814  
134.580526467375  
LOC100130356 155.104697146664 152.832573288735 137.975369568585  
149.070750686003 138.058404474114 140.527521345097 150.815117344434  
142.711117470317 138.640919060725 147.870549240703 150.854580568572  
155.111346336412

LOC100130357 134.447878635716 142.14654303591 163.108825245937  
142.081013617671 151.893573927407 146.978110148492 138.452698593232  
139.191746593825 122.426568507144 132.155877196474 122.10489926804  
132.192775993078

LOC100130358 137.378528742953 138.645156942894 137.229871801676  
123.668707648172 149.513744292932 132.992071643179 135.441550832737  
134.008118774075 137.7724100594 132.233396667074 128.251087452744  
137.303701514064

LOC100130361 165.813771791917 167.077669654786 147.653573379877  
192.860161535869 157.635531050489 160.573172150801 157.646948327818  
158.68792959603 135.585648980469 147.320976507643 149.995272585012  
145.472859089272

LOC100130363 127.938245853896 120.473038066927 125.050945917101  
115.184395637553 123.126240234396 120.07404952486 129.455347273068  
114.691842968597 110.935688075738 138.108184983014 122.027632589515  
128.990911924499

LOC100130367 279.668007824988 307.570405241182 281.304989265608  
301.695991929957 155.441190892146 306.773350448741 232.083160165968  
252.548942594125 206.876572583814 189.552385508772 199.397633942623  
209.984545596312

LOC100130370 125.463718280745 127.995790782392 133.42964827086  
134.275773172492 151.60113116166 118.572988141773 137.591469499374  
128.895325544109 125.798453479983 132.790039196443 129.026732674277  
120.967523586161

LOC100130383 128.322884322951 132.902437860565 123.45581374935  
131.060030943633 123.922817231917 132.924341641217 122.746185691827  
136.089888639987 128.798413084891 129.203236898198 136.003277940379  
128.585911203394

LOC100130386 142.478528530514 158.353171576491 168.588120398433  
145.514859606031 138.474429223902 139.574895021783 156.136962310077  
146.392657608076 144.216394153095 161.412427590994 142.011019998327  
131.179786925029

LOC100130387 129.004264497725 134.005402534879 141.059033576475  
132.01588294465 151.27882940428 139.606654715326 133.634886800037  
146.316145173343 155.865540894526 119.005230164124 155.007516124803  
130.728465509213

LOC100130406 108.04922729993 123.259322051795 130.156775178934  
123.994188725172 127.943935415045 122.385508330707 126.124937863679  
114.902673141786 131.221105247771 125.598828334465 105.25877906031  
119.720132373023

LOC100130411 135.735535533738 124.138036007288 118.891276329399  
136.390047634643 130.914932329297 125.566982723725 125.749024723383  
131.054302682707 143.405079593778 124.859984709406 120.833139334788  
123.306499698566

LOC100130413 139.161483596756 142.851432926979 138.213742418402  
149.657951204528 140.354508398385 145.524305076788 147.610616423185  
148.247826830556 149.548900791507 146.64835267642 173.586160103539  
154.617462666847

LOC100130417 173.10229478279 141.359142214228 150.073816271065  
160.466187961848 138.491922816359 148.960077949157 121.871105084095  
125.5449326311 159.223980639045 153.554159360954 192.465510013851  
145.28524062436

LOC100130420 127.799190369808 121.973581817041 125.999595008166  
129.384531576943 128.287127680554 134.378951325825 134.319316977485

135.031430487047 129.483116877682 115.332409360957 131.157702791998  
132.313884627836  
LOC100130422 178.186273279101 166.81024151246 167.817232948801  
205.4648759901 144.380485359951 166.9499656083 127.392877191785  
137.650917262528 164.603403251634 136.986022901377 215.453915231774  
140.199334790854  
LOC100130426 131.885529813944 144.292679144059 134.087875547168  
124.403662787819 133.642815510945 142.869595099569 125.208803405105  
133.369314179341 126.159880038854 138.93292293598 126.34649262976  
124.443643568527  
LOC100130429 136.436762791912 124.974113630014 129.689855810051  
126.0944894315 145.407517107023 125.549968985241 136.743659350798  
130.488972210403 126.728375196449 134.655842662899 116.360144963753  
128.001109846227  
LOC100130431 112.800733398209 125.940081665592 117.706795566317  
133.111791289725 112.65454329872 117.144778357339 124.031916322066  
116.449064666763 130.215290990406 143.710449544388 111.783160346742  
122.685360126599  
LOC100130440 123.285059856341 112.3786222545 116.566190779365  
113.422559344178 130.782296492278 121.006569103388 124.130599753093  
145.587386656619 123.745824514261 121.768195574022 137.714430743204  
118.461037435114  
LOC100130441 132.562090247233 143.662865541299 133.111791289725  
149.899789105328 125.569364049349 139.016274575854 145.741465098455  
142.173279109959 138.494266722799 138.841385034636 124.368438691944  
132.573953444192  
LOC100130443 130.131800537628 116.280157890082 111.010889276873  
127.282374513433 133.164566694394 124.372963874507 129.750835425023  
134.458958352588 127.74861041569 136.557466007228 113.326628149066  
139.00736252716  
LOC100130445 10417.5218406801 10661.2216586049 10135.7800994367  
11647.9643290124 2635.31067044245 11741.7473778842 5670.70220800096  
9323.53099359448 7617.316805798 5094.53287522452 2382.87910783088  
6441.13602696535  
LOC100130446 23053.5660790052 24377.1316448061 22872.0444589809  
23878.0022344804 26375.3000727296 21551.9994556128 29868.1819370827  
26375.3000727296 21225.306360484 21754.9904891312 17496.0674176329  
22354.1731362334  
LOC100130451 134.391386851101 149.339492984504 137.222125237171  
161.73079180403 138.566954604414 134.062423178775 155.566065673542  
135.345616014558 142.467552395104 139.258468432364 166.447510782568  
148.200449442782  
LOC100130452 129.750835425023 134.69274746407 153.813202812438  
125.9713489569 151.845172175463 164.948785167149 184.62149494522  
212.190707408572 197.91325268683 144.129889080946 181.229308386808  
162.592306630033  
LOC100130453 126.777633512781 132.132474135959 146.569958732206  
136.55090238808 130.661695937728 122.969215709433 159.801315111886  
131.816989019024 128.309602266886 130.641217515008 134.6897714907  
137.509100088226  
LOC100130454 134.381042390464 148.034899103241 140.829927714838  
144.288714958892 143.836637098747 135.6149724596 144.688515462537  
134.991379445799 127.769405736754 149.808222023726 158.87755965229  
139.414912158809



LOC100130457 128.023203858837 118.553226856337 132.236355533277  
124.42974326791 137.513315427454 134.653131708903 127.093255830978  
124.726035027951 125.447209413787 134.89031458837 125.28279436853  
134.364838071696  
LOC100130458 151.06209123698 167.741556663724 162.565576110247  
137.002473710189 175.819983804497 178.329946332806 154.648806105422  
165.576758218571 153.571517567657 160.57963709333 152.215146681655  
148.632332840817  
LOC100130465 109.156349683299 114.122395647516 125.785388817819  
124.188359398362 128.322884322951 135.600312863552 132.550022967297  
122.503984297406 110.419222236698 122.547842148486 107.498500136859  
127.000860999529  
LOC100130467 132.675172817752 123.368137868951 132.631819830347  
141.520125030042 130.804850476451 139.744142223177 130.260174841484  
131.442186260672 129.455347273068 133.830860948014 147.433388299999  
139.2454524913  
LOC100130469 142.93332947113 146.777258330572 125.868080230094  
129.958065173006 145.045633612194 140.77762487941 139.429908070687  
141.995158253845 133.625358030199 141.359142214228 146.425476034368  
147.539226876636  
LOC100130472 119.870661213608 125.311403516443 124.02280670421  
127.985051303973 128.699441450952 125.563646710294 122.608967303023  
129.083756379376 122.297401003756 117.374025543149 120.853961156534  
129.610980807708  
LOC100130476 182.495117800073 196.363005912532 177.143397572907  
208.237011955037 196.096936985479 188.322853571195 223.408447580188  
194.202977693583 189.509062639279 215.98963200839 200.486683704179  
211.505504834207  
LOC100130477 137.642858036384 134.758752741831 124.145492642453  
123.524952603672 117.937856116492 121.526724715417 155.004104153679  
130.701801496564 130.863753083296 125.802001118545 136.708746582636  
125.241484840139  
LOC100130480 142.863268359757 133.080437161283 122.476178620771  
114.942849575931 132.726182677685 132.17294083844 139.658932672049  
126.326609619996 146.446922196868 140.960907353937 134.78149307898  
136.819892773399  
LOC100130483 136.337076023706 131.442186260672 118.850495684547  
124.439917584199 127.924195488323 142.279695592224 136.106596229215  
131.963419175907 125.426018910517 127.480717762966 146.155809402461  
127.908872828095  
LOC100130488 142.919910421524 143.990328432869 165.337956130606  
148.361088792223 153.972471779464 160.667815093292 151.153466809603  
155.938283930571 152.344248425416 148.80452641061 147.725396196054  
149.97218338771  
LOC100130492 138.311892121437 153.992763544073 142.155463269751  
172.304496150036 125.187617901961 149.019120812629 150.650926518959  
133.288181734813 147.670425834523 142.416237823488 132.983739057264  
126.964621107029  
LOC100130494 144.084441938143 132.599115199416 133.146347243168  
129.413729619216 133.027592711375 133.737573120711 133.401620574886  
141.189008902155 133.762141373091 139.111604268732 137.183566882805  
140.18668846839  
LOC100130496 136.951350782053 136.998259410887 130.49338418515  
123.735827460404 142.046082566177 131.827899207029 144.329979284786

128.466244127634 131.97938329944 126.700147643 134.633286312653  
122.711143209444  
LOC100130502 140.169200413643 139.972797966319 132.918979842076  
129.845344493418 178.142393629606 171.155660467037 154.679076303046  
132.146027935802 140.709981878311 126.162713269943 167.380798617981  
128.862699779871  
LOC100130503 135.708804956764 137.957654220875 142.382367938838  
132.236355533277 132.343179716416 134.881854036527 124.807244018373  
128.606360476298 131.816989019024 131.483427112288 133.004765428575  
129.896711442418  
LOC100130506 259.146673652222 195.816317534388 265.670643951648  
200.652195873026 191.370761685627 231.517412929077 223.359785518285  
231.846509449829 200.741234443918 150.163801964104 228.45211887819  
169.860061216981  
LOC100130508 153.899573902499 142.157512965166 133.505261458701  
145.449099891256 143.45723206497 157.971293294367 145.281664250703  
140.954264409241 152.286545050749 154.300058278533 154.033776287398  
150.011603347578  
LOC100130511 389.109250187902 351.854828413334 402.299165610893  
332.032371697186 594.92419264579 675.480482223958 1024.95957828641  
1304.37930719411 1048.26872286983 1812.07394646463 1192.72383754851  
1208.9240215109  
LOC100130513 165.51742391186 176.176392369178 153.998849486363  
156.911538642765 133.611588728019 151.312853764675 146.552529779774  
164.929445749888 150.617039206311 145.700589723224 160.954017627605  
143.00932329728  
LOC100130516 10704.4678928541 10953.6229702446 8121.54750071211  
9759.87403504619 5327.13051940508 8292.04796307133 2470.86113150126  
5601.24254062491 3592.7878705048 4579.62296570302 6652.21610967461  
2962.11407134162  
LOC100130518 116.983869766097 127.265211069837 127.945144368504  
127.913463809158 136.617105945904 127.239282651919 121.072192130078  
119.862037840843 129.930888107958 138.446492794924 151.998942684339  
142.750432197016  
LOC100130519 133.645044060866 143.114384950467 140.350144438462  
122.327353563917 113.512670856029 124.256773437346 125.353389826276  
141.397046998678 123.782746527199 137.47514052942 107.187035835972  
139.564898998489  
LOC100130520 129.522339467532 126.682913361149 133.003743285746  
128.997028325896 134.95842832877 129.026732674277 138.222375471744  
137.183566882805 133.980792743661 133.367085445965 129.205783382977  
126.549876718792  
LOC100130522 148.808928892047 147.885769870843 139.249869918235  
143.423661752881 157.344758285153 149.377153449536 143.741676966126  
149.710337205986 150.566842106244 140.504486195539 156.704278982517  
147.983937675946  
LOC100130525 129.85040048805 120.177385114315 136.545742688573  
147.241136598626 131.933026690056 144.36575644625 118.816986517698  
132.730924522748 132.096095362238 123.81177057082 134.572552391307  
126.162713269943  
LOC100130536 128.606360476298 133.272540012108 132.692027897739  
128.322884322951 132.395993254065 139.253721683078 147.803464591663  
126.421148348261 129.260551359984 121.640681916546 142.288110423886  
140.429462488271

LOC100130539 128.077692981235 128.492142236807 117.048846466839  
136.195555442748 130.198147836925 131.125175244494 133.829889099442  
134.299575239865 128.134246199718 129.242093568433 132.303506517431  
136.069631519097  
LOC100130541 137.700691136287 138.877999126533 153.538565948453  
138.100014158367 129.874235646816 135.028746262383 142.472724215037  
143.795399778897 134.08270035062 150.267298097687 143.351341716363  
133.215151497536  
LOC100130542 146.013430937168 150.860090477342 145.686092190716  
139.77436722364 172.641322197031 171.190796424612 144.259643132933  
162.808270845998 142.30928744202 134.142423026264 163.621658579697  
155.550532734718  
LOC100130546 149.327794670124 140.743917481548 148.538400348149  
144.173163762502 137.586032396204 146.512045729234 137.333595298205  
148.126745515891 133.953303801604 138.269955723817 148.898587505337  
143.990328432869  
LOC100130549 143.827500301207 152.915692742755 140.717348834454  
132.591496435822 143.903216264503 136.781417098789 154.826710617351  
140.007937555694 135.711590400394 145.71535210212 134.56314960832  
136.664500207966  
LOC100130550 142.974541687789 138.35538364303 155.263513633703  
143.552343056702 174.02138265758 160.251996476232 149.557833322995  
169.713585775118 164.673579538023 172.622816559412 163.643554173995  
188.145154995617  
LOC100130552 139.42531690926 150.367927843529 151.538112896642  
137.25054616038 168.805630890928 138.601616246182 159.862252588012  
138.434347257063 146.128066033346 132.354503055131 174.979501466228  
155.343619434375  
LOC100130553 18220.6383250956 20217.6497214386 22750.0246358215  
16925.9167115963 27284.7333124039 27028.8951412615 23878.0022344804  
24098.0251582624 23878.0022344804 22354.1731362334 28095.1627766565  
31402.6950316226  
LOC100130555 119.205234864031 122.010855318111 132.354503055131  
121.860428893248 147.46607538135 133.12904935533 126.858621735156  
121.723964989551 109.536381305315 126.132339293132 148.454344601562  
119.360478719424  
LOC100130556 184.813094907887 165.558963147657 157.631978594005  
153.711354087243 166.024236370752 190.645917992472 182.02250582556  
176.516540713888 160.221974600577 167.087850057037 168.838723365068  
191.146276657897  
LOC100130557 233.20900339048 224.186573847185 255.066583469964  
245.351459157365 179.091917512822 198.925776755081 218.350166753833  
163.504122327429 195.282045838381 153.418095627352 195.84531580224  
231.955750250711  
LOC100130561 752.585744322608 724.103864917969 903.503768217033  
436.834825721843 491.112594297928 1663.71411325131 762.584280908728  
846.084919104262 1146.3535752748 1143.0779222425 741.255013151687  
1741.0131951509  
LOC100130562 658.47864958685 564.948126039762 880.719593734606  
484.903322308422 1035.98574557331 1192.72383754851 1961.26255930192  
1102.38234645327 1100.17618574297 1726.15788525017 1210.40302822121  
1731.62376348283  
LOC100130563 135.073449743301 118.034262386827 132.461730873857  
121.603608840998 135.484360570738 128.2409378561 121.334882368464

137.493436771898 133.613988293895 117.969576809288 135.664877050226  
131.065633574494  
LOC100130564 159.98205335759 134.845202154446 142.501655618849  
141.437891956239 149.848740870148 124.910390240995 146.398454169593  
156.061579024549 146.713861499546 135.381131982323 130.429076594441  
141.145419751161  
LOC100130575 122.165046954625 137.342348963288 134.507558495307  
114.880348648147 148.466658640201 120.839256811295 129.628859533303  
120.565485864499 135.726760147904 117.856184272322 144.690880401712  
131.141668650877  
LOC100130581 133.918638123756 131.938898032483 139.101471810467  
143.833057210822 140.906421938377 147.202510900548 122.376432064286  
133.299599411025 130.539632182729 123.881658891576 128.359034755228  
127.189310473419  
LOC100130589 129.155804800869 131.636779618185 127.202039384041  
141.94585838352 136.337076023706 135.057847490193 152.538048490265  
129.771073986855 147.185378560761 128.221548195595 129.340996658802  
137.683228179974  
LOC100130591 139.837616209536 138.700301754711 128.421242037748  
132.854078420045 124.958287100852 129.633387503618 134.036236880951  
128.134246199718 126.064311640223 129.461160777216 119.449118660481  
130.742940708861  
LOC100130592 146.16821907742 134.17351030102 140.815807483203  
139.503902205317 202.60339529874 169.101676908756 143.458937009197  
139.870306695324 161.26917182967 147.043228493047 141.725882943927  
153.165872773973  
LOC100130598 624.825216056495 749.859130465356 709.303384219887  
665.602699607102 283.27806319488 840.623505494489 433.019478861638  
516.892850913889 449.745016106912 487.07860019179 475.038389500056  
510.061974830525  
LOC100130600 150.484823814674 161.956032597813 153.964765831852  
146.353239460684 164.109321257638 165.239214141562 150.653030597808  
154.229914729772 152.752870674108 142.305484770249 146.916683989962  
164.890716656336  
LOC100130604 218.559622620349 208.080089376299 206.413554839865  
228.414049417352 176.312626750427 203.675655444583 210.925203743958  
173.816408146725 166.422360032182 181.202396068658 186.321879879561  
199.490190715307  
LOC100130616 142.872683795338 136.734131465433 144.179880084235  
140.796641921516 143.399877326927 133.384498169568 143.987296454585  
135.440472776418 136.612287212568 132.379706531581 131.153457976248  
140.918728758975  
LOC100130623 165.074983746785 164.89597889259 158.377396672742  
167.260319361746 160.742365719929 150.301540078433 154.459517779315  
147.93088503956 185.374745525698 155.249688219254 166.688771186254  
152.948391119096  
LOC100130624 231.239126548656 244.514230664694 280.127735578097  
245.522497675754 376.189276074918 253.049869714368 492.637241687561  
247.454326301069 261.541138637729 424.912426797488 566.914448800423  
317.353318759931  
LOC100130633 282.797367565702 243.622678182687 240.410292351169  
188.605328108654 236.326943078666 281.53843450593 406.900412510895  
315.47473326786 285.402072939954 279.159925913207 456.656123023446  
380.053166305637

LOC100130644 131.570358580547 131.811011266156 123.434963905308  
128.129780978486 140.805322576253 135.872060352476 125.296240086615  
125.18424162353 122.087107663865 127.251594986725 123.153925912632  
129.130212375815  
LOC100130648 140.934844668435 121.246967460178 122.522978939399  
120.702740607924 122.254824223167 128.082956839709 141.59474425685  
119.767154020462 129.428950259722 126.298187538812 120.76311889397  
120.551603446364  
LOC100130652 146.681183890181 126.506749037908 120.046892432373  
119.701313125748 135.231458421096 145.565772343165 121.728711587014  
124.486701452062 113.61408868553 129.655161833654 129.073750290924  
132.478801067837  
LOC100130663 137.449776383224 133.727447520255 141.815571093975  
137.7872481668 133.233826283531 144.463035490582 130.438957566111  
127.765987130281 134.946677624454 135.699583036042 137.361967082029  
128.019837242559  
LOC100130667 132.322618637842 122.005340508177 134.427601777639  
145.036719629525 132.435409278702 128.044165393924 137.314968268692  
143.325710305008 135.373824773008 146.398454169593 141.536764775726  
149.829363505519  
LOC100130673 125.513881890201 122.996616773523 130.374065525934  
141.941814923705 124.66386961898 133.54741488531 129.7536873083  
123.835583753941 118.05386204863 140.370626016794 124.048926099805  
141.760529549196  
LOC100130679 145.841028932318 158.308558656144 146.819830256127  
130.850419527271 151.776232847515 124.180511991605 138.402890124039  
125.384706864406 154.555255038453 141.840858913807 145.628239642187  
123.547821639269  
LOC100130691 132.629453540571 103.94864861172 166.936975782665  
140.552143090027 140.873210629865 131.099004325598 137.871870950302  
139.229351251973 135.603160096973 138.792521681771 131.380387461901  
155.097300548684  
LOC100130692 112.904318310632 119.11586630281 136.026302491961  
131.730758460802 112.999642731096 125.924219382375 113.938636269013  
128.941490662452 119.696656494403 125.27625242915 135.618562468776  
117.084984190461  
LOC100130696 147.73141408795 152.842777535666 172.502036705114  
174.510523238374 159.506275317015 182.478971050701 140.895053453126  
148.807422049327 149.317146997809 175.573400981771 146.023710941284  
164.063104872636  
LOC100130698 138.1774127311 143.52474218953 128.616121042106  
130.302829773323 125.166940410459 135.345616014558 138.905709709063  
137.513315427454 123.668707648172 137.572574328004 137.033870931133  
127.820096020782  
LOC100130700 153.217287503221 151.034392433934 133.311212623667  
145.530904040477 139.491769969541 133.783379558598 137.956295878287  
141.721829342179 131.683942368268 132.240470270795 131.7585591467  
144.836902182737  
LOC100130701 180.881464829981 193.554028681854 188.959655155629  
202.230920499592 172.28937151007 184.819937046061 178.130223302924  
184.414609874199 193.218266574099 172.916234073981 165.703810120915  
185.027902485379  
LOC100130703 124.258412895333 125.447209413787 145.956477465634  
128.429007921588 131.630132952441 124.207200622684 121.203149121743

131.836036241459 135.670409501435 117.889524670597 144.436358527414  
124.647992480694  
LOC100130705 124.818436949131 128.005043478952 128.929244741296  
126.064311640223 136.580363776109 142.900756181761 134.010031592003  
128.653335099674 123.259322051795 142.713318779614 136.77260462185  
128.655549652719  
LOC100130707 331.018914429561 321.627969147543 404.726926716133  
296.721891842563 536.46884541183 1129.15018335354 698.590134238302  
819.151876775691 676.293399523316 849.389818300305 361.768552564027  
1116.19403476786  
LOC100130709 114.002925521932 114.977135060317 123.256613702254  
122.97487285065 110.256771079797 127.979574243743 138.584190903303  
123.156154667242 116.700397932007 126.180714796187 134.005402534879  
137.923852688695  
LOC100130711 146.522066289381 143.090886224647 141.59046197203  
139.97636570613 138.48552149031 148.005500924157 151.325068155715  
151.671024612136 141.178668371671 144.579725208643 147.106355591496  
134.005402534879  
LOC100130712 131.80257432775 144.0534341937 142.589312139207  
130.433405111592 170.01557699913 136.547868436335 150.95033946042  
129.140978620864 122.719785082196 125.498081339586 158.784190231286  
151.351938656508  
LOC100130715 261.065986251886 238.88138498771 266.101158071711  
237.989479738133 393.013539328766 446.194196064909 507.342877360289  
346.862322263052 276.476790719416 407.442337662943 378.728516779744  
347.812754957414  
LOC100130716 127.456181182121 122.719785082196 125.20712393273  
124.672483602517 132.902437860565 131.473001455317 133.083877012766  
124.758906471654 126.185560760543 129.289216846128 126.378952839132  
135.743159681223  
LOC100130721 122.056070994213 132.712573198794 136.452338158252  
135.605541734293 128.367370419533 130.902319266342 128.922269289649  
112.179019393947 122.007909794484 128.126354569418 116.092815232176  
126.333814565085  
LOC100130734 135.005591691192 155.069048442532 134.330234316896  
129.203236898198 122.158160927149 132.311344653106 133.080437161283  
127.859873416515 125.677019190255 122.610529927104 126.049905221996  
132.637443692683  
LOC100130736 137.565050253948 114.624259793353 122.716563069312  
135.651188317474 140.841600764331 127.503849690009 129.614692778261  
148.660440219589 131.690417323838 126.27024495428 136.362761829761  
124.68729078792  
LOC100130743 138.154799037807 138.331509117817 137.129864761402  
131.631968933144 147.77916610545 134.691038011706 141.114148695402  
138.081268025435 138.192550945411 140.644800545854 141.289009185018  
139.955389033983  
LOC100130746 225.730739636442 211.183499580683 258.21341068758  
208.555506929113 155.121309543738 181.622689471026 216.403542903805  
170.342828808493 178.313238745665 247.236004734567 177.708263037199  
201.289402228512  
LOC100130750 160.644747532952 159.895303363094 156.301214161102  
154.177340021162 160.887121295848 157.635531050489 193.028341755594  
158.579717282881 146.619846538124 182.984076352185 175.784250947874  
168.314966639178

LOC100130757 143.722135315998 137.717859035645 134.637520371454  
140.641956393993 143.086872363116 125.285502203677 138.186616955926  
131.943014970855 138.728765780512 148.780775862239 136.786462547129  
135.773386496434  
LOC100130758 148.356726939122 142.974541687789 137.710725379804  
128.759751330525 134.944488136297 145.270140096768 141.321547895734  
149.117224130576 138.829793136954 144.396774242135 130.285187693932  
143.370698101204  
LOC100130764 391.400480065 443.964363178742 400.676876982655  
464.128022170285 162.007384919302 293.873921048642 285.214585324341  
282.282663608264 223.722742062251 188.818012746123 274.179232297038  
222.086635504858  
LOC100130769 136.473948855498 139.717662557602 126.118745937997  
134.907397302852 134.76397845723 133.301527400458 129.055874691136  
140.934144636302 126.362418476129 135.643341446691 137.195906276069  
128.287127680554  
LOC100130771 143.491142564838 138.93292293598 136.879615833565  
130.900049359243 138.43190460314 127.040027125755 132.221351364892  
135.30767047671 135.797170561599 132.584454429269 123.843823256462  
121.997885377703  
LOC100130775 425.708048519408 427.452114719877 533.893360199271  
341.197826517049 619.75986112089 441.331937921872 861.516925304722  
526.726224327409 420.017044147123 555.366765340014 1080.95725397659  
661.545179083009  
LOC100130776 143.050004021764 141.513636348978 150.160004473338  
153.348110626071 171.221972336784 151.524197474057 145.048033586779  
128.717719117128 121.297234504922 132.50676380992 146.047948193303  
149.518870320398  
LOC100130790 139.119638136874 153.613110881454 162.574338133241  
139.54021659275 151.41546939633 135.762603711262 140.971253689199  
136.344248873826 141.521742442341 138.060245284993 147.103340218488  
140.946008063839  
LOC100130794 145.144401160102 124.802639338573 149.290007708698  
129.737882221259 141.721829342179 132.317972465689 137.701271351806  
125.04156726504 124.439917584199 126.464893786922 139.595986615703  
141.5068665919  
LOC100130795 120.711150688559 132.299112653883 117.986939058467  
134.250052775987 136.91078498126 140.234485088845 125.224197852606  
129.610980807708 132.48841450242 132.352268262631 125.4408430419  
124.232144678947  
LOC100130798 140.515996180923 135.923022674367 137.476047500852  
139.109712542702 137.71280215369 130.265055842999 131.554055357245  
133.66893163718 132.471014832851 134.914830257315 113.970633751086  
130.247700541716  
LOC100130800 119.598216955485 126.058167594519 130.100501333725  
129.487458179949 135.837733533444 127.125906877098 133.704706615071  
134.224781719944 124.012439490264 137.134190411005 141.437891956239  
136.799138736925  
LOC100130802 144.982462113231 132.261161069329 149.340614923384  
136.732319750425 172.973175988757 144.623222072851 138.106499370074  
129.699765645519 140.92377681377 125.783265980169 154.452964510369  
135.023594109361  
LOC100130803 137.440295223749 135.810476921749 134.147586627141  
135.417519318028 151.115031304764 139.021552573529 134.635645106042

136.356895672212 138.462826342765 150.989202517615 134.604565335211  
131.595868226775  
LOC100130808 138.858138379065 140.736051985112 143.155998311198  
131.573729430926 141.397046998678 147.15764785567 136.342634691443  
130.461084106455 139.926488041421 127.507557925713 151.285933600303  
135.32160992961  
LOC100130809 124.511674561183 114.906396746556 138.119788738226  
112.219585614955 120.867408760075 134.271916545532 102.786517901308  
125.416113646128 111.11656427738 111.810575716678 109.760525674874  
120.76311889397  
LOC100130812 160.806678614325 139.959629641771 169.378422829858  
165.836534881802 150.904618960507 161.099805358232 167.769114519774  
145.789840511876 168.37850726499 166.411219327671 167.125830254039  
150.875392181869  
LOC100130814 144.206259414981 128.23910347716 140.719388544476  
136.146383365709 135.511902377219 133.278923716119 139.543551482943  
150.632724038845 135.956116718089 135.154441560264 139.535490288426  
137.412952822912  
LOC100130815 146.150048478173 136.009969058857 144.551233687082  
138.254479653425 135.542079867325 147.951996191313 133.702845956639  
139.268052431476 135.349868925415 144.064214573005 144.849525310826  
131.293563126249  
LOC100130816 148.821942578396 129.543069836687 123.76900858347  
119.315932907373 135.536810684197 125.67874617392 122.226875707253  
132.493888285566 141.289009185018 124.197397333928 141.65642171417  
123.946808975704  
LOC100130818 242.070630946726 199.597685421675 158.735283017367  
170.108500366942 231.47915227815 189.472541628897 205.149094703318  
187.852455291319 190.281570660806 222.508914765788 186.430014478919  
222.943046618742  
LOC100130819 112.14768481333 115.848659135231 116.36939555451  
126.856038484436 111.349642316073 111.065596151792 116.029201658798  
118.838332117453 118.186426364551 118.195512252508 121.838802846453  
120.481712066062  
LOC100130824 123.591078216224 140.541925660368 154.101698334466  
122.517559025268 142.095289977576 129.123522999226 148.534143255537  
127.6516565653 127.369456504277 124.28313315915 141.193081790037  
121.908945872994  
LOC100130825 131.525916493834 130.076926011271 120.238706364491  
136.418105816557 125.236926572282 131.786437478446 123.446714388901  
127.434873844923 125.806943645484 125.193729067011 128.292627005614  
144.342905860503  
LOC100130827 126.630787911053 132.277920991504 143.631345956176  
144.608882758506 132.811368246405 135.556943919872 140.277228495746  
137.804977813144 136.278361222532 130.677737553727 135.956116718089  
146.110545700163  
LOC100130828 133.197002327259 149.361498483705 138.523677181131  
132.247611790269 134.990075720145 127.687299576139 129.896711442418  
128.468978498871 128.967855397644 118.970693476152 147.813170436139  
144.820843146628  
LOC100130829 147.738146185884 142.171459019791 151.219051767056  
153.149523560021 156.339564110766 143.583650664594 164.000772606739  
135.542079867325 139.513752499004 174.09267813338 112.41270361848  
159.966729941991



LOC100130833 139.490103923544 122.300069045533 140.251168248117  
128.742617750403 126.806537241253 152.082927731045 119.422996538444  
131.633827974141 124.365185583133 125.951927536494 148.190696520521  
134.734429133481  
LOC100130835 1654.58270183167 1558.22238167317 1427.70292953827  
1702.68441407727 519.450899933049 1373.08023518911 697.774882173237  
1028.39666838369 818.761934233826 858.742139354587 874.816697884109  
758.863418917419  
LOC100130837 152.315376022976 154.7326161316 164.773489952844  
166.014450044695 161.627546190964 179.389797867379 169.815053752464  
154.594339065082 173.964378226631 176.194292036542 156.102877632001  
176.86489466512  
LOC100130840 145.276745572405 149.866592541235 131.066795873915  
159.513465644268 143.965049742993 141.194900058799 160.486513643798  
139.236217474885 140.533704857854 150.091854035356 136.683683776616  
146.235832275574  
LOC100130844 160.632809953993 146.71164737466 141.145419751161  
140.29803170157 137.352231982942 141.478253058549 139.178245419517  
148.052222389368 138.956057921718 125.212404794262 117.390049487174  
152.244018820259  
LOC100130846 138.1693725329 122.841135364088 133.567630962178  
118.787630332168 124.186557690235 127.150222504237 121.429270259367  
120.082391311921 139.375386456759 134.919972250554 133.537552829999  
126.404523759643  
LOC100130849 159.554978842683 157.443127950708 155.158028043823  
139.583514773196 132.263954832097 140.281512754823 132.965467229606  
147.221425204534 131.196196319523 144.979749941424 157.507108643575  
134.797624902585  
LOC100130850 142.476530302265 147.057116881846 145.938780249776  
148.463566046951 137.262309660909 145.78573175226 160.553214127047  
146.432468585736 144.477267427347 154.812587513407 136.344248873826  
144.765051967884  
LOC100130852 129.730685860688 123.804039963953 138.956057921718  
132.969187044132 146.361128670362 125.942455135541 133.243679173608  
131.349297554112 126.349403754775 121.522634801124 118.697969266426  
124.516264338772  
LOC100130855 136.238646974312 147.565485281003 137.445344116574  
136.743659350798 133.731500722599 132.352268262631 133.841519663164  
144.667638908504 136.049167597016 128.005043478952 158.788210937339  
147.094123051131  
LOC100130856 189.482046688226 200.688465653117 187.607426452073  
190.682392100564 191.692830869809 169.590101694098 183.314276033531  
190.825209733575 169.852769679312 203.223604138192 201.289402228512  
166.671563123047  
LOC100130859 139.15175079191 139.752845127584 132.84268776659  
149.910521500364 139.238936770274 122.238996815745 128.988736837863  
132.804216633852 127.404415477384 135.723554819107 113.400050190315  
140.899799480834  
LOC100130869 127.339018771488 118.626815116752 139.694950277714  
121.768195574022 123.494412056415 123.629279569085 124.876226351169  
128.105527466559 125.324187741972 122.878790127038 134.403789206552  
131.442186260672  
LOC100130872 157.207544072126 157.013200713587 146.486480663438  
131.992186668019 123.065355919378 139.484551562098 135.461112284848

145.104173410801 144.004831360797 127.610304071204 132.051614319023  
138.405215507471  
LOC100130880 130.74794199972 133.559082256772 139.733149319736  
132.416618775337 130.209752198964 139.063209125209 137.125637347852  
139.159510392614 136.470025638057 127.132970760907 139.325478877749  
128.907618218883  
LOC100130881 130.657342262492 121.815538475678 133.75142055959  
141.062226285596 129.825824640378 126.713610681382 136.158508521357  
123.361179535626 145.569870279379 123.908458472687 131.447941902406  
129.55573546861  
LOC100130882 140.868946922293 132.28931085483 133.376631703373  
123.972321838378 127.977782260866 141.717466442384 135.403206634483  
131.878155417065 127.560308850342 136.01865173754 124.899019467557  
126.573673878042  
LOC100130883 144.193756031386 141.016019076664 139.878752507646  
134.85809559975 143.062380176286 135.296271683847 138.45137517137  
142.206016362038 133.659475650376 142.112120308118 132.155877196474  
127.985051303973  
LOC100130884 131.611842804029 126.019246614944 135.966929064294  
132.063395162855 142.382367938838 137.97889661868 132.517780271488  
132.053242760381 120.80221197797 144.259643132933 119.188446525733  
130.59886317117  
LOC100130886 275.972447693982 293.825372123877 268.930428617695  
308.38513924253 912.143424293236 519.940347384877 386.598037190663  
411.160709628865 597.459920611726 497.110852407681 460.24741151155  
540.797164107185  
LOC100130887 140.929424764561 156.803516898875 134.924082270115  
154.869171648942 138.202872275661 138.381508741146 139.306122448857  
137.201149245092 138.129281196474 130.454496708632 142.622062798974  
136.72715888684  
LOC100130892 1133.87328758676 1128.60314361459 1458.13354165836  
824.427857809495 1080.95725397659 1255.62991601665 2263.73444150082  
1213.06007305892 1092.74905085695 1519.38642390142 2093.67403119512  
1261.61611961272  
LOC100130894 128.947211021681 136.269445455239 122.736882859231  
129.86336717605 124.536322123442 132.875314170399 136.27621600731  
132.589411973628 122.290822230565 114.618608815885 114.290611267606  
144.114177076352  
LOC100130897 135.750578960284 124.59937620719 138.275371291639  
124.01558540593 161.557558028531 120.660349211375 135.10155936286  
130.156775178934 172.46311371589 127.678512375099 133.185908839766  
144.428776560885  
LOC100130900 139.659787180513 130.058902161953 139.147327302581  
146.06717772919 131.999299893526 138.970853057174 141.420747583126  
130.772410329685 145.431393142782 134.166297738657 135.457059862669  
138.071335383596  
LOC100130902 126.952836653857 130.385747820089 127.090219286772  
131.882887826338 131.031639119149 109.669517182289 127.67121559907  
123.132178371802 118.457573670556 126.009358591395 123.488418655586  
132.094446606227  
LOC100130904 134.835962366555 141.425393615228 134.608734423113  
139.701504237962 140.989597586699 131.838522109796 138.308965237491  
137.584340154725 138.864844664017 154.466614452651 141.476041451832  
128.359034755228

LOC100130905 137.163699337032 146.287161912291 134.425483661043  
135.196797030404 144.900785401228 133.088758771353 141.760529549196  
130.365804613342 133.011320549232 140.029808783762 146.550421651378  
138.088712695622

LOC100130906 128.686425820835 156.973511952828 167.484236948415  
145.081965532691 206.715020025609 177.716742595321 201.49630027392  
171.85890372225 151.869928694006 172.997461101709 198.597176657619  
165.41729888767

LOC100130914 162.110943457969 176.964088090133 205.886398618369  
171.935132459373 230.770036998466 187.365807314802 289.616527814137  
226.221973502783 233.953994677015 310.917191279571 246.428746807313  
273.073938260793

LOC100130919 897.0125616892 1352.14737073174 825.781627776577  
1487.12201643008 4251.82554412383 3334.16277752222 1953.88327754946  
3436.32495553246 4246.19983955771 2430.70635781622 2500.07677977147  
2288.63508719706

LOC100130921 149.936366672592 145.496033735748 138.570150372729  
148.437676259828 134.058035351684 138.279431175685 133.99046926032  
131.786437478446 136.253264628863 130.773945967285 122.878790127038  
147.79341726211

LOC100130928 142.264536484668 157.244026506342 160.573172150801  
167.612577768782 154.252727576218 158.297624312257 144.289500521613  
170.410704499804 149.464962540085 147.913148020331 171.967974673053  
170.069291215013

LOC100130932 248.260998007814 247.779718065751 256.687384001447  
204.564770370164 892.038018567941 973.543357809971 465.54817048856  
599.307072499899 468.569725051459 432.726040933545 459.854279050269  
626.298707790229

LOC100130934 192.059255232313 161.26201213997 159.327764602722  
162.808270845998 180.096239155058 167.620915011868 155.981989040279  
143.394704760983 158.92254744379 170.541689758579 157.415211954103  
141.834582245454

LOC100130935 125.668463983985 139.526241501184 148.989286668424  
161.837272617767 170.585366369563 195.946096353894 160.557818466874  
133.966277922005 145.726651022813 146.139817421758 144.856801451884  
162.620593985693

LOC100130938 141.097257687941 143.913625824599 139.21825391822  
148.773558380167 153.934872807607 126.782805974059 148.607885635446  
122.978576290038 129.723501897231 138.723149134933 153.453969224725  
189.142295015168

LOC100130940 141.045379969014 127.900901613784 131.652854369619  
132.755256423863 123.225792525733 128.23432652395 132.395993254065  
138.719480482945 141.577373924378 119.795945889846 124.818436949131  
149.204816953404

LOC100130943 142.140247900227 151.479748626813 173.287859527767  
153.734347607222 125.500790447338 120.043811428091 132.203310946961  
131.613738869093 141.457040042276 123.267817390796 123.431969470387  
137.660051943656

LOC100130950 143.728569494708 136.539130156863 119.993313087183  
127.019978195283 125.649525720177 121.255814891176 135.750578960284  
145.578721432709 127.04217189075 135.766466392056 128.129780978486  
129.532122459128

LOC100130951 139.00736252716 136.116468624715 139.790098895306  
153.589626253969 151.567693140302 144.283716416188 141.743873995642

138.820797333519 134.495938988321 134.091723054647 147.085006263446  
145.383354200298  
LOC100130952 197.146035305296 181.758545723241 191.284275676256  
197.981112645168 173.450023117394 210.666799498141 157.898632788579  
203.693188114912 174.136806313142 172.20451139581 178.096998157452  
183.100286716683  
LOC100130953 126.260691770282 143.973464003036 140.408989128575  
134.237133546276 152.990523860831 123.153925912632 134.76397845723  
143.078022283871 138.800986934663 137.687480242109 127.424848301217  
143.403396831929  
LOC100130955 117.408465686218 117.910259090745 124.031916322066  
110.651971902576 132.600208090551 124.387133895009 124.372963874507  
120.418709541104 128.781123194219 119.029186503752 109.067239220744  
121.628827418997  
LOC100130958 127.758381206968 139.939863187181 152.047317751834  
127.964855970099 117.060696904303 132.976977898242 136.895650862562  
134.929441723387 128.341887728118 132.227561632637 145.371273337639  
133.631676386591  
LOC100130960 113.427848757112 108.768730405582 127.323157914914  
114.835386789236 124.942701123337 113.301733735994 115.427201752401  
115.600308687778 112.348094614855 116.176068923513 109.625579596864  
121.024572716324  
LOC100130964 141.455841055881 134.927386619223 129.803445949193  
148.607885635446 141.520125030042 129.964666668421 138.789908033669  
134.442947822188 127.036976462046 131.252368756892 120.839256811295  
136.021607232776  
LOC100130966 132.631819830347 142.646570636529 129.958065173006  
139.782152941027 146.616041788595 145.42029807396 128.287127680554  
142.385902610309 128.141725976839 127.224081416987 137.354782768068  
129.093864368842  
LOC100130967 133.009854792992 127.745801270205 132.484079454476  
124.516264338772 136.977435235496 127.814109293214 131.414690782328  
137.473779155388 137.808307749725 135.046003135933 125.367386907897  
128.245734702114  
LOC100130979 126.786434897401 132.063395162855 139.534014289993  
137.874370839801 126.877293296185 142.446514275674 128.5581535393  
133.123444023892 132.502153153826 128.202619705343 135.997144927956  
128.947211021681  
LOC100130980 7802.25987814138 9251.21629832018 8473.21873478131  
10506.1271023809 23878.0022344804 14544.3732040823 19661.6741558107  
15194.4972103372 14699.3902364192 18061.615487998 16642.71853486  
17917.7303120499  
LOC100130982 124.385193388896 131.545287070888 134.271916545532  
126.5929421833 136.478114537536 121.661141741782 123.463861015933  
128.232091717966 130.961207132451 146.869927141655 137.037299675471  
137.235469802064  
LOC100130987 131.736694577111 152.609055890822 134.397255719047  
146.287161912291 133.320865155329 152.465176508162 134.572552391307  
133.152523054305 130.266601299194 147.828226792835 160.997179739138  
157.979749139651  
LOC100130988 120.01190102634 131.806645427543 130.728465509213  
122.646850766733 130.983136465761 131.692626563078 133.185908839766  
130.557209560361 127.269672881591 122.238996815745 135.864853829421  
129.859331207247

LOC100130990 148.614214326995 137.623019849539 146.257923971069  
142.064680109047 149.029275579026 148.412895185127 150.123784990646  
145.195065312551 140.798706399757 157.682946957733 151.183847738922  
144.2753860947  
LOC100130992 131.786437478446 141.636604735133 133.404671629495  
135.383585408897 128.113966507586 130.672586991186 136.499228715856  
121.203149121743 139.568610307888 139.522018789485 135.4702891855  
133.401620574886  
LOC100130996 134.378951325825 136.927274496451 133.422190038356  
121.224389883994 123.077592992679 121.47058227778 122.010855318111  
127.800634041606 128.986795394842 124.809739073169 117.81168010976  
120.257886394616  
LOC100131001 130.661695937728 133.254663058352 118.859745315302  
129.4807689399 131.427686241226 134.434198188045 134.737901773547  
135.491412261604 134.668233738635 149.180704382192 120.36718185387  
134.081308836364  
LOC100131003 142.273279092298 122.007909794484 133.420267697961  
136.194082458655 114.278113876915 131.489715975987 145.329128512407  
127.731816003312 135.781190598068 128.06233429201 137.376602654929  
145.957934576055  
LOC100131009 148.04206955657 162.695319777455 170.035994634371  
175.21512930507 162.383584508358 169.705236302448 160.850840925561  
165.947514372877 178.790758444269 153.276938815536 174.615694779386  
158.975786937923  
LOC100131012 118.258886189283 120.337241026338 121.515872228716  
125.547399456656 110.562310620515 123.341568893224 133.695284981677  
117.636865477015 120.669452856028 111.962852412774 123.7421178083  
132.985645792864  
LOC100131015 130.242779079309 113.947948541258 148.709795687391  
142.339046840513 125.964335876018 123.247698282967 134.657787366869  
132.031693838834 131.430921437192 126.511314417328 127.496885890349  
137.50609001002  
LOC100131017 155.043017644694 171.180188911669 156.994265858123  
190.947996918605 212.571491543077 152.461930328923 166.376907377447  
164.87433908877 165.48594766783 150.056508971921 178.665552649698  
187.645390502607  
LOC100131031 140.014167357286 144.087004064416 147.250700603067  
136.869117921313 141.455841055881 137.123016784819 136.236441543681  
139.959629641771 136.657107363796 135.131890100292 131.965184111199  
135.203507726561  
LOC100131039 123.096995744616 118.355532305846 136.85323853426  
126.820834043224 109.886197655915 124.272447276746 125.905785653648  
128.396326753926 131.558842131826 126.049905221996 126.806537241253  
122.917915232153  
LOC100131044 138.584190903303 136.158508521357 130.736466113571  
127.166821363722 128.425838805072 130.100501333725 139.197364191101  
128.594951429021 124.998601194756 135.250379276888 140.800226245569  
134.096283448464  
LOC100131046 126.072053958666 127.41463780496 130.555405606993  
127.503849690009 129.780648518219 135.895945142328 133.691053105482  
138.313519292093 134.11753210296 143.508657511633 126.473768158566  
116.816688899055  
LOC100131049 112.298254005045 126.146213417225 132.096095362238  
137.779607093226 110.952108124186 131.312580984876 134.418976976995

140.372463604232 128.131324375789 130.161889021281 121.159593382017  
137.149156133537  
LOC100131060 129.135985676046 121.803676441059 132.177829138863  
156.654450436728 114.711310011993 129.105655010455 131.252368756892  
135.102827224896 130.844272373448 130.854818615966 145.962664629275  
118.787630332168  
LOC100131061 151.78607484924 162.560758971445 158.299765118221  
157.313737338264 158.738932073809 145.565772343165 158.716575777014  
147.539226876636 161.781529659549 152.337631025368 146.624631389743  
171.093611712143  
LOC100131064 133.401620574886 138.230197299262 134.235164622221  
133.585425721984 142.414323129638 137.997756995882 132.324630056168  
126.862274244977 131.604121223902 131.597937570173 141.412317125776  
139.121639005366  
LOC100131071 123.847186739627 126.343040504566 115.80245224388  
121.164978896057 124.22833964472 132.291157461345 129.418256130391  
123.81177057082 132.91094012928 135.504526903482 155.063255459112  
139.597493526257  
LOC100131076 134.616051224668 124.486701452062 122.512587751135  
119.399971165857 129.469949305913 127.935614145702 133.766199453456  
131.367075440559 133.887927451362 143.582187466814 145.378779757104  
131.483427112288  
LOC100131081 137.451687756052 132.461730873857 133.576812299149  
131.941069239017 140.762415240824 130.477824552202 126.667650990284  
138.374092984164 133.352279794853 133.019479277371 122.00079209554  
131.882887826338  
LOC100131085 135.877646659023 118.239637776941 137.85618381155  
127.975441922402 131.204616536341 128.635684412304 143.50323531501  
116.881212516879 123.354093930164 132.211379936941 137.488665424434  
133.090474303043  
LOC100131088 122.265071206163 150.657800679032 135.143532936828  
139.273651128094 133.757741295765 143.452992974333 144.92594578882  
149.289021275556 137.793462381778 136.420062669039 123.02879683948  
149.435684626505  
LOC100131091 135.544048708523 132.428675012593 140.613151527886  
139.075537402658 148.401698825687 138.885230982475 166.104915784875  
146.6306281408 150.142724640067 134.051756243089 149.904691068054  
131.992186668019  
LOC100131093 154.329176514501 162.846914172627 129.462319953515  
170.040914594182 120.514672572565 121.531401500498 124.70219935334  
128.209771391087 126.720031203392 134.834641868502 145.540872377507  
124.521130036013  
LOC100131094 124.401083237195 119.307131534253 114.977135060317  
129.173772079264 142.330094018419 126.143886553557 125.277752749246  
125.710199961297 135.359462657828 130.616175018332 127.058373069911  
133.869867161978  
LOC100131096 537.06835963726 559.899430596368 414.596948083067  
487.696347726467 292.037861000784 452.961307006622 406.133430120039  
420.871349359404 466.392151902286 344.379733302418 510.226374558703  
420.743637858421  
LOC100131098 134.519697269443 145.09909498449 134.931263946202  
136.295523520203 131.604121223902 139.771342253058 132.956167255292  
132.446406243531 137.997756995882 130.101422420432 134.273326732349  
142.842130077535

LOC100131104 126.009358591395 136.256456726841 141.066106476109  
128.705587172572 134.519697269443 126.553693803748 134.318290950377  
130.877306095063 127.295532954648 133.397734409167 127.028640787946  
133.885725703056  
LOC100131107 134.53861441495 127.972708116366 130.563756903074  
145.463105638655 135.860057860699 131.095431530473 133.52971984184  
130.047353911148 130.09958025354 133.320865155329 147.274945970072  
145.815454490804  
LOC100131109 128.47803330602 126.647643493986 130.545285774056  
127.918847837351 139.979025013908 138.129281196474 131.38881091292  
122.629146433216 129.825824640378 131.961236721149 128.655549652719  
125.444541266623  
LOC100131112 146.402352419692 134.55255098289 158.041568121766  
156.704278982517 149.941056059544 139.429008129291 132.135448831967  
130.870198462514 134.025385181979 129.553282780541 158.770502070553  
146.64560446484  
LOC100131124 128.966514855818 126.245597154052 123.347836436966  
123.081299769162 124.715454831847 124.275741099764 127.231647068635  
121.480455781173 119.305917403956 123.535803027153 136.144068118165  
128.888149939072  
LOC100131128 130.29531841096 137.240806191881 134.487476333464  
128.947211021681 115.902030217102 147.301909062399 129.32466533596  
144.436358527414 137.161065320948 145.789840511876 133.583297305219  
129.415078042622  
LOC100131131 145.024148458133 143.219722736891 146.482652762374  
170.145574727175 142.985328317347 131.285279061742 143.810050834214  
122.512587751135 147.292241873554 146.891471907784 132.50676380992  
158.675960205792  
LOC100131132 148.209164900319 150.555125135002 145.789840511876  
160.628894266843 149.758865915467 158.171302275984 155.92082882492  
153.255318944823 160.423982411027 143.62315472858 150.360754064321  
146.71868686671  
LOC100131138 127.047679628867 142.362022977137 134.4380641709  
116.514299377365 116.491342107103 111.73388372572 119.693318959661  
128.582520754296 133.087166272749 122.535728427528 131.707530115415  
122.696382705233  
LOC100131139 192.244413515864 232.023739004791 152.371569700039  
172.387657419201 332.599191067433 1034.2217095753 1444.45946291517  
185.165469121763 487.993796425035 309.861048237742 241.782750858091  
1920.16520804856  
LOC100131149 142.160941592768 141.976051648478 128.582520754296  
147.676279102364 134.988545581219 139.699189528879 132.94603323912  
144.856801451884 137.176144667253 133.106005881815 133.24828292554  
134.501410126169  
LOC100131154 138.562576783507 123.303143302526 139.843416673512  
131.641435734821 127.372242892513 126.647643493986 139.979025013908  
142.937182720493 129.822926691091 129.982236484842 130.0140921487  
138.993251266382  
LOC100131160 149.204816953404 157.078563342652 143.401971479167  
149.410729709855 220.136131941508 204.509884908059 195.755450324985  
154.908975734985 139.101471810467 149.193437559422 199.209279169496  
182.118544602205  
LOC100131164 135.131890100292 137.854873498783 125.839101611277  
128.713131994442 133.794524856909 122.297401003756 153.358189612307

128.870079563075 121.787875792887 134.28095064513 128.525769531728  
128.11006485185  
LOC100131165 158.49220347186 139.089444892187 162.383584508358  
148.077974205567 142.215285988753 139.231340020014 145.437544062449  
167.604959895451 143.752697178913 134.711144967036 146.052153515494  
115.878861991823  
LOC100131166 156.353914172996 155.648782851696 166.925695810781  
153.911165277809 201.289402228512 155.207839370162 195.740661051834  
158.87755965229 154.408875182219 177.491294133515 178.920528149177  
198.90533452253  
LOC100131169 137.680019787902 136.436762791912 120.035437167539  
131.856313046545 144.871396308673 123.347836436966 126.935731176024  
167.273378118452 119.984301761327 132.112112196592 164.50490221903  
131.114995025516  
LOC100131172 128.255141263975 132.814476434365 129.537345537086  
126.009358591395 136.913957413224 124.062863592295 135.289246539398  
124.403662787819 123.427366316096 128.647790058795 121.801291293249  
130.760835441776  
LOC100131174 131.335344547051 134.451423371791 136.359189516452  
135.061176512365 129.356401843185 139.13396769999 130.669539169739  
132.744261207073 122.046901607713 135.412051450659 136.009969058857  
133.236084190243  
LOC100131176 142.228042097379 139.101471810467 145.850605495564  
154.462766419353 139.310309748986 148.196320158939 145.241301006518  
136.005756600948 138.810236692956 130.626965797365 163.991378703958  
195.230219990395  
LOC100131180 130.804850476451 131.670601860412 145.346970289157  
127.67121559907 143.939522733945 128.643539098937 122.664353374047  
146.602252563413 125.390139830237 133.36168342199 121.134305707234  
135.71450593765  
LOC100131183 131.226834630025 150.621893089808 133.286702819953  
139.399195840117 138.4303531022 142.058086679048 141.410953064267  
142.331050242704 139.498452959831 142.09146795308 162.54567071663  
147.633793743254  
LOC100131187 158.014017648839 151.665244763743 152.942824158634  
149.984657985607 347.224999246223 448.767690095033 291.577778800314  
326.640168906375 225.050796356289 306.632103708321 303.138041758745  
500.132469062228  
LOC100131192 135.427985445559 130.368933537243 139.755211300398  
132.608622131443 133.502176289023 152.021576565132 145.100964170053  
141.38612990166 137.757902615328 133.720904256137 122.379537202709  
131.988591391373  
LOC100131193 127.187020441742 137.236279848623 148.47676851933  
136.491140756702 130.306478656159 141.56459720769 139.17480484652  
138.301397056664 117.915500197992 132.550022967297 131.611842804029  
131.188208693139  
LOC100131196 11190.1778174002 11741.7473778842 10417.5218406801  
10106.8225600705 7003.06505884735 5022.15374558514 10988.2836796736  
9272.37780151073 6522.27232911897 5748.57645553386 11647.9643290124  
10632.4185569238  
LOC100131199 133.760183242137 132.154131623051 154.618685493541  
145.630497368137 149.039132756817 136.967408633308 138.462826342765  
134.782388051531 131.676609824921 141.808122700968 130.586509996354  
151.839306445341



LOC100131203 131.031639119149 136.149732574763 114.85602874727  
121.919799968293 117.652693591865 129.891492052232 132.897554980037  
129.27634490676 131.436176224725 122.031894952046 138.743505629497  
128.785472881136  
LOC100131205 4251.82554412383 4377.59943975549 4793.22133852447  
2926.06746795504 2684.69013589621 3734.705550862 4602.81651147558  
2712.07480130502 3424.65126200697 4441.92485662082 5250.88041666757  
5714.36902486392  
LOC100131209 130.847215795313 135.479300698192 134.606126134531  
130.617505834747 130.887769728442 129.132523684894 133.190147746722  
121.505178996279 131.208112906919 129.551260802518 119.998260435095  
138.062345982865  
LOC100131210 136.942583515174 129.798965780918 125.777193592751  
127.555954288973 128.783262618114 126.935731176024 134.762169062357  
119.993313087183 130.189958197332 119.815258991448 118.117957479382  
136.522590104535  
LOC100131218 129.896711442418 138.304793826214 128.513011425662  
147.172440755724 134.05596537871 128.630613404354 131.903632821793  
134.61114877396 136.2336179571 132.256047602234 135.989816139218  
135.311980936088  
LOC100131223 133.460655803085 142.290253129837 135.86924353735  
141.966490100288 135.855243915966 132.952355710395 135.548042190047  
135.082715974111 141.302075343586 137.923852688695 125.443242860371  
126.048382998393  
LOC100131225 131.123149002831 164.146345008398 134.163388748526  
134.784568023655 149.799681364551 133.545405737639 136.708746582636  
137.652358744527 128.102787239877 141.425393615228 134.29036009792  
132.113317893587  
LOC100131234 124.530660958725 128.933672074497 125.044092929562  
126.33556674738 131.157702791998 117.289037817013 126.484819755399  
116.472796471694 119.112063328364 121.905741525277 114.056147008769  
120.406577236405  
LOC100131243 143.741676966126 139.482462221798 132.987389721592  
138.814930200619 152.148784410501 142.669207969715 147.626071601072  
138.132390735567 146.450806121927 145.096707533824 132.751406897891  
150.098708715617  
LOC100131244 137.25939455719 142.222833574043 130.311471059267  
155.52533851273 137.00397800873 132.20887307183 131.349297554112  
149.668587078867 125.899200544217 154.113228966411 121.336932276232  
138.633019006784  
LOC100131247 136.225792549383 129.422854634791 142.646570636529  
130.066177538896 133.111791289725 130.617505834747 126.693235227579  
124.666487633365 143.219722736891 138.743505629497 136.732319750425  
125.362754088168  
LOC100131250 135.289246539398 140.341589053972 139.459975305985  
157.457468761338 139.268942501979 149.651553512698 141.015441854424  
130.824958143557 136.175268696202 137.324247703318 143.05872558805  
134.549628985766  
LOC100131251 143.26896117546 129.208429861964 130.535859816562  
139.501279970508 140.528748608335 134.362834437771 142.296446144179  
143.327730271099 138.409284761652 133.467092274663 136.249621724093  
139.834535091869  
LOC100131253 164.922193471904 152.347154384235 175.902751522861  
151.092066533546 130.354641020141 161.724388995749 159.994376562272

159.005459875338 152.323927317575 140.182150393054 176.995049477843  
192.565733545715  
LOC100131254 117.639216182057 130.495294897642 145.539731152955  
129.79093244374 130.451929547262 138.746987455826 121.087514445827  
128.060612106762 137.258429777402 129.311134743311 126.566165822427  
136.258073395013  
LOC100131256 120.135349166633 136.173596381385 120.042717248207  
124.101111442605 136.188868917386 108.04922729993 126.388778582602  
123.782746527199 107.126004317323 130.41429837092 116.061356450855  
133.099175110023  
LOC100131257 125.393848851951 129.307025798583 132.934955542743  
130.457981404612 129.25124636593 130.258933321051 134.824147038515  
127.171331062578 121.696353230886 140.593510265137 127.356622898971  
128.777337552038  
LOC100131261 713.23381913235 680.509421043347 653.749043828462  
517.020259129974 449.523996620257 473.73182675469 798.758496171493  
807.604205890244 602.86705608228 372.024884481775 776.807656744828  
541.460843251764  
LOC100131265 136.103088234442 134.484499048949 141.099781722697  
141.876237297525 140.217243202557 147.777050372032 144.287786573389  
139.803568564059 137.416133786828 141.84490608317 128.775477649887  
143.662865541299  
LOC100131266 150.993910190626 156.145544501731 160.338146803754  
172.142411008084 155.253032078086 145.971656491073 148.112717810117  
153.550174378555 160.28767775843 173.526005872207 168.150270765792  
191.179662650057  
LOC100131271 146.204122329465 148.866229889479 150.484823814674  
147.605262422483 142.476530302265 144.850211439338 138.947760022173  
149.871960981882 136.739754726714 138.192550945411 133.43194756868  
146.432468585736  
LOC100131275 130.763957515652 131.369177333568 119.643417329571  
143.49969914174 133.185908839766 137.814391189269 119.739204799544  
147.78847662997 122.583461806645 129.546714583043 100.216750525986  
132.864018034342  
LOC100131276 122.711143209444 136.282608531191 133.792673129743  
132.47775411384 125.995374488153 136.570817174009 132.739435456445  
136.770515182612 113.512670856029 150.960096893517 135.86149691566  
140.381386314817  
LOC100131277 346.996310517446 516.088776850623 211.483693299981  
263.707476735938 148.562200783472 266.61343130101 140.28485470716  
152.964940071133 148.461172387171 138.924820359912 138.161690144518  
143.532014058535  
LOC100131283 150.294432623474 138.670077127324 159.218886890035  
146.725123303782 137.412952822912 141.026045918091 145.675032688915  
136.408314486465 149.000760379976 158.699778625671 151.174536186463  
132.902437860565  
LOC100131289 117.361778263056 135.695576019185 129.973380117841  
125.5449326311 142.005703694973 135.120878931851 147.238896426423  
129.705735906962 130.735223763219 124.654146040634 147.187681416171  
141.721829342179  
LOC100131293 133.88072491369 149.348231806916 145.42029807396  
158.344330353326 153.22516060649 140.36602776806 155.63328143658  
146.142934874698 134.623264303227 144.340734361996 137.149156133537  
154.443360208399

LOC100131294 183.719279448844 168.232843307077 174.168079247768  
176.088449983147 153.5256657638 152.217243924816 173.939159471022  
158.000456937922 175.010849510711 186.999459152483 170.974759483946  
181.941224633917  
LOC100131301 123.45443117154 133.552141086987 124.391225837909  
122.498794845416 110.315549501241 120.35956894661 123.622533094122  
121.643036773773 121.984179437382 123.853588042292 119.01990099776  
119.072213573568  
LOC100131303 127.787890405862 146.227452269648 125.732389000341  
128.748663215466 136.639637503571 134.555873832434 113.09980008288  
134.607501073433 130.824958143557 131.367075440559 118.258886189283  
134.233014993992  
LOC100131308 132.758313782606 134.58799530734 138.384797779855  
131.623527073985 186.747375844319 133.695284981677 145.690634269858  
147.393178410954 162.134726710448 123.446714388901 147.676279102364  
127.57284871013  
LOC100131311 133.487774861252 151.865924163231 135.809383370957  
132.446406243531 129.132523684894 136.682172321984 138.471894596606  
150.456500446175 137.058578192268 138.206065640158 139.943915452851  
143.393174544776  
LOC100131315 130.238231520218 120.812738312059 130.282212339065  
127.43866970659 134.55255098289 127.808579455383 135.36463588098  
127.116637906391 122.258432948151 130.925881698601 135.852591930882  
129.767878283811  
LOC100131316 137.609831343223 142.183154756458 149.520911664673  
116.871350997346 128.790166506932 142.55463239891 131.806645427543  
133.771691580031 125.227513212286 130.128585442593 136.934313990609  
121.356731684516  
LOC100131320 116.134550788966 121.334882368464 141.693224578298  
126.84966022925 124.59097574481 129.187574143637 128.925288777749  
123.424145707079 127.709638375626 123.227904580467 121.177681858671  
130.37544152572  
LOC100131323 144.718507303105 151.650777127117 170.298291784762  
139.329693510525 137.704257049203 151.067819234238 183.138955445765  
156.068308349225 152.097609803404 166.904990069484 158.216790540415  
167.087850057037  
LOC100131326 129.378442664568 148.686975104375 129.295956874012  
132.0888555526 137.82918941689 137.79714923769 118.737244693366  
136.951350782053 124.203250865069 113.536570797896 122.837807905774  
144.023798119335  
LOC100131330 126.752999657665 152.837739128546 134.387256336429  
145.97330701968 145.331858938535 159.973758408655 177.438968923426  
165.225475655526 149.039132756817 164.227134687088 153.705394500855  
189.292740365891  
LOC100131332 126.762116571216 131.241878941749 137.464914919148  
136.6729514905 142.142633050256 142.336164180947 130.179742057015  
130.686857648764 118.740346254406 129.818020166075 132.22974656114  
131.123149002831  
LOC100131335 136.72715888684 143.477670915091 142.85695042665  
139.117053855066 153.299196905367 149.267019532847 150.49183794045  
143.185372109165 137.990806386929 139.377027955744 141.781482381513  
136.986022901377  
LOC100131336 784.170983714588 645.183207984114 781.208872924532  
707.404709303506 529.529314022043 432.92947962962 372.024884481775

480.593729033799 427.98782239715 657.231047829537 392.282956362735  
342.487952136318  
LOC100131337 138.467624450885 118.918962530408 117.303671445328  
131.426355444136 141.550553034455 119.942425340025 123.881658891576  
118.025603140924 137.603046125938 119.842470751496 140.379874810685  
124.439917584199  
LOC100131342 136.131453703981 128.066043751951 143.577865527891  
142.498280938736 141.241717979079 137.819642907456 137.27298184582  
129.320210774045 141.013392458859 136.364830851128 149.702048490465  
133.71965790848  
LOC100131347 145.085091507228 137.290687951485 139.870306695324  
136.013989349192 126.589865262427 126.620889938532 131.036225888592  
127.356622898971 133.71610564207 127.047679628867 118.500956349352  
141.486042999328  
LOC100131349 156.053517438255 178.984409575632 153.571517567657  
158.953705937936 152.461930328923 154.722895261876 179.286187825363  
164.571974509529 175.262884960324 170.731358903019 164.247251507109  
185.583997792931  
LOC100131354 129.861693025157 124.193603137858 146.20679320119  
124.455340203012 145.652246303142 136.353051841792 137.363483527372  
132.735371358102 126.647643493986 131.132508349222 130.776213987522  
134.759283147919  
LOC100131359 114.658668711121 121.908945872994 126.75720720361  
125.429085234515 112.000309477972 126.019246614944 124.101111442605  
124.905889975958 126.139188586523 119.9414421871 129.269919529415  
125.693321471759  
LOC100131360 140.837360719964 131.296518221093 137.517461260687  
145.063062479224 173.189465201573 162.127697884504 168.437049123012  
148.350919010575 175.236826554583 176.340265963032 137.976533193418  
163.805257266374  
LOC100131364 140.774304412579 129.210356735226 140.469508410073  
129.135985676046 121.124574985464 146.406344338757 119.180033382937  
120.238706364491 128.779829252045 138.086270564406 139.97127025207  
125.558877611499  
LOC100131368 156.417000271727 173.850390626782 165.389652763451  
173.995889755792 166.611809859059 156.798431595608 161.992141305029  
160.518055978242 167.594414386475 167.021858307031 170.731358903019  
166.77329045424  
LOC100131372 123.935072913078 119.125002207396 129.044445373107  
152.500670025483 130.470034945295 124.213104788426 120.883785696583  
125.531371673679 136.444883411968 149.844677055508 135.839123867443  
134.285191872099  
LOC100131373 120.547683754604 125.658396221949 133.241744350369  
132.419400131137 134.344021502031 131.081793789906 141.006540481119  
123.67449826277 125.915689078001 137.384815877899 155.542691937539  
136.301442794928  
LOC100131381 140.805322576253 156.003233745771 151.59103070964  
145.498372398845 173.142436025281 152.760855359297 154.352518161283  
134.005402534879 142.621019060798 174.909258852845 219.441959146815  
161.412427590994  
LOC100131384 133.228822922258 139.260868989409 127.427014611349  
133.453702113571 138.640919060725 134.4380641709 124.411213807179  
125.914267820741 137.72327986309 117.131720092783 135.925813154268  
128.463982896081

LOC100131387 8163.29201165065 8649.07367196998 7902.9189607838  
5008.4888270731 20510.096303537 18665.5217411582 14592.6308255978  
13324.7465248375 12046.9345159347 12818.0509395717 15053.7547401937  
11741.7473778842

LOC100131389 134.076865693417 137.232722233042 128.207440197765  
127.678512375099 126.394032757479 135.542079867325 128.087991226561  
130.882463936853 136.70715656782 132.8615886934 124.68729078792  
134.725434838052

LOC100131390 150.841261270382 166.214167530158 151.10837100314  
181.453575300661 167.389632521521 166.97270256697 146.840735518984  
163.991378703958 142.201672822989 172.28937151007 153.34166495223  
160.243405030742

LOC100131391 142.326319895395 144.748564682545 137.21606512599  
137.691870502653 129.745892720738 151.484420979498 151.727603285205  
156.176537862398 146.406344338757 147.132625797946 178.657325741035  
252.171420358437

LOC100131392 125.874313058552 124.113451627593 133.197002327259  
138.096262211809 120.973428305414 121.455843337023 128.79724400425  
117.503848306325 127.263061874385 115.920514336615 124.542879928448  
132.342063356763

LOC100131397 115.211731367278 117.119533897652 116.486929280635  
118.764650384561 119.159078990339 132.668344126625 129.415078042622  
129.434594784981 118.787630332168 116.331428876124 118.488997046932  
128.06233429201

LOC100131401 119.480037559953 121.689416823766 132.346363545288  
139.931092990984 143.922878410438 136.720837676326 132.291157461345  
130.336466131215 136.90636489391 136.815411937352 128.412176346707  
128.626051185037

LOC100131403 139.265915951162 133.027236270978 124.913645688325  
152.99686989829 150.070213543579 143.322199505844 132.371165851333  
148.195611015135 150.006621336954 133.807992913171 155.091135297162  
149.355389396683

LOC100131409 147.457193565877 130.697148466042 141.336866031027  
119.112063328364 133.469323412904 138.620617643924 131.294930860752  
147.701092466105 134.469653093466 145.466538006138 147.73141408795  
148.072816925413

LOC100131414 136.231747456996 143.50323531501 141.555366493541  
134.582098893327 161.89906072679 141.092486112278 130.176734524308  
137.150183536061 137.971108694323 147.949560045212 132.096095362238  
142.122556679441

LOC100131416 147.44463861207 132.952355710395 151.176697752603  
136.2336179571 136.214432257698 154.352518161283 134.446758753426  
136.501159644992 132.963761182049 134.376870769669 128.788443476759  
126.809252651352

LOC100131426 139.652974659584 132.50027119027 130.471929699923  
128.052753068991 144.498245098592 132.320536722841 138.504398858454  
133.075748695526 135.375268329248 140.067809125008 131.296518221093  
141.568970008164

LOC100131431 123.766373146588 127.990453128978 130.024546949158  
144.604058256586 131.551085224112 130.06068534054 131.062360037777  
139.835983835267 127.900901613784 131.540436531741 117.141089194822  
129.158212237299

LOC100131433 120.36402353147 118.011195631598 129.382242021964  
123.207402172696 119.112063328364 130.128585442593 123.696942540314

119.492844191924 116.112013454335 121.997885377703 122.780453116176  
127.566369352079  
LOC100131434 132.721469335671 126.442999559539 121.699702849509  
121.898921780569 132.218907367109 114.927420605185 134.711144967036  
122.729918525032 138.090158433822 132.651922794567 149.066522533956  
132.371165851333  
LOC100131435 137.59017685842 137.869471689534 142.553175839278  
152.152106138031 158.645402461996 149.554174907798 144.558151519547  
141.066106476109 135.594186066942 126.749878702933 134.872654203921  
149.801573181126  
LOC100131436 151.293676705634 140.995418231627 156.123528587917  
150.868712184357 145.005991300977 155.997210529742 140.754706171596  
143.754105312957 143.867013358737 151.115031304764 153.332110179758  
142.91818218442  
LOC100131438 133.727447520255 156.494323415504 160.180961887686  
149.962143642332 157.919709478746 136.394920983439 136.492892469272  
149.99203906203 138.731957926247 145.01322767825 143.700865823615  
126.711037295629  
LOC100131447 128.907618218883 129.338551879984 134.814082968113  
115.884253217495 147.684875777977 138.887159625058 135.148723192316  
123.02546895475 129.069366041625 122.075440298074 126.501648842366  
122.241290967571  
LOC100131450 131.722397988741 119.13963074637 135.013075032671  
125.982423431253 144.578454791104 132.865704994046 131.545287070888  
129.356401843185 120.493082096235 123.538037290702 133.122809308876  
122.396214045451  
LOC100131452 218.470365730283 223.339132121796 205.362816362477  
220.999383789474 143.250386570155 241.251507026982 188.981391266203  
177.88534558205 183.657525723012 174.389706515542 243.772412032046  
188.74403596953  
LOC100131460 152.801801823442 153.744962185987 139.242481781927  
161.084088366981 155.285420689833 138.953926269905 162.082166316002  
154.985781979984 162.766038656637 139.314945862113 161.096914295309  
134.853253781256  
LOC100131463 125.021217009254 125.28279436853 118.000757530896  
119.370219299491 134.125038192486 118.966992191892 128.878051599968  
122.816049839521 130.485988201308 125.241484840139 127.562924931536  
131.543439103033  
LOC100131464 115.702900810606 115.208555742308 119.598216955485  
128.777337552038 120.276236447255 128.335132315812 129.365004129784  
121.130837254861 133.836390935612 130.334622987505 123.98384416057  
125.455347031878  
LOC100131471 176.47556448977 195.88263399968 176.934111889209  
220.791884858764 198.356420768703 215.931781291835 223.765583953184  
178.179238056905 175.395900648455 187.097765940131 266.468621734455  
254.83131041241  
LOC100131473 163.02140155858 149.499238912407 134.759283147919  
146.373162751863 182.736067431579 158.679903271595 167.447964370395  
143.0235772247 146.531692460121 133.223310036542 169.466129742085  
177.652022895288  
LOC100131477 131.164778405297 128.608401533371 125.058165131184  
128.967855397644 127.729912390394 116.95195122318 123.406144497577  
118.355532305846 130.782296492278 131.460388562433 130.987023228883  
121.462385497795

LOC100131479 127.445199722147 132.342063356763 124.028748209411  
145.050591047589 118.064858133264 135.020690381988 124.203250865069  
135.830453690107 127.820096020782 120.224154897296 121.945541820091  
129.3513576591

LOC100131480 128.862699779871 144.026432356249 126.958366599622  
141.937611082276 166.998311158378 126.623026026721 153.405052909585  
138.461113585594 122.841135364088 142.464394555901 140.058153633802  
133.087166272749

LOC100131482 157.094001180073 134.675247731364 125.079330440615  
127.492376657284 116.52455193626 126.370252616961 127.959474148217  
120.93965087814 132.610618885717 133.836390935612 130.185134787768  
116.403106568357

LOC100131487 122.129348411763 137.614020921217 123.841366760069  
128.711308958929 134.266373965186 107.239841465534 133.918638123756  
123.25201993575 124.657687121111 148.388093331273 136.627904756283  
125.489777118532

LOC100131496 147.640100078933 144.688515462537 135.446072698039  
150.421116058494 128.182419321978 136.113421708277 136.814736808725  
133.67719550997 157.692519370734 130.374065525934 157.692519370734  
132.261161069329

LOC100131500 126.191057198995 134.694911833015 141.38749436393  
134.354215877283 127.709638375626 133.915830295107 132.079255703621  
128.158605637751 124.942701123337 127.8514513762 140.36425603453  
120.691810909148

LOC100131504 142.984243805285 149.574353706911 129.420716653358  
154.904424749528 138.307574579062 147.60284257326 137.215025712057  
137.800512046163 148.306990501663 128.608401533371 130.621860095981  
152.353494489233

LOC100131507 130.616175018332 135.168792286819 115.5765427629  
135.899595115146 124.758906471654 150.144977373708 133.56263739203  
150.476228905372 132.924341641217 131.302225305148 133.780423932326  
146.474228901408

LOC100131509 123.420635380886 125.444541266623 119.787925356307  
137.936605651724 113.773684331489 134.805239981342 132.320536722841  
134.784568023655 136.434045183143 118.879931299016 135.063259138429  
127.83654093961

LOC100131510 152.112177721714 136.664500207966 152.44293820056  
138.239251358245 168.511517285223 141.440563159897 155.072752529178  
141.890803125137 154.38209765671 142.268018184723 175.236826554583  
133.59686364883

LOC100131512 174.246705740225 157.337193457189 161.430219824313  
152.358795162474 206.650760711745 149.576563410584 144.155591092387  
148.306990501663 150.269618125943 143.644862018676 151.538112896642  
151.153466809603

LOC100131514 139.904952662852 125.624661345169 131.560971848628  
133.026094667212 135.43939472868 142.656762407774 130.552857965694  
133.768419410758 137.893630842968 137.129864761402 142.920424995336  
150.417169156755

LOC100131518 127.352386363217 119.341806810441 135.413840160615  
118.540620928268 109.438965262717 122.347696497767 107.170981307304  
122.013040475143 112.488125161387 117.593226427794 105.467761348787  
121.067907968175

LOC100131519 137.20509387214 125.227513212286 131.633827974141  
140.208983238283 135.125414452178 131.477589792769 130.362378233288

130.773945967285 117.829228895897 118.139487760542 127.171331062578  
135.291264978088  
LOC100131525 143.582187466814 140.447933562667 135.020690381988  
130.470034945295 140.251168248117 148.803188053248 142.907969322845  
140.800226245569 138.16337207876 147.754489751457 146.072585331002  
141.935435502163  
LOC100131526 411.878556907186 405.64711132293 412.863887464545  
314.845965872164 471.816954259146 459.171226689178 594.38228123675  
396.126485121994 285.562276640039 554.652979820908 1389.93393245455  
331.383533814347  
LOC100131530 152.857278986877 168.269075560636 160.970946091146  
180.240305360865 156.964080041261 142.370721565016 153.083451626042  
150.939877261936 145.984425747963 153.761061653202 156.543267949167  
141.541355091514  
LOC100131531 1503.2049371911 1566.65825409044 1955.96772733047  
1484.32547474275 1099.80705776268 1114.10687039922 1180.7055699511  
1848.27927621606 1208.25171673432 1796.26091584668 1622.17491781572  
1803.06322760249  
LOC100131532 141.006540481119 141.169908353507 139.87715485885  
149.881708604156 153.694557276814 129.928047362701 152.738468369498  
147.110929610347 144.245174255133 136.955651763743 127.727311123825  
143.512348693556  
LOC100131539 148.320310040998 134.955823960889 129.065491477375  
156.06439656393 141.580944960818 143.956726538569 141.94585838352  
145.09909498449 165.723126764006 134.405155876727 146.029647001623  
146.616041788595  
LOC100131540 135.475597372104 132.393669306489 146.897528834303  
127.030113960477 137.065315360321 132.461730873857 140.451465188624  
141.050384368733 136.526706711584 151.445254181497 132.317972465689  
140.738977175997  
LOC100131541 535.861738240441 551.92688162618 577.98969050409  
503.59466398882 193.629237856758 593.090436323333 346.862322263052  
429.096075419528 347.812754957414 304.058158731957 551.206833852215  
275.343591424586  
LOC100131542 141.249687936867 146.701489210289 135.345616014558  
132.22974656114 137.025625133986 132.641236788053 142.558109812638  
137.107621189522 139.244051199144 142.680136733947 136.198583459346  
133.310323593945  
LOC100131544 152.755535408382 133.695284981677 150.380814008952  
152.746799687103 141.267715391739 136.988519762443 131.031639119149  
143.422419261603 134.418976976995 143.917152377544 153.6855881767  
142.711117470317  
LOC100131546 149.693559841189 119.974853329265 129.589056071463  
126.695387748732 142.406904585501 127.42914358124 143.540775745942  
153.630125822178 131.322008851059 139.342430217926 150.324132011201  
141.045379969014  
LOC100131549 120.394220715157 126.87882572904 123.015371659847  
127.462293158337 129.920586100555 126.652197216347 125.603448542611  
118.991494185841 127.00963790814 136.271412363498 136.967408633308  
129.884064654761  
LOC100131551 125.701083319929 129.618097261902 114.942849575931  
129.104084188187 127.511638455985 120.14201542563 118.60878652724  
135.313148180961 126.061141885666 154.771737131348 140.571143847885  
139.358218798638



LOC100131552 124.802639338573 136.300195727908 136.156548919515  
138.074645385322 139.256416415149 136.6729514905 129.246066890078  
145.217261514886 126.421148348261 128.367370419533 142.279695592224  
138.068164255305  
LOC100131554 158.558471586662 138.27272971335 134.730275384832  
141.418737063013 138.237030685795 153.966815534288 156.846991384413  
142.93332947113 134.494167613686 160.923897048848 152.445022409208  
140.92377681377  
LOC100131556 138.873925577739 134.078506829054 132.291759474331  
150.452467115669 133.427561208907 140.554684822646 138.751781355083  
123.75974844367 130.807596523171 134.011746666371 121.065278765151  
138.813126946007  
LOC100131565 130.977864137459 136.699011428085 133.594446233378  
145.954700424725 140.772074031028 130.058902161953 136.701400398129  
132.332128706656 136.409137464692 145.025703051661 128.090665893885  
132.038012025708  
LOC100131572 484.480643763982 426.896707161414 536.253405705975  
306.193157874683 580.996071040561 353.826834642154 837.872187194784  
404.726926716133 392.06522028189 370.301819403832 986.972987865318  
637.30300219673  
LOC100131573 129.6505724783 127.792241991414 130.63390061855  
132.645196037302 122.187031504466 139.403087367992 124.424565172377  
134.790410101679 118.015175851934 119.036965883266 131.539803642615  
122.816049839521  
LOC100131575 136.532168520039 131.414690782328 139.356478232855  
144.28597792625 139.317133739334 138.664401460739 133.872561340464  
123.849651946683 133.970510683179 128.386309075038 124.889829874126  
125.593595066736  
LOC100131578 131.635641515901 135.725202462502 165.723126764006  
127.560308850342 118.641431192759 137.714430743204 134.155655670103  
131.670601860412 119.666650919579 145.058110060639 108.910588012315  
131.099004325598  
LOC100131579 137.838096997956 145.389721946046 129.52578899011  
140.05419835434 152.550031868259 128.413213851142 155.035727630756  
135.275284142536 133.88072491369 119.774204444899 142.358754646258  
132.325483244388  
LOC100131580 131.12953085854 120.311723366684 128.007359083768  
132.249906289203 127.533939679071 125.234097725749 122.284431229917  
125.379842077431 130.852932147831 117.058031811694 131.507618414676  
139.325478877749  
LOC100131582 152.390371614602 154.598520288855 147.442483242063  
140.930897231705 123.306499698566 129.216693566478 122.900675062181  
126.228513847262 119.466200987489 113.427848757112 142.376921410427  
127.41463780496  
LOC100131583 136.569250038372 125.999595008166 134.119276589666  
142.630563791102 131.77642590781 132.960708384399 118.991494185841  
138.171858105728 136.865340099645 136.679405220947 128.097206000942  
136.253264628863  
LOC100131588 128.730649233876 118.912989775436 131.280092370361  
131.635641515901 140.958277301476 134.808485735121 130.917269984571  
130.675745275992 130.626965797365 128.616121042106 143.810050834214  
139.555322603323  
LOC100131591 135.241029533819 129.450937831864 130.953237161257  
131.924162435354 144.179880084235 127.998531115697 139.249869918235

126.680992733621 131.977212025523 129.933228671483 124.802639338573  
118.912989775436  
LOC100131594 138.35738548449 139.171486871664 125.689884251847  
124.238319768621 134.646131480502 139.416388461892 149.881708604156  
130.270184521521 145.198638080646 145.233055765001 133.202111355452  
136.099663831028  
LOC100131606 145.212306927438 154.886628987246 143.491142564838  
139.878752507646 129.756642179083 143.160281902098 145.524305076788  
135.346501914337 134.187456260969 138.156430188312 137.199186338519  
140.895053453126  
LOC100131608 143.451080466172 132.75673287656 144.634118305223  
140.002249873656 142.690911343704 148.532339759414 157.436513275737  
136.19083681188 142.788848338402 142.185345091219 143.921506580132  
146.437565098335  
LOC100131609 1343.2623011534 1184.3199328099 1790.53556140959  
891.194779815063 917.646958427824 2563.02488807613 3424.65126200697  
3938.94050658589 2496.17211592866 2547.53445585552 2154.00589005104  
3798.89743803968  
LOC100131610 162.294114485312 155.981989040279 134.166297738657  
161.891809608511 152.50843414723 151.815211341628 151.836705989155  
144.233097828078 144.842687993057 135.37120759813 132.6175371563  
147.75188889715  
LOC100131621 125.405373274081 145.844961942581 142.362022977137  
156.988189750309 117.847744476387 150.348608467097 156.796245322362  
150.557982810339 143.155998311198 150.265385257579 165.537853089052  
144.018198451676  
LOC100131622 125.724143659093 116.625518828978 136.587165242663  
119.993313087183 121.072192130078 129.722382881611 125.290320836648  
125.556444423391 112.851805868467 131.031639119149 157.227118680396  
142.059921012561  
LOC100131630 130.738915341653 136.229159638766 145.929907161493  
140.487887891414 156.213421099137 133.376631703373 127.637319802339  
134.078506829054 147.653573379877 149.262900833177 128.518381802959  
140.234485088845  
LOC100131635 144.845726048937 133.62358240645 129.831076624826  
128.132785279426 146.069543494352 134.058035351684 128.601885372662  
118.673325109944 128.17223916536 110.368392735494 132.369872013432  
128.879953205511  
LOC100131639 158.56996905631 124.464941711781 141.222884136243  
125.493004972076 121.087514445827 145.100964170053 140.762415240824  
128.84676695859 129.03753569157 128.820757822782 125.034243098087  
136.993102884269  
LOC100131643 144.505072819693 135.989816139218 137.53070284697  
134.734429133481 151.87495966414 152.915692742755 151.10837100314  
139.579764449867 143.993611400272 148.255769084026 166.819234137224  
150.132420238581  
LOC100131644 161.72730923536 160.75642485037 155.371772547395  
139.785767470943 132.151765465534 157.203304477454 153.251468534012  
152.927956172463 145.056914913573 135.532820436394 140.911080286243  
144.235298492095  
LOC100131646 160.496585125233 124.992439957206 164.708712337156  
133.769848328557 153.616692588396 129.221482161409 135.190698960212  
141.046537113211 104.780306305981 144.777043589925 133.352279794853  
115.582048644075

LOC100131647 132.823333905679 130.724642809645 140.699287635171  
156.368487784719 162.199381540369 155.490897312915 136.403353223002  
139.826273596452 144.542320520523 115.420810993676 136.647239621513  
137.830435972191  
LOC100131649 136.255711644596 135.453399741892 145.651301499721  
130.211247943634 139.136845089275 136.575784685895 146.940545711162  
151.16261275916 134.537123332992 148.231928963878 144.604714612091  
130.293492553638  
LOC100131653 129.873110494826 134.936025073531 129.330592465123  
132.855812035005 129.114161128113 143.120621855946 131.712745388563  
137.536053775531 136.879615833565 132.446406243531 131.512174491572  
138.307574579062  
LOC100131655 144.662545137915 159.773576221107 150.180037731272  
152.520828479026 160.748082658758 135.952202055637 129.717701654435  
138.145677924612 138.83760902012 148.306990501663 154.828782972852  
152.935963398921  
LOC100131656 116.363556872071 122.600274773736 130.991496243273  
121.44564199541 129.411734209444 122.262664384198 120.901639342731  
129.295956874012 122.522978939399 131.510494315469 121.624218243474  
128.539969915702  
LOC100131658 141.640292723776 135.499195435803 143.475725571943  
132.94603323912 147.643339410621 142.780100181736 145.058110060639  
146.735616237082 151.382199195953 153.184575380093 138.986877479278  
148.031899566208  
LOC100131660 155.134796468704 132.851791525098 134.668233738635  
138.363553671822 137.666849842576 137.956975047909 121.645021899034  
137.179058645907 140.244052740397 131.97938329944 142.41737138634  
133.483766053954  
LOC100131662 124.248997533959 114.585818507336 134.399228996542  
123.76900858347 217.165036362034 130.173734963758 128.02595294499  
119.922676683808 141.308299074832 123.336074100984 116.814269969508  
118.283346939564  
LOC100131665 137.823152565933 131.125175244494 127.995790782392  
134.686251400642 135.812301062763 147.85133493803 129.073750290924  
128.568463697992 142.230934617475 148.353927712013 134.21227169867  
140.482728188987  
LOC100131669 149.297012645798 152.158269344693 149.647926859169  
139.799467834109 158.125437004665 144.266864839344 141.980728956046  
144.02847768185 147.694098231655 136.745596788338 156.34272729153  
144.937697857147  
LOC100131672 686.028214419557 798.1490651671 725.621153262924  
489.118864124059 448.858580689107 553.615252472149 946.640841062802  
461.229315272354 441.435444003241 758.863418917419 1654.58270183167  
925.656701707763  
LOC100131673 133.502176289023 141.970301370404 138.838795320713  
146.188193301627 143.138613573764 144.562038493733 127.453866279181  
136.225792549383 132.923237903246 140.746062850603 152.152106138031  
136.83470470035  
LOC100131675 123.635470154191 127.279107079261 132.358418384733  
132.54577436954 170.198508633417 126.760835666143 137.962542261072  
132.338144393918 141.777089987975 135.017196494069 146.929717840755  
130.712515995658  
LOC100131683 142.21279866857 151.106858426994 152.393260140571  
169.306573880401 126.051431944357 142.121399383259 149.41564356447

153.34166495223 135.247018354192 146.968599872798 159.752644678596  
135.279197125157  
LOC100131686 136.209796259197 136.508969220268 143.279331050175  
138.20899000519 135.834000569736 128.886008923268 141.767311448808  
135.017196494069 129.034770823878 136.108500467418 126.780096523484  
130.778164962583  
LOC100131688 145.956477465634 132.480255866589 129.123522999226  
128.56000638844 145.958718601763 138.197500836501 135.880955433228  
131.646121568612 138.675023495021 150.792065744902 147.541437871615  
131.081793789906  
LOC100131691 130.973504803813 140.09417711803 148.04206955657  
129.192326574697 141.33919297402 137.691870502653 134.136687154241  
136.689064885984 146.321713521846 137.788504385206 131.097598299707  
141.715307041887  
LOC100131693 117.634514818946 124.072512083237 124.053190169486  
129.865581506307 141.060629922003 133.56263739203 135.116985816353  
116.764795914545 130.700175060255 127.365142833355 130.721987260546  
115.257318321108  
LOC100131696 132.566074764755 123.977467396003 125.932540615682  
126.282575548237 134.406692724353 131.228779762508 147.697973457776  
121.860428893248 135.388750095746 122.646850766733 138.645156942894  
137.800512046163  
LOC100131699 140.999877170481 154.2433882385 150.596350682411  
148.977202433511 155.431833398023 148.874533472738 145.948772123142  
136.18698517676 148.130993521745 159.097020087275 153.191840013692  
146.155809402461  
LOC100131702 139.843416673512 119.952108688414 141.741892403029  
140.759006929593 156.75001042701 139.251886500377 124.833659452957  
125.496553386629 146.992289167283 149.513744292932 142.815817738837  
144.082452235267  
LOC100131704 123.45443117154 123.946808975704 123.813766735115  
139.140647941752 130.42746492878 136.897888440409 121.752481757054  
137.298549014192 115.211731367278 128.306607216705 121.75662526451  
134.790410101679  
LOC100131705 138.98468042464 137.056500339577 150.387906232396  
144.141837615086 136.069631519097 146.464937541891 137.354782768068  
129.026732674277 143.816567683093 136.501159644992 128.341887728118  
128.118223792086  
LOC100131706 127.687299576139 126.141462782039 132.088335186716  
118.558673085303 118.850495684547 126.322527679273 113.568261995787  
127.786141874218 116.161473967382 117.015097017246 127.036976462046  
126.580227722115  
LOC100131707 143.980608339892 135.185283076286 152.286545050749  
133.052615777603 136.522590104535 126.473768158566 136.394920983439  
133.133892264995 138.114938404796 177.001637712889 160.17208299932  
134.936025073531  
LOC100131713 3648.38765465889 4251.82554412383 3251.62784659994  
4343.46317176151 6368.23123771343 3896.49785254733 5912.48904507462  
2782.94647782764 3917.05893989806 6253.84268792816 4309.86375945008  
2195.41077320434  
LOC100131716 135.789381967525 143.021435512861 139.260868989409  
137.704257049203 145.543942469821 131.338853426561 120.521509788705  
138.275371291639 128.599254558082 141.121364213272 141.74792000689  
147.588213090285

LOC100131718 5373.2173152906 4847.77258830631 3164.55070502403  
4923.36698713285 768.334658920971 4043.28299602858 2183.18692530644  
3536.14527317085 2572.01353724341 1836.22560264874 3983.37592132018  
2770.7811954029

LOC100131721 121.801291293249 138.694701349366 144.949897872252  
137.418345713224 146.817659734182 130.445343615035 140.05012958679  
143.985850833974 140.928627507036 140.756898474665 146.539196738195  
146.649944669876

LOC100131722 136.400959554698 139.658932672049 139.545451634208  
126.494665743087 131.816989019024 147.589201160993 138.114938404796  
132.86711707789 139.273651128094 137.683228179974 138.094719587545  
142.493119780028

LOC100131726 126.898894887386 148.618327213374 145.754504160436  
150.833523101057 128.931946787934 141.74792000689 151.81251450855  
119.849895979393 146.390223079987 152.296774123599 125.848597767733  
142.874797429568

LOC100131727 173.440596296333 167.961390966538 183.472290949588  
177.257355909681 148.725162101789 140.236618351922 153.78976320015  
140.611071681667 169.378422829858 197.981112645168 169.16155608071  
128.119556520151

LOC100131733 140.701132362458 133.71965790848 145.187490179166  
136.786462547129 133.628391175037 143.720044122451 146.077082896858  
137.232722233042 156.856149172225 150.632724038845 166.2468445883  
150.549883779193

LOC100131734 126.322527679273 135.987450822209 126.262349005661  
129.625046507677 123.839006667113 133.74741832303 127.503849690009  
129.501028506432 123.577138762427 135.479300698192 133.888892883291  
128.648559784611

LOC100131735 545.760623858473 528.275591281419 814.471143753335  
493.887026009442 563.779294315901 696.475639532595 711.729857540712  
635.819650434542 500.132469062228 571.439520427295 729.499296070289  
608.129959758538

LOC100131737 149.320667417893 158.312614511836 167.395369670065  
145.749887769807 197.938447651153 186.999459152483 172.468440317443  
178.014057622594 194.789918629905 203.87884605779 206.164058935215  
191.507657960386

LOC100131738 125.769903262265 130.766401858384 121.371348717752  
125.285502203677 137.644942697483 136.16560274503 132.181365505556  
122.355409068882 127.718341524417 127.733860645979 136.621173927187  
118.47752077032

LOC100131742 158.59135215074 138.50032459657 137.794858639838  
151.68523937819 149.851792558427 128.860744370967 164.236417852165  
154.161892545061 148.578688042147 134.304545258148 132.535722328813  
157.309058982117

LOC100131744 153.601918768668 139.579764449867 165.244616507084  
172.26834556696 172.622816559412 143.548858367002 153.507553306723  
154.057771254252 148.665627690915 152.832573288735 171.636121363019  
163.446813963119

LOC100131746 122.759905480504 128.336332748047 121.072192130078  
131.933026690056 128.108066199718 120.992440100307 123.364999283696  
120.094156375538 116.759526220736 109.574386044714 127.015086299437  
119.257387524365

LOC100131755 128.135216461862 123.453048609213 140.307931763353  
136.413745926388 147.676279102364 133.378374710498 158.25554353787

131.456697863268 146.666759322506 146.418147447541 142.058086679048  
126.27024495428  
LOC100131756 132.271437329873 132.590454200629 137.725329029129  
127.028640787946 136.394920983439 142.617474507282 134.09920571607  
154.564478911791 145.997380100999 140.439698763808 129.490800177429  
150.235026770931  
LOC100131760 139.684885298498 138.566954604414 130.217791888656  
139.607944722497 137.27298184582 134.307336063739 134.61114877396  
128.140333650496 128.695695565175 141.233642252649 113.479382235297  
140.539606951892  
LOC100131765 137.949215501559 138.182987173284 145.751336115646  
138.925802905636 130.388530183353 141.117659724704 137.27827836407  
135.916668738753 131.709341771599 141.488910091973 121.297234504922  
129.442111153737  
LOC100131767 174.526176588454 175.040086358446 150.875392181869  
169.385340991747 200.146843808423 140.384577697416 168.991551886143  
146.084461430546 156.920867019849 163.024215671479 173.573412346985  
165.900156600776  
LOC100131768 138.504398858454 141.259186690966 146.157459765796  
130.987023228883 139.541759919059 160.843325877861 149.65417821994  
141.999730335668 135.487310036251 142.338352884053 128.955241553429  
153.639559509292  
LOC100131769 136.705326991088 142.91818218442 136.617105945904  
139.108656684059 174.991941844263 172.097502416776 145.749887769807  
153.214696479001 155.3394927753 170.931788192825 165.545136704242  
142.826050917117  
LOC100131774 137.370670726978 138.649502040582 139.170102961407  
143.560065338939 135.627840788802 140.820807603291 132.902437860565  
149.490064894136 133.231066635063 135.273184185121 147.991572632747  
150.336115779606  
LOC100131778 128.131324375789 115.830631252469 134.970609100459  
128.229729571899 135.338077911839 139.826273596452 122.292692083352  
138.558300898079 131.252368756892 129.524056217383 130.154756165574  
129.031338314175  
LOC100131780 127.116637906391 127.595574823053 113.256481034259  
119.131613164405 131.034010150362 116.540729581355 131.138322527536  
127.361974492821 111.783160346742 125.937660544107 127.856634523494  
116.7299185256  
LOC100131783 126.338676765473 129.779076484273 130.603837917984  
129.436712663487 138.070353990356 158.712241098927 140.391753835434  
132.641236788053 122.607404698857 124.310436914027 119.952108688414  
124.35721327773  
LOC100131785 345.062426573519 325.43977732888 393.264726588522  
303.09499683953 1008.875250028 929.69741581954 1390.95426299323  
1051.45401327176 734.469481390593 771.694853062033 624.978351618077  
953.549801897112  
LOC100131786 297.285037835812 281.881563164961 265.919002666885  
313.536451935268 136.815411937352 231.796421262015 179.932404140099  
193.777175793218 177.039190810529 169.909886347082 213.215996114827  
198.506786870804  
LOC100131787 1437.5568316065 1606.01395227661 960.491731797061  
960.775251871864 1304.37930719411 672.862678078975 1542.35486950856  
753.007562127186 638.77182631975 461.413469623811 1520.59210521859  
1027.96306543235

LOC100131792 128.019837242559 120.835207882788 127.101752724954  
136.249621724093 123.084040312047 130.388530183353 131.400031203603  
134.000363767958 130.563756903074 131.46193427125 118.310496976818  
135.210887148305  
LOC100131794 133.103403333542 124.777895136212 127.263061874385  
137.719257499747 129.517511177852 136.621173927187 127.135199316758  
124.940836122365 136.940275156257 137.940675746397 132.906201428703  
127.023543953724  
LOC100131801 1850.98311401165 2026.85580212422 1840.14350831655  
2101.93705983383 3130.30693451802 5008.4888270731 3664.38955037715  
5226.05969701201 3447.19587767281 2468.47687203968 2208.49325118803  
3862.57980488881  
LOC100131808 133.133892264995 146.493927564338 142.505050582588  
155.041173289759 133.152523054305 138.19108838324 142.203367260558  
129.818020166075 141.956996308304 147.642693777383 128.492142236807  
149.374282007673  
LOC100131810 225.480366837274 186.640167849568 297.332272659995  
202.253560413436 176.533058719908 410.216584967666 297.805768288377  
316.409887372431 530.969825236996 240.439368352772 286.282132382462  
223.042575796603  
LOC100131811 115.310953814885 120.170269310738 138.476953078729  
135.306127055224 132.639070127232 141.691135410429 132.100026388604  
123.237851647499 131.287142490322 124.521130036013 139.744142223177  
121.878989839162  
LOC100131817 137.599810249536 131.933026690056 143.594003495859  
127.631770516132 128.001109846227 126.37572518012 127.291712212051  
117.324368138398 134.352155462211 126.106777865128 137.371400886441  
126.256716138724  
LOC100131818 120.585506729733 121.895778599116 130.526673128214  
133.003743285746 120.581554457723 131.655316312379 143.207187847583  
115.002176041974 122.431337063053 146.854523122404 113.362825181676  
129.95138839192  
LOC100131820 145.652246303142 124.05019986924 139.888008605915  
132.764150075465 147.903030308715 124.306049555272 134.17351030102  
138.864844664017 148.861141988806 149.149858208397 146.079727388849  
139.457084084368  
LOC100131825 126.398884382537 104.544792793756 124.28033876033  
155.893018702615 114.567609871292 129.265788005518 112.309528593741  
116.258629237662 126.715300671036 119.034003473459 107.049865500702  
107.049865500702  
LOC100131830 117.928456234796 134.323365608463 133.631676386591  
133.590552542806 128.594951429021 135.849839822066 134.928967716193  
127.8514513762 130.213596986351 127.130769263811 140.481148289418  
133.820016171453  
LOC100131831 149.231475480618 130.161889021281 128.844026422327  
129.386300987308 130.70867409848 163.922353493317 133.455138380277  
126.067296703905 134.998632527009 147.648020819059 138.814930200619  
131.045970236632  
LOC100131835 389.177193459 362.195903246495 352.562711030848  
343.488356185437 195.438353051306 343.121661664987 277.685488726472  
306.896732729554 268.832884350157 234.980382243116 390.573484082597  
285.63245179313  
LOC100131836 133.117701703454 116.355027746922 122.651702760414  
151.486362260537 128.16147857336 111.217595631623 123.195738824794

132.045595972712 105.236768436069 122.962219297463 156.488852212628  
132.924341641217  
LOC100131844 121.356731684516 129.21974206851 128.113966507586  
132.804216633852 125.253637835638 120.460433297007 136.436762791912  
126.222105816959 135.501192996538 118.091125088778 126.488299049827  
141.840858913807  
LOC100131845 140.307931763353 118.749046585251 140.630844296177  
131.828902700702 140.798706399757 136.041605158822 129.372522073479  
959.532977061027 403.043257175264 137.72327986309 132.653795458388  
135.139676303901  
LOC100131850 199.991077347491 205.52620827767 204.283030911897  
231.47915227815 155.456077670662 207.560911665319 174.389706515542  
160.979182561773 160.293522619371 170.111653122193 176.049946762504  
179.648479201164  
LOC100131851 129.338551879984 136.919702354166 154.445840992357  
129.180990946063 137.198654302648 131.601823550269 130.020743385543  
127.015086299437 123.084040312047 148.25001336038 130.535859816562  
123.478896502015  
LOC100131856 132.978746105877 149.726968520487 158.080749926756  
153.363629311799 150.73248190848 145.513333676569 137.138266859156  
155.773639092819 152.291176493005 169.391557085902 176.001771318766  
147.488635834397  
LOC100131857 214.100698312272 234.814109965002 232.519482087835  
206.376365685112 129.346063085291 165.45479542657 145.318539677981  
150.968998243223 150.238582112636 151.973681370675 134.475296383752  
155.498580125421  
LOC100131859 280.656087497806 298.926727289387 350.392951395182  
289.474517971859 309.155070674445 403.104188866804 360.991542429346  
422.590112942156 377.951523644306 434.792010353541 460.651156484562  
446.509863498357  
LOC100131864 133.215151497536 130.842257229979 145.684294398911  
141.331397551086 137.410687900298 139.442091671938 131.464229237662  
138.152641686151 141.097257687941 136.635413632094 145.576880854443  
130.304743083321  
LOC100131866 417.024088698182 411.784922368377 435.037306125887  
389.588346573823 604.737834405874 583.314509855875 929.198774489695  
579.049608568926 488.746614111382 793.891277937782 820.652972219658  
970.166036472486  
LOC100131867 134.569883788949 126.617737577634 130.385747820089  
137.788504385206 122.144209450757 125.280736217267 126.819413901915  
127.179420421981 137.744318243173 120.379393989882 125.247402280272  
126.433146708506  
LOC100131868 139.674001912099 144.924212639731 128.927103442679  
143.681220324074 139.54021659275 132.75673287656 141.108383815109  
130.399501479248 142.584504912189 134.408846338374 154.064184525311  
135.877646659023  
LOC100131871 134.192409943723 138.516066340784 131.856313046545  
147.28750335168 132.775182047159 139.658932672049 139.482462221798  
144.724040494873 140.586497829504 143.31117188259 140.121874960672  
138.497931380734  
LOC100131875 122.305514440939 137.649424237506 128.756818133357  
119.802832736435 119.686859562393 137.056500339577 128.425838805072  
131.228779762508 117.81168010976 118.148476979319 117.67638166062  
119.13963074637



LOC100131880 129.998824457005 133.355353808577 142.159597861804  
136.801338583441 146.787927492706 130.43775024291 133.259321087534  
123.102870027378 138.42029331811 137.00397800873 137.262309660909  
137.748443205818  
LOC100131882 136.573928520456 112.332130647215 126.05295868521  
126.216519704249 125.435268901131 118.737244693366 139.524233960073  
127.342017026873 127.681662711369 135.407536491819 109.728809191027  
122.600274773736  
LOC100131888 129.798965780918 128.929244741296 109.886197655915  
135.229197100212 129.930888107958 132.371165851333 132.484079454476  
143.978912435831 141.537578081123 156.460374293022 133.838032323605  
129.346063085291  
LOC100131891 140.234485088845 136.87712607887 126.340955733062  
128.941490662452 132.442771000976 131.814528687104 140.091378604453  
126.017158064032 135.166677520468 125.484453841158 140.429462488271  
139.170102961407  
LOC100131892 123.974409226349 126.837151457845 132.604589324628  
130.374065525934 121.855752708908 128.02595294499 133.54741488531  
130.215290990406 125.687688416588 137.450774903611 149.483826392464  
137.46978401237  
LOC100131894 159.245344068037 142.399253818882 147.483379646393  
117.79844873842 146.746669300049 134.516390697561 126.075528093376  
144.329979284786 122.139832263188 139.589612144962 155.227218488935  
135.315732654507  
LOC100131895 131.275712196961 130.639974588163 144.63774603725  
135.834000569736 144.595393134144 140.89666990854 145.239119337981  
140.157553508141 127.291712212051 140.359796538887 141.805028495425  
153.538565948453  
LOC100131897 137.485252316816 141.069243738242 130.215290990406  
138.708304921088 138.000714797563 142.697827839203 132.890396520305  
150.371716899336 132.934955542743 153.51550202829 129.835713633923  
133.812639120892  
LOC100131898 125.754741914111 127.806138997958 118.863150637476  
128.734694496357 125.851611268218 120.806180547422 132.845116298605  
121.441901286752 128.870079563075 130.74794199972 134.686251400642  
124.246363878094  
LOC100131904 127.903393519351 126.396385337235 130.041462255766  
133.76515446791 128.990911924499 123.081299769162 143.836637098747  
126.536245975137 120.724926760252 130.987023228883 133.082433951922  
130.675745275992  
LOC100131905 4548.5418978622 4110.76546218806 5572.23400804004  
3592.7878705048 9715.20127757161 5410.50736002544 9527.86367804896  
6670.51138785163 6601.004284244 5300.67886821231 6281.01687932005  
8016.1652884418  
LOC100131909 126.780096523484 117.889524670597 124.168162885295  
131.744454088995 117.575009754326 133.220878146063 130.93033679281  
125.165254272421 123.219903763265 128.257292171015 121.705065573911  
128.645334554749  
LOC100131912 131.649830934459 136.261907928796 125.000876313893  
126.37572518012 130.277107538053 134.811625739766 136.927274496451  
129.099780410063 134.824147038515 122.190734676247 130.09050436943  
128.637470206958  
LOC100131927 122.796362813922 118.689408983786 137.138266859156  
122.472909598385 129.558589108727 134.541606996118 123.709293439934

134.208537331186 120.26749529985 145.133151090252 115.120702589487  
138.920141982606  
LOC100131930 147.550385608773 142.007066214472 122.711143209444  
130.552857965694 155.058852833902 132.822351718257 142.155463269751  
135.82038791723 131.573729430926 142.137885203233 142.892198239879  
140.946729014405  
LOC100131933 126.791714564926 124.837187124441 141.404832197192  
136.964780183468 138.743505629497 137.529522471036 129.964666668421  
136.648306684974 137.00397800873 130.297203474319 135.179273562536  
134.796088225931  
LOC100131940 301.250189051376 318.628084728596 318.423602671236  
285.562276640039 349.248144552634 612.374364731095 497.916883763059  
454.64556253724 433.189221987242 494.875547886209 593.990687449346  
693.781708146282  
LOC100131941 123.089110282465 129.226815062589 124.837187124441  
115.734230176652 143.901267937876 126.292433523959 133.601133679159  
115.299986138153 116.07902130325 135.697550878438 111.161283080299  
119.192893408873  
LOC100131949 128.925288777749 137.618447592489 142.222833574043  
130.076926011271 134.304545258148 142.744045151046 135.229197100212  
141.576177844986 134.134810805413 147.017958916908 128.207440197765  
136.364830851128  
LOC100131960 132.243900762936 127.259038241163 127.003974141317  
127.146101490884 138.129281196474 130.646956516128 121.709375771276  
142.279695592224 142.276853170778 138.820797333519 135.624881949214  
137.94246602811  
LOC100131961 131.666853845458 129.503934996314 139.46518859956  
129.735862775199 146.984888309556 134.410706628655 138.182987173284  
130.131800537628 125.509221735447 129.732352495012 139.001493765421  
144.777043589925  
LOC100131963 131.007779278656 140.208983238283 127.350368333088  
127.70306883967 132.551989498706 118.488997046932 123.190757763412  
119.539713878832 131.275712196961 122.882799858239 121.603608840998  
141.292421722594  
LOC100131965 136.908861280856 130.257242615762 151.522526161299  
134.881854036527 137.419835194075 134.412129843957 130.526673128214  
133.079097536801 127.675206134992 121.224389883994 133.423376063284  
127.000860999529  
LOC100131967 143.996350813566 150.817922696097 129.861693025157  
126.802963197337 282.137282466192 219.288597751645 153.524100996368  
165.857032207991 158.216790540415 124.051695010353 158.74180418577  
132.965467229606  
LOC100131968 132.553445658347 135.273184185121 135.003236040032  
147.409936250284 151.387150218354 137.246089511045 193.744461104128  
142.00857631537 129.32466533596 133.585425721984 154.637740117457  
140.117644705946  
LOC100131970 176.53912635694 159.758196845781 138.69392148885  
140.511988097197 138.279087298069 137.027334042585 145.944809232038  
161.688125121941 154.267020640428 158.104336050835 178.628885995439  
172.909795209733  
LOC100131971 310.075815009404 353.50447714719 294.115163083721  
273.75192868583 469.540421642173 379.016207754533 369.434158443561  
519.27448770158 504.617795280805 406.998800177456 931.325266360957  
338.026161865853

LOC100131972 136.964780183468 136.440671408022 138.256765189241  
136.931476050688 160.256877369493 135.678138913772 125.846029991447  
130.418739793498 134.629996026323 145.107068919893 132.493888285566  
139.515794685984  
LOC100131973 134.679882781788 109.506450285923 136.317978146216  
107.431455226979 117.071585083051 135.06498850776 138.391203321266  
128.434301921433 128.087991226561 132.933035878334 120.410307377977  
134.403789206552  
LOC100131974 138.911993471119 120.497796762933 156.7940590796  
154.159124458167 145.002309193867 131.151578665754 146.873719524815  
130.985360700521 156.423687034312 138.352562277336 135.054931772725  
146.96472350529  
LOC100131975 125.785388817819 121.588054040961 137.450275642511  
132.115817176834 156.843997723699 123.338921824167 129.491732597331  
118.184571821176 136.683683776616 138.003440266411 132.996622574111  
130.429076594441  
LOC100131980 151.773749014775 155.263513633703 146.146800933028  
138.866469244936 131.46193427125 121.784166691545 144.482364671273  
126.452500728601 142.066903301882 136.882429810263 159.961729971624  
141.876237297525  
LOC100131982 156.62031503525 137.009303458922 132.871179509995  
129.722382881611 176.440625367948 139.568610307888 134.770852936106  
127.745801270205 126.075528093376 130.25146185271 123.318763391117  
136.118702626862  
LOC100131984 112.57049236673 122.284431229917 131.638954862848  
118.258886189283 125.809027384863 131.169769031768 139.526241501184  
134.595090783504 120.227386958188 113.451566510208 123.781002620866  
107.466184687811  
LOC100131986 162.022232949254 163.48462232122 153.519207482423  
184.267958772058 175.400802387403 146.402352419692 155.298546821687  
158.410170507412 167.662761175661 162.863781294205 160.419358656559  
159.650116062266  
LOC100131988 126.980375035189 126.292433523959 130.630504666374  
123.046069309901 136.922282125029 124.302581985661 128.897493103888  
129.210356735226 127.144291519133 124.207200622684 145.998177732093  
133.927844489731  
LOC100131989 4343.46317176151 4073.21075791737 3668.19307488953  
3441.9805896226 575.23272138912 3215.41238464601 1576.21727854603  
2305.11856249143 1901.97972168836 1294.74864310494 4882.16892310839  
1809.58702081877  
LOC100131997 132.885515958081 135.741404460897 128.628637585951  
126.292433523959 133.131953362455 127.879723100698 141.284962125757  
130.14600240687 129.977863589097 128.462674862751 144.842687993057  
129.368045611894  
LOC100131998 115.795989631016 136.002391758473 133.329392986316  
125.497317360782 144.654765322941 127.558034562151 139.295597388725  
134.109051944736 137.811304134207 132.105184573944 140.435724944447  
137.208796872026  
LOC100131999 146.725123303782 143.195338329759 130.165488538277  
140.599584289987 149.366554238043 149.31184788671 124.275741099764  
141.108383815109 147.345558455805 141.130462286785 150.255511248598  
145.513333676569  
LOC100132000 121.271403807802 137.014698467096 126.378952839132  
138.780488114634 140.063142443074 168.668125438154 132.969187044132

145.841028932318 127.451155926679 122.519746599387 136.965972077733  
137.760712896718  
LOC100132004 137.607767467172 127.404415477384 137.984988819967  
138.1774127311 133.404671629495 131.841436867483 128.662039886682  
135.018710687313 130.221351857959 140.946729014405 129.260551359984  
129.132523684894  
LOC100132008 149.879951192667 136.630678899513 126.809252651352  
138.483436753942 145.956477465634 130.410584413031 129.130212375815  
138.763250836766 129.520140995675 131.49577981738 111.66210002202  
122.828060462887  
LOC100132011 169.113439729353 163.805257266374 159.646538408414  
160.105903942674 127.135199316758 158.602687876661 153.610428214886  
147.096559685764 159.688862680139 142.370721565016 189.250846546817  
153.299196905367  
LOC100132015 130.567443018832 127.380083832809 123.227904580467  
132.972698450394 125.525241361472 121.421165640171 144.746134643761  
119.375727296235 123.622533094122 117.284724854784 130.766401858384  
132.600208090551  
LOC100132020 130.189958197332 117.740022708444 140.158309892319  
140.149064156135 138.924820359912 132.125545886181 122.254824223167  
132.529247880813 141.264096014725 119.395894479869 143.987296454585  
152.729355306724  
LOC100132024 130.647944268116 134.762169062357 131.836036241459  
142.548833391567 156.105736111274 144.059368898969 149.283495832731  
143.759171254761 143.891725249061 142.079184950618 141.315230997077  
135.041687549769  
LOC100132025 140.292781820528 140.245786278057 127.028640787946  
151.239879652761 118.533346268154 140.875923123766 142.819669471009  
143.982561564661 132.839431368337 153.639559509292 154.046550866249  
170.202597821861  
LOC100132029 147.425856984368 129.856994052591 163.59704679338  
146.612602970963 149.341736870692 132.524377835171 140.775447163954  
139.874118224204 140.552143090027 135.946808893146 130.215290990406  
138.006973261364  
LOC100132032 151.349739492368 169.332207863684 132.407736899761  
154.555255038453 249.489170536758 244.5675215931 171.433001048839  
235.563592256037 222.484058975856 179.687464522203 214.499670852615  
215.057917795456  
LOC100132033 129.973380117841 139.462804363695 147.751220590539  
142.013370954791 140.860339862967 133.469323412904 139.904952662852  
132.132474135959 143.105974876327 145.326803807448 150.407817355966  
140.121874960672  
LOC100132037 1288.3346537369 1341.78081782818 1737.57015396357  
1233.27155759407 2282.94927629821 1680.25851465727 2074.29945034697  
1733.96382719909 1366.06309834426 1754.99663827472 2059.09598012857  
2086.15449885278  
LOC100132041 138.97443063851 124.720004905439 138.584190903303  
140.304810288752 131.786437478446 130.582210755516 143.262288751967  
139.321570881862 145.718019736542 140.704317015307 136.246543311291  
145.944809232038  
LOC100132048 138.006973261364 140.316066297536 198.088834624665  
157.43824048982 141.73248778957 142.45047744931 171.924364939807  
137.459095066272 147.740657356905 151.208728458188 144.351763882823  
156.221773628832

LOC100132050 131.958760372325 131.255028381669 135.713266118447  
137.629855378016 137.578516107502 143.626022875491 136.807118099948  
149.138678142327 140.385509382606 145.633647856775 134.499588539919  
121.657744897668

LOC100132051 125.290320836648 141.444958186793 122.211000410541  
121.567879358508 140.652086055776 122.512587751135 126.22472822166  
125.73560975196 125.451525292802 130.983136465761 125.068362001087  
135.079944196457

LOC100132055 140.930897231705 127.874934513708 117.883635746379  
131.324822348301 123.748788684337 121.668166378914 125.227513212286  
119.319884675074 128.335132315812 138.363553671822 137.009303458922  
127.016845640004

LOC100132057 145.005991300977 134.56314960832 147.085006263446  
129.880696706381 142.934869757362 148.773558380167 138.071335383596  
135.116985816353 132.149864626575 145.139966629363 143.955817294375  
131.646121568612

LOC100132060 323.628636799403 268.264885392368 583.314509855875  
300.482945704017 151.88244935494 143.67880977119 159.065612005442  
140.267351731167 128.195916531413 231.146155346291 157.512561489621  
149.783542909965

LOC100132062 121.661141741782 124.145492642453 135.840528665314  
132.198536906752 132.878638378328 130.131800537628 140.992801405088  
128.363331337379 136.81406168343 116.074423050416 110.662552491706  
124.910390240995

LOC100132066 123.791515424464 150.938312240902 128.174382934295  
118.303150165804 130.511042322504 117.532063783977 120.216999784094  
131.216673806987 127.3079781139 118.401963042662 133.34207595093  
131.967245387861

LOC100132068 126.84966022925 121.99477069153 121.124574985464  
128.176779923348 131.210866639392 134.922488718676 136.077039612526  
128.381433897602 124.378096177801 134.024205981268 118.195512252508  
133.820016171453

LOC100132084 144.83282018024 139.096536887753 161.115842628581  
148.206529935876 159.05213637758 138.316043447788 137.650170747992  
144.370811043456 148.11536596061 146.192761134077 139.000248033373  
130.890314257211

LOC100132086 156.94531513373 151.06074622133 143.271346378958  
145.185902174023 148.062245676711 178.835679834487 168.197255166255  
151.965103021638 156.998563448664 197.815264620906 190.506201184419  
185.113098620798

LOC100132088 141.543147273205 137.306031826007 131.572485018063  
141.980728956046 144.298011270428 124.423556743827 126.501648842366  
127.802645313091 132.641236788053 122.94737290641 146.608010450782  
130.565986980021

LOC100132091 3566.89107958971 2715.55326746591 16533.5738137081  
2000.47497636965 130.927299997874 118.21084414402 136.724298878331  
127.977782260866 153.5256657638 151.81754291846 137.804977813144  
141.972403120632

LOC100132095 121.483610947845 112.063713561549 138.184717352015  
115.988180787152 121.024572716324 136.131453703981 136.202953030465  
124.401083237195 131.400031203603 133.108094159933 106.238539254093  
115.450352881048

LOC100132096 169.903088388196 153.690189121681 162.072695554798  
165.553581848949 178.186273279101 167.370030272847 207.338645756456

244.514230664694 157.994474909749 184.819937046061 170.720018572735  
150.218643705925  
LOC100132098 119.517021355598 126.698158279472 131.282091618102  
128.045931477827 141.950778601653 129.005211657936 123.02167644694  
110.296425545476 124.86699236406 147.643985046683 143.301399292539  
146.181764812924  
LOC100132101 117.803508098322 122.129348411763 129.405749374776  
131.638954862848 128.292627005614 137.018521754443 133.302364521094  
131.273916869754 126.127630885864 130.160236228857 112.348094614855  
123.501843029993  
LOC100132106 157.971293294367 152.705458417973 140.527521345097  
138.227082687797 145.938780249776 134.256243410916 210.989806933158  
158.622993108149 158.232100962615 152.258389962 178.304914997023  
185.544411160039  
LOC100132107 136.194082458655 148.510023599641 153.276938815536  
144.077080621909 142.715449859191 145.99474597064 159.615233521257  
148.955023180732 137.550607284001 154.094285855743 141.971805249136  
154.327065859051  
LOC100132108 147.191114491117 145.233055765001 145.520832968878  
131.904624845305 132.128418409996 130.182320154521 136.86685787001  
136.106596229215 136.396579126676 128.211076776316 125.217733034761  
138.204611862656  
LOC100132111 115.496108000499 112.993452506946 128.856640014006  
131.946938297748 137.011595584638 119.023688551496 123.922817231917  
141.831596320865 148.780775862239 145.549126188292 138.950197595669  
176.953099943185  
LOC100132112 168.232843307077 195.963361515546 196.470718183575  
193.502988612307 183.804849355341 183.815810733176 241.353916553991  
248.129640673859 224.869569455052 300.937118739654 180.20999937977  
250.766180970907  
LOC100132113 128.451788292588 132.48841450242 123.225792525733  
142.481897141275 124.755684505209 137.201149245092 134.528971384442  
125.467668442298 130.429076594441 131.946938297748 131.12775424877  
133.269658133558  
LOC100132116 160.429643729685 142.703116372162 135.212715912271  
170.052320640686 138.061295629934 156.273445355976 142.123716536843  
151.803707178383 153.426409060413 157.099868633958 130.92186531563  
143.943676099522  
LOC100132117 125.422348389595 116.639787832302 130.163574198827  
130.37185420347 120.611442477736 126.601395870533 130.603837917984  
131.917194849285 124.958287100852 131.715579653796 137.058578192268  
124.913645688325  
LOC100132119 158.459129254226 155.124158030085 164.03801002919  
145.814268094808 163.014903707857 174.441287575034 186.231346659144  
151.722405598425 167.751604259111 144.65238608866 170.290455446376  
203.410932496844  
LOC100132139 156.448355269561 162.748836971539 153.620767586182  
143.066552389513 237.216435972201 181.79418355897 197.231408726321  
181.412790232996 165.919497521143 284.891415492568 157.410205523901  
175.186435016433  
LOC100132144 122.323876787207 124.647992480694 123.035401501279  
139.658932672049 124.542879928448 135.47852126603 146.481298877242  
136.263658288289 116.825172441325 148.314248474411 133.063422581428  
148.89180107448

LOC100132146 132.359319280352 125.170874841845 149.535844856123  
134.475296383752 137.821010169859 138.267726309873 140.232244264861  
136.835889180879 145.423022762916 133.846275669922 135.120878931851  
131.013719535992

LOC100132147 140.732618320154 155.655771857361 132.273354705213  
138.328508662816 133.391421497441 150.132420238581 154.611011734772  
132.200648560899 138.317443162096 133.857996630836 153.354921961854  
142.58227004035

LOC100132153 163.100526829333 164.164463389212 139.693261291326  
145.989546968117 123.955819747616 147.754489751457 151.694193636313  
143.06806126472 144.982462113231 140.336479395866 153.719751724358  
134.821778017915

LOC100132154 131.280092370361 118.276198592775 143.962842383778  
128.936628289974 140.511988097197 137.908991199407 128.372225487481  
135.413840160615 122.729918525032 129.452826518288 122.854722097864  
123.609527892227

LOC100132159 130.10852948682 130.204571771396 146.16821907742  
130.213596986351 125.45936959544 134.185202200317 140.423711213355  
141.431172407792 131.530256606799 136.341358916638 141.104761546577  
131.608580511282

LOC100132167 155.101850847148 147.648020819059 160.136209944279  
143.52474218953 129.735862775199 138.719480482945 130.854818615966  
152.948391119096 143.901267937876 159.317429821638 153.485731788293  
128.929244741296

LOC100132168 122.412141495264 129.887187837732 121.144174389418  
142.971972776388 133.195030751476 122.133292722932 129.034770823878  
132.582062079623 133.911650164508 120.039031290299 130.066177538896  
137.76307316083

LOC100132169 144.64136816491 121.792573534134 133.930997975106  
132.737464610403 124.110446144763 139.331046480528 131.523538461751  
130.316282003711 122.711143209444 137.674025476238 135.491412261604  
133.697364081712

LOC100132176 139.08460576146 129.346063085291 140.709981878311  
143.644862018676 121.448671447499 131.913786256215 137.037299675471  
137.488665424434 151.557004418682 155.846106540378 132.727133259694  
141.884995734267

LOC100132177 147.901594006094 130.852932147831 149.941056059544  
138.724959677368 129.946925636595 135.487310036251 141.129013595331  
128.137646789236 144.876300850115 149.231475480618 110.419222236698  
150.831554010122

LOC100132184 140.986563785515 151.570977428443 133.164566694394  
137.430946130817 135.054931772725 129.394359810841 139.530196462344  
144.629350188283 142.354731066206 151.015243921984 136.418105816557  
134.679882781788

LOC100132199 205.026176598298 228.588693548447 275.888299685521  
197.2893692747 712.699853328955 309.283897272661 628.344122779625  
264.233381434738 299.616447269111 514.61297221467 780.961416212309  
420.446810988909

LOC100132202 123.852299272249 116.061356450855 112.321396616213  
126.259029676691 124.690141443832 124.449679223202 109.74983281634  
128.739880189022 118.336654504789 124.86699236406 104.36042819601  
126.457337803727

LOC100132203 123.510413258172 128.229729571899 121.796519488793  
128.806964077824 121.419301042072 127.816596414779 124.513891912986

133.736252068443 123.67449826277 162.695319777455 116.355027746922  
142.299535614113  
LOC100132205 162.54567071663 137.540275229889 151.702809524494  
133.458063863532 157.874624979775 135.407536491819 124.571807093748  
130.98982984989 145.524305076788 142.474762834848 176.820928772968  
146.081940883446  
LOC100132209 118.764650384561 135.383585408897 120.76311889397  
124.39748786803 130.399501479248 130.309092946921 126.978144285534  
124.913645688325 122.129348411763 137.416133786828 118.859745315302  
138.121905080822  
LOC100132210 136.492892469272 136.180063437699 127.890438577754  
144.380485359951 133.24828292554 148.47676851933 134.04235176608  
137.071402810983 139.527577649638 126.542112891953 147.736397115265  
134.391386851101  
LOC100132213 184.111756696658 190.427022049167 180.085975596327  
199.353823724989 191.128539630621 166.503112149416 204.5274881834  
162.233096422572 165.731179108649 168.3523504179 175.084729757407  
190.614236149496  
LOC100132215 130.782296492278 128.837901660985 129.411734209444  
142.110469428644 132.9990595243 127.086470811408 132.84666796678  
126.029431525943 143.812863334832 137.276586668477 137.4552565025  
125.35643274458  
LOC100132217 132.348603553752 115.766358387923 131.76272538453  
121.168550902281 127.822440239962 114.042914237667 114.860437706855  
123.446714388901 127.093255830978 121.472885562857 127.291712212051  
125.14833026167  
LOC100132221 135.210887148305 124.783306383852 128.907618218883  
125.079330440615 136.491140756702 141.838206951224 124.077104101209  
121.588054040961 123.908458472687 118.167740643871 132.989846726946  
135.810476921749  
LOC100132228 160.026178505749 136.678188851101 129.85040048805  
119.373287155621 136.065134838221 138.175538905334 136.161633283029  
128.777337552038 127.644315207178 124.261531006131 149.353072778508  
139.934460900409  
LOC100132229 132.227561632637 123.716400094852 126.705446263769  
133.954514563283 136.446877465751 129.748891462506 124.116400777472  
136.387904287903 129.391376518208 134.93455083142 141.616920429839  
142.485427762372  
LOC100132234 125.855451679929 133.570075399424 137.395895014456  
132.291157461345 133.767309427502 137.927403204849 137.434039024162  
139.163958829511 140.671406418004 139.840256729373 135.131890100292  
144.318556353673  
LOC100132235 110.544044723728 128.975785280465 111.568329540016  
130.732397679661 120.36718185387 124.712789674509 116.796995589816  
124.106971897779 121.080413308265 111.826509343353 127.073045558761  
126.897804011992  
LOC100132238 145.739537463907 125.146558509674 137.685104040843  
128.666652639862 123.946808975704 132.390330703084 131.330974614437  
135.458682745495 123.510413258172 122.216479103528 115.392989580183  
125.67874617392  
LOC100132240 128.359034755228 144.134485888258 135.427985445559  
131.80257432775 126.917669470999 134.285191872099 134.413046153072  
142.997365080299 140.477307701027 139.041005010106 140.52997588229  
130.57903858574



LOC100132247 2014.48411650613 1413.37062765856 2118.73410871718  
1427.27262061653 549.047065540118 2801.66917828364 1654.58270183167  
2527.99279063127 2036.43904731226 1165.05055932899 2074.29945034697  
1578.87371296418

LOC100132249 116.871350997346 118.626815116752 124.712789674509  
124.699127988314 130.858419819734 134.592495777159 122.072091994548  
124.142882936234 143.730966588794 133.571962238112 135.844983721014  
132.440818532628

LOC100132252 129.055874691136 133.043503979161 149.844677055508  
132.37223410529 125.905785653648 133.554822920765 136.925645302362  
141.636604735133 122.941711366641 131.913786256215 120.565485864499  
127.047679628867

LOC100132255 143.59105195427 143.744075931566 145.97512573326  
138.777120638896 128.490341173553 138.756638791139 130.368933537243  
134.474466007553 126.718380351644 133.849237689264 122.063996556575  
131.117294275244

LOC100132261 111.366283149236 125.517076778344 126.580227722115  
132.461730873857 124.411213807179 128.659393756477 112.208950290962  
116.819107878692 125.097835661279 130.304743083321 116.742079521048  
115.231121959397

LOC100132266 177.976550224863 178.665552649698 157.195967361907  
186.925138700818 146.122816653035 164.816672737691 157.306022722324  
174.680918805036 157.901967487277 174.491551019128 178.636555178682  
189.840366340622

LOC100132267 134.018379799826 138.102654893864 154.988494760267  
159.065612005442 150.279529635193 127.320624058583 135.58042404479  
143.222342904886 138.915185051749 151.87495966414 153.78976320015  
142.253826696208

LOC100132272 146.830752309354 129.896711442418 129.763063900493  
146.431166706908 139.253721683078 136.973804637915 136.092086452096  
136.3615279557 117.995551728392 129.614692778261 121.730973193225  
136.83883055114

LOC100132274 123.02546895475 125.088717405087 137.559204418819  
124.05019986924 123.403099206878 140.456277147131 117.710502693638  
119.412461116903 107.976233194926 125.899200544217 127.706499722854  
117.212164526913

LOC100132275 135.48250324478 131.136073942692 119.822587087968  
125.008209861774 135.399032687551 139.737748157901 114.290611267606  
127.601379088239 131.736694577111 131.369177333568 143.951756384507  
128.779829252045

LOC100132276 130.944610173285 127.128042857811 135.122770943076  
146.937052029619 144.496429994489 133.099175110023 117.590393673861  
131.079066781806 132.508133846896 123.952494134263 139.558611792069  
119.01990099776

LOC100132287 137.820326536962 137.926193455157 139.609751976657  
128.471437314295 137.132095345234 139.927773713324 162.982557003317  
136.051070946954 141.162443312437 147.319360896679 151.191822057706  
153.248199842194

LOC100132288 157.295602588814 162.254062646631 162.007384919302  
207.73395131954 141.344034069373 138.098165515898 155.91493956251  
169.927157878764 185.258354905314 226.712995229189 137.314968268692  
174.274996381853

LOC100132289 142.739686751422 139.902610126952 161.354014292373  
138.723149134933 149.760883745928 215.635313821029 159.476343366991

173.306283668215 166.024236370752 174.448910958935 155.330215726109  
186.999459152483  
LOC100132291 10953.6229702446 10988.2836796736 10075.6573898939  
7733.95252458705 15053.7547401937 9433.53967760357 13853.9715872573  
10608.0671430066 10449.7190201942 8016.1652884418 16230.8346205808  
11709.9785619141  
LOC100132292 144.513730107393 156.904781904311 157.15729049829  
137.404525565336 130.221351857959 145.022242996923 158.517778100137  
145.304050333309 144.104372749581 159.35787888191 154.725484895098  
157.385256442734  
LOC100132296 133.164566694394 149.113794439994 133.026879831536  
130.609596267168 127.284885819903 154.433679792749 116.67463130093  
136.457424070709 149.086836205064 133.71965790848 134.235164622221  
145.23179154441  
LOC100132299 273.709160508205 269.072221443403 415.749051861123  
279.790257881254 264.306927596371 481.037647470809 275.509805464276  
488.884511065882 309.36704220687 501.738490253982 297.466255000163  
394.962978677736  
LOC100132302 124.466986821169 132.404879616886 137.243175880462  
148.791182443623 136.569250038372 136.421163870578 139.205887721493  
132.573953444192 140.211016178402 127.215777044942 166.904990069484  
142.185903088074  
LOC100132306 135.931715324468 164.185346950306 136.256456726841  
160.562164904057 145.017264740722 135.973752893694 165.48594766783  
139.180086017033 139.736465430177 134.299048356762 144.725650040212  
138.98468042464  
LOC100132308 165.863118584978 162.168246402027 157.86653024793  
176.689683169567 138.560399473164 139.792313018728 134.420446702459  
132.737464610403 141.471127716868 144.87013280941 164.89597889259  
142.29309119138  
LOC100132310 127.814109293214 117.303671445328 124.859984709406  
130.773945967285 121.771891473027 126.189005734462 125.269726165403  
135.24841020592 129.420716653358 129.21974206851 124.915772594451  
127.342017026873  
LOC100132314 129.723501897231 107.91011371422 129.942594772751  
129.105655010455 126.748906552086 144.175551691291 140.244052740397  
139.073785024092 113.427848757112 119.334967856721 150.690143057308  
125.12823219142  
LOC100132315 122.292692083352 114.302645757446 121.347339077474  
116.061356450855 121.860428893248 130.887769728442 128.763176477983  
120.163286072512 127.139903623331 109.182623414389 111.716607815635  
116.87586240208  
LOC100132317 141.114148695402 150.489651880905 147.966224814966  
140.639012372681 157.378317015602 146.986891588172 133.832462719784  
156.01406297447 134.202497785854 134.664652044646 130.433405111592  
150.412929574507  
LOC100132318 133.554822920765 134.642898234003 118.470400686096  
138.064951932825 134.626371781978 131.761564745495 118.836387680022  
127.733860645979 132.363645381743 134.4811029314 123.782746527199  
136.526706711584  
LOC100132319 143.373932371335 129.421772713718 147.140771901106  
146.072585331002 147.550385608773 136.716554749722 148.977202433511  
134.10707191601 136.943481207516 133.422190038356 140.857793157932  
146.381147992719

LOC100132323 378.24336892367 378.967410725775 284.715092831843  
379.292531644085 299.986758612161 373.452370692334 270.787490294555  
447.674610082872 341.096072280715 351.395760651605 412.202049714695  
366.636754272029  
LOC100132324 281.996583337694 326.325210657599 221.502269474715  
372.149771075286 344.915370555826 211.736398352592 214.050918459805  
196.519125510368 214.38058301395 212.691702227442 257.372740535895  
197.51109998167  
LOC100132329 162.466301774088 154.863307331821 150.993910190626  
147.017958916908 165.900156600776 153.888212689508 142.80027343095  
160.031506612501 160.748082658758 149.264997927508 154.070450565144  
153.734347607222  
LOC100132330 123.25201993575 111.62514398781 123.872097378045  
125.509221735447 122.843792000493 124.515078120229 128.975785280465  
119.972337070176 120.931585398914 117.279162323013 124.901759819007  
127.040027125755  
LOC100132336 159.094117857743 153.694557276814 142.886493948916  
151.070654092886 152.789338329505 131.606765174514 164.281196089736  
153.505155981348 157.805871400914 143.941358917251 146.823157886228  
156.146154578237  
LOC100132339 133.606068125828 111.409447323674 133.204793127029  
136.692495869097 117.879058520659 134.877046981678 130.611233072509  
144.526499066594 119.252737868132 121.423030266904 127.006746526023  
119.107992692097  
LOC100132340 107.76497424356 126.413124995943 124.975454733084  
142.365009028839 142.086300138469 138.93292293598 147.140771901106  
153.039237274992 133.449527627723 135.987450822209 133.003743285746  
138.62308708151  
LOC100132345 144.610341215903 146.087596132093 145.144401160102  
127.792241991414 174.854570705 153.279026396412 129.524056217383  
161.046418048832 147.253919952267 140.861849838223 141.450800126786  
144.510062568989  
LOC100132346 151.841652724562 143.658600740177 134.374551571013  
136.494339004002 147.138814313885 155.097300548684 143.840979923821  
150.660106369128 150.477774834676 169.975329631607 136.735930829008  
142.440344960504  
LOC100132347 235.76573393374 230.697077917675 217.435155984897  
206.876572583814 159.696443182844 230.723142236623 160.045715314465  
209.702683803624 202.278323489515 181.313333665614 174.624446035895  
201.123529130035  
LOC100132352 178.425137262105 161.922462797736 186.640167849568  
182.711318507496 178.551434222154 179.711363255355 162.52512327258  
156.216127874063 188.40383184521 158.302977853133 187.586093248437  
173.66499836293  
LOC100132354 133.123444023892 148.785977829275 150.452467115669  
146.826292449698 144.355348009294 146.801936969172 143.200939506995  
143.763292219833 139.234549949916 148.578688042147 156.66832364923  
156.973511952828  
LOC100132356 139.654648891206 137.406420101257 133.879079395215  
135.205434173702 132.514706165018 139.532508621268 140.652086055776  
135.97263035403 129.192326574697 144.540174041867 152.230489051339  
143.572668991313  
LOC100132364 143.725497952919 145.318539677981 142.392860474555  
165.827405735044 147.382177739631 138.276865331434 151.06209123698

145.431393142782 142.711117470317 186.430014478919 158.747029092329  
151.484420979498  
LOC100132366 131.946938297748 121.575942603856 125.172189715764  
127.663578933727 117.428152859221 122.97229333908 128.280225530201  
119.125002207396 121.815538475678 116.977202125093 123.574319348191  
133.97321873161  
LOC100132369 150.319052894567 169.45559708224 146.694318629238  
150.109192774079 156.285963197762 163.612347715773 197.2893692747  
159.922627970233 157.607445509297 185.938983266802 177.619101765848  
173.240598306749  
LOC100132373 132.287326702468 126.279119798177 134.722574388775  
132.64813248505 131.426355444136 139.858812885649 140.332045911008  
142.058086679048 142.470799054068 144.551233687082 144.89403947454  
130.548611758921  
LOC100132377 141.947478902603 131.351303131574 127.073045558761  
159.688862680139 143.78994470501 138.205338749495 137.367390177293  
151.714420758741 138.076501233454 152.526785074182 138.374092984164  
142.759452994928  
LOC100132386 129.260551359984 114.00959999268 125.324187741972  
125.259164818744 125.749024723383 137.529522471036 119.087972087745  
137.607767467172 129.76141737109 121.297234504922 114.43491928161  
126.841836614341  
LOC100132388 149.579428189895 131.208112906919 148.996601285688  
130.005909892804 138.254479653425 160.319687451789 137.681280789305  
134.374551571013 157.512561489621 139.949563856936 126.834926242799  
142.06907380533  
LOC100132390 140.877230937687 148.913181799692 152.251128595777  
137.717859035645 153.461396593156 138.925802905636 134.292099546804  
143.695901115673 148.520371748891 139.130560988108 141.357668647617  
154.750512277909  
LOC100132391 15704.7314387339 16642.71853486 14181.1182110192  
15116.95436573 1556.41573079892 12877.2152068971 5327.13051940508  
10506.1271023809 8918.58940386786 5479.24427823207 14938.5975217303  
7406.86318549013  
LOC100132394 1590.87426068638 2728.04758874748 1296.10827265334  
3447.19587767281 11918.214537866 1639.76556136383 1995.6000523628  
1758.7809492929 3474.0924656878 2195.41077320434 6253.84268792816  
1603.87451959083  
LOC100132395 358.780920910909 346.635777358159 343.833659987063  
221.869191666931 136.895650862562 156.926617030752 150.590611246086  
167.018380617832 157.406969627689 168.867373925372 140.137435303984  
151.40067812803  
LOC100132396 163.967616022079 155.76860362365 142.728311130348  
133.581450824362 160.28767775843 152.29434111068 155.018009545475  
156.259214645427 153.592819860747 160.833948531272 143.974551393951  
150.91730768674  
LOC100132402 129.189479305468 121.303696898208 136.532168520039  
132.440818532628 136.614620534169 132.02259465879 133.399632102473  
129.108534267222 134.73970457131 140.943732564849 155.502363062633  
142.958906063186  
LOC100132403 145.999823250463 129.578488688293 123.574319348191  
131.919387743094 127.732838320554 118.32560379073 135.784481523923  
119.870661213608 131.904624845305 129.798965780918 116.576896337786  
127.772258845875

LOC100132410 151.639515017015 127.895989232696 156.068308349225  
145.557869163993 133.953303801604 143.277771142501 149.020824600931  
139.804518460303 154.47187360425 143.94902198632 142.788848338402  
130.207485841284  
LOC100132411 143.163083976105 150.985061659285 151.130401750721  
136.175268696202 135.336754997434 146.428534132236 131.045970236632  
145.003900788534 141.194900058799 138.442378791712 150.892319579472  
138.877999126533  
LOC100132413 140.03202338666 167.933231844271 128.649329515033  
182.827395663312 161.573975848093 126.085039271526 149.495077381649  
149.974080577906 133.922855125616 152.573063322741 149.049931380459  
134.333679772065  
LOC100132418 224.335742510577 213.510783808898 255.493109705211  
219.2695037071 144.642717750351 231.202047619476 184.278213908263  
203.913123559942 190.76537287329 188.027848008991 202.887417145119  
292.185246573643  
LOC100132424 108.655415285806 124.93629294955 136.461182044855  
130.454496708632 128.56495182759 127.346646117375 114.711310011993  
115.392989580183 126.27024495428 114.099623939954 123.814841047589  
123.538037290702  
LOC100132425 203.089661928125 198.411812737082 163.579282884905  
212.996456841785 486.197269936713 373.760551592844 306.43742010208  
261.366143735074 253.098839084408 222.315451077459 403.104188866804  
375.539588956213  
LOC100132426 116.282988576774 114.334059060506 126.702705908175  
115.440152891339 116.029201658798 125.677019190255 140.719388544476  
117.513523498725 119.739204799544 112.891050337488 117.119533897652  
132.960708384399  
LOC100132428 199.637257550762 194.961531388323 195.595275594235  
229.406012088782 159.643566663742 195.230219990395 203.831047867731  
172.657668514226 158.558471586662 156.779004465552 170.13453211897  
174.202069525223  
LOC100132429 134.178733595096 124.210840121525 132.118118271944  
139.174188535843 138.798959235723 129.108534267222 138.491922816359  
130.795318552623 140.904883114871 139.214589768245 125.894755032594  
139.585373400347  
LOC100132430 131.015519445322 131.934680869554 126.418295908353  
118.599484152561 140.704317015307 126.129564039673 117.870230005125  
123.117923525539 129.400895994387 128.833756478439 110.190708230962  
123.383334044683  
LOC100132439 180.733673680261 218.134101819445 175.93459327917  
245.766885283797 149.520911664673 212.223906015932 143.834501071806  
154.104321553472 144.087004064416 152.500670025483 143.849399031223  
139.54021659275  
LOC100132441 138.514356748249 137.018521754443 148.358847576281  
140.89666990854 133.939847853073 144.477267427347 159.554978842683  
151.9441336438 145.027741086645 144.277263594387 155.379116566097  
150.863099494798  
LOC100132442 143.851670859917 133.160197638474 141.088456756806  
133.340152756136 131.849442776642 152.516485296644 135.425518707018  
161.031148038478 149.432744784716 136.891612156271 151.051672692659  
132.507448826637  
LOC100132444 183.314276033531 173.675115244522 177.793860516896  
170.692146255416 198.374163029174 165.443069511115 163.640052220142

170.596937075493 170.725486814469 139.473459411633 173.829219279719  
174.635853531194  
LOC100132449 109.46255295836 112.65454329872 135.976837152799  
137.742393475755 127.034985265748 129.491732597331 156.018200674475  
149.630481387506 122.247130087475 139.602168254761 155.762890407496  
130.41429837092  
LOC100132453 165.009696356892 141.345379144177 149.219602109121  
153.189490068047 161.490941000872 154.627270742193 171.537040561599  
153.934872807607 156.783896946556 153.524100996368 131.984467471242  
149.726968520487  
LOC100132456 115.789536577324 129.661073814998 118.215641556163  
133.625358030199 141.092486112278 133.869867161978 129.135985676046  
131.013719535992 134.081308836364 136.770515182612 148.767517078508  
144.425214066833  
LOC100132457 1022.55215097491 1151.30600388403 813.034056288861  
892.515788744891 7539.6945050098 4228.5490138553 1808.26383618901  
2505.8565544797 1961.26255930192 1530.45813438919 1890.86868383409  
2414.22821062457  
LOC100132460 152.983678871668 135.056517225198 145.058110060639  
150.549883779193 131.179786925029 137.731390340708 117.757113741542  
152.643087608513 143.182399285928 135.693520183014 103.09089100768  
137.306031826007  
LOC100132464 133.832462719784 134.235164622221 140.485102148597  
124.42747321736 126.905235161069 128.019837242559 120.577995272053  
127.548070199148 121.327397317398 135.025907096066 123.786227856015  
129.811504562622  
LOC100132469 139.128751917566 155.164238647284 143.035245560484  
145.158039427157 133.634886800037 143.53550972177 142.334338599752  
137.06192448185 142.713318779614 139.900523831258 143.985850833974  
140.640160404077  
LOC100132472 120.77691423934 145.954700424725 133.436057118148  
129.493805009651 129.694178995061 126.368170959337 139.029404397979  
135.852591930882 132.865704994046 126.110426731941 132.407736899761  
124.697283474333  
LOC100132474 132.329892644992 138.449057377027 149.121894111871  
150.3259737066 154.38209765671 135.509927917168 160.159630699959  
143.861970001207 144.910863590251 164.084737224884 155.049051256459  
147.604213625382  
LOC100132475 140.646946425036 146.894793774087 150.348608467097  
146.323776429268 138.1774127311 157.36568754472 147.713967317159  
149.166635189875 152.980843102933 152.373931758229 156.834059922255  
155.218336968191  
LOC100132476 142.896723827753 133.322752419739 138.062345982865  
144.715167331434 148.09868976776 147.875855077738 141.448017858785  
130.99288239869 136.981043383326 142.648205566485 153.448882783807  
143.508657511633  
LOC100132483 144.713108022551 123.275246170603 142.124876403709  
141.539503634005 135.274205069488 139.840256729373 144.154217446011  
140.105675520432 133.537552829999 128.346598756853 141.25089277145  
138.154799037807  
LOC100132485 176.317805247749 154.080778100852 167.330860677012  
149.752188104803 165.085010975035 156.494323415504 175.9219991997  
147.754489751457 149.949425756405 144.718507303105 158.320863045015  
168.838723365068

LOC100132488 25808.3502428915 27028.8951412615 26082.8089351205  
22182.4877079778 28344.4547971342 26375.3000727296 27667.4034204988  
28530.8435957612 27667.4034204988 24731.0629964468 22750.0246358215  
29532.7890259497  
LOC100132491 151.761369162723 174.928155956396 150.998881139061  
151.96843908074 162.285199080777 149.526189446292 210.165098572428  
213.484986945295 175.510160114891 316.004332524937 177.910104644497  
218.269847477919  
LOC100132493 146.533374238616 146.900087470856 159.2488784104  
144.396774242135 132.492444216154 165.827405735044 146.595540577994  
143.807102980397 148.646699255797 137.22727238555 154.256214901103  
156.324643994552  
LOC100132494 128.663320241092 134.970609100459 122.508761687823  
144.233097828078 125.579970155301 135.911903336544 128.856640014006  
132.335549109106 116.273000405449 141.226901872221 127.327765407459  
143.389499905891  
LOC100132496 125.236926572282 131.347213356457 131.074021609161  
127.776112651456 130.790872334222 138.28745132277 137.587917564413  
134.394503574535 124.597605631582 139.470557140547 148.470120335761  
136.448045428081  
LOC100132499 1360.24752587939 1311.34904760947 1473.70433292382  
865.435843446989 2672.77147589342 1603.87451959083 2530.00219297102  
1944.15673951528 1369.89073267996 2129.84680802619 4228.5490138553  
2334.97297889593  
LOC100132503 190.682392100564 196.974807677659 217.287912825619  
207.831299397177 314.337680575998 177.11682975342 187.407526616724  
159.762733951454 155.612543356905 180.1204762193 195.561296046507  
162.649092834422  
LOC100132506 106.315801001506 131.554055357245 118.537378726617  
146.830752309354 110.544044723728 116.019123495537 148.649619242172  
122.423561732526 126.176505541577 132.832556359483 148.951632781748  
165.108876136738  
LOC100132509 141.583936153499 132.878638378328 146.609485664113  
140.765231611948 136.737964237109 141.557420268382 131.575356402693  
130.632096412204 157.874624979775 128.582520754296 119.044902525459  
125.884565343075  
LOC100132510 182.786177632757 146.70774472499 152.780908985916  
159.19183334563 155.737364431382 165.619206216088 158.025633316671  
153.784923783551 165.619206216088 150.724359913994 195.364709354814  
172.097502416776  
LOC100132513 165.389652763451 152.377056383547 192.022864170934  
161.002880798225 174.006516433854 194.86492119218 196.716209382446  
154.288075172115 149.606576415873 184.241640200823 176.364184489318  
165.244616507084  
LOC100132514 127.742948876822 127.935614145702 129.573520898314  
135.937066152894 130.423465505321 125.624661345169 135.925813154268  
133.345885001759 129.223872979789 136.169525758215 128.689465747173  
137.846463796994  
LOC100132515 130.858419819734 138.391203321266 144.419657674797  
143.393174544776 122.213445520365 139.450341736722 135.092226300609  
139.256416415149 114.226028611171 131.530256606799 124.659387568671  
138.704839659727  
LOC100132516 137.801899270172 130.71040889651 136.81406168343  
124.140880678888 132.411757518105 137.514952067562 127.930072902878

129.32466533596 129.215108424651 126.555972138115 139.892371997205  
154.2433882385  
LOC100132518 121.519309043513 123.288028185949 123.646558103253  
126.746388125956 144.518132543976 133.085476994246 129.916677638819  
131.885529813944 129.079917151186 146.157459765796 131.825172822888  
131.65084896906  
LOC100132519 136.647239621513 165.307808075027 146.303959493672  
151.954389699615 154.579913524947 155.23922239449 149.394952856085  
132.70109232982 143.965049742993 148.991357883449 167.713268780664  
141.609037401299  
LOC100132521 127.961153369579 136.84488044614 134.950905279775  
136.585541662028 129.940297696849 179.30729544595 148.410647472149  
155.598586699376 160.493314658788 126.0944894315 132.189426012448  
149.277880094957  
LOC100132526 174.027190728107 190.700515036197 192.153420834889  
185.602093266907 149.147411595596 165.797170648964 148.09868976776  
159.563866056798 156.205127163263 160.290104492275 174.08222895937  
146.823788992762  
LOC100132528 823.297606185721 689.590642377619 1047.2693539616  
514.463945278314 576.10291008626 1408.08614963928 1896.69856822105  
1994.00516809361 1550.61855325662 1156.19575610918 1473.70433292382  
1927.467713716  
LOC100132529 124.892438890234 131.473001455317 130.586509996354  
142.02169810999 124.056405566491 140.254665008195 142.160941592768  
142.33269270703 140.781647532361 133.74741832303 119.905127545336  
122.603226380439  
LOC100132532 128.592202602162 155.080900277147 136.201103852785  
140.597877909094 128.723261477217 123.524952603672 133.269658133558  
129.689855810051 113.238466329843 118.567548265638 119.451099896048  
123.646558103253  
LOC100132535 631.653707589221 661.545179083009 422.590112942156  
701.847905027147 697.774882173237 180.561514455864 197.526492324088  
193.315380090713 258.632372536866 905.751410113646 222.526610842047  
168.702991603656  
LOC100132540 136.528123792599 120.910703698292 130.886164807755  
149.576563410584 134.599629045981 121.903115540516 116.20008794813  
131.967245387861 120.873985900666 138.319321806028 131.665421461826  
127.687299576139  
LOC100132541 125.095999326598 137.7872481668 142.097126256137  
135.501192996538 149.597396040729 132.402255281009 151.043967734248  
135.007473769551 150.065275447769 136.916286605302 149.689071018094  
124.629877200816  
LOC100132547 729.499296070289 693.781708146282 636.970243888917  
516.429067667758 810.769136227155 707.715412321304 905.751410113646  
664.025683218037 382.902151239988 849.784051720996 2018.81730267601  
432.088303693555  
LOC100132549 146.54504551183 139.871928127715 142.705504445895  
143.157807632147 188.033890834418 165.789846154721 163.753434774656  
169.301498852556 156.75308999904 133.340152756136 167.796474464069  
133.093234861388  
LOC100132550 128.23432652395 125.935071837868 133.43362126395  
124.697283474333 139.181131600753 123.777133327569 132.916608405637  
138.436029489092 130.288547755599 136.005756600948 118.029258839619  
128.116795372698



LOC100132552 132.948096807634 118.490642232641 122.268560536152  
122.115925891088 120.846789922177 134.595090783504 124.592771536872  
131.528729642144 121.807661901776 117.48427100606 129.79093244374  
137.369033684705  
LOC100132553 140.38936578649 140.559553697317 129.069366041625  
143.13304460184 135.193659028591 153.488903967311 146.819830256127  
149.551030995489 137.033134002983 140.726084514407 144.313841064968  
155.064761390765  
LOC100132560 129.606271613463 144.131743978192 128.155080148958  
128.87498876738 117.203783530266 135.571239294086 129.448507622171  
144.853868519575 135.774569629738 130.10852948682 147.369767631957  
120.693808603805  
LOC100132561 130.191876914166 128.322884322951 141.28700484445  
124.726035027951 136.83470470035 136.118702626862 117.420765321056  
149.168758815526 137.552979154943 144.713108022551 152.56002779985  
139.748733350375  
LOC100132562 151.829217512763 141.923103467306 156.085949215738  
137.957654220875 135.238301951626 143.191095552619 154.789187466057  
143.419034484087 133.061016674211 126.853028093579 126.538061500993  
161.115842628581  
LOC100132564 1277.0921553877 2970.34597432588 664.343553341563  
1715.51071085304 3408.6535437109 2352.01196541874 2018.81730267601  
1963.23068846837 5149.78271096158 1845.87311313269 2388.03256067711  
1420.27222765071  
LOC100132565 152.350537364705 148.390417679848 143.685368799972  
150.173766182317 147.537691509156 143.728569494708 187.30908753142  
179.501659253141 145.539731152955 158.06915048955 148.284412570438  
149.707357499252  
LOC100132567 163.636550341231 164.281196089736 147.645530163725  
149.366554238043 133.133892264995 153.62335478774 180.610891208146  
137.50609001002 158.330403004116 141.374831983971 137.597788349982  
164.865846124876  
LOC100132568 130.768746032834 135.301844382418 143.776637809106  
137.320792454356 136.295523520203 160.518055978242 127.729912390394  
137.662135592983 116.346181133756 143.31590446076 138.889999702313  
135.317796804151  
LOC100132572 122.664353374047 128.583503171594 131.58537948771  
128.097206000942 117.728410015076 124.749727939593 132.002835547397  
134.682319733908 131.643633737316 133.777238071968 150.354401669138  
138.755173333171  
LOC100132578 118.372047967248 121.434713764246 123.577138762427  
141.162443312437 122.087107663865 122.953869661977 125.234097725749  
124.39748786803 121.410606617535 133.838032323605 134.178733595096  
119.622243247836  
LOC100132585 8739.02966610274 8633.71708020651 8096.28093399619  
8709.2221371432 599.926717145115 6944.90824302953 2786.35558271661  
4995.96906061198 4009.22206756187 2642.24374855334 6776.11712291246  
3430.76532174701  
LOC100132588 127.753065449769 133.077760160486 146.035731780312  
135.10155936286 137.559204418819 135.285224699704 126.137627769256  
128.289680999565 116.609122768341 135.732616463819 126.292433523959  
135.08927101395  
LOC100132593 26082.8089351205 29162.1093037754 28095.1627766565  
26906.6343314539 25808.3502428915 28095.1627766565 22182.4877079778

26719.5528617739 27501.6698286039 27667.4034204988 16123.3486890049  
29162.1093037754  
LOC100132596 132.551989498706 127.911258242431 139.779754416105  
131.917194849285 138.449057377027 140.857328923536 116.858439910319  
118.679664392666 134.927386619223 130.278980631435 131.885529813944  
133.352279794853  
LOC100132598 125.696434307671 122.773736159743 122.733870240098  
116.939471420419 122.99993610249 136.162285671867 130.097543328456  
120.975542702338 120.15332480712 118.26427946535 126.211525910631  
122.84779238795  
LOC100132603 116.769106223472 120.501697624977 120.148189532583  
120.96098661114 119.188446525733 133.692996980809 132.548259643258  
136.996535765175 128.714459781294 132.383542877819 126.70992730102  
139.172437503442  
LOC100132605 130.675745275992 136.184427467391 132.64813248505  
118.875640081461 128.356453959987 124.646093292382 134.273326732349  
134.569883788949 131.404001006643 128.309602266886 136.432109029368  
126.268418132  
LOC100132617 132.714532888989 118.07991087231 127.905616521853  
116.839796680107 133.876636039037 122.095978653755 127.150222504237  
129.079917151186 130.204571771396 113.492900106468 119.382151435379  
130.101422420432  
LOC100132620 136.446877465751 143.31117188259 147.713967317159  
130.680629893396 151.079500558067 140.26557508894 150.534608517044  
155.572357799741 154.539367933684 134.786678978467 153.507553306723  
158.528301072565  
LOC100132622 126.730314982553 132.510116371195 134.410706628655  
131.852067699187 136.988519762443 125.603448542611 126.606163970149  
122.337240239463 129.614692778261 135.383585408897 119.207503310618  
124.153063838817  
LOC100132625 137.229871801676 141.272049404557 130.686857648764  
135.497033143331 122.204249636472 130.33205883588 131.711193516482  
134.58799530734 141.332402615602 121.010811158088 125.777193592751  
126.737230874367  
LOC100132628 126.075528093376 127.349190705235 127.314089756429  
137.048292841566 131.261903118177 122.109009629395 129.493805009651  
133.541333581593 138.98468042464 130.142263689536 122.719785082196  
131.374680878107  
LOC100132630 146.332425559689 142.801645268128 134.891736344801  
134.668233738635 120.208584170364 128.499303407596 128.417571004317  
138.259512736404 143.697931551096 142.318709347082 121.821868944354  
134.21500333869  
LOC100132632 139.914034708144 132.733821031511 146.274284557421  
157.688982037448 140.868946922293 129.884064654761 144.321757243275  
129.546119539687 134.401733295755 146.306467130749 147.604213625382  
136.611670766233  
LOC100132635 131.552276774901 111.010889276873 120.665520347481  
121.747622617011 117.05536677976 138.102654893864 131.709341771599  
127.50624009248 125.976052547953 120.995697049378 127.980776299586  
122.371715108957  
LOC100132636 121.818632020666 144.224287382131 136.22416508552  
134.838366830668 132.770770310958 124.582577275358 138.861385127242  
141.84653748835 144.998415908498 133.897397228615 135.915252483475  
149.08527298577

LOC100132640 167.526798465556 132.930042559647 143.943676099522  
155.104697146664 153.51550202829 144.992993261203 157.963634535239  
151.855884026072 147.019460117987 142.664793323255 134.551054564417  
143.494511683426  
LOC100132648 145.671099346237 152.071081175788 153.528429414138  
140.839056652898 136.428826558493 151.755205401737 173.647320180498  
126.823886603295 138.712529531951 143.307838525991 143.895399273595  
141.750316403249  
LOC100132649 135.353539458856 134.01566484034 150.902548360746  
142.563762845657 143.215828010442 156.557792402376 141.29868389128  
137.00397800873 136.438788088263 137.499290547619 151.473239782301  
146.608010450782  
LOC100132652 153.011923016494 144.64757514198 169.232677769521  
147.18948282156 162.642344529383 166.430881793156 166.722369066673  
159.223980639045 159.324816814876 150.313058722346 190.614236149496  
170.370934381883  
LOC100132653 132.764150075465 137.995313285692 148.016402654687  
132.551989498706 141.302647488314 142.745838888446 148.611352905643  
144.227440632196 141.512008928271 147.257773507186 137.607767467172  
126.106777865128  
LOC100132655 128.91354251648 132.533234335153 127.372242892513  
122.268560536152 137.20509387214 126.067296703905 126.394032757479  
136.80943340993 133.306414477234 127.321890980445 137.383211680459  
126.919867899174  
LOC100132656 117.532063783977 119.815258991448 128.356453959987  
128.973904070983 161.250520154112 128.76720970745 114.520066232155  
119.911515364639 127.555954288973 119.643417329571 114.428050500096  
120.089228795888  
LOC100132657 131.992186668019 138.846543789882 132.338144393918  
140.943732564849 158.221595000183 140.608266389167 134.189023892662  
131.904624845305 149.193437559422 131.069515666204 151.228823957828  
132.730924522748  
LOC100132658 402.473870771741 403.907009699589 359.329520507158  
337.935183275743 227.288015854809 265.29629764006 526.285114043212  
268.186156177622 266.395569467956 551.622587349813 421.384700184923  
342.769825986756  
LOC100132663 138.557464672111 126.640141760199 137.103879676652  
134.551054564417 140.513291662274 129.092409995043 134.395879639746  
132.340183565771 145.045633612194 146.434716985396 151.815211341628  
139.972797966319  
LOC100132672 126.964621107029 124.142882936234 133.659475650376  
128.468978498871 121.979059173287 147.218415065692 133.483766053954  
123.522738813733 132.580937663749 124.690141443832 132.626349611404  
128.413213851142  
LOC100132673 1303.94157493616 1894.14699530855 1547.16936835284  
1479.69309189156 5947.89821087362 2645.72125268628 7617.316805798  
2583.46653460894 2053.71550326011 5008.4888270731 11360.2921551609  
4291.1724030909  
LOC100132675 119.594962686756 127.342017026873 123.541709359809  
124.395047385025 132.891375982227 137.555253894825 120.270397272069  
131.611842804029 122.793816135585 126.547883999721 124.251699375036  
131.599370671279  
LOC100132678 122.109009629395 129.43892498257 138.186616955926  
127.893555451807 149.150824615486 120.906553066296 142.625414022199

118.432307370605 126.48691003872 127.052618800004 149.774162138829  
139.32751718663  
LOC100132686 147.314687795555 146.986891588172 123.303143302526  
121.281990195113 144.318556353673 137.938310376106 124.726035027951  
140.275942067561 132.730924522748 121.895778599116 135.831453841801  
125.631073476381  
LOC100132691 123.643292039274 126.180714796187 127.2369420721  
121.505178996279 116.810827219571 129.992015202357 130.043904881142  
124.794260959228 121.846349358116 116.925863450165 114.494394548044  
122.549274599774  
LOC100132701 148.404000406948 152.148784410501 134.799648755296  
143.607579034109 134.044789094272 138.824082857747 130.535859816562  
136.372712400493 124.405905157157 135.516856254532 114.488760619745  
129.763063900493  
LOC100132702 126.148379057536 118.08607083874 127.287538993899  
129.910866236901 126.332299789266 130.406895174038 117.015097017246  
126.544685937984 123.161953011069 124.578552584603 122.031894952046  
127.696578575874  
LOC100132703 142.920939571001 153.328585916625 133.939847853073  
186.961638857905 131.377361030122 126.939543057414 143.149424892482  
139.843416673512 140.435724944447 133.307149027384 155.072752529178  
142.85695042665  
LOC100132705 177.214422668922 175.908645445479 179.896659891106  
177.478925091583 166.47851613068 163.51024840263 180.710636205653  
175.111460651956 156.353914172996 174.406779990708 186.215602572358  
183.04531185589  
LOC100132707 199.916301659113 208.914498369991 181.635664531851  
236.108432603479 133.886458291672 138.110317032494 165.919497521143  
156.801189586018 159.0794075765 141.632147679743 181.294497402507  
151.780459290205  
LOC100132713 127.211469322857 133.585425721984 117.089207321783  
143.810050834214 138.469997677004 134.793399942417 132.268445799639  
125.216463649367 130.461084106455 128.708956947928 140.443415669628  
121.689416823766  
LOC100132715 966.281849197568 764.774225930479 804.800251415824  
614.775559038663 821.465895280454 1030.97051104597 1151.89087953837  
1188.08712008638 850.125434374005 921.546033242474 1071.00507864299  
1341.78081782818  
LOC100132716 133.545405737639 130.973504803813 128.445065383646  
137.114604159523 146.582858169664 132.788102310611 163.134784474437  
143.965049742993 141.054587977578 148.620766059526 148.391885541349  
138.216926722025  
LOC100132717 293.12968694683 304.237479317271 401.960630197091  
233.192751618176 474.629173435475 1142.09977159958 692.729789121701  
763.880957432979 737.42784787426 788.693133735893 450.99430272315  
1222.59895569348  
LOC100132724 140.345652629553 132.839431368337 143.733505359106  
141.480793979634 151.406384541297 145.139966629363 138.383183017683  
126.762116571216 147.161720770972 136.545742688573 150.623182458747  
141.40690581885  
LOC100132727 10170.8669218992 9470.58919937464 8709.2221371432  
10075.6573898939 1821.08523647593 8322.20177173035 4465.66734676111  
7038.48958943724 6179.86800320807 4425.66777919789 5347.78127066964  
5281.353685715

LOC100132728 136.904851056919 142.922549076496 135.095095470362  
129.281564491007 159.097020087275 132.399633003253 143.752697178913  
169.725534829981 142.403121638265 145.873038603155 182.560363283264  
171.247946863662

LOC100132733 123.513588004371 130.806223492605 133.465593684519  
146.166710487448 147.968104627262 128.933672074497 130.160236228857  
122.223184326586 120.337241026338 137.647282354299 119.669441891401  
132.606735652984

LOC100132738 155.530415929059 140.071879210324 133.827296071709  
156.285963197762 146.349773982488 150.434376975922 152.049243916141  
147.968104627262 139.103395748894 152.877058628512 146.204122329465  
153.033582154882

LOC100132739 151.224289879776 143.626022875491 129.374418059091  
137.720747340105 123.607412609763 155.518807026156 156.531951576859  
130.185134787768 110.544044723728 150.138643811727 129.77374228644  
157.997750997487

LOC100132740 387.135002880995 352.897241809959 380.053166305637  
343.617417488962 346.862322263052 306.277823025572 253.202436065011  
379.615659443164 261.721726664029 264.8472508692 310.758803815671  
381.121621815163

LOC100132742 8514.94395408164 8292.04796307133 9349.76443528011  
7873.0525548049 7038.48958943724 8496.2506227676 10661.2216586049  
10533.5868398404 8982.75408120297 9881.69734721233 12221.7819812315  
9251.21629832018

LOC100132752 114.161540771427 133.567630962178 140.955772094739  
120.918190840083 135.383585408897 122.714122084817 131.915864620669  
142.495333453346 136.2727333616 128.23910347716 128.490341173553  
132.294365151614

LOC100132760 120.839256811295 122.508761687823 128.335132315812  
128.606360476298 121.815538475678 129.687743133943 126.372374084002  
144.388851371784 129.267923706188 118.186426364551 136.03117924052  
121.278346729876

LOC100132761 288.026656721827 233.129544542265 424.37437028833  
242.948136060281 214.8478629277 330.850098426464 293.528601172819  
262.296456281666 302.462763120177 407.875393458322 242.019489058244  
320.979443123471

LOC100132763 139.804518460303 152.20173979854 143.769240322865  
143.419034484087 138.551695969102 129.405749374776 135.536810684197  
144.916193282062 133.561188057423 137.225659453984 141.649911527714  
139.925201225224

LOC100132767 167.42476096854 157.990467804353 143.675696734051  
135.743159681223 159.461778054423 155.463400179872 147.995991912855  
138.094719587545 144.311620064675 154.384766720753 166.368623023308  
144.961976523279

LOC100132769 130.392575279055 138.59175751301 134.493062923443  
142.003414252064 145.412368252632 147.069488043503 145.1382587433  
129.589056071463 137.894482933806 135.807494668545 153.661632990172  
150.166324293431

LOC100132770 131.507618414676 135.999030570565 130.933379257307  
140.086978441723 145.768857553634 135.783125948784 157.792868983503  
150.606329295069 133.62358240645 142.284050423299 118.176124626025  
118.064858133264

LOC100132771 141.473218014605 140.493975416335 152.980843102933  
156.105736111274 146.920496801962 143.078022283871 171.941887376462

152.237183848896 135.17827963343 151.2639801322 183.138955445765  
154.133723492173  
LOC100132773 152.680068580858 139.555322603323 133.70941349665  
143.669490888725 144.287786573389 142.448384713937 162.994537815938  
147.725396196054 146.49022197174 148.253612913109 154.496005175117  
144.782706468281  
LOC100132774 217.576547690525 218.839681873515 211.22652563815  
201.235056368151 161.316521450944 217.628802427037 191.665827345888  
252.733973271584 203.04864785056 167.976680048356 202.314814594735  
184.758754197435  
LOC100132779 138.038446102921 137.778033050658 141.226901872221  
136.881019970399 128.81022558263 129.513590304528 132.570225520163  
130.160236228857 123.132178371802 144.876300850115 134.182902752156  
146.775403409562  
LOC100132781 130.09050436943 138.212860360467 131.221105247771  
129.198366503027 139.860093278582 138.859261763075 139.470557140547  
129.069366041625 125.596067857941 151.338765231607 128.963962067821  
129.041254463346  
LOC100132782 130.4631522533 135.937066152894 142.278523641008  
125.299513989334 132.962234774463 131.277646716635 138.724959677368  
122.841135364088 136.960656707275 120.235652849894 134.441142158135  
131.681566829159  
LOC100132784 147.144669932392 143.461785113446 136.739754726714  
132.442771000976 136.821228481217 146.865904106038 128.643539098937  
141.752031758589 151.09974848374 121.908945872994 157.528409294029  
148.711943433557  
LOC100132787 147.903030308715 133.627389970495 174.301952147167  
175.784250947874 165.219393390909 155.893018702615 142.874797429568  
143.401971479167 141.937611082276 175.395900648455 148.996601285688  
130.302829773323  
LOC100132791 129.455347273068 102.421174406474 115.033355516602  
126.067296703905 118.419311800417 128.907618218883 127.863583325139  
111.826509343353 119.763020707899 118.176124626025 120.422401793885  
123.93800397666  
LOC100132793 132.357517495246 120.724926760252 130.878694881324  
155.550532734718 127.964855970099 133.860077101582 141.473218014605  
153.461396593156 161.564505054217 129.938723074546 117.289037817013  
130.656206845965  
LOC100132794 132.769455423385 146.146800933028 140.36278240974  
136.465185148237 128.213678179359 142.221542344035 133.905162024888  
123.375592272781 152.27638422735 135.474070994652 165.808660192901  
143.080742311914  
LOC100132795 5748.57645553386 5347.78127066964 7717.01422791837  
4722.64356477773 3630.80752744347 3143.77161008321 5347.78127066964  
4437.40805296517 3522.61692270848 6810.50193989514 9433.53967760357  
4110.76546218806  
LOC100132797 199.837938317725 168.389069732474 285.102778078056  
160.164327420125 168.52952604693 182.165681034082 256.394563537658  
226.287196839644 220.533113603343 349.623729591612 223.81987303579  
234.768591315095  
LOC100132799 157.805871400914 149.664506761117 145.643752002787  
146.421195733989 142.485427762372 139.796168741191 126.905235161069  
120.862516074358 140.413503801467 151.88244935494 150.109192774079  
139.150209111606

LOC100132801 127.052618800004 110.966212705086 109.182623414389  
124.913645688325 119.682747854629 140.2533871084 133.869867161978  
132.978746105877 134.378951325825 120.641590368902 132.20764558027  
136.386031133644  
LOC100132802 127.380083832809 130.51901676405 135.758133410577  
123.130981962217 132.570225520163 130.076926011271 124.056405566491  
149.269417496936 137.999190557332 133.745413210496 117.646963986512  
128.054394154801  
LOC100132804 163.686535888943 159.438084699061 173.142436025281  
144.916193282062 146.287161912291 150.920224503051 178.377461551319  
146.654925456132 151.908841481413 198.166270627544 193.190059954084  
167.51207060064  
LOC100132805 143.58555556787 141.626504154989 140.267351731167  
145.015434711984 147.2233876988 151.214631373344 144.81689330206  
143.737021989907 156.516250236679 205.908052642222 150.072005848234  
178.445384902129  
LOC100132807 129.878330410179 132.767474034305 129.775280076365  
130.790872334222 133.288181734813 143.442361602626 146.287161912291  
131.40880014672 137.464339555312 136.767307268217 133.093234861388  
128.179293878252  
LOC100132810 152.432477504097 144.625105340312 151.09974848374  
135.790955294639 132.758313782606 132.699715693605 136.695790688466  
142.968008233583 142.025834438974 127.239282651919 143.421288665418  
117.820996523337  
LOC100132811 155.05329654089 135.425518707018 149.048057509964  
139.991780068793 148.031899566208 143.974551393951 142.025834438974  
140.117644705946 145.815454490804 136.357788670568 153.805972158269  
139.997245010492  
LOC100132813 129.420716653358 120.35956894661 126.368170959337  
126.418295908353 127.644315207178 120.280241193135 133.250966691407  
122.531675048414 130.233769058693 126.159880038854 119.288554466773  
128.060612106762  
LOC100132814 151.570977428443 126.391083453973 148.856482636773  
139.97127025207 148.683761948082 144.077080621909 149.227646026658  
131.277646716635 143.306843285336 144.767233774942 143.122278808091  
157.927709922368  
LOC100132815 149.808222023726 126.407313060022 129.145457341484  
137.513315427454 129.918038866006 137.340844554597 145.86855878099  
137.694556514044 128.207440197765 117.962188157317 147.519991961858  
125.510101829837  
LOC100132816 137.00532429734 113.051381310122 130.143953880391  
127.772258845875 133.14988092185 150.065275447769 150.897870536885  
138.150616787218 133.384498169568 130.598863171117 123.791515424464  
132.70888569469  
LOC100132820 131.326536951329 124.621381699241 119.886433564236  
128.044165393924 130.501010489883 133.592691897675 141.547112973262  
121.11184249981 138.695481214267 134.125038192486 132.014213378179  
128.421242037748  
LOC100132826 136.901107766796 140.36278240974 113.125349503734  
134.86940314824 135.771423315597 146.225422797118 131.466580723837  
141.424508069834 137.706893763747 144.468333012278 154.193086881801  
130.628967781841  
LOC100132829 179.079061789059 170.602603155092 159.862252588012  
202.927700504034 161.417207801991 163.653662369257 185.447093292348

149.647926859169 153.603765998461 159.746802905903 171.954184094677  
187.550461418888  
LOC100132831 125.04156726504 107.780763250481 139.875260384886  
128.513011425662 120.74273444647 113.822580779824 120.641590368902  
118.419311800417 120.809659457873 130.552857965694 114.174153178166  
118.792612926619  
LOC100132832 125.201152760148 149.597396040729 159.26101905957  
164.513371267476 145.980929136129 143.373932371335 137.821010169859  
138.319321806028 149.272219727411 149.061464748604 134.914830257315  
148.853877151493  
LOC100132833 130.2867846895 136.159825652148 133.397069137247  
147.114698384834 127.641370873147 140.271557921345 141.244589488591  
122.621839614189 127.407418037777 137.042097702398 111.62514398781  
136.732319750425  
LOC100132838 116.958052905168 131.987590706756 125.833649377492  
131.076562651831 132.966873990501 128.781123194219 118.393203921859  
118.388993232718 120.971313945446 123.566522075398 108.79453730066  
131.590180562108  
LOC100132839 133.985582992986 133.866011732878 132.908367372426  
124.723519607109 134.688504981603 128.400741751903 147.118987674809  
130.89594032962 141.455841055881 134.555873832434 149.17029600091  
139.995623005154  
LOC100132843 143.138613573764 136.657107363796 136.022614387461  
147.54950981909 136.335679863251 135.388750095746 132.049224908868  
134.585762409782 132.287326702468 131.753135000312 133.420267697961  
139.232893342069  
LOC100132847 136.988519762443 126.439948611449 125.539199863559  
120.481712066062 127.395094952914 119.926169902322 135.634385846692  
124.807244018373 132.399633003253 121.263939656119 129.165440930558  
126.279119798177  
LOC100132848 126.401145439668 143.954908055924 135.691862612951  
124.110446144763 146.916683989962 149.754842928462 137.027334042585  
130.852932147831 128.069504716124 119.952108688414 148.732027660387  
132.769455423385  
LOC100132856 118.230408871812 126.980375035189 120.241528853563  
122.729918525032 118.697969266426 148.729753117861 136.370317464946  
131.924162435354 138.48552149031 128.124456615525 134.02083946631  
129.603952706231  
LOC100132857 127.299853592344 139.064529330719 131.497454038525  
137.210805338701 129.404017329613 133.489068665353 137.904786382385  
151.226242696197 145.005991300977 134.076865693417 150.445647133244  
122.063996556575  
LOC100132858 131.77099316122 134.175287993769 137.369033684705  
126.956303896995 122.816049839521 130.543453631154 123.484987952263  
138.875827888646 120.551603446364 135.141067086648 154.985781979984  
129.467792559297  
LOC100132859 134.256243410916 137.303701514064 127.829001155781  
128.723261477217 130.485988201308 143.537785553911 127.928195199945  
123.303143302526 131.458411820485 152.555437272666 119.475462713424  
115.80245224388  
LOC100132861 121.110498703017 133.387065801837 117.837894438834  
128.009286101341 127.551486042435 125.637138636558 139.781351410748  
122.125746529725 114.936648783324 124.992439957206 116.90832995093  
127.044367488881



LOC100132863 1702.68441407727 1411.2586496281 1577.15895478896  
977.450397042213 952.724512915813 2084.44431604433 1246.2895253224  
1617.44377452783 1512.28202818467 1539.80266129509 1971.42527720714  
2303.0998502001

LOC100132864 131.58537948771 143.950279111815 142.812521349963  
130.563756903074 131.125175244494 148.196320158939 142.605816057276  
158.617209794418 137.206961927035 177.752497164503 142.705504445895  
145.204870282027

LOC100132869 124.522974214212 125.431735524937 127.464485396039  
144.364319564075 120.951365231971 146.792951584868 136.398521726896  
124.705614182596 126.404523759643 125.621467040793 138.834309377225  
135.544048708523

LOC100132870 136.351332391315 131.085965122946 132.132474135959  
142.788848338402 142.108805047729 141.552315273863 134.387256336429  
142.34471764492 131.358797630945 126.652197216347 130.753266976637  
125.749024723383

LOC100132878 116.476747183738 121.159593382017 132.271437329873  
118.9428715545 127.389942368953 127.749992538985 118.537378726617  
140.767270136561 118.797046082278 128.793186785667 112.456644814178  
143.405079593778

LOC100132880 124.955676894776 116.388079393669 128.009286101341  
134.595090783504 125.531371673679 125.381865040574 149.000760379976  
128.856640014006 126.069594320759 117.928456234796 126.013957128603  
140.14062775887

LOC100132883 120.231559540009 131.992186668019 120.054065939835  
133.697364081712 122.382304966782 133.885725703056 130.521731606987  
125.367386907897 120.024235522682 130.038936315246 125.027095330593  
124.387133895009

LOC100132884 131.65084896906 135.063259138429 138.43301474649  
136.241569739318 131.273916869754 132.043196381009 128.292627005614  
127.969833368917 127.349190705235 138.244585395561 136.120813399579  
128.593112520767

LOC100132885 115.51493368527 111.497241941203 119.370219299491  
127.31283918221 121.146511496024 125.606269267903 127.509583634884  
140.694993778394 134.149446827982 120.686906898624 116.300028266671  
120.679474100322

LOC100132887 146.861981788662 140.909875639658 138.106499370074  
145.832751296646 123.865424155099 158.639313207233 148.201649039381  
137.956295878287 136.328447182666 144.762006548375 137.914673796317  
141.639216893245

LOC100132888 133.887927451362 142.21279866857 131.473001455317  
136.569250038372 144.587253120884 143.349486755648 157.592607345742  
137.992477770842 148.618327213374 196.657475905674 170.596937075493  
169.089896796513

LOC100132891 128.585911203394 133.357385559881 133.621325902558  
133.093234861388 135.82038791723 140.800226245569 145.363692072132  
132.645196037302 143.784022884904 138.008679609979 120.675356009213  
135.559535347364

LOC100132893 135.907702243922 147.595573192579 139.3465236423  
150.971453664961 141.373059612034 166.760758231104 134.907397302852  
147.019460117987 141.775100066311 147.26204590693 147.565485281003  
164.726382689707

LOC100132894 142.463167960724 153.829636228764 128.077692981235  
134.298521475727 134.642898234003 132.692027897739 151.367402326399

131.570358580547 137.959775678716 148.720181793879 157.096799934494  
122.027632589515  
LOC100132896 141.023875058322 128.211076776316 126.00744446299  
127.977782260866 110.382724813928 146.446922196868 157.521230460545  
132.916608405637 119.052729327147 130.682112236817 142.500537230642  
115.174678745401  
LOC100132898 128.26423663004 124.028748209411 138.304793826214  
142.45047744931 118.866073031304 139.170102961407 137.234384760487  
127.9575507576 132.697727983601 125.902015309754 141.045958539926  
145.314204192565  
LOC100132899 122.213445520365 126.262349005661 129.591396165575  
132.0888555526 112.142263331903 127.401551376191 131.846160346403  
127.879723100698 127.91637627901 131.373012256275 125.280736217267  
123.58053320223  
LOC100132900 140.055272520317 154.086510608016 156.392603045231  
150.244284323504 150.132420238581 160.096507818256 141.222884136243  
144.518132543976 159.424105896749 130.724642809645 150.123784990646  
156.926617030752  
LOC100132901 255.59042517603 201.383739902873 339.917319653382  
228.820894086914 206.548878646452 411.285747588622 251.414717011661  
378.862741410359 264.109049504585 228.797912452429 273.984715370774  
150.168496148941  
LOC100132904 139.576852399535 161.73079180403 143.204058393718  
157.969559105622 159.130076733711 160.806678614325 162.55521875551  
143.070170783764 144.615156175885 159.012011848781 143.065258692424  
151.369387642458  
LOC100132909 130.001889950186 126.542112891953 129.179188863839  
134.943005383277 132.595360509902 130.644937322186 138.519129384809  
126.308622415913 131.796941315992 130.939543211439 117.003205777245  
143.745594527046  
LOC100132910 145.902572804249 142.900756181761 161.548130965486  
139.714198638713 139.878752507646 161.636411303968 137.356539213081  
136.522590104535 124.284551460617 144.64757514198 143.62103263895  
147.653573379877  
LOC100132911 121.912927816178 127.171331062578 135.58042404479  
124.019707408094 133.075748695526 135.166677520468 116.388079393669  
124.597605631582 123.683553177379 136.670253859184 130.504023268824  
123.439897913722  
LOC100132913 121.898921780569 155.794309652357 142.160941592768  
122.389557272277 137.188849160569 130.122672154144 116.360144963753  
113.799997627317 124.76274408368 117.274977920103 131.970514300585  
130.877306095063  
LOC100132918 167.451782810394 178.476483428474 228.542423012958  
159.253029632045 204.740183832461 384.464383569801 300.358738353443  
327.164773632634 412.582051585078 352.22815095475 245.723316636363  
367.382105696814  
LOC100132919 131.034010150362 134.285191872099 134.91213977595  
132.367155914392 129.961042190085 135.323341505875 142.093180304661  
132.027020683413 133.918638123756 132.819726980184 109.438965262717  
134.270043564053  
LOC100132920 137.384815877899 175.251238431716 130.625825024195  
141.29868389128 141.70844587896 140.125575976708 146.321713521846  
125.783265980169 135.883877544991 146.362705590778 136.570817174009  
140.747967724586

LOC100132923 139.375386456759 122.989642938474 135.848022588175  
142.011019998327 130.372959860013 124.83124879272 136.973804637915  
132.657106732366 143.982561564661 135.106072664488 126.33556674738  
121.010811158088

LOC100132932 116.819107878692 105.375878824562 128.695126347193  
146.669620721254 123.843823256462 137.225659453984 132.109267393571  
128.699441450952 113.311132067152 127.931887647108 155.83143112621  
129.227844833149

LOC100132934 154.150568177135 145.351662473858 138.934516083124  
158.509885816997 141.992490695142 136.653140842194 156.407166112409  
144.30519737569 138.426531345939 139.783725419023 126.450300907283  
143.901267937876

LOC100132938 141.666394024363 127.492376657284 131.726540162023  
141.84391267245 197.068795788491 129.537345537086 136.957209426823  
152.725025539491 119.352995485911 142.157512965166 116.533361070234  
128.944295118239

LOC100132939 145.286983999628 144.496429994489 154.094285855743  
140.055272520317 151.289464845626 137.767900781368 141.130462286785  
149.779323547896 153.432933930805 149.133055368147 135.168792286819  
130.131800537628

LOC100132941 148.222477811166 153.181097279473 144.998415908498  
141.145419751161 159.58125728432 147.161720770972 146.57274511202  
135.978826529736 133.198832503062 145.100964170053 147.292241873554  
141.299677389827

LOC100132942 172.794570587596 207.138680369683 148.943735606315  
168.37850726499 155.383166865192 159.177303894223 145.569870279379  
145.819198235878 153.610428214886 133.801549026691 143.452992974333  
169.661107080542

LOC100132944 134.386109951859 139.864176113337 130.742940708861  
136.453821861379 138.654301345398 132.177829138863 131.97938329944  
131.516100334597 135.018710687313 131.188208693139 131.560971848628  
135.57577294564

LOC100132947 129.290542121353 134.4811029314 153.630125822178  
134.867806860993 146.165632086981 140.089210795507 144.302925948596  
140.490023670841 131.926504315744 138.519129384809 133.455138380277  
149.405118010893

LOC100132948 133.659475650376 143.681220324074 138.363553671822  
136.908861280856 121.246967460178 134.91213977595 128.304919825754  
137.429832103492 141.236939351298 143.685368799972 142.920424995336  
134.95842832877

LOC100132952 127.610304071204 117.667611937195 124.093412630817  
134.452938571435 122.699993989189 128.229729571899 133.816601264067  
136.028011201077 145.120347147471 131.878155417065 135.822022526034  
127.052618800004

LOC100132955 127.863583325139 123.857527555048 138.538656638714  
138.805103589625 133.860077101582 135.358837968905 136.996535765175  
131.590180562108 128.723261477217 128.176779923348 121.076652800015  
135.474070994652

LOC100132956 119.806933383138 133.155925118245 126.075528093376  
121.799209715087 126.759554774012 117.48427100606 126.969504644414  
122.442590463781 112.612099135361 116.382348831504 147.579672274205  
124.682396766302

LOC100132957 129.179188863839 117.953453145685 121.640681916546  
128.195916531413 128.02595294499 133.374199939042 125.958139354095

141.689210867136 129.745892720738 119.152881350581 131.635641515901  
131.748753064488  
LOC100132960 157.863585655333 162.58152435515 149.606576415873  
150.663062131717 150.974364125849 147.585987099202 169.561657768387  
149.736837985314 159.683695366575 178.997098204457 140.954264409241  
158.377396672742  
LOC100132963 124.807244018373 110.678680817471 108.055271136842  
127.339018771488 130.004329307977 123.467227007155 137.141081365469  
116.552626146967 116.989409891761 108.318510762416 118.342067845126  
124.119104345119  
LOC100132964 144.292679144059 133.067237748129 150.399313562031  
109.228587997052 138.985778947618 129.626276841426 125.649525720177  
151.020903727566 126.523201566273 130.628967781841 121.88070274109  
132.845116298605  
LOC100132966 144.278830378899 145.034179171835 149.52880714343  
138.631273903053 150.540599489506 148.525224975266 148.8870854102  
150.682964448325 140.138870925001 127.269672881591 150.650926518959  
137.854873498783  
LOC100132967 151.891318080151 157.350979071365 150.761696482387  
138.411148122407 155.043017644694 136.01865173754 138.43190460314  
131.437847958077 136.607783800741 134.262346867514 144.243598691782  
127.731816003312  
LOC100132972 137.672798701643 129.594440309419 136.372712400493  
139.305220220411 134.8745127454 134.041098536814 133.026879831536  
127.763186950161 132.928639483854 129.985797334276 127.961153369579  
133.303201646987  
LOC100132973 129.073750290924 126.964621107029 135.137615432923  
107.450945262092 153.6855881767 145.056914913573 159.148717478277  
136.722636695506 127.229854957588 135.688346453694 139.217683863851  
144.64136816491  
LOC100132977 119.735807506447 124.132215738502 115.473431881597  
134.666505160831 124.964977322158 125.843089077365 126.442999559539  
123.379461430902 119.023688551496 134.034970203523 153.258616843783  
119.000436602325  
LOC100132979 133.615958668897 137.282038401275 134.509830749072  
133.738587139139 127.533939679071 126.563876945046 138.698178321535  
134.880138942756 143.877226672663 139.490103923544 147.684875777977  
144.70348930646  
LOC100132984 135.116985816353 140.818413826758 127.524310543779  
132.17294083844 116.331428876124 133.998381302146 138.557464672111  
129.446928016147 133.695284981677 127.712004247155 132.84666796678  
126.383238335161  
LOC100132990 120.793974839773 115.981530322377 124.436549041911  
125.945916345628 130.005909892804 114.936648783324 128.990911924499  
120.599440204711 127.174074003712 113.512670856029 126.872912960681  
132.256047602234  
LOC100132992 609.309339417625 601.401329244185 601.164127925014  
575.060457772307 824.070046083713 1683.83803339436 1499.07462479938  
1696.69982157582 2363.50330960038 1620.7954553764 2016.52142068599  
1955.96772733047  
LOC100132994 116.023563001039 119.931415360373 152.826356673175  
142.442450622311 137.834158814913 130.669539169739 138.688881393504  
119.188446525733 133.733674016447 141.445937312137 128.585911203394  
139.796168741191

LOC100133001 143.720044122451 138.940564112156 127.617449871137  
118.060781901686 149.601145171769 132.923237903246 132.878638378328  
123.877609932461 125.342580368417 144.143692745479 136.116468624715  
142.607578275494  
LOC100133002 133.71610564207 137.210805338701 139.723117427543  
140.359796538887 132.996622574111 158.080749926756 138.934516083124  
138.221749464651 135.713266118447 126.103561089901 139.503902205317  
139.104796184094  
LOC100133005 135.723554819107 135.226240774124 115.066084565112  
152.910433120981 126.88329158544 139.640918572569 142.648205566485  
130.354641020141 121.201267751612 219.792171863015 102.563722570171  
119.52150378372  
LOC100133008 254.909076658804 265.068532248682 292.429831186609  
258.489608621438 349.623729591612 288.542264120468 384.051170099325  
276.057101476947 266.442565636226 248.03801051527 372.475112554793  
283.918434443669  
LOC100133012 187.710185880162 185.856755885891 164.520247586053  
183.921173538112 401.750302347978 448.54309632232 219.753039699136  
431.182384100794 321.750495072759 258.075566417241 273.514200733343  
380.310795921752  
LOC100133013 133.071542710134 142.119327380686 150.115482378938  
125.803854387512 154.876638004094 145.695402948337 132.02259465879  
141.925012927873 139.6492947529 133.24828292554 147.245636620228  
141.515788643986  
LOC100133015 146.84891312893 122.05954649985 146.194467350201  
147.113541493157 148.450023054885 146.044279076949 132.918979842076  
141.453255692229 128.517315006019 127.593764897583 135.831453841801  
138.74117178479  
LOC100133017 167.912321820083 168.628947766217 183.371103136697  
173.240598306749 192.61436632814 172.877947895827 164.890716656336  
159.870967387108 155.938283930571 172.430211711547 180.022646625687  
166.085469368498  
LOC100133018 125.683334853039 116.736174147084 117.946664604751  
122.431337063053 131.277646716635 131.921799405427 127.451155926679  
124.647992480694 126.333814565085 124.342911165267 124.684937344502  
126.848211027661  
LOC100133019 424.751154004399 501.946140974776 325.859917318516  
363.594808277506 199.916301659113 410.002817143111 345.832589037442  
343.946831770916 359.099750692694 240.836979012241 317.061815822659  
323.841518852386  
LOC100133020 137.296790373528 128.751758311249 141.604832186257  
132.094446606227 138.036876466521 134.817665153925 161.520362399369  
123.505435008269 127.842177770276 145.850605495564 138.100014158367  
141.319594283071  
LOC100133021 156.581569063195 148.096551269076 139.121639005366  
146.660826209767 151.65364467801 149.813838004575 155.734509841719  
153.181097279473 143.281050499332 151.433634564939 139.094167748687  
147.550385608773  
LOC100133025 124.541257225826 126.693235227579 122.863612588759  
135.747939020471 133.537552829999 125.40832206502 123.104790590045  
124.05019986924 131.726540162023 135.5237675623 149.557833322995  
134.929915732246  
LOC100133033 143.802883430376 148.630293791756 148.417929733447  
145.802944788548 168.824578400555 150.939877261936 175.638328370133

167.395369670065 172.451128796055 154.744065805492 168.818595386221  
146.286319248569  
LOC100133034 130.201635099678 121.893446546512 143.207187847583  
138.807031587657 127.625252349231 136.104027032045 151.64806573742  
134.814082968113 152.900303734331 125.095999326598 137.191582153943  
143.464614171516  
LOC100133036 155.798048652444 126.55925846644 142.243866937888  
138.789908033669 150.587882657674 156.357126871243 145.584615439295  
155.427282703527 155.52533851273 153.62335478774 155.257184514112  
161.700258550244  
LOC100133042 129.023206862713 125.347442446239 127.172702525749  
128.925288777749 135.58042404479 128.96181458192 140.269160279333  
123.940632366675 117.024039521425 143.187539073659 157.301617257941  
134.318290950377  
LOC100133045 138.110317032494 139.2454524913 141.301503201175  
147.373174160478 148.272252953881 154.227433553131 168.232843307077  
149.548900791507 148.060086496148 146.245915271213 156.516250236679  
155.365673279823  
LOC100133047 139.768555796264 135.489000274316 133.075748695526  
127.532665057083 158.7912155022 139.383528389668 132.788102310611  
133.532323053215 153.582185523361 161.348562186667 140.955772094739  
132.092910274836  
LOC100133049 169.691392833277 162.627021719615 187.754968096521  
139.462804363695 143.090886224647 146.343230597246 137.082234284426  
148.930073905413 139.796168741191 140.760983862166 144.498245098592  
132.735371358102  
LOC100133050 146.099555861577 150.82596027483 149.462835741621  
157.468934439452 160.906550609416 148.450023054885 177.793860516896  
152.277810621542 161.573975848093 170.024833610695 146.21362402936  
155.851264092344  
LOC100133053 140.029808783762 127.890438577754 146.686192012988  
138.852212944492 150.71435300188 140.03202338666 133.909219998872  
146.771439168861 127.777945516765 138.464793389999 130.255689301211  
132.589411973628  
LOC100133055 160.549597620339 169.385340991747 204.161375686761  
147.187681416171 162.536009333787 218.314136992677 184.672330560677  
153.913513669361 159.390531348676 195.303469330682 200.558971047462  
224.824362819477  
LOC100133056 149.6730835169 138.231715814115 159.856190281237  
147.117286738537 153.756213924949 142.26998944788 172.591885279428  
159.655362710407 144.265352127763 145.291984088491 153.626180103404  
153.238678313147  
LOC100133058 165.537853089052 162.652929339533 162.629257046871  
153.018378403144 210.692705153337 151.751963310212 157.976810829398  
148.87242524521 152.692483731643 157.659824861915 152.705458417973  
145.735532706214  
LOC100133060 124.758906471654 128.50733429744 123.427366316096  
123.833219705499 135.880955433228 145.024148458133 127.372242892513  
119.711070285785 125.489777118532 128.593112520767 141.4587810296  
130.579954890389  
LOC100133063 137.406420101257 136.990610254852 154.433679792749  
151.981708806765 118.095936088242 152.908358615016 140.708683675555  
136.532168520039 145.481279504679 137.94246602811 148.372098844766  
138.870636101334

LOC100133065 118.319950396126 136.573928520456 128.488598467312  
132.206133020786 136.355319997318 148.199249855894 130.593846004132  
132.151765465534 135.913632939299 127.471479301983 137.681280789305  
142.709768829207  
LOC100133067 163.612347715773 152.973686387267 161.552475294424  
141.767311448808 145.962664629275 150.218643705925 143.839170216353  
151.128838696891 125.296240086615 134.327229861635 149.078664825533  
128.643539098937  
LOC100133070 135.358837968905 127.985051303973 144.521448574711  
133.016668180102 134.565199667396 132.437234970375 135.895945142328  
131.151578665754 127.206177583275 137.71627781928 152.483240622367  
131.539170756533  
LOC100133075 156.228039404029 156.248684477916 160.73807125195  
188.671807443641 173.892380305166 163.718595974283 191.740596601895  
180.941090529551 149.450921195838 180.698727334322 167.049197726715  
176.176392369178  
LOC100133076 106.030441145334 121.559477523123 128.594951429021  
143.954908055924 157.213868854329 124.130599753093 127.279107079261  
139.308325848216 135.024750597761 143.028618831382 146.617853918109  
142.892198239879  
LOC100133077 154.423801637411 146.266350809492 138.783017264895  
149.760883745928 154.281674854552 151.231685705236 144.937697857147  
148.452947427498 152.6969498938 157.551854647702 160.655929233978  
131.342562516383  
LOC100133079 123.601413134287 125.287738115754 118.871735074285  
113.347609066395 127.26820735867 122.309041354217 107.431455226979  
107.622342073167 128.683044953833 116.902574164498 135.114900669781  
113.112450527382  
LOC100133080 315.786908578669 243.95334982553 285.355815566148  
218.18756955522 164.58158284856 160.099731578122 183.447807651728  
174.962380276394 171.826623289946 187.871017629994 148.086979061158  
160.469645948225  
LOC100133083 137.125637347852 133.665206343648 133.980792743661  
129.167602517633 134.881854036527 132.661036963636 139.22776505842  
133.573744633212 139.493994206019 132.135448831967 117.639216182057  
130.944610173285  
LOC100133086 144.599578905334 130.336466131215 128.860744370967  
133.117701703454 128.471437314295 129.529372508883 133.86835278231  
143.881744063934 134.465488237877 124.546520456419 137.371400886441  
135.441550832737  
LOC100133090 119.943408501009 127.028640787946 149.410729709855  
118.792612926619 123.625734357908 137.42845093653 132.311344653106  
140.713537140957 120.465934391246 134.71514094826 109.770126492743  
132.336431473522  
LOC100133091 135.315732654507 139.826273596452 140.518206716196  
123.424145707079 127.539091409962 134.655842662899 128.466244127634  
136.346472365382 129.499283650632 139.408234219133 142.518266591748  
114.00959999268  
LOC100133095 144.910863590251 129.455347273068 137.42213762011  
169.311264420133 141.703410265546 124.766436060041 145.331858938535  
146.209104824109 141.398513269219 136.858037332222 129.201101445773  
131.782007636511  
LOC100133099 166.688771186254 154.209689403188 160.766121558583  
144.589482298525 182.907444581093 163.73339229802 165.177036955944

142.663334893424 148.424970450231 152.483240622367 164.236417852165  
163.97516075705  
LOC100133101 143.707084981291 137.660051943656 130.524630778991  
127.644315207178 128.251087452744 140.779962389412 135.638156623519  
138.108184983014 137.801899270172 132.621253769376 153.744962185987  
134.885883559391  
LOC100133111 117.390049487174 122.238996815745 132.294365151614  
139.883360543042 137.669753723768 120.36402353147 136.893392154262  
127.783892576352 135.839123867443 151.148295679242 155.134796468704  
141.277227483198  
LOC100133116 134.917733742892 127.121068682846 132.358418384733  
121.539958110688 129.318409053566 131.079066781806 113.572326615571  
125.609542142983 132.306569548052 126.042731009527 128.790166506932  
128.980519133484  
LOC100133118 141.558927907067 131.747367613225 134.011746666371  
142.617474507282 131.481679396553 128.668672935791 158.244741207036  
137.328370598183 134.47218436552 139.08460576146 147.772490977392  
135.453399741892  
LOC100133120 120.744994574029 113.989682635964 113.064645688715  
123.182903611854 115.170176263172 129.520140995675 123.015371659847  
108.362609680556 120.020781939389 107.049865500702 126.241307445165  
130.886164807755  
LOC100133123 132.801619479245 147.459385142695 150.35767254363  
142.195764444916 142.09146795308 136.370317464946 161.26201213997  
135.713266118447 142.808871284256 142.135495724286 152.323927317575  
147.216303852902  
LOC100133128 122.828060462887 139.071908528327 142.110469428644  
135.789381967525 133.054453517834 140.760983862166 128.413213851142  
124.857461801227 138.032265227728 138.331509117817 143.227410286571  
134.830021570666  
LOC100133129 198.597176657619 214.175691239597 179.785198362326  
194.240372898704 140.914966429342 191.554396977588 165.158465031363  
185.627515956848 160.553214127047 169.36029946801 205.260673843294  
160.055242985219  
LOC100133130 137.982667022604 121.472885562857 133.397069137247  
123.801380911257 140.000880942015 135.2979041294 143.626857507866  
140.05419835434 134.762169062357 137.091932621041 137.093170378295  
133.052615777603  
LOC100133138 119.427342766092 115.293844461817 126.029431525943  
120.065876525792 111.860763079995 115.531710316716 122.962219297463  
115.572088632106 121.893446546512 115.463150857002 119.152881350581  
123.629279569085  
LOC100133142 137.056500339577 133.292854943218 164.276668889213  
123.094324479352 135.446072698039 136.704018446388 144.487533992157  
127.629258006335 121.734873711651 123.662678397678 120.672291867109  
121.286130275542  
LOC100133144 176.533058719908 170.129558603697 150.476228905372  
173.70035122661 136.344248873826 151.340728221261 157.659824861915  
136.739754726714 143.905680376268 144.968459820523 157.761231106669  
147.909588100857  
LOC100133150 121.539958110688 128.274326990056 134.049094181433  
142.825203517688 131.146604635155 132.878638378328 123.935072913078  
141.16066528405 146.34029698108 129.83316008718 131.119810851017  
136.111569529393



LOC100133152 121.281990195113 128.748663215466 122.550707067805  
126.402405227897 136.106596229215 128.901707304582 122.749182465923  
135.238301951626 139.943915452851 131.04482088126 141.181931072161  
138.284533297052

LOC100133154 151.998942684339 148.742216703684 144.612549022264  
145.669033804967 139.980504765791 147.818956338752 137.312488161187  
148.6016741084 145.528676983944 132.01588294465 144.408426565541  
141.770977101211

LOC100133163 272.238922498583 315.306271141071 263.250833727291  
339.54582149284 439.616817413027 788.244353085369 267.451611731669  
1195.07608384189 326.1109406486 272.770616373687 311.269750643358  
303.423450627377

LOC100133165 127.305306470493 119.95959059725 145.770601609392  
120.041623078295 130.085138325818 119.486895914055 128.289680999565  
134.756377802151 121.117569938781 116.889373249017 124.070171664904  
131.679566454851

LOC100133166 116.507315786826 139.868714816245 115.858924428037  
128.147484804104 120.020781939389 122.770033312519 128.886008923268  
123.510413258172 129.245448026213 121.406758670435 119.48998115497  
121.56625295788

LOC100133167 120.015436934157 117.231243105897 133.667852983262  
134.664652044646 131.692626563078 141.193081790037 120.015436934157  
129.495680232567 130.590195477461 129.579455072999 133.661553334004  
123.683553177379

LOC100133169 145.630497368137 139.123489349026 137.15571320152  
131.899614022767 138.047487233711 141.389330839189 140.411200873743  
128.81022558263 131.500591219916 128.950308413612 132.829401072883  
135.003236040032

LOC100133171 132.352268262631 126.786434897401 122.759905480504  
124.889829874126 119.052729327147 136.051070946954 112.993452506946  
122.957621737726 129.874235646816 134.981272056795 113.031636180748  
131.514114515895

LOC100133172 134.208537331186 145.195065312551 140.05012958679  
132.320536722841 134.57472034679 150.860090477342 138.891642304194  
154.227433553131 148.553324405123 141.689210867136 130.235407859542  
141.636604735133

LOC100133173 129.946925636595 123.042372128864 132.227561632637  
122.149756212115 131.726540162023 124.45782375705 143.888318202599  
129.247701136266 130.92186531563 117.12833256636 129.511465164539  
129.715948793051

LOC100133176 125.00254973945 133.611588728019 148.470120335761  
134.060214479265 146.416318806523 134.296645422941 139.760425990939  
126.165220332132 128.773129597793 130.732397679661 131.80257432775  
128.077692981235

LOC100133177 12457.6956682374 11190.1778174002 10329.1999331936  
11432.8213906428 3734.705550862 12368.1423473066 7308.57540715512  
10632.4185569238 10312.8407173696 6851.54963413886 7218.21759302518  
8322.20177173035

LOC100133178 140.986563785515 138.02757574324 128.933672074497  
135.273184185121 132.924341641217 154.173439471404 134.931263946202  
138.834309377225 142.185624089373 138.132390735567 158.208998509937  
152.501914553441

LOC100133179 124.079109459437 119.686859562393 127.687299576139  
125.990762414974 124.602474178438 123.260800590266 118.419311800417

125.693321471759 122.837807905774 136.965972077733 136.77666893627  
124.513891912986  
LOC100133180 130.967476533254 136.318816786684 124.952026709219  
134.031960707639 116.58452862953 111.349642316073 135.427985445559  
120.873985900666 123.524952603672 124.807244018373 115.863243613121  
134.111348656261  
LOC100133181 121.841080387875 134.345387934995 120.693808603805  
126.428284589412 121.260355515095 112.841406363391 128.790166506932  
112.635430248416 123.887740029279 114.785989868306 116.751145098777  
125.005019889478  
LOC100133182 141.5311434224 161.37617568158 144.450810504499  
171.121834829333 145.298109334141 180.569583206488 145.862497313025  
154.8975607055 148.074494928651 157.809081184874 155.176714087209  
151.992112109698  
LOC100133184 121.575942603856 129.24482916531 121.141432480683  
125.215194276842 127.084267631845 126.561067704708 120.024235522682  
118.186426364551 127.018746030517 111.381427322188 128.56000638844  
135.151438845363  
LOC100133185 613.279465441319 608.129959758538 549.569374872629  
347.73629731446 238.88138498771 351.934158805882 689.271009631393  
299.33156125224 301.546624239855 712.699853328955 568.040362658955  
410.845034795716  
LOC100133189 127.137447808551 120.594874820899 135.232168302734  
119.886433564236 119.539713878832 124.924794564647 134.919972250554  
112.534864678892 121.57069706238 117.137027732123 126.623026026721  
137.788504385206  
LOC100133191 148.514806562804 141.583936153499 163.538862303362  
139.831964368637 136.884799902348 149.919344933814 153.51550202829  
134.350054065624 148.310640591781 129.404017329613 148.130993521745  
136.85323853426  
LOC100133200 120.922042875444 121.709375771276 126.058167594519  
126.476866025397 151.645636946799 123.752109790056 137.16842164453  
135.726760147904 149.264997927508 139.285128128996 149.73250641246  
142.221542344035  
LOC100133205 124.484589975207 128.585911203394 116.007006375993  
124.35721327773 131.81975648701 127.763186950161 127.189310473419  
129.093864368842 135.24841020592 124.093412630817 104.03442843396  
116.476747183738  
LOC100133211 221.930333726352 196.860228537112 205.908052642222  
177.896726792666 175.679405338399 147.78847662997 166.97270256697  
133.900005368973 149.320667417893 184.775001243453 132.334666750573  
153.865702787334  
LOC100133213 141.108383815109 136.346472365382 138.483436753942  
131.292195405993 133.0349214478 138.250288796456 142.459230639888  
141.73248778957 146.166710487448 135.345616014558 134.000363767958  
138.455086062782  
LOC100133214 130.625825024195 126.247378598596 122.20752192519  
125.068362001087 141.666394024363 142.846100831941 113.726931741236  
128.186963138555 147.114698384834 128.714459781294 146.235832275574  
128.020911959353  
LOC100133220 168.763640193219 169.475714234887 174.09267813338  
158.915858403237 142.617474507282 144.944095553004 166.14867551435  
175.442400672352 159.716066475442 159.282348516052 176.704617691988  
166.506602328929

LOC100133222 135.274205069488 150.431052959951 140.274655651173  
131.406366653787 133.069347559741 126.416290818296 137.504147221623  
142.234554325754 142.906227759701 131.81975648701 146.16821907742  
124.883575464443  
LOC100133224 152.910433120981 159.317429821638 142.661504601445  
155.283003653612 167.751604259111 139.576261630082 166.447510782568  
150.399313562031 161.348562186667 129.185514320138 168.919352453652  
152.054874792646  
LOC100133232 177.549330396268 157.915292037378 170.931788192825  
168.674809329231 162.320894555337 173.87113073582 192.565733545715  
206.446584387595 175.585857393085 184.348894461271 174.448910958935  
202.819949307954  
LOC100133233 25558.9005130606 23878.0022344804 23190.7842325067  
23190.7842325067 8016.1652884418 25295.5071561111 14651.3379687477  
23190.7842325067 20048.679735668 13853.9715872573 20381.3859535625  
17568.5229948989  
LOC100133234 146.493927564338 153.97869518398 132.924341641217  
139.205887721493 150.536178574986 134.545983176488 135.29954024755  
142.160941592768 148.498352529396 140.408989128575 147.185378560761  
144.834448238435  
LOC100133237 132.033116673897 126.809252651352 133.504078347324  
137.206961927035 136.042982529628 136.678188851101 128.655549652719  
121.419301042072 127.239282651919 148.186698759452 146.453030317456  
134.978785580693  
LOC100133242 166.819234137224 143.188958538221 135.823975527501  
138.747964592012 151.522526161299 131.486917325752 157.410205523901  
152.001155788544 139.888008605915 147.768946831173 183.130891975122  
150.053948736789  
LOC100133243 128.91354251648 133.318665755015 134.648780131578  
119.608334527504 129.508990861362 111.886543737378 119.469328303796  
123.031945101045 132.553445658347 121.661141741782 148.927040248436  
132.70442458261  
LOC100133249 125.400741907779 134.725434838052 138.361149460093  
118.902823494379 133.412452607155 137.447578898882 134.034970203523  
137.384815877899 121.353233207209 140.451465188624 149.88598449818  
152.104170622003  
LOC100133263 147.826950636822 128.0366252162 128.440024330942  
126.511314417328 132.343179716416 147.550385608773 142.166650343224  
135.723554819107 133.459221120979 140.490023670841 142.876069462608  
135.056517225198  
LOC100133264 148.09868976776 151.397068235685 143.625188247966  
137.042097702398 151.641486303453 146.828099826146 148.424970450231  
141.709261143855 139.969155812688 152.435416154284 155.651798065702  
154.47187360425  
LOC100133265 130.960045345375 135.345616014558 149.383429241903  
140.689631427359 118.269780903508 148.284412570438 161.713311969291  
141.134173683836 142.652939807341 136.146383365709 123.547821639269  
144.760229351772  
LOC100133266 138.694701349366 131.397850276558 121.425298866613  
137.745103113588 143.865717051998 137.182323015758 138.058404474114  
143.031909545902 136.08040874432 129.606271613463 134.614988219821  
141.437891956239  
LOC100133270 146.57274511202 158.33974431499 140.571143847885  
146.743260100643 134.169645445889 144.848839185565 144.472969298036

136.180063437699 142.524413202292 138.913591568111 143.614075503775  
143.915205639368  
LOC100133272 133.43194756868 129.384531576943 125.362754088168  
128.163613794257 131.046822533615 126.766964875664 130.047353911148  
143.629760301493 123.807693112932 113.989682635964 119.349376960211  
132.486311240725  
LOC100133273 16974.4822983201 18665.5217411582 14073.4649333964  
16480.781374867 10836.7380675792 12493.2940668467 13902.1067272762  
9016.04641569485 12577.0915543468 11432.8213906428 15924.2167735021  
15561.8923517816  
LOC100133275 115.371180170291 125.848597767733 137.587917564413  
129.703791330416 132.103084472404 119.787925356307 132.122273848715  
132.213890220705 123.527903217158 125.470172259885 125.241484840139  
120.497796762933  
LOC100133276 105.583474813289 123.875478428652 117.710502693638  
119.475462713424 114.41737808857 119.663182347566 123.865424155099  
129.236471271181 121.350491314441 113.822580779824 115.507474401239  
129.779076484273  
LOC100133277 338.46332239699 425.59810308048 387.827718022473  
335.790909130243 188.7348696188 344.128576341892 396.781827940009  
300.094509257518 299.669394721682 431.304147578425 598.449359425056  
294.808980631295  
LOC100133280 139.013404849037 135.817028661429 142.456527359961  
162.351212914573 141.125248464806 136.029898048127 124.892438890234  
150.536178574986 143.689257983705 121.084348994747 134.339535632463  
133.315888375614  
LOC100133283 143.999000471746 135.670409501435 144.490452173336  
124.513891912986 134.69274746407 137.368211928541 138.553151063218  
132.383542877819 128.119556520151 125.9888344762 125.154784284706  
132.608622131443  
LOC100133284 160.48993837044 132.294365151614 141.515788643986  
160.293522619371 142.728311130348 137.593577427321 141.715307041887  
130.408519735001 135.822022526034 130.068063785009 154.916023131856  
145.414563914801  
LOC100133286 152.244018820259 139.358218798638 137.760712896718  
139.570313872946 150.70383460714 141.860850603561 135.041687549769  
134.412129843957 145.669033804967 140.271557921345 139.783725419023  
138.576978828316  
LOC100133288 156.84104238878 172.827288328708 140.539606951892  
168.720694813918 190.843795579234 170.4583554058 164.615113709166  
175.28261759639 159.615233521257 150.685245572093 148.744599622165  
150.198869833614  
LOC100133293 125.631073476381 130.718729445329 132.795064859079  
134.94189148503 130.965418847276 131.688038068545 134.128061214081  
129.867246424399 140.765231611948 139.034940762344 133.357385559881  
135.613240463445  
LOC100133298 638.77182631975 575.386048896223 526.970555181851  
596.54904286299 194.488249052694 482.466736153026 488.57622466019  
465.102234374389 347.3483417873 412.736636437651 734.71562355687  
341.819090221654  
LOC100133301 136.068644730893 126.614876404146 119.06600048679  
134.330234316896 133.190147746722 113.22850386845 133.720904256137  
121.531401500498 114.574362093931 133.773427881651 135.338077911839  
122.508761687823

LOC100133304 127.277128410056 138.106499370074 133.165893710176  
116.007006375993 135.200049257744 118.731960910224 121.730973193225  
136.285410546751 112.534864678892 127.442587366678 108.21185649774  
124.541257225826  
LOC100133308 154.539367933684 161.618479762188 161.112906953532  
152.407614042236 155.917655560227 161.799743586569 159.52147764862  
149.821848101995 150.642465826166 146.345451252228 158.384505840662  
168.310680227156  
LOC100133311 120.447140228396 125.789509802098 125.410876867635  
126.88066987372 123.781002620866 126.319103548711 124.632373951797  
127.424848301217 133.53523683945 129.842252702648 125.486324819682  
131.750053934548  
LOC100133312 160.096507818256 152.215146681655 162.308297940279  
155.535222310709 134.996443685544 174.898012759712 133.026094667212  
130.12032144763 133.689255383855 138.773042747912 145.539731152955  
138.386391726042  
LOC100133313 125.350567304651 136.705326991088 124.119104345119  
128.608401533371 125.301602026407 130.013085255256 120.507930710099  
130.528198937596 120.003095000297 124.439917584199 126.3539479619  
143.219722736891  
LOC100133315 147.500009766324 142.153830345183 148.134642821094  
156.351734527745 151.714420758741 145.468654174037 141.332402615602  
159.016247993816 143.868962478182 141.344034069373 142.192934622228  
146.920496801962  
LOC100133328 461.822629852953 530.561387049511 436.155731212592  
623.68308750251 935.784743413185 455.124190541055 742.517302567436  
707.715412321304 748.015452242839 401.631377313065 458.282682131641  
1162.8644618472  
LOC100133329 198.753297290444 193.813717161291 186.021181691517  
169.815053752464 281.846246549202 197.775397831129 347.812754957414  
221.297127685676 203.563098303937 246.061496821699 309.155070674445  
282.963958072528  
LOC100133331 126.17342715006 110.510191137073 137.320792454356  
118.749046585251 126.222105816959 119.249084967945 123.02546895475  
123.420635380886 126.137627769256 123.940632366675 121.734873711651  
128.341887728118  
LOC100133333 126.828097770667 142.199182392836 147.738146185884  
122.777544465711 137.386308389265 125.653011880654 136.120813399579  
129.372522073479 125.063596569451 123.935072913078 139.303747021408  
121.973581817041  
LOC100133348 153.255318944823 144.917911601441 127.247764390727  
140.593510265137 145.034179171835 137.132095345234 148.162914253981  
153.860039535598 138.064951932825 142.876069462608 153.616692588396  
139.932849289354  
LOC100133362 114.711310011993 126.129564039673 131.566892082703  
130.847215795313 116.268259618103 127.669334230458 131.782007636511  
139.324006489527 124.650711299942 125.139029579691 133.229571269367  
126.124937863679  
LOC100133372 1450.44557173645 1118.28423222707 2572.01353724341  
816.266384662324 766.176882605175 2947.51998516453 4377.59943975549  
5240.40795364202 3301.98381607571 3474.0924656878 2084.44431604433  
4965.25728333142  
LOC100133373 127.977782260866 120.827732270626 119.530214079037  
142.039943511086 148.302775746627 121.728711587014 128.675527226161

128.643539098937 122.685360126599 128.158605637751 137.408247668043  
133.378374710498  
LOC100133377 135.508025612102 124.530660958725 126.84966022925  
118.625070307695 125.637138636558 126.162713269943 119.29304762171  
118.122186617611 110.942138645171 134.474466007553 156.671252606074  
130.088408942008  
LOC100133390 317.163768837813 253.385592447339 299.33156125224  
269.567704345075 454.235121917464 307.363302726074 336.067655676466  
314.182403961681 277.256341592701 475.927798702033 398.075524915003  
346.862322263052  
LOC100133398 149.88598449818 118.091125088778 150.272153646712  
137.445344116574 130.953237161257 128.591292689996 145.656767712617  
149.964827055916 147.581827861592 146.97334315047 138.496366637658  
176.008711524598  
LOC100133401 126.158204790885 144.48495176385 141.304791640723  
120.07404952486 144.008961720971 144.750407738866 127.776112651456  
149.317146997809 131.146604635155 139.574895021783 159.196987090991  
145.081468030567  
LOC100133402 146.052153515494 143.722135315998 146.151639797173  
148.022287939066 159.688862680139 140.56526023628 145.858537779106  
147.958483355783 159.213940274232 153.893753448473 147.598602877625  
143.389499905891  
LOC100133403 128.671626815639 122.089332300031 133.780423932326  
124.313901870563 121.094060100325 123.446714388901 126.640141760199  
118.470400686096 123.403099206878 119.480037559953 126.355699811531  
133.389930962407  
LOC100133404 115.101971719657 115.463150857002 121.099290122973  
122.333765477428 113.78644620959 129.469949305913 113.334665910428  
116.844361858869 113.370762349233 116.858439910319 113.905364405553  
119.83679981791  
LOC100133405 119.539713878832 117.380281099932 125.055545087871  
127.527378949803 122.953869661977 127.195619567384 122.716563069312  
132.50676380992 120.235652849894 126.588382665802 107.02909139647  
127.05677680446  
LOC100133408 138.631273903053 137.581659385375 129.375772737722  
123.007103885415 142.945392802281 140.908882557383 132.158817539201  
139.515794685984 126.905235161069 130.586509996354 127.945144368504  
148.431101051574  
LOC100133409 171.896929562022 161.764411756848 157.590017103385  
155.752117896424 150.403702679274 164.634694036993 167.46432961654  
155.02097482487 165.602175302848 144.621077658674 146.42288214248  
147.766043861937  
LOC100133418 143.860092956392 130.642810886161 128.0366252162  
127.604087759266 132.781725233271 121.54835308632 144.165277164871  
133.917283965036 133.24611329193 135.627840788802 144.082452235267  
132.47010267527  
LOC100133419 117.199217938531 113.597215383696 135.227424713702  
120.948246352846 133.984078167807 124.455340203012 120.511896155396  
121.559477523123 122.817695619508 118.866073031304 138.882483367088  
131.060030943633  
LOC100133420 141.727639388452 145.09280363189 128.020911959353  
125.879198238067 134.489421865495 164.562302265155 141.73799456072  
212.933062534244 134.628807679002 152.883970401452 168.323141675824  
155.268650584431

LOC100133421 155.180238551547 148.534143255537 149.691340727994  
158.647814364392 135.341892490559 151.004738508108 153.941193682697  
151.073257114127 165.30072618497 148.120968141789 154.043604150962  
139.182623417751  
LOC100133422 139.870306695324 143.737021989907 138.573829193205  
135.857403020659 141.585172896047 135.131890100292 150.359906271672  
162.422173095045 141.035566928475 137.356539213081 125.269726165403  
144.016137459279  
LOC100133425 133.36168342199 131.050255325564 119.98864381644  
122.727385599754 109.859878974527 122.519746599387 114.226028611171  
126.037968297611 128.23910347716 139.380610974147 120.465934391246  
129.77374228644  
LOC100133430 159.384480972135 155.906054212876 161.359609192977  
172.502036705114 138.563471679129 211.059870865354 146.71164737466  
163.621658579697 163.039564280484 152.853860043701 149.202628825354  
142.570182389682  
LOC100133431 129.625046507677 130.977864137459 121.448671447499  
130.274288258599 138.521952850632 132.71633377967 124.174140125309  
133.682715540066 111.616460084889 129.061316880624 133.374199939042  
156.890299350025  
LOC100133432 137.161065320948 150.269618125943 131.051711775229  
147.769702509047 131.804952187685 142.485427762372 138.213742418402  
116.858439910319 128.914885412263 112.800733398209 118.438942370745  
142.785631812039  
LOC100133435 133.046435968561 146.54504551183 134.629996026323  
142.661504601445 157.512561489621 143.665359343809 157.915292037378  
159.624341769644 160.865949438448 148.644800418517 167.871703133182  
149.836491640473  
LOC100133438 139.334552725255 140.021640936288 154.645353009618  
144.528360135884 169.903088388196 150.72835989269 160.078122267577  
120.148189532583 135.527445907621 134.155655670103 136.180063437699  
160.78368986036  
LOC100133441 139.429008129291 127.993841618875 132.195666100325  
138.28745132277 148.8870854102 126.301178976594 129.544594679212  
138.648584951121 126.705446263769 120.122719226116 131.773304233929  
128.417571004317  
LOC100133443 152.026310884327 147.303997146992 142.91818218442  
132.092910274836 135.987450822209 135.421804561804 151.421099926743  
130.935922915902 143.488761023636 142.501655618849 122.201293962463  
136.653140842194  
LOC100133444 133.436057118148 113.919529047225 121.734873711651  
138.50032459657 123.271452939936 129.515390475589 136.864106181375  
126.148379057536 139.566124411099 134.907397302852 156.445294524594  
125.967294930279  
LOC100133445 121.599883734552 133.083877012766 127.781732819297  
128.69455713173 132.251093122058 130.326980619676 123.265810024678  
131.226834630025 127.640525889316 126.806537241253 130.440164900487  
122.82388804774  
LOC100133446 125.478878240473 125.704264033102 141.775100066311  
117.511162285879 125.549968985241 145.407517107023 133.305679931132  
125.840932898827 130.630504666374 137.949215501559 128.680762033378  
128.756818133357  
LOC100133447 132.442771000976 122.891946370542 156.333133322672  
143.488761023636 134.998632527009 147.289061374598 136.940275156257

130.204571771396 138.150616787218 140.174087049513 144.396774242135  
133.436057118148  
LOC100133450 138.72219653692 128.591292689996 133.850733997442  
125.826111950648 124.582577275358 129.754376995879 126.235567899449  
127.597601325212 136.62213567467 123.813766735115 127.876894098781  
114.234369421536  
LOC100133459 146.00443946108 143.695901115673 149.023962828426  
151.007812189859 157.099868633958 140.214475962177 136.421163870578  
125.897190440417 159.021304119265 140.586497829504 178.455966482206  
152.66513184083  
LOC100133463 145.686092190716 139.418394104487 155.587018319981  
140.668597897404 139.080142195118 174.107661206415 218.862705238592  
146.077082896858 137.182323015758 181.110403721353 134.655842662899  
153.059432055089  
LOC100133465 28193.3833726673 28930.8933474342 28930.8933474342  
27284.7333124039 21754.9904891312 27501.6698286039 28730.9248954575  
28344.4547971342 29868.1819370827 26906.6343314539 26082.8089351205  
28730.9248954575  
LOC100133468 142.822594215168 122.89752183991 141.847928424152  
139.718721422663 134.845202154446 126.76986764971 126.908123260394  
138.582427155109 134.298521475727 132.786500984297 125.674471551099  
124.501262458393  
LOC100133469 149.964827055916 132.714532888989 134.252621436701  
133.467092274663 183.443006525616 137.792150225149 169.598493862848  
149.758215028408 145.223648967115 158.213784310645 139.570313872946  
151.606932937644  
LOC100133472 111.457176315964 121.396223519559 136.113421708277  
140.350144438462 117.32734978289 130.718729445329 141.463324155943  
133.599098708818 120.721341479615 132.703729298102 107.91011371422  
115.995309578182  
LOC100133473 127.068313862984 158.598999414864 152.798927898416  
146.70594914192 200.017741240426 148.388093331273 165.870621884073  
162.716712951629 158.448557470725 151.758970249544 152.617507769717  
185.650862663633  
LOC100133477 903.144845227364 1010.73988405469 991.081498002429  
802.017244099902 2149.13404212591 1953.88327754946 2473.22803972431  
1352.14737073174 2558.91648313228 2162.46602203822 1276.14915305515  
1986.81354260292  
LOC100133478 198.979744266277 196.657475905674 205.495823410422  
225.61275910008 200.456087759904 199.662592246931 222.794196053536  
190.5930909277 186.244764337256 229.542259738438 200.890547965585  
198.066837203458  
LOC100133479 127.040027125755 128.599254558082 129.806104966617  
128.671626815639 128.221548195595 128.124456615525 128.116795372698  
132.671227062948 124.757229519631 126.640141760199 118.9803314875  
129.145457341484  
LOC100133482 152.921328522953 156.981921830638 141.169908353507  
152.741229289112 192.709473588165 136.446877465751 150.36160186175  
151.993651822163 139.931092990984 132.941478943584 185.650862663633  
189.403934838648  
LOC100133483 122.139832263188 106.450154495663 115.01682934323  
129.543069836687 127.859873416515 130.047353911148 115.896463925125  
119.618176258524 128.879953205511 124.403662787819 123.921903967493  
113.78644620959



LOC100133487 126.682913361149 117.662611650515 131.255028381669  
135.467354817201 117.449306773025 125.467668442298 120.263659727964  
128.640202262896 127.980776299586 123.168787977805 130.786835186349  
134.489421865495  
LOC100133489 155.041173289759 160.221974600577 143.151478156897  
147.868721324602 304.636618563775 277.000882284125 172.707821624271  
268.961643716282 229.373686092654 191.146276657897 228.125521373477  
269.567704345075  
LOC100133500 115.184395637553 123.051777473512 119.207503310618  
128.933672074497 142.195764444916 115.47716627378 127.633362302159  
134.694911833015 130.592061896237 130.892302357045 133.141683141696  
121.57069706238  
LOC100133501 121.114696251546 130.154756165574 138.651419539729  
133.602870982718 150.0674092434 126.492058851464 139.023486014525  
118.850495684547 129.093864368842 134.943746757751 129.151767489346  
139.039276904833  
LOC100133502 150.578023008958 141.518491890811 134.865577264797  
155.680330654611 139.746733428525 137.801899270172 137.725329029129  
144.421572284568 134.383024487323 142.726324048628 135.611239765082  
153.129649174869  
LOC100133503 156.381599544223 146.474228901408 174.441287575034  
153.062710222618 140.304810288752 155.471795004237 151.877035446575  
174.854570705 152.609055890822 167.612577768782 151.788278519057  
152.137669424501  
LOC100133506 132.989846726946 131.277646716635 131.185836673529  
130.471929699923 136.444883411968 130.352674121108 155.535222310709  
140.870849757111 118.663847950696 179.57046217355 131.210866639392  
141.657914155491  
LOC100133510 127.776112651456 122.751674866182 113.283359026655  
129.343440464729 124.905889975958 136.501159644992 121.297234504922  
133.360017767635 119.455615461113 134.57472034679 122.733870240098  
125.126100642395  
LOC100133511 192.095235288818 149.31422191209 180.561514455864  
144.808774137749 135.618562468776 136.176688025337 303.138041758745  
143.063345350253 161.139253742858 146.559502785264 143.596530151289  
153.332110179758  
LOC100133516 6810.50193989514 6203.08085790474 5521.74673982411  
5558.51089816921 759.534249620343 5265.74259211695 2240.33212242003  
3152.64817044581 2358.46955614953 1901.97972168836 3896.49785254733  
2423.84327263111  
LOC100133517 192.314484368435 177.752497164503 168.867373925372  
157.256812907353 223.474531516972 176.340265963032 249.129943906228  
206.650760711745 207.581907737176 156.834059922255 175.101284960252  
205.679992893049  
LOC100133519 127.325087202483 130.806223492605 131.148926523383  
130.473842500245 147.515088047628 127.187020441742 146.984888309556  
134.288349336742 128.523703756493 130.488972210403 128.623302491798  
130.520275539672  
LOC100133521 123.722744366103 109.898406285895 129.455347273068  
142.81401345781 120.26749529985 134.7552564959 117.837894438834  
150.922279808832 118.134614195753 120.01190102634 118.348153875356  
129.852833137493  
LOC100133528 110.448948495323 117.716094828779 121.681261213422  
129.55573546861 125.241484840139 129.263794008537 124.942701123337

122.615852682436 123.033673289024 119.218909479403 130.479845410716  
124.755684505209  
LOC100133536 131.097598299707 146.617853918109 141.725882943927  
150.672985449063 134.452938571435 126.211525910631 131.968781256081  
131.098301310768 134.155655670103 128.563180697606 142.56910547147  
138.560399473164  
LOC100133539 144.310362660942 136.969124414576 139.576261630082  
131.241878941749 132.796961054534 136.475652722007 148.567630572897  
126.494665743087 123.98384416057 150.494260282384 131.910285685889  
136.837430157894  
LOC100133542 136.406132339187 153.345834660643 140.667415746111  
168.269075560636 143.793506250131 226.640323471375 167.594414386475  
145.748174062159 141.393814611166 139.378915474473 154.574826922632  
142.372470063444  
LOC100133545 141.449119281888 138.166546598846 149.609501725707  
152.404186073033 131.658321123374 137.28323311107 134.883708339914  
132.526286141997 141.256915527472 145.748174062159 151.451443480833  
151.26137860684  
LOC100133551 141.793216038882 128.814967091609 135.638156623519  
139.864176113337 138.068164255305 145.821544099585 132.28010415054  
138.285325970867 132.906201428703 139.798940929781 110.858201415824  
132.083532534267  
LOC100133553 138.085536097137 128.316767833033 127.792241991414  
132.548259643258 130.628967781841 128.645334554749 137.365567527202  
123.798513338021 139.442091671938 115.208555742308 127.330523871944  
138.409284761652  
LOC100133554 146.484364264513 145.610045243277 157.960172706254  
145.431393142782 147.172440755724 151.698385134218 161.066226957782  
139.963969716386 164.708712337156 133.334314509183 140.383646018409  
131.911579676047  
LOC100133555 125.547399456656 115.646023142125 133.280418227922  
136.560048419149 148.158062155247 144.710613442383 142.783159341229  
135.427985445559 144.604714612091 113.274668934773 166.298554732581  
155.130745957603  
LOC100133556 115.485515429446 121.760488406107 109.613208767992  
125.416113646128 118.9428715545 105.132185249959 124.494727558127  
124.418295003824 110.17590675298 122.759905480504 103.691075663721  
132.059507616101  
LOC100133558 153.005366371425 147.452986308926 156.467759630936  
151.923356524322 151.663203772586 166.600109853461 150.642465826166  
148.598920567714 169.349922114861 160.628894266843 166.32555285213  
163.059196519365  
LOC100133563 115.766358387923 137.838096997956 133.074027423549  
132.908367372426 116.688949603376 136.90421956457 127.995790782392  
149.88598449818 134.30854633824 137.127587786536 148.776470607859  
127.887666721519  
LOC100133564 158.85003890975 136.208608369019 149.4401812  
148.47676851933 167.011846920792 133.143695166498 137.794858639838  
136.171728950893 139.730999352036 143.759171254761 114.44610607807  
150.479320779862  
LOC100133565 1597.53010317504 2307.82327595071 1521.61996270758  
2491.33490046283 6960.46610781696 1366.06309834426 2195.41077320434  
2076.51786803222 1289.56069670699 1995.6000523628 4579.62296570302  
1512.28202818467

LOC100133567 134.367115858307 133.67719550997 131.33321167357  
133.97321873161 135.281686411685 146.539196738195 148.993620368781  
149.322537247388 134.646131480502 140.338622198206 155.42165869714  
143.271346378958  
LOC100133568 143.470181156799 131.512174491572 145.641373616866  
131.095431530473 178.166289723365 137.614020921217 138.582427155109  
129.145457341484 141.622592268163 127.2369420721 130.521003571299  
133.94206203396  
LOC100133569 135.465076459043 146.97203173446 146.052153515494  
136.040524807653 140.378255168229 130.541449457342 144.807626228351  
141.332402615602 138.365589511693 128.055531184549 154.104321553472  
134.972933635542  
LOC100133572 131.913786256215 158.521812954982 188.981391266203  
138.980079440205 664.60530723006 245.811312606484 181.735072060023  
445.505512764045 290.184801898828 150.778292242313 202.691507273819  
218.08515867102  
LOC100133576 205.036081947168 164.347168837655 142.066903301882  
137.685725744573 145.889336010424 133.583297305219 137.872742675806  
131.275712196961 124.33863635868 118.000757530896 144.349602838518  
139.010652831798  
LOC100133577 121.057111457792 115.855948612544 128.176779923348  
133.892661981648 139.615706918035 131.404001006643 129.623601211364  
132.908367372426 132.504264154139 133.625358030199 127.849141499408  
123.625734357908  
LOC100133578 212.933062534244 210.085329463347 188.145154995617  
253.833756857339 202.909188070184 163.529157756197 136.923876486522  
162.18174589792 151.712097221291 149.949425756405 195.963361515546  
150.936747236094  
LOC100133580 127.123123583856 121.768195574022 126.450300907283  
130.477824552202 99.9173294438729 129.6505724783 116.0999658586  
132.620474788855 120.410307377977 122.405469833024 114.14858855653  
118.039780360151  
LOC100133581 145.039617860588 140.127379332918 136.612287212568  
122.410340121549 127.086470811408 133.239703270008 135.244303669342  
140.82351325907 132.767474034305 152.413389525982 144.617654961472  
137.869471689534  
LOC100133583 208.838523729744 225.31216514083 205.65398844108  
207.598754515294 409.282410265733 204.078331021637 405.469705787631  
837.023434916281 1401.67503392145 338.260976633501 599.735180191091  
351.665934915634  
LOC100133584 134.155655670103 126.734835642553 133.378374710498  
116.547306374097 132.148166773943 125.926774314737 128.282999719959  
118.034262386827 121.141432480683 114.774530966446 115.440152891339  
120.351217130679  
LOC100133585 129.636135486593 135.959893035019 145.407517107023  
147.696506705909 142.839077978518 149.548900791507 148.504996616452  
141.272049404557 160.707290343231 141.980728956046 154.395261192114  
147.369111678068  
LOC100133586 127.055165613236 125.055545087871 123.949411804458  
132.456945758174 120.925930409474 135.493053871272 137.644942697483  
126.793778645808 141.712693059287 128.0171233156 121.334882368464  
123.643292039274  
LOC100133588 129.369968549738 135.274205069488 132.584454429269  
138.409284761652 141.18490443471 130.321133400634 132.807755600683

128.994977935861 135.855243915966 130.441808139335 142.121399383259  
116.639787832302  
LOC100133591 144.129889080946 149.149858208397 143.373932371335  
136.829137120584 202.927700504034 141.746032519746 131.114995025516  
151.526337610068 136.342634691443 138.313519292093 140.146894533044  
133.932594124721  
LOC100133592 138.132390735567 115.995309578182 137.446745269821  
119.164791441052 119.666650919579 134.797624902585 138.611074796816  
126.635105491524 117.392898601408 120.252164075308 106.746545626069  
140.264060906597  
LOC100133596 138.921608664788 149.010477279209 120.406577236405  
132.774127230452 144.565926379402 124.533543270311 123.926293128246  
152.783534456473 140.714455864886 128.033383607545 135.020690381988  
123.463861015933  
LOC100133598 117.264555636952 132.780055030907 131.252368756892  
128.205022859019 109.851507510788 115.687997771921 126.620889938532  
119.308345676905 122.736882859231 122.900675062181 130.567443018832  
113.487357534546  
LOC100133599 141.836648910979 141.649911527714 140.730085305185  
131.173355686001 143.019052979243 144.031305845388 147.335403843539  
140.199334790854 143.160281902098 141.461435494985 130.222698914337  
138.220016828327  
LOC100133600 214.52087460757 230.749601687217 239.827648772906  
229.347135478142 205.428900832926 202.622747952763 243.159062832085  
206.77605957523 204.740183832461 253.186749111526 197.543089645432  
217.125327913156  
LOC100133602 121.231939494619 130.450930089722 141.259186690966  
133.056659202188 129.513590304528 139.157088843803 136.770515182612  
130.907879150229 137.276586668477 127.84589484404 144.950935800291  
131.638954862848  
LOC100133606 138.925802905636 154.670631900834 140.345652629553  
133.496922906874 148.618327213374 149.073650082048 145.662818023154  
152.990523860831 141.717466442384 140.898380345452 147.553953240464  
147.868721324602  
LOC100133607 28730.9248954575 28730.9248954575 28344.4547971342  
27667.4034204988 10170.8669218992 27844.5606756791 17324.7697569598  
23878.0022344804 26082.8089351205 19356.3155476146 15420.9668207676  
22543.625434682  
LOC100133609 151.65364467801 151.538112896642 173.204163917896  
146.57274511202 189.389457481768 206.340478393262 197.605208310432  
198.631354372924 168.618667871117 197.12840030662 181.261666651301  
145.601922576321  
LOC100133612 125.28279436853 125.593595066736 128.890685255595  
130.574019477669 118.393203921859 152.54039461337 131.521311288114  
128.488598467312 136.198583459346 145.393431956588 134.648780131578  
117.193620642373  
LOC100133616 135.328774183469 127.951403055054 132.340183565771  
129.001192144163 146.602252563413 141.73248778957 138.836422729663  
135.409613764459 124.058332474379 129.098408596418 117.442158626871  
135.5237675623  
LOC100133621 119.040642659337 145.404469340821 134.784568023655  
139.181131600753 134.005402534879 143.959910170676 136.786462547129  
134.637520371454 137.599810249536 136.051070946954 142.922549076496  
142.853399942089

LOC100133627 177.073245863872 175.395900648455 167.293320986716  
173.38031514498 157.912864169081 186.975609955892 194.413759761549  
174.560168983121 156.717086120926 189.2642795052 162.447903830131  
162.900556089071  
LOC100133629 120.727504500018 131.423918669689 130.675745275992  
116.828333047376 125.107483348755 122.813441348997 120.594874820899  
118.011195631598 127.2369420721 119.355650892262 113.38168751499  
136.049167597016  
LOC100133632 137.157492354617 117.034228068173 134.483162806498  
129.165440930558 129.83316008718 135.880955433228 151.382199195953  
131.188208693139 139.111604268732 142.999526950651 128.659393756477  
133.627890571828  
LOC100133634 137.215025712057 146.550421651378 127.800634041606  
110.518806964366 152.452246595937 129.692578787988 139.938739652347  
130.444766583917 128.445065383646 129.179188863839 137.395895014456  
144.084441938143  
LOC100133636 154.826710617351 141.698329968978 152.67564185705  
153.114065147266 132.692027897739 117.442158626871 134.546975273631  
131.907246423067 149.99203906203 144.741063866547 147.922706629104  
143.899201949317  
LOC100133638 150.399313562031 139.969155812688 137.971108694323  
153.318678468245 149.541917326637 137.893630842968 137.85618381155  
132.439176846818 134.062423178775 143.421288665418 138.739176678465  
155.388752614336  
LOC100133639 138.414916506716 121.239461514704 126.730314982553  
117.15886922795 118.176124626025 131.785053503951 129.740166478951  
129.34905533265 135.689889081912 140.044536042073 153.966815534288  
136.029898048127  
LOC100133641 121.778756075848 117.172431931323 135.223957492606  
125.199837162105 125.547399456656 127.182067293944 138.231715814115  
136.84840505336 141.215542377796 128.434301921433 143.583650664594  
134.872654203921  
LOC100133649 31402.6950316226 26906.6343314539 27284.7333124039  
26719.5528617739 14592.6308255978 26906.6343314539 18760.3823237058  
25808.3502428915 26010.7684336005 18501.379301537 26719.5528617739  
23053.5660790052  
LOC100133654 122.007909794484 143.652009342522 151.503307004675  
145.636906369786 127.464485396039 135.954961086609 120.897228878841  
119.651470884046 137.370670726978 138.405215507471 137.378528742953  
141.283042601932  
LOC100133655 133.180554954396 116.428373788459 131.190238038695  
130.701801496564 129.564482772168 134.498439965049 131.275712196961  
123.470830748348 127.05677680446 140.061045085545 132.233396667074  
124.69564501518  
LOC100133659 139.097764484641 157.879839844491 150.75878820215  
140.602170750673 136.18698517676 146.892065987724 145.235087732482  
146.165632086981 155.335777680002 139.295597388725 153.092864798642  
151.744902566627  
LOC100133661 143.477670915091 136.543603346919 131.298129667973  
141.683298500736 136.413745926388 128.539969915702 131.300342835696  
133.363883851093 129.806104966617 150.564099989221 136.089888639987  
125.342580368417  
LOC100133662 1307.19490564658 892.868661511516 2050.34883263932  
744.225336494008 1260.50387106816 121.559477523123 3706.41283595794

1632.07671492041 1916.46158204806 342.037040881785 3000.46298223166  
4124.03779111916  
LOC100133666 163.991378703958 167.575968906119 157.675974692761  
173.189465201573 157.600193849783 157.546123603057 163.066051106092  
179.841665686703 145.837985729893 145.114382599368 173.611295051326  
162.453586139402  
LOC100133667 137.778033050658 131.036225888592 135.348086420636  
135.144908040903 139.693261291326 139.717662557602 140.477307701027  
125.995374488153 136.598215718877 141.340452225686 152.199095472082  
140.510889880872  
LOC100133669 153.02549014611 129.767878283811 137.258429777402  
130.444766583917 145.147428314514 131.460388562433 143.922878410438  
133.985582992986 153.389279691913 161.134322621805 150.056508971921  
134.637520371454  
LOC100133672 119.330439721904 150.821697835175 143.451080466172  
135.036576196425 134.928967716193 131.451173463405 138.167369090026  
140.8630233163 132.772085211553 136.295523520203 131.38881091292  
137.96452133771  
LOC100133673 167.941671074236 167.912321820083 157.006278815282  
196.345065354654 167.993851183401 160.272632590118 176.725347194807  
195.033792280119 171.035391211596 148.956326355381 144.152325539824  
155.722314592388  
LOC100133678 346.303862540751 303.608918161742 199.813528853649  
292.802762636861 208.095384605737 474.917507160629 422.973606694449  
1539.80266129509 3282.73711809465 424.285848583977 448.767690095033  
483.845891531326  
LOC100133683 139.593950393555 129.46430369977 151.966771042034  
159.788143847569 152.038902807701 152.095584118603 146.21362402936  
137.460936879873 144.690880401712 138.476953078729 129.645982978155  
137.992477770842  
LOC100133686 141.819762045169 158.125437004665 142.444072809204  
143.694412162756 131.583841535781 138.580264357741 142.652939807341  
151.171716392043 129.413729619216 147.117286738537 144.214589452164  
142.95001632948  
LOC100133690 151.758970249544 126.635105491524 136.760382409185  
120.831070822199 129.45936538019 131.800533523123 130.776213987522  
119.355650892262 135.925813154268 129.878330410179 115.778736387131  
138.383183017683  
LOC100133691 138.461113585594 128.052753068991 130.529367177452  
135.085039737228 127.876894098781 116.268259618103 135.934976183762  
127.26820735867 144.968459820523 124.443643568527 132.472505035111  
137.264095379365  
LOC100133692 731.848844821402 677.265576269103 553.123179808258  
610.915977337787 265.028512407839 327.811191081135 304.111808763793  
384.051170099325 370.301819403832 322.099431638246 251.307020289291  
334.056545911557  
LOC100133695 155.98413216883 155.893018702615 151.081339000609  
140.028169667777 154.143331594812 152.137669424501 158.712241098927  
160.227729155903 153.033582154882 157.061602966797 145.793794049657  
155.971045744096  
LOC100133696 135.16316100494 117.513523498725 134.673861365626  
123.463861015933 124.809739073169 136.657107363796 129.813090345837  
128.356453959987 114.798573331978 125.526744092256 126.103561089901  
143.978912435831

LOC100133697 220.242344043437 229.567444213626 210.103974340881  
207.467591256549 259.625943627223 265.754141836026 250.30085097088  
228.588693548447 213.145460679531 329.926864732606 382.744523022686  
235.291035302211

LOC100133714 131.811011266156 131.773304233929 131.104534164394  
131.404001006643 131.570358580547 136.614620534169 143.103779196037  
126.946305561543 119.135701239571 124.334450753704 131.828902700702  
136.560048419149

LOC100133716 150.267298097687 144.018198451676 147.576533768761  
178.270849389719 128.959487155628 124.079109459437 126.115828232308  
132.329420620954 138.653518319657 123.798513338021 134.952584272187  
131.563719927798

LOC100133718 126.468167800414 123.09149124559 118.410091682499  
132.158817539201 133.514843630183 120.682485578097 124.210840121525  
141.174971007547 120.35956894661 109.886197655915 121.014538677616  
112.264005988662

LOC100133719 140.655002540298 150.922279808832 142.029398672217  
155.449724554217 153.191840013692 170.731358903019 174.471304281502  
154.21623304309 171.537040561599 178.854873582873 140.699287635171  
164.777719508421

LOC100133724 154.350107666084 165.890492422031 159.706443636973  
139.573371281569 155.648782851696 150.35767254363 157.768329108254  
151.712097221291 157.565633456909 138.182987173284 160.019067307733  
143.980608339892

LOC100133728 114.598636725763 127.723052839953 131.18368961955  
150.513804134588 129.121598974852 124.145492642453 111.788481822686  
131.719227272527 125.803854387512 145.354740501503 116.321559000405  
131.007779278656

LOC100133729 120.85013281321 103.240215392215 123.791515424464  
131.215202712283 106.204350278634 125.995374488153 115.855948612544  
123.291258843371 115.863243613121 117.149781437983 107.07609243233  
120.015436934157

LOC100133732 133.794524856909 126.205931638442 135.705904966172  
143.548858367002 135.36523178082 125.707228291312 126.853028093579  
125.013839352291 127.494672751434 124.300285428221 120.711150688559  
149.520911664673

LOC100133737 132.251093122058 122.216479103528 133.120273569229  
130.495294897642 122.909152047474 131.164778405297 122.885879294532  
128.303046695142 136.159825652148 137.27827836407 129.01094835739  
131.430921437192

LOC100133739 121.48867035121 121.632494500096 141.645906784244  
157.390513637267 132.348603553752 145.544996009633 127.047679628867  
128.460750472464 124.542879928448 117.937856116492 129.295956874012  
127.349190705235

LOC100133740 139.395743826525 125.398875527365 133.778595695007  
133.504078347324 140.506191791073 146.318052064937 143.338628928675  
144.986655090517 140.74208906156 129.417232210341 148.666854582112  
132.952355710395

LOC100133741 169.744100665038 164.74234322574 159.06002608158  
152.315376022976 142.394644827434 155.502363062633 148.73620012231  
150.300108097623 142.617474507282 141.134173683836 145.948772123142  
145.146797807275

LOC100133744 124.095340478326 123.327238774943 127.749992538985  
127.617449871137 139.092075947067 136.837430157894 145.324499089416

158.23884088767 126.022145004164 133.775716376056 159.678281513591  
143.787766055379  
LOC100133745 153.616692588396 162.233096422572 142.963036923104  
147.533986324788 159.114325745692 160.19942770666 168.389069732474  
150.880818951088 155.405519023053 160.496585125233 164.82904652634  
139.694950277714  
LOC100133747 134.582098893327 131.704192327287 141.834582245454  
131.566892082703 177.039190810529 144.136328845967 126.026938396257  
142.336164180947 150.939877261936 123.61956613951 160.592404712197  
138.197500836501  
LOC100133752 127.975441922402 127.863583325139 128.729687597908  
136.240503841228 137.287492574396 126.856038484436 139.311816781874  
111.09179957013 139.15175079191 135.425518707018 117.893918180502  
123.56917054142  
LOC100133756 124.153063838817 127.482662155082 133.463464118897  
126.442999559539 121.543207264598 172.980441569522 127.849141499408  
132.971844952199 136.843164021899 135.304167695152 107.841100741858  
131.477589792769  
LOC100133758 138.828562311512 122.262664384198 127.7962242731  
144.998415908498 146.488402397597 127.517446456116 136.5680632044  
132.329420620954 143.846734516914 142.281657284178 142.900756181761  
144.339819009283  
LOC100133760 192.709473588165 214.162670073541 130.51901676405  
218.393783552484 198.760049629983 177.415756020166 249.489170536758  
172.80265044721 156.102877632001 273.984715370774 293.925995360234  
339.379250332987  
LOC100133761 156.477249817844 153.02127620577 135.304167695152  
152.099431258333 148.844916975586 148.908758741034 151.698385134218  
141.360125377949 138.83304645915 154.648806105422 146.188193301627  
147.565485281003  
LOC100133766 111.848472437543 128.224742304889 126.549876718792  
117.976107125982 120.311723366684 131.358797630945 127.226937898225  
128.748663215466 124.28033876033 129.257947818865 116.969799327195  
136.491140756702  
LOC100133767 119.905127545336 104.442909315944 133.63022526522  
130.266601299194 124.225294244156 124.405905157157 122.046901607713  
102.786517901308 127.427014611349 133.095245865663 110.988514718572  
119.261305304165  
LOC100133769 147.677900030844 142.090009728666 142.367003292264  
154.954906872501 131.7646616214 162.609829456486 145.549126188292  
158.573561336755 135.573170189235 154.01988200569 150.874014332213  
138.152641686151  
LOC100133770 129.920586100555 143.631345956176 138.358404420064  
127.015086299437 134.70636200986 148.713747597311 149.908997158341  
145.329128512407 149.457761307441 136.85323853426 173.142436025281  
156.022967076728  
LOC100133771 141.786962606666 137.070326499918 148.175206259619  
120.220156455352 141.67550758321 137.536053775531 141.178668371671  
143.301399292539 160.573172150801 160.618586213311 140.985432994867  
148.956326355381  
LOC100133772 12749.804597566 12368.1423473066 12577.0915543468  
11360.2921551609 3140.51157972795 10930.6720259935 6021.68798558746  
8633.71708020651 7104.65816621275 4800.99572384569 7753.61594300904  
7717.01422791837



LOC100133773 172.942666836182 176.579096613849 146.474228901408  
162.841318222066 150.48236051337 171.677654793775 152.898148619937  
149.722442994599 125.822346524903 159.824012085212 158.531514776098  
198.795112039249  
LOC100133774 127.995790782392 140.792400101142 133.249792744053  
146.031321571566 127.05677680446 130.820415610578 129.236471271181  
132.832556359483 116.373841472226 121.613684281664 133.500750738061  
130.253372129786  
LOC100133775 133.753999983813 136.198583459346 146.165632086981  
132.131378074469 124.606795061928 143.692305478191 137.990806386929  
130.41429837092 128.647790058795 131.204616536341 131.141668650877  
134.595090783504  
LOC100133777 130.797498958616 131.690417323838 149.166635189875  
141.099781722697 164.942652212218 139.868714816245 131.956481591804  
142.924854393401 139.941724115063 153.426409060413 111.788481822686  
138.775095929764  
LOC100133779 134.811625739766 144.765051967884 136.295523520203  
132.865704994046 123.835583753941 138.033668840392 136.01865173754  
144.983871250488 133.554822920765 129.4807689399 135.648906382608  
135.993598471576  
LOC100133788 120.428171428188 134.919972250554 134.585762409782  
126.191057198995 123.190757763412 137.561067667054 145.311964807443  
124.494727558127 119.418866166776 136.520811697544 132.551989498706  
131.926504315744  
LOC100133790 146.738411200698 136.430232926793 139.39112068213  
132.829401072883 126.782805974059 128.318545300038 139.628966306048  
126.3539479619 130.179742057015 135.573170189235 121.571579572958  
127.995790782392  
LOC100133795 162.212442593001 183.04531185589 220.010399552402  
154.125702106953 165.186696781985 339.917319653382 273.864293250688  
298.301504581296 207.467591256549 227.736106796551 187.494677180331  
284.195575802966  
LOC100133797 151.815211341628 167.040031488406 123.498540254464  
120.402155551818 113.61408868553 153.869144282319 152.393260140571  
150.989202517615 147.85133493803 146.486480663438 129.825824640378  
162.403942351933  
LOC100133800 551.823767223086 587.893636997642 418.574045635945  
435.901794650816 212.607094117882 535.354724252178 472.961857076681  
453.17378995737 310.142754559096 343.666488527549 302.809011218879  
451.621888586656  
LOC100133802 139.687574432387 130.249430984172 133.322752419739  
131.717160947964 136.227202534196 129.808590871788 152.404186073033  
137.27048486892 135.56878810365 150.985061659285 127.116637906391  
157.490138425943  
LOC100133803 202.061887608293 206.340478393262 224.466829629468  
199.88618355278 219.564603776774 259.979459472217 251.20133703465  
232.590542016298 280.798003990849 242.471259857978 273.835371304535  
295.935625475189  
LOC100133811 129.498275235032 144.544001385895 135.792966926642  
133.980792743661 149.786445079456 124.809739073169 145.371273337639  
149.335288055732 133.111791289725 128.599254558082 124.624046191085  
132.033116673897  
LOC100133812 14755.8570847826 13902.1067272762 16077.1585881362  
12406.7143043992 19434.8698477145 14798.1358474998 18501.379301537

16818.1954169657 16480.781374867 13142.4763966378 22543.625434682  
18501.379301537  
LOC100133814 130.221351857959 118.461037435114 115.631414599991  
129.397378057767 124.042153387391 122.010855318111 122.251178920649  
120.752194675024 125.848597767733 120.862516074358 128.858923585925  
126.199219102601  
LOC100133815 132.14412512622 151.020903727566 124.42974326791  
129.489867764242 137.864637728155 125.259164818744 137.376602654929  
134.013748718539 133.771691580031 127.543729713161 135.493053871272  
134.394503574535  
LOC100133817 119.373287155621 123.344450694117 124.469415593643  
131.176905383789 110.838647534175 123.518170356322 132.751406897891  
123.150299476109 122.746185691827 124.134916773123 113.125349503734  
127.966883271903  
LOC100133823 264.604297630839 299.33156125224 277.026538720417  
313.18989508207 311.337303524912 254.315783394932 228.926077117474  
317.061815822659 308.281798808746 241.251507026982 596.246316033079  
252.249994170536  
LOC100133825 142.688809469455 133.143695166498 134.111348656261  
142.266177608209 141.5311434224 142.307520290692 140.028169667777  
139.034940762344 139.420025842675 142.978818998012 146.554017952963  
137.066799877341  
LOC100133827 122.038534506506 126.418295908353 140.860339862967  
125.794788766462 138.609972011765 123.852299272249 128.499303407596  
141.855655600443 126.823886603295 133.82390829608 123.716400094852  
117.634514818946  
LOC100133829 120.78129870199 129.603952706231 122.624828884731  
135.301844382418 136.931476050688 130.105800581241 135.448170440824  
129.179188863839 143.984222627806 122.80785489118 155.043017644694  
142.276853170778  
LOC100133835 130.362378233288 133.713275043978 141.037217406848  
130.557209560361 115.118170902045 130.894384800009 140.096717188376  
132.103084472404 120.447140228396 128.966514855818 130.457981404612  
131.545287070888  
LOC100133836 166.422360032182 159.835577644136 221.359331823286  
153.82440233533 147.351826045609 183.735201125198 180.1204762193  
163.788418732315 205.546628064296 259.277693314055 178.262619516994  
245.811312606484  
LOC100133839 135.328774183469 152.514455788489 154.248226423862  
154.637740117457 158.495606141226 153.600132368924 158.356964958885  
144.375109087466 125.522498880785 141.772724512502 141.360125377949  
149.636887782574  
LOC100133840 385.750371084 236.292053621233 582.642500194997  
212.591357254196 180.15338103 1827.03179366146 484.028175202673  
743.510369438587 497.110852407681 558.934004505074 300.443499140896  
630.176145684641  
LOC100133842 127.314089756429 135.511902377219 127.352386363217  
132.623563631011 150.670783991982 144.664600892248 142.071492722749  
131.288785100733 139.535490288426 132.154131623051 126.853028093579  
127.187020441742  
LOC100133844 131.540436531741 132.795064859079 112.41270361848  
122.480000773859 127.139903623331 117.279162323013 118.724348027528  
131.551085224112 125.732389000341 126.479964493857 146.34029698108  
133.74051512341

LOC100133845 139.625635881693 125.429085234515 133.15144076432  
131.938898032483 148.332750352364 140.646946425036 131.604121223902  
151.134466830828 139.490103923544 140.49145570631 149.810655120216  
144.705559511075  
LOC100133846 128.150801169886 130.539632182729 134.501410126169  
144.195705502443 119.29304762171 143.305848051593 146.635140441079  
126.828097770667 130.860938463815 142.217762896203 139.843416673512  
133.061016674211  
LOC100133847 115.933805625814 140.719388544476 143.16930809425  
137.478556403046 133.228074579352 125.809027384863 123.494412056415  
116.142650095476 118.697969266426 127.478474451121 114.182798672347  
126.55925846644  
LOC100133851 162.085813676373 146.035731780312 143.431389389919  
140.174087049513 156.798431595608 144.240470871638 152.832573288735  
163.726898336284 151.979221390032 148.000706956532 163.575300618666  
150.896076207161  
LOC100133854 154.615097099186 153.114065147266 152.821735300697  
137.120973494952 149.119815471009 157.341422939225 147.720061897962  
145.566861062922 149.597396040729 148.627264102939 130.12032144763  
143.993611400272  
LOC100133855 140.427188241455 125.065813262416 145.418696807842  
138.89579816122 146.112388101621 137.240806191881 127.831950458406  
136.161633283029 144.421572284568 145.280485286937 145.971656491073  
149.138678142327  
LOC100133859 138.905709709063 125.902015309754 133.731500722599  
132.363645381743 133.792673129743 136.899405404096 138.60849268758  
137.404525565336 124.408996713299 130.212422459695 116.472796471694  
136.572645314012  
LOC100133860 140.323425587628 153.22516060649 137.694556514044  
133.917283965036 138.916830356763 149.860490620507 133.686850910378  
134.565199667396 127.729912390394 134.528971384442 120.688909943167  
138.778496466408  
LOC100133863 134.493062923443 120.024235522682 123.955819747616  
131.836036241459 127.226937898225 121.248923222807 132.562090247233  
122.136861827049 124.277983696239 124.910390240995 115.257318321108  
124.452631766045  
LOC100133866 257.100909006193 191.207048581306 243.336550161566  
191.284275676256 138.1693725329 134.821778017915 156.073428882485  
139.244051199144 172.909795209733 130.24527031028 209.568066932367  
145.090639086338  
LOC100133875 142.64161581553 137.488665424434 121.952255635669  
135.911903336544 140.163936299053 133.617501101389 130.390722272955  
140.885915460425 147.701092466105 118.9952230535 133.895547281411  
142.427198128376  
LOC100133876 27501.6698286039 28530.8435957612 28530.8435957612  
28730.9248954575 19661.6741558107 28930.8933474342 23053.5660790052  
27844.5606756791 27844.5606756791 29532.7890259497 17324.7697569598  
23878.0022344804  
LOC100133881 137.307786147787 146.992289167283 142.194507957661  
142.643027992419 142.358754646258 133.957160768065 125.879198238067  
144.89403947454 144.331409179705 133.976997391944 132.596941171401  
145.731800133702  
LOC100133882 141.209958892647 149.764447995426 131.866599432062  
128.872496485403 154.104321553472 133.192757350144 128.16147857336

148.47676851933 138.634814756987 158.058346079359 129.661073814998  
150.734560844391  
LOC100133885 152.812142230375 153.178934750919 181.735072060023  
144.964084792568 145.96012463103 139.111604268732 159.099495828517  
139.850892808592 139.82050388626 146.351622020606 150.203281104753  
155.072752529178  
LOC100133887 142.62707251786 137.395895014456 126.316613675316  
130.217791888656 137.170666175895 197.326259802349 130.247700541716  
137.858371717399 142.234554325754 136.609461559853 142.405569257901  
139.282741110499  
LOC100133888 258.075566417241 241.134385745554 209.487240895674  
213.93763684072 285.258824662946 212.591357254196 233.690524419327  
203.816305810343 309.423768054614 292.366934378643 204.999796322451  
293.873921048642  
LOC100133889 123.522738813733 110.392617179163 119.720132373023  
121.522634801124 124.288632450364 129.320210774045 136.146383365709  
140.336479395866 128.011387527117 113.773684331489 113.214390213004  
127.588907178652  
LOC100133890 123.566522075398 135.501192996538 130.314247368361  
133.847494826806 134.23001942966 121.88070274109 146.84891312893  
129.55573546861 145.185902174023 115.858924428037 134.966883985611  
143.812863334832  
LOC100133892 123.178049594968 133.74051512341 131.99470265134  
133.913578037255 138.708304921088 129.031338314175 136.635413632094  
123.591078216224 132.385096888962 132.423043364573 158.089922688997  
130.882463936853  
LOC100133893 147.172440755724 137.170666175895 127.718341524417  
131.237720549768 128.056668224393 122.94937342991 135.164117176127  
131.688038068545 131.527148910356 140.079516848788 123.889427666612  
134.646131480502  
LOC100133895 469.540421642173 317.457588721567 406.816482069141  
376.867306473426 129.665507668047 118.825948323992 117.436119533535  
121.188761627967 119.261305304165 118.694037994926 111.127245394321  
115.384304932365  
LOC100133896 148.107004870598 136.916286605302 141.236939351298  
151.252137441251 137.100207190052 129.180990946063 138.838795320713  
137.672798701643 131.80257432775 135.1951749488 124.853659050216  
128.42287610189  
LOC100133898 126.978144285534 132.158817539201 130.808911605271  
156.151075965844 164.601022396674 122.5651974076 136.874135348635  
155.569733738768 145.654559623732 125.840932898827 141.226901872221  
149.842326869644  
LOC100133899 135.598709185334 133.090474303043 147.494937826597  
137.884051774657 131.796941315992 140.641308444844 133.621325902558  
138.173547382901 142.830950036054 145.944809232038 117.404906698431  
142.334338599752  
LOC100133904 129.785078660064 133.577939901847 133.096984735092  
145.27890423835 134.978785580693 144.603401904061 124.516264338772  
128.756818133357 133.957160768065 133.913578037255 140.77762487941  
144.0534341937  
LOC100133905 139.499652059557 130.870198462514 143.051871940423  
130.582210755516 135.97450897438 140.648918459179 127.993841618875  
128.274326990056 137.458274418943 118.663847950696 122.204249636472  
138.624689897665

LOC100133908 142.206016362038 126.749878702933 126.228513847262  
125.304045138994 143.0235772247 125.749024723383 138.609972011765  
139.172437503442 130.937742379689 130.207485841284 133.191797029676  
133.233826283531  
LOC100133910 132.881693683384 137.350851760173 116.742079521048  
120.577995272053 138.523677181131 133.63668145135 136.71278398686  
124.138036007288 133.480196904786 127.164076119599 121.888886996534  
131.232417654705  
LOC100133911 141.954467306745 126.386738502885 133.82548013342  
114.093935026467 130.222698914337 133.379872189405 127.597601325212  
135.722321387765 126.056493244568 137.842375545994 116.416896654975  
137.248465324584  
LOC100133913 144.48495176385 133.645044060866 145.365935017728  
148.649619242172 140.552143090027 158.8246699332 165.686655824416  
181.193963616037 170.306241656131 151.702809524494 143.429394097222  
165.558963147657  
LOC100133915 113.451566510208 121.003207135942 129.029151164978  
129.763063900493 130.506708993193 128.966514855818 117.104945989023  
118.192302821514 118.432307370605 139.251886500377 113.283359026655  
127.22550964959  
LOC100133916 140.490023670841 125.533538277681 125.005019889478  
129.21974206851 161.968835903764 147.100947801261 161.371477511362  
168.269075560636 148.444479022559 141.281116867082 161.663893432522  
154.301338771241  
LOC100133918 113.025793645043 137.002473710189 124.578552584603  
132.168821720799 110.333339548402 131.882887826338 129.880696706381  
136.313623567821 138.171858105728 118.45291712775 149.666293193219  
121.924036463998  
LOC100133920 138.551695969102 128.771367080039 138.446492794924  
138.152641686151 149.980924447339 125.224197852606 142.367003292264  
140.909875639658 131.68571824487 134.32174235533 117.619337212037  
132.492444216154  
LOC100133923 599.926717145115 572.407760064901 543.810043433181  
289.517820913799 134.427601777639 242.299252896647 175.236826554583  
425.348619281876 251.161789722751 258.632372536866 310.815067427296  
183.676020826291  
LOC100133928 123.700076467648 135.356010814496 130.626965797365  
129.982236484842 122.944699010173 134.08270035062 133.466342977488  
133.422190038356 128.925288777749 125.243735617266 133.387065801837  
130.526673128214  
LOC100133930 214.617852048151 214.595639477696 222.919473675549  
213.432084172541 210.590774758661 150.098708715617 234.5655184349  
165.581217879395 224.963277964548 163.863677822465 206.488530785667  
268.78904911703  
LOC100133931 16742.6286866851 17324.7697569598 19189.4835303597  
13217.7001749493 14755.8570847826 17009.4268910772 18061.615487998  
19356.3155476146 17404.1167486753 18760.3823237058 20647.6275450554  
17324.7697569598  
LOC100133937 131.838522109796 124.624046191085 141.724442944322  
135.873325130921 137.754373055094 133.930997975106 125.110064579814  
126.619475852751 131.374680878107 128.525769531728 128.082956839709  
122.204249636472  
LOC100133939 154.156272284591 175.417320301614 138.428527640896  
138.319321806028 117.598778415488 124.676743480622 134.524644163286

121.545189875973 133.550008967009 130.680629893396 131.933026690056  
133.749271961438  
LOC100133944 110.810963139914 131.623527073985 139.470557140547  
131.029333093048 128.009286101341 135.717491814078 131.029333093048  
137.962542261072 127.271423859953 119.360478719424 155.535222310709  
132.379706531581  
LOC100133946 161.090443294391 148.42845062376 127.093255830978  
130.894384800009 135.532820436394 131.811011266156 147.600825146067  
141.884995734267 128.576310682958 127.637319802339 147.309245779031  
137.518616190847  
LOC100133947 130.435589649362 135.864853829421 128.224742304889  
120.110473925082 130.101422420432 147.973274498131 128.697647007046  
136.097571072206 126.430816528764 132.498092935232 130.858419819734  
134.86940314824  
LOC100133949 116.221426977629 123.25201993575 136.563471322998  
134.952584272187 125.73560975196 116.179625689647 132.596941171401  
129.987548571478 118.298444816712 129.961042190085 138.89579816122  
135.022438246099  
LOC100133950 411.359106929985 382.485769373364 376.374248850987  
362.195903246495 220.217745732407 529.228238133018 287.084253886676  
330.553659265085 315.963526790659 243.191238594142 384.464383569801  
359.935451429371  
LOC100133952 140.192644427334 139.727248583626 131.992186668019  
139.995623005154 118.505980204837 153.383776309267 140.444972979764  
136.879615833565 118.24368469845 133.406312157375 138.449057377027  
134.136687154241  
LOC100133955 115.257318321108 119.780654293448 140.706490845379  
116.433239116749 136.133538781918 120.721341479615 116.958052905168  
120.297848408451 128.860744370967 123.683553177379 111.366283149236  
131.190238038695  
LOC100133957 125.308318672456 125.475308885588 128.798413084891  
136.287909668938 120.876732151192 122.965328766807 125.077260389449  
141.205975588506 133.720904256137 121.643036773773 116.316845829267  
125.20712393273  
LOC100133959 149.233023751582 151.506013510204 140.509950286228  
129.381229220393 157.182954894643 136.790457887057 158.98666068453  
147.004172510641 118.807135693934 145.814268094808 149.113794439994  
139.162076054072  
LOC100133967 133.875667250136 130.40517506216 130.470034945295  
133.838032323605 142.752536416014 137.440295223749 135.797170561599  
118.475906136789 125.937660544107 141.158593399952 143.836637098747  
136.815411937352  
LOC100133972 137.968932080074 154.627270742193 141.54943189147  
149.262900833177 180.478294414245 144.155591092387 138.359423363142  
154.462766419353 137.563246867433 151.826103919919 139.306122448857  
138.1774127311  
LOC100133975 118.891276329399 144.148833164952 135.232168302734  
134.005402534879 137.508097741526 138.915185051749 124.661088039427  
124.731056918418 141.755954088275 139.677109265241 147.766043861937  
136.695790688466  
LOC100133979 135.341892490559 131.060030943633 150.708102506794  
141.311749168934 136.513942889781 144.55710963567 127.095347480109  
148.478570934155 151.183847738922 139.308325848216 134.608734423113  
144.542320520523

LOC100133981 142.01454627498 139.953572663277 120.118873350459  
140.650987394155 151.194282143046 126.539877052899 139.78795317086  
151.776232847515 142.206016362038 137.265533487496 167.100039749329  
130.555405606993  
LOC100133982 139.350622585937 154.552605305297 144.523620416439  
150.878323882503 155.183210738478 181.558764396201 170.585366369563  
141.939368369872 144.416116810532 150.224472335504 154.170007083026  
158.33974431499  
LOC100133984 134.327229861635 128.020374599828 142.017169259522  
134.028626989933 133.083877012766 140.081280065913 139.106442824079  
132.404879616886 120.290102399282 121.150371270451 130.576944864484  
123.323528039848  
LOC100133985 139.59941545613 144.380485359951 149.25240100689  
141.040862279633 171.36717256867 139.570313872946 143.31117188259  
150.784262878145 151.577450119302 140.502667595362 133.483766053954  
128.893208935783  
LOC100133990 109.817705421158 119.767154020462 121.410606617535  
110.636713168363 132.651922794567 115.830631252469 122.503984297406  
118.866073031304 126.623026026721 139.305220220411 129.904942554979  
129.980354138975  
LOC100133991 122.232732968363 141.302647488314 128.563180697606  
134.927386619223 133.050798832332 154.16370087233 142.444072809204  
151.221783750989 147.556482119673 138.48552149031 151.841652724562  
175.428000742222  
LOC100133993 144.532420788945 115.53736269794 137.572574328004  
128.458132030921 123.055210862247 120.371374172279 140.656633546501  
128.014092519305 122.766778018066 130.396593013401 122.300069045533  
129.372522073479  
LOC100133994 125.160161268474 134.531334130512 151.716042884808  
138.944595164363 121.583096465567 122.670689386332 146.817659734182  
142.646570636529 119.511962218143 131.951649373072 129.966755942173  
138.981712781568  
LOC100133997 134.452938571435 106.667175621971 133.299599411025  
124.975454733084 142.093180304661 137.471563342956 139.60494712939  
121.341177395499 118.276198592775 138.685330935707 112.314595956147  
130.770335966929  
LOC100133998 142.898851434337 146.722211039754 139.826273596452  
133.243679173608 130.205764567934 130.576944864484 141.678529125136  
129.777173431404 151.237088659409 151.308872564827 129.785078660064  
138.89354244296  
LOC100133999 235.019573994855 219.0221768576 186.708059183893  
234.626574390973 291.105673222859 190.96184674871 197.848577663238  
171.121834829333 155.319717753912 177.639351778834 165.169920299969  
171.221972336784  
LOC100134000 132.836513637574 131.85737847837 132.027020683413  
145.259981479761 200.603836348642 458.33221423434 304.811116024094  
171.650247980576 136.946137446743 168.007337847195 174.461487057542  
126.839037497031  
LOC100134002 147.676279102364 145.826955036113 145.768857553634  
168.611652451329 214.019190624184 136.718598487513 183.302479730653  
169.232677769521 143.377902352319 150.936747236094 180.418707740532  
160.655929233978  
LOC100134006 129.461160777216 123.094324479352 133.12641302705  
131.828902700702 122.610529927104 139.631165400881 121.75662526451

123.166013119235 128.093945009882 122.355409068882 125.293640452686  
121.805145639822  
LOC100134007 137.328370598183 121.164978896057 136.020600085547  
128.630613404354 122.476178620771 122.924017262559 125.4408430419  
124.174140125309 133.505261458701 108.247365868673 104.896224175106  
119.915330116696  
LOC100134009 127.104868352186 144.563144246691 169.556358586336  
143.766249538352 170.54511631708 160.98571841915 148.686975104375  
150.267298097687 136.44218532882 148.943735606315 153.643157329902  
133.921012946195  
LOC100134011 141.135840314665 140.713537140957 147.354535468933  
141.256915527472 243.893774595317 181.783275804424 250.602978521808  
262.019779752857 187.881334544018 163.227953876329 172.599654598668  
177.567833691547  
LOC100134016 163.936973279176 147.760782452857 158.579717282881  
161.603317039244 145.85414203374 150.880818951088 177.96452209396  
156.007630568494 141.715307041887 148.57301274812 144.096624787142  
162.082166316002  
LOC100134018 147.420580715112 124.474221706022 128.833756478439  
138.090158433822 188.878770168595 171.826623289946 276.830814061474  
175.210232663606 155.722314592388 131.477589792769 189.292740365891  
358.152044880733  
LOC100134022 135.87026484074 120.36402353147 139.168307371516  
125.658396221949 141.461435494985 164.603403251634 127.034985265748  
139.388484543482 120.076742232995 143.976395954528 140.115154069602  
137.938310376106  
LOC100134025 126.349403754775 139.039276904833 118.622346984257  
118.446703299916 130.524630778991 121.580726825432 119.787925356307  
132.521681289019 137.652358744527 122.501785735146 123.93800397666  
128.986795394842  
LOC100134027 132.70888569469 130.052593375075 116.225440873023  
119.403831071089 127.130769263811 124.828626063272 110.624328647003  
125.672285485643 120.616979607398 125.935071837868 143.467053670148  
123.275246170603  
LOC100134029 143.565597315289 130.104021521854 141.476041451832  
135.603160096973 123.777133327569 132.049224908868 136.364830851128  
129.278833426752 129.953801496113 130.054105892394 130.820415610578  
135.588132669957  
LOC100134031 139.619076126267 143.446317006075 130.066177538896  
128.959487155628 129.073750290924 134.790410101679 139.008854444223  
138.62994237184 146.781221728543 131.748753064488 141.791001213681  
130.571827557149  
LOC100134032 150.374573177474 142.108805047729 144.700955682048  
138.449057377027 134.074425424613 130.097543328456 143.662865541299  
134.914830257315 151.492236411757 125.549968985241 147.327675057481  
137.650917262528  
LOC100134035 153.636804025106 122.90702157852 140.009593108693  
145.835240952992 145.177195093247 139.47828235176 139.750281709938  
124.235958498969 130.742940708861 143.814798097425 136.970505971671  
128.407968177242  
LOC100134041 139.042034301544 135.271290872348 146.079727388849  
142.896723827753 148.320310040998 148.711943433557 147.991572632747  
139.780552911146 150.694215349678 146.349773982488 135.699583036042  
154.051705030348



LOC100134047 131.604121223902 129.964666668421 137.71280215369  
126.578035793406 128.623302491798 133.069347559741 125.80798551086  
130.027227278931 125.287738115754 131.429247528936 130.393631150485  
125.019064287385  
LOC100134050 140.474338177948 133.310323593945 146.334446516009  
164.241874094897 147.51773051441 150.707113487334 147.114698384834  
133.70941349665 146.71164737466 148.391885541349 145.223648967115  
145.437544062449  
LOC100134052 131.477589792769 149.645548888832 154.758831302515  
137.017882995262 148.79958121087 143.10996074311 162.57736365619  
147.73141408795 150.391286215189 162.244691888031 154.340042518983  
137.239088768176  
LOC100134053 951.772948602094 782.746481112316 891.637685856145  
692.095005197252 184.672330560677 1028.80076860235 475.038389500056  
765.128667448261 636.382696018633 692.53483413403 1151.89087953837  
764.774225930479  
LOC100134055 122.382304966782 109.680532131035 134.031960707639  
120.752194675024 120.09801164252 118.351607868932 133.625358030199  
122.382304966782 121.760488406107 122.729918525032 112.219585614955  
124.385193388896  
LOC100134057 140.239948346946 152.741229289112 144.649656552  
131.986590029726 146.081940883446 138.613373798613 141.076652697698  
136.254966566424 138.859261763075 131.18368961955 127.302714624905  
133.226542641174  
LOC100134058 123.062390088305 137.897243684023 136.089888639987  
114.936648783324 123.692366307662 135.767818903328 151.869928694006  
135.192181609947 135.802258952006 124.717079082023 137.709120153505  
131.741688265764  
LOC100134060 132.828179725129 114.76337651891 129.180990946063  
116.700397932007 104.780306305981 120.85013281321 128.202619705343  
114.749597426757 122.142323014287 129.372522073479 138.237030685795  
114.021546689428  
LOC100134067 144.370811043456 163.769959129611 141.872426752329  
124.269446398587 135.06498850776 138.000714797563 121.952255635669  
120.594874820899 138.496366637658 128.963962067821 151.792921211607  
141.150016212967  
LOC100134068 158.356964958885 138.553151063218 128.056668224393  
142.363309192458 129.728266017061 140.318155161909 129.138035235415  
145.200638964782 135.795717307603 138.523677181131 144.190847141944  
134.70636200986  
LOC100134071 119.180033382937 123.853588042292 125.75980494927  
131.269526665478 115.988180787152 126.100454068838 131.693923403533  
132.602336133471 139.027836356854 133.15144076432 124.222529964098  
118.749046585251  
LOC100134073 151.902352951251 177.132361355899 154.187420367647  
164.841156516242 152.272198017355 162.033909093358 187.016569445646  
177.11682975342 156.787932134605 178.072538529634 185.923374274306  
158.039920243116  
LOC100134076 158.87755965229 155.759861336991 139.140647941752  
145.731800133702 135.289246539398 134.58799530734 144.692900548503  
140.127379332918 144.032779435658 138.640919060725 147.808262170269  
145.507330257603  
LOC100134081 171.099675679944 145.587386656619 212.016247864691  
191.507657960386 128.929244741296 145.921381300813 152.990523860831

139.914034708144 135.085039737228 137.415158613413 144.216394153095  
151.463200570499  
LOC100134083 156.551925771312 144.262612328341 182.833961304079  
155.031272695335 199.118281632221 156.333133322672 197.308952757609  
163.824878791966 146.875733210901 200.652195873026 196.189101941489  
153.853856339585  
LOC100134091 138.239251358245 132.683594640696 134.675247731364  
140.909875639658 132.815753681623 133.66893163718 132.098421212796  
137.843244642235 135.68481384332 130.122672154144 134.728594388428  
129.005211657936  
LOC100134098 128.713131994442 152.577131215027 124.930303940168  
134.782388051531 162.203570429542 136.254966566424 133.048720362039  
154.443360208399 137.910618360623 130.694506122253 162.327039624723  
136.71278398686  
LOC100134099 148.767517078508 154.518641757391 139.220877923507  
138.913591568111 148.863297062269 158.319248599976 159.735182155088  
145.762724663455 144.460541430705 136.216577685046 157.684694038023  
155.906054212876  
LOC100134100 135.356010814496 147.777050372032 144.007071548045  
148.81406900745 146.316145173343 139.888008605915 145.904866987074  
159.021304119265 137.830435972191 136.173596381385 139.073785024092  
144.190203286506  
LOC100134101 136.858037332222 144.179880084235 147.127908355066  
127.742948876822 123.256613702254 124.242539075734 125.556444423391  
139.568610307888 119.184780023269 136.180063437699 135.889764019762  
123.141928612324  
LOC100134102 199.620978536397 141.939368369872 150.809693773343  
139.449895159273 145.208597795717 135.315732654507 148.209164900319  
136.811620595243 171.602950766191 127.112296857923 154.886628987246  
171.97578836712  
LOC100134103 134.952584272187 145.934643000545 132.328948598599  
134.32174235533 113.268379270385 132.755256423863 124.246363878094  
133.897397228615 127.430408113725 130.004329307977 108.34997967774  
125.396523818173  
LOC100134108 489.403061697031 381.182514249587 388.002365247498  
514.922742487521 415.82312615045 337.271784551586 340.860684371038  
408.7151485563 320.936905584424 269.238332581564 444.192734921566  
340.547010951537  
LOC100134118 126.48691003872 133.573744633212 115.445219455559  
133.755609587969 132.57219914253 125.111993560078 138.20899000519  
124.749727939593 123.271452939936 143.086872363116 120.311723366684  
128.517315006019  
LOC100134121 134.294287947795 125.374764771516 129.900540030251  
120.050548624975 116.214857935694 129.524056217383 145.61758790738  
129.537345537086 134.993349945063 119.373287155621 124.033766796333  
127.947547987882  
LOC100134122 155.427282703527 148.842322753916 144.564250008106  
131.666853845458 152.074017988748 139.679681813932 156.920867019849  
164.247251507109 141.191500203423 158.675960205792 154.670631900834  
148.8870854102  
LOC100134134 6006.01682776552 6484.36742084268 4441.92485662082  
9793.92604780228 500.643499051523 569.47446215213 289.724297749772  
739.874432767734 1183.1601379136 2263.73444150082 477.87583927675  
666.344430142655

LOC100134138 128.482976013813 144.931901042924 139.951275828765  
152.274957846518 131.456697863268 137.074564265915 145.700589723224  
119.968081249475 125.055545087871 153.616692588396 125.533538277681  
130.383001462828  
LOC100134139 134.331420680628 122.320966091375 127.213640193364  
129.327645260099 129.104869596932 132.819726980184 115.775525016883  
134.369532556726 129.088718286391 127.097605337434 125.339305282874  
119.993313087183  
LOC100134140 128.708956947928 132.781725233271 127.729912390394  
119.432201417811 121.501959818928 137.27298184582 134.991379445799  
126.693235227579 137.50266393001 123.678365506247 128.344679872625  
129.591396165575  
LOC100134144 307.906312092805 271.113617350982 264.563741039382  
314.90123632547 141.437891956239 133.176970578909 138.709991561675  
157.948814637726 174.587558727209 134.988545581219 169.306573880401  
163.102043862117  
LOC100134147 115.450352881048 137.793462381778 136.357788670568  
134.136687154241 163.936973279176 154.153249796248 133.052615777603  
123.315362903961 129.404017329613 136.981043383326 148.23392074197  
174.059172465573  
LOC100134152 141.317113425046 166.104915784875 173.87113073582  
152.06044555622 156.432292210399 162.893396525252 153.630125822178  
160.251996476232 163.960242712692 171.320653882424 156.077604146143  
177.478925091583  
LOC100134153 136.826606228323 140.548371692813 134.793399942417  
127.690860707933 144.964084792568 141.200676699805 130.083266044947  
120.773552653073 135.250379276888 130.814702312493 138.723149134933  
133.92485496581  
LOC100134157 133.425151103622 132.168821720799 119.544004279354  
135.961724275921 111.010889276873 133.228822922258 127.539091409962  
128.519448608754 121.464383202986 152.514455788489 116.998277297063  
116.061356450855  
LOC100134159 11017.1478502767 10930.6720259935 11874.9808592281  
10661.2216586049 2583.46653460894 12046.9345159347 6179.86800320807  
8140.6363797934 8445.36695108418 5250.88041666757 11112.4298269818  
6877.52553567598  
LOC100134160 137.353149614081 135.027715094704 127.84589484404  
141.719556176029 139.466683069609 139.741862925156 153.04599985182  
135.715745768179 134.799648755296 129.566451901256 132.310147451479  
136.988519762443  
LOC100134162 144.210698143215 142.427198128376 126.209426865327  
133.56263739203 143.844153373367 143.449303333495 141.537578081123  
141.712693059287 131.351303131574 135.63604256516 148.334425146129  
138.945855414918  
LOC100134167 129.222714748528 134.484499048949 134.872654203921  
140.588811000948 160.482734190577 157.309058982117 134.650161382949  
155.376656335974 132.490323093932 133.436057118148 128.44311762955  
119.366599958278  
LOC100134170 165.177036955944 153.679479224178 159.236429097777  
150.263578317272 150.204636832734 155.938283930571 158.895584550655  
156.930119977809 166.592366578462 193.358728044565 161.877378749103  
159.552457576922  
LOC100134172 130.441808139335 146.602252563413 137.491366243256  
131.719227272527 132.033116673897 123.541709359809 127.215777044942

122.144209450757 133.252140649104 138.515211541879 140.350144438462  
131.486917325752  
LOC100134173 140.527521345097 138.739176678465 128.662039886682  
146.83577460518 128.893208935783 138.221749464651 128.831988422272  
141.953114738413 135.841309719081 128.436499050769 132.340183565771  
125.215194276842  
LOC100134174 140.483227195637 136.732319750425 124.796876920269  
141.36525744062 137.245321102978 140.041977349982 139.446914318877  
130.712515995658 134.172033051676 140.971253689199 144.840218312168  
141.225533609907  
LOC100134176 129.745892720738 115.384304932365 119.297561749232  
112.78323842342 128.504026473695 124.597605631582 119.48998115497  
125.606269267903 122.083357581665 126.056493244568 130.483765953389  
133.345143691828  
LOC100134178 133.254663058352 127.959474148217 124.68729078792  
138.771088752839 140.925705285169 136.411722212312 130.89594032962  
144.068734533254 134.122776198036 148.609721587632 142.474762834848  
144.69686018715  
LOC100134182 214.175691239597 260.489744360233 270.787490294555  
255.305647212135 257.372740535895 210.015199832609 281.341452463344  
197.231408726321 177.759729226623 204.137195524755 196.470718183575  
216.783051958345  
LOC100134188 193.892810132985 164.942652212218 196.345065354654  
180.265418365803 148.18197556044 165.048922660581 185.432587490792  
158.658110539162 166.606522485953 186.939168482155 173.964378226631  
154.462766419353  
LOC100134189 154.037622223246 154.459517779315 185.650862663633  
154.183537565624 186.66469040433 185.258354905314 163.579282884905  
177.990274115348 185.783374935551 207.384408045502 163.753434774656  
183.804849355341  
LOC100134199 154.501338425995 146.940545711162 144.472969298036  
134.316859658338 141.860850603561 134.620896927473 127.675206134992  
145.158039427157 142.879705723262 147.75188889715 132.251093122058  
141.255406288178  
LOC100134201 149.353072778508 156.389361240637 137.632470240792  
159.102070980047 149.098381037466 136.311902195562 137.009303458922  
150.343825300998 149.919344933814 151.622719246408 158.23562423217  
146.582858169664  
LOC100134209 189.2642795052 178.179238056905 151.32179802686  
149.65417821994 165.327972973978 178.035700298977 253.789045068884  
170.283532007581 178.014057622594 194.86492119218 209.146021798649  
209.54573978355  
LOC100134210 164.063104872636 156.291522057567 150.45404183949  
135.837733533444 156.602240897907 182.997980582218 152.286545050749  
145.466538006138 148.943735606315 148.597346678768 128.045931477827  
160.315029612814  
LOC100134214 133.63022526522 144.708780756278 155.198503964295  
147.059096208832 145.615291241733 129.045934344719 132.458764637407  
128.093945009882 134.425483661043 137.861973133557 143.211127738941  
136.492892469272  
LOC100134216 141.963297887448 117.980052938167 137.726769003181  
137.296790373528 127.718341524417 128.870079563075 139.268942501979  
125.208803405105 126.364445020215 131.193538235053 152.47429737104  
139.435000959919

LOC100134217 133.594446233378 138.418604660734 135.144908040903  
133.608461289137 126.845048064014 124.592771536872 139.557059245431  
135.291264978088 128.398711525305 127.245190474707 148.342114514468  
137.288653308858  
LOC100134222 135.388750095746 118.974727968283 125.00254973945  
127.42914358124 121.252042151856 121.770043509503 108.179513318734  
124.895023786422 120.883785696583 122.158160927149 131.797936395014  
124.975454733084  
LOC100134226 123.609527892227 131.058360514673 123.527903217158  
139.421753451936 107.431455226979 119.673343767067 116.507315786826  
113.694351010121 129.409899416034 136.332399354517 136.937327692084  
118.544870925791  
LOC100134227 136.758262322199 129.378442664568 148.168587884369  
124.705614182596 125.815256068004 137.77107995457 119.50754902958  
125.617143363441 128.990911924499 116.328330266803 137.251513843314  
130.222698914337  
LOC100134228 128.533900744619 125.701083319929 152.373931758229  
135.356010814496 137.94246602811 144.302925948596 128.864822736402  
133.460655803085 125.243735617266 146.798444724408 135.639558187703  
141.904041228678  
LOC100134229 139.175421159925 124.174140125309 124.126715773068  
127.174074003712 140.809956497396 121.730973193225 146.959154938248  
138.768904143023 130.957441406855 134.189023892662 156.040073232376  
134.415163103911  
LOC100134230 153.108902978819 150.456500446175 169.649251828199  
158.232100962615 143.267246820729 158.708054164813 155.906054212876  
169.279866966079 148.763098715961 168.116928722035 153.667355714857  
153.97869518398  
LOC100134233 143.125454748996 152.56002779985 140.980119908597  
130.35985690876 159.273225917177 139.541759919059 151.773749014775  
136.969124414576 140.522470775478 147.576533768761 153.879427186342  
132.198536906752  
LOC100134234 147.508817393901 135.832454000859 134.288349336742  
136.08040874432 115.871151134713 142.434356144925 128.014092519305  
143.945039636839 125.422348389595 132.703729298102 140.354508398385  
134.825699448987  
LOC100134235 140.814009587096 150.476228905372 131.924162435354  
142.206016362038 152.486212022518 149.264997927508 145.144401160102  
150.321059418799 148.844916975586 120.201521341263 134.618121709059  
131.093917654245  
LOC100134236 122.568743478314 129.995417218564 123.45956380046  
127.233439204926 134.725434838052 126.693235227579 134.111348656261  
129.942594772751 127.325087202483 127.0631494857 132.253450751554  
126.247378598596  
LOC100134239 137.058578192268 117.144778357339 133.887192869502  
108.101686347192 146.629335531037 123.929180327423 137.923852688695  
133.307149027384 126.952836653857 126.396385337235 115.855948612544  
134.700543462375  
LOC100134240 137.825722180056 133.613988293895 139.617608585463  
155.70645844794 144.961095334901 133.391421497441 148.838294770082  
127.654130155446 137.701271351806 121.438875373878 122.238996815745  
134.76586363177  
LOC100134241 181.364325529405 184.602704530362 385.798784913201  
147.257773507186 150.123784990646 282.335582153109 223.013753785002

272.238922498583 228.588693548447 215.673878830563 168.660907237558  
289.667302610069  
LOC100134242 131.950295185477 129.294026995663 136.069631519097  
127.392877191785 121.572462089942 127.908872828095 132.555211779043  
136.949403128211 140.190749525193 142.859971805867 133.027592711375  
125.752962155179  
LOC100134244 124.403662787819 122.063996556575 124.385193388896  
120.590654346066 111.703224727793 123.104790590045 118.584773788416  
117.212164526913 126.468167800414 124.775529469869 137.945878061978  
125.313515459103  
LOC100134245 116.252227301161 127.562924931536 121.619593453259  
110.794219964997 112.922918499398 119.107992692097 132.04032925495  
127.03153185998 118.167740643871 123.67449826277 135.918590725404  
117.909050015516  
LOC100134246 126.301178976594 134.20988291379 128.44311762955  
136.238646974312 116.678969343492 131.483427112288 124.602474178438  
128.057827541114 130.872296869843 121.462385497795 124.815853677553  
114.45792163942  
LOC100134248 137.085712588455 141.613898853625 141.666394024363  
139.326694135427 123.782746527199 137.744318243173 142.246864759311  
140.338622198206 143.256590560776 137.369033684705 128.783262618114  
133.902707525069  
LOC100134252 138.26050964606 124.285969778268 136.751654856807  
127.3079781139 132.088335186716 123.782746527199 140.385509382606  
136.769073515537 137.890006487904 127.56749476181 129.984214994811  
128.63301490285  
LOC100134253 144.692900548503 127.509583634884 124.924794564647  
131.519455635415 135.634385846692 125.384706864406 126.369211783863  
132.17294083844 127.83654093961 131.410793139723 141.831596320865  
136.973804637915  
LOC100134256 123.035401501279 136.955651763743 127.9928491829  
139.955389033983 128.375390373307 124.153063838817 131.49577981738  
122.69021100699 134.524644163286 136.167141767484 101.915858150866  
125.171532277078  
LOC100134259 152.832573288735 142.765490244223 161.481227197715  
156.695440330379 116.929398630733 136.013989349192 119.370219299491  
143.242308032336 125.347442446239 133.31378749951 139.912325578837  
148.507598818039  
LOC100134261 159.994376562272 137.605244950708 147.330897105911  
144.310362660942 165.436881839632 192.258863431747 158.906481816035  
154.324955232468 163.880402141404 175.989742412417 178.997098204457  
171.579123521304  
LOC100134265 167.125830254039 165.003646188775 152.908358615016  
162.013164369593 136.044670179122 130.564962937297 120.447140228396  
133.742490937191 133.939847853073 139.318078285343 139.499652059557  
138.478911439144  
LOC100134266 129.756642179083 127.040027125755 124.807244018373  
123.427366316096 135.966929064294 135.058525398122 122.685360126599  
121.837571435384 120.988749021323 132.043196381009 151.747595672228  
137.125637347852  
LOC100134267 131.774882989257 130.12638520846 126.033673708286  
137.757902615328 132.730924522748 141.013392458859 142.119327380686  
136.62213567467 131.919387743094 132.836513637574 132.733821031511  
128.224742304889

LOC100134269 127.733860645979 138.050999864689 125.579970155301  
134.341489592504 129.179188863839 128.914885412263 139.55065372881  
138.661548678191 131.479997342133 142.808871284256 125.926774314737  
142.467552395104  
LOC100134272 132.478801067837 112.394223360492 145.183463058696  
117.335748689217 208.838523729744 172.698181201849 149.119815471009  
142.232918684259 143.533725135227 128.878051599968 128.244549276386  
125.250900940748  
LOC100134273 653.879734066271 658.47864958685 683.655205499779  
463.880793292701 1362.1486006778 748.703265448403 1249.89496565284  
835.834013018438 624.825216056495 994.802763887989 1895.72330348767  
1176.01058971561  
LOC100134274 139.209080672396 127.687299576139 141.97908047949  
133.532323053215 150.313058722346 127.969833368917 154.985781979984  
134.058035351684 135.937066152894 131.123149002831 138.867555269076  
131.379640556636  
LOC100134276 128.984613946021 124.840101287634 124.190161132628  
131.500591219916 131.865164933746 132.484079454476 129.294026995663  
120.799317509529 116.858439910319 133.378374710498 129.121598974852  
137.497145594629  
LOC100134277 120.897228878841 132.456945758174 125.048770476506  
132.328948598599 117.716094828779 140.818413826758 132.300508985399  
124.086902599543 131.548634017902 122.84603217721 131.521311288114  
116.802432258299  
LOC100134279 130.020743385543 136.418105816557 148.770315933249  
137.312488161187 117.166509072455 116.382348831504 135.554736716321  
126.115828232308 122.878790127038 126.649739818781 120.571074646092  
133.695284981677  
LOC100134280 149.65417821994 131.809235171629 143.641777655752  
135.539516564142 137.840396641618 136.448045428081 123.582509531804  
148.005500924157 155.731897985566 137.971108694323 151.181422205549  
135.825931047185  
LOC100134282 154.698312173556 139.94624507228 136.142380560596  
152.503889578356 147.182394557583 146.897528834303 136.013989349192  
139.096536887753 157.929976848515 132.975603230163 151.094682146074  
165.682617337317  
LOC100134291 378.920456227378 282.836518011311 350.166837086936  
325.907037744936 213.914599384797 181.832218001701 272.351487980415  
208.895657507883 208.895657507883 325.907037744936 295.727275232995  
219.462274506333  
LOC100134292 119.492844191924 113.347609066395 115.76177719261  
131.356437247149 121.59661598908 118.9428715545 119.172965618216  
118.148476979319 123.586359806158 120.76311889397 122.460829835477  
128.963962067821  
LOC100134294 129.03753569157 144.331409179705 136.689064885984  
112.126521532091 180.304585602206 160.970946091146 142.630563791102  
126.782805974059 154.270034951209 127.990453128978 132.533234335153  
136.246543311291  
LOC100134300 134.917733742892 152.007436762651 146.054535585464  
162.923734210933 142.521260841187 172.764511709731 138.677282903963  
179.730694272916 151.484420979498 184.102171963542 156.798431595608  
164.313238416498  
LOC100134301 128.775477649887 130.557209560361 156.385100395531  
134.299575239865 140.784853736558 162.247608931408 157.572446865749

151.392024228289 162.229052648595 178.745112514526 160.20843950503  
179.400220328552  
LOC100134303 129.573520898314 141.783181783668 135.250379276888  
139.593950393555 139.890519860289 140.682757521394 145.056914913573  
126.290840923683 130.479845410716 136.547868436335 123.340245351594  
124.178483414968  
LOC100134304 314.095043876244 259.472319994929 232.465880700217  
234.588584245938 550.901056837273 760.572409199179 276.961847241646  
675.978379566859 508.572981581855 363.594808277506 409.477576085245  
600.430996779799  
LOC100134308 127.941584184869 140.857793157932 145.045633612194  
142.583098605144 136.380523452336 152.42111372681 140.152177370089  
145.271106758295 131.570358580547 127.520134825082 137.702802090925  
127.844624093148  
LOC100134314 144.907294702865 134.816810619174 137.483830932387  
136.176688025337 123.7421178083 127.500754400224 117.517649866653  
139.925201225224 136.499228715856 132.324630056168 140.004456934031  
134.666505160831  
LOC100134315 145.641373616866 128.372225487481 138.171858105728  
125.447209413787 127.687299576139 128.713131994442 145.520832968878  
143.262288751967 129.01094835739 138.990971069382 148.541832125061  
119.463337435512  
LOC100134318 134.028626989933 144.534143943252 124.05019986924  
137.971108694323 114.774530966446 128.675527226161 133.545405737639  
130.138945493943 132.795064859079 131.298129667973 128.893208935783  
131.097598299707  
LOC100134320 160.752581271996 147.653573379877 153.56082876276  
160.537464426971 150.352308475398 161.849023343715 140.21908493941  
136.540568915609 147.545667896282 166.549192709614 144.902807664593  
154.281674854552  
LOC100134322 126.045231525329 134.08270035062 126.048382998393  
124.666487633365 131.593705080542 121.130837254861 117.231243105897  
138.553151063218 134.125038192486 132.600208090551 120.13937451914  
125.353389826276  
LOC100134327 124.959873714884 130.737690721877 128.997028325896  
138.557464672111 131.850952248545 121.51208055933 127.50624009248  
122.251178920649 132.456945758174 121.59661598908 136.267313223808  
128.108066199718  
LOC100134328 129.508990861362 124.235958498969 139.103395748894  
142.970256312313 152.767228183775 140.603933807629 147.946236579299  
136.570817174009 128.944295118239 146.075794515889 133.570075399424  
148.654099017805  
LOC100134329 139.31967261371 129.865581506307 136.472404812817  
124.595925483149 129.46430369977 143.161623642178 141.121364213272  
188.335102005839 135.203507726561 150.218643705925 138.411148122407  
133.423376063284  
LOC100134330 131.933026690056 133.369314179341 147.893916750136  
135.100687929821 132.423043364573 149.883237874886 168.111124820968  
140.641308444844 161.451253146578 157.994474909749 147.8838487685  
139.344344562134  
LOC100134331 129.171589574238 128.179293878252 127.104868352186  
127.26820735867 116.335864439545 135.957972463728 124.235958498969  
1039.92160906839 341.761516859319 140.002249873656 134.683553037185  
133.550008967009



LOC100134333 140.356164189622 141.40586900422 140.946368538661  
137.736771579507 143.229240978574 127.440987506769 130.187833435052  
138.499293816467 128.816610738922 135.993598471576 123.296382913131  
132.755256423863  
LOC100134338 128.336332748047 134.810212106122 134.257928609741  
127.034985265748 123.786227856015 129.23899614612 132.32633643811  
118.319950396126 119.870661213608 115.939620871703 111.525984720592  
115.285392699073  
LOC100134346 132.361106053517 138.397152876585 141.323417580648  
135.247018354192 150.602976963975 137.877756077011 160.816803370151  
142.148597793651 134.924082270115 130.265055842999 149.410729709855  
141.453255692229  
LOC100134348 124.416676687377 135.164117176127 126.755389668637  
124.405905157157 116.695313319162 134.544368736184 131.872583529419  
142.469353808346 139.265915951162 134.503552797411 124.568534983277  
126.682913361149  
LOC100134353 140.418010366997 122.046901607713 137.054278745724  
139.891445925682 141.838927087095 127.715766031466 131.773304233929  
132.171282327983 117.445284668654 120.126700838056 124.381674909742  
131.212705319485  
LOC100134357 187.296479395462 167.993851183401 168.925131238831  
186.611870261871 199.250680260804 144.796089646941 157.990467804353  
158.287108069245 147.920946479942 164.678646890649 169.909886347082  
153.879427186342  
LOC100134359 160.136209944279 140.14062775887 124.461997520222  
125.911259629489 145.503718833974 162.439052954676 149.098381037466  
124.393008692801 153.832132196284 147.199961777192 142.476530302265  
136.541973790157  
LOC100134360 152.071081175788 139.067516394141 146.626517077288  
133.104560685558 128.848008246639 136.465185148237 139.890519860289  
134.031960707639 142.108805047729 156.448355269561 121.06219555903  
158.74180418577  
LOC100134361 193.173703015873 212.933062534244 205.804144075374  
179.203783335674 181.508873226705 178.404791189835 146.84403879162  
186.140970908638 139.532508621268 166.214167530158 155.655771857361  
170.602603155092  
LOC100134363 159.48526814715 120.163286072512 122.953869661977  
120.887938517877 150.544779197947 119.060186838239 127.090219286772  
144.64136816491 125.902015309754 129.322481607056 131.230501496659  
131.792339956719  
LOC100134364 1310.60610806797 1994.00516809361 980.120729515821  
2233.00694575483 5912.48904507462 1113.59310757948 1288.3346537369  
1381.07447204233 2217.82628612929 1473.70433292382 4711.21389812942  
1137.42879398351  
LOC100134365 144.562038493733 132.141918502025 143.200939506995  
140.696326952077 126.752999657665 145.169804325334 125.384706864406  
132.371165851333 135.985358106767 140.934844668435 150.72835989269  
153.443397882028  
LOC100134366 152.237183848896 129.404017329613 131.257901340773  
133.14988092185 140.311843829601 120.616979607398 136.846912694371  
115.321501844663 140.089210795507 127.259038241163 120.065876525792  
123.7615105541  
LOC100134368 140.724541696229 128.421242037748 126.146213417225  
133.615958668897 147.051399102374 140.016122996485 128.462674862751

158.699778625671 142.863268359757 123.745824514261 152.939759795631  
141.500790455788  
LOC100134370 133.79868477192 135.509365701442 129.782134019986  
131.868557613642 119.01559016005 128.742617750403 139.768555796264  
123.019430618632 129.782134019986 122.662260070778 139.981905225845  
138.555443236183  
LOC100134372 124.336297973344 134.074425424613 131.534097198718  
129.669484303621 118.740346254406 124.066239570648 127.954231630338  
130.546471770588 132.398041172151 113.891385601095 122.786030993629  
135.834000569736  
LOC100134373 120.460433297007 129.788395150404 122.600274773736  
126.890841187249 129.127563278016 119.176139463015 139.94624507228  
136.403353223002 131.84454376953 126.058167594519 136.515951031895  
122.667593730152  
LOC100134376 121.049927973123 155.731897985566 135.457059862669  
128.668672935791 139.452773383624 137.808307749725 141.515788643986  
135.666278507269 134.41693612969 133.096984735092 120.864962392459  
120.452958447555  
LOC100134379 133.52971984184 132.566074764755 127.808579455383  
137.195906276069 129.529372508883 131.193538235053 133.70941349665  
122.089332300031 116.186846885411 134.253399256648 139.071908528327  
116.136849683574  
LOC100134381 106.982655360194 108.655415285806 124.828626063272  
119.720132373023 117.261443445891 119.842470751496 126.37572518012  
127.931887647108 123.341568893224 134.637520371454 122.610529927104  
112.404562115306  
LOC100134383 143.635367691412 114.533677697026 124.539006083936  
150.048431572712 135.661131815375 142.21279866857 138.980079440205  
136.70715656782 130.018928906449 133.7012683837 142.859971805867  
144.68114486527  
LOC100134384 119.640086587188 123.100949494673 112.893705259844  
106.263441906404 118.401963042662 133.048720362039 115.80656409185  
113.283359026655 134.151372457715 122.727385599754 136.743659350798  
128.675527226161  
LOC100134387 140.842305941666 147.284885210407 139.008854444223  
136.645091356305 124.647992480694 130.799009128937 146.927825526831  
122.736882859231 127.453866279181 123.389038274913 146.20679320119  
129.888444399067  
LOC100134393 314.949772661046 365.362177671146 214.824908522393  
294.323621186916 502.170430910893 687.700356531038 484.480643763982  
588.678767007017 584.199252444401 440.495339027491 514.124012546829  
482.226889092547  
LOC100134395 142.96594961303 133.581450824362 139.987681290389  
149.689071018094 135.802258952006 131.138322527536 125.130703953031  
139.311063263392 140.563079852037 138.13987378399 142.38097037888  
132.659196898439  
LOC100134396 150.73248190848 167.764352429391 158.92254744379  
174.127444395862 156.852187451794 171.481917188224 158.452089329714  
175.269675831824 150.72014060286 136.730623822061 166.036553680319  
154.892452237027  
LOC100134397 153.285830139349 127.097605337434 138.598167973067  
119.733311319912 140.129882333528 135.744202879162 149.565725707356  
122.133292722932 132.740647421445 129.838790698396 142.586051173329  
128.872496485403

LOC100134399 129.990534497026 134.270043564053 129.811504562622  
123.178049594968 143.673778816953 148.118705147238 123.827771590213  
126.542112891953 128.344679872625 140.617663657037 131.228779762508  
152.049243916141

LOC100134400 118.064858133264 118.312891459156 135.653222288637  
125.060387518072 119.486895914055 148.670562837021 129.507297276862  
141.073316497949 124.955676894776 115.090463537716 123.929180327423  
124.113451627593

LOC100134403 118.470400686096 151.248365605631 141.634246722965  
126.609398779757 129.692578787988 141.855655600443 119.666650919579  
124.157302365291 131.015519445322 127.969833368917 141.763072120718  
131.800533523123

LOC100134404 112.635430248416 118.697969266426 144.231539210695  
135.33941967076 121.508233749444 131.086904662241 135.373824773008  
135.904163043783 120.060776752215 136.486261473545 126.199219102601  
123.732299841696

LOC100134406 146.6886556805 129.758303592589 133.411087000196  
133.783379558598 142.385902610309 122.881793230233 121.031695489398  
131.138322527536 123.505435008269 123.424145707079 140.225329742578  
133.745413210496

LOC100134407 144.938908763591 161.803438841859 189.37832342197  
141.033948839613 180.578528984075 186.359770878343 209.811693771836  
278.942695435238 217.560691345072 197.405472374722 146.919110530891  
229.181725450534

LOC100134409 158.541906931082 144.643770374264 157.739526559807  
161.870389635266 134.152586955217 153.78976320015 137.911816180518  
152.373931758229 149.675363177375 135.023594109361 147.268006631005  
157.5032461329

LOC100134412 174.890624803452 167.093409692227 191.200215655114  
151.863048206341 145.749887769807 164.39910609636 146.316145173343  
171.130215858803 152.857278986877 157.901967487277 176.680708339236  
162.846914172627

LOC100134413 123.364999283696 133.201157825808 135.915252483475  
136.364830851128 143.830319259804 123.716400094852 133.998381302146  
130.052593375075 125.796438432905 140.648918459179 121.632494500096  
124.712789674509

LOC100134414 135.5668267936 128.779829252045 130.824958143557  
141.450800126786 137.058578192268 147.872625576731 130.2867846895  
135.556943919872 127.870241953024 147.958483355783 122.111982327877  
121.322817570375

LOC100134420 136.995197143668 134.790410101679 139.706279455371  
142.968008233583 122.167669805597 145.700589723224 149.912481263284  
128.860744370967 122.211000410541 132.027020683413 145.00699763203  
143.905680376268

LOC100134423 134.95415308911 133.745413210496 155.061749542085  
158.153875553171 141.327299595068 141.202092246048 154.542190113901  
153.875760529011 145.872258115708 141.904041228678 147.562757301251  
137.816691265242

LOC100134424 174.707059022891 197.087015414039 162.743192424569  
186.04763660516 545.566596665916 208.045210163121 148.406031732776  
162.333158524811 245.915473236403 212.119922561453 252.015257713669  
165.219393390909

LOC100134426 146.959154938248 145.25774926819 150.893280574091  
133.297361715205 122.11049596959 128.779829252045 145.731800133702

137.402567669086 141.104761546577 132.404879616886 147.195127201893  
135.535020220081  
LOC100134431 114.841964705981 127.080149144234 136.71278398686  
115.310953814885 131.500591219916 118.492287441192 121.515872228716  
124.095340478326 139.984102798711 123.240482782331 116.082361389405  
121.072192130078  
LOC100134435 141.508424382665 130.760835441776 125.099672022917  
129.692578787988 122.031894952046 120.971313945446 137.096785940897  
123.038646914863 140.792400101142 134.37355626628 138.56812029378  
121.197702744078  
LOC100134436 163.956894843504 148.479865869644 154.7326161316  
137.190593489949 168.847039069786 154.900676756492 132.600208090551  
156.548858402702 166.311421907434 141.25089277145 164.736294372006  
142.836229345273  
LOC100134440 184.437810305792 175.245611094434 146.944628763232  
172.980441569522 168.942165573542 139.853333847856 145.076068630259  
143.410917415691 155.42165869714 156.698856643638 167.397758092427  
157.248117633013  
LOC100134444 135.57577294564 172.562162872242 128.583503171594  
158.163599942547 129.195962576953 135.283742166077 144.071652839025  
103.36057518781 127.982696242304 121.30744400137 161.099805358232  
128.482976013813  
LOC100134455 130.322436253881 132.551989498706 123.474836673474  
117.740022708444 126.991140761102 126.470239371932 129.980354138975  
120.517691208358 134.288349336742 118.303150165804 113.311132067152  
124.012439490264  
LOC100134459 151.004738508108 133.66893163718 136.659134200122  
130.105800581241 141.939368369872 131.626173473789 146.515240633175  
138.418604660734 141.858928084825 136.207420489201 138.546549217819  
137.420986402271  
LOC100134461 130.14600240687 136.211694310501 134.603065558787  
128.381433897602 143.985850833974 133.832462719784 132.70643154246  
119.636334259263 150.034029031033 159.515698265424 114.664782541261  
149.869314204354  
LOC100134466 150.691815494794 160.735428753783 141.186913979346  
122.863612588759 127.771225410866 128.992837936606 142.081013617671  
132.211379936941 153.121693371757 146.488402397597 144.389805078873  
143.124719052301  
LOC100134468 168.618667871117 181.431827312784 193.777175793218  
175.485672103348 203.089661928125 219.638478100747 204.990512488181  
153.209409960324 167.018380617832 197.112749959833 182.736067431579  
293.350292227077  
LOC100134470 122.583461806645 142.680136733947 155.393326732887  
141.4587810296 144.464071397369 130.89594032962 130.973504803813  
148.222477811166 133.096984735092 135.315732654507 117.432860005907  
140.578378782903  
LOC100134474 143.897248922317 146.056723380149 128.99859423584  
153.620767586182 153.230304322351 145.660417208595 123.291258843371  
149.764447995426 157.055133233709 167.484236948415 130.495294897642  
144.86583288717  
LOC100134475 141.73799456072 140.244052740397 131.117294275244  
128.400741751903 122.512587751135 143.206100064821 131.897352210959  
129.811504562622 142.804411455413 129.079917151186 141.963297887448  
133.455138380277

LOC100134497 164.571974509529 138.5270206057 152.207601283271  
133.829889099442 126.588382665802 130.982011094627 140.899799480834  
133.871685084945 130.878694881324 134.947657801444 125.9713489569  
151.389433433911

LOC100134498 119.152881350581 135.153588830407 139.305671333904  
126.670227417269 138.586620636835 135.544048708523 146.070871543153  
126.865622462379 155.295464263911 186.04763660516 159.379420001197  
129.722382881611

LOC100134499 127.144291519133 125.35643274458 133.537552829999  
128.588822671032 151.142149775806 132.216453078716 142.763157232147  
142.002145315543 135.237042337721 132.085538520551 133.061016674211  
137.6160344044

LOC100134504 3474.0924656878 2952.67114077688 2947.51998516453  
1903.13326109546 2045.24382334506 1923.19560386389 3282.73711809465  
1813.79641422879 1455.75693295732 2065.51724858579 3869.12225821096  
1321.17236442448

LOC100134506 119.176139463015 111.515588041012 122.133292722932  
117.642441794442 122.337240239463 120.089228795888 137.264095379365  
122.051473363557 125.558877611499 134.748177388398 115.672307128514  
122.373400988227

LOC100134515 143.774841336279 157.663460168247 160.0697586671  
174.296028319781 160.70138318726 148.87690497281 147.034021626893  
143.673778816953 146.460464282676 149.857861968652 137.290687951485  
147.397591251955

LOC100134516 154.816213491233 120.857635836068 139.587192809431  
135.141067086648 138.188522429661 135.521802085177 139.625635881693  
133.861140449832 124.491884305455 139.607944722497 143.489951789296  
136.051070946954

LOC100134517 135.038195181839 113.905364405553 120.07034081564  
140.110258415883 123.094324479352 137.961504178836 123.368137868951  
116.828333047376 113.66416989856 121.957155610892 133.526213647686  
121.807661901776

LOC100134522 124.93629294955 109.495342943278 125.738320262644  
142.924854393401 140.78582131501 126.217702283708 130.902319266342  
141.668101962049 140.809956497396 142.414323129638 133.26167785455  
135.375268329248

LOC100134524 144.597060118959 154.698312173556 142.459230639888  
162.297999435613 132.828179725129 131.500591219916 161.983987604  
153.143706194386 137.363483527372 151.84373370805 157.43824048982  
158.906481816035

LOC100134528 129.985797334276 133.755609587969 130.363516180139  
141.521742442341 143.393174544776 140.743917481548 134.02083946631  
147.796610216375 146.323776429268 122.676368520743 174.953232190285  
131.290698895743

LOC100134530 183.921173538112 179.880812358974 181.313333665614  
198.456392063513 209.112959748917 234.041863839123 302.532985701607  
250.515579402334 215.744552410805 361.687156919012 257.602370597316  
291.444155562134

LOC100134537 441.785666261936 448.106077184152 548.288640768746  
353.285905782951 942.900963522948 1038.93733638848 1108.61301774472  
985.087150371964 696.003998372271 866.147379099606 599.307072499899  
916.836022395768

LOC100134539 145.110145981908 147.221425204534 131.380387461901  
163.718595974283 141.147683040881 139.709959820327 147.330897105911

137.7724100594 139.3465236423 138.052032298683 150.294432623474  
123.603972078897  
LOC100134540 119.886433564236 121.784166691545 129.476648077532  
136.687813884132 167.212960569538 131.681566829159 150.265385257579  
131.378893655618 132.324630056168 139.657182434153 166.611809859059  
135.338077911839  
LOC100134543 105.31352471598 109.044879188971 108.697696080014  
120.994068563884 121.177681858671 131.324822348301 118.777105073561  
118.572988141773 122.699993989189 126.260691770282 114.867454554206  
126.288011849541  
LOC100134549 130.607857562345 140.385509382606 142.958906063186  
142.674671804361 178.425137262105 143.429394097222 138.872536475067  
131.683942368268 133.879079395215 150.3259737066 136.411722212312  
157.895460674072  
LOC100134550 128.122197525844 153.102526191573 136.409960447884  
128.339161042799 137.002473710189 143.030777754448 132.943957535655  
144.039601001475 148.43357593249 141.544454931788 139.305220220411  
134.514251897045  
LOC100134551 128.736591902501 121.508233749444 131.668163693171  
125.00254973945 123.968639555673 129.771073986855 121.764933633063  
126.242935839683 143.92831903543 118.56332995149 122.881793230233  
130.838350486331  
LOC100134557 110.865668451601 131.029333093048 139.343387386742  
118.006338536085 132.076865522593 134.978785580693 117.60787142216  
121.957155610892 122.94737290641 140.809956497396 115.457121859064  
143.576177625265  
LOC100134560 134.13812854554 123.046069309901 125.212404794262  
119.01236045062 117.238968848218 124.693253194681 112.088944448944  
142.290253129837 124.267394371656 109.282814458761 162.077455145261  
125.413619056436  
LOC100134562 130.753266976637 115.80245224388 122.027632589515  
126.762116571216 123.484987952263 125.897190440417 130.867819112143  
135.206755687105 115.981530322377 129.628859533303 124.075077123156  
116.248026336995  
LOC100134563 156.285963197762 163.904137395349 153.563839578065  
143.629760301493 162.609829456486 161.667782505656 157.180095329946  
155.835077077665 176.964088090133 148.49560238679 184.724071110756  
169.791616021987  
LOC100134568 116.793408204625 133.017537400068 126.875483714734  
133.186678625229 120.995697049378 116.609122768341 119.915330116696  
118.628559951472 121.423030266904 128.972276851419 131.676609824921  
126.178476831007  
LOC100134571 120.918190840083 133.006192351471 151.024201732633  
137.913497715424 135.221786448517 138.888049140099 139.395743826525  
144.505072819693 140.669947387892 156.557792402376 126.538061500993  
178.329946332806  
LOC100134580 114.618608815885 120.290102399282 143.713962738562  
137.885506916098 141.830432745537 129.645982978155 128.0171233156  
127.736712231221 131.288785100733 141.97908047949 122.583461806645  
126.75720720361  
LOC100134582 128.669887479835 126.025161261042 133.391421497441  
137.545063966957 140.626181314061 146.565265415908 119.651470884046  
149.369418844044 141.362627556137 131.690417323838 157.907190910755  
150.991991926229

LOC100134584 170.342828808493 197.262062021667 238.482863150124  
185.405774238391 158.330403004116 251.011148303246 202.114480291084  
149.714982846365 192.752224665459 142.916274989816 190.309453030884  
206.469040492609

LOC100134587 275.468194644053 367.025117016472 286.035428568826  
330.143103381406 180.085975596327 394.414934831535 406.736165197168  
591.89966781883 329.88790758321 165.827405735044 254.517135747445  
157.244026506342

LOC100134591 131.670601860412 118.991494185841 135.449919220607  
135.135834717193 130.258933321051 138.132390735567 128.232091717966  
114.545476919992 127.856634523494 130.721987260546 129.153882779488  
128.082956839709

LOC100134592 117.67638166062 137.029726467523 124.22833964472  
120.342513393659 121.54835308632 110.977904932371 127.921209207879  
128.011387527117 122.992700222262 119.905127545336 128.186963138555  
128.628637585951

LOC100134598 136.760382409185 143.123983359386 146.108551647446  
156.548858402702 144.665235198936 136.005756600948 135.122770943076  
136.115306932124 128.611740835252 134.37355626628 147.858339902055  
132.570225520163

LOC100134600 127.797666392002 135.253713075341 129.077660633761  
122.878790127038 142.003414252064 133.929311295884 141.949098898957  
137.968932080074 144.386561289985 139.202670489857 158.98666068453  
143.294217840279

LOC100134601 156.572774198042 145.254692995502 155.317754378283  
141.781482381513 151.9441336438 143.913625824599 132.016944935305  
157.575902297677 162.808270845998 159.918778562802 142.541080856005  
156.68541512214

LOC100134609 142.750432197016 139.733149319736 130.593846004132  
134.768694020981 139.697477263244 128.36121178972 140.925705285169  
149.584582050615 131.967245387861 136.071856104688 137.842375545994  
147.626071601072

LOC100134624 137.120973494952 142.093180304661 151.289464845626  
143.326739481448 172.961115357569 140.668597897404 131.99470265134  
144.324313048777 138.028813480968 152.60462513339 153.310330832285  
142.514794686932

LOC100134634 203.87884605779 168.412162365467 211.786963444117  
187.443940151794 207.831299397177 219.246271924313 291.444155562134  
281.570685561526 207.831299397177 294.17588071297 257.880331012233  
270.894153548841

LOC100134638 137.729777643977 129.267923706188 122.022611139895  
123.949411804458 136.826606228323 116.977202125093 125.346526762316  
122.373400988227 124.654146040634 119.315932907373 111.506345174435  
135.71450593765

LOC100134644 122.642077625035 113.58962177275 117.289037817013  
117.847744476387 119.573635447638 135.310766630401 129.578488688293  
141.129013595331 121.04331582508 118.235640920527 128.697647007046  
140.511988097197

LOC100134648 337.973433871323 265.028512407839 610.070236234299  
164.472980733552 292.746711619565 655.094843900848 420.871349359404  
718.871732206362 496.328898534802 517.881547706391 294.922183826144  
966.281849197568

LOC100134651 121.260355515095 125.20712393273 130.666781754635  
128.725044326566 127.802645313091 149.213990424575 116.989409891761

150.841261270382 130.141611252834 125.584202037776 125.371128588617  
149.740404686695  
LOC100134654 120.297848408451 130.147848418265 134.835962366555  
143.141852982371 139.526241501184 113.989682635964 112.063713561549  
130.095585254401 128.9481574913 135.229197100212 136.91512200431  
126.298187538812  
LOC100134655 138.149037534929 127.637319802339 132.319254588053  
129.368045611894 116.889373249017 119.696656494403 128.429007921588  
128.247871411825 123.98775110588 123.665983073461 118.338713846941  
128.314990390649  
LOC100134658 132.137634927459 139.316189199729 137.244552699212  
136.84488044614 131.696834332724 143.419034484087 125.236926572282  
135.003236040032 141.205975588506 144.270828498856 128.259909378964  
136.113421708277  
LOC100134660 143.028618831382 138.748941735079 140.929424764561  
130.198147836925 136.140327952231 157.555410977564 146.457939801041  
151.665244763743 141.275667354541 152.137669424501 145.350342823866  
149.974080577906  
LOC100134667 134.407776033032 130.784802403934 134.30624644595  
138.1693725329 139.482462221798 129.127563278016 132.119370332298  
124.775529469869 133.228074579352 169.441789096441 135.725202462502  
136.344248873826  
LOC100134668 103.888971448792 118.731960910224 131.165798722835  
113.177330690612 127.540848073484 132.071099697667 128.407968177242  
126.260691770282 126.450300907283 132.514706165018 103.94864861172  
120.238706364491  
LOC100134669 133.272540012108 124.505487429568 146.266350809492  
146.873719524815 126.121516564343 149.355389396683 116.764795914545  
123.725998173975 136.294479720968 126.026938396257 119.399971165857  
140.856864690669  
LOC100134672 124.29420915051 123.395897439193 133.71965790848  
129.090955637629 116.787791109549 112.142263331903 130.924141812334  
122.010855318111 139.130560988108 125.016608289141 140.873210629865  
129.173772079264  
LOC100134674 121.053766591551 126.398884382537 124.313901870563  
131.335344547051 117.461198576063 129.730685860688 126.802963197337  
126.547883999721 112.190904058889 125.794788766462 127.661634554996  
122.254824223167  
LOC100134675 127.669334230458 127.650229552084 122.187031504466  
133.463464118897 141.050384368733 126.488299049827 135.127041919869  
130.829825154842 132.419898122309 130.63591305094 138.924820359912  
120.696557306298  
LOC100134676 141.927204640355 120.951365231971 118.820154030256  
142.432995657729 137.240806191881 136.067657949844 128.163613794257  
128.359034755228 132.591496435822 125.402714360058 129.018088749395  
140.617663657037  
LOC100134687 127.030113960477 156.402578892869 132.725232102483  
144.785852437305 143.60570420943 147.885769870843 130.975606477621  
142.103519373191 131.76272538453 151.466689967666 141.294094833197  
145.428297145967  
LOC100134688 162.52512327258 160.268754786532 165.808660192901  
153.519207482423 165.530397739051 154.190469538568 189.816900281053  
189.528686948872 181.328458560967 181.865456674829 188.490807652188  
193.544035570799



LOC100134699 117.570749340011 137.457453776513 133.642815510945  
131.257901340773 139.951275828765 118.161192318422 130.278980631435  
122.888626394154 127.6078497227 117.390049487174 115.981530322377  
137.747088378131  
LOC100134700 118.619176257622 123.629279569085 110.988514718572  
123.847186739627 117.467618148107 125.967294930279 127.202039384041  
127.742948876822 119.502758763438 114.494394548044 139.3864057463  
141.913001976093  
LOC100134703 137.958714945718 132.865704994046 140.213080190065  
129.01094835739 154.886628987246 142.086300138469 159.710615852435  
157.221008210698 135.10155936286 137.649424237506 152.22701178148  
156.859539612504  
LOC100134708 138.497931380734 119.934231033302 136.003277940379  
135.218648235324 131.989955864584 126.141462782039 127.661634554996  
129.374418059091 136.244995503799 137.483830932387 141.97908047949  
138.070353990356  
LOC100134710 114.213405341709 122.120307446003 112.605287278882  
137.714430743204 133.420267697961 125.83678485646 126.713610681382  
135.987450822209 140.160349667726 122.996616773523 149.949425756405  
132.610618885717  
LOC100134711 206.149539851803 193.858884443593 198.506786870804  
222.243523614518 193.753062958207 219.619022209985 182.958991847218  
204.877041314502 196.802641002079 174.116797337377 206.937770272939  
261.065986251886  
LOC100134712 160.156127781701 143.49969914174 152.254519859308  
143.643259003393 161.44729973777 141.76964678852 160.419358656559  
152.826356673175 143.567488854011 151.525267538284 170.007845523415  
167.521700144143  
LOC100134713 138.171858105728 129.313576009092 116.889373249017  
131.392533729943 137.605244950708 125.769903262265 128.11006485185  
141.753560518393 143.941358917251 125.885715928839 125.405373274081  
141.092486112278  
LOC100134719 146.910471989835 131.593705080542 152.407614042236  
141.960809148036 140.992801405088 147.221425204534 140.010161839229  
141.25089277145 143.296580629431 138.218392984717 152.097609803404  
135.031430487047  
LOC100134722 129.808590871788 121.492896642899 133.089616534434  
137.72327986309 123.135918415235 136.494339004002 116.263405190786  
123.58053320223 124.915772594451 122.736882859231 127.354826381656  
110.242638217587  
LOC100134728 129.25124636593 125.874313058552 120.551603446364  
124.657687121111 120.126700838056 118.558673085303 117.995551728392  
138.023752854109 138.19108838324 123.860747215706 110.810963139914  
134.247361216412  
LOC100134734 133.387065801837 134.73098146124 138.872536475067  
125.381865040574 155.641860356683 138.216926722025 159.655362710407  
150.942078067308 140.063142443074 154.828782972852 168.560093633607  
172.622816559412  
LOC100134735 120.422401793885 133.427561208907 131.681566829159  
133.486155360266 126.946305561543 130.024546949158 144.494401248678  
139.606654715326 120.085340927108 145.941674563997 125.5109819304  
154.518641757391  
LOC100134739 123.817878562971 125.500790447338 143.901267937876  
123.588194516972 134.786678978467 137.024230648861 140.475688390415

129.180990946063 133.315888375614 129.998824457005 116.700397932007  
133.191797029676  
LOC100134742 120.669452856028 123.11447940203 121.689416823766  
131.780134634616 129.875986080057 118.533346268154 125.798453479983  
127.077668562103 124.452631766045 129.616142780279 119.755151432304  
130.217791888656  
LOC100134743 130.582210755516 116.168270198375 128.745737514912  
111.956783714784 135.120878931851 141.636604735133 130.70867409848  
125.462709777781 109.438965262717 121.059923601223 114.721282552636  
125.687688416588  
LOC100134744 130.571827557149 131.859204862396 141.457040042276  
142.086300138469 129.029151164978 127.690860707933 135.964630862223  
141.642547489983 144.710613442383 129.375772737722 127.783892576352  
142.922549076496  
LOC100134764 139.545451634208 132.319254588053 132.54577436954  
130.753266976637 135.857403020659 134.436423298225 125.653011880654  
143.405079593778 135.479300698192 142.826898321575 112.867662941811  
128.748663215466  
LOC100134766 142.17773831901 158.627416752905 172.421637564661  
154.398416018484 145.096707533824 141.178668371671 140.873210629865  
151.660152977515 152.219906297607 165.904887259203 159.508223180752  
150.623182458747  
LOC100134768 152.954944775793 143.390971600678 145.122171099946  
137.378528742953 155.255279503782 141.558927907067 158.095373931016  
169.691392833277 144.845726048937 146.932655562613 157.844617425219  
167.106870400592  
LOC100134769 152.021576565132 143.326739481448 136.49035374704  
135.367261617271 148.585224298375 139.675292022085 145.804420322848  
136.167141767484 142.071492722749 145.783320434143 131.019345449516  
131.582231577364  
LOC100134773 144.604714612091 142.110469428644 148.991357883449  
136.852403978525 138.592943322694 168.289492873475 137.206961927035  
146.746669300049 152.927956172463 139.123489349026 143.015905927379  
155.108146847158  
LOC100134774 136.409960447884 131.249240371529 136.541973790157  
135.63604256516 145.880661952783 134.671840308041 139.644701550661  
128.695695565175 139.197364191101 141.380276932556 138.156430188312  
138.256765189241  
LOC100134778 143.501380161409 135.474070994652 127.473812381059  
124.542879928448 131.712745388563 136.026302491961 125.803854387512  
125.462709777781 131.324822348301 124.963418643156 138.753419730571  
128.274326990056  
LOC100134785 144.914015211747 162.082166316002 150.290025009187  
159.399804351771 180.468984099647 155.861829925386 151.739221728872  
163.165374495635 143.831294912255 165.347173283335 172.259627777465  
158.999305963902  
LOC100134787 125.531371673679 130.944610173285 135.762603711262  
131.619951110473 125.768053724055 138.036876466521 143.147325939994  
137.890006487904 130.42746492878 134.260779370821 143.011042973347  
127.12451522286  
LOC100134791 121.347339077474 121.661141741782 117.718893827092  
125.603448542611 142.103519373191 130.368933537243 131.277646716635  
127.320624058583 135.643341446691 133.204793127029 139.263602290256  
126.823886603295

LOC100134793 140.051904905695 158.554429311951 142.043121538885  
140.738977175997 147.307419859572 148.439740062804 141.831014532008  
125.143281492089 142.285486339143 149.423230365631 136.22416508552  
153.985529457122  
LOC100134794 134.838366830668 129.813090345837 138.631273903053  
134.544368736184 223.408447580188 191.074428905553 143.903216264503  
145.054873480806 177.851689709807 134.700543462375 160.72962443421  
208.628626112623  
LOC100134796 118.641431192759 124.574323079707 130.944610173285  
121.826474059574 134.679882781788 126.256716138724 129.382242021964  
130.282212339065 137.340844554597 125.525241361472 149.069732302093  
131.527148910356  
LOC100134802 121.908945872994 127.233439204926 128.42287610189  
117.805556408194 119.060186838239 136.553568679965 117.862532836494  
121.628827418997 121.48867035121 116.647291878845 133.085476994246  
130.822330736013  
LOC100134805 116.176068923513 126.294085960617 129.874235646816  
121.416038813102 110.1278204598 128.232091717966 114.072600760808  
124.641892391159 110.003750007057 123.782746527199 127.511638455985  
113.211979632702  
LOC100134812 136.970505971671 137.499290547619 149.684922983176  
127.753065449769 141.616920429839 129.549673572516 136.907453440141  
136.059884933876 135.812301062763 126.621957978122 126.988118823204  
144.570725886413  
LOC100134814 147.970243979273 140.347131743987 166.735962853075  
158.950169226637 158.175138008678 141.010588053284 156.040073232376  
144.664600892248 140.997594159186 155.397301207102 134.901659808633  
166.722369066673  
LOC100134815 145.666712006532 125.5109819304 122.442590463781  
131.527148910356 130.798254041597 134.369532556726 134.633286312653  
132.817645625115 127.016845640004 139.263602290256 140.018786803502  
137.752238510249  
LOC100134816 154.509924503184 128.84738760112 137.949215501559  
158.034418043685 142.924854393401 150.152613183213 169.681582570965  
151.87495966414 153.244758030666 147.657151780506 160.778296470857  
150.620603731907  
LOC100134819 136.520811697544 137.726769003181 148.162914253981  
145.017264740722 133.524698103972 152.344248425416 131.928871107722  
149.103778494524 134.618121709059 136.631948656268 121.410606617535  
137.347554578171  
LOC100134821 145.414563914801 125.008209861774 135.341892490559  
119.640086587188 136.585541662028 125.253637835638 142.968008233583  
131.434121613176 130.047353911148 137.43751840683 150.531753446398  
135.063259138429  
LOC100134822 144.920107068083 140.941447663862 144.765051967884  
141.76964678852 142.548833391567 152.004130711617 134.660181775674  
146.099555861577 132.517166202071 146.166710487448 161.031148038478  
157.697168349028  
LOC100134825 112.088944448944 101.597648528389 147.09751695349  
131.169769031768 134.746175914762 138.054470878471 132.795064859079  
129.938723074546 134.197892075036 136.716554749722 147.479390172796  
131.481679396553  
LOC100134868 1843.76920134139 1937.83242524439 1392.89422203207  
1718.80498208397 445.905756082569 2303.0998502001 1100.17618574297

1685.33737186733 1270.76282064793 983.094485868275 2120.14463347544  
1162.09529660662  
LOC100144603 143.700865823615 133.79868477192 129.741644654541  
144.958176005711 165.158465031363 154.71904132098 160.256877369493  
146.927825526831 148.821942578396 156.233573126063 165.74458564887  
152.67564185705  
LOC100144604 162.638805580226 182.873752254411 187.205674045893  
166.099940078284 189.49408026215 188.027848008991 407.760503937821  
639.688482258192 145.762724663455 140.57567768682 400.472835504879  
251.546290552828  
LOC100169752 148.294870328642 132.061436165754 155.058852833902  
148.16526158216 137.426226808356 140.525013926642 142.303654405005  
140.929424764561 139.508029141287 141.478253058549 154.398416018484  
141.956996308304  
LOC100170939 236.833653794223 200.443940449586 277.539110964815  
167.416417895159 126.512613967438 140.52997588229 151.80632463295  
155.511086289504 161.021740537372 209.487240895674 201.123529130035  
219.228720772236  
LOC100188947 144.287786573389 135.494894933583 147.294408903227  
122.223184326586 169.271175460047 138.825961991209 463.802270256246  
183.443006525616 203.960838492793 135.814893730549 350.077206368839  
732.040299742444  
LOC100188949 134.608734423113 143.182399285928 137.418345713224  
143.92831903543 134.674554546711 136.519697160267 140.169200413643  
137.669753723768 155.790759250672 122.211000410541 149.361498483705  
128.26423663004  
LOC100189589 141.746032519746 123.654787271088 152.729355306724  
135.349868925415 131.545287070888 139.306122448857 141.440563159897  
145.776143302784 136.931476050688 139.885054845153 164.883927796427  
143.152993168137  
LOC100190938 22182.4877079778 21956.7541751958 23053.5660790052  
21409.4415798676 5373.2173152906 25808.3502428915 12615.8332290932  
20217.6497214386 19434.8698477145 10862.3952192141 18501.379301537  
16818.1954169657  
LOC100190939 187.729071402782 189.114794029657 173.387549650592  
221.253717494488 129.549673572516 158.000456937922 137.029726467523  
146.373162751863 156.061579024549 186.420541099902 180.15338103  
153.453969224725  
LOC100190940 122.098850053347 138.952082680577 130.309092946921  
117.367470441908 119.360478719424 115.085961282227 132.748478264583  
137.009303458922 122.174036435094 131.081793789906 114.41737808857  
121.675007387533  
LOC100190986 721.603421985572 752.142287661845 733.195136251155  
775.382397816601 298.347201056937 1093.21579738952 453.17378995737  
628.485648053393 486.524284354103 494.067878734396 554.652979820908  
443.343806055858  
LOC100192378 126.928328902507 140.217243202557 131.606765174514  
130.047353911148 136.811620595243 121.219323788324 126.482660154852  
111.962852412774 134.041098536814 125.472342351466 123.535803027153  
124.130599753093  
LOC100192379 144.883597913037 146.345451252228 139.926488041421  
140.256871047018 145.954700424725 152.758653228708 156.169405925094  
133.095245865663 142.307520290692 160.848201202361 170.202597821861  
154.368499839507

LOC100192426 122.466276478613 131.097598299707 129.033433971346  
138.429440368539 133.397734409167 116.103369028871 131.497454038525  
121.619593453259 126.476866025397 138.596430973865 116.678969343492  
127.954231630338  
LOC100216001 129.445240570626 136.241569739318 152.717642489582  
129.517511177852 138.276865331434 127.155818626031 129.858162624661  
136.103088234442 144.713108022551 131.77099316122 137.422974008008  
129.311134743311  
LOC100216545 118.070716076005 138.85328409337 148.74881415573  
138.43301474649 138.156430188312 130.987023228883 133.838032323605  
125.381865040574 126.649739818781 127.409603645289 141.191500203423  
122.568743478314  
LOC100233209 141.550553034455 141.36525744062 133.743708220112  
127.597601325212 133.384498169568 123.738223146912 125.587057468028  
128.23432652395 115.170176263172 160.127254444487 160.203521879896  
122.634741242406  
LOC113230 158.330403004116 172.297698667311 182.055718892894  
199.96834355685 266.99947481587 165.682617337317 156.682781772069  
193.753062958207 187.812436252228 174.161146689117 191.018168651394  
179.46936343225  
LOC113386 305.906480933354 237.754067231793 419.047108206042  
299.039192744355 245.766885283797 294.653534388707 299.754985162237  
356.699466789374 588.334329592604 299.390443444504 271.113617350982  
362.445813697676  
LOC115648 151.26137860684 135.565256045133 153.882081780197  
145.03221570575 146.819830256127 146.21362402936 133.272540012108  
144.36575644625 148.000706956532 142.167918879613 144.141837615086  
147.045944019838  
LOC116349 141.004467676795 154.183537565624 143.036006001419  
160.419358656559 140.393624985807 153.752502094283 133.52271411034  
130.390722272955 149.693559841189 131.582231577364 140.236618351922  
157.57914268719  
LOC116412 136.77666893627 130.311471059267 128.751758311249  
135.118955626451 133.123444023892 143.41350503793 128.708956947928  
137.680019787902 139.348494759948 143.223510456306 126.45630489166  
137.217104547797  
LOC116437 138.295019395552 131.034010150362 140.398923642686  
132.71633377967 129.023206862713 136.506347083926 141.512008928271  
134.830021570666 131.162118170837 134.247361216412 144.972694558182  
129.564482772168  
LOC118945 146.65668813596 126.830269821364 133.231066635063  
146.70298187005 131.806645427543 141.398513269219 137.552979154943  
144.741063866547 127.247764390727 145.749887769807 132.045595972712  
136.580363776109  
LOC119358 150.929236917651 154.584367902971 169.674931517111  
145.553219709768 151.869928694006 173.281506912652 155.595651896155  
149.121894111871 139.166537591866 144.64136816491 146.256076936456  
164.072443259668  
LOC120364 143.122278808091 125.655823846115 124.715454831847  
147.049287475127 133.727447520255 125.08580835258 139.972797966319  
134.243435358729 126.919867899174 128.16147857336 119.725487374119  
123.09149124559  
LOC120376 130.09958025354 148.684855678535 149.237422245619  
147.565485281003 207.651142295123 133.268239762624 121.743701509981

140.911080286243 119.131613164405 121.877276961306 155.3394927753  
136.790457887057  
LOC120824 144.062079886084 139.675292022085 133.093234861388  
139.522018789485 136.403353223002 131.892151111901 125.000876313893  
123.735827460404 138.446492794924 125.048770476506 143.718210650338  
155.379116566097  
LOC121006 127.492376657284 127.146101490884 142.405569257901  
139.921002429353 132.093678438298 127.488853386792 136.099663831028  
129.461160777216 133.628391175037 142.133238886052 129.811504562622  
143.618454531431  
LOC121296 142.039943511086 137.347554578171 136.982719190537  
137.356539213081 143.784022884904 136.580363776109 139.858812885649  
152.346098251128 137.929082565223 132.028327486943 147.192815700248  
137.114604159523  
LOC121456 150.593928635647 137.82918941689 139.13396769999  
145.003104989017 156.47237266917 154.459517779315 146.599636794606  
137.709120153505 138.108184983014 138.121905080822 143.292552892073  
118.375739674144  
LOC121792 135.208478510375 147.681723355535 171.014432075829  
145.735532706214 157.979749139651 160.221974600577 137.916872642522  
144.927731613526 143.962842383778 158.517778100137 135.203507726561  
144.173163762502  
LOC121838 135.333055517636 135.186880148352 129.625046507677  
127.512733134453 144.396774242135 135.425518707018 134.853253781256  
128.692917766138 130.827726862159 125.166940410459 142.073529553425  
130.529367177452  
LOC121906 121.141432480683 123.518170356322 128.588822671032  
125.052770277549 142.896723827753 131.560971848628 136.207420489201  
130.849201993866 137.251513843314 125.542301916791 134.329334422886  
137.141081365469  
LOC121952 156.973511952828 142.34956863109 159.570288565855  
131.570358580547 133.348510114432 146.875733210901 130.732397679661  
153.000232171457 150.657800679032 151.606932937644 149.387467833684  
164.247251507109  
LOC121981 120.07404952486 110.190708230962 134.178733595096  
111.708970469189 129.041254463346 120.311723366684 130.674263597931  
105.010952544907 119.005230164124 142.362022977137 120.07034081564  
114.556542069712  
LOC122038 134.850260739685 130.143953880391 167.933231844271  
135.576975868985 144.161672064561 153.039237274992 148.314248474411  
129.666957539624 132.478801067837 133.876636039037 128.572388808833  
131.753135000312  
LOC123688 401.840794789616 408.510567121592 455.08515350006  
342.487952136318 174.161146689117 321.568127272161 222.285940575778  
256.964577037118 224.851680313689 212.959246855759 243.793465720264  
239.079352337243  
LOC123855 148.597346678768 160.20843950503 159.301581158613  
151.589273633331 165.491193869938 158.831813796522 180.456659320226  
147.145932651151 150.624740697168 161.968835903764 149.204816953404  
136.734131465433  
LOC123876 119.882472552083 116.943791343147 114.711310011993  
129.566451901256 109.781334128478 116.71331256222 105.010952544907  
107.531907287727 119.573635447638 115.531710316716 114.691842968597  
110.553759711075

LOC124216 135.377118045038 151.923356524322 146.552529779774  
133.075748695526 149.377153449536 170.98312926 128.054394154801  
158.030237507443 153.541193559658 144.772914483212 168.37043566813  
157.70581824787  
LOC124220 138.391203321266 144.417333931582 130.476322267589  
146.301300103564 147.909588100857 151.632801137039 186.04763660516  
172.142411008084 146.225422797118 164.406564594296 420.647394044431  
189.324370290702  
LOC124512 743.023225859813 706.292905820227 674.571475335107  
630.670530516275 834.788058321257 605.795439342384 1044.52286986369  
1138.44837250274 839.662936279727 935.423045210635 762.584280908728  
893.264940736694  
LOC124685 131.989955864584 137.549175595441 143.53550972177  
132.651922794567 133.935910746769 133.303201646987 140.197487078987  
145.944809232038 128.339161042799 142.964043764953 132.247611790269  
151.734683227196  
LOC126075 114.85602874727 114.589757401741 104.633603136988  
117.040953580545 107.930325780047 110.003750007057 114.062099086818  
114.308806726044 108.118551275778 105.859916438163 114.790717658188  
104.798333931019  
LOC126235 174.127444395862 170.490099282436 171.610742435469  
160.898061905021 139.966813133326 147.751220590539 206.127493726541  
151.528377719344 150.308048500142 147.982280671798 261.426617866925  
162.940190224943  
LOC126520 147.745780820004 133.850733997442 163.07139884152  
158.670835881902 160.6823824476 139.798414027439 142.579346058088  
157.28429690041 163.21153580549 143.275056599274 147.015427944761  
169.061364889307  
LOC126536 115.47716627378 112.971776964469 120.170269310738  
119.686859562393 114.841964705981 101.149125916797 105.193775204124  
116.14662237541 105.348008821162 108.266328505986 109.182623414389  
113.947948541258  
LOC126661 153.907737500104 132.038012025708 147.93442757931  
147.322622473251 129.904942554979 147.110929610347 136.704018446388  
148.134642821094 133.885725703056 148.760280320258 137.685104040843  
161.965270932582  
LOC126767 141.853711139375 134.391386851101 151.351938656508  
142.810564324354 133.056659202188 151.070654092886 136.978738825445  
140.496058408953 146.698766621345 144.589482298525 152.435416154284  
137.694556514044  
LOC126860 125.843089077365 137.333595298205 127.887666721519  
136.984172424718 142.106329280184 144.807626228351 132.517780271488  
160.349557404154 133.544149685358 139.172437503442 134.850260739685  
157.195967361907  
LOC126987 131.362128083159 135.573170189235 135.208478510375  
143.5709409749 109.342230674869 133.749271961438 147.327675057481  
130.346150829949 127.635341036911 132.402255281009 141.28700484445  
133.496922906874  
LOC127011 114.170354748872 130.355969431473 132.680140469504  
118.850495684547 121.787875792887 124.203250865069 106.900679222135  
134.053685488055 114.774530966446 128.717719117128 116.118745494794  
131.268454024753  
LOC127099 108.895922800601 128.574419295906 133.216489794592  
133.576812299149 119.308345676905 132.20887307183 126.51808376464

125.309861084957 128.763176477983 138.323567041191 163.904137395349  
126.720031203392  
LOC127150 148.278828579424 137.53070284697 151.72544764489  
138.581345752206 146.160188002433 166.917552275021 127.346646117375  
136.786462547129 144.949897872252 142.003414252064 146.150048478173  
140.508390945342  
LOC127295 2166.68174726155 1868.82736251524 2131.68478964427  
1519.38642390142 5314.0635307876 3636.59530016939 5825.9968524214  
3348.7622174821 2105.87438782831 5572.23400804004 5226.05969701201  
2808.78353621111  
LOC127406 159.331110936668 144.664600892248 160.882229345156  
141.052322220012 143.307838525991 177.343586047942 127.299853592344  
133.766199453456 133.396403868645 152.401204710292 139.860093278582  
135.648906382608  
LOC127602 136.596127228365 141.450800126786 142.059921012561  
141.002002397727 136.135223482208 147.138814313885 137.720747340105  
140.332045911008 137.842375545994 136.657107363796 133.640832782576  
142.114181233875  
LOC128102 146.658048787833 130.445920648705 155.402421581195  
147.958483355783 124.402373005821 134.147586627141 134.172033051676  
143.105974876327 145.806935833967 133.810472192646 116.58452862953  
141.434699050015  
LOC128192 821.020339593525 855.415038498392 875.7694907383  
619.223672253014 1088.25132365974 1344.87842417496 1949.60516542965  
1812.07394646463 1484.32547474275 3258.07532987071 3315.21586182496  
3700.75770419386  
LOC128322 155.150904036206 149.576563410584 157.213868854329  
144.763700813057 153.354921961854 174.214747421898 161.316521450944  
142.598106777707 163.159571059471 153.228048041467 156.407166112409  
151.144521344129  
LOC129870 149.606576415873 146.764908249803 126.217702283708  
152.272198017355 139.609751976657 127.941584184869 146.094951139804  
140.567565996849 129.79093244374 139.429008129291 119.405562450453  
141.040862279633  
LOC130678 142.808871284256 136.617105945904 164.905467905433  
159.683695366575 142.263088069997 159.52833930625 151.627496656808  
136.011474063229 154.104321553472 144.252481420079 153.231965895778  
156.47237266917  
LOC130773 329.214958614925 317.839512360245 378.4377409749  
291.577778800314 358.732947927445 298.209907157762 508.735412486964  
440.319777672273 357.514919818489 288.68376542946 434.61711290583  
360.90109922539  
LOC131054 129.658488766089 135.59027155522 128.570067783535  
125.315736755156 122.607404698857 133.573744633212 122.965328766807  
114.613368640356 118.631771242606 142.03837243998 124.441699369614  
120.843429388102  
LOC131055 138.968690339299 162.216377983292 145.572363722788  
133.886458291672 127.969833368917 138.907036194384 144.104372749581  
146.025781495177 138.058404474114 159.674396591041 120.094156375538  
143.071933285651  
LOC131185 155.878493935166 129.608034744581 148.73620012231  
138.875827888646 140.978511668091 136.792957035581 145.26329339067  
144.419657674797 151.794243108455 147.610616423185 139.299062352035  
147.114698384834



LOC131691 166.595529296463 149.151791028837 153.38260557666  
136.421163870578 136.77666893627 147.382177739631 156.674411447713  
218.487334022128 143.390971600678 141.40690581885 160.349557404154  
144.494401248678

LOC131873 124.439917584199 140.113334247294 144.117964288763  
135.744202879162 135.873325130921 146.031321571566 124.927989289122  
140.665332203898 143.00521196918 181.971189935628 138.42029331811  
137.790718305537

LOC131909 167.594414386475 162.778480318754 156.114825514646  
181.308852106289 168.838723365068 149.774162138829 142.000874773182  
156.576585764311 165.181215117323 177.88534558205 144.861804210272  
162.54567071663

LOC132203 154.205877662428 137.801899270172 133.296781138167  
145.928643520352 134.111348656261 132.23149173224 149.874424976813  
144.043818335414 140.987694585232 153.311705636864 139.993960054847  
144.056644468886

LOC132241 362.899103657252 366.788087591332 390.573484082597  
448.767690095033 230.447203571825 341.714401872192 396.708183244581  
318.196134631178 502.731019454502 288.481981529558 480.484639351046  
527.226517960073

LOC132706 151.436802637988 158.902676384853 146.223880979601  
181.036375971015 153.865702787334 160.176567985923 163.833372505148  
144.73389393695 154.834679562341 153.492072037266 153.574068503306  
163.014903707857

LOC132707 139.049085468313 148.086979061158 145.824996954376  
136.742206779136 134.151372457715 146.119700458464 129.329521415816  
129.23899614612 137.949215501559 122.706176540192 135.349868925415  
150.434376975922

LOC133185 142.266177608209 138.818492907643 136.537117054998  
176.100691355682 140.84880167881 141.353084959289 150.442821494908  
144.757068610657 145.110145981908 145.929907161493 152.222732770706  
146.223880979601

LOC133491 159.909121784808 180.569583206488 159.554978842683  
178.153527134452 164.571974509529 145.003900788534 155.488346781292  
151.379761514526 150.769819282075 169.355185349431 138.333435927107  
153.066630483602

LOC133609 137.100207190052 138.62994237184 153.423579724911  
165.647471565959 141.898948675823 139.831964368637 149.764447995426  
145.847629576886 120.157438564977 143.405079593778 121.455843337023  
155.575152212736

LOC133874 154.055550115498 169.378422829858 149.876687693565  
165.031678768564 169.844913799159 161.852665901359 134.897153824521  
160.17208299932 154.94587631386 151.176697752603 156.026806913759  
158.76356962428

LOC133993 139.025598691696 142.783159341229 152.179281925254  
148.960077949157 155.759861336991 146.71164737466 145.99474597064  
149.31020447459 142.163834995141 159.784369379077 146.873719524815  
138.250288796456

LOC134121 143.641777655752 144.046646189442 135.950465168457  
125.162662242842 148.034899103241 140.92066676704 141.249687936867  
141.468076901305 148.812015298003 150.645487532549 122.642077625035  
149.833346575446

LOC134145 165.2045030333 157.186747372076 152.823566129571  
141.976051648478 150.731093808891 151.169283505727 146.753212022975

152.411545237204 127.532665057083 147.07272598888 144.12472003202  
143.546629073997  
LOC134466 138.771088752839 128.086493618022 149.505323932806  
140.354508398385 144.81320329947 151.950883677297 159.106269972346  
141.488910091973 149.952762225731 145.036719629525 145.821544099585  
155.018009545475  
LOC134505 144.782706468281 151.632801137039 164.223990197735  
171.229729917612 133.218742606195 144.931901042924 129.501028506432  
143.036006001419 144.195705502443 147.192815700248 150.582568022489  
130.209752198964  
LOC134541 159.534017722536 154.049004176595 152.550031868259  
147.592770523507 151.176697752603 137.779607093226 152.650867743471  
132.442771000976 147.673016541108 147.376482709004 144.981106020985  
148.269123639781  
LOC134997 3363.51782842264 3784.59114921916 4437.40805296517  
3164.55070502403 5572.23400804004 6670.51138785163 7332.15849011291  
8739.02966610274 7838.92787031423 11647.9643290124 8496.2506227676  
14108.0461617941  
LOC136143 454.854528472591 538.252273740419 489.75389978732  
478.699172220804 1461.64901688125 398.61164689194 889.26314145856  
462.265785715695 548.686094748117 767.377380800066 893.264940736694  
433.751675703425  
LOC136157 138.279087298069 138.489443610941 129.544594679212  
139.697477263244 136.71278398686 141.755954088275 135.391788614828  
149.289021275556 138.528083984177 139.60494712939 128.09266452749  
146.249951130016  
LOC136288 155.966610886886 150.661584243174 147.461480849333  
193.428733288774 151.436802637988 146.185931276053 156.068308349225  
182.143506470859 155.349728277626 177.567833691547 142.995274641765  
151.776232847515  
LOC137107 209.130260450131 222.315451077459 225.803528238368  
204.470661830972 194.961531388323 215.300064529551 286.310923582432  
189.758013811338 200.915806094193 242.948136060281 361.160881334174  
213.432084172541  
LOC138652 144.643770374264 150.78145177853 137.945878061978  
148.109847175216 142.411117330429 147.645530163725 138.997524526643  
136.893392154262 143.705475208192 144.119035360928 153.267549449395  
148.770315933249  
LOC138864 139.623194916971 118.351607868932 137.415158613413  
138.333435927107 127.380083832809 137.089392202166 130.457981404612  
128.576310682958 128.488598467312 136.097571072206 130.778164962583  
122.438438464097  
LOC139046 140.909875639658 134.850260739685 138.18056202179  
129.297217956843 130.435589649362 141.121364213272 127.282374513433  
134.620896927473 142.874797429568 138.145677924612 143.258488502799  
140.875923123766  
LOC139116 128.440024330942 146.746669300049 164.901810642726  
149.280480796544 161.285587312115 176.121563444364 167.692053273833  
150.442821494908 153.690189121681 167.51207060064 139.231340020014  
144.808774137749  
LOC139363 134.89031458837 155.91493956251 151.067819234238  
151.911494020123 143.962842383778 166.17959304455 151.188412354358  
151.104891644466 138.21083121895 152.692483731643 151.377932495104  
177.257355909681

LOC139431 142.318709347082 130.962368929833 128.400741751903  
130.70867409848 142.843882404269 140.804008584006 144.879364072868  
134.885883559391 141.862767428244 139.957560460935 130.166741978483  
131.568898109933  
LOC139542 134.074425424613 164.264079172779 157.619627711954  
151.879398444495 145.163084967499 148.782907912893 150.701579893607  
160.415807880532 135.106072664488 142.956870642583 133.769848328557  
138.916830356763  
LOC139587 116.723991721647 133.284873295487 132.210100574787  
126.019246614944 143.951756384507 126.931328660501 135.889764019762  
130.987658962896 127.696578575874 129.126636617346 106.315801001506  
127.114560076444  
LOC139735 161.496700767073 170.655648004461 150.308048500142  
166.091736766853 168.996965070202 153.092864798642 153.214696479001  
143.378998368344 141.557420268382 165.638672456873 129.782134019986  
158.278496385543  
LOC142937 156.114825514646 178.572212478544 191.814634229865  
197.427788552936 180.142758394321 181.635664531851 159.354364289526  
164.787637367264 164.466332705334 159.170943469313 145.395042579024  
154.834679562341  
LOC143188 132.393669306489 149.977924522553 134.460035654795  
135.86924353735 144.765051967884 149.897440750742 149.320667417893  
149.292552957665 136.12905968041 145.103600666515 140.167274633872  
147.103340218488  
LOC143543 288.150694843614 281.054445185438 293.317880637519  
275.696829424061 243.308625792448 289.21739941764 318.971509860209  
331.62124160152 245.489266602897 267.451611731669 367.025117016472  
263.250833727291  
LOC143666 178.619580818758 178.027417594263 200.065184172871  
174.680918805036 169.33926580273 280.292616101827 184.989027770708  
165.613274361543 188.941900997781 155.376656335974 173.929353266244  
204.283030911897  
LOC143678 124.507958339495 134.782388051531 151.325068155715  
134.4380641709 137.114604159523 140.156797128045 151.004738508108  
137.757902615328 141.313482534472 139.237360556305 142.228042097379  
140.029808783762  
LOC143941 162.358237198517 174.075670633438 162.52512327258  
177.630246034993 146.790059505709 162.876684781936 154.177340021162  
162.819608252826 151.954389699615 159.738700107615 150.945167884077  
145.09909498449  
LOC144383 158.809865241567 125.101995710829 141.727639388452  
146.108551647446 149.844677055508 147.46607538135 153.882081780197  
161.870389635266 156.911538642765 152.954944775793 135.30767047671  
152.224281847792  
LOC144438 401.461825804111 353.437466689101 363.255517622046  
302.272304483941 262.259969786927 389.96566674501 355.443758121675  
352.303782547593 321.627969147543 320.360917595936 343.617417488962  
344.737964092526  
LOC144481 152.401204710292 159.701028026285 148.317958829244  
179.663258610881 133.979788317851 122.561285351587 131.322008851059  
127.983873767722 135.37120759813 137.038082933889 126.077945699709  
129.861693025157  
LOC144678 127.67321085144 133.164566694394 140.502667595362  
143.191095552619 125.12823219142 144.898770838913 147.371905597494

141.193081790037 138.59175751301 133.814720785534 121.255814891176  
146.858292465699  
LOC144742 116.884397420467 136.390047634643 131.759422682853  
130.59670974887 126.165220332132 146.455182336561 126.165220332132  
131.782007636511 135.622888091037 123.467227007155 114.099623939954  
112.332130647215  
LOC144776 121.114696251546 129.55573546861 139.981905225845  
134.81595608984 144.446903878863 122.516192906386 154.758831302515  
134.197892075036 144.612549022264 132.118118271944 120.36402353147  
137.096785940897  
LOC144817 133.333067546558 118.076139318165 143.728569494708  
133.82390829608 129.336402686549 137.364525523335 131.648308760913  
120.329105003959 125.843089077365 143.071933285651 129.670884353211  
137.251030000994  
LOC145783 173.959556466614 162.351212914573 146.725123303782  
190.850639994777 146.031321571566 147.866909109733 145.294665838127  
148.773558380167 147.330897105911 152.095584118603 161.632610858756  
162.466301774088  
LOC145814 139.403087367992 145.619570216377 138.764834713216  
151.07661060324 142.405569257901 131.604121223902 132.179747646893  
139.671302796695 131.132508349222 131.917194849285 138.171858105728  
136.485034823945  
LOC145820 141.884995734267 133.467092274663 151.201263631883  
145.987228759402 145.081468030567 144.83282018024 139.049085468313  
170.298291784762 152.44293820056 132.719730606922 160.297609596399  
149.818888178632  
LOC145837 135.998087745992 155.471795004237 155.971045744096  
131.665421461826 147.235245498002 137.959775678716 143.206100064821  
151.484420979498 150.405715534245 132.74579603362 133.054453517834  
130.097543328456  
LOC145845 142.382367938838 127.56862018147 136.330636532576  
159.758196845781 135.872060352476 149.098381037466 135.823975527501  
143.956726538569 152.75709431059 164.634694036993 131.81975648701  
146.171094379173  
LOC145853 277.75958501062 272.994195639694 290.582957824549  
291.056913909578 487.07860019179 326.417021307859 388.782774926005  
242.188218870393 309.0578543424 366.961565952239 276.653753970476  
254.101184686036  
LOC146053 159.406462604758 154.774977482202 177.538262133568  
171.080373870373 160.816803370151 150.929236917651 175.529441666151  
148.991357883449 150.904618960507 146.649944669876 172.097502416776  
196.942880967705  
LOC146177 194.80575419836 175.313689069815 194.775234425687  
165.022029012505 175.485672103348 158.185593294878 194.88319590729  
175.395900648455 175.638328370133 198.191669030952 182.798526632723  
173.939159471022  
LOC146439 156.307551403822 147.590189238316 161.148734808267  
145.444483891989 287.041585684111 254.393421265604 287.558897878375  
474.378918787006 413.000072500071 263.994460303088 371.00603789759  
355.213322760505  
LOC146481 138.359423363142 131.456697863268 135.508803488048  
140.158309892319 137.811304134207 137.294246530224 138.07557330627  
130.179742057015 128.108066199718 136.850940500212 133.663595328149  
131.641435734821

LOC146517 495.769802520637 477.741216640575 520.962651968997  
500.246996975 454.64556253724 340.668473351494 475.213525346293  
457.411248351795 692.945420109927 454.34729744062 482.739666411407  
452.606433325387  
LOC146909 165.200303470106 162.9279134169 174.100921524023  
152.353494489233 292.893332413185 651.675427664911 591.013515828247  
377.538276846051 163.48462232122 204.877041314502 206.010481981919  
282.719121652073  
LOC147645 158.886786960196 153.767488352037 170.720018572735  
167.212960569538 195.16856673253 154.499313851756 170.091913791176  
149.925051977052 181.479652131104 157.240466990977 172.827288328708  
148.688413944868  
LOC147646 151.836705989155 153.832132196284 148.960077949157  
168.210416363286 143.449303333495 154.591116158776 150.494260282384  
149.106615763242 139.782152941027 152.459041674768 149.554174907798  
138.580264357741  
LOC147650 156.083002868004 151.289464845626 153.577349107512  
144.601370216162 188.268774618164 157.076284096905 161.061119536632  
144.342905860503 152.861304149219 174.549929320587 126.139188586523  
146.079727388849  
LOC147670 155.507030276749 156.576585764311 138.090158433822  
153.34166495223 162.229052648595 138.002258986172 179.501659253141  
145.968884703737 158.550259547851 141.599211622756 139.837616209536  
138.230197299262  
LOC147710 115.468921844902 127.107223387937 130.166741978483  
135.511902377219 124.74291205933 115.949513659403 127.209043595332  
129.436712663487 123.722744366103 129.065491477375 138.216926722025  
130.016401638936  
LOC147727 303.138041758745 332.032371697186 325.570839576032  
352.354687089427 244.101521795539 258.145539382199 231.955750250711  
206.35895739543 280.398987330256 185.332215198617 216.903719298575  
226.712995229189  
LOC147804 167.662761175661 190.331589656379 182.560363283264  
140.225329742578 246.288681426405 297.419034136005 287.455622143233  
370.555627307623 340.966515437272 296.830999357172 224.62335524729  
362.849380477089  
LOC147975 150.339554736141 132.028327486943 143.123983359386  
137.872742675806 158.14434287956 157.490138425943 157.322594990954  
145.591320521493 144.581747568524 151.70917316194 134.46743016543  
163.636550341231  
LOC148003 158.185593294878 129.534721138679 142.796371223204  
139.938739652347 142.483308497682 194.637233028442 174.375388013694  
148.175206259619 143.582187466814 161.061119536632 116.276003190171  
171.358746749715  
LOC148137 176.11287574658 176.049946762504 165.576758218571  
183.302479730653 209.984545596312 177.96452209396 192.153420834889  
190.939726271153 205.026176598298 178.966169998125 161.968835903764  
194.724219884752  
LOC148203 135.494894933583 135.609239096236 156.834059922255  
137.450774903611 114.479886899622 127.395094952914 131.597937570173  
146.9554120076 140.326012404526 129.253638326633 141.164985468046  
129.845344493418  
LOC148413 404.366325262322 471.069295685718 446.194196064909  
570.533103778482 623.050854309724 522.77407098992 721.603421985572

687.269774217064 749.220616713093 470.42403724799 574.035124314622  
580.164288826741  
LOC148430 5759.5586948816 6522.27232911897 6944.90824302953  
6179.86800320807 13853.9715872573 9881.69734721233 13142.4763966378  
11809.4804843301 10075.6573898939 13090.0615116619 10360.162704111  
12109.3049135906  
LOC148696 136.818557078622 146.948261640482 146.830752309354  
117.420765321056 133.841519663164 143.925616978401 142.14654303591  
116.989409891761 134.810212106122 141.043668963717 151.194282143046  
127.430408113725  
LOC148709 129.788395150404 137.025625133986 135.661131815375  
147.420580715112 130.632096412204 133.15144076432 141.202092246048  
145.148058824491 143.381277901138 134.768694020981 125.484453841158  
137.127587786536  
LOC148766 151.68523937819 133.638664342783 138.068164255305  
143.092021593505 162.013164369593 154.096542063701 139.851678406637  
143.49969914174 149.023962828426 134.850260739685 155.166786601813  
154.569432344392  
LOC148915 1573.03248861784 1632.07671492041 1975.83062789692  
1183.1601379136 2786.35558271661 2496.17211592866 2023.92614092273  
3693.4058156307 3309.66193624859 2656.38138490746 1841.63015706195  
2799.0487754899  
LOC149069 123.303143302526 141.418737063013 144.69686018715  
142.434356144925 136.440671408022 143.496669740707 140.668597897404  
147.89884142817 145.587386656619 142.334338599752 138.494266722799  
150.866204945762  
LOC149086 156.453108485249 158.023626712181 161.17923997423  
155.883386742315 147.89884142817 152.93058803161 139.552533656255  
151.535177950367 143.477670915091 164.58158284856 153.848852170776  
140.554684822646  
LOC149134 168.890506147594 188.685460181066 196.990867962546  
205.362816362477 176.603760647035 686.028214419557 285.659010982301  
297.368197598038 170.046856179083 169.784837251279 685.620637807134  
189.092674335503  
LOC149224 148.57301274812 140.101511236793 144.705559511075  
156.373163373309 157.192320902906 178.055019987648 178.000672046849  
142.059921012561 137.877756077011 171.093611712143 144.907294702865  
149.306122206718  
LOC149351 140.446530307169 151.379761514526 158.224122084011  
149.848740870148 142.988500173397 157.87020867396 147.668990552874  
144.152325539824 148.143367490426 162.812665683603 140.648918459179  
143.122278808091  
LOC149448 390.752579014611 392.198487606534 430.100415399881  
405.469705787631 195.547320133122 266.534316786801 230.770036998466  
281.071129128589 226.989201461085 229.076507182239 299.039192744355  
265.536429548886  
LOC149478 148.874533472738 135.787323859105 130.532559074698  
142.501655618849 135.317796804151 125.693321471759 133.602870982718  
139.46518859956 133.559082256772 128.300838927918 119.767154020462  
131.804952187685  
LOC149501 193.641927801805 236.617896560938 193.028341755594  
208.270622752385 2385.5958396359 920.342429282889 529.228238133018  
517.881547706391 886.157279090932 166.489436134841 985.637230639964  
925.205399154409

LOC149620 143.643259003393 147.330897105911 139.736465430177  
130.856249657101 131.292195405993 147.371905597494 149.995272585012  
133.74051512341 143.167719135403 145.064773625365 154.503958858173  
132.829401072883  
LOC149837 145.396723478249 144.744603095605 137.265533487496  
142.625414022199 152.657649988502 141.482344048665 135.489000274316  
143.996350813566 146.122816653035 134.119276589666 148.486946087388  
136.225792549383  
LOC149950 124.491884305455 127.206177583275 133.083877012766  
151.445254181497 137.714430743204 155.438218501542 136.142380560596  
132.168821720799 146.132506246152 136.065134838221 132.66318177913  
138.145677924612  
LOC150051 177.666582096539 197.378801636702 167.201570648434  
182.495117800073 260.52593414721 198.244854812728 202.778539118009  
190.348359536057 183.921173538112 184.557630172634 170.98312926  
181.950658782069  
LOC150185 126.893023101449 122.621839614189 138.905709709063  
121.93549478261 136.356895672212 124.484589975207 141.468076901305  
130.043904881142 120.035437167539 143.381277901138 122.327353563917  
119.087972087745  
LOC150207 138.541779821934 139.886499402506 136.631948656268  
138.953926269905 134.834641868502 136.908861280856 137.429832103492  
129.205783382977 134.929915732246 139.886499402506 132.094446606227  
144.556413909655  
LOC150223 158.963726206466 150.835044630002 154.65319127051  
140.583804906052 245.399847987183 194.488249052694 159.643566663742  
193.04138438685 193.629237856758 160.511688319771 159.399804351771  
194.240372898704  
LOC150356 135.883119645931 154.33224999163 156.605568633665  
168.10131060526 224.707455448421 165.857032207991 170.243136294537  
135.741404460897 145.163084967499 138.882483367088 137.737908250097  
163.552608805894  
LOC150383 143.08841562593 132.203310946961 135.521802085177  
147.450681897766 134.09920571607 126.678746008577 128.872496485403  
140.946368538661 130.2867846895 142.739686751422 122.472909598385  
139.061072394426  
LOC150568 151.164936050256 156.674411447713 149.369418844044  
170.179304745674 166.760758231104 154.046550866249 154.300058278533  
163.380402251758 153.136863548105 160.131256419524 151.466689967666  
152.377056383547  
LOC150577 141.914966520049 136.570817174009 140.138870925001  
137.752238510249 130.300169316346 141.463324155943 144.998415908498  
115.958740595234 134.452938571435 133.203064891923 132.352268262631  
134.774591679724  
LOC150759 155.483400816946 152.077204721895 157.280532261425  
140.728126380228 162.161282071736 155.218336968191 157.6811998968  
136.454911192129 143.59105195427 162.970595558845 145.478233255862  
166.964057265095  
LOC150763 145.737361356678 146.366013190845 131.086904662241  
145.679907578808 204.802810257516 129.57551086282 153.600132368924  
147.978039160763 135.08927101395 130.858419819734 118.708644971927  
155.494095135266  
LOC150786 121.657744897668 114.002925521932 119.618176258524  
114.255733119076 117.928456234796 123.185652476312 120.039031290299

128.505296338657 114.10470841717 123.505435008269 125.882246459692  
121.242099666967  
LOC151121 120.224154897296 117.316790136526 124.327827104244  
124.277983696239 133.177950880393 112.166192839859 130.33205883588  
120.984641102879 123.601413134287 117.420765321056 130.399501479248  
121.847904946956  
LOC151162 1436.57771711084 1599.12034906314 614.239716118509  
973.543357809971 1039.92160906839 643.468308027006 958.63560158343  
1329.90419210779 1037.00025848491 713.525134497596 1012.44277312494  
916.026216386031  
LOC151174 160.618586213311 173.741466458636 161.803438841859  
144.472969298036 145.395042579024 147.500009766324 161.485353443949  
149.702048490465 146.96472350529 131.968781256081 143.879597098414  
151.567693140302  
LOC151234 131.97938329944 136.515951031895 135.452340998039  
152.620244087653 112.38543517651 135.58042404479 132.20764558027  
125.79193748535 128.047981250943 162.050520530297 119.613985826308  
141.602233757588  
LOC151300 121.263939656119 130.75707278606 126.925982415892  
131.454955038299 132.313884627836 140.687016530974 132.087183382523  
133.638664342783 132.589411973628 133.35096649325 132.781725233271  
127.855167644203  
LOC151457 144.043818335414 134.750046135498 140.300833590056  
142.724123724574 156.978585870854 164.281196089736 142.064680109047  
159.588575526536 147.409936250284 141.497125111619 155.53992663898  
141.996233801459  
LOC151534 134.316859658338 134.801507994667 154.24500773656  
142.545823714168 139.557059245431 160.589575894314 134.105941085621  
143.594003495859 131.023892409073 127.464485396039 141.079317977197  
130.161889021281  
LOC151579 683.019502027271 541.258721278882 520.585319342817  
410.533157400023 606.38343657878 1095.04571025381 936.957730361063  
1048.85768964657 825.345092964844 1841.63015706195 1287.3125466789  
1125.28599595312  
LOC151658 139.229351251973 128.582520754296 124.263901299025  
140.49969612403 135.605541734293 143.047617455953 139.995623005154  
139.042034301544 132.895500657638 140.169200413643 146.31468639383  
143.193305421206  
LOC151760 135.704067249674 166.595529296463 141.056924917269  
137.029726467523 143.098246338022 135.875595614483 142.171459019791  
145.872258115708 125.181327386534 149.143087870963 133.165893710176  
145.530904040477  
LOC152024 166.095964870713 175.51767355303 173.063002566542  
178.3652866131 158.627416752905 168.111124820968 186.06425658259  
156.494323415504 150.70383460714 152.173055053184 150.19577351885  
175.21512930507  
LOC152084 133.24611329193 134.010031592003 132.371165851333  
131.736694577111 144.402160347818 148.054367166566 130.705091244939  
136.430232926793 139.044150521333 141.5739152922 137.660051943656  
148.970251898527  
LOC152118 150.942078067308 140.782522936146 156.254944793402  
159.957371011316 162.560758971445 172.20451139581 148.367132982373  
155.056545639862 160.903342063542 148.797226586765 147.760782452857  
149.198753359122



LOC152195 126.058167594519 124.755684505209 119.072213573568  
123.835583753941 242.538036654192 143.613003173841 161.148734808267  
156.141123407905 180.941090529551 121.286130275542 192.353768499582  
180.430425314885  
LOC152217 163.600888221193 175.974598536074 156.779004465552  
189.770558810153 224.981439707657 182.453722105813 157.415211954103  
169.502103689662 173.951605889009 140.706490845379 151.171716392043  
159.424105896749  
LOC152225 118.24368469845 118.60878652724 117.084984190461  
111.217595631623 115.687997771921 133.728378162206 113.133798430215  
111.312348806957 129.025000034273 115.270544506813 116.973126196102  
138.639410179404  
LOC152578 140.888439624918 135.448170440824 140.295307451188  
144.175551691291 141.193081790037 138.751781355083 154.064184525311  
153.19516365535 147.77916610545 140.650987394155 136.811620595243  
135.802258952006  
LOC152586 107.841100741858 140.290598244169 132.623563631011  
133.483766053954 132.760567403706 127.676859244344 131.305785417254  
123.541709359809 114.607138204495 142.785631812039 124.288632450364  
132.131378074469  
LOC152663 128.975785280465 131.416923875254 156.077604146143  
157.466686487471 173.907933001446 139.6391154169 169.441789096441  
144.492756323647 137.383211680459 153.860039535598 145.880661952783  
145.595756379808  
LOC152667 123.782746527199 130.084202182014 127.612859839494  
116.355027746922 121.575942603856 120.238706364491 126.75720720361  
125.400741907779 132.018833785059 125.134516902118 134.907397302852  
113.810645407837  
LOC152742 132.379706531581 125.556444423391 133.670967970136  
144.6567095695 120.11244856479 157.240466990977 135.59027155522  
142.560797028716 133.334314509183 138.079494235456 123.491930765117  
124.83124879272  
LOC152845 135.906115546805 134.312156667838 131.827899207029  
137.97889661868 134.582098893327 137.195906276069 140.78582131501  
141.66312605042 133.909219998872 136.387904287903 141.267715391739  
133.959208066964  
LOC153328 160.92643755328 142.898851434337 168.170370963766  
156.849589396587 146.276706674761 149.306122206718 163.438043894189  
148.711943433557 151.228823957828 148.755559144241 151.877035446575  
152.175423676063  
LOC153561 275.642882589307 244.990374822652 420.446810988909  
203.19299227665 157.381401974279 251.511405838796 197.895094054577  
192.548337508559 208.270622752385 245.351459157365 219.792171863015  
331.215872600406  
LOC153684 186.813888805838 184.682478530334 250.037172478288  
227.288015854809 164.253219197128 162.464201058576 163.470025318612  
184.758754197435 173.507835230243 154.686025022972 185.165469121763  
185.258354905314  
LOC154449 141.180647782041 142.978818998012 134.350054065624  
148.02460124587 161.688125121941 134.782388051531 161.390489603929  
128.368669716591 131.414690782328 145.217261514886 137.500310477851  
136.061992660698  
LOC154761 161.148734808267 163.400576719974 157.713227527385  
148.04206955657 178.153527134452 180.77686098195 212.890259409988

190.625250757654 191.284275676256 223.128108720503 112.365278258185  
179.624208193114  
LOC154822 132.941478943584 120.157438564977 139.321570881862  
146.524138043215 127.019978195283 130.528198937596 136.582137928022  
129.462319953515 136.311902195562 131.910285685889 138.319321806028  
132.686006816081  
LOC154860 149.377153449536 147.113541493157 136.794860440446  
136.058527150792 146.002585729701 159.106269972346 165.181215117323  
148.785977829275 145.625205055601 147.027904536486 138.963864375073  
139.569462087818  
LOC154872 146.432468585736 125.350567304651 139.972797966319  
122.190734676247 118.186426364551 130.25146185271 129.026732674277  
116.597352307016 136.786462547129 147.393178410954 141.664271607079  
138.119788738226  
LOC155060 150.989202517615 152.54413356964 159.936703616817  
125.653011880654 155.794309652357 160.243405030742 154.281674854552  
153.412469512967 148.003041725027 154.459517779315 184.451469623426  
160.604195264968  
LOC155100 123.582509531804 132.6175371563 139.430808017891  
125.506466437764 131.637867236023 124.536322123442 136.409960447884  
132.91094012928 138.248708129528 121.930362099901 153.214696479001  
125.668463983985  
LOC157627 121.88070274109 116.421771593211 126.748906552086  
125.963257217901 119.502758763438 126.407313060022 135.082715974111  
133.333067546558 135.18026749895 136.861019517134 125.687688416588  
115.170176263172  
LOC158160 250.217137496422 208.793650722271 225.209315195163  
211.104243881644 293.646275396425 272.41397350779 254.101184686036  
409.206158277764 296.657844888195 245.489266602897 414.200068430184  
277.180850774168  
LOC158257 164.191906588579 139.734784859495 131.058360514673  
146.920496801962 148.086979061158 160.903342063542 137.393871430276  
133.490805791504 154.744065805492 148.636787484103 155.40832015652  
152.321890796527  
LOC158301 269.379272725008 292.185246573643 249.524956682907  
286.035428568826 169.067064352955 242.695286989672 180.408639020724  
197.605208310432 186.925138700818 182.209056248253 217.165036362034  
189.419941381565  
LOC158318 165.74458564887 180.77686098195 170.98312926  
198.470718196139 166.070152719459 150.807308519367 154.051705030348  
149.35848619832 158.784190231286 171.97578836712 144.540174041867  
150.51056917809  
LOC158345 4722.64356477773 3721.86725798812 6830.46932926077  
3106.94181270197 2962.11407134162 3251.62784659994 7342.79622458743  
3052.86038628748 4037.15442268836 7371.9761952537 7245.25086222102  
6737.97308530049  
LOC158376 139.589612144962 162.427505889157 160.441879289883  
163.086539217826 141.083966525597 158.499787920522 136.063563740389  
160.411218029114 153.393651104539 149.471240458766 133.345143691828  
164.791545858875  
LOC158381 129.501028506432 132.675172817752 119.360478719424  
126.547883999721 125.668463983985 125.810756286648 129.997181739652  
118.375739674144 125.326393776938 122.389557272277 159.848342125486  
128.184708916755

LOC158572 159.670815631794 177.393812005949 171.278489808694  
159.643566663742 170.918584418153 147.701092466105 179.067275037015  
147.268006631005 156.508428796592 157.58224826673 159.384480972135  
174.168079247768  
LOC158730 115.180659017144 123.591078216224 132.998223400178  
142.571259316029 100.04568139926 127.849141499408 125.418782388128  
124.203250865069 116.029201658798 124.632373951797 118.650091706226  
127.70306883967  
LOC158825 149.707357499252 138.438792881135 154.999192460283  
146.944628763232 126.457337803727 147.83240038699 135.959893035019  
140.137435303984 143.912136782374 154.683723064797 125.475308885588  
138.82269002406  
LOC161527 150.866204945762 155.550532734718 145.265512354674  
159.41705570719 159.384480972135 167.637638693195 160.454243375479  
152.538048490265 147.550385608773 153.299196905367 158.308558656144  
157.898632788579  
LOC162073 178.045931314857 181.3859695951 161.788118050564  
159.354364289526 182.118544602205 218.896760804208 195.123919692348  
198.437113196596 163.426663985855 179.241385747152 228.100112133941  
146.70298187005  
LOC162632 127.966883271903 132.641236788053 137.419835194075  
133.176970578909 126.939543057414 122.708102546276 125.27625242915  
126.450300907283 111.867464669155 134.323365608463 122.385508330707  
119.822587087968  
LOC163233 174.202069525223 182.055718892894 173.176900454904  
175.262884960324 154.256214901103 170.158189150422 170.326474367867  
166.788336808924 163.014903707857 150.319052894567 172.568852318369  
160.589575894314  
LOC164380 108.62191665589 112.219585614955 111.826509343353  
109.384112020063 111.000303209442 109.182623414389 104.406314027414  
106.182551369456 112.75167046116 108.2359175332 121.371348717752  
105.925737068775  
LOC165186 155.168592130392 151.037282417145 126.862274244977  
139.036978052242 150.645487532549 124.563594928763 140.518206716196  
144.516274148451 135.682971958096 148.574661934068 157.344758285153  
133.850733997442  
LOC168474 160.970946091146 151.979221390032 149.810655120216  
164.365630106697 202.44778603643 214.991170762327 174.593548891693  
191.112009690591 158.153875553171 159.49930229951 157.055133233709  
166.85671415475  
LOC169834 149.202628825354 152.052084712417 141.16066528405  
146.132506246152 150.989202517615 140.809956497396 135.493053871272  
134.947657801444 140.53597287752 171.954184094677 156.525347260458  
149.928613776186  
LOC196120 175.882911801581 170.290455446376 200.603836348642  
176.830879422227 162.975988989106 158.400572147671 165.926301648161  
176.927500850631 158.408494909763 153.738794649373 153.348110626071  
166.89884215297  
LOC196549 157.980947683333 204.564770370164 183.42877315644  
170.4583554058 213.178648382852 256.174286655796 261.286548990435  
245.978723809154 213.077884261943 158.452089329714 353.571106279836  
142.151209745109  
LOC196752 335.013713757031 416.638529499878 376.443086293235  
363.963951509433 248.43491649623 280.085692727562 376.374248850987

278.88183549759 282.392419584508 253.754869975548 330.457534783492  
372.757091748175  
LOC196993 138.920141982606 142.114181233875 152.238845270993  
125.894755032594 140.525013926642 153.681775929182 149.71132909303  
154.932132950843 147.333142209628 140.347131743987 138.02757574324  
148.960077949157  
LOC197135 141.401480567426 133.885725703056 145.540872377507  
132.688531077861 143.390971600678 142.583098605144 150.3259737066  
140.947852529815 144.934103671894 131.017355402204 145.072924262206  
137.629855378016  
LOC197350 118.584773788416 155.587018319981 138.395943168158  
137.668179813327 147.982280671798 145.029298288869 141.592180897595  
142.749568012703 133.666244052469 142.720769329396 143.713962738562  
132.398041172151  
LOC199800 175.784250947874 203.456296907031 175.158180187883  
167.07092218037 299.390443444504 234.626574390973 151.503307004675  
185.405774238391 259.374392296079 159.036647992998 155.041173289759  
172.599654598668  
LOC199882 134.924082270115 155.664126780859 121.545189875973  
141.229805348717 121.150371270451 136.540568915609 135.883119645931  
137.803749343493 138.950197595669 127.874934513708 122.133292722932  
141.056924917269  
LOC199897 138.088712695622 132.313884627836 136.641140715439  
140.016122996485 147.150063462728 130.675745275992 140.605866597575  
138.814930200619 137.345542507421 143.030777754448 143.212739422069  
140.73456875677  
LOC200030 873.010676463707 722.399669963921 909.020708316287  
795.037968409957 471.598175637494 541.764013317002 616.995114856023  
1030.56836625083 572.913714991136 638.77182631975 658.746224115551  
674.338740875512  
LOC200261 180.710636205653 149.464962540085 170.069291215013  
160.281830914755 148.686975104375 155.27707167384 158.708054164813  
159.547323273189 164.15288821931 143.262288751967 146.038599656417  
161.80922869659  
LOC200420 173.21291920566 150.807308519367 179.551640851353  
150.359906271672 145.630497368137 155.355051932357 155.129304059037  
182.197625235191 153.848852170776 155.861829925386 164.962201718762  
165.283700641161  
LOC200493 154.818414925242 139.515794685984 147.872625576731  
154.604363252526 153.008756051525 141.999730335668 168.6016897585  
151.397068235685 147.966224814966 186.854553034865 129.906744036052  
173.260348096238  
LOC200726 162.870317933909 148.342114514468 153.93249158209  
140.933444607646 158.770502070553 140.899799480834 137.714430743204  
150.78145177853 142.690911343704 135.218648235324 127.101752724954  
151.865924163231  
LOC201140 164.929445749888 145.491525555916 138.348160604288  
148.219406063533 139.054140295282 142.75592155869 162.71020036416  
138.469997677004 134.049094181433 146.229239731545 141.567425892004  
139.108656684059  
LOC201175 137.612446150193 121.130837254861 119.029186503752  
133.915830295107 242.570588364106 162.834961996238 267.939624375137  
177.182321788711 176.390014020936 499.048754087189 224.224264678645  
187.296479395462

LOC201229 191.365014963729 209.887047474042 202.643624039869  
254.235762677639 188.695527267631 148.598920567714 184.801068553988  
219.996410908721 178.939268046323 170.439725847568 178.728925255163  
156.481871341275  
LOC201651 137.969750384554 138.888049140099 137.543128522665  
139.646026806298 146.204122329465 139.524233960073 144.967580333329  
134.719531559829 153.787447416111 136.049167597016 130.644937322186  
136.539849534341  
LOC201725 165.355764467096 175.428000742222 155.715728894101  
184.322250984457 191.370761685627 258.632372536866 189.770558810153  
229.62164568989 221.889331385023 162.735609734946 163.718595974283  
196.031541155674  
LOC202051 151.142149775806 168.963976596839 144.581747568524  
144.845726048937 160.227729155903 164.309588213547 159.824012085212  
147.913148020331 150.409919207059 155.086559474139 173.017662861015  
198.840533461525  
LOC202134 159.346890686719 153.871893011106 142.167918879613  
151.563917522864 137.269267022826 143.410917415691 144.86583288717  
145.395042579024 148.396148091332 139.331046480528 142.968008233583  
143.629760301493  
LOC202181 157.410205523901 156.136962310077 188.7348696188  
145.123845983625 143.051871940423 169.927157878764 166.681646517413  
153.43000129811 147.085006263446 154.033776287398 151.863048206341  
150.835044630002  
LOC202227 151.389433433911 144.373226011578 134.091723054647  
147.274945970072 159.362293777146 152.829437376835 173.176900454904  
181.865456674829 159.124592503759 225.387674139093 220.288758600588  
217.513118676535  
LOC202459 134.243435358729 130.135721123253 131.863018503922  
132.733821031511 117.634514818946 140.510889880872 127.04953162892  
139.892371997205 135.494894933583 128.396326753926 149.082061203661  
126.446675008883  
LOC202781 4266.92715355342 5122.60899285635 3618.9385126441  
4266.92715355342 859.547169028149 4255.59773503364 2466.36457617864  
3648.38765465889 2794.89048827025 1903.13326109546 2799.0487754899  
2748.51360874099  
LOC203235 136.241569739318 132.096095362238 140.405405916188  
133.388533738482 123.635470154191 136.975775196224 138.269955723817  
130.975606477621 130.222698914337 127.430408113725 128.922269289649  
127.295532954648  
LOC203510 124.897463208595 159.752644678596 154.487546030444  
168.790464803746 138.899292894875 160.791355483048 153.93927752488  
145.675032688915 146.202611204712 138.371873773284 141.710076413441  
141.97478198531  
LOC203547 953.099915501575 1010.05884008623 816.580880338838  
928.151632070573 799.132592914065 1300.40889834984 1152.50523614436  
783.059427015955 1107.29687889378 996.999238316991 1431.52979384867  
1241.59946353857  
LOC205251 820.249910349431 733.49038042129 783.755776589969  
826.08372791138 1395.63393859192 904.733257358133 303.423450627377  
521.625146077176 511.374117402707 627.066031322234 667.421612441201  
572.548647437438  
LOC206227 133.161552914595 119.370219299491 131.302225305148  
140.73456875677 133.106005881815 135.713266118447 128.115993005977

136.728975205893 134.35958389775 133.190147746722 110.977904932371  
143.407371444437  
LOC219347 137.170666175895 145.229637715814 133.337863400762  
133.382099379709 146.828099826146 143.281050499332 138.868641301709  
137.265533487496 131.204616536341 137.045772853855 142.579346058088  
140.086978441723  
LOC220077 141.327299595068 131.732416355002 141.746032519746  
137.342348963288 153.541193559658 122.295222990408 148.029259633449  
133.297361715205 142.521260841187 135.393901125889 135.782158269978  
126.759554774012  
LOC220115 132.733821031511 123.315362903961 144.744603095605  
145.650356702429 132.454025879177 123.696942540314 129.330592465123  
133.704706615071 134.657787366869 120.204469421484 126.045231525329  
128.816610738922  
LOC220416 145.606098951179 139.799467834109 137.234384760487  
144.421572284568 122.339819585312 118.567548265638 135.814893730549  
136.934313990609 158.020651857664 143.5709409749 126.676875319815  
136.37481047902  
LOC220429 155.957570398118 153.289258540668 142.38097037888  
155.233830396052 148.895841777421 171.414869677333 158.928949614338  
153.972471779464 158.845174721328 149.348231806916 159.14477373952  
123.98384416057  
LOC220433 4276.70912292877 5624.32062666666 4266.92715355342  
3737.57754066891 2093.67403119512 2525.90466050731 5106.27623905309  
2666.06582231934 2500.07677977147 3253.76017336684 5670.70220800096  
4641.8793590085  
LOC220594 137.677396262152 152.93058803161 155.166786601813  
151.461857714097 144.617654961472 147.535225305685 138.640919060725  
159.696443182844 154.912576362196 147.849116400978 136.403353223002  
143.320787131532  
LOC220686 256.687384001447 218.896760804208 285.659010982301  
277.000882284125 234.768591315095 286.541028896473 262.061371466369  
244.596233138747 517.529147171876 245.811312606484 282.604890044452  
364.443097338814  
LOC220729 166.068489027866 158.455783755247 190.787437782456  
166.795671029174 151.110467345727 158.531514776098 177.619101765848  
151.282370273189 166.47851613068 156.930119977809 152.395272857974  
175.882911801581  
LOC220930 128.050677475339 152.09245741643 147.473875763319  
154.267020640428 133.197002327259 141.006540481119 159.678281513591  
118.604395992281 127.985051303973 161.456727894848 158.779261405573  
140.447933562667  
LOC220998 138.986877479278 135.135834717193 151.204487316077  
165.386056999339 155.777281781161 157.885229749634 136.069631519097  
139.519321690754 145.591320521493 133.305679931132 137.440295223749  
167.500410857353  
LOC221136 138.041411135053 153.741061283101 163.352317556107  
154.679076303046 148.567630572897 158.459129254226 167.190857452131  
142.658562927154 149.871960981882 132.151765465534 138.956057921718  
160.060406629689  
LOC221442 169.124088593549 178.464811133 197.003657786247  
154.789187466057 154.798287249541 194.281839133887 188.118989395838  
223.666832044186 204.564770370164 138.076501233454 213.432084172541  
181.578228610334

LOC221710 168.443386067427 195.481680273686 177.039190810529  
201.269380130546 275.468194644053 188.780089746036 218.644953001365  
176.449549075475 193.554028681854 228.349507726225 176.371404525626  
195.69447353356

LOC221981 144.432181150583 145.666712006532 150.564099989221  
146.948261640482 146.753212022975 135.889764019762 143.47200560038  
146.968599872798 149.078664825533 142.514794686932 138.032265227728  
149.110300099889

LOC222699 136.874135348635 129.976540483758 144.518132543976  
136.330636532576 149.619141707962 136.37481047902 135.822022526034  
146.376149543438 131.552276774901 136.998259410887 130.262411213764  
130.408519735001

LOC222967 129.661073814998 135.691862612951 137.76307316083  
132.766708502915 135.822999023257 140.644800545854 134.008118774075  
139.408234219133 135.143532936828 134.224781719944 134.307336063739  
143.330025840618

LOC23117 864.547109080675 822.545007054668 736.963699775724  
1038.93733638848 350.658722333252 998.631321857182 723.250763797522  
910.982557417978 821.265710686098 520.120193442648 883.702573960415  
682.315322994357

LOC253039 222.990586491219 197.003657786247 283.27806319488  
202.162432624505 219.729169245025 145.450039896731 190.66473033826  
281.405355165228 289.761702484888 172.764511709731 324.401611136662  
142.160941592768

LOC253482 134.928967716193 141.471127716868 139.577443171489  
134.479828866339 135.261561433405 144.892454033336 135.233417601805  
130.023560954071 137.393871430276 138.152641686151 132.087183382523  
123.852299272249

LOC253573 157.148880624381 154.199534276226 146.541890150631  
166.688771186254 151.981708806765 146.948261640482 156.228039404029  
163.306853098724 157.010145291837 158.193008411967 161.713311969291  
170.257439890277

LOC253724 148.973277994329 137.471563342956 141.29868389128  
137.902953501634 135.668768914964 135.43119649883 138.873925577739  
138.708304921088 133.296200563657 142.75592155869 129.670884353211  
142.791015845309

LOC253820 137.632470240792 144.662545137915 165.70840218273  
130.877306095063 153.500478301079 149.432744784716 140.999877170481  
157.11867820027 154.055550115498 159.7197697044 149.565725707356  
147.995991912855

LOC254028 135.695576019185 140.150884219813 132.192775993078  
125.187617901961 131.246704975084 135.795717307603 123.275246170603  
132.484079454476 129.558589108727 139.452773383624 130.886164807755  
143.849399031223

LOC254312 154.894196413558 124.616629956864 147.85133493803  
148.056333887679 154.771737131348 149.029275579026 130.062015525637  
142.630563791102 142.095289977576 149.457761307441 136.126542897364  
145.574725784632

LOC254398 149.18603646016 150.97777780024 142.948238172973  
148.084844579881 146.256076936456 131.104534164394 164.1572198075  
150.227629690236 131.702788057359 138.409284761652 144.122748003206  
140.760983862166

LOC254559 135.301844382418 138.968690339299 150.255511248598  
119.01559016005 148.713747597311 142.187694439611 155.346805606742

134.769926504916 141.632147679743 150.694215349678 131.200042525339  
148.967232828819  
LOC255025 151.256546638599 151.2639801322 145.254692995502  
158.455783755247 152.685860451112 158.183045411298 143.140502042489  
154.611011734772 145.880661952783 155.7441762827 150.737888487925  
148.755559144241  
LOC255130 163.880402141404 138.376176600064 148.773558380167  
148.668081483434 148.838294770082 141.895211025017 145.748174062159  
143.365976841902 119.594962686756 155.362503575715 135.273694626342  
140.36278240974  
LOC255167 5688.84918819457 5265.74259211695 5106.27623905309  
4377.59943975549 783.991448771818 5800.06300826802 2645.72125268628  
4628.04544865227 3749.80462365748 2406.67187918735 4569.44477073589  
3403.37530051435  
LOC255187 122.830376253922 124.148194572004 133.769848328557  
145.99474597064 132.066488589395 130.760835441776 138.620617643924  
132.119370332298 133.567630962178 126.549876718792 143.426053070219  
128.916142340807  
LOC255275 148.179398287068 158.536178747273 155.830196650117  
157.394035451151 144.848839185565 163.833372505148 165.773929204209  
147.014513403704 154.025625092599 158.602687876661 142.485427762372  
159.461778054423  
LOC255313 149.990378213915 154.792156982219 139.204218271711  
157.298181833321 156.06439656393 138.634814756987 169.279866966079  
146.579073345319 167.949422301257 152.585572167313 132.338144393918  
153.440952021924  
LOC255326 145.528676983944 168.830344627025 212.643559782754  
156.033897758869 187.425086057782 434.61711290583 294.115163083721  
226.824313642101 190.204960255989 165.698527470382 171.376976179465  
231.146155346291  
LOC255411 151.406384541297 149.292552957665 156.423687034312  
159.276726310525 137.988325215021 138.938546468136 154.104321553472  
149.385103319547 152.748807709142 159.549936351002 149.642946071295  
154.869171648942  
LOC255480 132.550022967297 117.186546702764 129.55573546861  
138.167369090026 128.304919825754 134.288349336742 129.763063900493  
116.850851308701 128.471437314295 127.947547987882 134.094231940612  
125.639355645626  
LOC255620 123.781002620866 135.379284233708 141.772724512502  
150.769819282075 267.901632267999 147.928629511539 152.725025539491  
152.57040089034 156.494323415504 148.996601285688 177.851689709807  
171.69834783037  
LOC255649 146.283340399533 154.321219471319 144.143692745479  
151.453985465369 153.345834660643 141.42859050659 163.19340939648  
144.725650040212 140.101511236793 160.415807880532 139.229351251973  
168.071171406779  
LOC255783 1230.63920848575 1025.27246494218 1436.57771711084  
1332.82617944131 1453.88161495484 671.821418586421 699.984140389009  
589.240581642145 996.240188311002 850.125434374005 441.331937921872  
677.503643398297  
LOC255809 155.8871985642 151.776232847515 164.438724387992  
162.778480318754 190.165771406362 170.046856179083 167.640645997754  
167.325227483198 176.547853494057 154.808798024399 122.160459795959  
152.818046945164



LOC256374 127.527378949803 140.370626016794 123.442970398288  
125.897190440417 124.913645688325 121.271403807802 133.058788697693  
126.722212054469 151.965103021638 119.040642659337 112.114933398547  
120.951365231971

LOC256483 139.123489349026 119.451099896048 142.148597793651  
153.752502094283 145.291984088491 135.817028661429 130.388530183353  
130.520275539672 132.390330703084 139.219476681919 135.238301951626  
137.601181150371

LOC256880 133.953303801604 127.295532954648 125.297877027282  
127.05677680446 117.470731811595 126.182856027765 139.878752507646  
134.185202200317 136.231747456996 145.177195093247 140.563079852037  
129.496473527496

LOC257039 150.295611829265 146.858292465699 144.727773039491  
139.993960054847 138.165240772401 134.86940314824 158.420821486138  
141.378381097266 147.255680306221 150.509710470354 132.782967735893  
134.808485735121

LOC257054 143.099341621411 111.672450681359 110.707755436868  
116.363556872071 130.917269984571 113.362825181676 132.027674083561  
128.22735290389 126.573673878042 130.383001462828 167.468390483999  
143.825062714273

LOC257358 120.379393989882 111.928204694188 119.735807506447  
115.738984899365 124.955676894776 127.068313862984 113.582654469735  
118.383317097375 116.225440873023 121.121686280797 146.486480663438  
114.078271807864

LOC257396 194.819597436776 217.847954914851 182.77693508164  
246.288681426405 163.066051106092 157.170136439095 158.937341335707  
178.270849389719 164.022021048626 139.1434049136 174.059172465573  
170.758319048911

LOC25845 250.928804390353 274.891033696257 242.070630946726  
309.423768054614 368.374002925137 221.74200490054 310.690317681243  
271.064405562085 289.434186747703 302.113807121396 291.683896942007  
258.964323941464

LOC260339 133.829889099442 143.035625780446 132.920775987309  
134.21227169867 138.624689897665 138.281188275319 127.962546712222  
135.407536491819 133.333067546558 131.300342835696 134.028626989933  
129.633387503618

LOC260340 143.833057210822 162.018860183534 127.239282651919  
134.181819177347 135.507247740621 134.251843621261 147.670425834523  
137.71280215369 135.154441560264 156.551925771312 109.37466528113  
119.229322984564

LOC282992 137.788504385206 144.528360135884 129.6505724783  
143.712450441816 142.829099538363 129.007924852801 134.776714949136  
154.336009472285 122.501785735146 134.553754121862 152.08574341962  
142.771243742561

LOC282997 146.363991934916 148.503282415207 154.574826922632  
153.709230037306 132.788102310611 140.559553697317 141.76964678852  
140.190234214948 148.209164900319 142.599815022061 139.016274575854  
127.792241991414

LOC283028 132.665590728755 130.941645638407 136.687813884132  
136.209796259197 141.4587810296 139.457084084368 138.000714797563  
136.013989349192 131.705912986393 136.682172321984 136.099663831028  
134.516390697561

LOC283029 160.557818466874 161.017267304159 164.791545858875  
186.854553034865 155.592219571564 187.50236021149 170.035994634371

168.963976596839 136.832494876249 159.572851489665 141.255406288178  
155.790759250672  
LOC283050 154.932132950843 138.523677181131 165.767629164724  
151.086688327023 138.970853057174 150.629932241703 148.848823912244  
135.151438845363 149.306122206718 146.743260100643 133.292854943218  
188.53221484746  
LOC283104 162.403942351933 162.364266549463 152.488480322526  
146.869927141655 150.590611246086 149.595375008252 141.616920429839  
151.037282417145 160.368226341458 141.191500203423 144.393688888553  
150.95033946042  
LOC283116 145.233055765001 151.836705989155 140.142884879106  
131.963419175907 135.75568942028 137.662135592983 143.727514442914  
138.494266722799 130.24527031028 135.899595115146 136.327014189932  
135.837733533444  
LOC283143 129.642952083513 130.917269984571 130.4631522533  
132.883408554592 134.507558495307 122.042136913991 126.180714796187  
120.611442477736 113.339155126202 118.850495684547 141.135840314665  
128.255141263975  
LOC283152 158.495606141226 125.262445870212 151.442463705271  
140.429462488271 134.260779370821 126.090985925439 140.115154069602  
139.316189199729 129.138035235415 138.256765189241 121.080413308265  
126.326609619996  
LOC283155 149.557833322995 148.247826830556 132.393669306489  
140.572442284673 127.150222504237 134.208537331186 136.660600727111  
137.094814176566 140.559553697317 140.058153633802 130.804850476451  
140.622130978368  
LOC283157 143.853643511287 156.698856643638 191.740596601895  
150.974364125849 159.479962316199 156.119899067238 139.484551562098  
151.463200570499 139.871928127715 164.717809928624 153.836520485018  
151.617989938924  
LOC283174 172.050718136571 184.056274452194 229.406012088782  
207.692077301142 118.47752077032 126.228513847262 133.820936825552  
128.574419295906 130.380766252137 131.514114515895 125.707228291312  
115.789536577324  
LOC283202 134.122776198036 134.811625739766 142.633121727277  
158.74180418577 148.166340306996 145.882793872634 154.384766720753  
142.294922363188 138.866469244936 145.983627592197 134.058035351684  
144.902807664593  
LOC283267 459.973764138144 425.471195039676 552.494327858264  
494.538861626895 200.558971047462 197.762169504041 207.545424360094  
196.169988112042 181.701252112196 283.084102918359 216.991823988763  
150.275163835924  
LOC283278 171.650247980576 138.737332306848 143.336538157639  
139.986119754908 155.349728277626 166.709393547104 165.370800097602  
154.79534193124 144.705559511075 128.074531806621 132.75673287656  
164.109321257638  
LOC283314 136.62213567467 146.64835267642 146.362705590778  
158.554429311951 143.224678017244 140.936204899093 122.447154928139  
130.211247943634 144.572485418264 125.920663904983 168.061346742356  
139.117776552573  
LOC283332 160.050872656883 153.719751724358 161.182901898379  
161.825134481279 146.326067008478 164.625407872446 158.704425428694  
160.53152291979 162.870317933909 167.937451406243 154.764283765316  
168.847039069786

LOC283340 123.166013119235 127.471479301983 164.824914851636  
138.836422729663 156.477249817844 134.872654203921 131.369177333568  
141.356127724777 155.906054212876 143.638456836103 115.299986138153  
139.372441366224  
LOC283392 147.260260687975 161.12121879514 137.7872481668  
136.769073515537 180.3779211444 197.191648960563 173.050039480459  
178.578295615344 257.338950719432 172.364618542922 148.697019570015  
159.706443636973  
LOC283398 158.157097243342 122.928863588006 128.247871411825  
141.310253828965 128.775477649887 137.478556403046 141.97908047949  
143.40955339735 128.753623886188 135.954961086609 119.229322984564  
136.960656707275  
LOC283412 4671.10203385528 4857.3155917904 4404.79209330918  
4134.02613649483 11432.8213906428 6339.16392696068 10135.7800994367  
4722.64356477773 6460.4291301245 9219.38828280399 9793.92604780228  
7038.48958943724  
LOC283432 129.384531576943 136.074837228096 138.147658465394  
135.491412261604 128.460750472464 139.15175079191 153.574068503306  
137.03111066852 163.422877959747 138.655815405894 123.683553177379  
142.296446144179  
LOC283440 148.504996616452 147.962721373177 136.633726784926  
143.913625824599 149.764447995426 131.780134634616 151.114186801496  
139.39442529119 136.970505971671 142.37457375182 140.83570584033  
134.54796737809  
LOC283481 181.695203523798 171.826623289946 194.80575419836  
182.698275130489 205.362816362477 141.934351226006 120.07404952486  
136.295523520203 130.642810886161 133.348510114432 119.759350702482  
141.336866031027  
LOC283487 166.452651396293 162.411156818437 173.329939140886  
155.228605554943 171.61704153463 197.003657786247 173.513108409372  
178.235281981508 161.390489603929 166.162656500954 168.437049123012  
199.555406967021  
LOC283514 130.669539169739 141.340452225686 152.772177215856  
149.702048490465 132.425596223397 149.348231806916 149.401462362512  
146.863611516518 155.496190048502 139.801108744526 151.734683227196  
148.096551269076  
LOC283523 130.905135502296 144.219104742099 146.20028051948  
137.379558348782 129.732352495012 139.959629641771 135.273694626342  
140.145470073979 135.497033143331 135.605541734293 136.998259410887  
130.445920648705  
LOC283547 134.35958389775 155.3394927753 149.702048490465  
181.400788152988 147.532747354296 146.725123303782 128.0366252162  
145.333097940759 150.807308519367 148.592330216136 126.391083453973  
138.695481214267  
LOC283553 155.747694056319 155.971045744096 154.037622223246  
161.017267304159 154.546460872415 148.879605388902 160.234704406302  
140.650987394155 162.127697884504 151.519845657755 142.478528530514  
154.620194499553  
LOC283584 129.621296567128 138.35738548449 147.205511952997  
143.381277901138 130.088408942008 146.091822904705 141.357668647617  
149.936366672592 137.76307316083 146.606442726047 140.856864690669  
125.885715928839  
LOC283585 147.401387099359 149.744358230709 148.045391886623  
144.930066324767 152.538048490265 137.04010227318 145.971656491073

144.298011270428 140.115154069602 169.661107080542 140.907889482107  
163.681014961332  
LOC283588 143.665359343809 153.726935957906 151.676232556697  
150.885460975199 148.096551269076 167.741556663724 142.318709347082  
141.606501859513 144.579725208643 138.930413256469 155.323822771755  
135.479300698192  
LOC283663 124.59097574481 128.255141263975 153.059432055089  
133.642815510945 154.515091049526 138.709148238818 160.022481227931  
156.221773628832 162.841318222066 144.692900548503 140.239948346946  
133.133892264995  
LOC283682 149.939035476611 146.95272087759 133.788197693571  
135.071400668179 134.42983422342 146.291932367254 138.798959235723  
167.298438019561 134.626371781978 141.898948675823 133.334314509183  
134.257928609741  
LOC283683 183.969897305028 213.301947003462 207.890408761692  
231.890885094917 196.450308368198 151.248365605631 165.82215325714  
155.397301207102 148.773558380167 152.426527124644 137.581659385375  
147.454902803231  
LOC283710 160.53152291979 149.639835429332 158.130933580414  
133.164566694394 158.025633316671 172.186384820044 176.47556448977  
157.742948919213 158.098055917452 153.807525239478 161.951996906162  
163.413365060063  
LOC283711 140.52059487958 152.06044555622 149.280480796544  
142.438586625317 140.171749368266 176.506227858258 159.746802905903  
140.214475962177 143.231806900648 141.008604646743 153.647343267295  
144.02239659305  
LOC283755 140.881084272745 136.08297876405 141.189008902155  
150.860090477342 140.267351731167 141.263207601393 145.161116298118  
136.099663831028 139.2454524913 139.56332664295 134.46179453106  
142.284050423299  
LOC283767 141.432461374482 156.546769952772 156.774097885381  
158.499787920522 150.272153646712 158.06129717954 148.084844579881  
145.806935833967 148.062245676711 150.156865995098 141.434699050015  
150.998881139061  
LOC283788 215.718714189719 213.966288689715 249.554443204445  
211.535720730612 169.948277715908 211.357321758564 206.469040492609  
162.500485773812 212.822328466993 219.246271924313 222.820391338687  
180.63469438043  
LOC283804 135.661131815375 139.484551562098 141.391508027714  
135.289246539398 130.776213987522 141.548272427617 127.000175858468  
142.536450265886 121.884067622971 133.766199453456 105.583474813289  
117.672645717508  
LOC283824 155.535222310709 151.121293928309 133.829889099442  
161.072844903925 148.134642821094 144.678895821726 144.934103671894  
144.181359740481 139.280151859534 153.285830139349 133.527906709491  
156.010027635627  
LOC283849 156.173099025259 149.801573181126 168.10131060526  
145.276745572405 168.668125438154 147.114698384834 149.196539425588  
149.756512110538 146.151639797173 141.555366493541 162.994537815938  
150.75878820215  
LOC283867 146.994103804515 133.24611329193 145.015434711984  
142.953661611418 135.267015629083 148.237980436128 144.114177076352  
128.513011425662 147.790720062226 126.349403754775 148.609721587632  
137.00532429734

LOC283874 179.478756495687 183.657525723012 193.589480577091  
200.902123076244 180.710636205653 159.085639414089 189.225893411944  
185.525760847281 169.556358586336 149.925051977052 196.519125510368  
196.169988112042

LOC283887 137.954283575143 129.284384810812 137.537197575152  
132.634538733205 131.050255325564 134.089308635893 128.367370419533  
120.922042875444 133.533718725309 133.382099379709 132.456945758174  
135.267015629083

LOC283914 133.252140649104 152.454414703534 159.213940274232  
159.021304119265 132.359319280352 150.837717923505 139.709959820327  
165.48594766783 160.843325877861 170.692146255416 150.670783991982  
153.54898879562

LOC283922 157.361421272816 151.792921211607 194.072260528037  
161.019770036957 139.847813838017 158.384505840662 153.267549449395  
160.584760930779 166.440530119785 167.373416675264 161.402322405903  
150.294432623474

LOC283932 162.900556089071 192.224242967539 178.072538529634  
186.276450732044 145.654559623732 218.615551704188 308.877027622691  
249.09278446472 349.910535555712 150.046300135261 435.48544637769  
205.047145898929

LOC283953 241.353916553991 199.281908522212 282.47352481715  
227.375773052577 376.124744806171 277.561376169965 506.029788151779  
268.930428617695 232.830038701628 357.35857422585 267.342817344746  
265.919002666885

LOC283970 146.785478478701 152.017655364287 132.50676380992  
142.468453098878 139.894559834783 149.975892236985 141.84653748835  
143.517327774456 147.991572632747 144.910863590251 148.936888662374  
150.674189235105

LOC283999 146.55327386448 136.152827218905 142.914863449833  
147.640100078933 123.766373146588 178.166289723365 139.671302796695  
137.188849160569 147.011838288594 147.359279533039 149.925051977052  
134.746175914762

LOC284009 133.003743285746 146.800324349321 141.002002397727  
121.387799881297 122.742891063864 134.650161382949 134.569883788949  
132.721469335671 121.728711587014 121.027465953657 136.275207732661  
119.249084967945

LOC284023 255.12306184224 334.199307788576 276.925017614147  
287.374706071354 224.466829629468 246.389203940944 263.123584372086  
288.221041179309 233.59297160203 275.343591424586 305.542978609337  
210.529782898493

LOC284064 142.183154756458 124.547559624623 147.543411823657  
139.22776505842 128.620852653765 137.237089899964 136.722636695506  
139.866536599877 134.666505160831 147.009325721272 116.70650322987  
132.100026388604

LOC284067 134.086301127594 142.351705613006 123.603972078897  
142.296446144179 139.589612144962 134.70636200986 134.427601777639  
138.070353990356 131.986590029726 133.310323593945 124.726035027951  
156.233573126063

LOC284100 133.315888375614 134.291229819546 130.182320154521  
136.751654856807 155.924471321076 134.447878635716 142.804411455413  
143.038248313305 138.655815405894 172.304496150036 138.239251358245  
131.284359027597

LOC284167 312.961981998512 334.443733461841 325.12056698785  
389.853534237748 461.229315272354 284.831817899986 268.224669588188

341.2887754025 248.729653566598 254.812605074045 227.926444925478  
260.67310907387  
LOC284215 147.211769989922 165.467462247066 150.73248190848  
151.034392433934 153.474566767304 156.083002868004 148.996601285688  
144.858656365799 154.065561942688 138.113751487484 156.003233745771  
173.088291472857  
LOC284230 14073.4649333964 15297.9020958577 13423.8921651885  
12690.801964606 26906.6343314539 14037.2575989329 18421.818380318  
10900.1783397368 15704.7314387339 16179.0939169232 20989.6494028551  
16974.4822983201  
LOC284232 135.175806654971 118.379914726645 140.949367846425  
137.824985884649 134.691038011706 136.294479720968 137.894482933806  
140.138870925001 147.143407224469 137.902953501634 130.962368929833  
117.575009754326  
LOC284260 138.244585395561 153.541193559658 158.845174721328  
169.561657768387 149.984657985607 144.982462113231 151.543678860049  
133.500750738061 157.231166272318 131.863018503922 131.162118170837  
150.677852949794  
LOC284274 139.727248583626 131.015519445322 131.608580511282  
128.528510920423 143.294217840279 146.06054700771 131.33321167357  
133.001613667656 124.347680638586 137.294246530224 126.77232818113  
140.165450892713  
LOC284276 164.955263076598 182.907444581093 149.400244837133  
163.54669668396 125.870730238298 150.540599489506 160.099731578122  
154.534605635191 129.935532080325 148.082026641671 148.104173238606  
151.80632463295  
LOC284288 156.336425973696 151.734683227196 181.914505612128  
151.40067812803 162.819608252826 150.102853150151 181.328458560967  
156.7940590796 167.350290326189 163.885645883066 125.157459724842  
160.954017627605  
LOC284293 162.629257046871 154.623548525522 141.935435502163  
147.129702047639 153.43000129811 147.619451225526 154.030432279825  
149.730467498266 172.045843691642 140.2533871084 140.513291662274  
179.551640851353  
LOC284296 140.781647532361 130.344292132363 141.743873995642  
132.555211779043 159.640027194076 148.204194003593 161.627546190964  
148.332750352364 132.533234335153 135.289246539398 147.393178410954  
141.296574431203  
LOC284297 596.934339406636 622.692834629555 231.338258067616  
789.401526545277 120.039031290299 144.671459266861 141.431172407792  
126.265475477399 129.508990861362 128.144653206398 143.554726863556  
132.472505035111  
LOC284352 127.9928491829 135.928428484011 126.5929421833  
141.609037401299 158.554429311951 152.755535408382 141.727639388452  
164.21464602746 147.079157199448 123.135918415235 156.96934803556  
151.622719246408  
LOC284371 174.832495287192 179.624208193114 186.321879879561  
159.196987090991 190.405863264717 163.113457178357 222.365208637146  
150.224472335504 184.332299740724 215.426918011158 165.267693285882  
198.885004378065  
LOC284379 133.927844489731 135.143532936828 143.004090696463  
133.24611329193 567.465201338735 151.714420758741 300.53017771156  
142.106329280184 1058.55850972326 148.23392074197 184.377923161698  
133.257477196196

LOC284393 22872.0444589809 21650.9263365935 22182.4877079778  
19434.8698477145 24377.1316448061 20764.6732139063 26375.3000727296  
21225.306360484 20989.6494028551 23053.5660790052 28193.3833726673  
22872.0444589809  
LOC284395 133.601133679159 118.269780903508 139.953572663277  
129.054577477882 138.084801633774 126.786434897401 117.623103460369  
135.884635448277 137.237089899964 127.077668562103 127.605805815475  
150.115482378938  
LOC284412 135.309431186017 131.590180562108 140.559553697317  
136.654902685184 138.111242936657 127.339018771488 140.513291662274  
134.572552391307 131.730758460802 131.989955864584 114.325967923393  
120.14201542563  
LOC284422 130.792692240592 139.397282021664 130.336466131215  
145.560904207183 147.614293127043 152.262147284452 136.689064885984  
161.24755274554 145.144401160102 135.175806654971 138.474429223902  
152.418315087218  
LOC284428 148.224587582189 136.585541662028 140.840895590527  
136.380523452336 138.771088752839 141.735123971775 138.235127932016  
142.80027343095 141.170937695272 151.803707178383 138.600017737884  
144.622149861788  
LOC284441 124.235958498969 128.124456615525 120.611442477736  
113.051381310122 128.895325544109 125.818432070199 126.009358591395  
126.531502877517 118.988269692812 120.740986472733 150.920224503051  
119.399971165857  
LOC284577 132.767474034305 129.771073986855 135.860057860699  
137.920724602098 142.101865506094 130.99288239869 142.217762896203  
130.607857562345 144.00214898009 165.692508737757 136.599305161841  
151.841652724562  
LOC284620 150.324132011201 139.076978731572 158.297624312257  
144.270828498856 159.52147764862 151.538112896642 148.206529935876  
149.41564356447 144.023798119335 142.625414022199 138.376176600064  
152.213746577124  
LOC284648 150.70383460714 115.944280729914 170.370934381883  
137.901317305531 152.124910935545 136.589250394236 142.148597793651  
165.647471565959 155.164238647284 141.760529549196 131.277646716635  
145.338156577438  
LOC284672 139.036978052242 133.760183242137 122.385508330707  
136.621654800082 120.912905886428 146.231937458616 134.227253565741  
132.387242907281 148.911306526869 143.870849001074 143.125454748996  
141.75279613643  
LOC284685 124.715454831847 120.13937451914 116.519527499611  
118.712730897987 124.324855155055 132.381685434931 122.149756212115  
119.000436602325 113.214390213004 120.163286072512 120.227386958188  
129.198366503027  
LOC284688 140.726084514407 152.360670942951 155.545904088857  
157.592607345742 129.007924852801 166.027988561421 156.957578703389  
148.520371748891 154.076216899447 143.050004021764 144.114177076352  
159.973758408655  
LOC284701 145.208597795717 153.474566767304 149.226700202481  
154.634289463743 157.697168349028 149.636887782574 154.71904132098  
148.898587505337 145.195065312551 162.850128623401 147.983937675946  
154.564478911791  
LOC284749 115.927914533359 115.520278378747 134.758222337831  
115.80656409185 121.871105084095 129.780648518219 126.724973604103

135.166677520468 121.356731684516 118.011195631598 107.559685467789  
115.855948612544  
LOC284751 142.639587833858 139.974586762939 148.278828579424  
158.770502070553 134.70848693317 137.891372981851 142.432995657729  
141.583936153499 138.399665664034 148.012353232918 122.456286448252  
143.725497952919  
LOC284757 145.478233255862 158.738932073809 128.449200385351  
133.820936825552 104.739307327595 105.284300851422 119.598216955485  
107.559685467789 94.3531468700382 154.932132950843 224.274329367512  
111.848472437543  
LOC284801 153.606787306076 142.452409969639 146.247825342634  
143.475725571943 142.50631960137 154.881797585583 152.418315087218  
144.02239659305 137.369033684705 164.836381332774 143.686906051698  
138.348160604288  
LOC284821 6441.13602696535 5250.88041666757 8182.20106181946  
4166.43837922103 7969.0710242842 8261.82420896892 11971.1664283024  
9970.08052783908 12221.7819812315 9171.47979464736 14798.1358474998  
10170.8669218992  
LOC284837 145.917220112846 149.013011292165 142.883466086309  
146.453030317456 203.704734790602 374.215345412947 205.200459980187  
1010.23703166498 553.368945998847 180.902950045351 262.832376198119  
331.937313503755  
LOC284861 166.076692502428 153.579955370444 149.871960981882  
165.74458564887 165.143417235314 165.752558888845 158.545435407585  
147.264690436042 129.578488688293 156.4687904356 119.319884675074  
178.647726085678  
LOC284890 159.009211991511 152.970079142629 152.148784410501  
151.527357661273 134.605345732609 139.577443171489 139.369815367465  
145.652246303142 144.056644468886 146.353239460684 169.355185349431  
152.591091223395  
LOC284912 107.32960937124 111.178024950204 119.242880574306  
108.589444216106 116.230993734675 113.043089777907 111.703224727793  
110.518806964366 103.09089100768 118.547605249191 126.106777865128  
117.893918180502  
LOC284948 141.964796033176 143.705475208192 127.822440239962  
157.600193849783 129.976540483758 139.890519860289 157.213868854329  
133.63668145135 131.659187927328 141.189008902155 140.678336884951  
137.464914919148  
LOC284964 152.331011756244 128.482976013813 137.666849842576  
158.779261405573 155.172667450053 153.13384838492 139.280151859534  
150.734560844391 151.020903727566 154.264142444882 129.854478528455  
148.253612913109  
LOC284988 1287.3125466789 1230.63920848575 1429.25367024696  
1219.36024606325 522.300029971277 691.205738835917 555.607185132941  
573.644925180854 732.630306104841 470.95418656881 699.270931701696  
378.509324619452  
LOC284998 126.609398779757 119.733311319912 121.818632020666  
149.032116392457 128.920313557255 133.895547281411 135.661131815375  
125.362754088168 123.379461430902 120.599440204711 156.349030617265  
134.948615133037  
LOC285016 253.098839084408 266.316485802808 107.802792435066  
126.27024495428 130.680629893396 143.546629073997 128.005043478952  
126.460390022632 117.539640414775 117.367470441908 110.966212705086  
123.042372128864



LOC285033 149.070750686003 132.066488589395 148.062245676711  
164.078423844421 156.053517438255 150.0084730766 141.741892403029  
146.139817421758 146.927825526831 156.674411447713 152.488480322526  
146.803549606737  
LOC285047 177.055023182887 160.98571841915 174.214747421898  
165.267693285882 152.22701178148 159.236429097777 151.026905311756  
160.537464426971 163.081050585097 189.419941381565 147.9084767638  
154.183537565624  
LOC285053 6384.66090426598 5789.71932579854 8787.57716309558  
5572.23400804004 10449.7190201942 9016.04641569485 11479.7406150358  
9937.36968397141 9171.47979464736 10075.6573898939 12916.6904389018  
10250.645112753  
LOC285074 310.426513884979 315.430399077266 358.152044880733  
336.212224495877 275.841929188802 291.779980648289 257.132618311227  
290.420307322101 240.07282016658 315.513423195489 257.168308311848  
252.810636571566  
LOC285095 160.066390229416 178.997098204457 184.742960975938  
167.933231844271 213.432084172541 283.014222473749 256.370052241046  
201.139510041141 165.131463797217 168.443386067427 167.542332146706  
211.059870865354  
LOC285141 131.717160947964 128.486896700405 121.984179437382  
122.382304966782 121.344724993789 125.493004972076 119.415822905251  
129.652331277375 127.068313862984 135.936021164312 110.475453268997  
114.841964705981  
LOC285176 14651.3379687477 14755.8570847826 15354.74541236  
13645.150201952 15851.5830405813 13479.8546809758 14417.2696849334  
13853.9715872573 13247.3528304243 12046.9345159347 9470.58919937464  
15053.7547401937  
LOC285194 123.048352070915 128.717719117128 127.080149144234  
116.412881235587 133.103403333542 128.292627005614 124.140880678888  
136.400959554698 124.372963874507 118.841699953612 123.364999283696  
125.851611268218  
LOC285205 162.940190224943 169.764014031526 152.609055890822  
164.497445195378 167.887047631073 160.368226341458 166.162656500954  
159.576585660511 153.267549449395 165.857032207991 151.803707178383  
158.23562423217  
LOC285216 148.390417679848 155.666943703002 149.63291071048  
138.29167712246 153.551359970644 150.003399000079 136.539130156863  
147.60284257326 143.953043041292 162.082166316002 146.033591220134  
153.774548290902  
LOC285296 146.388285560372 148.713747597311 149.480971898888  
155.46017572591 450.120868656638 196.734037460218 202.691507273819  
209.130260450131 192.113217321485 143.422419261603 269.530151236658  
195.863843860549  
LOC285299 148.512096079648 151.567693140302 149.473505461585  
137.85150144918 141.997165490755 154.373739162815 150.173766182317  
140.43729728368 137.017882995262 157.639688257892 120.524859681034  
153.402227428787  
LOC285307 152.097609803404 153.136863548105 164.377227860031  
161.916155040522 159.203584692924 145.389721946046 165.789846154721  
173.082167545676 136.05434446747 153.332110179758 132.649409216699  
153.159425380743  
LOC285346 134.93455083142 137.402567669086 146.900087470856  
139.310309748986 148.832461329713 161.434331154045 141.544454931788

129.977863589097 136.807118099948 150.841261270382 130.803561448083  
149.173121214851  
LOC285359 182.118544602205 175.93459327917 212.691702227442  
175.679405338399 166.440530119785 183.969897305028 200.065184172871  
230.893665210918 188.910933952136 156.938149948126 200.365899129972  
193.974325897472  
LOC285407 141.613898853625 138.248708129528 140.199334790854  
142.470799054068 170.966588957686 161.202844994203 148.962593686337  
166.936975782665 149.760883745928 148.423303776817 180.658930225735  
168.244523461915  
LOC285412 133.917283965036 155.53992663898 135.99579763634  
145.152605166094 146.552529779774 139.271829906127 151.248365605631  
137.50266393001 159.90466743683 161.281195929918 168.890506147594  
151.639515017015  
LOC285423 140.016122996485 157.457468761338 163.880402141404  
136.028011201077 143.775739569887 142.664793323255 139.418394104487  
143.744075931566 138.990971069382 145.351662473858 145.566861062922  
141.722817732641  
LOC285442 130.69582728747 135.680872395032 154.716750150891  
134.094231940612 133.090474303043 130.867819112143 130.724642809645  
146.398454169593 141.831596320865 135.06498850776 117.22284971665  
141.329559699056  
LOC285444 156.254944793402 154.239755912437 147.677900030844  
192.140442881209 134.206518622834 161.877378749103 150.968998243223  
153.326420485822 169.061364889307 156.68541512214 124.842426851438  
150.929236917651  
LOC285453 153.913513669361 139.3864057463 158.660859266099  
143.720044122451 147.476805635744 150.384559054133 135.420780282429  
147.248053518914 137.614020921217 137.899291413431 136.254966566424  
151.500282404318  
LOC285479 145.315039707314 133.820936825552 152.954944775793  
155.221833416673 152.837739128546 143.497909064641 157.035739033122  
151.305201022012 155.582036890436 136.743659350798 133.67719550997  
153.713298074917  
LOC285484 149.805955402639 138.701871179502 140.586497829504  
132.454025879177 140.191264837331 135.448170440824 139.186416741431  
146.125125252096 144.86583288717 141.209958892647 139.411792975474  
137.914673796317  
LOC285500 136.378203924435 141.920967855989 126.956303896995  
140.398923642686 131.271979461703 138.785538575745 147.225911875196  
150.763810844645 131.085965122946 132.570225520163 136.473948855498  
127.575660581922  
LOC285501 141.292421722594 153.018378403144 155.76568091161  
168.389069732474 130.255689301211 149.164469334038 157.192320902906  
161.983987604 132.971844952199 143.004090696463 155.168592130392  
141.892214695902  
LOC285544 159.298815559223 144.782706468281 145.440471538068  
163.899808733609 151.123104810793 146.416318806523 165.496065029161  
147.761374187766 145.333097940759 142.195764444916 140.865990571023  
171.099675679944  
LOC285548 147.937679308903 148.153776704837 145.67389337654  
141.490911535087 139.494962965774 150.359906271672 168.45157400976  
147.879286704 137.923852688695 143.137885798901 133.231066635063  
137.844113743956

LOC285550 216.705908017858 208.611557959861 181.328458560967  
227.144441241869 187.993907528473 209.913460781088 195.84531580224  
190.993590849624 256.022057262325 197.068795788491 178.106013202731  
220.791884858764  
LOC285556 205.781486117242 159.815932985135 157.221008210698  
162.457778455279 134.927386619223 142.064680109047 142.052454741558  
146.151639797173 126.118745937997 147.626071601072 152.555437272666  
131.400031203603  
LOC285577 154.8975607055 146.081940883446 153.031479923324  
167.365850007748 142.155463269751 136.146383365709 131.568898109933  
147.751554743466 146.709967739596 157.5032461329 158.829144564361  
129.16337177104  
LOC285588 168.384397488011 128.539969915702 147.26204590693  
150.376234759097 137.540275229889 169.36029946801 153.643157329902  
147.653573379877 149.968749911496 135.668768914964 133.363883851093  
148.844916975586  
LOC285620 149.131218007756 132.86879723151 140.885915460425  
140.35175858015 119.640086587188 134.94189148503 129.938723074546  
125.016608289141 132.189426012448 134.163388748526 136.925645302362  
148.32201986048  
LOC285634 126.259029676691 128.827129738041 136.609461559853  
131.849442776642 126.578035793406 130.66511389864 136.569250038372  
130.776213987522 135.621035941292 142.524413202292 131.739418639854  
139.923187410488  
LOC285697 152.241060990474 146.624631389743 141.37694311902  
140.092648878007 125.894755032594 152.952479729682 143.112205432731  
147.094123051131 135.968346417524 165.885072907195 153.947717667689  
144.134485888258  
LOC285733 152.395272857974 133.634886800037 140.525013926642  
141.652000792271 139.410739260343 131.470883854661 149.634975068742  
136.16560274503 126.798976470472 138.491922816359 144.043818335414  
148.197029306137  
LOC285735 149.556644928013 150.624740697168 119.463337435512  
142.560797028716 145.036719629525 137.208796872026 153.562334163034  
138.631273903053 153.916313595581 135.457059862669 124.126715773068  
153.829636228764  
LOC285741 1379.95968831696 1367.92869625376 1742.84803427086  
903.503768217033 610.759447723026 1139.76755449089 1038.34611017219  
1064.12835214671 1099.37392456694 3630.80752744347 3111.50508060882  
3522.61692270848  
LOC285768 129.173772079264 142.207501807009 139.571752933877  
152.095584118603 139.106442824079 144.991442620483 132.450954427876  
154.501338425995 139.892371997205 146.96472350529 123.671944323239  
149.477373469387  
LOC285804 144.131743978192 140.464476678448 134.592495777159  
143.172744119235 133.496922906874 127.905616521853 136.556183079815  
133.42964827086 131.631968933144 130.285187693932 147.100947801261  
139.809114250476  
LOC285900 4095.76073123843 5073.27433952351 5859.56559124843  
4238.41681589316 3693.4058156307 4238.41681589316 6793.99737496637  
5073.27433952351 5455.91604383389 6522.27232911897 10106.8225600705  
6384.66090426598  
LOC285908 201.837695818264 220.710324965453 282.870785313621  
228.125521373477 213.877482604185 236.251507822415 233.232319881243

281.740495452842 225.130011390856 190.645917992472 304.237479317271  
325.999687273862  
LOC285929 338.866471651692 288.88486628661 274.14931964455  
281.119138040097 144.688515462537 157.041481397151 166.830529779692  
188.557113298055 172.965746521132 196.819022688128 152.286545050749  
159.784369379077  
LOC285941 157.457468761338 153.162313098346 184.187847236508  
145.739537463907 162.390356943447 161.430219824313 151.730862403472  
149.244970309131 157.528409294029 143.296580629431 142.421913396368  
140.958277301476  
LOC285943 167.284724396943 179.985468369202 148.406031732776  
159.848342125486 145.027741086645 158.723133891017 172.764511709731  
161.144841967903 303.138041758745 178.920528149177 241.845941562418  
455.930204471585  
LOC286002 347.985315257161 321.84712975195 314.810001770583  
454.235121917464 154.528396813382 210.620764703468 171.426334687626  
198.737421468412 185.493554506958 163.748692741999 186.257814752354  
178.027417594263  
LOC286016 598.647226284738 611.208083466988 494.067878734396  
733.648333788712 1361.54107116915 893.676600121113 1221.58522138654  
1205.45751308367 1086.8615735568 1641.70484603137 1241.59946353857  
1222.014210447  
LOC286076 166.627372924295 135.783125948784 147.849116400978  
143.397823965608 133.682715540066 126.748906552086 143.123131081201  
151.034392433934 145.024148458133 135.542079867325 134.445893291422  
136.222421297872  
LOC286094 142.119327380686 149.230226445583 176.088449983147  
151.212606106351 136.267313223808 154.057771254252 151.87495966414  
155.666943703002 148.100508271232 145.270140096768 150.417169156755  
139.204218271711  
LOC286135 132.69067627743 164.236417852165 192.655899720909  
170.768398273919 140.571143847885 157.11867820027 138.880168623766  
167.568776552757 161.960392594363 164.922193471904 163.73339229802  
154.843607752473  
LOC286157 935.042067053226 743.023225859813 1570.39362935859  
608.129959758538 1602.63977096867 1039.92160906839 1233.27155759407  
1113.05943954513 1569.13457493554 1300.40889834984 1315.66699943181  
1285.02292965374  
LOC286177 133.318665755015 116.294180301039 138.010385979692  
122.636980845207 125.600500146679 132.191100992151 144.725650040212  
133.661553334004 136.513942889781 129.307025798583 128.05898686833  
146.937052029619  
LOC286187 120.316950428535 96.8261937365062 94.3531468700382  
108.751654061536 108.697696080014 116.428373788459 98.6941019230576  
107.450945262092 107.74537523456 114.504409331018 122.514826802737  
112.133567992833  
LOC286208 318.423602671236 329.406649846151 306.232249422327  
306.550948766362 242.72424280444 260.129513331703 202.943987922418  
214.261611197599 529.228238133018 176.603760647035 378.151202933526  
193.843978773764  
LOC286238 139.338384535905 127.289269745461 140.348718082786  
125.311403516443 130.714375454354 128.211076776316 145.298109334141  
129.072962023838 129.338551879984 125.124011798043 116.91470505098  
140.579839043912

LOC286239 143.905680376268 148.090431893307 158.463444189819  
147.638057399165 158.452089329714 149.642946071295 187.529556428609  
141.54943189147 155.76860362365 170.283532007581 129.973380117841  
169.012926546641  
LOC286260 151.526337610068 136.913957413224 143.752697178913  
144.889019483712 133.311212623667 139.87715485885 142.356747337127  
136.123129580618 140.041977349982 151.705219298578 124.302581985661  
134.034970203523  
LOC286297 141.1596293382 143.262810933054 137.025625133986  
132.008330288281 152.939759795631 140.025668085978 142.637421204193  
152.432477504097 143.378998368344 127.6078497227 138.266328639467  
144.671459266861  
LOC286310 140.2533871084 150.28508305615 152.910433120981  
150.790155351217 141.66312605042 144.143692745479 153.420392741659  
143.155998311198 155.014930599769 163.446813963119 166.640325848102  
158.509885816997  
LOC286367 178.728925255163 174.657352858049 161.234304237838  
162.203570429542 129.842252702648 146.666759322506 129.782134019986  
151.377932495104 147.841960346835 116.221426977629 178.551434222154  
138.53954980556  
LOC286411 159.362293777146 156.511202150773 166.606522485953  
167.384121560438 154.722895261876 160.303394115537 155.253032078086  
166.182850621447 157.293090577042 165.686655824416 141.696969082758  
155.690773461824  
LOC286444 3099.71798305764 3222.23985545506 4037.15442268836  
2853.14759681683 8368.88320476021 5572.23400804004 10417.5218406801  
5825.9968524214 4901.41175228982 8496.2506227676 7266.3946293904  
8473.21873478131  
LOC286456 132.071099697667 122.305514440939 142.510745106328  
135.866980620144 125.908576249439 135.938590242744 132.535722328813  
130.917269984571 132.282125790062 131.666853845458 156.646803208934  
122.989642938474  
LOC286467 154.236652966294 174.284268998257 174.657352858049  
170.390200730789 183.302479730653 221.231455446574 203.586310608403  
190.018871923219 207.488522933448 221.390817970859 159.660564323984  
182.958991847218  
LOC286478 157.162523271165 149.975892236985 160.117742879282  
149.554174907798 160.932913244423 160.122274989224 160.211460008777  
152.789338329505 157.221008210698 160.977462147352 148.336126836362  
154.070450565144  
LOC286512 3917.05893989806 3581.36347643133 3237.94149351627  
3566.89107958971 804.800251415824 1325.77498031227 2733.68308784024  
1164.22995893381 1291.12004949379 1349.84215478798 1868.82736251524  
1690.96371604294  
LOC286528 158.708054164813 154.491373296392 152.418315087218  
141.860850603561 128.0171233156 143.695901115673 158.377396672742  
180.327051100611 146.190750749851 138.880168623766 134.283467987991  
169.107948050094  
LOC338328 141.062226285596 136.396579126676 145.056914913573  
137.093170378295 148.057700860759 137.042097702398 133.043503979161  
142.804411455413 157.922718487881 147.216303852902 147.805819921429  
157.006278815282  
LOC338579 143.325710305008 134.407776033032 141.522701487198  
148.43357593249 136.400959554698 142.548833391567 135.106072664488

141.313482534472 145.165443106042 148.660440219589 128.844026422327  
140.912921321622  
LOC338586 136.807118099948 134.489421865495 150.911524755251  
139.585373400347 135.159590925066 138.491922816359 132.261161069329  
147.103340218488 137.891372981851 129.703791330416 126.868970616955  
141.777089987975  
LOC338588 164.905467905433 153.481752643937 157.415211954103  
157.86653024793 157.519633258844 154.764283765316 157.070500065037  
144.587253120884 145.965900441953 151.532859494021 145.01322767825  
152.286545050749  
LOC338598 121.429270259367 113.222264855561 124.885950473434  
125.04327844782 125.496553386629 119.890260409414 122.093290585838  
110.900309203531 112.264005988662 132.484079454476 141.313482534472  
135.364039983762  
LOC338651 134.516390697561 132.07268641595 138.041411135053  
134.051756243089 129.151171025294 140.752616434418 126.383238335161  
140.8630233163 129.090955637629 126.848211027661 121.515872228716  
122.914680091926  
LOC338667 135.323341505875 145.346970289157 150.677852949794  
138.173547382901 146.368188849777 151.137791721752 145.983627592197  
137.074564265915 132.983739057264 140.025668085978 147.60284257326  
151.301484852387  
LOC338739 138.661548678191 126.049905221996 126.529763042574  
136.499228715856 138.765755044366 125.071387239411 117.77708734157  
118.974727968283 122.804934452095 123.086596566142 103.168665937677  
126.17133877948  
LOC338750 128.29486937905 151.902352951251 174.389706515542  
147.62157260418 138.167369090026 136.971869448818 149.827791077797  
153.918462601781 143.195338329759 143.137885798901 151.043967734248  
159.070355781276  
LOC338756 157.038121210505 146.171094379173 159.074001164836  
137.222125237171 172.077522197357 172.245089970803 202.145180994821  
164.274491958161 140.736051985112 160.099731578122 135.027715094704  
176.088449983147  
LOC338758 518.760142491104 543.001249586573 347.557792829093  
536.9324595176 642.647554580301 597.795856268827 361.429760858441  
979.019125719101 322.302219773624 374.406855727422 235.822266856967  
249.524956682907  
LOC338797 141.391508027714 129.23899614612 141.008604646743  
124.056405566491 131.208112906919 145.081468030567 128.779829252045  
129.442111153737 137.475594014388 143.427721577372 139.223480216048  
136.202953030465  
LOC338799 194.202977693583 165.370800097602 206.127493726541  
157.368974632451 163.267148547147 188.417078622503 176.355556618289  
171.304896264805 199.353823724989 141.112047881014 203.544294328395  
190.921283434627  
LOC338805 130.101422420432 134.507558495307 150.371716899336  
141.763072120718 123.368137868951 140.934844668435 144.011792962785  
129.3513576591 151.367402326399 127.91637627901 132.774127230452  
134.613036378054  
LOC338829 140.763592237598 137.299908075811 184.569063297206  
138.296933822299 137.379558348782 155.168592130392 161.886342770305  
153.713298074917 148.185056724262 137.383211680459 149.786445079456  
145.806935833967

LOC338870 6737.97308530049 6508.71638048514 7218.21759302518  
4956.21683075884 3321.1350545346 3515.36256599555 8666.41250683965  
5789.71932579854 5300.67886821231 7948.88765120294 9171.47979464736  
9403.76665152182

LOC338963 154.886628987246 149.601145171769 141.86836086844  
143.618454531431 155.313873664923 150.831554010122 159.236429097777  
137.693410133625 135.141067086648 154.407622202006 148.663860923774  
140.997594159186

LOC339047 142.086300138469 143.250386570155 142.493119780028  
142.390243984362 147.416991272497 150.731093808891 142.89427871125  
141.929924728222 136.19725093985 137.434039024162 140.283106734666  
141.410953064267

LOC339192 159.879600154928 153.67215573765 132.822351718257  
138.692057950694 145.97512573326 147.610616423185 144.265352127763  
139.890519860289 164.652795899742 134.682319733908 132.04032925495  
147.951996191313

LOC339209 127.615631240096 121.539958110688 126.216519704249  
135.968346417524 144.931901042924 138.188522429661 116.142650095476  
112.736231367296 135.294664456623 129.222714748528 142.324077852852  
121.188761627967

LOC339240 134.524644163286 137.888195199363 136.093473732174  
142.103519373191 129.061316880624 147.032210333966 141.898948675823  
146.873719524815 138.588751758469 158.928949614338 152.780908985916  
139.733149319736

LOC339290 336.981561928411 296.333944172375 282.442528230519  
277.946395491073 130.641217515008 130.425809387444 158.33974431499  
139.369815367465 202.545147073902 180.035652063942 159.52147764862  
168.813895764991

LOC339352 182.009471368798 237.045634416039 196.519125510368  
273.303240462047 616.523853569261 260.921177985439 538.605085454393  
242.72424280444 333.349203784021 192.209344004015 456.126096817454  
277.359422005775

LOC339483 141.267715391739 164.571974509529 169.631386764054  
147.183141990315 140.359796538887 139.657182434153 134.94189148503  
144.352987324713 135.058525398122 147.659772694732 157.940873610797  
131.204616536341

LOC339524 161.354014292373 150.99622088333 156.349030617265  
168.618667871117 163.575300618666 151.742938010671 173.640326140494  
144.744603095605 145.511473738224 168.969180646603 135.643341446691  
177.976550224863

LOC339529 117.598778415488 115.566303449363 119.057157701097  
121.968807253639 121.591962855513 127.070677267233 113.38168751499  
131.017355402204 127.83967243279 124.924794564647 112.026113831896  
126.629012619208

LOC339535 152.411545237204 135.441550832737 152.210867113591  
170.446156541317 138.89579816122 153.738794649373 128.837901660985  
139.633941983246 147.395335979341 253.42022722564 133.122809308876  
141.097257687941

LOC339562 158.895584550655 150.227629690236 143.011042973347  
159.936703616817 151.519845657755 182.028675726969 142.674671804361  
160.964435028806 136.587165242663 149.341736870692 144.00214898009  
156.077604146143

LOC339674 137.830435972191 143.589222264786 142.541728149687  
156.487049947247 147.713967317159 150.534608517044 149.430396727944

157.922718487881 142.06907380533 139.793683692104 145.633647856775  
143.200939506995  
LOC339692 150.011603347578 151.369387642458 155.080900277147  
153.811165696928 145.832751296646 153.453969224725 191.128539630621  
156.502051001988 157.006278815282 150.500676225569 141.508424382665  
139.589612144962  
LOC339742 149.97218338771 151.70917316194 146.728881202697  
163.809967446414 145.247717878099 148.832461329713 152.524106827617  
148.842322753916 139.826273596452 145.221594295772 144.849525310826  
158.06129717954  
LOC339746 152.11956441072 157.5032461329 155.665535235558  
156.662150993832 135.345616014558 148.201649039381 151.540744107423  
155.8871985642 162.147989253357 157.745805838008 148.700297908071  
128.604270382206  
LOC339760 151.744902566627 174.23955831109 203.265559787292  
166.298554732581 162.933658389727 154.579913524947 185.905819051223  
160.573172150801 175.656204695951 171.061850719125 166.549192709614  
158.263657373911  
LOC339766 171.69834783037 165.017178571218 174.890624803452  
154.003862874241 141.180647782041 181.364325529405 175.908645445479  
221.916075811355 159.887898257218 140.842305941666 160.331940529151  
303.138041758745  
LOC339778 163.234966251618 148.162914253981 157.575902297677  
186.625452120269 169.107948050094 159.652739364784 171.740347129234  
156.585665091824 164.442400539653 170.748911334847 150.272153646712  
175.38376293575  
LOC339782 151.535177950367 159.674396591041 188.033890834418  
175.010849510711 164.634694036993 161.564505054217 155.938283930571  
155.233830396052 164.593531655305 146.146800933028 155.890403934674  
159.798024189461  
LOC339788 145.072924262206 139.348494759948 140.086978441723  
158.287108069245 153.393651104539 144.281217246178 145.67389337654  
135.484360570738 123.646558103253 130.746465595759 123.375592272781  
123.051777473512  
LOC339789 147.720061897962 128.363331337379 159.990561741675  
152.950227635138 125.478878240473 143.565597315289 138.161690144518  
150.75878820215 135.381131982323 128.4702079007 118.32560379073  
140.332045911008  
LOC339799 154.79534193124 141.466287523861 186.866029149035  
138.512938877774 150.648444878067 138.704839659727 162.223175359454  
157.309058982117 151.946691918521 157.535792192753 160.769011617127  
147.661748633455  
LOC339804 451.380376296813 290.638110977807 621.489906442001  
248.010317392179 193.98814423456 238.946506103155 163.451063547847  
347.411500022053 219.661502916874 264.383922859446 170.784229026842  
299.851173200352  
LOC339809 141.553465481789 128.649329515033 155.376656335974  
182.68965110437 127.825550834962 146.887506793665 131.081793789906  
145.503718833974 134.756377802151 143.60570420943 135.039901725369  
151.374665021513  
LOC339843 176.312626750427 165.954266127697 201.865955150869  
158.007926822094 144.690880401712 170.417054311946 156.497059936271  
186.939168482155 254.879772480457 174.727439318223 178.12073430094  
158.92538634742



LOC339862 129.612536218578 137.782648137869 131.071614211431  
127.097605337434 141.622592268163 133.88072491369 149.487167787687  
140.746062850603 125.661697165943 148.031899566208 130.686857648764  
118.410091682499  
LOC339879 197.405472374722 191.58185405868 163.67719444924  
239.836698194959 149.227646026658 154.812587513407 145.286983999628  
149.377153449536 158.579717282881 135.139676303901 160.557818466874  
134.264584077125  
LOC339902 142.806728419652 149.579428189895 141.383975990479  
152.837739128546 140.504486195539 149.797850183848 151.570977428443  
152.232245164212 149.341736870692 143.846734516914 140.842305941666  
165.866987051333  
LOC339970 506.430593289427 512.541205235935 470.868288641048  
508.861268738074 251.588748783592 310.690317681243 323.667189206453  
244.101521795539 293.234972169244 260.098788125373 322.684910198242  
300.247304779062  
LOC340069 143.172744119235 131.025725443485 135.573170189235  
142.524413202292 124.153063838817 139.094167748687 129.467792559297  
134.352155462211 153.072429774613 133.702845956639 126.662329971897  
135.954961086609  
LOC340094 153.100979553727 145.203083375014 141.277227483198  
143.700865823615 138.508015596135 151.40067812803 138.882483367088  
143.333211390741 147.034021626893 152.680068580858 141.342216963124  
136.158508521357  
LOC340096 164.160608039304 162.050520530297 148.866229889479  
145.843639385175 145.730054487572 151.893573927407 168.628947766217  
151.613134875009 148.069725041021 147.345558455805 144.5368823731  
140.624437508178  
LOC340113 179.060189557496 157.353493980339 168.958694643382  
158.467572658719 148.960077949157 150.648444878067 143.351341716363  
153.798367953373 151.899063970777 162.599466021255 164.520247586053  
149.487167787687  
LOC340156 146.948261640482 246.912159676595 145.039617860588  
161.412427590994 138.944595164363 159.584350289413 164.299585578035  
164.146345008398 158.963726206466 140.402944266863 138.708304921088  
152.746799687103  
LOC340204 129.825824640378 136.807118099948 152.577131215027  
142.129680127408 134.653131708903 146.994103804515 140.236618351922  
126.256716138724 142.027930009598 150.71435300188 122.428943658306  
166.595529296463  
LOC340221 136.84488044614 145.34533633425 154.534605635191  
146.252974508529 143.772376623996 142.438586625317 139.157088843803  
141.345379144177 149.915251958706 147.670425834523 132.703034017237  
144.579725208643  
LOC340228 133.874468336025 129.045934344719 122.226875707253  
137.037299675471 125.463718280745 145.020615552964 128.561593533226  
141.064086298948 125.982423431253 144.043818335414 128.284564251279  
139.244051199144  
LOC340239 125.486324819682 123.096995744616 129.236471271181  
125.98519427755 115.631414599991 125.839101611277 130.790872334222  
135.027715094704 122.54127694717 130.258087965663 134.30854633824  
121.991692204056  
LOC340260 151.252137441251 150.115482378938 146.912751127571  
140.553613300431 172.169129806643 157.979749139651 166.157713072213

149.264997927508 149.645548888832 161.667782505656 151.126252768792  
147.178598908199  
LOC340268 127.023543953724 116.437403962939 120.65473121078  
125.533538277681 125.704264033102 120.37619371663 124.368438691944  
133.738587139139 118.875640081461 132.502153153826 123.086596566142  
135.950465168457  
LOC340274 138.950197595669 150.42705284743 147.717748449017  
144.612549022264 220.999383789474 150.75878820215 231.0814970959  
209.385358804928 222.943046618742 152.101695555105 190.76537287329  
139.858812885649  
LOC340357 156.930119977809 147.889486635135 171.528350399075  
169.903088388196 173.951605889009 150.772752327567 149.99203906203  
170.998961353556 153.402227428787 162.879707592164 160.281830914755  
127.121068682846  
LOC340508 125.081880303992 124.251699375036 126.798976470472  
130.726640485925 128.510903178542 126.958366599622 128.042181036687  
132.265895156539 125.535877109652 121.316836274255 119.352995485911  
126.191057198995  
LOC340511 125.839101611277 130.714375454354 132.786500984297  
133.672964925321 134.436423298225 135.137615432923 125.241484840139  
131.838522109796 120.638330368388 133.070896773384 107.450945262092  
130.754320787628  
LOC340515 153.360382235409 142.688809469455 142.567737460006  
153.511995286293 157.195967361907 163.215507313506 181.431827312784  
156.328454726363 171.579123521304 151.734683227196 135.825931047185  
159.752644678596  
LOC340527 142.043121538885 127.323157914914 138.244585395561  
133.807992913171 140.892250639524 125.227513212286 139.993960054847  
128.882160435252 123.762963668211 121.728711587014 131.674409480919  
130.441808139335  
LOC340529 121.79022464086 136.80943340993 136.349603320553  
126.499257771192 126.077945699709 123.893768254549 119.905127545336  
130.361117564928 129.55573546861 129.194132399305 136.457424070709  
133.917283965036  
LOC340549 131.84454376953 144.210698143215 139.714198638713  
150.570540340126 160.215396651606 136.66358267095 128.582520754296  
161.148734808267 149.207481665265 147.110929610347 149.538429805372  
147.319360896679  
LOC340598 149.736837985314 140.754706171596 141.565599104245  
133.561188057423 242.269784551092 211.468099571442 207.531908382266  
173.741466458636 233.914433380121 125.833649377492 170.602603155092  
198.631354372924  
LOC340888 140.597877909094 156.714081537525 136.306727083526  
141.222884136243 138.150616787218 147.633793743254 161.019770036957  
165.607095120227 147.985843605585 164.078423844421 151.55812886168  
135.403206634483  
LOC340900 143.0235772247 148.356726939122 164.011683602245  
132.369872013432 143.440420261133 141.340452225686 148.760280320258  
154.136467767927 139.172437503442 142.752536416014 138.091795130567  
140.815807483203  
LOC340947 125.742631850732 119.330439721904 128.663320241092  
129.389420352857 137.642858036384 124.571807093748 116.929398630733  
125.940081665592 113.955459033122 135.52861375119 125.422348389595  
106.629065516249

LOC340970 133.096984735092 140.626181314061 133.184279519985  
131.481679396553 128.83022039037 123.822571859503 133.384498169568  
133.122174596886 134.119276589666 137.811304134207 98.4947439453387  
129.295956874012

LOC341112 153.731233276485 145.323212897142 156.228039404029  
138.117916412819 153.882081780197 145.61758790738 154.153249796248  
147.371905597494 153.869144282319 171.813279175663 164.917470819096  
156.662150993832

LOC341230 161.956032597813 157.490138425943 155.660302399877  
175.96841318924 252.222481637238 140.288612271406 255.066583469964  
181.453575300661 193.723953003899 146.389254316974 195.141733146452  
150.514589629384

LOC341315 1652.77814259264 1940.42283070543 1532.47920327769  
1107.29687889378 2941.69058596077 1986.81354260292 3636.59530016939  
3737.57754066891 4255.59773503364 2328.65814406636 4945.87677849967  
3111.50508060882

LOC341346 149.536681241497 149.774162138829 144.430478845702  
158.463444189819 155.686889874806 170.401653214867 169.87591929982  
156.000732564221 166.355086055404 157.435477846812 152.500670025483  
155.578524031078

LOC341356 154.198394507279 124.905889975958 143.864036545717  
155.622257285651 146.823157886228 131.069515666204 153.178934750919  
142.412731964179 144.642717750351 128.135216461862 143.078022283871  
135.071400668179

LOC341378 126.55925846644 122.850678471084 127.657961561231  
137.016495611111 123.357205547181 122.789656787728 132.442771000976  
151.622719246408 136.580363776109 133.661553334004 151.930565620382  
123.75974844367

LOC341457 7617.316805798 7555.47017983216 10765.0336035748  
6585.34962362923 11809.4804843301 15420.9668207676 14866.8264879369  
18421.818380318 18287.6015702456 23427.4695172122 13247.3528304243  
24098.0251582624

LOC341604 170.974759483946 178.284294783418 165.511561121012  
160.828718858381 163.170983091116 149.844677055508 164.757907224537  
172.552923333095 116.425301253959 173.939159471022 164.981665344298  
149.902420337518

LOC341651 141.632147679743 135.503338987971 143.572668991313  
150.815117344434 142.920939571001 156.073428882485 147.077695919758  
149.919344933814 150.263578317272 139.828781354865 140.323425587628  
154.261443597434

LOC341689 129.802596741962 121.75662526451 133.201157825808  
132.815753681623 134.782388051531 124.918089223417 143.172744119235  
126.428284589412 135.461112284848 123.789035728194 139.027836356854  
127.822440239962

LOC341784 178.429953283621 178.676812740925 176.680708339236  
203.206743799353 182.969563278473 219.814706416471 201.865955150869  
170.541689758579 186.831266888028 279.75914135192 261.028644858795  
175.251238431716

LOC341965 271.154246147262 241.706645643141 364.840751972169  
239.503369457867 284.764628939128 764.137504481329 319.018213637357  
465.926873285563 259.229153662504 391.039114500903 331.795832780176  
348.921877633633

LOC342293 120.581554457723 123.169713575888 119.52150378372  
129.694178995061 137.687480242109 126.009358591395 129.11843197744

129.640303191006 130.900049359243 133.111791289725 118.879931299016  
137.819642907456  
LOC342346 166.784804508647 164.458565398812 170.910998705968  
145.247717878099 152.112177721714 148.883263903527 138.800986934663  
148.679832253778 155.129304059037 160.090914414578 158.425950902309  
155.76568091161  
LOC342531 132.48841450242 135.413840160615 124.207200622684  
128.700516033555 128.255141263975 124.001295849091 133.771691580031  
123.946808975704 130.675745275992 129.636135486593 131.525916493834  
133.020551937677  
LOC342541 144.155591092387 144.565926379402 179.601348561497  
140.466612569756 159.701028026285 167.91761500242 157.560117350562  
158.208998509937 153.108902978819 144.991442620483 155.119146797226  
172.237115475147  
LOC342892 153.271518348258 167.421776383056 196.096936985479  
203.943245360496 168.720694813918 176.029791617989 213.584269089596  
167.341759854203 156.18389905051 153.315309202016 153.585849286113  
164.794626785115  
LOC342900 149.117224130576 158.138862054715 149.42148494796  
143.888318202599 142.830950036054 150.142724640067 139.868714816245  
157.768329108254 139.658932672049 146.023710941284 139.333282400639  
144.551233687082  
LOC342918 142.589971658757 159.26101905957 163.470025318612  
162.819608252826 134.817665153925 156.046085830566 153.443397882028  
133.388533738482 174.680918805036 150.096558906597 133.058788697693  
130.601241656346  
LOC342931 139.552533656255 146.318052064937 136.71484425521  
144.273011517032 128.856640014006 140.154925193842 128.640202262896  
133.889858322181 110.810963139914 144.133114926705 123.804039963953  
126.5929421833  
LOC342933 148.744599622165 135.776154891006 153.636804025106  
169.466129742085 163.004844049672 161.795378938402 161.841975820372  
159.90466743683 158.335952927257 146.129805607031 152.327247552986  
155.3394927753  
LOC342934 150.508851767517 154.286043402527 146.817659734182  
152.09245741643 161.365443930448 153.22516060649 137.229871801676  
152.769931978291 160.099731578122 141.647300896529 125.426018910517  
120.790536146461  
LOC342979 149.962143642332 150.300108097623 135.743159681223  
137.52653395793 188.503673684625 149.274901871663 207.138680369683  
245.269004485826 208.080089376299 144.214589452164 156.157567405927  
197.815264620906  
LOC342994 151.183847738922 132.593747375239 148.340380102097  
177.955579729463 144.346988809708 144.705559511075 143.583650664594  
142.208987267497 135.959893035019 148.382228428693 156.678686363755  
158.344330353326  
LOC343052 120.485138937899 139.491769969541 128.165775629664  
130.788557333561 145.301551442388 137.418345713224 130.355969431473  
150.914644894869 136.698189351878 116.90832995093 150.772752327567  
148.848823912244  
LOC343184 11971.1664283024 13217.7001749493 10506.1271023809  
12577.0915543468 23318.4614981217 16123.3486890049 18220.6383250956  
17009.4268910772 15463.4998494462 17830.1333276624 12334.7921691489  
19087.9532735841

LOC343296 144.760229351772 127.015086299437 135.923022674367  
137.336914480226 145.483667452136 140.73456875677 129.689855810051  
143.491142564838 135.784481523923 146.696029753123 135.812301062763  
157.713227527385  
LOC343384 138.338280468272 120.74273444647 151.228823957828  
133.753999983813 150.920224503051 128.572388808833 135.899595115146  
153.295838391099 121.334882368464 131.173355686001 128.0366252162  
145.267225993057  
LOC343515 132.591496435822 147.60284257326 141.432461374482  
146.795608819024 152.134895623504 138.3792224631 137.615027659126  
147.040759979063 137.056500339577 153.54898879562 142.694748293332  
141.275667354541  
LOC343705 163.919426088318 158.8054811093 174.690052785405  
185.896304740844 191.486717579847 212.420616436137 164.68600028429  
157.551854647702 161.841975820372 164.03801002919 162.259941098076  
176.449549075475  
LOC343927 118.9428715545 145.03221570575 112.420505354139  
132.647152200128 115.524441144063 137.706893763747 117.639216182057  
132.062415660672 137.27298184582 126.25011972597 112.612099135361  
128.530540860266  
LOC344065 125.398875527365 133.176970578909 130.513071750123  
131.578042179715 137.663941989772 114.644722005728 140.127379332918  
128.886008923268 130.076926011271 139.623194916971 146.9554120076  
148.763098715961  
LOC344165 139.000870898001 145.652246303142 149.153827025981  
139.435000959919 147.129702047639 142.051259785804 145.219057535246  
129.307025798583 144.871396308673 132.198536906752 144.090047165489  
147.975551540256  
LOC344167 140.964208731587 134.719531559829 136.706241776393  
132.661036963636 139.171486871664 145.203083375014 137.402567669086  
131.827899207029 139.675292022085 134.994013668445 121.246967460178  
142.153830345183  
LOC344328 148.139376772567 145.435794613203 150.835044630002  
142.91818218442 147.216303852902 147.910699446264 151.852294315212  
146.018097597373 148.686975104375 137.418345713224 169.271175460047  
152.577131215027  
LOC344382 161.983987604 156.704278982517 157.04599638368  
152.004130711617 164.120602897751 167.219062918573 155.603263242813  
166.600109853461 174.323881548679 159.728097053356 159.491388998564  
161.021740537372  
LOC344405 144.227440632196 147.171090285223 147.469101571149  
136.542788566108 130.892302357045 126.75720720361 124.611144621071  
132.407736899761 123.789035728194 122.265071206163 181.695203523798  
133.479513335694  
LOC344423 178.096998157452 145.281664250703 173.592875508663  
176.890596690798 151.761369162723 146.70594914192 140.180208418327  
136.593346330215 151.362686497226 147.77916610545 145.542888937635  
174.155599133789  
LOC344593 140.405405916188 140.976675511847 143.914415729816  
157.874624979775 141.874188629438 139.560555361919 149.548900791507  
141.261150586614 132.848926011576 149.898614923436 138.50032459657  
149.18603646016  
LOC344595 178.904696191996 165.424516708502 151.171716392043  
192.980781927122 144.528360135884 147.720061897962 143.737021989907

133.176970578909 139.804518460303 156.942156078314 137.011595584638  
144.20764300349  
LOC344741 143.434571922656 137.266420259287 145.669033804967  
133.836390935612 142.981967333546 138.354300118735 139.338384535905  
145.800379695397 140.581943144813 131.025725443485 138.467624450885  
151.561151654372  
LOC344875 147.389892239448 154.695060071104 141.794898246882  
152.342712570625 150.874703255468 147.624372080117 164.241874094897  
142.114181233875 153.945472622857 145.176141415244 145.536260846052  
152.459041674768  
LOC344887 145.123845983625 132.361106053517 135.771423315597  
131.568898109933 118.497920969001 120.846789922177 121.991692204056  
119.305917403956 115.097376525707 168.254689624696 128.398711525305  
121.99477069153  
LOC344967 124.451718955086 141.536073061736 132.733821031511  
135.594186066942 143.969566798989 125.628281846465 143.818379692331  
145.28524062436 146.245915271213 140.754706171596 137.897243684023  
153.888212689508  
LOC345041 523.435696794756 446.393631025049 758.863418917419  
529.368609163949 775.781735108886 1237.56662467492 1015.63768413332  
1217.29687282094 857.090339943417 855.415038498392 750.10819423982  
1077.95929298567  
LOC345051 133.249792744053 132.367155914392 133.223310036542  
128.899712906082 117.303671445328 132.510116371195 116.483432723207  
145.154323430995 135.778099658349 131.31716158922 127.811923445503  
135.18026749895  
LOC345222 124.571807093748 112.357261386644 120.915108114673  
124.059778432167 139.6492947529 129.969400693456 111.232274546928  
129.25124636593 136.799138736925 137.264095379365 120.182787241888  
129.327645260099  
LOC345537 136.580363776109 146.563078818674 124.170242736875  
143.112205432731 146.731584143625 135.596007994731 130.865693081945  
140.208983238283 139.249869918235 121.341177395499 147.584176709986  
124.160433356046  
LOC345630 123.694678408411 133.43194756868 138.471894596606  
164.659092629962 135.911903336544 152.685860451112 133.82390829608  
131.08389186558 124.176944998906 133.177950880393 131.241878941749  
144.516274148451  
LOC345643 157.484541464879 147.243263182654 191.84511431253  
164.534790315992 143.934585983797 154.288075172115 164.126980102525  
148.641780441227 146.819830256127 143.861970001207 131.347213356457  
152.057315195367  
LOC345645 251.20133703465 256.127197303751 315.615758089471  
221.664431984861 220.661922683143 239.474937674583 291.914408947328  
357.35857422585 254.424207773566 360.991542429346 189.283071231248  
366.473258467746  
LOC346085 181.823450464129 172.866517097198 158.653161314597  
201.800357785022 182.130970182242 156.497059936271 175.269675831824  
173.176900454904 168.942165573542 252.249994170536 174.42996813062  
167.278879415171  
LOC346157 144.73389393695 180.01471631205 179.779007442837  
183.464897811105 156.748330788367 165.219393390909 160.870390779084  
162.047249964859 151.194282143046 159.913028912492 151.41546939633  
152.783534456473

LOC346329 114.249891266241 124.134916773123 126.832182961671  
125.470172259885 116.519527499611 134.666505160831 117.824694297846  
126.528589411462 101.915858150866 121.734873711651 125.2051300372  
140.552143090027  
LOC346702 124.901759819007 130.63490683087 117.449306773025  
133.685254707686 126.469203581931 123.527903217158 136.91078498126  
147.395335979341 123.058261039164 131.741688265764 128.890685255595  
121.917596225576  
LOC346887 295.727275232995 255.71113398292 291.537725613819  
240.792557915987 514.799179506754 428.850337327605 703.587139938769  
490.153210371094 1013.03054571763 190.889832855403 445.95114929414  
372.149771075286  
LOC346950 371.06697207449 333.270203737291 394.186683910377  
293.600165830839 807.3257139219 433.594928641214 895.463355957918  
595.120528902501 345.686640885419 673.502723625773 1133.87328758676  
508.302878624289  
LOC347119 124.895023786422 137.344198938623 130.576944864484  
130.641217515008 135.699583036042 137.522792377933 122.99993610249  
126.991140761102 150.104178261667 129.025000034273 130.487480197325  
141.066106476109  
LOC347281 139.560555361919 140.684066288019 139.181131600753  
131.582231577364 128.363331337379 123.991249190444 132.141918502025  
130.74794199972 134.555873832434 140.277228495746 124.807244018373  
133.24828292554  
LOC347292 629.197022551069 719.369561410372 525.6579615077  
574.6506349984 1223.06438074895 737.193295872614 1370.61156801632  
739.52947559669 542.009873308344 1209.56018864779 1571.87128697931  
666.204695328096  
LOC347364 145.787468865642 146.368188849777 150.059862107155  
142.612035986517 152.358795162474 146.82149406175 142.56910547147  
137.176144667253 125.639355645626 151.219051767056 141.987635042691  
136.711382832269  
LOC347376 652.826023701545 641.774812292709 549.047065540118  
549.162299481184 1381.07447204233 1629.32740709526 933.723483173584  
634.556887178869 1160.25775445193 689.590642377619 1295.27257578314  
1559.26487922551  
LOC347411 141.301503201175 151.561151654372 134.620896927473  
162.739253457398 142.157512965166 144.845726048937 143.754105312957  
134.872654203921 157.40255559397 145.768857553634 145.133151090252  
135.889764019762  
LOC347475 143.256590560776 159.922627970233 163.086539217826  
121.242099666967 140.53597287752 147.172440755724 153.173746756225  
137.011595584638 149.127963327999 135.93352186143 140.704317015307  
152.545261723881  
LOC347487 148.199249855894 151.164936050256 152.435416154284  
169.764014031526 159.365070384451 145.643752002787 143.870849001074  
145.051794777243 137.220718873614 140.419686138586 149.959767051801  
154.509924503184  
LOC347544 2808.78353621111 2236.73950603157 3430.76532174701  
2118.73410871718 5281.353685715 4410.68280125001 6548.65498784806  
4088.12910138929 3706.41283595794 6203.08085790474 6188.04738762584  
4923.36698713285  
LOC347549 127.8514513762 128.69455713173 136.534812980964  
128.40650280096 122.688703494163 124.042153387391 126.022145004164

139.499652059557 132.081286801266 119.308345676905 110.333339548402  
125.139029579691  
LOC348021 139.276102596591 137.79714923769 132.714532888989  
132.423043364573 130.465221782084 145.079450753969 138.909419415137  
129.6505724783 146.075794515889 136.913957413224 142.29309119138  
129.813090345837  
LOC348174 133.631676386591 129.658488766089 130.651062724029  
150.851504454247 121.281990195113 121.930362099901 131.583841535781  
131.798931481549 143.823368276815 126.33556674738 130.052593375075  
126.418295908353  
LOC348840 113.388450168062 135.10155936286 118.628559951472  
120.660349211375 110.694256186941 120.227386958188 122.494779505958  
124.690141443832 128.626051185037 119.618176258524 141.515788643986  
113.492900106468  
LOC348926 131.615462296871 129.612536218578 156.737219981981  
131.943014970855 127.945144368504 153.230304322351 118.215641556163  
133.545405737639 139.667714422309 145.124968495678 104.780306305981  
132.148166773943  
LOC349114 126.856038484436 128.0805889548 144.056644468886  
142.675752131935 142.217762896203 133.330215359653 145.902572804249  
131.919387743094 133.408354896584 130.221351857959 130.784802403934  
134.407776033032  
LOC349196 148.052222389368 146.218767446679 132.287326702468  
135.689889081912 139.338384535905 132.016944935305 139.409685553177  
127.615631240096 134.194555223935 138.223001481672 129.093864368842  
136.937327692084  
LOC352909 144.92594578882 137.575688681319 142.772680460689  
128.957236136715 145.604066669916 119.087972087745 126.526489290128  
125.689884251847 136.115306932124 128.788443476759 119.498312996987  
130.041462255766  
LOC360030 149.288034848931 146.052153515494 134.968848574511  
135.188445928844 139.442091671938 136.016912147651 140.204023682096  
157.21132653949 137.974323288786 142.55463239891 139.282741110499  
124.090268443064  
LOC374395 1687.85201395597 1803.06322760249 1492.83354014907  
1424.79466712859 7617.316805798 2403.42261883515 3241.23835624706  
2568.95060767776 2189.53914329263 1939.1525084845 2986.6208659209  
3200.61067185412  
LOC374443 161.225608630791 173.690008681514 158.287108069245  
175.269675831824 167.91761500242 179.100368312505 160.520677267863  
172.836730741407 191.25724234927 178.835679834487 145.999823250463  
146.378522944864  
LOC374491 120.626155234319 121.110498703017 126.301178976594  
129.213523302268 118.351607868932 119.52150378372 125.199837162105  
114.234369421536 120.660349211375 126.786434897401 124.809739073169  
120.597157491201  
LOC374768 129.272835188209 125.589744938813 131.887778588005  
156.020996568814 135.29954024755 133.495243957927 149.824791474186  
125.068362001087 139.835983835267 167.408314067262 119.147377347069  
134.881854036527  
LOC374920 148.632332840817 142.394644827434 141.090356426567  
138.649502040582 124.513891912986 131.319783710908 137.271702725819  
140.348718082786 128.862699779871 136.130027137459 154.645353009618  
130.568746582504



LOC374973 139.205052994099 147.110929610347 155.756074127526  
144.972694558182 158.943005736645 160.039086963419 160.429643729685  
144.302925948596 143.432889871079 133.692996980809 140.63666629522  
142.461941376108  
LOC375010 142.49005761699 148.514806562804 135.6149724596  
145.608087633951 139.473459411633 156.632939064629 162.308297940279  
156.516250236679 130.907879150229 143.46919253255 134.89415027205  
136.095753586495  
LOC375190 151.788278519057 153.412469512967 138.913591568111  
151.16261275916 208.270622752385 127.43866970659 240.253944604431  
144.564250008106 126.460390022632 140.110258415883 134.333679772065  
146.309171902112  
LOC375295 170.98312926 180.34788837703 159.798024189461  
216.277178481058 166.662801900754 171.433001048839 218.08515867102  
148.695212949639 153.818325601312 235.261278607182 152.001155788544  
169.631386764054  
LOC375323 124.33863635868 126.609398779757 116.248026336995  
128.763176477983 139.286592412216 117.930665298163 122.97487285065  
116.998277297063 126.090985925439 132.557945249016 132.034701177759  
111.895279866421  
LOC375748 137.534079082878 139.041519654872 151.712097221291  
140.56526023628 143.116451998409 137.999190557332 153.494456800685  
150.48236051337 150.460618402778 142.836229345273 140.515996180923  
138.054470878471  
LOC376475 156.75308999904 156.346014084316 169.975329631607  
178.377461551319 161.099805358232 158.49220347186 148.525224975266  
152.633139090274 151.007812189859 152.319720089773 148.255769084026  
171.610742435469  
LOC376693 137.936605651724 123.97336552797 126.017158064032  
113.400050190315 145.824996954376 134.824147038515 128.756818133357  
119.573635447638 137.269267022826 139.986119754908 131.364187047583  
128.765369834041  
LOC377711 151.299425811105 135.57577294564 125.848597767733  
141.412317125776 141.262319193649 135.4702891855 129.448507622171  
131.961236721149 138.074645385322 136.312762878974 128.853089272901  
135.427985445559  
LOC387646 137.022366035333 136.154522071917 126.242935839683  
129.782134019986 134.316859658338 130.883516197483 119.882472552083  
129.900540030251 128.217078449064 127.295532954648 132.216453078716  
132.320536722841  
LOC387647 159.227123133854 160.0697586671 152.927956172463  
172.965746521132 168.10131060526 155.641860356683 167.575968906119  
156.396579029788 149.477373469387 161.592528958127 151.16261275916  
140.216148769999  
LOC387683 171.740347129234 165.225475655526 166.360005474414  
196.974807677659 150.053948736789 161.241165533091 173.169905329013  
168.882806817001 150.059862107155 165.570531605115 154.160508495401  
179.25743545231  
LOC387686 155.086559474139 145.735532706214 157.659824861915  
144.470642732973 154.789187466057 144.179880084235 148.342114514468  
145.520832968878 150.748298569951 176.008711524598 151.744902566627  
157.659824861915  
LOC387693 154.546460872415 153.792925101459 148.263293819238  
165.249658565871 137.838096997956 148.224587582189 122.937281123348

150.328995030071 140.730085305185 129.750835425023 148.620766059526  
143.851670859917  
LOC387701 146.466967386428 140.831508792119 151.497680466119  
159.223980639045 147.377355632407 147.292241873554 141.817230824364  
144.955918499353 144.159316670264 142.553175839278 129.752997624387  
144.6567095695  
LOC387703 705.529158880221 703.815551883635 684.428198622716  
725.621153262924 758.517101659762 1189.11053680293 573.644925180854  
733.49038042129 730.34994035645 738.087203930249 722.974310297586  
716.420861490714  
LOC387720 131.741688265764 126.762116571216 120.182787241888  
127.447218258785 119.202966460612 124.494727558127 130.09050436943  
126.298187538812 133.599098708818 129.534721138679 133.65688823581  
126.820834043224  
LOC387723 155.349728277626 149.936366672592 151.259426521768  
142.556535259086 147.407093814154 149.385103319547 149.554174907798  
161.769370009823 131.668163693171 143.432889871079 145.180346905484  
173.520662003159  
LOC387745 139.234549949916 142.528480882047 161.665837957395  
148.805974222925 141.283042601932 150.25322837689 124.391225837909  
153.744962185987 143.198622036573 161.072844903925 135.06498850776  
144.970383956581  
LOC387753 488.14606875418 528.650794915616 422.840163973614  
408.201232787978 256.538195034956 335.938170230765 452.961307006622  
283.235844022826 292.23287968517 472.669956708398 584.813665097407  
489.909407178594  
LOC387756 152.377056383547 148.539881077647 157.751477529076  
163.85327708023 150.763810844645 159.515698265424 152.401204710292  
143.865717051998 142.566028652989 143.836637098747 120.62139061084  
130.394687030464  
LOC387761 177.091809538824 166.735962853075 170.410704499804  
174.406779990708 143.056098955473 146.940545711162 153.843250142472  
129.694178995061 145.89593390936 126.237900397603 141.512008928271  
144.822943770596  
LOC387762 141.941814923705 146.286319248569 146.42288214248  
160.748082658758 132.399633003253 143.589222264786 163.346402397924  
140.63666629522 150.45404183949 142.476530302265 148.074494928651  
133.647637744785  
LOC387763 1027.48490028905 2213.1043022626 659.27672123763  
976.360310504918 407.052451784773 538.605085454393 173.751615672365  
209.5184563244 393.264726588522 566.228690652783 197.308952757609  
215.769986055534  
LOC387770 137.13615301204 142.272117655292 143.318291243905  
139.260868989409 143.405079593778 142.976123206776 142.272117655292  
130.497405221273 137.669753723768 136.654902685184 150.674189235105  
136.862764950361  
LOC387790 138.506569544482 138.295019395552 119.934231033302  
139.082897743357 128.87498876738 141.158593399952 146.136820062093  
128.901707304582 140.899799480834 157.449891798638 153.596205569255  
142.62707251786  
LOC387791 674.338740875512 472.961857076681 782.448692528135  
401.542072222692 708.056533282983 607.126514742951 1022.11537745428  
556.31484498921 582.382786876656 1035.0797237176 725.216684507759  
1390.95426299323

LOC387804 143.403396831929 143.322199505844 147.364301916733  
134.541606996118 136.209796259197 145.985223908092 146.580787463084  
130.684569384626 135.448170440824 147.074807267102 135.205434173702  
131.351303131574  
LOC387820 977.450397042213 900.039744829725 1070.4597488302  
714.052063877292 697.581541438891 1720.14021303639 1232.66885974069  
1430.20038077595 1262.96801072965 1868.82736251524 1208.25171673432  
1528.49457104932  
LOC387825 473.529519031797 418.244376024741 451.317592236192  
406.54518900348 575.722713461982 366.636754272029 1206.09815575399  
385.463209972694 378.967410725775 643.306565600931 889.6617510875  
472.405334652317  
LOC387826 146.437565098335 145.193296081527 136.497295707149  
138.471894596606 153.893753448473 163.004844049672 149.41357273704  
160.562164904057 142.883466086309 151.293676705634 173.071892362758  
141.755954088275  
LOC387841 12022.5515181682 13247.3528304243 11235.4970815873  
12916.6904389018 12877.2152068971 10741.3064142855 11112.4298269818  
13645.150201952 12877.2152068971 10106.8225600705 7802.25987814138  
12818.0509395717  
LOC387856 131.114995025516 146.892065987724 119.806933383138  
120.348381570883 114.574362093931 119.29304762171 119.233300586525  
117.255496552581 118.176124626025 119.261305304165 122.376432064286  
114.41737808857  
LOC387867 4602.81651147558 4690.93553472125 5874.57722671552  
4441.92485662082 8982.75408120297 8709.2221371432 12457.6956682374  
6339.16392696068 9596.10781313429 7617.316805798 8445.36695108418  
12615.8332290932  
LOC387870 157.399880496076 163.758054869675 134.86940314824  
154.973990421257 151.020903727566 146.322744971922 143.603022117503  
139.414912158809 140.760983862166 135.670409501435 140.381386314817  
138.59175751301  
LOC387873 137.537197575152 124.964977322158 153.068898842283  
130.018928906449 160.553214127047 127.449028221682 135.458682745495  
134.384963577069 128.882160435252 129.228874611916 123.964042357475  
144.358535632993  
LOC387876 147.772490977392 143.959910170676 136.313623567821  
134.828360289676 141.480793979634 130.99564079691 124.232144678947  
147.138814313885 135.232878188098 144.683260413888 131.866599432062  
149.704586651832  
LOC387882 223.058699622386 198.722993687455 157.466686487471  
173.088291472857 435.69811966429 307.982260548106 319.128582107184  
405.975221091252 302.1846598234 696.976036382401 187.365807314802  
229.116153948948  
LOC387885 150.768488673775 145.39813290003 148.197029306137  
147.722646851008 161.640122360448 147.653573379877 152.426527124644  
152.26903721278 156.859539612504 138.717541782317 145.352802493486  
149.839827383681  
LOC387895 132.168821720799 135.16316100494 138.088712695622  
149.94715601106 151.717558541683 147.738146185884 143.090886224647  
138.011923055019 137.462720784077 150.250193889942 124.501262458393  
138.35538364303  
LOC387924 138.077358032961 122.431337063053 130.987023228883  
139.63811945162 121.322817570375 132.383542877819 138.842935439006

121.387799881297 132.223321299997 127.814109293214 122.94737290641  
121.575942603856  
LOC387927 170.046856179083 154.935741493562 158.353171576491  
156.254944793402 171.595724119779 150.97777780024 150.819365726571  
141.416706868124 150.531753446398 153.756213924949 159.19183334563  
161.402322405903  
LOC387930 19496.8914296296 19806.1316481524 19661.6741558107  
15990.893941344 21650.9263365935 21650.9263365935 26719.5528617739  
25558.9005130606 27028.8951412615 20647.6275450554 25558.9005130606  
24731.0629964468  
LOC387931 140.895053453126 126.446675008883 145.259981479761  
125.402714360058 141.468076901305 132.433109154079 128.978197156274  
126.359440164601 121.841080387875 120.135349166633 126.87882572904  
140.500483234415  
LOC387934 238.149614104568 284.272977025491 232.735767435327  
246.63579788514 702.779943547386 699.550347374567 1673.5387396582  
1629.32740709526 281.926552464214 5981.08862268291 2129.84680802619  
1478.09582385838  
LOC387939 150.48744233923 131.917194849285 144.210698143215  
142.669207969715 144.454141873387 139.018588215263 150.51537512828  
136.104965836123 142.61573330083 148.825790628891 142.531683761072  
136.612903661685  
LOC387940 138.496366637658 143.641777655752 158.171302275984  
142.405569257901 151.532859494021 151.123104810793 127.382266838772  
145.261662166215 142.774449777424 147.422656909557 129.415078042622  
147.228812647235  
LOC387941 152.483240622367 139.092075947067 166.89285636895  
165.122737166322 142.545823714168 145.730054487572 149.34605615699  
150.71435300188 147.911923728231 143.325710305008 153.217287503221  
184.187847236508  
LOC388002 164.092847913322 154.534605635191 140.053051625323  
149.016767620428 168.061346742356 138.920141982606 136.537117054998  
141.789840190632 153.263883774915 138.171858105728 147.628367263728  
135.689889081912  
LOC388022 146.616041788595 152.961475450751 141.346722137248  
176.761123480566 138.242983316259 162.812665683603 129.884064654761  
148.18197556044 151.083551412109 153.815239954928 139.902610126952  
136.811620595243  
LOC388076 2684.69013589621 2775.84742592713 1967.82064011967  
1916.46158204806 2363.50330960038 1412.56164938199 3598.30438198858  
2104.59597571915 1518.13775377335 2293.05058904656 4511.9116742833  
2537.90501983425  
LOC388079 125.870730238298 125.519298131694 140.678336884951  
125.932540615682 120.862516074358 130.4631522533 130.745626975281  
127.04217189075 123.294321716108 127.114560076444 120.450111018432  
138.104527851969  
LOC388080 145.892876412762 138.945855414918 148.201649039381  
140.792400101142 141.512008928271 151.939710544553 150.354401669138  
153.39738748803 159.603586227897 152.6969498938 150.407817355966  
149.322537247388  
LOC388114 143.925616978401 145.338156577438 136.130027137459  
156.922271434657 143.473523258521 151.183847738922 138.250288796456  
156.351734527745 147.879286704 153.992763544073 114.999628959921  
132.265895156539

LOC388117 158.272071464923 132.934955542743 140.724541696229  
147.541437871615 138.994857740356 133.877857711552 128.678484452077  
146.418147447541 133.142689150296 131.759422682853 130.701801496564  
136.621173927187  
LOC388122 166.8846964604 176.890596690798 163.773702843544  
173.592875508663 212.959246855759 194.002075848131 226.086733606951  
180.418707740532 181.593291870136 193.412827246366 211.595513743111  
220.567951704044  
LOC388152 132.610618885717 136.240503841228 119.551741097918  
126.134393447943 139.843416673512 131.273916869754 129.737882221259  
146.174492025087 144.955918499353 130.01207836961 145.847629576886  
139.843416673512  
LOC388153 153.378150559081 125.199837162105 136.408314486465  
145.704057360697 151.617989938924 151.094682146074 142.993401965852  
139.755211300398 135.256735788722 159.203584692924 144.64757514198  
142.278523641008  
LOC388160 134.383024487323 125.976052547953 123.046069309901  
132.098421212796 136.960656707275 126.992697289075 132.971844952199  
139.615706918035 125.547399456656 124.401083237195 138.256111134072  
132.387242907281  
LOC388161 147.813170436139 149.272219727411 152.426527124644  
143.942810095867 139.420025842675 149.939035476611 138.990971069382  
139.182623417751 145.677477231455 149.151791028837 148.567630572897  
139.785767470943  
LOC388177 136.085524091635 123.67449826277 141.319594283071  
126.037968297611 137.070326499918 141.317113425046 145.764704553373  
148.700297908071 125.362754088168 157.394035451151 132.412642318813  
136.338683078123  
LOC388181 165.827405735044 131.967245387861 150.856917125736  
167.662761175661 140.245786278057 176.049946762504 153.263883774915  
155.966610886886 157.87020867396 157.739526559807 160.221974600577  
167.451782810394  
LOC388210 146.190750749851 147.868721324602 147.648020819059  
159.090982014161 143.681220324074 129.701347789845 157.309058982117  
145.551717838423 149.402679897813 136.751654856807 156.353914172996  
142.279695592224  
LOC388237 176.995049477843 161.441613587571 204.616225498655  
162.702767346393 150.184863108453 183.693300680495 156.562197068687  
166.263781040251 161.305860691151 166.485040297098 158.625060605976  
165.4474699807  
LOC388242 131.415807324048 122.843792000493 151.079500558067  
132.210100574787 138.911993471119 123.678365506247 123.389038274913  
135.745821200254 133.615958668897 124.368438691944 128.925288777749  
137.11719450122  
LOC388248 189.348690353874 172.942666836182 182.67941458824  
151.010493695217 177.438968923426 157.656220148041 173.839053227554  
187.167255451988 178.872635061826 176.980780681976 166.277960843095  
167.304721591124  
LOC388255 177.538262133568 156.605568633665 178.647726085678  
174.560168983121 165.062129636008 167.447964370395 170.910998705968  
178.445384902129 154.423801637411 163.474261351901 175.428000742222  
166.12184890921  
LOC388259 144.170287726456 146.023710941284 144.386968241512  
149.810655120216 160.861929142249 141.857434100065 150.399313562031

151.98710761363 155.911387663464 166.863589702453 151.373442180963  
157.368974632451  
LOC388275 663.782083028745 647.273409499313 862.669120338424  
541.351092873522 529.228238133018 1157.02365469464 1311.34904760947  
1342.29111510713 942.900963522948 1036.40082234884 1303.94157493616  
1325.77498031227  
LOC388276 141.194900058799 158.302977853133 142.326319895395  
137.146961654597 140.21908493941 140.290598244169 135.90207451581  
138.9183380982 134.619470709414 153.308956040034 128.663320241092  
141.596078062845  
LOC388279 118.500956349352 131.825172822888 125.822346524903  
132.848926011576 113.919529047225 128.725044326566 134.53861441495  
129.898242234869 126.88329158544 131.275712196961 140.533704857854  
157.096799934494  
LOC388282 152.204730003016 157.600193849783 143.231806900648  
175.313689069815 155.974463324915 163.265020898999 159.097020087275  
161.066226957782 170.430478598594 163.538862303362 159.424105896749  
173.690008681514  
LOC388312 139.180086017033 140.509950286228 122.636980845207  
139.733149319736 137.430946130817 135.049657594221 121.895778599116  
123.968639555673 136.893392154262 130.70867409848 151.029785584386  
118.366859032979  
LOC388327 148.408616955694 145.646191500321 151.167024833049  
143.292552892073 146.526744516344 143.0235772247 149.856951631661  
145.887262601586 144.349602838518 146.84403879162 148.09868976776  
150.496616601699  
LOC388333 166.803359138942 144.741063866547 151.421099926743  
149.941056059544 155.011931456736 151.164936050256 179.389797867379  
161.050438117555 149.647926859169 160.045715314465 139.032275257901  
162.893396525252  
LOC388339 3143.77161008321 3648.38765465889 3436.32495553246  
3103.4192907748 5670.70220800096 4536.46344538492 9349.76443528011  
4246.19983955771 3177.80599774525 7519.94306346326 13526.3170858629  
5624.32062666666  
LOC388344 353.621264641814 452.077434390612 261.203388718689  
362.849380477089 435.796737132969 209.051768656607 537.698489904622  
280.085692727562 230.284216427158 430.220363263561 675.596864001032  
393.013539328766  
LOC388381 129.511465164539 132.273354705213 141.362627556137  
152.861304149219 139.517413585211 160.338146803754 144.520435611318  
145.435794613203 131.755881982599 128.236840746655 128.510903178542  
140.378255168229  
LOC388397 197.112749959833 201.041792159394 184.518666956721  
214.933911087009 170.370934381883 180.315825600347 191.987301954927  
187.893420010787 209.180298459605 190.904614772409 201.637540930213  
176.725347194807  
LOC388401 130.656206845965 127.255966406144 138.002258986172  
135.472135601859 139.363571392476 132.639070127232 144.02847768185  
129.189479305468 133.75142055959 139.184647003326 144.792035839249  
143.277771142501  
LOC388436 141.104761546577 152.585572167313 137.824985884649  
137.340844554597 150.809693773343 138.499293816467 141.424508069834  
130.48231275063 126.292433523959 135.591199815271 157.21132653949  
154.400124981573

LOC388438 145.028519685667 127.517446456116 130.116771999391  
131.97938329944 139.708303388546 156.562197068687 123.231397809701  
125.309861084957 147.362120584524 151.123104810793 149.91705328815  
134.653131708903  
LOC388444 129.534721138679 149.219602109121 138.56436658053  
136.415734370763 134.04235176608 128.236840746655 146.40033464957  
123.02167644694 139.593950393555 144.136328845967 129.208429861964  
142.664793323255  
LOC388458 143.140502042489 140.888439624918 153.633095853017  
163.081050585097 164.801505601099 157.922718487881 154.433679792749  
149.078664825533 152.038902807701 139.796168741191 160.343551497512  
157.172970235254  
LOC388474 21315.9767866977 23190.7842325067 21315.9767866977  
23656.0669757593 27028.8951412615 13700.8527522612 18287.6015702456  
17658.0552091534 19889.8233042542 27844.5606756791 21225.306360484  
15704.7314387339  
LOC388476 140.765231611948 136.446877465751 127.856634523494  
151.327544435847 155.572357799741 145.060085149395 150.016550610991  
136.453821861379 154.615097099186 126.816402300701 144.63774603725  
139.295597388725  
LOC388481 144.80318019871 144.084441938143 152.467764730004  
144.292679144059 159.835577644136 136.83883055114 122.631814400575  
130.784802403934 130.325073627151 137.756209496729 130.682112236817  
131.696834332724  
LOC388494 143.647714966406 145.812607895325 156.213421099137  
162.383584508358 140.479321382192 141.925012927873 133.352279794853  
145.998177732093 147.568851471771 131.988591391373 125.924219382375  
142.500537230642  
LOC388503 133.738587139139 131.58537948771 143.114384950467  
129.442111153737 128.925288777749 133.611588728019 128.806964077824  
129.346063085291 130.444766583917 130.675745275992 136.152290887509  
125.280736217267  
LOC388514 146.040995022257 149.029275579026 135.010937737018  
156.745051321143 157.309058982117 132.342063356763 156.06439656393  
148.729753117861 136.891612156271 140.435724944447 197.003657786247  
130.10852948682  
LOC388524 7838.92787031423 8121.54750071211 7292.0342195035  
8864.70614223459 13247.3528304243 10988.2836796736 10704.4678928541  
8121.54750071211 10765.0336035748 8881.86480594052 6324.87600301793  
11971.1664283024  
LOC388526 133.027592711375 140.769815875109 167.049197726715  
140.510889880872 136.769073515537 130.217791888656 129.873110494826  
127.352386363217 125.553615182238 144.581747568524 135.895945142328  
128.367370419533  
LOC388532 5058.57872936027 5992.92384160188 5207.37974585707  
5291.83393775761 2580.98143004019 3668.19307488953 5373.2173152906  
2730.50913686613 3510.24464112094 4486.35687688252 6077.64695330731  
5506.81944079182  
LOC388553 120.227386958188 126.63730651721 123.395897439193  
126.343040504566 133.776477221849 130.856249657101 131.552276774901  
134.410706628655 129.150574563997 124.899019467557 129.675420096163  
124.800221241981  
LOC388556 4511.9116742833 5049.57929757135 4651.384971332  
4945.87677849967 10106.8225600705 3643.11229751348 7144.3257417116

2850.98525554116 4965.25728333142 5734.76405709934 5149.78271096158  
5582.64254130978  
LOC388559 149.498020676126 137.054278745724 146.528945049588  
140.522470775478 141.431172407792 144.873034900013 208.507486041165  
181.941224633917 155.080900277147 145.646191500321 180.392337212428  
156.040073232376  
LOC388564 243.246632667118 371.693808540758 322.213266293148  
225.238369884803 5688.84918819457 1662.51399707484 1999.10320742823  
2246.89876694944 1637.66306286151 761.726829618132 1783.8031212092  
1710.60409578293  
LOC388565 151.010493695217 149.902420337518 177.666582096539  
177.450674276588 197.112749959833 159.670815631794 193.843978773764  
162.039394839415 146.644317248414 180.493406236326 149.987571884748  
146.136820062093  
LOC388572 141.311749168934 134.498439965049 131.68571824487  
130.191876914166 130.185134787768 123.650702461773 138.785538575745  
132.373302367869 132.433109154079 135.830453690107 140.525013926642  
133.190147746722  
LOC388578 151.522526161299 130.563756903074 134.93455083142  
144.627784383455 132.247611790269 134.55255098289 136.77260462185  
147.011838288594 125.285502203677 138.733717670748 131.246704975084  
131.683942368268  
LOC388588 284.798325549665 281.694635436938 280.948704707655  
290.541184606565 298.028932089399 233.200877362755 347.866264631778  
246.88857694249 179.501659253141 292.23287968517 180.77686098195  
661.826149512811  
LOC388621 4318.50925204407 4527.53010866974 4318.50925204407  
4318.50925204407 1592.29734618345 2794.89048827025 4061.24537355697  
2553.92770795014 2563.02488807613 3618.9385126441 3643.11229751348  
4548.5418978622  
LOC388630 153.926214082991 163.426663985855 144.660095230819  
161.393953325115 162.134726710448 150.63456320644 148.898587505337  
151.06209123698 151.687402863648 145.612695657243 168.310680227156  
171.51411661213  
LOC388654 6203.08085790474 5702.11995823367 8016.1652884418  
4901.41175228982 8958.34797715349 12457.6956682374 16077.1585881362  
11509.9289491201 13853.9715872573 12334.7921691489 11281.201625198  
17830.1333276624  
LOC388681 185.016336026382 163.362182585182 201.221839281282  
163.643554173995 150.434376975922 140.079516848788 157.250409438404  
150.929236917651 166.076692502428 142.261639670072 172.395805302715  
154.108689872903  
LOC388692 150.321059418799 146.694318629238 156.441368290572  
147.457193565877 117.227635924674 115.264104392064 162.203570429542  
135.218648235324 131.349297554112 153.95615286919 181.966110264509  
154.990319019521  
LOC388707 1158.88528996131 1153.5175534971 1537.71464618832  
1105.10063745656 2172.89794460273 2187.3010896903 3490.77593331727  
1417.76295714364 1932.39418448203 2282.94927629821 2321.41228376157  
3099.71798305764  
LOC388720 26010.7684336005 28344.4547971342 25002.6870134094  
25558.9005130606 28095.1627766565 26082.8089351205 28930.8933474342  
28730.9248954575 23190.7842325067 24377.1316448061 27844.5606756791  
28095.1627766565



LOC388743 153.97869518398 157.399880496076 150.899664887945  
153.592819860747 161.951996906162 154.205877662428 156.396579029788  
151.356975600962 138.624689897665 140.913943871772 237.420951138877  
315.014639682046  
LOC388755 133.988494850477 143.697931551096 147.145932651151  
155.971045744096 142.58227004035 144.079935036119 146.406344338757  
162.702767346393 149.833346575446 163.62582285753 142.889911562811  
155.855564068891  
LOC388780 144.683260413888 146.937052029619 151.540744107423  
183.568426758223 145.195065312551 158.473244125101 141.644521617419  
171.751149502172 153.888212689508 156.825157746082 142.428578698775  
158.989652405732  
LOC388789 1023.29995420518 863.738809424958 1235.75946952752  
798.758496171493 1220.30347076968 1555.28458491244 1398.60850048351  
932.862030475849 1239.13016938378 1037.46485756166 1336.15622439522  
1196.34528225417  
LOC388795 122.97229333908 112.41270361848 119.382151435379  
123.119524624735 132.576755070703 118.955314417914 124.96926662367  
131.926504315744 129.775280076365 139.934460900409 111.137519376499  
123.652744849563  
LOC388796 315.47473326786 314.949772661046 353.98839683842  
333.131139447511 666.570977208535 550.671679318681 490.153210371094  
390.021666378804 331.464977124667 280.913748398876 363.343480850598  
452.077434390612  
LOC388813 138.275371291639 124.176944998906 125.384706864406  
135.423839577038 104.285022032604 133.388533738482 128.251087452744  
130.302829773323 121.99477069153 116.282988576774 122.796362813922  
143.552343056702  
LOC388814 135.155955441604 136.975775196224 139.493025452991  
140.849383992711 139.457084084368 129.382242021964 119.733311319912  
135.58042404479 154.681604647652 139.162076054072 138.887159625058  
145.093913515812  
LOC388820 146.268718590609 128.131324375789 135.511902377219  
136.969124414576 140.115154069602 126.386738502885 149.348231806916  
131.212705319485 126.134393447943 134.197892075036 121.207040901483  
127.361974492821  
LOC388849 132.195666100325 147.294408903227 162.54567071663  
145.363692072132 155.76568091161 140.60741459333 140.510889880872  
148.951632781748 155.578524031078 145.70726782469 137.894056887729  
148.415036326153  
LOC388882 109.599589420575 126.76986764971 115.257318321108  
120.894583222813 125.234097725749 118.047978285706 126.66432941518  
134.81595608984 112.957395064957 116.023563001039 145.492751560845  
122.362585067453  
LOC388885 136.009969058857 130.617505834747 148.597346678768  
145.428297145967 128.398711525305 142.157512965166 141.5068665919  
122.265071206163 125.496553386629 151.879398444495 118.24368469845  
122.098850053347  
LOC388900 135.732616463819 132.966873990501 147.428180649939  
136.923876486522 129.23899614612 125.426018910517 151.567693140302  
131.025725443485 155.694213876736 124.904518221898 116.412881235587  
126.647643493986  
LOC388906 159.374355553219 152.769931978291 143.954908055924  
161.281195929918 150.292858985795 135.36523178082 163.942131559267

151.619329363527 141.147683040881 155.130745957603 151.32179802686  
140.708683675555  
LOC388907 140.423711213355 141.547112973262 140.074841537258  
133.88072491369 150.211719786127 142.96594961303 141.304791640723  
133.423376063284 143.185372109165 137.962542261072 140.04612725812  
135.862790395984  
LOC388910 108.247365868673 113.479382235297 113.23302126254  
109.016991399605 111.908965758799 110.093565974873 109.438965262717  
109.898406285895 109.770126492743 107.466184687811 106.667175621971  
105.49491265382  
LOC388915 118.679664392666 106.551076380988 117.81168010976  
111.616460084889 116.20008794813 109.859878974527 119.439518481059  
110.22624111837 108.131097605872 113.005774989833 122.888626394154  
112.036753245281  
LOC388922 170.505553609318 184.111756696658 180.77686098195  
167.18881879422 175.647878042257 171.589889474122 164.072443259668  
180.493406236326 174.979501466228 189.403934838648 169.36029946801  
194.072260528037  
LOC388923 146.929717840755 156.392603045231 147.043228493047  
146.398454169593 147.562757301251 134.572552391307 143.30977386038  
151.102431192559 140.865990571023 154.483828924645 143.112205432731  
152.47429737104  
LOC388925 124.647992480694 124.889829874126 145.029298288869  
145.937733795336 128.647790058795 128.289680999565 125.301602026407  
139.171486871664 137.799016648135 153.834326325003 150.924948809354  
145.713179548811  
LOC388931 135.798387504219 142.266177608209 143.903216264503  
138.685330935707 128.689465747173 140.985432994867 122.519746599387  
123.643292039274 140.572442284673 150.134337895481 124.103321614841  
150.156865995098  
LOC388938 173.176900454904 159.289148392284 181.530767521222  
175.529441666151 156.759600627542 173.189465201573 163.788418732315  
145.522435728191 146.64560446484 144.428776560885 150.182173149394  
163.829218786716  
LOC388946 140.152177370089 139.739448838436 128.312170913496  
135.802258952006 133.141683141696 132.038012025708 142.598106777707  
135.475597372104 134.491232148834 135.405742719464 143.326739481448  
136.146383365709  
LOC388948 110.553759711075 113.091739139626 126.069594320759  
118.500956349352 121.459780480915 118.256000539093 128.51523581959  
120.224154897296 136.973804637915 127.729912390394 119.830261862805  
126.724973604103  
LOC388955 157.333615322941 149.048057509964 155.496190048502  
159.106269972346 128.844026422327 145.783320434143 170.95650329595  
149.361498483705 149.338249249161 181.813812621767 154.778726823719  
148.490236128772  
LOC388963 144.02847768185 138.076501233454 149.664506761117  
131.268454024753 146.808519947394 144.277263594387 139.3465236423  
147.736397115265 128.730649233876 131.280092370361 130.187833435052  
124.70219935334  
LOC388965 152.09245741643 124.378096177801 150.590611246086  
156.88782735706 152.67564185705 150.213657393257 131.140263788783  
147.422656909557 136.783974483005 143.444109491884 116.161473967382  
141.808122700968

LOC388969 268.186156177622 226.221973502783 277.406445570925  
261.065986251886 271.770138565186 259.184713471619 283.326226944158  
251.307020289291 244.132645171301 211.135364208221 223.703371558666  
267.069665000047  
LOC388996 136.071856104688 128.504026473695 124.164523121103  
134.017022313208 131.956481591804 124.746457912284 123.256613702254  
129.626276841426 137.559204418819 130.588481497083 145.25198093836  
147.485960802692  
LOC389000 138.28745132277 130.41429837092 118.256000539093  
134.045938361221 117.980052938167 127.776112651456 128.340524378217  
126.285743744314 120.748910864064 122.201293962463 129.633387503618  
130.985360700521  
LOC389024 135.170925092209 140.518206716196 148.222477811166  
138.345393524161 133.363883851093 149.09398454596 146.910471989835  
135.139676303901 144.404405100009 150.339554736141 161.922462797736  
138.354300118735  
LOC389031 151.532859494021 145.96012463103 144.116298946718  
138.414916506716 152.725025539491 133.180554954396 131.65084896906  
149.193437559422 154.688685142904 138.768904143023 151.72544764489  
141.821550320574  
LOC389033 146.919110530891 139.677109265241 129.699765645519  
165.590892262736 144.283716416188 141.019494314354 137.754373055094  
153.59485367224 142.736148814019 149.625528206375 136.90636489391  
136.987403767185  
LOC389036 154.232310911696 162.975988989106 150.587882657674  
158.278496385543 160.243405030742 159.443697452694 148.052222389368  
149.09398454596 151.312853764675 163.570018900148 131.280092370361  
163.781674803361  
LOC389043 120.80221197797 126.823886603295 135.419628087842  
139.117776552573 129.730685860688 120.394220715157 127.822440239962  
131.954310449801 129.887187837732 134.918496279185 123.067278658698  
139.336891718408  
LOC389049 151.086688327023 166.111496598928 155.335777680002  
168.682307349713 557.026028810367 287.041585684111 234.768591315095  
262.233918187791 249.234065130083 196.269193578525 214.38058301395  
247.015574724901  
LOC389053 147.100947801261 147.539226876636 135.864853829421  
147.829502959865 139.244051199144 133.439077726411 144.195705502443  
135.078198678379 149.173121214851 155.463400179872 150.184863108453  
132.593747375239  
LOC389072 131.364187047583 134.54796737809 133.006192351471  
138.216926722025 139.375386456759 148.764956861822 133.559082256772  
163.612347715773 151.176697752603 145.471090720048 131.367075440559  
144.116298946718  
LOC389101 8368.88320476021 8030.19731415448 7631.6124232898  
7468.70895916615 13700.8527522612 7786.96143641382 11777.9172529698  
13190.4826009741 11479.7406150358 7491.93659373205 7699.37963536892  
9820.93899217345  
LOC389102 139.032275257901 136.730623822061 134.927386619223  
143.747664482225 140.976675511847 148.421611987655 140.539606951892  
144.301577198126 137.601181150371 135.553183871663 156.105736111274  
137.693410133625  
LOC389105 156.466728833063 168.116928722035 158.25554353787  
123.629279569085 152.011551837951 136.364830851128 129.842252702648

158.999305963902 129.161305053472 131.90169441925 118.167740643871  
146.242897296397  
LOC389111 137.747088378131 146.29600238749 138.637735867167  
138.528083984177 154.924190468067 138.724959677368 149.919344933814  
147.056182807232 134.52098220054 126.381288663037 141.784881206191  
131.449370465834  
LOC389118 119.911515364639 124.306049555272 132.07268641595  
128.209771391087 124.33863635868 134.54796737809 128.845396683172  
131.374680878107 142.671190279415 120.806180547422 150.870830294349  
129.949894903048  
LOC389120 137.973211667003 135.805294188016 141.38612990166  
143.481112776388 147.297163685914 143.155998311198 133.093234861388  
141.518491890811 133.542620077059 136.003277940379 138.519129384809  
148.299945894738  
LOC389124 153.257097727888 158.260676113325 163.039564280484  
148.562200783472 164.615113709166 146.867740388881 150.72014060286  
153.258616843783 159.016247993816 156.200313064999 140.861849838223  
172.222262910052  
LOC389137 351.998551165704 374.657816575897 420.743637858421  
386.917038897322 296.75326294587 283.527656956105 442.698000781597  
365.950612890149 357.140791982825 353.98839683842 416.861099188252  
478.847650837714  
LOC389141 4175.70090899755 4569.44477073589 4711.21389812942  
4465.66734676111 8558.70496234991 6720.10473881011 9403.76665152182  
4923.36698713285 7631.6124232898 6188.04738762584 5396.55955971617  
8445.36695108418  
LOC389142 151.914252332792 140.989597586699 158.886786960196  
140.239948346946 143.625188247966 159.68134949161 189.971144220643  
153.850588492326 139.741862925156 153.972471779464 126.310788291075  
140.359796538887  
LOC389151 107.863971340407 111.055738573603 104.861024325857  
103.94864861172 105.900294919664 113.773684331489 107.520000793184  
109.228587997052 106.522641798274 110.847680175669 112.340161674529  
104.36042819601  
LOC389156 1806.24732793591 1908.81864728547 2905.12297639092  
1165.95924778817 1147.33034082693 2048.13524244516 3251.62784659994  
1410.58825009446 1992.71224011906 2874.43919426772 3424.65126200697  
3575.60827968852  
LOC389160 123.077592992679 127.333963230749 114.607138204495  
128.867710054234 117.662611650515 126.980375035189 126.158204790885  
129.485710719291 124.045745662173 127.177422395113 112.771141378159  
133.075748695526  
LOC389168 3334.16277752222 3424.65126200697 3378.126661761  
2758.01526530661 4397.32311216672 3205.74787769881 2274.75133434566  
3490.77593331727 4417.98524179686 3917.05893989806 4118.58682247781  
2715.55326746591  
LOC389174 140.63331087192 150.421116058494 155.319717753912  
149.244970309131 140.321675137237 148.79958121087 160.297609596399  
156.368487784719 136.518409978222 137.234384760487 162.55521875551  
174.338440780636  
LOC389199 134.145771195572 138.055909969804 130.085138325818  
149.387467833684 156.365413649149 140.393624985807 140.154925193842  
135.915252483475 154.849264978968 147.828226792835 134.018379799826  
147.751220590539

LOC389203 160.937256625847 173.879952136931 203.410932496844  
158.420821486138 172.741890316331 169.864628707043 199.813528853649  
189.633348499854 209.398724613377 219.729169245025 170.164668347783  
207.218779485342  
LOC389217 118.631771242606 120.041623078295 115.101971719657  
126.50870982427 154.01988200569 123.872097378045 142.95001632948  
139.14544832776 129.305455204291 130.009322405768 116.871350997346  
130.019836142831  
LOC389223 25002.6870134094 23427.4695172122 26719.5528617739  
21754.9904891312 9378.87287299048 19434.8698477145 26010.7684336005  
18862.7632438112 17975.1602090863 27284.7333124039 28344.4547971342  
27844.5606756791  
LOC389257 113.154880173167 116.07902130325 119.249084967945  
112.612099135361 125.04327844782 112.971776964469 108.530158480237  
110.510191137073 113.470356909765 123.069963218224 106.437660157036  
108.910588012315  
LOC389267 161.316521450944 131.371129237005 169.834078550805  
133.458063863532 147.526701500887 152.498222035534 152.685860451112  
152.258389962 141.86370253437 170.169402943662 134.61114877396  
143.555987405898  
LOC389286 277.359422005775 224.298067319406 454.984562256248  
224.361277033882 235.350819745387 362.252813848151 256.538195034956  
240.561105692347 290.213039891361 344.604699562938 191.912670416334  
394.186683910377  
LOC389293 290.326832430372 282.870785313621 384.733313349438  
288.261250589513 312.808044035117 312.705458415152 309.423768054614  
274.01377986185 295.241644408321 390.752579014611 381.971539806271  
245.110761598207  
LOC389300 137.318442197233 158.272071464923 140.84880167881  
138.911993471119 144.018198451676 144.12742465348 145.206796089128  
145.259981479761 150.962828147611 170.108500366942 129.898242234869  
142.17773831901  
LOC389316 149.007288765628 141.799236109474 155.837866295709  
129.318409053566 161.241165533091 146.617853918109 131.200042525339  
127.464485396039 143.825062714273 132.966873990501 125.35643274458  
152.31268334586  
LOC389322 331.32397534437 273.514200733343 342.611951034707  
249.339449789861 374.872358131797 430.728137105601 373.803772983872  
371.00603789759 386.679822751367 397.660202059209 645.438835606933  
373.452370692334  
LOC389328 278.219561902233 289.368511254335 313.536451935268  
342.245182599593 140.469508410073 145.27890423835 145.954700424725  
138.215708514725 138.924820359912 138.341918073941 126.656077572961  
135.807494668545  
LOC389332 122.965328766807 121.311836944721 124.595925483149  
149.026243159195 131.681566829159 142.974541687789 134.086301127594  
124.501262458393 125.742631850732 145.556318940043 138.483436753942  
127.890438577754  
LOC389333 149.839827383681 148.04206955657 130.657342262492  
153.639559509292 150.065275447769 160.724319010751 146.283340399533  
145.938780249776 155.441190892146 142.898851434337 144.718507303105  
161.618479762188  
LOC389342 13360.9483836861 12818.0509395717 13976.0448927093  
12221.7819812315 14417.2696849334 12109.3049135906 13276.1713779481

13247.3528304243 12749.804597566 14181.1182110192 6384.66090426598  
14755.8570847826  
LOC389362 144.731299077209 131.067958183644 134.354215877283  
104.223476853877 132.735371358102 132.186120302011 178.563665283267  
123.82555184043 126.332299789266 130.784802403934 110.448948495323  
118.034262386827  
LOC389365 152.215146681655 151.32179802686 154.055550115498  
140.204023682096 153.649235507812 146.353239460684 156.551925771312  
158.565676210997 169.544515294662 157.237147919803 166.12695134858  
151.705219298578  
LOC389369 135.111066946207 112.661607612444 123.318763391117  
142.431979387165 123.038646914863 116.408126010926 123.386622160181  
112.809629077555 112.729141678141 126.285743744314 108.895922800601  
126.656077572961  
LOC389370 135.94591985201 140.567565996849 170.202597821861  
168.018785514306 158.241349852419 161.208713751942 159.52833930625  
150.596350682411 145.987228759402 152.495540563792 136.678188851101  
156.007630568494  
LOC389386 187.796440205485 178.147960295054 197.034073391478  
179.389797867379 198.659595851481 226.449705559354 240.878804911613  
235.407064742194 301.250189051376 231.257543784864 236.219981978324  
218.644953001365  
LOC389394 141.512008928271 136.832494876249 145.681968019851  
147.384050169545 149.117224130576 133.367085445965 135.100687929821  
126.176505541577 132.576755070703 131.638954862848 136.981043383326  
131.551085224112  
LOC389396 138.972789382679 138.136901441896 126.3539479619  
143.25481667885 136.86685787001 128.702882993588 139.931092990984  
133.277326912499 148.118705147238 134.601565799073 115.631414599991  
142.206016362038  
LOC389404 4759.17973319588 3883.05620256963 5825.9968524214  
2542.44286642873 4929.26915002209 5373.2173152906 7389.95365139168  
4491.96934862425 4206.37667440908 6760.37324850804 8581.41617729997  
5410.50736002544  
LOC389405 143.475725571943 131.393633337276 133.131953362455  
144.487533992157 122.90702157852 138.058404474114 171.254015232189  
128.224742304889 121.837571435384 145.146797807275 151.561151654372  
129.405749374776  
LOC389422 137.81819274774 156.94531513373 153.267549449395  
163.681014961332 140.684066288019 147.581827861592 153.230304322351  
146.948261640482 147.722646851008 172.097502416776 123.902047880095  
146.209104824109  
LOC389435 19356.3155476146 20989.6494028551 20989.6494028551  
15667.6576521981 16480.781374867 15561.8923517816 26522.0142925211  
21754.9904891312 23427.4695172122 28344.4547971342 19889.8233042542  
20764.6732139063  
LOC389442 156.441368290572 164.970438494223 145.256660345252  
158.774910841987 139.85010721496 150.399313562031 161.636411303968  
150.815117344434 141.225533609907 160.98571841915 139.840256729373  
159.253029632045  
LOC389457 180.34788837703 222.268494113686 172.591885279428  
164.406564594296 138.805103589625 140.933444607646 160.960599932898  
174.221939793486 149.350630572336 163.586549438955 146.233195164295  
194.22713184875

LOC389458 133.722739936347 121.945541820091 130.255689301211  
137.074564265915 143.49969914174 132.850601603567 156.05583229359  
147.074807267102 141.73799456072 132.224831869802 127.018746030517  
141.931274901572  
LOC389465 141.127519700052 137.52743802861 152.137669424501  
126.34649262976 151.68523937819 153.171822092714 151.334463063946  
152.699431442817 162.812665683603 153.44628692569 154.94587631386  
152.78638215326  
LOC389493 123.53212786736 132.725232102483 133.902707525069  
121.316836274255 141.266129417042 132.387242907281 144.318556353673  
129.185514320138 136.333928675403 132.782967735893 124.160433356046  
155.355051932357  
LOC389517 2352.01196541874 2316.49886419499 2741.71904421456  
2437.63566094439 832.014011481807 2502.72913594103 1730.30703463073  
2091.73580292332 1724.22121078776 1555.28458491244 1574.65731564294  
1793.75125318113  
LOC389523 157.901967487277 162.531630234824 178.512206531256  
178.955938825556 154.725484895098 171.98820121502 145.528676983944  
153.217287503221 156.200313064999 148.28101912019 170.490099282436  
153.206468539619  
LOC389599 198.390247605355 200.72147365413 281.037762232619  
180.085975596327 190.204960255989 338.665115108128 249.925640256322  
283.645434184168 263.250833727291 239.403872988317 198.470718196139  
212.933062534244  
LOC389607 126.75720720361 129.114161128113 117.494422663086  
124.578552584603 124.977046954694 129.299810898979 122.94737290641  
123.640123613529 114.68345964966 134.20988291379 143.025570700585  
122.965328766807  
LOC389631 160.19942770666 165.763459146818 168.161117444474  
153.070664298267 165.003646188775 151.342902631318 163.275138097131  
155.747694056319 171.465178761171 161.525131363333 138.877999126533  
150.391286215189  
LOC389633 138.070353990356 141.285983481412 134.53861441495  
144.384287335249 139.421753451936 141.715307041887 145.578721432709  
138.67221078031 141.066106476109 142.863268359757 139.241145027974  
130.611233072509  
LOC389634 158.080749926756 155.997210529742 167.350290326189  
158.224122084011 149.740404686695 215.802713097166 170.266415287865  
170.465177938235 155.960886801091 146.49022197174 164.545596179262  
153.534763364558  
LOC389641 170.79303550487 158.224122084011 159.887898257218  
140.719388544476 228.001046173405 206.502189514795 277.314675225943  
228.852495818211 278.061498892643 194.413759761549 203.563098303937  
298.460273458181  
LOC389662 189.027594735456 168.095061700814 196.922837906592  
153.59485367224 178.717719615544 176.704617691988 184.021010234322  
164.641508485461 158.760577365464 257.622317771472 234.841813258798  
203.999142031297  
LOC389669 131.535277168505 154.591116158776 155.951509643078  
130.0140921487 118.567548265638 125.126100642395 149.385103319547  
142.648205566485 131.151578665754 150.914644894869 129.946925636595  
133.827296071709  
LOC389671 147.52403424052 152.993555372242 157.604224004016  
147.9084767638 128.525769531728 141.226901872221 143.051871940423

139.909719416938 137.77601089414 130.979513420888 137.320792454356  
143.861970001207  
LOC389672 277.817786943873 297.022984365795 359.440639663655  
303.608918161742 426.032234135861 412.415549375221 781.461780481171  
317.493387040816 423.966625351913 458.875979229339 825.781627776577  
639.184296110069  
LOC389676 144.89062965996 151.015243921984 167.692053273833  
160.395053149199 137.872742675806 155.660302399877 150.498954408708  
152.422690241301 134.590666885938 156.9540270155 147.903030308715  
160.906550609416  
LOC389705 124.869732867761 153.964765831852 141.94585838352  
133.171854425031 143.950279111815 146.563078818674 135.30767047671  
155.91493956251 131.04767483614 140.456277147131 166.214167530158  
133.507865919719  
LOC389722 134.848210768603 115.445219455559 116.20967792121  
123.557722415957 126.383238335161 122.860898886143 125.308318672456  
124.638075441482 117.688941284427 128.824243581806 126.097544650407  
119.795945889846  
LOC389730 143.381277901138 142.77817647952 134.17351030102  
145.919359461744 138.166546598846 142.51308872439 140.137435303984  
156.349030617265 138.785538575745 137.973211667003 138.464793389999  
148.96493117884  
LOC389740 119.387459594521 133.290168428696 129.692578787988  
127.831950458406 120.682485578097 113.311132067152 107.385565665491  
117.399753685854 126.910075365358 124.821581853501 112.088944448944  
130.479845410716  
LOC389748 145.250076958551 130.616175018332 161.596086502946  
140.379874810685 145.547037566774 140.05419835434 144.743281367797  
138.000714797563 175.073595611435 125.566982723725 130.288547755599  
151.629999903069  
LOC389765 3359.62015747752 3106.94181270197 2965.38280248519  
2649.39312662326 366.636754272029 2786.35558271661 1244.67453201339  
2183.18692530644 1510.77099418802 1239.66725147648 3033.50962589321  
1628.24528041404  
LOC389768 126.503135702506 145.503718833974 129.723501897231  
129.24482916531 138.132390735567 138.62308708151 122.329290563769  
145.064773625365 122.317877997527 123.773753287854 136.13751015238  
132.84666796678  
LOC389786 146.464937541891 168.935348409102 150.023791544584  
128.551335256123 148.970251898527 128.152956417755 132.387242907281  
152.834894011142 135.054931772725 134.122776198036 135.565256045133  
152.373931758229  
LOC389787 6244.58472720999 6271.34208268488 6021.68798558746  
4095.76073123843 3765.25491426198 4061.24537355697 4847.77258830631  
5080.63091497522 5688.84918819457 8558.70496234991 13563.1694195379  
10397.3656932566  
LOC389791 142.25795237339 152.524106827617 152.643087608513  
151.024201732633 179.109090120497 174.624446035895 191.018168651394  
187.430140289193 187.607426452073 168.588120398433 191.754626760061  
174.979501466228  
LOC389813 146.29600238749 128.844026422327 121.973581817041  
129.065491477375 144.046646189442 141.5739152922 123.98384416057  
125.519298131694 130.758707848676 141.970301370404 148.242794464181  
126.464893786922



LOC389816 147.4182675362 135.17827963343 143.877226672663  
137.603046125938 238.095599711942 168.150270765792 139.204218271711  
147.552635527742 173.272062328378 145.86855878099 178.235281981508  
181.088268167074  
LOC389827 136.211694310501 123.524952603672 132.776236872246  
135.844983721014 136.886677060418 142.964043764953 132.809364188497  
125.761205967344 130.874283538818 137.620843137286 140.628614910068  
138.464793389999  
LOC389830 156.926617030752 144.654765322941 160.954017627605  
150.227629690236 155.323822771755 171.49930976135 154.534605635191  
149.990378213915 160.811051590991 156.740412695351 146.335409183715  
137.483830932387  
LOC389832 120.867408760075 121.231939494619 131.326536951329  
136.631313776416 120.089228795888 126.640141760199 119.366599958278  
125.885140634643 126.946305561543 124.840101287634 152.927956172463  
123.518170356322  
LOC389834 138.35538364303 135.648906382608 143.351341716363  
130.131800537628 175.717830026564 127.088916295784 116.321559000405  
137.877756077011 243.979769719186 122.673596593654 121.824805374887  
155.893018702615  
LOC389842 154.854538639035 146.114159600635 151.362686497226  
159.674396591041 154.316929706697 158.573561336755 145.308548379215  
154.218967720305 142.981967333546 160.254101852355 147.436408919939  
158.756424011719  
LOC389852 136.922282125029 154.918405633244 167.365850007748  
139.361120875198 130.98982984989 149.202628825354 156.402578892869  
148.272252953881 134.830021570666 158.911404625381 140.538813908652  
146.877475544399  
LOC389857 144.985280401441 150.48236051337 137.379558348782  
150.775805918537 138.18056202179 144.190203286506 134.130913969327  
152.77616981167 145.239119337981 158.999305963902 116.59404046487  
154.959217895243  
LOC389873 147.208176455806 156.06439656393 155.651798065702  
169.895672129542 272.01602406899 292.802762636861 171.677654793775  
205.987280015028 184.493681387276 176.497706091676 177.204172894028  
198.522123898437  
LOC389888 116.806720503431 126.715300671036 135.531326977319  
170.655648004461 139.955389033983 120.470801825675 154.935741493562  
127.650229552084 127.099995420363 127.945144368504 137.210805338701  
139.437073790935  
LOC389895 149.180704382192 188.515336186633 186.66469040433  
148.404000406948 177.257355909681 168.521601064374 173.024402954772  
186.925138700818 155.801832826848 185.650862663633 154.978243057971  
172.457165477145  
LOC389901 200.591916768948 188.780089746036 196.486499238623  
193.753062958207 193.466377788318 209.867189613436 167.806420483187  
187.365807314802 187.645390502607 208.75656341402 175.400802387403  
174.717158790668  
LOC389904 165.67554738735 160.598186999524 173.260348096238  
165.376358421533 138.701871179502 162.090585987836 171.059849459102  
152.169087619827 149.225754384299 164.185346950306 143.455941298415  
159.245344068037  
LOC389906 158.48793705795 173.189465201573 150.866204945762  
122.414781975236 135.360087349634 140.316066297536 138.593689321259

144.562038493733 153.738794649373 139.180608807911 130.321133400634  
154.340042518983  
LOC389936 138.572054821151 130.449669345302 159.307394610466  
136.982719190537 135.659271030454 139.191746593825 148.291518446423  
149.977924522553 134.405155876727 151.570977428443 141.398513269219  
147.691011072898  
LOC389958 152.60462513339 149.441862883882 139.429008129291  
150.538541347453 140.192644427334 145.161116298118 138.440663763957  
140.229267364503 138.558300898079 136.83470470035 141.152406037213  
147.211769989922  
LOC389963 150.891358590974 142.17773831901 155.405519023053  
134.76397845723 123.998343902602 137.356539213081 135.267015629083  
144.461999591223 136.687813884132 144.212231875922 142.175432631861  
140.419686138586  
LOC389983 128.939572714685 133.34207595093 146.011084331925  
123.964042357475 121.661141741782 139.490103923544 144.683260413888  
132.593747375239 135.399032687551 148.551340840517 119.67745324922  
133.138744413911  
LOC390031 125.301602026407 135.175806654971 129.669484303621  
150.639235242268 128.492142236807 114.021546689428 126.982340580909  
114.41737808857 129.358112503486 124.17231659571 135.208478510375  
127.811923445503  
LOC390033 144.141837615086 136.612903661685 138.924820359912  
140.543382412084 136.657107363796 154.615097099186 151.81754291846  
127.462293158337 135.866980620144 139.811873260553 140.980119908597  
130.185134787768  
LOC390084 127.478474451121 119.735807506447 135.353539458856  
136.864106181375 121.320750074882 125.754741914111 134.327229861635  
121.018722403628 128.519448608754 123.835583753941 123.190757763412  
118.091125088778  
LOC390183 359.024299091145 370.945254716657 314.90123632547  
264.201932544662 246.112720011613 242.996248524203 422.338508598153  
237.216435972201 227.267783818298 348.808646570544 749.859130465356  
304.636618563775  
LOC390192 134.722574388775 142.472724215037 130.681371063005  
149.742140955184 130.150998843383 133.753999983813 132.07268641595  
133.022848457361 135.918590725404 129.018088749395 150.79785758452  
142.046082566177  
LOC390205 140.02337095267 143.074187168031 155.906054212876  
161.289708941062 144.477267427347 158.335952927257 162.98885109088  
142.036037957345 160.848201202361 147.228812647235 147.094123051131  
172.866517097198  
LOC390211 128.647790058795 123.622533094122 141.424508069834  
137.290687951485 133.832462719784 132.47775411384 140.431591727649  
128.455670598648 145.010108826238 140.818413826758 127.433203229267  
137.578516107502  
LOC390213 127.520134825082 128.197031700084 129.210356735226  
127.346646117375 126.952836653857 141.035566928475 121.387799881297  
128.11006485185 137.82918941689 128.36533737469 134.797624902585  
129.461160777216  
LOC390231 142.261639670072 127.086470811408 172.521737547052  
178.455966482206 136.473948855498 134.717258604899 140.630844296177  
141.730912072471 134.936025073531 144.625105340312 152.710827148511  
151.16261275916

LOC390251 136.227202534196 124.106971897779 129.389420352857  
128.300838927918 123.756349408641 138.049846456876 134.47218436552  
146.819830256127 135.923022674367 127.159947766922 134.270043564053  
130.352674121108  
LOC390259 144.295556086504 139.949563856936 155.471795004237  
145.200638964782 164.38282966938 152.274957846518 143.705475208192  
155.287837763675 144.87013280941 155.942609847585 150.263578317272  
151.858466721347  
LOC390282 106.182551369456 113.432757764419 121.624218243474  
153.974384951787 120.931585398914 115.211731367278 118.360186663758  
120.948246352846 113.627435441258 105.31352471598 108.288420807873  
118.426600479326  
LOC390298 229.881164774875 210.761398461329 215.607567127195  
239.572670410818 462.025126897013 364.840751972169 273.197814995543  
305.93974940209 294.069353373633 204.415267938007 270.021093158885  
304.013547190343  
LOC390332 177.619101765848 146.011694647614 138.467624450885  
158.434048174501 136.039076665712 144.736213465651 145.223648967115  
150.843975804117 139.999298193212 153.630125822178 116.819107878692  
140.827965102541  
LOC390345 7573.69742026367 6894.63087357693 6760.37324850804  
5776.63686968234 8709.2221371432 5506.81944079182 8812.91092406563  
5582.64254130978 5624.32062666666 7539.6945050098 14983.8256502293  
7631.6124232898  
LOC390349 155.46017572591 142.63406841734 143.700865823615  
134.304545258148 150.072005848234 147.651620353593 152.511331178337  
133.266524623338 143.431389389919 165.45479542657 126.819413901915  
138.777120638896  
LOC390354 5106.27623905309 4612.81760689869 6233.78489807054  
3822.05744774919 12368.1423473066 6368.23123771343 10250.645112753  
6793.99737496637 6409.23524786095 10988.2836796736 8558.70496234991  
8958.34797715349  
LOC390364 130.526673128214 140.238423894192 120.157438564977  
131.907246423067 133.483766053954 134.537123332992 129.289216846128  
127.637319802339 125.241484840139 125.081880303992 133.164566694394  
125.130703953031  
LOC390367 135.114900669781 136.202953030465 132.28931085483  
139.807421433384 128.244549276386 130.083266044947 151.500282404318  
135.9097041056 159.182533998843 149.76931674417 136.664500207966  
161.670800376344  
LOC390372 156.007630568494 137.992477770842 165.558963147657  
161.585555680663 164.593531655305 199.058972781223 174.357336296554  
154.657316209848 154.051705030348 169.667751894226 162.808270845998  
187.700723296295  
LOC390378 151.674143983846 155.468848105615 163.215507313506  
182.181756507598 164.319378349317 155.655771857361 168.491878435329  
142.194507957661 145.146797807275 165.192945734166 136.742206779136  
158.089922688997  
LOC390387 136.716554749722 137.893630842968 149.131218007756  
144.39135701666 139.027836356854 141.436235043864 130.967476533254  
138.43301474649 138.724959677368 139.253721683078 141.659197251282  
142.316441155937  
LOC390407 135.601916560736 143.100436913184 147.176801913145  
140.713537140957 134.264584077125 148.895841777421 123.860747215706

123.847186739627 133.093234861388 141.88777975766 147.79341726211  
138.211845785985  
LOC390414 163.100526829333 181.991820141929 221.849661343124  
176.27969404442 163.991378703958 207.173653740239 208.348515119045  
213.990575186237 194.374817778819 189.799091507686 174.928155956396  
185.617936412633  
LOC390424 142.903851392611 135.81863662958 127.189310473419  
134.10707191601 144.994931561779 137.949215501559 136.446877465751  
138.611074796816 130.947003916049 135.822022526034 129.626276841426  
139.42531690926  
LOC390427 154.670631900834 139.303747021408 148.26621607986  
153.209409960324 134.464053009101 141.622592268163 144.518132543976  
135.699583036042 148.794293762142 149.3567486207 144.333945716394  
146.395248696835  
LOC390466 432.088303693555 342.935878735854 707.048754700047  
346.065746911798 429.268202514543 802.304294140514 1109.79571066685  
1029.43177809276 1044.91923772265 857.090339943417 535.354724252178  
1515.38811502277  
LOC390483 184.493681387276 169.206723147505 185.027902485379  
180.561514455864 169.332207863684 170.676752248138 171.816841286562  
175.98210925643 159.674396591041 169.826068012389 154.250656489421  
157.231166272318  
LOC390507 129.546119539687 118.743966166637 149.968749911496  
121.849460555655 154.309257657136 134.283467987991 129.961042190085  
115.128667174745 129.461160777216 137.662135592983 116.248026336995  
132.514706165018  
LOC390530 259.511314588868 270.651318838953 369.373283422151  
254.722836822616 470.578335285993 369.373283422151 665.602699607102  
294.280238648737 292.965109701719 498.180196203245 300.199170426996  
401.267425721838  
LOC390531 153.756213924949 137.938310376106 145.235087732482  
141.461435494985 126.972399784537 149.842326869644 138.263361518905  
140.56526023628 148.835389500419 153.97869518398 136.459509901229  
137.265533487496  
LOC390547 150.531753446398 157.14512525321 152.038902807701  
161.295030274012 142.299535614113 167.011846920792 147.086734464001  
157.378317015602 146.097201498811 156.714081537525 152.238845270993  
143.25481667885  
LOC390551 132.685098573183 144.994931561779 128.966514855818  
127.855167644203 150.28169442832 155.908951665928 162.173506492562  
141.552315273863 149.959767051801 145.958718601763 145.306369509684  
163.758054869675  
LOC390557 986.972987865318 1295.27257578314 999.658013198849  
946.273229715791 4819.85672511343 3012.49794349837 4110.76546218806  
2590.80821234237 4671.10203385528 1652.77814259264 2753.89649259242  
4141.8682669995  
LOC390561 141.628203045085 160.806678614325 167.949422301257  
151.372219350291 154.030432279825 145.828229656781 150.102853150151  
152.66513184083 150.734560844391 176.670752486376 140.550044737476  
153.420392741659  
LOC390564 126.228513847262 117.976107125982 114.524341239889  
140.300833590056 126.55925846644 134.828360289676 124.940836122365  
128.587366928973 115.692324946633 121.874296836854 119.412461116903  
121.778756075848

LOC390570 164.534790315992 166.819234137224 147.255680306221  
154.066939372379 149.500457158616 162.574338133241 147.980827857138  
137.975369568585 149.487167787687 152.921328522953 121.760488406107  
153.255318944823  
LOC390578 154.412506915569 156.160899295182 164.917470819096  
155.365673279823 195.946096353894 194.337080066417 411.968307579588  
206.68694753419 199.662592246931 189.142295015168 751.269009484639  
276.057101476947  
LOC390594 156.69025356689 156.32137627012 145.476377346532  
168.384397488011 157.061602966797 142.06907380533 163.919426088318  
145.656767712617 142.401333414583 157.57914268719 170.350891928203  
146.261164125255  
LOC390595 132.277920991504 127.114560076444 145.133151090252  
156.307551403822 205.781486117242 154.304674359916 171.202766078337  
185.382647297259 160.853480692082 148.457872807838 176.208206282902  
138.944595164363  
LOC390617 143.393174544776 139.155456340488 145.493977576106  
157.885229749634 141.119491147925 134.168381235167 159.036647992998  
143.544671705984 143.888318202599 155.011931456736 152.450112620977  
146.574656147816  
LOC390638 127.00963790814 125.126100642395 117.754181884939  
122.84779238795 125.738320262644 124.474221706022 126.915338864323  
120.126700838056 117.696262292883 130.749763860615 143.204058393718  
123.45004246675  
LOC390660 163.970187373891 164.116142541038 163.781674803361  
164.438724387992 156.237282338037 149.744358230709 151.137791721752  
159.811778680604 141.929924728222 153.118492567137 138.620617643924  
157.374537572779  
LOC390669 134.115085057026 122.615852682436 116.839796680107  
144.129889080946 132.504264154139 133.427561208907 125.553615182238  
132.551989498706 129.984214994811 138.28374062778 128.675527226161  
145.368059425439  
LOC390671 196.189101941489 182.397795261147 222.646371492347  
208.125844007298 169.619338456208 198.620777452192 203.19299227665  
185.063870458561 164.525784478026 202.324795686879 211.468099571442  
205.305702209672  
LOC390683 159.266921692363 169.028519464989 152.303524109428  
150.442821494908 157.891350650633 187.407526616724 164.136551371866  
161.837272617767 166.341564850299 154.534605635191 138.301397056664  
163.977562404508  
LOC390688 112.190904058889 122.258432948151 117.728410015076  
129.033433971346 109.46255295836 123.571641517019 125.800508653231  
109.770126492743 114.785989868306 120.71782441569 137.071402810983  
121.764933633063  
LOC390705 169.607072855818 166.9499656083 192.992546726522  
157.200582422961 182.77693508164 159.665989587555 162.500485773812  
152.629680152219 163.086539217826 139.501279970508 160.060406629689  
145.536260846052  
LOC390712 134.273326732349 139.372441366224 144.141837615086  
158.975786937923 159.990561741675 145.015434711984 149.647926859169  
151.741079858395 153.891667472876 147.590189238316 132.758313782606  
131.367075440559  
LOC390714 137.180793826675 130.095585254401 127.863583325139  
131.636779618185 117.30724482798 141.480793979634 129.058085094891

127.566369352079 126.702705908175 134.808485735121 133.7012683837  
134.296645422941  
LOC390735 248.330154701293 220.487665103019 253.30325545013  
175.128935809466 334.140757209353 244.544473246593 433.594928641214  
229.594081405784 223.84997313236 340.487850009685 480.22496056277  
316.409887372431  
LOC390738 138.637735867167 144.873034900013 139.986119754908  
156.095520355029 142.084294087481 143.21411610625 152.837739128546  
140.882766779119 143.934585983797 132.146027935802 139.025598691696  
149.055493714692  
LOC390748 157.643461899964 146.716053772448 155.180238551547  
153.092864798642 150.786618560854 153.263883774915 150.888616811881  
144.603401904061 151.858466721347 150.799400717425 151.266352916239  
147.630900093277  
LOC390760 117.480506535399 128.781123194219 131.349297554112  
139.939863187181 131.755881982599 147.558603709566 132.115817176834  
130.334622987505 119.092335265325 133.056659202188 111.7529190597  
136.01865173754  
LOC390806 128.26957712082 120.853961156534 124.558026853954  
118.497920969001 124.140880678888 118.527464364564 121.59661598908  
118.500956349352 115.316430915446 124.815853677553 113.209569103727  
125.463718280745  
LOC390811 147.488635834397 134.95415308911 147.630900093277  
146.345451252228 140.464476678448 138.055909969804 130.385747820089  
144.155591092387 135.849839822066 124.277983696239 135.127041919869  
143.810050834214  
LOC390829 152.913814113632 159.102070980047 172.562162872242  
151.169283505727 156.642441706727 180.881464829981 147.885769870843  
171.373932115412 172.084184539157 187.93380542729 144.694679571377  
168.095061700814  
LOC390834 114.384296185446 131.668163693171 135.56878810365  
128.29486937905 143.388028226208 148.823805841381 136.975775196224  
146.621996129313 149.808222023726 127.146101490884 126.086991456747  
142.000874773182  
LOC390846 135.252082574955 131.77642590781 137.076766238637  
168.347445148881 153.989839987975 154.594339065082 157.967824935915  
142.793573585472 147.530719472217 142.77817647952 133.303201646987  
140.881084272745  
LOC390856 137.945878061978 139.127442770828 135.82038791723  
124.775529469869 142.906227759701 129.684916104674 146.70298187005  
132.086360948977 128.050677475339 130.033927910392 147.236728188605  
153.507553306723  
LOC390858 142.858554460651 150.790155351217 140.029808783762  
161.217964573491 157.619627711954 138.233799607706 134.790410101679  
134.11753210296 133.663595328149 148.81406900745 135.025907096066  
141.960809148036  
LOC390874 144.798664281991 128.08497128067 156.040073232376  
144.96670085147 140.492715555674 131.40880014672 149.217191121377  
148.905860943967 153.477432230141 140.345652629553 146.869927141655  
136.499228715856  
LOC390876 232.778488697337 200.652195873026 228.766847429517  
258.348298226232 238.344676327918 203.410932496844 221.975219056555  
188.013181859196 185.602093266907 227.483999162038 280.033528476199  
176.497706091676

LOC390877 134.950905279775 143.325710305008 158.390337945372  
158.660859266099 144.062079886084 130.466571969657 170.179304745674  
137.53234136613 152.134895623504 174.221939793486 152.77616981167  
144.92594578882

LOC390880 136.86685787001 149.108582827136 150.235026770931  
142.793573585472 153.832132196284 141.88072888667 144.077080621909  
141.76964678852 131.503936441405 128.765369834041 133.470643135354  
128.150801169886

LOC390933 138.4303531022 153.408890091225 147.228812647235  
156.32137627012 144.763700813057 152.495540563792 151.252137441251  
137.59017685842 151.431513447721 138.695481214267 143.653452869664  
159.615233521257

LOC390937 117.995551728392 121.176150171592 128.473834314632  
110.266032635568 120.447140228396 109.91537150286 126.748906552086  
129.612536218578 121.087514445827 123.185652476312 122.079685222733  
117.834484996559

LOC390940 243.283375388645 220.010399552402 281.996583337694  
292.911761762431 156.808992920564 151.70917316194 194.374817778819  
177.619101765848 196.245297362955 186.733394375839 158.841505957036  
248.43491649623

LOC390956 128.999893183462 135.993598471576 143.818379692331  
133.299599411025 140.486376016494 130.816301920872 155.759861336991  
131.153457976248 153.257097727888 147.483379646393 143.229240978574  
166.341564850299

LOC390975 160.411218029114 145.335830265052 132.610618885717  
153.554159360954 141.404832197192 149.423230365631 140.50127034921  
151.433634564939 138.60849268758 137.50609001002 143.197131668608  
138.723149134933

LOC390998 146.526744516344 133.216489794592 150.885460975199  
149.574353706911 147.441650320053 144.016137459279 143.57041789019  
134.507558495307 136.996535765175 143.045416067967 136.704018446388  
135.596007994731

LOC391004 181.70730090195 177.296424297967 150.786618560854  
166.549192709614 138.212860360467 142.036037957345 171.298701141684  
157.555410977564 166.879042308539 174.357336296554 146.528945049588  
165.122737166322

LOC391013 143.407371444437 149.552704503066 140.861849838223  
156.154079736651 128.473834314632 138.438792881135 139.77436722364  
140.292132023262 133.209211811498 142.095289977576 114.849872458647  
142.535416473783

LOC391019 625.932910814208 726.000622725287 603.061485415867  
582.062758687489 4206.37667440908 1518.13775377335 3226.53426370323  
816.823443819069 1360.85309203233 2320.41293992992 4612.81760689869  
1736.03342040646

LOC391025 134.943005383277 143.710449544388 149.364498870469  
129.997181739652 157.77398996415 148.989286668424 148.143367490426  
134.48825480809 153.679479224178 163.915489303508 154.661456780865  
140.567565996849

LOC391033 137.286331849749 124.045745662173 158.95714101556  
143.239666389592 138.756638791139 143.394704760983 155.641860356683  
158.039920243116 161.393953325115 152.29434111068 135.311980936088  
156.213421099137

LOC391037 116.576896337786 139.779754416105 147.471494294543  
136.532168520039 142.081013617671 128.495276191943 131.093917654245

145.01322767825 137.353149614081 130.119313219923 125.990762414974  
127.389942368953  
LOC391039 140.556631658219 132.357517495246 114.830474086443  
128.348910964448 138.510722755317 124.958287100852 122.941711366641  
124.883575464443 125.83678485646 127.980776299586 107.76497424356  
133.197002327259  
LOC391044 158.396149470397 162.333158524811 153.770852731422  
191.924177620803 154.312374306932 171.238423077347 181.022635001204  
171.414869677333 175.960788330149 165.200303470106 169.482586449402  
159.177303894223  
LOC391045 160.667815093292 167.057202756618 152.760855359297  
162.9279134169 136.5680632044 172.677083810424 146.814457904682  
161.096914295309 159.26101905957 156.269957530519 122.535728427528  
140.020294940544  
LOC391073 148.401698825687 147.327675057481 162.10411532202  
145.168031449425 146.694318629238 142.970256312313 154.760697311395  
160.72962443421 127.581332110857 151.231685705236 129.46545803309  
150.49183794045  
LOC391075 2986.6208659209 3251.62784659994 3917.05893989806  
4335.76831372031 5825.9968524214 2452.1304336603 5425.58761099475  
4857.3155917904 4343.46317176151 12968.2945749 5992.92384160188  
5347.78127066964  
LOC391081 139.22776505842 148.825790628891 140.968351978909  
125.884565343075 159.49930229951 139.613193302406 135.945030816689  
154.728941096647 143.833057210822 139.97127025207 141.706292773073  
162.416774743901  
LOC391092 115.048402956574 123.179986410723 118.457573670556  
132.807755600683 124.548598801497 123.090300758271 130.987023228883  
116.416896654975 114.512028664352 129.76141737109 132.502153153826  
124.995087711332  
LOC391124 127.760995691556 149.919344933814 147.910699446264  
133.343243441383 129.063617408979 143.05872558805 150.170712508944  
135.809383370957 146.091822904705 129.728266017061 137.720747340105  
140.704317015307  
LOC391126 5437.78386044638 5138.28186306948 5789.71932579854  
3522.61692270848 5207.37974585707 6244.58472720999 5965.21815409254  
5965.21815409254 3807.16206340771 6691.04319670055 10202.2226913537  
3706.41283595794  
LOC391132 141.319594283071 146.20028051948 130.100501333725  
137.549175595441 163.709174813901 149.532459719175 149.883237874886  
134.624322761212 148.00952002903 149.786445079456 144.461999591223  
134.994013668445  
LOC391135 134.005402534879 134.475296383752 116.810827219571  
127.434873844923 134.7552564959 133.92485496581 137.220718873614  
145.635453468646 138.276865331434 129.895388481159 141.176376265078  
139.844984829379  
LOC391142 143.215828010442 149.613701531197 142.090009728666  
141.568970008164 152.500670025483 149.490064894136 135.744202879162  
138.483436753942 139.008854444223 140.578378782903 128.777337552038  
156.417000271727  
LOC391157 147.182394557583 115.316430915446 129.918038866006  
127.610304071204 143.146404911993 149.902420337518 126.378952839132  
142.117819438992 136.295523520203 141.414384085164 135.976837152799  
126.623026026721



LOC391160 127.514381389109 141.327299595068 131.989955864584  
136.133538781918 116.276003190171 136.760382409185 127.320624058583  
134.582098893327 136.557466007228 133.236084190243 125.868080230094  
127.464485396039

LOC391165 140.63666629522 139.6492947529 145.547037566774  
138.659387475119 176.650953513413 145.787468865642 149.089067389266  
152.319720089773 140.696326952077 148.680794815584 135.764392116216  
139.980504765791

LOC391169 573.644925180854 659.673052713372 519.940347384877  
556.31484498921 247.550312458738 465.29290512169 330.005950459958  
455.564394647943 390.752579014611 328.680312364877 437.770841893227  
347.411500022053

LOC391205 127.622397233692 114.378420394004 133.836390935612  
139.844984829379 116.621735695217 131.558842131826 129.322481607056  
123.689439578326 129.69588182322 123.391298926957 124.460064642088  
125.899200544217

LOC391209 125.576103876855 131.298129667973 149.867541008113  
151.094682146074 133.058788697693 139.054140295282 144.930066324767  
126.112672816035 140.827965102541 141.905641114703 140.440610012557  
143.039251441179

LOC391241 140.321675137237 139.342430217926 135.961724275921  
144.946362772133 145.06205326107 139.055892787717 170.692146255416  
157.560117350562 144.667638908504 146.432468585736 137.20253329376  
128.348910964448

LOC391269 137.567384694894 141.463324155943 147.218415065692  
157.940873610797 143.558088035758 148.22974445263 142.713318779614  
158.429761055869 129.715948793051 155.468848105615 144.40361834862  
125.600500146679

LOC391276 123.949411804458 113.687931899298 121.886886059038  
125.995374488153 118.015175851934 117.218616752346 125.429085234515  
133.113581756557 127.727311123825 127.995790782392 123.853588042292  
124.582577275358

LOC391282 142.677386111317 142.236565028336 137.345542507421  
139.578603805852 145.666712006532 147.268006631005 143.061415008831  
140.077307351596 130.786835186349 149.25705328406 113.170014668758  
148.808928892047

LOC391322 152.845126167802 140.190234214948 144.720594512581  
164.603403251634 136.687813884132 146.501559368223 150.084909674721  
143.467053670148 149.547635666621 148.222477811166 131.604121223902  
138.596430973865

LOC391334 216.783051958345 211.22652563815 212.363151537303  
230.161369375718 172.794570587596 228.058870735016 177.910104644497  
174.690052785405 167.575968906119 196.053808536366 183.619184925353  
189.603621918298

LOC391347 124.461997520222 127.685469299406 154.951136632863  
123.062390088305 137.500310477851 135.736764623155 138.165240772401  
151.2639801322 129.185514320138 148.347642424885 139.856251508283  
127.913463809158

LOC391352 180.77686098195 165.692508737757 155.227218488935  
151.531667383273 155.140371265225 143.920134762902 166.730974538475  
150.974364125849 155.431833398023 179.624208193114 145.843639385175  
147.901594006094

LOC391358 129.665507668047 116.023563001039 125.810756286648  
154.564478911791 129.586337068199 111.152235113722 125.055545087871

123.860747215706 128.377928524315 136.353051841792 131.49577981738  
126.00744446299  
LOC391359 140.951031275943 132.257989841046 133.921012946195  
139.962307072428 178.872635061826 173.995889755792 173.408784502027  
163.319882002763 166.998311158378 129.854478528455 210.590774758661  
144.688515462537  
LOC391370 11432.8213906428 9759.87403504619 13247.3528304243  
8053.22070239424 6670.51138785163 6470.73189429877 12221.7819812315  
10741.3064142855 10360.162704111 13013.8166277495 18562.671630167  
15297.9020958577  
LOC391378 128.011387527117 141.659197251282 131.367075440559  
141.5739152922 136.560048419149 137.784270510433 130.0140921487  
131.110018165002 118.011195631598 139.450788315602 123.482626777491  
133.872561340464  
LOC391427 133.52271411034 128.304919825754 146.460464282676  
136.448045428081 129.76141737109 132.28010415054 141.577373924378  
138.227082687797 134.504873813959 113.214390213004 122.098850053347  
147.343712869579  
LOC391429 142.029398672217 165.659978250378 141.917318809044  
161.937384157098 150.303703193967 156.779004465552 144.836902182737  
127.512733134453 127.977782260866 167.219062918573 154.205877662428  
160.833948531272  
LOC391475 136.349603320553 156.9540270155 161.305860691151  
139.123489349026 157.43824048982 154.611011734772 154.080778100852  
151.899063970777 148.609721587632 157.967824935915 157.078563342652  
150.724359913994  
LOC391504 136.128092230238 131.269526665478 111.349642316073  
123.267817390796 115.944280729914 136.695790688466 125.818432070199  
120.231559540009 119.422996538444 133.906867716171 114.755442050481  
108.288420807873  
LOC391509 142.859971805867 131.514114515895 147.988883293205  
157.697168349028 149.335288055732 144.112401069818 143.053727675518  
149.4401812 143.00932329728 139.582054825147 148.658678900932  
147.978039160763  
LOC391532 576.10291008626 575.722713461982 598.924339094496  
624.106546150735 680.250735532287 679.822276398569 881.15414246017  
796.936154737659 682.538709448692 1407.43503866211 1526.66232186013  
1402.14708471728  
LOC391555 135.68481384332 122.501785735146 120.922042875444  
133.011320549232 151.629999903069 117.324368138398 124.851025681014  
131.521311288114 129.051642626091 131.22473774325 129.614692778261  
125.093376753408  
LOC391556 137.47514052942 136.301442794928 122.125746529725  
133.158570377793 121.945541820091 134.42983422342 134.53215156472  
131.166819048309 120.238706364491 127.003974141317 130.240366272285  
128.708956947928  
LOC391574 143.959910170676 150.102853150151 136.209796259197  
140.971253689199 151.59613008133 149.912481263284 159.665989587555  
141.071184297124 141.368078865065 142.646570636529 125.682297697017  
140.321675137237  
LOC391578 241.039766283972 244.897869154624 225.142823691625  
291.779980648289 275.509805464276 277.073510273425 305.906480933354  
285.562276640039 233.07015384759 299.170431746759 308.441120735095  
258.075566417241

LOC391592 128.163613794257 127.633362302159 132.965467229606  
126.910075365358 124.070171664904 134.85809559975 145.791950392049  
138.322109975426 122.905225081965 128.224742304889 136.540568915609  
137.029726467523  
LOC391609 155.130745957603 142.01454627498 130.383001462828  
159.438084699061 123.887740029279 136.541973790157 138.299629744589  
138.841385034636 142.910616700526 153.647343267295 127.985051303973  
146.190750749851  
LOC391636 132.795064859079 128.134246199718 129.524056217383  
127.077668562103 121.350491314441 134.71514094826 129.033433971346  
129.677874035481 127.657961561231 122.053867525393 126.048382998393  
128.525769531728  
LOC391655 153.661632990172 151.981708806765 139.211746200839  
129.099780410063 148.539881077647 133.016668180102 169.695658738618  
151.09670688533 135.253713075341 149.661929885679 175.946843919065  
130.844272373448  
LOC391656 6324.87600301793 6500.1854485891 6851.54963413886  
4047.99200599472 9994.54490550759 9636.32818474581 11741.7473778842  
9171.47979464736 7082.28969354712 8918.58940386786 7617.316805798  
9192.8966763778  
LOC391670 151.617989938924 143.342736976496 140.538020869886  
137.172030225913 138.920141982606 146.316145173343 164.198494818485  
147.939682463235 139.308325848216 145.496033735748 161.688125121941  
157.754622099874  
LOC391692 152.032418787633 172.451128796055 132.788102310611  
171.740347129234 200.890547965585 147.248053518914 153.792925101459  
165.411052799773 174.42996813062 170.951009118578 144.634118305223  
147.1476865809  
LOC391703 148.532339759414 142.45047744931 136.05610450926  
160.33003360942 148.936888662374 145.136075215082 158.617209794418  
127.863583325139 145.646191500321 151.364528898537 148.624135810148  
149.117224130576  
LOC391722 127.058373069911 124.190161132628 132.256047602234  
134.128061214081 130.441808139335 140.615078497305 135.732616463819  
127.202039384041 136.240503841228 120.521509788705 130.914932329297  
138.913591568111  
LOC391727 163.910041674646 149.303427221111 164.109321257638  
172.866517097198 152.142909854773 143.484004107893 145.965900441953  
166.872332652008 138.348160604288 162.254062646631 151.461857714097  
147.991572632747  
LOC391730 156.273445355976 152.908358615016 167.389632521521  
153.126111237668 152.624623171797 147.250700603067 162.333158524811  
149.851792558427 147.585081901818 147.543411823657 160.632809953993  
164.309588213547  
LOC391742 110.081964209973 127.938245853896 131.975248488461  
126.48691003872 135.586890819526 123.400143662218 130.392575279055  
145.090639086338 135.511902377219 132.587392944892 126.70992730102  
132.764150075465  
LOC391746 150.182173149394 124.942701123337 147.590189238316  
138.322109975426 147.045944019838 131.766114156138 157.797222258336  
145.354740501503 128.950308413612 133.292854943218 150.115482378938  
157.134782748175  
LOC391747 148.630293791756 136.356895672212 145.828229656781  
145.250076958551 121.665157726433 139.619076126267 148.340380102097

138.5270206057 129.898242234869 134.796088225931 129.636845496276  
139.841039854404  
LOC391761 122.102644097132 129.765440519589 144.944095553004  
141.626504154989 147.588213090285 131.836036241459 137.793462381778  
123.442970398288 129.668506092785 136.285410546751 139.013404849037  
142.175432631861  
LOC391763 128.363331337379 121.624218243474 138.374092984164  
154.408875182219 114.378420394004 121.778756075848 128.26423663004  
128.189685312596 133.507865919719 125.955431094455 125.796438432905  
144.738871562895  
LOC391764 152.077204721895 140.02337095267 144.049503774298  
149.636887782574 159.615233521257 150.893280574091 157.061602966797  
155.247452081206 145.221594295772 167.811412309356 122.644105247178  
152.68344738009  
LOC391766 141.094578556895 121.977373818244 140.916876460413  
126.468167800414 128.720517906732 136.459509901229 138.173547382901  
134.102929804129 131.601823550269 121.212521750566 134.216088147701  
131.162118170837  
LOC391767 120.14201542563 139.450788315602 128.478724185042  
136.760382409185 138.53179773391 119.188446525733 145.82249684619  
127.404415477384 122.543903508753 120.935863853101 128.997028325896  
147.922706629104  
LOC391769 137.974323288786 151.338765231607 136.913957413224  
154.778726823719 328.919401925375 161.769370009823 186.496160803789  
165.022029012505 161.548130965486 204.283030911897 172.020235319192  
179.109090120497  
LOC391770 157.04599638368 166.879042308539 160.511688319771  
147.725396196054 144.342905860503 155.362503575715 165.017178571218  
139.535490288426 152.011551837951 169.089896796513 144.370811043456  
156.605568633665  
LOC391771 144.373226011578 144.883597913037 157.856019979644  
147.469101571149 133.995928435022 129.675420096163 146.644317248414  
150.624740697168 133.018406625714 117.231243105897 131.859204862396  
143.10996074311  
LOC391777 19434.8698477145 21551.9994556128 16974.4822983201  
17975.1602090863 13944.7649147227 15053.7547401937 17658.0552091534  
13902.1067272762 14348.4009261372 15532.9759169142 28930.8933474342  
17141.9934540963  
LOC391810 119.32696696175 138.633019006784 130.186484104417  
126.178476831007 123.294321716108 125.974463216884 120.790536146461  
122.989642938474 144.336901248334 118.918962530408 145.324499089416  
126.026938396257  
LOC391811 2208.49325118803 2180.31963682546 2240.33212242003  
2982.80580616089 5702.11995823367 1798.5819962261 2321.41228376157  
2192.17997650999 2253.7522632414 3655.63669142687 1000.48723872058  
3157.98451877581  
LOC391817 153.589626253969 131.87052926802 153.399787997793  
148.160350542849 148.422457879826 154.725484895098 144.281217246178  
144.896960245309 157.524049610272 161.564505054217 140.038295509875  
142.108805047729  
LOC391825 250.602978521808 275.39986964837 255.435582426271  
224.67853219142 390.372738176917 257.989863290786 542.883453307  
391.326200093611 271.615621030842 299.568830444875 431.861762635568  
284.438411011954

LOC391833 2938.06458269406 3015.70954394585 3115.11499025766  
2476.51542420593 3983.37592132018 4291.1724030909 6737.97308530049  
4448.67183518984 2620.17683549005 4945.87677849967 8666.41250683965  
3896.49785254733

LOC391859 151.563917522864 139.597493526257 137.363483527372  
144.634118305223 140.279222720709 166.81024151246 144.83282018024  
131.630132952441 149.040720727554 140.120051507626 143.598567970841  
141.685620602226

LOC392008 154.352518161283 126.435928518593 161.825134481279  
144.056644468886 166.277960843095 144.822943770596 134.349043119219  
137.412952822912 138.207553349985 143.793506250131 159.994376562272  
147.442483242063

LOC392100 141.758827837244 137.30143217822 140.762415240824  
143.512348693556 132.971844952199 128.604270382206 122.883806494491  
128.616121042106 146.334446516009 135.068883036882 128.947211021681  
139.199446543251

LOC392145 154.65319127051 144.439320591901 151.805015900025  
173.459008248696 151.863048206341 188.74403596953 161.510497517852  
158.653161314597 157.797222258336 168.071171406779 157.860515609693  
158.452089329714

LOC392188 104.58424134098 123.256613702254 131.085965122946  
132.308358487671 122.079685222733 114.498610080481 115.939620871703  
125.256339476772 119.486895914055 129.297217956843 125.83678485646  
135.349868925415

LOC392196 156.311009595629 136.392389842232 130.29531841096  
158.573561336755 157.474913177177 145.44629057846 141.331397551086  
143.061415008831 134.20988291379 142.551161883518 132.804216633852  
163.988099963018

LOC392197 138.412897151567 128.501189288377 137.844113743956  
144.700955682048 124.480385254916 129.845344493418 131.77642590781  
118.757973008463 137.594506621573 138.909419415137 108.655415285806  
138.3792224631

LOC392215 131.99470265134 120.735176435195 120.951365231971  
106.147993332294 124.611144621071 128.844026422327 138.42216862811  
144.636277619886 121.59661598908 139.535490288426 117.32734978289  
125.603448542611

LOC392221 157.309058982117 139.311816781874 155.386226046894  
139.490103923544 156.389361240637 158.098055917452 162.427505889157  
157.385256442734 153.697775290962 150.709091532746 157.546123603057  
157.43824048982

LOC392232 134.318290950377 144.604714612091 134.48825480809  
145.698637908482 141.872426752329 147.913148020331 136.762273376313  
132.275953817076 121.968807253639 139.577443171489 125.589744938813  
130.329453160478

LOC392242 128.523703756493 124.977046954694 139.767216030715  
140.474338177948 120.01190102634 119.002833359088 133.416938451465  
121.653754668804 135.531326977319 132.465501156958 117.841844605128  
132.195666100325

LOC392262 135.285224699704 128.287127680554 130.105800581241  
146.153528461264 141.102274192049 131.551085224112 118.095936088242  
126.523201566273 142.907969322845 136.077039612526 125.603448542611  
125.256339476772

LOC392264 146.879019367939 119.159078990339 137.670655293096  
149.815494316469 124.918089223417 127.211469322857 132.587392944892

120.255081121925 128.594951429021 137.288653308858 138.316043447788  
118.338713846941  
LOC392275 135.485867373592 141.088456756806 145.466538006138  
133.113581756557 149.000760379976 144.073739611496 145.756455015309  
140.912921321622 147.494937826597 143.035625780446 128.126354569418  
138.18056202179  
LOC392285 1068.63350031223 1125.95664591686 1102.73689840572  
839.662936279727 1373.08023518911 1574.65731564294 2187.3010896903  
2334.97297889593 1883.74008471233 3664.38955037715 6059.74270502037  
4448.67183518984  
LOC392288 144.589482298525 134.350054065624 126.66432941518  
130.393631150485 155.04585737344 142.521260841187 164.74234322574  
128.771367080039 133.617501101389 133.939847853073 151.581593330224  
144.798664281991  
LOC392301 131.449370465834 147.320976507643 167.532512839891  
152.393260140571 236.592839463278 179.905809470907 183.815810733176  
229.347135478142 178.928873342925 249.858562350415 325.80154888448  
200.867515935703  
LOC392335 123.372689985035 128.601885372662 118.139487760542  
131.17119492692 137.539385624206 125.193729067011 136.457424070709  
141.882859092658 136.591299462104 135.556943919872 156.090871391873  
147.966224814966  
LOC392364 136.113421708277 134.132312782731 151.863048206341  
155.080900277147 147.446381217887 153.602842380788 145.396723478249  
144.627784383455 157.381401974279 141.949098898957 141.985130140173  
151.418316929551  
LOC392382 146.390223079987 141.016019076664 131.619951110473  
126.617737577634 130.392575279055 138.020031233095 135.208478510375  
133.509538648848 129.532122459128 141.321547895734 132.423043364573  
130.661695937728  
LOC392395 103.307703547649 105.741092375243 104.36042819601  
111.349642316073 113.209569103727 111.467722538327 121.006569103388  
110.553759711075 106.41329572636 111.515588041012 126.928328902507  
113.832885222354  
LOC392425 140.809956497396 148.492328039604 151.622719246408  
140.804008584006 143.31117188259 140.701132362458 144.270828498856  
147.077695919758 130.75707278606 147.127908355066 135.286686011087  
145.553219709768  
LOC392435 128.81022558263 125.217733034761 132.751406897891  
134.901659808633 134.814082968113 126.788749235867 130.036744891822  
133.372231702721 119.221976571036 126.856038484436 135.513494853742  
131.832311911703  
LOC392437 4979.31150268741 4763.89426388268 5226.05969701201  
5040.35379681644 14866.8264879369 2867.63319136936 10170.8669218992  
4386.83308119416 8496.2506227676 6179.86800320807 2496.17211592866  
1576.21727854603  
LOC392440 148.022287939066 160.361025839456 172.175584707792  
164.601022396674 141.524239210761 149.956759038516 129.586337068199  
143.025570700585 146.20028051948 146.686192012988 144.836902182737  
165.972090075204  
LOC392447 142.299535614113 137.757902615328 146.803549606737  
135.039901725369 148.364138636002 138.192550945411 156.022967076728  
122.498794845416 137.510586346207 163.41031443893 130.018928906449  
143.562164660825

LOC392452 107.103635692135 127.31790396929 123.625734357908  
119.463337435512 127.374600506681 121.874296836854 141.917318809044  
124.033766796333 120.046892432373 122.575357101038 135.946808893146  
119.034003473459  
LOC392459 133.692996980809 134.176925491721 143.905680376268  
164.68600028429 135.680872395032 137.20509387214 142.428578698775  
142.414323129638 134.952584272187 143.662865541299 153.273568880305  
132.329892644992  
LOC392467 131.668163693171 128.213678179359 138.731957926247  
146.805832438977 129.428950259722 133.847494826806 137.109541758085  
135.170925092209 148.23392074197 140.765231611948 128.282999719959  
146.537204621419  
LOC392481 150.632724038845 117.048846466839 135.973752893694  
144.346988809708 139.480361732772 146.805832438977 150.023791544584  
152.413389525982 130.977864137459 133.725177339262 127.047679628867  
135.895945142328  
LOC392489 153.408890091225 143.394704760983 135.148723192316  
149.532459719175 153.899573902499 133.834423222601 148.688413944868  
149.180704382192 142.159597861804 155.049051256459 161.667782505656  
132.203310946961  
LOC392501 155.27707167384 151.176697752603 156.169405925094  
150.709091532746 163.794436953711 172.641322197031 181.135519188216  
174.284268998257 151.973681370675 183.779065928447 242.037132958656  
154.574826922632  
LOC392506 168.173803952157 174.09267813338 200.456087759904  
178.186273279101 162.656951764783 190.5930909277 180.549865708041  
182.074569356713 156.759600627542 161.12121879514 149.863063160222  
167.746786642066  
LOC392522 138.573829193205 141.879359965317 142.185903088074  
149.492550066785 219.814706416471 163.159571059471 199.423120300557  
149.398118078302 144.627784383455 213.602504580364 213.710058427654  
164.497445195378  
LOC392559 146.84403879162 168.867373925372 146.343230597246  
148.176995739142 158.933097712363 138.22823004719 147.307419859572  
154.199534276226 139.377027955744 147.032210333966 123.607412609763  
139.409685553177  
LOC392563 144.81077501446 139.209080672396 130.772410329685  
134.860896462638 135.247018354192 135.738699497293 123.403099206878  
113.154880173167 140.583804906052 133.594446233378 136.303510503231  
128.997028325896  
LOC392583 135.173464753848 141.695537669891 122.213445520365  
130.849201993866 151.81251450855 145.025703051661 146.332425559689  
140.429462488271 130.25146185271 141.817230824364 147.673016541108  
144.724040494873  
LOC392617 130.642810886161 128.738746025289 137.601181150371  
137.740497848238 140.28485470716 139.696266471271 146.464937541891  
136.627904756283 127.562924931536 147.28750335168 149.473505461585  
142.978818998012  
LOC392635 150.137061170632 132.677272839165 160.066390229416  
150.380814008952 162.447903830131 188.593378315122 138.478911439144  
181.70730090195 172.468440317443 162.216377983292 175.469375624274  
155.780657091484  
LOC392713 150.951302116738 170.23937234395 192.512661648653  
195.269099451599 174.187510325385 221.561252012695 193.292596471113

201.441808401878 175.840639511966 170.758319048911 173.050039480459  
210.33390115739  
LOC392781 125.447209413787 119.422996538444 126.585679159459  
135.760578586004 151.561151654372 136.406132339187 139.943915452851  
125.157459724842 131.244759170642 129.687743133943 130.06068534054  
126.935731176024  
LOC392787 1098.78649254838 972.902937649492 1099.37392456694  
1547.16936835284 113.416743649576 124.291944151031 136.067657949844  
144.496429994489 141.320571086026 138.720489866687 133.281505040209  
137.091932621041  
LOC392843 133.850733997442 134.185202200317 133.777238071968  
147.903030308715 138.263361518905 145.588981165456 129.658488766089  
137.885506916098 151.181422205549 128.354163132392 143.673778816953  
141.378381097266  
LOC392871 141.623851511993 142.937182720493 144.65238608866  
141.862767428244 308.564935340635 145.187490179166 321.84712975195  
215.037122365095 236.032288046282 156.430981244063 209.811693771836  
134.919972250554  
LOC392979 129.677874035481 148.211354898758 131.246704975084  
158.039920243116 140.309394542299 142.603436693587 146.666759322506  
150.52625734893 152.885721101687 146.079727388849 135.348086420636  
136.942583515174  
LOC393076 138.616719975373 163.753434774656 154.821960325589  
152.721146962124 153.700168798494 158.946177055546 149.198753359122  
155.101850847148 152.319720089773 147.991572632747 154.199534276226  
144.139062513587  
LOC393078 132.110906510601 124.740700441589 127.048605625519  
127.723052839953 130.900049359243 133.404671629495 133.661553334004  
130.005909892804 128.812729239283 130.329453160478 119.432201417811  
123.354093930164  
LOC399491 266.756647182704 224.118739978257 308.38513924253  
228.542423012958 193.052112923573 214.331491507489 298.301504581296  
229.729195963667 166.709393547104 295.330307669482 270.651318838953  
236.676029292922  
LOC399706 131.954310449801 128.990911924499 120.530092530622  
114.00959999268 127.500754400224 120.216999784094 119.305917403956  
118.475906136789 121.903115540516 125.603448542611 137.199186338519  
118.233024867228  
LOC399715 172.26834556696 163.181323768362 168.082591651722  
174.953232190285 169.561657768387 159.820341130737 172.965746521132  
164.084737224884 165.149464497921 173.299643109576 157.166379887259  
172.008994980259  
LOC399744 152.743680985848 139.97127025207 164.784346867158  
155.201655653645 155.902461107328 180.941090529551 191.486717579847  
188.39062571513 176.062665550409 178.3652866131 169.132693907633  
161.00635457883  
LOC399746 118.567548265638 126.578035793406 139.776830704087  
124.897463208595 142.571259316029 138.963864375073 147.809934374849  
126.539877052899 137.537197575152 147.844734028193 118.866073031304  
146.823788992762  
LOC399748 1270.76282064793 1158.88528996131 1627.02882286283  
1037.46485756166 890.121325723286 2206.7447886564 1712.47877322331  
1816.3719976564 1535.27496251381 2267.0818302379 2886.92690692502  
1796.26091584668



LOC399753 136.683683776616 133.527906709491 141.925012927873  
139.186416741431 144.564250008106 140.83570584033 137.235469802064  
140.775447163954 136.366798516444 131.592172917738 135.32730674455  
145.67389337654

LOC399804 853.535700321202 772.061917233344 1696.69982157582  
548.869880723909 436.586158384666 1138.00644332379 2016.52142068599  
1443.68785521063 1089.16489859253 3387.5366256957 1423.02563792293  
1957.48508632607

LOC399815 146.64560446484 134.964619235561 137.079479050963  
137.373457956206 141.972403120632 146.016920431468 142.734103971267  
146.242897296397 131.136073942692 143.774841336279 141.249687936867  
152.429970809069

LOC399829 148.582022536314 140.158309892319 131.102996816222  
123.7615105541 136.84840505336 140.429462488271 130.12032144763  
129.103133449097 142.537484065487 132.277920991504 145.245316640391  
126.917669470999

LOC399881 134.113464449375 128.870079563075 130.073005698714  
139.000248033373 138.712529531951 125.107483348755 119.221976571036  
127.535214313797 137.084488743415 129.24482916531 157.627490896581  
130.342425029134

LOC399888 219.228720772236 244.668813440638 227.144441241869  
330.641230715217 139.163958829511 130.746465595759 138.154799037807  
133.805991920905 161.397788731595 139.244051199144 150.000851192531  
149.805955402639

LOC399898 129.70974867852 126.777633512781 116.126923911804  
114.072600760808 131.724061631389 112.875136585606 114.664782541261  
119.819082491115 109.087574814292 114.350596695469 124.627339426244  
119.854401979951

LOC399900 28930.8933474342 26010.7684336005 28730.9248954575  
28530.8435957612 5543.71998558526 22543.625434682 11190.1778174002  
17404.1167486753 14938.5975217303 10900.1783397368 13190.4826009741  
12968.2945749

LOC399936 114.01599035448 120.224154897296 136.293084080479  
131.338853426561 113.66416989856 127.494672751434 142.986412837634  
136.19481894871 139.131857948357 136.560048419149 113.694351010121  
143.410917415691

LOC399937 133.352279794853 139.409685553177 144.342905860503  
147.271220791722 131.22473774325 141.626504154989 141.056924917269  
138.376176600064 141.414384085164 134.688504981603 141.383975990479  
140.101511236793

LOC399939 155.516697616637 138.921608664788 126.155486659114  
143.996350813566 134.21227169867 139.972797966319 144.018198451676  
160.567934923347 138.070844686104 151.360575274272 119.622243247836  
140.481148289418

LOC399940 136.013989349192 131.234140286502 138.074645385322  
137.132095345234 130.48231275063 135.711590400394 130.447794983538  
139.184647003326 139.962307072428 129.420716653358 142.772680460689  
139.038389244329

LOC399942 179.711363255355 193.466377788318 245.607130404306  
294.033003779363 356.921627358141 565.112283062121 433.11536069928  
812.298381693378 838.93563319979 730.673649872205 269.345125874858  
706.292905820227

LOC399959 2271.82656399253 2530.00219297102 1620.7954553764  
2299.23805014176 150.790155351217 196.889520085412 131.646121568612

153.485731788293 190.56172211779 147.443560923128 129.665507668047  
158.56996905631  
LOC399965 131.159946917777 176.062665550409 159.185616602396  
152.646642492666 603.338538383128 409.380002417794 362.795691170335  
266.681711962236 493.492348317616 190.165771406362 467.387427864242  
344.992791638415  
LOC399978 166.570606752678 140.646946425036 150.880818951088  
164.905467905433 159.752644678596 133.707285280448 163.85327708023  
150.544779197947 178.819486867379 158.58863949084 152.362546746522  
171.028432989066  
LOC399988 826.314416168552 784.412433571927 1068.63350031223  
843.936924659514 1687.06111969368 2174.62979843528 1974.49672149862  
2449.76376608893 2087.55358504021 1599.12034906314 2446.31228564539  
2028.67873136046  
LOC400011 122.729918525032 128.739880189022 133.52271411034  
131.290698895743 125.071387239411 126.887989471803 131.876061826583  
130.378441113977 133.074027423549 132.903959880979 150.374573177474  
129.754376995879  
LOC400013 321.910803473854 286.035428568826 384.780426529733  
271.356289141017 327.696359071012 370.390323116113 436.155731212592  
472.405334652317 400.550044186372 466.909037277853 433.11536069928  
478.606567465979  
LOC400019 137.58025011566 145.081468030567 169.349922114861  
141.632147679743 167.447964370395 135.822022526034 132.604589324628  
143.021435512861 160.136209944279 129.469949305913 158.429761055869  
143.101750222256  
LOC400027 880.719593734606 843.936924659514 1082.00448164658  
901.644194512187 466.083451075744 651.43207839949 467.90388853336  
598.095370768587 883.140984728615 405.469705787631 644.868034665476  
719.13080264227  
LOC400036 134.76397845723 144.461999591223 123.09149124559  
148.949829934611 135.003236040032 137.022366035333 137.94246602811  
140.845958602151 141.048882618651 126.470780227711 147.697973457776  
139.519321690754  
LOC400061 233.029655807246 246.327991259259 214.739818213164  
212.836093887552 166.104915784875 164.678646890649 302.570932942847  
182.439945229388 169.311264420133 278.498278821829 297.332272659995  
202.00431685587  
LOC400095 134.406692724353 115.072622367144 130.925881698601  
127.83967243279 149.933919274985 123.833219705499 137.288653308858  
125.908576249439 115.235444833856 128.528510920423 135.185283076286  
128.651081092914  
LOC400099 116.268259618103 128.485150698799 134.314636524922  
117.513523498725 115.299986138153 124.093412630817 130.57903858574  
122.347696497767 123.327238774943 123.368137868951 96.0426636429757  
120.110473925082  
LOC400120 174.593548891693 148.727953739127 191.170105307944  
169.948277715908 152.760855359297 171.376976179465 139.271829906127  
147.772490977392 156.445294524594 151.965103021638 192.767155566493  
145.349023185855  
LOC400129 136.585541662028 131.796941315992 131.406366653787  
116.889373249017 127.044367488881 132.340183565771 129.977863589097  
127.720117789235 120.106270603148 141.021723049782 129.069366041625  
131.027605835275

LOC400145 168.547575047205 165.048922660581 161.451253146578  
165.767629164724 161.26917182967 169.656238760589 153.453969224725  
149.788558681761 146.018097597373 154.969503835593 158.738932073809  
175.79375235478  
LOC400163 133.839554874862 131.114995025516 133.459221120979  
127.430408113725 134.045938361221 131.608580511282 130.374065525934  
130.642810886161 119.931415360373 126.391083453973 122.921245774755  
132.045595972712  
LOC400174 160.395053149199 158.364031234356 156.843997723699  
133.15144076432 134.024205981268 134.616051224668 155.572357799741  
165.919497521143 152.382558543399 149.068713925139 127.161975533812  
138.274057264688  
LOC400197 168.37850726499 161.115842628581 178.928873342925  
166.570606752678 137.773960847088 176.77183598995 170.169402943662  
166.635366968851 161.849023343715 179.15284184774 162.047249964859  
163.495175710216  
LOC400214 152.853860043701 134.096283448464 140.533704857854  
136.779180530712 172.276968413879 138.97443063851 149.09398454596  
153.792925101459 156.650388509656 155.683727621475 159.636846021745  
177.60876237572  
LOC400221 131.572485018063 135.931715324468 161.139253742858  
129.375772737722 136.131453703981 126.214166842097 128.9481574913  
150.056508971921 139.541759919059 146.443892388756 139.904952662852  
143.733505359106  
LOC400236 138.831297375659 150.71435300188 142.737537206204  
149.524040913256 155.55288776049 135.554736716321 132.285835971705  
150.552186000149 143.090886224647 147.289061374598 141.5739152922  
154.728941096647  
LOC400298 161.837272617767 149.196539425588 158.953705937936  
177.204172894028 163.039564280484 168.27980269501 181.088268167074  
168.365262340217 162.06940121135 167.011846920792 129.568951363607  
159.89988762842  
LOC400299 143.063345350253 136.986022901377 140.60741459333  
134.178733595096 124.842426851438 156.126009063311 154.548286860883  
137.725329029129 142.00857631537 139.757191608836 126.421148348261  
137.495288670441  
LOC400301 133.052615777603 153.661632990172 143.884263862698  
139.175421159925 163.262893278578 136.617105945904 143.188958538221  
140.840895590527 136.627904756283 149.073650082048 153.929167381674  
147.405050592353  
LOC400304 396.459213999636 263.936023499588 312.601510033941  
295.187978994932 163.647306551474 235.350819745387 264.628012152168  
231.890885094917 205.52620827767 243.283375388645 185.374745525698  
258.605188272761  
LOC400347 122.226875707253 131.062360037777 116.718099363329  
128.26423663004 130.779805222363 126.531502877517 119.375727296235  
129.121598974852 126.418295908353 140.599584289987 149.369418844044  
119.502758763438  
LOC400352 119.845508281414 121.04331582508 119.539713878832  
123.839006667113 119.263824982583 125.256339476772 132.348603553752  
124.989313193779 117.976107125982 121.51208055933 138.514356748249  
135.127041919869  
LOC400388 140.146894533044 155.143752422033 161.26201213997  
137.75060150486 143.884263862698 146.370084152094 146.303959493672

151.349739492368 156.825157746082 156.923675862035 164.223990197735  
145.641373616866  
LOC400389 141.253030949701 150.989202517615 136.625136565562  
131.49577981738 137.876234091056 150.580133889656 131.907246423067  
127.924195488323 134.257928609741 127.905616521853 140.051904905695  
132.340183565771  
LOC400403 135.940629737073 134.819406064011 145.806935833967  
143.144153021901 154.615097099186 144.019824700027 143.06806126472  
139.400521576978 145.648810303756 145.237221169839 142.747793303346  
138.972789382679  
LOC400406 147.983937675946 157.180095329946 119.391213033544  
139.936661244361 198.456392063513 165.576758218571 152.689610196981  
144.12472003202 152.224281847792 139.232893342069 123.442970398288  
204.415267938007  
LOC400419 132.53122878527 133.085476994246 127.690860707933  
133.67719550997 154.679076303046 137.42213762011 137.599810249536  
120.413468119484 133.876636039037 131.816989019024 129.221482161409  
136.508969220268  
LOC400446 1706.06615968622 1963.23068846837 1751.22580157752  
1689.00127592755 472.279492678374 1707.09830463606 1004.6207350158  
1200.94425675913 1178.83933381069 947.425912541091 1643.08061372695  
1184.3199328099  
LOC400455 817.913210743023 768.67030514096 1276.14915305515  
737.193295872614 1492.15137418791 1016.18143428327 1801.74467005923  
1411.2586496281 1801.74467005923 1334.69145271749 913.22732386079  
1971.42527720714  
LOC400456 145.272073426254 153.899573902499 147.734708927825  
158.23562423217 143.423661752881 152.504620068655 150.831554010122  
152.397984799517 143.259468398603 154.821960325589 138.345393524161  
149.408530395745  
LOC400464 247.015574724901 209.258707976348 255.273375146278  
199.854728619468 136.328447182666 134.711144967036 136.84488044614  
138.224383646894 146.900087470856 144.501995579502 132.125545886181  
143.874735808114  
LOC400499 142.652939807341 135.596007994731 135.188445928844  
138.570150372729 126.084319215509 125.649525720177 125.964335876018  
145.766684470184 135.825931047185 131.473001455317 140.341589053972  
137.858371717399  
LOC400506 143.744075931566 145.360466216324 119.767154020462  
139.558611792069 240.005943851098 226.506852362359 290.688850193983  
309.36704220687 235.742017851879 228.499052416183 203.791916347213  
275.584858082096  
LOC400509 138.743505629497 130.626965797365 138.049846456876  
146.249951130016 137.894482933806 150.354401669138 131.865164933746  
141.858928084825 141.281116867082 128.131324375789 109.156349683299  
143.598567970841  
LOC400553 138.521952850632 132.7284396337 140.45860949168  
136.934313990609 135.68481384332 125.217733034761 140.746062850603  
137.698423468762 133.277326912499 141.920967855989 129.226815062589  
154.520935683104  
LOC400558 141.997165490755 151.635752404534 143.550908565401  
147.26204590693 240.224826736571 180.923089242255 557.868300839263  
565.313436777992 323.276514394119 165.781667492391 466.4890990178  
242.188218870393

LOC400578 145.952759497544 166.209190082084 155.191446350891  
143.837402372008 185.950131245699 4088.12910138929 175.96841318924  
170.825161347825 182.958991847218 18665.5217411582 508.735412486964  
157.643461899964

LOC400581 134.901659808633 134.86940314824 130.378441113977  
145.311964807443 146.04584032214 140.713537140957 152.849810441802  
131.739418639854 151.10837100314 125.894755032594 132.960708384399  
131.092140169861

LOC400590 145.26329339067 139.621016978072 159.413535577361  
180.468984099647 149.865644080359 143.216903218928 159.660564323984  
152.933230159216 144.064214573005 168.783725505491 128.583503171594  
158.384505840662

LOC400652 176.236140830355 190.625250757654 174.832495287192  
198.135240691225 167.92409473064 233.884660128222 321.568127272161  
198.549047189499 196.889520085412 278.385151185788 311.612118247493  
210.64483507528

LOC400657 225.423403713718 210.822216545773 217.264041781337  
199.250680260804 137.748443205818 144.930066324767 160.251996476232  
209.684346388892 183.247396324425 160.945886507456 189.092674335503  
187.824032557194

LOC400682 140.397184813186 137.144001915831 143.533725135227  
147.821639002833 143.601057437842 151.783090997855 147.278236958386  
139.450788315602 143.217978435486 139.108656684059 146.238333981318  
150.560305000601

LOC400696 129.257947818865 143.831294912255 131.943014970855  
140.10798818623 143.368327095618 132.943957535655 126.237900397603  
122.412141495264 124.324855155055 134.337249560706 141.609037401299  
128.705587172572

LOC400707 144.757068610657 173.169905329013 185.275787562938  
163.919426088318 149.042693712098 162.54567071663 149.182972268104  
145.315875226867 161.73079180403 150.542478166361 152.741229289112  
170.320777845496

LOC400708 155.550532734718 168.358323243918 161.217964573491  
161.079169854907 159.957371011316 159.563866056798 161.769370009823  
155.15575204653 136.612287212568 142.799260836457 157.787233338636  
160.72009357092

LOC400713 318.348505551265 264.604297630839 317.719381113816  
247.407442038488 197.554105926359 255.945470052489 225.546125484563  
222.764568757453 247.72190598581 188.36361073603 263.888891822857  
270.462865174106

LOC400721 26375.3000727296 26719.5528617739 25295.5071561111  
24098.0251582624 10329.1999331936 26719.5528617739 15851.5830405813  
23053.5660790052 21956.7541751958 14417.2696849334 19496.8914296296  
19434.8698477145

LOC400723 139.835983835267 116.465213348716 134.051756243089  
120.37619371663 110.475453268997 124.469415593643 153.354921961854  
117.199217938531 121.672811608791 129.95138839192 127.975441922402  
158.000456937922

LOC400743 108.715328458556 129.599661790972 134.676039394438  
129.754376995879 123.108694517244 151.744902566627 136.970505971671  
143.071933285651 129.077660633761 145.323212897142 149.551030995489  
121.103620738719

LOC400750 170.079723856247 160.43939815269 150.244284323504  
153.694557276814 168.21856603538 158.950169226637 157.316941011117

155.150904036206 158.670835881902 152.026310884327 184.278213908263  
159.090982014161  
LOC400752 170.007845523415 151.598423878653 144.433543176593  
157.378317015602 152.818046945164 158.536178747273 159.438084699061  
157.83121828793 158.316173597874 149.089067389266 144.73389393695  
143.506243892155  
LOC400759 191.58185405868 160.964435028806 171.51411661213  
166.681646517413 150.899664887945 154.679076303046 184.365354978005  
183.779065928447 228.001046173405 203.370353613423 219.0221768576  
174.727439318223  
LOC400768 144.777043589925 148.65131922365 154.912576362196  
129.946925636595 156.098240321674 142.487424651482 135.670409501435  
144.355348009294 144.574566623882 146.97203173446 123.7615105541  
162.857083430123  
LOC400793 131.961236721149 128.155080148958 142.249715102513  
145.882793872634 146.261164125255 145.887262601586 163.778790431064  
141.069243738242 134.772545694636 153.371065247493 127.030113960477  
134.350054065624  
LOC400796 126.967212770393 133.360017767635 132.493888285566  
142.027930009598 125.558877611499 135.494894933583 113.816165294487  
140.217243202557 130.914932329297 137.58025011566 131.265594391542  
149.647926859169  
LOC400804 142.329137800558 142.960875909369 138.341918073941  
143.202498941866 133.161552914595 140.873210629865 139.146387811999  
135.267015629083 132.110906510601 136.411722212312 147.045944019838  
140.929424764561  
LOC400807 156.330571337475 158.425950902309 176.128369308989  
160.939530665541 147.875855077738 160.75642485037 175.974598536074  
176.088449983147 160.589575894314 154.552605305297 156.173099025259  
182.57496767012  
LOC400831 146.278921849776 153.128027266281 171.759102794108  
151.524197474057 154.096542063701 130.98982984989 179.996590340102  
153.703682621695 170.129558603697 156.254944793402 154.086510608016  
162.117224868654  
LOC400836 227.715558644326 198.356420768703 194.475822533231  
206.303338709554 171.410912120195 181.3859695951 182.248178961707  
205.742386129597 186.625452120269 194.36669779004 182.248178961707  
195.724873069362  
LOC400858 171.689722533849 171.298701141684 182.248178961707  
182.907444581093 174.898012759712 199.70041209487 157.041481397151  
180.408639020724 158.76356962428 147.562757301251 148.320310040998  
167.756465178715  
LOC400879 143.492758492895 143.066552389513 153.295838391099  
159.68134949161 214.639374741553 215.272800347166 314.646369385896  
155.790759250672 231.572677616684 184.844915350411 143.744075931566  
279.000687630846  
LOC400890 398.61164689194 357.972320648217 391.326200093611  
426.364663722264 345.494740481759 386.85874184746 407.615019710707  
333.592915218163 491.290438575428 480.36420271348 305.854543429221  
356.154842959851  
LOC400891 166.780319723055 140.955772094739 167.776363541939  
159.735182155088 134.748177388398 138.016275878607 146.099555861577  
144.499680685194 130.435589649362 151.59613008133 122.312652834289  
136.760382409185

LOC400927 140.714455864886 156.737219981981 135.25612528874  
160.640160107693 151.470844748137 151.243948028303 155.211976328553  
159.420533375725 150.321059418799 133.731500722599 130.35985690876  
154.725484895098  
LOC400942 139.157088843803 116.615250922316 131.324822348301  
122.619429537799 117.611606270124 126.506749037908 136.879615833565  
122.68719599986 132.161764435769 128.78647242525 119.890260409414  
143.177915754998  
LOC400948 2645.72125268628 2789.67986601883 2630.78185410861  
3173.14004739767 2730.50913686613 3391.3005983725 4397.32311216672  
4166.43837922103 3215.41238464601 3413.39994653641 3235.38149926838  
4417.98524179686  
LOC400950 127.993841618875 126.462522391125 118.220555783444  
133.301527400458 153.494456800685 148.067562465748 130.506708993193  
137.462720784077 136.269445455239 141.127519700052 136.826606228323  
136.342634691443  
LOC400954 141.090356426567 122.426568507144 121.860428893248  
132.811368246405 137.415158613413 135.82038791723 128.793186785667  
129.946925636595 126.722212054469 136.188868917386 125.528638246486  
137.009303458922  
LOC400955 155.388752614336 145.314204192565 144.951973735763  
128.591292689996 146.557058433232 130.262411213764 132.580937663749  
143.598567970841 139.617608585463 148.577336081778 152.54039461337  
150.746423638097  
LOC400958 162.716712951629 150.468392290279 149.091925032548  
152.89366585726 160.604195264968 158.312614511836 163.69172577831  
176.995049477843 133.181855719499 148.663860923774 167.212960569538  
178.563665283267  
LOC400963 11509.9289491201 12577.0915543468 11190.1778174002  
13013.8166277495 26719.5528617739 17749.5685495445 22035.2646000952  
17917.7303120499 18220.6383250956 17496.0674176329 26906.6343314539  
21225.306360484  
LOC400965 174.006516433854 153.488903967311 146.880440100898  
167.559703634539 142.324077852852 166.981212790122 163.661196423902  
141.907307422968 150.144977373708 148.911306526869 150.227629690236  
166.760758231104  
LOC400968 133.912614097412 140.077307351596 153.801971958265  
147.088665779406 151.442463705271 133.768419410758 140.471953101887  
131.99470265134 144.513730107393 124.028748209411 157.971293294367  
134.299575239865  
LOC400986 412.202049714695 422.338508598153 325.252108402192  
345.977609212137 148.353927712013 177.257355909681 160.598186999524  
178.464811133 189.419941381565 195.160353691349 224.851680313689  
176.300743660299  
LOC400987 122.372558045688 145.847629576886 134.700543462375  
133.951322753098 131.674409480919 129.797601100832 135.938590242744  
124.652072110334 132.416618775337 136.504438803108 121.619593453259  
137.550607284001  
LOC401002 147.362120584524 156.385100395531 171.121834829333  
156.942156078314 151.360575274272 141.168198348093 143.475725571943  
141.954467306745 152.73588666971 137.249505738539 137.788504385206  
151.885992695789  
LOC401007 133.320865155329 142.000874773182 140.115154069602  
131.700854556022 132.203310946961 142.261639670072 136.718598487513

134.17351030102 129.961042190085 121.255814891176 132.885515958081  
129.065491477375  
LOC401010 162.337707154123 142.175432631861 140.641308444844  
138.21083121895 223.389795643722 164.665907233149 146.488402397597  
158.788210937339 154.420795931034 146.402352419692 187.920789153124  
157.759149893048  
LOC401019 16230.8346205808 16077.1585881362 14300.8562978211  
17211.1455384358 25295.5071561111 16397.4527321924 19189.4835303597  
18146.8167991873 15561.8923517816 18720.0460735814 12877.2152068971  
15745.699731183  
LOC401052 179.191401472241 192.532222258033 174.284268998257  
240.971675534641 177.60876237572 152.877058628512 158.216790540415  
189.482046688226 173.408784502027 146.814457904682 187.425086057782  
192.493439659184  
LOC401056 165.232545721733 152.719997757291 146.136044805856  
147.539226876636 154.124057382276 162.342112922504 137.107621189522  
143.212739422069 153.02549014611 143.245660951425 165.2045030333  
146.54504551183  
LOC401068 142.34956863109 145.776143302784 132.686915065196  
156.731291756066 140.434086004204 133.075748695526 136.506347083926  
125.470172259885 156.678686363755 167.741556663724 124.106971897779  
144.916193282062  
LOC401072 156.875068435974 134.70636200986 131.551085224112  
119.072213573568 127.900901613784 132.764150075465 137.540275229889  
130.209752198964 133.137299889323 130.074786642758 146.701489210289  
145.932170561687  
LOC401074 164.935120145905 162.047249964859 169.355185349431  
141.972403120632 343.666488527549 140.349431258812 174.177944561595  
190.66473033826 321.25076864104 801.702878226247 234.531140131763  
200.831877950718  
LOC401076 783.059427015955 743.915675090182 681.810927901806  
741.689442253375 538.484170364629 710.76653239801 611.088604425595  
686.445635754196 557.405157178952 899.667912542118 1540.71556891815  
616.995114856023  
LOC401087 147.135640862542 136.71278398686 123.467227007155  
140.416247564103 134.447878635716 134.149446827982 120.669452856028  
144.122748003206 139.633941983246 129.058085094891 130.770335966929  
136.264815594226  
LOC401093 524.973621024573 368.466518140043 385.317560758502  
437.344765185802 126.800718471804 140.117644705946 131.938898032483  
136.08040874432 135.020690381988 154.296467085914 117.969576809288  
159.701028026285  
LOC401097 134.333679772065 146.411873503163 145.464640276742  
148.797226586765 152.832573288735 150.109192774079 152.488480322526  
164.092847913322 134.719531559829 159.835577644136 138.993251266382  
140.160349667726  
LOC401098 6560.30885074315 7699.37963536892 5734.76405709934  
6281.01687932005 748.161769171818 5207.37974585707 2313.56743052616  
4238.41681589316 2611.61260614408 1883.74008471233 5022.15374558514  
2578.85391480563  
LOC401101 130.037840598918 141.559676443695 143.973464003036  
146.637799077812 128.637470206958 145.625205055601 141.968949222821  
132.8310947234 147.364301916733 140.236618351922 131.907246423067  
139.868714816245



LOC401115 491.906642849373 542.883453307 239.503369457867  
362.252813848151 6990.13809515289 3810.98043907046 3046.47354587949  
3495.66977000028 3164.55070502403 3093.38255333143 845.646455991008  
4118.58682247781

LOC401127 150.939877261936 155.049051256459 156.702300398105  
143.229240978574 274.427235605909 162.547569833931 160.469645948225  
179.704370382771 171.954184094677 214.785381549181 195.384273821324  
167.212960569538

LOC401131 135.814893730549 143.555987405898 155.223806761489  
139.005788243703 137.823152565933 138.021559586328 135.32730674455  
138.852212944492 133.927844489731 127.218362452043 130.224324464992  
142.133238886052

LOC401137 133.026094667212 141.348548071751 142.671190279415  
132.721469335671 140.307931763353 132.930042559647 140.723419465922  
130.570050159191 133.556805738801 139.807421433384 132.895500657638  
147.614293127043

LOC401152 1858.12855367119 1564.8868894162 1551.90775589919  
1639.76556136383 221.272872023413 542.379137999196 479.638653311025  
495.56459361431 782.139151423572 578.947889414387 797.28465621772  
457.650982600462

LOC401164 139.155456340488 140.767270136561 153.589626253969  
136.282608531191 156.020996568814 142.510745106328 154.420795931034  
130.878694881324 146.090291252325 154.232310911696 135.29954024755  
149.736837985314

LOC401180 143.324235640446 142.38097037888 152.340010735322  
147.478097898608 147.939682463235 148.188717941032 154.133723492173  
150.144977373708 156.88782735706 145.660417208595 145.122171099946  
138.807031587657

LOC401206 22750.0246358215 20099.9833491654 23656.0669757593  
19889.8233042542 15420.9668207676 18220.6383250956 22354.1731362334  
22354.1731362334 20381.3859535625 17568.5229948989 20048.679735668  
26010.7684336005

LOC401218 199.756584044664 192.680681636018 181.062188174871  
212.073472189229 318.06081614151 228.086256222312 226.506852362359  
188.431244390961 175.38376293575 203.357914242777 171.916201289104  
202.253560413436

LOC401220 151.369387642458 154.827746791634 172.764511709731  
145.892876412762 139.989830921287 146.162330544539 147.635761512135  
142.592455241752 130.406895174038 152.980843102933 152.808771946509  
142.376921410427

LOC401222 124.422548323449 124.49814598066 129.822926691091  
133.827296071709 128.992837936606 129.24482916531 129.547309629132  
145.574725784632 123.069963218224 127.979574243743 107.103635692135  
125.410876867635

LOC401233 143.242308032336 148.120968141789 132.081286801266  
147.614293127043 137.53234136613 131.825172822888 182.529167529936  
136.519697160267 186.231346659144 154.695060071104 179.49202902995  
131.017355402204

LOC401237 149.526189446292 159.074001164836 191.525291860022  
159.466972602203 151.734683227196 166.272237117441 164.172084711099  
140.226586111216 163.170983091116 147.414834563852 155.386226046894  
165.597236278435

LOC401238 164.914114315732 203.510106134882 171.967974673053  
171.314681729657 200.387623661458 243.589099648895 200.902123076244

223.013753785002 194.529045934216 210.900056977861 199.477350542491  
269.261595558589  
LOC401242 149.091925032548 141.890803125137 163.570018900148  
153.916313595581 153.947717667689 139.938739652347 168.801737310947  
161.825134481279 147.734708927825 162.364266549463 153.541193559658  
148.74881415573  
LOC401252 146.934990457666 170.08485436731 146.018097597373  
133.043503979161 135.3969732106 137.742393475755 141.905641114703  
151.369387642458 144.262612328341 137.706893763747 149.348231806916  
149.675363177375  
LOC401268 149.250205265163 141.985130140173 139.236217474885  
129.179188863839 160.159630699959 145.051794777243 136.225792549383  
129.368045611894 144.985280401441 147.865114383296 160.322541355391  
141.412317125776  
LOC401280 153.305679563467 174.991941844263 179.863096463897  
196.189101941489 171.014432075829 155.268650584431 165.009696356892  
145.810213943313 151.826103919919 160.240052678401 168.697565122105  
145.520832968878  
LOC401284 118.773864607553 104.406314027414 115.321501844663  
134.924082270115 122.94937342991 135.186880148352 116.369395555451  
117.270320709161 121.468398802591 116.106772298898 133.104560685558  
120.402155551818  
LOC401286 138.885230982475 133.280418227922 146.986891588172  
143.180247878507 132.899305777714 146.768631086088 133.332052638448  
129.85040048805 136.406132339187 135.436040515445 140.226586111216  
143.548858367002  
LOC401296 156.737219981981 145.675032688915 145.158039427157  
137.079479050963 144.02847768185 136.598215718877 147.966224814966  
145.161116298118 132.106673891288 128.112595697836 145.401101974736  
133.777238071968  
LOC401305 149.348231806916 141.552315273863 144.411176964424  
148.582022536314 146.606442726047 147.192815700248 147.325222091872  
155.3016514732 137.286331849749 141.777089987975 124.142882936234  
147.202510900548  
LOC401317 247.942904862478 179.687464522203 165.992542962911  
154.670631900834 156.304678960663 148.975112606364 154.627270742193  
132.033116673897 146.488402397597 162.802392115386 132.553445658347  
142.498280938736  
LOC401321 207.993943398697 217.202541167691 200.506615977654  
205.852731236069 199.854728619468 190.76537287329 228.086256222312  
197.543089645432 191.795952536469 175.485672103348 295.678097392123  
240.75934760601  
LOC401351 136.362761829761 125.371128588617 149.320667417893  
147.221425204534 133.079097536801 139.2454524913 135.131890100292  
122.651702760414 128.287127680554 140.457727109762 124.405905157157  
136.716554749722  
LOC401354 144.772914483212 127.644315207178 135.10155936286  
141.905641114703 144.836902182737 145.411264691728 143.393174544776  
126.553693803748 139.870306695324 155.756074127526 119.159078990339  
159.781313090489  
LOC401357 188.767121505943 175.551853899221 228.649073045499  
195.595275594235 232.414763435965 237.420951138877 305.854543429221  
240.663883443935 252.548942594125 277.561376169965 226.871028543248  
258.036064876416

LOC401358 162.876684781936 153.95615286919 139.363571392476  
152.705458417973 151.895142552067 162.223175359454 151.802632803321  
161.979914539039 165.67554738735 173.071892362758 136.749771286979  
145.478233255862  
LOC401387 133.5823740616 143.305848051593 132.926799887017  
151.201263631883 142.350637118038 135.188445928844 120.672291867109  
146.994103804515 126.788749235867 142.171459019791 115.76177719261  
161.475694690038  
LOC401397 652.654673756838 688.247581763352 1162.09529660662  
506.430593289427 1251.15912264225 826.08372791138 1540.71556891815  
1569.13457493554 1329.90419210779 1430.20038077595 952.724512915813  
3304.82581034038  
LOC401398 148.309872393 146.652641667543 174.42996813062  
157.717145014769 182.786177632757 173.240598306749 158.089922688997  
158.545435407585 143.50323531501 143.920134762902 159.154102271517  
159.513465644268  
LOC401399 138.394923932916 150.387906232396 196.136080427522  
160.441879289883 148.339086707343 176.440625367948 156.151075965844  
163.672213020803 162.122250419992 155.896065329825 150.557982810339  
138.720489866687  
LOC401410 117.089207321783 117.561878567749 114.042914237667  
116.850851308701 119.673343767067 119.862037840843 125.176747824384  
113.051381310122 112.578934972566 111.078930787656 124.720004905439  
114.561836290349  
LOC401431 152.426527124644 153.426409060413 148.497497694754  
184.569063297206 146.311966562883 124.071341868552 202.01798254763  
168.144811084102 157.016659994185 151.106858426994 135.125414452178  
156.78124246844  
LOC401433 143.013801508709 147.526701500887 133.728378162206  
140.460927375243 140.74208906156 139.038389244329 153.804419092743  
131.045970236632 144.520435611318 138.049846456876 161.694109087893  
146.999370190363  
LOC401442 127.003974141317 143.356999170877 150.203281104753  
136.13751015238 159.085639414089 142.77817647952 156.516250236679  
137.17370871536 151.092066533546 146.153528461264 154.227433553131  
145.051794777243  
LOC401447 145.015434711984 146.782830477983 146.261164125255  
143.101750222256 164.057147728625 150.985061659285 142.175432631861  
146.616041788595 140.615078497305 162.743192424569 143.047617455953  
142.171459019791  
LOC401463 142.95001632948 149.390481900424 140.238423894192  
137.337681987169 146.084461430546 154.985781979984 136.267313223808  
138.810236692956 150.070213543579 140.010730572075 146.464937541891  
137.435736170779  
LOC401480 151.893573927407 160.664407431261 137.128849888863  
140.191264837331 130.552857965694 144.313841064968 165.066555355918  
144.825231501747 150.763810844645 162.689415085423 168.618667871117  
152.088488171996  
LOC401497 163.858222964048 155.61996871093 165.30072618497  
150.904618960507 157.180095329946 163.534117903837 168.248982292489  
155.23922239449 168.854819201403 153.869144282319 156.907788377794  
147.314687795555  
LOC401498 147.272072245929 139.470557140547 153.332110179758  
139.021552573529 141.743873995642 150.412929574507 128.21042408204

139.617608585463 144.720594512581 152.667721542507 144.808774137749  
142.211357324461  
LOC401507 141.119491147925 155.303903514061 145.239119337981  
132.851791525098 140.341589053972 186.961638857905 160.319687451789  
147.666724626127 139.792313018728 145.584615439295 137.507093872109  
147.325222091872  
LOC401525 135.259226552938 144.930066324767 139.350622585937  
140.531789506024 209.279164243868 181.088268167074 145.695402948337  
148.853877151493 137.443463471483 151.679534447228 163.275138097131  
171.086559024882  
LOC401533 145.44629057846 130.352674121108 135.17827963343  
138.093181144173 146.462544135666 124.413136084728 131.919387743094  
143.326739481448 148.188717941032 143.129945647647 145.852430082228  
133.152523054305  
LOC401537 1547.16936835284 1677.93424842267 1978.95750795951  
1736.03342040646 3287.37172778474 3029.07443443457 4671.10203385528  
2009.21931102311 2670.9151276786 3359.62015747752 3441.9805896226  
4491.96934862425  
LOC401561 155.326276840738 150.109192774079 149.975892236985  
144.68114486527 136.664500207966 146.541890150631 146.979988781462  
136.069631519097 142.097126256137 149.502132524093 162.762473039474  
151.397068235685  
LOC401588 125.569364049349 137.77601089414 156.361037318986  
130.329453160478 128.280225530201 159.487615985875 133.672964925321  
131.335344547051 140.943732564849 130.036744891822 135.241029533819  
143.107570838895  
LOC401589 145.498372398845 142.316441155937 144.834448238435  
137.973211667003 140.557871626905 128.165775629664 142.853399942089  
133.120273569229 143.31117188259 135.241029533819 137.996291911198  
135.148723192316  
LOC401602 141.50968031684 128.72727523654 147.049287475127  
140.047749881567 126.48691003872 137.790718305537 152.95612120767  
132.622032754473 134.140533647509 152.331011756244 136.133538781918  
130.63390061855  
LOC401620 156.290018816692 175.744275464701 164.935120145905  
163.988099963018 135.825931047185 164.880911221767 149.73250641246  
154.250656489421 157.341422939225 137.996291911198 150.321059418799  
146.132506246152  
LOC401622 257.032174266905 292.468585109951 247.373571011712  
287.558897878375 170.505553609318 173.70035122661 249.554443204445  
241.077618798955 197.277310409328 210.043556816529 203.125568980238  
238.270501389189  
LOC401623 161.466192326759 173.773876769683 158.48793705795  
146.877475544399 127.895989232696 125.786371150778 165.627852733455  
175.010849510711 149.420396673799 139.109712542702 168.729301938015  
160.136209944279  
LOC401629 146.31980311926 160.773510498005 151.334463063946  
172.916234073981 136.300195727908 151.470844748137 143.324235640446  
170.202597821861 171.473538842796 160.27511502306 149.277880094957  
169.713585775118  
LOC401630 146.624631389743 163.558869203898 139.108656684059  
157.016659994185 152.72717701452 155.612543356905 156.385100395531  
137.002473710189 150.508080332477 172.077522197357 153.257097727888  
154.101698334466

LOC401640 270.33685210971 300.709410518382 290.389345090634  
267.028096234702 325.12056698785 184.862871179765 303.005912224195  
218.615551704188 219.318938396989 511.25179427158 686.679573646733  
214.933911087009  
LOC401648 146.121258547443 136.760382409185 150.439715066903  
154.574826922632 139.582054825147 147.505345299689 139.350622585937  
144.216394153095 135.075759558051 143.10996074311 146.698766621345  
139.023486014525  
LOC401650 146.753212022975 152.353494489233 133.571962238112  
135.461112284848 153.95615286919 143.488761023636 163.014903707857  
136.749771286979 133.239703270008 154.127346849182 160.136209944279  
174.347451984066  
LOC401676 362.95684683529 395.786295710815 353.285905782951  
371.552970811499 333.970844203158 330.193132765826 862.132582849511  
393.013539328766 360.756455184184 382.744523022686 643.13571432061  
464.907454552364  
LOC401677 150.056508971921 140.264060906597 136.465185148237  
140.682757521394 145.161116298118 126.580227722115 169.656238760589  
148.386249316173 127.289269745461 168.000247148058 178.531913384538  
148.709795687391  
LOC401703 162.208028489943 162.244691888031 161.870389635266  
133.970510683179 160.113042196058 158.558471586662 175.679405338399  
153.176268095608 158.36796888959 149.41564356447 148.688413944868  
141.925012927873  
LOC401717 172.403953571339 169.752525994991 178.745112514526  
160.27511502306 127.159947766922 145.503718833974 223.339132121796  
150.860090477342 143.543607779991 214.595639477696 225.169110687004  
197.02284475852  
LOC401720 161.581641777014 151.831627236638 154.569432344392  
167.806420483187 170.87247413028 303.608918161742 128.346598756853  
164.509354377985 155.162310001164 128.155080148958 147.138814313885  
167.408314067262  
LOC401730 130.543453631154 124.102216523803 127.918847837351  
125.999595008166 129.43892498257 120.270397272069 131.670601860412  
123.632031112507 129.029151164978 127.369456504277 128.523703756493  
136.028011201077  
LOC401778 170.516743115762 161.241165533091 177.223953859764  
195.438353051306 162.802392115386 182.410688592378 172.091884817207  
168.71216652064 167.219062918573 156.304678960663 138.395943168158  
180.590215659031  
LOC401805 135.349868925415 148.332750352364 138.936872956065  
144.023798119335 136.70715656782 135.839123867443 140.768926302035  
138.478911439144 134.512204051277 143.652009342522 139.752845127584  
138.299629744589  
LOC401817 166.592366578462 152.612116997575 142.942021904533  
165.476670465739 160.53152291979 161.922462797736 157.739526559807  
136.970505971671 138.514356748249 139.892371997205 179.44023315251  
148.520371748891  
LOC401845 137.463764193883 150.542478166361 145.010108826238  
153.39738748803 163.876218743322 164.652795899742 149.927773276383  
371.280926727395 357.584458526365 238.724909152512 144.510062568989  
183.568426758223  
LOC401847 173.364586678954 149.394952856085 147.064543281269  
141.054587977578 180.164353124488 159.977528879208 160.050872656883

149.303427221111 149.526189446292 207.545424360094 167.268645224361  
146.890877830248  
LOC401860 151.895142552067 155.23152084421 141.151211120032  
145.872258115708 150.802312408483 148.776470607859 138.361149460093  
159.534017722536 149.364498870469 148.750284842503 143.681220324074  
147.389892239448  
LOC401875 129.992015202357 138.709991561675 130.99288239869  
135.395071593072 146.014790698087 133.504078347324 140.38936578649  
133.845056524142 130.163574198827 135.449044827893 121.225996958339  
143.318291243905  
LOC401876 146.743260100643 129.754376995879 147.243263182654  
133.79868477192 140.151530793459 138.864844664017 130.863753083296  
146.249951130016 155.150904036206 138.777120638896 116.5272207025  
140.092648878007  
LOC401895 132.155877196474 128.14606899743 148.452947427498  
161.115842628581 150.874703255468 149.117224130576 138.515211541879  
130.020743385543 137.584340154725 136.643481414354 151.358775426916  
129.529372508883  
LOC401911 152.344248425416 150.904618960507 134.349043119219  
130.758707848676 141.019494314354 137.395895014456 134.084602409011  
145.919359461744 127.447218258785 126.585679159459 138.915185051749  
133.299599411025  
LOC401913 127.361974492821 135.704067249674 124.464941711781  
128.26957712082 119.9414421871 115.137475087954 124.365185583133  
122.682761393215 111.962852412774 116.52455193626 139.532508621268  
113.154880173167  
LOC401914 159.487615985875 142.032814623366 123.269635151963  
147.8838487685 153.041407358576 140.946008063839 133.215151497536  
135.168792286819 140.692586715322 131.111930163369 147.243263182654  
138.041411135053  
LOC401915 130.601241656346 147.768191157163 131.17119492692  
130.571827557149 129.925548182204 149.193437559422 136.198583459346  
140.548371692813 129.469949305913 135.971507823633 123.636735627104  
124.924794564647  
LOC401923 131.454955038299 128.734694496357 156.698856643638  
131.374680878107 150.142724640067 133.550008967009 136.532168520039  
146.731584143625 134.391386851101 129.722382881611 141.114148695402  
155.810034593382  
LOC401934 150.962828147611 147.568851471771 161.417207801991  
143.464614171516 164.008063563113 148.967232828819 149.722442994599  
149.956759038516 160.486513643798 142.011019998327 149.795655754301  
148.503282415207  
LOC401957 130.022574966461 127.287538993899 125.522498880785  
135.127041919869 129.415078042622 129.898242234869 134.541606996118  
132.20887307183 123.706910388724 133.352279794853 128.69455713173  
135.548042190047  
LOC401980 117.008277388399 136.216577685046 128.536721595589  
131.823019555685 133.082433951922 139.564898998489 130.909388246758  
131.876061826583 134.00481287258 142.444072809204 123.285059856341  
146.550421651378  
LOC402057 8211.38792799248 8016.1652884418 8812.91092406563  
7167.29945083872 10579.8650348916 8514.94395408164 10533.5868398404  
7371.9761952537 10280.5093368677 10202.2226913537 6691.04319670055  
9715.20127757161

LOC402066 141.436235043864 146.664285015996 148.42845062376  
159.98636352484 156.551925771312 148.391885541349 148.497497694754  
148.297939240474 139.128751917566 180.923089242255 157.688982037448  
143.421288665418  
LOC402096 146.595540577994 140.74208906156 165.82215325714  
122.953869661977 149.615585907229 136.008118769513 124.616629956864  
138.652077417473 132.755256423863 132.458764637407 125.899200544217  
141.558927907067  
LOC402100 128.236840746655 145.487783396345 129.491732597331  
150.831554010122 133.278923716119 136.508969220268 148.067562465748  
141.350135458015 131.946938297748 140.955018249974 121.588054040961  
140.543382412084  
LOC402110 153.056369304663 157.192320902906 128.314990390649  
151.110467345727 145.543942469821 145.276745572405 129.728266017061  
149.516743790585 150.396462763607 125.126100642395 155.933739693912  
147.117286738537  
LOC402112 724.442411170786 767.054576874115 1063.5903770389  
511.25179427158 578.650614747598 1283.68791110988 1848.27927621606  
2112.84348677276 1480.52638217173 1214.77298621465 1357.48791782399  
1899.94714976387  
LOC402116 151.024201732633 150.792065744902 153.51550202829  
145.072924262206 163.586549438955 144.86583288717 134.451423371791  
132.069175779393 139.746733428525 140.829927714838 178.904696191996  
142.798248249144  
LOC402117 140.197487078987 136.297963196301 153.453969224725  
152.101695555105 148.396148091332 143.454771158075 150.371716899336  
140.079516848788 158.163599942547 129.867246424399 126.659859384257  
151.239879652761  
LOC402145 138.106499370074 134.109051944736 144.152325539824  
142.169951083733 138.97776257708 139.086498524774 141.67277923437  
138.391203321266 139.980504765791 147.325222091872 133.482237631013  
141.772724512502  
LOC402160 128.777337552038 116.884397420467 141.204458186976  
134.897958140444 130.160236228857 128.812729239283 143.860092956392  
133.054453517834 116.369395555451 124.566313603935 146.016920431468  
137.063689600869  
LOC402175 2149.13404212591 2112.84348677276 3447.19587767281  
2176.59445919725 3938.94050658589 3909.47437917608 3338.13980198211  
3954.24763752814 5094.53287522452 3833.73632806344 2698.5455305009  
3515.36256599555  
LOC402176 135.058525398122 143.30977386038 134.325520377207  
141.047709861055 128.060612106762 147.673016541108 157.881569297409  
187.586093248437 149.250205265163 152.074017988748 174.26780796802  
155.442929492988  
LOC402198 143.985850833974 134.646131480502 138.386391726042  
140.571143847885 130.562422910426 149.369418844044 145.003900788534  
131.704192327287 134.181819177347 132.471759931885 117.575009754326  
152.879041561846  
LOC402199 139.750281709938 128.29486937905 147.18858211611  
138.753419730571 135.455283504668 162.961792330623 129.256138453675  
126.606163970149 125.754741914111 123.902047880095 140.522470775478  
136.016912147651  
LOC402207 138.279775054156 132.596941171401 135.463385553776  
123.96665768708 136.19481894871 126.259029676691 126.349403754775

130.735223763219 130.832462487806 144.265352127763 125.308318672456  
128.050677475339  
LOC402217 145.049387327924 141.202092246048 144.54895913821  
141.934351226006 136.949403128211 133.792673129743 139.587192809431  
147.195127201893 137.159781458748 138.85328409337 154.854538639035  
148.742216703684  
LOC402221 806.290662664708 751.269009484639 1278.30505902957  
1030.97051104597 625.544719251096 353.98839683842 637.457322054293  
355.80042210486 463.622673539254 1191.88706134921 629.707646271678  
555.109005518622  
LOC402232 154.256214901103 151.729232835588 139.469148541078  
159.806221777332 150.308048500142 146.351622020606 151.519845657755  
139.155456340488 161.8627732644 135.27739087376 149.664506761117  
148.732027660387  
LOC402251 6720.10473881011 6188.04738762584 10608.0671430066  
3798.89743803968 2486.24762158293 8182.20106181946 13217.7001749493  
8030.19731415448 6500.1854485891 9970.08052783908 14348.4009261372  
10417.5218406801  
LOC402269 153.448882783807 170.465177938235 147.584176709986  
145.389721946046 143.05872558805 138.367321366804 148.883263903527  
142.922549076496 151.123104810793 143.587562550004 148.18197556044  
148.47415004128  
LOC402279 132.913891550054 121.739219824085 150.000851192531  
135.375268329248 137.473779155388 141.446916444258 138.807031587657  
140.814009587096 131.373012256275 142.14654303591 134.69274746407  
133.621325902558  
LOC402282 145.136075215082 162.033909093358 154.030432279825  
156.418750858179 163.968901692945 162.397078614596 153.613110881454  
149.915251958706 146.543467822738 151.76341973891 153.041407358576  
165.066555355918  
LOC402342 169.656238760589 172.478461106269 164.545596179262  
168.415345783635 160.19942770666 158.023626712181 223.666832044186  
169.556358586336 166.868688936939 180.408639020724 227.236255752375  
156.176537862398  
LOC402360 126.470239371932 130.57903858574 132.269567096683  
124.503016568677 128.179293878252 126.241307445165 124.33863635868  
136.764881711137 106.953841653951 145.349023185855 126.589865262427  
125.486324819682  
LOC402377 135.659271030454 135.416008633632 144.405191855684  
156.594337089784 131.798931481549 153.734347607222 140.864196804152  
126.686404772601 150.319052894567 179.880812358974 149.968749911496  
130.714375454354  
LOC402382 145.724294862079 140.608266389167 143.48729871068  
160.811051590991 141.74792000689 136.022614387461 145.063062479224  
137.065315360321 153.630125822178 138.4303531022 136.085524091635  
139.246945739764  
LOC402457 140.574129695953 154.701413581915 155.63671938031  
149.228977421003 131.356437247149 142.945392802281 178.179238056905  
151.273261581765 153.67215573765 132.69067627743 149.026243159195  
153.108902978819  
LOC402483 133.408354896584 131.342562516383 138.252656818036  
150.79785758452 133.511698282195 132.686915065196 161.393953325115  
136.231747456996 148.616543842015 142.081013617671 139.22776505842  
127.816596414779



LOC402508 136.047032834863 132.738450029766 139.214589768245  
144.200389127129 153.996429870564 149.645548888832 147.2233876988  
144.65238608866 141.248526020456 156.46322298175 135.188445928844  
143.222342904886  
LOC402509 177.780479906048 181.215046876308 190.939726271153  
221.594737497504 214.241635800083 176.328994356625 141.204458186976  
164.816672737691 154.250656489421 159.0794075765 154.728941096647  
161.997058981786  
LOC402538 135.018710687313 150.263578317272 155.143752422033  
144.479410859199 131.615462296871 161.948033313443 141.74792000689  
147.562757301251 143.100436913184 147.187681416171 138.523677181131  
162.57736365619  
LOC402560 406.998800177456 333.91440669951 385.678901612324  
297.071121022183 131.308384127079 142.30928744202 134.996443685544  
141.683298500736 144.951973735763 144.370811043456 110.875112640101  
140.820807603291  
LOC402562 139.706279455371 140.429462488271 153.350690419636  
153.289258540668 148.797226586765 157.5032461329 165.665796569389  
155.6299578128 144.190203286506 151.266352916239 152.945550129539  
131.437847958077  
LOC402569 157.776321544382 129.527271401014 154.871166693561  
146.639556437847 142.971972776388 142.842130077535 136.386031133644  
135.857403020659 161.419873271162 149.552704503066 130.497405221273  
139.793683692104  
LOC402571 145.906601611338 151.130401750721 156.981921830638  
150.837717923505 149.138678142327 149.272219727411 146.882746173951  
140.754706171596 161.956032597813 173.017662861015 154.768422926874  
155.438218501542  
LOC402617 165.885072907195 159.765585531442 156.010027635627  
176.371404525626 155.494095135266 145.980929136129 147.736397115265  
157.186747372076 157.643461899964 150.899664887945 136.864106181375  
169.488652117125  
LOC402634 153.554159360954 139.55065372881 157.358696886078  
148.663860923774 162.457778455279 146.824420102008 152.030182228463  
145.289151849318 134.374551571013 157.844617425219 135.886859004208  
136.059884933876  
LOC402635 142.75592155869 121.805145639822 144.266864839344  
150.985061659285 166.46473789699 119.859508630454 137.360220389719  
133.155925118245 134.397255719047 124.119104345119 131.941069239017  
133.103403333542  
LOC402641 142.240333104987 144.711860727092 150.557982810339  
151.81754291846 150.807308519367 152.719997757291 154.336009472285  
154.713713332354 129.256138453675 157.298181833321 145.219057535246  
133.271506838359  
LOC402643 138.232757706984 146.817659734182 137.938310376106  
137.244552699212 113.163651806803 142.316441155937 125.393848851951  
129.46430369977 135.745821200254 117.575009754326 125.765399556488  
140.947852529815  
LOC402644 818.225731093346 729.202002368627 1146.3535752748  
521.714719320355 814.759191652981 1491.05501052706 2112.84348677276  
2168.58813300343 1996.65760745757 3968.38723079061 4299.06288109563  
4527.53010866974  
LOC402665 143.145483889918 138.537763477627 128.08497128067  
151.325068155715 137.435736170779 142.646570636529 115.80245224388

134.307336063739 131.202090507576 135.057847490193 136.643481414354  
125.553615182238  
LOC402670 170.158189150422 145.700589723224 140.708683675555  
138.317443162096 156.330571337475 144.73389393695 148.130993521745  
148.673763368264 153.320911882529 149.760883745928 138.506569544482  
148.553324405123  
LOC402677 173.372949622338 175.647878042257 164.284396793834  
160.090914414578 177.379186278216 179.753400474369 213.891435492914  
172.421637564661 163.82704877497 182.77693508164 220.816812192169  
181.566951620202  
LOC402679 138.825961991209 143.363002903815 143.891725249061  
142.342811880173 141.753560518393 139.117776552573 142.663334893424  
146.119700458464 136.760382409185 164.008063563113 130.744788360182  
147.043228493047  
LOC402693 174.045229095003 176.995049477843 155.233830396052  
170.079723856247 161.960392594363 150.529257416176 173.424541543058  
154.037622223246 159.961729971624 161.956032597813 141.623851511993  
170.701964358516  
LOC402694 4663.03253705034 4743.19967685595 5094.53287522452  
4214.83058308503 10048.4260790604 4110.76546218806 7771.28016059011  
4251.82554412383 5655.12135336698 6059.74270502037 6670.51138785163  
5702.11995823367  
LOC402715 160.090914414578 157.659824861915 149.110300099889  
144.520435611318 155.198503964295 142.467552395104 124.342911165267  
140.096717188376 141.38749436393 142.119327380686 135.971507823633  
140.689631427359  
LOC402716 148.522580898717 146.434716985396 111.596690019694  
146.67875644027 131.623527073985 128.533900744619 125.272796155561  
112.340161674529 126.619475852751 130.646956516128 140.541925660368  
140.746062850603  
LOC404266 176.650953513413 186.951061159734 163.534117903837  
194.186994486095 171.545695383454 183.100286716683 172.491604217899  
175.744275464701 185.627515956848 181.566951620202 155.194521954405  
186.021181691517  
LOC407835 259.796092536601 292.839392578318 225.890195278753  
322.153713097778 484.230510636533 286.945784387294 321.696082249696  
284.438411011954 261.322374889497 295.893482074241 323.95355217044  
279.921244070981  
LOC415056 126.528589411462 122.917915232153 150.352308475398  
137.208796872026 143.58555556787 139.263602290256 116.335864439545  
128.176779923348 123.104790590045 140.531789506024 138.613373798613  
125.576103876855  
LOC439914 138.230197299262 133.277326912499 136.823008283157  
150.587882657674 143.447768653042 142.276853170778 151.625248091441  
140.299459596491 129.637555509848 163.170983091116 151.755205401737  
148.906498938982  
LOC439936 143.920134762902 117.552229262461 137.50266393001  
135.588132669957 126.838094473932 133.288181734813 132.011199659803  
129.945543636232 134.316859658338 139.851678406637 107.580425848009  
144.065554025603  
LOC439945 141.840253068921 149.41357273704 154.395261192114  
137.373457956206 146.508628678304 150.778292242313 140.245786278057  
136.111569529393 158.854659281803 128.917399281607 139.717662557602  
156.964080041261

LOC439949 148.358847576281 137.672798701643 164.757907224537  
141.221162787167 141.76964678852 137.76307316083 152.890239929335  
145.056914913573 170.320777845496 131.351303131574 150.667001746475  
206.113290588613  
LOC439950 139.06923394504 143.086872363116 163.045605069267  
145.291984088491 147.036768856136 142.822594215168 148.143367490426  
155.702330867056 140.49969612403 156.875068435974 173.726420791056  
155.801832826848  
LOC439951 145.437544062449 138.052032298683 153.857048476879  
153.263883774915 145.180346905484 155.011931456736 148.520371748891  
159.074001164836 140.930897231705 143.867013358737 135.101123645638  
151.527357661273  
LOC439953 4377.59943975549 4711.21389812942 5032.66681917478  
4088.12910138929 6059.74270502037 7342.79622458743 7406.86318549013  
8617.2437024568 8473.21873478131 10661.2216586049 7948.88765120294  
12457.6956682374  
LOC439957 164.295628750438 140.083495854322 131.528729642144  
148.007068300762 161.849023343715 149.557833322995 156.638070437044  
146.222195387635 162.223175359454 134.270043564053 134.084602409011  
139.350622585937  
LOC439965 160.374491283254 152.232245164212 152.081492474691  
146.434716985396 160.315029612814 132.709845352383 153.821728151219  
143.834501071806 165.274189050141 155.42165869714 154.267020640428  
144.216394153095  
LOC439985 116.112013454335 109.625579596864 118.336654504789  
117.015097017246 119.594962686756 110.256771079797 123.072413274454  
123.24533179875 116.168270198375 113.557349524174 116.294180301039  
109.924867620862  
LOC439992 160.791355483048 137.767900781368 162.762473039474  
143.451080466172 151.086688327023 202.041958613989 189.419941381565  
155.400191634632 140.949367846425 149.331805754859 143.517327774456  
166.735962853075  
LOC439994 143.961467163406 140.453219944445 159.59942312149  
156.301214161102 162.735609734946 141.733840643889 126.611663427876  
119.131613164405 141.296574431203 145.889336010424 149.380733719756  
135.47852126603  
LOC440005 139.515794685984 138.802633518223 142.397433929092  
132.784949538167 145.44629057846 146.577524520274 157.368974632451  
143.122278808091 141.964796033176 147.191114491117 145.204870282027  
144.396774242135  
LOC440013 145.965900441953 137.534079082878 140.682757521394  
143.497909064641 140.52059487958 137.002473710189 148.717545103261  
139.075537402658 133.322752419739 138.988919994625 140.327799236005  
135.931715324468  
LOC440014 160.478519202775 147.532747354296 131.210866639392  
142.903851392611 142.556535259086 129.419280058541 146.675159409376  
145.505223177269 122.696382705233 144.961976523279 164.377227860031  
125.645986634914  
LOC440015 120.283706459738 129.969400693456 135.715745768179  
132.20764558027 127.462293158337 124.964977322158 128.813848160586  
136.965376129304 124.441699369614 133.209211811498 148.158062155247  
142.518266591748  
LOC440027 18287.6015702456 19434.8698477145 16397.4527321924  
15561.8923517816 25558.9005130606 18562.671630167 21225.306360484

27667.4034204988 22182.4877079778 17009.4268910772 14228.7550296952  
21409.4415798676  
LOC440030 141.008604646743 124.998601194756 136.969124414576  
127.959474148217 197.526492324088 145.954700424725 165.154844613899  
218.470365730283 207.400490077106 332.296938254329 180.641419603362  
243.861834405092  
LOC440031 164.332073056902 132.04032925495 153.07993334035  
138.348160604288 139.220877923507 134.918496279185 142.108805047729  
143.373932371335 145.26329339067 143.550908565401 136.995866452787  
129.916677638819  
LOC440040 144.013615296685 139.606654715326 140.012295249756  
151.356975600962 140.160349667726 143.038248313305 145.304050333309  
143.652009342522 139.415650308396 132.365002835934 144.454141873387  
143.658600740177  
LOC440041 123.748788684337 129.476648077532 126.0944894315  
124.157302365291 125.658396221949 129.522339467532 135.583556015955  
122.89752183991 131.142841840284 118.749046585251 124.955676894776  
125.154784284706  
LOC440043 3630.80752744347 3793.02341602102 3122.71790981947  
3408.6535437109 4141.8682669995 2307.82327595071 5455.91604383389  
2493.5484556802 3721.86725798812 5226.05969701201 9139.73212514992  
5233.72882607795  
LOC440053 119.551741097918 126.81140158672 116.91470505098  
116.91470505098 114.428050500096 111.041656398985 112.282839763467  
116.814269969508 107.156457065853 110.382724813928 123.977467396003  
122.607404698857  
LOC440055 3378.126661761 3277.24948092771 4800.99572384569  
2608.95227456417 2014.48411650613 2189.53914329263 6059.74270502037  
3930.2841381915 3829.87905458534 6105.64727031051 6203.08085790474  
6944.90824302953  
LOC440059 134.109051944736 140.539606951892 145.843639385175  
144.555718186987 153.821728151219 143.284230032303 137.901317305531  
151.110467345727 143.094799968981 149.374282007673 136.463867598256  
149.791777262424  
LOC440061 123.632031112507 123.237851647499 125.712260481294  
129.205783382977 114.556542069712 124.183297351614 144.568417378353  
135.2979041294 120.094156375538 124.731056918418 129.871985352583  
127.800634041606  
LOC440063 1708.87666406131 1563.71477584676 2068.04582900231  
947.766127685083 2005.76678571689 2910.00269086567 4875.22637286719  
5589.21471380445 3655.63669142687 7631.6124232898 8211.38792799248  
10661.2216586049  
LOC440067 135.348086420636 131.7646616214 148.825790628891  
141.193081790037 158.92538634742 131.77642590781 149.157934946623  
134.30854633824 142.086300138469 198.90533452253 139.108656684059  
125.979152567959  
LOC440080 147.815673580657 154.267020640428 145.902572804249  
147.777050372032 146.373162751863 153.251468534012 145.514859606031  
149.833346575446 139.986119754908 145.880661952783 147.728018766726  
145.556318940043  
LOC440082 138.26050964606 139.890519860289 163.778790431064  
131.013719535992 136.058527150792 135.472135601859 142.311108110185  
136.72715888684 137.009303458922 133.085476994246 147.648020819059  
127.152744243038

LOC440092 156.47237266917 133.699547652179 137.902953501634  
120.80221197797 141.65642171417 155.759861336991 125.121517583946  
142.964043764953 137.299908075811 141.571389983164 176.019082929386  
143.383697128285  
LOC440093 523.073926509865 494.538861626895 564.948126039762  
427.345809255426 672.348723983535 1654.58270183167 1403.09138858507  
1272.14273680177 1507.39761667421 2782.94647782764 587.654093308465  
2337.64145466514  
LOC440104 141.299677389827 116.540729581355 128.351235762192  
118.820154030256 127.193553054979 139.609751976657 142.470799054068  
134.333679772065 136.492892469272 116.369395555451 119.984301761327  
136.743659350798  
LOC440105 122.519746599387 132.814476434365 134.319316977485  
135.114900669781 127.04953162892 133.845056524142 140.806935772116  
131.514114515895 132.028327486943 130.555405606993 128.714459781294  
122.592960588642  
LOC440122 122.428943658306 134.111348656261 131.521311288114  
130.854818615966 141.275667354541 127.305306470493 122.799487123057  
124.684937344502 128.257292171015 128.663320241092 139.851678406637  
129.025000034273  
LOC440125 118.312891459156 119.598216955485 113.222264855561  
125.624661345169 121.224389883994 123.671944323239 121.441901286752  
122.547842148486 113.05681175258 125.008209861774 132.623563631011  
130.617505834747  
LOC440131 150.513804134588 156.562197068687 146.854523122404  
162.488819873513 172.057586741925 161.988082494464 138.538656638714  
153.996429870564 154.916023131856 155.728609337723 159.455596750304  
154.483828924645  
LOC440132 179.100368312505 130.018928906449 144.065554025603  
146.9069812014 135.259226552938 143.760519659724 127.802645313091  
133.303201646987 150.247639459773 133.642815510945 141.853711139375  
133.663595328149  
LOC440145 165.803549113373 167.941671074236 172.612152484322  
160.192540519103 214.888126361789 259.643957326575 228.588693548447  
197.427788552936 207.718619151226 236.617896560938 182.397795261147  
264.983729290122  
LOC440157 710.999354960979 790.321331435096 592.284071247642  
620.163512570453 378.308562999445 796.052115217208 996.999238316991  
441.873247266342 560.602047253306 609.504365141529 451.496617003797  
1377.75266942574  
LOC440160 175.663960113118 184.638141004171 180.315825600347  
168.443386067427 356.413190087706 347.73629731446 415.011847890313  
169.31618330657 274.70018535436 292.802762636861 144.555718186987  
437.248311551717  
LOC440180 130.559515534303 129.449242018727 137.539385624206  
140.756898474665 138.480633738745 144.084441938143 137.926193455157  
128.407968177242 135.736764623155 144.273011517032 133.836390935612  
132.140547119679  
LOC440181 130.429076594441 128.893208935783 118.743966166637  
134.301187092088 122.982686879394 127.084267631845 126.995207465164  
140.058153633802 142.945392802281 122.786030993629 127.548070199148  
137.872306812365  
LOC440225 142.780100181736 138.383990396414 142.866874321248  
155.660302399877 148.478570934155 138.469997677004 138.651419539729

146.612602970963 145.051794777243 146.548348470748 143.336538157639  
144.227440632196  
LOC440226 152.101695555105 140.146894533044 151.641486303453  
153.276938815536 140.43729728368 139.725987763226 161.543072816738  
151.431513447721 139.636177212128 144.182891591399 176.5588805282  
154.166668493152  
LOC440233 121.572462089942 124.958287100852 115.713909155043  
122.992700222262 115.420810993676 124.927989289122 118.186426364551  
139.416388461892 124.422548323449 114.960460615926 116.465213348716  
126.396385337235  
LOC440243 129.775280076365 133.443807124822 130.317604643904  
130.886164807755 122.385508330707 140.781647532361 146.328876892698  
138.365589511693 129.329521415816 131.212705319485 118.446703299916  
143.351341716363  
LOC440248 133.65688823581 136.271412363498 146.748572532267  
136.879615833565 134.134810805413 143.434571922656 133.264245969185  
133.849237689264 130.297203474319 150.576660798865 138.97776257708  
134.504873813959  
LOC440258 159.549936351002 140.44966014021 171.706534562905  
146.174492025087 163.319882002763 138.289361041588 157.374537572779  
167.373416675264 154.500326135559 176.66175597182 157.306022722324  
165.565284723155  
LOC440261 140.03443832328 140.418010366997 138.377628971966  
138.393565473857 147.422656909557 140.941447663862 135.766466392056  
145.120347147471 139.648187461906 140.779962389412 130.12638520846  
142.129680127408  
LOC440268 156.481871341275 190.238332933452 177.679330300381  
163.69172577831 166.22013573342 157.736101691222 161.237544868191  
166.881869360523 163.463191619941 149.557833322995 150.45404183949  
173.986750195954  
LOC440277 119.755151432304 120.967523586161 128.525769531728  
137.500310477851 132.464205461991 138.156430188312 139.537865511933  
149.211214631561 148.342114514468 133.88072491369 152.952479729682  
139.276102596591  
LOC440280 246.355720496468 207.718619151226 268.224669588188  
195.929328710358 214.546528079149 377.27961559752 389.800620731411  
292.23287968517 287.287337931982 236.855293143293 247.746304138866  
286.431013744652  
LOC440287 119.131613164405 131.516100334597 141.914966520049  
132.148166773943 137.697452180659 125.855451679929 123.383334044683  
127.898533598679 130.12638520846 136.294479720968 148.294870328642  
134.71514094826  
LOC440291 160.713790305656 157.316941011117 166.611809859059  
168.974155750959 167.55209828062 157.595468761042 175.51767355303  
161.434331154045 168.668125438154 162.914301705151 147.1476865809  
169.496129800444  
LOC440292 146.992289167283 141.54943189147 146.097201498811  
151.78607484924 153.152921890232 143.683545371898 143.692305478191  
123.646558103253 145.992883153161 157.77398996415 145.830916005206  
147.558603709566  
LOC440295 125.5109819304 132.161764435769 121.468398802591  
116.082361389405 124.145492642453 117.034228068173 121.774697402171  
126.690066353698 115.896463925125 134.737901773547 127.760995691556  
120.822923434486

LOC440296 120.767950825369 112.502812746669 118.764650384561  
116.280157890082 122.773736159743 124.796876920269 113.292688210897  
124.844481048039 120.01190102634 121.736056336879 107.605526304445  
116.91470505098  
LOC440297 141.592180897595 149.915251958706 138.649502040582  
137.734887788912 152.635792342068 140.384577697416 142.633121727277  
137.369033684705 130.334622987505 114.585818507336 129.461160777216  
152.587331888423  
LOC440302 132.085538520551 131.578042179715 147.040759979063  
126.925982415892 123.285059856341 119.903068083658 126.268418132  
119.627380812035 122.786030993629 132.684346604809 112.993452506946  
135.386650538345  
LOC440309 148.031899566208 146.240060512152 138.250288796456  
143.672118850295 140.485102148597 146.274284557421 138.82269002406  
148.326282600684 144.937697857147 149.17815859943 136.659134200122  
129.848276446896  
LOC440311 448.106077184152 477.160464512705 525.789451405743  
371.693808540758 331.62124160152 207.850956786183 379.387095129725  
223.389795643722 237.734385188542 235.291035302211 287.084253886676  
298.519371102278  
LOC440313 139.358218798638 158.226547375305 141.733840643889  
141.33919297402 156.022967076728 147.958483355783 154.127346849182  
134.849235750248 132.076865522593 139.306122448857 150.613624696604  
146.047948193303  
LOC440320 139.46518859956 130.080728694308 122.136861827049  
126.921925660996 132.533234335153 139.39112068213 130.211247943634  
128.341887728118 126.848211027661 131.449370465834 126.528589411462  
129.984214994811  
LOC440330 162.702767346393 163.991378703958 162.531630234824  
159.48526814715 142.876069462608 164.769320792025 152.857278986877  
168.838723365068 176.465559710285 169.598493862848 166.830529779692  
169.482586449402  
LOC440334 129.640303191006 135.705904966172 142.774449777424  
133.9382467268 155.056545639862 141.125248464806 140.086978441723  
138.993251266382 154.542190113901 146.57274511202 121.696353230886  
123.591078216224  
LOC440335 148.045391886623 161.430219824313 145.36249226764  
146.321713521846 887.147199303294 302.570932942847 565.509446660206  
322.443089373063 297.419034136005 185.876046259727 499.964000319181  
671.821418586421  
LOC440337 140.593510265137 150.854580568572 148.247826830556  
134.00481287258 139.311816781874 146.31980311926 147.640100078933  
137.234384760487 138.573829193205 137.590823177379 158.455783755247  
144.389328224541  
LOC440338 138.613373798613 126.265475477399 138.412897151567  
139.856251508283 119.920097823022 125.519298131694 149.666293193219  
129.722382881611 127.715766031466 126.127630885864 102.024765473404  
136.587165242663  
LOC440341 775.781735108886 575.857954264295 947.425912541091  
555.109005518622 499.048754087189 576.997804865103 648.38049615541  
756.390518977556 593.639955546556 593.821622986351 601.401329244185  
679.822276398569  
LOC440345 470.42403724799 398.272713014637 486.197269936713  
297.921617748468 163.203582580217 328.680312364877 205.036081947168

253.164596735793 212.730163981978 232.879578820053 187.112176929485  
206.376365685112  
LOC440348 936.221322010828 893.676600121113 1072.37500318471  
890.507257588957 365.541609015117 784.72162514331 615.058712877418  
1085.92360670051 777.410297605252 485.026081242201 958.63560158343  
705.529158880221  
LOC440349 193.609985124825 183.406510146725 284.638865013916  
177.415756020166 150.45404183949 240.971675534641 205.886398618369  
191.179662650057 183.604011732066 209.051768656607 158.023626712181  
191.093283411655  
LOC440350 162.188509438986 147.959740692766 214.100698312272  
151.989476683722 127.727311123825 182.984076352185 153.011923016494  
128.973904070983 146.077082896858 163.51024840263 176.145076825955  
184.111756696658  
LOC440352 173.38031514498 152.643087608513 177.457362387052  
182.235490620172 162.37762946664 147.169765031208 139.110658402501  
175.019580368717 162.47662918768 164.641508485461 143.137158027738  
150.99622088333  
LOC440353 5582.64254130978 4190.38366101529 5846.17594234628  
4548.5418978622 1515.38811502277 5981.08862268291 4073.21075791737  
5655.12135336698 5175.17279574945 2779.89882032092 4938.42484385053  
4022.23000497332  
LOC440354 202.483493595704 191.093283411655 242.188218870393  
188.093450717857 245.522497675754 443.623904480087 239.277801396834  
294.410833087913 229.26243866226 269.345125874858 251.268669431283  
273.044064077  
LOC440356 135.446072698039 132.50676380992 150.576660798865  
155.218336968191 151.9565369062 150.053948736789 147.526701500887  
148.797226586765 154.150568177135 138.963864375073 130.01207836961  
134.449083873514  
LOC440359 983.777608766079 809.729160605727 1399.41653736746  
739.874432767734 530.561387049511 690.903797251841 897.0125616892  
641.338900241674 607.126514742951 1830.56003081769 753.389428590366  
765.532997390972  
LOC440361 164.011683602245 149.331805754859 149.25705328406  
155.069048442532 168.906637816046 161.212598761378 143.956726538569  
167.594414386475 157.36568754472 149.366554238043 145.726651022813  
159.771672778698  
LOC440366 163.495175710216 170.251197850968 161.720405760536  
164.048326497989 136.598215718877 175.176693060261 154.808798024399  
177.592497020798 183.50553222647 163.400576719974 198.411812737082  
191.38608906576  
LOC440368 122.447154928139 141.512008928271 122.503984297406  
130.937742379689 126.180714796187 119.218909479403 124.142882936234  
138.600017737884 144.233097828078 134.344021502031 147.199961777192  
157.858267778665  
LOC440386 139.805930686563 130.628967781841 134.474466007553  
131.436176224725 145.471090720048 129.547309629132 140.898380345452  
125.682297697017 131.692626563078 130.40517506216 136.843164021899  
137.450774903611  
LOC440389 152.532083511961 177.343586047942 150.860090477342  
187.607426452073 161.035985824654 166.622070620588 152.56002779985  
144.601370216162 162.668896609848 154.555255038453 155.121309543738  
155.168592130392



LOC440396 157.058912028958 145.444483891989 142.566028652989  
142.187694439611 138.269955723817 160.186527465164 154.820187615267  
165.389652763451 156.642441706727 146.261164125255 173.132747018514  
159.854639082837  
LOC440402 126.862274244977 150.0674092434 147.946236579299  
130.807596523171 147.357032438442 142.920939571001 137.534079082878  
149.495077381649 134.768694020981 135.57577294564 136.935498266723  
132.28931085483  
LOC440407 164.901810642726 162.982557003317 151.104891644466  
153.488903967311 171.731395791818 145.962664629275 145.002309193867  
158.249743182741 154.876638004094 159.14477373952 141.094578556895  
167.315702949236  
LOC440414 131.832311911703 130.609596267168 124.901759819007  
139.648187461906 150.956247643013 140.930897231705 148.007068300762  
130.720097323382 129.135985676046 141.36525744062 132.714532888989  
145.882793872634  
LOC440419 118.673325109944 119.403831071089 116.983869766097  
138.426531345939 134.932416370825 128.118223792086 118.533346268154  
126.33556674738 137.096785940897 132.8310947234 128.910261453632  
135.997144927956  
LOC440421 129.485710719291 141.180647782041 132.855812035005  
137.584340154725 128.087991226561 145.802944788548 139.042034301544  
137.848546040474 134.599629045981 177.910104644497 139.85010721496  
164.587657424569  
LOC440422 142.047828639169 131.977212025523 154.229914729772  
147.343712869579 133.970510683179 143.388028226208 142.002145315543  
131.2834389999 137.650917262528 171.238423077347 118.047978285706  
143.143002997516  
LOC440434 117.104945989023 129.228874611916 133.34207595093  
134.140533647509 146.84403879162 146.629335531037 138.428527640896  
150.981208776163 142.914863449833 150.075738752092 140.466612569756  
151.973681370675  
LOC440438 152.382558543399 161.877378749103 143.837402372008  
151.188412354358 151.367402326399 164.890716656336 151.470844748137  
143.941358917251 154.236652966294 140.431591727649 161.430219824313  
151.488973553441  
LOC440456 143.739231124536 148.838294770082 152.47429737104  
156.61494867164 147.500009766324 148.003041725027 157.692519370734  
142.902838068479 154.808798024399 166.746037983859 138.911993471119  
158.704425428694  
LOC440459 135.185283076286 132.363645381743 125.974463216884  
126.332299789266 134.224781719944 134.850260739685 147.813170436139  
126.670227417269 134.314636524922 126.737230874367 147.669708191955  
133.788197693571  
LOC440461 131.700854556022 122.727385599754 136.578058206829  
132.850601603567 122.046901607713 144.688515462537 135.607537832704  
137.336914480226 138.521952850632 127.04953162892 124.336297973344  
137.731390340708  
LOC440487 215.194909819764 195.981555981238 206.428618912264  
170.129558603697 221.359331823286 190.238332933452 320.467139255533  
227.483999162038 205.260673843294 207.298994298453 270.679613997675  
260.715580924916  
LOC440491 156.077604146143 159.106269972346 167.106870400592  
148.888698484378 143.377902352319 165.659978250378 172.980441569522

137.229871801676 146.595540577994 161.543072816738 140.506191791073  
152.840202260007  
LOC440498 186.6902304653 187.167255451988 216.705908017858  
199.170488640762 190.625250757654 243.10297424873 283.874600697211  
218.298791348295 271.945851739635 272.571092944711 270.12941437975  
250.577945492981  
LOC440503 143.151478156897 146.235832275574 132.8310947234  
153.443397882028 140.487887891414 144.068734533254 137.95243466771  
174.313718712035 157.70581824787 141.152406037213 141.904041228678  
141.693224578298  
LOC440508 160.880152014981 172.544504923991 173.532300173223  
166.925695810781 161.155280539113 160.247370279802 159.918778562802  
155.608876496443 122.053867525393 152.662446724781 161.316521450944  
156.611727364072  
LOC440509 158.377396672742 161.592528958127 160.234704406302  
155.694213876736 153.097557560333 138.603793282123 160.861929142249  
150.235026770931 119.755151432304 155.272264997151 133.801549026691  
153.191840013692  
LOC440518 162.649092834422 143.582187466814 149.856041300199  
151.606932937644 154.512619892977 170.394088019518 152.371569700039  
149.464962540085 139.799467834109 154.281674854552 157.378317015602  
151.312853764675  
LOC440525 160.290104492275 146.927825526831 149.217191121377  
146.019622621809 177.780479906048 141.115539663314 189.403934838648  
193.245087824217 163.69172577831 162.457778455279 159.696443182844  
181.865456674829  
LOC440550 133.420267697961 129.930888107958 139.687574432387  
143.528208105237 132.367155914392 131.447941902406 129.21974206851  
122.804934452095 118.173752075833 120.065876525792 131.025725443485  
122.20752192519  
LOC440551 137.132095345234 138.796257513868 122.891946370542  
126.678746008577 126.88066987372 130.467450968785 125.785388817819  
127.211469322857 124.69564501518 122.5651974076 131.7585591467  
123.671944323239  
LOC440558 113.572326615571 113.924310293916 121.926377140115  
106.285472845323 123.198873421356 119.48998115497 124.295334523889  
107.802792435066 119.263824982583 116.615250922316 114.002925521932  
117.824694297846  
LOC440563 154.548286860883 156.873097743717 160.315029612814  
145.128919984856 162.620593985693 168.210416363286 162.919656039331  
164.39557148282 152.528571776589 151.451443480833 189.770558810153  
176.138621462315  
LOC440570 120.039031290299 131.930814868433 120.308260557986  
120.456817031716 124.632373951797 114.412739085949 111.217595631623  
122.921245774755 122.068058346443 113.791585365477 127.088916295784  
125.308318672456  
LOC440575 16925.9167115963 19087.9532735841 14454.6736124756  
18287.6015702456 11647.9643290124 12749.804597566 15053.7547401937  
10579.8650348916 11971.1664283024 11809.4804843301 13853.9715872573  
17658.0552091534  
LOC440577 144.181359740481 148.275939659102 159.253029632045  
159.838626443912 138.909419415137 143.905680376268 136.311902195562  
140.171749368266 142.846100831941 149.44520146627 151.421099926743  
139.557059245431

LOC440585 139.291775075915 218.487334022128 160.67285689491  
136.466367853188 196.117609477292 717.886050056576 450.327710374141  
918.742625270041 232.046814892685 383.626469817252 298.519371102278  
341.361299896997

LOC440589 12690.801964606 13276.1713779481 13563.1694195379  
11777.9172529698 24731.0629964468 20510.096303537 27844.5606756791  
20989.6494028551 18760.3823237058 26719.5528617739 15990.893941344  
22750.0246358215

LOC440595 9759.87403504619 9560.32907282993 13526.3170858629  
8633.71708020651 3062.22499714914 9251.21629832018 13479.8546809758  
8596.90650022148 9044.54885739666 11874.9808592281 10417.5218406801  
13758.4768543075

LOC440607 128.662039886682 136.370317464946 161.704966315183  
131.806645427543 139.241145027974 142.879705723262 135.518752716008  
129.752997624387 140.708683675555 146.151639797173 124.086902599543  
132.409582164007

LOC440687 133.079767347356 116.825172441325 131.672014089487  
119.285026330891 147.666724626127 136.952914053358 126.05295868521  
119.562180492359 126.009358591395 121.159593382017 117.227635924674  
133.056659202188

LOC440704 3655.63669142687 3618.9385126441 2544.58522979036  
2782.94647782764 792.247301083075 3115.11499025766 1871.91894530722  
2703.76111776248 2523.91287654539 1466.82170436229 3495.66977000028  
1787.32566525551

LOC440706 137.240806191881 133.839554874862 128.901707304582  
155.011931456736 133.576812299149 151.256546638599 147.172440755724  
140.000880942015 138.30326146769 138.807031587657 130.63390061855  
139.974586762939

LOC440731 180.994249258457 180.902950045351 146.318052064937  
203.675655444583 217.264041781337 206.620708230452 284.748764120614  
354.45785837703 366.408565514304 349.65350886897 161.506431005203  
280.595515386655

LOC440733 14499.7866852901 16974.4822983201 13944.7649147227  
16077.1585881362 29532.7890259497 17211.1455384358 20510.096303537  
16925.9167115963 14499.7866852901 17917.7303120499 27028.8951412615  
16077.1585881362

LOC440737 3822.05744774919 3570.21370790206 3721.86725798812  
3140.51157972795 7717.01422791837 4159.96851384358 4055.40322213638  
3833.73632806344 4373.91897463938 7681.48027081818 7082.28969354712  
3321.1350545346

LOC440742 131.907246423067 140.171749368266 141.70123350351  
146.395248696835 142.031106637522 146.608010450782 144.750407738866  
137.027334042585 147.725396196054 144.032779435658 143.567488854011  
136.02474314035

LOC440748 141.380276932556 136.133538781918 144.931901042924  
148.190696520521 151.216992571364 128.751758311249 139.162076054072  
133.841519663164 148.680794815584 134.275773172492 133.939847853073  
143.752697178913

LOC440776 194.36669779004 208.666760987764 255.866847225916  
231.287362732197 164.816672737691 272.571092944711 270.12941437975  
246.616749748028 214.52087460757 229.373686092654 256.424415389574  
231.670761847089

LOC440786 151.327544435847 144.505072819693 137.049677918041  
134.02083946631 151.276193269421 143.211127738941 145.591320521493

161.510497517852 137.445344116574 143.567488854011 136.946137446743  
154.876638004094  
LOC440792 136.871568211946 146.805832438977 142.285486339143  
160.92643755328 142.788848338402 141.357668647617 143.118188813831  
128.375390373307 145.095023408224 153.126111237668 121.145342937085  
133.479513335694  
LOC440795 135.904163043783 122.759905480504 119.498312996987  
139.397282021664 125.371128588617 139.010652831798 128.912199634685  
142.406904585501 133.364838901186 134.516390697561 129.223872979789  
140.960907353937  
LOC440804 140.341589053972 142.421913396368 138.720489866687  
146.823157886228 132.402255281009 135.904163043783 146.336371857755  
129.788395150404 134.863223806176 140.563079852037 162.411156818437  
127.090219286772  
LOC440820 160.6823824476 142.896723827753 151.488973553441  
134.777979170126 139.573371281569 154.501338425995 144.477267427347  
150.193479279784 147.022594294963 143.631345956176 148.408616955694  
122.86089886143  
LOC440829 147.436408919939 159.455596750304 161.126686827391  
144.765051967884 144.120106441052 136.872851774272 141.311749168934  
148.618327213374 161.694109087893 146.101547300741 119.558626216818  
139.075537402658  
LOC440836 169.220974415101 180.561514455864 168.538117820213  
197.687858915757 165.581217879395 171.97578836712 215.272800347166  
173.563363508314 165.638672456873 207.531908382266 149.944351491364  
167.67952650068  
LOC440839 127.808579455383 107.961322525982 128.50733429744  
129.313576009092 116.884397420467 124.215466523555 112.036753245281  
129.105655010455 114.133473556359 119.319884675074 118.192302821514  
121.168550902281  
LOC440848 154.306729472627 133.177950880393 140.105675520432  
159.406462604758 142.191569406599 150.241585041178 142.294922363188  
142.581441480371 158.371599884762 135.99579763634 129.192326574697  
151.085119861425  
LOC440864 126.426212216646 135.550882872661 146.298733090986  
145.349023185855 153.039237274992 141.801472885127 148.932696684374  
153.420392741659 142.112120308118 133.12904935533 147.387754442307  
130.425809387444  
LOC440871 158.295583769612 142.173279109959 147.138814313885  
150.856917125736 138.620617643924 155.383166865192 149.31422191209  
169.238325933605 167.011846920792 168.188793271919 131.623527073985  
155.164238647284  
LOC440888 171.465178761171 150.920224503051 143.376817049362  
173.773876769683 151.356975600962 154.675189522146 130.852932147831  
142.17773831901 160.690442125281 159.942971344216 139.730999352036  
154.539367933684  
LOC440895 173.010799217261 161.451253146578 176.001771318766  
181.425012248539 207.218779485342 148.253612913109 152.295451313545  
151.761369162723 154.209689403188 149.799681364551 152.14012587515  
156.262515148436  
LOC440896 152.191393042132 153.432933930805 163.769959129611  
162.127697884504 138.371873773284 148.688413944868 148.570769470645  
151.60113116166 147.844734028193 136.324020406359 147.491439949088  
150.449621353865

LOC440900 145.669033804967 126.143886553557 123.145830746127  
147.053391763304 149.536681241497 141.970301370404 132.504264154139  
159.670815631794 147.017958916908 176.86489466512 114.77964341895  
152.409211647994  
LOC440905 148.046961712162 155.488346781292 138.880168623766  
141.990639998829 156.75308999904 151.466689967666 197.667299074218  
168.491878435329 140.885012530186 169.771005675296 136.430232926793  
142.313725116274  
LOC440910 148.916981164664 161.202844994203 168.830344627025  
167.893596681867 165.586397236489 182.066922756289 167.586897846525  
160.628894266843 148.274122690409 172.965746521132 141.860850603561  
150.371716899336  
LOC440917 149.968749911496 144.711860727092 159.752644678596  
154.252727576218 153.885582272269 159.48526814715 148.149216812602  
153.393651104539 149.707357499252 135.918590725404 147.856285290748  
170.95650329595  
LOC440918 157.736101691222 148.31140879454 144.195705502443  
158.294082740156 122.928863588006 144.185406500473 141.717466442384  
136.126542897364 142.722227179256 133.788197693571 124.28313315915  
154.01988200569  
LOC440925 148.299945894738 132.423043364573 133.74741832303  
132.960708384399 132.518394343751 125.176747824384 122.03508430361  
125.241484840139 112.714282429822 130.399501479248 153.0141888126  
118.319950396126  
LOC440926 2779.89882032092 3122.71790981947 3188.90202907403  
3099.71798305764 7948.88765120294 8416.19700892758 5165.90865799172  
5040.35379681644 6484.36742084268 3949.19206005238 3157.98451877581  
7433.03226979876  
LOC440927 6571.35528952186 6409.23524786095 6894.63087357693  
5094.53287522452 5410.50736002544 4819.85672511343 10579.8650348916  
4945.87677849967 8292.04796307133 12109.3049135906 10836.7380675792  
13526.3170858629  
LOC440928 166.111496598928 163.81485578613 146.999370190363  
163.256472113745 149.44520146627 149.725422365342 167.384121560438  
150.590611246086 150.399313562031 145.855671447779 142.861359851088  
145.323212897142  
LOC440934 131.169769031768 139.432567336814 155.966610886886  
131.711193516482 130.40517506216 138.98468042464 158.353171576491  
136.05434446747 134.235164622221 142.535416473783 129.551260802518  
136.638141963514  
LOC440944 121.010811158088 119.036965883266 128.886008923268  
126.832182961671 118.601228886344 117.141089194822 122.339819585312  
120.485138937899 120.843429388102 110.315549501241 126.290840923683  
119.242880574306  
LOC440956 152.545261723881 160.778296470857 136.858037332222  
148.564655847496 135.464231003771 168.183542846746 138.50252234048  
154.046550866249 152.635792342068 139.437073790935 119.52150378372  
149.925051977052  
LOC440957 382.069677030369 388.416668785633 404.876478833713  
425.001043358831 1955.96772733047 924.040923247227 609.939982655706  
592.957842630046 949.789710063337 281.996583337694 520.761305892651  
790.790236361922  
LOC440970 139.617608585463 130.822330736013 142.95001632948  
132.105184573944 149.585616718523 149.086836205064 145.095023408224

146.777258330572 138.981712781568 130.548611758921 135.413840160615  
143.296580629431  
LOC440978 161.365443930448 153.681775929182 158.841505957036  
166.592366578462 151.671024612136 152.933230159216 158.044938495884  
143.421288665418 155.76568091161 163.558869203898 140.36602776806  
163.93199635496  
LOC440981 149.166635189875 130.611233072509 149.082061203661  
136.069631519097 154.586825710624 131.965184111199 165.467462247066  
150.767158077219 152.495540563792 144.951973735763 115.217608555334  
142.829099538363  
LOC440991 1060.24125879951 920.083835296898 1081.47077865393  
741.875751347917 1416.93831202323 1030.56836625083 2233.00694575483  
788.693133735893 621.173315178959 1268.73280473728 2240.33212242003  
1279.15873231449  
LOC440992 168.840018225742 144.221488906376 151.885992695789  
160.19942770666 150.833523101057 145.42392518235 139.21825391822  
141.659197251282 138.882483367088 146.992289167283 132.917794118568  
155.952902855994  
LOC440993 229.62164568989 204.89842561202 270.651318838953  
220.136131941508 161.359609192977 172.857643600385 167.900071375885  
288.968909550533 181.354279096644 221.070448906398 204.137195524755  
196.419891542139  
LOC440995 148.986058473609 145.054873480806 168.547575047205  
148.627264102939 134.516390697561 144.700955682048 140.421945574721  
122.343979874508 147.959740692766 118.777105073561 142.019263564073  
120.944267930809  
LOC441005 147.382177739631 142.401333414583 141.784881206191  
127.130769263811 154.499313851756 126.549876718792 152.6969498938  
131.540436531741 141.779801021888 135.038195181839 122.051473363557  
140.595496714752  
LOC441007 139.353080958675 137.037299675471 159.640027194076  
157.113536717393 161.295030274012 152.864765895508 163.030275835038  
150.931114848235 153.285830139349 167.173670781451 143.215828010442  
149.393022408213  
LOC441009 138.855454645579 140.615078497305 151.431513447721  
130.466571969657 128.695695565175 154.8975607055 153.293125258215  
153.128027266281 150.075738752092 130.266601299194 159.762733951454  
158.420821486138  
LOC441013 2982.80580616089 3136.27991502603 3522.61692270848  
3270.88476148156 7930.82679738435 5300.67886821231 8342.70113690382  
5489.19362780613 4441.92485662082 7266.3946293904 5582.64254130978  
7555.47017983216  
LOC441016 158.374760929273 147.490037885078 146.197678850188  
139.076978731572 156.123528587917 162.039394839415 144.511488474344  
153.538565948453 133.308383825604 136.118702626862 143.185372109165  
143.26896117546  
LOC441018 122.80785489118 116.828333047376 126.009358591395  
127.802645313091 128.005043478952 127.913463809158 130.682112236817  
130.198147836925 133.483766053954 131.681566829159 131.943014970855  
125.048770476506  
LOC441019 169.520544329439 160.055242985219 155.734509841719  
154.431051053529 162.472783116487 161.748547772524 150.479320779862  
143.62103263895 176.198555355383 392.430873293903 155.463400179872  
152.97753810644

LOC441031 144.856801451884 124.153063838817 153.5256657638  
138.907036194384 137.73313146889 138.50032459657 120.846789922177  
147.889486635135 143.278551094215 164.548505132213 131.890554636938  
142.032814623366

LOC441032 154.499313851756 152.429970809069 160.415807880532  
147.526701500887 122.837807905774 158.053654524927 187.625536724681  
167.130843160309 133.490805791504 170.684848540493 180.913502162011  
162.077455145261

LOC441034 21110.9013462062 22543.625434682 21551.9994556128  
22354.1731362334 24098.0251582624 13217.7001749493 17917.7303120499  
18665.5217411582 18862.7632438112 27028.8951412615 25808.3502428915  
15851.5830405813

LOC441046 136.161633283029 157.646948327818 141.450800126786  
142.510745106328 140.655002540298 149.925051977052 141.115539663314  
126.796253980623 143.725497952919 141.623851511993 163.500384982242  
145.034179171835

LOC441050 200.506615977654 210.64483507528 245.195406638979  
190.716424123036 217.847954914851 240.054164412429 284.638865013916  
281.341452463344 286.506419296679 376.692422468905 215.607567127195  
337.973433871323

LOC441052 121.177681858671 116.773599713111 116.214857935694  
124.362182111222 128.39171386085 130.933379257307 112.867662941811  
120.37619371663 123.173506315166 132.621253769376 128.086493618022  
131.670601860412

LOC441054 133.268239762624 136.881019970399 147.216303852902  
172.214433016685 150.224472335504 137.100207190052 152.573063322741  
156.123528587917 133.587927144452 192.418895349837 147.958483355783  
139.299062352035

LOC441056 135.292532783991 163.846242743377 148.600270795407  
146.06054700771 136.553568679965 146.245915271213 152.993555372242  
140.907889482107 145.744039709418 153.713298074917 123.582509531804  
148.534143255537

LOC441061 129.489867764242 124.526220300907 134.921230478748  
131.377361030122 132.890396520305 142.199182392836 132.404879616886  
122.098850053347 157.546123603057 141.850952191423 151.674143983846  
144.649656552

LOC441066 270.360397503276 322.028360309592 303.241375487319  
359.440639663655 167.724233915361 221.171478972931 186.813888805838  
225.505978789388 189.142295015168 164.74234322574 226.287196839644  
199.516043142784

LOC441070 128.402511355513 112.166192839859 117.251233255966  
113.947948541258 122.547842148486 121.116206210402 117.646963986512  
117.716094828779 115.902030217102 118.486195373059 134.70636200986  
121.730973193225

LOC441073 4641.8793590085 4697.94415026712 5073.27433952351  
3775.41389938231 5437.78386044638 4847.77258830631 5300.67886821231  
4800.99572384569 3536.14527317085 5425.58761099475 6091.9840719327  
3012.49794349837

LOC441081 146.042460762767 139.00736252716 151.585818981801  
149.725422365342 138.446492794924 146.361128670362 142.52234368939  
148.789295862953 138.345393524161 155.388752614336 126.479964493857  
146.222195387635

LOC441086 144.853868519575 141.996233801459 155.15575204653  
141.268819327475 152.28262533486 129.242093568433 152.543005423742

149.164469334038 140.286870147975 152.635792342068 133.695284981677  
169.556358586336  
LOC441087 17211.1455384358 14938.5975217303 16642.71853486  
14938.5975217303 2608.95227456417 15238.4097431619 7815.98936145067  
12577.0915543468 10953.6229702446 6384.66090426598 8864.70614223459  
8053.22070239424  
LOC441089 563.140382824149 673.824770556885 538.156335788156  
766.420275252501 737.843412273272 388.416668785633 278.005620372937  
346.065746911798 434.176007498693 441.958777965408 413.863345223345  
340.42197893246  
LOC441097 136.321816321193 121.45175516842 126.497472087036  
125.20712393273 132.54355871539 131.80257432775 146.6306281408  
132.109267393571 122.969215709433 145.652246303142 112.332130647215  
117.862532836494  
LOC441098 136.513942889781 139.798414027439 130.729989463558  
153.02127620577 138.785538575745 129.445240570626 143.184697704389  
132.365002835934 126.763282018991 161.229621453539 141.862767428244  
149.552704503066  
LOC441114 120.843429388102 131.169769031768 122.290822230565  
129.152825130086 125.924219382375 126.285743744314 127.274768398849  
151.473239782301 118.963119420175 124.49814598066 136.300195727908  
148.512096079648  
LOC441119 157.256812907353 151.384762644292 163.446813963119  
146.71164737466 157.901967487277 136.611670766233 153.088710298368  
141.336866031027 153.93927752488 174.985831291764 152.334669286305  
140.934844668435  
LOC441120 126.394032757479 121.74566204771 125.828998007608  
117.071585083051 129.327645260099 125.696434307671 129.973380117841  
125.720102558499 122.65547320922 127.612859839494 130.606211166873  
130.179742057015  
LOC441124 182.747079625619 190.947996918605 213.468420853218  
199.01458214661 195.674128236589 184.437810305792 202.583967728957  
186.758038665014 179.753400474369 161.608941774391 181.550597645633  
205.226635237992  
LOC441126 141.334394187941 160.861929142249 135.210887148305  
155.468848105615 129.848276446896 145.877943006533 135.753430034183  
154.900676756492 140.724541696229 150.126627487419 133.994376985194  
149.026243159195  
LOC441127 126.308622415913 129.854478528455 127.242627779136  
136.306727083526 122.84779238795 126.718380351644 118.438942370745  
125.095999326598 124.29420915051 124.726035027951 140.66266106824  
131.938898032483  
LOC441131 302.847274046748 295.187978994932 334.140757209353  
316.801725268792 500.343476678562 682.075583857856 801.702878226247  
646.461274173693 725.065727257421 738.37559871635 800.739422189427  
774.774214696342  
LOC441135 131.90169441925 134.905760222839 138.62308708151  
140.888439624918 137.59017685842 143.011042973347 126.934059693116  
137.829812693131 136.699011428085 132.393669306489 124.00806841872  
129.626276841426  
LOC441136 147.991572632747 163.37518739397 164.264079172779  
156.75001042701 148.996601285688 137.861973133557 159.393410854649  
151.340728221261 144.836902182737 141.628203045085 160.937256625847  
152.082927731045



LOC441150 182.143506470859 197.91325268683 192.848268768579  
184.451469623426 248.360540656183 226.531255313921 185.617936412633  
161.160974998803 170.18781660707 152.670691262738 176.245698601389  
192.532222258033

LOC441151 152.20173979854 169.800006803362 168.061346742356  
172.421637564661 156.981921830638 157.322594990954 179.203783335674  
162.933658389727 162.748836971539 175.670738308809 170.825161347825  
161.24755274554

LOC441154 461.314247041387 470.42403724799 453.760162338163  
393.914413372142 504.141861790903 247.340470321453 479.261755380872  
347.147961254829 309.318403417731 630.473042320288 1412.56164938199  
305.615423200097

LOC441155 185.525760847281 189.348690353874 169.332207863684  
177.32104138164 174.881557472722 197.651165059354 173.497575259833  
161.385691765316 176.53912635694 171.229729917612 190.520750756082  
217.074639597142

LOC441167 126.211525910631 154.808798024399 146.992289167283  
132.32633643811 150.231063426302 128.957236136715 142.510745106328  
124.00806841872 129.96280577492 142.722227179256 140.14062775887  
132.629453540571

LOC441171 124.452631766045 133.876636039037 126.544685937984  
128.50733429744 138.377628971966 117.917454674671 131.01107240791  
137.324247703318 136.861019517134 119.213217733213 116.764795914545  
129.222714748528

LOC441177 124.048926099805 127.663578933727 117.417112053842  
116.0999658586 134.10707191601 116.881212516879 120.481712066062  
113.362825181676 131.416923875254 128.685065364693 122.706176540192  
119.352995485911

LOC441178 110.382724813928 106.470524594239 111.065596151792  
112.268518171041 113.440171712791 104.321352818065 111.577400298092  
115.170176263172 115.778736387131 109.342230674869 125.798453479983  
103.448244268961

LOC441179 132.081286801266 141.232464220879 141.143572141958  
157.070500065037 133.67719550997 130.402496960735 133.755609587969  
145.992883153161 137.685104040843 136.969124414576 146.281429685059  
140.844007965202

LOC441191 225.64288602828 232.444867422559 267.190228116903  
247.373571011712 209.070372320593 217.715143869654 214.082408290757  
196.363005912532 200.964306455257 192.046442148183 180.364089931995  
267.800523478098

LOC441193 223.154771092064 274.202831856221 213.145460679531  
319.283603277754 197.895094054577 164.748676009072 165.863118584978  
157.423242850568 155.837866295709 166.095964870713 149.927773276383  
188.335102005839

LOC441196 141.953114738413 149.320667417893 177.371157649894  
157.213868854329 153.557991189227 153.577349107512 187.550461418888  
158.704425428694 159.346890686719 149.020824600931 136.532168520039  
131.427686241226

LOC441204 132.402255281009 135.773386496434 122.561285351587  
125.405373274081 148.22974445263 140.475688390415 142.240333104987  
137.517461260687 130.761936205169 139.209080672396 150.590611246086  
132.069175779393

LOC441205 121.353233207209 124.178483414968 148.908758741034  
134.842877075983 145.597134236583 133.945608193817 137.286331849749

135.303322290834 140.395662148924 117.417112053842 129.610980807708  
133.738587139139  
LOC441208 158.565676210997 169.067064352955 148.702473828167  
198.356420768703 185.382647297259 137.335501759561 148.350919010575  
153.626180103404 169.956827727468 148.949829934611 183.181125586276  
166.433933349193  
LOC441212 162.933658389727 157.844617425219 143.950279111815  
173.225064625094 143.825062714273 162.57736365619 154.847114601403  
164.513371267476 155.233830396052 141.492458250787 155.207839370162  
158.826907233022  
LOC441228 118.283346939564 121.448671447499 120.935863853101  
128.545699891734 139.798414027439 125.506466437764 126.531502877517  
129.647514123731 131.786437478446 118.838332117453 140.84880167881  
139.186416741431  
LOC441233 118.348153875356 114.067790137477 120.835207882788  
114.589757401741 118.26427946535 117.567991653999 110.392617179163  
113.064645688715 110.858201415824 119.436922168376 117.907840952685  
126.566165822427  
LOC441237 130.080728694308 130.244024688838 133.478829770103  
133.665206343648 147.769702509047 137.48217464385 154.722895261876  
141.026045918091 169.385340991747 125.761205967344 148.825790628891  
134.475296383752  
LOC441239 140.332045911008 129.068452023028 127.70306883967  
150.297422529071 142.729945734027 145.505223177269 150.663062131717  
144.80318019871 138.149037534929 138.899292894875 118.679664392666  
156.385100395531  
LOC441241 159.710615852435 151.334463063946 152.887471821971  
158.604431001643 187.247062073247 162.98885109088 162.683665945044  
179.376968970326 195.333029746339 199.516043142784 129.750835425023  
182.624130582754  
LOC441242 138.267726309873 147.155738185574 138.82269002406  
140.485102148597 121.640681916546 132.883408554592 137.011595584638  
137.742393475755 133.959208066964 128.662039886682 124.415058391979  
133.155925118245  
LOC441246 8140.6363797934 7656.97151002785 7802.25987814138  
6810.50193989514 16588.0599171804 8982.75408120297 7573.69742026367  
8445.36695108418 9636.32818474581 14300.8562978211 8473.21873478131  
6339.16392696068  
LOC441249 167.958792571511 176.008711524598 191.777253122672  
166.04965258862 155.285420689833 180.364089931995 164.886944426276  
164.497445195378 170.035994634371 163.579282884905 137.43751840683  
177.990274115348  
LOC441251 154.462766419353 160.435789207464 145.369791572077  
152.303524109428 146.812248482145 139.790098895306 154.252727576218  
152.182968451691 146.404727168045 150.951302116738 152.601626526117  
150.403702679274  
LOC441253 136.338683078123 143.533725135227 165.103398617203  
135.875595614483 158.999305963902 152.215146681655 137.601181150371  
158.886786960196 145.526941881413 179.067275037015 134.848210768603  
185.886737029845  
LOC441257 151.020903727566 141.56459720769 152.057315195367  
150.599425944486 136.392389842232 138.508015596135 169.089896796513  
149.272219727411 145.161116298118 156.050585687098 145.380971596154  
145.917220112846

LOC441261 128.449200385351 141.173167283016 138.21083121895  
135.894512504725 130.909388246758 136.167141767484 133.74741832303  
125.911259629489 128.137646789236 118.126133973555 117.585207821853  
129.1829592305

LOC441268 281.238656291587 278.219561902233 236.933960698783  
279.000687630846 258.25658838015 344.45331938267 228.349507726225  
311.337303524912 182.969563278473 183.181125586276 288.150694843614  
227.288015854809

LOC441282 148.825790628891 139.995623005154 161.608941774391  
154.140863428961 130.372959860013 164.959415532174 449.408793796673  
160.085325256991 115.927914533359 192.009562635198 122.174036435094  
130.199581370385

LOC441294 138.778496466408 142.480203661104 153.156264091925  
148.538400348149 141.794898246882 161.134322621805 172.065593177758  
163.93199635496 168.958694643382 167.965981130329 175.38376293575  
157.390513637267

LOC441296 120.497796762933 121.668166378914 120.790536146461  
117.917454674671 125.603448542611 119.735807506447 144.848839185565  
121.416038813102 137.747088378131 137.27506604142 110.234403581151  
122.780453116176

LOC441316 145.847629576886 153.263883774915 159.130076733711  
137.28323311107 141.03218895811 137.312488161187 143.517327774456  
151.406384541297 136.720837676326 131.000186898437 136.152290887509  
146.192761134077

LOC441320 134.669763149268 135.771423315597 151.194282143046  
142.774449777424 146.927825526831 119.876835248732 126.688235549921  
138.166546598846 137.333595298205 121.197702744078 140.839056652898  
133.391421497441

LOC441326 146.047948193303 151.976432805924 144.516274148451  
141.156434225355 126.788749235867 141.542251179523 144.36575644625  
143.331929080227 154.645353009618 146.309171902112 145.481279504679  
138.962649407431

LOC441340 135.562700479444 135.155955441604 158.7912155022  
167.325227483198 165.71382076724 146.709967739596 140.419686138586  
150.011603347578 151.392024228289 133.892661981648 140.044536042073  
152.44293820056

LOC441344 130.980885733161 135.627840788802 139.161483596756  
150.029313080668 126.763282018991 150.396462763607 144.358535632993  
135.195985987169 131.989955864584 126.88329158544 134.356796881432  
128.663320241092

LOC441347 147.716353308549 145.686092190716 155.578524031078  
160.76044995335 164.236417852165 155.298546821687 135.3969732106  
151.115031304764 157.612067634423 155.680330654611 137.426226808356  
158.699778625671

LOC441362 148.012353232918 125.08580835258 172.138554350738  
162.466301774088 135.096321258167 144.570725886413 162.304178370233  
138.244585395561 144.863617174741 134.928967716193 118.533346268154  
146.363348761434

LOC441368 150.129367314696 126.27024495428 149.65417821994  
148.930073905413 152.476932186797 150.255511248598 133.392934239554  
155.522274777451 142.960875909369 143.151478156897 125.384706864406  
140.78582131501

LOC441376 238.310077556167 261.028644858795 209.33028918341  
302.069236363626 137.949215501559 126.455271988029 127.585851003779

129.018088749395 117.30724482798 122.621839614189 126.802963197337  
135.223957492606  
LOC441377 2608.95227456417 2900.55309635211 2271.82656399253  
2080.47567326037 3184.98944679038 1971.42527720714 2009.21931102311  
3251.62784659994 3450.46728258139 1685.33737186733 7167.29945083872  
1640.99641023476  
LOC441378 147.439303942026 149.100294463597 156.519196335454  
152.952479729682 155.612543356905 132.057808599068 150.182173149394  
152.238845270993 147.896919205072 133.416938451465 150.687819649072  
134.891736344801  
LOC441395 123.916497557628 121.884067622971 116.019123495537  
117.048846466839 131.069515666204 126.3539479619 119.01236045062  
138.474429223902 121.094060100325 134.371254010574 147.966224814966  
139.991780068793  
LOC441408 230.263678910356 225.664432111551 246.457698183615  
235.261278607182 253.124449721731 289.517820913799 371.552970811499  
264.109049504585 385.317560758502 260.356834114611 247.845708587624  
237.734385188542  
LOC441416 130.883516197483 147.338615809214 134.447878635716  
132.253450751554 126.557869929234 143.860092956392 143.912136782374  
147.051399102374 134.848210768603 141.560424984281 146.215459988012  
151.836705989155  
LOC441420 142.598106777707 152.520828479026 150.303703193967  
140.60741459333 137.192570825063 133.606068125828 130.444766583917  
154.412506915569 131.890554636938 142.661504601445 134.13812854554  
143.436675541053  
LOC441424 133.069347559741 118.646119379542 141.026045918091  
136.93893152919 134.378951325825 146.192761134077 126.298187538812  
127.229854957588 123.893768254549 135.906115546805 112.758617084341  
135.309431186017  
LOC441426 151.635752404534 163.091280469234 135.650546885518  
158.943005736645 138.097213860574 150.786618560854 148.986058473609  
152.251128595777 136.308565710257 137.729777643977 155.272264997151  
133.571962238112  
LOC441436 143.467053670148 146.983646662811 146.368188849777  
146.992289167283 153.59485367224 149.647926859169 153.279026396412  
152.377056383547 152.030182228463 144.818492604488 135.766466392056  
142.339740800356  
LOC441440 124.548598801497 133.70941349665 132.514706165018  
127.646032547296 141.345379144177 141.5311434224 135.015161451899  
123.119524624735 123.640123613529 132.112112196592 123.096995744616  
122.80785489118  
LOC441442 127.58382536792 126.455271988029 121.723964989551  
124.964977322158 144.368355737187 142.630563791102 134.41693612969  
137.333595298205 151.676232556697 140.792400101142 145.584615439295  
126.585679159459  
LOC441453 143.05872558805 146.840735518984 139.00736252716  
136.220324225816 369.373283422151 405.975221091252 365.140886302762  
291.779980648289 315.3930052781 167.201570648434 533.37609065123  
271.615621030842  
LOC441454 180.690409026809 175.222531098958 183.764215745794  
188.952730860801 182.984076352185 164.917470819096 182.235490620172  
165.143417235314 172.008994980259 174.560168983121 190.031339775209  
197.489903263216

LOC441455 203.17525411575 245.489266602897 240.878804911613  
235.704824490397 256.495848662843 202.357989894268 275.841929188802  
228.212753830905 199.305626149918 261.541138637729 189.799091507686  
272.639413442579  
LOC441459 146.882746173951 161.651643789597 152.970079142629  
164.120602897751 151.849653154534 163.85327708023 164.247251507109  
168.847039069786 155.031272695335 157.067264221207 142.974541687789  
164.736294372006  
LOC441461 148.713747597311 148.522580898717 166.040918339519  
139.395743826525 195.353512458837 177.267145265362 169.992657041967  
149.526189446292 160.303394115537 189.136114953249 175.341310423897  
148.118705147238  
LOC441481 176.465559710285 175.98210925643 217.408824020423  
179.191401472241 603.764427348016 355.80042210486 414.713379367927  
255.74096237558 314.90123632547 360.285027176918 298.347201056937  
253.30325545013  
LOC441484 149.925051977052 145.875240619257 165.041296694491  
138.304793826214 159.576585660511 223.765583953184 164.327140372968  
207.269530621176 188.580458613357 198.753297290444 179.037397826592  
178.976116597291  
LOC441487 153.051143478997 180.047231265069 151.208728458188  
152.805525883571 174.08222895937 169.527424356913 164.417770955805  
179.932404140099 169.984859264412 166.400162299835 146.291932367254  
153.149523560021  
LOC441488 134.688504981603 131.722397988741 128.5581535393  
145.333097940759 149.579428189895 151.946691918521 129.900540030251  
152.585572167313 152.670691262738 137.00532429734 144.386561289985  
166.298554732581  
LOC441493 123.259322051795 131.312580984876 140.513291662274  
120.649467083125 108.446988282853 120.436408685057 114.056147008769  
110.794219964997 126.146213417225 113.143436184959 116.858439910319  
105.236768436069  
LOC441495 132.450954427876 128.440024330942 123.612648219993  
148.780775862239 127.905616521853 122.423561732526 136.351332391315  
118.195512252508 138.651419539729 116.552626146967 119.640086587188  
125.909917932316  
LOC441505 140.021640936288 136.501159644992 138.192550945411  
140.800226245569 150.122035262873 140.928627507036 139.798940929781  
144.829773937102 139.237360556305 147.666724626127 144.931901042924  
144.40361834862  
LOC441506 1978.95750795951 1816.3719976564 2449.76376608893  
1747.33558205825 3807.16206340771 3338.13980198211 5410.50736002544  
2072.01578063404 3262.24877138481 3700.75770419386 4266.92715355342  
5195.2087608308  
LOC441511 150.674189235105 155.824409540332 163.69172577831  
156.248684477916 153.734347607222 176.622758931306 175.7330682766  
195.384273821324 199.250680260804 221.594737497504 125.063596569451  
167.594414386475  
LOC441528 141.81391138301 143.727514442914 126.365861978893  
146.10417547509 168.582192754233 166.521472376759 151.237088659409  
174.832495287192 152.185397218918 154.607214750531 159.970332650101  
156.296046600921  
LOC441533 122.932745723044 118.9428715545 107.76497424356  
127.496885890349 132.16600019449 128.05898686833 125.902015309754

135.286686011087 127.434873844923 116.355027746922 118.406487008528  
131.038758046782  
LOC441546 125.500790447338 140.254665008195 133.014551645069  
145.360466216324 142.412731964179 133.241744350369 147.630900093277  
128.618422306397 153.989839987975 145.23179154441 135.200049257744  
135.728336465002  
LOC441548 126.948090173876 131.381189141974 152.591091223395  
126.991140761102 135.250379276888 132.105184573944 151.792921211607  
136.333928675403 149.09398454596 130.941645638407 139.609751976657  
131.903632821793  
LOC441550 336.639473916174 320.936905584424 262.171775165261  
256.022057262325 229.483578414375 221.916075811355 392.282956362735  
233.690524419327 203.727455875381 336.434368527549 700.877661166739  
279.790257881254  
LOC441551 141.898948675823 131.536457148878 129.529372508883  
136.891612156271 147.768191157163 144.547778247596 142.434356144925  
147.858339902055 135.364039983762 141.78867917709 116.449064666763  
135.913632939299  
LOC441554 161.16688895179 160.954017627605 170.614129599775  
163.736324784234 158.550259547851 149.999838961906 187.494677180331  
147.053391763304 156.351734527745 164.313238416498 168.180063344887  
159.470818285679  
LOC441582 137.234384760487 139.914034708144 149.726968520487  
141.639216893245 136.635413632094 136.852403978525 134.909230280708  
125.099672022917 148.8870854102 118.622346984257 136.984172424718  
135.58042404479  
LOC441584 155.441190892146 153.39738748803 177.401771322485  
150.489651880905 157.565633456909 147.515088047628 149.294728629784  
140.354508398385 133.638664342783 134.489421865495 137.264095379365  
140.061045085545  
LOC441601 129.586337068199 125.224197852606 125.071387239411  
128.793186785667 128.897493103888 121.722412245175 126.988118823204  
122.466276478613 123.7421178083 126.766964875664 132.699715693605  
132.855812035005  
LOC441617 150.023791544584 141.468076901305 157.203304477454  
137.203813576977 138.962649407431 147.768191157163 150.555125135002  
135.624881949214 150.053948736789 147.885769870843 139.883360543042  
131.809235171629  
LOC441632 170.376620730856 170.417054311946 199.058972781223  
186.127543877065 172.750926094884 195.740661051834 181.261666651301  
202.024504592763 161.182901898379 177.023536553193 150.464468573079  
178.707066209511  
LOC441642 398.971838949075 398.423396126075 390.501797367707  
406.133430120039 391.185365567603 252.733973271584 392.004079531068  
280.204167582951 297.970735665595 514.799179506754 1037.00025848491  
296.657844888195  
LOC441644 114.607138204495 136.05434446747 126.837151457845  
122.247130087475 136.3615279557 113.832885222354 122.013040475143  
119.172965618216 127.615631240096 125.768053724055 118.100611964852  
121.049927973123  
LOC441655 160.346554422714 160.17208299932 164.136551371866  
169.777032044409 162.465251412937 145.756455015309 178.728925255163  
192.375251343504 159.154102271517 163.612347715773 155.966610886886  
150.231063426302

LOC441662 156.333133322672 156.646803208934 158.023626712181  
165.789846154721 158.890522392445 161.338215647108 151.342902631318  
163.352317556107 160.311096717492 170.394088019518 147.85133493803  
167.149578610266  
LOC441666 133.155925118245 124.821581853501 130.199581370385  
129.52578899011 129.589056071463 138.584190903303 138.469997677004  
118.646119379542 137.350851760173 135.100687929821 142.874797429568  
141.426756696799  
LOC441682 141.099781722697 132.409582164007 133.906867716171  
124.842426851438 123.104790590045 137.587917564413 137.697452180659  
128.421242037748 149.8035588048 148.034899103241 131.397850276558  
130.477824552202  
LOC441687 133.860077101582 116.273000405449 134.130913969327  
125.859158049343 138.537763477627 126.972399784537 121.159593382017  
129.263794008537 119.395894479869 129.871985352583 107.466184687811  
136.421163870578  
LOC441698 148.421611987655 140.545351041252 174.898012759712  
153.697775290962 152.705458417973 153.744962185987 146.007311764212  
154.683723064797 140.464476678448 151.736824723671 154.24500773656  
148.592330216136  
LOC441709 143.644862018676 141.528115502473 130.290454258898  
140.156797128045 130.724642809645 127.731816003312 140.260053206523  
154.804753043168 130.718729445329 132.132474135959 117.634514818946  
135.918590725404  
LOC441711 152.50843414723 149.3567486207 145.791950392049  
146.366013190845 143.62315472858 142.954747193455 137.120973494952  
141.580944960818 134.111348656261 141.048882618651 141.050384368733  
148.120968141789  
LOC441714 148.406031732776 142.066903301882 143.934585983797  
132.780055030907 142.954747193455 181.229308386808 170.992074907355  
178.130223302924 158.650226303456 162.857083430123 147.706402141169  
181.635664531851  
LOC441722 134.445893291422 155.313873664923 136.698600389364  
135.59027155522 133.827296071709 134.590666885938 141.40690581885  
131.90169441925 131.58537948771 131.071614211431 147.053391763304  
134.799648755296  
LOC441728 135.25734629146 124.561511833959 133.266524623338  
129.887187837732 129.537345537086 133.505261458701 138.011923055019  
128.905042692431 131.921799405427 136.448045428081 141.645906784244  
141.208106961875  
LOC441730 128.651081092914 126.557869929234 145.588981165456  
132.801619479245 132.976977898242 140.672863685822 153.039237274992  
127.412539650291 133.190147746722 124.705614182596 109.425878885118  
122.447154928139  
LOC441734 121.805145639822 141.657914155491 145.301551442388  
128.029736384348 144.30519737569 140.845958602151 146.621996129313  
152.721146962124 137.85618381155 178.707066209511 113.58962177275  
126.734835642553  
LOC441736 144.694679571377 144.794806650252 143.263333116046  
137.94246602811 146.701489210289 143.381277901138 158.302977853133  
139.246945739764 132.825240485239 148.934593102452 150.077555721391  
140.608266389167  
LOC441737 162.819608252826 163.843143947012 158.795335941084  
171.202766078337 137.947606003247 131.672014089487 139.894559834783

130.902319266342 137.201149245092 147.260260687975 147.114698384834  
142.563762845657  
LOC441743 363.777212750779 296.375305136807 356.376890469558  
288.596513753617 584.813665097407 455.392133846517 1105.10063745656  
919.626220838414 559.0867397858 508.572981581855 543.170902795966  
615.254768508691  
LOC441752 142.45047744931 142.137885203233 150.878323882503  
156.456332386608 123.745824514261 157.623092996114 142.464394555901  
143.849399031223 144.413210364148 145.081468030567 127.462293158337  
131.688038068545  
LOC441759 129.054577477882 113.470356909765 114.995889945366  
115.600308687778 113.238466329843 111.336798977475 124.138036007288  
125.522498880785 126.626904958599 109.91537150286 115.35376992547  
123.638001112969  
LOC441762 120.611442477736 116.973126196102 119.446359837504  
133.439077726411 142.51308872439 116.5272207025 116.635455849571  
109.859878974527 127.155818626031 118.432307370605 118.558673085303  
115.967513057229  
LOC441763 866.765054377214 1264.90442763788 959.126054626181  
1329.3013039618 3560.23794634993 783.059427015955 1270.76282064793  
983.777608766079 767.662367310672 1065.74382494535 3099.71798305764  
920.840069938767  
LOC441768 128.827129738041 140.36602776806 133.507865919719  
141.693224578298 144.479410859199 140.423711213355 138.144085131733  
126.715300671036 130.579954890389 144.861804210272 145.144401160102  
139.029404397979  
LOC441771 128.113966507586 132.693707848508 129.419280058541  
156.453108485249 148.533241504738 146.64835267642 150.70383460714  
134.963301368391 145.737361356678 146.240060512152 142.199182392836  
138.244585395561  
LOC441773 181.668090319293 178.445384902129 162.063689419737  
193.134414137433 149.223102493474 129.246884010589 145.43470695949  
146.306467130749 157.256812907353 134.325520377207 111.217595631623  
131.253698562544  
LOC441775 10312.8407173696 10312.8407173696 10474.0047946187  
8182.20106181946 20887.0399135573 11874.9808592281 16328.5991894287  
12457.6956682374 17324.7697569598 16397.4527321924 12368.1423473066  
11647.9643290124  
LOC441782 141.169908353507 133.802898895457 167.906766146651  
143.303309656177 150.582568022489 146.06717772919 150.294432623474  
154.487546030444 136.338683078123 135.632298302036 151.234397206563  
138.828562311512  
LOC441792 124.853659050216 122.885879294532 125.729079191033  
132.57219914253 133.259321087534 128.032141013681 135.758133410577  
132.752401872376 128.501189288377 136.126542897364 122.484351696828  
128.974844672294  
LOC441795 131.355356245179 151.183847738922 136.862764950361  
149.175458427847 135.97450897438 147.278236958386 137.945878061978  
133.164566694394 122.438438464097 124.395047385025 128.856640014006  
135.661131815375  
LOC441799 141.246352591355 138.512938877774 160.6823824476  
136.84840505336 148.079107235035 150.632724038845 130.411849432351  
135.51506573405 143.426053070219 147.49720952988 118.737244693366  
147.545667896282



LOC441806 128.309602266886 123.141928612324 149.799681364551  
140.877230937687 151.231685705236 149.502132524093 137.800512046163  
133.94667806086 147.942495862714 144.411176964424 153.369334953677  
126.462522391125  
LOC441811 161.960392594363 129.256138453675 150.088034336851  
153.162313098346 167.173670781451 152.921328522953 158.845174721328  
150.053948736789 164.769320792025 121.942777234608 130.529367177452  
157.016659994185  
LOC441812 142.843882404269 158.869463014801 146.293735120772  
148.188717941032 153.93249158209 155.211976328553 160.006185904123  
148.578688042147 137.814391189269 142.230934617475 143.939522733945  
153.907737500104  
LOC441843 177.955579729463 155.690773461824 194.60309399944  
192.914362049985 184.62149494522 189.070238523683 163.407360509803  
174.461487057542 175.485672103348 165.062129636008 151.064422836695  
167.620915011868  
LOC441847 142.707913210557 147.736397115265 136.670253859184  
115.999443701343 139.086498524774 131.234140286502 138.036876466521  
141.840858913807 132.606735652984 136.899405404096 117.008277388399  
135.221786448517  
LOC441864 158.241349852419 150.544779197947 135.886859004208  
123.166013119235 162.519642881848 152.650867743471 162.208028489943  
141.763072120718 142.368601917778 223.666832044186 155.237180851323  
136.188868917386  
LOC441868 138.22823004719 145.010108826238 126.814332513301  
149.91705328815 151.55925331302 148.269123639781 133.859036862167  
148.166340306996 129.992015202357 170.465177938235 156.169405925094  
131.999299893526  
LOC441869 148.594322264158 118.777105073561 133.355353808577  
137.246089511045 187.352655464866 264.955939320296 369.646624431062  
184.813094907887 239.003718699156 129.16337177104 124.578552584603  
173.387549650592  
LOC441870 157.723341862468 148.160350542849 139.652974659584  
193.173703015873 168.244523461915 171.099675679944 152.439608473915  
146.052153515494 149.055493714692 148.630293791756 145.23179154441  
145.272073426254  
LOC441873 154.912576362196 131.437847958077 135.63604256516  
142.318709347082 136.79732903972 138.248708129528 143.385915173392  
145.048033586779 133.387065801837 147.281035392817 125.787353491408  
140.987694585232  
LOC441874 150.405715534245 141.937611082276 132.529247880813  
140.714455864886 135.923022674367 143.794453011397 145.776143302784  
142.086300138469 147.098474227445 128.099484678519 122.506058130261  
136.573928520456  
LOC441876 17496.0674176329 18220.6383250956 18720.0460735814  
19189.4835303597 19356.3155476146 22872.0444589809 28344.4547971342  
17975.1602090863 26375.3000727296 17324.7697569598 13976.0448927093  
20217.6497214386  
LOC441896 165.673535349675 165.885072907195 172.909795209733  
159.070355781276 146.052153515494 152.309460630038 212.016247864691  
160.914009756867 167.542332146706 174.375388013694 206.753993163216  
168.925131238831  
LOC441907 148.654099017805 167.532512839891 164.787637367264  
169.039807608035 166.014450044695 162.982557003317 149.929454280702

142.609678462615 164.601022396674 154.136467767927 144.904021527125  
177.246890307643  
LOC441920 161.12121879514 163.621658579697 154.449058407217  
162.28074297013 166.489436134841 188.013181859196 161.683243808528  
183.138955445765 149.41564356447 165.048922660581 160.848201202361  
166.767004180603  
LOC441931 152.467764730004 140.699287635171 170.233084517898  
133.526213647686 138.015301767961 145.365935017728 157.13859713415  
143.842566639842 145.919359461744 146.84891312893 144.81320329947  
140.989597586699  
LOC441956 144.945229158136 136.871568211946 133.766199453456  
142.671190279415 130.778164962583 138.28374062778 144.667638908504  
135.122770943076 136.869117921313 135.791961106915 133.453702113571  
133.079767347356  
LOC441957 123.607412609763 136.79732903972 136.818557078622  
138.252656818036 148.507598818039 138.184717352015 147.442483242063  
141.853711139375 125.500790447338 134.172033051676 143.741676966126  
139.051656180599  
LOC441958 163.593106951255 133.610143526954 155.8871985642  
163.474261351901 153.244758030666 138.546549217819 144.839170491334  
144.83282018024 138.307574579062 150.707113487334 139.494962965774  
160.549597620339  
LOC441964 135.825931047185 148.656917603142 164.478006648035  
134.158454639998 126.695387748732 137.976533193418 163.781674803361  
129.684916104674 139.862403685817 143.00932329728 122.442590463781  
141.494666823639  
LOC441996 160.164327420125 153.664503112778 149.492550066785  
148.74881415573 150.0084730766 151.613134875009 170.370934381883  
149.869314204354 147.18948282156 144.839170491334 154.324955232468  
135.005591691192  
LOC442015 114.740948266517 142.42442972908 135.753430034183  
125.542301916791 128.635684412304 135.375268329248 133.404671629495  
111.389873428517 132.271437329873 127.884750925048 139.582054825147  
141.359142214228  
LOC442020 152.317890573534 133.54741488531 153.758353103323  
159.646538408414 179.25743545231 134.961156870831 171.39347085745  
142.596113491002 162.15259972225 141.246352591355 156.830156083795  
150.974364125849  
LOC442028 117.672645717508 113.362825181676 133.601133679159  
137.689158155552 112.565341690522 112.41270361848 134.803612821519  
116.981243525714 118.235640920527 133.037138438863 108.850992642446  
118.256000539093  
LOC442041 157.200582422961 157.551854647702 167.67272339144  
151.573920235798 152.526785074182 145.709172732805 131.001996509052  
149.6730835169 145.921381300813 157.912864169081 144.820843146628  
148.007068300762  
LOC442049 144.705559511075 140.313216623427 149.045654499682  
148.547259731346 134.296645422941 126.080780033301 137.76307316083  
144.750407738866 143.673778816953 150.182173149394 162.841318222066  
134.966883985611  
LOC442057 177.772019227116 174.903798946103 188.378996128521  
159.207567680134 193.008902902654 159.728097053356 168.095061700814  
166.239339129505 155.598586699376 190.66473033826 166.001279428607  
152.593934787262

LOC442060 138.265155903051 135.855243915966 148.054367166566  
147.619451225526 136.897888440409 140.274655651173 153.244758030666  
166.415922313464 145.259981479761 142.313725116274 110.678680817471  
140.242272149424  
LOC442064 156.834059922255 157.512561489621 187.561298131124  
172.604689611475 175.019580368717 159.942971344216 184.542232315662  
162.134726710448 147.717748449017 172.8993416872 151.362686497226  
157.688982037448  
LOC442075 155.548684011748 214.295260811046 160.499355902773  
213.754156680604 150.854580568572 162.327039624723 139.856251508283  
192.399146702036 177.538262133568 158.665476708054 153.577349107512  
162.756185479013  
LOC442096 127.327765407459 113.321454160244 136.948039394935  
126.659859384257 119.029186503752 133.733674016447 120.628904050564  
146.923382271905 122.724429060184 128.451788292588 136.633726784926  
131.811011266156  
LOC442113 126.189005734462 129.819820730239 136.205702793983  
141.666394024363 128.217078449064 143.416816860089 131.785053503951  
130.351302840602 136.695790688466 140.548371692813 148.57301274812  
135.345616014558  
LOC442117 137.128849888863 135.605541734293 163.643554173995  
149.763038696374 150.734560844391 139.395743826525 144.840218312168  
143.951756384507 155.942609847585 152.045391611927 133.202111355452  
149.166635189875  
LOC442124 144.625105340312 146.683594365673 160.022481227931  
155.166786601813 158.653161314597 157.547814187442 149.625528206375  
158.558471586662 164.268280525424 160.382971629272 146.209104824109  
150.263578317272  
LOC442132 153.697775290962 144.743281367797 167.547551072373  
143.070170783764 166.12695134858 177.091809538824 147.710252756854  
156.346014084316 141.026045918091 155.639666182376 140.45860949168  
166.549192709614  
LOC442142 134.190511945944 135.205434173702 144.221488906376  
147.485960802692 132.962234774463 124.521130036013 141.853711139375  
137.823152565933 131.395959781477 140.43729728368 133.197002327259  
127.271423859953  
LOC442147 161.26201213997 167.180406126438 155.582036890436  
157.948814637726 178.984409575632 181.479652131104 178.878444404192  
168.327600230929 148.63131331279 163.487737425232 149.016767620428  
175.679405338399  
LOC442153 201.987081022654 198.244854812728 206.275885047321  
192.209344004015 177.862368731138 164.701183249762 172.934156790775  
190.309453030884 155.30926640293 202.178451227304 182.042104888745  
199.459711023907  
LOC442160 147.736397115265 144.02847768185 125.334995649504  
130.700175060255 131.252368756892 133.738587139139 136.754116864655  
138.416716745934 129.171589574238 156.316333575406 142.796371223204  
122.996616773523  
LOC442162 136.648306684974 147.668990552874 154.459517779315  
117.264555636952 140.672863685822 131.287142490322 122.102644097132  
138.199559519849 138.010385979692 140.538020869886 152.29434111068  
140.978511668091  
LOC442180 142.301581642006 160.882229345156 143.694412162756  
172.686798187142 143.614075503775 183.385868234361 167.093409692227

150.724359913994 179.687464522203 155.868109161417 167.976680048356  
154.336009472285  
LOC442181 154.94859976407 162.819608252826 166.526875572556  
151.849653154534 161.534421340752 164.986006226427 163.153676643372  
153.95615286919 147.297163685914 176.049946762504 187.082082429597  
154.816213491233  
LOC442204 124.012439490264 127.183924911179 128.56000638844  
128.901707304582 124.825103464238 138.269955723817 118.673325109944  
139.664055668127 126.563876945046 131.234140286502 118.983932995126  
131.069515666204  
LOC442206 117.423704591303 116.994216357989 135.889764019762  
128.492142236807 118.45291712775 110.428616140857 133.692996980809  
130.42746492878 123.922817231917 123.76900858347 135.285224699704  
135.59027155522  
LOC442208 113.995301093609 129.334217858282 126.786434897401  
126.333814565085 125.027095330593 122.863612588759 141.373059612034  
127.346646117375 117.773743603829 128.785472881136 123.150299476109  
116.321559000405  
LOC442211 155.906054212876 137.693410133625 136.08297876405  
141.659197251282 136.246543311291 151.219051767056 125.628281846465  
145.331858938535 122.651702760414 132.14412512622 134.169645445889  
132.926799887017  
LOC442229 134.503552797411 156.336425973696 142.002145315543  
130.912137250515 148.932696684374 123.291258843371 136.951350782053  
144.065554025603 129.750835425023 153.776361241587 146.999370190363  
147.903030308715  
LOC442232 475.038389500056 535.861738240441 365.286234166621  
458.218913259336 246.533813165981 300.83667045718 467.512355593598  
347.487059316081 255.066583469964 453.457361487577 645.806954296487  
341.64890727921  
LOC442240 123.952494134263 129.033433971346 135.289246539398  
129.434594784981 132.398041172151 134.89031458837 131.850952248545  
131.49577981738 128.495276191943 126.741498575874 123.545404885618  
123.694678408411  
LOC442245 138.780488114634 142.406904585501 131.46193427125  
144.991442620483 132.91094012928 144.122748003206 154.173439471404  
150.218643705925 136.453821861379 136.601220755282 148.79958121087  
144.301577198126  
LOC442249 140.656633546501 148.13657736444 136.03325645996  
132.385096888962 149.698664700146 138.764834713216 139.841822983821  
136.783974483005 138.848119273081 152.840202260007 127.189310473419  
145.029298288869  
LOC442251 134.350054065624 133.087166272749 134.603065558787  
127.144291519133 133.700408015171 135.915960609269 131.308384127079  
125.937660544107 145.393431956588 129.502730573463 116.609122768341  
124.057369016694  
LOC442261 161.817609920327 162.834961996238 147.357032438442  
154.273953018148 145.902572804249 169.028519464989 144.258128917228  
145.989546968117 142.886493948916 227.614623963331 155.587018319981  
170.885640563747  
LOC442270 220.60173086462 200.518684601283 236.592839463278  
207.218779485342 185.016336026382 179.582086214179 283.527656956105  
227.033342447929 178.904696191996 260.195256836955 325.082620845425  
272.077877821339

LOC442283 169.192327500032 151.508738608925 176.355556618289  
171.481917188224 140.531789506024 152.657649988502 178.142393629606  
154.503958858173 160.192540519103 168.33854702953 159.41078351918  
147.590189238316  
LOC442299 125.979152567959 133.473140653666 133.7012683837  
132.899305777714 133.869867161978 128.606360476298 126.939543057414  
135.532820436394 144.084441938143 124.126715773068 134.434198188045  
117.203783530266  
LOC442308 132.899305777714 160.604195264968 139.251886500377  
139.860093278582 163.340435089911 128.020911959353 137.446745269821  
143.187539073659 150.560305000601 117.207266754941 140.632573759426  
158.319248599976  
LOC442316 148.702473828167 139.82050388626 142.246864759311  
168.244523461915 139.621016978072 138.240874738649 124.791221329502  
146.26304624648 128.11006485185 140.225329742578 128.213678179359  
135.744202879162  
LOC442319 120.551603446364 125.649525720177 130.37544152572  
133.152523054305 125.195549796301 131.727533821438 132.956167255292  
124.334450753704 116.486929280635 130.686857648764 120.809659457873  
135.36523178082  
LOC442329 136.430232926793 128.102787239877 132.568354349687  
152.045391611927 238.509970054862 135.708804956764 136.480458837869  
137.720747340105 148.970251898527 135.585648980469 150.731093808891  
138.081268025435  
LOC442366 157.907190910755 132.218907367109 150.896076207161  
157.709832297666 155.237180851323 159.390531348676 151.148295679242  
169.428195354763 141.15458637181 161.39222145523 139.32751718663  
147.400082178491  
LOC442381 134.011746666371 147.604213625382 130.724642809645  
144.439320591901 133.932594124721 141.021723049782 135.647660756548  
120.465934391246 121.117569938781 128.377928524315 129.267923706188  
136.209796259197  
LOC442382 130.058902161953 137.945878061978 140.223599881961  
131.360310497851 130.290454258898 136.198583459346 131.393633337276  
136.865340099645 138.274057264688 124.329980024986 143.096097305398  
145.1382587433  
LOC442388 150.985061659285 146.162330544539 158.147502554814  
165.942761337382 152.729355306724 150.093684245826 151.362686497226  
157.592607345742 141.992490695142 139.076978731572 154.755544586846  
138.371873773284  
LOC442403 126.939543057414 138.681348536008 142.232918684259  
143.853643511287 144.970383956581 146.136820062093 163.22059466037  
137.237089899964 147.875855077738 136.925645302362 134.296645422941  
144.882207209439  
LOC442406 144.917911601441 149.180704382192 142.609678462615  
125.75980494927 134.371254010574 139.585373400347 134.782388051531  
136.647239621513 140.073208365817 125.334995649504 111.867464669155  
122.007909794484  
LOC442421 168.261511797218 156.548858402702 172.073751088968  
163.748692741999 186.127543877065 201.837695818264 166.981212790122  
167.542332146706 155.475804754732 163.113457178357 151.169283505727  
170.251197850968  
LOC442423 131.910285685889 140.563079852037 129.260551359984  
133.271506838359 137.607767467172 143.899201949317 145.000523037022

158.193008411967 133.403409882362 150.663062131717 145.154323430995  
136.545742688573  
LOC442427 134.666505160831 136.089888639987 145.832751296646  
138.521952850632 135.717491814078 148.179398287068 145.802944788548  
136.020600085547 143.038248313305 131.652854369619 141.520125030042  
145.534520042669  
LOC442434 135.548042190047 139.178245419517 130.036744891822  
142.592455241752 130.396593013401 141.907307422968 138.259512736404  
148.09868976776 131.362128083159 124.178483414968 128.56495182759  
133.241744350369  
LOC442442 149.956759038516 147.153129531937 168.682307349713  
163.62582285753 148.204194003593 160.435789207464 172.652645920958  
150.845846206549 155.412002482153 168.801737310947 179.730694272916  
147.942495862714  
LOC442446 134.642898234003 126.834926242799 121.657744897668  
143.103779196037 135.056517225198 128.862699779871 113.311132067152  
133.310323593945 134.877046981678 129.819820730239 129.89239171411  
126.471321085803  
LOC442448 148.527528612375 152.439608473915 147.526701500887  
155.049051256459 145.802944788548 147.420580715112 142.976123206776  
148.907136936731 142.62707251786 163.846242743377 160.390564881326  
154.264142444882  
LOC442454 6760.37324850804 7519.94306346326 8596.90650022148  
5859.56559124843 3909.47437917608 4000.45196171119 6358.5018930218  
5532.93454600454 5165.90865799172 5670.70220800096 5894.79176478976  
6324.87600301793  
LOC442459 123.98775110588 132.402255281009 121.464383202986  
143.2438241778 121.942777234608 131.528729642144 141.416706868124  
140.49969612403 131.427686241226 138.833677916752 128.837901660985  
131.106613067333  
LOC442465 137.740497848238 139.301435614165 172.120772549791  
143.210208388432 148.975112606364 142.813267401938 129.647514123731  
152.906352463546 121.51208055933 145.294665838127 133.487774861252  
118.773864607553  
LOC442474 156.46322298175 148.723165059122 144.36033726557  
155.097300548684 154.049004176595 155.031272695335 149.039132756817  
155.147962740503 142.598106777707 156.890299350025 155.130745957603  
158.562631157512  
LOC442480 129.256138453675 138.003440266411 128.471437314295  
112.10312035128 129.658488766089 122.405469833024 133.902707525069  
138.920141982606 128.827129738041 120.880547922392 117.735411259153  
127.277128410056  
LOC442501 156.66832364923 160.19942770666 183.280853265083  
136.669003646622 152.483240622367 158.890522392445 147.178598908199  
162.513107496558 149.756512110538 150.73248190848 133.830860948014  
152.123526286669  
LOC442512 165.471587934831 143.497909064641 146.479009988445  
144.131743978192 148.171225002967 143.239666389592 146.722211039754  
154.384766720753 159.837102036755 142.116311513299 144.910863590251  
153.349400517428  
LOC442517 157.955606242401 156.622993107052 149.532459719175  
172.84784588171 165.131463797217 158.895584550655 161.795378938402  
161.055911120534 158.260676113325 157.490138425943 145.049387327924  
164.472980733552

LOC442519 169.649251828199 158.420821486138 170.516743115762  
173.839053227554 157.797222258336 158.784190231286 155.815785551964  
165.074983746785 146.882746173951 143.223510456306 150.093684245826  
171.800143883192

LOC442535 140.063142443074 144.818492604488 132.221351364892  
123.853588042292 138.383183017683 130.277107538053 146.058477355527  
146.343230597246 154.329176514501 130.797498958616 160.628894266843  
129.751916520201

LOC442546 153.4392054301 141.424508069834 133.31378749951  
132.819726980184 150.812739240232 147.171090285223 149.747347428419  
138.449057377027 139.552533656255 145.200638964782 155.98413216883  
164.962201718762

LOC442560 119.558626216818 141.730912072471 129.961042190085  
127.137447808551 117.628564992187 155.124158030085 145.998177732093  
147.617354114584 156.938149948126 143.155998311198 127.263061874385  
147.519991961858

LOC442570 151.248365605631 134.4380641709 147.414834563852  
135.661131815375 140.497181450706 162.890650672747 150.46669393448  
148.444479022559 134.152586955217 130.410584413031 117.976107125982  
157.623092996114

LOC442572 132.765942975939 142.238908711402 156.916784141484  
137.854873498783 142.363309192458 142.274440538785 145.760577027524  
139.13396769999 136.161633283029 148.605816748229 109.898406285895  
141.264096014725

LOC442582 184.862871179765 185.783374935551 219.661502916874  
199.288100834476 206.620708230452 189.61702125418 175.656204695951  
156.783896946556 185.519000961898 144.944095553004 236.745054217055  
222.646371492347

LOC442590 155.639666182376 143.48729871068 152.454414703534  
188.543051108601 154.847114601403 175.121069571371 157.490138425943  
150.396462763607 152.81544746536 167.121623035375 144.492756323647  
169.311264420133

LOC442597 151.374665021513 154.154761033012 152.476932186797  
133.773427881651 172.370108210895 150.391286215189 156.557792402376  
135.598709185334 172.097502416776 161.466192326759 151.456702092528  
163.616115299926

LOC442606 142.066903301882 160.382971629272 173.507835230243  
167.315702949236 154.617462666847 139.582054825147 167.491399614986  
154.101698334466 148.668081483434 143.200939506995 152.840202260007  
148.720181793879

LOC442609 148.072816925413 157.901967487277 155.444668113276  
150.265385257579 185.783374935551 183.280853265083 201.661941695238  
184.611146047556 181.622689471026 190.572712684622 202.253560413436  
211.300733064951

LOC442668 111.672450681359 123.756349408641 118.9803314875  
124.807244018373 136.104027032045 129.813090345837 126.676875319815  
131.377361030122 140.16233428205 146.746669300049 134.555873832434  
131.419663282022

LOC442676 132.140547119679 130.593846004132 140.875923123766  
134.804426398976 128.468978498871 129.828896822571 133.115543233699  
128.984613946021 133.819095523687 130.754320787628 136.962442874268  
128.126354569418

LOC442710 143.658600740177 134.963301368391 115.00776048097  
132.524377835171 140.590802695412 134.384963577069 144.02239659305

142.719216118914 133.839554874862 153.606787306076 127.409603645289  
123.202829470888  
LOC442711 153.468933239223 146.904354404095 140.101511236793  
133.198832503062 128.126354569418 128.327528039933 137.020473156363  
142.029398672217 128.40650280096 139.353080958675 149.243164419714  
129.073750290924  
LOC442726 125.029516472944 128.289680999565 128.739313105907  
132.604589324628 124.588594750916 118.75071213401 144.873034900013  
128.837901660985 124.256773437346 144.278830378899 142.633121727277  
123.491930765117  
LOC442727 845.646455991008 918.162638134305 913.22732386079  
680.94167651697 1158.88528996131 728.176339659082 856.74270641707  
658.47864958685 1181.97868824758 726.556553101727 1556.41573079892  
1067.30106203503  
LOC474170 193.428733288774 170.108500366942 162.223175359454  
157.126460242995 188.543051108601 184.021010234322 162.914301705151  
172.961115357569 180.610891208146 171.36717256867 169.321832528939  
153.545086287929  
LOC492303 109.96017424123 108.079149792796 121.567879358508  
113.064645688715 111.475394003575 117.805556408194 110.486191378104  
113.388450168062 119.237802375552 113.23302126254 124.800221241981  
105.62620788923  
LOC493754 174.229093061024 152.492163303139 188.490807652188  
175.891947478891 152.163489631563 164.018470368389 154.373739162815  
169.012926546641 149.066522533956 166.076692502428 144.331409179705  
183.633719048831  
LOC493869 340.608165077422 272.968792195442 225.950750084197  
274.427235605909 148.905860943967 157.454558821261 193.261343922604  
177.214422668922 208.14618424983 608.129959758538 161.108249802467  
188.557113298055  
LOC494141 136.384308041001 125.822346524903 114.278113876915  
133.307149027384 134.769926504916 138.551695969102 143.825062714273  
145.096707533824 142.648205566485 126.919867899174 119.787925356307  
135.601916560736  
LOC497190 127.206177583275 146.249951130016 135.06498850776  
129.007924852801 138.573829193205 139.760425990939 122.928863588006  
140.899799480834 148.326282600684 141.626504154989 146.448568700393  
135.542079867325  
LOC497256 153.336395746742 138.551695969102 137.370670726978  
146.803549606737 150.213657393257 146.779054605199 141.213588194832  
152.972779110762 138.197500836501 136.532168520039 145.492751560845  
141.416706868124  
LOC504188 128.891947089512 126.372374084002 142.088243118644  
158.562631157512 132.86879723151 127.447218258785 135.294664456623  
123.427366316096 130.898067924686 137.100207190052 150.348608467097  
123.386622160181  
LOC51145 127.174074003712 139.840256729373 141.181931072161  
143.827500301207 121.843992693814 130.628967781841 154.764283765316  
129.973380117841 131.688038068545 125.5109819304 132.965467229606  
120.62139061084  
LOC51149 146.602252563413 141.246352591355 148.668081483434  
134.203949774763 136.111569529393 133.862203806529 137.253971514177  
149.513744292932 140.995418231627 142.635015113687 140.885915460425  
130.552857965694



LOC51152 150.875392181869 154.924190468067 173.640326140494  
139.997245010492 149.818888178632 169.574755162815 151.585818981801  
170.091913791176 148.67584969749 150.476228905372 156.32137627012  
152.422690241301  
LOC54103 181.479652131104 182.950456188966 157.192320902906  
176.927500850631 196.519125510368 202.643624039869 265.260411490697  
176.622758931306 184.682478530334 148.358847576281 189.567241599215  
253.933478547515  
LOC541469 127.949413503055 124.818436949131 122.376432064286  
127.167918433035 127.825550834962 130.257242615762 123.639062358695  
129.384531576943 132.781725233271 124.768399055809 158.33974431499  
129.665507668047  
LOC541471 153.072429774613 150.142724640067 173.714940254592  
153.285830139349 146.097201498811 147.216303852902 141.647300896529  
158.735283017367 157.134782748175 164.647634120888 127.271423859953  
155.140371265225  
LOC541472 131.951649373072 132.269567096683 140.557871626905  
138.990971069382 143.720044122451 124.288632450364 139.793683692104  
143.816567683093 146.26936366452 155.648782851696 170.140610481718  
146.457939801041  
LOC541473 139.530196462344 144.589482298525 135.956116718089  
119.480037559953 159.491388998564 164.208044717557 136.205702793983  
149.693559841189 137.426226808356 136.27621600731 116.664031217378  
141.071184297124  
LOC550112 168.483273292464 163.575300618666 189.770558810153  
165.062129636008 180.658930225735 140.09417711803 169.940177050294  
169.192327500032 172.338509138759 173.484307104751 182.42088387266  
171.481917188224  
LOC550631 133.45690661612 143.21411610625 130.975606477621  
161.651643789597 151.073257114127 116.126923911804 134.834641868502  
125.863969666806 148.729753117861 142.810564324354 128.02595294499  
159.867178630115  
LOC550643 2039.55802107872 2296.30423509176 1803.06322760249  
2053.71550326011 3450.46728258139 2515.7035557541 3384.19521857242  
4913.55892033682 3775.41389938231 2491.33490046283 4081.13406129846  
4901.41175228982  
LOC552889 543.810043433181 705.020444579319 560.015499136193  
673.502723625773 650.911886508922 670.856008549143 774.774214696342  
553.123179808258 867.369315017411 529.963453165714 971.99484515987  
760.572409199179  
LOC553137 137.199718376452 151.877035446575 147.409936250284  
140.089210795507 155.180238551547 152.185397218918 159.688862680139  
156.957578703389 148.065080664185 160.644747532952 163.426663985855  
167.629008083436  
LOC553158 158.950169226637 154.003862874241 164.295628750438  
156.13331481937 164.545596179262 156.085949215738 169.232677769521  
169.385340991747 158.509885816997 155.417694869593 178.320732186309  
152.045391611927  
LOC554175 141.905641114703 142.64161581553 132.268445799639  
160.364644321965 136.161633283029 143.272669418277 143.175483349968  
139.383528389668 130.66511389864 138.078214837785 143.416816860089  
140.909875639658  
LOC554203 290.135914275115 334.607533045929 310.917191279571  
291.261765585473 196.363005912532 227.499335248402 337.652945958921

310.026522549372 367.289651112346 309.155070674445 346.411586524655  
404.366325262322  
LOC554206 186.377571176623 183.568426758223 208.895657507883  
223.453776362112 173.563363508314 223.474531516972 202.568071395884  
207.581907737176 191.220064414876 170.67334244323 195.438353051306  
196.566937667522  
LOC554207 123.207402172696 117.893918180502 132.535722328813  
122.093290585838 117.837894438834 120.915108114673 119.998260435095  
123.839006667113 125.749024723383 147.230113868203 152.476932186797  
131.050255325564  
LOC554208 186.140970908638 169.777032044409 152.964940071133  
179.74065086312 165.467462247066 196.955723006838 147.171090285223  
172.057586741925 163.781674803361 192.353768499582 170.568719982587  
193.912456093767  
LOC554223 159.79463502085 153.807525239478 149.717739166461  
147.645530163725 156.895079878556 152.778732614944 169.378422829858  
147.343712869579 189.647009287524 203.675655444583 158.704425428694  
184.819937046061  
LOC554226 118.787630332168 133.601133679159 126.372374084002  
130.2867846895 134.824147038515 129.765440519589 127.874934513708  
130.43775024291 132.181365505556 136.142380560596 110.553759711075  
140.063142443074  
LOC554235 123.198873421356 132.243900762936 135.736764623155  
122.412141495264 124.992439957206 132.645196037302 125.839101611277  
118.601228886344 132.034701177759 135.333055517636 142.791015845309  
130.35985690876  
LOC55908 160.221974600577 158.163599942547 163.521095869383  
167.397758092427 148.224587582189 143.473523258521 149.05280915667  
149.904691068054 150.072005848234 153.903993884123 164.011683602245  
145.887262601586  
LOC572558 902.822697602452 642.255110250493 4913.55892033682  
515.158921349383 192.418895349837 171.844483419604 186.112835637689  
202.943987922418 195.481680273686 223.042575796603 201.569913451219  
183.894417745549  
LOC57399 135.057182356058 137.950955473086 128.941490662452  
120.672291867109 118.126133973555 131.121343131082 129.466612376702  
120.174672871542 124.095340478326 124.066239570648 145.31308449569  
128.856640014006  
LOC595101 123.554769032715 113.716741872499 137.340844554597  
113.672605838627 131.961236721149 146.599636794606 136.638141963514  
140.120051507626 134.972933635542 121.252042151856 151.40067812803  
126.542112891953  
LOC606724 155.855564068891 157.073850948746 148.516653846017  
149.467626202395 243.691004557778 291.683896942007 165.634117939571  
188.033890834418 284.891415492568 143.827500301207 172.866517097198  
171.376976179465  
LOC613037 3890.14358014877 3994.64569045702 3403.37530051435  
4773.62220024088 1131.22418479945 4457.64479507833 2952.67114077688  
4410.68280125001 3677.23129570773 2004.19532096239 4159.96851384358  
3038.02573182546  
LOC613038 127.167918433035 129.068452023028 124.113451627593  
116.204882835742 117.841844605128 121.818632020666 132.088335186716  
127.895989232696 128.692917766138 120.944267930809 125.920663904983  
132.213890220705

LOC613206 162.317084707395 151.285933600303 178.186273279101  
164.509354377985 146.181764812924 163.643554173995 144.328571856869  
153.251468534012 158.302977853133 154.843607752473 144.955918499353  
159.68134949161  
LOC613266 150.84999247088 145.063062479224 136.601220755282  
152.77616981167 184.426874913406 147.366877428537 183.214922844221  
143.760519659724 163.778790431064 148.684855678535 99.7487411813724  
182.357065848298  
LOC619207 127.413588723306 140.121874960672 131.911579676047  
133.874468336025 131.288785100733 117.913545753709 126.555972138115  
129.57551086282 126.743579586052 127.104868352186 129.330592465123  
125.136745288071  
LOC641298 230.179200974631 216.9491329483 233.975864722289  
204.740183832461 178.619580818758 198.311821616128 257.775569674531  
248.260998007814 188.654966029389 313.773476049783 210.043556816529  
212.749668083641  
LOC641365 146.599636794606 151.312853764675 140.738977175997  
159.154102271517 140.50127034921 177.896726792666 160.461846976268  
145.25198093836 171.706534562905 126.515480612924 146.245915271213  
172.169129806643  
LOC641367 176.77183598995 171.329984719612 163.600888221193  
184.775001243453 144.301577198126 153.832132196284 143.452992974333  
159.944547924357 149.630481387506 160.79631681714 169.860061216981  
144.477267427347  
LOC641515 128.755697083014 117.567991653999 131.861469782134  
134.2267111030456 126.100454068838 116.168270198375 144.779146672553  
131.196196319523 144.095471610836 117.900892627473 125.600500146679  
124.275741099764  
LOC641518 149.721351307304 138.661548678191 141.644521617419  
140.234485088845 143.554726863556 142.103519373191 137.581659385375  
143.305848051593 135.475597372104 132.291157461345 136.372712400493  
147.313494489487  
LOC641522 116.635455849571 135.037385686705 129.467792559297  
119.725487374119 142.34471764492 122.182695593404 123.21732068638  
125.569364049349 127.824005374202 126.305273697185 131.08389186558  
135.48250324478  
LOC641693 139.1434049136 147.738146185884 173.056715623574  
148.086979061158 152.857278986877 174.274996381853 181.558764396201  
145.45768403614 158.627416752905 146.058477355527 126.185560760543  
163.704616231638  
LOC641694 115.890431424899 129.76141737109 141.449119281888  
133.370488470007 141.442825487243 132.504264154139 138.237030685795  
135.317796804151 132.801619479245 131.657454325126 127.398873370484  
130.842257229979  
LOC641697 166.157713072213 143.558088035758 168.50246276469  
163.936973279176 152.224281847792 158.98007855379 152.77616981167  
166.14867551435 138.316043447788 158.85003890975 146.283340399533  
155.456077670662  
LOC641699 139.650726173186 130.297203474319 117.688941284427  
112.063713561549 132.903959880979 139.265915951162 130.666781754635  
147.250700603067 125.405373274081 135.242328667085 129.524056217383  
126.203255277356  
LOC641700 148.627264102939 164.534790315992 171.028432989066  
136.837430157894 148.600270795407 152.09245741643 139.47828235176

152.31268334586 161.134322621805 151.674143983846 131.90169441925  
144.019824700027  
LOC641704 137.842375545994 142.886493948916 164.227134687088  
147.029988235786 146.050714008913 147.966224814966 174.560168983121  
144.408426565541 148.691132137188 130.385747820089 138.224383646894  
159.58125728432  
LOC641705 214.413674287972 189.589053840976 229.31486399741  
183.969897305028 152.950227635138 190.975263192006 178.696562301918  
157.792868983503 173.635827398273 187.824032557194 166.730974538475  
199.235895708128  
LOC641710 161.310855691717 160.537464426971 212.223906015932  
166.214167530158 177.023536553193 160.975741751317 199.579818754014  
190.174729017089 180.250420976613 176.397715825653 172.276968413879  
204.237952297239  
LOC641714 150.112549201892 149.584582050615 138.530236176135  
125.021217009254 137.636900130922 123.625734357908 128.141725976839  
136.632837717704 160.833948531272 131.335344547051 127.106045864607  
140.941447663862  
LOC641716 145.198638080646 139.162076054072 147.572660963285  
134.257928609741 143.08841562593 137.22727238555 158.113794378426  
159.06002608158 132.5130209643 140.448796848785 146.826292449698  
144.098578955023  
LOC641719 137.232722233042 142.30928744202 147.2233876988  
124.378096177801 145.540872377507 144.743281367797 124.952026709219  
156.774097885381 124.42974326791 144.578454791104 129.072173761566  
143.090886224647  
LOC641721 135.93352186143 135.632298302036 138.215708514725  
134.374551571013 132.018833785059 140.330400168187 124.324855155055  
156.88782735706 133.311212623667 124.019707408094 139.446914318877  
135.111066946207  
LOC641724 137.693410133625 137.800512046163 147.978039160763  
138.275371291639 167.373416675264 143.851670859917 143.967197319361  
158.928949614338 169.132693907633 162.9279134169 144.977958320895  
149.601145171769  
LOC641726 151.403431105471 147.617354114584 129.311134743311  
127.336648342283 123.086596566142 140.622130978368 137.395895014456  
138.870636101334 140.446530307169 132.390330703084 115.048402956574  
133.343243441383  
LOC641727 259.025042304848 254.9636051363 281.341452463344  
266.286483421453 270.568660560796 209.623583937962 263.084557246752  
270.12941437975 199.776140037612 346.303862540751 398.796188440256  
215.115324454215  
LOC641733 132.996622574111 130.255689301211 147.673016541108  
128.814967091609 139.128751917566 140.763592237598 133.517685144186  
129.045934344719 137.183566882805 122.711143209444 136.124385992905  
143.191095552619  
LOC641738 137.303701514064 119.107992692097 139.08460576146  
140.724541696229 125.374764771516 139.421753451936 144.738871562895  
127.132970760907 129.566451901256 134.35958389775 133.820936825552  
140.283106734666  
LOC641741 124.138036007288 128.43745051 129.798965780918  
140.770705453805 124.794260959228 115.427201752401 132.610618885717  
124.058332474379 127.845259467015 127.486216183602 121.807661901776  
118.584773788416

LOC641742 140.539606951892 152.6969498938 143.796699867588  
150.888616811881 174.66966623557 144.951973735763 152.908358615016  
134.028626989933 150.48744233923 143.985850833974 154.304674359916  
162.923734210933

LOC641743 124.88118767481 141.370957100324 136.482609639417  
124.49814598066 133.008120853618 147.195127201893 145.560904207183  
135.997144927956 137.049677918041 152.30599498619 138.0249543452  
146.800324349321

LOC641744 138.634814756987 147.461480849333 159.867178630115  
139.217113811817 149.121894111871 178.955938825556 156.78124246844  
152.476932186797 143.46919253255 145.418696807842 158.414776465951  
151.88244935494

LOC641746 166.024236370752 177.246890307643 164.429483677715  
142.96594961303 268.328002606268 187.978627462391 177.716742595321  
183.416437587938 161.922462797736 188.847480174391 178.358003030064  
158.414776465951

LOC641750 139.866536599877 147.017958916908 139.237360556305  
140.533704857854 139.558611792069 137.269267022826 145.069840844153  
140.44966014021 143.672118850295 127.723052839953 143.23300128006  
145.27890423835

LOC641751 152.908358615016 127.578272480621 138.005168756932  
146.508628678304 134.236149080639 138.182987173284 137.834158814913  
130.213596986351 136.986022901377 144.492756323647 116.695313319162  
130.856249657101

LOC641753 130.626965797365 145.880661952783 135.491412261604  
135.007473769551 118.184571821176 139.106442824079 133.022848457361  
137.177271162749 131.280092370361 122.667593730152 110.727742629085  
136.585541662028

LOC641761 133.299599411025 137.901317305531 137.372131049785  
129.003317344469 142.596113491002 129.665507668047 150.902548360746  
139.242481781927 129.621296567128 132.865704994046 132.393669306489  
135.573170189235

LOC641765 150.655359765209 157.484541464879 179.25743545231  
159.961729971624 178.294972422671 162.940190224943 162.606273401226  
167.933231844271 164.870860592068 158.747029092329 159.603586227897  
164.455111983634

LOC641767 136.560048419149 120.641590368902 123.231397809701  
136.472404812817 134.323365608463 141.819762045169 128.224742304889  
157.067264221207 125.073353210914 142.294922363188 106.393497890486  
125.26492723752

LOC641768 3140.51157972795 3810.98043907046 2468.47687203968  
2403.42261883515 3290.27308365921 1927.467713716 1984.47173096657  
3668.19307488953 3106.94181270197 1643.08061372695 5543.71998558526  
1772.75453735112

LOC641772 132.642931022024 142.440344960504 132.090454301889  
129.534721138679 127.047679628867 138.311892121437 136.621173927187  
127.511638455985 132.788102310611 127.482662155082 139.363571392476  
134.436423298225

LOC641784 117.30724482798 109.438965262717 128.189685312596  
126.606163970149 127.289269745461 124.370381674692 134.05596537871  
125.326393776938 109.91537150286 159.133905701536 127.633362302159  
130.736466113571

LOC641785 132.425596223397 137.084488743415 146.084461430546  
148.027464692171 136.87712607887 161.144841967903 135.745821200254

137.267307036807 153.62335478774 136.565191271943 132.418902141838  
131.391434131813  
LOC641787 121.159593382017 126.228513847262 135.264074941678  
111.975027473284 120.329105003959 109.416512252532 135.309431186017  
135.437227744668 133.647637744785 126.457337803727 121.583096465567  
112.208950290962  
LOC641788 141.244589488591 128.765369834041 145.318539677981  
125.642282323003 147.866011743792 129.573520898314 141.907307422968  
164.048326497989 153.821728151219 154.623548525522 156.94531513373  
149.516743790585  
LOC641798 176.440625367948 173.708509414674 161.837272617767  
188.027848008991 167.243544185778 193.275162354467 179.456207450779  
175.752091217351 164.942652212218 201.530921073488 189.114794029657  
172.451128796055  
LOC641801 159.970332650101 161.683243808528 164.181915898563  
160.122274989224 180.523458795412 205.57572471694 165.320977593677  
152.758653228708 157.280532261425 160.882229345156 156.84104238878  
174.953232190285  
LOC641802 156.456332386608 148.683761948082 169.815053752464  
160.251996476232 145.294665838127 151.889644436875 144.974813243462  
161.365443930448 134.949572471421 178.209994522672 159.253029632045  
144.265352127763  
LOC641804 137.508097741526 141.609037401299 170.257439890277  
147.702785358046 169.257035030405 147.064543281269 159.090982014161  
151.089328533476 168.790464803746 162.233096422572 119.651470884046  
165.665796569389  
LOC641805 126.499257771192 118.47752077032 117.910259090745  
139.589612144962 543.170902795966 128.882160435252 115.107214937219  
129.067538010904 212.789259549841 130.738915341653 151.433634564939  
163.248980088946  
LOC641806 172.008994980259 168.491878435329 209.727089546377  
143.163083976105 171.714973501563 174.027190728107 170.164668347783  
174.012972901793 161.94312376726 190.018871923219 171.579123521304  
206.585387130993  
LOC641808 137.495288670441 128.543460982378 134.276804499925  
125.902015309754 151.524197474057 145.200638964782 135.250379276888  
133.71965790848 129.633387503618 144.152325539824 140.888439624918  
139.730999352036  
LOC641810 121.675007387533 138.026155846749 150.948076715456  
149.453103369806 135.789381967525 140.007937555694 121.930362099901  
129.623601211364 123.077592992679 147.202510900548 128.739880189022  
128.005043478952  
LOC641814 7342.79622458743 7245.25086222102 10170.8669218992  
6720.10473881011 5455.91604383389 7992.84111657183 12818.0509395717  
10449.7190201942 11647.9643290124 9852.51412359574 12046.9345159347  
13479.8546809758  
LOC641815 130.440164900487 119.213217733213 128.643539098937  
147.608094270078 132.346363545288 132.752401872376 151.397068235685  
123.893768254549 135.274205069488 111.137519376499 122.777544465711  
136.27621600731  
LOC641819 158.8246699332 158.76356962428 190.76537287329  
166.722369066673 175.774461934758 149.08527298577 182.042104888745  
147.893916750136 164.309588213547 154.645353009618 160.085325256991  
193.04138438685

LOC641820 171.473538842796 165.844762875582 172.604689611475  
174.812134675989 174.448910958935 186.551385094902 170.622615783608  
190.427022049167 157.58659226599 164.757907224537 172.794570587596  
183.64389891975  
LOC641823 153.464360995071 130.201635099678 140.77762487941  
136.553568679965 132.541420804792 137.198654302648 120.735176435195  
143.783078837501 134.517774302213 137.449776383224 168.521601064374  
133.988494850477  
LOC641825 501.434722063309 431.546135503733 691.916554922896  
454.492780042353 144.520435611318 223.975677959345 166.257275241937  
167.612577768782 203.693188114912 148.482530949134 156.808992920564  
163.442257036536  
LOC641834 141.996233801459 130.728465509213 139.15175079191  
145.195065312551 144.131743978192 147.799806976046 140.833666276568  
136.767307268217 121.377666938052 142.772680460689 139.104796184094  
137.988325215021  
LOC641835 116.456170659686 140.26557508894 143.422419261603  
137.42845093653 136.837430157894 139.285128128996 148.22974445263  
187.796440205485 132.454025879177 937.375361806971 156.208747691032  
137.024230648861  
LOC641841 129.059722322306 118.641431192759 152.470980074365  
130.562422910426 139.051656180599 136.691234705997 147.913148020331  
135.273184185121 139.872976072847 128.482976013813 127.797666392002  
131.200042525339  
LOC641844 449.859227376918 450.120868656638 856.424155671931  
380.514553097613 346.303862540751 541.642309122976 684.866405921987  
831.08287594363 523.937128789616 516.755267232127 592.822841077599  
1221.58522138654  
LOC641846 129.23899614612 137.5954358221 146.713861499546  
128.599254558082 141.727639388452 135.835518477299 137.694556514044  
135.758133410577 147.858339902055 152.158269344693 140.469508410073  
144.532420788945  
LOC641848 1120.87534972745 1214.16777512885 999.159652508318  
736.332743195416 874.816697884109 1352.14737073174 2026.85580212422  
731.513306289481 774.997895985917 1211.94273385872 2608.95227456417  
1179.42590997099  
LOC641849 427.637083424453 387.908774438461 606.162976359615  
287.703569453502 383.182507425579 912.878077940014 1168.68074786473  
497.759125486158 495.56459361431 811.564396886535 1125.95664591686  
721.603421985572  
LOC641851 137.72327986309 116.126923911804 144.883597913037  
145.912712700067 144.863617174741 148.452947427498 138.953926269905  
136.869117921313 134.260779370821 135.485867373592 136.874135348635  
158.890522392445  
LOC641852 160.035282578603 138.322109975426 133.617501101389  
141.141047405344 148.590732065459 146.097201498811 141.453255692229  
149.609501725707 131.626173473789 122.65547320922 139.063209125209  
121.18490040448  
LOC641858 146.381147992719 145.299625153537 132.762755202326  
118.970693476152 145.387562372871 119.627380812035 131.314766140505  
131.861469782134 136.716554749722 130.471929699923 115.409568875238  
126.056493244568  
LOC641860 141.492458250787 143.689257983705 165.350777445902  
140.784853736558 135.645439440707 138.735156909846 145.711007027894

142.757327296852 140.267351731167 137.471563342956 144.340734361996  
139.837616209536  
LOC641875 145.369791572077 151.316421810192 154.475735552851  
142.303654405005 136.040524807653 138.609972011765 148.757112903673  
127.112296857923 136.103088234442 167.842122798757 136.556183079815  
137.314968268692  
LOC641896 134.410706628655 132.965467229606 129.733935614802  
134.273326732349 141.414384085164 141.70123350351 138.411148122407  
117.060696904303 116.176068923513 142.970256312313 129.520140995675  
137.514952067562  
LOC641901 136.969124414576 137.981446468611 139.646026806298  
141.696969082758 175.044940252247 143.198622036573 125.830917527594  
143.867013358737 129.940297696849 151.269442319766 129.235033390384  
142.05571112803  
LOC641905 133.104560685558 140.515996180923 137.192570825063  
136.051070946954 147.024759173313 136.265972909993 126.421148348261  
146.541890150631 141.412317125776 146.281429685059 123.81177057082  
137.767900781368  
LOC641908 180.610891208146 144.349602838518 153.929167381674  
164.172084711099 146.779054605199 154.792156982219 169.903088388196  
145.472859089272 151.788278519057 165.239214141562 129.190900922265  
169.590101694098  
LOC641912 146.26304624648 150.841261270382 132.263954832097  
134.751916364581 139.340699808517 141.649911527714 139.034940762344  
148.866229889479 149.552704503066 125.94880312094 121.47058227778  
137.198654302648  
LOC641914 133.224926329053 120.441732791854 139.378915474473  
138.739176678465 124.436549041911 145.999823250463 129.910866236901  
122.005340508177 136.952914053358 129.89329138222 128.257292171015  
124.378096177801  
LOC641922 141.791001213681 136.635413632094 126.426212216646  
144.318556353673 303.184785797741 152.415752253205 167.484236948415  
132.096095362238 160.32111439724 128.947211021681 251.011148303246  
161.182901898379  
LOC641926 156.160899295182 133.175265384038 169.003310163058  
174.593548891693 147.697973457776 154.618685493541 156.105736111274  
156.890299350025 178.377461551319 152.516485296644 145.09909498449  
151.788278519057  
LOC641929 157.244026506342 149.182972268104 157.225479764928  
167.357570666817 164.509354377985 172.152570321727 150.109192774079  
143.16930809425 145.261662166215 151.497680466119 141.528115502473  
161.424105316969  
LOC641931 118.650091706226 132.555211779043 124.494727558127  
138.834309377225 128.104157345891 126.446675008883 129.599661790972  
147.768191157163 130.306478656159 120.585506729733 126.285743744314  
151.198928680018  
LOC641938 147.483379646393 138.808591995741 133.819095523687  
133.867182252477 133.804489975068 132.735371358102 143.823368276815  
126.442999559539 137.020473156363 144.505072819693 139.573371281569  
151.742938010671  
LOC641939 149.035590153457 140.525013926642 138.349773531218  
140.946008063839 141.929924728222 152.902458879101 131.421663453164  
151.879398444495 142.099541115973 139.044150521333 155.686889874806  
135.911903336544



LOC641941 165.500088159872 158.639313207233 149.508432746895  
156.349030617265 154.366071635971 142.431979387165 157.435477846812  
146.832797779597 133.281505040209 138.866469244936 139.205887721493  
143.349486755648  
LOC641942 126.181785407434 135.033601686007 132.5377752987  
130.443360119099 124.019707408094 131.887778588005 125.12823219142  
129.725706669166 130.191876914166 132.864018034342 131.892151111901  
144.781438651649  
LOC641943 136.83470470035 142.553175839278 148.029259633449  
138.598167973067 148.415036326153 126.396385337235 137.337681987169  
139.904952662852 138.834309377225 122.708102546276 137.997756995882  
114.174153178166  
LOC641944 161.627546190964 161.099805358232 154.548286860883  
168.570133927038 137.195906276069 178.06221214103 165.003646188775  
154.316929706697 163.996649606636 182.886100305943 153.893753448473  
164.268280525424  
LOC641945 147.710252756854 144.979749941424 126.292433523959  
131.069515666204 137.381470768186 146.286319248569 131.816989019024  
144.904021527125 139.694950277714 147.479390172796 132.28010415054  
161.85913459364  
LOC641947 128.848008246639 131.827899207029 128.882160435252  
123.439897913722 127.997280639609 126.982340580909 147.450681897766  
139.200284631709 136.964780183468 135.638156623519 157.595468761042  
131.894919149666  
LOC641948 142.553175839278 141.085111670206 142.898851434337  
151.206697943841 144.361871207081 147.1476865809 175.044940252247  
147.155738185574 144.792035839249 130.150998843383 140.453219944445  
142.081013617671  
LOC641950 146.362705590778 143.879597098414 154.088770236213  
178.976116597291 144.351763882823 147.939682463235 146.20679320119  
142.084294087481 150.911524755251 145.380971596154 137.97889661868  
122.830376253922  
LOC641953 160.923897048848 153.248199842194 160.91894600916  
143.236593995493 141.023875058322 149.563405421366 135.186880148352  
125.653011880654 143.138613573764 125.685852196342 129.123522999226  
146.363348761434  
LOC641955 128.174382934295 149.593135821045 143.196234996376  
146.298733090986 141.970301370404 152.286545050749 151.372219350291  
145.139112683819 134.790410101679 150.717996520257 137.760712896718  
117.593226427794  
LOC641957 128.101371225192 122.399241018147 119.023688551496  
118.703108284564 132.37450516592 134.719531559829 117.561878567749  
128.221548195595 115.531710316716 123.089110282465 134.66169946771  
121.150371270451  
LOC641958 159.706443636973 140.619606039582 144.746134643761  
131.188208693139 148.499207368959 132.570225520163 153.477432230141  
124.308243215293 128.800907223807 154.00005407707 131.268454024753  
139.900523831258  
LOC641959 147.473875763319 149.551030995489 169.422015793848  
134.087875547168 137.509100088226 160.32812671237 146.686192012988  
148.275031171973 149.335288055732 136.492892469272 137.510586346207  
149.975892236985  
LOC641964 142.313725116274 152.295451313545 171.106189029362  
154.108689872903 132.913891550054 139.718721422663 149.980924447339

132.128418409996 146.612602970963 140.413503801467 134.963301368391  
134.635645106042  
LOC641972 148.577336081778 175.608958881476 149.730467498266  
173.544556426164 174.471304281502 163.474261351901 188.335102005839  
145.843639385175 180.336623146341 153.202157381228 179.863096463897  
157.21132653949  
LOC641975 152.064982697394 164.509354377985 169.072574423443  
149.664506761117 153.67215573765 134.830021570666 144.760229351772  
153.610428214886 162.975988989106 158.845174721328 144.896960245309  
159.724824188037  
LOC641977 147.962721373177 129.859331207247 138.868641301709  
144.343993358829 145.393431956588 144.450810504499 138.670077127324  
148.376194044247 138.060245284993 148.206529935876 135.817028661429  
136.977435235496  
LOC641978 215.167086358143 191.018168651394 178.313238745665  
187.729071402782 221.231455446574 224.361277033882 179.854800301573  
196.908612360694 192.96586114861 184.974347306539 188.417078622503  
181.003812824014  
LOC641982 152.780908985916 137.462720784077 148.911306526869  
148.323729699672 147.305679046765 123.424145707079 137.180793826675  
150.685245572093 147.187681416171 152.8810245209 130.729989463558  
152.334669286305  
LOC641983 152.258389962 153.299196905367 153.005366371425  
156.654450436728 165.70840218273 158.095373931016 165.163490032007  
149.625528206375 152.713528089347 147.809934374849 136.730623822061  
152.974593669153  
LOC641987 141.132694466739 124.095340478326 136.826606228323  
134.176106740247 148.344941331885 128.455670598648 168.188793271919  
127.913463809158 127.314089756429 144.302925948596 144.380485359951  
142.833025633146  
LOC641989 164.319378349317 179.026308021985 204.584643964409  
170.577057395536 167.164675439456 204.137195524755 161.655336107432  
173.751615672365 177.666582096539 175.437651670246 170.901599088282  
174.832495287192  
LOC641990 138.963864375073 123.709293439934 143.13304460184  
145.572363722788 129.059722322306 137.765042156434 125.951927536494  
122.027632589515 124.840101287634 137.642858036384 122.297401003756  
134.163388748526  
LOC641992 154.701413581915 172.521737547052 175.663960113118  
171.61704153463 212.854068610681 230.015981563049 264.604297630839  
256.093363520707 261.96528977292 261.028644858795 307.363302726074  
259.625943627223  
LOC641994 147.766043861937 139.560555361919 154.212927357622  
139.744142223177 137.370670726978 139.092075947067 149.536681241497  
147.748142622566 135.507247740621 157.81327663167 146.779054605199  
142.556535259086  
LOC641995 139.675292022085 141.841889087507 140.181179402328  
142.64421300687 156.467759630936 147.635761512135 135.708804956764  
141.544454931788 134.592495777159 132.218907367109 124.148194572004  
128.432188632218  
LOC641996 162.161282071736 177.716742595321 196.583548193097  
160.042251279235 191.146276657897 196.189101941489 195.711047893396  
171.731395791818 182.042104888745 186.007710175103 151.758970249544  
172.583615020042

LOC641999 132.677272839165 129.831076624826 132.551989498706  
130.716570410608 113.470356909765 131.246704975084 123.807693112932  
125.794788766462 111.260486045985 133.871685084945 133.554822920765  
135.274205069488  
LOC642000 129.340996658802 123.02167644694 137.20253329376  
130.721987260546 138.831297375659 142.151209745109 117.570749340011  
123.07559417607 126.63730651721 126.340955733062 122.309041354217  
129.192326574697  
LOC642003 155.815785551964 143.692305478191 143.163083976105  
157.21132653949 148.848823912244 160.655929233978 148.501654210579  
154.16370087233 153.846723846716 156.7940590796 156.497059936271  
157.463122989559  
LOC642005 135.648906382608 142.294922363188 148.47415004128  
130.872296869843 140.018786803502 143.461785113446 158.631298154353  
124.35374445763 140.38936578649 117.611606270124 136.240503841228  
146.373162751863  
LOC642006 121.730973193225 133.020551937677 130.838350486331  
129.408282688425 129.964666668421 131.282091618102 134.358190382365  
132.769455423385 139.372441366224 137.235469802064 116.403106568357  
149.076146942797  
LOC642008 156.487049947247 133.204793127029 155.530415929059  
149.157934946623 129.661073814998 116.647291878845 158.8246699332  
127.70306883967 119.720132373023 138.760800146167 142.896723827753  
147.327675057481  
LOC642009 131.967245387861 151.40067812803 144.203716525289  
155.111346336412 162.173506492562 146.011694647614 124.134916773123  
136.222421297872 147.117286738537 156.901209828741 134.512204051277  
148.823805841381  
LOC642011 142.419777428399 139.750281709938 158.604431001643  
126.25011972597 112.605287278882 156.961070790639 140.978511668091  
139.619076126267 131.007779278656 129.428950259722 140.160349667726  
144.991442620483  
LOC642014 152.624623171797 118.879931299016 160.892163220381  
156.396579029788 133.892661981648 128.356453959987 149.863063160222  
139.162076054072 137.80436357695 158.902676384853 130.260174841484  
143.458937009197  
LOC642017 243.35880641566 214.050918459805 263.568160216149  
225.005311517365 185.891520823789 271.397087928135 189.603621918298  
199.620978536397 192.493439659184 191.937607311711 234.588584245938  
245.351459157365  
LOC642018 144.848839185565 145.34332740863 126.153806511702  
143.971152352313 157.264673452646 125.162662242842 155.104697146664  
155.227218488935 146.100551577766 140.997594159186 142.528480882047  
151.783090997855  
LOC642031 274.427235605909 334.377352542623 290.688850193983  
444.584594376357 868.86246684338 398.423396126075 371.127480221666  
314.292700455545 640.255747986724 281.405355165228 290.802509012089  
347.985315257161  
LOC642032 125.826111950648 120.883785696583 122.909152047474  
126.151017944639 122.139832263188 121.591962855513 131.965184111199  
134.06834346533 125.780294378066 130.018928906449 136.140327952231  
125.833649377492  
LOC642033 399.872401268958 399.963640581639 440.404188514231  
502.170430910893 252.548942594125 375.316610221279 310.142754559096

271.087125858775 294.871848467326 280.007569817323 243.308625792448  
364.331860640225  
LOC642035 149.788558681761 146.050714008913 166.388683552371  
146.64560446484 148.818562911616 160.690442125281 156.233573126063  
141.609037401299 158.58863949084 172.412059174046 149.086836205064  
170.522853717911  
LOC642037 134.149446827982 125.863969666806 126.077945699709  
127.83654093961 123.100949494673 129.079917151186 143.601057437842  
119.052729327147 115.14883090249 138.5270206057 104.739307327595  
119.709032462308  
LOC642044 130.720097323382 130.278980631435 136.549385403781  
130.570050159191 139.972797966319 136.210745281543 130.122672154144  
138.096262211809 147.988883293205 145.887262601586 122.373400988227  
146.326067008478  
LOC642047 168.269075560636 160.79631681714 166.430881793156  
167.724233915361 169.999692055871 159.652739364784 156.460374293022  
168.05687638693 153.302438200151 171.589889474122 162.638805580226  
164.429483677715  
LOC642049 131.514114515895 140.671406418004 142.419777428399  
121.252042151856 154.988494760267 141.73799456072 160.176567985923  
125.958139354095 140.603933807629 136.639637503571 137.048292841566  
140.504486195539  
LOC642062 182.165681034082 175.065781438801 162.940190224943  
164.50490221903 161.079169854907 177.524818593325 148.691132137188  
153.257097727888 164.39557148282 169.720414035325 169.441789096441  
187.997940126066  
LOC642072 170.145574727175 160.549597620339 145.82344959902  
154.455641374384 138.348160604288 135.857403020659 164.865846124876  
154.398416018484 159.253029632045 160.311096717492 154.894196413558  
173.056715623574  
LOC642073 181.950658782069 254.013921962363 158.100395482569  
197.341423434688 150.188128594079 169.661107080542 165.022029012505  
207.173653740239 618.661249163439 177.825648107126 179.250373572781  
186.406439948242  
LOC642076 200.964306455257 191.881157918071 187.965294229013  
232.385176936256 263.379982742085 221.471811658459 197.775397831129  
203.389294254141 184.557630172634 224.6588173737 312.484289357493  
209.004374703564  
LOC642077 157.390513637267 147.454902803231 150.431052959951  
156.411563412665 162.110943457969 184.844915350411 164.253219197128  
145.797047170492 147.055213172078 153.018378403144 158.193008411967  
148.23392074197  
LOC642082 190.389158930835 193.502988612307 169.061364889307  
219.288597751645 186.460034745907 173.272062328378 216.755681508811  
199.70041209487 183.853381322135 201.931760074628 181.431827312784  
188.959655155629  
LOC642083 142.902838068479 152.134895623504 160.664407431261  
177.831718771025 159.660564323984 162.063689419737 151.984619204523  
145.210787864362 147.561362873855 163.07139884152 133.446934298801  
145.837985729893  
LOC642093 132.02259465879 132.629453540571 135.766466392056  
145.487783396345 119.449118660481 125.932540615682 137.992477770842  
122.796362813922 132.344296085487 137.209801101689 130.128585442593  
118.553226856337

LOC642097 137.73733991363 129.059722322306 141.256915527472  
150.46669393448 129.111259771449 135.244303669342 150.891358590974  
144.188147197178 144.173163762502 164.433462115832 129.558589108727  
133.0349214478  
LOC642101 155.803946849495 153.705394500855 157.521230460545  
163.846242743377 155.98413216883 143.694412162756 154.918405633244  
143.851670859917 126.98588570464 146.20679320119 148.060086496148  
166.850279817976  
LOC642103 129.041254463346 120.447140228396 149.437212090587  
153.667355714857 150.058160923921 149.538429805372 155.873969001251  
144.54895913821 140.511988097197 143.833057210822 127.723052839953  
144.678895821726  
LOC642104 177.32104138164 143.700865823615 151.889644436875  
175.638328370133 154.153249796248 155.957570398118 137.112274459462  
153.418095627352 135.341892490559 140.014167357286 138.480633738745  
170.052320640686  
LOC642105 130.005909892804 143.870849001074 149.277880094957  
148.054367166566 134.376870769669 135.230327755927 133.318665755015  
161.305860691151 139.306122448857 151.598423878653 155.471795004237  
137.15288362126  
LOC642106 142.583098605144 144.313841064968 129.294026995663  
137.493436771898 131.637867236023 138.480633738745 142.043121538885  
129.779076484273 145.117574928189 131.486917325752 121.997885377703  
132.17294083844  
LOC642109 190.22021453133 190.471158323247 224.528190554963  
217.094085829328 179.198164545975 202.458096827378 208.194788326109  
191.740596601895 193.315380090713 197.762169504041 137.46978401237  
197.582402276079  
LOC642110 146.125125252096 150.851504454247 177.132361355899  
170.878962027347 169.691392833277 156.213421099137 146.122816653035  
132.106673891288 153.966815534288 156.283332326948 132.17294083844  
173.656241217331  
LOC642111 155.76860362365 146.440630638891 154.512619892977  
148.919726992353 146.559502785264 148.919726992353 144.461999591223  
166.209190082084 153.748035612441 196.117609477292 133.16973309664  
152.166586496729  
LOC642112 128.994977935861 136.355319997318 122.809241232029  
110.764586138261 124.176944998906 128.351235762192 132.390330703084  
125.301602026407 133.79868477192 143.787766055379 142.729945734027  
128.449200385351  
LOC642113 166.214167530158 190.614236149496 160.031506612501  
168.470685171939 486.334840298921 562.711562649704 327.811191081135  
14228.7550296952 10704.4678928541 821.020339593525 171.40549153673  
462.888171502285  
LOC642118 156.702300398105 150.247639459773 181.400788152988  
152.221694141976 149.032116392457 159.331110936668 145.89593390936  
143.229240978574 149.703317565769 139.340699808517 123.259322051795  
159.311949668403  
LOC642119 139.909719416938 129.413729619216 142.865320802784  
149.292552957665 128.41549156443 141.426756696799 155.71830087869  
133.216489794592 134.08708833507 132.367155914392 138.331509117817  
133.322752419739  
LOC642120 161.061119536632 134.825699448987 156.662150993832  
141.249687936867 142.505050582588 139.325478877749 179.321622114583

150.911524755251 160.30784625946 153.248199842194 151.563917522864  
149.815494316469  
LOC642121 135.420780282429 129.763063900493 128.032141013681  
144.511488474344 144.603401904061 130.304743083321 130.058902161953  
138.30326146769 128.988736837863 126.165220332132 112.841406363391  
140.964208731587  
LOC642127 131.38881091292 116.831725094917 137.565050253948  
138.940564112156 124.242539075734 129.961042190085 119.75069850668  
129.529372508883 124.056405566491 128.372225487481 119.578240680666  
126.786434897401  
LOC642130 151.641486303453 156.581569063195 142.253826696208  
147.191114491117 140.475688390415 128.135216461862 122.389557272277  
140.306808081269 136.362761829761 140.981666934622 121.059923601223  
150.582568022489  
LOC642131 124.958287100852 129.135985676046 142.650451413991  
122.456286448252 131.404001006643 126.734835642553 131.261903118177  
180.060096787617 224.89911221799 124.464941711781 139.642457979496  
130.892302357045  
LOC642132 148.707332454527 151.930565620382 150.578023008958  
159.424105896749 159.59942312149 177.371157649894 166.842970309527  
153.308956040034 160.168654167074 150.610633329908 151.338765231607  
150.014842228372  
LOC642133 159.678281513591 145.048033586779 141.649911527714  
154.713713332354 141.947478902603 146.357214078158 127.908872828095  
140.45860949168 135.407536491819 143.533725135227 150.629932241703  
139.82050388626  
LOC642134 133.75142055959 132.051614319023 161.055911120534  
125.328704545727 139.023486014525 151.202875465389 134.953368678368  
137.066799877341 140.123348569709 128.266906202941 136.415734370763  
143.959910170676  
LOC642140 116.291146910202 135.227424713702 131.806645427543  
141.834582245454 135.242328667085 141.892214695902 138.885230982475  
140.485102148597 133.226542641174 130.12032144763 134.253399256648  
124.297848065172  
LOC642141 141.917318809044 143.812863334832 163.175801793143  
152.232245164212 139.414912158809 164.641508485461 142.882928785377  
145.539731152955 142.41737138634 148.336126836362 159.35787888191  
162.850128623401  
LOC642144 124.659387568671 134.32174235533 125.202468372015  
124.69564501518 124.486701452062 123.294321716108 135.306127055224  
141.960809148036 131.271979461703 128.723261477217 134.544368736184  
127.093255830978  
LOC642147 140.121874960672 143.974551393951 134.224781719944  
145.776143302784 144.572485418264 126.340955733062 155.576838112772  
154.417731984391 142.288110423886 154.935741493562 144.794806650252  
141.882859092658  
LOC642148 127.844624093148 143.971152352313 151.742938010671  
133.411087000196 147.343712869579 125.576103876855 128.331867822629  
140.992801405088 155.180238551547 144.523620416439 137.471563342956  
127.183924911179  
LOC642149 150.945167884077 129.029151164978 140.497181450706  
144.361104234288 143.327730271099 144.683260413888 139.56332664295  
139.459975305985 138.281188275319 142.628296442123 153.068898842283  
132.16600019449

LOC642153 134.231634410324 128.711308958929 132.128418409996  
134.062423178775 123.361179535626 139.291775075915 141.327299595068  
137.25679451567 137.091932621041 137.462720784077 127.476819912992  
134.712935556892

LOC642154 160.865949438448 148.663860923774 161.325409589612  
189.403934838648 157.322594990954 138.12084690547 154.503958858173  
156.050585687098 149.247514768446 148.717545103261 152.719997757291  
146.453030317456

LOC642155 136.691234705997 153.869144282319 168.3523504179  
156.630366766924 144.783770949511 144.134485888258 133.871685084945  
134.30624644595 142.464394555901 136.817517693076 120.721341479615  
150.241585041178

LOC642156 130.445920648705 165.443069511115 159.806221777332  
146.34029698108 159.466972602203 154.079355899056 150.593928635647  
137.6160344044 147.305679046765 146.290334865039 153.592819860747  
143.021435512861

LOC642160 131.681566829159 118.109991440011 122.038534506506  
134.010889126443 130.056727701826 149.498020676126 178.222120802125  
167.106870400592 136.216577685046 123.865424155099 124.056405566491  
143.635367691412

LOC642161 132.294365151614 148.592330216136 171.433001048839  
176.612866969431 156.146154578237 150.431052959951 155.303903514061  
165.71382076724 163.942131559267 153.585849286113 125.236926572282  
157.155105022743

LOC642164 143.030777754448 149.97218338771 160.349557404154  
153.875760529011 155.27707167384 158.760577365464 149.449402325556  
151.92638745703 141.166605868578 144.040342300793 130.316282003711  
149.563405421366

LOC642165 144.302925948596 168.007337847195 155.7441762827  
182.608712782878 157.663460168247 174.383193885933 163.248980088946  
176.53912635694 169.232677769521 167.756465178715 160.374491283254  
159.110614190088

LOC642166 130.953237161257 128.158605637751 128.986795394842  
137.063689600869 114.545476919992 120.948246352846 139.123489349026  
125.797445952409 124.193603137858 131.074021609161 146.577524520274  
126.338676765473

LOC642167 128.129780978486 142.830950036054 147.606311227037  
147.306549450597 141.037217406848 133.018406625714 158.183045411298  
132.283682066898 125.195549796301 135.544048708523 147.975551540256  
131.780134634616

LOC642168 153.969493052468 157.035739033122 140.446530307169  
158.963726206466 148.02460124587 119.618176258524 142.774449777424  
133.175265384038 141.920967855989 151.204487316077 133.226542641174  
152.191393042132

LOC642169 132.952355710395 120.160652344221 159.534017722536  
163.215507313506 158.249743182741 161.937384157098 141.482344048665  
142.785631812039 140.556631658219 162.574338133241 152.317890573534  
151.342902631318

LOC642173 132.992071643179 148.497497694754 144.460541430705  
146.658048787833 142.282861913548 143.260448301109 144.664600892248  
137.398748156909 146.464937541891 154.190469538568 128.306607216705  
146.013430937168

LOC642176 141.710076413441 146.370084152094 131.628021008753  
139.781351410748 129.861693025157 122.320966091375 124.321503368855

148.541832125061 125.810756286648 163.880402141404 124.362182111222  
152.980843102933  
LOC642178 137.75060150486 141.841889087507 141.809577413906  
122.133292722932 142.663334893424 131.890554636938 140.317110725836  
144.951973735763 154.343424387068 133.425151103622 128.818684264163  
151.299425811105  
LOC642181 123.484987952263 140.985432994867 125.386545354096  
136.140327952231 125.563646710294 128.463982896081 126.386738502885  
124.521130036013 119.301746097298 136.55090238808 146.787927492706  
121.289159587394  
LOC642183 156.375876454394 139.367493349339 149.936366672592  
152.254519859308 152.545261723881 175.882911801581 155.598586699376  
158.670835881902 147.446381217887 155.031272695335 154.520935683104  
160.664407431261  
LOC642185 159.646538408414 143.917152377544 164.630705813584  
166.735962853075 153.675939908241 163.558869203898 142.099541115973  
158.631298154353 154.584367902971 143.385915173392 135.532820436394  
174.301952147167  
LOC642187 133.269658133558 134.21500333869 151.064422836695  
140.044536042073 154.812587513407 160.379168489216 135.020690381988  
154.070450565144 129.645982978155 137.303701514064 140.025668085978  
140.696326952077  
LOC642188 135.689889081912 150.956247643013 151.815211341628  
141.410953064267 144.985280401441 152.001155788544 154.021906399992  
149.535008475427 146.800324349321 146.919110530891 137.647282354299  
167.186780161168  
LOC642194 148.544887355857 146.6306281408 176.86489466512  
145.56468363155 169.285901212492 154.94587631386 173.132747018514  
154.889079187405 159.42746786085 157.252701277198 123.470830748348  
151.029785584386  
LOC642196 155.710272937386 139.39442529119 143.860092956392  
150.070213543579 131.919387743094 157.654040469774 143.456586680241  
160.766121558583 127.670274911298 147.040759979063 117.539640414775  
143.347066447019  
LOC642197 239.970202560698 276.961847241646 285.768837438859  
310.075815009404 480.101253056873 330.143103381406 411.039234404499  
436.891409783298 412.736636437651 509.618968665191 419.047108206042  
453.593585032712  
LOC642198 148.585224298375 134.986030185477 149.322537247388  
142.930903395131 142.427198128376 157.463122989559 159.515698265424  
149.308475163534 150.891358590974 127.633362302159 143.147325939994  
161.577683729655  
LOC642204 137.333595298205 151.984619204523 140.689631427359  
146.686192012988 131.104534164394 124.362182111222 117.284724854784  
140.593510265137 144.39135701666 152.082927731045 127.514381389109  
149.682150633146  
LOC642207 116.092815232176 134.024205981268 136.085524091635  
139.56332664295 142.05051822522 127.044367488881 143.52474218953  
142.211357324461 131.397850276558 144.423509403938 140.182150393054  
133.816601264067  
LOC642210 18501.379301537 17975.1602090863 20647.6275450554  
14108.0461617941 22182.4877079778 23318.4614981217 24098.0251582624  
27501.6698286039 22872.0444589809 21650.9263365935 28730.9248954575  
22182.4877079778



LOC642212 138.407207709066 146.67875644027 160.419358656559  
130.865693081945 131.123149002831 116.342242990651 156.368487784719  
138.938546468136 132.937942776777 132.322618637842 130.949405011154  
127.740057874561  
LOC642213 131.798931481549 138.573829193205 129.869363181125  
146.361128670362 132.091532692048 146.915247627846 138.003440266411  
126.752999657665 137.21916902421 134.696571019896 119.739204799544  
175.717830026564  
LOC642214 154.417731984391 143.616189776965 169.238325933605  
167.586897846525 157.895460674072 153.448882783807 150.667001746475  
167.858490180471 160.211460008777 150.378690719669 142.656762407774  
175.601912488918  
LOC642216 152.516485296644 165.590892262736 146.355229778997  
180.667897257797 158.364031234356 155.368204597287 161.305860691151  
163.315865817864 150.521719129181 170.12010526854 150.163801964104  
152.215146681655  
LOC642219 135.120878931851 125.720102558499 127.806138997958  
146.197678850188 139.039276904833 135.724378638305 139.377027955744  
142.351705613006 131.298129667973 124.930303940168 128.850480964163  
125.661697165943  
LOC642220 146.690308698414 141.855655600443 139.348494759948  
145.426171336045 138.010385979692 146.9554120076 147.491439949088  
136.553568679965 142.106329280184 143.103779196037 133.733674016447  
130.112882549637  
LOC642222 154.831307586538 166.061891147234 182.950456188966  
171.982071800592 154.070450565144 171.51411661213 161.573975848093  
161.877378749103 161.89906072679 157.860515609693 159.42746786085  
171.826623289946  
LOC642223 141.264096014725 165.827405735044 155.780657091484  
164.103306492559 167.776363541939 141.982743538528 173.372949622338  
140.466612569756 153.964765831852 140.292132023262 164.587657424569  
150.70383460714  
LOC642228 153.299196905367 142.951829221947 159.05213637758  
154.617462666847 171.636121363019 157.259599894923 154.066939372379  
163.748692741999 153.534763364558 178.496344474999 140.840895590527  
145.485453268383  
LOC642229 130.563756903074 116.929398630733 141.628203045085  
133.264245969185 131.498890334548 140.477307701027 127.257502314385  
120.003095000297 124.121555438466 128.513011425662 133.533718725309  
127.540848073484  
LOC642231 130.666781754635 129.150574563997 116.011005504201  
133.203064891923 124.980683327416 126.848211027661 119.52150378372  
129.408282688425 108.760780994582 126.858621735156 123.577138762427  
110.707755436868  
LOC642233 128.348910964448 142.598106777707 135.582230137515  
137.644942697483 121.377666938052 131.934680869554 129.797601100832  
140.815807483203 137.988325215021 137.93067182632 145.453460204097  
131.196196319523  
LOC642236 304.900910626137 266.534316786801 412.941907828617  
276.5177779623 271.823243396395 307.728083981504 274.120234926832  
277.359422005775 311.157764305033 281.071129128589 293.986292438714  
272.117599603586  
LOC642237 121.316836274255 123.484987952263 117.953453145685  
118.366859032979 130.760835441776 134.339535632463 150.632724038845

115.890431424899 126.228513847262 136.733225604928 119.701313125748  
136.152827218905  
LOC642243 147.951996191313 147.174977926293 149.557833322995  
151.519845657755 150.479320779862 143.094799968981 151.617989938924  
149.678629612616 138.474429223902 145.985223908092 154.296467085914  
143.607579034109  
LOC642244 142.543569032033 152.244018820259 134.848210768603  
133.927844489731 134.002424083826 152.350537364705 129.669484303621  
147.172440755724 135.993598471576 136.91779948054 127.6516565653  
147.985843605585  
LOC642245 136.71278398686 144.450810504499 146.043369917028  
136.032310569127 150.709091532746 149.661929885679 163.004844049672  
124.650711299942 140.13515064896 155.558839375761 140.613151527886  
147.446381217887  
LOC642248 123.720229113779 130.998637545686 129.16337177104  
147.600825146067 159.554978842683 137.406420101257 143.416816860089  
142.354731066206 136.578058206829 132.140547119679 135.894512504725  
142.185345091219  
LOC642249 126.402405227897 121.387799881297 139.560555361919  
131.442186260672 133.389232348615 134.741781820234 126.430816528764  
139.22543724535 129.878330410179 130.832462487806 138.206065640158  
126.409995188106  
LOC642250 7992.84111657183 7753.61594300904 9016.04641569485  
6877.52553567598 6441.13602696535 7873.0525548049 9192.8966763778  
10202.2226913537 7930.82679738435 9044.54885739666 8261.82420896892  
8368.88320476021  
LOC642252 135.764392116216 143.59754905745 143.987296454585  
138.060245284993 139.54738445816 142.514794686932 144.642717750351  
140.318155161909 145.060085149395 132.611864316181 142.483308497682  
138.976386995124  
LOC642255 168.166938045454 172.319604146201 179.30729544595  
175.41089164969 196.734037460218 169.33926580273 189.94130405123  
174.795822188504 183.633719048831 179.220691178402 171.677654793775  
180.1204762193  
LOC642257 148.996601285688 136.899405404096 125.243735617266  
141.207041271169 117.539640414775 130.920010795017 135.585648980469  
142.664793323255 133.975526667571 142.388076341254 119.682747854629  
135.4702891855  
LOC642263 145.789840511876 139.746733428525 134.590666885938  
149.678629612616 138.687013437904 134.936025073531 152.353494489233  
144.084441938143 129.369968549738 146.218767446679 126.682913361149  
152.445022409208  
LOC642265 140.770705453805 145.749887769807 150.134337895481  
156.114825514646 140.66266106824 149.974080577906 140.258615682066  
160.79631681714 148.263293819238 139.065849548762 150.25322837689  
156.581569063195  
LOC642267 146.112388101621 150.250193889942 153.579955370444  
151.134466830828 150.042173991463 160.537464426971 151.151297821117  
166.187099519035 147.038700869156 167.92409473064 146.495845282846  
154.212927357622  
LOC642268 131.551085224112 162.464201058576 140.837360719964  
154.645353009618 124.735542880811 131.628021008753 142.583098605144  
121.607527525765 124.288632450364 131.360310497851 139.606654715326  
134.074425424613

LOC642269 154.758831302515 143.810050834214 148.332750352364  
155.014930599769 163.612347715773 153.083451626042 147.691011072898  
152.680068580858 151.418316929551 150.837717923505 157.041481397151  
163.960242712692  
LOC642276 132.645196037302 131.719227272527 140.053051625323  
131.702788057359 122.777544465711 137.483830932387 144.927731613526  
136.823008283157 142.382367938838 136.960656707275 125.132610413051  
143.769240322865  
LOC642277 142.796371223204 149.089067389266 151.423936838934  
150.964506212368 125.67874617392 143.895399273595 139.46518859956  
136.617105945904 161.903016201041 138.499293816467 141.689210867136  
145.739537463907  
LOC642278 147.561362873855 143.962842383778 138.925802905636  
149.398118078302 162.769643886845 152.60462513339 143.710449544388  
127.831950458406 155.747694056319 130.790872334222 162.649092834422  
134.831550401848  
LOC642280 146.639556437847 134.734429133481 149.636887782574  
140.960907353937 145.054873480806 148.82892305156 153.664503112778  
148.479865869644 151.26137860684 147.943844184702 139.130560988108  
139.155456340488  
LOC642282 145.107068919893 144.043818335414 167.542332146706  
173.520662003159 159.065612005442 148.567630572897 161.663893432522  
231.547654653783 185.544411160039 245.850813387241 152.082927731045  
164.608496326181  
LOC642287 136.886677060418 144.900785401228 142.863268359757  
149.227646026658 144.559193410932 140.951031275943 137.165966740473  
133.78629612147 155.826394389322 145.110145981908 128.229729571899  
131.166819048309  
LOC642290 129.711973013336 129.021781431809 155.53992663898  
149.79295887612 124.629877200816 134.641840638331 149.369418844044  
136.048100211752 152.97753810644 123.875478428652 132.796961054534  
132.953762692926  
LOC642293 112.156010486085 113.549098821204 115.041324824728  
114.740948266517 122.426568507144 118.895095992424 117.990622156287  
114.182798672347 124.918089223417 111.286141277084 113.23302126254  
105.771723307783  
LOC642295 138.553151063218 155.463400179872 154.007244208673  
153.507553306723 139.303747021408 151.118430469429 143.394704760983  
145.08246303652 146.677241054745 146.912751127571 159.213940274232  
141.613898853625  
LOC642299 391.326200093611 432.088303693555 425.229044880287  
307.16835174775 537.982214580518 1194.42925868786 1531.54387233661  
1301.61742965939 1115.34267967366 421.255522475862 986.441377365124  
1880.35608492553  
LOC642302 159.624341769644 142.409003426775 161.646807806182  
178.619580818758 163.753434774656 158.138862054715 143.540775745942  
161.788118050564 162.846914172627 145.835240952992 150.97777780024  
139.365595511181  
LOC642305 144.40361834862 125.243735617266 129.307025798583  
130.304743083321 128.019837242559 131.794065532001 131.007779278656  
129.415078042622 116.433239116749 119.9652990395 138.19108838324  
124.061321002641  
LOC642312 162.656951764783 166.842970309527 170.585366369563  
167.604959895451 148.941194457652 147.364301916733 191.554396977588

156.090871391873 141.515788643986 153.468933239223 131.573729430926  
154.309257657136  
LOC642313 170.108500366942 144.011792962785 157.656220148041  
161.72730923536 164.857465272302 167.871703133182 154.856345114916  
157.306022722324 152.974593669153 176.689683169567 151.519845657755  
158.738932073809  
LOC642316 118.006338536085 108.247365868673 127.903393519351  
118.761737418652 107.239841465534 111.299115402008 112.156010486085  
109.586955365611 112.005939063045 107.544568250154 118.521075843163  
116.472796471694  
LOC642321 158.049286838471 148.038291195414 141.363863974586  
138.652735298338 151.543678860049 179.460777888284 149.740404686695  
165.767629164724 136.949403128211 145.190896872008 151.908841481413  
140.754706171596  
LOC642325 147.450681897766 135.844983721014 148.185056724262  
137.561067667054 142.281657284178 140.613151527886 133.209211811498  
144.972694558182 138.802633518223 149.6730835169 143.635367691412  
142.886493948916  
LOC642333 2580.98143004019 2859.94396089224 2303.0998502001  
2527.99279063127 477.626693328013 1213.06007305892 968.548243081111  
913.684449305965 1141.13648305827 955.604404066769 1271.46608195833  
1002.88224342342  
LOC642334 133.663595328149 134.679882781788 138.093181144173  
138.165240772401 145.264402868435 142.246864759311 139.517413585211  
143.639894909386 137.460936879873 153.267549449395 125.689884251847  
147.066582834257  
LOC642335 131.825172822888 141.901382169334 138.112168847027  
139.840256729373 145.762724663455 142.590631181358 146.90847051471  
148.684855678535 131.823019555685 126.656077572961 134.168381235167  
152.080057231881  
LOC642337 129.299810898979 110.807605625125 123.21732068638  
131.523538461751 131.984467471242 131.856313046545 130.907879150229  
127.377356715337 117.718893827092 127.490889148422 123.622533094122  
134.865577264797  
LOC642338 130.187833435052 134.181819177347 135.485867373592  
135.767818903328 127.412539650291 147.668990552874 140.608266389167  
134.27783583528 123.943080151532 128.879953205511 114.85602874727  
124.571807093748  
LOC642340 141.1596293382 125.450077160575 115.450352881048  
134.810212106122 142.775372580233 132.593747375239 137.572574328004  
132.973551954067 119.922676683808 120.571074646092 140.746062850603  
124.766436060041  
LOC642341 143.021435512861 141.299677389827 139.503902205317  
149.860490620507 154.475735552851 146.495845282846 135.279197125157  
137.446044691412 159.670815631794 143.583650664594 145.619570216377  
148.186698759452  
LOC642342 187.4351946569 192.709473588165 284.995098167431  
244.219585315024 158.85003890975 187.15740398852 172.8993416872  
173.790848780011 167.357570666817 187.955617187544 161.299920355406  
170.684848540493  
LOC642343 140.485102148597 155.119146797226 137.335501759561  
135.206755687105 147.270369342438 171.941887376462 164.870860592068  
150.460618402778 147.414834563852 150.46224324459 129.541049979717  
149.016767620428

LOC642344 158.171302275984 158.92538634742 167.284724396943  
158.98666068453 136.990610254852 157.955606242401 142.635015113687  
161.781529659549 155.130745957603 156.05583229359 138.218392984717  
158.73040336393  
LOC642345 136.364830851128 160.707290343231 136.403353223002  
143.160281902098 132.177829138863 133.760183242137 132.8615886934  
121.888886996534 149.155345369055 143.67880977119 124.947565043721  
125.010266083832  
LOC642346 113.549098821204 122.337240239463 122.305514440939  
127.31790396929 123.991249190444 124.515078120229 134.002424083826  
122.046901607713 118.388993232718 126.925982415892 117.034228068173  
118.424520312293  
LOC642347 159.513465644268 154.750512277909 149.783542909965  
143.816567683093 145.100964170053 158.109836032481 136.041605158822  
147.43089976575 148.96493117884 157.200582422961 139.711696905287  
143.802883430376  
LOC642348 150.19577351885 151.758970249544 146.96472350529  
164.820007934887 131.690417323838 142.175432631861 176.431477850092  
150.336115779606 147.815673580657 172.457165477145 148.516653846017  
153.597557478169  
LOC642350 147.011838288594 127.654130155446 129.477908941439  
149.202628825354 138.436029489092 144.642717750351 126.423739360894  
153.08734299815 137.054278745724 137.769431537236 126.242935839683  
133.387065801837  
LOC642351 134.160100276452 146.464937541891 140.906421938377  
141.779801021888 146.14494790114 140.750004067571 146.204122329465  
143.552343056702 143.532014058535 141.918291147773 135.088149158147  
155.427282703527  
LOC642354 138.213742418402 126.676875319815 138.820797333519  
139.378915474473 138.466136108202 150.582568022489 134.918496279185  
124.02280670421 123.835583753941 158.716575777014 144.0534341937  
145.440471538068  
LOC642355 133.984078167807 144.098578955023 150.391286215189  
152.801801823442 129.223872979789 137.620843137286 140.345652629553  
154.201375471487 134.376870769669 150.790155351217 141.953114738413  
140.855078775719  
LOC642356 150.91730768674 130.562422910426 154.555255038453  
145.315875226867 145.828229656781 131.615462296871 154.395261192114  
145.208597795717 141.069243738242 129.03753569157 124.676743480622  
148.00952002903  
LOC642357 12916.6904389018 13645.150201952 10222.4435857673  
13563.1694195379 16925.9167115963 10632.4185569238 14108.0461617941  
10862.3952192141 8768.32269645116 11971.1664283024 10449.7190201942  
13013.8166277495  
LOC642359 137.446745269821 147.15764785567 135.708804956764  
138.728765780512 153.028658323116 136.71484425521 144.979749941424  
129.838790698396 120.773552653073 139.587192809431 135.897498591391  
136.919702354166  
LOC642360 134.20988291379 139.671302796695 166.091736766853  
157.348475799643 147.626071601072 152.789338329505 151.04846635538  
139.491769969541 134.744175117719 152.725025539491 143.454771158075  
139.591231478841  
LOC642361 197.427788552936 195.84531580224 218.862705238592  
189.070238523683 201.123529130035 165.613274361543 187.380064367869

171.813279175663 174.027190728107 180.837420957945 210.085329463347  
187.325542100762  
LOC642362 146.880440100898 145.815454490804 150.812739240232  
154.088770236213 153.744962185987 137.144001915831 153.606787306076  
140.085359251038 144.840218312168 144.6567095695 145.958718601763  
148.052222389368  
LOC642365 142.910616700526 143.082880435412 152.516485296644  
148.304863957659 143.013801508709 142.956870642583 171.320653882424  
132.765942975939 145.25774926819 166.89884215297 130.593846004132  
142.991135981933  
LOC642366 126.146213417225 128.075865243385 146.016920431468  
143.452992974333 138.951140134927 128.618422306397 128.800907223807  
125.396523818173 135.605541734293 133.460655803085 111.484426481816  
122.442590463781  
LOC642367 207.598754515294 240.054164412429 222.544542998356  
271.770138565186 166.272237117441 216.403542903805 208.555506929113  
244.544473246593 199.947823264085 221.512905853031 331.062744782933  
219.96819201774  
LOC642369 166.582931148846 163.19340939648 190.904614772409  
137.962542261072 173.050039480459 176.176392369178 192.032080013216  
174.941551089279 153.532954370572 156.671252606074 164.191906588579  
158.541906931082  
LOC642370 145.741465098455 130.751522895053 132.906201428703  
139.790098895306 123.498540254464 141.598452174759 130.641217515008  
146.871145679651 152.295451313545 147.955701866515 136.028011201077  
132.291759474331  
LOC642372 145.679907578808 140.378255168229 146.091822904705  
136.109975252514 146.332425559689 136.635413632094 143.360311218423  
140.125575976708 136.152827218905 148.618327213374 139.646026806298  
148.022287939066  
LOC642373 145.530904040477 162.063689419737 155.201655653645  
212.037224737798 146.268073519544 153.206468539619 142.928920246687  
142.253826696208 141.196795654442 143.881744063934 135.15791174418  
150.643976671781  
LOC642374 140.213080190065 137.410687900298 136.494339004002  
142.747793303346 141.038721816572 149.166635189875 135.046003135933  
155.478383896934 138.946807715282 155.702330867056 135.427985445559  
152.778732614944  
LOC642377 177.990274115348 157.856019979644 177.708263037199  
180.994249258457 168.50246276469 184.801068553988 164.319378349317  
178.404791189835 177.023536553193 200.08007665693 155.673532440475  
171.689722533849  
LOC642380 126.793778645808 148.790239150298 135.261561433405  
137.581659385375 138.765755044366 137.694556514044 135.423839577038  
140.195820033314 129.014545365941 127.058373069911 123.687439699754  
134.011746666371  
LOC642381 179.015669199358 174.02138265758 161.419873271162  
178.416969664816 182.861900982333 187.216245895253 173.995889755792  
165.597236278435 160.598186999524 195.447966116819 162.933658389727  
170.266415287865  
LOC642383 150.772752327567 142.464394555901 168.801737310947  
143.260448301109 145.070927449969 136.03420235737 151.054834307689  
146.459202036419 144.038859705973 134.008118774075 135.993598471576  
157.341422939225

LOC642384 164.491207767654 171.262412981612 156.990325995053  
176.641899861006 164.962201718762 163.074919710259 163.239195865198  
189.461090469712 155.951509643078 183.201926323188 151.403431105471  
170.98312926

LOC642387 151.548865569913 151.714420758741 145.870135196037  
137.435736170779 135.6149724596 165.942761337382 131.750053934548  
144.059368898969 130.268322464805 160.429643729685 127.434873844923  
142.81401345781

LOC642393 274.01377986185 291.020789939476 191.679217737051  
246.80306998812 262.019779752857 228.125521373477 272.500572765647  
194.445463745418 186.377571176623 175.593421867771 353.826834642154  
257.775569674531

LOC642397 123.595133376092 119.544004279354 125.638247136202  
126.388778582602 123.949411804458 122.828060462887 131.992186668019  
128.471437314295 125.914267820741 127.753065449769 122.251178920649  
113.549098821204

LOC642398 164.587657424569 165.055636629118 206.915239638443  
176.883702717029 157.675974692761 163.81485578613 147.565485281003  
157.248117633013 180.132104305583 169.815053752464 160.91894600916  
162.457778455279

LOC642399 156.373163373309 153.176268095608 182.515302191173  
144.787836177147 191.405362404386 332.343558229873 256.127197303751  
192.441337304606 175.784250947874 179.25743545231 196.734037460218  
217.435155984897

LOC642403 120.257886394616 118.727279917776 136.396579126676  
128.800907223807 112.239647575661 135.814893730549 135.47852126603  
133.711821318079 122.120307446003 130.104021521854 128.41549156443  
137.614020921217

LOC642405 129.933228671483 123.019430618632 123.827771590213  
129.914077170794 120.441732791854 118.015175851934 131.071614211431  
119.50754902958 117.692662275393 137.367390177293 134.181819177347  
143.120621855946

LOC642406 111.66210002202 124.070171664904 122.371715108957  
114.953328013917 135.023594109361 124.197397333928 119.475462713424  
125.732389000341 120.481712066062 108.101686347192 123.53212786736  
124.66386961898

LOC642408 150.624740697168 134.413962468434 136.01865173754  
139.827527470037 131.477589792769 137.709120153505 153.339992195184  
132.04032925495 128.876385705559 139.909719416938 128.247871411825  
134.748177388398

LOC642411 144.288714958892 141.870640394206 143.92831903543  
162.970595558845 141.446916444258 156.141123407905 145.114382599368  
133.642815510945 133.274292647041 144.281217246178 125.447209413787  
145.525623473128

LOC642412 370.678040372273 389.177193459 343.270642449751  
355.213322760505 191.160340745501 157.399880496076 174.787077606165  
179.985468369202 210.960900130785 241.557810100265 166.540134051424  
177.132361355899

LOC642413 119.446359837504 130.866756092727 125.79193748535  
132.675172817752 132.14412512622 128.867710054234 126.265475477399  
126.455271988029 134.216088147701 118.095936088242 112.488125161387  
128.304919825754

LOC642414 146.018097597373 139.001493765421 129.201101445773  
142.452409969639 170.08485436731 133.406312157375 140.099069486005

136.91779948054 141.40690581885 143.160281902098 135.6149724596  
134.201392031199  
LOC642418 124.381674909742 142.601556980614 137.282038401275  
139.734784859495 128.883828419932 128.023203858837 139.153897381147  
131.477589792769 141.004467676795 140.020294940544 134.924082270115  
138.93292293598  
LOC642419 137.814391189269 158.550259547851 161.77611826709  
147.038700869156 132.539585717666 150.717996520257 159.629232808787  
152.082927731045 180.225637790292 133.0349214478 154.746081871718  
148.539881077647  
LOC642420 144.479410859199 123.178049594968 121.188761627967  
130.870198462514 134.639151701327 128.773129597793 126.295856316628  
139.798414027439 143.227410286571 139.325478877749 125.146558509674  
132.240470270795  
LOC642423 150.029313080668 144.724040494873 150.649685693403  
135.385133545332 151.293676705634 162.6762533989 131.512174491572  
166.714793209109 156.020996568814 160.297609596399 145.407517107023  
150.36160186175  
LOC642424 141.619432083003 131.582231577364 129.998824457005  
160.625367261779 119.806933383138 131.968781256081 139.595986615703  
137.674025476238 142.588013648337 152.752870674108 127.41463780496  
148.297939240474  
LOC642425 132.224831869802 134.521848929606 151.102431192559  
166.472068379965 155.655771857361 140.074841537258 131.423918669689  
150.960096893517 152.001155788544 147.502116289881 134.115085057026  
142.667173697017  
LOC642426 142.785631812039 147.803464591663 161.886342770305  
180.814610631281 164.227134687088 183.657525723012 158.034418043685  
156.964080041261 154.900676756492 155.6299578128 141.121364213272  
202.97197145851  
LOC642428 157.909530751723 131.958760372325 157.186747372076  
163.970187373891 145.643752002787 171.751149502172 135.535020220081  
148.863297062269 148.022287939066 160.35668299062 140.602170750673  
180.674246137171  
LOC642432 152.373931758229 142.508525378171 160.060406629689  
161.657344146676 142.798248249144 157.113536717393 152.906352463546  
146.378522944864 162.472783116487 142.683117062711 159.29430824799  
151.993651822163  
LOC642433 121.988237521196 131.641435734821 128.711308958929  
135.082715974111 133.487774861252 132.681475162386 160.945886507456  
129.96280577492 138.499293816467 127.511638455985 128.593112520767  
141.622592268163  
LOC642434 123.21732068638 124.501262458393 131.773304233929  
127.543729713161 131.68571824487 139.432567336814 144.181359740481  
133.065366727222 131.638954862848 147.937679308903 133.478829770103  
134.91697121091  
LOC642439 155.214638707046 137.128849888863 143.217978435486  
127.109798012351 137.740497848238 145.168031449425 152.098520528142  
146.091822904705 145.022242996923 129.236471271181 140.05419835434  
160.598186999524  
LOC642441 138.834309377225 140.980119908597 130.57903858574  
129.16337177104 133.962129094978 142.185903088074 127.183924911179  
130.222025384406 125.071387239411 133.216489794592 129.419998353956  
130.504023268824



LOC642443 170.701964358516 174.301952147167 195.230219990395  
178.488874074222 162.98885109088 257.573614085223 166.655585160657  
210.448904052352 242.657224881824 176.019082929386 209.004374703564  
174.560168983121

LOC642446 145.363692072132 153.435218661228 143.793506250131  
161.510497517852 147.085006263446 147.856285290748 145.919359461744  
158.396149470397 139.080142195118 158.25554353787 164.68600028429  
141.831596320865

LOC642447 145.828229656781 139.825088162247 146.359038260378  
155.511086289504 157.254757078837 147.330897105911 159.479962316199  
139.939863187181 134.408846338374 142.354731066206 147.93088503956  
140.839056652898

LOC642449 169.31618330657 152.591091223395 175.222531098958  
133.090474303043 363.706789137022 235.291035302211 268.186156177622  
226.640323471375 164.836381332774 148.416483022749 165.389652763451  
166.936975782665

LOC642450 140.971253689199 138.28745132277 140.941447663862  
141.147683040881 166.12184890921 139.633941983246 151.742938010671  
148.171225002967 138.758688249557 134.044789094272 136.553568679965  
138.959040014432

LOC642451 156.095520355029 149.042693712098 158.639313207233  
165.314290446922 146.658048787833 157.28429690041 154.016622581204  
157.672378669483 156.385100395531 160.407690552027 148.908758741034  
146.750774496317

LOC642452 153.752502094283 151.051672692659 157.809081184874  
162.592306630033 168.210416363286 167.67272339144 157.280532261425  
149.3567486207 147.922706629104 158.562631157512 132.521681289019  
147.409936250284

LOC642453 137.793462381778 133.378374710498 121.57069706238  
144.621077658674 128.42287610189 159.856190281237 135.367261617271  
131.530256606799 162.100547394235 148.094036534405 135.485867373592  
142.837688062688

LOC642456 148.976157516273 139.244051199144 185.186497037695  
143.258488502799 144.769824608083 144.886005815977 148.408616955694  
148.054367166566 158.364031234356 163.542848861552 159.592581700976  
158.044938495884

LOC642458 132.456945758174 124.650711299942 142.563762845657  
131.204616536341 187.997940126066 148.497497694754 133.411087000196  
142.801645268128 142.122556679441 138.651419539729 128.327528039933  
152.628220216104

LOC642460 115.417648857825 110.942138645171 125.077260389449  
110.707755436868 110.518806964366 103.94864861172 118.383317097375  
104.58424134098 104.896224175106 110.392617179163 102.343275379164  
117.928456234796

LOC642464 157.269049853539 151.954389699615 144.018198451676  
150.557982810339 158.200211812067 165.553581848949 153.82440233533  
159.324816814876 148.167464091421 144.892454033336 133.552141086987  
161.837272617767

LOC642468 148.680794815584 162.390356943447 155.219860096943  
144.358535632993 155.966610886886 153.43000129811 144.084441938143  
152.853860043701 154.193086881801 159.476343366991 175.417320301614  
149.100294463597

LOC642469 155.191446350891 158.213784310645 170.784229026842  
162.085813676373 290.502085667398 191.310372695208 135.930107381894

154.309257657136 175.7330682766 230.10433160008 187.833356349429  
161.069535896864  
LOC642471 140.301389592487 125.809027384863 149.76931674417  
140.025668085978 138.293242905081 144.165277164871 135.773386496434  
147.550385608773 139.805930686563 127.876894098781 144.636277619886  
137.234384760487  
LOC642473 134.842877075983 138.651419539729 146.6886556805  
140.975056186954 142.017169259522 136.106596229215 140.508390945342  
131.210866639392 139.340699808517 128.683044953833 143.086872363116  
139.530196462344  
LOC642475 133.816601264067 147.009325721272 131.741688265764  
152.829437376835 136.864106181375 151.367402326399 143.325710305008  
144.715167331434 122.190734676247 130.847215795313 129.242093568433  
155.752117896424  
LOC642477 151.506013510204 151.933078262284 130.076926011271  
158.205235596076 237.249949461085 250.84781675544 403.984761333129  
174.483233557264 342.147414141627 206.89716102989 157.779441363536  
362.65285317327  
LOC642480 132.089375920534 138.53179773391 143.942810095867  
147.751220590539 136.459509901229 149.907472831817 129.378442664568  
128.539969915702 135.155955441604 124.507958339495 131.832311911703  
130.718729445329  
LOC642486 149.904691068054 154.524588318927 169.107948050094  
203.704734790602 145.442914818456 168.6016897585 144.408426565541  
163.534117903837 159.159106382346 163.504122327429 152.321890796527  
159.640027194076  
LOC642489 959.532977061027 1068.63350031223 1053.09915077366  
1172.96121022579 1892.8338612507 2076.51786803222 1126.46241487062  
1488.37146754184 2072.01578063404 1545.71251527145 2159.2992548378  
1916.46158204806  
LOC642490 141.296574431203 132.031693838834 150.148902196995  
144.87013280941 132.063395162855 158.872962797815 145.831833648039  
139.406427549733 157.08300736206 146.392657608076 147.915337223934  
152.112177721714  
LOC642497 125.727521491768 130.847215795313 152.323927317575  
125.609542142983 133.663595328149 141.97908047949 130.807596523171  
134.163388748526 131.539170756533 113.927168436775 123.835583753941  
140.545351041252  
LOC642502 164.109321257638 174.795822188504 193.930569647995  
173.552535486766 223.941946219233 285.172001915966 226.315173823168  
221.685824197352 219.729169245025 206.488530785667 210.218440444631  
298.706655333472  
LOC642503 163.736324784234 173.863373934746 163.809967446414  
155.861829925386 145.158039427157 149.297012645798 148.725162101789  
154.698312173556 150.267298097687 134.251843621261 147.774588146924  
148.951632781748  
LOC642504 161.04173806448 138.113751487484 147.387754442307  
135.47852126603 134.53861441495 141.186913979346 143.078022283871  
144.694679571377 141.817230824364 141.535381351126 140.223599881961  
141.059033576475  
LOC642505 148.166340306996 163.21153580549 174.603285240228  
143.123983359386 145.941674563997 150.544779197947 156.632939064629  
157.546123603057 144.900785401228 156.978585870854 116.939471420419  
151.167024833049

LOC642506 137.987255649072 128.899712906082 140.09417711803  
137.361967082029 150.331324340476 133.765676959662 134.981272056795  
130.293492553638 140.713537140957 141.013392458859 127.466779212194  
140.983230581181

LOC642509 144.895601314903 127.488853386792 124.879018642505  
137.53234136613 154.548286860883 122.449574852865 133.281505040209  
139.365595511181 132.75673287656 133.301527400458 145.824996954376  
122.94737290641

LOC642513 199.87003105816 173.939159471022 188.797908601851  
160.140509175287 146.421195733989 159.097020087275 141.104761546577  
138.930413256469 148.597346678768 249.925640256322 182.222567053422  
155.02097482487

LOC642514 171.768618884215 147.18948282156 153.326420485822  
142.305484770249 136.742206779136 144.581747568524 145.365935017728  
147.241136598626 142.246864759311 172.251953149975 159.393410854649  
143.837402372008

LOC642515 163.821142892643 129.971670681199 131.655316312379  
142.133238886052 130.266601299194 148.980330875743 137.627338682823  
135.946808893146 145.671099346237 151.118430469429 109.266533255266  
136.501159644992

LOC642516 159.815932985135 165.459993078103 192.441337304606  
177.132361355899 159.337816095012 152.097609803404 159.59942312149  
166.232856234879 143.098246338022 162.223175359454 156.477249817844  
165.320977593677

LOC642520 132.219652920061 132.620474788855 141.721829342179  
147.562757301251 150.870830294349 148.514806562804 156.806407903626  
143.569894807386 133.834423222601 127.787890405862 143.577865527891  
130.74794199972

LOC642521 141.8268805463 127.277128410056 126.686404772601  
120.514672572565 143.267246820729 133.001613667656 147.774588146924  
154.173439471404 147.62157260418 132.348603553752 127.255966406144  
133.63668145135

LOC642527 126.294085960617 128.785472881136 134.10707191601  
136.319655432311 123.010614051218 135.920830568556 144.643770374264  
124.477586539576 145.957206019026 124.474221706022 139.155456340488  
134.147586627141

LOC642528 147.325222091872 140.04612725812 163.262893278578  
169.45559708224 149.8919086368 151.382199195953 139.998271598088  
131.351303131574 141.539503634005 136.444883411968 148.314248474411  
142.655287071175

LOC642530 140.018786803502 155.908951665928 143.458937009197  
157.675974692761 152.581729298159 134.613036378054 159.241573314833  
145.235087732482 145.304050333309 157.076284096905 113.071787850611  
145.952759497544

LOC642536 173.024402954772 165.066555355918 152.57040089034  
139.480361732772 154.066939372379 170.342828808493 152.107025120177  
148.89180107448 165.74458564887 154.798287249541 150.431052959951  
144.102872001089

LOC642537 131.970514300585 118.446703299916 135.565256045133  
178.12073430094 141.225533609907 140.06989960847 142.358754646258  
141.898948675823 142.52234368939 144.098578955023 138.861385127242  
136.457424070709

LOC642538 149.3567486207 145.789840511876 143.175483349968  
154.705630035232 146.986891588172 140.086978441723 149.990378213915

152.439608473915 147.069488043503 153.0141888126 152.908358615016  
136.520811697544  
LOC642539 154.220886444667 149.995272585012 139.913180140881  
154.999192460283 141.226901872221 150.292858985795 142.376921410427  
149.520911664673 141.4587810296 146.440630638891 138.16337207876  
155.058852833902  
LOC642546 125.253637835638 132.978746105877 130.863753083296  
129.233595525585 148.44261900795 132.310147451479 157.805871400914  
150.324132011201 137.483830932387 541.642309122976 140.063142443074  
161.592528958127  
LOC642548 133.455138380277 134.362834437771 140.099069486005  
158.517778100137 121.645021899034 153.893753448473 146.720204808211  
141.040862279633 143.272669418277 153.597557478169 163.315865817864  
150.208809981642  
LOC642550 130.983136465761 129.140978620864 136.843164021899  
125.798453479983 125.509221735447 122.343979874508 130.156775178934  
137.086936444421 142.041992878641 118.500956349352 118.139487760542  
131.054302682707  
LOC642553 146.287161912291 155.728609337723 154.985781979984  
176.382377784553 158.509885816997 174.812134675989 144.421572284568  
145.584615439295 137.824985884649 143.905680376268 156.47237266917  
148.812015298003  
LOC642558 140.767270136561 129.668506092785 127.712004247155  
136.542788566108 128.685065364693 122.841135364088 135.679481480408  
128.124456615525 135.391788614828 131.208112906919 119.806933383138  
122.955724972547  
LOC642559 187.769988580599 203.089661928125 182.969563278473  
177.549330396268 215.558688906165 181.941224633917 832.911633923496  
213.468420853218 265.29629764006 156.389361240637 623.888568444132  
426.032234135861  
LOC642561 126.067296703905 119.432201417811 121.06219555903  
127.697902314999 127.595574823053 134.152586955217 119.122305582754  
125.299513989334 122.850678471084 141.040862279633 131.587987756056  
145.956477465634  
LOC642563 142.667173697017 144.065554025603 140.934144636302  
151.231685705236 144.720594512581 147.991572632747 156.642441706727  
163.039564280484 146.533374238616 145.99474597064 147.161720770972  
150.521719129181  
LOC642564 122.749182465923 140.359796538887 131.106613067333  
127.997280639609 117.593226427794 125.746184969983 147.738146185884  
129.130212375815 129.756642179083 135.691862612951 120.931585398914  
140.513291662274  
LOC642566 125.884565343075 129.920586100555 134.618121709059  
134.700543462375 116.588138374632 125.833649377492 129.001192144163  
126.301178976594 128.36121178972 117.740022708444 125.095999326598  
130.991496243273  
LOC642567 352.665030560239 330.590986934704 352.121800955822  
283.014222473749 436.891409783298 267.901632267999 679.191060100076  
287.242697383558 277.946395491073 434.61711290583 433.405369327168  
287.83303360511  
LOC642568 139.825088162247 135.333055517636 129.005211657936  
126.460390022632 131.753135000312 142.173279109959 145.323212897142  
133.491963477649 136.473948855498 140.32909969607 128.36121178972  
139.313456284725

LOC642570 145.022242996923 141.850952191423 147.479390172796  
151.073257114127 157.484541464879 156.385100395531 155.365673279823  
144.114177076352 168.082591651722 155.803946849495 191.25724234927  
162.320894555337  
LOC642571 147.43089976575 131.007779278656 139.936661244361  
151.113342302947 132.894049694258 152.767228183775 133.500750738061  
143.137158027738 143.330025840618 135.25612528874 115.285392699073  
153.230304322351  
LOC642573 141.568970008164 152.447978675887 124.056405566491  
155.502363062633 150.152613183213 141.373059612034 147.357032438442  
147.62157260418 139.868714816245 153.062710222618 145.783320434143  
156.875068435974  
LOC642574 142.846100831941 136.762273376313 152.629680152219  
150.403702679274 145.731800133702 150.517832812714 166.382301680189  
152.520828479026 153.075594260208 133.001613667656 141.992490695142  
164.466332705334  
LOC642576 148.076841184769 157.590017103385 150.807308519367  
169.544515294662 157.779441363536 161.37617568158 165.2958475168  
160.970946091146 146.912751127571 154.061101136889 142.886493948916  
153.38260557666  
LOC642578 131.849442776642 142.051259785804 131.666853845458  
160.511688319771 150.767158077219 149.696766215866 164.264079172779  
134.251843621261 148.507598818039 139.494962965774 129.842252702648  
123.341568893224  
LOC642580 148.847472886691 138.715208319278 157.010145291837  
145.280485286937 141.060629922003 143.650172124086 154.949840064881  
147.670425834523 144.829773937102 144.310362660942 137.22727238555  
144.352987324713  
LOC642583 146.141376139915 131.987590706756 129.7137422914  
127.91637627901 126.928328902507 124.248997533959 143.40955339735  
115.502679218125 121.271403807802 124.915772594451 110.202982683256  
121.672811608791  
LOC642585 151.473239782301 143.665359343809 135.52861375119  
141.715307041887 167.180406126438 151.81251450855 166.549192709614  
158.872962797815 146.904354404095 172.750926094884 203.652936507291  
165.647471565959  
LOC642587 124.679444852938 132.283682066898 136.68056120003  
148.757112903673 125.157459724842 154.555255038453 134.262346867514  
153.184575380093 149.200848439601 117.81168010976 126.718380351644  
157.162523271165  
LOC642588 116.230993734675 132.186120302011 132.850601603567  
137.842375545994 132.624118917126 120.170269310738 122.969215709433  
137.769431537236 141.791001213681 139.383528389668 121.468398802591  
123.453048609213  
LOC642590 1053.09915077366 746.296354515617 1125.95664591686  
856.74270641707 978.389902096994 832.335328912437 662.58366387795  
1158.88528996131 615.485984065221 1646.76016031831 695.595965352335  
412.801213309591  
LOC642591 136.996535765175 128.074531806621 126.479964493857  
132.665590728755 123.391298926957 132.799355149191 130.504023268824  
134.78059811237 132.28010415054 135.210887148305 114.342980656214  
138.052032298683  
LOC642592 145.148058824491 147.570734399004 154.594339065082  
147.913148020331 148.66474430472 138.633019006784 136.955651763743

142.356747337127 149.143087870963 147.808262170269 129.102182717009  
135.504526903482  
LOC642594 135.795717307603 141.108383815109 150.72835989269  
152.230489051339 149.05280915667 138.462826342765 137.876234091056  
137.248465324584 150.601874392926 126.233395051706 137.819642907456  
145.819198235878  
LOC642595 142.058086679048 148.692602243778 157.805871400914  
147.004172510641 152.007436762651 148.01816554072 141.81391138301  
144.389805078873 156.336425973696 163.153676643372 156.605568633665  
153.703682621695  
LOC642597 131.140263788783 119.636334259263 141.407725666875  
140.509170613622 132.083532534267 135.999030570565 132.110906510601  
138.700301754711 124.947565043721 137.933122094638 143.763292219833  
122.97487285065  
LOC642602 147.854171854456 144.731299077209 149.644247474405  
160.904946328482 156.200313064999 148.337793323867 150.696963699371  
149.552704503066 140.009593108693 152.935963398921 132.504264154139  
141.518491890811  
LOC642606 131.719227272527 161.235924544873 143.73525260312  
152.112177721714 127.001546144286 132.94603323912 141.42859050659  
131.747367613225 174.985831291764 136.739754726714 136.440671408022  
131.825172822888  
LOC642607 143.416816860089 116.670491972948 134.256243410916  
138.197500836501 153.534763364558 127.130769263811 141.929924728222  
121.991692204056 120.665520347481 120.748910864064 132.092910274836  
144.012704126852  
LOC642608 126.796253980623 121.356731684516 114.936648783324  
129.675420096163 132.647152200128 137.412952822912 122.414781975236  
138.026155846749 122.676368520743 138.068164255305 117.953453145685  
154.558968826495  
LOC642611 159.674396591041 148.219406063533 159.334165651951  
151.979221390032 144.958176005711 145.560904207183 155.049051256459  
150.035890574132 133.526213647686 156.427158441352 139.718721422663  
134.952584272187  
LOC642615 149.155345369055 147.364301916733 148.582022536314  
157.83121828793 142.655287071175 154.950488347516 137.30143217822  
134.270043564053 166.89884215297 134.420446702459 148.057700860759  
156.822477235844  
LOC642616 141.870640394206 146.300016591645 144.349602838518  
157.856019979644 161.16688895179 159.120172969378 189.348690353874  
149.856951631661 157.333615322941 151.841652724562 149.678629612616  
141.16066528405  
LOC642617 138.53954980556 124.933738341123 133.615958668897  
145.204870282027 130.686857648764 129.902965506953 130.116771999391  
141.550553034455 157.233463720262 134.46743016543 130.900049359243  
129.606271613463  
LOC642620 118.134614195753 132.421863261746 133.455138380277  
157.723341862468 140.408989128575 123.607412609763 136.573928520456  
134.678445085174 127.648224668964 130.988294699995 125.212404794262  
132.70643154246  
LOC642621 147.83240038699 145.358431402568 157.967824935915  
138.129281196474 157.293090577042 157.551854647702 136.384308041001  
149.910521500364 153.700168798494 152.26903721278 161.655336107432  
139.701504237962

LOC642622 135.834000569736 155.323822771755 143.576177625265  
131.427686241226 120.644987579644 138.798959235723 143.454771158075  
132.486311240725 151.477239868429 145.265512354674 127.890438577754  
132.832556359483  
LOC642623 139.187325383105 141.073316497949 144.110544384466  
137.491366243256 141.158593399952 136.524640445539 143.954908055924  
145.773932754923 140.254665008195 139.898996725236 135.101123645638  
157.922718487881  
LOC642624 136.472404812817 122.595766303833 135.056517225198  
146.017509013234 153.320911882529 143.699398679866 133.594446233378  
135.324479598682 157.180095329946 146.512045729234 136.74788009263  
138.458816023289  
LOC642626 112.699674279523 114.133473556359 117.570749340011  
116.831725094917 129.85040048805 114.265920150451 118.740346254406  
110.727742629085 130.639974588163 115.702900810606 112.357261386644  
110.910693353871  
LOC642628 132.573953444192 124.158867850799 137.052507691254  
128.266906202941 151.585818981801 125.682297697017 126.497472087036  
132.987389721592 137.672798701643 131.933026690056 130.062015525637  
149.502132524093  
LOC642629 145.507330257603 125.426018910517 145.965900441953  
136.641140715439 137.563246867433 126.118745937997 149.290007708698  
128.119556520151 137.320792454356 118.388993232718 127.542288885184  
116.780639688465  
LOC642633 143.447768653042 130.551216910933 144.288714958892  
165.866987051333 154.218967720305 156.695440330379 141.263207601393  
130.987658962896 137.335501759561 135.493053871272 129.985797334276  
134.271916545532  
LOC642635 117.913545753709 123.015371659847 135.931715324468  
121.543207264598 120.322292418128 122.174036435094 116.252227301161  
117.119533897652 128.87498876738 120.594874820899 124.879018642505  
136.935498266723  
LOC642636 144.175551691291 164.808139478109 148.941194457652  
162.652929339533 160.644747532952 178.512206531256 151.989476683722  
146.96472350529 159.815932985135 156.990325995053 137.663038788415  
143.47200560038  
LOC642637 147.088665779406 147.013598868335 145.203083375014  
135.654614839107 160.402220755071 138.905709709063 161.496700767073  
146.218767446679 145.401101974736 127.125906877098 124.042153387391  
132.357517495246  
LOC642639 159.784369379077 155.05329654089 159.870967387108  
141.374831983971 167.157420848604 169.534469894464 148.936888662374  
158.834483073542 152.935963398921 169.211708954329 147.510848198689  
156.173099025259  
LOC642644 129.873110494826 120.721341479615 140.52997588229  
123.665983073461 141.822974252935 138.679545821015 135.621035941292  
139.22776505842 131.76829141949 146.081940883446 133.891337645936  
132.651922794567  
LOC642645 133.288181734813 138.1774127311 145.855671447779  
130.586509996354 134.983884722607 135.250379276888 134.986030185477  
146.728881202697 135.144908040903 113.816165294487 164.284396793834  
136.649743237542  
LOC642646 146.768631086088 152.107025120177 139.449895159273  
150.829439012542 165.108876136738 146.690308698414 155.61996871093

151.705219298578 154.725484895098 161.496700767073 162.890650672747  
156.808992920564  
LOC642648 178.130223302924 156.682781772069 157.878110410517  
181.622689471026 160.518055978242 158.359440014674 163.146581498065  
153.639559509292 147.565485281003 155.810034593382 155.777281781161  
152.067897082883  
LOC642650 162.9279134169 158.127523362251 155.865540894526  
142.032814623366 148.094036534405 150.974364125849 140.105675520432  
134.029984991385 138.471894596606 153.505155981348 143.905680376268  
161.289708941062  
LOC642653 146.503431281242 148.812015298003 143.956726538569  
155.298546821687 149.915251958706 144.587253120884 152.06044555622  
149.155345369055 156.085949215738 162.723310549554 142.830950036054  
170.132045343159  
LOC642655 153.713298074917 158.10628865476 157.907190910755  
161.841975820372 139.793683692104 187.812436252228 149.821848101995  
154.884821436554 179.037397826592 141.076652697698 137.31708798874  
159.665989587555  
LOC642656 140.044536042073 138.42216862811 130.253372129786  
162.333158524811 148.779043570204 124.210840121525 126.629012619208  
144.942289590793 146.336371857755 156.136962310077 123.084040312047  
148.337793323867  
LOC642659 134.828360289676 129.846685899183 137.981446468611  
131.252368756892 130.852932147831 129.601234646954 136.063563740389  
127.760995691556 132.109267393571 120.170269310738 125.00254973945  
135.146767090951  
LOC642660 151.981708806765 147.866909109733 156.875068435974  
149.427217345037 146.944628763232 155.780657091484 141.29868389128  
157.13859713415 138.600017737884 137.340844554597 140.622130978368  
150.476228905372  
LOC642661 149.532459719175 132.5377752987 154.826710617351  
151.917359928516 275.203046536524 194.475822533231 192.932285494022  
170.473956720945 172.26834556696 180.733673680261 154.088770236213  
182.68965110437  
LOC642662 144.056644468886 124.003914369077 156.516250236679  
133.514843630183 155.590197324062 138.348160604288 131.358797630945  
150.84999247088 146.309171902112 137.088164317794 140.664303738113  
136.231747456996  
LOC642666 150.596350682411 156.920867019849 158.260676113325  
164.794626785115 182.897563195019 155.835077077665 152.801801823442  
162.481362579872 149.508432746895 165.476670465739 141.026045918091  
157.907190910755  
LOC642669 132.858424396011 144.104372749581 142.579346058088  
150.353355068625 125.18424162353 135.866980620144 142.588013648337  
141.466287523861 144.408426565541 159.862252588012 124.942701123337  
135.036576196425  
LOC642671 130.509415570889 122.376432064286 133.24828292554  
135.971507823633 121.387799881297 122.978576290038 130.883516197483  
136.609461559853 122.182695593404 127.765987130281 131.946938297748  
130.726640485925  
LOC642672 154.406369231962 144.235298492095 167.430767074847  
159.717918079188 165.773929204209 163.632148441668 146.637799077812  
142.342811880173 138.263361518905 164.327140372968 141.054587977578  
146.16125926956



LOC642673 142.082257952004 140.229267364503 162.244691888031  
170.775283924087 150.421116058494 156.090871391873 153.911165277809  
148.410647472149 152.492163303139 140.180208418327 141.577373924378  
147.069488043503  
LOC642675 168.491878435329 157.639688257892 159.696443182844  
149.579428189895 133.355353808577 160.735428753783 152.660373241584  
158.950169226637 153.302438200151 146.442734810495 138.580264357741  
151.169283505727  
LOC642677 153.836520485018 155.365673279823 154.740395921562  
157.684694038023 148.962593686337 148.956326355381 146.96155692518  
146.877475544399 137.835936352525 142.160269725698 162.229052648595  
145.000523037022  
LOC642678 403.720036930931 283.084102918359 329.068463281182  
299.568830444875 253.495214569632 361.829819621662 282.137282466192  
287.751093664085 215.718714189719 237.78482574225 300.482945704017  
332.343558229873  
LOC642680 132.409582164007 140.174087049513 135.835518477299  
139.891445925682 143.635367691412 122.54127694717 121.197702744078  
137.861973133557 142.822594215168 130.138945493943 110.392617179163  
131.04767483614  
LOC642681 139.172437503442 135.096321258167 146.166710487448  
154.118601977256 149.693559841189 140.738977175997 134.590666885938  
149.37190049932 145.412368252632 143.08841562593 105.665621968915  
148.484823275343  
LOC642684 149.895214204184 177.468210189888 144.392522947899  
161.992141305029 157.944355564411 172.310673499572 161.688125121941  
165.51742391186 148.582022536314 152.709924336348 136.831280469398  
165.613274361543  
LOC642685 147.841960346835 159.495272062735 166.988725688589  
155.966610886886 143.823368276815 168.491878435329 145.572363722788  
137.563246867433 153.363629311799 163.69442149145 129.640303191006  
150.643976671781  
LOC642688 134.750046135498 152.44293820056 136.173596381385  
131.430921437192 146.278921849776 136.327014189932 144.64136816491  
133.883527462382 139.440415574681 128.375390373307 146.218767446679  
147.537691509156  
LOC642691 164.513371267476 151.421099926743 143.937726155116  
169.956827727468 159.946124520038 184.357124535926 169.502103689662  
181.328458560967 159.406462604758 155.483400816946 152.980843102933  
157.240466990977  
LOC642692 143.260448301109 151.463200570499 149.689071018094  
153.899573902499 136.396579126676 145.692644807799 158.278496385543  
139.555322603323 127.758381206968 153.811165696928 167.746786642066  
134.23001942966  
LOC642693 137.756209496729 156.365413649149 135.079944196457  
149.393022408213 132.184217000689 145.754504160436 151.675188266676  
139.917662338546 133.892661981648 129.499283650632 120.015436934157  
142.099541115973  
LOC642698 150.51537512828 134.728594388428 143.437546532782  
128.912199634685 126.856038484436 134.56134674893 146.803549606737  
139.470557140547 136.087702679172 137.339511714364 130.832462487806  
128.753623886188  
LOC642701 120.971313945446 156.534634574244 132.204721976343  
141.54943189147 112.78323842342 151.694193636313 135.527445907621

139.251886500377 117.621220321128 119.696656494403 145.695402948337  
138.480633738745  
LOC642702 136.290486122369 145.114382599368 137.443463471483  
150.374573177474 150.079372712689 150.295611829265 155.46017572591  
147.322622473251 144.117964288763 139.685629122498 143.035245560484  
130.066177538896  
LOC642707 157.096799934494 142.132576760619 154.227433553131  
162.664254855131 153.481752643937 147.04481509758 131.444734367396  
150.711857623087 148.158062155247 150.49183794045 143.839170216353  
145.150191397375  
LOC642711 120.065876525792 113.060728652796 116.305011582033  
130.528198937596 110.784682137658 117.003205777245 118.414329128347  
141.482344048665 121.404831900877 125.846029991447 109.924867620862  
119.50754902958  
LOC642712 157.692519370734 172.412059174046 172.478461106269  
165.244616507084 160.30784625946 177.32104138164 185.816827784447  
178.647726085678 183.42877315644 160.122274989224 160.880152014981  
165.30072618497  
LOC642714 127.392877191785 132.562090247233 149.586651393588  
144.004831360797 135.031430487047 132.674061422332 174.08222895937  
143.833057210822 133.99046926032 132.504264154139 152.783534456473  
140.26206122305  
LOC642716 145.267225993057 158.467572658719 170.701964358516  
138.968690339299 130.51901676405 140.772074031028 147.872625576731  
146.425476034368 136.792957035581 140.074024949157 128.451788292588  
134.166297738657  
LOC642718 134.033751039071 124.918089223417 145.396723478249  
133.24828292554 143.212739422069 144.433543176593 151.815211341628  
135.487310036251 131.715579653796 133.554822920765 149.675363177375  
141.970301370404  
LOC642720 117.986939058467 117.710502693638 120.971313945446  
130.104021521854 134.181819177347 127.077668562103 132.340183565771  
133.913578037255 136.037555727438 142.694748293332 118.006338536085  
120.126700838056  
LOC642726 155.728609337723 151.736824723671 164.302998010829  
151.687402863648 157.058912028958 149.863063160222 166.187099519035  
170.483686891321 148.823805841381 158.439409064812 172.7330526128  
155.680330654611  
LOC642730 119.415822905251 145.198638080646 132.365002835934  
135.168792286819 117.503848306325 123.375592272781 124.847325289068  
142.851432926979 142.91818218442 127.863583325139 123.875478428652  
133.327778635672  
LOC642731 140.004456934031 148.883263903527 167.260319361746  
142.485427762372 152.382558543399 143.193305421206 144.298011270428  
154.24500773656 155.023934989559 165.406452831375 128.899712906082  
148.938822951404  
LOC642732 147.796610216375 150.021512237553 141.931274901572  
133.480196904786 115.445219455559 153.93927752488 153.5256657638  
193.871324880919 172.612152484322 180.070209705044 174.246705740225  
161.748547772524  
LOC642733 141.513636348978 138.476953078729 130.521731606987  
121.459780480915 129.353536603449 137.265533487496 132.240470270795  
128.788443476759 131.90169441925 143.669490888725 128.131324375789  
128.504026473695

LOC642736 160.010501226517 156.531951576859 141.686945908315  
163.159571059471 145.502055020513 148.145136066071 151.518116154483  
150.126627487419 148.993620368781 146.223880979601 137.565050253948  
144.629350188283  
LOC642738 202.369905673351 228.317527475322 211.809434609469  
211.035617136177 186.089988569287 186.529656751005 262.832376198119  
187.082082429597 183.676020826291 202.741211613885 282.045333787115  
249.171307797736  
LOC642740 132.808559892154 149.173121214851 166.209190082084  
155.263513633703 140.754706171596 149.173121214851 142.142633050256  
150.352308475398 151.645636946799 158.819151102054 162.982557003317  
156.228039404029  
LOC642741 14544.3732040823 16533.5738137081 13645.150201952  
16397.4527321924 10474.0047946187 9171.47979464736 14699.3902364192  
11741.7473778842 10048.4260790604 11281.201625198 18760.3823237058  
14181.1182110192  
LOC642743 121.603608840998 116.566190779365 134.696571019896  
132.963761182049 140.541925660368 119.263824982583 116.7299185256  
124.222529964098 140.595496714752 128.897493103888 118.628559951472  
124.336297973344  
LOC642744 158.967160833334 154.353588150152 159.106269972346  
148.329635131296 163.256472113745 151.84373370805 168.269075560636  
158.041568121766 147.543411823657 143.999000471746 132.478801067837  
167.468390483999  
LOC642749 133.403409882362 137.091932621041 130.033927910392  
119.530214079037 137.867263869936 140.120051507626 137.15288362126  
156.030794481734 114.170354748872 122.333765477428 146.635140441079  
145.549126188292  
LOC642751 146.229239731545 153.146646647258 175.236826554583  
178.313238745665 146.357214078158 161.397788731595 154.691783046492  
159.838626443912 156.68541512214 145.900272803108 148.532339759414  
145.877943006533  
LOC642755 1338.83705469394 1502.3444541735 1211.94273385872  
1990.94596595493 1142.09977159958 712.067161025165 859.113541787323  
735.449040059761 738.087203930249 828.683748921915 630.670530516275  
1158.88528996131  
LOC642756 143.051871940423 132.398041172151 140.563079852037  
145.654559623732 136.861019517134 155.080900277147 152.021576565132  
133.31378749951 139.073785024092 175.442400672352 161.126686827391  
153.435218661228  
LOC642757 144.152325539824 147.23376282233 158.135321157995  
143.637018777217 144.219104742099 145.247717878099 143.725497952919  
137.867263869936 154.388776919015 151.950883677297 134.664652044646  
130.019836142831  
LOC642759 132.548259643258 142.002145315543 127.962546712222  
130.838350486331 134.197892075036 133.666244052469 131.748753064488  
123.949411804458 122.921245774755 124.494727558127 127.392877191785  
132.383542877819  
LOC642761 144.930066324767 140.234485088845 152.518729390047  
141.180647782041 145.528676983944 145.983627592197 149.595375008252  
143.787766055379 137.641136471239 142.248293068033 141.064086298948  
130.66511389864  
LOC642762 173.829219279719 151.355581590948 156.740412695351  
187.097765940131 150.547096071626 152.601626526117 181.566951620202

147.854171854456 157.113536717393 162.819608252826 140.912921321622  
188.708596785144  
LOC642765 160.648791273795 141.241717979079 145.646191500321  
149.110300099889 162.505305538911 162.173506492562 135.390226050803  
142.974541687789 147.369767631957 133.780423932326 151.629999903069  
148.046961712162  
LOC642767 150.006621336954 147.117286738537 138.796257513868  
145.404469340821 151.61049450647 137.171348199209 128.868894803208  
136.044670179122 136.864106181375 138.709991561675 132.765942975939  
136.009969058857  
LOC642769 170.473956720945 162.933658389727 151.384762644292  
148.715065348779 157.516278302035 165.731179108649 158.175138008678  
165.763459146818 153.918462601781 139.028620375206 151.531667383273  
148.773558380167  
LOC642771 155.741507341843 144.46549577902 144.643770374264  
151.27882940428 163.153676643372 150.578023008958 155.449724554217  
135.894512504725 161.115842628581 175.585857393085 171.11282933168  
163.22059466037  
LOC642772 174.471304281502 140.701132362458 151.397068235685  
148.544887355857 152.654938328424 151.360575274272 151.671024612136  
155.283003653612 149.94715601106 150.460618402778 144.623222072851  
178.955938825556  
LOC642773 154.13120950189 155.516697616637 148.448349327493  
141.422441104854 147.579672274205 177.16711492983 158.999305963902  
141.706292773073 156.605568633665 130.443360119099 162.52512327258  
146.40904127542  
LOC642775 143.629760301493 165.698527470382 133.392934239554  
130.260174841484 134.756377802151 136.742206779136 139.427216913809  
135.135834717193 133.131953362455 129.358112503486 156.7940590796  
127.74861041569  
LOC642776 171.941887376462 161.632610858756 158.020651857664  
157.656220148041 153.318678468245 151.266352916239 171.229729917612  
161.663893432522 145.387562372871 166.879042308539 152.364417528975  
176.312626750427  
LOC642778 149.410729709855 162.609829456486 134.10070984606  
146.226437529862 163.570018900148 157.797222258336 160.648791273795  
157.252701277198 160.361025839456 140.156797128045 158.325554470875  
143.446317006075  
LOC642780 147.971492964243 146.577524520274 153.532954370572  
157.419333185365 157.070500065037 159.735182155088 153.412469512967  
155.187900101727 155.522274777451 151.037282417145 144.30699572795  
163.726898336284  
LOC642781 154.113228966411 140.201501710276 133.069347559741  
129.098408596418 132.498092935232 141.805028495425 134.307336063739  
139.576261630082 129.918038866006 137.528342105233 155.218336968191  
148.785977829275  
LOC642782 137.77174500538 140.92066676704 138.928287624746  
131.58537948771 130.278980631435 133.008120853618 132.133979108537  
138.276865331434 133.16973309664 137.814391189269 135.834000569736  
140.471953101887  
LOC642784 143.611930851914 161.870389635266 141.360125377949  
148.400132332444 170.223509007961 150.701579893607 149.286184588967  
143.895399273595 151.893573927407 166.277960843095 174.116797337377  
153.418095627352

LOC642785 147.108661317945 122.662260070778 141.558927907067  
122.142323014287 143.644862018676 142.49005761699 138.858138379065  
127.442587366678 120.831070822199 139.312636530887 142.452409969639  
143.48729871068  
LOC642787 130.521731606987 169.87591929982 166.825501664231  
172.973175988757 255.71113398292 163.936973279176 210.33390115739  
158.104336050835 151.679534447228 141.913001976093 157.863585655333  
185.31769184805  
LOC642788 134.572552391307 156.502051001988 144.979749941424  
150.610633329908 148.607885635446 148.753891406126 163.336324451735  
154.47187360425 151.338765231607 148.641780441227 139.602168254761  
142.49005761699  
LOC642795 150.560305000601 146.785478478701 141.850952191423  
147.943844184702 191.961269585431 130.441808139335 159.085639414089  
143.347066447019 146.453030317456 136.421163870578 141.808850055572  
134.89415027205  
LOC642797 140.743917481548 148.201649039381 149.714982846365  
147.098474227445 154.740395921562 127.2369420721 177.393812005949  
143.294217840279 147.713967317159 149.895214204184 138.847331529247  
142.865320802784  
LOC642799 153.07993334035 144.840218312168 151.153466809603  
131.848213704003 151.758970249544 138.861385127242 138.333435927107  
137.73733991363 126.617737577634 154.218967720305 142.459230639888  
137.038866196785  
LOC642804 142.414323129638 148.80452641061 140.556631658219  
140.180208418327 150.680628549529 124.972772541334 139.466683069609  
131.573729430926 121.084348994747 149.691340727994 140.113334247294  
147.027904536486  
LOC642808 120.255081121925 129.606271613463 129.290542121353  
129.491732597331 135.704067249674 154.7326161316 136.599305161841  
146.166710487448 134.637520371454 136.570817174009 115.902030217102  
144.193756031386  
LOC642809 142.848438163322 151.908841481413 165.908756485356  
140.875923123766 145.524305076788 161.956032597813 137.710725379804  
180.569583206488 126.0944894315 150.423586547273 167.526798465556  
160.73807125195  
LOC642812 155.502363062633 155.952902855994 148.901723851925  
137.677396262152 155.444668113276 151.858466721347 145.245316640391  
151.736824723671 150.97777780024 153.494456800685 156.707737817443  
146.370084152094  
LOC642815 152.972779110762 162.735609734946 154.552605305297  
151.104891644466 158.120079903425 136.72715888684 151.60113116166  
168.720694813918 154.252727576218 149.09398454596 162.98885109088  
157.436513275737  
LOC642816 146.67875644027 144.599578905334 150.580133889656  
144.031305845388 152.42111372681 161.055911120534 148.941194457652  
146.983646662811 147.176801913145 143.191095552619 128.634431242405  
147.082068348591  
LOC642817 797.501324589697 777.410297605252 1441.29676998365  
774.774214696342 432.969886744613 1527.87148052149 2539.87833317526  
2518.88171283899 1508.24281455057 1951.69651954627 1775.32632165475  
3052.86038628748  
LOC642819 150.863099494798 135.616911926164 154.379788206936  
168.091278015885 140.643378462734 130.043904881142 143.427721577372

134.485835304676 145.371273337639 135.296271683847 134.750046135498  
164.288645768576  
LOC642820 186.309367281625 161.195562296834 179.400220328552  
183.214922844221 161.04173806448 164.922193471904 171.775741648309  
151.064422836695 162.050520530297 177.919885012006 163.946569217706  
156.453108485249  
LOC642821 127.279107079261 132.637443692683 130.749763860615  
128.699441450952 124.170242736875 123.178049594968 142.004558968904  
143.694412162756 141.968949222821 144.525782437057 114.021546689428  
129.982236484842  
LOC642826 152.134895623504 150.43722766614 140.40754434058  
138.267027472904 142.958906063186 156.534634574244 140.983230581181  
145.513333676569 140.434086004204 157.797222258336 144.288714958892  
133.201157825808  
LOC642828 2518.88171283899 3391.3005983725 2053.71550326011  
2313.56743052616 2620.17683549005 1689.00127592755 4081.13406129846  
2313.56743052616 2282.94927629821 2444.835635949 4592.14655702906  
2563.02488807613  
LOC642830 131.655316312379 118.988269692812 151.899063970777  
141.793216038882 126.051431944357 140.418010366997 139.684141478459  
126.418295908353 139.957560460935 136.181791404331 99.0767996209245  
123.875478428652  
LOC642832 140.48713195192 143.35902319003 154.236652966294  
134.394503574535 135.688346453694 135.732616463819 150.709091532746  
144.396774242135 129.864474336459 147.889486635135 136.216577685046  
141.331397551086  
LOC642833 130.473842500245 147.178598908199 132.834433153076  
141.468076901305 132.920775987309 151.389433433911 133.67719550997  
134.514251897045 144.532420788945 146.923382271905 155.648782851696  
146.245915271213  
LOC642834 126.702705908175 125.277002586952 119.586157804692  
128.51523581959 135.937066152894 145.048033586779 138.070353990356  
123.796657561057 144.120106441052 125.851611268218 116.604371744082  
131.941069239017  
LOC642838 151.722405598425 167.871703133182 172.980441569522  
163.153676643372 148.269123639781 162.683665945044 152.247504238261  
143.157807632147 153.649235507812 166.335294339013 161.129770392464  
162.439052954676  
LOC642843 125.345611085082 133.482237631013 119.412461116903  
122.80785489118 127.654130155446 136.886677060418 168.919352453652  
134.316859658338 127.073045558761 126.777633512781 152.131804134092  
131.530256606799  
LOC642846 162.547569833931 161.663893432522 136.990610254852  
147.79341726211 182.310140388705 144.141837615086 152.032418787633  
135.071400668179 163.863677822465 152.629680152219 142.596113491002  
143.523051024982  
LOC642849 137.629855378016 150.79785758452 155.42165869714  
147.595573192579 138.694701349366 129.01094835739 157.151992792746  
139.301435614165 143.628147237159 138.521952850632 114.042914237667  
138.934516083124  
LOC642851 154.768422926874 141.062226285596 143.338628928675  
127.277128410056 146.599636794606 135.562700479444 153.02549014611  
123.853588042292 139.411792975474 158.541906931082 133.308383825604  
136.195555442748

LOC642852 257.706904467657 208.385295246155 209.229537873706  
202.849544035436 152.262147284452 155.569733738768 187.296479395462  
175.601912488918 166.143084832472 157.948814637726 153.860039535598  
160.75642485037  
LOC642853 144.699084515687 143.601057437842 123.312000381122  
122.476178620771 139.577443171489 131.99470265134 155.281950758369  
134.094231940612 127.003974141317 112.332130647215 139.42531690926  
122.575357101038  
LOC642855 161.735609436394 146.019622621809 137.784270510433  
135.24841020592 153.811165696928 149.353072778508 149.135934269866  
142.296446144179 132.291157461345 146.775403409562 164.048326497989  
151.070654092886  
LOC642856 136.927274496451 131.305785417254 139.420025842675  
131.789877096016 133.812639120892 131.981505236332 151.167024833049  
136.630678899513 134.233014993992 129.589056071463 128.91354251648  
127.409603645289  
LOC642859 142.215285988753 142.37457375182 148.160350542849  
159.909121784808 146.775403409562 154.423801637411 171.967974673053  
147.545667896282 152.244018820259 157.049773524382 156.311009595629  
160.35668299062  
LOC642861 126.839037497031 122.167669805597 135.129656281091  
148.525224975266 131.181537219479 122.729918525032 142.229488350074  
124.542879928448 146.428534132236 136.491140756702 114.302645757446  
130.105800581241  
LOC642863 128.22735290389 132.62551190584 129.394359810841  
157.134782748175 142.534195262988 138.777120638896 146.95272087759  
142.556535259086 113.756115251188 117.316790136526 129.942594772751  
136.398521726896  
LOC642864 147.117286738537 133.397734409167 142.808871284256  
153.85854399897 149.788558681761 145.514859606031 150.72835989269  
156.018200674475 158.829144564361 148.145136066071 128.463982896081  
155.3016514732  
LOC642866 149.369418844044 144.736213465651 150.170712508944  
157.049773524382 129.445240570626 152.346098251128 133.088758771353  
134.41693612969 146.388285560372 145.426171336045 113.716741872499  
141.442825487243  
LOC642867 126.834926242799 129.748891462506 138.850077456103  
143.741676966126 132.481710681317 150.36160186175 135.6149724596  
122.957621737726 144.992993261203 124.048926099805 134.410706628655  
129.428950259722  
LOC642869 158.448557470725 156.822477235844 152.563532872898  
154.978243057971 176.486551181451 176.820928772968 170.706932460836  
157.213868854329 148.673763368264 159.273225917177 148.228662780391  
156.938149948126  
LOC642879 146.240060512152 145.106362864355 155.680330654611  
148.859129298141 129.075693654369 135.134213292186 141.681266095578  
144.634118305223 129.553282780541 133.336963266326 127.04217189075  
150.471558219667  
LOC642883 112.851805868467 116.947370388179 128.06233429201  
136.835889180879 125.272796155561 114.093935026467 117.913545753709  
117.718893827092 129.033433971346 128.097206000942 104.406314027414  
128.699441450952  
LOC642888 145.855671447779 148.196320158939 159.227123133854  
143.197131668608 148.780775862239 136.251820364823 147.745780820004

140.976675511847 139.406427549733 160.608674893418 148.794293762142  
140.184082384548  
LOC642889 134.988545581219 152.673212084312 146.245915271213  
140.336479395866 156.033897758869 133.204793127029 153.511995286293  
144.116298946718 151.086688327023 149.704586651832 134.731687541347  
138.096262211809  
LOC642891 146.649944669876 135.221786448517 136.18698517676  
143.517327774456 138.557464672111 126.569482909992 138.962649407431  
152.821735300697 125.353389826276 139.444577046509 135.164117176127  
116.456170659686  
LOC642892 20647.6275450554 21225.306360484 19889.8233042542  
17658.0552091534 28193.3833726673 23656.0669757593 26082.8089351205  
25002.6870134094 24377.1316448061 25295.5071561111 23053.5660790052  
26906.6343314539  
LOC642895 138.899292894875 126.0944894315 132.580130403836  
158.521812954982 141.016596301267 135.485867373592 150.587882657674  
129.628859533303 133.717451195844 139.432567336814 126.875483714734  
141.035566928475  
LOC642897 211.626970008102 210.290500215377 223.128108720503  
229.046153362151 194.257024100927 197.02284475852 356.413190087706  
320.467139255533 305.720812071583 327.251620296271 252.655315526015  
261.89195025254  
LOC642902 129.336402686549 132.628358688595 145.698637908482  
146.247825342634 123.884643288534 141.425393615228 140.578378782903  
134.08270035062 129.360773522498 141.779801021888 119.711070285785  
127.112296857923  
LOC642903 150.193479279784 157.333615322941 141.799236109474  
133.92485496581 150.287472248483 134.865577264797 163.686535888943  
143.831294912255 154.046550866249 162.342112922504 124.342911165267  
133.954514563283  
LOC642904 131.185836673529 131.865164933746 157.547814187442  
144.513730107393 142.474762834848 130.062015525637 141.480793979634  
133.594446233378 132.796961054534 138.483436753942 120.727504500018  
136.097571072206  
LOC642909 458.047799748696 417.987533397449 330.590986934704  
392.539157974899 187.069074575776 239.503369457867 272.994195639694  
175.784250947874 170.361237529247 233.464856303761 407.244564912365  
330.193132765826  
LOC642914 160.243405030742 147.49720952988 174.854570705  
160.945886507456 161.559920910487 182.009471368798 159.570288565855  
167.782882015229 145.498372398845 157.147002927578 141.393814611166  
159.479962316199  
LOC642916 151.531667383273 144.301577198126 152.783534456473  
169.590101694098 131.631968933144 156.863232221623 140.930897231705  
123.607412609763 144.387375194186 147.378228560979 158.545435407585  
147.360700051935  
LOC642918 140.180208418327 133.141683141696 143.953043041292  
145.254692995502 141.239354296152 146.257923971069 149.876687693565  
152.021576565132 141.304791640723 136.349603320553 134.89031458837  
153.279026396412  
LOC642921 202.849544035436 195.043838688467 280.749681050778  
241.799709160815 146.885404321622 208.816482659752 169.860061216981  
172.152570321727 149.420396673799 176.53912635694 178.89423690001  
139.22776505842



LOC642922 143.796699867588 149.227646026658 158.216790540415  
152.585572167313 165.547163740218 162.702767346393 157.848456517169  
143.999000471746 152.309460630038 163.380402251758 113.268379270385  
139.938739652347  
LOC642929 138.438792881135 129.083756379376 125.311403516443  
149.808222023726 126.897804011992 126.022145004164 135.377118045038  
128.711308958929 133.348510114432 133.443807124822 117.65847906412  
135.860057860699  
LOC642930 133.685254707686 141.623851511993 137.756209496729  
143.147325939994 146.75924072364 141.678529125136 145.758423590784  
157.446725405803 144.439320591901 128.200531810126 122.317877997527  
142.589312139207  
LOC642933 147.313494489487 144.555718186987 146.9554120076  
147.164348704012 165.177036955944 154.426605816862 152.435416154284  
119.418866166776 149.944351491364 149.980924447339 132.024244263352  
132.066488589395  
LOC642934 1996.65760745757 2753.89649259242 3215.41238464601  
2086.15449885278 2525.90466050731 3000.46298223166 4037.15442268836  
2611.61260614408 2547.53445585552 532.235193634196 3515.36256599555  
3195.71436046397  
LOC642935 153.571517567657 137.933122094638 135.898546849226  
149.010477279209 148.577336081778 154.820187615267 148.913181799692  
140.504486195539 150.998881139061 154.209689403188 142.467552395104  
139.181131600753  
LOC642936 154.618685493541 160.766121558583 154.503958858173  
150.845846206549 163.227953876329 155.683727621475 146.418147447541  
156.938149948126 152.577131215027 170.706932460836 130.539632182729  
175.121069571371  
LOC642938 147.250700603067 131.362128083159 141.389330839189  
135.75568942028 160.395053149199 131.177396785633 144.564250008106  
137.354782768068 144.256029338053 153.969493052468 142.537484065487  
158.631298154353  
LOC642939 131.930814868433 151.965103021638 139.490103923544  
118.740346254406 137.999190557332 140.696326952077 136.282608531191  
147.199961777192 147.643985046683 151.573920235798 142.294922363188  
132.693707848508  
LOC642943 128.14606899743 142.732625557628 127.320624058583  
128.620852653765 134.694911833015 142.543569032033 141.216869032251  
147.697973457776 134.819406064011 158.232100962615 137.517461260687  
133.561188057423  
LOC642946 163.227953876329 163.833372505148 164.82904652634  
169.422015793848 151.316421810192 185.974598267418 169.293852989203  
162.982557003317 175.744275464701 158.260676113325 165.48594766783  
185.570062118736  
LOC642947 13423.8921651885 13853.9715872573 14037.2575989329  
14228.7550296952 4417.98524179686 14417.2696849334 7948.88765120294  
12877.2152068971 11554.7330886956 7167.29945083872 6793.99737496637  
9470.58919937464  
LOC642948 124.321503368855 143.60570420943 129.198366503027  
128.359034755228 122.482176216024 132.033116673897 124.106971897779  
139.297276687352 132.69067627743 133.063422581428 142.17773831901  
136.769073515537  
LOC642950 193.930569647995 165.177036955944 187.852455291319  
185.432587490792 149.306122206718 163.362182585182 168.027892518772

137.172030225913 159.14477373952 177.055023182887 148.680794815584  
137.539385624206  
LOC642953 132.290234154865 143.713962738562 142.527422462824  
146.565265415908 165.995251661994 170.202597821861 157.350979071365  
141.301503201175 145.338156577438 139.926488041421 151.655854407186  
156.265168005937  
LOC642954 134.130913969327 135.688346453694 144.89403947454  
135.244303669342 135.353539458856 152.131804134092 146.71868686671  
142.326319895395 134.339535632463 150.657800679032 157.623092996114  
150.573523216151  
LOC642956 190.077302802065 249.953902454701 218.369954323686  
213.338918839446 546.611519125021 991.611982265221 1861.19763103381  
2300.9407349072 312.705458415152 7902.9189607838 1403.90487313049  
2068.04582900231  
LOC642960 170.561596645385 189.816900281053 176.183165494563  
148.89721463505 159.424105896749 207.624240598841 187.132496910208  
168.223865801948 171.751149502172 178.636555178682 169.667751894226  
157.28429690041  
LOC642961 127.152744243038 126.471321085803 133.895547281411  
136.278361222532 125.884565343075 125.077260389449 120.721341479615  
132.985645792864 139.459975305985 135.571239294086 133.096984735092  
130.34939602913  
LOC642962 153.563839578065 156.525347260458 201.235056368151  
158.100395482569 163.245806772716 164.247251507109 190.318957029666  
169.806644442071 172.631499322646 171.689722533849 159.643566663742  
152.573063322741  
LOC642965 132.776236872246 145.751336115646 105.221735747452  
117.585207821853 115.217608555334 114.078271807864 130.849810759153  
126.128597459065 131.848213704003 132.437234970375 113.083678884076  
129.476648077532  
LOC642966 122.031894952046 148.168587884369 163.885645883066  
140.855078775719 132.688531077861 133.171854425031 136.154522071917  
122.900675062181 123.960761343425 155.883386742315 122.575357101038  
134.604565335211  
LOC642968 137.77174500538 154.854538639035 137.75060150486  
156.642441706727 168.628947766217 149.848740870148 154.197254746757  
151.891318080151 159.7197697044 147.250700603067 142.981967333546  
155.452842883109  
LOC642969 163.799748670842 164.890716656336 169.301498852556  
162.122250419992 173.035013611377 170.966588957686 183.013090662119  
163.59704679338 187.4351946569 160.031506612501 152.007436762651  
194.029961195972  
LOC642974 139.416388461892 142.697827839203 124.17231659571  
148.28101912019 149.182972268104 140.48372620406 139.718721422663  
145.010108826238 160.272632590118 150.939877261936 130.24527031028  
158.63432604978  
LOC642975 1961.26255930192 1901.97972168836 2222.16226526877  
1687.06111969368 2379.15291239548 2180.31963682546 1520.59210521859  
1736.03342040646 2352.01196541874 1492.15137418791 2399.88695085752  
1828.66165670455  
LOC642976 143.096097305398 143.815682887538 150.854580568572  
139.046174587432 121.159593382017 137.260359343758 140.317110725836  
143.292552892073 135.429199205506 150.653030597808 137.618447592489  
137.675597243706

LOC642978 140.531789506024 144.30519737569 174.229093061024  
156.981921830638 147.064543281269 161.841975820372 147.359279533039  
145.547037566774 143.712450441816 160.060406629689 132.363645381743  
158.933097712363  
LOC642980 156.846991384413 151.87495966414 161.017267304159  
149.353072778508 139.570313872946 141.793216038882 140.877230937687  
147.117286738537 146.002585729701 150.660106369128 151.243948028303  
151.363607695078  
LOC642981 163.889522525848 158.562631157512 147.082068348591  
165.500088159872 166.182850621447 156.531951576859 169.220974415101  
150.272153646712 166.04965258862 151.831627236638 153.694557276814  
146.98903251354  
LOC642985 159.085639414089 167.67272339144 162.595632367022  
171.11282933168 169.488652117125 162.649092834422 146.536055773073  
154.118601977256 155.945838519586 157.454558821261 147.826950636822  
145.872258115708  
LOC642987 157.654040469774 145.889336010424 138.48552149031  
140.831508792119 137.996291911198 173.497575259833 145.352802493486  
145.569870279379 146.019622621809 165.2045030333 124.01558540593  
132.015048158775  
LOC642989 2728.04758874748 2694.98079256089 2782.94647782764  
1499.07462479938 968.548243081111 739.874432767734 3441.9805896226  
2050.34883263932 1176.01058971561 1189.69730508119 8787.57716309558  
2728.04758874748  
LOC642993 150.075738752092 124.904518221898 162.140112952434  
151.224289879776 152.948391119096 145.206796089128 138.434347257063  
165.74458564887 162.827112132145 131.903632821793 140.574129695953  
140.018786803502  
LOC642995 157.067264221207 148.856482636773 152.146033353926  
137.940675746397 144.385424308141 151.299425811105 150.290025009187  
143.733505359106 145.731800133702 145.407517107023 148.564655847496  
157.986640251147  
LOC642996 120.174672871542 125.290320836648 124.844481048039  
126.94941821459 117.423704591303 117.770032157393 139.103395748894  
119.598216955485 126.877293296185 137.183566882805 121.219323788324  
124.796876920269  
LOC643000 126.686404772601 149.369418844044 162.678619800767  
168.232843307077 153.374296511216 150.421116058494 160.192540519103  
151.010493695217 148.711943433557 157.273309095198 132.568354349687  
152.547558436703  
LOC643002 153.228048041467 125.321968563987 141.393814611166  
124.802639338573 128.495276191943 140.602170750673 166.89285636895  
145.950701448912 134.318290950377 144.92594578882 137.334548525575  
134.175287993769  
LOC643006 136.058527150792 123.7615105541 134.595090783504  
126.416290818296 125.208803405105 122.027632589515 125.496553386629  
121.045367784918 134.06834346533 128.09266452749 139.644701550661  
127.336648342283  
LOC643007 348.575690346536 380.514553097613 332.978350226738  
308.621688157016 811.144838166905 440.916522871266 707.404709303506  
281.659653592151 329.722135361491 476.076903428247 1371.56635975955  
451.887564294551  
LOC643008 143.73525260312 133.012006684865 140.434086004204  
134.922488718676 150.394483608039 129.378442664568 139.358218798638

135.989816139218 142.739686751422 132.628358688595 139.449895159273  
164.948785167149  
LOC643009 137.179058645907 144.166567293421 141.373059612034  
147.576533768761 157.231166272318 133.483766053954 128.734694496357  
143.470181156799 142.567737460006 129.044445373107 135.489000274316  
156.275506468809  
LOC643011 238.509970054862 230.589110372454 195.66091457697  
240.591548171052 201.569913451219 261.203388718689 180.060096787617  
198.954254778846 190.002630382394 175.93459327917 202.643624039869  
216.974834077975  
LOC643012 159.184075293158 166.027988561421 174.035835206078  
179.100368312505 180.250420976613 165.500088159872 143.349486755648  
163.48462232122 148.692602243778 179.501659253141 142.712218120721  
173.432960318793  
LOC643014 136.987403767185 144.777043589925 134.772545694636  
133.871685084945 144.738871562895 131.449370465834 135.747939020471  
131.732416355002 125.935071837868 130.786835186349 135.823975527501  
144.240470871638  
LOC643015 145.500011956699 135.548042190047 138.510722755317  
139.125340284813 136.450062043587 129.859331207247 134.372560968918  
146.264686158155 151.27882940428 138.112168847027 146.522066289381  
136.08040874432  
LOC643017 117.119533897652 143.423661752881 151.560202480724  
148.556161762978 139.805930686563 135.192181609947 128.994977935861  
137.524968609776 124.329980024986 140.831508792119 122.751674866182  
155.298546821687  
LOC643018 153.008756051525 137.127587786536 144.895601314903  
150.613624696604 167.949422301257 152.545261723881 158.241349852419  
146.626517077288 136.534812980964 157.313737338264 151.671024612136  
143.35902319003  
LOC643031 7144.3257417116 8514.94395408164 5265.74259211695  
9171.47979464736 1789.51979173209 9293.35991367953 4255.59773503364  
6944.90824302953 6138.10904830456 5240.40795364202 5467.84611694564  
9171.47979464736  
LOC643032 131.937867646778 129.049273337631 131.447941902406  
140.619606039582 131.381189141974 136.582137928022 131.910285685889  
122.452541100946 121.796519488793 124.947565043721 119.583378101838  
108.895922800601  
LOC643033 135.592128081677 124.879018642505 156.883255634126  
137.82918941689 120.14201542563 148.194450105682 135.095095470362  
134.425483661043 169.434164890542 117.628564992187 134.399228996542  
145.85414203374  
LOC643035 243.402781509365 236.809829701921 209.913460781088  
264.685862877779 318.196134631178 211.505504834207 205.226635237992  
215.84044779962 195.16856673253 201.105520537151 227.64196401771  
204.842791081358  
LOC643037 123.051777473512 124.170242736875 146.53663019612  
147.238896426423 159.487615985875 143.943676099522 134.81595608984  
137.534079082878 151.933078262284 150.231063426302 128.798413084891  
145.180346905484  
LOC643038 150.394483608039 133.697364081712 152.422690241301  
150.371716899336 157.021010130169 170.636731478608 156.32137627012  
152.566490804809 148.149216812602 150.540599489506 132.930042559647  
138.316043447788

LOC643039 125.606269267903 132.786500984297 129.703791330416  
134.465488237877 149.593135821045 130.036744891822 131.866599432062  
140.402944266863 126.557869929234 142.351705613006 127.620377473963  
140.882766779119  
LOC643040 144.137695673296 154.466614452651 144.6567095695  
149.377153449536 156.208747691032 149.570242115956 151.635752404534  
151.911494020123 139.757191608836 157.555410977564 144.664600892248  
140.768926302035  
LOC643043 138.121905080822 154.978243057971 146.97334315047  
142.240333104987 124.539006083936 138.363553671822 132.727133259694  
125.374764771516 131.666853845458 126.222105816959 129.1829592305  
139.097764484641  
LOC643045 151.790240553272 143.644862018676 145.793794049657  
147.849116400978 137.784270510433 142.734103971267 143.59105195427  
149.842326869644 139.615706918035 155.710272937386 129.89239171411  
138.620617643924  
LOC643047 146.413845130977 160.277755404001 179.230909178397  
152.348210524663 162.660027294291 140.730085305185 147.539226876636  
145.780927034516 152.573063322741 171.775741648309 139.052898232393  
152.272198017355  
LOC643055 134.620896927473 139.609751976657 148.503282415207  
152.188770978528 168.232843307077 145.547037566774 145.391496022306  
154.156272284591 143.481112776388 142.042557207642 129.391376518208  
143.969566798989  
LOC643060 129.792548588929 134.23001942966 146.508628678304  
134.10070984606 128.777337552038 134.506216147934 116.547306374097  
130.947003916049 129.998824457005 129.665507668047 134.694911833015  
147.055213172078  
LOC643062 176.300743660299 139.21331678591 161.498785105514  
150.674189235105 151.665244763743 168.477388641982 144.994931561779  
150.997551005337 155.111346336412 161.385691765316 156.986053534635  
158.859389972316  
LOC643069 115.058061620379 136.113421708277 141.577373924378  
124.715454831847 132.602336133471 120.433080754232 139.399195840117  
121.6801373043 136.545742688573 127.182067293944 129.697584673736  
136.021607232776  
LOC643070 161.569793476847 137.132095345234 136.572645314012  
150.006621336954 126.732121894377 136.518409978222 130.912137250515  
128.350073358056 138.980079440205 136.788269716383 124.70219935334  
135.589211439847  
LOC643072 127.946346172549 132.268445799639 138.825961991209  
161.790909578234 130.800427334056 152.337631025368 159.895303363094  
140.239948346946 139.560555361919 138.070353990356 138.359423363142  
146.948261640482  
LOC643075 163.885645883066 144.342905860503 133.343243441383  
149.117224130576 146.9069812014 135.650546885518 147.608094270078  
146.624631389743 158.799917136119 158.531514776098 142.321476446203  
144.445496145045  
LOC643081 133.864612785572 133.052615777603 135.015161451899  
128.659393756477 134.384963577069 134.172033051676 132.218907367109  
126.640141760199 128.274326990056 135.774569629738 113.334665910428  
125.124011798043  
LOC643082 118.697969266426 130.024546949158 123.833219705499  
146.334446516009 134.247361216412 157.58224826673 125.572299527276

133.337863400762 135.193659028591 123.711828013052 116.421771593211  
128.700516033555  
LOC643083 117.296972688814 119.237802375552 131.782007636511  
121.752481757054 133.654232991228 131.166819048309 127.295532954648  
118.000757530896 118.308102542942 141.441694319047 110.382724813928  
141.508424382665  
LOC643085 128.505296338657 147.297163685914 144.771457221413  
136.265972909993 137.81819274774 131.860337317402 131.7646616214  
144.476157581998 139.585373400347 148.725162101789 133.35096649325  
153.741061283101  
LOC643089 155.056545639862 159.633987751501 155.004104153679  
156.221773628832 162.668896609848 151.054834307689 143.769240322865  
157.528409294029 159.513465644268 152.382558543399 140.277228495746  
146.101547300741  
LOC643090 117.399753685854 129.928047362701 113.913337223716  
124.647992480694 141.164985468046 129.96280577492 141.412317125776  
117.103439577957 132.402255281009 119.75069850668 108.515401509039  
114.77964341895  
LOC643093 140.451465188624 144.188147197178 156.05583229359  
144.235298492095 137.279605991153 146.522066289381 138.9183380982  
145.640156204495 150.868712184357 139.579764449867 133.854760285591  
149.121894111871  
LOC643094 134.175287993769 128.966514855818 148.859129298141  
156.930119977809 132.375905857023 130.255689301211 135.645439440707  
130.779805222363 144.432181150583 139.229351251973 127.289269745461  
134.788450164055  
LOC643100 140.44966014021 135.715745768179 149.997047695778  
157.87020867396 236.35479928448 152.983678871668 224.528190554963  
193.444080047879 242.410260751835 156.904781904311 163.534117903837  
200.934618257908  
LOC643102 147.364301916733 128.994977935861 125.967294930279  
136.695790688466 127.3079781139 136.861019517134 131.570358580547  
144.772914483212 132.043196381009 127.247764390727 138.426531345939  
140.954264409241  
LOC643107 149.277880094957 120.138014822486 143.399877326927  
153.534763364558 136.2727333616 145.549126188292 145.526941881413  
129.816385177336 148.562200783472 144.00214898009 152.258389962  
136.438788088263  
LOC643109 167.70368494182 164.529828080312 161.992141305029  
155.777281781161 134.06834346533 163.741411769369 134.330234316896  
145.363692072132 162.802392115386 161.618479762188 125.088717405087  
162.574338133241  
LOC643116 157.288308753975 159.762733951454 167.55209828062  
158.665476708054 140.763592237598 173.468958175014 162.373508183992  
162.018860183534 160.060406629689 156.146154578237 142.046082566177  
161.419873271162  
LOC643120 133.599098708818 149.193437559422 146.722211039754  
150.529257416176 155.960886801091 127.349190705235 178.262619516994  
134.751916364581 155.018009545475 141.996233801459 143.155998311198  
168.408974578263  
LOC643121 165.4474699807 157.142101889337 158.249743182741  
147.100947801261 155.187900101727 145.559419404453 160.240052678401  
159.929830440641 158.205235596076 148.823805841381 140.812334019209  
140.52997588229

LOC643123 135.360087349634 142.625414022199 133.71610564207  
131.125175244494 416.861099188252 148.007068300762 546.755305058958  
270.231637012624 370.140588087649 133.604705630582 256.795346052751  
427.872407051254  
LOC643125 159.065612005442 156.806407903626 178.904696191996  
151.449690439424 170.326474367867 165.041296694491 145.819198235878  
160.853480692082 150.527757375079 162.58152435515 128.001109846227  
173.816408146725  
LOC643130 155.826394389322 156.508428796592 180.336623146341  
150.835044630002 144.94824685435 176.208206282902 169.864628707043  
177.910104644497 170.692146255416 149.526189446292 154.507721014473  
174.941551089279  
LOC643131 185.650862663633 144.20764300349 164.726382689707  
159.636846021745 157.982146236108 159.002382889848 160.221974600577  
163.885645883066 145.396723478249 161.972922129453 136.308565710257  
155.368204597287  
LOC643132 115.285392699073 128.033383607545 123.82555184043  
120.224154897296 131.164778405297 131.885529813944 142.34471764492  
126.512613967438 132.943957535655 130.231160879338 131.811011266156  
130.824958143557  
LOC643133 135.894512504725 136.2336179571 144.587253120884  
155.625320865565 138.311892121437 148.549257493128 134.081308836364  
125.822346524903 135.680872395032 133.886458291672 135.301844382418  
141.463324155943  
LOC643138 152.175423676063 146.252974508529 138.044751228397  
147.094123051131 129.013667813486 145.810213943313 148.853877151493  
131.503936441405 118.614641349402 127.055165613236 136.08297876405  
139.416388461892  
LOC643140 136.794860440446 139.340699808517 141.052322220012  
142.243866937888 150.624740697168 132.375905857023 141.218832234405  
140.506191791073 134.354215877283 140.234485088845 118.731960910224  
143.577865527891  
LOC643142 136.881019970399 133.046435968561 133.9382467268  
127.769405736754 129.471713415228 121.508233749444 142.485427762372  
139.263602290256 124.306049555272 120.831070822199 128.363331337379  
120.835207882788  
LOC643143 157.240466990977 172.84784588171 163.198834359304  
159.311949668403 163.352317556107 152.872139211415 149.117224130576  
164.701183249762 152.778732614944 162.55521875551 157.08300736206  
145.378779757104  
LOC643145 144.78971417658 148.79958121087 149.990378213915  
139.827527470037 132.926799887017 146.090291252325 144.340734361996  
146.363991934916 129.467792559297 149.634975068742 120.325985681299  
143.078022283871  
LOC643146 122.180428703208 117.428152859221 119.263824982583  
122.460829835477 125.154784284706 129.138035235415 131.825172822888  
123.260800590266 123.185652476312 107.655624022312 115.80245224388  
113.620070198869  
LOC643147 149.856041300199 157.038121210505 131.234140286502  
156.179501567984 133.040952285855 145.750611940928 160.150336334888  
164.181915898563 165.885072907195 140.248610391566 119.842470751496  
169.184111483933  
LOC643149 142.392860474555 145.324499089416 138.449057377027  
130.01207836961 142.914863449833 148.742216703684 144.529801006864

144.405191855684 132.604589324628 141.992490695142 120.514672572565  
162.013164369593  
LOC643150 146.915965807149 163.143613079037 146.877475544399  
147.494937826597 154.648806105422 159.98636352484 191.692830869809  
165.932628858503 156.389361240637 435.48544637769 152.404186073033  
153.592819860747  
LOC643152 127.494672751434 147.368455727098 150.211719786127  
172.531836863525 152.137669424501 139.127442770828 130.686857648764  
138.325950428197 153.165872773973 142.49005761699 138.582427155109  
145.464640276742  
LOC643153 122.572634128442 119.057157701097 129.187574143637  
130.399501479248 119.905127545336 128.683044953833 118.597739444445  
122.469113037809 128.02595294499 120.060776752215 114.545476919992  
114.14858855653  
LOC643154 146.996442729408 136.91078498126 157.316941011117  
139.497253870412 129.026732674277 149.516743790585 145.320945010364  
144.008961720971 129.158212237299 147.645530163725 139.828781354865  
143.30977386038  
LOC643158 147.409936250284 151.089328533476 168.628947766217  
163.542848861552 145.373751186893 160.390564881326 150.445647133244  
143.484004107893 131.377361030122 140.717348834454 152.080057231881  
138.519129384809  
LOC643159 140.402944266863 135.477059311179 121.705065573911  
123.527903217158 130.497405221273 123.166013119235 127.116637906391  
128.477342430713 135.330241638301 127.827096314406 132.801619479245  
133.579067514064  
LOC643161 134.69274746407 136.598215718877 148.560326703328  
134.406692724353 201.49630027392 162.933658389727 188.20675818131  
157.860515609693 143.637018777217 610.070236234299 119.704436785439  
150.102853150151  
LOC643167 517.993093601127 386.067573158514 599.208370337812  
328.730722366546 329.88790758321 616.701037274509 890.507257588957  
619.045921382959 589.070196307574 605.437395034282 496.697565640162  
590.515758538373  
LOC643169 170.54511631708 155.15575204653 173.735045816949  
158.906481816035 128.523703756493 127.866992108488 123.635470154191  
117.49013401175 126.033673708286 145.034179171835 124.930303940168  
120.193580405229  
LOC643171 154.398416018484 144.610341215903 151.41546939633  
141.653917856148 143.92831903543 162.620593985693 141.602233757588  
151.694193636313 149.3567486207 148.16526158216 149.357617406983  
155.824409540332  
LOC643175 148.844916975586 143.895399273595 135.36523178082  
145.745466612541 131.140263788783 129.654234837398 154.993784224548  
137.543128522665 145.176141415244 162.71020036416 135.114056458478  
148.868265867275  
LOC643176 153.770852731422 163.868129628544 166.335294339013  
151.751963310212 160.254101852355 158.631298154353 178.665552649698  
152.54039461337 152.342712570625 175.139231359014 162.337707154123  
164.21464602746  
LOC643186 135.509927917168 129.583916648999 135.86149691566  
136.659134200122 126.822360314075 127.575660581922 158.092775850886  
137.185243517766 135.049657594221 138.240874738649 122.437272605287  
135.968346417524



LOC643187 149.666293193219 131.378893655618 132.398041172151  
152.983678871668 141.639216893245 153.202157381228 132.899305777714  
122.821563586744 127.377356715337 160.941804737367 120.599440204711  
139.541759919059  
LOC643189 143.031909545902 143.138613573764 155.790759250672  
153.299196905367 152.872139211415 148.630293791756 136.783974483005  
134.194555223935 147.728018766726 150.471558219667 138.456465793474  
139.641688273911  
LOC643191 134.95842832877 139.650726173186 143.565597315289  
142.713318779614 134.579005092929 151.252137441251 138.883710791382  
152.887471821971 145.735532706214 150.079372712689 145.776143302784  
155.386226046894  
LOC643194 125.010266083832 117.639216182057 127.49352469919  
134.089308635893 154.881797585583 135.427985445559 136.124385992905  
133.12641302705 130.166741978483 127.893555451807 124.272447276746  
122.144209450757  
LOC643195 136.799138736925 137.363483527372 129.267923706188  
143.796699867588 143.446317006075 142.883466086309 135.592128081677  
139.993960054847 131.432729794636 128.931946787934 141.960809148036  
139.065849548762  
LOC643197 156.136962310077 151.256546638599 161.424105316969  
146.755803731358 141.145419751161 140.955772094739 134.247361216412  
152.06044555622 147.821639002833 117.862532836494 144.532420788945  
150.423586547273  
LOC643201 133.950160115805 134.533551900843 143.314754993075  
143.036006001419 147.547944397578 140.885915460425 134.85809559975  
147.196687432745 140.906421938377 137.961504178836 135.688346453694  
147.208176455806  
LOC643203 120.672291867109 132.582062079623 133.889858322181  
135.146767090951 129.256138453675 123.207402172696 144.40361834862  
119.213217733213 128.572388808833 131.798931481549 132.469190523971  
146.6306281408  
LOC643206 161.852665901359 166.714793209109 162.259941098076  
178.790758444269 142.91818218442 165.597236278435 156.875068435974  
170.23937234395 174.116797337377 173.879952136931 151.598423878653  
165.723126764006  
LOC643210 125.071387239411 155.268650584431 120.891023626809  
128.314990390649 137.076766238637 116.214857935694 137.500310477851  
139.427216913809 134.769926504916 141.346722137248 136.275207732661  
136.355319997318  
LOC643213 164.708712337156 143.603022117503 156.632939064629  
174.149718758884 165.274189050141 130.721987260546 154.1651846756  
146.479009988445 150.434376975922 150.247639459773 161.764411756848  
145.824996954376  
LOC643216 133.397734409167 138.466136108202 150.423586547273  
149.348231806916 122.238996815745 145.824996954376 145.588981165456  
137.419835194075 127.895989232696 136.394920983439 130.147848418265  
123.111192189217  
LOC643219 136.452338158252 143.333211390741 122.793816135585  
133.033913603001 272.238922498583 140.54700821058 131.730758460802  
124.251699375036 152.699431442817 136.356895672212 149.563405421366  
137.342348963288  
LOC643220 143.864036545717 136.83883055114 124.791221329502  
135.346501914337 142.648205566485 141.976051648478 136.745596788338

135.474070994652 136.009969058857 123.323528039848 151.899063970777  
131.034010150362  
LOC643222 165.158465031363 156.01406297447 178.537080546119  
156.572774198042 157.21132653949 177.652022895288 150.812739240232  
150.503278880269 149.642946071295 162.161282071736 135.367261617271  
146.278921849776  
LOC643224 149.462835741621 155.669470674985 153.464360995071  
158.788210937339 147.074807267102 177.802767772786 171.267907653007  
166.681646517413 168.37043566813 154.740395921562 171.278489808694  
185.984938124891  
LOC643225 124.744684973208 117.093818506721 135.548042190047  
134.530516701271 136.026302491961 144.062079886084 133.286702819953  
137.944260488223 123.654787271088 126.693235227579 132.344296085487  
135.531326977319  
LOC643226 138.603793282123 140.837360719964 144.750407738866  
136.767307268217 147.748142622566 132.615324904193 140.995418231627  
129.573520898314 134.845202154446 137.239088768176 136.543603346919  
136.70715656782  
LOC643227 137.248465324584 132.535722328813 153.214696479001  
148.8870854102 128.209771391087 154.312374306932 153.121693371757  
141.140392288975 159.592581700976 156.883255634126 148.390417679848  
163.575300618666  
LOC643231 137.654833215154 132.953762692926 150.182173149394  
145.299625153537 149.241358552148 137.129864761402 145.452220050902  
153.97869518398 144.206951207576 143.118188813831 124.940836122365  
137.251030000994  
LOC643233 152.547558436703 130.795318552623 145.671099346237  
141.143572141958 198.088834624665 210.085329463347 161.837272617767  
192.655899720909 156.748330788367 141.290905146249 151.134466830828  
164.959415532174  
LOC643234 140.548371692813 132.645196037302 135.968346417524  
155.979380606594 136.881019970399 142.452409969639 135.292532783991  
137.704257049203 150.387906232396 137.251513843314 128.462674862751  
131.142841840284  
LOC643235 129.735862775199 146.257923971069 133.352279794853  
131.715579653796 149.353072778508 133.24828292554 127.482662155082  
136.817517693076 126.94941821459 145.45097990828 141.968949222821  
140.115154069602  
LOC643236 148.153776704837 150.053948736789 168.269075560636  
140.435724944447 153.875760529011 159.549936351002 149.308475163534  
149.726968520487 145.957206019026 141.606501859513 143.118188813831  
170.692146255416  
LOC643237 160.423982411027 156.519196335454 167.057202756618  
168.37043566813 158.473244125101 147.378228560979 142.589312139207  
157.57914268719 158.120079903425 156.611727364072 145.298109334141  
149.604507483606  
LOC643240 134.498439965049 133.167635227902 141.990639998829  
147.973274498131 143.211127738941 134.310685502031 130.859679135715  
134.168381235167 136.181791404331 124.302581985661 139.469148541078  
142.570182389682  
LOC643242 140.028169667777 155.330215726109 163.833372505148  
134.992686224944 151.570977428443 163.356993518952 146.404727168045  
153.423579724911 150.580133889656 148.016402654687 135.54708602175  
152.849810441802

LOC643246 167.559703634539 129.105655010455 146.632312874102  
150.578023008958 157.856019979644 146.664285015996 128.322884322951  
140.457002126576 139.987681290389 142.243866937888 147.939682463235  
151.589273633331  
LOC643248 134.374551571013 116.087696503753 138.158400190671  
123.822571859503 128.618422306397 123.303143302526 132.366079370785  
138.062345982865 129.752997624387 118.951526834915 127.913463809158  
129.987548571478  
LOC643253 126.931328660501 131.239986488033 150.653030597808  
129.788395150404 156.875068435974 148.13657736444 163.416011199431  
137.070326499918 126.186758919929 150.626826756019 131.552276774901  
132.115817176834  
LOC643256 154.21623304309 147.082068348591 131.351303131574  
144.615156175885 147.86104992164 142.997365080299 138.634814756987  
146.029647001623 147.539226876636 137.752238510249 135.304167695152  
161.762768590193  
LOC643258 131.261903118177 132.118118271944 156.976539870288  
124.942701123337 144.456324230938 143.577865527891 145.522435728191  
144.905870145004 134.808485735121 154.146962684738 124.164523121103  
153.893753448473  
LOC643261 128.492142236807 132.526286141997 134.222453538421  
126.290840923683 129.108534267222 134.988545581219 142.09146795308  
152.673212084312 140.806935772116 139.466683069609 147.743331160624  
133.86835278231  
LOC643262 128.69455713173 145.85414203374 137.6160344044  
139.452773383624 138.184717352015 130.716570410608 144.402160347818  
133.82548013342 153.230304322351 149.385103319547 133.839554874862  
152.179281925254  
LOC643263 132.906201428703 142.215285988753 132.845116298605  
126.189005734462 137.842375545994 135.1951749488 133.320865155329  
134.675247731364 148.663860923774 159.236429097777 138.85328409337  
147.401387099359  
LOC643265 130.092881020271 135.311980936088 154.256214901103  
143.442361602626 150.701579893607 164.231281729415 133.982435445664  
149.487167787687 133.610143526954 153.850588492326 112.015423658372  
124.885950473434  
LOC643266 134.072912593456 133.514843630183 139.1434049136  
133.944538335319 152.518729390047 134.354215877283 135.217240511902  
148.069725041021 141.640292723776 142.007066214472 143.818379692331  
152.415752253205  
LOC643272 163.48462232122 186.420541099902 153.345834660643  
140.849383992711 171.561940747015 176.289693941489 199.88618355278  
189.985520850855 152.166586496729 339.012225830929 236.108432603479  
170.807514224412  
LOC643273 144.951973735763 144.850211439338 153.171822092714  
147.764068958635 135.841309719081 155.92082882492 136.71484425521  
138.726894569892 141.966490100288 169.744100665038 150.888616811881  
166.430881793156  
LOC643274 157.172970235254 156.210423316722 133.228074579352  
159.696443182844 146.188193301627 156.916784141484 148.503282415207  
148.514806562804 161.094103878416 149.082061203661 154.808798024399  
147.476805635744  
LOC643275 141.872426752329 133.686850910378 131.829906202014  
143.256590560776 138.814930200619 144.040342300793 150.993910190626

145.971656491073 143.096097305398 138.110317032494 132.601272107742  
140.933444607646  
LOC643278 147.196687432745 131.354275252104 159.686279002456  
148.247826830556 142.337258528293 164.377227860031 143.050004021764  
160.625367261779 134.412129843957 141.319594283071 116.408126010926  
142.039943511086  
LOC643283 126.186758919929 150.734560844391 136.459509901229  
130.51901676405 131.592172917738 128.17223916536 132.361106053517  
130.402496960735 127.543729713161 130.99288239869 115.366496551426  
130.316282003711  
LOC643284 14983.8256502293 15116.95436573 15532.9759169142  
12457.6956682374 25002.6870134094 19496.8914296296 19889.8233042542  
22035.2646000952 18338.3001930708 18338.3001930708 21650.9263365935  
23656.0669757593  
LOC643285 131.444734367396 141.181931072161 149.010477279209  
141.424508069834 140.490023670841 136.205702793983 138.870636101334  
161.632610858756 140.655002540298 145.183463058696 139.957560460935  
132.105184573944  
LOC643286 152.877058628512 138.313519292093 147.299872426498  
151.592787806315 154.637740117457 142.537484065487 145.142331981651  
146.582858169664 142.13191463827 156.218834695891 131.237720549768  
142.703116372162  
LOC643287 2206.7447886564 1948.24432908972 1617.44377452783  
1746.30519466572 2382.87910783088 1066.25208226214 1395.63393859192  
928.672013047007 1780.97169244555 1015.10079945997 1927.467713716  
1838.18547839898  
LOC643293 137.27827836407 143.397823965608 148.715065348779  
144.00214898009 148.386249316173 152.272198017355 145.97330701968  
147.901594006094 136.679405220947 148.212445624699 150.391286215189  
153.215991985634  
LOC643296 135.068883036882 145.459919416288 154.792156982219  
137.367390177293 134.00481287258 135.576975868985 139.234549949916  
135.020690381988 144.73389393695 150.748298569951 132.955473649746  
163.108825245937  
LOC643300 139.3465236423 153.913513669361 174.749832388791  
147.268006631005 163.141010815086 222.919473675549 177.073245863872  
256.924134409998 184.602704530362 227.965783945702 157.232314992094  
202.718428167217  
LOC643302 137.190593489949 145.659334130032 138.254479653425  
130.440164900487 147.673016541108 140.573285987781 139.170102961407  
116.20967792121 136.327014189932 138.72219653692 127.344210958898  
133.499361793303  
LOC643304 145.810213943313 138.028813480968 146.90847051471  
136.106596229215 152.927956172463 161.764411756848 148.297939240474  
136.306727083526 139.776830704087 134.524644163286 136.290486122369  
146.554017952963  
LOC643308 310.989043012841 327.566026396726 237.854774190873  
211.660148497276 294.410833087913 252.197271817794 464.196512015649  
291.444155562134 231.314944217099 314.095043876244 584.548578914846  
292.366934378643  
LOC643310 1467.50846948144 1302.54547114701 1772.75453735112  
1086.8615735568 717.686676823785 705.529158880221 1040.29664343743  
842.87865208079 815.045148478814 1195.07608384189 1379.26881813339  
1151.30600388403

LOC643311 137.929082565223 135.057847490193 171.561940747015  
116.038950886552 131.943014970855 135.146767090951 115.247223837316  
145.079450753969 139.718721422663 132.493888285566 120.602818832247  
127.233439204926  
LOC643313 143.519786615253 153.821728151219 172.84784588171  
149.237422245619 170.430478598594 186.625452120269 189.482046688226  
161.557558028531 158.788210937339 209.258707976348 166.143084832472  
184.398672994943  
LOC643318 129.143168240589 119.249084967945 142.268018184723  
142.019263564073 137.792150225149 158.260676113325 130.420753247797  
446.262895953004 149.6036366066 123.748788684337 135.872060352476  
137.68634745111  
LOC643319 198.066837203458 217.715143869654 220.079379312889  
230.770036998466 389.853534237748 703.587139938769 470.746477818201  
544.852019338212 572.262848718437 521.215655189324 230.806950763402  
684.428198622716  
LOC643320 154.345378564437 135.267015629083 172.186384820044  
147.351826045609 148.444479022559 155.8871985642 153.492072037266  
146.978110148492 138.255457081996 127.095347480109 130.037840598918  
170.931788192825  
LOC643322 147.479390172796 137.052507691254 143.116451998409  
141.255406288178 137.314968268692 129.875986080057 146.986891588172  
147.055213172078 158.027935395289 157.979749139651 130.385747820089  
143.912136782374  
LOC643324 136.769073515537 134.058035351684 155.855564068891  
146.31468639383 136.167141767484 155.710272937386 147.73141408795  
146.536055773073 144.283716416188 139.046174587432 146.019622621809  
143.360311218423  
LOC643325 154.534605635191 136.993102884269 141.583936153499  
141.985130140173 140.239948346946 134.327229861635 151.461857714097  
142.509635237928 139.180086017033 135.961724275921 137.299908075811  
133.736252068443  
LOC643326 144.977958320895 159.554978842683 141.239354296152  
167.822075935474 149.526189446292 151.654749538573 140.694993778394  
153.966815534288 140.954264409241 150.680628549529 137.934850241054  
147.253919952267  
LOC643327 136.635413632094 144.907294702865 156.389361240637  
132.744261207073 145.999823250463 138.383183017683 154.951136632863  
134.149446827982 135.100687929821 134.584076788979 120.971313945446  
138.963864375073  
LOC643328 137.685104040843 140.044536042073 140.914966429342  
149.72025962797 133.014551645069 125.104229604098 151.234397206563  
141.342216963124 147.225911875196 140.694993778394 132.817645625115  
147.395335979341  
LOC643329 143.626857507866 138.934516083124 143.834501071806  
124.693253194681 135.558239627426 144.262612328341 149.742140955184  
145.726651022813 134.691038011706 133.180554954396 132.631819830347  
145.34041912391  
LOC643330 145.464640276742 146.018097597373 128.947211021681  
141.954467306745 135.182524652868 125.435268901131 141.960809148036  
132.431566491955 120.342513393659 143.185372109165 142.914863449833  
139.987681290389  
LOC643331 151.849653154534 142.151209745109 133.154004369076  
155.780657091484 126.838094473932 180.641419603362 151.998942684339

150.412929574507 145.71535210212 147.784078315091 163.516075721791  
149.398118078302  
LOC643332 130.892302357045 109.318922864507 108.497209666203  
124.242539075734 124.527213402962 125.488511939819 122.022611139895  
119.931415360373 120.995697049378 121.85247363239 112.699674279523  
119.492844191924  
LOC643334 122.708102546276 131.432729794636 129.803445949193  
131.599370671279 115.066084565112 129.838790698396 141.535381351126  
122.749182465923 149.007288765628 136.121343288722 135.038195181839  
163.030275835038  
LOC643336 272.968792195442 330.758879244143 321.84712975195  
266.395569467956 638.287221212947 753.997560938003 953.861218000678  
817.036222521723 798.943242964857 805.875557314697 932.076509242794  
781.461780481171  
LOC643338 144.077080621909 138.266328639467 149.255405438966  
140.736051985112 147.121049266117 149.390481900424 135.114900669781  
157.374537572779 158.882535865069 164.284396793834 131.76272538453  
139.807421433384  
LOC643339 150.503278880269 154.261443597434 153.681775929182  
184.724071110756 147.511569289425 151.839306445341 168.223865801948  
172.827288328708 165.2045030333 143.945039636839 149.79295887612  
176.980780681976  
LOC643341 135.419628087842 137.567384694894 134.436423298225  
131.741688265764 135.405742719464 135.141067086648 139.180086017033  
115.76177719261 132.782967735893 119.242880574306 130.124601660028  
128.36121178972  
LOC643342 159.874161198304 149.200848439601 138.478911439144  
153.626180103404 166.095964870713 150.035890574132 153.907737500104  
137.792150225149 153.041407358576 154.634289463743 170.306241656131  
171.650247980576  
LOC643344 132.200648560899 143.177915754998 141.8268805463  
130.744788360182 137.463764193883 139.147327302581 142.560797028716  
132.421863261746 140.608266389167 133.324531689254 134.631638658586  
130.69582728747  
LOC643345 158.6953558198 153.38260557666 151.84373370805  
180.430425314885 172.578252260002 164.048326497989 179.30729544595  
168.232843307077 154.778726823719 157.443127950708 146.996442729408  
179.338652960181  
LOC643346 129.647514123731 116.796995589816 129.767878283811  
141.008604646743 134.991379445799 122.996616773523 125.689884251847  
123.813766735115 112.502812746669 128.912199634685 135.711590400394  
121.224389883994  
LOC643350 123.327238774943 140.296609941747 139.593950393555  
128.236840746655 137.009303458922 123.595133376092 119.352995485911  
127.774702462567 122.94937342991 125.593595066736 117.467618148107  
134.619470709414  
LOC643355 147.114698384834 150.998881139061 138.338280468272  
139.923187410488 127.713286292101 131.951649373072 136.835889180879  
147.079157199448 136.524640445539 136.380523452336 147.821639002833  
140.553613300431  
LOC643356 137.243864288111 143.583650664594 149.725422365342  
143.695901115673 112.858669660245 126.115828232308 134.558435781672  
152.007436762651 140.296609941747 144.393688888553 141.685620602226  
143.242308032336

LOC643357 1419.4638331856 1328.38230265655 2307.82327595071  
901.197085099854 1452.63736288691 3387.5366256957 3784.59114921916  
4134.02613649483 4425.66777919789 3140.51157972795 2782.94647782764  
6091.9840719327  
LOC643358 17404.1167486753 17404.1167486753 15990.893941344  
16179.0939169232 17568.5229948989 14983.8256502293 19496.8914296296  
19434.8698477145 14866.8264879369 15851.5830405813 14592.6308255978  
18760.3823237058  
LOC643359 158.617209794418 148.410647472149 138.011923055019  
128.116795372698 128.26957712082 149.31422191209 121.252042151856  
141.164985468046 136.638141963514 137.426226808356 135.952202055637  
130.260174841484  
LOC643363 132.854945224697 136.400959554698 126.115828232308  
130.799009128937 136.052640679977 143.984222627806 137.450774903611  
134.036236880951 127.242627779136 132.033116673897 119.795945889846  
128.933672074497  
LOC643365 140.160349667726 144.927731613526 126.728375196449  
144.221488906376 144.589482298525 139.732074331751 138.156430188312  
127.562924931536 143.562164660825 147.183889426843 164.794626785115  
137.745887988474  
LOC643368 147.055213172078 140.103020838882 164.87433908877  
149.538429805372 153.339992195184 148.212445624699 159.640027194076  
141.478253058549 140.29803170157 143.655901618594 160.215396651606  
148.605816748229  
LOC643369 115.545558600232 115.343251487944 123.094324479352  
122.583461806645 133.767309427502 121.113186311514 112.936472036608  
110.190708230962 115.053039576143 114.384296185446 113.656820701744  
122.937281123348  
LOC643371 123.884643288534 131.65084896906 138.026155846749  
135.614106458757 131.142841840284 126.159880038854 126.083599163604  
124.345320343901 130.720097323382 116.46192274217 116.087696503753  
134.316859658338  
LOC643373 153.865702787334 166.472068379965 180.418707740532  
160.268754786532 158.6067091347 165.380225715852 157.256812907353  
172.077522197357 175.974598536074 141.436235043864 162.161282071736  
153.738794649373  
LOC643376 156.411563412665 168.03501792841 168.437049123012  
161.806144472744 154.270034951209 143.184697704389 168.729301938015  
137.508097741526 141.689210867136 158.448557470725 148.753891406126  
157.494596757446  
LOC643377 134.10070984606 129.065491477375 136.518409978222  
141.664271607079 139.121639005366 135.116985816353 151.029785584386  
166.622070620588 166.085469368498 145.020615552964 146.803549606737  
147.106355591496  
LOC643378 138.59175751301 132.903959880979 156.46322298175  
135.105147647223 118.660213790078 134.479828866339 123.692366307662  
134.364838071696 138.880168623766 132.834433153076 117.696262292883  
124.526220300907  
LOC643381 121.705065573911 132.338144393918 127.199124606827  
145.440471538068 133.927844489731 134.73970457131 131.946938297748  
124.693253194681 129.466612376702 131.606765174514 115.137475087954  
127.543729713161  
LOC643382 143.481112776388 169.113439729353 189.647009287524  
180.902950045351 145.449099891256 147.980827857138 152.045391611927

150.082561726876 156.213421099137 179.191401472241 161.382041789666  
152.323927317575  
LOC643384 325.999687273862 350.077206368839 278.428310548805  
270.181005097697 3474.0924656878 519.450899933049 1014.23822508445  
889.26314145856 661.390308090982 339.448524400708 1605.2454230722  
839.662936279727  
LOC643386 129.547309629132 118.619176257622 138.261506562904  
132.14412512622 141.686945908315 130.686857648764 123.478896502015  
139.039276904833 135.481300250507 142.613654158833 117.667611937195  
141.994082714379  
LOC643387 416.392874553797 381.121621815163 466.392151902286  
414.200068430184 398.354212009426 323.244664586314 404.54681330209  
392.282956362735 450.688800547981 377.083379021079 368.374002925137  
436.891409783298  
LOC643388 173.708509414674 186.591941221632 178.835679834487  
179.582086214179 167.268645224361 151.641486303453 185.485858719975  
170.54511631708 163.165374495635 189.94130405123 162.364266549463  
166.81024151246  
LOC643389 153.592819860747 177.011776399483 158.002906093899  
175.79375235478 205.058210447711 170.577057395536 174.161146689117  
161.331326682743 182.222567053422 174.396061906109 199.235895708128  
155.664126780859  
LOC643391 160.882229345156 134.877046981678 167.594414386475  
119.9414421871 124.126715773068 133.36168342199 138.117916412819  
143.947729578484 138.778496466408 130.092881020271 140.943732564849  
151.206697943841  
LOC643395 122.837807905774 141.50968031684 151.463200570499  
121.303696898208 130.12638520846 124.952026709219 125.486324819682  
121.818632020666 128.623302491798 139.667714422309 143.799113486767  
133.804489975068  
LOC643396 191.029458520006 182.084333814175 154.079355899056  
153.972471779464 146.418147447541 288.026656721827 199.397633942623  
241.105817192695 185.342353172151 211.012142461725 252.628516068724  
201.507971833902  
LOC643397 145.380971596154 137.25054616038 127.41463780496  
140.611071681667 160.290104492275 161.299920355406 126.511314417328  
134.943005383277 150.328995030071 138.818492907643 131.410793139723  
146.75924072364  
LOC643401 138.175538905334 137.320792454356 150.802312408483  
164.098880989592 153.095594614683 138.471894596606 146.626517077288  
152.230489051339 152.566490804809 141.724442944322 127.578272480621  
154.373739162815  
LOC643402 123.853588042292 140.040420521312 132.983739057264  
141.982743538528 151.914252332792 136.282608531191 163.632148441668  
146.303959493672 133.154004369076 136.109975252514 138.677282903963  
130.521731606987  
LOC643403 144.117964288763 145.139966629363 149.707357499252  
151.118430469429 145.892876412762 145.735532706214 143.766249538352  
156.605568633665 148.190696520521 152.19583231051 152.237183848896  
147.285764611006  
LOC643406 139.900523831258 139.77436722364 155.43577761798  
138.938546468136 124.336297973344 131.300342835696 131.364187047583  
145.625205055601 133.935910746769 133.254663058352 124.638075441482  
147.21992012742



LOC643409 136.754116864655 147.107508450203 154.627270742193  
141.602233757588 149.262900833177 133.959208066964 138.820797333519  
138.53954980556 135.747939020471 149.827791077797 128.536721595589  
160.261708910517  
LOC643412 148.838294770082 155.283003653612 146.887506793665  
161.160974998803 148.74881415573 153.705394500855 164.15288821931  
144.310362660942 130.684569384626 161.234304237838 133.264245969185  
149.94715601106  
LOC643416 126.991140761102 129.801342433836 153.461396593156  
142.879705723262 129.338551879984 136.227202534196 139.953572663277  
125.870730238298 142.466067016788 122.742891063864 137.940675746397  
135.153588830407  
LOC643420 168.861884032201 145.172776053 159.273225917177  
161.225608630791 154.71904132098 148.578012060425 159.781313090489  
147.44463861207 139.602168254761 152.68344738009 137.310014841869  
139.041005010106  
LOC643422 165.947514372877 148.725162101789 180.528296177577  
169.975329631607 166.447510782568 166.368623023308 163.858222964048  
144.861804210272 157.003367685421 166.157713072213 148.067562465748  
165.134931755194  
LOC643423 197.443711199904 169.36029946801 194.403848868583  
174.587558727209 157.433725133173 199.88618355278 181.439775614781  
168.173803952157 148.803188053248 171.69834783037 158.562631157512  
174.795822188504  
LOC643424 156.026806913759 139.214589768245 143.730966588794  
151.84373370805 141.558927907067 151.198928680018 155.335777680002  
140.918728758975 145.979293623167 142.500537230642 138.064951932825  
138.609972011765  
LOC643426 138.76667538162 145.27890423835 153.374296511216  
152.071081175788 136.19725093985 134.880138942756 149.6036366066  
127.797666392002 136.001505582342 150.073816271065 128.012740016066  
127.969833368917  
LOC643428 125.969321927281 139.321570881862 128.72727523654  
115.496108000499 122.018200592563 124.899019467557 138.010385979692  
123.231397809701 139.841822983821 128.711308958929 125.584202037776  
136.052640679977  
LOC643429 130.043904881142 128.806964077824 135.067056559409  
129.594440309419 142.623106544789 127.220812636148 149.121894111871  
114.373370072994 139.168307371516 142.175432631861 144.262612328341  
135.467354817201  
LOC643430 162.609829456486 137.872742675806 149.283495832731  
154.94587631386 169.158049136321 149.366554238043 148.832461329713  
147.608094270078 157.66595229182 158.295583769612 145.374923175872  
159.572851489665  
LOC643431 151.159145294127 158.517778100137 163.014903707857  
171.589889474122 659.106229917309 697.774882173237 373.760551592844  
443.623904480087 825.034504959272 180.34788837703 455.564394647943  
765.911113050543  
LOC643432 172.304496150036 155.168592130392 188.724274062294  
189.142295015168 172.816477996646 168.405786851399 185.843639043466  
180.733673680261 161.382041789666 155.582036890436 151.342902631318  
171.982071800592  
LOC643433 3668.19307488953 3592.7878705048 3481.90072759183  
3608.10730106542 7601.58151657937 3938.94050658589 6188.04738762584

3552.78712528922 4190.38366101529 5373.2173152906 8322.20177173035  
3822.05744774919  
LOC643435 150.829439012542 168.013310840048 133.975526667571  
132.639070127232 159.344044864557 166.558080305926 163.829218786716  
135.114900669781 152.547558436703 134.47218436552 140.088094614168  
136.971869448818  
LOC643438 232.735767435327 209.7558663154 227.267783818298  
242.848821222611 257.168308311848 258.759507964221 314.221257518059  
238.270501389189 317.273940108333 271.468939477052 197.815264620906  
238.461248099002  
LOC643441 157.374537572779 145.165443106042 147.729716417584  
157.742948919213 152.93058803161 143.219722736891 144.898770838913  
158.130933580414 146.606442726047 151.78607484924 139.289968250444  
153.758353103323  
LOC643444 139.117053855066 141.432461374482 141.668101962049  
138.220016828327 155.731897985566 142.329137800558 134.202497785854  
149.717739166461 153.714902281332 159.806221777332 144.310362660942  
136.859366444351  
LOC643445 136.821228481217 125.14833026167 127.43866970659  
131.816989019024 129.798965780918 134.888404433315 126.308622415913  
134.93455083142 133.12904935533 130.520275539672 130.95176570982  
132.958521136  
LOC643446 171.16807372519 161.24755274554 213.301947003462  
169.003310163058 224.135228192655 255.273375146278 265.366632264085  
250.406775889932 254.9636051363 223.474531516972 196.598810934837  
286.230656780335  
LOC643449 144.199054675488 134.062423178775 145.214575855337  
140.559553697317 128.816610738922 141.150016212967 133.663595328149  
132.764150075465 130.165488538277 143.703367582367 132.346363545288  
122.642077625035  
LOC643451 147.056182807232 137.138266859156 122.822725811743  
145.217261514886 148.175206259619 123.372689985035 142.581441480371  
137.910618360623 148.65131922365 136.674553275255 141.956996308304  
149.343930487315  
LOC643452 246.88857694249 270.520229426015 283.499120551905  
279.598585549004 266.918302307596 232.845268785472 276.476790719416  
240.706548931192 268.660078500783 305.854543429221 396.04031733841  
278.385151185788  
LOC643453 170.298291784762 158.007926822094 160.32812671237  
169.927157878764 145.416733388652 157.66595229182 156.000732564221  
160.906550609416 150.132420238581 155.218336968191 164.773489952844  
158.034418043685  
LOC643454 132.735371358102 132.69067627743 140.26557508894  
149.250205265163 153.705394500855 138.199559519849 148.484823275343  
115.967513057229 140.898380345452 150.269618125943 138.093181144173  
150.72835989269  
LOC643461 196.378888436237 164.717809928624 205.852731236069  
139.652974659584 155.080900277147 146.437565098335 183.056707813352  
152.353494489233 153.371065247493 185.31769184805 150.596350682411  
161.485353443949  
LOC643464 148.074494928651 136.362761829761 162.047249964859  
147.096559685764 170.636731478608 148.866229889479 161.099805358232  
151.3362561751 151.739221728872 151.397068235685 145.017264740722  
145.250076958551

LOC643465 139.104095964732 132.686006816081 126.222105816959  
142.986412837634 136.151754558226 133.500750738061 125.220416203903  
131.223691762533 126.588382665802 137.689158155552 131.583841535781  
138.436029489092  
LOC643466 157.765771942689 185.830435830545 186.961638857905  
189.027594735456 244.011434605133 163.21153580549 200.342786450248  
176.289693941489 157.481645415121 185.765000029242 177.94501172269  
157.207544072126  
LOC643467 131.573729430926 128.876385705559 140.18668846839  
121.784166691545 126.146213417225 134.096283448464 134.953368678368  
131.866599432062 149.545278163222 135.938590242744 121.591962855513  
121.984179437382  
LOC643468 132.038012025708 143.884263862698 150.48744233923  
144.89062965996 143.191095552619 164.413893089607 147.459385142695  
136.452338158252 143.284230032303 143.167719135403 137.805895248174  
126.428284589412  
LOC643475 141.112047881014 133.259321087534 155.069048442532  
151.389433433911 142.116311513299 155.960886801091 156.353914172996  
147.500009766324 153.051143478997 137.71280215369 129.723501897231  
167.201570648434  
LOC643479 156.7940590796 141.37694311902 161.891809608511  
138.45137517137 157.11867820027 196.076386020815 158.814407805803  
144.606963457243 172.065593177758 201.235056368151 147.029988235786  
153.714902281332  
LOC643482 142.545823714168 134.944488136297 152.334669286305  
160.203521879896 144.474814266475 152.241060990474 142.110469428644  
147.943844184702 157.590017103385 143.470181156799 143.660679324057  
138.13987378399  
LOC643486 129.828896822571 127.069495559614 131.031639119149  
127.152744243038 130.105800581241 131.230501496659 129.529372508883  
124.961859983596 133.41548225025 131.013719535992 136.356895672212  
141.606501859513  
LOC643491 157.6790197503 136.049167597016 138.945855414918  
134.010889126443 146.132506246152 145.621384219688 143.231806900648  
135.479300698192 141.850952191423 132.133979108537 139.948097704949  
129.390398431836  
LOC643492 145.745466612541 154.207656926108 145.606098951179  
133.70941349665 148.199249855894 150.51056917809 150.339554736141  
141.442825487243 152.801801823442 140.443415669628 143.943676099522  
142.954204401406  
LOC643493 126.875483714734 129.625046507677 134.346754381858  
148.090431893307 131.027605835275 138.730409717578 138.487657776553  
127.921209207879 146.112388101621 138.687013437904 135.973752893694  
138.872536475067  
LOC643495 149.763038696374 150.029313080668 145.106362864355  
124.650711299942 150.769819282075 141.302647488314 149.241358552148  
157.259599894923 145.034179171835 141.577373924378 139.508029141287  
142.428578698775  
LOC643496 131.322008851059 134.990075720145 137.065315360321  
128.36121178972 126.370252616961 124.235958498969 131.173355686001  
126.430816528764 117.706795566317 125.576103876855 117.766156390814  
135.982797108848  
LOC643501 141.913001976093 146.142934874698 142.034369454643  
130.924141812334 144.65238608866 141.971207380159 126.816402300701

152.849810441802 142.088243118644 151.98710761363 138.279775054156  
133.101674466013  
LOC643502 132.236355533277 137.612446150193 139.377027955744  
144.301577198126 137.710725379804 126.0944894315 133.466342977488  
151.144521344129 140.04612725812 136.337076023706 134.514251897045  
149.586651393588  
LOC643503 136.101501973431 136.194082458655 123.24533179875  
117.417112053842 121.242099666967 135.275284142536 137.282038401275  
131.38881091292 123.660836177932 127.663578933727 145.077517845584  
131.866599432062  
LOC643505 163.385727569154 161.04173806448 160.870390779084  
153.176268095608 131.635641515901 201.123529130035 160.525939340745  
198.753297290444 155.548684011748 141.401480567426 170.858049313581  
159.016247993816  
LOC643507 330.143103381406 265.174306663185 439.616817413027  
254.133112176024 160.164327420125 481.630922092112 346.303862540751  
369.373283422151 438.231717096337 527.707841428677 360.551560710852  
313.581986704048  
LOC643509 15297.9020958577 15532.9759169142 15667.6576521981  
16642.71853486 6233.78489807054 15667.6576521981 9994.54490550759  
13479.8546809758 13423.8921651885 9470.58919937464 9937.36968397141  
12690.801964606  
LOC643520 125.396523818173 135.08927101395 153.39738748803  
139.723117427543 133.165893710176 144.69686018715 123.048352070915  
125.947359725013 134.842877075983 134.694911833015 115.235444833856  
126.791714564926  
LOC643529 143.272669418277 134.71514094826 149.977924522553  
144.542320520523 142.528480882047 135.68605915552 141.904041228678  
164.89597889259 134.990075720145 144.478339139298 157.436513275737  
134.592495777159  
LOC643531 6830.46932926077 6652.21610967461 6793.99737496637  
6484.36742084268 16818.1954169657 9596.10781313429 14983.8256502293  
7992.84111657183 10661.2216586049 14348.4009261372 11741.7473778842  
9293.35991367953  
LOC643533 108.43334699667 114.771585411255 130.265055842999  
118.180919555585 122.075440298074 126.938068475032 116.186846885411  
118.703108284564 112.962180108363 117.024039521425 132.760567403706  
116.647291878845  
LOC643534 143.040254576088 145.02142927266 145.483667452136  
149.289021275556 157.298181833321 137.037299675471 190.5930909277  
143.147325939994 145.128919984856 183.04531185589 203.616580991715  
165.45479542657  
LOC643547 118.115015846489 122.900675062181 113.748724650063  
130.435589649362 132.845116298605 126.22472822166 123.395897439193  
122.94737290641 122.410340121549 117.79844873842 125.672285485643  
134.145771195572  
LOC643550 165.851677392967 148.980330875743 168.007337847195  
139.690093593646 172.364618542922 181.070689877681 178.955938825556  
163.72257517759 154.455641374384 165.590892262736 185.100455193182  
159.05213637758  
LOC643556 145.308548379215 150.144977373708 160.880152014981  
143.879597098414 150.756776447358 162.155834067128 164.442400539653  
166.533191390639 152.258389962 160.368226341458 154.949840064881  
154.007244208673

LOC643558 140.839056652898 136.967408633308 147.928629511539  
153.784923783551 139.583514773196 160.466187961848 139.654648891206  
148.808928892047 146.90847051471 154.688685142904 139.109712542702  
150.297422529071

LOC643559 137.811304134207 140.096717188376 132.781725233271  
122.724429060184 120.504814127237 137.038866196785 142.236565028336  
129.032386138506 130.300169316346 137.217104547797 145.150191397375  
129.38021642675

LOC643563 108.589444216106 140.922678400415 133.927844489731  
117.781804727205 133.733674016447 121.696353230886 145.686092190716  
125.262445870212 131.489715975987 127.985051303973 131.000186898437  
142.930903395131

LOC643566 137.940675746397 146.880440100898 140.588811000948  
153.360382235409 136.425263391752 136.93893152919 140.613151527886  
131.753135000312 148.949829934611 138.434347257063 121.93549478261  
135.301844382418

LOC643570 142.922549076496 139.332164436099 136.978738825445  
131.926504315744 144.423509403938 148.18197556044 141.611712747368  
148.253612913109 125.794788766462 144.432181150583 124.246363878094  
142.274440538785

LOC643576 134.860896462638 144.779146672553 141.484730939562  
155.641860356683 122.631814400575 140.798706399757 132.439176846818  
127.255966406144 151.570977428443 147.85133493803 128.176779923348  
152.131804134092

LOC643577 179.048139035247 144.32655838488 182.028675726969  
149.863063160222 140.439698763808 154.455641374384 150.707113487334  
143.086872363116 134.696571019896 165.213327555428 146.460464282676  
163.81485578613

LOC643580 171.909358721737 164.373697447004 157.654040469774  
159.539320132392 147.106355591496 163.62582285753 133.966277922005  
146.349773982488 158.188039933865 156.154079736651 153.22516060649  
159.561431866706

LOC643581 145.206796089128 160.28767775843 143.821269460523  
143.340685579645 148.709795687391 144.256029338053 145.270140096768  
158.73040336393 143.783078837501 171.358746749715 136.069631519097  
165.267693285882

LOC643582 133.814720785534 119.319884675074 139.897320032723  
119.119693776276 143.028618831382 126.277165320165 122.796362813922  
124.539006083936 127.482662155082 125.962178569021 109.167312436827  
132.591496435822

LOC643583 143.577865527891 148.688413944868 142.079184950618  
155.76860362365 152.404186073033 143.985850833974 139.714198638713  
136.506347083926 132.053242760381 143.552343056702 143.834501071806  
151.84373370805

LOC643584 141.067419336609 145.306369509684 140.110258415883  
175.626096716758 152.432477504097 154.600966693059 161.673818303367  
162.397078614596 151.532859494021 162.085813676373 127.458099438957  
153.097557560333

LOC643590 154.273953018148 157.089650890944 160.168654167074  
167.751604259111 160.598186999524 168.018785514306 166.12695134858  
167.384121560438 156.290018816692 168.830344627025 173.735045816949  
176.038123840296

LOC643594 155.140371265225 128.189685312596 144.417333931582  
133.789738760547 138.877999126533 150.71435300188 154.65319127051

126.268418132 158.8054811093 148.215172022129 126.153806511702  
149.730467498266  
LOC643595 133.527906709491 135.774569629738 138.763250836766  
134.808485735121 147.452986308926 119.966690136422 142.942021904533  
141.613898853625 138.1342592966 142.573662441786 133.592691897675  
134.222453538421  
LOC643596 151.409290231274 127.982696242304 155.207839370162  
147.657151780506 154.594339065082 133.830860948014 144.41489969974  
138.489443610941 146.072585331002 141.834582245454 134.206518622834  
164.160608039304  
LOC643598 140.29803170157 141.717466442384 132.251093122058  
110.910693353871 121.164978896057 135.479300698192 135.86149691566  
126.741498575874 136.349603320553 159.98636352484 118.379914726645  
146.571351915492  
LOC643599 122.005340508177 139.008854444223 149.897440750742  
130.902319266342 124.828626063272 132.338144393918 138.779492286948  
133.101674466013 146.014790698087 134.384963577069 124.387133895009  
134.963301368391  
LOC643604 137.352231982942 137.13615301204 137.462720784077  
141.106863165059 139.211746200839 151.923356524322 138.207553349985  
149.394952856085 135.624881949214 175.222531098958 132.677272839165  
156.638070437044  
LOC643605 133.406312157375 146.229239731545 140.02337095267  
133.905162024888 127.814109293214 141.039792044042 138.93292293598  
149.374282007673 140.989597586699 137.821010169859 138.082870754768  
158.639313207233  
LOC643608 147.171090285223 146.541890150631 145.311964807443  
149.441862883882 142.590631181358 148.624135810148 161.911468506919  
164.841156516242 148.87690497281 153.263883774915 145.112399373761  
130.189958197332  
LOC643612 133.113581756557 136.907453440141 127.930072902878  
118.011195631598 124.28033876033 133.78629612147 118.161192318422  
118.312891459156 119.442114850181 120.106270603148 125.496553386629  
120.819163462986  
LOC643614 117.123891785437 146.31980311926 146.533374238616  
157.70581824787 153.238678313147 153.620767586182 135.054931772725  
136.959011188915 149.657951204528 142.201672822989 136.940275156257  
131.77642590781  
LOC643615 141.66312605042 129.949894903048 130.99564079691  
157.604224004016 152.77616981167 131.730758460802 129.867246424399  
126.217702283708 123.696942540314 129.618097261902 134.310685502031  
121.274997609378  
LOC643619 147.094123051131 144.920107068083 157.474913177177  
138.418604660734 150.019181654237 154.826710617351 139.075537402658  
140.150884219813 147.510848198689 141.261150586614 134.607501073433  
136.654902685184  
LOC643621 143.561114996045 140.50127034921 140.878935632862  
142.22515098612 134.072912593456 148.863297062269 140.281512754823  
132.562090247233 133.874468336025 142.036037957345 127.604087759266  
143.5709409749  
LOC643623 135.616911926164 138.317443162096 144.298011270428  
141.771850804164 153.818325601312 142.00857631537 140.227863970629  
148.570769470645 132.64813248505 138.449057377027 135.292532783991  
130.094233130309

LOC643624 168.314966639178 158.7912155022 191.056705282378  
166.503112149416 171.552010365305 175.974598536074 183.358807104988  
164.857465272302 176.641899861006 187.247062073247 160.113042196058  
167.791351000743  
LOC643626 138.62308708151 146.470444212748 136.965972077733  
148.89180107448 147.535225305685 142.143709425075 131.839890565869  
148.925418133902 134.734429133481 129.374418059091 132.8615886934  
137.440295223749  
LOC643630 121.148441367866 124.915772594451 133.53523683945  
131.031639119149 140.040420521312 125.429085234515 117.089207321783  
119.122305582754 145.054873480806 146.539196738195 118.336654504789  
118.855500322915  
LOC643634 146.347213904792 146.606442726047 151.548865569913  
136.420062669039 146.948261640482 142.041992878641 137.100207190052  
145.957934576055 149.267019532847 151.059401217656 143.184697704389  
136.515951031895  
LOC643637 151.092066533546 147.579672274205 136.147810636915  
151.889644436875 147.327675057481 141.503351545458 144.361871207081  
139.711696905287 167.51207060064 153.600132368924 133.449527627723  
146.119700458464  
LOC643640 144.678895821726 134.115085057026 135.952202055637  
141.681266095578 124.178483414968 135.289246539398 147.066582834257  
134.717258604899 139.993960054847 139.746733428525 140.890227770353  
117.590393673861  
LOC643647 133.037138438863 144.2753860947 125.533538277681  
132.383542877819 127.935614145702 136.906909165944 127.665162524824  
142.633121727277 132.07268641595 135.36463588098 128.179293878252  
147.15764785567  
LOC643648 154.533544838819 138.514356748249 150.63456320644  
157.976810829398 133.122174596886 154.740395921562 140.11211854056  
156.187809481625 158.002906093899 147.994386096925 150.880818951088  
154.218967720305  
LOC643652 159.572851489665 155.465250172768 154.768422926874  
157.922718487881 152.422690241301 146.335409183715 167.653412908384  
155.303903514061 155.62770968777 184.332299740724 146.743260100643  
159.806221777332  
LOC643660 136.396579126676 135.877646659023 149.035590153457  
137.086936444421 139.223480216048 133.711821318079 131.097598299707  
112.817015523662 122.337240239463 150.854580568572 155.835077077665  
138.649502040582  
LOC643662 145.095023408224 130.443360119099 153.639559509292  
145.057512485875 123.296382913131 132.431566491955 136.988519762443  
130.746465595759 124.889829874126 131.169769031768 141.469818222503  
138.476953078729  
LOC643664 163.672213020803 147.769702509047 127.398873370484  
146.014110816045 141.561769570516 155.295464263911 147.268006631005  
163.463191619941 142.939578759097 153.714902281332 150.126627487419  
161.237544868191  
LOC643665 161.559920910487 143.209289043824 150.155154998981  
140.743917481548 165.870621884073 165.767629164724 159.130076733711  
151.819220292189 142.238908711402 153.848852170776 141.246352591355  
154.2228051929  
LOC643668 328.730722366546 314.610979086485 570.130804179186  
299.986758612161 268.034972830233 467.04976953755 474.14051635531

664.343553341563 473.73182675469 777.651238374269 403.907009699589  
751.269009484639  
LOC643669 149.029275579026 143.821269460523 153.261002653668  
144.654765322941 152.798927898416 158.937341335707 154.683723064797  
147.192815700248 152.709021529522 158.98007855379 147.371905597494  
141.533138525284  
LOC643670 141.315230997077 125.050945917101 115.120702589487  
136.44218532882 135.285224699704 117.703025026759 107.780763250481  
125.628281846465 119.819082491115 123.484987952263 121.56625295788  
123.07559417607  
LOC643672 141.134173683836 148.512096079648 130.488972210403  
138.651419539729 151.921235758457 138.041411135053 146.16821907742  
149.52880714343 133.583297305219 140.42579083092 138.499293816467  
146.146800933028  
LOC643677 137.347554578171 134.776714949136 137.519771130707  
145.672496354689 142.652939807341 151.526337610068 119.830261862805  
135.668768914964 132.53122878527 138.838795320713 132.975603230163  
146.865904106038  
LOC643680 128.781123194219 121.371348717752 121.895778599116  
127.808579455383 123.439897913722 130.795318552623 143.632325018964  
149.175458427847 132.510116371195 124.66386961898 155.46017572591  
128.662039886682  
LOC643684 150.557982810339 158.845174721328 145.08853313195  
163.104822161892 140.204023682096 141.513636348978 157.546123603057  
151.301484852387 158.07640654075 162.267841475739 143.637018777217  
174.323881548679  
LOC643686 140.569391362701 146.481298877242 142.401333414583  
150.914644894869 155.072752529178 153.613110881454 152.913814113632  
121.984179437382 144.227440632196 133.570075399424 159.487615985875  
180.15338103  
LOC643687 144.592987736094 143.31590446076 157.919709478746  
152.142909854773 158.499787920522 166.12695134858 165.972090075204  
149.338249249161 149.223102493474 155.76568091161 113.529619135543  
177.267145265362  
LOC643690 137.7872481668 129.752997624387 130.632096412204  
131.04482088126 165.386056999339 131.631968933144 147.187681416171  
137.647282354299 128.725044326566 137.901317305531 130.628967781841  
139.917662338546  
LOC643692 128.165775629664 122.742891063864 142.073529553425  
157.595468761042 134.337249560706 148.478570934155 130.204571771396  
145.107068919893 137.475594014388 125.569364049349 115.400592594965  
143.385915173392  
LOC643693 117.051541123239 134.753783025994 135.405742719464  
145.633647856775 137.717859035645 145.335830265052 125.631073476381  
143.434571922656 127.881498149714 152.09245741643 134.301956886107  
147.659772694732  
LOC643695 138.723149134933 148.304863957659 142.630563791102  
146.268073519544 133.638664342783 132.425596223397 136.263658288289  
130.262411213764 143.744075931566 143.100436913184 126.428284589412  
133.320865155329  
LOC643696 143.543607779991 147.439303942026 148.166340306996  
132.109267393571 134.86940314824 141.216869032251 153.713298074917  
135.982797108848 130.058902161953 162.629257046871 118.215641556163  
136.607783800741



LOC643697 130.66511389864 125.942455135541 146.190750749851  
166.767004180603 153.713298074917 145.34041912391 165.131463797217  
143.692305478191 150.878323882503 158.463444189819 129.852833137493  
131.580226088647  
LOC643699 137.834158814913 166.272237117441 150.144977373708  
141.449119281888 143.971152352313 149.865644080359 160.742365719929  
153.408890091225 151.625248091441 158.521812954982 156.269957530519  
152.007436762651  
LOC643700 151.61049450647 135.131890100292 134.41693612969  
145.783320434143 157.240466990977 137.451687756052 126.662329971897  
131.580226088647 145.079450753969 144.065554025603 134.371907488157  
147.764068958635  
LOC643702 146.865904106038 138.557464672111 140.987694585232  
152.516485296644 140.456277147131 159.257221624668 140.599584289987  
150.096558906597 149.393022408213 134.407776033032 136.923876486522  
144.472969298036  
LOC643703 160.887121295848 135.146767090951 142.953661611418  
156.136962310077 161.139253742858 133.264245969185 162.416774743901  
138.836422729663 149.237422245619 133.288181734813 150.003399000079  
150.32505285608  
LOC643712 157.423242850568 153.569919606708 148.739888930189  
153.131271100637 139.078162119733 141.082569618216 174.068974937318  
165.436881839632 155.683727621475 154.21623304309 147.713967317159  
150.741291526753  
LOC643713 161.548130965486 163.570018900148 156.248684477916  
178.000672046849 138.100014158367 144.056644468886 146.880440100898  
157.779441363536 159.307394610466 141.838206951224 161.225608630791  
168.427124752461  
LOC643714 155.951509643078 122.557981210434 154.061101136889  
154.452964510369 147.505345299689 129.25124636593 143.739231124536  
150.656580217177 155.8871985642 135.869754188085 122.469113037809  
178.000672046849  
LOC643717 143.884263862698 131.479997342133 122.969215709433  
141.741892403029 142.249004083496 150.43722766614 141.634246722965  
156.433603187722 133.890597982015 136.415734370763 131.659187927328  
134.785623496928  
LOC643718 157.761231106669 146.978110148492 146.155809402461  
138.256765189241 141.361376461507 152.219906297607 140.595496714752  
147.619451225526 139.10561950165 150.25322837689 123.145830746127  
146.940545711162  
LOC643719 155.883386742315 196.922837906592 173.001985500448  
177.910104644497 136.253264628863 155.346805606742 148.26621607986  
143.934585983797 161.688125121941 164.82904652634 141.449119281888  
191.040134068942  
LOC643720 138.846543789882 128.950308413612 139.904952662852  
131.208112906919 129.025000034273 128.785472881136 129.265788005518  
139.021552573529 133.883527462382 125.027095330593 135.379284233708  
153.620767586182  
LOC643721 124.242539075734 130.195234920895 125.234097725749  
168.327600230929 166.32555285213 140.150884219813 122.362585067453  
133.675029107803 134.572552391307 134.238642042323 130.824958143557  
123.660836177932  
LOC643722 133.698455862488 133.35096649325 132.891375982227  
121.912927816178 157.269049853539 135.621035941292 143.446317006075

127.918847837351 159.824012085212 121.760488406107 134.318290950377  
134.022324496729  
LOC643729 130.69582728747 140.531789506024 119.407293854922  
134.410706628655 137.232722233042 132.987389721592 134.93455083142  
128.251087452744 125.79193748535 130.34939602913 116.20967792121  
125.166940410459  
LOC643731 135.403206634483 142.148597793651 144.544001385895  
152.295451313545 135.624881949214 141.418737063013 134.646131480502  
155.183210738478 124.522974214212 134.130913969327 123.612648219993  
140.522470775478  
LOC643733 232.879578820053 196.136080427522 167.822075935474  
152.789338329505 149.939035476611 165.844762875582 139.408234219133  
150.656580217177 176.940723174814 148.056333887679 168.570133927038  
156.285963197762  
LOC643734 128.042181036687 125.396523818173 148.132450240784  
144.81320329947 146.431166706908 154.309257657136 129.680406696779  
141.38749436393 137.765042156434 144.955918499353 130.274288258599  
141.698329968978  
LOC643738 158.000456937922 171.689722533849 160.159630699959  
162.606273401226 190.736796322054 168.244523461915 165.682617337317  
158.272071464923 164.39910609636 149.639835429332 153.920180168328  
148.206529935876  
LOC643740 144.311620064675 130.89594032962 127.065518421996  
131.897352210959 130.054105892394 135.241029533819 136.618643817686  
126.484819755399 142.143709425075 121.730973193225 147.764068958635  
160.28767775843  
LOC643747 149.63291071048 136.591299462104 151.92638745703  
171.86363382331 158.023626712181 139.159510392614 143.378998368344  
135.4702891855 152.476932186797 170.614129599775 144.249339611941  
137.599810249536  
LOC643748 112.488125161387 126.479964493857 133.948997488604  
144.690880401712 138.778496466408 132.811368246405 132.466796864599  
124.59097574481 131.99470265134 129.655161833654 110.602406076036  
124.061321002641  
LOC643749 116.902574164498 124.300285428221 133.76515446791  
130.038936315246 120.790536146461 133.154004369076 150.188128594079  
122.281263517691 134.08708833507 129.666957539624 130.016401638936  
127.128042857811  
LOC643750 113.40684693417 127.271423859953 127.669334230458  
114.798573331978 118.050920130511 120.799317509529 113.66416989856  
130.088408942008 122.125746529725 124.372963874507 130.99564079691  
120.547683754604  
LOC643752 114.182798672347 120.887938517877 128.867710054234  
115.270544506813 146.184624424737 116.533361070234 128.047981250943  
138.771088752839 127.70306883967 129.652331277375 124.215466523555  
136.478114537536  
LOC643755 149.364498870469 130.172041917023 143.101093566214  
139.204218271711 151.054834307689 134.825699448987 158.579717282881  
128.099484678519 155.488346781292 147.343712869579 148.74881415573  
160.176567985923  
LOC643757 171.924364939807 158.414776465951 189.027594735456  
157.997750997487 139.607944722497 161.402322405903 166.368623023308  
162.494429648551 169.422015793848 146.805832438977 149.94715601106  
157.627490896581

LOC643761 148.069725041021 101.981823814699 141.770977101211  
124.528206512938 129.852833137493 146.644317248414 127.856634523494  
146.31468639383 140.909875639658 140.341589053972 151.325068155715  
150.170712508944  
LOC643763 152.454414703534 144.678895821726 151.68523937819  
142.419777428399 143.945039636839 132.767474034305 160.390564881326  
147.420580715112 132.329892644992 141.342216963124 127.67121559907  
148.943735606315  
LOC643767 143.177915754998 156.938149948126 145.383354200298  
153.345834660643 133.026879831536 160.664407431261 147.024759173313  
149.070750686003 162.082166316002 159.009211991511 134.653131708903  
141.982743538528  
LOC643768 138.098165515898 135.822022526034 148.242794464181  
141.414384085164 136.475652722007 156.846991384413 145.120347147471  
147.610616423185 144.373226011578 125.146558509674 125.717328918165  
140.277228495746  
LOC643770 129.701347789845 121.076652800015 132.448602065824  
125.139029579691 129.413729619216 137.869471689534 121.796519488793  
137.217104547797 118.184571821176 132.369872013432 108.43334699667  
126.98588570464  
LOC643771 134.797624902585 138.42029331811 157.061602966797  
160.322541355391 132.809364188497 122.676368520743 132.755256423863  
141.176376265078 130.944610173285 142.160269725698 139.613193302406  
142.112120308118  
LOC643772 163.143613079037 163.996649606636 163.846242743377  
169.391557085902 150.552186000149 151.142149775806 159.301581158613  
154.011708696954 154.657316209848 155.63671938031 142.19728670565  
138.60849268758  
LOC643774 122.284431229917 132.091532692048 130.274288258599  
130.985360700521 126.045231525329 119.242880574306 112.817015523662  
124.958287100852 123.902047880095 133.487774861252 156.324643994552  
144.026432356249  
LOC643778 420.871349359404 256.538195034956 293.350292227077  
224.707455448421 165.511561121012 185.560737176115 200.890547965585  
152.344248425416 171.87497136272 164.690739760426 219.171591031864  
223.408447580188  
LOC643779 245.900840732668 239.789994201722 201.441808401878  
262.452869676209 240.75934760601 236.219981978324 483.312894744803  
248.229468372363 238.654367531982 268.370347292603 701.481003619067  
313.412131722189  
LOC643783 139.571752933877 129.994160770036 140.379874810685  
133.695284981677 144.81689330206 154.212927357622 146.466967386428  
136.348252715447 136.630678899513 154.33224999163 144.419657674797  
164.389447533163  
LOC643784 135.679481480408 130.820415610578 141.592180897595  
145.539731152955 152.230489051339 146.411873503163 141.414384085164  
133.753999983813 149.682150633146 149.813838004575 125.642282323003  
140.341589053972  
LOC643787 165.900156600776 143.252983617945 147.132625797946  
136.356895672212 141.269923271838 151.758970249544 144.902807664593  
155.777281781161 145.594378536072 142.316441155937 143.217978435486  
158.244741207036  
LOC643790 160.511688319771 168.687845035401 197.443711199904  
196.657475905674 206.340478393262 284.995098167431 311.916199912898

309.798246248863 462.265785715695 349.773289724658 262.171775165261  
451.317592236192  
LOC643791 139.409685553177 139.231340020014 134.074425424613  
146.411873503163 137.919253591105 124.883575464443 132.183250916482  
130.67342529187 125.12823219142 138.028813480968 132.198536906752  
148.973277994329  
LOC643792 137.578516107502 146.84891312893 172.276968413879  
150.711857623087 147.83240038699 158.278496385543 191.179662650057  
142.948238172973 151.428283279424 159.446705611995 150.570540340126  
148.219406063533  
LOC643797 136.91779948054 131.885529813944 129.026732674277  
128.182419321978 131.975248488461 130.814702312493 133.335188820708  
122.646850766733 124.513891912986 128.939572714685 132.171282327983  
127.512733134453  
LOC643799 136.698189351878 155.456077670662 142.221542344035  
161.44729973777 129.902965506953 139.671302796695 134.845202154446  
143.098246338022 129.57551086282 135.484360570738 132.548259643258  
151.730862403472  
LOC643801 137.652358744527 138.57506931811 120.988749021323  
136.052640679977 143.744075931566 130.720097323382 148.663860923774  
137.988325215021 136.03117924052 139.973692361771 134.008118774075  
133.26167785455  
LOC643802 135.603160096973 157.08300736206 137.25054616038  
148.82034800623 142.451443706198 138.810236692956 147.515088047628  
149.682150633146 151.770791549511 155.893018702615 165.149464497921  
150.046300135261  
LOC643805 131.820842728171 166.795671029174 158.767439363085  
147.949560045212 142.809717801796 143.447768653042 136.781417098789  
138.104527851969 140.307931763353 134.618121709059 130.025887107138  
136.261907928796  
LOC643807 132.969187044132 136.473948855498 128.708956947928  
151.128838696891 126.168223112165 142.19728670565 140.782085233573  
128.485150698799 127.356622898971 131.358797630945 144.329275569112  
151.506013510204  
LOC643808 116.031631038289 143.881744063934 132.14412512622  
137.107621189522 132.767474034305 146.885404321622 145.387562372871  
144.448503894295 133.94667806086 122.068058346443 134.451423371791  
134.203949774763  
LOC643809 130.75707278606 156.037150880384 120.876732151192  
134.48825480809 149.219602109121 152.254519859308 150.098708715617  
131.179786925029 145.380971596154 140.48372620406 123.807693112932  
142.179197020805  
LOC643811 159.98636352484 143.942810095867 147.019460117987  
137.252742673245 142.939578759097 148.162914253981 157.604224004016  
148.645749834125 146.823157886228 152.73588666971 139.399195840117  
151.132586978278  
LOC643813 137.6160344044 152.498222035534 140.127379332918  
152.964940071133 146.359038260378 168.720694813918 141.781482381513  
153.402227428787 154.449058407217 140.806935772116 143.550908565401  
155.842195370853  
LOC643814 149.554174907798 141.725882943927 160.045715314465  
141.304791640723 135.423839577038 137.95243466771 150.142724640067  
158.911404625381 132.437234970375 143.576177625265 133.117701703454  
150.442821494908

LOC643815 135.978826529736 163.487737425232 135.166677520468  
152.555437272666 143.477670915091 141.642547489983 162.802392115386  
146.738411200698 162.439052954676 130.592061896237 149.402679897813  
154.408875182219  
LOC643817 155.058852833902 149.881708604156 180.240305360865  
157.446725405803 161.735609436394 139.153897381147 165.443069511115  
163.809967446414 151.256546638599 150.308048500142 153.545086287929  
143.147325939994  
LOC643821 147.412608079997 142.95001632948 145.985223908092  
147.422656909557 137.519771130707 140.462651395483 152.004130711617  
147.628367263728 133.201157825808 141.194900058799 137.25679451567  
124.486701452062  
LOC643824 146.897528834303 132.480255866589 143.603022117503  
138.743505629497 133.564350740049 149.609501725707 137.704257049203  
147.826950636822 141.108383815109 135.645439440707 152.303524109428  
141.290905146249  
LOC643825 146.792951584868 136.342634691443 141.831596320865  
148.388093331273 157.568150431884 163.809967446414 146.863611516518  
144.720594512581 145.7202993771 152.244018820259 133.905162024888  
139.271829906127  
LOC643831 224.135228192655 184.832531598928 299.935166870211  
160.338146803754 145.636906369786 184.591789011195 163.59704679338  
187.280334341504 157.627490896581 148.936888662374 152.758653228708  
183.735201125198  
LOC643834 151.198928680018 145.440471538068 153.616692588396  
124.879018642505 157.684694038023 142.409003426775 142.088243118644  
139.238936770274 145.172776053 132.053242760381 144.581747568524  
148.286700314107  
LOC643836 136.285410546751 134.89415027205 148.286700314107  
155.569733738768 146.84891312893 153.551359970644 157.484541464879  
160.48993837044 137.634298014431 157.672378669483 137.258429777402  
149.895214204184  
LOC643837 132.395993254065 143.801139839773 155.147962740503  
120.790536146461 139.306122448857 134.509830749072 120.590654346066  
147.715160308036 126.858621735156 127.581332110857 118.388993232718  
145.99474597064  
LOC643841 161.8627732644 154.007244208673 177.103802332144  
163.416011199431 158.049286838471 168.000247148058 170.342828808493  
152.401204710292 160.441879289883 154.428779374984 142.801645268128  
161.930142040623  
LOC643842 121.289159587394 120.988749021323 119.984301761327  
118.891276329399 131.004145546364 122.685360126599 112.248047602652  
117.829228895897 125.712260481294 105.551878332786 133.315888375614  
113.597215383696  
LOC643844 132.300508985399 166.622070620588 150.251711125756  
152.11446058397 143.175483349968 163.053121879323 158.347972566681  
159.026102446297 151.690538050817 153.918462601781 148.304863957659  
147.741994252715  
LOC643847 139.289968250444 156.61494867164 142.50631960137  
144.89403947454 116.825172441325 143.481112776388 138.580264357741  
138.129281196474 129.297217956843 136.149732574763 120.276236447255  
133.554822920765  
LOC643850 124.441699369614 129.704763615045 132.685098573183  
141.88777975766 138.201164395948 135.215356532498 155.343619434375

136.71278398686 136.83470470035 155.974463324915 137.449776383224  
149.856041300199  
LOC643853 137.387249555592 138.119788738226 141.547112973262  
130.314247368361 138.074645385322 131.383113302567 129.195962576953  
125.859158049343 127.409603645289 134.746175914762 134.224781719944  
137.243175880462  
LOC643854 150.348608467097 156.311009595629 149.419308407564  
170.266415287865 143.764266466204 157.600193849783 158.455783755247  
131.232417654705 137.491366243256 155.227218488935 152.654938328424  
167.830629616121  
LOC643855 152.709021529522 159.446705611995 139.299062352035  
159.798024189461 159.207567680134 173.964378226631 174.820064644203  
147.362120584524 151.589273633331 173.513108409372 134.244658505187  
170.465177938235  
LOC643856 222.051005238856 212.420616436137 227.418630852215  
205.679992893049 527.498114662967 527.707841428677 389.96566674501  
522.486866458783 427.249733213787 313.025250337353 488.379057110543  
525.6579615077  
LOC643857 139.314945862113 145.502055020513 155.61996871093  
132.526286141997 131.202090507576 125.683334853039 127.41463780496  
134.828360289676 137.522792377933 156.265168005937 140.26557508894  
155.896065329825  
LOC643863 12968.2945749 12221.7819812315 15116.95436573  
10250.645112753 10506.1271023809 13090.0615116619 15532.9759169142  
15809.9561036761 13563.1694195379 16230.8346205808 17067.0086403248  
15990.893941344  
LOC643866 172.421637564661 155.683727621475 161.937384157098  
161.417207801991 144.470642732973 146.810384202933 175.065781438801  
159.185616602396 144.904021527125 162.096065738375 143.330025840618  
137.702802090925  
LOC643868 109.69466049307 133.621325902558 126.189005734462  
132.562090247233 138.367321366804 122.636980845207 127.144291519133  
133.218742606195 112.599970121166 109.46255295836 131.215938257574  
122.676368520743  
LOC643869 139.979025013908 135.666278507269 137.50609001002  
127.720117789235 131.792339956719 146.287161912291 123.654787271088  
111.188410935711 133.579067514064 137.398748156909 123.45004246675  
108.669141498627  
LOC643870 339.172031360524 312.903508201275 341.128917971124  
296.915883082902 235.563592256037 257.100909006193 264.905947922753  
232.667968049771 229.881164774875 710.003412772888 429.595453454621  
596.3549500121  
LOC643872 151.118430469429 145.301551442388 164.886944426276  
163.004844049672 166.830529779692 137.071402810983 153.500478301079  
147.218415065692 177.491294133515 164.96631670799 146.740694608146  
140.980119908597  
LOC643873 587.893636997642 538.872348151809 1105.80735904293  
454.34729744062 239.474937674583 318.778978094743 566.417354841707  
467.90388853336 524.392279804734 894.100792722707 596.076764072945  
625.699971780258  
LOC643878 132.204721976343 140.527521345097 144.443844205426  
138.675023495021 149.659505956629 144.544001385895 143.776637809106  
149.73250641246 119.590540166384 148.946563378752 123.294321716108  
134.243435358729

LOC643879 127.026168862919 160.272632590118 130.10852948682  
142.906227759701 169.864628707043 144.801071221985 162.861320877227  
162.203570429542 150.117906461237 139.231340020014 146.428534132236  
136.284283129801

LOC643882 604.237898104299 644.868034665476 436.982960786839  
551.92688162618 174.971350923613 491.290438575428 371.941204080246  
374.46180489079 315.306271141071 286.901115411673 488.57622466019  
317.802633831405

LOC643883 128.266906202941 125.537538475612 136.319655432311  
126.222105816959 126.488299049827 135.129656281091 136.611670766233  
141.628203045085 129.265788005518 125.262445870212 125.107483348755  
132.887701822875

LOC643884 155.926739769177 143.73525260312 153.46645509759  
165.71382076724 158.062853087619 132.881693683384 147.688664545959  
147.954079022076 136.93893152919 147.630900093277 143.244742561669  
148.417929733447

LOC643888 158.463444189819 143.137158027738 160.407690552027  
135.30767047671 178.904696191996 141.953114738413 176.029791617989  
152.667721542507 165.942761337382 145.82344959902 163.748692741999  
136.6729514905

LOC643894 160.57963709333 169.428195354763 160.543465620248  
165.186696781985 186.679199600379 163.480722123193 174.807363753172  
147.591479875268 154.637740117457 156.642441706727 159.446705611995  
183.302479730653

LOC643895 132.752401872376 116.142650095476 112.252555403121  
126.233395051706 128.972276851419 136.338683078123 119.387459594521  
125.318166919844 122.575357101038 130.179742057015 132.5130209643  
116.514299377365

LOC643896 137.269267022826 133.964163727962 142.571259316029  
141.890803125137 152.646642492666 133.675029107803 135.516856254532  
128.79607493422 140.89666990854 148.970251898527 124.885950473434  
146.603385998231

LOC643897 179.501659253141 153.118492567137 168.197255166255  
182.984076352185 156.353914172996 180.276082632155 171.121834829333  
156.417000271727 161.557558028531 170.129558603697 150.91730768674  
171.573342518254

LOC643899 123.75974844367 112.07238018581 104.544792793756  
119.573635447638 118.875640081461 123.442970398288 120.800764735081  
121.567879358508 132.665590728755 124.433114779288 128.155080148958  
109.167312436827

LOC643900 137.25939455719 138.293242905081 137.77601089414  
130.501010489883 147.494937826597 127.433203229267 131.548634017902  
124.449679223202 120.853961156534 121.988237521196 135.680872395032  
130.497405221273

LOC643901 139.564898998489 145.872258115708 145.837985729893  
153.255318944823 153.126111237668 153.675939908241 146.192761134077  
146.681183890181 147.110929610347 152.719997757291 133.480196904786  
150.97777780024

LOC643903 164.836381332774 169.246302492166 159.124592503759  
158.598999414864 152.210867113591 155.014930599769 140.865990571023  
157.971293294367 168.091278015885 145.256660345252 162.431674335726  
153.104072845043

LOC643904 140.191264837331 139.941724115063 139.505864135281  
148.520371748891 138.041411135053 136.346472365382 155.60532199001

144.026432356249 143.73525260312 133.502176289023 131.683942368268  
130.024546949158  
LOC643905 147.915337223934 153.989839987975 160.247370279802  
153.916313595581 161.803438841859 141.954467306745 161.678137139371  
150.137061170632 147.854171854456 174.953232190285 149.952762225731  
148.408616955694  
LOC643906 132.878638378328 135.017196494069 128.158605637751  
132.825240485239 133.337863400762 112.800733398209 142.567737460006  
154.562761981868 132.727133259694 125.974463216884 134.793399942417  
136.229159638766  
LOC643910 154.569432344392 141.630183595813 123.801380911257  
149.606576415873 118.871735074285 167.67952650068 133.211362932569  
138.512938877774 119.640086587188 150.380814008952 135.632298302036  
142.553175839278  
LOC643911 138.246963115014 156.433603187722 145.190896872008  
139.912325578837 149.860490620507 201.349209185128 195.513703253634  
166.780319723055 153.54898879562 248.850686917567 216.077955163344  
212.822328466993  
LOC643912 162.18174589792 152.877058628512 162.100547394235  
141.218832234405 158.886786960196 147.395335979341 148.655508303794  
142.368601917778 153.606787306076 169.888264971936 145.06736850005  
150.939877261936  
LOC643913 153.945472622857 161.385691765316 139.762998983487  
163.521095869383 166.415922313464 161.104993402456 152.492163303139  
150.91730768674 145.426171336045 162.923734210933 153.005366371425  
179.220691178402  
LOC643918 151.803707178383 135.952202055637 149.133055368147  
143.58555556787 150.933724024651 179.501659253141 161.281195929918  
152.393260140571 151.051672692659 170.636731478608 131.849442776642  
166.277960843095  
LOC643920 133.063422581428 147.664505309713 123.507963359911  
151.506013510204 124.837187124441 138.994054501048 131.232417654705  
139.080142195118 142.505050582588 134.413962468434 151.318320077986  
141.953114738413  
LOC643922 160.76044995335 150.911524755251 140.680326850085  
183.951404362826 158.160604786093 153.44628692569 155.855564068891  
161.891809608511 155.690773461824 160.604195264968 155.198503964295  
153.498332327444  
LOC643923 121.44038832089 123.817878562971 117.060696904303  
119.870661213608 115.072622367144 120.547683754604 121.320750074882  
118.718048764985 121.154389729409 124.083648029911 122.158160927149  
116.681996596451  
LOC643926 140.36278240974 141.222884136243 140.641956393993  
138.883710791382 138.777120638896 131.930814868433 137.194467539969  
128.736591902501 136.378203924435 135.058525398122 155.861829925386  
135.413840160615  
LOC643927 165.163490032007 126.370252616961 133.360017767635  
137.22727238555 137.452696552006 166.944701842349 133.836390935612  
139.730999352036 138.336667434109 127.783892576352 145.391496022306  
131.747367613225  
LOC643930 123.02167644694 122.572634128442 140.016122996485  
136.72715888684 134.553754121862 139.334552725255 124.982744176925  
129.201101445773 138.763250836766 138.9183380982 106.854721604889  
130.069789939568



LOC643932 172.468440317443 172.20451139581 170.13453211897  
187.231049280818 158.292581724934 190.736796322054 185.088667707155  
159.798024189461 171.935132459373 154.43808450305 178.955938825556  
169.028519464989  
LOC643933 128.683044953833 157.306022722324 164.288645768576  
150.324132011201 152.648490300617 143.662865541299 161.108249802467  
166.735962853075 144.908551199481 137.033502466562 127.733860645979  
185.519000961898  
LOC643935 143.212739422069 137.443463471483 123.683553177379  
148.286700314107 133.627389970495 144.295556086504 134.487476333464  
141.645906784244 147.483379646393 136.446877465751 156.233573126063  
135.704067249674  
LOC643936 140.708683675555 135.839123867443 133.524698103972  
131.809235171629 130.097543328456 133.402515225624 139.036978052242  
136.144068118165 137.04010227318 234.182164952936 136.317978146216  
131.755881982599  
LOC643937 131.153457976248 139.036978052242 159.065612005442  
151.015243921984 138.091795130567 160.268754786532 152.251128595777  
139.907840403521 140.408989128575 156.605568633665 154.379788206936  
152.251128595777  
LOC643938 152.429970809069 146.672270660899 128.820757822782  
153.358189612307 127.548070199148 136.48748813417 148.190696520521  
142.999526950651 146.181764812924 147.550385608773 142.12808103815  
140.772074031028  
LOC643943 132.5377752987 144.161672064561 131.2360427855  
140.091378604453 147.135640862542 126.511314417328 134.381042390464  
139.953572663277 124.818436949131 140.332045911008 121.024572716324  
147.535225305685  
LOC643948 133.357385559881 136.792957035581 120.355844117573  
134.696571019896 131.340453291188 122.236134282757 151.228823957828  
122.99993610249 131.81975648701 135.143532936828 148.590732065459  
122.766778018066  
LOC643949 1986.81354260292 2096.25803773108 1346.53215685106  
1984.47173096657 1301.61742965939 795.464850398761 1758.7809492929  
1014.63777151551 1060.24125879951 1623.92991386706 3200.61067185412  
926.670867201327  
LOC643950 123.338921824167 157.77047742735 146.512045729234  
150.724359913994 166.627372924295 155.371772547395 145.812607895325  
141.520125030042 140.327799236005 163.091280469234 145.159572111039  
146.090291252325  
LOC643951 126.741498575874 132.189426012448 154.615097099186  
140.981666934622 149.207481665265 161.520362399369 143.598567970841  
153.534763364558 135.412051450659 133.869867161978 120.024235522682  
141.156434225355  
LOC643953 149.260811184287 145.68886453261 136.935498266723  
164.227134687088 141.543147273205 149.231475480618 161.134322621805  
142.56910547147 124.17231659571 131.525916493834 147.552635527742  
141.289009185018  
LOC643955 131.383113302567 133.028789808654 133.301527400458  
137.73313146889 124.272447276746 133.935910746769 137.251513843314  
133.75142055959 132.371165851333 138.763250836766 124.186557690235  
121.905741525277  
LOC643958 142.690911343704 140.702685210277 139.219476681919  
129.603952706231 135.745821200254 129.610980807708 145.250076958551

135.360087349634 121.267153348313 131.391434131813 151.801558435863  
132.285835971705  
LOC643959 158.517778100137 137.591469499374 149.31020447459  
147.483379646393 125.826111950648 161.102731941183 149.526189446292  
149.380733719756 150.843975804117 158.200211812067 159.374355553219  
144.154217446011  
LOC643960 163.159571059471 172.329225247019 144.324313048777  
158.138862054715 150.650926518959 164.295628750438 179.863096463897  
169.784837251279 167.315702949236 151.089328533476 165.100811808026  
175.98210925643  
LOC643961 135.628411578541 140.474338177948 130.917269984571  
164.116142541038 151.07661060324 154.537240112989 152.868787961804  
133.085476994246 163.77183097588 155.752117896424 149.764447995426  
162.297999435613  
LOC643962 130.274288258599 132.692027897739 145.25198093836  
134.70636200986 134.30624644595 136.238646974312 133.804489975068  
128.322884322951 133.667852983262 134.190511945944 118.855500322915  
144.131743978192  
LOC643965 150.820808770853 136.485034823945 128.344679872625  
156.213421099137 144.562038493733 157.481645415121 137.383211680459  
152.591091223395 149.827791077797 139.006575383203 128.144653206398  
150.792065744902  
LOC643968 125.146558509674 117.251233255966 140.041977349982  
140.313216623427 128.463982896081 141.444958186793 131.798931481549  
145.700589723224 135.87026484074 130.113673389232 138.074645385322  
129.03753569157  
LOC643972 117.101933186269 129.397378057767 130.250446414483  
133.216489794592 118.558673085303 138.489443610941 118.480344364831  
126.069594320759 114.960460615926 115.639101191444 134.867806860993  
122.953869661977  
LOC643977 160.67285689491 168.21856603538 153.606787306076  
190.871696848118 164.959415532174 158.316173597874 273.106088088825  
181.991820141929 200.618080312379 210.942865876533 188.515336186633  
254.065327837176  
LOC643980 155.091135297162 133.953303801604 137.149156133537  
151.790240553272 132.790039196443 147.761965925044 138.015301767961  
154.270034951209 140.538020869886 147.150063462728 123.96665768708  
138.763250836766  
LOC643981 145.139966629363 150.396462763607 145.569870279379  
141.076652697698 150.336115779606 140.269160279333 133.887927451362  
134.512204051277 140.701908784225 131.102996816222 144.970383956581  
140.527521345097  
LOC643982 126.455271988029 146.522066289381 141.84490608317  
143.446317006075 133.561188057423 152.849810441802 127.511638455985  
148.607885635446 137.81819274774 128.329985147034 136.176688025337  
158.002906093899  
LOC643983 139.285128128996 144.532420788945 132.874263672434  
134.325520377207 129.977863589097 130.443360119099 119.894737403889  
132.195666100325 130.521731606987 146.861981788662 116.221426977629  
127.879723100698  
LOC643985 178.531913384538 183.071150926068 137.033134002983  
180.798671424395 233.232319881243 187.625536724681 211.300733064951  
180.468984099647 209.811693771836 157.805871400914 228.675099004411  
169.574755162815

LOC643986 159.620467672898 136.097571072206 148.618327213374  
139.515794685984 140.522470775478 163.102043862117 151.07661060324  
143.45723206497 156.157567405927 154.479733759712 147.452986308926  
144.654765322941  
LOC643988 156.540165645256 164.593531655305 187.955617187544  
154.027862576708 164.890716656336 189.633348499854 185.199972151831  
168.261511797218 153.07993334035 164.991522994763 169.285901212492  
156.88782735706  
LOC643990 136.115306932124 148.269123639781 130.365804613342  
139.418394104487 128.033383607545 129.029151164978 130.900049359243  
135.906115546805 139.184647003326 135.193659028591 145.208597795717  
128.466244127634  
LOC643993 135.423839577038 143.227410286571 129.553282780541  
118.527464364564 140.864196804152 130.413073895887 131.613738869093  
127.395094952914 141.062226285596 129.026732674277 140.222121251146  
135.643341446691  
LOC643995 145.576880854443 142.246864759311 136.865340099645  
146.621996129313 157.976810829398 177.468210189888 159.951697830252  
173.907933001446 172.091884817207 157.516278302035 154.908975734985  
148.684855678535  
LOC643997 500.132469062228 483.699436940387 667.156197045748  
402.026356201632 540.190808200264 842.22767901391 1102.73689840572  
1211.39534395597 925.009157785129 1861.19763103381 1656.02721259517  
1823.53870218167  
LOC643998 141.176376265078 132.897554980037 140.150884219813  
143.07651558428 156.78124246844 147.54950981909 143.897248922317  
134.669763149268 128.140333650496 144.073739611496 166.091736766853  
138.254479653425  
LOC644000 148.158062155247 136.092086452096 138.055909969804  
139.363571392476 164.748676009072 136.556183079815 144.351763882823  
153.675939908241 147.537691509156 157.368974632451 140.792400101142  
138.947760022173  
LOC644001 177.688568435599 157.170136439095 137.876234091056  
148.925418133902 159.016247993816 151.773749014775 169.408892048115  
152.052084712417 151.081339000609 145.274345879987 148.263293819238  
158.48793705795  
LOC644003 136.790457887057 157.273309095198 147.633793743254  
151.965103021638 164.032302455558 151.907188143411 125.038427667173  
156.126009063311 141.213588194832 155.317754378283 129.699765645519  
145.481279504679  
LOC644005 140.904883114871 138.587686193555 141.102274192049  
139.532508621268 130.110413621436 135.37120759813 136.986713332541  
141.004467676795 145.748174062159 135.30767047671 124.42974326791  
125.79193748535  
LOC644006 140.09417711803 134.262346867514 142.137885203233  
141.473218014605 137.017882995262 144.988803993714 138.655815405894  
141.36525744062 137.901317305531 134.669763149268 131.036225888592  
152.340010735322  
LOC644008 129.914077170794 136.111569529393 153.244758030666  
130.812309202831 133.367085445965 129.198366503027 135.056517225198  
137.966987037709 131.514114515895 133.220878146063 133.879079395215  
137.006917665541  
LOC644010 129.201101445773 137.438251288967 144.910863590251  
140.330400168187 140.058153633802 139.804518460303 139.823017208731

137.044079235724 137.243175880462 135.148723192316 143.865717051998  
135.978826529736  
LOC644011 161.764411756848 161.667782505656 146.077082896858  
143.013801508709 167.713268780664 161.12121879514 148.732027660387  
157.006278815282 160.518055978242 146.528945049588 152.337631025368  
149.290007708698  
LOC644012 135.020690381988 140.486376016494 126.159880038854  
135.151438845363 128.093945009882 135.369146072643 128.777337552038  
139.086498524774 122.102644097132 136.689064885984 152.552277008504  
117.470731811595  
LOC644014 138.474429223902 136.08040874432 119.974853329265  
136.718598487513 113.810645407837 121.22760405399 124.879018642505  
126.529763042574 135.264074941678 124.511674561183 121.648921929686  
132.895500657638  
LOC644019 144.389805078873 134.671840308041 142.551161883518  
142.866874321248 146.249951130016 159.223980639045 153.176268095608  
149.725422365342 151.70035428516 149.42148494796 144.771457221413  
166.526875572556  
LOC644021 133.14988092185 135.148723192316 148.112717810117  
132.799355149191 154.675189522146 136.267313223808 142.978818998012  
147.452986308926 134.21227169867 138.496366637658 135.866980620144  
138.659387475119  
LOC644023 150.82596027483 134.664652044646 164.256764783784  
146.384051525624 154.962835391567 143.326739481448 154.207656926108  
149.348231806916 138.331509117817 141.331397551086 133.218742606195  
152.689610196981  
LOC644024 155.988447182637 153.044682186978 162.71020036416  
157.13859713415 141.50968031684 166.714793209109 146.657368460319  
157.66595229182 170.257439890277 166.85671415475 138.038446102921  
157.076284096905  
LOC644026 156.293025312901 128.386309075038 141.779801021888  
143.647714966406 139.932849289354 131.915864620669 121.905741525277  
175.767556472012 135.120878931851 139.2454524913 140.655002540298  
149.267019532847  
LOC644029 5965.21815409254 6441.13602696535 6522.27232911897  
6253.84268792816 7054.92270618408 3983.37592132018 6460.4291301245  
5425.58761099475 5932.37714987741 8982.75408120297 6877.52553567598  
4857.3155917904  
LOC644031 136.176688025337 148.541832125061 150.0674092434  
145.411264691728 138.889999702313 155.259089547817 150.43722766614  
125.107483348755 149.377153449536 131.958760372325 128.720517906732  
138.930413256469  
LOC644033 471.720496000839 484.131020584378 465.102234374389  
437.248311551717 554.282040414368 582.382786876656 417.024088698182  
548.014025722956 541.460843251764 311.848379951974 521.625146077176  
511.547907091166  
LOC644035 129.147246809319 132.989846726946 134.155655670103  
123.547821639269 127.101752724954 130.336466131215 136.406132339187  
126.908123260394 125.75980494927 135.427985445559 141.474583706011  
128.583503171594  
LOC644037 215.115324454215 204.396576475753 207.417884407459  
181.695203523798 197.687858915757 205.026176598298 308.031816782343  
306.486275677467 204.057019122032 256.424415389574 434.509391836336  
257.643855420381

LOC644038 132.053242760381 155.917655560227 142.135495724286  
156.978585870854 143.631345956176 143.849399031223 140.855078775719  
136.74788009263 142.556535259086 139.348494759948 142.296446144179  
137.462720784077

LOC644039 18665.5217411582 19889.8233042542 19356.3155476146  
15704.7314387339 22035.2646000952 17404.1167486753 21409.4415798676  
18287.6015702456 17917.7303120499 21551.9994556128 20510.096303537  
22035.2646000952

LOC644043 164.630705813584 144.302925948596 226.43414383055  
157.860515609693 160.92643755328 196.486499238623 183.979513272793  
155.566065673542 146.790059505709 155.902461107328 168.3523504179  
175.551853899221

LOC644044 136.344248873826 133.480196904786 136.855445270531  
141.38612990166 151.606932937644 147.541437871615 132.354503055131  
143.198622036573 154.452964510369 145.063062479224 139.301435614165  
150.46669393448

LOC644045 121.752481757054 126.319103548711 122.854722097864  
128.118890154386 133.419239158866 150.835044630002 149.570242115956  
133.567630962178 140.000880942015 132.004294377032 143.984222627806  
141.327299595068

LOC644046 117.412956162665 115.299986138153 142.826898321575  
129.311134743311 139.631165400881 177.204172894028 132.628358688595  
130.033927910392 136.287909668938 141.15458637181 134.992686224944  
133.213697351807

LOC644047 145.735532706214 135.628982370682 158.919340819357  
161.035985824654 144.725650040212 139.131857948357 148.404000406948  
150.484823814674 127.339018771488 151.05681004513 143.846734516914  
144.669509071181

LOC644048 131.780134634616 123.007103885415 151.776232847515  
133.794524856909 142.034369454643 128.640202262896 128.135216461862  
138.388749930671 136.881019970399 125.068362001087 116.486929280635  
130.630504666374

LOC644055 128.396326753926 152.635792342068 135.999030570565  
139.209080672396 151.92638745703 141.205975588506 162.056622258216  
144.170287726456 134.399228996542 129.075693654369 145.203083375014  
134.140533647509

LOC644056 123.383334044683 133.816601264067 144.954595802474  
142.801645268128 136.547868436335 147.568851471771 135.434853296628  
145.177195093247 140.460927375243 139.595986615703 149.374282007673  
133.794524856909

LOC644057 173.424541543058 166.592366578462 183.447807651728  
182.958991847218 160.648791273795 148.247826830556 178.647726085678  
163.215507313506 156.531951576859 162.861320877227 156.304678960663  
170.731358903019

LOC644058 139.699189528879 137.42213762011 145.748174062159  
139.291775075915 123.847186739627 128.671626815639 146.932655562613  
135.840528665314 139.557059245431 132.282125790062 133.918638123756  
127.91637627901

LOC644059 131.273916869754 125.339305282874 122.642077625035  
132.6175371563 118.488997046932 115.296915259091 133.717451195844  
124.697283474333 130.644937322186 142.456527359961 105.741092375243  
122.27785621724

LOC644063 244.486311003619 221.231455446574 358.60777927888  
178.928873342925 251.062649517773 441.112782197591 410.954095610904

464.436380568216 460.742037437298 496.823662262772 319.639103463458  
533.37609065123  
LOC644064 131.999299893526 124.269446398587 134.252621436701  
154.057771254252 133.601133679159 127.56862018147 156.595917266416  
141.693224578298 145.584615439295 143.969566798989 127.259038241163  
145.168031449425  
LOC644065 110.033746435328 117.946664604751 122.583461806645  
122.799487123057 99.26400442869 120.767950825369 114.561836290349  
117.790593990682 127.631770516132 119.785062256421 133.885725703056  
137.71627781928  
LOC644066 144.321757243275 144.121427216077 185.154876233931  
146.968599872798 149.290007708698 174.454754564111 148.47676851933  
153.857048476879 147.096559685764 140.631709025143 131.470883854661  
149.532459719175  
LOC644068 128.980519133484 125.587057468028 135.151438845363  
145.481279504679 133.046435968561 146.160188002433 151.829217512763  
137.997756995882 129.231455282441 153.358189612307 147.651620353593  
158.723133891017  
LOC644070 128.292627005614 121.406758670435 147.264690436042  
138.381508741146 129.596851280135 131.992186668019 137.018521754443  
127.199124606827 139.97127025207 145.679907578808 129.687743133943  
134.344021502031  
LOC644072 131.282091618102 136.83470470035 131.789877096016  
149.131218007756 140.630844296177 159.762733951454 151.831627236638  
139.696266471271 131.027605835275 140.989597586699 134.949572471421  
145.380971596154  
LOC644074 146.846301957637 130.440164900487 155.878493935166  
149.833346575446 141.115539663314 128.530540860266 134.988545581219  
124.735542880811 140.826051635712 140.290598244169 132.605662484463  
130.163574198827  
LOC644075 149.907472831817 155.902461107328 159.624341769644  
179.015669199358 173.513108409372 181.277683429417 154.874899874233  
160.954017627605 162.9279134169 167.063762404009 140.192644427334  
178.153527134452  
LOC644079 139.065849548762 137.662135592983 130.080728694308  
131.705912986393 142.664793323255 126.069594320759 125.5109819304  
130.766401858384 130.95176570982 127.023543953724 136.37481047902  
135.106072664488  
LOC644083 128.09266452749 145.204870282027 143.120621855946  
151.497680466119 142.726324048628 138.377628971966 134.797624902585  
140.554684822646 134.304545258148 133.11040099808 145.819198235878  
136.362761829761  
LOC644086 136.631948656268 134.582098893327 130.647944268116  
143.431389389919 145.136075215082 148.73620012231 134.147586627141  
138.510722755317 141.360125377949 140.267351731167 130.219888837397  
144.905870145004  
LOC644087 134.963301368391 136.295523520203 151.137791721752  
138.831297375659 124.86699236406 147.294408903227 138.116568200293  
138.27272971335 141.571389983164 127.756214708077 128.759751330525  
130.430917518283  
LOC644088 142.588013648337 149.860490620507 147.313494489487  
133.34207595093 146.26304624648 148.056333887679 139.633941983246  
148.67584969749 130.052593375075 159.994376562272 152.725025539491  
158.902676384853

LOC644090 152.717642489582 158.053654524927 166.879042308539  
163.697117248984 144.035936160694 166.627372924295 144.0534341937  
141.256915527472 134.503552797411 155.498580125421 125.509221735447  
132.504264154139  
LOC644091 126.720031203392 121.556331561879 148.624135810148  
153.492072037266 135.166677520468 133.022848457361 139.3864057463  
128.463982896081 128.23432652395 133.66893163718 138.167369090026  
135.518752716008  
LOC644092 150.623182458747 133.063422581428 143.349486755648  
148.364138636002 144.660095230819 133.104560685558 125.914267820741  
141.865758685796 141.076037315613 122.174036435094 146.595540577994  
137.641136471239  
LOC644093 144.949897872252 145.163084967499 165.200303470106  
140.622130978368 135.013075032671 152.57040089034 151.073257114127  
151.917359928516 152.964940071133 151.07661060324 156.973511952828  
152.808771946509  
LOC644094 147.001408450583 158.814407805803 164.14265547147  
140.318155161909 130.606211166873 131.04482088126 142.661504601445  
139.423432468886 144.685707282641 147.818956338752 143.982561564661  
145.289151849318  
LOC644096 166.447510782568 157.57914268719 179.905809470907  
185.525760847281 215.532132200821 201.337186768645 193.98814423456  
197.895094054577 193.843978773764 181.135519188216 170.23937234395  
183.32467147543  
LOC644097 142.166650343224 149.545278163222 139.416388461892  
157.207544072126 166.89285636895 156.339564110766 145.289151849318  
144.836902182737 152.042744996136 129.96280577492 134.474466007553  
140.180208418327  
LOC644098 152.004130711617 125.019064287385 129.792548588929  
146.814457904682 151.905534823403 133.198832503062 133.611588728019  
137.342348963288 159.749576166342 147.51773051441 131.288785100733  
136.103088234442  
LOC644099 121.961568081299 114.730641277464 139.457084084368  
139.032275257901 132.839431368337 131.31716158922 132.668344126625  
122.053867525393 134.499588539919 151.081339000609 148.278828579424  
135.353539458856  
LOC644100 154.988494760267 146.649944669876 135.3969732106  
138.551695969102 137.904786382385 145.385816618728 156.453108485249  
138.701871179502 138.62308708151 143.484004107893 126.237900397603  
141.976051648478  
LOC644101 250.676092725829 263.123584372086 215.426918011158  
262.60377731258 354.840474468573 342.717252404581 310.989043012841  
304.237479317271 318.930960243303 320.597495751519 345.732364434125  
400.23671843715  
LOC644105 133.954514563283 139.499652059557 151.826103919919  
150.989202517615 145.677477231455 149.157934946623 135.767818903328  
135.237042337721 138.091795130567 145.666712006532 131.33321167357  
144.595393134144  
LOC644111 134.755817147859 148.821942578396 142.07664288788  
138.548983773386 146.298733090986 139.036978052242 140.444972979764  
140.689100728713 137.745887988474 152.78638215326 145.780927034516  
145.002309193867  
LOC644112 135.968346417524 139.807421433384 130.754320787628  
144.258128917228 158.594064857041 151.895142552067 139.063209125209

135.377118045038 122.860898886143 143.177915754998 120.873985900666  
135.196797030404  
LOC644113 163.426663985855 154.834679562341 155.572357799741  
206.620708230452 151.950883677297 186.515784641119 170.283532007581  
155.108146847158 161.755290291637 143.713962738562 148.052222389368  
169.733427590141  
LOC644116 125.621467040793 151.204487316077 147.500009766324  
156.973511952828 157.607445509297 150.468392290279 155.917655560227  
136.03117924052 149.258932222347 173.690008681514 144.199054675488  
140.557871626905  
LOC644117 147.691011072898 135.507247740621 151.010493695217  
150.224472335504 133.695284981677 164.534790315992 143.492758492895  
137.182323015758 140.593510265137 154.324955232468 136.049167597016  
134.777979170126  
LOC644120 134.931263946202 139.993960054847 159.49930229951  
133.760183242137 154.408875182219 138.72219653692 139.363571392476  
145.932170561687 125.269726165403 144.511488474344 135.747939020471  
144.161672064561  
LOC644122 135.067056559409 149.338249249161 149.622695843398  
137.084488743415 132.01588294465 172.057586741925 150.419668144913  
135.592128081677 142.958906063186 138.381508741146 138.311892121437  
136.03325645996  
LOC644124 135.433229702209 142.276853170778 142.968008233583  
140.574129695953 160.281830914755 145.937733795336 139.744142223177  
142.299535614113 158.735283017367 151.389433433911 163.20714296121  
180.641419603362  
LOC644126 125.296240086615 140.330400168187 126.253319664664  
125.110064579814 138.416716745934 133.486155360266 132.950480329605  
138.491922816359 137.543128522665 128.570067783535 125.150706047419  
139.057572927874  
LOC644128 350.58427958432 318.850765099332 354.656612182522  
332.400086578723 166.533191390639 205.886398618369 212.607094117882  
235.742017851879 194.86492119218 232.151020756625 247.643123415644  
181.313333665614  
LOC644131 280.337475979102 219.537335167901 280.007569817323  
217.560691345072 240.792557915987 385.584224833836 452.077434390612  
494.175437345451 568.310800941091 371.767182305618 525.920873434688  
386.379891865411  
LOC644132 357.972320648217 386.461076717316 395.261210769232  
458.875979229339 294.033003779363 317.206754773681 296.088938872643  
284.675990197899 256.614964511846 294.48534582475 236.164692035094  
244.101521795539  
LOC644133 143.103779196037 155.60532199001 141.611712747368  
141.65642171417 134.584919596742 171.896929562022 168.04198447141  
167.093409692227 175.128935809466 149.508432746895 140.833666276568  
156.16485596016  
LOC644135 154.388776919015 136.144068118165 131.780134634616  
145.837985729893 161.202844994203 136.02474314035 144.801071221985  
133.527906709491 141.038721816572 150.287472248483 152.492163303139  
155.219860096943  
LOC644136 138.758688249557 117.255496552581 131.868557613642  
117.74682797375 149.066522533956 129.794293922951 142.086300138469  
138.670077127324 129.70974867852 131.036225888592 131.548634017902  
130.647944268116



LOC644137 137.683228179974 126.982340580909 117.913545753709  
119.934231033302 140.781647532361 138.207553349985 134.21500333869  
146.698766621345 129.730685860688 144.419657674797 131.690417323838  
131.859204862396

LOC644143 131.045970236632 151.554352209634 137.799016648135  
136.79732903972 150.423586547273 146.101547300741 140.192644427334  
146.828099826146 132.466796864599 155.056545639862 131.054302682707  
150.653030597808

LOC644144 191.203632087687 170.701964358516 146.484364264513  
156.994265858123 147.844734028193 188.0434100445 179.711363255355  
155.46017572591 190.614236149496 165.870621884073 201.530921073488  
199.408907117764

LOC644145 130.302829773323 116.889373249017 127.694189114288  
117.503848306325 129.086186239653 142.383723965616 130.029719192412  
133.027236270978 125.566982723725 118.173752075833 118.419311800417  
112.755143719255

LOC644150 165.70840218273 154.101698334466 151.293676705634  
157.435477846812 148.688413944868 154.304674359916 141.369723386494  
141.008604646743 132.115817176834 151.384762644292 133.82548013342  
145.208597795717

LOC644151 229.511643376643 188.277563426829 209.960795065047  
142.148597793651 183.493455947795 160.441879289883 190.889832855403  
172.741890316331 124.321503368855 125.390139830237 398.61164689194  
747.322544683874

LOC644152 151.433634564939 148.627264102939 145.142331981651  
140.327799236005 151.790240553272 144.421572284568 160.031506612501  
149.921414617149 149.068713925139 160.243405030742 124.253582884351  
153.184575380093

LOC644153 146.455182336561 145.654559623732 146.094951139804  
139.00736252716 141.248526020456 137.940675746397 149.168758815526  
140.608266389167 139.10561950165 136.366798516444 145.146797807275  
148.702473828167

LOC644155 130.48231275063 150.461430821491 143.103779196037  
153.075594260208 135.766466392056 142.500537230642 157.481645415121  
143.151478156897 137.066799877341 136.222421297872 148.980330875743  
144.544001385895

LOC644157 142.253826696208 129.318409053566 133.627890571828  
152.011551837951 159.728097053356 134.333679772065 156.88782735706  
164.268280525424 151.930565620382 144.752418965039 131.963419175907  
149.941056059544

LOC644162 807.3257139219 922.009043194023 683.179460779062  
654.305724263754 396.459213999636 441.873247266342 495.241179224412  
437.049581919144 401.359711029934 554.800688991977 534.505132658177  
745.482863218223

LOC644165 138.942901099402 131.846160346403 132.958521136  
140.2533871084 123.929180327423 127.365142833355 143.833057210822  
130.260174841484 137.6160344044 143.73525260312 111.886543737378  
124.566313603935

LOC644166 141.222884136243 122.368581795931 146.406344338757  
145.368059425439 155.376656335974 138.223001481672 137.940675746397  
146.885404321622 136.639637503571 132.421863261746 134.134810805413  
121.080413308265

LOC644167 144.446903878863 141.503351545458 147.769702509047  
151.742938010671 156.018200674475 143.594003495859 142.195764444916

139.900523831258 145.226278521493 159.801315111886 134.312156667838  
158.171302275984  
LOC644168 157.86653024793 169.293852989203 171.884800118791  
169.826068012389 164.608496326181 161.26917182967 161.514651272858  
175.585857393085 157.348475799643 177.652022895288 153.405052909585  
162.678619800767  
LOC644171 173.416999972133 174.192898940601 187.443940151794  
158.14434287956 165.41729888767 174.155599133789 156.863232221623  
184.724071110756 163.045605069267 164.571974509529 139.242481781927  
194.617252921731  
LOC644172 174.576132939661 162.173506492562 172.722177339418  
167.237705290905 159.41078351918 161.596086502946 185.258354905314  
165.558963147657 151.877035446575 178.52221226882 176.802886129341  
186.167877791105  
LOC644173 123.82555184043 149.722442994599 133.995928435022  
136.754116864655 129.534721138679 140.434905471935 138.267726309873  
136.390047634643 141.176376265078 137.308900490306 140.142884879106  
129.292284546767  
LOC644175 126.898894887386 125.677019190255 121.181654892305  
140.726084514407 139.021552573529 125.114303270024 125.840932898827  
141.535381351126 133.775716376056 136.159825652148 122.84779238795  
143.217978435486  
LOC644183 143.616189776965 149.460660195293 147.541437871615  
148.317958829244 149.795655754301 136.214432257698 156.595917266416  
141.696969082758 139.801108744526 154.336009472285 134.483162806498  
147.677900030844  
LOC644184 141.021723049782 151.387150218354 138.036876466521  
146.368188849777 145.155989928336 157.663460168247 145.937733795336  
165.836534881802 139.450788315602 142.780100181736 144.464071397369  
139.805930686563  
LOC644186 128.789304988964 117.546508214236 140.892250639524  
141.442825487243 147.628367263728 157.436513275737 154.101698334466  
175.251238431716 143.665359343809 113.716741872499 127.539091409962  
162.98885109088  
LOC644187 153.929167381674 170.394088019518 154.894196413558  
156.233573126063 153.843250142472 168.095061700814 146.357214078158  
174.332913952768 171.086559024882 188.417078622503 144.950935800291  
178.872635061826  
LOC644188 134.624322761212 135.607537832704 137.747088378131  
123.453048609213 113.769815606191 110.242638217587 124.272447276746  
125.887854850942 120.07034081564 124.153063838817 119.886433564236  
129.477908941439  
LOC644189 119.218909479403 115.896463925125 136.529820456592  
126.165220332132 148.824798231827 133.775716376056 127.271423859953  
131.76272538453 134.69274746407 132.320536722841 121.672811608791  
122.727385599754  
LOC644191 1191.26028342929 1373.67062432073 1166.86593572716  
777.410297605252 1531.54387233661 1340.79810963983 1162.09529660662  
2001.92441724356 1848.27927621606 1278.30505902957 2416.49806112207  
1154.86609813021  
LOC644193 153.78976320015 154.306729472627 180.456659320226  
181.412790232996 158.135321157995 174.221939793486 161.577683729655  
156.301214161102 147.077695919758 168.668125438154 152.755535408382  
157.028963417138

LOC644195 133.514843630183 136.957209426823 141.647300896529  
151.895142552067 136.524640445539 150.331324340476 139.909719416938  
143.449303333495 150.960096893517 144.992993261203 142.732625557628  
142.063338490772

LOC644196 141.987635042691 139.957560460935 141.622592268163  
137.497145594629 144.311620064675 150.160004473338 157.378317015602  
143.925616978401 136.258073395013 161.557558028531 122.670689386332  
156.856149172225

LOC644197 163.21153580549 151.808767243647 149.97218338771  
162.879707592164 145.112399373761 155.741507341843 156.822477235844  
155.794309652357 161.102731941183 183.081450609516 161.849023343715  
163.579282884905

LOC644200 156.445294524594 168.310680227156 160.604195264968  
181.022635001204 146.785478478701 160.265389854694 160.303394115537  
148.361088792223 164.661445411833 161.285587312115 143.431389389919  
158.617209794418

LOC644201 114.28381541078 116.519527499611 126.566165822427  
130.74794199972 128.72727523654 107.697601478064 119.355650892262  
123.389038274913 113.326628149066 115.755585907264 122.651702760414  
124.033766796333

LOC644204 158.95714101556 138.994857740356 144.073739611496  
128.790166506932 146.038599656417 140.388212037661 149.636887782574  
133.052615777603 134.344021502031 147.983937675946 133.742490937191  
132.57219914253

LOC644207 135.24841020592 144.634118305223 123.338921824167  
140.74208906156 145.314204192565 152.44293820056 144.458829225668  
166.320461361356 142.571259316029 154.016622581204 129.816385177336  
162.085813676373

LOC644208 125.496553386629 154.838407529853 164.018470368389  
173.577723566555 138.452698593232 144.038859705973 122.498794845416  
138.361149460093 137.179058645907 163.18585933431 108.226917034591  
147.412608079997

LOC644209 155.07594431078 130.504023268824 142.22515098612  
149.37190049932 161.577683729655 149.492550066785 142.518266591748  
162.997720993338 159.120172969378 129.086186239653 123.069963218224  
152.581729298159

LOC644214 303.608918161742 307.020265874666 414.797416270335  
388.192984832638 339.012225830929 668.570984110088 762.8576747113  
879.301932542031 693.180345649331 718.142991571468 328.60529053804  
604.237898104299

LOC644215 162.304178370233 138.920141982606 145.608087633951  
139.067516394141 141.934351226006 138.53403492914 167.273378118452  
138.687013437904 142.729945734027 162.464201058576 143.60570420943  
154.24500773656

LOC644222 150.452467115669 148.660440219589 153.934872807607  
166.452651396293 142.14116448528 143.653452869664 148.31140879454  
161.667782505656 149.505323932806 133.769848328557 142.812521349963  
143.828909773599

LOC644224 142.12808103815 136.457424070709 157.099868633958  
144.579089998478 133.416938451465 152.476932186797 181.715992480635  
141.473218014605 141.143572141958 143.107570838895 136.051070946954  
133.063422581428

LOC644225 150.46224324459 152.713528089347 132.486311240725  
154.2228051929 124.025104622631 131.093917654245 127.769405736754

119.164791441052 139.755211300398 135.356010814496 112.742895297124  
133.970510683179  
LOC644227 147.835936450126 133.211362932569 153.118492567137  
140.89390566467 133.441783287131 131.722397988741 144.946362772133  
134.089308635893 133.185908839766 136.321816321193 138.487657776553  
141.927204640355  
LOC644228 124.246363878094 139.87715485885 156.75308999904  
145.057512485875 163.234966251618 131.670601860412 167.194306682927  
150.617039206311 154.705630035232 140.18668846839 151.445254181497  
142.783159341229  
LOC644229 120.387275261633 143.336538157639 133.353762794271  
148.446949168794 141.277227483198 144.523620416439 154.455641374384  
137.037299675471 144.136328845967 135.539516564142 123.706910388724  
147.846925198348  
LOC644231 127.159947766922 128.783262618114 151.453985465369  
140.368070973566 152.30599498619 149.020824600931 186.939168482155  
124.68729078792 149.842326869644 135.264074941678 122.268560536152  
179.297628357211  
LOC644234 154.371946675862 159.539320132392 157.922718487881  
132.071893054425 154.87316176388 163.956894843504 136.434045183143  
151.316421810192 150.610633329908 169.301498852556 151.989476683722  
174.568253693395  
LOC644237 834.537908087672 877.598505913096 882.037055216609  
1282.84159765715 1264.90442763788 610.337659723539 1400.81554054664  
1056.43975075255 849.389818300305 3304.82581034038 1640.99641023476  
1220.30347076968  
LOC644241 151.32179802686 138.167369090026 148.510023599641  
152.526785074182 140.559553697317 147.44463861207 139.244051199144  
134.464053009101 154.086510608016 157.170136439095 144.863617174741  
138.384797779855  
LOC644242 141.088456756806 130.277107538053 135.920830568556  
131.724061631389 118.303150165804 140.659276788384 131.566892082703  
142.043121538885 144.868337748544 126.931328660501 142.934869757362  
152.390371614602  
LOC644243 141.850952191423 154.973990421257 145.718019736542  
140.307931763353 160.778296470857 155.379116566097 142.739686751422  
139.648187461906 151.285933600303 165.39758732 152.566490804809  
139.579764449867  
LOC644246 156.102877632001 156.846991384413 172.020235319192  
156.581569063195 163.922353493317 151.628748274773 148.134642821094  
171.180188911669 159.207567680134 152.57040089034 137.543128522665  
171.449326065013  
LOC644248 141.015441854424 138.340652133783 142.238908711402  
138.516066340784 139.841822983821 139.591231478841 139.667714422309  
129.294026995663 136.398521726896 139.361120875198 144.886005815977  
133.670967970136  
LOC644250 5347.78127066964 6028.67062754577 4901.41175228982  
5789.71932579854 847.564628337955 4663.03253705034 2261.31473132315  
3408.6535437109 2741.71904421456 2187.3010896903 4367.38154535901  
2653.47752512393  
LOC644251 129.816385177336 132.371165851333 134.683553037185  
116.268259618103 136.601220755282 148.812015298003 141.362627556137  
126.55925846644 139.038389244329 136.603035996281 157.067264221207  
138.412897151567

LOC644253 132.328948598599 113.112450527382 148.616543842015  
138.731957926247 129.491732597331 139.22543724535 128.344679872625  
132.342063356763 137.071402810983 124.621381699241 132.668344126625  
141.123272165499

LOC644254 134.151372457715 133.26167785455 151.305201022012  
141.59474425685 140.508390945342 124.682396766302 146.851307767958  
149.219602109121 144.049503774298 138.560399473164 142.326319895395  
152.748807709142

LOC644255 121.51208055933 124.641892391159 113.66416989856  
126.583342262489 127.706499722854 120.606354515072 125.612670947405  
120.767950825369 119.894737403889 135.421804561804 122.676368520743  
128.042181036687

LOC644256 141.092486112278 143.840979923821 130.411849432351  
139.488057371254 143.501380161409 137.919253591105 146.875733210901  
140.370626016794 147.442483242063 131.093917654245 147.581827861592  
136.432109029368

LOC644257 148.485884677572 128.640202262896 160.735428753783  
152.148784410501 166.070152719459 174.168079247768 141.345379144177  
165.866987051333 159.185616602396 139.989830921287 151.622719246408  
152.204730003016

LOC644262 133.922855125616 132.025632466084 129.079917151186  
123.881658891576 160.806678614325 140.728126380228 133.218742606195  
137.623019849539 127.620377473963 152.624623171797 134.247361216412  
128.783262618114

LOC644264 165.634117939571 145.329128512407 160.085325256991  
194.281839133887 177.562561297777 177.772019227116 169.881866987359  
174.168079247768 172.961115357569 188.181647474317 161.189717452004  
172.827288328708

LOC644265 139.136845089275 158.072347847051 158.429761055869  
161.466192326759 179.122374556365 176.940723174814 194.753955100069  
167.380798617981 166.1677526191.59400638652 187.993907528473  
197.308952757609

LOC644266 139.340699808517 152.801801823442 156.160899295182  
158.167384416968 164.905467905433 157.273309095198 146.83577460518  
160.268754786532 135.114900669781 156.806407903626 135.675570204709  
165.179126023422

LOC644267 135.425518707018 130.282212339065 127.514381389109  
136.2727333616 134.741781820234 151.171716392043 130.795318552623  
146.114159600635 113.064645688715 124.606795061928 119.176139463015  
150.065275447769

LOC644268 131.208112906919 119.67745324922 132.620474788855  
139.909719416938 126.127630885864 126.946305561543 139.303747021408  
127.416912237613 133.067237748129 125.231476412101 126.652197216347  
152.77616981167

LOC644276 150.951302116738 168.643026828823 205.612579504495  
167.842122798757 194.60309399944 193.744461104128 179.704370382771  
198.925776755081 173.66499836293 177.630246034993 145.435794613203  
180.392337212428

LOC644277 150.082561726876 166.825501664231 171.444558905575  
182.725987056391 152.902458879101 173.424541543058 163.245806772716  
159.35787888191 168.052288484172 152.640683776403 150.580133889656  
179.969944022261

LOC644278 157.035739033122 139.570313872946 175.510160114891  
165.213327555428 156.727153398506 152.479402912801 164.513371267476

132.8615886934 165.511561121012 155.287837763675 140.641308444844  
159.815932985135  
LOC644280 149.4401812 133.654232991228 161.385691765316 128.685065364693  
132.587392944892 132.996622574111 130.644937322186 172.304496150036  
147.264690436042 158.854659281803 139.522018789485 128.922269289649  
LOC644284 182.263724979519 184.473198008234 147.213616261735  
205.282221255986 368.711718874343 186.007710175103 232.414763435965  
198.191669030952 203.816305810343 147.143407224469 190.871696848118  
232.519482087835  
LOC644285 125.846029991447 137.151210946281 151.805015900025  
133.311212623667 140.605866597575 136.218750083407 157.541796722309  
129.409899416034 130.425809387444 138.374092984164 123.413596815384  
128.438401976279  
LOC644286 142.776295389006 133.315888375614 142.143709425075  
139.063209125209 147.760782452857 128.837901660985 141.370957100324  
153.0141888126 142.351705613006 146.384051525624 126.464893786922  
149.202628825354  
LOC644288 143.973464003036 143.868962478182 131.820842728171  
146.522066289381 132.923237903246 152.713528089347 132.941478943584  
135.925813154268 123.484987952263 136.937327692084 130.559515534303  
131.121343131082  
LOC644291 151.863048206341 152.778732614944 157.038121210505  
152.725025539491 141.597692730835 143.937726155116 157.073850948746  
142.249715102513 154.586825710624 150.479320779862 150.71435300188  
152.344248425416  
LOC644294 148.206529935876 148.448349327493 146.139817421758  
168.082591651722 127.182067293944 149.168758815526 139.027836356854  
135.5668267936 146.512045729234 139.416388461892 114.358099210532  
148.332750352364  
LOC644295 142.934869757362 140.327799236005 177.742616962629  
134.238642042323 140.949367846425 156.998563448664 139.388484543482  
166.22013573342 144.977958320895 161.877378749103 149.355389396683  
167.658560306884  
LOC644297 187.920789153124 165.364935913232 148.437676259828  
178.262619516994 139.094167748687 234.126500054945 145.540872377507  
152.465176508162 238.310077556167 158.396149470397 213.382179917193  
172.888455552446  
LOC644298 139.023486014525 142.142633050256 148.530422089937  
141.103517863832 147.250700603067 146.968599872798 142.937182720493  
161.937384157098 144.499680685194 136.386031133644 139.175421159925  
139.109712542702  
LOC644299 146.609485664113 144.836902182737 127.023543953724  
142.846100831941 160.713790305656 129.822926691091 166.027988561421  
154.740395921562 137.025625133986 131.696834332724 145.61758790738  
141.016596301267  
LOC644300 152.024383072265 143.444109491884 154.076216899447  
138.188522429661 149.492550066785 146.814457904682 148.376194044247  
138.45137517137 144.585120811896 167.542332146706 143.050004021764  
148.160350542849  
LOC644302 127.972708116366 143.53550972177 129.147246809319  
123.126240234396 144.377501600001 123.853588042292 135.061176512365  
123.766373146588 139.181131600753 134.53861441495 117.05536677976  
121.863062638551

LOC644303 141.15458637181 136.494339004002 141.580944960818  
117.561878567749 127.075899925865 139.299062352035 134.452938571435  
138.50032459657 139.301435614165 125.071387239411 136.971869448818  
126.391083453973  
LOC644305 136.269445455239 138.442378791712 132.043196381009  
139.440415574681 133.001613667656 142.139331321085 135.565256045133  
148.373866613126 137.342348963288 152.035992124554 127.859873416515  
155.014930599769  
LOC644310 248.16594076495 244.954917633904 286.945784387294  
262.019779752857 372.088129459528 532.950400370668 434.390613381746  
419.593558001947 384.464383569801 388.002365247498 740.196934996626  
591.189034068137  
LOC644311 131.975248488461 122.873661677648 125.455347031878  
135.033601686007 135.628982370682 141.840858913807 126.203255277356  
132.081286801266 131.308384127079 142.878258542775 137.59017685842  
137.926193455157  
LOC644313 128.574419295906 136.934313990609 149.888719320368  
136.545742688573 119.83679981791 129.063617408979 146.755803731358  
133.59686364883 135.915252483475 135.153588830407 157.225479764928  
125.710199961297  
LOC644315 1439.37593006882 1535.27496251381 1862.88548451154  
1010.05884008623 3078.76695443407 4198.61471038267 3968.38723079061  
2473.22803972431 1567.89763050645 2891.03258768937 2882.51330563735  
2622.87486749984  
LOC644316 158.477017294725 134.11753210296 131.545287070888  
133.137299889323 133.184279519985 131.062360037777 148.076841184769  
152.660373241584 132.313884627836 145.010108826238 139.989830921287  
132.428675012593  
LOC644319 157.600193849783 147.51773051441 149.8919086368  
159.245344068037 150.726359890073 149.430396727944 168.310680227156  
140.132816040735 156.095520355029 163.976361576383 136.052640679977  
142.601556980614  
LOC644320 135.565256045133 124.449679223202 143.851670859917  
145.874529855286 129.176532377543 144.201723591119 151.32179802686  
136.84488044614 142.500537230642 125.20712393273 121.194138394375  
125.547399456656  
LOC644322 162.769643886845 166.863589702453 160.903342063542  
156.000732564221 139.331046480528 145.900272803108 148.905860943967  
146.14494790114 156.154079736651 160.019067307733 155.612543356905  
153.667355714857  
LOC644325 134.57472034679 145.017264740722 137.493436771898  
127.114560076444 133.176970578909 126.34649262976 136.040524807653  
137.987255649072 114.942849575931 150.070213543579 121.865696440776  
146.042460762767  
LOC644326 140.995418231627 139.280151859534 149.211214631561  
143.722135315998 147.15764785567 128.344679872625 138.18056202179  
148.6016741084 135.872060352476 141.350135458015 107.993707827557  
130.169291786693  
LOC644327 153.93927752488 148.638400592682 138.28745132277  
158.85003890975 140.227225039467 150.123784990646 137.528342105233  
144.256029338053 169.022351348819 137.388190728367 125.328704545727  
164.787637367264  
LOC644328 136.960656707275 122.187031504466 136.185953087697  
119.709032462308 124.455340203012 124.635917999969 125.293640452686

130.563756903074 120.188885479773 128.927103442679 121.977373818244  
134.845202154446  
LOC644330 175.960788330149 195.618369827396 164.634694036993  
163.141010815086 305.854543429221 362.742120043509 262.861105654051  
361.620362526358 295.047418816148 313.967636827811 369.070376276471  
498.534168389928  
LOC644331 167.46432961654 143.45723206497 157.565633456909  
138.218392984717 139.880733465536 146.626517077288 154.518641757391  
140.792400101142 148.44261900795 163.165374495635 130.689272423595  
152.496881293769  
LOC644334 139.981905225845 146.153528461264 145.89801576671  
152.939759795631 150.134337895481 188.864388750448 160.989242461839  
183.056707813352 165.062129636008 160.322541355391 137.360220389719  
181.110403721353  
LOC644335 154.190469538568 131.466580723837 134.407776033032  
132.628358688595 141.478253058549 141.198692540628 159.765585531442  
140.177708471199 148.611352905643 130.632096412204 117.408465686218  
136.881019970399  
LOC644336 140.336479395866 119.535267326862 130.14600240687  
138.654301345398 135.493053871272 143.582187466814 130.832462487806  
159.735182155088 145.150191397375 138.402890124039 125.172189715764  
156.525347260458  
LOC644338 165.017178571218 159.643566663742 166.472068379965  
170.150889760372 150.091854035356 135.230327755927 155.227218488935  
139.560555361919 154.847114601403 170.701964358516 181.668090319293  
165.286724415145  
LOC644339 125.603448542611 137.093170378295 131.903632821793  
135.073449743301 132.158817539201 151.674143983846 137.025625133986  
132.94603323912 120.96098661114 142.22515098612 123.916497557628  
130.749763860615  
LOC644341 157.528409294029 155.402421581195 149.096182775507  
147.991572632747 131.90169441925 135.86149691566 145.072924262206  
151.318320077986 141.420747583126 129.130212375815 140.229267364503  
139.703304553486  
LOC644342 156.78124246844 139.573371281569 152.838970689314  
137.138266859156 128.528510920423 154.894196413558 141.033068896117  
136.929570710155 134.266373965186 122.223184326586 116.850851308701  
138.868641301709  
LOC644343 133.44592405762 153.818325601312 140.85139374336  
136.975775196224 153.62335478774 143.360311218423 142.984243805285  
143.689257983705 138.841385034636 145.163084967499 152.801801823442  
129.409899416034  
LOC644345 161.031148038478 149.524040913256 169.888264971936  
184.974347306539 173.364586678954 159.182533998843 148.527528612375  
166.688771186254 136.330636532576 157.891350650633 139.694950277714  
164.172084711099  
LOC644347 126.479964493857 119.787925356307 121.508233749444  
129.672284417918 126.368170959337 122.850678471084 117.539640414775  
139.219476681919 117.873333897609 117.15886922795 128.262195551255  
133.243679173608  
LOC644348 169.168869363848 163.153676643372 150.269618125943  
142.588013648337 143.177915754998 131.910285685889 149.502132524093  
133.148442269517 151.455343772857 145.187490179166 159.534017722536  
158.895584550655



LOC644350 141.515788643986 131.76829141949 142.191569406599  
129.216693566478 140.968351978909 124.97886512783 137.094814176566  
143.915205639368 116.310166003024 130.880795616911 128.848008246639  
113.119021336236  
LOC644351 160.499355902773 142.726324048628 151.285933600303  
138.544053540799 166.1677526152.61583482402 144.432181150583  
151.801558435863 167.456481678813 172.888455552446 149.763038696374  
155.43577761798  
LOC644353 165.723126764006 160.997179739138 169.691392833277  
171.262412981612 141.153496200302 159.074001164836 140.142884879106  
145.621384219688 146.748572532267 145.161116298118 157.269049853539  
148.421611987655  
LOC644359 154.993784224548 135.196797030404 138.343232981485  
154.600966693059 141.647300896529 163.22059466037 146.920496801962  
150.152613183213 142.896723827753 148.09868976776 139.369815367465  
147.913148020331  
LOC644360 158.347972566681 145.756455015309 130.302829773323  
171.80440912191 166.382301680189 138.149037534929 160.791355483048  
164.373697447004 153.088710298368 150.513804134588 163.066051106092  
164.02617650236  
LOC644361 143.206100064821 158.098055917452 129.045934344719  
140.021640936288 131.897352210959 154.236652966294 134.613036378054  
139.077570424394 140.391753835434 139.999298193212 137.919253591105  
139.927773713324  
LOC644362 144.808774137749 149.856951631661 147.143407224469  
144.992993261203 151.796986456254 128.113966507586 137.328370598183  
140.13515064896 152.823566129571 141.382096896508 127.831950458406  
150.295611829265  
LOC644363 331.383533814347 347.147961254829 321.119758814618  
312.080864996592 374.761007556839 709.303384219887 392.582612044755  
356.05426191171 293.350292227077 284.351529744475 353.912654262209  
442.766704003254  
LOC644365 156.430981244063 167.212960569538 157.729732484131  
140.274655651173 154.7326161316 155.820194280153 180.77686098195  
150.885460975199 161.552475294424 161.096914295309 157.568150431884  
151.615675144083  
LOC644366 151.174536186463 139.055892787717 158.788210937339  
132.151765465534 140.870849757111 137.286331849749 155.130745957603  
158.584934514596 148.73620012231 142.774449777424 114.133473556359  
139.470557140547  
LOC644371 149.756512110538 142.963036923104 148.176995739142  
150.294432623474 160.964435028806 151.736824723671 160.825408895349  
157.337193457189 163.19340939648 143.52474218953 136.465185148237  
154.420795931034  
LOC644372 145.395042579024 139.851678406637 135.134213292186  
129.743808480368 125.631073476381 144.934103671894 130.892302357045  
143.279331050175 146.114159600635 145.024148458133 125.272796155561  
123.877609932461  
LOC644373 171.644710031098 171.014432075829 186.222567239198  
181.747090380435 163.059196519365 159.23414970379 156.194996994993  
175.663960113118 163.141010815086 150.741291526753 150.396462763607  
159.115391667901  
LOC644377 126.484819755399 130.314247368361 154.340042518983  
145.005991300977 153.752502094283 153.440078723527 144.48495176385

137.264095379365 122.727385599754 139.831964368637 124.466986821169  
143.239666389592  
LOC644379 118.622346984257 146.838547724148 167.830629616121  
133.281505040209 123.577138762427 127.588907178652 128.069504716124  
138.254479653425 141.960809148036 149.856041300199 140.152177370089  
123.096995744616  
LOC644380 169.482586449402 175.686248503777 173.810080280732  
156.567519536997 167.830629616121 181.813812621767 166.209190082084  
164.534790315992 159.990561741675 179.100368312505 214.662648581622  
197.443711199904  
LOC644384 131.369177333568 126.629012619208 136.91078498126  
125.761205967344 123.545404885618 137.719257499747 139.615706918035  
126.191057198995 128.033383607545 133.376631703373 141.914966520049  
135.852591930882  
LOC644386 125.328704545727 132.606735652984 131.872583529419  
133.379872189405 119.52150378372 116.433239116749 128.377928524315  
127.220812636148 127.964855970099 126.211525910631 117.511162285879  
119.949050292223  
LOC644387 125.262445870212 138.887159625058 119.449118660481  
136.678188851101 138.196640512429 125.658396221949 128.992837936606  
129.023206862713 127.7962242731 125.815256068004 131.377361030122  
117.77708734157  
LOC644388 143.279331050175 126.619475852751 141.018087546273  
139.691470247318 136.794860440446 144.278830378899 137.565050253948  
142.264536484668 133.932594124721 142.851432926979 117.166509072455  
142.984243805285  
LOC644390 155.207839370162 181.229308386808 158.967160833334  
162.513107496558 143.531102074376 136.463867598256 148.204194003593  
131.395959781477 153.93249158209 143.197131668608 137.605244950708  
141.173167283016  
LOC644391 152.79367157305 151.418316929551 153.776361241587  
141.026045918091 129.865581506307 142.757327296852 146.522066289381  
128.975785280465 140.628614910068 119.767154020462 132.741859397511  
129.973380117841  
LOC644396 136.861019517134 128.756818133357 135.90207451581  
141.317113425046 137.194467539969 140.586497829504 137.773960847088  
134.608734423113 120.922042875444 124.542879928448 136.657107363796  
134.479828866339  
LOC644397 138.328508662816 144.30699572795 122.449574852865  
142.64161581553 124.638075441482 147.457193565877 128.649329515033  
137.471563342956 152.350537364705 119.044902525459 147.064543281269  
138.846543789882  
LOC644399 123.038646914863 115.672307128514 116.609122768341  
116.179625689647 119.660942849265 128.895325544109 127.997280639609  
124.768399055809 134.616051224668 131.33321167357 132.836513637574  
118.355532305846  
LOC644402 157.980947683333 142.661504601445 161.371477511362  
128.007359083768 151.548865569913 169.933706225406 156.843997723699  
144.096624787142 136.472404812817 145.281664250703 137.50266393001  
157.535792192753  
LOC644403 158.425950902309 142.518266591748 155.694213876736  
146.798444724408 142.041992878641 132.906201428703 182.833961304079  
156.441368290572 135.989816139218 148.510023599641 132.076865522593  
139.650726173186

LOC644404 187.325542100762 176.100691355682 210.353341004865  
190.189217962555 193.173703015873 301.908667220208 175.670738308809  
244.766289564524 162.403942351933 223.573080955095 143.973464003036  
180.047231265069  
LOC644408 134.187456260969 134.155655670103 140.743917481548  
123.323528039848 150.148902196995 141.290905146249 127.101752724954  
131.136073942692 128.739880189022 154.993784224548 139.796168741191  
134.349043119219  
LOC644411 152.702847643082 136.478114537536 133.885725703056  
126.76986764971 141.914966520049 131.406366653787 139.917662338546  
151.403431105471 149.582406567077 137.609831343223 130.334622987505  
140.938442055097  
LOC644412 131.263641389894 129.517511177852 131.162118170837  
146.887506793665 131.40880014672 131.119810851017 131.267177634269  
136.518409978222 135.135834717193 134.961156870831 128.920313557255  
142.543569032033  
LOC644413 148.587929928134 119.655162437465 123.711828013052  
151.961811748754 135.218648235324 135.950465168457 130.689272423595  
133.016668180102 130.842257229979 138.16337207876 123.446714388901  
136.623658204558  
LOC644415 149.949425756405 152.337631025368 142.861359851088  
140.163936299053 155.471795004237 131.7646616214 157.81831741292  
151.486362260537 136.149732574763 130.562422910426 158.167384416968  
149.274901871663  
LOC644419 142.444072809204 138.897393621114 143.294217840279  
128.84676695859 148.1283706199 156.930119977809 145.299625153537  
142.259196792767 141.825162897153 148.700297908071 147.617354114584  
149.747347428419  
LOC644420 135.923022674367 121.930362099901 142.683117062711  
134.619470709414 131.18368961955 134.227796103219 136.308565710257  
153.293125258215 137.232722233042 136.205702793983 108.101686347192  
130.455560026617  
LOC644421 170.4583554058 157.252701277198 182.529167529936  
141.207041271169 145.45097990828 152.861304149219 158.414776465951  
155.402421581195 163.234966251618 169.349922114861 153.787447416111  
168.491878435329  
LOC644422 164.794626785115 144.54895913821 166.9499656083  
154.774977482202 182.529167529936 220.661922683143 224.008253365957  
213.602504580364 243.35880641566 247.845708587624 183.513101761782  
233.757965816721  
LOC644423 206.071709262227 177.055023182887 220.446775597113  
224.439293045835 145.852430082228 152.906352463546 171.521579011287  
159.090982014161 164.231281729415 170.452989060697 149.869314204354  
157.176001400747  
LOC644424 168.412162365467 178.329946332806 180.641419603362  
155.058852833902 169.956827727468 191.651818696629 167.315702949236  
151.679534447228 158.127523362251 161.948033313443 162.237172404557  
157.615017085961  
LOC644427 147.995991912855 144.692900548503 150.034959799695  
152.692483731643 136.537117054998 146.6886556805 147.176801913145  
140.784853736558 133.392934239554 138.940564112156 147.322622473251  
147.015427944761  
LOC644429 142.500537230642 150.129367314696 144.68114486527  
153.653453808799 149.684922983176 166.162656500954 149.153827025981

162.58152435515 141.784881206191 144.55710963567 133.697364081712  
157.932243807202  
LOC644431 130.495294897642 127.776112651456 138.096262211809  
156.562197068687 130.95176570982 143.601057437842 136.341358916638  
140.553613300431 119.366599958278 139.870306695324 124.045745662173  
139.725987763226  
LOC644433 158.420821486138 158.205235596076 144.040342300793  
176.11287574658 166.735962853075 158.364031234356 146.619846538124  
150.786618560854 147.211769989922 165.995251661994 142.851432926979  
134.631638658586  
LOC644436 121.567879358508 122.909152047474 123.198873421356  
106.126202301438 134.949572471421 132.236355533277 130.215290990406  
116.328330266803 123.108694517244 135.436040515445 129.692578787988  
117.503848306325  
LOC644444 139.621016978072 131.210866639392 145.99474597064  
124.526220300907 124.059778432167 133.318665755015 133.489068665353  
145.169804325334 137.43751840683 120.706421084476 116.007006375993  
130.970694919879  
LOC644447 134.675247731364 137.049677918041 162.002221893617  
148.171225002967 156.497059936271 131.848213704003 142.498280938736  
138.528083984177 136.016912147651 157.248117633013 151.067819234238  
152.662446724781  
LOC644450 127.884750925048 126.256716138724 136.03581843125  
128.988736837863 153.574068503306 114.520066232155 139.998271598088  
126.820123970582 122.550707067805 133.53523683945 115.080736217256  
137.082234284426  
LOC644451 129.226815062589 131.146604635155 129.263794008537  
128.451788292588 129.610980807708 138.645156942894 127.380083832809  
142.623106544789 148.782907912893 155.441190892146 143.363002903815  
122.162753353761  
LOC644452 144.388113281099 127.831950458406 145.919359461744  
146.274284557421 137.303701514064 159.710615852435 165.570531605115  
135.154441560264 167.157420848604 165.537853089052 137.342348963288  
143.085022888434  
LOC644456 114.067790137477 131.027605835275 121.912927816178  
124.119104345119 125.897190440417 118.871735074285 145.195065312551  
136.743659350798 127.350368333088 131.80257432775 127.001546144286  
125.195549796301  
LOC644457 149.020824600931 143.094799968981 162.735609734946  
148.215172022129 174.035835206078 134.730275384832 151.939710544553  
141.484730939562 149.668587078867 158.384505840662 148.977202433511  
147.610616423185  
LOC644464 12654.3779830648 13526.3170858629 12283.9915232122  
13247.3528304243 20989.6494028551 17917.7303120499 20217.6497214386  
14348.4009261372 20217.6497214386 16588.0599171804 11150.5512437377  
19889.8233042542  
LOC644466 145.214575855337 149.508432746895 150.91730768674  
155.61996871093 130.924141812334 159.554978842683 145.958718601763  
155.673532440475 129.684916104674 135.3969732106 142.166650343224  
211.085778902367  
LOC644468 148.090431893307 128.912199634685 136.864106181375  
138.555443236183 157.692519370734 139.097764484641 124.672483602517  
143.884263862698 131.572485018063 129.677874035481 126.330382425318  
146.105844205919

LOC644472 136.779180530712 135.046003135933 147.628367263728  
162.267841475739 138.655815405894 146.537204621419 129.748891462506  
137.934850241054 144.110544384466 150.582568022489 141.901382169334  
130.156775178934  
LOC644473 141.398513269219 128.195916531413 139.025598691696  
142.680136733947 133.917283965036 132.282125790062 135.079944196457  
125.874313058552 134.918496279185 132.213890220705 112.166192839859  
125.769903262265  
LOC644474 173.929353266244 170.95650329595 162.229052648595  
147.579672274205 156.9540270155 195.20398666139 172.509081696309  
162.002221893617 152.648490300617 147.094123051131 166.81024151246  
167.751604259111  
LOC644477 157.779441363536 135.978826529736 147.681723355535  
151.488973553441 140.482728188987 135.114056458478 138.064951932825  
135.582230137515 118.230408871812 143.013801508709 127.195619567384  
148.439740062804  
LOC644479 127.065518421996 127.31283918221 147.62157260418  
139.696266471271 133.71965790848 136.927274496451 138.735156909846  
135.783125948784 149.863063160222 148.977202433511 115.002176041974  
146.892065987724  
LOC644480 154.466614452651 154.607214750531 133.16868415814  
169.920799931309 143.560065338939 137.75060150486 151.615675144083  
133.259321087534 128.007359083768 141.985130140173 149.100294463597  
141.75279613643  
LOC644482 174.214747421898 167.806420483187 195.711047893396  
247.08460296705 281.881563164961 189.799091507686 196.974807677659  
185.432587490792 181.500222423634 183.023316857537 168.289492873475  
193.95909424044  
LOC644484 144.511488474344 153.241806795134 159.660564323984  
197.298982267459 154.083644327775 154.207656926108 141.476041451832  
139.466683069609 161.988082494464 147.322622473251 126.515480612924  
142.19015013243  
LOC644489 120.616979607398 137.663941989772 135.802258952006  
122.365693072105 114.170354748872 137.756209496729 131.578042179715  
136.392389842232 126.168223112165 120.871693555514 125.18424162353  
122.339819585312  
LOC644491 172.152570321727 138.988919994625 173.233357775898  
160.520677267863 161.055911120534 149.450921195838 158.973872644973  
149.865644080359 162.297999435613 147.89884142817 159.307394610466  
181.081050726043  
LOC644496 138.836422729663 153.78976320015 145.10302792449  
150.46224324459 136.420062669039 143.834501071806 130.749763860615  
142.007066214472 150.691815494794 193.871324880919 143.860092956392  
141.262319193649  
LOC644499 153.45050352117 149.267019532847 157.826457203706  
152.990523860831 145.921381300813 147.87699690647 170.490099282436  
164.191906588579 154.611011734772 137.987255649072 157.035739033122  
171.042491047256  
LOC644500 160.122274989224 163.030275835038 175.704031930103  
164.022021048626 178.89423690001 174.192898940601 158.135321157995  
164.032302455558 138.952082680577 159.113259830623 159.349719495214  
140.712618356383  
LOC644504 167.640645997754 141.363863974586 139.993960054847  
162.247608931408 153.620767586182 125.830917527594 135.498114285253

145.468654174037 143.320787131532 145.844961942581 119.792515907708  
138.259512736404  
LOC644507 133.897397228615 138.311892121437 153.159425380743  
152.591091223395 143.707084981291 142.206016362038 157.078563342652  
146.069543494352 162.488819873513 156.756159786366 133.556805738801  
151.295855278218  
LOC644508 140.381386314817 144.290286088611 143.093156971372  
131.774882989257 123.813766735115 190.152824885328 133.090474303043  
142.133238886052 131.836036241459 145.97512573326 121.988237521196  
149.068713925139  
LOC644511 3677.23129570773 3301.98381607571 4118.58682247781  
2891.03258768937 3522.61692270848 3655.63669142687 9251.21629832018  
4536.46344538492 5022.15374558514 4166.43837922103 4343.46317176151  
5058.57872936027  
LOC644512 120.406577236405 121.027465953657 142.180927190578  
137.252742673245 128.124456615525 137.464914919148 143.73525260312  
147.257773507186 117.218616752346 124.927989289122 129.045934344719  
129.733935614802  
LOC644516 139.055892787717 147.362120584524 156.911538642765  
143.799113486767 155.15575204653 153.299196905367 175.302832015761  
147.461480849333 158.308558656144 156.003233745771 143.877226672663  
144.417333931582  
LOC644517 154.804753043168 157.675974692761 208.666760987764  
147.108661317945 185.027902485379 235.162439885207 191.445291899108  
225.950750084197 192.130214856642 174.832495287192 171.537040561599  
172.421637564661  
LOC644518 127.287538993899 129.187574143637 150.570540340126  
139.980504765791 145.210787864362 146.122816653035 130.231160879338  
137.660051943656 137.052507691254 130.085138325818 132.409582164007  
132.186120302011  
LOC644519 138.060245284993 139.234549949916 132.105184573944  
155.43577761798 138.265155903051 151.026905311756 124.518818352113  
147.307419859572 155.575152212736 150.328995030071 152.883970401452  
158.6067091347  
LOC644524 125.77343813277 140.806935772116 139.886499402506  
157.075067518114 153.350690419636 148.317958829244 155.7441762827  
147.254800126614 148.457872807838 150.176942469551 139.625635881693  
133.527906709491  
LOC644525 139.503902205317 137.446745269821 142.406904585501  
135.940629737073 148.911306526869 150.367927843529 147.299872426498  
143.722135315998 152.401204710292 136.599305161841 141.76964678852  
142.26998944788  
LOC644528 164.120602897751 152.933230159216 147.86104992164  
148.713747597311 154.277670551775 156.61494867164 146.617853918109  
146.782830477983 154.179891883612 156.531951576859 164.824914851636  
138.808591995741  
LOC644530 144.120106441052 151.026905311756 151.687402863648  
159.946124520038 163.099009810658 155.507030276749 145.670066571941  
137.430946130817 141.695537669891 150.538541347453 139.984102798711  
149.164469334038  
LOC644532 154.079355899056 135.1951749488 147.027904536486  
135.730331297139 145.229637715814 146.368188849777 140.041977349982  
149.987571884748 140.481148289418 156.783896946556 154.798287249541  
146.65668813596

LOC644536 156.194996994993 155.235505614649 150.259400712685  
142.505050582588 143.686906051698 171.573342518254 146.069543494352  
156.237282338037 143.611930851914 147.274945970072 141.715307041887  
148.209164900319  
LOC644537 149.664506761117 141.703410265546 170.966588957686  
155.303903514061 146.395248696835 136.998259410887 148.789295862953  
146.231937458616 148.510023599641 149.383429241903 144.934103671894  
146.460464282676  
LOC644538 171.014432075829 161.108249802467 230.10433160008  
197.895094054577 127.115598987172 151.351938656508 135.618562468776  
146.293735120772 138.393565473857 143.206100064821 134.194555223935  
137.103116666893  
LOC644539 154.408875182219 149.143087870963 149.704586651832  
153.399787997793 143.015905927379 143.399877326927 170.878962027347  
144.834448238435 158.467572658719 138.89579816122 138.609972011765  
141.839647226623  
LOC644544 156.13331481937 168.52952604693 161.564505054217  
152.6969498938 185.961822133346 191.525291860022 153.0141888126  
154.876638004094 164.757907224537 154.900676756492 141.840858913807  
156.399808270033  
LOC644548 146.281429685059 147.510848198689 133.115543233699  
138.921608664788 140.814009587096 147.946236579299 139.862403685817  
139.325478877749 141.444958186793 138.970853057174 124.731056918418  
141.73248778957  
LOC644554 139.449895159273 122.94737290641 144.86583288717  
132.354503055131 140.357427912361 152.14012587515 123.178049594968  
124.423556743827 140.383646018409 123.338921824167 131.761564745495  
126.544685937984  
LOC644556 131.672014089487 116.787791109549 146.916683989962  
137.672798701643 127.125906877098 136.175268696202 140.563079852037  
119.866898356501 128.756818133357 145.965900441953 111.848472437543  
122.885879294532  
LOC644558 168.016048154878 164.678646890649 162.373508183992  
145.177195093247 161.764411756848 172.345201438148 167.43630698726  
165.055636629118 162.702767346393 157.682946957733 157.184851121922  
161.496700767073  
LOC644563 414.267332328081 402.213774592085 419.532420763449  
417.528353577952 619.995008098949 597.189355986293 432.92947962962  
678.365575489532 503.093655556038 782.746481112316 878.167149313285  
952.724512915813  
LOC644567 140.611071681667 129.03753569157 127.0631494857  
129.286782862113 140.03443832328 154.388776919015 134.436423298225  
141.425393615228 126.980375035189 136.468434653208 131.146604635155  
148.084844579881  
LOC644569 126.165220332132 147.905406818238 136.993102884269  
123.351112976814 128.939572714685 134.683553037185 136.755975832051  
127.503849690009 138.74117178479 143.2438241778 122.371715108957  
123.089110282465  
LOC644571 152.152106138031 148.501654210579 165.009696356892  
180.179981672095 171.740347129234 140.496058408953 159.273225917177  
154.347332766547 150.35767254363 154.574826922632 130.746465595759  
154.594339065082  
LOC644573 135.964630862223 156.7940590796 147.281035392817  
144.200389127129 139.574895021783 135.015161451899 142.956870642583

140.36278240974 147.195127201893 145.572363722788 143.324235640446  
159.832405510505  
LOC644574 127.540848073484 131.056011738962 121.722412245175  
124.077104101209 131.290698895743 146.856133875296 119.627380812035  
140.086978441723 125.374764771516 119.598216955485 152.137669424501  
133.509538648848  
LOC644577 146.298733090986 137.920724602098 126.939543057414  
129.452826518288 129.511465164539 127.018746030517 136.831887671476  
127.445199722147 143.467053670148 132.02259465879 126.340955733062  
139.403087367992  
LOC644578 170.768398273919 154.051705030348 134.181819177347  
154.64077390011 154.402315635227 174.881557472722 160.459100056689  
139.995623005154 143.298218989451 155.355051932357 136.324020406359  
149.061464748604  
LOC644580 154.267020640428 137.607767467172 151.81754291846  
145.472859089272 152.643087608513 147.285764611006 136.966690353637  
140.304810288752 118.397482835514 159.287816317316 132.203310946961  
140.699287635171  
LOC644584 157.844617425219 168.878645908397 164.313238416498  
166.001279428607 159.838626443912 219.103510284905 177.639351778834  
170.040914594182 192.022864170934 201.256649338315 158.627416752905  
198.681190016247  
LOC644586 139.897320032723 152.528571776589 145.522435728191  
146.846301957637 147.658462231804 146.716053772448 137.280933631075  
132.285835971705 139.737748157901 135.842090777339 124.403662787819  
143.530190096012  
LOC644587 126.698158279472 121.219323788324 127.040027125755  
127.445199722147 128.312170913496 130.435589649362 135.689889081912  
134.922488718676 126.216519704249 123.725998173975 134.301956886107  
132.183250916482  
LOC644589 121.747622617011 127.159947766922 135.306127055224  
128.850480964163 146.709967739596 147.657151780506 136.587165242663  
155.290648078877 146.97203173446 139.508029141287 145.161116298118  
134.369532556726  
LOC644590 149.79295887612 156.731291756066 147.856285290748  
137.816691265242 606.003956839826 341.096072280715 353.571106279836  
166.671563123047 369.070376276471 215.558688906165 228.025383952578  
384.216141843863  
LOC644591 209.090788790449 229.483578414375 191.897449038297  
206.127493726541 158.841505957036 205.4648759901 160.67285689491  
179.421854100287 167.260319361746 162.940190224943 186.551385094902  
168.254689624696  
LOC644592 144.248044718005 149.557833322995 150.613624696604  
153.62335478774 133.526213647686 150.042173991463 150.964506212368  
146.42288214248 147.681723355535 149.974080577906 126.63730651721  
144.826861308997  
LOC644593 134.61114877396 128.475588360698 141.283042601932  
139.234549949916 137.345542507421 152.772177215856 137.306031826007  
129.299810898979 123.150299476109 164.208044717557 161.208713751942  
151.102431192559  
LOC644596 161.632610858756 166.784804508647 186.57665470145  
180.096239155058 149.634975068742 167.55209828062 154.607214750531  
157.381401974279 161.740466814881 150.238582112636 167.157420848604  
189.791849830504



LOC644598 138.014046365103 141.408545519654 136.284283129801  
128.519448608754 129.580421464913 131.972669163481 136.609461559853  
142.527422462824 131.360310497851 144.904021527125 133.517685144186  
146.632312874102  
LOC644599 159.862252588012 162.085813676373 140.026918871291  
164.942652212218 168.289492873475 156.723502568908 150.711857623087  
152.863035012564 153.885582272269 167.07092218037 159.693019552703  
155.153328022432  
LOC644602 136.120813399579 147.694098231655 133.526213647686  
139.21331678591 146.909471248864 147.696506705909 140.338622198206  
142.64161581553 133.895547281411 150.981208776163 140.885012530186  
155.490897312915  
LOC644604 26906.6343314539 25558.9005130606 27028.8951412615  
23053.5660790052 11971.1664283024 21409.4415798676 31402.6950316226  
20381.3859535625 22543.625434682 29868.1819370827 19189.4835303597  
27028.8951412615  
LOC644607 132.815753681623 121.423030266904 142.605816057276  
156.280701500421 105.606964521964 150.0674092434 125.75980494927  
140.708683675555 140.878935632862 160.811051590991 148.107004870598  
125.914267820741  
LOC644611 136.843164021899 139.757191608836 136.207420489201  
137.700110923212 130.322436253881 124.654146040634 135.651829752462  
132.271437329873 130.370405378213 127.299853592344 136.66358267095  
135.412051450659  
LOC644612 146.49022197174 157.43824048982 150.063082731931  
155.346805606742 1818.92700816112 936.560290736127 605.437395034282  
244.990374822652 271.064405562085 147.585987099202 228.184535093641  
662.781145703653  
LOC644613 117.696262292883 119.122305582754 111.020070405368  
114.624259793353 112.449662536973 114.143874572202 100.216750525986  
101.981823814699 116.981243525714 107.205247133938 156.803516898875  
119.95666716163  
LOC644615 544.30845362168 486.947380524463 585.075322115635  
406.028724866233 378.24336892367 431.093544964576 487.537691131703  
429.812058546782 407.589300080181 607.26455470867 311.670576741448  
645.438835606933  
LOC644617 172.446482096058 168.018785514306 214.991170762327  
192.789886894821 197.100205890532 192.009562635198 194.240372898704  
160.272632590118 178.636555178682 212.210383398591 265.61506544085  
198.583407008317  
LOC644619 171.278489808694 166.709393547104 203.616580991715  
181.491120129045 175.573400981771 157.838771553729 166.111496598928  
209.304654633004 188.444498848767 226.871028543248 187.247062073247  
184.682478530334  
LOC644620 133.388533738482 133.75142055959 127.964855970099  
119.696656494403 130.226993687215 132.864018034342 129.77374228644  
132.291759474331 140.918728758975 125.958139354095 121.286130275542  
117.238968848218  
LOC644621 134.105941085621 157.256812907353 146.34029698108  
138.361149460093 142.64060182109 144.718507303105 159.624341769644  
135.144220487117 145.86855878099 142.50631960137 147.425856984368  
135.116985816353  
LOC644623 137.697452180659 141.987635042691 143.101093566214  
142.652939807341 133.954514563283 129.286782862113 141.86370253437

146.71164737466 143.275056599274 136.08040874432 140.184082384548  
139.798414027439  
LOC644624 148.082026641671 154.406369231962 146.828099826146  
152.748807709142 146.795608819024 157.672378669483 147.628367263728  
150.677852949794 145.500011956699 148.320310040998 138.560399473164  
157.948814637726  
LOC644625 146.9069812014 140.85139374336 174.396061906109  
175.805472275887 147.414834563852 178.488874074222 144.886005815977  
141.346722137248 157.594038046897 166.8846964604 151.849653154534  
143.985850833974  
LOC644628 132.342063356763 138.246963115014 138.202872275661  
126.88329158544 113.249267122926 134.784568023655 141.281116867082  
131.256325361974 127.646032547296 130.154756165574 133.026094667212  
125.071387239411  
LOC644629 145.412368252632 149.070750686003 139.501279970508  
140.222121251146 147.751554743466 157.21132653949 169.447827110558  
153.276938815536 141.636604735133 150.754492902512 157.094001180073  
149.175458427847  
LOC644631 155.114892891737 167.030667499538 154.657316209848  
151.171716392043 174.274996381853 165.342790388607 183.657525723012  
165.424516708502 159.365070384451 171.376976179465 150.885460975199  
171.329984719612  
LOC644632 128.978197156274 145.155989928336 141.56459720769  
153.056369304663 155.134796468704 143.31590446076 166.77329045424  
127.466779212194 154.140863428961 168.790464803746 167.250667092211  
158.584934514596  
LOC644634 167.599784887933 169.695658738618 196.207631868755  
196.001089662818 159.120172969378 149.135934269866 172.794570587596  
160.769011617127 156.75001042701 173.408784502027 175.251238431716  
179.048139035247  
LOC644635 142.521260841187 146.26936366452 148.755559144241  
153.219954133957 166.655585160657 143.512348693556 152.629680152219  
154.296467085914 139.293775885106 156.336425973696 146.937052029619  
164.299585578035  
LOC644637 137.25054616038 122.631814400575 127.346646117375  
115.058061620379 126.762116571216 123.330142002791 129.792548588929  
126.137627769256 125.926774314737 121.330383384978 142.61573330083  
136.569250038372  
LOC644638 143.394704760983 146.619846538124 155.952902855994  
138.735156909846 145.992883153161 143.432889871079 153.13384838492  
143.582187466814 149.133055368147 144.384287335249 168.773340961473  
139.214589768245  
LOC644640 159.738700107615 160.511688319771 151.473239782301  
142.573662441786 150.378690719669 143.26896117546 172.297698667311  
151.374665021513 140.343790129071 143.066552389513 150.300108097623  
145.212306927438  
LOC644641 141.522701487198 144.515002122324 157.627490896581  
150.648444878067 143.47200560038 170.596937075493 152.719997757291  
149.557833322995 172.073751088968 156.396579029788 158.716575777014  
158.68792959603  
LOC644642 634.774041584043 783.991448771818 663.782083028745  
883.140984728615 202.97197145851 554.652979820908 348.300300174924  
388.782774926005 352.180110869664 373.656487297238 456.038981546175  
345.291295192574

LOC644644 159.070355781276 140.779962389412 148.888698484378  
149.783542909965 161.496700767073 140.665332203898 160.997179739138  
144.011792962785 148.590732065459 156.516250236679 146.222195387635  
152.362546746522

LOC644646 145.625205055601 145.28524062436 143.031909545902  
160.127254444487 141.099781722697 150.188128594079 157.555410977564  
144.660095230819 144.046646189442 161.614426723521 130.14600240687  
142.596113491002

LOC644647 143.705475208192 159.52833930625 146.210814568357  
152.849810441802 165.954266127697 144.339819009283 156.759600627542  
156.216127874063 141.08625682411 142.046082566177 130.724642809645  
157.982146236108

LOC644650 133.281505040209 126.355699811531 130.882463936853  
179.54034642468 131.040377254587 131.263641389894 133.944538335319  
147.351826045609 146.437565098335 157.189041157784 135.336754997434  
159.438084699061

LOC644652 138.870636101334 148.186698759452 149.286184588967  
128.135216461862 135.670409501435 156.674411447713 135.159590925066  
133.115543233699 143.530190096012 139.150979949623 147.561362873855  
132.804216633852

LOC644655 165.960176666275 154.951136632863 134.768694020981  
149.736837985314 132.181365505556 153.013055910353 157.457468761338  
151.206697943841 159.094117857743 162.312313953026 122.629146433216  
162.472783116487

LOC644656 119.9652990395 126.705446263769 133.984830578284  
126.253319664664 126.048382998393 134.924082270115 127.132970760907  
130.562422910426 122.056070994213 143.144153021901 137.957654220875  
134.446758753426

LOC644658 163.579282884905 150.829439012542 168.882806817001  
155.400191634632 145.633647856775 158.14434287956 152.945550129539  
137.71627781928 138.233799607706 149.63291071048 131.655316312379  
142.478528530514

LOC644662 146.920496801962 144.129889080946 140.78902818186  
141.838206951224 132.562090247233 139.342430217926 142.793573585472  
130.383001462828 144.019824700027 138.967080709927 119.870661213608  
136.293084080479

LOC644663 133.883527462382 134.018379799826 135.556943919872  
148.511059836029 147.668990552874 157.032746784217 136.144068118165  
144.544001385895 146.6886556805 162.716712951629 137.485252316816  
138.434347257063

LOC644666 148.516653846017 144.955918499353 145.744039709418  
171.140106467064 148.232924849579 151.239879652761 148.463566046951  
143.954908055924 151.045803695015 159.670815631794 132.257989841046  
152.004130711617

LOC644667 153.111226896983 144.265352127763 147.270369342438  
136.940275156257 152.368485416992 160.557818466874 140.04612725812  
158.975786937923 131.159946917777 149.045654499682 137.276586668477  
146.709967739596

LOC644668 123.807693112932 147.638057399165 136.891612156271  
143.836637098747 129.969400693456 148.380555606786 127.620377473963  
135.186880148352 129.063617408979 124.455340203012 130.878694881324  
152.887471821971

LOC644669 135.484360570738 153.200153031275 133.099175110023  
131.034010150362 136.099663831028 145.286983999628 137.838096997956

137.999190557332 131.646121568612 133.241744350369 117.436119533535  
133.353762794271  
LOC644670 161.498785105514 166.944701842349 159.266921692363  
162.317084707395 203.265559787292 590.849222581206 217.094085829328  
330.241479004885 165.995251661994 195.608619642038 155.94422417523  
175.065781438801  
LOC644672 145.628239642187 163.982415393606 148.82892305156  
153.56082876276 153.585849286113 148.846121873401 150.255511248598  
142.339740800356 149.430396727944 165.665796569389 169.147351642004  
147.829502959865  
LOC644677 158.034418043685 144.785852437305 164.472980733552  
146.20028051948 117.760045671142 118.060781901686 121.531401500498  
119.281300456243 139.831964368637 143.438417529799 133.131953362455  
126.401145439668  
LOC644679 141.698329968978 148.973277994329 145.221594295772  
144.850211439338 149.792368068107 138.763250836766 144.256029338053  
151.524197474057 148.28101912019 159.311949668403 132.435409278702  
126.601395870533  
LOC644680 149.135934269866 139.021552573529 136.871568211946  
144.94824685435 134.635645106042 136.044670179122 156.430981244063  
134.955823960889 140.911080286243 129.32466533596 138.35538364303  
136.982719190537  
LOC644681 135.976837152799 122.480000773859 146.301300103564  
127.224081416987 148.054367166566 144.534143943252 143.258488502799  
142.466067016788 146.999370190363 150.168496148941 137.85618381155  
144.523620416439  
LOC644682 147.768191157163 142.481897141275 137.347554578171  
147.505345299689 138.768904143023 132.813199199389 137.50609001002  
146.840735518984 129.958065173006 133.59686364883 114.826501559828  
137.348951314875  
LOC644683 140.393624985807 132.850601603567 143.784022884904  
169.246302492166 161.85913459364 140.103020838882 138.53179773391  
145.536260846052 140.092648878007 173.497575259833 138.831297375659  
124.86699236406  
LOC644684 193.315380090713 186.447049658314 198.055877414824  
177.772019227116 272.077877821339 203.335012796883 227.033342447929  
183.26554404668 234.301520483864 262.093405224922 256.127197303751  
277.459328083162  
LOC644686 155.785933672918 147.86104992164 149.173121214851  
164.126980102525 142.011019998327 184.709768457405 139.424374685889  
169.293852989203 149.696766215866 162.513107496558 154.849264978968  
155.979380606594  
LOC644689 131.816989019024 140.117644705946 132.829401072883  
137.578516107502 121.134305707234 135.741404460897 172.412059174046  
141.632147679743 148.284412570438 129.397378057767 132.923237903246  
124.684937344502  
LOC644690 161.250520154112 138.383990396414 137.877756077011  
171.759102794108 139.374278310041 162.599466021255 156.243337414127  
140.378255168229 156.834059922255 136.121343288722 136.617105945904  
145.335830265052  
LOC644694 145.378779757104 153.888212689508 170.561596645385  
134.008118774075 157.148880624381 164.302998010829 147.281035392817  
151.086688327023 152.358795162474 145.060085149395 146.690308698414  
160.960599932898

LOC644695 166.81024151246 166.14867551435 178.780662099615  
171.967974673053 171.62327142765 160.937256625847 148.668081483434  
178.43642939806 163.73339229802 294.808980631295 207.218779485342  
441.873247266342

LOC644701 122.063996556575 106.238539254093 124.818436949131  
133.360017767635 131.255028381669 125.2051300372 128.63301490285  
110.875112640101 124.164523121103 112.198629213643 123.340245351594  
112.371497988132

LOC644704 166.825501664231 136.472404812817 157.546123603057  
143.217978435486 143.881744063934 154.954906872501 140.427188241455  
146.10417547509 128.26957712082 143.410917415691 114.927420605185  
156.801189586018

LOC644705 127.84589484404 135.766466392056 129.001192144163  
142.56910547147 130.449669345302 125.890941441352 129.044445373107  
139.065849548762 126.670227417269 139.321570881862 123.566522075398  
131.611842804029

LOC644707 126.082189590574 123.055210862247 143.145483889918  
150.321059418799 142.588013648337 129.658488766089 132.709845352383  
133.252140649104 119.854401979951 138.600017737884 117.79844873842  
146.579073345319

LOC644710 126.407313060022 119.395894479869 132.033116673897  
131.277646716635 132.664379033058 139.326694135427 131.705912986393  
132.32633643811 128.306607216705 138.573829193205 115.485515429446  
125.579970155301

LOC644711 142.294922363188 140.466612569756 136.370317464946  
147.980827857138 152.534482748598 158.627416752905 142.806728419652  
144.671459266861 148.297939240474 136.178501890585 138.953926269905  
134.406692724353

LOC644714 136.255711644596 137.737908250097 138.566954604414  
153.795665190439 131.707530115415 134.788450164055 145.992883153161  
148.149216812602 146.768631086088 139.519321690754 146.518478800271  
133.523706103471

LOC644715 162.904897605929 144.456324230938 158.263657373911  
160.382971629272 141.996233801459 154.552605305297 134.299575239865  
138.281188275319 146.14494790114 149.836491640473 112.07238018581  
172.152570321727

LOC644717 142.321476446203 134.544368736184 147.539226876636  
141.503351545458 158.87755965229 150.677852949794 134.629996026323  
134.304545258148 148.547259731346 143.643259003393 135.098343717085  
147.741994252715

LOC644719 148.124586158123 149.343930487315 163.030275835038  
150.809693773343 140.709981878311 174.347451984066 154.366071635971  
151.989476683722 137.94246602811 146.531692460121 135.43119649883  
158.650226303456

LOC644725 144.546597366629 133.720904256137 117.442158626871  
143.915205639368 138.35538364303 134.474466007553 134.479828866339  
126.841836614341 141.169908353507 130.912137250515 151.823845684041  
133.802898895457

LOC644727 118.540620928268 141.401480567426 130.325073627151  
131.244759170642 131.747367613225 128.543460982378 131.432729794636  
130.455560026617 138.53403492914 138.647667867725 122.587545171646  
120.076742232995

LOC644732 147.23376282233 144.81077501446 155.031272695335  
150.129367314696 143.356999170877 139.60494712939 136.349603320553

144.062079886084 133.0349214478 167.325227483198 137.038866196785  
150.056508971921  
LOC644733 175.040086358446 160.390564881326 175.372355078713  
164.701183249762 166.722369066673 180.265418365803 167.186780161168  
172.297698667311 206.915239638443 184.041062308263 209.960795065047  
186.103491222924  
LOC644734 115.775525016883 119.492844191924 126.310788291075  
128.22735290389 125.806943645484 139.101471810467 131.981505236332  
114.242056888286 128.060612106762 116.621735695217 139.096536887753  
113.919529047225  
LOC644735 152.942824158634 136.758262322199 160.496585125233  
131.089811472017 151.694193636313 141.281116867082 132.719730606922  
152.221694141976 134.753783025994 156.114825514646 165.586397236489  
144.159316670264  
LOC644736 164.647634120888 153.985529457122 145.601922576321  
153.435218661228 162.122250419992 148.983182193411 140.655002540298  
162.308297940279 139.701504237962 146.6886556805 150.866204945762  
141.919263493165  
LOC644738 131.757695616207 144.016137459279 128.840466579373  
121.462385497795 152.309460630038 128.115993005977 152.122141650397  
146.406344338757 128.554574566655 142.508525378171 130.297203474319  
128.72727523654  
LOC644739 232.986366625889 242.81187187788 297.228563607097  
271.196028302639 217.24573005272 214.38058301395 248.010317392179  
246.77831953556 204.82244206816 317.00629920068 172.169129806643  
208.932692585748  
LOC644743 266.19823384117 322.443089373063 305.854543429221  
258.145539382199 6281.01687932005 3078.76695443407 1532.47920327769  
1854.11328962023 3253.76017336684 239.871536598083 2653.47752512393  
3424.65126200697  
LOC644744 162.861320877227 126.915338864323 146.290334865039  
149.779323547896 150.534608517044 143.475725571943 153.033582154882  
143.796699867588 149.405118010893 138.328508662816 126.982340580909  
159.19183334563  
LOC644745 15238.4097431619 14300.8562978211 15924.2167735021  
17324.7697569598 7308.57540715512 19356.3155476146 11235.4970815873  
14938.5975217303 14181.1182110192 10250.645112753 7815.98936145067  
14348.4009261372  
LOC644748 131.196196319523 141.143572141958 119.29304762171  
122.766778018066 131.563719927798 138.695481214267 129.966755942173  
132.598022317288 125.851611268218 129.811504562622 145.992883153161  
134.483162806498  
LOC644749 133.711821318079 129.980354138975 156.926617030752  
138.237030685795 131.497454038525 124.33863635868 154.998011079046  
137.138266859156 138.038446102921 139.78795317086 147.4182675362  
147.118987674809  
LOC644753 122.27785621724 117.995551728392 150.888616811881  
163.93199635496 145.86855878099 141.106863165059 148.684855678535  
132.587392944892 139.395743826525 151.045803695015 125.995374488153  
144.349602838518  
LOC644754 136.207420489201 132.575354250047 128.530540860266  
148.751755543817 134.21500333869 129.779076484273 122.309041354217  
148.74881415573 131.885529813944 126.324771800638 127.962546712222  
132.963761182049

LOC644756 130.311471059267 114.790717658188 136.095753586495  
138.438792881135 134.446758753426 124.735542880811 129.315412536491  
137.685104040843 126.66432941518 127.654130155446 136.612903661685  
125.672285485643

LOC644760 170.111653122193 158.335952927257 173.816408146725  
152.409211647994 159.074001164836 155.313873664923 362.849380477089  
148.993620368781 144.879364072868 316.663128947813 150.927628184034  
167.456481678813

LOC644761 158.675960205792 153.795665190439 178.52221226882  
155.349728277626 186.276450732044 194.819597436776 231.287362732197  
219.351080515508 177.055023182887 202.778539118009 193.843978773764  
214.162670073541

LOC644762 272.994195639694 205.950347620158 338.260976633501  
228.184535093641 239.33642662112 280.913748398876 446.393631025049  
294.535979194434 354.922901990615 515.597523880328 256.897177822238  
430.220363263561

LOC644763 152.673212084312 166.32555285213 157.885229749634  
163.396651801661 150.893280574091 165.773929204209 147.26204590693  
151.466689967666 159.41078351918 148.302775746627 145.71535210212  
159.856190281237

LOC644764 130.344292132363 149.473505461585 146.278921849776  
142.272117655292 131.351303131574 135.760578586004 134.4811029314  
158.859389972316 129.771073986855 131.054302682707 148.782907912893  
147.696506705909

LOC644766 165.586397236489 150.843975804117 151.744902566627  
174.707059022891 149.17815859943 160.293522619371 141.066106476109  
134.629996026323 135.43939472868 154.804753043168 150.238582112636  
139.237360556305

LOC644767 111.783160346742 134.41693612969 133.918638123756  
133.336063137966 137.182323015758 110.296425545476 126.189005734462  
144.231539210695 128.585911203394 131.40880014672 132.580937663749  
125.063596569451

LOC644768 134.529744040637 136.328447182666 140.443415669628  
138.959040014432 134.700543462375 135.42020418391 135.513494853742  
141.997165490755 141.468076901305 132.937942776777 131.31716158922  
144.169072574865

LOC644769 165.757295630254 132.115817176834 146.772611341214  
146.978110148492 147.677900030844 134.867806860993 136.003277940379  
155.865540894526 128.042181036687 132.210100574787 129.049273337631  
154.371946675862

LOC644773 149.844677055508 145.985223908092 148.57301274812  
152.030182228463 136.159825652148 134.376870769669 135.915252483475  
139.42531690926 142.498280938736 153.07993334035 104.58424134098  
144.181359740481

LOC644774 339.069385816411 323.95355217044 566.228690652783  
316.004332524937 498.965895763801 1226.74043569231 1687.06111969368  
852.099019968701 1211.94273385872 3789.1316515671 828.683748921915  
2206.7447886564

LOC644779 121.619593453259 145.915129713165 112.75167046116  
124.573065080376 126.288011849541 124.045745662173 140.675094228846  
133.181855719499 126.643229085068 128.303046695142 147.260260687975  
139.817493158675

LOC644781 144.621077658674 135.562700479444 124.571807093748  
151.340728221261 142.693337885596 166.14867551435 142.646570636529

141.233642252649 147.805819921429 135.875595614483 147.512290383685  
136.755975832051  
LOC644782 165.048922660581 147.922706629104 151.318320077986  
158.092775850886 161.112906953532 163.442257036536 154.681604647652  
157.180095329946 149.779323547896 177.296424297967 145.041430440608  
156.248684477916  
LOC644783 149.786445079456 151.461857714097 149.740404686695  
132.433109154079 156.994265858123 160.628894266843 140.650987394155  
126.589865262427 149.910521500364 136.79732903972 139.236217474885  
183.937484597232  
LOC644785 131.917194849285 129.878330410179 147.373174160478  
151.216992571364 144.370811043456 123.386622160181 136.515951031895  
139.552533656255 140.182150393054 150.023791544584 122.056070994213  
149.473505461585  
LOC644787 137.393871430276 137.374784875444 143.686906051698  
144.868337748544 146.091822904705 137.850437814788 155.911387663464  
125.846029991447 134.817665153925 126.784243009941 121.545189875973  
150.35767254363  
LOC644789 139.377027955744 130.934651080427 141.374831983971  
124.256773437346 132.733821031511 131.755881982599 129.428950259722  
122.881793230233 144.621077658674 143.065258692424 128.588822671032  
136.280653079814  
LOC644790 2083.02482378721 2046.64499507352 2081.45603839306  
1282.38953612054 2505.8565544797 2505.8565544797 3744.5666678861  
2303.0998502001 1609.54149931375 2441.05534211996 3152.64817044581  
2385.5958396359  
LOC644799 1367.92869625376 1122.92917004037 1110.43791444289  
1026.61404215739 608.959089074987 1834.08657010335 1973.20689165831  
1265.88446775977 1294.74864310494 547.202354339933 1163.13845502757  
1522.87703817058  
LOC644800 142.717436384151 150.952264779196 137.406420101257  
147.841960346835 125.732389000341 138.980079440205 147.657151780506  
149.570242115956 138.188522429661 155.997210529742 144.774621469452  
141.937611082276  
LOC644802 140.354508398385 129.825824640378 132.774127230452  
129.247701136266 113.301733735994 147.389892239448 120.867408760075  
131.119810851017 134.46743016543 136.513942889781 129.003317344469  
139.826273596452  
LOC644806 161.241165533091 151.389433433911 175.79375235478  
157.410205523901 170.046856179083 156.978585870854 154.594339065082  
147.673016541108 166.036553680319 164.288645768576 153.241806795134  
159.170943469313  
LOC644808 123.237851647499 128.798413084891 155.981989040279  
151.722405598425 133.143695166498 151.907188143411 128.81022558263  
140.03202338666 138.311892121437 138.74117178479 106.876902604214  
158.25554353787  
LOC644809 158.854659281803 163.141010815086 169.656238760589  
157.963634535239 179.265395910119 165.283700641161 148.888698484378  
156.456332386608 155.091135297162 197.02284475852 162.786351190659  
143.001661958814  
LOC644811 124.110446144763 127.511638455985 129.819820730239  
136.387904287903 126.064311640223 140.57567768682 125.065813262416  
126.868970616955 132.05513812578 135.286686011087 117.837894438834  
123.804039963953



LOC644813 143.161623642178 144.946362772133 162.536009333787  
124.521130036013 146.923382271905 138.976386995124 143.57041789019  
139.476234663488 137.607767467172 145.219057535246 141.208106961875  
163.915489303508  
LOC644814 133.093234861388 129.515390475589 152.09245741643  
144.834448238435 157.126460242995 147.676279102364 148.538400348149  
143.436675541053 145.877943006533 159.611551480901 152.57905274438  
148.406031732776  
LOC644816 147.896919205072 163.215507313506 160.625367261779  
136.689064885984 175.327597807738 141.996233801459 165.763459146818  
178.766654213173 155.773639092819 160.48993837044 163.829218786716  
165.926301648161  
LOC644819 131.440195723963 129.862530097906 160.105903942674  
146.125125252096 126.118745937997 142.024171830924 124.183297351614  
144.136328845967 142.581441480371 136.499228715856 130.898067924686  
141.84490608317  
LOC644824 132.890396520305 133.52971984184 128.952986088886  
126.407313060022 138.394923932916 125.034243098087 133.233826283531  
127.182067293944 130.854818615966 132.091532692048 111.457176315964  
129.165440930558  
LOC644826 151.958818313561 164.948785167149 154.847114601403  
158.030237507443 149.308475163534 154.856345114916 152.319720089773  
149.536681241497 167.030667499538 161.424105316969 142.952745413746  
171.86363382331  
LOC644827 125.634045420702 134.717258604899 148.89180107448  
121.905741525277 126.690066353698 141.659197251282 147.185378560761  
139.703304553486 136.511669406292 133.266524623338 142.456527359961  
165.027938535393  
LOC644828 140.845958602151 138.50252234048 135.842090777339  
132.7284396337 149.625528206375 143.066552389513 141.261150586614  
158.85003890975 139.510764003291 153.405052909585 139.416388461892  
139.466683069609  
LOC644829 135.102827224896 132.251093122058 139.570313872946  
162.47662918768 149.918199106603 132.70888569469 143.212739422069  
144.822943770596 143.700865823615 137.800512046163 142.697827839203  
147.803464591663  
LOC644830 142.336164180947 172.03919618445 145.272073426254  
134.285191872099 138.616719975373 138.629055936272 135.067056559409  
141.082569618216 136.03420235737 144.165277164871 122.517559025268  
137.093170378295  
LOC644836 183.138955445765 174.441287575034 183.568426758223  
160.914009756867 166.671563123047 185.673549367125 161.596086502946  
169.447827110558 166.730974538475 138.030842581932 133.046435968561  
145.064773625365  
LOC644838 144.796089646941 130.430917518283 146.366013190845  
142.596113491002 147.218415065692 137.379558348782 145.877943006533  
137.7872481668 146.26304624648 151.946691918521 138.53954980556  
141.196795654442  
LOC644841 120.397683153445 132.848926011576 135.857403020659  
129.825824640378 138.033668840392 124.621381699241 151.526337610068  
143.26896117546 134.853253781256 120.255081121925 132.697727983601  
133.111791289725  
LOC644843 133.204793127029 144.384287335249 137.226465917397  
153.848852170776 139.628966306048 155.873969001251 144.985280401441

149.808222023726 152.213746577124 150.860090477342 145.756455015309  
140.603933807629  
LOC644844 155.259089547817 155.211976328553 187.494677180331  
165.389652763451 790.321331435096 221.961758403614 204.470661830972  
173.735045816949 390.194764817385 138.377628971966 2118.73410871718  
2418.66999907188  
LOC644845 167.887047631073 156.200313064999 155.478383896934  
160.880152014981 136.901107766796 178.854873582873 156.146154578237  
139.305220220411 165.926301648161 191.708350637714 150.896076207161  
148.919726992353  
LOC644846 135.317796804151 128.872496485403 142.613654158833  
142.709768829207 137.819642907456 137.842375545994 146.42288214248  
146.996442729408 135.348086420636 133.819095523687 131.838522109796  
143.655901618594  
LOC644852 669.602939159192 697.774882173237 685.848203651889  
606.003956839826 173.939159471022 487.597040819879 298.085365348496  
385.379119927642 315.014639682046 305.050933898691 407.957436380989  
366.564822549834  
LOC644853 150.376234759097 140.885012530186 159.879600154928  
128.751758311249 139.205887721493 143.212739422069 154.2228051929  
133.777238071968 148.079107235035 150.0512732245 143.644862018676  
142.383045950613  
LOC644856 136.692495869097 133.606068125828 126.503135702506  
127.876894098781 122.724429060184 139.209080672396 129.534721138679  
128.800907223807 134.728594388428 128.997028325896 121.425298866613  
120.170269310738  
LOC644860 214.261611197599 204.057019122032 202.300293733922  
184.473198008234 175.176693060261 145.110145981908 168.33854702953  
183.963578322984 150.674189235105 174.775676782795 165.767629164724  
149.495077381649  
LOC644863 2932.64120183406 2653.47752512393 4663.03253705034  
2195.41077320434 1080.42884514937 3566.89107958971 4763.89426388268  
4073.21075791737 4651.384971332 4448.67183518984 3721.86725798812  
4602.81651147558  
LOC644865 143.888318202599 137.033870931133 155.362503575715  
142.208987267497 135.650546885518 146.869927141655 149.79295887612  
149.383429241903 153.339992195184 129.782134019986 152.413389525982  
137.586032396204  
LOC644869 223.279017022443 212.915949933033 265.470314691221  
252.628516068724 235.961605948276 173.640326140494 224.298067319406  
208.666760987764 198.338416756432 283.123157828849 187.296479395462  
250.737252834098  
LOC644873 131.027605835275 154.503958858173 136.852403978525  
135.763497910794 142.481897141275 144.287786573389 141.508424382665  
163.62582285753 136.589250394236 173.010799217261 148.045391886623  
134.46743016543  
LOC644876 140.453219944445 133.113581756557 137.199718376452  
130.199581370385 137.660051943656 139.184647003326 149.213990424575  
137.31372820934 141.634246722965 127.356622898971 128.883828419932  
137.43751840683  
LOC644877 191.777253122672 205.381840116054 326.379855547052  
174.347451984066 395.327097512479 411.039234404499 403.812520074723  
739.251974981981 630.473042320288 581.191693771646 296.428342247529  
583.619362840814

LOC644879 285.882780066861 295.727275232995 191.25724234927  
284.195575802966 931.325266360957 578.650614747598 327.635520861099  
299.568830444875 253.463871742303 593.320132696649 512.184962338131  
579.318912497928

LOC644880 129.703791330416 143.893751699551 137.240806191881  
125.111993560078 121.824805374887 125.517076778344 133.167635227902  
128.910261453632 127.797666392002 146.64560446484 107.74537523456  
125.810756286648

LOC644883 143.831294912255 132.336431473522 134.175287993769  
117.390049487174 124.075077123156 138.962649407431 114.209249333221  
140.52059487958 143.541810469447 141.609037401299 120.035437167539  
118.312891459156

LOC644884 171.059849459102 153.836520485018 187.519053043173  
168.552631639996 156.01406297447 150.639235242268 177.549330396268  
172.157660228549 143.713962738562 176.312626750427 136.711382832269  
171.835438335216

LOC644885 135.526248253492 127.034985265748 133.243679173608  
136.711382832269 133.964163727962 138.997524526643 130.870198462514  
132.354503055131 123.738223146912 126.759554774012 133.957160768065  
127.412539650291

LOC644886 139.570313872946 142.889911562811 123.207402172696  
121.709375771276 123.219903763265 142.095289977576 120.410307377977  
145.983627592197 128.525769531728 129.155804800869 124.080382291282  
124.168162885295

LOC644887 133.579067514064 131.104534164394 145.298109334141  
149.707357499252 138.842935439006 140.487887891414 152.390371614602  
139.289968250444 131.719227272527 166.209190082084 120.216999784094  
141.383975990479

LOC644889 194.86492119218 225.050796356289 178.488874074222  
194.374817778819 281.238656291587 605.040026490154 230.367251714289  
183.894417745549 418.420753332232 257.643855420381 235.291035302211  
227.236255752375

LOC644891 144.425214066833 146.404727168045 145.810213943313  
135.095095470362 127.913463809158 138.1774127311 140.641956393993  
130.850419527271 159.09825795308 151.178586065066 146.240060512152  
135.170925092209

LOC644893 124.17231659571 143.741676966126 139.276102596591  
139.219476681919 136.91779948054 145.049387327924 136.843164021899  
123.53212786736 134.029984991385 134.330234316896 134.10707191601  
140.646946425036

LOC644897 154.579913524947 155.92082882492 170.394088019518  
151.334463063946 151.212606106351 177.592497020798 137.597788349982  
168.841313096346 171.561940747015 194.281839133887 146.71164737466  
166.12695134858

LOC644898 133.889858322181 127.91637627901 130.147848418265  
147.319360896679 137.071402810983 147.373174160478 147.379741260871  
124.121555438466 128.41549156443 133.9382467268 132.864018034342  
140.379874810685

LOC644899 138.386391726042 140.717348834454 155.014930599769  
153.104072845043 154.118601977256 175.084729757407 139.082897743357  
147.975551540256 145.67389337654 133.862203806529 150.019181654237  
154.630837508249

LOC644907 4503.01240138314 4166.43837922103 4732.31591164752  
3518.84173951107 6384.66090426598 4641.8793590085 7433.03226979876

7617.316805798 4697.94415026712 6077.64695330731 10075.6573898939  
5467.84611694564  
LOC644908 161.44729973777 162.61434899634 127.052618800004  
148.274122690409 154.406369231962 151.902352951251 149.968749911496  
158.751241730465 179.338652960181 164.02617650236 170.099045774947  
154.900676756492  
LOC644912 153.885582272269 162.825380100343 168.443386067427  
154.985781979984 146.506263412584 151.519845657755 139.660641694206  
169.201608999937 148.107004870598 146.713861499546 121.736056336879  
143.528208105237  
LOC644914 1192.47480377375 1499.07462479938 1206.09815575399  
1346.53215685106 2988.45928881468 3688.68740405322 2227.70654174379  
1895.72330348767 2850.98525554116 1639.76556136383 1940.42283070543  
3078.76695443407  
LOC644916 139.902610126952 120.26749529985 142.440344960504  
124.918089223417 132.051614319023 147.659772694732 137.385562131555  
144.064214573005 138.412897151567 135.666278507269 134.696571019896  
128.101371225192  
LOC644917 178.717719615544 159.19183334563 170.801761175916  
158.63432604978 119.75069850668 139.768555796264 146.011694647614  
131.796941315992 150.540599489506 129.334217858282 123.650702461773  
132.942718233843  
LOC644919 152.939759795631 149.72025962797 160.364644321965  
136.280653079814 184.915526626619 225.702629835215 148.195611015135  
208.869189492052 155.043017644694 190.270819689158 152.348210524663  
154.826710617351  
LOC644921 155.576838112772 142.356747337127 158.92538634742  
149.740404686695 150.046300135261 154.270034951209 157.927709922368  
178.476483428474 144.822943770596 138.147658465394 141.898948675823  
149.691340727994  
LOC644922 143.637018777217 138.56436658053 144.798664281991  
131.287142490322 148.842322753916 149.821848101995 154.512619892977  
134.819406064011 126.479964493857 129.422854634791 132.822351718257  
134.038213827843  
LOC644923 157.699854334374 159.016247993816 167.92409473064  
169.113439729353 165.558963147657 156.194996994993 146.079727388849  
199.798533722581 169.752525994991 165.370800097602 141.543147273205  
154.037622223246  
LOC644925 149.44788347071 157.301617257941 152.50843414723  
153.762995131216 156.311009595629 148.235495611248 162.599466021255  
155.483400816946 162.762473039474 154.133723492173 146.845170370268  
138.078214837785  
LOC644928 2162.46602203822 2932.64120183406 1754.99663827472  
2242.73511149559 2355.29862638453 1552.69879081022 1304.37930719411  
2427.21100330388 2372.26073354008 1222.59895569348 9636.32818474581  
1178.08490218853  
LOC644929 165.333608076984 150.000851192531 147.123477579978  
136.913957413224 146.493927564338 175.670738308809 148.168587884369  
140.398923642686 142.362022977137 152.538048490265 155.664126780859  
152.738468369498  
LOC644931 546.399972543938 394.73732350607 527.139476504986  
323.244664586314 228.317527475322 731.284098301795 446.262895953004  
584.919615953457 517.881547706391 397.153801851621 669.731546951281  
479.983368253935

LOC644934 1821.08523647593 2277.60839052397 2087.55358504021  
1281.1883621512 2859.94396089224 2236.73950603157 2096.25803773108  
3301.98381607571 3294.92439159154 2144.52984392647 4995.96906061198  
2016.52142068599  
LOC644935 512.467731561858 534.608644989102 595.593867616527  
526.416479408056 267.747633122387 509.14726076246 370.466403181536  
435.332573825425 340.366016191232 385.750371084 416.638529499878  
404.073802241516  
LOC644936 5175.17279574945 8496.2506227676 1147.96742431386  
13276.1713779481 3354.38704439295 1064.85152398919 2193.376951552  
1116.19403476786 1358.29475573637 2877.92845389611 865.435843446989  
1785.92695250894  
LOC644937 610.070236234299 553.123179808258 553.615252472149  
486.047284379068 650.679096367632 507.95331185029 825.781627776577  
475.833242673151 352.50679573356 662.958637409597 2618.64973582507  
724.442411170786  
LOC644943 131.381189141974 133.050798832332 129.520140995675  
130.220620345623 157.481645415121 123.841366760069 129.802596741962  
139.363571392476 139.582054825147 131.739418639854 140.936204899093  
135.348086420636  
LOC644944 157.656220148041 142.551161883518 127.109798012351  
138.395943168158 150.496616601699 140.605866597575 139.785767470943  
129.343440464729 142.592455241752 135.562700479444 149.160808104789  
139.501279970508  
LOC644946 112.495783269169 136.368258257435 136.815411937352  
140.595496714752 148.237980436128 142.498280938736 138.717541782317  
147.494937826597 123.662678397678 152.581729298159 121.826474059574  
137.668179813327  
LOC644948 139.708303388546 154.104321553472 147.341597963918  
135.573170189235 138.56812029378 138.27272971335 147.891442774921  
133.087166272749 143.576177625265 151.369387642458 144.112401069818  
140.129882333528  
LOC644949 183.815810733176 170.390200730789 193.95909424044  
161.77611826709 134.432461986523 176.410016510249 141.892214695902  
169.378422829858 164.066839397676 143.388028226208 174.417259650516  
167.976680048356  
LOC644950 147.866909109733 157.83460319212 142.715449859191  
145.169804325334 157.207544072126 152.913814113632 171.16807372519  
144.52304097966 146.357214078158 156.69025356689 129.353536603449  
134.262346867514  
LOC644951 136.111569529393 141.362627556137 146.531692460121  
150.626826756019 140.538020869886 150.99622088333 155.272264997151  
146.233195164295 149.874424976813 139.150979949623 143.707084981291  
147.617354114584  
LOC644952 134.013748718539 124.591873637605 117.141089194822  
125.107483348755 134.307941199626 149.44788347071 128.668672935791  
122.642077625035 122.557981210434 115.242526386551 121.353233207209  
126.045231525329  
LOC644953 131.748753064488 133.94667806086 144.83282018024  
129.147246809319 122.992700222262 127.921209207879 145.814268094808  
124.522974214212 138.020031233095 115.572088632106 118.81294782091  
123.207402172696  
LOC644954 134.266373965186 136.794860440446 151.650777127117  
137.649424237506 129.887187837732 141.039792044042 119.968081249475

128.344679872625 132.823333905679 132.582062079623 123.505435008269  
141.075421936212  
LOC644957 138.688881393504 138.030842581932 160.211460008777  
132.375905857023 149.52880714343 136.664500207966 157.333615322941  
136.701400398129 142.279695592224 135.313148180961 128.773129597793  
128.377928524315  
LOC644958 155.572357799741 162.828844182372 131.574542914295  
134.70848693317 157.306022722324 149.856041300199 173.364586678954  
159.973758408655 168.538117820213 151.989476683722 141.943910304145  
168.173803952157  
LOC644961 130.726640485925 125.885715928839 147.011838288594  
141.515788643986 136.306727083526 142.924854393401 136.671602668186  
138.338280468272 140.579839043912 145.022242996923 133.252140649104  
151.07661060324  
LOC644962 133.909219998872 150.576660798865 155.397301207102  
148.186698759452 147.970243979273 144.425214066833 145.789840511876  
134.97514790642 161.466192326759 140.664303738113 138.1693725329  
142.370721565016  
LOC644963 131.166819048309 142.29309119138 140.965498009244  
145.828229656781 164.673579538023 131.702788057359 129.148634038268  
145.858537779106 126.340955733062 135.695576019185 141.821550320574  
155.162310001164  
LOC644964 129.80429516198 137.149156133537 142.485427762372  
132.171282327983 125.091038614268 120.696557306298 124.74291205933  
129.701347789845 120.628904050564 120.015436934157 118.775484829506  
136.295523520203  
LOC644968 129.099780410063 141.319594283071 137.118488157416  
139.862403685817 135.589211439847 141.023875058322 134.23001942966  
154.670631900834 138.377628971966 135.259226552938 132.811368246405  
148.382228428693  
LOC644973 141.256915527472 146.83577460518 156.280701500421  
148.910032628503 158.260676113325 162.403942351933 165.954266127697  
172.084184539157 159.951697830252 189.693218759349 144.256029338053  
152.929272096375  
LOC644974 139.333282400639 148.400132332444 139.989830921287  
142.166650343224 134.11753210296 127.560308850342 137.642858036384  
132.560292119968 136.625136565562 145.961394624627 141.576177844986  
137.123016784819  
LOC644975 141.865758685796 135.304167695152 130.753266976637  
150.300108097623 141.956996308304 144.387375194186 144.501995579502  
138.496366637658 137.011595584638 168.166938045454 129.374418059091  
148.435419356331  
LOC644976 128.47803330602 133.532323053215 129.213523302268  
136.520811697544 142.376921410427 125.146558509674 119.815258991448  
143.191095552619 138.036876466521 132.733821031511 115.327402810793  
146.781221728543  
LOC644978 141.724442944322 140.689631427359 120.827732270626  
127.001546144286 150.822586904738 138.446492794924 132.454025879177  
129.801342433836 145.932170561687 142.00857631537 164.910911528819  
137.987255649072  
LOC644979 199.597685421675 193.801858215025 205.560952959537  
233.232319881243 201.931760074628 178.179238056905 204.637887777803  
226.144012966486 206.548878646452 199.058972781223 208.321765801227  
192.273528391588

LOC644981 154.007244208673 138.142193489481 147.074807267102  
146.644317248414 148.73620012231 157.435477846812 148.592330216136  
156.136962310077 130.520275539672 134.551054564417 140.56526023628  
137.658183450715  
LOC644982 133.167635227902 119.000436602325 134.737901773547  
120.860075930581 139.953572663277 141.923103467306 120.906553066296  
119.466200987489 118.836387680022 127.462293158337 123.361179535626  
117.412956162665  
LOC644986 138.205338749495 145.217261514886 146.150048478173  
159.52147764862 127.959474148217 146.675159409376 152.191393042132  
149.435684626505 157.754622099874 152.404186073033 135.68481384332  
132.407736899761  
LOC644988 343.571296297462 367.518273773904 360.124745133393  
396.126485121994 675.978379566859 465.54817048856 387.135002880995  
392.13175568099 363.594808277506 449.952497751758 391.782120640025  
375.767528676937  
LOC644989 153.085975710144 146.460464282676 132.310147451479  
165.938009275308 138.558300898079 153.920180168328 141.855655600443  
158.044938495884 144.339819009283 150.784262878145 133.088758771353  
144.886005815977  
LOC644990 137.962542261072 130.600052408343 146.282385039176  
138.068164255305 143.956726538569 151.497680466119 136.218750083407  
130.827726862159 138.56812029378 136.683683776616 133.050798832332  
138.810236692956  
LOC644992 155.545904088857 154.281674854552 173.70035122661  
155.140371265225 171.85890372225 140.044536042073 155.119146797226  
159.406462604758 143.658600740177 185.886737029845 149.042693712098  
148.288798428149  
LOC644993 133.475605284211 134.474466007553 157.874624979775  
154.049004176595 148.412895185127 145.843639385175 160.752581271996  
148.190696520521 143.641777655752 157.723341862468 126.247378598596  
148.027464692171  
LOC644994 148.763098715961 133.173541338355 136.289197889565  
159.801315111886 136.387904287903 159.918778562802 171.455216889348  
143.667207351415 143.494511683426 143.06806126472 140.641956393993  
149.143087870963  
LOC644999 145.900272803108 150.213657393257 156.205127163263  
167.887047631073 152.185397218918 145.320945010364 141.97478198531  
144.529801006864 148.470120335761 144.216394153095 162.660027294291  
163.956894843504  
LOC645000 132.458764637407 147.077695919758 131.451173463405  
123.513588004371 139.365595511181 138.726894569892 113.947948541258  
135.231458421096 113.549098821204 144.972694558182 103.240215392215  
127.756214708077  
LOC645001 150.639235242268 146.70298187005 155.465250172768  
148.683761948082 143.976395954528 156.008829097457 147.305679046765  
148.168587884369 139.555322603323 148.668081483434 135.57577294564  
149.774162138829  
LOC645004 140.439698763808 123.296382913131 132.989846726946  
131.282091618102 135.957972463728 141.941814923705 138.902097203056  
124.558026853954 136.267313223808 126.875483714734 138.43301474649  
136.934313990609  
LOC645006 129.583916648999 135.976837152799 156.585665091824  
140.306808081269 132.277920991504 139.06923394504 138.112168847027

170.140610481718 135.542079867325 146.355229778997 128.335132315812  
139.674001912099  
LOC645010 131.823019555685 148.155692596378 151.819220292189  
158.738932073809 149.582406567077 139.828781354865 149.35848619832  
131.956481591804 141.218832234405 135.711590400394 133.04222812639  
149.565725707356  
LOC645012 132.103084472404 128.099484678519 138.5270206057  
131.672014089487 110.486191378104 122.959518532165 123.665983073461  
142.628296442123 141.719556176029 142.17773831901 109.038182799871  
124.625603721372  
LOC645013 150.544779197947 139.583514773196 149.974080577906  
125.038427667173 142.750432197016 137.146961654597 144.295556086504  
131.328478053136 155.303903514061 144.408426565541 129.616142780279  
144.546597366629  
LOC645015 165.659978250378 164.332073056902 148.898587505337  
173.647320180498 207.204293555178 152.81544746536 153.996429870564  
143.180247878507 170.553940654493 162.876684781936 148.848823912244  
176.121563444364  
LOC645018 245.426639190893 291.577778800314 258.348298226232  
288.88486628661 396.212732639272 284.595024875896 502.499539192864  
314.90123632547 244.766289564524 399.248044997427 717.686676823785  
337.434882771953  
LOC645027 126.121516564343 130.829825154842 130.606211166873  
146.052153515494 119.415822905251 133.195030751476 123.822571859503  
137.683228179974 119.886433564236 123.30960025689 118.21084414402  
120.246240734668  
LOC645029 141.755954088275 143.807102980397 129.143168240589  
147.176801913145 142.763157232147 141.508424382665 152.826356673175  
157.390513637267 145.34533633425 135.122770943076 137.748443205818  
165.803549113373  
LOC645032 141.855655600443 149.556644928013 142.601556980614  
149.712320986646 150.948076715456 134.994013668445 144.131743978192  
146.390223079987 145.315875226867 139.457084084368 141.410953064267  
157.551854647702  
LOC645033 170.233084517898 158.377396672742 170.283532007581  
193.629237856758 169.940177050294 152.074017988748 185.570062118736  
170.150889760372 159.643566663742 153.83891040723 123.629279569085  
174.406779990708  
LOC645037 141.463324155943 150.371716899336 141.631165634373  
170.79303550487 255.225145197422 1124.67710585154 153.776361241587  
150.650926518959 145.909456876796 151.305201022012 143.120621855946  
145.502886924865  
LOC645038 144.935571704834 134.994013668445 161.24755274554  
138.289361041588 143.873048967535 170.553940654493 140.52059487958  
158.627416752905 133.329392986316 153.033582154882 129.677874035481  
155.60532199001  
LOC645039 156.022967076728 145.999823250463 146.256076936456  
154.804753043168 164.929445749888 154.996829706812 165.703810120915  
150.417169156755 150.907594445048 145.513333676569 156.875068435974  
147.21992012742  
LOC645040 120.748910864064 136.491140756702 131.193538235053  
136.83883055114 108.818976813708 140.669947387892 153.85854399897  
146.530318748416 131.838522109796 127.681662711369 125.353389826276  
119.052729327147



LOC645043 151.110467345727 133.103403333542 138.967080709927  
136.598215718877 150.642465826166 149.110300099889 140.588811000948  
143.368327095618 133.654232991228 151.345630073141 148.299945894738  
144.346988809708

LOC645045 147.942495862714 131.648308760913 150.056508971921  
151.089328533476 137.691870502653 126.793778645808 142.722227179256  
119.407293854922 130.66863243733 137.510586346207 129.104084188187  
137.956295878287

LOC645048 130.539632182729 143.07651558428 147.236728188605  
138.963864375073 146.047948193303 150.914644894869 146.865904106038  
143.197131668608 134.881854036527 161.520362399369 137.601181150371  
140.667415746111

LOC645052 143.368327095618 138.624689897665 141.739299634007  
131.019345449516 141.693224578298 165.314290446922 157.231166272318  
151.863048206341 131.336902822702 140.623284238544 146.792951584868  
149.997047695778

LOC645058 1050.90881385623 902.394410348792 1352.14737073174  
811.912727084669 1374.92806285803 2648.41012401723 2590.80821234237  
2944.63971819193 3078.76695443407 2416.49806112207 1771.39155164347  
2491.33490046283

LOC645066 127.000175858468 116.416896654975 133.773427881651  
131.551085224112 127.993841618875 135.434853296628 124.980683327416  
143.660679324057 125.444541266623 128.102787239877 116.483432723207  
115.409568875238

LOC645070 138.108184983014 156.18389905051 165.39758732  
165.638672456873 166.257275241937 156.053517438255 160.203521879896  
168.389069732474 159.508223180752 157.381401974279 148.650469230481  
171.731395791818

LOC645073 132.772085211553 128.556280049403 108.101686347192  
144.784835438567 112.309528593741 135.679481480408 152.780908985916  
121.44564199541 115.939620871703 120.297848408451 126.925982415892  
132.096095362238

LOC645078 143.816567683093 142.249715102513 145.621384219688  
160.769011617127 139.111604268732 145.324499089416 151.486362260537  
167.92409473064 151.528377719344 152.957297648595 130.278044081378  
164.253219197128

LOC645079 161.160974998803 151.054834307689 163.758054869675  
143.763292219833 153.815239954928 142.142633050256 202.343343669937  
147.1476865809 142.707913210557 163.413365060063 166.998311158378  
161.108249802467

LOC645084 156.733898702331 140.78582131501 152.738468369498  
170.370934381883 157.927709922368 169.475714234887 155.290648078877  
155.004104153679 160.644747532952 188.335102005839 154.713713332354  
172.276968413879

LOC645086 133.980792743661 151.676232556697 144.683260413888  
145.241301006518 146.800324349321 141.360125377949 149.576563410584  
155.983060600874 136.015561289357 148.401698825687 165.192945734166  
138.953926269905

LOC645088 137.294246530224 124.851025681014 136.952914053358  
134.337249560706 138.313519292093 142.203367260558 127.871445879091  
138.911993471119 143.618454531431 139.001493765421 128.447393268611  
160.349557404154

LOC645089 140.269160279333 124.693253194681 131.750053934548  
144.049503774298 142.000874773182 126.476866025397 151.936543085044

144.082452235267 142.806728419652 126.995207465164 133.932594124721  
152.42111372681  
LOC645090 140.936204899093 150.241585041178 134.463094391766  
142.175432631861 136.589250394236 127.462293158337 135.304167695152  
124.126715773068 129.026732674277 137.632470240792 130.979513420888  
139.32751718663  
LOC645093 121.645021899034 118.589392612801 121.849460555655  
128.090665893885 123.231397809701 117.696262292883 122.083357581665  
145.437544062449 134.190511945944 132.5377752987 109.398997827329  
120.325985681299  
LOC645094 181.491120129045 194.552533397944 232.083160165968  
176.340265963032 452.167674725454 493.209107049493 369.726867521935  
391.911768848267 400.23671843715 458.282682131641 359.577827010792  
528.275591281419  
LOC645098 140.45860949168 137.451687756052 140.281512754823  
142.916274989816 143.982561564661 141.334394187941 138.986877479278  
147.183889426843 143.093156971372 151.086688327023 137.182323015758  
151.123104810793  
LOC645099 134.034970203523 125.569364049349 137.510586346207  
119.218909479403 138.082870754768 130.647944268116 135.271290872348  
134.436423298225 134.475296383752 131.319783710908 126.748906552086  
132.291157461345  
LOC645100 174.854570705 178.425137262105 182.42088387266  
176.138621462315 185.617936412633 172.916234073981 187.673748059596  
212.5119818331 198.783034238774 256.202924421798 196.419891542139  
223.429738319185  
LOC645101 122.182695593404 123.035401501279 145.291984088491  
120.507930710099 125.942455135541 126.282575548237 122.992700222262  
130.769540997465 117.47631318854 133.567630962178 113.913337223716  
111.672450681359  
LOC645104 145.534520042669 153.371065247493 152.155760355248  
152.344248425416 154.64077390011 145.237221169839 152.315376022976  
139.6391154169 142.737537206204 150.290025009187 131.87052926802  
150.538541347453  
LOC645113 149.634975068742 152.291176493005 176.622758931306  
163.181323768362 155.162310001164 152.89366585726 183.905926269285  
162.06940121135 155.483400816946 142.232918684259 160.156127781701  
138.829793136954  
LOC645116 128.176779923348 140.680326850085 142.019263564073  
127.79057041268 139.049085468313 147.091280396135 141.023875058322  
133.006192351471 142.600685998678 126.782805974059 129.061316880624  
128.495276191943  
LOC645118 179.828494168009 179.779007442837 190.309453030884  
183.255119298602 172.26834556696 160.870390779084 183.863365305103  
171.844483419604 165.904887259203 156.576585764311 143.206100064821  
161.596086502946  
LOC645123 168.71216652064 150.084909674721 155.121309543738  
152.395272857974 181.491120129045 140.987694585232 168.830344627025  
135.440472776418 141.028377381019 133.026094667212 131.527939273875  
151.81251450855  
LOC645126 152.213746577124 155.558839375761 169.043206258073  
148.638400592682 154.108689872903 158.153875553171 159.337816095012  
138.873925577739 149.72025962797 146.029647001623 135.32160992961  
168.21856603538

LOC645128 159.324816814876 167.190857452131 181.453575300661  
162.063689419737 150.026314061051 163.030275835038 150.601874392926  
158.095373931016 144.597060118959 150.311274161073 159.327764602722  
178.745112514526  
LOC645133 163.373180928181 149.944351491364 158.23884088767  
157.863585655333 140.885012530186 166.187099519035 159.508223180752  
151.081339000609 153.222807811478 152.148784410501 135.395071593072  
146.603385998231  
LOC645135 125.073353210914 131.619951110473 130.646956516128  
137.607767467172 125.347442446239 131.566892082703 129.336402686549  
188.53221484746 129.95138839192 128.129780978486 144.329275569112  
131.221105247771  
LOC645137 130.511042322504 134.76586363177 122.347696497767  
138.142193489481 144.579725208643 126.853028093579 129.522339467532  
141.809577413906 144.182891591399 138.616719975373 112.875136585606  
128.536721595589  
LOC645138 8709.2221371432 9139.73212514992 7930.82679738435  
7771.28016059011 15990.893941344 7539.6945050098 12577.0915543468  
9470.58919937464 11874.9808592281 8416.19700892758 15354.74541236  
9272.37780151073  
LOC645139 168.180063344887 147.624372080117 135.487310036251  
163.570018900148 144.388851371784 142.598106777707 138.227082687797  
135.226240774124 129.976540483758 162.47662918768 134.881854036527  
145.544996009633  
LOC645141 141.831596320865 129.918038866006 147.171090285223  
151.736824723671 145.085091507228 150.238582112636 146.274284557421  
131.519455635415 117.958297137758 142.833025633146 128.274326990056  
162.766038656637  
LOC645143 133.561188057423 137.73313146889 167.206513789165  
146.276706674761 143.096097305398 131.198284945008 145.39813290003  
130.036744891822 132.819726980184 132.823333905679 126.601395870533  
154.838407529853  
LOC645144 123.108694517244 123.501843029993 136.480458837869  
136.444883411968 143.967197319361 127.736712231221 128.144653206398  
138.248708129528 124.00806841872 149.380733719756 141.686945908315  
138.85328409337  
LOC645146 140.989597586699 129.194132399305 147.803464591663  
135.448170440824 127.808579455383 132.91094012928 147.740657356905  
163.059196519365 134.770852936106 127.555954288973 127.090219286772  
123.303143302526  
LOC645151 164.801505601099 148.079107235035 153.293125258215  
150.45404183949 137.384815877899 158.670835881902 144.252481420079  
149.231475480618 145.383354200298 154.518641757391 142.331050242704  
152.188770978528  
LOC645153 153.031479923324 145.952759497544 147.185378560761  
150.059862107155 175.128935809466 150.321059418799 165.192945734166  
136.561852783331 167.92409473064 164.236417852165 152.31268334586  
167.025336068642  
LOC645157 3700.75770419386 3963.40575974446 3262.24877138481  
3359.62015747752 1250.58586679251 2210.67250954072 3463.23822434026  
1695.26858186096 1946.45172007314 2775.84742592713 3734.705550862  
3504.77617298452  
LOC645159 201.507971833902 178.542247857251 243.038392457584  
151.436802637988 172.430211711547 294.535979194434 199.620978536397

180.008152341531 173.432960318793 187.380064367869 160.022481227931  
252.473612525884  
LOC645162 128.551335256123 141.285983481412 140.063142443074  
140.012295249756 128.196474114536 116.491342107103 136.977435235496  
137.668179813327 137.50609001002 131.395959781477 133.689255383855  
133.713275043978  
LOC645164 147.221425204534 148.970251898527 148.919726992353  
148.868265867275 133.847494826806 158.330403004116 153.577349107512  
144.891541843777 144.540174041867 138.976386995124 147.055213172078  
147.195127201893  
LOC645165 156.622993107052 176.256840061919 150.003399000079  
150.053948736789 161.126686827391 171.561940747015 170.79303550487  
148.417929733447 158.639313207233 161.237544868191 157.353493980339  
162.304178370233  
LOC645166 590.646248924596 664.343553341563 453.457361487577  
758.517101659762 407.711669482083 458.875979229339 811.144838166905  
490.269418483997 266.892524131545 460.941286124613 296.721891842563  
379.615659443164  
LOC645167 131.067958183644 142.749568012703 155.168592130392  
134.599629045981 154.133723492173 153.336395746742 165.143417235314  
168.314966639178 150.989202517615 159.106269972346 163.400576719974  
134.21227169867  
LOC645168 126.976353967127 131.406366653787 150.376234759097  
135.550882872661 154.627270742193 144.104372749581 136.453821861379  
130.041462255766 135.55203336728 129.756642179083 120.15332480712  
137.290687951485  
LOC645172 143.793506250131 130.497405221273 136.333928675403  
148.941194457652 134.022324496729 144.68114486527 144.30699572795  
143.613003173841 127.040027125755 133.75142055959 118.230408871812  
143.365976841902  
LOC645173 2537.90501983425 3033.50962589321 3033.50962589321  
2786.35558271661 8072.83367137971 4214.83058308503 7786.96143641382  
4690.93553472125 3518.84173951107 5912.48904507462 8072.83367137971  
5955.10816224456  
LOC645174 19806.1316481524 21315.9767866977 18501.379301537  
20217.6497214386 14348.4009261372 15116.95436573 16480.781374867  
12334.7921691489 14592.6308255978 14699.3902364192 14108.0461617941  
19806.1316481524  
LOC645175 165.866987051333 140.012295249756 173.364586678954  
167.599784887933 191.740596601895 231.044588483625 213.674150322581  
251.20133703465 177.598422362298 226.144012966486 165.985885671398  
214.175691239597  
LOC645176 190.281570660806 174.155599133789 177.567833691547  
182.143506470859 150.682964448325 188.166168428752 204.415267938007  
174.107661206415 167.640645997754 169.590101694098 138.934516083124  
172.857643600385  
LOC645177 175.372355078713 171.982071800592 169.667751894226  
164.587657424569 166.917552275021 181.735072060023 163.413365060063  
171.636121363019 157.521230460545 150.364511432468 146.978110148492  
158.07640654075  
LOC645179 124.825103464238 131.212705319485 133.236084190243  
147.446381217887 132.584454429269 137.647282354299 146.533374238616  
151.228823957828 135.957972463728 127.314089756429 127.080149144234  
141.678529125136

LOC645181 121.771891473027 129.869363181125 124.446264376282  
128.335132315812 131.736694577111 126.083599163604 129.111259771449  
133.36168342199 132.851791525098 128.116795372698 133.514843630183  
131.000186898437  
LOC645183 146.716053772448 154.140863428961 136.19083681188  
147.790720062226 146.466967386428 135.750578960284 147.910699446264  
139.490103923544 139.576261630082 144.324313048777 160.843325877861  
144.136328845967  
LOC645186 128.870079563075 140.732618320154 131.045970236632  
152.733409144267 131.782007636511 135.797170561599 136.794860440446  
141.010588053284 131.381189141974 151.064422836695 135.9489027281  
132.175368142549  
LOC645188 129.382242021964 129.173772079264 126.282575548237  
132.332128706656 129.612536218578 138.899292894875 128.266906202941  
135.161667673191 122.498794845416 121.141432480683 127.575660581922  
130.406895174038  
LOC645194 128.783262618114 128.113966507586 123.288028185949  
138.537763477627 139.333282400639 129.365004129784 147.676279102364  
132.685098573183 146.290334865039 129.902965506953 127.829001155781  
134.650161382949  
LOC645195 140.49145570631 152.898148619937 142.452409969639  
150.102853150151 146.448568700393 142.874797429568 141.794898246882  
128.255141263975 132.353385654164 130.529367177452 138.264258708067  
136.87712607887  
LOC645196 154.713713332354 156.145544501731 149.207481665265  
159.620467672898 138.002258986172 148.704917490429 177.630246034993  
148.421611987655 140.368070973566 145.131215503044 121.387799881297  
148.635174393031  
LOC645197 160.28767775843 160.227729155903 160.297609596399  
162.994537815938 179.841665686703 156.581569063195 153.108902978819  
152.337631025368 163.876218743322 163.600888221193 151.083551412109  
159.349719495214  
LOC645198 143.834501071806 156.333133322672 139.589612144962  
157.881569297409 136.178501890585 156.304678960663 151.598423878653  
145.751336115646 136.943481207516 153.709230037306 162.716712951629  
159.508223180752  
LOC645200 121.709375771276 119.548432046443 134.553754121862  
129.828896822571 119.551741097918 122.258432948151 131.986590029726  
133.801549026691 115.184395637553 133.654232991228 123.994188725172  
126.143886553557  
LOC645201 135.336754997434 131.314766140505 141.691135410429  
121.084348994747 135.441550832737 134.85590586532 158.670835881902  
128.83022039037 128.259909378964 135.027715094704 142.066903301882  
131.277646716635  
LOC645202 138.336667434109 133.001613667656 148.547259731346  
148.632332840817 140.441521267218 127.975441922402 132.125545886181  
130.329453160478 135.028746262383 149.247514768446 121.429270259367  
147.642693777383  
LOC645203 127.777945516765 144.499680685194 130.985360700521  
141.999730335668 129.666957539624 149.85385474029 140.767270136561  
123.431969470387 143.416816860089 134.853253781256 158.113794378426  
144.062079886084  
LOC645208 141.657914155491 137.668179813327 150.746423638097  
167.149578610266 134.493062923443 149.292552957665 153.111226896983

148.286700314107 144.181359740481 121.784166691545 145.198638080646  
148.609721587632  
LOC645210 116.695313319162 129.92319548307 137.220718873614  
146.569958732206 139.076978731572 130.342425029134 143.501380161409  
146.204122329465 136.566588903194 138.905709709063 129.549673572516  
135.114056458478  
LOC645212 173.544556426164 150.48744233923 172.097502416776  
148.846121873401 145.915129713165 150.287472248483 150.346002924933  
135.446072698039 174.045229095003 140.487887891414 141.290905146249  
179.764260117544  
LOC645217 160.454243375479 160.970946091146 154.713713332354  
128.984613946021 136.005756600948 187.231049280818 154.205877662428  
143.874735808114 154.908975734985 133.252140649104 175.51767355303  
129.088718286391  
LOC645218 156.154079736651 143.105974876327 149.408530395745  
157.28429690041 154.146962684738 148.905860943967 161.354014292373  
154.183537565624 154.884821436554 151.650777127117 140.055272520317  
144.064214573005  
LOC645225 150.620603731907 141.876237297525 147.515088047628  
141.750316403249 152.821735300697 135.038195181839 131.868557613642  
138.637735867167 150.156865995098 125.044092929562 150.290025009187  
146.26304624648  
LOC645227 133.526213647686 145.698637908482 144.907922949811  
141.215542377796 126.061141885666 126.928328902507 142.173279109959  
148.007068300762 124.558026853954 149.821848101995 117.455432751161  
143.118188813831  
LOC645228 128.089328553242 121.681261213422 130.656206845965  
126.908123260394 143.036006001419 124.345320343901 144.782706468281  
131.593705080542 135.182524652868 142.07664288788 129.990534497026  
123.711828013052  
LOC645231 233.36028792331 243.308625792448 212.460476372263  
209.385358804928 205.341121539273 184.357124535926 339.490955270138  
206.972440734038 196.269193578525 222.268494113686 379.016207754533  
247.806371601734  
LOC645232 155.368204597287 142.859971805867 156.830156083795  
160.525939340745 136.485034823945 155.237180851323 138.006973261364  
148.818562911616 131.739418639854 175.084729757407 125.79193748535  
146.524138043215  
LOC645233 296.333944172375 297.466255000163 254.63506290698  
275.841929188802 344.021696764791 664.809419789814 379.200576951933  
467.387427864242 409.380002417794 381.625983354158 364.678403892354  
395.425715632302  
LOC645236 234.661864595717 194.819597436776 194.584034984339  
179.950904921667 248.791254839869 274.934292929666 192.046442148183  
226.25694727283 240.439368352772 193.173703015873 241.453456707114  
245.269004485826  
LOC645238 146.349773982488 154.764283765316 160.482734190577  
159.085639414089 146.875733210901 164.870860592068 145.621384219688  
146.550421651378 161.172420368335 163.607125532236 127.699226067847  
148.380555606786  
LOC645241 138.011923055019 153.305679563467 166.64535048582  
143.851670859917 152.689610196981 535.20662670885 257.685284145848  
216.353502371227 180.77686098195 148.003041725027 171.180188911669  
178.734634888773

LOC645246 162.778480318754 147.556482119673 141.670426206169  
161.983987604 147.004172510641 172.304496150036 155.62770968777  
145.254692995502 140.26206122305 145.152605166094 138.165240772401  
151.194282143046  
LOC645249 143.370698101204 162.317084707395 143.086872363116  
140.04612725812 140.545351041252 161.017267304159 174.229093061024  
177.72965427263 127.859873416515 145.695402948337 153.423579724911  
141.528115502473  
LOC645251 238.745953695925 187.893420010787 292.524552445564  
208.194788326109 208.164674386141 178.751706380632 201.616302398819  
212.836093887552 244.627091189503 257.685284145848 174.787077606165  
206.802308105224  
LOC645253 164.857465272302 153.606787306076 165.307808075027  
136.342634691443 169.052101570616 161.916155040522 151.802632803321  
154.569432344392 164.236417852165 155.237180851323 149.383429241903  
154.713713332354  
LOC645254 167.505381046729 156.695440330379 144.526499066594  
164.319378349317 143.849399031223 160.449911844008 147.49720952988  
157.697168349028 155.777281781161 139.823017208731 148.054367166566  
153.156264091925  
LOC645261 136.381593416533 138.20899000519 143.296580629431  
136.113421708277 157.50792056793 167.357570666817 135.247018354192  
161.592528958127 135.261561433405 152.407614042236 138.773042747912  
175.158180187883  
LOC645262 145.777778096701 147.722646851008 152.097609803404  
135.238301951626 174.646321871605 149.457761307441 168.942165573542  
156.487049947247 164.181915898563 156.763364462534 138.289361041588  
160.272632590118  
LOC645263 130.907879150229 140.965498009244 139.452773383624  
135.925813154268 131.946938297748 126.503135702506 123.615802924067  
125.077260389449 142.55463239891 130.799009128937 127.368831866968  
142.815817738837  
LOC645268 150.070213543579 136.869117921313 145.068754246476  
158.483006541613 142.082257952004 146.871145679651 152.8810245209  
140.730085305185 147.79341726211 145.630497368137 107.013012418356  
134.168381235167  
LOC645273 148.134642821094 150.498954408708 145.666712006532  
148.062245676711 154.286043402527 166.433933349193 146.764908249803  
160.742365719929 152.885721101687 150.184863108453 135.417519318028  
151.852294315212  
LOC645276 131.244759170642 147.060637536615 145.09280363189  
142.112120308118 143.662865541299 149.759516805355 135.760578586004  
136.327014189932 140.025668085978 133.009854792992 166.77329045424  
140.334331111538  
LOC645277 126.51808376464 137.039484233589 136.321816321193  
130.988294699995 129.400895994387 122.442590463781 117.112667504781  
139.585373400347 131.477589792769 129.664016819143 133.665206343648  
124.961859983596  
LOC645278 149.678629612616 147.479390172796 144.310362660942  
166.964057265095 149.696766215866 143.125454748996 164.625407872446  
160.989242461839 145.802944788548 139.168307371516 157.619627711954  
143.744075931566  
LOC645279 139.325478877749 133.408354896584 140.301945597122  
128.886008923268 144.68114486527 134.294287947795 123.315362903961

131.397850276558 139.779754416105 128.274326990056 130.329453160478  
135.102827224896  
LOC645282 126.396385337235 155.056545639862 167.273378118452  
171.238423077347 154.265581535942 156.911538642765 145.824996954376  
153.261002653668 137.138266859156 158.598999414864 157.521230460545  
155.035727630756  
LOC645284 158.550259547851 160.27511502306 161.585555680663  
146.828099826146 176.714471790643 176.783978625103 158.665476708054  
151.151297821117 155.815785551964 153.083451626042 158.312614511836  
169.003310163058  
LOC645287 144.216394153095 142.003414252064 145.1382587433  
155.824409540332 134.946677624454 141.455841055881 130.935922915902  
145.770601609392 124.148194572004 151.256546638599 159.909121784808  
152.001155788544  
LOC645289 187.205674045893 179.601348561497 158.691830524781  
206.77605957523 153.941193682697 184.111756696658 204.019377262081  
158.120079903425 163.470025318612 166.305219348008 209.887047474042  
200.518684601283  
LOC645291 134.025385181979 128.523703756493 139.473459411633  
125.874313058552 131.590180562108 144.540174041867 147.011838288594  
124.025104622631 128.697647007046 125.350567304651 136.194082458655  
139.450788315602  
LOC645293 142.771962099818 148.44261900795 138.281188275319  
136.353051841792 148.222477811166 148.153776704837 142.791015845309  
129.469949305913 143.242308032336 141.97478198531 133.755609587969  
135.991630745082  
LOC645294 131.841436867483 127.398873370484 128.17223916536  
132.735371358102 134.776714949136 135.10155936286 119.663182347566  
131.635641515901 140.11211854056 132.918979842076 125.139029579691  
143.160281902098  
LOC645296 13758.4768543075 13324.7465248375 14798.1358474998  
10474.0047946187 11112.4298269818 13247.3528304243 15990.893941344  
16230.8346205808 15053.7547401937 15603.3490258675 23656.0669757593  
15667.6576521981  
LOC645302 148.80452641061 140.508390945342 140.167274633872  
143.727514442914 138.038446102921 140.490023670841 155.926739769177  
143.322199505844 145.581755438161 131.558842131826 138.82269002406  
153.399787997793  
LOC645304 153.222807811478 139.112639975752 146.779054605199  
148.720181793879 154.443360208399 150.964506212368 139.703304553486  
165.213327555428 149.34605615699 144.649656552 157.5032461329  
138.150616787218  
LOC645306 128.447393268611 146.209104824109 133.268239762624  
147.060637536615 146.979988781462 139.287871460674 152.101695555105  
165.283700641161 168.405786851399 149.758215028408 160.186527465164  
157.990467804353  
LOC645307 140.251168248117 140.160349667726 134.522715664256  
137.514952067562 142.61573330083 132.363645381743 140.208983238283  
133.213697351807 152.122141650397 123.766373146588 121.675007387533  
133.711821318079  
LOC645312 175.757588503244 160.562164904057 166.071816427719  
156.353914172996 158.960488862727 181.54273463264 161.155280539113  
176.810979494826 178.045931314857 190.56172211779 161.466192326759  
168.996965070202



LOC645313 126.368170959337 120.201521341263 127.282374513433  
122.903428611669 144.975882336334 116.672561618582 131.674409480919  
126.925982415892 168.682307349713 209.44506543433 140.747967724586  
132.466796864599  
LOC645314 147.264690436042 130.786835186349 139.803568564059  
137.876995081933 148.808928892047 147.433388299999 161.77611826709  
141.777089987975 153.273568880305 162.634670715627 163.873355370767  
174.177944561595  
LOC645317 3744.5666678861 3876.04966263281 3876.04966263281  
3363.51782842264 6508.71638048514 5624.32062666666 6214.77579017084  
5149.78271096158 5122.60899285635 4995.96906061198 5609.58233117244  
7016.12801650552  
LOC645320 131.676609824921 153.389279691913 137.680019787902  
148.853877151493 140.696326952077 137.491366243256 139.844984829379  
139.902610126952 147.327675057481 141.811563725942 147.614293127043  
150.0084730766  
LOC645321 143.351341716363 147.161720770972 145.064773625365  
151.765013587671 144.710613442383 141.987635042691 141.021723049782  
135.675570204709 132.486311240725 152.232245164212 138.944595164363  
142.348246621217  
LOC645322 112.264005988662 133.675029107803 124.048926099805  
140.617663657037 128.51523581959 133.780423932326 117.703025026759  
139.999298193212 140.726084514407 150.822586904738 110.784682137658  
121.885476832858  
LOC645323 139.923187410488 156.994265858123 145.745466612541  
148.00952002903 133.308383825604 152.79367157305 152.662446724781  
139.446914318877 139.094167748687 150.082561726876 145.932170561687  
134.044789094272  
LOC645325 129.231455282441 128.407968177242 142.783159341229  
147.478097898608 147.412608079997 133.564350740049 145.89801576671  
139.625635881693 153.703682621695 151.151297821117 156.576585764311  
172.214433016685  
LOC645330 150.731093808891 150.479320779862 158.68792959603  
143.598567970841 153.173746756225 132.365002835934 143.10996074311  
146.176240539176 142.139331321085 127.924195488323 120.652099118243  
133.686850910378  
LOC645332 220.362946606131 215.866644799363 239.941641600769  
241.019436415703 258.384059994446 202.691507273819 205.679992893049  
218.944052733757 188.45479937455 188.557113298055 282.963958072528  
209.74583569369  
LOC645333 148.704917490429 153.577349107512 169.101676908756  
153.222807811478 146.00443946108 143.94902198632 141.693224578298  
143.416816860089 132.953762692926 131.889166605167 120.252164075308  
145.828229656781  
LOC645334 166.506602328929 163.889522525848 167.67952650068  
154.21623304309 180.747527895349 166.360005474414 188.378996128521  
172.84784588171 155.011931456736 165.143417235314 169.852769679312  
154.546460872415  
LOC645335 154.487546030444 146.975258859244 135.317796804151  
168.027892518772 163.416011199431 137.262309660909 141.026045918091  
153.93249158209 146.171094379173 162.274094333189 135.722321387765  
141.94585838352  
LOC645336 141.505120938773 151.144521344129 158.584934514596  
144.798664281991 158.150949554785 156.727153398506 167.049197726715

134.770852936106 156.191659799142 160.143443392509 143.594003495859  
145.286983999628  
LOC645339 139.191746593825 131.566892082703 155.323822771755  
161.755290291637 143.632325018964 142.621019060798 152.778732614944  
144.908551199481 146.554017952963 127.030113960477 162.285199080777  
161.922462797736  
LOC645342 139.860093278582 143.245660951425 141.334394187941  
162.077455145261 133.396403868645 151.598423878653 146.181764812924  
122.002822875994 131.958760372325 143.506243892155 109.586955365611  
150.489651880905  
LOC645349 161.331326682743 136.529820456592 151.939710544553  
147.281035392817 157.225479764928 155.747694056319 155.166786601813  
149.791777262424 152.131804134092 155.971045744096 151.645636946799  
179.230909178397  
LOC645351 147.688664545959 160.486513643798 164.022021048626  
156.026806913759 169.012926546641 175.946843919065 179.338652960181  
169.681582570965 165.698527470382 154.390764802264 167.093409692227  
177.281197832647  
LOC645355 158.622993108149 154.343424387068 170.145574727175  
154.362571105094 163.045605069267 157.390513637267 140.774304412579  
144.882207209439 148.605816748229 151.889644436875 162.494429648551  
165.471587934831  
LOC645359 127.274768398849 128.245734702114 144.02239659305  
137.528342105233 140.370626016794 141.512008928271 133.315888375614  
119.252737868132 130.368933537243 125.426018910517 143.641777655752  
142.34956863109  
LOC645362 210.392662092721 211.660148497276 244.668813440638  
278.192669077191 148.732027660387 203.999142031297 244.5675215931  
163.234966251618 174.301952147167 185.583997792931 214.068044241507  
218.944052733757  
LOC645363 124.521130036013 112.488125161387 120.394220715157  
122.232732968363 142.159597861804 130.049854901235 134.344021502031  
117.710502693638 123.21732068638 134.264584077125 108.199628274798  
138.5270206057  
LOC645364 141.085111670206 120.706421084476 143.909501365162  
138.017249996128 139.186416741431 151.208728458188 135.795717307603  
143.778327403708 135.003236040032 123.046069309901 114.084543168359  
142.720769329396  
LOC645365 165.225475655526 152.224281847792 144.189175238177  
156.073428882485 143.544671705984 151.037282417145 196.144420005021  
168.082591651722 154.728941096647 148.789295862953 162.15259972225  
145.82344959902  
LOC645367 160.78368986036 146.910471989835 153.869144282319  
156.818197172306 171.487594589922 183.130891975122 204.544266331066  
1219.36024606325 248.643311972844 168.861884032201 131.989955864584  
182.67941458824  
LOC645373 161.430219824313 170.731358903019 201.365457496683  
190.787437782456 154.209689403188 171.071893074072 169.012926546641  
154.026743830591 149.44788347071 176.995049477843 149.754842928462  
161.241165533091  
LOC645378 204.1974438819 211.505504834207 216.974834077975  
243.191238594142 161.237544868191 202.869364962231 177.862368731138  
193.554028681854 165.39758732 142.246864759311 167.373416675264  
195.043838688467

LOC645381 238.095599711942 219.638478100747 200.114704018645  
199.459711023907 328.486476842582 246.594244983507 341.564749445905  
327.951753740503 271.823243396395 300.482945704017 281.49247863022  
185.240692860387  
LOC645385 2590.80821234237 2176.59445919725 3518.84173951107  
1558.22238167317 1753.58770316818 4124.03779111916 5437.78386044638  
6271.34208268488 4592.14655702906 5265.74259211695 4819.85672511343  
6044.78942014135  
LOC645387 5955.10816224456 5874.57722671552 8739.02966610274  
5734.76405709934 4612.81760689869 5947.89821087362 9450.52572756597  
7245.25086222102 9450.52572756597 8666.41250683965 9378.87287299048  
9139.73212514992  
LOC645390 119.412461116903 118.388993232718 108.247365868673  
128.189685312596 124.263901299025 121.973581817041 114.441223528256  
121.141432480683 113.810645407837 117.803508098322 124.001295849091  
122.557981210434  
LOC645391 133.869867161978 129.223872979789 142.709768829207  
148.145136066071 145.08853313195 164.191906588579 131.470883854661  
155.049051256459 138.402890124039 132.419898122309 125.789509802098  
137.222125237171  
LOC645393 125.208803405105 137.276586668477 127.83967243279  
113.222264855561 130.567443018832 129.997181739652 120.351217130679  
144.402160347818 130.849201993866 127.849141499408 110.304102941202  
115.53736269794  
LOC645396 139.111604268732 145.002309193867 149.552704503066  
144.062079886084 142.456527359961 141.966490100288 145.423022762916  
143.125454748996 136.147810636915 131.539170756533 132.131378074469  
144.367056085868  
LOC645401 144.86583288717 134.105941085621 127.776112651456  
139.3864057463 164.472980733552 147.228812647235 127.977782260866  
132.873213182775 135.787323859105 150.098708715617 130.977864137459  
153.62335478774  
LOC645402 144.979749941424 143.236593995493 153.146646647258  
137.812249316763 135.918590725404 153.664503112778 144.068734533254  
142.223992275362 144.12472003202 154.407622202006 140.359796538887  
156.981921830638  
LOC645405 130.506708993193 130.187833435052 122.777544465711  
125.413619056436 140.865990571023 138.868641301709 134.182902752156  
136.324020406359 135.159590925066 133.296200563657 129.158212237299  
127.581332110857  
LOC645408 144.945229158136 134.881854036527 134.838366830668  
122.959518532165 128.917399281607 127.943935415045 142.321476446203  
132.84666796678 130.768746032834 126.553693803748 110.486191378104  
127.935614145702  
LOC645410 145.709172732805 140.356164189622 143.045416067967  
128.844026422327 131.400031203603 135.892248893607 124.574323079707  
151.506013510204 117.893918180502 128.259909378964 120.193580405229  
132.834433153076  
LOC645411 128.040201586267 151.073257114127 171.751149502172  
151.921235758457 136.480458837869 140.634047988278 153.085975710144  
147.232015056035 152.222732770706 150.968998243223 152.845126167802  
163.21153580549  
LOC645413 156.179501567984 161.748547772524 140.978511668091  
181.530767521222 145.726651022813 143.596530151289 153.275253838659

164.914114315732 154.483828924645 155.365673279823 150.624740697168  
168.958694643382  
LOC645416 149.619141707962 131.754508484296 141.410953064267  
139.073785024092 162.411156818437 148.503282415207 166.89884215297  
157.919709478746 136.154522071917 135.603160096973 146.6886556805  
147.568851471771  
LOC645418 148.908758741034 139.897320032723 144.212231875922  
136.792957035581 126.214166842097 137.675597243706 152.09245741643  
136.271412363498 142.485427762372 144.69686018715 134.509830749072  
135.252082574955  
LOC645427 159.693019552703 146.271180025157 164.865846124876  
152.467764730004 144.998415908498 152.520828479026 150.184863108453  
140.416247564103 150.968998243223 152.166586496729 158.282899758551  
143.831294912255  
LOC645430 185.783374935551 211.395593720534 169.619338456208  
169.909886347082 182.165681034082 137.754373055094 233.07015384759  
176.839917795004 174.515815532892 237.473927775823 245.850813387241  
205.65398844108  
LOC645431 173.599961799334 164.472980733552 146.781221728543  
169.301498852556 157.038121210505 159.909121784808 142.833025633146  
165.200303470106 161.891809608511 148.195611015135 180.837420957945  
144.743281367797  
LOC645434 156.130224537288 138.452698593232 150.42705284743  
166.635366968851 134.618121709059 161.761125440228 149.736837985314  
133.402515225624 136.171728950893 147.805819921429 159.90466743683  
145.745466612541  
LOC645435 131.395959781477 121.06219555903 130.240366272285  
141.006540481119 138.956057921718 128.990911924499 144.474814266475  
133.334314509183 139.163958829511 145.864902319111 117.862532836494  
131.177396785633  
LOC645436 1580.27059464289 1285.02292965374 2340.90990677253  
1189.69730508119 1323.91781040143 3301.98381607571 4491.96934862425  
4621.99241522677 3504.77617298452 3495.66977000028 2962.11407134162  
4749.69040198959  
LOC645438 140.166362760327 142.757327296852 140.227863970629  
177.151218006672 155.513572243604 170.748911334847 158.536178747273  
150.555125135002 136.929570710155 140.26557508894 132.834433153076  
150.378690719669  
LOC645441 128.910261453632 130.586509996354 131.766114156138  
137.464914919148 130.71040889651 124.647992480694 145.01322767825  
130.606211166873 129.130212375815 138.119788738226 140.569391362701  
146.669620721254  
LOC645442 158.025633316671 155.114892891737 138.235127932016  
169.061364889307 150.564099989221 159.815932985135 152.219906297607  
157.717145014769 144.595393134144 155.268650584431 146.332425559689  
142.971114541774  
LOC645444 133.290168428696 141.013392458859 141.125248464806  
135.32160992961 126.492058851464 132.154131623051 139.875260384886  
144.393688888553 121.895778599116 133.964163727962 148.317958829244  
134.283467987991  
LOC645445 165.558963147657 167.357570666817 178.130223302924  
187.529556428609 169.36029946801 168.082591651722 157.723341862468  
152.303524109428 145.169804325334 160.825408895349 152.516485296644  
162.168246402027

LOC645446 112.858669660245 139.002932985183 134.029984991385  
138.161690144518 144.997250967317 141.037217406848 131.878155417065  
116.061356450855 119.555954372381 139.679681813932 147.366877428537  
133.766199453456  
LOC645447 140.52997588229 138.746273750703 146.227452269648  
150.026314061051 146.343230597246 138.745560049251 156.508428796592  
144.540174041867 148.278828579424 146.162330544539 137.95243466771  
162.464201058576  
LOC645448 150.439715066903 152.8810245209 158.756424011719  
145.314204192565 161.002880798225 151.345630073141 151.453985465369  
140.885012530186 153.758353103323 152.124910935545 131.140263788783  
148.062245676711  
LOC645450 128.763176477983 130.470034945295 126.848211027661  
140.506191791073 140.398923642686 129.158212237299 132.431566491955  
126.381288663037 126.372374084002 114.032874859062 115.085961282227  
124.110446144763  
LOC645451 124.272447276746 120.514672572565 123.847186739627  
126.294085960617 132.737464610403 122.587545171646 119.399971165857  
124.415058391979 129.546119539687 121.556331561879 113.888903174188  
118.180919555585  
LOC645452 17067.0086403248 18760.3823237058 13479.8546809758  
16123.3486890049 3055.80298721424 17496.0674176329 8292.04796307133  
14300.8562978211 11809.4804843301 6500.1854485891 14037.2575989329  
10106.8225600705  
LOC645453 126.428284589412 128.820757822782 140.770705453805  
136.01865173754 128.876385705559 136.444883411968 137.612446150193  
133.794524856909 128.116795372698 132.943957535655 143.298218989451  
124.555847618988  
LOC645454 136.91078498126 137.927403204849 117.593226427794  
137.945878061978 144.685707282641 129.703791330416 123.720229113779  
134.312156667838 134.676039394438 144.623222072851 120.935863853101  
141.033948839613  
LOC645458 148.905860943967 115.440152891339 143.063345350253  
126.383238335161 129.748891462506 126.609398779757 137.336914480226  
135.333055517636 140.281512754823 135.15791174418 131.430921437192  
146.266350809492  
LOC645459 142.173279109959 140.760983862166 139.3864057463  
123.480761625667 130.644937322186 121.830137285032 137.784270510433  
119.774204444899 126.124937863679 137.977714900989 115.18875509198  
130.766401858384  
LOC645460 154.207656926108 152.000049232414 176.66175597182  
161.788118050564 175.262884960324 126.515480612924 154.417731984391  
155.587018319981 156.239937979051 151.64806573742 134.601565799073  
153.6855881767  
LOC645463 140.60741459333 141.929924728222 125.603448542611  
135.954961086609 128.640202262896 128.788443476759 148.132450240784  
136.421163870578 117.937856116492 130.247700541716 127.358616953147  
123.598210440312  
LOC645464 180.456659320226 170.918584418153 141.420747583126  
143.784022884904 137.888195199363 160.525939340745 143.236593995493  
131.859204862396 147.535225305685 209.112959748917 156.9540270155  
137.603046125938  
LOC645465 142.046082566177 140.123348569709 153.251468534012  
143.377902352319 146.854523122404 139.367493349339 130.953237161257

151.939710544553 132.461730873857 144.825231501747 142.64421300687  
141.56459720769  
LOC645466 668.853969513382 710.003412772888 683.019502027271  
568.310800941091 207.581907737176 426.032234135861 350.46078795627  
436.155731212592 405.64711132293 283.27806319488 438.03648998391  
402.026356201632  
LOC645468 121.014538677616 114.290611267606 130.949405011154  
119.555954372381 127.356622898971 119.50754902958 130.979513420888  
128.023203858837 127.274768398849 122.063996556575 112.190904058889  
109.898406285895  
LOC645476 136.316003989725 139.018588215263 132.168821720799  
139.566124411099 157.490138425943 148.570769470645 140.016122996485  
153.369334953677 138.113751487484 156.173099025259 147.325222091872  
142.55463239891  
LOC645478 153.784923783551 161.673818303367 126.468167800414  
150.292858985795 124.42747321736 142.776295389006 131.951649373072  
152.356731704094 144.071652839025 154.055550115498 130.546471770588  
134.460035654795  
LOC645481 165.870621884073 142.020480831815 140.304810288752  
163.566535828036 157.768329108254 150.46224324459 150.841261270382  
163.889522525848 148.400132332444 151.665244763743 139.703304553486  
146.904354404095  
LOC645485 141.137459291428 139.782152941027 137.524968609776  
138.386391726042 138.478911439144 140.722297244564 143.397823965608  
138.643442050615 139.353080958675 143.953043041292 119.645983822002  
128.812729239283  
LOC645487 160.695913747601 169.826068012389 176.953099943185  
168.205277839471 146.033591220134 152.581729298159 155.490897312915  
147.26204590693 140.158309892319 168.720694813918 139.46518859956  
174.192898940601  
LOC645489 521.625146077176 424.37437028833 546.611519125021  
617.185364180303 240.971675534641 378.38874489611 361.904370514991  
347.557792829093 356.84281623052 212.5119818331 312.080864996592  
374.406855727422  
LOC645490 136.625136565562 130.001889950186 134.469653093466  
117.112667504781 152.601626526117 131.031639119149 150.204636832734  
136.907453440141 127.183924911179 139.583514773196 141.767311448808  
141.306418675404  
LOC645492 134.346754381858 156.990325995053 157.073850948746  
157.848456517169 162.846914172627 156.301214161102 156.351734527745  
160.311096717492 153.191840013692 146.050714008913 136.173596381385  
159.646538408414  
LOC645494 127.786141874218 128.643539098937 136.251820364823  
122.834017529045 123.067278658698 140.692586715322 112.292129754508  
125.124011798043 137.063689600869 124.59097574481 131.290698895743  
134.694911833015  
LOC645504 132.615324904193 134.8745127454 137.689158155552  
138.596430973865 140.903091584884 156.407166112409 134.243435358729  
130.235407859542 130.858419819734 150.401509081265 145.594378536072  
132.727133259694  
LOC645508 149.338249249161 156.78124246844 179.037397826592  
137.79714923769 148.447649246493 143.915205639368 138.345393524161  
145.631278992488 141.59474425685 143.801139839773 149.419308407564  
147.553953240464

LOC645513 131.903632821793 115.958740595234 128.988736837863  
136.691234705997 126.203255277356 123.905462079972 123.835583753941  
132.535722328813 129.099780410063 114.658668711121 138.53403492914  
115.460136318681

LOC645515 358.897128592042 308.974786799114 533.54045706916  
315.786908578669 218.2454853526 265.992741398183 280.398987330256  
304.985269874607 265.791342287571 358.843277491684 323.628636799403  
351.448985413528

LOC645520 133.301527400458 140.844007965202 144.461999591223  
133.416938451465 127.106045864607 144.694679571377 139.534014289993  
144.907294702865 140.978511668091 142.581441480371 148.457872807838  
137.144001915831

LOC645522 133.392934239554 132.140547119679 123.786227856015  
131.123149002831 122.766778018066 144.532420788945 121.668166378914  
130.552857965694 122.821563586744 127.278117740813 119.29304762171  
138.616719975373

LOC645527 143.836637098747 163.97516075705 140.332045911008  
138.22823004719 140.922678400415 125.990762414974 134.871028666284  
157.631978594005 137.029726467523 131.230501496659 120.922042875444  
139.002932985183

LOC645529 139.437073790935 126.690066353698 140.775447163954  
138.687013437904 142.438586625317 147.512290383685 161.825134481279  
134.71514094826 125.617143363441 129.336402686549 132.375905857023  
141.221162787167

LOC645534 134.270043564053 137.336914480226 134.451423371791  
127.979574243743 139.367493349339 117.543074264347 132.342063356763  
127.104868352186 126.976353967127 128.669887479835 109.355444907633  
128.967855397644

LOC645535 153.613110881454 156.998563448664 146.904354404095  
150.484823814674 156.632939064629 161.903016201041 169.306573880401  
163.73339229802 148.564655847496 147.333142209628 157.516278302035  
155.40832015652

LOC645537 144.555718186987 128.714459781294 129.125709963326  
141.21138348075 141.691135410429 151.628748274773 129.059722322306  
135.634385846692 139.56332664295 135.911903336544 133.284873295487  
148.594322264158

LOC645545 117.593226427794 106.000943456483 120.384210318  
134.231634410324 102.024765473404 125.308318672456 125.999595008166  
122.575357101038 116.241531823869 123.288028185949 142.720769329396  
119.48998115497

LOC645548 125.765399556488 142.747793303346 156.528649383827  
140.951031275943 144.829773937102 125.642282323003 143.703367582367  
138.279087298069 158.193008411967 145.478233255862 149.498020676126  
137.93067182632

LOC645550 171.791030104358 186.185055364718 167.380798617981  
196.536086443884 158.36796888959 152.222732770706 186.975609955892  
198.489278156437 167.941671074236 137.187640876289 177.831718771025  
191.628693083169

LOC645551 135.860057860699 131.734429913106 140.650987394155  
143.554726863556 120.387275261633 140.616811333466 143.873048967535  
145.481279504679 140.309394542299 132.653795458388 130.247700541716  
163.889522525848

LOC645552 135.215356532498 144.217621961908 139.851678406637  
140.038295509875 144.231539210695 140.225329742578 142.81401345781

158.316173597874 127.510611041295 139.77436722364 122.347696497767  
141.135840314665  
LOC645553 116.472796471694 126.401775332213 123.689439578326  
136.335679863251 134.952584272187 133.14988092185 131.410793139723  
134.318290950377 143.865717051998 439.727046291381 122.365693072105  
137.286331849749  
LOC645557 143.405079593778 141.836648910979 153.257097727888  
136.528123792599 162.857083430123 157.994474909749 148.361088792223  
153.762995131216 152.347154384235 146.59366188125 143.172744119235  
148.825790628891  
LOC645558 154.679076303046 157.15947600423 167.114291248266  
177.091809538824 189.971144220643 167.51207060064 145.273209648677  
143.090886224647 162.565576110247 143.40955339735 160.247370279802  
155.981989040279  
LOC645563 199.235895708128 180.408639020724 183.988537525989  
190.520750756082 188.166168428752 185.602093266907 180.192015483309  
180.070209705044 163.20714296121 205.036081947168 179.451637129672  
185.876046259727  
LOC645565 130.751522895053 138.905709709063 136.028011201077  
128.367370419533 125.777193592751 120.65473121078 133.794524856909  
138.748941735079 137.360220389719 126.155486659114 133.874468336025  
128.141725976839  
LOC645566 158.414776465951 153.639559509292 161.951996906162  
159.746802905903 138.349773531218 146.900087470856 174.576132939661  
140.794929983858 148.18197556044 156.456332386608 148.147294674218  
129.213523302268  
LOC645574 135.481300250507 141.65642171417 168.805630890928  
140.929026135235 147.371905597494 136.794860440446 151.451443480833  
143.272669418277 129.340996658802 149.267019532847 155.475804754732  
161.295030274012  
LOC645576 142.81401345781 133.608461289137 140.999877170481  
128.730649233876 128.949103967865 145.686092190716 140.14062775887  
134.4811029314 135.27739087376 139.564898998489 125.732389000341  
138.142193489481  
LOC645580 133.99046926032 138.090158433822 133.654232991228  
146.129805607031 140.912000800926 137.625415175495 127.224081416987  
122.985117824212 144.224287382131 145.952759497544 118.060781901686  
129.223872979789  
LOC645581 137.997756995882 136.071856104688 143.258488502799  
156.418750858179 130.795318552623 134.247361216412 137.816691265242  
133.922855125616 139.415650308396 149.462835741621 137.687480242109  
137.867263869936  
LOC645582 150.717996520257 163.778790431064 166.89884215297  
151.377932495104 165.523150623132 161.972922129453 170.251197850968  
159.746802905903 167.194306682927 149.106615763242 133.788197693571  
187.035957486928  
LOC645585 138.708304921088 137.816691265242 158.834483073542  
152.67564185705 158.002906093899 151.362686497226 152.667721542507  
163.22480684222 144.808774137749 140.401508808129 131.406366653787  
148.953720017484  
LOC645586 177.428161690048 165.186696781985 188.503673684625  
159.115391667901 189.784608429624 155.777281781161 161.466192326759  
176.901042102323 172.568852318369 177.538262133568 160.43939815269  
170.140610481718



LOC645590 149.42148494796 139.660641694206 164.299585578035  
162.390356943447 162.876684781936 167.568776552757 141.931274901572  
161.520362399369 150.513804134588 167.55209828062 140.093412995935  
152.585572167313  
LOC645600 149.244970309131 160.482734190577 196.716209382446  
129.346063085291 140.599584289987 213.215996114827 172.077522197357  
141.784881206191 188.864388750448 154.816213491233 179.079061789059  
201.800357785022  
LOC645602 126.536245975137 165.389652763451 152.054874792646  
142.334338599752 124.533543270311 152.78638215326 141.994082714379  
141.892214695902 145.247717878099 154.849264978968 129.413729619216  
158.325554470875  
LOC645605 149.888719320368 157.826457203706 189.90406457741  
140.165450892713 190.018871923219 144.763700813057 213.877482604185  
184.577511730401 175.29178007783 159.592581700976 184.518666956721  
193.554028681854  
LOC645609 268.264885392368 264.306927596371 293.925995360234  
293.925995360234 290.288001750744 220.92105843037 307.020265874666  
309.318403417731 251.347519777204 315.3930052781 233.572055978465  
287.593221911064  
LOC645614 135.437227744668 142.370721565016 142.656762407774  
138.62308708151 136.728067043351 134.657787366869 123.507963359911  
150.956247643013 130.99288239869 151.342902631318 119.060186838239  
135.673080643346  
LOC645620 140.201501710276 158.06915048955 161.189717452004  
142.321476446203 121.207040901483 147.943844184702 131.234140286502  
151.191822057706 155.535222310709 145.229637715814 138.828562311512  
148.43357593249  
LOC645626 120.410307377977 121.877276961306 153.066630483602  
148.132450240784 139.679681813932 166.209190082084 147.153129531937  
139.326694135427 128.905042692431 135.56878810365 141.444958186793  
131.216673806987  
LOC645627 162.297999435613 154.555255038453 145.862497313025  
163.794436953711 164.808139478109 134.087875547168 138.367321366804  
159.354364289526 162.778480318754 175.334453981762 145.368059425439  
170.108500366942  
LOC645630 305.542978609337 278.687780705367 378.308562999445  
205.509515144263 231.018059960001 249.953902454701 379.911829623463  
262.861105654051 260.52593414721 583.697431061521 1550.61855325662  
294.033003779363  
LOC645634 139.075537402658 119.044902525459 134.033751039071  
150.763810844645 158.359440014674 149.262900833177 143.13304460184  
135.241029533819 142.052454741558 140.878935632862 139.476234663488  
154.343424387068  
LOC645635 129.063617408979 127.612859839494 136.144068118165  
151.747595672228 125.899200544217 131.587987756056 129.626276841426  
156.010027635627 129.851616807075 138.873925577739 132.033116673897  
121.830137285032  
LOC645636 157.768329108254 149.462835741621 163.956894843504  
157.66595229182 144.39135701666 175.452986514346 153.271518348258  
152.99686989829 165.977852973826 147.140771901106 150.835044630002  
143.015905927379  
LOC645638 145.690634269858 192.767155566493 143.791908191551  
146.266350809492 265.174306663185 2101.93705983383 994.213397985121

2185.46850787298 1400.81554054664 340.028737478082 1324.56751399862  
555.959424692051  
LOC645643 146.569958732206 150.778292242313 141.82958644061  
150.807308519367 131.938898032483 150.333572271902 140.110258415883  
165.048922660581 136.6729514905 167.850516495529 125.166940410459  
154.808798024399  
LOC645644 140.145470073979 127.116637906391 173.761036260869  
148.785977829275 139.097764484641 160.799950553311 167.201570648434  
145.601922576321 154.904424749528 137.629855378016 153.51550202829  
166.368623023308  
LOC645645 120.517691208358 133.061016674211 155.92082882492  
108.226917034591 122.068058346443 139.949563856936 141.862767428244  
130.742940708861 117.274977920103 134.02083946631 146.013430937168  
141.008604646743  
LOC645648 141.636604735133 140.393624985807 141.847928424152  
150.192562234405 107.91011371422 142.793573585472 134.678445085174  
141.278654291193 145.875240619257 167.887047631073 145.06205326107  
141.619432083003  
LOC645649 146.038599656417 146.968599872798 160.695913747601  
147.937679308903 154.520935683104 154.256214901103 147.77916610545  
167.040031488406 155.27707167384 143.096097305398 165.364935913232  
158.155486390053  
LOC645651 133.499361793303 135.795717307603 192.565733545715  
149.405118010893 142.45411401883 147.036768856136 168.358323243918  
164.593531655305 181.530767521222 169.158049136321 138.725927120257  
150.540599489506  
LOC645652 153.148085096884 148.007068300762 154.637740117457  
158.558471586662 150.0512732245 158.208998509937 144.405191855684  
151.669421563954 141.114148695402 139.948097704949 157.742948919213  
148.936888662374  
LOC645655 145.656767712617 144.411176964424 126.629012619208  
144.281217246178 153.511995286293 132.664379033058 133.473140653666  
129.798965780918 166.835922279372 128.501189288377 122.69021100699  
130.89594032962  
LOC645659 193.832033192375 165.163490032007 192.244413515864  
189.708396835236 177.708263037199 130.842257229979 147.702785358046  
154.847114601403 143.16930809425 157.697168349028 160.735428753783  
158.814407805803  
LOC645660 123.660836177932 120.822923434486 139.092075947067  
115.785084044427 120.806180547422 128.140333650496 123.887740029279  
123.875478428652 128.853089272901 121.381365873873 130.545285774056  
125.683334853039  
LOC645661 130.909388246758 134.777979170126 158.473244125101  
179.122374556365 165.602175302848 165.2958475168 165.213327555428  
126.362418476129 144.882207209439 154.548286860883 154.900676756492  
148.874533472738  
LOC645662 149.824791474186 161.019770036957 150.985061659285  
146.257923971069 159.114325745692 161.646807806182 137.546487338984  
144.68114486527 155.069048442532 159.867178630115 140.652086055776  
164.929445749888  
LOC645663 171.775741648309 172.169129806643 151.118430469429  
185.113098620798 168.302168350095 186.089988569287 159.19183334563  
168.405786851399 151.70917316194 156.221773628832 161.434331154045  
155.734509841719

LOC645669 167.933231844271 154.027862576708 161.202844994203  
137.298549014192 149.552704503066 150.371716899336 150.878323882503  
140.543382412084 143.147325939994 145.730054487572 135.878996521596  
160.887121295848  
LOC645671 143.812863334832 174.035835206078 165.737618983611  
155.737364431382 180.008152341531 167.003917876371 145.96012463103  
143.123983359386 141.410953064267 161.748547772524 152.796423361971  
157.288308753975  
LOC645676 162.37762946664 147.706402141169 159.620467672898  
154.209689403188 154.574826922632 157.649902282769 150.403702679274  
168.33854702953 156.916784141484 153.374296511216 148.82034800623  
182.02250582556  
LOC645679 140.864196804152 141.105812351905 131.404001006643  
130.14600240687 151.503307004675 142.560797028716 133.948997488604  
124.959873714884 153.09926854747 125.553615182238 103.594872791657  
130.12638520846  
LOC645681 148.286700314107 132.883408554592 135.226240774124  
143.407371444437 147.653573379877 131.516100334597 129.811504562622  
125.509221735447 131.440195723963 135.730331297139 128.647790058795  
146.493927564338  
LOC645682 145.221594295772 134.992686224944 146.515240633175  
129.501028506432 145.748174062159 136.491140756702 151.433634564939  
154.2433882385 143.434571922656 152.286545050749 156.146154578237  
144.565926379402  
LOC645683 16480.781374867 13090.0615116619 14983.8256502293  
14544.3732040823 17917.7303120499 14866.8264879369 21551.9994556128  
16533.5738137081 17568.5229948989 14108.0461617941 11479.7406150358  
16588.0599171804  
LOC645685 122.550707067805 127.588907178652 124.405905157157  
120.257886394616 130.262411213764 140.44966014021 133.79868477192  
133.311212623667 119.972337070176 137.314968268692 138.13987378399  
121.559477523123  
LOC645686 154.209689403188 135.9097041056 132.602336133471  
132.8310947234 134.678445085174 150.596350682411 143.48729871068  
146.453030317456 135.3969732106 149.554174907798 143.103779196037  
127.199124606827  
LOC645687 126.566165822427 138.82269002406 161.393953325115  
145.301551442388 135.108420614547 143.085022888434 166.095964870713  
142.121399383259 139.587192809431 146.5514757111785 122.711143209444  
145.301551442388  
LOC645688 2192.17997650999 1975.83062789692 3968.38723079061  
1975.83062789692 1400.81554054664 1777.29626660109 2804.99820187198  
2165.41403521012 1841.63015706195 3586.00189997341 4276.70912292877  
2009.21931102311  
LOC645689 130.370405378213 151.526337610068 131.973896985615  
120.193580405229 135.516856254532 130.849201993866 139.291775075915  
139.582054825147 121.961568081299 134.206518622834 124.176944998906  
110.333339548402  
LOC645690 139.326694135427 131.849442776642 141.539503634005  
146.156634581799 135.385133545332 144.361871207081 148.01816554072  
137.567384694894 138.414916506716 143.834501071806 143.921506580132  
142.421913396368  
LOC645691 384.566987097657 357.835334661098 444.082440002333  
283.645434184168 303.241375487319 511.670320118232 756.390518977556

697.581541438891 521.625146077176 579.493790910006 570.533103778482  
742.128229715198  
LOC645693 298.347201056937 268.930428617695 402.694564608582  
225.96618659877 167.250667092211 244.689936990021 539.125423322738  
230.806950763402 215.247472744419 555.959424692051 595.752426322468  
424.37437028833  
LOC645694 129.995417218564 136.016912147651 138.35538364303  
137.463764193883 133.998381302146 132.562090247233 138.328508662816  
138.981712781568 133.675029107803 141.59474425685 130.763957515652  
149.583494304891  
LOC645700 146.06054700771 134.748177388398 136.737964237109  
126.124937863679 164.309588213547 142.208987267497 172.451128796055  
147.446381217887 140.554684822646 131.580226088647 146.819830256127  
156.437949042181  
LOC645701 144.329979284786 155.097300548684 140.16233428205  
137.009303458922 129.697584673736 139.278366709094 126.573673878042  
139.991780068793 141.752031758589 146.910471989835 139.466683069609  
146.612602970963  
LOC645705 127.430408113725 128.4702079007 155.71830087869  
149.511776997149 152.207601283271 130.626965797365 147.057116881846  
140.722297244564 133.642815510945 135.481300250507 136.16560274503  
148.57301274812  
LOC645708 134.142423026264 147.717748449017 131.381189141974  
155.371772547395 141.334394187941 157.466686487471 145.612695657243  
135.743159681223 146.291932367254 147.681723355535 114.913534674899  
142.45411401883  
LOC645711 142.358754646258 155.70645844794 161.636411303968  
154.340042518983 137.027334042585 156.678686363755 162.285199080777  
160.073510173041 139.209080672396 164.753886197136 156.007630568494  
161.852665901359  
LOC645712 138.692057950694 128.22735290389 122.742891063864  
108.631224817901 129.201101445773 131.49577981738 127.879723100698  
114.213405341709 113.656820701744 122.719785082196 114.265920150451  
130.738915341653  
LOC645715 9378.87287299048 10533.5868398404 12221.7819812315  
7992.84111657183 2867.63319136936 6484.36742084268 10449.7190201942  
6894.63087357693 6059.74270502037 9908.59593023839 7104.65816621275  
10579.8650348916  
LOC645718 153.114065147266 171.935132459373 158.784190231286  
154.055550115498 156.622993107052 143.996350813566 174.332913952768  
152.662446724781 153.82440233533 175.334453981762 137.570343435498  
151.349739492368  
LOC645721 133.369314179341 135.760578586004 130.509415570889  
141.775100066311 142.25795237339 141.088456756806 165.100811808026  
142.81401345781 135.291264978088 152.528571776589 114.556542069712  
138.246963115014  
LOC645722 176.121563444364 183.385868234361 188.013181859196  
223.573080955095 193.843978773764 192.475309217696 167.139257044999  
183.83720937589 171.140106467064 196.908612360694 181.202396068658  
221.561252012695  
LOC645723 149.303427221111 158.999305963902 168.994258456498  
155.612543356905 170.342828808493 136.225792549383 161.37617568158  
162.876684781936 172.877947895827 161.603317039244 157.203304477454  
141.345379144177

LOC645724 132.317972465689 138.950197595669 150.521719129181  
131.557867491904 131.924162435354 136.169525758215 138.100014158367  
153.379118228796 144.310362660942 139.524233960073 122.265071206163  
135.433229702209  
LOC645726 133.348510114432 134.504873813959 150.555125135002  
134.493062923443 165.496065029161 156.873097743717 146.524138043215  
188.767121505943 169.568915494577 170.720018572735 158.523941833883  
153.349400517428  
LOC645730 140.13515064896 129.086186239653 133.702845956639  
151.734683227196 150.442821494908 135.071400668179 141.170937695272  
161.466192326759 143.145483889918 135.41857369883 118.614641349402  
118.470400686096  
LOC645732 162.885054245809 167.447964370395 157.341422939225  
154.503958858173 145.360466216324 161.94312376726 155.836471680447  
165.347173283335 167.330860677012 163.93199635496 155.263513633703  
158.886786960196  
LOC645733 139.147327302581 153.152921890232 136.955651763743  
146.75924072364 148.770315933249 146.934990457666 133.801549026691  
127.330523871944 135.607537832704 165.480489678822 127.740057874561  
173.741466458636  
LOC645737 148.638400592682 154.064184525311 152.939759795631  
155.651798065702 165.337956130606 152.845126167802 180.881464829981  
158.049286838471 156.818197172306 154.027862576708 172.065593177758  
182.32514927211  
LOC645739 139.579764449867 149.518870320398 142.791015845309  
163.922353493317 148.314248474411 155.76860362365 166.135707525987  
155.031272695335 148.874533472738 148.007068300762 132.873213182775  
145.86855878099  
LOC645743 165.062129636008 185.627515956848 183.735201125198  
191.665827345888 200.045606111354 187.196424491482 194.161930642068  
160.511688319771 163.991378703958 162.347140552869 150.724359913994  
177.639351778834  
LOC645744 128.262195551255 144.660095230819 131.657454325126  
123.660836177932 114.342980656214 142.195764444916 141.067419336609  
135.835518477299 119.730174479044 140.904883114871 136.211694310501  
123.891115326934  
LOC645745 140.254665008195 138.972789382679 149.619141707962  
146.044279076949 127.811923445503 138.296933822299 134.216088147701  
146.775403409562 153.336395746742 147.684875777977 147.600825146067  
146.856133875296  
LOC645752 143.340685579645 142.268018184723 149.292552957665  
133.906867716171 134.268075583733 128.122197525844 140.101511236793  
143.672118850295 138.476953078729 142.02169810999 152.112177721714  
165.344981821448  
LOC645755 132.661036963636 130.849201993866 125.929743286163  
126.98588570464 145.463105638655 124.542879928448 134.376870769669  
128.708956947928 131.897352210959 118.655954393594 123.817878562971  
131.878155417065  
LOC645757 128.87498876738 132.458764637407 136.553568679965  
134.169645445889 137.975369568585 126.832182961671 134.028626989933  
115.384304932365 139.646026806298 133.003743285746 120.967523586161  
127.034985265748  
LOC645762 175.9219991997 190.489530928259 183.921173538112  
189.887788314879 209.5184563244 195.019706886336 239.474937674583

208.75656341402 188.093450717857 284.574888587832 287.656436278551  
322.614169214764  
LOC645769 140.334331111538 137.495288670441 141.937611082276  
129.7137422914 141.069243738242 136.940275156257 151.037282417145  
139.303747021408 129.257947818865 129.805200061145 122.046901607713  
140.005968571997  
LOC645777 154.193086881801 159.798024189461 147.784078315091  
163.175801793143 150.235026770931 152.640683776403 158.514079887374  
154.716750150891 159.811778680604 142.153830345183 128.668672935791  
145.144401160102  
LOC645781 137.488665424434 136.120813399579 135.535020220081  
136.147810636915 136.817517693076 130.772410329685 133.731500722599  
141.236939351298 124.555847618988 146.069543494352 114.122395647516  
136.428826558493  
LOC645783 154.061101136889 137.698423468762 157.560117350562  
157.659824861915 133.254663058352 157.684694038023 130.836079676477  
134.635645106042 140.550044737476 133.517685144186 147.653573379877  
149.651553512698  
LOC645785 145.612695657243 142.566028652989 167.842122798757  
152.853860043701 150.63456320644 166.64535048582 162.231074522984  
137.788504385206 151.034392433934 141.876237297525 144.400004730049  
175.176693060261  
LOC645789 137.984988819967 131.890554636938 140.895053453126  
139.999298193212 155.249688219254 136.913957413224 143.116451998409  
168.238615437246 145.517559593811 148.334425146129 137.066799877341  
158.335952927257  
LOC645790 143.219722736891 154.388776919015 139.325478877749  
148.744599622165 161.108249802467 159.379420001197 153.752502094283  
140.581943144813 148.925418133902 156.748330788367 151.884221015031  
145.713179548811  
LOC645797 126.143886553557 155.842195370853 130.965418847276  
134.712935556892 132.155877196474 135.423839577038 137.129864761402  
136.591299462104 134.671840308041 138.167369090026 120.174672871542  
119.613985826308  
LOC645799 150.479320779862 164.02617650236 146.087596132093  
145.358431402568 149.827791077797 150.263578317272 151.531667383273  
141.359142214228 145.299625153537 145.934643000545 139.1434049136  
137.423810400996  
LOC645804 157.28429690041 136.708746582636 151.340728221261  
138.601616246182 146.721207920553 151.092066533546 128.831988422272  
143.842566639842 135.256735788722 151.792921211607 159.544710238172  
150.883139945292  
LOC645805 138.197070673796 130.979513420888 139.042034301544  
133.43194756868 137.522792377933 137.549175595441 125.777193592751  
128.785472881136 138.052032298683 143.292552892073 132.269567096683  
129.003317344469  
LOC645811 134.415163103911 135.373824773008 131.383113302567  
119.636334259263 132.471014832851 129.153882779488 110.727742629085  
136.246543311291 152.890239929335 148.493435517221 123.055210862247  
131.528729642144  
LOC645812 156.402578892869 147.67708956438 161.250520154112  
153.741061283101 144.683260413888 152.238845270993 160.644747532952  
159.227123133854 155.041173289759 148.803188053248 165.857032207991  
152.11956441072

LOC645818 140.311843829601 153.911165277809 146.559502785264  
158.241349852419 152.321890796527 144.685707282641 144.900785401228  
156.695440330379 148.678869698203 152.741229289112 136.480458837869  
150.570540340126  
LOC645822 138.216926722025 118.442856984861 127.926270257252  
106.36673326724 123.561016079801 122.197625748146 131.204616536341  
122.873661677648 137.265533487496 134.216088147701 122.216479103528  
140.190234214948  
LOC645835 116.373841472226 135.919710642366 134.744175117719  
132.91094012928 133.608461289137 124.679444852938 136.547868436335  
117.467618148107 116.558752619296 132.407736899761 159.845890841215  
144.338069855334  
LOC645836 134.623264303227 144.694679571377 159.895303363094  
147.015427944761 143.438417529799 139.85010721496 132.623563631011  
136.258073395013 129.487458179949 155.475804754732 138.43190460314  
161.498785105514  
LOC645837 125.166940410459 138.184717352015 109.454483612299  
143.16930809425 123.420635380886 123.643292039274 139.796168741191  
146.619846538124 122.10489926804 126.946305561543 122.834017529045  
130.912137250515  
LOC645839 123.574319348191 131.628021008753 132.719730606922  
145.906601611338 126.708817316134 149.089067389266 121.984179437382  
152.805525883571 150.503278880269 133.441783287131 155.365673279823  
146.522066289381  
LOC645843 141.817230824364 150.645487532549 153.741061283101  
154.13120950189 126.643229085068 136.229159638766 149.810655120216  
129.063617408979 148.627264102939 126.865622462379 109.832757716464  
140.640160404077  
LOC645848 146.851307767958 137.689158155552 172.741890316331  
145.183463058696 150.343825300998 148.272252953881 160.833948531272  
145.86855878099 154.990319019521 184.135651836627 170.145574727175  
148.01816554072  
LOC645850 140.946729014405 126.497472087036 132.218907367109  
142.230934617475 123.166013119235 139.302591312993 152.710827148511  
133.762141373091 124.138036007288 121.778756075848 125.393848851951  
145.123845983625  
LOC645851 142.376921410427 159.040409182674 143.377902352319  
131.230501496659 129.24482916531 138.123754096875 147.725396196054  
171.51411661213 140.323425587628 159.951697830252 151.09974848374  
149.244970309131  
LOC645852 160.30784625946 149.6730835169 146.785478478701  
150.093684245826 144.490452173336 150.989202517615 157.186747372076  
150.265385257579 149.135934269866 151.917359928516 139.374278310041  
157.654040469774  
LOC645863 188.941900997781 176.449549075475 163.438043894189  
223.359785518285 145.371273337639 164.241874094897 191.881157918071  
168.729301938015 149.764447995426 176.431477850092 161.325409589612  
187.965294229013  
LOC645868 125.472342351466 139.000248033373 147.83240038699  
133.65688823581 140.665332203898 140.556631658219 136.850940500212  
150.63456320644 147.250700603067 131.814528687104 128.79607493422  
120.311723366684  
LOC645869 128.521380879209 117.442158626871 131.659187927328  
144.896960245309 135.959893035019 151.849653154534 149.888719320368

141.284002360584 150.498954408708 144.315158433582 128.113966507586  
143.665359343809  
LOC645870 139.537865511933 131.543439103033 153.369334953677  
139.932849289354 136.761327889481 140.855078775719 145.459919416288  
134.189023892662 130.285187693932 120.626155234319 133.192757350144  
134.519697269443  
LOC645871 152.950227635138 155.393326732887 167.645930148254  
150.184863108453 162.358237198517 151.68523937819 141.623851511993  
147.919058170753 157.684694038023 165.48594766783 144.767233774942  
141.215542377796  
LOC645875 140.316066297536 142.861359851088 148.853877151493  
140.146894533044 144.840218312168 135.153588830407 142.861359851088  
146.013430937168 133.845056524142 134.631638658586 132.799355149191  
134.946677624454  
LOC645876 129.763063900493 137.609831343223 133.133892264995  
141.963297887448 127.749992538985 149.584582050615 125.170874841845  
125.566982723725 128.957236136715 132.294365151614 120.135349166633  
132.002835547397  
LOC645877 148.143367490426 135.200049257744 126.722212054469  
133.001613667656 134.666505160831 137.044079235724 128.510903178542  
125.472342351466 131.789877096016 155.207839370162 144.170287726456  
133.514843630183  
LOC645879 160.203521879896 171.40549153673 162.233096422572  
165.219393390909 170.622615783608 163.119211741255 155.55288776049  
159.547323273189 169.815053752464 180.276082632155 134.268075583733  
161.385691765316  
LOC645882 122.013040475143 151.409290231274 149.747347428419  
143.290642777702 135.639558187703 150.792065744902 130.270184521521  
134.95842832877 138.592943322694 121.984179437382 137.448412532999  
144.39135701666  
LOC645885 150.142724640067 156.277567608825 156.704278982517  
165.763459146818 141.393814611166 146.374656140032 146.362705590778  
143.501380161409 127.088916295784 191.777253122672 121.886886059038  
168.538117820213  
LOC645888 142.791015845309 159.918778562802 170.67334244323  
142.752536416014 145.254692995502 156.834059922255 190.138730960643  
162.879707592164 133.801549026691 137.262309660909 150.956247643013  
161.348562186667  
LOC645891 129.095469955392 118.787630332168 121.95061962467  
114.805810485989 120.450111018432 134.949572471421 121.559477523123  
132.481710681317 131.941069239017 127.155818626031 127.593764897583  
127.648224668964  
LOC645893 138.395943168158 146.518478800271 143.541810469447  
143.053727675518 144.190203286506 134.374551571013 147.761965925044  
140.089210795507 153.348110626071 130.788557333561 122.736882859231  
137.076766238637  
LOC645895 27284.7333124039 25808.3502428915 29162.1093037754  
27844.5606756791 17496.0674176329 28730.9248954575 21956.7541751958  
27284.7333124039 28730.9248954575 20048.679735668 21754.9904891312  
25558.9005130606  
LOC645897 146.999370190363 168.210416363286 152.81544746536  
144.5368823731 140.229267364503 149.698664700146 140.061045085545  
151.032389358279 138.201164395948 147.736397115265 148.022287939066  
149.625528206375



LOC645899 17749.5685495445 18720.0460735814 13360.9483836861  
18760.3823237058 21956.7541751958 19189.4835303597 20099.9833491654  
19806.1316481524 16642.71853486 17749.5685495445 15667.6576521981  
19189.4835303597  
LOC645904 141.117659724704 151.102431192559 143.528208105237  
152.241060990474 177.639351778834 154.569432344392 144.439320591901  
149.547635666621 153.941193682697 156.293025312901 150.188128594079  
149.799681364551  
LOC645908 142.563762845657 125.165254272421 146.179543599917  
143.866365203907 131.950295185477 166.040918339519 129.018088749395  
130.104021521854 143.497909064641 173.024402954772 130.603837917984  
145.502886924865  
LOC645914 157.13859713415 142.194507957661 157.600193849783  
132.05513812578 150.275163835924 142.853399942089 135.862790395984  
132.028327486943 139.076258065248 133.165893710176 136.071856104688  
132.983739057264  
LOC645915 134.344021502031 135.779516940893 127.159947766922  
167.250667092211 141.112047881014 144.825231501747 151.289464845626  
138.233799607706 141.70844587896 208.914498369991 144.895601314903  
136.657107363796  
LOC645927 209.93789387724 167.025336068642 210.502556087175  
219.519896184851 166.714793209109 176.364184489318 189.840366340622  
166.298554732581 168.327600230929 180.518621542868 140.368070973566  
159.491388998564  
LOC645929 129.782134019986 131.649830934459 145.306369509684  
137.756209496729 128.686425820835 143.990328432869 139.086498524774  
155.23152084421 130.565986980021 143.884263862698 146.639556437847  
121.154389729409  
LOC645930 130.266601299194 144.494401248678 129.910866236901  
142.658562927154 145.324499089416 143.028618831382 126.186758919929  
146.06717772919 137.627338682823 145.435794613203 146.355229778997  
134.041098536814  
LOC645931 144.335732650795 145.407517107023 161.817609920327  
124.588594750916 187.903298116031 139.358218798638 145.112399373761  
151.219051767056 138.313519292093 128.87498876738 140.719388544476  
137.27298184582  
LOC645932 133.375415815666 139.642457979496 130.543453631154  
165.225475655526 145.711007027894 145.465589138345 140.354508398385  
148.404000406948 130.586509996354 160.735428753783 139.880733465536  
139.697477263244  
LOC645937 159.660564323984 184.974347306539 191.220064414876  
205.765822478178 349.540558521616 181.439775614781 177.214422668922  
187.73896437823 179.996590340102 188.780089746036 172.877947895827  
191.160340745501  
LOC645941 154.336009472285 153.500478301079 172.169129806643  
161.520362399369 145.882793872634 150.503278880269 187.15740398852  
145.122171099946 149.045654499682 161.510497517852 157.103246263523  
155.964242240771  
LOC645942 140.343790129071 136.294479720968 128.499303407596  
156.46322298175 150.46669393448 154.076216899447 127.500754400224  
152.379441401583 134.793399942417 166.741762854246 162.606273401226  
163.198834359304  
LOC645944 126.056493244568 150.218643705925 136.84840505336  
137.81819274774 179.810507975486 129.756642179083 160.073510173041

148.13657736444 154.623548525522 151.079500558067 187.280334341504  
165.698527470382  
LOC645946 137.539385624206 142.973444931373 151.054834307689  
152.426527124644 143.531102074376 170.706932460836 159.320692108734  
146.838547724148 139.253721683078 145.824996954376 142.607578275494  
151.55925331302  
LOC645947 166.396160626179 140.752616434418 150.401509081265  
146.202611204712 130.092881020271 143.440420261133 125.672285485643  
132.236355533277 136.12905968041 125.247402280272 132.07268641595  
152.752870674108  
LOC645951 141.054587977578 128.348910964448 139.543551482943  
144.12472003202 139.147327302581 127.427014611349 139.817493158675  
132.303506517431 143.184697704389 140.56526023628 133.962129094978  
152.397984799517  
LOC645953 127.990453128978 129.470831357565 145.7202993771  
145.965900441953 145.756455015309 127.745801270205 129.771073986855  
134.427601777639 134.271916545532 144.195705502443 126.409995188106  
146.210814568357  
LOC645955 150.241585041178 147.004172510641 214.968589907686  
150.582568022489 123.81177057082 124.913645688325 146.832797779597  
124.815853677553 126.086991456747 114.048136176142 132.28931085483  
131.558842131826  
LOC645956 156.934589811742 167.298438019561 184.365354978005  
163.024215671479 161.667782505656 158.751241730465 162.294114485312  
165.627852733455 146.654925456132 155.3394927753 152.104170622003  
171.465178761171  
LOC645958 137.881776548665 125.83678485646 147.260260687975  
147.866909109733 139.258468432364 129.984214994811 136.448045428081  
132.076865522593 133.59686364883 151.68523937819 126.141462782039  
163.593106951255  
LOC645960 137.916872642522 118.567548265638 127.683344133492  
120.931585398914 129.895388481159 132.34532981135 120.082391311921  
133.686850910378 119.144128641393 118.336654504789 113.947948541258  
123.981053866137  
LOC645961 159.655362710407 151.581593330224 160.221974600577  
152.258389962 163.298729857831 177.919885012006 168.443386067427  
163.915489303508 155.201655653645 143.212739422069 158.36796888959  
159.909121784808  
LOC645963 169.311264420133 179.863096463897 241.494710905339  
161.704966315183 172.237115475147 159.636846021745 178.339211170442  
167.993851183401 172.478461106269 168.687845035401 176.964088090133  
150.109192774079  
LOC645964 150.815117344434 135.33941967076 144.384287335249  
151.054834307689 139.97636570613 132.683594640696 144.589482298525  
152.755535408382 144.090047165489 149.622695843398 126.45630489166  
166.411219327671  
LOC645966 165.041296694491 149.098381037466 144.808774137749  
155.086559474139 159.603586227897 140.578378782903 157.361421272816  
157.399880496076 145.739537463907 160.748082658758 152.124910935545  
137.446745269821  
LOC645967 144.534143943252 120.452958447555 134.441142158135  
160.113042196058 147.228812647235 146.479009988445 140.44966014021  
140.02337095267 154.661456780865 158.044938495884 137.567384694894  
140.497181450706

LOC645968 446.393631025049 482.226889092547 754.406896156858  
327.384671423687 397.307515234646 1079.58110075176 1412.56164938199  
610.337659723539 637.30300219673 1017.09497861942 1901.97972168836  
837.872187194784

LOC645969 138.466136108202 137.627338682823 146.434716985396  
131.580226088647 147.208176455806 173.544556426164 175.186435016433  
191.84511431253 214.968589907686 226.531255313921 163.876218743322  
228.968779778407

LOC645971 145.1382587433 139.652974659584 147.045944019838  
141.090356426567 154.949840064881 145.861217875066 138.48552149031  
147.85133493803 143.766249538352 133.26167785455 122.664353374047  
147.196687432745

LOC645974 122.685360126599 145.731800133702 137.190593489949  
152.971429120739 131.489715975987 138.412022634224 131.823019555685  
129.375772737722 162.259941098076 141.196795654442 147.768191157163  
135.609239096236

LOC645978 160.297609596399 160.724319010751 159.832405510505  
180.941090529551 221.975219056555 255.638433159437 349.054741747798  
242.269784551092 226.287196839644 166.582931148846 216.181417552574  
204.078331021637

LOC645979 2639.60135568 3152.64817044581 2180.31963682546  
2096.25803773108 3173.14004739767 2063.42824094932 1873.84654908146  
4037.15442268836 3093.38255333143 1509.69760873558 6522.27232911897  
1657.72357544205

LOC645981 146.890877830248 137.360220389719 121.768195574022  
139.039276904833 131.483427112288 147.925744210234 125.452973441746  
125.727521491768 129.451882171632 129.528321950688 132.719730606922  
135.526248253492

LOC645983 119.792515907708 135.982797108848 145.941674563997  
125.019064287385 150.075738752092 129.135985676046 129.818020166075  
147.473875763319 141.857434100065 130.697999379259 108.570463496052  
141.850952191423

LOC645986 133.324531689254 125.293640452686 127.665162524824  
156.466728833063 142.148597793651 134.034970203523 116.71331256222  
132.118118271944 132.926799887017 130.933379257307 128.742617750403  
116.961391747202

LOC645992 148.758316681306 132.490323093932 144.425214066833  
148.118705147238 150.584633044901 136.858037332222 146.368188849777  
138.905709709063 125.45936959544 137.675597243706 137.969750384554  
139.163958829511

LOC645993 469.107624227456 451.496617003797 706.292905820227  
256.729891423908 124.003914369077 141.931274901572 139.717662557602  
157.646948327818 132.950480329605 140.142884879106 132.149864626575  
129.356401843185

LOC645994 135.985358106767 147.205511952997 133.915830295107  
136.236441543681 155.164238647284 137.993406215861 137.4552565025  
137.100207190052 138.553151063218 153.792925101459 138.29167712246  
162.870317933909

LOC645995 138.397152876585 131.004145546364 141.114148695402  
127.884750925048 130.625825024195 141.064086298948 136.44218532882  
132.189426012448 139.939863187181 128.344679872625 139.344344562134  
138.12651823109

LOC646003 153.714902281332 157.860515609693 163.319882002763  
156.714081537525 167.384121560438 148.457872807838 162.863781294205

155.824409540332 157.672378669483 153.661632990172 143.652009342522  
153.918462601781  
LOC646004 144.411176964424 133.838032323605 154.118601977256  
147.185378560761 127.715766031466 133.615958668897 150.761696482387  
125.9888344762 155.272264997151 123.219903763265 141.422441104854  
145.855671447779  
LOC646008 170.326474367867 154.001258677199 179.376968970326  
184.278213908263 149.103778494524 134.187456260969 162.970595558845  
153.083451626042 155.40832015652 152.104170622003 160.549597620339  
145.924751649542  
LOC646009 136.734131465433 132.411757518105 130.912137250515  
141.315230997077 140.377179372804 142.62707251786 157.986640251147  
144.692900548503 131.599370671279 139.398238927606 123.959050197189  
137.701271351806  
LOC646010 154.445840992357 130.967476533254 140.383646018409  
136.396579126676 158.906481816035 146.604519441812 162.819608252826  
144.318556353673 155.263513633703 151.96843908074 144.159316670264  
136.353051841792  
LOC646011 141.348548071751 128.588822671032 146.635140441079  
182.209056248253 140.929424764561 140.138870925001 153.705394500855  
132.629453540571 137.662135592983 135.548042190047 137.25054616038  
129.247701136266  
LOC646012 164.264079172779 152.340010735322 165.627852733455  
146.171094379173 144.612549022264 153.435218661228 166.595529296463  
171.329984719612 164.191906588579 177.450674276588 171.229729917612  
164.03801002919  
LOC646019 150.899664887945 160.402220755071 157.997750997487  
156.208747691032 148.711943433557 149.061464748604 139.782152941027  
149.763038696374 147.325222091872 173.147311624838 144.101376910581  
153.93927752488  
LOC646021 140.628614910068 125.489777118532 138.289361041588  
144.604058256586 129.281564491007 140.304810288752 138.239251358245  
142.14654303591 147.405050592353 149.498020676126 134.531334130512  
136.074837228096  
LOC646023 140.216148769999 145.315875226867 143.326739481448  
157.221008210698 142.62707251786 153.885582272269 145.110145981908  
145.383354200298 161.027590226123 151.409290231274 146.98903251354  
155.582036890436  
LOC646026 143.506243892155 141.194900058799 134.105941085621  
136.198583459346 126.798976470472 145.25774926819 142.406904585501  
146.748572532267 135.86924353735 151.9565369062 145.281664250703  
141.397046998678  
LOC646029 130.085138325818 146.030484284194 155.810034593382  
144.122748003206 118.461037435114 140.557871626905 142.726324048628  
141.920967855989 149.999838961906 129.672284417918 129.756642179083  
139.691470247318  
LOC646030 155.007516124803 142.159597861804 142.211357324461  
150.25322837689 145.28524062436 147.766043861937 135.446072698039  
146.817659734182 151.849653154534 135.041687549769 158.316173597874  
146.606442726047  
LOC646033 134.041098536814 120.308260557986 128.922269289649  
127.507557925713 126.141462782039 141.628203045085 128.312170913496  
123.662678397678 129.344834474578 128.643539098937 135.226240774124  
114.027244455291

LOC646034 204.489837323989 183.081450609516 214.714726648332  
203.693188114912 178.055019987648 210.852300463808 185.027902485379  
197.277310409328 176.019082929386 196.777776509371 184.482849019679  
198.783034238774  
LOC646036 115.445219455559 132.472505035111 130.644937322186  
129.558589108727 129.70974867852 126.698158279472 127.389942368953  
138.745560049251 148.304863957659 123.968639555673 104.681530703922  
128.396326753926  
LOC646037 131.22421475185 136.863435564225 148.962593686337  
148.866229889479 140.509950286228 154.804753043168 162.834961996238  
147.844734028193 137.280933631075 136.951350782053 133.320865155329  
144.059368898969  
LOC646038 172.142411008084 168.982086590306 163.85327708023  
198.088834624665 177.267145265362 157.213868854329 157.113536717393  
164.365630106697 178.976116597291 159.932941342403 156.856149172225  
186.854553034865  
LOC646040 159.749576166342 148.431101051574 150.731093808891  
164.641508485461 153.974384951787 179.509758601636 151.577450119302  
154.515091049526 152.950227635138 144.217621961908 143.446317006075  
170.23937234395  
LOC646041 149.350630572336 129.938723074546 136.161633283029  
122.891946370542 139.287871460674 130.166741978483 132.131378074469  
132.793020446043 140.348718082786 132.016944935305 114.76337651891  
121.194138394375  
LOC646043 194.112534914308 158.859389972316 128.462674862751  
126.025161261042 125.951927536494 132.490323093932 153.626180103404  
157.361421272816 137.913497715424 137.605244950708 151.252137441251  
133.427561208907  
LOC646044 270.201322204641 321.492900106953 221.231455446574  
318.244342364572 499.321667633972 339.663295617139 281.846246549202  
332.343558229873 290.582957824549 236.772907994543 390.098830270926  
410.731869154912  
LOC646046 134.161664663192 127.458099438957 133.027592711375  
133.640832782576 151.3362561751 146.846301957637 157.40255559397  
148.895841777421 144.725650040212 145.08246303652 162.861320877227  
138.308965237491  
LOC646047 149.17029600091 135.943252855457 140.004456934031  
145.418696807842 143.292552892073 157.361421272816 147.407093814154  
154.990319019521 156.733898702331 159.307394610466 139.397282021664  
142.883466086309  
LOC646048 154.808798024399 149.831566330214 154.670631900834  
149.394952856085 156.191659799142 141.609037401299 152.552277008504  
156.818197172306 147.320976507643 144.221488906376 141.045958539926  
141.259186690966  
LOC646049 163.298729857831 150.756776447358 145.08246303652  
167.67272339144 141.571389983164 156.368487784719 146.363991934916  
166.1677526 149.604507483606 155.23922239449 163.833372505148  
162.695319777455  
LOC646050 134.158454639998 124.455340203012 140.21908493941  
127.966883271903 122.414781975236 135.51506573405 139.301435614165  
135.553183871663 122.339819585312 137.742393475755 122.766778018066  
153.664503112778  
LOC646055 137.803749343493 115.457121859064 144.00214898009  
138.93292293598 145.428297145967 134.990075720145 133.514843630183

141.947478902603 124.263901299025 127.456181182121 129.45936538019  
145.646191500321  
LOC646056 131.380387461901 122.749182465923 138.42216862811  
140.702685210277 141.310253828965 148.520371748891 122.426568507144  
132.924341641217 122.572634128442 133.439077726411 133.439077726411  
145.34332740863  
LOC646057 141.937611082276 135.36523178082 137.070326499918  
129.664016819143 137.565050253948 148.166340306996 127.763186950161  
132.092910274836 131.076562651831 137.123016784819 147.722646851008  
124.955676894776  
LOC646064 149.306122206718 130.491742824575 129.301839663122  
130.362378233288 145.42029807396 137.331864485838 128.492142236807  
137.163699337032 148.288798428149 128.381433897602 129.289216846128  
129.723501897231  
LOC646066 131.342562516383 138.528083984177 125.247402280272  
132.087183382523 128.886008923268 141.386812131149 139.336891718408  
132.848926011576 148.219406063533 149.05280915667 126.372374084002  
150.182173149394  
LOC646067 132.263954832097 127.485734862624 118.679664392666  
143.234195669431 144.747349658054 138.467624450885 157.821491577808  
128.899712906082 149.383429241903 141.78867917709 169.649251828199  
133.737573120711  
LOC646070 132.290234154865 138.299629744589 128.782192901724  
136.965972077733 145.365935017728 151.176697752603 155.790759250672  
120.706421084476 136.011474063229 136.878656455606 129.600448216577  
157.446725405803  
LOC646071 137.563246867433 149.188357651896 147.113541493157  
150.772752327567 137.584340154725 152.356731704094 147.051399102374  
136.008118769513 127.077668562103 137.867263869936 121.531401500498  
137.449776383224  
LOC646074 167.011846920792 147.995991912855 173.497575259833  
137.620843137286 149.975892236985 138.701871179502 160.876228450608  
146.517645037071 143.660679324057 145.698637908482 159.236429097777  
144.266864839344  
LOC646079 158.514079887374 123.038646914863 128.0171233156  
152.418315087218 141.59474425685 138.116568200293 136.818557078622  
156.678686363755 150.536178574986 151.921235758457 131.636779618185  
129.992015202357  
LOC646082 126.539877052899 138.416716745934 148.725162101789  
129.077660633761 128.099484678519 121.242099666967 119.119693776276  
128.578494940165 131.516100334597 126.800718471804 148.832461329713  
122.305514440939  
LOC646084 134.227796103219 150.547096071626 125.549968985241  
133.766199453456 129.808590871788 128.972276851419 134.48825480809  
137.331864485838 131.164778405297 127.890438577754 146.795608819024  
128.477342430713  
LOC646085 144.433543176593 133.270582482753 140.184082384548  
134.28095064513 124.684937344502 136.210745281543 128.086493618022  
138.117916412819 120.422401793885 127.070677267233 129.748891462506  
124.666487633365  
LOC646089 128.282999719959 148.072816925413 129.27634490676  
145.437544062449 163.552608805894 137.882914156968 155.379116566097  
154.043604150962 141.200676699805 164.202554380274 125.728300338988  
140.694993778394

LOC646090 133.619092072157 132.948096807634 140.269160279333  
149.545278163222 145.214575855337 150.833523101057 157.182954894643  
137.808307749725 148.302775746627 134.483162806498 127.787890405862  
148.212445624699  
LOC646093 162.846914172627 179.376968970326 157.032746784217  
189.94130405123 169.502103689662 191.405362404386 229.835576260403  
190.572712684622 150.014842228372 165.530397739051 280.656087497806  
186.222567239198  
LOC646094 170.452989060697 137.58025011566 141.015441854424  
145.619570216377 117.754181884939 149.693559841189 148.616543842015  
141.178668371671 140.397184813186 135.857403020659 136.346472365382  
145.134613145303  
LOC646096 153.371065247493 139.363571392476 157.443127950708  
170.212679845194 148.989286668424 148.227581116046 142.379120254855  
143.864036545717 131.575356402693 148.691132137188 132.059507616101  
153.633095853017  
LOC646097 125.272796155561 140.885915460425 137.677396262152  
146.559502785264 132.916608405637 150.734560844391 137.177271162749  
128.572388808833 138.963864375073 133.563494063292 131.173355686001  
152.872139211415  
LOC646098 125.661697165943 132.518394343751 134.442947822188  
146.283340399533 147.420580715112 133.527906709491 136.861019517134  
141.86836086844 131.961236721149 136.575784685895 123.240482782331  
134.683553037185  
LOC646100 378.509324619452 293.873921048642 295.367125961621  
262.488050186425 135.153588830407 202.314814594735 220.217745732407  
172.020235319192 171.444558905575 169.691392833277 152.89366585726  
194.112534914308  
LOC646103 156.720090761933 152.857278986877 158.670835881902  
161.740466814881 163.22059466037 171.106189029362 165.436881839632  
158.448557470725 152.921328522953 165.350777445902 162.063689419737  
149.883237874886  
LOC646106 127.713286292101 140.873210629865 131.204616536341  
133.161552914595 146.484364264513 146.114159600635 133.137299889323  
143.377902352319 145.126091016414 178.946928223991 134.53861441495  
137.500310477851  
LOC646109 137.014698467096 133.0349214478 142.201672822989  
134.415163103911 144.329979284786 136.964780183468 130.779805222363  
144.578454791104 136.967408633308 131.434121613176 124.269446398587  
133.541976827777  
LOC646110 139.720343780228 141.264096014725 159.399804351771  
152.50843414723 151.783090997855 145.306369509684 135.253713075341  
141.937611082276 136.794860440446 141.645906784244 149.273560793513  
135.24841020592  
LOC646111 133.749271961438 138.967080709927 145.812607895325  
153.647343267295 138.720489866687 154.400124981573 163.773702843544  
155.561821955048 142.399253818882 160.267072311782 139.825088162247  
152.692483731643  
LOC646114 157.635531050489 129.044445373107 141.971207380159  
151.191822057706 146.515240633175 134.946677624454 134.671840308041  
131.266386010519 147.738146185884 134.541606996118 123.913203953936  
150.079372712689  
LOC646119 121.915043935246 121.723964989551 138.613373798613  
117.593226427794 125.2051300372 136.2727333616 116.19219007097

143.901267937876 127.924195488323 115.066084565112 104.321352818065  
125.528638246486  
LOC646123 212.443407602682 186.563913311757 181.157738347957  
194.092089507551 142.143709425075 160.853480692082 153.261002653668  
183.493455947795 170.720018572735 132.092910274836 167.830629616121  
170.748911334847  
LOC646127 155.121309543738 154.350107666084 133.198832503062  
144.389805078873 138.723149134933 138.476953078729 141.112047881014  
118.60878652724 141.499192356469 139.644701550661 146.944628763232  
120.394220715157  
LOC646128 162.828844182372 180.761100930677 164.615113709166  
193.786889748038 171.573342518254 179.821008257902 162.327039624723  
166.305219348008 160.374491283254 169.999692055871 163.045605069267  
181.491120129045  
LOC646129 158.841505957036 150.899664887945 155.70645844794  
137.018521754443 141.232464220879 161.217964573491 133.82548013342  
144.994931561779 148.423303776817 141.613898853625 139.099483279141  
156.846991384413  
LOC646130 164.824914851636 165.476670465739 165.376358421533  
162.547569833931 154.324955232468 151.372219350291 161.806144472744  
148.949829934611 173.334154083555 156.622993107052 149.684922983176  
147.543411823657  
LOC646132 140.689100728713 130.476322267589 124.723519607109  
126.536245975137 123.908458472687 120.669452856028 126.292433523959  
131.681566829159 144.898770838913 132.206133020786 120.231559540009  
119.658703392877  
LOC646134 128.2409378561 143.370698101204 135.825931047185  
132.379706531581 132.317972465689 135.491412261604 119.094868654252  
121.414076245292 123.603972078897 121.194138394375 119.539713878832  
140.462651395483  
LOC646135 248.850686917567 245.607130404306 251.20133703465  
309.318403417731 223.184064606222 217.748916080172 275.755038921952  
275.543576337502 232.621526025603 308.031816782343 245.426639190893  
284.764628939128  
LOC646139 142.307520290692 141.825162897153 159.029406517237  
144.340734361996 180.408639020724 144.445496145045 128.9481574913  
142.223992275362 139.268497466017 157.207544072126 163.781674803361  
152.741229289112  
LOC646144 157.639688257892 160.91894600916 178.665552649698  
155.15575204653 160.676606760965 172.604689611475 175.510160114891  
170.941404165185 164.347168837655 167.194306682927 160.461846976268  
193.744461104128  
LOC646145 138.625680450198 134.797624902585 127.859873416515  
121.22760405399 126.895669261503 130.270184521521 146.74669300049  
128.685065364693 140.225329742578 127.001546144286 139.234549949916  
131.287142490322  
LOC646146 133.043503979161 151.622719246408 131.196196319523  
137.647282354299 125.5449326311 136.722636695506 149.756512110538  
144.760229351772 136.300195727908 147.335403843539 148.770315933249  
134.673861365626  
LOC646149 130.632096412204 128.458132030921 138.319321806028  
162.786351190659 150.396462763607 129.596851280135 129.356401843185  
122.685360126599 132.085538520551 128.510903178542 146.136820062093  
132.119370332298



LOC646154 183.294526267593 153.563839578065 151.958818313561  
176.533058719908 166.192990554427 177.851689709807 169.933706225406  
153.200153031275 149.984657985607 170.676752248138 149.895214204184  
173.573412346985  
LOC646155 142.26998944788 148.620766059526 132.133979108537  
141.853711139375 149.959767051801 161.704966315183 148.751755543817  
130.182320154521 144.252481420079 127.913463809158 134.796088225931  
159.746802905903  
LOC646156 125.068362001087 132.943957535655 133.876636039037  
135.489000274316 147.78095608696 141.839647226623 150.564099989221  
147.865114383296 154.400124981573 139.980504765791 130.814702312493  
153.092864798642  
LOC646160 129.856994052591 141.15458637181 133.046435968561  
122.587545171646 122.317877997527 134.614988219821 134.501410126169  
142.112120308118 146.706846930708 134.8745127454 138.147658465394  
133.608461289137  
LOC646162 129.167602517633 145.882793872634 131.312580984876  
143.263333116046 138.173547382901 133.44592405762 133.88072491369  
131.536457148878 135.938590242744 143.49969914174 135.24841020592  
136.625136565562  
LOC646168 128.578494940165 144.73389393695 127.874934513708  
141.522701487198 142.709768829207 125.828998007608 137.17370871536  
140.878935632862 140.269160279333 128.668672935791 121.871105084095  
147.530719472217  
LOC646173 133.0349214478 171.610742435469 200.443940449586  
141.359142214228 167.719651771357 156.176537862398 191.322056430728  
155.413300826229 148.21588894931 165.118167086792 135.695576019185  
171.006582229921  
LOC646176 137.625415175495 131.530256606799 129.730685860688  
130.686857648764 134.383024487323 128.939572714685 133.845056524142  
136.420062669039 140.571143847885 125.439033142431 141.990639998829  
124.922004609558  
LOC646178 159.466972602203 149.410729709855 148.967232828819  
164.981665344298 146.328876892698 166.879042308539 174.515815532892  
153.62335478774 165.355764467096 159.643566663742 140.190234214948  
145.39813290003  
LOC646179 139.336891718408 149.657951204528 142.848438163322  
152.320805439283 143.185372109165 143.616189776965 144.148833164952  
148.859129298141 146.033591220134 136.593346330215 146.790059505709  
147.821639002833  
LOC646183 165.511561121012 133.717451195844 157.528409294029  
130.285187693932 126.124937863679 144.877789873062 155.180238551547  
141.114844177644 132.421863261746 136.737964237109 107.221547998974  
151.040909999868  
LOC646187 139.954480845683 135.814893730549 146.14494790114  
134.637520371454 124.541257225826 143.45723206497 125.617143363441  
123.015371659847 117.67638166062 134.187456260969 123.498540254464  
124.408996713299  
LOC646190 118.076139318165 116.179625689647 116.19219007097  
117.937856116492 126.195222228248 131.481679396553 142.720769329396  
142.939578759097 124.712789674509 137.618447592489 119.168045349254  
165.213327555428  
LOC646191 109.564709878576 117.585207821853 125.942455135541  
131.958760372325 121.736056336879 111.032156655273 127.945144368504

134.45677772672 147.54950981909 115.25307661968 116.433239116749  
119.202966460612  
LOC646193 140.115154069602 156.018200674475 151.581593330224  
157.805871400914 137.938310376106 152.390371614602 136.74788009263  
151.252137441251 157.885229749634 143.807102980397 124.503016568677  
143.700865823615  
LOC646194 153.039237274992 133.181855719499 129.054577477882  
131.354275252104 140.151530793459 148.258850340107 129.374418059091  
160.960599932898 140.03202338666 157.826457203706 144.834448238435  
160.640160107693  
LOC646195 19661.6741558107 20887.0399135573 15420.9668207676  
20099.9833491654 21551.9994556128 21956.7541751958 25808.3502428915  
20887.0399135573 18953.8127741918 19496.8914296296 19806.1316481524  
21754.9904891312  
LOC646197 635.819650434542 514.922742487521 802.304294140514  
514.002313819685 706.759905439674 614.514126276981 724.442411170786  
615.254768508691 546.029974898225 572.049540360134 619.380514697732  
743.510369438587  
LOC646198 136.770515182612 134.499588539919 158.859389972316  
130.06441029462 110.707755436868 133.796029401157 138.378425715239  
128.402511355513 135.098343717085 143.750656408155 158.007926822094  
149.999838961906  
LOC646200 7016.12801650552 7617.316805798 8881.86480594052  
5058.57872936027 5049.57929757135 9759.87403504619 12171.1997841553  
10106.8225600705 10024.4662743012 9016.04641569485 13217.7001749493  
12749.804597566  
LOC646201 139.211746200839 134.288349336742 125.130703953031  
139.671302796695 138.471894596606 133.514843630183 142.469353808346  
132.216453078716 141.84490608317 132.014213378179 139.986119754908  
149.505323932806  
LOC646207 148.82034800623 141.164985468046 160.848201202361  
150.295611829265 141.831596320865 133.670967970136 139.840256729373  
140.35175858015 149.160808104789 125.364821583438 132.220398477217  
139.714198638713  
LOC646208 126.819413901915 148.463566046951 138.45137517137  
129.854478528455 139.075537402658 143.325710305008 142.388076341254  
129.543069836687 132.038012025708 142.531683761072 133.966277922005  
142.722227179256  
LOC646209 136.617105945904 123.126240234396 136.829137120584  
131.228779762508 123.267817390796 134.312156667838 136.280653079814  
136.2727333616 140.626181314061 136.128092230238 112.800733398209  
125.785388817819  
LOC646210 159.218886890035 129.95138839192 153.947717667689  
156.269957530519 141.596078062845 154.193086881801 146.537204621419  
143.182399285928 136.041605158822 143.04129238495 135.453399741892  
130.880795616911  
LOC646214 262.349315496653 312.129861040709 267.747633122387  
293.746733527346 354.336462793628 206.149539851803 251.511405838796  
288.072720517427 284.715092831843 432.92947962962 406.54518900348  
291.994364783888  
LOC646215 148.370331097467 141.884995734267 150.914644894869  
174.059172465573 137.572574328004 155.365673279823 130.782296492278  
144.240470871638 148.067562465748 147.856285290748 133.724135305758  
144.601370216162

LOC646223 133.048720362039 142.116311513299 139.640918572569  
154.261443597434 162.904897605929 116.819107878692 128.359034755228  
149.813838004575 134.673861365626 137.107621189522 143.569894807386  
138.880168623766  
LOC646226 143.756242843438 126.98588570464 141.281116867082  
139.388484543482 128.980519133484 156.311009595629 162.6762533989  
145.96012463103 120.71782441569 154.170007083026 134.918496279185  
134.85590586532  
LOC646227 140.865990571023 120.300291760091 131.111930163369  
112.867662941811 136.852403978525 116.355027746922 120.246240734668  
122.449574852865 119.29304762171 130.156775178934 118.56332995149  
119.972337070176  
LOC646236 147.345558455805 147.150063462728 139.847813838017  
149.340614923384 127.344210958898 145.254692995502 156.46322298175  
143.548858367002 130.473842500245 126.523201566273 142.19015013243  
148.618327213374  
LOC646237 142.401333414583 134.238642042323 151.486362260537  
146.750774496317 164.541417588646 130.027227278931 164.337486856997  
136.805379739087 156.13331481937 139.809114250476 121.939618902165  
138.873925577739  
LOC646241 138.307574579062 121.810767302322 133.357385559881  
135.647660756548 128.988736837863 130.758707848676 119.198789189881  
123.706910388724 129.725706669166 135.144908040903 147.129702047639  
130.396593013401  
LOC646243 140.245786278057 127.299853592344 157.517955771507  
140.829927714838 148.194450105682 147.937679308903 142.628296442123  
131.121343131082 138.424464248567 135.641355114263 127.804392143587  
139.499652059557  
LOC646246 156.105736111274 142.103519373191 154.384766720753  
135.335107344583 156.233573126063 149.962143642332 133.12904935533  
141.480793979634 129.505139430366 132.181365505556 132.135448831967  
144.169072574865  
LOC646249 127.637319802339 124.247680699048 139.636177212128  
133.686850910378 142.56910547147 140.588811000948 138.930413256469  
140.765231611948 130.909388246758 124.616629956864 119.655162437465  
136.888915439473  
LOC646254 128.112595697836 127.358616953147 157.36568754472  
129.980354138975 131.76829141949 163.915489303508 143.960688664936  
139.367493349339 137.528342105233 133.374199939042 150.0084730766  
126.978144285534  
LOC646256 183.64389891975 182.310140388705 195.400963839097  
183.85837324585 188.181647474317 169.502103689662 180.986305037222  
161.142723532061 165.647471565959 189.434597063058 164.948785167149  
179.896659891106  
LOC646257 129.13353785479 129.904942554979 124.944563166658  
144.688515462537 134.367115858307 113.672605838627 125.20712393273  
130.440164900487 128.738746025289 142.617474507282 134.730275384832  
141.763072120718  
LOC646260 116.118745494794 126.956303896995 123.02546895475  
131.548634017902 135.747939020471 139.966813133326 130.483765953389  
127.683344133492 118.029258839619 130.590195477461 131.336902822702  
120.322292418128  
LOC646262 170.13453211897 177.666582096539 174.006516433854  
175.417320301614 160.297609596399 168.254689624696 164.39910609636

176.267796612066 151.736824723671 150.28508305615 159.913028912492  
156.674411447713  
LOC646266 135.666278507269 134.35958389775 142.26998944788  
134.30854633824 126.967212770393 154.049004176595 144.524701422705  
145.08853313195 145.553219709768 156.964080041261 116.335864439545  
133.975526667571  
LOC646268 125.999595008166 120.355844117573 140.820807603291  
139.552533656255 117.008277388399 149.639835429332 139.021552573529  
145.389721946046 138.325950428197 137.968932080074 124.907788504503  
145.968285147454  
LOC646269 141.226901872221 148.739888930189 133.66893163718  
146.464937541891 137.962542261072 135.475597372104 122.382304966782  
141.589470439145 152.188770978528 130.565474957655 136.720837676326  
134.70848693317  
LOC646272 127.663578933727 129.551260802518 107.727848546225  
121.003207135942 138.014046365103 131.665421461826 146.735616237082  
126.158204790885 137.574131495849 137.7724100594 132.492444216154  
123.582509531804  
LOC646276 137.910618360623 157.148880624381 180.902950045351  
174.202069525223 134.968848574511 136.745596788338 135.911903336544  
157.003367685421 137.947606003247 155.98413216883 106.629065516249  
159.23414970379  
LOC646278 155.183210738478 165.896420029269 156.187809481625  
184.923312649584 205.966111721195 155.76568091161 159.223980639045  
143.931400351525 160.055242985219 161.160974998803 164.063104872636  
156.904781904311  
LOC646279 170.87247413028 154.170007083026 142.830950036054  
161.451253146578 178.966169998125 174.035835206078 163.54669668396  
160.816803370151 145.551717838423 142.842130077535 146.257923971069  
162.890650672747  
LOC646280 140.350144438462 141.262319193649 137.620843137286  
135.725202462502 144.507230362869 133.619092072157 127.350368333088  
127.430408113725 131.176413983785 121.076652800015 123.161953011069  
141.600833670693  
LOC646282 139.163958829511 139.760425990939 138.402890124039  
138.945855414918 149.638361598695 130.14600240687 128.858923585925  
143.618454531431 134.253399256648 136.406132339187 142.025834438974  
135.458682745495  
LOC646283 138.002258986172 144.86583288717 132.70442458261  
136.986022901377 132.752401872376 135.582230137515 128.813848160586  
134.932416370825 140.074841537258 135.719702250709 150.026314061051  
139.032275257901  
LOC646294 3737.57754066891 4335.76831372031 4134.02613649483  
3909.47437917608 9272.37780151073 6737.97308530049 10765.0336035748  
6760.37324850804 5759.5586948816 8342.70113690382 8140.6363797934  
8768.32269645116  
LOC646296 148.755559144241 140.443415669628 126.338676765473  
149.18603646016 128.713131994442 135.968346417524 137.660051943656  
145.063062479224 134.865577264797 127.669334230458 144.868337748544  
143.247977741752  
LOC646299 151.201263631883 144.968459820523 142.752536416014  
143.193305421206 128.798413084891 145.404469340821 139.316189199729  
138.557464672111 130.354641020141 125.277752749246 131.009425832936  
148.678869698203

LOC646300 151.923356524322 141.277227483198 151.773749014775  
169.271175460047 155.221833416673 151.96843908074 161.490941000872  
159.592581700976 148.42845062376 152.823566129571 148.503282415207  
147.854171854456  
LOC646301 167.389632521521 176.029791617989 181.261666651301  
142.414323129638 164.955263076598 204.113356572343 234.789040617681  
248.360540656183 185.199972151831 270.181005097697 209.180298459605  
230.975434289172  
LOC646302 132.897554980037 126.349403754775 130.858419819734  
143.631345956176 105.583474813289 137.904786382385 135.576975868985  
114.880348648147 123.198873421356 150.888616811881 112.624137732184  
120.984641102879  
LOC646303 147.294408903227 155.83143112621 155.104697146664  
135.614106458757 144.534143943252 132.890396520305 174.441287575034  
136.545742688573 149.980924447339 158.76356962428 144.107029869771  
163.538862303362  
LOC646304 162.244691888031 170.54511631708 168.21856603538  
172.259627777465 147.257773507186 145.731800133702 160.338146803754  
142.478528530514 163.846242743377 153.005366371425 159.177303894223  
149.936366672592  
LOC646307 146.71868686671 134.94189148503 138.695481214267  
142.837688062688 140.56526023628 140.447933562667 135.699583036042  
141.972403120632 135.078198678379 132.149864626575 136.529820456592  
127.291712212051  
LOC646309 113.163651806803 139.510764003291 121.170340423391  
137.014698467096 128.683044953833 127.593764897583 156.567519536997  
142.874797429568 138.182987173284 139.358218798638 136.734131465433  
131.328478053136  
LOC646310 132.061436165754 137.669753723768 154.881797585583  
146.425476034368 150.754492902512 147.183889426843 144.446903878863  
133.419239158866 148.045391886623 149.467626202395 128.354163132392  
158.760577365464  
LOC646312 133.463464118897 147.872625576731 131.748753064488  
147.87699690647 156.779004465552 137.950955473086 131.984467471242  
126.583342262489 139.78795317086 144.608882758506 141.580944960818  
161.640122360448  
LOC646316 255.066583469964 232.845268785472 282.244214637625  
228.852495818211 185.31769184805 201.059635671301 198.257497903131  
209.867189613436 210.942865876533 186.388067641269 195.333029746339  
201.349209185128  
LOC646317 152.095584118603 149.380733719756 140.831508792119  
143.047617455953 131.218141814078 149.188357651896 134.964619235561  
138.778496466408 134.943005383277 143.263333116046 130.574019477669  
131.369177333568  
LOC646320 141.499192356469 124.901759819007 135.81863662958  
144.710613442383 141.537578081123 125.498081339586 147.535225305685  
137.901317305531 129.018088749395 152.213746577124 126.482660154852  
120.511896155396  
LOC646324 143.539741029895 142.195764444916 141.156434225355  
137.070326499918 135.518752716008 111.10737497653 123.518170356322  
129.758303592589 135.58042404479 132.271437329873 122.714122084817  
114.726808450831  
LOC646330 151.10837100314 146.328876892698 141.368078865065  
152.942824158634 158.10628865476 139.17480484652 142.55463239891

154.187420367647 151.498981429633 162.728630453745 152.479402912801  
144.101376910581  
LOC646331 132.918979842076 134.136687154241 147.799806976046  
150.132420238581 145.718019736542 143.262288751967 141.779801021888  
137.146961654597 133.857996630836 136.194082458655 126.162713269943  
158.200211812067  
LOC646332 137.561067667054 156.880120259304 161.852665901359  
159.185616602396 157.248117633013 147.086734464001 153.920180168328  
161.202844994203 137.141081365469 164.21464602746 138.197500836501  
160.72962443421  
LOC646334 161.951996906162 148.605816748229 170.150889760372  
172.698181201849 136.649743237542 164.253219197128 148.859129298141  
156.020996568814 145.675032688915 168.244523461915 143.683545371898  
160.019067307733  
LOC646335 159.504327477065 146.125125252096 153.922713834296  
154.771737131348 167.106870400592 170.320777845496 152.89366585726  
146.185931276053 146.474228901408 159.848342125486 137.815541222457  
148.176995739142  
LOC646342 133.12904935533 119.810421687953 135.852591930882  
141.043668963717 128.386309075038 123.484987952263 133.555814326103  
127.139903623331 142.222833574043 127.642215862573 135.007473769551  
132.456945758174  
LOC646344 132.074571281938 123.361179535626 129.664016819143  
123.265810024678 137.543128522665 140.38936578649 126.290840923683  
141.249687936867 122.780453116176 133.014551645069 122.35832958054  
132.481710681317  
LOC646345 172.120772549791 157.189041157784 172.412059174046  
206.391403266202 135.223957492606 153.056369304663 135.37120759813  
154.406369231962 170.140610481718 154.750512277909 134.590666885938  
144.040342300793  
LOC646346 131.800533523123 139.589612144962 135.576975868985  
134.71514094826 137.848546040474 143.04129238495 134.774591679724  
144.654765322941 137.20253329376 141.884995734267 133.615958668897  
148.616543842015  
LOC646347 823.658996207582 689.821785472506 1080.02576143033  
671.134356672693 821.265710686098 700.601917911532 660.315285709317  
1076.09385014053 602.141151173094 1356.43255022363 634.556887178869  
451.147418314412  
LOC646348 158.760577365464 173.790848780011 154.808798024399  
178.055019987648 166.622070620588 164.548505132213 165.2045030333  
160.364644321965 157.070500065037 173.675115244522 154.003862874241  
145.730054487572  
LOC646350 148.193285676977 129.549673572516 133.755609587969  
149.380733719756 151.144521344129 124.003914369077 166.071816427719  
130.247700541716 132.322618637842 133.213697351807 141.292421722594  
149.457761307441  
LOC646353 126.181785407434 118.04359489354 118.9428715545  
134.197892075036 119.373287155621 117.432860005907 103.691075663721  
119.806933383138 127.629258006335 129.368045611894 118.783904603368  
108.415715678948  
LOC646357 154.648806105422 143.849399031223 153.412469512967  
145.142331981651 154.838407529853 148.560326703328 146.390223079987  
150.578023008958 149.255405438966 139.591231478841 129.382242021964  
151.224289879776

LOC646358 139.480361732772 167.769114519774 154.329176514501  
142.029398672217 130.352674121108 161.412427590994 166.143084832472  
151.106858426994 160.478519202775 141.512008928271 137.950955473086  
146.838547724148  
LOC646359 123.796657561057 127.713286292101 153.585849286113  
160.026178505749 149.410729709855 146.654925456132 136.03117924052  
138.184717352015 137.885506916098 155.431833398023 137.990806386929  
152.845126167802  
LOC646360 138.224383646894 134.318290950377 176.533058719908  
130.041462255766 144.02239659305 142.993401965852 153.275253838659  
145.024148458133 151.774990926064 161.217964573491 151.619329363527  
146.915965807149  
LOC646361 140.089210795507 130.163574198827 142.274440538785  
140.708683675555 133.82548013342 156.94531513373 135.273694626342  
138.394923932916 139.703304553486 138.664401460739 125.897190440417  
136.116468624715  
LOC646363 137.575688681319 156.642441706727 148.435419356331  
163.074919710259 143.227410286571 153.774548290902 145.416733388652  
164.438724387992 135.007473769551 141.132694466739 149.888719320368  
165.576758218571  
LOC646365 148.753891406126 138.041411135053 166.81024151246  
162.732574014686 154.758831302515 145.858537779106 149.462835741621  
144.69686018715 158.514079887374 129.123522999226 161.510497517852  
139.076978731572  
LOC646366 157.754622099874 145.45097990828 143.497909064641  
146.040995022257 152.721146962124 139.121639005366 156.037150880384  
145.559419404453 141.664271607079 140.888439624918 138.010385979692  
145.902572804249  
LOC646372 179.593817076317 192.032080013216 197.981112645168  
201.81649023518 202.483493595704 183.64389891975 191.112009690591  
173.929353266244 176.214950733324 179.273936200852 182.384190694142  
192.209344004015  
LOC646373 141.587109176431 138.60849268758 150.536178574986  
140.669947387892 141.216869032251 143.209289043824 128.556280049403  
142.436624546651 126.995207465164 166.068489027866 146.569958732206  
124.74291205933  
LOC646374 119.530214079037 117.781804727205 121.696353230886  
137.091932621041 131.056011738962 122.120307446003 133.171854425031  
129.578488688293 123.82555184043 137.027334042585 124.210840121525  
124.980683327416  
LOC646376 130.99564079691 132.70442458261 154.190469538568  
150.155154998981 139.358218798638 144.335732650795 134.817665153925  
135.463385553776 144.927731613526 148.527528612375 152.577131215027  
140.475688390415  
LOC646377 142.19728670565 140.800226245569 141.59474425685  
141.440563159897 134.288349336742 151.734683227196 141.315230997077  
143.939522733945 137.996291911198 138.02757574324 136.792957035581  
140.047749881567  
LOC646381 147.624372080117 139.411792975474 150.122035262873  
131.587987756056 143.700865823615 149.921414617149 149.322537247388  
133.816601264067 140.271557921345 126.749878702933 128.008322588928  
151.409290231274  
LOC646383 170.706932460836 159.584350289413 189.142295015168  
161.237544868191 171.190796424612 179.525651423361 147.547944397578

166.830529779692 162.140112952434 158.943005736645 155.951509643078  
159.563866056798  
LOC646388 139.027836356854 123.650702461773 141.437891956239  
136.850940500212 130.883516197483 136.248506185974 136.147810636915  
144.608882758506 141.805028495425 140.978511668091 134.12948758412  
138.060245284993  
LOC646396 160.006185904123 163.873355370767 183.815810733176  
167.756465178715 174.663845688179 163.146581498065 156.733898702331  
173.714940254592 158.906481816035 164.696616863082 147.761965925044  
163.936973279176  
LOC646399 136.16560274503 142.804411455413 151.698385134218  
159.461778054423 149.888719320368 127.128042857811 160.441879289883  
132.965467229606 145.566861062922 158.770502070553 145.176141415244  
140.338622198206  
LOC646400 161.948033313443 140.83570584033 153.13384838492  
155.92082882492 143.001661958814 134.235164622221 164.063104872636  
154.2228051929 123.368137868951 143.837402372008 129.502730573463  
144.825231501747  
LOC646401 141.895211025017 141.323417580648 139.690093593646  
152.808771946509 141.290905146249 154.522761990223 167.526798465556  
125.150706047419 125.769903262265 145.802944788548 128.717719117128  
132.950480329605  
LOC646403 173.986750195954 159.012011848781 158.396149470397  
147.994386096925 171.155660467037 188.973595445056 155.413300826229  
154.445840992357 167.756465178715 172.175584707792 137.71627781928  
159.413535577361  
LOC646405 125.94880312094 120.216999784094 124.422548323449  
122.610529927104 127.555954288973 130.300169316346 131.117294275244  
115.646023142125 136.005756600948 134.840285218383 121.687187898743  
144.876300850115  
LOC646407 140.899799480834 139.22776505842 131.692626563078  
143.116451998409 161.700258550244 142.518266591748 156.16485596016  
144.762006548375 131.110018165002 145.485453268383 156.957578703389  
136.413745926388  
LOC646422 146.912751127571 125.566982723725 161.212598761378  
142.199182392836 161.325409589612 149.968749911496 131.40880014672  
140.464476678448 136.303510503231 149.801573181126 136.026302491961  
156.098240321674  
LOC646424 127.130769263811 125.04156726504 127.016845640004  
130.290454258898 164.438724387992 137.443463471483 126.409995188106  
136.198583459346 123.535803027153 132.486311240725 122.813441348997  
131.744454088995  
LOC646426 164.665907233149 166.803359138942 196.287131027947  
202.483493595704 177.652022895288 202.662466141301 201.383739902873  
195.532022060219 164.433462115832 184.267958772058 158.604431001643  
183.130891975122  
LOC646428 118.514618614167 127.440987506769 118.641431192759  
130.317604643904 126.159880038854 118.064858133264 133.724135305758  
113.822580779824 116.764795914545 129.808590871788 123.849651946683  
135.208478510375  
LOC646429 127.336648342283 150.837717923505 146.390223079987  
135.897498591391 127.562924931536 112.179019393947 119.544004279354  
127.165448734253 120.846789922177 130.928718312512 138.000714797563  
135.419628087842



LOC646431 135.895945142328 137.812249316763 117.149781437983  
130.402496960735 141.473218014605 130.12032144763 150.259400712685  
125.071387239411 131.210866639392 145.677477231455 103.398929051742  
136.645091356305  
LOC646434 160.11539252042 158.514079887374 167.521700144143  
153.582185523361 167.468390483999 169.720414035325 173.507835230243  
158.308558656144 156.361037318986 168.628947766217 144.139062513587  
167.536828038178  
LOC646437 145.411264691728 158.565676210997 153.992763544073  
164.82904652634 178.572212478544 180.219813240126 166.611809859059  
167.769114519774 156.806407903626 193.098116087792 168.911840239685  
143.722135315998  
LOC646438 128.468978498871 133.396403868645 135.218648235324  
128.213678179359 117.149781437983 127.70306883967 121.736056336879  
123.168787977805 127.928195199945 137.088164317794 121.957155610892  
130.297203474319  
LOC646439 149.173121214851 133.909219998872 142.707913210557  
169.434164890542 139.041005010106 148.373866613126 143.78994470501  
160.122274989224 151.243948028303 148.484823275343 146.981521393075  
168.830344627025  
LOC646442 116.647291878845 115.468921844902 132.075718397284  
137.328370598183 130.977864137459 142.480203661104 127.657961561231  
124.003914369077 133.115543233699 136.922282125029 130.362378233288  
125.803854387512  
LOC646443 154.683723064797 149.131218007756 149.264997927508  
152.528571776589 129.13353785479 155.287837763675 156.110073009771  
159.706443636973 148.85250180736 139.652974659584 141.825162897153  
134.412129843957  
LOC646444 143.807102980397 135.047546966745 127.161975533812  
142.540433565262 128.23910347716 126.326609619996 145.440471538068  
131.624850267236 119.926169902322 136.303510503231 123.660836177932  
135.407536491819  
LOC646445 134.658664100744 140.165450892713 148.499207368959  
162.285199080777 139.416388461892 159.576585660511 141.251961856529  
134.145771195572 130.001889950186 147.970243979273 128.939572714685  
132.686006816081  
LOC646446 132.693707848508 140.047749881567 136.758262322199  
125.143281492089 133.755609587969 138.53954980556 140.782085233573  
143.107570838895 128.396326753926 129.327645260099 138.399665664034  
136.91779948054  
LOC646447 150.419668144913 152.379441401583 144.355348009294  
145.076068630259 127.56862018147 140.319851351329 164.87433908877  
143.769240322865 133.360017767635 134.626371781978 115.692324946633  
138.361149460093  
LOC646448 127.539091409962 136.128092230238 132.587392944892  
129.086186239653 127.84589484404 135.17827963343 129.633387503618  
125.350567304651 130.760835441776 119.341806810441 129.445240570626  
133.079767347356  
LOC646449 165.380225715852 175.663960113118 174.526176588454  
154.620194499553 174.100921524023 159.561431866706 152.379441401583  
176.371404525626 155.147962740503 173.773876769683 147.645530163725  
158.467572658719  
LOC646452 136.27621600731 103.772221923105 140.175724588255  
131.015519445322 128.734694496357 120.15332480712 130.255689301211

130.698850298016 124.766436060041 131.573729430926 103.888971448792  
130.689272423595  
LOC646456 149.696766215866 128.777337552038 131.988591391373  
123.913203953936 118.703108284564 131.2834389999 131.351303131574  
140.985432994867 136.841506794489 136.19083681188 106.685578858702  
135.154441560264  
LOC646458 124.368438691944 118.875640081461 135.527445907621  
126.17133877948 124.381674909742 114.585818507336 127.55397077248  
126.396385337235 114.696935316053 129.384531576943 123.13812550459  
121.06219555903  
LOC646461 172.230528631803 161.501062527272 145.455411983653  
157.341422939225 151.716042884808 146.923382271905 158.380964047483  
149.684922983176 157.058912028958 132.91094012928 135.383585408897  
151.325068155715  
LOC646463 169.022351348819 175.363223521128 247.111032124864  
198.722993687455 272.16090053595 202.761449711661 326.83982672544  
325.907037744936 272.314332734711 362.581768268116 214.968589907686  
321.524921332256  
LOC646470 129.92319548307 116.092815232176 136.03325645996  
148.709795687391 148.757112903673 128.510903178542 148.396148091332  
139.21825391822 141.971207380159 147.515088047628 134.319316977485  
128.910261453632  
LOC646471 144.405191855684 154.798287249541 150.168496148941  
156.733898702331 127.310437599803 134.29036009792 142.409003426775  
145.815454490804 132.758313782606 148.87690497281 133.372231702721  
137.769431537236  
LOC646473 140.73456875677 139.420025842675 165.169920299969  
153.136863548105 143.804903119745 132.5130209643 155.444668113276  
153.140087873773 137.089392202166 141.054587977578 125.472342351466  
170.326474367867  
LOC646476 184.694741621812 190.057030596611 189.567241599215  
156.907788377794 161.084088366981 269.62298406345 188.231614694297  
227.64196401771 168.095061700814 177.204172894028 214.261611197599  
218.106150021482  
LOC646481 132.99989565368 138.916830356763 162.970595558845  
139.801108744526 140.790450703097 136.485034823945 143.537785553911  
122.850678471084 129.215108424651 149.8919086368 156.622993107052  
142.362022977137  
LOC646482 156.759600627542 141.931274901572 149.394952856085  
147.309245779031 132.493888285566 147.425856984368 166.452651396293  
145.500011956699 162.893396525252 146.437565098335 150.657800679032  
142.993401965852  
LOC646483 3152.64817044581 3727.70199176703 4425.66777919789  
2944.63971819193 2586.87941889443 3371.24667467952 5467.84611694564  
3630.80752744347 4124.03779111916 4353.66854914351 6894.63087357693  
5080.63091497522  
LOC646484 150.434376975922 150.613624696604 148.67584969749  
147.951996191313 149.895214204184 144.008961720971 138.29167712246  
146.768631086088 141.939368369872 139.078162119733 136.093473732174  
137.042097702398  
LOC646486 151.598423878653 138.458816023289 148.646699255797  
145.027741086645 137.742393475755 141.457040042276 131.626173473789  
141.760529549196 132.140547119679 136.537117054998 118.144109564626  
136.874135348635

LOC646491 188.543051108601 180.690409026809 230.546762514966  
185.905819051223 157.032746784217 199.681103910705 176.256840061919  
161.960392594363 161.569793476847 160.026178505749 169.408892048115  
169.544515294662  
LOC646492 131.2834389999 128.36121178972 137.179058645907  
134.216088147701 130.466571969657 124.012439490264 135.553183871663  
124.130599753093 124.964977322158 138.42029331811 148.034899103241  
116.90832995093  
LOC646493 124.940836122365 112.813322240155 133.441783287131  
118.930792960643 133.778595695007 137.466291815166 123.994188725172  
134.086301127594 120.62139061084 127.959474148217 108.483284007316  
122.498794845416  
LOC646494 147.808262170269 141.505120938773 163.059196519365  
165.523150623132 155.865540894526 151.625248091441 147.915337223934  
158.058346079359 139.476234663488 142.603436693587 143.722135315998  
150.238582112636  
LOC646496 166.788336808924 160.105903942674 140.728126380228  
185.974598267418 120.992440100307 206.413554839865 162.668896609848  
180.77686098195 167.961390966538 149.563405421366 168.483273292464  
150.860090477342  
LOC646498 137.71627781928 136.409960447884 138.316043447788  
129.896049960104 142.81401345781 140.02337095267 145.677477231455  
137.215025712057 132.285835971705 139.760425990939 139.273651128094  
144.997833436737  
LOC646501 137.555253894825 120.752194675024 128.11006485185  
132.693707848508 142.30928744202 133.980792743661 142.368601917778  
135.159590925066 135.852591930882 114.704831217037 139.347509197639  
123.689439578326  
LOC646503 145.254692995502 146.198331189991 156.856149172225  
174.549929320587 145.128919984856 162.802392115386 154.838407529853  
145.036719629525 158.483006541613 140.055272520317 139.6492947529  
150.709091532746  
LOC646507 131.599370671279 129.305455204291 123.418266047461  
133.720281080856 127.330523871944 119.097521397712 127.218362452043  
127.517446456116 129.356401843185 145.045633612194 123.960761343425  
136.984172424718  
LOC646508 156.146154578237 171.650247980576 159.207567680134  
151.88244935494 141.657914155491 177.752497164503 164.022021048626  
168.682307349713 160.140509175287 174.657352858049 172.355215322173  
173.071892362758  
LOC646509 144.12472003202 162.192879711747 151.433634564939  
142.005703694973 139.182623417751 149.717739166461 149.584582050615  
137.949215501559 161.470611189347 132.53122878527 129.694178995061  
175.485672103348  
LOC646512 135.822022526034 133.243679173608 138.733717670748  
147.23376282233 127.503849690009 124.723519607109 163.116334434429  
134.01566484034 142.594553057288 126.972399784537 121.805145639822  
138.692057950694  
LOC646513 150.352308475398 137.159781458748 128.76720970745  
140.709981878311 131.780134634616 143.494511683426 142.872683795338  
138.85328409337 139.363571392476 150.371716899336 159.52833930625  
154.94587631386  
LOC646515 157.994474909749 144.806478328053 170.266415287865  
151.276193269421 143.893751699551 151.05681004513 153.603765998461

148.553324405123 145.214575855337 172.222262910052 142.114181233875  
140.664303738113  
LOC646519 166.007913607742 139.619076126267 149.262900833177  
145.385816618728 165.443069511115 150.878323882503 163.099009810658  
135.221786448517 134.991379445799 159.223980639045 165.459993078103  
157.612067634423  
LOC646521 171.414869677333 168.173803952157 171.287186905764  
161.988082494464 168.314966639178 169.631386764054 176.547853494057  
169.022351348819 164.078423844421 188.981391266203 162.940190224943  
186.447049658314  
LOC646527 1089.58643309156 1049.52258147141 921.140932799223  
811.144838166905 920.342429282889 1004.6207350158 1899.94714976387  
816.266384662324 718.449150898903 1109.79571066685 2144.52984392647  
871.528156184927  
LOC646529 153.649235507812 155.897806593986 149.511776997149  
143.318291243905 171.751149502172 151.790240553272 165.459993078103  
149.502132524093 150.590611246086 153.643157329902 143.739231124536  
136.472404812817  
LOC646531 5032.66681917478 4671.10203385528 5894.79176478976  
5149.78271096158 2828.97255380291 7016.12801650552 3315.21586182496  
4266.92715355342 3963.40575974446 4671.10203385528 2146.4265920569  
4759.17973319588  
LOC646533 146.079727388849 135.5237675623 156.497059936271  
132.629453540571 130.253372129786 158.795335941084 137.888195199363  
142.064680109047 124.526220300907 150.034029031033 151.196713920345  
149.237422245619  
LOC646537 125.364821583438 141.642547489983 141.685620602226  
150.031863363697 123.93800397666 143.015905927379 129.652331277375  
128.686425820835 137.691870502653 137.335501759561 129.257947818865  
141.052322220012  
LOC646543 140.11211854056 131.489715975987 139.54738445816  
139.223480216048 148.913181799692 129.284384810812 130.4631522533  
130.361117564928 123.119524624735 125.964335876018 105.221735747452  
132.725232102483  
LOC646547 227.065194522692 197.962159288376 203.244917049745  
235.43707989982 155.522274777451 256.873090834376 177.679330300381  
205.65398844108 174.807363753172 170.918584418153 188.378996128521  
187.871017629994  
LOC646548 142.617474507282 158.241349852419 135.139676303901  
136.841506794489 137.77601089414 126.956303896995 140.750004067571  
150.262342889379 146.16821907742 143.840979923821 148.943735606315  
149.135934269866  
LOC646549 133.15144076432 131.90169441925 152.483240622367  
132.313884627836 138.657241641263 139.746733428525 129.707421699091  
124.059778432167 145.777778096701 133.088758771353 128.504661404607  
142.772680460689  
LOC646550 134.399228996542 139.365595511181 126.423739360894  
115.247223837316 138.885230982475 119.966690136422 133.24611329193  
135.63604256516 137.497145594629 132.973551954067 106.030441145334  
134.678445085174  
LOC646552 130.778164962583 135.264074941678 124.35374445763  
137.933122094638 134.122776198036 137.50609001002 142.621019060798  
142.159597861804 122.351186755611 135.208478510375 140.877230937687  
135.795717307603

LOC646554 133.389930962407 132.832556359483 164.534790315992  
124.885950473434 141.964046958336 151.181422205549 139.375386456759  
143.879597098414 136.251820364823 164.48570046081 147.449186980143  
135.192181609947  
LOC646560 149.416411285088 130.92186531563 147.174977926293  
132.84268776659 121.849460555655 129.507297276862 163.926432479673  
143.149424892482 140.099069486005 145.937733795336 135.268963938932  
145.671099346237  
LOC646561 130.029719192412 132.579323148839 150.283447275981  
127.962546712222 137.220718873614 145.315875226867 137.726769003181  
138.144085131733 138.213742418402 148.520371748891 145.214575855337  
128.221548195595  
LOC646562 153.418095627352 156.895079878556 179.61374889626  
168.50246276469 156.102877632001 137.364525523335 127.065518421996  
159.944547924357 153.358189612307 130.423465505321 162.975988989106  
156.562197068687  
LOC646566 130.138945493943 130.176734524308 139.109712542702  
126.413124995943 138.506569544482 121.252042151856 144.671459266861  
135.47852126603 133.749271961438 134.105941085621 142.110469428644  
126.155486659114  
LOC646567 360.852730026133 303.858574395969 545.200687301057  
365.590174280114 478.909308632726 1160.25775445193 841.285351463894  
1071.83063260499 1379.95968831696 1085.92360670051 507.95331185029  
921.140932799223  
LOC646568 122.243585162452 128.209771391087 149.736837985314  
141.334394187941 139.739448838436 147.562757301251 140.163936299053  
142.039943511086 138.449057377027 153.068898842283 158.157097243342  
141.666394024363  
LOC646569 148.314248474411 153.217287503221 158.854659281803  
149.97218338771 139.168307371516 146.992289167283 165.376358421533  
148.973277994329 142.253826696208 143.62103263895 118.841699953612  
144.364319564075  
LOC646570 147.588213090285 147.829502959865 128.580625868379  
160.707290343231 143.506243892155 143.356999170877 146.885404321622  
132.306569548052 139.06923394504 131.7646616214 135.750578960284  
152.358795162474  
LOC646572 134.42983422342 125.2051300372 134.810212106122  
129.27634490676 131.521311288114 133.272540012108 121.51208055933  
129.831076624826 121.764933633063 132.296827080007 141.503351545458  
137.794858639838  
LOC646573 150.354401669138 165.900156600776 158.404154056472  
164.857465272302 159.094117857743 166.135707525987 144.331409179705  
149.85385474029 147.376482709004 147.106355591496 146.227452269648  
180.192015483309  
LOC646574 138.756638791139 139.199446543251 140.839056652898  
133.054453517834 144.743281367797 143.747664482225 147.23376282233  
121.087514445827 141.255406288178 140.73456875677 155.483400816946  
144.81077501446  
LOC646575 131.265594391542 140.54700821058 110.355493122568  
138.391203321266 127.109798012351 113.857477830423 126.656077572961  
122.376432064286 139.251886500377 136.704018446388 130.201635099678  
107.727848546225  
LOC646576 218.735620596634 243.538374440134 158.153875553171  
191.543371466252 144.273011517032 129.86336717605 133.175265384038

134.32174235533 138.753419730571 140.486376016494 109.255470590389  
139.660641694206  
LOC646580 158.085935267091 157.754622099874 169.012926546641  
156.022967076728 153.784923783551 155.828962183804 141.317113425046  
138.523677181131 144.155591092387 154.236652966294 153.95855605751  
141.304791640723  
LOC646581 129.185514320138 121.039678049579 132.490323093932  
141.547112973262 132.714532888989 133.223310036542 136.303510503231  
140.029808783762 135.679481480408 127.183924911179 128.032141013681  
129.976540483758  
LOC646582 125.892022613725 123.598210440312 132.807755600683  
138.424464248567 125.729079191033 134.860896462638 135.999030570565  
131.383113302567 119.759350702482 132.985645792864 127.921209207879  
135.114900669781  
LOC646584 131.937867646778 150.2214516849 142.694748293332  
137.77107995457 144.944095553004 144.476157581998 135.007473769551  
141.125248464806 148.109847175216 141.327299595068 114.378420394004  
133.801549026691  
LOC646585 135.837733533444 141.872426752329 167.325227483198  
159.166059518117 167.850516495529 169.022351348819 149.941056059544  
163.967616022079 146.376149543438 157.6790197503 154.291717784335  
134.374551571013  
LOC646588 145.39813290003 147.245636620228 140.466612569756  
141.281116867082 146.455182336561 139.488057371254 143.750656408155  
133.291511679188 143.340685579645 144.526499066594 142.678267012725  
151.676232556697  
LOC646589 143.967197319361 146.677241054745 137.816691265242  
142.808871284256 145.363692072132 147.449186980143 149.867541008113  
138.414916506716 143.338628928675 151.374665021513 129.856994052591  
156.389361240637  
LOC646590 151.632801137039 148.853877151493 147.059096208832  
143.78994470501 155.452842883109 154.179891883612 145.333097940759  
132.346363545288 137.700110923212 146.644317248414 152.197327387252  
137.911816180518  
LOC646596 131.558842131826 137.636900130922 147.454902803231  
134.626371781978 130.551216910933 128.090665893885 136.338683078123  
130.769540997465 149.730467498266 125.308318672456 122.84603217721  
140.110258415883  
LOC646604 163.714231827866 135.088149158147 165.659978250378  
152.73588666971 167.906766146651 145.36249226764 148.364138636002  
133.755609587969 159.665989587555 164.256764783784 151.09670688533  
172.338509138759  
LOC646607 138.444427173667 149.076146942797 157.126460242995  
152.411545237204 152.954944775793 155.488346781292 137.459095066272  
141.334394187941 139.049085468313 136.919702354166 123.265810024678  
130.651062724029  
LOC646609 162.793214727475 149.244970309131 177.296424297967  
150.63456320644 153.420392741659 152.175423676063 137.187640876289  
147.743331160624 137.222125237171 163.653662369257 137.792150225149  
166.8846964604  
LOC646615 138.235127932016 140.05419835434 143.10996074311  
146.652641667543 144.145612985703 137.670655293096 146.474228901408  
130.613760017864 152.452246595937 150.208809981642 113.512670856029  
154.248226423862

LOC646617 160.186527465164 147.949560045212 177.333305785248  
172.073751088968 167.408314067262 178.89423690001 162.018860183534  
156.32137627012 173.484307104751 179.389797867379 143.341711274401  
151.515460040167  
LOC646625 133.334314509183 148.47676851933 128.416531280164  
123.372689985035 129.450937831864 133.854760285591 109.016991399605  
125.749024723383 135.038195181839 142.326319895395 131.652854369619  
118.21084414402  
LOC646626 140.009593108693 135.122770943076 133.427561208907  
131.696834332724 131.237720549768 138.800986934663 128.630613404354  
129.260551359984 128.659393756477 131.774882989257 133.469323412904  
143.427721577372  
LOC646627 134.464053009101 134.295466680195 125.749024723383  
141.91067228913 124.45782375705 136.263658288289 136.009043911039  
130.09958025354 136.71484425521 142.34956863109 145.117574928189  
136.015561289357  
LOC646628 151.715231819606 134.988545581219 138.814930200619  
131.181537219479 159.913028912492 145.455411983653 144.249339611941  
120.853961156534 126.338676765473 131.157702791998 144.81077501446  
134.782388051531  
LOC646629 115.264104392064 108.007762863766 132.5130209643  
128.554574566655 134.030972845871 125.119425491746 131.177396785633  
135.761591144857 126.294971135521 112.000309477972 136.256456726841  
128.213678179359  
LOC646630 3495.66977000028 3536.14527317085 4327.90939653054  
3450.46728258139 8881.86480594052 7354.94071109106 7016.12801650552  
6059.74270502037 6441.13602696535 5655.12135336698 4913.55892033682  
8121.54750071211  
LOC646631 135.803599969904 141.442825487243 139.311816781874  
148.600270795407 144.825231501747 152.68344738009 155.665535235558  
138.928287624746 158.931023649818 131.371129237005 133.020551937677  
140.515996180923  
LOC646632 152.906352463546 147.610616423185 152.933230159216  
151.106858426994 157.627490896581 167.575968906119 171.602950766191  
156.626742111441 149.17029600091 154.366071635971 152.717642489582  
156.46322298175  
LOC646638 134.451423371791 147.988883293205 127.015086299437  
160.131256419524 131.196196319523 132.784949538167 135.003236040032  
144.224287382131 139.446914318877 137.253971514177 143.903216264503  
134.329334422886  
LOC646644 133.152523054305 132.987389721592 129.788395150404  
139.182623417751 134.788450164055 145.650356702429 147.452986308926  
142.583098605144 140.84880167881 133.505261458701 135.170925092209  
143.840979923821  
LOC646649 138.361149460093 139.497253870412 151.992112109698  
150.564099989221 151.98710761363 142.148597793651 152.861304149219  
144.439320591901 141.552315273863 140.217243202557 130.735223763219  
131.704192327287  
LOC646653 142.865320802784 144.277263594387 133.857996630836  
157.499803444188 133.340152756136 134.970609100459 140.319851351329  
138.916830356763 141.436235043864 161.837272617767 174.012972901793  
137.025625133986  
LOC646654 151.245520459264 126.544685937984 135.022438246099  
137.899291413431 143.062380176286 159.384480972135 151.204487316077

141.420747583126 141.668101962049 135.661131815375 144.642042956057  
133.64938083537  
LOC646663 174.23955831109 148.607885635446 139.258468432364  
159.2488784104 143.360311218423 158.282899758551 150.031863363697  
149.805955402639 146.778156465138 139.326694135427 122.083357581665  
141.920967855989  
LOC646664 128.771367080039 116.321559000405 116.252227301161  
139.289968250444 128.556280049403 129.289216846128 120.871693555514  
134.929441723387 125.314626102208 120.735176435195 122.329290563769  
126.370252616961  
LOC646665 173.063002566542 140.946729014405 146.519312568214  
145.401101974736 146.135269553731 148.400132332444 151.466689967666  
139.344344562134 150.737888487925 149.483826392464 162.06940121135  
153.187148832063  
LOC646667 132.839431368337 145.024148458133 143.508657511633  
164.327140372968 128.872496485403 159.102070980047 168.511517285223  
149.574353706911 148.641780441227 143.825062714273 154.428779374984  
158.130933580414  
LOC646670 149.106615763242 140.644800545854 150.301540078433  
146.413845130977 149.019120812629 153.231965895778 142.757327296852  
154.892452237027 137.754373055094 139.199446543251 136.392389842232  
139.949563856936  
LOC646672 349.128741707506 352.303782547593 328.269845211173  
304.152390210727 634.774041584043 279.413335686746 652.654673756838  
368.276805218658 334.377352542623 529.04238100948 647.666334416707  
447.372026268156  
LOC646674 185.240692860387 163.504122327429 165.504532455205  
172.045843691642 143.879597098414 131.623527073985 139.723117427543  
161.115842628581 137.848546040474 141.088456756806 143.694412162756  
130.038936315246  
LOC646675 147.491439949088 160.843325877861 212.291528248457  
149.8035588048 193.084818760857 187.097765940131 143.844153373367  
174.717158790668 184.437810305792 168.841313096346 153.345834660643  
180.674246137171  
LOC646676 153.738794649373 142.739686751422 167.237705290905  
142.736148814019 182.470538043064 185.639696270808 135.735535533738  
168.830344627025 159.420533375725 145.005991300977 129.059722322306  
151.477239868429  
LOC646677 147.696506705909 136.786462547129 138.652735298338  
122.885879294532 151.340728221261 164.929445749888 148.598920567714  
157.595468761042 143.565597315289 153.181097279473 123.76900858347  
153.679479224178  
LOC646680 152.272198017355 144.270828498856 147.015427944761  
142.772680460689 151.993651822163 143.506243892155 151.546908501054  
143.976395954528 145.560904207183 185.046826969912 152.861304149219  
148.158062155247  
LOC646686 141.874188629438 136.556183079815 147.106355591496  
134.115085057026 127.068313862984 145.152605166094 161.463042036376  
139.951275828765 148.01816554072 157.856019979644 146.654925456132  
147.440477126372  
LOC646688 7082.28969354712 6944.90824302953 7167.29945083872  
5894.79176478976 5058.57872936027 2974.04694562902 8416.19700892758  
3643.11229751348 4081.13406129846 6021.68798558746 8812.91092406563  
6628.17856159198



LOC646691 146.34029698108 146.132506246152 141.943910304145  
141.015441854424 136.923876486522 152.342712570625 139.826273596452  
143.681220324074 145.391496022306 128.05898686833 142.667173697017  
135.774569629738  
LOC646697 152.31268334586 182.470538043064 161.02075528415  
173.416999972133 148.883263903527 160.949030247406 187.205674045893  
172.26834556696 155.46017572591 181.758545723241 151.522526161299  
176.465559710285  
LOC646698 145.163084967499 140.929424764561 136.749771286979  
147.452986308926 126.290840923683 134.524644163286 155.3016514732  
133.026094667212 132.435409278702 129.476648077532 109.700513642061  
115.00776048097  
LOC646699 165.590892262736 161.688125121941 185.100455193182  
181.123571246557 164.784346867158 159.58125728432 162.716712951629  
172.430211711547 173.959556466614 176.839917795004 149.779323547896  
166.872332652008  
LOC646700 123.474836673474 146.569958732206 145.900272803108  
149.190528937822 132.579323148839 115.30786313391 135.830453690107  
138.307574579062 134.310685502031 148.367132982373 142.446514275674  
133.935910746769  
LOC646703 159.52147764862 165.2045030333 159.257221624668  
137.674025476238 158.404154056472 148.785977829275 152.612116997575  
144.542320520523 148.201649039381 165.108876136738 134.76586363177  
144.772914483212  
LOC646706 134.596391166462 132.20764558027 128.51523581959  
151.126252768792 131.017355402204 139.783725419023 148.188717941032  
139.505864135281 117.255496552581 141.670426206169 130.179742057015  
127.663578933727  
LOC646708 148.901723851925 141.653917856148 153.613110881454  
168.697565122105 146.934990457666 155.669470674985 146.040995022257  
137.893630842968 137.440295223749 140.199334790854 128.020911959353  
138.377628971966  
LOC646709 149.836491640473 144.038859705973 149.016767620428  
160.30784625946 141.317113425046 133.724135305758 127.05677680446  
136.370317464946 137.318442197233 144.417333931582 134.155655670103  
140.724541696229  
LOC646713 147.630900093277 148.700297908071 146.652641667543  
145.256660345252 127.763186950161 138.044751228397 139.131857948357  
140.644800545854 158.602687876661 141.29868389128 132.70643154246  
141.425393615228  
LOC646714 143.675696734051 151.729232835588 145.372579207362  
149.153827025981 136.408314486465 143.816567683093 136.425263391752  
131.759422682853 139.171486871664 162.620593985693 147.619451225526  
129.880696706381  
LOC646716 123.291258843371 130.874283538818 143.530190096012  
135.877646659023 132.709845352383 129.318409053566 128.519448608754  
141.980728956046 130.209752198964 130.411849432351 132.933035878334  
147.013598868335  
LOC646717 160.215396651606 125.472342351466 136.180063437699  
141.630183595813 142.19015013243 151.089328533476 156.208747691032  
148.751755543817 138.868641301709 141.686945908315 141.828740140733  
136.84840505336  
LOC646719 130.816301920872 122.619429537799 134.013748718539  
126.595668758744 133.290168428696 125.055545087871 134.410706628655

142.117819438992 124.45782375705 133.728378162206 128.289680999565  
120.333487171575  
LOC646720 150.300108097623 152.004130711617 149.779323547896  
153.51550202829 140.260053206523 145.176141415244 149.364498870469  
156.543267949167 151.511808301993 133.427561208907 124.711578994973  
158.439409064812  
LOC646723 246.237243726748 493.209107049493 341.43511159996  
207.254220247481 13479.8546809758 5734.76405709934 4457.64479507833  
5175.17279574945 11326.5935775813 1226.10881264804 1578.87371296418  
5106.27623905309  
LOC646730 124.126715773068 139.72868421672 130.043904881142  
162.304178370233 136.465185148237 138.440663763957 161.937384157098  
125.806943645484 131.314766140505 121.95061962467 138.903450375532  
142.331050242704  
LOC646731 126.37749112514 142.594553057288 160.311096717492  
148.967232828819 151.581593330224 146.079727388849 149.547635666621  
145.793794049657 146.838547724148 149.77596374205 118.310496976818  
153.972471779464  
LOC646734 142.830950036054 128.972276851419 137.642858036384  
136.454911192129 151.224289879776 132.776236872246 131.230501496659  
130.57903858574 149.41357273704 133.24611329193 152.660373241584  
141.778060508776  
LOC646740 123.22295112139 135.645439440707 132.69067627743  
134.134810805413 164.202554380274 136.739754726714 153.700168798494  
140.453219944445 121.743701509981 136.506347083926 118.461037435114  
123.959050197189  
LOC646743 120.501697624977 116.433239116749 127.209043595332  
143.982561564661 114.466368742403 124.269446398587 137.808307749725  
131.294930860752 122.368581795931 126.146213417225 144.985280401441  
131.915864620669  
LOC646746 158.604431001643 143.770808464879 150.837717923505  
137.891372981851 142.612035986517 141.236939351298 154.159124458167  
146.044279076949 150.191645194625 155.592219571564 139.188234030711  
149.734395134321  
LOC646748 145.773932754923 142.734103971267 136.878656455606  
153.879427186342 137.945878061978 141.703410265546 178.329946332806  
138.407207709066 137.347554578171 155.625320865565 125.744408397808  
172.961115357569  
LOC646750 170.966588957686 142.041992878641 203.510106134882  
144.370811043456 164.256764783784 160.473772347376 173.233357775898  
168.702991603656 151.669421563954 166.430881793156 173.001985500448  
176.689683169567  
LOC646753 716.731984660463 820.249910349431 680.250735532287  
745.844395215451 629.381791489871 577.33849844574 480.923468806193  
857.55777793754 794.636255515909 451.718912714608 1681.54485582868  
445.505512764045  
LOC646754 127.876894098781 137.792150225149 130.795318552623  
131.146604635155 135.303322290834 130.552857965694 133.773427881651  
127.560308850342 126.825785762925 124.955676894776 137.09814291566  
124.02280670421  
LOC646762 138.365589511693 152.89366585726 131.785053503951  
196.583548193097 151.295855278218 153.795665190439 158.902676384853  
135.778099658349 140.051904905695 135.651829752462 145.704057360697  
160.449911844008

LOC646764 130.501010489883 135.015161451899 124.491884305455  
149.17815859943 140.841600764331 138.576024069924 110.033746435328  
134.081308836364 123.877609932461 126.069594320759 126.32081560239  
141.332402615602  
LOC646766 6358.5018930218 6851.54963413886 6324.87600301793  
6006.01682776552 13423.8921651885 6919.4226838505 7167.29945083872  
6470.73189429877 7266.3946293904 12690.801964606 11509.9289491201  
5115.14161559446  
LOC646769 124.178483414968 124.717079082023 128.556280049403  
141.822974252935 195.608619642038 169.903088388196 139.080142195118  
156.654450436728 213.791379190359 133.866011732878 167.337624316172  
142.830950036054  
LOC646772 137.262309660909 133.148442269517 149.335288055732  
142.401333414583 135.726760147904 153.182836319911 149.956759038516  
140.14062775887 136.126542897364 136.348252715447 116.746018509166  
137.296790373528  
LOC646774 166.77329045424 165.239214141562 143.5709409749  
197.003657786247 167.51207060064 159.346890686719 162.695319777455  
159.317429821638 155.615655460277 156.865049786218 153.633095853017  
177.371157649894  
LOC646778 127.251594986725 157.200582422961 140.714455864886  
158.967160833334 165.813771791917 151.55925331302 154.096542063701  
151.389433433911 150.767158077219 146.099555861577 133.337863400762  
168.818595386221  
LOC646779 126.497472087036 110.333339548402 129.707421699091  
128.860744370967 152.215146681655 121.912927816178 116.038950886552  
130.380766252137 126.416290818296 138.824082857747 115.463150857002  
128.303046695142  
LOC646780 155.247452081206 155.855564068891 153.432933930805  
149.856041300199 153.360382235409 169.355185349431 142.551161883518  
145.909456876796 155.452842883109 156.534634574244 139.723117427543  
143.888318202599  
LOC646781 137.27506604142 120.638330368388 135.634385846692  
138.514356748249 131.597937570173 139.991780068793 148.578012060425  
126.938068475032 124.592771536872 151.891318080151 118.186426364551  
146.428534132236  
LOC646782 129.561012565141 137.043088465479 127.044367488881  
148.85250180736 149.160808104789 121.371348717752 125.321968563987  
132.836513637574 133.704706615071 122.10489926804 144.062079886084  
132.760567403706  
LOC646783 189.250846546817 185.220017451419 195.309773332459  
203.544294328395 197.740912476527 197.100205890532 203.335012796883  
192.932285494022 182.763057221385 193.858884443593 172.942666836182  
198.456392063513  
LOC646784 151.573920235798 162.904897605929 155.813740201987  
159.862252588012 165.163490032007 146.817659734182 152.500670025483  
139.657182434153 149.353072778508 151.121293928309 176.121563444364  
155.756074127526  
LOC646785 4134.02613649483 3976.40140405628 4386.83308119416  
2794.89048827025 4965.25728333142 6059.74270502037 8918.58940386786  
6585.34962362923 4503.01240138314 7144.3257417116 6044.78942014135  
6830.46932926077  
LOC646786 991.081498002429 1195.6335460045 617.833194119379  
911.340266389071 745.844395215451 634.356322976353 761.726829618132

599.926717145115 601.521068811063 821.465895280454 1067.30106203503  
896.625415670455  
LOC646791 255.866847225916 214.763232658841 325.493177980483  
229.511643376643 219.288597751645 194.403848868583 224.89911221799  
207.651142295123 239.419200107721 417.36454228858 252.404931238338  
246.186104432792  
LOC646793 139.87715485885 147.633793743254 141.553465481789  
130.682112236817 145.989546968117 153.51550202829 135.834000569736  
152.47429737104 152.439608473915 131.155117105954 143.140502042489  
136.704018446388  
LOC646795 138.384797779855 156.466728833063 155.910169659939  
150.235026770931 159.716066475442 162.565576110247 157.912864169081  
174.068974937318 146.125125252096 171.028432989066 145.025703051661  
148.908758741034  
LOC646796 137.141081365469 142.335251387423 128.001109846227  
128.862699779871 139.324006489527 135.303322290834 150.138643811727  
126.798976470472 151.902352951251 142.173279109959 135.252082574955  
127.776112651456  
LOC646799 144.968459820523 129.802596741962 150.297422529071  
141.268819327475 140.29803170157 150.28508305615 145.233055765001  
137.04010227318 145.789840511876 129.865581506307 144.612549022264  
137.549175595441  
LOC646801 131.665421461826 131.965184111199 146.857213166531  
139.163958829511 136.418105816557 129.599661790972 127.654130155446  
131.069515666204 132.765942975939 136.011474063229 147.264690436042  
125.685852196342  
LOC646802 149.44520146627 141.949098898957 128.455670598648  
135.43119649883 131.814528687104 147.922706629104 144.185406500473  
161.673818303367 135.2979041294 131.587987756056 148.764956861822  
144.599578905334  
LOC646803 149.799681364551 137.47514052942 150.624740697168  
147.16778072296 144.916193282062 145.872258115708 151.61049450647  
154.108689872903 153.709230037306 136.258073395013 130.867819112143  
145.235087732482  
LOC646804 144.384287335249 124.612293808606 144.148833164952  
127.377356715337 148.109847175216 150.298765307349 145.553219709768  
122.699993989189 136.975775196224 172.657668514226 160.30784625946  
162.885054245809  
LOC646805 132.94603323912 125.384706864406 126.988118823204  
125.892022613725 137.037299675471 135.516856254532 129.384531576943  
133.239703270008 130.497405221273 131.196196319523 124.611144621071  
117.348231147283  
LOC646806 137.42845093653 153.068898842283 163.504122327429  
147.378228560979 135.985358106767 140.870849757111 137.419835194075  
130.565986980021 137.190593489949 143.548858367002 128.5581535393  
153.228048041467  
LOC646808 197.848577663238 206.650760711745 211.995890899864  
232.354100565406 179.601348561497 184.873459141947 229.77428612216  
221.322724563472 191.525291860022 188.580458613357 199.947823264085  
168.384397488011  
LOC646812 139.219476681919 132.890886250364 145.89593390936  
154.161892545061 147.818956338752 133.343243441383 151.406384541297  
144.63774603725 142.305484770249 132.024244263352 145.455411983653  
142.222833574043

LOC646813 167.190857452131 167.341759854203 175.495965414493  
200.558971047462 165.500088159872 148.431101051574 189.647009287524  
179.863096463897 182.495117800073 181.654319266685 178.804669910283  
158.138862054715  
LOC646817 156.9540270155 167.568776552757 200.558971047462  
169.368090266817 181.215046876308 213.7326050342 159.074001164836  
180.304585602206 193.064450357153 373.760551592844 177.742616962629  
203.071186284148  
LOC646818 130.240366272285 140.865990571023 130.062015525637  
151.663203772586 139.711696905287 143.544671705984 168.854819201403  
134.113464449375 158.658110539162 141.422441104854 136.858037332222  
138.211845785985  
LOC646819 7601.58151657937 6990.13809515289 7555.47017983216  
5032.66681917478 11479.7406150358 8558.70496234991 12493.2940668467  
8709.2221371432 6851.54963413886 8812.91092406563 14651.3379687477  
10329.1999331936  
LOC646821 160.903342063542 196.378888436237 198.737421468412  
183.963578322984 406.900412510895 262.139211406599 426.464641742092  
230.201464318433 191.912670416334 439.928008927647 298.979106293393  
251.731327363027  
LOC646823 169.466129742085 154.755544586846 136.79732903972  
151.364528898537 160.822287037366 158.429761055869 170.320777845496  
176.641899861006 151.84373370805 154.94587631386 141.934351226006  
161.430219824313  
LOC646825 151.282370273189 152.772177215856 144.664600892248  
165.055636629118 165.803549113373 159.738700107615 156.71199811686  
158.439409064812 174.192898940601 151.163774400244 162.825380100343  
148.522580898717  
LOC646829 148.376194044247 131.426355444136 144.068734533254  
137.395895014456 128.36533737469 128.705587172572 130.818181991958  
126.180714796187 130.231160879338 127.646032547296 126.614876404146  
127.622397233692  
LOC646835 118.56332995149 128.713131994442 132.092910274836  
146.390223079987 143.512348693556 141.284962125757 135.764392116216  
121.689416823766 136.83883055114 120.450111018432 118.787630332168  
131.423918669689  
LOC646836 137.864637728155 156.859539612504 167.993851183401  
147.106355591496 135.018710687313 164.181915898563 145.801228425692  
136.699011428085 148.594322264158 142.099541115973 138.20827167572  
232.801257700571  
LOC646841 159.832405510505 162.358237198517 145.574725784632  
147.313494489487 182.248178961707 148.304863957659 203.704734790602  
150.560305000601 128.346598756853 191.554396977588 221.45275440794  
155.993849743656  
LOC646845 143.631345956176 133.862203806529 140.747967724586  
137.212568398657 145.464640276742 138.42029331811 134.425483661043  
117.598778415488 142.776295389006 134.176925491721 133.886458291672  
146.031321571566  
LOC646848 119.890260409414 138.3792224631 150.942078067308  
125.28279436853 114.498610080481 123.9209907098 118.895095992424  
139.018588215263 144.043818335414 133.315888375614 119.06600048679  
144.977958320895  
LOC646849 651.43207839949 696.277780670166 1227.36706427754  
518.281245498542 550.434931878586 835.834013018438 1681.54485582868

1005.62130301653 881.15414246017 2277.60839052397 1398.60850048351  
1637.66306286151  
LOC646851 113.362825181676 116.597352307016 123.02879683948  
128.827129738041 131.449370465834 133.965220820813 120.995697049378  
139.008854444223 136.265972909993 115.264104392064 151.026905311756  
120.706421084476  
LOC646853 147.278236958386 151.846610656503 153.217287503221  
152.935963398921 130.325073627151 137.234384760487 151.663203772586  
141.002002397727 148.709795687391 145.117574928189 155.595651896155  
171.884800118791  
LOC646855 134.329334422886 157.6790197503 153.554159360954  
148.302775746627 145.326803807448 153.405052909585 133.92485496581  
140.271557921345 156.230806240545 152.021576565132 148.179398287068  
144.458829225668  
LOC646858 123.762963668211 145.783320434143 132.148166773943  
134.296645422941 151.939710544553 157.049773524382 138.215708514725  
148.49560238679 147.498609641457 141.37694311902 150.135699526882  
152.467764730004  
LOC646861 156.4687904356 140.56526023628 134.151372457715  
152.488480322526 139.048016900762 152.109178223495 141.65642171417  
138.563471679129 142.95001632948 141.353084959289 152.309460630038  
144.246749835693  
LOC646862 143.652009342522 145.671099346237 173.017662861015  
147.382177739631 162.861320877227 149.742140955184 170.446156541317  
157.333615322941 135.122770943076 148.412895185127 150.343825300998  
149.645548888832  
LOC646863 151.362686497226 138.930413256469 143.333211390741  
145.387562372871 135.005591691192 153.723169560972 150.160004473338  
146.803549606737 136.829137120584 152.251128595777 142.07664288788  
156.783896946556  
LOC646864 152.038902807701 156.733898702331 168.611652451329  
175.165305179665 162.71020036416 176.300743660299 145.547037566774  
159.424105896749 143.318291243905 168.873282919232 134.394503574535  
149.023962828426  
LOC646867 139.573371281569 134.05596537871 134.446758753426  
153.047317528007 163.010527914347 139.878752507646 151.736824723671  
134.70848693317 141.600833670693 146.506263412584 128.099484678519  
155.283003653612  
LOC646869 171.51411661213 169.619338456208 172.509081696309  
192.96586114861 176.927500850631 170.212679845194 169.403422185018  
186.231346659144 164.084737224884 173.573412346985 155.603263242813  
183.513101761782  
LOC646870 148.332750352364 138.117916412819 149.198753359122  
127.969833368917 129.856994052591 129.618097261902 140.701132362458  
146.959154938248 145.210787864362 132.469190523971 129.278833426752  
139.953572663277  
LOC646871 144.008961720971 126.529763042574 130.672586991186  
146.608010450782 145.165443106042 132.454025879177 153.299196905367  
140.709981878311 125.093376753408 122.089332300031 139.440415574681  
132.786500984297  
LOC646879 134.955823960889 148.582022536314 147.459385142695  
138.338280468272 145.09280363189 157.443127950708 152.137669424501  
148.424970450231 156.727153398506 161.937384157098 144.278830378899  
148.916981164664

LOC646881 153.741061283101 161.552475294424 149.639835429332  
179.896659891106 156.920867019849 159.98205335759 169.771005675296  
149.783542909965 172.722177339418 156.248684477916 158.528301072565  
164.641508485461  
LOC646882 138.152641686151 167.692053273833 157.216793735479  
158.531514776098 142.540433565262 145.333097940759 161.694109087893  
157.237147919803 163.936973279176 161.335677383485 143.30977386038  
165.896420029269  
LOC646887 122.503984297406 145.158039427157 160.567934923347  
141.389330839189 143.52474218953 136.618643817686 172.562162872242  
153.033582154882 145.09909498449 159.957371011316 150.784262878145  
137.647282354299  
LOC646888 150.79785758452 126.755389668637 149.355389396683  
154.402315635227 130.836079676477 140.989597586699 139.725987763226  
142.363309192458 158.404154056472 134.537123332992 129.001192144163  
134.469653093466  
LOC646890 142.000874773182 146.442734810495 160.399059317919  
148.611352905643 144.182891591399 152.980843102933 152.798927898416  
151.196713920345 142.116311513299 150.829439012542 142.677386111317  
150.690143057308  
LOC646891 132.557945249016 149.734395134321 144.779146672553  
136.529820456592 158.171302275984 157.103246263523 137.706893763747  
155.317754378283 141.588478913204 138.002258986172 145.169804325334  
140.43729728368  
LOC646892 135.095095470362 138.855454645579 142.013370954791  
145.641373616866 140.881084272745 140.796641921516 147.416991272497  
130.410584413031 148.049570580734 128.455670598648 139.835983835267  
141.241717979079  
LOC646895 141.490911535087 155.405519023053 154.491373296392  
154.716750150891 143.685368799972 144.324313048777 155.134796468704  
150.496616601699 148.486946087388 158.299765118221 135.744202879162  
145.873819094778  
LOC646897 267.097999873387 281.369059516242 267.097999873387  
291.444155562134 181.022635001204 300.150235383065 197.034073391478  
218.134101819445 192.273528391588 192.992546726522 220.345184229077  
218.672831303767  
LOC646900 257.5097052677 236.651601701157 239.704459251571  
210.41046499545 272.885527139137 348.808646570544 295.607161318725  
409.282410265733 353.912654262209 384.780426529733 349.910535555712  
411.505580458401  
LOC646903 134.946677624454 128.853089272901 132.186120302011  
156.684098441572 131.096514910613 128.179293878252 134.784568023655  
153.603765998461 140.50127034921 133.14988092185 141.028377381019  
154.949840064881  
LOC646905 148.556161762978 132.413527125434 150.333572271902  
134.044789094272 137.279605991153 121.599883734552 145.049387327924  
125.67874617392 130.570050159191 135.185283076286 115.944280729914  
133.460655803085  
LOC646906 138.654301345398 129.745892720738 135.237042337721  
136.657107363796 162.893396525252 163.636550341231 140.553613300431  
130.119313219923 127.975441922402 167.692053273833 138.343232981485  
163.119211741255  
LOC646908 124.63978985808 126.720031203392 111.11656427738  
125.905785653648 140.668597897404 133.872561340464 139.191746593825

131.263641389894 130.567443018832 127.83967243279 135.860057860699  
129.075693654369  
LOC646909 315.615758089471 295.047418816148 314.221257518059  
216.485113690708 244.668813440638 273.911741951291 458.047799748696  
317.244256751418 267.451611731669 450.688800547981 884.248568386012  
374.718289636553  
LOC646914 135.416008633632 141.943910304145 139.063209125209  
148.922537778634 137.464914919148 151.09670688533 139.039276904833  
142.171459019791 139.418394104487 143.407371444437 145.578721432709  
145.760577027524  
LOC646915 164.078423844421 155.752117896424 190.348359536057  
167.965981130329 149.910521500364 161.021740537372 156.213421099137  
153.285830139349 155.086559474139 146.040995022257 160.73807125195  
160.853480692082  
LOC646916 217.670330817769 221.561252012695 219.537335167901  
223.941946219233 150.726359890073 273.152907354565 188.910933952136  
231.202047619476 194.240372898704 165.158465031363 211.941623411369  
207.560911665319  
LOC646917 140.080398454576 141.336866031027 160.997179739138  
142.236565028336 147.436408919939 140.680326850085 141.523470346891  
135.985358106767 127.152744243038 147.243263182654 130.323754933844  
145.110145981908  
LOC646918 146.194467350201 133.195030751476 152.555437272666  
166.076692502428 147.648020819059 163.951459935477 166.176511176489  
146.318052064937 148.404000406948 133.663595328149 114.01599035448  
150.176942469551  
LOC646920 176.75095377028 169.661107080542 169.561657768387  
181.313333665614 172.128489882364 169.556358586336 180.392337212428  
172.604689611475 184.167124143272 190.716424123036 146.95272087759  
186.529656751005  
LOC646926 153.238678313147 134.537123332992 138.064951932825  
131.755881982599 146.432468585736 167.500410857353 137.468570135972  
134.239416179248 143.081811369669 141.069243738242 140.154925193842  
129.658488766089  
LOC646931 140.916876460413 156.567519536997 164.696616863082  
132.181365505556 127.492376657284 148.340380102097 159.196987090991  
128.647790058795 143.040254576088 118.034262386827 136.639637503571  
124.915772594451  
LOC646932 136.566588903194 151.660152977515 165.654773882752  
154.236652966294 137.567384694894 139.178245419517 137.50266393001  
151.893573927407 146.139817421758 142.368601917778 156.895079878556  
155.83143112621  
LOC646933 131.38692240237 125.843089077365 136.811620595243  
138.755173333171 140.89390566467 130.488972210403 134.683553037185  
137.675597243706 131.300342835696 148.045391886623 126.25011972597  
137.559204418819  
LOC646934 131.08389186558 130.138945493943 131.839890565869  
134.931263946202 127.657961561231 127.514381389109 132.854078420045  
124.574323079707 130.506708993193 129.711973013336 143.857385585662  
138.997524526643  
LOC646936 411.285747588622 390.979822976551 455.665927568395  
408.60092780174 228.739556788924 396.126485121994 337.87475687838  
350.392951395182 309.720081933252 317.493387040816 268.406778092906  
387.355661073935



LOC646938 138.773042747912 152.629680152219 156.642441706727  
141.925012927873 171.880470629305 153.461396593156 172.108795190633  
169.764014031526 150.974364125849 165.327972973978 142.802965008073  
154.932132950843  
LOC646939 128.850480964163 128.10679682685 139.864176113337  
148.89721463505 131.77099316122 118.226036680442 125.924219382375  
133.408354896584 117.889524670597 149.593135821045 113.22850386845  
128.890685255595  
LOC646942 2622.87486749984 2816.29814823646 2583.46653460894  
2374.1382412432 2758.01526530661 2782.94647782764 4030.42725798136  
3119.93811557461 1832.35076992253 3205.74787769881 2915.72823797537  
2794.89048827025  
LOC646943 142.101865506094 140.286870147975 138.829793136954  
167.380798617981 160.122274989224 138.464793389999 140.405405916188  
153.426409060413 153.51550202829 164.948785167149 137.927403204849  
137.337681987169  
LOC646946 127.617449871137 119.627380812035 126.343040504566  
119.704436785439 144.705559511075 141.670426206169 132.369872013432  
127.121068682846 127.585851003779 132.285835971705 117.084984190461  
139.068375166939  
LOC646947 138.424464248567 127.833653828539 134.860896462638  
126.042731009527 127.490889148422 125.212404794262 135.075759558051  
133.470643135354 117.417112053842 126.378952839132 129.015422924366  
134.607501073433  
LOC646949 214.662648581622 204.453822958077 216.836094088131  
165.100811808026 230.015981563049 242.070630946726 510.555184032017  
263.845733455915 207.123420880185 307.083179338165 540.797164107185  
242.614881095485  
LOC646951 145.06736850005 155.023934989559 159.362293777146  
148.074494928651 156.531951576859 155.247452081206 150.948076715456  
148.242794464181 149.77596374205 140.274655651173 135.741404460897  
146.268073519544  
LOC646956 175.327597807738 169.238325933605 196.329602378007  
181.914505612128 173.573412346985 185.650862663633 185.396765725228  
171.247946863662 170.858049313581 192.891507272665 180.923089242255  
205.546628064296  
LOC646960 121.607527525765 123.566522075398 110.050374895171  
142.50631960137 127.349190705235 120.935863853101 125.639355645626  
114.002925521932 120.450111018432 132.894049694258 117.149781437983  
117.555999801887  
LOC646966 323.149792143481 280.948704707655 342.245182599593  
244.162496497466 394.962978677736 357.431640917696 482.739666411407  
421.583441056026 261.251965523684 515.158921349383 966.731520471976  
261.592512762969  
LOC646970 132.091532692048 158.002906093899 148.43357593249  
127.327765407459 146.782830477983 154.768422926874 137.163699337032  
142.390243984362 132.409582164007 129.568951363607 127.412539650291  
128.578494940165  
LOC646971 121.031695489398 143.683545371898 139.021552573529  
131.157702791998 144.216394153095 123.315362903961 132.103084472404  
141.436235043864 143.025570700585 131.340453291188 131.421663453164  
143.713962738562  
LOC646976 132.508133846896 149.904691068054 147.619451225526  
145.718019736542 139.150209111606 135.075759558051 144.227440632196

130.95176570982 128.580625868379 138.094719587545 133.436057118148  
147.635761512135  
LOC646981 157.431972439046 133.42964827086 150.456500446175  
135.437227744668 151.917359928516 170.376620730856 199.250680260804  
148.329635131296 142.33269270703 150.43722766614 167.604959895451  
172.319604146201  
LOC646982 161.441613587571 159.887898257218 142.524413202292  
165.048922660581 162.531630234824 149.76931674417 153.998849486363  
147.668990552874 140.89390566467 189.082778234831 139.733149319736  
158.06915048955  
LOC646990 185.950131245699 165.169920299969 182.152956182443  
172.20451139581 157.350979071365 200.443940449586 162.828844182372  
159.845890841215 151.473239782301 146.524138043215 154.066939372379  
221.930333726352  
LOC646992 153.148085096884 157.592607345742 136.732319750425  
144.400004730049 139.301435614165 144.917911601441 141.739299634007  
130.143953880391 147.44463861207 140.239948346946 136.478114537536  
163.970187373891  
LOC646993 152.492163303139 179.711363255355 163.099009810658  
152.296774123599 481.933386283351 400.472835504879 1233.99503576308  
394.576038252334 354.132752995385 319.812293134357 316.281469585496  
354.579728909336  
LOC646996 3515.36256599555 3246.86605825129 3000.46298223166  
3130.30693451802 844.778755052304 3560.23794634993 2295.16438420175  
3008.43964505208 2360.87760349888 1889.05071563459 2427.21100330388  
2132.90676194993  
LOC646997 137.816691265242 128.191959554459 139.329693510525  
131.223691762533 137.72327986309 134.451423371791 142.362022977137  
137.710725379804 142.85695042665 130.42746492878 113.938636269013  
135.405742719464  
LOC646999 151.026905311756 149.921414617149 175.469375624274  
143.098246338022 170.446156541317 161.496700767073 161.225608630791  
158.072347847051 155.71830087869 158.594064857041 150.547096071626  
152.30599498619  
LOC647000 2365.99940149374 3287.37172778474 2466.36457617864  
5073.27433952351 7838.92787031423 4309.86375945008 3211.2719052157  
3136.27991502603 4548.5418978622 3143.77161008321 3504.77617298452  
3850.41246770812  
LOC647003 150.971453664961 141.919263493165 162.61434899634  
157.668307146391 146.654925456132 160.766121558583 145.968884703737  
161.94312376726 150.707113487334 146.879019367939 135.425518707018  
148.275939659102  
LOC647006 115.053039576143 118.410091682499 120.897228878841  
129.816385177336 124.666487633365 133.352279794853 125.533538277681  
124.828626063272 125.809027384863 124.611144621071 144.576510694422  
110.764586138261  
LOC647008 147.127908355066 147.140771901106 135.111066946207  
139.615706918035 127.277128410056 118.679664392666 127.128042857811  
139.311063263392 120.977480111735 125.447209413787 118.604395992281  
138.084801633774  
LOC647009 203.831047867731 196.819022688128 233.953994677015  
167.125830254039 193.892810132985 209.785886171295 258.605188272761  
271.113617350982 251.062649517773 316.895545640437 205.036081947168  
242.299252896647

LOC647011 137.704257049203 128.882160435252 159.693019552703  
145.63870792125 128.608401533371 141.239354296152 157.449891798638  
139.502856192876 143.407371444437 155.490897312915 153.391895732807  
157.189041157784  
LOC647012 166.944701842349 150.971453664961 144.782706468281  
170.614129599775 146.608010450782 153.989839987975 141.350135458015  
143.836637098747 161.485353443949 153.82440233533 154.190469538568  
149.952762225731  
LOC647013 116.604371744082 140.881084272745 132.573953444192  
112.292129754508 125.787353491408 126.893023101449 125.761205967344  
136.05610450926 131.094674590174 128.827129738041 129.939510383312  
119.701313125748  
LOC647015 139.356478232855 126.17342715006 149.430396727944  
150.991991926229 138.680447175582 141.104761546577 130.625825024195  
128.438401976279 137.446745269821 134.349043119219 119.427342766092  
152.217243924816  
LOC647020 119.407293854922 137.552979154943 130.235407859542  
125.526744092256 129.083756379376 122.438438464097 128.09266452749  
120.988749021323 128.282999719959 139.715836473047 128.42287610189  
145.950701448912  
LOC647022 134.250052775987 167.157420848604 141.905641114703  
138.487657776553 148.31140879454 133.152523054305 159.806221777332  
135.848022588175 147.684875777977 152.309460630038 149.013011292165  
132.930042559647  
LOC647025 129.203236898198 141.685620602226 123.055210862247  
139.016274575854 148.744599622165 129.256138453675 128.318545300038  
139.847813838017 142.121399383259 129.223872979789 145.442914818456  
130.998637545686  
LOC647028 138.028813480968 135.825931047185 144.114177076352  
148.22974445263 124.028748209411 152.50843414723 133.173541338355  
132.014213378179 149.113794439994 143.705475208192 131.102996816222  
155.091135297162  
LOC647030 1939.1525084845 1702.68441407727 2157.50118108142  
1294.18114559128 1053.65938651514 2763.86550710042 2867.63319136936  
2486.24762158293 1806.24732793591 4073.21075791737 3581.36347643133  
2986.6208659209  
LOC647031 152.419714400591 138.684070773064 141.162443312437  
139.541759919059 140.539606951892 143.867013358737 133.197002327259  
139.333282400639 120.686906898624 138.546549217819 126.314233529267  
145.992883153161  
LOC647034 138.026155846749 116.316845829267 124.106971897779  
124.710368327189 134.524644163286 130.016401638936 123.089110282465  
131.841436867483 126.310788291075 142.527422462824 129.537345537086  
137.901317305531  
LOC647035 164.991522994763 142.26998944788 152.545261723881  
157.739526559807 145.513333676569 154.670631900834 147.036768856136  
129.904942554979 133.682715540066 150.295611829265 159.230636380063  
151.377932495104  
LOC647037 363.150472154973 349.485727214325 462.686385881492  
379.911829623463 433.11536069928 652.654673756838 596.54904286299  
362.742120043509 529.368609163949 292.60467054075 408.361368902627  
495.56459361431  
LOC647038 130.606211166873 139.016274575854 134.283467987991  
137.485252316816 123.905462079972 126.27024495428 138.35738548449

139.513752499004 133.378374710498 143.947729578484 133.94206203396  
147.547944397578  
LOC647041 137.545063966957 161.139253742858 132.385096888962  
145.106362864355 151.181422205549 156.324643994552 152.169087619827  
135.472135601859 145.948772123142 134.21363751173 146.714957631903  
145.915129713165  
LOC647042 148.263293819238 131.497454038525 142.937182720493  
143.730966588794 142.737537206204 150.79785758452 161.417207801991  
156.098240321674 165.186696781985 144.315158433582 144.619374612317  
140.385509382606  
LOC647044 143.903216264503 155.078035506545 175.908645445479  
152.702847643082 149.402679897813 162.634670715627 140.541925660368  
161.26201213997 151.191822057706 164.587657424569 120.054065939835  
142.368601917778  
LOC647046 152.883970401452 146.069543494352 144.597060118959  
158.584934514596 135.488155152648 131.635641515901 144.975882336334  
155.330215726109 142.409003426775 161.530878860883 140.292132023262  
158.594064857041  
LOC647049 152.007436762651 155.42165869714 132.809364188497  
152.309460630038 121.988237521196 147.985843605585 149.774162138829  
138.395943168158 148.551340840517 149.883237874886 137.509100088226  
157.410205523901  
LOC647050 175.601912488918 162.259941098076 153.111226896983  
160.655929233978 135.027715094704 151.305201022012 151.734683227196  
166.061891147234 150.42705284743 146.672270660899 148.807422049327  
141.557420268382  
LOC647054 168.33854702953 149.225754384299 163.915489303508  
150.115482378938 155.475804754732 180.3779211444 163.480722123193  
165.686655824416 154.360558958914 196.310746973798 164.784346867158  
188.291563792748  
LOC647055 136.630678899513 135.403206634483 138.909419415137  
141.494666823639 180.060096787617 142.432995657729 128.941490662452  
149.639835429332 147.428180649939 138.455086062782 148.797226586765  
129.195962576953  
LOC647058 130.987023228883 153.402227428787 138.240874738649  
149.168758815526 160.473772347376 161.618479762188 146.912751127571  
143.67880977119 144.781438651649 143.394704760983 141.134173683836  
158.049286838471  
LOC647060 133.028789808654 117.634514818946 151.59613008133  
130.097543328456 138.438792881135 145.850605495564 131.539170756533  
133.615958668897 115.992487254175 162.431674335726 117.740022708444  
125.855451679929  
LOC647065 145.168031449425 136.161633283029 157.994474909749  
149.611601613715 148.056333887679 156.373163373309 155.438218501542  
136.801338583441 145.432667767652 152.563532872898 135.814893730549  
166.662801900754  
LOC647070 115.321501844663 131.502263820023 125.803854387512  
119.905127545336 126.103561089901 127.277128410056 130.48231275063  
127.055165613236 117.646963986512 138.114938404796 147.108661317945  
130.51901676405  
LOC647074 192.640717683236 205.45079491218 186.430014478919  
203.125568980238 231.547654653783 208.164674386141 228.675099004411  
186.127543877065 183.719279448844 217.227441947056 211.916602665089  
215.426918011158

LOC647079 130.297203474319 123.725998173975 137.478556403046  
150.820808770853 130.987023228883 141.904041228678 125.861564323476  
141.075421936212 151.622719246408 121.410606617535 109.988237089025  
129.668506092785  
LOC647080 151.71942719041 163.267148547147 189.552385508772  
184.530853446688 168.958694643382 157.717145014769 165.803549113373  
172.030687707578 154.306729472627 179.358460170348 145.56468363155  
157.399880496076  
LOC647081 252.056131165397 253.601378730911 407.052451784773  
237.521746704115 216.290279815413 313.967636827811 345.433025456954  
408.993744895434 316.590387560909 297.228563607097 333.592915218163  
560.015499136193  
LOC647082 124.786029449452 121.965131419551 130.380766252137  
119.144128641393 121.752481757054 138.165240772401 135.419628087842  
134.584076788979 127.833653828539 139.297276687352 137.907709799074  
121.968807253639  
LOC647083 147.681723355535 150.224472335504 169.095270479344  
166.027988561421 143.030777754448 173.829219279719 158.74180418577  
137.141081365469 155.119146797226 146.996442729408 141.982743538528  
148.347642424885  
LOC647086 162.427505889157 151.895142552067 179.286187825363  
154.586825710624 131.212705319485 163.794436953711 156.779004465552  
127.440987506769 151.040909999868 149.651553512698 143.338628928675  
169.774018833113  
LOC647089 140.613151527886 142.029398672217 122.068058346443  
141.117659724704 131.536457148878 139.667714422309 157.344758285153  
131.558842131826 133.460655803085 148.776470607859 135.092226300609  
121.898921780569  
LOC647096 139.585373400347 141.599211622756 151.372219350291  
152.78638215326 142.603436693587 144.522461545204 144.436358527414  
132.088335186716 137.15571320152 155.572357799741 162.71020036416  
151.829217512763  
LOC647099 18421.818380318 15924.2167735021 17658.0552091534  
15053.7547401937 20381.3859535625 16077.1585881362 20048.679735668  
22750.0246358215 20647.6275450554 17141.9934540963 20764.6732139063  
18862.7632438112  
LOC647102 151.040909999868 133.483766053954 153.54898879562  
136.647239621513 170.164668347783 154.390764802264 141.626504154989  
148.060086496148 146.455182336561 155.855564068891 138.455086062782  
151.59613008133  
LOC647103 156.277567608825 152.890239929335 137.944260488223  
133.082433951922 146.517645037071 132.899305777714 138.43301474649  
146.031321571566 141.123272165499 151.770791549511 149.4401812  
151.113342302947  
LOC647104 196.001089662818 205.121123131992 180.250420976613  
211.34069504665 296.428342247529 222.20526515049 290.326832430372  
192.914362049985 225.335753745598 240.706548931192 271.791126011275  
237.045634416039  
LOC647107 143.94044082267 129.998824457005 137.854873498783  
159.130076733711 124.466986821169 144.924212639731 126.960777504772  
150.902548360746 131.473001455317 120.524859681034 126.887989471803  
146.782830477983  
LOC647108 207.785320401354 195.608619642038 181.771654391653  
350.803378042804 189.726075394359 205.244843885276 207.831299397177

194.702974020747 203.223604138192 195.256498208339 173.563363508314  
186.345823604119  
LOC647121 151.453985465369 149.211214631561 141.853711139375  
148.553324405123 156.787932134605 148.309872393 140.156797128045  
161.104993402456 164.063104872636 135.463385553776 149.264997927508  
139.446914318877  
LOC647122 132.903959880979 146.300016591645 141.557420268382  
156.9540270155 157.821491577808 139.414912158809 161.720405760536  
135.304167695152 136.497295707149 155.438218501542 145.950701448912  
156.396579029788  
LOC647123 117.74682797375 133.500750738061 157.499803444188  
148.585224298375 150.570540340126 133.337863400762 187.365807314802  
143.318291243905 141.13343407335 147.164348704012 141.062226285596  
153.095594614683  
LOC647129 138.715208319278 135.504526903482 131.060030943633  
141.97908047949 147.001408450583 147.319360896679 141.997165490755  
141.422441104854 131.766114156138 130.48231275063 128.65678873939  
125.374764771516  
LOC647130 134.4811029314 140.374644951491 140.120051507626  
135.711590400394 148.934593102452 142.717436384151 135.28448343086  
140.747967724586 131.099004325598 142.088243118644 135.86924353735  
136.159825652148  
LOC647131 143.429394097222 137.642858036384 145.826955036113  
141.302647488314 147.379741260871 141.963297887448 156.18389905051  
157.709832297666 135.966929064294 167.912321820083 121.739219824085  
132.767474034305  
LOC647134 163.59704679338 155.590197324062 142.667173697017  
126.823886603295 156.210423316722 147.446381217887 158.60084363504  
181.654319266685 146.276706674761 127.242627779136 137.871870950302  
133.238296113721  
LOC647135 160.140509175287 154.496005175117 153.056369304663  
150.035890574132 147.774588146924 157.484541464879 150.536178574986  
155.516697616637 148.134642821094 146.738411200698 140.204023682096  
143.675696734051  
LOC647138 124.059778432167 130.744788360182 132.018833785059  
135.862790395984 141.752031758589 136.641140715439 120.816130267055  
142.548833391567 150.213657393257 114.927420605185 133.807992913171  
125.689884251847  
LOC647147 140.56526023628 168.660907237558 153.511995286293  
163.951459935477 158.408494909763 145.076068630259 155.108146847158  
163.521095869383 153.723169560972 141.543147273205 147.405050592353  
140.868946922293  
LOC647149 132.204721976343 161.287648113422 147.725396196054  
138.301397056664 137.457453776513 162.082166316002 146.900087470856  
148.107004870598 143.177915754998 160.374491283254 119.873844587252  
162.294114485312  
LOC647150 302.113807121396 261.065986251886 319.128582107184  
247.683819429859 309.997909440664 510.434895296759 365.362177671146  
382.327656839936 518.478990211753 395.049127927637 318.73799597811  
402.299165610893  
LOC647154 146.249951130016 120.918190840083 137.450275642511  
130.306478656159 141.194900058799 186.708059183893 140.267351731167  
143.008280236963 159.286484253487 139.020070386495 136.563471322998  
139.744142223177

LOC647156 166.709393547104 162.656951764783 192.627266049516  
177.023536553193 164.787637367264 179.451637129672 186.515784641119  
176.070695522397 157.353493980339 152.47429737104 157.12360611723  
163.672213020803  
LOC647157 114.072600760808 119.275061991187 127.911258242431  
125.166940410459 115.967513057229 114.68345964966 122.575357101038  
116.635455849571 124.484589975207 117.436119533535 132.079255703621  
119.330439721904  
LOC647163 163.764600217347 159.23414970379 157.248117633013  
150.939877261936 143.725497952919 175.891947478891 136.528123792599  
150.262342889379 154.445840992357 150.765477999064 131.468537312778  
158.272071464923  
LOC647166 115.337592860132 115.174678745401 127.566369352079  
129.786941565218 133.672964925321 136.256456726841 131.543439103033  
124.977046954694 118.749046585251 124.715454831847 120.138014822486  
123.372689985035  
LOC647169 152.415752253205 144.977958320895 147.09751695349  
155.431833398023 152.327247552986 185.140211988926 168.327600230929  
197.02284475852 165.225475655526 133.052615777603 154.312374306932  
144.81689330206  
LOC647171 115.00776048097 135.120878931851 140.401508808129  
134.758222337831 139.08460576146 139.286592412216 148.258850340107  
142.68640844948 134.423260547727 129.513590304528 122.868393258957  
137.344198938623  
LOC647174 133.122174596886 116.919109599361 132.606735652984  
139.044150521333 140.165450892713 143.814798097425 133.363883851093  
158.712241098927 137.963531795842 143.473523258521 150.794680375075  
146.023710941284  
LOC647176 161.740466814881 159.683695366575 141.777089987975  
155.734509841719 157.955606242401 157.982146236108 151.269442319766  
163.81485578613 155.383166865192 163.21153580549 160.486513643798  
157.963634535239  
LOC647181 114.479886899622 127.000175858468 143.446317006075  
148.907136936731 126.728375196449 119.334967856721 131.719227272527  
124.053190169486 143.101750222256 129.265788005518 129.949894903048  
135.206755687105  
LOC647187 124.83124879272 124.684937344502 132.363645381743  
132.885515958081 125.413619056436 130.524630778991 144.781438651649  
141.541355091514 136.704018446388 139.755211300398 141.097257687941  
133.533718725309  
LOC647188 124.606795061928 143.015905927379 125.724143659093  
124.116400777472 117.218616752346 128.651081092914 125.826111950648  
129.748891462506 118.258886189283 123.98775110588 126.365861978893  
127.6516565653  
LOC647190 133.915830295107 129.990534497026 127.696578575874  
135.194416986571 136.501159644992 142.01454627498 134.13812854554  
136.891612156271 146.932655562613 137.438984175012 107.622342073167  
153.22516060649  
LOC647191 155.865540894526 152.667721542507 178.455966482206  
163.714231827866 163.41031443893 156.208747691032 182.508415915215  
159.320692108734 158.74180418577 161.066226957782 154.716750150891  
158.950169226637  
LOC647193 140.947852529815 147.172440755724 153.664503112778  
142.819669471009 147.400082178491 164.61921356441 135.412051450659

145.311964807443 129.606271613463 153.209409960324 142.81401345781  
140.318155161909  
LOC647195 146.968599872798 149.288034848931 194.831347257735  
129.431497372577 175.711836112986 194.552533397944 185.896304740844  
267.622579012917 239.12905945808 165.085010975035 222.484058975856  
214.200081541057  
LOC647197 144.221488906376 146.046894253919 108.669141498627  
141.805028495425 134.608734423113 139.571752933877 129.994160770036  
147.238896426423 144.476157581998 127.484178603011 136.158508521357  
135.261561433405  
LOC647199 141.208106961875 154.515091049526 152.709021529522  
147.553953240464 140.067809125008 154.661456780865 163.373180928181  
163.741411769369 144.839170491334 137.016495611111 148.866229889479  
148.1283706199  
LOC647200 138.476953078729 145.214575855337 130.758707848676  
125.088717405087 148.209164900319 125.902015309754 125.088717405087  
135.773386496434 138.771088752839 153.028658323116 135.787323859105  
145.737361356678  
LOC647206 137.337298233161 122.506058130261 146.800324349321  
131.400031203603 132.782967735893 137.685104040843 162.431674335726  
150.28508305615 145.455411983653 143.401971479167 149.300089212177  
133.45690661612  
LOC647208 127.473812381059 133.927844489731 146.84403879162  
133.046435968561 155.263513633703 152.950227635138 147.905406818238  
146.552529779774 149.366554238043 134.235164622221 119.810421687953  
150.964506212368  
LOC647210 152.6969498938 145.354740501503 178.89423690001  
149.004343851423 172.251953149975 163.960242712692 167.629008083436  
166.311421907434 186.939168482155 162.447903830131 136.569250038372  
161.744366588564  
LOC647211 135.196797030404 136.578058206829 140.92066676704  
148.162914253981 135.391788614828 125.94880312094 131.260111979219  
135.429199205506 145.760577027524 129.887187837732 139.804518460303  
129.669484303621  
LOC647212 127.084267631845 144.059368898969 168.347445148881  
142.960875909369 143.330025840618 138.13987378399 143.284230032303  
149.44520146627 146.929717840755 136.489566741917 142.622062798974  
153.485731788293  
LOC647213 141.91067228913 151.05681004513 145.374923175872  
154.426605816862 132.598022317288 150.870830294349 143.025570700585  
152.415752253205 142.45047744931 154.569432344392 141.244589488591  
141.108383815109  
LOC647215 149.41564356447 131.856313046545 131.80257432775  
140.160349667726 155.149433381384 126.253319664664 150.866204945762  
158.302977853133 136.306727083526 140.827965102541 133.176970578909  
134.389518389888  
LOC647219 143.49969914174 150.112549201892 133.305679931132  
140.471953101887 148.126745515891 152.221694141976 141.073316497949  
158.125437004665 143.08841562593 148.767517078508 144.501995579502  
143.962842383778  
LOC647224 136.786462547129 134.796088225931 134.545175953914  
143.674737772302 150.021512237553 132.141918502025 154.343424387068  
136.529820456592 139.108656684059 126.708817316134 137.754373055094  
148.818562911616



LOC647225 139.809114250476 124.119104345119 127.215777044942  
120.188885479773 124.477586539576 146.801936969172 112.922918499398  
123.188205093415 131.328478053136 120.220156455352 141.839647226623  
117.408465686218  
LOC647229 165.213327555428 138.510722755317 151.81251450855  
172.888455552446 156.803516898875 151.364528898537 169.043206258073  
155.3394927753 159.455596750304 145.411264691728 147.606311227037  
154.239755912437  
LOC647234 158.160604786093 152.950227635138 154.916023131856  
179.501659253141 143.162353807279 173.440596296333 172.486839924297  
169.043206258073 158.023626712181 126.698158279472 146.345451252228  
141.963297887448  
LOC647237 137.251513843314 141.739299634007 140.306808081269  
172.934156790775 133.573744633212 143.631345956176 140.89390566467  
145.298109334141 142.264536484668 139.39112068213 138.279087298069  
132.937942776777  
LOC647243 147.091280396135 164.787637367264 159.276726310525  
152.067897082883 151.059401217656 136.821228481217 158.521812954982  
146.97334315047 141.88777975766 153.700168798494 134.56763097313  
156.085949215738  
LOC647244 151.269442319766 125.5449326311 134.041098536814  
162.668896609848 158.902676384853 134.758222337831 157.713227527385  
142.745838888446 157.535792192753 183.42877315644 142.527422462824  
139.440415574681  
LOC647246 142.45411401883 129.717701654435 130.694506122253  
148.614214326995 146.690308698414 140.43729728368 158.967160833334  
149.899789105328 143.224678017244 134.218867540274 135.911903336544  
150.748298569951  
LOC647247 115.366496551426 114.953328013917 156.78124246844  
137.559204418819 120.342513393659 137.913497715424 119.774204444899  
118.514618614167 127.612859839494 130.669539169739 101.761615925097  
137.706893763747  
LOC647250 111.616460084889 131.188208693139 147.343712869579  
126.204593450804 138.361149460093 162.289781945582 120.170269310738  
146.033591220134 135.848022588175 135.215356532498 158.356964958885  
140.38936578649  
LOC647251 156.502051001988 139.923187410488 159.926719599391  
141.953114738413 163.280786875496 137.50266393001 154.8975607055  
143.008280236963 138.436029489092 140.145470073979 124.217337143269  
139.851678406637  
LOC647254 113.810645407837 117.461198576063 138.808591995741  
129.779076484273 125.818432070199 138.444427173667 136.87712607887  
143.685368799972 115.550587451456 142.208987267497 149.505323932806  
124.045745662173  
LOC647257 162.004803385891 148.274122690409 138.28374062778  
161.573975848093 164.901810642726 154.716750150891 172.604689611475  
147.630900093277 150.741291526753 175.476184387338 139.042034301544  
141.431816889669  
LOC647262 136.097571072206 136.691234705997 128.485150698799  
116.106772298898 137.448412532999 130.886164807755 136.020600085547  
114.44610607807 132.99095918041 139.414912158809 122.295222990408  
134.93455083142  
LOC647264 153.121693371757 138.000714797563 146.690308698414  
149.255405438966 142.95001632948 142.85695042665 139.168307371516

135.544048708523 142.839077978518 160.707290343231 139.658932672049  
143.093156971372  
LOC647269 125.525241361472 136.02474314035 138.113751487484  
151.819220292189 153.913513669361 152.071081175788 149.032116392457  
146.846301957637 137.555253894825 141.283042601932 150.70383460714  
133.006192351471  
LOC647274 147.140771901106 145.71535210212 153.918462601781  
158.602687876661 145.646191500321 162.178410412809 150.336115779606  
150.292858985795 158.241349852419 153.916313595581 152.872139211415  
159.203584692924  
LOC647275 121.267153348313 118.26427946535 136.301442794928  
126.512613967438 130.991496243273 114.129044806825 122.944699010173  
114.927420605185 138.144085131733 116.472796471694 107.816312357067  
130.786835186349  
LOC647276 18061.615487998 18287.6015702456 19434.8698477145  
18061.615487998 17009.4268910772 11360.2921551609 18720.0460735814  
11874.9808592281 13944.7649147227 16123.3486890049 13809.2057928642  
17975.1602090863  
LOC647279 139.414912158809 134.744175117719 130.495294897642  
146.71868686671 136.280653079814 147.592770523507 147.838660813476  
123.881658891576 135.592128081677 153.391895732807 146.731584143625  
165.009696356892  
LOC647281 138.352562277336 133.056659202188 144.20764300349  
130.258933321051 130.182320154521 148.646699255797 133.713275043978  
137.280933631075 133.080437161283 154.758831302515 147.823552813852  
133.463464118897  
LOC647283 126.784243009941 137.59017685842 139.184647003326  
144.954595802474 133.303201646987 144.232318517281 140.696326952077  
131.820842728171 135.878996521596 131.635641515901 126.274585491044  
135.100687929821  
LOC647285 1462.31151845458 1416.93831202323 1614.00098175383  
1337.38160266788 4875.22637286719 2183.18692530644 4323.76731419005  
1499.07462479938 2137.44704613378 4299.06288109563 3938.94050658589  
2146.4265920569  
LOC647286 149.193437559422 141.972403120632 131.646121568612  
147.738146185884 146.919110530891 144.507230362869 140.482728188987  
139.306122448857 135.829273398594 132.795064859079 139.545451634208  
152.73588666971  
LOC647288 151.002218995005 140.281512754823 148.49560238679  
122.99993610249 160.423982411027 162.923734210933 130.565986980021  
143.662865541299 157.765771942689 140.554684822646 206.521761031181  
152.516485296644  
LOC647295 178.939268046323 181.098584949344 169.447827110558  
176.198555355383 169.132693907633 170.801761175916 196.691380885508  
150.717996520257 171.216275057884 153.244758030666 188.444498848767  
182.725987056391  
LOC647297 145.229637715814 141.132694466739 131.2834389999  
118.098274003405 138.152641686151 145.072924262206 131.027605835275  
142.621019060798 140.316066297536 134.799648755296 144.785852437305  
161.627546190964  
LOC647302 988.297682407351 1144.07896461196 1071.83063260499  
1031.38207659547 2462.87034563426 1848.27927621606 2369.233048505  
3822.05744774919 2180.31963682546 1406.73270115373 2056.90127387648  
1721.20676889116

LOC647306 151.908841481413 149.730467498266 138.152641686151  
172.403953571339 151.305201022012 147.441650320053 185.525760847281  
152.609055890822 164.74234322574 138.584190903303 145.106362864355  
143.05872558805

LOC647307 1766.15001427132 2222.16226526877 2608.95227456417  
1994.00516809361 2853.14759681683 3235.38149926838 282.742833166843  
935.042067053226 3090.52810501797 961.355625338687 261.592512762969  
705.311256840178

LOC647308 149.040720727554 144.256029338053 155.388752614336  
151.655854407186 141.249687936867 147.376482709004 148.700297908071  
148.231928963878 150.374573177474 148.941194457652 132.498092935232  
152.717642489582

LOC647309 127.855167644203 143.888318202599 143.990328432869  
135.750578960284 139.941724115063 140.297320819858 149.091925032548  
134.273326732349 142.720769329396 157.437376880409 126.37572518012  
136.005756600948

LOC647310 164.942652212218 153.918462601781 152.689610196981  
143.231806900648 165.074983746785 149.682150633146 190.204960255989  
161.090443294391 151.07661060324 166.104915784875 133.24611329193  
147.387754442307

LOC647311 138.928287624746 145.493977576106 152.42111372681  
134.744175117719 135.009205742175 141.127519700052 131.704192327287  
132.983739057264 138.659387475119 155.072752529178 163.352317556107  
152.22701178148

LOC647315 142.334338599752 131.580226088647 135.338077911839  
128.783262618114 138.239251358245 134.151372457715 131.292195405993  
169.067064352955 139.000248033373 135.497033143331 123.625734357908  
124.726035027951

LOC647322 151.554352209634 161.806144472744 162.723310549554  
166.662801900754 584.199252444401 151.020903727566 248.613373429151  
150.547096071626 151.032389358279 219.638478100747 193.394225360968  
194.979795724712

LOC647323 130.557209560361 154.066939372379 143.019052979243  
153.000232171457 142.099541115973 151.428283279424 142.442450622311  
136.674553275255 138.242983316259 144.746134643761 121.483610947845  
162.173506492562

LOC647326 141.331397551086 146.373162751863 141.904041228678  
144.979749941424 126.50870982427 155.452842883109 124.29420915051  
132.719730606922 146.065491816894 143.019052979243 136.513942889781  
128.131324375789

LOC647328 176.86489466512 170.473956720945 177.491294133515  
190.904614772409 175.805472275887 172.142411008084 172.961115357569  
166.998311158378 166.22013573342 172.057586741925 176.714471790643  
186.112835637689

LOC647331 132.390330703084 137.908991199407 157.541796722309  
144.259643132933 126.153806511702 130.226993687215 140.323425587628  
143.953043041292 132.514706165018 144.917911601441 137.524968609776  
130.925881698601

LOC647333 130.300169316346 121.170340423391 134.76586363177  
134.266373965186 150.936747236094 147.485960802692 154.637740117457  
140.873210629865 143.810050834214 130.461084106455 147.153129531937  
142.540433565262

LOC647334 114.115609163126 134.367115858307 121.003207135942  
143.494511683426 122.447154928139 127.713286292101 129.179188863839

119.785062256421 125.833649377492 126.5764774133 123.303143302526  
127.640525889316  
LOC647335 130.321133400634 155.346805606742 131.885529813944  
139.750281709938 134.931263946202 127.926270257252 153.865702787334  
145.724294862079 147.968104627262 145.819198235878 131.335344547051  
147.161720770972  
LOC647336 156.707737817443 167.350290326189 161.665837957395  
136.506347083926 131.287142490322 142.628296442123 152.358795162474  
153.494456800685 167.130843160309 153.258616843783 152.972779110762  
157.013200713587  
LOC647337 135.286686011087 146.40033464957 147.75188889715  
145.133151090252 141.515788643986 159.032710656826 144.023798119335  
136.261907928796 141.91067228913 154.618685493541 137.068717031383  
139.835983835267  
LOC647339 161.89906072679 151.273261581765 154.113228966411  
164.690739760426 137.80710149367 136.557466007228 169.113439729353  
156.866867371872 144.501995579502 145.977658128528 134.801507994667  
134.85809559975  
LOC647340 2995.42172749615 3363.51782842264 4000.45196171119  
3560.23794634993 4061.24537355697 10449.7190201942 3164.55070502403  
4150.8511719558 2627.12900283627 2694.98079256089 3522.61692270848  
4386.83308119416  
LOC647341 125.40832206502 145.060085149395 141.006540481119  
143.040254576088 134.115085057026 126.203255277356 124.825103464238  
140.508390945342 129.501028506432 147.43089976575 142.566028652989  
142.472724215037  
LOC647343 152.368485416992 139.473459411633 138.237030685795  
142.121399383259 123.700076467648 124.083648029911 119.446359837504  
127.657961561231 132.334666750573 131.430921437192 117.392898601408  
116.074423050416  
LOC647344 134.834641868502 142.839077978518 110.829107724132  
132.920775987309 132.748478264583 154.574826922632 153.028658323116  
137.85618381155 130.682112236817 131.273916869754 126.00304757051  
144.094168021923  
LOC647346 480.712219116621 453.282973743379 625.932910814208  
417.442660073269 193.569894919176 591.89966781883 303.09499683953  
376.867306473426 648.38049615541 279.921244070981 354.531898366438  
290.241064926886  
LOC647347 150.096558906597 135.991630745082 147.169765031208  
156.110073009771 154.412506915569 149.237422245619 153.974384951787  
138.508015596135 141.536764775726 148.908758741034 125.429085234515  
145.989546968117  
LOC647348 134.340512608931 145.120347147471 144.873034900013  
144.278830378899 145.797047170492 137.391141254051 156.154079736651  
131.934680869554 155.785933672918 158.68792959603 138.242983316259  
162.945789604505  
LOC647349 427.452114719877 371.06697207449 686.679573646733  
329.146025181674 234.588584245938 404.54681330209 922.009043194023  
692.359779743985 466.691191261997 2423.84327263111 309.318403417731  
732.352357321273  
LOC647353 144.408426565541 135.713266118447 156.18389905051  
147.75625228531 128.118223792086 138.740174228042 131.165798722835  
139.287871460674 143.550908565401 133.948997488604 149.788558681761  
142.50631960137

LOC647357 170.844002412425 169.434164890542 164.99860393383  
150.313058722346 158.854659281803 159.716066475442 153.056369304663  
156.949439724914 160.473772347376 149.875556330919 148.901723851925  
165.232545721733  
LOC647359 145.360466216324 171.589889474122 166.341564850299  
195.906137340918 147.85133493803 156.68541512214 191.84511431253  
185.673549367125 164.82904652634 171.061850719125 164.417770955805  
163.748692741999  
LOC647360 154.302619274576 138.173547382901 153.674047811298  
182.130970182242 135.601916560736 149.597396040729 146.413845130977  
126.744983848225 138.730409717578 146.190750749851 143.655901618594  
142.859971805867  
LOC647361 20510.096303537 19496.8914296296 21225.306360484  
17568.5229948989 31402.6950316226 24377.1316448061 26906.6343314539  
26906.6343314539 25002.6870134094 26375.3000727296 18061.615487998  
28530.8435957612  
LOC647363 176.883702717029 162.716712951629 187.586093248437  
204.35801867216 168.248982292489 175.51767355303 203.298764374262  
170.024833610695 167.692053273833 217.646777099512 148.879605388902  
175.128935809466  
LOC647366 127.625252349231 149.157934946623 137.46978401237  
143.330025840618 141.094578556895 136.069631519097 135.205434173702  
137.170666175895 145.100964170053 128.17223916536 145.005991300977  
146.204122329465  
LOC647370 141.520125030042 150.731093808891 128.436499050769  
148.423303776817 164.641508485461 167.468390483999 148.707332454527  
136.398521726896 154.534605635191 148.107004870598 137.891372981851  
145.700589723224  
LOC647371 126.561067704708 127.182067293944 118.025603140924  
142.701714161281 121.48867035121 124.578552584603 123.999819867062  
145.958718601763 138.110317032494 141.874188629438 122.20752192519  
130.104021521854  
LOC647374 144.436358527414 144.997250967317 137.586032396204  
138.399665664034 135.443856371548 161.24755274554 155.317754378283  
147.205511952997 146.649944669876 123.527903217158 117.238968848218  
144.568417378353  
LOC647384 157.213868854329 157.841520434044 161.160974998803  
164.777719508421 146.994103804515 174.323881548679 138.866469244936  
153.717326983721 146.142934874698 151.528377719344 140.696326952077  
142.780100181736  
LOC647389 1468.50184641042 1314.62071412501 1358.29475573637  
1270.76282064793 222.709720471134 724.442411170786 509.702881232139  
608.816123736392 491.496499481595 556.31484498921 455.665927568395  
509.292779821787  
LOC647391 137.483830932387 146.238333981318 152.719997757291  
139.619076126267 144.049503774298 134.005402534879 135.997144927956  
127.026168862919 135.971507823633 132.54577436954 136.409960447884  
138.389976620532  
LOC647400 140.567565996849 126.308622415913 137.344198938623  
133.966277922005 125.14833026167 144.129889080946 137.102353661381  
128.824243581806 149.233023751582 131.734429913106 122.396214045451  
130.937742379689  
LOC647406 128.992837936606 129.13353785479 122.220327032799  
129.80429516198 134.329784369137 149.322537247388 132.533234335153

130.416957431512 147.809934374849 131.551085224112 145.051794777243  
155.181724637897  
LOC647407 156.646803208934 129.446928016147 126.460390022632  
119.349376960211 124.738217731488 137.874370839801 120.951365231971  
131.412979573687 129.330592465123 131.269526665478 129.400895994387  
107.170981307304  
LOC647413 131.249240371529 151.687402863648 157.792868983503  
135.651188317474 133.602870982718 115.285392699073 122.442590463781  
135.111066946207 142.558109812638 137.012646671173 114.749597426757  
134.11753210296  
LOC647415 146.590495255969 151.849653154534 145.079450753969  
164.673579538023 163.781674803361 156.365413649149 135.433229702209  
147.100947801261 156.7940590796 171.650247980576 147.751554743466  
177.955579729463  
LOC647417 188.268774618164 168.197255166255 154.969503835593  
179.265395910119 180.680595239651 162.975988989106 188.543051108601  
157.431972439046 156.123528587917 184.638141004171 156.674411447713  
162.481362579872  
LOC647435 136.68056120003 146.828099826146 132.709845352383  
147.628367263728 133.080437161283 128.65678873939 137.22727238555  
137.350851760173 138.43190460314 148.47676851933 150.971453664961  
140.968351978909  
LOC647436 566.813343200268 468.82816089485 843.936924659514  
361.429760858441 314.292700455545 494.747087458483 725.443026984982  
512.723592291378 472.279492678374 602.141151173094 319.768792196774  
635.37511798786  
LOC647439 153.719751724358 143.475725571943 152.237183848896  
146.606442726047 154.057771254252 143.393174544776 151.622719246408  
151.428283279424 149.865644080359 134.192409943723 163.915489303508  
155.530415929059  
LOC647444 157.699854334374 153.315309202016 164.103306492559  
158.622993108149 146.577524520274 148.755559144241 159.973758408655  
151.954389699615 150.690143057308 164.466332705334 137.988325215021  
148.376194044247  
LOC647447 134.413962468434 141.123272165499 146.654925456132  
139.674001912099 136.461182044855 136.593346330215 143.637018777217  
140.732618320154 144.464071397369 140.794929983858 126.506749037908  
146.873719524815  
LOC647448 131.310537960214 130.392575279055 161.34427428845  
177.716742595321 129.477908941439 159.749576166342 139.576261630082  
135.606539779826 140.379874810685 164.748676009072 131.563719927798  
142.749568012703  
LOC647450 206.340478393262 180.881464829981 174.549929320587  
176.735168607281 325.387193207414 525.6579615077 313.025250337353  
12968.2945749 16742.6286866851 756.068695265118 204.453822958077  
473.260534978556  
LOC647451 134.776714949136 125.974463216884 132.045595972712  
151.058105625837 125.455347031878 141.553465481789 140.908882557383  
145.965900441953 131.954310449801 150.048431572712 142.143709425075  
130.268322464805  
LOC647456 158.665476708054 159.678281513591 151.639515017015  
160.964435028806 166.040918339519 204.681956301306 151.911494020123  
160.045715314465 195.218005582618 156.585665091824 171.106189029362  
177.182321788711

LOC647460 144.182891591399 154.43808450305 148.120968141789  
155.566065673542 155.42165869714 150.521719129181 160.843325877861  
205.403820910921 199.423120300557 149.039132756817 126.606163970149  
146.812248482145  
LOC647461 129.942594772751 135.835518477299 149.604507483606  
136.540568915609 134.819406064011 131.894919149666 143.891725249061  
123.622533094122 140.081280065913 142.95001632948 116.884397420467  
135.760578586004  
LOC647466 144.752418965039 150.137061170632 169.168869363848  
154.193086881801 161.581641777014 178.43642939806 153.228048041467  
152.648490300617 159.236429097777 136.052640679977 147.664505309713  
147.738146185884  
LOC647468 134.268075583733 122.323876787207 129.38021642675  
143.26896117546 138.947760022173 142.724123724574 134.022324496729  
131.638954862848 133.92485496581 128.651081092914 133.627389970495  
136.720837676326  
LOC647471 135.212715912271 127.575660581922 137.339511714364  
135.323341505875 120.521509788705 128.876385705559 132.829401072883  
123.557722415957 130.925881698601 143.598567970841 124.833659452957  
122.921245774755  
LOC647474 144.685707282641 149.941056059544 166.842970309527  
166.89884215297 154.362571105094 151.831627236638 158.390337945372  
157.512561489621 151.118430469429 139.268942501979 167.284724396943  
172.128489882364  
LOC647479 151.470844748137 136.611670766233 160.019067307733  
147.624372080117 135.583556015955 170.684848540493 165.249658565871  
142.752536416014 143.410917415691 147.425856984368 106.182551369456  
134.08270035062  
LOC647480 137.070326499918 145.748174062159 135.613240463445  
149.423230365631 152.194337248455 158.030237507443 136.005756600948  
134.383024487323 143.301399292539 134.774591679724 133.022848457361  
146.83577460518  
LOC647481 144.818492604488 140.061045085545 164.455111983634  
126.137627769256 144.265352127763 142.362022977137 158.604431001643  
158.660859266099 137.53070284697 150.484823814674 129.612536218578  
130.626965797365  
LOC647485 163.643554173995 161.534421340752 139.97127025207  
147.879286704 139.927773713324 144.389805078873 163.306853098724  
132.181365505556 138.807031587657 142.986412837634 130.140958819402  
153.875760529011  
LOC647488 130.095585254401 166.068489027866 129.132523684894  
142.232918684259 110.575582352222 135.779516940893 155.402421581195  
122.965328766807 149.860490620507 122.297401003756 147.626071601072  
141.064086298948  
LOC647493 134.27783583528 134.081308836364 132.119370332298  
140.873210629865 142.848438163322 133.259321087534 135.920830568556  
128.086493618022 138.611074796816 135.186880148352 122.543903508753  
133.028789808654  
LOC647499 137.618447592489 138.783017264895 153.443397882028  
143.322199505844 134.801507994667 156.990325995053 160.92643755328  
151.442463705271 130.187833435052 181.328458560967 146.824420102008  
149.545278163222  
LOC647500 135.379284233708 133.268239762624 136.104965836123  
133.872561340464 137.253971514177 132.373302367869 124.070171664904

137.691870502653 141.152406037213 147.213616261735 139.674001912099  
138.161690144518  
LOC647506 192.353768499582 170.052320640686 143.959910170676  
135.822022526034 290.582957824549 276.582734590058 209.44506543433  
7104.65816621275 12022.5515181682 520.218545108099 147.232015056035  
366.317263094585  
LOC647509 141.821550320574 142.61573330083 177.93138555339  
151.456702092528 157.04599638368 150.566842106244 166.091736766853  
161.77611826709 162.885054245809 141.38612990166 135.377118045038  
181.550597645633  
LOC647513 124.238319768621 134.972933635542 126.746388125956  
125.217733034761 134.318290950377 121.826474059574 138.1774127311  
128.007359083768 103.520748827831 128.495276191943 126.635105491524  
124.35374445763  
LOC647515 133.665206343648 143.107570838895 139.642457979496  
126.132339293132 133.65688823581 132.295151487914 126.583342262489  
125.885140634643 123.964042357475 132.57219914253 141.15458637181  
134.241917425247  
LOC647519 142.999526950651 131.483427112288 141.331397551086  
151.020903727566 145.352802493486 140.192644427334 138.461113585594  
136.085524091635 150.468392290279 144.544001385895 145.163084967499  
145.695402948337  
LOC647520 155.097300548684 167.273378118452 168.418529261977  
168.925131238831 161.408318705503 198.701991021316 147.81143020317  
157.089650890944 151.895142552067 187.607426452073 153.918462601781  
180.501409705275  
LOC647521 141.193081790037 139.701504237962 140.550044737476  
146.087596132093 152.840202260007 152.334669286305 153.104072845043  
142.313725116274 164.244562778996 137.033502466562 150.815117344434  
150.364511432468  
LOC647527 156.714081537525 157.006278815282 177.023536553193  
144.432181150583 150.97777780024 156.843997723699 177.281197832647  
152.137669424501 147.16778072296 170.87247413028 155.326276840738  
150.775805918537  
LOC647529 149.876687693565 136.325517289927 143.383697128285  
129.278833426752 116.046983032621 155.114892891737 153.318678468245  
155.355051932357 131.615462296871 128.066043751951 160.964435028806  
146.247825342634  
LOC647531 143.422419261603 150.132420238581 150.275163835924  
157.36568754472 138.504398858454 154.124057382276 147.592770523507  
154.591116158776 129.067538010904 142.084294087481 137.717859035645  
149.576563410584  
LOC647533 164.701183249762 136.850940500212 149.213990424575  
152.993555372242 149.532459719175 142.474762834848 173.272062328378  
160.368226341458 153.798367953373 164.68600028429 131.539803642615  
152.57040089034  
LOC647534 130.062015525637 121.289159587394 129.501028506432  
134.845202154446 148.339086707343 135.481300250507 125.517076778344  
137.514952067562 140.398923642686 148.791182443623 143.931400351525  
129.257947818865  
LOC647535 142.829099538363 150.650926518959 146.595540577994  
151.755205401737 134.036236880951 145.00699763203 126.470239371932  
130.2867846895 148.206529935876 130.894384800009 156.228039404029  
122.087107663865



LOC647536 135.792966926642 139.708303388546 140.163936299053  
146.482652762374 140.675094228846 143.070170783764 142.577102697682  
142.888281750232 135.226240774124 140.36425603453 137.769431537236  
143.051871940423  
LOC647537 136.893392154262 140.311843829601 144.026432356249  
129.819820730239 135.118955626451 142.889911562811 132.801619479245  
143.066552389513 136.494339004002 158.738932073809 158.278496385543  
140.091378604453  
LOC647540 138.100014158367 142.907969322845 145.967685593635  
164.284396793834 161.8627732644 156.130224537288 159.379420001197  
148.649619242172 138.632146452173 135.784481523923 143.559076683944  
156.806407903626  
LOC647541 151.301484852387 163.227953876329 157.77047742735  
154.133723492173 167.912321820083 165.880071298733 165.904887259203  
155.237180851323 153.83891040723 169.860061216981 154.2228051929  
159.835577644136  
LOC647542 147.255680306221 137.20253329376 158.915858403237  
142.802965008073 147.954079022076 168.412162365467 156.210423316722  
130.865693081945 155.728609337723 142.379120254855 142.42442972908  
141.424508069834  
LOC647543 299.851173200352 299.234482744038 189.0608798771  
193.723953003899 153.249834179388 167.474790447134 186.733394375839  
169.791616021987 162.606273401226 175.51767355303 163.977562404508  
185.830435830545  
LOC647544 151.308872564827 163.438043894189 146.633627492419  
150.623182458747 137.570343435498 164.332073056902 141.953114738413  
153.226604317177 138.218392984717 147.638057399165 148.673763368264  
164.981665344298  
LOC647546 145.941674563997 131.374680878107 154.431051053529  
133.573744633212 139.564898998489 140.338622198206 138.739176678465  
142.951829221947 140.047749881567 154.096542063701 126.423739360894  
139.363571392476  
LOC647551 168.116928722035 150.51056917809 175.847256673734  
144.594190430117 170.775283924087 156.646803208934 158.297624312257  
131.322008851059 143.347066447019 157.646948327818 139.442091671938  
165.813771791917  
LOC647558 142.839077978518 130.603837917984 171.320653882424  
133.16973309664 137.93067182632 142.017169259522 130.235407859542  
139.936661244361 140.934844668435 126.407313060022 118.963119420175  
133.559082256772  
LOC647566 152.620244087653 143.301399292539 150.767158077219  
152.492163303139 138.855454645579 145.487783396345 141.200676699805  
138.411148122407 138.497931380734 131.889166605167 146.114159600635  
146.755803731358  
LOC647568 158.499787920522 155.478383896934 142.878258542775  
141.066106476109 162.481362579872 168.295044843056 147.558603709566  
161.310855691717 160.254101852355 148.590732065459 142.771243742561  
166.998311158378  
LOC647570 156.740412695351 149.483826392464 178.014057622594  
160.319687451789 139.685629122498 157.723341862468 157.635531050489  
156.273445355976 153.767488352037 132.236355533277 161.80922869659  
171.071893074072  
LOC647571 129.819820730239 128.202619705343 128.705587172572  
145.952759497544 150.359906271672 128.699441450952 137.047288508371

145.418696807842 133.985582992986 127.006746526023 115.445219455559  
130.606211166873  
LOC647579 143.066552389513 141.821550320574 142.951829221947  
162.609829456486 131.759422682853 141.905641114703 173.21291920566  
136.337879548547 154.509924503184 148.541832125061 136.450062043587  
162.689415085423  
LOC647582 128.695695565175 145.387562372871 156.046085830566  
139.640918572569 126.349403754775 145.832751296646 140.849966309018  
149.698664700146 138.434347257063 159.390531348676 126.191057198995  
133.796029401157  
LOC647584 136.368258257435 119.01990099776 130.988294699995  
133.780423932326 130.420753247797 153.821728151219 127.507557925713  
135.467354817201 140.040420521312 144.08344708327 117.992729826121  
138.340652133783  
LOC647585 140.073208365817 136.167141767484 137.926193455157  
167.741556663724 143.978912435831 149.987571884748 144.178210824181  
127.261349543394 148.406031732776 166.563411635721 148.168587884369  
153.114065147266  
LOC647588 181.971189935628 152.479402912801 159.815932985135  
146.531692460121 117.255496552581 136.648306684974 130.383001462828  
133.050798832332 154.98147307591 133.854760285591 174.375388013694  
142.648205566485  
LOC647589 154.924190468067 118.773864607553 165.964183460825  
155.669470674985 148.452947427498 163.141010815086 175.774461934758  
140.388212037661 151.823845684041 160.395053149199 162.955366577418  
156.407166112409  
LOC647591 161.997058981786 139.943915452851 157.646948327818  
147.995991912855 155.23922239449 157.57914268719 146.171094379173  
131.921799405427 142.919910421524 145.374923175872 137.345542507421  
160.131256419524  
LOC647592 146.031321571566 148.654099017805 178.235281981508  
157.560117350562 144.235298492095 155.475804754732 166.320461361356  
136.485034823945 132.784949538167 159.775479686193 155.815785551964  
155.837866295709  
LOC647595 128.367370419533 128.510903178542 131.125175244494  
140.079516848788 128.50733429744 129.281564491007 120.547683754604  
119.822587087968 143.336538157639 123.498540254464 137.72327986309  
127.490889148422  
LOC647596 123.538037290702 141.004467676795 133.847494826806  
140.332045911008 153.366677608026 144.692900548503 162.383584508358  
148.753891406126 138.825961991209 117.995551728392 125.653011880654  
137.426226808356  
LOC647597 210.822216545773 188.431244390961 183.804849355341  
178.425137262105 276.434192872962 249.884250040189 233.635876830148  
179.57046217355 262.416137698884 263.084557246752 196.802641002079  
250.885949055834  
LOC647606 190.754349388901 175.269675831824 155.773639092819  
177.567833691547 150.445647133244 215.247472744419 184.102171963542  
147.856285290748 167.984051648058 159.74220366735 167.933231844271  
195.414464905232  
LOC647621 158.439409064812 149.17815859943 141.683298500736  
145.34332740863 184.021010234322 174.775676782795 156.010027635627  
139.032275257901 149.394952856085 136.722636695506 158.120079903425  
145.595756379808

LOC647624 157.468934439452 152.805525883571 157.639688257892  
165.066555355918 137.920724602098 161.094103878416 143.644862018676  
165.908756485356 155.997210529742 136.901107766796 159.515698265424  
155.683727621475  
LOC647625 142.303654405005 150.948076715456 139.367493349339  
133.745413210496 132.70888569469 142.50631960137 137.603046125938  
163.643554173995 159.05213637758 146.462544135666 135.75568942028  
151.276193269421  
LOC647630 145.912712700067 128.0171233156 148.206529935876  
147.387754442307 137.045772853855 153.374296511216 140.083495854322  
144.190203286506 134.669763149268 151.10837100314 140.595496714752  
126.819413901915  
LOC647634 138.184717352015 124.275741099764 152.032418787633  
132.958521136 153.723169560972 141.577373924378 133.374199939042  
147.570734399004 141.373059612034 146.097201498811 127.681662711369  
139.78795317086  
LOC647645 143.263333116046 126.935731176024 162.609829456486  
130.408519735001 137.7872481668 131.938898032483 138.370241517025  
134.758222337831 152.504620068655 134.185202200317 142.339740800356  
143.452992974333  
LOC647646 157.425924587516 169.201608999937 155.561821955048  
164.652795899742 155.660302399877 169.713585775118 162.403942351933  
163.275138097131 166.958831664154 179.663258610881 142.571259316029  
154.150568177135  
LOC647647 132.496547953595 134.401733295755 146.602252563413  
134.694911833015 135.063259138429 142.739686751422 133.929311295884  
139.767216030715 119.399971165857 152.733409144267 129.422854634791  
136.939603341076  
LOC647648 152.498222035534 146.204122329465 148.459522588338  
127.052618800004 149.049931380459 162.909468312298 147.096559685764  
135.976837152799 129.543069836687 120.031976318697 130.169291786693  
140.123348569709  
LOC647649 158.371599884762 153.711354087243 173.09379121032  
143.432889871079 145.058110060639 163.748692741999 168.935348409102  
151.617989938924 151.41546939633 172.478461106269 138.295019395552  
149.702048490465  
LOC647650 146.072585331002 167.547551072373 158.814407805803  
149.089067389266 157.446725405803 147.017958916908 173.532300173223  
163.030275835038 148.879605388902 152.657649988502 169.568915494577  
145.748174062159  
LOC647651 140.785337524953 148.507598818039 155.622257285651  
148.530422089937 158.109836032481 133.720904256137 139.811873260553  
130.914932329297 146.079727388849 166.97270256697 164.39557148282  
157.499803444188  
LOC647654 137.376602654929 145.144401160102 134.21227169867  
130.425809387444 131.302225305148 140.26206122305 131.702788057359  
124.246363878094 141.125248464806 143.258488502799 151.506013510204  
126.17342715006  
LOC647655 151.717558541683 142.240333104987 156.200313064999  
173.810080280732 143.35902319003 154.698312173556 144.400004730049  
149.883237874886 144.65238608866 140.518206716196 136.524640445539  
174.107661206415  
LOC647656 125.935071837868 125.851611268218 134.495938988321  
130.624702758052 130.726640485925 134.998632527009 128.21042408204

126.370252616961 121.039678049579 138.020031233095 134.808485735121  
125.924219382375  
LOC647661 155.690773461824 138.005168756932 152.587331888423  
145.136075215082 140.885915460425 150.899664887945 143.120621855946  
140.903091584884 150.352308475398 161.673818303367 127.183924911179  
140.290598244169  
LOC647666 129.786941565218 130.182320154521 137.840396641618  
139.494962965774 146.407692800878 119.079680805247 131.227807192663  
138.758688249557 117.284724854784 118.604395992281 143.23300128006  
141.176376265078  
LOC647673 1290.39741199701 1093.21579738952 1566.65825409044  
856.039380523678 530.267835989435 1080.42884514937 973.543357809971  
987.564350211893 924.040923247227 3066.69261114251 2819.92361643968  
2992.18604022433  
LOC647677 165.977852973826 163.306853098724 157.189041157784  
160.311096717492 143.06806126472 168.50246276469 164.098880989592  
177.204172894028 146.129805607031 165.985885671398 160.055242985219  
175.608958881476  
LOC647678 135.618562468776 131.2360427855 112.710573586525  
128.662680062294 128.284564251279 140.550044737476 124.053190169486  
122.247130087475 123.574319348191 147.034021626893 119.036965883266  
142.388076341254  
LOC647680 135.957972463728 150.215811815246 164.120602897751  
163.97516075705 143.427721577372 150.298765307349 160.655929233978  
131.548634017902 155.43699805497 160.261708910517 147.93442757931  
143.056098955473  
LOC647681 181.578228610334 159.854639082837 176.328994356625  
167.547551072373 149.72025962797 150.737888487925 159.390531348676  
154.420795931034 162.940190224943 163.239195865198 141.202092246048  
171.751149502172  
LOC647683 138.789908033669 128.266906202941 133.502176289023  
127.291712212051 125.672285485643 117.879058520659 121.44564199541  
129.088718286391 130.466571969657 122.99993610249 131.151578665754  
114.122395647516  
LOC647691 329.660368915848 285.931444518474 244.5675215931  
274.343238288436 211.035617136177 233.809899915394 213.338918839446  
270.360397503276 190.291185322482 209.5184563244 342.878522959461  
288.182388699147  
LOC647696 132.184217000689 137.269267022826 134.76397845723  
133.810472192646 124.422548323449 122.749182465923 136.922282125029  
128.082956839709 134.751916364581 124.699127988314 120.337241026338  
135.373824773008  
LOC647704 165.45479542657 135.753430034183 157.21132653949  
138.331509117817 129.462319953515 163.504122327429 139.310309748986  
154.232310911696 140.190749525193 168.552631639996 145.142331981651  
146.49022197174  
LOC647706 130.955161943331 146.644317248414 128.280225530201  
142.472724215037 138.391203321266 131.806645427543 138.525131957094  
131.977212025523 131.87052926802 122.05954649985 125.193729067011  
122.251178920649  
LOC647707 145.471090720048 156.119899067238 137.416133786828  
150.138643811727 134.796088225931 200.98533822317 241.675251479835  
180.022646625687 170.622615783608 163.352317556107 151.389433433911  
190.098509544816

LOC647710 145.23179154441 134.601565799073 168.570133927038  
160.33003360942 132.865704994046 152.550031868259 124.853659050216  
139.809114250476 152.007436762651 150.122035262873 127.492376657284  
139.81502919163  
LOC647711 126.763282018991 130.435589649362 142.376921410427  
128.473834314632 140.117644705946 124.35721327773 139.801108744526  
139.564898998489 126.5929421833 135.789381967525 144.116298946718  
133.482237631013  
LOC647713 162.453586139402 142.958906063186 158.483006541613  
172.992936821292 156.961070790639 159.572851489665 150.576660798865  
175.428000742222 154.512619892977 176.198555355383 136.037555727438  
172.120772549791  
LOC647716 134.56763097313 141.353084959289 135.624881949214  
118.26427946535 138.594435323838 128.623302491798 128.69455713173  
135.952202055637 151.269442319766 141.410953064267 116.331428876124  
142.64161581553  
LOC647718 162.10411532202 147.268006631005 153.836520485018  
159.845890841215 149.956759038516 151.976432805924 145.159572111039  
133.215151497536 160.240052678401 143.48729871068 149.480971898888  
142.45047744931  
LOC647719 119.315932907373 147.066582834257 139.927773713324  
142.351705613006 153.969493052468 134.361064431414 131.848213704003  
142.329137800558 143.25481667885 144.96021415188 137.365567527202  
144.28597792625  
LOC647723 168.521601064374 135.449919220607 137.188849160569  
144.249339611941 136.430232926793 147.774588146924 140.738977175997  
144.983871250488 132.634538733205 140.74035966401 130.556307580561  
152.796423361971  
LOC647726 149.865644080359 135.247018354192 158.445124076906  
138.394923932916 154.518641757391 165.274189050141 136.295523520203  
140.395662148924 125.859158049343 141.002002397727 141.838206951224  
151.846610656503  
LOC647741 158.429761055869 156.157567405927 154.681604647652  
148.421611987655 159.413535577361 148.016402654687 166.433933349193  
161.657344146676 169.864628707043 148.932696684374 151.589273633331  
144.589482298525  
LOC647742 142.812521349963 131.708435940392 127.302714624905  
133.249792744053 139.671302796695 141.908791151061 144.690880401712  
152.729355306724 143.114384950467 140.567565996849 119.717408713154  
139.825088162247  
LOC647747 129.436712663487 134.166297738657 147.009325721272  
142.461941376108 141.710076413441 149.42148494796 141.50968031684  
120.020781939389 135.628982370682 149.100294463597 143.523051024982  
132.615324904193  
LOC647748 135.338077911839 151.80632463295 136.05434446747  
155.023934989559 140.92377681377 157.860515609693 143.730966588794  
167.206513789165 128.616121042106 145.299625153537 144.165277164871  
138.345393524161  
LOC647753 138.872536475067 129.931923954109 140.552143090027  
128.497571151343 134.537123332992 139.856251508283 128.695695565175  
142.305484770249 148.744599622165 117.203783530266 140.543382412084  
128.488598467312  
LOC647760 146.604519441812 139.314945862113 144.41489969974  
138.764834713216 142.416237823488 154.011708696954 140.103020838882

150.471558219667 152.789338329505 144.258128917228 141.283042601932  
130.799009128937  
LOC647766 148.470120335761 144.784835438567 157.436513275737  
175.065781438801 157.288308753975 145.06205326107 144.468333012278  
148.327340543504 150.215811815246 122.733870240098 142.581441480371  
139.606654715326  
LOC647778 168.790464803746 179.632562895905 173.050039480459  
159.561431866706 165.947514372877 177.708263037199 176.449549075475  
164.136551371866 156.427158441352 172.741890316331 152.81544746536  
180.327051100611  
LOC647783 154.270034951209 131.892151111901 130.222698914337  
141.59046197203 136.519697160267 138.285325970867 150.163801964104  
150.28169442832 138.645156942894 139.491769969541 123.972321838378  
143.909501365162  
LOC647784 165.249658565871 150.3259737066 162.134726710448  
156.671252606074 161.299920355406 159.74220366735 170.931788192825  
183.744959461078 174.560168983121 179.369845168822 145.735532706214  
204.019377262081  
LOC647785 144.649656552 135.412051450659 141.966490100288  
157.055133233709 157.425924587516 122.80785489118 156.646803208934  
153.374296511216 139.096536887753 146.595540577994 153.039237274992  
130.488972210403  
LOC647786 155.283003653612 143.501380161409 136.02474314035  
144.69686018715 140.999877170481 135.862790395984 135.668768914964  
142.14116448528 147.274945970072 123.791515424464 143.508657511633  
129.020356016653  
LOC647788 145.104173410801 146.832797779597 169.192327500032  
164.61921356441 157.841520434044 141.809577413906 161.096914295309  
149.098381037466 154.520935683104 158.095373931016 125.535877109652  
165.654773882752  
LOC647797 148.547259731346 145.965900441953 153.649235507812  
179.091917512822 147.720061897962 163.575300618666 165.386056999339  
149.143087870963 157.81327663167 156.727153398506 135.075759558051  
154.65319127051  
LOC647802 146.975258859244 172.486839924297 156.825157746082  
145.294665838127 148.977202433511 146.215459988012 153.534763364558  
162.022232949254 142.683117062711 145.491525555916 158.320863045015  
144.96670085147  
LOC647805 151.330035086652 162.457778455279 147.325222091872  
151.144521344129 173.325724300712 154.027862576708 147.530719472217  
164.541417588646 162.364266549463 147.299872426498 156.417000271727  
159.670815631794  
LOC647806 146.271180025157 153.998849486363 149.040720727554  
140.154925193842 158.799917136119 143.436675541053 145.989546968117  
139.482462221798 160.026178505749 151.245520459264 133.209211811498  
153.871893011106  
LOC647810 130.083266044947 128.984613946021 147.777050372032  
182.335981256243 131.626173473789 153.592819860747 140.293431620804  
135.095095470362 131.865164933746 138.058404474114 133.259321087534  
143.187539073659  
LOC647816 124.907788504503 115.992487254175 149.595375008252  
146.910471989835 145.333097940759 123.735827460404 124.148194572004  
125.637138636558 134.694911833015 135.170925092209 138.921608664788  
127.650229552084

LOC647819 163.988099963018 150.163801964104 147.425856984368  
144.871396308673 160.277755404001 156.890299350025 128.771367080039  
169.834078550805 161.683243808528 145.136075215082 126.583342262489  
143.780803045394  
LOC647827 144.203716525289 146.222195387635 144.623222072851  
153.545086287929 142.42442972908 158.113794378426 150.0674092434  
133.43362126395 147.891442774921 148.049570580734 166.97270256697  
173.09379121032  
LOC647832 127.773292289242 129.623601211364 150.500676225569  
126.515480612924 128.588822671032 132.858424396011 129.278833426752  
131.298129667973 139.161483596756 132.70109232982 106.088807114602  
138.196640512429  
LOC647834 235.595194918187 201.186963432715 224.135228192655  
245.811312606484 162.565576110247 211.419445018736 202.041958613989  
186.296882059398 193.466377788318 167.575968906119 185.258354905314  
192.767155566493  
LOC647836 130.37544152572 135.37120759813 158.943005736645  
133.54741488531 134.631638658586 138.159966250659 142.13191463827  
142.55463239891 132.524377835171 143.653452869664 131.554055357245  
134.194555223935  
LOC647839 128.466244127634 132.433109154079 133.475605284211  
146.690308698414 157.313737338264 148.323729699672 138.401406375804  
147.414834563852 143.204058393718 139.628966306048 120.308260557986  
158.622993108149  
LOC647841 127.3079781139 121.455843337023 118.07991087231  
121.039678049579 124.365185583133 141.765004355609 147.270369342438  
148.835389500419 115.848659135231 120.590654346066 141.21138348075  
127.245190474707  
LOC647843 145.726651022813 159.420533375725 161.557558028531  
153.916313595581 161.348562186667 129.945543636232 152.158269344693  
150.542478166361 132.845116298605 138.230197299262 132.794042648627  
180.881464829981  
LOC647844 110.966212705086 119.631847624882 116.433239116749  
121.396223519559 124.63978985808 137.996291911198 126.333814565085  
116.437403962939 123.998343902602 129.167602517633 135.049657594221  
133.449527627723  
LOC647849 142.749568012703 147.036768856136 140.78582131501  
140.096717188376 145.934643000545 144.585120811896 140.759006929593  
136.708746582636 154.373739162815 148.665627690915 125.455347031878  
156.304678960663  
LOC647850 164.018470368389 149.237422245619 146.795608819024  
135.916668738753 147.994386096925 148.423303776817 143.984222627806  
148.848823912244 139.59941545613 161.77611826709 151.705219298578  
156.050585687098  
LOC647854 136.380523452336 142.466067016788 151.364528898537  
156.018200674475 158.863516051439 146.503431281242 147.595573192579  
155.686889874806 139.966813133326 154.475735552851 146.772611341214  
138.655815405894  
LOC647855 149.933919274985 146.347213904792 160.039086963419  
149.805955402639 142.853399942089 136.121343288722 144.516274148451  
134.010031592003 158.756424011719 156.213421099137 139.339542167402  
156.602240897907  
LOC647856 3615.76740804718 3983.37592132018 3775.41389938231  
4280.66857663502 8121.54750071211 5543.71998558526 8016.1652884418

4103.06565237121 6028.67062754577 5489.19362780613 7468.70895916615  
7873.0525548049  
LOC647859 136.977435235496 135.513494853742 159.354364289526  
151.518116154483 218.08515867102 176.431477850092 172.030687707578  
172.097502416776 176.155413809391 176.145076825955 172.457165477145  
224.224264678645  
LOC647862 153.848852170776 157.203304477454 145.453460204097  
128.054394154801 128.812729239283 133.702845956639 130.37544152572  
157.692519370734 144.748564682545 156.453108485249 120.925930409474  
157.742948919213  
LOC647865 118.461037435114 117.331280455759 122.10489926804  
121.778756075848 130.116771999391 128.007359083768 120.238706364491  
117.420765321056 114.115609163126 129.861693025157 112.605287278882  
119.466200987489  
LOC647868 124.582577275358 136.005756600948 139.365595511181  
135.989816139218 141.097257687941 144.290286088611 148.949829934611  
133.146347243168 128.759751330525 119.686859562393 146.432468585736  
125.038427667173  
LOC647869 137.603046125938 137.352231982942 141.585172896047  
144.748564682545 165.972090075204 147.082068348591 167.92409473064  
142.324077852852 145.472859089272 137.805895248174 133.862203806529  
152.868787961804  
LOC647873 157.14512525321 147.62157260418 165.476670465739  
155.957570398118 132.517166202071 158.509885816997 151.958818313561  
149.741272818423 137.760712896718 129.343440464729 145.787468865642  
153.661632990172  
LOC647876 143.48729871068 122.125746529725 138.864844664017  
130.465221782084 144.760229351772 132.179747646893 125.04327844782  
122.587545171646 146.731584143625 140.405405916188 154.059436186574  
130.233769058693  
LOC647881 135.6149724596 127.681662711369 136.346472365382  
133.841519663164 132.548259643258 132.948096807634 140.989597586699  
134.666505160831 135.762603711262 129.925548182204 122.27785621724  
139.872976072847  
LOC647886 1534.21175984308 1270.76282064793 2662.43181510326  
1192.72383754851 243.936797286495 237.396466740419 316.955298948771  
814.759191652981 555.607185132941 752.585744322608 720.214044399108  
281.846246549202  
LOC647888 145.815454490804 126.580227722115 146.215459988012  
134.929915732246 151.426110043584 154.170007083026 131.215202712283  
143.342736976496 133.766199453456 132.634538733205 129.733935614802  
155.813740201987  
LOC647890 133.912614097412 153.461396593156 138.888049140099  
163.616115299926 135.268963938932 134.76397845723 139.640918572569  
159.640027194076 145.830916005206 146.476960694197 142.316441155937  
146.06054700771  
LOC647891 149.810655120216 140.907155708331 144.283716416188  
141.535381351126 140.722297244564 143.712450441816 135.704067249674  
153.579955370444 141.082569618216 150.948076715456 126.019246614944  
148.274122690409  
LOC647894 131.345038923753 148.956326355381 157.309058982117  
153.966815534288 150.500676225569 140.504486195539 143.066552389513  
144.39135701666 140.667415746111 155.612543356905 136.85323853426  
170.169402943662



LOC647904 171.320653882424 127.898533598679 158.973872644973  
176.440625367948 150.751386127903 164.116142541038 164.773489952844  
156.9540270155 154.670631900834 149.450921195838 131.631968933144  
174.510523238374  
LOC647908 146.443892388756 137.603046125938 136.683683776616  
134.840285218383 138.154799037807 140.05012958679 161.906823008445  
142.12808103815 143.30977386038 116.86635524597 151.409290231274  
153.700168798494  
LOC647910 145.646191500321 145.850605495564 135.377118045038  
154.746081871718 137.95243466771 141.383975990479 128.950308413612  
141.565599104245 140.619606039582 164.337486856997 156.825157746082  
132.971844952199  
LOC647911 129.483116877682 128.568463697992 133.296781138167  
162.660027294291 138.301397056664 142.848438163322 131.572485018063  
135.877646659023 138.637735867167 142.067988549461 112.57049236673  
128.640202262896  
LOC647919 139.313456284725 144.252481420079 150.667001746475  
182.833961304079 158.911404625381 161.295030274012 130.728465509213  
151.570977428443 167.273378118452 151.911494020123 147.841960346835  
152.197327387252  
LOC647920 144.65238608866 147.121049266117 156.157567405927  
163.267148547147 178.000672046849 158.735283017367 152.635792342068  
145.491525555916 143.207187847583 144.335732650795 147.373174160478  
146.482652762374  
LOC647928 165.342790388607 176.465559710285 173.798554769204  
187.920789153124 154.821960325589 180.814610631281 200.536814571322  
165.085010975035 166.988725688589 161.724388995749 148.695212949639  
178.804669910283  
LOC647935 125.117333434527 128.205022859019 137.864637728155  
143.35902319003 123.081299769162 135.079944196457 129.852833137493  
146.058477355527 132.031693838834 128.671626815639 135.807494668545  
146.091822904705  
LOC647941 150.238582112636 159.393410854649 190.057030596611  
198.066837203458 160.060406629689 151.463200570499 160.28767775843  
143.231806900648 167.293320986716 152.66513184083 156.373163373309  
164.717809928624  
LOC647942 139.457084084368 140.413503801467 138.264258708067  
156.519196335454 136.55090238808 142.367003292264 140.906421938377  
137.113439304545 160.113042196058 154.838407529853 139.046174587432  
148.725162101789  
LOC647943 129.198366503027 149.355389396683 130.720097323382  
137.220718873614 144.134485888258 135.449919220607 140.040420521312  
141.536764775726 146.235832275574 128.505296338657 143.611930851914  
130.470034945295  
LOC647946 141.28700484445 138.464793389999 140.732618320154  
151.142149775806 142.222833574043 134.299575239865 142.830950036054  
147.278236958386 145.048710455772 146.616041788595 125.67874617392  
145.320945010364  
LOC647947 173.624709850889 169.000137586852 196.802641002079  
178.854873582873 165.938009275308 170.257439890277 180.941090529551  
182.545896049446 162.155834067128 187.407526616724 160.589575894314  
178.416969664816  
LOC647949 135.231458421096 152.861304149219 145.296229550382  
145.924751649542 160.117742879282 128.336332748047 138.667081004369

148.868265867275 144.333945716394 133.404671629495 149.999838961906  
149.013011292165  
LOC647954 238.770586150777 237.575788579215 207.076364103755  
184.844915350411 3106.94181270197 1312.75601392984 603.569635276204  
776.030689773414 1310.60610806797 181.508873226705 1167.72023351098  
1253.05700051015  
LOC647955 142.51308872439 151.615675144083 154.306729472627  
156.18389905051 143.611930851914 131.707530115415 132.385096888962  
151.208728458188 141.558927907067 160.461846976268 140.946729014405  
169.888264971936  
LOC647958 145.718019736542 143.063345350253 137.962542261072  
163.165374495635 138.85328409337 141.741892403029 144.660095230819  
142.34956863109 143.007237184254 124.059778432167 176.47556448977  
159.932941342403  
LOC647960 147.125005489393 156.986053534635 160.632809953993  
164.448110885609 152.587331888423 142.987456501707 152.31268334586  
154.579913524947 163.02140155858 162.900556089071 129.570960882942  
148.991357883449  
LOC647961 129.515390475589 144.321757243275 120.590654346066  
146.353239460684 134.327229861635 133.871685084945 128.262195551255  
120.806180547422 124.242539075734 132.371165851333 111.928204694188  
126.680992733621  
LOC647965 148.005500924157 130.894384800009 139.111604268732  
130.768746032834 145.584615439295 129.861693025157 139.720343780228  
136.711382832269 150.91730768674 130.625825024195 167.07092218037  
148.457872807838  
LOC647970 146.702235538271 148.358847576281 148.635174393031  
136.27621600731 145.559419404453 144.625105340312 144.785343937043  
153.477432230141 150.297422529071 130.953237161257 131.514114515895  
129.985797334276  
LOC647971 151.60113116166 141.21138348075 157.838771553729  
197.489903263216 157.639688257892 147.040759979063 164.905467905433  
163.326102597955 173.132747018514 159.099495828517 148.367132982373  
159.970332650101  
LOC647972 132.994716261577 125.787353491408 139.180086017033  
137.914673796317 153.389279691913 125.058165131184 134.115085057026  
149.586651393588 134.463094391766 167.474790447134 143.844153373367  
158.135321157995  
LOC647974 142.394644827434 114.874358180801 140.702685210277  
135.049657594221 116.533361070234 132.008330288281 135.928428484011  
131.199163732231 121.076652800015 125.892022613725 112.063713561549  
114.574362093931  
LOC647979 140.509950286228 151.528377719344 124.757229519631  
149.895214204184 162.416774743901 172.412059174046 147.103340218488  
126.893023101449 146.457939801041 155.55288776049 150.275163835924  
152.327247552986  
LOC647983 147.330897105911 148.744599622165 157.306022722324  
123.775443296174 133.115543233699 141.488910091973 134.796088225931  
138.255457081996 139.403087367992 147.541437871615 128.708956947928  
135.800997202323  
LOC647987 167.965981130329 169.257035030405 151.979221390032  
180.290887733427 196.310746973798 209.398724613377 187.920789153124  
185.650862663633 168.643026828823 310.365203383647 145.812607895325  
169.774018833113

LOC647988 153.903993884123 137.383211680459 140.918728758975  
155.522274777451 142.268018184723 147.322622473251 148.57301274812  
155.926739769177 153.039237274992 163.373180928181 164.347168837655  
132.989846726946  
LOC647989 136.981881284369 143.78994470501 155.417694869593  
145.155989928336 165.262738484387 151.522526161299 135.421804561804  
138.21083121895 137.187640876289 154.212927357622 125.794788766462  
151.557004418682  
LOC647993 131.437847958077 143.440420261133 132.916608405637  
136.030538642815 170.568719982587 194.312315077985 189.985520850855  
149.613701531197 146.552529779774 497.269957926657 130.592061896237  
143.695901115673  
LOC647995 140.421945574721 136.028011201077 145.679907578808  
145.70726782469 145.020615552964 133.502176289023 162.565576110247  
147.600825146067 152.30599498619 152.057315195367 141.414384085164  
159.52833930625  
LOC647998 140.545351041252 135.536810684197 137.955289723046  
139.739448838436 119.693318959661 135.100687929821 130.022574966461  
142.973444931373 127.908872828095 145.214575855337 135.819512270582  
133.459221120979  
LOC648000 9251.21629832018 9937.36968397141 10048.4260790604  
7406.86318549013 9881.69734721233 12283.9915232122 14938.5975217303  
11598.65499235 11281.201625198 10765.0336035748 19087.9532735841  
11326.5935775813  
LOC648001 144.011792962785 127.797666392002 145.070927449969  
144.902807664593 155.951509643078 142.623106544789 146.582858169664  
131.868557613642 136.173596381385 139.866536599877 152.315376022976  
148.179398287068  
LOC648003 147.144669932392 130.049854901235 146.54504551183  
138.888049140099 148.544887355857 137.902953501634 134.408846338374  
148.919726992353 148.695212949639 133.760183242137 116.236538651031  
120.527518013376  
LOC648024 284.13865992802 273.073938260793 419.4017188518  
274.047586063773 387.224184063662 1551.90775589919 1257.00798908017  
1183.1601379136 872.320823993033 1980.4589291261 1225.33666840349  
1024.59845685519  
LOC648025 171.795878750365 165.613274361543 154.197254746757  
179.25743545231 163.542848861552 182.109092947203 170.335930486215  
182.470538043064 159.891562221587 233.842749683689 138.434347257063  
224.251136332123  
LOC648039 172.877947895827 179.241385747152 153.832132196284  
167.91761500242 168.71216652064 191.795952536469 140.073208365817  
176.714471790643 161.424105316969 162.188509438986 144.206259414981  
165.619206216088  
LOC648040 118.406487008528 124.3501719829 134.394503574535  
133.123444023892 119.288554466773 128.574419295906 126.732121894377  
126.976353967127 144.889019483712 140.477307701027 126.720031203392  
144.468333012278  
LOC648041 139.646026806298 131.868557613642 139.234549949916  
158.157097243342 135.852591930882 156.285963197762 149.016767620428  
139.862403685817 145.597134236583 133.027592711375 118.070716076005  
148.543359732604  
LOC648044 134.323365608463 151.04846635538 137.184405197724  
140.482728188987 141.246352591355 125.874313058552 129.918038866006

142.02169810999 132.587392944892 133.303201646987 124.546520456419  
146.508628678304  
LOC648050 154.428779374984 143.667207351415 153.667355714857  
188.145154995617 147.04481509758 159.021304119265 138.274057264688  
136.037555727438 145.692644807799 145.762724663455 137.063689600869  
165.511561121012  
LOC648054 131.391434131813 124.079745873727 131.140263788783  
125.634045420702 126.025161261042 126.153806511702 117.238968848218  
125.269726165403 133.850733997442 121.508233749444 119.815258991448  
127.099995420363  
LOC648057 161.678137139371 173.468958175014 188.557113298055  
162.689415085423 202.129153259445 203.223604138192 159.603586227897  
166.825501664231 154.574826922632 167.040031488406 159.362293777146  
190.993590849624  
LOC648058 155.417694869593 153.860039535598 160.099731578122  
160.478519202775 150.339554736141 123.968639555673 163.736324784234  
139.411792975474 154.691783046492 149.119815471009 141.420747583126  
151.450566957592  
LOC648059 254.393421265604 281.926552464214 252.548942594125  
279.75914135192 163.534117903837 287.402339322061 209.258707976348  
267.939624375137 172.297698667311 206.68694753419 214.132445321197  
208.067404132325  
LOC648064 154.104321553472 144.572485418264 154.296467085914  
160.055242985219 147.661748633455 141.60153371241 148.630293791756  
160.042251279235 158.463444189819 151.198928680018 137.406420101257  
175.055634340766  
LOC648066 134.302726684539 125.073353210914 137.805895248174  
137.811304134207 128.536721595589 133.542620077059 138.679545821015  
137.982667022604 152.957297648595 136.113421708277 127.685469299406  
151.137791721752  
LOC648069 162.247608931408 172.138554350738 176.390014020936  
150.204636832734 170.290455446376 190.309453030884 151.497680466119  
162.778480318754 169.695658738618 144.924212639731 170.046856179083  
166.780319723055  
LOC648080 109.274221164316 137.430389116025 126.94941821459  
140.949367846425 133.037138438863 154.522761990223 118.430401197079  
143.937726155116 125.593595066736 128.190822428484 115.184395637553  
149.861776884844  
LOC648085 115.420810993676 110.347631909888 137.336914480226  
127.456181182121 159.13662975347 145.1382587433 124.45782375705  
115.821231468312 121.818632020666 125.324187741972 101.981823814699  
142.560797028716  
LOC648089 151.98710761363 150.765477999064 145.352802493486  
144.664600892248 143.151478156897 149.462835741621 141.457040042276  
142.019263564073 145.862497313025 137.354782768068 143.950279111815  
143.098246338022  
LOC648099 228.270158363878 282.392419584508 246.850599569231  
242.538036654192 283.46492196692 229.907632927358 462.265785715695  
237.146972312448 215.769986055534 314.949772661046 405.843083758177  
277.026538720417  
LOC648103 137.869471689534 139.427216913809 130.684569384626  
158.473244125101 151.369387642458 152.488480322526 169.211708954329  
155.463400179872 144.191491000257 138.950197595669 165.219393390909  
150.129367314696

LOC648111 133.186678625229 135.343380336913 141.919263493165  
138.634814756987 131.4182935715 136.737964237109 122.129348411763  
130.874283538818 126.499257771192 117.692662275393 128.336332748047  
160.769011617127  
LOC648117 136.244995503799 134.897958140444 155.686889874806  
141.809577413906 149.821848101995 129.83316008718 116.615250922316  
141.709261143855 131.296518221093 135.999030570565 121.138461509096  
128.099484678519  
LOC648123 144.754401731628 144.243598691782 155.518807026156  
162.134726710448 130.364660391719 139.708303388546 152.155760355248  
146.286319248569 145.793794049657 165.080825814849 141.626504154989  
139.513752499004  
LOC648127 129.884064654761 141.33919297402 134.202497785854  
136.617105945904 148.739888930189 143.040254576088 137.835936352525  
140.40754434058 138.464793389999 147.932875151331 144.96021415188  
141.999730335668  
LOC648130 136.515951031895 146.06717772919 139.297276687352  
136.430232926793 136.415734370763 138.616719975373 149.714982846365  
138.592943322694 142.609678462615 149.759516805355 160.168654167074  
135.088149158147  
LOC648132 184.332299740724 153.554159360954 152.692483731643  
161.26917182967 169.113439729353 181.722373730185 167.73288535728  
155.023934989559 165.192945734166 160.256877369493 159.133905701536  
151.627496656808  
LOC648133 163.480722123193 148.404000406948 158.364031234356  
166.277960843095 158.8246699332 156.519196335454 157.860515609693  
158.679903271595 155.625320865565 141.221162787167 138.628169506372  
154.049004176595  
LOC648138 161.663893432522 159.090982014161 160.525939340745  
176.449549075475 168.37850726499 158.503284955019 155.824409540332  
157.08300736206 161.090443294391 159.070355781276 140.74035966401  
160.461846976268  
LOC648145 145.915129713165 144.964084792568 149.791777262424  
154.947359473187 155.938283930571 149.225754384299 133.970510683179  
145.850605495564 146.136820062093 156.632939064629 154.988494760267  
151.950883677297  
LOC648147 122.75516501062 126.603552416008 120.602818832247  
115.923424095859 127.908872828095 148.934593102452 115.337592860132  
131.481679396553 130.887769728442 121.774697402171 128.975785280465  
115.863243613121  
LOC648148 122.736882859231 123.782746527199 130.624702758052  
118.24368469845 124.952026709219 122.90702157852 124.048926099805  
118.161192318422 125.262445870212 121.687187898743 130.156775178934  
120.665520347481  
LOC648149 136.135223482208 131.527939273875 132.164132609317  
137.129864761402 138.588751758469 146.129805607031 133.158570377793  
153.131271100637 155.498580125421 144.574566623882 137.006917665541  
129.694178995061  
LOC648152 132.336431473522 131.089811472017 122.436106757578  
133.115543233699 135.192181609947 120.74273444647 119.931415360373  
123.891115326934 117.667611937195 132.748478264583 119.730174479044  
120.174672871542  
LOC648153 171.809717138613 161.112906953532 173.432960318793  
156.78124246844 182.410688592378 229.660838239474 191.814634229865

218.106150021482 193.292596471113 203.524150518033 175.647878042257  
201.221839281282  
LOC648154 135.783125948784 137.039484233589 137.987255649072  
138.72219653692 146.863611516518 142.25795237339 126.455271988029  
138.572054821151 130.329453160478 132.340183565771 128.931946787934  
135.805294188016  
LOC648164 157.073850948746 157.172970235254 161.289708941062  
146.664285015996 151.639515017015 153.02549014611 152.057315195367  
137.246089511045 159.138344477256 162.762473039474 134.668233738635  
155.431833398023  
LOC648167 136.133538781918 122.729918525032 145.551717838423  
140.732618320154 132.641236788053 132.221351364892 137.463764193883  
128.992837936606 136.039076665712 133.935910746769 132.978746105877  
125.787353491408  
LOC648169 140.746062850603 135.215356532498 148.823805841381  
131.657454325126 135.310766630401 139.597493526257 136.971869448818  
132.079255703621 133.854760285591 135.943252855457 137.734887788912  
150.837717923505  
LOC648170 143.038248313305 144.763700813057 176.486551181451  
135.507247740621 160.57963709333 152.587331888423 137.294246530224  
150.599425944486 156.904781904311 155.488346781292 124.285969778268  
133.82548013342  
LOC648173 141.828740140733 139.032275257901 134.70848693317  
158.699778625671 136.180063437699 145.997380100999 143.388028226208  
128.447393268611 140.441521267218 150.51660396548 131.125175244494  
147.954079022076  
LOC648174 146.812248482145 148.109847175216 133.173541338355  
161.212598761378 143.04129238495 137.298549014192 160.75642485037  
153.998849486363 143.376817049362 158.10628865476 139.526241501184  
147.790720062226  
LOC648176 186.482547532546 171.433001048839 150.82596027483  
167.430767074847 184.493681387276 179.61374889626 143.086872363116  
158.007926822094 210.030846572444 196.378888436237 312.961981998512  
265.572253407219  
LOC648189 158.625060605976 153.748035612441 159.847116478652  
152.22701178148 156.662150993832 144.217621961908 154.229914729772  
144.129889080946 142.101865506094 156.346014084316 177.438968923426  
149.52880714343  
LOC648196 148.807422049327 148.715065348779 200.094610104813  
158.297624312257 153.731233276485 182.897563195019 170.568719982587  
183.201926323188 187.097765940131 156.787932134605 129.356401843185  
188.724274062294  
LOC648200 161.806144472744 154.096542063701 154.133723492173  
185.002106079042 153.45050352117 154.469132478321 144.822943770596  
156.269957530519 138.154799037807 149.984657985607 148.553324405123  
139.948097704949  
LOC648205 145.524305076788 148.670562837021 165.232545721733  
144.762006548375 142.002145315543 164.032302455558 138.438792881135  
137.30143217822 134.022324496729 151.212606106351 157.368974632451  
147.297163685914  
LOC648210 2146.4265920569 1726.15788525017 2859.94396089224  
1172.4103691525 1022.11537745428 3309.66193624859 4280.66857663502  
5410.50736002544 3387.5366256957 4095.76073123843 4016.35381420598  
5032.66681917478

LOC648211 147.535225305685 162.416774743901 150.765477999064  
158.377396672742 172.599654598668 166.671563123047 157.399880496076  
168.570133927038 162.077455145261 152.925281215593 147.384050169545  
162.828844182372  
LOC648213 149.597396040729 164.022021048626 162.652929339533  
163.48462232122 155.496190048502 156.576585764311 199.798533722581  
163.500384982242 155.463400179872 139.543551482943 156.998563448664  
157.182954894643  
LOC648217 128.616121042106 115.692324946633 138.675023495021  
130.878694881324 125.050945917101 129.421772713718 120.53428198263  
126.899985772157 140.820807603291 129.966755942173 115.264104392064  
115.037340101655  
LOC648218 120.351217130679 118.584773788416 125.672285485643  
127.055165613236 127.588907178652 129.825824640378 134.434198188045  
131.560971848628 120.606354515072 135.817028661429 136.899405404096  
123.45581374935  
LOC648220 154.025625092599 145.885577577352 149.057388078138  
165.627852733455 143.867013358737 174.161146689117 136.817517693076  
166.988725688589 160.695913747601 160.499355902773 153.492072037266  
171.844483419604  
LOC648222 147.333142209628 151.064422836695 148.953720017484  
177.19138801548 141.696969082758 149.198753359122 165.890492422031  
163.946569217706 155.699649538664 151.183847738922 142.394644827434  
154.91429973744  
LOC648223 167.900071375885 141.980728956046 154.373739162815  
153.969493052468 152.972779110762 142.64421300687 165.844762875582  
138.83304645915 157.604224004016 170.818182800759 151.123104810793  
171.994330847901  
LOC648226 161.577683729655 163.821142892643 146.808519947394  
151.167024833049 162.683665945044 137.740497848238 152.213746577124  
144.991442620483 164.548505132213 132.021249712589 143.123983359386  
147.879286704  
LOC648230 162.994537815938 157.099868633958 142.095289977576  
184.167124143272 176.208206282902 178.920528149177 180.035652063942  
154.831307586538 164.763269377973 167.594414386475 151.282370273189  
157.779441363536  
LOC648237 142.122556679441 145.569870279379 153.557991189227  
136.735930829008 136.342634691443 142.859971805867 128.96181458192  
139.613193302406 133.504078347324 134.831550401848 151.81754291846  
145.365935017728  
LOC648240 138.442378791712 168.37850726499 185.583997792931  
148.299945894738 149.045654499682 156.466728833063 135.678138913772  
134.323365608463 153.713298074917 157.70581824787 136.386031133644  
156.825157746082  
LOC648245 125.522498880785 136.316003989725 149.157934946623  
151.416893156246 141.264096014725 148.155692596378 166.315369318355  
147.951996191313 140.539606951892 150.376234759097 135.210887148305  
162.595632367022  
LOC648249 1378.40627876546 1362.1486006778 1892.8338612507  
1403.90487313049 2767.77385345718 3152.64817044581 4711.21389812942  
1892.8338612507 2681.48138915107 2792.13364570755 2779.89882032092  
4773.62220024088  
LOC648251 168.654753237204 170.233084517898 175.030373805031  
155.868109161417 141.964046958336 176.927500850631 160.941804737367

161.182901898379 141.567425892004 150.870830294349 146.768631086088  
154.173439471404  
LOC648253 175.469375624274 179.009510246709 164.38282966938  
163.59704679338 149.078664825533 154.037622223246 151.316421810192  
163.899808733609 165.003646188775 164.520247586053 141.50968031684  
143.013801508709  
LOC648256 146.772611341214 157.061602966797 148.415036326153  
146.701489210289 159.159106382346 154.146962684738 159.470818285679  
150.379752360563 148.848823912244 183.64389891975 154.591116158776  
147.110929610347  
LOC648257 127.969833368917 120.831070822199 136.247524745098  
127.642215862573 130.947003916049 142.61573330083 137.658183450715  
131.832311911703 132.611864316181 145.536260846052 117.590393673861  
136.249063953892  
LOC648262 135.705904966172 147.199961777192 162.033909093358  
139.847813838017 157.78390301218 145.409722106953 142.19015013243  
138.986877479278 143.001661958814 148.821942578396 139.482462221798  
166.709393547104  
LOC648264 142.888281750232 134.266373965186 144.87013280941  
138.882483367088 146.623313753608 141.414384085164 147.572660963285  
141.611712747368 151.134466830828 133.387065801837 122.254824223167  
148.056333887679  
LOC648271 128.717719117128 146.826292449698 127.385776388242  
110.148555045276 131.257901340773 117.946664604751 135.474070994652  
127.289269745461 126.956303896995 132.890396520305 118.08607083874  
151.908841481413  
LOC648274 138.701086464887 136.492892469272 152.538048490265  
144.0534341937 124.321503368855 146.580787463084 130.882463936853  
132.155877196474 142.032814623366 151.248365605631 130.213596986351  
138.800986934663  
LOC648277 151.015243921984 141.019494314354 144.804829253992  
148.417929733447 127.195619567384 140.903091584884 149.851792558427  
140.849966309018 139.404820141366 137.212568398657 139.409685553177  
147.70836747108  
LOC648278 130.947003916049 138.601616246182 138.399665664034  
135.556943919872 131.328478053136 146.432468585736 137.47514052942  
139.840256729373 134.432461986523 131.114995025516 123.694678408411  
137.890006487904  
LOC648279 124.942701123337 124.995087711332 134.994013668445  
128.611740835252 136.645091356305 126.662329971897 118.366859032979  
130.038936315246 132.987389721592 115.02681415256 116.647291878845  
120.227386958188  
LOC648283 154.449058407217 150.244284323504 157.635531050489  
160.407690552027 178.854873582873 154.620194499553 156.75001042701  
157.997750997487 157.952018720438 160.150336334888 167.547551072373  
175.9219991997  
LOC648287 152.927956172463 147.449186980143 165.752558888845  
179.764260117544 159.832405510505 160.478519202775 150.843975804117  
129.756642179083 152.818046945164 159.065612005442 168.394330931524  
152.386986818959  
LOC648289 153.850588492326 155.625320865565 164.172084711099  
164.352366170527 155.498580125421 165.954266127697 148.413965751779  
164.202554380274 159.446705611995 154.183537565624 149.228977421003  
174.624446035895



LOC648293 136.295523520203 142.720769329396 136.316003989725  
139.934460900409 141.357668647617 177.500110974116 157.826457203706  
138.050999864689 143.722135315998 138.220016828327 139.14544832776  
158.598999414864

LOC648294 3734.705550862 3677.23129570773 4811.88424516272  
3083.98169220838 6138.10904830456 4323.76731419005 7838.92787031423  
8514.94395408164 6021.68798558746 4228.5490138553 4280.66857663502  
6296.24208225227

LOC648302 137.089392202166 149.839827383681 150.152613183213  
149.173121214851 162.634670715627 157.639688257892 147.818956338752  
145.265512354674 150.364511432468 149.010477279209 158.495606141226  
136.450062043587

LOC648304 126.237900397603 147.614293127043 149.772157318769  
150.863099494798 143.381277901138 138.220016828327 150.267298097687  
146.931186694342 143.427721577372 149.34605615699 134.553754121862  
154.908975734985

LOC648309 144.886005815977 141.561769570516 156.630366766924  
145.861217875066 134.033751039071 139.526241501184 153.328585916625  
140.313216623427 144.629350188283 146.777258330572 160.833948531272  
140.675094228846

LOC648329 167.637638693195 158.650226303456 174.417259650516  
153.332110179758 147.401387099359 154.713713332354 146.577524520274  
159.815932985135 159.655362710407 152.902458879101 160.865949438448  
155.400191634632

LOC648342 134.457932303561 144.458829225668 140.293431620804  
144.907294702865 151.015243921984 145.804420322848 130.024546949158  
156.531951576859 144.167857433516 118.988269692812 146.093387013881  
134.420446702459

LOC648343 313.773476049783 336.002793042439 333.533043832976  
255.638433159437 658.202765061937 347.224999246223 575.386048896223  
401.960630197091 338.739180103373 553.90008440429 723.428294037428  
548.686094748117

LOC648346 152.945550129539 144.199054675488 155.078035506545  
135.958932745982 136.829137120584 146.003512592449 148.022287939066  
141.266129417042 138.227082687797 149.235222982395 135.186880148352  
140.53597287752

LOC648354 130.471929699923 134.128061214081 130.441808139335  
121.311836944721 120.283706459738 124.258412895333 123.902047880095  
138.002258986172 125.097835661279 122.508761687823 109.506450285923  
135.108420614547

LOC648358 169.992657041967 174.560168983121 173.161152247499  
191.25724234927 178.014057622594 166.263781040251 174.221939793486  
165.327972973978 155.664126780859 168.139351579682 158.302977853133  
166.89285636895

LOC648359 111.409447323674 129.664016819143 138.418604660734  
134.350054065624 137.339511714364 130.567443018832 137.861973133557  
132.871179509995 133.065366727222 137.410687900298 136.280653079814  
141.08625682411

LOC648362 129.752997624387 115.321501844663 133.883527462382  
126.326609619996 138.055190422262 150.117906461237 126.452500728601  
131.454955038299 137.367390177293 134.741781820234 119.415822905251  
152.945550129539

LOC648364 158.030237507443 152.699431442817 147.49720952988  
174.187510325385 158.8054811093 160.022481227931 194.281839133887

167.484236948415 145.250076958551 153.231965895778 136.669003646622  
146.139817421758  
LOC648365 143.868962478182 130.244024688838 139.883360543042  
143.667207351415 153.000232171457 134.010031592003 154.398416018484  
130.867819112143 132.243900762936 166.46473789699 141.382096896508  
150.301540078433  
LOC648366 193.723953003899 151.59613008133 194.281839133887  
165.558963147657 156.880120259304 217.513118676535 181.681929801968  
187.461448376593 172.562162872242 196.329602378007 156.456332386608  
161.04173806448  
LOC648370 145.601922576321 158.034418043685 144.532420788945  
150.498954408708 177.091809538824 157.423242850568 158.963726206466  
143.354858193994 155.759861336991 147.628367263728 165.108876136738  
163.245806772716  
LOC648374 162.834961996238 147.576533768761 168.244523461915  
154.71904132098 149.689071018094 126.635105491524 144.606963457243  
145.058110060639 138.814930200619 147.570734399004 141.948288898469  
134.442947822188  
LOC648377 161.972922129453 151.470844748137 203.276353321185  
174.417259650516 155.43577761798 158.63432604978 154.327065859051  
166.388683552371 168.801737310947 170.784229026842 125.749024723383  
178.106013202731  
LOC648390 1846.61430264854 1720.14021303639 3052.86038628748  
1706.06615968622 1209.56018864779 2874.43919426772 2280.20302441765  
4956.21683075884 2234.85920641661 1481.24705642453 3784.59114921916  
1906.81344236287  
LOC648392 141.541355091514 142.605816057276 144.871396308673  
150.792065744902 130.162731607326 142.388076341254 146.373162751863  
145.731800133702 134.534815676852 137.312488161187 137.386308389265  
148.727953739127  
LOC648394 144.574566623882 145.581755438161 148.808928892047  
130.520275539672 145.329128512407 158.072347847051 158.374760929273  
152.315376022976 146.042460762767 145.043494048779 143.711449989619  
143.07651558428  
LOC648398 124.405905157157 140.132816040735 168.521601064374  
155.853414065788 135.708804956764 143.922878410438 150.468392290279  
141.486042999328 162.254062646631 126.589865262427 136.453821861379  
145.999823250463  
LOC648399 270.069634610818 233.884660128222 326.417021307859  
220.510248260182 129.135985676046 170.035994634371 182.197625235191  
174.526176588454 139.219476681919 167.260319361746 111.577400298092  
180.240305360865  
LOC648403 151.212606106351 155.680330654611 144.134485888258  
161.456727894848 158.675960205792 143.830319259804 158.653161314597  
161.903016201041 152.413389525982 151.392024228289 155.71830087869  
168.744610747563  
LOC648405 137.663941989772 121.679013405559 130.316282003711  
136.178501890585 139.611455791957 126.274585491044 151.081339000609  
133.226542641174 151.406384541297 131.924162435354 148.630293791756  
137.30143217822  
LOC648408 180.619956937489 173.66499836293 195.309773332459  
203.791916347213 180.354899434843 176.214950733324 192.891507272665  
182.042104888745 164.509354377985 163.203582580217 153.43000129811  
171.954184094677

LOC648415 163.951459935477 146.654925456132 154.13120950189  
156.783896946556 172.698181201849 164.497445195378 163.991378703958  
144.270828498856 160.164327420125 139.955389033983 147.949560045212  
160.613630476912  
LOC648424 141.370340242063 155.699649538664 181.865456674829  
150.680628549529 154.232310911696 157.874624979775 166.396160626179  
154.390764802264 144.454141873387 169.948277715908 145.581755438161  
164.198494818485  
LOC648432 139.744142223177 117.008277388399 146.353239460684  
148.255769084026 125.727521491768 142.442450622311 151.629999903069  
134.668233738635 142.370721565016 157.986640251147 129.958065173006  
133.585425721984  
LOC648434 198.925776755081 184.775001243453 232.127996106421  
196.942880967705 156.930119977809 166.77329045424 178.766654213173  
192.286192329464 184.029968090084 174.347451984066 159.021304119265  
185.765000029242  
LOC648438 143.224678017244 138.343232981485 155.575152212736  
149.551030995489 137.187640876289 141.397046998678 151.922296137689  
145.183463058696 144.634118305223 134.318290950377 153.610428214886  
153.121693371757  
LOC648447 124.632373951797 126.583342262489 121.824805374887  
125.358906118533 147.289061374598 143.2438241778 126.630787911053  
129.616142780279 144.400004730049 144.785852437305 142.804411455413  
128.211076776316  
LOC648453 149.604507483606 136.982719190537 149.143087870963  
146.122816653035 118.424520312293 149.524040913256 146.10417547509  
148.815219352345 138.1693725329 118.863150637476 151.032389358279  
135.632298302036  
LOC648454 144.724040494873 131.711193516482 143.583650664594  
134.369532556726 154.951136632863 130.651062724029 144.203716525289  
125.868080230094 143.662865541299 148.532339759414 124.062863592295  
161.688125121941  
LOC648456 154.951136632863 142.954747193455 145.587386656619  
152.163489631563 149.264997927508 141.28700484445 141.599211622756  
144.532420788945 154.395261192114 156.768976123975 146.476960694197  
141.457040042276  
LOC648460 179.198164545975 145.068754246476 143.484004107893  
152.538048490265 161.456727894848 151.679534447228 131.019345449516  
135.449044827893 143.397823965608 148.757112903673 149.089067389266  
158.282899758551  
LOC648469 132.28010415054 118.838332117453 130.93033679281  
134.972933635542 132.786500984297 122.982686879394 122.708102546276  
137.919253591105 118.006338536085 129.692578787988 129.148634038268  
132.579323148839  
LOC648470 287.242697383558 258.759507964221 220.959843573708  
241.706645643141 170.401653214867 223.220997990627 141.492458250787  
172.370108210895 209.004374703564 162.592306630033 155.056545639862  
148.695212949639  
LOC648473 119.934231033302 135.93352186143 129.623601211364  
126.386738502885 126.026938396257 121.792573534134 124.080382291282  
122.763138007612 109.978693735206 117.045020667394 141.56459720769  
127.482662155082  
LOC648476 156.098240321674 148.680794815584 161.569793476847  
160.180961887686 156.938149948126 151.503307004675 155.993849743656

148.592330216136 159.356121576029 135.798387504219 148.949829934611  
159.957371011316  
LOC648480 127.442587366678 149.119815471009 149.589901372799  
132.881693683384 142.436624546651 133.744560712587 139.457084084368  
132.697727983601 137.632470240792 140.826051635712 156.301214161102  
150.287472248483  
LOC648481 134.397255719047 137.180793826675 126.583342262489  
131.477589792769 140.2533871084 132.928639483854 129.061316880624  
128.929244741296 132.087183382523 132.70643154246 119.83679981791  
139.331046480528  
LOC648487 135.027715094704 131.659187927328 127.380083832809  
141.552315273863 116.919109599361 121.350491314441 117.555999801887  
137.670655293096 129.45936538019 206.999289979742 128.51523581959  
125.929743286163  
LOC648489 145.351662473858 131.950972277537 151.16261275916  
127.104868352186 129.365004129784 126.435928518593 140.888439624918  
141.186913979346 124.217337143269 130.097543328456 136.370317464946  
137.642858036384  
LOC648490 143.683545371898 155.40832015652 173.044636575826  
142.307520290692 163.996649606636 181.215046876308 147.241136598626  
153.67215573765 165.665796569389 149.919344933814 150.117906461237  
169.852769679312  
LOC648494 152.163489631563 156.262515148436 168.6016897585  
131.545287070888 181.277683429417 168.729301938015 208.587188476069  
169.963805688413 139.421753451936 181.500222423634 153.07993334035  
167.586897846525  
LOC648496 157.055133233709 133.241744350369 139.411792975474  
159.159106382346 144.718507303105 136.732319750425 123.119524624735  
163.181323768362 137.107621189522 140.54700821058 142.768691899824  
158.10628865476  
LOC648500 157.443127950708 143.145483889918 152.185397218918  
158.756424011719 144.331409179705 147.034021626893 166.709393547104  
145.581755438161 141.997165490755 151.780459290205 126.17133877948  
154.143331594812  
LOC648502 138.301397056664 136.408314486465 140.311843829601  
153.538565948453 151.330035086652 138.104527851969 122.881793230233  
150.452467115669 151.705219298578 150.391286215189 151.301484852387  
151.094682146074  
LOC648509 184.844915350411 177.538262133568 158.448557470725  
162.846914172627 194.36669779004 159.218886890035 181.148062201932  
163.970187373891 140.743917481548 160.949030247406 175.93459327917  
170.531713392258  
LOC648517 141.129013595331 139.6391154169 161.627546190964  
160.156127781701 161.837272617767 191.220064414876 155.247452081206  
168.21856603538 154.496005175117 143.754105312957 153.189490068047  
164.319378349317  
LOC648521 120.304037458526 117.913545753709 158.292581724934  
128.417571004317 126.75720720361 163.647306551474 136.526706711584  
143.888318202599 158.344330353326 160.977462147352 118.9428715545  
138.789908033669  
LOC648526 324.067396271281 370.877260088621 209.023926358109  
583.022090879298 657.77730563722 500.343476678562 243.793465720264  
340.487850009685 532.063437013967 600.162650426961 369.592501881153  
678.684323057327

LOC648527 127.369456504277 120.693808603805 128.26957712082  
138.026155846749 127.488853386792 135.003236040032 140.06989960847  
140.522470775478 134.011746666371 141.918291147773 113.370762349233  
135.421804561804

LOC648533 158.738932073809 149.682150633146 152.107025120177  
171.329984719612 144.385424308141 182.292947734054 151.201263631883  
169.544515294662 151.224289879776 145.333097940759 133.52271411034  
138.43301474649

LOC648541 161.655336107432 157.21132653949 173.488272345038  
171.869472272081 177.88534558205 176.465559710285 176.364184489318  
154.507721014473 169.077657790409 146.800324349321 138.438792881135  
143.729768036753

LOC648548 163.982415393606 167.063762404009 174.375388013694  
157.844617425219 130.020743385543 165.364935913232 167.164675439456  
151.051672692659 147.476805635744 172.997461101709 164.448110885609  
151.796986456254

LOC648552 150.122035262873 143.747664482225 137.226465917397  
150.014842228372 156.597497458992 154.371946675862 166.936975782665  
143.112205432731 134.052720862102 167.447964370395 153.339992195184  
149.098381037466

LOC648553 141.486042999328 154.452964510369 159.282348516052  
142.049776668507 135.978826529736 169.311264420133 143.218850583533  
129.80429516198 139.501279970508 147.4182675362 145.34041912391  
170.646233722767

LOC648556 136.154522071917 139.681211082196 144.370811043456  
144.579089998478 149.31422191209 138.093181144173 156.768976123975  
136.353051841792 127.733860645979 141.075421936212 136.284283129801  
162.347140552869

LOC648568 141.071184297124 153.228048041467 137.434039024162  
147.659772694732 153.285830139349 133.396403868645 130.511042322504  
140.763592237598 141.18490443471 143.26896117546 136.878656455606  
140.036463888037

LOC648569 134.420446702459 150.52625734893 142.64421300687  
163.876218743322 147.469101571149 138.789908033669 148.549257493128  
150.829439012542 128.162546179362 140.985432994867 125.290320836648  
141.368078865065

LOC648570 195.447966116819 202.869364962231 201.480444219547  
189.2642795052 143.342736976496 153.271518348258 128.221548195595  
145.917220112846 150.023791544584 133.411087000196 136.653140842194  
148.391885541349

LOC648576 139.109712542702 135.154441560264 139.328340242696  
145.662818023154 129.189479305468 131.700854556022 136.261907928796  
131.938898032483 133.35096649325 131.02157879562 133.922855125616  
135.758133410577

LOC648581 170.361237529247 171.006582229921 154.479733759712  
198.411812737082 324.713347085998 209.180298459605 204.1974438819  
280.494088228226 208.045210163121 172.783430414523 225.423403713718  
198.226525986857

LOC648585 141.722817732641 144.375109087466 166.741762854246  
156.830156083795 145.117574928189 149.904691068054 151.993651822163  
156.731291756066 148.908758741034 204.544266331066 139.329693510525  
152.479402912801

LOC648590 149.374282007673 158.030237507443 159.611551480901  
153.952788086758 145.304050333309 162.10411532202 161.849023343715

150.279529635193 167.491399614986 157.729732484131 148.760280320258  
166.819234137224  
LOC648596 130.890314257211 151.869928694006 136.466367853188  
151.852294315212 141.315230997077 143.799113486767 153.44628692569  
136.79732903972 137.068717031383 166.89285636895 141.948288898469  
137.913497715424  
LOC648600 128.224742304889 149.532459719175 174.775676782795  
148.656917603142 124.302581985661 161.129770392464 161.408318705503  
158.322477506517 141.730912072471 150.160004473338 156.285963197762  
164.241874094897  
LOC648603 128.931946787934 119.062611098235 129.745892720738  
119.184780023269 140.132816040735 137.476047500852 128.447393268611  
125.924219382375 144.924212639731 132.983739057264 101.713609383766  
120.786630750686  
LOC648604 135.134213292186 127.963701335952 138.715208319278  
136.805379739087 137.398748156909 149.508432746895 131.599370671279  
135.254996386778 130.616175018332 142.601556980614 131.633827974141  
143.31590446076  
LOC648605 183.115511373872 172.142411008084 190.427022049167  
182.453722105813 159.879600154928 189.985520850855 174.903798946103  
175.617504025145 169.948277715908 202.01798254763 168.071171406779  
214.396920524803  
LOC648608 142.916274989816 151.617989938924 137.21606512599  
138.452698593232 144.752418965039 138.293242905081 149.85385474029  
150.513804134588 148.417929733447 155.734509841719 154.491373296392  
148.744599622165  
LOC648609 158.33974431499 141.715307041887 186.156006020985  
180.142758394321 173.287859527767 157.668307146391 148.356726939122  
176.364184489318 160.466187961848 180.667897257797 149.073650082048  
162.122250419992  
LOC648612 151.461857714097 137.687480242109 136.519697160267  
138.343232981485 141.261150586614 134.044789094272 141.987635042691  
129.861693025157 138.070844686104 135.291264978088 124.518818352113  
151.470844748137  
LOC648615 170.95650329595 178.3652866131 162.472783116487  
157.915292037378 159.005459875338 160.828718858381 154.558968826495  
179.687464522203 153.639559509292 160.954017627605 148.549257493128  
134.256243410916  
LOC648620 146.720204808211 146.151639797173 127.31790396929  
136.599305161841 150.914644894869 147.303997146992 153.415901281564  
144.235298492095 148.334425146129 145.154323430995 126.037968297611  
150.343825300998  
LOC648622 7491.93659373205 7771.28016059011 6990.13809515289  
5327.13051940508 10024.4662743012 6990.13809515289 9560.32907282993  
8261.82420896892 7167.29945083872 6339.16392696068 9070.86397918429  
8864.70614223459  
LOC648623 145.610045243277 144.824087631654 131.000186898437  
156.210423316722 137.652358744527 134.489421865495 137.483830932387  
136.685430908977 132.780055030907 152.812142230375 131.894919149666  
134.998632527009  
LOC648625 148.782907912893 151.755205401737 150.191645194625  
136.612903661685 133.903934769355 142.728311130348 134.149446827982  
126.482660154852 133.103403333542 140.229267364503 151.040909999868  
136.869117921313

LOC648626 158.089922688997 138.530236176135 146.701489210289  
143.224678017244 155.119146797226 130.274288258599 147.684875777977  
161.498785105514 136.357788670568 128.402511355513 144.040342300793  
134.294287947795  
LOC648628 139.746733428525 132.955473649746 151.511808301993  
153.251468534012 124.207200622684 126.260691770282 150.690143057308  
158.473244125101 126.110426731941 138.296933822299 117.30724482798  
129.269919529415  
LOC648629 137.395895014456 134.172033051676 135.43119649883  
136.408314486465 158.380964047483 126.960777504772 138.62994237184  
147.176801913145 135.146767090951 138.730409717578 107.156457065853  
139.462804363695  
LOC648638 423.966625351913 396.04031733841 540.359249705821  
395.927222009721 468.060528109338 889.26314145856 678.684323057327  
426.132037075477 677.802147190757 362.376153348015 586.246004571452  
575.546802138889  
LOC648639 145.776143302784 125.839101611277 139.907840403521  
153.083451626042 137.103879676652 152.244018820259 142.924854393401  
145.542888937635 154.951136632863 129.471713415228 123.998343902602  
137.53234136613  
LOC648645 148.253612913109 145.190896872008 158.562631157512  
124.028748209411 137.318442197233 154.918405633244 141.442825487243  
143.764266466204 138.261506562904 155.966610886886 139.414912158809  
137.927403204849  
LOC648657 159.138344477256 161.094103878416 181.722373730185  
163.413365060063 162.57736365619 161.983987604 142.301581642006  
160.331940529151 149.939035476611 158.127523362251 150.52625734893  
160.215396651606  
LOC648659 207.73395131954 225.362253409428 205.476230849391  
218.470365730283 226.824313642101 220.098071755353 340.301980622308  
199.058972781223 196.860228537112 230.620456579897 533.893360199271  
200.017741240426  
LOC648665 129.780648518219 136.770515182612 136.133538781918  
126.964621107029 158.130933580414 140.652086055776 135.993598471576  
134.658664100744 130.967476533254 152.112177721714 136.195555442748  
134.909230280708  
LOC648667 137.335501759561 150.166324293431 131.340453291188  
123.501843029993 144.389805078873 138.205338749495 140.044536042073  
132.375905857023 137.517461260687 127.58382536792 129.880696706381  
139.21825391822  
LOC648668 136.71484425521 139.62718946833 126.690066353698  
138.67221078031 131.878155417065 144.011792962785 137.77601089414  
120.76311889397 140.980119908597 137.322392546784 133.998381302146  
126.673587174832  
LOC648672 170.091913791176 135.829273398594 143.015905927379  
149.907472831817 129.233595525585 150.981208776163 147.570734399004  
143.175483349968 133.389930962407 131.12775424877 130.632096412204  
143.853643511287  
LOC648674 143.180247878507 120.65473121078 141.765004355609  
132.611864316181 125.202468372015 133.651203764842 141.173167283016  
135.57577294564 124.699127988314 156.567519536997 139.675292022085  
137.310014841869  
LOC648680 139.297276687352 158.041568121766 155.785933672918  
151.208728458188 136.929570710155 136.835889180879 164.03801002919

153.041407358576 155.23152084421 128.860744370967 135.193659028591  
160.799950553311  
LOC648682 144.439320591901 149.274901871663 145.760577027524  
145.574725784632 159.710615852435 149.927773276383 142.058086679048  
148.686975104375 163.346402397924 164.513371267476 141.296574431203  
176.830879422227  
LOC648684 153.996429870564 143.712450441816 151.123104810793  
162.900556089071 148.004271319485 152.660373241584 147.988883293205  
167.850516495529 150.2214516849 154.091431691072 161.234304237838  
166.868688936939  
LOC648689 133.768419410758 142.592455241752 142.041992878641  
151.92638745703 174.136806313142 160.30784625946 137.691870502653  
162.536009333787 154.390764802264 143.784022884904 143.874735808114  
160.343551497512  
LOC648691 133.5823740616 136.201103852785 132.183250916482  
122.042136913991 129.77374228644 136.91078498126 146.20028051948  
119.952108688414 154.366071635971 130.041462255766 143.501380161409  
132.223321299997  
LOC648695 185.938983266802 177.151218006672 255.71113398292  
165.320977593677 274.343238288436 718.871732206362 492.05680879106  
461.940616438547 517.020259129974 375.407747753058 315.963526790659  
602.86705608228  
LOC648699 151.387150218354 123.24533179875 149.35848619832  
172.622816559412 156.682781772069 158.738932073809 158.463444189819  
149.247514768446 164.901810642726 153.78976320015 151.06209123698  
150.902548360746  
LOC648700 145.662818023154 129.420716653358 152.452246595937  
132.011199659803 131.310537960214 143.231806900648 133.198832503062  
141.158593399952 132.28931085483 119.517021355598 105.193775204124  
135.429199205506  
LOC648704 143.10996074311 145.161116298118 152.89366585726  
127.486697506397 134.4380641709 129.223293862861 143.031909545902  
132.456945758174 127.941584184869 142.919910421524 133.355353808577  
138.293242905081  
LOC648705 309.318403417731 284.940858938629 369.838429521168  
324.615093103582 225.238369884803 341.43511159996 262.629961694573  
280.749681050778 299.33156125224 262.389583658305 266.395569467956  
298.827660296715  
LOC648706 163.340435089911 154.892452237027 148.673763368264  
167.532512839891 158.565676210997 176.579096613849 156.399808270033  
161.569793476847 158.774910841987 150.029313080668 141.834582245454  
146.779054605199  
LOC648708 137.165966740473 158.767439363085 153.82440233533  
144.335732650795 146.539196738195 165.866987051333 143.550908565401  
149.125425566378 135.343380336913 144.565926379402 134.024205981268  
140.615078497305  
LOC648710 126.132339293132 138.127899706873 117.374025543149  
117.965208293925 144.787836177147 126.5764774133 129.741644654541  
127.996535708833 133.570075399424 130.016401638936 141.553465481789  
130.75707278606  
LOC648716 180.418707740532 171.573342518254 194.092089507551  
175.302832015761 178.347708009405 186.951061159734 170.290455446376  
159.461778054423 159.845890841215 167.157420848604 152.532083511961  
164.665907233149



LOC648718 148.574661934068 159.335990863027 145.112399373761  
163.459718635161 153.597557478169 148.668081483434 166.404164069728  
154.379788206936 155.355051932357 155.168592130392 134.842877075983  
154.161892545061  
LOC648729 12406.7143043992 11647.9643290124 12749.804597566  
8558.70496234991 18421.818380318 18338.3001930708 20887.0399135573  
15924.2167735021 13190.4826009741 16077.1585881362 21551.9994556128  
16642.71853486  
LOC648732 175.044940252247 158.448557470725 178.429953283621  
184.655641182839 149.682150633146 151.453985465369 152.445022409208  
150.878323882503 157.86653024793 145.828229656781 138.637735867167  
182.310140388705  
LOC648733 143.342736976496 147.83240038699 145.802944788548  
146.499065641095 145.965900441953 163.275138097131 151.776232847515  
149.749660071593 143.517327774456 160.335043636423 129.914077170794  
149.560505078257  
LOC648735 150.152613183213 121.989964850397 156.75001042701  
147.357032438442 148.422457879826 151.585818981801 151.428283279424  
152.057315195367 141.137459291428 149.338249249161 138.990971069382  
152.129092774005  
LOC648738 125.063596569451 145.917220112846 125.027095330593  
142.34956863109 129.625046507677 141.91067228913 142.476530302265  
126.94941821459 137.709120153505 131.49254872524 142.916274989816  
125.809027384863  
LOC648740 183.963578322984 206.042395282286 150.156865995098  
158.819151102054 271.468939477052 221.635333304767 294.368406238222  
240.054164412429 166.320461361356 314.557323400201 316.364342983155  
248.085349787686  
LOC648742 136.70715656782 149.959767051801 124.439917584199  
143.028618831382 234.693846527867 184.655641182839 151.277511331109  
150.540599489506 155.388752614336 127.79057041268 183.04531185589  
140.496058408953  
LOC648744 178.007364708903 148.89180107448 146.812248482145  
152.54039461337 154.600966693059 164.008063563113 169.488652117125  
153.843250142472 151.05681004513 153.821728151219 171.481917188224  
167.293320986716  
LOC648745 131.623527073985 174.646321871605 149.17029600091  
147.988883293205 134.624322761212 132.275953817076 151.548865569913  
139.679681813932 156.000732564221 129.888444399067 115.157321350379  
133.757741295765  
LOC648748 124.469415593643 141.946668640749 136.821228481217  
147.942495862714 165.634117939571 146.139817421758 137.20509387214  
131.806645427543 138.580264357741 138.649502040582 135.527445907621  
121.130837254861  
LOC648749 162.61434899634 160.640160107693 182.410688592378  
149.541917326637 147.972383728506 146.235832275574 150.405715534245  
170.568719982587 157.83460319212 164.848970268132 158.975786937923  
150.784262878145  
LOC648751 131.628021008753 123.104790590045 140.802033706122  
143.674737772302 132.268445799639 134.166297738657 135.085039737228  
132.557945249016 129.102182717009 130.651062724029 139.15175079191  
140.175724588255  
LOC648752 131.02157879562 127.50624009248 122.056070994213  
121.810767302322 125.429085234515 139.313456284725 133.65688823581

132.435409278702 133.670967970136 140.35175858015 151.716042884808  
135.25734629146  
LOC648754 154.861507590906 145.902572804249 136.009969058857  
152.29434111068 152.710827148511 135.622888091037 122.449574852865  
143.5709409749 155.873969001251 139.570313872946 144.161672064561  
158.347972566681  
LOC648758 157.446725405803 153.811165696928 154.928072022777  
142.964043764953 156.176537862398 158.906481816035 161.26917182967  
187.550461418888 151.196713920345 260.41082304175 174.221939793486  
170.901599088282  
LOC648761 140.689100728713 149.675363177375 148.525224975266  
159.362293777146 156.61494867164 157.609756554916 162.244691888031  
166.863589702453 151.819220292189 144.019824700027 143.432889871079  
145.928643520352  
LOC648763 130.628967781841 122.442590463781 127.164076119599  
134.896349513392 125.685852196342 139.361120875198 135.57577294564  
143.05872558805 150.945167884077 151.500282404318 130.363516180139  
145.354740501503  
LOC648771 6312.36452724398 6296.24208225227 7948.88765120294  
5226.05969701201 3976.40140405628 3495.66977000028 5859.56559124843  
4938.42484385053 3930.2841381915 7218.21759302518 9219.38828280399  
4088.12910138929  
LOC648775 163.977562404508 147.626071601072 156.973511952828  
151.71942719041 143.639894909386 151.712097221291 134.391386851101  
134.463094391766 150.991991926229 152.887471821971 129.203236898198  
141.858928084825  
LOC648790 142.942021904533 139.981905225845 158.514079887374  
148.808928892047 136.607783800741 144.338069855334 143.996350813566  
145.241301006518 142.390243984362 132.268445799639 155.349728277626  
153.726935957906  
LOC648791 109.793568518462 129.322481607056 164.808139478109  
141.42859050659 160.066390229416 122.329290563769 136.85323853426  
140.26206122305 147.743331160624 128.174382934295 133.571962238112  
129.455347273068  
LOC648792 128.779829252045 135.212715912271 152.221694141976  
145.505223177269 131.87052926802 143.58555556787 140.497181450706  
131.470883854661 145.850605495564 149.740404686695 131.426355444136  
147.702785358046  
LOC648794 148.684855678535 142.099541115973 147.208176455806  
152.323927317575 137.987255649072 150.419668144913 142.556535259086  
134.762169062357 137.429832103492 145.206796089128 133.762141373091  
146.629335531037  
LOC648795 132.933035878334 146.916683989962 126.268418132  
158.477017294725 145.977658128528 127.9575507576 145.641373616866  
136.178501890585 157.568150431884 132.66318177913 131.432729794636  
143.833779139502  
LOC648796 144.358535632993 150.359906271672 147.094123051131  
158.356964958885 130.529367177452 174.593548891693 146.416318806523  
152.555437272666 142.493119780028 161.00635457883 143.10996074311  
152.488480322526  
LOC648801 154.469132478321 154.789187466057 137.908991199407  
140.845958602151 169.061364889307 143.552343056702 153.601918768668  
138.773042747912 134.485835304676 145.272073426254 139.076978731572  
138.341918073941

LOC648803 148.691132137188 140.57567768682 147.581827861592  
141.698329968978 145.837985729893 152.142909854773 130.880795616911  
146.632312874102 131.566892082703 145.106362864355 133.216489794592  
142.203367260558  
LOC648809 119.052729327147 126.652197216347 113.832885222354  
123.574319348191 135.539516564142 117.048846466839 120.106270603148  
128.980519133484 120.441732791854 122.572634128442 113.256481034259  
122.337240239463  
LOC648814 167.776363541939 136.434045183143 159.365070384451  
149.41564356447 173.09379121032 360.90109922539 200.741234443918  
220.047563627558 186.961638857905 131.086904662241 161.34427428845  
181.889592946523  
LOC648815 165.2958475168 165.570531605115 163.636550341231  
152.628220216104 140.680326850085 138.43190460314 149.939035476611  
159.094117857743 156.94531513373 151.858466721347 138.325950428197  
151.338765231607  
LOC648816 132.131378074469 126.862274244977 128.634431242405  
135.064123820327 147.059096208832 135.663734178125 129.394359810841  
129.289216846128 135.385133545332 130.147848418265 127.274768398849  
143.846734516914  
LOC648822 183.255119298602 179.338652960181 195.547320133122  
164.948785167149 260.642170838161 230.672056810885 203.888365494623  
287.924891622962 255.156682699288 224.62335524729 218.18756955522  
233.232319881243  
LOC648823 160.192540519103 146.755803731358 141.994082714379  
164.769320792025 143.810050834214 141.524239210761 132.735371358102  
143.987296454585 138.235127932016 131.789877096016 132.223321299997  
155.899547877596  
LOC648827 156.037150880384 152.303524109428 141.752031758589  
147.915337223934 144.762006548375 147.343712869579 134.865577264797  
135.173464753848 124.284551460617 138.828562311512 132.311344653106  
129.594440309419  
LOC648829 153.345834660643 137.804977813144 146.06054700771  
134.344021502031 140.747015284372 132.782967735893 147.236728188605  
152.93058803161 138.220016828327 148.211354898758 145.718019736542  
142.456527359961  
LOC648830 135.762603711262 136.047032834863 146.579073345319  
133.43362126395 140.319851351329 136.751654856807 142.079184950618  
131.336902822702 142.920939571001 134.860896462638 132.958521136  
125.439033142431  
LOC648834 152.864765895508 160.186527465164 183.708917501519  
163.495175710216 178.728925255163 189.225893411944 162.893396525252  
182.997980582218 171.61704153463 191.322056430728 147.359279533039  
147.393178410954  
LOC648840 122.115925891088 140.925705285169 137.714430743204  
137.587917564413 134.102929804129 148.932696684374 149.061464748604  
145.453460204097 138.701871179502 145.635453468646 129.900540030251  
128.949103967865  
LOC648841 143.572668991313 169.136919982294 175.010849510711  
163.904137395349 170.725486814469 156.859539612504 184.241640200823  
174.787077606165 170.007845523415 165.389652763451 148.439740062804  
169.306573880401  
LOC648846 133.978783899572 131.486917325752 146.739552899981  
140.271557921345 132.686915065196 140.299459596491 134.758222337831

130.938642792468 120.816130267055 141.284962125757 137.656508322742  
133.012692824038  
LOC648851 136.415734370763 120.094156375538 130.860938463815  
124.297848065172 122.320966091375 129.637555509848 131.530256606799  
139.801108744526 122.300069045533 101.915858150866 109.74983281634  
123.153925912632  
LOC648852 3468.14455177277 3378.126661761 3501.86788138647  
2816.29814823646 372.757091748175 2611.61260614408 1144.53002508973  
2233.00694575483 1549.30900090605 1107.29687889378 3130.30693451802  
1412.56164938199  
LOC648855 155.23152084421 126.569482909992 148.758316681306  
144.631407964232 140.182150393054 141.408545519654 138.848119273081  
133.995928435022 141.528115502473 138.370241517025 149.223102493474  
134.46179453106  
LOC648859 156.248684477916 156.330571337475 144.718507303105  
155.702330867056 146.683594365673 149.387467833684 142.688809469455  
142.268018184723 145.270140096768 155.988447182637 135.857403020659  
139.071908528327  
LOC648863 155.569733738768 162.723310549554 169.403422185018  
148.65131922365 158.541906931082 201.441808401878 186.156006020985  
150.294432623474 147.541437871615 168.958694643382 212.730163981978  
178.89423690001  
LOC648868 135.17827963343 126.934059693116 161.678137139371  
135.855243915966 120.224154897296 137.084488743415 128.604270382206  
133.915830295107 125.587057468028 133.075748695526 143.277771142501  
135.227424713702  
LOC648874 137.177271162749 134.330234316896 152.459041674768  
145.797047170492 144.974813243462 132.359319280352 132.249906289203  
147.885769870843 139.97636570613 147.268006631005 167.993851183401  
160.843325877861  
LOC648876 133.834423222601 133.353021292501 151.198928680018  
145.730054487572 147.314687795555 144.900785401228 143.296580629431  
134.341489592504 138.269955723817 134.401733295755 171.650247980576  
130.027227278931  
LOC648878 151.384762644292 140.441521267218 141.08625682411  
164.922193471904 130.112882549637 168.52952604693 158.292581724934  
150.72014060286 155.427282703527 142.605816057276 148.758316681306  
135.797170561599  
LOC648879 139.931971137413 141.849319373594 140.286870147975  
136.927274496451 149.606576415873 186.296882059398 143.263333116046  
143.596530151289 151.445254181497 161.481227197715 129.992015202357  
134.35958389775  
LOC648894 135.244303669342 126.788749235867 132.135448831967  
126.340955733062 136.850940500212 124.76274408368 146.184624424737  
122.94937342991 118.66946078241 141.369723386494 141.004467676795  
130.625825024195  
LOC648897 141.84653748835 128.23432652395 129.70974867852  
142.194507957661 135.448170440824 156.218834695891 136.044670179122  
138.616719975373 148.846121873401 132.964614203091 107.365390754133  
128.994977935861  
LOC648898 133.259321087534 140.377179372804 136.607783800741  
130.138945493943 131.263641389894 142.029398672217 143.252983617945  
139.249869918235 141.431172407792 134.514251897045 137.47514052942  
138.566954604414

LOC648900 125.787353491408 129.966755942173 137.662135592983  
138.235127932016 106.41329572636 132.421863261746 131.973896985615  
133.743708220112 133.07218865002 142.498280938736 111.810575716678  
123.260800590266  
LOC648905 146.261164125255 134.206518622834 156.638070437044  
143.501380161409 140.077307351596 134.260779370821 150.792065744902  
149.135934269866 140.515996180923 144.191491000257 123.826661710348  
138.240874738649  
LOC648907 211.269041187154 221.093229309411 258.532432007328  
210.751430486845 169.984859264412 272.277433294605 186.563913311757  
189.816900281053 194.281839133887 165.181215117323 158.400572147671  
189.389457481768  
LOC648913 129.717701654435 111.820208385514 130.344292132363  
120.35956894661 135.895945142328 124.17231659571 134.415163103911  
127.323157914914 152.052084712417 135.675570204709 122.636980845207  
125.013839352291  
LOC648921 4110.76546218806 4183.06379632713 2900.55309635211  
4000.45196171119 614.094097408035 2580.98143004019 1317.1258783404  
1942.08859727404 1397.84878368705 1183.82018168635 3290.27308365921  
1645.05161227372  
LOC648926 139.527577649638 143.622093679845 151.606932937644  
157.702540365469 145.250076958551 144.954595802474 148.823805841381  
153.848852170776 147.760782452857 149.881708604156 159.085639414089  
157.521230460545  
LOC648927 195.69447353356 207.920724788669 291.313681141442  
202.97197145851 178.766654213173 204.103018614608 209.702683803624  
185.332215198617 211.300733064951 190.045156046541 202.300293733922  
181.294497402507  
LOC648931 156.961070790639 172.741890316331 151.356975600962  
140.391753835434 150.998881139061 156.154079736651 168.547575047205  
164.922193471904 169.052101570616 233.786136606682 154.076216899447  
174.42996813062  
LOC648934 159.561431866706 122.452541100946 121.168550902281  
133.087962519669 119.463337435512 120.748910864064 116.588138374632  
132.69067627743 120.043811428091 116.751145098777 112.404562115306  
131.111930163369  
LOC648943 135.05209575317 135.118955626451 137.681280789305  
137.618447592489 120.050548624975 129.155804800869 146.867740388881  
134.700543462375 137.963531795842 135.467354817201 122.115925891088  
126.50870982427  
LOC648955 133.416938451465 137.858371717399 157.385256442734  
137.495288670441 130.165488538277 134.996443685544 143.256590560776  
139.874118224204 143.913625824599 151.819220292189 122.129348411763  
147.628367263728  
LOC648963 150.517832812714 153.762995131216 146.112388101621  
165.169920299969 134.54796737809 155.548684011748 132.17294083844  
155.134796468704 141.801472885127 164.886944426276 135.58042404479  
181.735072060023  
LOC648966 158.312614511836 150.626826756019 135.333055517636  
167.139257044999 152.429970809069 163.668476670167 151.65364467801  
134.111348656261 154.620194499553 147.78095608696 140.129882333528  
166.376907377447  
LOC648972 134.863223806176 147.666724626127 158.06129717954  
153.714902281332 147.274945970072 168.347445148881 156.224769056915

147.325222091872 160.43939815269 162.192879711747 130.34939602913  
145.773932754923  
LOC648974 136.263658288289 141.670426206169 166.47851613068  
154.156272284591 135.386650538345 139.948097704949 130.041462255766  
147.140771901106 134.788450164055 170.350891928203 118.497920969001  
133.106005881815  
LOC648976 130.721987260546 134.130913969327 128.40650280096  
147.341597963918 137.954283575143 148.574661934068 130.694506122253  
129.075693654369 145.416733388652 141.178668371671 128.346598756853  
134.863223806176  
LOC648979 147.505345299689 136.594736772213 147.766043861937  
148.13657736444 129.711973013336 146.612602970963 139.378915474473  
154.459517779315 160.482734190577 146.247825342634 126.324771800638  
181.783275804424  
LOC648980 328.33387481068 361.26540006942 242.141362101262  
371.819911874273 456.038981546175 487.799854351205 254.63506290698  
425.471195039676 328.078808625906 265.366632264085 282.442528230519  
284.798325549665  
LOC648981 120.602818832247 137.999190557332 136.222421297872  
137.21916902421 112.005939063045 116.038950886552 129.570960882942  
136.154522071917 122.456286448252 119.701313125748 115.520278378747  
126.958366599622  
LOC648982 162.857083430123 164.284396793834 154.993784224548  
144.63774603725 146.197678850188 176.062665550409 152.877058628512  
155.535222310709 155.518807026156 161.417207801991 143.093156971372  
150.845846206549  
LOC648984 210.882890077598 179.211502448703 223.107391048316  
165.659978250378 150.138643811727 179.421854100287 140.951031275943  
152.902458879101 176.912121142015 214.413674287972 184.937088280378  
204.710203150526  
LOC648987 128.386309075038 123.522738813733 141.482344048665  
138.146668191454 126.330382425318 129.900540030251 125.926774314737  
118.414329128347 129.140978620864 120.497796762933 119.242880574306  
133.70941349665  
LOC648993 139.258468432364 139.811873260553 118.375739674144  
132.918979842076 129.573520898314 132.091532692048 124.758906471654  
144.612549022264 122.194493542073 119.112063328364 139.63811945162  
120.507930710099  
LOC648997 133.367085445965 129.57551086282 139.939863187181  
150.163801964104 147.54950981909 144.352987324713 132.875314170399  
133.138022149658 145.505223177269 171.644710031098 137.811304134207  
147.643985046683  
LOC648998 130.309092946921 122.992700222262 131.02157879562  
134.455623159793 147.235245498002 132.680140469504 133.308383825604  
142.166650343224 125.889860278265 140.089210795507 116.95195122318  
128.868894803208  
LOC648999 129.46430369977 135.544048708523 127.763186950161  
139.232893342069 119.733311319912 134.769926504916 115.958740595234  
149.747347428419 143.851670859917 136.561852783331 139.111604268732  
149.147411595596  
LOC649009 172.888455552446 164.39557148282 176.289693941489  
145.544996009633 178.636555178682 188.093450717857 174.866036336378  
181.288519308219 182.725987056391 179.674744176904 209.840035045167  
182.851203073653

LOC649021 117.847744476387 143.080742311914 131.688038068545  
128.955241553429 134.919972250554 130.898067924686 127.492376657284  
143.206100064821 127.540848073484 128.046956360283 149.290007708698  
121.047419779542  
LOC649023 157.898632788579 150.529257416176 148.549257493128  
147.766043861937 163.809967446414 143.052799804962 150.927628184034  
140.165450892713 147.230113868203 149.818888178632 160.164327420125  
140.145470073979  
LOC649025 165.797170648964 168.6016897585 168.878645908397  
164.748676009072 159.781313090489 171.62327142765 158.23562423217  
160.243405030742 154.886628987246 187.710185880162 166.964057265095  
156.037150880384  
LOC649030 150.272153646712 157.494596757446 147.60284257326  
134.97514790642 147.681723355535 151.029785584386 166.872332652008  
155.951509643078 140.548371692813 150.560305000601 158.610249594568  
142.808871284256  
LOC649034 126.526489290128 123.625734357908 113.05681175258  
127.972708116366 123.410467384598 121.95061962467 142.370721565016  
124.232144678947 125.77343813277 105.606964521964 107.205247133938  
148.660440219589  
LOC649037 142.68640844948 138.631273903053 144.448503894295  
141.035566928475 196.001089662818 147.469101571149 276.351810999317  
151.293676705634 207.338645756456 141.38749436393 162.642344529383  
126.33556674738  
LOC649041 126.512613967438 131.275712196961 138.580264357741  
135.291264978088 145.608087633951 144.902807664593 124.059778432167  
133.426356150823 132.902437860565 132.05513812578 144.02511523177  
136.360358731063  
LOC649044 161.501062527272 155.218336968191 164.769320792025  
158.374760929273 147.81143020317 158.550259547851 152.942824158634  
150.920224503051 159.629232808787 150.99622088333 164.256764783784  
158.726115143818  
LOC649049 3093.38255333143 3215.41238464601 4353.66854914351  
3211.2719052157 2910.00269086567 5589.21471380445 10632.4185569238  
6077.64695330731 6990.13809515289 7054.92270618408 5175.17279574945  
9937.36968397141  
LOC649057 134.051756243089 136.095753586495 143.874735808114  
164.962201718762 150.203281104753 133.031431118772 171.465178761171  
132.502153153826 132.685098573183 142.577102697682 132.179747646893  
153.363629311799  
LOC649060 130.870198462514 117.754181884939 138.269955723817  
167.293320986716 135.613240463445 139.140647941752 130.800427334056  
133.197002327259 140.292132023262 143.227410286571 118.891276329399  
135.513494853742  
LOC649063 122.706176540192 158.452089329714 158.906481816035  
144.820843146628 138.467624450885 146.322744971922 143.857385585662  
142.498280938736 150.182173149394 147.608094270078 128.723261477217  
140.518206716196  
LOC649067 121.087514445827 138.060245284993 134.115085057026  
150.701579893607 142.514794686932 122.817695619508 137.006917665541  
127.74861041569 127.478474451121 147.1476865809 124.232144678947  
138.235127932016  
LOC649071 147.919058170753 153.251468534012 147.914242618083  
139.868714816245 153.214696479001 138.295019395552 154.546460872415

130.728465509213 143.860092956392 162.961792330623 144.576510694422  
145.036719629525  
LOC649073 153.776361241587 161.371477511362 161.316521450944  
151.717558541683 152.699431442817 157.227118680396 147.354535468933  
149.25240100689 156.907788377794 136.742206779136 152.340010735322  
146.014790698087  
LOC649075 140.78902818186 136.698189351878 145.114382599368  
143.165150890885 145.82344959902 139.061072394426 139.048016900762  
143.961467163406 142.637421204193 143.756242843438 140.53597287752  
144.117964288763  
LOC649076 15116.95436573 16742.6286866851 14417.2696849334  
18338.3001930708 27844.5606756791 21225.306360484 22750.0246358215  
14592.6308255978 22354.1731362334 18421.818380318 29162.1093037754  
23318.4614981217  
LOC649086 137.002473710189 144.110544384466 134.464053009101  
147.082068348591 139.597493526257 138.299629744589 138.27272971335  
138.909419415137 132.04032925495 130.998637545686 137.987255649072  
152.758653228708  
LOC649088 147.568851471771 148.668081483434 157.688982037448  
152.974593669153 156.154079736651 156.392603045231 159.670815631794  
172.186384820044 159.576585660511 144.224287382131 137.339511714364  
152.20173979854  
LOC649091 164.048326497989 164.098880989592 159.44089105118  
172.186384820044 159.320692108734 181.261666651301 150.623182458747  
152.213746577124 170.497804969996 163.805257266374 151.923356524322  
147.931880092099  
LOC649092 132.659196898439 145.471090720048 134.9404536551  
153.690189121681 143.801139839773 135.349868925415 146.072585331002  
145.187490179166 131.633827974141 138.246963115014 113.005774989833  
141.689210867136  
LOC649094 150.833523101057 134.072912593456 141.196795654442  
137.591469499374 134.372560968918 141.191500203423 152.011551837951  
148.547259731346 140.672863685822 137.897243684023 134.187456260969  
142.37457375182  
LOC649095 162.178410412809 155.108146847158 163.575300618666  
166.754995454382 162.793214727475 186.321879879561 166.272237117441  
150.49183794045 162.876684781936 141.50968031684 129.025000034273  
160.676606760965  
LOC649101 148.956326355381 151.137791721752 157.148880624381  
165.549190801014 131.468537312778 149.964827055916 145.476377346532  
155.945838519586 145.576880854443 152.334669286305 137.73313146889  
151.445254181497  
LOC649103 144.423509403938 133.93015463284 150.529257416176  
147.43089976575 141.205975588506 132.245217686793 143.830319259804  
136.884799902348 157.898632788579 145.581755438161 131.442186260672  
137.907709799074  
LOC649107 151.9565369062 150.519775958405 153.907737500104  
164.678646890649 149.722442994599 149.31020447459 144.411176964424  
169.321832528939 145.82344959902 158.100395482569 138.384797779855  
153.821728151219  
LOC649112 138.478911439144 134.381042390464 140.232244264861  
127.121068682846 130.033927910392 132.502153153826 146.503431281242  
137.959775678716 120.138014822486 131.48517604564 131.004145546364  
140.775447163954



LOC649120 132.404879616886 136.711382832269 143.47200560038  
130.282212339065 135.472135601859 125.371128588617 134.922488718676  
133.939847853073 135.306127055224 123.474836673474 140.85139374336  
146.064523228661  
LOC649125 142.187694439611 131.053007222565 135.913632939299  
126.713610681382 135.535020220081 118.991494185841 137.607767467172  
124.924794564647 111.041656398985 160.70138318726 134.089308635893  
131.711193516482  
LOC649128 124.972772541334 153.095594614683 126.056493244568  
164.276668889213 141.123272165499 130.610414667274 139.001493765421  
144.902807664593 152.479402912801 134.7552564959 126.626904958599  
143.650172124086  
LOC649133 148.336126836362 146.054535585464 139.480361732772  
160.234704406302 146.353239460684 136.285410546751 149.317146997809  
130.621860095981 154.675189522146 141.659197251282 133.777238071968  
147.809934374849  
LOC649136 182.560363283264 171.190796424612 180.354899434843  
177.055023182887 178.464811133 187.63609695026 150.694215349678  
168.071171406779 162.54008293513 166.627372924295 145.68886453261  
170.028047334267  
LOC649137 139.760425990939 142.993401965852 149.267019532847  
148.337793323867 129.578488688293 142.09146795308 158.756424011719  
141.067419336609 149.722442994599 147.196687432745 132.54355871539  
151.739221728872  
LOC649139 131.575356402693 129.394359810841 133.869867161978  
139.925201225224 128.297879410629 139.044150521333 134.06996703302  
126.045231525329 134.633286312653 140.32909969607 133.902707525069  
135.556943919872  
LOC649143 161.338215647108 208.587188476069 174.707059022891  
174.100921524023 144.675182563174 187.550461418888 206.149539851803  
322.099431638246 315.786908578669 283.807827536147 208.045210163121  
171.314681729657  
LOC649144 168.611652451329 164.870860592068 165.471587934831  
166.143084832472 138.726894569892 159.334165651951 154.600966693059  
162.297999435613 153.836520485018 168.838723365068 145.551717838423  
162.914301705151  
LOC649150 10250.645112753 8581.41617729997 14938.5975217303  
8140.6363797934 2886.92690692502 10704.4678928541 13423.8921651885  
9560.32907282993 9219.38828280399 13563.1694195379 10170.8669218992  
14798.1358474998  
LOC649151 128.209771391087 143.407371444437 129.992015202357  
133.885725703056 122.508761687823 127.255966406144 133.299599411025  
120.665520347481 141.052322220012 116.802432258299 130.541449457342  
135.085039737228  
LOC649159 124.625603721372 132.587392944892 123.849651946683  
123.02879683948 129.295956874012 123.952494134263 124.536322123442  
129.445240570626 131.029333093048 130.955161943331 119.608334527504  
129.527271401014  
LOC649160 141.357668647617 155.608876496443 147.668990552874  
145.048033586779 149.832456450186 160.608674893418 142.655287071175  
141.647300896529 147.289061374598 138.802633518223 126.137627769256  
159.59942312149  
LOC649162 148.195611015135 142.456527359961 144.340734361996  
151.351938656508 149.876687693565 146.156634581799 141.381186911604

129.961042190085 146.639556437847 131.794065532001 133.403409882362  
138.082870754768  
LOC649167 140.26557508894 154.21623304309 155.383166865192  
162.240414467004 154.300058278533 152.163489631563 149.657951204528  
148.82034800623 148.031899566208 147.565485281003 152.210867113591  
191.937607311711  
LOC649169 187.993907528473 165.863118584978 241.453456707114  
180.619956937489 195.160353691349 223.941946219233 211.468099571442  
177.023536553193 210.852300463808 222.794196053536 211.626970008102  
240.497413647633  
LOC649174 153.136863548105 173.281506912652 164.673579538023  
170.306241656131 164.678646890649 168.660907237558 155.441190892146  
155.168592130392 152.182968451691 163.104822161892 149.193437559422  
167.719651771357  
LOC649179 136.370317464946 125.176747824384 136.996535765175  
141.446916444258 138.53403492914 145.159572111039 125.091038614268  
123.312000381122 121.110498703017 131.704192327287 124.113451627593  
129.471713415228  
LOC649181 138.807031587657 137.710725379804 143.720044122451  
144.685707282641 134.142423026264 141.696969082758 153.209409960324  
145.68886453261 142.976123206776 148.373866613126 143.434571922656  
141.492458250787  
LOC649182 138.055909969804 150.46669393448 146.996442729408  
141.992490695142 132.437234970375 185.519000961898 158.07640654075  
145.318539677981 136.040524807653 148.356726939122 145.967685593635  
148.22974445263  
LOC649184 134.237133546276 133.372231702721 132.948096807634  
137.170666175895 143.775739569887 132.223321299997 139.435000959919  
124.910390240995 137.737908250097 129.489867764242 126.820834043224  
162.812665683603  
LOC649185 131.510494315469 143.452992974333 142.33269270703  
160.349557404154 143.336538157639 133.954514563283 150.734560844391  
131.532660547328 139.54738445816 152.593934787262 130.069789939568  
125.75980494927  
LOC649186 151.379761514526 161.983987604 174.313718712035  
194.22713184875 157.423242850568 154.38209765671 179.369845168822  
153.330348038066 162.294114485312 155.326276840738 158.10628865476  
165.350777445902  
LOC649189 142.711117470317 127.131870007594 142.171459019791  
162.056622258216 135.800997202323 132.184217000689 143.899201949317  
118.807135693934 151.59613008133 125.26492723752 147.16778072296  
137.756209496729  
LOC649191 129.462319953515 123.955819747616 120.311723366684  
128.413213851142 142.500537230642 125.525241361472 120.280241193135  
134.346754381858 114.987285062108 135.844983721014 125.195549796301  
125.584202037776  
LOC649192 141.174971007547 137.71280215369 141.414384085164  
137.109541758085 148.336126836362 154.512619892977 156.774097885381  
134.292099546804 153.945472622857 157.215331288102 159.185616602396  
140.626181314061  
LOC649198 138.068164255305 132.996622574111 135.807494668545  
151.406384541297 147.870549240703 126.711037295629 135.325617701062  
130.761936205169 137.09814291566 141.767311448808 127.669334230458  
152.134895623504

LOC649199 148.237980436128 153.214696479001 156.597497458992  
134.086301127594 165.48594766783 146.984888309556 166.88833169342  
135.632298302036 172.376544221034 138.239251358245 145.45097990828  
161.799743586569  
LOC649200 158.322477506517 140.73456875677 149.020824600931  
135.143532936828 153.498332327444 141.292421722594 152.772177215856  
157.162523271165 152.543005423742 147.863198012238 124.110446144763  
141.272049404557  
LOC649201 136.792957035581 141.772724512502 181.950658782069  
148.11536596061 148.991357883449 163.059196519365 135.787323859105  
146.446922196868 150.599425944486 153.22516060649 149.121894111871  
160.419358656559  
LOC649203 135.47852126603 134.93814894432 136.274199465472  
138.841385034636 143.996350813566 130.977864137459 131.580226088647  
132.699715693605 135.544048708523 132.448602065824 124.370381674692  
122.194493542073  
LOC649209 194.998142472864 189.472541628897 194.112534914308  
203.586310608403 203.852316712377 217.940575516933 234.370850809531  
205.381840116054 172.438141471784 237.216435972201 240.439368352772  
193.858884443593  
LOC649210 153.481752643937 149.068713925139 148.707332454527  
149.289021275556 166.506602328929 221.796935051107 135.111066946207  
201.569913451219 320.024259346646 162.229052648595 152.146033353926  
163.256472113745  
LOC649212 152.486212022518 132.009764966246 149.710337205986  
135.795717307603 135.30767047671 146.70298187005 167.993851183401  
142.419777428399 140.850680024381 138.592350416584 126.168223112165  
146.635140441079  
LOC649214 166.187099519035 144.617654961472 141.176376265078  
143.015905927379 160.319687451789 145.666712006532 141.947478902603  
151.204487316077 143.030777754448 138.701871179502 151.783090997855  
154.127346849182  
LOC649217 152.277810621542 152.413389525982 145.983627592197  
156.531951576859 124.859984709406 148.544887355857 139.617608585463  
143.528208105237 140.868946922293 133.561188057423 128.606360476298  
134.769926504916  
LOC649227 154.528396813382 164.87433908877 167.278879415171  
165.411052799773 146.740694608146 143.222342904886 159.90466743683  
155.255279503782 146.479009988445 174.510523238374 132.218907367109  
137.990806386929  
LOC649238 151.130401750721 131.322008851059 152.385014030957  
144.839170491334 141.920967855989 152.127001840405 134.56763097313  
134.244658505187 142.667173697017 149.297012645798 152.620244087653  
151.78607484924  
LOC649242 150.792065744902 140.45860949168 145.532712030342  
149.639835429332 158.396149470397 166.355086055404 162.678619800767  
144.148833164952 139.010652831798 137.093170378295 136.181791404331  
159.148717478277  
LOC649246 164.948785167149 152.717642489582 162.748836971539  
162.18174589792 152.6969498938 176.802886129341 153.143706194386  
155.899547877596 152.624623171797 159.379420001197 147.301909062399  
169.656238760589  
LOC649248 127.769405736754 124.424565172377 154.388776919015  
133.259321087534 132.8310947234 120.263659727964 160.632809953993

128.925288777749 139.714198638713 127.427014611349 141.937611082276  
143.454771158075  
LOC649255 125.865974180252 118.173752075833 162.018860183534  
151.411708598688 146.347213904792 144.731299077209 134.449083873514  
141.67277923437 143.211127738941 143.519786615253 146.436141034941  
135.985358106767  
LOC649260 158.455783755247 166.872332652008 210.199788806189  
144.943192569086 159.746802905903 178.819486867379 212.223906015932  
175.199369463703 177.793860516896 201.969002368045 159.620467672898  
262.913054904154  
LOC649264 134.152586955217 147.114698384834 140.330400168187  
136.047032834863 144.522461545204 142.896723827753 147.519991961858  
138.28374062778 146.411873503163 142.920939571001 150.058160923921  
140.644800545854  
LOC649270 158.989652405732 159.48526814715 159.811778680604  
161.099805358232 137.15288362126 160.364644321965 159.856190281237  
167.912321820083 153.568321662387 183.676020826291 145.186696174423  
170.910998705968  
LOC649276 129.077660633761 140.688570032068 144.937697857147  
135.494894933583 137.020473156363 152.454414703534 143.614075503775  
139.987681290389 134.825699448987 137.877756077011 152.842777535666  
129.485710719291  
LOC649279 119.733311319912 119.984301761327 130.209752198964  
126.241307445165 128.282999719959 126.176505541577 124.786029449452  
117.449306773025 124.01558540593 137.956295878287 132.680140469504  
120.514672572565  
LOC649280 135.585648980469 139.109712542702 121.792573534134  
127.629258006335 121.084348994747 137.504147221623 135.15791174418  
132.469190523971 137.840396641618 118.488997046932 159.788143847569  
131.460388562433  
LOC649282 140.411200873743 152.990523860831 152.213746577124  
162.55521875551 155.63328143658 144.474814266475 158.150949554785  
143.512348693556 144.769824608083 142.984243805285 156.13331481937  
150.319052894567  
LOC649292 140.641956393993 131.440195723963 125.231476412101  
151.773749014775 141.463324155943 153.554159360954 145.799530970042  
147.868721324602 126.182856027765 133.576812299149 138.945855414918  
142.301581642006  
LOC649293 130.326980619676 143.001661958814 139.771342253058  
136.5680632044 137.260359343758 126.056493244568 133.753999983813  
146.047948193303 137.838096997956 153.582185523361 155.741507341843  
156.557792402376  
LOC649294 145.937733795336 126.430816528764 130.2867846895  
149.968749911496 144.468333012278 139.329016874967 157.295602588814  
143.58555556787 128.806964077824 148.600270795407 135.056517225198  
138.594435323838  
LOC649296 161.451253146578 165.376358421533 160.518055978242  
166.404164069728 153.200153031275 165.938009275308 171.896929562022  
162.739253457398 148.192121257421 155.233830396052 140.50127034921  
153.603765998461  
LOC649299 131.466580723837 123.678365506247 126.734835642553  
120.560056224145 138.064951932825 128.775477649887 133.736252068443  
126.935731176024 119.233300586525 130.98982984989 163.081050585097  
146.84891312893

LOC649305 140.669947387892 145.025703051661 164.332073056902  
141.872426752329 142.937182720493 142.524413202292 151.823845684041  
146.65668813596 150.112549201892 151.615675144083 135.539516564142  
153.784923783551  
LOC649313 131.657454325126 133.226542641174 126.676875319815  
137.632470240792 144.523620416439 135.106072664488 128.174382934295  
121.705065573911 111.336798977475 140.301945597122 168.935348409102  
140.195820033314  
LOC649317 144.026432356249 133.12641302705 139.752845127584  
142.382367938838 132.043196381009 138.692057950694 125.013839352291  
123.98775110588 123.478896502015 140.615078497305 114.452922529209  
123.839006667113  
LOC649318 132.413527125434 136.459509901229 156.508428796592  
133.862203806529 132.475414208533 154.755544586846 130.925881698601  
116.670491972948 149.31184788671 146.052153515494 159.944547924357  
138.313519292093  
LOC649320 140.171749368266 127.058373069911 126.110426731941  
141.647300896529 116.378552206652 121.801291293249 146.04584032214  
137.453705355364 130.59670974887 121.480455781173 125.951927536494  
123.135918415235  
LOC649324 157.717145014769 133.771691580031 149.502132524093  
146.493927564338 141.40690581885 140.508390945342 134.0676461327  
136.001505582342 150.035890574132 150.321059418799 148.627264102939  
139.633941983246  
LOC649327 122.425065110604 135.913632939299 143.141852982371  
135.351344868436 140.36278240974 152.409211647994 134.58799530734  
132.291157461345 141.963297887448 131.345038923753 111.860763079995  
132.310147451479  
LOC649330 196.310746973798 177.976550224863 197.326259802349  
176.497706091676 214.162670073541 185.165469121763 176.783978625103  
204.019377262081 221.82340413039 238.344676327918 250.406775889932  
218.031238893075  
LOC649337 151.340728221261 126.523201566273 137.71627781928  
143.360311218423 134.865577264797 145.599152743156 127.257502314385  
140.975056186954 134.442947822188 130.657342262492 138.692057950694  
144.858656365799  
LOC649340 149.119815471009 148.797226586765 156.224769056915  
139.459975305985 145.396723478249 165.919497521143 168.974155750959  
143.277771142501 152.301556397498 142.776295389006 140.708683675555  
137.784270510433  
LOC649341 138.015301767961 142.567737460006 141.838206951224  
158.226547375305 133.604705630582 142.888281750232 156.160899295182  
135.148723192316 150.184863108453 136.198583459346 138.033668840392  
147.673016541108  
LOC649346 145.45768403614 134.389518389888 137.350851760173  
140.760983862166 137.550607284001 150.761696482387 129.641627630494  
139.3864057463 142.442450622311 134.233014993992 144.513730107393  
134.010031592003  
LOC649350 126.5764774133 117.420765321056 129.223872979789  
137.642858036384 132.744261207073 137.16842164453 126.228513847262  
132.07268641595 120.329105003959 112.884916986215 123.235136639469  
133.707285280448  
LOC649351 137.146961654597 150.496616601699 156.032346112587  
153.248199842194 159.040409182674 170.298291784762 153.181097279473

148.317958829244 139.229351251973 134.927386619223 124.897463208595  
147.736397115265  
LOC649352 114.122395647516 120.394220715157 111.232274546928  
123.678365506247 118.215641556163 108.179513318734 119.859508630454  
119.005230164124 128.933672074497 124.00806841872 115.231121959397  
113.262357892613  
LOC649355 157.915292037378 159.638436599987 155.794309652357  
156.427158441352 134.623264303227 152.057315195367 168.013310840048  
146.652641667543 153.587737758431 160.251996476232 151.613134875009  
170.313045875402  
LOC649360 136.645091356305 132.975603230163 118.393203921859  
123.059971161711 125.110064579814 124.090268443064 126.964621107029  
122.664353374047 122.389557272277 118.912989775436 143.955817294375  
124.595925483149  
LOC649362 163.438043894189 159.646538408414 162.494429648551  
139.46518859956 151.228823957828 161.365443930448 156.949439724914  
155.058852833902 152.395272857974 205.244843885276 140.477307701027  
142.383045950613  
LOC649365 139.241145027974 153.075594260208 148.304863957659  
149.520911664673 175.139231359014 136.287909668938 167.776363541939  
164.299585578035 162.210235526457 173.204163917896 163.119211741255  
164.942652212218  
LOC649366 125.539199863559 132.448602065824 125.413619056436  
138.171858105728 155.8871985642 128.0805889548 126.919867899174  
150.907594445048 160.082087242964 188.475801713801 136.341358916638  
139.484551562098  
LOC649371 145.754504160436 151.115031304764 159.701028026285  
152.26903721278 139.587192809431 141.129013595331 140.184082384548  
149.867541008113 148.027464692171 145.306369509684 134.95415308911  
146.293735120772  
LOC649374 140.166362760327 136.022614387461 143.182399285928  
150.979493278455 140.223599881961 142.167918879613 184.223623297663  
159.683695366575 143.760519659724 121.455843337023 140.460927375243  
145.254692995502  
LOC649379 157.891350650633 154.070450565144 141.244589488591  
141.939368369872 150.835044630002 158.928949614338 162.766038656637  
145.226278521493 145.193296081527 153.474566767304 133.459221120979  
148.574661934068  
LOC649383 150.765477999064 147.182394557583 150.734560844391  
161.80922869659 139.237360556305 147.143407224469 145.619570216377  
131.062360037777 147.659772694732 154.177340021162 141.416706868124  
136.370317464946  
LOC649385 139.181131600753 141.431172407792 149.141033677244  
151.442463705271 123.563243360247 145.726651022813 120.693808603805  
130.601241656346 138.165240772401 137.840396641618 136.494339004002  
141.28700484445  
LOC649389 145.323212897142 148.673763368264 141.261150586614  
135.598709185334 170.661808797506 157.134782748175 152.150445265201  
157.776321544382 145.085091507228 143.363002903815 136.061992660698  
159.113259830623  
LOC649395 152.303524109428 135.481300250507 157.058912028958  
150.924948809354 139.874118224204 152.024383072265 146.135269553731  
145.106362864355 144.568417378353 138.295019395552 130.025887107138  
142.822594215168

LOC649396 153.423579724911 142.155463269751 141.121364213272  
142.765490244223 138.295019395552 151.705219298578 140.772074031028  
134.13812854554 147.053391763304 152.646642492666 131.111930163369  
144.175551691291

LOC649397 145.826955036113 133.82548013342 141.552315273863  
148.306990501663 148.47676851933 187.784865705837 147.473875763319  
142.088243118644 151.891318080151 145.235087732482 152.185397218918  
152.099431258333

LOC649404 128.83022039037 136.188868917386 131.876061826583  
124.461997520222 131.846160346403 116.416896654975 123.852299272249  
131.996032643928 127.412539650291 124.93629294955 120.585506729733  
135.554736716321

LOC649406 110.820329153348 127.361974492821 128.297879410629  
125.738320262644 146.018097597373 139.981905225845 129.940297696849  
130.751522895053 127.800634041606 124.818436949131 129.389420352857  
121.939618902165

LOC649407 146.373162751863 110.735199684144 138.601616246182  
155.6299578128 136.124385992905 130.085138325818 140.121874960672  
127.507557925713 143.996350813566 137.644942697483 132.966873990501  
148.005500924157

LOC649414 127.806138997958 139.513752499004 145.363692072132  
121.705065573911 171.376976179465 164.791545858875 140.554684822646  
133.480196904786 138.405215507471 153.350690419636 125.967294930279  
132.920775987309

LOC649415 160.159630699959 163.346402397924 160.887121295848  
143.477670915091 153.711354087243 153.228048041467 133.743708220112  
160.256877369493 157.844617425219 143.123983359386 130.270184521521  
164.191906588579

LOC649416 149.545278163222 156.490654498766 164.491207767654  
173.563363508314 174.301952147167 159.59942312149 161.139253742858  
161.250520154112 148.688413944868 166.671563123047 154.928072022777  
163.426663985855

LOC649417 148.003041725027 138.594435323838 179.060189557496  
150.682964448325 151.808767243647 140.999877170481 128.411138850655  
159.52833930625 150.812739240232 140.597877909094 155.715728894101  
149.383429241903

LOC649422 165.890492422031 174.491551019128 157.180095329946  
170.602603155092 160.022481227931 178.531913384538 169.466129742085  
159.615233521257 180.142758394321 153.399787997793 190.625250757654  
158.014017648839

LOC649425 123.789035728194 117.958297137758 126.620889938532  
124.347680638586 117.696262292883 130.452929012459 116.839796680107  
124.588594750916 120.148189532583 124.385193388896 122.068058346443  
122.624828884731

LOC649428 149.622695843398 150.0084730766 143.322199505844  
143.959910170676 158.104336050835 138.370241517025 150.529257416176  
145.163084967499 147.382177739631 168.483273292464 139.925201225224  
142.024171830924

LOC649429 143.763292219833 139.522018789485 170.998961353556  
159.473580802408 151.308872564827 144.547778247596 161.325409589612  
149.959767051801 144.602386056543 132.923237903246 145.424827607383  
131.963419175907

LOC649431 122.921245774755 120.148189532583 115.619116556625  
125.121517583946 109.932577444858 112.75167046116 115.224011128183

127.951403055054 118.410091682499 125.509221735447 137.563246867433  
113.370762349233  
LOC649432 138.850077456103 138.002258986172 144.396774242135  
152.868787961804 127.83654093961 139.217113811817 131.780134634616  
134.788450164055 137.199718376452 128.075865243385 133.590552542806  
134.803612821519  
LOC649436 151.615675144083 146.192761134077 146.994103804515  
127.485734862624 133.241744350369 139.991780068793 140.619606039582  
153.649235507812 142.560797028716 135.268963938932 145.698637908482  
144.328571856869  
LOC649442 141.218832234405 120.96098661114 137.913497715424  
136.904851056919 142.930903395131 155.550532734718 139.921002429353  
129.792548588929 130.728465509213 141.84653748835 140.763592237598  
133.728378162206  
LOC649443 163.542848861552 164.50490221903 150.763810844645  
154.070450565144 155.558839375761 154.366071635971 149.048057509964  
158.400572147671 170.801761175916 142.005703694973 158.377396672742  
151.650777127117  
LOC649445 148.326282600684 151.245520459264 144.840218312168  
149.515244034237 146.57274511202 153.636804025106 149.449402325556  
159.936703616817 159.055956234445 152.990523860831 165.781667492391  
174.221939793486  
LOC649447 5080.63091497522 5165.90865799172 4819.85672511343  
5175.17279574945 9514.74328718935 4979.31150268741 7902.9189607838  
4081.13406129846 4923.36698713285 6894.63087357693 8739.02966610274  
4663.03253705034  
LOC649452 122.075440298074 116.369395555451 142.788848338402  
125.519298131694 121.036054511761 126.033673708286 111.525984720592  
126.858621735156 124.842426851438 121.031695489398 124.717079082023  
129.408282688425  
LOC649455 119.079680805247 122.075440298074 126.421148348261  
114.755442050481 119.567911704298 129.931923954109 130.317604643904  
124.621381699241 120.77691423934 117.735411259153 121.212521750566  
131.019345449516  
LOC649456 202.504840299605 167.67952650068 222.820391338687  
179.250373572781 167.900071375885 161.475694690038 197.112749959833  
251.704037951295 172.020235319192 145.261662166215 180.881464829981  
174.962380276394  
LOC649458 134.11753210296 129.640303191006 130.221351857959  
117.995551728392 143.834501071806 123.791515424464 134.698857213208  
131.897352210959 132.291759474331 144.311620064675 123.643292039274  
130.187833435052  
LOC649466 156.427158441352 134.239416179248 132.146027935802  
134.222453538421 116.685023927951 131.820842728171 131.679566454851  
127.040027125755 135.771423315597 145.363092168648 123.004137408444  
137.893630842968  
LOC649469 152.898148619937 144.433543176593 158.598999414864  
150.542478166361 137.726769003181 158.047112652223 148.118705147238  
145.044563826542 148.770315933249 138.367321366804 135.776154891006  
160.628894266843  
LOC649470 125.162662242842 139.508029141287 123.940632366675  
123.368137868951 139.513752499004 121.770043509503 134.206518622834  
124.362182111222 141.374831983971 122.696382705233 119.147377347069  
124.837187124441



LOC649477 124.207200622684 126.533083459283 132.17294083844  
139.502856192876 126.714455673392 134.446758753426 125.339305282874  
131.643633737316 130.850419527271 141.418737063013 127.03153185998  
121.681261213422  
LOC649486 146.863611516518 158.829144564361 143.60570420943  
139.851678406637 157.759149893048 160.67285689491 167.389632521521  
161.813099560175 132.978746105877 156.66832364923 145.632060621034  
134.036236880951  
LOC649489 148.943735606315 154.433679792749 148.209164900319  
139.197364191101 162.312313953026 146.739552899981 138.049846456876  
152.709021529522 145.665155500862 155.124158030085 137.864637728155  
131.210866639392  
LOC649493 158.7912155022 151.531667383273 152.640683776403  
176.980780681976 167.130843160309 154.617462666847 179.250373572781  
163.480722123193 151.026905311756 170.370934381883 160.799950553311  
175.757588503244  
LOC649495 130.827726862159 115.734230176652 123.687439699754  
127.811923445503 141.919263493165 127.132970760907 133.814720785534  
138.16337207876 149.026243159195 124.28033876033 122.013040475143  
126.442999559539  
LOC649497 139.162076054072 147.915337223934 153.719751724358  
159.603586227897 1689.00127592755 155.752117896424 184.954673605577  
143.444109491884 159.52147764862 156.339564110766 126.288011849541  
151.293676705634  
LOC649500 159.159106382346 140.457727109762 150.36160186175  
151.522526161299 150.775805918537 140.914966429342 157.87020867396  
150.3259737066 157.446725405803 143.204058393718 148.846121873401  
161.134322621805  
LOC649501 156.727153398506 143.388028226208 155.883386742315  
152.413389525982 137.629855378016 141.166605868578 139.253721683078  
144.364319564075 146.934990457666 141.892214695902 135.521802085177  
141.010588053284  
LOC649503 138.331509117817 137.141081365469 147.994386096925  
139.041005010106 138.340652133783 136.303510503231 132.551989498706  
135.357424384319 132.005753222789 137.185243517766 120.272964182307  
147.18948282156  
LOC649504 124.170242736875 118.235640920527 126.386738502885  
122.111982327877 137.423810400996 138.654301345398 134.642898234003  
127.084267631845 128.9481574913 124.972772541334 156.280701500421  
140.630844296177  
LOC649509 140.479321382192 132.184217000689 151.174536186463  
149.277880094957 142.872683795338 176.761123480566 149.799681364551  
151.604093626944 140.453219944445 149.473505461585 119.285026330891  
146.018097597373  
LOC649524 152.067897082883 155.427282703527 136.580363776109  
137.975369568585 150.238582112636 144.181359740481 138.334626498686  
138.60849268758 142.278523641008 149.689071018094 137.146961654597  
146.257923971069  
LOC649527 145.210787864362 140.091378604453 137.509100088226  
142.354731066206 127.566369352079 138.514356748249 136.691234705997  
130.001889950186 134.331420680628 147.706402141169 121.174618503873  
148.069725041021  
LOC649540 145.002309193867 140.632573759426 131.277646716635  
123.281489592543 131.153457976248 142.715449859191 150.517832812714

135.336754997434 135.409613764459 146.915247627846 132.664379033058  
134.031960707639  
LOC649542 133.181855719499 136.91779948054 135.118955626451  
145.335830265052 142.599815022061 138.341918073941 132.786500984297  
131.086434891752 128.129780978486 134.053685488055 147.395335979341  
140.071879210324  
LOC649546 145.997380100999 142.084294087481 143.67880977119  
160.567934923347 143.305848051593 133.141683141696 150.931114848235  
135.513494853742 150.313058722346 140.269160279333 135.670409501435  
148.454344601562  
LOC649548 13190.4826009741 14037.2575989329 12171.1997841553  
11326.5935775813 19806.1316481524 13423.8921651885 17568.5229948989  
18953.8127741918 14651.3379687477 15354.74541236 16818.1954169657  
13324.7465248375  
LOC649553 552.494327858264 453.926991868451 966.281849197568  
476.641032594868 561.062594540005 889.054356462993 1004.97723186946  
1299.4782626583 941.572186137467 1101.66868138797 810.396770151757  
1620.7954553764  
LOC649555 237.521746704115 215.98963200839 272.41397350779  
202.643624039869 263.058972886829 572.753294955207 427.637083424453  
461.413469623811 499.683188662742 510.659785046811 270.421697521366  
540.078145038497  
LOC649557 137.322392546784 150.336115779606 157.013200713587  
143.252983617945 137.850437814788 150.874014332213 148.199249855894  
133.436057118148 132.413527125434 151.083551412109 137.134190411005  
142.508525378171  
LOC649563 148.094036534405 152.042744996136 156.534634574244  
148.936888662374 166.14867551435 143.333211390741 148.306990501663  
154.512619892977 153.498332327444 146.533374238616 146.398454169593  
157.78390301218  
LOC649571 161.922462797736 158.14434287956 140.595496714752  
168.897620634337 142.339740800356 167.92409473064 154.916023131856  
165.376358421533 158.221595000183 161.24755274554 142.276853170778  
143.574584852426  
LOC649578 153.267549449395 151.829217512763 169.903088388196  
146.448568700393 163.175801793143 147.813170436139 147.439303942026  
156.330571337475 134.224781719944 146.517645037071 130.365804613342  
136.598215718877  
LOC649580 170.320777845496 172.345201438148 159.424105896749  
170.941404165185 148.350919010575 150.456500446175 180.096239155058  
141.413350601693 158.135321157995 177.84188738734 167.741556663724  
163.769959129611  
LOC649583 168.365262340217 163.500384982242 148.603077434646  
147.442483242063 145.203083375014 163.967616022079 150.059011513127  
167.442950045855 163.81485578613 155.651798065702 127.532665057083  
144.784835438567  
LOC649584 131.294930860752 149.480971898888 139.949563856936  
126.620889938532 138.611074796816 138.308965237491 157.955606242401  
142.367003292264 132.622032754473 128.56000638844 140.180208418327  
168.982086590306  
LOC649587 151.295855278218 154.426605816862 145.176141415244  
155.496190048502 154.007244208673 164.022021048626 150.019181654237  
150.180037731272 154.973990421257 166.415922313464 160.303394115537  
164.696616863082

LOC649593 135.114056458478 127.532665057083 122.408016372747  
145.557869163993 137.125637347852 142.493119780028 121.322817570375  
126.391083453973 140.311843829601 120.752194675024 129.859331207247  
131.702788057359  
LOC649596 120.436408685057 123.347836436966 115.524441144063  
120.55570440025 125.452973441746 126.042731009527 116.112013454335  
128.417571004317 127.736712231221 124.889829874126 120.300291760091  
129.123522999226  
LOC649604 147.868721324602 154.190469538568 180.54598082867  
160.402220755071 154.33224999163 171.384487293154 169.744100665038  
169.631386764054 147.754489751457 161.084088366981 151.327544435847  
153.681775929182  
LOC649613 150.053948736789 156.702300398105 163.876218743322  
147.230113868203 155.855564068891 203.87884605779 153.893753448473  
145.219057535246 167.830629616121 167.114291248266 137.522792377933  
177.16711492983  
LOC649616 155.648782851696 141.006540481119 151.245520459264  
150.412929574507 140.827965102541 179.109090120497 164.208044717557  
136.074837228096 152.422690241301 148.431101051574 149.848740870148  
155.080900277147  
LOC649618 166.611809859059 137.634298014431 157.844617425219  
143.41350503793 175.51767355303 162.110943457969 153.202157381228  
155.803946849495 164.905467905433 133.101674466013 148.134642821094  
151.106858426994  
LOC649620 158.92538634742 156.4687904356 133.583297305219  
155.561821955048 150.314462939164 136.202953030465 140.914966429342  
165.682617337317 152.035992124554 179.376968970326 165.789846154721  
141.050384368733  
LOC649632 150.019181654237 135.188445928844 134.904123162692  
144.02239659305 138.097213860574 148.663860923774 133.699547652179  
128.803632055969 142.437605582605 128.870079563075 154.433679792749  
134.992686224944  
LOC649635 116.310166003024 117.449306773025 122.941711366641  
125.193729067011 137.745887988474 111.196610704726 123.703840971923  
128.952986088886 104.483909687253 123.21112178671 129.111259771449  
121.499802749899  
LOC649639 251.665539319612 197.667299074218 196.839016616283  
198.506786870804 149.535008475427 153.131271100637 174.491551019128  
190.506201184419 168.244523461915 141.259186690966 146.602252563413  
166.533191390639  
LOC649641 139.796168741191 156.448355269561 145.34533633425  
141.079317977197 134.942448433004 135.9489027281 132.313884627836  
137.618447592489 138.395943168158 146.986891588172 130.195234920895  
119.029186503752  
LOC649652 136.641140715439 136.104965836123 127.135199316758  
129.689855810051 137.102353661381 143.47200560038 140.334331111538  
152.872139211415 141.67550758321 148.390417679848 137.384815877899  
148.627264102939  
LOC649659 114.76337651891 128.356453959987 132.899305777714  
148.130993521745 148.26621607986 126.659859384257 151.118430469429  
143.626857507866 137.262309660909 136.508969220268 129.717701654435  
118.825948323992  
LOC649660 133.186678625229 127.226937898225 172.857643600385  
120.255081121925 138.555443236183 123.182903611854 124.595925483149

131.823019555685 137.038866196785 120.501697624977 129.987548571478  
118.677203713024  
LOC649661 163.899808733609 143.377902352319 152.725025539491  
157.415211954103 155.018009545475 149.035590153457 161.00635457883  
169.441789096441 166.239339129505 167.130843160309 152.743680985848  
159.48526814715  
LOC649667 120.325985681299 134.626371781978 116.397855001959  
119.281300456243 133.252140649104 115.80245224388 137.767900781368  
123.21732068638 120.977480111735 118.631771242606 132.450954427876  
120.450111018432  
LOC649676 140.083495854322 130.101422420432 129.400895994387  
119.651470884046 143.137158027738 144.087004064416 136.683683776616  
131.890554636938 125.20712393273 126.823886603295 152.993555372242  
138.911993471119  
LOC649679 187.550461418888 194.445463745418 175.065781438801  
244.5675215931 262.389583658305 181.288519308219 172.677083810424  
184.111756696658 214.396920524803 206.571433405844 205.226635237992  
172.934156790775  
LOC649680 155.938283930571 143.229240978574 134.728594388428  
137.248465324584 152.088488171996 158.002906093899 142.199182392836  
141.539503634005 149.535008475427 137.336914480226 151.289464845626  
125.253637835638  
LOC649683 150.856917125736 161.325409589612 134.750046135498  
147.250700603067 141.865758685796 163.781674803361 139.948097704949  
180.902950045351 160.281830914755 138.944595164363 140.844007965202  
151.687402863648  
LOC649686 162.320894555337 171.487594589922 160.949030247406  
155.168592130392 163.579282884905 163.542848861552 154.564478911791  
152.461930328923 166.830529779692 163.362182585182 134.927386619223  
154.366071635971  
LOC649700 150.835044630002 142.122556679441 156.050585687098  
156.497059936271 152.78638215326 150.401509081265 153.633095853017  
155.615655460277 146.787927492706 145.09909498449 135.463385553776  
144.748564682545  
LOC649701 140.861849838223 138.726894569892 158.829144564361  
141.561769570516 136.596127228365 165.103398617203 128.200531810126  
134.728594388428 149.795655754301 140.719388544476 137.944260488223  
142.017169259522  
LOC649702 135.781190598068 136.755975832051 133.345143691828  
163.653662369257 144.233097828078 140.689631427359 155.924471321076  
138.426531345939 153.457715729768 147.588213090285 151.846610656503  
150.029313080668  
LOC649703 132.608622131443 159.879600154928 137.618447592489  
134.961156870831 144.46549577902 145.314204192565 137.159781458748  
147.216303852902 152.717642489582 137.017882995262 127.199124606827  
162.933658389727  
LOC649707 143.94044082267 141.455841055881 133.544149685358  
147.348400730286 144.221488906376 140.916876460413 129.13353785479  
133.728378162206 124.802639338573 134.725434838052 136.156548919515  
129.179188863839  
LOC649711 153.922713834296 175.41089164969 160.303394115537  
152.001155788544 143.759171254761 243.979769719186 183.247396324425  
181.771654391653 188.724274062294 171.595724119779 172.980441569522  
167.083758835476

LOC649712 145.34533633425 149.589901372799 150.95033946042  
144.436358527414 145.632060621034 154.886628987246 157.013200713587  
142.397433929092 158.834483073542 160.870390779084 121.709375771276  
149.286184588967  
LOC649722 173.272062328378 165.200303470106 182.763057221385  
164.417770955805 154.584367902971 149.147411595596 154.469132478321  
155.349728277626 155.371772547395 180.590215659031 145.797047170492  
172.057586741925  
LOC649723 142.110469428644 164.057147728625 141.722817732641  
138.464793389999 133.64938083537 162.994537815938 133.788197693571  
137.361967082029 138.28374062778 149.731486951892 213.634295832535  
164.558875058199  
LOC649738 127.150222504237 125.467668442298 119.387459594521  
148.67584969749 112.502812746669 120.329105003959 125.447209413787  
127.057574934679 111.568329540016 117.672645717508 129.065491477375  
116.483432723207  
LOC649745 132.799355149191 136.146383365709 142.106329280184  
137.179058645907 128.957236136715 123.434963905308 140.726084514407  
139.570313872946 145.029298288869 140.388212037661 121.860428893248  
141.198692540628  
LOC649747 141.585172896047 157.595468761042 145.411264691728  
137.726769003181 136.293084080479 153.667355714857 135.05209575317  
137.025625133986 135.281686411685 139.289968250444 141.213588194832  
144.252481420079  
LOC649749 148.879605388902 166.040918339519 152.28262533486  
158.113794378426 159.082447644277 153.778409339975 150.431052959951  
151.821324922628 150.922279808832 146.373162751863 116.7299185256  
162.203570429542  
LOC649752 141.189008902155 130.173734963758 135.292532783991  
142.500537230642 127.869038038293 134.406692724353 126.887989471803  
125.304045138994 137.46978401237 138.224383646894 132.206133020786  
148.590732065459  
LOC649754 144.905870145004 136.557466007228 151.3362561751  
146.165632086981 157.14512525321 163.726898336284 148.260672564835  
137.363483527372 154.856345114916 142.830950036054 153.371065247493  
151.204487316077  
LOC649757 133.675029107803 125.326393776938 128.033383607545  
122.089332300031 135.63604256516 130.521731606987 128.194171809998  
132.659196898439 132.560292119968 142.419777428399 107.863971340407  
133.348510114432  
LOC649762 142.133238886052 152.927956172463 124.933738341123  
129.253638326633 131.580226088647 126.578035793406 146.291932367254  
132.05513812578 132.057808599068 151.776232847515 131.956481591804  
151.128838696891  
LOC649765 143.596530151289 134.201392031199 142.680136733947  
155.330215726109 144.428776560885 136.039076665712 130.977864137459  
122.083357581665 142.953661611418 158.617209794418 128.84676695859  
134.528971384442  
LOC649768 144.961976523279 143.071933285651 142.543569032033  
134.741781820234 151.2639801322 150.613624696604 144.595393134144  
148.370331097467 126.934059693116 138.675023495021 151.665244763743  
151.833386901811  
LOC649770 146.016920431468 143.488761023636 151.327544435847  
162.642344529383 142.768691899824 159.775479686193 148.016402654687

138.624689897665 141.78867917709 150.215811815246 138.905709709063  
149.666293193219  
LOC649771 123.563243360247 127.382266838772 124.947565043721  
124.310436914027 135.989816139218 154.368499839507 128.197031700084  
132.100026388604 135.32160992961 123.11447940203 128.878051599968  
129.366567668463  
LOC649773 129.38021642675 135.020690381988 145.395042579024  
122.087107663865 137.587917564413 162.047249964859 144.961976523279  
138.858138379065 134.604565335211 141.244589488591 136.115306932124  
142.481897141275  
LOC649775 136.60514429355 150.148902196995 143.999000471746  
145.165443106042 118.650091706226 162.117224868654 141.422441104854  
137.337681987169 133.897397228615 175.262884960324 120.633217745524  
147.720061897962  
LOC649783 135.137615432923 123.474836673474 127.615631240096  
137.141081365469 128.023203858837 130.797498958616 122.517559025268  
122.095978653755 134.70848693317 141.094578556895 146.442734810495  
122.903428611669  
LOC649784 139.831964368637 140.572442284673 149.487167787687  
156.875068435974 123.02546895475 126.158204790885 158.63432604978  
152.29434111068 144.016137459279 122.204249636472 133.865312257398  
137.814391189269  
LOC649800 144.36575644625 139.232893342069 159.674396591041  
158.98007855379 151.526337610068 151.833386901811 157.779441363536  
155.383166865192 141.828740140733 159.977528879208 143.473523258521  
149.196539425588  
LOC649801 196.399050990244 189.092674335503 250.766180970907  
191.335616210093 154.695060071104 158.647814364392 164.769320792025  
167.842122798757 166.671563123047 197.034073391478 178.885625009973  
207.545424360094  
LOC649804 122.763138007612 135.758133410577 123.547821639269  
130.43775024291 135.609239096236 147.677900030844 132.381685434931  
124.066239570648 136.982719190537 117.003205777245 142.567737460006  
137.933122094638  
LOC649812 130.742940708861 142.607578275494 148.404000406948  
146.90847051471 143.571804980507 156.417000271727 138.094719587545  
142.896723827753 151.164936050256 137.350851760173 138.598167973067  
147.865114383296  
LOC649813 143.484004107893 150.19577351885 168.697565122105  
165.154844613899 171.229729917612 182.508415915215 145.70726782469  
146.869927141655 148.222477811166 153.78045746564 135.330241638301  
151.554352209634  
LOC649817 133.939847853073 147.074807267102 175.313689069815  
155.108146847158 148.424970450231 161.83241639654 174.737828693216  
148.463566046951 138.296933822299 159.346890686719 144.48495176385  
140.572442284673  
LOC649821 4228.5490138553 3253.76017336684 4262.23145131525  
3378.126661761 1496.0924333403 3024.62888503536 5032.66681917478  
3149.26998719015 3200.61067185412 4437.40805296517 3570.21370790206  
4055.40322213638  
LOC649823 148.288798428149 152.834894011142 135.161667673191  
149.547635666621 167.629008083436 139.621016978072 157.512561489621  
151.470844748137 158.708054164813 150.617039206311 147.305679046765  
139.049085468313

LOC649826 179.411426984263 163.534117903837 154.764283765316  
172.237115475147 155.490897312915 168.753660955229 159.49930229951  
154.143331594812 155.004104153679 152.11956441072 150.829439012542  
182.248178961707  
LOC649839 213.584269089596 242.037132958656 229.835576260403  
164.433462115832 589.722914993267 248.299149406938 485.731287873723  
249.858562350415 246.355720496468 426.995700632434 737.193295872614  
365.727197088581  
LOC649841 852.926365088632 993.34112647221 331.215872600406  
308.031816782343 150.28508305615 254.552034511333 193.052112923573  
402.299165610893 207.902853533132 344.915370555826 414.596948083067  
210.199788806189  
LOC649848 151.973681370675 131.244759170642 146.249951130016  
149.726968520487 158.760577365464 161.155280539113 136.720837676326  
145.172776053 149.97218338771 161.983987604 163.764600217347  
160.839277476397  
LOC649851 139.934460900409 136.764881711137 136.735930829008  
170.465177938235 156.357126871243 142.397433929092 118.100611964852  
139.571752933877 152.09245741643 159.936703616817 133.559082256772  
148.782907912893  
LOC649853 158.221595000183 169.561657768387 193.554028681854  
175.617504025145 187.700723296295 265.829122816166 246.594244983507  
185.447093292348 165.143417235314 169.561657768387 172.245089970803  
192.153420834889  
LOC649856 132.375905857023 139.291775075915 143.105974876327  
149.082061203661 143.40955339735 146.932655562613 127.876894098781  
135.878996521596 156.477249817844 149.936366672592 151.340728221261  
128.329985147034  
LOC649857 137.752238510249 140.431591727649 127.265211069837  
147.359279533039 123.042372128864 126.969504644414 138.354300118735  
129.633387503618 134.372560968918 137.748443205818 114.39161822971  
124.964977322158  
LOC649858 141.54943189147 136.169525758215 148.980330875743  
144.678895821726 143.484004107893 147.519991961858 140.021640936288  
141.88072888667 135.565256045133 156.846991384413 143.360311218423  
126.775180133301  
LOC649859 152.654938328424 159.223980639045 167.194306682927  
159.110614190088 230.697077917675 187.352655464866 193.48293264444  
177.759729226623 190.5930909277 158.113794378426 149.783542909965  
198.166270627544  
LOC649864 169.800006803362 165.932628858503 160.655929233978  
147.955701866515 155.563943799824 131.237720549768 154.962835391567  
158.708054164813 161.129770392464 161.813099560175 173.892380305166  
183.397833894087  
LOC649873 132.782967735893 142.483308497682 138.993251266382  
145.409722106953 137.552979154943 146.194467350201 164.313238416498  
161.371477511362 156.176537862398 193.641927801805 200.017741240426  
225.387674139093  
LOC649878 146.664285015996 148.938822951404 158.602687876661  
154.388776919015 160.543465620248 145.299625153537 153.801971958265  
148.564655847496 160.989242461839 142.732625557628 138.48552149031  
140.236618351922  
LOC649886 163.19340939648 147.838660813476 141.422441104854  
169.132693907633 145.89593390936 166.788336808924 160.32812671237

156.073428882485 158.359440014674 160.186527465164 158.56996905631  
159.951697830252  
LOC649887 132.340183565771 115.485515429446 123.072413274454  
126.295856316628 126.698158279472 145.739537463907 124.723519607109  
130.880795616911 155.98413216883 128.137646789236 128.280225530201  
130.388530183353  
LOC649891 173.879952136931 165.857032207991 185.938983266802  
166.9499656083 152.791390145148 149.929454280702 150.503278880269  
164.910911528819 156.481871341275 162.793214727475 161.26917182967  
162.254062646631  
LOC649896 132.063395162855 123.839006667113 133.909219998872  
127.648224668964 139.6391154169 129.511465164539 136.664500207966  
127.540848073484 113.644993086829 124.336297973344 132.442771000976  
132.098421212796  
LOC649897 208.42712014566 185.843639043466 217.148957110623  
207.514489132778 181.453575300661 234.980382243116 211.483693299981  
189.070238523683 184.071078414327 198.94325874493 169.903088388196  
202.887417145119  
LOC649902 158.072347847051 143.796699867588 134.262346867514  
137.552979154943 151.80632463295 130.712515995658 149.233023751582  
151.796986456254 142.89427871125 137.536053775531 131.074021609161  
140.073208365817  
LOC649903 129.715948793051 130.238231520218 127.336648342283  
142.603436693587 128.486896700405 126.401775332213 130.40517506216  
189.225893411944 149.563405421366 118.230408871812 134.517774302213  
122.751674866182  
LOC649905 132.461730873857 141.78867917709 139.654648891206  
131.01107240791 132.958521136 140.294369532861 148.337793323867  
123.728481007459 123.926293128246 152.155760355248 142.643027992419  
140.009593108693  
LOC649908 135.108420614547 160.164327420125 142.175432631861  
149.63291071048 131.444734367396 136.052640679977 161.640122360448  
138.399665664034 140.2533871084 146.666759322506 130.98982984989  
160.876228450608  
LOC649909 140.000880942015 132.053242760381 184.071078414327  
145.077517845584 146.366013190845 162.383584508358 165.900156600776  
157.86653024793 156.16485596016 168.744610747563 137.206961927035  
145.315875226867  
LOC649910 124.35721327773 131.38692240237 145.636906369786  
133.742490937191 145.459919416288 135.025907096066 142.03837243998  
141.112047881014 123.406144497577 137.634298014431 143.27200789709  
147.813170436139  
LOC649917 226.841838641151 254.812605074045 284.13865992802  
254.359737178714 140.804008584006 144.259643132933 142.399253818882  
159.584350289413 132.668344126625 148.332750352364 216.880896769751  
178.045931314857  
LOC649921 137.024230648861 139.42531690926 136.092086452096  
129.267923706188 129.633387503618 133.311212623667 137.342348963288  
146.132506246152 134.167339482867 113.077691687266 137.322392546784  
134.883708339914  
LOC649923 158.68792959603 147.471494294543 158.272071464923  
141.16066528405 501.738490253982 183.397833894087 190.45739385453  
3684.05513498098 3671.86460903374 440.203336761263 167.906766146651  
235.091443641056



LOC649926 143.011042973347 162.857083430123 176.145076825955  
169.378422829858 170.052320640686 147.117286738537 176.138621462315  
166.563411635721 149.117224130576 162.472783116487 150.529257416176  
161.050438117555  
LOC649935 127.792241991414 120.62139061084 121.350491314441  
130.637567221512 150.300824086322 126.186758919929 123.946808975704  
129.265788005518 124.794260959228 132.098421212796 123.046069309901  
122.490271802207  
LOC649937 128.425838805072 128.973904070983 120.428171428188  
125.515479324107 108.984922760455 115.958740595234 117.766156390814  
122.813441348997 138.805103589625 110.562310620515 120.39039576721  
142.148597793651  
LOC649940 137.669753723768 154.379788206936 138.279775054156  
134.545983176488 142.874797429568 144.777043589925 137.491366243256  
158.906481816035 153.366677608026 135.390226050803 142.556535259086  
142.365009028839  
LOC649941 126.026938396257 132.765942975939 135.05209575317  
145.003104989017 136.398521726896 133.348510114432 132.014213378179  
135.075759558051 131.657454325126 138.458816023289 137.027334042585  
138.376176600064  
LOC649942 137.996291911198 153.78045746564 140.453219944445  
138.519129384809 140.578378782903 131.711193516482 145.855671447779  
135.648906382608 129.949894903048 145.158039427157 117.930665298163  
135.118955626451  
LOC649944 133.935910746769 133.093234861388 145.944809232038  
137.229871801676 141.862767428244 153.700168798494 140.885915460425  
139.637148328497 141.84653748835 147.760782452857 129.507297276862  
124.261531006131  
LOC649945 139.278366709094 139.878752507646 130.058902161953  
132.034701177759 137.408247668043 147.809934374849 136.085524091635  
134.516390697561 131.700854556022 138.088712695622 143.976395954528  
121.643036773773  
LOC649946 1873.84654908146 1823.53870218167 1887.82245931444  
1196.34528225417 2891.03258768937 1474.70984232307 3721.86725798812  
3528.62443098065 2146.4265920569 1589.70261092241 3309.66193624859  
2320.41293992992  
LOC649947 142.053649707364 143.745594527046 144.642717750351  
140.628614910068 164.191906588579 136.049167597016 142.869595099569  
158.809865241567 146.795608819024 160.519366617702 131.975248488461  
152.06044555622  
LOC649948 133.857996630836 112.599970121166 147.736397115265  
142.228042097379 133.52971984184 123.13812550459 131.239986488033  
120.809659457873 139.597493526257 130.182320154521 107.260023460914  
128.194171809998  
LOC649951 152.030182228463 145.608087633951 143.579660352652  
143.877226672663 134.161664663192 155.83143112621 140.16233428205  
153.241806795134 158.531514776098 149.657951204528 129.737882221259  
137.493436771898  
LOC649952 142.953661611418 123.75974844367 136.984172424718  
143.558088035758 134.942448433004 152.552277008504 136.48748813417  
143.165150890885 152.587331888423 146.453030317456 126.022145004164  
143.327234875417  
LOC649956 150.455271137811 138.576978828316 160.215396651606  
128.578494940165 140.955772094739 139.625635881693 147.015427944761

136.475652722007 145.306369509684 152.910433120981 146.633627492419  
181.400788152988  
LOC649957 152.362546746522 144.501995579502 197.859546367676  
195.141733146452 160.78368986036 152.045391611927 166.540134051424  
150.403702679274 160.799950553311 140.84880167881 155.988447182637  
156.813992534584  
LOC649963 124.132215738502 151.451443480833 145.393431956588  
148.989286668424 142.179197020805 162.735609734946 128.899712906082  
158.410170507412 141.233642252649 165.244616507084 148.522580898717  
141.046537113211  
LOC649965 122.773736159743 133.663595328149 136.457424070709  
142.607578275494 155.899547877596 142.872683795338 135.268963938932  
133.34207595093 126.603552416008 130.406895174038 142.088243118644  
125.506466437764  
LOC649967 135.954961086609 146.42288214248 138.081268025435  
156.290018816692 133.647637744785 139.406427549733 147.590189238316  
154.938900278679 141.073316497949 151.525267538284 130.51901676405  
151.803707178383  
LOC649970 175.442400672352 197.205792984885 183.951404362826  
157.81831741292 531.421912541822 561.251860964966 552.790706181938  
369.513420606401 821.465895280454 864.161191021297 393.579552385074  
1310.60610806797  
LOC649971 129.610980807708 124.059778432167 135.18026749895  
136.101501973431 119.974853329265 142.192934622228 122.512587751135  
128.76720970745 135.987450822209 133.333067546558 125.301602026407  
128.197031700084  
LOC649974 130.630504666374 123.665983073461 149.857861968652  
144.321757243275 134.361949431678 150.891358590974 136.623658204558  
145.45097990828 149.836491640473 131.01107240791 126.090985925439  
145.799530970042  
LOC649975 178.304914997023 149.164469334038 153.011923016494  
159.236429097777 134.208537331186 150.409919207059 139.739448838436  
160.27511502306 140.855078775719 148.396148091332 133.74741832303  
148.624135810148  
LOC649977 136.216577685046 139.625635881693 155.902461107328  
151.846610656503 144.155591092387 160.168654167074 155.427282703527  
157.415211954103 141.389330839189 148.812015298003 145.414563914801  
154.027862576708  
LOC649978 146.091822904705 152.331011756244 138.246963115014  
138.308965237491 133.845056524142 168.588120398433 145.517559593811  
141.299677389827 135.217240511902 159.997580819443 130.511042322504  
150.247639459773  
LOC649979 141.622592268163 137.146961654597 144.559193410932  
137.662135592983 160.79631681714 143.477670915091 159.159106382346  
140.951031275943 138.489443610941 147.161720770972 129.668506092785  
147.54950981909  
LOC649984 169.184111483933 136.452338158252 159.824012085212  
132.28010415054 157.940873610797 149.227646026658 139.951275828765  
152.452246595937 143.263333116046 145.198638080646 152.898148619937  
146.488402397597  
LOC649987 133.292854943218 123.607412609763 131.865164933746  
135.058525398122 146.481298877242 138.855454645579 132.399633003253  
145.34533633425 129.649043291997 126.05295868521 119.573635447638  
137.16842164453

LOC649990 166.320461361356 161.569793476847 176.198555355383  
146.457939801041 157.885229749634 159.046016068252 161.310855691717  
158.33974431499 155.715728894101 176.579096613849 170.283532007581  
155.71830087869  
LOC649991 126.50870982427 145.941674563997 127.128042857811  
147.510848198689 136.497295707149 126.588382665802 146.486480663438  
120.827732270626 138.106499370074 157.337193457189 127.026168862919  
141.522701487198  
LOC649993 147.760782452857 130.128585442593 117.392898601408  
126.033673708286 134.676039394438 132.54577436954 138.082870754768  
140.423711213355 132.206133020786 136.90636489391 128.137646789236  
142.166650343224  
LOC649999 159.287816317316 165.767629164724 189.225893411944  
174.807363753172 174.560168983121 175.469375624274 179.411426984263  
177.716742595321 158.130933580414 174.187510325385 159.223980639045  
167.640645997754  
LOC650003 165.139423820186 188.20675818131 195.863843860549  
177.793860516896 228.524222740306 291.994364783888 140.827965102541  
188.348499229585 162.620593985693 154.124057382276 178.3652866131  
127.644315207178  
LOC650005 135.275284142536 121.248923222807 141.209958892647  
121.239461514704 114.242056888286 130.71040889651 143.426053070219  
117.652693591865 125.818432070199 111.525984720592 128.626051185037  
143.514848892447  
LOC650006 149.110300099889 123.694678408411 140.781647532361  
148.842322753916 135.713266118447 128.482976013813 129.969400693456  
127.945144368504 132.079255703621 143.546629073997 120.270397272069  
141.436235043864  
LOC650008 145.426171336045 118.21084414402 169.909886347082  
159.977528879208 173.056715623574 153.059432055089 154.828782972852  
149.004343851423 134.801507994667 137.850437814788 145.562772839517  
145.658251059524  
LOC650009 138.594435323838 153.339992195184 128.925288777749  
149.385103319547 147.114698384834 131.97938329944 154.239755912437  
134.262346867514 134.341489592504 170.516743115762 127.820096020782  
143.451080466172  
LOC650010 150.645487532549 150.763810844645 145.25774926819  
143.737021989907 151.961811748754 164.158913914661 138.16337207876  
129.782134019986 146.462544135666 154.38209765671 152.064982697394  
160.50439457257  
LOC650013 134.239416179248 129.311134743311 127.760995691556  
139.897320032723 134.369532556726 120.638330368388 128.040201586267  
130.443360119099 127.354826381656 141.004467676795 125.885715928839  
138.970853057174  
LOC650014 130.009322405768 116.981243525714 149.94715601106  
139.746733428525 125.063596569451 125.512431901925 139.480361732772  
146.276706674761 141.112047881014 135.884635448277 110.935688075738  
144.642717750351  
LOC650020 177.103802332144 125.631073476381 157.81831741292  
161.903016201041 196.399050990244 165.009696356892 179.779007442837  
155.488346781292 172.641322197031 164.455111983634 165.092451754065  
164.057147728625  
LOC650024 119.261305304165 138.21083121895 148.274122690409  
133.524698103972 130.376941311222 140.464476678448 141.555366493541

146.014790698087 140.775447163954 146.9554120076 133.66893163718  
134.838366830668  
LOC650028 125.809027384863 109.669517182289 112.904318310632  
140.490023670841 120.397683153445 119.911515364639 129.875986080057  
124.048926099805 124.638075441482 127.282374513433 125.500790447338  
125.606269267903  
LOC650029 273.911741951291 254.607324522225 304.679197422439  
307.264586007015 539.720389702148 319.352940751688 402.026356201632  
306.773350448741 376.791876040886 252.171420358437 312.019603761673  
379.200576951933  
LOC650030 145.483667452136 136.720837676326 139.089444892187  
139.002932985183 136.578058206829 147.725396196054 157.615017085961  
150.971453664961 142.812521349963 137.694556514044 149.18603646016  
152.601626526117  
LOC650034 168.183542846746 170.370934381883 159.115391667901  
192.512661648653 234.339913501761 185.063870458561 219.441959146815  
170.684848540493 182.181756507598 206.098534554876 177.96452209396  
223.722742062251  
LOC650036 132.422453311845 140.079516848788 129.816385177336  
141.808122700968 125.810756286648 138.304793826214 128.052753068991  
130.314247368361 142.833025633146 110.138220982557 150.346002924933  
112.800733398209  
LOC650037 157.952018720438 145.684294398911 138.274057264688  
133.634886800037 167.536828038178 141.681266095578 158.434048174501  
157.035739033122 156.774097885381 157.907190910755 136.504438803108  
159.738700107615  
LOC650038 128.528510920423 153.5256657638 146.890877830248  
122.343979874508 144.237691418911 129.697584673736 145.154323430995  
152.97753810644 140.624437508178 145.28524062436 111.908965758799  
129.573520898314  
LOC650040 131.33321167357 125.202468372015 125.815256068004  
155.55288776049 118.256000539093 146.143941384453 139.699189528879  
134.772545694636 146.174492025087 132.631819830347 136.287909668938  
141.980728956046  
LOC650058 154.900676756492 155.530415929059 144.062079886084  
152.524106827617 165.200303470106 173.372949622338 159.997580819443  
151.64806573742 151.639515017015 152.927956172463 136.927274496451  
144.201723591119  
LOC650061 153.432933930805 154.969503835593 149.106615763242  
134.988545581219 139.127442770828 149.556644928013 143.616189776965  
148.062245676711 141.245471037222 138.386391726042 135.87026484074  
159.895303363094  
LOC650062 145.401101974736 149.788558681761 171.935132459373  
155.27707167384 160.939530665541 170.251197850968 171.494975393562  
147.299872426498 149.244970309131 147.264690436042 131.7646616214  
198.760049629983  
LOC650074 138.934516083124 127.084267631845 135.315732654507  
141.353084959289 124.359615295938 125.181327386534 132.677272839165  
136.641140715439 121.429270259367 139.171486871664 116.011005504201  
127.179420421981  
LOC650076 173.675115244522 135.762603711262 146.71868686671  
135.25734629146 127.800634041606 136.770515182612 145.411264691728  
142.882391486465 141.735123971775 137.074564265915 138.313519292093  
157.337193457189

LOC650087 143.290642777702 150.176942469551 135.135834717193  
151.569335275477 159.724824188037 153.947717667689 142.261639670072  
156.085949215738 157.419333185365 148.237980436128 140.21908493941  
166.22013573342  
LOC650095 175.084729757407 160.211460008777 155.566065673542  
167.958792571511 171.006582229921 188.641397688261 171.751149502172  
152.194337248455 155.007516124803 169.107948050094 146.880440100898  
174.364798143068  
LOC650098 164.58158284856 144.007071548045 162.337707154123  
140.067809125008 164.61921356441 158.598999414864 159.544710238172  
157.668307146391 151.96843908074 138.29167712246 164.14265547147  
146.056723380149  
LOC650103 126.288011849541 128.997028325896 129.896711442418  
132.649409216699 120.456817031716 126.700147643 127.706499722854  
144.931901042924 139.39112068213 138.528083984177 136.832494876249  
138.968690339299  
LOC650107 154.600966693059 136.333928675403 149.579428189895  
160.499355902773 148.155692596378 172.951567541592 132.469190523971  
167.55209828062 151.3362561751 161.909145741021 142.939578759097  
163.290050020756  
LOC650111 142.728311130348 159.094117857743 166.346572488391  
184.437810305792 189.082778234831 154.261443597434 187.993907528473  
162.762473039474 176.008711524598 201.569913451219 153.734347607222  
188.013181859196  
LOC650114 160.473772347376 153.171822092714 162.397078614596  
150.353355068625 147.034021626893 163.248980088946 157.269049853539  
164.665907233149 159.282348516052 147.155738185574 145.524305076788  
154.445840992357  
LOC650116 145.63870792125 171.706534562905 152.60462513339  
168.906637816046 154.834679562341 155.317754378283 177.688568435599  
160.240052678401 163.053121879323 163.636550341231 163.146581498065  
147.245636620228  
LOC650118 140.10798818623 129.408282688425 134.89415027205  
124.031916322066 124.775529469869 113.816165294487 124.711578994973  
116.987471433258 128.367370419533 129.543069836687 128.087991226561  
117.646963986512  
LOC650120 151.629999903069 134.579005092929 129.656088836537  
131.543439103033 176.289693941489 156.259214645427 148.715065348779  
158.716575777014 155.228605554943 161.090443294391 140.634047988278  
162.513107496558  
LOC650122 156.787932134605 139.991780068793 137.404525565336  
138.149827158817 139.317133739334 155.813740201987 152.28262533486  
139.285128128996 144.746134643761 130.874283538818 151.132586978278  
146.506263412584  
LOC650128 846.425467119342 927.478050257292 473.947538805454  
577.33849844574 374.215345412947 1006.24899131914 724.103864917969  
593.639955546556 409.073045356073 419.047108206042 576.873245313776  
684.866405921987  
LOC650132 171.254015232189 166.910561772689 211.34069504665  
161.596086502946 149.595375008252 179.973655632636 176.670752486376  
170.497804969996 182.165681034082 161.112906953532 153.206468539619  
181.062188174871  
LOC650137 149.795655754301 112.790552379447 146.563078818674  
133.511698282195 155.964242240771 142.999526950651 145.770601609392

127.777945516765 130.880795616911 143.342736976496 128.72727523654  
127.509583634884  
LOC650140 152.826356673175 160.92643755328 184.655641182839  
142.160941592768 144.794806650252 142.648205566485 134.676039394438  
165.003646188775 149.687372584136 165.70840218273 127.765987130281  
122.317877997527  
LOC650144 127.333963230749 126.100454068838 128.029736384348  
138.848119273081 119.651470884046 125.334995649504 119.622243247836  
114.3172128566 114.726808450831 127.900901613784 113.852849454448  
114.242056888286  
LOC650146 146.077082896858 149.815494316469 160.690442125281  
171.130215858803 137.119730820553 158.16210235723 148.437676259828  
148.342114514468 146.83577460518 149.582406567077 135.325617701062  
156.090871391873  
LOC650147 160.992494552269 154.884821436554 158.359440014674  
167.484236948415 154.229914729772 162.716712951629 166.662801900754  
157.821491577808 164.14265547147 169.238325933605 136.201103852785  
141.497125111619  
LOC650148 145.99474597064 140.236618351922 131.921799405427  
146.261164125255 139.065849548762 136.993102884269 140.714455864886  
143.700865823615 151.178586065066 143.35902319003 135.550882872661  
135.550882872661  
LOC650151 150.812739240232 161.250520154112 137.146961654597  
144.943192569086 153.687536747147 144.675182563174 152.729355306724  
126.468167800414 152.812142230375 163.22480684222 152.581729298159  
160.48993837044  
LOC650152 2637.62596741408 3334.16277752222 2253.7522632414  
2430.70635781622 7218.21759302518 7389.95365139168 5008.4888270731  
7433.03226979876 7016.12801650552 6548.65498784806 6508.71638048514  
8342.70113690382  
LOC650154 156.61494867164 155.535222310709 142.085297109435  
145.68886453261 146.194467350201 138.45137517137 132.895500657638  
144.295556086504 157.316941011117 160.876228450608 127.74861041569  
138.30326146769  
LOC650155 165.424516708502 165.496065029161 197.605208310432  
186.345823604119 158.73040336393 191.830711714844 200.017741240426  
196.922837906592 206.620708230452 180.468984099647 180.867208892996  
212.171281020103  
LOC650157 482.857203798212 471.510683045651 475.927798702033  
417.865461351681 602.703887178113 688.915534194306 849.158029646233  
792.247301083075 653.264945856916 1340.79810963983 1032.4540300024  
1430.20038077595  
LOC650159 138.220016828327 123.031945101045 151.526337610068  
156.061579024549 141.289009185018 156.114825514646 153.67215573765  
143.120621855946 156.022967076728 164.890716656336 128.08497128067  
175.670738308809  
LOC650162 147.706402141169 137.923852688695 121.076652800015  
125.522498880785 140.296609941747 140.18668846839 147.260260687975  
151.345630073141 137.450774903611 128.910261453632 137.844113743956  
136.151754558226  
LOC650167 165.134931755194 134.56763097313 151.755205401737  
148.760280320258 129.570960882942 145.09909498449 166.904990069484  
153.78045746564 146.975258859244 151.312853764675 143.46919253255  
147.717748449017

LOC650174 145.797047170492 123.703840971923 142.700311964178  
132.021249712589 149.357617406983 140.244052740397 131.753135000312  
152.28262533486 153.756213924949 134.825699448987 132.828179725129  
152.08574341962  
LOC650177 127.962546712222 149.933919274985 131.926504315744  
143.279331050175 128.597272557033 151.276193269421 136.504438803108  
143.140502042489 124.019707408094 131.755881982599 137.28323311107  
130.399501479248  
LOC650180 128.195916531413 146.278921849776 127.558034562151  
144.581747568524 130.543453631154 126.815367402778 153.481752643937  
124.995087711332 132.790039196443 149.500457158616 134.091723054647  
134.850260739685  
LOC650185 142.243866937888 137.773960847088 138.409284761652  
132.175368142549 132.458764637407 143.965049742993 142.584504912189  
155.298546821687 136.708746582636 153.448882783807 118.601228886344  
148.816369706133  
LOC650187 119.709032462308 133.239703270008 129.946925636595  
134.863223806176 133.486155360266 130.535859816562 125.598828334465  
140.180208418327 119.532740676246 145.576880854443 123.571641517019  
123.955819747616  
LOC650188 161.77611826709 154.400124981573 188.952730860801  
161.83241639654 160.082087242964 198.783034238774 148.380555606786  
155.63328143658 166.209190082084 156.78124246844 138.972789382679  
178.270849389719  
LOC650193 124.833659452957 136.882429810263 136.103088234442  
131.613738869093 134.872654203921 129.745892720738 130.947003916049  
141.222884136243 139.449895159273 126.539877052899 117.386273592501  
133.806992413298  
LOC650195 128.879953205511 137.75060150486 137.540275229889  
143.655901618594 139.962307072428 162.457778455279 134.441142158135  
131.773304233929 131.759422682853 141.457040042276 143.442361602626  
123.827771590213  
LOC650200 146.108551647446 155.496190048502 147.441650320053  
143.422419261603 214.082408290757 212.669156800241 250.766180970907  
148.120968141789 190.270819689158 147.013598868335 181.654319266685  
294.069353373633  
LOC650203 133.489068665353 141.596078062845 145.711007027894  
137.814391189269 139.60494712939 144.188147197178 141.310253828965  
141.318353848615 134.576622528874 128.447393268611 136.591299462104  
137.054278745724  
LOC650210 117.420765321056 139.951275828765 134.09920571607  
127.879723100698 129.725706669166 138.629055936272 135.407536491819  
137.760712896718 138.739176678465 128.858923585925 124.433114779288  
141.863234980537  
LOC650212 128.592202602162 122.10489926804 130.005909892804  
139.408234219133 136.790457887057 158.933097712363 129.340996658802  
133.206919058442 142.663334893424 130.163574198827 123.372689985035  
129.315412536491  
LOC650214 138.256111134072 132.419898122309 128.950308413612  
126.830269821364 126.862274244977 162.748836971539 128.381433897602  
133.783379558598 140.304810288752 123.354093930164 120.076742232995  
141.572652632051  
LOC650215 363.963951509433 268.186156177622 412.801213309591  
289.257002046658 319.685597963267 447.779854598556 512.312880441098

735.165830487162 445.661863626419 768.053694275398 306.232249422327  
344.021696764791  
LOC650217 142.116311513299 147.943844184702 153.626180103404  
163.781674803361 137.033134002983 148.25001336038 151.879398444495  
158.650226303456 146.301300103564 147.049287475127 147.299872426498  
160.319687451789  
LOC650227 117.841844605128 146.425476034368 136.724298878331  
142.639587833858 145.505223177269 118.480344364831 129.998824457005  
133.769848328557 135.437227744668 121.54835308632 151.911494020123  
125.025064237439  
LOC650235 139.331046480528 136.565191271943 151.790240553272  
137.926193455157 147.260260687975 168.873282919232 141.695537669891  
151.459397907666 141.602233757588 153.423579724911 143.937726155116  
148.857805961575  
LOC650236 120.799317509529 121.400652285172 124.61344300674  
126.875483714734 134.251843621261 130.329453160478 119.029186503752  
124.3501719829 126.256716138724 134.494167613686 115.277302351501  
118.540620928268  
LOC650238 117.980052938167 120.839256811295 136.695790688466  
135.377118045038 122.396214045451 131.580226088647 128.890685255595  
130.653971083035 133.284873295487 128.26957712082 131.155117105954  
136.916286605302  
LOC650239 144.464071397369 145.758423590784 133.768419410758  
135.907702243922 136.16560274503 137.450774903611 143.105974876327  
129.311134743311 137.500310477851 142.493119780028 127.099995420363  
134.452938571435  
LOC650241 126.115828232308 128.335132315812 128.824243581806  
141.722323536548 117.045020667394 130.689272423595 138.171858105728  
136.308565710257 128.074531806621 127.683344133492 133.585425721984  
136.372712400493  
LOC650243 128.901707304582 149.110300099889 147.813170436139  
147.85133493803 130.988294699995 164.647634120888 132.611864316181  
146.122816653035 149.175458427847 148.410647472149 117.567991653999  
148.410647472149  
LOC650247 149.175458427847 137.543128522665 147.389892239448  
145.100964170053 146.442734810495 131.970514300585 162.28074297013  
175.158180187883 130.457981404612 145.072924262206 125.942455135541  
137.459095066272  
LOC650251 166.277960843095 164.136551371866 167.698883940638  
168.197255166255 167.456481678813 159.138344477256 176.300743660299  
153.821728151219 161.354014292373 167.365850007748 153.468933239223  
191.074428905553  
LOC650253 148.457872807838 149.634975068742 122.888626394154  
142.114181233875 140.983230581181 136.631948656268 146.075794515889  
132.184217000689 141.03218895811 138.677282903963 136.767307268217  
149.207481665265  
LOC650254 156.176537862398 149.306122206718 158.193008411967  
155.76568091161 177.143397572907 169.067064352955 190.825209733575  
188.797908601851 161.559920910487 178.751706380632 163.59704679338  
187.893420010787  
LOC650256 140.511988097197 146.586879656174 145.449099891256  
137.48217464385 148.417929733447 156.16485596016 154.705630035232  
151.981708806765 161.720405760536 135.869754188085 124.585675323305  
154.459517779315



LOC650257 136.984172424718 148.076841184769 156.285963197762  
128.099484678519 138.017249996128 160.511688319771 158.167384416968  
146.557058433232 156.798431595608 146.826292449698 129.534721138679  
150.063082731931  
LOC650261 127.0631494857 138.213742418402 133.832462719784  
162.695319777455 133.700408015171 139.14544832776 143.526983440589  
123.635470154191 141.647300896529 133.093234861388 155.335777680002  
151.486362260537  
LOC650262 129.517511177852 116.046983032621 130.41429837092  
133.592691897675 129.561012565141 123.427366316096 124.215466523555  
113.043089777907 130.038936315246 129.090955637629 123.745824514261  
120.733009784454  
LOC650263 171.031912064945 143.10996074311 167.713268780664  
165.904887259203 148.598920567714 144.065554025603 151.208728458188  
131.659187927328 140.372463604232 133.284873295487 131.188208693139  
130.160236228857  
LOC650268 140.292781820528 130.770335966929 145.597134236583  
156.262515148436 141.923103467306 161.066226957782 147.422656909557  
139.291775075915 137.28323311107 144.167857433516 127.50624009248  
149.34605615699  
LOC650274 138.471894596606 131.643633737316 136.220324225816  
139.730999352036 183.3378528327 146.153528461264 150.091854035356  
146.038599656417 151.0189104086 133.079097536801 164.553511697702  
153.860039535598  
LOC650276 14108.0461617941 16588.0599171804 15603.3490258675  
12493.2940668467 14544.3732040823 16588.0599171804 14073.4649333964  
13360.9483836861 13526.3170858629 14755.8570847826 21956.7541751958  
13142.4763966378  
LOC650278 128.675527226161 131.595868226775 144.777043589925  
151.289464845626 139.251886500377 139.348494759948 138.444427173667  
141.090356426567 142.14654303591 138.154799037807 134.087875547168  
140.619606039582  
LOC650280 155.337635216544 130.48231275063 138.719480482945  
142.920939571001 148.299945894738 159.592581700976 144.345080865349  
145.704057360697 147.588213090285 144.636277619886 150.82596027483  
155.124158030085  
LOC650285 141.313482534472 127.016845640004 144.914015211747  
124.272447276746 132.987389721592 120.422401793885 129.675420096163  
134.237133546276 137.728163622673 123.943080151532 113.018985316061  
138.469997677004  
LOC650293 136.981881284369 149.155345369055 132.361106053517  
143.129945647647 148.89180107448 142.071492722749 143.028618831382  
136.635413632094 143.085022888434 136.346472365382 149.173121214851  
152.407614042236  
LOC650295 124.031916322066 145.326803807448 135.68481384332  
154.094285855743 132.387242907281 138.572054821151 138.888049140099  
132.018833785059 127.771225410866 127.961153369579 132.192775993078  
143.652009342522  
LOC650296 153.498332327444 143.056098955473 163.586549438955  
136.324020406359 132.213890220705 153.178934750919 141.613898853625  
125.999595008166 128.297879410629 155.61996871093 149.980924447339  
141.652000792271  
LOC650298 312.705458415152 345.627266482686 304.844121431627  
346.411586524655 336.5543056115 286.506419296679 255.198862778405

360.605223912114 361.160881334174 245.042781391047 789.971871940893  
229.284931844047  
LOC650311 140.844007965202 142.903851392611 150.962828147611  
155.942609847585 144.262612328341 171.410912120195 147.949560045212  
147.118987674809 147.970243979273 165.314290446922 152.099431258333  
156.365413649149  
LOC650314 136.03420235737 140.904883114871 171.229729917612  
165.692508737757 145.619570216377 148.691132137188 138.254479653425  
165.041296694491 149.258932222347 138.506569544482 135.082715974111  
159.926719599391  
LOC650321 172.502036705114 158.459129254226 159.781313090489  
157.779441363536 195.84531580224 227.144441241869 211.720536220806  
231.044588483625 194.36669779004 180.430425314885 218.615551704188  
222.794196053536  
LOC650323 145.435794613203 143.383697128285 130.056727701826  
130.555405606993 136.285410546751 133.945608193817 147.069488043503  
141.623851511993 141.97908047949 115.631414599991 120.702740607924  
139.249869918235  
LOC650325 151.543678860049 137.704257049203 132.600208090551  
118.470400686096 134.56314960832 136.380523452336 135.218648235324  
145.414563914801 139.444577046509 125.250900940748 134.256243410916  
158.145922709296  
LOC650329 148.190696520521 152.503159091556 154.462766419353  
154.277670551775 157.15729049829 149.799681364551 148.334425146129  
141.311749168934 142.508525378171 149.35848619832 142.95001632948  
153.811165696928  
LOC650330 113.845770994796 122.817695619508 138.175538905334  
135.429199205506 130.646956516128 140.74208906156 131.169769031768  
144.848839185565 130.160236228857 134.671840308041 135.196797030404  
126.468167800414  
LOC650339 133.736252068443 142.248293068033 154.426605816862  
142.535416473783 154.947359473187 151.615675144083 139.783725419023  
145.44629057846 144.997250967317 145.841028932318 143.152993168137  
153.922713834296  
LOC650341 137.623019849539 132.764150075465 146.384051525624  
147.799806976046 129.819820730239 129.949894903048 142.765490244223  
125.025064237439 127.943935415045 134.268075583733 129.425699141995  
133.723437619233  
LOC650342 141.283042601932 133.845056524142 154.520935683104  
127.911258242431 131.373012256275 157.751477529076 147.341597963918  
138.891642304194 137.778033050658 130.63390061855 137.642858036384  
148.057700860759  
LOC650346 215.219246394594 230.284216427158 211.208937901871  
192.752224665459 139.997245010492 166.964057265095 158.872962797815  
150.576660798865 159.148717478277 158.950169226637 146.376149543438  
165.355764467096  
LOC650354 128.485150698799 137.376602654929 130.641217515008  
127.478474451121 143.46919253255 124.442671465273 148.960077949157  
129.835713633923 138.756638791139 145.971656491073 125.73560975196  
148.340380102097  
LOC650361 154.066939372379 140.911080286243 150.84999247088  
141.497125111619 143.596530151289 142.531683761072 133.123444023892  
145.34041912391 134.275773172492 138.758688249557 152.670691262738  
136.198583459346

LOC650363 181.081050726043 153.44628692569 161.441613587571  
152.238845270993 139.650726173186 152.492163303139 168.000247148058  
146.790059505709 151.9441336438 149.532459719175 139.741862925156  
145.054873480806  
LOC650368 127.161975533812 128.545699891734 122.587545171646  
130.504023268824 135.253713075341 128.759751330525 136.104965836123  
127.327765407459 128.126354569418 128.975785280465 128.205022859019  
141.992490695142  
LOC650369 1196.34528225417 1375.76915021882 1379.95968831696  
1074.96415574964 1901.97972168836 5058.57872936027 2521.58055221647  
3581.36347643133 4520.84412831414 2153.17165155392 2107.99357083999  
3342.8737952486  
LOC650373 134.545175953914 136.108500467418 118.331237160995  
124.573065080376 116.87586240208 127.993841618875 131.836036241459  
126.997614441981 125.539199863559 116.408126010926 134.964619235561  
127.869038038293  
LOC650387 151.423936838934 141.553465481789 149.995272585012  
141.28700484445 143.160281902098 141.994082714379 146.975258859244  
149.560505078257 124.291944151031 151.201263631883 135.023016176493  
144.94824685435  
LOC650390 154.401220304515 136.225792549383 161.700258550244  
150.255511248598 166.298554732581 138.360286408926 156.456332386608  
159.693019552703 156.411563412665 137.658183450715 150.328995030071  
146.153528461264  
LOC650392 151.792921211607 175.543924200429 150.445647133244  
164.801505601099 165.767629164724 155.855564068891 172.002600588279  
157.176001400747 166.17959304455 169.403422185018 117.428152859221  
148.074494928651  
LOC650399 136.87712607887 125.553615182238 124.340773743603  
124.933738341123 127.863583325139 139.587192809431 131.034010150362  
127.090219286772 132.496547953595 140.669947387892 117.101933186269  
132.375905857023  
LOC650405 138.739176678465 137.312488161187 144.699084515687  
160.039086963419 164.284396793834 135.539516564142 141.609037401299  
150.231063426302 138.692057950694 144.387375194186 152.358795162474  
152.983678871668  
LOC650406 133.340152756136 158.87755965229 171.314681729657  
157.192320902906 157.385256442734 183.358807104988 173.959556466614  
169.124088593549 162.447903830131 157.565633456909 175.562070915794  
164.886944426276  
LOC650407 144.585120811896 143.521510363933 158.76356962428  
150.000851192531 151.712097221291 148.816369706133 143.399877326927  
134.169645445889 146.696029753123 132.300508985399 137.234384760487  
133.581450824362  
LOC650410 131.157702791998 157.055133233709 144.120106441052  
145.126091016414 153.532954370572 153.154592981962 182.665357598121  
147.483379646393 148.684855678535 153.511995286293 137.17370871536  
163.558869203898  
LOC650412 146.97203173446 141.982743538528 154.218967720305  
146.486480663438 147.230113868203 145.380971596154 133.613988293895  
148.497497694754 181.876635968785 155.15575204653 155.893018702615  
138.611074796816  
LOC650418 161.85913459364 149.684922983176 154.173439471404  
158.68792959603 141.191500203423 168.071171406779 140.77762487941

152.077204721895 140.518206716196 140.306808081269 112.309528593741  
159.862252588012  
LOC650422 190.736796322054 174.854570705 191.310372695208  
180.968659614238 176.912121142015 183.168629351124 203.816305810343  
157.607445509297 170.158189150422 162.909468312298 148.196320158939  
162.606273401226  
LOC650427 150.549883779193 150.400411317642 155.330215726109  
150.761696482387 161.382041789666 154.360558958914 137.25054616038  
152.20173979854 154.146962684738 152.238845270993 152.585572167313  
152.210867113591  
LOC650428 153.534763364558 171.238423077347 168.873282919232  
161.096914295309 166.59781955922 155.794309652357 145.861217875066  
141.241717979079 153.741061283101 144.720594512581 140.694993778394  
150.989202517615  
LOC650429 131.393633337276 134.434198188045 147.959740692766  
147.694098231655 126.865622462379 139.685629122498 121.497645719165  
139.054140295282 148.755559144241 133.599098708818 126.617737577634  
118.614641349402  
LOC650433 182.644319628554 154.288075172115 200.204064462384  
162.982557003317 147.761965925044 208.14618424983 170.655648004461  
184.742960975938 182.508415915215 171.161297672182 187.686326872667  
200.652195873026  
LOC650436 134.686251400642 135.743159681223 137.861973133557  
133.184279519985 145.574725784632 148.562200783472 146.376149543438  
123.762963668211 143.06806126472 146.40033464957 126.557869929234  
137.691870502653  
LOC650439 167.653412908384 156.020996568814 195.438353051306  
160.644747532952 146.245915271213 159.683695366575 152.362546746522  
152.210867113591 146.011694647614 156.445294524594 145.828229656781  
170.164668347783  
LOC650454 146.519312568214 147.248053518914 139.781351410748  
132.610618885717 148.038291195414 136.996535765175 152.038902807701  
131.051711775229 137.192570825063 155.561821955048 125.77343813277  
134.628807679002  
LOC650455 133.720904256137 127.352386363217 124.668658660052  
140.248610391566 118.833188167696 146.755803731358 131.794065532001  
123.122705969332 139.286592412216 138.317443162096 142.843006238215  
143.028618831382  
LOC650457 144.871396308673 151.436802637988 142.411117330429  
145.588981165456 141.828740140733 146.197678850188 150.786618560854  
142.307520290692 150.367927843529 126.670227417269 167.315702949236  
149.538429805372  
LOC650458 158.528301072565 138.907036194384 157.709832297666  
165.545136704242 158.020651857664 163.824878791966 150.297422529071  
143.045416067967 149.374282007673 155.101850847148 146.075794515889  
151.527357661273  
LOC650459 140.175724588255 139.888008605915 143.825062714273  
138.307574579062 127.282374513433 130.48231275063 155.176714087209  
133.449527627723 147.928629511539 127.496885890349 128.112595697836  
121.36708642226  
LOC650463 181.722373730185 128.858923585925 155.140371265225  
141.505120938773 155.60532199001 134.519697269443 149.138678142327  
141.927204640355 160.078122267577 154.431051053529 143.031909545902  
153.111226896983

LOC650465 143.025570700585 146.565265415908 147.433388299999  
148.168587884369 147.176801913145 181.832218001701 164.365630106697  
159.643566663742 161.678137139371 166.622070620588 144.927731613526  
141.054587977578  
LOC650468 137.897243684023 137.459095066272 142.771243742561  
130.352674121108 127.392877191785 132.774127230452 141.045379969014  
123.507963359911 124.59937620719 124.738217731488 140.288612271406  
126.908123260394  
LOC650475 133.56263739203 141.508424382665 133.496922906874  
140.395662148924 126.868970616955 137.349901534237 126.775180133301  
139.734784859495 136.621173927187 141.956996308304 145.675032688915  
141.819762045169  
LOC650482 156.678686363755 148.134642821094 138.831297375659  
132.233396667074 150.295611829265 150.173766182317 129.601234646954  
134.122776198036 135.443856371548 146.557058433232 144.914015211747  
146.476960694197  
LOC650488 145.553219709768 150.098708715617 145.110145981908  
142.253826696208 136.566588903194 127.392877191785 134.403789206552  
141.127519700052 147.422656909557 137.172030225913 142.348246621217  
131.849442776642  
LOC650491 149.164469334038 139.828781354865 131.724061631389  
141.275667354541 151.563917522864 147.384050169545 139.926488041421  
153.149523560021 157.739526559807 141.170937695272 152.667721542507  
136.518409978222  
LOC650494 143.697931551096 173.056715623574 174.205940911242  
202.145180994821 142.669207969715 163.153676643372 143.960688664936  
154.688685142904 145.522435728191 162.397078614596 136.147096999442  
149.928613776186  
LOC650496 157.313737338264 138.394923932916 139.828781354865  
136.633726784926 133.125084506877 157.86653024793 138.824082857747  
148.23392074197 127.416912237613 134.362834437771 136.897888440409  
133.874468336025  
LOC650498 142.05571112803 146.10417547509 131.539170756533  
132.472505035111 134.929915732246 141.119491147925 135.254996386778  
127.485734862624 135.4702891855 122.885879294532 126.948090173876  
125.566982723725  
LOC650509 161.614426723521 159.746802905903 153.258616843783  
138.709991561675 162.072695554798 148.297939240474 135.717491814078  
138.730409717578 159.032710656826 159.946124520038 141.636604735133  
145.847629576886  
LOC650515 155.924471321076 153.308956040034 185.974598267418  
169.067064352955 306.011283364888 338.510045856515 270.847923557176  
329.48021621087 260.921177985439 229.689010178622 270.894153548841  
321.977549744483  
LOC650517 140.435724944447 142.942021904533 148.838294770082  
138.469997677004 154.386771806864 159.040409182674 198.701991021316  
158.179586948369 167.769114519774 4511.9116742833 310.142754559096  
545.026293696209  
LOC650518 1683.83803339436 1927.467713716 1583.79384467611  
1873.84654908146 4682.62607750437 6500.1854485891 2816.29814823646  
3287.37172778474 2792.13364570755 3111.50508060882 3387.5366256957  
2947.51998516453  
LOC650520 114.234369421536 147.8838487685 134.725434838052  
148.107004870598 155.233830396052 157.499803444188 147.642693777383

142.612035986517 132.566074764755 147.292241873554 127.595574823053  
152.342712570625  
LOC650526 148.258850340107 152.112177721714 159.461778054423  
154.229914729772 165.553581848949 190.871696848118 141.156434225355  
176.47556448977 147.706402141169 174.646321871605 144.920107068083  
182.197625235191  
LOC650528 156.033897758869 152.670691262738 146.846301957637  
159.640027194076 158.523941833883 154.406369231962 149.3567486207  
138.239251358245 145.633647856775 149.032116392457 155.70645844794  
133.651203764842  
LOC650534 146.392657608076 144.421572284568 147.838660813476  
138.858138379065 145.354740501503 145.539731152955 130.586509996354  
149.233023751582 143.07651558428 138.033668840392 131.904624845305  
148.367132982373  
LOC650538 142.19015013243 149.8035588048 168.847039069786  
158.73040336393 166.173429365582 169.321832528939 155.942609847585  
147.932875151331 157.103246263523 168.560093633607 184.223623297663  
157.729732484131  
LOC650543 141.604832186257 132.334666750573 138.098165515898  
139.328340242696 133.012692824038 140.711699577809 132.615324904193  
128.029736384348 116.723991721647 141.901382169334 132.294365151614  
130.049854901235  
LOC650546 147.928629511539 158.882535865069 148.314248474411  
151.698385134218 138.716375045891 168.232843307077 158.205235596076  
169.475714234887 157.499803444188 179.198164545975 149.004343851423  
163.134784474437  
LOC650548 142.80027343095 145.507330257603 124.324855155055  
135.231458421096 130.808911605271 148.132450240784 138.913591568111  
136.852403978525 129.541049979717 146.660826209767 104.977794653504  
136.306727083526  
LOC650549 149.758215028408 139.476234663488 143.407371444437  
139.984102798711 144.627784383455 149.772157318769 130.509415570889  
148.556161762978 151.598423878653 144.958176005711 144.479410859199  
131.921799405427  
LOC650553 138.156430188312 132.287326702468 143.040254576088  
129.658488766089 146.537204621419 133.887927451362 125.124011798043  
139.260868989409 135.82038791723 145.414563914801 128.033383607545  
123.389038274913  
LOC650556 147.110929610347 139.534752287258 165.333608076984  
131.782007636511 144.781438651649 133.101674466013 128.42287610189  
160.748082658758 146.629335531037 153.214696479001 133.713275043978  
142.433675899702  
LOC650557 132.727133259694 148.94765984808 150.343825300998  
136.916286605302 140.980119908597 139.260868989409 141.763072120718  
141.196795654442 138.354300118735 145.704057360697 161.806144472744  
136.384308041001  
LOC650561 140.925705285169 135.678138913772 137.30143217822  
126.673587174832 142.993401965852 129.733935614802 144.634118305223  
137.322392546784 135.961724275921 131.166819048309 138.947760022173  
140.904883114871  
LOC650562 117.203783530266 130.758707848676 140.490023670841  
121.124574985464 127.220812636148 133.927844489731 121.396223519559  
124.17231659571 127.121068682846 138.084801633774 139.798414027439  
120.212294184999

LOC650566 155.622257285651 128.763176477983 147.253919952267  
163.042083189818 148.04206955657 163.438043894189 159.990561741675  
142.545823714168 130.224324464992 150.606329295069 138.047487233711  
165.659978250378  
LOC650568 125.390139830237 146.885404321622 144.167857433516  
153.613110881454 131.945667475797 132.34532981135 129.537345537086  
135.837733533444 150.685245572093 137.222125237171 134.629996026323  
144.914015211747  
LOC650577 141.019494314354 139.356478232855 161.841975820372  
158.359440014674 133.181205335359 132.423043364573 165.752558888845  
138.093181144173 149.435684626505 138.848119273081 133.930997975106  
141.50968031684  
LOC650580 328.550286726543 429.457884032977 380.664528809678  
248.927790738447 188.708596785144 237.045634416039 180.889946069121  
173.035013611377 184.62149494522 155.790759250672 156.466728833063  
215.607567127195  
LOC650584 157.77398996415 154.949840064881 153.551359970644  
140.486376016494 131.040377254587 147.93442757931 149.338249249161  
137.048292841566 161.795378938402 140.397184813186 146.488402397597  
150.648444878067  
LOC650594 122.05954649985 145.187490179166 134.731687541347  
134.46743016543 153.636804025106 131.023892409073 133.583297305219  
137.740497848238 129.626276841426 143.973464003036 132.256047602234  
140.728126380228  
LOC650599 138.123754096875 134.799648755296 128.152956417755  
126.978144285534 145.804420322848 131.092140169861 135.866980620144  
132.66318177913 143.961467163406 146.072585331002 146.861981788662  
131.512174491572  
LOC650611 156.890299350025 151.079500558067 154.406369231962  
154.949840064881 166.315369318355 193.203053225456 164.509354377985  
151.132586978278 153.02127620577 205.705962405954 173.599961799334  
162.233096422572  
LOC650612 126.982340580909 126.958366599622 123.81177057082  
148.457872807838 116.483432723207 129.906744036052 137.994334667126  
124.63978985808 124.863832760607 126.268418132 136.364830851128  
131.01107240791  
LOC650620 160.742365719929 154.843607752473 147.617354114584  
185.140211988926 143.296580629431 158.380964047483 165.39758732  
131.360310497851 154.286043402527 155.23152084421 149.639835429332  
144.81320329947  
LOC650621 133.820936825552 128.045931477827 120.682485578097  
158.658110539162 134.119276589666 129.612536218578 147.743331160624  
139.883360543042 150.880818951088 143.279331050175 117.900892627473  
131.617027772841  
LOC650628 120.220156455352 137.984988819967 128.990911924499  
139.358218798638 133.776477221849 138.814930200619 164.078423844421  
133.606068125828 136.229159638766 137.590823177379 141.668101962049  
135.75568942028  
LOC650631 130.513071750123 126.097544650407 136.216577685046  
125.539199863559 116.043095688871 129.811504562622 126.910075365358  
114.830474086443 126.992697289075 111.895279866421 115.224011128183  
116.038950886552  
LOC650632 121.006569103388 127.407418037777 133.480196904786  
124.174140125309 127.099995420363 122.962219297463 127.473812381059

117.672645717508 132.094446606227 128.637470206958 133.542620077059  
124.372963874507  
LOC650634 141.670426206169 127.052618800004 166.4983332269  
154.889079187405 126.995207465164 134.678445085174 147.9084767638  
147.870549240703 139.016274575854 127.987449338817 140.268256002335  
135.871162593642  
LOC650638 142.722227179256 147.414834563852 144.087004064416  
149.31422191209 157.468934439452 151.9441336438 149.498020676126  
177.708263037199 143.764266466204 144.982462113231 156.880120259304  
151.801558435863  
LOC650646 8016.1652884418 9171.47979464736 7332.15849011291  
6105.64727031051 10312.8407173696 7733.95252458705 5932.37714987741  
13090.0615116619 13758.4768543075 6944.90824302953 16179.0939169232  
6894.63087357693  
LOC650651 155.02097482487 138.307574579062 138.834309377225  
156.068308349225 133.137299889323 157.856019979644 181.654319266685  
160.724319010751 168.394330931524 160.466187961848 130.570050159191  
173.563363508314  
LOC650656 135.68605915552 122.111982327877 139.308325848216  
125.489777118532 134.061318824472 126.364445020215 132.903959880979  
132.514706165018 134.102929804129 138.22823004719 126.704076078563  
123.035401501279  
LOC650657 154.362571105094 134.028626989933 131.444734367396  
136.384308041001 149.202628825354 149.300089212177 140.397184813186  
131.111930163369 144.212231875922 134.606126134531 151.178586065066  
137.094814176566  
LOC650659 150.215811815246 137.225659453984 133.610143526954  
145.459919416288 131.117294275244 154.546460872415 160.592404712197  
143.607579034109 143.325710305008 139.527577649638 132.622032754473  
147.385714746214  
LOC650668 130.672586991186 139.013404849037 129.041254463346  
128.108066199718 144.64136816491 132.096095362238 120.316950428535  
140.60741459333 121.274997609378 135.05209575317 125.104229604098  
135.463385553776  
LOC650673 154.475735552851 143.733505359106 147.688664545959  
155.290648078877 158.297624312257 179.54034642468 158.039920243116  
146.464937541891 148.907136936731 149.636887782574 141.088456756806  
145.161116298118  
LOC650677 140.586497829504 142.776295389006 148.139376772567  
151.625248091441 148.42845062376 134.495938988321 150.84999247088  
144.589482298525 151.079500558067 141.010588053284 131.260111979219  
152.50843414723  
LOC650678 144.201723591119 135.697550878438 143.452992974333  
126.528589411462 150.431052959951 133.011320549232 130.684569384626  
140.201501710276 140.752616434418 154.2433882385 116.52455193626  
153.056369304663  
LOC650680 146.563078818674 134.427601777639 125.176747824384  
134.966883985611 151.421099926743 143.945039636839 142.405569257901  
141.18490443471 140.229267364503 148.076841184769 139.552533656255  
144.049503774298  
LOC650681 135.125414452178 137.264095379365 141.310253828965  
134.55255098289 137.029726467523 135.441550832737 133.376631703373  
143.853643511287 137.432492568789 141.616920429839 136.351332391315  
147.93442757931



LOC650683 158.287108069245 142.878258542775 165.523150623132  
168.483273292464 158.384505840662 151.984619204523 149.668587078867  
163.02140155858 154.569432344392 158.287108069245 175.774461934758  
178.819486867379

LOC650684 130.018928906449 140.665332203898 125.621467040793  
130.529367177452 149.518870320398 146.010474018786 127.642215862573  
138.279775054156 133.292854943218 165.565284723155 129.247701136266  
129.570960882942

LOC650686 135.346501914337 139.534752287258 132.066488589395  
134.383024487323 135.499195435803 131.984467471242 136.265972909993  
136.297963196301 139.034940762344 140.605866597575 116.019123495537  
123.607412609763

LOC650687 132.793020446043 136.041605158822 157.70581824787  
129.13353785479 117.172431931323 149.405118010893 132.634538733205  
120.276236447255 129.938723074546 136.794860440446 137.352231982942  
120.36718185387

LOC650689 131.968781256081 143.716377201615 141.208106961875  
157.333615322941 137.632470240792 160.786907816025 148.709795687391  
145.669033804967 151.917359928516 151.239879652761 136.214432257698  
152.925281215593

LOC650695 120.822923434486 127.630514255051 119.548432046443  
137.310014841869 115.321501844663 122.220327032799 117.740022708444  
124.439917584199 129.904942554979 118.294324274616 137.584340154725  
128.868894803208

LOC650698 149.774162138829 150.267298097687 150.28508305615  
149.331805754859 148.680794815584 154.021906399992 128.759751330525  
135.680872395032 156.875068435974 134.182902752156 167.063762404009  
157.702540365469

LOC650706 140.754706171596 140.66266106824 146.869927141655  
155.410704148925 148.821145290177 151.369387642458 131.811011266156  
156.707737817443 134.631638658586 128.115993005977 161.960392594363  
132.507448826637

LOC650708 143.160281902098 138.064951932825 152.743680985848  
165.139423820186 149.744358230709 144.631407964232 139.442091671938  
143.447768653042 150.667001746475 154.261443597434 130.435589649362  
138.028813480968

LOC650712 137.271702725819 152.66513184083 155.194521954405  
143.567488854011 145.233055765001 145.03221570575 152.566490804809  
159.300198352916 133.318665755015 139.576261630082 131.572485018063  
172.186384820044

LOC650713 142.487424651482 146.290334865039 128.477342430713  
145.081965532691 146.98903251354 136.86685787001 137.744318243173  
135.798387504219 138.709991561675 131.806645427543 139.875260384886  
142.537484065487

LOC650716 140.978511668091 123.968639555673 125.77343813277  
131.246704975084 136.678188851101 135.292532783991 121.841080387875  
125.634045420702 131.356437247149 147.710252756854 134.076865693417  
144.120106441052

LOC650717 176.001771318766 198.925776755081 182.209056248253  
192.804447792672 157.406969627689 144.377501600001 187.903298116031  
171.287186905764 165.017178571218 208.72873686638 153.402227428787  
169.036409026328

LOC650721 136.423161205425 154.417731984391 142.623106544789  
158.06129717954 136.116468624715 127.657961561231 152.459041674768

132.287326702468 148.87242524521 130.322436253881 134.744175117719  
134.30624644595  
LOC650724 136.482609639417 116.558752619296 149.933919274985  
149.039132756817 137.201149245092 131.153457976248 136.356895672212  
144.32655838488 136.207420489201 142.311108110185 133.988494850477  
138.456465793474  
LOC650733 154.744065805492 144.958176005711 181.022635001204  
153.532954370572 155.993849743656 177.143397572907 152.210867113591  
146.548348470748 139.21331678591 146.14494790114 153.276938815536  
146.227452269648  
LOC650737 282.604890044452 275.996693627151 342.037040881785  
316.281469585496 263.005303710717 322.506898833351 275.543576337502  
190.045156046541 312.808044035117 219.597808863947 310.640107228956  
193.218266574099  
LOC650739 148.173215617922 133.64938083537 140.044536042073  
138.700301754711 141.229805348717 136.749771286979 144.098578955023  
125.589744938813 139.963969716386 136.074837228096 154.354658146438  
136.699011428085  
LOC650744 134.218867540274 125.777193592751 155.683727621475  
155.026276988302 156.714081537525 139.936661244361 135.817028661429  
135.33941967076 157.915292037378 141.717466442384 104.505454151012  
128.837901660985  
LOC650747 145.043494048779 131.176413983785 152.526785074182  
137.543128522665 133.829889099442 128.925288777749 137.176144667253  
130.524630778991 137.378528742953 130.452929012459 157.189041157784  
148.516653846017  
LOC650749 133.449527627723 135.790955294639 127.112296857923  
125.59966423779 123.612648219993 145.45768403614 136.167141767484  
130.317604643904 130.803561448083 146.586879656174 140.617663657037  
139.157088843803  
LOC650751 131.705912986393 135.975265059269 131.360310497851  
144.665869508406 137.144001915831 145.737361356678 138.755173333171  
134.753783025994 140.127379332918 145.315875226867 131.086904662241  
152.017655364287  
LOC650755 122.659174808512 139.767216030715 162.090585987836  
159.624341769644 130.63591305094 145.847629576886 147.865114383296  
133.496922906874 141.323417580648 130.195234920895 148.85250180736  
158.779261405573  
LOC650757 134.555873832434 164.247251507109 179.15284184774  
146.114159600635 162.488819873513 146.283340399533 143.865717051998  
174.624446035895 160.964435028806 155.924471321076 202.01798254763  
149.154586195586  
LOC650759 186.951061159734 161.235924544873 165.836534881802  
154.449058407217 133.269658133558 175.573400981771 174.323881548679  
180.354899434843 164.816672737691 163.566535828036 155.773639092819  
160.562164904057  
LOC650761 144.826861308997 134.034970203523 143.722135315998  
140.129882333528 142.878258542775 136.805379739087 144.603401904061  
137.446044691412 147.720061897962 138.032265227728 119.305917403956  
171.504939477949  
LOC650767 127.597601325212 135.719702250709 130.804850476451  
123.29908883119 127.030113960477 139.736465430177 138.67221078031  
134.418976976995 128.150801169886 120.669452856028 112.476111928742  
113.400050190315

LOC650770 129.797601100832 129.786941565218 134.782388051531  
126.708817316134 127.166821363722 152.038902807701 125.668463983985  
125.413619056436 142.613654158833 135.221786448517 112.851805868467  
127.433203229267  
LOC650771 136.755975832051 144.428776560885 142.011019998327  
142.444072809204 137.625415175495 137.401137659118 135.63604256516  
132.294365151614 145.281664250703 133.887927451362 132.91094012928  
144.393688888553  
LOC650776 122.297401003756 144.715167331434 139.280151859534  
148.587929928134 138.628169506372 144.400004730049 138.026155846749  
123.615802924067 141.898948675823 127.195619567384 140.556631658219  
142.411117330429  
LOC650780 139.440415574681 155.355051932357 159.349719495214  
159.781313090489 154.849264978968 145.530904040477 160.039086963419  
169.826068012389 154.170007083026 148.65131922365 163.858222964048  
142.801645268128  
LOC650781 120.733009784454 127.088916295784 138.149037534929  
135.409613764459 115.485515429446 134.21500333869 151.239879652761  
144.86583288717 144.446903878863 135.4702891855 120.255081121925  
138.144085131733  
LOC650787 139.776830704087 146.495845282846 157.028963417138  
133.26167785455 144.079935036119 153.761061653202 138.405215507471  
153.524100996368 134.4811029314 144.516274148451 118.372047967248  
144.985280401441  
LOC650788 141.262319193649 143.579660352652 153.339992195184  
138.052032298683 149.925051977052 148.057700860759 140.254665008195  
138.805103589625 149.888719320368 138.202872275661 148.350919010575  
157.425924587516  
LOC650794 140.885012530186 146.077082896858 149.490064894136  
150.35767254363 141.108383815109 143.363002903815 149.71132909303  
139.828781354865 137.876234091056 153.379118228796 135.745821200254  
132.582062079623  
LOC650795 161.419873271162 172.686798187142 164.955263076598  
173.681078272467 171.028432989066 167.746786642066 155.04585737344  
147.982280671798 161.704966315183 168.71216652064 127.663578933727  
159.29430824799  
LOC650796 136.925645302362 131.99470265134 128.717719117128  
130.621860095981 131.970514300585 128.959487155628 129.730685860688  
152.107025120177 159.870967387108 149.747347428419 125.802927749616  
133.939847853073  
LOC650799 137.009303458922 149.883237874886 145.821544099585  
161.817609920327 149.331805754859 154.239755912437 143.376817049362  
151.80632463295 148.147294674218 149.968749911496 147.885769870843  
141.083966525597  
LOC650803 198.489278156437 221.889331385023 202.343343669937  
238.095599711942 377.89330639683 313.480307434343 181.813812621767  
330.944203807675 210.290500215377 743.915675090182 276.057101476947  
233.809899915394  
LOC650804 125.339305282874 119.612288460361 137.318442197233  
135.338077911839 143.943676099522 127.350368333088 121.076652800015  
131.958760372325 118.951526834915 127.284885819903 134.981272056795  
134.187456260969  
LOC650810 134.271916545532 133.496922906874 140.57567768682  
130.116771999391 132.282903926191 141.693224578298 147.868721324602

129.654234837398 147.471494294543 139.147327302581 131.275712196961  
137.936605651724  
LOC650812 137.052507691254 140.395662148924 156.727153398506  
158.072347847051 136.948039394935 143.338628928675 147.212693122934  
140.930897231705 155.974463324915 132.850601603567 125.334995649504  
145.106362864355  
LOC650815 164.406564594296 170.748911334847 151.518116154483  
156.895079878556 155.365673279823 152.146033353926 160.964435028806  
144.958176005711 167.106870400592 159.696443182844 156.293025312901  
151.826103919919  
LOC650822 153.811165696928 154.665212863369 194.055394488452  
149.35848619832 147.4182675362 155.702330867056 148.094036534405  
149.888719320368 149.689071018094 145.267225993057 143.219722736891  
158.455783755247  
LOC650823 143.421288665418 156.427158441352 153.850588492326  
149.939035476611 145.556318940043 172.157660228549 141.56459720769  
151.477239868429 153.405052909585 146.252974508529 145.836613334985  
163.621658579697  
LOC650826 152.224281847792 176.138621462315 155.639666182376  
162.536009333787 336.279209908669 185.154876233931 221.390817970859  
173.416999972133 167.139257044999 148.779043570204 213.966288689715  
197.100205890532  
LOC650830 147.309245779031 139.997245010492 144.836902182737  
144.266108481571 140.73456875677 154.475735552851 147.620511911043  
142.573662441786 130.51901676405 163.904137395349 143.801139839773  
157.04599638368  
LOC650831 140.224464809602 156.587747115317 157.269049853539  
165.642728895682 171.130215858803 153.661632990172 166.671563123047  
168.188793271919 151.911494020123 177.72965427263 141.941814923705  
182.763057221385  
LOC650832 571.136519973808 522.300029971277 299.80615152845  
552.962676093514 4276.70912292877 565.843200661721 332.666916002481  
408.444629429553 378.151202933526 395.521241316058 535.041545916303  
383.407365952689  
LOC650834 133.419239158866 134.369532556726 134.582098893327  
133.78629612147 121.174618503873 138.519129384809 132.092910274836  
143.905680376268 135.238301951626 147.633793743254 136.188868917386  
133.384498169568  
LOC650836 145.909456876796 137.125637347852 138.497931380734  
142.278523641008 130.504023268824 130.476322267589 136.408314486465  
136.543603346919 117.137027732123 130.37544152572 132.823333905679  
138.735156909846  
LOC650840 153.191840013692 159.58125728432 171.06385200256  
152.368485416992 154.428779374984 190.427022049167 172.073751088968  
155.648782851696 155.317754378283 208.816482659752 179.704370382771  
181.681929801968  
LOC650841 123.260800590266 138.664401460739 134.132312782731  
134.314636524922 125.882246459692 137.493436771898 126.077945699709  
132.897554980037 122.484351696828 125.9713489569 137.326796995017  
127.903393519351  
LOC650843 178.854873582873 146.790059505709 166.143084832472  
150.667001746475 145.944809232038 148.797226586765 170.223509007961  
142.833025633146 136.743659350798 150.129367314696 138.414916506716  
179.582086214179

LOC650845 158.59135215074 141.145419751161 144.946362772133  
147.971492964243 150.102853150151 154.061101136889 142.970256312313  
158.080749926756 152.520828479026 149.086836205064 157.213868854329  
140.793616429174  
LOC650846 147.202510900548 146.476960694197 147.796610216375  
142.656762407774 128.232091717966 141.88777975766 143.07651558428  
138.97776257708 151.372219350291 134.830021570666 129.27634490676  
152.277810621542  
LOC650849 117.856184272322 137.074564265915 134.650161382949  
131.734429913106 142.203367260558 116.896087423948 135.852591930882  
126.34649262976 140.611071681667 134.442947822188 127.827096314406  
140.865990571023  
LOC650850 144.63774603725 156.126009063311 160.143443392509  
176.167129202773 154.306729472627 180.867208892996 159.592581700976  
152.654938328424 152.447978675887 162.358237198517 165.723126764006  
163.422877959747  
LOC650851 143.673778816953 158.278496385543 139.246945739764  
145.551717838423 154.398416018484 142.951829221947 151.908841481413  
150.43722766614 160.265389854694 138.497931380734 147.550385608773  
157.010145291837  
LOC650852 146.101547300741 142.432995657729 149.582406567077  
153.46645509759 138.20899000519 160.454243375479 162.649092834422  
159.970332650101 141.765004355609 172.138554350738 165.737618983611  
135.217240511902  
LOC650853 135.779516940893 143.969566798989 139.388484543482  
141.321547895734 134.084602409011 135.343380336913 158.179586948369  
144.6567095695 129.92319548307 154.990319019521 145.190896872008  
140.971253689199  
LOC650860 138.670077127324 137.114604159523 137.959775678716  
128.548201588898 127.871445879091 137.689158155552 126.542112891953  
411.039234404499 147.829502959865 153.104072845043 132.398041172151  
142.142633050256  
LOC650861 156.525347260458 131.945667475797 134.712935556892  
137.956295878287 139.325478877749 127.097605337434 149.405118010893  
139.744142223177 129.284384810812 133.148442269517 119.257387524365  
124.530660958725  
LOC650862 139.369815367465 162.199381540369 138.296933822299  
144.414055029474 128.850480964163 154.108689872903 130.557209560361  
143.523051024982 133.866011732878 147.768946831173 126.520909083643  
140.736051985112  
LOC650867 140.368070973566 162.342112922504 146.00443946108  
145.223648967115 144.175551691291 149.99203906203 155.988447182637  
137.352231982942 179.764260117544 150.093684245826 131.97328307312  
146.298733090986  
LOC650869 133.542620077059 131.750053934548 133.333067546558  
139.591231478841 125.416113646128 142.858554460651 134.717258604899  
125.052770277549 128.115993005977 134.810212106122 121.915043935246  
129.758303592589  
LOC650874 128.158605637751 134.491232148834 135.666278507269  
124.561511833959 126.268418132 135.689889081912 147.053391763304  
130.074786642758 131.636779618185 108.850992642446 130.311471059267  
131.140263788783  
LOC650879 150.72835989269 135.385133545332 146.437565098335  
133.74051512341 151.219051767056 136.001505582342 125.444541266623

134.371254010574 122.506058130261 123.067278658698 113.924310293916  
140.239948346946  
LOC650881 128.957236136715 118.895095992424 142.116311513299  
138.490683208102 145.320945010364 139.573371281569 124.755684505209  
126.216519704249 136.913957413224 128.730649233876 128.63301490285  
117.897556445952  
LOC650883 131.060030943633 119.83679981791 148.306990501663  
125.515479324107 140.214475962177 136.969124414576 137.97889661868  
147.07272598888 149.929454280702 127.742948876822 114.470670941078  
134.32174235533  
LOC650885 135.489000274316 154.881797585583 140.989597586699  
148.444479022559 122.503984297406 130.949405011154 156.179501567984  
141.719556176029 156.437949042181 154.856345114916 155.728609337723  
156.511202150773  
LOC650887 114.488760619745 142.129680127408 136.074837228096  
137.534079082878 141.346722137248 145.416733388652 141.106863165059  
123.202829470888 134.983884722607 129.594440309419 142.683117062711  
119.866898356501  
LOC650889 140.736051985112 140.725313103204 138.592943322694  
136.135223482208 161.651643789597 130.408519735001 151.114186801496  
145.03221570575 138.824082857747 130.539632182729 153.271518348258  
146.281429685059  
LOC650898 171.537040561599 149.078664825533 158.950169226637  
140.999877170481 181.70730090195 179.297628357211 168.841313096346  
151.81754291846 146.481298877242 146.772611341214 134.197892075036  
172.677083810424  
LOC650901 146.181764812924 132.84666796678 148.684855678535  
155.686889874806 144.295556086504 135.634385846692 138.768904143023  
142.394644827434 140.227863970629 136.042982529628 144.65238608866  
136.86685787001  
LOC650905 142.596113491002 123.660836177932 129.534721138679  
132.348603553752 141.500790455788 130.551216910933 140.878935632862  
137.731390340708 125.603448542611 137.109541758085 140.54700821058  
149.498020676126  
LOC650909 160.543465620248 171.636121363019 190.170250158984  
162.52512327258 172.065593177758 201.167206950576 187.046760972666  
195.364709354814 196.207631868755 202.369905673351 230.855806094267  
197.947433984294  
LOC650914 152.197327387252 141.499192356469 166.767004180603  
148.821942578396 169.881866987359 161.289708941062 147.313494489487  
153.687536747147 150.031863363697 162.519642881848 151.604093626944  
146.357214078158  
LOC650919 154.491373296392 159.913028912492 146.31468639383  
164.14265547147 146.040995022257 134.238642042323 157.745805838008  
141.253030949701 165.022029012505 144.86583288717 134.064206964444  
128.09266452749  
LOC650921 158.767439363085 145.072924262206 139.106442824079  
144.343993358829 148.65131922365 130.965418847276 141.497125111619  
144.016137459279 148.327340543504 148.42845062376 149.237422245619  
148.587929928134  
LOC650922 129.121598974852 120.37619371663 123.081299769162  
134.362834437771 132.604589324628 134.275773172492 116.939471420419  
135.137615432923 151.106858426994 123.094324479352 146.677241054745  
116.769106223472

LOC650924 155.846106540378 138.909419415137 132.913891550054  
154.916023131856 151.440732942734 155.694213876736 130.653971083035  
140.656633546501 139.408959884266 160.75642485037 122.600274773736  
164.841156516242  
LOC650930 141.431172407792 162.599466021255 176.830879422227  
160.215396651606 147.975551540256 150.48236051337 147.319360896679  
138.308965237491 160.537464426971 153.114065147266 144.428776560885  
170.483686891321  
LOC650933 173.306283668215 161.790909578234 165.549190801014  
158.260676113325 163.20714296121 150.655359765209 158.884661398415  
167.756465178715 161.412427590994 145.453460204097 155.449724554217  
155.333294650676  
LOC650938 140.829927714838 142.448384713937 144.886005815977  
137.950955473086 136.274199465472 119.459625817735 117.141089194822  
120.456817031716 133.731500722599 149.551030995489 132.332128706656  
135.273184185121  
LOC650942 132.579323148839 146.40904127542 138.53179773391  
123.357205547181 139.667714422309 140.563079852037 136.899405404096  
124.740700441589 147.777050372032 142.365009028839 131.712745388563  
135.017953588568  
LOC650943 140.295307451188 138.913591568111 151.037282417145  
167.350290326189 142.757327296852 139.617608585463 133.099175110023  
154.789187466057 141.884995734267 160.164327420125 158.795335941084  
154.579913524947  
LOC650950 188.74403596953 164.986006226427 176.612866969431  
182.357065848298 182.545896049446 180.070209705044 176.980780681976  
162.294114485312 171.37545414068 181.635664531851 169.124088593549  
184.008405576875  
LOC650961 152.791390145148 121.640681916546 146.376149543438  
160.473772347376 141.189008902155 151.993651822163 163.910041674646  
137.834158814913 156.160899295182 146.389254316974 145.226278521493  
145.411264691728  
LOC650965 137.436627285916 144.861804210272 146.332425559689  
154.080778100852 126.705446263769 153.176268095608 129.891492052232  
140.602170750673 130.477824552202 128.700516033555 144.148833164952  
113.995301093609  
LOC650968 160.914009756867 150.593928635647 158.819151102054  
166.760758231104 180.761100930677 151.60113116166 155.287837763675  
161.700258550244 168.018785514306 162.168246402027 124.659387568671  
167.040031488406  
LOC650975 171.06385200256 170.844002412425 195.353512458837  
179.779007442837 155.463400179872 182.095387488796 167.645930148254  
173.951605889009 168.150270765792 164.914114315732 151.423936838934  
171.267907653007  
LOC650976 167.077669654786 132.285835971705 123.777133327569  
126.246487873182 137.997756995882 138.461113585594 146.278921849776  
142.338352884053 133.475605284211 138.19108838324 124.597605631582  
130.116771999391  
LOC650977 132.490323093932 126.865622462379 135.895945142328  
145.766684470184 143.67880977119 128.033383607545 130.049854901235  
135.855243915966 123.777133327569 141.966490100288 138.281188275319  
140.354508398385  
LOC650985 131.377361030122 129.723501897231 146.923382271905  
140.11211854056 126.626904958599 137.910618360623 144.604714612091

132.790039196443 132.829401072883 135.74368127919 139.356478232855  
126.294085960617  
LOC650990 136.83883055114 126.457337803727 155.02097482487  
134.105941085621 136.372712400493 142.806728419652 143.381277901138  
138.872536475067 146.770267005869 134.425483661043 138.428527640896  
135.122770943076  
LOC650995 154.969503835593 161.055911120534 147.863198012238  
141.088456756806 141.380276932556 143.954908055924 129.366567668463  
171.80440912191 135.286686011087 130.449669345302 142.041992878641  
143.614075503775  
LOC651004 179.61374889626 162.741222929067 156.32137627012  
153.989839987975 146.301300103564 166.46473789699 159.788143847569  
151.142149775806 154.232310911696 160.203521879896 135.975265059269  
163.607125532236  
LOC651006 146.075794515889 141.266129417042 147.378228560979  
154.371946675862 150.661584243174 150.075738752092 152.479402912801  
149.556644928013 134.53861441495 141.129013595331 139.776830704087  
149.786445079456  
LOC651007 127.034985265748 148.125665833072 139.835983835267  
161.501062527272 134.094231940612 142.119327380686 140.922678400415  
137.11719450122 156.456332386608 159.655362710407 143.539741029895  
130.410584413031  
LOC651008 147.645530163725 132.741859397511 145.71535210212  
153.829636228764 146.240060512152 134.160100276452 145.346970289157  
139.280151859534 143.429394097222 130.59670974887 123.738223146912  
162.802392115386  
LOC651012 152.129092774005 153.420392741659 147.191114491117  
135.562700479444 138.281188275319 139.388484543482 141.233642252649  
155.243643210534 160.892163220381 131.973896985615 120.724926760252  
131.421663453164  
LOC651017 140.709981878311 149.851792558427 126.964621107029  
150.48236051337 139.883360543042 128.247871411825 133.737573120711  
139.510764003291 123.240482782331 138.875827888646 148.605816748229  
141.112047881014  
LOC651022 140.619606039582 124.35721327773 154.539367933684  
146.378522944864 144.408426565541 133.953303801604 147.975551540256  
140.855078775719 145.520832968878 157.277051544704 132.027020683413  
137.473779155388  
LOC651029 148.147294674218 146.418147447541 139.497253870412  
161.046418048832 125.181327386534 177.88534558205 146.281429685059  
149.277880094957 144.617654961472 145.608087633951 146.347213904792  
171.180188911669  
LOC651031 133.94206203396 136.208608369019 139.823017208731  
143.096097305398 169.534469894464 125.962178569021 149.190528937822  
147.821639002833 145.998177732093 138.915185051749 136.737964237109  
147.127908355066  
LOC651040 140.83570584033 130.020743385543 125.846029991447  
129.148634038268 130.630504666374 132.069175779393 133.16973309664  
136.238646974312 130.882463936853 131.730758460802 133.269658133558  
136.669003646622  
LOC651044 135.54708602175 168.437049123012 155.826394389322  
158.023626712181 140.256871047018 157.096799934494 153.985529457122  
145.26329339067 134.060214479265 138.166546598846 144.221488906376  
153.969493052468



LOC651051 141.373059612034 134.786678978467 129.421772713718  
124.980683327416 130.74794199972 138.21083121895 139.527577649638  
139.318078285343 132.99095918041 138.605661097886 127.486697506397  
122.522978939399

LOC651055 142.892198239879 141.956996308304 142.612035986517  
134.387256336429 129.123522999226 141.862767428244 138.613373798613  
134.367115858307 147.901594006094 157.322594990954 142.440344960504  
142.639587833858

LOC651059 120.76311889397 127.0631494857 123.668707648172  
130.160236228857 132.04032925495 124.833659452957 138.85328409337  
130.509415570889 128.941490662452 125.187617901961 123.681353449198  
116.373841472226

LOC651060 154.479733759712 143.442361602626 152.635792342068  
137.826458479398 176.449549075475 142.311108110185 138.551695969102  
152.215146681655 134.178733595096 144.413210364148 152.265624144393  
133.204793127029

LOC651062 154.027862576708 158.834483073542 150.208809981642  
156.779004465552 151.374665021513 145.924751649542 139.08460576146  
154.207656926108 156.986053534635 155.731897985566 151.676232556697  
162.488819873513

LOC651064 805.120147618984 770.632068590053 856.74270641707  
652.826023701545 2023.92614092273 2586.87941889443 2421.87041217217  
1367.92869625376 2374.1382412432 1246.2895253224 1992.71224011906  
2544.58522979036

LOC651065 135.386650538345 148.094036534405 146.398454169593  
128.931946787934 141.134173683836 139.557059245431 146.042460762767  
149.462835741621 130.754320787628 129.846685899183 143.051871940423  
149.483826392464

LOC651073 187.494677180331 164.513371267476 178.847858667374  
198.244854812728 137.488665424434 188.268774618164 152.717642489582  
140.286870147975 111.389873428517 143.21411610625 155.172667450053  
163.858222964048

LOC651075 167.057202756618 163.203582580217 170.401653214867  
178.52221226882 176.100691355682 194.941454173896 179.632562895905  
167.157420848604 168.071171406779 178.429953283621 165.992542962911  
167.018380617832

LOC651079 136.724298878331 138.875827888646 135.351344868436  
135.310766630401 132.887701822875 120.706421084476 131.38692240237  
139.082897743357 127.084267631845 135.079944196457 143.675696734051  
142.621019060798

LOC651091 138.207553349985 145.912712700067 129.935532080325  
154.011708696954 126.260691770282 133.297361715205 125.937660544107  
137.43751840683 143.639894909386 131.060030943633 140.260053206523  
157.649902282769

LOC651096 134.650161382949 125.110064579814 116.106772298898  
116.092815232176 114.927420605185 129.27634490676 130.824958143557  
106.551076380988 122.347696497767 134.616051224668 134.817665153925  
125.525241361472

LOC651100 127.604087759266 135.429199205506 141.857434100065  
144.087004064416 130.454496708632 140.765231611948 141.890803125137  
162.668896609848 157.244026506342 133.839554874862 126.695387748732  
148.314248474411

LOC651101 162.267841475739 160.478519202775 191.074428905553  
178.404791189835 141.215542377796 145.396723478249 153.219954133957

132.926799887017 153.577349107512 134.301187092088 160.192540519103  
169.784837251279  
LOC6511102 130.979513420888 143.40955339735 129.891492052232  
143.965049742993 136.406132339187 140.197487078987 126.814332513301  
143.772376623996 139.660641694206 130.528198937596 125.932540615682  
134.341489592504  
LOC6511112 136.74788009263 132.976977898242 137.448412532999  
137.77601089414 122.519746599387 147.348400730286 140.814009587096  
141.537578081123 133.006192351471 146.111466897988 147.937679308903  
138.20899000519  
LOC6511113 159.576585660511 157.919709478746 146.840735518984  
146.210814568357 161.289708941062 146.632312874102 143.145483889918  
139.123489349026 149.032116392457 153.377182895472 131.804952187685  
149.35848619832  
LOC6511115 146.264686158155 159.124592503759 167.70368494182  
157.252701277198 150.964506212368 134.46743016543 161.614426723521  
165.985885671398 147.243263182654 149.604507483606 145.1382587433  
141.793216038882  
LOC6511116 143.943676099522 125.481506166304 132.70643154246  
141.839647226623 144.592987736094 127.874934513708 141.935435502163  
154.499313851756 153.184575380093 148.504996616452 139.566124411099  
138.252656818036  
LOC6511118 145.948772123142 127.543729713161 136.303510503231  
143.324235640446 138.775095929764 137.347554578171 136.324020406359  
150.866204945762 147.384050169545 150.011603347578 141.115539663314  
134.401733295755  
LOC6511122 139.466683069609 162.403942351933 141.50968031684  
163.125317704446 163.113457178357 155.069048442532 157.58659226599  
146.701489210289 151.198928680018 150.36160186175 133.915830295107  
168.729301938015  
LOC6511123 137.73733991363 111.722827315911 100.325215581101  
131.202090507576 131.832311911703 117.367470441908 127.535214313797  
135.872060352476 125.176747824384 125.010266083832 122.281263517691  
116.282988576774  
LOC6511125 140.020294940544 148.8870854102 175.608958881476  
162.022232949254 153.563839578065 154.443360208399 170.150889760372  
155.622257285651 153.354921961854 158.604431001643 143.603022117503  
164.857465272302  
LOC6511126 150.455271137811 150.508851767517 144.477267427347  
145.107068919893 153.19516365535 133.482237631013 132.741859397511  
134.489421865495 138.681348536008 134.533551900843 139.165248204716  
144.752418965039  
LOC6511128 159.918778562802 166.376907377447 184.801068553988  
189.603621918298 164.562302265155 170.497804969996 168.365262340217  
160.090914414578 159.867178630115 166.830529779692 150.394483608039  
151.318320077986  
LOC6511131 130.402496960735 130.920010795017 146.311966562883  
146.731584143625 146.222195387635 135.27739087376 154.113228966411  
169.496129800444 151.629999903069 141.552315273863 137.901317305531  
130.270184521521  
LOC6511133 132.311344653106 140.511988097197 147.545667896282  
157.344758285153 140.236618351922 144.914015211747 134.71514094826  
141.67550758321 140.260053206523 156.402578892869 141.158593399952  
155.119146797226

LOC651137 139.807421433384 146.503431281242 154.124057382276  
149.113794439994 155.690773461824 156.160899295182 144.031305845388  
155.180238551547 147.088665779406 161.694109087893 150.549883779193  
148.079107235035  
LOC651140 162.342112922504 152.131804134092 126.112672816035  
136.781417098789 143.813830712875 148.856482636773 140.997594159186  
150.778292242313 141.119491147925 150.927628184034 153.93927752488  
145.652246303142  
LOC651141 133.026879831536 141.767311448808 123.153925912632  
137.709120153505 139.172437503442 129.411734209444 124.157302365291  
131.380387461901 133.812639120892 125.290320836648 136.48748813417  
133.909219998872  
LOC651143 207.864808684047 185.016336026382 260.41082304175  
194.584034984339 250.217137496422 317.00629920068 270.679613997675  
442.493108530222 434.716530273383 262.756237406794 219.96819201774  
348.98762709818  
LOC651149 969.811933814244 1036.40082234884 2101.93705983383  
1008.875250028 524.725307261999 1244.67453201339 2730.50913686613  
1823.53870218167 1602.63977096867 1957.48508632607 2037.96470181871  
2185.46850787298  
LOC651150 153.173746756225 145.944809232038 152.445022409208  
164.935120145905 144.026432356249 141.253030949701 155.545904088857  
141.281116867082 137.858371717399 159.19183334563 116.126923911804  
155.442929492988  
LOC651158 115.967513057229 142.467552395104 143.544671705984  
139.374832382299 128.539969915702 141.067419336609 140.533704857854  
136.762273376313 145.612695657243 127.433203229267 128.012740016066  
135.943252855457  
LOC651166 164.347168837655 163.946569217706 177.990274115348  
171.826623289946 141.907307422968 180.022646625687 166.506602328929  
168.50246276469 168.925131238831 174.603285240228 165.773929204209  
174.840923772532  
LOC651167 118.388993232718 132.730924522748 136.225792549383  
138.905709709063 130.416957431512 144.65238608866 136.071856104688  
126.834926242799 136.169525758215 132.781725233271 136.724298878331  
127.749992538985  
LOC651169 147.694098231655 157.264673452646 149.842326869644  
154.758831302515 140.711699577809 155.043017644694 145.108281984556  
147.488635834397 154.812587513407 157.089650890944 142.307520290692  
154.362571105094  
LOC651175 121.194138394375 138.544053540799 116.14662237541  
150.596350682411 142.305484770249 144.96021415188 121.526724715417  
130.847215795313 148.005500924157 136.990610254852 121.121686280797  
134.072912593456  
LOC651177 126.365861978893 126.887989471803 137.683228179974  
141.319594283071 116.759526220736 134.102929804129 127.588907178652  
134.796088225931 121.057111457792 133.087166272749 126.934059693116  
119.627380812035  
LOC651186 153.798367953373 142.648205566485 148.751755543817  
148.478570934155 138.746987455826 146.96155692518 151.59613008133  
156.102877632001 155.957570398118 139.13396769999 155.855564068891  
149.341736870692  
LOC651189 126.042731009527 133.801549026691 138.506569544482  
136.392389842232 117.207266754941 137.82918941689 139.276102596591

131.9651841111199 127.966883271903 135.336754997434 134.374551571013  
134.094231940612  
LOC651192 131.260111979219 138.093181144173 144.262612328341  
135.639558187703 136.254966566424 142.114181233875 139.101471810467  
139.046174587432 143.750656408155 140.750004067571 111.895279866421  
135.143532936828  
LOC651195 127.226937898225 126.189005734462 140.061045085545  
131.712745388563 111.820208385514 131.269526665478 117.897556445952  
140.971253689199 147.52178512946 136.669003646622 151.625248091441  
140.60741459333  
LOC651196 123.625734357908 130.418739793498 121.85247363239  
124.451718955086 123.791515424464 136.423161205425 126.086991456747  
143.31590446076 124.003914369077 143.922878410438 109.384112020063  
130.850419527271  
LOC651197 148.503282415207 142.438586625317 141.941814923705  
117.67638166062 139.701504237962 145.352802493486 141.401480567426  
135.825931047185 140.044536042073 126.621957978122 144.518132543976  
137.609831343223  
LOC651198 341.015631528464 355.609033348692 503.757797957538  
313.888035511709 398.193129265416 270.787490294555 368.466518140043  
322.36247485445 317.600728351694 629.97342429259 394.576038252334  
295.047418816148  
LOC651202 4612.81760689869 3930.2841381915 3586.00189997341  
2637.62596741408 10250.645112753 4037.15442268836 6720.10473881011  
2767.77385345718 4022.23000497332 5521.74673982411 7786.96143641382  
4847.77258830631  
LOC651208 153.206468539619 128.634431242405 136.859366444351  
142.958906063186 124.494727558127 140.16233428205 133.99226161886  
130.511042322504 128.152956417755 140.78582131501 145.514859606031  
145.304050333309  
LOC651212 161.229621453539 141.178668371671 147.307419859572  
171.106189029362 141.304791640723 169.691392833277 165.581217879395  
166.368623023308 163.758054869675 133.932594124721 169.881866987359  
156.787932134605  
LOC651213 144.018198451676 142.729945734027 137.435736170779  
136.730623822061 141.994082714379 138.496366637658 151.191822057706  
151.118430469429 133.768419410758 141.550553034455 146.722211039754  
146.097201498811  
LOC651219 126.090985925439 135.139676303901 132.189426012448  
137.000868503792 137.483830932387 124.075077123156 150.748298569951  
138.412897151567 135.647660756548 139.051656180599 120.752194675024  
121.336932276232  
LOC651231 140.206268652318 153.498332327444 160.20843950503  
159.099495828517 145.877943006533 156.003233745771 154.037622223246  
145.426171336045 150.419668144913 172.934156790775 151.153466809603  
152.230489051339  
LOC651249 143.916179005164 139.648187461906 126.430816528764  
136.648306684974 139.757191608836 141.308299074832 151.176697752603  
116.029201658798 135.654614839107 157.12360611723 123.494412056415  
135.416008633632  
LOC651268 176.506227858258 161.225608630791 184.602704530362  
148.962593686337 148.376194044247 165.602175302848 144.601370216162  
181.425012248539 165.2958475168 162.383584508358 170.342828808493  
154.515091049526

LOC651272 160.35668299062 144.876300850115 159.835577644136  
137.597788349982 169.306573880401 159.887898257218 159.534017722536  
140.857793157932 144.358535632993 150.42705284743 139.898996725236  
126.452500728601  
LOC651280 130.863753083296 133.554822920765 139.657182434153  
136.973804637915 142.173279109959 134.145771195572 143.667207351415  
147.624372080117 149.818888178632 153.369334953677 131.630132952441  
142.910616700526  
LOC651285 150.417169156755 149.619141707962 154.177340021162  
141.840858913807 159.106269972346 175.96841318924 154.768422926874  
150.379752360563 159.701028026285 152.972779110762 152.685860451112  
144.690880401712  
LOC651286 135.613240463445 121.722412245175 136.730623822061  
131.648308760913 139.959629641771 137.094814176566 136.66358267095  
150.075738752092 132.699715693605 137.593577427321 134.883708339914  
128.702882993588  
LOC651287 139.252804088704 130.749763860615 135.682971958096  
126.788749235867 119.446359837504 128.097206000942 120.530092530622  
136.227202534196 141.232464220879 128.686425820835 138.870636101334  
133.288181734813  
LOC651289 156.221773628832 126.946305561543 156.602240897907  
139.766288958232 172.827288328708 154.277670551775 151.059401217656  
145.671099346237 145.615291241733 143.215828010442 139.579764449867  
143.444109491884  
LOC651291 158.302977853133 169.671341667693 165.530397739051  
151.984619204523 157.604224004016 170.150889760372 174.549929320587  
178.863722055499 163.256472113745 169.003310163058 138.656528521745  
181.070689877681  
LOC651293 128.653335099674 112.771141378159 129.618097261902  
129.77374228644 147.241136598626 127.409603645289 117.22284971665  
137.410687900298 118.850495684547 114.308806726044 122.770033312519  
122.125746529725  
LOC651296 148.100508271232 142.101865506094 152.77616981167  
150.933724024651 151.040909999868 140.451465188624 138.802633518223  
155.979380606594 139.13396769999 134.460035654795 168.405786851399  
135.783125948784  
LOC651301 135.36523178082 153.085975710144 147.248053518914  
167.746786642066 135.647660756548 133.829889099442 151.581593330224  
142.285486339143 154.443360208399 155.259089547817 138.050999864689  
141.267715391739  
LOC651302 166.540134051424 184.365354978005 179.369845168822  
179.525651423361 149.127963327999 157.374537572779 179.923966067226  
156.976539870288 167.746786642066 167.149578610266 153.389279691913  
146.826292449698  
LOC651308 161.700258550244 151.06074622133 145.660417208595  
152.885721101687 121.154389729409 143.468123097363 122.305514440939  
133.713275043978 136.962442874268 134.777979170126 141.482344048665  
137.406420101257  
LOC651309 244.668813440638 302.532985701607 258.311739685895  
226.506852362359 163.788418732315 240.792557915987 321.794887577351  
179.896659891106 183.795632040455 184.505279093688 351.079435946154  
184.223623297663  
LOC651311 140.652086055776 134.031960707639 144.082452235267  
132.083532534267 145.952759497544 124.285969778268 128.155080148958

126.890841187249 123.513588004371 131.641435734821 134.314636524922  
132.820327307762  
LOC651314 134.830021570666 139.005788243703 132.848926011576  
140.895053453126 130.351302840602 136.901107766796 152.520828479026  
152.67564185705 134.031960707639 165.682617337317 126.647643493986  
139.776830704087  
LOC651315 138.13987378399 133.106005881815 145.247717878099  
161.408318705503 142.621019060798 138.53179773391 139.195281937545  
152.710827148511 136.79732903972 141.727639388452 127.665162524824  
144.340734361996  
LOC651316 176.791758333054 144.839170491334 221.561252012695  
143.347066447019 148.901723851925 177.306794546105 186.033093285894  
184.437810305792 191.128539630621 179.265395910119 158.558471586662  
174.854570705  
LOC651319 148.439740062804 152.808771946509 137.107621189522  
149.211214631561 150.096558906597 183.447807651728 138.573829193205  
151.734683227196 136.553568679965 148.838294770082 134.91697121091  
126.282575548237  
LOC651324 129.346063085291 145.669033804967 141.821550320574  
146.537204621419 154.558968826495 142.671190279415 147.471494294543  
137.27048486892 133.527906709491 155.007516124803 136.08040874432  
149.361498483705  
LOC651326 119.382151435379 144.040342300793 131.853183159267  
145.980929136129 148.948744887393 114.072600760808 142.483308497682  
127.070677267233 132.774127230452 131.676609824921 118.724348027528  
134.273326732349  
LOC651333 147.684875777977 130.900049359243 144.474814266475  
143.019052979243 160.707290343231 161.837272617767 154.423801637411  
129.256138453675 151.389433433911 132.265895156539 142.785631812039  
139.263602290256  
LOC651337 134.296645422941 136.311902195562 122.860898886143  
147.46607538135 150.250193889942 144.87013280941 160.6823824476  
144.949897872252 144.636277619886 140.012295249756 142.693337885596  
153.616692588396  
LOC651341 131.104534164394 148.587929928134 144.982462113231  
147.584176709986 121.416038813102 123.240482782331 131.849442776642  
128.933672074497 138.677282903963 123.100949494673 121.406758670435  
136.55090238808  
LOC651344 149.997047695778 164.423960071908 153.95615286919  
153.305679563467 162.595632367022 159.42746786085 132.539585717666  
155.326276840738 143.422419261603 139.367493349339 140.774304412579  
147.784078315091  
LOC651345 129.428950259722 137.25679451567 151.142149775806  
148.253612913109 128.606360476298 146.750774496317 146.428534132236  
140.408989128575 139.750281709938 143.152993168137 122.190734676247  
130.95176570982  
LOC651353 146.981521393075 139.762998983487 136.901107766796  
138.112168847027 143.31590446076 144.839170491334 158.023626712181  
153.532954370572 139.907840403521 144.68114486527 148.194450105682  
154.055550115498  
LOC651357 132.74579603362 134.784568023655 148.086979061158  
169.028519464989 142.64060182109 138.661548678191 166.835922279372  
156.834059922255 139.898996725236 159.636846021745 123.354093930164  
151.671024612136

LOC651361 130.213596986351 140.502667595362 136.77260462185  
140.074841537258 155.550532734718 129.013667813486 143.695901115673  
152.503159091556 130.247700541716 133.54741488531 137.652358744527  
141.321547895734  
LOC651362 132.285835971705 132.181365505556 135.717491814078  
141.177522313723 138.494266722799 123.609527892227 135.386650538345  
123.094324479352 125.068362001087 127.179420421981 120.35956894661  
139.768555796264  
LOC651371 145.711007027894 143.422419261603 142.815817738837  
143.00521196918 132.07268641595 152.173055053184 132.692027897739  
143.716377201615 139.276102596591 149.076146942797 154.935741493562  
121.44564199541  
LOC651373 157.231166272318 126.967212770393 145.423022762916  
131.176905383789 149.545278163222 140.630844296177 147.414834563852  
141.5068665919 138.930413256469 138.03766128249 136.271412363498  
137.418345713224  
LOC651380 162.735609734946 165.131463797217 152.68344738009  
189.114794029657 166.162656500954 165.947514372877 158.509885816997  
153.964765831852 160.277755404001 154.764283765316 129.179188863839  
146.681183890181  
LOC651381 156.34272729153 135.966929064294 148.520371748891  
158.347972566681 120.786630750686 129.816385177336 144.219104742099  
159.236429097777 133.288181734813 129.591396165575 135.487310036251  
145.965900441953  
LOC651386 150.748298569951 138.74117178479 137.811304134207  
154.865107093653 142.354731066206 147.400082178491 131.079066781806  
165.960176666275 133.11040099808 144.476157581998 134.549628985766  
139.762998983487  
LOC651390 135.144908040903 138.015301767961 146.388285560372  
127.425931451679 141.733840643889 139.195281937545 134.93814894432  
142.818122106598 141.008604646743 137.555253894825 134.081308836364  
134.494167613686  
LOC651397 121.252042151856 156.587747115317 137.056500339577  
133.537552829999 142.680136733947 3510.24464112094 137.683228179974  
145.665933751618 176.456539071735 21110.9013462062 1075.3328563531  
152.492163303139  
LOC651398 141.018087546273 140.274655651173 141.290905146249  
141.703410265546 153.829636228764 118.104763610751 154.360558958914  
142.185345091219 150.084909674721 169.834078550805 135.465076459043  
153.345834660643  
LOC651400 130.773945967285 133.587927144452 146.616041788595  
155.952902855994 154.011708696954 136.647239621513 132.793020446043  
119.079680805247 136.254966566424 135.173464753848 141.70844587896  
141.512008928271  
LOC651401 139.430808017891 145.36249226764 150.629932241703  
141.202092246048 157.575902297677 135.096321258167 144.834448238435  
147.946236579299 129.628859533303 138.598167973067 146.373162751863  
145.374923175872  
LOC651403 126.033673708286 123.21732068638 131.543439103033  
132.413527125434 135.175806654971 130.207485841284 137.374784875444  
113.326628149066 130.847215795313 122.554760526767 110.273174147374  
134.753783025994  
LOC651404 145.048033586779 146.658048787833 165.406452831375  
161.930142040623 138.159966250659 155.333294650676 146.233195164295

153.178934750919 158.795335941084 181.771654391653 139.136845089275  
163.62582285753  
LOC651407 148.22974445263 145.630497368137 126.067296703905  
165.4474699807 131.33321167357 149.763038696374 149.255405438966  
133.796029401157 133.406312157375 149.545278163222 124.261531006131  
137.408247668043  
LOC651410 136.029898048127 125.379842077431 151.852294315212  
129.867246424399 140.595496714752 144.423509403938 149.974080577906  
138.888049140099 120.09801164252 135.049657594221 141.721829342179  
136.452338158252  
LOC651427 147.954079022076 151.308872564827 163.267148547147  
133.175265384038 161.564505054217 185.359195899057 164.48570046081  
155.933739693912 154.218967720305 144.528360135884 165.436881839632  
153.723169560972  
LOC651429 133.74741832303 147.387754442307 136.513942889781  
138.182987173284 126.919867899174 130.325073627151 129.520140995675  
132.091532692048 128.570067783535 124.749727939593 144.311620064675  
146.664285015996  
LOC651430 151.463200570499 132.71633377967 154.001258677199  
170.335930486215 138.220016828327 155.410704148925 146.160188002433  
146.537204621419 149.63291071048 152.390371614602 127.55397077248  
138.698178321535  
LOC651436 9403.76665152182 7948.88765120294 12690.801964606  
5601.24254062491 11190.1778174002 11777.9172529698 14798.1358474998  
10417.5218406801 9937.36968397141 13190.4826009741 14181.1182110192  
11874.9808592281  
LOC651441 150.626826756019 133.883527462382 163.245806772716  
175.469375624274 177.11682975342 142.405569257901 173.681078272467  
162.909468312298 164.281196089736 153.187148832063 141.59046197203  
166.1677526  
LOC651450 140.782522936146 158.23562423217 148.587929928134  
127.090219286772 129.884064654761 153.532954370572 142.776295389006  
141.975416815475 155.219860096943 143.336538157639 149.668587078867  
141.404832197192  
LOC651452 134.189023892662 122.682761393215 126.141462782039  
142.637421204193 146.404727168045 141.853711139375 142.749568012703  
137.423810400996 139.387445141015 135.663734178125 132.70109232982  
137.546487338984  
LOC651453 241.599271777806 270.421697521366 253.867947800583  
226.531255313921 428.850337327605 284.043349407812 578.947889414387  
290.541184606565 234.214191437687 524.245387973163 545.026293696209  
337.342034950908  
LOC651454 147.893916750136 145.737361356678 149.100294463597  
139.331046480528 149.815494316469 143.354858193994 152.68344738009  
155.715728894101 152.832573288735 129.697584673736 128.074531806621  
137.888195199363  
LOC651463 138.1342592966 129.711973013336 138.586620636835  
144.829773937102 121.468398802591 140.038295509875 121.556331561879  
122.868393258957 126.083599163604 134.255021727555 135.603160096973  
143.686906051698  
LOC651465 125.04327844782 137.760712896718 150.295611829265  
132.809364188497 143.695901115673 126.796253980623 139.809114250476  
136.058527150792 133.9382467268 132.245217686793 143.294217840279  
126.386738502885



LOC651467 124.874757806833 134.73098146124 138.768904143023  
140.345652629553 132.949288563278 135.443856371548 141.329559699056  
142.169951083733 130.763957515652 135.81863662958 138.078854535139  
125.517076778344

LOC651468 136.949403128211 130.63490683087 137.328370598183  
144.114177076352 136.359189516452 129.03753569157 120.979417552159  
132.016944935305 126.982340580909 137.565050253948 121.476730561812  
133.800111596565

LOC651476 125.624661345169 122.514826802737 135.975265059269  
134.91213977595 134.696571019896 144.147223066335 136.175268696202  
123.960761343425 126.290840923683 128.297879410629 114.673517800886  
136.337076023706

LOC651481 156.151075965844 130.374753524012 146.892065987724  
148.993620368781 142.337258528293 137.968932080074 144.173163762502  
138.352562277336 141.81391138301 137.926193455157 127.622397233692  
149.460660195293

LOC651483 128.497571151343 141.267715391739 138.684070773064  
166.182850621447 146.21362402936 161.237544868191 127.566369352079  
135.351344868436 137.212568398657 140.137435303984 129.797601100832  
152.514455788489

LOC651493 164.757907224537 156.875068435974 152.379441401583  
169.852769679312 155.868109161417 141.266129417042 147.18948282156  
136.669003646622 145.61758790738 159.374355553219 152.689610196981  
157.530573508003

LOC651495 160.20843950503 147.790720062226 155.507030276749  
186.999459152483 151.902352951251 169.488652117125 162.289781945582  
149.619141707962 158.085935267091 160.227729155903 136.118702626862  
150.265385257579

LOC651503 107.605526304445 104.977794653504 121.871105084095  
109.724082559234 115.211731367278 113.620070198869 117.470731811595  
123.833219705499 108.179513318734 119.673343767067 138.323567041191  
112.90900939264

LOC651506 142.826898321575 146.316145173343 158.325554470875  
159.036647992998 147.643339410621 135.966929064294 154.501338425995  
165.2958475168 144.152325539824 162.333158524811 139.82050388626  
148.356726939122

LOC651511 129.502730573463 143.528208105237 145.980929136129  
133.324531689254 226.595006724068 160.482734190577 165.737618983611  
165.4474699807 145.23179154441 144.298011270428 143.177915754998  
144.386968241512

LOC651513 132.257989841046 145.206796089128 134.887143990464  
150.211719786127 143.853643511287 134.618121709059 140.21669598521  
139.380610974147 135.153588830407 135.802258952006 122.673596593654  
126.924014801186

LOC651515 136.526706711584 130.027227278931 148.767517078508  
149.09398454596 114.999628959921 134.28095064513 124.684937344502  
137.157492354617 124.393008692801 135.2979041294 116.718099363329  
142.902838068479

LOC651520 147.799806976046 145.23179154441 132.813199199389  
157.010145291837 141.323417580648 173.225064625094 151.76341973891  
131.774882989257 143.837402372008 136.290486122369 143.48729871068  
139.931092990984

LOC651524 138.888049140099 144.492756323647 167.42476096854  
173.299643109576 154.350107666084 155.049051256459 161.877378749103

134.711144967036 300.765518378297 204.161375686761 159.862252588012  
146.626517077288  
LOC651530 118.901581218802 123.135918415235 128.585911203394  
135.997144927956 122.309041354217 128.389494971858 126.825785762925  
122.702175900246 130.122672154144 131.294930860752 136.297963196301  
124.749727939593  
LOC651536 171.130215858803 157.166379887259 162.347140552869  
146.574656147816 152.341361646984 141.137459291428 159.89988762842  
174.127444395862 163.37518739397 202.60339529874 151.635752404534  
153.95615286919  
LOC651537 140.080398454576 136.303510503231 140.74035966401  
139.78795317086 152.035992124554 135.680872395032 141.052322220012  
129.21974206851 137.861973133557 139.943915452851 135.571239294086  
142.264536484668  
LOC651546 136.05434446747 133.533718725309 120.616979607398  
141.195847853439 128.368669716591 159.997580819443 142.501655618849  
149.563405421366 152.643087608513 145.587386656619 127.995790782392  
132.542489755781  
LOC651552 142.07664288788 137.401137659118 157.946585085332  
139.242481781927 121.303696898208 151.392024228289 152.270617606866  
154.509924503184 150.817922696097 138.959040014432 123.453048609213  
150.542478166361  
LOC651553 151.382199195953 152.780908985916 132.668344126625  
156.957578703389 155.530415929059 162.229052648595 157.922718487881  
148.780775862239 159.344044864557 163.326102597955 120.581554457723  
154.256214901103  
LOC651554 146.070871543153 125.794788766462 130.877306095063  
140.13515064896 135.022438246099 138.227082687797 144.386561289985  
145.553219709768 157.21132653949 140.947852529815 141.03218895811  
126.402405227897  
LOC651556 166.932757191847 181.735072060023 163.709174813901  
174.985831291764 166.157713072213 173.315097944835 163.647306551474  
165.523150623132 157.881569297409 181.876635968785 155.997210529742  
191.679217737051  
LOC651558 132.448602065824 140.43729728368 128.692917766138  
129.705735906962 132.469190523971 135.81863662958 129.167602517633  
151.024201732633 134.330234316896 133.192757350144 147.928629511539  
147.433388299999  
LOC651561 135.738699497293 141.576177844986 153.083451626042  
125.005019889478 132.560292119968 141.045379969014 135.68481384332  
143.962842383778 137.381470768186 133.611588728019 142.444072809204  
123.019430618632  
LOC651562 151.776232847515 133.71610564207 143.857385585662  
148.753891406126 141.842919268688 151.051672692659 156.65842876856  
135.369146072643 131.447941902406 151.515460040167 148.188717941032  
146.738411200698  
LOC651565 145.957934576055 134.551054564417 144.585120811896  
121.353233207209 128.630613404354 119.780654293448 140.457727109762  
130.616175018332 133.67719550997 126.512613967438 136.301442794928  
127.926270257252  
LOC651568 148.291518446423 139.395743826525 143.078022283871  
147.051399102374 157.333615322941 131.76272538453 159.491388998564  
140.692586715322 141.985130140173 150.573523216151 114.373370072994  
145.997380100999

LOC651575 222.285940575778 186.854553034865 235.32095278846  
222.005022189667 333.822167152866 242.440966395613 303.638516587721  
225.050796356289 282.719121652073 359.776068595698 226.919545367682  
331.999693230194  
LOC651576 150.259400712685 148.344941331885 163.558869203898  
153.947717667689 208.507486041165 248.229468372363 206.605699708924  
211.183499580683 226.506852362359 152.237183848896 200.84691030169  
216.559563381808  
LOC651577 138.566954604414 141.343125513329 130.34939602913  
132.521681289019 139.734784859495 122.592960588642 147.043228493047  
128.587366928973 138.897393621114 142.05571112803 128.147484804104  
124.641892391159  
LOC651578 139.138329217724 152.42111372681 139.397282021664  
138.950197595669 142.367003292264 163.570018900148 137.73313146889  
134.479828866339 136.907453440141 141.311749168934 150.267298097687  
131.516100334597  
LOC651580 146.056723380149 148.696116257083 140.368070973566  
151.826103919919 143.167719135403 143.530190096012 133.108094159933  
143.830319259804 130.488972210403 152.783534456473 123.801380911257  
140.296609941747  
LOC651581 111.276543583667 114.45792163942 127.831950458406  
128.174382934295 139.660641694206 133.994376985194 127.211469322857  
126.141462782039 125.234097725749 121.492896642899 107.48180681159  
124.310436914027  
LOC651586 141.145419751161 142.81401345781 130.909388246758  
157.358696886078 144.955918499353 142.587032407457 134.314636524922  
132.492444216154 139.121639005366 151.428283279424 124.418295003824  
134.94189148503  
LOC651589 147.764068958635 153.008756051525 140.264060906597  
144.917911601441 137.984988819967 124.933738341123 153.311705636864  
129.365004129784 125.628281846465 130.601241656346 127.365142833355  
124.869732867761  
LOC651597 109.255470590389 133.422190038356 121.834248129933  
121.194138394375 131.667508767686 121.356731684516 125.350567304651  
121.053766591551 117.946664604751 123.887740029279 117.928456234796  
111.423140302983  
LOC651603 126.924014801186 140.345652629553 129.222714748528  
137.50266393001 126.409995188106 139.1434049136 136.473948855498  
138.963864375073 137.03111066852 125.45936959544 126.226621020269  
136.328447182666  
LOC651609 155.522274777451 145.704057360697 146.268073519544  
143.082880435412 151.221783750989 149.211214631561 155.502363062633  
153.829636228764 155.566065673542 145.476377346532 137.079479050963  
144.464071397369  
LOC651610 163.470025318612 145.183463058696 151.231685705236  
164.313238416498 153.505155981348 182.32514927211 158.829144564361  
160.001115445038 123.285059856341 158.130933580414 120.470801825675  
158.943005736645  
LOC651612 135.848022588175 146.264686158155 150.163801964104  
137.006917665541 135.173464753848 115.863243613121 144.12742465348  
151.05681004513 143.88649412841 136.457424070709 150.023791544584  
143.632325018964  
LOC651614 146.268718590609 142.446514275674 154.267020640428  
144.331409179705 162.9279134169 147.379741260871 147.937679308903

134.53215156472 144.389805078873 128.713131994442 125.055545087871  
157.524049610272  
LOC651617 137.848546040474 143.849399031223 147.303997146992  
147.643985046683 135.956116718089 148.727953739127 141.010588053284  
135.16316100494 157.81831741292 140.197487078987 141.596078062845  
137.386308389265  
LOC651619 176.038123840296 155.957570398118 163.843143947012  
161.348562186667 161.371477511362 168.841313096346 162.595632367022  
165.337956130606 156.374519907968 158.989652405732 160.493314658788  
167.822075935474  
LOC651621 170.430478598594 159.14477373952 188.567747377006  
163.799748670842 149.774162138829 178.939268046323 182.827395663312  
229.157389498775 180.047231265069 190.125009931628 162.885054245809  
177.93138555339  
LOC651624 147.463822782303 146.999370190363 157.419333185365  
151.714420758741 138.758688249557 138.090158433822 142.26998944788  
149.483826392464 144.278830378899 150.521719129181 133.792673129743  
162.728630453745  
LOC651630 151.66733314947 143.909501365162 126.698158279472  
135.203507726561 152.970079142629 135.023016176493 142.29309119138  
143.554726863556 151.774990926064 137.280933631075 144.507230362869  
147.651620353593  
LOC651635 152.57040089034 153.93249158209 157.535792192753  
154.300058278533 144.747349658054 153.992763544073 157.049773524382  
144.479410859199 151.815211341628 146.621996129313 142.142633050256  
152.09245741643  
LOC651638 132.920775987309 121.006569103388 114.749597426757  
142.29309119138 123.974409226349 117.962188157317 127.903393519351  
132.799355149191 137.742393475755 126.189005734462 111.078930787656  
126.042731009527  
LOC651643 152.741229289112 163.922353493317 141.004467676795  
160.446191353364 148.973277994329 165.181215117323 171.086559024882  
163.426663985855 159.636846021745 158.186816609641 147.205511952997  
161.841975820372  
LOC651647 159.102070980047 173.347463632976 163.104822161892  
167.083758835476 164.89597889259 161.806144472744 176.940723174814  
151.354187593773 161.916155040522 171.329984719612 147.932875151331  
155.23922239449  
LOC651648 174.059172465573 170.266415287865 188.079188251085  
180.501409705275 177.450674276588 156.389361240637 143.356999170877  
178.284294783418 177.415756020166 172.376544221034 168.027892518772  
169.095270479344  
LOC651655 148.1283706199 163.824878791966 150.46224324459  
140.290598244169 151.829217512763 160.042251279235 145.064773625365  
144.494401248678 148.598920567714 143.454771158075 142.071492722749  
139.681211082196  
LOC651659 128.656169194563 157.874624979775 155.873969001251  
129.701347789845 132.291157461345 153.916313595581 163.181323768362  
159.41078351918 139.119638136874 166.298554732581 161.241165533091  
144.879364072868  
LOC651668 114.574362093931 133.918638123756 126.750850861235  
135.16316100494 126.640141760199 120.55570440025 120.288469716375  
129.466612376702 121.168550902281 123.13812550459 126.370252616961  
135.323341505875

LOC651675 126.734835642553 130.934651080427 140.515996180923  
141.904041228678 146.669620721254 137.545063966957 140.35175858015  
121.575942603856 125.134516902118 149.460660195293 120.485138937899  
139.657182434153  
LOC651680 148.945466917496 139.576261630082 143.094799968981  
148.353927712013 151.226242696197 140.947852529815 140.56526023628  
162.267841475739 145.885577577352 142.543569032033 181.288519308219  
156.259214645427  
LOC651686 133.827296071709 146.091822904705 152.498222035534  
139.6391154169 153.209409960324 141.450800126786 149.432744784716  
125.929743286163 152.864765895508 131.246704975084 140.177708471199  
138.938546468136  
LOC651694 134.427601777639 132.224831869802 134.405155876727  
138.388749930671 135.273184185121 144.773767973816 134.358190382365  
133.7012683837 139.029404397979 127.500754400224 113.740942665269  
132.133979108537  
LOC651695 125.038427667173 139.081519962413 129.665507668047  
136.059884933876 152.054874792646 131.977212025523 138.805103589625  
121.371348717752 134.076865693417 131.2360427855 142.34956863109  
133.692996980809  
LOC651697 436.891409783298 465.102234374389 432.088303693555  
448.715938510132 473.853999833395 1176.01058971561 1119.23362648056  
1221.58522138654 990.814111681408 807.3257139219 1140.40904196731  
816.580880338838  
LOC651701 150.920224503051 147.382177739631 134.389518389888  
149.121894111871 146.486480663438 148.370331097467 122.852700267837  
136.831280469398 148.086979061158 136.962442874268 126.526489290128  
151.345630073141  
LOC651704 115.975794003391 131.328478053136 126.409995188106  
128.695695565175 113.451566510208 115.53736269794 134.950905279775  
144.979749941424 140.248610391566 120.428171428188 114.91722828113  
118.457573670556  
LOC651709 130.611233072509 121.564626579011 140.103020838882  
167.121623035375 131.173355686001 134.349043119219 141.999730335668  
132.141918502025 133.184279519985 127.55397077248 140.603933807629  
129.553282780541  
LOC651711 151.089328533476 129.079917151186 146.336371857755  
151.815211341628 140.016122996485 151.334463063946 159.98636352484  
152.689610196981 142.155463269751 146.199305851486 142.93332947113  
152.801801823442  
LOC651713 152.131804134092 135.092226300609 142.839077978518  
157.075067518114 158.625060605976 123.53212786736 122.00079209554  
130.110413621436 133.016668180102 144.914015211747 111.584425166104  
144.806478328053  
LOC651714 153.178934750919 156.05583229359 169.211708954329  
197.262062021667 145.23179154441 170.306241656131 158.429761055869  
155.121309543738 142.837688062688 141.150016212967 138.014046365103  
170.614129599775  
LOC651721 135.291264978088 135.242328667085 145.599152743156  
126.915338864323 122.247130087475 132.69067627743 127.374600506681  
124.755684505209 139.076258065248 156.000732564221 129.741644654541  
133.570075399424  
LOC651723 136.701400398129 166.746037983859 125.478878240473  
135.259226552938 147.808262170269 142.19015013243 155.333294650676

135.663734178125 144.974813243462 140.13515064896 150.843975804117  
133.177460728749  
LOC651728 141.290905146249 149.204816953404 140.511988097197  
126.256716138724 126.110426731941 129.257947818865 149.833346575446  
151.992112109698 132.740647421445 136.413745926388 129.020356016653  
145.656767712617  
LOC651729 126.619475852751 142.836229345273 148.186698759452  
143.025570700585 127.884750925048 136.74788009263 162.769643886845  
137.290687951485 142.973444931373 139.790098895306 134.786678978467  
135.750578960284  
LOC651730 130.712515995658 133.161552914595 145.70726782469  
136.578058206829 149.599523779175 141.66312605042 145.464640276742  
146.781221728543 139.162076054072 138.728765780512 110.594755513247  
145.165443106042  
LOC651731 142.971972776388 137.42845093653 157.6811998968  
156.638070437044 159.693019552703 148.242794464181 153.95855605751  
165.350777445902 143.2438241778 175.212680967232 164.352366170527  
145.142331981651  
LOC651732 158.653161314597 158.716575777014 197.848577663238  
159.710615852435 150.43722766614 159.082447644277 165.797170648964  
156.119899067238 149.441862883882 163.704616231638 143.222342904886  
160.353649786837  
LOC651738 159.781313090489 163.876218743322 162.320894555337  
157.288308753975 148.242794464181 172.376544221034 167.547551072373  
169.355185349431 169.032464199628 182.529167529936 164.58158284856  
162.786351190659  
LOC651741 163.356993518952 139.403087367992 166.061891147234  
191.708350637714 150.48744233923 164.406564594296 155.890403934674  
155.780657091484 147.312150911752 150.942078067308 153.128027266281  
150.394483608039  
LOC651745 136.052640679977 136.287909668938 141.166605868578  
149.839827383681 137.328370598183 135.203507726561 133.469323412904  
132.54355871539 145.346970289157 161.463042036376 131.711193516482  
127.881498149714  
LOC651746 132.902437860565 129.628859533303 153.875760529011  
124.536322123442 137.4552565025 138.582427155109 136.891612156271  
133.264245969185 141.253030949701 147.651620353593 121.031695489398  
133.886458291672  
LOC651747 136.444883411968 127.42914358124 148.578688042147  
139.271829906127 146.975258859244 141.416706868124 143.673778816953  
134.201392031199 140.338622198206 138.233799607706 150.552186000149  
119.815258991448  
LOC651751 135.200049257744 147.274945970072 132.975603230163  
148.44261900795 187.183762762259 180.1204762193 147.889486635135  
1756.88092410303 942.41077071058 219.044271073282 146.010474018786  
250.139061165593  
LOC651752 165.327972973978 170.676752248138 173.450023117394  
180.01471631205 160.006185904123 155.728609337723 171.545695383454  
171.909358721737 168.238615437246 168.52952604693 142.553175839278  
160.923897048848  
LOC651754 140.581943144813 144.472969298036 138.97776257708  
150.51537512828 135.135834717193 150.956247643013 156.704278982517  
146.353239460684 117.499697378893 127.869038038293 153.871893011106  
136.040524807653

LOC651758 136.743659350798 151.546908501054 139.785767470943  
131.371129237005 139.706279455371 133.978783899572 135.43939472868  
129.580421464913 153.34166495223 156.033897758869 141.597692730835  
133.760183242137  
LOC651760 149.897440750742 139.305220220411 140.222121251146  
155.064761390765 141.652000792271 146.90847051471 137.192570825063  
141.094578556895 139.452773383624 139.611455791957 144.692900548503  
142.367003292264  
LOC651763 163.833372505148 149.526189446292 131.525916493834  
149.829363505519 155.893018702615 149.495077381649 150.417169156755  
146.381147992719 149.520911664673 149.25240100689 148.538400348149  
151.71942719041  
LOC651769 142.655287071175 152.550031868259 137.737908250097  
125.377377116057 151.121293928309 149.788558681761 132.54355871539  
147.643985046683 142.017169259522 141.508424382665 128.438401976279  
132.64813248505  
LOC651771 137.453705355364 139.325478877749 131.76829141949  
132.200648560899 133.009854792992 118.397482835514 132.851791525098  
137.330207626732 129.794293922951 140.539606951892 129.920586100555  
137.561067667054  
LOC651772 169.87591929982 161.182901898379 186.460034745907  
183.937484597232 164.442400539653 189.567241599215 192.627266049516  
171.552010365305 171.97578836712 177.123497519231 163.880402141404  
172.020235319192  
LOC651774 137.443463471483 145.07503221134 126.649739818781  
126.364445020215 141.186913979346 137.091932621041 134.413046153072  
135.43119649883 135.639558187703 141.218832234405 140.557871626905  
156.911538642765  
LOC651777 175.437651670246 159.026102446297 151.445254181497  
175.210232663606 184.638141004171 156.307551403822 169.285901212492  
180.889946069121 165.333608076984 151.477239868429 167.629008083436  
147.322622473251  
LOC651787 169.568915494577 172.764511709731 190.045156046541  
207.920724788669 178.707066209511 187.769988580599 182.397795261147  
177.001637712889 173.892380305166 171.579123521304 159.012011848781  
165.496065029161  
LOC651789 129.24482916531 135.553183871663 133.254663058352  
125.202468372015 143.197131668608 140.202762690515 144.910863590251  
140.987694585232 131.04482088126 135.031430487047 125.696434307671  
137.420986402271  
LOC651790 151.045803695015 128.897493103888 153.279026396412  
130.965418847276 138.308965237491 135.993598471576 151.573920235798  
141.616920429839 150.84999247088 139.571752933877 127.951403055054  
134.244658505187  
LOC651794 119.920097823022 138.677282903963 131.599370671279  
141.943910304145 152.983678871668 129.705735906962 130.173734963758  
124.70219935334 126.724973604103 139.951275828765 123.395897439193  
131.466580723837  
LOC651807 160.773510498005 154.617462666847 166.662801900754  
147.865114383296 154.329176514501 184.029968090084 168.405786851399  
161.683243808528 162.660027294291 187.016569445646 162.28074297013  
176.070695522397  
LOC651808 108.404733392914 124.582577275358 127.389942368953  
135.726760147904 140.947852529815 120.77691423934 116.983869766097

126.324771800638 115.600308687778 131.404001006643 138.028813480968  
143.007237184254  
LOC651809 156.237282338037 151.266352916239 161.903016201041  
142.082257952004 136.386031133644 135.348086420636 139.962307072428  
143.454771158075 151.792921211607 166.964057265095 121.303696898208  
160.553214127047  
LOC651816 223.389795643722 252.197271817794 233.572055978465  
270.945325305492 2459.05558915812 976.782815449208 585.075322115635  
892.038018567941 1050.40488466179 440.916522871266 225.61275910008  
557.868300839263  
LOC651820 148.067562465748 124.393008692801 147.858339902055  
135.895945142328 137.760712896718 136.522590104535 141.786962606666  
141.547112973262 151.351938656508 146.580787463084 145.000523037022  
157.81831741292  
LOC651821 148.479865869644 142.169951083733 137.528342105233  
136.02474314035 147.87699690647 135.643341446691 160.265389854694  
130.147848418265 141.561769570516 135.377118045038 127.106045864607  
128.047981250943  
LOC651825 143.116451998409 125.231476412101 140.112726392608  
130.479845410716 138.442378791712 128.434301921433 128.386309075038  
139.036978052242 125.696434307671 142.394644827434 137.888195199363  
130.854818615966  
LOC651829 131.601823550269 115.725323816619 126.609398779757  
136.951350782053 108.101686347192 123.622533094122 121.722412245175  
114.032874859062 119.95666716163 118.593717189375 115.656801309856  
128.0171233156  
LOC651830 130.829825154842 152.593934787262 115.366496551426  
150.0084730766 120.744994574029 144.760229351772 120.126700838056  
147.722646851008 119.517021355598 123.893768254549 118.256000539093  
130.551216910933  
LOC651834 133.137299889323 112.832122823829 129.445240570626  
126.195222228248 135.810476921749 139.932849289354 137.667514826346  
146.428534132236 121.23469201559 134.273326732349 119.233300586525  
132.106673891288  
LOC651842 151.273261581765 166.97270256697 181.070689877681  
147.905406818238 158.085935267091 148.702473828167 152.61583482402  
154.079355899056 158.034418043685 164.309588213547 139.914034708144  
139.750281709938  
LOC651845 139.597493526257 144.178210824181 167.724233915361  
130.288547755599 157.736101691222 181.428419748662 152.476932186797  
140.09417711803 159.311949668403 141.249687936867 135.433229702209  
156.502051001988  
LOC651848 161.781529659549 151.557004418682 166.981212790122  
169.784837251279 144.090047165489 141.725162942296 162.050520530297  
155.810034593382 172.355215322173 154.894196413558 141.221162787167  
155.545904088857  
LOC651849 139.473459411633 148.190696520521 146.30781951018  
165.682617337317 153.443397882028 142.551161883518 129.732352495012  
148.484823275343 158.747029092329 150.112549201892 143.129945647647  
140.469508410073  
LOC651850 173.863373934746 159.365070384451 185.602093266907  
201.415695076278 173.176900454904 175.437651670246 173.573412346985  
174.448910958935 166.917552275021 230.227432807772 163.07139884152  
175.327597807738



LOC651859 130.124601660028 124.511674561183 134.853253781256  
135.668768914964 118.895095992424 122.111982327877 137.033134002983  
136.946137446743 147.75188889715 141.500790455788 100.04568139926  
139.823017208731  
LOC651860 129.409899416034 141.046537113211 127.04217189075  
152.629680152219 132.125545886181 136.895650862562 149.160808104789  
139.340699808517 133.651203764842 157.768329108254 119.492844191924  
133.768419410758  
LOC651861 161.906823008445 149.871960981882 163.380402251758  
175.9510758779 156.218834695891 151.528377719344 157.006278815282  
154.951136632863 153.620767586182 148.209164900319 143.803893271515  
146.215459988012  
LOC651864 139.633941983246 147.4182675362 153.391895732807  
142.185903088074 134.619470709414 138.237030685795 143.373932371335  
148.970251898527 152.900303734331 155.603263242813 138.530236176135  
133.876636039037  
LOC651868 137.726769003181 140.388212037661 165.553581848949  
159.413535577361 126.452500728601 140.890227770353 137.570343435498  
143.697931551096 137.819642907456 129.874235646816 138.753419730571  
130.258933321051  
LOC651872 141.552315273863 170.283532007581 162.890650672747  
146.11669387238 139.781351410748 159.130076733711 142.411117330429  
169.45559708224 238.037110997575 204.914390718161 159.758196845781  
167.389632521521  
LOC651876 127.535214313797 128.329985147034 126.868970616955  
127.938245853896 129.636135486593 132.442771000976 120.054065939835  
133.932594124721 132.411757518105 197.51109998167 134.54796737809  
129.079917151186  
LOC651881 173.839053227554 162.642344529383 178.619580818758  
156.126009063311 142.390243984362 193.245087824217 145.407517107023  
154.524588318927 176.183165494563 143.996350813566 154.918405633244  
161.393953325115  
LOC651886 131.568898109933 165.523150623132 145.917220112846  
134.381042390464 141.949098898957 162.861320877227 159.752644678596  
146.856133875296 138.953926269905 157.016659994185 136.824357247954  
152.624623171797  
LOC651892 144.318556353673 137.919253591105 152.131804134092  
159.443697452694 158.788210937339 152.887471821971 147.006482557682  
158.467572658719 146.298733090986 153.336395746742 130.076926011271  
137.518616190847  
LOC651894 10533.5868398404 10397.3656932566 11017.1478502767  
8812.91092406563 6470.73189429877 7218.21759302518 11150.5512437377  
9514.74328718935 10632.4185569238 11360.2921551609 9994.54490550759  
14499.7866852901  
LOC651896 137.478556403046 156.84104238878 145.892876412762  
150.517832812714 136.71484425521 133.333067546558 138.779492286948  
125.050945917101 138.902097203056 142.896723827753 138.976386995124  
143.60570420943  
LOC651898 134.501410126169 139.374832382299 134.584076788979  
144.20764300349 130.495294897642 137.888195199363 141.750316403249  
171.573342518254 157.77398996415 134.30854633824 135.233957017664  
145.281074767624  
LOC651900 163.245806772716 149.026243159195 166.714793209109  
152.169087619827 135.205434173702 163.306853098724 160.667815093292

148.288798428149 157.207544072126 164.415832011273 145.777778096701  
148.054367166566  
LOC651905 148.646699255797 152.760855359297 156.581569063195  
138.269955723817 148.390417679848 154.13120950189 140.071879210324  
145.7202993771 136.013989349192 134.797624902585 157.551854647702  
149.888719320368  
LOC651907 113.927168436775 118.807135693934 129.4807689399  
128.245734702114 117.513523498725 119.044902525459 126.00744446299  
132.475414208533 123.391298926957 123.065355919378 111.086170834553  
134.087875547168  
LOC651914 149.269417496936 120.975542702338 146.192761134077  
150.979493278455 152.411545237204 133.050798832332 154.362571105094  
159.393410854649 151.214631373344 135.787323859105 131.196196319523  
155.237180851323  
LOC651916 146.311966562883 150.687819649072 137.365567527202  
136.362761829761 153.128027266281 137.543128522665 163.024215671479  
141.876237297525 142.148597793651 141.181931072161 150.016550610991  
140.586497829504  
LOC651919 181.37137053478 163.967616022079 152.99686989829  
172.46311371589 192.244413515864 151.589273633331 193.777175793218  
164.959415532174 163.976361576383 171.247946863662 287.703569453502  
184.157941055948  
LOC651921 121.406758670435 127.433203229267 170.08485436731  
155.164238647284 145.453460204097 145.885577577352 128.258600768314  
140.513291662274 145.241301006518 133.606068125828 113.427848757112  
128.659393756477  
LOC651923 134.579005092929 119.023688551496 136.861019517134  
137.929082565223 137.647282354299 138.078214837785 150.088034336851  
146.67875644027 149.799681364551 123.884643288534 140.659276788384  
146.696029753123  
LOC651933 149.516743790585 146.406344338757 136.790457887057  
148.482530949134 145.850605495564 143.004090696463 154.025625092599  
131.448656182179 148.007068300762 124.079109459437 136.044670179122  
169.534469894464  
LOC651936 153.318678468245 158.6067091347 159.946124520038  
146.209104824109 137.296790373528 169.984859264412 157.623092996114  
153.554159360954 139.619076126267 142.745838888446 161.397788731595  
153.209409960324  
LOC651951 133.375415815666 129.144312785965 141.342216963124  
137.468570135972 149.248860010742 140.105675520432 141.215542377796  
133.695284981677 147.919058170753 139.675292022085 157.932243807202  
141.587109176431  
LOC651952 128.054394154801 128.917399281607 124.39748786803  
140.747015284372 137.449776383224 140.307931763353 130.632096412204  
122.093290585838 143.802883430376 146.675159409376 148.907136936731  
110.256771079797  
LOC651957 146.171094379173 145.542888937635 147.519991961858  
155.388752614336 187.93380542729 206.915239638443 328.14373061894  
219.394500571586 279.495192828873 174.045229095003 218.314136992677  
533.279122416818  
LOC651959 149.317146997809 155.162310001164 155.228605554943  
176.431477850092 160.390564881326 153.289258540668 178.542247857251  
146.440630638891 143.506243892155 139.21825391822 165.682617337317  
146.412859313751

LOC651961 142.194507957661 124.895023786422 139.130560988108  
142.621019060798 135.848022588175 137.03111066852 116.828333047376  
121.215558351076 127.41463780496 148.564655847496 124.090268443064  
138.921608664788  
LOC651963 168.358323243918 147.369767631957 154.789187466057  
143.467053670148 149.233023751582 149.374282007673 148.401698825687  
157.341422939225 158.044938495884 156.487049947247 139.938739652347  
149.082061203661  
LOC651965 116.881212516879 129.35944300615 132.322618637842  
155.828962183804 127.70306883967 120.786630750686 123.02879683948  
126.982340580909 141.767311448808 140.429462488271 138.942901099402  
125.212404794262  
LOC651966 142.861359851088 145.423022762916 167.370030272847  
147.195127201893 152.06044555622 159.113259830623 122.670689386332  
136.465185148237 143.62315472858 142.971972776388 145.315875226867  
152.319720089773  
LOC651968 136.732319750425 124.213104788426 135.554736716321  
129.469949305913 140.213080190065 122.799487123057 127.816596414779  
130.70867409848 150.302621632309 123.153925912632 142.759452994928  
131.025725443485  
LOC651974 136.108500467418 137.584340154725 135.583556015955  
153.402227428787 150.503278880269 134.514251897045 130.736466113571  
150.148902196995 144.026432356249 137.448412532999 147.43089976575  
157.055133233709  
LOC651979 168.007337847195 148.199249855894 156.626742111441  
156.085949215738 143.419034484087 168.71216652064 149.661929885679  
153.354921961854 154.579913524947 186.089988569287 158.072347847051  
146.135269553731  
LOC651986 144.603401904061 123.609527892227 137.048292841566  
141.588478913204 166.910561772689 136.009969058857 153.332110179758  
148.016402654687 151.115031304764 135.17827963343 123.735827460404  
138.952082680577  
LOC651987 146.002585729701 170.497804969996 150.48236051337  
126.763282018991 140.085359251038 156.942156078314 137.85150144918  
176.486551181451 130.744788360182 135.108420614547 137.179058645907  
148.067562465748  
LOC651991 131.595868226775 156.671252606074 132.688531077861  
143.577865527891 134.809348917858 134.074425424613 126.277165320165  
123.981053866137 139.921002429353 123.913203953936 136.337076023706  
139.62718946833  
LOC651997 134.307941199626 139.103395748894 123.010614051218  
133.028191258668 142.07664288788 136.970505971671 149.791777262424  
136.381593416533 121.665157726433 137.663941989772 143.780803045394  
142.846100831941  
LOC652000 144.233097828078 128.257292171015 138.100014158367  
140.45860949168 127.265211069837 145.556318940043 126.673587174832  
138.02757574324 132.342063356763 136.026302491961 133.794524856909  
128.386309075038  
LOC652002 197.938447651153 172.926288703434 163.298729857831  
187.65716654049 178.358003030064 153.244758030666 140.557871626905  
150.888616811881 148.980330875743 148.11536596061 120.01190102634  
145.025703051661  
LOC652003 173.97085982677 149.797850183848 169.246302492166  
168.007337847195 161.965270932582 154.2433882385 159.406462604758

161.155280539113 147.338615809214 149.565725707356 144.727773039491  
140.301945597122  
LOC652009 148.034899103241 133.185908839766 161.72730923536  
134.978785580693 155.507030276749 147.015427944761 129.513590304528  
145.681968019851 147.617354114584 138.340652133783 131.666853845458  
131.533378871062  
LOC652011 124.02280670421 122.095978653755 130.429076594441  
127.665162524824 142.397433929092 119.436922168376 126.316613675316  
121.849460555655 121.024572716324 137.819642907456 112.394223360492  
136.077039612526  
LOC652015 143.601057437842 142.55463239891 153.545086287929  
132.948096807634 147.901594006094 135.040794634617 148.419770849131  
150.642465826166 131.984467471242 143.939522733945 117.348231147283  
153.818325601312  
LOC652022 131.358797630945 141.925012927873 134.292099546804  
139.611455791957 122.575357101038 134.786678978467 154.755544586846  
131.668163693171 138.438792881135 139.762998983487 126.734835642553  
134.996443685544  
LOC652030 124.28033876033 129.610980807708 133.805991920905  
133.223310036542 144.324313048777 123.835583753941 122.018200592563  
120.447140228396 131.593705080542 134.950905279775 146.353239460684  
129.637555509848  
LOC652034 138.990971069382 135.68481384332 141.469818222503  
142.785631812039 131.335344547051 142.093180304661 127.369456504277  
152.496881293769 132.878638378328 139.552533656255 145.426171336045  
135.237042337721  
LOC652038 173.468958175014 164.615113709166 150.011603347578  
160.010501226517 152.609055890822 145.453460204097 146.448568700393  
167.173670781451 163.336324451735 155.140371265225 143.867013358737  
151.164936050256  
LOC652043 144.30519737569 142.571259316029 142.732625557628  
150.423586547273 129.980354138975 152.769931978291 137.556552701816  
155.072752529178 146.621996129313 146.65668813596 138.112168847027  
129.46430369977  
LOC652044 118.300797467864 139.720343780228 135.678138913772  
145.625205055601 163.446813963119 132.751406897891 148.777757083469  
140.752616434418 144.850211439338 130.870198462514 145.97330701968  
155.393326732887  
LOC652045 181.308852106289 168.3523504179 177.001637712889  
195.230219990395 165.827405735044 203.524150518033 170.577057395536  
173.544556426164 163.956894843504 163.956894843504 175.9219991997  
189.647009287524  
LOC652046 125.277002586952 140.802033706122 137.982667022604  
133.879079395215 147.52178512946 132.971844952199 121.553107861517  
140.356164189622 129.34905533265 138.737332306848 125.478878240473  
129.741644654541  
LOC652048 163.72257517759 152.210867113591 150.584633044901  
153.850588492326 132.05513812578 153.100979553727 141.209958892647  
156.650388509656 145.00699763203 150.303703193967 151.007812189859  
178.847858667374  
LOC652049 135.487310036251 148.773558380167 138.76667538162  
149.754842928462 147.183889426843 127.829001155781 123.557722415957  
145.695402948337 128.247871411825 129.067538010904 129.105655010455  
127.404415477384

LOC652051 133.075748695526 129.867246424399 163.480722123193  
142.42442972908 145.7202993771 135.413840160615 149.556644928013  
138.588751758469 149.754842928462 138.715208319278 150.746423638097  
138.562576783507  
LOC652054 149.108582827136 152.054874792646 135.946808893146  
158.691830524781 147.264690436042 125.840932898827 131.659187927328  
123.692366307662 129.116354997747 140.78902818186 134.029984991385  
129.256138453675  
LOC652062 133.470643135354 152.415752253205 136.835889180879  
153.448882783807 162.317084707395 153.088710298368 150.105503384881  
129.524056217383 150.011603347578 135.659271030454 138.625185173046  
148.342114514468  
LOC652065 142.798248249144 140.226586111216 137.333595298205  
163.20714296121 142.401333414583 155.722314592388 149.987571884748  
157.43824048982 144.179880084235 130.937742379689 135.645439440707  
146.722211039754  
LOC652067 169.422015793848 155.938283930571 175.29178007783  
177.333305785248 175.784250947874 157.035739033122 168.082591651722  
163.143613079037 164.608496326181 168.890506147594 137.217104547797  
140.306808081269  
LOC652068 149.34605615699 138.915185051749 153.969493052468  
147.07272598888 134.734429133481 143.021435512861 154.688685142904  
145.07503221134 139.55065372881 140.474338177948 121.099290122973  
138.798959235723  
LOC652070 125.553615182238 144.829773937102 144.861804210272  
136.077039612526 125.979152567959 137.314968268692 135.812301062763  
141.985130140173 140.812334019209 121.18490040448 139.217683863851  
142.201672822989  
LOC652071 14300.8562978211 14073.4649333964 13853.9715872573  
12046.9345159347 19889.8233042542 13902.1067272762 22872.0444589809  
24377.1316448061 21650.9263365935 13809.2057928642 22354.1731362334  
18220.6383250956  
LOC652076 159.282348516052 153.295838391099 158.503284955019  
170.423881865022 163.422877959747 165.143417235314 148.763098715961  
145.42029807396 153.468933239223 160.865949438448 147.066582834257  
151.914252332792  
LOC652077 125.840932898827 137.959775678716 123.681353449198  
130.209752198964 116.576896337786 115.097376525707 117.628564992187  
121.350491314441 135.421804561804 132.664379033058 151.276193269421  
146.713861499546  
LOC652078 156.061579024549 156.852187451794 156.437949042181  
143.137158027738 153.453969224725 144.110544384466 141.392661314737  
155.465250172768 139.021552573529 156.75001042701 158.756424011719  
163.074919710259  
LOC652080 126.488299049827 120.184782039538 131.288785100733  
123.98384416057 118.192302821514 132.629453540571 118.684077097437  
125.199837162105 144.380485359951 135.499195435803 126.832182961671  
152.337631025368  
LOC652082 155.7441762827 174.898012759712 171.16807372519  
168.73918684069 168.919352453652 154.417731984391 148.818562911616  
153.807525239478 158.299765118221 165.581217879395 163.41031443893  
169.378422829858  
LOC652086 131.730758460802 116.695313319162 128.793186785667  
139.87715485885 120.543881800775 118.641431192759 115.878861991823

116.793408204625 122.662260070778 136.202953030465 117.943511615792  
126.112672816035  
LOC652094 126.583342262489 134.247361216412 154.302619274576  
138.864844664017 121.747622617011 129.167602517633 131.437847958077  
111.802672864815 143.40955339735 122.642077625035 136.074837228096  
111.349642316073  
LOC652097 144.059368898969 166.143084832472 176.820928772968  
142.567737460006 167.933231844271 150.968998243223 147.982280671798  
132.639070127232 155.622257285651 144.715167331434 154.001258677199  
159.0794075765  
LOC652100 169.201608999937 144.581747568524 134.381042390464  
140.665332203898 146.9554120076 127.295532954648 143.227410286571  
133.760183242137 141.505120938773 135.722321387765 132.937942776777  
123.640123613529  
LOC652101 134.772545694636 109.038182799871 136.927274496451  
131.633827974141 138.426531345939 142.677386111317 130.154756165574  
133.959208066964 132.365002835934 142.103519373191 127.842177770276  
138.838795320713  
LOC652102 131.432729794636 139.073785024092 140.216148769999  
138.276865331434 165.836534881802 123.7615105541 152.796423361971  
1665.14066952917 3073.40543048878 221.152973486208 144.292679144059  
149.848740870148  
LOC652111 147.668990552874 144.868337748544 135.191440283047  
168.254689624696 157.860515609693 157.237147919803 133.307149027384  
149.471240458766 160.960599932898 153.464360995071 156.05583229359  
158.150949554785  
LOC652113 131.397850276558 136.267313223808 147.949560045212  
148.431101051574 139.388484543482 150.851504454247 160.766121558583  
163.960242712692 206.73292907905 146.582858169664 115.816156193574  
148.49560238679  
LOC652115 149.749660071593 178.854873582873 173.708509414674  
178.766654213173 173.088291472857 186.57665470145 160.887121295848  
138.456465793474 167.243544185778 160.589575894314 165.851677392967  
174.767697866801  
LOC652119 149.915251958706 122.636980845207 128.416531280164  
126.298187538812 131.693923403533 138.592943322694 140.295307451188  
123.285059856341 134.579005092929 136.612903661685 147.357032438442  
122.777544465711  
LOC652126 144.581747568524 126.895669261503 156.433603187722  
137.457453776513 141.497125111619 141.706292773073 129.703791330416  
149.032116392457 160.655929233978 141.073316497949 138.336667434109  
140.541925660368  
LOC652127 136.18698517676 138.596430973865 165.213327555428  
153.031479923324 143.260448301109 139.537865511933 163.956894843504  
132.154131623051 144.771457221413 142.187694439611 144.20764300349  
145.948772123142  
LOC652128 130.43775024291 145.148058824491 128.912199634685  
148.367132982373 144.40361834862 157.155105022743 143.011042973347  
150.851504454247 145.656767712617 130.920010795017 133.702845956639  
145.416733388652  
LOC652134 141.97478198531 153.687536747147 164.820007934887  
154.16370087233 155.23152084421 153.467694163404 156.66832364923  
160.496585125233 139.94624507228 163.407360509803 147.182394557583  
176.587559615019

LOC652139 144.834448238435 139.104796184094 120.806180547422  
137.93067182632 144.345080865349 142.326319895395 138.506569544482  
128.097206000942 133.439077726411 139.002932985183 131.449370465834  
132.647152200128  
LOC652140 159.311949668403 176.75095377028 167.416417895159  
189.784608429624 174.246705740225 193.444080047879 156.157567405927  
162.732574014686 138.015301767961 170.099045774947 149.647926859169  
156.336425973696  
LOC652141 140.672863685822 143.764266466204 153.731233276485  
135.773386496434 130.746465595759 162.484777758676 153.850588492326  
145.956477465634 138.370241517025 141.28700484445 138.084801633774  
147.450681897766  
LOC652142 137.430946130817 144.705559511075 141.755954088275  
177.88534558205 127.742948876822 140.28485470716 138.748941735079  
150.419668144913 140.772074031028 135.191440283047 124.629877200816  
138.831297375659  
LOC652147 126.715300671036 140.283106734666 145.335830265052  
137.47514052942 147.303997146992 127.783892576352 160.57963709333  
143.455941298415 129.295956874012 136.140327952231 139.285128128996  
134.928967716193  
LOC652148 134.465488237877 131.674409480919 130.744788360182  
142.635015113687 125.224197852606 125.038427667173 130.642810886161  
141.793216038882 148.80452641061 130.293492553638 121.830137285032  
135.508025612102  
LOC652150 144.998415908498 155.358918578397 148.309872393  
163.134784474437 145.468654174037 163.280786875496 164.116142541038  
150.449621353865 148.742216703684 146.67875644027 138.461113585594  
141.987635042691  
LOC652152 151.852294315212 142.643027992419 156.798431595608  
156.69025356689 145.500011956699 150.138643811727 134.534815676852  
155.548684011748 137.449776383224 140.864196804152 140.446530307169  
132.665590728755  
LOC652153 145.455411983653 128.759751330525 139.127442770828  
145.711007027894 137.372131049785 153.93249158209 142.277688403441  
144.377501600001 139.664055668127 148.975112606364 124.461997520222  
127.132970760907  
LOC652155 156.822477235844 145.787468865642 143.112205432731  
134.673861365626 139.005788243703 147.975551540256 147.343712869579  
147.036768856136 143.821269460523 139.842619826396 135.916668738753  
132.54577436954  
LOC652156 155.129304059037 149.94715601106 144.787836177147  
175.832474809232 156.65842876856 142.829099538363 151.589273633331  
151.237088659409 146.979988781462 141.473218014605 121.344724993789  
153.748035612441  
LOC652160 122.158160927149 123.635470154191 115.958740595234  
127.955891183207 126.635105491524 132.969187044132 148.452947427498  
130.068063785009 132.854078420045 130.804850476451 128.499303407596  
128.941490662452  
LOC652161 161.24755274554 151.98710761363 144.185406500473  
175.400802387403 178.096998157452 167.186780161168 149.393022408213  
159.775479686193 160.090914414578 154.507721014473 160.67285689491  
165.139423820186  
LOC652163 119.094868654252 127.350368333088 129.616142780279  
123.946808975704 128.840466579373 136.159825652148 123.841366760069

132.113317893587 124.197397333928 118.446703299916 138.959040014432  
120.316950428535  
LOC652164 159.951697830252 164.901810642726 179.411426984263  
142.951829221947 146.96472350529 166.549192709614 136.674553275255  
157.863585655333 151.627496656808 149.31422191209 164.264079172779  
174.985831291764  
LOC652168 137.805895248174 122.093290585838 150.034959799695  
140.421945574721 134.753783025994 130.858419819734 145.025703051661  
130.396593013401 149.883237874886 130.753266976637 141.954467306745  
147.805819921429  
LOC652173 130.388530183353 137.799016648135 132.373302367869  
152.056094989111 145.826955036113 135.281686411685 130.42746492878  
130.909388246758 132.969187044132 140.206268652318 127.998531115697  
142.002145315543  
LOC652175 139.286592412216 129.626276841426 150.251711125756  
164.160608039304 149.211214631561 157.516278302035 136.328447182666  
157.70581824787 140.545351041252 154.620194499553 158.919340819357  
147.973274498131  
LOC652179 128.335132315812 126.599418127637 122.144209450757  
124.215466523555 143.407371444437 129.998824457005 126.561067704708  
137.299908075811 137.717859035645 127.068313862984 148.87242524521  
129.856994052591  
LOC652183 181.898985277176 170.531713392258 163.829218786716  
177.582314734704 171.49930976135 240.561105692347 192.331142672469  
179.100368312505 215.094633380547 294.871848467326 165.960176666275  
208.385295246155  
LOC652184 143.191095552619 129.417232210341 140.985432994867  
133.006192351471 142.818122106598 164.901810642726 157.207544072126  
167.260319361746 184.900027626401 159.554978842683 167.114291248266  
260.746952459282  
LOC652185 168.813895764991 147.397591251955 145.841028932318  
158.095373931016 149.070750686003 145.123008539369 153.95615286919  
155.259089547817 167.057202756618 163.086539217826 156.737219981981  
153.189490068047  
LOC652190 152.805525883571 146.166710487448 137.473779155388  
156.916784141484 143.00521196918 159.124592503759 143.877226672663  
133.083877012766 136.104965836123 160.791355483048 151.78607484924  
149.678629612616  
LOC652191 163.552608805894 150.564099989221 161.331326682743  
159.835577644136 161.708130705995 163.319882002763 147.673016541108  
147.86104992164 156.525347260458 165.634117939571 154.412506915569  
151.05681004513  
LOC652195 144.071652839025 154.264142444882 153.774548290902  
143.846734516914 134.909230280708 152.486212022518 138.981712781568  
138.967080709927 121.687187898743 153.744962185987 170.473956720945  
163.873355370767  
LOC652197 139.858812885649 128.316767833033 142.652939807341  
138.800986934663 148.660440219589 143.451080466172 141.752031758589  
134.465488237877 128.144653206398 121.977373818244 134.637520371454  
145.223648967115  
LOC652200 129.722382881611 129.566451901256 148.975112606364  
134.378951325825 143.603022117503 128.287127680554 133.061016674211  
130.898067924686 121.121686280797 124.783306383852 124.847325289068  
138.331509117817



LOC652202 139.329693510525 132.103084472404 146.6306281408  
132.875314170399 141.390419429261 147.556482119673 145.185902174023  
148.431101051574 141.016596301267 130.513071750123 144.579725208643  
138.446492794924  
LOC652203 148.016402654687 122.854722097864 122.592960588642  
131.81975648701 143.074187168031 153.408890091225 125.362754088168  
134.845202154446 135.433229702209 131.554055357245 140.395662148924  
149.8919086368  
LOC652204 158.353171576491 157.463122989559 147.826950636822  
151.581593330224 154.737117718424 164.787637367264 150.191645194625  
149.772157318769 150.079372712689 151.153466809603 138.041411135053  
149.857861968652  
LOC652209 138.880168623766 145.223648967115 170.901599088282  
188.231614694297 143.262810933054 148.616543842015 147.405050592353  
143.741676966126 170.05799929575 139.636177212128 144.433543176593  
161.126686827391  
LOC652211 147.75188889715 159.936703616817 142.064680109047  
175.428000742222 134.335309757663 165.074983746785 147.508817393901  
155.172667450053 152.993555372242 138.657241641263 137.391141254051  
177.619101765848  
LOC652213 157.787233338636 147.366877428537 147.651620353593  
177.281197832647 167.430767074847 154.874899874233 146.983646662811  
148.544887355857 164.120602897751 157.041481397151 143.796699867588  
166.835922279372  
LOC652215 143.377902352319 116.20967792121 143.342736976496  
130.34939602913 136.369287857303 139.042034301544 128.205022859019  
131.705912986393 133.988494850477 131.941069239017 141.455841055881  
131.015519445322  
LOC652216 157.15947600423 146.887506793665 157.982146236108  
152.452246595937 157.66595229182 135.261561433405 135.311980936088  
153.191840013692 145.610045243277 140.03443832328 126.430816528764  
169.408892048115  
LOC652217 139.888008605915 135.268963938932 147.384050169545  
151.950883677297 132.973551954067 145.704057360697 137.000868503792  
147.606311227037 144.448503894295 125.533538277681 123.368137868951  
165.274189050141  
LOC652222 149.628421263062 134.793399942417 149.860490620507  
137.881776548665 141.313482534472 151.488973553441 168.052288484172  
151.61049450647 146.626517077288 139.681211082196 138.267726309873  
138.72219653692  
LOC652224 142.724123724574 118.465111174212 122.490271802207  
132.573953444192 130.564962937297 135.143532936828 133.640832782576  
120.74273444647 131.256325361974 130.917269984571 138.285325970867  
134.202497785854  
LOC652226 149.055493714692 162.347140552869 159.539320132392  
145.281664250703 164.103306492559 165.82215325714 163.873355370767  
172.677083810424 159.706443636973 232.699786290509 141.602233757588  
186.778334749551  
LOC652227 143.840979923821 134.950905279775 150.339554736141  
140.258615682066 151.794243108455 139.08460576146 148.419770849131  
155.826394389322 146.892065987724 161.916155040522 149.119815471009  
148.034899103241  
LOC652231 150.991991926229 152.000049232414 162.560758971445  
153.985529457122 154.140863428961 146.42288214248 134.881854036527

152.146033353926 161.142723532061 149.619141707962 129.801342433836  
168.824578400555  
LOC652233 135.075759558051 153.443397882028 133.277326912499  
133.226542641174 129.358112503486 134.700543462375 142.421913396368  
134.02083946631 131.543439103033 127.694189114288 128.054394154801  
135.781190598068  
LOC652234 145.114382599368 148.600270795407 146.357214078158  
147.024759173313 140.316066297536 131.013719535992 127.911258242431  
131.260111979219 127.323157914914 121.564626579011 98.1433670546536  
130.471929699923  
LOC652235 146.867740388881 164.120602897751 161.281195929918  
157.530573508003 150.364511432468 154.816213491233 140.330400168187  
149.355389396683 153.899573902499 142.883466086309 150.632724038845  
147.260260687975  
LOC652238 120.675356009213 119.184780023269 125.899200544217  
123.694678408411 125.593595066736 137.929082565223 126.110426731941  
145.022242996923 137.834158814913 134.675247731364 110.61165787102  
121.231939494619  
LOC652242 125.429085234515 117.284724854784 126.132339293132  
131.852067699187 144.227440632196 137.054278745724 130.224324464992  
137.212568398657 125.887854850942 129.896711442418 136.499228715856  
128.434301921433  
LOC652246 121.993231438082 127.167918433035 132.796961054534  
130.858419819734 145.735532706214 132.626349611404 135.762603711262  
133.043503979161 134.226711030456 118.807135693934 134.376870769669  
139.658932672049  
LOC652251 130.735223763219 132.340183565771 140.477307701027  
134.420446702459 128.466244127634 148.941194457652 136.572645314012  
128.545699891734 129.307025798583 128.702882993588 119.934231033302  
136.400959554698  
LOC652252 130.219888837397 133.376631703373 130.047353911148  
149.020824600931 142.278523641008 142.558109812638 136.482609639417  
128.346598756853 156.96934803556 159.970332650101 140.211016178402  
152.57905274438  
LOC652255 144.68114486527 147.882530392424 148.986058473609  
166.595529296463 184.278213908263 183.863365305103 150.489651880905  
148.194450105682 150.25322837689 156.477249817844 146.696029753123  
177.401771322485  
LOC652256 127.881498149714 154.166668493152 154.507721014473  
149.508432746895 147.425856984368 159.544710238172 158.622993108149  
156.856149172225 149.010477279209 153.801971958265 166.085469368498  
132.496547953595  
LOC652258 128.289680999565 126.110426731941 121.018722403628  
122.187031504466 132.198536906752 146.442734810495 137.48217464385  
125.060387518072 121.027465953657 134.081308836364 149.929454280702  
128.992837936606  
LOC652259 132.811368246405 130.340819826224 151.76341973891  
140.608266389167 123.281489592543 145.496033735748 142.540433565262  
144.28597792625 151.330035086652 130.483765953389 136.159825652148  
133.334314509183  
LOC652260 139.096536887753 163.748692741999 156.06439656393  
145.352802493486 145.932170561687 141.313482534472 130.185134787768  
149.666293193219 147.576533768761 136.6729514905 149.048057509964  
144.249339611941

LOC652264 157.78390301218 148.901723851925 151.821324922628  
168.139351579682 160.454243375479 157.216793735479 146.265518481456  
141.130462286785 158.98007855379 139.781351410748 149.196539425588  
137.476047500852  
LOC652265 150.657800679032 138.18056202179 152.017655364287  
142.036037957345 143.816567683093 140.420815852109 131.165798722835  
136.463867598256 144.564250008106 152.492163303139 156.731291756066  
149.535008475427  
LOC652271 167.43630698726 178.728925255163 176.839917795004  
168.702991603656 179.821008257902 200.405532717305 193.974325897472  
172.237115475147 170.394088019518 205.403820910921 154.834679562341  
179.74065086312  
LOC652272 141.147683040881 151.712097221291 144.214589452164  
140.03443832328 144.669509071181 124.715454831847 139.108656684059  
151.741079858395 157.474913177177 157.378317015602 139.038833073872  
133.619092072157  
LOC652274 139.488057371254 144.510775519908 176.497706091676  
143.0235772247 141.817230824364 144.985280401441 123.782746527199  
143.980608339892 143.747664482225 135.446072698039 134.805239981342  
136.801338583441  
LOC652276 127.413588723306 124.666487633365 117.67638166062  
121.957155610892 131.552276774901 119.455615461113 124.253582884351  
124.248997533959 111.691973758042 119.822587087968 130.383001462828  
120.263659727964  
LOC652278 132.161764435769 141.071184297124 135.938590242744  
131.732416355002 133.459221120979 141.050384368733 165.41729888767  
150.790155351217 149.829363505519 138.365589511693 145.615291241733  
146.42288214248  
LOC652281 161.769370009823 146.190750749851 165.642728895682  
146.081940883446 180.418707740532 138.712529531951 150.484823814674  
153.206468539619 156.502051001988 145.385816618728 166.257275241937  
159.443697452694  
LOC652282 157.595468761042 152.77616981167 140.617663657037  
136.293084080479 133.836390935612 140.960907353937 143.125454748996  
147.676279102364 135.798387504219 143.488761023636 127.758381206968  
144.562038493733  
LOC652286 130.504023268824 146.90847051471 145.709172732805  
149.416411285088 133.280418227922 147.893916750136 135.182524652868  
127.433203229267 135.807494668545 138.343232981485 124.327827104244  
137.190593489949  
LOC652287 141.013392458859 132.906201428703 147.135640862542  
153.408890091225 161.704966315183 152.404186073033 140.005968571997  
120.538535752185 146.010474018786 146.632312874102 141.076652697698  
160.486513643798  
LOC652288 152.356731704094 142.259196792767 147.367666575705  
156.890299350025 151.206697943841 147.340106879021 117.244895482991  
154.402315635227 140.238423894192 136.699011428085 137.307786147787  
163.091280469234  
LOC652290 146.536055773073 150.863099494798 142.30928744202  
165.932628858503 131.884208813525 165.122737166322 154.462766419353  
158.014017648839 157.431972439046 165.558963147657 161.740466814881  
144.287786573389  
LOC652291 131.734429913106 140.513291662274 142.818122106598  
128.033383607545 179.230909178397 138.230197299262 148.597346678768

153.709230037306 180.719868519867 148.337793323867 159.138344477256  
155.63671938031  
LOC652292 126.946305561543 119.391213033544 135.704067249674  
158.135321157995 130.520275539672 141.817230824364 142.863268359757  
130.639974588163 137.916872642522 141.664271607079 129.971670681199  
123.281489592543  
LOC652294 155.405519023053 154.985781979984 149.698664700146  
151.3362561751 144.136328845967 155.899547877596 156.737219981981  
147.017958916908 152.760855359297 151.993651822163 151.794243108455  
159.344044864557  
LOC652298 123.067278658698 130.682112236817 144.36575644625  
126.81140158672 130.238231520218 133.490805791504 121.134305707234  
139.336891718408 134.231634410324 139.131857948357 140.504486195539  
139.558611792069  
LOC652300 133.930997975106 136.865340099645 128.545699891734  
136.799138736925 129.049273337631 135.333055517636 139.326694135427  
136.205702793983 138.647667867725 144.178210824181 138.661548678191  
128.959487155628  
LOC652305 143.198622036573 133.249792744053 159.603586227897  
138.902097203056 136.216577685046 142.106329280184 156.083002868004  
168.643026828823 143.801139839773 133.685254707686 129.722382881611  
134.172033051676  
LOC652317 147.284005815059 142.081013617671 167.468390483999  
144.445496145045 134.620896927473 160.001115445038 142.121399383259  
144.727773039491 145.444483891989 152.011551837951 132.168821720799  
159.082447644277  
LOC652322 143.517327774456 161.744366588564 132.53122878527  
142.079184950618 161.724388995749 147.844734028193 133.550008967009  
152.524106827617 141.357668647617 140.616811333466 160.72009357092  
118.195512252508  
LOC652324 173.017662861015 163.538862303362 195.185025611945  
163.582678113215 159.266921692363 201.731223995887 198.066837203458  
191.987301954927 190.921283434627 187.903298116031 200.443940449586  
194.775234425687  
LOC652326 159.665989587555 163.59704679338 161.530878860883  
170.622615783608 141.604832186257 142.392860474555 154.865107093653  
169.956827727468 167.871703133182 161.108249802467 170.692146255416  
163.653662369257  
LOC652327 136.294479720968 138.764834713216 157.13859713415  
140.405405916188 159.199045715212 132.916608405637 145.71535210212  
137.938310376106 151.889644436875 137.726769003181 134.493062923443  
159.74220366735  
LOC652330 166.515199732076 167.125830254039 174.928155956396  
144.256029338053 165.537853089052 189.853136769155 210.64483507528  
191.830711714844 176.420075374686 154.201375471487 209.417052464583  
203.791916347213  
LOC652331 161.208713751942 166.964057265095 141.657167932865  
158.56996905631 164.870860592068 139.344344562134 152.633139090274  
135.752004489749 149.204816953404 142.703116372162 125.262445870212  
148.245974323625  
LOC652335 157.481645415121 161.331326682743 154.239755912437  
158.390337945372 146.446922196868 159.354364289526 154.193086881801  
146.97203173446 147.221425204534 158.975786937923 141.794898246882  
151.492236411757

LOC652341 127.31283918221 161.481227197715 139.831964368637  
142.073529553425 123.046069309901 128.988736837863 144.387375194186  
140.010730572075 142.166650343224 137.607767467172 132.735371358102  
148.444479022559  
LOC652342 175.495965414493 171.916201289104 222.8766610624  
197.873787638411 147.743331160624 170.768398273919 141.166605868578  
153.941193682697 140.767270136561 123.591078216224 137.625415175495  
135.81863662958  
LOC652344 139.205052994099 149.335288055732 159.41705570719  
143.114384950467 156.110073009771 145.745466612541 146.440630638891  
140.960907353937 150.063082731931 144.518132543976 155.896065329825  
135.725202462502  
LOC652346 127.67321085144 145.739537463907 118.05386204863  
132.240470270795 134.168381235167 132.135448831967 119.152881350581  
136.6729514905 132.555211779043 140.040420521312 142.924854393401  
125.539199863559  
LOC652349 139.005788243703 129.278833426752 135.773386496434  
130.684569384626 127.036976462046 133.727447520255 121.414076245292  
139.348494759948 130.933379257307 137.561067667054 134.175287993769  
147.135640862542  
LOC652350 150.799400717425 148.708564065858 149.987571884748  
157.431972439046 150.259400712685 159.476343366991 158.030237507443  
161.73079180403 148.941194457652 143.626857507866 137.012646671173  
140.860339862967  
LOC652353 172.491604217899 157.021010130169 145.155989928336  
160.553214127047 148.702473828167 163.59704679338 157.58224826673  
164.466332705334 155.971045744096 170.901599088282 156.787932134605  
159.874161198304  
LOC652354 126.718380351644 140.319851351329 134.66169946771  
123.156154667242 129.669484303621 136.22416508552 134.053685488055  
129.668506092785 156.06439656393 152.052084712417 140.482728188987  
125.865974180252  
LOC652355 140.563079852037 135.745821200254 139.285128128996  
151.9565369062 145.821544099585 134.585762409782 140.857793157932  
140.142884879106 164.011683602245 144.80318019871 143.377902352319  
133.667852983262  
LOC652357 144.461999591223 152.526785074182 155.30926640293  
165.103398617203 122.932745723044 155.851264092344 142.815817738837  
152.032418787633 131.693923403533 153.279026396412 119.618176258524  
174.515815532892  
LOC652367 149.511776997149 149.091925032548 125.364821583438  
159.811778680604 142.039943511086 139.378915474473 133.581450824362  
136.603035996281 149.678629612616 142.114181233875 124.526220300907  
137.27827836407  
LOC652368 141.982743538528 134.952584272187 122.702175900246  
133.406312157375 134.000363767958 136.317978146216 130.497405221273  
141.245471037222 141.480793979634 144.013615296685 132.899305777714  
141.8268805463  
LOC652369 141.536764775726 140.293431620804 135.195985987169  
120.611442477736 129.315412536491 125.445875333112 133.195030751476  
129.957292351968 133.816601264067 120.184782039538 113.388450168062  
128.056668224393  
LOC652373 148.446949168794 140.687016530974 148.450023054885  
149.936366672592 155.130745957603 153.165872773973 137.517461260687

140.113334247294 143.385915173392 146.111466897988 145.652246303142  
142.623106544789  
LOC652377 175.810411923013 158.953705937936 148.052222389368  
167.194306682927 134.853253781256 156.030794481734 145.256660345252  
154.352518161283 126.00744446299 148.190696520521 138.21083121895  
145.206796089128  
LOC652379 127.829001155781 144.193756031386 151.312853764675  
135.964630862223 149.383429241903 160.215396651606 140.702685210277  
133.238296113721 144.763700813057 157.530573508003 160.466187961848  
136.557466007228  
LOC652383 189.799091507686 153.524100996368 157.067264221207  
173.315097944835 149.772157318769 146.84891312893 154.190469538568  
144.891541843777 132.903959880979 146.90847051471 124.116400777472  
144.610341215903  
LOC652388 164.15288821931 150.751386127903 168.235729347406  
159.317429821638 194.014764659513 188.605328108654 212.643559782754  
197.91325268683 199.88618355278 196.345065354654 174.903798946103  
196.819022688128  
LOC652389 138.82269002406 154.771737131348 146.114159600635  
143.390971600678 151.070654092886 146.125125252096 133.343243441383  
149.432744784716 148.237980436128 154.973990421257 153.295838391099  
142.208987267497  
LOC652392 143.080742311914 150.170712508944 138.325950428197  
149.584582050615 153.801971958265 169.948277715908 154.273953018148  
142.077913913564 147.082068348591 144.592987736094 145.294665838127  
152.543005423742  
LOC652396 148.764956861822 128.346598756853 153.752502094283  
138.76667538162 140.418010366997 135.715745768179 142.139331321085  
130.603837917984 135.063259138429 138.440663763957 145.250076958551  
131.83430682495  
LOC652400 140.16233428205 145.221594295772 133.994376985194  
135.531326977319 142.480203661104 148.597346678768 155.478383896934  
142.470799054068 136.27621600731 132.950480329605 135.809383370957  
130.914932329297  
LOC652401 126.00744446299 142.590631181358 129.073750290924  
151.650777127117 140.451465188624 147.89884142817 152.409211647994  
129.086186239653 138.42216862811 131.146604635155 123.551225884748  
156.994265858123  
LOC652404 171.706534562905 159.159106382346 173.010799217261  
168.890506147594 172.446482096058 164.558875058199 144.625105340312  
162.484777758676 145.08853313195 187.216245895253 134.243435358729  
157.142101889337  
LOC652405 141.255406288178 148.516653846017 151.367402326399  
131.617027772841 147.013598868335 147.988883293205 143.101750222256  
131.981505236332 146.249951130016 155.655771857361 114.533677697026  
160.164327420125  
LOC652408 137.006917665541 139.718721422663 160.98571841915  
163.668476670167 162.10411532202 151.761369162723 148.856482636773  
153.811165696928 158.058346079359 141.67277923437 138.760800146167  
159.990561741675  
LOC652416 146.612602970963 149.752188104803 149.127963327999  
164.880911221767 179.376968970326 133.891337645936 151.174536186463  
146.826292449698 148.153776704837 137.641136471239 159.120172969378  
158.735283017367

LOC652417 148.715065348779 146.98903251354 132.216453078716  
140.782085233573 147.192815700248 135.227424713702 145.562772839517  
146.639556437847 158.495606141226 145.128919984856 143.165150890885  
154.501338425995  
LOC652418 139.790098895306 158.960488862727 139.314945862113  
154.908975734985 127.011594171986 166.515199732076 169.385340991747  
139.409685553177 144.494401248678 163.919426088318 158.967160833334  
139.305220220411  
LOC652424 138.434347257063 138.161690144518 148.514806562804  
133.414198431469 113.362825181676 153.000232171457 113.154880173167  
144.924212639731 137.509100088226 158.92254744379 136.381058433385  
139.552533656255  
LOC652427 153.453969224725 134.676039394438 141.18490443471  
140.793616429174 130.224324464992 128.695695565175 132.150815042636  
128.398711525305 137.968932080074 137.514133745073 149.462835741621  
131.451173463405  
LOC652433 117.045020667394 127.166821363722 133.689255383855  
137.100207190052 147.268006631005 130.694506122253 145.247717878099  
125.410876867635 133.64938083537 134.134810805413 126.643229085068  
134.537123332992  
LOC652435 126.865622462379 122.941711366641 126.783524489964  
136.660600727111 130.031303483631 127.709638375626 118.619176257622  
121.675007387533 130.820415610578 135.764392116216 125.587057468028  
123.488418655586  
LOC652436 178.766654213173 149.000760379976 168.013310840048  
200.915806094193 173.299643109576 185.583997792931 167.912321820083  
169.895672129542 163.356993518952 164.970438494223 162.403942351933  
158.448557470725  
LOC652437 152.334669286305 146.779054605199 165.703810120915  
156.030794481734 161.419873271162 160.164327420125 180.430425314885  
160.644747532952 154.771737131348 149.642946071295 131.414690782328  
149.31184788671  
LOC652438 150.073816271065 143.951756384507 137.899291413431  
138.221749464651 149.272219727411 143.508657511633 146.768631086088  
129.11843197744 140.802033706122 143.322199505844 128.543460982378  
138.011923055019  
LOC652439 140.319851351329 126.853028093579 143.802883430376  
133.148442269517 146.336371857755 143.182399285928 151.751963310212  
142.916274989816 137.322392546784 138.981712781568 157.874624979775  
147.307419859572  
LOC652441 141.994082714379 123.30960025689 132.28010415054  
166.611809859059 144.708780756278 137.966987037709 140.908882557383  
131.464229237662 142.469353808346 126.938068475032 123.02546895475  
138.746987455826  
LOC652448 140.571143847885 127.999820474468 123.505435008269  
144.324313048777 137.388190728367 136.151754558226 135.333055517636  
125.038427667173 134.533551900843 114.860437706855 133.404671629495  
132.604589324628  
LOC652450 139.951275828765 124.772219140795 154.161892545061  
157.013200713587 143.119405329718 150.203281104753 129.57551086282  
156.698856643638 143.554726863556 130.639974588163 135.106072664488  
130.512057032369  
LOC652451 134.85809559975 132.070137735026 143.385915173392  
155.362503575715 123.235136639469 138.808591995741 135.185283076286

136.368258257435 132.834433153076 135.472135601859 140.809956497396  
135.215356532498  
LOC652453 142.882391486465 128.879953205511 149.049931380459  
156.492488946383 138.928287624746 144.744603095605 151.914252332792  
145.325651443863 148.390417679848 149.364498870469 125.553615182238  
147.722646851008  
LOC652454 121.917596225576 142.93332947113 122.216479103528  
129.284384810812 127.509583634884 132.815753681623 123.598210440312  
138.397152876585 120.006982591236 143.449303333495 126.713610681382  
126.186758919929  
LOC652455 173.907933001446 164.99860393383 141.606501859513  
184.826234215216 148.435419356331 170.13453211897 176.77183598995  
170.18781660707 165.430811083128 176.328994356625 163.681014961332  
195.595275594235  
LOC652456 132.23149173224 160.70138318726 149.696766215866  
155.572357799741 124.160433356046 155.061749542085 131.360310497851  
167.389632521521 142.192934622228 131.570358580547 126.473768158566  
135.640456648007  
LOC652458 179.551640851353 163.681014961332 226.841838641151  
192.168634727505 176.849238577762 268.78904911703 214.566711351899  
193.589480577091 195.043838688467 168.460095116205 163.809967446414  
225.730739636442  
LOC652460 137.264095379365 156.456332386608 159.584350289413  
136.317978146216 152.191393042132 155.7441762827 163.593106951255  
154.604363252526 137.432492568789 154.515091049526 138.220016828327  
162.147989253357  
LOC652463 152.488480322526 139.191746593825 169.984859264412  
140.616811333466 158.089922688997 141.775100066311 155.6299578128  
163.956894843504 135.911903336544 200.094610104813 123.379461430902  
140.66266106824  
LOC652466 137.185243517766 128.505296338657 138.006973261364  
128.650205300992 137.229871801676 139.646026806298 127.824005374202  
149.984657985607 127.938245853896 134.730275384832 128.685065364693  
124.213104788426  
LOC652468 132.261161069329 143.795399778897 133.78629612147  
135.553183871663 127.187020441742 134.125038192486 130.524630778991  
119.984301761327 128.29486937905 136.236441543681 114.093935026467  
138.206065640158  
LOC652469 118.104763610751 141.686945908315 134.264584077125  
129.732352495012 158.704425428694 137.047288508371 138.808591995741  
139.974586762939 133.306414477234 149.829363505519 135.437227744668  
115.389934936253  
LOC652470 147.199961777192 149.326216726716 150.97777780024  
143.45723206497 154.469132478321 163.298729857831 151.41546939633  
151.585818981801 148.466658640201 144.643770374264 150.046300135261  
151.60113116166  
LOC652471 137.720747340105 142.825203517688 160.557818466874  
140.541925660368 135.586890819526 138.506569544482 127.765987130281  
124.668658660052 127.0631494857 144.700955682048 152.277810621542  
140.402944266863  
LOC652472 137.644942697483 148.598920567714 138.322109975426  
122.068058346443 129.322481607056 131.804952187685 134.850260739685  
132.7284396337 133.056659202188 128.083964056229 127.527378949803  
136.631313776416



LOC652476 129.247701136266 127.760995691556 127.644315207178  
141.478253058549 126.841836614341 146.227452269648 136.888915439473  
147.657151780506 140.079516848788 134.000363767958 127.220812636148  
138.557464672111

LOC652479 144.458829225668 153.377182895472 168.180063344887  
175.704031930103 165.985885671398 174.873893094923 150.456500446175  
181.062188174871 159.009211991511 175.832474809232 154.959217895243  
141.115539663314

LOC652481 202.741211613885 191.284275676256 268.264885392368  
198.795112039249 214.100698312272 460.24741151155 346.065746911798  
308.974786799114 331.018914429561 334.350011399462 239.827648772906  
445.763740779039

LOC652483 149.100294463597 129.884064654761 136.573928520456  
145.733828447934 130.877306095063 135.010937737018 126.139188586523  
129.636135486593 141.141047405344 139.817493158675 121.747622617011  
145.049387327924

LOC652489 371.224296589448 326.417021307859 598.095370768587  
280.749681050778 402.366797969833 943.23069404564 913.934874451961  
915.015154168627 1070.4597488302 735.8141982568 549.692164962653  
1443.68785521063

LOC652490 127.859873416515 139.034940762344 151.221783750989  
121.159593382017 134.633286312653 162.168246402027 152.08574341962  
146.108551647446 135.9489027281 129.719122724699 159.43317827517  
140.02337095267

LOC652491 152.470980074365 149.217191121377 164.608496326181  
150.391286215189 141.508424382665 173.816408146725 146.381147992719  
180.01471631205 140.486376016494 182.919385608842 156.16485596016  
145.637807142732

LOC652492 170.577057395536 172.888455552446 170.350891928203  
158.523941833883 184.974347306539 188.847480174391 173.142436025281  
180.132104305583 185.027902485379 167.057202756618 176.456539071735  
191.405362404386

LOC652493 246.263259852067 203.563098303937 170.974759483946  
170.007845523415 383.033242143031 647.666334416707 392.06522028189  
14755.8570847826 21110.9013462062 954.488185198006 255.156682699288  
694.429144766435

LOC652495 149.400244837133 133.411087000196 148.973277994329  
135.849839822066 158.316173597874 128.78647242525 155.997210529742  
145.873819094778 143.839170216353 144.446903878863 142.032814623366  
126.678746008577

LOC652499 128.888149939072 127.540848073484 139.825088162247  
132.342063356763 134.555873832434 119.725487374119 132.038012025708  
136.919702354166 127.187020441742 126.455271988029 106.829040075772  
126.87100632595

LOC652501 122.376432064286 161.514651272858 139.232893342069  
132.5377752987 131.414690782328 144.555718186987 157.997750997487  
136.209796259197 150.46669393448 143.689257983705 135.253713075341  
142.612035986517

LOC652505 161.050438117555 142.228042097379 152.20173979854  
152.710827148511 138.72219653692 151.577450119302 142.639587833858  
135.792966926642 138.279775054156 150.991991926229 133.606068125828  
134.770852936106

LOC652508 136.545742688573 153.731233276485 163.451063547847  
158.919340819357 145.539731152955 173.656241217331 173.299643109576

157.328404229451 153.474566767304 163.119211741255 147.988883293205  
161.870389635266  
LOC652510 138.582427155109 155.603263242813 156.733898702331  
133.422190038356 131.839890565869 143.30977386038 146.916683989962  
144.625105340312 150.765477999064 152.054874792646 140.581943144813  
125.964335876018  
LOC652512 151.694193636313 143.517327774456 152.883970401452  
137.858371717399 136.457424070709 170.522853717911 147.790720062226  
152.42111372681 145.459919416288 166.187099519035 135.48250324478  
151.540744107423  
LOC652513 138.618761382177 138.609972011765 145.690634269858  
174.737828693216 139.939863187181 145.63870792125 128.071379991958  
150.933724024651 148.513451315042 152.42111372681 138.418604660734  
141.683298500736  
LOC652515 134.369532556726 166.760758231104 151.440732942734  
165.896420029269 138.28374062778 153.464360995071 146.792951584868  
147.320976507643 138.461113585594 133.480196904786 149.865644080359  
136.532168520039  
LOC652517 151.102431192559 139.885054845153 145.524305076788  
140.527521345097 139.219476681919 136.461182044855 136.540568915609  
157.81831741292 141.513636348978 147.694098231655 149.288034848931  
139.914034708144  
LOC652519 155.072752529178 156.756159786366 140.52059487958  
130.420753247797 151.171716392043 158.809865241567 150.333572271902  
153.882081780197 147.461480849333 141.266129417042 156.191659799142  
144.107029869771  
LOC652522 132.422453311845 133.86835278231 116.588138374632  
139.644701550661 139.568610307888 121.110498703017 133.59686364883  
137.767900781368 118.737244693366 146.114159600635 123.111192189217  
126.698158279472  
LOC652523 135.744202879162 131.615462296871 142.678267012725  
151.80632463295 129.933228671483 165.017178571218 135.395071593072  
146.160188002433 138.011923055019 149.60803906364 146.626517077288  
154.13120950189  
LOC652525 138.455086062782 142.788848338402 135.542079867325  
156.632939064629 141.143572141958 139.870306695324 153.464360995071  
134.260779370821 148.945466917496 137.844113743956 154.38209765671  
160.078122267577  
LOC652526 136.240503841228 129.409899416034 134.580526467375  
148.143367490426 133.016668180102 136.779180530712 150.269618125943  
141.849319373594 121.289159587394 134.734429133481 129.130212375815  
141.236939351298  
LOC652529 130.466571969657 136.904851056919 138.084801633774  
130.953237161257 135.254996386778 137.468570135972 147.216303852902  
135.918590725404 138.700301754711 139.223480216048 141.606501859513  
138.42029331811  
LOC652530 149.385103319547 163.256472113745 146.428534132236  
153.366677608026 154.452964510369 142.399253818882 132.251093122058  
130.705091244939 146.894793774087 137.206961927035 140.793616429174  
149.77596374205  
LOC652533 139.81502919163 137.934850241054 141.229805348717  
143.555987405898 149.482399138862 152.067897082883 126.763282018991  
136.90636489391 150.193479279784 134.722574388775 150.460618402778  
134.590666885938

LOC652534 168.132172570809 164.763269377973 151.761369162723  
161.89906072679 148.143367490426 153.943227610765 163.863677822465  
175.302832015761 163.809967446414 151.712097221291 148.520371748891  
176.927500850631  
LOC652536 131.521311288114 135.938590242744 144.273011517032  
160.892163220381 151.029785584386 145.017264740722 130.080728694308  
161.417207801991 156.304678960663 140.873210629865 166.452651396293  
150.016550610991  
LOC652537 156.626742111441 173.440596296333 154.962835391567  
126.845048064014 159.090982014161 154.291717784335 158.950169226637  
148.832461329713 161.592528958127 160.379168489216 154.371946675862  
174.663845688179  
LOC652540 124.080382291282 124.164523121103 121.75662526451  
129.752997624387 132.50676380992 131.657454325126 129.086186239653  
115.25307661968 129.269919529415 133.379872189405 129.058085094891  
129.151767489346  
LOC652541 247.683819429859 260.045018348182 229.181725450534  
244.954917633904 217.576547690525 230.508733145583 210.729945718068  
267.069665000047 230.161369375718 192.548337508559 279.598585549004  
217.094085829328  
LOC652542 136.767307268217 151.340728221261 141.681266095578  
142.388076341254 148.219406063533 145.041430440608 141.239354296152  
140.617663657037 136.556183079815 155.330215726109 144.129889080946  
137.973211667003  
LOC652543 143.901267937876 146.033591220134 165.938009275308  
155.498580125421 168.027892518772 163.227953876329 153.377182895472  
151.515460040167 158.452089329714 147.357032438442 138.557464672111  
157.352236520828  
LOC652544 134.891736344801 144.388851371784 137.97889661868  
158.213784310645 124.396267620543 149.3567486207 143.096097305398  
129.884064654761 134.044789094272 125.519298131694 137.018202374481  
136.140327952231  
LOC652545 441.112782197591 416.392874553797 537.828979447378  
460.514672966125 342.878522959461 207.598754515294 311.04252785157  
211.869300324471 227.774354299962 244.18714778846 200.934618257908  
214.434355263652  
LOC652547 144.224287382131 155.513572243604 150.841261270382  
154.428779374984 140.839056652898 161.382041789666 187.145134088286  
156.859539612504 155.026276988302 152.948391119096 157.280532261425  
158.841505957036  
LOC652548 111.886543737378 138.239251358245 133.704706615071  
148.57301274812 131.80257432775 122.098850053347 137.298549014192  
128.755697083014 142.203367260558 146.301300103564 129.780648518219  
145.072924262206  
LOC652551 148.13657736444 148.879605388902 150.287472248483  
154.43808450305 140.208983238283 163.175801793143 137.96452133771  
139.457084084368 141.696969082758 145.684294398911 141.446916444258  
143.925616978401  
LOC652552 126.915338864323 140.617663657037 141.987635042691  
132.518394343751 127.31283918221 117.580122770251 145.054873480806  
149.554174907798 134.888404433315 129.158212237299 145.862497313025  
122.452541100946  
LOC652553 132.189426012448 124.031916322066 124.833659452957  
149.350630572336 124.148194572004 149.783542909965 139.328340242696

134.919972250554 141.853711139375 141.383975990479 128.91354251648  
150.531753446398  
LOC652554 141.073316497949 149.554174907798 154.737117718424  
153.821728151219 157.221008210698 129.45936538019 147.1476865809  
131.872583529419 166.88833169342 142.017169259522 110.865668451601  
157.912864169081  
LOC652557 152.404186073033 142.19015013243 159.420533375725  
153.200153031275 142.579346058088 149.752188104803 148.80452641061  
145.190896872008 142.793573585472 142.942021904533 115.00776048097  
161.694109087893  
LOC652562 147.643985046683 144.727773039491 157.623092996114  
157.006278815282 161.514651272858 151.134466830828 150.584633044901  
140.806935772116 143.193305421206 159.021304119265 145.671099346237  
160.941804737367  
LOC652563 148.678869698203 133.329392986316 165.692508737757  
163.915489303508 127.433203229267 160.53152291979 142.338352884053  
147.949560045212 144.578454791104 144.559193410932 147.257773507186  
134.901659808633  
LOC652565 154.33224999163 150.279529635193 151.973681370675  
144.71955090408 163.600888221193 156.825157746082 142.960875909369  
153.360382235409 164.784346867158 165.262738484387 144.032779435658  
162.002221893617  
LOC652566 142.126620107418 161.937384157098 157.530573508003  
154.665212863369 161.548130965486 172.942666836182 166.932757191847  
134.04235176608 148.034899103241 163.59704679338 155.031272695335  
150.854580568572  
LOC652568 143.92831903543 131.510494315469 139.519321690754  
137.999190557332 156.144934427609 152.397984799517 145.63870792125  
136.742206779136 134.71514094826 139.648187461906 125.637138636558  
134.53215156472  
LOC652570 148.42845062376 133.43362126395 137.177271162749  
132.864018034342 156.026806913759 140.169200413643 150.231063426302  
144.458829225668 132.233396667074 145.159572111039 140.401508808129  
130.154756165574  
LOC652571 131.762145063734 126.700147643 143.198622036573  
139.727248583626 143.193305421206 137.029726467523 148.532339759414  
129.471713415228 132.680140469504 133.486155360266 135.400054238597  
144.214589452164  
LOC652575 167.73288535728 135.421804561804 144.731299077209  
149.876687693565 151.885992695789 141.8268805463 138.240874738649  
149.450921195838 142.553175839278 148.632332840817 152.587331888423  
139.654648891206  
LOC652577 133.895547281411 133.707285280448 137.923852688695  
146.633627492419 126.630787911053 134.819406064011 117.946664604751  
136.284283129801 136.249621724093 155.405519023053 140.256871047018  
134.924082270115  
LOC652578 142.296446144179 150.091854035356 149.303427221111  
138.370241517025 142.991135981933 167.226663395855 165.277935422113  
152.526785074182 151.72544764489 158.347972566681 149.881708604156  
134.250052775987  
LOC652579 145.599152743156 140.398923642686 154.701413581915  
149.987571884748 129.01094835739 168.132172570809 135.139676303901  
148.87690497281 137.044079235724 148.44261900795 111.975027473284  
148.452947427498

LOC652582 141.166605868578 175.236826554583 162.825380100343  
144.905870145004 159.42746786085 148.82034800623 156.390982134534  
163.829218786716 130.902319266342 156.801189586018 142.51308872439  
162.018860183534  
LOC652585 131.062360037777 128.383541329939 140.055272520317  
132.273354705213 121.219323788324 142.922549076496 135.226240774124  
133.52971984184 142.763157232147 153.481752643937 125.259164818744  
129.645982978155  
LOC652586 136.737964237109 132.197941566244 139.028620375206  
125.940081665592 129.898242234869 138.909419415137 139.866536599877  
130.782296492278 142.974541687789 138.633019006784 119.819082491115  
130.659631155616  
LOC652587 133.209211811498 132.16600019449 151.515460040167  
152.587331888423 132.629453540571 157.038121210505 135.073449743301  
139.350622585937 135.485867373592 138.888049140099 128.686425820835  
135.232878188098  
LOC652588 145.569870279379 142.339740800356 149.944351491364  
168.302168350095 148.67584969749 143.962842383778 138.002258986172  
153.066630483602 136.682172321984 145.296229550382 143.368327095618  
143.301399292539  
LOC652589 165.731179108649 170.931788192825 150.922279808832  
165.370800097602 130.179742057015 173.563363508314 164.478006648035  
160.140509175287 167.906766146651 160.042251279235 171.487594589922  
146.517645037071  
LOC652593 139.927773713324 138.086270564406 138.334626498686  
138.429440368539 140.833666276568 140.842305941666 128.436499050769  
128.211076776316 128.473834314632 133.631676386591 140.426489534449  
129.286782862113  
LOC652594 150.711857623087 151.094682146074 155.899547877596  
163.422877959747 149.441862883882 149.223102493474 159.611551480901  
146.880440100898 152.532083511961 163.821142892643 134.257928609741  
161.525131363333  
LOC652595 274.891033696257 253.218123990428 290.914381066573  
246.112720011613 484.658140651032 1048.26872286983 545.760623858473  
748.015452242839 865.435843446989 671.563789496889 396.988248940183  
652.201948082657  
LOC652597 149.188357651896 152.57905274438 143.320787131532  
149.225754384299 153.033582154882 149.936366672592 140.597877909094  
133.697364081712 137.100207190052 122.466276478613 157.736101691222  
130.70867409848  
LOC652599 150.701579893607 160.429643729685 147.257773507186  
168.824578400555 148.980330875743 167.365850007748 152.052084712417  
150.387906232396 152.620244087653 160.816803370151 150.851504454247  
153.798367953373  
LOC652602 144.825231501747 145.992883153161 149.464962540085  
142.678267012725 148.927040248436 136.5680632044 153.149523560021  
149.055493714692 148.139376772567 157.654040469774 131.619951110473  
130.288547755599  
LOC652605 134.202497785854 137.187640876289 167.451782810394  
141.329559699056 122.056070994213 145.045633612194 141.963297887448  
147.108661317945 140.377179372804 134.457932303561 116.994216357989  
142.52234368939  
LOC652606 144.942289590793 135.583556015955 134.97514790642  
141.758827837244 116.572001618531 128.519448608754 118.521075843163

120.300291760091 139.055016538739 121.239461514704 138.807031587657  
139.593950393555  
LOC652607 171.106189029362 163.170983091116 160.786907816025  
167.796474464069 179.624208193114 167.559703634539 190.871696848118  
164.022021048626 161.663893432522 161.055911120534 167.961390966538  
165.947514372877  
LOC652608 169.777032044409 182.747079625619 145.28524062436  
153.700168798494 165.904887259203 153.811165696928 213.510783808898  
152.224281847792 166.388683552371 178.766654213173 262.296456281666  
152.295451313545  
LOC652610 153.000232171457 136.580363776109 166.355086055404  
150.003399000079 135.25612528874 151.377932495104 127.70306883967  
154.764283765316 145.320945010364 153.415901281564 127.420678243564  
127.975441922402  
LOC652612 178.488874074222 174.775676782795 153.78976320015  
170.298291784762 175.626096716758 184.900027626401 156.427158441352  
175.757588503244 148.26621607986 179.794718712964 154.889079187405  
164.406564594296  
LOC652614 135.624881949214 123.281489592543 138.340652133783  
138.924820359912 123.237851647499 164.02617650236 133.63668145135  
139.741862925156 128.748663215466 142.700311964178 135.601916560736  
141.837427928962  
LOC652615 181.558764396201 161.338215647108 220.312301059818  
184.505279093688 158.56996905631 286.282132382462 236.809829701921  
225.583966894864 194.569325586241 225.362253409428 187.325542100762  
282.47352481715  
LOC652616 163.575300618666 139.690093593646 159.298815559223  
148.953720017484 138.252656818036 132.416618775337 150.198869833614  
154.828782972852 163.487737425232 167.268645224361 136.674553275255  
154.740395921562  
LOC652618 161.937384157098 154.24500773656 170.768398273919  
161.365443930448 162.885054245809 157.189041157784 166.640325848102  
145.193296081527 149.08527298577 160.192540519103 117.231243105897  
149.464962540085  
LOC652620 124.502139510446 127.327765407459 130.768746032834  
144.104372749581 131.503936441405 135.589211439847 131.630132952441  
149.815494316469 121.018722403628 148.437676259828 118.180919555585  
142.997365080299  
LOC652623 127.678512375099 123.56917054142 125.439033142431  
122.68719599986 141.08625682411 131.46193427125 121.624218243474  
120.682485578097 117.231243105897 121.400652285172 130.020743385543  
132.431566491955  
LOC652624 2910.00269086567 3103.4192907748 3850.41246770812  
2521.58055221647 8292.04796307133 5361.3600315322 6851.54963413886  
3843.07094386605 5049.57929757135 5040.35379681644 5291.83393775761  
7342.79622458743  
LOC652625 119.655162437465 131.117294275244 139.56332664295  
129.404017329613 137.618447592489 142.798248249144 127.099995420363  
137.210805338701 140.845958602151 129.400895994387 129.596851280135  
129.819820730239  
LOC652627 162.312313953026 140.964208731587 160.57963709333  
145.393431956588 152.426527124644 154.055550115498 174.635853531194  
132.508133846896 166.182850621447 131.700854556022 183.531156021887  
175.537039794925

LOC652628 151.660152977515 140.722297244564 148.347642424885  
152.60462513339 151.598423878653 136.948039394935 158.263657373911  
146.824420102008 156.949439724914 146.31980311926 142.481897141275  
145.01322767825  
LOC652629 140.533704857854 144.340734361996 152.112177721714  
147.416991272497 142.951829221947 146.171094379173 140.171749368266  
144.482364671273 153.279026396412 141.853711139375 143.632325018964  
138.319321806028  
LOC652630 145.505223177269 144.212231875922 170.87247413028  
171.254015232189 144.615156175885 178.551434222154 179.037397826592  
151.773749014775 146.994103804515 151.226242696197 142.208987267497  
161.557558028531  
LOC652633 148.727953739127 145.476377346532 143.224678017244  
146.416318806523 146.6306281408 151.355581590948 137.190593489949  
134.434198188045 150.914644894869 145.690634269858 156.481871341275  
148.791182443623  
LOC652634 187.812436252228 162.383584508358 164.063104872636  
162.599466021255 175.495965414493 152.738468369498 216.181417552574  
170.129558603697 187.871017629994 178.294972422671 179.230909178397  
182.907444581093  
LOC652635 152.99686989829 138.751781355083 140.814009587096  
145.791950392049 142.025834438974 144.466914388684 162.793214727475  
153.13384838492 155.842195370853 145.921381300813 140.933444607646  
171.455216889348  
LOC652637 180.192015483309 152.373931758229 183.348764012358  
172.942666836182 145.572363722788 151.981708806765 154.309257657136  
150.364511432468 147.348400730286 175.617504025145 143.993611400272  
150.031863363697  
LOC652640 149.747347428419 131.560971848628 145.025703051661  
150.907594445048 132.836513637574 165.192945734166 155.198503964295  
144.117964288763 148.683761948082 157.182954894643 142.52234368939  
156.187809481625  
LOC652641 132.210100574787 129.782134019986 129.786941565218  
132.950480329605 112.800733398209 119.535267326862 136.411722212312  
135.518752716008 137.567384694894 128.539969915702 130.808911605271  
121.059923601223  
LOC652644 133.97321873161 137.208796872026 126.960777504772  
129.301839663122 123.735827460404 134.770852936106 136.643481414354  
133.058788697693 133.94206203396 129.221482161409 144.231539210695  
139.042034301544  
LOC652645 139.524233960073 135.812301062763 153.315309202016  
137.745103113588 126.649739818781 126.815367402778 139.62718946833  
135.795717307603 137.779607093226 137.463764193883 149.37190049932  
149.3567486207  
LOC652646 138.085536097137 141.794898246882 144.725650040212  
138.768904143023 146.959154938248 141.052322220012 143.784022884904  
140.073208365817 128.118223792086 138.997524526643 125.905785653648  
128.966514855818  
LOC652647 133.647637744785 127.55397077248 138.516066340784  
134.788450164055 123.015371659847 128.686425820835 135.078198678379  
136.015561289357 139.720343780228 126.460390022632 132.891375982227  
132.369872013432  
LOC652651 137.102353661381 132.819726980184 148.463566046951  
138.005168756932 145.997380100999 137.867263869936 139.585373400347

141.016596301267 142.290253129837 151.406384541297 130.810353054091  
130.827726862159  
LOC652652 123.640123613529 131.400031203603 131.859204862396  
121.781562010645 121.472885562857 122.10489926804 123.227904580467  
120.422401793885 122.115925891088 112.832122823829 123.598210440312  
126.085039271526  
LOC652655 145.71535210212 133.777238071968 133.226542641174  
145.862497313025 134.256243410916 133.103403333542 127.026168862919  
130.539632182729 121.886886059038 116.316845829267 123.288028185949  
136.475652722007  
LOC652656 148.478570934155 129.697584673736 148.294870328642  
130.48231275063 135.452340998039 130.790872334222 139.268052431476  
157.055133233709 145.45097990828 167.653412908384 135.673080643346  
148.291518446423  
LOC652657 135.693520183014 134.700543462375 155.04585737344  
139.94624507228 128.236840746655 167.912321820083 157.21132653949  
165.2045030333 141.56459720769 147.171090285223 132.211379936941  
186.640167849568  
LOC652659 133.307149027384 141.953114738413 155.548684011748  
151.198928680018 134.584919596742 130.526673128214 136.869117921313  
125.342580368417 153.528429414138 145.502055020513 144.316475814221  
130.379603677874  
LOC652661 139.697477263244 129.077660633761 124.362182111222  
124.922004609558 128.835216648178 132.657106732366 131.563719927798  
137.353149614081 127.690860707933 140.466612569756 144.375109087466  
127.814109293214  
LOC652662 130.449669345302 131.989955864584 120.831070822199  
107.48180681159 124.02280670421 126.058167594519 127.445199722147  
119.083957999725 129.233595525585 127.494672751434 130.455560026617  
118.336654504789  
LOC652663 149.168758815526 151.9565369062 163.362182585182  
159.082447644277 158.505363728431 161.229621453539 142.45047744931  
151.364528898537 144.961976523279 147.23376282233 140.922678400415  
147.701092466105  
LOC652664 136.575784685895 130.761936205169 136.925645302362  
140.632573759426 117.511162285879 139.727248583626 132.338144393918  
144.688515462537 142.937182720493 138.412897151567 133.18744841514  
132.82284281106  
LOC652665 115.327402810793 119.297561749232 139.974586762939  
114.412739085949 125.5109819304 122.804934452095 127.075899925865  
110.475453268997 113.680875214845 128.339161042799 129.216693566478  
117.598778415488  
LOC652667 142.007066214472 142.106329280184 141.019494314354  
143.713962738562 134.947657801444 137.926193455157 138.222375471744  
131.984467471242 124.153063838817 144.5368823731 147.218415065692  
138.751781355083  
LOC652668 151.687402863648 151.456702092528 161.310855691717  
154.368499839507 119.023688551496 140.814009587096 154.771737131348  
155.957570398118 133.229571269367 139.897320032723 161.559920910487  
169.238325933605  
LOC652669 170.179304745674 173.272062328378 177.562561297777  
147.006482557682 251.939696394174 436.482580413523 376.189276074918  
224.298067319406 158.565676210997 169.656238760589 196.226732738526  
238.124340832815



LOC652670 125.176747824384 123.338921824167 156.84104238878  
129.969400693456 146.10417547509 131.18368961955 134.350054065624  
140.051904905695 147.354535468933 144.421572284568 101.316813921703  
124.469415593643

LOC652671 124.313901870563 140.892250639524 135.697550878438  
142.791015845309 151.492236411757 143.298218989451 164.804822506224  
143.73525260312 156.69025356689 177.468210189888 146.658048787833  
160.644747532952

LOC652672 275.252966071473 267.970798709017 359.518199449791  
265.670643951648 602.141151173094 419.272193677273 382.069677030369  
317.719381113816 303.608918161742 337.271784551586 349.330629649093  
298.573180660083

LOC652673 143.114384950467 143.979760385364 162.786351190659  
144.290286088611 161.017267304159 141.664271607079 158.06915048955  
158.127523362251 165.219393390909 149.402679897813 158.760577365464  
140.692586715322

LOC652674 134.475296383752 127.109798012351 153.348110626071  
124.302581985661 117.212164526913 130.860938463815 138.371873773284  
137.911816180518 121.303696898208 123.852299272249 127.166821363722  
129.061316880624

LOC652675 225.130011390856 221.74200490054 226.315173823168  
204.637887777803 156.62031503525 203.852316712377 201.004491067972  
183.214922844221 205.403820910921 202.357989894268 192.752224665459  
185.063870458561

LOC652676 140.395662148924 132.548259643258 127.83654093961  
133.133892264995 138.827262145272 157.940873610797 144.904945833116  
142.737537206204 117.49013401175 148.673763368264 135.275284142536  
146.31980311926

LOC652677 149.871960981882 139.416388461892 137.990806386929  
148.501654210579 152.660373241584 137.27827836407 157.654040469774  
142.876069462608 143.942810095867 149.004343851423 138.402890124039  
119.759350702482

LOC652678 140.595496714752 131.880438747579 149.338249249161  
138.184717352015 156.453108485249 140.309394542299 129.231455282441  
128.742617750403 134.97514790642 143.780803045394 155.23922239449  
158.495606141226

LOC652679 137.402567669086 139.771342253058 145.536260846052  
156.077604146143 121.492896642899 154.177340021162 145.873819094778  
138.753419730571 137.539385624206 129.138035235415 128.604270382206  
147.024759173313

LOC652680 151.567693140302 141.289009185018 138.196640512429  
147.414834563852 151.389433433911 142.652939807341 144.079935036119  
147.835936450126 149.869314204354 156.102877632001 138.967080709927  
151.019907064794

LOC652682 162.970595558845 169.948277715908 163.753434774656  
160.960599932898 151.674143983846 150.945167884077 151.389433433911  
153.238678313147 144.944095553004 158.344330353326 131.034010150362  
187.016569445646

LOC652683 160.361025839456 139.121639005366 165.386056999339  
137.556552701816 125.26492723752 134.155655670103 147.614293127043  
119.998260435095 135.223957492606 149.915251958706 119.696656494403  
146.353239460684

LOC652684 165.654773882752 168.890506147594 171.071893074072  
159.487615985875 141.583936153499 183.236087954054 149.763038696374

151.372219350291 165.080825814849 154.309257657136 172.197077149985  
177.88534558205  
LOC652685 288.221041179309 281.53843450593 217.491746961471  
389.260166168847 430.220363263561 365.727197088581 421.929674562786  
513.518424350159 368.879825610754 286.376638135463 314.486603134656  
381.323457262383  
LOC652687 130.705091244939 143.861031475738 144.246749835693  
138.079494235456 134.744175117719 134.383024487323 140.036463888037  
140.413503801467 137.524968609776 136.66358267095 143.73525260312  
133.900005368973  
LOC652688 149.682150633146 137.670655293096 141.158593399952  
142.577102697682 149.962143642332 135.659271030454 144.694679571377  
145.114382599368 148.919726992353 278.555009982029 134.427601777639  
140.357427912361  
LOC652690 151.070654092886 131.257901340773 144.829773937102  
122.888626394154 124.29420915051 161.331326682743 154.306729472627  
142.541728149687 142.199182392836 136.660600727111 130.768746032834  
137.835936352525  
LOC652692 112.993452506946 119.640086587188 123.902047880095  
136.71484425521 129.867246424399 134.427601777639 131.397850276558  
125.236926572282 130.792692240592 130.095585254401 102.166449349339  
116.397855001959  
LOC652694 216.755681508811 187.673748059596 190.716424123036  
179.687464522203 303.986544460218 517.529147171876 240.341031437493  
7468.70895916615 5207.37974585707 327.384671423687 172.438141471784  
310.026522549372  
LOC652696 161.195562296834 148.027464692171 172.866517097198  
167.018380617832 148.525224975266 159.203584692924 151.295855278218  
140.659276788384 154.546460872415 179.230909178397 148.388093331273  
147.360700051935  
LOC652697 121.984179437382 118.375739674144 130.258933321051  
125.818432070199 116.497714896018 122.682761393215 126.788749235867  
125.587057468028 123.168787977805 129.515390475589 122.165046954625  
120.915108114673  
LOC652698 147.245636620228 151.239879652761 143.660679324057  
143.550908565401 151.979221390032 141.33190008245 150.685245572093  
148.922537778634 150.250193889942 145.124968495678 141.169908353507  
159.570288565855  
LOC652699 162.505305538911 161.021740537372 151.212606106351  
153.557991189227 153.610428214886 171.06385200256 160.625367261779  
160.848201202361 143.496669740707 167.416417895159 156.46322298175  
154.591116158776  
LOC652701 131.633827974141 155.298546821687 148.688413944868  
145.050591047589 153.664503112778 141.770977101211 150.421116058494  
155.43577761798 130.928718312512 144.94824685435 134.70848693317  
140.479321382192  
LOC652703 156.534634574244 128.162546179362 143.833057210822  
137.698423468762 145.78573175226 147.187681416171 154.670631900834  
146.225422797118 145.640156204495 157.922718487881 137.725329029129  
157.960172706254  
LOC652704 167.384121560438 171.49930976135 186.077477713775  
165.041296694491 154.774977482202 182.588697551677 207.692077301142  
155.851264092344 153.083451626042 152.738468369498 155.358918578397  
157.955606242401

LOC652707 151.466689967666 142.583098605144 150.672985449063  
145.690634269858 139.336891718408 178.863722055499 142.180927190578  
149.016767620428 145.354740501503 151.739221728872 141.235290792352  
137.037299675471

LOC652708 134.626371781978 124.401083237195 145.971656491073  
131.890554636938 130.849201993866 146.830752309354 129.192326574697  
154.159124458167 131.554055357245 135.164117176127 135.950465168457  
147.029988235786

LOC652710 120.507930710099 124.746457912284 128.790166506932  
122.075440298074 119.252737868132 126.233395051706 125.945916345628  
118.366859032979 132.626349611404 126.958366599622 122.941711366641  
131.934680869554

LOC652712 130.839508306116 135.203507726561 121.219323788324  
153.244758030666 143.868962478182 144.516274148451 137.869471689534  
150.985061659285 140.201501710276 155.097300548684 143.381277901138  
152.238845270993

LOC652713 134.635645106042 151.739221728872 159.345467769285  
160.876228450608 148.153776704837 147.959740692766 153.592819860747  
141.290905146249 161.04173806448 169.520544329439 146.20028051948  
137.966987037709

LOC652715 154.604363252526 131.451173463405 164.319378349317  
137.50609001002 139.602168254761 145.562772839517 154.406369231962  
141.686945908315 139.469148541078 147.653573379877 118.673325109944  
155.46017572591

LOC652721 160.168654167074 159.972045520208 156.866867371872  
167.298438019561 148.326282600684 142.476530302265 131.926504315744  
145.934643000545 139.81502919163 160.53152291979 155.513572243604  
173.70035122661

LOC652722 136.261907928796 124.857461801227 124.178483414968  
139.837616209536 124.527213402962 185.816827784447 143.816567683093  
157.192320902906 142.317575246991 123.126240234396 145.027741086645  
145.391496022306

LOC652725 151.204487316077 149.696766215866 136.908157358689  
136.497295707149 147.696506705909 145.718019736542 164.011683602245  
166.157713072213 152.232245164212 164.608496326181 133.327778635672  
146.328876892698

LOC652726 241.890850719625 231.338258067616 269.345125874858  
166.97270256697 133.24611329193 159.13662975347 148.574661934068  
216.731618532814 166.863589702453 182.57496767012 150.496616601699  
162.422173095045

LOC652730 139.785767470943 145.208597795717 146.522066289381  
150.91730768674 139.675292022085 131.592172917738 131.212705319485  
145.610045243277 154.166668493152 149.435684626505 145.247717878099  
151.905534823403

LOC652733 159.606633817645 154.118601977256 154.710000519109  
137.056500339577 141.758827837244 150.155154998981 142.541728149687  
153.6855881767 151.905534823403 134.579005092929 136.944378905743  
158.175138008678

LOC652734 131.076562651831 142.997365080299 144.249339611941  
159.728097053356 144.796089646941 150.3259737066 167.212960569538  
148.461172387171 150.761696482387 135.330241638301 158.943005736645  
152.182968451691

LOC652735 128.14606899743 143.947729578484 136.549385403781  
137.318442197233 134.455623159793 131.38692240237 134.227253565741

150.439715066903 139.936661244361 140.427188241455 127.159947766922  
121.787875792887  
LOC652736 137.510586346207 152.364417528975 154.705630035232  
150.500676225569 157.709832297666 153.952788086758 153.440952021924  
161.217964573491 157.800913051929 154.954906872501 144.110544384466  
157.848456517169  
LOC652737 123.752109790056 113.163651806803 125.879198238067  
131.83430682495 132.059507616101 132.464205461991 121.591962855513  
126.506749037908 130.036744891822 121.57069706238 128.432188632218  
120.196595293401  
LOC652740 157.394035451151 129.161305053472 138.59175751301  
131.051711775229 134.730275384832 145.801228425692 126.55925846644  
140.025668085978 141.73248778957 146.070871543153 128.075865243385  
124.998601194756  
LOC652741 137.804977813144 151.500282404318 130.669539169739  
167.18881879422 133.473140653666 125.241484840139 121.810767302322  
110.448948495323 124.368438691944 135.033601686007 131.226834630025  
109.506450285923  
LOC652742 136.865340099645 126.659859384257 127.982696242304  
127.202039384041 134.774591679724 146.047948193303 146.590495255969  
126.061141885666 149.897440750742 133.031431118772 145.86855878099  
131.079066781806  
LOC652743 148.109847175216 138.652735298338 146.70298187005  
144.026432356249 145.906601611338 137.49980051179 149.848740870148  
141.778930762662 139.314945862113 140.631709025143 147.588213090285  
150.578023008958  
LOC652745 156.224769056915 152.356731704094 181.79418355897  
151.32179802686 152.447978675887 163.672213020803 152.11446058397  
155.026276988302 145.06736850005 165.586397236489 151.231685705236  
142.363309192458  
LOC652747 157.061602966797 166.157713072213 177.831718771025  
185.938983266802 148.145136066071 144.470642732973 151.385956426616  
141.8268805463 145.534520042669 155.945838519586 163.616115299926  
154.854538639035  
LOC652750 147.558603709566 149.712320986646 157.77398996415  
132.448602065824 137.13615301204 139.211746200839 129.083756379376  
137.73733991363 148.054367166566 163.67719444924 145.024148458133  
133.264245969185  
LOC652751 303.184785797741 202.230920499592 243.538374440134  
202.314814594735 152.204730003016 150.626826756019 137.412952822912  
162.728630453745 299.234482744038 139.842619826396 135.582230137515  
145.492751560845  
LOC652753 158.408494909763 152.752870674108 131.761564745495  
136.957209426823 141.370340242063 135.452340998039 136.438788088263  
136.861019517134 127.368207232723 143.021435512861 118.289405191861  
138.020031233095  
LOC652755 230.893665210918 246.989526028884 310.465070184707  
170.858049313581 147.310807346272 196.345065354654 248.993716339029  
183.969897305028 173.488272345038 167.640645997754 217.811099067262  
170.01557699913  
LOC652757 134.404472539902 136.497295707149 183.358807104988  
124.418295003824 143.333211390741 164.955263076598 172.686798187142  
145.25774926819 153.911165277809 142.249715102513 139.358218798638  
120.524859681034

LOC652759 141.205975588506 150.754492902512 133.320865155329  
133.167635227902 142.974541687789 154.187420367647 137.968932080074  
137.981446468611 151.548865569913 138.407207709066 142.498280938736  
147.098474227445  
LOC652760 151.936543085044 159.624341769644 165.634117939571  
136.817517693076 138.090158433822 153.07993334035 146.830752309354  
162.586012723045 161.769370009823 145.606098951179 145.934643000545  
154.665212863369  
LOC652761 130.975606477621 151.345630073141 134.206518622834  
141.857434100065 131.460388562433 151.16261275916 139.687574432387  
165.992542962911 141.819762045169 146.474228901408 162.093325839949  
159.227123133854  
LOC652762 163.456245724169 152.685860451112 163.960242712692  
212.822328466993 156.540165645256 153.391895732807 133.228074579352  
170.951009118578 165.964183460825 161.886342770305 150.419668144913  
160.441879289883  
LOC652763 141.588478913204 161.646807806182 148.074494928651  
144.468333012278 160.799950553311 144.662545137915 157.83460319212  
136.643481414354 143.669490888725 136.472404812817 151.164936050256  
158.429761055869  
LOC652764 143.426053070219 141.811563725942 146.97203173446  
152.780908985916 161.781529659549 152.204730003016 152.528571776589  
157.406969627689 143.278551094215 138.562576783507 119.469328303796  
169.667751894226  
LOC652765 145.677477231455 150.191645194625 143.58555556787  
147.264690436042 137.757902615328 141.539503634005 153.528429414138  
142.571259316029 138.67221078031 134.04235176608 120.224154897296  
127.354826381656  
LOC652767 158.278496385543 113.440171712791 132.626349611404  
139.760425990939 126.829183791366 134.558435781672 135.465076459043  
148.04206955657 129.777173431404 138.071335383596 137.591469499374  
130.732397679661  
LOC652768 135.049657594221 150.419668144913 163.385727569154  
143.562164660825 126.17133877948 169.301498852556 149.437212090587  
144.581747568524 143.793506250131 151.81251450855 140.264060906597  
126.708817316134  
LOC652769 126.482660154852 132.105184573944 120.809659457873  
111.538651711074 148.96493117884 129.313576009092 137.339511714364  
125.976052547953 130.390722272955 118.497920969001 130.477824552202  
140.873210629865  
LOC652771 143.207187847583 141.775100066311 159.120172969378  
132.933035878334 161.066226957782 195.185025611945 178.055019987648  
171.384487293154 213.833894542292 156.497059936271 174.284268998257  
225.950750084197  
LOC652773 247.72190598581 202.369905673351 407.244564912365  
192.331142672469 158.562631157512 182.384190694142 247.373571011712  
219.661502916874 211.679799388351 319.560819487616 199.516043142784  
288.072720517427  
LOC652774 137.5954358221 142.020480831815 162.774716879847  
150.696963699371 148.408616955694 155.041173289759 147.04481509758  
143.616189776965 150.016550610991 155.386226046894 143.543607779991  
156.7940590796  
LOC652775 146.814457904682 147.264690436042 143.555987405898  
148.263293819238 165.066555355918 137.282038401275 170.87247413028

301.139737613279 220.567951704044 162.18174589792 163.69172577831  
172.758230728437  
LOC652776 126.492058851464 120.71782441569 123.545404885618  
115.992487254175 143.065258692424 142.466067016788 128.905042692431  
131.429247528936 135.830453690107 130.440164900487 131.223691762533  
134.69274746407  
LOC652777 135.421804561804 157.436513275737 153.488903967311  
144.836902182737 144.798664281991 147.526701500887 155.219860096943  
123.711828013052 129.127563278016 147.821639002833 146.318052064937  
156.330571337475  
LOC652779 148.188717941032 136.461182044855 139.552533656255  
129.987548571478 142.700311964178 144.071652839025 126.072053958666  
140.03443832328 132.146027935802 164.558875058199 141.248526020456  
149.664506761117  
LOC652781 126.324771800638 134.134810805413 125.45936959544  
126.766964875664 135.723554819107 124.616629956864 147.962721373177  
120.839256811295 140.49145570631 136.040524807653 139.044150521333  
138.114938404796  
LOC652783 128.287127680554 140.709981878311 131.416923875254  
153.128027266281 155.71830087869 172.583615020042 168.654753237204  
150.123784990646 133.043503979161 130.076926011271 157.841520434044  
139.962307072428  
LOC652784 146.011694647614 147.289061374598 146.750774496317  
133.659475650376 157.113536717393 134.669763149268 145.23179154441  
138.516066340784 132.442771000976 131.866599432062 107.316786994369  
139.395743826525  
LOC652786 136.846912694371 130.10852948682 136.769073515537  
151.838006211681 141.908791151061 135.946808893146 139.762998983487  
137.93067182632 137.114604159523 137.157492354617 138.785538575745  
135.576975868985  
LOC652787 137.584340154725 152.67564185705 152.191393042132  
146.59366188125 126.583342262489 144.794806650252 150.348608467097  
136.492892469272 142.093180304661 142.759452994928 138.246963115014  
151.085119861425  
LOC652789 168.878645908397 184.577511730401 184.332299740724  
186.778334749551 165.682617337317 156.280701500421 150.617039206311  
171.916201289104 157.454558821261 175.9219991997 171.809717138613  
166.076692502428  
LOC652790 150.123784990646 147.75625228531 157.055133233709  
151.936543085044 147.8838487685 159.446705611995 139.807421433384  
162.769643886845 125.724143659093 149.37190049932 194.921021761976  
136.205702793983  
LOC652792 134.787564568352 137.509100088226 153.787447416111  
165.424516708502 161.663893432522 171.314681729657 134.582098893327  
142.266177608209 149.538429805372 161.72730923536 121.45175516842  
154.156272284591  
LOC652793 132.928639483854 144.386561289985 132.103084472404  
147.83240038699 141.838927087095 139.076978731572 152.752870674108  
153.273568880305 141.949098898957 150.016550610991 121.18490040448  
154.452964510369  
LOC652794 122.351186755611 144.975882336334 151.70035428516  
127.016845640004 152.353494489233 133.095245865663 142.68640844948  
134.744175117719 140.842305941666 124.267394371656 122.561285351587  
149.824791474186

LOC652796 143.846734516914 130.047353911148 123.665983073461  
129.446084290637 120.413468119484 130.504023268824 127.884750925048  
134.865577264797 130.020743385543 119.052729327147 131.878155417065  
137.457453776513  
LOC652797 138.480633738745 146.466967386428 134.296645422941  
130.185134787768 132.161764435769 153.426409060413 157.250409438404  
128.282999719959 147.043228493047 136.927274496451 128.356453959987  
171.278489808694  
LOC652798 132.175368142549 115.066084565112 112.949643549398  
148.938822951404 137.709120153505 123.010614051218 129.511465164539  
135.047546966745 132.958521136 157.341422939225 128.876385705559  
133.254663058352  
LOC652799 150.378690719669 160.159630699959 157.50873249647  
144.068734533254 147.348400730286 162.28074297013 144.826861308997  
149.297012645798 135.897498591391 172.544504923991 128.608401533371  
152.26903721278  
LOC652800 130.800427334056 126.890841187249 130.054105892394  
128.069504716124 129.330056939361 115.858924428037 118.000757530896  
105.976284291356 127.625252349231 126.488299049827 130.698850298016  
113.025793645043  
LOC652801 127.562924931536 135.883119645931 134.152586955217  
145.10302792449 138.773042747912 127.629258006335 150.863099494798  
145.864902319111 143.464614171516 125.150706047419 128.093945009882  
141.028377381019  
LOC652802 140.142884879106 141.853711139375 125.497317360782  
136.874135348635 130.532559074698 136.13751015238 159.365070384451  
140.706490845379 134.872654203921 138.35538364303 153.903993884123  
132.275953817076  
LOC652803 139.648741106305 133.99046926032 128.447393268611  
128.980519133484 135.501192996538 132.978746105877 121.818632020666  
141.505120938773 137.290687951485 143.565597315289 122.550707067805  
131.267177634269  
LOC652804 160.811051590991 144.092864444802 157.684694038023  
131.232417654705 140.641308444844 159.771672778698 143.971152352313  
146.990660831392 136.923079303455 150.893280574091 125.855451679929  
143.903216264503  
LOC652805 122.220327032799 134.741781820234 127.395094952914  
130.949405011154 130.4631522533 153.969493052468 148.754725272846  
143.152993168137 127.827096314406 133.184279519985 143.167719135403  
137.58025011566  
LOC652806 141.86836086844 128.140333650496 127.471479301983  
131.981505236332 124.712789674509 128.81022558263 133.028789808654  
136.146383365709 145.217261514886 124.324855155055 137.984988819967  
129.305455204291  
LOC652808 143.703367582367 140.907155708331 139.334552725255  
155.639666182376 136.573286915727 149.867541008113 156.205127163263  
140.525013926642 146.281429685059 147.915337223934 139.870306695324  
135.920830568556  
LOC652809 129.083756379376 139.117053855066 140.191264837331  
146.851307767958 151.372219350291 199.101099226668 143.2438241778  
135.233957017664 129.859331207247 140.03202338666 144.731299077209  
146.010474018786  
LOC652811 150.445647133244 126.378952839132 133.810472192646  
138.889999702313 147.951996191313 148.600270795407 139.246945739764

146.911611554283 151.40067812803 144.510062568989 135.386650538345  
136.115306932124  
LOC652813 147.724021517135 131.853183159267 136.327014189932  
130.71040889651 135.938590242744 131.271979461703 133.365793958118  
125.111993560078 141.585172896047 151.698385134218 139.150209111606  
144.419657674797  
LOC652814 126.623026026721 130.646956516128 130.300169316346  
128.318545300038 141.284962125757 138.259512736404 168.418529261977  
139.041005010106 129.835713633923 116.403106568357 177.143397572907  
159.032710656826  
LOC652815 165.964183460825 129.910866236901 170.164668347783  
165.781667492391 164.03801002919 174.389706515542 180.085975596327  
140.206268652318 151.655854407186 188.268774618164 164.098880989592  
181.202396068658  
LOC652816 146.21362402936 153.59485367224 140.692586715322  
141.8268805463 148.646699255797 155.664126780859 142.973444931373  
143.330025840618 150.696963699371 146.983646662811 144.83282018024  
141.205975588506  
LOC652819 131.374680878107 129.054577477882 123.420635380886  
130.810353054091 131.913786256215 130.613760017864 122.281263517691  
133.452032750397 133.364838901186 126.333814565085 122.5651974076  
134.498439965049  
LOC652821 154.173439471404 163.024215671479 164.647634120888  
154.043604150962 166.223079895236 185.046826969912 154.212927357622  
188.580458613357 155.444668113276 173.563363508314 163.442257036536  
160.914009756867  
LOC652825 138.868641301709 125.712260481294 143.149424892482  
149.05280915667 149.237422245619 131.356437247149 134.477081392474  
134.151372457715 140.814009587096 139.939863187181 145.468654174037  
131.636779618185  
LOC652826 222.675370226786 178.377461551319 270.847923557176  
197.543089645432 285.402072939954 441.578261054602 343.048904374136  
447.995213144892 463.880793292701 352.121800955822 199.87003105816  
356.84281623052  
LOC652828 136.494339004002 130.666781754635 144.339819009283  
135.122770943076 123.752109790056 142.527422462824 124.480385254916  
131.556892859203 140.717348834454 135.916668738753 104.826135297161  
152.657649988502  
LOC652831 126.061141885666 120.333487171575 133.117701703454  
141.923103467306 125.008209861774 122.056070994213 120.345546077894  
121.263939656119 120.196595293401 127.374600506681 123.700076467648  
123.420635380886  
LOC652833 155.330215726109 145.280485286937 145.852430082228  
169.072574423443 151.742938010671 153.557991189227 167.505381046729  
159.012011848781 152.738468369498 155.666943703002 140.127379332918  
157.994474909749  
LOC652834 135.190698960212 150.63456320644 128.742617750403  
144.796089646941 151.477239868429 151.515460040167 140.117644705946  
141.772724512502 138.480633738745 144.690880401712 133.59686364883  
140.149064156135  
LOC652837 144.974813243462 151.09670688533 132.651922794567  
137.623019849539 152.107025120177 139.336891718408 150.737888487925  
129.558589108727 191.59400638652 144.597060118959 139.868714816245  
146.361128670362



LOC652838 157.103246263523 131.071614211431 132.265895156539  
131.296518221093 171.320653882424 185.691922436569 188.268774618164  
174.866036336378 185.816827784447 185.071775840607 169.681582570965  
198.285073991956  
LOC652839 145.692644807799 147.73141408795 153.83891040723  
144.02847768185 154.509924503184 138.667081004369 146.602252563413  
139.78795317086 142.978818998012 145.711007027894 152.11956441072  
139.136845089275  
LOC652840 135.58042404479 122.405469833024 167.040031488406  
137.299908075811 144.316475814221 129.477908941439 134.253399256648  
121.810767302322 124.566313603935 129.467792559297 133.834423222601  
144.907294702865  
LOC652842 131.530256606799 131.474485888864 132.811368246405  
130.59886317117 126.603552416008 134.968848574511 135.242328667085  
131.354275252104 126.388778582602 146.635140441079 115.3611179192  
127.209043595332  
LOC652843 149.390481900424 137.522792377933 152.163489631563  
153.146646647258 131.007779278656 155.255279503782 144.370811043456  
140.36425603453 149.956759038516 132.953762692926 139.591231478841  
146.912751127571  
LOC652844 130.886164807755 133.184279519985 146.574656147816  
154.286043402527 140.146894533044 119.830261862805 152.134895623504  
137.779607093226 136.617105945904 125.227513212286 148.840533233712  
139.783725419023  
LOC652845 148.65131922365 148.139376772567 147.740657356905  
156.169405925094 128.572388808833 143.318291243905 143.004090696463  
139.329693510525 156.453108485249 145.481279504679 123.225792525733  
147.248053518914  
LOC652846 139.739448838436 150.117906461237 159.495272062735  
146.21362402936 212.710910778949 434.792010353541 449.952497751758  
190.357437485436 260.195256836955 1219.36024606325 507.827473844576  
619.635734567779  
LOC652848 117.79844873842 138.319321806028 129.984214994811  
139.286592412216 127.618913664155 122.736882859231 154.79534193124  
139.150209111606 141.416706868124 133.43194756868 129.114161128113  
129.712857649351  
LOC652849 141.410953064267 143.467053670148 140.522470775478  
158.020651857664 151.622719246408 144.246749835693 143.745594527046  
146.720204808211 149.666293193219 142.643027992419 158.767439363085  
129.958065173006  
LOC652850 162.664254855131 157.348475799643 147.835936450126  
140.14062775887 144.338069855334 145.826955036113 179.74065086312  
157.77398996415 151.113342302947 170.028047334267 155.522274777451  
169.552424961465  
LOC652854 128.413213851142 151.196713920345 136.556183079815  
128.944295118239 154.352518161283 145.581755438161 131.649830934459  
140.016122996485 121.952255635669 132.730924522748 139.597493526257  
129.543069836687  
LOC652856 142.273279092298 154.47187360425 159.913028912492  
146.677241054745 145.2572048057 135.033601686007 161.072844903925  
132.437234970375 150.79785758452 144.031305845388 131.823019555685  
195.50039162477  
LOC652857 154.552605305297 138.755173333171 138.976386995124  
145.144401160102 139.868714816245 142.282861913548 137.335501759561

136.664500207966 159.977528879208 139.505864135281 136.175268696202  
151.981708806765  
LOC652859 130.231160879338 124.403662787819 116.597352307016  
124.036907709461 133.238296113721 137.033134002983 130.495294897642  
131.102996816222 142.772680460689 131.058360514673 138.847331529247  
128.16147857336  
LOC652860 144.016137459279 133.197917412017 148.65131922365  
130.380766252137 144.12472003202 125.452973441746 154.347332766547  
133.988494850477 133.944538335319 138.8603234411 136.05920604064  
129.111259771449  
LOC652864 294.535979194434 237.521746704115 430.412897698085  
213.531307836195 293.482512212153 785.290353402444 546.181615768667  
396.526590512521 570.130804179186 530.561387049511 453.926991868451  
773.057095787974  
LOC652865 123.732299841696 132.969187044132 135.679481480408  
117.186546702764 127.615631240096 135.877646659023 126.404523759643  
131.507618414676 122.111982327877 135.701041557713 129.845344493418  
140.845958602151  
LOC652869 124.927989289122 126.5764774133 128.386309075038  
133.544149685358 153.860039535598 135.864853829421 130.351302840602  
136.052640679977 141.158593399952 130.907879150229 138.93292293598  
133.120273569229  
LOC652870 135.993598471576 135.792966926642 153.008756051525  
137.612446150193 142.963036923104 136.015561289357 139.055892787717  
123.773753287854 155.608876496443 136.03581843125 134.756377802151  
130.354641020141  
LOC652871 134.71514094826 138.936872956065 141.882859092658  
161.285587312115 153.305679563467 160.945886507456 157.096799934494  
143.287237534352 144.964084792568 150.352308475398 132.021249712589  
147.576533768761  
LOC652874 124.859984709406 143.873048967535 118.230408871812  
133.018406625714 131.643633737316 145.89593390936 138.166546598846  
131.945667475797 121.522634801124 127.532665057083 133.645044060866  
138.090158433822  
LOC652875 141.446916444258 137.378528742953 120.812738312059  
141.292421722594 147.362120584524 151.563917522864 144.715167331434  
142.958906063186 130.374065525934 112.046615825307 108.148715413122  
158.020651857664  
LOC652876 158.153875553171 170.145574727175 139.175421159925  
180.070209705044 148.118705147238 162.390356943447 180.80811429888  
165.267693285882 171.36717256867 173.432960318793 152.017655364287  
181.123571246557  
LOC652877 146.450806121927 143.984222627806 148.336126836362  
140.613151527886 141.368078865065 150.250193889942 128.39171386085  
131.239986488033 161.408318705503 145.847629576886 131.668163693171  
137.365567527202  
LOC652879 129.891492052232 123.7421178083 123.327238774943  
126.529763042574 109.728809191027 150.137061170632 127.001546144286  
115.902030217102 133.486965108303 149.833346575446 133.171854425031  
125.717328918165  
LOC652880 144.725650040212 130.528198937596 129.583916648999  
140.43729728368 140.964208731587 138.838795320713 137.033870931133  
142.06907380533 135.309431186017 130.080728694308 127.480717762966  
154.016622581204

LOC652881 171.202766078337 174.100921524023 163.36682525399  
184.557630172634 154.918405633244 179.779007442837 168.71216652064  
160.28767775843 150.802312408483 173.544556426164 145.789840511876  
162.063689419737  
LOC652882 136.519697160267 142.603436693587 144.256029338053  
133.749271961438 124.972772541334 129.360773522498 129.591396165575  
136.380523452336 132.375905857023 136.829137120584 102.851152421943  
145.919359461744  
LOC652883 143.987296454585 143.224678017244 140.632573759426  
157.990467804353 137.884051774657 154.025625092599 138.603793282123  
151.865924163231 126.143886553557 143.769240322865 144.606963457243  
142.810564324354  
LOC652886 141.616920429839 152.662446724781 155.910169659939  
150.117906461237 152.439608473915 161.632610858756 162.457778455279  
157.189041157784 147.498609641457 134.111348656261 142.630563791102  
158.100395482569  
LOC652887 153.332110179758 142.459230639888 152.834894011142  
155.368204597287 145.560904207183 148.28101912019 141.857434100065  
150.170712508944 134.337249560706 155.828962183804 142.461941376108  
161.790909578234  
LOC652889 129.980354138975 122.347696497767 129.928047362701  
135.364039983762 150.155154998981 177.478925091583 144.774621469452  
140.110258415883 134.896349513392 125.099672022917 141.619432083003  
143.707084981291  
LOC652894 140.722297244564 140.74035966401 157.176001400747  
178.531913384538 169.293852989203 147.740657356905 161.241165533091  
160.75642485037 140.09417711803 143.252983617945 145.89801576671  
138.462826342765  
LOC652898 134.970609100459 145.793794049657 144.842687993057  
147.371905597494 120.62139061084 140.359796538887 150.324132011201  
134.389518389888 139.991780068793 133.369314179341 114.567609871292  
141.313482534472  
LOC652900 133.277326912499 140.579839043912 155.187900101727  
142.034369454643 465.41233536979 276.830814061474 262.296456281666  
174.296028319781 141.277227483198 155.379116566097 151.508738608925  
149.879951192667  
LOC652903 130.073005698714 134.947657801444 161.632610858756  
137.46978401237 153.554159360954 154.016622581204 155.592219571564  
179.460777888284 197.489903263216 200.322334039458 165.333608076984  
182.969563278473  
LOC652904 149.419308407564 145.641373616866 143.873048967535  
145.666712006532 156.046085830566 157.43824048982 132.5377752987  
184.655641182839 166.549192709614 161.795378938402 143.401971479167  
156.269957530519  
LOC652905 147.670425834523 153.879427186342 162.895923745031  
142.45411401883 145.08246303652 156.254944793402 124.796876920269  
141.746032519746 136.297963196301 148.922537778634 136.475652722007  
144.972694558182  
LOC652906 146.764908249803 155.747694056319 133.490805791504  
126.446675008883 127.816596414779 140.129882333528 144.997250967317  
137.899291413431 133.346626315812 148.029259633449 137.163699337032  
134.192409943723  
LOC652968 250.085444708918 266.217879616686 258.759507964221  
249.029098902357 418.645775576811 226.701637237203 273.478372861114

240.439368352772 183.033044475752 302.601458409102 228.739556788924  
178.531913384538  
LOC652993 135.390226050803 144.951973735763 129.845344493418  
146.388285560372 134.10070984606 130.294405479101 138.293242905081  
130.661695937728 141.577373924378 137.395895014456 137.629855378016  
148.482530949134  
LOC653034 181.098584949344 163.495175710216 198.681190016247  
168.521601064374 177.204172894028 181.308852106289 160.186527465164  
163.833372505148 157.83121828793 175.510160114891 175.128935809466  
156.976539870288  
LOC653037 147.281035392817 128.753623886188 117.008277388399  
151.228823957828 146.274284557421 147.369767631957 133.496922906874  
147.164348704012 127.756214708077 134.52098220054 151.526337610068  
138.942901099402  
LOC653039 135.527445907621 132.131378074469 145.503718833974  
146.075794515889 120.333487171575 135.632298302036 136.026302491961  
154.479733759712 126.948090173876 129.973380117841 109.91537150286  
130.110413621436  
LOC653040 119.475462713424 123.439897913722 133.340152756136  
120.988749021323 123.145830746127 121.515872228716 130.135721123253  
124.507958339495 127.047679628867 119.159078990339 110.942138645171  
129.138035235415  
LOC653043 136.300195727908 142.385902610309 158.499787920522  
156.622993107052 136.573286915727 138.753419730571 175.469375624274  
142.392860474555 150.122035262873 162.828844182372 134.831550401848  
127.578272480621  
LOC653047 142.89427871125 139.170102961407 135.302583334608  
145.522435728191 145.435794613203 146.210814568357 140.299459596491  
136.413745926388 131.263641389894 136.522590104535 146.306467130749  
146.150048478173  
LOC653050 148.934593102452 154.13120950189 162.37762946664  
152.331011756244 141.181931072161 147.968104627262 149.200848439601  
148.143367490426 151.635752404534 165.908756485356 131.457554839083  
156.916784141484  
LOC653051 138.436029489092 149.560505078257 142.924854393401  
134.371254010574 137.22727238555 142.268018184723 132.981346767415  
126.086991456747 134.988545581219 136.280653079814 148.196320158939  
133.994376985194  
LOC653052 125.851611268218 132.213890220705 144.487533992157  
134.616051224668 133.336063137966 140.341589053972 153.128027266281  
145.660417208595 137.95243466771 143.864036545717 128.950308413612  
129.489867764242  
LOC653053 134.821778017915 149.836491640473 146.499065641095  
145.983627592197 143.320787131532 141.410953064267 146.162330544539  
151.9565369062 144.178210824181 136.061992660698 118.9952230535  
129.153882779488  
LOC653056 145.587386656619 159.406462604758 141.535381351126  
135.976837152799 142.973444931373 153.45050352117 134.85590586532  
149.473505461585 145.389721946046 182.929326147069 135.940629737073  
142.981967333546  
LOC653057 167.858490180471 166.635366968851 153.989839987975  
157.982146236108 164.14265547147 176.145076825955 182.109092947203  
158.06915048955 147.359279533039 225.64288602828 153.028658323116  
165.459993078103

LOC653059 160.72962443421 152.973686387267 151.083551412109  
158.989652405732 145.079450753969 158.814407805803 113.672605838627  
158.221595000183 144.877789873062 145.076068630259 156.720090761933  
136.415734370763  
LOC653060 141.106863165059 162.649092834422 148.275939659102  
139.356478232855 132.871179509995 146.698766621345 155.747694056319  
149.839827383681 135.722938102035 161.470611189347 143.207187847583  
137.42845093653  
LOC653061 137.50609001002 149.007288765628 138.456465793474  
149.888719320368 155.780657091484 185.088667707155 176.603760647035  
143.239666389592 302.408563830315 219.318938396989 149.040720727554  
146.188193301627  
LOC653066 192.914362049985 202.421990203844 220.710324965453  
188.431244390961 187.978627462391 192.992546726522 191.207048581306  
182.130970182242 197.582402276079 219.940167815376 187.769988580599  
229.729195963667  
LOC653071 229.443064589306 213.652091843896 262.349315496653  
201.748876422401 399.872401268958 303.184785797741 258.964323941464  
307.728083981504 356.323554000768 273.911741951291 161.930142040623  
412.344820823968  
LOC653073 168.919352453652 163.480722123193 160.243405030742  
179.854800301573 165.781667492391 155.974463324915 167.298438019561  
158.895584550655 159.68134949161 160.892163220381 165.30072618497  
171.40549153673  
LOC653075 141.215542377796 123.789035728194 129.422854634791  
124.654146040634 133.857996630836 135.5237675623 144.428776560885  
137.096785940897 138.733717670748 183.464897811105 126.316613675316  
146.04584032214  
LOC653079 1934.30779703747 1818.92700816112 3055.80298721424  
1382.95068105649 1346.53215685106 2253.7522632414 3042.88425356552  
1551.90775589919 2131.68478964427 3164.55070502403 2358.46955614953  
3636.59530016939  
LOC653080 270.894153548841 214.785381549181 316.004332524937  
202.778539118009 155.346805606742 224.547982731402 192.113217321485  
168.10131060526 203.87884605779 200.84691030169 231.47915227815  
280.990656342284  
LOC653081 154.94859976407 170.98312926 191.912670416334  
180.690409026809 155.427282703527 174.045229095003 177.772019227116  
173.507835230243 167.782882015229 162.786351190659 136.722636695506  
196.287131027947  
LOC653082 178.083311435916 184.900027626401 180.619956937489  
190.645917992472 146.023710941284 175.529441666151 176.953099943185  
161.229621453539 130.877306095063 158.467572658719 158.58863949084  
137.084488743415  
LOC653086 1990.94596595493 1958.96627327952 2043.73482086765  
1953.88327754946 523.717949503639 1951.69651954627 1312.75601392984  
1526.66232186013 1309.01193284992 1139.76755449089 1519.38642390142  
1454.94889750152  
LOC653088 151.933078262284 131.848213704003 149.086836205064  
137.118488157416 139.450788315602 127.601379088239 140.370626016794  
142.500537230642 142.646570636529 124.121555438466 116.86635524597  
137.206961927035  
LOC653089 116.106772298898 127.67121559907 132.303506517431  
152.219906297607 117.943511615792 129.179188863839 143.993611400272

152.624623171797 133.254663058352 149.098381037466 112.252555403121  
135.732616463819  
LOC653092 134.091723054647 148.818562911616 139.414912158809  
148.382228428693 149.813838004575 147.191114491117 148.104173238606  
119.036965883266 145.142331981651 151.094682146074 130.892302357045  
134.158454639998  
LOC653093 152.81544746536 151.592787806315 160.435789207464  
141.130462286785 145.998177732093 131.946938297748 158.953705937936  
157.541796722309 161.744366588564 139.619076126267 144.487533992157  
143.579660352652  
LOC653094 145.028519685667 160.584760930779 172.973175988757  
155.05329654089 171.941887376462 133.519359066907 155.23922239449  
156.47237266917 150.0084730766 152.91729346961 151.80632463295  
163.586549438955  
LOC653097 135.18026749895 135.622888091037 182.130970182242  
135.825931047185 149.277880094957 156.427158441352 139.032275257901  
150.521719129181 173.773876769683 158.149226045408 138.176475815041  
138.730409717578  
LOC653100 123.442970398288 138.541779821934 145.777778096701  
134.524644163286 127.215777044942 133.310323593945 149.975892236985  
150.238582112636 144.678895821726 136.874135348635 144.720594512581  
134.990075720145  
LOC653103 277.000882284125 268.961643716282 273.709160508205  
358.479218923158 240.561105692347 219.901025447571 310.465070184707  
247.373571011712 375.651196211048 278.737944234055 330.908743070095  
327.951753740503  
LOC653104 159.438084699061 137.510586346207 153.420392741659  
151.403431105471 128.955241553429 156.883255634126 141.793216038882  
156.339564110766 146.782830477983 133.542620077059 151.639515017015  
144.622149861788  
LOC653105 146.019622621809 140.581943144813 143.140502042489  
147.882530392424 142.869595099569 166.024236370752 152.407614042236  
148.934593102452 151.641486303453 151.660152977515 131.181537219479  
151.176697752603  
LOC653107 141.750316403249 147.441650320053 157.963634535239  
163.203582580217 159.399804351771 157.809081184874 157.81327663167  
153.152921890232 161.017267304159 162.072695554798 145.126091016414  
173.726420791056  
LOC653108 140.779962389412 174.246705740225 141.134173683836  
133.274292647041 479.866450988091 311.715351215263 667.156197045748  
597.459920611726 1215.96648642927 456.990425618007 402.425130776131  
572.753294955207  
LOC653110 161.417207801991 161.287648113422 149.881708604156  
142.329137800558 172.020235319192 201.152639979358 194.257024100927  
159.070355781276 200.688465653117 365.046815163035 242.382534384155  
310.8725368426  
LOC653111 130.41429837092 132.324630056168 132.510116371195  
144.937697857147 139.280151859534 133.032905765836 141.404832197192  
136.113421708277 143.360311218423 145.254692995502 155.699649538664  
153.19516365535  
LOC653113 150.570540340126 153.926214082991 141.173167283016  
144.185406500473 159.68134949161 159.765585531442 159.946124520038  
170.737352030035 161.930142040623 181.261666651301 152.72717701452  
163.946569217706

LOC653114 128.623302491798 138.814930200619 147.815673580657  
168.173803952157 135.832454000859 155.183210738478 148.003041725027  
143.913625824599 144.291482611374 148.594322264158 136.227202534196  
130.031303483631

LOC653115 225.387674139093 194.80575419836 250.626556981376  
202.504840299605 155.362503575715 203.816305810343 205.305702209672  
202.300293733922 203.125568980238 166.803359138942 250.885949055834  
291.50783830983

LOC653117 131.202090507576 129.699765645519 124.025104622631  
131.646121568612 119.870661213608 120.883785696583 120.665520347481  
125.785388817819 130.195234920895 112.999642731096 117.104945989023  
117.316790136526

LOC653118 142.362022977137 146.984888309556 145.245316640391  
144.355348009294 132.524377835171 156.981921830638 164.048326497989  
147.640100078933 150.082561726876 144.765051967884 134.136687154241  
136.161633283029

LOC653119 119.866898356501 130.641217515008 132.171282327983  
132.317972465689 149.422357654247 143.224678017244 128.383541329939  
148.757112903673 155.530415929059 169.674931517111 145.554769316657  
163.099009810658

LOC653123 131.794065532001 126.274585491044 132.051614319023  
127.195619567384 123.118724072534 142.116311513299 122.94937342991  
142.85695042665 139.039276904833 129.201101445773 145.597134236583  
135.553183871663

LOC653125 136.126542897364 140.746062850603 146.162330544539  
141.898948675823 142.720769329396 152.319720089773 171.155660467037  
149.204816953404 145.766684470184 193.95909424044 135.877646659023  
165.530397739051

LOC653127 133.592691897675 128.119556520151 130.135721123253  
141.097257687941 140.502667595362 144.355348009294 137.188849160569  
146.658048787833 133.43194756868 152.821735300697 145.409722106953  
138.643442050615

LOC653129 125.293640452686 140.928627507036 144.182891591399  
130.222698914337 142.313725116274 129.483116877682 137.782648137869  
133.875667250136 123.766373146588 139.388484543482 119.446359837504  
165.763459146818

LOC653135 144.877789873062 141.719556176029 135.467354817201  
130.12032144763 152.8810245209 144.221488906376 137.550607284001  
141.81391138301 146.306467130749 128.978197156274 143.978912435831  
135.296271683847

LOC653136 144.112401069818 143.622093679845 161.573975848093  
158.049286838471 144.425214066833 152.422690241301 167.018380617832  
146.087596132093 173.798554769204 184.873459141947 139.075537402658  
153.072429774613

LOC653137 128.793186785667 129.336402686549 130.939543211439  
128.897493103888 137.468570135972 141.849319373594 139.6492947529  
121.919799968293 133.108094159933 126.503135702506 139.092075947067  
139.016274575854

LOC653140 137.681280789305 140.292132023262 166.289763097913  
142.163834995141 150.247639459773 147.476805635744 152.466470613591  
157.50873249647 138.082870754768 136.869117921313 139.858812885649  
151.791580876522

LOC653143 151.221783750989 155.362503575715 128.967855397644  
120.547683754604 143.785769607842 152.533283125562 130.438957566111

144.141837615086 153.258616843783 134.169013339039 130.800427334056  
125.634045420702  
LOC653145 133.704706615071 132.125545886181 133.412452607155  
142.191569406599 146.087596132093 144.654765322941 142.750432197016  
140.391753835434 140.999877170481 148.499207368959 138.584190903303  
151.259426521768  
LOC653146 155.23922239449 160.799950553311 168.470685171939  
176.516540713888 173.766372029062 152.705458417973 155.83143112621  
162.229052648595 145.700589723224 161.764411756848 136.19725093985  
150.685245572093  
LOC653147 321.627969147543 332.464176231219 305.16668987495  
303.907003535357 431.182384100794 696.131296166255 657.562129888446  
559.0867397858 438.431160975498 1000.48723872058 483.067471841953  
636.56692204969  
LOC653148 135.472135601859 119.29304762171 129.353536603449  
137.438984175012 116.764795914545 140.770705453805 141.272049404557  
126.812867041543 136.466367853188 136.843164021899 115.594489123676  
141.809577413906  
LOC653149 143.508657511633 143.58555556787 119.131613164405  
139.582054825147 141.444958186793 139.411792975474 153.387113356064  
155.71830087869 136.927274496451 154.908975734985 146.986891588172  
149.387467833684  
LOC653154 149.919344933814 144.159316670264 144.48495176385  
139.804518460303 145.937733795336 142.953661611418 152.741229289112  
137.239088768176 139.677109265241 137.876234091056 124.28033876033  
147.515088047628  
LOC653155 161.104993402456 139.493025452991 139.305671333904  
144.636277619886 153.93927752488 151.671024612136 155.319717753912  
134.904123162692 160.022481227931 155.319717753912 137.555253894825  
146.466967386428  
LOC653156 756.068695265118 644.741046498743 1200.94425675913  
632.031410234577 563.907454700224 861.516925304722 1329.90419210779  
634.906566690042 824.746488539942 1172.4103691525 1191.26028342929  
1777.29626660109  
LOC653157 218.031238893075 209.112959748917 246.263259852067  
228.766847429517 153.136863548105 234.996704304673 159.811778680604  
143.349486755648 146.381147992719 141.486042999328 158.299765118221  
180.733673680261  
LOC653158 368.948300262634 579.493790910006 240.147082836599  
386.221302830248 245.110761598207 390.573484082597 343.571296297462  
262.53374754047 191.84511431253 331.62124160152 356.376890469558  
262.832376198119  
LOC653160 143.360311218423 143.118188813831 148.410647472149  
134.85590586532 133.146347243168 150.927628184034 140.723419465922  
156.336425973696 145.1382587433 140.527521345097 146.686192012988  
141.189008902155  
LOC653162 7218.21759302518 7733.95252458705 7144.3257417116  
8840.92490099301 12749.804597566 10506.1271023809 11281.201625198  
8342.70113690382 10930.6720259935 9323.53099359448 4857.3155917904  
11112.4298269818  
LOC653163 144.492756323647 139.06923394504 148.895841777421  
142.599815022061 146.06054700771 153.649235507812 136.269445455239  
140.997594159186 141.642547489983 145.42029807396 134.389518389888  
157.787233338636



LOC653165 135.092226300609 141.099781722697 138.279087298069  
147.199961777192 131.110018165002 146.720204808211 140.779962389412  
142.203367260558 136.280653079814 120.470801825675 136.561852783331  
132.542489755781  
LOC653166 160.892163220381 147.07272598888 195.16856673253  
140.805322576253 141.121364213272 152.585572167313 169.667751894226  
131.825172822888 137.298549014192 145.574725784632 126.146213417225  
149.779323547896  
LOC653169 113.018985316061 121.824805374887 124.474221706022  
134.096283448464 116.635455849571 125.593595066736 125.780294378066  
112.314595956147 129.551260802518 151.431513447721 134.675247731364  
128.429007921588  
LOC653171 199.490190715307 187.196424491482 184.923312649584  
191.814634229865 288.913660405191 300.937118739654 260.195256836955  
265.470314691221 237.754067231793 397.2528907311 251.511405838796  
290.638110977807  
LOC653174 129.469949305913 130.479845410716 134.413962468434  
134.349043119219 129.180990946063 136.109975252514 133.53523683945  
144.649656552 134.501410126169 128.734694496357 135.719702250709  
139.736465430177  
LOC653175 143.583650664594 151.70035428516 162.793214727475  
169.631386764054 150.531753446398 168.511517285223 175.989742412417  
158.95714101556 139.263602290256 151.436802637988 144.265352127763  
168.6016897585  
LOC653178 138.400536017182 140.714455864886 141.778060508776  
135.3969732106 148.004271319485 148.848823912244 142.707913210557  
127.150222504237 141.222884136243 141.963297887448 141.170937695272  
140.732618320154  
LOC653180 139.044150521333 140.89666990854 115.43068422162  
135.527445907621 128.933672074497 153.524100996368 142.401333414583  
151.543678860049 138.244585395561 132.083532534267 116.168270198375  
134.314636524922  
LOC653182 191.814634229865 153.787447416111 195.269099451599  
165.964183460825 160.486513643798 164.601022396674 189.461090469712  
163.227953876329 162.484777758676 169.168869363848 151.488973553441  
159.584350289413  
LOC653184 147.305679046765 152.28262533486 160.368226341458  
157.361421272816 166.932757191847 156.316333575406 156.880120259304  
148.11536596061 149.541917326637 158.23562423217 139.623194916971  
154.705630035232  
LOC653185 127.620377473963 113.460835359833 115.327402810793  
120.984641102879 119.11586630281 118.185499089226 125.932540615682  
136.478114537536 145.44629057846 122.607404698857 122.490271802207  
130.01207836961  
LOC653186 138.411148122407 155.227218488935 138.015301767961  
149.717739166461 525.6579615077 158.8054811093 143.864036545717  
147.715160308036 160.50439457257 139.991780068793 139.660641694206  
156.534634574244  
LOC653188 156.040073232376 142.14116448528 160.265389854694  
146.675159409376 126.42955055275 132.517166202071 142.801645268128  
144.460541430705 138.102654893864 148.973277994329 122.903428611669  
135.141067086648  
LOC653189 137.825722180056 169.834078550805 166.277960843095  
151.527357661273 139.3465236423 165.389652763451 168.50246276469

176.420075374686 140.800226245569 158.95714101556 161.874184077257  
150.731093808891  
LOC653192 144.627784383455 132.611864316181 120.488694213288  
131.615462296871 134.950905279775 131.239986488033 154.340042518983  
149.061464748604 135.773386496434 134.128061214081 145.977658128528  
137.950955473086  
LOC653193 120.995697049378 130.778164962583 130.001889950186  
124.768399055809 147.980827857138 144.720594512581 117.735411259153  
147.823552813852 129.38021642675 141.503351545458 120.574820369421  
147.348400730286  
LOC653194 141.576177844986 120.114423236962 136.986022901377  
150.405715534245 129.205783382977 136.633726784926 136.966690353637  
126.37749112514 133.357385559881 136.342634691443 152.254519859308  
136.537117054998  
LOC653197 133.284873295487 134.616051224668 144.917911601441  
146.091822904705 129.088718286391 145.812607895325 141.927204640355  
142.826898321575 156.119899067238 151.325068155715 123.75974844367  
162.762473039474  
LOC653198 159.957371011316 167.604959895451 173.395370400371  
149.842326869644 169.184111483933 147.473875763319 133.976997391944  
156.375876454394 156.460374293022 160.898061905021 148.853877151493  
145.114382599368  
LOC653199 160.960599932898 150.105503384881 156.65842876856  
157.57914268719 148.520371748891 166.036553680319 164.726382689707  
158.973872644973 147.995991912855 165.866987051333 151.981708806765  
169.963805688413  
LOC653200 129.608034744581 127.842177770276 143.494511683426  
133.768419410758 152.182968451691 132.458764637407 130.941645638407  
144.049503774298 142.734103971267 123.159407368236 132.454025879177  
132.774127230452  
LOC653203 132.133226620105 148.258850340107 136.6729514905  
140.301945597122 137.180793826675 148.490236128772 141.996233801459  
140.556631658219 140.216148769999 149.94715601106 132.647152200128  
142.392860474555  
LOC653204 149.487167787687 139.803568564059 176.167129202773  
140.77762487941 161.021740537372 143.587562550004 156.662150993832  
140.699287635171 155.05329654089 166.091736766853 157.955606242401  
163.542848861552  
LOC653206 143.672118850295 137.944260488223 149.297012645798  
146.777258330572 143.165150890885 147.661748633455 133.680691168661  
145.487783396345 154.43808450305 164.116142541038 142.090009728666  
141.567425892004  
LOC653210 149.17815859943 159.870967387108 155.595651896155  
164.89597889259 141.925012927873 152.66513184083 154.086510608016  
139.063209125209 151.74392028547 154.98147307591 127.969833368917  
176.410016510249  
LOC653211 140.211016178402 154.408875182219 166.932757191847  
161.618479762188 176.761123480566 156.375876454394 147.143407224469  
157.313737338264 133.167635227902 139.395743826525 137.434039024162  
165.692508737757  
LOC653214 159.099495828517 143.791908191551 175.084729757407  
170.966588957686 150.737888487925 154.838407529853 151.273261581765  
148.670562837021 150.71435300188 151.453985465369 147.351826045609  
150.841261270382

LOC653216 116.142650095476 126.5929421833 130.865693081945  
129.606271613463 119.590540166384 118.677203713024 122.472909598385  
116.621735695217 122.428943658306 124.863832760607 135.041687549769  
124.821581853501  
LOC653217 116.994216357989 118.414329128347 132.887701822875  
135.717491814078 137.047288508371 132.548259643258 125.117333434527  
131.968781256081 120.675356009213 138.349773531218 132.002835547397  
127.863583325139  
LOC653219 159.936703616817 151.148295679242 165.154844613899  
156.926617030752 162.085813676373 126.682913361149 165.607095120227  
154.959217895243 170.901599088282 144.863617174741 152.789338329505  
140.509950286228  
LOC653225 145.862497313025 142.785631812039 135.358837968905  
140.481148289418 145.281664250703 143.093156971372 122.002822875994  
140.374644951491 140.004456934031 148.711943433557 144.551233687082  
149.049931380459  
LOC653226 1323.05745869565 1407.43503866211 1783.8031212092  
1125.28599595312 1519.38642390142 4569.44477073589 3029.07443443457  
2433.83421295012 3270.88476148156 1994.00516809361 2065.51724858579  
4682.62607750437  
LOC653227 152.760855359297 148.767517078508 147.729716417584  
137.43751840683 144.292679144059 153.82440233533 142.51308872439  
154.016622581204 142.243866937888 147.441650320053 125.231476412101  
139.353080958675  
LOC653232 7054.92270618408 7308.57540715512 7342.79622458743  
6244.58472720999 13758.4768543075 7468.70895916615 12654.3779830648  
8558.70496234991 10790.3738999898 9793.92604780228 11017.1478502767  
10222.4435857673  
LOC653234 170.08485436731 159.98205335759 192.188662949149  
146.017509013234 165.257737836487 198.979744266277 162.54008293513  
185.002106079042 181.783275804424 168.232843307077 167.451782810394  
185.396765725228  
LOC653238 136.394920983439 142.444072809204 150.649685693403  
141.484730939562 132.257989841046 137.752238510249 155.191446350891  
141.08625682411 138.054470878471 150.874014332213 132.083532534267  
140.665332203898  
LOC653240 133.695284981677 134.244658505187 137.609831343223  
144.594190430117 137.43751840683 141.311749168934 134.653131708903  
143.903216264503 143.141852982371 143.895399273595 137.076766238637  
147.552635527742  
LOC653241 148.132450240784 116.59404046487 133.953303801604  
130.852932147831 115.51493368527 145.793794049657 187.729071402782  
127.407418037777 134.227796103219 131.141668650877 141.870640394206  
136.952914053358  
LOC653242 161.704966315183 149.925051977052 186.359770878343  
183.531156021887 209.304654633004 160.625367261779 164.96631670799  
173.387549650592 166.014450044695 158.459129254226 165.342790388607  
163.942131559267  
LOC653244 153.38494705081 158.429761055869 139.660641694206  
158.000456937922 155.402421581195 147.150063462728 148.107004870598  
147.942495862714 140.885915460425 154.352518161283 154.304674359916  
145.971656491073  
LOC653249 143.778327403708 134.47218436552 138.576978828316  
139.872976072847 139.314945862113 134.619470709414 154.579913524947

142.713318779614 131.77642590781 130.047353911148 132.790039196443  
137.805895248174  
LOC653252 129.419280058541 178.745112514526 147.305679046765  
176.121563444364 152.109178223495 145.358431402568 139.016274575854  
133.544149685358 147.93442757931 158.809865241567 151.073257114127  
151.92638745703  
LOC653253 154.750512277909 158.014017648839 147.954079022076  
155.722314592388 140.096717188376 150.479320779862 144.192623511374  
164.848970268132 151.153466809603 174.593548891693 156.75308999904  
153.78045746564  
LOC653254 141.412317125776 127.733860645979 145.604066669916  
143.587562550004 131.453064237253 135.364039983762 137.975369568585  
119.451099896048 121.556331561879 142.677386111317 115.371180170291  
135.173464753848  
LOC653257 141.082569618216 149.241358552148 145.471090720048  
157.898632788579 139.617608585463 160.113042196058 144.215491799806  
169.136919982294 150.851504454247 149.815494316469 163.319882002763  
153.000232171457  
LOC653260 171.455216889348 148.953720017484 175.96841318924  
158.882535865069 161.506431005203 159.784369379077 163.97516075705  
162.342112922504 167.341759854203 165.919497521143 152.386986818959  
160.713790305656  
LOC653261 162.472783116487 168.50246276469 152.081492474691  
174.840923772532 161.608941774391 176.198555355383 159.35787888191  
164.120602897751 151.990794390998 155.444668113276 142.153830345183  
146.817659734182  
LOC653262 144.032779435658 150.794680375075 156.053517438255  
144.423509403938 144.767233774942 164.098880989592 158.738932073809  
151.930565620382 132.70643154246 146.16821907742 142.119327380686  
153.100979553727  
LOC653264 154.686025022972 135.294664456623 148.744599622165  
145.064773625365 144.122748003206 161.456727894848 149.865644080359  
139.374278310041 139.399858706972 156.375876454394 142.510745106328  
161.055911120534  
LOC653265 147.230113868203 174.205940911242 176.761123480566  
147.150063462728 159.513465644268 152.265624144393 156.916784141484  
150.331324340476 164.276668889213 166.47851613068 156.551925771312  
158.788210937339  
LOC653269 131.880438747579 142.865320802784 127.642215862573  
147.057116881846 159.620467672898 146.748572532267 155.371772547395  
157.547814187442 140.682757521394 133.006192351471 120.204469421484  
149.939035476611  
LOC653270 158.521812954982 151.522526161299 158.384505840662  
195.831574717135 151.632801137039 199.001860912128 181.635664531851  
172.338509138759 154.027862576708 187.893420010787 158.902676384853  
163.22480684222  
LOC653272 144.333945716394 150.026314061051 152.262147284452  
155.7441762827 133.885725703056 150.308048500142 145.483667452136  
149.149858208397 147.208176455806 136.299079457533 148.962593686337  
149.364498870469  
LOC653275 161.102731941183 144.101376910581 148.930073905413  
141.613898853625 139.427216913809 126.55925846644 138.388749930671  
147.282520596449 123.100949494673 154.087640417973 124.972772541334  
133.489068665353

LOC653276 159.301581158613 142.284050423299 153.899573902499  
143.272669418277 155.702330867056 150.176942469551 181.976252906929  
178.665552649698 158.902676384853 158.330403004116 134.140533647509  
138.503460596289  
LOC653280 127.289269745461 138.56812029378 129.887187837732  
155.402421581195 158.127523362251 134.002424083826 137.997756995882  
159.966729941991 151.126252768792 142.203367260558 116.588138374632  
145.606098951179  
LOC653284 170.257439890277 162.320894555337 197.308952757609  
167.389632521521 173.97085982677 163.463191619941 160.082087242964  
172.486839924297 149.157934946623 190.614236149496 150.449621353865  
153.261002653668  
LOC653286 138.9183380982 142.005703694973 157.761231106669  
136.698600389364 148.342114514468 125.398875527365 122.508761687823  
145.507330257603 132.091532692048 144.011792962785 144.281217246178  
143.720044122451  
LOC653288 107.67395123577 133.206919058442 116.934457270701  
125.785388817819 117.49013401175 120.224154897296 126.595668758744  
138.252656818036 124.033766796333 129.579455072999 109.781334128478  
121.583096465567  
LOC653291 151.167024833049 154.988494760267 125.475308885588  
146.683594365673 150.573523216151 144.767233774942 128.929244741296  
134.691038011706 135.311373781882 148.400132332444 118.970693476152  
140.538020869886  
LOC653293 144.051468970593 141.035566928475 137.660051943656  
149.990378213915 149.244970309131 149.808222023726 154.371946675862  
137.945878061978 144.752418965039 144.794806650252 131.97328307312  
165.627852733455  
LOC653297 164.82904652634 156.787932134605 158.414776465951  
164.373697447004 250.406775889932 297.368197598038 174.812134675989  
189.283071231248 159.337816095012 177.091809538824 156.68541512214  
181.215046876308  
LOC653303 144.6567095695 137.082234284426 153.952788086758  
147.395335979341 158.272071464923 148.327340543504 152.265624144393  
156.324643994552 144.975882336334 152.760855359297 142.438586625317  
145.511473738224  
LOC653305 129.116354997747 128.647790058795 113.529619135543  
122.702175900246 146.072585331002 124.511674561183 136.430232926793  
137.894482933806 120.521509788705 134.208537331186 119.859508630454  
125.498081339586  
LOC653308 193.203053225456 187.73896437823 197.699100346967  
190.152824885328 191.040134068942 203.960838492793 170.18781660707  
202.504840299605 194.475822533231 213.510783808898 162.519642881848  
211.916602665089  
LOC653310 126.872912960681 122.226875707253 124.899019467557  
137.916872642522 139.104796184094 130.941645638407 124.697283474333  
123.794432024417 130.278980631435 157.070500065037 133.391421497441  
131.885529813944  
LOC653313 155.162310001164 161.498785105514 179.389797867379  
164.870860592068 150.868712184357 149.722442994599 146.725123303782  
145.954700424725 169.206723147505 156.026806913759 149.599523779175  
155.588607813902  
LOC653314 9044.54885739666 9450.52572756597 9323.53099359448  
8958.34797715349 7771.28016059011 9070.86397918429 13700.8527522612

16077.1585881362 11598.65499235 10312.8407173696 12406.7143043992  
10449.7190201942  
LOC653316 154.598520288855 138.370241517025 153.051143478997  
135.704986104812 132.048276936309 151.766607453172 147.15764785567  
162.6762533989 136.22416508552 153.354921961854 130.406895174038  
132.903959880979  
LOC653319 148.962593686337 149.44520146627 156.032346112587  
144.4421922847 144.482364671273 142.248293068033 144.396774242135  
136.156548919515 145.652246303142 156.96934803556 142.655287071175  
141.555366493541  
LOC653321 125.247402280272 125.413619056436 133.346626315812  
122.519746599387 129.699765645519 146.488402397597 181.758545723241  
139.853333847856 124.995087711332 131.631968933144 118.465111174212  
148.598920567714  
LOC653324 156.907788377794 137.702802090925 151.801558435863  
152.945550129539 176.783978625103 187.607426452073 180.3779211444  
175.693873820963 163.125317704446 198.135240691225 182.197625235191  
180.20999937977  
LOC653325 143.301399292539 150.75878820215 145.934643000545  
150.176942469551 159.406462604758 168.654753237204 127.829001155781  
151.451443480833 133.514843630183 156.911538642765 150.43722766614  
151.09974848374  
LOC653326 131.76829141949 115.113000553093 141.489910809991  
138.560399473164 136.324020406359 139.782152941027 142.185903088074  
142.01454627498 123.692366307662 135.285224699704 124.203250865069  
123.267817390796  
LOC653333 176.088449983147 156.239937979051 177.619101765848  
161.061119536632 164.753886197136 160.150336334888 149.904691068054  
165.380225715852 154.161892545061 175.073595611435 170.483686891321  
169.158049136321  
LOC653337 152.407614042236 148.234708174518 156.907788377794  
149.141033677244 196.014841240142 178.717719615544 168.412162365467  
166.89285636895 163.18585933431 149.08527298577 163.010527914347  
138.739176678465  
LOC653338 155.22791202039 152.945550129539 139.301435614165  
156.130224537288 148.479865869644 156.934589811742 149.698664700146  
162.161282071736 137.306031826007 146.470444212748 161.755290291637  
148.109847175216  
LOC653340 135.918590725404 114.696935316053 126.88329158544  
116.764795914545 121.396223519559 123.225792525733 130.380766252137  
123.069963218224 130.080728694308 141.404832197192 124.365185583133  
148.145136066071  
LOC653342 151.736824723671 159.508223180752 144.301577198126  
139.667714422309 122.494779505958 125.379842077431 135.4702891855  
131.780134634616 144.203716525289 131.451173463405 121.893446546512  
128.458132030921  
LOC653344 276.653753970476 344.856199123543 382.485769373364  
335.059844742031 585.933822585718 341.564749445905 995.263014856158  
556.568221094639 738.892511276134 828.276436883306 925.009157785129  
788.693133735893  
LOC653346 146.384051525624 132.151765465534 140.374644951491  
142.648205566485 146.252974508529 164.284396793834 146.664285015996  
149.595375008252 123.916497557628 134.341489592504 148.512096079648  
148.922537778634

LOC653348 145.42029807396 144.355348009294 150.72014060286  
155.04585737344 137.094814176566 151.132586978278 163.880402141404  
158.74180418577 161.803438841859 145.304050333309 136.630678899513  
149.871960981882  
LOC653349 143.330025840618 143.47200560038 145.250076958551  
144.777043589925 137.06775845101 152.518729390047 144.610341215903  
138.53403492914 149.219602109121 145.155989928336 152.26903721278  
139.690093593646  
LOC653352 154.030432279825 156.316333575406 162.975988989106  
155.313873664923 172.612152484322 201.569913451219 182.181756507598  
177.696849418064 171.994330847901 167.237705290905 161.485353443949  
176.382377784553  
LOC653353 148.611352905643 143.053727675518 151.747595672228  
145.108281984556 130.563756903074 151.511808301993 146.323776429268  
147.866909109733 149.019120812629 158.565676210997 148.666854582112  
157.378317015602  
LOC653354 161.112906953532 184.518666956721 204.219197797869  
172.816477996646 260.921177985439 216.506914782226 232.735767435327  
146.29600238749 211.916602665089 206.502189514795 221.171478972931  
201.269380130546  
LOC653355 150.763810844645 141.793216038882 179.821008257902  
177.96452209396 135.750578960284 163.451063547847 165.500088159872  
148.791182443623 164.68600028429 146.249951130016 145.832751296646  
159.218886890035  
LOC653362 158.973872644973 150.981208776163 151.831627236638  
157.244026506342 124.904518221898 134.646131480502 143.697931551096  
180.192015483309 163.67719444924 135.897498591391 130.346150829949  
152.950227635138  
LOC653366 130.25146185271 133.640832782576 140.833666276568  
139.034940762344 139.444577046509 154.199534276226 146.392657608076  
146.448568700393 142.818122106598 144.016137459279 124.511674561183  
130.979513420888  
LOC653375 204.35801867216 200.902123076244 244.011434605133  
218.997165156081 349.773289724658 178.304914997023 212.171281020103  
202.524668687686 200.84691030169 182.736067431579 173.497575259833  
236.292053621233  
LOC653377 916.4187683687 891.637685856145 1002.88224342342  
1203.47834989609 513.518424350159 604.737834405874 513.036729214095  
736.603605876572 482.677635089583 993.774175699873 1185.70008959602  
952.357976050712  
LOC653380 113.422559344178 132.540503258053 137.430946130817  
121.837571435384 130.616175018332 127.769405736754 143.127795310829  
119.446359837504 134.413962468434 139.276102596591 136.167141767484  
137.572574328004  
LOC653381 501.738490253982 696.976036382401 462.025126897013  
543.933989965705 1241.59946353857 862.669120338424 1738.96798001895  
1385.28044421961 778.846928848361 1444.45946291517 2227.70654174379  
1028.80076860235  
LOC653382 152.952479729682 148.192121257421 150.931114848235  
148.541832125061 144.606963457243 159.009211991511 171.880470629305  
167.741556663724 160.608674893418 156.441368290572 158.138862054715  
153.577349107512  
LOC653383 176.390014020936 161.992141305029 193.466377788318  
169.022351348819 216.181417552574 192.954269340616 197.146035305296

185.639696270808 220.633692394229 236.707875629511 200.179796117115  
187.231049280818  
LOC653387 148.840533233712 135.624881949214 149.385103319547  
132.027020683413 474.14051635531 142.830950036054 150.000851192531  
155.710272937386 139.199446543251 144.368355737187 138.512938877774  
130.047353911148  
LOC653392 139.986119754908 154.449058407217 156.018200674475  
144.408426565541 158.371599884762 135.661131815375 139.238936770274  
158.213784310645 147.285764611006 179.203783335674 118.974727968283  
143.185372109165  
LOC653394 173.161152247499 168.560093633607 184.462286724102  
149.786445079456 139.723117427543 145.628239642187 147.284005815059  
148.28101912019 142.928920246687 140.374644951491 123.632031112507  
146.151639797173  
LOC653397 146.225422797118 146.063554646851 141.891508908764  
148.31140879454 143.587562550004 129.80429516198 127.462293158337  
146.683594365673 130.529367177452 141.368078865065 130.71040889651  
129.566451901256  
LOC653410 148.85250180736 129.852833137493 150.79785758452  
124.263901299025 138.945855414918 159.245344068037 147.585987099202  
169.417764098848 148.779043570204 155.876231451789 143.532014058535  
156.978585870854  
LOC653411 164.377227860031 185.240692860387 152.845126167802  
166.489436134841 138.275371291639 171.706534562905 151.285933600303  
140.04612725812 142.768691899824 154.533544838819 144.405191855684  
160.277755404001  
LOC653412 130.698850298016 118.601228886344 129.195962576953  
131.140263788783 132.969187044132 134.325520377207 149.788558681761  
130.076926011271 128.005043478952 136.578058206829 131.961236721149  
138.859261763075  
LOC653418 134.285191872099 125.134516902118 146.070871543153  
131.93683726912 136.630678899513 133.231066635063 150.391286215189  
151.823845684041 148.983182193411 152.017655364287 146.368188849777  
141.469818222503  
LOC653419 150.75878820215 139.78795317086 135.673080643346  
134.310685502031 178.745112514526 158.455783755247 165.122737166322  
150.468392290279 148.072816925413 290.288001750744 145.766684470184  
146.9069812014  
LOC653420 146.702235538271 134.218867540274 146.40904127542  
160.256877369493 152.801801823442 143.543607779991 152.301556397498  
151.921235758457 150.198869833614 145.318539677981 129.013667813486  
146.689482187129  
LOC653421 162.155834067128 184.322250984457 156.487049947247  
176.66175597182 171.844483419604 191.25724234927 189.307823427362  
164.880911221767 159.584350289413 196.076386020815 173.66499836293  
164.377227860031  
LOC653423 139.798414027439 150.893280574091 149.366554238043  
139.162076054072 169.681582570965 145.912712700067 141.064086298948  
141.023875058322 145.679907578808 171.994330847901 145.909456876796  
155.078035506545  
LOC653424 117.602986362773 125.452973441746 120.744994574029  
125.048770476506 143.737021989907 138.426531345939 129.976540483758  
135.131890100292 134.658664100744 133.541333581593 112.054379249781  
143.224678017244



LOC653425 124.998601194756 123.850975602392 150.952264779196  
126.992697289075 118.029258839619 135.897498591391 133.850733997442  
136.093473732174 122.165046954625 132.338144393918 126.766964875664  
131.257901340773  
LOC653427 159.074001164836 135.52861375119 127.931887647108  
141.73248778957 137.276586668477 143.971152352313 144.73389393695  
145.34332740863 135.65700435306 144.853868519575 131.543439103033  
140.446530307169  
LOC653428 148.084844579881 131.840663714409 145.139966629363  
142.255657518926 146.223880979601 144.310362660942 152.185397218918  
141.357668647617 129.811504562622 149.000760379976 110.510191137073  
152.660373241584  
LOC653429 140.274655651173 137.076766238637 162.161282071736  
135.618562468776 160.407690552027 151.228823957828 147.100947801261  
131.58537948771 160.997179739138 155.747694056319 139.885054845153  
140.833666276568  
LOC653431 119.097521397712 140.682757521394 134.824147038515  
131.497454038525 132.216453078716 147.178598908199 129.353536603449  
142.334338599752 124.929146609285 135.08927101395 134.919972250554  
140.767270136561  
LOC653434 141.038721816572 115.101971719657 131.913786256215  
155.121309543738 141.450800126786 127.995790782392 141.778060508776  
146.190750749851 139.951275828765 142.783159341229 137.347554578171  
136.335679863251  
LOC653436 123.058261039164 113.170014668758 152.812142230375  
129.344834474578 125.353389826276 123.11447940203 138.386391726042  
145.832751296646 130.949405011154 127.263061874385 135.422822065599  
121.747622617011  
LOC653437 125.299513989334 130.380766252137 144.600474557974  
145.877943006533 134.049094181433 150.812739240232 143.780803045394  
143.720044122451 156.546769952772 179.122374556365 115.750690887988  
153.075594260208  
LOC653438 262.233918187791 243.861834405092 266.71318061066  
271.823243396395 461.940616438547 351.515059400947 293.746733527346  
308.767036855508 267.839640412797 335.239364345057 275.543576337502  
287.402339322061  
LOC653441 138.897393621114 138.402890124039 139.619076126267  
153.336395746742 144.214589452164 141.03218895811 147.846925198348  
139.823017208731 151.923356524322 137.669753723768 134.790410101679  
144.273011517032  
LOC653450 230.508733145583 193.134414137433 314.386320310898  
213.412498914309 194.186994486095 226.824313642101 224.167511918105  
205.476230849391 211.535720730612 238.823244541016 199.378179817518  
227.736106796551  
LOC653451 135.622888091037 129.797601100832 141.803250679131  
169.984859264412 126.960777504772 143.931400351525 157.516278302035  
119.725487374119 141.583936153499 142.110469428644 127.979574243743  
132.8615886934  
LOC653453 127.434873844923 130.09958025354 144.333945716394  
137.540275229889 144.988803993714 135.997144927956 144.532420788945  
148.767517078508 117.847744476387 136.659134200122 135.010937737018  
145.393431956588  
LOC653458 146.932655562613 158.297624312257 151.183847738922  
142.51308872439 133.711821318079 130.516632662261 131.412979573687

138.829793136954 142.011019998327 138.263361518905 147.457193565877  
127.026168862919  
LOC653461 127.895989232696 134.722574388775 139.623194916971  
124.833659452957 133.887927451362 126.359440164601 123.285059856341  
127.093255830978 123.089110282465 128.907618218883 124.616629956864  
113.38168751499  
LOC653463 163.267148547147 159.724824188037 162.846914172627  
180.20999937977 170.490099282436 155.376656335974 149.343930487315  
157.81327663167 143.446317006075 167.532512839891 150.75878820215  
160.211460008777  
LOC653464 156.361037318986 147.006482557682 149.055493714692  
141.623851511993 146.363991934916 136.60514429355 154.124057382276  
135.457059862669 143.31590446076 140.132816040735 137.154298404093  
150.073816271065  
LOC653468 155.04585737344 150.888616811881 147.351826045609  
165.483218650824 139.591231478841 150.931114848235 141.88777975766  
147.572660963285 156.374519907968 135.134213292186 154.423801637411  
151.961811748754  
LOC653471 190.625250757654 182.222567053422 214.200081541057  
188.780089746036 163.829218786716 184.322250984457 174.383193885933  
174.568253693395 173.97085982677 170.992074907355 166.780319723055  
167.505381046729  
LOC653472 173.592875508663 156.928368494507 262.139211406599  
145.318539677981 124.927989289122 161.569793476847 199.916301659113  
171.481917188224 171.37545414068 239.649306804266 159.973758408655  
183.815810733176  
LOC653479 183.82450756022 182.861900982333 276.434192872962  
187.63609695026 185.923374274306 217.013533525724 330.703588385626  
345.062426573519 261.814227719605 254.287838845201 239.452559981542  
258.145539382199  
LOC653480 155.449724554217 142.563762845657 158.98666068453  
160.618586213311 145.861217875066 149.004343851423 143.728569494708  
140.06989960847 161.475694690038 140.244052740397 152.024383072265  
154.136467767927  
LOC653481 139.941724115063 161.640122360448 132.735371358102  
161.886342770305 154.156272284591 136.864106181375 125.522498880785  
132.796012953422 130.388530183353 142.485427762372 137.177271162749  
141.544454931788  
LOC653483 139.308325848216 127.630514255051 141.262319193649  
130.29531841096 127.352386363217 119.418866166776 123.571641517019  
136.654902685184 132.539585717666 127.578272480621 127.372242892513  
131.293563126249  
LOC653486 128.257292171015 128.447393268611 141.567425892004  
136.831280469398 144.861804210272 143.891725249061 129.942594772751  
134.996443685544 131.345038923753 128.0805889548 133.318665755015  
139.046174587432  
LOC653487 141.678529125136 158.541906931082 154.604363252526  
146.40033464957 133.619092072157 133.452032750397 144.972694558182  
137.388190728367 137.065315360321 160.655929233978 187.754968096521  
151.751963310212  
LOC653489 2157.50118108142 1925.60246708149 1961.26255930192  
1797.65684760558 520.470790410856 1958.96627327952 1207.11788506001  
1667.86825735893 1427.70292953827 1129.15018335354 1516.97921112926  
1195.07608384189

LOC653492 129.389420352857 136.90636489391 144.318556353673  
136.614620534169 142.249004083496 145.369791572077 142.185345091219  
132.261161069329 122.519746599387 134.691038011706 136.248506185974  
137.307786147787  
LOC653493 116.483432723207 140.248610391566 127.440987506769  
123.395897439193 135.215356532498 124.071341868552 121.406758670435  
132.002835547397 143.363002903815 136.085524091635 129.546119539687  
139.096536887753  
LOC653495 134.770852936106 151.428283279424 145.000523037022  
171.190796424612 154.076216899447 161.316521450944 154.574826922632  
153.435218661228 133.204793127029 136.62213567467 138.994857740356  
147.896919205072  
LOC653496 416.075109522039 392.004079531068 612.61438059983  
426.548994267836 180.01471631205 225.095016600703 215.019239034819  
233.464856303761 205.679992893049 267.589020526148 243.622678182687  
269.424055734143  
LOC653497 136.695790688466 138.643442050615 141.033948839613  
146.748572532267 147.428180649939 140.898380345452 133.608461289137  
148.457872807838 144.796089646941 140.077307351596 155.063255459112  
135.746880106233  
LOC653498 120.37619371663 118.342067845126 124.503016568677  
143.807102980397 133.651203764842 119.720132373023 133.592691897675  
124.317870455205 132.089375920534 139.182623417751 123.809866652834  
136.420062669039  
LOC653499 132.098421212796 130.565986980021 128.975785280465  
123.67449826277 129.733935614802 128.466244127634 133.177950880393  
120.638330368388 130.452929012459 14798.1358474998 275.642882589307  
135.346501914337  
LOC653501 140.174087049513 144.446903878863 149.657951204528  
156.050585687098 149.326216726716 136.408314486465 144.342905860503  
148.663860923774 143.051871940423 148.201649039381 142.203367260558  
139.159510392614  
LOC653505 910.087388930485 1039.46136549795 1495.04587558545  
924.040923247227 1278.30505902957 2051.45788386541 2596.43650409044  
2847.42635118026 2168.58813300343 4206.37667440908 2313.56743052616  
5226.05969701201  
LOC653506 1336.75600604068 1333.73334006986 665.602699607102  
1325.77498031227 2197.44189747261 894.100792722707 1113.05943954513  
1702.68441407727 1772.75453735112 1721.20676889116 650.679096367632  
1323.91781040143  
LOC653507 137.832597613423 132.688531077861 138.144085131733  
138.715208319278 118.206034087145 140.180208418327 137.401137659118  
137.46978401237 146.738411200698 148.670562837021 122.292692083352  
126.512613967438  
LOC653510 125.418782388128 125.4408430419 123.93800397666  
127.449028221682 140.021640936288 114.730641277464 128.354163132392  
130.545285774056 128.582520754296 150.536178574986 132.105929230517  
129.013667813486  
LOC653512 136.005756600948 135.663734178125 138.959040014432  
147.4182675362 135.420780282429 153.616692588396 133.733674016447  
142.953661611418 151.865924163231 142.382367938838 141.558927907067  
155.181724637897  
LOC653513 153.393651104539 158.872962797815 151.086688327023  
163.73339229802 160.136209944279 158.205235596076 146.097201498811

127.269672881591 146.681183890181 150.902548360746 150.964506212368  
160.945886507456  
LOC653514 150.768488673775 140.469508410073 145.100964170053  
166.263781040251 152.217243924816 152.840202260007 166.355086055404  
146.814457904682 143.774841336279 168.347445148881 123.11447940203  
143.628147237159  
LOC653515 144.038859705973 159.055956234445 140.796641921516  
164.848970268132 148.162914253981 157.333615322941 140.684066288019  
141.449119281888 143.844153373367 137.904786382385 140.067809125008  
143.356999170877  
LOC653520 148.898587505337 138.252656818036 151.059401217656  
136.901107766796 158.183045411298 163.042083189818 174.214747421898  
169.113439729353 179.44023315251 162.140112952434 153.97869518398  
168.183542846746  
LOC653521 138.980079440205 156.141123407905 155.936011795688  
155.603263242813 146.904354404095 144.258128917228 159.936703616817  
166.81024151246 150.822586904738 155.078035506545 157.013200713587  
145.793794049657  
LOC653524 150.555125135002 161.031148038478 160.640160107693  
169.834078550805 166.582931148846 203.456296907031 150.772752327567  
148.26621607986 157.768329108254 158.973872644973 162.373508183992  
163.809967446414  
LOC653526 127.471479301983 145.401101974736 141.4587810296  
157.182954894643 148.956326355381 143.967197319361 156.123528587917  
147.896919205072 138.639410179404 167.106870400592 126.439948611449  
156.311009595629  
LOC653527 165.286724415145 152.486212022518 116.445184223804  
148.209164900319 144.908551199481 131.87052926802 136.698600389364  
149.500457158616 151.632801137039 148.695212949639 119.122305582754  
114.618608815885  
LOC653528 135.15791174418 123.442970398288 134.122776198036  
130.565986980021 133.944538335319 116.046983032621 125.828998007608  
120.402155551818 130.637567221512 137.891372981851 141.88777975766  
128.611740835252  
LOC653533 139.628966306048 116.276003190171 149.548900791507  
130.423465505321 140.419686138586 140.321675137237 127.881498149714  
127.372242892513 132.688531077861 159.41705570719 136.71484425521  
135.973752893694  
LOC653536 125.358906118533 125.220416203903 124.507958339495  
120.118873350459 128.211076776316 127.183924911179 139.803568564059  
141.778930762662 132.719730606922 124.811760828557 138.114938404796  
108.296042016208  
LOC653537 146.666759322506 153.770852731422 158.400572147671  
153.45050352117 146.743260100643 150.73248190848 151.293676705634  
149.65417821994 139.117053855066 147.2233876988 136.470025638057  
135.43939472868  
LOC653539 141.630183595813 133.24828292554 141.520125030042  
147.745780820004 137.093170378295 146.637799077812 140.462651395483  
142.461941376108 137.897243684023 145.956477465634 140.710840725439  
136.394920983439  
LOC653541 151.132586978278 145.108281984556 146.029647001623  
138.044751228397 143.045416067967 142.090009728666 158.960488862727  
156.427158441352 149.651553512698 148.067562465748 134.369532556726  
125.720102558499

LOC653543 139.117776552573 133.794524856909 160.828718858381  
148.410647472149 134.901659808633 134.986030185477 132.686915065196  
145.123845983625 139.927773713324 153.360382235409 140.987694585232  
148.147294674218  
LOC653544 126.404523759643 146.877475544399 144.386968241512  
129.976540483758 131.38692240237 135.883119645931 125.081880303992  
136.236441543681 130.049854901235 136.201103852785 133.599098708818  
131.125175244494  
LOC653545 142.159597861804 174.941551089279 158.658110539162  
174.454754564111 166.558080305926 181.110403721353 153.703682621695  
157.316941011117 159.693019552703 150.833523101057 158.347972566681  
167.484236948415  
LOC653547 146.007311764212 133.76515446791 152.713528089347  
142.892198239879 132.685098573183 140.84880167881 131.319783710908  
146.686192012988 154.324955232468 140.152177370089 133.074027423549  
151.171716392043  
LOC653550 125.285502203677 128.463982896081 134.298521475727  
129.018088749395 130.385747820089 138.875827888646 146.887506793665  
129.822926691091 133.82548013342 134.698857213208 130.031303483631  
141.74792000689  
LOC653554 120.931585398914 124.203250865069 118.521075843163  
120.348381570883 121.800250499722 139.748733350375 125.712260481294  
125.452973441746 128.79607493422 123.277867938275 130.985360700521  
129.450937831864  
LOC653555 153.557991189227 138.798959235723 135.360087349634  
141.901382169334 138.192550945411 143.16930809425 165.134931755194  
141.94585838352 126.775180133301 148.539881077647 145.67389337654  
130.761936205169  
LOC653557 200.652195873026 178.904696191996 200.767743455226  
198.760049629983 219.318938396989 216.880896769751 231.47915227815  
190.904614772409 195.630643168176 232.735767435327 189.160454951382  
251.307020289291  
LOC653559 142.765490244223 123.860747215706 124.59097574481  
125.780294378066 130.33205883588 120.876732151192 132.725232102483  
125.742631850732 129.148634038268 139.530196462344 126.902441495413  
138.017249996128  
LOC653560 132.953762692926 131.123149002831 125.025064237439  
142.397433929092 121.895778599116 134.292099546804 146.091822904705  
142.421913396368 125.364821583438 129.338551879984 125.470172259885  
132.836513637574  
LOC653562 148.980330875743 134.187456260969 147.310807346272  
142.62707251786 147.905406818238 138.29167712246 154.998011079046  
149.829363505519 140.129882333528 137.915773215037 139.153897381147  
133.16973309664  
LOC653563 159.728097053356 126.072053958666 158.316173597874  
150.346002924933 120.547683754604 128.504026473695 145.401101974736  
160.76044995335 140.882766779119 128.545699891734 151.961811748754  
148.767517078508  
LOC653564 121.414076245292 131.754508484296 150.517832812714  
158.353171576491 142.999526950651 147.717748449017 120.460433297007  
139.253721683078 138.670077127324 148.549257493128 120.951365231971  
128.78647242525  
LOC653566 497.110852407681 467.944850290806 766.176882605175  
434.073729807058 781.208872924532 1140.40904196731 900.839073800181

1077.33874251157 1085.38819961412 910.087388930485 683.179460779062  
1421.72388964898  
LOC653567 176.420075374686 152.254519859308 154.423801637411  
175.030373805031 150.888616811881 157.431972439046 161.73079180403  
153.511995286293 142.942021904533 154.312374306932 157.697168349028  
149.661929885679  
LOC653569 131.142841840284 135.217240511902 130.48231275063  
141.931274901572 138.464793389999 138.850077456103 138.659387475119  
140.05012958679 149.625528206375 144.41489969974 124.197397333928  
141.141047405344  
LOC653570 146.621996129313 172.251953149975 173.681078272467  
172.652645920958 163.97516075705 179.265395910119 164.223990197735  
162.026757124868 162.513107496558 173.132747018514 156.179501567984  
158.205235596076  
LOC653574 130.744788360182 158.645402461996 155.452842883109  
143.795399778897 138.116568200293 148.678869698203 155.388752614336  
142.771243742561 152.939759795631 114.14858855653 121.980744551615  
138.304793826214  
LOC653576 134.477081392474 133.869867161978 135.800997202323  
133.737573120711 130.131800537628 138.261506562904 149.007288765628  
132.70643154246 133.138744413911 146.276706674761 116.225440873023  
145.608087633951  
LOC653577 132.804216633852 138.866469244936 117.907840952685  
131.041996482401 114.122395647516 127.159947766922 128.08497128067  
134.399228996542 131.77099316122 138.679545821015 129.745892720738  
122.578170988039  
LOC653579 138.560399473164 146.740694608146 152.30599498619  
147.706402141169 137.344198938623 143.961467163406 131.945667475797  
133.745413210496 145.844961942581 137.549175595441 134.288349336742  
135.481300250507  
LOC653580 183.951404362826 174.064073632442 163.306853098724  
160.632809953993 167.278879415171 176.420075374686 190.534176839652  
170.099045774947 158.895584550655 184.569063297206 168.45157400976  
173.675115244522  
LOC653581 142.324077852852 142.536450265886 157.103246263523  
158.92254744379 143.629760301493 167.976680048356 159.48526814715  
152.620244087653 149.326216726716 145.054873480806 143.778327403708  
164.274491958161  
LOC653582 127.374600506681 119.9652990395 137.555253894825  
135.987450822209 148.603077434646 123.501843029993 130.217791888656  
133.446934298801 137.435736170779 139.025598691696 115.914842445934  
145.426171336045  
LOC653583 200.741234443918 214.229228850802 173.526005872207  
225.75155298452 566.647927867646 200.767743455226 255.992494620859  
354.405235378302 335.059844742031 237.825857080173 346.691690520054  
321.696082249696  
LOC653584 138.074645385322 135.654614839107 127.648224668964  
134.66169946771 135.458682745495 128.42287610189 135.719702250709  
143.160281902098 133.158570377793 134.58799530734 117.324368138398  
132.813199199389  
LOC653587 131.054302682707 148.00952002903 126.77232818113  
135.333055517636 134.158454639998 149.990378213915 130.716570410608  
126.186758919929 136.146383365709 126.019246614944 144.671459266861  
133.146347243168

LOC653588 132.031693838834 127.648224668964 122.932745723044  
142.922549076496 129.997181739652 130.211247943634 143.065258692424  
134.909230280708 131.155117105954 141.602233757588 144.460541430705  
126.777633512781

LOC653589 129.541049979717 135.25612528874 119.125002207396  
144.456324230938 122.592960588642 127.650229552084 145.498372398845  
136.450062043587 135.356010814496 131.065633574494 114.874358180801  
136.66358267095

LOC653590 162.748836971539 177.72965427263 169.052101570616  
156.843997723699 182.197625235191 156.707737817443 150.674189235105  
153.679479224178 159.946124520038 139.480361732772 163.54669668396  
148.620766059526

LOC653591 139.187325383105 150.0512732245 166.12184890921  
159.606633817645 153.39738748803 174.749832388791 158.505363728431  
158.377396672742 164.986006226427 155.737364431382 140.880009948707  
158.946177055546

LOC653596 162.909468312298 166.70212615715 190.204960255989  
160.297609596399 142.697827839203 165.200303470106 158.819151102054  
144.754401731628 152.50843414723 155.933739693912 158.25554353787  
154.079355899056

LOC653598 136.357788670568 134.599629045981 133.94667806086  
119.622243247836 137.910618360623 150.129367314696 136.11588777718  
132.008330288281 132.994716261577 136.037555727438 130.782296492278  
151.142149775806

LOC653600 160.876228450608 142.829099538363 159.466972602203  
150.929236917651 157.6811998968 155.971045744096 139.344344562134  
154.177340021162 164.848970268132 149.977924522553 146.160188002433  
170.4583554058

LOC653601 167.822075935474 160.019067307733 175.752091217351  
191.616483214712 145.131215503044 163.373180928181 189.283071231248  
166.881869360523 155.846106540378 156.759600627542 161.44729973777  
144.619374612317

LOC653602 133.280418227922 142.717436384151 124.59937620719  
154.136467767927 152.017655364287 128.09266452749 158.550259547851  
135.86924353735 144.546597366629 145.43470695949 169.31618330657  
142.541728149687

LOC653604 144.040342300793 149.642946071295 131.934680869554  
143.866365203907 153.231965895778 178.647726085678 129.408282688425  
143.801139839773 142.964043764953 159.79463502085 155.622257285651  
140.659276788384

LOC653605 148.607885635446 148.031899566208 135.24841020592  
157.406969627689 127.263061874385 145.929907161493 136.18698517676  
136.556183079815 131.40880014672 133.792673129743 138.930413256469  
130.772410329685

LOC653606 137.330207626732 126.383238335161 137.451687756052  
143.683545371898 130.75707278606 145.989546968117 131.46193427125  
138.487657776553 120.790536146461 133.099175110023 131.079066781806  
142.232918684259

LOC653609 137.290687951485 148.82034800623 162.203570429542  
124.126715773068 152.591091223395 138.313519292093 125.513881890201  
169.520544329439 145.276745572405 144.699084515687 141.599211622756  
148.680794815584

LOC653610 162.390356943447 162.876684781936 148.189707227474  
130.564962937297 176.038123840296 168.124936529582 149.687372584136

156.787932134605 218.393783552484 385.584224833836 151.392024228289  
132.089375920534  
LOC653616 136.739754726714 143.496669740707 133.753999983813  
147.379741260871 130.651062724029 161.072844903925 157.78390301218  
155.268650584431 141.59046197203 143.182399285928 156.976539870288  
143.41350503793  
LOC653618 121.464383202986 122.828060462887 137.17370871536  
128.257292171015 144.907294702865 132.790039196443 130.677737553727  
105.050093408041 145.89801576671 133.691053105482 124.294771835926  
130.290454258898  
LOC653620 118.034262386827 129.320210774045 131.574542914295  
142.973444931373 169.800006803362 135.063259138429 131.023892409073  
129.281564491007 136.678188851101 150.498954408708 138.639410179404  
139.268942501979  
LOC653623 123.135918415235 142.621019060798 128.432188632218  
147.515088047628 129.228874611916 130.351302840602 135.2979041294  
129.051642626091 138.030842581932 137.854873498783 160.853480692082  
141.200676699805  
LOC653625 151.511808301993 159.196987090991 177.415756020166  
152.961475450751 170.737352030035 143.846734516914 152.95612120767  
161.948033313443 144.589482298525 161.755290291637 159.7197697044  
160.379168489216  
LOC653629 169.238325933605 139.615706918035 174.991941844263  
127.132970760907 148.168587884369 179.94333102877 147.754489751457  
175.93459327917 158.915858403237 164.509354377985 154.229914729772  
170.243136294537  
LOC653630 146.683594365673 139.768555796264 154.466614452651  
135.404474671036 136.01865173754 150.682964448325 136.3615279557  
146.64560446484 147.015427944761 142.804411455413 128.990911924499  
139.278366709094  
LOC653631 239.31180635241 246.88857694249 411.359106929985  
204.283030911897 179.854800301573 274.70018535436 267.097999873387  
205.52620827767 235.407064742194 331.383533814347 238.461248099002  
264.201932544662  
LOC653632 143.250386570155 121.728711587014 128.713131994442  
145.520832968878 135.304167695152 151.788278519057 137.854873498783  
149.912481263284 136.089888639987 146.599636794606 137.992477770842  
128.327528039933  
LOC653635 185.886737029845 171.85890372225 168.911840239685  
159.016247993816 171.602950766191 161.585555680663 159.070355781276  
168.166938045454 174.100921524023 164.773489952844 169.984859264412  
186.430014478919  
LOC653636 157.607445509297 178.055019987648 159.384480972135  
153.869144282319 166.77329045424 165.158465031363 159.513465644268  
160.180961887686 154.65319127051 157.003367685421 157.494596757446  
163.104822161892  
LOC653641 137.85618381155 133.233826283531 145.728370703165  
149.684922983176 133.414198431469 144.117964288763 132.937942776777  
137.014698467096 140.659276788384 129.558589108727 128.042181036687  
146.808519947394  
LOC653643 154.778726823719 134.576622528874 146.95272087759  
148.883263903527 135.701041557713 140.628614910068 148.729753117861  
155.660302399877 154.199534276226 166.780319723055 148.96493117884  
133.913578037255



LOC653645 132.788102310611 137.016495611111 125.509221735447  
124.45782375705 149.797850183848 141.515788643986 136.593346330215  
149.364498870469 129.925548182204 131.77642590781 134.35958389775  
138.266328639467  
LOC653648 118.951526834915 133.266524623338 150.78145177853  
127.736712231221 115.337592860132 142.228042097379 135.071400668179  
137.654833215154 128.513011425662 144.675182563174 134.425483661043  
157.748641658052  
LOC653650 149.25240100689 151.950883677297 171.924364939807  
152.840202260007 139.931092990984 154.43808450305 165.411052799773  
142.677386111317 147.710252756854 144.564250008106 140.892250639524  
154.209689403188  
LOC653651 143.769240322865 143.939522733945 139.324006489527  
146.856133875296 123.703840971923 141.424508069834 139.241145027974  
144.826861308997 135.046003135933 146.011694647614 139.615706918035  
141.853711139375  
LOC653652 141.294094833197 138.483436753942 150.694215349678  
136.514946957145 138.968690339299 138.401406375804 142.683117062711  
139.178245419517 155.049051256459 150.255511248598 128.478724185042  
144.423509403938  
LOC653653 128.032141013681 157.003367685421 146.746669300049  
204.1974438819 117.930665298163 139.652974659584 123.722744366103  
127.187020441742 130.068063785009 140.441521267218 137.729777643977  
145.041430440608  
LOC653656 121.895778599116 121.980744551615 143.537785553911  
148.711943433557 128.543460982378 139.002932985183 134.599629045981  
134.616051224668 131.975248488461 121.973581817041 140.875923123766  
140.393624985807  
LOC653657 133.789738760547 132.553445658347 140.567565996849  
136.095753586495 137.354782768068 127.41463780496 144.623222072851  
131.692626563078 137.264095379365 148.785977829275 115.646023142125  
127.783892576352  
LOC653658 8096.28093399619 8918.58940386786 8030.19731415448  
6460.4291301245 5789.71932579854 5912.48904507462 10280.5093368677  
5800.06300826802 5361.3600315322 8473.21873478131 18146.8167991873  
9349.76443528011  
LOC653663 146.501559368223 142.33269270703 158.627416752905  
148.782907912893 139.229351251973 159.43317827517 138.936872956065  
157.076284096905 141.083966525597 151.237088659409 144.784835438567  
151.461857714097  
LOC653664 131.704192327287 137.524968609776 148.109847175216  
143.818379692331 152.758653228708 141.725162942296 135.639558187703  
152.173055053184 142.281657284178 150.006621336954 139.55065372881  
136.965972077733  
LOC653665 122.644105247178 125.193729067011 133.307149027384  
147.922706629104 138.455086062782 135.771423315597 145.152605166094  
135.324479598682 131.903632821793 123.96665768708 118.636694749194  
164.208044717557  
LOC653667 153.941193682697 155.326276840738 130.611233072509  
180.364089931995 157.844617425219 157.073850948746 170.233084517898  
151.32179802686 146.675159409376 155.041173289759 157.425924587516  
147.310807346272  
LOC653669 149.535008475427 140.882766779119 146.824420102008  
140.699287635171 141.071184297124 179.177884962513 144.617654961472

117.040953580545 145.97512573326 130.767573940356 117.611606270124  
143.377902352319  
LOC653673 155.014930599769 166.722369066673 155.410704148925  
160.573172150801 164.39557148282 152.939759795631 143.548858367002  
139.101471810467 160.562164904057 139.923187410488 170.313045875402  
173.959556466614  
LOC653674 140.857793157932 139.421753451936 148.757112903673  
151.841652724562 145.289151849318 148.334425146129 141.73248778957  
141.557420268382 131.173355686001 131.153457976248 125.000876313893  
137.074564265915  
LOC653676 136.03581843125 123.773753287854 149.3567486207  
134.271916545532 140.374644951491 132.903959880979 124.405905157157  
135.203507726561 126.65748100631 128.899712906082 123.538037290702  
147.113541493157  
LOC653680 136.274199465472 150.655359765209 124.546520456419  
134.09920571607 114.302645757446 142.914863449833 124.460064642088  
142.661504601445 128.630613404354 106.470524594239 129.462319953515  
131.296518221093  
LOC653683 123.527903217158 134.13812854554 138.885230982475  
122.763138007612 136.421163870578 123.327238774943 131.516100334597  
123.748788684337 138.598167973067 136.251820364823 123.896578371318  
121.181654892305  
LOC653684 156.774097885381 157.58659226599 148.260672564835  
174.323881548679 160.085325256991 139.602168254761 171.080373870373  
143.550908565401 140.639012372681 176.820928772968 139.406427549733  
148.195611015135  
LOC653686 147.932875151331 114.048136176142 138.331509117817  
168.919352453652 129.949894903048 128.833756478439 127.733860645979  
149.160808104789 143.066552389513 149.734395134321 138.555443236183  
149.103778494524  
LOC653687 119.67745324922 127.2369420721 118.514618614167  
135.973752893694 113.311132067152 133.0349214478 119.463337435512  
119.845508281414 127.576966524587 120.479270037091 126.00744446299  
124.738217731488  
LOC653689 151.770791549511 147.670425834523 158.104336050835  
147.345558455805 170.602603155092 171.267907653007 144.818492604488  
161.636411303968 152.169087619827 136.176688025337 151.086688327023  
157.035739033122  
LOC653692 136.837430157894 132.295937828888 155.3394927753  
134.025385181979 140.717348834454 158.244741207036 145.599152743156  
126.492058851464 135.832454000859 120.514672572565 133.760183242137  
141.353084959289  
LOC653695 136.411722212312 148.188717941032 147.153129531937  
143.665359343809 140.738977175997 139.803568564059 129.878330410179  
132.960708384399 142.510745106328 142.356747337127 141.908791151061  
150.313058722346  
LOC653696 149.480971898888 154.681604647652 135.238301951626  
145.464640276742 150.387906232396 156.169405925094 180.418707740532  
147.784078315091 147.452986308926 154.546460872415 166.396160626179  
142.303654405005  
LOC653701 162.606273401226 141.763072120718 155.752117896424  
183.979513272793 139.470557140547 131.570358580547 146.9069812014  
143.62315472858 168.205277839471 148.062245676711 137.846463796994  
148.247826830556

LOC653702 468.712260193746 439.492285515997 504.275299381356  
301.428024926428 418.062540009856 376.007938436483 703.815551883635  
417.191960489528 300.199170426996 452.357898123926 765.128667448261  
396.526590512521  
LOC653706 142.084294087481 134.983884722607 138.381508741146  
151.758970249544 135.982797108848 148.760280320258 153.04599985182  
137.478556403046 163.833372505148 149.839827383681 152.812142230375  
150.021512237553  
LOC653707 101.761615925097 119.135701239571 113.938636269013  
117.570749340011 133.667852983262 120.740986472733 114.76337651891  
114.119002354873 122.873661677648 123.145830746127 113.816165294487  
120.827732270626  
LOC653711 151.121293928309 161.972922129453 170.243136294537  
187.035957486928 165.590892262736 164.777719508421 165.471587934831  
173.624709850889 147.626071601072 182.950456188966 142.148597793651  
140.790450703097  
LOC653712 125.110064579814 126.290840923683 126.830269821364  
123.391298926957 135.830453690107 131.93683726912 123.694678408411  
128.862699779871 130.886164807755 114.093935026467 120.626155234319  
127.31790396929  
LOC653715 121.107979534361 140.839056652898 158.138862054715  
158.188039933865 131.466580723837 139.039276904833 147.212693122934  
138.014046365103 156.307551403822 123.796657561057 113.78644620959  
136.739754726714  
LOC653717 150.933724024651 126.22472822166 202.483493595704  
152.954944775793 152.61583482402 145.932170561687 172.641322197031  
146.368188849777 160.557818466874 140.918728758975 161.408318705503  
126.228513847262  
LOC653720 176.27969404442 145.590150838776 163.858222964048  
144.167857433516 149.867541008113 159.879600154928 147.314687795555  
141.021723049782 149.76931674417 169.607072855818 155.545904088857  
142.180927190578  
LOC653722 144.096624787142 132.985645792864 140.997594159186  
148.578688042147 130.140958819402 155.40832015652 148.286700314107  
151.259426521768 150.259400712685 134.169013339039 120.082391311921  
149.76931674417  
LOC653729 127.83967243279 127.284885819903 135.416008633632  
135.776154891006 123.442970398288 133.226542641174 148.413965751779  
147.069488043503 131.456697863268 124.541257225826 140.197487078987  
133.82390829608  
LOC653733 140.258615682066 133.74741832303 172.888455552446  
159.854639082837 131.336902822702 156.000732564221 142.656762407774  
131.38692240237 133.917283965036 140.493975416335 131.474485888864  
133.180554954396  
LOC653734 119.341806810441 164.748676009072 172.446482096058  
143.611930851914 112.841406363391 132.695992860853 135.954961086609  
139.897320032723 150.756776447358 130.394687030464 135.036576196425  
143.974551393951  
LOC653735 120.280241193135 160.066390229416 134.881854036527  
125.104229604098 142.321476446203 149.076146942797 142.818122106598  
122.379537202709 137.468570135972 140.506191791073 121.145342937085  
150.909559587354  
LOC653736 146.218767446679 132.227561632637 131.263641389894  
143.247977741752 148.439740062804 143.172744119235 152.238845270993

142.51308872439 138.796257513868 142.675752131935 132.54577436954  
153.085975710144  
LOC653737 6021.68798558746 6384.66090426598 5609.58233117244  
5382.31371568106 3510.24464112094 4441.92485662082 5714.36902486392  
3232.96611074938 4262.23145131525 4892.17875938832 4397.32311216672  
5947.89821087362  
LOC653741 157.560117350562 154.716750150891 128.303046695142  
135.566041417092 141.966490100288 144.446903878863 146.013430937168  
141.743873995642 135.664877050226 134.158454639998 126.547883999721  
162.793214727475  
LOC653746 126.563876945046 135.098343717085 129.034770823878  
125.696434307671 133.850733997442 115.118170902045 142.997365080299  
120.901639342731 118.426600479326 129.517511177852 157.099868633958  
130.165488538277  
LOC653748 138.293242905081 147.559983285261 160.537464426971  
155.444668113276 155.664126780859 141.267715391739 148.641780441227  
141.808122700968 142.129680127408 140.958277301476 132.651922794567  
147.46607538135  
LOC653750 151.113342302947 143.157807632147 144.540174041867  
150.339554736141 127.128042857811 188.231614694297 159.154102271517  
149.17029600091 150.0674092434 137.308900490306 153.056369304663  
130.392575279055  
LOC653751 163.336324451735 138.640919060725 139.885054845153  
131.693274981709 144.86583288717 144.340734361996 141.246352591355  
140.509950286228 132.521681289019 153.457715729768 143.066552389513  
150.184863108453  
LOC653752 179.273936200852 204.802810257516 211.104243881644  
232.918330930051 195.513703253634 169.107948050094 169.583355171423  
181.123571246557 174.059172465573 162.890650672747 156.822477235844  
195.353512458837  
LOC653753 141.442825487243 124.222529964098 144.145612985703  
140.401508808129 135.085039737228 134.963301368391 130.59670974887  
121.281990195113 122.373400988227 144.486242872235 143.533725135227  
125.794788766462  
LOC653759 149.430396727944 130.661695937728 139.81502919163  
122.274656361883 140.951031275943 130.114464233633 132.772085211553  
134.877046981678 135.196797030404 123.453048609213 118.442856984861  
154.086510608016  
LOC653764 187.231049280818 170.140610481718 201.415695076278  
195.561296046507 157.216793735479 127.511638455985 142.112120308118  
139.783725419023 162.274094333189 145.520832968878 132.825240485239  
145.076068630259  
LOC653765 178.563665283267 140.490023670841 171.358746749715  
150.812739240232 154.261443597434 178.313238745665 158.87755965229  
167.965981130329 157.443127950708 143.502307735212 154.518641757391  
164.236417852165  
LOC653766 162.961792330623 163.356993518952 176.783978625103  
175.693873820963 174.417259650516 166.346572488391 176.735168607281  
166.173429365582 170.561596645385 188.864388750448 150.748298569951  
154.190469538568  
LOC653773 6628.17856159198 6760.37324850804 6652.21610967461  
4995.96906061198 9293.35991367953 7519.94306346326 9044.54885739666  
6105.64727031051 4511.9116742833 8072.83367137971 10790.3738999898  
7308.57540715512

LOC653778 537.216291942143 483.429488817674 419.272193677273  
499.321667633972 219.192900411543 263.426870776148 282.442528230519  
233.842749683689 377.661589835101 214.86995782548 263.005303710717  
316.524115715585  
LOC653781 140.960907353937 151.231685705236 139.671302796695  
145.686092190716 146.649944669876 158.408494909763 151.198928680018  
159.710615852435 151.377932495104 142.589312139207 148.868265867275  
145.219057535246  
LOC653786 147.422656909557 159.154102271517 163.390929975591  
136.575784685895 160.0697586671 151.972509608956 155.194521954405  
156.18389905051 152.22701178148 175.251238431716 154.261443597434  
140.914966429342  
LOC653787 131.606765174514 143.647714966406 134.134810805413  
139.314945862113 133.449527627723 151.660152977515 148.646699255797  
120.696557306298 140.149064156135 124.913645688325 133.82390829608  
136.627904756283  
LOC653789 140.125575976708 150.578023008958 147.110929610347  
152.948391119096 153.219954133957 138.852212944492 154.881797585583  
141.567425892004 137.246089511045 156.707737817443 135.434853296628  
150.204636832734  
LOC653794 128.814967091609 115.613348109569 145.730927308023  
160.67285689491 131.338853426561 133.063422581428 136.039076665712  
137.990806386929 139.46518859956 134.149446827982 111.802672864815  
144.700955682048  
LOC653796 152.158269344693 139.241145027974 143.985850833974  
154.143331594812 146.996442729408 150.670783991982 147.734708927825  
155.699649538664 160.156127781701 163.248980088946 152.450112620977  
149.524040913256  
LOC653799 132.211379936941 150.059862107155 130.390722272955  
146.984888309556 146.968599872798 143.250386570155 137.969750384554  
163.821142892643 143.631345956176 141.947478902603 131.863018503922  
137.192570825063  
LOC653800 221.050093964575 199.353823724989 162.909468312298  
219.351080515508 132.84268776659 152.303524109428 153.697775290962  
169.771005675296 140.665332203898 141.561769570516 136.631948656268  
160.791355483048  
LOC653801 126.643229085068 119.759350702482 138.620617643924  
135.129656281091 123.488418655586 130.641217515008 149.72025962797  
126.378952839132 128.533900744619 126.828097770667 119.218909479403  
127.213640193364  
LOC653803 112.520199390427 105.976284291356 113.09980008288  
110.428616140857 109.333276735523 116.806720503431 106.953841653951  
130.023560954071 127.654130155446 128.678484452077 107.67395123577  
120.114423236962  
LOC653806 142.768691899824 145.237221169839 138.365589511693  
133.305679931132 162.870317933909 157.6811998968 132.344296085487  
152.72717701452 139.334552725255 152.945550129539 149.437212090587  
138.637735867167  
LOC653807 135.255560836581 123.692366307662 151.349739492368  
159.097020087275 109.898406285895 131.917194849285 136.494339004002  
127.942759794556 139.564898998489 138.842935439006 124.977046954694  
135.746880106233  
LOC653808 161.217964573491 151.004738508108 167.025336068642  
175.158180187883 152.099431258333 151.316421810192 137.324247703318

152.954944775793 143.011042973347 147.060637536615 146.316145173343  
150.331324340476  
LOC653809 167.186780161168 157.672378669483 158.517778100137  
200.405532717305 165.857032207991 167.293320986716 169.201608999937  
171.826623289946 169.201608999937 174.192898940601 140.279222720709  
172.631499322646  
LOC653816 133.071542710134 140.496058408953 148.727953739127  
144.81077501446 142.036037957345 132.324630056168 140.256871047018  
136.659134200122 129.365004129784 135.616911926164 135.223957492606  
130.334622987505  
LOC653817 148.185056724262 119.412461116903 133.619092072157  
140.569391362701 155.168592130392 170.737352030035 126.523201566273  
128.812729239283 124.387133895009 136.253264628863 111.188410935711  
134.354215877283  
LOC653820 148.725162101789 154.395261192114 150.354401669138  
167.077669654786 177.910104644497 160.898061905021 195.88263399968  
204.770742504612 184.819937046061 190.787437782456 212.710910778949  
159.43317827517  
LOC653829 1030.97051104597 1085.38819961412 902.394410348792  
775.5664718389 222.624150073858 1014.63777151551 360.053590374552  
587.026042400878 453.875259610173 422.840163973614 882.429823267754  
511.670320118232  
LOC653830 126.048382998393 138.203742066422 132.367155914392  
140.671406418004 124.3501719829 130.832462487806 137.303701514064  
143.050004021764 142.889911562811 135.654614839107 134.777347058149  
125.079330440615  
LOC653832 145.830916005206 155.074348411767 166.85671415475  
152.397984799517 141.244589488591 153.339992195184 151.96843908074  
149.636887782574 144.259643132933 141.267715391739 131.882887826338  
167.599784887933  
LOC653841 142.783159341229 129.568951363607 135.127041919869  
146.916683989962 146.805832438977 147.471494294543 127.330523871944  
136.19481894871 119.974853329265 135.51506573405 115.502679218125  
121.113186311514  
LOC653852 163.741411769369 152.81544746536 127.011594171986  
168.238615437246 151.538112896642 130.674263597931 139.321570881862  
127.718341524417 125.077260389449 140.763592237598 143.750656408155  
140.293431620804  
LOC653853 147.751220590539 164.181915898563 145.085091507228  
139.823017208731 140.648918459179 188.145154995617 200.558971047462  
167.505381046729 157.108043150259 170.737352030035 164.857465272302  
187.993907528473  
LOC653855 162.082166316002 161.614426723521 158.000456937922  
151.679534447228 142.675752131935 156.597497458992 143.521510363933  
148.562200783472 149.810655120216 135.373824773008 120.479270037091  
155.121309543738  
LOC653857 147.85133493803 140.696326952077 150.105503384881  
146.450806121927 144.203716525289 158.989652405732 156.098240321674  
154.433679792749 146.536055773073 141.253030949701 141.073316497949  
154.746081871718  
LOC653866 124.555847618988 122.955724972547 125.696434307671  
131.312580984876 115.47716627378 121.545189875973 118.488997046932  
121.396223519559 124.895023786422 131.454955038299 120.031976318697  
129.236471271181

LOC653867 158.095373931016 142.669207969715 142.658562927154  
149.570242115956 160.975741751317 140.085359251038 154.043604150962  
150.820808770853 154.768422926874 144.873034900013 140.413503801467  
153.146646647258  
LOC653874 152.435416154284 161.397788731595 183.26554404668  
172.152570321727 276.867974638972 183.138955445765 253.697419495959  
211.692743811486 214.566711351899 241.799709160815 193.569894919176  
263.379982742085  
LOC653876 140.682757521394 141.090356426567 166.485040297098  
144.861804210272 143.040254576088 152.543005423742 161.385691765316  
143.392073068497 158.767439363085 167.645930148254 160.090914414578  
143.423661752881  
LOC653877 133.203064891923 126.588382665802 142.882391486465  
133.777238071968 134.777979170126 140.569391362701 133.353762794271  
138.186616955926 133.197002327259 143.41350503793 131.121343131082  
127.344210958898  
LOC653878 159.716066475442 135.673080643346 155.280897870265  
144.428776560885 147.319360896679 142.41737138634 143.423661752881  
150.51537512828 112.394223360492 127.749992538985 153.774548290902  
145.134613145303  
LOC653879 424.201556056759 259.064601204239 464.196512015649  
238.745953695925 161.948033313443 149.010477279209 710.76653239801  
169.674931517111 320.097510212422 193.660159482867 173.306283668215  
151.212606106351  
LOC653881 13944.7649147227 13976.0448927093 14699.3902364192  
13853.9715872573 10533.5868398404 10312.8407173696 17749.5685495445  
11071.0448447818 12406.7143043992 13360.9483836861 18953.8127741918  
15420.9668207676  
LOC653882 131.349297554112 125.682297697017 130.814702312493  
121.689416823766 122.97229333908 130.852932147831 162.885054245809  
113.879459563492 125.876114993687 142.25795237339 142.637421204193  
137.48217464385  
LOC653883 148.779043570204 135.934976183762 160.343551497512  
144.565926379402 145.61758790738 140.009593108693 159.362293777146  
147.106355591496 152.067897082883 139.748733350375 126.494665743087  
146.882746173951  
LOC653884 336.338518973032 288.596513753617 402.425130776131  
249.09278446472 291.221427744817 619.487800014979 440.319777672273  
437.122373082112 419.902534806131 442.493108530222 349.382889326613  
501.166869173253  
LOC653885 162.090585987836 130.513071750123 155.974463324915  
142.106329280184 135.275284142536 145.128919984856 166.592366578462  
139.108656684059 157.078563342652 152.705458417973 152.411545237204  
132.236355533277  
LOC653886 161.825134481279 139.383528389668 139.372441366224  
165.143417235314 160.270693676597 131.988591391373 138.695481214267  
145.308548379215 147.319360896679 162.606273401226 139.640918572569  
173.635827398273  
LOC653887 144.5368823731 132.200648560899 132.038012025708  
137.681280789305 136.022614387461 162.825380100343 163.607125532236  
152.148784410501 159.48526814715 133.675029107803 155.660302399877  
173.647320180498  
LOC653888 339.843776738468 283.918434443669 260.85776723575  
306.59090554099 1312.44215746801 402.694564608582 572.049540360134

789.401526545277 700.353187874339 706.759905439674 529.04238100948  
846.084919104262  
LOC653889 154.630837508249 145.154323430995 156.69025356689  
141.323417580648 144.12742465348 142.52234368939 131.595868226775  
163.170983091116 146.948261640482 141.842919268688 142.126620107418  
153.920180168328  
LOC653891 161.055911120534 148.237980436128 186.886677174192  
182.508415915215 143.567488854011 162.689415085423 183.531156021887  
176.820928772968 161.911468506919 178.976116597291 148.466658640201  
194.125840053843  
LOC653894 111.788481822686 121.262147572365 132.456945758174  
141.010588053284 133.75142055959 135.390226050803 134.637520371454  
137.881776548665 133.915830295107 140.929424764561 118.025603140924  
116.773599713111  
LOC653895 141.920967855989 153.279026396412 144.615156175885  
159.717918079188 151.16261275916 146.840735518984 131.074021609161  
150.098708715617 168.935348409102 161.860953918795 152.837739128546  
150.259400712685  
LOC653899 147.183889426843 135.166677520468 145.819198235878  
142.171459019791 124.907788504503 140.334331111538 142.810564324354  
145.131215503044 135.111066946207 133.99046926032 130.552857965694  
135.134213292186  
LOC653904 139.631165400881 143.25481667885 151.833386901811  
141.640292723776 148.82892305156 159.539320132392 158.272071464923  
147.412608079997 136.457424070709 140.204023682096 140.860339862967  
173.10229478279  
LOC653905 138.248708129528 148.578688042147 148.686975104375  
147.228812647235 139.885054845153 137.402567669086 152.721146962124  
141.401480567426 157.186747372076 126.112672816035 140.061045085545  
157.078563342652  
LOC653907 167.806420483187 150.648444878067 172.686798187142  
148.901723851925 138.434347257063 162.778480318754 162.464201058576  
123.625734357908 150.564099989221 161.182901898379 131.84454376953  
145.120347147471  
LOC653917 154.118601977256 156.16485596016 157.296892205781  
155.227218488935 168.73918684069 152.101695555105 151.449690439424  
155.456077670662 162.390356943447 159.832405510505 162.212442593001  
148.258850340107  
LOC653920 129.754376995879 132.009764966246 140.341589053972  
141.724442944322 108.515401509039 132.418902141838 129.832118351824  
134.801507994667 138.986877479278 139.31967261371 130.465221782084  
127.745801270205  
LOC653924 151.345630073141 161.596086502946 143.88649412841  
166.22013573342 1336.75600604068 120.337241026338 123.410467384598  
138.899292894875 190.238332933452 138.53403492914 135.516856254532  
135.335107344583  
LOC653930 146.70774472499 145.906601611338 146.590495255969  
153.505155981348 144.750407738866 152.927956172463 143.867013358737  
154.616279878492 146.266350809492 142.612035986517 140.806935772116  
150.084909674721  
LOC653934 151.231685705236 134.255021727555 145.159572111039  
170.931788192825 145.299625153537 147.407093814154 152.175423676063  
134.301187092088 154.133723492173 132.839431368337 150.756776447358  
132.75673287656



LOC653935 139.435000959919 141.469818222503 140.229267364503  
134.076865693417 148.824798231827 157.08300736206 146.108551647446  
125.905785653648 138.428527640896 143.514848892447 125.227513212286  
125.612670947405  
LOC653937 123.202829470888 134.025385181979 133.666244052469  
138.349773531218 150.367927843529 140.439698763808 133.037138438863  
144.568417378353 136.3615279557 136.37481047902 134.109051944736  
126.077945699709  
LOC653941 152.66513184083 138.224383646894 148.479865869644  
148.832461329713 136.317978146216 139.912325578837 135.173464753848  
159.848342125486 136.106596229215 153.34166495223 127.731816003312  
147.83240038699  
LOC653962 142.151209745109 143.752697178913 129.21974206851  
149.108582827136 139.674001912099 156.328454726363 136.378203924435  
135.588132669957 138.596430973865 130.949405011154 134.97514790642  
153.387113356064  
LOC653968 135.448170440824 143.085022888434 159.762733951454  
148.185056724262 133.425151103622 154.65319127051 143.914415729816  
136.973804637915 166.558080305926 145.61758790738 142.039943511086  
173.001985500448  
LOC653971 134.216088147701 136.978738825445 128.920313557255  
129.025000034273 136.303510503231 150.868712184357 127.787890405862  
123.281489592543 138.017249996128 133.278923716119 119.422996538444  
134.986030185477  
LOC653972 358.60777927888 428.237210115667 395.425715632302  
388.638095539186 398.272713014637 440.657747083721 431.799795646414  
426.249411635589 446.698665191047 445.505512764045 407.518324776453  
695.086203058575  
LOC653978 139.717662557602 137.252742673245 144.388851371784  
153.273568880305 154.996829706812 169.784837251279 165.103398617203  
186.961638857905 165.813771791917 197.699100346967 152.6969498938  
175.562070915794  
LOC653980 132.37450516592 135.682971958096 133.711821318079  
126.316613675316 137.720747340105 133.446934298801 139.092075947067  
133.918638123756 130.628967781841 138.780488114634 129.982236484842  
131.919387743094  
LOC653981 144.185406500473 134.596391166462 143.432889871079  
149.869314204354 162.297999435613 161.010206405916 154.412506915569  
155.942609847585 152.79367157305 153.305679563467 166.681646517413  
154.306729472627  
LOC653983 150.343825300998 144.346988809708 140.397184813186  
144.008961720971 141.168198348093 136.111569529393 156.050585687098  
168.552631639996 156.9540270155 137.82918941689 131.580226088647  
162.090585987836  
LOC653994 163.22480684222 176.725347194807 233.394506254045  
182.873752254411 212.996456841785 256.590289281076 289.164969943385  
306.111172289632 278.219561902233 409.477576085245 219.351080515508  
475.403662030875  
LOC654000 173.573412346985 158.625060605976 186.591941221632  
146.892065987724 153.34166495223 166.835922279372 160.690442125281  
155.449724554217 174.909258852845 178.347708009405 157.13859713415  
184.569063297206  
LOC654002 136.356895672212 155.518807026156 142.55463239891  
143.149424892482 133.257477196196 197.618757939729 153.031479923324

157.826457203706 150.211719786127 277.256341592701 137.388190728367  
171.85890372225  
LOC654010 127.016845640004 139.181131600753 128.816610738922  
135.267015629083 145.048710455772 135.688346453694 143.094799968981  
145.077517845584 142.175432631861 125.754741914111 133.211362932569  
132.158817539201  
LOC654020 139.092075947067 141.710076413441 154.746081871718  
145.726651022813 148.382228428693 129.3513576591 139.883360543042  
134.387256336429 138.576978828316 147.368455727098 159.009211991511  
146.652641667543  
LOC654023 168.873282919232 173.233357775898 169.963805688413  
174.045229095003 171.935132459373 164.126980102525 190.975263192006  
150.991991926229 170.661808797506 178.512206531256 164.120602897751  
171.130215858803  
LOC654032 137.812249316763 135.878996521596 133.634886800037  
146.900087470856 138.003440266411 133.691053105482 134.30624644595  
135.118955626451 139.840256729373 134.352155462211 145.929907161493  
134.062423178775  
LOC654042 161.651643789597 157.010145291837 169.948277715908  
154.918405633244 191.074428905553 168.161117444474 165.781667492391  
140.941447663862 152.791390145148 159.665989587555 159.781313090489  
179.122374556365  
LOC654046 150.396462763607 150.45404183949 143.681220324074  
148.235495611248 153.289258540668 143.879597098414 158.160604786093  
151.384762644292 137.048292841566 140.641956393993 136.964780183468  
141.659197251282  
LOC654053 151.421099926743 143.040254576088 163.686535888943  
158.829144564361 549.692164962653 393.264726588522 243.807038920733  
214.566711351899 198.954254778846 156.926617030752 168.210416363286  
154.9953069582  
LOC654055 161.530878860883 159.638436599987 184.915526626619  
181.364325529405 173.577723566555 166.795671029174 166.8846964604  
158.937341335707 166.872332652008 150.974364125849 145.630497368137  
153.911165277809  
LOC654056 149.073650082048 154.273953018148 199.149959995133  
150.566842106244 155.773639092819 160.954017627605 181.202396068658  
156.808992920564 142.902838068479 152.265624144393 124.679444852938  
156.194996994993  
LOC654069 166.549192709614 179.421854100287 180.035652063942  
176.704617691988 162.294114485312 161.490941000872 166.85671415475  
162.743192424569 157.733042033549 153.952788086758 170.465177938235  
173.592875508663  
LOC654074 231.202047619476 233.671878221507 261.639437655633  
232.321454436688 240.663883443935 286.856346704286 288.968909550533  
307.124331101976 274.202831856221 290.037325939883 350.22221782412  
275.169415154893  
LOC654078 141.753560518393 151.989476683722 140.805322576253  
147.086734464001 141.819762045169 145.326803807448 133.875667250136  
142.321476446203 132.311344653106 149.294728629784 150.899664887945  
146.692827583525  
LOC654080 134.487476333464 136.18698517676 125.717328918165  
131.934680869554 139.276102596591 140.42579083092 131.700854556022  
137.871870950302 128.966514855818 147.384050169545 147.590189238316  
152.258389962

LOC654085 140.504486195539 108.34997967774 131.536457148878  
126.268418132 138.462826342765 135.878996521596 122.82388804774  
131.988591391373 123.046069309901 135.68481384332 104.544792793756  
126.905235161069  
LOC654088 160.640160107693 138.104527851969 153.6855881767  
170.758319048911 164.877625122523 145.418696807842 151.243948028303  
147.645530163725 160.618586213311 162.825380100343 149.85385474029  
142.043121538885  
LOC654091 132.692027897739 127.585851003779 142.558109812638  
149.867541008113 160.265389854694 138.733717670748 136.057315824634  
123.051777473512 145.543942469821 134.504873813959 124.507958339495  
160.724319010751  
LOC654092 154.133723492173 150.538541347453 161.520362399369  
169.279866966079 166.788336808924 150.624740697168 153.468933239223  
168.854819201403 174.338440780636 143.217978435486 148.049570580734  
145.959421614703  
LOC654096 288.370985514978 248.16594076495 231.146155346291  
226.458509834965 152.650867743471 137.217104547797 150.799400717425  
142.815817738837 179.321622114583 140.307931763353 215.300064529551  
164.914114315732  
LOC654101 128.666652639862 121.44564199541 138.758688249557  
126.186758919929 136.013989349192 116.572001618531 121.877276961306  
119.792515907708 126.141462782039 116.082361389405 131.806645427543  
118.154953746492  
LOC654103 699.06539333455 727.814681346494 617.185364180303  
668.286400833485 269.981476129439 338.822464893411 380.053166305637  
303.241375487319 527.226517960073 293.873921048642 352.180110869664  
438.231717096337  
LOC654106 130.59886317117 143.544139742002 139.510764003291  
148.727953739127 126.529763042574 143.59105195427 140.506191791073  
146.999370190363 131.880438747579 137.625415175495 151.570977428443  
139.3864057463  
LOC654109 140.911080286243 145.110145981908 130.394687030464  
127.731816003312 149.294728629784 133.717451195844 162.478995866539  
154.306729472627 145.573544748919 148.544887355857 151.865924163231  
130.362947205472  
LOC654113 141.557420268382 129.47419698487 134.811625739766  
121.771891473027 157.254757078837 129.985797334276 143.242308032336  
120.35956894661 131.748753064488 138.868641301709 124.391225837909  
139.421753451936  
LOC654114 125.124011798043 112.248047602652 140.800226245569  
125.717328918165 123.330142002791 123.354093930164 126.080780033301  
131.77642590781 152.633139090274 134.620896927473 154.133723492173  
124.345320343901  
LOC654115 130.205764567934 149.233023751582 125.114303270024  
146.318052064937 137.466291815166 143.112205432731 131.726540162023  
137.957654220875 146.582858169664 148.124586158123 150.311274161073  
149.213990424575  
LOC654116 182.798526632723 177.235586767256 172.7330526128  
185.199972151831 164.288645768576 196.096936985479 158.558471586662  
167.304721591124 178.166289723365 181.607253339427 172.446482096058  
186.04763660516  
LOC654117 152.194337248455 143.703367582367 148.532339759414  
164.74234322574 159.961729971624 163.607125532236 155.660302399877

148.943735606315 155.855564068891 152.721146962124 142.628296442123  
158.359440014674  
LOC654118 146.446922196868 140.930897231705 140.49969612403  
135.938590242744 139.831964368637 113.529619135543 123.9209907098  
137.222125237171 135.837733533444 129.231455282441 127.137447808551  
131.700854556022  
LOC654121 704.152296359463 511.670320118232 634.356322976353  
361.218491712891 419.272193677273 3038.02573182546 752.585744322608  
2845.0377634896 878.986106116952 913.22732386079 560.362502519639  
861.516925304722  
LOC654123 126.848211027661 123.896578371318 132.04032925495  
136.104965836123 129.515390475589 129.763063900493 141.302075343586  
131.324822348301 132.557945249016 130.504023268824 149.990378213915  
141.21138348075  
LOC654126 159.752644678596 158.753832849946 161.035985824654  
154.828782972852 196.942880967705 161.506431005203 155.908951665928  
164.708712337156 155.064761390765 168.091278015885 156.218834695891  
162.642344529383  
LOC654127 141.721829342179 124.568534983277 133.233826283531  
132.674061422332 122.796362813922 164.96631670799 157.940873610797  
140.381386314817 145.950701448912 142.652939807341 126.569482909992  
159.765585531442  
LOC654128 154.7326161316 130.219888837397 141.112047881014  
160.085325256991 154.187420367647 155.842195370853 167.430767074847  
150.856917125736 142.169951083733 148.983182193411 139.347509197639  
147.091280396135  
LOC654133 160.261708910517 146.865904106038 146.002585729701  
150.601874392926 171.042491047256 177.073245863872 148.499207368959  
145.633647856775 152.272198017355 170.320777845496 141.173167283016  
188.40383184521  
LOC654134 132.028327486943 118.660213790078 132.05513812578  
125.058165131184 123.872097378045 137.697452180659 119.903068083658  
111.837468699281 147.123477579978 127.617449871137 117.040953580545  
116.168270198375  
LOC654135 119.926169902322 141.440563159897 140.391753835434  
167.114291248266 248.643311972844 172.002600588279 155.07594431078  
179.338652960181 179.46936343225 180.418707740532 163.769959129611  
212.669156800241  
LOC654147 133.777238071968 123.478896502015 136.087702679172  
120.688909943167 121.059923601223 124.602474178438 123.67449826277  
156.594337089784 123.946808975704 120.333487171575 144.882207209439  
132.458764637407  
LOC654155 174.540209145695 178.512206531256 155.60532199001  
195.740661051834 171.629605754643 175.019580368717 190.270819689158  
176.689683169567 191.405362404386 194.724219884752 173.681078272467  
207.598754515294  
LOC654159 142.818122106598 126.253319664664 151.531667383273  
140.903091584884 142.703116372162 138.235127932016 143.939522733945  
127.551486042435 131.562345881038 150.038722708606 126.916504162312  
136.735930829008  
LOC654161 262.061371466369 226.871028543248 315.064477782052  
262.296456281666 220.288758600588 247.504198063293 297.228563607097  
248.594000664466 248.330154701293 287.889774984754 236.052008824688  
226.173501275026

LOC654163 132.916608405637 129.730685860688 147.284005815059  
136.66358267095 135.073449743301 156.330571337475 143.980608339892  
152.980843102933 130.800427334056 136.754116864655 141.229805348717  
153.408890091225  
LOC654164 165.244616507084 155.23922239449 176.5588805282  
164.717809928624 149.393022408213 156.205127163263 155.933739693912  
153.453969224725 163.951459935477 156.381599544223 122.708102546276  
154.9953069582  
LOC654165 157.507108643575 149.547635666621 158.872962797815  
161.371477511362 139.725987763226 165.627852733455 158.49220347186  
171.145909843389 161.501062527272 141.445937312137 150.170712508944  
162.15259972225  
LOC654172 131.72852748835 137.434039024162 147.89884142817  
144.572485418264 131.296518221093 148.522580898717 143.579660352652  
151.094682146074 146.84891312893 142.902838068479 128.886008923268  
140.391753835434  
LOC654174 144.154217446011 159.74220366735 165.022029012505  
139.313456284725 192.512661648653 195.831574717135 201.893722965557  
194.403848868583 181.976252906929 213.324226314713 159.26101905957  
206.876572583814  
LOC654187 149.520911664673 161.735609436394 170.737352030035  
157.038121210505 156.301214161102 161.096914295309 166.239339129505  
146.334446516009 150.348608467097 172.355215322173 161.646807806182  
161.569793476847  
LOC654189 255.839878446312 229.835576260403 264.905947922753  
225.130011390856 194.312315077985 278.498278821829 238.095599711942  
231.572677616684 243.538374440134 232.231236745251 260.157440518033  
314.4408959517  
LOC654191 312.808044035117 311.670576741448 402.824964079515  
338.934501259414 275.252966071473 223.747350951099 280.558463661137  
227.614623963331 249.884250040189 218.811490883852 237.358925391616  
204.637887777803  
LOC654192 179.54034642468 143.849399031223 184.816515945311  
160.518055978242 141.560424984281 145.027741086645 146.499065641095  
159.055956234445 149.042693712098 157.590017103385 157.021010130169  
158.716575777014  
LOC654194 4901.41175228982 4262.23145131525 6628.17856159198  
4743.19967685595 11392.4189359453 6830.46932926077 10202.2226913537  
7838.92787031423 7389.95365139168 5636.26097921507 5165.90865799172  
8496.2506227676  
LOC654200 136.907453440141 144.02239659305 123.048352070915  
149.264997927508 135.088149158147 133.883527462382 156.316333575406  
135.023016176493 144.402160347818 133.879079395215 142.106329280184  
142.954204401406  
LOC654201 125.98519427755 160.618586213311 146.453030317456  
134.851757252167 308.679189788554 201.616302398819 225.730739636442  
132.580937663749 169.561657768387 138.100014158367 159.629232808787  
146.306467130749  
LOC654202 162.642344529383 154.368499839507 204.5274881834  
148.82892305156 160.379168489216 170.129558603697 181.288519308219  
162.317084707395 166.587100972754 142.678267012725 148.497497694754  
132.502153153826  
LOC654203 160.954017627605 155.598586699376 187.231049280818  
144.48495176385 167.341759854203 152.823566129571 169.067064352955

164.48570046081 139.953572663277 160.553214127047 147.038700869156  
154.487546030444  
LOC654206 138.456465793474 119.922676683808 128.2409378561  
128.907618218883 129.707421699091 119.213217733213 122.733870240098  
134.432461986523 122.27785621724 119.301746097298 145.272073426254  
120.09801164252  
LOC654208 138.491922816359 132.84268776659 143.118188813831  
161.614426723521 128.585911203394 144.746134643761 136.742206779136  
134.863223806176 129.415078042622 152.038902807701 129.513590304528  
140.985432994867  
LOC654209 141.642547489983 145.513333676569 150.042173991463  
151.219051767056 147.565485281003 150.28169442832 139.298169516832  
149.532459719175 153.143706194386 150.445647133244 127.871445879091  
137.508097741526  
LOC654220 162.431674335726 161.010206405916 156.243337414127  
188.475801713801 145.478233255862 190.098509544816 143.821269460523  
184.187847236508 162.793214727475 154.267020640428 153.399787997793  
159.552457576922  
LOC654222 133.886458291672 114.936648783324 133.519359066907  
137.149156133537 137.044079235724 133.559082256772 148.468389477892  
129.949894903048 122.937281123348 153.731233276485 111.010889276873  
114.730641277464  
LOC654230 119.876835248732 138.842160234657 145.787468865642  
129.537345537086 147.032210333966 164.256764783784 144.313841064968  
152.915692742755 142.313725116274 146.755803731358 139.803568564059  
147.684875777977  
LOC654235 157.990467804353 136.62213567467 154.876638004094  
153.261002653668 154.051705030348 129.502730573463 134.316859658338  
139.029404397979 148.898587505337 144.36575644625 150.204636832734  
139.765361891899  
LOC654244 156.304678960663 147.973274498131 159.504327477065  
173.115418167551 201.041792159394 217.607230767028 198.863347487219  
202.662466141301 204.489837323989 156.856149172225 151.524197474057  
186.975609955892  
LOC654249 163.045605069267 155.63328143658 156.494323415504  
153.882081780197 153.911165277809 160.073510173041 140.456277147131  
150.674189235105 142.459230639888 140.021640936288 141.473218014605  
146.011694647614  
LOC654252 144.518132543976 151.84373370805 161.397788731595  
149.824791474186 138.161690144518 133.228822922258 148.841427991125  
139.545451634208 138.751781355083 152.321890796527 147.022594294963  
145.562772839517  
LOC654253 152.439608473915 171.494975393562 145.658251059524  
155.820194280153 125.475308885588 132.956860864455 136.993102884269  
146.26936366452 166.330001480033 130.274288258599 125.911259629489  
154.804753043168  
LOC654254 146.087596132093 149.659505956629 148.82034800623  
132.496547953595 159.936703616817 133.277326912499 135.25612528874  
146.675159409376 153.295838391099 144.301577198126 148.109847175216  
144.380485359951  
LOC654256 153.767488352037 158.384505840662 164.327140372968  
162.857083430123 138.359423363142 163.284853420896 156.714081537525  
150.259400712685 132.6175371563 189.283071231248 143.447768653042  
147.053391763304

LOC654258 129.520140995675 133.425151103622 140.752616434418  
126.603552416008 144.671459266861 126.715300671036 150.178490092437  
140.036463888037 124.345320343901 123.383334044683 127.346646117375  
133.108094159933  
LOC654259 161.155280539113 142.403121638265 131.300342835696  
135.242328667085 141.901382169334 150.42705284743 143.852657182221  
146.153528461264 140.393624985807 132.591496435822 133.241744350369  
155.465250172768  
LOC654260 192.548337508559 194.569325586241 189.362958041175  
214.714726648332 236.617896560938 207.467591256549 173.816408146725  
222.605195861218 191.679217737051 168.594235675558 168.238615437246  
195.711047893396  
LOC654264 129.318409053566 130.110413621436 143.764266466204  
161.761125440228 136.781417098789 128.883828419932 124.638075441482  
136.15916708516 137.647282354299 149.168758815526 121.141432480683  
143.631345956176  
LOC654335 138.144085131733 135.784481523923 156.296046600921  
157.316941011117 149.857861968652 183.613051401168 133.031431118772  
147.93442757931 151.78607484924 162.54567071663 138.746987455826  
152.303524109428  
LOC654340 168.582192754233 166.263781040251 179.764260117544  
204.078331021637 173.225064625094 180.418707740532 179.079061789059  
177.478925091583 152.581729298159 191.160340745501 164.99860393383  
187.833356349429  
LOC654342 337.822337721287 359.577827010792 215.635313821029  
306.773350448741 165.017178571218 216.102897582821 271.791126011275  
225.065765924246 169.136919982294 157.66595229182 149.704586651832  
174.357336296554  
LOC654346 149.563405421366 155.803946849495 152.024383072265  
174.255919030841 154.354658146438 144.781438651649 189.292740365891  
228.086256222312 175.593421867771 138.594435323838 169.720414035325  
196.16056297158  
LOC654350 550.434931878586 611.772512110915 528.650794915616  
534.608644989102 383.682951666155 384.216141843863 503.757797957538  
337.652945958921 276.284517459626 433.594928641214 713.832153334389  
348.575690346536  
LOC654433 146.722211039754 147.236728188605 176.890596690798  
187.4351946569 144.882207209439 133.336063137966 133.266524623338  
141.221162787167 170.473956720945 132.395993254065 131.500591219916  
160.690442125281  
LOC654780 134.06834346533 117.193620642373 129.194132399305  
127.605805815475 136.986022901377 137.603046125938 187.035957486928  
138.381508741146 146.57274511202 149.842326869644 157.799067644342  
179.273936200852  
LOC678655 777.410297605252 847.276523445973 956.153239481189  
955.143610867351 248.562843471699 277.180850774168 314.751799003704  
377.951523644306 573.509780150018 215.453915231774 267.483886037099  
375.255445179952  
LOC723805 145.803682553832 151.702809524494 147.333142209628  
153.405052909585 152.232245164212 145.26329339067 150.97777780024  
147.740657356905 137.423810400996 150.97777780024 165.942761337382  
148.630293791756  
LOC723972 222.943046618742 228.45211887819 187.63609695026  
266.217879616686 403.104188866804 272.639413442579 285.402072939954

216.32785564297 184.187847236508 210.711890471222 331.999693230194  
287.924891622962  
LOC727677 120.812738312059 141.125248464806 127.333963230749  
129.330592465123 130.838350486331 142.342811880173 117.672645717508  
133.802898895457 126.662329971897 134.241917425247 123.21732068638  
127.998531115697  
LOC727721 141.181931072161 137.871870950302 131.036225888592  
135.521802085177 138.940564112156 143.873048967535 141.5311434224  
138.19108838324 125.477093550338 148.027464692171 161.155280539113  
138.537763477627  
LOC727722 133.346626315812 132.784949538167 137.033870931133  
127.226937898225 130.24527031028 139.59941545613 139.002932985183  
128.955241553429 128.618422306397 163.256472113745 128.377928524315  
130.933379257307  
LOC727726 175.543924200429 158.735283017367 183.033044475752  
183.545741265706 161.713311969291 169.206723147505 174.854570705  
180.456659320226 188.695527267631 181.681929801968 163.390929975591  
188.027848008991  
LOC727732 151.645636946799 148.306990501663 151.60113116166  
165.880071298733 161.852665901359 164.14265547147 170.417054311946  
158.919340819357 161.335677383485 176.176392369178 148.785977829275  
174.657352858049  
LOC727735 148.065080664185 143.318291243905 147.870549240703  
156.546769952772 156.68541512214 150.623182458747 173.450023117394  
156.307551403822 153.315309202016 150.802312408483 153.964765831852  
156.339564110766  
LOC727737 129.236471271181 166.22013573342 134.512204051277  
143.616189776965 142.171459019791 146.105844205919 138.708304921088  
142.362022977137 137.404525565336 156.368487784719 166.346572488391  
143.799113486767  
LOC727747 141.440563159897 127.466779212194 150.711857623087  
124.809739073169 139.508029141287 128.050677475339 136.990610254852  
139.718721422663 134.883708339914 131.578042179715 134.316859658338  
147.581827861592  
LOC727748 134.919972250554 144.92594578882 126.176505541577  
140.955772094739 141.106863165059 149.317146997809 132.685098573183  
142.822594215168 138.519129384809 132.960708384399 142.266177608209  
138.915185051749  
LOC727751 178.027417594263 159.961729971624 188.891032176388  
154.483828924645 187.296479395462 162.018860183534 196.676479140094  
164.801505601099 175.647878042257 170.251197850968 149.200848439601  
195.547320133122  
LOC727752 141.567425892004 129.914077170794 148.000706956532  
135.536810684197 137.294246530224 138.576024069924 145.279694760493  
127.818137805569 138.254479653425 136.647239621513 147.748142622566  
137.897243684023  
LOC727753 148.007068300762 140.522470775478 132.647152200128  
140.385509382606 130.937742379689 145.85414203374 121.014538677616  
153.667355714857 129.023206862713 126.413124995943 155.826394389322  
146.198331189991  
LOC727755 138.166546598846 119.806933383138 132.442771000976  
145.150191397375 129.6505724783 134.983884722607 128.742617750403  
133.827296071709 126.908123260394 136.572645314012 153.415901281564  
133.500750738061



LOC727756 123.439897913722 136.044670179122 144.671459266861  
134.996443685544 140.628614910068 145.195065312551 132.200648560899  
118.338713846941 115.327402810793 124.940836122365 127.718341524417  
116.437403962939  
LOC727757 126.728375196449 127.921209207879 128.888149939072  
142.874797429568 131.326536951329 140.199334790854 148.723165059122  
138.110317032494 143.52474218953 138.852212944492 127.555954288973  
137.182323015758  
LOC727758 195.645181575647 187.93380542729 286.469773081481  
167.906766146651 156.160899295182 174.255919030841 201.337186768645  
232.321454436688 190.45739385453 291.577778800314 175.121069571371  
214.068044241507  
LOC727759 149.151791028837 150.933724024651 158.751241730465  
173.675115244522 169.590101694098 175.073595611435 155.064761390765  
166.582931148846 156.981921830638 152.685860451112 174.035835206078  
149.500457158616  
LOC727761 192.258863431747 188.818012746123 171.809717138613  
190.045156046541 485.373169494941 339.32415558339 293.4021207271  
336.002793042439 519.450899933049 444.374521095495 311.848379951974  
386.16563750478  
LOC727762 205.282221255986 207.985880193245 195.333029746339  
209.146021798649 162.453586139402 224.027605834751 185.382647297259  
201.931760074628 207.857882619727 174.301952147167 173.798554769204  
219.103510284905  
LOC727764 149.513744292932 153.56082876276 148.367132982373  
156.237282338037 156.723502568908 139.104796184094 132.790039196443  
151.869928694006 152.640683776403 155.183210738478 138.12651823109  
149.536681241497  
LOC727765 130.59670974887 136.420613268697 136.998259410887  
118.584773788416 120.481712066062 125.724143659093 133.355353808577  
134.527165454543 141.954467306745 128.478724185042 118.401963042662  
143.145483889918  
LOC727768 202.178451227304 205.341121539273 231.47915227815  
318.628084728596 164.986006226427 148.717545103261 164.525784478026  
278.651369597422 267.970798709017 288.728608411903 157.358696886078  
198.94325874493  
LOC727773 159.58125728432 152.849810441802 155.728609337723  
150.670783991982 144.505072819693 174.296028319781 152.640683776403  
160.67285689491 149.380733719756 154.360558958914 154.366071635971  
178.245841646175  
LOC727775 138.79473329684 152.573063322741 146.649944669876  
150.650926518959 150.401509081265 171.884800118791 153.748035612441  
152.064982697394 161.463042036376 156.562197068687 127.535214313797  
159.320692108734  
LOC727778 156.365413649149 132.106673891288 140.664303738113  
122.535728427528 140.856864690669 137.447578898882 136.80943340993  
139.501279970508 147.666724626127 133.850733997442 125.754741914111  
132.526286141997  
LOC727781 140.256871047018 145.442914818456 139.702404392824  
136.403353223002 145.628239642187 141.173167283016 136.188868917386  
132.066488589395 124.436549041911 127.773292289242 145.802944788548  
136.332399354517  
LOC727787 141.046537113211 137.063689600869 157.113536717393  
159.368376366657 143.383697128285 149.040720727554 133.085476994246

149.565725707356 142.924854393401 146.318052064937 141.037217406848  
134.399228996542  
LOC727788 142.954747193455 144.992993261203 131.498890334548  
137.923852688695 124.616629956864 147.297163685914 135.463385553776  
138.167369090026 148.314248474411 135.020690381988 136.801338583441  
143.689257983705  
LOC727789 128.082956839709 124.513891912986 121.201267751612  
131.31716158922 123.709293439934 114.302645757446 130.738915341653  
133.621325902558 129.384531576943 121.539958110688 125.220416203903  
140.267351731167  
LOC727791 130.724642809645 140.309394542299 136.16560274503  
125.563646710294 143.464614171516 138.836422729663 136.687813884132  
146.245915271213 135.704067249674 127.539091409962 116.288113598488  
149.180704382192  
LOC727796 140.711699577809 137.517461260687 135.877646659023  
133.012692824038 130.488972210403 142.160941592768 124.647992480694  
131.241878941749 137.112274459462 135.067056559409 124.76274408368  
128.023203858837  
LOC727797 134.201392031199 146.915247627846 153.173746756225  
162.890650672747 159.98636352484 145.183463058696 152.024383072265  
153.330348038066 161.055911120534 142.734103971267 163.967616022079  
159.301581158613  
LOC727803 456.201998988891 475.403662030875 520.761305892651  
510.226374558703 1116.95795024994 1448.64875525408 834.537908087672  
1120.3009282887 1373.08023518911 1127.07858210156 741.689442253375  
1364.83036157729  
LOC727804 144.986655090517 135.400054238597 143.861970001207  
138.458816023289 122.75516501062 135.474070994652 126.211525910631  
137.084488743415 127.566369352079 140.286870147975 145.588981165456  
143.143002997516  
LOC727805 129.654234837398 146.890877830248 150.617039206311  
143.301399292539 142.609678462615 145.766684470184 149.025102989448  
160.261708910517 135.678138913772 132.106673891288 155.101850847148  
154.236652966294  
LOC727808 30573.5859783923 29868.1819370827 29868.1819370827  
28193.3833726673 17975.1602090863 30573.5859783923 21315.9767866977  
31402.6950316226 29532.7890259497 21225.306360484 17141.9934540963  
28193.3833726673  
LOC727811 100.04568139926 110.286187184448 125.124011798043  
124.121555438466 118.593717189375 121.425298866613 118.24368469845  
123.96665768708 124.772219140795 122.773736159743 121.316836274255  
127.011594171986  
LOC727815 165.436881839632 137.356539213081 153.879427186342  
135.805294188016 142.573662441786 142.584504912189 130.955161943331  
135.849839822066 135.131890100292 131.004145546364 113.043089777907  
144.373226011578  
LOC727818 162.743192424569 168.668125438154 178.096998157452  
139.101471810467 172.722177339418 159.52147764862 191.297539967707  
147.648020819059 166.2468445883 182.410688592378 167.67272339144  
171.473538842796  
LOC727820 204.470661830972 200.094610104813 215.802713097166  
250.003965480779 310.533399024851 188.431244390961 244.011434605133  
196.598810934837 224.824362819477 172.230528631803 217.202541167691  
290.184801898828

LOC727821 900.233783407148 1011.14472068314 903.824331691969  
554.511983790164 502.935749606918 700.353187874339 1069.25265476373  
440.203336761263 555.959424692051 977.450397042213 1360.24752587939  
873.010676463707  
LOC727825 172.364618542922 218.000351930307 192.032080013216  
199.149959995133 331.018914429561 224.335742510577 228.414049417352  
203.04864785056 190.098509544816 218.350166753833 209.464347017443  
186.244764337256  
LOC727826 566.228690652783 725.216684507759 667.892385395063  
567.465201338735 1072.82323999638 638.129080224049 1243.96721244424  
677.503643398297 783.059427015955 798.758496171493 1461.64901688125  
753.654626233604  
LOC727827 146.894793774087 162.247608931408 137.888195199363  
142.05571112803 126.66432941518 133.672964925321 130.680629893396  
142.155463269751 151.387150218354 153.577349107512 149.52880714343  
138.625680450198  
LOC727828 156.672832018932 136.372712400493 137.084488743415  
167.474790447134 136.755975832051 150.182173149394 146.770267005869  
148.755559144241 143.473523258521 156.920867019849 145.601922576321  
140.099069486005  
LOC727831 139.51836763472 136.381593416533 139.39442529119  
167.219062918573 154.025625092599 136.660600727111 169.705236302448  
145.372579207362 143.694412162756 160.281830914755 143.530190096012  
147.769702509047  
LOC727832 169.211708954329 159.199045715212 167.858490180471  
151.569335275477 150.014842228372 154.962835391567 153.371065247493  
155.590197324062 162.933658389727 159.495272062735 153.201155202974  
156.998563448664  
LOC727833 145.349023185855 137.219943946724 130.370405378213  
136.596127228365 158.467572658719 146.381147992719 132.247611790269  
137.127587786536 135.242328667085 136.214432257698 133.133892264995  
138.365589511693  
LOC727834 145.081468030567 120.611442477736 126.464893786922  
132.595360509902 126.620889938532 124.225294244156 127.088916295784  
122.368581795931 133.343243441383 128.856640014006 108.497209666203  
141.88777975766  
LOC727836 113.687931899298 119.188446525733 132.334666750573  
128.331867822629 127.849141499408 128.551335256123 122.903428611669  
133.978783899572 114.880348648147 110.093565974873 120.96098661114  
118.289405191861  
LOC727837 133.061016674211 137.565050253948 156.420501464224  
129.717701654435 142.467552395104 139.372441366224 139.941724115063  
135.52861375119 145.200638964782 162.834961996238 136.355319997318  
137.089392202166  
LOC727838 122.714122084817 135.250379276888 128.637470206958  
123.82555184043 130.803561448083 121.643036773773 133.165893710176  
125.955431094455 117.969576809288 116.736174147084 115.958740595234  
128.400741751903  
LOC727839 127.05677680446 129.144312785965 128.955241553429  
135.285224699704 128.324383749931 137.572574328004 136.995197143668  
140.938442055097 140.125575976708 130.043904881142 133.686850910378  
131.736694577111  
LOC727842 116.501174707117 125.876114993687 122.5651974076  
126.601395870533 116.316845829267 125.339305282874 121.294366964074

123.716400094852 128.462674862751 127.731816003312 130.799009128937  
138.047487233711  
LOC727844 125.461701282922 124.563594928763 123.53212786736  
139.741862925156 125.596067857941 132.175368142549 120.29173510435  
137.48217464385 125.5449326311 129.831076624826 122.928863588006  
137.720747340105  
LOC727846 134.853253781256 150.283447275981 128.651081092914  
149.023962828426 123.161953011069 134.356796881432 128.41549156443  
135.215356532498 133.621325902558 116.342242990651 156.938149948126  
127.04217189075  
LOC727847 124.058332474379 127.905616521853 141.313482534472  
136.524640445539 145.349023185855 131.429247528936 125.593595066736  
123.102870027378 124.062863592295 133.155925118245 135.621035941292  
137.920724602098  
LOC727848 172.138554350738 177.639351778834 203.675655444583  
198.701991021316 197.981112645168 195.043838688467 239.419200107721  
196.226732738526 182.736067431579 272.351487980415 196.429685815196  
207.977817300376  
LOC727849 141.908791151061 141.170937695272 155.097300548684  
141.735123971775 160.311096717492 149.441862883882 160.20843950503  
152.719997757291 155.666943703002 153.784923783551 140.110258415883  
160.402220755071  
LOC727851 136.147810636915 136.420613268697 142.869595099569  
140.567565996849 144.839170491334 144.755735165001 129.421772713718  
136.494339004002 139.671302796695 132.675172817752 143.438417529799  
136.085524091635  
LOC727855 132.369872013432 145.948772123142 142.279695592224  
148.18197556044 146.242897296397 142.046082566177 139.231340020014  
132.137634927459 151.067819234238 141.229805348717 118.825948323992  
145.599152743156  
LOC727857 125.558877611499 129.281564491007 116.294180301039  
124.168162885295 119.998260435095 125.362754088168 117.017844025726  
123.926293128246 129.086186239653 118.338713846941 133.634886800037  
109.851507510788  
LOC727858 149.821848101995 126.713610681382 133.43194756868  
142.294922363188 150.232470359841 135.518752716008 129.132523684894  
138.800986934663 139.880733465536 143.660679324057 149.315684447787  
141.791001213681  
LOC727860 131.644877647087 133.331037738063 139.890519860289  
124.460064642088 135.058525398122 136.925645302362 138.825961991209  
126.50870982427 123.809866652834 124.555847618988 129.054577477882  
125.143281492089  
LOC727863 126.746388125956 118.970693476152 127.773292289242  
140.936204899093 115.507474401239 123.439897913722 115.927914533359  
123.601413134287 120.300291760091 117.696262292883 129.92319548307  
114.428050500096  
LOC727865 2921.59274577877 2482.27419621925 3552.78712528922  
1548.09554827056 3237.94149351627 2988.45928881468 4663.03253705034  
2511.04500638697 2078.76377557352 3938.94050658589 4682.62607750437  
2910.00269086567  
LOC727866 154.542190113901 157.406969627689 151.519845657755  
151.153466809603 193.37618381669 188.818012746123 209.487240895674  
184.451469623426 188.308588359317 175.626096716758 166.88833169342  
165.537853089052

LOC727868 128.864822736402 118.75237770613 130.973504803813  
130.509415570889 176.019082929386 143.766249538352 142.38097037888  
129.874235646816 129.491732597331 123.306499698566 146.838547724148  
134.897958140444

LOC727869 137.16842164453 149.570242115956 147.676279102364  
137.241991031057 141.38749436393 136.386031133644 138.28374062778  
141.013392458859 145.45768403614 132.817645625115 137.232722233042  
136.770515182612

LOC727872 130.169291786693 125.727521491768 135.43939472868  
124.638075441482 140.232244264861 152.232245164212 162.940190224943  
124.83124879272 143.778327403708 144.104372749581 147.633793743254  
139.168307371516

LOC727874 111.538651711074 126.235567899449 135.5237675623  
125.095999326598 124.818436949131 125.496553386629 129.045934344719  
119.696656494403 119.451099896048 122.243585162452 111.559325333192  
116.723991721647

LOC727877 259.767151797583 160.6823824476 279.75914135192  
194.86492119218 190.904614772409 233.975864722289 336.212224495877  
200.603836348642 204.695311233073 209.913460781088 246.710233781784  
262.296456281666

LOC727878 132.50676380992 130.029719192412 133.239703270008  
151.037282417145 141.484730939562 127.146101490884 129.499283650632  
126.013957128603 139.025598691696 130.609596267168 143.807102980397  
133.847494826806

LOC727879 140.483227195637 143.324235640446 137.324247703318  
157.293090577042 143.187539073659 129.856994052591 146.672270660899  
144.12742465348 136.061992660698 130.770335966929 121.661141741782  
134.405155876727

LOC727880 130.497405221273 142.326319895395 137.765042156434  
138.054470878471 144.949897872252 137.668179813327 130.700175060255  
121.330383384978 134.4380641709 129.689855810051 119.213217733213  
135.242328667085

LOC727882 352.945088028205 298.519371102278 275.072079692264  
328.60529053804 167.746786642066 151.581593330224 153.568321662387  
131.930814868433 204.584643964409 228.184535093641 169.691392833277  
144.556413909655

LOC727884 139.125340284813 138.957548960075 153.285830139349  
160.493314658788 137.21916902421 134.814082968113 130.980885733161  
133.895547281411 132.192775993078 148.962593686337 177.073245863872  
146.40033464957

LOC727894 138.377628971966 125.280736217267 147.982280671798  
132.112112196592 141.209958892647 131.2360427855 134.231634410324  
136.109975252514 138.873925577739 135.004413860474 154.309257657136  
136.264815594226

LOC727895 139.803568564059 137.842375545994 139.658932672049  
138.920141982606 154.552605305297 141.834582245454 140.479321382192  
138.235127932016 142.563762845657 132.195666100325 139.268942501979  
137.471563342956

LOC727896 137.513315427454 131.18368961955 144.479410859199  
121.267153348313 129.854478528455 140.431591727649 140.918728758975  
134.483162806498 136.359189516452 137.025625133986 143.331929080227  
132.200648560899

LOC727899 154.87316176388 171.099675679944 145.735532706214  
163.373180928181 145.70726782469 158.523941833883 146.056723380149

149.799681364551 149.400244837133 155.794309652357 157.032746784217  
145.776143302784  
LOC727900 153.457715729768 115.417648857825 156.339564110766  
141.357668647617 128.389494971858 161.608941774391 162.231074522984  
147.354535468933 171.636121363019 147.327675057481 137.668179813327  
148.336126836362  
LOC727901 195.618369827396 297.332272659995 164.466332705334  
575.857954264295 557.214020485204 195.256498208339 138.192550945411  
127.663578933727 258.075566417241 130.485988201308 200.867515935703  
142.916274989816  
LOC727908 1482.15461429206 1436.57771711084 836.613819700658  
1035.0797237176 282.076744753348 455.486248388968 595.120528902501  
608.129959758538 412.048097766066 596.246316033079 452.24100098898  
468.82816089485  
LOC727909 143.347066447019 127.769405736754 157.672378669483  
151.421099926743 155.578524031078 154.988494760267 146.462544135666  
132.781725233271 156.018200674475 149.121894111871 147.51773051441  
143.06806126472  
LOC727910 120.031976318697 116.136849683574 128.814967091609  
118.631771242606 150.412929574507 128.309602266886 134.493062923443  
140.73456875677 126.288011849541 137.372131049785 129.44773229782  
132.631819830347  
LOC727913 207.831299397177 178.06221214103 180.994249258457  
181.840985962045 147.949560045212 205.200459980187 150.224472335504  
168.996965070202 172.774914399844 171.86363382331 188.767121505943  
172.002600588279  
LOC727914 152.301556397498 150.400411317642 146.184624424737  
140.020294940544 165.2045030333 177.679330300381 177.72965427263  
165.954266127697 163.134784474437 178.717719615544 174.985831291764  
175.632212436963  
LOC727916 143.015905927379 126.148379057536 139.748733350375  
148.052222389368 133.621325902558 130.253372129786 132.626349611404  
152.974593669153 142.997365080299 152.146033353926 120.843429388102  
132.626349611404  
LOC727918 143.149424892482 148.209164900319 149.294728629784  
143.05872558805 148.431101051574 142.180927190578 143.772376623996  
138.885230982475 130.277107538053 134.966883985611 139.60494712939  
134.018379799826  
LOC727922 124.168162885295 112.714282429822 157.595468761042  
148.723165059122 135.991630745082 146.677241054745 135.9489027281  
148.406031732776 153.726935957906 149.518870320398 141.925012927873  
126.868970616955  
LOC727924 142.463167960724 143.567488854011 139.55065372881  
129.599661790972 140.16233428205 143.5709409749 183.255119298602  
130.856249657101 139.543551482943 140.50127034921 143.766249538352  
139.792313018728  
LOC727927 134.412129843957 140.669947387892 148.231928963878  
136.565191271943 161.886342770305 124.477586539576 123.563243360247  
131.992186668019 135.521802085177 138.18056202179 100.841352336505  
126.991140761102  
LOC727929 160.589575894314 141.664271607079 142.261639670072  
135.728336465002 142.129680127408 140.543382412084 159.282348516052  
148.132450240784 143.247977741752 125.4408430419 144.352987324713  
142.534195262988

LOC727934 145.165443106042 169.403422185018 159.524235332529  
153.111226896983 152.692483731643 170.807514224412 156.9540270155  
154.598520288855 165.277935422113 148.204194003593 159.301581158613  
157.12360611723  
LOC727935 146.151639797173 150.596350682411 148.577336081778  
150.778292242313 143.452992974333 145.584615439295 156.375876454394  
146.851307767958 148.560326703328 154.938900278679 164.406564594296  
144.525782437057  
LOC727937 146.453030317456 151.946691918521 190.405863264717  
162.002221893617 149.31020447459 166.998311158378 146.017509013234  
141.104761546577 159.133905701536 135.341892490559 150.560305000601  
146.968599872798  
LOC727938 145.058110060639 128.517315006019 145.909456876796  
134.485835304676 140.622130978368 123.798513338021 118.269780903508  
109.044879188971 113.76411537952 116.14662237541 109.113476990309  
146.484364264513  
LOC727941 135.082715974111 133.887927451362 132.141232809073  
139.574895021783 141.390419429261 140.182150393054 144.757068610657  
135.17827963343 132.593747375239 133.52271411034 137.415158613413  
152.906352463546  
LOC727942 156.543267949167 153.028658323116 174.296028319781  
145.219057535246 165.51742391186 152.73588666971 139.411792975474  
159.41705570719 141.046537113211 151.159145294127 139.097764484641  
141.004467676795  
LOC727944 145.760577027524 161.148734808267 154.412506915569  
150.540599489506 146.119700458464 168.384397488011 132.712573198794  
147.46607538135 149.303427221111 139.476234663488 139.727248583626  
147.856285290748  
LOC727945 130.12638520846 139.075537402658 137.508097741526  
146.025781495177 136.321816321193 127.605805815475 140.485102148597  
133.24828292554 137.386308389265 143.528208105237 127.155818626031  
134.558435781672  
LOC727947 162.199381540369 130.25146185271 149.004343851423  
130.485988201308 136.128092230238 144.120106441052 151.219051767056  
136.995197143668 136.092086452096 133.917283965036 152.004130711617  
144.574566623882  
LOC727948 237.171424222756 251.993821914623 216.32785564297  
255.59042517603 188.973595445056 188.070213212057 214.52087460757  
196.345065354654 190.309453030884 188.641397688261 227.267783818298  
185.275787562938  
LOC727950 162.997720993338 147.841960346835 144.667638908504  
153.787447416111 174.510523238374 153.843250142472 149.441862883882  
172.595769895332 151.282370273189 126.090985925439 148.012353232918  
152.952479729682  
LOC727951 128.891947089512 137.00532429734 136.124385992905  
135.36523178082 131.921799405427 127.845259467015 124.768399055809  
132.992071643179 137.146961654597 143.284230032303 129.930888107958  
137.510586346207  
LOC727958 145.299625153537 152.692483731643 122.176811388389  
146.185931276053 151.132586978278 148.211354898758 146.164093136588  
148.967232828819 132.045595972712 132.897554980037 135.678138913772  
140.54700821058  
LOC727960 136.601220755282 126.416290818296 139.564898998489  
131.915864620669 127.947547987882 133.004765428575 133.769848328557

131.666137651694 126.433146708506 124.480385254916 137.612446150193  
132.334666750573  
LOC727962 368.418553384965 394.65807885612 265.332196877456  
282.870785313621 215.300064529551 301.139737613279 291.221427744817  
314.4408959517 209.867189613436 223.81987303579 438.817248820137  
268.832884350157  
LOC727963 142.259196792767 155.413300826229 143.846734516914  
149.303427221111 138.414916506716 144.212231875922 144.89062965996  
154.695060071104 141.033948839613 158.167384416968 136.908861280856  
135.585648980469  
LOC727967 151.971337856271 171.414869677333 173.552535486766  
158.216790540415 184.813094907887 177.598422362298 156.445294524594  
170.079723856247 169.321832528939 163.910041674646 163.982415393606  
159.266921692363  
LOC727969 134.762169062357 121.281990195113 132.878638378328  
140.150884219813 134.20988291379 131.058360514673 142.865320802784  
115.975794003391 131.01107240791 142.467552395104 141.232464220879  
128.844026422327  
LOC727970 168.588120398433 167.893596681867 181.288519308219  
163.534117903837 167.474790447134 210.33390115739 225.583966894864  
183.863365305103 172.175584707792 166.311421907434 197.947433984294  
183.719279448844  
LOC727977 133.532323053215 142.143709425075 153.756213924949  
136.05434446747 127.581332110857 131.017355402204 154.001258677199  
137.697452180659 128.300838927918 135.840528665314 126.809252651352  
139.926488041421  
LOC727978 140.466612569756 126.048382998393 141.397046998678  
128.217078449064 134.61114877396 124.138036007288 121.575942603856  
142.046082566177 134.132312782731 123.595133376092 140.216148769999  
126.129564039673  
LOC727980 142.180927190578 138.45137517137 139.997245010492  
155.790759250672 245.997705723007 189.419941381565 181.193963616037  
203.544294328395 191.881157918071 191.284275676256 181.500222423634  
192.441337304606  
LOC727983 125.563646710294 112.495783269169 139.524233960073  
142.446514275674 123.849651946683 124.49814598066 139.273651128094  
131.268454024753 124.072512083237 145.015434711984 132.249906289203  
119.931415360373  
LOC727984 1037.46485756166 1126.46241487062 878.986106116952  
797.73902873919 644.868034665476 677.265576269103 1214.16777512885  
827.157920721418 658.968318349334 968.548243081111 1593.49895307361  
789.971871940893  
LOC727987 185.743212726702 177.508603290389 198.411812737082  
173.468958175014 170.243136294537 153.697775290962 146.9554120076  
153.734347607222 147.086734464001 155.119146797226 142.717436384151  
168.790464803746  
LOC727992 155.355051932357 150.927628184034 162.254062646631  
136.723467784393 146.892065987724 146.025781495177 150.672985449063  
139.739448838436 137.908991199407 146.664285015996 145.03221570575  
138.907036194384  
LOC727994 133.106005881815 144.606963457243 143.187539073659  
148.635174393031 150.856917125736 150.756776447358 149.597396040729  
137.406420101257 133.713275043978 146.519312568214 140.010730572075  
149.269417496936



LOC727997 130.772410329685 133.628391175037 133.284873295487  
147.405050592353 127.930072902878 126.84966022925 145.139966629363  
129.551260802518 126.693235227579 130.029719192412 160.105903942674  
134.410706628655  
LOC728002 175.832474809232 189.49408026215 159.576585660511  
188.252507246148 239.621756857095 153.19516365535 229.373686092654  
153.770852731422 175.065781438801 206.071709262227 251.869781014029  
183.979513272793  
LOC728003 141.289009185018 142.675752131935 140.309394542299  
145.587386656619 140.634047988278 138.82269002406 147.896919205072  
134.655842662899 144.082452235267 147.433388299999 141.310253828965  
144.277263594387  
LOC728004 148.344941331885 132.375905857023 131.712745388563  
144.694679571377 125.746184969983 143.103779196037 146.343230597246  
128.597272557033 159.41705570719 136.970505971671 123.474836673474  
130.201635099678  
LOC728005 143.07651558428 136.805379739087 141.524239210761  
148.764956861822 156.141123407905 140.747967724586 149.423230365631  
134.498439965049 132.584454429269 141.960809148036 148.16526158216  
142.285486339143  
LOC728006 407.760503937821 440.203336761263 507.236601481067  
531.711823481265 367.229293432041 264.054997398621 396.988248940183  
403.405544395163 313.025250337353 473.947538805454 468.93543246394  
297.862653495715  
LOC728012 127.164076119599 132.681475162386 136.817517693076  
136.440671408022 134.664652044646 136.685430908977 137.42213762011  
125.752962155179 137.726769003181 127.833653828539 127.011594171986  
129.701347789845  
LOC728014 232.083160165968 249.633252091596 220.661922683143  
212.798133015556 1167.26555140613 505.143815448613 710.531876484467  
473.947538805454 1154.86609813021 438.817248820137 1178.08490218853  
668.570984110088  
LOC728018 119.984301761327 112.841406363391 120.07404952486  
126.960777504772 112.420505354139 120.397683153445 121.267153348313  
106.263441906404 134.828360289676 125.461701282922 116.363556872071  
120.714981493593  
LOC728022 151.051672692659 136.837430157894 155.23922239449  
159.420533375725 156.822477235844 155.405519023053 154.094285855743  
147.790720062226 158.536178747273 148.986058473609 144.806478328053  
160.254101852355  
LOC728024 135.673080643346 135.661131815375 155.295464263911  
144.243598691782 146.075794515889 159.838626443912 138.136901441896  
148.435419356331 140.759006929593 142.163834995141 143.980608339892  
141.668101962049  
LOC728026 900.839073800181 778.28014337938 692.095005197252  
481.933386283351 911.782783698439 608.959089074987 806.88003660673  
617.474181543858 836.235700891687 573.644925180854 1444.45946291517  
863.086199215353  
LOC728027 130.42746492878 125.121517583946 132.74579603362  
118.410091682499 134.848210768603 159.936703616817 130.576944864484  
127.928195199945 116.844361858869 127.70306883967 125.830917527594  
119.469328303796  
LOC728031 3215.41238464601 3749.80462365748 2715.55326746591  
3598.30438198858 7389.95365139168 3798.89743803968 6233.78489807054

2986.6208659209 4299.06288109563 3490.77593331727 6560.30885074315  
5776.63686968234  
LOC728032 146.068360606981 138.023752854109 158.809865241567  
142.763157232147 155.086559474139 158.06915048955 153.571517567657  
141.678529125136 151.503307004675 170.801761175916 126.841836614341  
166.024236370752  
LOC728034 148.616543842015 139.249869918235 145.289151849318  
136.587165242663 151.613134875009 145.10302792449 137.850437814788  
145.352802493486 166.754995454382 150.835044630002 169.888264971936  
150.701579893607  
LOC728037 238.823244541016 222.605195861218 249.590923098575  
237.171424222756 524.245387973163 519.829743770022 271.858059712406  
291.476113017794 286.587945301875 212.798133015556 205.546628064296  
285.83626978316  
LOC728044 161.930142040623 137.043088465479 128.36533737469  
147.170427656724 140.471953101887 142.456527359961 152.927956172463  
156.714081537525 137.853137973756 180.968659614238 156.949439724914  
157.468934439452  
LOC728045 165.576758218571 145.804420322848 145.223648967115  
148.288798428149 141.416706868124 164.373697447004 157.43824048982  
143.814798097425 132.647152200128 130.543453631154 144.36575644625  
150.883139945292  
LOC728046 166.988725688589 154.65319127051 145.549126188292  
156.737219981981 142.948238172973 149.63291071048 142.586051173329  
149.41357273704 146.105844205919 160.695913747601 155.111346336412  
156.9540270155  
LOC728047 143.694412162756 137.748443205818 142.892198239879  
134.872654203921 121.327397317398 130.294405479101 135.835518477299  
133.046435968561 127.514381389109 135.475597372104 129.46545803309  
117.141089194822  
LOC728052 180.430425314885 160.099731578122 230.508733145583  
167.268645224361 121.505178996279 135.668768914964 128.195916531413  
131.615462296871 122.682761393215 129.949894903048 132.926799887017  
127.786141874218  
LOC728054 123.657246099004 124.395047385025 136.247524745098  
123.507963359911 123.56917054142 135.535020220081 121.781562010645  
141.735123971775 124.907788504503 119.651470884046 137.908991199407  
131.519455635415  
LOC728056 133.016668180102 131.904624845305 130.570050159191  
129.083756379376 130.042683562719 137.370670726978 138.276865331434  
144.604714612091 126.77232818113 131.670601860412 116.346181133756  
126.058167594519  
LOC728059 160.848201202361 156.843997723699 157.170136439095  
146.311966562883 164.352366170527 293.234972169244 247.340470321453  
252.628516068724 238.823244541016 518.925188630246 223.747350951099  
368.466518140043  
LOC728060 502.935749606918 434.943371634824 537.06835963726  
370.798852361374 615.662993833692 365.950612890149 1100.81588201714  
861.516925304722 549.047065540118 567.869601934138 993.34112647221  
636.382696018633  
LOC728064 150.035890574132 149.606576415873 143.568691825659  
126.211525910631 137.112274459462 218.106150021482 248.887522059485  
144.525782437057 173.675115244522 137.466291815166 155.94422417523  
229.31486399741

LOC728065 121.681261213422 115.878861991823 127.74861041569  
136.201103852785 137.440295223749 124.992439957206 127.440987506769  
122.522978939399 120.740986472733 119.442114850181 125.324187741972  
129.419280058541  
LOC728066 148.620766059526 126.800718471804 132.005753222789  
145.326803807448 155.468848105615 138.474429223902 142.329137800558  
158.282899758551 133.571962238112 143.943676099522 149.593135821045  
150.63456320644  
LOC728069 324.949988230276 247.528753010193 300.709410518382  
229.77428612216 230.424145472916 229.181725450534 292.037861000784  
263.084557246752 381.4054004349 246.594244983507 373.033658917608  
268.660078500783  
LOC728070 168.389069732474 157.240466990977 173.38031514498  
150.016550610991 154.973990421257 193.723953003899 155.376656335974  
169.072574423443 167.776363541939 156.682781772069 162.769643886845  
161.335677383485  
LOC728073 130.818181991958 142.514794686932 134.914830257315  
126.958366599622 126.245597154052 149.871960981882 131.696834332724  
136.908861280856 134.891736344801 131.853183159267 112.90900939264  
131.383113302567  
LOC728080 147.872625576731 135.86924353735 167.782882015229  
146.42288214248 138.700301754711 145.000523037022 137.344198938623  
147.79341726211 132.721469335671 132.741859397511 122.727385599754  
147.846925198348  
LOC728081 148.412895185127 152.321890796527 180.437648146588  
150.112549201892 140.907889482107 165.964183460825 163.824878791966  
147.357032438442 148.603077434646 169.527424356913 146.681183890181  
158.356964958885  
LOC728086 148.549257493128 138.401406375804 134.465488237877  
162.216377983292 152.547558436703 147.829502959865 148.212445624699  
153.83891040723 150.056508971921 138.53179773391 167.389632521521  
148.294870328642  
LOC728088 154.212927357622 152.787860234233 166.285052506316  
152.109178223495 157.863585655333 140.405405916188 141.232464220879  
161.094103878416 142.749568012703 156.357126871243 154.183537565624  
151.269442319766  
LOC728089 158.562631157512 156.572774198042 176.912121142015  
135.481300250507 139.400521576978 155.035727630756 156.926617030752  
152.124910935545 160.429643729685 151.002218995005 146.388285560372  
143.982561564661  
LOC728093 144.572485418264 135.206755687105 135.829273398594  
126.430816528764 132.875314170399 123.357205547181 134.383024487323  
135.25123092324 134.17351030102 136.792957035581 144.004831360797  
147.645530163725  
LOC728094 145.977658128528 139.13396769999 145.904866987074  
150.333572271902 149.687372584136 143.116451998409 140.177708471199  
131.941069239017 152.31268334586 129.801342433836 122.167669805597  
140.28485470716  
LOC728095 142.693337885596 132.504264154139 146.929717840755  
134.830021570666 145.68886453261 137.333595298205 144.046646189442  
141.652959320966 147.129702047639 135.565256045133 134.909230280708  
154.828782972852  
LOC728098 166.12695134858 160.975741751317 162.285199080777  
155.673532440475 226.893147371644 238.617228632505 196.189101941489

202.193338797533 184.157941055948 279.113984512619 209.74583569369  
216.506914782226  
LOC728100 121.636361281148 129.190900922265 133.651203764842  
129.661073814998 131.132508349222 116.300028266671 141.383975990479  
131.543439103033 130.694506122253 124.213104788426 117.628564992187  
135.092226300609  
LOC728103 167.397758092427 130.600052408343 164.413893089607  
147.93088503956 153.066630483602 137.634298014431 130.672586991186  
141.919263493165 141.628203045085 144.290286088611 133.43362126395  
138.165240772401  
LOC728105 968.157701932137 862.669120338424 651.43207839949  
853.535700321202 266.101158071711 966.281849197568 516.577357935963  
764.493610798958 473.057488824363 440.404188514231 590.3584324045  
526.416479408056  
LOC728111 141.052322220012 133.526213647686 168.000247148058  
157.649902282769 139.273651128094 156.050585687098 143.62103263895  
135.965779958403 148.624135810148 169.764014031526 141.345379144177  
130.795318552623  
LOC728114 135.046003135933 136.754116864655 134.458958352588  
140.014167357286 141.153496200302 129.11843197744 146.856133875296  
135.747939020471 140.462651395483 146.283340399533 140.52059487958  
138.35738548449  
LOC728115 182.67941458824 184.294172429054 162.431674335726  
158.799917136119 212.050953977485 351.665934915634 217.646777099512  
253.30325545013 259.979459472217 231.769926214655 310.8725368426  
253.495214569632  
LOC728116 116.425301253959 115.827175143972 104.223476853877  
117.47631318854 147.570734399004 120.922042875444 122.75516501062  
125.810756286648 124.922004609558 114.44610607807 128.653335099674  
120.15332480712  
LOC728117 133.483766053954 118.770061426689 127.484178603011  
123.887740029279 119.725487374119 143.49969914174 152.670691262738  
131.575356402693 135.441550832737 137.290687951485 143.764266466204  
130.257242615762  
LOC728119 156.990325995053 170.046856179083 165.491193869938  
140.809956497396 132.32633643811 153.072429774613 147.748142622566  
159.629232808787 146.603385998231 155.722314592388 146.411873503163  
159.196987090991  
LOC728125 121.830137285032 130.466571969657 136.473948855498  
147.110929610347 144.270828498856 135.073449743301 149.180704382192  
138.100014158367 132.832556359483 136.786462547129 133.065366727222  
131.601823550269  
LOC728126 7266.3946293904 7585.47289520004 6427.33783376005  
7786.96143641382 15603.3490258675 10579.8650348916 14300.8562978211  
7873.0525548049 11150.5512437377 9349.76443528011 6737.97308530049  
13809.2057928642  
LOC728127 179.203783335674 173.132747018514 173.959556466614  
178.284294783418 148.816369706133 197.667299074218 199.477350542491  
192.209344004015 189.853136769155 171.216275057884 185.856755885891  
233.394506254045  
LOC728128 3775.41389938231 3775.41389938231 4280.66857663502  
3334.16277752222 4262.23145131525 2392.93562797606 4150.8511719558  
3396.40593844715 3232.96611074938 6271.34208268488 5947.89821087362  
2913.2685312165

LOC728129 127.908872828095 134.049094181433 149.204816953404  
133.241744350369 124.821581853501 135.095095470362 121.462385497795  
130.886164807755 125.334995649504 132.148166773943 134.17351030102  
130.613760017864  
LOC728132 123.745824514261 123.9209907098 124.242539075734  
157.909530751723 129.265788005518 132.744261207073 133.725177339262  
130.309092946921 129.263794008537 131.72852748835 118.743966166637  
134.730275384832  
LOC728138 521.83794739314 595.120528902501 526.285114043212  
534.745066397679 925.205399154409 476.383294794912 609.309339417625  
431.686900474971 470.42403724799 560.362502519639 534.920870202582  
483.312894744803  
LOC728139 918.742625270041 988.297682407351 1293.70593826709  
884.248568386012 1126.46241487062 722.974310297586 1341.78081782818  
903.503768217033 885.713964813911 2132.90676194993 2081.45603839306  
858.524630425687  
LOC728142 162.695319777455 155.846106540378 166.376907377447  
151.761369162723 147.519991961858 165.638672456873 144.479410859199  
145.387562372871 153.066630483602 199.637257550762 158.14434287956  
146.359038260378  
LOC728143 160.435789207464 163.977562404508 153.219954133957  
157.280532261425 153.275253838659 154.935741493562 172.909795209733  
152.348210524663 162.247608931408 163.456245724169 157.328404229451  
168.875964392526  
LOC728145 158.183045411298 147.250700603067 168.674809329231  
145.547037566774 138.603793282123 155.993849743656 163.538862303362  
156.875068435974 152.61583482402 152.097609803404 158.814407805803  
161.084088366981  
LOC728147 149.280480796544 140.402944266863 149.644247474405  
161.632610858756 129.680406696779 145.604066669916 126.282575548237  
144.840218312168 128.39171386085 139.180608807911 169.022351348819  
129.121598974852  
LOC728148 159.788143847569 133.099175110023 145.281664250703  
155.890403934674 140.934844668435 144.905870145004 137.811304134207  
156.160899295182 140.05012958679 139.741862925156 132.692027897739  
145.117574928189  
LOC728150 158.503284955019 159.399804351771 143.812863334832  
154.096542063701 157.595468761042 151.492236411757 166.606522485953  
148.084844579881 153.860039535598 148.989286668424 159.334165651951  
154.962835391567  
LOC728152 142.29309119138 137.50609001002 135.313148180961  
136.092086452096 137.934850241054 124.148194572004 140.296609941747  
135.860057860699 150.208809981642 147.500009766324 150.421116058494  
142.025834438974  
LOC728153 728.743541467167 794.165408266062 619.487800014979  
653.879734066271 364.527677995774 593.462634352052 589.409235971915  
510.285766295993 509.14726076246 496.426739836535 493.347308943133  
658.068932688816  
LOC728157 121.768195574022 128.931946787934 141.216869032251  
121.85247363239 124.574323079707 130.219888837397 129.150574563997  
122.619429537799 120.345546077894 119.096195018596 132.089375920534  
139.018588215263  
LOC728160 140.664303738113 131.155117105954 147.241136598626  
142.534195262988 140.877230937687 131.434121613176 154.2433882385

363.706789137022 135.108420614547 134.712935556892 121.743701509981  
142.192934622228  
LOC728162 141.741892403029 134.493062923443 140.195820033314  
134.487476333464 119.968081249475 127.539091409962 129.544594679212  
127.83967243279 124.833659452957 137.243175880462 120.460433297007  
128.276471459777  
LOC728163 120.082391311921 123.943080151532 116.412881235587  
121.51208055933 133.376631703373 112.292129754508 128.327528039933  
120.441732791854 120.910703698292 120.283706459738 137.045772853855  
122.527517633626  
LOC728170 126.274585491044 133.725177339262 131.054302682707  
142.084294087481 130.516632662261 136.573928520456 135.691862612951  
149.508432746895 140.77762487941 133.672964925321 137.328370598183  
138.818492907643  
LOC728175 135.886859004208 127.155818626031 125.990762414974  
132.502153153826 128.505296338657 127.166821363722 133.238296113721  
138.868641301709 157.378317015602 136.185953087697 159.624341769644  
146.343230597246  
LOC728178 144.671459266861 128.78647242525 163.19340939648  
161.514651272858 157.436513275737 143.603022117503 157.463122989559  
140.634047988278 140.02337095267 119.95959059725 138.72219653692  
161.520362399369  
LOC728179 145.190896872008 139.640918572569 144.99221793877  
143.155998311198 146.035731780312 139.799467834109 140.78902818186  
134.544368736184 129.601234646954 135.275284142536 158.85003890975  
145.643752002787  
LOC728181 157.298181833321 147.409936250284 168.139351579682  
159.289148392284 147.838660813476 184.602704530362 164.603403251634  
158.953705937936 157.826457203706 176.100691355682 165.048922660581  
157.435477846812  
LOC728183 131.451173463405 126.845048064014 134.56314960832  
140.844007965202 143.670804863501 123.689439578326 131.210866639392  
133.994376985194 132.220398477217 139.101471810467 132.399633003253  
138.783017264895  
LOC728185 113.209569103727 135.192181609947 119.036965883266  
144.86583288717 135.521802085177 146.67875644027 122.841135364088  
137.310014841869 122.592960588642 152.99686989829 132.772085211553  
129.561012565141  
LOC728188 224.274329367512 207.204293555178 342.487952136318  
259.094411953361 246.850599569231 297.466255000163 706.292905820227  
346.78158577526 481.238450505207 1027.96306543235 429.922530506572  
905.751410113646  
LOC728190 133.783379558598 153.111226896983 146.629335531037  
145.245316640391 155.05329654089 140.667415746111 147.955701866515  
136.960656707275 141.150016212967 143.120621855946 146.683594365673  
139.497253870412  
LOC728193 153.092864798642 139.792313018728 160.752581271996  
150.460618402778 160.014635964846 155.545904088857 178.313238745665  
151.153466809603 165.108876136738 185.30916081621 129.775280076365  
152.709021529522  
LOC728196 126.557869929234 119.242880574306 130.029719192412  
133.556805738801 126.338676765473 135.605541734293 136.465185148237  
129.03753569157 123.055210862247 134.09920571607 115.725323816619  
137.13615301204

LOC728199 124.910390240995 124.927989289122 126.439948611449  
145.423022762916 132.529247880813 125.445875333112 128.669887479835  
135.923022674367 126.746388125956 121.679013405559 122.022611139895  
121.455843337023  
LOC728205 144.606963457243 154.847114601403 143.303309656177  
133.07218865002 166.526875572556 241.453456707114 153.041407358576  
144.769824608083 160.01685162095 215.247472744419 186.127543877065  
178.997098204457  
LOC728207 192.580288063603 176.77183598995 190.281570660806  
167.984051648058 236.508498739509 173.364586678954 269.238332581564  
232.918330930051 184.542232315662 214.295260811046 229.31486399741  
228.820894086914  
LOC728208 150.837717923505 161.627546190964 167.011846920792  
155.272264997151 175.663960113118 161.825134481279 174.526176588454  
164.241874094897 168.867373925372 177.182321788711 160.975741751317  
170.381897441659  
LOC728210 133.26167785455 125.259164818744 121.036054511761  
129.467792559297 129.553282780541 140.071879210324 127.562924931536  
121.645021899034 126.455271988029 131.717160947964 121.260355515095  
123.926293128246  
LOC728211 125.195549796301 127.369456504277 125.677019190255  
139.104796184094 135.413840160615 126.775180133301 131.950295185477  
128.09266452749 128.244549276386 143.031909545902 146.865904106038  
131.897352210959  
LOC728212 130.882463936853 121.860428893248 121.99477069153  
138.028813480968 132.858424396011 136.180063437699 132.265895156539  
115.142111396055 137.027334042585 128.356453959987 130.714375454354  
133.382099379709  
LOC728216 135.736764623155 181.968650082343 140.423711213355  
166.422360032182 138.409284761652 163.863677822465 181.550597645633  
182.798526632723 151.984619204523 146.119700458464 162.870317933909  
199.001860912128  
LOC728217 129.153882779488 119.463337435512 131.961236721149  
124.755684505209 133.86835278231 130.545285774056 128.739880189022  
131.93683726912 124.977046954694 127.842177770276 126.603552416008  
127.380083832809  
LOC728219 124.597605631582 143.416816860089 129.777173431404  
124.103321614841 131.958760372325 132.66318177913 123.467227007155  
146.9069812014 121.391637838137 140.479321382192 118.60878652724  
140.451465188624  
LOC728224 129.699765645519 132.823333905679 130.423465505321  
120.337241026338 118.75237770613 124.253582884351 126.365861978893  
134.158454639998 139.318078285343 135.054931772725 125.14833026167  
117.045020667394  
LOC728226 166.735962853075 153.131271100637 143.025570700585  
145.852430082228 144.585120811896 156.806407903626 134.944488136297  
373.096629378654 173.513108409372 141.558927907067 149.883237874886  
143.729768036753  
LOC728229 148.983182193411 150.275163835924 137.016495611111  
158.041568121766 176.347535860374 204.990512488181 184.167124143272  
158.364031234356 198.066837203458 205.930921729192 180.798671424395  
230.201464318433  
LOC728241 151.032389358279 138.323567041191 148.970251898527  
151.354187593773 140.550044737476 136.457424070709 139.831964368637

134.676039394438 149.125425566378 143.455941298415 139.048016900762  
136.128092230238  
LOC728244 9820.93899217345 8342.70113690382 9560.32907282993  
6960.46610781696 4901.41175228982 5195.2087608308 11709.9785619141  
10075.6573898939 7815.98936145067 10930.6720259935 11598.65499235  
13700.8527522612  
LOC728247 146.887506793665 147.628367263728 131.809235171629  
136.977435235496 132.992071643179 146.453030317456 126.332299789266  
143.686906051698 147.373174160478 144.602386056543 137.68634745111  
139.055892787717  
LOC728248 132.407736899761 123.375592272781 126.33556674738  
149.029275579026 135.15791174418 126.17133877948 130.370405378213  
131.582231577364 133.875667250136 134.54796737809 127.56862018147  
122.841135364088  
LOC728249 123.964042357475 132.282125790062 142.363309192458  
118.724348027528 135.335107344583 140.632573759426 124.666487633365  
136.468434653208 153.853856339585 144.546597366629 132.297716337104  
159.922627970233  
LOC728250 117.879058520659 115.785084044427 126.319103548711  
124.629877200816 129.334217858282 133.269658133558 125.324187741972  
118.154953746492 121.723964989551 126.667650990284 113.356070669308  
121.636361281148  
LOC728253 101.597648528389 139.894559834783 128.675527226161  
136.609461559853 178.496344474999 145.198638080646 145.744039709418  
144.092864444802 132.133979108537 145.530904040477 131.423918669689  
138.834309377225  
LOC728254 124.35374445763 110.764586138261 122.484351696828  
127.239282651919 131.453064237253 130.110413621436 118.342067845126  
124.975454733084 121.591962855513 119.072213573568 126.793778645808  
123.735827460404  
LOC728255 140.918728758975 130.316282003711 128.341887728118  
138.899292894875 130.716570410608 135.385133545332 128.588822671032  
132.811368246405 162.494429648551 151.349739492368 131.305785417254  
125.882246459692  
LOC728257 136.049167597016 137.853137973756 148.594322264158  
137.294246530224 141.784881206191 175.717830026564 141.360125377949  
160.78368986036 157.50873249647 149.867541008113 168.254689624696  
167.397758092427  
LOC728262 146.735616237082 135.51506573405 137.27506604142  
143.692305478191 148.065080664185 143.941358917251 145.024148458133  
142.013370954791 154.003862874241 141.090356426567 148.215172022129  
141.474583706011  
LOC728263 147.485960802692 150.394483608039 151.557004418682  
133.204793127029 209.960795065047 168.3523504179 186.420541099902  
167.637638693195 183.32467147543 159.05213637758 153.38260557666  
186.377571176623  
LOC728264 177.11682975342 172.468440317443 148.124586158123  
178.745112514526 135.809383370957 139.027836356854 124.186557690235  
127.31790396929 134.686251400642 123.372689985035 123.826661710348  
142.577102697682  
LOC728275 119.613985826308 124.723519607109 131.305785417254  
128.771367080039 125.876114993687 122.063996556575 142.971972776388  
125.894755032594 142.329137800558 132.296827080007 121.04331582508  
130.624702758052



LOC728276 141.450800126786 140.475688390415 133.804489975068  
155.243643210534 147.471494294543 142.674671804361 138.496366637658  
133.489068665353 149.461747964498 131.416923875254 136.097571072206  
190.111477641308  
LOC728278 119.112063328364 118.841699953612 117.144778357339  
111.584425166104 130.939543211439 132.233396667074 115.76177719261  
120.71782441569 122.97229333908 124.650711299942 132.755256423863  
118.04359489354  
LOC728285 154.507721014473 170.335930486215 161.740466814881  
170.233084517898 168.697565122105 177.910104644497 181.70730090195  
158.260676113325 159.957371011316 145.539731152955 144.699084515687  
157.094001180073  
LOC728288 129.098408596418 132.774127230452 134.989310648514  
127.709638375626 123.762963668211 130.603837917984 139.934460900409  
130.172041917023 136.664500207966 142.939578759097 153.78045746564  
139.790098895306  
LOC728290 117.312094804205 134.531334130512 123.065355919378  
128.692917766138 113.694351010121 120.644987579644 128.505296338657  
125.285502203677 134.981272056795 124.513891912986 136.066396388185  
123.45956380046  
LOC728291 134.194555223935 141.461435494985 137.950955473086  
128.678484452077 130.863753083296 130.570050159191 138.084801633774  
132.348603553752 118.718048764985 128.329985147034 148.835389500419  
138.426531345939  
LOC728295 123.843823256462 120.669452856028 118.319950396126  
119.233300586525 136.698189351878 155.176714087209 117.051541123239  
126.404523759643 129.813090345837 120.138014822486 127.139903623331  
122.763138007612  
LOC728297 123.908458472687 131.273916869754 133.123444023892  
133.070896773384 139.406427549733 138.720489866687 129.692578787988  
131.312580984876 122.051473363557 131.364187047583 130.094233130309  
123.665983073461  
LOC728302 133.138744413911 148.960077949157 138.692057950694  
138.792521681771 160.50439457257 123.288028185949 152.915692742755  
120.551603446364 128.492142236807 152.224281847792 135.985358106767  
131.951649373072  
LOC728307 152.001155788544 135.849839822066 146.363991934916  
156.609370182062 137.800512046163 150.784262878145 162.748836971539  
131.001996509052 135.369146072643 133.909219998872 151.796986456254  
145.25198093836  
LOC728308 142.589971658757 170.069291215013 147.9084767638  
159.549936351002 153.56082876276 137.85150144918 148.638400592682  
152.483240622367 165.71382076724 141.480793979634 142.416237823488  
151.382199195953  
LOC728310 304.152390210727 269.424055734143 232.023739004791  
263.568160216149 138.97443063851 270.894153548841 173.161152247499  
227.467161919443 188.593378315122 169.475714234887 304.844121431627  
214.968589907686  
LOC728312 156.050585687098 164.601022396674 151.492236411757  
165.085010975035 153.371065247493 156.856149172225 164.673579538023  
237.473927775823 174.657352858049 245.01029221002 130.233769058693  
160.473772347376  
LOC728316 118.366859032979 120.740986472733 138.108184983014  
137.524968609776 135.391788614828 129.4807689399 131.404001006643

138.639410179404 144.302925948596 126.830269821364 142.952745413746  
115.337592860132  
LOC728317 147.155738185574 138.334626498686 130.277107538053  
144.494401248678 132.825240485239 126.333814565085 134.323365608463  
144.920107068083 134.130913969327 135.805294188016 135.27739087376  
141.349341762655  
LOC728318 132.094446606227 137.988325215021 121.830137285032  
130.033927910392 123.722744366103 137.570343435498 138.596430973865  
127.206177583275 132.84666796678 123.285059856341 129.469949305913  
128.186963138555  
LOC728320 143.922878410438 146.731584143625 140.475688390415  
145.812607895325 135.665577776938 135.273184185121 141.450800126786  
138.945855414918 120.308260557986 161.26917182967 127.943935415045  
127.982696242304  
LOC728323 130.352674121108 137.867263869936 117.380281099932  
144.333945716394 131.474485888864 117.862532836494 127.514381389109  
139.864176113337 146.184624424737 164.787637367264 126.132339293132  
118.761737418652  
LOC728324 465.809961695043 474.629173435475 642.484527246259  
424.578659172414 1055.79590411506 1127.07858210156 1222.014210447  
888.371107987343 896.185223980593 943.677679525947 798.1490651671  
1323.05745869565  
LOC728326 148.538400348149 123.185652476312 128.905042692431  
138.798959235723 135.046003135933 128.739880189022 144.498245098592  
130.800427334056 128.460750472464 133.123444023892 144.335732650795  
118.66946078241  
LOC728334 141.40690581885 123.681353449198 149.8035588048  
134.748177388398 140.837360719964 134.932416370825 140.83570584033  
135.797170561599 121.134305707234 150.496616601699 123.410467384598  
114.906396746556  
LOC728340 153.066630483602 137.835936352525 131.232417654705  
156.05583229359 132.557945249016 125.28279436853 145.56468363155  
135.283742166077 134.498439965049 152.461930328923 122.182695593404  
140.04612725812  
LOC728341 118.963119420175 122.220327032799 126.462522391125  
136.990610254852 155.815785551964 118.619176257622 129.093864368842  
120.160652344221 136.095753586495 125.720102558499 131.516100334597  
119.746227888415  
LOC728343 150.707113487334 141.093532330708 144.708780756278  
137.198654302648 131.578042179715 144.970383956581 140.975056186954  
137.199718376452 135.390226050803 141.5311434224 127.065518421996  
142.80027343095  
LOC728344 143.275056599274 133.257477196196 144.413210364148  
129.748891462506 120.973428305414 145.902572804249 128.548201588898  
128.179293878252 144.30519737569 144.731299077209 151.714420758741  
147.870549240703  
LOC728347 135.797170561599 136.026302491961 130.760835441776  
122.97229333908 132.739435456445 134.045938361221 124.217337143269  
132.395993254065 143.151478156897 129.930888107958 134.569883788949  
141.561769570516  
LOC728348 142.878258542775 135.182524652868 129.871985352583  
135.842090777339 129.020356016653 138.418604660734 130.647944268116  
139.31967261371 128.711308958929 143.692305478191 138.129281196474  
128.912199634685

LOC728351 185.974598267418 163.942131559267 136.786462547129  
134.499588539919 176.029791617989 175.510160114891 184.873459141947  
179.44023315251 168.483273292464 148.879605388902 217.24573005272  
191.881157918071  
LOC728352 143.523051024982 138.203742066422 126.647643493986  
128.050677475339 130.57903858574 156.224769056915 104.483909687253  
139.949563856936 131.894919149666 128.490341173553 136.716554749722  
149.919344933814  
LOC728353 122.365693072105 112.943630133093 122.00079209554  
128.287127680554 125.526744092256 116.796995589816 135.494894933583  
116.723991721647 112.114933398547 131.575356402693 120.501697624977  
121.157614971438  
LOC728361 122.408016372747 134.051756243089 127.802645313091  
130.277107538053 150.198869833614 126.097544650407 135.484360570738  
134.190511945944 126.259029676691 147.172440755724 119.202966460612  
127.449028221682  
LOC728362 180.889946069121 168.45157400976 180.1204762193  
134.865577264797 207.531908382266 200.741234443918 252.733973271584  
420.160939829121 331.062744782933 208.363905749882 216.582862850259  
281.926552464214  
LOC728364 131.232417654705 140.551093909835 122.013040475143  
123.582509531804 128.184708916755 121.675007387533 131.354275252104  
131.117294275244 132.881693683384 121.094060100325 122.554760526767  
125.531371673679  
LOC728368 5572.23400804004 5776.63686968234 5759.5586948816  
6522.27232911897 7122.07276863122 7930.82679738435 7717.01422791837  
9433.53967760357 8633.71708020651 8840.92490099301 7433.03226979876  
11071.0448447818  
LOC728369 130.355969431473 134.169645445889 131.540436531741  
134.679882781788 124.772219140795 140.397184813186 138.813126946007  
130.385747820089 129.946925636595 140.849966309018 130.119313219923  
133.640832782576  
LOC728379 138.970853057174 124.775529469869 130.270184521521  
127.058373069911 136.130027137459 131.996032643928 135.400054238597  
128.052753068991 126.112672816035 128.781123194219 135.835518477299  
131.623527073985  
LOC728380 120.106270603148 121.215558351076 131.12775424877  
148.789295862953 125.539199863559 137.00532429734 132.832556359483  
130.979513420888 130.779805222363 141.634246722965 108.807891863679  
143.49969914174  
LOC728388 134.425483661043 143.256590560776 152.232245164212  
152.185397218918 162.435363603304 130.266601299194 142.744045151046  
150.948076715456 141.16066528405 142.598106777707 132.675172817752  
139.036978052242  
LOC728393 144.779146672553 140.556631658219 150.079372712689  
147.633793743254 139.690093593646 143.320787131532 142.019263564073  
137.754373055094 137.037299675471 154.179891883612 154.493246900289  
151.979221390032  
LOC728395 163.653662369257 163.647306551474 149.155345369055  
162.766038656637 147.069488043503 167.42476096854 148.934593102452  
161.713311969291 137.620843137286 166.533191390639 142.086300138469  
145.666712006532  
LOC728400 150.208809981642 155.004104153679 169.466129742085  
143.331929080227 143.870849001074 154.691783046492 159.253029632045

153.801971958265 151.334463063946 156.13331481937 173.044636575826  
146.323776429268  
LOC728401 131.934680869554 129.272835188209 124.49814598066  
136.899405404096 125.315736755156 126.423739360894 139.490103923544  
126.433146708506 136.801338583441 130.844272373448 129.703791330416  
128.630613404354  
LOC728403 140.812334019209 132.664984879523 124.267394371656  
137.239088768176 127.106045864607 128.647790058795 129.636135486593  
133.093234861388 118.567548265638 129.445240570626 114.65036208773  
122.170662903259  
LOC728405 157.028963417138 145.648810303756 158.699778625671  
151.55925331302 148.700297908071 149.829363505519 161.646807806182  
151.780459290205 146.349773982488 147.975551540256 157.254757078837  
141.583936153499  
LOC728408 199.327939161502 176.506227858258 205.244843885276  
151.70035428516 153.348110626071 204.299375966441 231.796421262015  
221.027562527572 181.048789688798 207.850956786183 208.75656341402  
279.452819132461  
LOC728411 243.589099648895 248.993716339029 509.702881232139  
231.257543784864 151.528377719344 284.748764120614 239.970202560698  
297.805768288377 254.101184686036 259.338947392465 226.763252784108  
293.825372123877  
LOC728412 121.121686280797 118.230408871812 127.966883271903  
124.225294244156 115.343251487944 133.976997391944 132.933035878334  
125.865974180252 131.050255325564 139.299062352035 134.558435781672  
121.59661598908  
LOC728416 195.776369840059 219.2695037071 199.288100834476  
175.495965414493 340.966515437272 377.083379021079 367.289651112346  
229.567444213626 285.980446338971 251.307020289291 330.281193038198  
348.241471067257  
LOC728417 169.16155608071 161.988082494464 177.639351778834  
169.475714234887 155.064761390765 165.581217879395 213.754156680604  
175.562070915794 176.622758931306 164.000772606739 181.238505183667  
216.859640534581  
LOC728418 128.543460982378 128.122197525844 127.187020441742  
123.375592272781 124.378096177801 132.103084472404 123.949411804458  
123.463861015933 124.768399055809 141.78867917709 130.807596523171  
136.660600727111  
LOC728419 142.481897141275 136.695790688466 151.788278519057  
135.812301062763 139.342430217926 133.003743285746 137.495288670441  
144.358535632993 138.374092984164 147.691011072898 146.660826209767  
143.047617455953  
LOC728423 126.732121894377 136.861019517134 137.885506916098  
119.693318959661 118.220555783444 125.410876867635 132.074571281938  
128.680762033378 120.514672572565 118.757973008463 137.982667022604  
131.04482088126  
LOC728428 5008.4888270731 5327.13051940508 4377.59943975549  
5213.40342339233 12916.6904389018 5670.70220800096 8633.71708020651  
6028.67062754577 4016.35381420598 6990.13809515289 10329.1999331936  
5609.58233117244  
LOC728429 128.922269289649 115.507474401239 114.373370072994  
131.305785417254 125.863969666806 122.268560536152 124.541257225826  
121.95061962467 120.806180547422 112.156010486085 109.003365273337  
118.269780903508

LOC728431 237.754067231793 257.168308311848 214.566711351899  
324.713347085998 232.231236745251 171.504939477949 308.088967616175  
255.039661999732 252.32907388173 250.515579402334 303.638516587721  
259.767151797583  
LOC728440 139.733149319736 137.877756077011 142.916274989816  
141.189008902155 144.112401069818 168.634534857593 166.780319723055  
156.75001042701 163.593106951255 183.83720937589 153.171822092714  
164.74234322574  
LOC728441 142.02169810999 137.674025476238 168.018785514306  
155.615655460277 167.100039749329 144.408426565541 141.033068896117  
372.374101464689 152.719997757291 147.83240038699 131.164778405297  
136.846912694371  
LOC728444 143.544671705984 130.390722272955 132.760567403706  
127.833653828539 133.53523683945 147.488635834397 133.419239158866  
120.995697049378 138.994857740356 143.763292219833 137.744318243173  
141.54943189147  
LOC728448 227.32463765717 199.620978536397 201.702688815038  
211.941623411369 139.696266471271 205.282221255986 123.453048609213  
191.665827345888 177.688568435599 130.429076594441 143.579660352652  
188.431244390961  
LOC728449 130.718729445329 132.631819830347 134.208537331186  
129.073750290924 122.466276478613 128.800907223807 123.111192189217  
138.573829193205 125.381865040574 132.829401072883 140.471953101887  
142.658562927154  
LOC728450 132.181365505556 131.360310497851 126.693235227579  
136.77666893627 116.86635524597 129.450089922519 143.722135315998  
125.892022613725 130.240366272285 141.434699050015 133.810472192646  
128.736591902501  
LOC728452 247.643123415644 420.502251256406 499.891000749138  
315.689865927834 175.551853899221 235.822266856967 194.475822533231  
229.660838239474 202.314814594735 191.754626760061 231.670761847089  
195.057830521304  
LOC728453 6091.9840719327 6601.004284244 6339.16392696068  
5748.57645553386 9044.54885739666 10417.5218406801 14499.7866852901  
10170.8669218992 7245.25086222102 9403.76665152182 7354.94071109106  
11150.5512437377  
LOC728454 155.468848105615 136.398521726896 158.58863949084  
159.762733951454 157.13859713415 146.063554646851 143.129945647647  
168.03501792841 146.772611341214 682.315322994357 150.922279808832  
156.003233745771  
LOC728457 567.465201338735 487.358720934063 793.071192619058  
562.711562649704 365.441289363381 549.460612060753 911.340266389071  
709.303384219887 704.152296359463 1084.10984365393 1285.54492194393  
1080.02576143033  
LOC728460 144.89403947454 155.007516124803 183.719279448844  
174.515815532892 179.321622114583 155.737364431382 160.364644321965  
154.373739162815 145.979293623167 163.074919710259 168.269075560636  
143.381277901138  
LOC728463 135.151438845363 124.940836122365 121.519309043513  
124.740700441589 126.511314417328 126.686404772601 121.886886059038  
129.16337177104 122.97487285065 133.978783899572 133.499361793303  
119.125002207396  
LOC728465 140.955772094739 136.929570710155 143.340685579645  
132.132474135959 156.825157746082 146.649944669876 165.200303470106

146.629335531037 170.111653122193 160.454243375479 153.162313098346  
158.030237507443  
LOC728467 195.438353051306 179.177884962513 168.582192754233  
203.475080163804 168.45157400976 198.226525986857 184.294172429054  
179.091917512822 186.904126552483 178.083311435916 251.472556189141  
198.568180234676  
LOC728468 157.623092996114 150.423586547273 152.377056383547  
130.497405221273 148.609721587632 136.823682763893 145.780927034516  
141.437891956239 143.306843285336 138.358404420064 157.81327663167  
144.529801006864  
LOC728470 164.164463389212 176.340265963032 143.783078837501  
135.616911926164 152.042744996136 162.050520530297 133.131953362455  
144.690880401712 158.263657373911 151.895142552067 170.676752248138  
141.539503634005  
LOC728473 331.62124160152 346.476121089685 375.316610221279  
406.369889501135 136.879615833565 132.219652920061 135.503338987971  
142.472724215037 160.604195264968 150.48744233923 147.81143020317  
146.233195164295  
LOC728475 143.971152352313 140.769815875109 133.138744413911  
141.50968031684 155.031272695335 147.230113868203 135.049657594221  
139.057572927874 157.14512525321 142.421913396368 146.153528461264  
148.842322753916  
LOC728476 147.607202745865 135.231458421096 137.729777643977  
144.059368898969 198.226525986857 157.337193457189 167.536828038178  
156.923675862035 164.935120145905 177.438968923426 159.470818285679  
164.82904652634  
LOC728477 148.812015298003 159.749576166342 164.373697447004  
149.042693712098 146.381147992719 158.788210937339 153.062710222618  
136.584199831088 145.453460204097 146.204122329465 145.440471538068  
158.213784310645  
LOC728481 11150.5512437377 10280.5093368677 10533.5868398404  
7948.88765120294 16179.0939169232 10024.4662743012 19356.3155476146  
17830.1333276624 16179.0939169232 10608.0671430066 25002.6870134094  
13944.7649147227  
LOC728484 959.126054626181 897.0125616892 851.633522004342  
652.654673756838 1593.49895307361 749.515603904233 2311.05587511258  
1961.26255930192 1020.19774509086 936.957730361063 1961.26255930192  
1235.02626456572  
LOC728485 279.026742408164 273.75192868583 261.171723011396  
226.35854874278 165.692508737757 294.997671630798 213.634295832535  
215.744552410805 226.221973502783 191.616483214712 221.297127685676  
231.257543784864  
LOC728492 809.362464219294 702.460234202652 1131.22418479945  
682.538709448692 1110.43791444289 1151.30600388403 1229.47460924638  
820.652972219658 1261.61611961272 1262.96801072965 1586.00600118477  
2456.36776585765  
LOC728493 115.992487254175 129.013667813486 122.506058130261  
131.804952187685 124.766436060041 115.902030217102 127.844624093148  
117.30724482798 136.202953030465 126.253319664664 122.284431229917  
114.567609871292  
LOC728494 132.433109154079 133.069347559741 133.726312424941  
118.533346268154 142.432995657729 130.029719192412 119.548432046443  
124.336297973344 131.056011738962 126.423739360894 115.600308687778  
144.038859705973

LOC728498 146.637799077812 135.56878810365 146.495845282846  
148.700297908071 138.144085131733 135.971507823633 150.286277647569  
137.853137973756 135.317796804151 134.9404536551 141.966490100288  
138.010385979692  
LOC728499 484.363052437459 541.642309122976 1128.60314361459  
300.709410518382 243.95334982553 923.130629121442 459.854279050269  
815.045148478814 634.906566690042 629.197022551069 652.201948082657  
853.535700321202  
LOC728500 135.118955626451 145.256660345252 145.628239642187  
123.433466678767 128.341887728118 131.709341771599 122.84779238795  
148.31140879454 132.960708384399 124.989313193779 143.007237184254  
135.499195435803  
LOC728503 139.841822983821 127.104868352186 132.475414208533  
130.049854901235 135.350606894914 132.820927638053 135.120878931851  
135.774569629738 129.973380117841 134.289354713568 140.101511236793  
145.633647856775  
LOC728504 161.748547772524 143.277771142501 158.716575777014  
156.801189586018 139.21825391822 149.702048490465 155.456077670662  
152.112177721714 156.169405925094 156.407166112409 141.73248778957  
150.707113487334  
LOC728505 160.446191353364 156.083002868004 166.503112149416  
175.236826554583 160.140509175287 174.657352858049 211.941623411369  
139.790098895306 179.230909178397 216.381643581705 155.851264092344  
191.616483214712  
LOC728509 137.894056887729 131.310537960214 122.120307446003  
143.750656408155 127.466779212194 130.639974588163 122.572634128442  
116.0999658586 129.735862775199 118.544870925791 119.135701239571  
135.93352186143  
LOC728510 120.329105003959 128.699441450952 140.234485088845  
113.031636180748 129.493805009651 126.151017944639 131.324822348301  
124.079109459437 123.318763391117 114.556542069712 126.180714796187  
144.741063866547  
LOC728516 157.076284096905 141.189008902155 149.863063160222  
135.723554819107 161.481227197715 171.722839172783 147.568851471771  
160.752581271996 148.960077949157 145.352802493486 138.916830356763  
146.455182336561  
LOC728517 17324.7697569598 16397.4527321924 17067.0086403248  
14651.3379687477 23656.0669757593 17568.5229948989 27284.7333124039  
29162.1093037754 23053.5660790052 17658.0552091534 14866.8264879369  
20647.6275450554  
LOC728518 180.240305360865 209.840035045167 172.698181201849  
184.758754197435 173.147311624838 176.128369308989 172.276968413879  
156.597497458992 152.210867113591 161.010206405916 189.235998474945  
238.344676327918  
LOC728519 183.033044475752 153.853856339585 201.637540930213  
143.100436913184 139.432567336814 145.70726782469 144.829773937102  
147.983937675946 162.945789604505 149.026243159195 162.664254855131  
173.829219279719  
LOC728522 136.990610254852 119.903068083658 125.525241361472  
128.06233429201 133.552141086987 130.844272373448 122.120307446003  
138.218392984717 125.962178569021 125.942455135541 135.59027155522  
130.285187693932  
LOC728528 113.938636269013 119.257387524365 127.733860645979  
120.860075930581 126.533083459283 127.654130155446 129.228874611916

114.364953312191 127.745801270205 123.891115326934 116.831725094917  
121.760488406107  
LOC728530 143.548858367002 129.025000034273 146.692827583525  
138.206065640158 130.166741978483 135.639558187703 141.630183595813  
127.779401352802 137.736771579507 137.578516107502 154.512619892977  
156.053517438255  
LOC728531 138.202872275661 132.486311240725 130.557209560361  
134.401733295755 129.95138839192 137.404525565336 134.966883985611  
139.573371281569 134.30624644595 135.689889081912 132.416618775337  
133.665206343648  
LOC728532 738.37559871635 718.449150898903 1027.48490028905  
734.97763567765 510.434895296759 1080.95725397659 568.935113269368  
664.19083888799 637.457322054293 1089.58643309156 894.734451279225  
786.62709337246  
LOC728533 1441.29676998365 1482.15461429206 1322.14570224119  
1464.04124596264 1044.00217726486 1263.64725236472 1442.11349373764  
1324.56751399862 1859.88000417483 1147.33034082693 1916.46158204806  
1496.0924333403  
LOC728534 127.650229552084 136.465185148237 145.630497368137  
141.336866031027 131.880438747579 135.829273398594 155.53992663898  
153.172784421446 134.175287993769 146.639556437847 143.88649412841  
142.888281750232  
LOC728537 177.393812005949 175.562070915794 174.357336296554  
157.003367685421 151.727603285205 188.836327151669 158.915858403237  
165.122737166322 170.866433766203 155.938283930571 152.274957846518  
173.468958175014  
LOC728539 131.563719927798 132.762755202326 132.839431368337  
129.608034744581 130.894384800009 131.298129667973 128.05898686833  
122.527517633626 130.641217515008 121.448671447499 124.079109459437  
123.494412056415  
LOC728543 123.354093930164 142.527422462824 124.657687121111  
136.987403767185 128.064189008549 129.677874035481 134.91697121091  
133.272540012108 142.583098605144 129.976540483758 136.05920604064  
126.308622415913  
LOC728544 136.852403978525 142.843882404269 136.86685787001  
136.962442874268 122.888626394154 130.63390061855 121.519309043513  
131.913786256215 127.806138997958 133.353762794271 135.227424713702  
140.368070973566  
LOC728553 10506.1271023809 11017.1478502767 9715.20127757161  
10170.8669218992 14651.3379687477 10790.3738999898 14454.6736124756  
11971.1664283024 10170.8669218992 11509.9289491201 12749.804597566  
12877.2152068971  
LOC728554 364.840751972169 380.243136469602 407.760503937821  
311.966971734249 495.241179224412 567.715714233608 1492.15137418791  
767.662367310672 435.69811966429 1167.26555140613 503.59466398882  
751.568940762011  
LOC728556 293.528601172819 272.314332734711 349.382889326613  
266.057472924341 406.028724866233 885.713964813911 472.405334652317  
792.634423781309 439.492285515997 638.393099392849 283.760131847707  
518.760142491104  
LOC728557 128.488598467312 108.483284007316 127.365142833355  
125.170874841845 179.753400474369 145.944809232038 125.101995710829  
134.853253781256 136.205702793983 116.844361858869 118.75237770613  
140.397184813186



LOC728558 135.817028661429 138.436029489092 146.448568700393  
140.581943144813 125.345611085082 141.25089277145 152.204730003016  
149.400244837133 148.614214326995 135.117970717813 145.900272803108  
151.178586065066  
LOC728564 425.471195039676 421.583441056026 452.517134370928  
362.019824026781 708.779490017407 627.803400871547 629.381791489871  
910.087388930485 662.58366387795 611.286068355939 328.269845211173  
578.650614747598  
LOC728565 492.780880796036 349.722963659175 852.926365088632  
285.46340356157 189.37832342197 560.757496975779 362.195903246495  
464.323065038265 423.256021602613 488.57622466019 470.746477818201  
562.232754247201  
LOC728566 147.07272598888 146.00443946108 139.862403685817  
154.821960325589 132.581499870494 158.064409011013 151.592787806315  
148.916981164664 151.221783750989 125.345611085082 152.382558543399  
146.580787463084  
LOC728572 178.966169998125 197.427788552936 168.111124820968  
176.128369308989 201.507971833902 169.598493862848 233.464856303761  
184.167124143272 176.901042102323 220.710324965453 253.867947800583  
179.177884962513  
LOC728573 138.645156942894 138.789908033669 125.377377116057  
141.313482534472 116.71331256222 139.163958829511 139.505864135281  
130.224324464992 132.631819830347 123.814841047589 136.593346330215  
120.711150688559  
LOC728576 10202.2226913537 10741.3064142855 10790.3738999898  
9293.35991367953 19496.8914296296 10765.0336035748 16230.8346205808  
11112.4298269818 14454.6736124756 15704.7314387339 14699.3902364192  
14300.8562978211  
LOC728586 131.539170756533 136.74788009263 139.532508621268  
128.152956417755 123.29908883119 133.948997488604 133.345885001759  
132.913891550054 122.089332300031 129.330592465123 130.37544152572  
128.354163132392  
LOC728588 148.173215617922 140.868946922293 139.966813133326  
131.054302682707 147.670425834523 150.775805918537 144.700955682048  
134.253399256648 166.595529296463 148.507598818039 152.377056383547  
148.132450240784  
LOC728590 10741.3064142855 11326.5935775813 9403.76665152182  
9403.76665152182 10135.7800994367 8053.22070239424 13526.3170858629  
12221.7819812315 8121.54750071211 9378.87287299048 13645.150201952  
11392.4189359453  
LOC728591 154.298262671775 149.520911664673 153.76202838917  
171.051948060796 171.759102794108 148.818562911616 148.056333887679  
149.628421263062 150.104178261667 153.875760529011 162.173506492562  
153.215991985634  
LOC728592 137.356539213081 139.258468432364 133.640832782576  
132.906201428703 136.047032834863 121.188761627967 139.140647941752  
145.455411983653 137.208796872026 140.992801405088 129.865581506307  
134.682319733908  
LOC728597 134.260779370821 120.665520347481 126.553693803748  
118.718048764985 128.738746025289 131.395959781477 122.843792000493  
129.336402686549 132.639070127232 125.727521491768 126.343040504566  
126.176505541577  
LOC728599 126.676875319815 125.732389000341 139.734784859495  
138.877999126533 135.039901725369 124.058332474379 137.819642907456

139.720343780228 138.905709709063 132.481710681317 137.161065320948  
131.626173473789  
LOC728601 130.609596267168 143.098246338022 138.859261763075  
137.949215501559 132.186120302011 136.133538781918 123.185652476312  
136.130027137459 138.466136108202 144.470642732973 100.637271902591  
128.140333650496  
LOC728602 242.695286989672 207.815226999953 208.72873686638  
217.491746961471 333.349203784021 209.33028918341 249.953902454701  
200.342786450248 212.473610495213 228.270158363878 326.325210657599  
220.9384439772  
LOC728606 133.108094159933 140.895053453126 139.42531690926  
145.338156577438 117.361778263056 133.613988293895 127.83654093961  
126.168223112165 140.541925660368 142.403121638265 150.259400712685  
153.600132368924  
LOC728607 171.39347085745 157.70581824787 178.445384902129  
161.724388995749 160.592404712197 144.147223066335 166.635366968851  
160.604195264968 167.003917876371 172.641322197031 152.680068580858  
152.972779110762  
LOC728608 170.283532007581 184.437810305792 169.488652117125  
203.149001616967 141.522221963957 189.044966519228 144.311620064675  
149.651553512698 183.879114762264 149.405118010893 161.992141305029  
162.364266549463  
LOC728611 133.355353808577 128.978197156274 133.860077101582  
125.637138636558 128.824243581806 125.484453841158 125.739946257697  
123.582509531804 127.333963230749 115.795989631016 127.610304071204  
114.624259793353  
LOC728612 131.68571824487 121.628827418997 133.482237631013  
130.069789939568 144.056644468886 154.343424387068 141.691135410429  
147.684875777977 142.679201870274 151.377932495104 146.484364264513  
134.955823960889  
LOC728613 134.810212106122 135.915252483475 154.140863428961  
137.076766238637 122.651702760414 134.190511945944 145.886420087036  
136.101501973431 118.375739674144 128.11006485185 140.306808081269  
137.033134002983  
LOC728615 124.744684973208 130.088408942008 131.456697863268  
136.959011188915 130.637567221512 129.083756379376 124.998601194756  
131.583841535781 125.162662242842 127.895989232696 135.762603711262  
138.275371291639  
LOC728620 11709.9785619141 11112.4298269818 11971.1664283024  
12109.3049135906 2028.67873136046 11235.4970815873 5080.63091497522  
8322.20177173035 7681.48027081818 5506.81944079182 6720.10473881011  
5965.21815409254  
LOC728621 111.922007318017 109.098105822556 112.081127853476  
129.058085094891 112.884916986215 115.890431424899 124.062863592295  
111.349642316073 115.43068422162 118.677203713024 141.717466442384  
113.301733735994  
LOC728622 119.395894479869 134.233014993992 123.814841047589  
123.24533179875 128.944295118239 117.803508098322 132.282125790062  
126.702705908175 124.59097574481 120.538535752185 131.400031203603  
119.693318959661  
LOC728624 131.378893655618 134.163388748526 142.581441480371  
137.835936352525 144.445496145045 138.325950428197 148.294870328642  
143.452992974333 144.562038493733 130.980885733161 136.837430157894  
164.413893089607

LOC728626 151.007812189859 137.438251288967 154.312374306932  
142.882391486465 128.129780978486 149.207481665265 130.720097323382  
147.903030308715 142.299535614113 143.658600740177 132.99989565368  
148.166340306996  
LOC728627 149.754842928462 136.891612156271 137.376602654929  
136.171728950893 128.104157345891 155.101850847148 145.034179171835  
124.918089223417 136.532168520039 138.592350416584 149.125425566378  
142.744045151046  
LOC728635 342.096409626768 386.544913399837 401.542072222692  
277.101000223971 809.362464219294 257.880331012233 349.910535555712  
244.18714778846 333.592915218163 512.184962338131 541.896444696137  
361.160881334174  
LOC728636 142.399253818882 135.571239294086 144.421572284568  
130.016401638936 130.659631155616 130.191876914166 130.95176570982  
128.917399281607 130.031303483631 122.837807905774 138.928287624746  
134.237133546276  
LOC728637 146.644317248414 141.244589488591 148.879605388902  
142.392860474555 150.931114848235 156.880120259304 148.907136936731  
134.896349513392 159.781313090489 140.38936578649 154.007244208673  
138.110317032494  
LOC728640 636.382696018633 528.014268424539 485.026081242201  
469.794672718173 326.640168906375 478.040234382488 443.125195744202  
461.822629852953 372.374101464689 364.527677995774 365.864755316163  
492.637241687561  
LOC728643 1062.749459378 925.656701707763 1386.56788941677  
682.075583857856 705.020444579319 2000.47497636965 2767.77385345718  
3205.74787769881 1858.12855367119 1667.86825735893 1920.16520804856  
2758.01526530661  
LOC728648 154.828782972852 140.960907353937 137.271702725819  
118.139487760542 128.755697083014 128.131324375789 156.420501464224  
151.312853764675 134.445893291422 154.270034951209 149.824791474186  
154.881797585583  
LOC728649 139.383528389668 149.213990424575 163.668476670167  
140.54700821058 145.108281984556 155.773639092819 153.295838391099  
136.128092230238 147.488635834397 145.804420322848 145.039617860588  
143.050004021764  
LOC728650 222.086635504858 212.643559782754 266.395569467956  
238.270501389189 259.826625866106 211.626970008102 171.06385200256  
165.938009275308 178.966169998125 189.49408026215 172.073751088968  
224.396933003452  
LOC728653 307.665281863258 322.263925912805 261.500728878974  
246.237243726748 239.20206002 353.621264641814 228.212753830905  
217.684410907748 225.362253409428 204.695311233073 275.013838208239  
220.330477277988  
LOC728654 142.573662441786 147.920946479942 131.267177634269  
152.662446724781 152.628220216104 139.041005010106 144.796089646941  
141.497125111619 146.522066289381 159.758196845781 146.979988781462  
141.340452225686  
LOC728656 127.924195488323 156.110073009771 156.239937979051  
133.775716376056 135.87026484074 134.266373965186 133.63022526522  
142.448384713937 138.411148122407 128.101371225192 141.808850055572  
132.883408554592  
LOC728657 154.812587513407 138.688881393504 146.185931276053  
137.237089899964 136.878656455606 133.590552542806 146.569958732206

136.93893152919 123.02167644694 129.980354138975 137.416133786828  
134.331420680628  
LOC728658 18760.3823237058 19189.4835303597 21956.7541751958  
16533.5738137081 21225.306360484 23878.0022344804 24731.0629964468  
26522.0142925211 26906.6343314539 22182.4877079778 17975.1602090863  
27501.6698286039  
LOC728660 174.92026613834 172.446482096058 183.168629351124  
179.61374889626 166.396160626179 166.415922313464 207.864808684047  
156.262515148436 157.089650890944 183.3378528327 154.487546030444  
180.710636205653  
LOC728661 1751.22580157752 1493.90578573732 1995.6000523628  
1658.78888936164 1345.8970795036 1589.70261092241 2068.04582900231  
1965.13870083236 2599.421026133 619.635734567779 2246.89876694944  
1569.13457493554  
LOC728664 125.707228291312 155.63671938031 156.543267949167  
146.506263412584 140.928627507036 134.464053009101 130.41429837092  
139.147327302581 133.541333581593 150.578023008958 149.601145171769  
161.434331154045  
LOC728666 358.654569870431 369.592501881153 402.026356201632  
438.431160975498 605.21685916883 552.298965378403 693.516351173476  
675.083275037052 530.122419830951 1435.4236709581 341.501397478593  
883.140984728615  
LOC728667 121.04331582508 137.954283575143 133.208065430037  
125.707228291312 136.05434446747 155.227218488935 147.15999706579  
156.916784141484 176.312626750427 145.89593390936 167.330860677012  
154.87316176388  
LOC728670 174.767697866801 148.215172022129 186.611870261871  
166.157713072213 165.249658565871 169.201608999937 161.501062527272  
160.338146803754 143.157807632147 152.241060990474 169.631386764054  
165.186696781985  
LOC728671 119.830261862805 160.407690552027 133.789738760547  
143.943676099522 109.176852761745 133.387065801837 118.167740643871  
100.477911152746 134.89415027205 127.771225410866 111.065596151792  
127.928195199945  
LOC728672 19889.8233042542 16818.1954169657 18665.5217411582  
13360.9483836861 5589.21471380445 10250.645112753 17830.1333276624  
8768.32269645116 8072.83367137971 15463.4998494462 27501.6698286039  
16397.4527321924  
LOC728673 136.118702626862 133.541333581593 132.233396667074  
124.899019467557 140.199334790854 156.47237266917 136.865340099645  
136.461182044855 140.334331111538 135.536810684197 148.160350542849  
147.191114491117  
LOC728675 126.912226185444 117.815045605383 120.36402353147  
129.340996658802 138.976386995124 130.677737553727 129.386300987308  
124.825103464238 131.711969450237 136.047032834863 120.880547922392  
119.651470884046  
LOC728677 116.082361389405 119.551741097918 150.072005848234  
131.630132952441 125.889860278265 129.145457341484 120.809659457873  
119.663182347566 125.752962155179 130.886164807755 128.255141263975  
126.301178976594  
LOC728678 192.532222258033 190.993590849624 231.890885094917  
171.455216889348 149.348231806916 211.941623411369 245.317436234586  
293.018282386003 228.284236550547 197.938447651153 263.74335003375  
209.623583937962

LOC728683 136.418105816557 132.788102310611 137.82918941689  
131.988591391373 149.752188104803 132.84268776659 130.726640485925  
134.066948803697 137.25054616038 133.117701703454 131.570358580547  
140.864196804152  
LOC728686 162.536009333787 143.199780767096 148.544887355857  
146.023710941284 135.675570204709 152.670691262738 134.038213827843  
133.180554954396 143.727514442914 147.539226876636 137.994334667126  
163.451063547847  
LOC728687 142.715449859191 137.483830932387 134.391386851101  
136.572645314012 140.643378462734 137.799016648135 145.027741086645  
144.55710963567 123.756349408641 137.888195199363 135.503338987971  
123.972321838378  
LOC728689 194.055394488452 194.979795724712 200.360518276784  
223.474531516972 183.464897811105 155.666943703002 203.475080163804  
157.233463720262 169.101676908756 207.674249122047 197.24751449599  
179.163748161358  
LOC728690 117.380281099932 151.518116154483 117.284724854784  
128.087991226561 117.992729826121 114.45792163942 130.541449457342  
119.555954372381 119.278231442871 112.642429076777 138.196640512429  
115.624167024067  
LOC728692 126.153806511702 119.802832736435 142.819669471009  
138.775095929764 129.594440309419 142.436624546651 124.193603137858  
133.426356150823 144.602386056543 137.670655293096 131.786437478446  
130.832462487806  
LOC728693 7167.29945083872 7144.3257417116 6960.46610781696  
7144.3257417116 3921.67860557329 5250.88041666757 6312.36452724398  
4055.40322213638 5058.57872936027 5811.97916044218 6628.17856159198  
7802.25987814138  
LOC728694 125.044092929562 138.274057264688 127.913463809158  
150.384559054133 136.207420489201 128.101371225192 138.722672835109  
131.68571824487 137.045772853855 132.84666796678 150.198869833614  
152.486212022518  
LOC728698 206.303338709554 189.419941381565 236.855293143293  
178.751706380632 491.906642849373 1427.27262061653 965.031655021246  
960.491731797061 806.88003660673 2001.92441724356 980.120729515821  
859.547169028149  
LOC728701 129.777173431404 130.607857562345 123.796657561057  
129.121598974852 130.457981404612 132.295151487914 120.599440204711  
123.330142002791 119.890260409414 130.470034945295 142.577102697682  
121.903115540516  
LOC728707 133.571962238112 128.150801169886 124.042153387391  
130.393631150485 144.433543176593 127.490889148422 132.423043364573  
121.522634801124 137.000868503792 132.684346604809 118.021169080914  
136.998259410887  
LOC728709 166.4983332269 134.73970457131 157.313737338264  
149.08527298577 162.351212914573 170.901599088282 163.267148547147  
149.645548888832 157.717145014769 163.647306551474 135.033601686007  
161.096914295309  
LOC728711 160.964435028806 151.349739492368 146.599636794606  
138.313519292093 149.380733719756 162.022232949254 151.456702092528  
154.150568177135 140.05419835434 144.402160347818 152.906352463546  
131.773304233929  
LOC728715 302.021033686056 227.483999162038 199.681103910705  
186.758038665014 187.365807314802 277.726756691133 195.561296046507

294.115163083721 432.604462607037 195.10410545445 174.187510325385  
212.443407602682  
LOC728716 132.741859397511 135.82038791723 133.841519663164  
133.229571269367 145.700589723224 123.463861015933 131.263641389894  
136.300195727908 124.480385254916 130.962368929833 121.203149121743  
127.949413503055  
LOC728723 145.852430082228 143.611930851914 146.875733210901  
150.948076715456 141.890803125137 163.456245724169 155.124158030085  
135.695576019185 157.631978594005 137.858371717399 107.431455226979  
123.271452939936  
LOC728725 148.424970450231 151.132586978278 132.84666796678  
148.350919010575 139.501279970508 138.950197595669 123.607412609763  
148.340380102097 135.137615432923 143.818379692331 147.110929610347  
135.226240774124  
LOC728728 158.799917136119 159.487615985875 159.932941342403  
145.396723478249 174.389706515542 169.552424961465 176.128369308989  
174.161146689117 168.310680227156 188.231614694297 160.459100056689  
196.759802659759  
LOC728729 130.074786642758 126.77232818113 125.741289047045  
137.801899270172 139.633941983246 157.986640251147 148.556161762978  
149.545278163222 134.944488136297 218.2454853526 138.338280468272  
167.782882015229  
LOC728732 465.41233536979 417.024088698182 540.797164107185  
348.111872425949 378.151202933526 833.430847243676 1113.59310757948  
1212.55338792557 735.165830487162 700.353187874339 916.026216386031  
1232.66885974069  
LOC728734 530.267835989435 443.343806055858 565.164961255054  
463.187551361986 238.310077556167 239.148333781084 273.959220003188  
322.64731764456 220.772387104223 223.722742062251 276.184421402511  
245.426639190893  
LOC728735 118.173752075833 134.61114877396 128.129780978486  
124.548598801497 124.879018642505 129.666957539624 120.65473121078  
138.402890124039 135.717491814078 138.275371291639 137.674025476238  
130.975606477621  
LOC728737 128.486896700405 134.637520371454 130.288547755599  
119.669441891401 136.184427467391 117.207266754941 123.513588004371  
133.074027423549 133.604705630582 128.213678179359 132.987389721592  
130.272086123019  
LOC728739 312.339824919124 272.927830312746 368.466518140043  
290.135914275115 375.958347293549 379.911829623463 420.017044147123  
390.501797367707 411.039234404499 355.519647649551 566.417354841707  
569.236322997211  
LOC728741 163.086539217826 127.135199316758 164.160608039304  
144.743281367797 166.099940078284 176.830879422227 153.092864798642  
172.329225247019 180.994249258457 152.801801823442 188.623897093065  
164.96631670799  
LOC728743 174.09267813338 186.496160803789 190.471158323247  
253.538171006307 150.99622088333 159.508223180752 140.728126380228  
158.299765118221 164.615113709166 152.577131215027 163.51024840263  
163.876218743322  
LOC728744 139.016274575854 133.469323412904 130.721987260546  
141.996233801459 140.664303738113 128.525769531728 145.117574928189  
121.400652285172 133.661553334004 131.239986488033 141.600833670693  
143.045416067967

LOC728747 145.09909498449 150.960096893517 147.376482709004  
156.597497458992 135.028746262383 137.793462381778 152.97753810644  
143.263333116046 124.22833964472 145.754504160436 122.659174808512  
129.997181739652

LOC728748 167.003917876371 164.327140372968 182.919385608842  
170.05799929575 161.740466814881 305.854543429221 227.806050911154  
215.47323777134 174.840923772532 217.628802427037 186.794165469219  
230.367251714289

LOC728752 148.168587884369 132.845116298605 126.195222228248  
129.374418059091 115.457121859064 127.811923445503 134.078506829054  
133.12904935533 144.235298492095 124.582577275358 132.953762692926  
116.092815232176

LOC728755 566.543765584009 557.513306351027 572.407760064901  
547.516635695872 466.392151902286 1495.04587558545 736.140249105836  
828.276436883306 547.367381020623 845.369108604819 734.469481390593  
1043.14253624883

LOC728758 186.778334749551 185.560737176115 192.168634727505  
184.682478530334 151.792921211607 280.204167582951 205.162633740798  
176.761123480566 205.65398844108 155.773639092819 174.737828693216  
171.722839172783

LOC728760 149.157934946623 135.980886879513 139.197364191101  
148.149216812602 163.22480684222 149.055493714692 141.567425892004  
141.950778601653 133.511698282195 160.247370279802 145.104173410801  
146.064523228661

LOC728763 117.060696904303 125.353389826276 120.481712066062  
127.509583634884 125.058165131184 128.840466579373 130.056727701826  
122.834017529045 135.892248893607 124.76274408368 118.173752075833  
121.815538475678

LOC728764 122.786030993629 149.874424976813 137.331864485838  
131.412979573687 121.991692204056 133.52971984184 125.765399556488  
134.731687541347 133.686850910378 132.878638378328 140.997594159186  
139.236217474885

LOC728765 135.654614839107 149.049931380459 140.688570032068  
144.782706468281 147.462651811169 147.299872426498 149.836491640473  
142.697827839203 171.595724119779 145.85414203374 160.828718858381  
124.321503368855

LOC728767 130.786835186349 123.926293128246 135.417519318028  
111.127245394321 123.868848032411 131.868557613642 136.459509901229  
120.790536146461 132.195666100325 121.952255635669 125.9888344762  
123.782746527199

LOC728772 176.456539071735 184.591789011195 170.602603155092  
193.974325897472 164.970438494223 157.108043150259 158.213784310645  
169.705236302448 165.480489678822 174.035835206078 183.314276033531  
157.560117350562

LOC728773 137.872742675806 121.543207264598 132.94603323912  
126.204593450804 125.08580835258 129.568951363607 124.757229519631  
125.220416203903 129.69588182322 129.920586100555 126.127630885864  
128.257292171015

LOC728774 163.697117248984 140.197487078987 154.849264978968  
146.716053772448 178.734634888773 159.640027194076 194.063827325017  
160.136209944279 160.315029612814 187.145134088286 189.662974464847  
169.067064352955

LOC728779 500.246996975 480.22496056277 497.411169898778  
400.621427274425 258.145539382199 720.214044399108 321.910803473854

397.737702926328 391.500696444149 260.278595572575 450.851711160136  
438.611973005212  
LOC728780 138.56436658053 147.821639002833 145.219057535246  
151.484420979498 146.932655562613 139.462804363695 148.493435517221  
144.974813243462 136.572645314012 150.155154998981 146.508628678304  
148.564655847496  
LOC728782 7873.0525548049 7902.9189607838 8514.94395408164  
8030.19731415448 4373.91897463938 6312.36452724398 7699.37963536892  
4579.62296570302 5992.92384160188 7190.89891723932 7573.69742026367  
9852.51412359574  
LOC728783 156.830156083795 139.163958829511 124.148194572004  
162.586012723045 138.123754096875 150.319052894567 144.551233687082  
136.482609639417 128.702882993588 124.446264376282 141.760529549196  
140.602170750673  
LOC728787 152.364417528975 160.870390779084 159.909121784808  
198.631354372924 195.831574717135 168.418529261977 156.825157746082  
184.306452616482 168.702991603656 200.045606111354 201.269380130546  
157.038121210505  
LOC728789 164.268280525424 157.963634535239 171.909358721737  
155.747694056319 152.864765895508 156.110073009771 164.562302265155  
162.846914172627 157.560117350562 157.595468761042 152.550031868259  
151.96843908074  
LOC728790 132.367155914392 135.889764019762 133.52971984184  
134.618121709059 144.082452235267 128.655549652719 157.765771942689  
134.768694020981 136.858037332222 133.524698103972 155.317754378283  
124.768399055809  
LOC728791 410.138738410101 441.112782197591 374.406855727422  
368.825190022937 350.392951395182 414.114051645565 607.499206410372  
416.392874553797 265.992741398183 444.826775824095 705.987531074737  
335.698400607132  
LOC728792 131.038758046782 123.323528039848 143.442361602626  
128.714459781294 141.292421722594 141.420747583126 129.953801496113  
140.66266106824 130.454496708632 131.393633337276 124.828626063272  
128.009286101341  
LOC728796 112.841406363391 113.756115251188 131.477589792769  
121.350491314441 113.262357892613 122.796362813922 123.683553177379  
131.568898109933 121.322817570375 107.260023460914 105.521320791331  
123.13812550459  
LOC728799 137.383211680459 150.775805918537 146.867740388881  
140.860339862967 130.272086123019 178.142393629606 145.957934576055  
166.515199732076 157.77047742735 136.151754558226 138.685330935707  
151.32179802686  
LOC728800 123.491930765117 137.248465324584 132.86711707789  
124.952026709219 110.17590675298 125.136745288071 126.972399784537  
122.996616773523 122.412141495264 125.160161268474 124.791221329502  
129.728266017061  
LOC728802 137.593577427321 133.082433951922 130.467450968785  
133.277326912499 128.477342430713 130.784802403934 133.138744413911  
138.775095929764 130.35985690876 142.837688062688 154.47187360425  
136.978738825445  
LOC728804 136.450062043587 127.918847837351 127.339018771488  
134.717258604899 149.661929885679 136.630678899513 125.114303270024  
130.941645638407 131.188208693139 132.709845352383 137.7724100594  
140.271557921345



LOC728806 172.28937151007 157.13859713415 182.263724979519  
127.374600506681 128.309602266886 135.356010814496 125.982423431253  
164.811120992602 160.882229345156 134.08270035062 152.942824158634  
140.840895590527  
LOC728807 152.11446058397 133.209211811498 120.560056224145  
151.674143983846 143.539741029895 134.401733295755 134.601565799073  
144.139062513587 149.495077381649 142.185903088074 127.683344133492  
135.766466392056  
LOC728809 18146.8167991873 18421.818380318 17009.4268910772  
15532.9759169142 2698.5455305009 19661.6741558107 8096.28093399619  
16742.6286866851 15297.9020958577 8182.20106181946 13479.8546809758  
11509.9289491201  
LOC728811 144.842687993057 159.257221624668 156.572774198042  
155.810034593382 282.652193666078 250.376178742476 289.297370738382  
311.269750643358 551.350758868377 157.623092996114 211.995890899864  
387.403502892897  
LOC728813 132.541420804792 131.093917654245 131.458411820485  
149.813838004575 137.348951314875 156.551925771312 135.036576196425  
124.474221706022 121.526724715417 136.749771286979 105.62620788923  
139.999298193212  
LOC728816 127.7962242731 130.179742057015 122.900675062181  
139.754028208983 126.450300907283 123.277867938275 123.748788684337  
127.753065449769 131.094674590174 128.812729239283 127.736712231221  
131.724061631389  
LOC728819 152.222732770706 134.337249560706 156.678686363755  
152.709021529522 156.990325995053 168.570133927038 144.243598691782  
167.796474464069 142.383723965616 142.090009728666 140.497181450706  
148.857805961575  
LOC728820 1521.61996270758 1387.90327883679 1611.58245311122  
1162.09529660662 4095.76073123843 2031.01186679713 4800.99572384569  
1681.54485582868 2116.39371296122 4410.68280125001 4979.31150268741  
2135.04382065446  
LOC728823 1955.96772733047 2091.73580292332 1298.60552708737  
1347.10650016064 1632.07671492041 1360.85309203233 1089.58643309156  
2288.63508719706 1944.15673951528 1137.42879398351 4353.66854914351  
1047.2693539616  
LOC728825 198.631354372924 191.725728813959 235.133284525241  
176.47556448977 182.384190694142 229.933577323411 247.845708587624  
218.794112567823 235.261278607182 230.469548500304 193.892810132985  
291.020789939476  
LOC728830 147.015427944761 168.302168350095 147.322622473251  
155.280897870265 133.66893163718 143.980608339892 145.00699763203  
126.319103548711 146.228345997866 154.248226423862 163.81485578613  
150.058160923921  
LOC728831 141.026045918091 130.694506122253 128.848008246639  
123.341568893224 133.292854943218 121.267153348313 138.546549217819  
117.517649866653 129.701347789845 120.696557306298 135.717491814078  
138.044751228397  
LOC728832 141.37694311902 140.864196804152 137.28323311107  
161.94312376726 127.781732819297 148.697019570015 153.59485367224  
140.49145570631 138.186616955926 147.059096208832 140.672863685822  
139.621016978072  
LOC728835 146.779054605199 140.815807483203 144.0534341937  
145.208597795717 176.802886129341 407.518324776453 153.891667472876

176.397715825653 320.597495751519 419.902534806131 169.246302492166  
245.978723809154  
LOC728836 131.029333093048 128.790166506932 154.146962684738  
124.857461801227 113.292688210897 127.404415477384 151.301484852387  
149.228977421003 149.786445079456 139.672652347877 126.972399784537  
130.987023228883  
LOC728843 325.252108402192 325.642275889649 381.740838644647  
202.99342484328 302.362619893594 349.485727214325 533.784151495549  
317.600728351694 262.452869676209 465.54817048856 925.205399154409  
303.555333002419  
LOC728844 167.456481678813 172.376544221034 198.226525986857  
150.218643705925 137.725329029129 184.832531598928 160.085325256991  
157.207544072126 189.160454951382 163.22059466037 188.7348696188  
220.92105843037  
LOC728846 130.285187693932 141.964796033176 126.763282018991  
134.05596537871 137.378528742953 134.512204051277 139.329693510525  
133.836390935612 152.721146962124 136.147810636915 140.330400168187  
142.64421300687  
LOC728847 115.343251487944 132.70643154246 130.455560026617  
142.928920246687 121.905741525277 117.089207321783 116.294180301039  
117.662611650515 128.790166506932 125.800508653231 119.184780023269  
110.419222236698  
LOC728849 119.486895914055 120.891023626809 127.305306470493  
134.506216147934 120.046892432373 124.672483602517 120.748910864064  
130.272086123019 114.888157310977 121.830137285032 127.150222504237  
142.329137800558  
LOC728850 122.699993989189 134.494167613686 129.754376995879  
130.09958025354 129.524056217383 141.256915527472 142.243866937888  
134.407776033032 124.791221329502 143.056098955473 105.375878824562  
134.534815676852  
LOC728853 148.118705147238 152.199095472082 146.370084152094  
167.73288535728 144.979749941424 144.396774242135 138.132390735567  
140.569391362701 143.262288751967 152.077204721895 161.463042036376  
142.167918879613  
LOC728855 376.374248850987 382.630113452429 457.292146759215  
416.861099188252 206.77605957523 176.27969404442 244.627091189503  
196.615914367563 274.179232297038 385.379119927642 195.595275594235  
290.037325939883  
LOC728857 150.048431572712 144.246749835693 169.720414035325  
125.010266083832 118.050920130511 130.501010489883 140.374644951491  
130.644937322186 147.43089976575 151.563917522864 121.289159587394  
136.504438803108  
LOC728863 158.224122084011 143.494511683426 156.13331481937  
156.702300398105 139.153897381147 141.645906784244 156.84104238878  
146.023710941284 133.976997391944 134.817665153925 128.888149939072  
142.405569257901  
LOC728866 120.641590368902 127.490889148422 111.389873428517  
126.819413901915 134.821778017915 132.725232102483 117.682034050478  
126.820123970582 136.91078498126 130.339214643083 129.198366503027  
133.292854943218  
LOC728873 4291.1724030909 4448.67183518984 4030.42725798136  
4175.70090899755 6296.24208225227 3501.86788138647 4068.18567686753  
3338.13980198211 6188.04738762584 3391.3005983725 2599.421026133  
5589.21471380445

LOC728875 149.582406567077 143.120621855946 152.429970809069  
144.910863590251 151.026905311756 145.077517845584 153.191840013692  
142.409003426775 147.579672274205 134.299048356762 151.766607453172  
150.445647133244  
LOC728876 158.953705937936 165.122737166322 163.20714296121  
170.381897441659 164.223990197735 183.633719048831 180.022646625687  
166.382301680189 158.434048174501 146.658048787833 159.282348516052  
166.576768836782  
LOC728877 309.720081933252 316.004332524937 502.170430910893  
309.75140197669 343.571296297462 747.322544683874 536.9324595176  
870.409935772423 555.758485277905 585.933822585718 484.480643763982  
665.106631364961  
LOC728882 137.934850241054 131.887778588005 143.969566798989  
136.311902195562 145.048710455772 135.25612528874 138.426531345939  
138.455086062782 137.680019787902 135.098343717085 145.520832968878  
129.340996658802  
LOC728887 127.630514255051 124.036907709461 140.694993778394  
127.517446456116 138.240874738649 136.142380560596 126.5929421833  
129.625046507677 132.092910274836 144.018198451676 137.938310376106  
139.625635881693  
LOC728888 4353.66854914351 3270.88476148156 4945.87677849967  
4410.68280125001 1312.75601392984 4335.76831372031 2986.6208659209  
4016.35381420598 3463.23822434026 2193.376951552 3430.76532174701  
2877.92845389611  
LOC728889 143.320787131532 133.491384633321 169.028519464989  
139.278366709094 154.564478911791 150.112549201892 128.434301921433  
144.839170491334 154.985781979984 137.240806191881 142.139331321085  
129.362793087439  
LOC728895 179.037397826592 149.121894111871 176.456539071735  
143.416816860089 148.763098715961 195.123919692348 163.319882002763  
197.873787638411 142.541728149687 156.973511952828 160.676606760965  
181.098584949344  
LOC728897 108.061315311823 122.268560536152 126.976353967127  
139.545451634208 126.802963197337 132.047328970556 137.448412532999  
130.454496708632 138.97443063851 128.803632055969 125.315736755156  
123.860747215706  
LOC728900 136.05610450926 125.884565343075 138.828562311512  
150.552186000149 149.457761307441 131.734429913106 146.97203173446  
144.428776560885 138.514356748249 144.095471610836 138.186616955926  
150.267298097687  
LOC728901 157.216793735479 153.658747612827 150.460618402778  
125.724143659093 171.180188911669 150.072005848234 179.177884962513  
148.704917490429 133.736252068443 177.562561297777 164.61921356441  
159.455596750304  
LOC728903 3976.40140405628 3684.05513498098 3843.07094386605  
3309.66193624859 435.48544637769 2913.2685312165 1437.5568316065  
2479.34567973462 1713.93035637146 1417.76295714364 2622.87486749984  
1798.5819962261  
LOC728904 134.998632527009 143.191095552619 141.808122700968  
157.841520434044 149.829363505519 155.575152212736 154.487546030444  
133.724135305758 139.878752507646 131.383113302567 125.517076778344  
152.107025120177  
LOC728905 126.958366599622 136.594736772213 122.165046954625  
128.262195551255 143.373932371335 119.704436785439 135.918590725404

123.671944323239 128.44311762955 128.44311762955 131.861469782134  
142.599815022061  
LOC728908 256.873090834376 305.325519265387 162.173506492562  
310.758803815671 466.777454704543 258.16437138327 289.037033338975  
251.268669431283 246.369521698487 325.493177980483 335.142319387164  
325.859917318516  
LOC728910 152.30599498619 164.701183249762 155.326276840738  
145.06736850005 142.126620107418 158.960488862727 136.246543311291  
130.491742824575 164.072443259668 13976.0448927093 283.701987275608  
151.508738608925  
LOC728912 146.892065987724 136.285410546751 138.861385127242  
144.419657674797 126.526489290128 140.226586111216 141.323417580648  
138.997524526643 138.147658465394 137.545063966957 122.817695619508  
143.763292219833  
LOC728914 129.95138839192 114.441223528256 123.386622160181  
135.956116718089 116.558752619296 128.052753068991 131.623527073985  
139.81502919163 121.360822445187 135.217240511902 115.795989631016  
115.420810993676  
LOC728919 163.718595974283 143.492758492895 149.774162138829  
150.82596027483 179.828494168009 157.089650890944 168.594235675558  
163.362182585182 154.094285855743 147.400734637481 140.782522936146  
168.611652451329  
LOC728924 139.851678406637 148.457872807838 146.857213166531  
123.603972078897 166.036553680319 128.259909378964 151.110467345727  
139.6492947529 146.247825342634 142.963036923104 135.789381967525  
152.476932186797  
LOC728927 152.617507769717 146.819830256127 136.764881711137  
139.914034708144 141.642547489983 152.853860043701 176.410016510249  
152.808771946509 150.109192774079 149.335288055732 172.28937151007  
128.280225530201  
LOC728929 149.684922983176 151.674143983846 133.500750738061  
140.684066288019 138.147658465394 129.357257170508 132.891375982227  
147.272072245929 134.507558495307 147.354535468933 153.104072845043  
142.728311130348  
LOC728931 244.132645171301 248.260998007814 316.364342983155  
254.036619126409 199.378179817518 281.278843600876 226.287196839644  
291.616195651001 229.116153948948 207.368252249039 190.270819689158  
286.541028896473  
LOC728933 126.332299789266 115.502679218125 126.512613967438  
139.737748157901 138.213742418402 122.868393258957 137.999190557332  
117.602986362773 131.568898109933 128.251087452744 111.032156655273  
122.351186755611  
LOC728934 140.48713195192 141.571389983164 143.2438241778  
147.717748449017 141.999730335668 141.86836086844 157.103246263523  
138.22823004719 142.888281750232 161.295030274012 165.906821861  
173.017662861015  
LOC728936 157.11867820027 161.581641777014 186.244764337256  
162.373508183992 148.803188053248 178.684992551017 178.804669910283  
170.145574727175 149.020824600931 176.612866969431 152.44293820056  
177.393812005949  
LOC728937 12368.1423473066 14866.8264879369 11326.5935775813  
11741.7473778842 15532.9759169142 13809.2057928642 9139.73212514992  
18720.0460735814 18501.379301537 9715.20127757161 30573.5859783923  
10533.5868398404

LOC728939 171.338371572269 166.563411635721 159.138344477256  
164.084737224884 181.950658782069 179.220691178402 193.689806171113  
152.409211647994 168.302168350095 191.25724234927 155.91493956251  
149.430396727944  
LOC728940 121.893446546512 133.969782716761 120.74273444647  
124.783306383852 139.042034301544 128.221548195595 135.75568942028  
131.894919149666 121.926377140115 139.864176113337 126.759554774012  
131.930814868433  
LOC728942 185.691922436569 183.056707813352 192.375251343504  
176.547853494057 153.146646647258 181.803275243281 174.296028319781  
173.024402954772 170.910998705968 171.140106467064 163.108825245937  
184.041062308263  
LOC728944 223.89854167651 225.505978789388 220.487665103019  
259.374392296079 221.297127685676 223.184064606222 200.591916768948  
187.50236021149 225.438177833064 205.612579504495 206.303338709554  
352.811351813364  
LOC728945 122.490271802207 133.65688823581 121.968807253639  
137.799764345121 129.871985352583 133.125084506877 165.576758218571  
148.245974323625 132.8310947234 159.393410854649 151.722405598425  
162.997720993338  
LOC728946 140.806935772116 146.268073519544 145.858537779106  
138.020031233095 145.095023408224 140.829927714838 150.321059418799  
146.135269553731 150.856917125736 144.935571704834 135.732616463819  
139.175421159925  
LOC728951 135.971507823633 141.221162787167 139.809114250476  
142.75592155869 142.356747337127 148.076841184769 141.710076413441  
140.474338177948 132.481710681317 145.239119337981 130.827726862159  
136.904851056919  
LOC728953 322.889296658955 318.561557474749 264.628012152168  
316.663128947813 267.285998701386 252.432175363972 290.241064926886  
279.598585549004 236.508498739509 235.350819745387 419.126814511305  
302.945860276233  
LOC728955 122.337240239463 135.781190598068 142.103519373191  
141.500790455788 128.763176477983 148.516653846017 148.692602243778  
159.289148392284 124.980683327416 150.629932241703 141.099781722697  
148.547259731346  
LOC728956 139.268052431476 133.343243441383 139.333282400639  
139.406427549733 139.606654715326 134.169645445889 137.299908075811  
142.878258542775 142.03837243998 141.18490443471 135.829273398594  
145.100964170053  
LOC728961 125.717328918165 124.518818352113 131.591176736153  
125.339305282874 123.413596815384 115.939620871703 124.750963415771  
115.327402810793 127.884750925048 129.794293922951 131.106613067333  
121.255814891176  
LOC728965 136.611670766233 134.788450164055 130.816301920872  
126.623026026721 157.076284096905 139.289968250444 190.152824885328  
172.259627777465 164.146345008398 165.2958475168 187.167255451988  
173.424541543058  
LOC728969 198.549047189499 211.869300324471 172.794570587596  
190.625250757654 389.800620731411 482.048928546145 396.04031733841  
337.271784551586 435.603911474926 299.106362530855 254.991678321253  
416.546844844021  
LOC728970 140.150884219813 129.925548182204 162.914301705151  
137.567384694894 144.302925948596 143.187539073659 137.650170747992

131.170481977406 141.865758685796 144.321757243275 142.541080856005  
130.311471059267  
LOC728971 173.315097944835 178.429953283621 167.456481678813  
161.577683729655 156.674411447713 161.16688895179 160.482734190577  
164.763269377973 152.241060990474 164.959415532174 166.285052506316  
188.847480174391  
LOC728973 3727.70199176703 4088.12910138929 4527.53010866974  
3019.57419253979 7585.47289520004 7838.92787031423 8368.88320476021  
5347.78127066964 3688.68740405322 5291.83393775761 8342.70113690382  
5300.67886821231  
LOC728975 136.156548919515 140.611071681667 143.514848892447  
136.482609639417 140.689631427359 136.683683776616 143.015905927379  
145.391496022306 128.26423663004 190.309453030884 142.883466086309  
147.009325721272  
LOC728979 139.939863187181 140.747967724586 133.288181734813  
155.221833416673 134.961156870831 137.769431537236 136.62213567467  
132.398041172151 129.431497372577 144.203716525289 159.710615852435  
150.812739240232  
LOC728989 133.006192351471 132.194221038804 125.345611085082  
138.233799607706 129.221482161409 131.173355686001 135.437227744668  
135.65700435306 141.799236109474 118.406487008528 141.362627556137  
133.845056524142  
LOC728990 148.96493117884 119.949050292223 136.704018446388  
149.294728629784 145.844961942581 156.875068435974 142.215285988753  
134.805239981342 143.239666389592 143.481112776388 107.385565665491  
147.608094270078  
LOC728991 141.269923271838 133.137299889323 134.168381235167  
138.478911439144 129.880696706381 121.094060100325 148.304863957659  
131.204616536341 126.189005734462 127.389942368953 131.483427112288  
132.141918502025  
LOC728992 137.208796872026 158.175138008678 146.271180025157  
143.284230032303 150.439715066903 157.061602966797 142.902838068479  
146.984888309556 147.915337223934 152.099431258333 169.301498852556  
145.880661952783  
LOC729003 117.805556408194 141.91067228913 128.689465747173  
149.402679897813 132.573953444192 141.4587810296 144.542320520523  
134.698857213208 136.742206779136 142.89427871125 132.776236872246  
146.174492025087  
LOC729004 152.342712570625 133.505261458701 148.194450105682  
142.411117330429 125.326393776938 144.64757514198 159.845890841215  
133.125084506877 134.142423026264 131.599370671279 176.167129202773  
156.642441706727  
LOC729008 214.824908522393 181.914505612128 172.652645920958  
164.136551371866 159.997580819443 238.430350258686 168.824578400555  
161.299920355406 268.111403429364 159.29430824799 249.953902454701  
167.117957101613  
LOC729009 4732.31591164752 4437.40805296517 4548.5418978622  
3287.37172778474 7266.3946293904 3290.27308365921 9070.86397918429  
3615.76740804718 2801.66917828364 4722.64356477773 5361.3600315322  
3468.14455177277  
LOC729010 153.853856339585 148.297939240474 143.492758492895  
145.948772123142 166.17959304455 154.118601977256 148.090431893307  
158.226547375305 145.318539677981 149.290007708698 144.373226011578  
143.496669740707

LOC729012 128.697647007046 140.451465188624 126.100454068838  
122.900675062181 123.375592272781 135.225099128546 113.609215169397  
127.183924911179 140.306808081269 131.255028381669 125.021217009254  
116.087696503753  
LOC729020 147.416991272497 141.162443312437 149.432744784716  
136.511669406292 134.203949774763 135.446072698039 149.94715601106  
156.16485596016 150.717996520257 165.376358421533 160.707290343231  
157.709832297666  
LOC729021 237.854774190873 235.091443641056 234.661864595717  
244.897869154624 303.138041758745 311.449205777595 416.475440894731  
330.080428155378 327.951753740503 358.479218923158 389.051174954505  
374.56251861444  
LOC729023 111.826509343353 111.7529190597 122.80785489118  
124.757229519631 131.239986488033 118.783904603368 142.372470063444  
111.73388372572 118.446703299916 121.624218243474 126.66432941518  
123.668707648172  
LOC729025 171.444558905575 148.711943433557 161.108249802467  
154.030432279825 173.929353266244 146.378522944864 141.145419751161  
167.91761500242 156.296046600921 151.484420979498 144.102872001089  
149.264997927508  
LOC729028 137.027334042585 125.964335876018 151.387150218354  
138.267027472904 147.221425204534 139.409685553177 153.008756051525  
143.897248922317 147.624372080117 149.956759038516 146.359038260378  
151.819220292189  
LOC729032 150.576660798865 148.717545103261 136.560048419149  
133.985582992986 131.859204862396 138.307574579062 126.33556674738  
137.816691265242 139.321570881862 141.536764775726 128.224742304889  
141.695537669891  
LOC729034 126.372374084002 130.965418847276 130.088408942008  
139.904952662852 127.155818626031 124.807244018373 131.83430682495  
131.266386010519 131.924162435354 195.078843867124 136.755975832051  
135.461112284848  
LOC729040 134.349043119219 127.987449338817 125.4408430419  
133.812639120892 118.777105073561 132.845116298605 121.657744897668  
131.563719927798 117.511162285879 137.728163622673 119.164791441052  
131.062360037777  
LOC729041 126.082189590574 127.783892576352 132.557945249016  
130.57903858574 123.591078216224 141.644521617419 128.781123194219  
139.094167748687 123.981053866137 143.492758492895 137.966987037709  
140.92066676704  
LOC729046 157.672378669483 170.585366369563 149.182972268104  
154.466614452651 161.866405026758 145.308548379215 148.126745515891  
148.358847576281 146.119700458464 148.842322753916 176.622758931306  
155.287837763675  
LOC729047 138.499293816467 138.175538905334 140.964208731587  
127.8514513762 151.392024228289 127.581332110857 135.975265059269  
127.003974141317 125.874313058552 127.631770516132 111.475394003575  
128.113966507586  
LOC729051 133.111791289725 142.49005761699 127.327765407459  
142.579346058088 133.724135305758 123.29908883119 126.118745937997  
120.316950428535 135.601916560736 145.289151849318 143.959910170676  
133.018406625714  
LOC729057 128.711308958929 143.864036545717 134.777979170126  
141.828740140733 312.845219991659 196.942880967705 167.468390483999

171.338371572269 175.902751522861 168.398366575579 165.143417235314  
174.903798946103  
LOC729059 130.917269984571 142.52234368939 121.441901286752  
122.160459795959 131.507618414676 129.389420352857 139.97127025207  
132.75673287656 140.370626016794 125.818432070199 124.851025681014  
122.702175900246  
LOC729061 125.091038614268 116.925863450165 137.58025011566  
115.427201752401 128.147484804104 117.652693591865 125.215194276842  
129.223872979789 130.686857648764 126.595668758744 136.692495869097  
124.879018642505  
LOC729065 148.31140879454 143.891725249061 151.722405598425  
141.678529125136 145.789840511876 149.05280915667 140.667415746111  
146.40904127542 147.473875763319 139.593950393555 153.143706194386  
142.745838888446  
LOC729069 130.454496708632 116.552626146967 141.180647782041  
127.551486042435 108.779204939177 117.499697378893 136.169525758215  
125.600500146679 113.597215383696 133.131953362455 113.222264855561  
139.256416415149  
LOC729076 126.262349005661 131.412979573687 118.724348027528  
143.294217840279 129.425699141995 126.910075365358 134.463094391766  
141.114844177644 132.066488589395 135.105147647223 114.334059060506  
132.218907367109  
LOC729078 121.545189875973 123.058261039164 127.985051303973  
133.412452607155 122.292692083352 122.274656361883 124.251699375036  
118.239637776941 138.976386995124 129.151767489346 112.321396616213  
129.411734209444  
LOC729080 115.848659135231 126.195222228248 120.995697049378  
116.71331256222 126.314233529267 138.715208319278 118.126133973555  
137.052507691254 120.691810909148 125.822346524903 128.174382934295  
138.000714797563  
LOC729081 150.387906232396 171.481917188224 153.114065147266  
155.530415929059 162.077455145261 158.869463014801 146.677241054745  
164.74234322574 148.868265867275 171.909358721737 171.545695383454  
145.56468363155  
LOC729082 191.708350637714 176.980780681976 243.501083338279  
193.871324880919 309.283897272661 288.072720517427 385.238961394234  
358.732947927445 403.812520074723 617.185364180303 319.560819487616  
427.390091157726  
LOC729085 143.112205432731 139.242481781927 131.364187047583  
126.755389668637 143.093156971372 123.482626777491 128.398711525305  
131.474485888864 131.617027772841 132.762755202326 116.685023927951  
137.299908075811  
LOC729086 462.144334719146 565.609400092543 310.989043012841  
392.746574862867 574.779350011402 325.387193207414 325.252108402192  
405.843083758177 500.246996975 293.746733527346 494.067878734396  
496.823662262772  
LOC729088 149.689071018094 145.63870792125 135.601916560736  
147.301909062399 171.816841286562 135.613240463445 142.842130077535  
140.039358011563 140.175724588255 161.017267304159 151.299425811105  
145.648810303756  
LOC729090 14228.7550296952 14651.3379687477 15809.9561036761  
13479.8546809758 3668.19307488953 14755.8570847826 7992.84111657183  
12916.6904389018 12615.8332290932 8261.82420896892 6021.68798558746  
11017.1478502767



LOC729096 122.508761687823 136.480458837869 144.513730107393  
120.13869466889 129.079917151186 135.848022588175 127.125906877098  
135.805294188016 149.121894111871 141.026045918091 133.175265384038  
136.648306684974  
LOC729101 193.629237856758 192.286192329464 201.004491067972  
165.2958475168 351.448985413528 243.336550161566 351.079435946154  
295.153786338687 337.342034950908 296.333944172375 279.668007824988  
274.202831856221  
LOC729102 3643.11229751348 3241.23835624706 4335.76831372031  
2808.78353621111 2568.95060767776 5040.35379681644 4773.62220024088  
6508.71638048514 4477.54806526552 4956.21683075884 2856.14739820295  
5489.19362780613  
LOC729113 144.248044718005 133.969782716761 133.44592405762  
143.325710305008 135.954961086609 127.099995420363 131.59293899691  
137.620843137286 158.98666068453 135.779516940893 155.402421581195  
137.974323288786  
LOC729120 3149.26998719015 2965.38280248519 3168.27825058989  
2630.78185410861 440.404188514231 3195.71436046397 1360.85309203233  
2197.44189747261 1822.14935116363 1138.00644332379 2441.05534211996  
1590.87426068638  
LOC729121 137.188245017099 150.902548360746 134.276804499925  
142.829099538363 149.702048490465 151.451443480833 140.165450892713  
142.976123206776 145.072924262206 160.906550609416 143.356999170877  
145.190896872008  
LOC729123 253.124449721731 238.745953695925 307.728083981504  
219.661502916874 176.328994356625 326.45984882427 322.099431638246  
297.176755638159 270.604799126393 374.872358131797 228.058870735016  
266.316485802808  
LOC729127 118.401963042662 124.075077123156 119.696656494403  
125.535877109652 132.221351364892 122.766778018066 124.49814598066  
124.225294244156 119.682747854629 127.777945516765 122.323876787207  
132.354503055131  
LOC729130 140.772074031028 134.10070984606 135.493053871272  
144.699084515687 141.876237297525 128.729687597908 126.512613967438  
140.628614910068 148.269123639781 145.999823250463 137.368211928541  
138.132390735567  
LOC729135 135.539516564142 136.306727083526 123.431969470387  
152.66513184083 140.878935632862 128.653335099674 137.091932621041  
134.349043119219 119.334967856721 143.53550972177 120.901639342731  
137.240806191881  
LOC729137 137.73313146889 140.063142443074 142.991135981933  
130.659631155616 212.239485199343 263.379982742085 181.593291870136  
248.085349787686 147.191965093225 180.047231265069 149.260811184287  
148.514806562804  
LOC729141 122.891946370542 135.391788614828 125.658396221949  
141.746032519746 135.095095470362 132.12082208253 128.599254558082  
118.510960607141 131.814528687104 133.058788697693 117.449306773025  
136.324020406359  
LOC729142 270.945325305492 279.598585549004 316.955298948771  
289.82072316082 258.759507964221 320.812909889014 290.288001750744  
255.903775525554 268.328002606268 317.659548748735 265.068532248682  
289.616527814137  
LOC729143 177.562561297777 184.813094907887 173.741466458636  
180.923089242255 170.111653122193 147.052395429464 165.908756485356

159.130076733711 152.432477504097 161.909145741021 203.913123559942  
166.88833169342  
LOC729148 576.873245313776 588.076436392983 714.6859666834  
525.789451405743 494.747087458483 508.735412486964 693.339946866196  
602.86705608228 767.861763134136 640.568342662067 472.514017604645  
548.869880723909  
LOC729150 130.637567221512 133.264245969185 142.833025633146  
149.883237874886 138.57506931811 129.580421464913 133.619092072157  
132.071099697667 128.213678179359 144.077080621909 121.118933682515  
135.864853829421  
LOC729153 139.85010721496 142.086300138469 131.950295185477  
133.020551937677 133.480196904786 138.386391726042 139.136845089275  
134.69274746407 136.284283129801 137.824985884649 135.279197125157  
142.510745106328  
LOC729154 123.557722415957 131.373012256275 134.227253565741  
138.640919060725 142.889911562811 138.760800146167 144.065554025603  
134.491232148834 129.405749374776 133.592691897675 150.817922696097  
135.027715094704  
LOC729156 129.838790698396 153.947717667689 136.450062043587  
136.156548919515 147.79501373062 150.51537512828 141.703410265546  
139.106442824079 143.526983440589 144.36033726557 145.015434711984  
150.682964448325  
LOC729157 145.2572048057 146.31468639383 120.280241193135  
123.743971147401 151.282370273189 134.61114877396 146.6886556805  
146.709967739596 144.526499066594 124.393008692801 159.806221777332  
153.374296511216  
LOC729159 141.808122700968 140.578378782903 148.084844579881  
147.278236958386 148.953720017484 143.138613573764 140.167274633872  
141.382096896508 145.204870282027 143.962842383778 146.171094379173  
157.656220148041  
LOC729162 157.344758285153 154.818414925242 132.01588294465  
154.750512277909 141.383975990479 155.201655653645 141.588478913204  
154.469132478321 155.513572243604 147.055213172078 138.544053540799  
161.010206405916  
LOC729164 163.566535828036 155.333294650676 169.552424961465  
181.247766545135 174.107661206415 154.452964510369 163.203582580217  
165.192945734166 154.347332766547 166.263781040251 150.498954408708  
184.655641182839  
LOC729173 157.83460319212 170.516743115762 137.698423468762  
161.663893432522 133.969054754299 131.001996509052 125.746184969983  
146.792951584868 140.645873481353 127.575660581922 146.894793774087  
139.380610974147  
LOC729175 163.141010815086 155.993849743656 148.153776704837  
150.367927843529 153.639559509292 143.689257983705 197.003657786247  
157.898632788579 156.822477235844 162.955366577418 149.341736870692  
155.07594431078  
LOC729176 151.80632463295 152.286545050749 143.939522733945  
161.877378749103 137.107621189522 140.794929983858 138.252656818036  
144.368355737187 133.022848457361 141.8268805463 172.612152484322  
142.469353808346  
LOC729177 130.617505834747 128.578494940165 115.113000553093  
140.815807483203 128.339161042799 135.013075032671 148.770315933249  
156.540165645256 143.830319259804 150.687819649072 148.120968141789  
149.007288765628

LOC729179 119.346574301289 120.182787241888 145.559419404453  
142.476530302265 117.380281099932 141.342216963124 133.143695166498  
123.852299272249 140.648918459179 145.658251059524 116.310166003024  
131.950295185477  
LOC729185 125.914267820741 127.75729795293 130.559515534303  
138.69392148885 134.825699448987 135.837733533444 140.965498009244  
140.916876460413 139.85010721496 134.646131480502 141.765004355609  
149.283495832731  
LOC729189 130.832462487806 136.406132339187 124.981713747923  
135.475597372104 126.978144285534 122.69021100699 135.526248253492  
131.038758046782 129.095469955392 121.572462089942 140.44966014021  
131.275712196961  
LOC729191 130.488972210403 120.507930710099 142.690911343704  
127.524310543779 128.545699891734 133.315888375614 130.339214643083  
119.242880574306 129.073750290924 138.266328639467 135.562700479444  
129.227844833149  
LOC729193 145.751336115646 126.301178976594 135.750578960284  
131.050255325564 125.339305282874 132.758313782606 127.323157914914  
133.009854792992 133.82390829608 131.859204862396 126.186758919929  
134.828360289676  
LOC729195 133.613988293895 119.899649497032 143.616189776965  
121.414076245292 133.542620077059 118.319950396126 113.756115251188  
122.667593730152 119.312201620247 126.430816528764 112.298254005045  
121.425298866613  
LOC729196 158.660859266099 166.360005474414 167.190857452131  
154.834679562341 269.673122990604 189.887788314879 179.35113214277  
174.035835206078 169.619338456208 171.212749388553 175.819983804497  
210.5689532432  
LOC729197 158.06129717954 148.720181793879 138.299629744589  
148.534143255537 156.151075965844 131.397850276558 150.46224324459  
143.631345956176 139.493994206019 136.807118099948 132.610618885717  
132.566074764755  
LOC729198 136.923876486522 153.974384951787 157.971293294367  
141.836648910979 138.42216862811 198.568180234676 155.846106540378  
162.857083430123 150.931114848235 156.433603187722 167.500410857353  
147.449186980143  
LOC729199 121.341177395499 122.522978939399 139.155456340488  
128.075865243385 136.570817174009 126.294085960617 126.100454068838  
133.376631703373 141.838206951224 135.018710687313 124.738217731488  
120.887938517877  
LOC729200 338.934501259414 312.484289357493 369.070376276471  
261.117845544884 481.037647470809 638.287221212947 567.317223907142  
527.294087043601 623.050854309724 442.766704003254 527.930077857945  
486.425387717472  
LOC729204 142.713318779614 134.712935556892 126.555972138115  
135.688346453694 134.728594388428 124.251699375036 143.62315472858  
144.546597366629 133.707285280448 136.154522071917 143.105974876327  
155.917655560227  
LOC729208 2456.36776585765 2486.24762158293 2456.36776585765  
1581.06548216423 1206.09815575399 1611.58245311122 2811.84191700516  
1314.62071412501 1429.25367024696 2230.45015969936 4238.41681589316  
2853.14759681683  
LOC729209 225.438177833064 251.224369831275 182.644319628554  
270.604799126393 148.007068300762 156.654450436728 157.649902282769

166.330001480033 171.677654793775 178.455966482206 194.072260528037  
148.82892305156  
LOC729212 150.566842106244 153.140087873773 153.705394500855  
144.982462113231 139.378915474473 155.810034593382 147.661748633455  
150.311274161073 141.835615574452 151.790240553272 149.471240458766  
145.452220050902  
LOC729217 287.041585684111 304.292209676095 389.686045618228  
265.866465528654 424.37437028833 412.048097766066 278.598913464804  
299.463563393179 519.112018353676 736.332743195416 362.502631441716  
674.101599637653  
LOC729218 156.396579029788 152.887471821971 143.754105312957  
147.161720770972 155.835077077665 150.387906232396 138.123754096875  
143.873048967535 143.647714966406 147.615823612879 135.229197100212  
165.964183460825  
LOC729222 252.473612525884 221.390817970859 219.171591031864  
186.904126552483 145.373751186893 182.57496767012 179.551640851353  
164.917470819096 202.162432624505 187.50236021149 208.713555471888  
199.101099226668  
LOC729225 141.418737063013 152.230489051339 147.155738185574  
145.435794613203 137.298549014192 134.000363767958 135.058525398122  
137.262309660909 141.876237297525 145.599152743156 144.81689330206  
144.606963457243  
LOC729227 130.110413621436 146.71868686671 139.78795317086  
151.892445999591 126.549876718792 138.877999126533 150.833523101057  
131.631968933144 137.451687756052 125.848597767733 115.01682934323  
140.877230937687  
LOC729231 131.963419175907 136.029898048127 133.009854792992  
145.804420322848 162.756185479013 173.850390626782 151.128838696891  
140.379874810685 140.513291662274 177.831718771025 150.985061659285  
146.894793774087  
LOC729234 185.46843333826 184.267958772058 197.47340234886  
229.200570583629 154.212927357622 135.311980936088 144.727773039491  
150.313058722346 165.424516708502 135.015161451899 151.431513447721  
208.713555471888  
LOC729236 2670.9151276786 2718.440149645 3282.73711809465  
1530.45813438919 937.593129242257 1643.08061372695 3066.69261114251  
2321.41228376157 2197.44189747261 4793.22133852447 5859.56559124843  
2151.9395095819  
LOC729238 139.482462221798 132.64813248505 147.46607538135  
155.180238551547 152.99686989829 135.467354817201 129.201101445773  
156.13331481937 142.432995657729 147.015427944761 152.647566393845  
151.911494020123  
LOC729242 132.183250916482 135.728336465002 124.641892391159  
125.606269267903 139.755211300398 138.388749930671 135.153588830407  
130.816301920872 131.292195405993 132.045595972712 134.753783025994  
147.320976507643  
LOC729249 132.171282327983 142.700311964178 139.343387386742  
153.643157329902 146.128066033346 136.981043383326 136.730623822061  
135.968346417524 145.363692072132 134.613036378054 149.135934269866  
148.09868976776  
LOC729251 160.211460008777 145.695402948337 172.544504923991  
147.648020819059 123.926293128246 124.717079082023 131.757695616207  
137.916872642522 123.45004246675 144.133114926705 129.041254463346  
123.24533179875

LOC729252 139.595986615703 142.180927190578 127.980776299586  
136.152827218905 155.243643210534 2544.58522979036 150.763810844645  
153.047317528007 161.237544868191 23878.0022344804 293.646275396425  
146.070871543153  
LOC729254 172.259627777465 162.786351190659 192.273528391588  
182.529167529936 151.40067812803 126.724973604103 129.198366503027  
149.010477279209 141.524239210761 144.781438651649 136.316003989725  
135.455283504668  
LOC729255 437.248311551717 392.824840252824 351.02823853348  
322.263925912805 653.879734066271 968.548243081111 754.607039665508  
567.317223907142 877.598505913096 509.292779821787 1085.92360670051  
912.483177705931  
LOC729259 129.532122459128 131.599370671279 139.369815367465  
131.606765174514 133.606068125828 141.598452174759 143.67880977119  
141.018087546273 140.506191791073 150.063082731931 174.149718758884  
144.191491000257  
LOC729260 181.635664531851 188.181647474317 171.650247980576  
170.490099282436 172.304496150036 191.543371466252 169.158049136321  
158.167384416968 166.173429365582 181.85552254233 143.891725249061  
206.35895739543  
LOC729261 126.547883999721 147.476805635744 145.472859089272  
134.119276589666 133.665206343648 132.665590728755 151.164936050256  
124.433114779288 133.470643135354 131.232417654705 146.817659734182  
135.975265059269  
LOC729264 144.20764300349 143.247977741752 146.863611516518  
141.434699050015 161.485353443949 138.254479653425 173.416999972133  
150.802312408483 138.883710791382 141.071184297124 145.100964170053  
135.049657594221  
LOC729266 144.161672064561 147.968104627262 139.664055668127  
143.265532486512 150.348608467097 159.170943469313 157.5032461329  
130.732397679661 155.191446350891 139.847813838017 137.609831343223  
141.865758685796  
LOC729269 177.19138801548 155.566065673542 158.558471586662  
172.002600588279 163.93199635496 177.874821397216 165.995251661994  
151.113342302947 152.265624144393 158.297624312257 162.774716879847  
129.505139430366  
LOC729270 134.711144967036 127.961153369579 134.250052775987  
135.271290872348 121.347339077474 136.366798516444 134.474466007553  
117.408465686218 131.973896985615 128.055531184549 126.148379057536  
138.9183380982  
LOC729272 152.629680152219 136.799138736925 134.95415308911  
139.536677895126 151.411708598688 137.011595584638 156.976539870288  
141.553465481789 138.613373798613 146.179543599917 154.861507590906  
141.33919297402  
LOC729273 160.364644321965 137.298549014192 147.640100078933  
144.927731613526 136.786462547129 150.674189235105 156.273445355976  
143.161623642178 128.438401976279 130.808911605271 137.902953501634  
172.091884817207  
LOC729275 147.537691509156 140.21908493941 145.496033735748  
150.075738752092 136.643481414354 138.265155903051 133.278923716119  
142.21279866857 138.605661097886 144.499680685194 142.89427871125  
138.393565473857  
LOC729277 127.466779212194 139.423432468886 123.21112178671  
146.146800933028 139.377027955744 151.508738608925 122.379537202709

140.234485088845 133.075748695526 141.821550320574 129.628859533303  
139.902610126952  
LOC729278 121.784166691545 123.510413258172 137.112274459462  
119.451099896048 108.604763499678 127.486697506397 113.362825181676  
117.361778263056 138.184717352015 126.569482909992 102.474380813907  
121.350491314441  
LOC729279 2005.76678571689 1969.67552562117 1421.04485772969  
1863.96986643676 9016.04641569485 1706.06615968622 5195.2087608308  
2811.84191700516 2482.27419621925 2944.63971819193 2459.05558915812  
2550.08769415478  
LOC729284 122.751674866182 125.522498880785 138.188522429661  
128.616121042106 120.308260557986 140.294369532861 134.623264303227  
138.464793389999 135.015161451899 134.412129843957 129.03753569157  
135.726760147904  
LOC729289 126.333814565085 111.616460084889 127.146101490884  
132.481710681317 119.040642659337 119.666650919579 126.407313060022  
130.637567221512 118.021169080914 133.370488470007 133.783379558598  
122.980631567542  
LOC729291 130.37185420347 144.772914483212 137.894482933806  
146.819830256127 143.324235640446 122.733870240098 136.489566741917  
142.432995657729 143.206100064821 124.359615295938 150.213657393257  
127.31283918221  
LOC729296 127.822440239962 142.073529553425 146.431166706908  
142.221542344035 132.64813248505 122.431337063053 137.842375545994  
139.128751917566 142.718326248758 125.304045138994 112.428707152237  
126.617737577634  
LOC729298 176.725347194807 159.166059518117 170.596937075493  
157.041481397151 187.325542100762 157.293090577042 189.0608798771  
147.738146185884 175.210232663606 195.282045838381 258.109876262342  
180.968659614238  
LOC729301 12046.9345159347 11479.7406150358 10360.162704111  
10202.2226913537 8812.91092406563 8649.07367196998 12046.9345159347  
11432.8213906428 9251.21629832018 9937.36968397141 11235.4970815873  
10135.7800994367  
LOC729310 177.696849418064 177.401771322485 180.578528984075  
150.534608517044 183.214922844221 185.896304740844 168.03501792841  
153.366677608026 175.165305179665 185.233210060342 153.173746756225  
169.764014031526  
LOC729312 122.251178920649 119.709032462308 138.634814756987  
137.893630842968 123.940632366675 141.327299595068 127.187020441742  
133.832462719784 136.248506185974 120.473038066927 132.164132609317  
128.738746025289  
LOC729313 146.937052029619 131.523538461751 142.166650343224  
139.055892787717 143.909501365162 147.245636620228 145.198638080646  
136.730623822061 146.176240539176 144.568417378353 129.185514320138  
144.032779435658  
LOC729314 133.819095523687 135.007473769551 128.879953205511  
122.821563586744 134.391386851101 139.648187461906 130.962368929833  
149.151791028837 130.054105892394 135.082715974111 137.799016648135  
130.820415610578  
LOC729317 1790.53556140959 1641.70484603137 3046.47354587949  
1694.24232555141 731.848844821402 834.788058321257 1574.65731564294  
947.766127685083 1118.86225415732 2084.44431604433 2206.7447886564  
1753.58770316818

LOC729319 116.558752619296 121.515872228716 136.767307268217  
128.683044953833 130.41429837092 127.753065449769 121.760488406107  
132.952355710395 131.866599432062 126.409995188106 121.381365873873  
118.26427946535  
LOC729324 15420.9668207676 15667.6576521981 17975.1602090863  
18665.5217411582 8342.70113690382 17324.7697569598 11392.4189359453  
15297.9020958577 15194.4972103372 10704.4678928541 7308.57540715512  
13247.3528304243  
LOC729327 135.516856254532 128.232091717966 138.824082857747  
136.020600085547 125.121517583946 138.792521681771 134.499588539919  
131.249240371529 132.464205461991 138.611074796816 123.347836436966  
131.823019555685  
LOC729332 142.694748293332 130.365804613342 148.255769084026  
152.204730003016 147.541437871615 148.482530949134 156.490654498766  
155.191446350891 137.310014841869 142.566028652989 174.890624803452  
134.601565799073  
LOC729335 157.742948919213 140.809956497396 128.568463697992  
163.575300618666 136.944378905743 153.985529457122 157.507108643575  
155.379116566097 139.790098895306 167.698883940638 144.36033726557  
156.301214161102  
LOC729338 119.455615461113 126.083599163604 133.691053105482  
116.288113598488 122.131320551425 123.159407368236 148.510023599641  
113.87024833117 124.684937344502 121.665157726433 152.350537364705  
118.820154030256  
LOC729339 166.1677526 150.28169442832 163.741411769369 148.497497694754  
159.758196845781 156.022967076728 182.560363283264 139.195281937545  
156.901209828741 145.363092168648 159.944547924357 165.880071298733  
LOC729340 3968.38723079061 3807.16206340771 3287.37172778474  
3226.53426370323 2388.03256067711 2599.421026133 4228.5490138553  
3371.24667467952 2273.12164779441 3062.22499714914 4690.93553472125  
2926.06746795504  
LOC729342 197.489903263216 200.22145130696 212.037224737798  
171.521579011287 167.087850057037 177.393812005949 241.987100712218  
195.981555981238 177.19138801548 343.833659987063 256.648540685098  
233.161848094769  
LOC729346 116.934457270701 122.878790127038 119.049388179929  
114.217867810848 133.911650164508 132.256047602234 133.372231702721  
111.506345174435 122.82388804774 125.181327386534 142.264536484668  
136.330636532576  
LOC729348 178.235281981508 210.218440444631 185.673549367125  
180.518621542868 188.580458613357 216.731618532814 224.588225855066  
269.981476129439 212.5119818331 197.205792984885 204.378245089766  
213.194154171149  
LOC729349 136.541973790157 137.386308389265 123.773753287854  
136.03581843125 134.544368736184 123.868848032411 143.35902319003  
133.35096649325 129.055874691136 129.599661790972 131.785053503951  
140.613151527886  
LOC729350 130.068926859425 135.285224699704 133.449527627723  
134.9404536551 125.962178569021 132.807755600683 143.647714966406  
124.093412630817 133.146347243168 132.604589324628 151.349739492368  
142.183154756458  
LOC729351 163.125317704446 163.709174813901 198.437113196596  
147.289061374598 151.010493695217 172.578252260002 178.12073430094

164.96631670799 153.379118228796 174.663845688179 153.477432230141  
185.896304740844  
LOC729353 129.090955637629 147.659772694732 124.070171664904  
123.728481007459 125.846029991447 124.413136084728 158.325554470875  
124.328903559955 135.535020220081 121.699702849509 124.263901299025  
133.552141086987  
LOC729355 136.214432257698 135.647660756548 143.622093679845  
150.84999247088 146.388285560372 134.30854633824 144.977958320895  
145.844961942581 130.74794199972 122.685360126599 119.281300456243  
129.180990946063  
LOC729356 120.241528853563 121.344724993789 136.171728950893  
138.785538575745 131.611842804029 119.733311319912 130.574019477669  
135.576975868985 124.755684505209 125.696434307671 125.379842077431  
125.796438432905  
LOC729362 189.283071231248 188.093450717857 179.44023315251  
154.207656926108 462.437471715008 684.866405921987 307.906312092805  
197.24751449599 534.920870202582 351.759100605991 294.069353373633  
242.471259857978  
LOC729366 134.495938988321 152.122141650397 149.483826392464  
152.064982697394 141.156434225355 159.311949668403 150.034029031033  
158.053654524927 135.790955294639 157.960172706254 169.232677769521  
155.468848105615  
LOC729368 135.393901125889 138.014046365103 142.896723827753  
119.894737403889 142.518266591748 133.962129094978 131.963419175907  
118.820154030256 131.545287070888 126.991140761102 115.270544506813  
132.851791525098  
LOC729369 145.885577577352 122.362585067453 131.338853426561  
123.797585446062 134.494167613686 137.096785940897 139.424374685889  
131.77099316122 153.882081780197 130.317604643904 132.458764637407  
145.172776053  
LOC729370 132.431566491955 151.682386885888 147.808262170269  
147.225911875196 149.405118010893 164.146345008398 197.651165059354  
144.079935036119 150.677852949794 161.126686827391 146.479009988445  
146.846301957637  
LOC729371 136.198583459346 134.022324496729 131.928871107722  
128.042181036687 123.601413134287 116.497714896018 126.553693803748  
133.370488470007 124.518818352113 120.231559540009 128.973904070983  
120.957197551997  
LOC729372 178.284294783418 169.881866987359 179.753400474369  
181.971189935628 140.759006929593 150.442821494908 171.358746749715  
139.652974659584 148.913181799692 147.16778072296 179.321622114583  
144.355348009294  
LOC729373 136.975775196224 130.675745275992 133.026094667212  
136.955651763743 127.911258242431 138.638573020758 127.251594986725  
118.372047967248 134.558435781672 122.197625748146 140.206268652318  
126.00304757051  
LOC729374 139.840256729373 132.790039196443 132.675172817752  
141.920967855989 142.658562927154 170.585366369563 144.004831360797  
135.155955441604 136.77666893627 145.547037566774 149.032116392457  
162.390356943447  
LOC729375 291.056913909578 294.808980631295 341.015631528464  
352.180110869664 359.440639663655 279.26508919212 298.625127845168  
351.515059400947 292.317998405609 271.238736772408 304.479999301061  
283.527656956105



LOC729378 147.397591251955 155.592219571564 149.013011292165  
148.077974205567 143.899201949317 143.707084981291 138.197500836501  
158.06129717954 132.894049694258 164.072443259668 148.587929928134  
157.675974692761  
LOC729379 115.384304932365 110.138220982557 114.598636725763  
129.499283650632 128.84676695859 105.859916438163 127.678512375099  
105.925737068775 114.618608815885 124.193603137858 138.391203321266  
125.5449326311  
LOC729383 152.321890796527 137.891372981851 148.439740062804  
133.867182252477 155.615655460277 145.940227399711 155.360711066715  
149.023962828426 146.283340399533 150.786618560854 149.231475480618  
151.256546638599  
LOC729384 124.443643568527 145.89801576671 115.582048644075  
127.073045558761 125.377377116057 122.89752183991 119.949050292223  
128.623302491798 124.066239570648 129.425699141995 136.406132339187  
124.775529469869  
LOC729385 143.211127738941 139.693261291326 110.501341211051  
122.292692083352 127.164076119599 148.665627690915 138.343232981485  
128.659393756477 114.91722828113 107.841100741858 143.00521196918  
131.892151111901  
LOC729387 134.8745127454 117.628564992187 129.013667813486  
131.036225888592 128.075865243385 131.367075440559 142.85695042665  
129.43892498257 137.016495611111 123.122705969332 131.310537960214  
121.705065573911  
LOC729389 189.633348499854 203.487137264 204.770742504612  
218.156162474715 163.538862303362 274.831898505989 175.663960113118  
169.422015793848 166.662801900754 162.007384919302 164.701183249762  
166.447510782568  
LOC729390 141.518491890811 131.726540162023 140.079516848788  
129.497266827284 140.295307451188 137.988325215021 134.489421865495  
135.423839577038 124.05019986924 129.573520898314 129.343440464729  
136.121873179928  
LOC729392 136.087702679172 127.202039384041 132.382614153117  
157.481645415121 134.329784369137 133.900005368973 139.340699808517  
143.356999170877 135.449919220607 142.301581642006 138.988919994625  
133.789738760547  
LOC729393 136.623658204558 119.859508630454 139.535490288426  
132.641236788053 122.300069045533 123.913203953936 145.354740501503  
143.601057437842 151.16261275916 136.929570710155 127.84589484404  
144.871396308673  
LOC729394 125.413619056436 139.541759919059 125.315736755156  
134.804426398976 123.798513338021 127.466779212194 152.317890573534  
125.639355645626 137.591469499374 135.713266118447 137.693410133625  
129.931923954109  
LOC729396 131.809235171629 135.039901725369 134.376870769669  
157.519633258844 149.667440131648 148.02460124587 139.184647003326  
141.695537669891 145.711007027894 132.659196898439 118.757973008463  
134.387256336429  
LOC729397 124.76274408368 129.148634038268 130.068063785009  
139.147327302581 131.054302682707 134.533551900843 139.331046480528  
134.231634410324 129.786941565218 138.265155903051 123.968639555673  
135.161667673191  
LOC729399 137.687480242109 133.363883851093 132.450954427876  
131.913786256215 137.510586346207 140.949367846425 159.549936351002

137.950955473086 144.266864839344 136.370317464946 123.852299272249  
133.541976827777  
LOC729400 136.109975252514 135.472135601859 135.87026484074  
137.15288362126 129.16337177104 134.23001942966 124.477586539576  
127.099995420363 127.255966406144 129.899391127479 132.071099697667  
123.794432024417  
LOC729402 12615.8332290932 11598.65499235 12457.6956682374  
12877.2152068971 8596.90650022148 10533.5868398404 10329.1999331936  
8368.88320476021 10988.2836796736 9251.21629832018 9450.52572756597  
11598.65499235  
LOC729404 140.117644705946 126.022145004164 136.335679863251  
130.309092946921 177.468210189888 138.117916412819 180.761100930677  
154.007244208673 154.096542063701 175.176693060261 181.491120129045  
162.955366577418  
LOC729406 380.664528809678 351.585604465402 280.085692727562  
410.645457106122 1547.16936835284 969.360864006371 618.661249163439  
505.404271675438 404.073802241516 1044.00217726486 1038.34611017219  
1108.61301774472  
LOC729408 141.70123350351 123.277867938275 130.763957515652  
143.985850833974 144.098578955023 151.226242696197 122.914680091926  
127.458099438957 130.262411213764 124.684937344502 129.428950259722  
140.89390566467  
LOC729409 147.86104992164 133.738587139139 135.989816139218  
133.567630962178 137.731390340708 252.957489543915 143.370698101204  
186.103491222924 141.482344048665 144.175551691291 161.673818303367  
149.04685599998  
LOC729412 137.288653308858 127.977782260866 140.036463888037  
133.63668145135 137.159781458748 137.974846427694 146.044279076949  
129.098408596418 132.049224908868 141.521742442341 123.732299841696  
131.548634017902  
LOC729417 189.784608429624 190.098509544816 164.942652212218  
170.198508633417 155.078035506545 179.137734914428 166.411219327671  
159.887898257218 153.655778377717 143.58555556787 183.963578322984  
160.014635964846  
LOC729421 175.030373805031 149.283495832731 167.893596681867  
180.113222861966 154.001258677199 132.628358688595 141.334394187941  
138.240874738649 159.438084699061 162.565576110247 168.824578400555  
142.187694439611  
LOC729423 372.594990024312 327.384671423687 355.213322760505  
295.367125961621 307.083179338165 418.645775576811 602.371843434907  
644.449861831749 416.861099188252 483.845891531326 498.334266735594  
551.823767223086  
LOC729424 127.642215862573 126.680992733621 128.699441450952  
128.056668224393 133.455138380277 132.329892644992 129.023206862713  
132.776236872246 145.326803807448 132.737464610403 146.436141034941  
130.466571969657  
LOC729426 140.208983238283 126.17133877948 139.036978052242  
126.143886553557 134.28095064513 123.100949494673 121.059923601223  
129.618097261902 125.016608289141 134.202497785854 124.61344300674  
130.653971083035  
LOC729427 131.221105247771 137.94246602811 142.183154756458  
140.211016178402 120.78129870199 129.551260802518 141.819762045169  
125.044092929562 125.584202037776 131.04767483614 114.314425748312  
142.75592155869

LOC729433 143.632325018964 137.948410750056 161.906823008445  
125.450077160575 137.330207626732 147.547944397578 140.077307351596  
143.298218989451 149.308475163534 158.183045411298 135.622888091037  
147.354535468933  
LOC729435 134.607501073433 165.333608076984 152.175423676063  
146.98903251354 130.334622987505 147.93088503956 148.25001336038  
145.204870282027 157.176001400747 133.755609587969 128.800907223807  
149.039132756817  
LOC729438 155.233830396052 156.662150993832 160.989242461839  
156.194996994993 159.298815559223 163.970187373891 155.828962183804  
157.435477846812 166.563411635721 151.617989938924 150.48744233923  
160.20843950503  
LOC729439 28095.1627766565 26522.0142925211 27844.5606756791  
26010.7684336005 22750.0246358215 28530.8435957612 20764.6732139063  
28930.8933474342 28095.1627766565 26522.0142925211 17917.7303120499  
26375.3000727296  
LOC729444 135.949683946034 138.412897151567 146.063554646851  
145.471090720048 132.240470270795 141.943910304145 134.025385181979  
133.659475650376 139.123489349026 137.581659385375 137.975369568585  
139.963969716386  
LOC729445 128.168460083895 130.258933321051 139.282741110499  
133.35096649325 126.359440164601 124.611144621071 120.193580405229  
119.346574301289 125.377377116057 118.895095992424 130.29531841096  
112.999642731096  
LOC729446 354.922901990615 365.950612890149 353.005548289786  
394.576038252334 239.924227955313 379.476768908492 317.309949792707  
250.577945492981 235.795627549799 206.127493726541 198.659595851481  
401.631377313065  
LOC729451 164.000772606739 134.76397845723 148.216605879958  
146.981521393075 133.327778635672 133.995928435022 131.406366653787  
133.504078347324 136.282608531191 131.223691762533 126.905235161069  
135.434853296628  
LOC729454 133.962129094978 123.067278658698 132.928639483854  
126.848211027661 130.138945493943 129.715948793051 131.085965122946  
124.42747321736 135.29954024755 124.124076599417 134.978785580693  
122.888626394154  
LOC729456 128.300838927918 135.170925092209 132.593747375239  
123.247698282967 122.962219297463 130.839508306116 130.714375454354  
142.566028652989 125.958139354095 116.7299185256 118.833188167696  
145.604066669916  
LOC729458 141.277227483198 133.478829770103 133.680691168661  
138.030842581932 134.008118774075 132.848926011576 139.117053855066  
132.454025879177 126.555972138115 142.206016362038 111.389873428517  
130.166741978483  
LOC729459 140.194414869595 125.081880303992 133.125084506877  
143.689257983705 152.808771946509 133.184279519985 133.441783287131  
132.996622574111 127.760995691556 150.142724640067 136.039076665712  
123.108694517244  
LOC729461 116.632612170106 147.019460117987 145.205833182385  
140.545351041252 135.663734178125 137.31708798874 146.750774496317  
128.720517906732 123.007103885415 129.340996658802 124.563594928763  
123.801380911257  
LOC729462 122.397727522442 132.223321299997 137.006917665541  
126.928328902507 150.180037731272 137.677396262152 125.136745288071

123.527903217158 133.685254707686 137.737908250097 131.938898032483  
140.798706399757  
LOC729466 8030.19731415448 7717.01422791837 11281.201625198  
8596.90650022148 4569.44477073589 8342.70113690382 9970.08052783908  
10048.4260790604 12818.0509395717 8958.34797715349 11392.4189359453  
10075.6573898939  
LOC729467 117.552229262461 127.385776388242 135.964630862223  
117.873333897609 139.566124411099 119.905127545336 122.142323014287  
126.368170959337 119.079680805247 108.483284007316 112.790552379447  
125.447209413787  
LOC729476 118.44089966163 113.852849454448 120.085340927108  
122.251178920649 126.319103548711 100.477911152746 118.691723466789  
121.501959818928 123.122705969332 126.322527679273 131.578042179715  
137.328370598183  
LOC729479 136.582137928022 115.890431424899 122.431337063053  
129.483116877682 119.862037840843 134.584076788979 125.422348389595  
114.539671934155 119.52150378372 137.514133745073 129.360773522498  
115.992487254175  
LOC729484 161.412427590994 164.103306492559 151.971337856271  
149.076146942797 146.192761134077 142.861359851088 155.762890407496  
137.920724602098 143.558088035758 143.541810469447 165.262738484387  
144.917911601441  
LOC729485 141.229805348717 125.955431094455 139.711696905287  
149.207481665265 145.780927034516 153.041407358576 139.400521576978  
155.498580125421 147.036768856136 147.019460117987 143.26896117546  
145.909456876796  
LOC729486 152.719997757291 159.576585660511 141.332402615602  
157.733042033549 242.410260751835 154.681604647652 260.278595572575  
171.298701141684 151.252137441251 152.673212084312 188.062732621031  
290.954496559897  
LOC729487 135.106072664488 146.863611516518 158.025633316671  
165.181215117323 128.950308413612 139.356478232855 126.033673708286  
153.165872773973 140.762415240824 164.442400539653 140.958277301476  
145.560161803925  
LOC729492 129.570960882942 120.78129870199 130.832462487806  
136.065134838221 125.439033142431 134.226711030456 128.497571151343  
135.875595614483 132.051614319023 122.799487123057 133.052615777603  
128.505296338657  
LOC729494 143.934585983797 144.36575644625 131.690417323838  
125.787353491408 141.408545519654 149.464962540085 134.42983422342  
125.475308885588 138.381508741146 140.21908493941 122.816049839521  
130.205764567934  
LOC729495 314.810001770583 354.336462793628 338.326304736048  
337.521614253267 652.201948082657 447.521645706162 385.317560758502  
362.195903246495 355.80042210486 449.304281526081 363.777212750779  
358.843277491684  
LOC729497 116.316845829267 117.841844605128 123.111192189217  
125.165254272421 120.577995272053 129.642952083513 141.858928084825  
134.091723054647 143.21411610625 133.218742606195 119.903068083658  
132.22974656114  
LOC729500 779.922653392712 707.173691257322 1169.43742964112  
636.970243888917 476.168679880357 567.465201338735 1027.48490028905  
734.139557942719 553.198321853202 1197.58205444449 2197.44189747261  
675.978379566859

LOC729501 137.641136471239 141.522701487198 145.049387327924  
126.17342715006 139.101471810467 120.686906898624 126.791714564926  
145.646191500321 135.663734178125 131.643633737316 133.160197638474  
133.420267697961

LOC729505 216.615694348945 232.105867345662 251.414717011661  
178.904696191996 342.769825986756 274.627303114477 267.372241661758  
361.829819621662 298.979106293393 319.128582107184 300.53017771156  
275.794847140407

LOC729506 128.536721595589 142.628296442123 131.604121223902  
124.083648029911 132.448602065824 135.704067249674 141.251961856529  
128.126354569418 128.191959554459 133.579067514064 135.161667673191  
132.74579603362

LOC729510 163.570018900148 127.330523871944 150.991991926229  
136.116468624715 138.266328639467 151.650777127117 154.774977482202  
147.659772694732 129.672284417918 147.412608079997 157.172970235254  
142.326319895395

LOC729513 300.247304779062 170.596937075493 207.815226999953  
154.201375471487 177.84188738734 454.030083521756 241.944581086483  
234.550692915716 211.468099571442 200.518684601283 233.20900339048  
240.054164412429

LOC729516 139.894559834783 142.705504445895 140.842305941666  
127.650229552084 141.162443312437 142.973444931373 119.922676683808  
132.385096888962 139.902610126952 147.218415065692 136.689064885984  
126.728375196449

LOC729517 125.217733034761 112.649012857276 111.65024009102  
131.679566454851 124.944563166658 121.841080387875 123.884643288534  
121.231939494619 128.101371225192 111.312348806957 114.977135060317  
126.277165320165

LOC729519 139.344344562134 146.261164125255 149.039132756817  
150.387906232396 138.028194610717 153.528429414138 143.410917415691  
148.415036326153 142.93332947113 140.06989960847 146.139817421758  
138.905709709063

LOC729523 133.206919058442 117.408465686218 139.287871460674  
126.182856027765 123.571641517019 128.689465747173 139.236217474885  
125.553615182238 130.979513420888 126.912226185444 128.827129738041  
144.30519737569

LOC729524 134.73970457131 146.637799077812 138.560399473164  
138.616719975373 145.466538006138 133.31378749951 139.220877923507  
133.864612785572 133.31378749951 128.014092519305 142.234554325754  
142.288110423886

LOC729526 136.453821861379 150.667001746475 137.384815877899  
138.058404474114 132.249906289203 130.450930089722 119.890260409414  
130.352674121108 141.370957100324 143.074187168031 119.249084967945  
132.894049694258

LOC729530 147.059096208832 141.045379969014 143.637018777217  
130.829825154842 137.6160344044 136.801338583441 146.215459988012  
135.495964034239 130.810353054091 136.524640445539 156.224769056915  
133.301527400458

LOC729533 134.135748976546 118.816986517698 133.374199939042  
138.352562277336 131.02157879562 139.78795317086 131.416923875254  
130.656206845965 131.498890334548 130.872296869843 155.899547877596  
124.693253194681

LOC729534 126.902441495413 122.274656361883 132.261161069329  
136.301442794928 127.183924911179 140.028169667777 148.603077434646

140.829927714838 144.433543176593 135.849839822066 112.142263331903  
132.168821720799  
LOC729535 261.671277686467 276.089623957012 311.966971734249  
337.652945958921 286.376638135463 209.279164243868 229.689010178622  
186.611870261871 203.487137264 229.483578414375 205.830321788612  
182.545896049446  
LOC729537 125.911259629489 128.331867822629 135.513494853742  
135.51506573405 136.995197143668 131.200042525339 139.214589768245  
137.636900130922 125.439033142431 133.231066635063 139.534014289993  
138.758688249557  
LOC729538 148.757112903673 137.134190411005 139.201122725213  
151.598423878653 140.09417711803 156.033897758869 145.513333676569  
155.468848105615 135.233957017664 138.735156909846 147.098474227445  
137.294246530224  
LOC729545 132.291759474331 121.888886996534 130.443360119099  
127.251594986725 124.474221706022 123.535803027153 123.58053320223  
126.470239371932 127.802645313091 142.26998944788 137.464914919148  
159.085639414089  
LOC729549 129.493805009651 138.147658465394 142.208987267497  
144.516274148451 149.897440750742 137.85618381155 134.233014993992  
124.180511991605 133.161552914595 155.780657091484 140.096717188376  
133.365793958118  
LOC729558 139.715836473047 135.701041557713 133.699547652179  
148.732027660387 150.907594445048 145.444483891989 153.947717667689  
146.291932367254 143.861970001207 148.616543842015 141.681266095578  
153.519207482423  
LOC729559 292.802762636861 304.751330890753 304.013547190343  
321.25076864104 385.135014083686 328.401537339876 378.728516779744  
365.140886302762 255.413231082357 332.978350226738 335.059844742031  
301.591430919567  
LOC729562 173.640326140494 174.064073632442 164.701183249762  
154.352518161283 168.744610747563 179.551640851353 170.844002412425  
153.528429414138 166.503112149416 181.157738347957 161.948033313443  
172.84784588171  
LOC729566 148.711943433557 139.687574432387 147.866011743792  
155.043017644694 141.730912072471 150.49183794045 150.581350951154  
159.52147764862 138.719480482945 154.207656926108 140.295307451188  
139.63811945162  
LOC729568 119.360478719424 131.943014970855 131.84454376953  
129.400895994387 116.305011582033 133.773427881651 130.99288239869  
127.727311123825 135.041687549769 123.577138762427 132.642931022024  
130.935922915902  
LOC729569 143.916179005164 135.954961086609 145.977658128528  
131.49254872524 158.76356962428 112.126521532091 153.257097727888  
134.94189148503 136.13751015238 138.566954604414 142.30928744202  
156.254944793402  
LOC729570 131.981505236332 127.462293158337 145.758423590784  
131.798931481549 121.912927816178 137.4962171294 121.18490040448  
147.123477579978 138.679545821015 138.144085131733 165.158465031363  
126.421148348261  
LOC729574 130.476322267589 154.620194499553 141.786962606666  
152.247504238261 131.556892859203 139.397282021664 127.648224668964  
135.453399741892 124.652072110334 148.688413944868 139.080142195118  
126.322527679273

LOC729580 239.474937674583 218.944052733757 222.456810024193  
240.439368352772 341.197826517049 223.253794809571 465.102234374389  
254.424207773566 197.775397831129 215.167086358143 242.538036654192  
252.697160031025  
LOC729581 133.264245969185 151.118430469429 135.585648980469  
133.087962519669 134.064206964444 118.294324274616 132.733821031511  
120.633217745524 154.962835391567 125.063596569451 113.636570490048  
131.474485888864  
LOC729587 158.25554353787 141.838206951224 144.173163762502  
153.173746756225 144.857728905873 136.128092230238 150.193479279784  
152.340010735322 160.992494552269 148.185056724262 159.074001164836  
146.619846538124  
LOC729590 125.645986634914 117.470731811595 119.583378101838  
134.770852936106 124.062863592295 128.297879410629 146.96472350529  
122.724429060184 128.0171233156 133.054453517834 135.518752716008  
135.125414452178  
LOC729591 127.729912390394 132.508133846896 131.753135000312  
142.508525378171 124.723519607109 129.041254463346 133.491963477649  
138.29167712246 142.151209745109 137.85150144918 152.948391119096  
133.704706615071  
LOC729595 155.069048442532 168.10131060526 162.728630453745  
161.85913459364 174.075670633438 139.31967261371 153.140087873773  
155.798048652444 126.319103548711 139.532508621268 142.956870642583  
141.073316497949  
LOC729597 111.683074830042 141.021723049782 131.081793789906  
122.736882859231 114.155592351175 138.525131957094 135.741404460897  
146.016920431468 147.009325721272 144.474814266475 125.818432070199  
145.104173410801  
LOC729601 150.442821494908 170.561596645385 153.603765998461  
143.652009342522 168.634534857593 172.430211711547 181.85552254233  
147.23376282233 149.467626202395 164.553511697702 127.174074003712  
162.819608252826  
LOC729602 208.611557959861 204.183472655276 224.424524191566  
168.958694643382 153.787447416111 168.818595386221 150.620603731907  
162.652929339533 161.084088366981 175.199369463703 149.844677055508  
155.595651896155  
LOC729603 25295.5071561111 26082.8089351205 24098.0251582624  
25002.6870134094 8840.92490099301 26522.0142925211 15238.4097431619  
24731.0629964468 23318.4614981217 14454.6736124756 27284.7333124039  
20510.096303537  
LOC729608 808.837225580351 812.298381693378 829.992212133165  
723.250763797522 845.646455991008 933.723483173584 1091.69584249713  
882.429823267754 699.984140389009 1057.80846320642 972.902937649492  
1288.3346537369  
LOC729609 153.538565948453 154.033776287398 139.241145027974  
158.528301072565 158.030237507443 157.960172706254 148.486946087388  
177.896726792666 144.496429994489 148.376194044247 170.381897441659  
139.31967261371  
LOC729616 155.018009545475 142.498280938736 138.508015596135  
141.037217406848 135.779516940893 151.92638745703 142.480203661104  
156.265168005937 140.055272520317 144.905870145004 143.151478156897  
140.327799236005  
LOC729617 10765.0336035748 11071.0448447818 12654.3779830648  
9450.52572756597 17141.9934540963 12221.7819812315 18146.8167991873

21110.9013462062 16925.9167115963 10360.162704111 18287.6015702456  
15532.9759169142  
LOC729619 128.963962067821 117.017844025726 142.438586625317  
126.569482909992 128.485150698799 127.09430165124 149.899789105328  
119.192893408873 124.466986821169 134.06996703302 115.435942397626  
124.930303940168  
LOC729623 170.266415287865 181.277683429417 197.24751449599  
193.203053225456 175.9510758779 150.902548360746 142.07664288788  
137.603046125938 154.302619274576 160.640160107693 176.070695522397  
180.231462528702  
LOC729626 143.60570420943 126.203255277356 144.071652839025  
136.815411937352 136.749771286979 133.181855719499 150.880818951088  
140.552143090027 135.275284142536 142.948238172973 129.231455282441  
134.155655670103  
LOC729629 124.019707408094 129.822926691091 132.431566491955  
130.344292132363 138.553151063218 134.344021502031 143.941358917251  
130.423465505321 121.30744400137 142.583801756932 132.181365505556  
128.695695565175  
LOC729639 142.937182720493 169.33926580273 180.20999937977  
165.857032207991 177.679330300381 176.11287574658 177.825648107126  
164.548505132213 150.602976963975 159.479962316199 156.859539612504  
172.329225247019  
LOC729642 132.781725233271 134.087875547168 122.850678471084  
127.481689955317 148.720181793879 143.672118850295 569.656573915709  
163.442257036536 179.25743545231 135.866980620144 326.379855547052  
141.374831983971  
LOC729643 119.636334259263 133.590552542806 126.34649262976  
127.04953162892 140.563079852037 114.607138204495 129.779076484273  
125.839101611277 125.964335876018 129.431497372577 127.866992108488  
129.771073986855  
LOC729645 139.917662338546 125.962178569021 136.381593416533  
132.409582164007 129.378442664568 132.106673891288 122.063996556575  
129.92319548307 170.465177938235 134.909230280708 126.413124995943  
123.446714388901  
LOC729646 452.357898123926 383.626469817252 547.516635695872  
381.4054004349 1183.1601379136 1558.22238167317 1101.66868138797  
952.724512915813 788.693133735893 1850.98311401165 1462.31151845458  
846.985164747386  
LOC729647 133.64938083537 151.169283505727 140.50127034921  
166.071816427719 168.687845035401 167.542332146706 156.813992534584  
153.636804025106 134.95415308911 141.296574431203 139.917662338546  
165.380225715852  
LOC729652 147.769702509047 135.997144927956 142.394644827434  
152.445022409208 158.716575777014 146.770267005869 137.891372981851  
148.702473828167 139.236217474885 150.2214516849 139.555322603323  
144.895601314903  
LOC729655 134.618121709059 130.334622987505 140.943732564849  
129.612536218578 136.792957035581 136.149732574763 139.450341736722  
147.327675057481 140.204023682096 141.994082714379 132.890396520305  
149.410729709855  
LOC729659 123.368137868951 134.405155876727 130.637567221512  
140.105675520432 130.270184521521 117.889524670597 132.171282327983  
121.48867035121 127.055165613236 119.184780023269 130.133760815676  
135.164117176127



LOC729660 209.568066932367 203.999142031297 267.372241661758  
209.051768656607 269.770777921703 265.572253407219 348.711663415777  
274.974304050999 296.603054615145 372.374101464689 256.471672362567  
320.214614455231  
LOC729663 128.608401533371 138.267726309873 127.715766031466  
153.217287503221 143.085022888434 129.707421699091 147.784078315091  
155.952902855994 145.870135196037 149.492550066785 133.388533738482  
138.363553671822  
LOC729666 152.993555372242 134.044789094272 142.339740800356  
143.460361054254 142.019263564073 145.770601609392 136.108500467418  
131.12775424877 141.327299595068 186.758038665014 142.80027343095  
131.218141814078  
LOC729667 151.783090997855 159.41078351918 158.330403004116  
146.552529779774 172.562162872242 155.388752614336 175.139231359014  
166.910561772689 150.527757375079 147.526701500887 169.279866966079  
154.774977482202  
LOC729668 144.178210824181 142.230934617475 138.988919994625  
145.07503221134 150.674189235105 142.129680127408 137.348951314875  
189.434597063058 132.418902141838 132.131378074469 160.553214127047  
140.672863685822  
LOC729669 139.171486871664 126.686404772601 124.365185583133  
140.837360719964 136.126542897364 130.074786642758 133.329392986316  
128.045931477827 142.548833391567 161.781529659549 141.611712747368  
140.127379332918  
LOC729675 141.350135458015 133.704706615071 145.294665838127  
153.748035612441 132.624118917126 126.132339293132 133.480196904786  
147.066582834257 129.997181739652 128.543460982378 145.511473738224  
121.414076245292  
LOC729677 141.33919297402 132.253450751554 116.023563001039  
133.691053105482 152.258389962 137.232722233042 132.867957152044  
135.628982370682 130.666781754635 124.045745662173 147.494937826597  
145.471090720048  
LOC729679 1999.10320742823 2398.71483410593 2206.7447886564  
2296.30423509176 7573.69742026367 3822.05744774919 7969.0710242842  
4022.23000497332 2763.86550710042 5859.56559124843 6105.64727031051  
5207.37974585707  
LOC729680 159.688862680139 154.863307331821 166.627372924295  
150.691815494794 410.002817143111 342.555640222963 255.156682699288  
231.819341041105 338.934501259414 226.701637237203 167.186780161168  
235.867149024041  
LOC729681 131.996032643928 127.023543953724 122.881793230233  
139.613193302406 129.794293922951 135.929267930361 143.544671705984  
135.880955433228 133.436057118148 134.931263946202 148.01816554072  
128.668672935791  
LOC729683 132.045595972712 136.679405220947 165.985885671398  
150.754492902512 139.232893342069 133.812639120892 142.808871284256  
133.41621034887 147.982280671798 145.751336115646 144.402160347818  
132.071099697667  
LOC729684 137.25679451567 139.452773383624 131.715579653796  
128.132785279426 149.944351491364 127.545397354821 131.977212025523  
134.596391166462 143.864036545717 127.879723100698 139.251886500377  
136.618643817686  
LOC729686 282.561381978659 261.171723011396 375.958347293549  
235.32095278846 223.453776362112 249.339449789861 410.337491313251

268.148673257455 239.33642662112 527.930077857945 425.826693178023  
407.760503937821  
LOC729687 202.214495168688 196.990867962546 191.160340745501  
171.809717138613 253.42022722564 215.426918011158 230.399207047948  
287.334035234496 237.906142045719 242.070630946726 232.699786290509  
228.086256222312  
LOC729692 204.710203150526 184.62149494522 177.468210189888  
222.8766610624 207.674249122047 212.239485199343 208.045210163121  
183.168629351124 184.775001243453 257.075088169589 192.992546726522  
176.420075374686  
LOC729694 117.718893827092 124.253582884351 129.161305053472  
129.194132399305 146.900087470856 137.463764193883 128.939572714685  
148.567630572897 133.113581756557 120.873985900666 132.555211779043  
131.314766140505  
LOC729698 121.781562010645 125.304045138994 130.697148466042  
124.961859983596 123.510413258172 123.067278658698 132.855812035005  
127.998531115697 116.023563001039 113.78323485587 115.967513057229  
119.974853329265  
LOC729700 128.689465747173 128.645334554749 118.902823494379  
120.77691423934 123.877609932461 124.897463208595 144.654765322941  
129.171589574238 137.018521754443 123.554769032715 136.506347083926  
124.317870455205  
LOC729703 129.918038866006 125.937660544107 130.052593375075  
129.780648518219 134.530516701271 146.70774472499 139.138329217724  
133.502176289023 121.553107861517 136.589250394236 130.905135502296  
120.460433297007  
LOC729704 124.070171664904 132.719730606922 134.996443685544  
131.910285685889 125.088717405087 126.413124995943 120.744994574029  
125.738320262644 128.83448656124 163.48462232122 126.151017944639  
138.27272971335  
LOC729706 148.231928963878 140.845958602151 134.943005383277  
145.034179171835 136.181791404331 142.201672822989 145.395042579024  
139.844984829379 156.994265858123 136.975775196224 152.68344738009  
152.526785074182  
LOC729708 609.939982655706 588.458314503034 466.691191261997  
677.265576269103 1263.64725236472 888.04996477314 1360.24752587939  
1204.7397215229 984.181272274704 1650.77281891596 1294.18114559128  
1084.5920943349  
LOC729715 134.096283448464 136.115306932124 153.4392054301  
135.624881949214 134.533551900843 146.184624424737 148.336126836362  
139.684141478459 163.390929975591 158.282899758551 140.02337095267  
135.956116718089  
LOC729722 129.498275235032 134.182902752156 123.557722415957  
119.341806810441 131.086904662241 131.314766140505 138.515211541879  
135.033601686007 138.456465793474 126.265475477399 122.355409068882  
130.221351857959  
LOC729724 124.502139510446 136.425263391752 127.595574823053  
131.265594391542 135.457059862669 140.258615682066 121.924036463998  
135.058525398122 135.668768914964 125.997109913348 124.796876920269  
135.341892490559  
LOC729731 127.551486042435 122.837807905774 116.784024112826  
127.433203229267 138.343232981485 129.497266827284 114.358099210532  
121.730973193225 129.003317344469 121.350491314441 123.981053866137  
114.129044806825

LOC729732 157.568150431884 148.585224298375 166.239339129505  
160.70138318726 183.50553222647 145.551717838423 206.071709262227  
167.51207060064 163.922353493317 186.033093285894 148.856482636773  
171.629605754643  
LOC729737 140.588811000948 153.464360995071 130.33205883588  
141.518491890811 159.374355553219 142.593504145662 147.461480849333  
135.54708602175 126.067296703905 130.637567221512 139.450788315602  
142.573662441786  
LOC729739 135.717491814078 147.309245779031 145.511473738224  
149.912481263284 134.93455083142 138.537763477627 223.058699622386  
141.543147273205 138.349773531218 155.263513633703 139.00736252716  
192.475309217696  
LOC729742 3450.46728258139 2962.11407134162 5489.19362780613  
2932.64120183406 2009.21931102311 2269.44503773126 3775.41389938231  
2974.04694562902 2309.63504858248 5582.64254130978 4929.26915002209  
2723.55722258794  
LOC729744 143.496669740707 131.635641515901 149.749660071593  
140.309394542299 145.401101974736 139.63811945162 138.715208319278  
142.274440538785 138.653518319657 137.757902615328 127.879723100698  
149.977924522553  
LOC729751 135.778099658349 137.06192448185 139.223480216048  
150.993910190626 136.805379739087 135.018710687313 142.348246621217  
141.446916444258 137.336914480226 154.007244208673 141.741892403029  
144.243598691782  
LOC729754 146.054535585464 122.796362813922 130.321133400634  
143.825062714273 117.870230005125 134.128061214081 134.201392031199  
125.139029579691 136.093473732174 130.559515534303 140.299459596491  
132.6175371563  
LOC729756 127.193553054979 125.887854850942 136.13751015238  
158.085935267091 135.203507726561 112.528908277828 121.260355515095  
123.908458472687 124.113451627593 132.626349611404 127.982696242304  
131.76829141949  
LOC729758 157.176001400747 124.959873714884 137.947606003247  
147.530719472217 148.406031732776 145.67389337654 142.14116448528  
156.96934803556 147.202510900548 138.50032459657 148.007068300762  
142.399253818882  
LOC729759 128.50733429744 126.752999657665 124.632373951797  
141.127519700052 134.628807679002 136.955651763743 131.221105247771  
124.385193388896 131.246704975084 126.877293296185 120.060776752215  
132.765942975939  
LOC729760 162.147989253357 158.622993108149 153.305679563467  
155.249688219254 137.96452133771 140.345652629553 163.426663985855  
126.274585491044 135.336754997434 157.521230460545 171.706534562905  
139.582054825147  
LOC729764 221.070448906398 259.426050921239 178.920528149177  
223.220997990627 163.074919710259 139.894559834783 179.122374556365  
161.496700767073 163.72257517759 141.528115502473 181.062188174871  
142.173279109959  
LOC729766 131.079066781806 139.793683692104 139.435000959919  
161.485353443949 138.570150372729 146.579073345319 143.04129238495  
140.511988097197 149.698664700146 137.874370839801 121.665157726433  
140.279222720709  
LOC729768 664.19083888799 582.527835746927 729.729297413233  
603.764427348016 1021.81988990874 628.710901107436 1200.03423010236

1675.35431076885 1197.00004043747 1683.83803339436 919.626220838414  
857.090339943417  
LOC729769 1086.8615735568 1156.19575610918 1778.73916100529  
1192.47480377375 3157.98451877581 3518.84173951107 3983.37592132018  
3130.30693451802 3436.32495553246 2558.91648313228 2437.63566094439  
4651.384971332  
LOC729770 130.842257229979 126.512613967438 135.412051450659  
132.955473649746 147.281035392817 132.8615886934 134.235164622221  
126.090985925439 130.985360700521 130.772410329685 144.179880084235  
125.956785216996  
LOC729774 206.203717450138 200.934618257908 243.839402991061  
245.110761598207 241.353916553991 161.126686827391 174.205940911242  
175.626096716758 191.335616210093 219.49354518392 178.429953283621  
183.693300680495  
LOC729776 335.938170230765 267.483886037099 403.907009699589  
288.072720517427 392.582612044755 369.646624431062 339.843776738468  
354.981966077502 344.021696764791 249.129943906228 336.845908630493  
307.16835174775  
LOC729777 141.809577413906 152.217243924816 139.440415574681  
135.735535533738 148.753891406126 144.920107068083 144.96021415188  
132.433109154079 152.837739128546 132.399633003253 123.98775110588  
135.680872395032  
LOC729779 138.746987455826 131.696834332724 137.706893763747  
156.273445355976 169.927157878764 163.400576719974 144.64757514198  
203.983168778488 185.140211988926 242.141362101262 133.336063137966  
160.478519202775  
LOC729780 183.201926323188 160.315029612814 166.863589702453  
170.844002412425 178.130223302924 164.491207767654 209.417052464583  
167.958792571511 163.22638035169 181.530767521222 191.445291899108  
161.281195929918  
LOC729786 155.371772547395 141.040862279633 135.443856371548  
129.875986080057 137.672798701643 145.068754246476 151.259426521768  
145.039617860588 158.751241730465 139.188234030711 156.375876454394  
138.512938877774  
LOC729789 8649.07367196998 9636.32818474581 7753.61594300904  
9070.86397918429 18862.7632438112 10397.3656932566 13758.4768543075  
10988.2836796736 8030.19731415448 10953.6229702446 11809.4804843301  
9908.59593023839  
LOC729792 135.899595115146 147.253919952267 139.566124411099  
158.514079887374 138.030842581932 156.803516898875 149.844677055508  
150.173766182317 169.720414035325 139.938739652347 131.782007636511  
149.247514768446  
LOC729793 145.076793236112 149.436448356594 178.854873582873  
152.612116997575 142.285486339143 134.601565799073 139.038389244329  
150.854580568572 151.463200570499 139.6492947529 161.724388995749  
154.778726823719  
LOC729798 3862.57980488881 3643.11229751348 4722.64356477773  
2789.67986601883 5734.76405709934 4448.67183518984 7585.47289520004  
8812.91092406563 6296.24208225227 4562.75659565027 4047.99200599472  
6244.58472720999  
LOC729799 171.61704153463 160.143443392509 182.711318507496  
162.155834067128 164.865846124876 175.752091217351 199.305626149918  
172.758230728437 179.241385747152 158.890522392445 170.040914594182  
156.727153398506

LOC729806 127.581332110857 148.934593102452 146.242897296397  
134.218867540274 130.758707848676 146.019622621809 154.143331594812  
170.818182800759 173.863373934746 158.221595000183 166.714793209109  
182.560363283264  
LOC729809 110.727742629085 138.480633738745 117.412956162665  
124.329980024986 128.667662783862 146.278921849776 130.579954890389  
114.056147008769 125.40832206502 121.501959818928 121.877276961306  
125.729079191033  
LOC729810 138.003440266411 164.641508485461 143.239666389592  
133.559082256772 152.921328522953 153.013055910353 134.867806860993  
139.698333393438 147.519991961858 135.403206634483 166.330001480033  
136.175268696202  
LOC729815 154.783699020901 148.291518446423 144.233097828078  
155.194521954405 146.735616237082 147.428180649939 151.216992571364  
147.225911875196 146.31980311926 141.045379969014 143.853643511287  
153.916313595581  
LOC729816 231.39684528494 209.279164243868 260.129513331703  
215.698924670416 691.205738835917 293.4021207271 486.653672099699  
317.206754773681 367.229293432041 396.40172043456 293.528601172819  
473.151324002277  
LOC729826 140.941447663862 151.070654092886 139.076978731572  
143.739231124536 145.929907161493 127.786141874218 160.914009756867  
147.77581925435 143.437546532782 162.664254855131 130.751522895053  
148.192121257421  
LOC729828 129.311134743311 141.946668640749 155.926739769177  
142.259196792767 153.143706194386 143.776637809106 146.002585729701  
141.982743538528 142.039943511086 137.947606003247 134.584076788979  
144.910863590251  
LOC729830 130.838350486331 124.415058391979 128.973904070983  
136.08297876405 125.418782388128 123.129785564258 143.456586680241  
118.783904603368 131.761564745495 117.65847906412 126.84966022925  
123.872097378045  
LOC729832 132.674061422332 139.278366709094 129.945543636232  
144.046646189442 198.753297290444 153.360382235409 149.211214631561  
141.499192356469 134.387256336429 126.330382425318 145.547037566774  
142.694748293332  
LOC729835 131.001996509052 128.742617750403 140.54700821058  
121.138461509096 148.515730201538 135.616911926164 125.576103876855  
128.135216461862 135.061176512365 126.762116571216 138.57506931811  
120.853961156534  
LOC729837 116.59404046487 149.99203906203 121.988237521196  
155.683727621475 130.282212339065 127.777945516765 145.08853313195  
118.966992191892 125.384706864406 127.202039384041 135.017196494069  
140.57567768682  
LOC729839 139.853333847856 143.59754905745 139.286592412216  
134.361064431414 144.934103671894 137.876234091056 157.203304477454  
186.460034745907 187.625536724681 151.007812189859 149.182972268104  
137.044079235724  
LOC729841 940.008438825765 938.499337889075 1028.80076860235  
882.037055216609 1493.90578573732 2078.76377557352 2444.835635949  
2114.9754128463 2172.89794460273 2091.73580292332 2794.89048827025  
2374.1382412432  
LOC729843 1391.89900758685 1263.64725236472 1257.00798908017  
1370.61156801632 2261.31473132315 1497.32522786098 1307.19490564658

1845.87311313269 792.634423781309 623.68308750251 1796.26091584668  
1053.09915077366  
LOC729852 149.227646026658 143.922878410438 157.078563342652  
139.086498524774 154.760697311395 169.124088593549 178.904696191996  
162.37762946664 165.938009275308 178.235281981508 154.248226423862  
203.298764374262  
LOC729854 125.048770476506 129.431497372577 130.788557333561  
122.719785082196 128.478724185042 126.746388125956 139.82050388626  
119.263824982583 125.202468372015 115.316430915446 124.294771835926  
125.381865040574  
LOC729856 126.423739360894 129.1829592305 122.170662903259  
124.731056918418 142.55463239891 137.086936444421 147.145932651151  
125.683334853039 142.124876403709 134.485835304676 141.882859092658  
135.381131982323  
LOC729858 174.624446035895 167.620915011868 151.04846635538  
157.172970235254 153.879427186342 170.67334244323 165.692508737757  
171.071893074072 164.288645768576 148.501654210579 163.18585933431  
170.966588957686  
LOC729859 148.925418133902 172.230528631803 200.618080312379  
186.185055364718 283.952604729032 153.255318944823 191.200215655114  
212.223906015932 172.816477996646 158.163599942547 278.061498892643  
182.938824846376  
LOC729862 152.667721542507 164.811120992602 157.344758285153  
154.270034951209 156.037150880384 154.408875182219 157.77398996415  
154.520935683104 153.420392741659 154.13120950189 157.733042033549  
153.83891040723  
LOC729863 152.247504238261 146.871145679651 148.564655847496  
163.726898336284 154.818414925242 139.310309748986 150.717996520257  
140.321675137237 151.32179802686 144.092864444802 119.75069850668  
137.934850241054  
LOC729866 139.3864057463 151.26137860684 140.508390945342  
137.654833215154 129.32466533596 125.269726165403 128.468978498871  
130.574019477669 123.344450694117 130.466571969657 117.361778263056  
126.858621735156  
LOC729870 138.796257513868 132.66318177913 140.856864690669  
135.571239294086 163.48462232122 145.967685593635 136.908861280856  
151.615675144083 132.155877196474 130.524630778991 137.497145594629  
132.043196381009  
LOC729878 131.086904662241 128.4702079007 131.489715975987  
143.60570420943 136.575784685895 133.284873295487 118.703108284564  
139.205887721493 132.661036963636 120.80221197797 111.020070405368  
129.786941565218  
LOC729879 137.436627285916 131.49577981738 134.333679772065  
140.827965102541 129.055874691136 127.742948876822 152.413389525982  
140.359796538887 126.529763042574 149.788558681761 125.704264033102  
139.853333847856  
LOC729882 177.679330300381 153.399787997793 207.218779485342  
140.922678400415 148.696116257083 150.046300135261 155.201655653645  
143.236593995493 123.202829470888 144.529801006864 149.209348136739  
162.026757124868  
LOC729885 130.40517506216 126.872912960681 147.178598908199  
127.026168862919 145.039617860588 136.253264628863 146.222195387635  
131.539170756533 135.304167695152 135.351344868436 129.767878283811  
120.641590368902

LOC729887 165.467462247066 179.321622114583 176.382377784553  
204.862387642573 320.525885538523 238.068308163643 172.857643600385  
155.813740201987 161.289708941062 141.793216038882 141.461435494985  
152.961475450751

LOC729891 123.905462079972 142.879705723262 136.263658288289  
127.694189114288 135.907702243922 142.681626890547 128.011387527117  
140.293431620804 141.193081790037 133.388533738482 128.785472881136  
136.144068118165

LOC729897 125.20712393273 120.48691656248 117.735411259153  
121.580726825432 120.696557306298 133.271506838359 122.97229333908  
133.228074579352 129.570960882942 129.054577477882 125.016608289141  
121.476730561812

LOC729898 126.759554774012 120.41188773836 125.685852196342  
137.038866196785 173.424541543058 151.606932937644 169.520544329439  
151.858466721347 153.068898842283 160.690442125281 184.414609874199  
152.942824158634

LOC729900 150.761696482387 123.463861015933 152.511331178337  
134.983884722607 117.392898601408 137.06192448185 120.272964182307  
138.304793826214 128.973904070983 135.11447856347 115.999443701343  
142.02169810999

LOC729903 15745.699731183 15194.4972103372 13324.7465248375  
15745.699731183 16533.5738137081 15354.74541236 16123.3486890049  
16588.0599171804 15809.9561036761 14866.8264879369 15561.8923517816  
13563.1694195379

LOC729905 152.746799687103 158.989652405732 175.428000742222  
137.215025712057 155.101850847148 158.232100962615 176.008711524598  
172.783430414523 175.400802387403 180.01471631205 152.974593669153  
156.477249817844

LOC729907 130.588481497083 137.563246867433 141.471127716868  
139.336891718408 137.601181150371 137.339511714364 137.765042156434  
148.186698759452 125.517076778344 134.21363751173 133.36168342199  
125.315736755156

LOC729911 113.315182274675 120.39039576721 127.26820735867  
122.921245774755 115.01682934323 118.863150637476 116.59404046487  
115.34945441214 125.26492723752 115.738984899365 113.09980008288  
127.130769263811

LOC729912 138.808591995741 145.26329339067 131.260111979219  
156.141123407905 148.100508271232 139.519321690754 123.796657561057  
138.598167973067 134.565199667396 171.714973501563 163.091280469234  
134.750046135498

LOC729915 129.834436854273 116.902574164498 137.342348963288  
137.025625133986 126.84966022925 114.826501559828 137.326796995017  
125.704264033102 127.537152847147 129.176532377543 137.125637347852  
125.141185839817

LOC729919 127.661634554996 133.446429177254 123.595133376092  
127.511638455985 125.674471551099 138.322109975426 128.653335099674  
124.516264338772 127.305306470493 114.182798672347 122.900675062181  
117.024039521425

LOC729920 150.687819649072 154.021906399992 147.556482119673  
135.753430034183 198.244854812728 146.087596132093 147.397591251955  
153.339992195184 141.21138348075 147.341597963918 154.584367902971  
169.147351642004

LOC729926 1312.44215746801 1267.5716872154 1639.76556136383  
1071.47374315822 1079.58110075176 774.180202250076 1345.8970795036

1097.60805874165 1115.53524128833 2867.63319136936 2355.29862638453  
1057.80846320642  
LOC729930 117.724353829377 121.648921929686 127.900901613784  
115.855948612544 123.178049594968 124.666487633365 122.642077625035  
120.246240734668 127.220812636148 117.953453145685 121.803676441059  
124.207200622684  
LOC729933 130.653971083035 131.872583529419 133.99226161886  
139.166537591866 123.959050197189 138.147658465394 128.438401976279  
144.970383956581 134.725434838052 140.411200873743 144.741063866547  
141.373059612034  
LOC729941 154.443360208399 158.523941833883 139.999298193212  
149.593135821045 146.470444212748 154.750512277909 158.608479354755  
144.534143943252 155.323822771755 153.734347607222 162.850128623401  
146.513643172496  
LOC729944 122.603226380439 142.63406841734 134.197892075036  
110.670057121283 128.837901660985 134.633286312653 135.771423315597  
126.151017944639 127.79057041268 162.285199080777 147.213616261735  
128.563180697606  
LOC729948 117.710502693638 148.527528612375 123.478896502015  
131.977212025523 134.797624902585 125.786371150778 129.86336717605  
124.275741099764 129.447773229782 130.326980619676 128.06233429201  
134.671840308041  
LOC729950 142.032814623366 131.838522109796 138.98468042464  
127.344210958898 156.998563448664 140.545351041252 150.897870536885  
138.476953078729 130.619624347751 163.516075721791 135.105147647223  
154.768422926874  
LOC729952 124.847325289068 129.372522073479 139.361120875198  
135.532820436394 165.225475655526 138.731957926247 193.444080047879  
137.869471689534 140.83570584033 137.667514826346 145.855671447779  
132.253450751554  
LOC729954 131.287142490322 134.657787366869 132.677272839165  
126.242935839683 134.658664100744 137.605244950708 130.253372129786  
136.913957413224 150.275163835924 132.533234335153 136.79732903972  
131.253698562544  
LOC729956 121.425298866613 121.252042151856 131.269526665478  
124.484589975207 125.101995710829 138.67221078031 129.508990861362  
136.248506185974 136.84488044614 136.372712400493 131.041996482401  
131.794065532001  
LOC729957 179.177884962513 168.942165573542 177.32104138164  
150.920224503051 158.299765118221 186.406439948242 165.638672456873  
162.850128623401 163.982415393606 180.3779211444 168.232843307077  
168.654753237204  
LOC729960 144.623222072851 131.477589792769 126.588382665802  
124.563594928763 122.232732968363 135.233957017664 137.276586668477  
131.414690782328 133.34207595093 137.5954358221 137.603046125938  
150.517832812714  
LOC729964 146.98903251354 158.841505957036 169.568915494577  
159.665989587555 361.26540006942 379.670492165938 218.917357155289  
522.050619657197 348.575690346536 279.202256032476 197.277310409328  
409.206158277764  
LOC729966 130.844272373448 149.405118010893 129.138035235415  
134.187456260969 168.991551886143 145.42392518235 136.03581843125  
145.78573175226 127.365142833355 140.736051985112 173.70035122661  
168.027892518772



LOC729967 154.954906872501 140.641308444844 160.964435028806  
146.772611341214 152.291176493005 145.476377346532 140.57567768682  
138.401406375804 145.749887769807 140.319851351329 120.93965087814  
143.432889871079  
LOC729970 408.811415529922 390.573484082597 453.282973743379  
402.473870771741 137.524968609776 145.862497313025 134.838366830668  
182.453722105813 151.531667383273 155.60532199001 167.416417895159  
144.856801451884  
LOC729971 133.213697351807 122.056070994213 135.898546849226  
129.568951363607 138.483436753942 135.005591691192 137.406420101257  
135.106072664488 144.355348009294 143.915205639368 135.129656281091  
128.306607216705  
LOC729973 151.702809524494 164.21464602746 158.007926822094  
133.12641302705 141.308299074832 129.623601211364 139.560555361919  
133.108094159933 143.209289043824 128.42287610189 121.781562010645  
136.679405220947  
LOC729974 119.399971165857 110.296425545476 121.661141741782  
128.81022558263 116.981243525714 125.935071837868 117.445284668654  
119.261305304165 126.806537241253 116.688949603376 120.833139334788  
125.114303270024  
LOC729977 117.930665298163 145.821544099585 141.198692540628  
130.140958819402 146.105844205919 133.561188057423 137.340844554597  
133.663595328149 136.506347083926 142.45411401883 133.654232991228  
139.755211300398  
LOC729978 8072.83367137971 8322.20177173035 6312.36452724398  
9908.59593023839 2244.6916226146 9272.37780151073 5558.51089816921  
9994.54490550759 9433.53967760357 3930.2841381915 9099.13956219312  
5825.9968524214  
LOC729983 138.777120638896 136.987403767185 136.238646974312  
135.950465168457 144.842687993057 137.644942697483 143.643259003393  
164.558875058199 164.337486856997 122.295222990408 142.545823714168  
136.093473732174  
LOC729985 222.919473675549 197.651165059354 268.600782558985  
181.566951620202 181.229308386808 197.699100346967 184.398672994943  
164.50490221903 177.16711492983 182.335981256243 186.460034745907  
378.151202933526  
LOC729986 123.889427666612 129.719122724699 119.83679981791  
126.112672816035 126.426212216646 126.457337803727 129.409899416034  
124.86699236406 126.355699811531 124.536322123442 123.773753287854  
115.587874563785  
LOC729989 133.641824143083 117.593226427794 122.405469833024  
127.187020441742 130.217791888656 109.140708667012 134.094231940612  
118.802030418792 101.431474941041 126.752999657665 112.520199390427  
129.378442664568  
LOC729992 265.712482648121 300.482945704017 373.803772983872  
281.071129128589 278.095939961034 229.881164774875 286.774606295106  
272.077877821339 248.531972733475 318.561557474749 234.020419732787  
284.638865013916  
LOC729993 141.261150586614 147.808262170269 142.675752131935  
156.328454726363 145.599152743156 133.209211811498 141.069243738242  
138.010385979692 139.765361891899 129.7536873083 133.298480558419  
134.346754381858  
LOC729995 127.946346172549 138.207553349985 128.16147857336  
135.566041417092 133.351623142435 131.148926523383 132.579323148839

127.514381389109 124.74291205933 134.95842832877 132.274654254761  
123.344450694117  
LOC730004 2694.98079256089 2630.78185410861 2670.9151276786  
2240.33212242003 1558.22238167317 2374.1382412432 3737.57754066891  
2547.53445585552 2376.52728883131 2677.17579532816 2891.03258768937  
3140.51157972795  
LOC730005 129.591396165575 135.260393988134 135.632298302036  
135.250379276888 124.516264338772 140.912921321622 137.46978401237  
128.662039886682 139.331046480528 140.812334019209 143.785769607842  
141.380276932556  
LOC730007 123.9209907098 115.664551127497 123.410467384598  
128.864822736402 120.485138937899 116.871350997346 126.106777865128  
111.559325333192 129.313576009092 123.624133715653 137.312488161187  
121.799209715087  
LOC730011 135.310766630401 128.936628289974 126.137627769256  
123.632031112507 145.887262601586 127.374600506681 126.958366599622  
117.74682797375 134.033751039071 147.305679046765 120.652099118243  
130.93033679281  
LOC730012 162.203570429542 188.995551740427 151.007812189859  
218.944052733757 162.026757124868 146.753212022975 145.036719629525  
155.223806761489 145.274345879987 153.93249158209 119.32696696175  
166.692386207143  
LOC730015 150.677852949794 142.75592155869 147.78847662997  
135.787323859105 151.259426521768 149.138678142327 138.62308708151  
138.220016828327 138.340652133783 159.253029632045 154.688685142904  
163.566535828036  
LOC730020 193.813717161291 199.933148219784 177.84188738734  
226.623172906957 192.548337508559 198.166270627544 244.307627077001  
209.727089546377 215.585089158905 347.866264631778 182.624130582754  
259.826625866106  
LOC730024 174.795822188504 162.274094333189 160.150336334888  
176.049946762504 181.135519188216 180.599150102184 202.662466141301  
219.537335167901 146.97334315047 181.183277133224 131.527939273875  
154.889079187405  
LOC730027 145.985223908092 149.758215028408 149.340614923384  
151.164936050256 141.173167283016 138.530236176135 141.346722137248  
177.468210189888 134.460035654795 128.5581535393 155.410704148925  
161.813099560175  
LOC730029 2285.86163259073 2563.02488807613 2414.22821062457  
2544.58522979036 4956.21683075884 3287.37172778474 6077.64695330731  
2330.60389526686 3552.78712528922 3518.84173951107 4901.41175228982  
5040.35379681644  
LOC730031 155.595651896155 128.980519133484 151.411708598688  
156.557792402376 139.72868421672 133.206919058442 147.799806976046  
137.022366035333 134.064206964444 144.743281367797 145.748174062159  
138.814930200619  
LOC730032 146.050714008913 156.061579024549 139.807421433384  
145.380971596154 143.122278808091 135.894512504725 139.397282021664  
128.115993005977 137.992477770842 136.265972909993 121.722412245175  
123.887740029279  
LOC730034 145.45097990828 129.596851280135 137.042097702398  
130.697148466042 134.425483661043 131.210866639392 143.496669740707  
136.990610254852 138.005168756932 146.522066289381 138.252656818036  
140.82351325907

LOC730036 141.170937695272 145.168031449425 147.612454763666  
152.518729390047 150.112549201892 159.798024189461 157.86653024793  
150.707113487334 149.899789105328 166.447510782568 165.500088159872  
162.861320877227  
LOC730038 130.444766583917 141.434699050015 153.393651104539  
144.818492604488 158.100395482569 146.298733090986 136.009043911039  
144.313841064968 151.442463705271 144.058006677487 137.869471689534  
140.648918459179  
LOC730041 142.203367260558 162.431674335726 156.763364462534  
153.95855605751 150.707113487334 156.502051001988 134.031960707639  
132.428675012593 146.577524520274 145.39813290003 137.084488743415  
123.368137868951  
LOC730045 127.43866970659 134.30854633824 124.809739073169  
133.191797029676 131.554055357245 141.836648910979 133.271506838359  
135.688346453694 131.732416355002 121.434713764246 125.549968985241  
122.68719599986  
LOC730049 163.275138097131 145.977658128528 134.485835304676  
147.872625576731 136.109975252514 147.174977926293 160.0697586671  
142.812521349963 150.51056917809 137.000868503792 135.691862612951  
168.763640193219  
LOC730050 155.582036890436 157.986640251147 213.077884261943  
163.516075721791 154.908975734985 165.39758732 179.478756495687  
152.908358615016 156.519196335454 174.323881548679 173.287859527767  
187.046760972666  
LOC730051 162.919656039331 200.371280127668 190.614236149496  
217.778414825515 171.924364939807 171.329984719612 160.778296470857  
176.194292036542 164.253219197128 157.186747372076 187.881334544018  
146.609485664113  
LOC730052 290.954496559897 328.969023478451 309.5988292104  
294.115163083721 304.013547190343 374.169744342352 714.6859666834  
357.259935567823 349.816819166182 572.753294955207 329.263397240111  
542.121375354644  
LOC730058 163.119211741255 176.680708339236 153.039237274992  
162.050520530297 143.959910170676 145.806935833967 155.665535235558  
152.445022409208 139.858812885649 160.446191353364 158.064409011013  
155.861829925386  
LOC730060 476.782624160552 506.430593289427 392.430873293903  
413.000072500071 210.290500215377 605.583144451322 332.296938254329  
405.032674307193 368.711718874343 350.22221782412 608.816123736392  
388.096183735126  
LOC730063 188.797908601851 171.350620456505 239.845747958475  
193.95909424044 177.011776399483 196.310746973798 188.818012746123  
202.00431685587 173.142436025281 164.777719508421 171.298701141684  
184.915526626619  
LOC730066 123.638001112969 130.647944268116 113.071787850611  
130.06068534054 118.474291525263 123.827771590213 137.00532429734  
115.855948612544 125.979152567959 121.118933682515 112.949643549398  
126.340955733062  
LOC730074 383.74357557363 297.757657398146 468.569725051459  
369.726867521935 347.081036934975 206.999289979742 403.405544395163  
389.96566674501 430.412897698085 756.390518977556 327.480268032814  
458.953009417683  
LOC730076 129.568951363607 134.339535632463 124.297848065172  
133.489068665353 148.253612913109 133.621325902558 137.330207626732

129.132523684894 138.215708514725 142.166650343224 111.992738490468  
144.283716416188  
LOC730077 158.716575777014 158.400572147671 146.791505538166  
160.939530665541 167.451782810394 140.89390566467 148.082026641671  
161.803438841859 153.843250142472 159.624341769644 134.81595608984  
154.947359473187  
LOC730078 156.123528587917 127.336648342283 142.409003426775  
143.454771158075 156.432292210399 138.834309377225 163.091280469234  
137.296790373528 117.324368138398 143.737021989907 144.822943770596  
155.263513633703  
LOC730079 140.949367846425 137.76307316083 131.568898109933  
149.223102493474 131.93683726912 134.197892075036 133.125084506877  
129.072962023838 139.369815367465 144.079935036119 140.36278240974  
131.946302885243  
LOC730081 155.498580125421 159.89988762842 139.991780068793  
143.206100064821 142.879705723262 168.197255166255 151.123104810793  
140.667415746111 146.157459765796 140.588811000948 158.226547375305  
158.499787920522  
LOC730083 130.808911605271 127.036976462046 150.213657393257  
122.837807905774 130.822330736013 153.804419092743 145.977658128528  
140.26557508894 152.11956441072 128.630613404354 131.899614022767  
158.374760929273  
LOC730085 131.041996482401 121.912927816178 135.116985816353  
129.945543636232 140.42579083092 116.196676877996 136.946137446743  
125.250900940748 120.428171428188 148.175206259619 121.613684281664  
128.297879410629  
LOC730086 125.136745288071 118.863150637476 141.982743538528  
142.203367260558 129.831076624826 129.025000034273 150.331324340476  
129.77374228644 139.182623417751 133.408354896584 120.351217130679  
125.951927536494  
LOC730087 132.755256423863 133.670967970136 129.487458179949  
122.281263517691 140.092648878007 124.548598801497 143.407371444437  
134.618121709059 130.43775024291 129.928047362701 136.610566158577  
139.545451634208  
LOC730092 166.223079895236 163.280786875496 151.780459290205  
166.998311158378 148.104173238606 170.758319048911 144.038859705973  
145.802944788548 166.904990069484 159.895303363094 147.221425204534  
148.260672564835  
LOC730098 222.848935978648 225.065765924246 236.164692035094  
255.866847225916 216.836094088131 168.838723365068 157.142101889337  
150.924948809354 153.962758393332 149.306122206718 157.348475799643  
157.600193849783  
LOC730099 137.149156133537 132.502153153826 139.157088843803  
132.218907367109 142.063338490772 131.573729430926 127.941584184869  
139.08460576146 132.336431473522 140.515996180923 134.711144967036  
152.496881293769  
LOC730100 150.255511248598 136.274199465472 143.001661958814  
145.391496022306 129.094667159621 145.517559593811 145.06205326107  
148.074494928651 155.639666182376 138.43190460314 156.508428796592  
144.145612985703  
LOC730101 165.122737166322 164.352366170527 167.397758092427  
159.874161198304 152.987939791009 170.23937234395 162.188509438986  
161.325409589612 150.874014332213 151.134466830828 167.395369670065  
155.223806761489

LOC730102 153.639559509292 146.202611204712 146.188193301627  
144.934103671894 161.596086502946 162.846914172627 146.176240539176  
163.267148547147 151.98710761363 168.132172570809 153.926214082991  
177.598422362298  
LOC730105 125.75980494927 132.680140469504 138.264258708067  
127.369456504277 134.750046135498 137.59017685842 146.890877830248  
138.071335383596 131.48517604564 129.85040048805 133.711821318079  
137.112274459462  
LOC730107 382.806570442504 381.971539806271 402.213774592085  
390.670702155192 735.165830487162 472.961857076681 380.243136469602  
322.837446618323 287.503594820801 465.29290512169 244.280971257965  
338.822464893411  
LOC730109 156.490654498766 143.750656408155 155.237180851323  
147.49720952988 146.696029753123 148.644800418517 165.262738484387  
141.310253828965 146.753212022975 148.424970450231 137.267307036807  
151.869928694006  
LOC730110 128.85983397523 133.058788697693 142.739686751422  
135.931715324468 139.46518859956 144.402160347818 137.949215501559  
131.234140286502 134.018379799826 137.163699337032 146.97203173446  
137.537197575152  
LOC730118 156.745051321143 150.364511432468 165.066555355918  
168.061346742356 140.760983862166 125.882246459692 169.192327500032  
148.269123639781 155.104697146664 166.925695810781 138.371873773284  
150.163801964104  
LOC730121 135.146767090951 121.843992693814 135.061176512365  
143.354858193994 134.078506829054 126.614876404146 126.780096523484  
139.694950277714 143.947729578484 125.769903262265 120.628904050564  
129.210356735226  
LOC730130 182.42088387266 166.095964870713 205.149094703318  
167.157420848604 127.903393519351 128.922269289649 129.838790698396  
141.180647782041 146.499065641095 137.440295223749 146.249951130016  
152.185397218918  
LOC730132 144.419657674797 146.609485664113 140.56526023628  
147.970243979273 120.201521341263 147.962721373177 143.689257983705  
136.520811697544 134.607501073433 135.9489027281 134.830021570666  
155.502363062633  
LOC730134 162.595632367022 149.341736870692 147.382177739631  
167.713268780664 163.480722123193 154.043604150962 156.095520355029  
153.962758393332 159.98636352484 171.660157220703 169.110693867431  
156.333133322672  
LOC730144 126.895669261503 151.325068155715 128.785472881136  
135.504526903482 125.217733034761 120.304037458526 140.522470775478  
134.448481253264 146.047948193303 120.721341479615 107.531907287727  
124.451718955086  
LOC730145 135.313148180961 138.800986934663 119.709032462308  
137.365567527202 115.285392699073 131.179786925029 123.135918415235  
122.501785735146 127.424848301217 129.805200061145 134.158454639998  
126.394032757479  
LOC730152 145.768857553634 148.760280320258 153.43000129811  
140.370626016794 143.103779196037 144.30699572795 139.491769969541  
138.913591568111 143.455941298415 142.097126256137 134.669763149268  
162.033909093358  
LOC730153 188.515336186633 148.171225002967 181.183277133224  
173.121618125421 169.771005675296 170.661808797506 165.530397739051

185.519000961898 172.138554350738 176.725347194807 171.689722533849  
154.562761981868  
LOC730159 122.392159083328 134.633286312653 124.775529469869  
116.902574164498 124.568534983277 126.595668758744 128.236840746655  
123.935072913078 124.083648029911 127.792241991414 122.339819585312  
131.761564745495  
LOC730163 136.392389842232 150.49183794045 140.194414869595  
144.757068610657 145.562772839517 130.169291786693 133.675029107803  
149.041707216561 136.728975205893 142.951829221947 131.308384127079  
152.426527124644  
LOC730167 168.935348409102 139.783725419023 218.592402813219  
137.012646671173 169.003310163058 162.513107496558 171.304896264805  
156.333133322672 178.717719615544 682.538709448692 156.399808270033  
198.489278156437  
LOC730173 180.15338103 179.265395910119 217.531179216305  
209.180298459605 186.611870261871 301.546624239855 364.331860640225  
312.845219991659 383.503040287678 175.495965414493 237.396466740419  
207.123420880185  
LOC730176 208.628626112623 235.48876511325 253.42022722564  
257.573614085223 208.75656341402 190.471158323247 198.840533461525  
217.327543190687 179.973655632636 199.191065549132 180.690409026809  
189.482046688226  
LOC730179 121.553107861517 127.913463809158 126.388778582602  
134.604565335211 142.775372580233 136.390047634643 133.406312157375  
134.746175914762 124.509816436474 133.396403868645 140.665332203898  
129.281564491007  
LOC730183 169.321832528939 172.120772549791 164.753886197136  
154.688685142904 191.725728813959 200.790119570144 208.914498369991  
152.81544746536 198.631354372924 153.697775290962 169.583355171423  
207.651142295123  
LOC730184 147.057116881846 148.415036326153 171.247946863662  
165.347173283335 163.616115299926 137.159781458748 157.619627711954  
160.374491283254 149.936366672592 146.916683989962 154.173439471404  
153.857048476879  
LOC730185 120.55570440025 131.444734367396 124.256773437346  
138.967080709927 124.368438691944 120.410307377977 122.813441348997  
122.572634128442 150.489651880905 126.905235161069 145.889336010424  
145.351662473858  
LOC730187 7519.94306346326 7873.0525548049 7656.97151002785  
6894.63087357693 10202.2226913537 10836.7380675792 12022.5515181682  
10704.4678928541 6571.35528952186 10024.4662743012 8163.29201165065  
8709.2221371432  
LOC730194 137.93067182632 146.590495255969 147.091280396135  
145.695402948337 158.434048174501 154.324955232468 168.161117444474  
161.402322405903 147.600825146067 139.246945739764 148.212445624699  
146.336371857755  
LOC730196 134.304545258148 131.138322527536 139.005788243703  
147.045944019838 139.718191989129 134.01566484034 147.694098231655  
144.879364072868 134.394503574535 139.733149319736 132.440818532628  
136.730623822061  
LOC730198 140.132816040735 119.95666716163 132.981346767415  
135.155955441604 130.06441029462 122.821563586744 130.447794983538  
129.719122724699 130.970694919879 125.28279436853 139.480361732772  
146.398454169593

LOC730200 144.098578955023 150.313058722346 150.070213543579  
143.539741029895 140.099069486005 135.336754997434 127.9928491829  
128.425838805072 127.913463809158 125.688786329422 136.648306684974  
127.871445879091

LOC730202 274.77366169918 275.468194644053 210.605864685448  
281.694635436938 166.305219348008 244.627091189503 183.779065928447  
204.990512488181 187.380064367869 168.289492873475 207.173653740239  
192.340135076104

LOC730226 156.920867019849 156.324643994552 151.428283279424  
140.687016530974 151.506013510204 152.717642489582 151.221783750989  
165.017178571218 141.174971007547 165.553581848949 160.598186999524  
171.809717138613

LOC730232 135.409613764459 151.641486303453 127.018746030517  
138.887159625058 150.566842106244 134.501410126169 143.920134762902  
132.247611790269 137.663941989772 140.260053206523 144.592987736094  
143.681220324074

LOC730234 133.411087000196 122.860898886143 162.317084707395  
129.055874691136 140.326012404526 148.147294674218 153.726935957906  
141.56459720769 161.099805358232 155.826394389322 160.748082658758  
178.200678423426

LOC730235 183.443006525616 171.677654793775 216.680795762761  
169.321832528939 195.50039162477 182.736067431579 293.448046685909  
221.664431984861 216.859640534581 289.297370738382 242.81187187788  
259.094411953361

LOC730236 166.382301680189 167.594414386475 157.425924587516  
156.678686363755 160.960599932898 153.630125822178 152.483240622367  
146.261164125255 149.292552957665 146.311966562883 151.687402863648  
144.746134643761

LOC730240 143.947729578484 141.373059612034 154.620194499553  
171.40549153673 129.417232210341 141.066106476109 144.748564682545  
147.045944019838 141.870640394206 118.836387680022 138.737332306848  
149.000760379976

LOC730241 140.163936299053 139.591231478841 147.393178410954  
116.378552206652 153.507553306723 134.863223806176 138.244585395561  
137.016495611111 145.070927449969 137.386308389265 150.845846206549  
136.18698517676

LOC730242 142.416237823488 147.416991272497 162.358237198517  
136.971869448818 126.51808376464 139.943915452851 135.16316100494  
136.287909668938 164.513371267476 133.778595695007 138.79473329684  
146.044279076949

LOC730243 147.04481509758 138.704839659727 142.052454741558  
137.358139652612 149.779323547896 169.31618330657 148.444479022559  
139.962307072428 153.0141888126 157.28429690041 158.960488862727  
166.32555285213

LOC730246 5022.15374558514 5240.40795364202 4882.16892310839  
4386.83308119416 4836.4008757421 6522.27232911897 7468.70895916615  
9636.32818474581 6877.52553567598 5894.79176478976 7717.01422791837  
7969.0710242842

LOC730249 143.04129238495 129.121598974852 144.760229351772  
152.760855359297 123.522738813733 149.400244837133 138.916830356763  
148.176995739142 139.344344562134 147.615823612879 128.052753068991  
129.098408596418

LOC730254 153.804419092743 148.107004870598 140.907889482107  
145.665155500862 162.762473039474 143.934585983797 161.559920910487

147.49720952988 148.337793323867 157.353493980339 168.813895764991  
158.573561336755  
LOC730255 4536.46344538492 4995.96906061198 4246.19983955771  
3855.33040541264 2741.71904421456 3122.71790981947 5291.83393775761  
3896.49785254733 2578.85391480563 4016.35381420598 7992.84111657183  
3536.14527317085  
LOC730256 200.84691030169 238.847091900666 305.720812071583  
276.089623957012 330.281193038198 201.555964610849 300.094509257518  
245.582279957584 301.747788416496 252.222481637238 293.746733527346  
349.248144552634  
LOC730259 160.769011617127 150.328995030071 140.28485470716  
143.484004107893 136.611670766233 140.091378604453 142.848438163322  
157.800913051929 136.647239621513 130.607857562345 135.005591691192  
160.234704406302  
LOC730262 142.372470063444 149.949425756405 149.6036366066  
153.005366371425 132.365002835934 149.552704503066 157.166379887259  
154.049004176595 144.902807664593 146.617853918109 143.056098955473  
146.887506793665  
LOC730268 130.761936205169 143.643259003393 150.833523101057  
133.517685144186 142.815817738837 159.701028026285 148.812015298003  
150.772752327567 140.411200873743 132.269567096683 133.814720785534  
148.404000406948  
LOC730272 127.04217189075 132.752401872376 128.984613946021  
113.119021336236 125.318166919844 117.331280455759 126.711037295629  
131.848213704003 137.93067182632 139.117776552573 110.764586138261  
136.169525758215  
LOC730273 201.773745532242 190.111477641308 174.187510325385  
178.966169998125 158.834483073542 165.149464497921 185.961822133346  
158.989652405732 157.572446865749 139.400521576978 172.128489882364  
153.762995131216  
LOC730274 127.930072902878 148.401698825687 144.380485359951  
135.904163043783 167.941671074236 136.87712607887 179.432235153344  
151.040909999868 151.440732942734 139.273651128094 136.691234705997  
149.297012645798  
LOC730275 143.783078837501 135.852591930882 132.903959880979  
131.984467471242 141.079317977197 126.77232818113 133.288181734813  
148.941194457652 128.574419295906 124.345320343901 120.790536146461  
137.885506916098  
LOC730278 1135.49876948815 1291.12004949379 788.693133735893  
952.357976050712 6548.65498784806 5479.24427823207 6960.46610781696  
5506.81944079182 4913.55892033682 10533.5868398404 8918.58940386786  
12368.1423473066  
LOC730281 144.578454791104 135.872692740227 128.551335256123  
121.181654892305 120.897228878841 128.040201586267 162.961792330623  
139.931092990984 156.84104238878 165.767629164724 143.840979923821  
147.86104992164  
LOC730284 189.450316943845 191.128539630621 203.125568980238  
173.372949622338 254.013921962363 229.284931844047 323.244664586314  
258.384059994446 223.531323159808 318.244342364572 239.31180635241  
281.278843600876  
LOC730286 153.440952021924 129.231455282441 187.572517928061  
149.821848101995 175.902751522861 194.36669779004 205.821101661022  
211.059870865354 183.619184925353 232.276667029184 200.405532717305  
194.80575419836



LOC730288 950.144166422001 1024.59845685519 728.176339659082  
894.734451279225 1135.49876948815 1015.10079945997 1669.97250023755  
1069.25265476373 747.077451281453 1050.40488466179 2476.51542420593  
1154.1046856215

LOC730291 123.427366316096 125.769903262265 141.874188629438  
137.6160344044 124.130599753093 133.453702113571 138.255457081996  
133.379872189405 129.236471271181 129.263794008537 141.162443312437  
128.950308413612

LOC730294 120.827732270626 136.353051841792 137.997756995882  
119.48998115497 122.410340121549 144.116298946718 140.047749881567  
130.199581370385 139.310309748986 141.310253828965 117.480506535399  
155.471795004237

LOC730302 132.796961054534 138.108184983014 129.645982978155  
129.25124636593 111.078930787656 114.624259793353 107.531907287727  
113.005774989833 116.58633348811 118.319950396126 155.702330867056  
111.867464669155

LOC730313 23656.0669757593 23053.5660790052 22543.625434682  
21956.7541751958 3301.98381607571 21754.9904891312 8617.2437024568  
17141.9934540963 14544.3732040823 9099.13956219312 16397.4527321924  
10930.6720259935

LOC730316 1449.33679383001 1751.22580157752 1590.87426068638  
2099.85702995194 2112.84348677276 1797.65684760558 1925.60246708149  
2282.94927629821 1521.61996270758 1368.91287156398 1246.2895253224  
2804.99820187198

LOC730322 122.042136913991 122.816049839521 128.047981250943  
141.346722137248 125.754741914111 157.419333185365 133.847494826806  
130.890314257211 143.081811369669 126.115828232308 136.398521726896  
134.325520377207

LOC730323 252.851164967726 285.83626978316 302.570932942847  
264.654879741889 310.758803815671 1077.33874251157 2874.43919426772  
1445.72064343302 344.247544510881 262.259969786927 1712.47877322331  
1292.13921040404

LOC730324 360.684900316265 359.935451429371 349.722963659175  
452.606433325387 360.684900316265 358.415933397099 438.533112511098  
772.399017166118 467.347509383673 388.192984832638 296.141012087256  
462.265785715695

LOC730329 120.967523586161 128.43745051 127.485734862624  
117.639216182057 131.996032643928 144.636277619886 146.347213904792  
137.522792377933 141.492458250787 133.665206343648 127.629258006335  
123.126240234396

LOC730340 167.67272339144 177.333305785248 177.257355909681  
190.700515036197 194.202977693583 187.881334544018 169.124088593549  
186.377571176623 158.347972566681 162.638805580226 163.336324451735  
174.229093061024

LOC730344 150.218643705925 152.845126167802 151.981708806765  
150.192562234405 145.172776053 157.14512525321 155.810034593382  
141.568970008164 169.975329631607 171.190796424612 118.646119379542  
152.812142230375

LOC730347 139.765361891899 139.057572927874 139.450788315602  
136.859366444351 142.747793303346 150.056508971921 150.038722708606  
139.002932985183 133.020551937677 144.774621469452 139.497253870412  
149.380733719756

LOC730351 134.888404433315 129.684916104674 122.914680091926  
135.369146072643 130.199581370385 128.848008246639 127.687299576139

124.145492642453 135.129656281091 131.466580723837 129.327645260099  
135.961724275921  
LOC730357 158.598999414864 154.154761033012 157.035739033122  
140.985432994867 159.43317827517 171.791030104358 187.519053043173  
163.714231827866 172.310673499572 180.132104305583 139.611455791957  
161.72730923536  
LOC730358 174.971350923613 169.649251828199 202.458096827378  
163.234966251618 179.44023315251 191.777253122672 215.167086358143  
189.575681012578 181.823450464129 205.476230849391 179.338652960181  
249.064573038094  
LOC730360 163.748692741999 155.777281781161 168.702991603656  
152.222732770706 180.430425314885 165.355764467096 182.698275130489  
160.994837128661 164.520247586053 146.823157886228 136.758262322199  
162.825380100343  
LOC730375 130.433405111592 136.745596788338 119.763020707899  
134.151372457715 125.364821583438 126.064311640223 122.187031504466  
129.711973013336 128.372225487481 124.086902599543 137.450774903611  
124.048926099805  
LOC730376 135.864853829421 131.789877096016 143.152993168137  
130.172041917023 136.454911192129 135.86924353735 134.70848693317  
134.803612821519 130.724642809645 143.873048967535 138.605661097886  
143.212739422069  
LOC730378 142.142633050256 129.151767489346 149.659505956629  
139.82050388626 152.563532872898 133.115543233699 134.734429133481  
137.719257499747 146.368188849777 140.254665008195 159.032710656826  
140.456277147131  
LOC730379 130.390722272955 132.890886250364 149.188357651896  
154.021906399992 145.235087732482 167.250667092211 137.201149245092  
158.425950902309 147.955701866515 147.951996191313 129.52578899011  
131.176413983785  
LOC730382 330.457534783492 314.386320310898 278.737944234055  
262.196293231028 495.438672949441 634.556887178869 575.060457772307  
396.611050163857 558.251384152474 383.802494922918 725.443026984982  
634.046843336128  
LOC730385 134.803612821519 151.852294315212 150.031863363697  
149.241358552148 162.61434899634 148.275939659102 172.097502416776  
166.20327698517 148.903792383578 153.538565948453 165.244616507084  
181.048789688798  
LOC730387 135.866980620144 121.024572716324 142.777235931165  
125.40832206502 130.949405011154 133.67719550997 141.84490608317  
147.561362873855 150.126627487419 135.576975868985 111.10737497653  
150.960096893517  
LOC730389 127.263061874385 146.355229778997 132.115817176834  
125.701083319929 139.47828235176 119.164791441052 147.232015056035  
132.981346767415 130.272086123019 127.595574823053 117.870230005125  
150.547096071626  
LOC730392 134.253399256648 143.00521196918 137.388190728367  
138.870636101334 126.872912960681 156.973511952828 155.397301207102  
128.556280049403 151.151297821117 163.030275835038 136.598215718877  
138.647667867725  
LOC730393 139.150209111606 128.705587172572 138.789908033669  
124.217337143269 146.889192302286 133.411087000196 145.581755438161  
136.425263391752 145.855671447779 149.85385474029 140.511988097197  
141.644521617419

LOC730396 128.16147857336 120.345546077894 140.479321382192  
129.740166478951 154.539367933684 131.744454088995 125.073353210914  
132.269567096683 127.485734862624 137.680019787902 131.780134634616  
142.019263564073  
LOC730401 132.346363545288 136.142380560596 135.689889081912  
148.590732065459 130.738915341653 142.363309192458 142.027930009598  
145.020615552964 147.83240038699 146.624631389743 138.27272971335  
139.442091671938  
LOC730411 131.497454038525 125.141185839817 130.592061896237  
142.358754646258 146.355229778997 149.155345369055 147.764068958635  
131.185836673529 151.761369162723 127.560308850342 126.295856316628  
144.931901042924  
LOC730412 120.342513393659 113.311132067152 112.190904058889  
113.609215169397 114.995889945366 115.332409360957 111.783160346742  
116.507315786826 117.22284971665 106.953841653951 143.303309656177  
125.879198238067  
LOC730413 851.221199352646 872.320823993033 583.022090879298  
1147.96742431386 140.608266389167 221.975219056555 149.518870320398  
138.609972011765 160.127254444487 218.862705238592 145.265512354674  
140.485102148597  
LOC730415 433.405369327168 461.822629852953 242.81187187788  
304.292209676095 546.274050902567 404.726926716133 522.486866458783  
1088.25132365974 1758.7809492929 586.867772838753 576.451964662024  
495.241179224412  
LOC730417 188.291563792748 178.304914997023 185.570062118736  
186.708059183893 145.139966629363 149.106615763242 155.777281781161  
134.797624902585 147.889486635135 177.073245863872 133.443807124822  
152.317890573534  
LOC730419 153.832132196284 138.374092984164 162.199381540369  
147.299872426498 150.176942469551 159.317429821638 148.069725041021  
140.538020869886 147.932875151331 150.807308519367 140.005968571997  
163.709174813901  
LOC730426 136.485034823945 126.37749112514 138.464793389999  
141.576177844986 135.453399741892 125.119425491746 132.998223400178  
137.128849888863 117.104945989023 138.345393524161 117.048846466839  
132.661036963636  
LOC730427 149.831566330214 141.437891956239 156.822477235844  
148.654099017805 128.432188632218 156.548858402702 151.094682146074  
140.92066676704 161.85913459364 185.570062118736 128.2409378561  
136.824357247954  
LOC730429 140.975056186954 132.135448831967 130.477824552202  
130.998637545686 128.941490662452 151.639515017015 139.597493526257  
128.548201588898 142.187694439611 135.877646659023 134.746175914762  
132.227561632637  
LOC730432 1170.07851727046 1228.89116158868 950.144166422001  
1324.56751399862 483.174262289559 391.500696444149 561.062594540005  
470.154677948419 438.611973005212 841.623780229898 574.262112643403  
522.899203071911  
LOC730455 361.218491712891 336.981561928411 421.056268094661  
317.839512360245 255.903775525554 561.062594540005 523.435696794756  
813.454826901794 477.056706273413 596.743397794872 498.812823949508  
596.743397794872  
LOC730456 116.061356450855 133.003743285746 138.166546598846  
124.385193388896 128.601885372662 123.379461430902 111.137519376499

124.443643568527 122.072091994548 111.055738573603 133.155925118245  
123.813766735115  
LOC730461 145.522435728191 148.175206259619 144.464783586439  
138.207553349985 140.965498009244 144.559193410932 164.82904652634  
140.704317015307 149.322537247388 138.399665664034 130.754320787628  
143.011042973347  
LOC730465 124.378096177801 128.129780978486 126.470239371932  
126.100454068838 132.336431473522 121.154389729409 125.28279436853  
127.749992538985 132.674061422332 140.938442055097 133.728378162206  
127.43866970659  
LOC730474 138.19108838324 130.066177538896 139.938739652347  
129.642952083513 127.404415477384 132.653795458388 137.473779155388  
130.231160879338 138.049846456876 137.864637728155 116.142650095476  
136.287909668938  
LOC730476 123.893768254549 109.654666772771 113.852849454448  
121.572462089942 113.656820701744 129.034770823878 128.785472881136  
127.712645268019 125.256339476772 131.342562516383 113.955459033122  
128.972276851419  
LOC730479 125.5449326311 132.299112653883 137.027334042585  
145.821544099585 138.734437288431 131.019345449516 130.418739793498  
135.621035941292 143.245660951425 156.481871341275 129.079917151186  
122.158160927149  
LOC730496 135.745821200254 132.271437329873 122.418378964982  
135.601916560736 129.896711442418 114.524341239889 111.09179957013  
120.871693555514 149.290007708698 137.149156133537 124.93629294955  
137.363483527372  
LOC730510 159.926719599391 156.328454726363 160.914009756867  
190.364362436485 164.696616863082 145.909456876796 156.290018816692  
160.399059317919 159.491388998564 173.056715623574 145.654559623732  
150.711857623087  
LOC730517 126.969504644414 135.330241638301 137.038866196785  
131.234140286502 135.212715912271 134.086301127594 136.274199465472  
130.967476533254 136.529820456592 135.429199205506 135.309431186017  
142.747793303346  
LOC730525 2028.67873136046 2877.92845389611 824.746488539942  
1618.64901092072 471.315730378641 1276.14915305515 660.535644289024  
461.722481634933 504.9864660689 418.062540009856 376.692422468905  
479.761165832339  
LOC730534 2947.51998516453 2615.07927836881 3384.19521857242  
2433.83421295012 5233.72882607795 4732.31591164752 3688.68740405322  
7292.0342195035 7122.07276863122 5049.57929757135 3862.57980488881  
5165.90865799172  
LOC730535 146.094951139804 131.196196319523 133.367085445965  
129.405749374776 126.976353967127 129.189479305468 134.029984991385  
149.057388078138 133.699547652179 157.484541464879 151.188412354358  
135.501192996538  
LOC730546 131.177396785633 148.996601285688 137.25679451567  
149.061464748604 143.035245560484 139.939863187181 126.5764774133  
144.095471610836 144.565926379402 134.312156667838 128.779829252045  
132.137634927459  
LOC730631 133.771691580031 128.126354569418 136.111569529393  
127.161975533812 123.185652476312 122.624828884731 131.619951110473  
121.846349358116 127.903393519351 130.35985690876 122.343979874508  
122.610529927104

LOC730644 126.457337803727 135.44496453026 141.082569618216  
129.931923954109 133.959208066964 159.298815559223 117.432860005907  
146.499065641095 139.430808017891 143.956726538569 122.423561732526  
145.844961942581  
LOC730656 140.123348569709 124.588594750916 120.511896155396  
144.295556086504 129.785078660064 123.860747215706 122.167669805597  
123.809866652834 126.048382998393 123.108694517244 140.208983238283  
144.413210364148  
LOC730658 128.460750472464 120.193580405229 130.914932329297  
138.212860360467 127.753065449769 128.56000638844 133.463464118897  
134.824147038515 129.075693654369 134.427601777639 124.892438890234  
135.010937737018  
LOC730668 118.414329128347 126.611663427876 134.372560968918  
125.815256068004 114.755442050481 126.750850861235 127.690860707933  
124.193603137858 132.32633643811 123.801380911257 126.619475852751  
117.331280455759  
LOC730684 157.348475799643 148.81406900745 137.020473156363  
164.223990197735 159.856190281237 176.100691355682 161.903016201041  
153.815239954928 146.293735120772 140.590802695412 133.280418227922  
144.538528198113  
LOC730686 152.650867743471 137.599810249536 157.108043150259  
149.374282007673 154.459517779315 145.679907578808 159.838626443912  
156.053517438255 142.869595099569 149.516743790585 146.612602970963  
153.047317528007  
LOC730704 176.062665550409 179.730694272916 215.585089158905  
181.238505183667 157.013200713587 130.779805222363 140.515996180923  
167.025336068642 145.265512354674 141.741892403029 159.055956234445  
135.144908040903  
LOC730713 149.52880714343 140.279222720709 156.083002868004  
149.498020676126 151.0189104086 147.310807346272 149.297012645798  
152.640683776403 154.296467085914 142.406236920136 140.2533871084  
146.863611516518  
LOC730740 3062.22499714914 3693.4058156307 2995.42172749615  
2748.51360874099 8030.19731415448 7948.88765120294 5521.74673982411  
4743.19967685595 7218.21759302518 3896.49785254733 8596.90650022148  
7930.82679738435  
LOC730743 114.39161822971 109.793568518462 142.722227179256  
138.83304645915 153.332110179758 117.071585083051 111.765812595638  
121.303696898208 127.097605337434 135.964630862223 126.746388125956  
121.665157726433  
LOC730744 1148.80141486692 1178.08490218853 1208.9240215109  
1272.14273680177 2078.76377557352 1191.88706134921 1534.21175984308  
1580.27059464289 2379.15291239548 1383.68977267418 1803.06322760249  
1589.70261092241  
LOC730746 216.880896769751 185.984938124891 238.230110356671  
176.038123840296 192.331142672469 269.927694984528 341.714401872192  
321.367338145787 259.643957326575 221.869191666931 337.434882771953  
381.57978490093  
LOC730754 13479.8546809758 16123.3486890049 15745.699731183  
15194.4972103372 20048.679735668 20048.679735668 23656.0669757593  
19189.4835303597 18665.5217411582 26082.8089351205 20217.6497214386  
24377.1316448061  
LOC730755 140.158309892319 129.125709963326 152.818046945164  
127.928195199945 127.449028221682 126.185560760543 125.287738115754

119.525701528869 134.730275384832 130.653971083035 125.377377116057  
124.522974214212  
LOC730760 135.267015629083 124.232144678947 151.034392433934  
131.999299893526 136.346472365382 133.932594124721 130.894384800009  
143.745594527046 127.50624009248 135.205434173702 124.455340203012  
141.733840643889  
LOC730796 129.953801496113 127.00963790814 145.180346905484  
135.638156623519 125.712260481294 142.802965008073 135.452340998039  
134.881854036527 144.2753860947 141.685620602226 139.587192809431  
135.06498850776  
LOC730804 124.566313603935 120.07034081564 124.261531006131  
120.479270037091 121.580726825432 130.812309202831 142.201672822989  
140.578378782903 126.17342715006 134.522715664256 123.170639180926  
134.817665153925  
LOC730805 154.367285732964 163.736324784234 140.421945574721  
156.763364462534 160.828718858381 160.861929142249 149.615585907229  
162.192879711747 159.98205335759 145.224963738352 142.26998944788  
154.792156982219  
LOC730809 117.837894438834 125.358906118533 122.018200592563  
128.929244741296 136.934313990609 131.578042179715 128.396326753926  
133.526213647686 128.200531810126 132.096095362238 118.474291525263  
147.422656909557  
LOC730811 140.756898474665 145.296229550382 143.982561564661  
143.298218989451 136.964780183468 133.769848328557 141.344034069373  
124.585675323305 133.727447520255 139.776830704087 127.43866970659  
130.797498958616  
LOC730818 154.503958858173 148.949829934611 159.102070980047  
151.148295679242 134.517774302213 136.03581843125 136.475652722007  
139.727248583626 149.369418844044 143.047617455953 135.661131815375  
158.113794378426  
LOC730820 221.975219056555 201.004491067972 233.59297160203  
185.801540278924 176.049946762504 259.796092536601 366.788087591332  
248.330154701293 300.401370666633 401.542072222692 286.035428568826  
308.148212607944  
LOC730826 129.987548571478 122.80785489118 141.407725666875  
146.04584032214 141.202092246048 129.353536603449 149.897440750742  
138.030842581932 127.588907178652 124.59937620719 146.363991934916  
142.906227759701  
LOC730833 114.734439905052 121.480455781173 137.581659385375  
145.998177732093 139.170102961407 134.268075583733 128.122197525844  
130.071397809203 129.891492052232 162.297999435613 119.666650919579  
135.046003135933  
LOC730839 130.199581370385 132.735371358102 139.595986615703  
140.457727109762 127.650229552084 129.140978620864 137.430946130817  
130.617505834747 127.905616521853 132.595360509902 129.998824457005  
123.173506315166  
LOC730841 164.50490221903 164.773489952844 181.898985277176  
173.97085982677 208.955110569558 198.285073991956 137.016495611111  
173.647320180498 170.992074907355 162.317084707395 159.584350289413  
177.862368731138  
LOC730845 140.74035966401 125.932540615682 129.34905533265  
123.306499698566 128.303046695142 146.069543494352 108.62191665589  
121.134305707234 135.536810684197 118.154953746492 125.612670947405  
131.785745489382

LOC730861 131.136073942692 138.020031233095 132.815753681623  
129.745892720738 135.906115546805 140.708683675555 142.948238172973  
141.644521617419 142.002145315543 136.396579126676 134.522715664256  
146.425476034368  
LOC730862 163.053121879323 143.155998311198 149.88598449818  
155.23152084421 151.71942719041 147.764068958635 149.997047695778  
165.100811808026 161.250520154112 159.349719495214 148.192121257421  
185.968210090666  
LOC730877 142.788848338402 148.82892305156 150.51537512828  
129.524056217383 147.26204590693 142.082257952004 143.277771142501  
136.927274496451 140.45860949168 166.2468445883 164.472980733552  
150.003399000079  
LOC730883 161.514651272858 142.338352884053 146.174492025087  
136.016912147651 140.388212037661 145.318539677981 149.604507483606  
135.309431186017 140.169200413643 141.679897603748 148.823805841381  
152.612116997575  
LOC730908 116.491342107103 123.884643288534 139.484551562098  
133.389930962407 154.43808450305 128.29486937905 150.053948736789  
132.647642341683 129.895388481159 138.558300898079 146.361128670362  
136.831280469398  
LOC730909 141.310253828965 139.63811945162 128.042181036687  
142.03837243998 122.290822230565 126.072053958666 140.160349667726  
138.74117178479 143.967197319361 143.070170783764 133.561188057423  
132.84268776659  
LOC730919 164.458565398812 145.562772839517 155.690773461824  
134.634465704182 151.788278519057 153.114065147266 151.933078262284  
140.768926302035 153.563839578065 158.869463014801 164.084737224884  
143.697931551096  
LOC730920 164.309588213547 162.208028489943 176.317805247749  
159.994376562272 154.021906399992 201.139510041141 176.714471790643  
169.667751894226 158.950169226637 174.737828693216 172.237115475147  
160.322541355391  
LOC730924 138.89579816122 143.982561564661 123.738223146912  
131.285279061742 143.396264354814 144.879364072868 147.127908355066  
146.787927492706 116.678969343492 130.187833435052 126.686404772601  
130.900049359243  
LOC730926 139.280151859534 141.758827837244 136.506347083926  
148.624135810148 148.522580898717 137.658183450715 142.106329280184  
138.3792224631 142.311108110185 144.871396308673 135.934976183762  
149.693559841189  
LOC730952 129.411734209444 138.707412596757 146.716053772448  
133.667852983262 136.927274496451 140.248610391566 152.91729346961  
157.280532261425 137.658183450715 119.733311319912 146.828099826146  
131.662585510218  
LOC730953 138.313519292093 137.625415175495 143.229240978574  
143.764266466204 145.536260846052 139.677109265241 143.555987405898  
132.858424396011 140.641956393993 137.132095345234 133.573744633212  
144.65238608866  
LOC730964 120.752194675024 135.06498850776 138.807031587657  
126.533083459283 134.255021727555 148.853877151493 133.280418227922  
138.722672835109 138.352562277336 146.979988781462 138.527552293918  
135.893380694453  
LOC730974 135.956116718089 122.746185691827 145.280485286937  
144.411176964424 151.511808301993 143.401971479167 131.48517604564

126.282575548237 136.313623567821 141.799236109474 138.304793826214  
140.925705285169  
LOC730978 137.30143217822 132.686006816081 138.082870754768  
135.913632939299 153.162313098346 143.25481667885 141.448017858785  
131.48517604564 138.842935439006 130.812309202831 132.661036963636  
125.839101611277  
LOC730990 1538.78070281348 1634.20135156938 1228.89116158868  
1268.73280473728 317.904396212359 1426.56252600395 675.978379566859  
991.081498002429 859.113541787323 585.075322115635 1247.02514044778  
843.075879568455  
LOC730993 475.833242673151 459.771019162573 405.570281788901  
369.156887999872 189.292740365891 572.407760064901 310.917191279571  
406.900412510895 317.949646885539 269.62298406345 401.267425721838  
323.276514394119  
LOC730994 361.620362526358 295.973370766318 353.571106279836  
255.413231082357 181.238505183667 269.345125874858 212.836093887552  
203.410932496844 248.965394617795 257.24481414803 197.087015414039  
239.33642662112  
LOC730995 222.332748220525 214.461773810376 208.776711004753  
164.665907233149 159.311949668403 173.766372029062 164.58158284856  
160.303394115537 151.488973553441 160.211460008777 116.501174707117  
184.056274452194  
LOC730996 162.914301705151 159.513465644268 192.580288063603  
151.503307004675 161.979914539039 177.639351778834 187.082082429597  
185.905819051223 183.236087954054 231.338258067616 161.195562296834  
187.069074575776  
LOC731000 147.728018766726 146.753212022975 146.287161912291  
148.594322264158 157.787233338636 149.915251958706 146.128066033346  
149.460660195293 148.723165059122 154.760697311395 145.810213943313  
162.259941098076  
LOC731002 142.518266591748 152.29434111068 128.608401533371  
134.528971384442 155.842195370853 162.728630453745 155.639666182376  
157.568150431884 150.784262878145 145.625205055601 126.395209041884  
163.480722123193  
LOC731007 198.795112039249 186.57665470145 248.43491649623  
181.081050726043 238.430350258686 204.740183832461 260.955030428944  
187.216245895253 214.8478629277 368.548135194271 191.38608906576  
215.698924670416  
LOC731017 154.076216899447 145.741465098455 145.060085149395  
149.106615763242 148.723165059122 142.801645268128 150.026314061051  
155.452842883109 149.213990424575 154.512619892977 134.860896462638  
145.177195093247  
LOC731035 174.903798946103 161.755290291637 170.473956720945  
158.147502554814 158.053654524927 169.179630363359 177.091809538824  
164.389447533163 178.728925255163 170.13453211897 162.909468312298  
174.035835206078  
LOC731039 133.707285280448 129.80429516198 124.83124879272  
141.801472885127 136.049167597016 143.144153021901 141.36525744062  
132.920775987309 136.386031133644 149.722442994599 130.336466131215  
132.306569548052  
LOC731040 141.600833670693 147.086734464001 138.047487233711  
136.745596788338 127.593764897583 156.611727364072 141.225533609907  
147.114698384834 143.492758492895 130.024546949158 154.055550115498  
145.692644807799



LOC731042 147.407093814154 141.543147273205 134.95842832877  
130.122672154144 130.14600240687 158.521812954982 127.966883271903  
145.396723478249 130.128585442593 125.654417855519 123.991249190444  
133.026879831536  
LOC731049 328.200548902445 385.978867521533 305.906480933354  
386.16563750478 5165.90865799172 1369.89073267996 979.019125719101  
1358.29475573637 1600.10235468018 700.601917911532 404.54681330209  
792.634423781309  
LOC731050 127.566369352079 112.292129754508 134.412129843957  
129.831076624826 119.792515907708 121.988237521196 139.636177212128  
123.804039963953 118.770061426689 119.594962686756 123.406144497577  
118.218098644268  
LOC731052 168.734244316967 146.038599656417 156.846991384413  
152.877058628512 158.014017648839 158.356964958885 161.202844994203  
163.926432479673 153.418095627352 170.577057395536 133.771691580031  
158.691830524781  
LOC731074 144.612549022264 150.314462939164 146.644317248414  
138.688881393504 138.692057950694 141.33190008245 146.06054700771  
138.444427173667 153.154592981962 155.513572243604 166.868688936939  
162.834961996238  
LOC731075 133.054453517834 149.818888178632 141.497125111619  
143.780803045394 146.519312568214 136.440671408022 132.649409216699  
136.547868436335 136.955651763743 139.613193302406 150.247639459773  
136.962442874268  
LOC731082 132.568354349687 137.440295223749 134.756377802151  
133.396403868645 132.952355710395 132.303506517431 125.9888344762  
139.111604268732 134.814082968113 126.915338864323 139.178245419517  
146.087596132093  
LOC731085 113.78323485587 120.329105003959 118.383317097375  
114.960460615926 128.680762033378 106.36673326724 115.033355516602  
117.015097017246 123.547821639269 130.617505834747 120.876732151192  
122.742891063864  
LOC731096 6339.16392696068 6312.36452724398 7016.12801650552  
6548.65498784806 12171.1997841553 7104.65816621275 10930.6720259935  
6571.35528952186 5073.27433952351 10449.7190201942 16533.5738137081  
9378.87287299048  
LOC731102 149.213990424575 140.49145570631 158.650226303456  
149.975892236985 148.361088792223 151.727603285205 164.678646890649  
143.823368276815 150.663062131717 155.108146847158 146.586879656174  
137.4552565025  
LOC731106 136.420062669039 142.025834438974 128.647790058795  
135.092226300609 159.561431866706 143.514848892447 159.124592503759  
157.028963417138 154.758831302515 152.987939791009 137.614020921217  
137.840396641618  
LOC731109 132.087183382523 141.521742442341 146.209104824109  
127.330523871944 134.686251400642 141.083966525597 125.558877611499  
153.885582272269 146.506263412584 122.841135364088 147.889486635135  
150.333572271902  
LOC731139 143.354858193994 153.189490068047 141.329559699056  
162.885054245809 164.690739760426 191.84511431253 159.13662975347  
137.017882995262 145.203083375014 132.811368246405 149.821848101995  
149.12669444179  
LOC731157 139.880733465536 137.100207190052 139.513752499004  
134.831550401848 142.053649707364 128.501189288377 135.601916560736

139.654648891206 136.609461559853 140.722297244564 137.002473710189  
134.776714949136  
LOC731158 153.492072037266 150.552186000149 175.485672103348  
148.803188053248 154.265581535942 147.932875151331 132.850601603567  
148.683761948082 151.305201022012 145.731800133702 122.54127694717  
139.258468432364  
LOC731159 124.536322123442 132.623563631011 154.865107093653  
152.262147284452 142.440344960504 145.214575855337 140.639012372681  
152.61583482402 132.822351718257 153.273568880305 122.908086808381  
136.453821861379  
LOC731170 147.307419859572 133.388533738482 142.745838888446  
125.280736217267 136.218750083407 158.819151102054 138.89579816122  
120.951365231971 135.420780282429 131.354275252104 139.936661244361  
139.897320032723  
LOC731186 159.368376366657 153.804419092743 149.634975068742  
190.098509544816 161.510497517852 173.459008248696 192.399146702036  
163.239195865198 154.713713332354 176.038123840296 149.801573181126  
163.846242743377  
LOC731196 156.96934803556 150.096558906597 161.496700767073  
155.794309652357 168.935348409102 169.077657790409 166.9499656083  
173.513108409372 154.665212863369 164.438724387992 162.61434899634  
168.470685171939  
LOC731227 163.62582285753 161.354014292373 169.852769679312  
180.327051100611 183.879114762264 175.040086358446 163.621658579697  
159.203584692924 171.304896264805 152.364417528975 150.948076715456  
167.447964370395  
LOC731228 113.87024833117 130.235407859542 126.908123260394  
120.62139061084 114.002925521932 115.257318321108 120.355844117573  
120.182787241888 122.180428703208 137.614020921217 129.918038866006  
125.47382560976  
LOC731231 160.099731578122 162.072695554798 154.281674854552  
174.332913952768 160.76044995335 182.747079625619 172.622816559412  
182.009471368798 168.03501792841 187.336349390012 197.981112645168  
184.332299740724  
LOC731236 135.930107381894 143.965049742993 146.981521393075  
136.547868436335 143.562164660825 119.237802375552 115.920514336615  
139.997245010492 128.466244127634 117.879058520659 152.498222035534  
135.86924353735  
LOC731275 139.002932985183 139.60494712939 138.89354244296  
130.593846004132 134.423260547727 129.409899416034 135.989816139218  
133.154004369076 132.01588294465 134.762169062357 147.505345299689  
132.795064859079  
LOC731282 127.91637627901 126.88329158544 139.2454524913  
135.056517225198 128.348910964448 125.099672022917 118.807135693934  
125.353389826276 124.235958498969 142.633121727277 132.934955542743  
133.814720785534  
LOC731283 130.746465595759 141.102274192049 144.389805078873  
127.588907178652 155.026276988302 123.93800397666 113.970633751086  
135.822022526034 134.831550401848 134.17351030102 136.518409978222  
136.601220755282  
LOC731308 148.269123639781 146.725123303782 138.802633518223  
127.763186950161 153.379118228796 130.311471059267 154.227433553131  
141.275667354541 139.674001912099 149.749660071593 164.929445749888  
130.609596267168

LOC731312 142.024171830924 123.632031112507 146.411873503163  
138.903450375532 159.26101905957 135.810476921749 135.039901725369  
138.182987173284 143.251685088165 134.244658505187 135.333055517636  
132.081286801266  
LOC731314 263.936023499588 278.88183549759 218.735620596634  
305.854543429221 3241.23835624706 534.083703564903 406.54518900348  
653.749043828462 763.880957432979 325.859917318516 398.892968579918  
529.529314022043  
LOC731338 162.71020036416 156.75001042701 151.917359928516  
168.405786851399 149.17029600091 132.357517495246 147.218415065692  
157.684694038023 154.507721014473 133.475605284211 139.113675690483  
152.11446058397  
LOC731365 9470.58919937464 10170.8669218992 7585.47289520004  
9099.13956219312 10661.2216586049 8401.40370474392 10790.3738999898  
9044.54885739666 9099.13956219312 9272.37780151073 15238.4097431619  
8292.04796307133  
LOC731366 183.100286716683 176.735168607281 207.400490077106  
163.529157756197 142.535416473783 176.371404525626 178.997098204457  
164.116142541038 141.66312605042 170.878962027347 142.354731066206  
192.224242967539  
LOC731377 137.620843137286 123.048352070915 124.157302365291  
123.916497557628 137.320792454356 132.902437860565 127.715766031466  
115.848659135231 115.821231468312 128.775477649887 121.48867035121  
132.416618775337  
LOC731396 131.904624845305 154.947359473187 155.861829925386  
163.438043894189 151.174536186463 143.08841562593 144.769824608083  
156.567519536997 137.314968268692 165.642728895682 126.743579586052  
150.224472335504  
LOC731408 159.59942312149 143.152993168137 143.52474218953  
132.845116298605 155.478383896934 145.656767712617 133.722739936347  
141.670426206169 144.487533992157 145.741465098455 131.22473774325  
137.754373055094  
LOC731414 133.231066635063 144.324313048777 125.976052547953  
116.126923911804 124.300285428221 122.937281123348 127.26820735867  
119.943408501009 119.968081249475 137.704257049203 137.451687756052  
128.570067783535  
LOC731419 140.061045085545 125.506466437764 140.357427912361  
131.592172917738 136.77260462185 142.878258542775 129.515390475589  
144.81689330206 131.234140286502 121.588054040961 127.494672751434  
126.450300907283  
LOC731431 148.770315933249 134.441142158135 128.959487155628  
149.927773276383 134.71514094826 131.097598299707 140.199334790854  
128.002822538671 131.72852748835 126.626904958599 116.19219007097  
130.967476533254  
LOC731432 145.054873480806 129.558589108727 144.5368823731  
158.308558656144 141.626504154989 161.965270932582 176.145076825955  
152.950227635138 166.600109853461 157.709832297666 168.470685171939  
164.634694036993  
LOC731438 133.800111596565 144.529801006864 127.6078497227  
137.59017685842 136.508969220268 130.233769058693 123.527903217158  
136.240503841228 127.31283918221 130.135721123253 125.208803405105  
150.088034336851  
LOC731444 145.301551442388 139.744142223177 146.455182336561  
161.027590226123 145.987228759402 161.803438841859 156.307551403822

143.785769607842 135.205434173702 136.886677060418 131.38692240237  
142.051259785804  
LOC731477 138.764834713216 119.562180492359 132.23149173224  
138.796257513868 139.684141478459 129.397378057767 115.914842445934  
126.617737577634 128.477342430713 124.627339426244 127.833653828539  
138.064951932825  
LOC731479 125.587057468028 119.040642659337 125.526744092256  
111.204065131669 121.414076245292 127.104868352186 124.578552584603  
138.020031233095 142.628296442123 115.933805625814 124.944563166658  
123.908458472687  
LOC731486 161.129770392464 166.730974538475 185.199972151831  
169.674931517111 718.871732206362 218.433524126584 371.767182305618  
245.351459157365 203.11015591813 242.81187187788 364.527677995774  
337.652945958921  
LOC731488 138.643442050615 128.417571004317 119.819082491115  
123.952494134263 125.489777118532 148.23392074197 141.174971007547  
133.79868477192 137.756209496729 137.969750384554 136.135223482208  
143.945039636839  
LOC731496 132.083532534267 150.079372712689 140.047749881567  
141.879359965317 143.004090696463 154.033776287398 155.513572243604  
152.778732614944 160.713790305656 144.494401248678 147.385714746214  
140.288612271406  
LOC731501 119.937665469629 123.330142002791 117.238968848218  
115.619116556625 134.136687154241 115.944280729914 125.855451679929  
115.02681415256 136.069631519097 132.177829138863 156.068308349225  
119.119693776276  
LOC731511 133.032905765836 109.586955365611 129.442111153737  
123.296382913131 137.157492354617 120.07034081564 125.833649377492  
138.049846456876 131.054302682707 135.022438246099 129.586337068199  
125.754741914111  
LOC731528 140.752616434418 146.437565098335 146.910471989835  
133.502176289023 239.109163320417 144.820843146628 148.431101051574  
153.95855605751 158.631298154353 131.674409480919 174.347451984066  
170.801761175916  
LOC731542 13700.8527522612 14699.3902364192 13700.8527522612  
14866.8264879369 4280.66857663502 15704.7314387339 8121.54750071211  
12615.8332290932 11709.9785619141 7332.15849011291 7190.89891723932  
10506.1271023809  
LOC731548 150.203281104753 147.78847662997 157.454558821261  
147.397591251955 157.646948327818 148.215172022129 152.643087608513  
146.351622020606 148.235495611248 161.419873271162 148.291518446423  
154.428779374984  
LOC731551 125.732389000341 127.696578575874 135.373824773008  
117.986939058467 132.027020683413 124.451718955086 121.356731684516  
142.348246621217 124.110446144763 125.455347031878 131.489715975987  
130.509415570889  
LOC731602 132.576755070703 141.500790455788 126.402405227897  
135.067056559409 133.16868415814 132.693707848508 145.997380100999  
136.599305161841 132.744261207073 140.815807483203 134.367115858307  
150.421116058494  
LOC731605 272.351487980415 236.985483155452 189.461090469712  
199.191065549132 161.498785105514 182.152956182443 229.907632927358  
171.006582229921 168.470685171939 175.784250947874 209.229537873706  
222.118666699301

LOC731631 139.388484543482 129.467792559297 153.853856339585  
148.630293791756 131.378893655618 135.399032687551 145.039617860588  
145.346970289157 134.907397302852 136.952914053358 127.368831866968  
144.767233774942  
LOC731640 6233.78489807054 7082.28969354712 6244.58472720999  
6312.36452724398 2637.62596741408 4857.3155917904 6006.01682776552  
3417.22292085668 4635.42002659719 5149.78271096158 7656.97151002785  
6990.13809515289  
LOC731641 144.377501600001 126.728375196449 157.240466990977  
146.503431281242 137.737908250097 138.796257513868 139.444577046509  
137.076766238637 143.899201949317 135.554736716321 128.897493103888  
137.575688681319  
LOC731642 141.340452225686 134.145771195572 134.383024487323  
131.792339956719 154.999192460283 139.902610126952 145.601922576321  
128.054394154801 142.639587833858 143.011042973347 158.085935267091  
161.552475294424  
LOC731656 118.492287441192 119.221976571036 120.422401793885  
127.352386363217 134.863223806176 131.01107240791 133.310323593945  
116.87586240208 130.753266976637 133.619092072157 117.728410015076  
133.164566694394  
LOC731658 134.298521475727 132.796961054534 122.804934452095  
155.902461107328 134.010031592003 137.328370598183 124.522974214212  
120.812738312059 163.988099963018 167.337624316172 166.958831664154  
126.830269821364  
LOC731670 126.106777865128 122.456286448252 124.972772541334  
137.728163622673 151.702809524494 116.994216357989 126.058167594519  
133.670967970136 136.220324225816 131.996032643928 148.45148523399  
127.612859839494  
LOC731682 164.478006648035 166.1677526 151.479748626813 137.434039024162  
156.448355269561 164.553511697702 153.326420485822 145.828229656781  
409.691865300362 176.791758333054 115.208555742308 169.956827727468  
LOC731714 148.87690497281 130.866756092727 137.605244950708  
131.383113302567 131.968781256081 127.289269745461 122.561285351587  
130.322436253881 148.364138636002 149.131218007756 125.806943645484  
137.485252316816  
LOC731718 151.989476683722 153.072429774613 147.088665779406  
164.03801002919 143.519786615253 141.683298500736 161.451253146578  
158.135321157995 176.038123840296 161.678137139371 159.728097053356  
165.017178571218  
LOC731724 164.690739760426 150.352308475398 156.218834695891  
174.890624803452 146.889192302286 130.143953880391 159.257221624668  
141.037217406848 156.961070790639 135.550882872661 146.49022197174  
161.160974998803  
LOC731742 143.953043041292 157.410205523901 149.601145171769  
142.14654303591 136.185953087697 151.010493695217 151.639515017015  
156.934589811742 144.848839185565 173.250350363688 161.390489603929  
159.633987751501  
LOC731751 178.445384902129 168.470685171939 183.3378528327  
166.582931148846 279.921244070981 317.457588721567 219.044271073282  
267.970798709017 293.448046685909 307.728083981504 198.722993687455  
269.072221443403  
LOC731777 318.930960243303 391.039114500903 547.367381020623  
315.565349831797 266.395569467956 341.973002478932 425.348619281876

369.070376276471 368.418553384965 503.466550870577 224.251136332123  
495.89837457901  
LOC731779 144.134485888258 161.470611189347 157.490138425943  
161.735609436394 200.468804559127 170.998961353556 197.47340234886  
163.868129628544 177.132361355899 174.749832388791 184.505279093688  
181.695203523798  
LOC731787 122.290822230565 140.48372620406 136.664500207966  
124.393008692801 120.574820369421 130.100501333725 133.859036862167  
130.420753247797 129.612536218578 140.418010366997 119.822587087968  
133.160197638474  
LOC731789 365.541609015117 401.960630197091 306.111172289632  
356.154842959851 171.795878750365 355.714202328378 242.657224881824  
296.657844888195 262.259969786927 240.12078342024 309.36704220687  
242.695286989672  
LOC731797 142.059921012561 124.391225837909 138.407207709066  
133.725177339262 147.213616261735 132.781725233271 134.89031458837  
142.836229345273 200.603836348642 123.547821639269 125.809027384863  
130.461084106455  
LOC731823 127.458099438957 131.428466882762 142.290253129837  
142.201672822989 128.653335099674 130.187833435052 138.512938877774  
143.846734516914 132.221351364892 139.256416415149 128.803632055969  
136.037555727438  
LOC731827 141.935435502163 146.421195733989 159.19183334563  
153.369334953677 137.033870931133 143.673778816953 153.02127620577  
154.400124981573 142.063338490772 153.891667472876 139.214589768245  
145.929907161493  
LOC731835 150.964506212368 133.14988092185 169.089896796513  
140.427188241455 137.493436771898 147.868721324602 160.122274989224  
133.628391175037 152.026310884327 125.342580368417 106.066897223031  
136.903588075134  
LOC731837 190.56172211779 162.077455145261 176.138621462315  
164.295628750438 164.99860393383 179.25743545231 158.153875553171  
171.099675679944 157.963634535239 163.284853420896 145.43470695949  
157.406969627689  
LOC731852 152.173055053184 142.991135981933 141.908791151061  
131.928871107722 146.233195164295 152.042744996136 145.559419404453  
133.810472192646 151.855884026072 132.913891550054 127.448123237021  
140.028169667777  
LOC731878 245.607130404306 198.191669030952 209.7558663154  
218.000351930307 339.98018551524 472.793332506369 359.776068595698  
317.00629920068 288.026656721827 624.638115878703 322.153713097778  
384.641319423853  
LOC731881 157.134782748175 136.971869448818 135.621035941292  
138.213742418402 136.641140715439 142.331050242704 134.885883559391  
155.393326732887 138.158400190671 123.694678408411 145.89593390936  
133.771691580031  
LOC731884 136.189852861078 134.91213977595 135.063259138429  
160.454243375479 131.617027772841 150.610633329908 149.045654499682  
152.426527124644 144.4421922847 166.223079895236 127.900901613784  
142.351705613006  
LOC731895 276.224613560582 309.5988292104 178.496344474999  
208.587188476069 164.208044717557 234.432954093705 185.405774238391  
232.200025766422 167.298438019561 173.986750195954 188.780089746036  
153.630125822178

LOC731898 160.176567985923 141.275667354541 144.920107068083  
142.978818998012 146.139817421758 146.713861499546 146.202611204712  
144.210698143215 141.849319373594 141.86836086844 133.331037738063  
148.704917490429  
LOC731909 120.572947493211 147.422656909557 153.697775290962  
147.688664545959 137.353149614081 150.802312408483 147.032210333966  
141.941814923705 137.215025712057 127.382266838772 138.049846456876  
122.480000773859  
LOC731915 135.1951749488 129.735862775199 162.390356943447  
149.073650082048 141.082569618216 153.534763364558 149.702048490465  
139.54738445816 157.295602588814 149.601145171769 164.801505601099  
164.011683602245  
LOC731932 122.514826802737 129.811504562622 139.931092990984  
130.429076594441 128.708956947928 136.342634691443 135.33941967076  
129.041254463346 136.225792549383 119.735807506447 123.522738813733  
133.001613667656  
LOC731950 197.231408726321 180.192015483309 234.789040617681  
162.895923745031 205.476230849391 194.617252921731 228.184535093641  
284.995098167431 196.419891542139 191.725728813959 173.272062328378  
179.44023315251  
LOC731954 1205.45751308367 988.788192022196 2867.63319136936  
932.076509242794 214.396920524803 160.816803370151 137.663941989772  
126.27024495428 179.582086214179 233.300864925399 194.202977693583  
183.879114762264  
LOC731957 118.970693476152 130.112882549637 130.483765953389  
150.203281104753 128.155080148958 126.316613675316 125.894755032594  
128.858923585925 146.71868686671 148.272252953881 139.953572663277  
131.899614022767  
LOC731969 135.835518477299 135.223957492606 137.298549014192  
140.779962389412 142.466067016788 138.842935439006 160.48993837044  
144.599578905334 134.420446702459 123.640123613529 138.005168756932  
138.002258986172  
LOC731985 5947.89821087362 5291.83393775761 6560.30885074315  
4055.40322213638 9852.51412359574 5965.21815409254 11509.9289491201  
12368.1423473066 9671.66667662331 5776.63686968234 6944.90824302953  
8532.46059476152  
LOC731992 148.490236128772 149.255405438966 164.848970268132  
176.53912635694 144.713108022551 149.91705328815 162.447903830131  
126.476866025397 153.694557276814 133.527906709491 139.926488041421  
144.41489969974  
LOC731999 179.914070416793 173.497575259833 173.088291472857  
148.134642821094 187.016569445646 177.438968923426 225.820503820866  
187.881334544018 178.035700298977 183.280853265083 203.704734790602  
251.704037951295  
LOC732007 378.967410725775 327.635520861099 628.000860165888  
439.33566689752 508.861268738074 556.725550806207 1259.75918248468  
553.757847979529 815.388288623756 1600.10235468018 693.339946866196  
1466.82170436229  
LOC732040 118.206034087145 142.683117062711 137.410687900298  
148.73620012231 134.81595608984 140.906421938377 129.832118351824  
134.331420680628 133.290168428696 140.005968571997 130.022574966461  
139.229351251973  
LOC732043 127.218362452043 119.98864381644 133.970510683179  
129.269919529415 134.339535632463 127.101752724954 124.705614182596

127.509583634884 120.819163462986 129.785078660064 137.706893763747  
127.765987130281  
LOC732058 169.246302492166 148.065080664185 169.502103689662  
177.296424297967 159.236429097777 152.648490300617 148.382228428693  
150.610633329908 139.733149319736 151.958818313561 140.49145570631  
141.418737063013  
LOC732075 177.257355909681 223.107391048316 186.140970908638  
237.641190133427 574.496860164135 210.030846572444 227.177100762395  
322.684910198242 299.717935831288 250.037172478288 391.569187190375  
289.517820913799  
LOC732107 140.790450703097 133.45690661612 140.462651395483  
132.049224908868 135.206755687105 145.442914818456 145.679907578808  
128.206231522695 131.18368961955 146.225422797118 161.104993402456  
140.040420521312  
LOC732111 164.032302455558 162.178410412809 160.042251279235  
164.247251507109 152.295451313545 156.381599544223 189.726075394359  
163.385727569154 147.232015056035 163.672213020803 160.48993837044  
156.32137627012  
LOC732134 137.217104547797 203.752540576935 140.214475962177  
158.845174721328 166.803359138942 165.977852973826 158.584934514596  
152.447978675887 145.466538006138 141.490911535087 158.044938495884  
150.45404183949  
LOC732138 125.452973441746 128.176779923348 132.311344653106  
134.024205981268 128.530540860266 152.500670025483 136.627904756283  
124.062863592295 156.597497458992 147.841960346835 126.700147643  
143.710449544388  
LOC732139 157.490138425943 141.292421722594 156.357126871243  
151.902352951251 149.086836205064 175.165305179665 164.922193471904  
173.121618125421 161.817609920327 151.3362561751 137.243864288111  
172.412059174046  
LOC732146 144.237691418911 145.25198093836 132.319254588053  
136.346472365382 168.405786851399 130.346150829949 140.790450703097  
127.678512375099 141.490911535087 149.394952856085 147.544539855657  
144.974813243462  
LOC732150 168.248982292489 149.34605615699 159.513465644268  
163.709174813901 153.922713834296 176.603760647035 153.222807811478  
150.870830294349 149.098381037466 173.995889755792 155.280897870265  
168.03501792841  
LOC732156 165.570531605115 158.244741207036 150.264481784709  
152.386986818959 147.299872426498 132.471014832851 158.127523362251  
146.162330544539 160.409454280874 140.533704857854 134.025385181979  
150.601874392926  
LOC732157 146.71164737466 152.532083511961 152.095584118603  
145.146797807275 145.841028932318 157.353493980339 151.409290231274  
146.171094379173 152.593934787262 155.410704148925 154.091431691072  
159.636846021745  
LOC732160 157.415211954103 147.292241873554 178.563665283267  
132.871179509995 130.59670974887 154.140863428961 135.379284233708  
149.997047695778 137.339511714364 147.81143020317 169.206723147505  
144.664600892248  
LOC732162 151.0189104086 155.813740201987 186.854553034865  
152.8810245209 156.904781904311 160.43939815269 161.053174595796  
149.907472831817 153.169450192935 157.40255559397 147.118987674809  
137.488665424434



LOC732165 285.931444518474 321.910803473854 281.278843600876  
267.222762759781 687.789976218334 357.35857422585 516.429067667758  
471.315730378641 340.608165077422 715.638378711433 671.563789496889  
439.122658719747  
LOC732172 185.639696270808 196.583548193097 201.269380130546  
197.231408726321 253.697419495959 213.364858759772 254.393421265604  
211.22652563815 224.67853219142 217.513118676535 192.655899720909  
208.125844007298  
LOC732199 139.348494759948 136.293084080479 130.195234920895  
142.099541115973 163.159571059471 135.047546966745 126.25011972597  
129.242093568433 128.485150698799 141.023875058322 128.548201588898  
135.131890100292  
LOC732206 147.176801913145 132.807755600683 172.237115475147  
146.586879656174 144.834448238435 136.178501890585 164.701183249762  
140.572442284673 140.78902818186 138.515211541879 117.790593990682  
152.91729346961  
LOC732215 141.571389983164 145.858537779106 141.489910809991  
137.024230648861 144.920107068083 135.940629737073 124.629877200816  
128.879953205511 133.950160115805 141.540429359732 128.158605637751  
147.378228560979  
LOC732226 139.725987763226 142.121399383259 140.903091584884  
146.056723380149 124.768399055809 155.23152084421 141.37694311902  
138.203742066422 138.487657776553 149.824791474186 146.466967386428  
152.232245164212  
LOC732229 138.440663763957 131.759422682853 129.362793087439  
141.786962606666 119.669441891401 137.737908250097 141.196795654442  
122.182695593404 130.483765953389 161.16688895179 129.143168240589  
137.28323311107  
LOC732272 140.678336884951 141.193081790037 140.242272149424  
146.362705590778 135.930107381894 133.292854943218 133.78629612147  
135.27739087376 141.645906784244 133.79868477192 172.764511709731  
155.05329654089  
LOC732275 123.281489592543 143.019052979243 143.172744119235  
149.31020447459 158.041568121766 151.821324922628 155.608876496443  
119.873844587252 151.130401750721 155.545904088857 120.906553066296  
147.943844184702  
LOC732300 168.082591651722 166.099940078284 168.45157400976  
154.812587513407 166.674240866931 163.764600217347 161.295030274012  
161.618479762188 158.7912155022 162.904897605929 165.866987051333  
165.277935422113  
LOC732313 140.306808081269 138.186616955926 137.459095066272  
137.276586668477 143.101750222256 126.045231525329 135.416008633632  
135.455283504668 137.826458479398 138.555443236183 137.412952822912  
147.980827857138  
LOC732316 144.004831360797 166.830529779692 176.194292036542  
152.685860451112 165.283700641161 154.932132950843 141.985130140173  
157.032746784217 153.214696479001 195.595275594235 148.258850340107  
150.138643811727  
LOC732343 147.925744210234 131.681566829159 133.487774861252  
126.365861978893 138.248708129528 154.892452237027 141.8268805463  
126.744983848225 126.589865262427 121.796519488793 128.755697083014  
145.432667767652  
LOC732360 232.321454436688 245.915473236403 191.725728813959  
224.528190554963 302.462763120177 544.107739610054 333.745543022749

404.172535442156 406.900412510895 401.960630197091 337.585502787016  
357.773949920377  
LOC732371 157.264673452646 137.391141254051 159.331110936668  
159.867178630115 152.001155788544 157.541796722309 154.988494760267  
147.135640862542 165.827405735044 170.79303550487 167.46432961654  
171.909358721737  
LOC732372 138.494266722799 135.925813154268 145.625205055601  
140.730085305185 145.776143302784 139.369815367465 135.693520183014  
148.224587582189 137.59017685842 129.758303592589 150.860090477342  
137.73313146889  
LOC732377 128.429007921588 130.778164962583 126.265475477399  
121.099290122973 106.315801001506 135.061176512365 130.346150829949  
114.970485002776 124.101111442605 117.682034050478 119.567911704298  
122.290822230565  
LOC732381 157.43824048982 156.050585687098 156.589829166493  
128.593112520767 124.433114779288 142.963036923104 133.892661981648  
133.820936825552 126.960777504772 151.971337856271 145.917220112846  
128.806964077824  
LOC732387 146.166710487448 131.672014089487 154.368499839507  
147.412608079997 146.792951584868 158.404154056472 148.457872807838  
140.039358011563 156.265168005937 173.450023117394 137.478556403046  
160.57963709333  
LOC732391 139.236217474885 143.783078837501 135.844983721014  
139.276102596591 134.257928609741 147.838660813476 138.555443236183  
142.960875909369 130.342425029134 144.889824569599 115.871151134713  
135.916668738753  
LOC732393 132.697727983601 131.655316312379 140.326012404526  
153.601918768668 143.206100064821 150.156865995098 144.035936160694  
138.751781355083 143.791908191551 138.953926269905 138.491922816359  
139.46518859956  
LOC732402 123.76900858347 112.142263331903 121.416038813102  
124.178483414968 116.221426977629 121.396223519559 128.591292689996  
113.927168436775 135.206755687105 120.311723366684 110.900309203531  
123.849651946683  
LOC732415 139.39112068213 124.066239570648 128.284564251279  
124.066239570648 144.178210824181 149.269417496936 125.475308885588  
133.561912722761 144.210698143215 150.72014060286 146.303959493672  
141.382096896508  
LOC732416 156.562197068687 135.137615432923 162.457778455279  
154.001258677199 146.660826209767 165.154844613899 152.486212022518  
164.302998010829 154.928072022777 175.212680967232 162.857083430123  
169.279866966079  
LOC732419 161.305860691151 174.177944561595 171.487594589922  
180.658930225735 259.742175498038 172.631499322646 165.602175302848  
197.003657786247 180.569583206488 175.165305179665 174.971350923613  
161.678137139371  
LOC732424 150.331324340476 156.928368494507 151.554352209634  
158.784190231286 162.337707154123 160.839277476397 152.578091976678  
155.011931456736 168.111124820968 137.539385624206 140.35175858015  
141.162443312437  
LOC732425 167.568776552757 179.905809470907 202.99342484328  
174.364798143068 276.756415094228 223.389795643722 177.666582096539  
188.490807652188 206.428618912264 192.59376129133 184.655641182839  
200.443940449586

LOC732428 131.190238038695 127.211469322857 126.533083459283  
128.920313557255 116.456170659686 130.788557333561 145.843639385175  
135.776154891006 125.463718280745 143.993611400272 123.231397809701  
130.29531841096  
LOC732429 136.829137120584 137.503405573817 133.278923716119  
131.683942368268 137.251513843314 142.385902610309 130.473842500245  
146.635140441079 130.955161943331 114.255733119076 117.131720092783  
135.787323859105  
LOC732432 160.839277476397 154.558968826495 281.554559571948  
147.260260687975 159.148717478277 184.377923161698 150.352308475398  
213.674150322581 181.558764396201 224.439293045835 177.500110974116  
207.718619151226  
LOC732434 125.833649377492 118.115015846489 126.718380351644  
129.114161128113 115.242526386551 121.556331561879 132.492444216154  
121.11184249981 132.440818532628 127.011594171986 130.89594032962  
122.84603217721  
LOC732435 116.403106568357 118.866073031304 131.941069239017  
122.94937342991 127.685469299406 132.532231556418 145.576880854443  
121.103620738719 121.215558351076 129.346063085291 118.924317138158  
128.952986088886  
LOC732436 122.405469833024 138.171858105728 138.643442050615  
129.045189856765 120.606354515072 122.727385599754 137.15571320152  
134.688504981603 127.358616953147 124.327827104244 117.331280455759  
134.988545581219  
LOC732441 129.447773229782 133.07218865002 133.897397228615  
124.93629294955 126.853028093579 149.217191121377 145.229637715814  
146.664285015996 136.058527150792 127.866992108488 144.190847141944  
122.102644097132  
LOC732443 126.569482909992 119.555954372381 157.607445509297  
135.474070994652 133.615958668897 128.011387527117 122.410340121549  
129.4807689399 123.814841047589 131.019345449516 121.360822445187  
124.295334523889  
LOC732445 117.141089194822 130.260174841484 128.22735290389  
113.487357534546 155.595651896155 134.189023892662 166.298554732581  
127.409603645289 131.169769031768 136.344248873826 140.021640936288  
138.824082857747  
LOC732446 148.856482636773 150.691815494794 150.319052894567  
149.204816953404 147.091280396135 131.717160947964 139.256416415149  
140.020294940544 140.213080190065 133.259321087534 134.947657801444  
143.307838525991  
LOC732447 131.692626563078 141.079317977197 146.920496801962  
128.580625868379 122.770033312519 139.866536599877 132.57219914253  
149.492550066785 134.329334422886 137.543128522665 137.460936879873  
151.863048206341  
LOC732450 384.296190598736 470.308610828825 317.163768837813  
290.184801898828 143.925616978401 183.921173538112 163.967616022079  
201.616302398819 172.677083810424 194.789918629905 176.980780681976  
182.736067431579  
LOC732455 149.35848619832 128.570067783535 126.452500728601  
137.27827836407 140.327799236005 129.357257170508 139.097764484641  
132.70888569469 134.136687154241 133.011320549232 126.026938396257  
142.255657518926  
LOC791120 527.707841428677 475.686805714298 543.584413650467  
527.294087043601 215.335795337978 418.163219634152 204.770742504612

277.596303701405 265.972387419683 340.608165077422 691.632061537999  
416.715760038095  
LOC81691 139.995623005154 134.924082270115 142.34471764492  
142.744045151046 179.369845168822 162.919656039331 174.246705740225  
186.66469040433 181.54273463264 135.360087349634 175.065781438801  
174.116797337377  
LOC85389 204.019377262081 187.965294229013 143.647714966406  
166.830529779692 214.175691239597 219.687151891777 174.301952147167  
265.402310598892 189.90406457741 210.666799498141 166.655585160657  
185.743212726702  
LOC85390 140.983230581181 131.692626563078 143.013801508709  
140.563079852037 133.613988293895 198.374163029174 160.379168489216  
210.085329463347 165.992542962911 205.058210447711 139.81502919163  
175.29178007783  
LOC85391 140.279222720709 140.334331111538 147.774588146924  
148.194450105682 137.418345713224 146.810384202933 145.835240952992  
156.026806913759 130.513071750123 130.579954890389 133.408354896584  
179.460777888284  
LOC88523 687.789976218334 791.402660066193 1131.96129284658  
893.676600121113 234.094722315007 247.194197143562 325.570839576032  
458.953009417683 413.863345223345 507.236601481067 423.562598841704  
283.084102918359  
LOC90113 155.004104153679 139.172437503442 142.336164180947  
149.601145171769 158.483006541613 133.571962238112 148.560326703328  
138.625680450198 148.162914253981 142.534195262988 136.603035996281  
139.560555361919  
LOC90120 203.777944180067 213.338918839446 218.794112567823  
289.667302610069 354.067771806542 210.502556087175 224.186573847185  
196.676479140094 197.699100346967 186.831266888028 203.004815689972  
207.831299397177  
LOC90342 133.422190038356 131.271979461703 137.834158814913  
135.90207451581 155.563943799824 140.083495854322 127.419227292862  
139.723117427543 160.880152014981 128.060612106762 163.672213020803  
135.05209575317  
LOC90499 120.122719226116 137.71627781928 143.552343056702  
140.408989128575 133.360017767635 155.441190892146 164.61921356441  
165.108876136738 138.371873773284 132.822351718257 142.609678462615  
145.619570216377  
LOC90586 5506.81944079182 5226.05969701201 5410.50736002544  
4913.55892033682 679.822276398569 5521.74673982411 2703.76111776248  
4569.44477073589 3693.4058156307 2421.87041217217 4486.35687688252  
3315.21586182496  
LOC90624 225.890195278753 212.473610495213 363.539983343859  
235.48876511325 182.357065848298 236.401834189942 230.201464318433  
236.032288046282 178.619580818758 294.595972099366 200.114704018645  
193.723953003899  
LOC90925 115.920514336615 119.511962218143 126.277165320165  
108.007762863766 134.831550401848 118.891276329399 122.476178620771  
127.488853386792 181.803275243281 120.433080754232 145.03804642447  
138.909419415137  
LOC91316 188.685460181066 160.828718858381 175.341310423897  
140.029808783762 132.303506517431 168.45157400976 173.071892362758  
208.194788326109 164.665907233149 162.870317933909 170.992074907355  
140.593510265137

LOC91431 184.638141004171 206.428618912264 156.650388509656  
172.544504923991 188.847480174391 228.524222740306 206.257167235126  
262.671819506189 207.545424360094 225.583966894864 200.652195873026  
262.53374754047

LOC91461 508.861268738074 601.018867455333 477.160464512705  
1204.7397215229 139.429008129291 131.860337317402 120.035437167539  
120.26749529985 131.861469782134 120.188885479773 124.277983696239  
138.015301767961

LOC91561 9937.36968397141 10632.4185569238 10397.3656932566  
10930.6720259935 14699.3902364192 12916.6904389018 13324.7465248375  
13944.7649147227 13217.7001749493 11326.5935775813 8958.34797715349  
13645.150201952

LOC91661 164.96631670799 162.090585987836 170.320777845496  
174.615694779386 155.333294650676 171.035391211596 201.415695076278  
141.703410265546 235.162439885207 159.854639082837 154.831307586538  
172.446482096058

LOC91664 191.740596601895 179.297628357211 217.628802427037  
171.042491047256 170.108500366942 199.01458214661 246.061496821699  
187.729071402782 196.839016616283 199.305626149918 166.071816427719  
183.255119298602

LOC91948 161.335677383485 151.449690439424 185.639696270808  
165.496065029161 162.652929339533 157.950416670957 172.827288328708  
146.84403879162 160.247370279802 173.189465201573 136.491140756702  
168.347445148881

LOC92017 247.373571011712 256.764450748941 150.701579893607  
271.430915699592 171.809717138613 182.786177632757 139.681211082196  
153.846723846716 165.851677392967 142.528480882047 192.340135076104  
128.984613946021

LOC92154 119.815258991448 129.072173761566 121.855752708908  
138.084801633774 130.154756165574 123.507963359911 138.50032459657  
135.559535347364 127.224081416987 120.853961156534 132.832556359483  
120.184782039538

LOC92249 1039.46136549795 875.38834441246 1032.11574332305  
1317.1258783404 297.544216175512 266.918302307596 280.531844086775  
338.866471651692 267.589020526148 288.261250589513 321.25076864104  
265.992741398183

LOC92497 192.153420834889 156.88782735706 179.091917512822  
191.84511431253 189.872997882033 192.244413515864 182.222567053422  
204.544266331066 175.111460651956 160.778296470857 158.07640654075  
195.84531580224

LOC92659 176.049946762504 155.790759250672 150.238582112636  
169.720414035325 342.096409626768 198.135240691225 307.81941988503  
268.78904911703 207.440700355457 160.664407431261 187.407526616724  
165.048922660581

LOC92755 309.181150342727 334.056545911557 487.799854351205  
374.46180489079 705.529158880221 1006.03677177164 728.930140593418  
723.428294037428 910.087388930485 857.55777793754 410.337491313251  
958.005138077899

LOC92973 163.681014961332 179.841665686703 185.765000029242  
224.186573847185 152.415752253205 159.327764602722 147.556482119673  
155.752117896424 152.407614042236 151.470844748137 168.327600230929  
149.106615763242

LOC93349 153.374296511216 149.810655120216 149.41564356447  
164.571974509529 151.515460040167 138.231715814115 132.883408554592

148.439740062804 131.305785417254 153.293125258215 158.344330353326  
151.902352951251  
LOC93432 133.552141086987 152.925281215593 138.915185051749  
131.90169441925 121.603608840998 148.175206259619 142.703116372162  
124.134916773123 150.948076715456 128.287127680554 123.467227007155  
129.313576009092  
LOC93463 136.511669406292 165.181215117323 152.503159091556  
136.758262322199 145.864902319111 155.223806761489 153.418095627352  
139.435000959919 140.650987394155 128.41549156443 126.523201566273  
151.899063970777  
LOC93556 145.338156577438 150.184863108453 162.893396525252  
149.049931380459 160.880152014981 137.271702725819 157.423242850568  
152.296774123599 146.746669300049 138.810236692956 153.723169560972  
145.024148458133  
LOC93622 346.917113326564 356.268960813032 397.307515234646  
352.303782547593 376.276954313674 304.547738011742 354.579728909336  
217.353396632732 331.999693230194 222.919473675549 259.025042304848  
395.786295710815  
LOC96597 150.663062131717 142.281657284178 151.655854407186  
141.84653748835 140.073208365817 128.26957712082 128.711308958929  
133.020551937677 146.448568700393 129.788395150404 126.388778582602  
146.077082896858  
LOC96610 148.28101912019 157.736101691222 161.031148038478  
181.439775614781 140.405405916188 179.923966067226 163.040823730286  
164.757907224537 161.603317039244 185.382647297259 185.359195899057  
202.483493595704  
LOH12CR1 134.02083946631 129.058085094891 124.359615295938  
129.23899614612 136.653140842194 117.166509072455 121.157614971438  
118.115015846489 132.251093122058 135.292532783991 160.667815093292  
134.033751039071  
LOH12CR2 149.125425566378 156.825157746082 188.131876231735  
171.494975393562 128.2409378561 131.12953085854 133.011320549232  
136.175268696202 140.357427912361 131.176413983785 142.191569406599  
132.551989498706  
LOH3CR2A 195.50039162477 237.358925391616 217.513118676535  
212.691702227442 154.386771806864 176.874265462986 153.238678313147  
167.746786642066 147.420580715112 155.622257285651 161.769370009823  
136.850940500212  
LONP1 489.528040775004 747.587723573212 591.763423878737 1015.63768413332  
1268.73280473728 620.614820117452 792.101559967381 561.251860964966  
513.036729214095 714.494228450456 486.653672099699 507.710604451713  
LONP2 569.133295913677 543.810043433181 562.232754247201 626.582864105324  
291.683896942007 396.708183244581 381.323457262383 386.221302830248  
482.857203798212 426.548994267836 350.58427958432 395.588345893987  
LONRF1 315.963526790659 257.643855420381 272.712242893937  
260.443814523694 205.121123131992 294.22752955801 305.542978609337  
251.472556189141 202.869364962231 171.80440912191 261.775269058607  
215.744552410805  
LONRF2 198.257497903131 162.756185479013 186.747375844319  
189.283071231248 163.326102597955 203.357914242777 188.995551740427  
146.604519441812 157.313737338264 148.570769470645 135.148723192316  
166.422360032182  
LONRF3 143.821269460523 152.599052194143 177.083095120017  
135.945030816689 139.762998983487 127.972708116366 137.379558348782

|        |                  |                  |                  |                  |
|--------|------------------|------------------|------------------|------------------|
|        | 135.508803488048 | 129.411734209444 | 126.66432941518  | 128.303046695142 |
|        | 141.830432745537 |                  |                  |                  |
| LOR    | 123.822571859503 | 158.434048174501 | 134.145771195572 | 125.942455135541 |
|        | 123.383334044683 | 123.227904580467 | 143.596530151289 | 128.020911959353 |
|        | 149.294728629784 | 126.085039271526 | 117.555999801887 | 138.634814756987 |
| LOX    | 159.021304119265 | 132.981346767415 | 146.894793774087 | 146.840735518984 |
|        | 137.163699337032 | 149.398118078302 | 113.077691687266 | 118.533346268154 |
|        | 133.176970578909 | 626.104755496369 | 126.401145439668 | 116.501174707117 |
| LOXHD1 | 141.565599104245 | 139.329693510525 | 133.331037738063 |                  |
|        | 127.799190369808 | 124.203250865069 | 135.65700435306  | 121.699702849509 |
|        | 151.55925331302  | 122.436106757578 | 129.775280076365 | 177.652022895288 |
|        | 124.563594928763 |                  |                  |                  |
| LOXL1  | 198.191669030952 | 210.33390115739  | 162.766038656637 | 255.039661999732 |
|        | 216.32785564297  | 183.853381322135 | 195.481680273686 | 153.879427186342 |
|        | 147.278236958386 | 151.751963310212 | 169.520544329439 | 212.643559782754 |
| LOXL2  | 125.005019889478 | 117.003205777245 | 114.072600760808 | 115.502679218125 |
|        | 118.011195631598 | 120.488694213288 | 115.902030217102 | 115.048402956574 |
|        | 112.476111928742 | 119.103219740679 | 133.138744413911 | 127.229854957588 |
| LOXL3  | 180.1204762193   | 159.79463502085  | 164.513371267476 | 177.639351778834 |
|        | 143.492758492895 | 146.40033464957  | 137.134190411005 | 130.535859816562 |
|        | 136.515951031895 | 131.288785100733 | 148.670562837021 | 133.532323053215 |
| LOXL4  | 687.494132125365 | 594.713185954954 | 487.19625805337  | 754.97177863997  |
|        | 162.002221893617 | 148.314248474411 | 209.004374703564 | 149.895214204184 |
|        | 187.920789153124 | 196.450308368198 | 169.201608999937 | 151.007812189859 |
| LPA    | 143.227410286571 | 139.566124411099 | 147.034021626893 | 146.579073345319 |
|        | 146.686192012988 | 139.681211082196 | 146.240060512152 | 146.753212022975 |
|        | 145.573544748919 | 141.5068665919   | 152.628220216104 | 151.821324922628 |
| LPAL2  | 117.820996523337 | 116.958052905168 | 117.227635924674 | 120.493082096235 |
|        | 118.397482835514 | 118.308102542942 | 119.057157701097 | 120.672291867109 |
|        | 114.734439905052 | 115.785084044427 | 130.080728694308 | 120.633217745524 |
| LPAR1  | 771.294254795752 | 558.251384152474 | 360.243484271891 | 452.357898123926 |
|        | 224.335742510577 | 260.314440448486 | 330.193132765826 | 237.88097138936  |
|        | 201.349209185128 | 207.993943398697 | 320.597495751519 | 215.635313821029 |
| LPAR2  | 165.844762875582 | 206.915239638443 | 171.740347129234 | 147.581827861592 |
|        | 1017.09497861942 | 698.358285634451 | 593.462634352052 | 636.56692204969  |
|        | 349.623729591612 | 307.866499851733 | 572.407760064901 | 379.911829623463 |
| LPAR3  | 141.830432745537 | 156.783896946556 | 148.620766059526 | 147.248053518914 |
|        | 352.22815095475  | 151.911494020123 | 158.60084363504  | 197.298982267459 |
|        | 163.643554173995 | 413.757630469808 | 212.443407602682 | 183.764215745794 |
| LPAR4  | 167.421776383056 | 165.836534881802 | 142.082257952004 | 202.741211613885 |
|        | 134.97514790642  | 135.092226300609 | 145.237221169839 | 142.41737138634  |
|        | 143.484004107893 | 160.303394115537 | 164.690739760426 | 134.356796881432 |
| LPAR5  | 187.472028627511 | 181.622689471026 | 147.701092466105 | 172.128489882364 |
|        | 245.900840732668 | 203.04864785056  | 208.363905749882 | 395.327097512479 |
|        | 602.371843434907 | 648.549890890375 | 351.934158805882 | 433.019478861638 |
| LPCAT1 | 294.922183826144 | 267.800523478098 | 252.655315526015 |                  |
|        | 313.322307299463 | 403.720036930931 | 432.088303693555 | 384.296190598736 |
|        | 512.184962338131 | 309.47429862515  | 402.213774592085 | 318.628084728596 |
|        | 434.855262284265 |                  |                  |                  |
| LPCAT2 | 147.335403843539 | 154.648806105422 | 127.824005374202 |                  |
|        | 127.404415477384 | 137.504147221623 | 132.265895156539 | 165.836534881802 |
|        | 140.296609941747 | 125.549968985241 | 144.840218312168 | 178.179238056905 |
|        | 131.613738869093 |                  |                  |                  |

LPCAT3 413.555310697751 417.262521411065 367.229293432041  
334.52685347521 2168.58813300343 516.892850913889 1409.42016970226  
1587.84395475807 1239.66725147648 423.607299503704 989.396074034945  
948.150767619765  
LPCAT4 165.919497521143 201.256649338315 152.987939791009  
200.741234443918 293.600165830839 178.804669910283 252.894371238554  
183.815810733176 248.465457421469 185.961822133346 236.427507270325  
268.224669588188  
LPGAT1 180.336623146341 192.512661648653 168.660907237558  
179.821008257902 202.214495168688 197.47340234886 213.364858759772  
168.911840239685 188.335102005839 181.081050726043 244.011434605133  
282.244214637625  
LPHN1 179.241385747152 193.203053225456 216.24497587588 185.275787562938  
201.850932289186 206.071709262227 150.006621336954 175.874387612235  
145.924751649542 144.141837615086 179.203783335674 183.921173538112  
LPHN2 497.411169898778 543.170902795966 369.513420606401 488.746614111382  
155.438218501542 719.13080264227 237.01460308334 408.758021864761  
216.836094088131 649.438995824208 334.377352542623 1169.43742964112  
LPHN3 144.86271068967 137.157492354617 126.528589411462 139.237360556305  
129.409091049705 131.724061631389 136.625136565562 132.344296085487  
143.632325018964 124.113451627593 135.802258952006 128.745737514912  
LPIN1 1183.82018168635 841.944755849006 1527.26678152732 925.205399154409  
552.962676093514 586.366632966978 509.512410867348 339.490955270138  
489.260272645085 457.411248351795 264.955939320296 351.585604465402  
LPIN2 239.704459251571 226.315173823168 248.465457421469 212.571491543077  
255.305647212135 236.592839463278 183.385868234361 199.288100834476  
191.310372695208 186.653791045656 197.2893692747 157.635531050489  
LPIN3 131.972669163481 145.049387327924 135.302583334608 156.228039404029  
144.771457221413 146.398454169593 151.445254181497 144.771457221413  
129.816385177336 135.930107381894 156.095520355029 147.017958916908  
LPL 186.167877791105 196.908612360694 201.320381706496 198.583407008317  
183.482640529727 168.890506147594 176.198555355383 193.502988612307  
171.11282933168 218.487334022128 174.205940911242 169.391557085902  
LPO 168.37043566813 141.783181783668 136.940275156257 147.826950636822  
142.732625557628 145.520832968878 151.492236411757 135.606539779826  
151.231685705236 164.373697447004 151.295855278218 126.589865262427  
LPP 21551.9994556128 19356.3155476146 18146.8167991873 21225.306360484  
1243.96721244424 5049.57929757135 3930.2841381915 3321.1350545346  
3241.23835624706 2493.5484556802 2859.94396089224 3843.07094386605  
LPPR1 135.688346453694 134.737901773547 147.199961777192 137.737908250097  
130.718729445329 169.306573880401 135.9097041056 148.794293762142  
132.071099697667 127.330523871944 146.563078818674 140.411200873743  
LPPR2 295.571900619972 329.068463281182 247.779718065751 442.334886941795  
450.327710374141 190.331589656379 232.344545356395 173.088291472857  
168.33854702953 197.667299074218 222.605195861218 143.791908191551  
LPPR3 126.515480612924 133.115543233699 117.990622156287 126.791714564926  
129.269919529415 117.312094804205 127.058373069911 123.277867938275  
123.081299769162 118.533346268154 136.687813884132 121.824805374887  
LPPR4 322.213266293148 344.487982154705 127.58382536792 158.371599884762  
117.703025026759 136.231747456996 129.205783382977 131.46193427125  
129.704763615045 175.96841318924 126.176505541577 132.061436165754  
LPPR5 135.154441560264 141.862767428244 131.49254872524 129.394359810841  
129.421772713718 129.867246424399 146.142934874698 127.625252349231  
127.167369897196 126.245597154052 121.350491314441 139.29087166025



|       |                  |                  |                  |                  |
|-------|------------------|------------------|------------------|------------------|
| LPXN  | 403.104188866804 | 390.194764817385 | 494.347792360629 | 347.487059316081 |
|       | 218.000351930307 | 328.60529053804  | 544.107739610054 | 657.231047829537 |
|       | 807.92851898782  | 338.326304736048 | 2850.98525554116 | 791.137867905579 |
| LQK1  | 165.972090075204 | 143.427721577372 | 186.1961391235   | 136.728975205893 |
|       | 157.094001180073 | 226.763252784108 | 184.900027626401 | 159.196987090991 |
|       | 187.978627462391 | 136.244995503799 | 184.493681387276 | 263.084557246752 |
| LRAP  | 20989.6494028551 | 17917.7303120499 | 20381.3859535625 | 19806.1316481524 |
|       | 4486.35687688252 | 18146.8167991873 | 7733.95252458705 | 13976.0448927093 |
|       | 12368.1423473066 | 8096.28093399619 | 12577.0915543468 | 10862.3952192141 |
| LRAT  | 153.443397882028 | 142.264536484668 | 149.651553512698 | 153.257097727888 |
|       | 160.989242461839 | 170.931788192825 | 134.361064431414 | 137.27506604142  |
|       | 138.478911439144 | 157.474913177177 | 139.121639005366 | 141.137459291428 |
| LRBA  | 262.019779752857 | 304.479999301061 | 267.069665000047 | 287.145105895235 |
|       | 285.102778078056 | 403.043257175264 | 398.971838949075 | 377.800067476868 |
|       | 435.796737132969 | 333.91440669951  | 414.797416270335 | 404.876478833713 |
| LRCH1 | 137.426226808356 | 133.874468336025 | 139.238936770274 | 137.476047500852 |
|       | 137.956295878287 | 135.279197125157 | 124.083648029911 | 136.294479720968 |
|       | 121.803676441059 | 133.391421497441 | 148.386249316173 | 121.419301042072 |
| LRCH2 | 504.141861790903 | 346.065746911798 | 656.009451448101 | 310.718449468465 |
|       | 149.952762225731 | 182.950456188966 | 150.387906232396 | 178.000672046849 |
|       | 168.04198447141  | 166.709393547104 | 152.778732614944 | 178.186273279101 |
| LRCH3 | 298.085365348496 | 285.355815566148 | 353.385210690169 | 233.426170535227 |
|       | 172.197077149985 | 272.994195639694 | 224.547982731402 | 305.096320805078 |
|       | 235.453139389486 | 320.525885538523 | 233.690524419327 | 272.314332734711 |
| LRCH4 | 269.726397478364 | 251.324685584062 | 223.747350951099 | 309.47429862515  |
|       | 255.273375146278 | 279.232290927348 | 235.595194918187 | 371.693808540758 |
|       | 390.372738176917 | 242.440966395613 | 267.535469518664 | 288.968909550533 |
| LRDD  | 166.341564850299 | 183.764215745794 | 165.602175302848 | 213.077884261943 |
|       | 227.467161919443 | 151.418316929551 | 161.788118050564 | 187.325542100762 |
|       | 170.748911334847 | 169.541411677993 | 211.869300324471 | 162.500485773812 |
| LRFN1 | 114.129044806825 | 150.152613183213 | 129.447773229782 | 119.180033382937 |
|       | 145.147428314514 | 141.722817732641 | 123.059971161711 | 120.55570440025  |
|       | 121.603608840998 | 124.183297351614 | 123.58053320223  | 121.545189875973 |
| LRFN2 | 139.862403685817 | 140.628614910068 | 143.125454748996 | 151.067819234238 |
|       | 339.172031360524 | 149.255405438966 | 188.252507246148 | 162.52512327258  |
|       | 151.216992571364 | 138.452698593232 | 140.784853736558 | 176.001771318766 |
| LRFN3 | 405.975221091252 | 515.432065049838 | 340.098306132634 | 578.465753476561 |
|       | 1414.95226752155 | 483.067471841953 | 756.246712133116 | 434.855262284265 |
|       | 375.856200488667 | 490.631757904175 | 541.351092873522 | 546.274050902567 |
| LRFN4 | 212.822328466993 | 185.258354905314 | 167.640645997754 | 257.941367816557 |
|       | 358.217145707718 | 199.118281632221 | 158.770502070553 | 141.935435502163 |
|       | 163.704616231638 | 191.220064414876 | 185.128661141884 | 285.131244588624 |
| LRFN5 | 489.118864124059 | 444.192734921566 | 537.350891960682 | 544.580311371212 |
|       | 145.656767712617 | 264.685862877779 | 155.011931456736 | 170.361237529247 |
|       | 156.594337089784 | 144.318556353673 | 157.541796722309 | 157.225479764928 |
| LRG1  | 159.643566663742 | 175.101284960252 | 160.268754786532 | 151.04846635538  |
|       | 393.98210915852  | 326.1109406486   | 477.160464512705 | 448.54309632232  |
|       | 331.937313503755 | 443.259619455624 | 468.712260193746 | 461.314247041387 |
| LRGUK | 153.679479224178 | 152.906352463546 | 140.675094228846 | 159.379420001197 |
|       | 138.028194610717 | 169.830073234366 | 152.098520528142 | 165.307808075027 |
|       | 177.235586767256 | 162.656951764783 | 147.18948282156  | 144.757068610657 |
| LRIG1 | 657.231047829537 | 642.934824227327 | 627.803400871547 | 852.926365088632 |
|       | 143.053727675518 | 145.648810303756 | 159.040409182674 | 153.943227610765 |
|       | 187.73896437823  | 226.678503956411 | 147.248053518914 | 138.265155903051 |

|        |                  |                  |                  |                  |
|--------|------------------|------------------|------------------|------------------|
| LRIG2  | 273.864293250688 | 249.064573038094 | 321.049000153127 | 201.913709602894 |
|        | 180.837420957945 | 242.019489058244 | 215.98963200839  | 218.896760804208 |
|        | 189.324370290702 | 264.779154931102 | 235.961605948276 | 211.869300324471 |
| LRIG3  | 196.207631868755 | 179.137734914428 | 232.667968049771 | 179.048139035247 |
|        | 150.269618125943 | 136.450062043587 | 138.129281196474 | 186.06425658259  |
|        | 122.109009629395 | 181.062188174871 | 207.138680369683 | 124.461997520222 |
| LRIT1  | 122.624828884731 | 148.314248474411 | 153.481752643937 | 135.330241638301 |
|        | 151.204487316077 | 153.505155981348 | 151.557004418682 | 145.271106758295 |
|        | 144.324313048777 | 141.248526020456 | 128.824243581806 | 160.667815093292 |
| LRIT2  | 136.832494876249 | 139.633941983246 | 128.899712906082 | 128.047981250943 |
|        | 157.81327663167  | 145.085091507228 | 124.22833964472  | 133.692996980809 |
|        | 135.071400668179 | 120.638330368388 | 115.988180787152 | 135.193659028591 |
| LRIT3  | 132.016944935305 | 127.199124606827 | 131.342562516383 | 142.173279109959 |
|        | 127.456181182121 | 126.599418127637 | 133.046435968561 | 131.466580723837 |
|        | 127.57284871013  | 133.198832503062 | 119.125002207396 | 134.128061214081 |
| LRMP   | 174.498521167568 | 196.598810934837 | 193.394225360968 | 167.341759854203 |
|        | 240.465165615601 | 384.365878895439 | 445.214621023114 | 517.993093601127 |
|        | 357.431640917696 | 141.636604735133 | 627.066031322234 | 414.797416270335 |
| LRP1   | 344.021696764791 | 368.948300262634 | 249.633252091596 | 425.826693178023 |
|        | 256.729891423908 | 111.497241941203 | 137.824985884649 | 120.897228878841 |
|        | 183.447807651728 | 133.469323412904 | 164.87433908877  | 134.618121709059 |
| LRP10  | 1963.23068846837 | 2452.1304336603  | 2026.85580212422 | 2622.87486749984 |
|        | 2021.92898855142 | 609.665323786904 | 1914.96285167893 | 1228.89116158868 |
|        | 986.65554605455  | 1513.28088592885 | 2001.92441724356 | 1540.71556891815 |
| LRP11  | 359.518199449791 | 324.067396271281 | 339.98018551524  | 285.05846406041  |
|        | 564.056592672374 | 482.592481827722 | 774.442392607873 | 575.386048896223 |
|        | 565.609400092543 | 481.933386283351 | 915.579581760396 | 561.062594540005 |
| LRP12  | 141.275667354541 | 137.31708798874  | 122.460829835477 | 124.130599753093 |
|        | 116.031631038289 | 119.711070285785 | 131.479997342133 | 127.842177770276 |
|        | 128.066043751951 | 133.173541338355 | 135.511902377219 | 128.087991226561 |
| LRP1B  | 146.04584032214  | 137.262309660909 | 140.48372620406  | 124.042153387391 |
|        | 134.576622528874 | 145.684294398911 | 135.261561433405 | 147.243263182654 |
|        | 125.08580835258  | 132.257989841046 | 115.343251487944 | 150.117906461237 |
| LRP2   | 133.975526667571 | 130.700175060255 | 134.432461986523 | 132.014213378179 |
|        | 140.238423894192 | 138.062345982865 | 118.401963042662 | 124.518818352113 |
|        | 126.539877052899 | 138.102654893864 | 137.623019849539 | 138.657241641263 |
| LRP2BP | 132.158817539201 | 127.104097294238 | 150.538541347453 |                  |
|        | 124.735542880811 | 136.846912694371 | 129.13353785479  | 123.141928612324 |
|        | 125.658396221949 | 124.879018642505 | 127.346646117375 | 136.975775196224 |
|        | 129.061316880624 |                  |                  |                  |
| LRP3   | 837.023434916281 | 997.460212152591 | 780.961416212309 | 1407.43503866211 |
|        | 3359.62015747752 | 1223.68146968716 | 941.572186137467 | 460.651156484562 |
|        | 577.98969050409  | 434.073729807058 | 275.841929188802 | 595.882696498804 |
| LRP4   | 158.943005736645 | 153.336395746742 | 146.984888309556 | 161.713311969291 |
|        | 212.836093887552 | 156.516250236679 | 199.191065549132 | 166.521472376759 |
|        | 174.187510325385 | 180.219813240126 | 150.799400717425 | 149.73250641246  |
| LRP5   | 297.636316709322 | 370.140588087649 | 333.349203784021 | 468.569725051459 |
|        | 816.580880338838 | 353.078842299761 | 464.128022170285 | 274.281532397691 |
|        | 264.654879741889 | 210.392662092721 | 390.501797367707 | 431.413030534188 |
| LRP5L  | 380.053166305637 | 359.099750692694 | 389.853534237748 | 383.682951666155 |
|        | 300.482945704017 | 462.144334719146 | 317.949646885539 | 306.43742010208  |
|        | 281.694635436938 | 156.626742111441 | 229.542259738438 | 434.61711290583  |

LRP6 157.435477846812 160.880152014981 151.002218995005 151.479748626813  
136.409960447884 155.249688219254 173.863373934746 143.338628928675  
142.903851392611 127.407418037777 165.017178571218 144.129889080946  
LRP8 155.22791202039 137.709120153505 146.276706674761 148.269123639781  
178.684992551017 200.915806094193 165.048922660581 152.274957846518  
166.277960843095 224.466829629468 142.081013617671 194.847305068008  
LRPAP1 738.892511276134 722.974310297586 927.137881369911  
655.094843900848 1699.8374761666 881.561688713557 1589.70261092241  
596.3549500121 1238.11700377838 517.529147171876 813.772804994191  
1004.6207350158  
LRPPRC 526.726224327409 562.089999265955 555.607185132941  
625.374595058488 561.609211243027 724.607317443904 519.829743770022  
544.956712516196 371.224296589448 423.256021602613 620.614820117452  
691.397238677552  
LRRC1 225.950750084197 258.348298226232 257.534293550585 216.077955163344  
446.194196064909 669.330078861673 751.269009484639 563.907454700224  
715.93836911426 402.694564608582 448.260934224454 432.726040933545  
LRRC10 169.844913799159 163.086539217826 154.033776287398  
171.350620456505 167.284724396943 158.089922688997 156.330571337475  
161.501062527272 160.297609596399 151.488973553441 157.654040469774  
162.199381540369  
LRRC14 381.121621815163 454.34729744062 458.33221423434  
584.199252444401 482.466736153026 320.467139255533 318.004190156313  
551.206833852215 393.914413372142 388.416668785633 473.947538805454  
386.221302830248  
LRRC14B 106.126202301438 107.205247133938 116.632612170106  
120.263659727964 117.244895482991 115.51493368527 110.465934808915  
117.943511615792 117.77708734157 116.276003190171 135.369146072643  
113.726931741236  
LRRC15 167.724233915361 158.113794378426 206.042395282286  
177.468210189888 154.466614452651 157.702540365469 181.313333665614  
176.547853494057 160.79631681714 204.616225498655 163.697117248984  
154.043604150962  
LRRC16 209.684346388892 225.335753745598 226.960024551778  
205.036081947168 184.071078414327 234.182164952936 212.798133015556  
262.832376198119 186.640167849568 246.288681426405 207.531908382266  
229.373686092654  
LRRC16A 192.113217321485 179.509758601636 192.59376129133  
169.656238760589 164.429483677715 176.155413809391 184.591789011195  
211.844563155792 161.906823008445 184.451469623426 224.027605834751  
192.059255232313  
LRRC16B 144.765051967884 140.479321382192 144.572485418264  
139.39442529119 135.278293996444 155.121309543738 154.615097099186  
137.75060150486 146.701489210289 134.475296383752 149.659505956629  
149.797850183848  
LRRC17 180.01471631205 198.311821616128 208.955110569558  
261.286548990435 136.975775196224 138.081268025435 131.690417323838  
144.328571856869 136.74788009263 217.45700166961 152.8810245209  
136.404742774017  
LRRC18 152.834894011142 156.856149172225 148.609721587632  
171.410912120195 135.844983721014 154.420795931034 156.707737817443  
159.337816095012 149.147411595596 151.694193636313 165.906821861  
145.187490179166

LRRC19 121.825639714374 121.924036463998 117.034228068173  
121.334882368464 112.365278258185 115.999443701343 111.743461522689  
146.944628763232 111.765812595638 111.299115402008 135.385133545332  
115.933805625814  
LRRC2 193.704510912321 177.592497020798 188.242091666446 193.358728044565  
123.822571859503 124.892438890234 123.857527555048 124.635917999969  
131.179786925029 125.379842077431 141.108383815109 129.344834474578  
LRRC20 243.441938832251 302.021033686056 288.261250589513  
393.796356067403 254.768537214795 197.687858915757 167.284724396943  
209.112959748917 181.070689877681 193.813717161291 185.063870458561  
223.573080955095  
LRRC23 204.396576475753 191.418673767345 180.3779211444  
207.204293555178 233.103476996669 154.493246900289 198.681190016247  
158.092775850886 176.506227858258 165.277935422113 169.496129800444  
152.646642492666  
LRRC24 122.962219297463 146.247825342634 119.168045349254  
132.790039196443 143.722135315998 142.37457375182 136.423161205425  
136.818557078622 142.724123724574 142.750432197016 130.272086123019  
133.773427881651  
LRRC25 129.543069836687 135.386650538345 136.630678899513  
130.142263689536 133.26167785455 126.763282018991 132.606735652984  
136.826606228323 137.77107995457 134.95415308911 140.099069486005  
133.838032323605  
LRRC26 151.137791721752 160.76044995335 162.861320877227  
153.597557478169 346.356312668445 218.735620596634 157.760190496427  
174.383193885933 209.623583937962 167.620915011868 246.594244983507  
251.939696394174  
LRRC27 106.066897223031 105.816457443844 100.637271902591  
100.746407116143 109.52020660772 108.296042016208 105.31352471598  
105.741092375243 111.672450681359 124.378096177801 139.002932985183  
105.606964521964  
LRRC28 289.474517971859 284.748764120614 306.773350448741  
323.086368767924 297.12411625104 269.194172034595 400.23671843715  
217.969738417693 251.472556189141 338.866471651692 225.803528238368  
293.4021207271  
LRRC29 137.956295878287 153.969493052468 135.884635448277  
148.840533233712 182.747079625619 119.517021355598 147.769702509047  
124.746457912284 130.265055842999 135.980886879513 149.613701531197  
134.52098220054  
LRRC3 190.947996918605 186.758038665014 193.052112923573 176.912121142015  
169.920799931309 189.403934838648 240.147082836599 185.923374274306  
178.339211170442 228.001046173405 220.098071755353 226.287196839644  
LRRC30 164.634694036993 148.646699255797 150.974364125849  
142.907969322845 151.76341973891 142.14116448528 159.43317827517  
157.494596757446 151.831627236638 168.295044843056 149.956759038516  
149.72025962797  
LRRC31 120.702740607924 110.784682137658 117.930665298163  
109.793568518462 125.765399556488 123.81177057082 123.678365506247  
146.094951139804 116.7299185256 108.62191665589 132.100026388604  
132.510116371195  
LRRC32 932.862030475849 1209.56018864779 563.490027149224  
1162.8644618472 252.015257713669 258.384059994446 183.181125586276  
211.438615793742 350.983969007868 285.63245179313 185.816827784447  
190.165771406362

LRRC33 189.292740365891 215.802713097166 196.076386020815  
275.072079692264 201.987081022654 175.960788330149 157.535792192753  
170.590817818414 182.810581377888 150.529257416176 158.390337945372  
146.923382271905

LRRC34 127.449028221682 136.942583515174 134.528971384442  
130.240366272285 133.460655803085 130.455560026617 139.691470247318  
144.87013280941 155.07594431078 123.872097378045 131.643633737316  
149.073650082048

LRRC36 136.311902195562 147.946236579299 125.83678485646  
125.500790447338 110.885714048075 134.452938571435 129.404017329613  
162.10411532202 135.102827224896 133.514843630183 113.143436184959  
138.748941735079

LRRC37A 170.423881865022 163.73339229802 163.988099963018  
175.442400672352 153.903993884123 172.084184539157 159.606633817645  
189.49408026215 193.444080047879 167.724233915361 168.552631639996  
196.990867962546

LRRC37A2 144.41489969974 137.784270510433 136.415734370763  
134.432461986523 121.51208055933 131.060030943633 150.613624696604  
144.490452173336 151.002218995005 150.334844020375 140.572442284673  
145.681968019851

LRRC37A3 125.794788766462 136.258073395013 149.570242115956  
143.579660352652 163.977562404508 148.1283706199 126.94941821459  
145.70726782469 131.019345449516 156.205127163263 153.95615286919  
138.328508662816

LRRC37A4 156.000732564221 156.62031503525 164.202554380274  
177.592497020798 154.101698334466 147.074807267102 167.365850007748  
186.309367281625 167.430767074847 164.389447533163 162.320894555337  
154.701413581915

LRRC37B 212.210383398591 210.030846572444 198.90533452253  
228.901579068997 233.842749683689 187.167255451988 218.106150021482  
256.590289281076 194.941454173896 186.021181691517 195.20398666139  
176.670752486376

LRRC37B2 10579.8650348916 12406.7143043992 8368.88320476021  
11235.4970815873 1671.82101590797 11150.5512437377 5049.57929757135  
8840.92490099301 7308.57540715512 4061.24537355697 8617.2437024568  
5894.79176478976

LRRC38 148.67584969749 178.734634888773 139.47828235176  
154.618685493541 146.612602970963 149.895214204184 148.194450105682  
142.024171830924 145.513333676569 140.53597287752 130.912137250515  
146.349773982488

LRRC39 147.225911875196 135.585648980469 137.663941989772  
137.393871430276 135.292532783991 134.929915732246 142.448384713937  
143.284230032303 146.210814568357 145.524305076788 149.262900833177  
141.784881206191

LRRC3B 238.461248099002 208.045210163121 165.283700641161  
178.780662099615 128.984613946021 137.821010169859 133.236084190243  
133.733674016447 148.317958829244 135.862790395984 126.226621020269  
127.339018771488

LRRC4 114.774530966446 124.158867850799 121.893446546512 124.213104788426  
118.974727968283 116.86635524597 127.517446456116 127.392877191785  
107.02909139647 116.897299691798 129.34905533265 129.375772737722

LRRC40 143.229240978574 137.559204418819 154.838407529853  
138.494266722799 155.483400816946 175.495965414493 168.963976596839

158.263657373911 145.873819094778 168.248982292489 161.393953325115  
156.420501464224  
LRRC41 702.779943547386 691.397238677552 894.734451279225  
704.653073777277 2410.32095582515 1289.56069670699 1544.45026075974  
1321.17236442448 1379.26881813339 897.51782613323 1201.82026045778  
1223.06438074895  
LRRC42 417.528353577952 360.852730026133 348.921877633633  
349.773289724658 478.699172220804 606.679284487803 599.735180191091  
495.241179224412 293.746733527346 450.120868656638 518.478990211753  
602.371843434907  
LRRC43 144.767233774942 146.381147992719 165.364935913232  
152.699431442817 154.681604647652 144.974813243462 144.513730107393  
158.183045411298 137.374784875444 164.223990197735 135.134213292186  
152.142909854773  
LRRC44 167.325227483198 153.703682621695 152.534482748598  
166.135707525987 172.091884817207 165.476670465739 164.753886197136  
139.136845089275 149.902420337518 149.797850183848 138.269955723817  
151.384762644292  
LRRC45 173.995889755792 173.544556426164 180.599150102184  
188.070213212057 377.225452025984 205.341121539273 187.069074575776  
213.028568789661 185.560737176115 165.163490032007 185.876046259727  
203.652936507291  
LRRC46 121.255814891176 121.416038813102 127.392877191785  
126.752999657665 152.101695555105 133.054453517834 139.513752499004  
129.297217956843 136.384308041001 126.482660154852 155.61996871093  
131.872583529419  
LRRC47 745.844395215451 869.542306259337 925.009157785129  
889.26314145856 932.076509242794 800.373159084181 907.306121257236  
728.176339659082 790.321331435096 687.700356531038 842.87865208079  
951.772948602094  
LRRC48 150.741291526753 149.692450280479 142.68640844948  
144.908551199481 140.029808783762 134.834641868502 138.331509117817  
138.537763477627 139.437073790935 137.328370598183 134.350054065624  
144.83282018024  
LRRC49 261.366143735074 257.408058436941 246.237243726748  
235.933451977398 147.457193565877 191.040134068942 222.646371492347  
163.400576719974 154.113228966411 144.32655838488 286.541028896473  
227.689356258276  
LRRC4B 142.584504912189 164.38282966938 145.168031449425  
172.722177339418 146.999370190363 141.743873995642 145.017264740722  
149.689071018094 154.402315635227 146.508628678304 141.84490608317  
134.551054564417  
LRRC4C 156.210423316722 147.982280671798 141.079317977197  
143.007237184254 164.736294372006 143.31117188259 123.347836436966  
143.658600740177 157.298181833321 154.140863428961 114.658668711121  
138.848119273081  
LRRC50 151.442463705271 133.913578037255 150.279529635193  
145.068754246476 133.745413210496 141.15458637181 144.917911601441  
144.445496145045 131.442186260672 135.753430034183 108.446988282853  
150.352308475398  
LRRC52 155.71830087869 144.540174041867 162.57736365619  
168.460095116205 132.385096888962 142.166650343224 136.052640679977  
140.826051635712 149.805955402639 129.645982978155 148.126745515891  
151.895142552067

LRRC55 114.133473556359 110.594755513247 119.062611098235  
118.816986517698 132.131378074469 112.088944448944 111.299115402008  
125.797445952409 115.949513659403 113.262357892613 118.991494185841  
111.475394003575

LRRC56 152.503159091556 137.95243466771 148.585224298375  
142.663334893424 215.718714189719 206.68694753419 242.538036654192  
200.302384864371 173.353648927895 150.48236051337 213.990575186237  
161.37617568158

LRRC57 181.681929801968 166.04965258862 175.593421867771  
153.574068503306 169.612203020686 161.26201213997 231.257543784864  
205.362816362477 199.077893147154 290.213039891361 238.230110356671  
247.72190598581

LRRC58 311.375563161772 305.050933898691 381.971539806271  
311.612118247493 207.254220247481 380.664528809678 269.141120401835  
333.439929772897 314.014654357569 391.644649726254 214.100698312272  
220.633692394229

LRRC59 154.179891883612 143.347066447019 141.5739152922  
147.728018766726 166.346572488391 186.653791045656 162.909468312298  
177.94501172269 176.049946762504 169.293852989203 218.08515867102  
155.290648078877

LRRC6 153.132559737356 136.278361222532 131.179786925029 134.964619235561  
145.791950392049 114.953328013917 146.897528834303 117.331280455759  
194.686527131656 152.064982697394 162.178410412809 153.129649174869

LRRC61 167.719651771357 160.822287037366 184.937088280378  
188.503673684625 214.86995782548 153.200153031275 165.055636629118  
183.193029399643 167.653412908384 163.134784474437 172.531836863525  
187.920789153124

LRRC66 149.717739166461 129.495680232567 152.585572167313  
144.373226011578 138.428527640896 149.288034848931 133.906867716171  
152.6969498938 140.482728188987 127.05677680446 132.16600019449  
135.645439440707

LRRC67 140.441521267218 138.367321366804 135.007473769551  
144.237691418911 148.835389500419 151.80632463295 139.121639005366  
144.221488906376 147.572660963285 130.659631155616 148.578012060425  
128.040201586267

LRRC69 143.747664482225 123.424145707079 127.259038241163  
126.682913361149 124.566313603935 141.777089987975 134.091723054647  
138.877999126533 137.356539213081 148.656917603142 151.660152977515  
145.294665838127

LRRC7 139.641688273911 134.914830257315 150.292858985795 138.293242905081  
165.597236278435 133.108094159933 129.343440464729 135.991630745082  
123.58053320223 128.077692981235 125.892022613725 126.802963197337

LRRC70 107.40922161073 119.218909479403 120.13937451914  
111.423140302983 127.694189114288 112.520199390427 129.346063085291  
126.00744446299 112.449662536973 116.092815232176 125.444541266623  
114.711310011993

LRRC8A 271.897511879509 309.538690289233 260.098788125373  
332.296938254329 250.342080183479 249.524956682907 182.357065848298  
243.191238594142 267.747633122387 540.359249705821 320.936905584424  
216.24497587588

LRRC8B 137.112274459462 128.551335256123 126.501648842366  
128.645334554749 139.851678406637 134.264584077125 127.447218258785  
123.566522075398 129.517511177852 139.094167748687 140.759006929593  
129.147246809319

LRR8C 134.418976976995 141.994082714379 121.884067622971  
122.109009629395 118.807135693934 121.945541820091 123.237851647499  
130.677737553727 135.425518707018 168.389069732474 142.958906063186  
137.378528742953  
LRR8D 205.57572471694 188.567747377006 221.093229309411  
225.4575611466 261.814227719605 287.287337931982 229.542259738438  
319.685597963267 211.118308738617 263.204269632206 223.765583953184  
261.203388718689  
LRR8E 143.931400351525 145.681968019851 151.524197474057  
151.440732942734 236.933960698783 254.768537214795 231.462907786174  
197.51109998167 165.673535349675 240.306287921209 201.893722965557  
209.258707976348  
LRR9 110.003750007057 107.531907287727 127.000175858468 114.893462783007  
127.9575507576 127.831950458406 125.955431094455 126.097544650407  
121.330383384978 131.836036241459 120.74273444647 109.69466049307  
LRRCC1 290.914381066573 279.113984512619 259.064601204239  
264.109049504585 185.088667707155 200.867515935703 174.540209145695  
246.031568259337 314.126706052299 234.693846527867 173.592875508663  
211.289598823191  
LRRFIP1 5874.57722671552 6091.9840719327 5601.24254062491  
5759.5586948816 553.198321853202 2620.17683549005 1538.78070281348  
1796.26091584668 1787.32566525551 1660.70040058102 2195.41077320434  
1834.08657010335  
LRRFIP2 445.905756082569 328.33387481068 442.698000781597  
354.705553237406 260.098788125373 243.65518489122 234.322989368622  
195.863843860549 222.544542998356 328.078808625906 246.552713031445  
222.005022189667  
LRRIQ1 118.195512252508 113.315182274675 113.620070198869  
108.296042016208 116.5272207025 109.228587997052 118.276198592775  
118.777105073561 124.395047385025 114.373370072994 123.561016079801  
107.714294216913  
LRRIQ3 122.506058130261 128.81022558263 116.902574164498  
111.632811186988 130.768746032834 121.575942603856 121.884067622971  
119.403831071089 124.145492642453 119.180033382937 132.184217000689  
130.433405111592  
LRRIQ4 122.187031504466 125.299513989334 122.664353374047  
116.428373788459 127.494672751434 121.224389883994 126.798976470472  
137.765042156434 147.761965925044 122.843792000493 160.640160107693  
133.022848457361  
LRRK1 150.148902196995 153.379118228796 132.836513637574 138.376176600064  
153.363629311799 142.593504145662 159.266921692363 149.327794670124  
144.660095230819 150.868712184357 183.556662533396 153.173746756225  
LRRK2 171.345989796519 159.862252588012 178.425137262105 182.310140388705  
144.78971417658 152.107025120177 164.534790315992 157.40255559397  
157.449891798638 166.77329045424 147.171765518924 158.911404625381  
LRRN1 151.27882940428 143.976395954528 168.594235675558 159.887898257218  
190.444387031552 159.994376562272 149.467626202395 183.314276033531  
163.741411769369 170.381897441659 126.37749112514 159.487615985875  
LRRN2 176.670752486376 191.074428905553 150.602976963975 235.372592051464  
171.121834829333 133.236084190243 135.776154891006 129.976540483758  
140.632573759426 141.202092246048 137.670655293096 142.230934617475  
LRRN3 188.242091666446 176.704617691988 169.681582570965 219.901025447571  
154.569432344392 155.335777680002 175.176693060261 171.69834783037  
165.154844613899 159.845890841215 160.014635964846 156.046085830566



LRRN4 151.70917316194 166.440530119785 159.970332650101 164.389447533163  
 168.327600230929 154.47187360425 160.478519202775 134.495938988321  
 142.248293068033 147.091280396135 150.769819282075 139.957560460935  
 LRRN4CL 170.381897441659 156.022967076728 139.138329217724  
 151.123104810793 107.170981307304 119.686859562393 121.607527525765  
 120.960986611114 132.484079454476 111.349642316073 130.933379257307  
 116.20967792121  
 LRRTM1 144.173163762502 140.194414869595 129.715948793051  
 137.330207626732 138.186616955926 140.548371692813 129.553282780541  
 132.902437860565 139.883360543042 124.635917999969 139.617608585463  
 118.694037994926  
 LRRTM2 116.355027746922 121.653754668804 119.26921157552  
 122.982686879394 116.802432258299 122.759905480504 116.310166003024  
 125.390139830237 126.862274244977 115.101971719657 121.501959818928  
 117.879058520659  
 LRRTM3 134.751916364581 133.743708220112 134.69274746407  
 139.907840403521 132.5130209643 139.282741110499 137.28323311107  
 133.329392986316 139.462804363695 139.344344562134 130.370405378213  
 133.717451195844  
 LRRTM4 139.757191608836 142.261639670072 143.965049742993  
 144.64757514198 139.209080672396 166.239339129505 124.521130036013  
 127.605805815475 133.191797029676 142.540433565262 137.710725379804  
 142.757327296852  
 LRSAM1 314.610979086485 344.992791638415 431.304147578425  
 444.712990986138 214.132445321197 160.045715314465 197.795275907042  
 215.019239034819 195.88263399968 246.77831953556 239.941641600769  
 193.028341755594  
 LRTM1 148.603077434646 137.280933631075 121.636361281148 147.401387099359  
 134.262346867514 139.885054845153 139.314945862113 143.167719135403  
 126.045231525329 138.726894569892 147.270369342438 130.435589649362  
 LRTM2 117.374025543149 124.053190169486 125.418782388128 116.465213348716  
 118.510960607141 123.522738813733 120.065876525792 120.679474100322  
 118.047978285706 121.281990195113 144.494401248678 118.619176257622  
 LRTOMT 164.39910609636 182.165681034082 150.680628549529  
 180.437648146588 194.775234425687 164.659092629962 171.329984719612  
 159.874161198304 190.138730960643 147.004172510641 171.528350399075  
 163.73339229802  
 LRWD1 235.905788497166 211.545484517339 257.880331012233 241.293046687076  
 465.809961695043 323.95355217044 334.857690525582 383.626469817252  
 316.004332524937 308.564935340635 217.307872538386 335.938170230765  
 LSAMP 275.841929188802 263.183010631644 184.638141004171 203.87884605779  
 194.500222559978 199.275716402358 171.278489808694 201.320381706496  
 193.674681547989 184.167124143272 171.014432075829 179.601348561497  
 LSG1 235.261278607182 244.132645171301 250.139061165593 257.602370597316  
 296.20443113482 296.915883082902 274.316982298975 283.874600697211  
 326.962330523237 217.940575516933 285.507315916663 381.867665449509  
 LSM1 2398.71483410593 2031.01186679713 2083.02482378721 2151.9395095819  
 7016.12801650552 5655.12135336698 2189.53914329263 2563.02488807613  
 2055.27692947656 1978.12229412176 778.28014337938 2360.87760349888  
 LSM10 507.342877360289 499.048754087189 621.946994961864 543.001249586573  
 542.267204956846 637.892677173103 458.33221423434 548.455251483009  
 513.518424350159 406.224345292389 265.402310598892 491.034395489684

|           |                  |                  |                  |                  |
|-----------|------------------|------------------|------------------|------------------|
| LSM11     | 210.960900130785 | 212.073472189229 | 311.916199912898 | 309.538690289233 |
|           | 163.72257517759  | 176.355556618289 | 166.12184890921  | 168.27980269501  |
|           | 173.09379121032  | 149.879951192667 | 147.854171854456 | 166.981212790122 |
| LSM12     | 234.156713102803 | 226.824313642101 | 258.915802108562 | 218.615551704188 |
|           | 257.685284145848 | 274.564508105177 | 278.498278821829 | 249.763375041547 |
|           | 304.547738011742 | 255.770193180874 | 297.921617748468 | 278.469340236003 |
| LSM14A    | 1840.14350831655 | 1895.72330348767 | 1704.25279485563 |                  |
|           | 2004.19532096239 | 1127.07858210156 | 1635.35544761095 | 1344.1288416533  |
|           | 1230.63920848575 | 1675.35431076885 | 1170.88763035931 | 1237.56662467492 |
|           | 1006.03677177164 |                  |                  |                  |
| LSM14B    | 136.293084080479 | 138.981712781568 | 125.256339476772 |                  |
|           | 129.621296567128 | 146.457939801041 | 124.837187124441 | 127.193553054979 |
|           | 122.068058346443 | 126.401145439668 | 126.935731176024 | 155.014930599769 |
|           | 125.861564323476 |                  |                  |                  |
| LSM2      | 1823.53870218167 | 2068.04582900231 | 1687.85201395597 | 2452.1304336603  |
|           | 3700.75770419386 | 2045.24382334506 | 2568.95060767776 | 1754.99663827472 |
|           | 1785.92695250894 | 1424.79466712859 | 2293.05058904656 | 1813.79641422879 |
| LSM3      | 960.775251871864 | 1072.82323999638 | 1181.97868824758 | 916.836022395768 |
|           | 2590.80821234237 | 2014.48411650613 | 2456.36776585765 | 3963.40575974446 |
|           | 2618.64973582507 | 1662.51399707484 | 1808.26383618901 | 2111.32236867229 |
| LSM4      | 664.809419789814 | 713.23381913235  | 644.11603826131  | 822.129234065933 |
|           | 3371.24667467952 | 2255.92551080483 | 1076.62597781124 | 1788.35884039549 |
|           | 981.781076110568 | 879.301932542031 | 1047.2693539616  | 1263.64725236472 |
| LSM5      | 670.571106793204 | 682.538709448692 | 721.966539760341 | 644.741046498743 |
|           | 2305.11856249143 | 1323.91781040143 | 1314.62071412501 | 1441.29676998365 |
|           | 1202.74869573717 | 1128.60314361459 | 1000.05896885496 | 1861.19763103381 |
| LSM6      | 222.593554194453 | 229.076507182239 | 232.892635502424 | 220.312301059818 |
|           | 287.145105895235 | 235.997227173296 | 319.223127076041 | 242.410260751835 |
|           | 304.292209676095 | 264.429717032654 | 301.546624239855 | 269.853718252574 |
| LSM7      | 829.126529857044 | 953.549801897112 | 757.406530000489 | 926.283018664897 |
|           | 3012.49794349837 | 2819.92361643968 | 2120.14463347544 | 2418.66999907188 |
|           | 1808.26383618901 | 1503.2049371911  | 1717.09434498876 | 2200.94974896771 |
| LSM8      | 162.683665945044 | 139.853333847856 | 166.549192709614 | 155.134796468704 |
|           | 176.300743660299 | 161.285587312115 | 206.35895739543  | 266.442565636226 |
|           | 212.497773003032 | 196.716209382446 | 168.906637816046 | 221.796935051107 |
| LSM11     | 685.354305381323 | 643.13571432061  | 622.142195892701 | 686.445635754196 |
|           | 1114.85422895959 | 1696.69982157582 | 535.612000577004 | 866.765054377214 |
|           | 510.555184032017 | 723.640113902925 | 838.93563319979  | 488.884511065882 |
| LSP1      | 190.614236149496 | 183.138955445765 | 171.262412981612 | 186.496160803789 |
|           | 155.878493935166 | 159.491388998564 | 161.813099560175 | 166.944701842349 |
|           | 174.702891494074 | 161.316521450944 | 154.277670551775 | 232.960832410426 |
| LSR       | 136.093473732174 | 146.808519947394 | 133.272540012108 | 138.510722755317 |
|           | 785.290353402444 | 264.779154931102 | 244.897869154624 | 228.879434668972 |
|           | 217.45700166961  | 164.534790315992 | 287.402339322061 | 202.778539118009 |
| LSS       | 265.754141836026 | 257.685284145848 | 288.150694843614 | 348.711663415777 |
|           | 210.41046499545  | 165.890492422031 | 189.027594735456 | 187.824032557194 |
|           | 217.969738417693 | 299.463563393179 | 173.97085982677  | 170.150889760372 |
| LST-3TM12 | 114.093935026467 | 126.606163970149 | 122.414781975236 |                  |
|           | 136.071856104688 | 129.260551359984 | 137.419835194075 | 143.565597315289 |
|           | 147.303997146992 | 128.543460982378 | 137.380514555157 | 128.929244741296 |
|           | 140.706490845379 |                  |                  |                  |
| LST1      | 144.328571856869 | 145.724294862079 | 127.993841618875 | 135.542079867325 |
|           | 132.034701177759 | 139.864176113337 | 144.856801451884 | 162.063689419737 |
|           | 182.515302191173 | 147.449186980143 | 142.846100831941 | 136.440671408022 |

|        |                  |                  |                  |                  |
|--------|------------------|------------------|------------------|------------------|
| LTA    | 158.602687876661 | 171.449326065013 | 173.544556426164 | 159.346890686719 |
|        | 170.313045875402 | 159.730925830278 | 161.212598761378 | 170.111653122193 |
|        | 213.710058427654 | 167.077669654786 | 188.36361073603  | 157.607445509297 |
| LTA4H  | 1918.14260920544 | 1584.81089248914 | 2288.63508719706 | 1478.09582385838 |
|        | 1328.38230265655 | 1562.9779683714  | 2316.49886419499 | 1862.88548451154 |
|        | 1966.09691567857 | 2789.67986601883 | 2418.66999907188 | 1338.83705469394 |
| LTB    | 141.968949222821 | 168.838723365068 | 128.359034755228 | 124.374156313613 |
|        | 196.802641002079 | 139.917662338546 | 342.769825986756 | 252.404931238338 |
|        | 982.367000148189 | 193.444080047879 | 394.101052511043 | 211.692743811486 |
| LTB4R  | 176.820928772968 | 169.089896796513 | 179.009510246709 | 166.382301680189 |
|        | 163.956894843504 | 173.063002566542 | 179.026308021985 | 212.854068610681 |
|        | 168.477388641982 | 538.484170364629 | 180.889946069121 | 158.550259547851 |
| LTB4R2 | 117.097159106043 | 129.652331277375 | 110.148555045276 |                  |
|        | 128.327528039933 | 121.194138394375 | 140.063142443074 | 113.356070669308 |
|        | 121.462385497795 | 117.724353829377 | 538.872348151809 | 137.534079082878 |
|        | 119.370219299491 |                  |                  |                  |
| LTBP1  | 132.560292119968 | 128.87498876738  | 143.827500301207 | 144.210698143215 |
|        | 133.436057118148 | 145.039617860588 | 143.098246338022 | 142.303654405005 |
|        | 143.909501365162 | 144.482364671273 | 137.746488181995 | 133.54741488531  |
| LTBP2  | 528.098472417251 | 470.154677948419 | 495.56459361431  | 325.570839576032 |
|        | 181.54273463264  | 189.307823427362 | 214.413674287972 | 220.169099923628 |
|        | 260.129513331703 | 379.292531644085 | 328.969023478451 | 203.983168778488 |
| LTBP3  | 447.182566890086 | 481.453770150269 | 352.418229893699 | 438.146919555296 |
|        | 458.047799748696 | 350.392951395182 | 210.605864685448 | 206.715020025609 |
|        | 188.53221484746  | 223.373877165342 | 203.87884605779  | 205.966111721195 |
| LTBP4  | 1695.26858186096 | 1576.21727854603 | 710.531876484467 | 1143.0779222425  |
|        | 278.775971122032 | 213.412498914309 | 175.757588503244 | 184.398672994943 |
|        | 220.710324965453 | 264.355693070937 | 181.247766545135 | 205.950347620158 |
| LTBR   | 738.087203930249 | 813.772804994191 | 841.944755849006 | 962.559482864549 |
|        | 2395.75453574049 | 913.22732386079  | 1657.72357544205 | 744.523059417351 |
|        | 1367.92869625376 | 1267.5716872154  | 1279.15873231449 | 1141.49294161587 |
| LTC4S  | 181.976252906929 | 159.696443182844 | 142.09146795308  | 165.027938535393 |
|        | 143.258488502799 | 129.233595525585 | 127.305306470493 | 124.365185583133 |
|        | 143.45723206497  | 127.089567789608 | 127.694189114288 | 133.165893710176 |
| LTF    | 190.357437485436 | 188.910933952136 | 193.629237856758 | 173.169905329013 |
|        | 165.009696356892 | 191.754626760061 | 192.140442881209 | 180.690409026809 |
|        | 213.674150322581 | 181.340312140534 | 169.800006803362 | 182.633773540249 |
| LTK    | 127.114560076444 | 123.582509531804 | 106.437660157036 | 115.337592860132 |
|        | 122.131320551425 | 117.517649866653 | 120.581554457723 | 122.236134282757 |
|        | 117.552229262461 | 118.206034087145 | 132.14412512622  | 118.724348027528 |
| LTV1   | 570.130804179186 | 497.53605530806  | 538.369868115137 | 504.9864660689   |
|        | 429.351447428661 | 672.637760135254 | 892.515788744891 | 728.743541467167 |
|        | 668.286400833485 | 616.188923504376 | 798.943242964857 | 1170.07851727046 |
| LUC7L  | 241.134385745554 | 202.927700504034 | 226.595006724068 | 203.357914242777 |
|        | 174.347451984066 | 241.203521822269 | 211.692743811486 | 206.605699708924 |
|        | 197.146035305296 | 182.545896049446 | 283.952604729032 | 250.647644543963 |
| LUC7L2 | 205.121123131992 | 185.876046259727 | 179.35113214277  |                  |
|        | 191.58185405868  | 204.299375966441 | 173.782474972742 | 170.465177938235 |
|        | 211.300733064951 | 206.113290588613 | 166.111496598928 | 256.590289281076 |
|        | 249.884250040189 |                  |                  |                  |
| LUM    | 4088.12910138929 | 2941.69058596077 | 2847.42635118026 | 1803.06322760249 |
|        | 336.786227017391 | 1398.60850048351 | 348.575690346536 | 1155.4487861163  |
|        | 1942.08859727404 | 2921.59274577877 | 275.468194644053 | 577.33849844574  |

LUZP1 1013.60354455825 961.355625338687 593.639955546556 995.812184456562  
738.087203930249 670.097523566652 817.913210743023 871.913035811066  
712.699853328955 710.531876484467 1165.05055932899 769.586135629964  
LUZP2 116.408126010926 116.031631038289 124.794260959228 116.759526220736  
130.01207836961 135.834000569736 126.3539479619 163.922353493317  
124.528206512938 118.24368469845 142.082257952004 120.975542702338  
LUZP4 102.166449349339 98.4947439453387 106.102093734748 112.599970121166  
112.558241320112 121.281990195113 111.312348806957 100.04568139926  
119.288554466773 108.760780994582 121.231939494619 122.174036435094  
LUZP5 135.810476921749 130.351302840602 139.427216913809 148.514806562804  
146.846301957637 141.378381097266 147.027904536486 123.066317285283  
140.861849838223 129.945543636232 143.373932371335 137.625415175495  
LUZP6 132.521681289019 145.200638964782 131.981505236332 147.854171854456  
155.201655653645 139.898996725236 152.628220216104 141.664271607079  
157.166379887259 130.501010489883 145.063062479224 146.531692460121  
LVRN 150.115482378938 132.858424396011 146.70774472499 147.043228493047  
138.824082857747 146.20679320119 128.99859423584 142.195764444916  
135.463385553776 151.507376053438 131.434121613176 129.400895994387  
LXN 420.743637858421 331.383533814347 403.208138816247 298.979106293393  
169.136919982294 531.555532787504 1135.49876948815 860.688314783077  
1958.96627327952 485.373169494941 457.650982600462 465.683139139622  
LY6D 118.249148086655 117.367470441908 109.781334128478 109.52020660772  
274.736124442229 109.924867620862 149.127963327999 105.408689610638  
125.846029991447 2681.48138915107 236.676029292922 803.840404197117  
LY6E 2620.17683549005 1453.88161495484 644.868034665476 1239.66725147648  
677.023591987179 1439.37593006882 2159.2992548378 508.572981581855  
968.157701932137 1299.4782626583 1965.13870083236 4228.5490138553  
LY6G5B 116.91470505098 114.512028664352 120.493082096235  
124.441699369614 122.799487123057 131.641435734821 116.449064666763  
116.784024112826 125.2051300372 116.241531823869 123.048352070915  
113.905364405553  
LY6G5C 126.013957128603 132.854078420045 126.381288663037  
136.475652722007 139.440415574681 123.195738824794 126.37749112514  
124.253582884351 129.740166478951 125.005019889478 139.6391154169  
128.497571151343  
LY6G6C 115.113000553093 129.222098453499 115.702900810606  
124.70219935334 122.373400988227 130.031303483631 124.072512083237  
125.104229604098 159.59942312149 135.5668267936 151.118430469429  
120.901639342731  
LY6G6D 129.928047362701 130.293492553638 121.531401500498  
176.958593931371 110.636713168363 120.497796762933 115.43068422162  
122.80785489118 127.635341036911 119.787925356307 113.051381310122  
125.556444423391  
LY6G6E 142.58039376538 148.439740062804 135.15791174418  
156.296046600921 154.390764802264 144.472969298036 147.351826045609  
136.940275156257 139.287871460674 143.231806900648 115.389934936253  
148.977202433511  
LY6G6F 142.801645268128 146.912751127571 146.099555861577  
139.103395748894 136.621173927187 130.870198462514 144.924212639731  
127.068313862984 135.254996386778 138.625185173046 120.992440100307  
147.351826045609  
LY6H 157.070500065037 143.454771158075 157.322594990954 165.467462247066  
141.221162787167 138.605661097886 146.019622621809 141.70123350351  
155.397301207102 142.607578275494 153.047317528007 147.777050372032

|        |                  |                  |                  |                  |
|--------|------------------|------------------|------------------|------------------|
| LY6K   | 134.163388748526 | 140.391753835434 | 137.296790373528 | 134.655842662899 |
|        | 164.948785167149 | 181.758545723241 | 131.76272538453  | 137.95243466771  |
|        | 158.183045411298 | 140.790450703097 | 151.717558541683 | 146.231937458616 |
| LY75   | 178.209994522672 | 150.295611829265 | 146.240060512152 | 160.045715314465 |
|        | 156.695440330379 | 169.279866966079 | 193.786889748038 | 150.160004473338 |
|        | 165.659978250378 | 155.686889874806 | 212.798133015556 | 210.290500215377 |
| LY86   | 181.183277133224 | 156.355520513868 | 150.772752327567 | 172.169129806643 |
|        | 151.722405598425 | 183.879114762264 | 171.714973501563 | 182.300628120658 |
|        | 270.021093158885 | 197.2893692747   | 166.040918339519 | 149.949425756405 |
| LY9    | 137.404525565336 | 134.384963577069 | 135.784481523923 | 131.121343131082 |
|        | 127.434873844923 | 134.712935556892 | 135.429199205506 | 144.763700813057 |
|        | 145.349023185855 | 135.589211439847 | 140.020294940544 | 124.715454831847 |
| LY96   | 560.015499136193 | 467.387427864242 | 343.666488527549 | 396.526590512521 |
|        | 334.857690525582 | 390.194764817385 | 261.500728878974 | 399.963640581639 |
|        | 509.512410867348 | 673.824770556885 | 342.315456386729 | 171.740347129234 |
| LYAR   | 419.846584903512 | 334.101619029105 | 492.780880796036 | 355.372836460906 |
|        | 368.948300262634 | 471.720496000839 | 501.301694626942 | 571.136519973808 |
|        | 651.759589129833 | 514.354512083591 | 374.337030706199 | 468.93543246394  |
| LYG1   | 150.790155351217 | 147.169765031208 | 134.867806860993 | 135.487310036251 |
|        | 135.693520183014 | 126.780096523484 | 131.013719535992 | 138.62308708151  |
|        | 120.355844117573 | 137.423810400996 | 150.929236917651 | 119.696656494403 |
| LYG2   | 122.10489926804  | 115.041324824728 | 118.342067845126 | 116.819107878692 |
|        | 115.981530322377 | 115.702900810606 | 115.29099102455  | 104.780306305981 |
|        | 103.168665937677 | 107.170981307304 | 116.632612170106 | 110.718864165172 |
| LYL1   | 483.429488817674 | 550.124359517322 | 413.084646927035 | 761.726829618132 |
|        | 339.917319653382 | 235.407064742194 | 183.613051401168 | 261.639437655633 |
|        | 447.779854598556 | 228.739556788924 | 253.186749111526 | 212.730163981978 |
| LYN    | 397.307515234646 | 420.361583975644 | 325.907037744936 | 352.897241809959 |
|        | 699.06539333455  | 511.779988437654 | 1211.94273385872 | 943.677679525947 |
|        | 1578.87371296418 | 610.915977337787 | 739.085574858917 | 371.693808540758 |
| LYNX1  | 147.661748633455 | 140.029808783762 | 143.879597098414 | 134.42983422342  |
|        | 135.196797030404 | 134.111348656261 | 137.805436529896 | 129.520140995675 |
|        | 132.858424396011 | 1204.7397215229  | 130.242779079309 | 136.701400398129 |
| LYPD1  | 155.397301207102 | 165.938009275308 | 155.365673279823 | 153.059432055089 |
|        | 162.082166316002 | 162.54008293513  | 161.988082494464 | 170.661808797506 |
|        | 162.624786423084 | 184.426874913406 | 220.446775597113 | 184.801068553988 |
| LYPD2  | 145.158039427157 | 143.144153021901 | 154.546460872415 | 142.00857631537  |
|        | 142.907969322845 | 148.444479022559 | 147.823552813852 | 138.340652133783 |
|        | 153.360382235409 | 146.565265415908 | 142.399253818882 | 148.691132137188 |
| LYPD3  | 155.70645844794  | 179.828494168009 | 143.160281902098 | 131.221105247771 |
|        | 1290.39741199701 | 829.992212133165 | 1776.38646235135 | 778.28014337938  |
|        | 1221.58522138654 | 3012.49794349837 | 544.30845362168  | 529.854965483609 |
| LYPD4  | 137.799016648135 | 153.261002653668 | 136.87712607887  | 171.267907653007 |
|        | 142.771243742561 | 143.725497952919 | 145.870135196037 | 147.661748633455 |
|        | 137.288653308858 | 147.93088503956  | 143.873048967535 | 159.716066475442 |
| LYPD5  | 138.735156909846 | 141.380276932556 | 136.013989349192 | 142.55463239891  |
|        | 143.403396831929 | 140.466612569756 | 157.551854647702 | 145.814268094808 |
|        | 156.646803208934 | 526.625936680738 | 190.682392100564 | 147.056649843798 |
| LYPD6  | 241.782750858091 | 190.281570660806 | 226.531255313921 | 231.517412929077 |
|        | 267.483886037099 | 559.0867397858   | 220.258804437828 | 350.983969007868 |
|        | 238.685014863143 | 150.63456320644  | 362.742120043509 | 288.313931067158 |
| LYPD6B | 143.993611400272 | 185.570062118736 | 168.302168350095 |                  |
|        | 129.666957539624 | 485.026081242201 | 1162.8644618472  | 498.180196203245 |

472.108893832845 779.623566217277 267.097999873387 872.320823993033  
 358.479218923158  
 LYPLA1 141.691135410429 140.225329742578 149.754842928462  
 139.571752933877 261.39435936661 722.725186727796 505.302263971007  
 430.590533290315 505.143815448613 417.024088698182 430.329437928013  
 526.285114043212  
 LYPLA2 192.331142672469 228.284236550547 195.033792280119  
 226.893147371644 918.742625270041 396.459213999636 342.555640222963  
 333.049612399093 358.092809491843 316.125364442611 513.036729214095  
 530.387315639095  
 LYPLA2P1 130.728465509213 143.004090696463 145.077517845584  
 136.946137446743 293.873921048642 196.031541155674 186.359770878343  
 165.355764467096 187.145134088286 173.735045816949 197.326259802349  
 234.243977361232  
 LYPLAL1 284.043349407812 306.387898121409 422.688531130043  
 275.468194644053 381.323457262383 302.601458409102 501.946140974776  
 306.193157874683 460.089380701982 591.013515828247 497.269957926657  
 510.285766295993  
 LYRM1 1792.35343044443 1798.5819962261 1695.26858186096 2293.05058904656  
 1062.03157932144 872.512754090023 798.389385197471 1377.75266942574  
 957.54149804446 489.260272645085 552.962676093514 627.335757721489  
 LYRM2 337.342034950908 306.59090554099 768.053694275398 269.053237303244  
 220.169099923628 457.905741500454 664.809419789814 560.481802403627  
 507.827473844576 576.10291008626 291.020789939476 726.556553101727  
 LYRM4 232.385176936256 246.237243726748 246.288681426405 276.414209660023  
 193.930569647995 173.071892362758 231.517412929077 215.453915231774  
 200.468804559127 185.974598267418 186.961638857905 189.528686948872  
 LYRM5 668.286400833485 639.011144305614 770.632068590053 598.647226284738  
 433.189221987242 351.337287690674 540.005877322817 422.338508598153  
 569.866002248352 473.151324002277 417.103816140912 452.357898123926  
 LYRM7 588.197697799448 650.494111214312 588.334329592604 698.882871686866  
 198.597176657619 263.123584372086 364.022018936132 275.794847140407  
 240.631264915238 379.387095129725 414.114051645565 319.223127076041  
 LYSMD1 192.680681636018 192.992546726522 218.529160053398  
 199.327939161502 191.58185405868 152.514455788489 152.334669286305  
 172.888455552446 167.526798465556 168.805630890928 179.794718712964  
 201.954167006591  
 LYSMD2 582.527835746927 541.896444696137 478.38361571213  
 459.171226689178 477.87583927675 342.037040881785 557.214020485204  
 428.340060893467 612.06231165648 631.819659701092 231.517412929077  
 553.757847979529  
 LYSMD3 149.290007708698 134.477081392474 142.851432926979  
 124.477586539576 132.799355149191 125.461701282922 139.461389827666  
 128.29486937905 130.751522895053 146.863611516518 158.272071464923  
 140.383646018409  
 LYSMD4 300.094509257518 275.642882589307 254.013921962363  
 314.4408959517 206.571433405844 197.2893692747 214.546528079149  
 183.64389891975 187.035957486928 334.916875239616 176.431477850092  
 230.589110372454  
 LYST 204.283030911897 203.777944180067 208.476367897256 206.21848253717  
 146.826292449698 160.964435028806 185.240692860387 159.2488784104  
 164.58158284856 164.801505601099 170.233084517898 163.764600217347

|         |                  |                  |                  |                   |
|---------|------------------|------------------|------------------|-------------------|
| LYVE1   | 334.607533045929 | 222.177290763736 | 308.767036855508 | 285.768837438859  |
|         | 135.105147647223 | 243.080229016932 | 155.518807026156 | 147.366877428537  |
|         | 172.329225247019 | 144.40361834862  | 122.702175900246 | 139.316189199729  |
| LYZ     | 142.541728149687 | 131.717160947964 | 135.592128081677 | 136.218750083407  |
|         | 178.976116597291 | 169.544515294662 | 252.171420358437 | 1460.24985399013  |
|         | 1338.83705469394 | 445.661863626419 | 182.529167529936 | 251.09230266334   |
| LYZL1   | 148.895841777421 | 144.563144246691 | 141.106863165059 | 139.171486871664  |
|         | 139.032275257901 | 145.450039896731 | 136.698600389364 | 139.628966306048  |
|         | 148.197029306137 | 141.964796033176 | 129.564482772168 | 142.38097037888   |
| LYZL2   | 128.400741751903 | 116.934457270701 | 105.164790181452 | 118.027430976118  |
|         | 112.3786222545   | 122.254824223167 | 120.027996187915 | 107.40922161073   |
|         | 119.391213033544 | 129.161305053472 | 118.945264994404 | 106.263441906404  |
| LYZL4   | 119.233300586525 | 135.919710642366 | 116.994216357989 | 129.851616807075  |
|         | 117.408465686218 | 113.451566510208 | 128.720517906732 | 123.055210862247  |
|         | 118.95971064289  | 115.058061620379 | 125.624661345169 | 128.905042692431  |
| LYZL6   | 157.797222258336 | 152.518729390047 | 146.59366188125  | 149.749660071593  |
|         | 143.385915173392 | 174.807363753172 | 158.841505957036 | 159.113259830623  |
|         | 150.632724038845 | 166.540134051424 | 145.7202993771   | 165.985885671398  |
| LZIC    | 237.692959394487 | 252.473612525884 | 240.341031437493 | 218.058543664561  |
|         | 307.728083981504 | 231.180528071672 | 291.369577397743 | 266.162244070031  |
|         | 274.494074082359 | 258.348298226232 | 204.596753034535 | 258.552964322998  |
| LZTFL1  | 270.520229426015 | 265.219444616245 | 286.431013744652 |                   |
|         | 263.64863646012  | 258.807028561407 | 274.427235605909 | 270.490971664802  |
|         | 251.915179734134 | 330.241479004885 | 192.752224665459 | 256.820546409632  |
|         | 169.441789096441 |                  |                  |                   |
| LZTR1   | 1347.10650016064 | 1298.60552708737 | 1332.11815966955 | 1908.81864728547  |
|         | 1226.74043569231 | 816.823443819069 | 991.081498002429 | 921.546033242474  |
|         | 845.150147618462 | 858.020739710943 | 1032.11574332305 | 777.901979189395  |
| LZTS1   | 137.107621189522 | 181.193963616037 | 133.087166272749 | 141.895211025017  |
|         | 181.654319266685 | 141.84653748835  | 114.44610607807  | 119.233300586525  |
|         | 154.562761981868 | 138.724959677368 | 141.205975588506 | 126.017158064032  |
| LZTS2   | 303.986544460218 | 379.788696204016 | 319.417555901733 | 504.709613434391  |
|         | 287.656436278551 | 192.548337508559 | 235.216589534371 | 177.549330396268  |
|         | 186.733394375839 | 192.331142672469 | 255.945470052489 | 278.335289966805  |
| M160    | 158.473244125101 | 147.176801913145 | 136.440671408022 | 147.962721373177  |
|         | 222.315451077459 | 148.222477811166 | 169.733427590141 | 212.996456841785  |
|         | 221.664431984861 | 157.374537572779 | 197.489903263216 | 187.729071402782  |
| M6PR    | 540.584471920486 | 485.576566972696 | 690.246312542011 | 383.74357557363   |
|         | 511.113083958771 | 1134.64039256323 | 1323.05745869565 | 1262.96801072965  |
|         | 1450.44557173645 | 1010.73988405469 | 718.142991571468 | 1436.577717111084 |
| M6PRBP1 | 1750.21700780511 | 1695.26858186096 | 1903.13326109546 |                   |
|         | 1707.09830463606 | 2433.83421295012 | 2703.76111776248 | 2305.11856249143  |
|         | 2620.17683549005 | 2246.89876694944 | 5165.90865799172 | 2656.38138490746  |
|         | 2558.91648313228 |                  |                  |                   |
| MAB21L1 | 135.713266118447 | 141.691135410429 | 134.053685488055 |                   |
|         | 137.065315360321 | 132.70109232982  | 129.570960882942 | 140.18668846839   |
|         | 139.099483279141 | 134.955823960889 | 138.27272971335  | 157.184851121922  |
|         | 145.89801576671  |                  |                  |                   |
| MAB21L2 | 145.556318940043 | 147.272072245929 | 141.907307422968 |                   |
|         | 174.717158790668 | 135.86924353735  | 142.159597861804 | 141.340452225686  |
|         | 143.561114996045 | 148.479865869644 | 125.617143363441 | 140.946008063839  |
|         | 138.295019395552 |                  |                  |                   |

MACC1 123.922817231917 128.101371225192 139.760425990939 134.944488136297  
 138.930413256469 134.580526467375 135.154441560264 128.893208935783  
 136.899405404096 125.837943228537 145.604066669916 145.704057360697  
 MACF1 661.390308090982 613.063954859056 663.668537495345 712.94845413251  
 203.149001616967 279.070493043898 197.489903263216 239.148333781084  
 260.888612454097 489.118864124059 307.866499851733 262.629961694573  
 MACROD1 321.367338145787 363.150472154973 348.457808063307  
 422.688531130043 393.579552385074 318.196134631178 264.306927596371  
 171.579123521304 163.910041674646 193.930569647995 326.703488388966  
 223.551813819581  
 MACROD2 122.410340121549 132.610618885717 132.344296085487  
 131.996032643928 127.451155926679 120.131839791515 127.458099438957  
 129.034770823878 129.005211657936 125.732389000341 131.017355402204  
 129.422854634791  
 MAD1L1 154.426605816862 159.466972602203 133.838032323605  
 168.111124820968 227.926444925478 139.510764003291 149.083667086067  
 157.170136439095 159.710615852435 149.875556330919 150.295611829265  
 208.237011955037  
 MAD2L1 149.595375008252 156.934589811742 156.210423316722  
 151.115031304764 303.051124835907 583.022090879298 246.616749748028  
 380.243136469602 414.333324610267 280.337475979102 162.267841475739  
 322.213266293148  
 MAD2L1BP 168.628947766217 183.604011732066 204.438365139666  
 164.986006226427 274.179232297038 413.757630469808 339.379250332987  
 329.146025181674 339.598452080917 288.072720517427 295.607161318725  
 401.960630197091  
 MAD2L2 509.880640462 553.90008440429 442.590987372759  
 646.461274173693 1828.66165670455 1447.07989164988 677.265576269103  
 933.408902924063 1147.96742431386 920.840069938767 437.248311551717  
 839.324324662619  
 MADCAM1 139.943915452851 150.272153646712 132.437234970375  
 143.327730271099 144.532420788945 143.327730271099 131.092140169861  
 135.253713075341 130.352674121108 148.132450240784 136.438788088263  
 139.080142195118  
 MADD 176.155413809391 185.275787562938 187.920789153124 206.915239638443  
 217.307872538386 172.667770359278 202.300293733922 191.241000498118  
 167.087850057037 169.422015793848 247.779718065751 179.501659253141  
 MAEA 180.364089931995 169.844913799159 228.797912452429 152.617507769717  
 311.916199912898 255.59042517603 343.417041721907 303.380479700334  
 471.15333189869 336.380724981693 296.657844888195 391.500696444149  
 MAEL 126.743579586052 128.850480964163 129.329521415816 122.575357101038  
 130.590195477461 129.420716653358 117.374025543149 118.336654504789  
 114.999628959921 123.265810024678 119.876835248732 118.641431192759  
 MAF 237.575788579215 227.614623963331 192.224242967539 244.627091189503  
 177.415756020166 154.300058278533 203.276353321185 192.153420834889  
 209.5184563244 369.275635424092 270.201322204641 206.825575257029  
 MAF1 524.245387973163 550.901056837273 479.638653311025 671.563789496889  
 529.854965483609 230.332652534446 252.697160031025 294.033003779363  
 337.434882771953 246.989526028884 356.413190087706 240.561105692347  
 MAFA 122.083357581665 121.874296836854 118.614641349402 121.322817570375  
 127.018746030517 119.180033382937 124.393008692801 121.024572716324  
 129.623601211364 128.584707181857 116.639787832302 133.096984735092



|         |                  |                  |                  |                  |
|---------|------------------|------------------|------------------|------------------|
| MAFB    | 299.513950278952 | 343.346755862776 | 207.254220247481 | 306.387898121409 |
|         | 226.458509834965 | 469.64693728427  | 303.184785797741 | 439.33566689752  |
|         | 537.419316887523 | 1990.94596595493 | 334.772648743153 | 216.290279815413 |
| MAFF    | 310.533399024851 | 291.221427744817 | 256.729891423908 | 283.918434443669 |
|         | 231.846509449829 | 257.685284145848 | 255.866847225916 | 223.279017022443 |
|         | 248.43491649623  | 277.026538720417 | 263.084557246752 | 209.727089546377 |
| MAFG    | 228.317527475322 | 233.953994677015 | 209.984545596312 | 285.258824662946 |
|         | 210.103974340881 | 179.687464522203 | 194.847305068008 | 191.38608906576  |
|         | 187.443940151794 | 158.650226303456 | 174.068974937318 | 175.372355078713 |
| MAFK    | 127.398873370484 | 131.527939273875 | 127.727311123825 | 125.851611268218 |
|         | 133.453702113571 | 125.547399456656 | 118.792612926619 | 119.436922168376 |
|         | 134.32174235533  | 125.14833026167  | 143.08841562593  | 127.395094952914 |
| MAG     | 143.568691825659 | 157.11867820027  | 152.573063322741 | 164.785992108998 |
|         | 151.349739492368 | 162.285199080777 | 144.949897872252 | 150.188128594079 |
|         | 137.074564265915 | 145.070927449969 | 154.96616957771  | 152.026310884327 |
| MAGEA1  | 131.839890565869 | 127.520134825082 | 134.176925491721 |                  |
|         | 128.356453959987 | 138.618761382177 | 144.525782437057 | 145.478233255862 |
|         | 135.289246539398 | 142.916274989816 | 712.94845413251  | 147.717748449017 |
|         | 139.209080672396 |                  |                  |                  |
| MAGEA10 | 116.416896654975 | 159.972045520208 | 128.229729571899 |                  |
|         | 137.165966740473 | 880.719593734606 | 1021.25947613827 | 122.027632589515 |
|         | 167.662761175661 | 1035.98574557331 | 142.900756181761 | 116.67463130093  |
|         | 124.783306383852 |                  |                  |                  |
| MAGEA11 | 127.282374513433 | 132.615324904193 | 128.895325544109 |                  |
|         | 133.296200563657 | 152.890239929335 | 124.940836122365 | 134.550341773204 |
|         | 135.800997202323 | 127.458099438957 | 136.161633283029 | 130.732397679661 |
|         | 130.473842500245 |                  |                  |                  |
| MAGEA12 | 125.720102558499 | 138.560399473164 | 123.657246099004 |                  |
|         | 128.530540860266 | 156.385100395531 | 212.545989139388 | 123.150299476109 |
|         | 135.701041557713 | 128.65678873939  | 131.181537219479 | 135.509927917168 |
|         | 129.640303191006 |                  |                  |                  |
| MAGEA2  | 143.737021989907 | 138.546549217819 | 127.374600506681 |                  |
|         | 145.962664629275 | 141.374831983971 | 137.43751840683  | 131.606765174514 |
|         | 139.715836473047 | 136.5680632044   | 142.228042097379 | 134.78149307898  |
|         | 131.907246423067 |                  |                  |                  |
| MAGEA2B | 105.050093408041 | 113.512670856029 | 104.977794653504 |                  |
|         | 115.821231468312 | 123.159407368236 | 124.589785242175 | 106.685578858702 |
|         | 110.966212705086 | 113.740942665269 | 116.273000405449 | 117.069094451283 |
|         | 108.751654061536 |                  |                  |                  |
| MAGEA3  | 151.801558435863 | 140.954264409241 | 145.932170561687 |                  |
|         | 136.231747456996 | 283.499120551905 | 183.905926269285 | 137.982667022604 |
|         | 139.397282021664 | 152.845126167802 | 151.486362260537 | 130.849201993866 |
|         | 131.31716158922  |                  |                  |                  |
| MAGEA4  | 125.79193748535  | 144.98596774435  | 148.934593102452 |                  |
|         | 135.190698960212 | 447.521645706162 | 584.548578914846 | 137.654833215154 |
|         | 143.821269460523 | 178.696562301918 | 141.4587810296   | 126.195222228248 |
|         | 132.221351364892 |                  |                  |                  |
| MAGEA5  | 158.523941833883 | 150.809693773343 | 156.562197068687 |                  |
|         | 161.470611189347 | 155.465250172768 | 169.520544329439 | 154.665212863369 |
|         | 160.878190220833 | 159.177303894223 | 148.227581116046 | 153.184575380093 |
|         | 156.179501567984 |                  |                  |                  |
| MAGEA6  | 150.851504454247 | 144.423509403938 | 147.664505309713 |                  |
|         | 149.369418844044 | 407.957436380989 | 322.443089373063 | 146.035731780312 |

174.471304281502 160.937256625847 148.258850340107 149.076146942797  
149.288034848931  
MAGEA8 130.530963116318 127.339018771488 111.73388372572  
127.955891183207 132.943957535655 132.285835971705 111.10737497653  
124.646093292382 127.101752724954 123.868848032411 131.463081749448  
118.673325109944  
MAGEA9 147.62157260418 138.775095929764 151.26137860684  
155.846106540378 143.149424892482 143.947729578484 153.379118228796  
142.635015113687 136.596127228365 151.592787806315 134.772545694636  
153.903993884123  
MAGEA9B 147.958483355783 161.849023343715 144.715167331434  
147.253919952267 439.394914369983 510.226374558703 499.776233241535  
494.604716660887 455.313553278155 140.63666629522 361.218491712891  
153.998849486363  
MAGEB1 140.242272149424 149.736837985314 130.038936315246  
141.797497681512 136.831280469398 145.212306927438 144.380485359951  
140.805322576253 140.525013926642 144.555718186987 138.394923932916  
151.2639801322  
MAGEB10 111.935554828717 129.27634490676 122.139832263188  
124.324855155055 132.608622131443 145.294665838127 116.023563001039  
133.905162024888 126.409995188106 127.325087202483 126.555972138115  
126.455271988029  
MAGEB16 152.393260140571 133.180554954396 133.11040099808  
129.633387503618 126.253319664664 147.915337223934 136.313623567821  
141.173167283016 113.184495948936 126.00744446299 119.735807506447  
127.494672751434  
MAGEB18 145.161116298118 129.327645260099 143.161623642178  
145.110145981908 152.470980074365 146.276706674761 151.377932495104  
145.749887769807 143.644862018676 143.272669418277 128.695695565175  
140.493975416335  
MAGEB2 131.071614211431 132.256047602234 125.193729067011  
133.7012683837 132.813199199389 131.648308760913 129.654234837398  
133.980792743661 128.251087452744 122.527517633626 142.185903088074  
128.723261477217  
MAGEB3 161.720405760536 118.220555783444 131.811011266156  
140.123348569709 127.633362302159 137.27506604142 143.464614171516  
136.432109029368 126.471321085803 147.485960802692 103.734303632543  
137.674025476238  
MAGEB4 124.558026853954 118.180919555585 125.12823219142  
110.465934808915 122.305514440939 114.048136176142 114.556542069712  
111.078930787656 118.727279917776 110.033746435328 110.910693353871  
123.541709359809  
MAGEB5 128.182419321978 152.241060990474 142.556535259086  
150.602976963975 137.096785940897 122.679628839976 135.031430487047  
141.596078062845 133.697364081712 142.812521349963 137.296790373528  
131.631968933144  
MAGEB6 159.771672778698 172.421637564661 168.729301938015  
158.150949554785 157.166379887259 150.290025009187 164.103306492559  
163.21153580549 153.085975710144 166.422360032182 144.12742465348  
154.552605305297  
MAGEB6B 125.126100642395 124.961859983596 142.240333104987  
153.649235507812 137.858371717399 134.803612821519 134.730275384832  
146.609485664113 138.831297375659 125.500790447338 130.788557333561  
168.124936529582

MAGEC1 133.345143691828 137.195906276069 138.942901099402  
135.516856254532 137.225659453984 136.869117921313 135.238301951626  
135.212715912271 131.071614211431 134.501410126169 132.200648560899  
137.997756995882

MAGEC2 130.182320154521 131.216673806987 132.608622131443  
125.181327386534 133.900005368973 148.582022536314 137.899291413431  
140.255768023269 136.346472365382 133.336963266326 150.265385257579  
139.068375166939

MAGEC3 126.820834043224 121.61143371132 126.931328660501  
124.494727558127 126.982340580909 129.447773229782 121.675007387533  
126.025161261042 118.88525116298 119.083957999725 116.112013454335  
125.358906118533

MAGED1 937.593129242257 934.173273294189 785.290353402444  
1023.29995420518 2511.04500638697 782.139151423572 985.637230639964  
1364.1224589383 1011.14472068314 821.862271569917 706.628675634893  
801.702878226247

MAGED2 244.544473246593 242.269784551092 271.064405562085  
278.385151185788 227.033342447929 210.290500215377 223.975677959345  
212.571491543077 229.017256104437 212.460476372263 211.483693299981  
201.235056368151

MAGED4 125.193729067011 119.594962686756 115.795989631016  
145.507330257603 118.9952230535 114.213405341709 109.140708667012  
127.259038241163 115.01682934323 130.268322464805 121.330383384978  
131.717160947964

MAGED4B 165.698527470382 157.912864169081 193.203053225456  
164.58158284856 160.105903942674 171.69834783037 175.245611094434  
153.78976320015 159.544710238172 162.416774743901 170.706932460836  
174.593548891693

MAGEE1 278.095939961034 293.794745907663 260.489744360233  
328.680312364877 237.521746704115 209.702683803624 189.693218759349  
136.944378905743 156.638070437044 157.736101691222 157.751477529076  
163.470025318612

MAGEE2 124.113451627593 113.611651901331 105.712302595131  
111.826509343353 124.511674561183 112.449662536973 119.072213573568  
113.492900106468 121.689416823766 109.770126492743 121.559477523123  
109.182623414389

MAGEF1 213.432084172541 230.424145472916 315.306271141071  
220.742788129847 256.590289281076 321.492900106953 259.935831886014  
237.01460308334 248.761038207278 188.593378315122 212.915949933033  
288.542264120468

MAGEH1 239.12905945808 240.591548171052 250.676092725829  
217.327543190687 214.968589907686 214.617852048151 248.594000664466  
184.223623297663 187.280334341504 184.085616342099 192.932285494022  
189.791849830504

MAGEL2 236.617896560938 234.947745514175 241.203521822269  
239.419200107721 206.098534554876 229.567444213626 255.71113398292  
202.741211613885 224.497348027469 255.066583469964 223.094496588657  
238.823244541016

MAGI1 132.7284396337 128.5581535393 141.076652697698 136.485034823945  
144.889019483712 152.052084712417 142.75592155869 142.759452994928  
155.83143112621 142.446514275674 140.084427549581 144.498245098592

MAGI2 146.746669300049 169.607072855818 157.041481397151 142.059921012561  
142.342811880173 123.98384416057 123.804039963953 124.313901870563  
136.66358267095 128.497571151343 125.668463983985 122.97229333908

|        |                  |                  |                  |                  |
|--------|------------------|------------------|------------------|------------------|
| MAGI3  | 130.049854901235 | 134.216088147701 | 143.05872558805  | 124.145492642453 |
|        | 115.755585907264 | 116.769106223472 | 120.276236447255 | 117.820996523337 |
|        | 117.628564992187 | 126.151017944639 | 134.719531559829 | 115.963144087717 |
| MAGIX  | 139.268942501979 | 158.928949614338 | 153.121693371757 | 138.455086062782 |
|        | 124.777895136212 | 151.007812189859 | 138.078214837785 | 130.37544152572  |
|        | 154.001258677199 | 144.219104742099 | 146.975258859244 | 131.02157879562  |
| Magmas | 478.293220151258 | 495.438672949441 | 486.524284354103 |                  |
|        | 589.541347392215 | 1931.16906839143 | 952.724512915813 | 761.097992055119 |
|        | 858.524630425687 | 816.823443819069 | 601.521068811063 | 641.338900241674 |
|        | 740.973440818582 |                  |                  |                  |
| MAGOH  | 288.313931067158 | 317.493387040816 | 360.185005480216 | 218.96845208513  |
|        | 496.426739836535 | 665.341859712345 | 475.833242673151 | 594.38228123675  |
|        | 335.47484353322  | 395.327097512479 | 185.240692860387 | 608.351527783086 |
| MAGOHB | 118.192302821514 | 122.355409068882 | 119.882472552083 |                  |
|        | 117.718893827092 | 116.744048998494 | 140.306808081269 | 120.241528853563 |
|        | 184.801068553988 | 148.320310040998 | 115.871151134713 | 147.720061897962 |
|        | 131.085965122946 |                  |                  |                  |
| MAGT1  | 23190.7842325067 | 17830.1333276624 | 20217.6497214386 | 18953.8127741918 |
|        | 1230.63920848575 | 6691.04319670055 | 2921.59274577877 | 6214.77579017084 |
|        | 4251.82554412383 | 4088.12910138929 | 6760.37324850804 | 3396.40593844715 |
| MAK    | 127.220812636148 | 130.832462487806 | 128.683044953833 | 131.572485018063 |
|        | 126.469203581931 | 135.899595115146 | 138.57506931811  | 136.337879548547 |
|        | 136.541973790157 | 122.969215709433 | 129.409899416034 | 125.470172259885 |
| MAK10  | 205.728673153914 | 198.568180234676 | 213.240181616274 | 187.216245895253 |
|        | 220.330477277988 | 189.01309885917  | 193.358728044565 | 185.765000029242 |
|        | 187.993907528473 | 229.406012088782 | 218.000351930307 | 180.941090529551 |
| MAK16  | 456.038981546175 | 394.892918166519 | 417.36454228858  | 421.140525880287 |
|        | 284.13865992802  | 753.654626233604 | 460.514672966125 | 560.602047253306 |
|        | 395.261210769232 | 325.387193207414 | 360.243484271891 | 539.720389702148 |
| MAL    | 471.510683045651 | 479.053300726301 | 357.773949920377 | 463.622673539254 |
|        | 5040.35379681644 | 1939.1525084845  | 152.182968451691 | 418.645775576811 |
|        | 1856.05025952611 | 1226.74043569231 | 380.243136469602 | 503.59466398882  |
| MAL2   | 129.193229483846 | 177.16711492983  | 129.13353785479  | 116.070254821073 |
|        | 455.313553278155 | 1464.04124596264 | 1001.65849130836 | 2271.82656399253 |
|        | 3136.27991502603 | 1890.86868383409 | 944.92617668298  | 1480.52638217173 |
| MALAT1 | 139.361120875198 | 136.432109029368 | 117.390049487174 |                  |
|        | 132.024244263352 | 130.548611758921 | 135.54708602175  | 128.335132315812 |
|        | 134.296645422941 | 126.640141760199 | 125.556444423391 | 140.000880942015 |
|        | 131.977212025523 |                  |                  |                  |
| MALL   | 268.930428617695 | 387.135002880995 | 208.690347128273 | 277.285526811736 |
|        | 289.474517971859 | 200.204064462384 | 154.447449691409 | 261.541138637729 |
|        | 234.550692915716 | 2941.69058596077 | 2811.84191700516 | 189.307823427362 |
| MALT1  | 183.023316857537 | 184.167124143272 | 166.830529779692 | 159.42746786085  |
|        | 152.344248425416 | 177.428161690048 | 196.759802659759 | 218.862705238592 |
|        | 210.33390115739  | 299.039192744355 | 180.599150102184 | 203.335012796883 |
| MAMDC2 | 1649.46398639795 | 1405.2134783352  | 1659.80909859514 |                  |
|        | 1136.14069801696 | 121.027465953657 | 149.8919086368   | 109.384112020063 |
|        | 115.43068422162  | 124.49814598066  | 128.905042692431 | 122.320966091375 |
|        | 117.965208293925 |                  |                  |                  |
| MAMDC4 | 145.837985729893 | 143.830319259804 | 136.83470470035  |                  |
|        | 146.934990457666 | 162.890650672747 | 132.183250916482 | 116.871350997346 |
|        | 138.709991561675 | 146.919110530891 | 137.15288362126  | 161.573975848093 |
|        | 135.668768914964 |                  |                  |                  |

|        |                  |                  |                  |                  |
|--------|------------------|------------------|------------------|------------------|
| MAML1  | 161.94312376726  | 159.588575526536 | 160.461846976268 | 169.556358586336 |
|        | 164.389447533163 | 150.314462939164 | 151.536645416399 | 151.532859494021 |
|        | 149.408530395745 | 174.816099615132 | 173.919504730673 | 155.194521954405 |
| MAML2  | 152.789338329505 | 134.888404433315 | 153.241806795134 | 159.29430824799  |
|        | 153.524100996368 | 138.528083984177 | 159.79463502085  | 153.865702787334 |
|        | 136.837430157894 | 154.199534276226 | 149.338249249161 | 156.448355269561 |
| MAML3  | 141.056924917269 | 126.531502877517 | 134.420446702459 | 140.644800545854 |
|        | 134.312156667838 | 150.016550610991 | 143.88649412841  | 149.874424976813 |
|        | 128.052753068991 | 127.776112651456 | 169.043206258073 | 143.155998311198 |
| MAMLD1 | 241.418016203544 | 200.179796117115 | 165.080825814849 |                  |
|        | 210.822216545773 | 125.132610413051 | 141.568970008164 | 140.327799236005 |
|        | 148.611352905643 | 151.939710544553 | 161.382041789666 | 139.706279455371 |
|        | 139.864176113337 |                  |                  |                  |
| MAN1A1 | 211.736398352592 | 212.239485199343 | 242.752995772995 |                  |
|        | 197.795275907042 | 176.579096613849 | 184.557630172634 | 179.137734914428 |
|        | 328.60529053804  | 259.277693314055 | 218.08515867102  | 242.902900881585 |
|        | 181.622689471026 |                  |                  |                  |
| MAN1A2 | 188.567747377006 | 191.486717579847 | 185.830435830545 |                  |
|        | 183.482640529727 | 231.191287595191 | 178.096998157452 | 211.395593720534 |
|        | 180.798671424395 | 195.123919692348 | 186.866029149035 | 197.405472374722 |
|        | 176.486551181451 |                  |                  |                  |
| MAN1B1 | 607.805002786409 | 699.984140389009 | 682.075583857856 |                  |
|        | 814.471143753335 | 2151.9395095819  | 557.405157178952 | 662.373189001788 |
|        | 544.30845362168  | 714.6859666834   | 831.08287594363  | 884.747476952289 |
|        | 437.049581919144 |                  |                  |                  |
| MAN1C1 | 276.961847241646 | 262.577672828611 | 283.416246133873 |                  |
|        | 259.064601204239 | 604.687265229902 | 1012.44277312494 | 2427.21100330388 |
|        | 1208.9240215109  | 174.23955831109  | 122.944699010173 | 215.698924670416 |
|        | 148.866229889479 |                  |                  |                  |
| MAN2A1 | 321.568127272161 | 292.068293167526 | 257.622317771472 |                  |
|        | 237.312766830206 | 249.400820221233 | 299.039192744355 | 338.510045856515 |
|        | 343.048904374136 | 233.757965816721 | 359.256193328366 | 385.238961394234 |
|        | 255.527764534636 |                  |                  |                  |
| MAN2A2 | 156.497059936271 | 165.926301648161 | 162.039394839415 |                  |
|        | 143.202498941866 | 143.50323531501  | 170.361237529247 | 159.286484253487 |
|        | 195.057830521304 | 180.085975596327 | 137.636900130922 | 209.33028918341  |
|        | 154.354658146438 |                  |                  |                  |
| MAN2B1 | 213.447886742681 | 229.689010178622 | 235.291035302211 |                  |
|        | 315.130912368929 | 362.195903246495 | 288.770330002807 | 300.886032768166 |
|        | 268.370347292603 | 223.013753785002 | 245.454945056317 | 272.639413442579 |
|        | 229.689010178622 |                  |                  |                  |
| MAN2B2 | 1626.34607278613 | 1660.70040058102 | 1587.84395475807 |                  |
|        | 1744.58410715956 | 1609.54149931375 | 786.160002434066 | 1762.09874961415 |
|        | 1072.82323999638 | 1213.61170930345 | 942.900963522948 | 2072.01578063404 |
|        | 1245.47421607111 |                  |                  |                  |
| MAN2C1 | 370.140588087649 | 316.125364442611 | 280.990656342284 |                  |
|        | 349.128741707506 | 307.768302846647 | 159.35787888191  | 294.033003779363 |
|        | 184.071078414327 | 253.218123990428 | 235.32095278846  | 275.929414239664 |
|        | 284.675990197899 |                  |                  |                  |
| MANBA  | 454.030083521756 | 386.305638633172 | 459.30568829087  | 359.162549472301 |
|        | 235.43707989982  | 449.952497751758 | 616.339439383796 | 618.661249163439 |
|        | 444.712990986138 | 567.465201338735 | 454.133372808458 | 515.432065049838 |
| MANBAL | 1240.4863200811  | 1332.11815966955 | 1221.58522138654 |                  |
|        | 1764.53168329081 | 721.31849915135  | 777.651238374269 | 959.126054626181 |

|           |                  |                  |                  |                  |
|-----------|------------------|------------------|------------------|------------------|
|           | 666.344430142655 | 819.151876775691 | 605.040026490154 | 1138.44837250274 |
|           | 699.984140389009 |                  |                  |                  |
| MANEA     | 137.68634745111  | 146.830752309354 | 137.353149614081 | 151.801558435863 |
|           | 155.673532440475 | 165.781667492391 | 192.914362049985 | 172.276968413879 |
|           | 176.364184489318 | 175.529441666151 | 173.782474972742 | 187.784865705837 |
| MANEAL    | 127.464485396039 | 134.922488718676 | 137.276586668477 |                  |
|           | 140.226586111216 | 222.919473675549 | 249.633252091596 | 188.864388750448 |
|           | 162.28074297013  | 133.336063137966 | 139.63811945162  | 197.582402276079 |
|           | 160.537464426971 |                  |                  |                  |
| MANSC1    | 170.835513021958 | 165.565284723155 | 176.245698601389 |                  |
|           | 161.525131363333 | 229.181725450534 | 214.639374741553 | 238.270501389189 |
|           | 268.600782558985 | 257.372740535895 | 165.386056999339 | 208.385295246155 |
|           | 300.53017771156  |                  |                  |                  |
| MAOA      | 2891.03258768937 | 2850.98525554116 | 3737.57754066891 | 2395.75453574049 |
|           | 3066.69261114251 | 5582.64254130978 | 4486.35687688252 | 5846.17594234628 |
|           | 6944.90824302953 | 1208.25171673432 | 5040.35379681644 | 1854.11328962023 |
| MAOB      | 935.784743413185 | 929.198774489695 | 817.036222521723 | 1093.85316636801 |
|           | 143.162353807279 | 139.333282400639 | 129.420716653358 | 133.099175110023 |
|           | 154.406369231962 | 119.023688551496 | 154.264142444882 | 125.704264033102 |
| MAP1A     | 757.877066703516 | 1056.43975075255 | 673.502723625773 | 1966.09691567857 |
|           | 124.256773437346 | 114.528407572496 | 108.557097186828 | 116.769106223472 |
|           | 125.314626102208 | 121.865696440776 | 110.138220982557 | 119.135701239571 |
| MAP1B     | 733.195136251155 | 488.14606875418  | 1073.40463823132 | 420.871349359404 |
|           | 118.336654504789 | 175.79375235478  | 135.973752893694 | 157.530573508003 |
|           | 153.653453808799 | 149.666293193219 | 147.056182807232 | 151.891318080151 |
| MAP1D     | 145.034179171835 | 147.469101571149 | 160.164327420125 | 151.058105625837 |
|           | 142.459230639888 | 136.783974483005 | 141.162443312437 | 170.198508633417 |
|           | 150.956247643013 | 143.458937009197 | 154.094285855743 | 128.882160435252 |
| MAP1LC3A  | 936.560290736127 | 885.927972780392 | 845.646455991008 |                  |
|           | 1071.00507864299 | 859.860994525775 | 1033.03719406038 | 334.316711893654 |
|           | 334.443733461841 | 366.705048374078 | 327.749926183823 | 229.933577323411 |
|           | 273.402804140541 |                  |                  |                  |
| MAP1LC3B  | 573.244735292944 | 620.760947818536 | 506.029788151779 |                  |
|           | 591.89966781883  | 400.472835504879 | 380.821355948507 | 419.532420763449 |
|           | 323.20628717764  | 370.466403181536 | 543.584413650467 | 548.869880723909 |
|           | 393.98210915852  |                  |                  |                  |
| MAP1LC3B2 | 132.008330288281 | 145.424827607383 | 150.670783991982 |                  |
|           | 160.833948531272 | 156.907788377794 | 141.304791640723 | 143.141852982371 |
|           | 138.256765189241 | 141.250892771145 | 152.353494489233 | 137.999190557332 |
|           | 159.390531348676 |                  |                  |                  |
| MAP1LC3C  | 157.81831741292  | 145.418696807842 | 166.422360032182 |                  |
|           | 144.096048197835 | 128.351235762192 | 143.265532486512 | 168.3523504179   |
|           | 154.87316176388  | 145.365935017728 | 144.400004730049 | 157.66595229182  |
|           | 149.078664825533 |                  |                  |                  |
| MAP1S     | 332.599191067433 | 424.134483971176 | 303.858574395969 | 488.14606875418  |
|           | 846.084919104262 | 290.326832430372 | 290.420307322101 | 310.815067427296 |
|           | 240.147082836599 | 207.598754515294 | 275.072079692264 | 281.659653592151 |
| MAP2      | 143.785769607842 | 151.301484852387 | 144.295556086504 | 153.477432230141 |
|           | 145.491525555916 | 142.427198128376 | 140.960907353937 | 137.996291911198 |
|           | 138.903450375532 | 160.17208299932  | 144.2753860947   | 140.350144438462 |
| MAP2K1    | 541.896444696137 | 498.641091757363 | 578.297031096292 |                  |
|           | 444.663812851378 | 1663.71411325131 | 644.301665020526 | 765.911113050543 |
|           | 613.063954859056 | 1002.44383771056 | 1251.56853099362 | 422.520372346993 |
|           | 698.590134238302 |                  |                  |                  |

MAP2K1IP1 683.470866056244 590.849222581206 622.348802511009  
539.471166362469 466.58966852405 789.043948009585 970.634736994313  
837.603727062008 948.150767619765 1236.56870367797 767.861763134136  
1133.22524345111

MAP2K2 529.700356666006 551.206833852215 468.060528109338  
711.491528818004 1018.38836615952 438.611973005212 495.56459361431  
459.973764138144 358.60777927888 550.24496459253 509.618968665191  
357.431640917696

MAP2K3 215.335795337978 205.781486117242 173.751615672365  
229.483578414375 938.049312229961 242.752995772995 182.861900982333  
195.414464905232 182.335981256243 185.923374274306 233.103476996669  
199.980312703646

MAP2K4 307.570405241182 315.014639682046 300.83667045718  
303.380479700334 221.152973486208 358.60777927888 258.830885826237  
313.641656294638 230.015981563049 273.709160508205 323.086368767924  
266.99947481587

MAP2K5 179.525651423361 178.966169998125 181.123571246557  
210.392662092721 224.588225855066 139.293775885106 192.548337508559  
147.16778072296 169.447827110558 173.347463632976 181.735072060023  
145.198638080646

MAP2K6 137.094814176566 135.082715974111 140.711699577809  
133.845056524142 135.449919220607 149.664506761117 134.142423026264  
150.0084730766 147.029988235786 141.389330839189 134.336279655683  
141.147683040881

MAP2K7 180.132104305583 189.887788314879 169.293852989203  
236.326943078666 210.015199832609 157.927709922368 156.176537862398  
167.083758835476 169.800006803362 148.478570934155 229.567444213626  
159.2488784104

MAP3K1 506.165100641525 702.779943547386 333.439929772897  
533.893360199271 479.469659712246 524.541494680558 739.52947559669  
586.642581067137 623.888568444132 632.843164522867 533.54045706916  
450.120868656638

MAP3K10 184.267958772058 171.06385200256 158.625060605976  
154.542190113901 236.219981978324 151.174536186463 178.531913384538  
174.202069525223 182.798526632723 143.318291243905 212.749668083641  
174.749832388791

MAP3K11 231.63127072986 325.907037744936 200.017741240426  
327.010503005631 1017.6969123529 312.080864996592 324.401611136662  
277.129985959184 295.187978994932 245.900840732668 391.500696444149  
270.604799126393

MAP3K12 346.862322263052 320.812909889014 274.092048989484  
333.745543022749 165.364935913232 172.045843691642 184.148058872585  
171.677654793775 199.96834355685 157.073850948746 170.446156541317  
238.770586150777

MAP3K13 156.546769952772 154.604363252526 139.078162119733  
136.269445455239 132.338144393918 129.192326574697 145.043494048779  
142.667173697017 151.327544435847 143.30977386038 153.165872773973  
135.17827963343

MAP3K14 195.577739376082 223.573080955095 187.296479395462  
243.839402991061 175.395900648455 170.692146255416 154.710000519109  
194.072260528037 183.168629351124 169.963805688413 176.874265462986  
141.0009397801

MAP3K15 135.589211439847 127.480717762966 124.551603326682  
125.443242860371 114.45792163942 119.952108688414 120.891023626809

128.0171233156 123.827771590213 118.308102542942 166.558080305926  
129.719122724699  
MAP3K2 318.628084728596 258.727309442475 280.723379809959  
280.127735578097 196.226732738526 380.310795921752 281.44159425243  
220.288758600588 211.891710626953 246.748589597262 287.455622143233  
262.093405224922  
MAP3K3 214.546528079149 204.82244206816 216.427103365727  
248.562843471699 158.400572147671 182.084333814175 175.462290891421  
157.881569297409 168.547575047205 150.78145177853 164.466332705334  
163.736324784234  
MAP3K4 381.014521577291 327.251620296271 335.3366819308  
409.743899750699 231.257543784864 203.206743799353 360.124745133393  
226.531255313921 235.216589534371 282.963958072528 423.396271159345  
296.915883082902  
MAP3K5 402.213774592085 384.883635849576 397.660202059209  
241.494710905339 389.381039495553 587.893636997642 1071.83063260499  
575.546802138889 510.285766295993 320.390351199433 1192.47480377375  
887.147199303294  
MAP3K6 980.67040349547 971.99484515987 873.879064183441  
1059.19317548869 607.126514742951 453.17378995737 318.112626495401  
528.650794915616 449.859227376918 1296.10827265334 487.19625805337  
698.358285634451  
MAP3K7 388.638095539186 352.945088028205 328.60529053804  
289.911635155481 300.937118739654 303.907003535357 389.177193459  
277.561376169965 275.841929188802 382.562403424855 281.996583337694  
411.160709628865  
MAP3K7IP1 182.028675726969 187.296479395462 212.473610495213  
239.789994201722 203.436527043293 188.959655155629 179.880812358974  
170.614129599775 171.320653882424 178.878444404192 173.395370400371  
172.750926094884  
MAP3K7IP2 197.873787638411 190.138730960643 213.215996114827  
226.841838641151 176.543489871572 172.568852318369 180.132104305583  
168.925131238831 175.608958881476 178.955938825556 200.518684601283  
191.987301954927  
MAP3K7IP3 130.235407859542 123.835583753941 131.676609824921  
138.285325970867 148.767517078508 134.13812854554 137.248465324584  
134.774591679724 137.157492354617 151.939710544553 162.422173095045  
132.016944935305  
MAP3K8 211.679799388351 203.265559787292 223.453776362112  
162.893396525252 254.133112176024 359.099750692694 247.72190598581  
210.245551279259 341.819090221654 189.887788314879 250.085444708918  
283.326226944158  
MAP3K9 122.517559025268 138.43190460314 131.198284945008  
112.476111928742 173.281506912652 148.344941331885 129.173772079264  
150.290025009187 165.213327555428 141.522701487198 191.795952536469  
148.306990501663  
MAP4 211.572396862776 220.92105843037 180.986305037222 290.037325939883  
171.689722533849 151.958818313561 148.65131922365 149.390481900424  
151.524197474057 176.440625367948 148.780775862239 145.97330701968  
MAP4K1 159.14477373952 152.465176508162 133.416938451465  
139.161483596756 173.347463632976 150.549883779193 168.205277839471  
199.490190715307 303.858574395969 141.143572141958 172.622816559412  
148.760280320258



MAP4K2 734.97763567765 825.345092964844 814.759191652981  
 1018.80178630497 1551.90775589919 1200.03423010236 831.289724465877  
 804.362909579005 753.007562127186 959.126054626181 851.221199352646  
 895.463355957918  
 MAP4K3 181.070689877681 186.722842989058 221.152973486208  
 193.315380090713 220.415211013843 461.314247041387 345.897250519387  
 326.379855547052 214.824908522393 197.582402276079 301.638918685657  
 439.616817413027  
 MAP4K4 231.572677616684 192.168634727505 216.53417734069  
 198.437113196596 144.636277619886 193.466377788318 165.70840218273  
 172.222262910052 177.428161690048 281.278843600876 206.428618912264  
 210.989806933158  
 MAP4K5 481.751102333172 452.961307006622 405.322847383739  
 387.224184063662 272.351487980415 315.863232876382 319.812293134357  
 341.251360936154 307.906312092805 342.147414141627 518.925188630246  
 391.252450588331  
 MAP6 164.198494818485 148.012353232918 155.702330867056 151.374665021513  
 142.903851392611 150.014842228372 195.438353051306 133.004765428575  
 137.16842164453 131.079066781806 139.429008129291 140.323425587628  
 MAP6D1 181.747090380435 201.702688815038 170.111653122193  
 187.167255451988 317.839512360245 216.859640534581 181.070689877681  
 227.52352046188 236.164692035094 305.93974940209 189.027594735456  
 182.152956182443  
 MAP7 162.439052954676 184.505279093688 180.719868519867 146.229239731545  
 584.433155497378 464.812091712746 681.677841333095 604.453803994875  
 467.944850290806 705.529158880221 1181.97868824758 960.775251871864  
 MAP7D1 696.976036382401 1064.85152398919 930.25842384208  
 1728.86115695979 446.698665191047 319.417555901733 409.282410265733  
 295.507504000509 446.07651799079 639.688482258192 469.540421642173  
 328.33387481068  
 MAP7D2 152.555437272666 144.80318019871 147.211769989922  
 148.424970450231 276.32528705384 145.777778096701 157.010145291837  
 544.107739610054 143.920134762902 133.490805791504 125.093376753408  
 130.804850476451  
 MAP7D3 225.4575611466 220.578790067967 202.869364962231  
 209.196695368783 188.924084292126 179.950904921667 212.147155923729  
 180.1204762193 175.428000742222 218.944052733757 157.646948327818  
 164.661445411833  
 MAP9 198.226525986857 185.801540278924 180.518621542868 152.137669424501  
 140.071879210324 205.322733011516 159.166059518117 176.791758333054  
 172.502036705114 132.807755600683 181.722373730185 147.335403843539  
 MAPBPIP 452.24100098898 466.777454704543 595.120528902501  
 686.923164688096 657.562129888446 1118.86225415732 720.214044399108  
 1128.60314361459 853.535700321202 760.572409199179 636.781477235579  
 1076.62597781124  
 MAPK1 192.891507272665 176.214950733324 196.245297362955 183.201926323188  
 204.637887777803 195.674128236589 178.734634888773 191.467626362851  
 235.933451977398 254.991678321253 211.012142461725 239.31180635241  
 MAPK10 189.225893411944 165.074983746785 165.320977593677  
 159.273225917177 186.140970908638 216.32785564297 210.550995170071  
 183.82450756022 230.589110372454 156.733898702331 244.514230664694  
 228.414049417352  
 MAPK11 157.860515609693 162.574338133241 148.763098715961  
 166.315369318355 155.756074127526 153.305679563467 154.379788206936

151.266352916239 151.466689967666 167.164675439456 157.680109819782  
150.321059418799  
MAPK12 139.057572927874 141.281116867082 114.43491928161  
128.78647242525 124.168162885295 128.06233429201 120.501697624977  
121.297234504922 123.09149124559 167.559703634539 144.423509403938  
126.934059693116  
MAPK13 190.645917992472 280.127735578097 215.866644799363  
154.792156982219 1990.94596595493 1272.14273680177 1487.12201643008  
771.694853062033 1186.96351738518 2767.77385345718 1059.19317548869  
3359.62015747752  
MAPK14 142.09146795308 134.372560968918 140.318155161909  
136.463867598256 135.562700479444 132.393669306489 149.460660195293  
144.454141873387 148.356726939122 160.30784625946 150.011603347578  
142.806728419652  
MAPK15 136.142380560596 126.209426865327 117.119533897652  
128.19878174316 127.065518421996 146.26304624648 125.410876867635  
121.997885377703 118.636694749194 120.02611584057 145.120347147471  
119.472410874778  
MAPK1IP1L 150.885460975199 162.945789604505 165.597236278435  
175.857952663383 146.225422797118 199.746775121317 140.66266106824  
149.190528937822 162.383584508358 149.135934269866 134.446758753426  
147.823552813852  
MAPK3 868.40984928812 1145.96710556468 737.650963292668 1082.75419087929  
1028.80076860235 583.192225756596 788.693133735893 539.471166362469  
503.757797957538 1071.47374315822 447.521645706162 497.629319581786  
MAPK4 212.396522888943 204.260800563197 207.977817300376 224.298067319406  
143.326739481448 125.589744938813 142.527422462824 129.906744036052  
131.907246423067 125.329960261871 140.770705453805 138.407207709066  
MAPK6 490.631757904175 508.302878624289 315.47473326786 341.64890727921  
714.274201838067 779.623566217277 1143.0779222425 522.300029971277  
729.729297413233 1944.15673951528 699.800360892516 862.132582849511  
MAPK7 180.276082632155 201.167206950576 156.328454726363 234.980382243116  
172.521737547052 166.076692502428 152.241060990474 160.499355902773  
137.884051774657 148.179398287068 167.806420483187 135.449919220607  
MAPK8 157.013200713587 146.197678850188 158.213784310645 156.511202150773  
151.625248091441 159.002382889848 170.614129599775 132.198536906752  
160.769011617127 163.306853098724 154.675189522146 156.714081537525  
MAPK8IP1 173.035013611377 196.096936985479 123.391298926957  
140.539606951892 131.089811472017 122.554760526767 127.866992108488  
116.179625689647 119.627380812035 112.298254005045 125.141185839817  
129.27634490676  
MAPK8IP2 142.50631960137 150.896076207161 147.943844184702  
145.148058824491 139.571752933877 140.191264837331 145.827592345054  
142.825203517688 135.844983721014 143.625188247966 146.800324349321  
139.197364191101  
MAPK8IP3 242.996248524203 302.735372807236 268.148673257455  
407.589300080181 246.263259852067 221.050093964575 434.61711290583  
348.98762709818 233.232319881243 199.477350542491 336.279209908669  
278.095939961034  
MAPK9 273.197814995543 236.35479928448 303.907003535357 258.868119227979  
247.145700155364 241.527811817146 333.049612399093 332.082749517913  
215.950811436427 379.200576951933 287.334035234496 316.722160860531  
MAPKAP1 219.318938396989 195.269099451599 270.462865174106  
225.275049011909 224.118739978257 224.724262742427 222.990586491219

214.331491507489 232.250434241457 286.133496092533 175.805472275887  
214.824908522393  
MAPKAPK2 347.932135290714 357.191675549592 293.600165830839  
380.664528809678 377.353441970543 241.845941562418 254.315783394932  
226.989201461085 279.704940529618 281.740495452842 340.028737478082  
322.028360309592  
MAPKAPK3 404.618867159141 446.262895953004 481.86545778383  
498.641091757363 3294.92439159154 1144.53002508973 977.227184625781  
793.300636780035 1095.04571025381 1212.55338792557 814.759191652981  
1063.5903770389  
MAPKAPK5 339.598452080917 299.669394721682 358.843277491684  
326.962330523237 396.126485121994 438.958573676953 420.502251256406  
340.028737478082 561.379619105609 446.194196064909 332.194163016646  
308.38513924253  
MAPKBP1 214.068044241507 269.448201975645 207.531908382266  
366.240941980786 147.096559685764 123.02879683948 154.634289463743  
142.806728419652 149.725422365342 182.698275130489 158.723133891017  
140.074841537258  
MAPKSP1 196.419891542139 198.15257384667 189.070238523683  
221.930333726352 172.80265044721 199.991077347491 190.331589656379  
164.545596179262 164.787637367264 184.923312649584 186.112835637689  
183.657525723012  
MAPRE1 2530.00219297102 2131.68478964427 2767.77385345718  
2493.5484556802 1191.26028342929 2822.48671794913 2944.63971819193  
2905.12297639092 2293.05058904656 1651.68171717875 2028.67873136046  
1853.20812924694  
MAPRE2 772.776364492813 702.049571167356 932.076509242794  
808.837225580351 420.446810988909 384.641319423853 348.98762709818  
420.361583975644 428.782703561238 396.781827940009 585.234286698678  
390.670702155192  
MAPRE3 341.2887754025 362.445813697676 345.832589037442  
470.578335285993 299.170431746759 227.668046559074 226.020769172424  
210.692705153337 204.1974438819 155.502363062633 129.235033390384  
180.549865708041  
MAPT 241.799709160815 282.604890044452 417.103816140912 448.371946119074  
139.184647003326 135.812301062763 140.941447663862 131.221105247771  
133.046435968561 143.351341716363 145.085091507228 133.743708220112  
MARCH1 138.452698593232 137.094814176566 135.193659028591  
138.136901441896 138.897393621114 144.621077658674 130.914932329297  
141.84490608317 155.966610886886 139.374278310041 132.324630056168  
141.15458637181  
MARCH10 137.071402810983 146.013430937168 141.083966525597  
130.073005698714 138.050999864689 126.967212770393 133.449527627723  
135.399032687551 135.192181609947 125.710199961297 124.207200622684  
138.159966250659  
MARCH11 141.763072120718 136.878656455606 134.981272056795  
146.632312874102 117.331280455759 129.059722322306 147.013598868335  
138.679545821015 133.355353808577 143.497909064641 135.232878188098  
148.094036534405  
MARCH2 405.469705787631 384.216141843863 376.007938436483  
601.640387246951 217.811099067262 196.583548193097 159.728097053356  
208.507486041165 165.549190801014 185.016336026382 192.153420834889  
166.20327698517

MARCH3 164.1572198075 161.160974998803 152.364417528975  
164.630705813584 190.318957029666 199.397633942623 219.129781831192  
178.920528149177 161.046418048832 202.421990203844 219.151144724168  
154.604363252526  
MARCH4 109.52020660772 108.446988282853 107.520000793184  
106.900679222135 112.896360244636 105.551878332786 109.044879188971  
113.672605838627 104.223476853877 122.392159083328 105.236768436069  
130.336466131215  
MARCH5 194.552533397944 199.250680260804 212.396522888943  
201.637540930213 177.182321788711 221.594737497504 213.7326050342  
224.497348027469 253.495214569632 179.177884962513 247.899467998443  
238.095599711942  
MARCH6 3328.99028463277 3441.9805896226 1669.97250023755  
3693.4058156307 702.049571167356 1794.82283439196 841.944755849006  
953.861218000678 848.620986404914 489.75389978732 1035.0797237176  
817.342172321486  
MARCH7 1154.86609813021 977.450397042213 1201.82026045778  
827.400420888645 725.216684507759 1730.30703463073 996.240188311002  
1177.70376288106 1080.42884514937 1470.23096656138 328.14373061894  
1250.58586679251  
MARCH8 135.805294188016 134.10707191601 136.718598487513  
130.10852948682 127.41463780496 133.524698103972 138.988919994625  
134.132312782731 129.208429861964 139.917662338546 138.695481214267  
129.945543636232  
MARCH9 142.508525378171 151.486362260537 143.506243892155  
153.803195520637 148.160350542849 141.033948839613 182.066922756289  
154.918405633244 155.587018319981 145.569870279379 153.46645509759  
149.280480796544  
MARCKS 2258.30916111153 2273.12164779441 2074.29945034697  
1796.26091584668 8666.41250683965 4009.22206756187 5122.60899285635  
3450.46728258139 5233.72882607795 4373.91897463938 5714.36902486392  
5382.31371568106  
MARCKSL1 262.259969786927 411.160709628865 223.094496588657  
242.695286989672 5932.37714987741 3090.52810501797 1652.77814259264  
2180.31963682546 3363.51782842264 803.840404197117 2841.96460830166  
2730.50913686613  
MARCO 142.148597793651 163.85327708023 149.202628825354 162.863781294205  
150.267298097687 140.354508398385 163.640052220142 150.549883779193  
151.592787806315 164.794626785115 160.870390779084 139.677109265241  
MARK1 247.053215951505 273.432712475089 302.905840432998 333.592915218163  
243.538374440134 462.948429969719 357.259935567823 178.358003030064  
182.009471368798 183.056707813352 666.847934976479 272.277433294605  
MARK2 184.241640200823 184.414609874199 148.493435517221 209.44506543433  
330.641230715217 196.378888436237 194.143649677822 166.692386207143  
189.082778234831 165.938009275308 228.499052416183 207.785320401354  
MARK3 317.121202656311 257.24481414803 318.628084728596 266.681711962236  
221.171478972931 260.955030428944 244.401472859026 275.252966071473  
233.496804016764 294.922183826144 266.217879616686 314.810001770583  
MARK4 156.981921830638 127.802645313091 126.48691003872 125.588401196232  
123.354093930164 138.48552149031 145.133151090252 142.693337885596  
133.783379558598 145.331858938535 151.373442180963 138.108184983014  
MARLIN1 139.497253870412 138.743505629497 132.758313782606  
137.846463796994 144.917911601441 134.222453538421 139.771342253058

|          |                  |                  |                  |                  |
|----------|------------------|------------------|------------------|------------------|
|          | 140.018786803502 | 127.9575507576   | 132.122273848715 | 140.138870925001 |
|          | 129.336402686549 |                  |                  |                  |
| MARS     | 672.348723983535 | 499.891000749138 | 542.379137999196 | 570.26564132238  |
|          | 455.564394647943 | 569.866002248352 | 460.807117177285 | 438.817248820137 |
|          | 662.213423011533 | 497.53605530806  | 424.201556056759 | 403.043257175264 |
| MARS2    | 163.846242743377 | 153.667355714857 | 170.12010526854  | 149.902420337518 |
|          | 200.810204162831 | 229.017256104437 | 198.795112039249 | 227.350260241585 |
|          | 173.986750195954 | 189.872997882033 | 172.319604146201 | 206.845306095447 |
| MARVELD1 | 156.385100395531 | 172.965746521132 | 149.37190049932  |                  |
|          | 175.593421867771 | 136.745596788338 | 117.728410015076 | 132.836513637574 |
|          | 154.264142444882 | 130.069789939568 | 154.600966693059 | 154.483828924645 |
|          | 137.269267022826 |                  |                  |                  |
| MARVELD2 | 134.238642042323 | 153.815239954928 | 140.359796538887 |                  |
|          | 132.70109232982  | 289.82072316082  | 201.850932289186 | 243.308625792448 |
|          | 201.004491067972 | 194.655710454472 | 200.114704018645 | 345.209128382239 |
|          | 278.651369597422 |                  |                  |                  |
| MARVELD3 | 121.973581817041 | 128.967855397644 | 121.543207264598 |                  |
|          | 124.616629956864 | 216.077955163344 | 217.287912825619 | 202.887417145119 |
|          | 214.86995782548  | 250.060734219351 | 318.690043546203 | 246.152798696993 |
|          | 200.558971047462 |                  |                  |                  |
| MAS1     | 112.747067417774 | 114.673517800886 | 129.797601100832 | 117.218616752346 |
|          | 116.179625689647 | 112.38543517651  | 132.703034017237 | 110.847680175669 |
|          | 119.242880574306 | 112.081127853476 | 139.607944722497 | 111.783160346742 |
| MAS1L    | 116.597352307016 | 127.04217189075  | 114.191245210321 | 132.99989565368  |
|          | 115.613348109569 | 111.985567835684 | 118.650091706226 | 101.316813921703 |
|          | 129.449242018727 | 123.687439699754 | 138.173547382901 | 115.332409360957 |
| MASP1    | 171.487594589922 | 147.129702047639 | 146.446922196868 | 142.818122106598 |
|          | 129.447773229782 | 136.185190275407 | 139.499652059557 | 135.725202462502 |
|          | 133.832462719784 | 140.160349667726 | 135.920830568556 | 137.962542261072 |
| MASP2    | 144.167857433516 | 147.412608079997 | 147.585987099202 | 144.148833164952 |
|          | 150.173766182317 | 148.807422049327 | 152.077204721895 | 154.65319127051  |
|          | 150.339554736141 | 146.779054605199 | 144.155591092387 | 141.114148695402 |
| MAST1    | 149.883237874886 | 154.501338425995 | 134.73970457131  | 141.821550320574 |
|          | 144.45968532565  | 138.405215507471 | 157.841520434044 | 139.709959820327 |
|          | 133.271506838359 | 137.81819274774  | 137.180793826675 | 146.271180025157 |
| MAST2    | 300.358738353443 | 275.888299685521 | 284.195575802966 | 334.316711893654 |
|          | 181.771654391653 | 161.673818303367 | 158.6953558198   | 169.036409026328 |
|          | 150.775805918537 | 169.101676908756 | 223.429738319185 | 135.186880148352 |
| MAST3    | 226.173501275026 | 210.973303650385 | 237.961826989344 | 239.73396414153  |
|          | 301.051775938853 | 210.605864685448 | 233.36028792331  | 270.069634610818 |
|          | 251.09230266334  | 225.803528238368 | 244.925472495705 | 233.272000923172 |
| MAST4    | 172.46311371589  | 159.245344068037 | 135.433229702209 | 143.210208388432 |
|          | 175.065781438801 | 207.338645756456 | 256.022057262325 | 130.150998843383 |
|          | 154.774977482202 | 184.008405576875 | 155.201655653645 | 177.84188738734  |
| MASTL    | 133.083877012766 | 146.616041788595 | 138.841385034636 | 132.813199199389 |
|          | 191.207048581306 | 192.399146702036 | 181.991820141929 | 173.678096732903 |
|          | 177.708263037199 | 158.390337945372 | 192.475309217696 | 200.890547965585 |
| MAT1A    | 106.000943456483 | 107.638492587723 | 107.863971340407 | 121.632494500096 |
|          | 107.187035835972 | 122.84779238795  | 116.328330266803 | 119.733311319912 |
|          | 103.94864861172  | 98.1433670546536 | 133.54741488531  | 124.028748209411 |
| MAT2A    | 5601.24254062491 | 5115.14161559446 | 3822.05744774919 | 3983.37592132018 |
|          | 1677.93424842267 | 5489.19362780613 | 2808.78353621111 | 3413.39994653641 |
|          | 3066.69261114251 | 1916.46158204806 | 3615.76740804718 | 3177.80599774525 |

|        |                  |                  |                  |                  |
|--------|------------------|------------------|------------------|------------------|
| MAT2B  | 596.246316033079 | 708.056533282983 | 771.512332113075 | 658.968318349334 |
|        | 554.115756730498 | 467.187222441283 | 793.300636780035 | 769.586135629964 |
|        | 643.13571432061  | 768.334658920971 | 555.259469428492 | 686.679573646733 |
| MATK   | 143.716377201615 | 146.851307767958 | 136.65402176085  | 144.525782437057 |
|        | 155.694213876736 | 144.182891591399 | 148.816369706133 | 154.755544586846 |
|        | 165.027938535393 | 157.288308753975 | 150.709091532746 | 163.081050585097 |
| MATN1  | 140.195820033314 | 155.545904088857 | 138.980079440205 | 133.099175110023 |
|        | 137.434039024162 | 141.583936153499 | 137.04010227318  | 152.532083511961 |
|        | 143.683545371898 | 148.603077434646 | 147.920946479942 | 147.968104627262 |
| MATN2  | 2325.02143920169 | 1756.88092410303 | 1505.09908072606 | 1047.78978081493 |
|        | 159.032710656826 | 227.689356258276 | 160.290104492275 | 1424.79466712859 |
|        | 711.729857540712 | 169.192327500032 | 691.397238677552 | 266.347965690851 |
| MATN3  | 118.029258839619 | 115.371180170291 | 116.635455849571 | 123.681353449198 |
|        | 112.227434965199 | 129.505139430366 | 130.441808139335 | 120.891023626809 |
|        | 120.735176435195 | 125.882246459692 | 152.342712570625 | 127.629258006335 |
| MATN4  | 124.157302365291 | 118.184571821176 | 119.725487374119 | 121.59661598908  |
|        | 118.694037994926 | 122.603226380439 | 117.688941284427 | 128.570067783535 |
|        | 126.533083459283 | 120.342513393659 | 117.123891785437 | 129.334217858282 |
| MATR3  | 1296.10827265334 | 1211.94273385872 | 1323.91781040143 | 915.579581760396 |
|        | 787.874585290601 | 1468.50184641042 | 1239.13016938378 | 1119.23362648056 |
|        | 960.775251871864 | 1071.00507864299 | 1195.07608384189 | 1262.96801072965 |
| MAX    | 175.711836112986 | 165.134931755194 | 194.921021761976 | 171.62327142765  |
|        | 168.295044843056 | 152.407614042236 | 179.94333102877  | 162.574338133241 |
|        | 165.890492422031 | 190.255797389524 | 170.266415287865 | 192.954269340616 |
| MAZ    | 129.527271401014 | 139.263602290256 | 132.471014832851 | 132.061436165754 |
|        | 188.941900997781 | 143.999000471746 | 133.220878146063 | 131.545287070888 |
|        | 144.468333012278 | 139.202670489857 | 173.708509414674 | 133.783379558598 |
| MB     | 131.036225888592 | 139.338384535905 | 126.897804011992 | 132.141918502025 |
|        | 137.138266859156 | 126.394032757479 | 128.748663215466 | 162.117224868654 |
|        | 124.048926099805 | 129.792548588929 | 130.461084106455 | 126.253319664664 |
| MBD1   | 181.439775614781 | 176.236140830355 | 219.2695037071   | 188.45479937455  |
|        | 169.556358586336 | 176.883702717029 | 318.244342364572 | 210.711890471222 |
|        | 244.307627077001 | 268.885346595453 | 240.836979012241 | 287.503594820801 |
| MBD2   | 147.539226876636 | 147.67708956438  | 144.316475814221 | 143.874735808114 |
|        | 147.600825146067 | 154.487546030444 | 159.120172969378 | 158.147502554814 |
|        | 160.449911844008 | 195.755450324985 | 157.449891798638 | 162.229052648595 |
| MBD3   | 260.921177985439 | 269.141120401835 | 191.3765085801   | 323.20628717764  |
|        | 462.553267274302 | 247.942904862478 | 247.194197143562 | 208.611557959861 |
|        | 210.199788806189 | 176.533058719908 | 246.77831953556  | 183.443006525616 |
| MBD3L1 | 115.389934936253 | 117.870230005125 | 121.138461509096 |                  |
|        | 109.37466528113  | 116.023563001039 | 131.611842804029 | 108.446988282853 |
|        | 121.438875373878 | 108.646136431909 | 122.914680091926 | 126.629012619208 |
|        | 112.449662536973 |                  |                  |                  |
| MBD3L2 | 170.596937075493 | 187.264411519101 | 179.730694272916 |                  |
|        | 183.764215745794 | 169.661107080542 | 189.708396835236 | 194.500222559978 |
|        | 171.155660467037 | 166.692386207143 | 160.035282578603 | 150.2214516849   |
|        | 156.392603045231 |                  |                  |                  |
| MBD3L5 | 136.037555727438 | 127.187020441742 | 135.907702243922 |                  |
|        | 120.873985900666 | 134.175287993769 | 129.888444399067 | 131.426355444136 |
|        | 124.019707408094 | 131.079066781806 | 128.276471459777 | 133.056659202188 |
|        | 127.9928491829   |                  |                  |                  |
| MBD4   | 5670.70220800096 | 5281.353685715   | 3989.14883668905 | 4579.62296570302 |
|        | 738.892511276134 | 4359.98094976179 | 2107.99357083999 | 3378.126661761   |
|        | 2183.18692530644 | 1484.32547474275 | 3833.73632806344 | 2233.00694575483 |

|        |                  |                  |                  |                   |
|--------|------------------|------------------|------------------|-------------------|
| MBD5   | 154.051705030348 | 147.44463861207  | 184.62149494522  | 150.319052894567  |
|        | 141.340452225686 | 134.891736344801 | 150.152613183213 | 156.682781772069  |
|        | 144.201723591119 | 133.796029401157 | 143.915205639368 | 156.151075965844  |
| MBD6   | 619.487800014979 | 667.693216401836 | 557.513306351027 | 1001.65849130836  |
|        | 789.043948009585 | 608.351527783086 | 728.743541467167 | 643.306565600931  |
|        | 802.304294140514 | 475.213525346293 | 868.86246684338  | 710.531876484467  |
| MBIP   | 283.235844022826 | 265.402310598892 | 329.926864732606 | 286.541028896473  |
|        | 167.194306682927 | 340.301980622308 | 312.484289357493 | 277.652851236546  |
|        | 202.230920499592 | 283.760131847707 | 259.625943627223 | 300.443499140896  |
| MBL1P1 | 145.783320434143 | 156.098240321674 | 143.814798097425 |                   |
|        | 142.362022977137 | 154.542190113901 | 144.288714958892 | 144.842687993057  |
|        | 161.225608630791 | 164.736294372006 | 154.340042518983 | 160.773510498005  |
|        | 161.325409589612 |                  |                  |                   |
| MBL2   | 110.885714048075 | 116.802432258299 | 122.578170988039 | 120.311723366684  |
|        | 120.77691423934  | 122.327353563917 | 113.504670764963 | 117.423704591303  |
|        | 115.587874563785 | 122.550707067805 | 121.010811158088 | 115.085961282227  |
| MBLAC1 | 153.02127620577  | 139.577443171489 | 162.997720993338 |                   |
|        | 149.774162138829 | 174.42996813062  | 125.14833026167  | 161.475694690038  |
|        | 135.375268329248 | 154.865107093653 | 147.896919205072 | 147.228812647235  |
|        | 148.049570580734 |                  |                  |                   |
| MBLAC2 | 194.847305068008 | 189.136114953249 | 223.311817085871 |                   |
|        | 187.389039221193 | 156.221773628832 | 183.993497813128 | 174.187510325385  |
|        | 159.032710656826 | 156.136962310077 | 210.620764703468 | 182.786177632757  |
|        | 171.602950766191 |                  |                  |                   |
| MBNL1  | 1362.75971646355 | 1048.26872286983 | 1214.16777512885 | 991.081498002429  |
|        | 295.607161318725 | 359.440639663655 | 333.439929772897 | 352.5627111030848 |
|        | 401.960630197091 | 430.649188209901 | 337.271784551586 | 324.615093103582  |
| MBNL2  | 915.015154168627 | 814.759191652981 | 742.517302567436 | 666.570977208535  |
|        | 288.221041179309 | 549.569374872629 | 472.108893832845 | 337.822337721287  |
|        | 354.205670284123 | 331.018914429561 | 494.604716660887 | 536.46884541183   |
| MBNL3  | 167.769114519774 | 187.833356349429 | 162.212442593001 | 174.158372889364  |
|        | 171.884800118791 | 153.95855605751  | 147.094123051131 | 146.692827583525  |
|        | 149.153827025981 | 150.880818951088 | 172.26834556696  | 160.0697586671    |
| MBOAT1 | 252.761035334279 | 269.053237303244 | 234.126500054945 |                   |
|        | 229.116153948948 | 156.949439724914 | 180.619956937489 | 209.385358804928  |
|        | 217.811099067262 | 191.348260799746 | 158.249743182741 | 189.94130405123   |
|        | 197.740912476527 |                  |                  |                   |
| MBOAT2 | 293.825372123877 | 262.093405224922 | 300.53017771156  |                   |
|        | 267.800523478098 | 154.630837508249 | 238.095599711942 | 193.218266574099  |
|        | 211.357321758564 | 176.802886129341 | 398.892968579918 | 277.101000223971  |
|        | 199.916301659113 |                  |                  |                   |
| MBOAT4 | 116.71331256222  | 119.382151435379 | 131.023892409073 |                   |
|        | 121.830137285032 | 113.609215169397 | 121.893446546512 | 120.085340927108  |
|        | 118.655954393594 | 109.924867620862 | 117.652693591865 | 111.743461522689  |
|        | 119.849895979393 |                  |                  |                   |
| MBOAT7 | 439.616817413027 | 536.9324595176   | 424.201556056759 |                   |
|        | 510.555184032017 | 6114.33638002734 | 1145.96710556468 | 1349.84215478798  |
|        | 832.335328912437 | 1456.76683429755 | 482.226889092547 | 1614.00098175383  |
|        | 1078.41947691758 |                  |                  |                   |
| MBP    | 320.024259346646 | 286.282132382462 | 315.863232876382 | 260.746952459282  |
|        | 259.277693314055 | 300.199170426996 | 315.064477782052 | 467.681480781925  |
|        | 326.570967321756 | 548.138527647594 | 466.909037277853 | 513.518424350159  |

|        |                  |                  |                  |                  |
|--------|------------------|------------------|------------------|------------------|
| MBTD1  | 619.75986112089  | 526.416479408056 | 504.502047826003 | 522.899203071911 |
|        | 194.143649677822 | 472.030150842569 | 331.32397534437  | 421.459312180809 |
|        | 375.255445179952 | 281.659653592151 | 392.824840252824 | 326.379855547052 |
| MBTPS1 | 550.901056837273 | 540.190808200264 | 586.366632966978 |                  |
|        | 575.546802138889 | 680.94167651697  | 566.914448800423 | 523.937128789616 |
|        | 381.014521577291 | 597.651682540611 | 512.541205235935 | 601.164127925014 |
|        | 514.463945278314 |                  |                  |                  |
| MBTPS2 | 135.238301951626 | 141.4587810296   | 168.460095116205 |                  |
|        | 137.112274459462 | 178.52221226882  | 161.559920910487 | 143.497909064641 |
|        | 153.907737500104 | 155.478383896934 | 166.099940078284 | 141.880044424342 |
|        | 150.599425944486 |                  |                  |                  |
| MC1R   | 227.668046559074 | 275.755038921952 | 182.181756507598 | 202.909188070184 |
|        | 227.847614397311 | 234.693846527867 | 157.787233338636 | 923.130629121442 |
|        | 198.620777452192 | 235.453139389486 | 257.408058436941 | 302.809011218879 |
| MC2R   | 141.474583706011 | 150.621893089808 | 147.608094270078 | 156.365413649149 |
|        | 130.342425029134 | 157.805871400914 | 157.863585655333 | 165.41729888767  |
|        | 152.821735300697 | 176.11287574658  | 137.782648137869 | 155.908951665928 |
| MC3R   | 114.412739085949 | 133.975526667571 | 110.966212705086 | 111.860763079995 |
|        | 100.746407116143 | 118.348153875356 | 108.101686347192 | 107.013012418356 |
|        | 116.688949603376 | 111.260486045985 | 115.118170902045 | 107.993707827557 |
| MC4R   | 136.284283129801 | 156.269957530519 | 148.007068300762 | 163.356993518952 |
|        | 147.751554743466 | 163.843143947012 | 161.335677383485 | 151.121293928309 |
|        | 146.108551647446 | 129.717701654435 | 133.757741295765 | 151.134466830828 |
| MC5R   | 151.905534823403 | 130.980885733161 | 156.003233745771 | 142.963036923104 |
|        | 142.898851434337 | 140.13515064896  | 130.928718312512 | 127.67121559907  |
|        | 128.304919825754 | 126.343040504566 | 134.266373965186 | 124.828626063272 |
| MCAM   | 433.189221987242 | 539.27766384282  | 297.368197598038 | 600.838420404663 |
|        | 125.639355645626 | 125.997109913348 | 125.624661345169 | 136.596127228365 |
|        | 126.155486659114 | 131.839206336057 | 134.838366830668 | 127.269672881591 |
| MCART1 | 14699.3902364192 | 14544.3732040823 | 15194.4972103372 |                  |
|        | 13809.2057928642 | 1974.49672149862 | 11809.4804843301 | 5624.32062666666 |
|        | 8581.41617729997 | 8096.28093399619 | 4602.81651147558 | 7016.12801650552 |
|        | 6851.54963413886 |                  |                  |                  |
| MCART2 | 122.883806494491 | 139.444577046509 | 125.531371673679 |                  |
|        | 129.067538010904 | 114.084543168359 | 130.461084106455 | 122.194493542073 |
|        | 131.489715975987 | 132.367155914392 | 134.346754381858 | 116.929398630733 |
|        | 125.073353210914 |                  |                  |                  |
| MCART6 | 135.311980936088 | 133.736252068443 | 132.992071643179 |                  |
|        | 123.065355919378 | 133.872561340464 | 127.492376657284 | 142.403121638265 |
|        | 129.327645260099 | 139.326694135427 | 134.387256336429 | 132.016944935305 |
|        | 127.514381389109 |                  |                  |                  |
| MCAT   | 154.524588318927 | 159.311949668403 | 153.93927752488  | 156.01406297447  |
|        | 234.432954093705 | 213.556015518863 | 183.804849355341 | 183.921173538112 |
|        | 200.387623661458 | 166.81024151246  | 195.50039162477  | 190.152824885328 |
| MCC    | 132.64813248505  | 132.14412512622  | 156.557792402376 | 126.722212054469 |
|        | 134.238642042323 | 153.643157329902 | 176.995049477843 | 132.059507616101 |
|        | 123.678365506247 | 167.42476096854  | 180.096239155058 | 141.125248464806 |
| MCCC1  | 444.712990986138 | 509.01330998156  | 694.02978779693  | 363.89527566597  |
|        | 1006.24899131914 | 953.099915501575 | 1127.07858210156 | 649.438995824208 |
|        | 1062.749459378   | 430.412897698085 | 1103.13439876128 | 922.50743596248  |
| MCCC2  | 183.744959461078 | 173.573412346985 | 169.285901212492 | 167.028001762818 |
|        | 180.698727334322 | 250.406775889932 | 284.104619768635 | 247.683819429859 |
|        | 292.911761762431 | 210.245551279259 | 240.465165615601 | 247.340470321453 |



|          |                  |                  |                  |                  |
|----------|------------------|------------------|------------------|------------------|
| MCCD1    | 157.494596757446 | 167.397758092427 | 159.320692108734 | 176.86489466512  |
|          | 151.382199195953 | 158.150949554785 | 152.104170622003 | 157.623092996114 |
|          | 162.970595558845 | 146.526744516344 | 137.752238510249 | 138.681348536008 |
| MCEE     | 429.992169596618 | 376.692422468905 | 604.237898104299 | 410.002817143111 |
|          | 986.441377365124 | 513.036729214095 | 458.705688226305 | 673.502723625773 |
|          | 614.775559038663 | 480.101253056873 | 751.896334334052 | 315.513423195489 |
| MCF2     | 124.066239570648 | 117.404906698431 | 121.130837254861 | 111.161283080299 |
|          | 119.876835248732 | 112.710573586525 | 112.962180108363 | 114.452922529209 |
|          | 117.15886922795  | 115.217608555334 | 128.649329515033 | 114.85602874727  |
| MCF2L    | 149.710337205986 | 156.375876454394 | 150.0512732245   | 145.455411983653 |
|          | 157.449891798638 | 204.616225498655 | 176.347535860374 | 163.686535888943 |
|          | 153.062710222618 | 134.078506829054 | 177.592497020798 | 182.798526632723 |
| MCF2L2   | 131.631968933144 | 136.86685787001  | 142.970256312313 |                  |
|          | 132.48841450242  | 140.818413826758 | 131.583841535781 | 141.494666823639 |
|          | 143.019052979243 | 136.465185148237 | 146.291932367254 | 157.792868983503 |
|          | 139.885054845153 |                  |                  |                  |
| MCFD2    | 246.533813165981 | 253.42022722564  | 232.444867422559 | 216.05364037271  |
|          | 193.444080047879 | 212.643559782754 | 229.567444213626 | 178.394895649664 |
|          | 189.092674335503 | 271.196028302639 | 218.592402813219 | 211.966139902562 |
| MCHR1    | 143.056098955473 | 121.665157726433 | 134.301187092088 | 138.5270206057   |
|          | 128.245734702114 | 137.354782768068 | 122.087107663865 | 125.418782388128 |
|          | 138.861385127242 | 131.377361030122 | 133.239703270008 | 114.099623939954 |
| MCHR2    | 150.211719786127 | 159.05213637758  | 153.97869518398  | 158.49220347186  |
|          | 139.029404397979 | 170.028047334267 | 151.245520459264 | 142.376921410427 |
|          | 146.326067008478 | 136.453821861379 | 154.316929706697 | 136.705326991088 |
| MCL1     | 722.725186727796 | 698.882871686866 | 554.652979820908 | 473.370240289761 |
|          | 404.95944990868  | 1023.94850651125 | 509.14726076246  | 809.545702751155 |
|          | 851.633522004342 | 1597.53010317504 | 526.285114043212 | 771.059329972125 |
| MCM10    | 134.262346867514 | 135.940629737073 | 130.334622987505 | 129.366567668463 |
|          | 251.09230266334  | 434.390613381746 | 129.887187837732 | 186.563913311757 |
|          | 224.251136332123 | 181.022635001204 | 156.557792402376 | 226.114369645703 |
| MCM2     | 159.640027194076 | 197.775397831129 | 139.526241501184 | 206.650760711745 |
|          | 1048.85768964657 | 382.186095123659 | 248.761038207278 | 501.301694626942 |
|          | 510.061974830525 | 244.219585315024 | 184.008405576875 | 248.562843471699 |
| MCM3     | 835.834013018438 | 1106.21439150501 | 1018.38836615952 | 1226.74043569231 |
|          | 1918.14260920544 | 1197.58205444449 | 1099.37392456694 | 1340.79810963983 |
|          | 1696.69982157582 | 1193.82799849555 | 1536.52218968817 | 1481.24705642453 |
| MCM3AP   | 626.298707790229 | 633.104379362137 | 544.852019338212 |                  |
|          | 695.321886304133 | 352.121800955822 | 615.485984065221 | 646.461274173693 |
|          | 672.637760135254 | 846.985164747386 | 587.388038484307 | 777.901979189395 |
|          | 667.156197045748 |                  |                  |                  |
| MCM3APAS | 178.106013202731 | 146.70594914192  | 151.9565369062   |                  |
|          | 137.988325215021 | 145.612695657243 | 148.094036534405 | 151.479748626813 |
|          | 167.180406126438 | 153.350690419636 | 144.81320329947  | 142.243866937888 |
|          | 166.714793209109 |                  |                  |                  |
| MCM4     | 182.938824846376 | 199.408907117764 | 222.565515020501 | 211.891710626953 |
|          | 793.501244347257 | 952.357976050712 | 427.452114719877 | 699.270931701696 |
|          | 912.143424293236 | 668.853969513382 | 353.621264641814 | 570.26564132238  |
| MCM5     | 233.464856303761 | 267.747633122387 | 221.050093964575 | 289.037033338975 |
|          | 1367.92869625376 | 446.819873986024 | 247.307128520272 | 399.248044997427 |
|          | 486.778046640624 | 383.74357557363  | 265.992741398183 | 291.261765585473 |
| MCM6     | 759.058176862524 | 686.801358367968 | 698.590134238302 | 713.087392708048 |
|          | 1181.1611856364  | 1873.84654908146 | 613.846166856328 | 1654.58270183167 |
|          | 1466.08446530283 | 1162.8644618472  | 627.335757721489 | 988.788192022196 |

|        |                  |                  |                  |                  |
|--------|------------------|------------------|------------------|------------------|
| MCM7   | 486.653672099699 | 574.496860164135 | 634.046843336128 | 670.347447480331 |
|        | 1885.93146154931 | 1007.7803477458  | 597.952909577121 | 1482.92498205315 |
|        | 1160.78730097715 | 693.339946866196 | 738.579262579782 | 1088.25132365974 |
| MCM8   | 6548.65498784806 | 7038.48958943724 | 6776.11712291246 | 5874.57722671552 |
|        | 1651.68171717875 | 7601.58151657937 | 3581.36347643133 | 6114.33638002734 |
|        | 5291.83393775761 | 3287.37172778474 | 5748.57645553386 | 4732.31591164752 |
| MCM9   | 125.535877109652 | 140.416247564103 | 124.652072110334 | 126.075528093376 |
|        | 121.705065573911 | 118.56332995149  | 120.585506729733 | 133.104560685558 |
|        | 127.951403055054 | 140.583804906052 | 135.018710687313 | 139.87715485885  |
| MCMDC1 | 139.754028208983 | 123.683553177379 | 123.860747215706 |                  |
|        | 130.09050436943  | 116.474771810965 | 133.556805738801 | 126.294085960617 |
|        | 121.252042151856 | 129.707421699091 | 130.511042322504 | 132.381685434931 |
|        | 131.597937570173 |                  |                  |                  |
| MCOLN1 | 265.536429548886 | 242.971958493453 | 226.334672545273 |                  |
|        | 274.01377986185  | 505.560841055884 | 361.969355316032 | 273.668871896558 |
|        | 287.967349876429 | 214.331491507489 | 263.74335003375  | 220.379186481273 |
|        | 219.564603776774 |                  |                  |                  |
| MCOLN2 | 165.565284723155 | 148.158062155247 | 131.400031203603 |                  |
|        | 123.700076467648 | 153.592819860747 | 146.877475544399 | 174.192898940601 |
|        | 241.799709160815 | 519.27448770158  | 176.75095377028  | 185.016336026382 |
|        | 172.562162872242 |                  |                  |                  |
| MCOLN3 | 172.531836863525 | 169.864628707043 | 163.004844049672 |                  |
|        | 169.408892048115 | 164.82904652634  | 174.646321871605 | 157.390513637267 |
|        | 160.466187961848 | 167.724233915361 | 199.135932984641 | 155.803946849495 |
|        | 160.466187961848 |                  |                  |                  |
| MCPH1  | 189.83433085782  | 170.007845523415 | 222.118666699301 | 194.36669779004  |
|        | 137.342348963288 | 157.328404229451 | 206.186324475847 | 202.778539118009 |
|        | 165.51742391186  | 172.816477996646 | 203.357914242777 | 170.473956720945 |
| MCRS1  | 452.517134370928 | 491.35949123223  | 482.592481827722 | 572.753294955207 |
|        | 832.622843175217 | 468.569725051459 | 568.555967950896 | 647.666334416707 |
|        | 652.201948082657 | 605.21685916883  | 491.35949123223  | 603.338538383128 |
| MCTP1  | 136.02474314035  | 137.53234136613  | 134.863223806176 | 128.775477649887 |
|        | 131.530256606799 | 132.018833785059 | 127.938245853896 | 128.990911924499 |
|        | 135.039901725369 | 189.225893411944 | 142.839077978518 | 126.563876945046 |
| MCTP2  | 121.047419779542 | 116.258629237662 | 118.351607868932 | 116.994216357989 |
|        | 117.084984190461 | 122.834017529045 | 144.934103671894 | 128.645334554749 |
|        | 125.624661345169 | 142.199182392836 | 161.640122360448 | 177.19138801548  |
| MCTS1  | 347.866264631778 | 329.146025181674 | 307.316241247336 | 284.675990197899 |
|        | 817.913210743023 | 371.552970811499 | 613.631311147328 | 530.387315639095 |
|        | 533.784151495549 | 636.781477235579 | 597.459920611726 | 606.003956839826 |
| MDC1   | 678.365575489532 | 694.429144766435 | 652.429025114523 | 584.919615953457 |
|        | 794.636255515909 | 411.968307579588 | 340.487850009685 | 468.82816089485  |
|        | 437.344765185802 | 390.670702155192 | 375.038561820137 | 355.372836460906 |
| MDFI   | 125.093376753408 | 130.062015525637 | 110.17590675298  | 117.815045605383 |
|        | 122.863612588759 | 122.535728427528 | 117.494422663086 | 117.847744476387 |
|        | 115.101971719657 | 130.570050159191 | 138.154799037807 | 118.414329128347 |
| MDFIC  | 160.816803370151 | 146.014790698087 | 176.791758333054 | 143.140502042489 |
|        | 145.759500305177 | 199.353823724989 | 192.512661648653 | 221.231455446574 |
|        | 180.680595239651 | 224.251136332123 | 175.165305179665 | 215.47323777134  |
| MDGA1  | 156.557792402376 | 156.304678960663 | 138.745560049251 | 140.885915460425 |
|        | 219.709231012465 | 152.11956441072  | 289.667302610069 | 139.966813133326 |
|        | 141.164985468046 | 147.87699690647  | 153.805972158269 | 160.493314658788 |

|       |                  |                  |                  |                  |
|-------|------------------|------------------|------------------|------------------|
| MDGA2 | 114.556542069712 | 121.818632020666 | 118.109991440011 | 115.907902010701 |
|       | 118.383317097375 | 113.143436184959 | 103.99234480919  | 107.498500136859 |
|       | 116.889373249017 | 121.803676441059 | 125.999595008166 | 109.209241676429 |
| MDH1  | 2660.39990175415 | 2992.18604022433 | 4397.32311216672 | 3749.80462365748 |
|       | 3222.23985545506 | 4437.40805296517 | 2382.87910783088 | 4198.61471038267 |
|       | 2537.90501983425 | 3408.6535437109  | 2157.50118108142 | 2932.64120183406 |
| MDH1B | 175.79375235478  | 157.134782748175 | 182.310140388705 | 170.099045774947 |
|       | 149.8035588048   | 140.976675511847 | 150.784262878145 | 141.639216893245 |
|       | 128.717719117128 | 147.532747354296 | 145.864902319111 | 134.302726684539 |
| MDH2  | 6179.86800320807 | 6244.58472720999 | 6470.73189429877 | 8739.02966610274 |
|       | 12818.0509395717 | 5874.57722671552 | 6585.34962362923 | 9715.20127757161 |
|       | 8649.07367196998 | 6091.9840719327  | 5955.10816224456 | 9759.87403504619 |
| MDK   | 221.889331385023 | 248.465457421469 | 157.288308753975 | 203.831047867731 |
|       | 820.249910349431 | 986.004777675332 | 1222.59895569348 | 765.532997390972 |
|       | 1451.64055568759 | 224.981439707657 | 999.159652508318 | 663.451243037105 |
| MDM1  | 162.397078614596 | 158.967160833334 | 188.308588359317 | 171.909358721737 |
|       | 151.153466809603 | 243.191238594142 | 147.664505309713 | 203.727455875381 |
|       | 165.41729888767  | 168.6016897585   | 153.798367953373 | 161.456727894848 |
| MDM2  | 139.365595511181 | 135.834000569736 | 147.691011072898 | 144.671459266861 |
|       | 144.96670085147  | 333.745543022749 | 156.277567608825 | 182.665357598121 |
|       | 146.370084152094 | 151.130401750721 | 140.036463888037 | 143.368327095618 |
| MDM4  | 167.07092218037  | 161.393953325115 | 173.513108409372 | 180.578528984075 |
|       | 162.649092834422 | 198.549047189499 | 158.675960205792 | 167.521700144143 |
|       | 184.974347306539 | 147.15764785567  | 171.504939477949 | 229.130679600654 |
| MDN1  | 194.002075848131 | 178.790758444269 | 205.546628064296 | 173.624709850889 |
|       | 173.240598306749 | 193.358728044565 | 172.008994980259 | 168.824578400555 |
|       | 172.077522197357 | 178.014057622594 | 151.256546638599 | 187.057683141644 |
| MDP1  | 262.577672828611 | 244.627091189503 | 263.204269632206 | 207.560911665319 |
|       | 269.300548648755 | 214.888126361789 | 259.672238210968 | 284.272977025491 |
|       | 196.345065354654 | 252.432175363972 | 288.596513753617 | 273.75192868583  |
| MDS1  | 119.780654293448 | 133.079097536801 | 132.249906289203 | 134.579005092929 |
|       | 120.809659457873 | 141.299677389827 | 129.517511177852 | 135.93352186143  |
|       | 139.574895021783 | 125.253637835638 | 163.362182585182 | 129.208429861964 |
| ME1   | 476.249239197777 | 360.605223912114 | 658.968318349334 | 331.464977124667 |
|       | 207.960802948119 | 203.510106134882 | 278.219561902233 | 233.786136606682 |
|       | 192.737713851863 | 683.365770196967 | 178.245841646175 | 168.552631639996 |
| ME2   | 396.40172043456  | 324.346723939622 | 578.084277076692 | 361.829819621662 |
|       | 327.324711245289 | 421.255522475862 | 399.963640581639 | 569.236322997211 |
|       | 478.909308632726 | 424.025588636796 | 386.85874184746  | 495.099443245153 |
| ME3   | 181.148062201932 | 181.85552254233  | 185.591700082272 | 171.884800118791 |
|       | 160.364644321965 | 143.791908191551 | 155.868109161417 | 209.090788790449 |
|       | 187.472028627511 | 135.588132669957 | 217.576547690525 | 165.808660192901 |
| MEA1  | 442.590987372759 | 468.339735327273 | 459.53652431464  | 571.64723305848  |
|       | 426.249411635589 | 515.158921349383 | 644.868034665476 | 484.568420044471 |
|       | 365.650071660806 | 460.807117177285 | 467.681480781925 | 532.394088545421 |
| MEAF6 | 204.057019122032 | 200.387623661458 | 262.061371466369 | 209.887047474042 |
|       | 174.461487057542 | 220.217745732407 | 198.722993687455 | 188.093450717857 |
|       | 172.783430414523 | 206.428618912264 | 186.747375844319 | 185.382647297259 |
| MECP2 | 192.932285494022 | 220.633692394229 | 286.506419296679 | 208.666760987764 |
|       | 185.295480519718 | 188.724274062294 | 206.446584387595 | 190.405863264717 |
|       | 195.595275594235 | 193.148369507405 | 198.338416756432 | 201.320381706496 |
| MECR  | 138.50252234048  | 138.206065640158 | 139.644701550661 | 140.513291662274 |
|       | 140.06989960847  | 128.765369834041 | 130.898067924686 | 132.834433153076 |
|       | 130.669539169739 | 155.278984760268 | 142.878258542775 | 133.75142055959  |

|        |                  |                  |                  |                  |
|--------|------------------|------------------|------------------|------------------|
| MED1   | 186.866029149035 | 215.300064529551 | 221.322724563472 | 178.512206531256 |
|        | 173.735045816949 | 207.123420880185 | 203.852316712377 | 222.736706411035 |
|        | 211.289598823191 | 199.408907117764 | 235.563592256037 | 202.691507273819 |
| MED10  | 547.042461070351 | 433.405369327168 | 762.584280908728 | 454.732029358748 |
|        | 566.543765584009 | 697.299604049748 | 731.513306289481 | 1017.6969123529  |
|        | 688.915534194306 | 654.663838918786 | 432.726040933545 | 507.827473844576 |
| MED11  | 165.283700641161 | 173.353648927895 | 188.475801713801 | 182.57496767012  |
|        | 157.259599894923 | 159.891562221587 | 188.0434100445   | 167.077669654786 |
|        | 153.59485367224  | 198.522123898437 | 229.017256104437 | 176.603760647035 |
| MED12  | 236.745054217055 | 277.406445570925 | 243.246632667118 | 302.462763120177 |
|        | 370.227329649269 | 185.923374274306 | 213.123453925578 | 183.633719048831 |
|        | 226.640323471375 | 169.940177050294 | 241.134385745554 | 185.602093266907 |
| MED12L | 140.313216623427 | 122.149756212115 | 146.225422797118 |                  |
|        | 125.455347031878 | 143.750656408155 | 133.697364081712 | 144.335732650795 |
|        | 140.622130978368 | 110.735199684144 | 137.009303458922 | 134.457932303561 |
|        | 140.251168248117 |                  |                  |                  |
| MED13  | 158.039920243116 | 136.724298878331 | 144.02847768185  | 137.183566882805 |
|        | 148.632332840817 | 143.426053070219 | 132.105184573944 | 140.664303738113 |
|        | 150.964506212368 | 136.818557078622 | 153.943227610765 | 153.426409060413 |
| MED13L | 223.84997313236  | 176.689683169567 | 166.88833169342  |                  |
|        | 176.940723174814 | 164.848970268132 | 153.128027266281 | 151.863048206341 |
|        | 149.999838961906 | 150.751386127903 | 160.234704406302 | 211.289598823191 |
|        | 160.303394115537 |                  |                  |                  |
| MED14  | 294.871848467326 | 335.790909130243 | 340.668473351494 | 328.14373061894  |
|        | 294.069353373633 | 522.300029971277 | 292.429831186609 | 428.959561932229 |
|        | 296.051639873628 | 297.544216175512 | 348.98762709818  | 310.465070184707 |
| MED15  | 180.561514455864 | 185.896304740844 | 170.497804969996 | 206.89716102989  |
|        | 214.803167803712 | 152.011551837951 | 150.401509081265 | 156.022967076728 |
|        | 163.36682525399  | 167.806420483187 | 200.302384864371 | 147.835936450126 |
| MED16  | 483.845891531326 | 631.106334754678 | 548.014025722956 | 761.89271251455  |
|        | 1325.77498031227 | 590.515758538373 | 859.547169028149 | 694.288215755716 |
|        | 603.764427348016 | 658.068932688816 | 755.79669622705  | 662.373189001788 |
| MED17  | 153.62335478774  | 156.75308999904  | 142.228042097379 | 143.188958538221 |
|        | 161.592528958127 | 150.193479279784 | 166.472068379965 | 163.256472113745 |
|        | 168.634534857593 | 142.483308497682 | 164.276668889213 | 142.826050917117 |
| MED18  | 129.417232210341 | 126.026938396257 | 126.305273697185 | 115.25307661968  |
|        | 171.909358721737 | 125.171532277078 | 131.162118170837 | 129.222714748528 |
|        | 124.336297973344 | 109.167312436827 | 159.41705570719  | 133.411087000196 |
| MED19  | 358.298768623212 | 333.200230327106 | 391.500696444149 | 416.215253990273 |
|        | 578.947889414387 | 730.988069115919 | 718.871732206362 | 538.872348151809 |
|        | 531.555532787504 | 611.088604425595 | 435.603911474926 | 735.8141982568   |
| MED20  | 907.306121257236 | 892.038018567941 | 899.336817124312 | 920.342429282889 |
|        | 660.907502776003 | 794.636255515909 | 979.761537450366 | 715.039905439621 |
|        | 775.5664718389   | 897.958748317315 | 960.491731797061 | 784.412433571927 |
| MED21  | 260.85776723575  | 231.314944217099 | 212.798133015556 | 214.4829383264   |
|        | 219.619022209985 | 185.876046259727 | 191.708350637714 | 176.236140830355 |
|        | 169.744100665038 | 211.468099571442 | 270.181005097697 | 168.991551886143 |
| MED22  | 878.520681466946 | 1010.23703166498 | 741.689442253375 | 1552.69879081022 |
|        | 889.6617510875   | 264.306927596371 | 394.892918166519 | 354.656612182522 |
|        | 426.896707161414 | 395.425715632302 | 594.713185954954 | 332.543652462234 |
| MED23  | 218.70412656621  | 234.626574390973 | 217.307872538386 | 213.847316974717 |
|        | 218.209523110843 | 220.959843573708 | 256.326661031361 | 232.250434241457 |
|        | 203.317264638828 | 239.541516080716 | 262.196293231028 | 253.098839084408 |

|       |                  |                  |                  |                  |
|-------|------------------|------------------|------------------|------------------|
| MED24 | 216.485113690708 | 250.928804390353 | 204.654489493854 | 316.081825144651 |
|       | 419.593558001947 | 230.227432807772 | 306.232249422327 | 531.421912541822 |
|       | 317.353318759931 | 290.090495047722 | 280.848426993226 | 222.20526515049  |
| MED25 | 266.99947481587  | 298.209907157762 | 351.854828413334 | 296.830999357172 |
|       | 1050.90881385623 | 354.205670284123 | 420.743637858421 | 348.300300174924 |
|       | 390.501797367707 | 251.20133703465  | 319.417555901733 | 323.95355217044  |
| MED26 | 199.209279169496 | 199.555406967021 | 192.804447792672 | 209.568066932367 |
|       | 209.7558663154   | 248.204358220728 | 227.375773052577 | 265.712482648121 |
|       | 198.795112039249 | 237.692959394487 | 176.465559710285 | 220.959843573708 |
| MED27 | 207.850956786183 | 183.921173538112 | 240.439368352772 | 209.74583569369  |
|       | 245.454945056317 | 239.452559981542 | 186.276450732044 | 224.466829629468 |
|       | 229.483578414375 | 249.80160363144  | 199.96834355685  | 208.14618424983  |
| MED28 | 494.067878734396 | 460.514672966125 | 375.131728190867 | 433.189221987242 |
|       | 891.194779815063 | 472.514017604645 | 1176.01058971561 | 554.511983790164 |
|       | 764.493610798958 | 637.892677173103 | 821.862271569917 | 941.936830901588 |
| MED29 | 597.795856268827 | 629.381791489871 | 629.197022551069 | 728.930140593418 |
|       | 457.411248351795 | 796.439819579938 | 749.515603904233 | 716.420861490714 |
|       | 690.582550537485 | 528.921893077914 | 520.470790410856 | 566.914448800423 |
| MED30 | 340.966515437272 | 330.241479004885 | 402.366797969833 | 287.889774984754 |
|       | 473.60579090007  | 466.392151902286 | 562.891241563711 | 606.38343657878  |
|       | 644.741046498743 | 409.883222213537 | 365.541609015117 | 464.128022170285 |
| MED31 | 163.042083189818 | 165.092451754065 | 171.731395791818 | 161.172420368335 |
|       | 192.475309217696 | 257.775569674531 | 213.93763684072  | 251.959823608766 |
|       | 188.836327151669 | 298.664864578349 | 216.24497587588  | 201.661941695238 |
| MED4  | 307.083179338165 | 344.915370555826 | 327.480268032814 | 383.182507425579 |
|       | 381.253673759781 | 479.983368253935 | 212.996456841785 | 286.282132382462 |
|       | 605.583144451322 | 377.225452025984 | 314.646369385896 | 492.377642058095 |
| MED6  | 625.374595058488 | 630.894382644903 | 606.38343657878  | 597.795856268827 |
|       | 558.934004505074 | 444.082440002333 | 985.087150371964 | 717.025533065694 |
|       | 673.502723625773 | 996.240188311002 | 727.114956464515 | 904.733257358133 |
| MED7  | 216.403542903805 | 217.811099067262 | 262.196293231028 | 209.623583937962 |
|       | 243.283375388645 | 227.441436540742 | 286.133496092533 | 255.305647212135 |
|       | 208.067404132325 | 316.590387560909 | 273.432712475089 | 282.045333787115 |
| MED8  | 196.908612360694 | 200.468804559127 | 241.867699338253 | 204.851374931284 |
|       | 227.209630859635 | 382.701467158304 | 307.316241247336 | 310.174932137546 |
|       | 254.83131041241  | 295.367125961621 | 196.657475905674 | 298.664864578349 |
| MED9  | 281.694635436938 | 294.410833087913 | 204.1974438819   | 301.369680426563 |
|       | 224.361277033882 | 169.999692055871 | 209.180298459605 | 217.646777099512 |
|       | 183.255119298602 | 188.910933952136 | 281.341452463344 | 203.089661928125 |
| MEF2A | 164.548505132213 | 142.367003292264 | 155.924471321076 | 140.747015284372 |
|       | 136.966690353637 | 138.076501233454 | 147.378228560979 | 137.192570825063 |
|       | 140.117644705946 | 179.079061789059 | 138.640919060725 | 157.595468761042 |
| MEF2B | 154.264142444882 | 135.904163043783 | 155.803946849495 | 157.568150431884 |
|       | 153.104072845043 | 144.868337748544 | 152.179281925254 | 153.492072037266 |
|       | 121.255814891176 | 152.498222035534 | 157.960172706254 | 153.008756051525 |
| MEF2C | 491.290438575428 | 600.264940641426 | 403.043257175264 | 557.214020485204 |
|       | 137.71627781928  | 183.371103136697 | 96.0426636429757 | 129.246066890078 |
|       | 188.685460181066 | 135.465076459043 | 154.892452237027 | 128.798413084891 |
| MEF2D | 1072.37500318471 | 1235.75946952752 | 1270.76282064793 | 1352.14737073174 |
|       | 406.369889501135 | 430.100415399881 | 368.134303229682 | 424.855168311509 |
|       | 398.354212009426 | 326.325210657599 | 470.42403724799  | 397.861172312706 |
| MEFV  | 132.71633377967  | 142.279695592224 | 145.542888937635 | 139.423432468886 |
|       | 129.869363181125 | 132.955473649746 | 137.06192448185  | 131.910285685889 |
|       | 130.894384800009 | 134.608734423113 | 146.122816653035 | 139.671302796695 |

|         |                  |                  |                  |                  |
|---------|------------------|------------------|------------------|------------------|
| MEG3    | 1178.08490218853 | 780.734359041347 | 506.562512021352 | 501.946140974776 |
|         | 135.99579763634  | 185.591700082272 | 135.291264978088 | 223.311817085871 |
|         | 427.872407051254 | 368.711718874343 | 165.286724415145 | 166.285052506316 |
| MEG8    | 149.239390385906 | 170.439725847568 | 143.007237184254 | 156.16485596016  |
|         | 156.866867371872 | 139.687574432387 | 144.555718186987 | 155.214638707046 |
|         | 150.936747236094 | 129.187574143637 | 182.984076352185 | 126.484819755399 |
| MEGF10  | 149.495077381649 | 157.162523271165 | 150.394483608039 |                  |
|         | 136.067657949844 | 151.933078262284 | 151.622719246408 | 148.386249316173 |
|         | 148.118705147238 | 154.558968826495 | 160.364644321965 | 156.942156078314 |
|         | 149.040720727554 |                  |                  |                  |
| MEGF11  | 152.93058803161  | 150.339554736141 | 140.947852529815 |                  |
|         | 192.113217321485 | 152.004130711617 | 157.572446865749 | 144.450810504499 |
|         | 135.296271683847 | 149.714982846365 | 148.370331097467 | 137.473779155388 |
|         | 165.239214141562 |                  |                  |                  |
| MEGF6   | 179.421854100287 | 162.620593985693 | 166.320461361356 | 156.774097885381 |
|         | 124.895023786422 | 135.63604256516  | 170.505553609318 | 162.689415085423 |
|         | 144.364319564075 | 155.201655653645 | 249.763375041547 | 369.018856220394 |
| MEGF8   | 152.413389525982 | 168.223865801948 | 166.558080305926 | 183.815810733176 |
|         | 183.371103136697 | 148.683761948082 | 146.652641667543 | 130.788557333561 |
|         | 143.756242843438 | 146.871145679651 | 170.198508633417 | 144.608882758506 |
| MEGF9   | 203.11015591813  | 188.417078622503 | 222.243523614518 | 185.950131245699 |
|         | 154.083644327775 | 178.572212478544 | 177.759729226623 | 166.741762854246 |
|         | 174.576132939661 | 151.794243108455 | 219.8511043213   | 146.291932367254 |
| MEI1    | 144.746134643761 | 134.78059811237  | 137.27298184582  | 143.969566798989 |
|         | 138.605661097886 | 137.748443205818 | 140.929424764561 | 143.625188247966 |
|         | 153.22516060649  | 139.217113811817 | 148.932696684374 | 142.776295389006 |
| MEIG1   | 119.785062256421 | 135.491412261604 | 128.521380879209 | 139.987681290389 |
|         | 148.072816925413 | 137.008110557038 | 131.959998540928 | 130.434497375903 |
|         | 141.666394024363 | 136.692495869097 | 127.9575507576   | 133.511698282195 |
| MEIS1   | 1124.67710585154 | 1038.93733638848 | 990.206369590236 | 1226.10881264804 |
|         | 259.146673652222 | 209.5184563244   | 210.245551279259 | 209.840035045167 |
|         | 202.324795686879 | 246.552713031445 | 281.278843600876 | 350.392951395182 |
| MEIS2   | 522.899203071911 | 487.993796425035 | 706.759905439674 | 483.429488817674 |
|         | 146.474228901408 | 143.035245560484 | 154.843607752473 | 150.896076207161 |
|         | 144.107029869771 | 146.683594365673 | 194.998142472864 | 166.622070620588 |
| MEIS3   | 167.106870400592 | 168.805630890928 | 150.829439012542 | 173.204163917896 |
|         | 152.520828479026 | 149.738621325385 | 147.826950636822 | 143.899201949317 |
|         | 146.366013190845 | 145.739537463907 | 152.864765895508 | 173.115418167551 |
| MEIS3P1 | 526.285114043212 | 539.471166362469 | 528.275591281419 |                  |
|         | 441.435444003241 | 337.271784551586 | 516.755267232127 | 415.322560616847 |
|         | 429.992169596618 | 345.38424761963  | 295.973370766318 | 281.659653592151 |
|         | 439.394914369983 |                  |                  |                  |
| MELK    | 154.248226423862 | 154.713713332354 | 146.524138043215 | 146.063554646851 |
|         | 418.420753332232 | 381.867665449509 | 220.312301059818 | 370.798852361374 |
|         | 448.95671696823  | 443.732580517751 | 179.96623248843  | 312.845219991659 |
| MEMO1   | 235.43707989982  | 240.376851873817 | 249.884250040189 | 246.457698183615 |
|         | 362.742120043509 | 608.611927946607 | 390.284689962661 | 534.920870202582 |
|         | 314.557323400201 | 433.189221987242 | 295.367125961621 | 391.644649726254 |
| MEN1    | 143.830319259804 | 136.901107766796 | 140.83570584033  | 139.476234663488 |
|         | 223.573080955095 | 154.710000519109 | 162.254062646631 | 148.255769084026 |
|         | 152.91729346961  | 148.514806562804 | 171.573342518254 | 158.302977853133 |
| MEOX1   | 155.655771857361 | 178.106013202731 | 145.619570216377 | 201.139510041141 |
|         | 134.751916364581 | 133.475605284211 | 131.856313046545 | 140.197487078987 |
|         | 158.007926822094 | 137.53234136613  | 142.592455241752 | 131.7646616214   |

|         |                  |                  |                  |                  |
|---------|------------------|------------------|------------------|------------------|
| MEOX2   | 213.510783808898 | 224.439293045835 | 202.718428167217 | 285.63245179313  |
|         | 148.812015298003 | 148.44261900795  | 163.504122327429 | 143.127795310829 |
|         | 140.656633546501 | 154.584367902971 | 144.781438651649 | 146.166710487448 |
| MEP1A   | 124.101111442605 | 127.011594171986 | 127.998531115697 | 130.224324464992 |
|         | 123.738223146912 | 124.22833964472  | 189.799091507686 | 126.331341103654 |
|         | 121.476730561812 | 121.242099666967 | 135.085039737228 | 138.334626498686 |
| MEP1B   | 117.652693591865 | 119.131613164405 | 118.825948323992 | 115.43068422162  |
|         | 120.799317509529 | 115.457121859064 | 123.586359806158 | 111.020070405368 |
|         | 112.817015523662 | 122.385508330707 | 110.536316697732 | 118.029258839619 |
| MEPCE   | 436.222568287601 | 344.604699562938 | 392.582612044755 | 413.983821839274 |
|         | 636.048536814356 | 276.138650967632 | 492.377642058095 | 392.198487606534 |
|         | 295.973370766318 | 286.642323413104 | 403.208138816247 | 303.907003535357 |
| MEPE    | 142.683117062711 | 144.908551199481 | 148.350919010575 | 153.181097279473 |
|         | 150.063082731931 | 150.642465826166 | 152.526785074182 | 142.243866937888 |
|         | 165.682617337317 | 151.744902566627 | 134.585762409782 | 149.987571884748 |
| MERTK   | 219.940167815376 | 229.511643376643 | 371.06697207449  | 208.64349688412  |
|         | 232.621526025603 | 363.89527566597  | 377.462793982812 | 430.412897698085 |
|         | 352.665030560239 | 173.708509414674 | 272.456310079164 | 538.369868115137 |
| MESDC1  | 164.558875058199 | 158.282899758551 | 118.797046082278 |                  |
|         | 137.128849888863 | 214.662648581622 | 158.135321157995 | 223.154771092064 |
|         | 147.971492964243 | 170.818182800759 | 139.138329217724 | 223.279017022443 |
|         | 162.140112952434 |                  |                  |                  |
| MESDC2  | 171.552010365305 | 159.461778054423 | 159.148717478277 |                  |
|         | 180.304585602206 | 165.267693285882 | 153.602842380788 | 174.347451984066 |
|         | 172.175584707792 | 159.29430824799  | 177.19138801548  | 155.346805606742 |
|         | 183.406510146725 |                  |                  |                  |
| MESP1   | 142.467552395104 | 141.724442944322 | 127.382266838772 | 138.558300898079 |
|         | 972.902937649492 | 170.531713392258 | 153.315309202016 | 160.449911844008 |
|         | 128.056668224393 | 110.050374895171 | 116.328330266803 | 127.911258242431 |
| MESP2   | 133.959208066964 | 126.295856316628 | 140.44966014021  | 144.64136816491  |
|         | 154.503958858173 | 144.916193282062 | 140.336479395866 | 145.692644807799 |
|         | 133.745413210496 | 135.648906382608 | 135.497033143331 | 157.565633456909 |
| MEST    | 119.903068083658 | 116.90832995093  | 111.204065131669 | 127.070677267233 |
|         | 130.753266976637 | 135.405742719464 | 120.538535752185 | 163.407360509803 |
|         | 124.300285428221 | 122.111982327877 | 128.901707304582 | 178.661439148013 |
| MESTIT1 | 142.993401965852 | 137.109541758085 | 140.416247564103 |                  |
|         | 143.031909545902 | 122.431337063053 | 135.886859004208 | 128.637470206958 |
|         | 132.725232102483 | 135.499195435803 | 139.585373400347 | 126.728375196449 |
|         | 136.79732903972  |                  |                  |                  |
| MET     | 250.037172478288 | 301.747788416496 | 217.715143869654 | 236.191384383802 |
|         | 369.434158443561 | 186.611870261871 | 500.343476678562 | 451.496617003797 |
|         | 346.411586524655 | 537.510539142248 | 675.978379566859 | 433.491835341321 |
| METAP1  | 1122.92917004037 | 999.159652508318 | 1382.12750708801 |                  |
|         | 1012.44277312494 | 743.915675090182 | 2033.67956299225 | 1863.96986643676 |
|         | 2416.49806112207 | 3403.37530051435 | 1164.61390835016 | 2045.24382334506 |
|         | 1570.39362935859 |                  |                  |                  |
| METAP2  | 1612.79779117655 | 1771.39155164347 | 1733.96382719909 |                  |
|         | 1843.76920134139 | 1076.62597781124 | 1200.94425675913 | 1501.18820017008 |
|         | 1563.71477584676 | 1504.15682715484 | 1373.08023518911 | 1355.66237447026 |
|         | 1513.28088592885 |                  |                  |                  |
| METRNR  | 181.328458560967 | 157.313737338264 | 172.364618542922 | 177.438968923426 |
|         | 283.645434184168 | 131.380387461901 | 160.096507818256 | 149.113794439994 |
|         | 151.356975600962 | 173.287859527767 | 128.840466579373 | 144.78971417658  |

METRNL 311.449205777595 284.995098167431 239.079352337243  
318.297819854586 540.005877322817 293.825372123877 362.252813848151  
414.538237455116 446.262895953004 538.156335788156 259.868701878844  
363.150472154973

METT10D 246.552713031445 257.44230597145 212.822328466993  
260.016906472407 162.347140552869 156.396579029788 139.201122725213  
153.592819860747 141.987635042691 151.126252768792 167.018380617832  
171.238423077347

METT11D1 252.697160031025 244.101521795539 323.276514394119  
280.558463661137 275.39986964837 226.595006724068 254.9636051363  
285.102778078056 240.306287921209 255.273375146278 239.503369457867  
289.911635155481

METT5D1 245.915473236403 244.797792477941 275.39986964837  
238.685014863143 191.795952536469 210.353341004865 211.160781061336  
216.381643581705 266.80383076887 250.085444708918 250.481442411876  
195.141733146452

METTL1 222.415704486709 229.74418058711 179.137734914428  
232.354100565406 465.102234374389 244.18714778846 328.269845211173  
585.371892598422 351.585604465402 247.504198063293 259.316557834724  
329.068463281182

METTL10 158.505363728431 159.29430824799 173.132747018514  
154.615097099186 152.467764730004 152.993555372242 161.817609920327  
145.754504160436 145.514859606031 142.376921410427 146.53663019612  
158.834483073542

METTL11A 169.590101694098 179.122374556365 179.525651423361  
169.713585775118 327.566026396726 181.876635968785 184.557630172634  
174.375388013694 254.722836822616 283.527656956105 189.136114953249  
174.205940911242

METTL11B 118.45291712775 117.986939058467 120.263659727964  
125.296240086615 119.334967856721 138.83304645915 124.93629294955  
130.965418847276 127.551486042435 136.116468624715 144.765051967884  
139.025598691696

METTL12 123.994188725172 124.907788504503 124.197397333928  
121.805145639822 114.226028611171 134.950905279775 122.068058346443  
127.539091409962 118.625070307695 116.828333047376 114.161540771427  
125.976052547953

METTL13 308.38513924253 347.932135290714 349.910535555712  
378.728516779744 601.521068811063 575.857954264295 448.767690095033  
655.431236290512 584.813665097407 423.152420192284 388.782774926005  
506.290241222253

METTL14 167.173670781451 168.702991603656 204.862387642573  
157.176001400747 173.592875508663 210.900056977861 188.033890834418  
184.832531598928 187.754968096521 208.983138060317 182.346834032145  
197.277310409328

METTL2A 170.028047334267 174.962380276394 160.251996476232  
162.961792330623 139.493025452991 179.079061789059 172.421637564661  
194.161930642068 178.142393629606 154.239755912437 157.244026506342  
166.157713072213

METTL2B 142.290253129837 139.350622585937 127.898533598679  
132.994716261577 119.95959059725 134.176925491721 113.315182274675  
153.005366371425 126.935731176024 129.946925636595 153.328585916625  
140.208983238283

METTL3 328.078808625906 297.228563607097 329.535023880129  
316.165926273381 268.370347292603 337.822337721287 403.657727266403



444.584594376357 380.310795921752 298.165097953983 537.698489904622  
 558.051041108282  
 METTL4 193.292596471113 186.551385094902 190.736796322054  
 157.322594990954 190.96184674871 217.531179216305 171.552010365305  
 181.238505183667 211.720536220806 146.71868686671 187.264411519101  
 169.561657768387  
 METTL5 605.795439342384 624.825216056495 883.702573960415  
 542.740017003369 694.907086612929 872.320823993033 771.694853062033  
 895.463355957918 760.572409199179 1090.20254511452 880.140852200235  
 1060.24125879951  
 METTL6 139.197364191101 133.905162024888 152.721146962124  
 118.45291712775 168.03501792841 143.149424892482 176.820928772968  
 175.327597807738 170.614129599775 178.780662099615 163.910041674646  
 172.657668514226  
 METTL7A 886.157279090932 1061.29067124163 935.042067053226  
 693.781708146282 588.334329592604 499.776233241535 914.654262296682  
 878.167149313285 1177.70376288106 190.871696848118 1984.47173096657  
 1008.875250028  
 METTL7B 138.988919994625 151.761369162723 141.712693059287  
 140.192644427334 162.254062646631 163.942131559267 148.702473828167  
 174.985831291764 211.059870865354 147.600825146067 124.746457912284  
 157.590017103385  
 METTL8 147.274945970072 147.901594006094 153.363629311799  
 151.051672692659 120.227386958188 134.853253781256 132.291759474331  
 117.172431931323 121.830137285032 133.783379558598 139.21331678591  
 123.977467396003  
 METTL9 190.291185322482 197.699100346967 195.755450324985  
 178.734634888773 166.430881793156 186.185055364718 200.22145130696  
 173.10229478279 171.410912120195 177.896726792666 256.99019407912  
 182.897563195019  
 MEX3A 175.38376293575 172.030687707578 188.027848008991 192.932285494022  
 360.852730026133 432.372995789404 243.191238594142 239.845747958475  
 289.368511254335 205.509515144263 217.847954914851 289.368511254335  
 MEX3B 167.370030272847 166.587100972754 191.322056430728 196.691380885508  
 131.249240371529 146.59366188125 144.798664281991 141.294094833197  
 160.251996476232 185.100455193182 130.967476533254 145.418696807842  
 MEX3C 341.901565692251 337.652945958921 336.70893120135 373.452370692334  
 313.888035511709 392.282956362735 449.859227376918 421.929674562786  
 353.50447714719 411.039234404499 371.819911874273 387.305348482856  
 MEX3D 206.548878646452 217.628802427037 218.997165156081 209.811693771836  
 538.252273740419 320.525885538523 284.940858938629 248.03801051527  
 239.924227955313 293.794745907663 313.581986704048 242.348427307994  
 MFAP1 357.063270015318 386.221302830248 368.548135194271 365.82705202869  
 280.085692727562 297.176755638159 491.635435224507 394.414934831535  
 519.829743770022 478.847650837714 578.084277076692 386.917038897322  
 MFAP2 164.880911221767 160.446191353364 159.452527363763 152.898148619937  
 197.618757939729 168.238615437246 140.981666934622 148.527528612375  
 168.443386067427 214.888126361789 145.276745572405 172.376544221034  
 MFAP3 167.692053273833 186.999459152483 172.157660228549 197.277310409328  
 184.260835471542 222.820391338687 242.5085895186 261.203388718689  
 232.667968049771 360.684900316265 203.831047867731 223.094496588657  
 MFAP3L 132.533234335153 148.370331097467 134.533551900843  
 133.675029107803 151.248365605631 149.691340727994 163.93199635496

|        |                  |                  |                  |                  |
|--------|------------------|------------------|------------------|------------------|
|        | 129.315412536491 | 143.776637809106 | 141.781482381513 | 151.500282404318 |
|        | 152.169087619827 |                  |                  |                  |
| MFAP4  | 8182.20106181946 | 7054.92270618408 | 3744.5666678861  | 5115.14161559446 |
|        | 218.433524126584 | 550.124359517322 | 231.180528071672 | 549.460612060753 |
|        | 1242.61637859159 | 380.754569467715 | 201.041792159394 | 264.273245283343 |
| MFAP5  | 2601.89405525276 | 1666.80650105101 | 1910.08485008041 | 2303.0998502001  |
|        | 135.24841020592  | 161.534421340752 | 150.244284323504 | 166.007913607742 |
|        | 148.973277994329 | 310.026522549372 | 156.650388509656 | 146.787927492706 |
| MFF    | 475.403662030875 | 434.61711290583  | 423.152420192284 | 519.27448770158  |
|        | 175.882911801581 | 300.047728281275 | 240.07282016658  | 232.231236745251 |
|        | 399.476401949891 | 387.477198908304 | 395.049127927637 | 383.802494922918 |
| MFGE8  | 5382.31371568106 | 5714.36902486392 | 4061.24537355697 | 6384.66090426598 |
|        | 780.461254794127 | 884.248568386012 | 580.645924062301 | 972.902937649492 |
|        | 1500.16816750361 | 2730.50913686613 | 230.620456579897 | 921.546033242474 |
| MHAS1  | 236.855293143293 | 257.338950719432 | 174.068974937318 |                  |
|        | 263.74335003375  | 205.852731236069 | 148.780775862239 | 138.079494235456 |
|        | 143.587562550004 | 127.161975533812 | 146.084461430546 | 146.29600238749  |
|        | 133.56263739203  |                  |                  |                  |
| MFI2   | 137.206961927035 | 132.5130209643   | 139.488057371254 | 133.228074579352 |
|        | 122.685360126599 | 131.244759170642 | 131.827899207029 | 134.76397845723  |
|        | 135.55203336728  | 127.150222504237 | 140.244052740397 | 135.849839822066 |
| MFN1   | 173.635827398273 | 170.223509007961 | 148.87690497281  | 170.951009118578 |
|        | 172.951567541592 | 170.473956720945 | 167.454132228122 | 175.222531098958 |
|        | 174.284268998257 | 176.547853494057 | 177.780479906048 | 166.289763097913 |
| MFN2   | 1267.5716872154  | 1479.69309189156 | 855.112210714686 | 1828.66165670455 |
|        | 695.595965352335 | 438.817248820137 | 513.662594875431 | 495.655170027296 |
|        | 462.779122987815 | 492.534183006883 | 568.555967950896 | 396.988248940183 |
| MFNG   | 234.461229199142 | 229.443064589306 | 160.811051590991 | 210.590774758661 |
|        | 189.160454951382 | 180.798671424395 | 183.081450609516 | 291.883157643902 |
|        | 418.319283832879 | 169.095270479344 | 233.884660128222 | 162.841318222066 |
| MFRP   | 112.096627288813 | 111.549719888905 | 102.094370876743 | 111.232274546928 |
|        | 104.977794653504 | 107.91011371422  | 109.228587997052 | 113.919529047225 |
|        | 112.208950290962 | 109.098105822556 | 136.584199831088 | 122.631814400575 |
| MFSD1  | 498.180196203245 | 520.585319342817 | 365.650071660806 | 410.731869154912 |
|        | 789.752781067888 | 671.387334588652 | 1095.04571025381 | 937.593129242257 |
|        | 1267.5716872154  | 733.648333788712 | 750.494286476465 | 869.245621105614 |
| MFSD10 | 1756.88092410303 | 1942.08859727404 | 1794.82283439196 |                  |
|        | 2032.50052162637 | 5425.58761099475 | 2751.75479578587 | 4743.19967685595 |
|        | 4159.96851384358 | 4061.24537355697 | 4103.06565237121 | 3258.07532987071 |
|        | 4562.75659565027 |                  |                  |                  |
| MFSD11 | 3581.36347643133 | 3235.38149926838 | 3173.14004739767 |                  |
|        | 3090.52810501797 | 364.113665301598 | 1224.49891389348 | 915.015154168627 |
|        | 1136.14069801696 | 996.999238316991 | 784.170983714588 | 1332.11815966955 |
|        | 1062.749459378   |                  |                  |                  |
| MFSD2  | 130.95176570982  | 140.82351325907  | 124.915772594451 | 161.922462797736 |
|        | 226.020769172424 | 196.16056297158  | 162.117224868654 | 139.452773383624 |
|        | 148.715065348779 | 154.876638004094 | 160.57963709333  | 148.401698825687 |
| MFSD2B | 136.387904287903 | 120.263659727964 | 118.636694749194 |                  |
|        | 116.86635524597  | 124.405905157157 | 117.824694297846 | 121.689416823766 |
|        | 115.550587451456 | 125.668463983985 | 119.984301761327 | 124.958287100852 |
|        | 118.430401197079 |                  |                  |                  |
| MFSD3  | 200.045606111354 | 218.156162474715 | 216.077955163344 | 195.384273821324 |
|        | 1702.68441407727 | 401.840794789616 | 543.389747823877 | 732.877169346979 |
|        | 722.399669963921 | 827.157920721418 | 371.552970811499 | 845.646455991008 |

|        |                  |                  |                  |                  |
|--------|------------------|------------------|------------------|------------------|
| MFSD4  | 131.613738869093 | 137.754373055094 | 137.303701514064 | 131.479997342133 |
|        | 136.520811697544 | 133.478829770103 | 143.934585983797 | 133.16973309664  |
|        | 132.809364188497 | 126.635105491524 | 139.191746593825 | 134.304545258148 |
| MFSD5  | 245.850813387241 | 286.541028896473 | 272.968792195442 | 237.71636970719  |
|        | 1003.93455977232 | 632.278924237678 | 795.720196538039 | 650.679096367632 |
|        | 658.746224115551 | 548.869880723909 | 714.494228450456 | 795.720196538039 |
| MFSD6  | 363.706789137022 | 398.892968579918 | 371.280926727395 | 323.667189206453 |
|        | 284.104619768635 | 721.31849915135  | 409.380002417794 | 455.08515350006  |
|        | 422.338508598153 | 407.244564912365 | 617.67819271245  | 635.536499281829 |
| MFSD6L | 133.297361715205 | 132.54577436954  | 128.572388808833 |                  |
|        | 133.290168428696 | 169.674931517111 | 149.435684626505 | 149.125425566378 |
|        | 133.957160768065 | 138.047487233711 | 132.306569548052 | 151.617989938924 |
|        | 168.394330931524 |                  |                  |                  |
| MFSD7  | 173.656241217331 | 159.42746786085  | 155.542691937539 | 175.437651670246 |
|        | 240.915496717526 | 183.443006525616 | 159.730925830278 | 161.359609192977 |
|        | 164.659092629962 | 149.574353706911 | 160.932913244423 | 169.403422185018 |
| MFSD8  | 176.008711524598 | 174.615694779386 | 188.543051108601 | 157.944355564411 |
|        | 176.901042102323 | 204.057019122032 | 204.489837323989 | 207.036293322882 |
|        | 176.431477850092 | 191.074428905553 | 163.824878791966 | 229.77428612216  |
| MFSD9  | 175.269675831824 | 165.638672456873 | 190.520750756082 | 181.183277133224 |
|        | 171.51411661213  | 198.088834624665 | 196.598810934837 | 207.488522933448 |
|        | 177.825648107126 | 183.513101761782 | 180.164353124488 | 219.129781831192 |
| MGA    | 208.045210163121 | 204.219197797869 | 199.88618355278  | 217.408824020423 |
|        | 190.716424123036 | 204.770742504612 | 235.019573994855 | 192.140442881209 |
|        | 201.337186768645 | 182.357065848298 | 212.987082617173 | 219.8511043213   |
| MGAM   | 145.43470695949  | 142.667173697017 | 133.108094159933 | 138.572054821151 |
|        | 144.461999591223 | 138.218392984717 | 141.389330839189 | 135.643341446691 |
|        | 144.098578955023 | 145.744039709418 | 131.615462296871 | 147.100947801261 |
| MGAT1  | 996.240188311002 | 1278.30505902957 | 560.757496975779 | 1376.84058291266 |
|        | 7342.79622458743 | 1531.54387233661 | 5811.97916044218 | 2736.98692493933 |
|        | 1222.59895569348 | 1098.20033709043 | 2635.31067044245 | 2365.99940149374 |
| MGAT2  | 199.397633942623 | 182.109092947203 | 173.66499836293  | 174.568253693395 |
|        | 282.190861594303 | 194.789918629905 | 266.101158071711 | 254.879772480457 |
|        | 212.836093887552 | 287.145105895235 | 254.101184686036 | 292.60467054075  |
| MGAT3  | 150.034029031033 | 157.113536717393 | 126.783524489964 | 148.216605879958 |
|        | 156.095520355029 | 135.925813154268 | 125.150706047419 | 151.839306445341 |
|        | 228.524222740306 | 128.729687597908 | 296.24781576525  | 211.483693299981 |
| MGAT4A | 185.405774238391 | 163.175801793143 | 158.188039933865 |                  |
|        | 166.622070620588 | 256.326661031361 | 179.632562895905 | 208.611557959861 |
|        | 200.790119570144 | 210.64483507528  | 214.461773810376 | 191.897449038297 |
|        | 193.07463429041  |                  |                  |                  |
| MGAT4B | 154.250656489421 | 171.671895682052 | 136.041605158822 |                  |
|        | 159.307394610466 | 381.182514249587 | 181.491120129045 | 322.837446618323 |
|        | 204.260800563197 | 180.761100930677 | 350.926679856514 | 371.06697207449  |
|        | 261.639437655633 |                  |                  |                  |
| MGAT4C | 136.864106181375 | 147.942495862714 | 152.832573288735 |                  |
|        | 163.67719444924  | 135.381131982323 | 147.706402141169 | 141.568970008164 |
|        | 136.957209426823 | 146.872432596594 | 141.908791151061 | 133.79868477192  |
|        | 142.082257952004 |                  |                  |                  |
| MGAT5  | 119.612288460361 | 130.29531841096  | 136.140327952231 | 125.461701282922 |
|        | 121.334882368464 | 123.551225884748 | 133.876636039037 | 130.452929012459 |
|        | 124.130599753093 | 112.126521532091 | 104.798333931019 | 125.390139830237 |
| MGAT5B | 149.647926859169 | 147.107508450203 | 140.928627507036 |                  |
|        | 143.831294912255 | 158.344330353326 | 149.283495832731 | 145.155989928336 |

141.715307041887 144.077080621909 151.560202480724 157.089650890944  
146.548348470748  
MGC102966 157.963634535239 183.214922844221 172.457165477145  
155.30926640293 211.844563155792 6077.64695330731 178.014057622594  
193.974325897472 248.204358220728 21956.7541751958 729.729297413233  
165.39758732  
MGC10646 136.90636489391 134.93455083142 159.942971344216  
133.141683141696 151.488973553441 174.890624803452 128.959487155628  
143.922878410438 127.947547987882 140.295307451188 147.285764611006  
133.026094667212  
MGC10701 144.565926379402 162.895923745031 157.736101691222  
191.525291860022 153.709230037306 149.108582827136 131.2834389999  
142.652939807341 157.779441363536 159.542015162519 150.786618560854  
138.825961991209  
MGC10981 126.841836614341 141.29868389128 124.058332474379  
122.749182465923 126.964621107029 131.646121568612 139.493025452991  
124.028748209411 128.510903178542 146.334446516009 127.350368333088  
128.616121042106  
MGC10997 1051.45401327176 1037.97124386242 1028.39666838369  
1233.99503576308 800.739422189427 1139.14730341921 1607.52029676299  
1206.59866455529 968.548243081111 903.824331691969 1274.39152410752  
1238.11700377838  
MGC11082 140.704317015307 150.549883779193 144.692900548503  
154.01988200569 135.513494853742 139.558611792069 142.859971805867  
140.319851351329 144.78971417658 135.978826529736 131.338853426561  
143.996350813566  
MGC119295 133.148442269517 114.755442050481 103.448244268961  
115.692324946633 109.74983281634 131.004145546364 126.426212216646  
101.431474941041 128.082956839709 118.258886189283 127.05677680446  
116.884397420467  
MGC12538 140.040420521312 132.776236872246 126.839037497031  
129.358112503486 129.953801496113 148.356726939122 129.301839663122  
136.181791404331 128.06233429201 148.294870328642 145.758423590784  
135.86149691566  
MGC12760 303.241375487319 292.746711619565 279.202256032476  
277.359422005775 189.770558810153 319.223127076041 236.548439331855  
274.092048989484 206.027235767232 206.376365685112 346.356312668445  
233.047541132048  
MGC12965 194.072260528037 219.462274506333 264.604297630839  
180.952017616136 252.138168292964 168.773340961473 214.617852048151  
180.430425314885 171.314681729657 166.346572488391 292.28857006885  
193.832033192375  
MGC12982 151.488973553441 154.127346849182 150.468392290279  
154.046550866249 153.741061283101 136.599305161841 138.054470878471  
151.045803695015 154.607214750531 166.320461361356 133.223310036542  
147.799806976046  
MGC13005 119.319884675074 129.419280058541 141.151211120032  
137.453705355364 146.209104824109 140.206268652318 143.707084981291  
138.764834713216 136.987403767185 133.500750738061 129.316910786349  
136.178501890585  
MGC13057 167.093409692227 171.106189029362 146.065491816894  
153.169450192935 209.727089546377 150.088034336851 145.625205055601  
147.457193565877 148.361088792223 143.744075931566 206.825575257029  
142.487424651482

MGC13098 150.401509081265 146.336371857755 168.04198447141  
166.981212790122 119.498312996987 140.501968970549 162.439052954676  
150.748298569951 149.79295887612 137.21916902421 145.640156204495  
147.436408919939  
MGC13168 183.071150926068 174.510523238374 193.292596471113  
174.168079247768 160.584760930779 191.679217737051 160.608674893418  
175.176693060261 165.320977593677 180.994249258457 163.21153580549  
190.754349388901  
MGC15634 144.839170491334 146.768631086088 160.331940529151  
169.771005675296 140.975056186954 190.904614772409 169.095270479344  
146.476960694197 148.323729699672 143.628147237159 164.429483677715  
177.772019227116  
MGC15705 135.261561433405 134.189023892662 123.913203953936  
128.643539098937 135.691862612951 136.398521726896 142.954747193455  
126.235567899449 135.526248253492 131.556892859203 133.441783287131  
124.072512083237  
MGC15763 141.414384085164 146.57274511202 122.337240239463  
124.291944151031 151.338765231607 178.885625009973 159.016247993816  
204.489837323989 211.035617136177 172.521737547052 174.898012759712  
180.578528984075  
MGC15885 137.79714923769 140.199334790854 142.311108110185  
145.640156204495 158.448557470725 131.924162435354 135.650546885518  
133.969054754299 148.541832125061 141.839647226623 138.796257513868  
132.854078420045  
MGC16025 132.295937828888 149.168758815526 147.359279533039  
153.100979553727 147.568851471771 177.450674276588 164.811120992602  
147.341597963918 155.333294650676 182.470538043064 152.954944775793  
167.806420483187  
MGC16075 155.431833398023 128.947211021681 162.022232949254  
167.164675439456 158.92254744379 138.76667538162 174.979501466228  
159.29430824799 158.73040336393 150.878323882503 145.286983999628  
186.733394375839  
MGC16121 256.174286655796 268.454310218604 271.568797887976  
385.750371084 186.794165469219 201.186963432715 166.285052506316  
230.589110372454 200.424975825325 232.105867345662 176.312626750427  
157.170136439095  
MGC16169 309.658122422202 267.149525812834 517.676093149981  
284.595024875896 227.350260241585 341.251360936154 429.992169596618  
288.913660405191 397.737702926328 311.157764305033 525.515169794593  
465.809961695043  
MGC16291 107.013012418356 114.042914237667 109.255470590389  
116.87586240208 119.886433564236 128.087242420103 130.131800537628  
116.155949676272 120.727504500018 116.871350997346 126.473768158566  
116.053859681399  
MGC16384 210.925203743958 190.204960255989 240.005943851098  
147.93442757931 137.890689733185 324.671490117952 207.920724788669  
220.330477277988 229.347135478142 183.583432296209 176.198555355383  
246.912159676595  
MGC16703 15603.3490258675 13563.1694195379 17917.7303120499  
20381.3859535625 10704.4678928541 18421.818380318 12334.7921691489  
13809.2057928642 14983.8256502293 12749.804597566 8709.2221371432  
13090.0615116619  
MGC18216 502.170430910893 462.779122987815 465.683139139622  
411.505580458401 293.925995360234 234.156713102803 345.686640885419

221.070448906398 221.390817970859 420.160939829121 787.017214032692  
192.418895349837  
MGC19604 141.239354296152 150.331324340476 138.963864375073  
150.417169156755 128.765369834041 143.713962738562 147.338615809214  
153.616692588396 149.876687693565 134.666505160831 151.950883677297  
155.42165869714  
MGC20983 120.649467083125 131.548634017902 115.845468537936  
131.272948162154 145.237221169839 119.346574301289 125.929743286163  
117.567991653999 122.305514440939 117.585207821853 133.841519663164  
123.424145707079  
MGC21881 141.043668963717 154.932132950843 151.736824723671  
145.824996954376 138.870636101334 172.652645920958 160.735428753783  
156.740412695351 157.076284096905 139.117053855066 183.744959461078  
153.926214082991  
MGC22014 139.170102961407 139.568610307888 150.294432623474  
147.292241873554 144.201723591119 136.818557078622 146.657368460319  
148.258850340107 132.261161069329 143.796699867588 133.544777710022  
142.999526950651  
MGC23270 108.131097605872 136.130027137459 139.517413585211  
117.274977920103 131.887778588005 107.126004317323 137.987255649072  
140.904883114871 128.425838805072 133.915830295107 111.935554828717  
121.483610947845  
MGC23284 150.138643811727 138.28374062778 141.486042999328  
131.38692240237 130.509415570889 135.200049257744 133.475605284211  
134.218867540274 130.689272423595 135.487310036251 144.587253120884  
132.50027119027  
MGC24103 1057.1528284934 1322.14570224119 631.819659701092  
2014.48411650613 123.58053320223 185.843639043466 156.723502568908  
156.420501464224 170.223509007961 200.633009710701 147.049287475127  
135.736764623155  
MGC24125 165.530397739051 154.856345114916 144.455233048041  
153.457715729768 179.060189557496 195.218005582618 144.522461545204  
148.470120335761 160.001115445038 143.172744119235 153.658747612827  
153.848852170776  
MGC25181 130.57903858574 113.334665910428 140.419686138586  
114.3172128566 137.209801101689 130.314247368361 134.533551900843  
127.209043595332 145.219057535246 130.970694919879 141.194900058799  
134.907397302852  
MGC26356 11479.7406150358 11360.2921551609 10900.1783397368  
11017.1478502767 3586.00189997341 12406.7143043992 7003.06505884735  
10474.0047946187 8812.91092406563 6427.33783376005 8030.19731415448  
8182.20106181946  
MGC26647 113.78644620959 120.283706459738 116.998277297063  
125.390139830237 114.115609163126 117.178495957357 127.139903623331  
132.122273848715 124.735542880811 127.395094952914 115.34945441214  
124.638075441482  
MGC26718 140.129882333528 144.801071221985 131.967245387861  
126.662329971897 139.963969716386 566.417354841707 315.306271141071  
178.455966482206 139.725987763226 120.984641102879 261.171723011396  
283.952604729032  
MGC26733 145.295447692151 138.469997677004 144.889019483712  
142.883466086309 139.515794685984 141.466287523861 147.243263182654  
154.133723492173 142.434356144925 165.673535349675 156.813992534584  
128.209771391087

MGC27121 106.470524594239 113.370762349233 108.2359175332  
112.133567992833 121.371348717752 115.496108000499 115.00776048097  
106.491867793742 110.465934808915 109.740801301993 121.157614971438  
103.691075663721  
MGC27165 135.852591930882 144.942289590793 141.528115502473  
146.672270660899 133.625358030199 168.925131238831 137.652358744527  
164.455111983634 144.101376910581 150.180037731272 132.992071643179  
148.216605879958  
MGC27345 179.985468369202 166.503112149416 163.41031443893  
195.645181575647 159.52833930625 163.97516075705 158.020651857664  
191.128539630621 174.177944561595 165.972090075204 193.37618381669  
184.493681387276  
MGC27348 142.472724215037 150.160004473338 159.89988762842  
163.275138097131 166.549192709614 149.876687693565 156.630366766924  
154.033776287398 156.511202150773 135.400054238597 159.0794075765  
175.647878042257  
MGC27382 160.277755404001 148.96493117884 140.014167357286  
160.791355483048 154.686025022972 166.382301680189 147.049287475127  
151.984619204523 142.448384713937 150.117906461237 134.904123162692  
155.926739769177  
MGC2752 177.039190810529 185.447093292348 160.72009357092  
178.320732186309 183.358807104988 170.646233722767 157.75304980664  
172.942666836182 178.804669910283 156.01406297447 208.095384605737  
180.085975596327  
MGC29506 183.081450609516 171.051948060796 173.790848780011  
168.45157400976 245.978723809154 174.903798946103 181.941224633917  
505.560841055884 529.700356666006 189.528686948872 171.935132459373  
188.543051108601  
MGC3020 165.619206216088 188.557113298055 162.488819873513  
196.955723006838 235.183590602209 264.8472508692 266.534316786801  
217.227441947056 205.4648759901 182.711318507496 254.013921962363  
256.820546409632  
MGC3032 216.991823988763 235.933451977398 230.723142236623  
240.915496717526 168.269075560636 177.214422668922 162.634670715627  
166.9499656083 166.289763097913 194.029961195972 161.790909578234  
152.939759795631  
MGC3196 173.964378226631 182.886100305943 176.431477850092  
186.482547532546 200.902123076244 243.225815954365 260.41082304175  
208.016730103629 183.280853265083 249.763375041547 265.972387419683  
285.355815566148  
MGC33407 112.742895297124 110.419222236698 112.096627288813  
115.981530322377 114.730641277464 114.613368640356 116.382348831504  
114.696935316053 107.76497424356 123.638001112969 130.669539169739  
110.428616140857  
MGC33556 130.334622987505 139.494962965774 136.539130156863  
139.519321690754 156.205127163263 169.815053752464 136.032310569127  
133.911650164508 159.678281513591 122.780453116176 142.401333414583  
143.569894807386  
MGC33948 163.248980088946 167.796474464069 158.74180418577  
177.343586047942 161.430219824313 167.645930148254 148.192121257421  
171.06385200256 156.068308349225 173.169905329013 155.639666182376  
163.714231827866  
MGC34774 128.618422306397 129.52578899011 132.739435456445  
130.526673128214 145.029298288869 129.476648077532 127.358616953147

128.536721595589 123.968639555673 115.120702589487 141.328429642544  
113.211979632702  
MGC34800 148.373866613126 132.263954832097 133.26167785455  
142.21279866857 157.172970235254 136.823682763893 148.680794815584  
131.04482088126 135.789381967525 156.110073009771 138.352562277336  
142.956870642583  
MGC34821 132.154131623051 138.83304645915 142.804411455413  
131.449370465834 138.052032298683 138.677282903963 139.078162119733  
137.006917665541 142.796371223204 145.733828447934 139.894559834783  
135.218648235324  
MGC34829 150.582568022489 140.456277147131 195.795728497916  
153.761061653202 151.266352916239 160.811051590991 155.111346336412  
142.715449859191 146.590495255969 142.481897141275 142.284050423299  
133.976997391944  
MGC35030 114.798573331978 123.646558103253 134.102929804129  
153.154592981962 138.078214837785 136.879615833565 156.534634574244  
137.347554578171 145.068754246476 135.309431186017 122.883806494491  
153.258616843783  
MGC35361 185.002106079042 174.448910958935 224.6588173737  
171.561940747015 164.302998010829 185.233210060342 184.111756696658  
176.121563444364 169.279866966079 167.505381046729 173.056715623574  
222.177290763736  
MGC35440 141.972403120632 128.63301490285 117.879058520659  
117.760045671142 107.520000793184 123.498540254464 126.330382425318  
128.197031700084 121.965131419551 133.243679173608 151.650777127117  
117.069094451283  
MGC3731 332.978350226738 311.544429285897 410.138738410101  
340.547010951537 629.197022551069 1007.41624313399 586.246004571452  
659.27672123763 813.772804994191 595.270107963842 596.54904286299  
1045.49947183547  
MGC3771 141.471127716868 128.65678873939 134.805239981342  
131.369177333568 148.627264102939 138.006973261364 140.029808783762  
133.807992913171 140.57567768682 139.197364191101 142.822594215168  
143.950279111815  
MGC39372 145.304050333309 142.771243742561 151.895142552067  
146.406344338757 161.424105316969 156.043994260248 131.863018503922  
163.284853420896 160.227729155903 141.450800126786 138.764042772731  
156.368487784719  
MGC39545 154.623548525522 148.212445624699 156.783896946556  
154.65319127051 158.07640654075 162.850128623401 138.414916506716  
149.831566330214 150.680628549529 164.865846124876 152.219906297607  
144.631407964232  
MGC39581 156.938149948126 155.639666182376 153.371065247493  
152.818046945164 159.223980639045 161.813099560175 153.43000129811  
157.967824935915 140.226586111216 137.258429777402 157.615017085961  
148.556161762978  
MGC39584 152.017655364287 153.363629311799 160.382971629272  
142.066903301882 155.52533851273 161.441613587571 144.705559511075  
157.227118680396 137.597788349982 162.178410412809 141.857434100065  
148.168587884369  
MGC39606 135.499195435803 165.723126764006 164.553511697702  
161.390489603929 142.01454627498 166.655585160657 151.121293928309  
142.399253818882 131.065633574494 137.451687756052 147.376482709004  
145.938780249776



MGC39821 148.776470607859 160.423982411027 141.013392458859  
137.13615301204 138.334031211616 131.816989019024 145.539731152955  
132.906201428703 144.744603095605 129.669484303621 153.679479224178  
143.256590560776  
MGC39900 210.761398461329 210.14307111352 229.729195963667  
204.378245089766 397.2528907311 765.333633142088 493.715108157171  
416.075109522039 299.463563393179 185.816827784447 176.783978625103  
422.23268864343  
MGC40069 125.224197852606 116.91470505098 121.728711587014  
120.511896155396 132.061436165754 122.452541100946 122.982686879394  
114.755442050481 126.237900397603 121.468398802591 116.947370388179  
114.10470841717  
MGC40168 130.222698914337 130.98982984989 129.102182717009  
122.312652834289 134.595090783504 133.465593684519 132.825240485239  
118.021169080914 126.05295868521 130.66511389864 132.354503055131  
140.010730572075  
MGC40170 153.879427186342 165.031678768564 169.368090266817  
155.911387663464 144.667638908504 170.505553609318 150.626826756019  
148.337793323867 140.92066676704 155.542691937539 158.477017294725  
155.785933672918  
MGC40489 172.157660228549 164.661445411833 162.982557003317  
168.124936529582 220.742788129847 352.665030560239 196.429685815196  
396.988248940183 292.693830444839 251.993821914623 195.711047893396  
285.102778078056  
MGC40499 165.100811808026 151.790240553272 159.854639082837  
145.272073426254 133.181205335359 139.991780068793 143.716377201615  
148.560326703328 152.60462513339 164.603403251634 152.432477504097  
149.182972268104  
MGC40574 138.374092984164 118.258886189283 126.601395870533  
152.129092774005 124.424565172377 127.372242892513 123.781002620866  
140.711699577809 136.734131465433 118.015175851934 149.579428189895  
143.416816860089  
MGC42105 201.041792159394 191.445291899108 196.031541155674  
175.819983804497 170.129558603697 165.523150623132 154.261443597434  
170.807514224412 194.903531690239 165.880071298733 146.524138043215  
153.557991189227  
MGC42157 137.694556514044 124.458944194526 138.442378791712  
139.677109265241 136.142380560596 135.844983721014 128.824243581806  
139.473459411633 146.548348470748 145.401101974736 114.384296185446  
130.235407859542  
MGC42367 187.057683141644 226.796825544749 148.253612913109  
156.922271434657 393.796356067403 495.099443245153 248.229468372363  
425.001043358831 346.303862540751 322.213266293148 477.741216640575  
289.164969943385  
MGC42630 187.167255451988 209.623583937962 222.848935978648  
274.202831856221 158.335952927257 213.178648382852 175.29178007783  
157.77047742735 142.802965008073 153.230304322351 151.780459290205  
143.641777655752  
MGC42638 151.557004418682 140.597877909094 131.181537219479  
158.400572147671 133.365793958118 147.9084767638 142.191569406599  
138.846543789882 138.021559586328 145.885577577352 139.08460576146  
144.043818335414  
MGC4294 161.744366588564 154.611011734772 155.535222310709  
148.373866613126 149.292552957665 142.837688062688 156.090871391873

151.946691918521 145.236154447244 148.079107235035 131.065633574494  
156.680734054531  
MGC44328 119.221976571036 115.76177719261 123.491930765117  
122.828060462887 116.751145098777 117.841844605128 114.314425748312  
116.428373788459 112.841406363391 124.592771536872 135.650546885518  
128.618422306397  
MGC4473 128.840466579373 132.622032754473 123.946808975704  
120.735176435195 134.803612821519 117.740022708444 139.697477263244  
122.830376253922 126.667650990284 122.428943658306 121.356731684516  
117.513523498725  
MGC45491 128.513011425662 147.543411823657 131.017355402204  
125.410876867635 135.86149691566 123.638001112969 125.016608289141  
134.786678978467 120.231559540009 128.63301490285 134.330234316896  
121.632494500096  
MGC45800 133.441783287131 130.792692240592 144.492756323647  
139.766288958232 115.821231468312 125.478878240473 134.485835304676  
123.161953011069 152.780908985916 135.413840160615 121.818632020666  
132.103084472404  
MGC45922 146.654925456132 130.169291786693 138.438792881135  
147.635761512135 142.236565028336 139.752845127584 152.67564185705  
145.323212897142 139.589612144962 142.392860474555 140.268256002335  
149.41564356447  
MGC46336 135.987450822209 135.764392116216 128.79607493422  
146.694318629238 153.601918768668 160.960599932898 126.214166842097  
163.290050020756 129.767878283811 154.728941096647 148.353927712013  
151.694193636313  
MGC4677 408.758021864761 303.483515328621 215.84044779962  
317.550000625189 229.511643376643 344.529927973082 167.906766146651  
217.202541167691 321.426100243434 590.3584324045 229.907632927358  
368.637819994033  
MGC48628 154.064184525311 127.787890405862 130.43775024291  
145.562772839517 153.761061653202 144.572485418264 138.915185051749  
137.079479050963 146.863611516518 152.368485416992 138.388749930671  
145.937733795336  
MGC48637 173.761036260869 181.566951620202 165.773929204209  
176.208206282902 163.108825245937 145.608087633951 173.810080280732  
156.241637687344 142.984243805285 140.667415746111 142.434356144925  
158.098055917452  
MGC50722 118.269780903508 118.703108284564 133.324531689254  
125.364821583438 114.589757401741 130.529367177452 121.22760405399  
115.041324824728 127.783892576352 117.546508214236 159.820341130737  
135.873325130921  
MGC51338 143.837402372008 148.046961712162 151.266352916239  
144.642717750351 149.783542909965 154.252727576218 159.06002608158  
141.444958186793 140.877230937687 143.45723206497 129.316910786349  
157.415211954103  
MGC5139 169.534469894464 159.524235332529 163.552608805894  
179.49202902995 162.240414467004 174.284268998257 165.654773882752  
182.478971050701 184.021010234322 162.018860183534 170.158189150422  
158.854659281803  
MGC52000 720.364080505785 838.267069860172 734.139557942719  
1029.75852676191 1071.00507864299 1421.04485772969 466.691191261997  
1408.08614963928 505.704957182936 428.569462312363 686.445635754196  
459.388390392518

MGC52282 154.889079187405 146.735616237082 138.706520278166  
134.774591679724 166.388683552371 176.390014020936 172.355215322173  
154.746081871718 185.447093292348 150.35767254363 140.378255168229  
197.72068061775  
MGC52498 155.896065329825 141.357668647617 151.239879652761  
143.035245560484 159.730925830278 151.059401217656 152.972779110762  
143.227410286571 167.442950045855 140.782522936146 152.514455788489  
156.210423316722  
MGC5457 522.400055538966 374.872358131797 454.235121917464  
532.394088545421 145.072924262206 206.469040492609 172.197077149985  
153.658747612827 177.438968923426 199.714647839712 175.663960113118  
191.897449038297  
MGC57346 228.616558999054 230.399207047948 238.88138498771  
249.554443204445 247.72190598581 214.261611197599 367.825328832492  
218.96845208513 244.544473246593 247.72190598581 233.914433380121  
274.120234926832  
MGC57359 134.147586627141 139.623194916971 142.747793303346  
139.1434049136 138.789908033669 142.774449777424 140.938442055097  
145.861217875066 141.604832186257 142.590631181358 139.2454524913  
137.159781458748  
MGC61598 229.284931844047 340.860684371038 237.601064742453  
307.982260548106 263.509066170434 301.369680426563 191.543371466252  
205.966111721195 320.154891655397 515.327420453564 514.799179506754  
264.563741039382  
MGC62100 134.10707191601 129.130212375815 134.558435781672  
147.774588146924 151.126252768792 133.71965790848 138.07557330627  
122.517559025268 152.194337248455 133.299599411025 135.023016176493  
144.096624787142  
MGC70857 263.123584372086 290.867822301134 297.921617748468  
358.355621069787 296.333944172375 245.675725760577 255.305647212135  
226.712995229189 240.792557915987 271.087125858775 235.997227173296  
309.798246248863  
MGC70863 126.501648842366 136.64902495937 120.379393989882  
128.462674862751 128.168460083895 134.731687541347 129.621296567128  
126.659859384257 131.239986488033 138.487657776553 150.211719786127  
138.855454645579  
MGC70870 128.490341173553 122.182695593404 117.261443445891  
122.659174808512 140.49969612403 123.943080151532 127.985051303973  
117.279162323013 120.041623078295 127.545397354821 130.09958025354  
119.763020707899  
MGC71805 168.3523504179 161.050438117555 135.285224699704  
177.851689709807 157.170136439095 158.647814364392 165.942761337382  
173.592875508663 164.03801002919 166.071816427719 165.827405735044  
153.360382235409  
MGC71993 1220.30347076968 1288.3346537369 1286.55103838368  
1343.2623011534 2189.53914329263 1473.70433292382 990.206369590236  
981.313778685019 1192.72383754851 1360.85309203233 1756.88092410303  
911.782783698439  
MGC72080 160.906550609416 162.155834067128 157.244026506342  
159.706443636973 396.611050163857 179.122374556365 292.317998405609  
366.007451523992 188.277563426829 234.626574390973 159.130076733711  
268.885346595453  
MGC72104 788.244353085369 775.382397816601 1041.58583268313  
870.887539668967 510.285766295993 795.037968409957 601.164127925014

|          |                  |                  |                  |                  |
|----------|------------------|------------------|------------------|------------------|
|          | 416.307629596091 | 745.482863218223 | 488.746614111382 | 460.408628542721 |
|          | 466.909037277853 |                  |                  |                  |
| MGC87042 | 241.845941562418 | 257.100909006193 | 218.487334022128 |                  |
|          | 206.521761031181 | 469.206346008875 | 381.740838644647 | 507.137104111742 |
|          | 575.722713461982 | 733.648333788712 | 397.307515234646 | 465.41233536979  |
|          | 191.554396977588 |                  |                  |                  |
| MGC87895 | 3177.80599774525 | 2819.92361643968 | 3277.24948092771 |                  |
|          | 2321.41228376157 | 2677.17579532816 | 2320.41293992992 | 4612.81760689869 |
|          | 2837.36293710422 | 1599.12034906314 | 4857.3155917904  | 5008.4888270731  |
|          | 3015.70954394585 |                  |                  |                  |
| MGC88374 | 146.023710941284 | 129.216693566478 | 137.654833215154 |                  |
|          | 136.151754558226 | 138.005168756932 | 144.114177076352 | 148.309872393    |
|          | 133.778595695007 | 123.865424155099 | 151.479748626813 | 134.891736344801 |
|          | 152.902458879101 |                  |                  |                  |
| MGEA5    | 4141.8682669995  | 3408.6535437109  | 3636.59530016939 | 3119.93811557461 |
|          | 923.383014892221 | 1280.57297272231 | 1581.06548216423 | 1359.63626195826 |
|          | 2129.84680802619 | 1578.87371296418 | 3115.11499025766 | 2105.87438782831 |
| MGLL     | 309.0578543424   | 305.854543429221 | 250.481442411876 | 298.256131536504 |
|          | 150.321059418799 | 141.520125030042 | 143.161623642178 | 152.004130711617 |
|          | 156.990325995053 | 157.83460319212  | 159.337816095012 | 148.016402654687 |
| MGMT     | 744.523059417351 | 715.638378711433 | 625.374595058488 | 835.834013018438 |
|          | 903.144845227364 | 446.393631025049 | 832.622843175217 | 328.200548902445 |
|          | 655.094843900848 | 248.791254839869 | 895.114975754684 | 830.455793617181 |
| MGP      | 16179.0939169232 | 11392.4189359453 | 12877.2152068971 | 13976.0448927093 |
|          | 284.473085899219 | 1153.5175534971  | 286.703712311781 | 983.094485868275 |
|          | 3566.89107958971 | 810.396770151757 | 454.235121917464 | 444.826775824095 |
| MGRN1    | 327.480268032814 | 395.521241316058 | 313.480307434343 | 409.206158277764 |
|          | 505.143815448613 | 319.812293134357 | 301.798676825176 | 249.064573038094 |
|          | 297.636316709322 | 248.465457421469 | 309.798246248863 | 345.832589037442 |
| MGST1    | 304.292209676095 | 290.326832430372 | 316.125364442611 | 252.514569129392 |
|          | 554.511983790164 | 1310.60610806797 | 1717.09434498876 | 1439.37593006882 |
|          | 832.335328912437 | 1327.65573168233 | 765.911113050543 | 1362.1486006778  |
| MGST2    | 1317.1258783404  | 1536.52218968817 | 1626.34607278613 | 1326.95332435394 |
|          | 1764.53168329081 | 2637.62596741408 | 3205.74787769881 | 4009.22206756187 |
|          | 6560.30885074315 | 1771.39155164347 | 3765.25491426198 | 6960.46610781696 |
| MGST3    | 2804.99820187198 | 2804.99820187198 | 3474.0924656878  | 2691.41389079777 |
|          | 3566.89107958971 | 3413.39994653641 | 1843.76920134139 | 4110.76546218806 |
|          | 1458.13354165836 | 2856.14739820295 | 1828.66165670455 | 1751.22580157752 |
| MIA      | 187.112176929485 | 181.593291870136 | 174.873893094923 | 161.354014292373 |
|          | 169.520544329439 | 161.385691765316 | 157.844617425219 | 152.166586496729 |
|          | 161.514651272858 | 154.025625092599 | 163.942131559267 | 164.1572198075   |
| MIA2     | 131.290698895743 | 137.199718376452 | 130.329453160478 | 134.648780131578 |
|          | 135.916668738753 | 134.389518389888 | 141.895211025017 | 135.005591691192 |
|          | 145.826955036113 | 137.801899270172 | 134.161664663192 | 141.849319373594 |
| MIA3     | 144.110544384466 | 144.751413348459 | 149.250205265163 | 146.222195387635 |
|          | 151.418316929551 | 148.350919010575 | 150.0512732245   | 138.551695969102 |
|          | 153.524100996368 | 145.002309193867 | 137.834158814913 | 151.104891644466 |
| MIAT     | 145.934643000545 | 155.134796468704 | 149.353072778508 | 136.370317464946 |
|          | 144.059368898969 | 124.684937344502 | 122.290822230565 | 157.200582422961 |
|          | 188.490807652188 | 145.852430082228 | 175.21512930507  | 172.552923333095 |
| MIB1     | 201.235056368151 | 191.056705282378 | 208.237011955037 | 171.487594589922 |
|          | 179.35113214277  | 243.246632667118 | 168.132172570809 | 190.850639994777 |
|          | 188.181647474317 | 200.890547965585 | 208.666760987764 | 230.469548500304 |

|         |                  |                  |                  |                  |
|---------|------------------|------------------|------------------|------------------|
| MIB2    | 381.867665449509 | 363.025385707747 | 398.193129265416 | 411.160709628865 |
|         | 413.555310697751 | 390.501797367707 | 258.4424008891   | 262.691387377392 |
|         | 270.201322204641 | 484.658140651032 | 247.806371601734 | 242.096692715029 |
| MICA    | 175.744275464701 | 171.791030104358 | 249.129943906228 | 154.512619892977 |
|         | 201.865955150869 | 138.85328409337  | 175.537039794925 | 140.943732564849 |
|         | 130.471929699923 | 137.430946130817 | 154.691783046492 | 154.79534193124  |
| MICAL1  | 958.005138077899 | 1424.04009914668 | 1403.90487313049 |                  |
|         | 2379.15291239548 | 221.635333304767 | 192.153420834889 | 183.26554404668  |
|         | 170.313045875402 | 219.394500571586 | 238.548578086943 | 204.637887777803 |
|         | 273.152907354565 |                  |                  |                  |
| MICAL2  | 161.234304237838 | 163.636550341231 | 194.014764659513 |                  |
|         | 166.88833169342  | 142.372470063444 | 186.722842989058 | 163.616115299926 |
|         | 162.841318222066 | 190.444387031552 | 178.531913384538 | 145.760577027524 |
|         | 152.447978675887 |                  |                  |                  |
| MICAL3  | 118.289405191861 | 130.274288258599 | 128.864822736402 |                  |
|         | 128.756818133357 | 116.486929280635 | 132.579323148839 | 116.428373788459 |
|         | 137.276586668477 | 140.706490845379 | 135.166677520468 | 130.718729445329 |
|         | 128.39171386085  |                  |                  |                  |
| MICALCL | 175.989742412417 | 170.706932460836 | 175.656204695951 |                  |
|         | 164.181915898563 | 183.604011732066 | 320.774102343889 | 178.425137262105 |
|         | 211.535720730612 | 256.370052241046 | 219.619022209985 | 256.873090834376 |
|         | 208.587188476069 |                  |                  |                  |
| MICALL1 | 255.638433159437 | 348.111872425949 | 198.815448428294 |                  |
|         | 579.678635803225 | 600.919152191636 | 242.81187187788  | 246.77831953556  |
|         | 169.583355171423 | 206.413554839865 | 430.100415399881 | 305.050933898691 |
|         | 234.925852373127 |                  |                  |                  |
| MICALL2 | 150.682964448325 | 148.560326703328 | 139.22543724535  |                  |
|         | 154.197254746757 | 157.494596757446 | 137.318442197233 | 145.950701448912 |
|         | 139.47828235176  | 139.491769969541 | 147.553953240464 | 187.93380542729  |
|         | 179.863096463897 |                  |                  |                  |
| MICB    | 131.636779618185 | 144.206259414981 | 128.482976013813 | 125.846029991447 |
|         | 195.256498208339 | 162.411156818437 | 127.806138997958 | 223.765583953184 |
|         | 166.97270256697  | 143.326739481448 | 149.818888178632 | 227.965783945702 |
| MID1    | 360.053590374552 | 315.565349831797 | 394.414934831535 | 304.357050745605 |
|         | 375.856200488667 | 577.56891124468  | 590.849222581206 | 532.063437013967 |
|         | 286.133496092533 | 197.651165059354 | 351.448985413528 | 304.985269874607 |
| MID1IP1 | 336.490076158135 | 362.252813848151 | 361.969355316032 |                  |
|         | 435.603911474926 | 681.429327723794 | 417.865461351681 | 325.859917318516 |
|         | 353.187829498591 | 419.593558001947 | 395.645016679312 | 409.206158277764 |
|         | 399.664121956178 |                  |                  |                  |
| MID2    | 207.150354734189 | 181.840985962045 | 195.123919692348 | 201.530921073488 |
|         | 193.190059954084 | 150.2214516849   | 158.10628865476  | 140.055272520317 |
|         | 155.287837763675 | 229.511643376643 | 171.155660467037 | 159.207567680134 |
| MIDN    | 624.264994653057 | 656.660582895703 | 326.703488388966 | 496.697565640162 |
|         | 917.188039935737 | 1037.97124386242 | 688.247581763352 | 539.720389702148 |
|         | 541.351092873522 | 867.601542930533 | 849.389818300305 | 691.916554922896 |
| MIER1   | 478.479988875208 | 447.521645706162 | 534.745066397679 | 451.380376296813 |
|         | 188.724274062294 | 282.47352481715  | 235.795627549799 | 301.747788416496 |
|         | 277.459328083162 | 295.507504000509 | 312.808044035117 | 274.494074082359 |
| MIER2   | 189.915720614467 | 186.127543877065 | 162.237172404557 | 208.611557959861 |
|         | 261.541138637729 | 162.732574014686 | 207.384408045502 | 167.719651771357 |
|         | 183.963578322984 | 176.964088090133 | 193.801858215025 | 207.514489132778 |

|        |                  |                  |                  |                  |
|--------|------------------|------------------|------------------|------------------|
| MIER3  | 115.958740595234 | 120.873985900666 | 114.874358180801 | 116.282988576774 |
|        | 121.973581817041 | 121.648921929686 | 131.159946917777 | 134.05596537871  |
|        | 119.904097810075 | 129.111259771449 | 118.641431192759 | 126.539877052899 |
| MIF    | 3029.07443443457 | 3157.98451877581 | 2974.04694562902 | 2995.42172749615 |
|        | 19189.4835303597 | 8596.90650022148 | 8532.46059476152 | 6601.004284244   |
|        | 7786.96143641382 | 13645.150201952  | 10222.4435857673 | 7573.69742026367 |
| MIF4GD | 413.983821839274 | 451.985108262982 | 507.710604451713 |                  |
|        | 629.97342429259  | 330.908743070095 | 389.588346573823 | 435.796737132969 |
|        | 632.843164522867 | 365.590174280114 | 313.351441953859 | 339.069385816411 |
|        | 444.374521095495 |                  |                  |                  |
| MIIP   | 150.756776447358 | 207.076364103755 | 166.2468445883   | 238.183096218311 |
|        | 384.566987097657 | 210.925203743958 | 173.240598306749 | 225.387674139093 |
|        | 213.510783808898 | 160.676606760965 | 187.784865705837 | 157.295602588814 |
| MIMT1  | 147.598602877625 | 164.784346867158 | 159.479962316199 | 176.029791617989 |
|        | 156.830156083795 | 161.678137139371 | 159.420533375725 | 140.248610391566 |
|        | 145.900272803108 | 159.032710656826 | 144.958176005711 | 164.478006648035 |
| MINA   | 164.389447533163 | 155.449724554217 | 161.85913459364  | 154.239755912437 |
|        | 167.958792571511 | 189.292740365891 | 230.749601687217 | 189.799091507686 |
|        | 172.583615020042 | 184.62149494522  | 202.145180994821 | 179.060189557496 |
| MINK1  | 151.079500558067 | 149.08527298577  | 137.869471689534 | 147.118987674809 |
|        | 140.756898474665 | 144.972694558182 | 134.788450164055 | 145.528676983944 |
|        | 127.021761061991 | 138.920141982606 | 155.456077670662 | 139.77436722364  |
| MINPP1 | 212.890259409988 | 189.082778234831 | 179.250373572781 |                  |
|        | 159.266921692363 | 203.04864785056  | 167.906766146651 | 285.355815566148 |
|        | 191.881157918071 | 193.892810132985 | 203.410932496844 | 250.577945492981 |
|        | 208.080089376299 |                  |                  |                  |
| MIOS   | 346.173614351499 | 254.909076658804 | 287.374706071354 | 298.347201056937 |
|        | 335.142319387164 | 270.069634610818 | 325.907037744936 | 340.42197893246  |
|        | 275.794847140407 | 393.796356067403 | 321.910803473854 | 374.46180489079  |
| MIOX   | 138.42029331811  | 129.740166478951 | 127.685469299406 | 122.442590463781 |
|        | 133.099175110023 | 123.646558103253 | 141.645906784244 | 132.295937828888 |
|        | 121.705065573911 | 127.380083832809 | 126.064311640223 | 140.316066297536 |
| MIP    | 124.755684505209 | 159.065612005442 | 111.956783714784 | 136.425263391752 |
|        | 132.074571281938 | 134.679882781788 | 136.897888440409 | 145.176141415244 |
|        | 129.020356016653 | 139.000248033373 | 99.5148073333731 | 123.288028185949 |
| MIPEP  | 267.970798709017 | 279.75914135192  | 304.547738011742 | 324.871248300476 |
|        | 267.589020526148 | 394.892918166519 | 219.318938396989 | 211.766884719761 |
|        | 269.853718252574 | 295.463118191589 | 284.438411011954 | 329.146025181674 |
| MIPOL1 | 169.674931517111 | 165.158465031363 | 164.625407872446 |                  |
|        | 153.920180168328 | 150.538541347453 | 137.71280215369  | 168.753660955229 |
|        | 159.561431866706 | 149.974080577906 | 152.06044555622  | 181.313333665614 |
|        | 184.167124143272 |                  |                  |                  |
| MIR1-1 | 135.722321387765 | 135.025907096066 | 128.893208935783 |                  |
|        | 121.722412245175 | 114.504409331018 | 126.355699811531 | 131.80257432775  |
|        | 126.853028093579 | 123.591078216224 | 135.41857369883  | 151.070654092886 |
|        | 124.705614182596 |                  |                  |                  |
| MIR1-2 | 142.995274641765 | 127.84589484404  | 120.452958447555 |                  |
|        | 132.653795458388 | 134.613036378054 | 139.171486871664 | 131.829906202014 |
|        | 131.592172917738 | 147.343712869579 | 136.888915439473 | 133.026879831536 |
|        | 127.706499722854 |                  |                  |                  |
| MIR100 | 149.217191121377 | 150.35767254363  | 146.979988781462 |                  |
|        | 138.553151063218 | 149.355389396683 | 138.60849268758  | 143.965049742993 |
|        | 139.768555796264 | 126.585679159459 | 161.94312376726  | 142.159597861804 |
|        | 148.717545103261 |                  |                  |                  |

MIR101-1 124.045745662173 125.195549796301 129.878330410179  
134.413962468434 124.101111442605 140.709981878311 129.745892720738  
130.810353054091 134.21500333869 124.833659452957 148.463566046951  
130.721987260546  
MIR101-2 144.39135701666 165.757295630254 140.510889880872  
145.709172732805 141.779801021888 158.147502554814 141.956996308304  
145.325651443863 134.250052775987 153.636804025106 129.334217858282  
151.06209123698  
MIR106A 129.450937831864 136.05610450926 129.246066890078  
176.236140830355 171.916201289104 133.970510683179 132.018833785059  
144.910863590251 136.601220755282 139.963969716386 170.4583554058  
165.827405735044  
MIR106B 130.363516180139 130.394687030464 127.068313862984  
135.57577294564 122.482176216024 138.252656818036 133.096984735092  
139.1434049136 151.546908501054 132.490323093932 128.711308958929  
136.238646974312  
MIR107 120.599440204711 130.546471770588 127.943935415045  
115.933805625814 117.390049487174 129.195962576953 119.005230164124  
124.075077123156 134.333679772065 137.740497848238 121.048673869836  
131.575356402693  
MIR10A 152.823566129571 149.749660071593 136.121873179928  
136.91779948054 133.567630962178 133.79868477192 135.206755687105  
142.906227759701 124.215466523555 141.315230997077 141.302647488314  
142.246864759311  
MIR10B 129.997181739652 117.386273592501 118.718048764985  
139.875260384886 119.937665469629 125.5449326311 122.786030993629  
141.199684616731 115.309408464043 122.989642938474 148.094036534405  
134.477081392474  
MIR1178 129.869363181125 138.244585395561 136.603035996281  
139.263602290256 139.776830704087 148.512096079648 145.640156204495  
128.620852653765 116.831725094917 123.841366760069 143.163083976105  
124.138036007288  
MIR1179 114.995889945366 138.655815405894 120.524859681034  
109.003365273337 140.861849838223 124.142882936234 127.869038038293  
125.147444382537 114.078271807864 134.239416179248 126.762116571216  
126.875483714734  
MIR1180 119.98864381644 120.577995272053 112.629266772219  
116.973126196102 114.255733119076 122.711143209444 126.65748100631  
123.403099206878 129.378442664568 114.265920150451 129.21974206851  
123.21112178671  
MIR1183 121.854113159619 119.229322984564 127.959474148217  
138.456465793474 137.11719450122 133.014551645069 143.700865823615  
123.13812550459 139.099483279141 124.837187124441 123.696942540314  
132.493888285566  
MIR1185-1 193.028341755594 220.098071755353 181.876635968785  
222.990586491219 191.881157918071 168.628947766217 230.447203571825  
175.964600718395 201.383739902873 200.342786450248 184.387409077972  
234.214191437687  
MIR1197 123.117923525539 123.182903611854 136.897888440409  
122.027632589515 132.192775993078 136.572645314012 138.248708129528  
123.318763391117 126.3539479619 135.36463588098 128.771367080039  
139.696266471271  
MIR1200 122.653587970329 141.515788643986 140.541925660368  
125.914267820741 127.842177770276 123.896578371318 123.681353449198

130.325073627151 120.641590368902 142.705504445895 123.865424155099  
133.573744633212  
MIR1202 118.336654504789 131.364187047583 138.060245284993  
123.595133376092 149.974080577906 135.085039737228 135.170925092209  
118.855500322915 137.25679451567 127.949413503055 140.880009948707  
129.069366041625  
MIR1203 135.680872395032 126.121516564343 147.060637536615  
124.15094220181 132.210100574787 127.612859839494 129.767878283811  
138.731957926247 130.63390061855 125.114303270024 143.552343056702  
118.866073031304  
MIR1204 150.25322837689 158.48793705795 145.481279504679  
149.473505461585 136.718598487513 146.882746173951 147.488635834397  
154.002560770216 160.628894266843 150.144977373708 138.397152876585  
145.159572111039  
MIR1205 144.564250008106 153.893753448473 150.534608517044  
140.980119908597 147.18858211611 129.069366041625 136.02474314035  
141.140392288975 134.746175914762 128.994977935861 142.151209745109  
134.565199667396  
MIR1206 136.08297876405 130.191876914166 121.924036463998  
130.718729445329 143.813830712875 130.513071750123 132.966873990501  
135.911903336544 149.228977421003 129.269919529415 127.729912390394  
150.670783991982  
MIR1207 127.255966406144 124.295334523889 127.001546144286  
124.720004905439 115.468921844902 122.167669805597 147.796610216375  
131.597937570173 121.653754668804 133.959208066964 115.491262364277  
117.724353829377  
MIR1208 128.471437314295 123.902047880095 134.323365608463  
128.202619705343 143.275056599274 147.545667896282 140.359796538887  
132.50027119027 128.864822736402 137.402567669086 146.125125252096  
137.597788349982  
MIR122 134.514251897045 132.875314170399 133.720904256137  
134.078506829054 140.701908784225 131.832311911703 142.206016362038  
145.677477231455 132.179747646893 140.496058408953 143.279331050175  
138.841385034636  
MIR1224 141.383975990479 127.799190369808 146.959154938248  
146.142934874698 154.713713332354 136.319655432311 139.096536887753  
155.069048442532 136.855445270531 125.724143659093 162.168246402027  
144.818492604488  
MIR1225 136.55090238808 129.447773229782 127.123123583856  
146.541890150631 140.77762487941 132.203310946961 132.47775411384  
138.563471679129 148.112717810117 140.922678400415 120.384210318  
143.793506250131  
MIR1226 139.931971137413 115.43068422162 133.874468336025  
127.179420421981 151.024201732633 132.514706165018 138.925802905636  
134.362834437771 133.003743285746 129.977863589097 122.572634128442  
122.347696497767  
MIR1227 135.605541734293 134.041098536814 131.159946917777  
153.633095853017 154.79534193124 130.172041917023 128.093945009882  
142.011019998327 142.49005761699 125.104229604098 163.030275835038  
134.834641868502  
MIR1228 146.75924072364 140.505338990718 149.744358230709  
145.762724663455 203.004815689972 246.112720011613 207.73395131954  
204.942500423413 205.495823410422 209.60319248212 133.416938451465  
188.685460181066



MIR1229 171.140106467064 133.507865919719 162.085813676373  
145.122171099946 134.504873813959 144.619374612317 153.744962185987  
142.276853170778 136.895650862562 131.458411820485 125.752962155179  
151.531667383273  
MIR1231 130.076926011271 131.786437478446 130.792692240592  
135.906115546805 138.731957926247 129.210356735226 134.018379799826  
151.979221390032 138.911993471119 147.408515025368 131.051711775229  
136.058527150792  
MIR1234 153.162313098346 145.177195093247 178.179238056905  
166.988725688589 147.558603709566 152.591091223395 158.098055917452  
153.916313595581 168.878645908397 139.220877923507 148.396148091332  
139.482462221798  
MIR1236 124.930303940168 126.814332513301 136.485034823945  
152.364417528975 136.9834458057 142.808871284256 127.365142833355  
149.601145171769 163.143613079037 135.904163043783 121.61143371132  
135.437227744668  
MIR1237 147.510848198689 144.64136816491 147.319360896679  
126.647643493986 143.778327403708 133.35096649325 149.410729709855  
144.031305845388 138.852212944492 157.415211954103 160.364644321965  
146.753212022975  
MIR1238 126.917669470999 139.736465430177 135.259226552938  
136.121873179928 122.885879294532 124.056405566491 125.166940410459  
136.241569739318 124.635917999969 137.667514826346 145.646191500321  
132.325483244388  
MIR124-2 136.061992660698 142.964043764953 134.161664663192  
122.868393258957 147.060637536615 127.04953162892 139.199446543251  
138.082870754768 126.383238335161 150.866204945762 133.45690661612  
141.389330839189  
MIR1243 131.285279061742 127.871445879091 135.883119645931  
135.860057860699 136.951350782053 139.117053855066 107.316786994369  
138.89354244296 129.13353785479 132.5130209643 117.172431931323  
121.267153348313  
MIR1245 122.20752192519 113.451566510208 125.400741907779  
119.774204444899 114.494394548044 130.485988201308 139.013404849037  
120.721341479615 115.944280729914 137.180793826675 113.416743649576  
129.203236898198  
MIR1246 141.524239210761 138.487657776553 149.525115175915  
118.93828679356 148.454344601562 129.606271613463 138.745560049251  
128.714459781294 128.421242037748 132.769455423385 115.531710316716  
127.350368333088  
MIR1247 166.746037983859 163.02140155858 187.93380542729  
146.959154938248 130.201635099678 134.904123162692 123.126240234396  
132.273354705213 134.528971384442 149.055493714692 145.669033804967  
127.763186950161  
MIR1249 135.32160992961 131.000186898437 130.473842500245  
144.617654961472 128.806964077824 119.475462713424 129.015422924366  
118.006338536085 117.837894438834 112.114933398547 123.722744366103  
125.783265980169  
MIR1250 122.84603217721 123.638001112969 129.780648518219  
141.018087546273 126.0944894315 133.093234861388 130.560969214272  
114.170354748872 124.275741099764 137.282038401275 118.426600479326  
135.054931772725  
MIR1251 124.106971897779 133.954514563283 118.731960910224  
128.738746025289 148.274122690409 125.704264033102 131.638954862848

137.500310477851 124.606795061928 137.058578192268 127.445199722147  
132.634538733205  
MIR1252 114.755442050481 134.640783050966 130.773945967285  
113.416743649576 122.002822875994 112.371497988132 120.428171428188  
113.955459033122 121.174618503873 137.056500339577 101.149125916797  
119.525701528869  
MIR1253 149.138678142327 172.816477996646 161.94312376726  
154.894196413558 176.980780681976 157.530573508003 147.303997146992  
157.955606242401 168.654753237204 150.593928635647 165.659978250378  
162.876684781936  
MIR1255A 134.691038011706 111.992738490468 137.184405197724  
136.897888440409 122.65547320922 131.226834630025 131.373846564542  
123.306499698566 130.322436253881 130.306478656159 105.050093408041  
110.081964209973  
MIR1255B1 115.090463537716 120.682485578097 112.747067417774  
115.713909155043 128.582520754296 133.079097536801 117.834484996559  
111.328185454541 118.694037994926 122.213445520365 123.847186739627  
114.466368742403  
MIR1255B2 118.419311800417 121.327397317398 124.693253194681  
112.509731206295 121.400652285172 113.636570490048 130.293492553638  
120.460433297007 116.248026336995 120.14201542563 113.857477830423  
123.294321716108  
MIR1256 109.806338826826 127.640525889316 119.901358778161  
126.5764774133 125.522498880785 123.318763391117 137.398748156909  
113.748724650063 130.440164900487 120.733009784454 118.625070307695  
129.45936538019  
MIR1257 134.064206964444 152.101695555105 128.700516033555  
136.855445270531 126.822360314075 124.757229519631 137.331864485838  
141.522701487198 136.908861280856 140.525013926642 145.800379695397  
132.548259643258  
MIR1258 123.344450694117 125.488511939819 126.013957128603  
138.405215507471 119.972337070176 113.025793645043 141.670426206169  
123.709293439934 129.445240570626 122.978576290038 144.425214066833  
140.213080190065  
MIR125A 122.512587751135 125.754741914111 132.421863261746  
124.901759819007 118.331237160995 122.142323014287 135.508803488048  
137.572574328004 115.789536577324 132.359319280352 127.482662155082  
121.801291293249  
MIR125B1 147.844734028193 139.064529330719 129.931923954109  
130.385747820089 148.861141988806 144.090047165489 143.302354471175  
129.591396165575 137.514952067562 131.200042525339 137.123016784819  
142.903851392611  
MIR125B2 197.02284475852 161.795378938402 165.219393390909  
194.819597436776 180.913502162011 162.416774743901 156.336425973696  
171.39347085745 145.077517845584 143.739231124536 168.942165573542  
138.242983316259  
MIR126 124.148194572004 121.462385497795 138.773042747912  
138.159966250659 119.349376960211 138.424464248567 146.174492025087  
136.009969058857 128.96181458192 132.680140469504 150.564099989221  
128.176779923348  
MIR1261 129.43892498257 143.470181156799 143.250386570155  
132.817645625115 123.150299476109 132.240470270795 138.633019006784  
142.017169259522 143.754105312957 137.95243466771 124.740700441589  
124.42747321736

MIR1262 121.099290122973 116.335864439545 137.391141254051  
120.283706459738 117.743425291931 131.943014970855 131.058360514673  
115.827175143972 122.773736159743 118.787630332168 126.182856027765  
117.008277388399  
MIR1263 124.533543270311 136.685430908977 140.611071681667  
133.369314179341 137.936605651724 132.933035878334 138.69392148885  
126.402405227897 131.825172822888 124.056405566491 132.433109154079  
116.943791343147  
MIR1264 130.425809387444 118.836387680022 122.046901607713  
118.924317138158 113.347609066395 125.157459724842 135.550882872661  
129.527271401014 135.491412261604 121.672811608791 132.788102310611  
121.855752708908  
MIR1265 141.186913979346 138.721343199179 138.97443063851  
132.828179725129 126.072053958666 151.855884026072 124.627339426244  
121.787875792887 132.448602065824 141.698329968978 148.062245676711  
150.660106369128  
MIR1266 127.879723100698 128.200531810126 142.628296442123  
142.284050423299 139.790098895306 135.151438845363 128.65678873939  
127.856634523494 129.586337068199 129.145457341484 125.940081665592  
120.35956894661  
MIR1267 170.099045774947 166.335294339013 189.840366340622  
148.204194003593 171.11282933168 220.999383789474 164.164463389212  
171.278489808694 185.765000029242 184.021010234322 168.974155750959  
206.999289979742  
MIR1269 132.593747375239 132.018833785059 131.915864620669  
145.956477465634 112.292129754508 138.647667867725 124.731056918418  
128.50733429744 132.776236872246 131.322008851059 134.76397845723  
128.205022859019  
MIR1271 147.982280671798 150.617039206311 136.701400398129  
139.466683069609 162.056622258216 137.434039024162 135.330241638301  
133.53523683945 126.676875319815 143.354858193994 143.464614171516  
145.621384219688  
MIR1272 155.452842883109 144.808774137749 136.975775196224  
138.274057264688 130.99564079691 144.101376910581 142.988500173397  
144.335732650795 127.650229552084 132.061436165754 131.285279061742  
136.77260462185  
MIR1274A 130.467450968785 137.330207626732 144.820843146628  
131.336902822702 142.255657518926 143.953043041292 144.355348009294  
125.484453841158 131.036225888592 131.861469782134 152.344248425416  
152.987939791009  
MIR1274B 127.548070199148 137.453705355364 125.783265980169  
126.285743744314 110.688722702767 134.728594388428 140.85139374336  
136.694143268855 135.5668267936 132.928639483854 131.820842728171  
135.923022674367  
MIR1275 156.110073009771 141.693224578298 150.49183794045  
154.113228966411 146.146800933028 135.027715094704 154.778726823719  
137.627338682823 134.56314960832 164.929445749888 155.452842883109  
116.796995589816  
MIR1276 122.281263517691 140.538020869886 125.800508653231  
122.167669805597 133.158570377793 123.61956613951 128.134246199718  
126.103561089901 111.423140302983 130.302829773323 129.256138453675  
123.507963359911  
MIR1277 128.152956417755 131.712745388563 125.769903262265  
133.436057118148 127.104097294238 111.65024009102 141.668101962049

115.491262364277 130.799009128937 139.737748157901 140.619606039582  
127.633362302159  
MIR1278 115.631414599991 131.377361030122 123.752109790056  
121.327397317398 129.015422924366 146.64560446484 132.642931022024  
133.76515446791 132.70109232982 129.041254463346 115.14883090249  
124.145492642453  
MIR128-1 125.35643274458 119.349376960211 132.653795458388  
136.015561289357 126.890841187249 143.330025840618 144.80318019871  
131.554055357245 138.35538364303 142.034369454643 155.666943703002  
139.524233960073  
MIR128-2 130.562422910426 122.672142981381 113.451566510208  
125.478878240473 138.53954980556 124.518818352113 130.983136465761  
132.541420804792 139.325478877749 131.179786925029 126.155486659114  
120.231559540009  
MIR1280 131.87404363664 130.651062724029 141.855655600443  
126.153806511702 131.741688265764 138.813126946007 124.930303940168  
133.406312157375 140.336479395866 142.253826696208 130.420753247797  
150.384559054133  
MIR1281 131.590180562108 131.502263820023 137.307786147787  
130.262411213764 131.226834630025 133.897397228615 125.997109913348  
139.60494712939 128.528510920423 124.982744176925 144.474814266475  
122.365693072105  
MIR1282 142.697827839203 106.746545626069 153.926214082991  
174.624446035895 130.720097323382 146.042460762767 142.623106544789  
135.959893035019 118.195512252508 172.604689611475 133.108094159933  
137.052507691254  
MIR1284 150.804810443235 135.461112284848 136.001505582342  
130.226993687215 142.52234368939 130.657342262492 124.885950473434  
133.482237631013 132.431566491955 142.711117470317 129.895388481159  
133.231066635063  
MIR1286 141.482344048665 136.218750083407 133.379872189405  
135.65700435306 127.985051303973 146.880440100898 125.655823846115  
132.994716261577 133.259321087534 136.059884933876 126.609398779757  
131.153457976248  
MIR1288 125.250900940748 130.720097323382 130.850419527271  
131.138322527536 124.113451627593 127.189310473419 146.738411200698  
130.344292132363 115.646023142125 137.959775678716 133.576812299149  
133.79868477192  
MIR1289-1 121.564626579011 123.45956380046 122.714122084817  
133.901356440205 137.333595298205 141.821550320574 137.578516107502  
157.126460242995 136.285410546751 131.899614022767 148.13657736444  
153.846723846716  
MIR1289-2 136.817517693076 120.046892432373 128.858923585925  
132.75673287656 128.36121178972 119.01559016005 122.69021100699  
122.268560536152 119.01236045062 139.872976072847 127.637319802339  
134.125038192486  
MIR129-1 157.155105022743 131.820842728171 128.09266452749  
159.891562221587 133.003743285746 136.529820456592 136.293084080479  
136.268379335353 140.350144438462 151.010493695217 141.344034069373  
134.896349513392  
MIR129-2 155.561821955048 166.558080305926 162.484777758676  
194.847305068008 169.667751894226 165.530397739051 166.879042308539  
165.665796569389 170.390200730789 181.54273463264 168.314966639178  
151.641486303453

MIR1290 121.531401500498 124.800221241981 124.42747321736  
120.246240734668 132.854078420045 115.594489123676 131.378893655618  
125.141185839817 123.949411804458 124.148194572004 140.794929983858  
121.687187898743  
MIR1292 130.998637545686 144.468333012278 130.790872334222  
132.989846726946 122.083357581665 123.119524624735 124.170242736875  
120.998665308561 121.505178996279 118.08607083874 117.60787142216  
130.735223763219  
MIR1293 153.068898842283 130.036744891822 138.903450375532  
134.036236880951 141.775100066311 138.911993471119 123.53212786736  
121.764933633063 125.855451679929 129.505139430366 132.5377752987  
150.691815494794  
MIR1294 132.86879723151 143.780803045394 132.481710681317  
139.679681813932 135.428592324173 124.442671465273 132.05513812578  
127.128042857811 145.385816618728 146.056723380149 123.541709359809  
137.016495611111  
MIR1295 139.793683692104 123.169713575888 126.124937863679  
141.84391267245 126.418295908353 123.470830748348 136.570817174009  
117.696262292883 134.218867540274 132.725232102483 126.919867899174  
124.621381699241  
MIR1296 131.300342835696 118.761737418652 128.182419321978  
114.867454554206 137.471563342956 137.623019849539 145.104173410801  
125.828998007608 139.687574432387 125.803854387512 108.247365868673  
133.085476994246  
MIR1297 127.70306883967 125.236926572282 133.604705630582  
138.828562311512 129.914077170794 129.330592465123 126.563876945046  
128.897493103888 128.086493618022 132.057808599068 110.847680175669  
126.235567899449  
MIR1298 131.277646716635 122.531675048414 140.713537140957  
129.378442664568 119.98864381644 119.172965618216 123.896578371318  
126.75720720361 128.303046695142 128.745737514912 116.428373788459  
126.87882572904  
MIR1299 149.863063160222 135.717491814078 156.173099025259  
122.031894952046 141.522221963957 124.059778432167 140.248610391566  
123.084040312047 126.00304757051 145.447695228075 140.485102148597  
130.306478656159  
MIR1301 125.509221735447 149.147411595596 133.812639120892  
120.433080754232 129.677874035481 137.372131049785 139.532508621268  
132.624674205566 145.368059425439 133.918638123756 147.289061374598  
144.955918499353  
MIR1302-1 120.96098661114 133.131953362455 117.003205777245  
132.458764637407 133.789738760547 134.253399256648 124.740700441589  
124.01558540593 125.621467040793 147.905406818238 116.806720503431  
128.468978498871  
MIR1302-3 142.279695592224 131.679566454851 140.634047988278  
135.679481480408 133.976997391944 142.464394555901 138.348160604288  
140.047749881567 138.76667538162 157.227118680396 142.427198128376  
142.159597861804  
MIR1302-4 120.163286072512 126.722212054469 128.460750472464  
119.899649497032 133.691053105482 141.16066528405 127.543729713161  
129.344834474578 127.011594171986 125.285502203677 121.274997609378  
132.916608405637  
MIR1302-5 121.888886996534 121.067907968175 119.890260409414  
123.943080151532 129.311134743311 133.299599411025 127.998531115697

115.587874563785 125.050945917101 119.882472552083 130.797498958616  
125.272796155561  
MIR1302-6 138.20899000519 140.169200413643 120.581554457723  
131.557867491904 143.616189776965 123.632031112507 140.885012530186  
131.619951110473 136.951350782053 132.07268641595 124.735542880811  
114.830474086443  
MIR1302-7 160.941804737367 137.190593489949 158.33974431499  
139.817493158675 152.73588666971 142.12808103815 150.311274161073  
133.161552914595 124.140880678888 151.627496656808 131.853183159267  
144.754401731628  
MIR1302-8 133.796029401157 128.755697083014 120.29173510435  
111.603221942108 126.305273697185 121.168550902281 121.874296836854  
116.70650322987 134.986030185477 122.97487285065 117.097159106043  
127.086470811408  
MIR1305 126.549876718792 133.104560685558 121.645021899034  
133.008120853618 123.694678408411 124.359615295938 128.803632055969  
118.945264994404 128.929244741296 128.50733429744 113.557349524174  
137.468570135972  
MIR1308 128.11006485185 122.651702760414 133.016668180102  
134.327229861635 134.189023892662 128.087242420103 123.786227856015  
132.110906510601 130.219888837397 129.126636617346 122.197625748146  
126.800718471804  
MIR130A 190.921283434627 185.186497037695 208.385295246155  
205.058210447711 223.89854167651 181.048789688798 190.754349388901  
207.298994298453 181.022635001204 179.779007442837 371.224296589448  
148.975112606364  
MIR130B 130.420753247797 123.612648219993 135.928428484011  
123.541709359809 123.972321838378 130.953237161257 136.998259410887  
135.689889081912 144.70348930646 138.98468042464 137.306031826007  
115.939620871703  
MIR132 133.175265384038 123.089110282465 131.230501496659  
131.2834389999 127.239282651919 127.482662155082 132.815753681623  
135.682971958096 129.190900922265 131.992186668019 126.931328660501  
136.865340099645  
MIR1321 145.640156204495 138.070353990356 149.498020676126  
140.293431620804 151.858466721347 128.99859423584 145.378779757104  
150.401509081265 136.769073515537 151.65364467801 135.221786448517  
146.768631086088  
MIR1322 151.09670688533 117.480506535399 134.531334130512  
155.592219571564 145.949736782839 146.309171902112 143.763292219833  
139.223480216048 176.820928772968 141.33919297402 137.923852688695  
149.808222023726  
MIR1323 135.607537832704 135.542079867325 134.078506829054  
128.837901660985 132.115817176834 143.234195669431 125.493004972076  
126.626904958599 141.946668640749 137.374784875444 141.29868389128  
122.312652834289  
MIR1324 179.400220328552 143.125454748996 159.245344068037  
145.045633612194 152.702847643082 167.330860677012 153.962758393332  
152.199095472082 138.53954980556 144.122748003206 146.202611204712  
157.83121828793  
MIR133B 126.409995188106 124.362182111222 156.47237266917  
138.094719587545 130.451929547262 128.669887479835 133.932594124721  
152.395272857974 146.495845282846 134.544368736184 135.303322290834  
136.718598487513

MIR134 145.824996954376 143.008280236963 138.333435927107  
122.522978939399 118.9803314875 152.166586496729 150.573523216151  
132.553445658347 122.452541100946 129.765440519589 154.445840992357  
133.875667250136  
MIR135A2 142.774449777424 124.258412895333 136.218750083407  
124.408996713299 156.738816330537 130.344292132363 147.835936450126  
136.582137928022 127.527378949803 138.89354244296 108.179513318734  
123.681353449198  
MIR135B 159.89988762842 160.543465620248 178.000672046849  
141.794898246882 121.778756075848 167.268645224361 162.689415085423  
151.308872564827 152.368485416992 128.756818133357 169.101676908756  
147.866909109733  
MIR137 126.326609619996 133.154004369076 128.126354569418  
132.579323148839 120.355844117573 131.232417654705 136.641140715439  
126.695387748732 147.060637536615 130.351302840602 131.071614211431  
121.878989839162  
MIR138-1 137.326796995017 141.860850603561 142.720769329396  
146.26936366452 171.869472272081 141.972403120632 133.027592711375  
137.799016648135 142.700311964178 128.312170913496 119.555954372381  
151.431513447721  
MIR138-2 133.805991920905 134.406692724353 118.355532305846  
131.628021008753 116.07902130325 126.365861978893 129.389420352857  
125.431735524937 129.104084188187 130.905135502296 116.456170659686  
136.981043383326  
MIR139 135.94591985201 120.906553066296 124.853659050216  
131.876061826583 129.546119539687 135.934976183762 131.456697863268  
142.027930009598 121.146511496024 123.557722415957 126.203255277356  
139.285128128996  
MIR140 134.066948803697 116.70650322987 145.578721432709  
137.790718305537 132.741859397511 141.071184297124 129.281564491007  
131.340453291188 112.015423658372 123.413596815384 119.50754902958  
142.041992878641  
MIR141 117.965208293925 115.211731367278 140.43729728368  
145.104173410801 128.069504716124 121.48867035121 149.516743790585  
137.914673796317 128.521380879209 113.708683868028 141.907307422968  
127.709638375626  
MIR142 127.890438577754 110.068122112671 123.260800590266  
115.389934936253 130.920010795017 120.521509788705 120.691810909148  
120.733009784454 128.456901308889 124.33863635868 134.777347058149  
137.376602654929  
MIR144 151.316421810192 148.708564065858 141.803250679131  
134.145771195572 147.645530163725 145.239119337981 142.163834995141  
133.505261458701 131.218141814078 144.405191855684 140.081280065913  
172.364618542922  
MIR1468 132.387242907281 124.180511991605 137.691870502653  
122.634741242406 116.723991721647 133.64938083537 124.086902599543  
131.035118014794 125.143281492089 119.792515907708 121.837571435384  
135.980886879513  
MIR146A 149.045654499682 146.944628763232 139.265915951162  
153.389279691913 130.613760017864 145.096707533824 136.387904287903  
138.021559586328 139.628966306048 131.655316312379 152.818046945164  
142.802965008073  
MIR146B 124.033766796333 142.637421204193 124.654146040634  
133.404671629495 124.518818352113 122.888626394154 140.602170750673

123.09149124559 124.690141443832 124.595925483149 129.84933846313  
142.548833391567  
MIR147 136.952914053358 129.916677638819 130.766401858384  
146.007311764212 151.831627236638 143.001661958814 126.242935839683  
136.829137120584 134.441142158135 145.396723478249 136.202953030465  
153.315309202016  
MIR1470 121.416038813102 130.411849432351 114.902673141786  
117.790593990682 124.402373005821 124.28033876033 130.105800581241  
128.432188632218 143.383697128285 121.675007387533 128.879953205511  
131.503936441405  
MIR1471 149.691340727994 140.195820033314 146.081940883446  
151.285933600303 157.878110410517 152.439608473915 155.780657091484  
132.875314170399 152.725025539491 155.158028043823 164.811120992602  
134.02083946631  
MIR148A 129.822926691091 120.043811428091 131.038758046782  
128.482976013813 138.316043447788 115.750690887988 133.160197638474  
118.269780903508 113.557349524174 126.893023101449 122.437272605287  
131.406366653787  
MIR148B 127.462293158337 121.687187898743 128.014092519305  
128.490341173553 121.121686280797 147.18948282156 125.243735617266  
135.036576196425 146.185931276053 112.977469350139 108.415715678948  
122.002822875994  
MIR149 126.673587174832 147.751220590539 151.739221728872  
148.016402654687 153.275253838659 144.265352127763 127.640525889316  
173.281506912652 156.737219981981 129.610980807708 144.077080621909  
139.708303388546  
MIR152 128.700516033555 128.137646789236 139.522018789485  
118.249148086655 113.192313147111 132.088335186716 127.8514513762  
118.442856984861 130.074786642758 120.790536146461 115.920514336615  
128.324383749931  
MIR153-1 122.442590463781 109.886197655915 125.467668442298  
131.155117105954 131.141668650877 128.626051185037 125.975257879912  
111.584425166104 118.414329128347 133.048720362039 105.284300851422  
129.801342433836  
MIR153-2 124.842426851438 130.712515995658 143.831294912255  
146.550421651378 140.061045085545 140.656633546501 144.546597366629  
132.998223400178 154.746081871718 135.991630745082 143.325710305008  
128.820757822782  
MIR1537 141.437891956239 132.37450516592 149.175458427847  
136.042982529628 154.371946675862 132.582062079623 131.296518221093  
136.988519762443 144.340734361996 142.815817738837 129.591396165575  
151.585818981801  
MIR154 137.235469802064 140.725313103204 126.952836653857  
144.884801859505 137.680019787902 128.197031700084 139.416388461892  
130.822330736013 144.826861308997 126.55925846644 143.098246338022  
128.05898686833  
MIR155HG 134.507558495307 128.11006485185 139.909719416938  
138.499293816467 124.275741099764 144.167857433516 126.589865262427  
132.677272839165 166.305219348008 131.92059356875 169.428195354763  
132.680140469504  
MIR15A 128.327528039933 136.788269716383 152.386986818959  
123.256613702254 144.608882758506 134.329334422886 142.879705723262  
143.973464003036 127.114560076444 136.799138736925 154.329176514501  
154.884821436554



MIR15B 133.810472192646 137.536053775531 139.768555796264  
116.305011582033 123.640123613529 132.478801067837 134.251843621261  
126.338676765473 139.466683069609 132.051614319023 114.798573331978  
139.767216030715  
MIR16-1 138.675023495021 129.034770823878 136.627904756283  
130.450930089722 123.857527555048 142.759452994928 127.935614145702  
121.821868944354 127.605805815475 128.790166506932 137.675597243706  
128.606360476298  
MIR16-2 162.55521875551 161.906823008445 161.911468506919  
178.946928223991 164.072443259668 157.745805838008 153.758353103323  
163.843143947012 163.62582285753 163.529157756197 141.729275721015  
145.684294398911  
MIR181A1 165.337956130606 147.581827861592 174.461487057542  
148.030579593944 146.929717840755 159.902277514765 145.650356702429  
155.997210529742 163.885645883066 146.142934874698 139.278366709094  
149.984657985607  
MIR181A2 140.096717188376 139.045162550699 123.240482782331  
148.916981164664 148.358847576281 143.785769607842 135.978826529736  
145.081468030567 140.152177370089 115.68358702028 120.786630750686  
143.363002903815  
MIR181B1 117.071585083051 117.212164526913 126.982340580909  
118.283346939564 131.058360514673 125.535877109652 131.796941315992  
126.230887413874 125.94880312094 115.678486138934 124.235958498969  
117.05536677976  
MIR181B2 113.582654469735 129.167602517633 112.07238018581  
114.607138204495 103.660742045068 109.209241676429 123.771380912926  
121.93549478261 107.930325780047 137.919253591105 130.344292132363  
135.536810684197  
MIR181C 139.21331678591 124.566313603935 128.668672935791  
127.412539650291 124.267394371656 131.65084896906 128.375390373307  
114.10470841717 131.074021609161 123.643292039274 123.327238774943  
133.077760160486  
MIR181D 136.565191271943 136.653140842194 143.421288665418  
149.682150633146 126.580227722115 123.170639180926 136.359189516452  
143.219722736891 141.139737175648 141.755954088275 148.691132137188  
133.249792744053  
MIR182 134.527165454543 134.835962366555 135.930107381894  
127.401551376191 122.27785621724 127.555954288973 133.585425721984  
127.496885890349 142.810564324354 151.676232556697 132.659196898439  
124.892438890234  
MIR1826 127.424848301217 121.781562010645 136.805379739087  
133.319765450636 148.28101912019 119.395894479869 127.104097294238  
147.568851471771 128.980519133484 118.966992191892 114.598636725763  
126.141462782039  
MIR1827 126.381288663037 132.206133020786 130.250446414483  
137.15571320152 119.922676683808 136.528123792599 125.099672022917  
127.595574823053 134.163388748526 124.02280670421 117.523834738903  
132.373302367869  
MIR183 131.360310497851 124.533543270311 141.929924728222  
117.093818506721 128.119556520151 122.578170988039 128.001109846227  
130.93033679281 152.78638215326 128.980519133484 120.263659727964  
122.512587751135  
MIR184 128.806964077824 130.892302357045 123.275246170603  
146.728881202697 137.234384760487 129.935532080325 130.01207836961

131.624850267236 131.887778588005 149.576563410584 120.493082096235  
136.366798516444  
MIR185 201.637540930213 232.046814892685 168.52952604693  
231.439252571168 137.620843137286 123.30960025689 131.468537312778  
144.818492604488 133.964163727962 145.027741086645 154.847114601403  
133.7012683837  
MIR186 148.058893673648 153.143706194386 159.68134949161  
187.965294229013 139.113675690483 140.595496714752 147.389892239448  
174.454754564111 154.340042518983 153.031479923324 126.798976470472  
157.901967487277  
MIR187 135.227424713702 112.088944448944 138.22823004719  
133.272540012108 125.958139354095 113.339155126202 118.319950396126  
124.946064096174 143.10996074311 142.38097037888 130.205764567934  
123.922817231917  
MIR188 133.329392986316 131.597937570173 132.819726980184  
118.338713846941 141.048882618651 122.355409068882 142.592455241752  
127.756214708077 121.643036773773 135.386650538345 126.5929421833  
127.758381206968  
MIR18B 162.863781294205 156.205127163263 132.641236788053  
154.691783046492 125.752962155179 120.060776752215 127.177422395113  
122.595766303833 124.815853677553 120.35956894661 139.560555361919  
126.069594320759  
MIR190 125.18424162353 120.957197551997 128.910261453632  
118.432307370605 114.673517800886 131.704192327287 137.605244950708  
131.599370671279 129.155804800869 127.760995691556 109.635825046436  
140.423711213355  
MIR1908 146.869927141655 143.905680376268 143.750656408155  
132.338144393918 133.399632102473 136.240503841228 139.117776552573  
134.759283147919 143.596530151289 126.277165320165 145.745466612541  
140.805322576253  
MIR1909 170.807514224412 153.51550202829 155.835077077665  
151.788278519057 194.161930642068 200.591916768948 153.156264091925  
165.511561121012 161.24755274554 166.688771186254 163.956894843504  
165.257737836487  
MIR190B 127.177422395113 128.910261453632 135.206755687105  
143.207187847583 132.22974656114 130.339214643083 123.913203953936  
133.077760160486 126.887989471803 131.617027772841 120.045351920348  
128.011387527117  
MIR191 128.41549156443 120.679474100322 130.66863243733  
139.606654715326 131.019345449516 120.39039576721 127.052618800004  
128.713131994442 133.443807124822 140.195820033314 127.908872828095  
132.018833785059  
MIR1910 137.920724602098 151.939710544553 131.114995025516  
129.072173761566 138.244585395561 141.580944960818 139.251886500377  
134.657787366869 130.865693081945 138.916830356763 140.286870147975  
146.376149543438  
MIR1911 112.987890650593 118.578205738502 119.034003473459  
131.921799405427 129.27634490676 133.16973309664 123.271452939936  
124.056405566491 121.197702744078 120.816130267055 126.856038484436  
116.019123495537  
MIR1912 140.54700821058 159.120172969378 155.249688219254  
137.265533487496 156.863232221623 138.20899000519 129.775280076365  
136.497295707149 136.421163870578 146.770267005869 149.815494316469  
132.197346228417

MIR1913 121.672811608791 131.866599432062 140.624437508178  
129.305455204291 141.990639998829 142.063338490772 130.352674121108  
129.786941565218 125.73560975196 137.779607093226 144.445496145045  
143.292552892073

MIR1914 107.221547998974 114.129044806825 114.867454554206  
133.887927451362 133.343243441383 132.70643154246 134.527165454543  
149.086836205064 146.016920431468 124.101111442605 127.00963790814  
141.363863974586

MIR1915 145.126091016414 137.907709799074 139.075537402658  
158.053654524927 136.338683078123 147.011838288594 145.921381300813  
155.280897870265 121.545189875973 152.983678871668 141.253030949701  
154.197254746757

MIR192 117.193620642373 119.993313087183 129.469949305913  
114.812254477058 132.949288563278 133.436057118148 140.42579083092  
128.628637585951 142.986412837634 123.156154667242 130.854818615966  
136.05434446747

MIR193A 130.874283538818 127.507557925713 136.167141767484  
142.609678462615 136.059884933876 137.840396641618 140.474338177948  
126.711037295629 132.875314170399 135.443856371548 121.508233749444  
129.446928016147

MIR193B 126.242935839683 122.982686879394 129.596851280135  
137.488665424434 141.636604735133 133.266524623338 115.34945441214  
128.122197525844 129.346063085291 131.029333093048 136.368258257435  
120.55570440025

MIR194-1 148.347642424885 156.487049947247 146.416318806523  
149.035590153457 115.954828435072 135.247018354192 132.496547953595  
136.799138736925 145.530904040477 134.010031592003 135.057847490193  
160.454243375479

MIR194-2 144.975882336334 146.763046352405 153.885582272269  
118.351607868932 128.116795372698 142.601556980614 139.305220220411  
135.790955294639 145.698637908482 138.45137517137 140.827965102541  
139.595986615703

MIR195 138.731957926247 118.891276329399 120.208584170364  
144.848839185565 118.663847950696 129.461160777216 127.011594171986  
118.348153875356 121.957155610892 122.90702157852 133.048720362039  
137.012646671173

MIR196A1 120.470801825675 133.379872189405 122.329290563769  
140.145470073979 116.248026336995 123.794432024417 122.176811388389  
142.843882404269 127.021761061991 134.418976976995 133.951322753098  
123.706910388724

MIR196A2 140.53597287752 119.704436785439 123.038646914863  
130.406895174038 132.770770310958 143.137158027738 126.557869929234  
135.957972463728 131.882887826338 128.992837936606 108.818976813708  
126.939543057414

MIR196B 123.696942540314 114.217867810848 128.850480964163  
117.296972688814 138.461113585594 132.369872013432 119.451099896048  
123.720229113779 131.12775424877 124.766436060041 122.891946370542  
126.81140158672

MIR197 123.21112178671 135.664877050226 134.989310648514  
128.101371225192 123.277867938275 124.786029449452 138.218392984717  
134.642898234003 143.951756384507 148.195611015135 138.340652133783  
138.184717352015

MIR1974 942.41077071058 375.255445179952 636.56692204969  
1291.12004949379 1313.89440013246 627.335757721489 1013.60354455825

234.156713102803 418.244376024741 416.546844844021 1352.14737073174  
517.676093149981  
MIR1976 122.885879294532 126.426212216646 127.820096020782  
138.85328409337 123.913203953936 152.30599498619 123.725998173975  
124.461997520222 133.500750738061 132.103084472404 131.532660547328  
134.319316977485  
MIR1978 3287.37172778474 3455.20639616159 2295.16438420175  
2895.71836177599 5582.64254130978 3328.99028463277 9099.13956219312  
2733.68308784024 2941.69058596077 6793.99737496637 2822.48671794913  
4569.44477073589  
MIR1979 130.34939602913 143.275056599274 148.179398287068  
136.878656455606 140.916876460413 165.163490032007 142.717436384151  
145.67389337654 148.176995739142 146.047948193303 153.066630483602  
125.905785653648  
MIR199A1 154.584367902971 165.39758732 162.870317933909  
179.94333102877 141.630183595813 152.026310884327 165.283700641161  
143.431389389919 157.688982037448 148.85250180736 150.135699526882  
139.611455791957  
MIR199A2 127.849141499408 133.048720362039 142.999526950651  
132.692027897739 126.777633512781 128.158605637751 156.678686363755  
136.724298878331 123.56917054142 147.366877428537 143.347066447019  
144.900785401228  
MIR199B 136.501159644992 136.351332391315 133.35096649325  
139.342430217926 137.885506916098 142.428578698775 141.054587977578  
130.933379257307 135.783125948784 149.871960981882 142.910616700526  
129.520140995675  
MIR19B2 157.739526559807 127.539091409962 134.304545258148  
144.277263594387 148.43357593249 141.130462286785 125.126100642395  
115.871151134713 129.741644654541 123.563243360247 137.018202374481  
132.034701177759  
MIR200A 147.400082178491 130.511042322504 154.493246900289  
130.135721123253 142.388076341254 136.562662050767 137.079479050963  
143.541810469447 140.768926302035 141.106863165059 150.875392181869  
127.305306470493  
MIR200B 134.494167613686 134.650161382949 139.462804363695  
141.137459291428 123.814841047589 136.882429810263 133.082433951922  
126.497472087036 134.479828866339 145.873038603155 134.814082968113  
133.680691168661  
MIR200C 145.226278521493 125.710199961297 134.00481287258  
119.922676683808 139.579764449867 121.320750074882 130.329453160478  
124.258412895333 129.689855810051 106.066897223031 124.863832760607  
126.531502877517  
MIR202 145.485453268383 147.348400730286 142.964043764953  
144.193756031386 138.42029331811 139.491769969541 134.270043564053  
135.06498850776 141.727639388452 154.368499839507 144.643770374264  
144.155591092387  
MIR203 148.520371748891 136.335679863251 131.294930860752  
146.599636794606 157.922718487881 139.957560460935 154.01988200569  
161.412427590994 132.492444216154 144.159316670264 149.435684626505  
148.911306526869  
MIR204 140.525013926642 139.505864135281 137.578516107502  
132.154131623051 138.719480482945 132.191100992151 132.437234970375  
137.345542507421 132.269567096683 120.263659727964 134.8745127454  
140.223599881961

MIR205 120.006982591236 138.491922816359 131.956481591804  
142.993401965852 168.132172570809 163.48462232122 623.409211766224  
221.719848707318 193.704510912321 410.216584967666 983.094485868275  
238.782040902727

MIR2052 134.206518622834 138.221749464651 122.129348411763  
122.506058130261 126.460390022632 139.108656684059 132.566074764755  
133.387065801837 135.750578960284 139.175421159925 129.786941565218  
133.980792743661

MIR2053 128.876385705559 160.031506612501 142.301581642006  
151.511808301993 150.685245572093 159.874161198304 143.58555556787  
144.787836177147 129.652331277375 163.081050585097 148.424970450231  
144.195705502443

MIR206 127.869038038293 119.486895914055 128.980519133484  
144.752418965039 141.222884136243 121.796519488793 114.607138204495  
126.667650990284 113.083678884076 122.347696497767 132.963761182049  
118.432307370605

MIR208A 142.108805047729 124.627339426244 121.242099666967  
129.471713415228 139.199446543251 132.649409216699 133.780423932326  
134.268075583733 137.134190411005 138.756638791139 133.001613667656  
127.84589484404

MIR208B 130.265055842999 124.654146040634 129.997181739652  
126.934059693116 122.010855318111 133.346626315812 133.541333581593  
144.863617174741 130.582210755516 128.76720970745 131.87404363664  
145.452220050902

MIR20B 125.034243098087 122.190734676247 122.670689386332  
134.091723054647 127.287538993899 116.161473967382 117.503848306325  
122.297401003756 124.869732867761 107.316786994369 127.83654093961  
126.66432941518

MIR21 127.422129210789 144.6567095695 124.758906471654 124.646093292382  
139.623194916971 229.373686092654 168.588120398433 182.827395663312  
165.789846154721 232.590542016298 409.883222213537 221.768507175814

MIR210 126.245597154052 127.947547987882 127.284885819903  
131.563719927798 130.402496960735 129.895388481159 143.114384950467  
135.108420614547 150.088034336851 143.053727675518 140.722297244564  
151.598423878653

MIR211 128.545699891734 131.460388562433 120.163286072512  
127.849141499408 132.069175779393 115.170176263172 135.18026749895  
117.392898601408 121.281990195113 112.993452506946 126.976353967127  
127.3079781139

MIR2113 147.069488043503 125.40832206502 134.243435358729  
128.141725976839 137.30143217822 152.371569700039 134.222453538421  
131.190238038695 138.119788738226 143.725497952919 134.628807679002  
140.274655651173

MIR2114 127.781732819297 113.680875214845 146.882746173951  
132.112112196592 126.075528093376 119.640086587188 121.564626579011  
124.627339426244 130.716570410608 121.743701509981 132.221351364892  
125.165254272421

MIR2115 153.846723846716 153.173746756225 159.14477373952  
163.821142892643 163.315865817864 157.028963417138 173.115418167551  
165.803549113373 165.491193869938 137.170666175895 155.820194280153  
160.203521879896

MIR2116 219.129781831192 231.600532144945 227.177100762395  
292.28857006885 147.459385142695 232.735767435327 171.035391211596

222.565515020501 203.999142031297 175.686248503777 213.7326050342  
172.197077149985  
MIR2117 114.893462783007 142.243866937888 136.799138736925  
141.378381097266 141.821550320574 131.850952248545 138.700301754711  
130.217791888656 137.361967082029 145.534520042669 115.37736249419  
135.061176512365  
MIR212 122.996616773523 128.775477649887 144.331409179705  
133.278923716119 122.498794845416 137.381470768186 118.134614195753  
145.029298288869 137.271702725819 146.867740388881 148.417929733447  
134.362834437771  
MIR214 120.384210318 116.501174707117 128.200531810126  
126.409995188106 131.144774362059 127.74861041569 124.441699369614  
133.268239762624 132.5377752987 132.450954427876 136.957209426823  
119.285026330891  
MIR215 161.585555680663 123.822571859503 161.466192326759  
174.192898940601 118.527464364564 130.001889950186 140.408989128575  
150.51056917809 162.678619800767 168.061346742356 132.005753222789  
148.686975104375  
MIR216A 125.311403516443 132.087183382523 137.934850241054  
138.201164395948 139.853333847856 117.361778263056 115.142111396055  
132.596941171401 127.765987130281 123.654787271088 119.198789189881  
137.151210946281  
MIR216B 137.95243466771 115.545558600232 131.427686241226  
125.752962155179 140.60741459333 127.471479301983 143.561114996045  
153.585849286113 136.711382832269 128.485150698799 121.689416823766  
134.384963577069  
MIR217 122.469113037809 136.231747456996 130.322436253881  
129.785078660064 129.033433971346 142.747793303346 134.190511945944  
127.855167644203 126.841836614341 127.881498149714 128.383541329939  
126.755389668637  
MIR218-1 135.229197100212 142.382367938838 158.125437004665  
138.859261763075 143.082880435412 138.560399473164 144.2753860947  
132.089375920534 145.96012463103 141.733840643889 149.143087870963  
137.940675746397  
MIR218-2 134.947657801444 127.442587366678 128.626051185037  
135.509927917168 122.733870240098 142.545823714168 152.646642492666  
126.595668758744 118.419311800417 145.654559623732 141.168198348093  
138.026155846749  
MIR219-2 134.479828866339 140.343790129071 132.175368142549  
128.124456615525 152.277810621542 128.878051599968 148.373866613126  
145.665933751618 128.411138850655 138.104527851969 134.703474191011  
145.200638964782  
MIR220C 129.495680232567 134.423260547727 145.928643520352  
136.492892469272 138.9183380982 130.390722272955 119.555954372381  
129.723501897231 126.396385337235 143.903216264503 108.021898335735  
117.969576809288  
MIR221 121.188761627967 138.962649407431 153.0141888126  
127.881498149714 127.844624093148 145.274345879987 142.456527359961  
134.613036378054 143.686906051698 144.96670085147 162.453586139402  
142.545823714168  
MIR222 143.804903119745 132.484079454476 124.418295003824  
136.638141963514 136.482609639417 148.930073905413 141.378381097266  
129.419280058541 132.752401872376 123.972321838378 147.879286704  
133.054453517834

MIR223 133.257477196196 123.267817390796 124.740700441589  
126.563876945046 128.276471459777 135.417519318028 120.493082096235  
119.057157701097 128.705587172572 120.182787241888 136.229159638766  
111.65024009102

MIR224 116.14662237541 108.226917034591 123.117923525539  
130.12638520846 117.856184272322 115.463150857002 123.955819747616  
115.775525016883 125.944185728694 116.388079393669 137.453705355364  
128.568463697992

MIR2276 139.972797966319 132.373302367869 130.567443018832  
124.070171664904 120.118873350459 144.526499066594 118.770061426689  
131.170481977406 134.737901773547 135.848022588175 124.715454831847  
147.774588146924

MIR2278 116.943791343147 124.679444852938 143.157807632147  
134.049094181433 132.057808599068 132.829401072883 131.345038923753  
119.640086587188 131.734429913106 147.962721373177 147.2233876988  
143.544671705984

MIR23A 158.784190231286 141.791001213681 138.142193489481  
141.524239210761 132.109267393571 138.771088752839 128.176779923348  
148.815219352345 138.166546598846 144.81689330206 135.47852126603  
145.728370703165

MIR23B 135.949683946034 137.27298184582 137.109541758085  
131.256325361974 138.925802905636 128.680762033378 166.04965258862  
130.368933537243 128.284564251279 155.05329654089 135.2979041294  
150.557982810339

MIR24-1 147.614293127043 120.55570440025 137.356539213081  
125.160161268474 138.032265227728 124.731056918418 128.329985147034  
146.812248482145 161.651643789597 124.975454733084 106.285472845323  
119.792515907708

MIR24-2 128.563180697606 137.85618381155 129.063617408979  
129.920586100555 130.058902161953 126.391083453973 135.017196494069  
120.345546077894 127.109798012351 136.256456726841 124.536322123442  
136.285410546751

MIR25 134.629996026323 140.348718082786 121.303696898208 129.130212375815  
142.448384713937 146.018097597373 151.821324922628 147.479390172796  
162.018860183534 146.959154938248 158.554429311951 189.450316943845

MIR26A1 104.714872508838 130.467450968785 126.978144285534  
137.572574328004 137.322392546784 128.029736384348 129.063617408979  
141.054587977578 119.446359837504 145.861217875066 114.902673141786  
115.76177719261

MIR26A2 119.562180492359 116.403106568357 110.333339548402  
116.491342107103 116.14662237541 110.562310620515 143.561114996045  
120.006982591236 119.787925356307 122.522978939399 131.704192327287  
123.881658891576

MIR26B 125.848597767733 131.01107240791 125.422348389595  
131.190238038695 149.166635189875 150.748298569951 141.241717979079  
151.239879652761 129.842252702648 122.937281123348 151.831627236638  
175.093007163166

MIR27A 128.274326990056 132.751406897891 129.366567668463  
128.383541329939 130.43775024291 127.496885890349 137.070864654394  
122.120307446003 128.975785280465 142.480203661104 124.058332474379  
128.763176477983

MIR27B 142.612035986517 119.696656494403 111.152235113722  
113.301733735994 127.675206134992 128.126354569418 134.626371781978

120.263659727964 117.986939058467 118.930792960643 99.26400442869  
132.057808599068  
MIR296 115.566303449363 136.743659350798 109.438965262717  
119.578240680666 120.735176435195 132.675172817752 115.080736217256  
108.007762863766 117.470731811595 135.931715324468 125.311403516443  
130.941645638407  
MIR297 144.784835438567 143.140502042489 131.591176736153  
121.908945872994 128.042181036687 127.779401352802 119.164791441052  
141.092486112278 123.694678408411 143.467053670148 131.954310449801  
144.112401069818  
MIR298 137.265533487496 137.929082565223 139.046174587432  
136.05610450926 141.953114738413 143.73525260312 134.888404433315  
136.589250394236 129.044445373107 131.804952187685 132.53122878527  
143.227410286571  
MIR299 128.17223916536 119.774204444899 127.451155926679  
116.609122768341 133.271506838359 154.064184525311 128.495276191943  
120.216999784094 114.830474086443 111.457176315964 114.987285062108  
120.288469716375  
MIR29A 129.652331277375 127.503849690009 141.075421936212  
134.491232148834 147.640100078933 140.020294940544 128.245734702114  
138.648584951121 140.401508808129 132.373302367869 141.117659724704  
127.779401352802  
MIR29B1 141.178668371671 143.506243892155 153.028658323116  
115.142111396055 138.497931380734 142.478528530514 147.716353308549  
144.277263594387 138.401406375804 130.444766583917 169.158049136321  
136.823008283157  
MIR300 164.185346950306 155.523806637546 185.923374274306  
174.02138265758 178.429953283621 169.830073234366 192.804447792672  
166.627372924295 169.032464199628 137.552979154943 160.159630699959  
170.676752248138  
MIR301A 128.599254558082 121.099290122973 129.668506092785  
136.949403128211 130.684569384626 122.667593730152 123.031945101045  
128.040201586267 130.656206845965 120.210439163369 126.025161261042  
118.836387680022  
MIR301B 128.297879410629 136.349603320553 132.828179725129  
133.190147746722 140.283106734666 127.135199316758 148.11536596061  
155.496190048502 136.528123792599 138.907036194384 123.010614051218  
131.90169441925  
MIR302A 140.238423894192 141.524239210761 133.976997391944  
149.801573181126 133.849237689264 154.201375471487 159.05213637758  
149.939035476611 155.490897312915 144.822943770596 136.91779948054  
136.468434653208  
MIR302B 134.914830257315 137.340844554597 137.858371717399  
142.448384713937 117.532063783977 132.149864626575 133.883527462382  
130.114464233633 138.907036194384 127.015086299437 111.73388372572  
133.123444023892  
MIR302C 130.644937322186 143.833057210822 132.923237903246  
144.623222072851 150.218643705925 157.976810829398 153.398587738216  
142.135495724286 150.538541347453 214.662648581622 157.148880624381  
140.007937555694  
MIR302D 125.704264033102 131.606765174514 125.157459724842  
124.661088039427 114.812254477058 149.437212090587 126.76986764971  
127.7962242731 135.161667673191 139.803568564059 143.053727675518  
150.629932241703



MIR302E 108.604763499678 123.657246099004 133.707285280448  
125.486324819682 130.326980619676 147.104847897266 118.375739674144  
120.436408685057 124.627339426244 136.687813884132 128.152956417755  
129.788395150404

MIR302F 134.801507994667 131.290698895743 145.560904207183  
148.702473828167 143.200939506995 148.446949168794 144.161672064561  
148.162914253981 136.321816321193 134.751916364581 125.347442446239  
142.531683761072

MIR30A 135.812301062763 133.502176289023 125.126100642395  
134.821778017915 133.921012946195 117.570749340011 126.737230874367  
129.669484303621 128.606360476298 152.772177215856 121.201267751612  
106.923686318112

MIR30B 155.933739693912 127.597601325212 143.074187168031  
145.117574928189 154.016622581204 148.104173238606 135.627840788802  
144.510062568989 145.628239642187 142.91818218442 123.601413134287  
134.509830749072

MIR30C1 139.397282021664 136.93893152919 127.445199722147  
145.34533633425 126.322527679273 128.005043478952 141.908791151061  
135.388750095746 138.299629744589 141.225533609907 132.924341641217  
122.928863588006

MIR30C2 125.926774314737 126.925982415892 133.527906709491  
138.011154515216 120.122719226116 129.527271401014 132.867957152044  
128.001109846227 119.578240680666 131.314766140505 124.329980024986  
125.095999326598

MIR30D 154.657316209848 147.001408450583 133.211362932569  
141.432461374482 164.74234322574 137.5954358221 133.768419410758  
130.894384800009 147.303997146992 158.937341335707 142.988500173397  
142.680136733947

MIR30E 133.24828292554 129.445240570626 130.122672154144  
134.457932303561 120.351217130679 131.041996482401 134.389518389888  
139.77436722364 155.099575681229 130.430917518283 135.494894933583  
127.831950458406

MIR31 135.031430487047 126.828097770667 126.37572518012 124.74291205933  
133.742490937191 137.534079082878 152.44293820056 145.110145981908  
150.042173991463 124.873289279767 110.586147059226 138.248708129528

MIR32 147.585987099202 130.543453631154 144.741063866547 150.378690719669  
133.392934239554 140.300833590056 145.737361356678 156.920867019849  
141.494666823639 153.13384838492 148.683761948082 158.109836032481

MIR320A 132.146027935802 132.079255703621 133.892661981648  
137.271702725819 135.920830568556 126.802963197337 130.191876914166  
134.85590586532 120.857635836068 127.625252349231 132.598022317288  
126.912226185444

MIR320B1 143.801139839773 125.897190440417 128.862699779871  
127.595574823053 119.511962218143 123.156154667242 124.401083237195  
146.633627492419 125.525241361472 137.286331849749 114.067790137477  
131.604121223902

MIR320B2 127.125906877098 124.012439490264 135.229197100212  
118.807135693934 121.607527525765 122.932745723044 118.338713846941  
122.670689386332 126.33556674738 129.92319548307 111.632811186988  
118.397482835514

MIR320C1 134.673861365626 139.313456284725 145.648810303756  
143.716377201615 141.870640394206 137.508097741526 125.299513989334  
125.40832206502 123.364999283696 132.858424396011 135.991630745082  
141.524239210761

MIR323 163.868129628544 155.494095135266 136.937327692084  
127.183924911179 127.480717762966 158.543671159518 145.85414203374  
147.027904536486 148.522580898717 151.276193269421 141.466287523861  
132.385096888962

MIR324 131.782007636511 122.699993989189 135.778099658349  
127.633362302159 143.217978435486 134.119276589666 134.072912593456  
133.441783287131 139.606654715326 124.306049555272 140.868946922293  
128.548201588898

MIR325 135.938590242744 120.297848408451 127.342017026873  
120.85013281321 116.186846885411 131.146604635155 126.980375035189  
130.803561448083 129.014545365941 116.572001618531 116.280157890082  
128.202619705343

MIR326 133.778595695007 138.521952850632 127.593764897583  
136.937327692084 124.180511991605 132.158817539201 141.600833670693  
157.895460674072 134.451423371791 126.029431525943 134.049094181433  
138.573829193205

MIR328 145.326803807448 138.721343199179 142.96594961303  
139.754028208983 150.529257416176 124.98399667725 141.226901872221  
134.825699448987 147.145932651151 137.773960847088 141.544454931788  
137.894482933806

MIR330 139.792313018728 157.103246263523 150.70383460714  
153.391895732807 173.169905329013 142.902838068479 194.186994486095  
168.470685171939 154.227433553131 156.119899067238 170.655648004461  
165.327972973978

MIR331 151.879398444495 128.678484452077 120.944267930809  
134.533551900843 147.320976507643 148.901723851925 144.040342300793  
129.165440930558 132.151765465534 136.81406168343 117.417112053842  
133.654232991228

MIR335 141.931274901572 140.949367846425 131.850952248545  
132.100026388604 120.964862799634 140.812334019209 127.015086299437  
140.50127034921 126.282575548237 138.428527640896 148.607885635446  
136.647239621513

MIR337 121.080413308265 123.913203953936 137.101280421516  
130.914932329297 129.21974206851 127.625252349231 113.051381310122  
128.988736837863 119.341806810441 132.752401872376 113.091739139626  
124.568534983277

MIR338 128.186963138555 119.755151432304 144.986655090517  
123.035401501279 114.093935026467 124.160433356046 119.643417329571  
122.174036435094 127.395094952914 132.253450751554 124.825103464238  
127.900901613784

MIR339 134.86940314824 139.237360556305 152.047317751834  
135.373824773008 127.856634523494 128.485150698799 138.647667867725  
148.85250180736 137.784270510433 127.034985265748 130.207485841284  
127.0631494857

MIR33A 135.071400668179 131.899614022767 133.929311295884  
140.502667595362 133.272540012108 123.420635380886 157.406969627689  
133.357385559881 143.393174544776 125.742631850732 116.214857935694  
126.151017944639

MIR33B 156.243337414127 162.793214727475 171.826623289946  
139.172437503442 146.058477355527 140.509950286228 165.51742391186  
162.940190224943 160.870390779084 202.162432624505 116.305011582033  
183.280853265083

MIR340 128.63301490285 125.803854387512 118.034262386827  
124.59937620719 141.533138525284 128.973904070983 124.588594750916

135.789381967525 123.813766735115 123.259322051795 132.764150075465  
138.508015596135  
MIR342 130.576944864484 142.34471764492 121.51208055933  
158.23884088767 154.003862874241 128.134246199718 140.747967724586  
133.611588728019 128.824243581806 143.517327774456 147.027904536486  
127.456181182121  
MIR345 176.704617691988 180.364089931995 208.838523729744  
175.840639511966 186.57665470145 167.416417895159 201.637540930213  
182.763057221385 188.166168428752 182.263724979519 172.120772549791  
178.209994522672  
MIR346 145.06205326107 131.345038923753 130.339214643083  
153.271518348258 147.029988235786 136.990610254852 139.715836473047  
132.206133020786 141.272049404557 138.891642304194 120.975542702338  
141.592180897595  
MIR34A 132.079255703621 141.882859092658 139.444577046509  
134.21500333869 139.119638136874 119.75069850668 140.206268652318  
123.574319348191 124.251699375036 136.362761829761 131.917194849285  
144.316475814221  
MIR34B 138.256111134072 118.537378726617 132.562090247233  
127.539091409962 120.724926760252 125.081880303992 142.780100181736  
117.499697378893 134.264584077125 139.3864057463 126.693235227579  
140.36425603453  
MIR361 121.06219555903 144.518132543976 138.19108838324  
142.024171830924 133.702845956639 143.061415008831 130.402496960735  
140.831508792119 133.627389970495 134.595090783504 142.954747193455  
136.893392154262  
MIR362 143.754105312957 131.570358580547 128.102787239877  
132.221351364892 141.129013595331 141.196795654442 146.681183890181  
134.182902752156 129.846685899183 131.312580984876 132.671227062948  
143.124719052301  
MIR363 133.16973309664 137.519771130707 117.024039521425  
130.41429837092 125.362754088168 137.509100088226 128.72727523654  
140.888439624918 113.726931741236 121.961568081299 148.003041725027  
109.625579596864  
MIR365-1 132.960708384399 144.12742465348 143.038248313305  
144.112401069818 133.085476994246 149.795655754301 147.93442757931  
143.31117188259 143.931400351525 150.945167884077 129.378442664568  
134.691038011706  
MIR365-2 144.615156175885 145.286983999628 131.314766140505  
125.59966423779 133.032905765836 147.702785358046 139.282741110499  
142.837688062688 138.079494235456 124.907788504503 146.515240633175  
141.499192356469  
MIR367 129.11843197744 141.927204640355 120.224154897296  
133.095245865663 129.816385177336 118.457573670556 134.522715664256  
118.764650384561 110.304102941202 123.161953011069 115.128667174745  
148.577336081778  
MIR369 119.257387524365 135.341892490559 127.429775845914  
140.199334790854 132.70442458261 120.714981493593 147.815673580657  
130.016401638936 140.63666629522 135.369146072643 142.285486339143  
142.21279866857  
MIR370 142.185345091219 130.924141812334 126.899985772157  
135.294664456623 131.633827974141 138.858138379065 140.868946922293  
140.041977349982 131.466580723837 145.988387859158 137.468570135972  
138.613373798613

MIR371 140.626181314061 147.913148020331 150.311274161073  
139.484551562098 149.322537247388 166.988725688589 149.339492984504  
159.990561741675 130.726640485925 150.19577351885 162.656951764783  
129.608034744581

MIR372 137.517461260687 139.699189528879 138.020031233095  
159.005459875338 146.595540577994 151.167024833049 144.896960245309  
133.838032323605 134.530516701271 137.650917262528 123.872097378045  
140.083495854322

MIR373 168.197255166255 138.637735867167 140.672863685822  
132.02259465879 150.115482378938 156.238610152902 136.904851056919  
135.134213292186 131.123149002831 151.252137441251 169.815053752464  
152.262147284452

MIR374A 118.26427946535 122.382304966782 112.558241320112  
117.602986362773 118.122186617611 135.93352186143 127.112296857923  
131.318472643519 130.602539780714 106.629065516249 119.631847624882  
117.101933186269

MIR374B 112.321396616213 134.678445085174 109.416512252532  
122.165046954625 124.35374445763 122.038534506506 130.277107538053  
146.879019367939 123.135918415235 146.019622621809 123.603972078897  
136.908861280856

MIR375 146.343230597246 121.053766591551 129.413729619216  
145.526941881413 134.509830749072 129.782134019986 152.591091223395  
137.756209496729 134.897958140444 136.131453703981 118.510960607141  
133.148442269517

MIR376A1 121.860428893248 155.121309543738 144.694679571377  
141.045379969014 162.828844182372 148.185056724262 139.508029141287  
140.893078149667 124.585675323305 138.17454314053 130.738915341653  
141.079317977197

MIR376A2 116.547306374097 158.770502070553 131.49577981738  
138.341918073941 126.682913361149 130.912137250515 130.856249657101  
122.10489926804 140.388212037661 136.465185148237 125.874313058552  
131.249240371529

MIR376B 132.373302367869 125.104229604098 124.302581985661  
139.560555361919 124.295334523889 119.01236045062 108.669141498627  
130.905135502296 119.815258991448 125.837943228537 122.503984297406  
134.614988219821

MIR376C 169.9239788753 138.220016828327 170.590817818414  
146.582858169664 157.87020867396 167.719651771357 144.988803993714  
159.765585531442 146.503431281242 168.156002330441 140.978511668091  
150.778292242313

MIR377 125.685852196342 125.005019889478 127.251594986725  
125.796438432905 129.994160770036 125.940081665592 132.211379936941  
124.291944151031 119.663182347566 123.696942540314 117.47631318854  
125.08580835258

MIR379 129.902965506953 133.625358030199 121.865696440776  
124.83124879272 138.698178321535 122.631814400575 130.584348445667  
125.008209861774 111.253743009588 134.885883559391 138.334626498686  
125.848597767733

MIR380 113.133798430215 127.093255830978 125.519298131694  
115.16087297104 113.582654469735 135.592128081677 129.96280577492  
129.322481607056 122.885879294532 123.198873421356 114.528407572496  
118.192302821514

MIR381 150.412929574507 138.97776257708 125.444541266623  
152.81544746536 141.474583706011 142.459230639888 141.292421722594

128.389494971858 147.736397115265 138.625185173046 121.846349358116  
136.282608531191  
MIR382 145.404469340821 139.287871460674 161.002880798225  
153.846723846716 143.658600740177 136.817517693076 171.61704153463  
155.890403934674 138.384797779855 149.141033677244 105.31352471598  
153.776361241587  
MIR383 128.79607493422 128.429007921588 123.096995744616  
127.930072902878 135.416008633632 127.663578933727 130.816301920872  
126.262349005661 117.862532836494 128.245734702114 129.680406696779  
125.339305282874  
MIR384 122.634741242406 122.813441348997 120.26749529985  
140.954264409241 127.980776299586 125.905785653648 127.006746526023  
129.910866236901 136.735930829008 139.006575383203 128.905042692431  
140.038295509875  
MIR409 145.967685593635 126.137627769256 135.205434173702  
131.989955864584 141.808122700968 147.118987674809 132.985645792864  
139.334552725255 142.17773831901 135.760578586004 128.375390373307  
141.204458186976  
MIR410 141.580944960818 139.31967261371 138.57506931811  
135.241029533819 139.034940762344 144.80318019871 132.764150075465  
135.200049257744 140.860339862967 144.161672064561 135.906115546805  
127.422129210789  
MIR411 128.949103967865 139.527577649638 122.629146433216  
121.150371270451 139.866536599877 132.486311240725 126.247378598596  
126.960777504772 127.080149144234 149.779323547896 134.074425424613  
117.428152859221  
MIR412 132.051614319023 133.353021292501 138.182987173284  
128.72727523654 128.570067783535 135.90207451581 136.057315824634  
122.428943658306 135.701041557713 120.55570440025 142.712218120721  
136.745596788338  
MIR421 128.773129597793 127.496885890349 138.424464248567  
120.686906898624 132.048276936309 134.530516701271 131.81975648701  
142.594553057288 129.165440930558 124.585675323305 133.704706615071  
136.194082458655  
MIR422A 130.957441406855 130.545285774056 136.698600389364  
138.407207709066 143.433730894402 123.410467384598 153.34166495223  
122.317877997527 123.935072913078 125.416113646128 144.710613442383  
133.171854425031  
MIR423 138.381508741146 144.145612985703 129.697584673736  
152.634465710406 148.211354898758 136.84488044614 132.608622131443  
137.747088378131 130.776213987522 146.735616237082 130.471929699923  
136.819892773399  
MIR424 128.720517906732 146.443892388756 133.077760160486  
129.069366041625 126.235567899449 128.147484804104 136.734131465433  
133.561912722761 135.693520183014 138.254479653425 131.897352210959  
128.033383607545  
MIR425 130.329453160478 126.561067704708 129.666957539624  
122.699993989189 129.916677638819 131.110018165002 134.00481287258  
124.116400777472 125.259164818744 121.838802846453 131.766114156138  
132.942718233843  
MIR429 153.369334953677 138.235127932016 148.522580898717  
139.469148541078 157.761231106669 154.993784224548 156.748330788367  
133.340152756136 138.570150372729 168.173803952157 145.944809232038  
142.521260841187

MIR448 142.13191463827 152.633139090274 158.863516051439  
154.423801637411 156.361037318986 149.707357499252 134.741781820234  
124.901759819007 138.231715814115 139.730999352036 161.564505054217  
148.188717941032

MIR449A 130.985360700521 141.134173683836 121.632494500096  
119.387459594521 123.207402172696 135.87026484074 126.195222228248  
110.764586138261 130.705091244939 129.483116877682 125.628281846465  
131.933026690056

MIR449B 121.334882368464 132.469190523971 129.256138453675  
139.717662557602 114.421383025971 126.649739818781 129.898242234869  
120.641590368902 125.472342351466 133.628391175037 125.563646710294  
129.104084188187

MIR449C 124.45782375705 117.644702868748 131.019345449516  
127.980776299586 114.585818507336 112.684334910243 123.038646914863  
122.03508430361 125.868080230094 126.837151457845 121.787875792887  
115.14883090249

MIR450A1 129.446928016147 132.265895156539 137.27827836407  
132.096095362238 145.318539677981 143.48729871068 136.05434446747  
152.612116997575 132.629453540571 132.776236872246 163.239195865198  
165.857032207991

MIR450A2 137.994334667126 130.140958819402 138.911993471119  
127.995790782392 131.523538461751 149.818888178632 139.792313018728  
144.998415908498 131.041996482401 131.595868226775 133.727447520255  
132.699715693605

MIR450B 122.425065110604 118.029258839619 123.277867938275  
129.570960882942 122.535728427528 128.36533737469 127.727311123825  
113.119021336236 116.483432723207 134.657787366869 136.333928675403  
135.175806654971

MIR451 162.013164369593 133.075748695526 131.7646616214  
123.100949494673 121.768195574022 126.978144285534 125.658396221949  
133.909219998872 123.839006667113 131.668163693171 123.952494134263  
144.861804210272

MIR452 121.134305707234 128.692917766138 128.601885372662  
115.090463537716 128.259909378964 119.643417329571 134.0676461327  
147.519991961858 130.93033679281 139.020070386495 123.703840971923  
151.043967734248

MIR453 129.397378057767 125.612670947405 136.278361222532  
142.945392802281 124.235958498969 130.413073895887 144.00214898009  
138.263361518905 128.867710054234 120.644987579644 124.783306383852  
139.005788243703

MIR454 132.956860864455 124.494727558127 138.248708129528  
141.874188629438 123.303143302526 139.980504765791 134.97404076644  
131.587987756056 133.320865155329 133.86835278231 143.021435512861  
123.170639180926

MIR455 152.868787961804 117.900892627473 141.317113425046  
140.775447163954 118.859745315302 131.204616536341 136.03420235737  
148.038291195414 148.386249316173 142.907969322845 132.943957535655  
135.693520183014

MIR483 130.255689301211 145.921381300813 131.308384127079  
128.895325544109 143.198622036573 127.274768398849 142.12808103815  
148.139376772567 131.273916869754 151.984619204523 126.796253980623  
132.820327307762

MIR485 149.779323547896 134.295466680195 135.641355114263  
132.125545886181 147.110929610347 134.316859658338 138.97443063851

141.245471037222 130.09050436943 142.953661611418 132.274654254761  
142.628296442123  
MIR486 150.2214516849 153.610428214886 146.805832438977  
142.822594215168 143.303309656177 136.140327952231 156.339564110766  
181.922907273871 134.81595608984 148.284412570438 135.663734178125  
161.470611189347  
MIR487A 149.300089212177 134.655842662899 135.159590925066  
142.13191463827 143.675696734051 143.613003173841 127.833653828539  
132.934955542743 135.453399741892 139.280151859534 132.329892644992  
131.49254872524  
MIR487B 140.572442284673 123.981053866137 110.847680175669  
124.815853677553 132.093678438298 141.097257687941 121.653754668804  
130.485988201308 127.044367488881 138.011923055019 128.959487155628  
130.807596523171  
MIR488 155.172667450053 158.039920243116 155.475804754732  
132.930042559647 182.588697551677 165.134931755194 206.027235767232  
165.406452831375 154.969503835593 175.704031930103 164.032302455558  
173.38031514498  
MIR489 136.297963196301 121.59661598908 131.437847958077  
128.17223916536 122.527517633626 134.944488136297 129.180990946063  
139.757191608836 134.519697269443 130.742940708861 127.265211069837  
136.465185148237  
MIR490 143.825062714273 156.254944793402 147.763017438098  
138.132390735567 136.251820364823 151.796986456254 143.94902198632  
142.889911562811 148.439740062804 156.798431595608 138.308965237491  
156.540165645256  
MIR491 173.287859527767 139.446914318877 156.978585870854  
152.798927898416 139.543551482943 150.244284323504 149.471240458766  
139.623194916971 136.209796259197 137.698423468762 146.328876892698  
146.406344338757  
MIR493 150.888616811881 117.045020667394 130.849201993866  
127.575660581922 130.792692240592 126.421148348261 161.8627732644  
131.290698895743 123.61956613951 153.149523560021 127.451155926679  
120.606354515072  
MIR494 151.622719246408 115.939620871703 133.18744841514  
140.197487078987 131.652854369619 131.029333093048 136.68056120003  
135.48250324478 123.400143662218 128.56495182759 118.677203713024  
130.720097323382  
MIR495 127.385776388242 145.431393142782 124.682396766302  
131.347213356457 134.105941085621 149.125425566378 123.019430618632  
121.796519488793 124.853659050216 123.327238774943 126.921925660996  
123.657246099004  
MIR496 143.152993168137 148.327340543504 140.934144636302  
140.964208731587 117.101933186269 137.916872642522 126.148379057536  
138.142193489481 128.793186785667 145.681968019851 139.418394104487  
118.258886189283  
MIR497 122.262664384198 114.115609163126 105.771723307783  
122.490271802207 119.168045349254 134.93814894432 131.335344547051  
117.494422663086 129.797601100832 138.325950428197 119.334967856721  
119.98864381644  
MIR498 143.526983440589 151.167024833049 140.818413826758  
160.423982411027 153.920180168328 153.848852170776 139.685629122498  
148.076841184769 138.720489866687 171.528350399075 159.257221624668  
143.065258692424

MIR499 111.608386387842 135.747939020471 124.066239570648  
128.853089272901 135.940629737073 166.095964870713 133.001613667656  
125.668463983985 133.331037738063 129.189479305468 130.877306095063  
121.818632020666

MIR503 107.126004317323 125.095999326598 148.956326355381  
137.159781458748 129.684916104674 130.70867409848 122.056070994213  
137.307786147787 131.097598299707 122.69021100699 128.119556520151  
134.772545694636

MIR504 138.719480482945 129.185514320138 141.86370253437  
144.970383956581 124.959873714884 145.217261514886 140.175724588255  
169.800006803362 137.714430743204 140.158309892319 135.1951749488  
146.179543599917

MIR505 131.230501496659 131.558842131826 139.231340020014  
125.016608289141 136.205702793983 153.571517567657 135.877646659023  
133.243679173608 147.532747354296 126.473768158566 152.721146962124  
128.697647007046

MIR506 113.989682635964 120.054065939835 136.280653079814  
141.169908353507 137.959775678716 127.310437599803 123.09149124559  
124.269446398587 119.733311319912 126.533083459283 133.305679931132  
133.082433951922

MIR507 111.423140302983 115.687997771921 132.950480329605  
122.449574852865 128.047981250943 134.10707191601 139.939863187181  
122.992700222262 128.436499050769 119.382151435379 146.309171902112  
129.756642179083

MIR508 123.065355919378 130.95176570982 129.748891462506  
124.777895136212 136.669003646622 133.177950880393 124.750963415771  
121.768195574022 117.199217938531 134.76397845723 129.051642626091  
129.143168240589

MIR509-2 114.906396746556 124.130599753093 140.121874960672  
144.863617174741 115.949513659403 113.370762349233 124.922004609558  
131.081793789906 126.520909083643 121.116206210402 122.144209450757  
130.344292132363

MIR509-3 131.943014970855 132.059507616101 128.523703756493  
125.566982723725 132.140547119679 118.08607083874 131.832311911703  
139.010652831798 129.419280058541 116.700397932007 140.775447163954  
128.445065383646

MIR510 143.497909064641 145.06205326107 144.955918499353  
134.631638658586 153.658747612827 128.730649233876 149.815494316469  
140.368070973566 145.464640276742 132.952355710395 137.410687900298  
136.171728950893

MIR511-2 173.189465201573 149.44788347071 155.641860356683  
174.962380276394 150.006621336954 135.161667673191 160.254101852355  
148.507598818039 163.718595974283 151.893573927407 138.527552293918  
155.187900101727

MIR512-2 123.132178371802 132.950480329605 128.458132030921  
128.697647007046 121.696353230886 138.42216862811 129.311134743311  
121.154389729409 127.213640193364 123.02546895475 131.717160947964  
124.148194572004

MIR513A2 124.791221329502 127.065518421996 135.501192996538  
127.640525889316 131.861469782134 120.819163462986 122.355409068882  
129.147246809319 116.670491972948 113.886420801388 128.11006485185  
122.484351696828

MIR514-2 152.72717701452 130.501010489883 131.481679396553  
141.152406037213 123.156154667242 148.134642821094 155.971045744096



139.130560988108 135.675570204709 145.948772123142 128.949103967865  
131.371129237005  
MIR515-2 149.552704503066 120.560056224145 124.477586539576  
148.069725041021 129.054577477882 132.793020446043 133.962129094978  
145.128919984856 145.187490179166 132.247611790269 127.430408113725  
134.8745127454  
MIR516A1 135.701041557713 125.537538475612 122.727385599754  
136.886677060418 126.407313060022 124.480385254916 105.859916438163  
121.760488406107 126.511314417328 121.901018642508 123.795544787736  
123.296382913131  
MIR517B 163.280786875496 143.270153772245 151.61049450647  
169.574755162815 169.428195354763 155.263513633703 136.852403978525  
150.741291526753 157.955606242401 174.02138265758 144.631407964232  
167.604959895451  
MIR518E 128.955241553429 117.051541123239 133.467092274663  
129.842252702648 118.338713846941 127.512733134453 130.470034945295  
136.716554749722 127.132970760907 139.860093278582 152.97753810644  
131.630132952441  
MIR518F 135.678138913772 147.754489751457 134.983884722607  
136.882429810263 136.37481047902 136.492892469272 128.686425820835  
127.593764897583 125.839101611277 132.641236788053 131.440195723963  
137.710725379804  
MIR519A2 125.687688416588 156.516250236679 144.892454033336  
126.439948611449 131.848213704003 135.873325130921 128.186963138555  
131.089811472017 117.634514818946 139.249869918235 135.306127055224  
139.886499402506  
MIR519B 130.565986980021 141.321547895734 135.997144927956  
143.368327095618 141.576177844986 146.166710487448 136.792957035581  
131.76829141949 127.510611041295 148.732027660387 139.72868421672  
138.296933822299  
MIR519D 138.952082680577 163.385727569154 166.958831664154  
141.191500203423 149.217191121377 161.031148038478 128.572388808833  
142.446514275674 174.603285240228 141.722817732641 155.243643210534  
148.913181799692  
MIR519E 127.654130155446 138.506569544482 139.032275257901  
139.628966306048 132.334666750573 145.97330701968 133.403409882362  
132.576755070703 131.988591391373 145.540872377507 135.588132669957  
134.751916364581  
MIR520H 123.288028185949 106.923686318112 123.25201993575  
113.822580779824 126.033673708286 113.87024833117 115.827175143972  
131.028469461315 116.070254821073 116.305011582033 125.861564323476  
111.525984720592  
MIR521-2 119.125002207396 117.374025543149 129.088718286391  
113.05681175258 129.467792559297 141.461435494985 124.679444852938  
115.120702589487 118.673325109944 126.862274244977 118.660213790078  
117.017844025726  
MIR523 130.894384800009 121.224389883994 136.678188851101  
125.612670947405 137.20253329376 134.32174235533 122.115925891088  
112.699674279523 118.215641556163 114.072600760808 112.000309477972  
124.126715773068  
MIR524 126.580227722115 127.742948876822 132.657106732366  
132.295937828888 127.199124606827 109.932577444858 134.024205981268  
124.491884305455 131.2834389999 140.687016530974 111.672450681359  
125.572299527276

MIR525 135.218648235324 139.691470247318 133.783379558598  
137.180793826675 141.486042999328 114.428050500096 124.310436914027  
126.464893786922 136.236441543681 133.286702819953 132.865704994046  
126.407313060022

MIR526A2 125.628281846465 159.452527363763 145.270140096768  
128.702882993588 161.050438117555 131.176413983785 119.275061991187  
178.329946332806 136.008118769513 141.289009185018 114.644722005728  
127.310437599803

MIR532 132.475414208533 118.757973008463 146.476960694197  
124.415058391979 132.70643154246 131.065633574494 139.85010721496  
122.204249636472 135.734075990932 140.316066297536 131.595868226775  
128.771367080039

MIR539 122.863612588759 152.175423676063 129.637555509848  
135.809383370957 127.610304071204 134.175287993769 116.276003190171  
136.341358916638 138.239251358245 119.937665469629 122.978576290038  
126.416290818296

MIR541 131.498890334548 141.140392288975 121.774697402171  
145.08853313195 118.761737418652 133.052615777603 125.94880312094  
135.146767090951 135.417519318028 112.096627288813 126.730314982553  
124.405905157157

MIR542 134.292099546804 139.236217474885 132.435409278702  
136.167141767484 122.989642938474 122.484351696828 125.431735524937  
127.669334230458 141.587109176431 140.380630560717 145.666712006532  
140.687016530974

MIR543 135.91276813517 153.907737500104 145.299625153537  
135.391788614828 157.551854647702 160.315029612814 137.063689600869  
139.543551482943 146.978110148492 130.509415570889 149.110300099889  
138.42216862811

MIR544 128.389494971858 147.371905597494 152.898148619937  
148.670562837021 156.194996994993 162.61434899634 144.744603095605  
144.52304097966 139.220877923507 133.308383825604 145.85414203374  
151.773749014775

MIR545 146.83577460518 153.415901281564 150.166324293431  
143.105974876327 130.172041917023 153.369334953677 138.737332306848  
139.762998983487 143.635367691412 149.035590153457 135.964630862223  
146.790059505709

MIR548A1 141.980728956046 141.383975990479 133.552141086987  
136.74788009263 138.596430973865 145.437544062449 135.789381967525  
140.946368538661 148.818562911616 154.306729472627 131.429247528936  
131.560971848628

MIR548A2 129.233595525585 117.279162323013 130.746465595759  
119.682747854629 120.433080754232 123.389038274913 134.294287947795  
129.553282780541 133.871685084945 138.855454645579 145.569870279379  
122.068058346443

MIR548A3 137.742393475755 125.9888344762 127.949413503055  
122.94737290641 128.11006485185 118.840016023602 115.646023142125  
127.972708116366 120.839256811295 122.046901607713 117.917454674671  
127.827096314406

MIR548B 141.733840643889 112.666812944192 138.72219653692  
131.275712196961 112.268518171041 123.75974844367 140.350144438462  
126.413124995943 119.704436785439 128.645334554749 147.454902803231  
134.28095064513

MIR548C 108.768730405582 125.958139354095 123.671944323239  
114.488760619745 114.412739085949 121.838802846453 114.730641277464

121.207040901483 123.22295112139 111.876915242732 108.631224817901  
127.445199722147  
MIR548E 137.063689600869 148.525224975266 144.104372749581  
142.888281750232 136.85323853426 132.671227062948 135.487310036251  
147.389892239448 135.618562468776 135.618562468776 130.198147836925  
134.367115858307  
MIR548F1 140.928627507036 147.661748633455 142.749568012703  
140.182150393054 150.056508971921 132.727133259694 146.740694608146  
138.743505629497 121.455843337023 137.370670726978 134.208537331186  
129.782134019986  
MIR548F2 115.463150857002 122.799487123057 144.302925948596  
138.082870754768 128.318545300038 121.30744400137 123.260800590266  
128.99859423584 108.79453730066 125.339305282874 115.613348109569  
140.965498009244  
MIR548F3 124.977046954694 137.826458479398 135.489000274316  
120.71782441569 119.819082491115 127.646032547296 115.821231468312  
114.953328013917 115.967513057229 111.253743009588 118.303150165804  
119.511962218143  
MIR548F4 128.738746025289 139.285128128996 122.955724972547  
116.382348831504 125.902015309754 120.998665308561 128.570067783535  
116.787791109549 115.999443701343 147.75625228531 124.548598801497  
118.167740643871  
MIR548F5 119.472410874778 122.789656787728 130.712515995658  
131.536457148878 133.838032323605 119.352995485911 138.068164255305  
130.187833435052 132.570225520163 146.457939801041 132.049224908868  
127.006746526023  
MIR548G 137.709120153505 130.797498958616 149.824791474186  
136.862764950361 141.471127716868 158.039920243116 120.14201542563  
123.048352070915 113.568261995787 122.716563069312 126.50870982427  
134.352155462211  
MIR548H1 110.847680175669 135.292532783991 131.636779618185  
146.9554120076 140.277228495746 119.942425340025 132.683594640696  
105.771723307783 128.040201586267 131.374680878107 105.010952544907  
132.051614319023  
MIR548H3 152.528571776589 143.065258692424 152.319720089773  
143.127795310829 142.493119780028 133.757741295765 132.765942975939  
155.983060600874 128.671626815639 128.929244741296 136.986022901377  
141.069243738242  
MIR548H4 121.665157726433 114.400185930969 112.248047602652  
123.330142002791 130.2867846895 122.780453116176 110.553759711075  
118.88525116298 114.76337651891 118.660213790078 112.916256784817  
123.086596566142  
MIR548I1 147.16778072296 139.051656180599 137.468570135972  
160.695913747601 159.563866056798 143.090886224647 140.214475962177  
142.605816057276 134.996443685544 130.165488538277 146.675159409376  
140.975056186954  
MIR548I2 146.617853918109 122.804934452095 148.022287939066  
138.50252234048 137.460936879873 118.426600479326 121.912927816178  
133.198832503062 125.498081339586 125.596067857941 105.925737068775  
125.259164818744  
MIR548I4 114.350596695469 118.289405191861 145.532712030342  
132.227561632637 143.912136782374 140.14062775887 124.446264376282  
116.929398630733 127.876894098781 113.620070198869 127.239282651919  
133.830860948014

MIR548J 137.867263869936 117.412956162665 128.221548195595  
132.953762692926 123.336074100984 126.908123260394 138.631273903053  
128.141725976839 128.593112520767 121.939618902165 138.97443063851  
134.757300066835

MIR548K 130.258933321051 132.094446606227 139.853333847856  
137.821010169859 141.8268805463 132.053242760381 130.99564079691  
136.384308041001 134.54796737809 134.175287993769 148.016402654687  
142.951829221947

MIR548L 128.190822428484 150.772752327567 133.388533738482  
121.053766591551 145.43470695949 147.351826045609 135.443856371548  
121.194138394375 122.167669805597 120.257886394616 119.005230164124  
132.05513812578

MIR548M 120.644987579644 134.624322761212 133.460655803085  
150.122035262873 124.501262458393 139.078162119733 125.549968985241  
136.528123792599 123.849651946683 125.717328918165 131.319783710908  
145.08246303652

MIR548N 116.831725094917 121.501959818928 129.527271401014  
143.118188813831 130.786835186349 137.267307036807 139.741862925156  
127.648224668964 130.677737553727 153.865702787334 140.290598244169  
115.750690887988

MIR548O 127.694189114288 132.454025879177 134.746175914762  
133.392934239554 153.140087873773 133.645044060866 131.838522109796  
125.405373274081 129.568951363607 128.618422306397 128.165775629664  
131.410793139723

MIR548P 138.783017264895 130.850419527271 160.35668299062  
115.080736217256 126.308622415913 113.091739139626 130.71040889651  
142.739686751422 134.840285218383 130.020743385543 138.611074796816  
122.149756212115

MIR548Q 114.428050500096 127.195619567384 120.517691208358  
125.398875527365 135.141067086648 131.330974614437 135.143532936828  
120.530092530622 133.804489975068 126.763282018991 126.960777504772  
129.447773229782

MIR549 120.024235522682 121.567879358508 127.57284871013  
126.858621735156 120.11244856479 135.651829752462 136.472404812817  
127.073045558761 120.672291867109 123.671944323239 130.221351857959  
120.035437167539

MIR550-2 152.44293820056 128.466244127634 153.255318944823  
130.551216910933 136.996535765175 124.446264376282 134.178733595096  
134.271916545532 139.853333847856 140.446530307169 131.40880014672  
145.912712700067

MIR551A 169.9239788753 164.726382689707 146.915247627846  
143.48729871068 138.50252234048 139.779754416105 155.183210738478  
157.038121210505 157.385256442734 135.959893035019 154.792156982219  
142.793573585472

MIR551B 138.753419730571 124.277983696239 136.236441543681  
137.869471689534 132.100026388604 157.765771942689 130.207485841284  
125.935071837868 125.765399556488 128.594951429021 131.294930860752  
149.968749911496

MIR552 118.060781901686 108.021898335735 129.297217956843  
123.646558103253 135.114900669781 108.895922800601 109.728809191027  
116.973126196102 117.523834738903 107.395559299582 103.36057518781  
117.946664604751

MIR553 120.757288533244 111.716607815635 122.410340121549  
122.770033312519 139.3864057463 128.314990390649 123.916497557628

119.567911704298 111.032156655273 128.988736837863 128.407968177242  
133.753999983813  
MIR554 129.187574143637 129.953801496113 137.769431537236  
122.376432064286 141.331397551086 132.328948598599 135.743159681223  
150.215811815246 136.925645302362 141.872426752329 137.353149614081  
137.384815877899  
MIR555 151.342902631318 146.6886556805 187.686326872667  
146.861981788662 110.753661013519 182.397795261147 151.714420758741  
143.296580629431 152.215146681655 134.227796103219 123.166013119235  
173.850390626782  
MIR556 116.248026336995 127.356622898971 117.193620642373  
125.324187741972 121.588054040961 131.963419175907 107.961322525982  
116.007006375993 127.346646117375 120.628904050564 115.293844461817  
129.966755942173  
MIR557 130.920010795017 150.84999247088 140.768926302035  
144.522461545204 135.934249020651 132.268445799639 147.038700869156  
134.115085057026 151.561151654372 138.681348536008 148.069725041021  
148.278828579424  
MIR558 138.681348536008 145.06736850005 147.069488043503  
136.664500207966 135.576975868985 140.997594159186 151.712097221291  
148.065080664185 137.402567669086 152.476932186797 132.50027119027  
153.574068503306  
MIR559 132.744261207073 138.371873773284 117.805556408194  
128.840466579373 137.369033684705 122.600274773736 135.409613764459  
128.147484804104 128.51523581959 122.922631510846 119.180033382937  
108.079149792796  
MIR561 130.684569384626 126.340955733062 136.931476050688  
163.113457178357 142.066903301882 133.320865155329 145.146797807275  
150.026314061051 136.19481894871 140.619606039582 137.929082565223  
136.722636695506  
MIR562 121.400652285172 121.30744400137 144.252481420079  
126.649739818781 126.433146708506 122.651702760414 127.471479301983  
131.458411820485 128.184708916755 131.381189141974 131.252368756892  
133.634886800037  
MIR563 127.121068682846 128.862699779871 126.457337803727  
112.936472036608 125.589744938813 127.876894098781 136.901107766796  
140.169200413643 120.280241193135 121.607527525765 145.212306927438  
112.298254005045  
MIR564 148.284412570438 131.525916493834 150.843975804117  
124.985249190127 165.370800097602 137.206961927035 148.320310040998  
141.592180897595 164.098880989592 136.430232926793 159.495272062735  
127.625252349231  
MIR567 123.323528039848 126.732121894377 110.408301129053  
123.81177057082 108.386545220984 121.123130624519 122.682761393215  
111.935554828717 110.518806964366 120.131839791515 125.785388817819  
129.483116877682  
MIR568 135.474070994652 130.656206845965 151.159145294127  
121.080413308265 135.773386496434 137.187640876289 124.654146040634  
134.446758753426 115.827175143972 139.568610307888 145.186696174423  
129.466612376702  
MIR569 137.418345713224 149.698664700146 140.145470073979  
153.350690419636 150.593928635647 143.973464003036 146.290334865039  
141.805028495425 133.026879831536 141.108383815109 152.729355306724  
135.886859004208

MIR570 134.54796737809 131.181537219479 132.590454200629  
154.843607752473 136.648306684974 133.985582992986 133.412452607155  
132.221351364892 137.945878061978 135.323341505875 126.32081560239  
145.522435728191

MIR571 140.696326952077 141.38612990166 151.665244763743  
118.544870925791 137.287492574396 161.8627732644 121.391637838137  
159.7197697044 140.605866597575 133.667852983262 171.909358721737  
160.168654167074

MIR572 131.400031203603 132.570225520163 135.497033143331  
168.437049123012 161.225608630791 145.267225993057 131.340453291188  
146.090291252325 142.900756181761 140.299459596491 149.532459719175  
136.380523452336

MIR573 123.709293439934 149.106615763242 135.934976183762  
139.380610974147 140.747015284372 168.643026828823 115.35376992547  
144.868337748544 152.461930328923 146.031321571566 121.391637838137  
155.303903514061

MIR574 131.882887826338 142.724123724574 134.734429133481  
133.033913603001 172.259627777465 136.659134200122 141.283042601932  
150.015696417249 138.661548678191 304.900910626137 142.976123206776  
125.98519427755

MIR575 122.211000410541 127.908872828095 131.271979461703  
123.687439699754 128.0366252162 126.705446263769 121.501959818928  
142.625414022199 122.595766303833 132.471759931885 111.683074830042  
121.781562010645

MIR576 135.758133410577 135.588132669957 124.726035027951  
140.061045085545 123.406144497577 129.7137422914 123.93800397666  
127.820096020782 138.142193489481 133.171854425031 124.101111442605  
142.452409969639

MIR577 136.3615279557 155.673532440475 144.278830378899  
152.107025120177 145.885577577352 167.049197726715 174.107661206415  
136.904851056919 139.6391154169 139.163958829511 143.861970001207  
161.331326682743

MIR578 145.68886453261 141.935435502163 146.493927564338  
140.277228495746 140.882766779119 154.778726823719 147.645530163725  
131.676609824921 142.518266591748 135.895945142328 143.639894909386  
149.526189446292

MIR579 135.699583036042 136.701400398129 156.930119977809  
128.720517906732 127.760995691556 151.518116154483 139.334552725255  
146.764908249803 146.563078818674 137.612446150193 130.041462255766  
138.050999864689

MIR580 130.784802403934 134.376870769669 147.537691509156  
123.135918415235 118.900338956203 128.346598756853 119.391213033544  
117.703025026759 138.706520278166 127.548070199148 105.816457443844  
107.74537523456

MIR581 133.590552542806 137.112274459462 143.31117188259  
126.506749037908 110.033746435328 128.984613946021 133.509538648848  
127.979574243743 123.296382913131 127.349190705235 133.651203764842  
125.027095330593

MIR582 111.328185454541 140.301945597122 129.093864368842  
131.105573611743 131.648308760913 127.480717762966 124.119104345119  
128.184708916755 125.920663904983 139.534014289993 130.049854901235  
124.342911165267

MIR583 138.813126946007 143.514848892447 141.382096896508  
141.987635042691 132.354503055131 127.016845640004 142.039943511086

144.572485418264 141.021723049782 165.964183460825 145.365935017728  
139.476234663488  
MIR584 138.720489866687 111.683074830042 129.284384810812  
139.195281937545 126.957335244119 125.396523818173 135.728336465002  
126.195222228248 111.243322115126 135.271290872348 123.756349408641  
145.749887769807  
MIR585 121.274997609378 146.413845130977 140.804008584006  
123.488418655586 136.528123792599 138.79473329684 137.747088378131  
132.086360948977 140.982448755734 137.28323311107 142.49005761699  
125.655823846115  
MIR586 161.988082494464 150.584633044901 161.066226957782  
155.655771857361 200.342786450248 264.383922859446 180.619956937489  
173.611295051326 196.117609477292 215.718714189719 149.758215028408  
247.053215951505  
MIR587 124.985249190127 119.407293854922 133.203064891923  
128.755697083014 115.208555742308 117.953453145685 121.350491314441  
119.673343767067 116.958052905168 134.403789206552 133.41548225025  
121.248923222807  
MIR588 120.862516074358 131.911579676047 127.844624093148  
139.681211082196 136.603035996281 146.75924072364 131.633827974141  
118.918962530408 139.955389033983 145.142331981651 127.881498149714  
128.002822538671  
MIR589 109.932577444858 132.649409216699 125.347442446239  
122.211000410541 141.370340242063 127.542288885184 135.227424713702  
129.785078660064 119.472410874778 124.853659050216 133.452032750397  
119.459625817735  
MIR590 136.159825652148 123.119524624735 124.253582884351  
136.211694310501 132.726182677685 131.556892859203 126.865622462379  
117.770032157393 133.519359066907 119.144128641393 123.007103885415  
128.115993005977  
MIR591 138.16337207876 111.603221942108 125.598828334465  
139.709959820327 132.819726980184 131.554055357245 132.783958633333  
143.138613573764 153.95615286919 141.997165490755 123.291258843371  
135.250379276888  
MIR592 116.947370388179 128.060612106762 122.194493542073  
121.519309043513 122.813441348997 128.184708916755 124.63978985808  
126.37572518012 111.922007318017 133.069347559741 108.333135424315  
139.231340020014  
MIR593 133.482237631013 122.583461806645 134.113464449375  
127.612859839494 111.43827410589 141.246352591355 129.344834474578  
127.769405736754 131.507618414676 130.716570410608 151.345630073141  
128.833756478439  
MIR595 134.52098220054 128.396326753926 143.429394097222  
137.471563342956 151.484420979498 123.96665768708 138.720489866687  
137.251513843314 148.492328039604 147.568851471771 120.184782039538  
137.97889661868  
MIR596 118.93828679356 124.859984709406 125.720102558499  
128.432188632218 122.438438464097 119.040642659337 128.478724185042  
129.029151164978 131.310537960214 125.422348389595 126.217702283708  
142.945392802281  
MIR597 139.406427549733 114.28381541078 136.267313223808  
122.379537202709 126.029431525943 135.747939020471 137.11719450122  
132.133979108537 142.481897141275 122.928863588006 121.341177395499  
128.601885372662

MIR598 133.176970578909 147.351826045609 128.086493618022  
130.653971083035 127.879723100698 135.294664456623 131.666853845458  
128.40650280096 121.164978896057 132.192775993078 145.331858938535  
124.717079082023

MIR599 131.429247528936 133.792673129743 138.054470878471  
142.68640844948 157.078563342652 129.489867764242 147.121049266117  
160.20843950503 136.573928520456 160.315029612814 173.839053227554  
160.031506612501

MIR601 155.080900277147 159.327764602722 128.504026473695  
145.635453468646 161.806144472744 138.100014158367 156.381599544223  
149.255405438966 135.999030570565 137.587917564413 141.436235043864  
131.77099316122

MIR602 127.015086299437 119.079680805247 132.223321299997  
138.637735867167 124.079109459437 129.777173431404 125.687688416588  
125.447209413787 136.144068118165 127.017795831706 133.368199807997  
132.955473649746

MIR603 118.807135693934 118.139487760542 123.372689985035  
109.635825046436 123.535803027153 129.086186239653 125.212404794262  
131.707530115415 123.804039963953 134.91213977595 115.041324824728  
116.161473967382

MIR604 144.035936160694 143.161623642178 145.692644807799  
138.102654893864 142.185903088074 139.188234030711 148.400132332444  
139.943915452851 145.643752002787 156.194996994993 153.551359970644  
141.741892403029

MIR605 164.084737224884 134.666505160831 138.014046365103  
144.386561289985 124.157302365291 161.002880798225 132.150815042636  
146.71868686671 133.083877012766 149.464962540085 102.421174406474  
150.536178574986

MIR606 116.7299185256 107.365390754133 117.862532836494  
127.783892576352 124.121555438466 125.262445870212 113.810645407837  
118.584773788416 119.330439721904 138.911993471119 131.256325361974  
121.93549478261

MIR607 155.323822771755 172.186384820044 172.045843691642  
157.551854647702 195.66091457697 198.737421468412 194.80575419836  
162.096065738375 146.565265415908 197.003657786247 173.790848780011  
181.747090380435

MIR608 136.2336179571 136.582137928022 141.494666823639  
146.455182336561 124.174140125309 130.038936315246 142.438586625317  
128.050677475339 136.937327692084 134.901659808633 125.285502203677  
139.383528389668

MIR609 115.305518560239 122.766778018066 128.734694496357  
127.535214313797 128.191959554459 139.057572927874 115.963144087717  
135.098343717085 116.497714896018 143.368327095618 140.615078497305  
144.367056085868

MIR610 148.176995739142 137.808307749725 133.190147746722  
161.144841967903 162.18174589792 147.638057399165 142.671190279415  
146.128066033346 141.462379822312 137.984988819967 151.10837100314  
145.885577577352

MIR611 161.17923997423 128.957236136715 141.696969082758  
141.135840314665 156.589829166493 143.567488854011 193.064450357153  
153.092864798642 139.380610974147 148.100508271232 146.968599872798  
148.134642821094

MIR612 147.610616423185 123.159407368236 119.792515907708  
135.457059862669 131.096514910613 133.425151103622 166.341564850299



129.216693566478 132.002835547397 124.518818352113 136.547868436335  
130.325073627151  
MIR613 136.253264628863 127.019978195283 130.784802403934  
125.091038614268 133.249792744053 120.511896155396 137.488665424434  
134.70636200986 132.920775987309 129.964666668421 128.22735290389  
145.514859606031  
MIR614 142.232918684259 137.177271162749 135.695576019185  
133.805991920905 146.830752309354 140.694993778394 136.249621724093  
140.630844296177 131.319783710908 129.77374228644 149.726968520487  
130.12032144763  
MIR616 131.850952248545 127.736712231221 133.022848457361  
126.899985772157 122.719785082196 145.835240952992 113.192313147111  
122.561285351587 112.156010486085 116.252227301161 130.176734524308  
122.980631567542  
MIR617 120.93965087814 130.983136465761 136.508969220268  
125.189588215659 123.852299272249 139.130560988108 128.876385705559  
127.239282651919 132.568354349687 127.997280639609 123.946808975704  
131.85737847837  
MIR618 124.267394371656 136.313623567821 127.640525889316  
130.883516197483 120.527518013376 134.00481287258 124.972772541334  
125.739946257697 121.425298866613 131.825172822888 124.647992480694  
148.396148091332  
MIR620 130.208619015193 133.152523054305 141.132694466739  
142.878258542775 134.551054564417 141.484730939562 138.211845785985  
135.913632939299 134.239029110227 153.320911882529 112.558241320112  
141.099781722697  
MIR623 124.982744176925 119.578240680666 131.583841535781  
142.000874773182 140.431591727649 166.32555285213 149.383429241903  
131.711193516482 143.925616978401 134.888404433315 145.97512573326  
130.955161943331  
MIR624 146.632312874102 153.468933239223 150.3259737066  
148.01816554072 148.139376772567 152.251128595777 142.192934622228  
132.969187044132 132.132474135959 144.007071548045 130.454496708632  
145.00699763203  
MIR625 116.046983032621 113.388450168062 130.504023268824  
124.511674561183 115.672307128514 115.392989580183 124.933738341123  
126.837151457845 112.126521532091 124.757229519631 111.398760606544  
130.674263597931  
MIR626 122.385508330707 107.283814651497 119.711070285785  
123.202829470888 121.559477523123 146.466967386428 127.496885890349  
116.625518828978 112.65454329872 126.368170959337 131.510494315469  
126.832182961671  
MIR627 124.668658660052 134.161664663192 115.080736217256  
119.103219740679 135.571239294086 123.615802924067 144.433543176593  
120.616979607398 126.750850861235 122.932745723044 135.736764623155  
128.447393268611  
MIR628 133.101674466013 108.318510762416 143.0235772247  
137.536053775531 146.856133875296 122.873661677648 135.317796804151  
145.837985729893 139.760425990939 171.121834829333 138.202872275661  
133.43194756868  
MIR629 131.218141814078 122.735376540421 111.584425166104  
124.053190169486 117.770032157393 126.673587174832 130.14600240687  
120.992440100307 117.461198576063 130.827726862159 105.859916438163  
131.507618414676

MIR630 151.755205401737 139.725987763226 144.784835438567  
139.675292022085 120.024235522682 149.687372584136 153.206468539619  
129.389420352857 128.071379991958 124.735542880811 145.648810303756  
134.579005092929

MIR631 122.079685222733 120.290102399282 119.092335265325  
117.567991653999 127.517446456116 123.76900858347 138.476953078729  
120.822923434486 125.318166919844 127.31790396929 125.655823846115  
118.859745315302

MIR632 108.730058525654 121.787875792887 124.246363878094  
114.888157310977 116.416896654975 110.544044723728 136.335679863251  
125.422348389595 104.798333931019 121.723964989551 123.45956380046  
126.557869929234

MIR633 126.659859384257 119.822587087968 134.21500333869  
131.027605835275 144.095471610836 115.778736387131 120.413468119484  
130.641217515008 117.003205777245 129.541049979717 114.405811161631  
121.402905161896

MIR634 139.423432468886 125.73560975196 129.621296567128  
130.960045345375 124.072512083237 126.905235161069 134.831550401848  
136.316003989725 123.638001112969 118.900338956203 149.322537247388  
140.256871047018

MIR635 170.531713392258 146.332425559689 128.518381802959  
140.856864690669 174.177944561595 124.121555438466 155.168592130392  
133.689255383855 144.96670085147 157.431972439046 158.999305963902  
140.671406418004

MIR636 132.54355871539 128.009286101341 142.047828639169  
134.13812854554 135.343380336913 124.375348764151 137.927403204849  
136.563471322998 138.780488114634 132.261161069329 141.931274901572  
155.349728277626

MIR637 138.010385979692 143.193305421206 138.204611862656  
155.386226046894 139.271829906127 146.003512592449 146.151639797173  
146.897528834303 135.946808893146 135.598709185334 148.991357883449  
153.943227610765

MIR638 158.007926822094 142.217762896203 130.12638520846  
167.51207060064 153.402227428787 163.805257266374 147.409936250284  
138.154799037807 137.151210946281 167.049197726715 124.528206512938  
166.925695810781

MIR639 137.497145594629 144.65238608866 138.091795130567  
150.95033946042 129.226815062589 138.523677181131 132.177829138863  
145.39813290003 135.90207451581 136.946137446743 146.526744516344  
164.89597889259

MIR640 121.476730561812 130.735223763219 134.08270035062  
131.007779278656 149.230226445583 124.385193388896 127.753065449769  
132.668344126625 132.57219914253 145.017264740722 115.572088632106  
125.727521491768

MIR641 131.268454024753 131.265594391542 132.649409216699  
116.802432258299 138.171858105728 139.318078285343 136.882429810263  
137.94246602811 145.360466216324 163.552608805894 127.799190369808  
143.211127738941

MIR642 114.721282552636 128.623302491798 139.150209111606  
131.358797630945 132.361106053517 126.195222228248 144.621077658674  
128.931946787934 133.489068665353 150.557982810339 143.27200789709  
118.161192318422

MIR643 134.631638658586 127.820096020782 133.661553334004  
132.671227062948 122.102644097132 125.798453479983 128.931946787934

122.727385599754 127.211469322857 124.772219140795 118.749046585251  
131.498890334548  
MIR644 143.209289043824 131.49254872524 131.512174491572  
120.517691208358 125.683334853039 145.612695657243 131.536457148878  
148.382228428693 131.744454088995 136.934313990609 130.476322267589  
136.346472365382  
MIR645 140.965498009244 169.16155608071 182.545896049446  
147.327675057481 140.301945597122 146.306467130749 149.754842928462  
159.660564323984 161.208713751942 158.639313207233 144.94824685435  
135.682971958096  
MIR646 131.638954862848 149.513744292932 151.234397206563  
138.53954980556 144.240470871638 144.643770374264 139.677109265241  
124.148194572004 138.993251266382 136.248506185974 139.862403685817  
137.811304134207  
MIR647 130.898067924686 135.238301951626 144.625105340312  
117.402330163871 129.098408596418 142.217762896203 129.47419698487  
136.754116864655 139.313456284725 133.483766053954 149.749660071593  
132.839431368337  
MIR648 151.171716392043 127.030113960477 125.874313058552  
135.93352186143 141.046537113211 128.521380879209 131.970514300585  
140.269160279333 129.21974206851 132.128418409996 121.645021899034  
119.830261862805  
MIR649 121.203149121743 130.878694881324 121.915043935246  
122.644105247178 127.369456504277 123.24533179875 107.283814651497  
130.51901676405 125.052770277549 131.256325361974 126.277165320165  
143.182399285928  
MIR651 147.373174160478 148.112717810117 125.897190440417  
132.103084472404 131.442186260672 118.176124626025 119.792515907708  
133.948997488604 115.058061620379 132.998223400178 106.000943456483  
128.339161042799  
MIR652 143.772376623996 124.828626063272 135.653222288637  
139.894559834783 131.223691762533 124.840101287634 123.198873421356  
129.992015202357 132.998223400178 138.97776257708 119.590540166384  
142.191569406599  
MIR653 140.510889880872 146.447745446317 147.772490977392  
139.853333847856 142.409003426775 155.785933672918 140.840895590527  
134.361064431414 123.881658891576 156.16485596016 149.320667417893  
143.252983617945  
MIR654 123.386622160181 128.402511355513 131.891352872004  
138.081268025435 138.402890124039 129.982236484842 123.612648219993  
134.579005092929 128.449200385351 129.647514123731 131.292195405993  
143.953043041292  
MIR655 138.232757706984 128.730649233876 137.636900130922  
130.114464233633 127.090219286772 131.117294275244 142.029398672217  
151.81251450855 136.344248873826 138.993251266382 132.725232102483  
122.327353563917  
MIR656 130.278980631435 141.310253828965 139.174188535843  
135.096321258167 129.286782862113 134.142423026264 120.602818832247  
124.308243215293 130.088408942008 131.943014970855 129.150574563997  
138.166546598846  
MIR657 124.712789674509 138.746273750703 138.525131957094  
133.816601264067 158.869463014801 126.895669261503 140.74208906156  
125.055545087871 125.578037001199 127.065518421996 135.803599969904  
132.210100574787

MIR658 120.488694213288 119.355650892262 150.204636832734  
128.978197156274 126.755389668637 128.168460083895 119.943408501009  
136.537117054998 120.325985681299 134.302726684539 130.029719192412  
157.800913051929

MIR659 115.041324824728 113.627435441258 115.072622367144  
116.07902130325 114.133473556359 119.072213573568 117.218616752346  
121.327397317398 118.641431192759 129.528321950688 104.483909687253  
113.672605838627

MIR660 130.674263597931 140.827965102541 132.555211779043  
150.962828147611 149.394952856085 143.909501365162 127.777945516765  
139.530196462344 125.038427667173 142.749568012703 133.953303801604  
142.495333453346

MIR663B 146.808519947394 146.879019367939 142.643027992419  
144.750407738866 150.449621353865 140.844007965202 139.914034708144  
161.841975820372 144.492756323647 136.821228481217 131.02157879562  
155.143752422033

MIR665 150.893280574091 150.208809981642 138.760800146167  
137.867263869936 149.068713925139 173.735045816949 168.302168350095  
137.829812693131 152.064982697394 152.511331178337 151.592787806315  
152.829437376835

MIR668 129.958065173006 135.892248893607 120.906553066296  
120.355844117573 128.96181458192 116.742079521048 120.862516074358  
129.656088836537 127.829001155781 123.22295112139 114.539671934155  
119.594962686756

MIR670 120.276236447255 137.065315360321 125.761205967344  
121.188761627967 113.627435441258 110.988514718572 142.50631960137  
131.451173463405 115.608857734241 123.501843029993 113.451566510208  
127.962546712222

MIR7-1 171.954184094677 138.634814756987 154.973990421257  
165.009696356892 128.725044326566 153.687536747147 130.027227278931  
140.063142443074 149.844677055508 131.679566454851 137.04010227318  
140.800226245569

MIR7-2 145.265512354674 125.531371673679 124.375348764151  
163.889522525848 132.306569548052 126.247378598596 143.224678017244  
133.291511679188 127.779401352802 125.701083319929 125.526744092256  
135.884635448277

MIR7-3 124.256773437346 153.440952021924 118.154953746492  
125.876114993687 121.810767302322 129.147246809319 118.064858133264  
128.497571151343 131.774882989257 138.047487233711 121.464383202986  
131.282091618102

MIR708 139.989830921287 141.611712747368 168.935348409102  
160.0697586671 170.007845523415 152.413389525982 153.38260557666  
148.630293791756 156.47237266917 168.925131238831 165.320977593677  
162.660027294291

MIR718 122.607404698857 128.499303407596 117.137027732123  
134.73970457131 116.053859681399 130.960045345375 132.419898122309  
125.35643274458 128.895325544109 145.648810303756 132.769455423385  
130.211247943634

MIR720 141.048882618651 139.962307072428 145.185902174023  
141.262319193649 154.373739162815 131.829906202014 153.869144282319  
143.144153021901 136.645091356305 145.777778096701 151.702809524494  
133.564350740049

MIR744 150.28508305615 127.6078497227 136.575784685895  
132.541420804792 141.505120938773 149.758215028408 142.168934978042

131.421663453164 132.548259643258 135.582230137515 150.173766182317  
130.43775024291  
MIR758 136.140327952231 143.786767828146 146.619846538124  
138.59175751301 143.533725135227 160.0697586671 147.285764611006  
138.596430973865 147.294408903227 154.205877662428 159.554978842683  
143.287237534352  
MIR759 157.590017103385 126.601395870533 162.304178370233  
184.638141004171 150.354401669138 138.340652133783 148.713747597311  
158.98666068453 159.379420001197 134.972933635542 150.807308519367  
155.272264997151  
MIR760 129.880696706381 124.048926099805 142.007066214472  
124.246363878094 147.088665779406 126.332299789266 150.059011513127  
126.700147643 135.027715094704 136.582137928022 136.60514429355  
133.154004369076  
MIR761 125.9888344762 125.826111950648 123.561016079801  
119.472410874778 175.38376293575 136.962442874268 146.378522944864  
134.087875547168 132.361106053517 140.313216623427 118.820154030256  
135.582230137515  
MIR764 139.737748157901 132.175368142549 132.524377835171  
142.238908711402 154.507721014473 135.548042190047 134.810212106122  
123.955819747616 130.112882549637 140.680326850085 131.378893655618  
130.810353054091  
MIR765 131.057186121556 137.789611340925 130.661695937728  
131.85737847837 120.773552653073 138.068164255305 123.668707648172  
140.184082384548 128.955241553429 136.473948855498 131.045970236632  
141.503351545458  
MIR766 130.380766252137 120.809659457873 124.225294244156  
149.999838961906 139.715836473047 155.427282703527 134.992686224944  
127.905616521853 137.731390340708 134.132312782731 132.920775987309  
121.464383202986  
MIR767 121.201267751612 125.926774314737 120.36718185387  
132.28931085483 132.291759474331 143.78994470501 127.314089756429  
134.555873832434 133.737573120711 128.530540860266 129.6505724783  
114.334059060506  
MIR769 130.233769058693 141.632147679743 121.784166691545  
128.736591902501 126.416290818296 125.247402280272 120.110473925082  
124.992439957206 138.83760902012 120.93965087814 128.751758311249  
138.224383646894  
MIR770 139.131857948357 142.556535259086 146.378522944864  
139.427216913809 144.142765177298 141.920967855989 146.70594914192  
126.48691003872 134.364838071696 155.150904036206 137.904786382385  
158.249743182741  
MIR802 122.834017529045 126.547883999721 132.550022967297  
125.83521710721 120.135349166633 121.336932276232 126.132339293132  
120.935863853101 121.61143371132 132.203310946961 127.177422395113  
114.798573331978  
MIR873 110.784682137658 137.415646199256 124.174140125309  
125.08580835258 113.521599852465 138.323567041191 117.15886922795  
110.347631909888 141.306418675404 118.060781901686 111.962852412774  
130.939543211439  
MIR874 131.121343131082 131.68571824487 148.683761948082  
163.248980088946 141.040862279633 154.586825710624 153.798367953373  
148.627264102939 149.664506761117 140.930897231705 124.632373951797  
141.164985468046

MIR875 138.483436753942 143.672118850295 125.470172259885  
134.418976976995 136.316003989725 126.520909083643 136.244995503799  
143.643259003393 145.85414203374 133.67719550997 152.504620068655  
143.279331050175

MIR876 138.158400190671 132.496547953595 122.97487285065  
122.696382705233 126.722212054469 137.82918941689 136.790457887057  
128.65678873939 127.694189114288 134.333679772065 136.154522071917  
150.419668144913

MIR877 144.741063866547 159.544710238172 142.41737138634  
149.446542462474 143.287237534352 161.419873271162 126.048382998393  
145.385816618728 143.652009342522 143.752697178913 149.045654499682  
167.796474464069

MIR885 145.559419404453 126.992697289075 140.873210629865  
149.722442994599 123.45581374935 117.104945989023 141.397046998678  
128.914885412263 149.231475480618 134.607501073433 115.496108000499  
138.541779821934

MIR886 145.432667767652 161.841975820372 137.826458479398  
147.441650320053 156.494323415504 220.458449424062 149.801573181126  
158.915858403237 262.196293231028 226.893147371644 144.845726048937  
149.225754384299

MIR887 116.664031217378 115.594489123676 127.972708116366  
110.678680817471 114.902673141786 140.292132023262 133.789738760547  
132.177829138863 116.881212516879 112.357261386644 130.097543328456  
121.031695489398

MIR888 129.689855810051 141.817230824364 135.797170561599  
134.000363767958 138.044751228397 127.0631494857 134.811625739766  
135.504526903482 133.177950880393 147.169765031208 137.422974008008  
130.917269984571

MIR889 132.385096888962 121.88070274109 158.989652405732  
160.303394115537 146.565265415908 153.857048476879 122.484351696828  
133.499361793303 120.224154897296 142.222833574043 149.08527298577  
130.619624347751

MIR890 131.856313046545 129.34905533265 127.520134825082  
143.569894807386 117.343165720552 146.790059505709 132.873213182775  
128.820757822782 126.793778645808 119.993313087183 140.084427549581  
132.758313782606

MIR891A 124.15094220181 114.726808450831 132.336431473522  
131.739418639854 114.91722828113 115.672307128514 116.647291878845  
121.648921929686 119.475462713424 121.980744551615 128.196474114536  
113.256481034259

MIR891B 118.537378726617 125.117333434527 118.593717189375  
122.881793230233 120.493082096235 123.361179535626 135.346501914337  
139.103395748894 126.407313060022 129.031338314175 129.090955637629  
120.597157491201

MIR892A 120.020781939389 127.555954288973 121.330383384978  
125.677019190255 146.894793774087 113.214390213004 131.106613067333  
123.756349408641 128.888149939072 114.730641277464 111.922007318017  
118.60878652724

MIR892B 118.625070307695 126.029431525943 122.087107663865  
121.696353230886 123.019430618632 126.026938396257 124.582577275358  
116.355027746922 121.657744897668 116.335864439545 118.410091682499  
120.616979607398

MIR9-1 125.304045138994 119.32696696175 127.429775845914  
145.841028932318 138.704839659727 138.455086062782 135.381131982323

111.577400298092 127.107223387937 148.556161762978 132.091532692048  
142.281657284178  
MIR9-3 141.393814611166 140.460927375243 135.031430487047  
130.189958197332 125.313515459103 153.310330832285 131.573729430926  
137.545063966957 141.543147273205 139.541759919059 110.651971902576  
145.261662166215  
MIR920 146.462544135666 127.3079781139 133.511698282195  
136.755975832051 133.406312157375 133.24611329193 135.943252855457  
146.83577460518 134.722574388775 133.727447520255 134.741781820234  
121.124574985464  
MIR921 133.469323412904 134.901659808633 128.300838927918  
131.196196319523 115.607031940137 137.838096997956 146.090291252325  
134.918496279185 126.026938396257 120.649467083125 138.361149460093  
118.527464364564  
MIR924 144.313841064968 125.606269267903 128.407968177242  
137.09814291566 144.278830378899 132.739435456445 130.773945967285  
127.811923445503 130.624702758052 146.466967386428 104.714872508838  
135.767818903328  
MIR92A2 125.000876313893 123.202829470888 124.059778432167  
137.446745269821 113.687931899298 112.943630133093 131.125175244494  
117.166509072455 126.34649262976 125.435268901131 133.011320549232  
126.209426865327  
MIR92B 120.308260557986 122.265071206163 129.677874035481  
115.041324824728 124.668658660052 120.853961156534 127.284885819903  
126.905235161069 122.031894952046 117.665111767293 120.355844117573  
115.520278378747  
MIR93 120.208584170364 128.41549156443 130.95176570982 133.930997975106  
116.7299185256 133.082433951922 130.659631155616 129.305455204291  
131.228779762508 131.347213356457 147.379741260871 131.241878941749  
MIR933 130.714375454354 146.919110530891 153.534763364558  
134.111348656261 152.082927731045 132.348603553752 137.345542507421  
152.617507769717 154.755544586846 150.696963699371 147.051399102374  
155.92082882492  
MIR934 138.748941735079 128.02595294499 135.925813154268  
137.333595298205 136.162938063831 137.288653308858 133.502176289023  
132.28931085483 138.275371291639 121.047419779542 133.63668145135  
132.671227062948  
MIR937 148.665627690915 142.299535614113 139.086498524774  
133.814720785534 132.031693838834 138.802633518223 143.999000471746  
135.622888091037 118.294324274616 146.790059505709 152.99686989829  
145.183463058696  
MIR938 131.516100334597 115.080736217256 116.388079393669  
146.554017952963 109.832757716464 119.873844587252 114.217867810848  
134.302726684539 125.997109913348 134.549628985766 104.934718065476  
117.231243105897  
MIR939 142.874797429568 126.450300907283 132.721469335671  
130.588481497083 140.603933807629 152.826356673175 130.378441113977  
137.018521754443 135.458682745495 141.611712747368 141.557420268382  
147.011838288594  
MIR940 140.644800545854 128.653335099674 124.110446144763  
129.3513576591 145.815454490804 139.013404849037 151.930565620382  
130.268322464805 143.187539073659 140.372463604232 155.114892891737  
129.842252702648

MIR941-2 121.653754668804 128.886008923268 133.303201646987  
132.685098573183 135.186880148352 157.130045415943 156.702300398105  
121.722412245175 134.782388051531 134.447878635716 113.542803491215  
131.49577981738  
MIR942 126.185560760543 117.570749340011 133.63668145135  
116.214857935694 135.758133410577 136.888915439473 130.758707848676  
131.031639119149 138.367321366804 127.476819912992 122.220327032799  
133.24611329193  
MIR943 130.790872334222 139.175421159925 131.026665636006  
130.311471059267 134.722574388775 135.781190598068 120.988749021323  
131.789877096016 128.105527466559 132.796961054534 121.699702849509  
137.177271162749  
MIR944 129.020356016653 126.285743744314 142.236565028336  
117.428152859221 159.633987751501 127.380083832809 117.05536677976  
121.59661598908 123.182903611854 136.87712607887 120.767950825369  
133.31378749951  
MIR95 139.363571392476 121.36708642226 134.788450164055 158.999305963902  
142.090009728666 121.099290122973 139.318078285343 133.667852983262  
152.163489631563 151.717558541683 124.334450753704 146.764908249803  
MIR96 131.474485888864 142.89427871125 129.278833426752 129.846685899183  
136.220324225816 137.199718376452 125.789509802098 141.162443312437  
129.205783382977 109.333276735523 128.245734702114 130.528198937596  
MIR98 141.966490100288 142.953661611418 145.797047170492 120.157438564977  
184.437810305792 143.200939506995 148.863297062269 155.63671938031  
140.137435303984 148.038291195414 166.376907377447 181.898985277176  
MIR99A 120.188885479773 131.33321167357 130.565986980021  
134.503552797411 121.44564199541 128.490341173553 140.831508792119  
115.939620871703 121.75662526451 116.806720503431 136.83470470035  
123.935072913078  
MIR99B 130.686857648764 137.966987037709 140.757952698181  
138.670077127324 128.745737514912 124.261531006131 132.148166773943  
140.57567768682 144.907294702865 148.084844579881 147.738146185884  
146.416318806523  
MIRH1 144.997250967317 144.671459266861 138.555443236183 161.112906953532  
149.435684626505 149.338249249161 170.394088019518 135.405742719464  
131.437847958077 151.538112896642 148.742216703684 136.691234705997  
MIRLET7A1 136.609461559853 137.460936879873 134.850260739685  
117.101933186269 120.082391311921 126.755389668637 130.297203474319  
136.351332391315 134.369532556726 128.205022859019 136.03420235737  
121.543207264598  
MIRLET7A2 128.85983397523 140.694993778394 121.997885377703  
143.546629073997 131.071614211431 150.224472335504 126.626904958599  
135.810476921749 124.39748786803 131.444734367396 140.29803170157  
125.488511939819  
MIRLET7C 111.860763079995 121.95061962467 122.35832958054  
130.383001462828 112.904318310632 137.235469802064 135.82038791723  
119.087972087745 142.535416473783 116.425301253959 128.594951429021  
135.351344868436  
MIRLET7D 119.436922168376 149.563405421366 125.668463983985  
132.70442458261 120.100672968415 136.154522071917 122.160459795959  
146.301300103564 135.215356532498 129.43892498257 215.585089158905  
150.376234759097  
MIRLET7E 122.959518532165 116.65880728655 126.595668758744  
129.185514320138 117.069094451283 124.558026853954 129.4807689399



132.688531077861 132.184217000689 132.529247880813 109.564709878576  
 123.781002620866  
 MIRLET7F1 145.311964807443 145.828229656781 136.042982529628  
 138.279775054156 131.188208693139 138.255457081996 128.76720970745  
 130.744788360182 134.034970203523 138.136901441896 176.128369308989  
 130.847215795313  
 MIRLET7F2 125.920663904983 127.881498149714 142.331050242704  
 131.04767483614 125.519298131694 147.642693777383 141.461435494985  
 125.746184969983 134.434198188045 141.222884136243 154.288075172115  
 127.084267631845  
 MIRLET7G 140.288612271406 124.522974214212 133.692996980809  
 153.374296511216 155.762890407496 143.025570700585 134.553754121862  
 137.415158613413 130.552037435735 146.877475544399 146.897528834303  
 132.780055030907  
 MIRLET7I 128.044165393924 130.038936315246 129.888444399067  
 136.682172321984 131.688038068545 131.474485888864 130.548611758921  
 141.329559699056 129.147246809319 129.105655010455 149.97218338771  
 132.828179725129  
 MIS12 608.351527783086 572.548647437438 570.916936074747 545.566596665916  
 289.257002046658 932.862030475849 422.520372346993 593.090436323333  
 387.403502892897 491.709723745226 380.053166305637 477.741216640575  
 MIST 131.836036241459 139.948097704949 132.158817539201 127.998531115697  
 137.794858639838 137.872742675806 135.916668738753 131.970514300585  
 136.133538781918 137.102353661381 141.348548071751 131.138322527536  
 MITD1 310.8725368426 265.366632264085 379.615659443164 263.994460303088  
 365.286234166621 426.769986378276 398.673582680257 330.281193038198  
 378.585058475083 484.764806127211 521.714719320355 498.812823949508  
 MITF 178.52221226882 175.819983804497 200.72147365413 183.385868234361  
 141.178668371671 146.229239731545 133.74051512341 138.497931380734  
 144.185406500473 147.838660813476 128.460750472464 143.198622036573  
 MIXL1 145.764704553373 122.232732968363 149.168758815526 138.104527851969  
 139.902610126952 115.058061620379 131.59293899691 129.601234646954  
 124.588594750916 123.722744366103 118.095936088242 142.898851434337  
 MKI67 144.660095230819 148.299945894738 144.81320329947 147.123477579978  
 204.260800563197 155.63671938031 148.160350542849 161.720405760536  
 173.071892362758 142.650451413991 161.608941774391 155.516697616637  
 MKI67IP 454.235121917464 421.836020491624 545.026293696209  
 335.47484353322 698.590134238302 1132.27988339924 702.265884752474  
 868.066644155313 610.070236234299 727.425595270342 891.194779815063  
 884.747476952289  
 MKKS 358.415933397099 368.418553384965 425.13721408756 417.615521090665  
 288.072720517427 367.825328832492 243.691004557778 296.333944172375  
 324.56043349882 284.675990197899 319.490670412394 308.767036855508  
 MKL1 222.544542998356 243.441938832251 148.916981164664 258.4424008891  
 304.237479317271 168.302168350095 177.143397572907 157.12360611723  
 184.611146047556 152.445022409208 195.981555981238 149.551030995489  
 MKL2 272.927830312746 293.350292227077 224.274329367512 260.370285504512  
 262.60377731258 224.298067319406 212.073472189229 240.182016388745  
 194.702974020747 149.795655754301 305.577166690215 194.488249052694  
 MKLN1 1448.64875525408 1429.25367024696 1410.58825009446 1362.75971646355  
 298.979106293393 832.911633923496 1115.53524128833 1049.52258147141  
 929.69741581954 902.394410348792 1145.96710556468 1617.44377452783

|        |                  |                  |                  |                  |
|--------|------------------|------------------|------------------|------------------|
| MKNK1  | 279.969975697164 | 263.295012964476 | 251.472556189141 | 281.618175110153 |
|        | 252.32907388173  | 343.666488527549 | 295.278972023002 | 310.718449468465 |
|        | 257.880331012233 | 276.79778275734  | 274.627303114477 | 287.334035234496 |
| MKNK2  | 993.34112647221  | 1292.13921040404 | 1111.47772523331 | 1093.21579738952 |
|        | 1951.69651954627 | 1619.67820476414 | 2091.73580292332 | 2677.17579532816 |
|        | 1790.53556140959 | 5080.63091497522 | 1508.24281455057 | 1562.9779683714  |
| MKRN1  | 2441.05534211996 | 2956.63335018838 | 3130.30693451802 | 3066.69261114251 |
|        | 2068.04582900231 | 2346.47361943533 | 2962.11407134162 | 3909.47437917608 |
|        | 3157.98451877581 | 2014.48411650613 | 2544.58522979036 | 3205.74787769881 |
| MKRN2  | 587.654093308465 | 447.995213144892 | 920.083835296898 | 429.096075419528 |
|        | 605.795439342384 | 530.122419830951 | 479.761165832339 | 604.047164856689 |
|        | 705.737228226014 | 587.54075434249  | 504.9864660689   | 425.348619281876 |
| MKRN3  | 137.462720784077 | 140.951031275943 | 128.812729239283 | 125.974463216884 |
|        | 135.735535533738 | 139.228558152937 | 144.12472003202  | 130.176734524308 |
|        | 132.683594640696 | 149.810655120216 | 118.631771242606 | 131.876061826583 |
| MKS1   | 146.276706674761 | 165.942761337382 | 152.309460630038 | 182.969563278473 |
|        | 191.093283411655 | 143.861970001207 | 189.192494970145 | 150.36160186175  |
|        | 169.257035030405 | 156.859539612504 | 149.772157318769 | 142.788848338402 |
| MKX    | 767.377380800066 | 434.509391836336 | 623.888568444132 | 447.909277144896 |
|        | 135.373824773008 | 152.612116997575 | 134.255021727555 | 155.295464263911 |
|        | 145.331858938535 | 167.468390483999 | 136.739754726714 | 137.959775678716 |
| MLANA  | 138.667081004369 | 148.231928963878 | 149.565725707356 | 157.166379887259 |
|        | 136.341358916638 | 144.779146672553 | 134.369532556726 | 136.253264628863 |
|        | 145.081468030567 | 134.41693612969  | 135.108420614547 | 131.489715975987 |
| MLC1   | 135.192181609947 | 139.184647003326 | 148.80452641061  | 150.134337895481 |
|        | 141.200676699805 | 139.493025452991 | 145.426171336045 | 144.477267427347 |
|        | 134.477081392474 | 137.6160344044   | 137.151210946281 | 136.269445455239 |
| MLEC   | 885.104778820041 | 1107.99131702522 | 779.922653392712 | 1769.6386910047  |
|        | 1386.56788941677 | 769.34961339184  | 850.125434374005 | 1007.7803477458  |
|        | 1490.02976786379 | 495.241179224412 | 1021.81988990874 | 878.167149313285 |
| MLF1   | 192.168634727505 | 167.51207060064  | 199.01458214661  | 183.26554404668  |
|        | 269.853718252574 | 192.314484368435 | 200.712182818203 | 193.930569647995 |
|        | 183.348764012358 | 221.359331823286 | 132.611864316181 | 144.720594512581 |
| MLF1IP | 125.964335876018 | 162.308297940279 | 146.770267005869 |                  |
|        | 130.839508306116 | 225.61275910008  | 312.557093674533 | 175.28261759639  |
|        | 250.217137496422 | 252.249994170536 | 189.678680702271 | 191.322056430728 |
|        | 221.070448906398 |                  |                  |                  |
| MLF2   | 586.366632966978 | 621.825622897512 | 568.040362658955 | 815.388288623756 |
|        | 1279.9555644913  | 650.494111214312 | 909.388774224614 | 1095.04571025381 |
|        | 935.042067053226 | 729.729297413233 | 680.250735532287 | 868.86246684338  |
| MLH1   | 441.578261054602 | 473.73182675469  | 583.697431061521 | 459.854279050269 |
|        | 415.178470246749 | 509.880640462    | 457.130051460676 | 448.715938510132 |
|        | 587.893636997642 | 448.371946119074 | 573.509780150018 | 530.267835989435 |
| MLH3   | 146.209104824109 | 138.778496466408 | 139.217113811817 | 134.125038192486 |
|        | 130.316282003711 | 130.735223763219 | 138.558300898079 | 141.097257687941 |
|        | 131.757695616207 | 123.225792525733 | 149.209348136739 | 133.67719550997  |
| MLKL   | 221.297127685676 | 190.318957029666 | 177.235586767256 | 191.128539630621 |
|        | 174.027190728107 | 238.270501389189 | 193.428733288774 | 226.701637237203 |
|        | 295.153786338687 | 298.460273458181 | 305.451247405518 | 288.68376542946  |
| MLL    | 348.241471067257 | 357.672950588403 | 442.027630433527 | 329.535023880129 |
|        | 200.179796117115 | 166.674240866931 | 207.254220247481 | 195.239829623017 |
|        | 216.645552082667 | 135.968346417524 | 279.790257881254 | 280.007569817323 |

|        |                  |                  |                  |                  |
|--------|------------------|------------------|------------------|------------------|
| MLL2   | 130.867819112143 | 137.381470768186 | 137.897243684023 | 139.311816781874 |
|        | 168.261511797218 | 131.340453291188 | 129.794293922951 | 129.763063900493 |
|        | 128.122197525844 | 131.427686241226 | 138.59175751301  | 133.070896773384 |
| MLL3   | 165.993897306927 | 160.518055978242 | 187.132496910208 | 143.496669740707 |
|        | 148.176995739142 | 190.572712684622 | 168.398366575579 | 177.415756020166 |
|        | 161.874184077257 | 173.741466458636 | 167.620915011868 | 206.164058935215 |
| MLL4   | 329.926864732606 | 405.409668978569 | 366.636754272029 | 519.829743770022 |
|        | 691.397238677552 | 440.579262120451 | 405.843083758177 | 434.61711290583  |
|        | 513.428413503031 | 315.182134426778 | 342.403428822464 | 388.326080754063 |
| MLL5   | 265.572253407219 | 264.983729290122 | 278.005620372937 | 231.63127072986  |
|        | 199.058972781223 | 254.909076658804 | 229.347135478142 | 208.125844007298 |
|        | 207.785320401354 | 238.685014863143 | 241.019436415703 | 281.694635436938 |
| MLLT1  | 143.401971479167 | 122.75516501062  | 143.804903119745 | 141.927204640355 |
|        | 144.87013280941  | 133.455138380277 | 138.052032298683 | 136.218750083407 |
|        | 132.083532534267 | 140.913943871772 | 132.371165851333 | 130.592061896237 |
| MLLT10 | 431.093544964576 | 368.0573385048   | 497.53605530806  |                  |
|        | 350.077206368839 | 211.660148497276 | 251.704037951295 | 257.338950719432 |
|        | 238.654367531982 | 212.073472189229 | 237.312766830206 | 224.439293045835 |
|        | 313.773476049783 |                  |                  |                  |
| MLLT11 | 275.203046536524 | 315.182134426778 | 277.180850774168 |                  |
|        | 327.207408852474 | 210.852300463808 | 354.263934274937 | 268.724338967108 |
|        | 235.063474370925 | 381.867665449509 | 204.681956301306 | 240.591548171052 |
|        | 1280.57297272231 |                  |                  |                  |
| MLLT3  | 160.014635964846 | 141.474583706011 | 143.219722736891 | 149.622695843398 |
|        | 189.419941381565 | 142.278523641008 | 166.515199732076 | 155.086559474139 |
|        | 163.091280469234 | 164.917470819096 | 155.680330654611 | 140.348718082786 |
| MLLT4  | 136.328447182666 | 134.447878635716 | 134.817665153925 | 147.143407224469 |
|        | 138.921608664788 | 137.805895248174 | 138.938546468136 | 139.640918572569 |
|        | 136.674553275255 | 142.693337885596 | 150.241585041178 | 136.507961715591 |
| MLLT6  | 1163.13845502757 | 1183.1601379136  | 1238.11700377838 | 1502.3444541735  |
|        | 893.676600121113 | 512.467731561858 | 938.918431240228 | 998.157643452741 |
|        | 1174.69701182094 | 463.298781071364 | 801.051513639714 | 612.06231165648  |
| MLN    | 122.881793230233 | 133.404671629495 | 129.694178995061 | 123.141928612324 |
|        | 121.888886996534 | 120.09801164252  | 126.569482909992 | 129.45936538019  |
|        | 130.528198937596 | 127.486216183602 | 137.112274459462 | 135.487310036251 |
| MLNR   | 122.436106757578 | 135.554736716321 | 127.478474451121 | 116.897299691798 |
|        | 132.189426012448 | 131.879982461545 | 142.365009028839 | 123.884643288534 |
|        | 127.849141499408 | 127.57284871013  | 141.299677389827 | 138.667081004369 |
| MLPH   | 256.897177822238 | 254.722836822616 | 346.411586524655 | 200.518684601283 |
|        | 849.784051720996 | 375.189005729903 | 620.760947818536 | 202.01798254763  |
|        | 171.80440912191  | 513.036729214095 | 1699.17470788219 | 483.174262289559 |
| MLST8  | 309.36704220687  | 326.176058036757 | 319.223127076041 | 403.47026424469  |
|        | 673.502723625773 | 255.462706428149 | 319.966785546419 | 311.375563161772 |
|        | 305.906480933354 | 341.819090221654 | 294.871848467326 | 291.616195651001 |
| MLX    | 182.152956182443 | 173.964378226631 | 200.242239130026 | 189.225893411944 |
|        | 195.303469330682 | 225.730739636442 | 231.915272112361 | 260.224777636733 |
|        | 222.709720471134 | 211.369442150136 | 191.881157918071 | 268.264885392368 |
| MLXIP  | 159.798024189461 | 164.191906588579 | 150.117906461237 | 183.168629351124 |
|        | 128.306607216705 | 130.574019477669 | 138.261506562904 | 132.149864626575 |
|        | 132.373302367869 | 131.688038068545 | 135.730331297139 | 145.270140096768 |
| MLXIPL | 149.380733719756 | 138.308965237491 | 123.007103885415 |                  |
|        | 163.778790431064 | 134.605345732609 | 139.150209111606 | 133.490805791504 |
|        | 162.431674335726 | 146.038599656417 | 146.238333981318 | 134.111348656261 |
|        | 145.797047170492 |                  |                  |                  |

|        |                  |                  |                  |                  |
|--------|------------------|------------------|------------------|------------------|
| MLYCD  | 163.36682525399  | 180.315825600347 | 244.350562866593 | 171.97578836712  |
|        | 217.287912825619 | 160.322541355391 | 205.987280015028 | 166.315369318355 |
|        | 206.937770272939 | 147.069488043503 | 214.933911087009 | 200.204064462384 |
| MMAA   | 170.67334244323  | 156.237282338037 | 161.713311969291 | 161.055911120534 |
|        | 157.530573508003 | 186.482547532546 | 212.497773003032 | 227.050629701762 |
|        | 191.241000498118 | 182.310140388705 | 203.852316712377 | 209.070372320593 |
| MMAB   | 173.552535486766 | 180.850779069931 | 176.650953513413 | 200.84691030169  |
|        | 179.079061789059 | 166.662801900754 | 181.898985277176 | 169.864628707043 |
|        | 185.661496988658 | 167.430767074847 | 171.254015232189 | 178.222120802125 |
| MMACHC | 153.647343267295 | 168.248982292489 | 152.397984799517 |                  |
|        | 157.643461899964 | 234.399431238026 | 191.179662650057 | 254.936706344174 |
|        | 308.208276315292 | 180.265418365803 | 183.657525723012 | 214.241635800083 |
|        | 213.833894542292 |                  |                  |                  |
| MMADHC | 783.991448771818 | 623.888568444132 | 1113.05943954513 |                  |
|        | 521.30110104669  | 914.654262296682 | 1836.22560264874 | 1122.92917004037 |
|        | 1347.75629878765 | 1303.33810980467 | 1564.8868894162  | 1383.68977267418 |
|        | 1592.29734618345 |                  |                  |                  |
| MMD    | 675.978379566859 | 700.601917911532 | 865.800709006332 | 858.020739710943 |
|        | 321.367338145787 | 408.7151485563   | 332.464176231219 | 413.084646927035 |
|        | 306.43742010208  | 468.82816089485  | 163.48462232122  | 255.638433159437 |
| MMD2   | 114.056147008769 | 111.423140302983 | 107.283814651497 | 106.746545626069 |
|        | 110.024815508703 | 106.876902604214 | 107.841100741858 | 108.04922729993  |
|        | 106.551076380988 | 105.925737068775 | 118.366859032979 | 104.714872508838 |
| MME    | 131.7646616214   | 136.19725093985  | 124.876226351169 | 122.531675048414 |
|        | 142.859971805867 | 131.132508349222 | 247.08460296705  | 147.558603709566 |
|        | 275.972447693982 | 291.720204789005 | 137.240806191881 | 131.806645427543 |
| MMEL1  | 127.349190705235 | 134.271916545532 | 131.486917325752 | 132.593747375239 |
|        | 225.142823691625 | 173.907933001446 | 169.496129800444 | 172.916234073981 |
|        | 160.945886507456 | 130.370405378213 | 187.216245895253 | 256.99019407912  |
| MMGT1  | 811.144838166905 | 740.973440818582 | 959.897744425251 | 589.409235971915 |
|        | 508.735412486964 | 612.758976723556 | 419.4017188518   | 434.073729807058 |
|        | 482.048928546145 | 589.409235971915 | 498.641091757363 | 493.209107049493 |
| MMP1   | 153.169450192935 | 156.942156078314 | 184.530853446688 | 150.784262878145 |
|        | 155.608876496443 | 172.84784588171  | 348.067061666237 | 164.890716656336 |
|        | 366.788087591332 | 3315.21586182496 | 236.470206707351 | 167.416417895159 |
| MMP10  | 171.449326065013 | 150.606329295069 | 161.543072816738 | 167.55209828062  |
|        | 178.416969664816 | 143.165150890885 | 183.604011732066 | 198.470718196139 |
|        | 182.938824846376 | 1459.31031099055 | 190.174729017089 | 167.961390966538 |
| MMP11  | 200.302384864371 | 239.871536598083 | 194.617252921731 | 273.353254857377 |
|        | 297.636316709322 | 239.079352337243 | 180.599150102184 | 209.7558663154   |
|        | 178.984409575632 | 3430.76532174701 | 192.399146702036 | 246.389203940944 |
| MMP12  | 320.360917595936 | 147.100947801261 | 131.123149002831 | 133.177950880393 |
|        | 213.301947003462 | 131.705912986393 | 265.29629764006  | 205.08372943071  |
|        | 515.432065049838 | 781.461780481171 | 349.623729591612 | 191.170105307944 |
| MMP13  | 164.641508485461 | 139.125340284813 | 180.164353124488 | 171.473538842796 |
|        | 172.310673499572 | 162.37762946664  | 192.168634727505 | 144.574566623882 |
|        | 140.701908784225 | 179.015669199358 | 133.737573120711 | 144.842687993057 |
| MMP14  | 161.510497517852 | 167.782882015229 | 134.964619235561 | 145.261662166215 |
|        | 251.511405838796 | 134.606126134531 | 135.252082574955 | 128.044165393924 |
|        | 134.679882781788 | 140.096717188376 | 203.456296907031 | 140.152177370089 |
| MMP15  | 150.314462939164 | 177.281197832647 | 133.849237689264 | 196.802641002079 |
|        | 517.42417250172  | 197.298982267459 | 130.274288258599 | 139.378915474473 |
|        | 198.489278156437 | 137.835047580854 | 208.348515119045 | 206.413554839865 |

|        |                  |                  |                  |                  |
|--------|------------------|------------------|------------------|------------------|
| MMP16  | 139.54738445816  | 137.681280789305 | 140.531789506024 | 138.402890124039 |
|        | 137.545063966957 | 135.335107344583 | 157.672378669483 | 130.085138325818 |
|        | 137.11719450122  | 134.194555223935 | 133.406312157375 | 144.436358527414 |
| MMP17  | 116.773599713111 | 117.555999801887 | 128.150801169886 | 116.316845829267 |
|        | 126.00304757051  | 126.841836614341 | 124.160433356046 | 118.397482835514 |
|        | 125.398875527365 | 123.45581374935  | 112.776764215618 | 122.664353374047 |
| MMP19  | 147.628367263728 | 149.436448356594 | 133.984830578284 | 138.091795130567 |
|        | 136.993102884269 | 147.459385142695 | 134.880138942756 | 133.773427881651 |
|        | 137.570343435498 | 144.193756031386 | 146.672270660899 | 140.177708471199 |
| MMP2   | 216.353502371227 | 188.242091666446 | 152.26903721278  | 168.882806817001 |
|        | 117.284724854784 | 137.53234136613  | 133.020551937677 | 124.083648029911 |
|        | 171.051948060796 | 159.874161198304 | 165.327972973978 | 139.140647941752 |
| MMP20  | 132.109267393571 | 146.869927141655 | 138.659387475119 | 132.719730606922 |
|        | 147.584176709986 | 140.029808783762 | 142.675752131935 | 145.830916005206 |
|        | 135.895945142328 | 149.904691068054 | 129.147246809319 | 140.563079852037 |
| MMP21  | 143.193305421206 | 134.264584077125 | 129.801342433836 | 137.185243517766 |
|        | 135.161667673191 | 149.997047695778 | 136.511669406292 | 140.493975416335 |
|        | 131.277646716635 | 138.116568200293 | 141.842919268688 | 129.933228671483 |
| MMP23A | 324.177924877233 | 264.628012152168 | 276.830814061474 |                  |
|        | 305.669636871734 | 175.251238431716 | 166.784804508647 | 167.206513789165 |
|        | 161.80922869659  | 185.332215198617 | 191.814634229865 | 142.029398672217 |
|        | 151.635752404534 |                  |                  |                  |
| MMP23B | 817.036222521723 | 605.583144451322 | 553.198321853202 |                  |
|        | 633.401624753368 | 226.989201461085 | 218.672831303767 | 175.543924200429 |
|        | 208.321765801227 | 326.640168906375 | 308.679189788554 | 170.401653214867 |
|        | 167.46432961654  |                  |                  |                  |
| MMP24  | 136.841506794489 | 152.26903721278  | 139.527577649638 | 149.933919274985 |
|        | 140.127379332918 | 149.143087870963 | 141.135840314665 | 150.875392181869 |
|        | 138.467624450885 | 137.75060150486  | 136.960656707275 | 143.567488854011 |
| MMP25  | 124.542879928448 | 133.577939901847 | 141.311749168934 | 139.136845089275 |
|        | 134.759283147919 | 142.663334893424 | 138.449057377027 | 165.703810120915 |
|        | 164.357373919714 | 140.368070973566 | 143.864036545717 | 139.367493349339 |
| MMP26  | 154.384766720753 | 143.313605534609 | 167.186780161168 | 150.802312408483 |
|        | 147.333142209628 | 163.686535888943 | 152.088488171996 | 133.74741832303  |
|        | 144.757068610657 | 133.891337645936 | 142.466067016788 | 151.64806573742  |
| MMP27  | 126.378952839132 | 113.87024833117  | 116.176068923513 | 125.034243098087 |
|        | 119.631847624882 | 110.465934808915 | 114.3172128566   | 113.192313147111 |
|        | 107.780763250481 | 113.283359026655 | 119.01236045062  | 119.9652990395   |
| MMP28  | 214.904634494921 | 217.576547690525 | 232.621526025603 | 243.35880641566  |
|        | 388.966303073519 | 596.743397794872 | 256.614964511846 | 169.844913799159 |
|        | 213.215996114827 | 211.300733064951 | 299.106362530855 | 376.791876040886 |
| MMP3   | 689.590642377619 | 220.999383789474 | 256.174286655796 | 372.374101464689 |
|        | 165.103398617203 | 177.793860516896 | 177.039190810529 | 168.289492873475 |
|        | 758.517101659762 | 1627.02882286283 | 152.563532872898 | 149.764447995426 |
| MMP7   | 122.133292722932 | 147.143407224469 | 113.947948541258 | 118.298444816712 |
|        | 137.119730820553 | 160.234704406302 | 568.040362658955 | 182.786177632757 |
|        | 994.802763887989 | 326.570967321756 | 504.141861790903 | 202.60339529874  |
| MMP8   | 102.255408120852 | 111.975027473284 | 100.477911152746 | 108.179513318734 |
|        | 101.713609383766 | 114.556542069712 | 102.932013031511 | 110.575582352222 |
|        | 105.25877906031  | 96.0426636429757 | 106.522641798274 | 101.981823814699 |
| MMP9   | 121.419301042072 | 130.247700541716 | 108.131097605872 | 120.182787241888 |
|        | 260.278595572575 | 168.389069732474 | 243.425632941131 | 371.369895979832 |
|        | 483.699436940387 | 272.277433294605 | 175.608958881476 | 216.836094088131 |

|        |                  |                  |                  |                  |
|--------|------------------|------------------|------------------|------------------|
| MMPL1  | 175.638328370133 | 148.504996616452 | 149.833346575446 | 152.534482748598 |
|        | 166.981212790122 | 168.205277839471 | 167.149578610266 | 163.718595974283 |
|        | 144.570725886413 | 161.790909578234 | 167.751604259111 | 195.400963839097 |
| MMRN1  | 377.89330639683  | 238.509970054862 | 278.687780705367 | 227.092319765009 |
|        | 139.63811945162  | 136.609461559853 | 145.36249226764  | 190.614236149496 |
|        | 193.609985124825 | 133.94667806086  | 141.418737063013 | 128.2409378561   |
| MMRN2  | 133.82548013342  | 142.501655618849 | 130.829825154842 | 117.634514818946 |
|        | 150.667001746475 | 132.885515958081 | 206.010481981919 | 145.679907578808 |
|        | 128.009286101341 | 138.261506562904 | 195.816317534388 | 145.572363722788 |
| MMS19  | 812.75075757351  | 990.206369590236 | 890.810315261602 | 1374.92806285803 |
|        | 634.906566690042 | 487.358720934063 | 706.759905439674 | 460.742037437298 |
|        | 552.298965378403 | 725.443026984982 | 1267.5716872154  | 890.810315261602 |
| MMS19L | 811.912727084669 | 905.751410113646 | 990.814111681408 |                  |
|        | 1056.43975075255 | 524.973621024573 | 516.177596584059 | 835.284130042504 |
|        | 553.368945998847 | 725.621153262924 | 922.50743596248  | 748.161769171818 |
|        | 1111.88018487186 |                  |                  |                  |
| MN1    | 447.995213144892 | 304.937584086529 | 278.498278821829 | 259.796092536601 |
|        | 151.531667383273 | 156.622993107052 | 156.698856643638 | 147.04481509758  |
|        | 163.521095869383 | 263.47760086159  | 161.577683729655 | 148.751755543817 |
| MNAT1  | 217.013533525724 | 243.468673768141 | 298.209907157762 | 246.95071325085  |
|        | 222.20526515049  | 182.515302191173 | 302.637859140061 | 230.332652534446 |
|        | 228.739556788924 | 302.696004448559 | 273.61337724143  | 257.622317771472 |
| MND1   | 134.81595608984  | 147.606311227037 | 150.891358590974 | 167.92409473064  |
|        | 204.057019122032 | 173.017662861015 | 165.389652763451 | 200.688465653117 |
|        | 211.786963444117 | 157.733042033549 | 155.3016514732   | 187.93380542729  |
| MNDA   | 161.911468506919 | 151.305201022012 | 154.127346849182 | 175.121069571371 |
|        | 157.521230460545 | 159.320692108734 | 171.487594589922 | 187.997940126066 |
|        | 194.312315077985 | 200.468804559127 | 159.036647992998 | 166.795671029174 |
| MNS1   | 191.284275676256 | 212.210383398591 | 194.569325586241 | 233.103476996669 |
|        | 190.077302802065 | 165.4474699807   | 171.36717256867  | 189.0608798771   |
|        | 242.070630946726 | 170.423881865022 | 161.250520154112 | 181.558764396201 |
| MNT    | 511.113083958771 | 686.198351821711 | 487.358720934063 | 823.297606185721 |
|        | 486.653672099699 | 622.142195892701 | 281.740495452842 | 387.135002880995 |
|        | 325.082620845425 | 366.473258467746 | 689.271009631393 | 442.698000781597 |
| MNX1   | 148.919726992353 | 170.79303550487  | 159.133905701536 | 137.194467539969 |
|        | 184.655641182839 | 218.470365730283 | 198.815448428294 | 254.668502187945 |
|        | 168.982086590306 | 179.460777888284 | 175.395900648455 | 154.104321553472 |
| MOAP1  | 604.737834405874 | 609.939982655706 | 884.747476952289 | 593.821622986351 |
|        | 288.770330002807 | 273.864293250688 | 366.857139377277 | 339.598452080917 |
|        | 262.171775165261 | 251.915179734134 | 461.722481634933 | 390.573484082597 |
| MOBK1B | 174.510523238374 | 158.74180418577  | 192.340135076104 |                  |
|        | 187.881334544018 | 386.598037190663 | 276.434192872962 | 306.716682293251 |
|        | 269.892633574243 | 246.95071325085  | 262.139211406599 | 235.905788497166 |
|        | 255.992494620859 |                  |                  |                  |
| MOBK1A | 215.532132200821 | 261.89195025254  | 212.987082617173 |                  |
|        | 247.622351589081 | 213.754156680604 | 212.915949933033 | 215.931781291835 |
|        | 206.149539851803 | 210.973303650385 | 187.389039221193 | 304.013547190343 |
|        | 240.410292351169 |                  |                  |                  |
| MOBK1B | 200.456087759904 | 188.973595445056 | 219.687151891777 |                  |
|        | 165.870621884073 | 991.611982265221 | 387.617166711971 | 549.569374872629 |
|        | 463.187551361986 | 396.526590512521 | 492.930906036297 | 255.273375146278 |
|        | 417.865461351681 |                  |                  |                  |
| MOBK1A | 254.287838845201 | 266.71318061066  | 259.935831886014 |                  |
|        | 419.593558001947 | 220.60173086462  | 195.10410545445  | 213.847316974717 |

|         |                  |                  |                  |                  |
|---------|------------------|------------------|------------------|------------------|
|         | 218.2454853526   | 217.24573005272  | 316.364342983155 | 188.864388750448 |
|         | 181.453575300661 |                  |                  |                  |
| MOBKL2B | 149.049931380459 | 144.608882758506 | 123.794432024417 |                  |
|         | 121.006569103388 | 126.816402300701 | 118.486195373059 | 118.47752077032  |
|         | 141.727639388452 | 116.91470505098  | 153.966815534288 | 178.717719615544 |
|         | 118.708644971927 |                  |                  |                  |
| MOBKL2C | 288.968909550533 | 276.224613560582 | 249.925640256322 |                  |
|         | 254.909076658804 | 215.744552410805 | 251.833571288967 | 417.528353577952 |
|         | 280.398987330256 | 245.900840732668 | 215.744552410805 | 381.484062427466 |
|         | 375.189005729903 |                  |                  |                  |
| MOBKL3  | 390.194764817385 | 395.645016679312 | 436.731545612902 |                  |
|         | 372.757091748175 | 301.304268871606 | 803.133619199479 | 383.503040287678 |
|         | 422.688531130043 | 307.665281863258 | 529.854965483609 | 304.152390210727 |
|         | 493.492348317616 |                  |                  |                  |
| MOBP    | 126.542112891953 | 122.038534506506 | 126.308622415913 | 124.818436949131 |
|         | 126.924014801186 | 120.039031290299 | 119.704436785439 | 122.578170988039 |
|         | 132.236355533277 | 123.431969470387 | 130.4631522533   | 128.318545300038 |
| MOCOS   | 142.851432926979 | 156.130224537288 | 114.223991452083 | 130.738915341653 |
|         | 332.343558229873 | 281.44159425243  | 353.50447714719  | 515.729905361375 |
|         | 291.167223094542 | 622.834462068316 | 415.749051861123 | 531.217306770605 |
| MOCS1   | 270.12941437975  | 289.257002046658 | 281.554559571948 | 322.099431638246 |
|         | 479.395948662331 | 285.131244588624 | 281.49247863022  | 210.590774758661 |
|         | 232.879578820053 | 223.703371558666 | 348.171901445232 | 196.657475905674 |
| MOCS2   | 157.322594990954 | 149.264997927508 | 230.893665210918 | 141.253030949701 |
|         | 130.018928906449 | 139.593950393555 | 170.430478598594 | 197.795275907042 |
|         | 163.748692741999 | 174.587558727209 | 182.763057221385 | 171.338371572269 |
| MOCS3   | 122.924017262559 | 114.721282552636 | 114.265920150451 | 118.480344364831 |
|         | 123.478896502015 | 124.697283474333 | 144.524701422705 | 127.874934513708 |
|         | 118.597739444445 | 115.821231468312 | 123.857527555048 | 138.147658465394 |
| MOG     | 140.882766779119 | 144.498245098592 | 148.288798428149 | 139.119638136874 |
|         | 153.582185523361 | 130.209752198964 | 153.582185523361 | 142.19015013243  |
|         | 142.317575246991 | 153.121693371757 | 153.675939908241 | 172.641322197031 |
| MOGAT1  | 120.238706364491 | 118.167740643871 | 121.080413308265 |                  |
|         | 122.753419925997 | 120.922042875444 | 121.613684281664 | 124.918089223417 |
|         | 118.924317138158 | 120.511896155396 | 121.603608840998 | 128.23432652395  |
|         | 107.344825308293 |                  |                  |                  |
| MOGAT2  | 143.070170783764 | 147.983937675946 | 142.907969322845 |                  |
|         | 147.891442774921 | 143.325710305008 | 135.906115546805 | 152.980843102933 |
|         | 150.927628184034 | 141.895211025017 | 171.042491047256 | 168.674809329231 |
|         | 183.348764012358 |                  |                  |                  |
| MOGAT3  | 171.595724119779 | 144.121427216077 | 169.391557085902 |                  |
|         | 167.42476096854  | 161.73079180403  | 159.926719599391 | 161.618479762188 |
|         | 169.184111483933 | 161.079169854907 | 154.8975607055   | 143.5709409749   |
|         | 166.521472376759 |                  |                  |                  |
| MOGS    | 170.910998705968 | 195.185025611945 | 135.2979041294   | 183.633719048831 |
|         | 637.892677173103 | 287.703569453502 | 275.343591424586 | 194.60309399944  |
|         | 173.115418167551 | 147.303997146992 | 329.722135361491 | 248.010317392179 |
| MON1A   | 189.74261433647  | 165.530397739051 | 177.592497020798 | 179.286187825363 |
|         | 210.199788806189 | 179.203783335674 | 192.022864170934 | 173.635827398273 |
|         | 168.805630890928 | 164.478006648035 | 157.856019979644 | 176.456539071735 |
| MON1B   | 179.674744176904 | 190.520750756082 | 154.402315635227 | 179.321622114583 |
|         | 344.247544510881 | 185.447093292348 | 232.699786290509 | 166.767004180603 |
|         | 189.362958041175 | 208.955110569558 | 292.893332413185 | 206.275885047321 |

|         |                  |                  |                  |                  |
|---------|------------------|------------------|------------------|------------------|
| MON2    | 410.533157400023 | 379.102958448288 | 353.621264641814 | 294.410833087913 |
|         | 373.290426793366 | 452.24100098898  | 484.903322308422 | 565.509446660206 |
|         | 461.482735533799 | 456.298408568636 | 477.160464512705 | 487.07860019179  |
| MORC1   | 134.9404536551   | 154.728941096647 | 172.641322197031 | 150.156865995098 |
|         | 139.530196462344 | 128.372225487481 | 145.077517845584 | 142.041992878641 |
|         | 152.112177721714 | 152.504620068655 | 149.829363505519 | 155.794309652357 |
| MORC2   | 268.370347292603 | 292.911761762431 | 241.648044508699 | 316.895545640437 |
|         | 327.251620296271 | 267.285998701386 | 312.557093674533 | 370.227329649269 |
|         | 271.568797887976 | 188.277563426829 | 235.133284525241 | 221.664431984861 |
| MORC3   | 160.997179739138 | 160.567934923347 | 171.62327142765  | 117.900892627473 |
|         | 125.493004972076 | 243.861834405092 | 195.66091457697  | 206.127493726541 |
|         | 201.702688815038 | 213.652091843896 | 173.176900454904 | 162.599466021255 |
| MORC4   | 197.191648960563 | 172.980441569522 | 157.779441363536 | 158.48793705795  |
|         | 206.413554839865 | 163.769959129611 | 149.524040913256 | 164.615113709166 |
|         | 154.701413581915 | 175.638328370133 | 168.197255166255 | 156.293025312901 |
| MORF4   | 111.020070405368 | 112.558241320112 | 117.561878567749 | 118.173752075833 |
|         | 126.484819755399 | 118.930792960643 | 120.967523586161 | 112.420505354139 |
|         | 119.993313087183 | 114.213405341709 | 126.499257771192 | 106.701716475947 |
| MORF4L1 | 1896.69856822105 | 1496.0924333403  | 2197.44189747261 |                  |
|         | 1213.61170930345 | 663.451243037105 | 1424.79466712859 | 1677.93424842267 |
|         | 1127.89414462606 | 1730.30703463073 | 1471.01897242089 | 1327.65573168233 |
|         | 1473.70433292382 |                  |                  |                  |
| MORF4L2 | 1018.38836615952 | 698.590134238302 | 1658.78888936164 |                  |
|         | 508.449904285771 | 1641.70484603137 | 2026.85580212422 | 1963.23068846837 |
|         | 1267.5716872154  | 2083.02482378721 | 1603.87451959083 | 1685.33737186733 |
|         | 1683.83803339436 |                  |                  |                  |
| MORG1   | 193.689806171113 | 198.066837203458 | 203.642739476708 | 194.352807599399 |
|         | 208.125844007298 | 197.146035305296 | 223.81987303579  | 207.440700355457 |
|         | 171.545695383454 | 151.560202480724 | 203.19299227665  | 171.161297672182 |
| MORN1   | 116.011005504201 | 127.625252349231 | 116.155949676272 | 120.626155234319 |
|         | 120.641590368902 | 110.392617179163 | 115.392989580183 | 122.484351696828 |
|         | 117.367470441908 | 117.897556445952 | 143.256590560776 | 111.794102015354 |
| MORN2   | 219.103510284905 | 205.871133967588 | 255.198862778405 | 172.750926094884 |
|         | 356.84281623052  | 386.461076717316 | 539.720389702148 | 545.200687301057 |
|         | 374.215345412947 | 427.542390397986 | 296.051639873628 | 310.365203383647 |
| MORN3   | 129.01094835739  | 134.46743016543  | 144.216394153095 | 129.290542121353 |
|         | 159.549936351002 | 133.627389970495 | 132.865704994046 | 131.744454088995 |
|         | 132.141918502025 | 125.589744938813 | 134.580526467375 | 133.897397228615 |
| MORN4   | 140.318155161909 | 161.8627732644   | 134.921230478748 | 142.466067016788 |
|         | 132.8615886934   | 124.106971897779 | 137.82918941689  | 127.712645268019 |
|         | 147.505345299689 | 157.13859713415  | 171.287186905764 | 146.639556437847 |
| MORN5   | 157.306022722324 | 157.221008210698 | 152.61583482402  | 199.837938317725 |
|         | 119.161972571516 | 114.785989868306 | 120.727504500018 | 116.382348831504 |
|         | 125.911259629489 | 120.337241026338 | 118.249148086655 | 118.185499089226 |
| MOS     | 143.857385585662 | 150.461430821491 | 139.702404392824 | 153.903993884123 |
|         | 166.795671029174 | 130.808911605271 | 145.148058824491 | 140.781647532361 |
|         | 148.437676259828 | 160.168654167074 | 155.837866295709 | 136.409960447884 |
| MOSC1   | 278.598913464804 | 251.062649517773 | 364.527677995774 | 282.719121652073 |
|         | 294.746622369436 | 281.996583337694 | 165.549190801014 | 198.411812737082 |
|         | 388.573321838751 | 195.414464905232 | 163.487737425232 | 227.033342447929 |
| MOSC2   | 249.064573038094 | 197.308952757609 | 252.761035334279 | 187.833356349429 |
|         | 158.319248599976 | 151.106858426994 | 162.997720993338 | 152.054874792646 |
|         | 183.613051401168 | 189.192494970145 | 133.177950880393 | 204.438365139666 |



MOSPD1 191.754626760061 172.050718136571 169.385340991747  
159.572851489665 239.12905945808 195.057830521304 222.456810024193  
250.676092725829 253.65959805538 222.394280571312 213.602504580364  
204.544266331066  
MOSPD2 244.5675215931 259.935831886014 236.470206707351  
248.129640673859 208.64349688412 246.850599569231 211.736398352592  
225.702629835215 207.73395131954 233.103476996669 230.893665210918  
231.044588483625  
MOSPD3 188.708596785144 191.297539967707 184.505279093688  
215.866644799363 420.743637858421 247.683819429859 272.077877821339  
239.079352337243 186.04763660516 243.622678182687 236.833653794223  
301.428024926428  
MOV10 256.729891423908 258.075566417241 249.09278446472 303.555333002419  
341.761516859319 186.925138700818 297.708113541379 249.263194321516  
280.337475979102 217.408824020423 260.642170838161 283.645434184168  
MOV10L1 133.343243441383 145.928643520352 145.97330701968  
134.93455083142 127.696578575874 139.470557140547 147.384050169545  
139.898996725236 139.078162119733 159.424105896749 146.53663019612  
159.399804351771  
MOXD1 449.598181155897 436.482580413523 206.753993163216 167.658560306884  
137.177271162749 149.427217345037 137.893630842968 176.631604815669  
212.190707408572 174.136806313142 145.068754246476 132.688531077861  
MOXD2 129.765440519589 126.233395051706 161.084088366981 141.332402615602  
143.488029865295 137.760712896718 142.13436730069 131.672014089487  
120.530092530622 142.928920246687 149.44520146627 144.178210824181  
MPDU1 192.273528391588 197.795275907042 176.267796612066 230.893665210918  
444.479355480138 285.931444518474 262.756237406794 307.768302846647  
227.52352046188 247.746304138866 325.252108402192 239.941641600769  
MPDZ 1064.85152398919 848.620986404914 1247.91041567746 799.759250503507  
222.990586491219 301.747788416496 341.251360936154 427.345809255426  
278.095939961034 271.356289141017 307.020265874666 175.974598536074  
MPEG1 157.976810829398 134.231634410324 145.882793872634 158.044938495884  
148.587929928134 182.529167529936 178.939268046323 167.713268780664  
156.105736111274 174.100921524023 156.978585870854 162.609829456486  
MPG 129.334217858282 140.18668846839 146.466967386428 142.248293068033  
157.745805838008 137.114604159523 141.884995734267 139.125340284813  
135.283742166077 140.933444607646 137.16842164453 140.487887891414  
MPHOSPH10 433.11536069928 421.384700184923 487.537691131703  
399.620724969771 521.30110104669 713.087392708048 507.56875910742  
662.781145703653 536.253405705975 373.361263985383 469.930860750773  
502.935749606918  
MPHOSPH6 222.005022189667 169.999692055871 260.67310907387  
184.862871179765 207.368252249039 302.532985701607 277.86338481075  
242.037132958656 312.224309341171 395.133831206474 365.046815163035  
280.204167582951  
MPHOSPH8 532.394088545421 448.371946119074 913.934874451961  
379.615659443164 262.629961694573 305.096320805078 302.905840432998  
310.365203383647 391.400480065 366.636754272029 318.244342364572  
351.337287690674  
MPHOSPH9 187.461448376593 179.478756495687 207.674249122047  
204.82244206816 218.058543664561 220.288758600588 209.5184563244  
223.872330412144 217.307872538386 221.961758403614 169.992657041967  
199.037998955485

|        |                  |                  |                  |                  |
|--------|------------------|------------------|------------------|------------------|
| MPI    | 165.320977593677 | 185.519000961898 | 144.313841064968 | 180.747527895349 |
|        | 209.662262708551 | 147.815673580657 | 190.787437782456 | 145.826955036113 |
|        | 155.641860356683 | 169.012926546641 | 190.405863264717 | 161.94312376726  |
| MPL    | 188.593378315122 | 175.400802387403 | 297.544216175512 | 216.290279815413 |
|        | 130.274288258599 | 114.249891266241 | 125.892022613725 | 133.443807124822 |
|        | 119.034003473459 | 122.274656361883 | 125.40832206502  | 122.022611139895 |
| MPND   | 170.998961353556 | 165.995251661994 | 171.40549153673  | 241.867699338253 |
|        | 267.342817344746 | 183.719279448844 | 224.805404798696 | 186.482547532546 |
|        | 185.485858719975 | 187.205674045893 | 221.889331385023 | 195.481680273686 |
| MPO    | 177.910104644497 | 159.534017722536 | 132.011199659803 | 150.42705284743  |
|        | 152.454414703534 | 143.783078837501 | 127.548070199148 | 149.157934946623 |
|        | 138.82269002406  | 140.833666276568 | 147.446381217887 | 140.588811000948 |
| MPP1   | 325.387193207414 | 345.433025456954 | 403.582461109859 | 468.339735327273 |
|        | 171.278489808694 | 154.101698334466 | 156.477249817844 | 186.276450732044 |
|        | 207.857882619727 | 218.209523110843 | 191.725728813959 | 136.684557340005 |
| MPP2   | 239.827648772906 | 217.86728342043  | 231.769926214655 | 277.219796733134 |
|        | 159.021304119265 | 127.578272480621 | 143.655901618594 | 152.717642489582 |
|        | 150.137061170632 | 137.094814176566 | 120.995697049378 | 152.301556397498 |
| MPP3   | 153.821728151219 | 147.592770523507 | 151.598423878653 | 162.481362579872 |
|        | 129.771073986855 | 137.567384694894 | 140.794929983858 | 137.056500339577 |
|        | 145.68886453261  | 142.521260841187 | 151.936543085044 | 127.685469299406 |
| MPP4   | 121.45175516842  | 106.263441906404 | 106.876902604214 | 102.932013031511 |
|        | 114.618608815885 | 106.088807114602 | 108.04922729993  | 102.661440700541 |
|        | 102.522925993233 | 112.758617084341 | 112.509731206295 | 102.343275379164 |
| MPP5   | 400.676876982655 | 355.714202328378 | 445.905756082569 | 376.54010486682  |
|        | 260.999345837027 | 294.871848467326 | 322.213266293148 | 379.983165400941 |
|        | 231.796421262015 | 442.86942574917  | 402.824964079515 | 405.570281788901 |
| MPP6   | 157.668307146391 | 134.045938361221 | 218.773153183388 | 132.057808599068 |
|        | 112.635430248416 | 124.657687121111 | 153.913513669361 | 128.9628883204   |
|        | 119.403831071089 | 247.053215951505 | 130.165488538277 | 127.951403055054 |
| MPP7   | 149.995272585012 | 172.387657419201 | 170.918584418153 | 146.286319248569 |
|        | 157.186747372076 | 139.374278310041 | 138.418604660734 | 138.147658465394 |
|        | 128.536721595589 | 150.384559054133 | 143.160281902098 | 131.429247528936 |
| MPPE1  | 382.960724128105 | 397.660202059209 | 462.948429969719 | 461.143361255467 |
|        | 197.667299074218 | 315.963526790659 | 343.346755862776 | 446.509863498357 |
|        | 377.800067476868 | 318.348505551265 | 444.479355480138 | 396.861835715943 |
| MPPED1 | 133.233826283531 | 132.918979842076 | 133.315888375614 |                  |
|        | 130.546471770588 | 136.244995503799 | 130.418739793498 | 137.71627781928  |
|        | 137.348951314875 | 141.316172207927 | 129.601234646954 | 137.877756077011 |
|        | 141.088456756806 |                  |                  |                  |
| MPPED2 | 153.893753448473 | 154.324955232468 | 145.360466216324 |                  |
|        | 135.292532783991 | 157.713227527385 | 153.6855881767   | 167.67272339144  |
|        | 196.419891542139 | 153.744962185987 | 123.231397809701 | 182.938824846376 |
|        | 130.542451540402 |                  |                  |                  |
| MPRIP  | 907.904780399957 | 982.367000148189 | 854.815394943219 | 1050.40488466179 |
|        | 483.845891531326 | 319.868227988842 | 292.068293167526 | 317.309949792707 |
|        | 378.509324619452 | 361.620362526358 | 526.182262872235 | 395.327097512479 |
| MPST   | 221.74200490054  | 209.180298459605 | 235.76573393374  | 213.301947003462 |
|        | 506.562512021352 | 275.072079692264 | 242.695286989672 | 212.420616436137 |
|        | 219.462274506333 | 288.436880408624 | 283.235844022826 | 253.218123990428 |
| MPV17  | 528.921893077914 | 495.56459361431  | 522.77407098992  | 555.758485277905 |
|        | 559.0867397858   | 360.551560710852 | 521.625146077176 | 441.001837510132 |
|        | 413.913442080187 | 548.455251483009 | 510.811470658575 | 420.567884340705 |

MPV17L 191.203632087687 175.350734537491 185.31769184805  
 186.430014478919 211.766884719761 158.886786960196 191.651818696629  
 159.891562221587 150.682964448325 158.658110539162 138.551695969102  
 180.250420976613  
 MPV17L2 131.662585510218 139.265915951162 121.414076245292  
 138.255457081996 166.404164069728 134.53861441495 129.641627630494  
 132.675172817752 138.746987455826 120.003095000297 146.912751127571  
 138.967080709927  
 MPZ 148.302775746627 147.032210333966 146.457939801041 138.620617643924  
 154.046550866249 145.150191397375 144.016137459279 164.696616863082  
 137.768666157176 143.105974876327 124.811760828557 139.979025013908  
 MPZL1 309.937351755502 283.952604729032 263.084557246752 318.004190156313  
 481.238450505207 328.078808625906 263.448958595597 360.756455184184  
 262.061371466369 346.862322263052 302.408563830315 353.674560414317  
 MPZL2 296.375305136807 470.95418656881 310.026522549372 201.320381706496  
 1741.0131951509 1605.2454230722 2544.58522979036 1748.77270039774  
 1348.80530206238 1188.08712008638 2165.41403521012 2162.46602203822  
 MPZL3 119.161972571516 124.385193388896 112.999642731096 115.137475087954  
 125.710199961297 126.868970616955 122.501785735146 116.248026336995  
 119.412461116903 127.352386363217 129.301839663122 120.744994574029  
 MR1 140.827965102541 146.557058433232 152.331011756244 134.241917425247  
 166.515199732076 206.164058935215 463.091387717305 484.131020584378  
 256.729891423908 335.47484353322 224.805404798696 736.603605876572  
 MRAP 116.5272207025 123.240482782331 118.697969266426 114.41737808857  
 118.000757530896 117.186546702764 114.325967923393 110.707755436868  
 119.9652990395 111.409447323674 124.646093292382 119.213217733213  
 MRAP2 142.603436693587 152.262147284452 153.289258540668 130.822330736013  
 149.37190049932 135.855243915966 155.323822771755 153.464360995071  
 154.007244208673 149.200848439601 144.525782437057 151.570977428443  
 MRAS 295.278972023002 216.126000558319 311.10841853984 302.113807121396  
 163.02140155858 156.293025312901 140.678336884951 127.006746526023  
 162.834961996238 140.857793157932 127.776112651456 151.411708598688  
 MRC1 139.404820141366 142.192934622228 138.255457081996 145.780927034516  
 138.011923055019 152.91729346961 139.579764449867 143.204058393718  
 143.893751699551 144.858656365799 121.99477069153 146.368188849777  
 MRC1L1 117.760045671142 105.050093408041 116.408126010926  
 112.999642731096 119.618176258524 118.983932995126 103.734303632543  
 118.663847950696 109.454483612299 109.859878974527 117.77708734157  
 124.121555438466  
 MRC2 187.73896437823 192.96586114861 184.111756696658 222.365208637146  
 158.658110539162 141.404832197192 147.829502959865 153.717326983721  
 148.888698484378 158.064409011013 142.003414252064 140.640160404077  
 MRE11A 181.3859695951 167.416417895159 185.493554506958  
 156.330571337475 172.916234073981 183.193029399643 190.489530928259  
 188.378996128521 174.09267813338 182.197625235191 172.992936821292  
 179.15284184774  
 MREG 145.615291241733 138.285325970867 169.136919982294 172.084184539157  
 159.870967387108 162.879707592164 201.105520537151 163.982415393606  
 172.827288328708 192.789886894821 165.607095120227 156.650388509656  
 MRFAP1 2956.63335018838 2537.90501983425 3727.70199176703  
 2165.41403521012 1657.72357544205 1906.81344236287 2965.38280248519  
 2129.84680802619 2874.43919426772 2051.45788386541 2491.33490046283  
 2712.07480130502

MRFAP1L1 687.987647193563 658.746224115551 636.781477235579  
628.939201051801 397.577760464197 469.407481002198 767.377380800066  
581.191693771646 249.925640256322 478.479988875208 659.673052713372  
640.255747986724  
MRGPRD 161.094103878416 139.843416673512 153.104072845043  
134.634465704182 145.123845983625 146.164093136588 147.040759979063  
147.385714746214 150.160004473338 158.906481816035 146.983646662811  
159.223980639045  
MRGPRE 130.925881698601 134.458958352588 147.891442774921  
150.091854035356 143.444109491884 152.362546746522 134.998632527009  
129.735862775199 154.212927357622 131.244759170642 147.088665779406  
134.7552564959  
MRGPRF 869.542306259337 1021.25947613827 707.404709303506  
1259.38111177521 134.17351030102 119.083957999725 122.295222990408  
145.06205326107 145.155989928336 129.586337068199 119.308345676905  
113.636570490048  
MRGPRG 130.732397679661 123.908458472687 171.869472272081  
135.645439440707 150.082561726876 130.268322464805 147.624372080117  
129.675420096163 160.402220755071 137.519771130707 120.773552653073  
138.571102593669  
MRGPRX1 97.8058879269165 107.544568250154 109.793568518462  
104.934718065476 107.32960937124 115.048402956574 115.672307128514  
117.131720092783 112.371497988132 107.961322525982 122.426568507144  
98.1433670546536  
MRGPRX2 152.829437376835 143.167719135403 145.517559593811  
141.571389983164 152.26903721278 137.485252316816 138.196640512429  
138.728765780512 143.327234875417 133.689255383855 141.585172896047  
132.132474135959  
MRGPRX3 113.400050190315 113.292688210897 120.998665308561  
119.631847624882 109.740801301993 118.021169080914 115.157321350379  
121.687187898743 119.67745324922 117.392898601408 124.895023786422  
117.218616752346  
MRGPRX4 126.938068475032 147.903030308715 132.433109154079  
151.973681370675 142.246864759311 131.256325361974 146.033591220134  
142.75592155869 142.183154756458 131.536457148878 121.322817570375  
159.026102446297  
MRI1 414.200068430184 349.816819166182 480.712219116621 351.585604465402  
458.282682131641 818.445501500731 662.958637409597 630.894382644903  
345.897250519387 547.367381020623 587.388038484307 730.34994035645  
MRLC2 3829.87905458534 4397.32311216672 3441.9805896226 3413.39994653641  
13526.3170858629 8633.71708020651 5655.12135336698 7573.69742026367  
7539.6945050098 6737.97308530049 6358.5018930218 8666.41250683965  
MRM1 154.229914729772 146.49022197174 145.090639086338 194.475822533231  
171.660157220703 157.6790197503 170.439725847568 168.132172570809  
161.997058981786 158.041568121766 192.804447792672 189.136114953249  
MRO 109.098105822556 129.537345537086 119.180033382937 125.14833026167  
111.467722538327 124.794260959228 112.10312035128 110.820329153348  
103.398929051742 118.66946078241 125.964335876018 116.839796680107  
MRP63 562.891241563711 653.749043828462 523.306451464643 707.048754700047  
221.070448906398 508.572981581855 321.492900106953 375.189005729903  
372.54091392596 271.064405562085 447.727229248315 355.519647649551  
MRPL1 558.621429366984 487.799854351205 677.265576269103 476.495282784602  
540.797164107185 717.419388886784 615.254768508691 550.124359517322  
611.36406319509 685.354305381323 603.764427348016 714.6859666834

MRPL10 299.170431746759 331.848516303011 396.40172043456  
382.401290201025 273.75192868583 235.372592051464 347.3483417873  
284.236970342827 258.348298226232 231.0814970959 312.177191402945  
228.739556788924

MRPL11 476.495282784602 450.327710374141 534.505132658177  
533.784151495549 585.721610434501 912.143424293236 785.599211190431  
543.933989965705 467.387427864242 676.570119607984 520.120193442648  
758.517101659762

MRPL12 332.749676505218 487.19625805337 252.593574250965  
700.601917911532 1122.92917004037 602.480822390671 830.684999498776  
671.563789496889 578.947889414387 452.24100098898 380.514553097613  
796.439819579938

MRPL13 473.260534978556 477.87583927675 496.823662262772  
496.426739836535 1013.03054571763 1318.3633082502 1267.5716872154  
1331.18605673705 1628.24528041404 1227.36706427754 1164.22995893381  
1200.94425675913

MRPL14 448.54309632232 546.755305058958 496.560127152436  
542.121375354644 1680.25851465727 1102.38234645327 1084.95095717937  
812.75075757351 971.170460915918 852.099019968701 986.004777675332  
944.47112348734

MRPL15 572.407760064901 618.437282203498 595.270107963842  
610.337659723539 983.777608766079 1233.27155759407 1450.44557173645  
1450.44557173645 1491.05501052706 912.143424293236 1426.56252600395  
1091.69584249713

MRPL16 481.037647470809 580.645924062301 595.409419899436  
709.778171909457 744.523059417351 965.031655021246 817.036222521723  
733.86133557115 5250.88041666757 799.759250503507 883.140984728615  
886.157279090932

MRPL17 672.637760135254 804.362909579005 685.080426814888  
999.658013198849 1051.98943987926 987.78377957731 932.862030475849  
1070.4597488302 1243.96721244424 1522.87703817058 1321.17236442448  
769.958422740085

MRPL18 982.367000148189 917.188039935737 1174.69701182094  
1100.17618574297 635.536499281829 863.086199215353 1184.3199328099  
1458.13354165836 1362.1486006778 1145.35733270036 1037.46485756166  
1217.29687282094

MRPL19 385.050282185255 375.189005729903 326.908959531021  
408.993744895434 622.348802511009 508.302878624289 519.672796004691  
646.933504790891 434.509391836336 707.404709303506 461.314247041387  
577.56891124468

MRPL2 251.268669431283 318.930960243303 231.915272112361 474.750156829195  
372.81255844018 316.281469585496 241.418016203544 220.92105843037  
271.238736772408 211.085778902367 331.888150158628 217.628802427037

MRPL20 544.107739610054 579.678635803225 912.483177705931  
583.455617065556 877.255923473532 1099.80705776268 1118.86225415732  
1180.7055699511 1071.47374315822 724.103864917969 803.60413590137  
1167.72023351098

MRPL21 564.749082802433 610.759447723026 861.516925304722  
667.693216401836 609.939982655706 936.957730361063 696.475639532595  
638.129080224049 692.095005197252 667.892385395063 427.249733213787  
816.266384662324

MRPL22 624.978351618077 600.635914090365 833.430847243676  
643.905401805862 449.408793796673 790.561585641193 744.523059417351

789.043948009585 573.846138124455 999.658013198849 616.523853569261  
812.75075757351  
MRPL23 702.049571167356 796.052115217208 597.952909577121  
829.992212133165 1906.81344236287 544.956712516196 747.587723573212  
688.684644604218 975.685771692095 832.911633923496 1245.47421607111  
359.703969802888  
MRPL24 1151.30600388403 1138.00644332379 1376.84058291266  
1353.61552261489 1708.87666406131 1378.40627876546 1033.48252432603  
2403.42261883515 1083.26599217847 838.63350090385 1116.95795024994  
1767.70023790753  
MRPL27 374.268489263941 355.213322760505 341.501397478593  
457.548150688248 309.75140197669 435.095843349921 547.817028243811  
462.948429969719 379.670492165938 283.952604729032 357.259935567823  
424.495400604335  
MRPL28 211.289598823191 220.446775597113 228.349507726225  
272.500572765647 370.555627307623 225.664432111551 249.292766428035  
224.588225855066 214.888126361789 273.303240462047 231.044588483625  
250.003965480779  
MRPL3 486.947380524463 443.005424069211 679.822276398569 428.782703561238  
1103.81439809121 1441.29676998365 1366.06309834426 1402.14708471728  
1558.22238167317 1151.89087953837 757.877066703516 1331.18605673705  
MRPL30 186.406439948242 176.631604815669 204.544266331066  
150.765477999064 275.609716327452 310.533399024851 240.734451149197  
232.046814892685 198.597176657619 324.177924877233 226.387465899611  
237.456245064363  
MRPL32 831.610501402173 798.943242964857 1186.96351738518  
653.500279510032 1320.74943817958 1389.93393245455 1362.75971646355  
1903.13326109546 1538.78070281348 1111.88018487186 1615.60472592991  
2240.33212242003  
MRPL33 2012.36542989953 1707.09830463606 2473.22803972431  
1563.71477584676 1971.42527720714 2622.87486749984 2101.93705983383  
2630.78185410861 2307.82327595071 1266.53539318831 1346.53215685106  
2215.43744802035  
MRPL34 834.788058321257 683.179460779062 1095.52349352502  
696.976036382401 796.936154737659 1099.37392456694 897.51782613323  
944.47112348734 590.3584324045 858.524630425687 777.651238374269  
957.54149804446  
MRPL35 357.584458526365 391.911768848267 437.770841893227  
475.038389500056 488.14606875418 552.790706181938 366.473258467746  
577.33849844574 374.337030706199 497.759125486158 405.322847383739  
527.597948979568  
MRPL36 688.915534194306 666.847934976479 1030.56836625083  
625.932910814208 1368.91287156398 2296.30423509176 2242.73511149559  
2346.47361943533 1551.90775589919 1082.75419087929 562.891241563711  
1505.90883940934  
MRPL37 1106.75785702993 1495.04587558545 1207.11788506001  
1892.8338612507 4118.58682247781 2433.83421295012 1934.30779703747  
2340.90990677253 1685.33737186733 1813.79641422879 1509.69760873558  
1602.63977096867  
MRPL38 681.591028334969 829.126529857044 723.807658768693  
1002.88224342342 1024.59845685519 825.345092964844 680.94167651697  
803.60413590137 770.19255305977 496.991561192565 523.073926509865  
640.029195821436

MRPL39 234.841813258798 238.400565506288 301.369680426563  
228.926077117474 222.332748220525 378.967410725775 359.991823789356  
432.92947962962 501.434722063309 567.715714233608 308.517561840596  
424.578659172414

MRPL4 170.497804969996 176.883702717029 165.149464497921 205.950347620158  
289.576706584644 268.885346595453 191.405362404386 228.349507726225  
183.969897305028 189.509062639279 203.983168778488 219.729169245025

MRPL40 395.927222009721 509.618968665191 630.176145684641  
513.292377117011 452.961307006622 614.094097408035 569.866002248352  
489.118864124059 463.091387717305 701.847905027147 466.392151902286  
499.176926371542

MRPL41 951.371815352591 916.4187683687 1187.62490367696  
906.886423608706 1925.60246708149 890.121325723286 600.162650426961  
811.912727084669 858.524630425687 1369.89073267996 1369.89073267996  
641.12919339861

MRPL42 229.116153948948 225.438177833064 218.96845208513  
226.936810012475 422.02217814979 341.015631528464 381.253673759781  
482.677635089583 519.672796004691 344.128576341892 309.098519056843  
361.768552564027

MRPL42P5 174.873893094923 157.094001180073 159.891562221587  
175.882911801581 162.778480318754 173.761036260869 154.270034951209  
177.862368731138 168.628947766217 153.402227428787 181.3859695951  
189.708396835236

MRPL43 539.471166362469 496.991561192565 700.601917911532  
514.354512083591 540.078145038497 372.024884481775 669.124699103132  
369.78624104057 482.344514972063 512.895335481876 492.05680879106  
588.076436392983

MRPL44 172.002600588279 180.179981672095 183.998458233995  
182.028675726969 200.506615977654 193.674681547989 198.166270627544  
204.862387642573 232.231236745251 256.795346052751 225.31216514083  
234.5655184349

MRPL45 444.663812851378 480.101253056873 686.198351821711  
501.301694626942 365.727197088581 560.602047253306 1037.46485756166  
1298.60552708737 841.285351463894 558.810095726517 759.534249620343  
590.849222581206

MRPL46 445.505512764045 437.344765185802 651.235249028924  
532.235193634196 424.578659172414 558.251384152474 692.095005197252  
460.807117177285 734.97763567765 470.308610828825 575.060457772307  
762.584280908728

MRPL47 209.258707976348 187.48055574295 204.453822958077  
187.993907528473 223.703371558666 268.724338967108 235.530986541549  
299.170431746759 280.007569817323 237.906142045719 254.722836822616  
256.764450748941

MRPL48 282.392419584508 266.395569467956 317.600728351694  
264.905947922753 383.10686624119 314.4408959517 322.153713097778  
313.025250337353 323.628636799403 313.536451935268 412.048097766066  
336.212224495877

MRPL49 288.072720517427 252.919704128539 322.64731764456  
260.098788125373 418.244376024741 314.708587131145 286.035428568826  
308.330044958513 315.064477782052 257.775569674531 337.39574303968  
266.892524131545

MRPL50 429.680602294138 418.574045635945 344.247544510881  
337.434882771953 829.992212133165 497.916883763059 385.584224833836

431.546135503733 457.130051460676 620.614820117452 757.406530000489  
400.676876982655  
MRPL51 1528.49457104932 1460.24985399013 2016.52142068599  
1599.12034906314 2423.84327263111 2132.90676194993 2476.51542420593  
3219.27851139047 3490.77593331727 2539.87833317526 2132.90676194993  
2296.30423509176  
MRPL52 389.500591134279 342.487952136318 467.944850290806  
466.083451075744 343.946831770916 321.31562287169 221.093229309411  
237.521746704115 361.904370514991 293.925995360234 484.568420044471  
326.1109406486  
MRPL53 327.566026396726 401.840794789616 327.951753740503  
440.495339027491 985.087150371964 618.140160251927 921.546033242474  
636.382696018633 507.236601481067 469.930860750773 508.572981581855  
576.10291008626  
MRPL54 852.099019968701 788.244353085369 992.744093752678  
876.288248962843 2430.70635781622 1382.95068105649 1120.87534972745  
968.157701932137 910.982557417978 1095.04571025381 898.877732360841  
1285.54492194393  
MRPL55 340.366016191232 366.705048374078 307.363302726074  
439.852826905352 498.534168389928 374.9555524303 349.248144552634  
245.675725760577 386.305638633172 296.290104133844 283.499120551905  
315.565349831797  
MRPL9 208.776711004753 231.462907786174 246.77831953556 246.88857694249  
286.282132382462 246.369521698487 300.765518378297 271.522696252995  
273.959220003188 336.002793042439 215.143973502566 319.966785546419  
MRPS10 1157.02365469464 1072.37500318471 1074.19589851599  
1111.47772523331 618.829716818725 945.830852603704 1008.43888926584  
1244.67453201339 1222.014210447 1397.84878368705 865.800709006332  
1140.40904196731  
MRPS11 430.100415399881 448.715938510132 466.141717595301  
541.258721278882 545.200687301057 683.365770196967 569.967953318205  
565.843200661721 789.043948009585 481.453770150269 458.875979229339  
576.873245313776  
MRPS12 387.068276379114 445.763740779039 364.113665301598  
478.479988875208 2157.50118108142 1753.58770316818 1338.83705469394  
1154.86609813021 1368.91287156398 779.022508413529 716.420861490714  
931.598413783099  
MRPS14 157.516278302035 173.751615672365 161.89906072679  
153.4392054301 165.797170648964 155.483400816946 176.194292036542  
162.199381540369 177.091809538824 168.05687638693 153.596205569255  
205.428900832926  
MRPS15 858.524630425687 924.630951485299 818.225731093346  
981.781076110568 1112.4055726239 1282.38953612054 1326.95332435394  
1264.90442763788 1067.80176606977 1215.96648642927 741.875751347917  
1054.47292895417  
MRPS16 538.605085454393 600.430996779799 413.757630469808  
614.957397883514 449.598181155897 387.827718022473 522.050619657197  
563.490027149224 451.887564294551 375.856200488667 708.534025308731  
610.915977337787  
MRPS17 492.377642058095 537.216291942143 520.218545108099  
532.786041960586 1004.97723186946 791.137867905579 860.688314783077  
913.22732386079 818.445501500731 901.197085099854 549.047065540118  
819.151876775691



MRPS18A 384.97980473847 426.769986378276 370.301819403832  
562.232754247201 779.623566217277 484.230510636533 466.257158794525  
407.589300080181 492.780880796036 351.337287690674 551.823767223086  
417.024088698182

MRPS18B 653.047570485109 676.570119607984 749.515603904233  
766.710479603963 473.529519031797 506.562512021352 963.343120586863  
854.224454791713 730.988069115919 710.228463443265 1134.64039256323  
789.752781067888

MRPS18C 409.073045356073 413.084646927035 588.076436392983  
343.200277800027 623.508710830895 870.887539668967 679.822276398569  
1044.91923772265 1204.32784721885 910.541650889451 661.096668635469  
722.974310297586

MRPS2 304.985269874607 353.621264641814 319.639103463458 384.566987097657  
646.704226815099 252.919704128539 253.385592447339 274.371523790341  
301.871924474014 295.935625475189 325.525450750788 257.075088169589

MRPS21 1195.6335460045 1132.27988339924 1439.37593006882  
993.34112647221 1505.90883940934 2321.41228376157 1521.61996270758  
3277.24948092771 1816.3719976564 1940.42283070543 1157.02365469464  
2596.43650409044

MRPS22 927.137881369911 846.084919104262 1088.25132365974  
869.937761943249 808.55123510297 1222.59895569348 1096.61874892572  
1403.90487313049 1195.6335460045 1325.77498031227 1266.53539318831  
1305.2232532959

MRPS23 235.650688823345 210.103974340881 237.113813706224  
234.094722315007 384.365878895439 478.293220151258 464.323065038265  
455.313553278155 453.058639550475 331.215872600406 358.975346234854  
532.786041960586

MRPS24 1243.96721244424 1253.05700051015 1423.02563792293  
1367.19652160532 2185.46850787298 1032.4540300024 1492.83354014907  
1337.38160266788 1373.67062432073 1478.09582385838 811.144838166905  
1462.31151845458

MRPS25 357.431640917696 314.810001770583 424.912426797488  
384.216141843863 232.127996106421 283.918434443669 314.845965872164  
332.464176231219 322.64731764456 284.13865992802 296.830999357172  
535.49374437073

MRPS26 630.670530516275 641.338900241674 811.912727084669  
681.677841333095 1491.05501052706 1879.08108720938 977.450397042213  
1344.1288416533 1029.09818399518 699.800360892516 775.382397816601  
1270.76282064793

MRPS27 558.810095726517 657.231047829537 870.887539668967  
718.142991571468 292.068293167526 417.731815310276 604.453803994875  
475.403662030875 431.686900474971 689.821785472506 680.743052197025  
641.338900241674

MRPS28 309.861048237742 360.756455184184 429.812058546782  
317.309949792707 575.386048896223 603.338538383128 619.380514697732  
782.139151423572 610.915977337787 583.455617065556 525.789451405743  
829.740755449333

MRPS30 321.119758814618 296.657844888195 322.028360309592  
247.340470321453 1107.99131702522 624.106546150735 619.635734567779  
1038.93733638848 597.952909577121 773.330948077036 410.845034795716  
712.699853328955

MRPS31 589.409235971915 505.704957182936 622.692834629555  
540.584471920486 438.340341490622 852.436775264873 608.959089074987

475.686805714298 645.806954296487 592.957842630046 930.704688414069  
 1017.09497861942  
 MRPS33 371.941204080246 416.715760038095 485.576566972696  
 355.879841671975 545.760623858473 591.641325402032 822.545007054668  
 900.839073800181 581.37957221282 542.009873308344 739.874432767734  
 1164.61390835016  
 MRPS34 185.342353172151 195.16856673253 245.01029221002  
 218.559622620349 525.515169794593 361.620362526358 327.324711245289  
 314.708587131145 323.462252156562 375.539588956213 266.442565636226  
 380.888728347647  
 MRPS35 335.142319387164 345.135289739599 528.098472417251  
 311.157764305033 416.475440894731 754.406896156858 641.12919339861  
 1075.3328563531 787.615195903993 653.879734066271 643.905401805862  
 713.23381913235  
 MRPS36 182.470538043064 197.740912476527 196.819022688128  
 210.973303650385 147.243263182654 152.411545237204 171.238423077347  
 155.111346336412 156.32137627012 160.839277476397 223.778708427552  
 153.947717667689  
 MRPS5 485.576566972696 469.714826990063 461.722481634933 560.362502519639  
 513.662594875431 477.160464512705 368.711718874343 424.134483971176  
 415.82312615045 600.635914090365 609.504365141529 486.334840298921  
 MRPS6 3387.5366256957 3168.27825058989 4081.13406129846 3504.77617298452  
 3215.41238464601 2938.06458269406 3115.11499025766 3164.55070502403  
 3598.30438198858 3200.61067185412 3149.26998719015 2642.24374855334  
 MRPS7 352.50679573356 405.975221091252 467.90388853336 430.100415399881  
 458.782864873657 907.610179738644 935.423045210635 956.76879975749  
 846.425467119342 660.315285709317 684.715981522999 961.355625338687  
 MRPS9 423.045329000756 451.317592236192 670.856008549143 526.285114043212  
 395.716879127149 513.292377117011 325.751369001105 430.649188209901  
 385.978867521533 455.778776920897 525.138476928759 404.726926716133  
 MRRF 233.300864925399 223.872330412144 273.402804140541 222.646371492347  
 210.942865876533 228.649073045499 246.327991259259 259.979459472217  
 250.443147156029 354.981966077502 304.590636814607 268.568824794145  
 MRS2 156.763364462534 159.06002608158 143.00932329728 139.249869918235  
 180.327051100611 234.370850809531 261.844708446856 222.990586491219  
 181.813812621767 243.35880641566 208.125844007298 257.168308311848  
 MRS2P2 145.921381300813 133.812639120892 112.166192839859  
 126.806537241253 127.339018771488 138.651419539729 133.370488470007  
 138.530236176135 122.093290585838 155.413300826229 117.380281099932  
 129.942594772751  
 MRTO4 242.871915060884 246.112720011613 232.151020756625 241.890850719625  
 290.638110977807 386.738154577763 358.479218923158 367.825328832492  
 376.867306473426 302.1846598234 275.298642145005 428.237210115667  
 MRVI1 248.403014089812 221.961758403614 283.952604729032 225.546125484563  
 152.823566129571 143.784022884904 150.639235242268 153.700168798494  
 148.329635131296 151.210814209064 142.007066214472 148.715065348779  
 MS4A1 142.635015113687 149.019120812629 153.38494705081 152.769931978291  
 141.552315273863 142.243866937888 158.495606141226 147.185378560761  
 163.352317556107 149.430396727944 138.643442050615 148.700297908071  
 MS4A10 127.350368333088 148.029259633449 148.219406063533  
 162.161282071736 157.729732484131 143.271346378958 150.929236917651  
 140.175724588255 148.916981164664 138.748941735079 137.404525565336  
 146.763046352405

MS4A12 106.238539254093 112.896360244636 122.575357101038  
116.483432723207 121.730973193225 113.656820701744 123.081299769162  
110.988514718572 112.309528593741 120.07034081564 125.019064287385  
112.520199390427  
MS4A13 139.694950277714 161.090443294391 163.922353493317  
151.295855278218 150.19577351885 153.095594614683 154.831307586538  
163.446813963119 157.58224826673 155.890403934674 151.144521344129  
149.725422365342  
MS4A14 126.247378598596 113.422559344178 124.86699236406  
113.321454160244 116.294180301039 117.602986362773 115.613348109569  
123.551225884748 123.794432024417 121.47058227778 134.774591679724  
123.336074100984  
MS4A15 115.902030217102 107.385565665491 123.058261039164  
108.386545220984 121.764933633063 115.907902010701 121.801291293249  
125.065813262416 108.62191665589 104.58424134098 106.470524594239  
142.51308872439  
MS4A2 360.605223912114 239.079352337243 220.578790067967 273.709160508205  
132.227561632637 170.452989060697 142.034369454643 160.50439457257  
194.734255772365 145.00699763203 157.457468761338 157.316941011117  
MS4A3 144.122748003206 145.887262601586 143.667207351415 148.874533472738  
145.766684470184 149.471240458766 143.937726155116 145.358431402568  
145.34332740863 146.26936366452 144.688515462537 148.486946087388  
MS4A4A 127.295532954648 121.915043935246 122.079685222733  
119.551741097918 129.743808480368 130.766401858384 115.890431424899  
140.583804906052 142.954747193455 118.9803314875 144.499680685194  
121.888886996534  
MS4A5 118.75237770613 105.010952544907 109.760525674874 107.559685467789  
104.248226402465 111.127245394321 107.605526304445 114.384296185446  
102.563722570171 118.521075843163 112.081127853476 112.962180108363  
MS4A6A 270.604799126393 227.926444925478 268.186156177622  
221.093229309411 229.594081405784 466.257158794525 293.873921048642  
603.764427348016 685.620637807134 299.29004204677 344.575967665039  
311.157764305033  
MS4A6E 142.58039376538 134.883708339914 131.004145546364  
120.460433297007 134.076865693417 131.954310449801 134.655842662899  
137.85150144918 130.242779079309 135.073449743301 136.84840505336  
139.684141478459  
MS4A7 221.796935051107 164.794626785115 174.255919030841 170.901599088282  
163.904137395349 234.322989368622 177.60876237572 410.216584967666  
346.862322263052 212.363151537303 206.21848253717 328.078808625906  
MS4A8B 144.231539210695 130.909388246758 124.258412895333  
131.416923875254 136.962442874268 128.827129738041 118.05386204863  
392.6758818959 153.095594614683 129.741644654541 136.790457887057  
130.516632662261  
MSC 202.343343669937 243.936797286495 126.919867899174 149.231475480618  
128.101371225192 127.09430165124 123.341568893224 135.195985987169  
195.057830521304 177.039190810529 133.220878146063 128.155080148958  
MSGN1 142.170705049763 142.376921410427 148.258850340107 155.699649538664  
151.461857714097 139.955389033983 163.709174813901 147.581827861592  
125.000876313893 140.26206122305 145.770601609392 154.744065805492  
MSH2 158.249743182741 164.848970268132 157.484541464879 159.35787888191  
200.633009710701 203.308014296113 192.441337304606 207.545424360094  
174.313718712035 184.611146047556 181.098584949344 173.484307104751

|        |                  |                  |                  |                  |
|--------|------------------|------------------|------------------|------------------|
| MSH3   | 13853.9715872573 | 14417.2696849334 | 15463.4998494462 | 17830.1333276624 |
|        | 10953.6229702446 | 14938.5975217303 | 11017.1478502767 | 13758.4768543075 |
|        | 14228.7550296952 | 11112.4298269818 | 7491.93659373205 | 12221.7819812315 |
| MSH4   | 166.9499656083   | 171.410912120195 | 172.091884817207 | 151.716042884808 |
|        | 173.115418167551 | 155.790759250672 | 160.954017627605 | 155.868109161417 |
|        | 151.522526161299 | 164.820007934887 | 152.699431442817 | 163.504122327429 |
| MSH5   | 132.628358688595 | 138.805103589625 | 133.64938083537  | 127.765987130281 |
|        | 141.746032519746 | 128.905042692431 | 135.56878810365  | 141.733840643889 |
|        | 136.156548919515 | 140.000880942015 | 148.704917490429 | 145.363692072132 |
| MSH6   | 1027.96306543235 | 1112.4055726239  | 929.198774489695 | 994.802763887989 |
|        | 974.007008568051 | 1640.99641023476 | 1092.33328323944 | 1343.2623011534  |
|        | 923.383014892221 | 967.797017108447 | 629.197022551069 | 884.248568386012 |
| MSI1   | 170.992074907355 | 176.300743660299 | 164.39910609636  | 160.752581271996 |
|        | 169.147351642004 | 150.794680375075 | 146.188193301627 | 173.839053227554 |
|        | 157.863585655333 | 160.914009756867 | 155.129304059037 | 161.874184077257 |
| MSI2   | 136.888915439473 | 130.957441406855 | 128.040201586267 | 119.422996538444 |
|        | 366.705048374078 | 153.865702787334 | 189.324370290702 | 181.889592946523 |
|        | 191.692830869809 | 126.314233529267 | 177.379186278216 | 149.684922983176 |
| MSL1   | 189.419941381565 | 213.364858759772 | 185.507663455634 | 196.096936985479 |
|        | 143.209289043824 | 155.988447182637 | 198.205113187281 | 250.718986968076 |
|        | 184.577511730401 | 148.832461329713 | 198.745359220907 | 179.828494168009 |
| MSL2   | 179.091917512822 | 179.15284184774  | 162.364266549463 | 192.258863431747 |
|        | 170.376620730856 | 142.575382559357 | 169.36029946801  | 156.978585870854 |
|        | 167.547551072373 | 148.883263903527 | 181.110403721353 | 166.040918339519 |
| MSL3   | 281.369059516242 | 350.803378042804 | 205.987280015028 | 366.473258467746 |
|        | 220.098071755353 | 312.224309341171 | 248.03801051527  | 273.514200733343 |
|        | 236.427507270325 | 239.621756857095 | 236.082185670774 | 226.43414383055  |
| MSL3L1 | 744.225336494008 | 1058.55850972326 | 384.296190598736 |                  |
|        | 1127.07858210156 | 417.262521411065 | 747.077451281453 | 401.461825804111 |
|        | 602.371843434907 | 428.959561932229 | 335.698400607132 | 388.096183735126 |
|        | 297.285037835812 |                  |                  |                  |
| MSL3L2 | 120.456817031716 | 119.049388179929 | 117.093818506721 |                  |
|        | 134.172033051676 | 108.34997967774  | 118.787630332168 | 130.476322267589 |
|        | 106.953841653951 | 118.833188167696 | 118.641431192759 | 107.239841465534 |
|        | 123.256613702254 |                  |                  |                  |
| MSLN   | 143.45723206497  | 156.381599544223 | 132.053242760381 | 160.343551497512 |
|        | 144.904945833116 | 163.709174813901 | 152.54039461337  | 135.817028661429 |
|        | 158.319248599976 | 138.618761382177 | 139.923187410488 | 147.28750335168  |
| MSLNL  | 141.859889340936 | 146.994103804515 | 133.452032750397 | 136.871568211946 |
|        | 136.761327889481 | 135.259226552938 | 140.481148289418 | 141.943910304145 |
|        | 143.807102980397 | 135.678138913772 | 155.183210738478 | 135.822022526034 |
| MSMB   | 166.674240866931 | 123.850975602392 | 141.763072120718 | 124.436549041911 |
|        | 326.354469134694 | 353.385210690169 | 766.710479603963 | 127.035980859996 |
|        | 393.198813167839 | 125.157459724842 | 2648.41012401723 | 120.682485578097 |
| MSMP   | 131.482553251516 | 136.403353223002 | 159.58125728432  | 153.865702787334 |
|        | 141.724442944322 | 148.556161762978 | 144.338069855334 | 138.112168847027 |
|        | 133.631676386591 | 150.374573177474 | 134.991379445799 | 146.165632086981 |
| MSN    | 2900.55309635211 | 2523.91287654539 | 1780.97169244555 | 3436.32495553246 |
|        | 612.374364731095 | 574.035124314622 | 302.735372807236 | 574.262112643403 |
|        | 965.031655021246 | 1663.71411325131 | 552.662610888399 | 390.752579014611 |
| MSR1   | 156.339564110766 | 150.924948809354 | 170.452989060697 | 153.774548290902 |
|        | 143.431389389919 | 151.212606106351 | 146.185931276053 | 161.382041789666 |
|        | 156.010027635627 | 155.587018319981 | 148.94765984808  | 141.645906784244 |

|        |                  |                  |                  |                  |
|--------|------------------|------------------|------------------|------------------|
| MSRA   | 332.885488115858 | 268.568824794145 | 341.564749445905 | 346.691690520054 |
|        | 322.153713097778 | 221.027562527572 | 223.531323159808 | 168.45157400976  |
|        | 343.617417488962 | 288.150694843614 | 248.887522059485 | 388.192984832638 |
| MSRB2  | 3136.27991502603 | 3304.82581034038 | 3455.20639616159 | 4592.14655702906 |
|        | 2037.96470181871 | 714.494228450456 | 1287.3125466789  | 859.547169028149 |
|        | 1087.69177809384 | 923.130629121442 | 1127.89414462606 | 1175.27165286568 |
| MSRB3  | 1247.91041567746 | 1124.67710585154 | 1899.94714976387 | 1448.64875525408 |
|        | 139.502856192876 | 167.612577768782 | 139.860093278582 | 149.089067389266 |
|        | 168.6016897585   | 199.96834355685  | 145.08246303652  | 140.486376016494 |
| MST1   | 274.70018535436  | 218.08515867102  | 268.724338967108 | 253.789045068884 |
|        | 286.230656780335 | 283.191303666907 | 612.06231165648  | 270.92671642109  |
|        | 302.272304483941 | 275.203046536524 | 423.045329000756 | 461.822629852953 |
| MST1R  | 118.430401197079 | 116.019123495537 | 115.247223837316 | 109.242622591321 |
|        | 746.296354515617 | 109.52020660772  | 295.330307669482 | 160.773510498005 |
|        | 126.802963197337 | 173.225064625094 | 580.645924062301 | 364.678403892354 |
| MST4   | 690.582550537485 | 587.54075434249  | 728.930140593418 | 615.485984065221 |
|        | 487.696347726467 | 852.926365088632 | 475.540659315339 | 433.928818077527 |
|        | 471.946284490029 | 557.405157178952 | 235.350819745387 | 516.088776850623 |
| MSTN   | 116.90832995093  | 119.792515907708 | 114.730641277464 | 116.65880728655  |
|        | 121.006569103388 | 113.119021336236 | 117.930665298163 | 117.910259090745 |
|        | 110.910693353871 | 126.143886553557 | 137.094814176566 | 121.661141741782 |
| MSTO1  | 292.640251411131 | 326.83982672544  | 286.133496092533 | 369.838429521168 |
|        | 316.165926273381 | 210.692705153337 | 299.463563393179 | 386.738154577763 |
|        | 284.574888587832 | 250.342080183479 | 350.308420518351 | 374.215345412947 |
| MSTO2P | 164.970438494223 | 160.667815093292 | 165.225475655526 |                  |
|        | 181.950658782069 | 166.503112149416 | 163.134784474437 | 150.168496148941 |
|        | 142.093180304661 | 142.294922363188 | 145.095023408224 | 149.131218007756 |
|        | 146.805832438977 |                  |                  |                  |
| MSTP9  | 110.437728036347 | 118.401963042662 | 119.730174479044 | 110.694256186941 |
|        | 114.624259793353 | 117.523834738903 | 128.554574566655 | 129.366567668463 |
|        | 133.031431118772 | 115.902030217102 | 122.478089682405 | 114.093935026467 |
| MSX1   | 839.662936279727 | 1187.62490367696 | 534.276129011237 | 1467.50846948144 |
|        | 174.515815532892 | 259.742175498038 | 436.982960786839 | 180.698727334322 |
|        | 190.96184674871  | 281.570685561526 | 172.222262910052 | 194.212177449077 |
| MSX2   | 182.711318507496 | 214.639374741553 | 172.152570321727 | 172.599654598668 |
|        | 323.95355217044  | 325.43977732888  | 348.921877633633 | 260.999345837027 |
|        | 441.001837510132 | 142.236565028336 | 505.404271675438 | 289.724297749772 |
| MSX2P1 | 124.393008692801 | 125.908576249439 | 137.546487338984 |                  |
|        | 128.477342430713 | 130.476322267589 | 134.607501073433 | 127.646032547296 |
|        | 130.374065525934 | 131.648308760913 | 134.250052775987 | 146.649944669876 |
|        | 129.865581506307 |                  |                  |                  |
| MT1A   | 1115.34267967366 | 2423.84327263111 | 1093.21579738952 | 1379.95968831696 |
|        | 452.606433325387 | 1526.66232186013 | 298.460273458181 | 878.986106116952 |
|        | 1229.47460924638 | 10836.7380675792 | 420.160939829121 | 488.505191823403 |
| MT1B   | 130.551216910933 | 115.427201752401 | 128.697647007046 | 130.772410329685 |
|        | 141.440563159897 | 127.382266838772 | 118.388993232718 | 126.766964875664 |
|        | 118.9428715545   | 125.940081665592 | 127.295532954648 | 128.623302491798 |
| MT1E   | 514.124012546829 | 754.607039665508 | 560.362502519639 | 612.06231165648  |
|        | 205.679992893049 | 448.371946119074 | 209.785886171295 | 238.770586150777 |
|        | 349.128741707506 | 2479.34567973462 | 187.183762762259 | 247.111032124864 |
| MT1F   | 184.611146047556 | 228.766847429517 | 166.04965258862  | 186.359770878343 |
|        | 254.83131041241  | 307.597733293218 | 242.299252896647 | 488.14606875418  |
|        | 352.303782547593 | 524.541494680558 | 348.067061666237 | 519.112018353676 |

|       |                  |                  |                  |                  |
|-------|------------------|------------------|------------------|------------------|
| MT1G  | 174.417259650516 | 210.245551279259 | 165.177036955944 | 173.929353266244 |
|       | 193.660159482867 | 164.520247586053 | 186.007710175103 | 306.59090554099  |
|       | 401.102586700919 | 383.259887828605 | 174.560168983121 | 153.457715729768 |
| MT1H  | 133.838032323605 | 133.436057118148 | 141.045379969014 | 129.075693654369 |
|       | 145.152605166094 | 134.928967716193 | 133.191797029676 | 152.385014030957 |
|       | 191.029458520006 | 154.661456780865 | 145.662818023154 | 150.311274161073 |
| MT1IP | 139.736465430177 | 138.499293816467 | 144.608882758506 | 141.186913979346 |
|       | 143.338628928675 | 142.14654303591  | 146.565265415908 | 144.413210364148 |
|       | 139.974586762939 | 140.770705453805 | 159.203584692924 | 152.074017988748 |
| MT1JP | 140.267351731167 | 146.554017952963 | 141.73799456072  | 154.764283765316 |
|       | 130.592061896237 | 133.581450824362 | 156.030794481734 | 168.156002330441 |
|       | 136.758262322199 | 165.003646188775 | 139.086498524774 | 152.155760355248 |
| MT1L  | 135.43939472868  | 141.313482534472 | 152.961475450751 | 159.870967387108 |
|       | 158.691830524781 | 150.667001746475 | 155.826394389322 | 149.153827025981 |
|       | 138.416716745934 | 148.176995739142 | 130.863753083296 | 154.412506915569 |
| MT1M  | 159.148717478277 | 393.914413372142 | 130.238231520218 | 137.675597243706 |
|       | 118.836387680022 | 354.579728909336 | 114.122395647516 | 154.928072022777 |
|       | 164.365630106697 | 132.223321299997 | 142.299535614113 | 121.784166691545 |
| MT1P2 | 119.334967856721 | 120.15332480712  | 118.677203713024 | 110.562310620515 |
|       | 116.038950886552 | 116.328330266803 | 114.658668711121 | 112.558241320112 |
|       | 114.494394548044 | 112.649012857276 | 124.157302365291 | 110.727742629085 |
| MT1X  | 293.646275396425 | 447.909277144896 | 314.486603134656 | 300.937118739654 |
|       | 343.767393640683 | 916.836022395768 | 186.951061159734 | 610.591049634222 |
|       | 575.060457772307 | 15053.7547401937 | 305.93974940209  | 446.698665191047 |
| MT2A  | 1076.09385014053 | 2390.41825815872 | 1151.30600388403 | 986.004777675332 |
|       | 308.517561840596 | 1901.97972168836 | 293.317880637519 | 942.41077071058  |
|       | 1340.79810963983 | 12283.9915232122 | 298.256131536504 | 398.61164689194  |
| MT3   | 140.873210629865 | 142.709768829207 | 127.344210958898 | 127.255966406144 |
|       | 125.555029794845 | 123.964042357475 | 127.152744243038 | 117.048846466839 |
|       | 132.425596223397 | 136.519697160267 | 131.460388562433 | 150.529257416176 |
| MT4   | 132.539585717666 | 138.405215507471 | 128.363331337379 | 136.653140842194 |
|       | 115.235444833856 | 130.185134787768 | 137.449776383224 | 132.390330703084 |
|       | 146.013430937168 | 141.70123350351  | 127.333963230749 | 131.72852748835  |
| MTA1  | 748.161769171818 | 827.157920721418 | 674.742955681908 | 1096.61874892572 |
|       | 953.099915501575 | 334.199307788576 | 481.933386283351 | 500.643499051523 |
|       | 441.578261054602 | 429.595453454621 | 912.143424293236 | 590.646248924596 |
| MTA2  | 415.113340335205 | 413.330906392915 | 401.359711029934 | 430.649188209901 |
|       | 922.877217016704 | 808.55123510297  | 642.484527246259 | 585.234286698678 |
|       | 519.564563632951 | 444.082440002333 | 811.912727084669 | 726.000622725287 |
| MTA3  | 484.230510636533 | 454.984562256248 | 480.101253056873 | 495.241179224412 |
|       | 487.901310664037 | 397.861172312706 | 344.070947256963 | 422.434778100827 |
|       | 379.546197364027 | 562.232754247201 | 405.032674307193 | 526.726224327409 |
| MTAP  | 538.647888236878 | 585.075322115635 | 741.433093896472 | 686.198351821711 |
|       | 301.955019831714 | 429.680602294138 | 177.919885012006 | 332.296938254329 |
|       | 456.126096817454 | 367.825328832492 | 148.446949168794 | 166.214167530158 |
| MTBP  | 118.360186663758 | 126.288011849541 | 123.140027043775 | 112.684334910243 |
|       | 133.104560685558 | 163.778790431064 | 117.728410015076 | 138.620617643924 |
|       | 153.010339525816 | 137.823152565933 | 132.148166773943 | 184.25384366282  |
| MTCH1 | 4166.43837922103 | 3765.25491426198 | 3869.12225821096 | 4711.21389812942 |
|       | 6810.50193989514 | 3706.41283595794 | 3528.62443098065 | 2792.13364570755 |
|       | 3545.8833678963  | 2910.00269086567 | 3798.89743803968 | 3560.23794634993 |
| MTCH2 | 200.810204162831 | 195.256498208339 | 186.939168482155 | 239.363511706064 |
|       | 172.175584707792 | 225.387674139093 | 206.227392581929 | 203.791916347213 |
|       | 184.111756696658 | 194.941454173896 | 337.22646304739  | 184.813094907887 |

|         |                  |                  |                  |                  |
|---------|------------------|------------------|------------------|------------------|
| MTCP1   | 692.945420109927 | 608.959089074987 | 640.568342662067 | 649.438995824208 |
|         | 570.916936074747 | 435.901794650816 | 1146.84239258543 | 451.380376296813 |
|         | 323.086368767924 | 503.967725251906 | 624.106546150735 | 514.213675499369 |
| MTDH    | 1034.2217095753  | 792.101559967381 | 970.634736994313 | 665.341859712345 |
|         | 1033.03719406038 | 1056.43975075255 | 843.075879568455 | 830.455793617181 |
|         | 943.23069404564  | 843.545962045705 | 855.112210714686 | 894.46029531926  |
| MTE     | 232.667968049771 | 315.513423195489 | 299.234482744038 | 307.480644393018 |
|         | 160.67285689491  | 180.456659320226 | 122.644105247178 | 161.34427428845  |
|         | 209.93789387724  | 1488.37146754184 | 159.749576166342 | 159.942971344216 |
| MTERF   | 195.946096353894 | 191.740596601895 | 163.93199635496  | 188.847480174391 |
|         | 187.796440205485 | 182.698275130489 | 216.731618532814 | 180.952017616136 |
|         | 185.30916081621  | 168.73918684069  | 194.240372898704 | 191.725728813959 |
| MTERFD1 | 369.646624431062 | 334.772648743153 | 397.064325578854 |                  |
|         | 288.505502880424 | 467.681480781925 | 528.650794915616 | 494.747087458483 |
|         | 644.868034665476 | 622.348802511009 | 427.390091157726 | 389.800620731411 |
|         | 407.957436380989 |                  |                  |                  |
| MTERFD2 | 129.405749374776 | 135.32160992961  | 129.990534497026 |                  |
|         | 131.681566829159 | 137.627338682823 | 122.362585067453 | 124.693253194681 |
|         | 117.969576809288 | 110.050374895171 | 120.971313945446 | 140.408989128575 |
|         | 129.6505724783   |                  |                  |                  |
| MTERFD3 | 140.283106734666 | 151.911494020123 | 137.499290547619 |                  |
|         | 129.338551879984 | 148.641780441227 | 129.067538010904 | 146.798444724408 |
|         | 141.860850603561 | 134.683553037185 | 132.100026388604 | 146.108551647446 |
|         | 126.619475852751 |                  |                  |                  |
| MTF1    | 313.480307434343 | 380.053166305637 | 294.808980631295 | 321.84712975195  |
|         | 329.068463281182 | 310.718449468465 | 343.488356185437 | 306.387898121409 |
|         | 321.696082249696 | 285.507315916663 | 276.351810999317 | 261.469732730752 |
| MTF2    | 532.950400370668 | 697.581541438891 | 409.883222213537 | 540.078145038497 |
|         | 564.948126039762 | 914.654262296682 | 629.197022551069 | 920.342429282889 |
|         | 780.461254794127 | 301.695991929957 | 744.523059417351 | 878.986106116952 |
| MTFMT   | 183.531156021887 | 178.096998157452 | 197.815264620906 | 169.649251828199 |
|         | 205.381840116054 | 213.324226314713 | 236.651601701157 | 193.832033192375 |
|         | 191.112009690591 | 190.031339775209 | 227.209630859635 | 234.399431238026 |
| MTFR1   | 252.655315526015 | 233.07015384759  | 286.230656780335 | 229.373686092654 |
|         | 339.843776738468 | 503.093655556038 | 315.3930052781   | 583.455617065556 |
|         | 518.17401959981  | 264.905947922753 | 326.246702537465 | 247.373571011712 |
| MTG1    | 131.868557613642 | 136.428826558493 | 126.256716138724 | 118.430401197079 |
|         | 180.986305037222 | 138.675023495021 | 151.528377719344 | 166.335294339013 |
|         | 175.476184387338 | 139.687574432387 | 166.20327698517  | 161.490941000872 |
| MTHFD1  | 171.844483419604 | 168.958694643382 | 185.717123241832 |                  |
|         | 174.767697866801 | 248.229468372363 | 165.337956130606 | 179.25743545231  |
|         | 204.237952297239 | 186.778334749551 | 232.556667737827 | 260.098788125373 |
|         | 177.151218006672 |                  |                  |                  |
| MTHFD1L | 174.820064644203 | 186.6902304653   | 167.769114519774 |                  |
|         | 191.692830869809 | 425.229044880287 | 256.127197303751 | 306.550948766362 |
|         | 303.986544460218 | 265.43897208356  | 615.058712877418 | 209.051768656607 |
|         | 279.159925913207 |                  |                  |                  |
| MTHFD2  | 311.481739745423 | 239.503369457867 | 248.613373429151 |                  |
|         | 204.219197797869 | 286.774606295106 | 332.798130757632 | 331.848516303011 |
|         | 399.762451559805 | 406.369889501135 | 496.560127152436 | 172.304496150036 |
|         | 239.452559981542 |                  |                  |                  |
| MTHFD2L | 201.530921073488 | 191.987301954927 | 212.312154721246 |                  |
|         | 212.363151537303 | 185.519000961898 | 173.395370400371 | 163.946569217706 |

|        |                  |                  |                  |                  |
|--------|------------------|------------------|------------------|------------------|
|        | 179.211502448703 | 175.442400672352 | 205.742386129597 | 171.345989796519 |
|        | 176.820928772968 |                  |                  |                  |
| MTHFR  | 209.840035045167 | 235.32095278846  | 186.551385094902 | 236.855293143293 |
|        | 239.050379187643 | 157.013200713587 | 144.349602838518 | 189.114794029657 |
|        | 176.631604815669 | 131.512174491572 | 192.954269340616 | 149.639835429332 |
| MTHFS  | 269.892633574243 | 252.810636571566 | 333.91440669951  | 277.596303701405 |
|        | 275.013838208239 | 287.334035234496 | 359.363523948825 | 261.89195025254  |
|        | 335.239364345057 | 378.24336892367  | 335.533053221675 | 359.162549472301 |
| MTHFSD | 145.983627592197 | 152.725025539491 | 145.86855878099  |                  |
|        | 156.825157746082 | 137.053393215628 | 125.311403516443 | 158.809865241567 |
|        | 131.02157879562  | 157.435995560423 | 148.096551269076 | 164.365630106697 |
|        | 146.624631389743 |                  |                  |                  |
| MTIF2  | 307.81941988503  | 331.062744782933 | 405.409668978569 | 306.43742010208  |
|        | 291.056913909578 | 510.555184032017 | 646.933504790891 | 612.758976723556 |
|        | 469.333357789149 | 579.678635803225 | 415.011847890313 | 579.923640505245 |
| MTIF3  | 1047.78978081493 | 879.301932542031 | 1227.94401191112 | 999.159652508318 |
|        | 489.403061697031 | 838.93563319979  | 882.429823267754 | 822.545007054668 |
|        | 1312.75601392984 | 906.359365544713 | 1180.7055699511  | 1488.37146754184 |
| MTL5   | 124.717079082023 | 126.802963197337 | 127.422129210789 | 123.038646914863 |
|        | 147.011838288594 | 127.453866279181 | 139.046174587432 | 138.685330935707 |
|        | 126.924014801186 | 129.880696706381 | 123.921903967493 | 133.504078347324 |
| MTM    | 138.402890124039 | 153.13384838492  | 137.773960847088 | 130.074786642758 |
|        | 138.255457081996 | 147.07272598888  | 140.550044737476 | 153.38494705081  |
|        | 129.366567668463 | 152.385014030957 | 129.589056071463 | 153.554159360954 |
| MTM1   | 184.021010234322 | 154.487546030444 | 171.376976179465 | 150.891358590974 |
|        | 161.916155040522 | 182.77693508164  | 166.014450044695 | 164.223990197735 |
|        | 178.445384902129 | 196.955723006838 | 200.810204162831 | 183.604011732066 |
| MTMR1  | 153.93249158209  | 158.049286838471 | 168.511517285223 | 152.908358615016 |
|        | 174.127444395862 | 166.173429365582 | 181.277683429417 | 156.105736111274 |
|        | 153.059432055089 | 178.904696191996 | 147.019460117987 | 178.636555178682 |
| MTMR10 | 585.721610434501 | 532.235193634196 | 660.096727566678 |                  |
|        | 564.056592672374 | 259.979459472217 | 320.877897822963 | 452.606433325387 |
|        | 384.464383569801 | 386.067573158514 | 362.195903246495 | 415.957832362051 |
|        | 362.095074331893 |                  |                  |                  |
| MTMR11 | 601.018867455333 | 518.760142491104 | 557.702374840532 |                  |
|        | 537.982214580518 | 244.251315474587 | 215.98963200839  | 278.687780705367 |
|        | 324.203537490975 | 261.366143735074 | 282.045333787115 | 376.124744806171 |
|        | 485.309521583972 |                  |                  |                  |
| MTMR12 | 190.031339775209 | 174.161146689117 | 200.890547965585 |                  |
|        | 179.828494168009 | 166.692386207143 | 171.320653882424 | 188.444498848767 |
|        | 177.567833691547 | 153.171822092714 | 179.730694272916 | 152.791390145148 |
|        | 139.97636570613  |                  |                  |                  |
| MTMR14 | 275.013838208239 | 293.986292438714 | 285.931444518474 |                  |
|        | 343.833659987063 | 411.505580458401 | 382.327656839936 | 350.803378042804 |
|        | 388.887050777137 | 382.744523022686 | 361.26540006942  | 344.786541451395 |
|        | 320.877897822963 |                  |                  |                  |
| MTMR15 | 298.165097953983 | 262.756237406794 | 382.233826557803 |                  |
|        | 326.908959531021 | 168.443386067427 | 219.49354518392  | 310.426513884979 |
|        | 235.133284525241 | 240.511797905018 | 229.881164774875 | 234.789040617681 |
|        | 238.430350258686 |                  |                  |                  |
| MTMR2  | 217.607230767028 | 214.52087460757  | 266.286483421453 | 264.054997398621 |
|        | 198.257497903131 | 209.130260450131 | 206.042395282286 | 187.132496910208 |
|        | 188.013181859196 | 253.538171006307 | 191.112009690591 | 196.486499238623 |



|        |                  |                  |                  |                  |
|--------|------------------|------------------|------------------|------------------|
| MTMR3  | 323.391456630794 | 313.412131722189 | 290.288001750744 | 339.448524400708 |
|        | 287.558897878375 | 258.036064876416 | 249.171307797736 | 240.253944604431 |
|        | 361.082957133644 | 246.95071325085  | 250.443147156029 | 280.723379809959 |
| MTMR4  | 455.665927568395 | 530.267835989435 | 584.433155497378 | 480.22496056277  |
|        | 587.388038484307 | 803.60413590137  | 774.180202250076 | 719.13080264227  |
|        | 817.342172321486 | 433.491835341321 | 618.661249163439 | 821.465895280454 |
| MTMR6  | 615.662993833692 | 487.07860019179  | 627.066031322234 | 572.262848718437 |
|        | 359.518199449791 | 585.552940765069 | 334.443733461841 | 337.87475687838  |
|        | 324.871248300476 | 423.562598841704 | 441.112782197591 | 515.729905361375 |
| MTMR7  | 140.938442055097 | 149.37190049932  | 130.920010795017 | 135.102827224896 |
|        | 149.65417821994  | 132.133979108537 | 129.284384810812 | 138.311892121437 |
|        | 130.57903858574  | 142.122556679441 | 158.645402461996 | 137.719257499747 |
| MTMR8  | 114.730641277464 | 120.626155234319 | 120.839256811295 | 125.418782388128 |
|        | 126.274585491044 | 127.177422395113 | 126.529763042574 | 118.597739444445 |
|        | 115.37736249419  | 127.137447808551 | 136.452338158252 | 127.401551376191 |
| MTMR9  | 522.77407098992  | 530.122419830951 | 554.282040414368 | 549.359675306309 |
|        | 196.144420005021 | 390.979822976551 | 368.220523234399 | 389.686045618228 |
|        | 275.203046536524 | 439.023181761356 | 273.369722814068 | 385.135014083686 |
| MTNR1A | 134.022324496729 | 147.055213172078 | 129.687743133943 |                  |
|        | 135.281686411685 | 137.264814431548 | 133.778595695007 | 150.655359765209 |
|        | 132.933035878334 | 125.674471551099 | 127.74861041569  | 145.363692072132 |
|        | 131.144774362059 |                  |                  |                  |
| MTNR1B | 112.404562115306 | 117.123891785437 | 125.780294378066 |                  |
|        | 116.981243525714 | 116.632612170106 | 123.25201993575  | 118.446703299916 |
|        | 116.572001618531 | 116.87586240208  | 115.235444833856 | 142.749568012703 |
|        | 110.22624111837  |                  |                  |                  |
| MTO1   | 240.511797905018 | 218.350166753833 | 277.459328083162 | 213.652091843896 |
|        | 198.94325874493  | 254.991678321253 | 239.050379187643 | 234.461229199142 |
|        | 234.432954093705 | 278.061498892643 | 254.9636051363   | 239.827648772906 |
| MTP18  | 147.433388299999 | 167.43630698726  | 138.605661097886 | 146.479009988445 |
|        | 819.151876775691 | 424.855168311509 | 386.544913399837 | 275.298642145005 |
|        | 249.823314327355 | 453.17378995737  | 376.189276074918 | 415.011847890313 |
| MTPAP  | 141.985130140173 | 124.484589975207 | 138.994857740356 | 130.842257229979 |
|        | 140.174087049513 | 139.720343780228 | 163.463191619941 | 150.134337895481 |
|        | 131.512174491572 | 140.602170750673 | 125.199837162105 | 121.930362099901 |
| MTPN   | 1830.56003081769 | 1794.82283439196 | 1454.94889750152 | 1638.72366638732 |
|        | 1355.07170485397 | 1875.21979956596 | 1694.24232555141 | 2139.42448145954 |
|        | 1687.06111969368 | 1999.10320742823 | 928.672013047007 | 2532.82545752082 |
| MTR    | 498.965895763801 | 390.897464546943 | 420.361583975644 | 448.106077184152 |
|        | 254.552034511333 | 332.749676505218 | 306.946103334814 | 328.826483579278 |
|        | 271.897511879509 | 365.199125315964 | 369.018856220394 | 367.567681162661 |
| MTRF1  | 142.114181233875 | 169.095270479344 | 170.007845523415 | 152.864765895508 |
|        | 136.144068118165 | 192.273528391588 | 143.884263862698 | 204.695311233073 |
|        | 200.456087759904 | 205.679992893049 | 250.18189549573  | 208.555506929113 |
| MTRF1L | 494.175437345451 | 448.644778906048 | 490.849163737598 |                  |
|        | 492.534183006883 | 289.434186747703 | 440.495339027491 | 435.332573825425 |
|        | 398.272713014637 | 327.207408852474 | 398.354212009426 | 469.714826990063 |
|        | 418.574045635945 |                  |                  |                  |
| MTRR   | 268.568824794145 | 240.439368352772 | 318.004190156313 | 240.75934760601  |
|        | 203.223604138192 | 280.990656342284 | 304.547738011742 | 293.4021207271   |
|        | 228.901579068997 | 198.023465629218 | 208.72873686638  | 243.441938832251 |
| MTSS1  | 267.67093646012  | 306.550948766362 | 256.237185590901 | 294.280238648737 |
|        | 302.069236363626 | 522.899203071911 | 393.579552385074 | 746.523071806534 |
|        | 741.875751347917 | 1504.15682715484 | 694.644744547412 | 319.812293134357 |

|        |                  |                  |                  |                  |
|--------|------------------|------------------|------------------|------------------|
| MTSS1L | 151.289464845626 | 162.134726710448 | 168.405786851399 |                  |
|        | 185.447093292348 | 213.93763684072  | 145.432667767652 | 143.660679324057 |
|        | 137.383211680459 | 175.437651670246 | 146.537204621419 | 176.497706091676 |
|        | 167.421776383056 |                  |                  |                  |
| MTTP   | 202.300293733922 | 178.657325741035 | 152.628220216104 | 242.037132958656 |
|        | 129.187574143637 | 128.383541329939 | 119.407293854922 | 121.274997609378 |
|        | 120.290102399282 | 117.270320709161 | 110.804248212067 | 116.71331256222  |
| MTUS1  | 174.515815532892 | 164.836381332774 | 166.311421907434 | 148.347642424885 |
|        | 132.393669306489 | 156.187809481625 | 194.388383297922 | 159.913028912492 |
|        | 163.529157756197 | 156.423687034312 | 173.520662003159 | 141.576177844986 |
| MTUS2  | 114.27112025541  | 114.860437706855 | 106.491867793742 | 107.863971340407 |
|        | 110.212739445    | 114.970485002776 | 113.512670856029 | 111.886543737378 |
|        | 115.907902010701 | 106.854721604889 | 154.030432279825 | 112.436972452838 |
| MTX1   | 222.268494113686 | 242.996248524203 | 188.45479937455  | 267.285998701386 |
|        | 509.292779821787 | 300.53017771156  | 382.327656839936 | 385.522443482    |
|        | 293.600165830839 | 304.679197422439 | 264.805236346895 | 361.969355316032 |
| MTX2   | 442.334886941795 | 415.322560616847 | 495.769802520637 | 431.546135503733 |
|        | 475.213525346293 | 767.662367310672 | 894.100792722707 | 706.759905439674 |
|        | 742.751664201272 | 841.285351463894 | 629.381791489871 | 1030.97051104597 |
| MTX3   | 379.387095129725 | 338.46332239699  | 440.657747083721 | 369.646624431062 |
|        | 190.309453030884 | 264.273245283343 | 385.135014083686 | 258.915802108562 |
|        | 303.005912224195 | 417.262521411065 | 291.883157643902 | 341.43511159996  |
| MUC1   | 274.564508105177 | 771.512332113075 | 285.882780066861 | 382.485769373364 |
|        | 2952.67114077688 | 293.600165830839 | 529.700356666006 | 536.067857235731 |
|        | 2192.17997650999 | 726.346459754217 | 2853.14759681683 | 400.550044186372 |
| MUC12  | 156.187809481625 | 149.692450280479 | 157.200582422961 | 158.120079903425 |
|        | 146.428534132236 | 146.10417547509  | 153.426409060413 | 145.912712700067 |
|        | 151.204487316077 | 142.059921012561 | 129.161305053472 | 156.083002868004 |
| MUC13  | 145.992883153161 | 133.733674016447 | 139.244051199144 | 139.513752499004 |
|        | 137.662135592983 | 148.986058473609 | 156.973511952828 | 132.5130209643   |
|        | 139.383528389668 | 145.604066669916 | 136.342634691443 | 145.360466216324 |
| MUC15  | 133.854760285591 | 155.71830087869  | 158.933097712363 | 147.590189238316 |
|        | 137.361967082029 | 128.047981250943 | 136.603035996281 | 133.564350740049 |
|        | 145.323212897142 | 145.308548379215 | 144.049503774298 | 143.870849001074 |
| MUC16  | 149.76931674417  | 155.542691937539 | 157.986640251147 | 162.834961996238 |
|        | 161.195562296834 | 156.037150880384 | 176.617812881115 | 145.783320434143 |
|        | 129.408282688425 | 155.759861336991 | 156.460374293022 | 151.363607695078 |
| MUC17  | 112.693431140524 | 123.728481007459 | 119.802832736435 | 125.350567304651 |
|        | 127.095347480109 | 115.113000553093 | 115.750690887988 | 119.399971165857 |
|        | 120.964862799634 | 108.148715413122 | 127.146101490884 | 111.66210002202  |
| MUC19  | 154.849264978968 | 125.478878240473 | 121.787875792887 | 121.668166378914 |
|        | 158.989652405732 | 124.461997520222 | 130.399501479248 | 123.654787271088 |
|        | 139.54021659275  | 133.74051512341  | 131.662585510218 | 128.759751330525 |
| MUC2   | 144.806478328053 | 143.141852982371 | 135.37120759813  | 147.81143020317  |
|        | 159.177303894223 | 128.438401976279 | 146.64835267642  | 143.427721577372 |
|        | 146.261164125255 | 144.112401069818 | 153.664503112778 | 190.444387031552 |
| MUC20  | 160.50439457257  | 199.980312703646 | 138.078214837785 | 138.383183017683 |
|        | 307.410175748955 | 181.950658782069 | 518.760142491104 | 400.060972573122 |
|        | 684.180060287047 | 121.110498703017 | 628.197839884392 | 288.88486628661  |
| MUC21  | 141.500790455788 | 145.873819094778 | 132.832556359483 | 136.705326991088 |
|        | 142.584504912189 | 161.310855691717 | 126.924014801186 | 136.955651763743 |
|        | 134.407776033032 | 148.614214326995 | 141.971805249136 | 144.750407738866 |

|        |                  |                  |                  |                  |
|--------|------------------|------------------|------------------|------------------|
| MUC3A  | 138.887159625058 | 144.445496145045 | 140.881084272745 | 145.308548379215 |
|        | 136.916286605302 | 135.56878810365  | 144.212231875922 | 136.396579126676 |
|        | 137.235469802064 | 134.025385181979 | 143.074187168031 | 140.504486195539 |
| MUC3B  | 152.890239929335 | 164.288645768576 | 150.2214516849   | 137.383211680459 |
|        | 146.937052029619 | 151.196713920345 | 135.982797108848 | 135.125414452178 |
|        | 154.789187466057 | 159.026102446297 | 134.682319733908 | 139.6391154169   |
| MUC4   | 150.670783991982 | 151.81251450855  | 148.567630572897 | 151.639515017015 |
|        | 152.379441401583 | 144.203716525289 | 146.869927141655 | 146.362705590778 |
|        | 146.826292449698 | 150.907594445048 | 147.145932651151 | 150.091854035356 |
| MUC5AC | 141.225533609907 | 161.72730923536  | 140.849966309018 |                  |
|        | 145.700589723224 | 173.552535486766 | 138.652735298338 | 155.548684011748 |
|        | 138.902097203056 | 151.409290231274 | 158.784190231286 | 147.62157260418  |
|        | 183.447807651728 |                  |                  |                  |
| MUC5B  | 136.704018446388 | 140.738977175997 | 132.02259465879  | 137.599810249536 |
|        | 130.761936205169 | 132.063395162855 | 153.926214082991 | 127.398873370484 |
|        | 133.388533738482 | 134.848210768603 | 135.390226050803 | 140.330400168187 |
| MUC6   | 145.491525555916 | 155.27707167384  | 152.241060990474 | 164.824914851636 |
|        | 141.725882943927 | 158.854659281803 | 148.665627690915 | 152.272198017355 |
|        | 150.576660798865 | 155.494095135266 | 154.924190468067 | 156.095520355029 |
| MUC7   | 107.697601478064 | 107.993707827557 | 120.470801825675 | 111.398760606544 |
|        | 117.051541123239 | 107.727848546225 | 106.719519490874 | 116.011005504201 |
|        | 108.768730405582 | 117.199217938531 | 114.400185930969 | 115.890431424899 |
| MUCDHL | 142.646570636529 | 150.963667177658 | 163.113457178357 |                  |
|        | 154.537240112989 | 164.820007934887 | 160.297609596399 | 153.391895732807 |
|        | 161.027590226123 | 136.418105816557 | 152.221694141976 | 124.036907709461 |
|        | 170.132045343159 |                  |                  |                  |
| MUCL1  | 132.829401072883 | 128.96181458192  | 121.747622617011 | 137.234384760487 |
|        | 173.526005872207 | 184.135651836627 | 134.208537331186 | 215.057917795456 |
|        | 154.16370087233  | 135.501192996538 | 145.503718833974 | 201.337186768645 |
| MUDENG | 249.339449789861 | 250.217137496422 | 275.543576337502 |                  |
|        | 239.003718699156 | 229.076507182239 | 270.201322204641 | 288.182388699147 |
|        | 363.195371577097 | 276.925017614147 | 301.051775938853 | 345.135289739599 |
|        | 413.398641688413 |                  |                  |                  |
| MUL1   | 1086.33540858772 | 1154.1046856215  | 1079.58110075176 | 1342.29111510713 |
|        | 1030.56836625083 | 981.313778685019 | 1027.96306543235 | 898.877732360841 |
|        | 889.26314145856  | 1038.34611017219 | 932.505095432049 | 1035.0797237176  |
| MUM1   | 758.517101659762 | 786.62709337246  | 660.315285709317 | 944.47112348734  |
|        | 796.439819579938 | 350.983969007868 | 386.85874184746  | 638.77182631975  |
|        | 414.888512708716 | 539.720389702148 | 673.176084400831 | 380.514553097613 |
| MUM1L1 | 147.743331160624 | 138.199559519849 | 133.171854425031 |                  |
|        | 133.376631703373 | 236.032288046282 | 271.356289141017 | 163.380402251758 |
|        | 278.498278821829 | 163.284853420896 | 180.986305037222 | 115.933805625814 |
|        | 175.902751522861 |                  |                  |                  |
| MUPCDH | 115.550587451456 | 116.810827219571 | 114.002925521932 |                  |
|        | 116.310166003024 | 120.827732270626 | 117.380281099932 | 123.952494134263 |
|        | 125.091038614268 | 116.961391747202 | 117.048846466839 | 133.31378749951  |
|        | 123.974409226349 |                  |                  |                  |
| MURC   | 135.29954024755  | 144.079935036119 | 125.908576249439 | 143.785769607842 |
|        | 139.191746593825 | 122.531675048414 | 124.124076599417 | 139.06923394504  |
|        | 126.553693803748 | 125.5449326311   | 121.85247363239  | 125.937660544107 |
| MUS81  | 461.581199513891 | 462.025126897013 | 426.249411635589 | 466.691191261997 |
|        | 398.892968579918 | 311.916199912898 | 292.802762636861 | 277.219796733134 |
|        | 268.034972830233 | 274.120234926832 | 342.555640222963 | 324.203537490975 |

|        |                  |                  |                  |                  |
|--------|------------------|------------------|------------------|------------------|
| MUSK   | 134.172033051676 | 128.141725976839 | 122.828060462887 | 130.027227278931 |
|        | 142.199182392836 | 139.246945739764 | 121.648921929686 | 129.642952083513 |
|        | 137.120973494952 | 138.30326146769  | 118.93828679356  | 135.835518477299 |
| MUSTN1 | 308.148212607944 | 317.353318759931 | 234.531140131763 |                  |
|        | 415.642099109855 | 162.333158524811 | 161.035985824654 | 164.202554380274 |
|        | 163.863677822465 | 179.74065086312  | 166.368623023308 | 162.002221893617 |
|        | 151.546908501054 |                  |                  |                  |
| MUT    | 325.570839576032 | 358.780920910909 | 418.889972660958 | 321.492900106953 |
|        | 272.927830312746 | 357.584458526365 | 383.74357557363  | 288.631429069336 |
|        | 289.297370738382 | 365.362177671146 | 412.344820823968 | 300.937118739654 |
| MUTED  | 268.698146407497 | 270.92671642109  | 262.79667156266  | 291.914408947328 |
|        | 195.88263399968  | 196.759802659759 | 266.756647182704 | 212.890259409988 |
|        | 197.378801636702 | 199.579818754014 | 250.626556981376 | 196.189101941489 |
| MUTYH  | 208.095384605737 | 207.269530621176 | 223.013753785002 | 196.269193578525 |
|        | 344.604699562938 | 213.432084172541 | 225.927425596831 | 322.778260588465 |
|        | 254.188830191845 | 169.417764098848 | 205.476230849391 | 225.99848688881  |
| MVD    | 208.291714758548 | 256.873090834376 | 214.169180557611 | 254.315783394932 |
|        | 358.298768623212 | 194.202977693583 | 193.173703015873 | 208.14618424983  |
|        | 234.370850809531 | 314.292700455545 | 195.795728497916 | 206.428618912264 |
| MVK    | 157.049773524382 | 167.653412908384 | 153.723169560972 | 170.257439890277 |
|        | 307.16835174775  | 194.88319590729  | 189.01309885917  | 159.513465644268 |
|        | 201.480444219547 | 265.754141836026 | 250.060734219351 | 186.925138700818 |
| MVP    | 502.598518192729 | 529.368609163949 | 464.907454552364 | 547.202354339933 |
|        | 986.004777675332 | 788.693133735893 | 530.122419830951 | 520.585319342817 |
|        | 692.53483413403  | 680.94167651697  | 906.359365544713 | 600.264940641426 |
| MX1    | 3575.60827968852 | 1161.39230511792 | 1042.40539020413 | 813.454826901794 |
|        | 924.040923247227 | 468.339735327273 | 4437.40805296517 | 1953.88327754946 |
|        | 4404.79209330918 | 688.684644604218 | 1649.46398639795 | 1340.79810963983 |
| MX2    | 557.868300839263 | 240.631264915238 | 186.345823604119 | 202.458096827378 |
|        | 256.897177822238 | 327.749926183823 | 672.13164205724  | 548.288640768746 |
|        | 748.161769171818 | 194.753955100069 | 949.789710063337 | 480.36420271348  |
| MXD1   | 293.482512212153 | 339.069385816411 | 336.490076158135 | 343.346755862776 |
|        | 614.239716118509 | 360.475989559226 | 213.468420853218 | 272.639413442579 |
|        | 450.468410589415 | 1176.62418139379 | 517.676093149981 | 204.5274881834   |
| MXD3   | 140.309394542299 | 152.030182228463 | 145.169804325334 | 205.011514211101 |
|        | 231.044588483625 | 141.831596320865 | 139.900523831258 | 173.432960318793 |
|        | 158.8246699332   | 154.104321553472 | 172.631499322646 | 155.323822771755 |
| MXD4   | 1618.64901092072 | 2118.73410871718 | 1823.53870218167 | 2941.69058596077 |
|        | 1800.25771851544 | 1062.03157932144 | 1057.80846320642 | 1537.71464618832 |
|        | 1065.36715400306 | 975.315904185938 | 1932.39418448203 | 860.315938621256 |
| MXI1   | 151.285933600303 | 154.900676756492 | 178.339211170442 | 140.175724588255 |
|        | 135.722321387765 | 131.512174491572 | 156.796245322362 | 137.102353661381 |
|        | 144.608882758506 | 172.259627777465 | 144.193756031386 | 134.596391166462 |
| MXRA5  | 2547.53445585552 | 2691.41389079777 | 563.907454700224 | 1569.13457493554 |
|        | 1251.56853099362 | 545.026293696209 | 483.549698382115 | 523.306451464643 |
|        | 588.863382995875 | 1737.57015396357 | 4055.40322213638 | 592.284071247642 |
| MXRA7  | 1141.49294161587 | 1109.08288440559 | 1097.18236659974 | 1564.8868894162  |
|        | 165.576758218571 | 148.8870854102   | 146.527844778835 | 146.298733090986 |
|        | 166.64535048582  | 203.999142031297 | 164.922193471904 | 169.864628707043 |
| MXRA8  | 212.312154721246 | 193.723953003899 | 207.150354734189 | 192.61436632814  |
|        | 153.985529457122 | 146.499065641095 | 142.082257952004 | 151.557004418682 |
|        | 159.788143847569 | 173.050039480459 | 139.681211082196 | 129.114161128113 |

MYADM 2744.77453865893 2660.39990175415 1920.16520804856 2694.98079256089  
 506.898635822094 501.166869173253 174.364798143068 263.352118305612  
 341.564749445905 505.560841055884 232.083160165968 210.711890471222  
 MYADML 132.486311240725 150.540599489506 189.114794029657  
 143.46919253255 133.63022526522 153.511995286293 148.18197556044  
 142.788848338402 132.686915065196 169.864628707043 165.530397739051  
 138.600017737884  
 MYB 178.928873342925 191.179662650057 155.130745957603 185.639696270808  
 171.537040561599 160.989242461839 172.26834556696 373.033658917608  
 221.74200490054 153.238678313147 177.401771322485 204.862387642573  
 MYBBP1A 141.397046998678 148.848823912244 138.89579816122  
 162.955366577418 314.486603134656 176.001771318766 152.805525883571  
 150.529257416176 168.139351579682 185.856755885891 232.556667737827  
 190.204960255989  
 MYBL1 158.579717282881 152.445022409208 158.704425428694 167.201570648434  
 133.707285280448 160.461846976268 137.358139652612 164.417770955805  
 150.831554010122 132.303506517431 126.326609619996 145.61758790738  
 MYBL2 134.922488718676 137.823152565933 137.151210946281 128.386309075038  
 181.110403721353 135.301844382418 120.174672871542 158.297624312257  
 142.573662441786 132.671227062948 146.323776429268 132.247611790269  
 MYBPC1 125.789509802098 132.275953817076 132.890396520305  
 146.557058433232 127.006746526023 130.751522895053 133.446934298801  
 150.82596027483 235.530986541549 135.725202462502 226.893147371644  
 129.265788005518  
 MYBPC2 113.816165294487 117.024039521425 119.842470751496  
 122.928863588006 112.509731206295 127.887666721519 117.034228068173  
 126.5764774133 121.739219824085 136.518409978222 142.167918879613  
 120.07404952486  
 MYBPC3 158.98007855379 169.631386764054 164.777719508421  
 176.070695522397 158.573561336755 181.320895955585 156.546769952772  
 156.895079878556 162.71020036416 159.576585660511 149.536681241497  
 165.389652763451  
 MYBPH 124.863832760607 132.471014832851 118.173752075833 106.982655360194  
 131.711193516482 134.331420680628 110.810963139914 117.580122770251  
 133.71965790848 120.456817031716 149.326216726716 136.03325645996  
 MYBPHL 126.599418127637 132.599115199416 120.984641102879  
 140.453219944445 112.649012857276 127.881498149714 110.636713168363  
 120.675356009213 115.277302351501 129.290542121353 129.517511177852  
 122.136861827049  
 MYC 329.263397240111 508.449904285771 250.84781675544 297.970735665595  
 373.925939492544 723.807658768693 336.845908630493 315.182134426778  
 326.055727207966 1780.97169244555 628.344122779625 468.712260193746  
 MYCBP 124.359615295938 129.365004129784 120.894583222813 118.599484152561  
 127.786141874218 174.549929320587 143.713962738562 171.465178761171  
 154.740395921562 123.420635380886 163.290050020756 156.740412695351  
 MYCBP2 708.268962600305 632.565736446505 576.997804865103  
 528.556049506759 387.711471687237 468.82816089485 461.314247041387  
 427.98782239715 548.455251483009 400.060972573122 841.944755849006  
 725.065727257421  
 MYCBPAP 114.512028664352 110.050374895171 111.687524205412  
 112.790552379447 123.474836673474 122.883806494491 113.748724650063  
 111.639177843969 112.252555403121 114.28381541078 122.809241232029  
 133.039045348692

|        |                  |                  |                  |                  |
|--------|------------------|------------------|------------------|------------------|
| MYCL1  | 133.537552829999 | 146.075794515889 | 135.356010814496 | 146.164093136588 |
|        | 141.755954088275 | 140.506191791073 | 205.341121539273 | 167.003917876371 |
|        | 157.575902297677 | 131.308384127079 | 154.789187466057 | 145.455411983653 |
| MYCN   | 147.05034328496  | 144.056644468886 | 149.223102493474 | 158.408494909763 |
|        | 698.882871686866 | 341.64890727921  | 155.471795004237 | 296.24781576525  |
|        | 950.818917078515 | 165.017178571218 | 246.912159676595 | 305.050933898691 |
| MYCNOS | 120.138014822486 | 121.036054511761 | 128.574419295906 |                  |
|        | 123.442970398288 | 184.365354978005 | 126.66432941518  | 137.00397800873  |
|        | 131.076562651831 | 135.127041919869 | 118.740346254406 | 121.085931709943 |
|        | 129.061316880624 |                  |                  |                  |
| MYCT1  | 156.200313064999 | 152.921328522953 | 163.681014961332 | 169.355185349431 |
|        | 144.352987324713 | 149.779323547896 | 142.30928744202  | 143.209289043824 |
|        | 143.739231124536 | 147.748142622566 | 139.931092990984 | 141.53717142784  |
| MYD88  | 206.469040492609 | 183.32467147543  | 154.834679562341 | 180.478294414245 |
|        | 571.136519973808 | 413.913442080187 | 496.218605366298 | 398.571054759451 |
|        | 371.941204080246 | 263.509066170434 | 519.450899933049 | 371.06697207449  |
| MYEF2  | 146.577524520274 | 172.578252260002 | 124.800221241981 | 148.314248474411 |
|        | 137.674025476238 | 143.60570420943  | 146.326067008478 | 168.969180646603 |
|        | 133.257477196196 | 148.162914253981 | 136.359189516452 | 165.055636629118 |
| MYEOV  | 113.249267122926 | 127.731816003312 | 123.891115326934 | 116.576896337786 |
|        | 182.095387488796 | 108.669141498627 | 105.665621968915 | 110.624328647003 |
|        | 109.266533255266 | 116.793408204625 | 133.505261458701 | 136.631313776416 |
| MYEOV2 | 123.235136639469 | 118.300797467864 | 116.89487516867  |                  |
|        | 120.26749529985  | 117.623103460369 | 121.239461514704 | 117.986939058467 |
|        | 112.114933398547 | 110.977904932371 | 123.375592272781 | 145.081468030567 |
|        | 114.721282552636 |                  |                  |                  |
| MYF5   | 141.050384368733 | 125.052770277549 | 147.547944397578 | 137.267307036807 |
|        | 142.85695042665  | 160.752581271996 | 143.180247878507 | 148.758316681306 |
|        | 128.840466579373 | 145.360466216324 | 145.195065312551 | 164.448110885609 |
| MYF6   | 131.523538461751 | 142.995274641765 | 140.071879210324 | 132.135448831967 |
|        | 144.288714958892 | 141.778060508776 | 154.091431691072 | 126.159880038854 |
|        | 146.586879656174 | 138.279775054156 | 147.919058170753 | 135.343380336913 |
| MYH1   | 129.834436854273 | 126.549876718792 | 128.775477649887 | 136.368258257435 |
|        | 120.660349211375 | 132.066488589395 | 129.005211657936 | 128.781123194219 |
|        | 118.9952230535   | 120.384210318    | 137.719257499747 | 132.021249712589 |
| MYH10  | 1424.04009914668 | 1504.15682715484 | 996.240188311002 | 1481.24705642453 |
|        | 780.734359041347 | 856.424155671931 | 541.351092873522 | 437.489929507567 |
|        | 649.438995824208 | 981.313778685019 | 226.173501275026 | 436.482580413523 |
| MYH11  | 18953.8127741918 | 18146.8167991873 | 21650.9263365935 | 21551.9994556128 |
|        | 195.532022060219 | 784.170983714588 | 133.864612785572 | 721.966539760341 |
|        | 1188.08712008638 | 419.532420763449 | 203.265559787292 | 431.974037914233 |
| MYH13  | 141.70844587896  | 134.102929804129 | 140.652086055776 | 125.920663904983 |
|        | 124.058332474379 | 150.601874392926 | 124.889829874126 | 137.644942697483 |
|        | 130.33205883588  | 135.416008633632 | 114.129044806825 | 131.848213704003 |
| MYH14  | 126.433146708506 | 123.173506315166 | 122.97229333908  | 127.993841618875 |
|        | 521.512936372701 | 150.374573177474 | 204.584643964409 | 147.691011072898 |
|        | 181.425012248539 | 125.301602026407 | 281.881563164961 | 155.295464263911 |
| MYH15  | 133.672964925321 | 135.252082574955 | 142.80027343095  | 134.494167613686 |
|        | 135.894512504725 | 129.735862775199 | 145.204870282027 | 144.073739611496 |
|        | 139.934460900409 | 119.446359837504 | 136.788269716383 | 124.876226351169 |
| MYH16  | 127.155818626031 | 123.059971161711 | 121.837571435384 | 132.052428537192 |
|        | 127.629258006335 | 131.33321167357  | 126.528589411462 | 121.752481757054 |
|        | 124.222529964098 | 128.398711525305 | 130.42746492878  | 120.157438564977 |

|        |                  |                  |                  |                  |
|--------|------------------|------------------|------------------|------------------|
| MYH2   | 148.697019570015 | 151.826103919919 | 150.029313080668 | 174.075670633438 |
|        | 141.363863974586 | 145.569870279379 | 145.471090720048 | 128.729687597908 |
|        | 159.384480972135 | 131.590180562108 | 142.882391486465 | 125.217733034761 |
| MYH3   | 1737.57015396357 | 513.20896845398  | 265.61506544085  | 672.862678078975 |
|        | 118.24368469845  | 130.729989463558 | 100.637271902591 | 207.531908382266 |
|        | 151.159145294127 | 126.609398779757 | 140.951031275943 | 104.248226402465 |
| MYH4   | 152.107025120177 | 141.317113425046 | 152.514455788489 | 142.336164180947 |
|        | 137.76307316083  | 132.481710681317 | 130.92093805204  | 142.139331321085 |
|        | 139.399858706972 | 138.885230982475 | 138.204611862656 | 135.485867373592 |
| MYH6   | 161.079169854907 | 145.210787864362 | 176.883702717029 | 152.634465710406 |
|        | 166.485040297098 | 156.296046600921 | 154.661456780865 | 159.716066475442 |
|        | 160.131256419524 | 148.166340306996 | 154.459517779315 | 163.086539217826 |
| MYH7   | 130.51901676405  | 143.654677238911 | 121.672811608791 | 125.117333434527 |
|        | 133.948997488604 | 134.232324700383 | 125.472342351466 | 136.491140756702 |
|        | 137.195906276069 | 127.109798012351 | 144.167857433516 | 132.908367372426 |
| MYH7B  | 125.749024723383 | 113.018985316061 | 129.514490386931 | 123.048352070915 |
|        | 117.735411259153 | 120.235652849894 | 127.644315207178 | 121.212521750566 |
|        | 117.879058520659 | 119.168045349254 | 145.193296081527 | 124.661088039427 |
| MYH8   | 108.530158480237 | 106.36673326724  | 111.66210002202  | 108.970432124412 |
|        | 103.691075663721 | 105.952640312359 | 104.544792793756 | 108.939608619532 |
|        | 104.03442843396  | 105.25877906031  | 109.613208767992 | 115.180659017144 |
| MYH9   | 3618.9385126441  | 4811.88424516272 | 2792.13364570755 | 4763.89426388268 |
|        | 6427.33783376005 | 3119.93811557461 | 2441.05534211996 | 3403.37530051435 |
|        | 3528.62443098065 | 5022.15374558514 | 4190.38366101529 | 3152.64817044581 |
| MYL1   | 149.361498483705 | 138.868641301709 | 150.247639459773 | 161.866405026758 |
|        | 151.730862403472 | 155.214638707046 | 156.254944793402 | 147.442483242063 |
|        | 151.717558541683 | 154.537240112989 | 133.63022526522  | 150.555125135002 |
| MYL12A | 3157.98451877581 | 2794.89048827025 | 1996.65760745757 |                  |
|        | 2309.63504858248 | 5655.12135336698 | 3765.25491426198 | 2694.98079256089 |
|        | 4377.59943975549 | 3876.04966263281 | 2736.98692493933 | 2744.77453865893 |
|        | 4190.38366101529 |                  |                  |                  |
| MYL2   | 142.560797028716 | 151.524197474057 | 151.914252332792 | 149.045654499682 |
|        | 151.351938656508 | 140.336479395866 | 155.097300548684 | 197.087015414039 |
|        | 153.448882783807 | 145.656767712617 | 142.964043764953 | 148.644800418517 |
| MYL3   | 125.181327386534 | 139.136845089275 | 132.780055030907 | 127.829001155781 |
|        | 131.658321123374 | 139.446914318877 | 147.425856984368 | 137.381470768186 |
|        | 145.025703051661 | 144.068734533254 | 122.095978653755 | 149.400244837133 |
| MYL4   | 137.944260488223 | 139.268052431476 | 131.001996509052 | 130.545285774056 |
|        | 139.913180140881 | 130.247700541716 | 140.194414869595 | 134.405155876727 |
|        | 128.456901308889 | 136.425263391752 | 136.901107766796 | 131.540436531741 |
| MYL5   | 240.591548171052 | 224.167511918105 | 228.270158363878 | 250.217137496422 |
|        | 249.680729921602 | 215.81995779019  | 392.198487606534 | 266.534316786801 |
|        | 267.422232051733 | 204.183472655276 | 209.785886171295 | 290.420307322101 |
| MYL6   | 26719.5528617739 | 28095.1627766565 | 25808.3502428915 | 30573.5859783923 |
|        | 11741.7473778842 | 12818.0509395717 | 12109.3049135906 | 13276.1713779481 |
|        | 14417.2696849334 | 14544.3732040823 | 13013.8166277495 | 12577.0915543468 |
| MYL6B  | 974.007008568051 | 959.532977061027 | 1052.553421812   | 887.471553448641 |
|        | 1240.4863200811  | 585.933822585718 | 1114.85422895959 | 599.735180191091 |
|        | 873.256632365737 | 1030.56836625083 | 397.2528907311   | 1406.73270115373 |
| MYL7   | 122.955724972547 | 128.905042692431 | 129.916677638819 | 116.998277297063 |
|        | 127.756214708077 | 133.661553334004 | 124.904518221898 | 117.623103460369 |
|        | 125.208803405105 | 123.170639180926 | 150.35767254363  | 117.417112053842 |

|         |                  |                  |                  |                  |
|---------|------------------|------------------|------------------|------------------|
| MYL9    | 8617.2437024568  | 9219.38828280399 | 9820.93899217345 | 14454.6736124756 |
|         | 214.229228850802 | 219.151144724168 | 209.112959748917 | 195.16856673253  |
|         | 240.561105692347 | 251.161789722751 | 172.544504923991 | 180.610891208146 |
| MYLC2PL | 143.376817049362 | 145.967685593635 | 126.17342715006  |                  |
|         | 159.942971344216 | 140.089210795507 | 118.75071213401  | 150.144977373708 |
|         | 133.389930962407 | 132.885515958081 | 139.125340284813 | 140.370626016794 |
|         | 141.642547489983 |                  |                  |                  |
| MYLIP   | 1595.22997714906 | 1417.76295714364 | 2620.17683549005 | 819.151876775691 |
|         | 1350.87073284396 | 846.425467119342 | 3262.24877138481 | 1690.96371604294 |
|         | 2300.9407349072  | 411.878556907186 | 2050.34883263932 | 2004.19532096239 |
| MYLK    | 4299.06288109563 | 3917.05893989806 | 4491.96934862425 | 5281.353685715   |
|         | 160.415807880532 | 179.358460170348 | 144.175551691291 | 179.297628357211 |
|         | 199.714647839712 | 212.836093887552 | 160.608674893418 | 163.54669668396  |
| MYLK2   | 130.411849432351 | 134.648780131578 | 128.262195551255 | 128.99859423584  |
|         | 112.993452506946 | 140.286870147975 | 124.42974326791  | 129.114161128113 |
|         | 125.98519427755  | 126.629012619208 | 142.879705723262 | 128.134246199718 |
| MYLK3   | 109.398997827329 | 110.518806964366 | 112.590379042108 | 105.925737068775 |
|         | 114.561836290349 | 120.118873350459 | 122.396214045451 | 110.636713168363 |
|         | 112.054379249781 | 111.366283149236 | 120.691810909148 | 120.767950825369 |
| MYLK4   | 146.582858169664 | 236.251507822415 | 145.877943006533 | 153.328585916625 |
|         | 127.50624009248  | 158.7912155022   | 142.62707251786  | 176.75095377028  |
|         | 186.515784641119 | 133.737573120711 | 155.23152084421  | 154.21623304309  |
| MYLPF   | 107.431455226979 | 108.333135424315 | 104.826135297161 | 110.068122112671 |
|         | 104.321352818065 | 105.712302595131 | 104.934718065476 | 108.861243071977 |
|         | 107.531907287727 | 108.021898335735 | 120.984641102879 | 103.168665937677 |
| MYNN    | 208.321765801227 | 204.877041314502 | 202.927700504034 | 181.681929801968 |
|         | 214.434355263652 | 252.015257713669 | 246.112720011613 | 257.372740535895 |
|         | 273.806452412737 | 194.161930642068 | 231.202047619476 | 211.22652563815  |
| MYO10   | 236.548439331855 | 269.006221210929 | 169.113439729353 | 256.093363520707 |
|         | 325.80154888448  | 319.283603277754 | 330.641230715217 | 321.177982468322 |
|         | 358.780920910909 | 403.292651623365 | 322.028360309592 | 245.042781391047 |
| MYO15A  | 144.281217246178 | 144.792035839249 | 149.879951192667 |                  |
|         | 138.820797333519 | 141.469818222503 | 132.446406243531 | 123.474836673474 |
|         | 151.598423878653 | 141.568970008164 | 140.955018249974 | 144.744603095605 |
|         | 147.2233876988   |                  |                  |                  |
| MYO15B  | 113.61408868553  | 145.530904040477 | 127.224081416987 |                  |
|         | 131.102996816222 | 132.521681289019 | 113.58962177275  | 126.103561089901 |
|         | 147.313494489487 | 125.477093550338 | 127.786141874218 | 118.966992191892 |
|         | 135.16316100494  |                  |                  |                  |
| MYO16   | 116.433239116749 | 119.459625817735 | 126.235567899449 | 123.577138762427 |
|         | 127.291712212051 | 124.775529469869 | 112.605287278882 | 124.616629956864 |
|         | 123.952494134263 | 115.944280729914 | 150.038722708606 | 124.042153387391 |
| MYO18A  | 209.913460781088 | 251.61451602376  | 188.0434100445   |                  |
|         | 281.846246549202 | 290.541184606565 | 169.881866987359 | 171.528350399075 |
|         | 187.112176929485 | 185.843639043466 | 224.851680313689 | 190.96184674871  |
|         | 177.039190810529 |                  |                  |                  |
| MYO18B  | 105.193775204124 | 109.613208767992 | 109.038182799871 |                  |
|         | 107.170981307304 | 111.11656427738  | 114.217867810848 | 112.14768481333  |
|         | 114.65036208773  | 116.806720503431 | 113.840813583258 | 112.832122823829 |
|         | 103.240215392215 |                  |                  |                  |
| MYO19   | 133.495243957927 | 128.952986088886 | 129.547309629132 | 133.509538648848 |
|         | 158.545435407585 | 187.296479395462 | 141.434699050015 | 164.491207767654 |
|         | 137.128849888863 | 145.919359461744 | 164.525784478026 | 155.201655653645 |



|       |                  |                  |                  |                  |
|-------|------------------|------------------|------------------|------------------|
| MYO1A | 121.350491314441 | 131.119810851017 | 117.652693591865 | 129.822926691091 |
|       | 151.032389358279 | 119.83679981791  | 120.257886394616 | 126.875483714734 |
|       | 118.510960607141 | 121.267153348313 | 134.344021502031 | 124.359615295938 |
| MYO1B | 254.722836822616 | 328.200548902445 | 172.430211711547 | 284.574888587832 |
|       | 199.681103910705 | 379.546197364027 | 313.480307434343 | 316.125364442611 |
|       | 278.737944234055 | 1068.63350031223 | 287.374706071354 | 215.866644799363 |
| MYO1C | 390.284689962661 | 403.582461109859 | 342.315456386729 | 570.130804179186 |
|       | 303.483515328621 | 212.710910778949 | 163.059196519365 | 191.507657960386 |
|       | 187.016569445646 | 251.062649517773 | 290.914381066573 | 243.283375388645 |
| MYO1D | 283.952604729032 | 369.275635424092 | 254.517135747445 | 388.710465457313 |
|       | 342.147414141627 | 180.164353124488 | 289.859695541999 | 373.860920943049 |
|       | 219.2695037071   | 589.953707188378 | 558.440840319738 | 258.384059994446 |
| MYO1E | 158.8054811093   | 153.801971958265 | 188.231614694297 | 184.462286724102 |
|       | 182.515302191173 | 137.773185451062 | 187.700723296295 | 154.066939372379 |
|       | 192.69687837782  | 211.679799388351 | 127.233439204926 | 167.811412309356 |
| MYO1F | 185.140211988926 | 179.400220328552 | 158.23562423217  | 153.891667472876 |
|       | 184.709768457405 | 173.97085982677  | 162.900556089071 | 172.387657419201 |
|       | 167.46432961654  | 171.561940747015 | 137.330207626732 | 176.440625367948 |
| MYO1G | 191.170105307944 | 168.238615437246 | 140.622130978368 | 159.390531348676 |
|       | 222.243523614518 | 145.7202993771   | 182.644319628554 | 187.336349390012 |
|       | 277.359422005775 | 201.139510041141 | 152.933230159216 | 169.043206258073 |
| MYO1H | 129.3513576591   | 154.675189522146 | 134.797624902585 | 142.379120254855 |
|       | 129.449242018727 | 135.391788614828 | 152.72717701452  | 148.380555606786 |
|       | 140.345652629553 | 143.88649412841  | 134.011746666371 | 126.324771800638 |
| MYO3A | 132.529247880813 | 144.585120811896 | 126.877293296185 | 139.720343780228 |
|       | 147.086734464001 | 132.608622131443 | 144.237691418911 | 126.601395870533 |
|       | 121.917596225576 | 127.685469299406 | 136.942583515174 | 135.82038791723  |
| MYO3B | 498.334266735594 | 434.792010353541 | 471.069295685718 | 422.23268864343  |
|       | 156.368487784719 | 409.592855687405 | 228.001046173405 | 323.788197265954 |
|       | 256.326661031361 | 271.113617350982 | 319.352940751688 | 246.88857694249  |
| MYO5A | 175.010849510711 | 175.810411923013 | 163.736324784234 | 179.55905250703  |
|       | 188.444498848767 | 130.231160879338 | 163.074919710259 | 169.003310163058 |
|       | 179.821008257902 | 305.542978609337 | 173.624709850889 | 140.730085305185 |
| MYO5B | 153.231965895778 | 148.278828579424 | 145.368059425439 | 139.416388461892 |
|       | 162.743192424569 | 220.312301059818 | 206.098534554876 | 241.039766283972 |
|       | 284.798325549665 | 197.848577663238 | 187.673748059596 | 204.681956301306 |
| MYO5C | 218.529160053398 | 213.710058427654 | 187.069074575776 | 175.139231359014 |
|       | 435.332573825425 | 289.667302610069 | 320.305852961452 | 316.623219008156 |
|       | 514.922742487521 | 199.87003105816  | 196.16056297158  | 251.993821914623 |
| MYO6  | 161.348562186667 | 166.582931148846 | 196.16056297158  | 152.346098251128 |
|       | 299.33156125224  | 371.127480221666 | 320.877897822963 | 354.531898366438 |
|       | 329.779210536849 | 372.475112554793 | 257.643855420381 | 327.207408852474 |
| MYO7A | 159.806221777332 | 147.04481509758  | 148.269123639781 | 158.886786960196 |
|       | 147.359279533039 | 141.791001213681 | 143.801139839773 | 164.753886197136 |
|       | 158.06129717954  | 183.82450756022  | 153.711354087243 | 155.820194280153 |
| MYO7B | 128.39171386085  | 125.470172259885 | 130.977864137459 | 136.48748813417  |
|       | 127.271423859953 | 137.524968609776 | 129.677874035481 | 126.728375196449 |
|       | 139.767216030715 | 129.715948793051 | 127.959474148217 | 141.943910304145 |
| MYO9A | 740.800822095116 | 769.586135629964 | 789.401526545277 | 730.988069115919 |
|       | 173.979001863717 | 350.077206368839 | 353.912654262209 | 232.444867422559 |
|       | 253.049869714368 | 431.182384100794 | 407.589300080181 | 264.604297630839 |
| MYO9B | 477.489368828457 | 519.112018353676 | 429.922530506572 | 689.271009631393 |
|       | 486.778046640624 | 382.902151239988 | 344.737964092526 | 361.687156919012 |
|       | 365.97903110365  | 301.798676825176 | 393.707031354025 | 338.129250886594 |

|        |                  |                  |                  |                  |
|--------|------------------|------------------|------------------|------------------|
| MYOC   | 712.94845413251  | 388.326080754063 | 1141.13648305827 | 376.124744806171 |
|        | 127.91637627901  | 129.501028506432 | 118.122186617611 | 123.364999283696 |
|        | 140.457727109762 | 154.528396813382 | 140.254665008195 | 132.273354705213 |
| MYOCD  | 187.30908753142  | 163.053121879323 | 210.852300463808 | 163.81485578613  |
|        | 149.400244837133 | 137.923852688695 | 153.19516365535  | 150.000851192531 |
|        | 141.890803125137 | 130.763957515652 | 141.468076901305 | 132.220398477217 |
| MYOD1  | 146.065491816894 | 151.548865569913 | 166.157713072213 | 164.377227860031 |
|        | 127.000175858468 | 142.678267012725 | 134.459497002613 | 144.386561289985 |
|        | 151.354187593773 | 147.815673580657 | 132.210100574787 | 164.601022396674 |
| MYOF   | 1146.3535752748  | 950.144166422001 | 1241.59946353857 | 944.92617668298  |
|        | 751.896334334052 | 630.176145684641 | 1387.90327883679 | 708.268962600305 |
|        | 1279.15873231449 | 615.485984065221 | 1114.85422895959 | 795.464850398761 |
| MYOG   | 159.588575526536 | 162.586012723045 | 174.027190728107 | 160.469645948225 |
|        | 171.775741648309 | 173.726420791056 | 182.42088387266  | 163.336324451735 |
|        | 159.524235332529 | 162.033909093358 | 158.232100962615 | 175.476184387338 |
| MYOHD1 | 118.021169080914 | 116.664031217378 | 122.763138007612 |                  |
|        | 119.984301761327 | 113.031636180748 | 128.425838805072 | 125.995374488153 |
|        | 118.215641556163 | 130.433405111592 | 119.725487374119 | 151.554352209634 |
|        | 124.05019986924  |                  |                  |                  |
| MYOM1  | 3012.49794349837 | 3510.24464112094 | 2568.95060767776 | 6851.54963413886 |
|        | 178.780662099615 | 158.322477506517 | 192.353768499582 | 189.971144220643 |
|        | 196.189101941489 | 154.611011734772 | 137.374784875444 | 160.240052678401 |
| MYOM2  | 247.845708587624 | 328.431289733169 | 311.806908624308 | 415.82312615045  |
|        | 147.488635834397 | 167.893596681867 | 147.696506705909 | 143.271346378958 |
|        | 187.796440205485 | 154.886628987246 | 159.070355781276 | 160.811051590991 |
| MYOM3  | 119.622243247836 | 128.812729239283 | 107.622342073167 | 123.591078216224 |
|        | 112.684334910243 | 118.206034087145 | 100.325215581101 | 125.181327386534 |
|        | 119.373287155621 | 149.207481665265 | 162.599466021255 | 121.553107861517 |
| MYOT   | 352.121800955822 | 332.543652462234 | 309.798246248863 | 255.374689750672 |
|        | 134.835962366555 | 137.672798701643 | 122.629146433216 | 118.220555783444 |
|        | 124.391225837909 | 115.231121959397 | 134.845202154446 | 119.159078990339 |
| MYOZ1  | 147.774588146924 | 158.809865241567 | 143.849399031223 | 165.430811083128 |
|        | 153.4392054301   | 146.421195733989 | 127.982696242304 | 127.284885819903 |
|        | 146.706846930708 | 147.389892239448 | 151.358775426916 | 139.473459411633 |
| MYOZ2  | 153.744962185987 | 154.366071635971 | 157.955606242401 | 163.753434774656 |
|        | 136.467401249286 | 159.399804351771 | 151.214631373344 | 140.701132362458 |
|        | 149.100294463597 | 158.353171576491 | 146.395248696835 | 157.797222258336 |
| MYOZ3  | 262.60377731258  | 278.168897504985 | 182.357065848298 | 231.239126548656 |
|        | 136.623658204558 | 146.533374238616 | 146.812248482145 | 139.980504765791 |
|        | 132.675172817752 | 137.652358744527 | 134.748177388398 | 138.461113585594 |
| MYPN   | 145.372579207362 | 135.25734629146  | 151.178586065066 | 156.822477235844 |
|        | 164.231281729415 | 160.014635964846 | 148.242794464181 | 153.705394500855 |
|        | 153.538565948453 | 137.331864485838 | 125.350567304651 | 151.428283279424 |
| MYPOP  | 703.29965727829  | 832.335328912437 | 876.288248962843 | 976.050097371579 |
|        | 1762.09874961415 | 780.734359041347 | 964.473774310687 | 902.394410348792 |
|        | 1076.09385014053 | 685.080426814888 | 819.151876775691 | 726.346459754217 |
| MYRIP  | 156.020996568814 | 149.366554238043 | 138.717541782317 | 145.576880854443 |
|        | 160.209949749785 | 155.592219571564 | 150.0084730766   | 144.585120811896 |
|        | 144.979749941424 | 145.27890423835  | 140.393624985807 | 146.035731780312 |
| MYSM1  | 149.25705328406  | 132.99989565368  | 135.175806654971 | 158.902676384853 |
|        | 139.595986615703 | 151.397068235685 | 131.655316312379 | 134.949572471421 |
|        | 135.273184185121 | 142.910616700526 | 125.493004972076 | 148.757112903673 |

|         |                  |                  |                  |                  |
|---------|------------------|------------------|------------------|------------------|
| MYST1   | 338.223462327622 | 334.709049890042 | 325.525450750788 | 413.172954892025 |
|         | 261.988345506548 | 190.174729017089 | 269.495247190598 | 205.612579504495 |
|         | 251.588748783592 | 240.792557915987 | 218.334273320319 | 218.350166753833 |
| MYST2   | 211.720536220806 | 208.291714758548 | 185.113098620798 | 184.187847236508 |
|         | 175.148318011395 | 164.981665344298 | 179.54034642468  | 163.014903707857 |
|         | 170.825161347825 | 158.895584550655 | 191.405362404386 | 169.681582570965 |
| MYST3   | 1145.35733270036 | 1350.87073284396 | 791.840531191783 | 1127.89414462606 |
|         | 654.305724263754 | 1239.13016938378 | 593.320132696649 | 678.937151822411 |
|         | 606.851072672402 | 401.359711029934 | 140.820807603291 | 578.811908030805 |
| MYST4   | 203.586310608403 | 183.130891975122 | 200.934618257908 | 208.291714758548 |
|         | 130.89594032962  | 129.85040048805  | 158.147502554814 | 146.637799077812 |
|         | 138.737332306848 | 124.740700441589 | 161.585555680663 | 144.141837615086 |
| MYT1    | 147.029988235786 | 147.314687795555 | 134.494167613686 | 144.884801859505 |
|         | 128.152956417755 | 531.217306770605 | 179.211502448703 | 134.051756243089 |
|         | 170.024833610695 | 132.926799887017 | 318.06081614151  | 670.856008549143 |
| MYT1L   | 132.446406243531 | 125.063596569451 | 130.852932147831 | 126.531502877517 |
|         | 134.650161382949 | 128.720517906732 | 135.613240463445 | 121.539958110688 |
|         | 127.911258242431 | 119.631847624882 | 125.124011798043 | 127.675206134992 |
| MZF1    | 356.699466789374 | 372.475112554793 | 443.005424069211 | 366.073387075385 |
|         | 424.912426797488 | 451.985108262982 | 606.162976359615 | 480.923468806193 |
|         | 695.321886304133 | 322.443089373063 | 458.782864873657 | 458.607367472574 |
| N-PAC   | 659.900771633223 | 588.678767007017 | 705.737228226014 | 740.973440818582 |
|         | 348.640185950469 | 318.561557474749 | 354.705553237406 | 570.533103778482 |
|         | 532.950400370668 | 527.498114662967 | 426.769986378276 | 442.590987372759 |
| N4BP1   | 226.203994206714 | 212.147155923729 | 237.473927775823 | 241.527811817146 |
|         | 239.419200107721 | 262.832376198119 | 245.489266602897 | 239.572670410818 |
|         | 278.168897504985 | 202.869364962231 | 290.688850193983 | 233.884660128222 |
| N4BP2   | 2392.93562797606 | 2233.00694575483 | 2146.4265920569  | 1885.93146154931 |
|         | 412.863887464545 | 2222.16226526877 | 1059.80292026589 | 1493.90578573732 |
|         | 1319.3522488218  | 1031.38207659547 | 2337.64145466514 | 1134.64039256323 |
| N4BP2L1 | 182.300628120658 | 190.66473033826  | 224.118739978257 |                  |
|         | 163.36682525399  | 125.296240086615 | 154.604363252526 | 210.942865876533 |
|         | 163.37518739397  | 176.810979494826 | 147.73141408795  | 172.926288703434 |
|         | 193.945494721138 |                  |                  |                  |
| N4BP2L2 | 235.997227173296 | 225.820503820866 | 290.241064926886 |                  |
|         | 248.360540656183 | 144.986655090517 | 141.215542377796 | 163.21153580549  |
|         | 161.968835903764 | 179.451637129672 | 180.599150102184 | 184.577511730401 |
|         | 160.035282578603 |                  |                  |                  |
| N4BP3   | 123.603972078897 | 109.740801301993 | 128.837901660985 | 116.647291878845 |
|         | 108.036254606246 | 110.865668451601 | 118.45291712775  | 111.908965758799 |
|         | 116.635455849571 | 112.14768481333  | 120.201521341263 | 109.454483612299 |
| N6AMT1  | 196.922837906592 | 176.019082929386 | 208.64349688412  |                  |
|         | 183.32467147543  | 149.576563410584 | 144.364319564075 | 213.990575186237 |
|         | 178.939268046323 | 229.511643376643 | 169.447827110558 | 199.101099226668 |
|         | 187.205674045893 |                  |                  |                  |
| N6AMT2  | 412.801213309591 | 364.331860640225 | 358.355621069787 |                  |
|         | 427.766660764042 | 339.379250332987 | 498.334266735594 | 393.914413372142 |
|         | 283.527656956105 | 393.579552385074 | 325.525450750788 | 405.64711132293  |
|         | 388.710465457313 |                  |                  |                  |
| NAAA    | 228.184535093641 | 185.41739522833  | 220.169099923628 | 157.454558821261 |
|         | 188.093450717857 | 190.371287639453 | 169.077657790409 | 213.7326050342   |
|         | 243.893774595317 | 218.470365730283 | 183.493455947795 | 200.633009710701 |
| NAALAD2 | 228.243668453958 | 216.615694348945 | 199.516043142784 |                  |
|         | 240.814860403562 | 159.253029632045 | 141.935435502163 | 147.045944019838 |

|          |                  |                  |                  |                  |
|----------|------------------|------------------|------------------|------------------|
|          | 155.438218501542 | 144.798664281991 | 159.337816095012 | 140.418010366997 |
|          | 140.652086055776 |                  |                  |                  |
| NAALADL1 | 325.80154888448  | 268.832884350157 | 218.058543664561 |                  |
|          | 282.652193666078 | 147.740657356905 | 139.963969716386 | 144.102872001089 |
|          | 150.680628549529 | 157.982146236108 | 155.371772547395 | 133.975526667571 |
|          | 163.868129628544 |                  |                  |                  |
| NAALADL2 | 119.29304762171  | 137.97889661868  | 124.079109459437 |                  |
|          | 126.319103548711 | 124.258412895333 | 116.276003190171 | 126.233395051706 |
|          | 116.087696503753 | 122.600274773736 | 136.780298810179 | 153.209409960324 |
|          | 129.737882221259 |                  |                  |                  |
| NAB1     | 529.368609163949 | 467.04976953755  | 430.94199035855  | 398.272713014637 |
|          | 220.487665103019 | 358.479218923158 | 238.88138498771  | 254.812605074045 |
|          | 231.39684528494  | 573.846138124455 | 441.785666261936 | 343.571296297462 |
| NAB2     | 335.059844742031 | 392.430873293903 | 292.468585109951 | 465.54817048856  |
|          | 244.162496497466 | 227.267783818298 | 234.996704304673 | 172.578252260002 |
|          | 215.019239034819 | 288.968909550533 | 188.308588359317 | 205.781486117242 |
| NACA     | 10280.5093368677 | 10106.8225600705 | 10741.3064142855 | 8322.20177173035 |
|          | 6484.36742084268 | 10170.8669218992 | 13247.3528304243 | 12046.9345159347 |
|          | 12457.6956682374 | 12406.7143043992 | 13360.9483836861 | 10900.1783397368 |
| NACA2    | 159.455596750304 | 153.097557560333 | 172.030687707578 | 164.429483677715 |
|          | 164.603403251634 | 160.27511502306  | 174.832495287192 | 152.818046945164 |
|          | 153.795665190439 | 165.576758218571 | 181.530767521222 | 165.307808075027 |
| NACAD    | 200.712182818203 | 220.60173086462  | 179.273936200852 | 233.809899915394 |
|          | 149.871960981882 | 148.47415004128  | 150.378690719669 | 149.94715601106  |
|          | 153.374296511216 | 152.454414703534 | 143.427721577372 | 156.763364462534 |
| NACAP1   | 533.784151495549 | 503.59466398882  | 681.677841333095 |                  |
|          | 347.812754957414 | 305.720812071583 | 558.440840319738 | 834.187014201026 |
|          | 635.038752622494 | 566.914448800423 | 716.731984660463 | 747.587723573212 |
|          | 655.665164535648 |                  |                  |                  |
| NACC1    | 143.336538157639 | 157.40255559397  | 148.282715835607 | 164.198494818485 |
|          | 207.920724788669 | 157.912864169081 | 170.13453211897  | 195.929328710358 |
|          | 150.49183794045  | 154.321219471319 | 179.265395910119 | 168.323141675824 |
| NACC2    | 154.021906399992 | 151.221783750989 | 133.401620574886 | 151.892445999591 |
|          | 281.341452463344 | 139.321570881862 | 143.107570838895 | 140.696326952077 |
|          | 146.832797779597 | 156.986053534635 | 145.338156577438 | 139.573371281569 |
| NADK     | 242.902900881585 | 330.457534783492 | 208.793650722271 | 302.945860276233 |
|          | 298.573180660083 | 240.663883443935 | 264.936739264566 | 257.075088169589 |
|          | 249.554443204445 | 267.67093646012  | 270.847923557176 | 244.440857688518 |
| NADSYN1  | 326.758278851698 | 322.614169214764 | 324.949988230276 |                  |
|          | 291.616195651001 | 1424.04009914668 | 839.324324662619 | 905.233241047678 |
|          | 684.180060287047 | 574.896304593109 | 539.008286968106 | 847.276523445973 |
|          | 920.083835296898 |                  |                  |                  |
| NAE1     | 482.466736153026 | 452.167674725454 | 492.207833630086 | 393.579552385074 |
|          | 547.367381020623 | 806.290662664708 | 789.971871940893 | 772.776364492813 |
|          | 791.402660066193 | 699.550347374567 | 772.399017166118 | 908.704610877319 |
| NAF1     | 153.0141888126   | 173.532300173223 | 170.541689758579 | 169.16155608071  |
|          | 197.003657786247 | 178.52221226882  | 214.639374741553 | 163.876218743322 |
|          | 201.637540930213 | 202.024504592763 | 183.853381322135 | 200.468804559127 |
| NAG18    | 16533.5738137081 | 16230.8346205808 | 17749.5685495445 | 19661.6741558107 |
|          | 14300.8562978211 | 19087.9532735841 | 12749.804597566  | 15603.3490258675 |
|          | 15532.9759169142 | 11918.214537866  | 10280.5093368677 | 14938.5975217303 |
| NAGA     | 148.216605879958 | 160.261708910517 | 140.619606039582 | 146.466967386428 |
|          | 188.593378315122 | 155.393326732887 | 171.504939477949 | 155.219860096943 |
|          | 158.973872644973 | 142.342811880173 | 179.369845168822 | 152.011551837951 |

|        |                  |                  |                  |                  |
|--------|------------------|------------------|------------------|------------------|
| NAGK   | 928.151632070573 | 1057.1528284934  | 916.4187683687   | 1207.11788506001 |
|        | 3143.77161008321 | 1771.39155164347 | 1373.08023518911 | 1635.35544761095 |
|        | 1813.79641422879 | 1305.2232532959  | 1759.9632914516  | 859.860994525775 |
| NAGLU  | 321.25076864104  | 438.958573676953 | 335.013713757031 | 520.585319342817 |
|        | 1111.88018487186 | 308.803322140241 | 323.628636799403 | 380.562212796792 |
|        | 325.642275889649 | 285.131244588624 | 330.143103381406 | 271.945851739635 |
| NAGPA  | 197.205792984885 | 255.462706428149 | 253.124449721731 | 304.237479317271 |
|        | 341.501397478593 | 194.143649677822 | 277.501071684448 | 209.464347017443 |
|        | 208.321765801227 | 245.675725760577 | 197.12840030662  | 214.461773810376 |
| NAGS   | 125.997109913348 | 140.497181450706 | 127.976612086284 | 123.791515424464 |
|        | 148.80452641061  | 170.140610481718 | 140.812334019209 | 144.46549577902  |
|        | 128.634431242405 | 134.406692724353 | 148.260672564835 | 136.108500467418 |
| NAIF1  | 139.648741106305 | 147.490037885078 | 158.6953558198   | 152.432477504097 |
|        | 250.18189549573  | 156.361037318986 | 150.137061170632 | 168.460095116205 |
|        | 183.26554404668  | 166.315369318355 | 193.358728044565 | 154.232310911696 |
| NAIP   | 136.903588075134 | 136.466367853188 | 133.585425721984 | 134.189023892662 |
|        | 133.807992913171 | 144.351763882823 | 138.828562311512 | 136.534812980964 |
|        | 133.211362932569 | 153.67215573765  | 131.649830934459 | 139.904952662852 |
| NALCN  | 143.881744063934 | 154.205877662428 | 150.065275447769 | 159.508223180752 |
|        | 145.104173410801 | 150.904618960507 | 146.11669387238  | 158.023626712181 |
|        | 138.388749930671 | 150.851504454247 | 124.592771536872 | 149.687372584136 |
| NALP5  | 126.265475477399 | 117.803508098322 | 134.339535632463 | 136.149732574763 |
|        | 135.839123867443 | 126.752999657665 | 120.157438564977 | 126.241307445165 |
|        | 123.797585446062 | 125.329960261871 | 134.988545581219 | 140.245786278057 |
| NAMPT  | 146.856133875296 | 174.832495287192 | 143.692305478191 | 127.358616953147 |
|        | 308.38513924253  | 312.645778869254 | 306.677271064305 | 263.568160216149 |
|        | 264.306927596371 | 1077.95929298567 | 225.850439131864 | 315.689865927834 |
| NANOG  | 125.114303270024 | 140.794273204984 | 134.255021727555 | 135.027715094704 |
|        | 139.397282021664 | 126.741498575874 | 131.87052926802  | 128.773129597793 |
|        | 133.399632102473 | 127.305306470493 | 131.045970236632 | 127.419227292862 |
| NANOS1 | 155.3016514732   | 154.990319019521 | 138.551695969102 |                  |
|        | 142.876069462608 | 132.526286141997 | 148.126745515891 | 135.335931168501 |
|        | 137.933122094638 | 139.844984829379 | 138.322109975426 | 148.925418133902 |
|        | 149.423230365631 |                  |                  |                  |
| NANOS2 | 117.227635924674 | 122.953869661977 | 115.816156193574 |                  |
|        | 115.656801309856 | 106.746545626069 | 116.884397420467 | 118.593717189375 |
|        | 126.388778582602 | 111.603221942108 | 112.005939063045 | 113.192313147111 |
|        | 121.174618503873 |                  |                  |                  |
| NANOS3 | 155.194521954405 | 171.69834783037  | 156.873097743717 |                  |
|        | 192.655899720909 | 210.77489002666  | 237.312766830206 | 178.619580818758 |
|        | 183.294526267593 | 178.358003030064 | 160.573172150801 | 135.3969732106   |
|        | 197.848577663238 |                  |                  |                  |
| NANP   | 145.975125733326 | 145.553219709768 | 131.328478053136 | 145.214575855337 |
|        | 133.266524623338 | 182.725987056391 | 159.276726310525 | 126.211525910631 |
|        | 141.797497681512 | 136.569250038372 | 154.838407529853 | 147.716353308549 |
| NANS   | 231.372316734945 | 245.240006198482 | 228.086256222312 | 246.428746807313 |
|        | 357.006610037663 | 346.411586524655 | 294.22752955801  | 449.745016106912 |
|        | 365.199125315964 | 462.779122987815 | 427.872407051254 | 195.963361515546 |
| NAP1L1 | 534.505132658177 | 468.170972478717 | 583.619362840814 |                  |
|        | 388.326080754063 | 258.915802108562 | 514.124012546829 | 514.61297221467  |
|        | 469.333357789149 | 436.834825721843 | 387.135002880995 | 375.316610221279 |
|        | 395.386242257877 |                  |                  |                  |
| NAP1L2 | 137.312488161187 | 138.424464248567 | 133.176970578909 |                  |
|        | 126.450300907283 | 120.488694213288 | 123.108694517244 | 129.668506092785 |

126.153806511702 129.145457341484 129.637555509848 131.919387743094  
 121.006569103388  
 NAP1L3 232.492398623889 202.357989894268 237.171424222756  
 217.940575516933 143.461785113446 151.87495966414 131.038758046782  
 151.201263631883 153.705394500855 161.799743586569 132.176598634979  
 150.737888487925  
 NAP1L4 2406.67187918735 2547.53445585552 2500.07677977147  
 2859.94396089224 1467.50846948144 1563.71477584676 1279.15873231449  
 1666.80650105101 2096.25803773108 1809.58702081877 1929.52146517699  
 1403.90487313049  
 NAP1L5 265.470314691221 276.756415094228 317.121202656311  
 309.720081933252 185.071775840607 175.989742412417 193.124599671798  
 199.01458214661 227.092319765009 195.333029746339 161.26201213997  
 204.1974438819  
 NAP1L6 139.052898232393 137.260359343758 141.970301370404  
 138.562576783507 130.526673128214 130.57903858574 132.161764435769  
 141.353084959289 139.803568564059 154.520935683104 148.711943433557  
 143.560065338939  
 NAPA 236.707875629511 228.025383952578 243.080229016932 245.900840732668  
 544.462032960964 216.154203111101 207.718619151226 196.880135762817  
 247.407442038488 235.867149024041 314.810001770583 208.816482659752  
 NAPB 634.906566690042 544.956712516196 741.875751347917 721.11578916385  
 218.96845208513 398.075524915003 386.738154577763 213.891435492914  
 334.709049890042 404.073802241516 348.413827101046 499.683188662742  
 NAPEPLD 183.979513272793 189.362958041175 208.75656341402  
 202.524668687686 183.969897305028 208.348515119045 228.820894086914  
 239.419200107721 222.268494113686 203.475080163804 258.632372536866  
 373.803772983872  
 NAPG 162.457778455279 196.955723006838 203.089661928125 167.421776383056  
 183.779065928447 158.226547375305 186.140970908638 208.237011955037  
 220.458449424062 220.487665103019 175.767556472012 213.123453925578  
 NAPRT1 465.029298672645 502.598518192729 396.492900824907  
 509.880640462 1766.15001427132 941.065508539108 766.176882605175  
 723.640113902925 1000.91520225219 1274.39152410752 1660.70040058102  
 1191.88706134921  
 NAPSA 127.898533598679 162.919656039331 166.97270256697 161.769370009823  
 175.608958881476 145.675032688915 179.601348561497 187.231049280818  
 235.291035302211 146.06054700771 149.570242115956 143.821269460523  
 NAPSB 158.712241098927 155.400191634632 150.620603731907 147.954079022076  
 164.136551371866 143.607579034109 187.686326872667 234.28146549561  
 384.365878895439 139.631165400881 196.974807677659 151.946691918521  
 NARF 404.876478833713 454.133372808458 489.909407178594 480.923468806193  
 648.549890890375 809.545702751155 1106.75785702993 792.101559967381  
 742.128229715198 483.067471841953 532.596772298766 799.759250503507  
 NARFL 253.218123990428 264.654879741889 259.025042304848 315.182134426778  
 415.388760988459 254.812605074045 263.509066170434 214.4829383264  
 238.946506103155 216.522992914538 263.183010631644 216.102897582821  
 NARG1 207.977817300376 182.248178961707 185.485858719975 183.100286716683  
 164.773489952844 339.252515920242 221.359331823286 226.334672545273  
 247.111032124864 218.031238893075 235.32095278846 252.32907388173  
 NARG1L 210.478088018501 189.174957940401 230.697077917675  
 177.708263037199 156.239937979051 232.276667029184 149.025102989448  
 188.417078622503 177.549330396268 185.743212726702 191.651818696629  
 249.379605914827

|       |                  |                  |                  |                  |
|-------|------------------|------------------|------------------|------------------|
| NARG2 | 180.658930225735 | 171.759102794108 | 187.196424491482 | 175.084729757407 |
|       | 178.209994522672 | 175.055634340766 | 171.444558905575 | 154.64077390011  |
|       | 168.269075560636 | 153.047317528007 | 197.699100346967 | 177.055023182887 |
| NARS  | 2376.52728883131 | 2468.47687203968 | 2637.62596741408 | 2337.64145466514 |
|       | 1419.4638331856  | 2337.64145466514 | 2505.8565544797  | 3917.05893989806 |
|       | 2900.55309635211 | 2550.08769415478 | 3008.43964505208 | 2751.75479578587 |
| NARS2 | 243.893774595317 | 217.646777099512 | 301.871924474014 | 237.420951138877 |
|       | 317.493387040816 | 393.375554593484 | 319.352940751688 | 357.928880740814 |
|       | 274.534901548678 | 260.157440518033 | 321.426100243434 | 306.896732729554 |
| NASP  | 174.953232190285 | 170.306241656131 | 169.864628707043 | 175.810411923013 |
|       | 204.990512488181 | 262.954856857756 | 160.019067307733 | 203.888365494623 |
|       | 196.566937667522 | 189.348690353874 | 262.349315496653 | 196.638594797353 |
| NAT1  | 146.135269553731 | 131.850952248545 | 136.964780183468 | 143.987296454585 |
|       | 148.691132137188 | 174.116797337377 | 145.635453468646 | 173.287859527767 |
|       | 159.832405510505 | 166.024236370752 | 158.49220347186  | 151.473239782301 |
| NAT10 | 584.919615953457 | 563.140382824149 | 559.668195903429 | 680.250735532287 |
|       | 1032.11574332305 | 598.924339094496 | 947.766127685083 | 654.881990232975 |
|       | 753.389428590366 | 950.818917078515 | 624.467319041884 | 670.347447480331 |
| NAT11 | 134.176925491721 | 134.569883788949 | 133.152523054305 | 122.426568507144 |
|       | 160.625367261779 | 133.070896773384 | 137.43751840683  | 134.160882467542 |
|       | 134.09920571607  | 135.82038791723  | 166.735962853075 | 134.688504981603 |
| NAT12 | 205.011514211101 | 189.461090469712 | 177.549330396268 | 179.060189557496 |
|       | 198.113398073968 | 163.36682525399  | 203.071186284148 | 175.417320301614 |
|       | 192.168634727505 | 205.804144075374 | 207.624240598841 | 162.494429648551 |
| NAT13 | 321.524921332256 | 310.301616266762 | 355.290621188435 | 283.163770658619 |
|       | 353.005548289786 | 510.659785046811 | 466.392151902286 | 559.559921312181 |
|       | 547.042461070351 | 423.045329000756 | 732.040299742444 | 534.276129011237 |
| NAT14 | 339.379250332987 | 389.853534237748 | 288.072720517427 | 440.579262120451 |
|       | 704.448123154868 | 409.477576085245 | 387.355661073935 | 290.213039891361 |
|       | 226.43414383055  | 250.217137496422 | 249.590923098575 | 341.096072280715 |
| NAT15 | 321.696082249696 | 322.36247485445  | 312.705458415152 | 410.138738410101 |
|       | 622.834462068316 | 350.741303038926 | 438.7446527797   | 359.363523948825 |
|       | 375.038561820137 | 339.379250332987 | 469.794672718173 | 359.440639663655 |
| NAT2  | 124.690141443832 | 140.167274633872 | 125.481506166304 | 131.595868226775 |
|       | 107.780763250481 | 113.845770994796 | 120.418709541104 | 128.262195551255 |
|       | 128.375390373307 | 124.215466523555 | 118.283346939564 | 127.109798012351 |
| NAT5  | 726.000622725287 | 810.396770151757 | 762.182213353032 | 740.196934996626 |
|       | 1084.5920943349  | 1502.3444541735  | 1435.4236709581  | 1193.82799849555 |
|       | 1210.40302822121 | 2171.00457877604 | 838.267069860172 | 1362.75971646355 |
| NAT6  | 172.686798187142 | 190.682392100564 | 155.431833398023 | 198.257497903131 |
|       | 199.288100834476 | 137.811776724675 | 133.800111596565 | 148.574661934068 |
|       | 126.305273697185 | 165.467462247066 | 176.940723174814 | 126.506749037908 |
| NAT8  | 125.165254272421 | 120.897228878841 | 118.039780360151 | 118.797046082278 |
|       | 115.180659017144 | 118.336654504789 | 125.720102558499 | 120.470801825675 |
|       | 123.554769032715 | 109.728809191027 | 133.190147746722 | 115.845468537936 |
| NAT8B | 135.413840160615 | 125.674471551099 | 126.715300671036 | 125.367386907897 |
|       | 202.253560413436 | 203.487137264    | 236.108432603479 | 131.846160346403 |
|       | 191.961269585431 | 133.211362932569 | 206.203717450138 | 123.084040312047 |
| NAT8L | 130.142263689536 | 138.76667538162  | 137.814391189269 | 139.096536887753 |
|       | 150.294432623474 | 140.099069486005 | 126.782805974059 | 137.854873498783 |
|       | 135.880955433228 | 141.934351226006 | 115.142111396055 | 139.301435614165 |
| NAT9  | 334.443733461841 | 295.463118191589 | 340.028737478082 | 317.904396212359 |
|       | 390.098830270926 | 461.722481634933 | 572.548647437438 | 575.857954264295 |
|       | 499.964000319181 | 305.398934391579 | 452.357898123926 | 630.670530516275 |

|           |                  |                  |                  |                  |
|-----------|------------------|------------------|------------------|------------------|
| NAV1      | 348.36178568457  | 323.20628717764  | 250.25959091612  | 331.062744782933 |
|           | 143.172744119235 | 204.842791081358 | 130.165488538277 | 133.507865919719 |
|           | 164.922193471904 | 193.245087824217 | 156.611727364072 | 236.401834189942 |
| NAV2      | 379.292531644085 | 378.509324619452 | 341.901565692251 | 483.067471841953 |
|           | 220.510248260182 | 167.822075935474 | 156.102877632001 | 177.919885012006 |
|           | 252.593574250965 | 286.506419296679 | 224.361277033882 | 150.308048500142 |
| NAV3      | 157.927709922368 | 154.79534193124  | 129.586337068199 | 132.584454429269 |
|           | 116.700397932007 | 115.310953814885 | 120.188885479773 | 122.885879294532 |
|           | 123.629279569085 | 136.436762791912 | 150.831554010122 | 107.187035835972 |
| NBAS      | 293.317880637519 | 298.256131536504 | 300.247304779062 | 381.971539806271 |
|           | 270.12941437975  | 247.280717385562 | 253.30325545013  | 216.880896769751 |
|           | 190.427022049167 | 264.563741039382 | 230.424145472916 | 223.253794809571 |
| NBEA      | 367.644907862372 | 327.324711245289 | 514.61297221467  | 320.648966489586 |
|           | 154.127346849182 | 143.236593995493 | 189.662974464847 | 156.630366766924 |
|           | 160.390564881326 | 163.521095869383 | 140.684066288019 | 157.541796722309 |
| NBEAL1    | 108.483284007316 | 113.955459033122 | 116.981243525714 |                  |
|           | 105.31352471598  | 110.858201415824 | 117.893918180502 | 111.848472437543 |
|           | 120.039031290299 | 112.629266772219 | 115.80245224388  | 128.381433897602 |
|           | 119.221976571036 |                  |                  |                  |
| NBEAL2    | 243.936797286495 | 257.372740535895 | 251.138401278632 |                  |
|           | 268.930428617695 | 644.11603826131  | 326.703488388966 | 282.190861594303 |
|           | 292.317998405609 | 363.343480850598 | 753.654626233604 | 775.5664718389   |
|           | 402.425130776131 |                  |                  |                  |
| NBL1      | 3321.1350545346  | 4548.5418978622  | 2723.55722258794 | 4437.40805296517 |
|           | 1291.12004949379 | 1708.87666406131 | 685.080426814888 | 1360.24752587939 |
|           | 977.450397042213 | 1197.00004043747 | 1174.0922389136  | 824.746488539942 |
| NBLA00301 | 214.714726648332 | 195.218005582618 | 370.227329649269 |                  |
|           | 239.33642662112  | 152.952479729682 | 167.083758835476 | 150.155154998981 |
|           | 158.002906093899 | 142.861359851088 | 166.433933349193 | 149.175458427847 |
|           | 149.385103319547 |                  |                  |                  |
| NBN       | 209.984545596312 | 195.057830521304 | 237.456245064363 | 205.987280015028 |
|           | 241.251507026982 | 306.387898121409 | 214.785381549181 | 337.487980551006 |
|           | 290.090495047722 | 232.363656167375 | 258.759507964221 | 246.288681426405 |
| NBPF1     | 169.45559708224  | 165.581217879395 | 165.870621884073 | 153.418095627352 |
|           | 153.176268095608 | 161.142723532061 | 165.364935913232 | 176.670752486376 |
|           | 150.99622088333  | 152.617507769717 | 168.261511797218 | 182.084333814175 |
| NBPF10    | 1520.59210521859 | 1053.65938651514 | 1367.19652160532 |                  |
|           | 1047.2693539616  | 482.965800108538 | 1048.85768964657 | 1023.29995420518 |
|           | 1336.75600604068 | 880.719593734606 | 1104.61581891596 | 713.23381913235  |
|           | 1011.9675459648  |                  |                  |                  |
| NBPF11    | 190.427022049167 | 174.540209145695 | 244.486311003619 |                  |
|           | 155.908951665928 | 162.188509438986 | 263.084557246752 | 219.729169245025 |
|           | 245.454945056317 | 179.297628357211 | 204.596753034535 | 159.298815559223 |
|           | 225.75155298452  |                  |                  |                  |
| NBPF12    | 139.6391154169   | 130.306478656159 | 142.06907380533  |                  |
|           | 144.079935036119 | 131.744454088995 | 132.730924522748 | 140.957024692542 |
|           | 128.844026422327 | 136.052640679977 | 129.733935614802 | 131.566892082703 |
|           | 146.64835267642  |                  |                  |                  |
| NBPF14    | 275.298642145005 | 238.037110997575 | 272.927830312746 |                  |
|           | 248.594000664466 | 177.123497519231 | 250.515579402334 | 256.873090834376 |
|           | 292.640251411131 | 226.387465899611 | 225.783771938969 | 198.285073991956 |
|           | 255.066583469964 |                  |                  |                  |
| NBPF15    | 140.815807483203 | 135.711590400394 | 140.129882333528 |                  |
|           | 144.771457221413 | 141.640292723776 | 142.556535259086 | 150.985061659285 |



|         |                  |                  |                  |                  |
|---------|------------------|------------------|------------------|------------------|
|         | 139.677109265241 | 140.421945574721 | 150.088034336851 | 140.531789506024 |
|         | 143.467053670148 |                  |                  |                  |
| NBPF16  | 132.653795458388 | 129.677874035481 | 131.630132952441 |                  |
|         | 135.425518707018 | 144.181359740481 | 137.969750384554 | 128.140333650496 |
|         | 145.152605166094 | 130.37544152572  | 133.753999983813 | 134.620896927473 |
|         | 141.209958892647 |                  |                  |                  |
| NBPF20  | 4945.87677849967 | 4759.17973319588 | 3235.38149926838 |                  |
|         | 4262.23145131525 | 919.626220838414 | 2219.71846304201 | 2168.58813300343 |
|         | 3177.80599774525 | 1846.61430264854 | 2012.36542989953 | 1338.83705469394 |
|         | 2065.51724858579 |                  |                  |                  |
| NBPF22P | 124.433114779288 | 139.709959820327 | 127.731816003312 |                  |
|         | 111.243322115126 | 155.76860362365  | 149.810655120216 | 128.634431242405 |
|         | 115.656801309856 | 145.601922576321 | 139.46518859956  | 136.770515182612 |
|         | 142.613654158833 |                  |                  |                  |
| NBPF3   | 219.080383154432 | 206.275885047321 | 222.593554194453 | 194.831347257735 |
|         | 195.561296046507 | 224.396933003452 | 224.439293045835 | 263.936023499588 |
|         | 191.297539967707 | 214.763232658841 | 209.684346388892 | 225.61275910008  |
| NBPF4   | 142.736148814019 | 145.003900788534 | 137.288653308858 | 148.739888930189 |
|         | 126.520909083643 | 137.680019787902 | 146.359038260378 | 150.672985449063 |
|         | 145.395042579024 | 137.42213762011  | 139.437073790935 | 153.992763544073 |
| NBPF5   | 169.881866987359 | 155.612543356905 | 155.890403934674 | 170.473956720945 |
|         | 168.161117444474 | 186.127543877065 | 177.083095120017 | 162.403942351933 |
|         | 163.024215671479 | 172.345201438148 | 164.008063563113 | 193.412827246366 |
| NBPF6   | 150.301540078433 | 126.124937863679 | 136.244995503799 | 127.733860645979 |
|         | 143.846734516914 | 143.431389389919 | 144.69686018715  | 145.428297145967 |
|         | 144.46549577902  | 144.782706468281 | 134.271916545532 | 138.202872275661 |
| NBPF7   | 157.733042033549 | 157.668307146391 | 159.009211991511 | 150.911524755251 |
|         | 153.82440233533  | 149.119815471009 | 149.408530395745 | 159.133905701536 |
|         | 162.242553163421 | 161.195562296834 | 142.501655618849 | 154.379788206936 |
| NBPF8   | 1778.73916100529 | 1630.1630053946  | 1046.65224316733 | 1148.80141486692 |
|         | 355.372836460906 | 692.945420109927 | 814.759191652981 | 980.67040349547  |
|         | 596.934339406636 | 696.650617523899 | 392.909481887174 | 700.877661166739 |
| NBPF9   | 144.748564682545 | 138.613373798613 | 148.299945894738 | 134.47218436552  |
|         | 145.358431402568 | 165.430811083128 | 151.515460040167 | 163.919426088318 |
|         | 149.599523779175 | 143.772376623996 | 152.987939791009 | 145.217261514886 |
| NBR1    | 125.334995649504 | 127.943935415045 | 130.827726862159 | 121.154389729409 |
|         | 118.787630332168 | 129.428950259722 | 135.301844382418 | 131.7646616214   |
|         | 129.754376995879 | 121.327397317398 | 139.771342253058 | 127.518790633514 |
| NBR2    | 135.576975868985 | 140.756898474665 | 116.796995589816 | 134.185202200317 |
|         | 146.283340399533 | 181.148062201932 | 175.251238431716 | 183.447807651728 |
|         | 229.284931844047 | 182.851203073653 | 170.553940654493 | 225.065765924246 |
| NCALD   | 987.78377957731  | 1092.33328323944 | 959.532977061027 | 1490.02976786379 |
|         | 178.835679834487 | 181.550597645633 | 138.499293816467 | 175.543924200429 |
|         | 206.203717450138 | 170.646233722767 | 147.164348704012 | 170.401653214867 |
| NCAM1   | 258.25658838015  | 229.729195963667 | 258.632372536866 | 264.544964752932 |
|         | 125.666013736767 | 128.777337552038 | 122.399241018147 | 116.547306374097 |
|         | 121.810767302322 | 122.659174808512 | 141.08625682411  | 121.203149121743 |
| NCAM2   | 137.358139652612 | 123.949411804458 | 136.501159644992 | 129.410816809488 |
|         | 114.249891266241 | 120.752194675024 | 120.135349166633 | 110.382724813928 |
|         | 117.123891785437 | 117.754181884939 | 109.599589420575 | 121.263939656119 |
| NCAN    | 178.055019987648 | 165.386056999339 | 176.449549075475 | 172.631499322646 |
|         | 173.38031514498  | 172.030687707578 | 170.54511631708  | 197.526492324088 |
|         | 177.296424297967 | 167.293320986716 | 191.58185405868  | 151.535177950367 |

|        |                  |                  |                  |                  |
|--------|------------------|------------------|------------------|------------------|
| NCAPD2 | 261.171723011396 | 305.542978609337 | 357.672950588403 |                  |
|        | 338.026161865853 | 625.699971780258 | 478.606567465979 | 397.577760464197 |
|        | 533.54045706916  | 1158.88528996131 | 587.026042400878 | 389.500591134279 |
|        | 648.38049615541  |                  |                  |                  |
| NCAPD3 | 133.177950880393 | 144.853868519575 | 143.725497952919 |                  |
|        | 138.82269002406  | 294.22752955801  | 203.727455875381 | 179.358460170348 |
|        | 213.556015518863 | 194.22713184875  | 147.677900030844 | 181.400788152988 |
|        | 204.584643964409 |                  |                  |                  |
| NCAPG  | 107.466184687811 | 140.820807603291 | 127.797666392002 | 122.830376253922 |
|        | 406.816482069141 | 384.566987097657 | 287.334035234496 | 457.779218916808 |
|        | 529.529314022043 | 389.260166168847 | 198.004357069446 | 310.758803815671 |
| NCAPG2 | 159.856190281237 | 163.632148441668 | 182.665357598121 |                  |
|        | 190.281570660806 | 195.218005582618 | 216.24497587588  | 201.969002368045 |
|        | 195.795728497916 | 216.290279815413 | 221.561252012695 | 173.656241217331 |
|        | 221.253717494488 |                  |                  |                  |
| NCAPH  | 125.951927536494 | 124.29420915051  | 106.953841653951 | 109.817705421158 |
|        | 110.16174213285  | 120.204469421484 | 119.418866166776 | 110.602406076036 |
|        | 125.467668442298 | 126.326609619996 | 124.15094220181  | 121.344724993789 |
| NCAPH2 | 169.378422829858 | 172.531836863525 | 163.500384982242 |                  |
|        | 186.103491222924 | 180.336623146341 | 153.507553306723 | 168.982086590306 |
|        | 158.353171576491 | 165.380225715852 | 165.757295630254 | 161.614426723521 |
|        | 169.285901212492 |                  |                  |                  |
| NCBP1  | 435.095843349921 | 404.366325262322 | 417.615521090665 | 424.912426797488 |
|        | 616.339439383796 | 449.103432410618 | 404.618867159141 | 525.6579615077   |
|        | 521.30110104669  | 591.437752991512 | 517.993093601127 | 437.836503489425 |
| NCBP2  | 394.101052511043 | 307.665281863258 | 522.300029971277 | 353.005548289786 |
|        | 380.888728347647 | 409.073045356073 | 626.298707790229 | 720.907992182476 |
|        | 562.387692458382 | 418.574045635945 | 586.366632966978 | 437.770841893227 |
| NCCRP1 | 138.400536017182 | 148.895841777421 | 133.264245969185 |                  |
|        | 122.978576290038 | 210.882890077598 | 284.891415492568 | 188.685460181066 |
|        | 254.991678321253 | 433.314881387431 | 725.216684507759 | 417.024088698182 |
|        | 330.321113875647 |                  |                  |                  |
| NCDN   | 189.887788314879 | 183.464897811105 | 169.771005675296 | 223.311817085871 |
|        | 195.577739376082 | 169.496129800444 | 190.921283434627 | 162.347140552869 |
|        | 181.966110264509 | 181.354279096644 | 183.397833894087 | 170.446156541317 |
| NCF1   | 150.265385257579 | 156.961070790639 | 159.070355781276 | 166.741762854246 |
|        | 147.62157260418  | 150.538541347453 | 168.674809329231 | 199.209279169496 |
|        | 225.095016600703 | 175.269675831824 | 156.423687034312 | 147.060637536615 |
| NCF1B  | 131.863018503922 | 124.571807093748 | 145.354740501503 | 122.046901607713 |
|        | 122.265071206163 | 130.399501479248 | 143.193305421206 | 144.311620064675 |
|        | 143.5709409749   | 132.688531077861 | 127.938245853896 | 136.185953087697 |
| NCF1C  | 143.200939506995 | 151.780459290205 | 130.898067924686 | 130.977864137459 |
|        | 147.943844184702 | 130.154756165574 | 128.22735290389  | 177.32104138164  |
|        | 231.670761847089 | 135.923022674367 | 146.198331189991 | 132.517166202071 |
| NCF2   | 129.205783382977 | 147.483379646393 | 169.752525994991 | 136.386031133644 |
|        | 138.808591995741 | 164.478006648035 | 145.221594295772 | 193.124599671798 |
|        | 203.888365494623 | 238.124340832815 | 145.915129713165 | 135.839123867443 |
| NCF4   | 159.334165651951 | 146.157459765796 | 144.40361834862  | 131.945667475797 |
|        | 153.966815534288 | 141.500790455788 | 136.565191271943 | 174.991941844263 |
|        | 194.337080066417 | 153.328585916625 | 236.032288046282 | 164.357373919714 |
| NCK1   | 648.38049615541  | 619.380514697732 | 773.803350315426 | 553.368945998847 |
|        | 387.403502892897 | 395.786295710815 | 482.344514972063 | 584.813665097407 |
|        | 531.421912541822 | 1859.88000417483 | 395.261210769232 | 510.811470658575 |

|         |                  |                  |                  |                  |
|---------|------------------|------------------|------------------|------------------|
| NCK2    | 586.246004571452 | 671.563789496889 | 472.405334652317 | 626.104755496369 |
|         | 492.207833630086 | 458.953009417683 | 442.766704003254 | 418.319283832879 |
|         | 395.927222009721 | 564.948126039762 | 471.598175637494 | 410.645457106122 |
| NCKAP1  | 271.615621030842 | 260.356834114611 | 473.260534978556 |                  |
|         | 270.490971664802 | 242.141362101262 | 640.255747986724 | 352.354687089427 |
|         | 345.565843875296 | 331.523536427527 | 614.514126276981 | 224.963277964548 |
|         | 475.038389500056 |                  |                  |                  |
| NCKAP1L | 377.951523644306 | 256.590289281076 | 351.337287690674 |                  |
|         | 258.632372536866 | 132.801619479245 | 157.148880624381 | 152.887471821971 |
|         | 271.858059712406 | 396.611050163857 | 168.897620634337 | 188.277563426829 |
|         | 168.398366575579 |                  |                  |                  |
| NCKAP5  | 138.077358032961 | 148.100508271232 | 133.871685084945 |                  |
|         | 144.643770374264 | 143.031909545902 | 136.986022901377 | 148.582022536314 |
|         | 158.795335941084 | 144.237691418911 | 173.782474972742 | 151.55812886168  |
|         | 166.904990069484 |                  |                  |                  |
| NCKIPSD | 199.798533722581 | 208.125844007298 | 236.617896560938 |                  |
|         | 221.685824197352 | 393.500781010617 | 187.280334341504 | 274.235001739215 |
|         | 204.378245089766 | 242.471259857978 | 289.164969943385 | 252.473612525884 |
|         | 201.593025256991 |                  |                  |                  |
| NCL     | 1261.61611961272 | 1131.22418479945 | 1225.33666840349 | 1251.56853099362 |
|         | 1221.58522138654 | 1204.32784721885 | 1358.29475573637 | 1024.59845685519 |
|         | 1382.95068105649 | 1881.90353127141 | 1390.95426299323 | 1863.96986643676 |
| NCLN    | 403.582461109859 | 510.972389503051 | 398.971838949075 | 663.451243037105 |
|         | 1769.6386910047  | 735.165830487162 | 631.819659701092 | 785.008529077795 |
|         | 670.097523566652 | 792.634423781309 | 627.803400871547 | 608.959089074987 |
| NCOA1   | 480.484639351046 | 510.659785046811 | 467.347509383673 | 539.008286968106 |
|         | 319.417555901733 | 333.592915218163 | 316.590387560909 | 429.351447428661 |
|         | 252.197271817794 | 282.742833166843 | 226.086733606951 | 311.337303524912 |
| NCOA2   | 131.106613067333 | 117.539640414775 | 129.906744036052 | 119.866898356501 |
|         | 120.252164075308 | 134.084602409011 | 122.343979874508 | 133.604705630582 |
|         | 138.394923932916 | 155.908951665928 | 134.834641868502 | 135.391788614828 |
| NCOA3   | 442.766704003254 | 436.222568287601 | 395.716879127149 | 511.113083958771 |
|         | 354.531898366438 | 726.731270955732 | 1068.63350031223 | 571.64723305848  |
|         | 608.129959758538 | 616.701037274509 | 628.485648053393 | 501.738490253982 |
| NCOA4   | 4836.4008757421  | 4621.99241522677 | 5714.36902486392 | 4641.8793590085  |
|         | 1737.57015396357 | 5609.58233117244 | 5281.353685715   | 3734.705550862   |
|         | 5506.81944079182 | 2760.57475805426 | 5327.13051940508 | 4299.06288109563 |
| NCOA5   | 443.343806055858 | 482.592481827722 | 366.073387075385 | 520.761305892651 |
|         | 467.777995124655 | 439.492285515997 | 414.538237455116 | 348.067061666237 |
|         | 354.705553237406 | 265.470314691221 | 355.290621188435 | 345.062426573519 |
| NCOA6   | 885.927972780392 | 930.25842384208  | 974.007008568051 | 1175.27165286568 |
|         | 599.307072499899 | 848.620986404914 | 1062.03157932144 | 1166.86593572716 |
|         | 697.97116981445  | 645.438835606933 | 727.425595270342 | 761.586663689579 |
| NCOA6IP | 164.14265547147  | 169.556358586336 | 159.957371011316 |                  |
|         | 147.691011072898 | 208.237011955037 | 175.372355078713 | 193.554028681854 |
|         | 196.802641002079 | 201.105520537151 | 159.504327477065 | 202.622747952763 |
|         | 201.773745532242 |                  |                  |                  |
| NCOA7   | 450.468410589415 | 600.757699463777 | 359.991823789356 | 336.898462056187 |
|         | 417.865461351681 | 908.704610877319 | 839.901173743755 | 406.998800177456 |
|         | 502.281584081805 | 607.979208454176 | 381.323457262383 | 619.487800014979 |
| NCOR1   | 218.350166753833 | 194.488249052694 | 261.89195025254  | 193.660159482867 |
|         | 171.106189029362 | 235.091443641056 | 187.769988580599 | 190.031339775209 |
|         | 203.983168778488 | 230.672056810885 | 207.560911665319 | 189.49408026215  |

NCOR2 1141.13648305827 1304.37930719411 851.221199352646 1690.96371604294  
886.517088614968 337.39574303968 483.699436940387 348.848550937417  
583.192225756596 547.681206272188 352.121800955822 461.143361255467  
NCR1 115.18875509198 120.082391311921 132.063395162855 119.229322984564  
128.78647242525 122.412141495264 116.773599713111 121.246967460178  
122.512587751135 125.884565343075 122.821563586744 124.403662787819  
NCR2 137.988325215021 140.211016178402 146.10417547509 148.692602243778  
138.631273903053 139.907840403521 139.150209111606 120.122719226116  
131.285279061742 120.812738312059 139.365595511181 136.251820364823  
NCR3 126.845048064014 119.01559016005 124.625603721372 121.441901286752  
124.080382291282 117.22284971665 131.859204862396 127.966883271903  
135.539516564142 128.023203858837 125.870730238298 119.01236045062  
NCRNA00028 129.767878283811 132.369872013432 138.167369090026  
133.197002327259 131.470883854661 128.714459781294 136.881019970399  
144.798664281991 119.382151435379 141.819762045169 109.96017424123  
156.934589811742  
NCRNA00051 120.288469716375 119.603565559838 113.143436184959  
145.496033735748 120.106270603148 148.553324405123 134.060214479265  
132.423043364573 115.51493368527 136.418105816557 131.856313046545  
128.044165393924  
NCRNA00081 156.368487784719 160.67285689491 172.677083810424  
156.66832364923 163.51024840263 161.891809608511 170.602603155092  
158.459129254226 168.969180646603 159.420533375725 173.951605889009  
166.489436134841  
NCRNA00085 618.829716818725 500.343476678562 598.647226284738  
571.838717184447 257.602370597316 430.220363263561 376.124744806171  
162.975988989106 450.220658078322 196.922837906592 250.217137496422  
384.16579891756  
NCRNA00086 149.576563410584 144.781438651649 145.107068919893  
156.324643994552 134.182902752156 146.777258330572 149.609501725707  
136.039076665712 150.920224503051 130.344292132363 159.633987751501  
138.036876466521  
NCRNA00087 159.235289396705 170.661808797506 153.807525239478  
160.724319010751 152.713528089347 125.780294378066 168.882806817001  
132.674061422332 130.816301920872 170.401653214867 164.630705813584  
148.87242524521  
NCRNA00092 204.770742504612 203.357914242777 188.322853571195  
222.736706411035 197.489903263216 183.583432296209 379.546197364027  
191.365014963729 184.223623297663 167.243544185778 366.007451523992  
200.179796117115  
NCRNA00093 146.460464282676 133.651203764842 130.219888837397  
135.54708602175 127.055165613236 133.389930962407 132.475414208533  
139.372441366224 133.195030751476 125.539199863559 136.886677060418  
139.094167748687  
NCRNA00094 182.248178961707 195.400963839097 244.766289564524  
218.896760804208 224.851680313689 169.777032044409 185.984938124891  
189.192494970145 169.661107080542 195.239829623017 156.18389905051  
169.077657790409  
NCRNA00095 167.025336068642 173.599961799334 169.220974415101  
197.308952757609 174.690052785405 204.347931209047 238.068308163643  
196.889520085412 246.061496821699 159.811778680604 257.5097052677  
192.046442148183  
NCRNA00099 138.620617643924 150.093684245826 128.599254558082  
128.63301490285 129.173772079264 143.827500301207 131.608580511282

115.954828435072 118.283346939564 127.086470811408 150.059862107155  
131.910285685889  
NCRNA00111 142.680136733947 131.601823550269 135.516856254532  
134.243435358729 147.077695919758 138.011923055019 141.706292773073  
142.534195262988 149.141033677244 145.801228425692 138.452698593232  
133.567630962178  
NCRNA00112 112.710573586525 126.37572518012 123.781002620866  
129.956519535525 136.009969058857 134.304545258148 136.133538781918  
116.65880728655 126.019246614944 130.816301920872 131.977212025523  
131.256325361974  
NCRNA00113 129.603952706231 120.402155551818 137.074564265915  
125.865974180252 122.262664384198 108.131097605872 115.713909155043  
116.363556872071 127.8514513762 134.445893291422 116.476747183738  
122.095978653755  
NCRNA00115 141.647300896529 153.714902281332 144.578454791104  
128.466244127634 127.605805815475 155.715728894101 125.40832206502  
129.930888107958 120.925930409474 135.303322290834 117.688941284427  
147.4182675362  
NCRNA00119 148.245974323625 136.013989349192 138.401406375804  
139.900523831258 122.595766303833 139.350622585937 140.947852529815  
139.265915951162 137.881776548665 151.581593330224 156.602240897907  
137.332729889295  
NCRNA00120 131.928871107722 121.696353230886 132.243900762936  
133.348510114432 136.970505971671 172.222262910052 119.432201417811  
125.967294930279 127.277128410056 140.481148289418 119.922676683808  
137.584340154725  
NCRNA00152 145.580238427531 140.639012372681 151.59103070964  
143.543607779991 137.966987037709 144.634118305223 130.98982984989  
146.493927564338 144.669509071181 158.149226045408 148.755559144241  
147.971492964243  
NCRNA00153 543.710330214344 496.560127152436 647.273409499313  
556.863361789449 201.235056368151 193.16411905957 228.45211887819  
207.764456828813 178.027417594263 241.648044508699 311.916199912898  
133.252140649104  
NCRNA00157 138.094719587545 129.452826518288 159.35787888191  
143.583650664594 126.623026026721 131.345038923753 136.584199831088  
137.134190411005 126.737230874367 141.408545519654 152.890239929335  
144.572485418264  
NCRNA00158 132.91094012928 137.904786382385 141.21138348075  
131.611842804029 137.52653395793 119.810421687953 129.431497372577  
142.284050423299 129.880696706381 139.3465236423 128.16147857336  
129.135985676046  
NCRNA00159 131.956481591804 131.12775424877 123.119524624735  
128.023203858837 134.790410101679 144.498245098592 146.772611341214  
131.423918669689 139.834535091869 127.189310473419 132.313884627836  
118.807135693934  
NCRNA00160 142.282861913548 135.419628087842 130.425809387444  
137.483830932387 136.222421297872 126.523201566273 143.785769607842  
124.090268443064 138.704839659727 141.640292723776 136.817517693076  
133.780423932326  
NCRNA00161 151.176697752603 140.759006929593 149.151791028837  
130.625825024195 153.271518348258 137.612446150193 141.799236109474  
148.192121257421 148.934593102452 139.55958357361 131.715579653796  
149.44520146627

NCRNA00162 142.221542344035 127.44620898647 142.872683795338  
129.059722322306 127.8514513762 121.799209715087 129.995417218564  
145.530904040477 128.407968177242 129.763063900493 129.405749374776  
119.475462713424  
NCRNA00167 140.74208906156 119.525701528869 133.043503979161  
142.688809469455 143.660679324057 163.039564280484 137.054278745724  
139.188234030711 125.569364049349 135.135834717193 140.930897231705  
137.129864761402  
NCRNA00168 157.919709478746 150.711857623087 154.469132478321  
163.22059466037 132.7284396337 145.223648967115 142.866874321248  
137.468570135972 141.299677389827 147.086734464001 140.397184813186  
148.038291195414  
NCRNA00173 141.929924728222 146.363991934916 158.282899758551  
168.261511797218 131.856313046545 148.638400592682 146.579073345319  
148.723165059122 144.736213465651 168.660907237558 161.229621453539  
139.22543724535  
NCRNA00181 125.982423431253 126.409995188106 124.083648029911  
132.695992860853 123.02167644694 120.402155551818 122.438438464097  
120.918190840083 126.786434897401 129.520140995675 120.106270603148  
123.554769032715  
NCRNA00200 187.700723296295 175.857952663383 174.406779990708  
209.304654633004 189.693218759349 168.314966639178 175.98210925643  
162.955366577418 169.408892048115 190.077302802065 167.430767074847  
164.327140372968  
NCRNA00219 1587.84395475807 1507.39761667421 2358.46955614953  
1109.79571066685 612.06231165648 474.629173435475 2452.1304336603  
862.132582849511 613.063954859056 1638.72366638732 1880.35608492553  
1434.1439428394  
NCSTN 1215.96648642927 1403.09138858507 1303.94157493616 1277.0921553877  
2670.9151276786 2511.04500638697 2390.41825815872 2656.38138490746  
1896.69856822105 1720.14021303639 1912.2369374258 2486.24762158293  
NDC80 145.496033735748 193.37618381669 145.409722106953 152.483240622367  
407.589300080181 327.251620296271 178.512206531256 342.487952136318  
269.927694984528 240.224826736571 181.354279096644 273.478372861114  
NDE1 369.018856220394 401.102586700919 291.839070398338 298.209907157762  
427.452114719877 439.023181761356 388.416668785633 484.764806127211  
380.053166305637 664.025683218037 365.650071660806 347.292438587205  
NDEL1 1028.39666838369 843.545962045705 852.649997188692 772.061917233344  
468.82816089485 714.91842349236 523.073926509865 642.647554580301  
643.468308027006 1593.49895307361 586.642581067137 504.502047826003  
NDFIP1 333.533043832976 340.547010951537 347.812754957414  
310.426513884979 177.333305785248 267.839640412797 400.676876982655  
236.141982516399 226.020769172424 389.853534237748 312.645778869254  
250.217137496422  
NDFIP2 347.487059316081 455.313553278155 471.510683045651  
265.992741398183 605.040026490154 2398.71483410593 1726.15788525017  
1080.95725397659 2295.16438420175 1353.61552261489 1381.07447204233  
2956.63335018838  
NDN 1949.60516542965 2174.62979843528 2605.13680290987 2162.46602203822  
1377.75266942574 255.527764534636 177.343586047942 321.119758814618  
816.580880338838 461.940616438547 400.98290237416 223.184064606222  
NDNL2 198.374163029174 182.529167529936 230.620456579897 186.244764337256  
254.101184686036 189.552385508772 208.75656341402 193.544035570799  
185.41739522833 176.650953513413 190.22021453133 192.860161535869

|         |                  |                  |                  |                  |
|---------|------------------|------------------|------------------|------------------|
| NDOR1   | 110.368392735494 | 112.78323842342  | 120.918190840083 | 120.241528853563 |
|         | 129.583916648999 | 114.504409331018 | 123.439897913722 | 117.071585083051 |
|         | 116.784024112826 | 116.428373788459 | 115.702900810606 | 109.318922864507 |
| NDP     | 150.690143057308 | 164.309588213547 | 150.906106695444 | 168.013310840048 |
|         | 176.194292036542 | 141.004467676795 | 144.062079886084 | 179.794718712964 |
|         | 245.607130404306 | 146.042460762767 | 115.321501844663 | 169.705236302448 |
| NDRG1   | 1912.2369374258  | 2567.4299860517  | 1753.58770316818 | 1804.63762008613 |
|         | 8096.28093399619 | 1677.93424842267 | 9272.37780151073 | 3876.04966263281 |
|         | 3515.36256599555 | 11598.65499235   | 2219.71846304201 | 4081.13406129846 |
| NDRG2   | 680.743052197025 | 634.906566690042 | 703.29965727829  | 657.058213650454 |
|         | 961.931130189779 | 272.500572765647 | 525.515169794593 | 377.593087606046 |
|         | 556.568221094639 | 264.654879741889 | 534.083703564903 | 385.317560758502 |
| NDRG3   | 446.509863498357 | 444.712990986138 | 444.192734921566 | 439.727046291381 |
|         | 323.51769984082  | 485.731287873723 | 674.742955681908 | 331.888150158628 |
|         | 322.263925912805 | 362.095074331893 | 426.032234135861 | 324.401611136662 |
| NDRG4   | 150.648444878067 | 163.41031443893  | 154.43808450305  | 154.584367902971 |
|         | 164.116142541038 | 176.183165494563 | 179.582086214179 | 172.045843691642 |
|         | 152.8810245209   | 317.273940108333 | 238.548578086943 | 182.919385608842 |
| NDST1   | 220.345184229077 | 212.822328466993 | 167.157420848604 | 245.582279957584 |
|         | 259.184713471619 | 161.160974998803 | 160.261708910517 | 173.169905329013 |
|         | 161.195562296834 | 203.831047867731 | 155.397301207102 | 166.64535048582  |
| NDST2   | 266.217879616686 | 295.507504000509 | 236.292053621233 | 330.080428155378 |
|         | 326.379855547052 | 174.560168983121 | 353.674560414317 | 205.871133967588 |
|         | 212.987082617173 | 223.389795643722 | 272.16090053595  | 282.604890044452 |
| NDST3   | 145.03804642447  | 147.281035392817 | 149.300089212177 | 141.668101962049 |
|         | 130.411849432351 | 145.142331981651 | 163.600888221193 | 137.27298184582  |
|         | 136.874135348635 | 131.545287070888 | 143.318291243905 | 139.324006489527 |
| NDST4   | 135.226240774124 | 161.208713751942 | 129.322481607056 | 145.23242365333  |
|         | 139.691470247318 | 167.791351000743 | 139.736465430177 | 148.812015298003 |
|         | 139.42531690926  | 130.877306095063 | 140.38936578649  | 128.793186785667 |
| NDUFA1  | 4043.28299602858 | 4141.8682669995  | 5425.58761099475 |                  |
|         | 3890.14358014877 | 7681.48027081818 | 7082.28969354712 | 5789.71932579854 |
|         | 7016.12801650552 | 5874.57722671552 | 5825.9968524214  | 7144.3257417116  |
|         | 7902.9189607838  |                  |                  |                  |
| NDUFA10 | 567.317223907142 | 533.279122416818 | 635.234445318087 |                  |
|         | 690.246312542011 | 538.369868115137 | 557.868300839263 | 569.47446215213  |
|         | 425.969575503375 | 572.753294955207 | 885.713964813911 | 760.070180572621 |
|         | 727.114956464515 |                  |                  |                  |
| NDUFA11 | 1488.37146754184 | 1574.65731564294 | 1724.22121078776 |                  |
|         | 2084.44431604433 | 2502.72913594103 | 2192.17997650999 | 2213.1043022626  |
|         | 2005.76678571689 | 1828.66165670455 | 1971.42527720714 | 1309.7660860424  |
|         | 1850.98311401165 |                  |                  |                  |
| NDUFA12 | 1482.92498205315 | 1441.29676998365 | 2530.00219297102 |                  |
|         | 1567.89763050645 | 952.357976050712 | 1990.94596595493 | 1580.27059464289 |
|         | 2808.78353621111 | 2462.87034563426 | 3122.71790981947 | 1530.45813438919 |
|         | 2305.11856249143 |                  |                  |                  |
| NDUFA13 | 1077.33874251157 | 1261.61611961272 | 1080.42884514937 |                  |
|         | 1577.15895478896 | 4047.99200599472 | 2670.9151276786  | 1459.31031099055 |
|         | 1780.97169244555 | 859.547169028149 | 1285.54492194393 | 1468.50184641042 |
|         | 1574.65731564294 |                  |                  |                  |
| NDUFA2  | 1630.1630053946  | 1787.32566525551 | 1622.17491781572 |                  |
|         | 1897.92061704124 | 2139.42448145954 | 2583.46653460894 | 3793.02341602102 |
|         | 3173.14004739767 | 2021.92898855142 | 3099.71798305764 | 1809.58702081877 |
|         | 2249.8123426309  |                  |                  |                  |

NDUFA3 1975.83062789692 1999.10320742823 1858.12855367119  
2456.36776585765 6851.54963413886 3315.21586182496 3099.71798305764  
2648.41012401723 2982.80580616089 2086.15449885278 1074.96415574964  
3232.96611074938

NDUFA4 7245.25086222102 8072.83367137971 7406.86318549013  
8881.86480594052 8496.2506227676 7371.9761952537 4749.69040198959  
8211.38792799248 6368.23123771343 4641.8793590085 4562.75659565027  
9994.54490550759

NDUFA4L2 227.375773052577 366.240941980786 155.023934989559  
355.048838683854 332.798130757632 347.932135290714 177.831718771025  
655.094843900848 537.828979447378 8140.6363797934 344.856199123543  
2833.30537635103

NDUFA5 190.371287639453 191.200215655114 191.543371466252  
176.465559710285 148.715065348779 155.699649538664 155.530415929059  
161.793144242885 158.278496385543 161.310855691717 179.198164545975  
175.262884960324

NDUFA6 1109.08288440559 1064.12835214671 1279.9555644913  
1230.63920848575 440.319777672273 600.430996779799 405.183882455109  
600.635914090365 478.040234382488 485.309521583972 527.226517960073  
780.105135529728

NDUFA7 317.550000625189 350.22221782412 346.173614351499  
427.390091157726 717.025533065694 715.039905439621 793.501244347257  
558.440840319738 630.670530516275 486.425387717472 446.07651799079  
689.590642377619

NDUFA8 2523.91287654539 2340.90990677253 2877.92845389611  
3157.98451877581 2258.30916111153 1577.15895478896 1561.87054049124  
2069.70335195314 1751.22580157752 2159.2992548378 1823.53870218167  
1296.10827265334

NDUFA9 682.075583857856 796.699879495384 750.494286476465  
935.042067053226 677.503643398297 809.362464219294 640.255747986724  
980.120729515821 1186.23169583595 711.729857540712 1093.21579738952  
975.685771692095

NDUFAB1 2446.31228564539 2871.34694522381 2406.67187918735  
3232.96611074938 4110.76546218806 3552.78712528922 3304.82581034038  
4327.90939653054 2988.45928881468 2741.71904421456 3055.80298721424  
4068.18567686753

NDUFAB1 287.924891622962 284.764628939128 362.65285317327  
312.129861040709 250.911817769829 349.65350886897 325.493177980483  
376.374248850987 379.862305342147 240.511797905018 349.65350886897  
323.391456630794

NDUFAB2 807.604205890244 728.743541467167 948.734577648136  
805.120147618984 464.907454552364 741.433093896472 722.399669963921  
357.191675549592 386.544913399837 917.188039935737 511.113083958771  
644.301665020526

NDUFAB3 815.779445689417 920.342429282889 717.025533065694  
936.560290736127 2811.84191700516 629.381791489871 1453.88161495484  
809.362464219294 1843.76920134139 927.478050257292 848.620986404914  
1094.67740173529

NDUFB1 153.585849286113 146.692827583525 133.86835278231  
156.813992534584 183.708917501519 151.10837100314 137.243175880462  
170.516743115762 143.508657511633 163.442257036536 164.313238416498  
219.597808863947

NDUFB10 2988.45928881468 3552.78712528922 2863.51286169094  
4602.81651147558 4527.53010866974 2845.0377634896 2758.01526530661



3309.66193624859 2230.45015969936 2427.21100330388 3232.96611074938  
1929.52146517699  
NDUFB11 1464.04124596264 1582.0221231161 1258.7730046784  
1944.15673951528 3727.70199176703 2744.77453865893 2246.89876694944  
3211.2719052157 1963.23068846837 2116.39371296122 2332.98074920207  
2601.89405525276  
NDUFB2 3348.7622174821 3315.21586182496 3765.25491426198  
3954.24763752814 6312.36452724398 6441.13602696535 4520.84412831414  
5947.89821087362 4690.93553472125 4022.23000497332 4923.36698713285  
7292.0342195035  
NDUFB3 1827.03179366146 2007.0121037284 2210.67250954072  
1951.69651954627 2065.51724858579 3528.62443098065 2599.421026133  
4323.76731419005 3184.98944679038 2979.27692778783 2096.25803773108  
3775.41389938231  
NDUFB4 130.928718312512 129.247701136266 143.839170216353  
127.900901613784 127.898533598679 141.209958892647 137.874370839801  
137.681280789305 144.470642732973 137.838096997956 125.810756286648  
143.195338329759  
NDUFB5 1787.32566525551 1673.5387396582 2596.43650409044  
1375.76915021882 1717.09434498876 1858.12855367119 2871.34694522381  
2751.75479578587 2645.72125268628 2882.51330563735 2874.43919426772  
2819.92361643968  
NDUFB6 580.996071040561 560.481802403627 801.52891824571  
589.722914993267 483.312894744803 896.625415670455 514.922742487521  
869.245621105614 662.958637409597 987.564350211893 549.359675306309  
546.841563406813  
NDUFB7 2360.87760349888 2430.70635781622 2421.87041217217  
2952.67114077688 5609.58233117244 3570.21370790206 2124.12760841901  
2694.98079256089 2159.2992548378 1934.30779703747 1683.83803339436  
2316.49886419499  
NDUFB8 5846.17594234628 6339.16392696068 5467.84611694564  
8163.29201165065 2956.63335018838 2299.23805014176 2720.83642320419  
3033.50962589321 3000.46298223166 2601.89405525276 2468.47687203968  
4800.99572384569  
NDUFB9 1531.54387233661 1692.01248523526 1782.2498613913  
1704.25279485563 1119.23362648056 1699.8374761666 1146.3535752748  
2213.1043022626 2001.92441724356 1303.33810980467 1836.22560264874  
1934.30779703747  
NDUFC1 488.505191823403 508.127470400078 544.30845362168  
507.56875910742 481.86545778383 708.056533282983 812.298381693378  
750.10819423982 801.051513639714 809.362464219294 755.42757464615  
804.362909579005  
NDUFC2 133.236084190243 137.701271351806 146.013430937168  
138.466136108202 152.709021529522 161.992141305029 160.368226341458  
135.812301062763 155.056545639862 140.728126380228 186.406439948242  
147.505345299689  
NDUFS1 205.546628064296 169.552424961465 241.353916553991  
162.656951764783 167.315702949236 312.129861040709 180.658930225735  
250.25959091612 194.257024100927 178.804669910283 181.003812824014  
248.887522059485  
NDUFS2 201.81649023518 198.760049629983 195.20398666139  
237.825857080173 227.267783818298 240.94056877904 201.289402228512  
308.517561840596 203.943245360496 216.102897582821 352.354687089427  
260.955030428944

NDUFS3 2355.29862638453 2760.57475805426 2369.233048505  
3262.24877138481 1658.78888936164 2099.85702995194 1996.65760745757  
3608.10730106542 2104.59597571915 2418.66999907188 2369.233048505  
1840.14350831655  
NDUFS4 1753.58770316818 1892.8338612507 2677.17579532816  
1940.42283070543 1001.65849130836 1114.85422895959 2291.40912229281  
2900.55309635211 1331.18605673705 2804.99820187198 2267.0818302379  
2779.89882032092  
NDUFS5 4697.94415026712 4635.42002659719 5138.28186306948  
4043.28299602858 4759.17973319588 7332.15849011291 5981.08862268291  
6296.24208225227 4110.76546218806 6114.33638002734 3417.22292085668  
7167.29945083872  
NDUFS6 125.14833026167 119.092335265325 120.027996187915  
109.318922864507 128.649329515033 118.379914726645 112.534864678892  
119.01559016005 118.04359489354 113.199690522854 131.693923403533  
119.312201620247  
NDUFS7 1149.90248188644 1443.68785521063 1381.07447204233  
2093.67403119512 2171.00457877604 1281.1883621512 1002.88224342342  
1243.96721244424 976.050097371579 1206.59866455529 910.087388930485  
1350.87073284396  
NDUFS8 3200.61067185412 3608.10730106542 3258.07532987071  
5437.78386044638 9527.86367804896 3963.40575974446 3246.86605825129  
2816.29814823646 2837.36293710422 3226.53426370323 2225.59207490574  
3917.05893989806  
NDUFV1 1345.8970795036 1578.87371296418 1747.33558205825  
1774.22769195939 2970.34597432588 1632.84261181074 1274.39152410752  
1306.20183851747 1126.46241487062 1625.55754007235 857.55777793754  
1612.79779117655  
NDUFV2 1681.54485582868 1759.9632914516 1571.87128697931  
2016.52142068599 3251.62784659994 2332.98074920207 1736.03342040646  
2515.7035557541 2399.88695085752 1590.87426068638 1892.8338612507  
2219.71846304201  
NDUFV3 164.225562434885 175.510160114891 180.008152341531  
186.747375844319 167.260319361746 166.085469368498 188.767121505943  
164.99860393383 183.708917501519 164.593531655305 174.962380276394  
161.713311969291  
NEB 129.529372508883 136.660600727111 146.57274511202 162.716712951629  
183.64389891975 158.915858403237 150.645487532549 165.249658565871  
164.929445749888 139.693261291326 138.728765780512 230.855806094267  
NEBL 149.639835429332 147.038700869156 142.837688062688 143.976395954528  
167.612577768782 151.823845684041 144.558151519547 136.410841327254  
168.013310840048 212.171281020103 151.993651822163 144.958176005711  
NECAB1 152.640683776403 165.673535349675 198.783034238774  
172.355215322173 168.188793271919 166.404164069728 146.446922196868  
162.828844182372 157.838771553729 158.863516051439 146.455182336561  
167.887047631073  
NECAB2 131.442186260672 136.475652722007 134.201392031199  
130.235407859542 138.813126946007 130.138945493943 148.299945894738  
130.306478656159 140.968351978909 138.8603234411 127.135199316758  
118.966992191892  
NECAB3 212.107842040568 247.111032124864 225.362253409428  
284.236970342827 339.252515920242 171.298701141684 242.570588364106  
181.500222423634 153.308956040034 155.449724554217 168.511517285223  
151.210814209064

|        |                  |                  |                  |                  |
|--------|------------------|------------------|------------------|------------------|
| NECAP1 | 536.253405705975 | 555.259469428492 | 456.817057099146 |                  |
|        | 444.826775824095 | 372.894376776771 | 699.984140389009 | 571.136519973808 |
|        | 661.545179083009 | 902.394410348792 | 631.106334754678 | 665.106631364961 |
|        | 806.591035100794 |                  |                  |                  |
| NECAP2 | 422.12964420709  | 481.037647470809 | 336.279209908669 |                  |
|        | 458.440488401029 | 417.528353577952 | 506.290241222253 | 553.368945998847 |
|        | 497.916883763059 | 674.338740875512 | 439.852826905352 | 638.129080224049 |
|        | 582.642500194997 |                  |                  |                  |
| NEDD1  | 154.985781979984 | 151.473239782301 | 165.866987051333 | 155.548684011748 |
|        | 146.763046352405 | 170.465177938235 | 178.847858667374 | 170.79303550487  |
|        | 165.467462247066 | 188.378996128521 | 153.443397882028 | 162.71020036416  |
| NEDD4  | 166.135707525987 | 167.776363541939 | 180.590215659031 | 153.962758393332 |
|        | 136.711382832269 | 154.874899874233 | 172.329225247019 | 154.366071635971 |
|        | 151.421099926743 | 153.574068503306 | 178.847858667374 | 143.13304460184  |
| NEDD4L | 349.540558521616 | 450.688800547981 | 405.64711132293  |                  |
|        | 344.915370555826 | 232.200025766422 | 364.022018936132 | 378.151202933526 |
|        | 570.26564132238  | 664.60530723006  | 208.869189492052 | 827.863789600981 |
|        | 412.129826478453 |                  |                  |                  |
| NEDD8  | 3510.24464112094 | 3501.86788138647 | 3450.46728258139 | 3495.66977000028 |
|        | 3869.12225821096 | 2350.01764791897 | 3618.9385126441  | 3545.8833678963  |
|        | 2691.41389079777 | 4291.1724030909  | 3015.70954394585 | 4367.38154535901 |
| NEDD9  | 209.811693771836 | 189.726075394359 | 150.981208776163 | 189.292740365891 |
|        | 274.371523790341 | 206.203717450138 | 348.457808063307 | 198.311821616128 |
|        | 225.96618659877  | 139.55958357361  | 201.337186768645 | 152.929272096375 |
| NEFH   | 180.941090529551 | 170.737352030035 | 159.379420001197 | 161.229621453539 |
|        | 158.377396672742 | 138.820797333519 | 154.814400491704 | 128.833756478439 |
|        | 146.058477355527 | 157.306022722324 | 161.017267304159 | 154.598520288855 |
| NEFL   | 150.580133889656 | 162.502895638492 | 147.183889426843 | 165.092451754065 |
|        | 163.198834359304 | 171.358746749715 | 148.578012060425 | 146.431166706908 |
|        | 164.164463389212 | 131.915864620669 | 157.474913177177 | 153.787447416111 |
| NEFM   | 123.055210862247 | 117.962188157317 | 117.770032157393 | 122.392159083328 |
|        | 126.340955733062 | 229.62164568989  | 175.626096716758 | 126.952836653857 |
|        | 108.497209666203 | 124.170242736875 | 146.984888309556 | 134.58308783752  |
| NEGR1  | 187.425086057782 | 164.755896698569 | 186.722842989058 | 161.530878860883 |
|        | 119.13963074637  | 112.858669660245 | 109.740801301993 | 114.378420394004 |
|        | 107.187035835972 | 110.718864165172 | 112.809629077555 | 110.678680817471 |
| NEIL1  | 153.214696479001 | 163.919426088318 | 158.708054164813 | 154.990319019521 |
|        | 171.579123521304 | 181.593291870136 | 201.269380130546 | 156.961070790639 |
|        | 176.236140830355 | 180.15338103     | 177.182321788711 | 176.506227858258 |
| NEIL2  | 346.411586524655 | 354.531898366438 | 344.786541451395 | 344.529927973082 |
|        | 330.703588385626 | 247.015574724901 | 281.405355165228 | 277.285526811736 |
|        | 190.66473033826  | 193.428733288774 | 318.690043546203 | 208.406980186223 |
| NEIL3  | 135.771423315597 | 133.689255383855 | 144.498245098592 | 145.432667767652 |
|        | 140.732618320154 | 136.829137120584 | 158.188039933865 | 147.208176455806 |
|        | 160.215396651606 | 155.669470674985 | 140.416247564103 | 153.832132196284 |
| NEK1   | 352.897241809959 | 361.829819621662 | 392.365008240567 | 386.461076717316 |
|        | 163.668476670167 | 200.456087759904 | 215.426918011158 | 226.43414383055  |
|        | 236.772907994543 | 209.867189613436 | 252.919704128539 | 220.896363324634 |
| NEK10  | 135.467354817201 | 144.237691418911 | 145.468654174037 | 143.440420261133 |
|        | 142.812521349963 | 142.000874773182 | 141.939368369872 | 144.801071221985 |
|        | 136.356895672212 | 149.921414617149 | 148.87690497281  | 150.893280574091 |
| NEK11  | 166.587100972754 | 170.13453211897  | 179.55905250703  | 183.226294747874 |
|        | 187.812436252228 | 153.189490068047 | 169.752525994991 | 202.643624039869 |
|        | 177.831718771025 | 152.842777535666 | 163.198834359304 | 154.347332766547 |

|       |                  |                  |                  |                  |
|-------|------------------|------------------|------------------|------------------|
| NEK2  | 134.463094391766 | 154.618685493541 | 135.155955441604 | 151.992881963981 |
|       | 473.947538805454 | 601.018867455333 | 233.20900339048  | 328.401537339876 |
|       | 401.87674893993  | 248.690121805116 | 162.240414467004 | 367.439588680092 |
| NEK3  | 160.390564881326 | 157.909530751723 | 152.952479729682 | 145.524305076788 |
|       | 138.026155846749 | 144.529801006864 | 135.971507823633 | 137.485252316816 |
|       | 147.745780820004 | 152.808771946509 | 151.773749014775 | 162.312313953026 |
| NEK4  | 137.765042156434 | 135.857403020659 | 138.129281196474 | 144.570725886413 |
|       | 160.848201202361 | 169.619338456208 | 149.013011292165 | 162.247608931408 |
|       | 147.024759173313 | 148.060086496148 | 141.373059612034 | 144.496429994489 |
| NEK5  | 110.988514718572 | 112.957395064957 | 107.049865500702 | 107.344825308293 |
|       | 112.348094614855 | 111.161283080299 | 109.342230674869 | 98.6941019230576 |
|       | 111.975027473284 | 116.236538651031 | 111.65024009102  | 120.270397272069 |
| NEK6  | 525.138476928759 | 504.436992949763 | 437.122373082112 | 727.425595270342 |
|       | 213.215996114827 | 167.384121560438 | 175.832474809232 | 168.37850726499  |
|       | 211.22652563815  | 238.482863150124 | 152.232245164212 | 175.236826554583 |
| NEK7  | 115.409568875238 | 111.538651711074 | 126.247378598596 | 126.103561089901 |
|       | 135.5237675623   | 145.68886453261  | 129.902965506953 | 122.258432948151 |
|       | 118.064858133264 | 137.934850241054 | 116.282988576774 | 127.440987506769 |
| NEK8  | 182.478971050701 | 183.613051401168 | 141.954467306745 | 165.773929204209 |
|       | 250.443147156029 | 157.410205523901 | 197.262062021667 | 262.577672828611 |
|       | 181.840985962045 | 149.317146997809 | 212.836093887552 | 199.53455266342  |
| NEK9  | 111.232274546928 | 120.944267930809 | 125.727521491768 | 106.603674195422 |
|       | 121.728711587014 | 120.255081121925 | 117.423704591303 | 115.463150857002 |
|       | 123.868848032411 | 124.693253194681 | 108.62191665589  | 112.922918499398 |
| NELF  | 394.892918166519 | 444.826775824095 | 249.193270428348 | 633.762608454521 |
|       | 915.015154168627 | 282.101714660307 | 203.999142031297 | 180.240305360865 |
|       | 183.744959461078 | 415.322560616847 | 427.542390397986 | 254.315783394932 |
| NELL1 | 173.387549650592 | 140.007937555694 | 149.331805754859 | 134.333679772065 |
|       | 145.077517845584 | 179.15284184774  | 152.071081175788 | 136.792957035581 |
|       | 152.411545237204 | 148.808928892047 | 175.638328370133 | 232.414763435965 |
| NELL2 | 210.199788806189 | 216.582862850259 | 152.404186073033 | 154.849264978968 |
|       | 136.716554749722 | 156.453108485249 | 175.601912488918 | 172.641322197031 |
|       | 197.687858915757 | 1116.19403476786 | 151.895142552067 | 198.470718196139 |
| NENF  | 2500.07677977147 | 2525.90466050731 | 1974.49672149862 | 2360.87760349888 |
|       | 1887.82245931444 | 2558.91648313228 | 2437.63566094439 | 1030.97051104597 |
|       | 1275.43768532088 | 1920.16520804856 | 1212.55338792557 | 2511.04500638697 |
| NEO1  | 708.534025308731 | 669.602939159192 | 508.302878624289 | 596.934339406636 |
|       | 525.287367366192 | 431.182384100794 | 508.449904285771 | 432.604462607037 |
|       | 470.154677948419 | 557.702374840532 | 473.853999833395 | 544.107739610054 |
| NES   | 518.281245498542 | 523.216537391852 | 380.562212796792 | 601.018867455333 |
|       | 201.349209185128 | 215.950811436427 | 168.05687638693  | 179.203783335674 |
|       | 180.80811429888  | 175.469375624274 | 156.626742111441 | 165.885072907195 |
| NET1  | 745.153336165802 | 732.040299742444 | 715.638378711433 | 625.699971780258 |
|       | 843.075879568455 | 2267.0818302379  | 1291.12004949379 | 1001.35912007916 |
|       | 992.744093752678 | 1003.36623972843 | 1619.67820476414 | 1248.69137283095 |
| NETO1 | 136.48748813417  | 138.081268025435 | 140.296609941747 | 141.294094833197 |
|       | 142.472724215037 | 133.849237689264 | 140.756898474665 | 137.907709799074 |
|       | 145.780927034516 | 138.199559519849 | 133.475605284211 | 142.342811880173 |
| NETO2 | 124.735542880811 | 130.552857965694 | 117.231243105897 | 136.394920983439 |
|       | 197.341423434688 | 414.538237455116 | 272.927830312746 | 317.121202656311 |
|       | 359.162549472301 | 686.028214419557 | 241.418016203544 | 228.901579068997 |
| NEU1  | 318.971509860209 | 345.649572073924 | 281.846246549202 | 313.641656294638 |
|       | 627.526008812413 | 303.380479700334 | 881.561688713557 | 536.9324595176   |
|       | 452.843213944986 | 451.887564294551 | 382.401290201025 | 267.097999873387 |

NEU2 135.463385553776 150.238582112636 151.403431105471 173.599961799334  
144.191491000257 151.2639801322 149.086836205064 164.327140372968  
152.296774123599 145.324499089416 152.213746577124 153.45050352117  
NEU3 114.191245210321 125.894755032594 113.862790983655 123.015371659847  
110.428616140857 122.615852682436 120.918190840083 119.463337435512  
125.088717405087 109.781334128478 152.371569700039 124.757229519631  
NEU4 117.539640414775 124.516264338772 120.039031290299 120.076742232995  
124.83124879272 127.330523871944 133.659475650376 124.263901299025  
120.944267930809 114.76337651891 134.888404433315 112.000309477972  
NEURL 147.366877428537 153.46645509759 147.450681897766 202.60339529874  
135.333055517636 122.621839614189 101.431474941041 128.174382934295  
128.655549652719 119.669441891401 143.262288751967 131.031639119149  
NEURL1B 659.673052713372 1040.29664343743 873.408431189194  
1720.14021303639 278.88183549759 177.508603290389 228.025383952578  
228.766847429517 268.370347292603 345.062426573519 236.35479928448  
294.653534388707  
NEURL2 207.036293322882 179.060189557496 208.587188476069  
222.028626209166 169.552424961465 171.473538842796 208.955110569558  
175.946843919065 182.074569356713 154.496005175117 172.468440317443  
189.472541628897  
NEURL4 192.954269340616 211.369442150136 160.843325877861  
322.576886792502 169.527424356913 148.842322753916 121.640681916546  
164.38282966938 138.055909969804 139.404820141366 162.247608931408  
123.410467384598  
NEUROD1 162.732574014686 138.675023495021 141.302647488314  
177.94501172269 133.915830295107 151.188412354358 150.945167884077  
146.808519947394 139.690093593646 164.357373919714 145.643752002787  
126.349403754775  
NEUROD2 143.442361602626 155.371772547395 141.689210867136  
141.426756696799 150.784262878145 134.029984991385 143.419034484087  
146.539196738195 138.792521681771 146.271180025157 144.6567095695  
152.791390145148  
NEUROD4 138.182987173284 128.26957712082 124.883575464443  
136.349603320553 141.135840314665 130.714375454354 127.604087759266  
121.865696440776 146.95272087759 126.282575548237 115.02681415256  
129.353536603449  
NEUROD6 119.48998115497 125.542301916791 109.806338826826  
115.01682934323 113.119021336236 122.543903508753 121.965131419551  
108.226917034591 113.222264855561 119.278231442871 122.799487123057  
112.502812746669  
NEUROG1 157.524049610272 138.957548960075 164.571974509529  
152.552277008504 175.9219991997 148.911306526869 147.174977926293  
148.73620012231 140.222860564605 158.814407805803 145.158039427157  
147.562757301251  
NEUROG2 144.992993261203 159.832405510505 160.186527465164  
168.188793271919 184.111756696658 193.394225360968 168.139351579682  
167.07092218037 167.250667092211 159.788143847569 161.557558028531  
187.561298131124  
NEUROG3 127.001546144286 133.951322753098 122.547842148486  
139.555322603323 135.682971958096 136.246543311291 144.777043589925  
140.74208906156 146.035731780312 143.700865823615 147.307419859572  
139.1434049136

|          |                  |                  |                  |                  |
|----------|------------------|------------------|------------------|------------------|
| NEXN     | 2736.98692493933 | 1822.14935116363 | 2410.32095582515 | 2078.76377557352 |
|          | 162.955366577418 | 200.518684601283 | 172.20451139581  | 215.219246394594 |
|          | 184.462286724102 | 222.156471143857 | 237.734385188542 | 174.498521167568 |
| NF1      | 185.186497037695 | 182.560363283264 | 180.364089931995 | 179.369845168822 |
|          | 193.098116087792 | 242.141362101262 | 199.170488640762 | 216.209052148435 |
|          | 186.007710175103 | 171.267907653007 | 189.74261433647  | 216.181417552574 |
| NF2      | 125.381865040574 | 125.362754088168 | 122.917915232153 | 126.026938396257 |
|          | 130.49338418515  | 128.23910347716  | 126.340955733062 | 127.709638375626 |
|          | 131.421663453164 | 132.784949538167 | 134.41693612969  | 138.510722755317 |
| NFAM1    | 153.962758393332 | 134.122776198036 | 131.228779762508 | 137.848546040474 |
|          | 140.583804906052 | 130.198147836925 | 136.346472365382 | 127.822440239962 |
|          | 123.351112976814 | 145.643752002787 | 149.308475163534 | 148.549257493128 |
| NFASC    | 162.233096422572 | 151.914252332792 | 150.0084730766   | 163.352317556107 |
|          | 146.981521393075 | 141.076652697698 | 147.841960346835 | 135.779516940893 |
|          | 148.644800418517 | 152.857278986877 | 134.460035654795 | 156.543267949167 |
| NFAT5    | 279.413335686746 | 270.201322204641 | 266.918302307596 | 212.460476372263 |
|          | 199.579818754014 | 403.720036930931 | 283.499120551905 | 216.24497587588  |
|          | 304.937584086529 | 216.32785564297  | 419.532420763449 | 344.575967665039 |
| NFATC1   | 162.416774743901 | 150.36160186175  | 138.239251358245 |                  |
|          | 147.978039160763 | 139.552533656255 | 144.298011270428 | 136.301442794928 |
|          | 150.015696417249 | 149.619141707962 | 125.798453479983 | 152.390371614602 |
|          | 142.249715102513 |                  |                  |                  |
| NFATC2   | 123.98384416057  | 117.348231147283 | 118.749046585251 |                  |
|          | 123.804039963953 | 121.003207135942 | 128.421242037748 | 118.372047967248 |
|          | 121.877276961306 | 115.445219455559 | 117.186546702764 | 122.568743478314 |
|          | 117.628564992187 |                  |                  |                  |
| NFATC2IP | 302.945860276233 | 325.96632528242  | 321.910803473854 |                  |
|          | 335.533053221675 | 227.806050911154 | 372.689712716797 | 286.469773081481 |
|          | 352.811351813364 | 329.82030842286  | 332.24505665756  | 236.933960698783 |
|          | 355.290621188435 |                  |                  |                  |
| NFATC3   | 165.836534881802 | 175.452986514346 | 185.961822133346 |                  |
|          | 166.910561772689 | 157.5032461329   | 157.142101889337 | 155.452842883109 |
|          | 161.761125440228 | 151.829217512763 | 153.108902978819 | 162.308297940279 |
|          | 162.565576110247 |                  |                  |                  |
| NFATC4   | 220.772387104223 | 217.607230767028 | 204.596753034535 |                  |
|          | 252.32907388173  | 149.026243159195 | 149.786445079456 | 166.674240866931 |
|          | 151.815211341628 | 154.309257657136 | 154.288075172115 | 120.481712066062 |
|          | 151.563917522864 |                  |                  |                  |
| NFE2     | 132.249906289203 | 134.469653093466 | 126.186758919929 | 125.290320836648 |
|          | 122.190734676247 | 123.554769032715 | 124.746457912284 | 130.049854901235 |
|          | 144.700955682048 | 154.918405633244 | 134.142423026264 | 119.934231033302 |
| NFE2L1   | 1114.10687039922 | 1103.81439809121 | 1203.47834989609 |                  |
|          | 1635.35544761095 | 511.779988437654 | 372.475112554793 | 465.29290512169  |
|          | 519.672796004691 | 624.467319041884 | 603.764427348016 | 524.855915371246 |
|          | 436.731545612902 |                  |                  |                  |
| NFE2L2   | 1120.3009282887  | 1004.6207350158  | 1188.08712008638 |                  |
|          | 560.913732951675 | 369.906476027936 | 1226.10881264804 | 1160.78730097715 |
|          | 1040.73829397913 | 1008.875250028   | 1867.55140010155 | 1072.37500318471 |
|          | 1243.11900823259 |                  |                  |                  |
| NFE2L3   | 158.834483073542 | 167.791351000743 | 149.576563410584 |                  |
|          | 144.853868519575 | 209.090788790449 | 222.848935978648 | 234.841813258798 |
|          | 299.106362530855 | 342.878522959461 | 158.292581724934 | 281.792602269388 |
|          | 375.316610221279 |                  |                  |                  |

|         |                  |                  |                  |                  |
|---------|------------------|------------------|------------------|------------------|
| NFIA    | 2153.17165155392 | 1454.94889750152 | 2234.85920641661 | 1320.74943817958 |
|         | 197.605208310432 | 204.396576475753 | 237.473927775823 | 229.97640195632  |
|         | 176.783978625103 | 368.374002925137 | 135.743159681223 | 216.05364037271  |
| NFIB    | 3789.1316515671  | 4081.13406129846 | 3205.74787769881 | 4979.31150268741 |
|         | 277.561376169965 | 922.50743596248  | 360.684900316265 | 1015.10079945997 |
|         | 625.152889992949 | 483.312894744803 | 283.982575660968 | 244.596233138747 |
| NFIC    | 387.617166711971 | 546.274050902567 | 334.52685347521  | 762.182213353032 |
|         | 245.195406638979 | 156.671252606074 | 155.511086289504 | 165.904887259203 |
|         | 165.590892262736 | 176.506227858258 | 173.387549650592 | 163.380402251758 |
| NFIL3   | 688.464980326689 | 467.512355593598 | 348.575690346536 | 208.321765801227 |
|         | 401.631377313065 | 340.966515437272 | 490.849163737598 | 238.037110997575 |
|         | 335.533053221675 | 859.860994525775 | 227.558441474918 | 206.391403266202 |
| NFIX    | 3560.23794634993 | 4343.46317176151 | 2416.49806112207 | 5300.67886821231 |
|         | 682.315322994357 | 169.368090266817 | 260.67310907387  | 388.416668785633 |
|         | 396.861835715943 | 386.679822751367 | 237.113813706224 | 210.550995170071 |
| NFKB1   | 2219.71846304201 | 2059.09598012857 | 1982.3154578939  | 1713.93035637146 |
|         | 962.559482864549 | 2146.4265920569  | 2056.90127387648 | 2325.02143920169 |
|         | 2660.39990175415 | 1626.34607278613 | 2372.26073354008 | 2618.64973582507 |
| NFKB2   | 222.605195861218 | 238.095599711942 | 196.759802659759 | 312.557093674533 |
|         | 206.605699708924 | 133.087166272749 | 155.43577761798  | 155.575152212736 |
|         | 166.89285636895  | 144.665869508406 | 179.015669199358 | 147.174977926293 |
| NFKBIA  | 3424.65126200697 | 7446.59106452583 | 2244.6916226146  |                  |
|         | 3055.80298721424 | 5094.53287522452 | 6324.87600301793 | 4819.85672511343 |
|         | 5543.71998558526 | 5008.4888270731  | 4359.98094976179 | 3262.24877138481 |
|         | 5912.48904507462 |                  |                  |                  |
| NFKBIB  | 157.627490896581 | 162.595632367022 | 158.167384416968 |                  |
|         | 160.01685162095  | 291.020789939476 | 199.555406967021 | 165.659978250378 |
|         | 192.860161535869 | 202.568071395884 | 169.052101570616 | 180.590215659031 |
|         | 168.805630890928 |                  |                  |                  |
| NFKBID  | 153.792925101459 | 148.696116257083 | 166.027988561421 |                  |
|         | 164.785992108998 | 176.236140830355 | 164.886944426276 | 159.820341130737 |
|         | 168.443386067427 | 175.199369463703 | 189.01309885917  | 157.952018720438 |
|         | 184.348894461271 |                  |                  |                  |
| NFKBIE  | 158.751241730465 | 171.287186905764 | 120.688909943167 |                  |
|         | 140.356164189622 | 314.126706052299 | 197.068795788491 | 237.754067231793 |
|         | 197.72068061775  | 230.179200974631 | 169.544515294662 | 233.047541132048 |
|         | 218.487334022128 |                  |                  |                  |
| NFKBIL1 | 144.908551199481 | 145.615291241733 | 129.023206862713 |                  |
|         | 145.306369509684 | 184.518666956721 | 125.20712393273  | 134.163388748526 |
|         | 135.704067249674 | 129.677874035481 | 122.494779505958 | 155.07594431078  |
|         | 146.637799077812 |                  |                  |                  |
| NFKBIL2 | 153.916313595581 | 138.088712695622 | 133.74051512341  |                  |
|         | 151.045803695015 | 152.29434111068  | 136.351332391315 | 152.244018820259 |
|         | 157.474913177177 | 163.579282884905 | 142.472724215037 | 151.206697943841 |
|         | 149.554174907798 |                  |                  |                  |
| NFKBIZ  | 250.766180970907 | 322.506898833351 | 211.595513743111 |                  |
|         | 173.879952136931 | 234.020419732787 | 890.810315261602 | 387.305348482856 |
|         | 487.799854351205 | 715.039905439621 | 1047.78978081493 | 519.27448770158  |
|         | 385.238961394234 |                  |                  |                  |
| NFRKB   | 161.096914295309 | 160.989242461839 | 211.369442150136 | 171.358746749715 |
|         | 224.62335524729  | 201.365457496683 | 193.336246844237 | 212.987082617173 |
|         | 181.400788152988 | 158.002906093899 | 163.521095869383 | 204.260800563197 |

|         |                  |                  |                  |                  |
|---------|------------------|------------------|------------------|------------------|
| NFS1    | 145.67389337654  | 141.067419336609 | 147.600825146067 | 148.09868976776  |
|         | 146.992289167283 | 146.574656147816 | 157.348475799643 | 159.036647992998 |
|         | 151.470844748137 | 150.891358590974 | 148.501654210579 | 159.327764602722 |
| NFU1    | 452.961307006622 | 481.630922092112 | 602.480822390671 | 441.684169663552 |
|         | 541.896444696137 | 428.959561932229 | 450.566031840493 | 498.534168389928 |
|         | 366.317263094585 | 531.711823481265 | 501.301694626942 | 504.141861790903 |
| NFX1    | 400.472835504879 | 385.798784913201 | 406.028724866233 | 402.299165610893 |
|         | 218.997165156081 | 266.162244070031 | 241.077618798955 | 283.326226944158 |
|         | 318.348505551265 | 381.808809625801 | 330.641230715217 | 238.068308163643 |
| NFXL1   | 222.134519361117 | 202.214495168688 | 220.999383789474 | 195.863843860549 |
|         | 344.070947256963 | 308.330044958513 | 293.692083555844 | 371.127480221666 |
|         | 626.582864105324 | 246.616749748028 | 394.892918166519 | 325.642275889649 |
| NFYA    | 142.281657284178 | 129.945543636232 | 128.289680999565 | 141.129013595331 |
|         | 157.433725133173 | 167.278879415171 | 186.268881719287 | 152.011551837951 |
|         | 148.02460124587  | 153.829636228764 | 171.49930976135  | 165.364935913232 |
| NFYB    | 273.106088088825 | 268.698146407497 | 258.036064876416 | 266.99947481587  |
|         | 165.698527470382 | 283.982575660968 | 220.633692394229 | 205.804144075374 |
|         | 181.238505183667 | 187.352655464866 | 219.996410908721 | 200.114704018645 |
| NFYC    | 546.611519125021 | 618.829716818725 | 561.609211243027 | 681.172359997071 |
|         | 582.382786876656 | 454.984562256248 | 475.686805714298 | 645.806954296487 |
|         | 513.816017871024 | 310.142754559096 | 507.710604451713 | 471.15333189869  |
| NGB     | 163.319882002763 | 145.97330701968  | 133.722739936347 | 143.774841336279 |
|         | 141.204458186976 | 148.723165059122 | 159.835577644136 | 132.466796864599 |
|         | 135.99579763634  | 133.008120853618 | 164.274491958161 | 152.109178223495 |
| NGDN    | 377.225452025984 | 349.623729591612 | 438.958573676953 | 309.0578543424   |
|         | 295.099840299681 | 319.966785546419 | 402.366797969833 | 358.975346234854 |
|         | 330.193132765826 | 452.606433325387 | 343.270642449751 | 509.14726076246  |
| NGEF    | 140.359796538887 | 148.868265867275 | 156.654450436728 | 174.027190728107 |
|         | 271.397087928135 | 161.348562186667 | 159.957371011316 | 195.043838688467 |
|         | 174.471304281502 | 224.92725876841  | 171.455216889348 | 155.815785551964 |
| NGF     | 210.165098572428 | 210.043556816529 | 157.787233338636 | 189.853136769155 |
|         | 131.364187047583 | 141.048882618651 | 139.648187461906 | 125.830917527594 |
|         | 133.929311295884 | 168.654753237204 | 143.244742561669 | 121.353233207209 |
| NGFR    | 155.917655560227 | 149.76931674417  | 158.477017294725 | 169.992657041967 |
|         | 146.503431281242 | 157.207544072126 | 145.090639086338 | 158.92538634742  |
|         | 158.208998509937 | 151.317370941112 | 153.285830139349 | 143.594003495859 |
| NGFRAP1 | 995.812184456562 | 1160.25775445193 | 1265.88446775977 |                  |
|         | 1063.5903770389  | 4222.55224241399 | 1818.92700816112 | 2789.67986601883 |
|         | 1224.49891389348 | 1850.98311401165 | 842.567990276734 | 2403.42261883515 |
|         | 1910.08485008041 |                  |                  |                  |
| NGLY1   | 306.232249422327 | 285.30221551106  | 315.014639682046 | 263.845733455915 |
|         | 685.354305381323 | 628.197839884392 | 601.640387246951 | 674.101599637653 |
|         | 833.430847243676 | 447.297590650141 | 726.731270955732 | 563.140382824149 |
| NGRN    | 2486.24762158293 | 2230.45015969936 | 3015.70954394585 | 2505.8565544797  |
|         | 840.623505494489 | 1086.8615735568  | 2086.15449885278 | 1382.95068105649 |
|         | 1432.93880448974 | 1557.00226259883 | 1669.97250023755 | 2379.15291239548 |
| NHEDC1  | 165.476670465739 | 171.751149502172 | 169.705236302448 |                  |
|         | 166.355086055404 | 156.626742111441 | 175.601912488918 | 170.257439890277 |
|         | 155.993849743656 | 158.175138008678 | 153.412469512967 | 156.333133322672 |
|         | 152.650867743471 |                  |                  |                  |
| NHEDC2  | 149.405118010893 | 154.876638004094 | 144.043818335414 |                  |
|         | 152.599052194143 | 124.036907709461 | 133.402515225624 | 127.199124606827 |
|         | 129.221482161409 | 125.542301916791 | 129.369968549738 | 126.216519704249 |
|         | 126.430816528764 |                  |                  |                  |



|        |                  |                  |                  |                  |
|--------|------------------|------------------|------------------|------------------|
| NHEJ1  | 121.377666938052 | 117.097159106043 | 126.394032757479 | 113.905364405553 |
|        | 114.539671934155 | 129.586337068199 | 109.978693735206 | 113.76411537952  |
|        | 115.871151134713 | 113.315182274675 | 144.470642732973 | 121.980744551615 |
| NHLH1  | 122.978576290038 | 117.47631318854  | 125.253637835638 | 120.082391311921 |
|        | 125.350567304651 | 125.806943645484 | 115.02681415256  | 114.618608815885 |
|        | 122.075440298074 | 122.955724972547 | 127.771225410866 | 116.355027746922 |
| NHLH2  | 127.964855970099 | 127.512733134453 | 119.079680805247 | 118.308102542942 |
|        | 119.866898356501 | 124.566313603935 | 132.366079370785 | 124.45782375705  |
|        | 122.365693072105 | 125.513881890201 | 127.245190474707 | 120.428171428188 |
| NHLRC1 | 110.315549501241 | 114.226028611171 | 105.551878332786 |                  |
|        | 133.475605284211 | 114.384296185446 | 106.829040075772 | 112.436972452838 |
|        | 100.637271902591 | 108.861243071977 | 107.993707827557 | 123.062390088305 |
|        | 109.96017424123  |                  |                  |                  |
| NHLRC2 | 176.783978625103 | 174.707059022891 | 167.984051648058 |                  |
|        | 161.564505054217 | 208.587188476069 | 161.451253146578 | 164.389447533163 |
|        | 164.935120145905 | 181.123571246557 | 165.380225715852 | 173.995889755792 |
|        | 222.8766610624   |                  |                  |                  |
| NHLRC3 | 238.617228632505 | 203.125568980238 | 261.814227719605 |                  |
|        | 211.720536220806 | 184.682478530334 | 339.448524400708 | 300.314088267108 |
|        | 207.815226999953 | 254.013921962363 | 222.051005238856 | 373.803772983872 |
|        | 440.203336761263 |                  |                  |                  |
| NHLRC4 | 144.331409179705 | 147.43089976575  | 160.240052678401 |                  |
|        | 159.055956234445 | 135.697550878438 | 157.176001400747 | 154.509924503184 |
|        | 156.727153398506 | 158.420821486138 | 156.830156083795 | 155.427282703527 |
|        | 171.39347085745  |                  |                  |                  |
| NHP2   | 596.54904286299  | 639.38881853171  | 694.907086612929 | 725.216684507759 |
|        | 1376.84058291266 | 1164.22995893381 | 1625.55754007235 | 1127.07858210156 |
|        | 953.861218000678 | 1610.38263368771 | 1011.9675459648  | 1367.92869625376 |
| NHP2L1 | 577.801009921199 | 654.108318810728 | 628.939201051801 |                  |
|        | 685.620637807134 | 549.162299481184 | 882.429823267754 | 658.746224115551 |
|        | 501.600329334497 | 652.429025114523 | 1105.80735904293 | 967.123240442957 |
|        | 1013.03054571763 |                  |                  |                  |
| NHS    | 202.761449711661 | 212.749668083641 | 196.880135762817 | 225.927425596831 |
|        | 189.472541628897 | 181.183277133224 | 205.282221255986 | 224.439293045835 |
|        | 157.096799934494 | 153.767488352037 | 172.002600588279 | 160.511688319771 |
| NHSL2  | 139.82050388626  | 153.601918768668 | 170.169402943662 | 162.327039624723 |
|        | 154.755544586846 | 142.211357324461 | 131.347213356457 | 136.508969220268 |
|        | 137.981446468611 | 153.589626253969 | 142.365009028839 | 156.546769952772 |
| NICN1  | 633.104379362137 | 612.61438059983  | 564.588706307423 | 749.220616713093 |
|        | 835.284130042504 | 280.798003990849 | 273.911741951291 | 246.112720011613 |
|        | 452.24100098898  | 255.903775525554 | 590.849222581206 | 340.966515437272 |
| NID1   | 178.572212478544 | 183.115511373872 | 182.68965110437  | 190.111477641308 |
|        | 168.013310840048 | 181.70730090195  | 142.383723965616 | 170.069291215013 |
|        | 166.4983332269   | 191.795952536469 | 143.78994470501  | 168.180063344887 |
| NID2   | 199.423120300557 | 176.128369308989 | 163.239195865198 | 142.719216118914 |
|        | 142.531683761072 | 129.740166478951 | 120.39039576721  | 121.219323788324 |
|        | 144.102872001089 | 173.233357775898 | 149.457761307441 | 119.586157804692 |
| NIF3L1 | 555.758485277905 | 634.356322976353 | 658.068932688816 |                  |
|        | 607.126514742951 | 581.191693771646 | 1809.58702081877 | 916.4187683687   |
|        | 1294.74864310494 | 1069.93503700632 | 952.724512915813 | 784.72162514331  |
|        | 1192.72383754851 |                  |                  |                  |
| NIN    | 222.394280571312 | 206.999289979742 | 223.84997313236  | 183.04531185589  |
|        | 147.508817393901 | 176.980780681976 | 159.854639082837 | 188.847480174391 |
|        | 161.371477511362 | 195.50039162477  | 217.910445051307 | 186.515784641119 |

|           |                  |                  |                  |                  |
|-----------|------------------|------------------|------------------|------------------|
| NINJ1     | 722.974310297586 | 836.235700891687 | 608.129959758538 | 902.822697602452 |
|           | 838.267069860172 | 490.631757904175 | 210.41046499545  | 419.532420763449 |
|           | 872.512754090023 | 920.342429282889 | 988.788192022196 | 489.403061697031 |
| NINJ2     | 234.814109965002 | 213.754156680604 | 162.620593985693 | 279.834616502591 |
|           | 189.070238523683 | 200.264756078778 | 134.694911833015 | 178.578295615344 |
|           | 230.227432807772 | 214.933911087009 | 158.517778100137 | 187.097765940131 |
| NINL      | 199.037998955485 | 202.114480291084 | 182.798526632723 | 204.654489493854 |
|           | 170.140610481718 | 250.443147156029 | 181.110403721353 | 156.399808270033 |
|           | 205.058210447711 | 149.453103369806 | 123.926293128246 | 156.516250236679 |
| NIP30     | 219.49354518392  | 216.353502371227 | 250.003965480779 | 235.563592256037 |
|           | 183.348764012358 | 188.490807652188 | 212.730163981978 | 195.20398666139  |
|           | 204.396576475753 | 194.569325586241 | 180.610891208146 | 236.508498739509 |
| NIP7      | 271.770138565186 | 263.888891822857 | 264.936739264566 | 204.299375966441 |
|           | 317.802633831405 | 875.7694907383   | 682.730262408017 | 592.079898463345 |
|           | 750.10819423982  | 793.071192619058 | 470.868288641048 | 1072.82323999638 |
| NIPA1     | 361.829819621662 | 371.00603789759  | 454.492780042353 | 366.705048374078 |
|           | 207.338645756456 | 257.5097052677   | 578.084277076692 | 338.934501259414 |
|           | 188.973595445056 | 746.523071806534 | 354.981966077502 | 276.79778275734  |
| NIPA2     | 353.674560414317 | 370.227329649269 | 322.956882599715 | 346.635777358159 |
|           | 607.499206410372 | 528.478292835214 | 508.861268738074 | 509.880640462    |
|           | 558.440840319738 | 439.33566689752  | 546.029974898225 | 755.79669622705  |
| NIPAL1    | 187.365807314802 | 209.385358804928 | 203.704734790602 |                  |
|           | 157.575902297677 | 389.588346573823 | 423.826189747546 | 491.496499481595 |
|           | 396.345382600445 | 501.005898087825 | 281.792602269388 | 440.404188514231 |
|           | 348.111872425949 |                  |                  |                  |
| NIPAL2    | 152.77616981167  | 147.893916750136 | 150.264481784709 |                  |
|           | 146.894793774087 | 164.659092629962 | 154.79534193124  | 158.364031234356 |
|           | 152.368485416992 | 148.391885541349 | 163.843143947012 | 158.68792959603  |
|           | 171.967974673053 |                  |                  |                  |
| NIPAL4    | 201.016287924499 | 214.331491507489 | 214.169180557611 |                  |
|           | 211.766884719761 | 281.405355165228 | 332.24505665756  | 277.561376169965 |
|           | 243.732074437237 | 191.200215655114 | 463.488995330457 | 456.990425618007 |
|           | 273.106088088825 |                  |                  |                  |
| NIPBL     | 281.792602269388 | 308.38513924253  | 282.604890044452 | 270.462865174106 |
|           | 208.42712014566  | 270.293807247372 | 246.288681426405 | 354.132752995385 |
|           | 230.424145472916 | 229.200570583629 | 322.099431638246 | 277.539110964815 |
| NIPSNAP1  | 244.925472495705 | 300.793542873709 | 260.157440518033 |                  |
|           | 281.168898910065 | 1025.27246494218 | 691.397238677552 | 769.586135629964 |
|           | 660.907502776003 | 954.488185198006 | 430.505037012814 | 726.000622725287 |
|           | 854.224454791713 |                  |                  |                  |
| NIPSNAP3A | 167.100039749329 | 159.349719495214 | 165.586397236489 |                  |
|           | 160.35668299062  | 213.046162847735 | 199.87003105816  | 162.096065738375 |
|           | 166.958831664154 | 188.431244390961 | 222.820391338687 | 241.105817192695 |
|           | 195.532022060219 |                  |                  |                  |
| NIPSNAP3B | 124.083648029911 | 116.382348831504 | 105.583474813289 |                  |
|           | 118.679664392666 | 105.25877906031  | 113.460835359833 | 108.288420807873 |
|           | 111.895279866421 | 113.154880173167 | 111.837468699281 | 119.943408501009 |
|           | 115.293844461817 |                  |                  |                  |
| NISCH     | 1203.47834989609 | 998.631321857182 | 895.821578104681 | 1027.11849332495 |
|           | 1128.60314361459 | 640.90860274227  | 863.738809424958 | 529.963453165714 |
|           | 936.560290736127 | 739.874432767734 | 849.784051720996 | 675.281131488524 |
| NIT1      | 169.179630363359 | 189.283071231248 | 144.858656365799 | 168.477388641982 |
|           | 210.33390115739  | 147.572660963285 | 167.559703634539 | 188.641397688261 |
|           | 175.495965414493 | 187.4351946569   | 209.196695368783 | 175.030373805031 |

|         |                  |                  |                  |                  |
|---------|------------------|------------------|------------------|------------------|
| NIT2    | 336.279209908669 | 284.195575802966 | 320.154891655397 | 292.185246573643 |
|         | 446.07651799079  | 592.613689704907 | 596.246316033079 | 491.35949123223  |
|         | 616.701037274509 | 610.337659723539 | 651.675427664911 | 520.585319342817 |
| NKAIN1  | 147.754489751457 | 136.77260462185  | 126.492058851464 |                  |
|         | 138.281188275319 | 145.662818023154 | 136.881019970399 | 126.019246614944 |
|         | 132.074571281938 | 132.550022967297 | 122.854722097864 | 129.553282780541 |
|         | 133.218742606195 |                  |                  |                  |
| NKAIN2  | 141.281116867082 | 141.147683040881 | 153.128027266281 |                  |
|         | 133.638664342783 | 192.258863431747 | 128.963962067821 | 142.392860474555 |
|         | 136.560048419149 | 169.733427590141 | 155.835077077665 | 163.612347715773 |
|         | 332.885488115858 |                  |                  |                  |
| NKAIN3  | 133.414840339315 | 150.500676225569 | 174.727439318223 |                  |
|         | 154.912576362196 | 147.384050169545 | 162.863781294205 | 157.233463720262 |
|         | 154.113228966411 | 155.400191634632 | 150.137061170632 | 154.406369231962 |
|         | 156.66832364923  |                  |                  |                  |
| NKAIN4  | 108.646136431909 | 110.428616140857 | 114.774530966446 |                  |
|         | 103.520748827831 | 110.900309203531 | 112.649012857276 | 102.522925993233 |
|         | 102.725375719353 | 112.57049236673  | 101.316813921703 | 123.02167644694  |
|         | 109.482330324734 |                  |                  |                  |
| NKAP    | 167.063762404009 | 159.379420001197 | 146.735616237082 | 153.767488352037 |
|         | 199.001860912128 | 155.219860096943 | 167.791351000743 | 165.314290446922 |
|         | 166.533191390639 | 172.7330526128   | 186.345823604119 | 162.737431585974 |
| NKAPL   | 130.700175060255 | 131.142841840284 | 136.448045428081 | 130.909388246758 |
|         | 116.604371744082 | 125.439033142431 | 117.289037817013 | 124.723519607109 |
|         | 125.863969666806 | 118.331237160995 | 128.140333650496 | 120.846789922177 |
| NKD1    | 137.670655293096 | 138.16337207876  | 114.470670941078 | 119.739204799544 |
|         | 121.06219555903  | 109.654666772771 | 105.050093408041 | 106.341910466588 |
|         | 180.54209603289  | 125.859158049343 | 107.544568250154 | 114.350596695469 |
| NKD2    | 421.583441056026 | 402.299165610893 | 140.192644427334 | 168.783725505491 |
|         | 157.390513637267 | 149.634975068742 | 153.095594614683 | 198.760049629983 |
|         | 170.577057395536 | 507.342877360289 | 320.525885538523 | 497.759125486158 |
| NKG7    | 194.961531388323 | 195.946096353894 | 147.579672274205 | 194.998142472864 |
|         | 187.710185880162 | 171.022976593689 | 161.651643789597 | 180.164353124488 |
|         | 302.362619893594 | 193.261343922604 | 161.911468506919 | 156.020996568814 |
| NKIRAS1 | 431.686900474971 | 386.960778432157 | 540.190808200264 |                  |
|         | 471.816954259146 | 260.443814523694 | 195.88263399968  | 380.514553097613 |
|         | 234.094722315007 | 280.414161197286 | 381.484062427466 | 253.218123990428 |
|         | 182.074569356713 |                  |                  |                  |
| NKIRAS2 | 220.791884858764 | 258.145539382199 | 212.107842040568 |                  |
|         | 325.43977732888  | 262.861105654051 | 199.933148219784 | 225.950750084197 |
|         | 242.096692715029 | 262.389583658305 | 226.989201461085 | 209.93789387724  |
|         | 212.497773003032 |                  |                  |                  |
| NKPD1   | 128.304919825754 | 130.63490683087  | 126.752999657665 | 140.509170613622 |
|         | 138.102654893864 | 144.178210824181 | 161.997058981786 | 134.981272056795 |
|         | 139.837616209536 | 149.427217345037 | 138.508015596135 | 122.837807905774 |
| NKRF    | 250.885949055834 | 255.413231082357 | 241.039766283972 | 233.394506254045 |
|         | 390.979822976551 | 419.532420763449 | 266.395569467956 | 293.746733527346 |
|         | 302.735372807236 | 262.79667156266  | 267.939624375137 | 295.153786338687 |
| NKTR    | 675.281131488524 | 563.779294315901 | 633.594811068524 | 499.544050752036 |
|         | 278.469340236003 | 553.368945998847 | 618.058496806334 | 448.858580689107 |
|         | 767.054576874115 | 442.590987372759 | 711.729857540712 | 871.268905562551 |
| NKX1-1  | 135.057182356058 | 138.67221078031  | 145.776143302784 |                  |
|         | 142.806728419652 | 140.619606039582 | 141.985130140173 | 132.996622574111 |

151.829217512763 139.488057371254 137.714430743204 143.494511683426  
141.817230824364  
NKX1-2 130.165488538277 132.32633643811 128.108066199718  
130.204571771396 151.976432805924 149.131218007756 134.238642042323  
125.4408430419 139.231340020014 128.335132315812 134.010031592003  
136.308565710257  
NKX2-1 121.396223519559 117.856184272322 118.406487008528  
112.321396616213 111.409447323674 118.840016023602 117.12833256636  
106.797707723826 113.791585365477 116.635455849571 158.6067091347  
122.646850766733  
NKX2-2 136.978738825445 140.84880167881 142.383723965616  
147.75188889715 137.04010227318 134.350054065624 137.7724100594  
140.014167357286 148.840533233712 129.003317344469 121.036054511761  
142.013370954791  
NKX2-3 128.634431242405 110.670057121283 113.051381310122  
129.808590871788 114.613368640356 122.165046954625 124.597605631582  
119.01236045062 123.178049594968 118.718048764985 144.777043589925  
115.981530322377  
NKX2-5 114.631759839092 111.020070405368 107.544568250154  
119.52150378372 106.182551369456 133.765676959662 107.76497424356  
110.977904932371 109.700513642061 119.50754902958 98.6941019230576  
108.497209666203  
NKX2-6 148.493435517221 116.588138374632 135.670409501435  
133.482237631013 141.805028495425 128.736591902501 130.582210755516  
155.896065329825 142.675752131935 123.150299476109 139.089444892187  
136.294479720968  
NKX2-8 126.097544650407 127.593764897583 135.036576196425  
132.043196381009 114.042914237667 135.105147647223 131.241878941749  
118.438942370745 127.492376657284 114.498610080481 144.595393134144  
117.49013401175  
NKX3-1 239.419200107721 205.047145898929 254.235762677639  
206.802308105224 205.908052642222 252.138168292964 319.560819487616  
183.226294747874 201.850932289186 190.625250757654 175.302832015761  
172.7330526128  
NKX6-1 112.456644814178 111.43827410589 109.947300629824  
107.816312357067 133.99046926032 112.036753245281 113.980716384814  
118.902823494379 105.408689610638 104.154182930018 115.566303449363  
105.839106819841  
NKX6-2 105.348008821162 108.864961422232 118.289405191861  
110.510191137073 102.522925993233 115.5765427629 107.498500136859  
104.505454151012 111.497241941203 112.502812746669 122.685360126599  
114.512028664352  
NKX6-3 148.410647472149 137.719257499747 138.679545821015  
129.461160777216 144.818492604488 140.327799236005 152.818046945164  
141.199684616731 137.485252316816 134.469653093466 159.926719599391  
146.084461430546  
NLE1 147.60284257326 161.85913459364 158.06915048955 163.764600217347  
191.023813502294 139.767216030715 190.165771406362 178.619580818758  
152.109178223495 150.021512237553 151.528377719344 144.904021527125  
NLF2 178.455966482206 207.123420880185 134.694911833015 240.005943851098  
164.917470819096 132.780055030907 151.256546638599 141.558927907067  
162.090585987836 155.83143112621 165.134931755194 134.251843621261

|        |                  |                  |                  |                  |
|--------|------------------|------------------|------------------|------------------|
| NLGN1  | 513.518424350159 | 435.69811966429  | 365.140886302762 | 458.705688226305 |
|        | 150.623182458747 | 133.82390829608  | 134.049094181433 | 142.192934622228 |
|        | 141.710076413441 | 123.845504986626 | 160.435789207464 | 124.134916773123 |
| NLGN2  | 291.616195651001 | 359.518199449791 | 362.306819797508 | 454.64556253724  |
|        | 233.347820352278 | 294.922183826144 | 245.997705723007 | 231.146155346291 |
|        | 188.671807443641 | 214.261611197599 | 161.748547772524 | 182.028675726969 |
| NLGN3  | 132.924341641217 | 122.396214045451 | 137.002473710189 | 124.424565172377 |
|        | 113.222264855561 | 115.847063825599 | 118.614641349402 | 121.799209715087 |
|        | 107.993707827557 | 106.876902604214 | 124.561511833959 | 120.543881800775 |
| NLGN4X | 195.303469330682 | 200.890547965585 | 150.019181654237 |                  |
|        | 150.28508305615  | 134.236149080639 | 458.705688226305 | 137.307786147787 |
|        | 336.067655676466 | 139.771342253058 | 174.127444395862 | 154.562761981868 |
|        | 141.939368369872 |                  |                  |                  |
| NLGN4Y | 183.04531185589  | 187.529556428609 | 199.916301659113 |                  |
|        | 157.800913051929 | 159.452527363763 | 135.286686011087 | 149.760883745928 |
|        | 226.506852362359 | 168.720694813918 | 148.835389500419 | 204.681956301306 |
|        | 338.739180103373 |                  |                  |                  |
| NLK    | 200.633009710701 | 203.410932496844 | 213.990575186237 | 214.566711351899 |
|        | 194.092089507551 | 208.555506929113 | 290.389345090634 | 314.646369385896 |
|        | 305.542978609337 | 162.37762946664  | 287.593221911064 | 249.763375041547 |
| NLN    | 164.981665344298 | 152.30599498619  | 163.400576719974 | 160.848201202361 |
|        | 162.427505889157 | 187.93380542729  | 173.773876769683 | 161.85913459364  |
|        | 163.736324784234 | 183.385868234361 | 177.223953859764 | 157.15947600423  |
| NLRC3  | 152.348210524663 | 149.086836205064 | 157.87020867396  | 154.199534276226 |
|        | 165.092451754065 | 158.622993108149 | 158.869463014801 | 167.468390483999 |
|        | 174.646321871605 | 156.543267949167 | 162.531630234824 | 160.073510173041 |
| NLRC4  | 137.769431537236 | 130.031303483631 | 119.472410874778 | 114.021546689428 |
|        | 115.827175143972 | 121.410606617535 | 127.760995691556 | 120.843429388102 |
|        | 125.451525292802 | 117.77708734157  | 139.628966306048 | 121.95061962467  |
| NLRC5  | 146.442734810495 | 133.453702113571 | 136.03117924052  | 127.314089756429 |
|        | 121.643036773773 | 130.465221782084 | 139.564898998489 | 130.912137250515 |
|        | 188.231614694297 | 131.481679396553 | 163.153676643372 | 135.491412261604 |
| NLRP1  | 150.184863108453 | 140.332045911008 | 144.762006548375 | 125.997109913348 |
|        | 125.124011798043 | 145.773932754923 | 133.711821318079 | 134.235164622221 |
|        | 137.047288508371 | 137.491366243256 | 143.831294912255 | 158.627416752905 |
| NLRP10 | 124.616629956864 | 128.475588360698 | 124.904518221898 |                  |
|        | 123.683553177379 | 124.460064642088 | 127.299853592344 | 123.752109790056 |
|        | 122.212222959338 | 126.730314982553 | 126.100454068838 | 140.583804906052 |
|        | 117.980052938167 |                  |                  |                  |
| NLRP11 | 118.47752077032  | 117.399753685854 | 109.740801301993 |                  |
|        | 104.977794653504 | 104.633603136988 | 108.939608619532 | 109.506450285923 |
|        | 112.142263331903 | 109.003365273337 | 115.337592860132 | 117.374025543149 |
|        | 110.212739445    |                  |                  |                  |
| NLRP12 | 152.29434111068  | 145.99474597064  | 147.70836747108  |                  |
|        | 152.080057231881 | 151.989476683722 | 150.423586547273 | 157.575902297677 |
|        | 152.175423676063 | 149.750924082863 | 137.885506916098 | 142.534195262988 |
|        | 149.821848101995 |                  |                  |                  |
| NLRP13 | 104.681530703922 | 114.740948266517 | 117.470731811595 |                  |
|        | 113.23302126254  | 113.043089777907 | 112.357261386644 | 119.034003473459 |
|        | 113.773684331489 | 111.381427322188 | 109.898406285895 | 144.608882758506 |
|        | 106.102093734748 |                  |                  |                  |
| NLRP14 | 156.976539870288 | 148.052222389368 | 157.568150431884 |                  |
|        | 166.587100972754 | 161.129770392464 | 142.613654158833 | 148.390417679848 |

|           |                  |                  |                  |                  |
|-----------|------------------|------------------|------------------|------------------|
|           | 160.435789207464 | 154.617462666847 | 161.870389635266 | 137.740497848238 |
|           | 166.70212615715  |                  |                  |                  |
| NLRP2     | 148.660440219589 | 150.378690719669 | 142.768691899824 | 154.509924503184 |
|           | 157.765771942689 | 372.255208814622 | 4759.17973319588 | 162.240414467004 |
|           | 2325.02143920169 | 160.67285689491  | 458.047799748696 | 149.698664700146 |
| NLRP3     | 152.842777535666 | 153.332110179758 | 153.913513669361 | 149.495077381649 |
|           | 143.455941298415 | 154.384766720753 | 148.100508271232 | 148.986058473609 |
|           | 152.970079142629 | 158.723133891017 | 148.415036326153 | 150.000851192531 |
| NLRP4     | 138.489443610941 | 152.68344738009  | 147.939682463235 | 144.190203286506 |
|           | 135.092226300609 | 138.112168847027 | 141.117659724704 | 135.264074941678 |
|           | 136.882429810263 | 135.812301062763 | 140.586497829504 | 139.092075947067 |
| NLRP5     | 172.451128796055 | 151.442463705271 | 150.091854035356 | 161.744366588564 |
|           | 130.980199575227 | 143.287237534352 | 137.262309660909 | 147.710252756854 |
|           | 136.042982529628 | 134.507558495307 | 149.217191121377 | 139.493025452991 |
| NLRP6     | 116.0999658586   | 129.489867764242 | 127.150222504237 | 116.632612170106 |
|           | 121.709375771276 | 113.970633751086 | 107.816312357067 | 125.712260481294 |
|           | 124.602474178438 | 117.834484996559 | 113.672605838627 | 120.441732791854 |
| NLRP7     | 120.527518013376 | 127.494672751434 | 121.841080387875 | 129.034770823878 |
|           | 143.271346378958 | 136.623658204558 | 155.023934989559 | 127.661634554996 |
|           | 137.194467539969 | 123.202829470888 | 134.56134674893  | 122.376432064286 |
| NLRP8     | 7468.70895916615 | 6737.97308530049 | 5670.70220800096 | 5955.10816224456 |
|           | 778.846928848361 | 5811.97916044218 | 2525.90466050731 | 4697.94415026712 |
|           | 3417.22292085668 | 2222.16226526877 | 5521.74673982411 | 3309.66193624859 |
| NLRP9     | 133.635784122681 | 135.639558187703 | 140.486376016494 | 140.752616434418 |
|           | 133.466342977488 | 133.917283965036 | 147.250700603067 | 145.412368252632 |
|           | 130.029719192412 | 130.593846004132 | 129.642952083513 | 135.395071593072 |
| NLRX1     | 268.78904911703  | 306.068269136821 | 314.751799003704 | 475.540659315339 |
|           | 667.156197045748 | 247.643123415644 | 206.73292907905  | 291.720204789005 |
|           | 301.955019831714 | 283.416246133873 | 287.558897878375 | 296.375305136807 |
| NMB       | 175.510160114891 | 170.028047334267 | 165.277935422113 | 190.077302802065 |
|           | 548.686094748117 | 278.428310548805 | 640.90860274227  | 629.197022551069 |
|           | 327.251620296271 | 726.000622725287 | 670.571106793204 | 588.197697799448 |
| NMBR      | 120.831070822199 | 129.147246809319 | 114.27112025541  | 114.28381541078  |
|           | 112.699674279523 | 125.091038614268 | 121.61143371132  | 118.619176257622 |
|           | 117.071585083051 | 121.170340423391 | 141.38612990166  | 117.81168010976  |
| NMD3      | 418.319283832879 | 413.172954892025 | 584.548578914846 | 298.776176246196 |
|           | 773.057095787974 | 1320.74943817958 | 877.255923473532 | 834.537908087672 |
|           | 751.896334334052 | 653.500279510032 | 785.290353402444 | 826.314416168552 |
| NME1      | 479.053300726301 | 567.715714233608 | 462.265785715695 | 627.066031322234 |
|           | 1180.7055699511  | 2666.06582231934 | 1611.58245311122 | 3073.40543048878 |
|           | 2539.87833317526 | 1343.2623011534  | 1222.014210447   | 1876.64079464928 |
| NME1-NME2 | 1257.32413345748 | 1206.09815575399 | 1538.78070281348 |                  |
|           | 848.154015576436 | 2076.51786803222 | 2853.14759681683 | 3700.75770419386 |
|           | 4882.16892310839 | 2703.76111776248 | 4503.01240138314 | 427.345809255426 |
|           | 2767.77385345718 |                  |                  |                  |
| NME2      | 222.709720471134 | 232.830038701628 | 270.727749014046 | 242.657224881824 |
|           | 284.272977025491 | 363.963951509433 | 364.527677995774 | 304.636618563775 |
|           | 311.670576741448 | 358.654569870431 | 284.236970342827 | 321.910803473854 |
| NME2P1    | 133.976997391944 | 126.673587174832 | 118.660213790078 |                  |
|           | 144.433543176593 | 139.249869918235 | 138.026155846749 | 141.018087546273 |
|           | 138.078214837785 | 146.484364264513 | 138.017249996128 | 145.318539677981 |
|           | 137.72327986309  |                  |                  |                  |

|        |                  |                  |                  |                  |
|--------|------------------|------------------|------------------|------------------|
| NME3   | 1024.95957828641 | 966.281849197568 | 1022.11537745428 | 984.181272274704 |
|        | 2195.41077320434 | 666.344430142655 | 1090.20254511452 | 1091.12493937368 |
|        | 393.98210915852  | 802.643357549193 | 897.0125616892   | 986.441377365124 |
| NME4   | 2698.5455305009  | 2982.80580616089 | 2837.36293710422 | 5195.2087608308  |
|        | 2622.87486749984 | 792.634423781309 | 1699.8374761666  | 772.061917233344 |
|        | 793.501244347257 | 695.595965352335 | 1471.01897242089 | 1210.40302822121 |
| NME5   | 154.390764802264 | 154.179891883612 | 167.586897846525 | 165.619206216088 |
|        | 125.83678485646  | 125.12823219142  | 149.860490620507 | 143.703367582367 |
|        | 149.188357651896 | 104.223476853877 | 132.133979108537 | 127.777945516765 |
| NME6   | 249.489170536758 | 219.619022209985 | 259.625943627223 | 256.897177822238 |
|        | 186.708059183893 | 200.84691030169  | 274.092048989484 | 226.387465899611 |
|        | 234.814109965002 | 265.829122816166 | 217.715143869654 | 271.154246147262 |
| NME7   | 209.180298459605 | 192.860161535869 | 228.820894086914 | 189.205724390913 |
|        | 167.653412908384 | 251.915179734134 | 232.046814892685 | 242.81187187788  |
|        | 199.001860912128 | 269.495247190598 | 202.214495168688 | 218.839681873515 |
| NMI    | 321.31562287169  | 259.277693314055 | 334.056545911557 | 294.997671630798 |
|        | 257.5097052677   | 260.195256836955 | 403.720036930931 | 367.382105696814 |
|        | 462.025126897013 | 538.252273740419 | 556.568221094639 | 403.907009699589 |
| NMNAT1 | 177.802767772786 | 161.212598761378 | 161.241165533091 |                  |
|        | 145.844961942581 | 139.644701550661 | 162.422173095045 | 158.232100962615 |
|        | 190.204960255989 | 168.21856603538  | 158.157097243342 | 195.929328710358 |
|        | 162.022232949254 |                  |                  |                  |
| NMNAT2 | 125.488511939819 | 134.387256336429 | 131.507618414676 |                  |
|        | 133.830860948014 | 122.600274773736 | 123.45004246675  | 172.750926094884 |
|        | 123.418266047461 | 133.241744350369 | 123.317063135818 | 173.299643109576 |
|        | 129.910866236901 |                  |                  |                  |
| NMNAT3 | 232.200025766422 | 223.722742062251 | 257.685284145848 |                  |
|        | 241.203521822269 | 147.409936250284 | 152.910433120981 | 216.126000558319 |
|        | 161.419873271162 | 156.151075965844 | 127.42914358124  | 148.779043570204 |
|        | 142.976123206776 |                  |                  |                  |
| NMRAL1 | 564.948126039762 | 709.136137559152 | 578.811908030805 |                  |
|        | 849.389818300305 | 1435.4236709581  | 773.330948077036 | 1434.1439428394  |
|        | 1098.20033709043 | 718.871732206362 | 731.284098301795 | 768.67030514096  |
|        | 1068.63350031223 |                  |                  |                  |
| NMS    | 122.716563069312 | 129.411734209444 | 132.566074764755 | 135.315732654507 |
|        | 134.607501073433 | 132.291759474331 | 133.939847853073 | 130.860938463815 |
|        | 136.934313990609 | 154.737117718424 | 128.17223916536  | 137.229871801676 |
| NMT1   | 372.689712716797 | 383.583234619781 | 378.509324619452 | 489.75389978732  |
|        | 305.096320805078 | 255.3451781862   | 419.902534806131 | 331.383533814347 |
|        | 487.597040819879 | 231.728984785324 | 368.879825610754 | 250.928804390353 |
| NMT2   | 405.570281788901 | 341.761516859319 | 410.645457106122 | 361.904370514991 |
|        | 129.664016819143 | 141.616920429839 | 163.331424612891 | 162.893396525252 |
|        | 153.907737500104 | 191.912670416334 | 168.783725505491 | 139.862403685817 |
| NMU    | 118.589392612801 | 122.254824223167 | 137.779607093226 | 125.101995710829 |
|        | 216.559563381808 | 139.841822983821 | 141.724442944322 | 271.770138565186 |
|        | 184.505279093688 | 607.126514742951 | 135.63604256516  | 147.459385142695 |
| NMUR1  | 120.665520347481 | 116.988440658494 | 118.558673085303 | 118.951526834915 |
|        | 121.391637838137 | 118.07991087231  | 133.427561208907 | 115.840266274696 |
|        | 110.536316697732 | 116.280157890082 | 114.213405341709 | 111.703224727793 |
| NMUR2  | 121.448671447499 | 139.837616209536 | 132.737464610403 | 113.963798749897 |
|        | 144.5368823731   | 119.583378101838 | 127.055165613236 | 130.355969431473 |
|        | 119.636334259263 | 117.837894438834 | 123.61956613951  | 121.624218243474 |

|       |                  |                  |                  |                  |
|-------|------------------|------------------|------------------|------------------|
| NNAT  | 470.308610828825 | 709.778171909457 | 958.005138077899 | 903.824331691969 |
|       | 138.836422729663 | 135.088149158147 | 188.891032176388 | 138.060245284993 |
|       | 129.286782862113 | 139.398238927606 | 140.391753835434 | 146.287161912291 |
| NNMT  | 398.673582680257 | 486.197269936713 | 278.775971122032 | 260.489744360233 |
|       | 150.792065744902 | 241.320049298228 | 164.288645768576 | 213.324226314713 |
|       | 379.102958448288 | 330.005950459958 | 162.945789604505 | 174.23955831109  |
| NNT   | 282.190861594303 | 276.184421402511 | 307.16835174775  | 302.847274046748 |
|       | 261.117845544884 | 304.357050745605 | 261.203388718689 | 304.111808763793 |
|       | 211.766884719761 | 189.461090469712 | 244.797792477941 | 286.035428568826 |
| NOB1  | 176.5588805282   | 218.559622620349 | 228.284236550547 | 243.65518489122  |
|       | 246.237243726748 | 205.871133967588 | 264.983729290122 | 230.508733145583 |
|       | 246.049729366987 | 279.969975697164 | 271.615621030842 | 261.500728878974 |
| NOBOX | 131.099004325598 | 123.291258843371 | 121.289159587394 | 116.021343227054 |
|       | 119.319884675074 | 116.639787832302 | 128.440024330942 | 113.214390213004 |
|       | 117.820996523337 | 123.58053320223  | 131.374680878107 | 126.013957128603 |
| NOC2L | 172.045843691642 | 179.785198362326 | 219.709231012465 | 195.50039162477  |
|       | 389.109250187902 | 225.803528238368 | 196.419891542139 | 242.948136060281 |
|       | 188.475801713801 | 176.849238577762 | 209.596792486876 | 202.145180994821 |
| NOC3L | 499.891000749138 | 437.931339781992 | 349.816819166182 | 376.082040863747 |
|       | 409.743899750699 | 523.435696794756 | 483.174262289559 | 349.128741707506 |
|       | 392.198487606534 | 320.154891655397 | 165.880071298733 | 587.181357555703 |
| NOC4L | 167.850516495529 | 159.738700107615 | 153.308956040034 | 170.243136294537 |
|       | 217.353396632732 | 160.825408895349 | 160.537464426971 | 164.231281729415 |
|       | 171.86363382331  | 165.992542962911 | 163.039564280484 | 169.920799931309 |
| NOD1  | 168.702991603656 | 154.783699020901 | 147.702785358046 | 164.268280525424 |
|       | 150.417169156755 | 142.135495724286 | 140.954264409241 | 142.281657284178 |
|       | 145.684294398911 | 172.008994980259 | 172.591885279428 | 180.113222861966 |
| NOD2  | 115.944280729914 | 121.643036773773 | 118.694037994926 | 105.132185249959 |
|       | 133.213697351807 | 109.044879188971 | 112.666812944192 | 109.74983281634  |
|       | 155.756074127526 | 288.026656721827 | 103.307703547649 | 116.007006375993 |
| NOD3  | 151.518116154483 | 166.305219348008 | 168.052288484172 | 167.447964370395 |
|       | 151.64806573742  | 198.456392063513 | 155.405519023053 | 162.223175359454 |
|       | 160.338146803754 | 153.056369304663 | 153.13384838492  | 172.108795190633 |
| NODAL | 124.676743480622 | 125.572299527276 | 120.065876525792 | 133.372231702721 |
|       | 125.048770476506 | 128.359034755228 | 117.976107125982 | 120.479270037091 |
|       | 128.578494940165 | 177.955579729463 | 149.740404686695 | 121.847904946956 |
| NOG   | 135.643341446691 | 145.606098951179 | 161.099805358232 | 163.198834359304 |
|       | 134.758222337831 | 138.807031587657 | 148.171225002967 | 137.926798328677 |
|       | 145.064773625365 | 138.764834713216 | 141.178668371671 | 123.789035728194 |
| NOL10 | 238.588762326319 | 248.594000664466 | 262.019779752857 | 265.791342287571 |
|       | 178.404791189835 | 228.001046173405 | 189.90406457741  | 204.851374931284 |
|       | 197.341423434688 | 228.414049417352 | 183.693300680495 | 244.350562866593 |
| NOL11 | 633.401624753368 | 609.100385482325 | 610.591049634222 | 484.230510636533 |
|       | 787.425941491281 | 1556.41573079892 | 1186.96351738518 | 1233.27155759407 |
|       | 1147.33034082693 | 796.699879495384 | 783.991448771818 | 1312.44215746801 |
| NOL12 | 222.565515020501 | 221.127492253636 | 248.129640673859 | 218.529160053398 |
|       | 236.470206707351 | 545.362650746876 | 287.503594820801 | 301.49286558088  |
|       | 441.785666261936 | 274.974304050999 | 378.38874489611  | 583.314509855875 |
| NOL3  | 267.190228116903 | 281.846246549202 | 304.811116024094 | 302.637859140061 |
|       | 184.377923161698 | 219.940167815376 | 241.039766283972 | 196.399050990244 |
|       | 219.441959146815 | 456.656123023446 | 183.32467147543  | 233.572055978465 |
| NOL4  | 187.069074575776 | 176.901042102323 | 208.713555471888 | 178.027417594263 |
|       | 145.759500305177 | 144.152325539824 | 149.457761307441 | 146.823157886228 |
|       | 134.94189148503  | 141.278654291193 | 150.892319579472 | 152.821735300697 |



|       |                  |                  |                  |                  |
|-------|------------------|------------------|------------------|------------------|
| NOL6  | 418.574045635945 | 436.155731212592 | 358.897128592042 | 484.568420044471 |
|       | 744.808064061459 | 584.813665097407 | 382.902151239988 | 523.073926509865 |
|       | 455.930204471585 | 486.524284354103 | 543.389747823877 | 369.513420606401 |
| NOL7  | 2078.76377557352 | 2055.27692947656 | 2493.5484556802  | 2139.42448145954 |
|       | 2496.17211592866 | 1545.71251527145 | 2751.75479578587 | 2496.17211592866 |
|       | 2891.03258768937 | 3277.24948092771 | 2456.36776585765 | 2847.42635118026 |
| NOL8  | 455.08515350006  | 423.562598841704 | 477.056706273413 | 419.763812610671 |
|       | 280.723379809959 | 467.90388853336  | 371.457568934695 | 410.731869154912 |
|       | 484.230510636533 | 413.502150181875 | 566.543765584009 | 319.639103463458 |
| NOL9  | 173.484307104751 | 163.442257036536 | 195.50039162477  | 157.170136439095 |
|       | 158.000456937922 | 160.549597620339 | 144.63774603725  | 165.659978250378 |
|       | 161.385691765316 | 139.333282400639 | 134.172033051676 | 151.518116154483 |
| NOLA1 | 255.462706428149 | 265.61506544085  | 275.841929188802 | 268.961643716282 |
|       | 274.120234926832 | 320.305852961452 | 271.238736772408 | 325.011269531407 |
|       | 347.985315257161 | 275.996693627151 | 381.253673759781 | 305.398934391579 |
| NOLC1 | 172.80265044721  | 165.813771791917 | 167.961390966538 | 132.902437860565 |
|       | 260.787104931135 | 203.089661928125 | 241.782750858091 | 221.849661343124 |
|       | 218.862705238592 | 246.88857694249  | 277.314675225943 | 280.749681050778 |
| NOM1  | 145.183463058696 | 147.81143020317  | 145.416733388652 | 133.11040099808  |
|       | 134.669763149268 | 148.112717810117 | 138.887159625058 | 139.209080672396 |
|       | 137.27827836407  | 130.776213987522 | 141.801472885127 | 144.762006548375 |
| NOMO1 | 289.82072316082  | 262.196293231028 | 343.307036883726 | 291.994364783888 |
|       | 472.669956708398 | 363.706789137022 | 509.292779821787 | 330.758879244143 |
|       | 326.176058036757 | 295.241644408321 | 268.186156177622 | 338.585771590234 |
| NOMO2 | 518.925188630246 | 449.103432410618 | 500.343476678562 | 464.436380568216 |
|       | 921.546033242474 | 539.720389702148 | 803.60413590137  | 573.846138124455 |
|       | 471.598175637494 | 393.375554593484 | 482.344514972063 | 461.413469623811 |
| NOMO3 | 116.263405190786 | 101.915858150866 | 122.99993610249  | 107.828378413233 |
|       | 154.088770236213 | 135.25734629146  | 157.971293294367 | 134.025385181979 |
|       | 140.192644427334 | 139.411792975474 | 123.042372128864 | 146.70594914192  |
| NONO  | 1783.8031212092  | 1890.86868383409 | 2021.92898855142 | 1602.63977096867 |
|       | 1838.18547839898 | 2723.55722258794 | 2282.94927629821 | 1764.53168329081 |
|       | 2508.50428529255 | 1741.0131951509  | 3648.38765465889 | 2280.20302441765 |
| NOP10 | 2176.59445919725 | 2080.47567326037 | 1944.15673951528 | 1853.20812924694 |
|       | 4511.9116742833  | 3917.05893989806 | 4628.04544865227 | 2723.55722258794 |
|       | 5226.05969701201 | 3909.47437917608 | 3301.98381607571 | 3734.705550862   |
| NOP14 | 258.998065427002 | 253.124449721731 | 302.735372807236 | 256.820546409632 |
|       | 331.684298221133 | 289.474517971859 | 353.078842299761 | 317.353318759931 |
|       | 322.028360309592 | 343.488356185437 | 374.9555524303   | 312.019603761673 |
| NOP16 | 179.863096463897 | 156.030794481734 | 247.053215951505 | 205.403820910921 |
|       | 261.203388718689 | 368.879825610754 | 391.644649726254 | 327.89660021611  |
|       | 272.968792195442 | 418.244376024741 | 219.597808863947 | 400.924914238052 |
| NOP2  | 233.426170535227 | 243.425632941131 | 224.167511918105 | 265.366632264085 |
|       | 377.148528768679 | 397.387054218873 | 331.684298221133 | 569.656573915709 |
|       | 386.738154577763 | 346.917113326564 | 314.221257518059 | 395.261210769232 |
| NOP56 | 788.693133735893 | 893.264940736694 | 792.634423781309 | 760.070180572621 |
|       | 753.654626233604 | 1769.6386910047  | 898.877732360841 | 1010.73988405469 |
|       | 1125.28599595312 | 1181.97868824758 | 703.29965727829  | 1020.19774509086 |
| NOP58 | 765.532997390972 | 613.631311147328 | 714.494228450456 | 494.347792360629 |
|       | 581.54874141672  | 1440.14449872047 | 1049.52258147141 | 1901.97972168836 |
|       | 1323.05745869565 | 1362.1486006778  | 783.755776589969 | 1534.21175984308 |
| NOS1  | 144.191491000257 | 132.164132609317 | 143.212739422069 | 128.425838805072 |
|       | 123.566522075398 | 139.418394104487 | 139.061072394426 | 124.571807093748 |
|       | 137.71627781928  | 140.892250639524 | 131.613738869093 | 129.712857649351 |

NOS1AP 139.885054845153 153.709230037306 135.403206634483  
 155.475804754732 150.960096893517 168.33854702953 161.956032597813  
 154.431051053529 146.238333981318 164.011683602245 162.513107496558  
 169.232677769521  
 NOS2 162.047249964859 137.728970630961 128.702882993588 154.016622581204  
 137.209801101689 142.587032407457 141.028377381019 131.97938329944  
 184.348894461271 133.994376985194 150.376234759097 150.73248190848  
 NOS2A 143.187539073659 138.780488114634 146.443313598482 153.843250142472  
 144.217621961908 145.952759497544 133.953303801604 141.106863165059  
 183.556662533396 139.363571392476 141.071184297124 140.105675520432  
 NOS3 186.66469040433 182.028675726969 135.680872395032 158.175138008678  
 173.714940254592 151.079500558067 127.631770516132 171.212749388553  
 173.586160103539 129.52578899011 135.472135601859 138.990971069382  
 NOSIP 1495.04587558545 1471.01897242089 1307.19490564658 1505.90883940934  
 6691.04319670055 1862.88548451154 1496.0924333403 1718.80498208397  
 2728.04758874748 1696.69982157582 1414.95226752155 1177.01310527577  
 NOSTRIN 266.80383076887 252.851164967726 214.241635800083  
 245.399847987183 166.88833169342 347.081036934975 169.184111483933  
 259.742175498038 234.094722315007 183.604011732066 191.241000498118  
 175.165305179665  
 NOTCH1 643.306565600931 889.6617510875 591.641325402032  
 1083.26599217847 603.061485415867 650.263737836685 751.568940762011  
 459.53652431464 714.494228450456 1566.65825409044 601.521068811063  
 728.485195792194  
 NOTCH2 158.545435407585 146.750774496317 150.412929574507  
 158.33974431499 164.96631670799 132.087183382523 143.807102980397  
 157.78390301218 153.111226896983 154.108689872903 137.324247703318  
 136.708746582636  
 NOTCH2NL 177.96452209396 163.951459935477 183.979513272793  
 154.232310911696 281.44159425243 172.888455552446 178.166289723365  
 185.570062118736 171.278489808694 195.16856673253 173.459008248696  
 191.348260799746  
 NOTCH3 417.442660073269 797.501324589697 284.043349407812  
 626.298707790229 1302.54547114701 976.360310504918 1041.58583268313  
 613.846166856328 654.52788411248 1400.81554054664 1255.62991601665  
 1577.15895478896  
 NOTCH4 248.690121805116 249.339449789861 151.921235758457  
 208.385295246155 192.314484368435 206.21848253717 141.255406288178  
 178.804669910283 183.472290949588 147.284005815059 221.916075811355  
 150.632724038845  
 NOTO 155.488346781292 158.359440014674 154.428779374984 164.525784478026  
 171.338371572269 166.223079895236 152.709021529522 174.389706515542  
 153.19516365535 156.022967076728 134.05596537871 165.344981821448  
 NOTUM 144.873034900013 141.966490100288 139.925201225224 140.554684822646  
 150.300824086322 147.978039160763 143.849399031223 156.94531513373  
 238.344676327918 144.472969298036 146.959154938248 151.015243921984  
 NOV 186.321879879561 167.965981130329 153.226604317177 164.478006648035  
 143.990328432869 143.632325018964 139.15175079191 178.728925255163  
 156.567519536997 174.26780796802 156.141123407905 167.637638693195  
 NOVA1 149.625528206375 149.35848619832 155.441190892146 134.683553037185  
 131.9651841111199 129.987548571478 131.381189141974 118.871735074285  
 128.266906202941 137.071402810983 120.319621393685 132.008330288281

|        |                  |                  |                  |                  |
|--------|------------------|------------------|------------------|------------------|
| NOVA2  | 110.202982683256 | 109.29279076901  | 123.96665768708  | 114.631759839092 |
|        | 123.02879683948  | 116.388079393669 | 109.832757716464 | 115.29099102455  |
|        | 116.14662237541  | 105.62620788923  | 116.342242990651 | 112.943630133093 |
| NOX1   | 142.285486339143 | 136.185953087697 | 138.952082680577 | 135.170925092209 |
|        | 141.5068665919   | 135.338077911839 | 133.226542641174 | 137.294246530224 |
|        | 144.662545137915 | 134.91697121091  | 130.430917518283 | 130.135721123253 |
| NOX3   | 151.921235758457 | 131.468537312778 | 132.253450751554 | 149.283495832731 |
|        | 135.155955441604 | 140.995418231627 | 138.601616246182 | 143.950279111815 |
|        | 140.167274633872 | 124.001295849091 | 126.967212770393 | 137.709120153505 |
| NOX4   | 172.065593177758 | 175.757588503244 | 259.184713471619 | 183.033044475752 |
|        | 130.09050436943  | 140.115154069602 | 140.949367846425 | 140.714455864886 |
|        | 148.094036534405 | 197.605208310432 | 153.857048476879 | 141.88072888667  |
| NOX5   | 136.026302491961 | 135.232878188098 | 133.185908839766 | 145.950701448912 |
|        | 140.338622198206 | 134.768694020981 | 143.631345956176 | 142.603436693587 |
|        | 136.565191271943 | 139.153897381147 | 132.517166202071 | 129.628859533303 |
| NOXA1  | 220.458449424062 | 203.436527043293 | 218.18756955522  | 248.260998007814 |
|        | 304.547738011742 | 159.090982014161 | 160.353649786837 | 191.418673767345 |
|        | 181.431827312784 | 246.152798696993 | 361.082957133644 | 228.542423012958 |
| NOXO1  | 144.568417378353 | 145.824996954376 | 141.985130140173 | 150.78145177853  |
|        | 145.71535210212  | 155.52533851273  | 146.508628678304 | 156.033897758869 |
|        | 176.849238577762 | 204.337844243869 | 165.347173283335 | 156.594337089784 |
| NP     | 197.24751449599  | 220.959843573708 | 170.577057395536 | 167.850516495529 |
|        | 397.387054218873 | 412.202049714695 | 389.260166168847 | 352.354687089427 |
|        | 260.554343693588 | 805.600599570258 | 406.998800177456 | 486.524284354103 |
| NPAL3  | 275.169415154893 | 268.148673257455 | 302.219514290905 | 272.193578770314 |
|        | 338.075238647592 | 357.928880740814 | 466.58966852405  | 501.946140974776 |
|        | 670.347447480331 | 284.195575802966 | 725.065727257421 | 337.119524477446 |
| NPAS1  | 111.65024009102  | 106.341910466588 | 124.611144621071 | 107.605526304445 |
|        | 187.280334341504 | 125.416113646128 | 128.126354569418 | 116.540729581355 |
|        | 123.336074100984 | 114.545476919992 | 128.419406507915 | 100.477911152746 |
| NPAS2  | 323.244664586314 | 308.803322140241 | 292.965109701719 | 347.11449748201  |
|        | 280.531844086775 | 284.351529744475 | 286.431013744652 | 404.073802241516 |
|        | 250.18189549573  | 174.332913952768 | 683.365770196967 | 401.542072222692 |
| NPAS3  | 151.151297821117 | 142.307520290692 | 149.078664825533 | 151.803707178383 |
|        | 134.966883985611 | 150.073816271065 | 148.153776704837 | 146.411873503163 |
|        | 145.588981165456 | 142.596113491002 | 141.797497681512 | 145.870135196037 |
| NPAS4  | 241.675251479835 | 290.288001750744 | 263.64863646012  | 447.297590650141 |
|        | 149.048057509964 | 153.792925101459 | 151.858466721347 | 139.403087367992 |
|        | 136.971869448818 | 131.226834630025 | 145.301551442388 | 141.664271607079 |
| NPAT   | 175.704031930103 | 185.485858719975 | 166.795671029174 | 135.848022588175 |
|        | 149.073650082048 | 171.909358721737 | 152.902458879101 | 209.60319248212  |
|        | 159.624341769644 | 136.095753586495 | 210.729945718068 | 162.247608931408 |
| NPB    | 182.608712782878 | 170.320777845496 | 193.173703015873 | 167.304721591124 |
|        | 177.524818593325 | 182.118544602205 | 173.035013611377 | 158.799917136119 |
|        | 157.878110410517 | 253.933478547515 | 158.973872644973 | 149.089067389266 |
| NPBWR1 | 113.370762349233 | 109.482330324734 | 112.357261386644 |                  |
|        | 117.089207321783 | 117.602986362773 | 107.303126530947 | 110.273174147374 |
|        | 109.536381305315 | 115.718600552187 | 115.041324824728 | 119.862037840843 |
|        | 112.661607612444 |                  |                  |                  |
| NPBWR2 | 141.725882943927 | 129.621296567128 | 130.266601299194 |                  |
|        | 142.771243742561 | 139.585373400347 | 134.405155876727 | 131.110018165002 |
|        | 138.93292293598  | 132.240470270795 | 137.497145594629 | 130.189958197332 |
|        | 135.906115546805 |                  |                  |                  |

NPC1 438.431160975498 349.99912485533 432.604462607037 336.434368527549  
 412.277592266475 227.288015854809 275.696829424061 371.552970811499  
 243.038392457584 555.259469428492 306.333710880618 238.946506103155  
 NPC1L1 139.501279970508 144.154217446011 149.453103369806  
 157.443127950708 125.079330440615 145.471090720048 123.086596566142  
 136.899405404096 138.27272971335 142.993401965852 133.659475650376  
 130.763957515652  
 NPC2 6484.36742084268 5859.56559124843 4979.31150268741 4857.3155917904  
 4441.92485662082 3545.8833678963 6877.52553567598 6179.86800320807  
 6281.01687932005 7802.25987814138 6810.50193989514 5688.84918819457  
 NPCCR1 148.89180107448 152.035992124554 145.108281984556  
 168.966578601686 130.998637545686 152.620244087653 152.199095472082  
 145.411264691728 137.689158155552 165.942761337382 137.129864761402  
 170.361237529247  
 NPDC1 239.649306804266 218.529160053398 242.253995801882 237.113813706224  
 314.386320310898 211.535720730612 205.011514211101 171.140106467064  
 200.017741240426 137.537197575152 260.888612454097 241.134385745554  
 NPEPL1 780.961416212309 774.180202250076 1035.0797237176  
 928.672013047007 1468.50184641042 940.008438825765 919.165331064155  
 377.462793982812 476.249239197777 597.459920611726 696.131296166255  
 509.702881232139  
 NPEPPS 331.251075774227 310.426513884979 420.017044147123  
 331.999693230194 304.357050745605 333.676803661366 372.475112554793  
 341.714401872192 330.143103381406 443.623904480087 288.505502880424  
 307.083179338165  
 NPFF 142.52234368939 162.289781945582 127.928195199945 141.173167283016  
 129.330056939361 126.656077572961 130.290454258898 129.887187837732  
 134.966883985611 129.561012565141 163.422877959747 123.76900858347  
 NPFFR1 134.896349513392 135.634385846692 121.930362099901  
 128.434301921433 130.970694919879 125.202468372015 126.603552416008  
 126.63730651721 129.446928016147 137.096785940897 118.918962530408  
 125.171532277078  
 NPFFR2 142.397433929092 143.996350813566 131.954310449801  
 127.657961561231 134.56134674893 139.340699808517 136.751654856807  
 168.538117820213 259.900447705311 144.256029338053 158.030237507443  
 140.634047988278  
 NPHP1 150.778292242313 144.87013280941 144.375109087466 149.487167787687  
 160.954017627605 149.176808507529 145.900272803108 151.501794696948  
 141.553465481789 155.058852833902 149.430396727944 142.09146795308  
 NPHP3 423.489441909617 341.43511159996 492.534183006883 331.164053277361  
 192.954269340616 336.002793042439 251.224369831275 304.679197422439  
 250.037172478288 303.638516587721 261.500728878974 284.272977025491  
 NPHP4 161.870389635266 152.169087619827 144.94824685435 156.502051001988  
 255.793823796456 169.192327500032 165.118167086792 170.13453211897  
 181.088268167074 172.319604146201 154.65319127051 173.169905329013  
 NPHS1 112.248047602652 112.949643549398 112.693431140524 113.362825181676  
 118.039780360151 112.495783269169 121.053766591551 111.086170834553  
 112.026113831896 109.806338826826 126.611663427876 104.826135297161  
 NPHS2 118.226036680442 118.486195373059 131.797936395014 122.578170988039  
 131.391434131813 115.520278378747 114.278113876915 125.339305282874  
 114.740948266517 113.05681175258 161.456727894848 115.43068422162  
 NPIP 666.204695328096 500.132469062228 682.538709448692 544.222458349696  
 321.426100243434 361.516275756449 441.331937921872 423.489441909617  
 310.426513884979 393.914413372142 324.56043349882 362.899103657252

|        |                  |                  |                  |                  |
|--------|------------------|------------------|------------------|------------------|
| NPL    | 161.456727894848 | 161.155280539113 | 155.035727630756 | 162.289781945582 |
|        | 265.919002666885 | 191.146276657897 | 262.233918187791 | 265.219444616245 |
|        | 255.039661999732 | 245.582279957584 | 246.989526028884 | 214.684538620841 |
| NPLOC4 | 349.65350886897  | 413.687046868111 | 381.253673759781 |                  |
|        | 507.827473844576 | 494.875547886209 | 361.687156919012 | 348.640185950469 |
|        | 453.282973743379 | 395.645016679312 | 244.766289564524 | 344.992791638415 |
|        | 372.255208814622 |                  |                  |                  |
| NPM1   | 118.32560379073  | 126.839037497031 | 140.327799236005 | 137.919253591105 |
|        | 127.79057041268  | 141.369723386494 | 137.844113743956 | 142.991135981933 |
|        | 146.347213904792 | 144.201723591119 | 129.3513576591   | 141.781482381513 |
| NPM2   | 114.45792163942  | 108.570463496052 | 110.753661013519 | 117.646963986512 |
|        | 110.061459744714 | 115.450352881048 | 109.599589420575 | 112.000309477972 |
|        | 111.204065131669 | 114.314425748312 | 127.972708116366 | 117.367470441908 |
| NPM3   | 491.709723745226 | 488.249967208882 | 386.544913399837 | 482.677635089583 |
|        | 164.769320792025 | 526.970555181851 | 578.297031096292 | 587.893636997642 |
|        | 415.322560616847 | 889.6617510875   | 831.289724465877 | 845.150147618462 |
| NPNT   | 141.139737175648 | 157.207544072126 | 150.082561726876 | 157.521230460545 |
|        | 146.617853918109 | 346.691690520054 | 126.222105816959 | 129.918038866006 |
|        | 145.686092190716 | 208.838523729744 | 146.223880979601 | 131.674409480919 |
| NPPA   | 148.47415004128  | 172.591885279428 | 163.863677822465 | 155.42165869714  |
|        | 147.017958916908 | 151.592787806315 | 136.258073395013 | 147.838660813476 |
|        | 153.047317528007 | 170.069291215013 | 150.493049106543 | 144.908551199481 |
| NPPB   | 137.15571320152  | 157.848456517169 | 148.126745515891 | 152.320805439283 |
|        | 135.210887148305 | 156.682781772069 | 128.608401533371 | 196.429685815196 |
|        | 149.18603646016  | 132.661036963636 | 135.553183871663 | 139.576261630082 |
| NPPC   | 117.60787142216  | 118.000757530896 | 116.134550788966 | 116.369395555451 |
|        | 117.743425291931 | 123.902047880095 | 112.190904058889 | 121.75662526451  |
|        | 122.379537202709 | 114.567609871292 | 120.696557306298 | 122.079685222733 |
| NPR1   | 172.578252260002 | 145.449099891256 | 150.403702679274 | 162.090585987836 |
|        | 172.073751088968 | 152.798927898416 | 160.268754786532 | 145.544996009633 |
|        | 157.663460168247 | 161.172420368335 | 166.600109853461 | 146.770267005869 |
| NPR2   | 238.904826940476 | 211.208937901871 | 233.635876830148 | 216.353502371227 |
|        | 145.110145981908 | 145.296229550382 | 145.500011956699 | 162.178410412809 |
|        | 177.393812005949 | 169.642188114285 | 180.493406236326 | 149.394952856085 |
| NPR3   | 170.417054311946 | 144.389805078873 | 158.034418043685 | 134.737901773547 |
|        | 151.803707178383 | 144.907294702865 | 139.755211300398 | 157.590017103385 |
|        | 145.43470695949  | 151.289464845626 | 129.719122724699 | 121.54835308632  |
| NPS    | 150.403702679274 | 147.333142209628 | 161.102731941183 | 152.755535408382 |
|        | 145.870135196037 | 149.604072044469 | 148.744599622165 | 156.296046600921 |
|        | 147.46607538135  | 132.964614203091 | 131.272948162154 | 151.879398444495 |
| NPSR1  | 143.990328432869 | 143.151478156897 | 142.388076341254 | 142.30928744202  |
|        | 141.411635093377 | 141.249687936867 | 144.877789873062 | 139.077570424394 |
|        | 138.93292293598  | 142.545823714168 | 146.413845130977 | 138.023752854109 |
| NPTN   | 2542.44286642873 | 2502.72913594103 | 2069.70335195314 | 2605.13680290987 |
|        | 785.599211190431 | 1059.19317548869 | 1110.43791444289 | 873.879064183441 |
|        | 1101.66868138797 | 1044.52286986369 | 990.206369590236 | 1024.95957828641 |
| NPTX1  | 202.943987922418 | 174.698724064671 | 133.581450824362 | 141.619432083003 |
|        | 132.096095362238 | 134.954988522413 | 131.12775424877  | 130.887769728442 |
|        | 154.515091049526 | 328.200548902445 | 130.907879150229 | 134.545983176488 |
| NPTX2  | 148.058893673648 | 185.938983266802 | 173.240598306749 | 149.599523779175 |
|        | 184.25384366282  | 318.004190156313 | 136.037555727438 | 233.192751618176 |
|        | 156.852187451794 | 176.070695522397 | 164.661445411833 | 188.166168428752 |

|       |                  |                  |                  |                  |
|-------|------------------|------------------|------------------|------------------|
| NPTXR | 159.443697452694 | 178.928873342925 | 157.431972439046 | 203.276353321185 |
|       | 187.380064367869 | 135.155955441604 | 135.36463588098  | 158.819151102054 |
|       | 146.854523122404 | 126.928328902507 | 144.589482298525 | 139.664055668127 |
| NPVF  | 134.394503574535 | 142.928920246687 | 151.836705989155 | 132.992071643179 |
|       | 118.614641349402 | 149.52880714343  | 144.528360135884 | 148.65131922365  |
|       | 136.478114537536 | 139.47828235176  | 139.280151859534 | 139.959629641771 |
| NPW   | 135.51506573405  | 131.81975648701  | 130.506708993193 | 133.460655803085 |
|       | 163.290050020756 | 138.631273903053 | 136.598215718877 | 125.818432070199 |
|       | 131.265594391542 | 134.096283448464 | 120.517691208358 | 139.342430217926 |
| NPY   | 147.89884142817  | 182.152956182443 | 127.310437599803 | 128.495276191943 |
|       | 122.868393258957 | 111.672450681359 | 130.304743083321 | 129.077660633761 |
|       | 121.543207264598 | 118.025603140924 | 139.677109265241 | 130.71040889651  |
| NPY1R | 177.338445842102 | 152.798927898416 | 166.587100972754 | 158.751241730465 |
|       | 159.788143847569 | 151.083551412109 | 148.879605388902 | 171.035391211596 |
|       | 160.67285689491  | 173.044636575826 | 149.44788347071  | 173.867252292026 |
| NPY2R | 127.827096314406 | 113.177330690612 | 127.786141874218 | 102.563722570171 |
|       | 121.22760405399  | 121.274997609378 | 127.179420421981 | 121.429270259367 |
|       | 120.110473925082 | 104.896224175106 | 112.268518171041 | 122.236134282757 |
| NPY5R | 137.784270510433 | 150.748298569951 | 157.848456517169 | 157.494596757446 |
|       | 159.845890841215 | 147.320976507643 | 154.046550866249 | 163.248980088946 |
|       | 154.698312173556 | 149.599523779175 | 156.589829166493 | 152.705458417973 |
| NPY6R | 147.659772694732 | 140.184082384548 | 166.640325848102 | 126.22472822166  |
|       | 109.806338826826 | 105.521320791331 | 122.724429060184 | 117.296972688814 |
|       | 113.78323485587  | 98.4947439453387 | 116.566190779365 | 105.859916438163 |
| NQO1  | 821.862271569917 | 954.488185198006 | 944.47112348734  | 1334.69145271749 |
|       | 1033.48252432603 | 1615.60472592991 | 1623.92991386706 | 1978.12229412176 |
|       | 1715.51071085304 | 909.727616721285 | 1355.07170485397 | 1465.2419150392  |
| NQO2  | 349.330629649093 | 341.564749445905 | 311.449205777595 | 324.346723939622 |
|       | 282.719121652073 | 261.814227719605 | 264.741946816665 | 321.568127272161 |
|       | 194.413759761549 | 434.716530273383 | 276.714748212739 | 220.098071755353 |
| NR0B1 | 145.749887769807 | 134.149446827982 | 135.191440283047 | 135.353539458856 |
|       | 147.722646851008 | 160.254101852355 | 135.688346453694 | 149.223102493474 |
|       | 134.323365608463 | 125.868080230094 | 160.79631681714  | 130.005909892804 |
| NR0B2 | 122.817695619508 | 118.457573670556 | 115.923424095859 | 111.299115402008 |
|       | 120.665520347481 | 108.910588012315 | 108.751654061536 | 109.209241676429 |
|       | 113.536570797896 | 116.65880728655  | 120.665520347481 | 108.2359175332   |
| NR1D1 | 170.306241656131 | 177.267145265362 | 176.410016510249 | 197.859546367676 |
|       | 153.121693371757 | 165.080825814849 | 157.016659994185 | 163.951459935477 |
|       | 169.003310163058 | 182.763057221385 | 150.287472248483 | 153.4392054301   |
| NR1D2 | 242.471259857978 | 249.09278446472  | 281.881563164961 | 252.249994170536 |
|       | 192.860161535869 | 244.486311003619 | 212.5119818331   | 195.160353691349 |
|       | 208.42712014566  | 261.065986251886 | 204.695311233073 | 200.536814571322 |
| NR1H2 | 442.86942574917  | 479.395948662331 | 473.73182675469  | 589.070196307574 |
|       | 1074.96415574964 | 282.652193666078 | 324.615093103582 | 289.434186747703 |
|       | 493.622989939072 | 222.764568757453 | 248.129640673859 | 242.871915060884 |
| NR1H3 | 658.068932688816 | 604.237898104299 | 397.2528907311   | 506.165100641525 |
|       | 703.29965727829  | 380.393153331219 | 684.715981522999 | 405.766055310869 |
|       | 989.77058497525  | 290.389345090634 | 481.238450505207 | 642.934824227327 |
| NR1H4 | 117.343165720552 | 128.835216648178 | 128.659393756477 | 130.521731606987 |
|       | 116.881212516879 | 124.690141443832 | 118.192302821514 | 976.782815449208 |
|       | 116.943791343147 | 135.829273398594 | 415.497783305278 | 120.29173510435  |
| NR1I2 | 155.035727630756 | 143.987296454585 | 152.052084712417 | 148.684855678535 |
|       | 148.294870328642 | 133.257477196196 | 152.50843414723  | 140.18668846839  |
|       | 143.512348693556 | 138.897393621114 | 141.712693059287 | 142.669207969715 |

|         |                  |                  |                  |                  |
|---------|------------------|------------------|------------------|------------------|
| NR1I3   | 127.842177770276 | 115.270544506813 | 118.9952230535   | 123.231397809701 |
|         | 122.428943658306 | 130.92186531563  | 125.967294930279 | 117.555999801887 |
|         | 118.201092260839 | 121.181654892305 | 115.170176263172 | 116.86635524597  |
| NR2C1   | 247.111032124864 | 216.209052148435 | 309.098519056843 | 199.058972781223 |
|         | 233.426170535227 | 345.433025456954 | 268.034972830233 | 305.577166690215 |
|         | 255.992494620859 | 236.809829701921 | 241.077618798955 | 288.823376348944 |
| NR2C2   | 184.204036882642 | 196.399050990244 | 207.785320401354 | 182.197625235191 |
|         | 200.518684601283 | 190.993590849624 | 198.925776755081 | 238.482863150124 |
|         | 207.269530621176 | 188.348499229585 | 198.506786870804 | 204.183472655276 |
| NR2C2AP | 300.53017771156  | 323.391456630794 | 296.830999357172 |                  |
|         | 379.546197364027 | 548.288640768746 | 637.695341427976 | 434.176007498693 |
|         | 624.978351618077 | 391.911768848267 | 332.138346958671 | 341.361299896997 |
|         | 371.457568934695 |                  |                  |                  |
| NR2E1   | 140.738977175997 | 141.301503201175 | 153.985529457122 | 125.67874617392  |
|         | 132.695992860853 | 141.380276932556 | 147.617354114584 | 143.893751699551 |
|         | 141.698329968978 | 139.128751917566 | 159.572851489665 | 141.342216963124 |
| NR2E3   | 113.479382235297 | 110.61165787102  | 116.46192274217  | 109.947300629824 |
|         | 108.179513318734 | 115.954828435072 | 110.296425545476 | 110.068122112671 |
|         | 107.221547998974 | 113.66416989856  | 121.116206210402 | 112.227434965199 |
| NR2F1   | 2061.9164323309  | 2185.46850787298 | 1148.80141486692 | 1509.69760873558 |
|         | 187.645390502607 | 249.737588031219 | 204.596753034535 | 313.322307299463 |
|         | 393.796356067403 | 222.118666699301 | 197.795275907042 | 254.63506290698  |
| NR2F2   | 418.645775576811 | 564.200165295159 | 405.843083758177 | 552.494327858264 |
|         | 311.848379951974 | 261.286548990435 | 341.128917971124 | 340.903961204211 |
|         | 454.030083521756 | 488.884511065882 | 333.131139447511 | 455.392133846517 |
| NR2F6   | 480.36420271348  | 598.647226284738 | 358.415933397099 | 605.437395034282 |
|         | 3403.37530051435 | 1595.22997714906 | 1567.89763050645 | 1556.41573079892 |
|         | 1665.14066952917 | 678.684323057327 | 1632.84261181074 | 1211.39534395597 |
| NR3C1   | 152.552277008504 | 155.572357799741 | 145.44629057846  | 142.728311130348 |
|         | 120.669452856028 | 137.556552701816 | 123.566522075398 | 128.966514855818 |
|         | 136.097571072206 | 183.633719048831 | 158.95714101556  | 135.705904966172 |
| NR3C2   | 506.80969228563  | 571.439520427295 | 559.0867397858   | 601.401329244185 |
|         | 145.280485286937 | 148.49560238679  | 143.00521196918  | 169.661107080542 |
|         | 172.544504923991 | 143.554726863556 | 162.778480318754 | 153.02127620577  |
| NR4A1   | 148.062245676711 | 144.345080865349 | 155.313873664923 | 139.268052431476 |
|         | 130.233769058693 | 144.170287726456 | 127.206177583275 | 129.13353785479  |
|         | 126.893023101449 | 139.336891718408 | 136.977435235496 | 131.432729794636 |
| NR4A2   | 381.323457262383 | 941.572186137467 | 384.566987097657 | 403.984761333129 |
|         | 279.495192828873 | 811.144838166905 | 177.562561297777 | 243.425632941131 |
|         | 179.109090120497 | 300.443499140896 | 204.509884908059 | 195.946096353894 |
| NR4A3   | 137.000868503792 | 162.900556089071 | 189.472541628897 | 139.153897381147 |
|         | 132.265895156539 | 191.924177620803 | 135.839826264562 | 127.833653828539 |
|         | 136.641140715439 | 135.29954024755  | 139.831964368637 | 129.656088836537 |
| NR5A1   | 105.606964521964 | 105.408689610638 | 104.58424134098  | 99.7487411813724 |
|         | 105.976284291356 | 105.31352471598  | 113.620070198869 | 112.38543517651  |
|         | 110.16174213285  | 108.04922729993  | 112.3786222545   | 115.264104392064 |
| NR5A2   | 136.246543311291 | 142.581441480371 | 118.855500322915 | 127.095347480109 |
|         | 127.31790396929  | 134.465488237877 | 118.21084414402  | 135.647660756548 |
|         | 136.71278398686  | 126.501648842366 | 137.599810249536 | 120.873985900666 |
| NR6A1   | 153.43000129811  | 141.200676699805 | 152.915692742755 | 148.549257493128 |
|         | 162.15259972225  | 147.305679046765 | 145.208597795717 | 159.286484253487 |
|         | 153.146646647258 | 151.933078262284 | 138.469997677004 | 147.728018766726 |

|       |                  |                  |                  |                  |
|-------|------------------|------------------|------------------|------------------|
| NRAP  | 153.165872773973 | 152.179281925254 | 156.957578703389 | 167.337624316172 |
|       | 156.061579024549 | 151.130401750721 | 163.960242712692 | 153.647343267295 |
|       | 147.389892239448 | 159.196987090991 | 138.489443610941 | 154.431051053529 |
| NRARP | 136.930523377107 | 135.840528665314 | 140.464476678448 | 138.480633738745 |
|       | 170.835513021958 | 158.23562423217  | 139.613193302406 | 144.331409179705 |
|       | 145.507330257603 | 164.048326497989 | 152.393260140571 | 140.84880167881  |
| NRAS  | 154.520935683104 | 152.258389962    | 134.545175953914 | 140.06989960847  |
|       | 207.514489132778 | 202.421990203844 | 224.963277964548 | 208.476367897256 |
|       | 170.807514224412 | 565.164961255054 | 207.338645756456 | 223.058699622386 |
| NRBF2 | 202.314814594735 | 182.919385608842 | 186.679199600379 | 170.320777845496 |
|       | 175.341310423897 | 204.942500423413 | 213.215996114827 | 216.427103365727 |
|       | 199.397633942623 | 364.443097338814 | 254.447650810819 | 224.274329367512 |
| NRBP1 | 333.91440669951  | 326.758278851698 | 282.045333787115 | 371.767182305618 |
|       | 662.04757187541  | 277.539110964815 | 250.577945492981 | 241.527811817146 |
|       | 229.97640195632  | 291.914408947328 | 252.894371238554 | 209.417052464583 |
| NRBP2 | 882.798927428142 | 777.901979189395 | 946.273229715791 | 1000.48723872058 |
|       | 256.471672362567 | 256.424415389574 | 342.998459706966 | 304.937584086529 |
|       | 310.465070184707 | 560.015499136193 | 314.337680575998 | 485.87138934376  |
| NRCAM | 145.875240619257 | 152.350537364705 | 139.62718946833  | 133.308383825604 |
|       | 156.911538642765 | 160.91894600916  | 147.879286704    | 150.176942469551 |
|       | 181.288519308219 | 161.208713751942 | 141.753560518393 | 159.42746786085  |
| NRD1  | 1307.96033038529 | 1230.00744483191 | 1355.66237447026 | 1258.16519121331 |
|       | 1145.96710556468 | 1338.83705469394 | 1164.61390835016 | 1301.18893681695 |
|       | 998.631321857182 | 1516.97921112926 | 1490.02976786379 | 1242.61637859159 |
| NRF1  | 126.435928518593 | 126.476866025397 | 123.453048609213 | 127.661634554996 |
|       | 122.125746529725 | 120.246240734668 | 122.873661677648 | 128.604270382206 |
|       | 120.379393989882 | 124.526220300907 | 140.92377681377  | 120.041623078295 |
| NRG1  | 139.864176113337 | 141.261150586614 | 135.242328667085 | 129.953801496113 |
|       | 134.891736344801 | 136.601220755282 | 133.891337645936 | 132.425596223397 |
|       | 140.975056186954 | 135.16316100494  | 129.299810898979 | 131.300342835696 |
| NRG2  | 138.405215507471 | 148.09868976776  | 130.579954890389 | 135.766466392056 |
|       | 172.045843691642 | 109.266533255266 | 132.631819830347 | 115.457121859064 |
|       | 118.47752077032  | 116.819107878692 | 132.395993254065 | 114.200099628087 |
| NRG3  | 166.036553680319 | 171.473538842796 | 184.816515945311 | 171.216275057884 |
|       | 170.452989060697 | 180.231462528702 | 164.804822506224 | 164.072443259668 |
|       | 158.999305963902 | 171.537040561599 | 152.738468369498 | 171.190796424612 |
| NRG4  | 152.948391119096 | 143.231806900648 | 147.903030308715 | 151.694193636313 |
|       | 149.622695843398 | 170.614129599775 | 273.402804140541 | 164.791545858875 |
|       | 161.972922129453 | 277.285526811736 | 197.146035305296 | 260.999345837027 |
| NRGN  | 175.428000742222 | 237.456245064363 | 161.208713751942 | 172.438141471784 |
|       | 309.861048237742 | 163.446813963119 | 168.867373925372 | 179.49202902995  |
|       | 179.478756495687 | 178.377461551319 | 153.519207482423 | 165.737618983611 |
| NRIP1 | 491.112594297928 | 471.816954259146 | 431.861762635568 | 395.716879127149 |
|       | 515.432065049838 | 1088.25132365974 | 619.223672253014 | 738.087203930249 |
|       | 693.516351173476 | 902.089561157715 | 463.622673539254 | 701.208391798006 |
| NRIP2 | 145.924751649542 | 161.316521450944 | 138.058404474114 | 154.187420367647 |
|       | 146.880440100898 | 146.084461430546 | 131.551085224112 | 138.634814756987 |
|       | 150.613624696604 | 141.145419751161 | 131.031639119149 | 135.666278507269 |
| NRIP3 | 419.126814511305 | 484.363052437459 | 282.190861594303 | 614.094097408035 |
|       | 255.12306184224  | 243.732074437237 | 282.870785313621 | 551.92688162618  |
|       | 391.782120640025 | 335.059844742031 | 245.978723809154 | 227.050629701762 |
| NRK   | 205.200459980187 | 181.148062201932 | 197.146035305296 | 238.617228632505 |
|       | 176.631604815669 | 189.539458686123 | 199.70041209487  | 189.362958041175 |
|       | 178.43642939806  | 196.031541155674 | 193.641927801805 | 201.517356610591 |



|       |                  |                  |                  |                  |
|-------|------------------|------------------|------------------|------------------|
| NRL   | 135.63604256516  | 139.571752933877 | 137.919253591105 | 130.316282003711 |
|       | 133.533020887439 | 128.339161042799 | 126.956303896995 | 131.193538235053 |
|       | 123.065355919378 | 124.758906471654 | 174.357336296554 | 127.424848301217 |
| NRM   | 178.745112514526 | 237.171424222756 | 158.356964958885 | 278.061498892643 |
|       | 250.718986968076 | 157.425924587516 | 167.871703133182 | 178.142393629606 |
|       | 167.637638693195 | 178.284294783418 | 177.478925091583 | 203.244917049745 |
| NRN1  | 143.899201949317 | 143.877226672663 | 139.741862925156 | 142.776295389006 |
|       | 138.384797779855 | 127.930072902878 | 132.464205461991 | 125.073353210914 |
|       | 134.299575239865 | 156.998563448664 | 169.332207863684 | 128.572388808833 |
| NRN1L | 127.985051303973 | 118.88525116298  | 121.174618503873 | 126.719205774829 |
|       | 123.902047880095 | 128.835216648178 | 115.409568875238 | 130.161889021281 |
|       | 124.086902599543 | 126.788749235867 | 137.850437814788 | 109.128394735532 |
| NRP1  | 304.590636814607 | 320.648966489586 | 216.731618532814 | 334.857690525582 |
|       | 196.269193578525 | 273.984715370774 | 169.168869363848 | 212.312154721246 |
|       | 213.891435492914 | 268.78904911703  | 211.419445018736 | 191.861598059182 |
| NRP2  | 139.644701550661 | 138.712529531951 | 139.667714422309 | 131.510494315469 |
|       | 133.113581756557 | 125.068362001087 | 128.182419321978 | 122.170662903259 |
|       | 124.61344300674  | 129.462319953515 | 130.761936205169 | 126.492058851464 |
| NRSN1 | 145.324499089416 | 132.674061422332 | 125.865974180252 | 129.551260802518 |
|       | 129.018088749395 | 130.392575279055 | 128.129780978486 | 136.229159638766 |
|       | 126.708817316134 | 128.79607493422  | 134.828360289676 | 134.757300066835 |
| NRSN2 | 271.356289141017 | 306.486275677467 | 279.541294184609 | 369.275635424092 |
|       | 385.522443482    | 239.388546850124 | 219.996410908721 | 209.887047474042 |
|       | 277.86338481075  | 221.18757533703  | 176.410016510249 | 240.005943851098 |
| NRTN  | 185.100455193182 | 196.207631868755 | 145.03221570575  | 274.316982298975 |
|       | 146.579073345319 | 129.880696706381 | 119.974853329265 | 138.086270564406 |
|       | 123.25201993575  | 135.48250324478  | 127.279107079261 | 125.40832206502  |
| NRXN1 | 154.725484895098 | 151.282370273189 | 143.582187466814 | 148.401698825687 |
|       | 143.13304460184  | 143.639894909386 | 138.850077456103 | 138.972789382679 |
|       | 138.748941735079 | 143.810050834214 | 141.378381097266 | 137.812249316763 |
| NRXN2 | 286.506419296679 | 477.056706273413 | 193.871324880919 | 832.335328912437 |
|       | 147.679233228201 | 146.054535585464 | 138.541779821934 | 142.077913913564 |
|       | 141.746976260176 | 134.963301368391 | 136.572645314012 | 133.011320549232 |
| NRXN3 | 173.798554769204 | 147.028946382445 | 142.108805047729 | 147.896919205072 |
|       | 161.983987604    | 135.341892490559 | 148.777757083469 | 153.911165277809 |
|       | 132.197346228417 | 136.760382409185 | 142.34471764492  | 137.663941989772 |
| NS3BP | 133.802898895457 | 138.068164255305 | 158.712241098927 | 135.455283504668 |
|       | 139.856251508283 | 124.036907709461 | 124.329980024986 | 127.354826381656 |
|       | 125.634045420702 | 135.096321258167 | 131.117294275244 | 139.297276687352 |
| NSA2  | 1619.67820476414 | 1736.03342040646 | 1736.03342040646 | 1158.057104827   |
|       | 541.460843251764 | 960.491731797061 | 2618.64973582507 | 1057.1528284934  |
|       | 923.130629121442 | 2395.75453574049 | 1542.35486950856 | 1669.97250023755 |
| NSBP1 | 273.668871896558 | 306.677271064305 | 304.636618563775 | 291.50783830983  |
|       | 161.891809608511 | 173.681078272467 | 193.522811257085 | 181.431827312784 |
|       | 199.191065549132 | 193.786889748038 | 193.660159482867 | 187.352655464866 |
| NSD1  | 169.095270479344 | 158.292581724934 | 169.881866987359 | 152.933230159216 |
|       | 153.222807811478 | 166.452651396293 | 145.176141415244 | 168.744610747563 |
|       | 150.711857623087 | 160.543465620248 | 167.121623035375 | 166.4983332269   |
| NSDHL | 310.174932137546 | 348.413827101046 | 360.812953749077 | 359.363523948825 |
|       | 873.010676463707 | 639.184296110069 | 561.858563298512 | 515.432065049838 |
|       | 540.190808200264 | 1070.4597488302  | 479.638653311025 | 419.532420763449 |
| NSF   | 327.164773632634 | 349.248144552634 | 329.406649846151 | 360.053590374552 |
|       | 373.096629378654 | 485.576566972696 | 503.093655556038 | 720.214044399108 |
|       | 724.442411170786 | 452.077434390612 | 572.753294955207 | 653.047570485109 |

|         |                  |                  |                  |                  |
|---------|------------------|------------------|------------------|------------------|
| NSFL1C  | 654.108318810728 | 683.861021234927 | 777.901979189395 |                  |
|         | 770.19255305977  | 605.583144451322 | 451.380376296813 | 416.307629596091 |
|         | 369.434158443561 | 417.987533397449 | 378.920456227378 | 564.749082802433 |
|         | 389.853534237748 |                  |                  |                  |
| NSL1    | 320.979443123471 | 320.214614455231 | 285.562276640039 | 309.155070674445 |
|         | 250.139061165593 | 305.050933898691 | 309.155070674445 | 248.791254839869 |
|         | 284.195575802966 | 277.652851236546 | 243.95334982553  | 351.998551165704 |
| NSMAF   | 852.436775264873 | 734.139557942719 | 798.943242964857 | 704.448123154868 |
|         | 596.934339406636 | 776.411045078049 | 553.123179808258 | 726.731270955732 |
|         | 709.778171909457 | 648.823677010146 | 926.283018664897 | 624.106546150735 |
| NSMCE1  | 653.500279510032 | 734.71562355687  | 850.125434374005 |                  |
|         | 1004.97723186946 | 407.518324776453 | 572.548647437438 | 874.348941257592 |
|         | 606.003956839826 | 713.087392708048 | 538.369868115137 | 729.202002368627 |
|         | 569.967953318205 |                  |                  |                  |
| NSMCE2  | 236.933960698783 | 247.236004734567 | 285.507315916663 |                  |
|         | 302.532985701607 | 236.427507270325 | 301.871924474014 | 337.585502787016 |
|         | 267.222762759781 | 336.338518973032 | 358.975346234854 | 225.783771938969 |
|         | 265.29629764006  |                  |                  |                  |
| NSMCE4A | 1382.12750708801 | 1293.70593826709 | 1602.63977096867 |                  |
|         | 1456.76683429755 | 1247.91041567746 | 775.5664718389   | 1139.76755449089 |
|         | 876.288248962843 | 1044.00217726486 | 574.6506349984   | 1590.87426068638 |
|         | 1445.72064343302 |                  |                  |                  |
| NSUN2   | 1062.03157932144 | 1198.53117439169 | 1141.49294161587 | 1222.59895569348 |
|         | 1707.09830463606 | 1694.24232555141 | 1812.07394646463 | 2779.89882032092 |
|         | 1695.26858186096 | 1373.67062432073 | 1413.37062765856 | 1996.65760745757 |
| NSUN3   | 167.330860677012 | 168.483273292464 | 180.798671424395 | 195.033792280119 |
|         | 194.072260528037 | 181.123571246557 | 208.64349688412  | 210.061754644824 |
|         | 209.304654633004 | 178.153527134452 | 206.149539851803 | 187.443940151794 |
| NSUN4   | 413.398641688413 | 387.827718022473 | 337.39574303968  | 405.975221091252 |
|         | 364.678403892354 | 491.906642849373 | 420.446810988909 | 483.549698382115 |
|         | 548.869880723909 | 401.102586700919 | 522.300029971277 | 637.457322054293 |
| NSUN5   | 238.068308163643 | 232.918330930051 | 234.5655184349   | 261.721726664029 |
|         | 351.854828413334 | 238.782040902727 | 231.018059960001 | 246.676401619881 |
|         | 213.484986945295 | 231.39684528494  | 212.996456841785 | 365.590174280114 |
| NSUN5B  | 218.672831303767 | 192.130214856642 | 238.823244541016 |                  |
|         | 189.307823427362 | 318.971509860209 | 218.156162474715 | 225.065765924246 |
|         | 240.341031437493 | 225.209315195163 | 228.542423012958 | 229.74418058711  |
|         | 462.553267274302 |                  |                  |                  |
| NSUN5C  | 200.486683704179 | 193.16411905957  | 268.034972830233 |                  |
|         | 177.538262133568 | 214.617852048151 | 204.959164579011 | 214.739818213164 |
|         | 215.802713097166 | 227.209630859635 | 215.506175859782 | 228.713818522476 |
|         | 386.598037190663 |                  |                  |                  |
| NSUN6   | 259.277693314055 | 222.028626209166 | 272.117599603586 | 216.154203111101 |
|         | 247.643123415644 | 240.878804911613 | 269.468453936818 | 249.884250040189 |
|         | 253.30325545013  | 171.61704153463  | 536.253405705975 | 465.54817048856  |
| NSUN7   | 160.825408895349 | 161.490941000872 | 191.961269585431 | 161.250520154112 |
|         | 166.285052506316 | 182.873752254411 | 197.087015414039 | 169.403422185018 |
|         | 179.914070416793 | 147.088665779406 | 170.768398273919 | 197.775397831129 |
| NT5C    | 990.55038742453  | 1077.33874251157 | 1149.90248188644 | 1115.34267967366 |
|         | 2111.32236867229 | 1305.2232532959  | 987.78377957731  | 1085.38819961412 |
|         | 1224.49891389348 | 1395.63393859192 | 1863.96986643676 | 2656.38138490746 |
| NT5C1A  | 126.370252616961 | 147.213616261735 | 132.6175371563   |                  |
|         | 135.554736716321 | 127.543729713161 | 131.38881091292  | 142.903851392611 |

|        |                  |                  |                  |                  |
|--------|------------------|------------------|------------------|------------------|
|        | 131.578042179715 | 165.844762875582 | 130.06441029462  | 161.143782746501 |
|        | 128.927103442679 |                  |                  |                  |
| NT5C1B | 141.560424984281 | 129.898242234869 | 135.407536491819 |                  |
|        | 134.192409943723 | 133.92485496581  | 137.947606003247 | 146.629335531037 |
|        | 140.510889880872 | 130.545285774056 | 142.930903395131 | 129.38021642675  |
|        | 126.368170959337 |                  |                  |                  |
| NT5C2  | 1570.39362935859 | 1283.68791110988 | 1154.86609813021 | 1265.88446775977 |
|        | 1200.03423010236 | 2043.73482086765 | 2307.82327595071 | 1918.14260920544 |
|        | 1803.06322760249 | 832.335328912437 | 3630.80752744347 | 1794.82283439196 |
| NT5C3  | 461.229315272354 | 449.598181155897 | 371.224296589448 | 309.229066204308 |
|        | 537.06835963726  | 470.42403724799  | 628.939201051801 | 649.052806726591 |
|        | 534.505132658177 | 574.035124314622 | 956.153239481189 | 1391.89900758685 |
| NT5C3L | 419.763812610671 | 402.140437036706 | 371.127480221666 |                  |
|        | 514.799179506754 | 399.963640581639 | 418.772484676858 | 386.960778432157 |
|        | 497.411169898778 | 326.525579400607 | 341.361299896997 | 179.785198362326 |
|        | 312.961981998512 |                  |                  |                  |
| NT5DC1 | 269.927694984528 | 294.48534582475  | 393.198813167839 |                  |
|        | 241.418016203544 | 219.901025447571 | 295.851459742115 | 312.645778869254 |
|        | 309.098519056843 | 229.77428612216  | 245.317436234586 | 273.106088088825 |
|        | 296.428342247529 |                  |                  |                  |
| NT5DC2 | 257.643855420381 | 300.247304779062 | 212.571491543077 |                  |
|        | 421.929674562786 | 1731.62376348283 | 511.891269255193 | 423.740836541835 |
|        | 395.786295710815 | 452.517134370928 | 251.138401278632 | 487.993796425035 |
|        | 567.143102792772 |                  |                  |                  |
| NT5DC3 | 1019.627634011   | 784.72162514331  | 1263.64725236472 |                  |
|        | 1018.38836615952 | 181.715992480635 | 202.545147073902 | 191.029458520006 |
|        | 196.691380885508 | 192.140442881209 | 199.378179817518 | 166.355086055404 |
|        | 165.092451754065 |                  |                  |                  |
| NT5DC4 | 127.690860707933 | 137.620843137286 | 128.331867822629 |                  |
|        | 129.771073986855 | 130.574019477669 | 123.955819747616 | 126.319103548711 |
|        | 118.970693476152 | 128.168460083895 | 120.09801164252  | 136.601220755282 |
|        | 133.363883851093 |                  |                  |                  |
| NT5E   | 389.588346573823 | 256.370052241046 | 402.564148020948 | 317.121202656311 |
|        | 132.220398477217 | 127.988951225086 | 140.326012404526 | 137.726769003181 |
|        | 145.814268094808 | 238.782040902727 | 298.209907157762 | 125.77343813277  |
| NT5M   | 158.226547375305 | 166.8846964604   | 148.501654210579 | 152.373931758229 |
|        | 141.781482381513 | 146.058477355527 | 132.894049694258 | 128.297879410629 |
|        | 123.643292039274 | 131.2834389999   | 116.230993734675 | 129.589056071463 |
| NTAN1  | 415.178470246749 | 376.276954313674 | 435.095843349921 | 387.403502892897 |
|        | 313.641656294638 | 573.074116810032 | 501.863855158062 | 783.373390305885 |
|        | 456.530337997907 | 513.20896845398  | 514.463945278314 | 530.561387049511 |
| NTF3   | 204.113356572343 | 266.135477775641 | 209.146021798649 | 272.968792195442 |
|        | 138.412897151567 | 140.980119908597 | 131.641435734821 | 160.168654167074 |
|        | 145.122171099946 | 144.856801451884 | 156.934589811742 | 154.321219471319 |
| NTF4   | 143.514848892447 | 146.042460762767 | 157.259599894923 | 191.777253122672 |
|        | 241.203521822269 | 154.483828924645 | 154.744065805492 | 142.91818218442  |
|        | 156.723502568908 | 149.615585907229 | 162.834961996238 | 158.660859266099 |
| NTF5   | 115.107214937219 | 120.524859681034 | 124.45782375705  | 119.382151435379 |
|        | 215.769986055534 | 123.488418655586 | 155.722314592388 | 119.498312996987 |
|        | 119.686859562393 | 130.842257229979 | 164.883927796427 | 132.390330703084 |
| NTHL1  | 380.393153331219 | 441.958777965408 | 422.02217814979  | 516.177596584059 |
|        | 980.120729515821 | 440.745866155629 | 367.382105696814 | 349.248144552634 |
|        | 267.069665000047 | 294.997671630798 | 235.091443641056 | 253.538171006307 |

|       |                  |                  |                  |                  |
|-------|------------------|------------------|------------------|------------------|
| NTM   | 246.594244983507 | 219.519896184851 | 171.140106467064 | 164.87433908877  |
|       | 152.826356673175 | 139.295597388725 | 152.970079142629 | 159.213940274232 |
|       | 145.906601611338 | 281.238656291587 | 135.443856371548 | 150.507308901391 |
| NTN1  | 220.258804437828 | 187.425086057782 | 161.37617568158  | 170.676752248138 |
|       | 139.555322603323 | 138.891642304194 | 145.962664629275 | 140.405405916188 |
|       | 143.903216264503 | 137.038082933889 | 148.821942578396 | 131.023892409073 |
| NTN3  | 121.736056336879 | 116.844361858869 | 119.486895914055 | 121.047419779542 |
|       | 140.528748608335 | 136.769073515537 | 127.827096314406 | 128.56495182759  |
|       | 127.280740785862 | 129.822926691091 | 136.698189351878 | 132.71633377967  |
| NTN4  | 325.43977732888  | 326.962330523237 | 252.851164967726 | 249.129943906228 |
|       | 193.394225360968 | 204.438365139666 | 252.473612525884 | 256.648540685098 |
|       | 174.690052785405 | 200.443940449586 | 283.123157828849 | 187.145134088286 |
| NTN5  | 154.340042518983 | 147.70193890965  | 151.09670688533  | 145.025703051661 |
|       | 149.570242115956 | 144.235298492095 | 144.262612328341 | 156.551925771312 |
|       | 151.722405598425 | 147.604213625382 | 138.968690339299 | 137.947606003247 |
| NTNG1 | 344.992791638415 | 269.345125874858 | 284.595024875896 | 263.606930507829 |
|       | 126.791714564926 | 133.663595328149 | 130.528198937596 | 132.760567403706 |
|       | 137.85150144918  | 133.957160768065 | 131.657454325126 | 134.533551900843 |
| NTNG2 | 132.580937663749 | 132.221351364892 | 121.679013405559 | 133.490805791504 |
|       | 117.893918180502 | 114.673517800886 | 123.062390088305 | 116.802432258299 |
|       | 130.027227278931 | 117.532063783977 | 137.910618360623 | 117.986939058467 |
| NTRK1 | 132.8310947234   | 123.166013119235 | 134.194555223935 | 126.782805974059 |
|       | 143.07651558428  | 117.449306773025 | 121.255814891176 | 124.29420915051  |
|       | 127.866992108488 | 118.375739674144 | 146.321713521846 | 122.241290967571 |
| NTRK2 | 161.573975848093 | 171.376976179465 | 141.992490695142 | 160.667815093292 |
|       | 120.497796762933 | 129.194132399305 | 124.977046954694 | 127.339018771488 |
|       | 134.410706628655 | 127.447218258785 | 135.409613764459 | 131.223691762533 |
| NTRK3 | 148.539881077647 | 155.483400816946 | 128.680762033378 | 125.044092929562 |
|       | 129.7642522046   | 122.414781975236 | 128.432188632218 | 120.220156455352 |
|       | 125.967294930279 | 124.203250865069 | 138.715208319278 | 120.220156455352 |
| NTS   | 130.154756165574 | 138.409284761652 | 129.647514123731 | 138.055909969804 |
|       | 129.11843197744  | 124.501262458393 | 122.80785489118  | 173.132747018514 |
|       | 127.195619567384 | 136.460345970481 | 128.002822538671 | 123.522738813733 |
| NTSR1 | 136.454911192129 | 143.759171254761 | 136.716554749722 | 139.404820141366 |
|       | 124.49814598066  | 131.617027772841 | 139.324006489527 | 130.142263689536 |
|       | 139.1434049136   | 137.586032396204 | 140.165450892713 | 131.471942650725 |
| NTSR2 | 142.567737460006 | 141.997165490755 | 139.442091671938 | 140.213080190065 |
|       | 133.587927144452 | 143.423040505897 | 134.169645445889 | 129.153882779488 |
|       | 136.065134838221 | 131.436176224725 | 130.467450968785 | 131.814528687104 |
| NUAK1 | 451.621888586656 | 428.09583118349  | 276.756415094228 | 347.620001353026 |
|       | 264.109049504585 | 323.841518852386 | 447.779854598556 | 288.313931067158 |
|       | 290.802509012089 | 336.845908630493 | 247.683819429859 | 215.365809536522 |
| NUAK2 | 141.374831983971 | 141.436235043864 | 152.291176493005 | 140.347131743987 |
|       | 151.841652724562 | 144.599578905334 | 134.109051944736 | 142.995274641765 |
|       | 161.886342770305 | 242.253995801882 | 134.616051224668 | 147.250700603067 |
| NUB1  | 437.836503489425 | 463.880793292701 | 502.935749606918 | 557.513306351027 |
|       | 347.620001353026 | 314.949772661046 | 353.621264641814 | 411.505580458401 |
|       | 479.469659712246 | 381.253673759781 | 469.206346008875 | 448.371946119074 |
| NUBP1 | 257.880331012233 | 275.252966071473 | 287.558897878375 | 341.714401872192 |
|       | 301.591430919567 | 224.89911221799  | 265.61506544085  | 266.032134528055 |
|       | 280.848426993226 | 212.545989139388 | 277.946395491073 | 246.263259852067 |
| NUBP2 | 175.774461934758 | 184.148058872585 | 175.601912488918 | 176.486551181451 |
|       | 366.564822549834 | 202.504840299605 | 173.552535486766 | 189.770558810153 |
|       | 205.149094703318 | 180.008152341531 | 201.593025256991 | 184.672330560677 |

NUBPL 7190.89891723932 6548.65498784806 5165.90865799172 6091.9840719327  
 724.777166238211 4548.5418978622 1994.00516809361 3168.27825058989  
 2433.83421295012 1677.93424842267 4410.68280125001 2382.87910783088  
 NUCB1 5589.21471380445 7332.15849011291 5040.35379681644 9016.04641569485  
 13809.2057928642 5240.40795364202 5589.21471380445 4763.89426388268  
 7038.48958943724 3038.02573182546 3294.92439159154 3235.38149926838  
 NUCB2 834.187014201026 757.406530000489 587.54075434249 785.599211190431  
 303.638516587721 345.832589037442 367.130155304037 535.49374437073  
 435.48544637769 406.54518900348 253.098839084408 248.791254839869  
 NUCKS1 6028.67062754577 7003.06505884735 4857.3155917904  
 7003.06505884735 2649.39312662326 2672.77147589342 3921.67860557329  
 2550.08769415478 3575.60827968852 2691.41389079777 3954.24763752814  
 4892.17875938832  
 NUDC 3391.3005983725 3205.74787769881 3883.05620256963 4073.21075791737  
 4103.06565237121 2859.94396089224 2081.45603839306 3195.71436046397  
 2089.82894186824 2295.16438420175 1328.38230265655 2080.47567326037  
 NUDCD1 136.205702793983 144.675182563174 125.301602026407  
 138.62994237184 144.620226132989 133.755609587969 148.358847576281  
 142.071492722749 159.913028912492 139.260868989409 166.187099519035  
 141.950778601653  
 NUDCD2 208.72873686638 200.204064462384 257.989863290786  
 214.019190624184 290.135914275115 275.298642145005 387.617166711971  
 290.135914275115 231.517412929077 496.328898534802 326.962330523237  
 337.728737393381  
 NUDCD3 567.715714233608 632.278924237678 532.394088545421  
 833.430847243676 475.540659315339 311.612118247493 374.657816575897  
 302.069236363626 360.243484271891 355.990908506973 364.964572587289  
 363.343480850598  
 NUDT1 296.721891842563 325.751369001105 294.033003779363 395.327097512479  
 659.27672123763 392.198487606534 250.963601187362 452.24100098898  
 369.646624431062 345.433025456954 244.307627077001 381.625983354158  
 NUDT10 160.573172150801 128.860744370967 142.25795237339  
 145.692644807799 125.868080230094 112.268518171041 123.13812550459  
 139.001493765421 120.693808603805 124.625603721372 132.110906510601  
 131.334278105981  
 NUDT11 211.809434609469 179.932404140099 212.669156800241  
 172.319604146201 135.743159681223 142.253826696208 135.338077911839  
 145.921381300813 147.205511952997 145.745466612541 134.724004605822  
 139.720343780228  
 NUDT12 136.106596229215 134.408846338374 139.558611792069  
 131.48517604564 136.097571072206 147.104847897266 147.400082178491  
 118.859745315302 146.716053772448 142.563762845657 134.053685488055  
 133.443807124822  
 NUDT13 163.781674803361 154.201375471487 140.898380345452  
 158.439409064812 141.026045918091 151.040909999868 154.408875182219  
 146.677241054745 143.370698101204 124.270946828609 151.9565369062  
 162.427505889157  
 NUDT14 256.99019407912 266.101158071711 232.830038701628  
 169.888264971936 1537.71464618832 464.436380568216 1055.22233969473  
 493.347308943133 601.018867455333 721.31849915135 619.995008098949  
 1010.05884008623  
 NUDT15 203.816305810343 209.464347017443 216.615694348945  
 200.72147365413 212.987082617173 259.575461599189 181.3859695951

269.831616158113 263.379982742085 384.365878895439 279.75914135192  
 358.52459123416  
 NUDT16 275.509805464276 282.963958072528 321.31562287169  
 336.786227017391 218.944052733757 212.5119818331 200.242239130026  
 199.250680260804 208.507486041165 169.895672129542 195.630643168176  
 183.83720937589  
 NUDT16L1 306.773350448741 306.111172289632 315.963526790659  
 345.732364434125 773.803350315426 424.285848583977 406.028724866233  
 443.259619455624 374.169744342352 338.46332239699 286.085833802132  
 452.517134370928  
 NUDT16P 120.565485864499 130.074786642758 145.399617429804  
 132.766708502915 152.511331178337 125.789509802098 142.151209745109  
 142.405569257901 166.932757191847 138.201164395948 140.790450703097  
 150.215811815246  
 NUDT17 130.470034945295 128.297879410629 115.944280729914  
 125.549968985241 125.974463216884 114.384296185446 115.270544506813  
 119.366599958278 120.527518013376 119.122305582754 129.419998353956  
 128.282999719959  
 NUDT18 201.850932289186 223.058699622386 192.314484368435  
 293.317880637519 570.771089597761 161.543072816738 439.492285515997  
 212.107842040568 210.822216545773 267.839640412797 432.92947962962  
 284.995098167431  
 NUDT19 130.682112236817 138.592943322694 117.824694297846  
 150.180037731272 184.577511730401 164.58158284856 143.333211390741  
 121.973581817041 170.040914594182 150.570540340126 153.639559509292  
 149.628421263062  
 NUDT2 622.561634660589 589.541347392215 988.297682407351 675.083275037052  
 277.180850774168 739.251974981981 344.247544510881 518.281245498542  
 417.615521090665 402.866491417369 563.648536446918 235.48876511325  
 NUDT21 273.303240462047 295.278972023002 297.970735665595  
 208.080089376299 246.748589597262 499.544050752036 325.082620845425  
 302.381946749711 368.548135194271 300.709410518382 347.620001353026  
 412.863887464545  
 NUDT22 279.325065941252 294.653534388707 299.039192744355  
 455.665927568395 912.878077940014 538.484170364629 585.933822585718  
 376.007938436483 323.737610506003 354.336462793628 492.207833630086  
 462.686385881492  
 NUDT3 668.570984110088 817.913210743023 600.162650426961 718.871732206362  
 729.729297413233 437.601814037248 557.513306351027 619.635734567779  
 625.699971780258 554.282040414368 565.313436777992 562.891241563711  
 NUDT4 138.333435927107 140.814009587096 136.446877465751 138.070353990356  
 128.986795394842 176.725347194807 144.019824700027 174.417259650516  
 152.467764730004 137.054278745724 153.500478301079 135.135834717193  
 NUDT4P1 130.054105892394 128.14606899743 134.23001942966  
 127.818137805569 119.903068083658 125.822346524903 133.527906709491  
 131.419663282022 132.186120302011 130.51901676405 124.248997533959  
 134.181819177347  
 NUDT5 276.089623957012 287.334035234496 246.616749748028 248.761038207278  
 853.314313182949 1295.27257578314 599.926717145115 559.236012019639  
 604.453803994875 620.371912523332 561.609211243027 675.083275037052  
 NUDT6 165.022029012505 160.082087242964 163.422877959747 148.943735606315  
 163.042083189818 167.933231844271 181.79418355897 163.936973279176  
 165.767629164724 152.134895623504 141.480793979634 156.346014084316

NUDT7 427.249733213787 409.282410265733 528.556049506759 432.969886744613  
 194.998142472864 145.114382599368 204.35801867216 138.792521681771  
 170.091913791176 158.558471586662 239.762135294506 138.661548678191  
 NUDT8 134.372560968918 137.096785940897 129.086186239653 140.675094228846  
 139.063209125209 127.090219286772 139.155456340488 143.675696734051  
 134.950905279775 155.043017644694 152.752870674108 127.620377473963  
 NUDT9 253.538171006307 217.307872538386 288.481981529558 215.247472744419  
 222.177290763736 225.96618659877 288.072720517427 319.868227988842  
 284.940858938629 304.636618563775 284.13865992802 265.148061007894  
 NUDT9P1 118.393203921859 116.688949603376 116.819107878692  
 122.428943658306 98.1433670546536 104.406314027414 118.470400686096  
 113.133798430215 114.567609871292 100.216750525986 138.872536475067  
 124.077104101209  
 NUF2 151.128838696891 148.520371748891 132.895500657638 148.060086496148  
 202.504840299605 234.094722315007 155.861829925386 175.810411923013  
 166.068489027866 154.924190468067 144.625105340312 198.135240691225  
 NUFIP1 156.068308349225 160.865949438448 158.200211812067  
 160.221974600577 151.486362260537 182.300628120658 128.0805889548  
 145.416733388652 152.657649988502 137.778033050658 156.259214645427  
 163.407360509803  
 NUFIP2 415.011847890313 387.305348482856 330.281193038198  
 360.39998507367 558.251384152474 703.815551883635 635.536499281829  
 722.725186727796 485.576566972696 412.344820823968 454.030083521756  
 481.453770150269  
 NUMA1 690.903797251841 817.036222521723 756.246712133116 1034.2217095753  
 710.999354960979 348.171901445232 358.780920910909 294.22752955801  
 355.14024238296 279.668007824988 602.703887178113 363.195371577097  
 NUMB 1459.31031099055 1390.95426299323 1520.59210521859 1632.07671492041  
 580.474775712828 459.854279050269 539.008286968106 719.628501451187  
 604.737834405874 886.517088614968 1159.44907165386 687.789976218334  
 NUMBL 236.35479928448 233.690524419327 207.453490385508 273.252023367028  
 255.435582426271 179.191401472241 188.39062571513 162.140112952434  
 157.200582422961 198.489278156437 165.031678768564 187.30908753142  
 NUP107 403.405544395163 415.178470246749 433.405369327168  
 428.66614441422 606.162976359615 2234.85920641661 632.031410234577  
 5291.83393775761 892.515788744891 577.801009921199 756.068695265118  
 677.802147190757  
 NUP133 603.338538383128 719.628501451187 732.040299742444  
 568.935113269368 479.761165832339 938.499337889075 575.546802138889  
 492.534183006883 625.544719251096 575.546802138889 602.86705608228  
 665.936368667321  
 NUP153 334.916875239616 265.992741398183 331.018914429561  
 215.506175859782 283.874600697211 304.751330890753 305.16668987495  
 274.120234926832 293.17183601265 347.73629731446 276.79778275734  
 362.742120043509  
 NUP155 167.474790447134 176.420075374686 175.874387612235  
 152.812142230375 264.429717032654 277.129985959184 211.916602665089  
 234.531140131763 197.827534617557 265.402310598892 194.686527131656  
 213.966288689715  
 NUP160 327.696359071012 267.67093646012 377.661589835101  
 249.884250040189 249.858562350415 720.077057619735 326.525579400607  
 558.934004505074 400.060972573122 539.471166362469 333.676803661366  
 255.305647212135

NUP188 226.989201461085 245.378747269929 180.867208892996  
 259.742175498038 373.452370692334 195.282045838381 194.202977693583  
 172.8993416872 215.40037757604 220.258804437828 213.754156680604  
 178.476483428474  
 NUP205 622.348802511009 662.213423011533 564.056592672374  
 719.369561410372 779.340880980422 827.157920721418 620.899414581162  
 1021.81988990874 698.358285634451 811.912727084669 809.362464219294  
 1001.35912007916  
 NUP210 132.014213378179 155.386226046894 135.283742166077  
 135.719702250709 1471.01897242089 271.154246147262 219.394500571586  
 327.749926183823 287.242697383558 133.146347243168 166.9499656083  
 254.036619126409  
 NUP210L 134.434198188045 126.365861978893 126.820834043224  
 123.671944323239 122.022611139895 125.701083319929 126.659859384257  
 140.383646018409 127.164076119599 120.682485578097 120.441732791854  
 122.724429060184  
 NUP214 494.875547886209 554.282040414368 479.261755380872  
 612.758976723556 570.26564132238 342.769825986756 298.256131536504  
 314.810001770583 433.11536069928 336.786227017391 372.81255844018  
 258.632372536866  
 NUP35 176.612866969431 195.547320133122 193.945494721138 168.991551886143  
 189.362958041175 236.985483155452 210.199788806189 234.738241125899  
 230.620456579897 260.554343693588 199.077893147154 240.878804911613  
 NUP37 477.87583927675 531.421912541822 702.265884752474 466.909037277853  
 1499.07462479938 1214.16777512885 953.549801897112 1509.69760873558  
 1492.15137418791 1084.5920943349 988.297682407351 976.050097371579  
 NUP43 543.933989965705 566.228690652783 541.258721278882 557.702374840532  
 479.138177792954 546.755305058958 599.307072499899 628.197839884392  
 527.139476504986 583.192225756596 934.546444634669 517.020259129974  
 NUP50 137.540275229889 129.269919529415 129.318409053566 124.611144621071  
 153.579955370444 142.898851434337 174.045229095003 169.052101570616  
 153.681775929182 250.003965480779 154.679076303046 176.849238577762  
 NUP54 368.825190022937 348.171901445232 469.206346008875 280.292616101827  
 352.897241809959 469.930860750773 559.236012019639 460.408628542721  
 491.112594297928 579.923640505245 445.905756082569 478.479988875208  
 NUP62 696.003998372271 839.324324662619 853.314313182949 885.104778820041  
 1394.31467757456 1386.56788941677 1212.55338792557 1698.08853832248  
 2240.33212242003 1055.22233969473 802.017244099902 1397.84878368705  
 NUP62CL 140.849966309018 161.066226957782 146.669620721254  
 151.838006211681 278.219561902233 175.693873820963 192.59376129133  
 183.804849355341 207.993943398697 175.030373805031 171.006582229921  
 224.707455448421  
 NUP85 419.593558001947 405.570281788901 454.854528472591 421.690849282483  
 520.218545108099 869.937761943249 714.494228450456 1071.00507864299  
 806.290662664708 637.695341427976 595.409419899436 849.389818300305  
 NUP88 505.143815448613 476.641032594868 456.126096817454 509.01330998156  
 400.845137156678 986.65554605455 469.540421642173 1035.98574557331  
 639.688482258192 713.23381913235 876.288248962843 934.546444634669  
 NUP93 395.645016679312 455.778776920897 341.64890727921 461.940616438547  
 1294.74864310494 585.234286698678 371.280926727395 422.02217814979  
 484.658140651032 486.947380524463 533.279122416818 429.096075419528  
 NUP98 136.359189516452 133.921012946195 139.186416741431 124.746457912284  
 159.036647992998 167.125830254039 153.762995131216 159.835577644136  
 166.655585160657 163.319882002763 171.350620456505 153.318678468245



|        |                  |                  |                  |                  |
|--------|------------------|------------------|------------------|------------------|
| NUPL1  | 132.725232102483 | 129.874235646816 | 131.744454088995 | 128.963962067821 |
|        | 132.918979842076 | 143.397823965608 | 137.729777643977 | 132.755256423863 |
|        | 136.522590104535 | 153.934872807607 | 133.125084506877 | 145.369791572077 |
| NUPL2  | 360.285027176918 | 292.317998405609 | 424.134483971176 | 285.798047501616 |
|        | 323.788197265954 | 412.277592266475 | 453.058639550475 | 510.434895296759 |
|        | 464.907454552364 | 422.12964420709  | 407.711669482083 | 665.341859712345 |
| NUPR1  | 1925.60246708149 | 1728.86115695979 | 2574.74962955426 | 2532.82545752082 |
|        | 182.997980582218 | 168.618667871117 | 579.049608568926 | 318.112626495401 |
|        | 288.542264120468 | 366.408565514304 | 166.627372924295 | 192.709473588165 |
| NUS1   | 231.044588483625 | 254.287838845201 | 214.8478629277   | 240.663883443935 |
|        | 190.389158930835 | 269.053237303244 | 223.703371558666 | 165.695518076741 |
|        | 206.715020025609 | 174.540209145695 | 228.979483128684 | 214.413674287972 |
| NUSAP1 | 137.04010227318  | 183.619184925353 | 146.043369917028 |                  |
|        | 183.447807651728 | 321.049000153127 | 464.128022170285 | 426.769986378276 |
|        | 740.973440818582 | 699.270931701696 | 621.946994961864 | 263.123584372086 |
|        | 668.127527385348 |                  |                  |                  |
| NUTF2  | 329.48021621087  | 339.98018551524  | 324.203537490975 | 499.436680354749 |
|        | 526.726224327409 | 409.743899750699 | 404.876478833713 | 391.039114500903 |
|        | 407.442337662943 | 475.686805714298 | 404.876478833713 | 548.014025722956 |
| NVL    | 217.094085829328 | 196.001089662818 | 238.946506103155 | 210.803130108618 |
|        | 206.275885047321 | 250.139061165593 | 236.772907994543 | 202.178451227304 |
|        | 237.641190133427 | 203.563098303937 | 197.775397831129 | 271.791126011275 |
| NWD1   | 116.850851308701 | 116.038950886552 | 120.740986472733 | 112.962180108363 |
|        | 110.935688075738 | 100.04568139926  | 121.347339077474 | 107.221547998974 |
|        | 117.015097017246 | 108.730058525654 | 109.416512252532 | 110.694256186941 |
| NXF1   | 763.533962249076 | 648.549890890375 | 757.877066703516 | 709.136137559152 |
|        | 771.294254795752 | 682.315322994357 | 666.847934976479 | 518.925188630246 |
|        | 683.655205499779 | 694.644744547412 | 597.795856268827 | 565.313436777992 |
| NXF2   | 143.175483349968 | 135.897498591391 | 169.544515294662 | 136.128092230238 |
|        | 136.720837676326 | 140.860339862967 | 140.73456875677  | 144.975882336334 |
|        | 143.071933285651 | 145.938780249776 | 139.959629641771 | 143.163083976105 |
| NXF2B  | 134.336279655683 | 129.090955637629 | 136.154522071917 | 138.603793282123 |
|        | 134.918496279185 | 142.661504601445 | 131.440195723963 | 130.804850476451 |
|        | 144.154217446011 | 144.02239659305  | 135.475597372104 | 143.275056599274 |
| NXF3   | 161.694109087893 | 148.260672564835 | 168.720694813918 | 164.39557148282  |
|        | 152.913814113632 | 143.92831903543  | 172.430211711547 | 164.630705813584 |
|        | 150.835044630002 | 166.592366578462 | 145.904866987074 | 162.982557003317 |
| NXF4   | 140.077307351596 | 130.399501479248 | 137.03111066852  | 142.464394555901 |
|        | 142.284050423299 | 146.293735120772 | 136.284283129801 | 147.436408919939 |
|        | 134.028626989933 | 148.919726992353 | 132.858424396011 | 143.340685579645 |
| NXF5   | 130.314247368361 | 132.085538520551 | 138.444427173667 | 138.108184983014 |
|        | 119.472410874778 | 128.942892882721 | 153.6855881767   | 147.4182675362   |
|        | 139.693261291326 | 146.26304624648  | 117.642441794442 | 139.631165400881 |
| NXN    | 765.333633142088 | 831.610501402173 | 669.124699103132 | 1123.93087912174 |
|        | 158.034418043685 | 148.43357593249  | 226.824313642101 | 162.312313953026 |
|        | 177.281197832647 | 667.156197045748 | 242.752995772995 | 220.458449424062 |
| NXNL1  | 170.024833610695 | 177.688568435599 | 219.288597751645 | 213.468420853218 |
|        | 143.643259003393 | 187.069074575776 | 166.760758231104 | 177.802767772786 |
|        | 172.491604217899 | 177.132361355899 | 176.66175597182  | 169.33926580273  |
| NXNL2  | 133.090474303043 | 130.576944864484 | 133.542620077059 | 130.036744891822 |
|        | 130.788557333561 | 133.420267697961 | 132.01588294465  | 126.825785762925 |
|        | 134.457932303561 | 133.92485496581  | 122.213445520365 | 129.524056217383 |

|          |                   |                  |                  |                  |
|----------|-------------------|------------------|------------------|------------------|
| NXPH1    | 129.848276446896  | 137.874370839801 | 128.653335099674 | 122.527517633626 |
|          | 134.086301127594  | 123.635470154191 | 126.743579586052 | 136.788269716383 |
|          | 129.994160770036  | 131.827899207029 | 154.865107093653 | 130.924141812334 |
| NXPH2    | 125.154784284706  | 120.100672968415 | 135.268963938932 | 108.288420807873 |
|          | 114.14858855653   | 109.625579596864 | 122.953869661977 | 106.088807114602 |
|          | 112.198629213643  | 111.639177843969 | 123.640123613529 | 122.719785082196 |
| NXPH3    | 185.544411160039  | 196.429685815196 | 179.985468369202 | 210.015199832609 |
|          | 123.170639180926  | 110.061459744714 | 120.308260557986 | 120.379393989882 |
|          | 107.303126530947  | 110.885714048075 | 114.613368640356 | 124.511674561183 |
| NXPH4    | 147.980827857138  | 145.472859089272 | 140.429462488271 | 146.077082896858 |
|          | 147.123477579978  | 148.686975104375 | 150.301540078433 | 149.366554238043 |
|          | 146.543467822738  | 176.802886129341 | 146.548348470748 | 147.006482557682 |
| NXT1     | 622.692834629555  | 710.531876484467 | 455.313553278155 | 503.285430318683 |
|          | 1282.84159765715  | 1403.09138858507 | 1086.33540858772 | 895.821578104681 |
|          | 1019.627634011    | 781.790858580895 | 902.822697602452 | 1136.14069801696 |
| NXT2     | 244.514230664694  | 262.79667156266  | 238.095599711942 | 235.133284525241 |
|          | 375.189005729903  | 779.922653392712 | 323.896313343796 | 213.338918839446 |
|          | 440.579262120451  | 290.867822301134 | 245.675725760577 | 258.915802108562 |
| NY-REN-7 | 184.377923161698  | 190.309453030884 | 184.672330560677 |                  |
|          | 207.764456828813  | 186.033093285894 | 193.589480577091 | 192.244413515864 |
|          | 186.021181691517  | 174.296028319781 | 197.618757939729 | 188.027848008991 |
|          | 183.464897811105  |                  |                  |                  |
| NYNRIN   | 389.800620731411  | 489.022371276542 | 330.080428155378 |                  |
|          | 478.293220151258  | 2018.81730267601 | 319.768792196774 | 852.099019968701 |
|          | 441.4354444003241 | 288.313931067158 | 159.98205335759  | 501.600329334497 |
|          | 379.292531644085  |                  |                  |                  |
| NYX      | 147.185378560761  | 119.06600048679  | 126.50870982427  | 123.598210440312 |
|          | 137.799016648135  | 122.396214045451 | 137.984988819967 | 117.003205777245 |
|          | 126.17133877948   | 125.558877611499 | 143.378998368344 | 125.894755032594 |
| OAF      | 1279.9555644913   | 957.54149804446  | 564.200165295159 | 1141.13648305827 |
|          | 868.066644155313  | 283.377663208926 | 308.767036855508 | 293.080122239022 |
|          | 438.7446527797    | 297.368197598038 | 222.456810024193 | 324.871248300476 |
| OAS1     | 180.060096787617  | 152.555437272666 | 148.02460124587  | 154.366071635971 |
|          | 400.676876982655  | 410.533157400023 | 547.042461070351 | 744.225336494008 |
|          | 587.54075434249   | 177.306794546105 | 340.42197893246  | 382.701467158304 |
| OAS2     | 263.52595855321   | 186.377571176623 | 138.218392984717 | 149.526189446292 |
|          | 210.900056977861  | 143.825062714273 | 370.390323116113 | 424.578659172414 |
|          | 478.180723959397  | 230.284216427158 | 526.970555181851 | 221.719848707318 |
| OAS3     | 264.779154931102  | 153.507553306723 | 134.909230280708 | 149.196539425588 |
|          | 259.767151797583  | 194.029961195972 | 307.16835174775  | 233.426170535227 |
|          | 296.75326294587   | 174.498521167568 | 422.973606694449 | 213.484986945295 |
| OASL     | 154.016622581204  | 137.697452180659 | 133.771691580031 | 129.415078042622 |
|          | 152.543005423742  | 134.352155462211 | 209.913460781088 | 219.597808863947 |
|          | 165.82215325714   | 142.148597793651 | 190.489530928259 | 150.093684245826 |
| OAT      | 726.556553101727  | 574.779350011402 | 950.818917078515 | 569.967953318205 |
|          | 189.434597063058  | 334.140757209353 | 394.101052511043 | 340.366016191232 |
|          | 216.731618532814  | 371.280926727395 | 167.658560306884 | 362.502631441716 |
| OAZ1     | 13217.7001749493  | 13479.8546809758 | 11509.9289491201 | 13700.8527522612 |
|          | 22543.625434682   | 15532.9759169142 | 15297.9020958577 | 14073.4649333964 |
|          | 18720.0460735814  | 14651.3379687477 | 9192.8966763778  | 15238.4097431619 |
| OAZ2     | 332.543652462234  | 589.953707188378 | 323.896313343796 | 385.379119927642 |
|          | 452.732079010502  | 240.224826736571 | 309.47429862515  | 236.251507822415 |
|          | 311.544429285897  | 239.970202560698 | 248.690121805116 | 263.509066170434 |

|        |                  |                  |                  |                  |
|--------|------------------|------------------|------------------|------------------|
| OAZ3   | 143.576177625265 | 144.796089646941 | 149.551030995489 | 133.446934298801 |
|        | 157.733042033549 | 140.827965102541 | 127.783892576352 | 133.067237748129 |
|        | 132.615324904193 | 145.669033804967 | 136.618643817686 | 146.590495255969 |
| OBFC1  | 631.106334754678 | 484.658140651032 | 522.899203071911 | 557.405157178952 |
|        | 346.118765910093 | 316.165926273381 | 466.4890990178   | 403.984761333129 |
|        | 497.411169898778 | 601.401329244185 | 707.404709303506 | 663.214972254236 |
| OBFC2A | 297.022984365795 | 305.93974940209  | 284.891415492568 |                  |
|        | 300.886032768166 | 422.434778100827 | 496.03509813734  | 455.124190541055 |
|        | 326.758278851698 | 453.926991868451 | 650.0804221227   | 409.743899750699 |
|        | 331.062744782933 |                  |                  |                  |
| OBFC2B | 332.194163016646 | 277.073510273425 | 340.966515437272 |                  |
|        | 319.768792196774 | 276.961847241646 | 273.61337724143  | 304.152390210727 |
|        | 288.150694843614 | 295.278972023002 | 270.293807247372 | 261.639437655633 |
|        | 233.20900339048  |                  |                  |                  |
| OBP2A  | 114.860437706855 | 119.926169902322 | 112.456644814178 | 127.342017026873 |
|        | 115.559551514777 | 123.505435008269 | 109.69466049307  | 119.072213573568 |
|        | 126.106777865128 | 125.093376753408 | 132.47775411384  | 117.847744476387 |
| OBP2B  | 126.277165320165 | 143.419034484087 | 122.667593730152 | 117.913545753709 |
|        | 130.607857562345 | 112.10312035128  | 126.097544650407 | 127.279107079261 |
|        | 134.904123162692 | 129.411734209444 | 139.432567336814 | 135.330241638301 |
| OBSCN  | 131.479997342133 | 149.628421263062 | 146.677241054745 | 137.729777643977 |
|        | 150.371716899336 | 169.649251828199 | 163.653662369257 | 158.163599942547 |
|        | 125.486324819682 | 134.883708339914 | 151.208728458188 | 244.514230664694 |
| OBSL1  | 166.085469368498 | 146.233195164295 | 151.106858426994 | 151.585818981801 |
|        | 125.384706864406 | 133.601133679159 | 115.988180787152 | 129.920586100555 |
|        | 126.233395051706 | 126.834926242799 | 139.268052431476 | 124.474221706022 |
| OC90   | 112.771141378159 | 105.25877906031  | 109.333276735523 | 104.321352818065 |
|        | 104.58424134098  | 108.984922760455 | 108.21185649774  | 109.740801301993 |
|        | 103.550817366724 | 110.347631909888 | 116.987471433258 | 112.528908277828 |
| OCA2   | 127.070677267233 | 115.34945441214  | 107.884870799936 | 130.207485841284 |
|        | 117.499697378893 | 121.59661598908  | 123.687439699754 | 133.722739936347 |
|        | 122.376432064286 | 134.703474191011 | 105.408689610638 | 128.29486937905  |
| OCEL1  | 443.005424069211 | 404.54681330209  | 406.638419179213 | 399.762451559805 |
|        | 918.162638134305 | 485.309521583972 | 604.237898104299 | 949.260897408911 |
|        | 583.619362840814 | 407.052451784773 | 657.562129888446 | 368.418553384965 |
| OCIAD1 | 10222.4435857673 | 10579.8650348916 | 8840.92490099301 |                  |
|        | 10397.3656932566 | 1957.48508632607 | 9139.73212514992 | 4621.99241522677 |
|        | 8053.22070239424 | 6339.16392696068 | 3921.67860557329 | 6548.65498784806 |
|        | 6138.10904830456 |                  |                  |                  |
| OCIAD2 | 357.672950588403 | 449.304281526081 | 419.593558001947 |                  |
|        | 312.705458415152 | 1733.96382719909 | 2159.2992548378  | 2222.16226526877 |
|        | 2277.60839052397 | 2303.0998502001  | 1932.39418448203 | 1792.35343044443 |
|        | 2213.1043022626  |                  |                  |                  |
| OCLM   | 119.720132373023 | 128.071379991958 | 120.925930409474 | 116.294180301039 |
|        | 119.882472552083 | 120.773552653073 | 127.174074003712 | 111.596690019694 |
|        | 114.364953312191 | 128.973904070983 | 136.400959554698 | 112.420505354139 |
| OCLN   | 119.164791441052 | 119.785062256421 | 117.567991653999 | 127.601379088239 |
|        | 139.658932672049 | 131.652854369619 | 134.337249560706 | 125.063596569451 |
|        | 130.408519735001 | 133.164566694394 | 127.615631240096 | 133.810472192646 |
| OCM    | 136.169525758215 | 151.171716392043 | 132.402255281009 | 146.328876892698 |
|        | 135.648906382608 | 134.06834346533  | 137.885506916098 | 148.707332454527 |
|        | 136.77260462185  | 141.168198348093 | 117.15886922795  | 120.800764735081 |

|        |                  |                  |                  |                  |
|--------|------------------|------------------|------------------|------------------|
| OCM2   | 127.657961561231 | 129.647514123731 | 133.0349214478   | 149.383429241903 |
|        | 117.443721637362 | 116.773599713111 | 130.619624347751 | 127.195619567384 |
|        | 128.848008246639 | 144.0534341937   | 128.266906202941 | 131.393633337276 |
| OCRL   | 705.311256840178 | 621.946994961864 | 889.26314145856  | 677.9972761887   |
|        | 451.621888586656 | 507.137104111742 | 413.983821839274 | 365.590174280114 |
|        | 377.024120035829 | 419.846584903512 | 352.303782547593 | 411.285747588622 |
| ODAM   | 105.408689610638 | 109.128394735532 | 115.085961282227 | 114.533677697026 |
|        | 128.751758311249 | 111.260486045985 | 109.564709878576 | 107.816312357067 |
|        | 128.09266452749  | 111.928204694188 | 143.193305421206 | 107.205247133938 |
| ODC1   | 1226.74043569231 | 826.314416168552 | 1132.27988339924 | 988.788192022196 |
|        | 1980.4589291261  | 1187.62490367696 | 285.83626978316  | 1620.7954553764  |
|        | 1403.09138858507 | 1367.92869625376 | 336.639473916174 | 1615.60472592991 |
| ODF1   | 137.365567527202 | 132.971844952199 | 148.945466917496 | 130.751522895053 |
|        | 144.038859705973 | 141.278654291193 | 142.487424651482 | 132.357517495246 |
|        | 128.640202262896 | 133.327778635672 | 145.003900788534 | 162.863781294205 |
| ODF2   | 213.215996114827 | 203.727455875381 | 202.691507273819 | 240.561105692347 |
|        | 320.877897822963 | 214.019190624184 | 179.241385747152 | 208.64349688412  |
|        | 221.796935051107 | 213.634295832535 | 223.128108720503 | 198.311821616128 |
| ODF2L  | 149.326216726716 | 148.056333887679 | 142.169951083733 | 137.650917262528 |
|        | 188.45479937455  | 218.559622620349 | 240.497413647633 | 210.33390115739  |
|        | 198.456392063513 | 265.110264596425 | 178.572212478544 | 257.372740535895 |
| ODF3   | 139.199446543251 | 121.103620738719 | 124.585675323305 | 122.139832263188 |
|        | 135.309431186017 | 139.94624507228  | 136.330636532576 | 127.035980859996 |
|        | 124.93629294955  | 138.20899000519  | 140.201501710276 | 123.809866652834 |
| ODF3B  | 170.243136294537 | 151.961811748754 | 149.756512110538 | 161.104993402456 |
|        | 157.963634535239 | 157.225479764928 | 152.258389962    | 160.843325877861 |
|        | 175.51767355303  | 161.817609920327 | 182.066922756289 | 167.73288535728  |
| ODF3L1 | 136.657107363796 | 134.033751039071 | 124.735542880811 |                  |
|        | 121.246967460178 | 134.56763097313  | 140.581943144813 | 121.807661901776 |
|        | 121.059923601223 | 119.072213573568 | 145.735532706214 | 142.236565028336 |
|        | 131.707530115415 |                  |                  |                  |
| ODF3L2 | 133.099175110023 | 135.477059311179 | 133.425151103622 |                  |
|        | 129.356401843185 | 128.135216461862 | 134.013748718539 | 152.555437272666 |
|        | 128.912199634685 | 130.63591305094  | 123.601413134287 | 135.938590242744 |
|        | 126.343040504566 |                  |                  |                  |
| ODF4   | 129.55573546861  | 137.012646671173 | 131.479997342133 | 130.689272423595 |
|        | 129.299810898979 | 119.539713878832 | 133.982435445664 | 130.24527031028  |
|        | 140.058153633802 | 128.853089272901 | 166.570606752678 | 123.21732068638  |
| ODZ1   | 159.273225917177 | 148.000706956532 | 155.590197324062 | 164.299585578035 |
|        | 140.569391362701 | 133.984078167807 | 142.677386111317 | 146.515240633175 |
|        | 137.348951314875 | 140.975056186954 | 135.930107381894 | 153.711354087243 |
| ODZ2   | 126.626904958599 | 121.989964850397 | 131.374680878107 | 123.470830748348 |
|        | 121.903115540516 | 117.008277388399 | 132.573953444192 | 127.41463780496  |
|        | 126.88066987372  | 132.171282327983 | 147.790720062226 | 125.677019190255 |
| ODZ3   | 396.611050163857 | 444.479355480138 | 270.945325305492 | 456.298408568636 |
|        | 133.378374710498 | 113.891385601095 | 110.662552491706 | 130.977864137459 |
|        | 128.601885372662 | 247.806371601734 | 121.51208055933  | 106.470524594239 |
| ODZ4   | 176.641899861006 | 188.74403596953  | 143.49969914174  | 193.148369507405 |
|        | 189.539458686123 | 136.280653079814 | 145.643752002787 | 168.111124820968 |
|        | 129.573520898314 | 336.120322555703 | 359.703969802888 | 210.165098572428 |
| OFCC1  | 149.098381037466 | 143.861031475738 | 145.937733795336 | 150.148902196995 |
|        | 136.701400398129 | 136.306727083526 | 138.79473329684  | 143.50323531501  |
|        | 136.871568211946 | 146.328876892698 | 146.994103804515 | 140.35175858015  |

|        |                  |                  |                  |                  |
|--------|------------------|------------------|------------------|------------------|
| OFD1   | 318.487401106209 | 292.366934378643 | 277.219796733134 | 285.507315916663 |
|        | 261.322374889497 | 739.52947559669  | 573.244735292944 | 527.226517960073 |
|        | 317.493387040816 | 315.786908578669 | 681.677841333095 | 372.689712716797 |
| OGDH   | 376.962937292973 | 415.642099109855 | 275.437030326768 | 578.947889414387 |
|        | 327.010503005631 | 170.167035629256 | 185.765000029242 | 192.258863431747 |
|        | 187.365807314802 | 184.398672994943 | 214.8478629277   | 200.322334039458 |
| OGDHL  | 132.825240485239 | 132.381685434931 | 143.756242843438 | 133.53523683945  |
|        | 162.216377983292 | 163.552608805894 | 154.695060071104 | 130.526673128214 |
|        | 139.147327302581 | 198.795112039249 | 134.371907488157 | 137.949215501559 |
| OGFOD1 | 282.836518011311 | 264.054997398621 | 272.639413442579 |                  |
|        | 272.01602406899  | 217.513118676535 | 265.43897208356  | 287.287337931982 |
|        | 245.153736298067 | 254.552034511333 | 332.343558229873 | 241.383657414248 |
|        | 282.282663608264 |                  |                  |                  |
| OGFOD2 | 123.841366760069 | 115.600308687778 | 114.65036208773  |                  |
|        | 127.55397077248  | 127.601379088239 | 117.284724854784 | 114.39161822971  |
|        | 115.531710316716 | 119.152881350581 | 126.81140158672  | 136.682172321984 |
|        | 120.065876525792 |                  |                  |                  |
| OGFR   | 297.368197598038 | 312.705458415152 | 298.165097953983 | 351.292682758926 |
|        | 675.480482223958 | 291.261765585473 | 576.997804865103 | 250.18189549573  |
|        | 314.337680575998 | 252.32907388173  | 342.611951034707 | 314.486603134656 |
| OGFRL1 | 142.757327296852 | 131.092140169861 | 126.720031203392 |                  |
|        | 131.87052926802  | 120.675356009213 | 136.79732903972  | 126.433146708506 |
|        | 145.320945010364 | 138.289361041588 | 294.033003779363 | 117.494422663086 |
|        | 127.451155926679 |                  |                  |                  |
| OGG1   | 174.284268998257 | 178.347708009405 | 173.484307104751 | 185.743212726702 |
|        | 185.938983266802 | 174.510523238374 | 175.111460651956 | 222.646371492347 |
|        | 185.165469121763 | 207.218779485342 | 170.430478598594 | 195.618369827396 |
| OGN    | 428.09583118349  | 281.238656291587 | 487.597040819879 | 286.133496092533 |
|        | 129.801969586384 | 129.818020166075 | 121.246967460178 | 133.286702819953 |
|        | 129.52578899011  | 133.028789808654 | 129.344834474578 | 127.356622898971 |
| OGT    | 778.846928848361 | 711.166793546075 | 786.62709337246  | 644.97200337335  |
|        | 298.519371102278 | 774.774214696342 | 570.130804179186 | 432.726040933545 |
|        | 705.987531074737 | 437.931339781992 | 987.78377957731  | 840.623505494489 |
| OIP5   | 140.038295509875 | 159.301581158613 | 145.404469340821 | 156.873097743717 |
|        | 319.223127076041 | 231.890885094917 | 225.783771938969 | 339.917319653382 |
|        | 421.929674562786 | 279.495192828873 | 167.180406126438 | 215.897620927751 |
| OIT3   | 116.070254821073 | 129.520140995675 | 112.936472036608 | 121.575942603856 |
|        | 118.410091682499 | 121.917596225576 | 117.449306773025 | 122.197625748146 |
|        | 122.418378964982 | 124.365185583133 | 133.53523683945  | 122.554760526767 |
| OKL38  | 462.025126897013 | 430.833137328233 | 532.786041960586 | 758.863418917419 |
|        | 487.358720934063 | 166.850279817976 | 265.43897208356  | 199.579818754014 |
|        | 255.638433159437 | 322.506898833351 | 186.758038665014 | 225.005311517365 |
| OLA1   | 137.047288508371 | 144.89062965996  | 140.356164189622 | 145.652246303142 |
|        | 124.61344300674  | 150.48744233923  | 132.448602065824 | 138.664401460739 |
|        | 136.852403978525 | 140.038295509875 | 148.269123639781 | 142.939578759097 |
| OLAH   | 140.431591727649 | 140.624437508178 | 126.991140761102 | 132.924341641217 |
|        | 133.160197638474 | 121.645021899034 | 128.112595697836 | 130.647944268116 |
|        | 140.299459596491 | 155.926739769177 | 159.549936351002 | 132.464205461991 |
| OLFM1  | 408.037874667173 | 414.333324610267 | 204.710203150526 | 339.32415558339  |
|        | 117.199217938531 | 121.448671447499 | 121.271403807802 | 151.690538050817 |
|        | 178.294972422671 | 120.436408685057 | 133.980792743661 | 116.310166003024 |
| OLFM2  | 131.848213704003 | 123.762963668211 | 116.773599713111 | 120.003095000297 |
|        | 118.104763610751 | 128.367370419533 | 133.357385559881 | 119.427342766092 |
|        | 114.664782541261 | 137.144001915831 | 149.72025962797  | 126.588382665802 |

|         |                  |                  |                  |                  |
|---------|------------------|------------------|------------------|------------------|
| OLFM3   | 117.05536677976  | 116.221426977629 | 115.884253217495 | 125.481506166304 |
|         | 129.687743133943 | 111.794102015354 | 118.825948323992 | 123.259322051795 |
|         | 115.884253217495 | 112.74498133815  | 130.917269984571 | 106.341910466588 |
| OLFM4   | 179.15284184774  | 138.572054821151 | 136.977435235496 | 130.511042322504 |
|         | 120.041623078295 | 165.703810120915 | 125.285502203677 | 138.349773531218 |
|         | 150.924948809354 | 127.657961561231 | 110.17590675298  | 128.734694496357 |
| OLFML1  | 639.688482258192 | 589.240581642145 | 386.679822751367 |                  |
|         | 424.134483971176 | 141.513636348978 | 150.265385257579 | 153.620767586182 |
|         | 151.411708598688 | 183.905926269285 | 179.478756495687 | 151.61049450647  |
|         | 145.274345879987 |                  |                  |                  |
| OLFML2A | 1548.09554827056 | 1567.89763050645 | 1702.68441407727 |                  |
|         | 1894.14699530855 | 328.401537339876 | 268.264885392368 | 205.08372943071  |
|         | 244.350562866593 | 256.237185590901 | 659.106229917309 | 195.863843860549 |
|         | 235.933451977398 |                  |                  |                  |
| OLFML2B | 161.688125121941 | 208.016730103629 | 129.320210774045 |                  |
|         | 242.81187187788  | 154.336009472285 | 124.98399667725  | 116.639787832302 |
|         | 131.829906202014 | 158.622993108149 | 242.5085895186   | 149.77596374205  |
|         | 117.420765321056 |                  |                  |                  |
| OLFML3  | 1162.09529660662 | 865.435843446989 | 597.795856268827 |                  |
|         | 818.225731093346 | 157.792868983503 | 206.972440734038 | 145.28524062436  |
|         | 174.301952147167 | 206.502189514795 | 219.2695037071   | 164.593531655305 |
|         | 143.984222627806 |                  |                  |                  |
| OLIG1   | 146.781221728543 | 119.442114850181 | 133.491963477649 | 142.858554460651 |
|         | 128.176779923348 | 145.34533633425  | 137.609831343223 | 126.675231236654 |
|         | 142.114181233875 | 131.432729794636 | 127.642215862573 | 128.685065364693 |
| OLIG2   | 144.477267427347 | 145.333097940759 | 129.286782862113 | 128.680762033378 |
|         | 142.968008233583 | 137.804977813144 | 146.49022197174  | 152.937861585496 |
|         | 139.979025013908 | 149.322537247388 | 128.864822736402 | 132.448602065824 |
| OLIG3   | 116.685023927951 | 126.452500728601 | 129.334217858282 | 122.682761393215 |
|         | 135.553183871663 | 129.054577477882 | 127.422129210789 | 128.090665893885 |
|         | 122.309041354217 | 121.628827418997 | 149.343930487315 | 129.449242018727 |
| OLR1    | 127.485734862624 | 136.059884933876 | 135.310766630401 | 124.684937344502 |
|         | 177.132361355899 | 156.907788377794 | 209.023926358109 | 179.923966067226 |
|         | 273.651114834013 | 387.355661073935 | 155.249688219254 | 126.614876404146 |
| OMA1    | 283.123157828849 | 261.639437655633 | 377.593087606046 | 230.263678910356 |
|         | 233.809899915394 | 227.050629701762 | 329.48021621087  | 374.761007556839 |
|         | 380.514553097613 | 209.417052464583 | 396.781827940009 | 250.911817769829 |
| OMD     | 350.166837086936 | 225.75155298452  | 405.469705787631 | 230.179200974631 |
|         | 156.738816330537 | 174.971350923613 | 145.177195093247 | 135.120878931851 |
|         | 146.29600238749  | 182.515302191173 | 141.630183595813 | 144.448503894295 |
| OMG     | 153.59485367224  | 145.219057535246 | 147.823552813852 | 147.626071601072 |
|         | 149.338249249161 | 141.277227483198 | 137.625415175495 | 137.434039024162 |
|         | 143.577865527891 | 171.768618884215 | 146.440630638891 | 150.904618960507 |
| OMP     | 99.7487411813724 | 110.22624111837  | 106.238539254093 | 109.416512252532 |
|         | 112.742895297124 | 101.981823814699 | 108.646136431909 | 110.61165787102  |
|         | 107.727848546225 | 106.491867793742 | 126.511314417328 | 107.559685467789 |
| ONECUT1 | 122.676368520743 | 125.806943645484 | 116.168270198375 |                  |
|         | 122.503984297406 | 132.045595972712 | 131.853183159267 | 137.693410133625 |
|         | 121.459780480915 | 122.751674866182 | 129.786941565218 | 130.074786642758 |
|         | 118.56332995149  |                  |                  |                  |
| ONECUT2 | 128.36533737469  | 136.895650862562 | 135.125414452178 |                  |
|         | 135.390226050803 | 143.733505359106 | 148.231928963878 | 192.767155566493 |
|         | 235.019573994855 | 137.740497848238 | 128.957236136715 | 225.387674139093 |
|         | 136.724298878331 |                  |                  |                  |

|         |                  |                  |                  |                  |
|---------|------------------|------------------|------------------|------------------|
| ONECUT3 | 150.173766182317 | 126.316613675316 | 140.14062775887  |                  |
|         | 132.398041172151 | 151.466689967666 | 144.40361834862  | 141.557420268382 |
|         | 139.181131600753 | 132.407736899761 | 142.438586625317 | 134.6897714907   |
|         | 143.583650664594 |                  |                  |                  |
| OOEP    | 133.957160768065 | 123.905462079972 | 148.611352905643 | 174.761105961773 |
|         | 151.130401750721 | 151.98710761363  | 150.765477999064 | 170.423881865022 |
|         | 154.459517779315 | 145.1382587433   | 151.663203772586 | 148.16526158216  |
| OPA1    | 241.320049298228 | 244.689936990021 | 266.892524131545 | 236.985483155452 |
|         | 161.903016201041 | 265.670643951648 | 169.649251828199 | 215.585089158905 |
|         | 209.090788790449 | 195.863843860549 | 231.698163424706 | 257.338950719432 |
| OPA3    | 223.128108720503 | 224.089220507176 | 219.228720772236 | 268.724338967108 |
|         | 217.408824020423 | 215.585089158905 | 224.335742510577 | 246.288681426405 |
|         | 250.928804390353 | 206.186324475847 | 256.022057262325 | 235.680462167404 |
| OPALIN  | 144.771457221413 | 141.634246722965 | 145.576880854443 |                  |
|         | 148.344941331885 | 152.599052194143 | 151.846610656503 | 151.144521344129 |
|         | 149.196539425588 | 141.946668640749 | 140.684066288019 | 146.541890150631 |
|         | 151.237088659409 |                  |                  |                  |
| OPCML   | 116.533361070234 | 113.816165294487 | 115.766358387923 | 103.99234480919  |
|         | 113.879459563492 | 109.167312436827 | 110.113844434493 | 109.438965262717 |
|         | 113.78644620959  | 107.638492587723 | 114.062099086818 | 111.286141277084 |
| OPHN1   | 156.269957530519 | 150.717996520257 | 158.072347847051 | 154.728941096647 |
|         | 146.376149543438 | 147.307419859572 | 147.369767631957 | 148.072816925413 |
|         | 157.126460242995 | 149.320667417893 | 132.721469335671 | 145.45768403614  |
| OPLAH   | 171.373932115412 | 172.502036705114 | 156.94531513373  | 183.416437587938 |
|         | 843.545962045705 | 280.398987330256 | 434.509391836336 | 357.672950588403 |
|         | 246.63579788514  | 330.080428155378 | 205.509515144263 | 272.571092944711 |
| OPN1LW  | 174.646321871605 | 146.897528834303 | 141.715307041887 |                  |
|         | 148.082026641671 | 148.367132982373 | 158.295583769612 | 135.93352186143  |
|         | 153.345834660643 | 149.801573181126 | 148.553324405123 | 110.544044723728 |
|         | 170.376620730856 |                  |                  |                  |
| OPN1MW  | 136.202953030465 | 129.636135486593 | 129.701347789845 |                  |
|         | 149.166635189875 | 147.502116289881 | 143.385915173392 | 148.326282600684 |
|         | 131.448656182179 | 144.64757514198  | 140.925705285169 | 130.625825024195 |
|         | 142.119327380686 |                  |                  |                  |
| OPN1MW2 | 126.386738502885 | 124.334450753704 | 125.452973441746 |                  |
|         | 114.721282552636 | 115.107214937219 | 126.543399408429 | 143.473523258521 |
|         | 138.201164395948 | 124.800221241981 | 128.019837242559 | 135.668768914964 |
|         | 122.323876787207 |                  |                  |                  |
| OPN1SW  | 118.712730897987 | 123.306499698566 | 125.381865040574 |                  |
|         | 114.696935316053 | 121.624218243474 | 107.961322525982 | 113.799997627317 |
|         | 107.126004317323 | 110.662552491706 | 107.365390754133 | 117.682034050478 |
|         | 118.924317138158 |                  |                  |                  |
| OPN3    | 144.252481420079 | 142.05571112803  | 137.453705355364 | 137.808307749725 |
|         | 175.7330682766   | 153.589626253969 | 166.007913607742 | 225.423403713718 |
|         | 154.070450565144 | 255.638433159437 | 166.061891147234 | 214.355086255855 |
| OPN4    | 144.413210364148 | 143.953043041292 | 148.553324405123 | 144.544001385895 |
|         | 143.802883430376 | 138.106499370074 | 140.441521267218 | 139.444577046509 |
|         | 146.515240633175 | 141.141047405344 | 148.046961712162 | 141.604832186257 |
| OPN5    | 144.396774242135 | 144.358535632993 | 143.50323531501  | 135.621035941292 |
|         | 144.857728905873 | 145.165443106042 | 145.03804642447  | 142.768691899824 |
|         | 147.51773051441  | 141.277227483198 | 151.214631373344 | 145.163084967499 |
| OPRD1   | 123.306499698566 | 120.93965087814  | 124.961859983596 | 130.418739793498 |
|         | 142.646570636529 | 128.898603000207 | 129.701347789845 | 122.543903508753 |
|         | 116.983869766097 | 125.654417855519 | 127.075899925865 | 137.352231982942 |

OPRK1 150.409919207059 150.412929574507 161.761125440228 167.408314067262  
166.239339129505 165.504532455205 163.714231827866 157.073850948746  
162.595632367022 157.656220148041 162.208028489943 162.342112922504  
OPRL1 147.809934374849 156.273445355976 139.080142195118 140.92377681377  
157.142101889337 146.616041788595 145.872258115708 143.891725249061  
143.58555556787 141.941814923705 143.730966588794 148.31140879454  
OPRM1 134.927386619223 136.704018446388 129.722382881611 132.184217000689  
135.25734629146 132.361106053517 133.184279519985 129.007924852801  
131.190238038695 133.480196904786 134.91213977595 134.323365608463  
OPRS1 137.044079235724 130.606211166873 145.526941881413 131.76829141949  
156.873097743717 128.001109846227 120.812738312059 145.301551442388  
139.046174587432 118.134614195753 129.210356735226 131.652854369619  
OPTC 121.036054511761 127.729912390394 123.470830748348 125.256339476772  
108.570463496052 115.485515429446 116.961391747202 107.365390754133  
107.103635692135 119.613985826308 130.945807039197 122.142323014287  
OPTN 1478.09582385838 1229.47460924638 1224.49891389348 1046.65224316733  
213.412498914309 315.513423195489 401.542072222692 259.094411953361  
377.27961559752 575.060457772307 776.030689773414 442.12886967939  
OR10A2 157.003367685421 143.562164660825 152.342712570625  
151.515460040167 158.48793705795 147.670425834523 154.713713332354  
133.191797029676 149.879951192667 152.591091223395 141.729275721015  
193.196556480538  
OR10A3 138.633019006784 144.81689330206 133.085476994246  
139.280151859534 138.846543789882 135.618562468776 160.407690552027  
141.213588194832 141.043668963717 138.586620636835 147.461480849333  
163.227953876329  
OR10A4 110.662552491706 129.828896822571 113.479382235297  
118.379914726645 118.115015846489 112.825399620524 117.879058520659  
117.432860005907 110.382724813928 120.915108114673 120.120796272896  
119.422996538444  
OR10A5 136.020600085547 127.566369352079 130.138945493943  
138.508015596135 119.548432046443 128.182419321978 121.636361281148  
140.251168248117 132.573953444192 127.073045558761 108.543795408713  
124.401083237195  
OR10A6 153.420392741659 126.067296703905 151.169283505727  
132.265895156539 153.952788086758 181.654319266685 154.088770236213  
144.36033726557 135.650546885518 155.53992663898 138.667081004369  
141.178668371671  
OR10A7 160.281830914755 145.578721432709 147.446381217887  
179.704370382771 142.05571112803 154.688685142904 148.079107235035  
150.204636832734 140.668597897404 156.981921830638 146.552529779774  
155.558839375761  
OR10AD1 146.010474018786 156.105736111274 161.16688895179  
188.013181859196 147.638057399165 165.307808075027 156.411563412665  
154.988494760267 155.861829925386 156.843997723699 130.293492553638  
148.237980436128  
OR10AG1 127.490889148422 124.375348764151 120.910703698292  
120.441732791854 112.977469350139 121.231939494619 115.587874563785  
131.572485018063 125.104229604098 128.425838805072 128.529525886337  
119.640086587188  
OR10C1 155.762890407496 132.311344653106 143.265532486512  
152.317890573534 126.228513847262 130.24527031028 141.083966525597  
145.948772123142 163.442257036536 150.620603731907 145.060085149395  
137.792806301902



OR10G2 131.626173473789 129.051642626091 125.707228291312  
130.720097323382 134.499588539919 130.322436253881 121.619593453259  
126.603552416008 123.141928612324 114.691842968597 127.617449871137  
135.247018354192

OR10G3 122.746185691827 123.554769032715 125.634045420702  
118.360186663758 118.802030418792 116.378552206652 124.818436949131  
123.588194516972 118.547605249191 119.135701239571 144.02239659305  
124.302581985661

OR10G4 121.462385497795 117.992729826121 113.963798749897  
116.773599713111 118.955314417914 117.470731811595 127.792241991414  
126.488299049827 131.7646616214 106.341910466588 124.566313603935  
112.239647575661

OR10G7 123.45004246675 125.418782388128 128.236840746655  
130.729989463558 124.661088039427 124.863832760607 121.977373818244  
122.673596593654 129.425699141995 120.910703698292 140.40754434058  
125.065813262416

OR10G8 109.318922864507 111.152235113722 105.49491265382  
112.547907748842 117.873333897609 119.422996538444 117.805556408194  
108.557097186828 112.949643549398 112.936472036608 111.639177843969  
100.325215581101

OR10G9 149.453103369806 138.792521681771 136.011474063229  
134.835962366555 138.858138379065 154.229914729772 129.242093568433  
132.148166773943 135.383585408897 143.051871940423 125.234097725749  
131.928871107722

OR10H1 143.912136782374 148.691132137188 130.511042322504  
134.89415027205 135.814893730549 137.693410133625 142.732625557628  
167.421776383056 152.101695555105 137.330207626732 138.021559586328  
148.560326703328

OR10H2 148.18197556044 138.970853057174 147.968104627262  
129.158212237299 160.176567985923 152.857278986877 139.21331678591  
145.338156577438 140.837360719964 128.675527226161 145.587386656619  
136.68056120003

OR10H3 137.423810400996 144.845726048937 144.292679144059  
137.426226808356 139.771342253058 136.638141963514 143.063345350253  
157.240466990977 134.251843621261 148.953720017484 122.908086808381  
146.746669300049

OR10H4 150.956247643013 150.058160923921 149.525115175915  
153.5256657638 153.926214082991 143.569894807386 150.51056917809  
144.131743978192 163.340435089911 140.951031275943 145.941674563997  
151.669421563954

OR10H5 124.851025681014 129.997181739652 129.684916104674  
126.793778645808 134.030972845871 127.58382536792 132.213890220705  
131.486917325752 128.42287610189 124.647992480694 129.369968549738  
130.803561448083

OR10J1 158.232100962615 169.852769679312 167.219062918573  
187.812436252228 162.500485773812 165.267693285882 160.949030247406  
164.748676009072 165.558963147657 175.462290891421 164.841156516242  
177.919885012006

OR10J3 136.659134200122 125.498081339586 144.850211439338  
134.572552391307 145.418696807842 150.021512237553 135.87026484074  
152.262147284452 134.347898745664 151.104891644466 101.431474941041  
159.41705570719

OR10J5 125.444541266623 127.665162524824 138.74117178479  
147.064543281269 135.315732654507 134.835962366555 138.924820359912

126.106777865128 143.004090696463 128.835216648178 133.717451195844  
139.488057371254  
OR10K1 123.122705969332 118.593717189375 130.653971083035  
119.094868654252 128.669887479835 118.011195631598 121.057111457792  
126.473768158566 127.218362452043 125.111993560078 131.65084896906  
121.942777234608  
OR10K2 161.596086502946 144.820843146628 147.768191157163  
151.877035446575 143.182399285928 135.082715974111 128.980519133484  
145.404469340821 133.905162024888 148.967232828819 126.667650990284  
136.026302491961  
OR10P1 137.748443205818 129.680406696779 129.813090345837  
145.229637715814 139.835983835267 138.173547382901 126.688235549921  
142.910616700526 133.532323053215 134.049094181433 123.219903763265  
127.330523871944  
OR10Q1 124.699127988314 125.830917527594 130.154756165574  
128.888149939072 134.992686224944 138.882483367088 123.153925912632  
128.611740835252 133.401620574886 135.385133545332 127.224081416987  
136.360358731063  
OR10R2 114.704831217037 109.781334128478 114.342980656214  
99.9173294438729 108.333135424315 113.740942665269 112.509731206295  
110.662552491706 115.34945441214 114.290611267606 130.004329307977  
107.841100741858  
OR10S1 132.219652920061 119.164791441052 110.093565974873  
118.783904603368 129.628859533303 120.272964182307 128.158605637751  
125.83678485646 119.449118660481 117.590393673861 142.412731964179  
123.059971161711  
OR10T2 139.801108744526 162.100547394235 121.116206210402  
129.652331277375 149.839827383681 140.222121251146 134.947657801444  
150.203281104753 147.132625797946 137.754373055094 139.316189199729  
130.483765953389  
OR10V1 110.419222236698 108.036254606246 119.315932907373  
123.498540254464 111.178024950204 112.605287278882 103.307703547649  
116.031631038289 109.228587997052 103.99234480919 126.912226185444  
119.903068083658  
OR10W1 153.694557276814 141.712693059287 137.639342727211  
137.992477770842 148.370331097467 142.108805047729 147.985843605585  
142.678267012725 135.088149158147 135.274205069488 120.406577236405  
140.421945574721  
OR10X1 137.835936352525 149.260811184287 135.744202879162  
133.397734409167 140.593510265137 136.872851774272 148.235495611248  
138.50252234048 135.741404460897 153.408890091225 132.271437329873  
147.508817393901  
OR10Z1 127.745801270205 119.112063328364 129.471713415228  
125.262445870212 130.076926011271 125.431735524937 130.822330736013  
125.034243098087 121.898921780569 122.763138007612 137.00532429734  
129.083756379376  
OR11A1 150.232470359841 149.175458427847 153.911165277809  
138.114938404796 160.435789207464 148.81406900745 145.632060621034  
138.440663763957 146.056723380149 138.692057950694 148.44261900795  
151.118430469429  
OR11G2 157.301617257941 156.723502568908 139.291775075915  
129.891492052232 147.16778072296 161.305860691151 187.784865705837  
150.168496148941 156.330571337475 152.599052194143 146.84891312893  
143.165150890885

OR11H1 159.848342125486 167.842122798757 158.8246699332  
157.672378669483 145.389721946046 160.695913747601 180.327051100611  
160.598186999524 152.445022409208 168.942165573542 154.648806105422  
170.775283924087

OR11H12 125.609542142983 128.51523581959 127.713286292101  
129.502730573463 130.024546949158 128.980519133484 135.802258952006  
118.424520312293 130.378441113977 129.701347789845 141.356127724777  
140.103020838882

OR11H4 169.428195354763 161.788118050564 194.202977693583  
159.650116062266 177.688568435599 168.582192754233 158.68792959603  
175.139231359014 149.895214204184 165.752558888845 142.064680109047  
203.370353613423

OR11H6 138.947760022173 140.599584289987 143.669490888725  
137.570343435498 143.745594527046 150.72014060286 127.409603645289  
139.926488041421 136.887796245371 143.001661958814 142.013370954791  
145.977658128528

OR11L1 153.82440233533 150.297422529071 127.291712212051  
134.260779370821 149.143087870963 132.918979842076 143.530190096012  
127.456181182121 142.872683795338 132.916608405637 144.529801006864  
129.873110494826

OR12D2 145.25198093836 137.545063966957 141.870640394206  
134.7552564959 147.745780820004 146.261164125255 146.992289167283  
143.451080466172 134.247361216412 139.140647941752 157.672378669483  
144.731299077209

OR12D3 131.427686241226 123.603972078897 131.696834332724  
149.535008475427 139.344344562134 136.332399354517 142.930903395131  
134.972933635542 130.176734524308 135.526248253492 124.83124879272  
132.584454429269

OR13A1 133.780423932326 129.368045611894 125.313515459103  
132.04032925495 128.753623886188 134.298521475727 157.668307146391  
163.616115299926 142.456527359961 131.421663453164 207.076364103755  
167.850516495529

OR13C2 130.701801496564 141.369723386494 154.71904132098  
138.149827158817 149.805955402639 136.453821861379 148.539881077647  
125.584202037776 150.384559054133 147.098474227445 124.904518221898  
160.117742879282

OR13C3 131.829906202014 140.137435303984 134.840285218383  
157.240466990977 146.677241054745 146.233195164295 143.100436913184  
138.544053540799 127.052618800004 126.452500728601 134.824147038515  
142.199182392836

OR13C4 168.511517285223 177.355210393749 148.874533472738  
179.905809470907 157.055133233709 153.108902978819 147.925744210234  
174.903798946103 137.372131049785 160.055242985219 142.658562927154  
169.674931517111

OR13C5 151.899063970777 138.19108838324 170.522853717911  
139.72868421672 149.193437559422 131.693923403533 142.129680127408  
157.612067634423 149.933919274985 154.962835391567 141.964796033176  
145.36249226764

OR13C8 100.746407116143 101.316813921703 103.660742045068  
112.464951599416 118.446703299916 105.236768436069 101.713609383766  
122.243585162452 102.024765473404 118.833188167696 120.85013281321  
102.851152421943

OR13C9 144.617654961472 147.896919205072 149.836491640473  
142.518266591748 157.041481397151 147.140771901106 151.067819234238

143.60570420943 141.753560518393 150.283447275981 155.393326732887  
149.990378213915  
OR13D1 110.234403581151 103.520748827831 110.586147059226  
111.7529190597 125.311403516443 106.41329572636 115.180659017144  
112.063713561549 118.076139318165 107.863971340407 108.830525786872  
119.164791441052  
OR13F1 114.466368742403 108.148715413122 109.898406285895  
120.757288533244 108.830525786872 113.756115251188 113.557349524174  
114.358099210532 117.374025543149 109.564709878576 128.196474114536  
118.510960607141  
OR13G1 123.668707648172 139.917662338546 132.094446606227  
128.739880189022 138.317443162096 121.003207135942 130.849810759153  
121.423030266904 117.990622156287 128.922269289649 137.765042156434  
123.98775110588  
OR13H1 117.494422663086 114.209249333221 111.475394003575  
108.247365868673 128.922269289649 108.830525786872 107.126004317323  
111.956783714784 119.774204444899 112.699674279523 117.623103460369  
127.615631240096  
OR13J1 114.308806726044 110.234403581151 112.292129754508  
115.775525016883 109.156349683299 124.132215738502 106.923686318112  
116.388079393669 118.319950396126 113.810645407837 127.187020441742  
123.379461430902  
OR14A16 117.692662275393 126.868970616955 117.101933186269  
118.770061426689 130.675745275992 126.589865262427 120.283706459738  
127.019978195283 125.431735524937 119.472410874778 120.611442477736  
117.312094804205  
OR14C36 150.601874392926 151.535177950367 173.929353266244  
153.118492567137 160.156127781701 153.694557276814 150.500676225569  
169.992657041967 157.041481397151 167.341759854203 148.551340840517  
167.093409692227  
OR14I1 153.389279691913 136.522590104535 135.971507823633  
138.250288796456 149.082061203661 139.623194916971 136.095753586495  
155.431833398023 132.198536906752 138.414916506716 147.009325721272  
145.435794613203  
OR14J1 113.22850386845 122.82388804774 110.865668451601  
109.924867620862 116.310166003024 115.613348109569 112.790552379447  
110.544044723728 112.558241320112 111.243322115126 142.590631181358  
112.858669660245  
OR1A1 114.10470841717 131.780134634616 122.903428611669 122.339819585312  
122.098850053347 127.456181182121 127.456181182121 121.320750074882  
119.845508281414 119.903068083658 134.406692724353 126.806537241253  
OR1A2 104.36042819601 111.448871835514 111.802672864815 114.913534674899  
116.273000405449 125.377377116057 109.46255295836 115.878861991823  
114.27112025541 117.773743603829 107.344825308293 117.455432751161  
OR1B1 154.011708696954 147.815673580657 147.920946479942 155.162310001164  
144.499680685194 145.185902174023 153.714902281332 155.218336968191  
152.404186073033 138.67221078031 142.129680127408 148.803188053248  
OR1C1 130.277107538053 125.111993560078 140.149064156135 126.121516564343  
118.100611964852 133.680691168661 124.263901299025 136.878656455606  
126.199219102601 146.185931276053 129.961042190085 129.785078660064  
OR1D2 118.235640920527 118.406487008528 126.614876404146 129.093864368842  
114.913534674899 120.931585398914 109.552501987529 122.519746599387  
115.420810993676 120.62139061084 127.542288885184 112.309528593741

|        |                  |                  |                  |                  |
|--------|------------------|------------------|------------------|------------------|
| OR1D4  | 156.731291756066 | 153.655778377717 | 151.360575274272 | 178.235281981508 |
|        | 159.196987090991 | 143.804903119745 | 154.849264978968 | 157.468934439452 |
|        | 154.101698334466 | 155.62770968777  | 147.303997146992 | 154.475735552851 |
| OR1D5  | 145.386689493179 | 133.18744841514  | 134.299575239865 | 136.539130156863 |
|        | 132.784949538167 | 139.46518859956  | 141.770977101211 | 135.654614839107 |
|        | 140.569391362701 | 136.701400398129 | 157.142101889337 | 131.766114156138 |
| OR1E1  | 110.562310620515 | 124.42974326791  | 116.925863450165 | 129.668506092785 |
|        | 114.818898581401 | 108.288420807873 | 111.65024009102  | 115.992487254175 |
|        | 113.400050190315 | 116.294180301039 | 117.593226427794 | 114.062099086818 |
| OR1E2  | 131.689227690818 | 119.658703392877 | 130.970694919879 | 130.814702312493 |
|        | 125.761205967344 | 122.456286448252 | 133.012692824038 | 132.709845352383 |
|        | 121.645021899034 | 128.165775629664 | 117.186546702764 | 125.452973441746 |
| OR1F1  | 163.538862303362 | 140.154925193842 | 166.214167530158 | 138.021559586328 |
|        | 140.997594159186 | 144.460541430705 | 145.882793872634 | 143.653452869664 |
|        | 150.3259737066   | 143.236593995493 | 142.493119780028 | 141.653917856148 |
| OR1F2P | 165.443069511115 | 155.431833398023 | 143.327730271099 |                  |
|        | 169.496129800444 | 148.564655847496 | 168.674809329231 | 167.380798617981 |
|        | 163.245806772716 | 145.369791572077 | 180.747527895349 | 142.671190279415 |
|        | 181.340312140534 |                  |                  |                  |
| OR1G1  | 120.688909943167 | 114.85602874727  | 117.331280455759 | 115.949513659403 |
|        | 115.738984899365 | 116.558752619296 | 107.260023460914 | 114.27112025541  |
|        | 114.755442050481 | 120.660349211375 | 125.769903262265 | 123.062390088305 |
| OR1I1  | 120.590654346066 | 122.213445520365 | 111.708970469189 | 119.202966460612 |
|        | 109.760525674874 | 110.900309203531 | 110.408301129053 | 112.088944448944 |
|        | 117.312094804205 | 117.22284971665  | 113.963798749897 | 114.849872458647 |
| OR1J1  | 160.022481227931 | 149.374282007673 | 157.5032461329   | 155.590197324062 |
|        | 137.871870950302 | 149.6730835169   | 142.336164180947 | 146.501559368223 |
|        | 151.374665021513 | 150.348608467097 | 131.930814868433 | 150.250193889942 |
| OR1J2  | 160.353649786837 | 158.973872644973 | 176.100691355682 | 168.654753237204 |
|        | 145.799530970042 | 138.212860360467 | 144.572485418264 | 139.583514773196 |
|        | 141.990639998829 | 132.820927638053 | 147.970243979273 | 154.542190113901 |
| OR1J4  | 129.887187837732 | 120.733009784454 | 113.845770994796 | 117.172431931323 |
|        | 130.34939602913  | 125.277752749246 | 114.01599035448  | 114.906396746556 |
|        | 108.543795408713 | 117.923459503989 | 139.593950393555 | 123.868848032411 |
| OR1K1  | 170.401653214867 | 148.057700860759 | 153.798367953373 | 156.157567405927 |
|        | 160.293522619371 | 140.533704857854 | 142.914863449833 | 153.136863548105 |
|        | 146.851307767958 | 156.437949042181 | 145.873038603155 | 160.766121558583 |
| OR1L1  | 110.910693353871 | 111.577400298092 | 121.084348994747 | 117.084984190461 |
|        | 115.778736387131 | 105.839106819841 | 122.182695593404 | 112.488125161387 |
|        | 121.865696440776 | 107.622342073167 | 124.180511991605 | 117.494422663086 |
| OR1L3  | 133.686850910378 | 141.84490608317  | 126.151017944639 | 122.102644097132 |
|        | 138.121905080822 | 126.63730651721  | 145.787468865642 | 129.570960882942 |
|        | 133.026094667212 | 151.641486303453 | 129.689855810051 | 129.051642626091 |
| OR1L4  | 142.648205566485 | 135.116985816353 | 141.104761546577 | 141.25089277145  |
|        | 143.204058393718 | 125.999595008166 | 135.485867373592 | 145.068061371609 |
|        | 141.839647226623 | 137.975369568585 | 136.278361222532 | 137.107621189522 |
| OR1L6  | 112.578934972566 | 114.494394548044 | 117.499697378893 | 116.236538651031 |
|        | 113.924310293916 | 115.34945441214  | 109.806338826826 | 118.740346254406 |
|        | 110.256771079797 | 113.734280863323 | 133.608461289137 | 117.74682797375  |
| OR1L8  | 157.378317015602 | 162.863781294205 | 155.722314592388 | 179.109090120497 |
|        | 176.66175597182  | 162.870317933909 | 192.07791693203  | 161.348562186667 |
|        | 159.266921692363 | 162.208028489943 | 167.949422301257 | 163.741411769369 |

OR1M1 115.858924428037 112.642429076777 120.131839791515 110.22624111837  
122.97487285065 119.95959059725 111.62514398781 112.684334910243  
119.583378101838 116.263405190786 121.416038813102 117.837894438834  
OR1N1 126.343040504566 121.838802846453 125.915689078001 120.436408685057  
127.471479301983 128.447393268611 128.645334554749 125.189588215659  
128.276471459777 116.943791343147 128.40650280096 128.510903178542  
OR1N2 116.700397932007 116.161473967382 120.410307377977 125.126100642395  
126.155486659114 118.215641556163 116.476747183738 116.994216357989  
122.742891063864 111.538651711074 127.83967243279 113.238466329843  
OR1Q1 152.447978675887 143.673778816953 137.457453776513 142.051259785804  
112.156010486085 162.885054245809 138.442378791712 140.89666990854  
136.077039612526 135.511902377219 127.380083832809 133.206919058442  
OR1S1 125.26492723752 128.05898686833 125.350567304651 125.639355645626  
126.595668758744 130.810353054091 127.449028221682 128.02595294499  
122.05954649985 125.117333434527 125.645986634914 121.429270259367  
OR1S2 130.104021521854 139.174188535843 131.670601860412 139.113675690483  
145.380971596154 130.761936205169 146.823157886228 145.233055765001  
141.772724512502 140.288612271406 146.692827583525 140.395662148924  
OR2A1 140.06989960847 144.116298946718 134.7552564959 133.610143526954  
134.27783583528 152.97753810644 142.21279866857 130.609596267168  
148.739888930189 138.645156942894 159.115391667901 162.327039624723  
OR2A12 137.306031826007 128.375390373307 118.388993232718  
119.334967856721 139.900523831258 129.344834474578 131.216673806987  
125.12823219142 131.241878941749 123.470830748348 133.621325902558  
133.702845956639  
OR2A14 163.586549438955 173.001985500448 157.524049610272  
159.06002608158 163.306853098724 158.584934514596 179.509758601636  
175.670738308809 157.073850948746 183.226294747874 157.994474909749  
159.603586227897  
OR2A2 134.731687541347 149.103778494524 149.599523779175 147.460432992291  
152.748807709142 137.710725379804 135.872060352476 140.728126380228  
140.704317015307 162.466301774088 151.632801137039 158.226547375305  
OR2A20P 133.396403868645 130.506708993193 136.061992660698  
135.559535347364 117.386273592501 148.410647472149 152.547558436703  
140.38936578649 142.217762896203 137.691870502653 163.593106951255  
152.038902807701  
OR2A25 139.374278310041 159.324816814876 125.882246459692  
120.465934391246 144.55710963567 140.058153633802 133.15144076432  
135.594186066942 137.629855378016 143.145483889918 138.188522429661  
147.143407224469  
OR2A4 129.694178995061 134.509830749072 125.535877109652 123.551225884748  
140.713537140957 137.330207626732 129.104084188187 140.260053206523  
148.638400592682 126.715300671036 148.332750352364 148.42845062376  
OR2A42 156.695440330379 135.405742719464 132.75673287656  
148.527528612375 155.326276840738 161.325409589612 146.854523122404  
157.449891798638 160.752581271996 166.9499656083 171.247946863662  
182.165681034082  
OR2A5 141.233642252649 145.852430082228 132.727133259694 144.311620064675  
161.17923997423 150.191645194625 168.805630890928 132.393669306489  
142.412731964179 145.487783396345 117.470731811595 160.022481227931  
OR2A7 135.3969732106 138.824082857747 133.052615777603 124.690141443832  
126.242935839683 132.002835547397 139.989830921287 131.679566454851  
131.859204862396 130.611233072509 128.545699891734 137.134190411005

OR2A9P 154.170007083026 143.41350503793 147.268006631005  
136.297963196301 157.415211954103 177.688568435599 151.722405598425  
151.548865569913 192.059255232313 158.092775850886 175.476184387338  
205.026176598298

OR2AE1 102.421174406474 110.16174213285 108.910588012315  
126.372374084002 118.355532305846 114.721282552636 108.036254606246  
102.522925993233 115.631414599991 113.416743649576 105.839106819841  
116.939471420419

OR2AG1 130.047353911148 143.180247878507 139.917662338546  
133.331037738063 125.542301916791 142.709768829207 129.987548571478  
132.741859397511 139.657182434153 137.913497715424 152.849810441802  
132.011199659803

OR2AG2 132.481710681317 141.819762045169 147.457193565877  
148.945466917496 132.110906510601 132.273354705213 151.224289879776  
137.891372981851 142.677386111317 157.021010130169 138.633019006784  
132.251093122058

OR2AK2 148.386249316173 147.849116400978 136.929570710155  
144.139062513587 133.148442269517 142.222833574043 134.8745127454  
127.771225410866 119.709032462308 139.862403685817 137.885506916098  
133.53523683945

OR2AT4 136.121873179928 147.515088047628 140.381386314817  
174.383193885933 132.908367372426 148.925418133902 146.271180025157  
152.738468369498 150.896076207161 142.411117330429 153.557991189227  
135.358837968905

OR2B11 125.528638246486 120.543881800775 119.188446525733  
116.925863450165 119.755151432304 117.244895482991 121.141432480683  
111.568329540016 109.947300629824 119.511962218143 119.131613164405  
112.488125161387

OR2B2 147.338615809214 153.222807811478 162.247608931408 173.334154083555  
155.851264092344 140.267351731167 154.136467767927 153.377182895472  
157.912864169081 144.148833164952 152.834894011142 150.790155351217

OR2B3P 130.260174841484 116.0999658586 126.106777865128  
131.058360514673 131.230501496659 135.3969732106 123.420635380886  
135.883119645931 129.779076484273 124.39748786803 126.88066987372  
136.357788670568

OR2B6 137.854873498783 145.777778096701 150.685245572093 153.088710298368  
142.976123206776 169.003310163058 135.860057860699 150.517832812714  
148.797226586765 156.94531513373 130.680629893396 151.65364467801

OR2C1 121.148441367866 126.780096523484 121.344724993789 125.649525720177  
129.284384810812 119.573635447638 119.876835248732 114.644722005728  
117.79844873842 119.544004279354 132.809364188497 123.896578371318

OR2C3 116.236538651031 111.398760606544 117.820996523337 115.594489123676  
130.751522895053 113.963798749897 112.38543517651 109.947300629824  
111.515588041012 110.304102941202 137.381470768186 109.342230674869

OR2D2 132.096095362238 142.485427762372 135.381131982323 147.651620353593  
132.86711707789 136.301442794928 135.498114285253 132.249906289203  
148.760280320258 138.055909969804 125.802927749616 159.185616602396

OR2D3 138.30326146769 134.197892075036 129.344834474578 134.786678978467  
137.561067667054 137.832597613423 143.909501365162 123.488418655586  
132.257989841046 129.958065173006 143.647714966406 172.926288703434

OR2F1 112.063713561549 99.0767996209245 109.282814458761 114.43491928161  
110.050374895171 120.867408760075 111.922007318017 114.494394548044  
103.772221923105 110.910693353871 109.719356131043 106.41329572636

OR2F2 117.432860005907 126.585679159459 114.10470841717 104.739307327595  
113.091739139626 110.707755436868 123.660836177932 121.572462089942  
115.507474401239 109.355444907633 134.613036378054 131.288785100733  
OR2G2 112.502812746669 119.152881350581 115.789536577324 122.038534506506  
113.125349503734 108.955761698524 109.719356131043 107.283814651497  
117.060696904303 112.729141678141 114.561836290349 113.857477830423  
OR2G3 130.593846004132 147.049287475127 133.363883851093 144.102872001089  
133.617501101389 135.559535347364 130.797498958616 136.152827218905  
150.241585041178 143.157807632147 138.466136108202 136.635413632094  
OR2G6 102.661440700541 102.851152421943 106.147993332294 120.406577236405  
111.716607815635 112.394223360492 109.52020660772 119.152881350581  
108.446988282853 106.204350278634 107.40922161073 116.681996596451  
OR2H1 120.53428198263 128.901707304582 115.566303449363 124.259971940951  
120.517691208358 145.063062479224 124.042153387391 117.227635924674  
124.186557690235 123.706910388724 132.994716261577 121.065278765151  
OR2H2 129.123522999226 135.842090777339 170.858049313581 124.401083237195  
139.446914318877 133.567630962178 147.659772694732 131.761564745495  
145.543942469821 164.61921356441 125.386545354096 145.195065312551  
OR2J2 128.119556520151 122.685360126599 135.764392116216 137.670655293096  
133.052615777603 177.862368731138 136.011474063229 140.004456934031  
153.601918768668 147.314091141313 122.412141495264 141.5311434224  
OR2J3 124.056405566491 121.919799968293 138.521952850632 120.497796762933  
129.777173431404 120.100672968415 139.065849548762 126.439948611449  
117.390049487174 123.827771590213 153.19516365535 131.159946917777  
OR2K2 110.586147059226 103.99234480919 106.015691274983 119.67745324922  
112.332130647215 108.021898335735 102.725375719353 110.256771079797  
114.249891266241 105.665621968915 116.106772298898 114.613368640356  
OR2L13 149.41357273704 146.582858169664 139.685629122498  
129.995417218564 142.38097037888 140.641956393993 134.275773172492  
139.375386456759 134.931263946202 169.067064352955 129.471713415228  
134.805239981342  
OR2L1P 129.221482161409 136.103088234442 129.253638326633  
128.158605637751 137.383211680459 131.373012256275 139.638617433372  
125.296240086615 124.940836122365 132.439176846818 136.519697160267  
123.662678397678  
OR2L2 151.950883677297 145.308548379215 165.803549113373 148.645749834125  
147.823552813852 148.838294770082 140.890227770353 135.711590400394  
150.866204945762 137.522792377933 151.308872564827 162.223175359454  
OR2L3 136.372712400493 114.021546689428 125.73560975196 125.287738115754  
126.536245975137 128.583503171594 138.928287624746 136.095753586495  
117.593226427794 139.984102798711 138.618761382177 119.382151435379  
OR2L8 134.534815676852 123.010614051218 136.682172321984 123.650702461773  
128.077692981235 131.759422682853 122.373400988227 148.482530949134  
123.703840971923 131.287142490322 117.024039521425 127.593764897583  
OR2M1P 122.236134282757 130.541449457342 130.947003916049  
120.163286072512 136.670253859184 127.261349543394 135.479300698192  
138.603793282123 127.385776388242 130.838350486331 137.838096997956  
132.076865522593  
OR2M2 112.142263331903 117.805556408194 114.574362093931 124.345320343901  
116.403106568357 114.405811161631 116.403106568357 116.943791343147  
113.748724650063 130.14600240687 116.688949603376 121.118933682515  
OR2M3 127.856634523494 132.758313782606 126.333814565085 128.879953205511  
129.520140995675 124.232144678947 132.817645625115 124.321503368855  
131.899614022767 126.578035793406 135.805294188016 125.081880303992



OR2M4 120.26749529985 134.668233738635 128.244549276386 134.442947822188  
129.891492052232 144.28597792625 136.948039394935 138.825961991209  
124.080382291282 124.157302365291 118.88525116298 140.120051507626  
OR2M5 121.170340423391 112.75167046116 121.402905161896 127.949413503055  
116.321559000405 124.423556743827 101.316813921703 116.465213348716  
119.50754902958 123.361179535626 126.407313060022 117.356389952799  
OR2M7 121.391637838137 114.613368640356 119.152881350581 116.934457270701  
121.672811608791 118.109991440011 115.366496551426 121.476730561812  
113.23302126254 119.161972571516 110.266032635568 111.62514398781  
OR2S2 144.487533992157 140.613151527886 142.19015013243 157.912864169081  
150.772752327567 150.754492902512 133.670967970136 146.287161912291  
157.390513637267 160.19942770666 117.803508098322 138.091795130567  
OR2T1 125.739946257697 153.102526191573 131.151578665754 138.496366637658  
128.09266452749 123.994188725172 132.653795458388 116.71331256222  
122.531675048414 136.939603341076 133.796029401157 131.510494315469  
OR2T10 143.13304460184 121.47058227778 142.442450622311  
140.882766779119 126.333814565085 146.96472350529 136.231747456996  
137.840396641618 141.67277923437 142.93332947113 122.595766303833  
144.4421922847  
OR2T11 148.380555606786 137.335501759561 155.615655460277  
137.466291815166 139.490103923544 130.571827557149 139.566124411099  
135.085039737228 126.837151457845 133.99226161886 163.653662369257  
128.499303407596  
OR2T12 130.852932147831 125.377377116057 135.862790395984  
134.814082968113 141.035566928475 150.376234759097 133.459221120979  
135.023016176493 135.976051103762 138.643442050615 133.685254707686  
147.205511952997  
OR2T2 145.744039709418 160.256877369493 165.607095120227 168.398366575579  
151.615675144083 154.686025022972 172.951567541592 160.486513643798  
159.393410854649 148.274122690409 150.99622088333 157.277051544704  
OR2T27 108.461141538047 107.156457065853 117.646963986512  
116.346181133756 111.7529190597 113.487357534546 115.417648857825  
110.829107724132 106.437660157036 108.21185649774 125.859158049343  
116.987471433258  
OR2T29 134.362834437771 132.703034017237 126.433146708506  
136.011474063229 135.729333877406 161.234304237838 130.068063785009  
124.717079082023 141.626504154989 142.194507957661 120.100672968415  
148.386249316173  
OR2T3 104.442909315944 116.491342107103 106.923686318112 106.829040075772  
107.76497424356 113.268379270385 112.599970121166 108.118551275778  
108.751654061536 108.199628274798 129.434594784981 115.25307661968  
OR2T33 159.746802905903 163.125317704446 175.251238431716  
168.867373925372 141.568970008164 166.819234137224 150.380814008952  
161.997058981786 168.323141675824 147.494937826597 154.7326161316  
156.154079736651  
OR2T34 142.431979387165 126.695387748732 162.294114485312  
154.256214901103 133.243679173608 136.584199831088 130.778164962583  
139.469148541078 132.965467229606 159.470818285679 126.542112891953  
152.368485416992  
OR2T35 134.045938361221 128.700516033555 137.988325215021  
136.457424070709 132.310147451479 138.449057377027 152.974593669153  
145.619570216377 132.074571281938 136.03420235737 127.2369420721  
134.049094181433

OR2T4 116.276003190171 125.818432070199 119.288554466773 120.76311889397  
116.168270198375 105.050093408041 127.163025822368 126.780096523484  
113.262357892613 126.730314982553 142.390243984362 119.044902525459  
OR2T5 130.552857965694 135.526248253492 113.87024833117 129.874235646816  
135.778099658349 121.402905161896 122.371715108957 112.790552379447  
129.489867764242 121.099290122973 154.760697311395 125.052770277549  
OR2T6 145.331858938535 157.656220148041 184.694741621812 174.498521167568  
162.812665683603 157.04599638368 138.952082680577 173.459008248696  
165.267693285882 154.889079187405 148.43357593249 155.317754378283  
OR2T8 117.667611937195 117.12833256636 115.457121859064 114.520066232155  
121.538140679525 108.807891863679 116.742079521048 115.933805625814  
114.3172128566 116.363556872071 120.679474100322 118.697969266426  
OR2V2 114.533677697026 109.635825046436 108.543795408713 114.466368742403  
123.67449826277 107.395559299582 111.000303209442 109.266533255266  
120.876732151192 105.521320791331 141.38749436393 102.563722570171  
OR2W1 142.621019060798 117.692662275393 124.01558540593 139.338384535905  
120.076742232995 133.131953362455 128.486896700405 130.029719192412  
125.653011880654 115.00776048097 124.755684505209 134.04235176608  
OR2W3 140.760983862166 156.043994260248 172.491604217899 141.784881206191  
163.426663985855 167.965981130329 186.999459152483 166.662801900754  
136.993102884269 166.795671029174 163.805257266374 154.124057382276  
OR2W5 143.849399031223 146.748572532267 151.976432805924 141.752031758589  
130.712515995658 167.698883940638 162.850128623401 155.263513633703  
148.807422049327 158.528301072565 150.617039206311 140.281512754823  
OR2Y1 158.937341335707 145.039617860588 155.162310001164 150.741291526753  
166.20327698517 141.929924728222 138.649502040582 126.17342715006  
133.192757350144 164.146345008398 142.33269270703 148.840533233712  
OR2Z1 156.169405925094 141.555366493541 156.154079736651 150.624740697168  
155.997210529742 146.701489210289 164.332073056902 155.625320865565  
154.737117718424 172.297698667311 162.351212914573 142.724123724574  
OR3A1 165.549190801014 141.492458250787 137.071402810983 143.760519659724  
150.992951055381 155.798048652444 138.940564112156 132.359319280352  
135.695576019185 133.519359066907 119.263824982583 150.829439012542  
OR3A2 166.192990554427 148.470120335761 173.353648927895 152.024383072265  
142.442450622311 153.377182895472 154.604363252526 158.756424011719  
151.730862403472 145.902572804249 137.024230648861 186.127543877065  
OR3A3 129.018088749395 137.587917564413 138.000714797563 152.476932186797  
155.722314592388 136.811620595243 169.147351642004 146.150048478173  
130.102721964653 139.062140755714 130.818181991958 135.369146072643  
OR3A4 157.856019979644 155.349728277626 164.593531655305 164.146345008398  
147.377355632407 161.817609920327 152.429970809069 151.905534823403  
140.531789506024 143.038248313305 133.819095523687 136.817517693076  
OR4A15 114.888157310977 116.653897702566 113.347609066395  
104.406314027414 107.802792435066 119.651470884046 121.939618902165  
116.168270198375 112.133567992833 121.705065573911 136.835889180879  
117.870230005125  
OR4A16 145.803682553832 144.112401069818 155.511086289504  
152.648490300617 139.423432468886 152.67564185705 141.808122700968  
134.414562784832 148.275939659102 133.954514563283 135.837733533444  
143.336538157639  
OR4A47 146.782830477983 149.25240100689 165.267693285882  
140.634047988278 134.013748718539 131.335344547051 138.098165515898  
135.589211439847 136.415734370763 148.242794464181 136.852403978525  
150.952264779196

OR4A5 135.479300698192 141.360125377949 148.932696684374 148.983182193411  
126.497472087036 142.305484770249 144.982462113231 129.284384810812  
148.977202433511 145.507330257603 122.68719599986 142.646570636529  
OR4B1 141.363863974586 133.702845956639 133.570075399424 153.279026396412  
130.754320787628 136.135223482208 136.653140842194 133.86835278231  
128.912199634685 126.086991456747 151.384762644292 131.395959781477  
OR4C11 133.638664342783 128.883828419932 126.938068475032  
132.251093122058 128.071379991958 128.108066199718 129.656088836537  
129.566451901256 124.679444852938 122.329290563769 131.749403497912  
125.27625242915  
OR4C12 140.21908493941 138.848119273081 145.675032688915  
156.389361240637 148.684855678535 146.395248696835 152.81544746536  
137.734887788912 140.553613300431 149.613701531197 137.30143217822  
146.229239731545  
OR4C13 146.537204621419 145.463105638655 145.562772839517  
137.071402810983 144.110544384466 152.925281215593 148.739888930189  
148.237980436128 146.052153515494 140.115154069602 156.818197172306  
156.205127163263  
OR4C15 161.017267304159 153.369334953677 163.37518739397  
167.653412908384 160.48993837044 165.066555355918 157.474913177177  
156.622993107052 156.259214645427 168.974155750959 153.393651104539  
174.26780796802  
OR4C16 125.889860278265 115.967513057229 110.518806964366  
118.064858133264 113.716741872499 111.783160346742 115.550587451456  
113.400050190315 110.093565974873 119.920097823022 126.398884382537  
116.031631038289  
OR4C3 148.23392074197 141.76964678852 150.645487532549 147.568851471771  
138.572054821151 144.617654961472 136.903588075134 144.705559511075  
135.325617701062 133.103982008292 133.037138438863 142.272117655292  
OR4C45 145.86855878099 157.415211954103 157.162523271165  
154.170007083026 149.430396727944 158.193008411967 134.298521475727  
154.428779374984 147.994386096925 147.813170436139 168.007337847195  
175.222531098958  
OR4C46 134.595090783504 130.329453160478 122.247130087475  
121.99477069153 132.933035878334 121.977373818244 126.98588570464  
129.715948793051 133.860077101582 128.604270382206 126.332299789266  
118.360186663758  
OR4C6 116.168270198375 108.461141538047 121.572462089942 119.278231442871  
113.995301093609 117.436119533535 122.042136913991 106.030441145334  
115.855948612544 112.371497988132 111.152235113722 113.694351010121  
OR4D1 138.199559519849 144.013615296685 163.234966251618 134.113464449375  
140.345652629553 156.78124246844 145.932170561687 137.125637347852  
131.483427112288 146.905667796876 138.081268025435 142.818122106598  
OR4D10 136.899405404096 145.265512354674 139.573371281569  
145.677477231455 149.013011292165 146.328876892698 146.081940883446  
143.051871940423 143.939522733945 147.045944019838 142.745838888446  
150.772752327567  
OR4D11 123.498540254464 109.74983281634 115.231121959397  
105.665621968915 113.756115251188 117.503848306325 111.908965758799  
126.245597154052 112.547907748842 108.9291713877 118.775484829506  
107.520000793184  
OR4D2 146.404727168045 147.196687432745 147.013598868335 155.343619434375  
158.007926822094 138.611074796816 147.155738185574 150.538541347453  
142.084294087481 151.04846635538 142.388076341254 138.687013437904

OR4D5 144.876300850115 145.096707533824 151.188412354358 148.124586158123  
145.431393142782 161.72730923536 149.779323547896 149.824791474186  
140.790450703097 137.950955473086 142.206016362038 134.47218436552  
OR4D6 117.455432751161 116.134550788966 128.944295118239 107.395559299582  
119.598216955485 120.174672871542 124.68729078792 114.350596695469  
117.244895482991 116.485180988801 130.705091244939 118.909153405102  
OR4D9 120.085340927108 116.723991721647 120.193580405229 112.605287278882  
122.149756212115 117.543074264347 110.694256186941 120.560056224145  
107.884870799936 117.069094451283 118.593717189375 103.826308328446  
OR4E2 104.091301211096 108.604763499678 105.236768436069 107.103635692135  
108.2359175332 113.919529047225 119.862037840843 103.520748827831  
110.496084922302 122.312652834289 127.484178603011 115.884253217495  
OR4F15 136.470025638057 149.127963327999 162.077455145261  
133.303201646987 148.616543842015 123.086596566142 145.44629057846  
136.720837676326 142.133238886052 147.893916750136 145.25774926819  
145.483667452136  
OR4F16 145.070927449969 142.388076341254 124.393008692801  
129.11843197744 136.081693748118 137.654833215154 130.859679135715  
163.85327708023 145.751336115646 138.942901099402 135.584602494174  
145.954700424725  
OR4F17 132.784949538167 139.253721683078 137.314968268692  
134.268075583733 151.245520459264 139.128751917566 132.923237903246  
138.56812029378 132.562090247233 142.801645268128 142.406904585501  
122.749182465923  
OR4F21 126.203255277356 133.191797029676 129.562747657036  
140.906421938377 135.481300250507 127.962546712222 136.216577685046  
129.095469955392 133.24828292554 129.455347273068 138.462826342765  
134.109051944736  
OR4F29 141.164985468046 148.67584969749 129.551260802518  
141.636604735133 142.135495724286 136.181791404331 124.959873714884  
130.339214643083 141.249687936867 119.252737868132 123.711828013052  
112.394223360492  
OR4F3 133.311212623667 110.325803953516 119.872252889863 122.679628839976  
116.360144963753 120.163286072512 119.9414421871 115.257318321108  
123.323528039848 120.280241193135 150.456500446175 117.930665298163  
OR4F4 134.21227169867 135.598709185334 142.750432197016 124.090268443064  
131.31716158922 137.09814291566 141.934351226006 142.000874773182  
133.340152756136 134.495938988321 131.451173463405 136.617105945904  
OR4F5 130.114464233633 118.558673085303 128.383541329939 142.715449859191  
120.571074646092 126.806537241253 125.253637835638 120.793974839773  
123.972321838378 146.619846538124 125.165254272421 125.653011880654  
OR4F6 134.251843621261 137.734887788912 117.423704591303 132.079255703621  
125.94880312094 124.629877200816 118.07991087231 133.032905765836  
124.859984709406 123.949411804458 141.331397551086 133.929311295884  
OR4K1 109.228587997052 116.476747183738 111.137519376499 98.4947439453387  
124.345320343901 111.328185454541 113.22850386845 113.339155126202  
115.795989631016 107.531907287727 102.255408120852 108.247365868673  
OR4K13 168.911840239685 149.636887782574 159.0794075765  
163.956894843504 129.717701654435 157.776321544382 145.435794613203  
161.010206405916 141.090356426567 162.609829456486 156.88782735706  
146.499065641095  
OR4K14 139.949563856936 161.217964573491 138.132390735567  
157.350979071365 172.050718136571 150.198869833614 129.825824640378

139.508029141287 144.479410859199 144.678895821726 128.984613946021  
137.552979154943  
OR4K15 138.044751228397 133.619092072157 127.587379082064  
129.079917151186 147.764068958635 138.947760022173 130.712515995658  
127.193553054979 174.767697866801 143.629760301493 149.722442994599  
126.165220332132  
OR4K17 147.863198012238 139.900523831258 145.274345879987  
159.749576166342 138.888049140099 145.08853313195 138.014046365103  
140.632573759426 143.857385585662 151.285933600303 128.122197525844  
147.425856984368  
OR4K2 129.940297696849 122.013040475143 122.051473363557 126.349403754775  
126.086991456747 122.793816135585 122.830376253922 116.038950886552  
120.216999784094 123.650702461773 117.879058520659 124.036907709461  
OR4K5 123.195738824794 122.962219297463 116.273000405449 115.834056091815  
125.696434307671 118.195512252508 118.833188167696 125.101995710829  
117.078720392441 120.78129870199 121.396223519559 122.182695593404  
OR4L1 150.974364125849 153.318678468245 144.193756031386 153.500478301079  
147.385714746214 161.557558028531 157.099868633958 151.092066533546  
145.952759497544 142.663334893424 131.913786256215 149.752188104803  
OR4M1 135.638156623519 145.414563914801 150.657800679032 151.379761514526  
140.269160279333 146.904354404095 146.608010450782 143.065258692424  
143.394704760983 140.398923642686 137.185243517766 141.480793979634  
OR4M2 143.390971600678 144.405191855684 136.621173927187 144.155591092387  
151.852294315212 148.938822951404 135.616911926164 161.552475294424  
142.487424651482 139.334552725255 148.614214326995 149.589901372799  
OR4N2 134.814082968113 147.325222091872 133.839554874862 141.174971007547  
149.613701531197 140.411200873743 143.652009342522 147.809934374849  
141.597692730835 136.735930829008 150.399313562031 131.456697863268  
OR4N4 144.301577198126 130.509415570889 153.643157329902 149.149858208397  
148.447649246493 160.006185904123 154.740395921562 143.056098955473  
143.769240322865 129.34905533265 162.37762946664 136.378203924435  
OR4N5 137.198654302648 127.926270257252 148.691132137188 133.897397228615  
147.485960802692 139.974586762939 135.388750095746 137.440295223749  
133.310323593945 148.329635131296 133.876636039037 137.623019849539  
OR4P4 138.348160604288 137.508097741526 129.226815062589 138.43190460314  
129.289216846128 129.336402686549 137.435736170779 130.154756165574  
136.271412363498 131.263641389894 153.843250142472 131.058360514673  
OR4Q3 120.901639342731 121.834248129933 128.497571151343 126.214166842097  
137.406420101257 129.732352495012 122.727385599754 123.612648219993  
129.884064654761 124.225294244156 135.141067086648 133.004765428575  
OR4S1 120.118873350459 125.271261151078 140.899799480834 123.752109790056  
151.269442319766 140.004456934031 130.455560026617 133.610143526954  
146.750774496317 141.895211025017 148.547259731346 128.742617750403  
OR4S2 139.55065372881 145.455411983653 148.527528612375 135.233957017664  
151.70917316194 134.04235176608 128.020911959353 129.990534497026  
138.159966250659 138.808591995741 143.925616978401 150.439715066903  
OR4X1 125.450077160575 125.855451679929 125.935071837868 130.776213987522  
140.688570032068 139.136845089275 137.476047500852 135.330241638301  
135.095095470362 135.936021164312 137.666849842576 133.918638123756  
OR4X2 111.467722538327 127.090219286772 107.714294216913 120.711150688559  
110.093565974873 107.103635692135 119.192893408873 116.053859681399  
109.282814458761 111.975027473284 112.156010486085 104.633603136988  
OR51A2 100.841352336505 104.633603136988 99.0767996209245  
112.495783269169 109.613208767992 108.751654061536 107.187035835972

96.8261937365062 110.553759711075 102.661440700541 121.543207264598  
104.896224175106  
OR51A4 121.628827418997 135.899595115146 149.952762225731  
128.351235762192 136.156548919515 138.566954604414 126.967212770393  
114.936648783324 122.965328766807 122.327353563917 122.89752183991  
112.57049236673  
OR51A7 116.346181133756 128.548201588898 106.341910466588  
117.32734978289 126.542112891953 115.417648857825 116.456170659686  
112.949643549398 133.004765428575 118.614641349402 145.985223908092  
125.099672022917  
OR51B2 127.756214708077 120.714981493593 120.644987579644  
121.201267751612 119.915330116696 118.757973008463 117.261443445891  
123.482626777491 111.055738573603 123.072413274454 135.999030570565  
119.876835248732  
OR51B4 148.818562911616 148.132450240784 150.687819649072  
129.925548182204 135.106072664488 151.308872564827 138.480633738745  
136.645091356305 155.15575204653 125.272796155561 149.977924522553  
152.673212084312  
OR51B5 154.094285855743 137.911816180518 150.754492902512  
150.250193889942 131.166819048309 137.46978401237 149.188357651896  
140.357427912361 140.504486195539 132.081286801266 142.763157232147  
143.491142564838  
OR51B6 118.60878652724 115.217608555334 110.910693353871  
113.891385601095 123.372689985035 103.691075663721 125.738320262644  
104.714872508838 112.096627288813 110.988514718572 115.718600552187  
118.100611964852  
OR51D1 113.268379270385 114.182798672347 116.501174707117  
113.58962177275 124.35721327773 107.993707827557 120.220156455352  
115.718600552187 126.87100632595 134.983884722607 149.734395134321  
125.4408430419  
OR51E1 127.783892576352 142.656762407774 132.851791525098  
141.261150586614 112.957395064957 135.383585408897 134.963301368391  
131.215202712283 126.470239371932 130.402496960735 133.360017767635  
134.824147038515  
OR51E2 138.218392984717 141.622592268163 158.095373931016  
155.101850847148 152.319720089773 144.413210364148 150.507308901391  
153.643157329902 147.23376282233 161.104993402456 143.313605534609  
142.25795237339  
OR51F1 121.003207135942 127.003974141317 119.502758763438  
123.612648219993 128.08497128067 119.937665469629 128.458132030921  
124.012439490264 119.044902525459 129.735862775199 133.301527400458  
124.466986821169  
OR51F2 120.13937451914 129.005211657936 137.096785940897  
123.480761625667 123.431969470387 133.633281583673 125.802001118545  
118.144109564626 121.834248129933 128.533900744619 118.689408983786  
125.73560975196  
OR51G1 148.953720017484 130.043904881142 135.475597372104  
125.308318672456 132.895500657638 145.540872377507 147.395335979341  
134.327229861635 139.21825391822 152.11446058397 123.22295112139  
137.872306812365  
OR51G2 106.450154495663 117.917454674671 125.572299527276  
110.838647534175 106.829040075772 113.422559344178 121.957155610892  
113.542803491215 117.119533897652 117.356389952799 114.3172128566  
120.906553066296

OR51I1 126.103561089901 111.596690019694 119.911515364639  
121.219323788324 114.524341239889 112.65454329872 121.734873711651  
113.440171712791 115.257318321108 114.129044806825 116.552626146967  
119.544004279354  
OR51I2 142.498280938736 147.951996191313 149.615585907229  
138.916830356763 137.940675746397 160.143443392509 157.244026506342  
142.130797378448 146.228345997866 141.622592268163 135.873325130921  
136.22416508552  
OR51L1 119.087972087745 128.2409378561 118.201092260839  
114.704831217037 121.722412245175 115.343251487944 118.006338536085  
121.699702849509 118.039780360151 117.724353829377 125.956785216996  
120.931585398914  
OR51M1 164.769320792025 162.337707154123 152.78638215326  
193.04138438685 181.914505612128 172.03919618445 160.932913244423  
159.524235332529 150.854580568572 156.187809481625 159.368376366657  
167.365850007748  
OR51Q1 130.255689301211 134.487476333464 138.756638791139  
136.344248873826 142.577102697682 134.943005383277 123.541709359809  
140.497181450706 131.153457976248 116.031631038289 149.34605615699  
127.555954288973  
OR51S1 115.718600552187 106.797707723826 128.292627005614  
112.642429076777 128.17223916536 110.820329153348 104.154182930018  
116.134550788966 122.610529927104 114.302645757446 121.480455781173  
115.999443701343  
OR51T1 170.522853717911 139.898996725236 172.297698667311  
142.605816057276 159.874161198304 150.259400712685 156.626742111441  
154.94587631386 164.227134687088 162.237172404557 145.471090720048  
152.518729390047  
OR51V1 128.576310682958 125.099672022917 114.358099210532  
121.203149121743 132.135448831967 118.474291525263 110.190708230962  
122.65547320922 110.061459744714 110.544044723728 135.56878810365  
124.433114779288  
OR52A1 106.772581387455 115.30786313391 110.594755513247  
108.939608619532 114.334059060506 109.574386044714 118.139487760542  
119.709032462308 114.730641277464 104.798333931019 123.839006667113  
109.536381305315  
OR52A4 139.469148541078 136.526706711584 144.004831360797  
170.835513021958 163.910041674646 125.661697165943 160.573172150801  
146.443892388756 149.004343851423 143.20823844185 148.709795687391  
152.032418787633  
OR52A5 140.012295249756 136.499228715856 134.06996703302  
135.427985445559 124.985249190127 144.02847768185 132.66318177913  
132.335549109106 142.50631960137 129.997181739652 141.505120938773  
126.214166842097  
OR52B2 109.586955365611 112.605287278882 106.088807114602  
116.597352307016 111.975027473284 104.798333931019 111.683074830042  
102.421174406474 104.285022032604 112.227434965199 112.78323842342  
106.685578858702  
OR52B4 111.299115402008 102.024765473404 104.285022032604  
104.861024325857 110.347631909888 105.900294919664 111.276543583667  
112.015423658372 123.386622160181 108.131097605872 119.686859562393  
123.807693112932  
OR52B6 151.911494020123 156.411563412665 135.787323859105  
195.364709354814 141.176376265078 158.157097243342 143.650172124086

141.028377381019 153.43000129811 137.347554578171 146.748572532267  
135.465076459043  
OR52D1 135.2979041294 120.585506729733 124.086902599543  
126.573673878042 133.854760285591 125.025064237439 129.020356016653  
120.581554457723 130.99564079691 128.620852653765 143.833057210822  
130.094233130309  
OR52E2 156.213421099137 131.383113302567 150.336115779606  
162.117224868654 137.391141254051 154.503958858173 133.192757350144  
131.81975648701 146.233195164295 141.73248778957 133.731500722599  
142.137885203233  
OR52E4 114.209249333221 112.736231367296 106.182551369456  
108.779204939177 105.408689610638 118.836387680022 117.662611650515  
115.923424095859 116.155949676272 113.440171712791 119.785062256421  
115.440152891339  
OR52E5 159.016247993816 157.565633456909 158.975786937923  
149.710337205986 160.078122267577 174.059172465573 171.314681729657  
142.316441155937 153.922713834296 157.528409294029 152.11446058397  
159.040409182674  
OR52E6 148.235495611248 149.423230365631 163.18585933431  
138.078214837785 140.05419835434 135.253713075341 123.547821639269  
154.623548525522 127.058373069911 142.19015013243 151.211710155053  
140.299459596491  
OR52E8 111.928204694188 118.983932995126 114.691842968597  
120.07034081564 114.768639931659 120.473038066927 118.9803314875  
105.665621968915 113.209569103727 115.995309578182 134.95842832877  
118.076139318165  
OR52H1 128.668672935791 112.046615825307 118.991494185841  
119.843989506832 113.644993086829 104.780306305981 106.238539254093  
119.275061991187 121.047419779542 118.430401197079 127.401551376191  
123.557722415957  
OR52I1 139.301435614165 157.507108643575 146.282385039176  
159.349719495214 148.323729699672 146.519312568214 156.783896946556  
160.632809953993 148.199249855894 148.074494928651 164.455111983634  
143.440420261133  
OR52I2 117.461198576063 121.084348994747 116.161473967382  
122.371715108957 121.653754668804 113.924310293916 125.898195488305  
106.238539254093 113.58962177275 105.771723307783 130.865693081945  
111.409447323674  
OR52J3 140.217243202557 140.656633546501 137.846463796994  
146.617853918109 170.079723856247 148.382228428693 130.219888837397  
145.002309193867 142.527422462824 151.163774400244 128.554574566655  
132.790039196443  
OR52K1 126.798976470472 129.79093244374 134.646131480502  
131.465404975492 132.132474135959 127.723052839953 139.372441366224  
120.100672968415 141.474583706011 127.615631240096 146.857213166531  
128.931946787934  
OR52K2 149.99203906203 146.75924072364 144.290286088611  
153.121693371757 149.704586651832 143.807102980397 149.057388078138  
145.198638080646 139.583514773196 147.561362873855 121.640681916546  
149.904691068054  
OR52L1 156.399808270033 131.069515666204 127.535214313797  
138.336667434109 142.288110423886 124.589785242175 137.361967082029  
126.802963197337 148.732027660387 141.59046197203 126.814332513301  
125.789509802098



OR52M1 158.960488862727 146.11669387238 164.281196089736  
160.949030247406 138.108184983014 180.889946069121 158.627416752905  
148.197029306137 145.435794613203 160.72962443421 133.401620574886  
170.223509007961

OR52N1 123.972321838378 109.817705421158 119.905127545336  
134.288349336742 110.392617179163 131.638954862848 132.963761182049  
123.501843029993 114.545476919992 129.045934344719 142.906227759701  
133.505261458701

OR52N2 151.604093626944 131.617027772841 133.79868477192  
133.206919058442 131.676609824921 129.408282688425 140.343790129071  
117.084984190461 129.537345537086 138.462826342765 161.825134481279  
127.930072902878

OR52N4 121.124574985464 129.222098453499 129.190900922265  
128.637470206958 138.963864375073 123.132178371802 121.93549478261  
120.85013281321 123.153925912632 119.13963074637 132.151765465534  
120.410307377977

OR52N5 130.914932329297 146.361128670362 151.984619204523  
143.857385585662 154.670631900834 137.307786147787 140.49145570631  
139.912325578837 145.107675450957 149.255405438966 157.264673452646  
143.844153373367

OR52R1 124.134916773123 112.800733398209 121.239461514704  
120.204469421484 134.407776033032 121.736056336879 122.603226380439  
116.408126010926 114.405811161631 123.607412609763 130.611233072509  
115.766358387923

OR52W1 131.228779762508 129.301839663122 128.23910347716  
130.363516180139 129.637555509848 121.805145639822 126.416290818296  
124.757229519631 127.075899925865 130.29531841096 137.954283575143  
123.265810024678

OR56A1 112.357261386644 114.364953312191 109.495342943278  
111.188410935711 121.689416823766 113.249267122926 120.224154897296  
112.922918499398 115.299986138153 107.283814651497 119.072213573568  
116.59404046487

OR56A3 135.253713075341 124.955676894776 158.528301072565  
162.98885109088 139.681211082196 148.049570580734 139.779754416105  
157.83460319212 145.476377346532 146.795608819024 138.142193489481  
134.10707191601

OR56A4 127.356622898971 127.715766031466 126.589865262427  
119.161972571516 121.138461509096 130.140958819402 117.270320709161  
134.901659808633 123.53212786736 117.770032157393 123.822571859503  
122.519746599387

OR56B1 162.422173095045 169.903088388196 161.475694690038  
157.028963417138 170.169402943662 161.960392594363 159.879600154928  
153.311705636864 162.358237198517 172.667770359278 144.016137459279  
171.36717256867

OR56B4 113.143436184959 113.487357534546 111.127245394321  
116.858439910319 124.031916322066 112.987890650593 112.371497988132  
120.110473925082 116.65635246873 122.056070994213 131.349297554112  
119.567911704298

OR5A1 153.687536747147 142.892198239879 141.571389983164 155.899547877596  
140.770705453805 148.96493117884 164.057147728625 161.295030274012  
154.524588318927 169.713585775118 147.809934374849 138.424464248567

OR5A2 137.782648137869 168.254689624696 160.898061905021 170.439725847568  
140.815807483203 179.785198362326 139.188234030711 153.315309202016  
140.844007965202 155.40832015652 149.99203906203 136.513942889781

OR5AC2 117.356389952799 117.071585083051 115.235444833856  
110.437728036347 110.602406076036 111.506345174435 117.724353829377  
114.942849575931 119.01559016005 115.624167024067 121.263939656119  
113.051381310122  
OR5AK2 121.246967460178 124.652072110334 122.830376253922  
116.168270198375 119.578240680666 117.79844873842 120.711150688559  
114.841964705981 118.703108284564 118.298444816712 133.411087000196  
120.757288533244  
OR5AN1 146.188193301627 139.21825391822 147.561362873855  
157.309058982117 143.125454748996 143.421288665418 153.885582272269  
138.467624450885 150.224472335504 130.819298796501 126.943978009809  
122.223184326586  
OR5AP2 140.110258415883 147.051399102374 148.386249316173  
163.21153580549 138.207553349985 142.810564324354 156.938149948126  
152.587331888423 135.978826529736 156.090871391873 133.995928435022  
150.696963699371  
OR5AR1 127.488853386792 139.201122725213 135.627840788802  
125.584202037776 136.081693748118 130.878694881324 126.112672816035  
127.167918433035 133.769848328557 137.348951314875 131.35955406222  
127.808579455383  
OR5AS1 168.982086590306 172.26834556696 193.190059954084  
210.165098572428 171.358746749715 164.327140372968 189.472541628897  
159.728097053356 173.347463632976 179.996590340102 149.625528206375  
175.908645445479  
OR5AU1 127.088916295784 132.671227062948 126.085039271526  
119.449118660481 129.3513576591 136.077039612526 137.045772853855  
130.792692240592 121.203149121743 162.203570429542 120.793974839773  
126.967212770393  
OR5AY1 111.243322115126 116.241531823869 127.869038038293  
117.386273592501 123.351112976814 108.318510762416 117.937856116492  
107.884870799936 120.246240734668 112.179019393947 135.978826529736  
117.374025543149  
OR5B12 120.693808603805 120.227386958188 135.559535347364  
124.944563166658 122.10489926804 135.32730674455 136.884799902348  
127.0631494857 128.689465747173 137.495288670441 119.094868654252  
131.732416355002  
OR5B17 113.76411537952 114.798573331978 113.422559344178  
112.348094614855 119.436922168376 108.768730405582 112.081127853476  
108.061315311823 106.900679222135 130.92186531563 121.459780480915  
113.170014668758  
OR5B2 132.737464610403 110.988514718572 113.460835359833 114.711310011993  
120.270397272069 114.032874859062 112.428707152237 107.828378413233  
113.620070198869 112.771141378159 121.965131419551 116.342242990651  
OR5B21 112.624137732184 117.837894438834 112.800733398209  
119.176139463015 121.057111457792 121.434713764246 119.079680805247  
113.995301093609 116.282988576774 121.837571435384 132.490323093932  
110.061459744714  
OR5B3 134.408846338374 144.961976523279 145.150191397375 152.194337248455  
132.634538733205 139.172437503442 157.15947600423 133.590552542806  
144.122748003206 146.010474018786 134.503552797411 139.418394104487  
OR5C1 137.509100088226 126.766964875664 143.292552892073 141.158593399952  
140.829927714838 150.336115779606 149.689071018094 142.047828639169  
140.675094228846 151.9441336438 145.235087732482 143.865717051998

OR5D13 133.082433951922 121.107979534361 125.063596569451  
 116.248026336995 115.332409360957 113.521599852465 110.024815508703  
 115.435942397626 117.172431931323 122.714122084817 140.105675520432  
 111.935554828717  
 OR5D14 161.475694690038 160.035282578603 136.052640679977  
 134.017022313208 149.057388078138 147.849116400978 174.136806313142  
 148.209164900319 160.159630699959 154.070450565144 140.405405916188  
 154.8975607055  
 OR5D16 150.449621353865 158.558471586662 142.412731964179  
 147.598602877625 139.760425990939 156.096880332427 146.470444212748  
 155.828962183804 144.008961720971 150.314462939164 145.63870792125  
 152.350537364705  
 OR5D18 142.002145315543 147.187681416171 141.781482381513  
 155.004104153679 140.271557921345 141.225533609907 142.535416473783  
 142.255657518926 153.807525239478 152.080057231881 144.219104742099  
 144.071652839025  
 OR5F1 140.63331087192 156.707737817443 172.926288703434 185.886737029845  
 154.417731984391 161.17923997423 139.674001912099 156.519196335454  
 153.633095853017 148.946563378752 143.252983617945 162.056622258216  
 OR5H1 113.487357534546 124.947565043721 114.161540771427 123.019430618632  
 124.441699369614 126.462522391125 117.356389952799 110.865668451601  
 118.331237160995 112.949643549398 119.95959059725 116.889373249017  
 OR5H14 122.702175900246 133.345143691828 120.050548624975  
 125.345611085082 108.895922800601 127.269672881591 119.278231442871  
 128.678484452077 114.373370072994 116.981243525714 112.65454329872  
 119.403831071089  
 OR5H15 122.854722097864 112.916256784817 118.787630332168  
 123.21112178671 117.348231147283 124.168162885295 116.519527499611  
 127.938245853896 115.417648857825 113.177330690612 127.114560076444  
 116.497714896018  
 OR5H2 117.567991653999 119.645983822002 117.532063783977 110.536316697732  
 109.003365273337 119.285026330891 117.552229262461 115.247223837316  
 108.461141538047 114.970485002776 119.845508281414 114.501509669035  
 OR5H6 110.624328647003 122.20752192519 122.883806494491 120.641590368902  
 118.770061426689 121.871105084095 115.184395637553 121.781562010645  
 115.785084044427 111.178024950204 108.683531606889 113.09980008288  
 OR5I1 118.636694749194 112.081127853476 114.539671934155 125.789509802098  
 116.806720503431 118.879931299016 111.956783714784 113.38168751499  
 107.205247133938 114.242056888286 118.351607868932 110.810963139914  
 OR5J2 123.622533094122 128.292627005614 110.602406076036 132.493888285566  
 117.034228068173 131.521311288114 135.161667673191 114.084543168359  
 117.883635746379 134.151979705092 141.895211025017 122.190734676247  
 OR5K1 118.895095992424 112.962180108363 102.024765473404 113.083678884076  
 113.05681175258 123.7421178083 108.9291713877 107.76497424356  
 113.005774989833 113.031636180748 113.582654469735 119.937665469629  
 OR5K2 118.866073031304 120.085340927108 121.522634801124 122.550707067805  
 122.552733780528 121.997885377703 112.590379042108 111.928204694188  
 118.461037435114 121.231939494619 153.916313595581 113.61408868553  
 OR5K3 114.942849575931 124.591873637605 115.878861991823 111.703224727793  
 123.07559417607 120.031976318697 120.806180547422 119.558626216818  
 117.735411259153 125.450077160575 119.596589810052 123.185652476312  
 OR5K4 136.578058206829 139.099483279141 145.148058824491 149.066522533956  
 151.06209123698 145.323212897142 154.1651846756 148.490236128772  
 140.28485470716 140.175724588255 142.750432197016 144.89062965996

|        |                  |                  |                  |                  |
|--------|------------------|------------------|------------------|------------------|
| OR5L1  | 137.52653395793  | 133.92485496581  | 129.902965506953 | 133.854760285591 |
|        | 124.391225837909 | 136.679405220947 | 132.233396667074 | 134.06996703302  |
|        | 133.794524856909 | 118.283346939564 | 131.534097198718 | 122.476178620771 |
| OR5L2  | 124.627339426244 | 124.093412630817 | 126.788749235867 | 124.989313193779 |
|        | 123.453048609213 | 124.174140125309 | 109.495342943278 | 123.998343902602 |
|        | 119.463337435512 | 120.402155551818 | 137.514952067562 | 113.083678884076 |
| OR5M1  | 148.056333887679 | 147.630900093277 | 125.308318672456 | 142.356747337127 |
|        | 132.71633377967  | 134.901659808633 | 131.067958183644 | 131.282091618102 |
|        | 130.939543211439 | 128.893208935783 | 134.423260547727 | 133.065366727222 |
| OR5M10 | 123.046069309901 | 123.814841047589 | 126.967212770393 |                  |
|        | 129.684916104674 | 126.216519704249 | 131.798931481549 | 128.533900744619 |
|        | 128.144653206398 | 118.838332117453 | 134.00361847288  | 127.251594986725 |
|        | 129.86336717605  |                  |                  |                  |
| OR5M11 | 124.918089223417 | 117.598778415488 | 131.97938329944  |                  |
|        | 138.446492794924 | 139.808267839368 | 124.334450753704 | 163.143613079037 |
|        | 161.04173806448  | 127.329144632232 | 140.579839043912 | 140.332045911008 |
|        | 132.69067627743  |                  |                  |                  |
| OR5M3  | 126.816402300701 | 122.087107663865 | 132.411757518105 | 140.446530307169 |
|        | 115.389934936253 | 128.144653206398 | 131.076562651831 | 124.387133895009 |
|        | 124.327827104244 | 118.474291525263 | 142.338352884053 | 126.245597154052 |
| OR5M8  | 149.490064894136 | 140.05012958679  | 149.274901871663 | 166.040918339519 |
|        | 136.041605158822 | 147.135640862542 | 147.541437871615 | 144.767233774942 |
|        | 142.14116448528  | 144.352987324713 | 142.470799054068 | 148.614214326995 |
| OR5M9  | 137.379558348782 | 134.628807679002 | 141.822974252935 | 139.199446543251 |
|        | 151.821324922628 | 128.620852653765 | 129.27634490676  | 138.594435323838 |
|        | 134.805239981342 | 129.658488766089 | 119.709032462308 | 132.402255281009 |
| OR5P2  | 142.34471764492  | 136.996535765175 | 132.154131623051 | 140.754706171596 |
|        | 135.817028661429 | 139.258468432364 | 140.586497829504 | 134.072912593456 |
|        | 146.812248482145 | 137.719257499747 | 134.222453538421 | 138.745560049251 |
| OR5P3  | 137.649424237506 | 131.226834630025 | 136.227202534196 | 121.476730561812 |
|        | 130.960045345375 | 134.255021727555 | 126.045231525329 | 135.823975527501 |
|        | 129.625046507677 | 141.976051648478 | 132.448602065824 | 128.790166506932 |
| OR5R1  | 114.91722828113  | 109.471542280224 | 117.803508098322 | 116.769106223472 |
|        | 110.988514718572 | 118.628559951472 | 113.87024833117  | 128.936628289974 |
|        | 127.500754400224 | 116.491342107103 | 136.2727333616   | 120.188885479773 |
| OR5T1  | 146.334446516009 | 140.551093909835 | 150.960096893517 | 190.614236149496 |
|        | 145.423022762916 | 141.927204640355 | 138.756638791139 | 134.09920571607  |
|        | 144.456324230938 | 122.849235421041 | 135.015161451899 | 144.946362772133 |
| OR5T2  | 132.526286141997 | 122.944699010173 | 129.825824640378 | 125.693321471759 |
|        | 122.969215709433 | 126.988118823204 | 131.68571824487  | 137.194467539969 |
|        | 122.587545171646 | 129.180990946063 | 117.244895482991 | 127.961153369579 |
| OR5T3  | 120.572947493211 | 119.998260435095 | 119.774204444899 | 118.383317097375 |
|        | 109.654666772771 | 117.423704591303 | 131.056011738962 | 108.850992642446 |
|        | 119.01990099776  | 125.013839352291 | 116.196676877996 | 114.691842968597 |
| OR5V1  | 122.087107663865 | 115.118170902045 | 119.558626216818 | 119.06600048679  |
|        | 115.750690887988 | 131.221105247771 | 121.522634801124 | 113.740942665269 |
|        | 113.362825181676 | 116.989409891761 | 137.044079235724 | 124.873289279767 |
| OR5W2  | 119.249084967945 | 133.935910746769 | 114.545476919992 | 131.68571824487  |
|        | 121.961568081299 | 128.411138850655 | 129.090955637629 | 121.665157726433 |
|        | 121.003207135942 | 116.67463130093  | 117.710502693638 | 129.167602517633 |
| OR6A2  | 126.520909083643 | 118.724348027528 | 140.790450703097 | 116.533361070234 |
|        | 142.121399383259 | 128.763176477983 | 129.869363181125 | 126.567824355343 |
|        | 128.788443476759 | 126.75720720361  | 126.245597154052 | 134.737901773547 |

OR6B1 123.665983073461 108.179513318734 119.334967856721 110.003750007057  
115.789536577324 116.011005504201 119.583378101838 109.635825046436  
117.112667504781 105.467761348787 114.466368742403 122.426568507144  
OR6B2 110.838647534175 115.00776048097 105.62620788923 103.888971448792  
116.428373788459 115.624167024067 108.868679899494 103.691075663721  
103.660742045068 120.006982591236 112.825399620524 105.31352471598  
OR6B3 131.535277168505 121.157614971438 118.684077097437 109.988237089025  
113.636570490048 106.437660157036 119.711070285785 110.16174213285  
126.599418127637 114.91722828113 136.982719190537 121.572462089942  
OR6C1 100.637271902591 110.496084922302 102.255408120852 113.018985316061  
121.336932276232 108.148715413122 110.688722702767 108.646136431909  
121.381365873873 99.9173294438729 100.325215581101 109.398997827329  
OR6C2 128.816610738922 145.036719629525 128.075198523268 146.326067008478  
121.515872228716 143.831294912255 124.436549041911 143.920134762902  
130.311471059267 154.487546030444 133.682715540066 129.616142780279  
OR6C3 115.170176263172 108.939608619532 113.512670856029 106.088807114602  
116.59404046487 110.847680175669 113.542803491215 117.149781437983  
114.384296185446 120.711150688559 126.080780033301 121.30964045316  
OR6C4 116.678969343492 113.927168436775 112.528908277828 117.432860005907  
110.586147059226 118.777105073561 115.231121959397 121.255814891176  
112.292129754508 114.740948266517 148.412895185127 108.266328505986  
OR6C6 144.501995579502 141.382096896508 151.727603285205 149.874424976813  
142.296446144179 175.847256673734 131.146604635155 135.247018354192  
124.632373951797 158.933097712363 119.854401979951 136.271412363498  
OR6C65 129.374418059091 118.006338536085 122.65547320922  
119.213217733213 116.19219007097 120.252164075308 106.437660157036  
114.158566522557 109.46255295836 116.547306374097 139.574895021783  
114.39161822971  
OR6C68 142.535416473783 135.884635448277 162.904897605929  
167.028001762818 164.406564594296 143.147325939994 170.646233722767  
140.750004067571 140.419686138586 131.956481591804 136.171728950893  
148.807422049327  
OR6C70 137.894056887729 145.409722106953 150.193479279784  
152.857278986877 135.188445928844 149.326216726716 148.005500924157  
158.380964047483 145.076068630259 149.410729709855 134.391386851101  
154.611011734772  
OR6C74 141.478253058549 131.665421461826 128.83022039037  
131.2360427855 132.937942776777 136.545742688573 120.675356009213  
127.161975533812 133.220878146063 134.592495777159 125.634045420702  
136.274199465472  
OR6C75 126.471321085803 140.569391362701 133.726312424941  
136.126542897364 125.146558509674 130.10852948682 140.36602776806  
136.328447182666 129.462319953515 133.154004369076 134.494167613686  
146.586879656174  
OR6C76 111.127245394321 103.202873534814 116.759526220736  
109.700513642061 109.242622591321 99.9173294438729 117.149781437983  
103.398929051742 99.26400442869 114.062099086818 123.588194516972  
110.847680175669  
OR6F1 121.591962855513 130.340819826224 119.427342766092 116.7299185256  
116.20967792121 125.4408430419 116.632612170106 112.495783269169  
109.781334128478 117.30724482798 110.575582352222 129.717701654435  
OR6K2 123.015371659847 128.276471459777 161.795378938402 151.869928694006  
124.546520456419 115.816156193574 129.743808480368 127.617449871137  
130.701801496564 145.247717878099 139.462804363695 143.716377201615

OR6K3 112.884916986215 113.025793645043 113.857477830423 111.672450681359  
122.281263517691 118.9952230535 118.855500322915 110.408301129053  
114.400185930969 109.228587997052 133.969054754299 116.225440873023  
OR6K6 130.418739793498 134.9404536551 147.202510900548 139.078162119733  
127.358616953147 133.7012683837 134.399228996542 140.809956497396  
144.81689330206 136.333928675403 131.58537948771 132.404879616886  
OR6M1 130.520275539672 146.007311764212 143.180247878507 140.722297244564  
139.858812885649 134.232324700383 142.521260841187 138.560399473164  
128.907618218883 136.908861280856 147.835936450126 127.202039384041  
OR6N1 143.183548490547 134.770852936106 137.42845093653 138.962649407431  
132.755256423863 133.65688823581 120.560056224145 134.619470709414  
138.601616246182 123.981053866137 139.619076126267 127.22550964959  
OR6N2 131.83430682495 135.296271683847 121.286130275542 115.174678745401  
125.150706047419 115.507474401239 122.809241232029 130.195234920895  
125.110064579814 116.588138374632 136.482609639417 116.664031217378  
OR6P1 133.995152707862 123.420635380886 136.392389842232 128.0366252162  
130.029719192412 143.840979923821 127.969833368917 111.683074830042  
127.990453128978 128.432188632218 135.242328667085 121.648921929686  
OR6Q1 114.960460615926 116.764795914545 107.395559299582 121.672811608791  
111.137519376499 108.21185649774 113.031636180748 100.216750525986  
108.984922760455 108.570463496052 129.145457341484 104.780306305981  
OR6S1 126.858621735156 123.357205547181 121.556331561879 128.284564251279  
123.096995744616 129.788395150404 125.539199863559 121.915043935246  
124.775529469869 125.429085234515 126.129564039673 129.748891462506  
OR6T1 113.199690522854 136.448045428081 118.283346939564 108.570463496052  
132.195666100325 111.232274546928 114.631759839092 113.810645407837  
109.425878885118 123.513588004371 124.985249190127 113.989682635964  
OR6V1 129.697584673736 130.35985690876 122.572634128442 123.522738813733  
124.418295003824 127.771225410866 130.242779079309 117.81168010976  
111.716607815635 129.216693566478 148.337793323867 129.798965780918  
OR6W1P 130.592061896237 129.11843197744 127.424848301217  
121.559477523123 119.097521397712 131.911579676047 127.615631240096  
116.397855001959 128.669887479835 125.481506166304 123.609527892227  
127.075899925865  
OR6X1 123.896578371318 119.097521397712 124.710368327189 121.553107861517  
119.890260409414 130.449669345302 122.816049839521 123.484987952263  
127.112296857923 120.925930409474 123.015371659847 113.980716384814  
OR6Y1 132.620474788855 113.529619135543 131.719227272527 157.907190910755  
143.491142564838 140.413503801467 135.303322290834 131.140263788783  
118.379914726645 144.634118305223 120.616979607398 136.519697160267  
OR7A10 155.873969001251 122.84603217721 160.486513643798  
157.535792192753 153.169450192935 136.565191271943 140.129882333528  
149.949425756405 137.578516107502 153.289258540668 140.509950286228  
130.59670974887  
OR7A17 124.302581985661 112.298254005045 122.197625748146  
123.781002620866 130.666781754635 121.134305707234 116.288113598488  
118.104763610751 122.985117824212 123.178049594968 147.500009766324  
119.905127545336  
OR7A5 148.635174393031 118.021169080914 142.956870642583 128.344679872625  
128.963962067821 139.480361732772 133.335188820708 130.584348445667  
125.683334853039 138.1342592966 121.681261213422 138.1693725329  
OR7C1 108.318510762416 117.49013401175 114.960460615926 120.170269310738  
109.113476990309 112.081127853476 117.412956162665 115.713909155043  
115.242526386551 109.851507510788 130.173734963758 119.11586630281

OR7C2 125.777193592751 128.44311762955 128.093945009882 119.407293854922  
121.010811158088 124.904518221898 124.711578994973 124.455340203012  
131.665421461826 116.007006375993 166.917552275021 149.579428189895  
OR7D2 110.428616140857 113.656820701744 107.638492587723 112.841406363391  
121.774697402171 114.223991452083 99.5148073333731 126.588382665802  
114.913534674899 115.496108000499 115.559551514777 111.276543583667  
OR7D4 123.019430618632 123.98384416057 128.438401976279 125.220416203903  
125.400741907779 116.331428876124 123.991249190444 116.373841472226  
115.142111396055 121.311836944721 123.173506315166 124.455340203012  
OR7E156P 221.390817970859 187.607426452073 227.558441474918  
178.804669910283 147.920946479942 157.221008210698 156.883255634126  
163.709174813901 172.836730741407 213.364858759772 205.403820910921  
168.897620634337  
OR7E24 130.368933537243 142.842130077535 135.097332483841  
147.748142622566 133.284873295487 144.510775519908 127.924195488323  
133.613988293895 137.079479050963 143.596530151289 136.895650862562  
144.934103671894  
OR7E37P 151.808767243647 147.384050169545 119.278231442871  
138.038446102921 155.511086289504 146.798444724408 155.615655460277  
146.75924072364 156.339564110766 121.203149121743 204.260800563197  
133.470643135354  
OR7E91P 142.234554325754 170.040914594182 125.393848851951  
121.838802846453 822.129234065933 271.897511879509 168.470685171939  
487.696347726467 302.601458409102 141.657914155491 239.079352337243  
214.019190624184  
OR7G1 131.726540162023 146.669620721254 161.00635457883 156.803516898875  
137.899291413431 126.619475852751 147.921826551905 146.309171902112  
151.714420758741 146.132506246152 147.250700603067 142.661504601445  
OR7G2 115.988180787152 134.152586955217 126.65748100631 127.781732819297  
124.68729078792 128.824243581806 145.892876412762 124.277983696239  
114.906396746556 142.264536484668 167.900071375885 142.442450622311  
OR7G3 122.456286448252 129.513590304528 119.555954372381 140.63666629522  
131.809235171629 120.641590368902 148.00952002903 127.358616953147  
136.957209426823 138.745560049251 146.637799077812 116.382348831504  
OR8A1 125.738320262644 117.829228895897 120.160652344221 122.300069045533  
128.56000638844 114.631759839092 116.07902130325 119.103219740679  
113.315182274675 111.860763079995 139.246945739764 111.09179957013  
OR8B12 126.442999559539 130.937742379689 128.759751330525  
129.529372508883 148.067562465748 134.897958140444 141.689210867136  
159.122382721225 141.006540481119 161.596086502946 150.84999247088  
143.747664482225  
OR8B2 113.339155126202 125.685852196342 109.635825046436 119.915330116696  
123.386622160181 117.480506535399 108.910588012315 113.687931899298  
111.683074830042 115.840266274696 123.038646914863 112.428707152237  
OR8B3 120.521509788705 107.727848546225 123.994188725172 113.311132067152  
118.625070307695 106.701716475947 106.41329572636 110.536316697732  
119.904097810075 111.398760606544 125.277752749246 112.776764215618  
OR8B4 130.288547755599 131.140263788783 131.899614022767 124.635917999969  
130.268322464805 129.578488688293 130.944610173285 131.269526665478  
125.526744092256 129.564482772168 144.762006548375 132.20764558027  
OR8B8 121.118933682515 108.864961422232 119.876835248732 118.355532305846  
125.467668442298 120.995697049378 108.760780994582 112.642429076777  
123.76900858347 118.983932995126 128.763176477983 117.652693591865

|       |                  |                  |                  |                  |
|-------|------------------|------------------|------------------|------------------|
| OR8D1 | 120.887938517877 | 128.666652639862 | 123.843823256462 | 118.957512510094 |
|       | 126.482660154852 | 119.993313087183 | 112.528908277828 | 122.238996815745 |
|       | 111.7529190597   | 114.3172128566   | 144.413210364148 | 122.733870240098 |
| OR8D2 | 125.887854850942 | 131.447941902406 | 134.946677624454 | 115.285392699073 |
|       | 130.728465509213 | 115.646023142125 | 132.657106732366 | 124.772219140795 |
|       | 131.2360427855   | 128.087991226561 | 127.478474451121 | 126.743579586052 |
| OR8D4 | 117.386273592501 | 129.70974867852  | 113.031636180748 | 116.604371744082 |
|       | 115.646023142125 | 126.112672816035 | 107.395559299582 | 107.260023460914 |
|       | 116.038950886552 | 115.457121859064 | 113.927168436775 | 122.469113037809 |
| OR8G1 | 129.945543636232 | 129.888444399067 | 135.985358106767 | 144.898770838913 |
|       | 126.473768158566 | 143.703367582367 | 132.714532888989 | 151.183847738922 |
|       | 129.758303592589 | 137.853137973756 | 142.737537206204 | 130.784802403934 |
| OR8G2 | 126.529763042574 | 133.108094159933 | 133.645044060866 | 128.255141263975 |
|       | 145.07503221134  | 138.136901441896 | 120.433080754232 | 138.293242905081 |
|       | 127.476819912992 | 130.368933537243 | 149.350630572336 | 124.391225837909 |
| OR8G5 | 105.62620788923  | 119.622243247836 | 113.339155126202 | 121.613684281664 |
|       | 152.66513184083  | 110.784682137658 | 118.117957479382 | 115.174678745401 |
|       | 116.134550788966 | 105.236768436069 | 118.124160279094 | 109.228587997052 |
| OR8H1 | 131.292195405993 | 146.129805607031 | 136.692495869097 | 136.967408633308 |
|       | 150.79785758452  | 147.270369342438 | 143.187539073659 | 148.045391886623 |
|       | 155.824409540332 | 140.047749881567 | 137.94246602811  | 139.3465236423   |
| OR8H2 | 148.989286668424 | 145.806935833967 | 140.171749368266 | 152.689610196981 |
|       | 138.582427155109 | 154.127346849182 | 145.131215503044 | 147.086734464001 |
|       | 140.475688390415 | 140.167274633872 | 127.905616521853 | 143.948375780951 |
| OR8H3 | 118.875640081461 | 127.779401352802 | 117.773743603829 | 118.974727968283 |
|       | 106.603674195422 | 113.840813583258 | 116.65880728655  | 116.136849683574 |
|       | 113.980716384814 | 126.025161261042 | 135.231458421096 | 122.531675048414 |
| OR8I2 | 142.073529553425 | 119.725487374119 | 148.846121873401 | 131.879526177089 |
|       | 132.928639483854 | 138.167369090026 | 138.657241641263 | 146.274284557421 |
|       | 126.343040504566 | 135.461112284848 | 137.398748156909 | 142.839077978518 |
| OR8J1 | 134.185202200317 | 131.534097198718 | 135.153588830407 | 132.118118271944 |
|       | 127.299853592344 | 132.532231556418 | 135.501192996538 | 136.120813399579 |
|       | 134.244658505187 | 135.33941967076  | 135.353539458856 | 131.739418639854 |
| OR8J3 | 138.299629744589 | 154.443360208399 | 159.196987090991 | 160.997179739138 |
|       | 163.672213020803 | 146.247825342634 | 148.13657736444  | 149.77596374205  |
|       | 154.722895261876 | 146.209104824109 | 142.194507957661 | 138.756638791139 |
| OR8K1 | 114.520066232155 | 119.26921157552  | 115.954828435072 | 104.896224175106 |
|       | 121.830137285032 | 110.536316697732 | 105.62620788923  | 107.993707827557 |
|       | 104.154182930018 | 115.048402956574 | 121.778756075848 | 112.126521532091 |
| OR8K3 | 153.945472622857 | 145.843639385175 | 159.977528879208 | 142.279695592224 |
|       | 137.128849888863 | 139.900523831258 | 138.661548678191 | 132.411757518105 |
|       | 144.199054675488 | 131.237720549768 | 118.897717445414 | 152.207601283271 |
| OR8K5 | 150.534608517044 | 143.16930809425  | 141.092486112278 | 157.078563342652 |
|       | 152.030182228463 | 141.960809148036 | 226.114369645703 | 148.25001336038  |
|       | 152.961475450751 | 147.920946479942 | 141.478253058549 | 137.634298014431 |
| OR8S1 | 115.277302351501 | 119.415822905251 | 120.846789922177 | 105.236768436069 |
|       | 109.69466049307  | 111.949644842971 | 108.404733392914 | 108.895922800601 |
|       | 109.851507510788 | 110.694256186941 | 119.95666716163  | 118.148476979319 |
| OR8U1 | 110.670057121283 | 107.655624022312 | 116.825172441325 | 113.879459563492 |
|       | 110.794219964997 | 120.527518013376 | 120.93965087814  | 116.5272207025   |
|       | 112.268518171041 | 120.485138937899 | 121.23469201559  | 110.273174147374 |
| OR8U8 | 108.288420807873 | 117.790593990682 | 115.608857734241 | 110.784682137658 |
|       | 112.357261386644 | 112.884916986215 | 112.578934972566 | 115.672307128514 |
|       | 105.31352471598  | 107.02909139647  | 107.32960937124  | 113.862790983655 |



|        |                  |                  |                  |                  |
|--------|------------------|------------------|------------------|------------------|
| OR8U9  | 140.659276788384 | 138.659387475119 | 132.277920991504 | 143.526983440589 |
|        | 149.164469334038 | 144.595393134144 | 141.825162897153 | 145.997380100999 |
|        | 150.557982810339 | 139.170102961407 | 138.805103589625 | 146.054535585464 |
| OR9A2  | 135.188445928844 | 157.295602588814 | 147.422656909557 | 146.058477355527 |
|        | 167.219062918573 | 133.137299889323 | 143.974551393951 | 146.404727168045 |
|        | 143.67880977119  | 138.255457081996 | 142.945392802281 | 144.863617174741 |
| OR9A4  | 196.169988112042 | 189.160454951382 | 194.337080066417 | 208.816482659752 |
|        | 190.520750756082 | 175.065781438801 | 221.411372022459 | 188.623897093065 |
|        | 189.567241599215 | 206.257167235126 | 187.046760972666 | 189.90406457741  |
| OR9G1  | 131.162118170837 | 137.77107995457  | 128.870079563075 | 136.355319997318 |
|        | 138.363553671822 | 127.389942368953 | 137.212568398657 | 126.948090173876 |
|        | 126.151017944639 | 124.959873714884 | 128.477342430713 | 123.814841047589 |
| OR9G4  | 114.155592351175 | 105.096927149239 | 111.922007318017 | 107.714294216913 |
|        | 119.034003473459 | 107.802792435066 | 111.549719888905 | 113.356070669308 |
|        | 111.366283149236 | 112.605287278882 | 126.083599163604 | 117.662611650515 |
| OR9G9  | 122.809241232029 | 133.647637744785 | 152.612116997575 | 159.970332650101 |
|        | 140.930897231705 | 135.809383370957 | 132.416618775337 | 133.173541338355 |
|        | 138.946807715282 | 139.768555796264 | 127.003974141317 | 125.364821583438 |
| OR9I1  | 143.101750222256 | 134.151372457715 | 140.288612271406 | 137.335501759561 |
|        | 135.244303669342 | 135.118955626451 | 153.45050352117  | 131.999299893526 |
|        | 140.18668846839  | 139.718721422663 | 127.863583325139 | 144.290286088611 |
| OR9K2  | 134.436423298225 | 138.038446102921 | 123.678365506247 | 140.814009587096 |
|        | 134.9404536551   | 124.802639338573 | 134.744175117719 | 124.036907709461 |
|        | 140.590802695412 | 128.864822736402 | 138.570150372729 | 138.112168847027 |
| OR9Q1  | 115.778736387131 | 125.484453841158 | 111.867464669155 | 129.811504562622 |
|        | 126.611663427876 | 118.289405191861 | 122.608967303023 | 116.331428876124 |
|        | 112.684334910243 | 115.656801309856 | 118.540620928268 | 113.891385601095 |
| OR9Q2  | 128.344679872625 | 124.539006083936 | 124.568534983277 | 125.765399556488 |
|        | 146.151639797173 | 131.000186898437 | 119.95666716163  | 131.019345449516 |
|        | 125.081880303992 | 127.31283918221  | 132.287326702468 | 127.610304071204 |
| ORAI1  | 155.303903514061 | 175.29178007783  | 145.03804642447  | 171.784981874184 |
|        | 385.978867521533 | 133.587927144452 | 156.34272729153  | 128.939572714685 |
|        | 152.175423676063 | 147.077695919758 | 175.744275464701 | 150.817922696097 |
| ORAI2  | 121.815538475678 | 137.107621189522 | 141.920967855989 | 154.623548525522 |
|        | 165.430811083128 | 134.423260547727 | 144.073739611496 | 152.496881293769 |
|        | 144.301577198126 | 160.549597620339 | 137.890006487904 | 158.665476708054 |
| ORAI3  | 162.812665683603 | 161.80922869659  | 165.092451754065 | 187.586093248437 |
|        | 174.941551089279 | 121.501959818928 | 188.145154995617 | 126.643229085068 |
|        | 133.12641302705  | 128.955241553429 | 205.305702209672 | 133.297361715205 |
| ORAOV1 | 355.14024238296  | 314.063025950327 | 354.705553237406 |                  |
|        | 376.443086293235 | 317.273940108333 | 447.059120541009 | 298.028932089399 |
|        | 338.665115108128 | 278.651369597422 | 276.867974638972 | 328.401537339876 |
|        | 359.776068595698 |                  |                  |                  |
| ORC1L  | 173.726420791056 | 171.844483419604 | 157.449891798638 | 188.444498848767 |
|        | 198.90533452253  | 180.578528984075 | 164.548505132213 | 200.114704018645 |
|        | 178.89423690001  | 180.265418365803 | 157.948814637726 | 193.336246844237 |
| ORC2L  | 196.519125510368 | 224.6588173737   | 238.124340832815 | 214.132445321197 |
|        | 232.845268785472 | 367.025117016472 | 258.727309442475 | 310.640107228956 |
|        | 291.221427744817 | 271.713695056313 | 294.115163083721 | 339.32415558339  |
| ORC3L  | 320.525885538523 | 323.667189206453 | 367.825328832492 | 283.326226944158 |
|        | 337.434882771953 | 331.523536427527 | 392.365008240567 | 290.288001750744 |
|        | 283.982575660968 | 281.881563164961 | 343.488356185437 | 327.89660021611  |

|         |                  |                  |                  |                  |
|---------|------------------|------------------|------------------|------------------|
| ORC4L   | 166.863589702453 | 172.992936821292 | 214.38058301395  | 179.460777888284 |
|         | 167.965981130329 | 196.638594797353 | 190.045156046541 | 167.474790447134 |
|         | 174.787077606165 | 153.913513669361 | 129.311134743311 | 186.758038665014 |
| ORC5L   | 263.426870776148 | 276.867974638972 | 301.49286558088  | 302.768870633398 |
|         | 313.773476049783 | 306.011283364888 | 255.462706428149 | 336.120322555703 |
|         | 269.238332581564 | 263.606930507829 | 243.455305933211 | 372.81255844018  |
| ORC6L   | 17141.9934540963 | 15990.893941344  | 20510.096303537  | 20048.679735668  |
|         | 10397.3656932566 | 20099.9833491654 | 13190.4826009741 | 16397.4527321924 |
|         | 17141.9934540963 | 12171.1997841553 | 10312.8407173696 | 16123.3486890049 |
| ORM1    | 145.619570216377 | 138.647667867725 | 147.562757301251 | 143.145483889918 |
|         | 140.912000800926 | 152.680068580858 | 134.550341773204 | 140.48372620406  |
|         | 154.431051053529 | 149.416411285088 | 143.00932329728  | 144.699084515687 |
| ORM2    | 125.321968563987 | 128.959487155628 | 132.409582164007 | 130.215290990406 |
|         | 137.049677918041 | 133.814720785534 | 126.520909083643 | 143.35902319003  |
|         | 138.723149134933 | 135.825931047185 | 124.385193388896 | 133.281505040209 |
| ORMDL1  | 451.317592236192 | 388.782774926005 | 434.390613381746 |                  |
|         | 323.462252156562 | 357.140791982825 | 596.54904286299  | 506.80969228563  |
|         | 603.906237227931 | 645.183207984114 | 471.15333189869  | 801.702878226247 |
|         | 618.058496806334 |                  |                  |                  |
| ORMDL2  | 156.357126871243 | 155.43577761798  | 179.478756495687 |                  |
|         | 153.258616843783 | 207.864808684047 | 199.077893147154 | 219.564603776774 |
|         | 230.947339143332 | 220.047563627558 | 251.833571288967 | 250.928804390353 |
|         | 242.848821222611 |                  |                  |                  |
| ORMDL3  | 268.885346595453 | 286.194197552489 | 256.127197303751 |                  |
|         | 301.051775938853 | 392.430873293903 | 460.089380701982 | 561.761160223609 |
|         | 924.040923247227 | 603.906237227931 | 226.449705559354 | 268.148673257455 |
|         | 491.906642849373 |                  |                  |                  |
| OS9     | 286.856346704286 | 304.111808763793 | 268.832884350157 | 243.732074437237 |
|         | 381.625983354158 | 262.233918187791 | 373.545629693667 | 466.392151902286 |
|         | 283.556453980797 | 289.001004912528 | 342.935878735854 | 278.005620372937 |
| OSAP    | 184.602704530362 | 182.624130582754 | 245.378747269929 | 245.195406638979 |
|         | 139.130560988108 | 137.161065320948 | 134.753783025994 | 143.613003173841 |
|         | 147.9084767638   | 141.54943189147  | 147.011838288594 | 156.4687904356   |
| OSBP    | 1485.776977235   | 1329.3013039618  | 1744.58410715956 | 1310.60610806797 |
|         | 1257.32413345748 | 1865.44709751822 | 1294.18114559128 | 1515.38811502277 |
|         | 2430.70635781622 | 1261.61611961272 | 1396.4168898623  | 1160.25775445193 |
| OSBP2   | 131.298129667973 | 131.894919149666 | 126.743579586052 | 133.857996630836 |
|         | 402.694564608582 | 231.47915227815  | 200.001438979007 | 183.406510146725 |
|         | 224.547982731402 | 345.977609212137 | 273.75192868583  | 224.439293045835 |
| OSBPL10 | 1640.99641023476 | 1430.20038077595 | 1804.63762008613 |                  |
|         | 1669.97250023755 | 197.308952757609 | 152.11446058397  | 130.965418847276 |
|         | 194.686527131656 | 225.423403713718 | 366.317263094585 | 127.930072902878 |
|         | 178.628885995439 |                  |                  |                  |
| OSBPL11 | 179.376968970326 | 182.453722105813 | 219.318938396989 |                  |
|         | 182.346834032145 | 196.053808536366 | 200.242239130026 | 196.207631868755 |
|         | 209.004374703564 | 206.77605957523  | 199.798533722581 | 215.47323777134  |
|         | 186.563913311757 |                  |                  |                  |
| OSBPL1A | 1029.43177809276 | 652.654673756838 | 1072.82323999638 |                  |
|         | 729.729297413233 | 285.355815566148 | 424.37437028833  | 366.073387075385 |
|         | 481.86545778383  | 338.129250886594 | 465.41233536979  | 359.024299091145 |
|         | 209.44506543433  |                  |                  |                  |
| OSBPL2  | 782.139151423572 | 744.523059417351 | 885.927972780392 |                  |
|         | 894.46029531926  | 596.3549500121   | 557.702374840532 | 482.226889092547 |

369.726867521935 667.693216401836 330.641230715217 789.401526545277  
555.366765340014  
OSBPL3 144.02239659305 154.574826922632 161.285587312115  
142.590631181358 150.860090477342 183.013090662119 171.826623289946  
165.066555355918 171.650247980576 193.522811257085 187.63609695026  
260.278595572575  
OSBPL5 585.234286698678 732.352357321273 525.287367366192  
1040.29664343743 204.710203150526 186.388067641269 198.113398073968  
184.056274452194 204.5274881834 318.06081614151 214.4829383264  
209.60319248212  
OSBPL6 153.54898879562 146.21362402936 142.464394555901  
150.084909674721 137.127587786536 150.049852391879 147.968104627262  
137.649424237506 130.714375454354 185.627515956848 137.294246530224  
142.438586625317  
OSBPL7 218.106150021482 217.910445051307 218.672831303767  
248.993716339029 207.036293322882 206.825575257029 259.277693314055  
194.819597436776 228.058870735016 188.708596785144 329.333236839082  
343.270642449751  
OSBPL8 455.21285026588 536.067857235731 374.337030706199  
418.244376024741 272.712242893937 462.265785715695 317.802633831405  
315.430399077266 318.561557474749 528.556049506759 332.978350226738  
278.88183549759  
OSBPL9 330.944203807675 304.013547190343 364.678403892354  
275.437030326768 287.924891622962 369.434158443561 459.30568829087  
400.98290237416 368.220523234399 584.813665097407 381.4054004349  
427.151797273226  
OSCAR 147.889486635135 162.15259972225 140.313216623427 146.698766621345  
165.471587934831 150.231063426302 157.468934439452 152.467764730004  
162.879707592164 158.316173597874 153.603765998461 147.281035392817  
OSCP1 147.414834563852 153.276938815536 156.194996994993 150.0512732245  
185.240692860387 195.595275594235 178.358003030064 207.850956786183  
161.031148038478 187.132496910208 201.800357785022 191.84511431253  
OSGEP 375.189005729903 361.904370514991 398.571054759451 397.737702926328  
369.726867521935 265.919002666885 358.732947927445 277.685488726472  
222.20526515049 390.284689962661 544.669441360594 337.077153882632  
OSGEPL1 143.165150890885 151.212606106351 179.067275037015  
156.083002868004 145.588183908855 175.462290891421 167.083758835476  
175.774461934758 160.648791273795 156.18389905051 153.379118228796  
152.913814113632  
OSGIN1 171.86363382331 155.183210738478 173.306283668215  
180.1204762193 156.460374293022 139.750281709938 149.280480796544  
138.074645385322 142.826898321575 140.543382412084 124.42747321736  
145.675032688915  
OSGIN2 160.127254444487 169.888264971936 175.51767355303  
134.23001942966 182.725987056391 348.640185950469 213.710058427654  
220.010399552402 236.141982516399 205.162633740798 198.390247605355  
190.939726271153  
OSM 148.038291195414 180.15338103 148.949829934611 177.103802332144  
150.632724038845 141.476041451832 149.366554238043 156.130224537288  
164.726382689707 396.611050163857 140.419686138586 158.973872644973  
OSMR 138.167369090026 144.173163762502 161.983987604 136.783974483005  
130.187833435052 127.911258242431 152.222213455455 136.625136565562  
140.599584289987 176.5588805282 125.839101611277 114.942849575931

|          |                  |                  |                  |                  |
|----------|------------------|------------------|------------------|------------------|
| OSR1     | 1854.11328962023 | 2853.14759681683 | 2886.92690692502 | 4732.31591164752 |
|          | 4562.75659565027 | 278.385151185788 | 2449.76376608893 | 274.77366169918  |
|          | 329.146025181674 | 239.924227955313 | 1690.96371604294 | 637.892677173103 |
| OSR2     | 167.130843160309 | 182.197625235191 | 151.248365605631 | 156.187809481625 |
|          | 143.508657511633 | 144.564250008106 | 150.250193889942 | 145.777778096701 |
|          | 137.002473710189 | 140.448796848785 | 127.91637627901  | 125.739946257697 |
| OSTalpha | 172.7330526128   | 156.068308349225 | 152.009494286376 |                  |
|          | 164.955263076598 | 183.42877315644  | 296.830999357172 | 201.123529130035 |
|          | 207.560911665319 | 152.56002779985  | 141.679897603748 | 132.385096888962 |
|          | 153.005366371425 |                  |                  |                  |
| OSTbeta  | 122.89752183991  | 127.941584184869 | 119.612288460361 |                  |
|          | 110.966212705086 | 128.748663215466 | 116.456170659686 | 110.536316697732 |
|          | 121.99477069153  | 126.446675008883 | 111.467722538327 | 126.009358591395 |
|          | 117.611606270124 |                  |                  |                  |
| OSTC     | 774.774214696342 | 699.270931701696 | 931.325266360957 | 577.56891124468  |
|          | 976.050097371579 | 2083.02482378721 | 1875.21979956596 | 2083.02482378721 |
|          | 2694.98079256089 | 2055.27692947656 | 1778.73916100529 | 1715.51071085304 |
| OSTCL    | 150.336115779606 | 135.073449743301 | 149.471240458766 | 141.071184297124 |
|          | 136.593346330215 | 159.026102446297 | 188.671807443641 | 176.245698601389 |
|          | 180.276082632155 | 179.785198362326 | 194.552533397944 | 151.273261581765 |
| OSTF1    | 384.216141843863 | 379.387095129725 | 359.822784070765 | 257.168308311848 |
|          | 863.086199215353 | 731.513306289481 | 696.003998372271 | 807.92851898782  |
|          | 673.176084400831 | 1821.08523647593 | 1063.5903770389  | 879.809795251142 |
| OSTM1    | 160.27511502306  | 187.754968096521 | 196.378888436237 | 162.259941098076 |
|          | 176.670752486376 | 190.270819689158 | 179.163748161358 | 144.795448147175 |
|          | 176.603760647035 | 207.581907737176 | 191.861598059182 | 160.268754786532 |
| OSTN     | 110.061459744714 | 106.126202301438 | 108.333135424315 | 120.024235522682 |
|          | 107.67395123577  | 109.333276735523 | 100.966979609222 | 108.333135424315 |
|          | 107.48180681159  | 107.91011371422  | 121.441901286752 | 121.743701509981 |
| OTC      | 141.88072888667  | 156.291522057567 | 136.348252715447 | 149.756512110538 |
|          | 144.031305845388 | 154.350107666084 | 139.285128128996 | 145.117574928189 |
|          | 132.033116673897 | 148.636787484103 | 135.247018354192 | 142.625414022199 |
| OTOA     | 115.3611179192   | 113.78323485587  | 110.014935095391 | 113.995301093609 |
|          | 119.218909479403 | 110.496084922302 | 113.852849454448 | 117.186546702764 |
|          | 113.542803491215 | 113.905364405553 | 132.851791525098 | 114.774530966446 |
| OTOF     | 123.7615105541   | 126.324771800638 | 121.057111457792 | 123.61956613951  |
|          | 402.140437036706 | 127.344210958898 | 136.937327692084 | 191.3765085801   |
|          | 144.329979284786 | 122.27785621724  | 160.816803370151 | 141.168198348093 |
| OTOG     | 128.069504716124 | 135.518752716008 | 142.276853170778 | 128.137646789236 |
|          | 134.867806860993 | 128.942892882721 | 127.486697506397 | 135.315732654507 |
|          | 123.02879683948  | 135.039901725369 | 117.343165720552 | 127.287538993899 |
| OTOL1    | 119.502758763438 | 112.309528593741 | 110.256771079797 | 115.896463925125 |
|          | 123.524952603672 | 105.976284291356 | 116.331428876124 | 119.645983822002 |
|          | 112.456644814178 | 116.769106223472 | 132.688531077861 | 122.212222959338 |
| OTOP1    | 123.395897439193 | 138.885230982475 | 114.084543168359 | 122.320966091375 |
|          | 127.612859839494 | 118.406487008528 | 120.757288533244 | 116.688949603376 |
|          | 111.09179957013  | 126.316613675316 | 126.460390022632 | 114.358099210532 |
| OTOP2    | 110.355493122568 | 120.806180547422 | 115.531710316716 | 113.919529047225 |
|          | 112.758617084341 | 109.613208767992 | 115.830631252469 | 103.888971448792 |
|          | 103.691075663721 | 110.952108124186 | 119.926169902322 | 115.840266274696 |
| OTOP3    | 123.126240234396 | 113.154880173167 | 134.46179453106  | 107.385565665491 |
|          | 105.741092375243 | 123.45581374935  | 123.303143302526 | 117.889524670597 |
|          | 107.316786994369 | 119.926169902322 | 124.393008692801 | 119.451099896048 |

|        |                  |                  |                  |                  |
|--------|------------------|------------------|------------------|------------------|
| OTOR   | 145.463105638655 | 132.772085211553 | 141.950778601653 | 134.161664663192 |
|        | 149.628421263062 | 144.70348930646  | 145.468654174037 | 141.908791151061 |
|        | 149.659505956629 | 154.698312173556 | 137.176144667253 | 150.655359765209 |
| OTOS   | 116.764795914545 | 112.858669660245 | 109.74983281634  | 102.166449349339 |
|        | 105.132185249959 | 116.919109599361 | 117.166509072455 | 108.760780994582 |
|        | 111.992738490468 | 106.126202301438 | 118.47752077032  | 110.544044723728 |
| OTP    | 152.657649988502 | 147.77916610545  | 144.570725886413 | 150.152613183213 |
|        | 147.245636620228 | 159.479962316199 | 158.439409064812 | 151.72544764489  |
|        | 152.524106827617 | 146.828099826146 | 142.808871284256 | 164.922193471904 |
| OTUB1  | 197.12840030662  | 219.996410908721 | 183.779065928447 | 208.045210163121 |
|        | 576.636077770998 | 346.065746911798 | 288.026656721827 | 216.290279815413 |
|        | 195.981555981238 | 212.016247864691 | 260.370285504512 | 235.43707989982  |
| OTUB2  | 128.820757822782 | 126.784243009941 | 113.170014668758 | 126.520909083643 |
|        | 140.844007965202 | 121.289159587394 | 130.937742379689 | 132.197346228417 |
|        | 128.588822671032 | 144.940119680152 | 143.492758492895 | 127.206177583275 |
| OTUD1  | 250.718986968076 | 238.149614104568 | 216.805365763069 | 206.669783013221 |
|        | 283.014222473749 | 187.112176929485 | 220.446775597113 | 187.993907528473 |
|        | 179.905809470907 | 187.112176929485 | 178.863722055499 | 168.132172570809 |
| OTUD3  | 176.183165494563 | 152.826356673175 | 164.185346950306 | 174.136806313142 |
|        | 166.780319723055 | 189.324370290702 | 154.350107666084 | 175.686248503777 |
|        | 167.791351000743 | 158.241349852419 | 150.544779197947 | 157.252701277198 |
| OTUD4  | 189.49408026215  | 173.225064625094 | 204.237952297239 | 153.154592981962 |
|        | 142.77817647952  | 210.973303650385 | 177.802767772786 | 175.245611094434 |
|        | 202.60339529874  | 217.125327913156 | 185.706228572019 | 196.269193578525 |
| OTUD5  | 280.414161197286 | 331.523536427527 | 308.441120735095 | 401.87674893993  |
|        | 221.491633607126 | 220.567951704044 | 196.245297362955 | 205.852731236069 |
|        | 209.60319248212  | 181.593291870136 | 301.955019831714 | 174.66966623557  |
| OTUD6A | 135.232878188098 | 142.405569257901 | 129.938723074546 |                  |
|        | 121.472885562857 | 132.637443692683 | 128.478724185042 | 121.110498703017 |
|        | 131.636779618185 | 128.736591902501 | 130.233769058693 | 154.564478911791 |
|        | 150.584633044901 |                  |                  |                  |
| OTUD6B | 212.050953977485 | 193.04138438685  | 263.52595855321  |                  |
|        | 184.056274452194 | 233.496804016764 | 357.672950588403 | 258.807028561407 |
|        | 230.053292316517 | 268.568824794145 | 229.26243866226  | 216.731618532814 |
|        | 259.575461599189 |                  |                  |                  |
| OTUD7A | 148.201649039381 | 148.704917490429 | 163.542848861552 |                  |
|        | 149.851792558427 | 156.13331481937  | 148.415036326153 | 157.494596757446 |
|        | 148.022287939066 | 141.079317977197 | 150.275163835924 | 135.448170440824 |
|        | 143.234195669431 |                  |                  |                  |
| OTUD7B | 137.459095066272 | 154.076216899447 | 129.378442664568 |                  |
|        | 150.439715066903 | 121.556331561879 | 136.011474063229 | 145.431393142782 |
|        | 108.9291713877   | 128.417571004317 | 140.840895590527 | 149.752188104803 |
|        | 137.374784875444 |                  |                  |                  |
| OTX1   | 109.760525674874 | 119.886433564236 | 108.646136431909 | 113.66416989856  |
|        | 123.072413274454 | 115.656801309856 | 120.333487171575 | 147.537691509156 |
|        | 119.717408713154 | 133.496922906874 | 130.142263689536 | 102.166449349339 |
| OTX2   | 119.555954372381 | 119.882472552083 | 120.96098661114  | 118.802030418792 |
|        | 117.580122770251 | 118.589392612801 | 114.598636725763 | 113.61408868553  |
|        | 115.321501844663 | 118.558673085303 | 140.431591727649 | 117.207266754941 |
| OVCA2  | 134.831550401848 | 124.327827104244 | 119.352995485911 | 117.910259090745 |
|        | 130.143953880391 | 163.773702843544 | 140.149064156135 | 140.167274633872 |
|        | 136.904851056919 | 151.040909999868 | 141.913001976093 | 175.019580368717 |

|        |                  |                  |                  |                  |
|--------|------------------|------------------|------------------|------------------|
| OVCH1  | 112.126521532091 | 103.734303632543 | 117.361778263056 | 123.748788684337 |
|        | 127.496885890349 | 126.897804011992 | 110.496084922302 | 100.966979609222 |
|        | 123.067278658698 | 120.422401793885 | 118.294324274616 | 119.486895914055 |
| OVCH2  | 151.519845657755 | 143.532014058535 | 135.186880148352 | 144.568417378353 |
|        | 140.105675520432 | 140.754706171596 | 154.701413581915 | 146.459202036419 |
|        | 140.071879210324 | 145.542888937635 | 140.071879210324 | 147.688664545959 |
| OVGP1  | 278.88183549759  | 282.47352481715  | 304.402066421813 | 293.986292438714 |
|        | 329.333236839082 | 883.140984728615 | 625.152889992949 | 828.683748921915 |
|        | 384.216141843863 | 219.080383154432 | 475.403662030875 | 360.852730026133 |
| OVOL1  | 126.992697289075 | 124.794260959228 | 119.673343767067 | 129.719122724699 |
|        | 237.906142045719 | 204.710203150526 | 175.711836112986 | 157.094001180073 |
|        | 138.5270206057   | 153.02127620577  | 205.886398618369 | 207.902853533132 |
| OVOL2  | 122.94937342991  | 173.798554769204 | 138.562576783507 | 111.783160346742 |
|        | 567.715714233608 | 328.486476842582 | 351.292682758926 | 446.698665191047 |
|        | 719.628501451187 | 791.840531191783 | 795.720196538039 | 485.373169494941 |
| OVOS   | 148.832461329713 | 149.791777262424 | 175.210232663606 | 174.991941844263 |
|        | 156.043994260248 | 169.211708954329 | 170.966588957686 | 151.269442319766 |
|        | 157.099868633958 | 136.846912694371 | 149.797850183848 | 144.004831360797 |
| OVOS2  | 141.488910091973 | 131.631968933144 | 144.373226011578 | 135.017196494069 |
|        | 141.791001213681 | 138.158400190671 | 130.988294699995 | 137.540275229889 |
|        | 136.730623822061 | 126.680992733621 | 132.265895156539 | 131.726540162023 |
| OXAL1  | 579.678635803225 | 567.317223907142 | 760.070180572621 | 642.647554580301 |
|        | 351.665934915634 | 366.788087591332 | 551.086785904249 | 659.483452217461 |
|        | 468.712260193746 | 636.382696018633 | 508.861268738074 | 706.759905439674 |
| OXCT1  | 221.127492253636 | 217.165036362034 | 292.640251411131 | 209.702683803624 |
|        | 131.866599432062 | 179.009510246709 | 114.533677697026 | 159.466972602203 |
|        | 142.765490244223 | 230.975434289172 | 141.215542377796 | 121.027465953657 |
| OXCT2  | 172.783430414523 | 167.373416675264 | 159.094117857743 | 176.183165494563 |
|        | 220.633692394229 | 196.269193578525 | 156.333133322672 | 176.128369308989 |
|        | 176.355556618289 | 157.776321544382 | 159.951697830252 | 180.3779211444   |
| OXER1  | 170.858049313581 | 199.916301659113 | 162.900556089071 | 205.260673843294 |
|        | 172.157660228549 | 150.843975804117 | 154.889079187405 | 151.973681370675 |
|        | 140.602170750673 | 156.130224537288 | 141.770977101211 | 156.280701500421 |
| OXGR1  | 118.220555783444 | 125.833649377492 | 130.247700541716 | 117.361778263056 |
|        | 119.172965618216 | 133.305679931132 | 138.911993471119 | 157.619627711954 |
|        | 139.435000959919 | 125.176747824384 | 131.212705319485 | 163.159571059471 |
| OXNAD1 | 121.311836944721 | 122.714122084817 | 121.429270259367 |                  |
|        | 128.375390373307 | 123.994188725172 | 124.791221329502 | 119.658703392877 |
|        | 128.835216648178 | 117.040953580545 | 116.604371744082 | 113.339155126202 |
|        | 128.84676695859  |                  |                  |                  |
| OXR1   | 618.661249163439 | 685.620637807134 | 621.825622897512 | 611.772512110915 |
|        | 850.882404546093 | 976.050097371579 | 1030.56836625083 | 865.800709006332 |
|        | 2718.440149645   | 652.429025114523 | 1118.28423222707 | 888.04996477314  |
| OXSM   | 165.143417235314 | 181.530767521222 | 151.299425811105 | 196.144420005021 |
|        | 302.847274046748 | 227.32463765717  | 231.39684528494  | 285.46340356157  |
|        | 277.219796733134 | 227.065194522692 | 234.126500054945 | 234.738241125899 |
| OXSR1  | 1155.4487861163  | 1071.83063260499 | 1403.09138858507 | 1184.3199328099  |
|        | 1038.93733638848 | 838.267069860172 | 928.672013047007 | 821.862271569917 |
|        | 1002.88224342342 | 1321.17236442448 | 674.101599637653 | 911.340266389071 |
| OXT    | 155.53992663898  | 160.156127781701 | 154.300058278533 | 170.169402943662 |
|        | 176.145076825955 | 138.070353990356 | 148.329635131296 | 158.064409011013 |
|        | 145.152605166094 | 149.013011292165 | 146.632312874102 | 142.876069462608 |

|        |                  |                  |                  |                  |
|--------|------------------|------------------|------------------|------------------|
| OXTR   | 158.631298154353 | 170.01557699913  | 182.747079625619 | 210.77489002666  |
|        | 238.745953695925 | 198.522123898437 | 221.127492253636 | 194.36669779004  |
|        | 218.269847477919 | 222.134519361117 | 230.10433160008  | 208.869189492052 |
| P11    | 117.870230005125 | 121.917596225576 | 125.095999326598 | 119.092335265325 |
|        | 133.204793127029 | 117.820996523337 | 123.643292039274 | 113.609215169397 |
|        | 118.161192318422 | 122.766778018066 | 138.235127932016 | 122.287535209629 |
| P15RS  | 2065.51724858579 | 2151.9395095819  | 2031.01186679713 | 2280.20302441765 |
|        | 591.641325402032 | 1400.81554054664 | 968.157701932137 | 1220.30347076968 |
|        | 1303.94157493616 | 892.038018567941 | 1117.77397620221 | 1119.23362648056 |
| P2RX1  | 2611.61260614408 | 3630.80752744347 | 2280.20302441765 | 7573.69742026367 |
|        | 160.045715314465 | 151.202875465389 | 131.371129237005 | 153.726935957906 |
|        | 157.860515609693 | 144.333945716394 | 136.454911192129 | 147.584176709986 |
| P2RX2  | 144.476157581998 | 133.327778635672 | 132.526286141997 | 131.503936441405 |
|        | 127.6078497227   | 132.965467229606 | 130.406895174038 | 128.451788292588 |
|        | 130.309092946921 | 130.736466113571 | 132.86711707789  | 134.224781719944 |
| P2RX3  | 151.497680466119 | 140.156797128045 | 147.4182675362   | 166.007913607742 |
|        | 144.48495176385  | 151.722405598425 | 156.173099025259 | 147.766043861937 |
|        | 147.911923728231 | 155.247452081206 | 150.105503384881 | 145.709172732805 |
| P2RX4  | 244.954917633904 | 225.950750084197 | 232.879578820053 | 234.550692915716 |
|        | 517.881547706391 | 253.867947800583 | 328.730722366546 | 290.914381066573 |
|        | 321.524921332256 | 220.661922683143 | 219.422260093722 | 202.061887608293 |
| P2RX5  | 122.093290585838 | 122.780453116176 | 124.180511991605 | 117.517649866653 |
|        | 117.67638166062  | 116.472796471694 | 117.361778263056 | 125.272796155561 |
|        | 109.793568518462 | 121.689416823766 | 117.834484996559 | 117.913545753709 |
| P2RX6  | 179.74065086312  | 172.836730741407 | 191.146276657897 | 190.331589656379 |
|        | 155.393326732887 | 148.610537244399 | 187.955617187544 | 137.22727238555  |
|        | 134.650161382949 | 131.692626563078 | 274.092048989484 | 222.332748220525 |
| P2RX6P | 115.34945441214  | 121.734873711651 | 107.156457065853 |                  |
|        | 110.061459744714 | 120.616979607398 | 114.664782541261 | 116.981243525714 |
|        | 113.938636269013 | 112.3786222545   | 120.227386958188 | 133.296200563657 |
|        | 114.545476919992 |                  |                  |                  |
| P2RX7  | 207.05325577114  | 209.984545596312 | 233.464856303761 | 211.916602665089 |
|        | 148.856482636773 | 149.339492984504 | 151.356975600962 | 180.276082632155 |
|        | 180.599150102184 | 161.720405760536 | 157.912864169081 | 140.955772094739 |
| P2RXL1 | 138.981712781568 | 149.416411285088 | 148.649619242172 |                  |
|        | 160.584760930779 | 143.954908055924 | 157.381401974279 | 135.118955626451 |
|        | 147.309245779031 | 135.465076459043 | 148.846121873401 | 139.999298193212 |
|        | 143.999000471746 |                  |                  |                  |
| P2RY1  | 136.607783800741 | 135.493053871272 | 132.379706531581 | 133.101674466013 |
|        | 130.471929699923 | 120.626155234319 | 119.480037559953 | 129.733935614802 |
|        | 120.880547922392 | 196.419891542139 | 137.6160344044   | 114.880348648147 |
| P2RY10 | 128.759751330525 | 138.558300898079 | 143.653452869664 |                  |
|        | 127.349190705235 | 131.383113302567 | 138.12084690547  | 127.433203229267 |
|        | 144.713108022551 | 152.20173979854  | 129.916677638819 | 159.159106382346 |
|        | 133.41548225025  |                  |                  |                  |
| P2RY11 | 208.067404132325 | 254.065327837176 | 230.855806094267 |                  |
|        | 257.534293550585 | 235.795627549799 | 311.806908624308 | 157.717145014769 |
|        | 334.316711893654 | 235.43707989982  | 147.096559685764 | 261.988345506548 |
|        | 189.348690353874 |                  |                  |                  |
| P2RY12 | 143.550908565401 | 156.046085830566 | 165.239214141562 |                  |
|        | 139.414912158809 | 155.813740201987 | 126.265475477399 | 126.503135702506 |
|        | 130.516632662261 | 135.467354817201 | 132.381685434931 | 131.872583529419 |
|        | 129.187574143637 |                  |                  |                  |

P2RY13 140.885915460425 147.716353308549 136.398521726896  
141.712693059287 147.922706629104 150.645487532549 145.123845983625  
166.376907377447 181.340312140534 153.726935957906 160.227729155903  
146.00443946108  
P2RY14 137.042097702398 147.93088503956 180.889946069121  
128.396326753926 137.024230648861 149.604072044469 130.262411213764  
141.59474425685 148.532339759414 144.450810504499 123.841366760069  
137.022366035333  
P2RY2 127.543729713161 127.430408113725 120.887938517877 121.871105084095  
285.214585324341 168.483273292464 247.454326301069 148.782907912893  
173.726420791056 199.662592246931 187.035957486928 208.164674386141  
P2RY4 146.153528461264 147.045944019838 142.17773831901 137.609831343223  
129.495680232567 126.037968297611 138.921608664788 137.700110923212  
126.211525910631 134.310685502031 145.754504160436 144.839170491334  
P2RY5 281.659653592151 241.353916553991 223.279017022443 201.349209185128  
307.81941988503 343.833659987063 166.388683552371 444.192734921566  
402.213774592085 673.176084400831 578.811908030805 448.858580689107  
P2RY6 160.459100056689 162.664254855131 172.783430414523 157.094001180073  
155.149433381384 159.273225917177 160.105903942674 159.300198352916  
187.046760972666 159.838626443912 141.642547489983 159.730925830278  
P2RY8 154.183537565624 174.027190728107 130.124601660028 190.96184674871  
174.890624803452 202.00431685587 202.314814594735 199.235895708128  
269.530151236658 172.926288703434 183.447807651728 154.201375471487  
P4HA1 293.234972169244 254.447650810819 278.219561902233 204.113356572343  
356.770158430601 233.635876830148 1060.24125879951 314.221257518059  
319.090371885653 427.345809255426 846.425467119342 659.673052713372  
P4HA2 447.297590650141 351.292682758926 395.327097512479 344.992791638415  
264.526189799049 184.724071110756 280.948704707655 228.243668453958  
202.718428167217 1001.35912007916 249.680729921602 356.376890469558  
P4HA3 131.630132952441 139.440415574681 117.343165720552 137.331864485838  
136.05610450926 116.483432723207 120.09801164252 117.754181884939  
118.091125088778 118.891276329399 127.715766031466 114.479886899622  
P4HB 1937.83242524439 2267.0818302379 1406.73270115373 2563.02488807613  
7656.97151002785 3396.40593844715 5175.17279574945 6233.78489807054  
5106.27623905309 3727.70199176703 4759.17973319588 3282.73711809465  
P4HTM 343.307036883726 318.112626495401 335.47484353322 345.38424761963  
781.790858580895 545.200687301057 647.666334416707 330.505633088656  
586.366632966978 194.212177449077 565.843200661721 651.998433127992  
P704P 254.879772480457 290.582957824549 393.98210915852 294.069353373633  
265.972387419683 263.183010631644 360.852730026133 234.301520483864  
218.298791348295 556.863361789449 272.238922498583 313.18989508207  
P76 244.440857688518 265.536429548886 186.529656751005 297.12411625104  
478.479988875208 172.741890316331 155.590197324062 160.525939340745  
165.607095120227 152.837739128546 191.84511431253 135.771423315597  
P8 1189.11053680293 1101.66868138797 1524.46745239811 1958.96627327952  
153.78976320015 146.099555861577 476.249239197777 206.236303011662  
221.869191666931 271.287767448621 147.345558455805 148.26621607986  
PA2G4 875.38834441246 992.744093752678 883.140984728615 1072.82323999638  
1825.10168716051 1233.99503576308 918.742625270041 1165.05055932899  
1103.81439809121 1210.40302822121 834.187014201026 1213.61170930345  
PA2G4P4 118.918962530408 111.783160346742 116.653897702566  
128.251087452744 114.056147008769 114.830474086443 118.220555783444  
111.398760606544 115.3611179192 124.588594750916 157.443127950708  
121.438875373878



PAAF1 549.460612060753 549.047065540118 886.517088614968 563.140382824149  
558.621429366984 492.930906036297 704.653073777277 489.75389978732  
483.549698382115 377.89330639683 460.514672966125 470.154677948419  
PABPC1 3833.73632806344 4465.66734676111 4612.81760689869  
2974.04694562902 12615.8332290932 7753.61594300904 9293.35991367953  
11777.9172529698 14798.1358474998 6324.87600301793 11071.0448447818  
8739.02966610274  
PABPC1L 197.341423434688 212.691702227442 218.433524126584  
192.565733545715 247.942904862478 670.571106793204 1549.30900090605  
546.841563406813 634.356322976353 458.953009417683 620.163512570453  
527.139476504986  
PABPC1L2A 154.562761981868 146.488402397597 138.071335383596  
138.56436658053 144.643770374264 134.487865570214 145.060085149395  
138.667081004369 136.998259410887 134.464053009101 132.098421212796  
150.751386127903  
PABPC1L2B 112.558241320112 120.517691208358 111.743461522689  
123.940632366675 110.670057121283 120.36718185387 112.495783269169  
113.40684693417 121.159593382017 129.190900922265 135.215356532498  
126.110426731941  
PABPC3 160.319687451789 161.525131363333 204.509884908059  
164.661445411833 271.356289141017 253.65959805538 368.374002925137  
377.225452025984 393.013539328766 194.529045934216 420.361583975644  
302.408563830315  
PABPC4 1738.96798001895 1520.59210521859 2789.67986601883  
1772.75453735112 2965.38280248519 1910.08485008041 2970.34597432588  
2804.99820187198 3455.20639616159 2280.20302441765 1482.15461429206  
3545.8833678963  
PABPC4L 217.202541167691 221.070448906398 218.106150021482  
222.051005238856 147.433388299999 176.497706091676 142.25795237339  
129.167602517633 146.432468585736 167.003917876371 129.25124636593  
127.683344133492  
PABPC5 154.935741493562 172.80265044721 169.16155608071  
152.334669286305 164.458565398812 144.958176005711 174.396061906109  
149.477373469387 165.134931755194 153.000232171457 164.625407872446  
152.566490804809  
PABPN1 1151.89087953837 1008.875250028 1054.47292895417  
1184.88559645917 1085.38819961412 571.439520427295 581.54874141672  
471.946284490029 720.214044399108 690.903797251841 978.389902096994  
909.727616721285  
PACAP 145.621384219688 140.306808081269 144.970383956581 137.020473156363  
153.261002653668 144.940119680152 134.271916545532 153.481752643937  
174.255919030841 162.649092834422 141.40690581885 154.352518161283  
PACRG 135.033601686007 142.442450622311 129.86336717605 135.177043138545  
134.190511945944 137.519771130707 153.579955370444 170.931788192825  
145.440471538068 126.191057198995 153.131271100637 134.218867540274  
PACRGL 159.2488784104 157.049773524382 148.195611015135  
178.584378959369 141.67277923437 146.392657608076 145.276745572405  
147.319360896679 145.291984088491 146.268073519544 155.27707167384  
138.875827888646  
PACS1 322.153713097778 325.387193207414 253.009376944901 531.217306770605  
595.270107963842 206.236303011662 266.892524131545 193.674681547989  
208.476367897256 225.850439131864 283.014222473749 219.351080515508

PACS2 249.884250040189 279.969975697164 202.761449711661 295.973370766318  
314.014654357569 133.074027423549 188.780089746036 146.486480663438  
148.79958121087 164.901810642726 193.04138438685 183.493455947795  
PAC SIN1 151.979221390032 156.626742111441 165.851677392967  
154.755544586846 277.596303701405 194.903531690239 183.42877315644  
240.836979012241 239.363511706064 149.505323932806 189.174957940401  
205.886398618369  
PAC SIN2 817.529344685717 973.543357809971 744.523059417351  
1171.62361359992 583.455617065556 438.03648998391 486.947380524463  
469.206346008875 507.710604451713 569.656573915709 609.309339417625  
556.31484498921  
PAC SIN3 355.213322760505 405.766055310869 382.630113452429  
620.614820117452 501.166869173253 208.270622752385 267.535469518664  
187.572517928061 224.089220507176 495.89837457901 261.251965523684  
196.519125510368  
PADI1 118.474291525263 126.326609619996 121.730973193225 138.340652133783  
134.78059811237 132.624674205566 130.546471770588 128.200531810126  
131.38881091292 132.657106732366 155.979380606594 121.739219824085  
PADI2 160.254101852355 153.059432055089 193.275162354467 172.468440317443  
168.873282919232 174.568253693395 165.139423820186 159.159106382346  
157.227118680396 174.92026613834 161.803438841859 184.021010234322  
PADI3 244.162496497466 348.575690346536 308.031816782343 186.268881719287  
4183.06379632713 564.588706307423 2385.5958396359 2970.34597432588  
1471.01897242089 156.353914172996 1455.75693295732 314.708587131145  
PADI4 161.002880798225 152.787860234233 156.368487784719 171.221972336784  
146.772611341214 175.327597807738 144.540174041867 159.14477373952  
176.612866969431 163.988099963018 146.266350809492 144.662545137915  
PADI6 113.170014668758 109.978693735206 116.142650095476 115.975794003391  
113.748724650063 111.475394003575 114.334059060506 111.423140302983  
122.320966091375 115.427201752401 118.235640920527 124.59937620719  
PAEP 136.319655432311 125.717328918165 132.008330288281 134.038213827843  
136.016912147651 133.918638123756 139.223480216048 129.272835188209  
126.165220332132 136.895650862562 124.258412895333 121.410606617535  
PAF1 780.734359041347 837.413261433363 849.158029646233 931.598413783099  
921.140932799223 875.38834441246 713.087392708048 672.348723983535  
899.667912542118 722.399669963921 571.838717184447 572.407760064901  
PAFAH1B1 1666.80650105101 1394.31467757456 2045.24382334506  
1606.01395227661 281.53843450593 1346.53215685106 541.258721278882  
940.716682221364 811.564396886535 1077.33874251157 1070.4597488302  
1413.37062765856  
PAFAH1B2 146.90847051471 145.478233255862 140.439698763808  
139.188234030711 180.561514455864 138.071335383596 152.215146681655  
151.234397206563 162.609829456486 177.267145265362 154.938900278679  
167.575968906119  
PAFAH1B3 224.439293045835 347.557792829093 204.35801867216  
271.897511879509 4437.40805296517 3890.14358014877 1508.24281455057  
2280.20302441765 3033.50962589321 667.421612441201 689.04773343291  
2225.59207490574  
PAFAH2 212.363151537303 230.546762514966 207.940596890723  
229.567444213626 166.842970309527 185.332215198617 228.284236550547  
239.003718699156 341.501397478593 339.54582149284 213.891435492914  
200.790119570144

|         |                  |                  |                  |                  |
|---------|------------------|------------------|------------------|------------------|
| PAG1    | 172.509081696309 | 186.794165469219 | 133.408354896584 | 141.284962125757 |
|         | 178.928873342925 | 318.348505551265 | 235.32095278846  | 251.224369831275 |
|         | 181.036375971015 | 162.259941098076 | 246.327991259259 | 214.331491507489 |
| PAGE1   | 112.282839763467 | 116.300028266671 | 113.504670764963 | 109.978693735206 |
|         | 107.622342073167 | 112.252555403121 | 109.91537150286  | 104.934718065476 |
|         | 105.284300851422 | 109.255470590389 | 102.725375719353 | 112.65454329872  |
| PAGE2   | 123.081299769162 | 127.220812636148 | 118.963119420175 | 123.696942540314 |
|         | 173.829219279719 | 122.508761687823 | 114.488760619745 | 119.040642659337 |
|         | 115.878861991823 | 115.845468537936 | 115.834056091815 | 168.45157400976  |
| PAGE2B  | 150.547096071626 | 150.685245572093 | 144.882207209439 |                  |
|         | 195.414464905232 | 164.548505132213 | 120.300291760091 | 135.047546966745 |
|         | 130.370405378213 | 151.543678860049 | 140.911080286243 | 120.452958447555 |
|         | 213.877482604185 |                  |                  |                  |
| PAGE3   | 153.273568880305 | 149.135934269866 | 159.716066475442 | 122.642077625035 |
|         | 143.094799968981 | 140.142884879106 | 146.563078818674 | 146.357214078158 |
|         | 140.613151527886 | 145.826955036113 | 140.234485088845 | 129.425699141995 |
| PAGE4   | 119.873844587252 | 121.591962855513 | 116.700397932007 | 111.722827315911 |
|         | 123.505435008269 | 107.316786994369 | 117.499697378893 | 119.062611098235 |
|         | 112.666812944192 | 120.26749529985  | 124.451718955086 | 148.446949168794 |
| PAGE5   | 123.687439699754 | 115.128667174745 | 130.924141812334 | 126.816402300701 |
|         | 143.947729578484 | 127.50624009248  | 130.697148466042 | 150.359906271672 |
|         | 144.559193410932 | 125.642282323003 | 134.27783583528  | 125.134516902118 |
| PAH     | 161.434331154045 | 152.418315087218 | 159.90466743683  | 148.358847576281 |
|         | 152.964940071133 | 159.570288565855 | 161.04173806448  | 146.450806121927 |
|         | 150.300108097623 | 164.986006226427 | 156.774097885381 | 150.794680375075 |
| PAICS   | 406.638419179213 | 438.817248820137 | 516.088776850623 | 406.638419179213 |
|         | 995.263014856158 | 1260.50387106816 | 1031.38207659547 | 1054.47292895417 |
|         | 1411.2586496281  | 1342.29111510713 | 669.330078861673 | 1080.95725397659 |
| PAIP1   | 159.990561741675 | 160.898061905021 | 173.416999972133 | 152.872139211415 |
|         | 177.666582096539 | 225.362253409428 | 176.155413809391 | 207.977817300376 |
|         | 180.1204762193   | 187.264411519101 | 177.468210189888 | 194.686527131656 |
| PAIP2   | 479.261755380872 | 478.293220151258 | 752.585744322608 | 438.340341490622 |
|         | 363.255517622046 | 626.104755496369 | 767.054576874115 | 542.379137999196 |
|         | 619.045921382959 | 646.117381960716 | 603.906237227931 | 565.609400092543 |
| PAIP2B  | 143.976395954528 | 130.590195477461 | 128.336332748047 |                  |
|         | 139.098623879237 | 130.565986980021 | 138.1693725329   | 129.405749374776 |
|         | 135.390226050803 | 126.601395870533 | 139.186416741431 | 121.278346729876 |
|         | 137.31708798874  |                  |                  |                  |
| PAK1    | 430.590533290315 | 413.555310697751 | 450.566031840493 | 520.470790410856 |
|         | 192.655899720909 | 295.571900619972 | 289.368511254335 | 250.443147156029 |
|         | 294.410833087913 | 305.325519265387 | 443.853458865556 | 312.080864996592 |
| PAK1IP1 | 435.183433729519 | 364.022018936132 | 286.282132382462 |                  |
|         | 315.014639682046 | 272.117599603586 | 528.556049506759 | 511.374117402707 |
|         | 377.353441970543 | 351.854828413334 | 387.224184063662 | 334.857690525582 |
|         | 493.071213662125 |                  |                  |                  |
| PAK2    | 350.308420518351 | 373.033658917608 | 366.961565952239 | 303.184785797741 |
|         | 332.296938254329 | 483.429488817674 | 346.118765910093 | 444.663812851378 |
|         | 399.762451559805 | 428.237210115667 | 400.924914238052 | 482.857203798212 |
| PAK3    | 149.801573181126 | 143.449303333495 | 139.840256729373 | 142.264536484668 |
|         | 152.640683776403 | 155.402421581195 | 135.449919220607 | 134.256243410916 |
|         | 142.693337885596 | 140.820807603291 | 145.711007027894 | 130.983136465761 |
| PAK4    | 202.662466141301 | 226.919545367682 | 208.628626112623 | 274.934292929666 |
|         | 678.684323057327 | 314.063025950327 | 347.985315257161 | 353.826834642154 |
|         | 375.407747753058 | 275.794847140407 | 274.427235605909 | 290.389345090634 |

|             |                  |                  |                  |                  |
|-------------|------------------|------------------|------------------|------------------|
| PAK6        | 150.038722708606 | 160.131256419524 | 167.871703133182 | 148.415036326153 |
|             | 270.293807247372 | 232.414763435965 | 204.999796322451 | 181.37137053478  |
|             | 162.57736365619  | 198.659595851481 | 193.777175793218 | 249.633252091596 |
| PAK7        | 133.220878146063 | 129.434594784981 | 117.296972688814 | 117.455432751161 |
|             | 133.725177339262 | 145.133151090252 | 142.288110423886 | 137.826458479398 |
|             | 128.0805889548   | 127.644315207178 | 121.764933633063 | 139.739448838436 |
| PALB2       | 147.858339902055 | 164.541417588646 | 181.85552254233  | 162.472783116487 |
|             | 182.478971050701 | 211.572396862776 | 204.183472655276 | 230.749601687217 |
|             | 175.79375235478  | 208.080089376299 | 166.622070620588 | 226.796825544749 |
| PALLD       | 10474.0047946187 | 9514.74328718935 | 10930.6720259935 | 10900.1783397368 |
|             | 291.444155562134 | 665.936368667321 | 539.471166362469 | 613.631311147328 |
|             | 602.480822390671 | 1816.3719976564  | 374.268489263941 | 624.467319041884 |
| PALM        | 561.858563298512 | 631.819659701092 | 461.482735533799 | 740.800822095116 |
|             | 177.478925091583 | 191.093283411655 | 176.340265963032 | 167.057202756618 |
|             | 192.980781927122 | 167.526798465556 | 154.079355899056 | 208.507486041165 |
| PALM2       | 116.155949676272 | 118.820154030256 | 117.015097017246 | 111.608386387842 |
|             | 120.686906898624 | 112.790552379447 | 118.015175851934 | 114.893462783007 |
|             | 114.213405341709 | 112.916256784817 | 114.906396746556 | 109.46255295836  |
| PALM2-AKAP2 | 129.286782862113 | 129.792548588929 | 128.060612106762 |                  |
|             | 133.487774861252 | 132.256047602234 | 132.14412512622  | 121.04331582508  |
|             | 129.226815062589 | 132.86879723151  | 129.987548571478 | 133.307149027384 |
|             | 130.0140921487   |                  |                  |                  |
| PALMD       | 200.934618257908 | 187.50236021149  | 179.841665686703 | 212.107842040568 |
|             | 173.024402954772 | 315.786908578669 | 201.349209185128 | 344.070947256963 |
|             | 175.529441666151 | 235.905788497166 | 160.006185904123 | 158.960488862727 |
| PAM         | 5281.353685715   | 3949.19206005238 | 4222.55224241399 | 2833.30537635103 |
|             | 269.345125874858 | 877.255923473532 | 1056.43975075255 | 626.298707790229 |
|             | 1103.13439876128 | 4251.82554412383 | 421.255522475862 | 1172.4103691525  |
| PAMR1       | 2215.43744802035 | 1353.61552261489 | 1214.77298621465 | 731.848844821402 |
|             | 149.131218007756 | 258.21341068758  | 171.006582229921 | 253.867947800583 |
|             | 282.652193666078 | 150.115482378938 | 156.128116786072 | 188.580458613357 |
| PAN2        | 368.466518140043 | 362.502631441716 | 354.067771806542 | 385.978867521533 |
|             | 248.085349787686 | 292.037861000784 | 445.95114929414  | 592.387650564803 |
|             | 376.443086293235 | 285.78344209704  | 323.841518852386 | 276.476790719416 |
| PAN3        | 540.946852709312 | 495.241179224412 | 614.094097408035 | 472.514017604645 |
|             | 332.138346958671 | 785.599211190431 | 564.056592672374 | 468.712260193746 |
|             | 610.591049634222 | 482.739666411407 | 684.866405921987 | 844.187489702587 |
| PANK1       | 156.723502568908 | 158.095373931016 | 149.563405421366 | 168.588120398433 |
|             | 223.496400038284 | 152.247504238261 | 166.22013573342  | 192.878416717298 |
|             | 226.623172906957 | 157.203304477454 | 181.747090380435 | 171.487594589922 |
| PANK2       | 293.448046685909 | 281.618175110153 | 220.876114717642 | 248.299149406938 |
|             | 356.323554000768 | 301.798676825176 | 293.234972169244 | 298.165097953983 |
|             | 323.667189206453 | 376.867306473426 | 424.134483971176 | 354.981966077502 |
| PANK3       | 156.265168005937 | 155.194521954405 | 156.682781772069 | 144.32655838488  |
|             | 167.811412309356 | 198.437113196596 | 208.476367897256 | 171.042491047256 |
|             | 150.401509081265 | 201.441808401878 | 211.357321758564 | 174.02138265758  |
| PANK4       | 190.825209733575 | 200.767743455226 | 230.770036998466 | 257.075088169589 |
|             | 262.196293231028 | 203.777944180067 | 222.709720471134 | 208.838523729744 |
|             | 190.018871923219 | 173.919504730673 | 188.231614694297 | 184.267958772058 |
| PANX1       | 203.913123559942 | 199.516043142784 | 212.119922561453 | 185.560737176115 |
|             | 185.974598267418 | 163.326102597955 | 168.166938045454 | 202.253560413436 |
|             | 173.364586678954 | 309.798246248863 | 184.260835471542 | 200.094610104813 |

|        |                  |                  |                  |                  |
|--------|------------------|------------------|------------------|------------------|
| PANX2  | 117.289037817013 | 148.780775862239 | 119.666650919579 | 109.613208767992 |
|        | 326.45984882427  | 361.390981655795 | 501.600329334497 | 453.058639550475 |
|        | 169.113439729353 | 134.292099546804 | 168.460095116205 | 380.243136469602 |
| PANX3  | 122.653587970329 | 122.490271802207 | 126.139188586523 | 137.094814176566 |
|        | 127.949413503055 | 126.941650500751 | 135.146767090951 | 119.097521397712 |
|        | 124.207200622684 | 111.1002996982   | 140.274655651173 | 124.606795061928 |
| PAOX   | 183.056707813352 | 189.389457481768 | 175.638328370133 | 221.231455446574 |
|        | 229.85833221434  | 153.293125258215 | 203.727455875381 | 198.226525986857 |
|        | 184.954673605577 | 150.419668144913 | 213.077884261943 | 208.363905749882 |
| PAPD1  | 508.735412486964 | 449.220056843562 | 579.923640505245 | 467.187222441283 |
|        | 343.417041721907 | 392.365008240567 | 416.075109522039 | 415.749051861123 |
|        | 364.191263843897 | 348.506289278042 | 392.365008240567 | 546.029974898225 |
| PAPD4  | 474.629173435475 | 484.028175202673 | 643.905401805862 | 455.313553278155 |
|        | 318.930960243303 | 591.013515828247 | 554.800688991977 | 487.993796425035 |
|        | 619.75986112089  | 570.771089597761 | 567.715714233608 | 808.300067805897 |
| PAPD5  | 1164.61390835016 | 1120.3009282887  | 1310.60610806797 | 1051.45401327176 |
|        | 590.3584324045   | 748.38293089716  | 519.112018353676 | 425.13721408756  |
|        | 564.200165295159 | 619.380514697732 | 531.421912541822 | 467.387427864242 |
| PAPLN  | 188.891032176388 | 187.352655464866 | 184.473198008234 | 216.102897582821 |
|        | 139.619076126267 | 131.427686241226 | 160.311096717492 | 148.911306526869 |
|        | 228.499052416183 | 366.240941980786 | 159.324816814876 | 241.557810100265 |
| PAPOLA | 1379.26881813339 | 1114.10687039922 | 1000.91520225219 |                  |
|        | 1152.50523614436 | 809.068563907145 | 961.931130189779 | 1368.91287156398 |
|        | 1622.17491781572 | 1144.92109214621 | 1265.88446775977 | 963.343120586863 |
|        | 1419.4638331856  |                  |                  |                  |
| PAPOLB | 115.999443701343 | 112.005939063045 | 117.897556445952 |                  |
|        | 122.197625748146 | 113.857477830423 | 123.395897439193 | 119.257387524365 |
|        | 125.528638246486 | 114.027244455291 | 126.561067704708 | 117.856184272322 |
|        | 116.670491972948 |                  |                  |                  |
| PAPOLG | 140.89666990854  | 155.578524031078 | 151.734683227196 |                  |
|        | 171.49930976135  | 170.18781660707  | 159.368376366657 | 146.54504551183  |
|        | 153.248199842194 | 139.972797966319 | 175.537039794925 | 135.217240511902 |
|        | 160.407690552027 |                  |                  |                  |
| PAPPA  | 292.068293167526 | 289.82072316082  | 185.727947276958 | 214.662648581622 |
|        | 153.02549014611  | 285.63245179313  | 187.352655464866 | 257.880331012233 |
|        | 246.80306998812  | 289.724297749772 | 153.524100996368 | 177.831718771025 |
| PAPPA2 | 135.872060352476 | 135.641355114263 | 122.438438464097 |                  |
|        | 123.111192189217 | 128.224742304889 | 129.368045611894 | 129.158212237299 |
|        | 120.915108114673 | 139.092075947067 | 146.450806121927 | 129.297217956843 |
|        | 127.987449338817 |                  |                  |                  |
| PAPSS1 | 476.168679880357 | 503.757797957538 | 583.938727139698 |                  |
|        | 398.512947526406 | 382.562403424855 | 613.063954859056 | 610.070236234299 |
|        | 669.602939159192 | 551.206833852215 | 704.448123154868 | 735.8141982568   |
|        | 537.419316887523 |                  |                  |                  |
| PAPSS2 | 443.623904480087 | 349.65350886897  | 284.236970342827 |                  |
|        | 305.451247405518 | 192.69687837782  | 181.966110264509 | 198.191669030952 |
|        | 248.690121805116 | 244.925472495705 | 324.871248300476 | 165.863118584978 |
|        | 199.149959995133 |                  |                  |                  |
| PAQR3  | 233.71520737817  | 218.369954323686 | 230.179200974631 | 180.231462528702 |
|        | 206.428618912264 | 331.848516303011 | 361.160881334174 | 260.746952459282 |
|        | 267.483886037099 | 270.568660560796 | 236.326943078666 | 259.796092536601 |
| PAQR4  | 182.763057221385 | 177.772019227116 | 157.435477846812 | 213.877482604185 |
|        | 662.213423011533 | 357.063270015318 | 182.929326147069 | 327.635520861099 |
|        | 338.822464893411 | 671.821418586421 | 269.072221443403 | 367.983166440977 |

|        |                  |                  |                  |                  |
|--------|------------------|------------------|------------------|------------------|
| PAQR5  | 163.534117903837 | 152.021576565132 | 151.766607453172 | 139.60494712939  |
|        | 136.704018446388 | 158.200211812067 | 144.107029869771 | 135.227424713702 |
|        | 143.118188813831 | 166.061891147234 | 137.85150144918  | 141.013392458859 |
| PAQR6  | 125.969321927281 | 121.468398802591 | 122.428943658306 | 130.4631522533   |
|        | 140.379874810685 | 143.982561564661 | 120.964862799634 | 170.12010526854  |
|        | 126.991140761102 | 122.305514440939 | 148.739888930189 | 124.777895136212 |
| PAQR7  | 337.077153882632 | 393.375554593484 | 332.400086578723 | 383.10686624119  |
|        | 1182.50261323518 | 620.163512570453 | 740.527607312565 | 476.782624160552 |
|        | 1056.43975075255 | 274.534901548678 | 1233.27155759407 | 309.229066204308 |
| PAQR8  | 464.196512015649 | 521.512936372701 | 519.112018353676 | 382.744523022686 |
|        | 503.967725251906 | 297.285037835812 | 308.803322140241 | 371.457568934695 |
|        | 434.073729807058 | 196.014841240142 | 1908.81864728547 | 271.430915699592 |
| PAQR9  | 111.188410935711 | 109.728809191027 | 116.70650322987  | 105.348008821162 |
|        | 115.582048644075 | 115.217608555334 | 113.549098821204 | 109.924867620862 |
|        | 110.368392735494 | 117.829228895897 | 110.952108124186 | 116.566190779365 |
| PAR1   | 143.799113486767 | 147.740657356905 | 153.457715729768 | 147.684875777977 |
|        | 153.589626253969 | 153.412469512967 | 141.099781722697 | 131.915864620669 |
|        | 151.961811748754 | 148.195611015135 | 148.632332840817 | 151.226242696197 |
| PAR4   | 120.735176435195 | 121.730973193225 | 135.918590725404 | 128.779829252045 |
|        | 127.242627779136 | 124.625603721372 | 121.893446546512 | 124.370381674692 |
|        | 122.953869661977 | 127.964855970099 | 143.628147237159 | 136.754116864655 |
| PAR5   | 155.686889874806 | 148.888698484378 | 179.421854100287 | 149.714982846365 |
|        | 146.533374238616 | 138.466136108202 | 153.846723846716 | 142.589312139207 |
|        | 148.340380102097 | 145.892876412762 | 159.784369379077 | 132.365002835934 |
| PARD3  | 155.343619434375 | 158.135321157995 | 150.503278880269 | 169.293852989203 |
|        | 194.753955100069 | 139.459975305985 | 153.217287503221 | 129.116354997747 |
|        | 122.708102546276 | 124.033766796333 | 179.109090120497 | 139.195281937545 |
| PARD3B | 132.233396667074 | 139.429008129291 | 144.258128917228 |                  |
|        | 160.117742879282 | 136.366798516444 | 146.975258859244 | 150.956247643013 |
|        | 139.750281709938 | 135.345616014558 | 134.436423298225 | 129.16337177104  |
|        | 149.622695843398 |                  |                  |                  |
| PARD6A | 185.896304740844 | 206.585387130993 | 205.428900832926 |                  |
|        | 242.471259857978 | 337.077153882632 | 235.133284525241 | 195.608619642038 |
|        | 213.531307836195 | 171.835438335216 | 129.984214994811 | 183.613051401168 |
|        | 190.682392100564 |                  |                  |                  |
| PARD6B | 154.379788206936 | 161.456727894848 | 148.951632781748 |                  |
|        | 138.829793136954 | 161.922462797736 | 181.036375971015 | 190.111477641308 |
|        | 145.286983999628 | 161.299920355406 | 174.898012759712 | 161.094103878416 |
|        | 141.13343407335  |                  |                  |                  |
| PARD6G | 166.388683552371 | 189.450316943845 | 170.01557699913  |                  |
|        | 166.20327698517  | 284.438411011954 | 294.808980631295 | 265.829122816166 |
|        | 296.290104133844 | 239.941641600769 | 369.974231530826 | 366.408565514304 |
|        | 273.369722814068 |                  |                  |                  |
| PARG   | 148.388093331273 | 144.916193282062 | 149.722442994599 | 149.127963327999 |
|        | 150.029313080668 | 153.964765831852 | 177.001637712889 | 151.079500558067 |
|        | 159.102070980047 | 154.681604647652 | 154.197254746757 | 149.019120812629 |
| PARK2  | 138.924820359912 | 133.509538648848 | 159.572851489665 | 135.778099658349 |
|        | 117.119533897652 | 132.083532534267 | 139.693261291326 | 121.898921780569 |
|        | 129.294026995663 | 136.440671408022 | 132.146027935802 | 130.309092946921 |
| PARK7  | 3671.86460903374 | 3447.19587767281 | 3994.64569045702 | 3468.14455177277 |
|        | 2763.86550710042 | 4711.21389812942 | 3648.38765465889 | 3598.30438198858 |
|        | 3384.19521857242 | 2446.31228564539 | 2563.02488807613 | 4016.35381420598 |

PARL 1200.03423010236 1251.56853099362 1421.72388964898 1303.94157493616  
1105.80735904293 1032.11574332305 1105.80735904293 1000.05896885496  
1084.10984365393 825.345092964844 882.798927428142 1329.3013039618  
PARM1 2770.7811954029 2479.34567973462 3241.23835624706 2009.21931102311  
312.177191402945 316.895545640437 397.153801851621 967.797017108447  
1206.09815575399 209.023926358109 700.601917911532 214.261611197599  
PARN 474.14051635531 493.622989939072 490.464012303239 664.343553341563  
530.969825236996 374.406855727422 510.811470658575 465.29290512169  
364.895113721763 541.896444696137 404.95944990868 340.028737478082  
PARP1 2104.59597571915 2403.42261883515 2313.56743052616 3008.43964505208  
2010.57142784228 2385.5958396359 1399.41653736746 1400.81554054664  
1894.14699530855 1207.11788506001 1213.06007305892 1897.92061704124  
PARP10 266.964673763497 221.685824197352 160.791355483048  
198.205113187281 443.259619455624 181.976252906929 281.071129128589  
305.200911653347 375.767528676937 215.866644799363 357.835334661098  
258.311739685895  
PARP11 152.148784410501 145.468654174037 141.963297887448  
139.308325848216 135.504526903482 132.836513637574 127.016845640004  
128.280225530201 167.226663395855 143.934585983797 179.400220328552  
152.146033353926  
PARP12 551.622587349813 375.539588956213 320.024259346646  
384.464383569801 512.895335481876 272.314332734711 462.553267274302  
410.954095610904 494.347792360629 474.917507160629 434.073729807058  
524.392279804734  
PARP14 601.401329244185 352.562711030848 302.462763120177  
326.325210657599 257.100909006193 428.782703561238 733.49038042129  
616.339439383796 958.63560158343 428.09583118349 831.610501402173  
732.877169346979  
PARP15 122.431337063053 125.215194276842 120.901639342731  
119.594962686756 116.155949676272 110.794219964997 125.390139830237  
129.150574563997 137.52653395793 131.117294275244 138.537763477627  
119.75069850668  
PARP16 234.322989368622 218.393783552484 234.214191437687  
253.218123990428 186.296882059398 178.416969664816 206.113290588613  
159.099495828517 171.714973501563 161.640122360448 203.071186284148  
203.563098303937  
PARP2 287.334035234496 248.927790738447 300.937118739654 296.141012087256  
246.492735271771 198.066837203458 211.766884719761 269.072221443403  
206.186324475847 267.149525812834 261.366143735074 254.188830191845  
PARP3 287.374706071354 317.206754773681 374.106258053201 360.852730026133  
507.827473844576 265.174306663185 336.70893120135 269.053237303244  
345.649572073924 329.722135361491 593.320132696649 496.218605366298  
PARP4 923.130629121442 827.400420888645 1137.42879398351 782.746481112316  
1184.88559645917 2195.41077320434 1767.70023790753 1996.65760745757  
1756.88092410303 1133.22524345111 3052.86038628748 3592.7878705048  
PARP6 232.918330930051 235.530986541549 239.31180635241 247.971366020963  
174.068974937318 211.395593720534 193.008902902654 182.028675726969  
152.51547053919 204.584643964409 205.871133967588 227.774354299962  
PARP8 248.927790738447 240.07282016658 355.048838683854 286.642323413104  
149.707357499252 150.885460975199 182.095387488796 180.761100930677  
178.707066209511 208.611557959861 163.181323768362 208.456472621593  
PARP9 402.965083947376 295.420691959792 281.618175110153 273.197814995543  
245.811312606484 348.848550937417 417.987533397449 437.770841893227  
696.650617523899 304.237479317271 594.180861801958 389.109250187902

|       |                  |                  |                  |                  |
|-------|------------------|------------------|------------------|------------------|
| PARS2 | 165.627852733455 | 178.488874074222 | 162.642344529383 | 170.992074907355 |
|       | 222.8766610624   | 165.467462247066 | 198.760049629983 | 178.636555178682 |
|       | 173.532300173223 | 168.702991603656 | 174.761105961773 | 166.47851613068  |
| PART1 | 153.426409060413 | 165.085010975035 | 158.882535865069 | 161.678137139371 |
|       | 135.964630862223 | 139.476234663488 | 138.038446102921 | 128.26957712082  |
|       | 131.613738869093 | 141.308299074832 | 144.905870145004 | 137.884051774657 |
| PARVA | 919.626220838414 | 774.997895985917 | 1096.10636044885 | 969.811933814244 |
|       | 196.615914367563 | 253.495214569632 | 171.954184094677 | 224.528190554963 |
|       | 246.850599569231 | 373.033658917608 | 221.027562527572 | 196.310746973798 |
| PARVB | 241.557810100265 | 233.975864722289 | 196.777776509371 | 322.837446618323 |
|       | 177.457362387052 | 174.941551089279 | 151.889644436875 | 161.548130965486 |
|       | 170.684848540493 | 195.84531580224  | 173.088291472857 | 181.876635968785 |
| PARVG | 155.83143112621  | 140.622130978368 | 121.553107861517 | 133.083877012766 |
|       | 128.482976013813 | 119.305917403956 | 119.806933383138 | 168.183542846746 |
|       | 217.910445051307 | 133.357385559881 | 159.207567680134 | 135.607537832704 |
| PASD1 | 148.816369706133 | 147.919058170753 | 137.195906276069 | 146.875733210901 |
|       | 172.591885279428 | 144.046646189442 | 152.42111372681  | 147.433388299999 |
|       | 148.347642424885 | 154.347332766547 | 135.93352186143  | 155.728609337723 |
| PASK  | 149.153827025981 | 158.602687876661 | 164.098880989592 | 185.342353172151 |
|       | 193.336246844237 | 207.036293322882 | 187.93380542729  | 197.262062021667 |
|       | 242.5085895186   | 185.46843333826  | 176.547853494057 | 187.529556428609 |
| PATE1 | 159.41705570719  | 154.113228966411 | 134.307336063739 | 148.490236128772 |
|       | 141.985130140173 | 141.275667354541 | 136.111569529393 | 156.381599544223 |
|       | 140.121874960672 | 141.449119281888 | 155.828962183804 | 140.583804906052 |
| PATE2 | 397.387054218873 | 510.226374558703 | 345.565843875296 | 411.451612988791 |
|       | 210.14307111352  | 493.492348317616 | 315.47473326786  | 343.121661664987 |
|       | 280.531844086775 | 263.568160216149 | 478.909308632726 | 331.523536427527 |
| PATE3 | 152.353494489233 | 169.744100665038 | 164.442400539653 | 143.745594527046 |
|       | 152.274957846518 | 187.389039221193 | 201.731223995887 | 175.469375624274 |
|       | 164.880911221767 | 216.705908017858 | 166.320461361356 | 217.86728342043  |
| PATL1 | 544.222458349696 | 560.913732951675 | 556.568221094639 | 512.541205235935 |
|       | 439.023181761356 | 732.352357321273 | 854.815394943219 | 609.100385482325 |
|       | 845.646455991008 | 720.710754387733 | 861.786094902013 | 856.424155671931 |
| PATL2 | 144.277263594387 | 144.623222072851 | 139.331046480528 | 149.320667417893 |
|       | 147.772490977392 | 144.12472003202  | 144.339819009283 | 157.096799934494 |
|       | 156.194996994993 | 136.893392154262 | 152.331011756244 | 141.202092246048 |
| PATZ1 | 135.766466392056 | 133.382099379709 | 153.524100996368 | 149.343930487315 |
|       | 189.662974464847 | 158.130933580414 | 154.894196413558 | 154.768422926874 |
|       | 145.496033735748 | 136.124385992905 | 161.525131363333 | 155.228605554943 |
| PAWR  | 230.227432807772 | 194.388383297922 | 225.75155298452  | 226.989201461085 |
|       | 349.128741707506 | 248.850686917567 | 292.746711619565 | 527.498114662967 |
|       | 239.148333781084 | 357.063270015318 | 188.013181859196 | 253.601378730911 |
| PAX1  | 115.137475087954 | 124.833659452957 | 121.888886996534 | 118.461037435114 |
|       | 118.945264994404 | 124.053190169486 | 128.030938693369 | 114.048136176142 |
|       | 122.238996815745 | 127.473812381059 | 152.129092774005 | 132.762755202326 |
| PAX2  | 127.330523871944 | 125.563646710294 | 126.049905221996 | 127.715766031466 |
|       | 122.759905480504 | 123.198873421356 | 123.777133327569 | 123.453048609213 |
|       | 119.915330116696 | 132.387242907281 | 138.798959235723 | 127.284885819903 |
| PAX3  | 119.463337435512 | 115.305518560239 | 124.964977322158 | 126.877293296185 |
|       | 126.609398779757 | 119.472410874778 | 124.777895136212 | 118.909153405102 |
|       | 119.480037559953 | 128.140333650496 | 134.788450164055 | 125.386545354096 |
| PAX4  | 117.546508214236 | 114.841964705981 | 119.198789189881 | 112.565341690522 |
|       | 118.838332117453 | 119.119693776276 | 113.222264855561 | 118.988269692812 |
|       | 123.24533179875  | 118.289405191861 | 139.739448838436 | 109.91537150286  |



|        |                  |                  |                  |                  |
|--------|------------------|------------------|------------------|------------------|
| PAX5   | 121.957155610892 | 109.209241676429 | 106.982655360194 | 117.131720092783 |
|        | 108.655415285806 | 106.551076380988 | 114.161540771427 | 122.018200592563 |
|        | 107.260023460914 | 109.635825046436 | 112.629266772219 | 109.770126492743 |
| PAX6   | 139.086498524774 | 126.66432941518  | 140.74208906156  | 128.060612106762 |
|        | 147.991572632747 | 143.365976841902 | 148.038291195414 | 126.515480612924 |
|        | 130.712515995658 | 150.442821494908 | 147.082068348591 | 125.822346524903 |
| PAX7   | 114.378420394004 | 140.110258415883 | 143.444109491884 | 143.73525260312  |
|        | 134.4811029314   | 133.040952285855 | 149.952762225731 | 128.957236136715 |
|        | 135.596007994731 | 150.188128594079 | 158.06915048955  | 141.37694311902  |
| PAX8   | 125.642282323003 | 127.771225410866 | 129.854478528455 | 132.972698450394 |
|        | 123.051777473512 | 125.765399556488 | 124.491884305455 | 132.461730873857 |
|        | 130.509415570889 | 120.887938517877 | 142.261639670072 | 203.586310608403 |
| PAX9   | 133.074027423549 | 126.499257771192 | 133.611588728019 | 125.386545354096 |
|        | 140.336479395866 | 134.750046135498 | 134.968848574511 | 167.430767074847 |
|        | 127.287538993899 | 158.882535865069 | 164.103306492559 | 134.122776198036 |
| PAXIP1 | 255.74096237558  | 246.428746807313 | 313.412131722189 |                  |
|        | 220.959843573708 | 334.316711893654 | 383.626469817252 | 382.401290201025 |
|        | 506.562512021352 | 376.124744806171 | 340.239348689005 | 293.794745907663 |
|        | 505.83860711693  |                  |                  |                  |
| PBEF1  | 141.064086298948 | 165.411052799773 | 162.834961996238 | 162.565576110247 |
|        | 147.93442757931  | 148.541832125061 | 151.885992695789 | 152.68344738009  |
|        | 158.179586948369 | 141.216869032251 | 137.823152565933 | 136.404742774017 |
| PBK    | 123.375592272781 | 110.014935095391 | 109.506450285923 | 116.621735695217 |
|        | 279.969975697164 | 315.014639682046 | 203.370353613423 | 209.74583569369  |
|        | 281.341452463344 | 248.594000664466 | 174.909258852845 | 339.98018551524  |
| PBLD   | 130.770335966929 | 144.273011517032 | 148.100508271232 | 130.792692240592 |
|        | 128.5581535393   | 131.750053934548 | 134.860896462638 | 141.450800126786 |
|        | 144.715167331434 | 126.580227722115 | 148.275939659102 | 143.074187168031 |
| PBOV1  | 142.703116372162 | 141.236939351298 | 136.037555727438 | 141.246352591355 |
|        | 139.703304553486 | 142.95001632948  | 141.636604735133 | 136.916286605302 |
|        | 129.3513576591   | 146.654925456132 | 138.4303531022   | 136.244995503799 |
| PBRM1  | 173.056715623574 | 157.280532261425 | 180.941090529551 | 158.767439363085 |
|        | 191.861598059182 | 197.740912476527 | 197.699100346967 | 187.196424491482 |
|        | 193.98814423456  | 213.484986945295 | 196.880135762817 | 204.35801867216  |
| PBX1   | 411.505580458401 | 471.720496000839 | 336.380724981693 | 616.339439383796 |
|        | 426.548994267836 | 181.898985277176 | 201.059635671301 | 162.595632367022 |
|        | 177.123497519231 | 151.113342302947 | 252.810636571566 | 230.161369375718 |
| PBX2   | 450.851711160136 | 579.318912497928 | 392.004079531068 | 719.628501451187 |
|        | 259.025042304848 | 242.5085895186   | 402.564148020948 | 253.538171006307 |
|        | 258.998065427002 | 272.712242893937 | 694.288215755716 | 427.452114719877 |
| PBX3   | 1871.91894530722 | 1442.11349373764 | 1881.90353127141 | 1827.03179366146 |
|        | 270.973600107882 | 336.70893120135  | 357.928880740814 | 479.138177792954 |
|        | 546.274050902567 | 774.774214696342 | 292.640251411131 | 429.268202514543 |
| PBX4   | 172.677083810424 | 165.277935422113 | 156.68541512214  | 154.856345114916 |
|        | 225.664432111551 | 298.776176246196 | 257.372740535895 | 346.566241319814 |
|        | 200.322334039458 | 153.072429774613 | 187.472028627511 | 201.059635671301 |
| PBXIP1 | 292.60467054075  | 335.389274425025 | 313.641656294638 |                  |
|        | 371.369895979832 | 168.657830209313 | 143.071933285651 | 169.999692055871 |
|        | 176.176392369178 | 142.728311130348 | 140.572442284673 | 321.524921332256 |
|        | 140.770705453805 |                  |                  |                  |
| PC     | 147.70836747108  | 137.15288362126  | 148.723165059122 | 152.435416154284 |
|        | 213.791379190359 | 165.74458564887  | 160.399059317919 | 136.040524807653 |
|        | 146.550421651378 | 149.350630572336 | 134.294287947795 | 138.56812029378  |

|         |                  |                  |                  |                  |
|---------|------------------|------------------|------------------|------------------|
| PCA3    | 111.765812595638 | 102.094370876743 | 120.447140228396 | 122.373400988227 |
|         | 129.203236898198 | 113.315182274675 | 139.383528389668 | 106.876902604214 |
|         | 110.437728036347 | 110.273174147374 | 108.768730405582 | 127.646032547296 |
| PCAF    | 157.792868983503 | 155.104697146664 | 147.93088503956  | 128.085732447084 |
|         | 144.36575644625  | 140.541925660368 | 144.863617174741 | 140.668597897404 |
|         | 146.9554120076   | 146.694318629238 | 156.4687904356   | 136.126542897364 |
| PCBD1   | 435.037306125887 | 443.623904480087 | 621.173315178959 | 510.811470658575 |
|         | 566.228690652783 | 430.412897698085 | 783.373390305885 | 774.442392607873 |
|         | 496.991561192565 | 264.054997398621 | 676.293399523316 | 935.784743413185 |
| PCBD2   | 163.081050585097 | 175.752091217351 | 216.506914782226 | 182.009471368798 |
|         | 144.511488474344 | 155.815785551964 | 139.609751976657 | 171.487594589922 |
|         | 144.587253120884 | 161.39222145523  | 176.029791617989 | 148.530422089937 |
| PCBP1   | 4857.3155917904  | 4749.69040198959 | 6138.10904830456 | 4417.98524179686 |
|         | 14228.7550296952 | 5455.91604383389 | 4404.79209330918 | 5361.3600315322  |
|         | 5714.36902486392 | 6028.67062754577 | 5912.48904507462 | 4465.66734676111 |
| PCBP2   | 2615.07927836881 | 2406.67187918735 | 2779.89882032092 | 1923.19560386389 |
|         | 3518.84173951107 | 2032.50052162637 | 2330.60389526686 | 2010.57142784228 |
|         | 2586.87941889443 | 2080.47567326037 | 2291.40912229281 | 2089.82894186824 |
| PCBP3   | 138.959040014432 | 162.327039624723 | 132.395993254065 | 141.825162897153 |
|         | 128.65678873939  | 144.542320520523 | 152.364417528975 | 146.70594914192  |
|         | 134.544368736184 | 143.502307735212 | 148.578012060425 | 132.858424396011 |
| PCBP4   | 209.662262708551 | 199.459711023907 | 171.298701141684 | 236.772907994543 |
|         | 273.984715370774 | 223.013753785002 | 165.885072907195 | 146.512045729234 |
|         | 161.241165533091 | 180.549865708041 | 212.854068610681 | 206.149539851803 |
| PCCA    | 536.46884541183  | 517.020259129974 | 687.269774217064 | 577.98969050409  |
|         | 208.555506929113 | 512.184962338131 | 560.913732951675 | 370.877260088621 |
|         | 367.732191251547 | 324.481229901658 | 698.882871686866 | 610.759447723026 |
| PCCB    | 672.13164205724  | 754.97177863997  | 1134.64039256323 | 888.706978062337 |
|         | 1104.61581891596 | 972.902937649492 | 702.779943547386 | 1320.74943817958 |
|         | 1105.80735904293 | 911.340266389071 | 1013.60354455825 | 1289.56069670699 |
| PCDH1   | 123.959050197189 | 128.359034755228 | 129.980354138975 | 123.347836436966 |
|         | 142.605816057276 | 141.162443312437 | 146.795608819024 | 130.758707848676 |
|         | 134.203949774763 | 138.661548678191 | 145.987228759402 | 138.598167973067 |
| PCDH10  | 148.212445624699 | 147.053391763304 | 152.950227635138 |                  |
|         | 144.794806650252 | 133.749271961438 | 137.954283575143 | 143.25481667885  |
|         | 150.031863363697 | 155.143752422033 | 138.576978828316 | 145.206796089128 |
|         | 153.655778377717 |                  |                  |                  |
| PCDH11X | 143.950279111815 | 144.904021527125 | 151.908841481413 |                  |
|         | 150.137061170632 | 142.311108110185 | 142.694748293332 | 150.261107471642 |
|         | 149.734395134321 | 144.942289590793 | 141.046537113211 | 134.304545258148 |
|         | 149.810655120216 |                  |                  |                  |
| PCDH11Y | 125.4408430419   | 128.56000638844  | 119.451099896048 |                  |
|         | 123.45956380046  | 119.391213033544 | 122.476178620771 | 118.900338956203 |
|         | 117.367470441908 | 121.515872228716 | 108.939608619532 | 115.25307661968  |
|         | 120.752194675024 |                  |                  |                  |
| PCDH12  | 150.198869833614 | 170.553940654493 | 136.93893152919  |                  |
|         | 147.630900093277 | 157.067264221207 | 127.642215862573 | 125.139029579691 |
|         | 133.308383825604 | 126.080780033301 | 142.968008233583 | 150.863099494798 |
|         | 121.810767302322 |                  |                  |                  |
| PCDH15  | 149.09398454596  | 147.202510900548 | 143.94902198632  |                  |
|         | 159.43317827517  | 148.11536596061  | 149.247514768446 | 167.106870400592 |
|         | 166.2468445883   | 134.947657801444 | 157.800913051929 | 150.319052894567 |
|         | 164.708712337156 |                  |                  |                  |

PCDH17 418.968095159939 779.022508413529 415.82312615045  
880.140852200235 183.152005135504 274.316982298975 152.262147284452  
203.510106134882 266.286483421453 213.301947003462 177.306794546105  
193.444080047879

PCDH18 721.11578916385 771.294254795752 831.08287594363  
842.22767901391 188.780089746036 288.261250589513 177.896726792666  
211.468099571442 211.555248754731 261.89195025254 191.310372695208  
251.011148303246

PCDH19 204.103018614608 202.193338797533 143.234195669431  
174.663845688179 128.402511355513 154.924190468067 122.54127694717  
219.49354518392 137.725329029129 125.101995710829 171.473538842796  
130.24527031028

PCDH20 183.676020826291 175.617504025145 203.298764374262  
168.560093633607 115.392989580183 130.726640485925 130.637567221512  
133.65688823581 126.832182961671 163.356993518952 111.515588041012  
123.02546895475

PCDH21 124.528206512938 126.237900397603 117.841844605128  
118.859745315302 139.727248583626 115.678486138934 124.766436060041  
128.194171809998 116.456170659686 143.464614171516 143.305848051593  
124.632373951797

PCDH24 150.072005848234 134.996443685544 132.902437860565  
135.695576019185 145.01322767825 131.410793139723 143.852657182221  
125.277752749246 138.566954604414 143.378998368344 154.166668493152  
150.924948809354

PCDH7 265.068532248682 258.311739685895 287.703569453502 273.432712475089  
136.362761829761 135.730331297139 138.976386995124 149.453103369806  
145.835240952992 191.987301954927 171.924364939807 126.741498575874

PCDH8 126.134393447943 126.536245975137 127.678512375099 131.378893655618  
126.365153497568 130.201635099678 123.735827460404 126.62990026202  
133.611588728019 128.739880189022 136.807118099948 129.956519535525

PCDH9 163.413365060063 167.325227483198 150.096558906597 166.388683552371  
133.067237748129 132.118118271944 130.10852948682 126.520909083643  
122.022611139895 130.465221782084 141.565599104245 132.423043364573

PCDHA1 133.310323593945 135.388750095746 131.72852748835  
137.460936879873 136.987403767185 130.362378233288 137.149156133537  
143.776637809106 134.167339482867 136.942583515174 134.970609100459  
133.675029107803

PCDHA10 110.875112640101 111.299115402008 103.240215392215  
110.050374895171 113.326628149066 115.00776048097 119.01990099776  
113.862790983655 111.217595631623 113.356070669308 114.768639931659  
119.375727296235

PCDHA11 154.691783046492 145.877943006533 157.494596757446  
141.657914155491 133.640832782576 145.690634269858 142.812521349963  
159.758196845781 144.336901248334 139.617608585463 147.962721373177  
137.71280215369

PCDHA12 132.908367372426 144.141837615086 140.292132023262  
131.765387886767 132.357517495246 135.221786448517 140.706490845379  
128.997028325896 134.301187092088 148.840533233712 146.056723380149  
140.191264837331

PCDHA13 122.027632589515 125.029516472944 122.412141495264  
130.336466131215 124.451718955086 122.786030993629 126.457337803727  
117.815045605383 118.866073031304 135.129656281091 124.640841120186  
139.329693510525

PCDHA2 117.728410015076 130.799009128937 140.809956497396  
129.728266017061 128.659393756477 122.223184326586 134.955823960889  
127.295532954648 120.311723366684 141.018087546273 122.99993610249  
125.920663904983  
PCDHA3 136.859366444351 129.4807689399 127.699226067847  
131.972669163481 135.952202055637 140.036463888037 130.233769058693  
130.844272373448 138.667081004369 140.701132362458 123.237851647499  
131.458411820485  
PCDHA4 109.613208767992 131.539170756533 122.292692083352  
130.749763860615 133.154004369076 138.555443236183 143.322199505844  
136.580363776109 127.171331062578 133.627389970495 141.404832197192  
119.859508630454  
PCDHA5 156.632939064629 173.050039480459 151.671024612136  
165.286724415145 162.574338133241 154.248226423862 152.447978675887  
159.554978842683 151.936543085044 152.97753810644 137.187640876289  
135.675570204709  
PCDHA6 143.105974876327 134.354215877283 141.046537113211  
127.488853386792 138.544053540799 133.685254707686 135.532820436394  
147.310807346272 133.966277922005 130.767573940356 127.471479301983  
144.769824608083  
PCDHA7 121.47058227778 124.635917999969 129.281564491007  
125.154784284706 124.982744176925 130.872296869843 123.318763391117  
123.491930765117 129.875986080057 124.408996713299 126.27024495428  
127.261349543394  
PCDHA8 113.492900106468 113.40684693417 106.829040075772  
113.636570490048 123.860747215706 105.583474813289 122.337240239463  
105.193775204124 103.240215392215 117.913545753709 114.479886899622  
115.594489123676  
PCDHA9 145.444483891989 144.28597792625 151.891318080151  
138.532916327009 139.984102798711 138.873925577739 138.775095929764  
142.553175839278 145.159572111039 156.852187451794 141.822974252935  
146.412859313751  
PCDHAC1 126.383238335161 132.74579603362 140.005968571997  
144.032779435658 142.846100831941 145.636906369786 150.45404183949  
130.726640485925 138.240874738649 134.455623159793 121.575942603856  
131.523538461751  
PCDHAC2 138.842935439006 131.999299893526 143.00521196918  
152.545261723881 135.889764019762 141.585172896047 136.297963196301  
147.491439949088 136.02474314035 139.462804363695 144.564250008106  
149.897440750742  
PCDHB1 105.010952544907 117.928456234796 115.316430915446  
114.970485002776 123.327238774943 110.190708230962 108.715328458556  
111.603221942108 108.9291713877 113.832885222354 113.756115251188  
98.6941019230576  
PCDHB10 140.244052740397 138.123754096875 141.357668647617  
140.456277147131 139.155456340488 146.072585331002 131.151578665754  
136.118702626862 136.218750083407 186.813888805838 128.568463697992  
128.244549276386  
PCDHB11 144.69686018715 141.311749168934 143.961467163406  
138.997524526643 132.486311240725 137.844113743956 134.151372457715  
135.664877050226 130.829825154842 137.198654302648 123.636735627104  
137.014698467096  
PCDHB12 150.269618125943 139.883360543042 127.56862018147  
131.198284945008 137.801899270172 124.901759819007 132.992071643179

123.93800397666 127.034985265748 279.452819132461 114.711310011993  
167.219062918573  
PCDHB13 118.139487760542 129.586337068199 120.948246352846  
121.886886059038 142.667173697017 107.655624022312 111.032156655273  
108.079149792796 110.202982683256 214.499670852615 156.904781904311  
120.800764735081  
PCDHB14 152.916493104088 156.759600627542 158.87755965229  
145.810213943313 151.151297821117 154.916023131856 145.015434711984  
146.019622621809 140.645873481353 140.201501710276 161.310855691717  
145.245316640391  
PCDHB15 143.197131668608 138.365589511693 144.654765322941  
142.796371223204 132.285835971705 152.987939791009 140.504486195539  
148.727953739127 149.182972268104 139.72868421672 146.14494790114  
141.169908353507  
PCDHB16 141.408545519654 152.99686989829 152.746799687103  
138.19108838324 142.114181233875 132.539585717666 149.416411285088  
134.00481287258 127.372242892513 171.099675679944 148.82892305156  
145.096707533824  
PCDHB17 176.371404525626 162.536009333787 153.320911882529  
169.285901212492 184.742960975938 147.098474227445 168.560093633607  
164.281196089736 165.523150623132 262.019779752857 162.294114485312  
167.92409473064  
PCDHB18 160.664407431261 171.809717138613 148.983182193411  
163.41031443893 147.738146185884 140.684066288019 153.434076291764  
149.91705328815 152.913814113632 156.228039404029 147.661748633455  
143.129945647647  
PCDHB19P 774.180202250076 684.180060287047 738.579262579782  
708.779490017407 220.578790067967 468.060528109338 362.376153348015  
384.780426529733 343.200277800027 343.571296297462 446.948699651916  
329.214958614925  
PCDHB2 154.070450565144 151.104891644466 135.59027155522  
142.282861913548 358.52459123416 130.584348445667 122.554760526767  
213.364858759772 121.260355515095 494.538861626895 143.239666389592  
134.209210120802  
PCDHB3 132.730924522748 130.266601299194 128.124456615525  
135.708804956764 131.904128832616 126.603552416008 132.524377835171  
129.813090345837 135.57577294564 136.438788088263 139.866536599877  
127.030113960477  
PCDHB4 182.181756507598 176.121563444364 164.092847913322  
150.011603347578 130.584348445667 129.980354138975 142.279695592224  
133.008120853618 139.909719416938 200.964306455257 127.070677267233  
153.709230037306  
PCDHB5 158.691830524781 154.362571105094 131.208112906919  
144.949897872252 122.587545171646 122.292692083352 115.113000553093  
120.473038066927 108.850992642446 150.812739240232 140.490023670841  
111.788481822686  
PCDHB6 153.097557560333 157.761231106669 139.476234663488  
145.768857553634 154.744065805492 154.232310911696 149.480971898888  
140.194414869595 146.923382271905 166.452651396293 140.421945574721  
160.735428753783  
PCDHB7 108.818976813708 115.863243613121 109.96017424123  
115.605206174867 110.22624111837 113.05681175258 112.502812746669  
114.498610080481 118.32560379073 118.797046082278 121.215558351076  
114.970485002776

PCDHB8 103.168665937677 115.085961282227 109.654666772771  
114.585818507336 117.724353829377 110.678680817471 109.355444907633  
115.231121959397 101.713609383766 119.911515364639 111.43827410589  
102.421174406474  
PCDHB9 587.181357555703 603.569635276204 534.608644989102  
609.939982655706 232.801257700571 772.061917233344 415.113340335205  
459.30568829087 446.393631025049 408.510567121592 693.516351173476  
413.757630469808  
PCDHGA1 124.964977322158 131.391434131813 133.92485496581  
132.566074764755 133.374199939042 124.652072110334 131.668163693171  
125.777193592751 123.474836673474 143.101750222256 122.418378964982  
144.597060118959  
PCDHGA10 139.607944722497 141.597692730835 137.767900781368  
137.966987037709 133.117701703454 141.363863974586 134.51101739494  
143.508657511633 137.68634745111 140.732618320154 157.838771553729  
141.822974252935  
PCDHGA11 116.65880728655 119.763020707899 120.031976318697  
119.466200987489 119.125002207396 121.61143371132 114.512028664352  
122.031894952046 115.180659017144 117.017844025726 132.008330288281  
121.871105084095  
PCDHGA12 157.572446865749 172.080853336015 157.891350650633  
162.945789604505 149.94715601106 159.455596750304 140.378255168229  
151.950883677297 153.494456800685 157.963634535239 142.605816057276  
154.548286860883  
PCDHGA2 116.961391747202 116.969799327195 121.919799968293  
117.883635746379 116.625518828978 119.150626141327 111.010889276873  
114.559189149447 113.636570490048 128.363331337379 116.519527499611  
111.260486045985  
PCDHGA3 131.986590029726 136.627904756283 127.274768398849  
142.495333453346 134.352155462211 135.325617701062 133.161552914595  
138.628169506372 137.22727238555 129.859331207247 132.361106053517  
138.333435927107  
PCDHGA4 121.648921929686 118.900338956203 132.661036963636  
115.384304932365 114.533677697026 130.606211166873 125.661697165943  
128.17223916536 117.017844025726 122.371715108957 108.079149792796  
120.37619371663  
PCDHGA5 155.731897985566 150.769819282075 158.295583769612  
149.086836205064 160.898061905021 149.879951192667 143.467053670148  
151.453985465369 143.287237534352 149.702048490465 148.461172387171  
143.172744119235  
PCDHGA6 125.111993560078 127.018746030517 121.497645719165  
116.421771593211 110.774802298005 107.344825308293 121.336932276232  
111.217595631623 107.67395123577 117.965208293925 105.096927149239  
108.768730405582  
PCDHGA7 127.416912237613 122.068058346443 133.032905765836  
133.284873295487 128.115993005977 127.985051303973 133.537552829999  
127.369456504277 146.242897296397 139.513752499004 128.348910964448  
130.172041917023  
PCDHGA8 147.823552813852 137.971108694323 170.661808797506  
138.9183380982 147.397591251955 134.694911833015 159.289148392284  
148.153776704837 149.416411285088 156.283332326948 118.148476979319  
154.584367902971  
PCDHGA9 135.842090777339 127.617449871137 146.164093136588  
135.771423315597 142.294922363188 139.113675690483 130.874283538818

128.947211021681 138.828562311512 134.350054065624 140.992801405088  
135.096321258167  
PCDHGB1 138.600017737884 156.68541512214 134.302726684539  
137.125637347852 159.629232808787 131.437847958077 133.056659202188  
144.201723591119 138.084801633774 151.295855278218 152.950227635138  
130.920010795017  
PCDHGB2 111.506345174435 114.161540771427 111.336798977475  
116.664031217378 119.842470751496 120.13937451914 117.30724482798  
105.900294919664 115.208555742308 116.19219007097 105.164790181452  
119.655162437465  
PCDHGB3 136.728975205893 131.961236721149 126.732121894377  
130.925881698601 133.201157825808 127.898533598679 127.718341524417  
114.325967923393 126.55925846644 136.482609639417 137.457453776513  
121.696353230886  
PCDHGB4 147.784078315091 148.941194457652 157.81327663167  
162.728630453745 153.95855605751 149.73250641246 143.0235772247  
151.841652724562 149.241358552148 143.821269460523 155.415497832382  
147.760782452857  
PCDHGB5 121.734873711651 119.436922168376 118.186426364551  
121.130837254861 115.995309578182 119.792515907708 112.41270361848  
124.69564501518 116.421771593211 114.067790137477 122.287535209629  
119.686859562393  
PCDHGB6 151.55925331302 162.013164369593 159.922627970233  
160.589575894314 172.084184539157 160.520677267863 185.602093266907  
172.091884817207 163.697117248984 186.611870261871 168.183542846746  
178.904696191996  
PCDHGB7 135.127041919869 138.771088752839 151.151297821117  
136.359189516452 139.741862925156 132.887701822875 138.771088752839  
133.829889099442 135.210887148305 147.664505309713 141.555366493541  
145.401101974736  
PCDHGB8P 136.649743237542 129.511465164539 136.364830851128  
135.583556015955 149.717739166461 133.576812299149 137.208796872026  
146.04584032214 136.48748813417 122.770033312519 126.531502877517  
146.184624424737  
PCDHGC3 150.275163835924 143.594003495859 147.463822782303  
138.119788738226 142.842130077535 142.234554325754 150.166324293431  
138.818492907643 133.104560685558 143.495590708009 146.293735120772  
138.733717670748  
PCDHGC4 148.79958121087 151.411708598688 144.678895821726  
148.147294674218 137.944260488223 148.062245676711 152.758653228708  
145.214575855337 129.666957539624 148.461172387171 134.125038192486  
139.984102798711  
PCDHGC5 142.842130077535 136.032310569127 124.210840121525  
131.239986488033 124.461997520222 124.193603137858 135.774569629738  
129.856994052591 131.369177333568 142.560797028716 129.956519535525  
134.41693612969  
PCDP1 161.790909578234 159.788143847569 156.9540270155 166.257275241937  
160.050872656883 171.304896264805 170.720018572735 140.418010366997  
154.618685493541 153.568321662387 156.050585687098 156.65842876856  
PCF11 389.381039495553 385.888395433066 405.766055310869 353.621264641814  
238.617228632505 338.026161865853 331.251075774227 382.960724128105  
323.149792143481 181.425012248539 451.317592236192 398.423396126075  
PCGEM1 130.293492553638 134.243435358729 125.199837162105  
120.501697624977 126.464893786922 134.241917425247 123.267817390796

|        |                  |                  |                  |                  |
|--------|------------------|------------------|------------------|------------------|
|        | 122.418378964982 | 131.943014970855 | 121.747622617011 | 128.194171809998 |
|        | 132.435409278702 |                  |                  |                  |
| PCGF1  | 239.079352337243 | 272.277433294605 | 233.272000923172 | 252.404931238338 |
|        | 336.70893120135  | 332.138346958671 | 322.889296658955 | 284.473085899219 |
|        | 231.372316734945 | 312.705458415152 | 281.53843450593  | 265.068532248682 |
| PCGF2  | 401.359711029934 | 465.54817048856  | 378.728516779744 | 403.657727266403 |
|        | 397.449905380349 | 421.690849282483 | 436.222568287601 | 309.229066204308 |
|        | 380.393153331219 | 264.685862877779 | 486.047284379068 | 438.870464403215 |
| PCGF3  | 169.147351642004 | 148.082026641671 | 180.63469438043  | 146.110545700163 |
|        | 153.263883774915 | 160.923897048848 | 172.667770359278 | 166.027988561421 |
|        | 153.711354087243 | 148.96493117884  | 179.57046217355  | 190.331589656379 |
| PCGF5  | 150.088034336851 | 150.204636832734 | 149.327794670124 | 135.835518477299 |
|        | 135.738699497293 | 128.858923585925 | 145.022242996923 | 135.613240463445 |
|        | 162.002221893617 | 130.166741978483 | 141.056924917269 | 140.044536042073 |
| PCGF6  | 211.208937901871 | 210.77489002666  | 258.868119227979 | 199.516043142784 |
|        | 188.079188251085 | 287.593221911064 | 223.601312199935 | 234.041863839123 |
|        | 207.173653740239 | 205.65398844108  | 189.419941381565 | 244.132645171301 |
| PCID2  | 1769.6386910047  | 1312.44215746801 | 2171.00457877604 | 1355.07170485397 |
|        | 793.071192619058 | 2355.29862638453 | 1516.97921112926 | 1958.96627327952 |
|        | 1825.10168716051 | 1288.3346537369  | 1030.56836625083 | 2508.50428529255 |
| PCIF1  | 161.393953325115 | 190.56172211779  | 163.904137395349 | 196.598810934837 |
|        | 305.200911653347 | 155.064761390765 | 148.590732065459 | 145.612695657243 |
|        | 146.910471989835 | 130.355969431473 | 155.76860362365  | 138.289361041588 |
| PCK1   | 143.452992974333 | 132.920775987309 | 137.212568398657 | 164.763269377973 |
|        | 143.941358917251 | 145.360466216324 | 147.86104992164  | 153.738794649373 |
|        | 146.050714008913 | 142.143709425075 | 124.869732867761 | 147.270369342438 |
| PCK2   | 176.198555355383 | 174.461487057542 | 160.493314658788 | 156.385100395531 |
|        | 741.255013151687 | 217.094085829328 | 285.102778078056 | 294.48534582475  |
|        | 258.109876262342 | 224.67853219142  | 257.573614085223 | 357.672950588403 |
| PCLO   | 129.888444399067 | 150.802312408483 | 132.885515958081 | 134.474466007553 |
|        | 359.024299091145 | 127.209043595332 | 128.207440197765 | 127.55397077248  |
|        | 130.005909892804 | 131.164778405297 | 133.311212623667 | 123.678365506247 |
| PCM1   | 1042.40539020413 | 1005.62130301653 | 1116.19403476786 | 878.520681466946 |
|        | 386.738154577763 | 601.640387246951 | 782.139151423572 | 577.98969050409  |
|        | 653.749043828462 | 740.527607312565 | 1058.55850972326 | 782.746481112316 |
| PCMT1  | 2748.51360874099 | 2720.83642320419 | 3177.80599774525 | 3078.76695443407 |
|        | 1267.5716872154  | 1485.776977235   | 1417.76295714364 | 1293.70593826709 |
|        | 1435.4236709581  | 1455.75693295732 | 1178.83933381069 | 1447.07989164988 |
| PCMTD1 | 1291.12004949379 | 1410.58825009446 | 1534.21175984308 |                  |
|        | 1139.14730341921 | 449.745016106912 | 556.863361789449 | 1138.44837250274 |
|        | 756.246712133116 | 1190.62010668045 | 662.213423011533 | 1197.58205444449 |
|        | 636.048536814356 |                  |                  |                  |
| PCMTD2 | 310.142754559096 | 280.749681050778 | 375.651196211048 |                  |
|        | 266.652805624826 | 319.768792196774 | 1186.23169583595 | 802.643357549193 |
|        | 373.452370692334 | 463.754869412768 | 298.706655333472 | 516.177596584059 |
|        | 474.14051635531  |                  |                  |                  |
| PCNA   | 208.406980186223 | 232.986366625889 | 212.959246855759 | 184.709768457405 |
|        | 834.537908087672 | 855.112210714686 | 383.259887828605 | 686.923164688096 |
|        | 753.654626233604 | 604.047164856689 | 469.333357789149 | 667.421612441201 |
| PCNP   | 1754.99663827472 | 1724.22121078776 | 2337.64145466514 | 1247.02514044778 |
|        | 1093.21579738952 | 1630.1630053946  | 1931.16906839143 | 1452.63736288691 |
|        | 1793.75125318113 | 1500.16816750361 | 1592.29734618345 | 1423.02563792293 |



|         |                  |                  |                  |                  |
|---------|------------------|------------------|------------------|------------------|
| PCNT    | 588.863382995875 | 558.810095726517 | 691.397238677552 | 724.607317443904 |
|         | 300.985037429772 | 592.079898463345 | 449.745016106912 | 668.570984110088 |
|         | 805.600599570258 | 526.285114043212 | 423.826189747546 | 589.070196307574 |
| PCNX    | 501.600329334497 | 513.036729214095 | 507.56875910742  | 515.729905361375 |
|         | 405.975221091252 | 302.381946749711 | 555.366765340014 | 469.540421642173 |
|         | 416.715760038095 | 502.063888359427 | 389.381039495553 | 430.649188209901 |
| PCNXL2  | 161.525131363333 | 169.012926546641 | 153.738794649373 |                  |
|         | 161.241165533091 | 140.167274633872 | 144.998415908498 | 138.301397056664 |
|         | 158.455783755247 | 147.454902803231 | 193.569894919176 | 153.846723846716 |
|         | 168.223865801948 |                  |                  |                  |
| PCNXL3  | 277.501071684448 | 385.238961394234 | 250.376178742476 |                  |
|         | 434.176007498693 | 1206.59866455529 | 390.809169896009 | 302.945860276233 |
|         | 308.031816782343 | 274.736124442229 | 298.827660296715 | 373.361263985383 |
|         | 347.3483417873   |                  |                  |                  |
| PCOLCE  | 801.52891824571  | 567.465201338735 | 409.691865300362 |                  |
|         | 889.054356462993 | 273.911741951291 | 201.105520537151 | 219.537335167901 |
|         | 253.601378730911 | 338.665115108128 | 718.670564185576 | 217.940575516933 |
|         | 251.324685584062 |                  |                  |                  |
| PCOLCE2 | 4410.68280125001 | 2244.6916226146  | 4150.8511719558  |                  |
|         | 1936.88813111969 | 174.953232190285 | 130.753266976637 | 154.236652966294 |
|         | 132.256047602234 | 143.191095552619 | 205.428900832926 | 138.011923055019 |
|         | 138.188522429661 |                  |                  |                  |
| PCOTH   | 136.993102884269 | 133.320865155329 | 139.054140295282 | 144.669509071181 |
|         | 138.829793136954 | 137.778033050658 | 127.605805815475 | 132.22974656114  |
|         | 146.069543494352 | 133.97321873161  | 147.829502959865 | 134.801507994667 |
| PCP2    | 109.574386044714 | 119.192893408873 | 116.514299377365 | 109.932577444858 |
|         | 114.85602874727  | 117.467618148107 | 134.73970457131  | 119.044902525459 |
|         | 125.908576249439 | 121.505178996279 | 131.816989019024 | 113.886420801388 |
| PCP4    | 11392.4189359453 | 9970.08052783908 | 12968.2945749    | 16328.5991894287 |
|         | 124.652072110334 | 136.028011201077 | 123.427366316096 | 117.77708734157  |
|         | 148.574661934068 | 114.226028611171 | 123.09149124559  | 133.594446233378 |
| PCP4L1  | 145.835240952992 | 129.400895994387 | 151.679534447228 |                  |
|         | 150.275163835924 | 140.671406418004 | 135.393901125889 | 223.872330412144 |
|         | 142.848438163322 | 165.048922660581 | 151.034392433934 | 181.813812621767 |
|         | 148.551340840517 |                  |                  |                  |
| PCSK1   | 129.982236484842 | 143.129945647647 | 142.621019060798 | 127.687299576139 |
|         | 127.622397233692 | 127.665162524824 | 136.739754726714 | 137.76307316083  |
|         | 137.132095345234 | 133.329392986316 | 142.558109812638 | 140.36602776806  |
| PCSK1N  | 154.607214750531 | 141.950778601653 | 151.869928694006 |                  |
|         | 176.328994356625 | 173.204163917896 | 175.9219991997   | 149.277880094957 |
|         | 154.894196413558 | 137.410687900298 | 208.067404132325 | 139.765361891899 |
|         | 171.121834829333 |                  |                  |                  |
| PCSK2   | 129.692578787988 | 124.791221329502 | 119.466200987489 | 119.360478719424 |
|         | 124.731056918418 | 116.092815232176 | 114.942849575931 | 122.476178620771 |
|         | 111.086170834553 | 111.72835538405  | 116.14662237541  | 118.636694749194 |
| PCSK4   | 152.397984799517 | 148.382228428693 | 142.843882404269 | 178.096998157452 |
|         | 148.497497694754 | 159.895303363094 | 154.750512277909 | 159.801315111886 |
|         | 135.48250324478  | 157.863585655333 | 148.684855678535 | 160.53152291979  |
| PCSK5   | 892.515788744891 | 617.474181543858 | 518.17401959981  | 547.681206272188 |
|         | 173.044636575826 | 174.832495287192 | 170.12010526854  | 187.625536724681 |
|         | 213.634295832535 | 248.403014089812 | 149.907472831817 | 157.269049853539 |
| PCSK6   | 135.43119649883  | 130.37185420347  | 132.332128706656 | 127.787016137049 |
|         | 166.341564850299 | 132.6175371563   | 128.297879410629 | 133.998381302146 |
|         | 142.142633050256 | 138.044751228397 | 140.296609941747 | 140.774304412579 |

|         |                  |                  |                  |                  |
|---------|------------------|------------------|------------------|------------------|
| PCSK7   | 413.863345223345 | 409.073045356073 | 439.852826905352 | 469.407481002198 |
|         | 601.997464467917 | 359.935451429371 | 343.946831770916 | 373.925939492544 |
|         | 400.676876982655 | 332.798130757632 | 453.17378995737  | 487.901310664037 |
| PCSK9   | 133.43362126395  | 139.986119754908 | 125.666013736767 | 133.180554954396 |
|         | 139.625635881693 | 127.249679674312 | 133.742490937191 | 133.717451195844 |
|         | 128.402511355513 | 277.501071684448 | 136.231747456996 | 124.256773437346 |
| PCTK1   | 128.504026473695 | 120.691810909148 | 134.531334130512 | 130.201635099678 |
|         | 130.898067924686 | 132.094446606227 | 128.87498876738  | 135.764392116216 |
|         | 137.976533193418 | 131.412979573687 | 129.828896822571 | 132.085538520551 |
| PCTK2   | 177.235586767256 | 165.009696356892 | 147.196687432745 | 159.331110936668 |
|         | 167.604959895451 | 161.640122360448 | 154.150568177135 | 158.292581724934 |
|         | 155.780657091484 | 166.825501664231 | 159.230636380063 | 160.186527465164 |
| PCTK3   | 127.093255830978 | 127.26820735867  | 122.662260070778 | 124.210840121525 |
|         | 166.433933349193 | 121.246967460178 | 138.295019395552 | 122.480000773859 |
|         | 138.319321806028 | 151.645636946799 | 168.166938045454 | 176.802886129341 |
| PCTP    | 182.588697551677 | 180.549865708041 | 164.274491958161 | 183.85837324585  |
|         | 237.396466740419 | 275.39986964837  | 280.414161197286 | 426.649095732979 |
|         | 343.346755862776 | 230.770036998466 | 183.879114762264 | 285.402072939954 |
| PCYOX1  | 1301.18893681695 | 1217.29687282094 | 1445.72064343302 |                  |
|         | 1132.27988339924 | 461.314247041387 | 835.284130042504 | 1047.78978081493 |
|         | 938.049312229961 | 522.77407098992  | 966.281849197568 | 794.636255515909 |
|         | 564.948126039762 |                  |                  |                  |
| PCYOX1L | 207.076364103755 | 210.666799498141 | 202.819949307954 |                  |
|         | 210.103974340881 | 214.824908522393 | 168.248982292489 | 244.162496497466 |
|         | 217.748916080172 | 190.754349388901 | 215.219246394594 | 207.940596890723 |
|         | 173.063002566542 |                  |                  |                  |
| PCYT1A  | 119.787925356307 | 133.762141373091 | 118.379914726645 |                  |
|         | 134.678445085174 | 132.820927638053 | 136.249621724093 | 135.192181609947 |
|         | 124.375348764151 | 128.486896700405 | 147.558603709566 | 160.970946091146 |
|         | 126.928328902507 |                  |                  |                  |
| PCYT1B  | 139.963969716386 | 121.926377140115 | 137.093170378295 |                  |
|         | 141.550553034455 | 125.803854387512 | 149.714982846365 | 142.37457375182  |
|         | 159.918778562802 | 137.324247703318 | 139.805930686563 | 128.102787239877 |
|         | 163.175801793143 |                  |                  |                  |
| PCYT2   | 201.383739902873 | 209.785886171295 | 246.552713031445 | 232.845268785472 |
|         | 287.889774984754 | 228.349507726225 | 330.457534783492 | 279.000687630846 |
|         | 194.014764659513 | 266.286483421453 | 230.546762514966 | 268.724338967108 |
| PDAP1   | 142.112120308118 | 134.194555223935 | 141.596078062845 | 134.27783583528  |
|         | 132.20764558027  | 140.167274633872 | 178.966169998125 | 147.955701866515 |
|         | 146.652641667543 | 127.515913913403 | 125.253637835638 | 148.04206955657  |
| PDC     | 137.950955473086 | 139.010652831798 | 140.746062850603 | 135.665577776938 |
|         | 139.418394104487 | 146.033591220134 | 136.181791404331 | 133.757741295765 |
|         | 134.606126134531 | 137.48217464385  | 138.596430973865 | 153.271518348258 |
| PDCD1   | 120.089228795888 | 111.876915242732 | 116.973126196102 | 113.125349503734 |
|         | 118.951526834915 | 118.034262386827 | 123.591078216224 | 124.602474178438 |
|         | 139.537865511933 | 114.906396746556 | 150.51056917809  | 110.113844434493 |
| PDCD10  | 227.483999162038 | 205.362816362477 | 261.671277686467 |                  |
|         | 187.700723296295 | 370.877260088621 | 401.542072222692 | 307.768302846647 |
|         | 375.316610221279 | 390.098830270926 | 519.27448770158  | 438.611973005212 |
|         | 428.850337327605 |                  |                  |                  |
| PDCD11  | 148.562200783472 | 144.425214066833 | 163.356993518952 |                  |
|         | 132.987389721592 | 143.670804863501 | 155.164238647284 | 143.239666389592 |
|         | 159.646538408414 | 157.702540365469 | 168.643026828823 | 180.814610631281 |
|         | 164.87433908877  |                  |                  |                  |

|          |                  |                  |                  |                  |
|----------|------------------|------------------|------------------|------------------|
| PDCD1LG2 | 99.0767996209245 | 105.606964521964 | 108.226917034591 |                  |
|          | 102.786517901308 | 105.164790181452 | 100.637271902591 | 109.425878885118 |
|          | 110.910693353871 | 104.633603136988 | 105.221735747452 | 107.828378413233 |
|          | 100.216750525986 |                  |                  |                  |
| PDCD2    | 309.997909440664 | 288.770330002807 | 360.361719991381 | 264.544964752932 |
|          | 526.896146537814 | 404.876478833713 | 592.387650564803 | 468.569725051459 |
|          | 521.714719320355 | 463.091387717305 | 545.362650746876 | 710.999354960979 |
| PDCD2L   | 180.578528984075 | 188.941900997781 | 189.450316943845 |                  |
|          | 197.938447651153 | 446.262895953004 | 334.857690525582 | 270.894153548841 |
|          | 357.140791982825 | 442.86942574917  | 237.601064742453 | 205.52620827767  |
|          | 245.582279957584 |                  |                  |                  |
| PDCD4    | 2819.92361643968 | 2986.6208659209  | 2277.60839052397 | 2502.72913594103 |
|          | 487.19625805337  | 1775.32632165475 | 1147.33034082693 | 1701.43479420427 |
|          | 1284.19937294949 | 1067.80176606977 | 2023.92614092273 | 1183.1601379136  |
| PDCD5    | 573.509780150018 | 551.823767223086 | 616.188923504376 | 569.47446215213  |
|          | 813.034056288861 | 1249.89496565284 | 975.315904185938 | 1107.99131702522 |
|          | 1383.68977267418 | 1251.15912264225 | 631.106334754678 | 778.28014337938  |
| PDCD6    | 1061.79595707572 | 1120.87534972745 | 1083.26599217847 | 945.403379196643 |
|          | 2748.51360874099 | 3140.51157972795 | 3504.77617298452 | 4875.22637286719 |
|          | 2684.69013589621 | 2028.67873136046 | 1830.56003081769 | 3042.88425356552 |
| PDCD6IP  | 380.754569467715 | 365.441289363381 | 435.332573825425 |                  |
|          | 321.696082249696 | 197.827534617557 | 430.94199035855  | 327.251620296271 |
|          | 344.737964092526 | 286.310923582432 | 375.316610221279 | 396.212732639272 |
|          | 351.188086838653 |                  |                  |                  |
| PDCD7    | 16642.71853486   | 17496.0674176329 | 18562.671630167  | 16974.4822983201 |
|          | 9759.87403504619 | 16642.71853486   | 11647.9643290124 | 14651.3379687477 |
|          | 16123.3486890049 | 11150.5512437377 | 6601.004284244   | 14228.7550296952 |
| PDCL     | 238.183096218311 | 224.528190554963 | 202.00431685587  | 249.263194321516 |
|          | 183.251257770829 | 207.453490385508 | 169.301498852556 | 200.443940449586 |
|          | 166.944701842349 | 285.05846406041  | 248.085349787686 | 215.506175859782 |
| PDCL2    | 128.833756478439 | 122.97487285065  | 125.141185839817 | 145.773932754923 |
|          | 119.802832736435 | 134.553754121862 | 134.712935556892 | 126.214166842097 |
|          | 129.374418059091 | 131.447941902406 | 125.435268901131 | 133.88072491369  |
| PDCL3    | 790.790236361922 | 741.689442253375 | 1415.67109281133 | 793.071192619058 |
|          | 510.555184032017 | 925.205399154409 | 594.180861801958 | 707.404709303506 |
|          | 550.671679318681 | 551.086785904249 | 558.934004505074 | 753.007562127186 |
| PDDC1    | 247.504198063293 | 252.432175363972 | 228.588693548447 | 329.263397240111 |
|          | 248.993716339029 | 191.207048581306 | 204.283030911897 | 160.43939815269  |
|          | 218.70412656621  | 222.526610842047 | 290.638110977807 | 229.017256104437 |
| PDE10A   | 148.567630572897 | 154.146962684738 | 138.370241517025 |                  |
|          | 159.832405510505 | 143.760519659724 | 150.660106369128 | 142.607578275494 |
|          | 138.223001481672 | 138.586620636835 | 140.101511236793 | 138.56436658053  |
|          | 178.304914997023 |                  |                  |                  |
| PDE11A   | 116.969799327195 | 118.764650384561 | 117.279162323013 |                  |
|          | 121.591962855513 | 117.356389952799 | 119.062611098235 | 116.889373249017 |
|          | 117.335748689217 | 116.268259618103 | 117.028963434266 | 126.980375035189 |
|          | 119.01559016005  |                  |                  |                  |
| PDE12    | 236.676029292922 | 196.638594797353 | 201.123529130035 | 201.893722965557 |
|          | 337.652945958921 | 338.739180103373 | 288.631429069336 | 231.600532144945 |
|          | 272.994195639694 | 250.911817769829 | 163.529157756197 | 316.165926273381 |
| PDE1A    | 304.479999301061 | 316.165926273381 | 307.945884504629 | 381.57978490093  |
|          | 130.985360700521 | 140.992801405088 | 123.235136639469 | 135.261561433405 |
|          | 149.661929885679 | 135.283742166077 | 142.01454627498  | 128.597272557033 |

|         |                  |                  |                  |                  |
|---------|------------------|------------------|------------------|------------------|
| PDE1B   | 235.822266856967 | 249.400820221233 | 239.050379187643 | 344.604699562938 |
|         | 162.233096422572 | 121.653754668804 | 139.535490288426 | 132.324630056168 |
|         | 129.603952706231 | 135.310766630401 | 140.768926302035 | 163.521095869383 |
| PDE1C   | 186.653791045656 | 185.027902485379 | 185.661496988658 | 194.941454173896 |
|         | 140.611071681667 | 154.340042518983 | 139.59941545613  | 157.049773524382 |
|         | 155.072752529178 | 132.186120302011 | 152.035992124554 | 154.657316209848 |
| PDE2A   | 242.410260751835 | 301.188296465202 | 220.113261580385 | 390.897464546943 |
|         | 111.62514398781  | 130.420753247797 | 112.742895297124 | 128.191959554459 |
|         | 103.448244268961 | 117.227635924674 | 123.527903217158 | 124.96926662367  |
| PDE3A   | 119.034003473459 | 119.172965618216 | 116.221426977629 | 117.523834738903 |
|         | 108.631224817901 | 109.635825046436 | 117.965208293925 | 116.456170659686 |
|         | 111.020070405368 | 116.214857935694 | 118.909153405102 | 105.096927149239 |
| PDE3B   | 234.925852373127 | 184.694741621812 | 237.078644686891 | 165.844762875582 |
|         | 139.038389244329 | 137.788504385206 | 127.159947766922 | 189.205724390913 |
|         | 153.162313098346 | 128.806964077824 | 151.364528898537 | 122.793816135585 |
| PDE4A   | 194.430896269275 | 203.389294254141 | 173.147311624838 | 184.111756696658 |
|         | 157.967824935915 | 161.581641777014 | 177.415756020166 | 173.573412346985 |
|         | 201.507971833902 | 202.927700504034 | 209.702683803624 | 177.666582096539 |
| PDE4B   | 174.332913952768 | 181.500222423634 | 157.134782748175 | 194.337080066417 |
|         | 122.297401003756 | 126.381288663037 | 132.283682066898 | 129.568951363607 |
|         | 155.91493956251  | 140.724541696229 | 136.244995503799 | 132.891375982227 |
| PDE4C   | 12283.9915232122 | 11874.9808592281 | 11741.7473778842 | 11598.65499235   |
|         | 3618.9385126441  | 13360.9483836861 | 6944.90824302953 | 11235.4970815873 |
|         | 9994.54490550759 | 6571.35528952186 | 7122.07276863122 | 8812.91092406563 |
| PDE4D   | 330.505633088656 | 292.28857006885  | 654.52788411248  | 230.91747428831  |
|         | 115.80656409185  | 190.506201184419 | 165.092451754065 | 194.029961195972 |
|         | 131.849442776642 | 161.027590226123 | 193.098116087792 | 331.888150158628 |
| PDE4DIP | 150.494260282384 | 142.807799847935 | 145.27890423835  |                  |
|         | 146.271180025157 | 141.553465481789 | 146.345451252228 | 140.182150393054 |
|         | 145.85414203374  | 138.888049140099 | 146.125125252096 | 141.59474425685  |
|         | 143.429394097222 |                  |                  |                  |
| PDE5A   | 637.30300219673  | 688.684644604218 | 474.750156829195 | 809.068563907145 |
|         | 124.889829874126 | 148.396148091332 | 135.134213292186 | 133.581450824362 |
|         | 147.312150911752 | 148.463566046951 | 133.970510683179 | 137.194467539969 |
| PDE6A   | 139.558611792069 | 138.256765189241 | 153.813202812438 | 130.630504666374 |
|         | 140.574129695953 | 138.371873773284 | 148.045391886623 | 126.100454068838 |
|         | 133.486965108303 | 136.511669406292 | 135.364039983762 | 137.808307749725 |
| PDE6B   | 137.719257499747 | 136.325517289927 | 142.195764444916 | 145.468654174037 |
|         | 136.925645302362 | 141.123272165499 | 131.85737847837  | 149.260811184287 |
|         | 144.404405100009 | 155.164238647284 | 131.185836673529 | 169.527424356913 |
| PDE6C   | 136.850940500212 | 121.410606617535 | 133.104560685558 | 147.069488043503 |
|         | 130.642810886161 | 125.313515459103 | 140.792400101142 | 131.364187047583 |
|         | 130.576944864484 | 134.838366830668 | 126.158204790885 | 156.466728833063 |
| PDE6D   | 317.493387040816 | 285.659010982301 | 315.912220767901 | 331.848516303011 |
|         | 322.506898833351 | 333.970844203158 | 381.484062427466 | 323.841518852386 |
|         | 261.500728878974 | 403.043257175264 | 395.786295710815 | 354.783364481955 |
| PDE6G   | 134.078506829054 | 136.884799902348 | 126.407313060022 | 125.800508653231 |
|         | 137.438984175012 | 134.759283147919 | 132.461730873857 | 140.129882333528 |
|         | 132.177829138863 | 146.40904127542  | 156.316333575406 | 125.243735617266 |
| PDE6H   | 119.590540166384 | 134.928967716193 | 121.877276961306 | 107.67395123577  |
|         | 133.11040099808  | 107.816312357067 | 143.390971600678 | 136.22416508552  |
|         | 117.212164526913 | 126.450300907283 | 124.028748209411 | 119.449118660481 |

|        |                  |                  |                   |                  |
|--------|------------------|------------------|-------------------|------------------|
| PDE7A  | 248.03801051527  | 229.805500520256 | 255.903775525554  | 186.089988569287 |
|        | 192.209344004015 | 342.487952136318 | 235.905788497166  | 295.851459742115 |
|        | 240.224826736571 | 212.915949933033 | 244.897869154624  | 208.793650722271 |
| PDE7B  | 784.412433571927 | 799.423640530777 | 467.777995124655  | 659.106229917309 |
|        | 313.077481033093 | 769.958422740085 | 252.222481637238  | 431.799795646414 |
|        | 257.408058436941 | 166.981212790122 | 736.963699775724  | 243.35880641566  |
| PDE8A  | 160.268754786532 | 155.575152212736 | 169.132693907633  | 141.373059612034 |
|        | 151.801558435863 | 144.667638908504 | 169.036409026328  | 151.702809524494 |
|        | 144.518132543976 | 156.519196335454 | 178.06221214103   | 149.44788347071  |
| PDE8B  | 288.68376542946  | 239.20206002     | 431.686900474971  | 274.595218795127 |
|        | 147.651620353593 | 192.680681636018 | 151.134466830828  | 152.134895623504 |
|        | 191.093283411655 | 159.085639414089 | 155.569733738768  | 158.322477506517 |
| PDE9A  | 351.515059400947 | 363.777212750779 | 479.395948662331  | 510.061974830525 |
|        | 229.542259738438 | 207.514489132778 | 150.741291526753  | 173.986750195954 |
|        | 311.806908624308 | 142.906227759701 | 261.39435936661   | 248.613373429151 |
| PDF    | 141.204458186976 | 139.324006489527 | 123.403099206878  | 130.962368929833 |
|        | 157.805871400914 | 139.505864135281 | 144.630379072598  | 139.016274575854 |
|        | 148.989286668424 | 146.31468639383  | 151.104891644466  | 153.461396593156 |
| PDGFA  | 166.64535048582  | 171.140106467064 | 175.946843919065  | 183.613051401168 |
|        | 160.411218029114 | 142.461941376108 | 151.194282143046  | 154.518641757391 |
|        | 139.932849289354 | 148.713747597311 | 150.754492902512  | 184.709768457405 |
| PDGFB  | 155.615655460277 | 165.30072618497  | 133.365793958118  | 189.758013811338 |
|        | 164.164463389212 | 153.83891040723  | 145.45768403614   | 143.403396831929 |
|        | 147.106355591496 | 155.04585737344  | 140.650987394155  | 152.654938328424 |
| PDGFC  | 441.958777965408 | 397.064325578854 | 370.066087375401  | 297.466255000163 |
|        | 157.399880496076 | 200.127994198329 | 147.510848198689  | 188.973595445056 |
|        | 188.509504845439 | 269.770777921703 | 158.6953558198    | 164.417770955805 |
| PDGFD  | 285.402072939954 | 248.690121805116 | 219.129781831192  | 181.803275243281 |
|        | 171.896929562022 | 448.260934224454 | 199.275716402358  | 224.008253365957 |
|        | 188.818012746123 | 184.306452616482 | 173.082167545676  | 184.135651836627 |
| PDGFRA | 1336.15622439522 | 1151.89087953837 | 919.165331064155  |                  |
|        | 810.769136227155 | 151.518116154483 | 544.222458349696  | 207.150354734189 |
|        | 555.758485277905 | 550.566402986082 | 277.817786943873  | 216.209052148435 |
|        | 281.238656291587 |                  |                   |                  |
| PDGFRB | 2183.18692530644 | 2723.55722258794 | 1304.37930719411  |                  |
|        | 2822.48671794913 | 417.987533397449 | 337.22646304739   | 160.839277476397 |
|        | 341.819090221654 | 657.562129888446 | 1366.06309834426  | 294.280238648737 |
|        | 257.534293550585 |                  |                   |                  |
| PDGFRL | 591.013515828247 | 407.244564912365 | 516.429067667758  |                  |
|        | 574.496860164135 | 214.499670852615 | 152.990523860831  | 208.72873686638  |
|        | 168.310680227156 | 169.36029946801  | 212.420616436137  | 151.984619204523 |
|        | 161.506431005203 |                  |                   |                  |
| PDHA1  | 984.695710317818 | 925.205399154409 | 1252.28642463619  | 1028.80076860235 |
|        | 803.133619199479 | 873.408431189194 | 763.880957432979  | 1482.15461429206 |
|        | 801.702878226247 | 1061.79595707572 | 1235.02626456572  | 1035.98574557331 |
| PDHA2  | 134.840285218383 | 134.250052775987 | 145.921381300813  | 141.5068665919   |
|        | 140.699287635171 | 142.011019998327 | 144.117964288763  | 133.177950880393 |
|        | 139.825088162247 | 134.415163103911 | 127.336648342283  | 143.325710305008 |
| PDHB   | 1810.68433539154 | 1843.76920134139 | 2198.4268389426   | 2325.02143920169 |
|        | 1121.87292339787 | 1828.66165670455 | 1788.35884039549  | 1605.2454230722  |
|        | 2505.8565544797  | 2048.13524244516 | 1436.577717111084 | 2527.99279063127 |
| PDHX   | 395.133831206474 | 343.488356185437 | 440.745866155629  | 346.862322263052 |
|        | 325.907037744936 | 285.402072939954 | 297.285037835812  | 385.050282185255 |
|        | 326.246702537465 | 386.379891865411 | 285.562276640039  | 265.260411490697 |

|        |                  |                  |                  |                  |
|--------|------------------|------------------|------------------|------------------|
| PDIA2  | 137.690514322424 | 132.575354250047 | 128.883828419932 | 123.271452939936 |
|        | 134.128061214081 | 118.666654333368 | 118.289405191861 | 130.588481497083 |
|        | 129.167602517633 | 121.519309043513 | 128.351235762192 | 128.069504716124 |
| PDIA3  | 140.05012958679  | 117.137027732123 | 124.995087711332 | 123.145830746127 |
|        | 118.863150637476 | 124.530660958725 | 129.3513576591   | 130.624702758052 |
|        | 127.699226067847 | 135.007473769551 | 137.669753723768 | 128.814967091609 |
| PDIA3P | 320.214614455231 | 250.737252834098 | 298.519371102278 |                  |
|        | 241.557810100265 | 466.909037277853 | 322.36247485445  | 687.987647193563 |
|        | 473.370240289761 | 471.816954259146 | 484.480643763982 | 518.760142491104 |
|        | 602.141151173094 |                  |                  |                  |
| PDIA4  | 181.922907273871 | 194.36669779004  | 129.489867764242 | 185.691922436569 |
|        | 764.493610798958 | 280.007569817323 | 347.411500022053 | 508.735412486964 |
|        | 282.442528230519 | 179.753400474369 | 411.221560795912 | 287.889774984754 |
| PDIA5  | 226.623172906957 | 238.375823012603 | 187.145134088286 | 273.61337724143  |
|        | 379.292531644085 | 360.991542429346 | 307.866499851733 | 418.574045635945 |
|        | 355.048838683854 | 252.365946808078 | 253.580286414227 | 232.641965649602 |
| PDIA6  | 310.917191279571 | 262.629961694573 | 368.418553384965 | 287.402339322061 |
|        | 1115.53524128833 | 755.79669622705  | 798.1490651671   | 710.999354960979 |
|        | 538.872348151809 | 665.936368667321 | 375.131728190867 | 976.782815449208 |
| PDIK1L | 173.182013165174 | 234.339913501761 | 202.314814594735 |                  |
|        | 178.563665283267 | 253.833756857339 | 486.047284379068 | 318.297819854586 |
|        | 310.989043012841 | 275.169415154893 | 176.456539071735 | 284.764628939128 |
|        | 269.379272725008 |                  |                  |                  |
| PDILT  | 117.517649866653 | 112.987890650593 | 118.064858133264 | 119.391213033544 |
|        | 128.497571151343 | 112.776764215618 | 100.746407116143 | 117.137027732123 |
|        | 109.342230674869 | 116.087696503753 | 115.427201752401 | 117.552229262461 |
| PDK1   | 139.871928127715 | 131.095431530473 | 140.644800545854 | 115.435942397626 |
|        | 126.980375035189 | 183.294526267593 | 158.975786937923 | 133.192757350144 |
|        | 137.729777643977 | 139.174188535843 | 181.425012248539 | 140.750004067571 |
| PDK2   | 201.954167006591 | 229.62164568989  | 234.947745514175 | 255.839878446312 |
|        | 193.412827246366 | 172.355215322173 | 157.919709478746 | 177.393812005949 |
|        | 156.863232221623 | 132.971844952199 | 170.298291784762 | 147.302953100995 |
| PDK3   | 146.635140441079 | 158.594064857041 | 209.623583937962 | 213.914599384797 |
|        | 461.482735533799 | 239.363511706064 | 291.167223094542 | 443.964363178742 |
|        | 209.913460781088 | 291.883157643902 | 212.050953977485 | 170.410704499804 |
| PDK4   | 636.781477235579 | 1077.95929298567 | 2321.41228376157 | 431.182384100794 |
|        | 188.0434100445   | 706.759905439674 | 229.805500520256 | 634.356322976353 |
|        | 484.480643763982 | 153.602842380788 | 171.190796424612 | 182.275998840116 |
| PDLIM1 | 727.814681346494 | 720.214044399108 | 500.643499051523 |                  |
|        | 447.579975492958 | 946.273229715791 | 1050.90881385623 | 2129.84680802619 |
|        | 902.089561157715 | 1347.10650016064 | 1123.93087912174 | 3321.1350545346  |
|        | 2159.2992548378  |                  |                  |                  |
| PDLIM2 | 116.421771593211 | 121.194138394375 | 117.682034050478 |                  |
|        | 117.178495957357 | 116.161473967382 | 114.658668711121 | 116.126923911804 |
|        | 109.182623414389 | 107.049865500702 | 118.963119420175 | 117.093818506721 |
|        | 110.325803953516 |                  |                  |                  |
| PDLIM3 | 3586.00189997341 | 2974.04694562902 | 4373.91897463938 |                  |
|        | 3930.2841381915  | 153.295838391099 | 234.814109965002 | 163.899808733609 |
|        | 218.644953001365 | 284.438411011954 | 441.578261054602 | 157.322594990954 |
|        | 168.116928722035 |                  |                  |                  |
| PDLIM4 | 179.950904921667 | 205.705962405954 | 152.710827148511 |                  |
|        | 265.068532248682 | 107.395559299582 | 96.8261937365062 | 115.907902010701 |
|        | 116.316845829267 | 101.316813921703 | 117.467618148107 | 110.624328647003 |
|        | 104.483909687253 |                  |                  |                  |

|        |                  |                  |                  |                  |
|--------|------------------|------------------|------------------|------------------|
| PDLIM5 | 335.3366819308   | 231.0814970959   | 390.194764817385 |                  |
|        | 218.644953001365 | 140.155861157819 | 236.772907994543 | 190.993590849624 |
|        | 168.04198447141  | 164.571974509529 | 216.783051958345 | 197.651165059354 |
|        | 208.045210163121 |                  |                  |                  |
| PDLIM7 | 335.623336587396 | 378.037190077449 | 347.866264631778 |                  |
|        | 662.373189001788 | 281.926552464214 | 140.101511236793 | 146.826292449698 |
|        | 151.976432805924 | 161.764411756848 | 237.961826989344 | 160.449911844008 |
|        | 168.942165573542 |                  |                  |                  |
| PDP2   | 159.765585531442 | 158.232100962615 | 173.563363508314 | 160.379168489216 |
|        | 144.6567095695   | 152.331011756244 | 152.461930328923 | 144.570725886413 |
|        | 167.532512839891 | 170.661808797506 | 152.296774123599 | 157.216793735479 |
| PDPK1  | 209.33028918341  | 206.876572583814 | 214.434355263652 | 230.332652534446 |
|        | 224.497348027469 | 198.338416756432 | 213.914599384797 | 233.635876830148 |
|        | 202.797135825668 | 215.094633380547 | 249.400820221233 | 218.70412656621  |
| PDPN   | 570.26564132238  | 504.838017072725 | 175.819983804497 | 195.256498208339 |
|        | 154.493246900289 | 242.902900881585 | 159.58125728432  | 273.61337724143  |
|        | 313.967636827811 | 666.847934976479 | 180.276082632155 | 163.926432479673 |
| P DPR  | 493.071213662125 | 501.301694626942 | 720.710754387733 | 720.077057619735 |
|        | 202.00431685587  | 336.380724981693 | 299.851173200352 | 321.696082249696 |
|        | 384.16579891756  | 318.196134631178 | 356.268960813032 | 274.179232297038 |
| PDRG1  | 254.768537214795 | 285.402072939954 | 303.300028849873 | 326.525579400607 |
|        | 353.621264641814 | 476.168679880357 | 536.805979562807 | 373.545629693667 |
|        | 445.214621023114 | 354.132752995385 | 260.356834114611 | 292.693830444839 |
| PDS5A  | 510.226374558703 | 489.260272645085 | 512.467731561858 | 403.907009699589 |
|        | 304.590636814607 | 500.246996975    | 412.582051585078 | 555.959424692051 |
|        | 494.067878734396 | 537.419316887523 | 934.173273294189 | 496.03509813734  |
| PDS5B  | 369.070376276471 | 328.730722366546 | 334.350011399462 | 293.281098275134 |
|        | 215.866644799363 | 265.61506544085  | 174.749832388791 | 192.009562635198 |
|        | 189.192494970145 | 192.827534610486 | 201.256649338315 | 254.447650810819 |
| PDSS1  | 181.022635001204 | 185.31769184805  | 238.770586150777 | 199.746775121317 |
|        | 248.761038207278 | 350.803378042804 | 225.142823691625 | 269.726397478364 |
|        | 238.847091900666 | 271.897511879509 | 194.569325586241 | 299.568830444875 |
| PDSS2  | 386.738154577763 | 414.200068430184 | 407.875393458322 | 567.715714233608 |
|        | 289.001004912528 | 331.383533814347 | 569.353661326724 | 400.550044186372 |
|        | 372.594990024312 | 394.414934831535 | 554.282040414368 | 391.782120640025 |
| PDX1   | 133.713275043978 | 131.282091618102 | 129.626276841426 | 140.85139374336  |
|        | 127.235190626458 | 164.438724387992 | 130.466571969657 | 126.917669470999 |
|        | 116.695313319162 | 137.138266859156 | 136.995866452787 | 126.890841187249 |
| PDXDC1 | 1107.99131702522 | 845.150147618462 | 1192.47480377375 |                  |
|        | 924.630951485299 | 1224.49891389348 | 1281.9073569335  | 1710.60409578293 |
|        | 1975.83062789692 | 1473.70433292382 | 933.408902924063 | 1364.83036157729 |
|        | 1408.08614963928 |                  |                  |                  |
| PDXDC2 | 207.338645756456 | 164.299585578035 | 177.598422362298 |                  |
|        | 153.070664298267 | 150.168496148941 | 197.169703621888 | 176.704617691988 |
|        | 136.942583515174 | 154.256214901103 | 153.145176413765 | 209.130260450131 |
|        | 183.033044475752 |                  |                  |                  |
| PDXK   | 697.774882173237 | 852.926365088632 | 609.309339417625 | 1021.81988990874 |
|        | 2271.82656399253 | 1383.68977267418 | 1890.86868383409 | 2544.58522979036 |
|        | 3391.3005983725  | 1297.25632532536 | 2620.17683549005 | 642.647554580301 |
| PDXP   | 455.124190541055 | 471.598175637494 | 474.378918787006 | 529.04238100948  |
|        | 1230.00744483191 | 483.699436940387 | 331.383533814347 | 444.374521095495 |
|        | 514.799179506754 | 528.478292835214 | 266.057472924341 | 336.067655676466 |

|          |                  |                  |                  |                  |
|----------|------------------|------------------|------------------|------------------|
| PDYN     | 175.476184387338 | 158.374760929273 | 143.191095552619 | 135.82038791723  |
|          | 167.139257044999 | 145.915129713165 | 146.054535585464 | 144.400004730049 |
|          | 145.824996954376 | 146.75924072364  | 141.130462286785 | 153.328585916625 |
| PDZD11   | 137.586032396204 | 134.95842832877  | 135.005591691192 |                  |
|          | 135.628982370682 | 148.232924849579 | 138.497931380734 | 132.076865522593 |
|          | 142.37457375182  | 138.002258986172 | 146.368188849777 | 150.034029031033 |
|          | 143.683545371898 |                  |                  |                  |
| PDZD2    | 149.702048490465 | 153.121693371757 | 139.256416415149 | 136.158508521357 |
|          | 118.56332995149  | 134.403789206552 | 129.368045611894 | 127.930072902878 |
|          | 124.70219935334  | 126.88066987372  | 131.519455635415 | 137.982667022604 |
| PDZD3    | 128.312170913496 | 129.743808480368 | 129.779076484273 | 157.186747372076 |
|          | 157.237147919803 | 137.914673796317 | 133.290168428696 | 221.093229309411 |
|          | 238.617228632505 | 146.413845130977 | 174.045229095003 | 147.036768856136 |
| PDZD4    | 367.327273578513 | 323.896313343796 | 305.343879847672 | 396.04031733841  |
|          | 136.03581843125  | 146.9069812014   | 149.193437559422 | 142.388076341254 |
|          | 148.525224975266 | 152.643087608513 | 136.285410546751 | 146.347213904792 |
| PDZD7    | 117.12833256636  | 112.036753245281 | 111.188410935711 | 117.051541123239 |
|          | 110.553759711075 | 114.805810485989 | 120.497796762933 | 116.609122768341 |
|          | 107.638492587723 | 114.27112025541  | 114.726808450831 | 111.584425166104 |
| PDZD8    | 194.500222559978 | 189.403934838648 | 201.152639979358 | 149.164469334038 |
|          | 199.87003105816  | 158.6953558198   | 177.223953859764 | 162.945789604505 |
|          | 182.478971050701 | 201.016287924499 | 200.127994198329 | 175.946843919065 |
| PDZK1    | 139.104095964732 | 134.838366830668 | 146.865904106038 | 136.041605158822 |
|          | 128.533900744619 | 136.03117924052  | 139.265915951162 | 146.911611554283 |
|          | 139.31967261371  | 131.672014089487 | 125.461701282922 | 133.18744841514  |
| PDZK1IP1 | 131.512174491572 | 154.212927357622 | 172.310673499572 |                  |
|          | 151.546908501054 | 134.01566484034  | 144.321757243275 | 162.478995866539 |
|          | 145.875240619257 | 369.78624104057  | 421.140525880287 | 142.648205566485 |
|          | 136.387904287903 |                  |                  |                  |
| PDZK1P1  | 130.40770745199  | 140.704317015307 | 140.53597287752  |                  |
|          | 133.080437161283 | 146.626517077288 | 135.386650538345 | 138.963864375073 |
|          | 132.839431368337 | 124.516264338772 | 140.129882333528 | 149.984657985607 |
|          | 132.135448831967 |                  |                  |                  |
| PDZK3    | 119.449118660481 | 109.46255295836  | 115.420810993676 | 118.957512510094 |
|          | 115.080736217256 | 121.297234504922 | 121.961568081299 | 125.443242860371 |
|          | 118.855500322915 | 114.143874572202 | 129.213523302268 | 114.589757401741 |
| PDZRN3   | 283.527656956105 | 248.204358220728 | 317.244256751418 |                  |
|          | 242.365480246106 | 150.048431572712 | 142.703116372162 | 132.236355533277 |
|          | 145.276745572405 | 140.52059487958  | 144.349602838518 | 129.7137422914   |
|          | 137.736771579507 |                  |                  |                  |
| PDZRN4   | 349.248144552634 | 285.798047501616 | 497.759125486158 |                  |
|          | 372.689712716797 | 152.44293820056  | 149.944351491364 | 142.187694439611 |
|          | 142.842130077535 | 141.681266095578 | 157.244026506342 | 126.916504162312 |
|          | 141.794898246882 |                  |                  |                  |
| PEA15    | 4073.21075791737 | 4061.24537355697 | 3062.22499714914 | 5825.9968524214  |
|          | 2236.73950603157 | 1883.74008471233 | 1155.4487861163  | 2187.3010896903  |
|          | 2162.46602203822 | 2523.91287654539 | 1722.26954281876 | 1536.52218968817 |
| PEAR1    | 181.036375971015 | 197.815264620906 | 144.752418965039 | 228.270158363878 |
|          | 128.739880189022 | 129.208429861964 | 120.456817031716 | 139.186416741431 |
|          | 138.45137517137  | 164.264079172779 | 159.674396591041 | 157.863585655333 |
| PEBP1    | 4323.76731419005 | 4503.01240138314 | 4103.06565237121 | 3862.57980488881 |
|          | 6877.52553567598 | 4956.21683075884 | 3301.98381607571 | 2662.43181510326 |
|          | 7601.58151657937 | 1317.1258783404  | 3608.10730106542 | 1939.1525084845  |



|        |                  |                  |                  |                  |
|--------|------------------|------------------|------------------|------------------|
| PEBP4  | 113.311132067152 | 125.315736755156 | 127.077668562103 | 116.977202125093 |
|        | 119.399971165857 | 120.193580405229 | 130.300169316346 | 123.066317285283 |
|        | 116.547306374097 | 118.731960910224 | 147.701092466105 | 122.343979874508 |
| PECAM1 | 504.9864660689   | 593.990687449346 | 444.479355480138 |                  |
|        | 621.354393918348 | 181.735072060023 | 451.496617003797 | 272.238922498583 |
|        | 492.377642058095 | 853.314313182949 | 315.306271141071 | 292.068293167526 |
|        | 240.07282016658  |                  |                  |                  |
| PECI   | 516.177596584059 | 442.334886941795 | 565.843200661721 | 451.887564294551 |
|        | 213.584269089596 | 318.971509860209 | 440.495339027491 | 241.599271777806 |
|        | 243.501083338279 | 539.27766384282  | 269.927694984528 | 252.197271817794 |
| PECR   | 207.940596890723 | 167.811412309356 | 234.28146549561  | 166.485040297098 |
|        | 140.427188241455 | 139.067516394141 | 168.790464803746 | 147.382177739631 |
|        | 312.961981998512 | 199.776140037612 | 132.645196037302 | 130.37185420347  |
| PEF1   | 598.449359425056 | 541.764013317002 | 484.480643763982 | 690.582550537485 |
|        | 599.208370337812 | 411.359106929985 | 372.689712716797 | 362.849380477089 |
|        | 314.063025950327 | 396.459213999636 | 339.448524400708 | 330.944203807675 |
| PEG10  | 212.996456841785 | 199.477350542491 | 225.61275910008  | 205.322733011516 |
|        | 136.201103852785 | 170.54511631708  | 150.122035262873 | 166.89884215297  |
|        | 133.74741832303  | 137.575688681319 | 125.345611085082 | 162.208028489943 |
| PEG3   | 887.147199303294 | 858.020739710943 | 663.451243037105 | 675.596864001032 |
|        | 161.142723532061 | 176.088449983147 | 167.811412309356 | 173.09379121032  |
|        | 213.178648382852 | 163.753434774656 | 123.777133327569 | 170.951009118578 |
| PEG3AS | 135.776154891006 | 120.773552653073 | 126.025161261042 |                  |
|        | 135.200049257744 | 119.984301761327 | 123.233267210406 | 130.751522895053 |
|        | 127.302714624905 | 121.628827418997 | 121.476730561812 | 122.749182465923 |
|        | 141.70844587896  |                  |                  |                  |
| PELI1  | 231.670761847089 | 221.82340413039  | 192.932285494022 | 199.275716402358 |
|        | 190.255797389524 | 475.927798702033 | 279.232290927348 | 333.349203784021 |
|        | 332.032371697186 | 458.782864873657 | 267.372241661758 | 259.511314588868 |
| PELI2  | 468.339735327273 | 426.032234135861 | 986.004777675332 | 428.237210115667 |
|        | 176.995049477843 | 228.414049417352 | 177.16711492983  | 170.692146255416 |
|        | 128.72727523654  | 172.46311371589  | 136.948039394935 | 143.616189776965 |
| PELI3  | 202.927700504034 | 221.796935051107 | 256.820546409632 | 303.005912224195 |
|        | 233.161848094769 | 122.955724972547 | 139.843416673512 | 128.287127680554 |
|        | 120.333487171575 | 134.968848574511 | 151.382199195953 | 123.960761343425 |
| PELO   | 924.312051919404 | 940.716682221364 | 1101.66868138797 | 1119.23362648056 |
|        | 586.246004571452 | 439.122658719747 | 695.595965352335 | 891.637685856145 |
|        | 630.176145684641 | 923.383014892221 | 414.888512708716 | 741.689442253375 |
| PELP1  | 427.345809255426 | 510.555184032017 | 390.284689962661 | 744.808064061459 |
|        | 653.264945856916 | 400.353795948162 | 300.675907594637 | 365.650071660806 |
|        | 270.490971664802 | 325.570839576032 | 285.594100976705 | 309.318403417731 |
| PEMT   | 197.775397831129 | 208.14618424983  | 188.335102005839 | 226.871028543248 |
|        | 291.313681141442 | 314.182403961681 | 206.669783013221 | 212.591357254196 |
|        | 190.255797389524 | 263.005303710717 | 234.814109965002 | 231.769926214655 |
| PENK   | 155.734509841719 | 183.447807651728 | 162.876684781936 | 194.702974020747 |
|        | 147.919058170753 | 169.975329631607 | 152.545261723881 | 156.843997723699 |
|        | 154.016622581204 | 160.932913244423 | 150.837717923505 | 155.249688219254 |
| PEPD   | 941.936830901588 | 946.640841062802 | 1025.27246494218 | 1066.25208226214 |
|        | 2086.15449885278 | 983.094485868275 | 1002.44383771056 | 797.28465621772  |
|        | 1552.69879081022 | 861.516925304722 | 700.353187874339 | 860.688314783077 |
| PER1   | 176.66175597182  | 246.533813165981 | 157.745805838008 | 180.047231265069 |
|        | 126.501648842366 | 117.408465686218 | 106.000943456483 | 112.332130647215 |
|        | 116.382348831504 | 140.837360719964 | 136.241569739318 | 124.124076599417 |

|         |                  |                  |                  |                  |
|---------|------------------|------------------|------------------|------------------|
| PER2    | 459.171226689178 | 548.686094748117 | 388.326080754063 | 559.668195903429 |
|         | 228.45211887819  | 227.177100762395 | 235.291035302211 | 216.485113690708 |
|         | 184.832531598928 | 225.890195278753 | 260.746952459282 | 286.085833802132 |
| PER3    | 441.331937921872 | 561.379619105609 | 509.400965222318 | 798.389385197471 |
|         | 192.046442148183 | 223.042575796603 | 176.587559615019 | 179.191401472241 |
|         | 176.890596690798 | 275.252966071473 | 188.033890834418 | 159.845890841215 |
| PER4    | 123.45956380046  | 110.977904932371 | 127.581332110857 | 136.826606228323 |
|         | 130.619624347751 | 124.869732867761 | 145.909456876796 | 124.811760828557 |
|         | 120.679474100322 | 131.144774362059 | 110.774802298005 | 145.122171099946 |
| PERP    | 797.28465621772  | 890.507257588957 | 1002.44383771056 | 367.382105696814 |
|         | 2217.82628612929 | 1702.68441407727 | 4811.88424516272 | 2360.87760349888 |
|         | 1683.83803339436 | 11190.1778174002 | 4491.96934862425 | 4486.35687688252 |
| PES1    | 218.334273320319 | 225.702629835215 | 271.287767448621 | 270.679613997675 |
|         | 440.203336761263 | 337.585502787016 | 293.12968694683  | 254.315783394932 |
|         | 316.955298948771 | 275.437030326768 | 311.375563161772 | 280.246711704036 |
| PET112L | 274.281532397691 | 302.408563830315 | 354.132752995385 |                  |
|         | 436.482580413523 | 178.027417594263 | 256.394563537658 | 389.686045618228 |
|         | 271.791126011275 | 332.666916002481 | 390.897464546943 | 324.79327985156  |
|         | 371.552970811499 |                  |                  |                  |
| PEX1    | 193.261343922604 | 173.035013611377 | 267.285998701386 | 178.329946332806 |
|         | 198.701991021316 | 281.926552464214 | 285.258824662946 | 279.834616502591 |
|         | 254.63506290698  | 203.004815689972 | 226.35854874278  | 236.427507270325 |
| PEX10   | 123.031945101045 | 130.814702312493 | 130.031303483631 | 126.455271988029 |
|         | 191.554396977588 | 137.901317305531 | 172.657668514226 | 143.683545371898 |
|         | 142.414323129638 | 143.140502042489 | 154.558968826495 | 136.211694310501 |
| PEX11A  | 230.332652534446 | 239.924227955313 | 226.055406842613 |                  |
|         | 219.78041403077  | 305.669636871734 | 206.098534554876 | 297.176755638159 |
|         | 353.774297577869 | 215.194909819764 | 214.175691239597 | 245.399847987183 |
|         | 177.438968923426 |                  |                  |                  |
| PEX11B  | 580.347496467173 | 622.348802511009 | 826.08372791138  |                  |
|         | 602.703887178113 | 670.097523566652 | 856.039380523678 | 917.646958427824 |
|         | 912.878077940014 | 632.278924237678 | 905.233241047678 | 1218.05434595121 |
|         | 1651.68171717875 |                  |                  |                  |
| PEX11G  | 195.160353691349 | 233.232319881243 | 261.922485502971 |                  |
|         | 269.100400678077 | 447.372026268156 | 267.589020526148 | 308.974786799114 |
|         | 292.693830444839 | 237.216435972201 | 239.050379187643 | 262.913054904154 |
|         | 311.544429285897 |                  |                  |                  |
| PEX12   | 132.865704994046 | 129.263794008537 | 131.841436867483 | 128.640202262896 |
|         | 130.344292132363 | 134.517774302213 | 128.044165393924 | 136.480458837869 |
|         | 135.484360570738 | 137.945878061978 | 141.830432745537 | 127.760995691556 |
| PEX13   | 162.689415085423 | 165.232545721733 | 144.627784383455 | 142.180927190578 |
|         | 277.285526811736 | 226.458509834965 | 229.74418058711  | 268.454310218604 |
|         | 206.571433405844 | 204.999796322451 | 183.894417745549 | 215.40037757604  |
| PEX14   | 830.684999498776 | 896.625415670455 | 604.687265229902 | 1197.00004043747 |
|         | 429.680602294138 | 241.134385745554 | 273.252023367028 | 197.12840030662  |
|         | 244.054469051058 | 225.480366837274 | 235.76573393374  | 240.341031437493 |
| PEX16   | 271.945851739635 | 267.901632267999 | 274.427235605909 | 299.935166870211 |
|         | 455.778776920897 | 320.097510212422 | 588.678767007017 | 350.58427958432  |
|         | 317.550000625189 | 406.133430120039 | 327.010503005631 | 302.847274046748 |
| PEX19   | 443.444024128516 | 435.183433729519 | 435.48544637769  | 375.651196211048 |
|         | 464.436380568216 | 741.875751347917 | 505.560841055884 | 787.425941491281 |
|         | 564.749082802433 | 403.720036930931 | 636.048536814356 | 804.800251415824 |

|        |                  |                  |                  |                  |
|--------|------------------|------------------|------------------|------------------|
| PEX26  | 144.283716416188 | 154.688685142904 | 138.117916412819 | 137.563246867433 |
|        | 152.356731704094 | 145.210787864362 | 136.841506794489 | 148.486946087388 |
|        | 137.125637347852 | 142.52234368939  | 176.420075374686 | 156.830156083795 |
| PEX3   | 117.172431931323 | 118.195512252508 | 110.735199684144 | 121.286130275542 |
|        | 118.855500322915 | 112.565341690522 | 118.355532305846 | 115.884253217495 |
|        | 105.925737068775 | 120.13937451914  | 144.898770838913 | 121.371348717752 |
| PEX5   | 1510.77099418802 | 1545.71251527145 | 1630.1630053946  | 1605.2454230722  |
|        | 1337.38160266788 | 944.47112348734  | 1158.057104827   | 1283.68791110988 |
|        | 1325.77498031227 | 970.166036472486 | 1084.10984365393 | 922.877217016704 |
| PEX5L  | 166.027988561421 | 149.927773276383 | 141.898948675823 | 146.722211039754 |
|        | 145.206796089128 | 160.211460008777 | 159.245344068037 | 148.501654210579 |
|        | 149.516743790585 | 163.331424612891 | 141.592180897595 | 173.334154083555 |
| PEX6   | 291.50783830983  | 336.434368527549 | 185.128661141884 | 425.348619281876 |
|        | 445.348044448953 | 147.340106879021 | 179.753400474369 | 301.591430919567 |
|        | 342.315456386729 | 166.376907377447 | 376.007938436483 | 259.672238210968 |
| PEX7   | 224.118739978257 | 267.451611731669 | 314.610979086485 | 269.448201975645 |
|        | 344.856199123543 | 232.918330930051 | 460.408628542721 | 351.337287690674 |
|        | 329.604568691377 | 356.921627358141 | 267.222762759781 | 424.665056900526 |
| PF4    | 146.141376139915 | 132.070137735026 | 128.753623886188 | 141.811563725942 |
|        | 133.918638123756 | 134.579005092929 | 147.433388299999 | 144.4421922847   |
|        | 121.580726825432 | 131.832311911703 | 128.069504716124 | 142.02866433901  |
| PF4V1  | 128.601885372662 | 115.778736387131 | 119.480037559953 | 118.148476979319 |
|        | 109.625579596864 | 131.613738869093 | 126.868970616955 | 113.886420801388 |
|        | 138.798959235723 | 117.104945989023 | 142.13191463827  | 133.666244052469 |
| PFAAP5 | 489.260272645085 | 402.866491417369 | 428.340060893467 |                  |
|        | 398.892968579918 | 210.5689532432   | 602.141151173094 | 527.294087043601 |
|        | 364.113665301598 | 488.884511065882 | 245.640193659159 | 647.439372562271 |
|        | 552.167699318911 |                  |                  |                  |
| PFAS   | 265.992741398183 | 274.974304050999 | 235.680462167404 | 301.591430919567 |
|        | 502.598518192729 | 299.106362530855 | 226.701637237203 | 438.611973005212 |
|        | 343.048904374136 | 284.473085899219 | 317.904396212359 | 253.833756857339 |
| PFDN1  | 490.849163737598 | 549.692164962653 | 596.246316033079 | 761.586663689579 |
|        | 359.363523948825 | 442.698000781597 | 540.797164107185 | 454.235121917464 |
|        | 380.821355948507 | 739.52947559669  | 315.411701623527 | 455.778776920897 |
| PFDN2  | 207.104548555929 | 143.546629073997 | 188.878770168595 | 197.443711199904 |
|        | 195.141733146452 | 180.902950045351 | 167.751604259111 | 158.726115143818 |
|        | 154.207656926108 | 209.596792486876 | 207.890408761692 | 204.802810257516 |
| PFDN4  | 157.878110410517 | 173.766372029062 | 139.289968250444 | 155.119146797226 |
|        | 261.775269058607 | 193.148369507405 | 250.376178742476 | 143.101750222256 |
|        | 162.827112132145 | 131.534097198718 | 173.353648927895 | 130.637567221512 |
| PFDN5  | 7902.9189607838  | 7930.82679738435 | 7371.9761952537  | 6441.13602696535 |
|        | 4548.5418978622  | 6571.35528952186 | 7190.89891723932 | 6737.97308530049 |
|        | 5702.11995823367 | 5213.40342339233 | 5410.50736002544 | 6271.34208268488 |
| PFDN6  | 359.935451429371 | 252.761035334279 | 345.686640885419 | 251.939696394174 |
|        | 406.224345292389 | 385.317560758502 | 375.651196211048 | 328.269845211173 |
|        | 318.971509860209 | 397.387054218873 | 305.669636871734 | 439.33566689752  |
| PFKFB1 | 118.863150637476 | 123.964042357475 | 121.341177395499 |                  |
|        | 127.6516565653   | 132.28010415054  | 112.922918499398 | 128.097206000942 |
|        | 125.313515459103 | 129.245448026213 | 118.04359489354  | 132.496547953595 |
|        | 133.984078167807 |                  |                  |                  |
| PFKFB2 | 161.877378749103 | 155.960886801091 | 168.73918684069  |                  |
|        | 161.569793476847 | 155.061749542085 | 159.913028912492 | 157.639688257892 |
|        | 154.291717784335 | 168.027892518772 | 175.428000742222 | 155.507030276749 |
|        | 164.748676009072 |                  |                  |                  |

|        |                  |                  |                  |                  |
|--------|------------------|------------------|------------------|------------------|
| PFKFB3 | 479.983368253935 | 538.369868115137 | 413.172954892025 |                  |
|        | 469.107624227456 | 764.774225930479 | 405.032674307193 | 989.77058497525  |
|        | 701.481003619067 | 324.713347085998 | 1152.50523614436 | 959.126054626181 |
|        | 565.97975389646  |                  |                  |                  |
| PFKFB4 | 187.280334341504 | 209.596792486876 | 171.384487293154 |                  |
|        | 201.616302398819 | 1236.56870367797 | 466.691191261997 | 1744.58410715956 |
|        | 409.592855687405 | 674.742955681908 | 2099.85702995194 | 563.779294315901 |
|        | 546.755305058958 |                  |                  |                  |
| PFKL   | 222.526610842047 | 257.989863290786 | 208.363905749882 | 254.447650810819 |
|        | 663.668537495345 | 251.324685584062 | 314.949772661046 | 289.037033338975 |
|        | 300.886032768166 | 357.672950588403 | 401.840794789616 | 306.333710880618 |
| PFKM   | 641.12919339861  | 699.06539333455  | 1031.59140059071 | 747.322544683874 |
|        | 332.885488115858 | 270.847923557176 | 347.147961254829 | 333.200230327106 |
|        | 498.180196203245 | 479.395948662331 | 228.414049417352 | 388.782774926005 |
| PFKP   | 2895.71836177599 | 2399.88695085752 | 2882.51330563735 | 3586.00189997341 |
|        | 1683.83803339436 | 713.525134497596 | 1134.64039256323 | 869.542306259337 |
|        | 465.41233536979  | 1480.52638217173 | 994.802763887989 | 1260.50387106816 |
| PFN1   | 9293.35991367953 | 11281.201625198  | 9450.52572756597 | 15809.9561036761 |
|        | 14073.4649333964 | 9219.38828280399 | 5572.23400804004 | 9671.66667662331 |
|        | 8053.22070239424 | 11017.1478502767 | 12171.1997841553 | 11190.1778174002 |
| PFN2   | 410.002817143111 | 395.716879127149 | 560.913732951675 | 344.379733302418 |
|        | 879.809795251142 | 807.92851898782  | 1132.27988339924 | 458.607367472574 |
|        | 410.845034795716 | 691.205738835917 | 1692.01248523526 | 801.52891824571  |
| PFN3   | 109.859878974527 | 111.328185454541 | 109.482330324734 | 125.063596569451 |
|        | 125.052770277549 | 119.112063328364 | 110.789450948689 | 108.683531606889 |
|        | 117.682034050478 | 108.226917034591 | 117.513523498725 | 124.646093292382 |
| PFN4   | 169.391557085902 | 166.627372924295 | 175.101284960252 | 166.850279817976 |
|        | 190.489530928259 | 155.42165869714  | 164.914114315732 | 194.092089507551 |
|        | 156.585665091824 | 171.180188911669 | 147.059096208832 | 165.2958475168   |
| PFTK1  | 224.008253365957 | 201.555964610849 | 219.564603776774 | 226.203994206714 |
|        | 133.994376985194 | 145.289151849318 | 171.85890372225  | 163.159571059471 |
|        | 169.043206258073 | 186.140970908638 | 199.70041209487  | 151.092066533546 |
| PFTK2  | 123.010614051218 | 130.01207836961  | 119.442114850181 | 121.116206210402 |
|        | 140.258615682066 | 129.594440309419 | 128.449200385351 | 124.197397333928 |
|        | 122.158160927149 | 127.336648342283 | 117.423704591303 | 122.863612588759 |
| PGA3   | 134.66169946771  | 149.166635189875 | 137.59017685842  | 149.944351491364 |
|        | 146.407692800878 | 146.728881202697 | 140.271557921345 | 141.170937695272 |
|        | 141.533138525284 | 141.437891956239 | 139.13396769999  | 142.697827839203 |
| PGA4   | 117.279162323013 | 116.342242990651 | 110.496084922302 | 114.673517800886 |
|        | 111.66210002202  | 120.665520347481 | 105.606964521964 | 115.440152891339 |
|        | 118.863150637476 | 116.134550788966 | 115.766358387923 | 109.574386044714 |
| PGA5   | 122.777544465711 | 117.178495957357 | 114.062099086818 | 117.144778357339 |
|        | 126.056493244568 | 117.958297137758 | 122.621839614189 | 121.039678049579 |
|        | 113.913337223716 | 119.854401979951 | 131.903632821793 | 118.731960910224 |
| PGAM1  | 374.406855727422 | 326.45984882427  | 625.544719251096 | 361.620362526358 |
|        | 535.861738240441 | 575.060457772307 | 1524.46745239811 | 582.062758687489 |
|        | 857.55777793754  | 1733.96382719909 | 853.535700321202 | 1660.70040058102 |
| PGAM2  | 108.167670899938 | 129.806104966617 | 119.573635447638 | 127.772258845875 |
|        | 117.639216182057 | 111.992738490468 | 116.973126196102 | 108.669141498627 |
|        | 121.107979534361 | 109.719356131043 | 123.463861015933 | 115.927914533359 |
| PGAM4  | 386.305638633172 | 381.625983354158 | 509.618968665191 | 392.430873293903 |
|        | 550.124359517322 | 474.750156829195 | 1099.80705776268 | 454.133372808458 |
|        | 660.315285709317 | 1182.50261323518 | 801.52891824571  | 1117.77397620221 |

|         |                  |                  |                  |                  |
|---------|------------------|------------------|------------------|------------------|
| PGAM5   | 163.97516075705  | 157.575902297677 | 176.714471790643 | 174.229093061024 |
|         | 232.083160165968 | 192.580288063603 | 197.298982267459 | 189.419941381565 |
|         | 222.332748220525 | 259.472319994929 | 164.865846124876 | 198.815448428294 |
| PGAP1   | 201.349209185128 | 170.154539416255 | 195.364709354814 | 184.900027626401 |
|         | 150.922279808832 | 233.997642139328 | 208.016730103629 | 215.607567127195 |
|         | 166.223079895236 | 200.146843808423 | 266.964673763497 | 184.518666956721 |
| PGAP3   | 358.843277491684 | 433.82566459288  | 332.885488115858 | 537.06835963726  |
|         | 755.42757464615  | 497.110852407681 | 617.474181543858 | 2601.89405525276 |
|         | 586.246004571452 | 383.10686624119  | 505.143815448613 | 523.306451464643 |
| PGBD1   | 197.762169504041 | 173.315097944835 | 170.179304745674 | 190.018871923219 |
|         | 152.488480322526 | 174.332913952768 | 157.675974692761 | 127.816596414779 |
|         | 145.463105638655 | 165.491193869938 | 130.226993687215 | 137.908991199407 |
| PGBD2   | 154.096542063701 | 165.781667492391 | 182.397795261147 | 157.692519370734 |
|         | 165.890492422031 | 203.004815689972 | 205.244843885276 | 254.552034511333 |
|         | 171.042491047256 | 179.525651423361 | 184.473198008234 | 194.413759761549 |
| PGBD3   | 166.850279817976 | 159.68134949161  | 153.920180168328 | 130.661695937728 |
|         | 170.4583554058   | 170.223509007961 | 165.307808075027 | 150.623182458747 |
|         | 153.481752643937 | 169.022351348819 | 179.241385747152 | 159.097020087275 |
| PGBD4   | 137.445344116574 | 129.501028506432 | 143.501380161409 | 140.423711213355 |
|         | 126.693235227579 | 128.756818133357 | 147.309245779031 | 141.218832234405 |
|         | 129.289216846128 | 141.703410265546 | 158.937341335707 | 140.701132362458 |
| PGBD5   | 122.053867525393 | 117.930665298163 | 118.161192318422 | 114.512028664352 |
|         | 173.959556466614 | 122.917915232153 | 147.479390172796 | 110.355493122568 |
|         | 132.692027897739 | 131.516100334597 | 123.21112178671  | 115.664551127497 |
| PGC     | 153.154592981962 | 135.15791174418  | 156.411563412665 | 150.592269931732 |
|         | 147.585987099202 | 156.994265858123 | 149.783542909965 | 140.968351978909 |
|         | 154.947359473187 | 139.987681290389 | 131.732416355002 | 158.517778100137 |
| PGCP    | 973.543357809971 | 748.015452242839 | 810.396770151757 | 633.594811068524 |
|         | 213.556015518863 | 295.047418816148 | 451.718912714608 | 265.572253407219 |
|         | 259.767151797583 | 218.70412656621  | 345.627266482686 | 294.997671630798 |
| PGD     | 382.485769373364 | 414.596948083067 | 427.98782239715  | 483.699436940387 |
|         | 4628.04544865227 | 1687.06111969368 | 1107.29687889378 | 2120.14463347544 |
|         | 1526.66232186013 | 926.670867201327 | 679.557656724243 | 727.425595270342 |
| PGF     | 157.960172706254 | 204.438365139666 | 157.78390301218  | 201.152639979358 |
|         | 242.81187187788  | 161.655336107432 | 226.796825544749 | 148.691132137188 |
|         | 183.64389891975  | 531.555532787504 | 174.593548891693 | 204.787016443123 |
| PGGT1B  | 139.999298193212 | 133.220878146063 | 141.474583706011 |                  |
|         | 126.724973604103 | 132.665590728755 | 137.462720784077 | 149.260811184287 |
|         | 148.390417679848 | 147.439303942026 | 182.68965110437  | 176.062665550409 |
|         | 152.470980074365 |                  |                  |                  |
| PGK1    | 1184.3199328099  | 1089.16489859253 | 1507.39761667421 | 1091.69584249713 |
|         | 1478.09582385838 | 2733.68308784024 | 2580.98143004019 | 1889.05071563459 |
|         | 2426.2098937241  | 5106.27623905309 | 2482.27419621925 | 3241.23835624706 |
| PGK2    | 130.156775178934 | 140.35175858015  | 135.688346453694 | 134.46179453106  |
|         | 127.484178603011 | 129.340996658802 | 126.578035793406 | 134.599629045981 |
|         | 134.919972250554 | 126.718380351644 | 118.703108284564 | 127.104097294238 |
| PGLS    | 472.279492678374 | 649.438995824208 | 421.836020491624 | 614.239716118509 |
|         | 1797.65684760558 | 772.776364492813 | 1227.94401191112 | 745.844395215451 |
|         | 566.417354841707 | 826.771587455122 | 1155.4487861163  | 798.758496171493 |
| PGLYRP1 | 126.553693803748 | 123.207402172696 | 119.866898356501 |                  |
|         | 122.176811388389 | 119.586157804692 | 131.568898109933 | 130.501010489883 |
|         | 115.310953814885 | 119.285026330891 | 130.819298796501 | 126.349403754775 |
|         | 123.156154667242 |                  |                  |                  |

|         |                  |                  |                  |                  |
|---------|------------------|------------------|------------------|------------------|
| PGLYRP2 | 139.641688273911 | 136.70715656782  | 129.369968549738 |                  |
|         | 134.064206964444 | 129.782134019986 | 127.422129210789 | 138.728765780512 |
|         | 127.480717762966 | 132.247611790269 | 126.089217853289 | 132.119370332298 |
|         | 133.374199939042 |                  |                  |                  |
| PGLYRP3 | 156.594337089784 | 144.436358527414 | 160.127254444487 |                  |
|         | 151.330035086652 | 137.165966740473 | 140.736051985112 | 142.009798151592 |
|         | 152.877058628512 | 133.760183242137 | 152.974593669153 | 144.585120811896 |
|         | 149.597396040729 |                  |                  |                  |
| PGLYRP4 | 130.854818615966 | 125.313515459103 | 127.183924911179 |                  |
|         | 122.00079209554  | 137.973211667003 | 124.028748209411 | 114.91722828113  |
|         | 118.410091682499 | 120.316950428535 | 133.802898895457 | 136.701400398129 |
|         | 122.418378964982 |                  |                  |                  |
| PGM1    | 1491.05501052706 | 1467.50846948144 | 2086.15449885278 | 1659.80909859514 |
|         | 1262.96801072965 | 666.204695328096 | 1379.26881813339 | 872.512754090023 |
|         | 487.696347726467 | 2291.40912229281 | 671.387334588652 | 1114.85422895959 |
| PGM2    | 201.123529130035 | 236.855293143293 | 218.000351930307 | 175.7330682766   |
|         | 613.846166856328 | 985.637230639964 | 650.0804221227   | 682.730262408017 |
|         | 1162.09529660662 | 965.673699120049 | 462.686385881492 | 519.940347384877 |
| PGM2L1  | 371.280926727395 | 352.180110869664 | 363.777212750779 |                  |
|         | 304.058158731957 | 160.769011617127 | 197.034073391478 | 168.634534857593 |
|         | 167.030667499538 | 183.998458233995 | 206.669783013221 | 170.497804969996 |
|         | 197.651165059354 |                  |                  |                  |
| PGM3    | 207.254220247481 | 192.059255232313 | 220.047563627558 | 172.836730741407 |
|         | 227.965783945702 | 251.61451602376  | 302.362619893594 | 318.004190156313 |
|         | 279.75914135192  | 336.279209908669 | 243.936797286495 | 250.542405852865 |
| PGM5    | 6409.23524786095 | 6021.68798558746 | 7519.94306346326 | 7245.25086222102 |
|         | 142.451443706198 | 169.607072855818 | 138.841385034636 | 235.261278607182 |
|         | 229.181725450534 | 151.194282143046 | 142.798248249144 | 137.011595584638 |
| PGM5P2  | 147.132625797946 | 141.174971007547 | 140.482728188987 |                  |
|         | 143.30977386038  | 130.176734524308 | 137.326796995017 | 132.53122878527  |
|         | 135.975265059269 | 139.748733350375 | 142.744045151046 | 135.154441560264 |
|         | 140.167274633872 |                  |                  |                  |
| PGP     | 165.703810120915 | 167.284724396943 | 163.704616231638 | 184.332299740724 |
|         | 293.350292227077 | 179.601348561497 | 182.143506470859 | 176.802886129341 |
|         | 175.372355078713 | 164.365630106697 | 192.709473588165 | 196.429685815196 |
| PGPEP1  | 142.30928744202  | 139.862403685817 | 142.655287071175 |                  |
|         | 123.709293439934 | 177.103802332144 | 129.143168240589 | 156.856149172225 |
|         | 133.99226161886  | 131.282091618102 | 131.336902822702 | 141.156434225355 |
|         | 131.271979461703 |                  |                  |                  |
| PGR     | 145.449099891256 | 159.182533998843 | 135.429199205506 | 131.362128083159 |
|         | 111.055738573603 | 136.074837228096 | 131.972669163481 | 132.649409216699 |
|         | 145.112399373761 | 138.628169506372 | 126.978144285534 | 125.350567304651 |
| PGRMC1  | 2174.62979843528 | 1834.08657010335 | 2712.07480130502 |                  |
|         | 1287.3125466789  | 3833.73632806344 | 3784.59114921916 | 2995.42172749615 |
|         | 4222.55224241399 | 4579.62296570302 | 2360.87760349888 | 2171.00457877604 |
|         | 4343.46317176151 |                  |                  |                  |
| PGRMC2  | 2502.72913594103 | 2089.82894186824 | 2230.45015969936 |                  |
|         | 2249.8123426309  | 1437.5568316065  | 1418.60088387728 | 1849.21906428944 |
|         | 1838.18547839898 | 2222.16226526877 | 1290.39741199701 | 1567.89763050645 |
|         | 946.273229715791 |                  |                  |                  |
| PGS1    | 370.798852361374 | 326.055727207966 | 382.701467158304 | 368.276805218658 |
|         | 496.823662262772 | 555.109005518622 | 655.665164535648 | 447.372026268156 |
|         | 636.781477235579 | 329.88790758321  | 658.47864958685  | 580.347496467173 |

|         |                  |                  |                  |                  |
|---------|------------------|------------------|------------------|------------------|
| PH-4    | 128.194171809998 | 135.364039983762 | 140.112726392608 | 133.288181734813 |
|         | 139.737748157901 | 137.322392546784 | 132.821639676246 | 149.34605615699  |
|         | 152.591091223395 | 136.573928520456 | 153.726935957906 | 144.73389393695  |
| PHACS   | 172.657668514226 | 177.851689709807 | 189.662974464847 | 163.868129628544 |
|         | 170.024833610695 | 144.095471610836 | 216.559563381808 | 142.464394555901 |
|         | 170.655648004461 | 138.338280468272 | 218.487334022128 | 143.801139839773 |
| PHACTR1 | 147.082068348591 | 173.395370400371 | 198.311821616128 |                  |
|         | 203.04864785056  | 174.624446035895 | 146.731584143625 | 132.721469335671 |
|         | 149.430396727944 | 136.482609639417 | 197.231408726321 | 134.646131480502 |
|         | 144.02847768185  |                  |                  |                  |
| PHACTR2 | 418.244376024741 | 277.561376169965 | 297.708113541379 |                  |
|         | 226.796825544749 | 260.129513331703 | 559.899430596368 | 294.323621186916 |
|         | 255.677315946354 | 387.477198908304 | 382.485769373364 | 322.263925912805 |
|         | 378.38874489611  |                  |                  |                  |
| PHACTR3 | 137.884051774657 | 137.398748156909 | 146.136044805856 |                  |
|         | 134.04235176608  | 142.392860474555 | 135.346501914337 | 137.350851760173 |
|         | 139.97636570613  | 133.422190038356 | 136.935498266723 | 151.829217512763 |
|         | 251.869781014029 |                  |                  |                  |
| PHACTR4 | 330.908743070095 | 260.85776723575  | 306.632103708321 |                  |
|         | 272.712242893937 | 319.283603277754 | 394.65807885612  | 401.840794789616 |
|         | 448.767690095033 | 330.703588385626 | 386.85874184746  | 502.499539192864 |
|         | 327.251620296271 |                  |                  |                  |
| PHAX    | 441.001837510132 | 374.169744342352 | 473.370240289761 | 383.583234619781 |
|         | 225.64288602828  | 363.445110627483 | 443.623904480087 | 434.390613381746 |
|         | 306.486275677467 | 563.648536446918 | 360.475989559226 | 387.617166711971 |
| PHB     | 958.63560158343  | 924.312051919404 | 1046.13353853089 | 1117.77397620221 |
|         | 807.92851898782  | 823.297606185721 | 793.891277937782 | 766.710479603963 |
|         | 1294.18114559128 | 748.38293089716  | 847.863177169335 | 680.250735532287 |
| PHB2    | 955.143610867351 | 1065.74382494535 | 1180.7055699511  | 932.505095432049 |
|         | 1868.82736251524 | 1001.35912007916 | 1822.14935116363 | 1472.54829263217 |
|         | 1045.49947183547 | 1125.95664591686 | 1379.95968831696 | 1347.10650016064 |
| PHC1    | 230.806950763402 | 200.867515935703 | 226.678503956411 | 230.284216427158 |
|         | 173.656241217331 | 163.829218786716 | 180.179981672095 | 199.746775121317 |
|         | 211.357321758564 | 200.065184172871 | 206.236303011662 | 192.286192329464 |
| PHC2    | 181.062188174871 | 190.270819689158 | 178.464811133    | 222.484058975856 |
|         | 231.63127072986  | 160.136209944279 | 180.164353124488 | 167.806420483187 |
|         | 189.225893411944 | 169.612203020686 | 205.149094703318 | 179.478756495687 |
| PHC3    | 167.206513789165 | 147.255680306221 | 157.915292037378 | 147.910699446264 |
|         | 167.237705290905 | 143.575381236637 | 163.922353493317 | 159.241573314833 |
|         | 164.377227860031 | 154.452964510369 | 165.314290446922 | 166.600109853461 |
| PHCA    | 499.436680354749 | 402.425130776131 | 429.351447428661 | 390.194764817385 |
|         | 208.14618424983  | 783.991448771818 | 356.154842959851 | 316.524115715585 |
|         | 272.666435295288 | 373.803772983872 | 241.293046687076 | 314.845965872164 |
| PHEX    | 147.590189238316 | 140.216148769999 | 133.638664342783 | 145.760577027524 |
|         | 147.734708927825 | 128.864822736402 | 151.3362561751   | 160.786907816025 |
|         | 146.081940883446 | 154.156272284591 | 140.163936299053 | 142.594553057288 |
| PHF1    | 340.487850009685 | 296.051639873628 | 307.665281863258 | 293.17183601265  |
|         | 227.375773052577 | 162.134726710448 | 203.317264638828 | 163.758054869675 |
|         | 181.735072060023 | 185.17273221366  | 217.435155984897 | 181.607253339427 |
| PHF10   | 217.24573005272  | 209.811693771836 | 212.239485199343 | 193.444080047879 |
|         | 253.789045068884 | 218.944052733757 | 321.177982468322 | 279.26508919212  |
|         | 225.505978789388 | 383.682951666155 | 221.390817970859 | 239.649306804266 |

|         |                  |                  |                  |                  |
|---------|------------------|------------------|------------------|------------------|
| PHF11   | 954.488185198006 | 764.493610798958 | 905.233241047678 | 763.533962249076 |
|         | 569.866002248352 | 840.276501350383 | 479.138177792954 | 699.800360892516 |
|         | 1122.92917004037 | 907.610179738644 | 1104.61581891596 | 1144.07896461196 |
| PHF12   | 198.506786870804 | 203.693188114912 | 210.761398461329 | 255.066583469964 |
|         | 230.723142236623 | 172.7330526128   | 218.773153183388 | 221.594737497504 |
|         | 181.202396068658 | 145.709172732805 | 197.962159288376 | 210.245551279259 |
| PHF13   | 1118.28423222707 | 1282.38953612054 | 943.677679525947 | 1341.78081782818 |
|         | 1039.46136549795 | 708.268962600305 | 832.335328912437 | 600.757699463777 |
|         | 747.587723573212 | 527.294087043601 | 928.151632070573 | 787.615195903993 |
| PHF14   | 222.484058975856 | 207.598754515294 | 253.218123990428 | 213.240181616274 |
|         | 241.077618798955 | 288.221041179309 | 293.600165830839 | 299.669394721682 |
|         | 300.985037429772 | 226.114369645703 | 359.518199449791 | 306.011283364888 |
| PHF15   | 551.206833852215 | 543.389747823877 | 604.047164856689 | 724.103864917969 |
|         | 169.211708954329 | 224.439293045835 | 499.891000749138 | 282.926325589238 |
|         | 239.871536598083 | 190.111477641308 | 336.434368527549 | 212.571491543077 |
| PHF16   | 387.403502892897 | 387.403502892897 | 596.076764072945 | 334.916875239616 |
|         | 270.33685210971  | 390.021666378804 | 240.224826736571 | 435.037306125887 |
|         | 334.916875239616 | 236.141982516399 | 258.012234458166 | 288.261250589513 |
| PHF17   | 246.80306998812  | 254.879772480457 | 273.864293250688 | 276.714748212739 |
|         | 180.192015483309 | 179.478756495687 | 172.722177339418 | 224.707455448421 |
|         | 194.724219884752 | 224.869569455052 | 182.410688592378 | 151.456702092528 |
| PHF19   | 292.037861000784 | 314.557323400201 | 317.457588721567 | 349.65350886897  |
|         | 213.847316974717 | 168.867373925372 | 156.68541512214  | 165.232545721733 |
|         | 192.789886894821 | 216.277178481058 | 164.018470368389 | 203.704734790602 |
| PHF2    | 419.272193677273 | 377.593087606046 | 352.354687089427 | 419.690542859168 |
|         | 346.411586524655 | 232.778488697337 | 151.024201732633 | 230.263678910356 |
|         | 237.575788579215 | 263.183010631644 | 359.363523948825 | 255.462706428149 |
| PHF20   | 342.611951034707 | 320.097510212422 | 414.267332328081 | 325.173931553891 |
|         | 192.580288063603 | 281.369059516242 | 300.150235383065 | 267.097999873387 |
|         | 272.01602406899  | 279.232290927348 | 263.936023499588 | 225.130011390856 |
| PHF20L1 | 197.2893692747   | 197.489903263216 | 201.748876422401 |                  |
|         | 200.371280127668 | 157.15729049829  | 220.710324965453 | 204.710203150526 |
|         | 194.979795724712 | 213.468420853218 | 208.348515119045 | 190.549084022965 |
|         | 215.950811436427 |                  |                  |                  |
| PHF21A  | 1329.90419210779 | 1336.15622439522 | 1395.63393859192 |                  |
|         | 1395.63393859192 | 339.54582149284  | 364.895113721763 | 732.877169346979 |
|         | 509.618968665191 | 687.789976218334 | 739.251974981981 | 720.077057619735 |
|         | 478.293220151258 |                  |                  |                  |
| PHF21B  | 180.54209603289  | 185.154876233931 | 190.754349388901 |                  |
|         | 176.579096613849 | 179.048139035247 | 158.6067091347   | 154.716750150891 |
|         | 166.540134051424 | 174.127444395862 | 159.922627970233 | 164.072443259668 |
|         | 173.798554769204 |                  |                  |                  |
| PHF23   | 385.584224833836 | 402.824964079515 | 410.731869154912 | 431.799795646414 |
|         | 434.390613381746 | 480.797281489891 | 361.218491712891 | 421.255522475862 |
|         | 364.443097338814 | 425.13721408756  | 495.655170027296 | 389.051174954505 |
| PHF3    | 606.162976359615 | 622.561634660589 | 834.788058321257 | 583.697431061521 |
|         | 325.570839576032 | 340.028737478082 | 583.314509855875 | 448.644778906048 |
|         | 412.415549375221 | 542.740017003369 | 501.738490253982 | 461.088572554864 |
| PHF5A   | 562.711562649704 | 579.049608568926 | 491.35949123223  | 601.997464467917 |
|         | 1841.63015706195 | 1109.08288440559 | 596.934339406636 | 494.747087458483 |
|         | 532.786041960586 | 446.509863498357 | 741.433093896472 | 723.640113902925 |
| PHF6    | 139.39442529119  | 146.629335531037 | 133.579067514064 | 124.873289279767 |
|         | 149.471240458766 | 142.185345091219 | 133.43362126395  | 135.493053871272 |
|         | 133.345143691828 | 138.289361041588 | 141.269923271838 | 137.079479050963 |



|        |                  |                  |                  |                  |
|--------|------------------|------------------|------------------|------------------|
| PHF7   | 142.661504601445 | 142.545823714168 | 143.071933285651 | 148.755559144241 |
|        | 155.371772547395 | 144.792035839249 | 142.394644827434 | 148.616543842015 |
|        | 145.709172732805 | 157.406969627689 | 154.343424387068 | 138.685330935707 |
| PHF8   | 141.533138525284 | 133.452032750397 | 159.655362710407 | 135.192181609947 |
|        | 142.524413202292 | 136.84840505336  | 132.589411973628 | 141.33919297402  |
|        | 140.56526023628  | 156.540165645256 | 150.802312408483 | 136.368258257435 |
| PHGDH  | 2618.64973582507 | 3671.86460903374 | 2988.45928881468 | 6044.78942014135 |
|        | 3136.27991502603 | 1121.87292339787 | 1602.63977096867 | 1481.24705642453 |
|        | 2841.96460830166 | 1339.83170225337 | 296.962992349662 | 538.605085454393 |
| PHIP   | 1229.47460924638 | 1426.56252600395 | 1138.00644332379 | 1170.88763035931 |
|        | 580.859914041323 | 1737.57015396357 | 1189.69730508119 | 918.162638134305 |
|        | 615.88518704181  | 714.91842349236  | 133.12641302705  | 1103.13439876128 |
| PHKA1  | 179.923966067226 | 183.280853265083 | 223.81987303579  | 173.440596296333 |
|        | 206.813941353924 | 209.7558663154   | 203.389294254141 | 177.401771322485 |
|        | 180.437648146588 | 205.781486117242 | 164.136551371866 | 204.999796322451 |
| PHKA2  | 408.263886786123 | 522.400055538966 | 371.693808540758 | 457.292146759215 |
|        | 371.369895979832 | 537.510539142248 | 435.901794650816 | 628.710901107436 |
|        | 486.653672099699 | 313.18989508207  | 566.813343200268 | 381.484062427466 |
| PHKB   | 326.176058036757 | 306.773350448741 | 388.416668785633 | 340.608165077422 |
|        | 182.560363283264 | 256.764450748941 | 209.279164243868 | 217.125327913156 |
|        | 213.412498914309 | 280.085692727562 | 305.615423200097 | 306.193157874683 |
| PHKG1  | 147.359279533039 | 148.084844579881 | 159.735182155088 | 151.70917316194  |
|        | 128.26423663004  | 134.842877075983 | 144.087004064416 | 139.113675690483 |
|        | 135.5237675623   | 135.253713075341 | 142.726324048628 | 131.349297554112 |
| PHKG2  | 184.294172429054 | 195.711047893396 | 160.156127781701 | 203.389294254141 |
|        | 280.913748398876 | 228.212753830905 | 204.959164579011 | 234.063633889254 |
|        | 199.555406967021 | 216.506914782226 | 213.412498914309 | 191.220064414876 |
| PHLDA1 | 178.542247857251 | 333.970844203158 | 145.912712700067 |                  |
|        | 170.67334244323  | 467.944850290806 | 736.963699775724 | 198.226525986857 |
|        | 237.906142045719 | 254.668502187945 | 2433.83421295012 | 281.119138040097 |
|        | 410.138738410101 |                  |                  |                  |
| PHLDA2 | 119.730174479044 | 137.639342727211 | 122.68719599986  |                  |
|        | 115.107214937219 | 238.978845152474 | 192.827534610486 | 119.98864381644  |
|        | 153.804419092743 | 185.382647297259 | 222.20526515049  | 158.660859266099 |
|        | 166.036553680319 |                  |                  |                  |
| PHLDA3 | 512.312880441098 | 625.152889992949 | 399.963640581639 |                  |
|        | 860.315938621256 | 805.600599570258 | 246.710233781784 | 682.538709448692 |
|        | 195.711047893396 | 374.033009122079 | 493.622989939072 | 464.907454552364 |
|        | 874.348941257592 |                  |                  |                  |
| PHLDB1 | 970.634736994313 | 860.688314783077 | 771.294254795752 |                  |
|        | 1065.36715400306 | 346.78158577526  | 307.16835174775  | 224.851680313689 |
|        | 417.731815310276 | 343.946831770916 | 386.16563750478  | 245.811312606484 |
|        | 502.063888359427 |                  |                  |                  |
| PHLDB2 | 515.597523880328 | 397.985856484851 | 554.511983790164 |                  |
|        | 428.959561932229 | 187.65716654049  | 179.764260117544 | 276.79778275734  |
|        | 206.802308105224 | 173.592875508663 | 213.813667557079 | 274.70018535436  |
|        | 224.027605834751 |                  |                  |                  |
| PHLDB3 | 136.711382832269 | 164.587657424569 | 134.85809559975  |                  |
|        | 139.530196462344 | 245.01029221002  | 156.774097885381 | 153.62335478774  |
|        | 194.374817778819 | 187.852455291319 | 169.428195354763 | 212.460476372263 |
|        | 178.3652866131   |                  |                  |                  |
| PHLPP1 | 196.014841240142 | 198.226525986857 | 212.497773003032 |                  |
|        | 194.312315077985 | 207.545424360094 | 178.563665283267 | 167.51207060064  |

206.376365685112 195.831574717135 175.774461934758 236.548439331855  
 136.62213567467  
 PHLPP2 191.961269585431 156.957578703389 170.818182800759  
 152.61583482402 135.474834181228 144.755735165001 131.913786256215  
 140.469508410073 143.537785553911 127.101752724954 147.238896426423  
 130.265055842999  
 PHOSPHO1 141.685620602226 159.716066475442 143.206100064821  
 154.552605305297 145.010108826238 140.152177370089 159.572851489665  
 127.471479301983 133.303201646987 158.859389972316 137.269267022826  
 148.175206259619  
 PHOSPHO2 169.072574423443 190.031339775209 219.080383154432  
 157.787233338636 226.086733606951 176.449549075475 199.947823264085  
 185.583997792931 169.012926546641 173.035013611377 221.664431984861  
 178.055019987648  
 PHOX2A 148.598920567714 147.994386096925 138.388749930671  
 137.710725379804 150.034959799695 136.466367853188 183.82450756022  
 157.600193849783 128.84676695859 145.203083375014 163.668476670167  
 149.119815471009  
 PHOX2B 153.276938815536 152.783534456473 150.599425944486  
 145.48456035752 144.914015211747 151.531667383273 150.343825300998  
 151.877035446575 143.103779196037 150.690143057308 149.283495832731  
 161.365443930448  
 PHPT1 984.181272274704 1027.48490028905 880.140852200235 1129.15018335354  
 1331.18605673705 354.705553237406 810.769136227155 797.501324589697  
 900.039744829725 1551.90775589919 1004.6207350158 747.077451281453  
 PHRF1 422.590112942156 505.302263971007 449.523996620257 538.484170364629  
 867.369315017411 500.132469062228 454.732029358748 453.926991868451  
 549.569374872629 739.085574858917 501.434722063309 464.323065038265  
 PHTF1 243.839402991061 221.512905853031 219.519896184851 246.152798696993  
 290.754210152709 340.239348689005 293.925995360234 286.818166898922  
 308.38513924253 202.504840299605 315.786908578669 321.627969147543  
 PHTF2 151.194282143046 149.487167787687 142.085297109435 134.819406064011  
 133.192757350144 177.567833691547 177.84188738734 170.505553609318  
 172.622816559412 161.559920910487 130.565986980021 157.592607345742  
 PHYH 598.924339094496 629.197022551069 787.874585290601 702.779943547386  
 762.584280908728 1515.38811502277 439.122658719747 593.821622986351  
 365.541609015117 355.714202328378 363.255517622046 537.698489904622  
 PHYHD1 166.2468445883 168.05687638693 169.279866966079  
 146.150048478173 169.834078550805 120.182787241888 126.460390022632  
 125.624661345169 119.32696696175 119.612288460361 110.838647534175  
 123.122705969332  
 PHYHIP 166.89884215297 138.842160234657 145.861217875066  
 131.110018165002 117.316790136526 125.443242860371 114.115609163126  
 109.495342943278 116.092815232176 115.5765427629 131.97938329944  
 114.325967923393  
 PHYHIPL 121.501959818928 124.110446144763 116.787791109549  
 115.863243613121 122.323876787207 107.544568250154 120.252164075308  
 126.755389668637 140.634047988278 120.035437167539 118.383317097375  
 125.227513212286  
 PI15 178.819486867379 235.76573393374 215.019239034819 254.991678321253  
 159.276726310525 163.045605069267 151.181422205549 162.961792330623  
 152.662446724781 231.044588483625 158.602687876661 150.78145177853

|         |                  |                  |                  |                  |
|---------|------------------|------------------|------------------|------------------|
| PI16    | 5702.11995823367 | 2767.77385345718 | 3789.1316515671  | 2720.83642320419 |
|         | 140.794929983858 | 147.236728188605 | 141.876237297525 | 150.48744233923  |
|         | 167.451782810394 | 127.816596414779 | 147.844734028193 | 143.534617425725 |
| PI3     | 117.251233255966 | 119.711070285785 | 111.381427322188 | 120.602818832247 |
|         | 161.956032597813 | 112.629266772219 | 173.010799217261 | 132.517166202071 |
|         | 154.869171648942 | 21409.4415798676 | 381.625983354158 | 113.572326615571 |
| PI4K2A  | 155.773639092819 | 150.866204945762 | 148.907136936731 |                  |
|         | 152.532083511961 | 179.582086214179 | 126.88329158544  | 160.713790305656 |
|         | 152.79367157305  | 152.805525883571 | 150.672985449063 | 172.008994980259 |
|         | 146.701489210289 |                  |                  |                  |
| PI4K2B  | 183.152005135504 | 197.618757939729 | 188.417078622503 |                  |
|         | 161.148734808267 | 288.631429069336 | 247.779718065751 | 302.847274046748 |
|         | 217.847954914851 | 333.200230327106 | 293.448046685909 | 272.41397350779  |
|         | 215.931781291835 |                  |                  |                  |
| PI4KA   | 157.663460168247 | 141.097257687941 | 153.795665190439 | 147.813170436139 |
|         | 170.753615127089 | 169.642188114285 | 159.870967387108 | 166.904990069484 |
|         | 169.502103689662 | 166.595529296463 | 150.014842228372 | 168.521601064374 |
| PI4KAP1 | 210.117033165026 | 182.711318507496 | 232.231236745251 |                  |
|         | 220.633692394229 | 242.614881095485 | 307.083179338165 | 307.665281863258 |
|         | 260.52593414721  | 599.307072499899 | 245.195406638979 | 247.454326301069 |
|         | 491.35949123223  |                  |                  |                  |
| PI4KAP2 | 444.192734921566 | 361.620362526358 | 438.231717096337 |                  |
|         | 374.106258053201 | 387.135002880995 | 656.32782132983  | 474.378918787006 |
|         | 417.442660073269 | 1295.27257578314 | 414.403321220432 | 418.772484676858 |
|         | 1044.91923772265 |                  |                  |                  |
| PI4KB   | 483.699436940387 | 495.655170027296 | 454.030083521756 | 613.063954859056 |
|         | 525.789451405743 | 487.19625805337  | 445.505512764045 | 501.738490253982 |
|         | 526.285114043212 | 387.617166711971 | 581.191693771646 | 551.206833852215 |
| PIAS1   | 949.260897408911 | 793.891277937782 | 1005.62130301653 | 664.60530723006  |
|         | 331.999693230194 | 574.779350011402 | 473.947538805454 | 415.322560616847 |
|         | 506.290241222253 | 455.21285026588  | 502.063888359427 | 489.118864124059 |
| PIAS2   | 208.75656341402  | 199.378179817518 | 207.123420880185 | 203.11015591813  |
|         | 207.850956786183 | 174.42996813062  | 175.417320301614 | 196.269193578525 |
|         | 171.494975393562 | 201.186963432715 | 177.825648107126 | 178.455966482206 |
| PIAS3   | 254.607324522225 | 243.893774595317 | 239.635531434767 | 289.297370738382 |
|         | 330.005950459958 | 159.362293777146 | 268.568824794145 | 177.343586047942 |
|         | 193.813717161291 | 279.413335686746 | 285.882780066861 | 233.975864722289 |
| PIAS4   | 714.6859666834   | 894.46029531926  | 604.737834405874 | 1288.3346537369  |
|         | 1600.10235468018 | 809.068563907145 | 902.822697602452 | 818.225731093346 |
|         | 675.596864001032 | 748.015452242839 | 482.857203798212 | 696.003998372271 |
| PIB5PA  | 136.116468624715 | 143.836637098747 | 134.002424083826 |                  |
|         | 130.024546949158 | 177.246890307643 | 137.438984175012 | 145.507330257603 |
|         | 130.973504803813 | 140.479321382192 | 127.808579455383 | 134.759283147919 |
|         | 138.79473329684  |                  |                  |                  |
| PIBF1   | 192.375251343504 | 182.300628120658 | 172.304496150036 | 171.677654793775 |
|         | 162.6762533989   | 170.835513021958 | 181.950658782069 | 146.474228901408 |
|         | 163.22059466037  | 158.374760929273 | 192.860161535869 | 191.241000498118 |
| PICALM  | 778.28014337938  | 619.75986112089  | 714.052063877292 |                  |
|         | 443.005424069211 | 413.757630469808 | 459.771019162573 | 536.253405705975 |
|         | 413.172954892025 | 472.108893832845 | 626.298707790229 | 595.593867616527 |
|         | 587.026042400878 |                  |                  |                  |
| PICK1   | 295.778154263981 | 328.019503002384 | 322.153713097778 | 333.200230327106 |
|         | 754.97177863997  | 604.687265229902 | 556.568221094639 | 299.390443444504 |
|         | 370.555627307623 | 357.928880740814 | 412.941907828617 | 561.609211243027 |

|      |                  |                  |                  |                  |
|------|------------------|------------------|------------------|------------------|
| PID1 | 598.287431134037 | 383.182507425579 | 608.611927946607 | 415.957832362051 |
|      | 148.592330216136 | 164.962201718762 | 149.613701531197 | 171.62327142765  |
|      | 185.997327421952 | 137.760712896718 | 158.06129717954  | 166.674240866931 |
| PIF1 | 175.176693060261 | 184.530853446688 | 178.200678423426 | 151.214631373344 |
|      | 226.623172906957 | 162.997720993338 | 171.014432075829 | 187.903298116031 |
|      | 187.48055574295  | 171.39347085745  | 141.328429642544 | 186.215602572358 |
| PIGA | 177.759729226623 | 197.24751449599  | 168.248982292489 | 171.731395791818 |
|      | 241.867699338253 | 548.138527647594 | 351.759100605991 | 389.500591134279 |
|      | 240.253944604431 | 355.80042210486  | 258.311739685895 | 360.053590374552 |
| PIGB | 176.547853494057 | 181.681929801968 | 228.739556788924 | 147.022594294963 |
|      | 278.598913464804 | 247.806371601734 | 337.271784551586 | 277.726756691133 |
|      | 327.566026396726 | 359.703969802888 | 278.687780705367 | 362.95684683529  |
| PIGC | 334.056545911557 | 309.181150342727 | 470.308610828825 | 295.278972023002 |
|      | 392.282956362735 | 408.60092780174  | 372.149771075286 | 473.057488824363 |
|      | 466.141717595301 | 334.140757209353 | 500.643499051523 | 585.552940765069 |
| PIGF | 183.280853265083 | 198.456392063513 | 196.974807677659 | 159.032710656826 |
|      | 364.840751972169 | 368.825190022937 | 443.964363178742 | 488.379057110543 |
|      | 345.433025456954 | 316.955298948771 | 431.093544964576 | 449.103432410618 |
| PIGG | 206.650760711745 | 172.909795209733 | 190.238332933452 | 173.741466458636 |
|      | 194.413759761549 | 211.966139902562 | 296.20443113482  | 298.926727289387 |
|      | 304.590636814607 | 281.341452463344 | 297.544216175512 | 247.145700155364 |
| PIGH | 266.534316786801 | 232.083160165968 | 289.576706584644 | 222.764568757453 |
|      | 295.420691959792 | 280.414161197286 | 362.65285317327  | 341.361299896997 |
|      | 229.542259738438 | 273.806452412737 | 316.524115715585 | 295.330307669482 |
| PIGK | 234.370850809531 | 221.930333726352 | 278.335289966805 | 217.264041781337 |
|      | 266.652805624826 | 348.575690346536 | 246.989526028884 | 416.861099188252 |
|      | 261.844708446856 | 354.067771806542 | 218.735620596634 | 204.103018614608 |
| PIGL | 170.01557699913  | 168.991551886143 | 172.057586741925 | 160.001115445038 |
|      | 178.946928223991 | 183.42877315644  | 169.713585775118 | 177.011776399483 |
|      | 167.325227483198 | 204.509884908059 | 166.709393547104 | 174.92026613834  |
| PIGM | 453.457361487577 | 458.440488401029 | 496.697565640162 | 399.476401949891 |
|      | 628.197839884392 | 1293.70593826709 | 627.066031322234 | 713.087392708048 |
|      | 641.12919339861  | 356.62074247786  | 591.89966781883  | 1082.00448164658 |
| PIGN | 218.08515867102  | 208.095384605737 | 234.156713102803 | 202.568071395884 |
|      | 229.017256104437 | 465.683139139622 | 314.182403961681 | 365.727197088581 |
|      | 331.888150158628 | 409.206158277764 | 374.657816575897 | 369.070376276471 |
| PIGO | 183.894417745549 | 187.586093248437 | 201.800357785022 | 188.322853571195 |
|      | 424.134483971176 | 219.8511043213   | 222.624150073858 | 201.235056368151 |
|      | 202.253560413436 | 208.237011955037 | 212.497773003032 | 194.789918629905 |
| PIGP | 430.649188209901 | 359.822784070765 | 544.956712516196 | 294.22752955801  |
|      | 335.239364345057 | 506.165100641525 | 870.409935772423 | 532.596772298766 |
|      | 704.653073777277 | 296.141012087256 | 476.641032594868 | 586.642581067137 |
| PIGQ | 380.821355948507 | 438.611973005212 | 418.772484676858 | 522.400055538966 |
|      | 1069.25265476373 | 290.502085667398 | 425.229044880287 | 482.739666411407 |
|      | 508.861268738074 | 455.564394647943 | 502.731019454502 | 512.184962338131 |
| PIGR | 128.232091717966 | 178.632720545904 | 145.737361356678 | 126.599418127637 |
|      | 141.778060508776 | 122.129348411763 | 138.796257513868 | 112.957395064957 |
|      | 276.32528705384  | 117.386273592501 | 388.326080754063 | 167.430767074847 |
| PIGS | 252.138168292964 | 232.735767435327 | 316.281469585496 | 338.822464893411 |
|      | 805.120147618984 | 368.374002925137 | 351.934158805882 | 567.143102792772 |
|      | 343.417041721907 | 376.007938436483 | 291.313681141442 | 277.256341592701 |
| PIGT | 559.559921312181 | 521.83794739314  | 613.846166856328 | 512.312880441098 |
|      | 2059.09598012857 | 1006.69598892631 | 1136.14069801696 | 420.567884340705 |
|      | 537.06835963726  | 562.891241563711 | 888.706978062337 | 596.246316033079 |

FIGU 552.167699318911 558.440840319738 445.763740779039 595.270107963842  
813.454826901794 1067.80176606977 1348.80530206238 796.052115217208  
854.815394943219 404.618867159141 881.561688713557 772.061917233344  
PIGV 299.039192744355 269.927694984528 254.909076658804 347.411500022053  
253.385592447339 201.235056368151 281.618175110153 195.906137340918  
203.913123559942 243.10297424873 203.244917049745 254.235762677639  
PIGW 146.210814568357 147.378228560979 141.67550758321 140.321675137237  
163.030275835038 203.791916347213 170.98312926 203.487137264  
177.679330300381 179.593817076317 154.904424749528 178.920528149177  
PIGX 1929.52146517699 1534.21175984308 1412.56164938199 1677.93424842267  
244.897869154624 759.534249620343 451.496617003797 522.899203071911  
471.720496000839 476.917496749381 813.034056288861 489.528040775004  
PIGY 1617.44377452783 1628.24528041404 2193.376951552 1576.21727854603  
1944.15673951528 2382.87910783088 2615.07927836881 2219.71846304201  
3413.39994653641 1810.68433539154 1602.63977096867 2708.20624364471  
PIGZ 187.50236021149 198.205113187281 198.066837203458 192.493439659184  
255.198862778405 135.429199205506 211.891710626953 399.476401949891  
152.942824158634 162.327039624723 710.003412772888 177.793860516896  
PIH1D1 281.740495452842 309.283897272661 283.235844022826  
380.888728347647 795.037968409957 382.401290201025 392.13175568099  
347.866264631778 407.711669482083 418.645775576811 382.960724128105  
320.360917595936  
PIH1D2 154.928072022777 150.126627487419 151.849653154534  
137.348951314875 145.068754246476 140.746062850603 149.149858208397  
143.200939506995 145.733828447934 156.160899295182 158.335952927257  
146.029647001623  
PIK3AP1 175.840639511966 160.379168489216 178.377461551319  
176.001771318766 178.512206531256 154.598520288855 170.23937234395  
182.711318507496 226.701637237203 198.356420768703 150.112549201892  
165.938009275308  
PIK3C2A 204.337844243869 175.186435016433 264.779154931102  
179.44023315251 145.751336115646 219.78041403077 190.281570660806  
188.910933952136 189.662974464847 220.079379312889 205.852731236069  
151.770791549511  
PIK3C2B 461.413469623811 450.468410589415 377.024120035829  
567.317223907142 516.429067667758 664.025683218037 643.13571432061  
513.20896845398 897.0125616892 302.362619893594 649.438995824208  
852.926365088632  
PIK3C2G 132.817645625115 137.322392546784 133.018406625714  
123.902047880095 141.278654291193 141.518491890811 123.791515424464  
133.223310036542 134.294287947795 132.456945758174 135.628982370682  
124.424565172377  
PIK3C3 267.901632267999 226.712995229189 279.704940529618  
246.031568259337 190.76537287329 245.915473236403 257.408058436941  
249.339449789861 253.975577255772 331.684298221133 421.690849282483  
302.069236363626  
PIK3CA 195.863843860549 173.299643109576 174.246705740225  
168.223865801948 166.411219327671 165.900156600776 183.795632040455  
158.034418043685 158.890522392445 164.89597889259 171.751149502172  
158.316173597874  
PIK3CB 147.849116400978 145.597134236583 183.619184925353  
138.311892121437 151.128838696891 177.281197832647 190.189217962555  
197.815264620906 180.902950045351 199.01458214661 179.55905250703  
156.105736111274

PIK3CD 218.997165156081 187.572517928061 238.724909152512  
252.365946808078 167.325227483198 169.220974415101 153.077763784905  
164.433462115832 218.369954323686 206.753993163216 163.67719444924  
181.70730090195  
PIK3CG 177.296424297967 162.762473039474 164.890716656336  
192.286192329464 161.027590226123 167.662761175661 154.232310911696  
186.551385094902 220.9384439772 152.908358615016 158.095373931016  
168.483273292464  
PIK3IP1 560.757496975779 756.068695265118 803.60413590137  
671.387334588652 583.022090879298 433.405369327168 1063.5903770389  
768.053694275398 839.901173743755 513.428413503031 793.300636780035  
340.098306132634  
PIK3R1 304.402066421813 296.830999357172 309.538690289233  
314.182403961681 162.624786423084 230.179200974631 170.998961353556  
160.319687451789 150.672985449063 141.441694319047 237.078644686891  
210.14307111352  
PIK3R2 917.646958427824 1105.80735904293 1142.09977159958  
1167.26555140613 3501.86788138647 2261.31473132315 1764.53168329081  
2087.55358504021 1350.87073284396 2410.32095582515 2203.82462320864  
2021.92898855142  
PIK3R3 145.423022762916 133.922855125616 141.550553034455  
146.440630638891 165.022029012505 138.740174228042 153.538565948453  
151.0189104086 144.896960245309 127.036976462046 158.241349852419  
141.686945908315  
PIK3R4 155.164238647284 205.612579504495 167.087850057037  
154.166668493152 217.202541167691 184.915526626619 209.130260450131  
199.459711023907 188.322853571195 174.42996813062 254.235762677639  
176.128369308989  
PIK3R5 119.645983822002 125.880722339653 118.419311800417  
122.297401003756 133.206919058442 129.76141737109 118.04359489354  
132.533234335153 124.541257225826 115.085961282227 128.118223792086  
120.735176435195  
PIK3R6 156.05583229359 148.753891406126 157.909530751723  
157.08300736206 149.035590153457 134.201392031199 142.159597861804  
155.043017644694 153.056369304663 145.500011956699 147.666724626127  
137.109541758085  
PIK4CA 545.566596665916 460.408628542721 486.778046640624  
493.622989939072 470.154677948419 615.254768508691 546.274050902567  
435.095843349921 1061.29067124163 431.686900474971 548.138527647594  
989.396074034945  
PIKFYVE 136.459509901229 154.373739162815 137.009303458922  
133.969054754299 134.405155876727 138.384797779855 137.132095345234  
134.834641868502 132.131378074469 121.049927973123 133.152523054305  
140.861849838223  
PILRA 163.256472113745 159.213940274232 136.65402176085 170.202597821861  
129.945543636232 150.452467115669 146.150048478173 162.531630234824  
159.730925830278 142.397433929092 170.541689758579 148.663860923774  
PILRB 270.293807247372 249.171307797736 279.598585549004 274.891033696257  
171.080373870373 210.751430486845 217.45700166961 234.322989368622  
233.635876830148 272.193578770314 225.362253409428 240.591548171052  
PIM1 540.359249705821 561.251860964966 691.205738835917 552.662610888399  
1418.60088387728 677.802147190757 775.781735108886 600.162650426961  
873.010676463707 1382.12750708801 843.545962045705 774.442392607873

|         |                  |                  |                  |                  |
|---------|------------------|------------------|------------------|------------------|
| PIM2    | 174.301952147167 | 173.450023117394 | 170.951009118578 | 159.59942312149  |
|         | 311.715351215263 | 180.667897257797 | 192.878416717298 | 327.480268032814 |
|         | 500.848273432862 | 164.268280525424 | 211.085778902367 | 191.912670416334 |
| PIM3    | 184.569063297206 | 201.458970969685 | 179.220691178402 | 176.680708339236 |
|         | 179.525651423361 | 230.546762514966 | 171.106189029362 | 185.342353172151 |
|         | 204.89842561202  | 278.598913464804 | 186.625452120269 | 232.986366625889 |
| PIN1    | 2000.47497636965 | 1974.49672149862 | 2149.13404212591 | 2568.95060767776 |
|         | 2159.2992548378  | 1750.21700780511 | 1497.32522786098 | 1669.97250023755 |
|         | 1555.28458491244 | 1344.87842417496 | 1251.15912264225 | 1360.24752587939 |
| PIN1L   | 118.770061426689 | 121.903115540516 | 131.70505265403  | 135.68481384332  |
|         | 146.029647001623 | 131.85737847837  | 132.759440588374 | 124.907788504503 |
|         | 121.781562010645 | 123.395897439193 | 123.391298926957 | 136.008118769513 |
| PIN4    | 197.049616858296 | 189.250846546817 | 206.999289979742 | 191.467626362851 |
|         | 164.794626785115 | 302.945860276233 | 226.712995229189 | 156.733898702331 |
|         | 188.605328108654 | 182.055718892894 | 209.7558663154   | 191.795952536469 |
| PINK1   | 962.559482864549 | 748.703265448403 | 871.268905562551 | 817.913210743023 |
|         | 559.559921312181 | 515.327420453564 | 466.141717595301 | 444.082440002333 |
|         | 344.992791638415 | 561.761160223609 | 591.189034068137 | 284.043349407812 |
| PINX1   | 177.379186278216 | 171.426334687626 | 190.138730960643 | 177.524818593325 |
|         | 163.21153580549  | 149.79295887612  | 164.970438494223 | 185.661496988658 |
|         | 170.701964358516 | 181.070689877681 | 165.553581848949 | 177.023536553193 |
| PION    | 151.954389699615 | 149.897440750742 | 192.914362049985 | 153.681775929182 |
|         | 131.730758460802 | 181.681929801968 | 193.801858215025 | 169.285901212492 |
|         | 194.60309399944  | 158.025633316671 | 175.192902120699 | 210.77489002666  |
| PIP     | 150.026314061051 | 131.017355402204 | 125.461701282922 | 125.45936959544  |
|         | 156.273445355976 | 113.582654469735 | 149.759516805355 | 123.822571859503 |
|         | 118.148476979319 | 117.619337212037 | 126.452500728601 | 119.29304762171  |
| PIP3-E  | 191.679217737051 | 188.145154995617 | 163.612347715773 |                  |
|         | 194.125840053843 | 188.641397688261 | 164.455111983634 | 185.295480519718 |
|         | 193.801858215025 | 195.303469330682 | 152.861304149219 | 184.819937046061 |
|         | 203.317264638828 |                  |                  |                  |
| PIP4K2A | 908.704610877319 | 720.077057619735 | 1094.67740173529 |                  |
|         | 693.516351173476 | 282.045333787115 | 334.52685347521  | 289.21739941764  |
|         | 496.03509813734  | 508.735412486964 | 366.073387075385 | 369.156887999872 |
|         | 313.641656294638 |                  |                  |                  |
| PIP4K2B | 171.11282933168  | 166.88833169342  | 164.986006226427 |                  |
|         | 169.192327500032 | 176.088449983147 | 158.953705937936 | 164.647634120888 |
|         | 201.702688815038 | 180.710636205653 | 181.550597645633 | 185.544411160039 |
|         | 172.764511709731 |                  |                  |                  |
| PIP4K2C | 240.224826736571 | 268.406778092906 | 276.351810999317 |                  |
|         | 257.372740535895 | 338.026161865853 | 390.752579014611 | 376.867306473426 |
|         | 413.863345223345 | 357.972320648217 | 379.546197364027 | 396.861835715943 |
|         | 398.075524915003 |                  |                  |                  |
| PIP5K1A | 167.604959895451 | 163.858222964048 | 152.500670025483 |                  |
|         | 156.007630568494 | 146.940545711162 | 145.640156204495 | 134.814082968113 |
|         | 138.43190460314  | 147.248053518914 | 142.988500173397 | 180.667897257797 |
|         | 149.300089212177 |                  |                  |                  |
| PIP5K1B | 154.916023131856 | 151.72544764489  | 153.418095627352 |                  |
|         | 149.308475163534 | 152.197327387252 | 149.228977421003 | 147.722646851008 |
|         | 147.213616261735 | 155.061749542085 | 150.962828147611 | 127.044367488881 |
|         | 142.567737460006 |                  |                  |                  |
| PIP5K1C | 909.388774224614 | 1231.92253664482 | 687.494132125365 |                  |
|         | 1992.71224011906 | 601.401329244185 | 248.613373429151 | 291.883157643902 |

238.782040902727 222.285940575778 225.335753745598 333.745543022749  
245.766885283797  
PIP5K2A 155.603263242813 152.191393042132 162.403942351933  
165.017178571218 152.122141650397 146.362705590778 132.227561632637  
170.87247413028 146.373162751863 161.289708941062 132.428675012593  
163.165374495635  
PIP5K2B 9219.38828280399 9016.04641569485 8401.40370474392  
8532.46059476152 1064.85152398919 6894.63087357693 2886.92690692502  
5122.60899285635 4291.1724030909 2756.22069438696 4183.06379632713  
3391.3005983725  
PIP5K3 157.948814637726 159.665989587555 149.818888178632  
151.026905311756 159.811778680604 153.56082876276 156.740412695351  
156.208747691032 161.325409589612 150.409919207059 144.662545137915  
155.835077077665  
PIP5KL1 142.819669471009 164.955263076598 183.100286716683  
191.200215655114 179.94333102877 163.899808733609 166.485040297098  
141.600833670693 174.347451984066 207.138680369683 136.993102884269  
147.345558455805  
PIPOX 152.752870674108 159.273225917177 147.086734464001 188.291563792748  
106.102093734748 105.179281694336 124.869732867761 107.316786994369  
116.86635524597 108.683531606889 122.557981210434 118.060781901686  
PIPSL 331.684298221133 294.323621186916 545.760623858473 283.807827536147  
343.346755862776 391.569187190375 480.101253056873 724.103864917969  
473.370240289761 658.968318349334 251.347519777204 587.654093308465  
PIR 431.182384100794 480.923468806193 781.461780481171 525.515169794593  
378.088675670786 489.118864124059 537.982214580518 2572.01353724341  
326.83982672544 289.911635155481 862.132582849511 365.864755316163  
PIRT 132.179747646893 126.718380351644 127.245190474707 120.543881800775  
128.927103442679 124.178483414968 133.654232991228 140.154925193842  
120.07404952486 130.582210755516 133.333067546558 124.053190169486  
PISD 311.966971734249 245.900840732668 303.795701960506 328.486476842582  
331.215872600406 412.941907828617 283.760131847707 269.300548648755  
294.997671630798 260.787104931135 266.252875242286 366.705048374078  
PISRT1 150.059862107155 147.2233876988 139.746733428525  
144.977958320895 126.858621735156 129.327645260099 131.481679396553  
137.047288508371 139.709959820327 129.318409053566 136.526706711584  
147.494937826597  
PITPNA 173.586160103539 195.364709354814 193.858884443593  
168.847039069786 173.708509414674 222.794196053536 163.07139884152  
194.312315077985 174.396061906109 222.8766610624 203.04864785056  
248.690121805116  
PITPNB 442.698000781597 452.606433325387 740.527607312565  
565.313436777992 240.814860403562 292.693830444839 248.690121805116  
243.159062832085 260.715580924916 346.566241319814 324.346723939622  
343.767393640683  
PITPNC1 165.031678768564 147.505345299689 150.790155351217  
148.005500924157 252.919704128539 174.483233557264 204.862387642573  
185.154876233931 178.512206531256 293.350292227077 152.61583482402  
185.30916081621  
PITPNM1 190.975263192006 205.804144075374 145.656767712617  
165.436881839632 2053.71550326011 932.505095432049 614.957397883514  
464.196512015649 458.782864873657 766.176882605175 1400.81554054664  
769.34961339184



PITPNM2 140.190234214948 141.86370253437 143.562164660825  
 127.279107079261 123.467227007155 127.065518421996 129.102182717009  
 133.887927451362 126.606163970149 123.635470154191 147.568851471771  
 130.073005698714  
 PITPNM3 118.184571821176 113.256481034259 115.285392699073  
 112.693431140524 118.375739674144 119.373287155621 114.987285062108  
 115.01682934323 119.103219740679 115.29099102455 115.884253217495  
 118.983932995126  
 PITRM1 655.094843900848 588.863382995875 648.38049615541  
 707.173691257322 819.887322757281 1051.45401327176 498.812823949508  
 491.034395489684 360.053590374552 398.971838949075 492.637241687561  
 672.862678078975  
 PITX1 4749.69040198959 6281.01687932005 4965.25728333142 7699.37963536892  
 685.848203651889 570.916936074747 1020.19774509086 476.249239197777  
 731.513306289481 6508.71638048514 425.13721408756 1571.87128697931  
 PITX2 303.051124835907 372.594990024312 460.807117177285 446.819873986024  
 164.717809928624 150.820808770853 140.54700821058 145.835240952992  
 181.508873226705 151.855884026072 138.852212944492 157.259599894923  
 PITX3 137.552979154943 117.274977920103 142.348246621217 132.894049694258  
 143.140502042489 134.115085057026 114.995889945366 139.831964368637  
 134.268075583733 132.854078420045 118.761737418652 147.169765031208  
 PIWIL1 117.873333897609 127.622397233692 124.513891912986  
 115.53736269794 116.445184223804 128.628637585951 112.133567992833  
 117.561878567749 124.952026709219 129.344834474578 264.685862877779  
 125.962178569021  
 PIWIL2 134.474466007553 123.446714388901 123.756349408641  
 131.798931481549 122.408016372747 167.389632521521 126.823886603295  
 123.126240234396 120.436408685057 120.148189532583 122.965328766807  
 121.47058227778  
 PIWIL3 111.908965758799 102.255408120852 103.94864861172  
 110.392617179163 110.190708230962 116.814269969508 116.196676877996  
 109.416512252532 108.683531606889 104.442909315944 120.148189532583  
 100.841352336505  
 PIWIL4 175.96841318924 164.791545858875 193.148369507405  
 146.470444212748 165.607095120227 150.378690719669 141.571389983164  
 147.387754442307 140.258615682066 144.617654961472 143.888318202599  
 129.394359810841  
 PJA1 174.075670633438 180.641419603362 191.445291899108 164.99860393383  
 191.284275676256 199.037998955485 182.711318507496 151.563917522864  
 184.25384366282 186.496160803789 192.168634727505 260.016906472407  
 PJA2 6585.34962362923 6877.52553567598 6044.78942014135 7617.316805798  
 666.344430142655 1507.39761667421 1630.1630053946 1138.00644332379  
 924.312051919404 3136.27991502603 1466.82170436229 1485.776977235  
 PJCG6 175.101284960252 167.984051648058 178.734634888773 170.706932460836  
 609.309339417625 203.831047867731 195.256498208339 354.783364481955  
 293.873921048642 171.345989796519 173.507835230243 225.169110687004  
 PKD1 370.066087375401 443.444024128516 336.981561928411 594.38228123675  
 242.752995772995 158.467572658719 173.592875508663 160.055242985219  
 144.534143943252 180.610891208146 178.766654213173 145.690634269858  
 PKD1L1 150.283447275981 150.70383460714 157.227118680396  
 155.8871985642 151.327544435847 148.206529935876 157.170136439095  
 186.625452120269 151.554352209634 152.379441401583 153.681775929182  
 134.149446827982

PKD1L2 144.090047165489 136.623658204558 142.025834438974  
 132.16600019449 126.569482909992 123.640123613529 117.900892627473  
 122.706176540192 119.000436602325 123.586359806158 122.969215709433  
 126.915338864323  
 PKD1L3 129.476648077532 122.170662903259 118.983932995126  
 120.819163462986 122.295222990408 120.076742232995 117.296972688814  
 125.162662242842 111.577400298092 122.038534506506 116.615250922316  
 120.106270603148  
 PKD1P1 143.247977741752 131.972669163481 163.442257036536  
 123.446714388901 146.218767446679 122.022611139895 147.46607538135  
 142.898851434337 127.9928491829 133.816601264067 128.044165393924  
 136.742206779136  
 PKD2 591.437752991512 410.645457106122 558.440840319738 371.168752104821  
 151.739221728872 277.652851236546 259.374392296079 253.42022722564  
 262.980079074599 205.966111721195 195.353512458837 288.913660405191  
 PKD2L1 140.214475962177 129.236471271181 156.859539612504  
 145.298109334141 152.845126167802 133.625358030199 157.443127950708  
 154.43808450305 146.268073519544 146.316145173343 150.484823814674  
 151.406384541297  
 PKD2L2 126.450300907283 143.763292219833 126.22472822166  
 125.371128588617 131.49577981738 128.663320241092 124.975454733084  
 131.285279061742 124.302581985661 113.292688210897 138.701871179502  
 130.122672154144  
 PKDCC 725.443026984982 845.369108604819 796.439819579938 1542.35486950856  
 154.865107093653 150.960096893517 155.031272695335 153.289258540668  
 174.663845688179 158.135321157995 160.664407431261 143.070170783764  
 PKDREJ 176.980780681976 132.049224908868 144.856801451884  
 179.009510246709 145.056914913573 146.686192012988 151.895142552067  
 161.748547772524 177.93138555339 132.934955542743 166.925695810781  
 158.064409011013  
 PKHD1 123.612648219993 126.488299049827 124.755684505209 126.404523759643  
 117.137027732123 118.81294782091 118.567548265638 130.75707278606  
 123.470830748348 124.897463208595 130.675745275992 119.083957999725  
 PKHD1L1 140.650987394155 147.322622473251 163.487737425232  
 156.84104238878 145.724294862079 154.744065805492 141.665332811746  
 155.76860362365 157.659824861915 156.273445355976 159.59942312149  
 144.46549577902  
 PKIA 267.939624375137 311.449205777595 286.818166898922 286.901115411673  
 1134.64039256323 1520.59210521859 1103.13439876128 1121.87292339787  
 295.507504000509 219.0221768576 577.33849844574 770.632068590053  
 PKIB 133.635784122681 139.025598691696 124.905889975958 127.931887647108  
 172.866517097198 237.249949461085 162.358237198517 231.670761847089  
 141.283042601932 137.804977813144 133.195030751476 145.239119337981  
 PKIG 351.665934915634 331.251075774227 569.133295913677 390.809169896009  
 153.279026396412 172.020235319192 156.727153398506 173.347463632976  
 171.775741648309 164.458565398812 150.279529635193 149.758215028408  
 PKLR 129.969400693456 126.042731009527 120.641590368902 127.368207232723  
 128.912199634685 125.027095330593 130.839508306116 123.386622160181  
 125.277002586952 132.20764558027 135.046003135933 132.461730873857  
 PKM2 405.032674307193 453.875259610173 356.699466789374 530.819778703194  
 742.128229715198 578.811908030805 885.927972780392 410.337491313251  
 672.862678078975 1139.14730341921 895.821578104681 1030.56836625083  
 PKMYT1 146.728881202697 141.414384085164 134.341489592504  
 145.578721432709 462.888171502285 180.085975596327 161.470611189347

|          |                  |                  |                  |                  |
|----------|------------------|------------------|------------------|------------------|
|          | 190.754349388901 | 180.518621542868 | 184.204036882642 | 138.631273903053 |
|          | 201.530921073488 |                  |                  |                  |
| PKN1     | 262.196293231028 | 289.761702484888 | 219.878230463206 | 358.60777927888  |
|          | 337.342034950908 | 184.426874913406 | 160.466187961848 | 170.390200730789 |
|          | 170.417054311946 | 144.090047165489 | 168.082591651722 | 150.927628184034 |
| PKN2     | 352.741885295157 | 344.786541451395 | 370.877260088621 | 308.564935340635 |
|          | 264.741946816665 | 392.13175568099  | 340.193863653875 | 319.927209914181 |
|          | 254.936706344174 | 376.627801547869 | 397.861172312706 | 325.12056698785  |
| PKN3     | 147.870549240703 | 170.410704499804 | 135.675570204709 | 176.631604815669 |
|          | 261.028644858795 | 145.633647856775 | 124.387133895009 | 148.206529935876 |
|          | 154.153249796248 | 170.140610481718 | 178.939268046323 | 127.924195488323 |
| PKNOX1   | 327.749926183823 | 312.808044035117 | 281.926552464214 |                  |
|          | 359.703969802888 | 199.037998955485 | 222.544542998356 | 234.461229199142 |
|          | 239.388546850124 | 240.836979012241 | 236.745054217055 | 239.33642662112  |
|          | 189.225893411944 |                  |                  |                  |
| PKNOX2   | 214.763232658841 | 195.316077537716 | 151.905534823403 |                  |
|          | 175.372355078713 | 126.659859384257 | 130.907879150229 | 172.438141471784 |
|          | 147.454902803231 | 133.576812299149 | 136.423161205425 | 149.582406567077 |
|          | 123.031945101045 |                  |                  |                  |
| PKP1     | 154.558968826495 | 149.63291071048  | 146.450806121927 | 145.323212897142 |
|          | 160.459100056689 | 144.505072819693 | 138.307574579062 | 140.330400168187 |
|          | 177.652022895288 | 2141.855356411   | 193.753062958207 | 478.38361571213  |
| PKP2     | 128.920313557255 | 137.982667022604 | 130.352674121108 | 129.798965780918 |
|          | 219.171591031864 | 173.929353266244 | 160.937256625847 | 147.132625797946 |
|          | 170.596937075493 | 237.575788579215 | 155.846106540378 | 170.505553609318 |
| PKP3     | 132.492444216154 | 141.619432083003 | 142.448384713937 | 138.323567041191 |
|          | 172.030687707578 | 149.684922983176 | 149.100294463597 | 144.914015211747 |
|          | 141.743873995642 | 364.597798667541 | 180.80811429888  | 154.046550866249 |
| PKP4     | 291.221427744817 | 299.754985162237 | 350.983969007868 | 331.888150158628 |
|          | 356.699466789374 | 302.362619893594 | 303.858574395969 | 292.60467054075  |
|          | 288.436880408624 | 314.221257518059 | 265.260411490697 | 309.283897272661 |
| PLA1A    | 157.575902297677 | 173.240598306749 | 146.349773982488 | 157.463122989559 |
|          | 160.43939815269  | 134.049094181433 | 157.240466990977 | 168.935348409102 |
|          | 214.434355263652 | 150.731093808891 | 158.135321157995 | 160.096507818256 |
| PLA2G10  | 146.368188849777 | 180.164353124488 | 190.975263192006 |                  |
|          | 148.386249316173 | 433.314881387431 | 184.775001243453 | 215.950811436427 |
|          | 234.020419732787 | 187.325542100762 | 161.34427428845  | 524.541494680558 |
|          | 310.23294370018  |                  |                  |                  |
| PLA2G12A | 160.565049887783 | 142.059921012561 | 172.8993416872   |                  |
|          | 150.893280574091 | 166.263781040251 | 148.332750352364 | 190.405863264717 |
|          | 160.822287037366 | 163.600888221193 | 152.524106827617 | 145.937733795336 |
|          | 172.836730741407 |                  |                  |                  |
| PLA2G12B | 147.187681416171 | 149.280480796544 | 165.900156600776 |                  |
|          | 146.002585729701 | 131.825172822888 | 161.85913459364  | 142.238908711402 |
|          | 157.443127950708 | 144.510062568989 | 163.004844049672 | 158.594064857041 |
|          | 166.192990554427 |                  |                  |                  |
| PLA2G15  | 248.613373429151 | 240.663883443935 | 207.560911665319 |                  |
|          | 276.284517459626 | 407.152764702613 | 259.935831886014 | 278.737944234055 |
|          | 239.474937674583 | 220.999383789474 | 199.620978536397 | 212.363151537303 |
|          | 212.78038645414  |                  |                  |                  |
| PLA2G16  | 156.957578703389 | 151.690538050817 | 164.816672737691 |                  |
|          | 143.122278808091 | 127.745801270205 | 157.344758285153 | 155.27707167384  |
|          | 145.371273337639 | 141.346722137248 | 138.074645385322 | 153.440952021924 |
|          | 129.194132399305 |                  |                  |                  |

PLA2G1B 120.790536146461 129.246066890078 138.504398858454  
130.714375454354 131.785053503951 130.588481497083 140.377179372804  
124.955676894776 140.096717188376 122.426568507144 116.176068923513  
137.605244950708

PLA2G2A 287.83303360511 193.660159482867 187.73896437823  
233.496804016764 925.009157785129 176.038123840296 2500.07677977147  
139.109712542702 192.07791693203 163.833372505148 313.077481033093  
1967.82064011967

PLA2G2C 126.292433523959 138.165240772401 137.697452180659  
132.730924522748 141.490911535087 138.088712695622 130.471929699923  
127.827096314406 126.506749037908 125.609542142983 146.357214078158  
153.405052909585

PLA2G2D 700.877661166739 739.874432767734 588.197697799448  
636.048536814356 243.35880641566 656.867138022837 414.114051645565  
564.948126039762 439.023181761356 390.372738176917 660.315285709317  
493.622989939072

PLA2G2E 144.195705502443 124.668658660052 122.676368520743  
118.879931299016 124.443643568527 119.466200987489 134.565199667396  
122.216479103528 124.342911165267 130.4631522533 136.413745926388  
124.39748786803

PLA2G2F 155.496190048502 161.189717452004 137.563246867433  
143.021435512861 560.015499136193 372.374101464689 488.379057110543  
543.710330214344 628.710901107436 153.097557560333 277.652851236546  
237.358925391616

PLA2G3 114.68345964966 130.321133400634 119.164791441052  
113.470356909765 111.286141277084 114.913534674899 110.212739445  
125.815256068004 122.20752192519 140.881084272745 122.759905480504  
118.737244693366

PLA2G4A 182.074569356713 180.132104305583 205.200459980187  
169.520544329439 171.433001048839 147.643985046683 167.70368494182  
171.545695383454 153.597557478169 163.500384982242 317.00629920068  
165.870621884073

PLA2G4B 658.746224115551 520.470790410856 652.826023701545  
485.136339836897 345.627266482686 502.170430910893 800.739422189427  
770.19255305977 784.412433571927 2104.59597571915 901.197085099854  
1016.18143428327

PLA2G4C 589.240581642145 511.891269255193 484.903322308422  
602.86705608228 140.401508808129 144.349602838518 145.530904040477  
159.606633817645 227.467161919443 160.713790305656 172.909795209733  
140.712618356383

PLA2G4D 140.912921321622 149.88598449818 141.815571093975  
158.193008411967 147.803464591663 148.578012060425 148.370331097467  
143.00521196918 150.75878820215 144.850211439338 145.554769316657  
150.587882657674

PLA2G4E 116.981243525714 130.677737553727 123.638001112969  
122.514826802737 124.530660958725 125.150706047419 125.915689078001  
127.123123583856 132.135448831967 178.12073430094 140.760983862166  
130.362947205472

PLA2G4F 129.145457341484 139.138329217724 121.248923222807  
109.832757716464 235.216589534371 131.188208693139 239.924227955313  
231.39684528494 175.98210925643 276.756415094228 240.663883443935  
622.348802511009

PLA2G5 298.573180660083 298.403224729528 293.528601172819  
452.077434390612 164.553511697702 147.409936250284 145.604066669916

149.127963327999 138.096262211809 149.419308407564 146.599636794606  
 155.933739693912  
 PLA2G6 159.327764602722 160.322541355391 150.43722766614  
 153.616692588396 159.110614190088 148.294870328642 146.425476034368  
 139.637148328497 150.048431572712 148.907136936731 156.430981244063  
 148.753891406126  
 PLA2G7 148.463566046951 152.049243916141 138.480633738745  
 133.31378749951 152.331011756244 181.247766545135 191.146276657897  
 480.101253056873 280.292616101827 230.015981563049 192.032080013216  
 152.071081175788  
 PLA2R1 156.18389905051 145.835240952992 145.505223177269  
 145.737361356678 131.76272538453 163.880402141404 168.818595386221  
 151.849653154534 148.484823275343 157.349727430526 180.619956937489  
 184.505279093688  
 PLAA 212.190707408572 202.324795686879 202.324795686879 219.996410908721  
 183.951404362826 210.64483507528 170.734355440231 175.044940252247  
 162.188509438986 189.575681012578 212.822328466993 163.85327708023  
 PLAC1 134.725434838052 131.946938297748 124.777895136212 135.697550878438  
 136.19083681188 132.550022967297 146.194467350201 183.152005135504  
 127.180743851077 143.219722736891 152.524106827617 126.788749235867  
 PLAC1L 154.617462666847 141.114148695402 145.226278521493  
 137.269267022826 145.576880854443 145.298109334141 145.463105638655  
 144.631407964232 144.631407964232 135.873325130921 145.296229550382  
 150.227629690236  
 PLAC2 127.731816003312 133.959208066964 124.910390240995 120.13869466889  
 160.923897048848 136.432109029368 121.988237521196 138.618761382177  
 131.551085224112 151.722405598425 132.902437860565 130.66863243733  
 PLAC4 122.414781975236 118.470400686096 127.482662155082 142.729945734027  
 137.756209496729 125.154784284706 118.558673085303 120.957197551997  
 117.380281099932 118.021169080914 109.46255295836 155.227218488935  
 PLAC8 145.407517107023 144.487533992157 138.216926722025 139.253721683078  
 169.043206258073 135.792966926642 238.548578086943 182.67941458824  
 328.680312364877 141.743873995642 432.969886744613 166.640325848102  
 PLAC8L1 137.201149245092 132.306569548052 124.851025681014  
 120.043811428091 128.905042692431 126.555972138115 127.352386363217  
 167.397758092427 124.578552584603 122.136861827049 139.714198638713  
 125.995374488153  
 PLAC9 2756.22069438696 2045.24382334506 1017.6969123529 2334.97297889593  
 151.426110043584 154.136467767927 121.468398802591 152.545261723881  
 223.918931440768 164.857465272302 160.499355902773 147.049287475127  
 PLAG1 145.648810303756 139.831964368637 148.627264102939 137.658183450715  
 142.421913396368 144.765051967884 138.726894569892 150.073816271065  
 137.911816180518 181.088268167074 144.217621961908 185.220017451419  
 PLAGL1 260.356834114611 201.016287924499 185.17273221366  
 164.309588213547 127.597601325212 144.592987736094 130.804850476451  
 141.393814611166 187.389039221193 327.480268032814 135.966929064294  
 131.155117105954  
 PLAGL2 230.589110372454 243.10297424873 255.945470052489  
 235.216589534371 244.307627077001 337.973433871323 407.244564912365  
 297.071121022183 345.977609212137 224.361277033882 251.993821914623  
 371.941204080246  
 PLAT 1178.83933381069 1164.22995893381 414.403321220432 703.29965727829  
 267.222762759781 407.152764702613 1067.30106203503 276.414209660023  
 437.770841893227 526.726224327409 177.16711492983 238.685014863143

|       |                  |                  |                  |                  |
|-------|------------------|------------------|------------------|------------------|
| PLAU  | 305.200911653347 | 442.590987372759 | 252.957489543915 | 395.786295710815 |
|       | 555.959424692051 | 313.581986704048 | 1559.26487922551 | 306.677271064305 |
|       | 606.679284487803 | 1645.05161227372 | 682.075583857856 | 554.282040414368 |
| PLAUR | 149.601145171769 | 152.038902807701 | 135.453399741892 | 132.981346767415 |
|       | 192.095235288818 | 211.183499580683 | 208.14618424983  | 189.348690353874 |
|       | 213.432084172541 | 389.177193459    | 163.495175710216 | 198.390247605355 |
| PLB1  | 134.325520377207 | 116.998277297063 | 119.233300586525 | 126.401145439668 |
|       | 121.68422452     | 115.35376992547  | 134.830021570666 | 118.963119420175 |
|       | 113.572326615571 | 119.164791441052 | 131.841436867483 | 124.794260959228 |
| PLCB1 | 329.779210536849 | 323.51769984082  | 288.542264120468 | 353.571106279836 |
|       | 469.714826990063 | 256.795346052751 | 201.365457496683 | 229.689010178622 |
|       | 173.782474972742 | 172.050718136571 | 275.794847140407 | 274.891033696257 |
| PLCB2 | 151.993651822163 | 128.697647007046 | 126.893023101449 | 137.803749343493 |
|       | 162.786351190659 | 116.186846885411 | 126.274585491044 | 143.641777655752 |
|       | 179.828494168009 | 134.94189148503  | 198.522123898437 | 404.95944990868  |
| PLCB3 | 158.150949554785 | 134.653131708903 | 148.977202433511 | 147.011838288594 |
|       | 180.733673680261 | 134.848210768603 | 151.089328533476 | 149.881708604156 |
|       | 142.452409969639 | 153.443397882028 | 173.690008681514 | 162.178410412809 |
| PLCB4 | 240.376851873817 | 271.791126011275 | 293.080122239022 | 281.405355165228 |
|       | 171.265160295274 | 167.764352429391 | 146.923382271905 | 172.03919618445  |
|       | 143.607579034109 | 138.237030685795 | 153.571517567657 | 154.286043402527 |
| PLCD1 | 246.031568259337 | 288.505502880424 | 251.268669431283 | 339.598452080917 |
|       | 321.524921332256 | 221.297127685676 | 303.795701960506 | 709.136137559152 |
|       | 307.866499851733 | 377.462793982812 | 246.616749748028 | 232.200025766422 |
| PLCD3 | 199.170488640762 | 200.045606111354 | 215.673878830563 | 211.786963444117 |
|       | 218.298791348295 | 210.761398461329 | 218.269847477919 | 179.905809470907 |
|       | 224.981439707657 | 194.352807599399 | 367.130155304037 | 389.260166168847 |
| PLCD4 | 551.350758868377 | 581.191693771646 | 714.91842349236  | 979.761537450366 |
|       | 125.693321471759 | 141.073316497949 | 132.700404009928 | 142.934869757362 |
|       | 132.273354705213 | 136.907453440141 | 133.897397228615 | 134.053685488055 |
| PLCE1 | 206.35895739543  | 194.430896269275 | 202.145180994821 | 154.150568177135 |
|       | 205.282221255986 | 233.842749683689 | 227.418630852215 | 283.123157828849 |
|       | 166.506602328929 | 142.537484065487 | 839.324324662619 | 346.356312668445 |
| PLCG1 | 485.026081242201 | 527.139476504986 | 499.176926371542 | 534.276129011237 |
|       | 331.523536427527 | 465.102234374389 | 448.644778906048 | 357.835334661098 |
|       | 382.806570442504 | 428.782703561238 | 207.05325577114  | 421.140525880287 |
| PLCG2 | 320.467139255533 | 406.900412510895 | 313.888035511709 | 511.670320118232 |
|       | 243.425632941131 | 207.368252249039 | 465.926873285563 | 747.804958601763 |
|       | 560.913732951675 | 354.205670284123 | 652.654673756838 | 461.482735533799 |
| PLCH1 | 164.61921356441  | 149.907472831817 | 147.51773051441  | 158.171302275984 |
|       | 182.919385608842 | 145.542888937635 | 152.593934787262 | 179.55905250703  |
|       | 237.146972312448 | 150.534608517044 | 150.098708715617 | 162.072695554798 |
| PLCH2 | 254.013921962363 | 233.59297160203  | 197.51109998167  | 162.743192424569 |
|       | 493.071213662125 | 454.732029358748 | 744.808064061459 | 347.081036934975 |
|       | 435.037306125887 | 538.605085454393 | 1427.27262061653 | 1360.85309203233 |
| PLCL1 | 191.795952536469 | 182.938824846376 | 186.127543877065 | 181.85552254233  |
|       | 144.516274148451 | 154.861507590906 | 138.628169506372 | 141.373059612034 |
|       | 148.751755543817 | 151.687402863648 | 156.427158441352 | 153.178934750919 |
| PLCL2 | 272.277433294605 | 267.190228116903 | 197.112749959833 | 259.979459472217 |
|       | 178.676812740925 | 181.771654391653 | 171.768618884215 | 192.954269340616 |
|       | 247.015574724901 | 175.372355078713 | 257.813193543819 | 166.563411635721 |
| PLCL4 | 155.243643210534 | 149.383429241903 | 148.812015298003 | 154.725484895098 |
|       | 159.674396591041 | 151.933078262284 | 176.371404525626 | 146.940545711162 |
|       | 161.437972329744 | 159.324816814876 | 169.725534829981 | 183.82450756022  |

PLCXD1 269.300548648755 195.929328710358 256.964577037118  
 247.053215951505 1010.05884008623 986.972987865318 517.881547706391  
 579.923640505245 908.704610877319 275.841929188802 302.768870633398  
 574.262112643403  
 PLCXD2 123.833219705499 119.862037840843 114.644722005728  
 129.949894903048 114.072600760808 118.646119379542 116.819107878692  
 110.694256186941 108.955761698524 138.311892121437 125.863969666806  
 107.103635692135  
 PLCXD3 209.051768656607 164.647634120888 189.434597063058  
 212.497773003032 139.099483279141 181.453575300661 139.461389827666  
 165.995251661994 141.221162787167 129.256138453675 138.223001481672  
 135.68481384332  
 PLCZ1 146.286319248569 134.463094391766 141.129013595331 153.664503112778  
 141.043668963717 151.153466809603 169.725534829981 138.807031587657  
 145.724294862079 156.594337089784 141.78867917709 161.724388995749  
 PLD1 227.288015854809 215.194909819764 184.267958772058 214.413674287972  
 141.544454931788 160.598186999524 210.316431648335 166.411219327671  
 170.028047334267 489.528040775004 250.676092725829 193.245087824217  
 PLD2 192.188662949149 177.204172894028 174.08222895937 185.295480519718  
 190.754349388901 205.821101661022 202.504840299605 201.865955150869  
 160.735428753783 247.407442038488 290.090495047722 195.816317534388  
 PLD3 378.585058475083 382.902151239988 330.241479004885 422.02217814979  
 1026.61404215739 643.905401805862 832.014011481807 530.561387049511  
 619.995008098949 401.461825804111 354.336462793628 376.082040863747  
 PLD4 153.143706194386 158.653161314597 143.053727675518 155.690773461824  
 160.979182561773 145.671099346237 150.680628549529 174.09267813338  
 160.085325256991 146.326067008478 157.799067644342 167.190857452131  
 PLD5 175.073595611435 166.239339129505 154.193086881801 152.495540563792  
 134.356796881432 145.39813290003 137.830435972191 147.565485281003  
 122.220327032799 129.608034744581 145.393431956588 131.157702791998  
 PLD6 346.691690520054 360.684900316265 424.665056900526 411.285747588622  
 196.598810934837 220.742788129847 171.262412981612 181.135519188216  
 149.726968520487 184.602704530362 157.490138425943 143.21411610625  
 PLDN 3241.23835624706 3384.19521857242 3152.64817044581 2662.43181510326  
 424.495400604335 2882.51330563735 1427.27262061653 2032.50052162637  
 1673.5387396582 1399.41653736746 2660.39990175415 1608.40826380713  
 PLEC1 174.979501466228 187.812436252228 164.347168837655 209.662262708551  
 205.546628064296 152.77616981167 152.550031868259 149.05280915667  
 159.762733951454 195.513703253634 184.135651836627 192.113217321485  
 PLEK 193.124599671798 204.237952297239 149.343930487315 199.597685421675  
 178.563665283267 206.446584387595 193.569894919176 308.564935340635  
 669.124699103132 570.533103778482 374.406855727422 218.862705238592  
 PLEK2 157.252701277198 158.712241098927 155.979380606594 147.547944397578  
 209.004374703564 187.461448376593 217.86728342043 249.379605914827  
 146.21362402936 664.60530723006 467.777995124655 618.661249163439  
 PLEKHA1 670.097523566652 659.106229917309 661.390308090982  
 497.759125486158 416.715760038095 772.399017166118 804.800251415824  
 604.687265229902 600.264940641426 703.815551883635 1240.4863200811  
 809.362464219294  
 PLEKHA2 313.581986704048 340.728888109597 323.788197265954  
 339.252515920242 556.863361789449 430.329437928013 356.699466789374  
 274.534901548678 278.385151185788 267.028096234702 490.631757904175  
 413.863345223345

PLEKHA3 174.313718712035 159.110614190088 151.663203772586  
137.968932080074 155.166786601813 186.244764337256 184.518666956721  
156.572774198042 200.001438979007 157.940873610797 165.496065029161  
172.157660228549

PLEKHA4 638.393099392849 666.204695328096 333.049612399093  
1021.25947613827 369.78624104057 236.191384383802 215.453915231774  
170.910998705968 257.706904467657 171.722839172783 149.385103319547  
177.630246034993

PLEKHA5 405.766055310869 418.645775576811 459.854279050269  
359.518199449791 274.281532397691 289.724297749772 320.936905584424  
292.839392578318 286.996908547553 228.384686248604 359.162549472301  
261.028644858795

PLEKHA6 552.790706181938 376.962937292973 322.684910198242  
456.817057099146 270.421697521366 225.130011390856 279.159925913207  
192.767155566493 274.934292929666 141.588478913204 726.346459754217  
597.651682540611

PLEKHA7 159.49930229951 172.774914399844 146.675159409376  
140.269160279333 267.149525812834 225.783771938969 370.555627307623  
210.761398461329 312.080864996592 176.155413809391 596.743397794872  
294.115163083721

PLEKHA8 118.05386204863 103.398929051742 129.415078042622  
102.851152421943 107.697601478064 118.355532305846 123.161953011069  
115.664551127497 130.526673128214 117.303671445328 157.006278815282  
138.902097203056

PLEKHA9 381.4054004349 361.390981655795 307.982260548106  
486.524284354103 209.146021798649 148.448349327493 251.959823608766  
344.856199123543 286.376638135463 221.471811658459 487.901310664037  
287.967349876429

PLEKHB1 210.751430486845 198.631354372924 209.304654633004  
260.715580924916 258.998065427002 139.555322603323 144.87013280941  
143.363002903815 140.142884879106 127.287538993899 149.714982846365  
141.446916444258

PLEKHB2 200.264756078778 196.716209382446 230.332652534446  
208.016730103629 186.591941221632 283.760131847707 258.16437138327  
272.854435771465 299.390443444504 310.758803815671 296.088938872643  
334.443733461841

PLEKHF1 347.224999246223 448.767690095033 451.380376296813  
440.038896046559 576.873245313776 656.660582895703 436.482580413523  
687.987647193563 627.803400871547 261.322374889497 591.013515828247  
358.780920910909

PLEKHF2 151.037282417145 156.090871391873 152.633139090274  
145.01322767825 189.235998474945 171.714973501563 198.94325874493  
176.138621462315 213.274106157675 201.085046871333 231.372316734945  
182.384190694142

PLEKHG1 190.700515036197 186.112835637689 149.959767051801  
164.836381332774 211.869300324471 239.649306804266 243.336550161566  
273.369722814068 285.102778078056 194.092089507551 220.9384439772  
246.061496821699

PLEKHG2 172.237115475147 185.332215198617 138.199559519849  
210.620764703468 180.047231265069 144.41489969974 150.367927843529  
145.745466612541 163.534117903837 159.438084699061 152.067897082883  
136.871568211946

PLEKHG3 557.513306351027 729.729297413233 791.137867905579  
1022.11537745428 557.868300839263 215.335795337978 394.294057009443



179.400220328552 216.506914782226 975.685771692095 929.198774489695  
793.300636780035  
PLEKHG4 194.161930642068 195.795728497916 162.933658389727  
207.453490385508 593.821622986351 341.501397478593 261.322374889497  
202.545147073902 171.896929562022 166.17959304455 150.960096893517  
484.903322308422  
PLEKHG4B 110.636713168363 122.624828884731 106.393497890486  
122.056070994213 115.600308687778 116.486929280635 105.712302595131  
108.247365868673 106.603674195422 104.483909687253 127.420678243564  
119.131613164405  
PLEKHG5 134.30624644595 130.701801496564 133.384498169568  
130.506708993193 138.730409717578 127.121068682846 134.924082270115  
133.167635227902 128.678484452077 130.957441406855 126.830269821364  
142.155463269751  
PLEKHG6 148.353927712013 166.64535048582 155.665535235558  
154.87316176388 513.20896845398 189.647009287524 359.440639663655  
413.502150181875 341.43511159996 141.520125030042 336.70893120135  
307.410175748955  
PLEKHG7 151.92638745703 149.190528937822 148.663860923774  
147.310807346272 133.800111596565 135.237042337721 156.94531513373  
144.528360135884 180.478294414245 149.288034848931 164.787637367264  
142.734103971267  
PLEKHH1 158.699778625671 149.702048490465 145.957934576055  
144.12742465348 233.192751618176 317.839512360245 372.594990024312  
383.407365952689 239.452559981542 176.912121142015 531.217306770605  
402.824964079515  
PLEKHH2 216.559563381808 181.070689877681 198.760049629983  
152.439608473915 123.122705969332 126.146213417225 127.247764390727  
138.968690339299 139.268497466017 165.659978250378 214.082408290757  
140.058153633802  
PLEKHH3 428.782703561238 584.548578914846 484.131020584378  
596.246316033079 924.312051919404 816.266384662324 1213.06007305892  
960.775251871864 716.731984660463 813.454826901794 1129.76078220457  
1124.67710585154  
PLEKHJ1 174.389706515542 153.358189612307 152.409211647994  
229.157389498775 251.546290552828 261.988345506548 226.35854874278  
179.551640851353 208.690347128273 195.618369827396 258.25658838015  
258.807028561407  
PLEKHM1 194.186994486095 223.551813819581 236.052008824688  
259.511314588868 300.602422224047 191.486717579847 273.806452412737  
282.244214637625 241.706645643141 293.646275396425 372.255208814622  
218.156162474715  
PLEKHM2 1096.10636044885 1097.18236659974 986.441377365124  
1454.94889750152 1656.02721259517 984.181272274704 1077.95929298567  
941.572186137467 919.626220838414 1371.56635975955 860.315938621256  
702.265884752474  
PLEKHM3 121.286130275542 116.604371744082 114.528407572496  
113.852849454448 114.032874859062 110.16174213285 105.952640312359  
104.285022032604 112.046615825307 108.830525786872 110.794219964997  
111.1002996982  
PLEKHN1 183.3378528327 199.714647839712 195.481680273686  
189.044966519228 357.35857422585 218.811490883852 244.251315474587  
193.358728044565 173.681078272467 199.681103910705 333.91440669951  
246.031568259337

|         |                  |                  |                  |                  |
|---------|------------------|------------------|------------------|------------------|
| PLEKHO1 | 1544.45026075974 | 2001.92441724356 | 1963.23068846837 |                  |
|         | 2611.61260614408 | 391.569187190375 | 457.411248351795 | 398.61164689194  |
|         | 358.780920910909 | 501.166869173253 | 371.168752104821 | 280.127735578097 |
|         | 319.352940751688 |                  |                  |                  |
| PLEKHO2 | 509.01330998156  | 473.057488824363 | 239.572670410818 |                  |
|         | 473.853999833395 | 269.424055734143 | 146.652641667543 | 145.08246303652  |
|         | 172.128489882364 | 195.755450324985 | 174.515815532892 | 203.17525411575  |
|         | 146.996442729408 |                  |                  |                  |
| PLG     | 130.465221782084 | 118.802030418792 | 123.7615105541   | 127.044367488881 |
|         | 129.452826518288 | 123.922817231917 | 136.578058206829 | 124.561511833959 |
|         | 130.274288258599 | 115.184395637553 | 108.461141538047 | 119.897193425305 |
| PLGLA   | 139.127442770828 | 131.804952187685 | 142.266177608209 | 140.48372620406  |
|         | 147.439303942026 | 148.641780441227 | 144.619374612317 | 147.314687795555 |
|         | 147.371905597494 | 136.648306684974 | 149.394952856085 | 150.46224324459  |
| PLGLA1  | 136.570817174009 | 138.062345982865 | 138.624689897665 |                  |
|         | 143.078022283871 | 135.980886879513 | 145.144401160102 | 137.976533193418 |
|         | 137.063689600869 | 137.376602654929 | 134.668233738635 | 146.851307767958 |
|         | 144.694679571377 |                  |                  |                  |
| PLGLB1  | 151.70035428516  | 150.942078067308 | 136.2727333616   |                  |
|         | 146.135269553731 | 137.335501759561 | 183.04531185589  | 134.46743016543  |
|         | 144.678895821726 | 143.442361602626 | 135.957972463728 | 151.024201732633 |
|         | 141.0009397801   |                  |                  |                  |
| PLGLB2  | 170.394088019518 | 158.895584550655 | 166.692386207143 |                  |
|         | 182.851203073653 | 152.346098251128 | 164.865846124876 | 146.893429874574 |
|         | 161.241165533091 | 167.612577768782 | 150.655359765209 | 155.917655560227 |
|         | 162.547569833931 |                  |                  |                  |
| PLIN    | 144.380485359951 | 150.963667177658 | 184.954673605577 | 150.343825300998 |
|         | 159.070355781276 | 157.358696886078 | 149.44520146627  | 158.550259547851 |
|         | 132.602336133471 | 155.92082882492  | 127.800634041606 | 144.068734533254 |
| PLIN2   | 409.592855687405 | 438.231717096337 | 631.106334754678 | 365.140886302762 |
|         | 1057.80846320642 | 986.441377365124 | 1510.77099418802 | 2132.90676194993 |
|         | 640.568342662067 | 467.347509383673 | 592.079898463345 | 364.840751972169 |
| PLIN5   | 1914.96285167893 | 1830.56003081769 | 1683.83803339436 | 1238.11700377838 |
|         | 349.910535555712 | 1758.7809492929  | 719.13080264227  | 1906.81344236287 |
|         | 913.934874451961 | 927.137881369911 | 1303.33810980467 | 1021.25947613827 |
| PLK1    | 146.336371857755 | 138.462826342765 | 129.340996658802 | 137.408247668043 |
|         | 233.347820352278 | 174.707059022891 | 140.936204899093 | 187.30908753142  |
|         | 177.919885012006 | 183.815810733176 | 160.315029612814 | 150.596350682411 |
| PLK2    | 156.843997723699 | 171.155660467037 | 138.594435323838 | 149.450921195838 |
|         | 147.530719472217 | 134.896349513392 | 138.055909969804 | 120.212294184999 |
|         | 135.641355114263 | 424.855168311509 | 225.4575611466   | 132.399633003253 |
| PLK3    | 121.886886059038 | 137.96452133771  | 117.958297137758 | 133.722739936347 |
|         | 133.297361715205 | 120.581554457723 | 122.878790127038 | 128.449200385351 |
|         | 119.937665469629 | 131.975248488461 | 161.678137139371 | 131.056011738962 |
| PLK4    | 150.746423638097 | 158.153875553171 | 155.413300826229 | 169.179630363359 |
|         | 242.299252896647 | 381.323457262383 | 273.353254857377 | 483.312894744803 |
|         | 390.670702155192 | 369.906476027936 | 186.359770878343 | 370.466403181536 |
| PLK5P   | 129.666957539624 | 143.038248313305 | 120.735176435195 | 131.319783710908 |
|         | 122.978576290038 | 128.324383749931 | 127.578272480621 | 123.843823256462 |
|         | 122.881793230233 | 125.828998007608 | 132.342063356763 | 138.712529531951 |
| PLLP    | 169.556358586336 | 176.940723174814 | 178.537080546119 | 170.541689758579 |
|         | 234.5655184349   | 186.112835637689 | 232.492398623889 | 188.444498848767 |
|         | 154.493246900289 | 198.374163029174 | 293.350292227077 | 176.622758931306 |

|        |                  |                  |                  |                  |
|--------|------------------|------------------|------------------|------------------|
| PLN    | 394.576038252334 | 407.957436380989 | 425.348619281876 | 487.993796425035 |
|        | 148.821145290177 | 156.477249817844 | 152.042744996136 | 162.47662918768  |
|        | 161.799743586569 | 153.579955370444 | 135.913632939299 | 152.237183848896 |
| PLOD1  | 1582.0221231161  | 2000.47497636965 | 1133.22524345111 | 2718.440149645   |
|        | 3258.07532987071 | 1231.37475540937 | 1699.17470788219 | 1237.56662467492 |
|        | 1013.60354455825 | 1759.9632914516  | 765.532997390972 | 888.371107987343 |
| PLOD2  | 600.162650426961 | 549.460612060753 | 747.804958601763 | 510.434895296759 |
|        | 520.120193442648 | 323.462252156562 | 1441.29676998365 | 282.076744753348 |
|        | 374.268489263941 | 1049.52258147141 | 256.326661031361 | 504.436992949763 |
| PLOD3  | 740.196934996626 | 789.971871940893 | 685.354305381323 | 1053.65938651514 |
|        | 2311.05587511258 | 773.803350315426 | 635.819650434542 | 692.945420109927 |
|        | 544.956712516196 | 542.267204956846 | 486.524284354103 | 1056.43975075255 |
| PLP1   | 239.762135294506 | 214.4829383264   | 187.700723296295 | 211.118308738617 |
|        | 146.157459765796 | 143.644862018676 | 144.792035839249 | 150.584633044901 |
|        | 136.614620534169 | 146.984888309556 | 148.231928963878 | 138.381508741146 |
| PLP2   | 385.238961394234 | 343.767393640683 | 377.148528768679 | 426.032234135861 |
|        | 336.845908630493 | 298.926727289387 | 370.617422894068 | 243.308625792448 |
|        | 244.849563563729 | 780.734359041347 | 816.823443819069 | 379.546197364027 |
| PLRG1  | 796.439819579938 | 750.494286476465 | 1084.10984365393 | 666.847934976479 |
|        | 374.268489263941 | 728.485195792194 | 833.198511430615 | 714.91842349236  |
|        | 1051.45401327176 | 1148.80141486692 | 651.759589129833 | 818.761934233826 |
| PLS1   | 145.090639086338 | 164.959415532174 | 152.11446058397  | 143.812863334832 |
|        | 411.451612988791 | 366.473258467746 | 383.033242143031 | 528.478292835214 |
|        | 587.388038484307 | 200.001438979007 | 607.499206410372 | 292.893332413185 |
| PLS3   | 1129.15018335354 | 1061.79595707572 | 940.716682221364 | 1062.749459378   |
|        | 1186.96351738518 | 1141.49294161587 | 941.936830901588 | 537.419316887523 |
|        | 1136.14069801696 | 1955.96772733047 | 1004.97723186946 | 677.9972761887   |
| PLSCR1 | 195.474525582555 | 161.390489603929 | 190.357437485436 |                  |
|        | 169.691392833277 | 184.989027770708 | 240.511797905018 | 259.094411953361 |
|        | 238.461248099002 | 337.119524477446 | 243.225815954365 | 248.010317392179 |
|        | 253.65959805538  |                  |                  |                  |
| PLSCR2 | 131.351303131574 | 126.50870982427  | 121.322817570375 |                  |
|        | 120.644987579644 | 120.80221197797  | 124.403662787819 | 125.256339476772 |
|        | 123.467227007155 | 123.424145707079 | 122.414781975236 | 127.193553054979 |
|        | 128.309602266886 |                  |                  |                  |
| PLSCR3 | 1223.68146968716 | 1306.20183851747 | 1536.52218968817 |                  |
|        | 1440.14449872047 | 1966.09691567857 | 1530.45813438919 | 1592.29734618345 |
|        | 2026.85580212422 | 1375.76915021882 | 3706.41283595794 | 1687.06111969368 |
|        | 2615.07927836881 |                  |                  |                  |
| PLSCR4 | 661.096668635469 | 685.354305381323 | 665.106631364961 |                  |
|        | 657.231047829537 | 159.798024189461 | 172.387657419201 | 199.235895708128 |
|        | 193.95909424044  | 195.816317534388 | 245.399847987183 | 206.669783013221 |
|        | 188.417078622503 |                  |                  |                  |
| PLSCR5 | 137.401137659118 | 136.601220755282 | 139.834535091869 |                  |
|        | 147.132625797946 | 128.23432652395  | 125.75980494927  | 138.280481662932 |
|        | 121.884067622971 | 134.58799530734  | 127.903393519351 | 135.206755687105 |
|        | 157.061602966797 |                  |                  |                  |
| PLTP   | 953.861218000678 | 760.070180572621 | 686.028214419557 | 599.307072499899 |
|        | 1096.61874892572 | 639.38881853171  | 885.713964813911 | 467.347509383673 |
|        | 477.160464512705 | 329.068463281182 | 485.576566972696 | 430.100415399881 |
| PLUNC  | 165.752558888845 | 157.499803444188 | 150.494260282384 | 172.338509138759 |
|        | 182.873752254411 | 176.267796612066 | 166.622070620588 | 141.315230997077 |
|        | 146.528945049588 | 169.733427590141 | 148.423303776817 | 141.484730939562 |

PLVAP 304.237479317271 485.731287873723 209.702683803624 457.411248351795  
386.067573158514 288.596513753617 215.40037757604 241.168936008174  
294.922183826144 266.61343130101 266.563990988678 218.794112567823  
PLXDC1 155.576838112772 147.389892239448 144.470642732973  
147.519991961858 150.088034336851 169.612203020686 140.583804906052  
144.782706468281 163.451063547847 167.491399614986 164.302998010829  
141.284962125757  
PLXDC2 599.307072499899 561.062594540005 369.974231530826  
307.083179338165 163.529157756197 153.248199842194 153.723169560972  
208.164674386141 204.078331021637 450.468410589415 197.427788552936  
168.05687638693  
PLXNA1 237.420951138877 248.531972733475 198.338416756432  
340.668473351494 729.202002368627 291.105673222859 377.661589835101  
588.458314503034 586.867772838753 273.369722814068 325.173931553891  
332.032371697186  
PLXNA2 231.287362732197 234.214191437687 209.385358804928  
299.170431746759 141.858181090478 148.585224298375 148.927040248436  
142.587032407457 146.603385998231 149.487167787687 178.347708009405  
273.353254857377  
PLXNA3 249.590923098575 220.047563627558 204.740183832461  
243.538374440134 509.880640462 148.326282600684 287.402339322061  
184.775001243453 281.119138040097 411.359106929985 194.529045934216  
249.029098902357  
PLXNA4 163.516075721791 163.62582285753 152.662446724781  
168.813895764991 140.121874960672 170.541689758579 167.67952650068  
161.506431005203 154.362571105094 145.346970289157 164.634694036993  
154.064184525311  
PLXNA4B 133.012692824038 128.530540860266 124.15094220181  
126.470239371932 140.313216623427 139.77436722364 134.384963577069  
138.915185051749 128.653335099674 135.596007994731 119.103219740679  
138.192550945411  
PLXNB1 323.20628717764 365.046815163035 307.81941988503  
384.296190598736 983.094485868275 647.955521647635 650.494111214312  
381.740838644647 771.694853062033 468.060528109338 777.410297605252  
567.317223907142  
PLXNB2 436.731545612902 537.982214580518 421.690849282483  
586.366632966978 1408.08614963928 629.197022551069 712.433345978749  
519.940347384877 752.142287661845 766.710479603963 871.913035811066  
885.713964813911  
PLXNB3 197.068795788491 191.628693083169 207.624240598841  
268.264885392368 234.041863839123 177.976550224863 171.784981874184  
162.237172404557 173.624709850889 154.423801637411 206.071709262227  
228.9901869793  
PLXNC1 164.625407872446 140.16233428205 145.331858938535  
143.941358917251 139.55065372881 140.929424764561 167.337624316172  
168.618667871117 150.794680375075 160.76044995335 132.183250916482  
159.534017722536  
PLXND1 169.232677769521 160.022481227931 160.667815093292  
187.955617187544 174.284268998257 189.74261433647 170.306241656131  
162.457778455279 165.200303470106 137.584340154725 185.088667707155  
126.695387748732  
PM20D1 155.993849743656 191.3765085801 133.195030751476  
161.102731941183 665.341859712345 1090.20254511452 2078.76377557352

|        |                  |                  |                  |                  |
|--------|------------------|------------------|------------------|------------------|
|        | 2031.01186679713 | 394.576038252334 | 148.742216703684 | 1208.9240215109  |
|        | 494.538861626895 |                  |                  |                  |
| PM20D2 | 243.538374440134 | 221.152973486208 | 243.979769719186 |                  |
|        | 211.505504834207 | 173.233357775898 | 200.831877950718 | 211.135364208221 |
|        | 156.986053534635 | 161.713311969291 | 182.397795261147 | 156.567519536997 |
|        | 167.701284424049 |                  |                  |                  |
| PMAIP1 | 141.42859050659  | 156.650388509656 | 144.877789873062 |                  |
|        | 130.606211166873 | 173.315097944835 | 216.615694348945 | 224.274329367512 |
|        | 220.999383789474 | 209.44506543433  | 317.353318759931 | 234.301520483864 |
|        | 224.92725876841  |                  |                  |                  |
| PMCH   | 134.29036009792  | 147.70836747108  | 121.36708642226  | 134.657787366869 |
|        | 135.732616463819 | 130.601241656346 | 135.832454000859 | 137.020473156363 |
|        | 136.135223482208 | 125.677019190255 | 125.833649377492 | 143.473523258521 |
| PMCHL1 | 182.084333814175 | 167.756465178715 | 178.551434222154 |                  |
|        | 201.441808401878 | 172.631499322646 | 212.147155923729 | 160.343551497512 |
|        | 174.873893094923 | 164.018470368389 | 193.98814423456  | 170.522853717911 |
|        | 174.127444395862 |                  |                  |                  |
| PMCHL2 | 135.283742166077 | 131.540436531741 | 133.665206343648 |                  |
|        | 127.425931451679 | 134.698857213208 | 132.306569548052 | 133.552141086987 |
|        | 121.830137285032 | 119.746227888415 | 125.637138636558 | 135.945030816689 |
|        | 136.91078498126  |                  |                  |                  |
| PMEPA1 | 320.305852961452 | 293.12968694683  | 208.611557959861 |                  |
|        | 330.281193038198 | 205.495823410422 | 167.212960569538 | 173.315097944835 |
|        | 153.172784421446 | 170.531713392258 | 311.916199912898 | 182.165681034082 |
|        | 186.794165469219 |                  |                  |                  |
| PMF1   | 216.506914782226 | 248.850686917567 | 219.462274506333 | 267.342817344746 |
|        | 407.875393458322 | 251.268669431283 | 269.072221443403 | 315.863232876382 |
|        | 310.365203383647 | 267.342817344746 | 288.072720517427 | 330.505633088656 |
| PMFBP1 | 116.736174147084 | 114.093935026467 | 110.774802298005 |                  |
|        | 108.148715413122 | 124.385193388896 | 115.184395637553 | 118.465111174212 |
|        | 132.498092935232 | 120.757288533244 | 165.496065029161 | 134.01566484034  |
|        | 116.958052905168 |                  |                  |                  |
| PML    | 150.751386127903 | 145.380971596154 | 135.993598471576 | 143.53550972177  |
|        | 142.362022977137 | 140.611071681667 | 151.064422836695 | 139.886499402506 |
|        | 147.272072245929 | 146.42288214248  | 158.505363728431 | 151.421099926743 |
| PMM1   | 771.512332113075 | 747.077451281453 | 877.598505913096 | 915.015154168627 |
|        | 757.877066703516 | 770.632068590053 | 469.206346008875 | 1187.62490367696 |
|        | 916.836022395768 | 846.985164747386 | 386.221302830248 | 445.95114929414  |
| PMM2   | 269.141120401835 | 267.696284751923 | 246.80306998812  | 312.484289357493 |
|        | 555.758485277905 | 510.811470658575 | 443.343806055858 | 543.389747823877 |
|        | 489.022371276542 | 380.562212796792 | 345.649572073924 | 484.480643763982 |
| PMP2   | 191.616483214712 | 202.178451227304 | 181.668090319293 | 196.615914367563 |
|        | 169.860061216981 | 139.000248033373 | 144.762006548375 | 138.12651823109  |
|        | 156.003233745771 | 148.453646012886 | 128.927103442679 | 144.796089646941 |
| PMP22  | 2031.01186679713 | 1717.09434498876 | 1660.70040058102 | 1505.09908072606 |
|        | 205.162633740798 | 351.854828413334 | 171.099675679944 | 930.25842384208  |
|        | 476.383294794912 | 475.038389500056 | 228.349507726225 | 192.258863431747 |
| PMPCA  | 371.693808540758 | 469.794672718173 | 349.540558521616 | 621.825622897512 |
|        | 893.264940736694 | 337.077153882632 | 337.935183275743 | 298.209907157762 |
|        | 381.484062427466 | 318.112626495401 | 356.62074247786  | 314.90123632547  |
| PMPCB  | 670.347447480331 | 753.389428590366 | 963.343120586863 | 687.987647193563 |
|        | 781.461780481171 | 747.587723573212 | 1321.17236442448 | 992.320202251161 |
|        | 838.63350090385  | 946.640841062802 | 1442.94175124818 | 1654.58270183167 |

|         |                  |                  |                   |                  |
|---------|------------------|------------------|-------------------|------------------|
| PMS1    | 159.036647992998 | 168.919352453652 | 137.4129528222912 | 156.119899067238 |
|         | 164.836381332774 | 168.897620634337 | 139.711696905287  | 178.628885995439 |
|         | 155.592219571564 | 143.290642777702 | 193.689806171113  | 165.504532455205 |
| PMS2    | 150.817922696097 | 149.082061203661 | 160.773510498005  | 153.464360995071 |
|         | 171.384487293154 | 154.091431691072 | 184.056274452194  | 194.961531388323 |
|         | 186.1961391235   | 160.584760930779 | 172.857643600385  | 235.407064742194 |
| PMS2CL  | 151.479748626813 | 152.812142230375 | 157.348475799643  |                  |
|         | 149.151791028837 | 149.473505461585 | 157.058912028958  | 152.386986818959 |
|         | 158.522877390859 | 154.750512277909 | 165.844762875582  | 149.760883745928 |
|         | 173.347463632976 |                  |                   |                  |
| PMS2L1  | 153.159425380743 | 162.122250419992 | 166.257275241937  |                  |
|         | 161.031148038478 | 172.297698667311 | 171.528350399075  | 164.284396793834 |
|         | 209.913460781088 | 175.040086358446 | 161.891809608511  | 178.488874074222 |
|         | 203.17525411575  |                  |                   |                  |
| PMS2L11 | 140.831508792119 | 147.87699690647  | 148.391885541349  |                  |
|         | 139.834535091869 | 130.744788360182 | 152.563532872898  | 148.479865869644 |
|         | 147.153129531937 | 173.299643109576 | 149.535008475427  | 154.821960325589 |
|         | 164.880911221767 |                  |                   |                  |
| PMS2L2  | 175.251238431716 | 164.962201718762 | 165.027938535393  |                  |
|         | 160.923897048848 | 183.863365305103 | 218.334273320319  | 195.078843867124 |
|         | 237.266455875982 | 171.481917188224 | 160.105903942674  | 196.076386020815 |
|         | 232.444867422559 |                  |                   |                  |
| PMS2L3  | 196.345065354654 | 180.354899434843 | 210.117033165026  |                  |
|         | 163.053121879323 | 185.199972151831 | 195.776369840059  | 222.415704486709 |
|         | 224.547982731402 | 238.068308163643 | 219.288597751645  | 176.267796612066 |
|         | 307.124331101976 |                  |                   |                  |
| PMS2L4  | 531.421912541822 | 627.066031322234 | 700.353187874339  |                  |
|         | 589.240581642145 | 483.067471841953 | 2120.14463347544  | 5226.05969701201 |
|         | 3983.37592132018 | 656.660582895703 | 482.592481827722  | 3173.14004739767 |
|         | 2666.06582231934 |                  |                   |                  |
| PMS2L5  | 276.582734590058 | 269.194172034595 | 339.663295617139  |                  |
|         | 245.723316636363 | 248.465457421469 | 344.487982154705  | 309.997909440664 |
|         | 503.285430318683 | 347.620001353026 | 301.908667220208  | 327.164773632634 |
|         | 502.499539192864 |                  |                   |                  |
| PMVK    | 452.732079010502 | 422.520372346993 | 507.342877360289  | 537.350891960682 |
|         | 868.40984928812  | 479.761165832339 | 323.95355217044   | 486.425387717472 |
|         | 538.156335788156 | 381.182514249587 | 418.645775576811  | 419.902534806131 |
| PNCK    | 4022.23000497332 | 4722.64356477773 | 4448.67183518984  | 8768.32269645116 |
|         | 9450.52572756597 | 334.607533045929 | 5233.72882607795  | 1312.75601392984 |
|         | 668.570984110088 | 161.988082494464 | 3277.24948092771  | 1532.47920327769 |
| PNKD    | 172.251953149975 | 182.588697551677 | 188.118989395838  | 171.880470629305 |
|         | 438.870464403215 | 176.245698601389 | 400.783945471037  | 159.856190281237 |
|         | 184.426874913406 | 136.871568211946 | 199.637257550762  | 227.483999162038 |
| PNKP    | 428.569462312363 | 594.92419264579  | 415.178470246749  | 601.521068811063 |
|         | 3592.7878705048  | 579.493790910006 | 920.342429282889  | 819.488546995594 |
|         | 1012.44277312494 | 871.528156184927 | 793.891277937782  | 892.038018567941 |
| PNLDC1  | 124.375348764151 | 152.197327387252 | 129.517511177852  |                  |
|         | 139.027836356854 | 130.068063785009 | 116.425301253959  | 129.305455204291 |
|         | 128.675527226161 | 123.247698282967 | 123.709293439934  | 130.354641020141 |
|         | 122.75516501062  |                  |                   |                  |
| PNLIP   | 102.932013031511 | 167.268645224361 | 111.549719888905  | 118.109991440011 |
|         | 115.68358702028  | 112.348094614855 | 108.984922760455  | 112.993452506946 |
|         | 114.561836290349 | 117.404906698431 | 129.176532377543  | 109.282814458761 |

PNLIPRP1 112.179019393947 112.851805868467 116.342242990651  
 123.622533094122 126.241307445165 114.902673141786 118.666654333368  
 115.927914533359 118.81294782091 126.897804011992 132.295937828888  
 120.53428198263  
 PNLIPRP2 110.594755513247 108.631224817901 116.919109599361  
 103.398929051742 96.0426636429757 104.681530703922 114.174153178166  
 111.765812595638 108.296042016208 110.829107724132 108.715328458556  
 114.265920150451  
 PNLIPRP3 104.03442843396 106.982655360194 103.012774960061  
 104.442909315944 106.685578858702 102.932013031511 118.974727968283  
 104.861024325857 108.021898335735 265.61506544085 111.985567835684  
 105.816457443844  
 PNMA1 469.64693728427 391.252450588331 443.343806055858 520.962651968997  
 118.882591201241 123.545404885618 115.858924428037 135.535915449183  
 135.446072698039 176.587559615019 168.963976596839 123.745824514261  
 PNMA2 227.033342447929 176.038123840296 165.731179108649 131.326536951329  
 133.62358240645 132.584454429269 113.536570797896 128.312170913496  
 141.488910091973 115.848659135231 129.055874691136 124.591873637605  
 PNMA3 165.347173283335 148.284412570438 156.110073009771 143.725497952919  
 153.184575380093 189.589053840976 154.146962684738 197.565122821625  
 165.686655824416 155.121309543738 149.010477279209 183.385868234361  
 PNMA5 126.049905221996 120.397683153445 120.204469421484 118.276198592775  
 108.910588012315 338.866471651692 117.324368138398 123.535803027153  
 113.816165294487 124.503016568677 139.77436722364 119.103219740679  
 PNMA6A 130.163574198827 137.805895248174 135.54708602175  
 131.280092370361 123.796657561057 143.145483889918 140.393624985807  
 141.524239210761 132.703034017237 142.922549076496 157.50873249647  
 146.644317248414  
 PNMA6B 149.450921195838 134.66169946771 124.35721327773  
 115.927914533359 126.741498575874 133.399632102473 138.336667434109  
 139.237360556305 128.952986088886 101.530900217921 145.385816618728  
 139.131857948357  
 PNMAL1 254.101184686036 167.474790447134 231.981501596284  
 171.414869677333 182.508415915215 130.586509996354 125.2051300372  
 123.178049594968 141.156434225355 132.346363545288 128.992837936606  
 145.980929136129  
 PNMAL2 132.005753222789 129.180990946063 143.25481667885  
 142.290253129837 134.53215156472 135.823975527501 134.871028666284  
 129.95138839192 125.461701282922 130.363516180139 140.989597586699  
 134.914830257315  
 PNMT 119.370219299491 113.822580779824 124.424565172377 120.485138937899  
 119.119693776276 115.384304932365 118.235640920527 158.216790540415  
 122.547842148486 112.875136585606 149.039132756817 118.000757530896  
 PNN 699.984140389009 476.782624160552 608.816123736392 386.738154577763  
 354.405235378302 365.046815163035 686.445635754196 557.026028810367  
 548.014025722956 470.154677948419 921.546033242474 1258.16519121331  
 PNO1 260.370285504512 227.52352046188 207.864808684047 207.440700355457  
 577.250493023431 461.940616438547 356.530530468568 467.777995124655  
 226.531255313921 261.203388718689 177.235586767256 280.292616101827  
 PNOC 124.844481048039 140.983230581181 118.589392612801 121.764933633063  
 149.642946071295 125.579970155301 142.478528530514 153.391895732807  
 170.98312926 135.886859004208 118.430401197079 131.587987756056  
 PNPLA1 134.730275384832 143.239666389592 145.154323430995  
 139.684141478459 134.731687541347 137.179926233547 134.620896927473

|        |                  |                  |                  |                  |
|--------|------------------|------------------|------------------|------------------|
|        | 141.842919268688 | 130.40517506216  | 137.063689600869 | 139.679681813932 |
|        | 137.460936879873 |                  |                  |                  |
| PNPLA2 | 344.575967665039 | 352.22815095475  | 422.12964420709  |                  |
|        | 401.461825804111 | 656.660582895703 | 303.241375487319 | 341.197826517049 |
|        | 367.518273773904 | 424.578659172414 | 354.579728909336 | 436.482580413523 |
|        | 246.594244983507 |                  |                  |                  |
| PNPLA3 | 136.678188851101 | 159.35787888191  | 146.743260100643 |                  |
|        | 153.95615286919  | 141.976051648478 | 161.552475294424 | 154.491373296392 |
|        | 141.434699050015 | 140.774304412579 | 147.297163685914 | 131.608580511282 |
|        | 149.217191121377 |                  |                  |                  |
| PNPLA4 | 134.671840308041 | 133.571962238112 | 129.987548571478 |                  |
|        | 120.594874820899 | 124.783306383852 | 164.092847913322 | 127.56862018147  |
|        | 142.124876403709 | 133.978783899572 | 121.006569103388 | 162.6762533989   |
|        | 127.690860707933 |                  |                  |                  |
| PNPLA5 | 127.763186950161 | 122.223184326586 | 117.590393673861 |                  |
|        | 121.212521750566 | 116.019123495537 | 117.60787142216  | 119.060186838239 |
|        | 113.311132067152 | 111.908965758799 | 127.601379088239 | 137.731390340708 |
|        | 106.522641798274 |                  |                  |                  |
| PNPLA6 | 564.41151411028  | 680.94167651697  | 580.645924062301 |                  |
|        | 998.157643452741 | 1076.09385014053 | 730.042712083388 | 660.096727566678 |
|        | 693.516351173476 | 505.404271675438 | 545.362650746876 | 606.38343657878  |
|        | 484.230510636533 |                  |                  |                  |
| PNPLA7 | 595.409419899436 | 495.769802520637 | 938.499337889075 |                  |
|        | 453.457361487577 | 184.102171963542 | 198.356420768703 | 225.238369884803 |
|        | 208.776711004753 | 218.944052733757 | 170.497804969996 | 280.948704707655 |
|        | 197.895094054577 |                  |                  |                  |
| PNPLA8 | 272.117599603586 | 302.113807121396 | 289.616527814137 |                  |
|        | 260.554343693588 | 263.47760086159  | 262.296456281666 | 300.793542873709 |
|        | 321.492900106953 | 264.054997398621 | 236.35479928448  | 288.631429069336 |
|        | 349.623729591612 |                  |                  |                  |
| PNPO   | 541.642309122976 | 542.267204956846 | 638.129080224049 | 502.731019454502 |
|        | 897.51782613323  | 1168.3174645384  | 1614.00098175383 | 1920.16520804856 |
|        | 1472.54829263217 | 1264.90442763788 | 1191.88706134921 | 1204.32784721885 |
| PNPT1  | 12109.3049135906 | 11509.9289491201 | 10449.7190201942 | 11709.9785619141 |
|        | 2553.92770795014 | 11432.8213906428 | 6028.67062754577 | 9349.76443528011 |
|        | 8016.1652884418  | 5543.71998558526 | 7539.6945050098  | 7446.59106452583 |
| PNRC1  | 127.928195199945 | 120.935863853101 | 107.74537523456  | 106.182551369456 |
|        | 118.08607083874  | 102.661440700541 | 127.709638375626 | 116.519527499611 |
|        | 105.712302595131 | 117.455432751161 | 130.2867846895   | 117.296972688814 |
| PNRC2  | 755.79669622705  | 679.822276398569 | 806.591035100794 | 519.112018353676 |
|        | 518.760142491104 | 694.429144766435 | 1028.39666838369 | 1181.97868824758 |
|        | 869.245621105614 | 526.970555181851 | 1680.25851465727 | 746.777330152729 |
| PODN   | 2154.00589005104 | 2154.00589005104 | 1889.05071563459 | 2473.22803972431 |
|        | 199.798533722581 | 224.008253365957 | 208.406980186223 | 238.745953695925 |
|        | 325.80154888448  | 210.478088018501 | 171.51411661213  | 174.09267813338  |
| PODNL1 | 113.66416989856  | 127.486697506397 | 135.275284142536 |                  |
|        | 132.560292119968 | 126.77232818113  | 134.413962468434 | 131.336902822702 |
|        | 128.907618218883 | 144.436358527414 | 139.265915951162 | 147.191114491117 |
|        | 130.365804613342 |                  |                  |                  |
| PODXL  | 267.028096234702 | 306.716682293251 | 200.536814571322 | 225.850439131864 |
|        | 203.642739476708 | 320.648966489586 | 157.313737338264 | 215.769986055534 |
|        | 220.816812192169 | 181.364325529405 | 182.725987056391 | 224.805404798696 |
| PODXL2 | 145.551717838423 | 159.282348516052 | 133.07218865002  |                  |
|        | 171.816841286562 | 1701.43479420427 | 507.56875910742  | 424.495400604335 |



|         |                  |                  |                  |                  |
|---------|------------------|------------------|------------------|------------------|
|         | 386.817736004263 | 279.452819132461 | 147.581827861592 | 182.588697551677 |
|         | 405.183882455109 |                  |                  |                  |
| POF1B   | 151.865924163231 | 147.684875777977 | 133.814720785534 | 127.112296857923 |
|         | 461.581199513891 | 304.590636814607 | 285.63245179313  | 284.043349407812 |
|         | 282.244214637625 | 210.448904052352 | 761.586663689579 | 270.231637012624 |
| POFUT1  | 4628.04544865227 | 5022.15374558514 | 4359.98094976179 |                  |
|         | 5122.60899285635 | 841.944755849006 | 3775.41389938231 | 2032.50052162637 |
|         | 2992.18604022433 | 2355.29862638453 | 2023.92614092273 | 2770.7811954029  |
|         | 2321.41228376157 |                  |                  |                  |
| POFUT2  | 418.062540009856 | 389.260166168847 | 355.80042210486  |                  |
|         | 387.908774438461 | 319.966785546419 | 314.557323400201 | 455.392133846517 |
|         | 367.130155304037 | 594.92419264579  | 303.09499683953  | 342.245182599593 |
|         | 292.640251411131 |                  |                  |                  |
| POGK    | 950.818917078515 | 1031.59140059071 | 996.999238316991 | 805.600599570258 |
|         | 2416.49806112207 | 3737.57754066891 | 1447.07989164988 | 2227.70654174379 |
|         | 1603.87451959083 | 976.782815449208 | 2258.30916111153 | 1883.74008471233 |
| POGZ    | 189.174957940401 | 204.654489493854 | 224.766155406229 | 196.207631868755 |
|         | 152.772177215856 | 209.487240895674 | 152.93058803161  | 188.322853571195 |
|         | 165.443069511115 | 159.735182155088 | 181.922907273871 | 209.130260450131 |
| POL3S   | 195.269099451599 | 201.893722965557 | 232.556667737827 | 267.970798709017 |
|         | 120.71782441569  | 142.599815022061 | 133.077760160486 | 162.660027294291 |
|         | 146.361128670362 | 230.697077917675 | 156.581569063195 | 124.477586539576 |
| POLA    | 144.700955682048 | 148.179398287068 | 150.048431572712 | 139.121639005366 |
|         | 147.082068348591 | 151.104891644466 | 131.111930163369 | 145.365935017728 |
|         | 143.234195669431 | 137.049677918041 | 152.635792342068 | 139.253721683078 |
| POLA1   | 295.153786338687 | 343.270642449751 | 288.596513753617 | 412.415549375221 |
|         | 286.856346704286 | 368.548135194271 | 267.342817344746 | 444.712990986138 |
|         | 332.24505665756  | 271.638179116269 | 240.814860403562 | 264.936739264566 |
| POLA2   | 293.4021207271   | 250.885949055834 | 199.209279169496 | 275.252966071473 |
|         | 583.697431061521 | 370.140588087649 | 289.001004912528 | 359.099750692694 |
|         | 288.221041179309 | 303.483515328621 | 237.692959394487 | 357.35857422585  |
| POLB    | 354.783364481955 | 452.24100098898  | 380.393153331219 | 377.800067476868 |
|         | 862.132582849511 | 1994.00516809361 | 930.704688414069 | 849.158029646233 |
|         | 559.236012019639 | 908.704610877319 | 628.939201051801 | 606.679284487803 |
| POLD1   | 156.756159786366 | 175.9219991997   | 166.944701842349 | 216.181417552574 |
|         | 886.157279090932 | 220.379186481273 | 217.165036362034 | 240.971675534641 |
|         | 287.334035234496 | 262.349315496653 | 176.008711524598 | 191.924177620803 |
| POLD2   | 356.05426191171  | 358.975346234854 | 385.584224833836 | 486.778046640624 |
|         | 753.389428590366 | 273.668871896558 | 311.806908624308 | 301.955019831714 |
|         | 289.956528242564 | 544.669441360594 | 219.901025447571 | 413.555310697751 |
| POLD3   | 160.042251279235 | 156.740412695351 | 176.901042102323 | 148.278828579424 |
|         | 161.988082494464 | 164.717809928624 | 142.826050917117 | 171.106189029362 |
|         | 164.808139478109 | 168.935348409102 | 174.168079247768 | 168.643026828823 |
| POLD4   | 182.873752254411 | 205.428900832926 | 171.059849459102 | 235.530986541549 |
|         | 311.544429285897 | 160.941804737367 | 242.752995772995 | 149.876687693565 |
|         | 173.063002566542 | 175.744275464701 | 221.635333304767 | 275.543576337502 |
| POLDIP2 | 221.512905853031 | 241.648044508699 | 237.71636970719  |                  |
|         | 275.609716327452 | 414.114051645565 | 180.468984099647 | 239.503369457867 |
|         | 291.105673222859 | 250.626556981376 | 180.290887733427 | 190.189217962555 |
|         | 179.810507975486 |                  |                  |                  |
| POLDIP3 | 364.443097338814 | 384.16579891756  | 314.4408959517   |                  |
|         | 506.80969228563  | 399.724529998085 | 291.020789939476 | 242.348427307994 |
|         | 266.135477775641 | 296.428342247529 | 249.379605914827 | 434.716530273383 |
|         | 238.978845152474 |                  |                  |                  |

|        |                  |                  |                  |                  |
|--------|------------------|------------------|------------------|------------------|
| POLE   | 178.320732186309 | 200.360518276784 | 198.94325874493  | 219.878230463206 |
|        | 392.06522028189  | 220.330477277988 | 213.274106157675 | 248.562843471699 |
|        | 266.135477775641 | 194.055394488452 | 181.022635001204 | 236.617896560938 |
| POLE2  | 187.097765940131 | 186.611870261871 | 169.31618330657  | 176.603760647035 |
|        | 283.807827536147 | 252.655315526015 | 216.805365763069 | 303.051124835907 |
|        | 223.311817085871 | 321.696082249696 | 195.282045838381 | 263.845733455915 |
| POLE3  | 1133.22524345111 | 1142.44180956604 | 1230.63920848575 | 1156.19575610918 |
|        | 1630.1630053946  | 1467.50846948144 | 1067.80176606977 | 1834.08657010335 |
|        | 1868.82736251524 | 1856.05025952611 | 1774.22769195939 | 977.450397042213 |
| POLE4  | 1804.63762008613 | 1897.92061704124 | 1767.70023790753 | 2068.04582900231 |
|        | 2255.92551080483 | 2871.34694522381 | 2172.89794460273 | 4417.98524179686 |
|        | 2493.5484556802  | 2620.17683549005 | 1251.56853099362 | 2118.73410871718 |
| POLG   | 282.045333787115 | 259.184713471619 | 318.06081614151  | 332.464176231219 |
|        | 282.101714660307 | 291.914408947328 | 351.998551165704 | 258.489608621438 |
|        | 319.490670412394 | 329.82030842286  | 308.974786799114 | 333.592915218163 |
| POLG2  | 202.97197145851  | 162.841318222066 | 200.424975825325 | 194.637233028442 |
|        | 185.856755885891 | 221.512905853031 | 214.824908522393 | 314.095043876244 |
|        | 257.44230597145  | 215.272800347166 | 198.088834624665 | 239.503369457867 |
| POLH   | 163.18585933431  | 187.710185880162 | 186.185055364718 | 180.913502162011 |
|        | 148.644800418517 | 144.448503894295 | 168.061346742356 | 155.92082882492  |
|        | 166.784804508647 | 173.892380305166 | 171.329984719612 | 174.603285240228 |
| POLI   | 159.524235332529 | 127.451155926679 | 137.15288362126  | 132.553445658347 |
|        | 128.434301921433 | 125.04327844782  | 133.532323053215 | 138.802633518223 |
|        | 129.281564491007 | 136.099663831028 | 178.270849389719 | 131.715579653796 |
| POLK   | 147.384050169545 | 138.628169506372 | 141.127519700052 | 144.2753860947   |
|        | 132.864018034342 | 151.645636946799 | 144.876300850115 | 144.103622373381 |
|        | 152.104170622003 | 124.22833964472  | 139.106442824079 | 137.904786382385 |
| POLL   | 136.425263391752 | 160.090914414578 | 145.06736850005  | 154.306729472627 |
|        | 161.115842628581 | 114.255733119076 | 132.930042559647 | 136.982719190537 |
|        | 127.130769263811 | 125.055545087871 | 170.748911334847 | 129.434594784981 |
| POLM   | 180.80811429888  | 188.335102005839 | 207.651142295123 | 207.384408045502 |
|        | 273.668871896558 | 170.266415287865 | 188.166168428752 | 198.840533461525 |
|        | 171.16807372519  | 170.202597821861 | 209.090788790449 | 270.181005097697 |
| POLN   | 145.987228759402 | 149.277880094957 | 151.751963310212 | 154.033776287398 |
|        | 170.910998705968 | 145.412368252632 | 138.325950428197 | 163.422877959747 |
|        | 140.086978441723 | 134.161664663192 | 139.933655092561 | 136.835889180879 |
| POLQ   | 147.205511952997 | 187.903298116031 | 154.287059283977 | 193.261343922604 |
|        | 360.053590374552 | 409.282410265733 | 237.171424222756 | 435.983803453746 |
|        | 472.030150842569 | 253.049869714368 | 178.209994522672 | 333.270203737291 |
| POLR1A | 157.932243807202 | 168.925131238831 | 148.145136066071 |                  |
|        | 157.374537572779 | 154.843607752473 | 146.569958732206 | 178.083311435916 |
|        | 151.123104810793 | 171.573342518254 | 152.395272857974 | 149.138678142327 |
|        | 168.437049123012 |                  |                  |                  |
| POLR1B | 188.724274062294 | 211.085778902367 | 193.134414137433 |                  |
|        | 202.421990203844 | 159.98205335759  | 439.852826905352 | 188.557113298055 |
|        | 214.068044241507 | 198.166270627544 | 157.078563342652 | 246.676401619881 |
|        | 248.299149406938 |                  |                  |                  |
| POLR1C | 339.012225830929 | 336.120322555703 | 323.391456630794 |                  |
|        | 319.018213637357 | 502.731019454502 | 1028.39666838369 | 683.861021234927 |
|        | 653.047570485109 | 689.04773343291  | 458.607367472574 | 526.625936680738 |
|        | 778.639512538949 |                  |                  |                  |
| POLR1D | 1456.76683429755 | 1366.06309834426 | 2023.92614092273 |                  |
|        | 1168.3174645384  | 1417.76295714364 | 2061.9164323309  | 3111.50508060882 |

1247.91041567746 1853.20812924694 2712.07480130502 3378.126661761  
2741.71904421456  
POLR1E 560.481802403627 538.605085454393 675.978379566859  
527.226517960073 284.831817899986 290.213039891361 280.292616101827  
322.889296658955 276.414209660023 426.032234135861 456.530337997907  
244.544473246593  
POLR2A 1006.69598892631 1309.01193284992 798.389385197471  
1090.20254511452 2895.71836177599 1812.07394646463 1077.33874251157  
1710.60409578293 1777.29626660109 2385.5958396359 3282.73711809465  
991.081498002429  
POLR2B 388.096183735126 390.372738176917 519.27448770158  
348.171901445232 300.401370666633 831.289724465877 632.843164522867  
727.425595270342 791.137867905579 522.899203071911 561.379619105609  
707.404709303506  
POLR2C 392.004079531068 410.42088953434 449.745016106912  
465.29290512169 435.037306125887 368.948300262634 413.863345223345  
336.490076158135 410.216584967666 359.822784070765 569.656573915709  
413.330906392915  
POLR2D 184.873459141947 202.300293733922 193.641927801805  
205.560952959537 233.975864722289 302.408563830315 258.632372536866  
228.901579068997 260.443814523694 331.888150158628 293.317880637519  
321.426100243434  
POLR2E 222.156471143857 194.847305068008 233.536023295039  
228.499052416183 192.891507272665 215.967319486874 138.945855414918  
185.30916081621 154.548286860883 141.348548071751 161.903016201041  
150.32505285608  
POLR2F 1593.49895307361 1620.7954553764 1625.55754007235  
1798.5819962261 2426.2098937241 2311.05587511258 1612.79779117655  
2041.03024136014 2416.49806112207 2206.7447886564 1376.84058291266  
1966.09691567857  
POLR2G 1282.38953612054 1376.84058291266 1343.2623011534  
1372.63540073207 2476.51542420593 2444.835635949 1862.88548451154  
2101.93705983383 1951.69651954627 1904.39962279504 1782.2498613913  
2372.26073354008  
POLR2H 1281.1883621512 1271.46608195833 1314.62071412501  
1338.83705469394 2694.98079256089 2694.98079256089 2493.5484556802  
2615.07927836881 2521.58055221647 2567.4299860517 2253.7522632414  
2325.02143920169  
POLR2I 1119.23362648056 1146.3535752748 1055.22233969473  
1250.58586679251 3721.86725798812 1287.3125466789 1224.49891389348  
1019.627634011 2206.7447886564 1441.29676998365 506.80969228563  
1048.26872286983  
POLR2J 157.751477529076 170.835513021958 151.256546638599  
190.939726271153 359.822784070765 203.436527043293 281.369059516242  
224.89911221799 163.542848861552 175.805472275887 228.649073045499  
269.530151236658  
POLR2J2 300.443499140896 240.253944604431 352.665030560239  
237.734385188542 326.83982672544 423.256021602613 482.857203798212  
422.12964420709 544.580311371212 510.226374558703 357.584458526365  
831.08287594363  
POLR2J3 477.160464512705 402.473870771741 619.223672253014  
329.82030842286 817.529344685717 722.399669963921 820.652972219658  
749.515603904233 809.729160605727 818.225731093346 441.684169663552  
1204.7397215229

POLR2J4 200.767743455226 207.531908382266 189.74261433647  
195.84531580224 146.798444724408 231.915272112361 161.557558028531  
177.688568435599 166.315369318355 166.722369066673 174.255919030841  
188.995551740427  
POLR2K 176.364184489318 177.84188738734 175.41089164969  
154.591116158776 197.859546367676 176.533058719908 161.608941774391  
164.603403251634 187.65716654049 145.108281984556 201.507971833902  
163.066051106092  
POLR2L 205.45079491218 199.397633942623 191.486717579847  
245.553138677866 276.224613560582 163.198834359304 140.313216623427  
177.976550224863 214.684538620841 188.7348696188 188.39062571513  
149.570242115956  
POLR3A 332.082749517913 380.146996799549 335.623336587396  
429.680602294138 216.381643581705 280.595515386655 297.071121022183  
269.424055734143 284.351529744475 239.941641600769 317.802633831405  
308.281798808746  
POLR3B 314.557323400201 370.466403181536 273.478372861114  
392.824840252824 306.232249422327 359.518199449791 343.270642449751  
346.118765910093 402.866491417369 402.140437036706 377.353441970543  
380.393153331219  
POLR3C 619.635734567779 766.710479603963 625.699971780258  
765.911113050543 461.822629852953 550.901056837273 480.36420271348  
702.460234202652 443.444024128516 652.201948082657 434.943371634824  
702.981741565482  
POLR3D 146.044279076949 146.482652762374 131.468537312778  
151.833386901811 160.562164904057 127.820096020782 138.654301345398  
122.389557272277 132.657106732366 144.240470871638 178.464811133  
135.047546966745  
POLR3E 308.974786799114 291.994364783888 416.475440894731  
280.948704707655 569.353661326724 386.544913399837 479.395948662331  
420.017044147123 486.334840298921 322.36247485445 503.967725251906  
522.664475688419  
POLR3F 278.737944234055 314.126706052299 346.566241319814  
412.941907828617 203.727455875381 313.351441953859 268.111403429364  
209.487240895674 276.867974638972 297.862653495715 219.619022209985  
271.522696252995  
POLR3G 153.83891040723 158.404154056472 160.17208299932  
147.803464591663 147.185378560761 145.950701448912 163.474261351901  
148.309872393 151.734683227196 204.82244206816 143.45723206497  
136.348252715447  
POLR3GL 1232.66885974069 1109.79571066685 1260.50387106816  
1223.06438074895 619.223672253014 494.175437345451 659.483452217461  
946.640841062802 667.156197045748 683.470866056244 1056.43975075255  
880.140852200235  
POLR3H 186.077477713775 195.333029746339 183.879114762264  
200.424975825325 301.638918685657 205.950347620158 212.312154721246  
188.062732621031 209.33028918341 206.027235767232 188.995551740427  
172.438141471784  
POLR3K 202.44778603643 192.493439659184 230.806950763402  
218.487334022128 379.387095129725 414.403321220432 293.018282386003  
304.811116024094 367.327273578513 234.020419732787 240.147082836599  
301.798676825176  
POLRMT 402.425130776131 440.579262120451 476.383294794912  
545.026293696209 666.847934976479 383.682951666155 307.410175748955

|            |                  |                  |                  |                  |
|------------|------------------|------------------|------------------|------------------|
|            | 488.505191823403 | 301.49286558088  | 326.246702537465 | 305.096320805078 |
|            | 385.750371084    |                  |                  |                  |
| POLS       | 446.601751145647 | 337.487980551006 | 366.240941980786 | 379.670492165938 |
|            | 354.981966077502 | 530.387315639095 | 538.647888236878 | 633.401624753368 |
|            | 347.866264631778 | 358.152044880733 | 470.95418656881  | 441.331937921872 |
| POM121     | 122.072091994548 | 124.140880678888 | 126.17133877948  |                  |
|            | 124.566313603935 | 147.132625797946 | 134.648780131578 | 121.103620738719 |
|            | 125.029516472944 | 119.297561749232 | 133.137299889323 | 117.264555636952 |
|            | 120.702740607924 |                  |                  |                  |
| POM121C    | 1525.24196488688 | 1680.25851465727 | 1548.09554827056 |                  |
|            | 1961.26255930192 | 1843.76920134139 | 1718.80498208397 | 1966.09691567857 |
|            | 2146.4265920569  | 1583.79384467611 | 1323.05745869565 | 1545.71251527145 |
|            | 2816.29814823646 |                  |                  |                  |
| POM121L10P | 133.224926329053 | 145.643752002787 | 146.879019367939 |                  |
|            | 142.981967333546 | 133.088758771353 | 138.256765189241 | 145.544996009633 |
|            | 135.210887148305 | 132.71633377967  | 132.992071643179 | 130.548611758921 |
|            | 137.976533193418 |                  |                  |                  |
| POM121L1P  | 149.219602109121 | 144.94824685435  | 149.029275579026 |                  |
|            | 156.808992920564 | 131.83430682495  | 134.415163103911 | 138.458816023289 |
|            | 165.773929204209 | 133.7012683837   | 134.028626989933 | 150.155154998981 |
|            | 146.617853918109 |                  |                  |                  |
| POM121L2   | 124.752198904184 | 124.077104101209 | 128.623302491798 |                  |
|            | 129.263794008537 | 140.719388544476 | 121.603608840998 | 135.356010814496 |
|            | 117.412956162665 | 117.279162323013 | 118.457573670556 | 110.325803953516 |
|            | 128.692917766138 |                  |                  |                  |
| POM121L4P  | 151.592787806315 | 143.728569494708 | 138.070353990356 |                  |
|            | 141.108383815109 | 145.517559593811 | 152.593934787262 | 143.917152377544 |
|            | 126.426212216646 | 151.515460040167 | 140.40754434058  | 151.946691918521 |
|            | 152.721146962124 |                  |                  |                  |
| POMC       | 152.520828479026 | 153.0141888126   | 139.383528389668 | 197.651165059354 |
|            | 138.231715814115 | 123.364999283696 | 121.768195574022 | 143.750656408155 |
|            | 139.644701550661 | 126.209426865327 | 160.604195264968 | 126.956303896995 |
| POMGNT1    | 702.265884752474 | 779.922653392712 | 742.128229715198 |                  |
|            | 827.157920721418 | 1883.74008471233 | 1570.39362935859 | 1646.76016031831 |
|            | 1161.39230511792 | 920.342429282889 | 578.297031096292 | 1344.87842417496 |
|            | 1353.61552261489 |                  |                  |                  |
| POMP       | 1225.33666840349 | 1186.96351738518 | 1266.53539318831 | 1069.25265476373 |
|            | 1405.2134783352  | 2149.13404212591 | 1552.69879081022 | 1382.12750708801 |
|            | 1986.81354260292 | 2296.30423509176 | 1596.33832632698 | 2580.98143004019 |
| POMT1      | 242.72424280444  | 241.494710905339 | 246.031568259337 | 248.850686917567 |
|            | 358.897128592042 | 181.157738347957 | 220.242344043437 | 199.101099226668 |
|            | 197.543089645432 | 213.145460679531 | 188.242091666446 | 172.951567541592 |
| POMT2      | 410.845034795716 | 465.926873285563 | 386.85874184746  | 629.707646271678 |
|            | 200.264756078778 | 186.679199600379 | 221.664431984861 | 223.941946219233 |
|            | 178.245841646175 | 212.890259409988 | 339.917319653382 | 249.590923098575 |
| POMZP3     | 222.820391338687 | 205.260673843294 | 234.339913501761 |                  |
|            | 239.704459251571 | 196.287131027947 | 174.909258852845 | 163.73339229802  |
|            | 175.363223521128 | 159.820341130737 | 169.806644442071 | 170.79303550487  |
|            | 169.201608999937 |                  |                  |                  |
| PON1       | 120.74273444647  | 121.961568081299 | 125.26492723752  | 120.65473121078  |
|            | 124.624046191085 | 124.391225837909 | 126.547883999721 | 119.655162437465 |
|            | 123.494412056415 | 118.161192318422 | 125.98519427755  | 126.316613675316 |

|        |                  |                  |                  |                  |
|--------|------------------|------------------|------------------|------------------|
| PON2   | 798.758496171493 | 679.557656724243 | 1050.90881385623 | 597.952909577121 |
|        | 582.642500194997 | 1025.88559245013 | 931.325266360957 | 1288.3346537369  |
|        | 963.343120586863 | 1160.78730097715 | 418.574045635945 | 1564.8868894162  |
| POP3   | 218.18756955522  | 198.659595851481 | 142.981967333546 | 181.783275804424 |
|        | 137.022366035333 | 154.98147307591  | 141.139737175648 | 160.878190220833 |
|        | 145.934643000545 | 130.729227484165 | 144.546597366629 | 309.861048237742 |
| POP1   | 123.683553177379 | 118.432307370605 | 117.873333897609 | 127.926270257252 |
|        | 185.602093266907 | 149.453103369806 | 153.461396593156 | 148.960077949157 |
|        | 169.860061216981 | 164.625407872446 | 165.257737836487 | 145.654559623732 |
| POP4   | 267.451611731669 | 220.9384439772   | 277.652851236546 | 285.83626978316  |
|        | 246.389203940944 | 450.688800547981 | 375.038561820137 | 499.436680354749 |
|        | 506.562512021352 | 414.797416270335 | 272.571092944711 | 282.442528230519 |
| POP5   | 266.118317370425 | 252.628516068724 | 300.401370666633 | 299.80615152845  |
|        | 327.207408852474 | 249.193270428348 | 309.181150342727 | 259.472319994929 |
|        | 233.394506254045 | 305.343879847672 | 257.338950719432 | 256.326661031361 |
| POP7   | 240.439368352772 | 232.556667737827 | 256.873090834376 | 280.723379809959 |
|        | 693.781708146282 | 458.047799748696 | 347.487059316081 | 390.098830270926 |
|        | 329.406649846151 | 319.966785546419 | 230.975434289172 | 354.405235378302 |
| POPDC2 | 739.251974981981 | 812.75075757351  | 1006.24899131914 |                  |
|        | 1290.39741199701 | 154.978243057971 | 148.466658640201 | 150.011603347578 |
|        | 159.368376366657 | 162.500485773812 | 154.883309503689 | 142.370721565016 |
|        | 134.983884722607 |                  |                  |                  |
| POPDC3 | 119.717408713154 | 129.715948793051 | 118.26427946535  |                  |
|        | 115.582048644075 | 110.820329153348 | 109.536381305315 | 107.344825308293 |
|        | 115.420810993676 | 121.939618902165 | 185.843639043466 | 138.354300118735 |
|        | 117.561878567749 |                  |                  |                  |
| POR    | 316.895545640437 | 277.946395491073 | 309.181150342727 | 285.102778078056 |
|        | 1540.71556891815 | 347.487059316081 | 458.875979229339 | 500.343476678562 |
|        | 591.013515828247 | 314.014654357569 | 418.244376024741 | 453.457361487577 |
| PORCN  | 152.082927731045 | 143.818379692331 | 143.727514442914 | 152.624623171797 |
|        | 187.472028627511 | 131.879982461545 | 150.283447275981 | 160.117742879282 |
|        | 138.79473329684  | 157.481645415121 | 175.030373805031 | 130.957441406855 |
| POSTN  | 196.942880967705 | 173.306283668215 | 154.750512277909 | 163.336324451735 |
|        | 156.508428796592 | 210.711890471222 | 138.967080709927 | 203.752540576935 |
|        | 188.509504845439 | 820.249910349431 | 167.692053273833 | 165.406452831375 |
| POT1   | 142.37457375182  | 140.938442055097 | 132.897554980037 | 134.498439965049 |
|        | 157.723341862468 | 153.579955370444 | 142.609678462615 | 162.793214727475 |
|        | 152.315376022976 | 151.783090997855 | 153.228048041467 | 159.90466743683  |
| POTE14 | 123.813766735115 | 135.375268329248 | 134.489421865495 |                  |
|        | 126.948090173876 | 134.880138942756 | 135.111066946207 | 132.329892644992 |
|        | 139.220877923507 | 130.987023228883 | 116.746018509166 | 124.372963874507 |
|        | 118.740346254406 |                  |                  |                  |
| POTE2  | 135.047546966745 | 145.03804642447  | 163.942131559267 | 144.997250967317 |
|        | 141.16066528405  | 146.764908249803 | 148.179398287068 | 154.96616957771  |
|        | 144.018198451676 | 151.936543085044 | 142.521260841187 | 139.799467834109 |
| POTEA  | 125.796438432905 | 133.829889099442 | 126.800718471804 | 133.901356440205 |
|        | 126.259029676691 | 133.42964827086  | 130.344292132363 | 125.402714360058 |
|        | 133.672964925321 | 137.044079235724 | 127.374600506681 | 125.088717405087 |
| POTEB  | 113.321454160244 | 122.550707067805 | 115.927914533359 | 116.074423050416 |
|        | 115.184395637553 | 121.752481757054 | 120.992440100307 | 117.123891785437 |
|        | 122.978576290038 | 113.913337223716 | 119.658703392877 | 107.949834974369 |
| POTEC  | 131.111930163369 | 118.737244693366 | 128.917399281607 | 135.221786448517 |
|        | 129.210356735226 | 135.360087349634 | 130.488972210403 | 125.110064579814 |
|        | 135.627840788802 | 135.834000569736 | 104.442909315944 | 129.517511177852 |

POTED 123.434963905308 121.010811158088 151.330035086652 121.834248129933  
121.039678049579 107.049865500702 129.098408596418 142.370721565016  
113.672605838627 119.375727296235 126.497472087036 126.168223112165  
POTEE 156.119899067238 177.708263037199 198.620777452192 146.871145679651  
147.835936450126 154.479733759712 185.233210060342 170.531713392258  
160.415807880532 250.481442411876 159.895303363094 175.632212436963  
POTEF 12493.2940668467 12615.8332290932 11809.4804843301 16742.6286866851  
8182.20106181946 2539.87833317526 4901.41175228982 3560.23794634993  
3896.49785254733 6776.11712291246 7585.47289520004 3528.62443098065  
POTEG 144.243598691782 134.000363767958 143.574584852426 119.862037840843  
138.563471679129 130.863753083296 130.394687030464 127.486697506397  
133.573744633212 151.80632463295 148.228662780391 111.243322115126  
POTEH 122.914680091926 122.03508430361 125.796438432905 143.373932371335  
120.835207882788 120.316950428535 128.255141263975 136.993102884269  
121.908945872994 137.151210946281 135.166677520468 133.07218865002  
POU1F1 125.879198238067 121.53632327554 129.434594784981  
112.14768481333 128.576310682958 117.404906698431 125.262445870212  
126.5929421833 123.225792525733 124.095340478326 134.072912593456  
120.89590604359  
POU2AF1 118.66946078241 127.669334230458 123.104790590045  
127.00963790814 120.418709541104 120.110473925082 130.491742824575  
164.794626785115 192.878416717298 115.113000553093 156.022967076728  
122.355409068882  
POU2F1 307.982260548106 366.636754272029 240.75934760601  
380.053166305637 247.779718065751 386.305638633172 232.556667737827  
266.918302307596 231.044588483625 179.009510246709 238.509970054862  
241.203521822269  
POU2F2 111.632811186988 127.412539650291 105.816457443844  
131.151578665754 110.014935095391 108.007762863766 105.583474813289  
112.248047602652 130.953237161257 106.437660157036 111.616460084889  
112.456644814178  
POU2F3 154.998011079046 158.747029092329 150.71435300188  
149.691340727994 158.113794378426 149.37190049932 147.846925198348  
150.048431572712 145.635453468646 143.393174544776 159.026102446297  
155.960886801091  
POU3F1 127.440987506769 132.584454429269 140.882766779119  
136.631313776416 188.910933952136 213.674150322581 222.028626209166  
154.869171648942 146.274284557421 210.77489002666 251.062649517773  
156.144934427609  
POU3F2 152.729355306724 154.402315635227 153.152921890232  
148.970251898527 140.701908784225 160.411218029114 148.791182443623  
155.05329654089 149.750924082863 145.756455015309 131.168294031745  
157.306022722324  
POU3F3 112.133567992833 111.608386387842 111.000303209442  
114.042914237667 116.70650322987 114.888157310977 108.415715678948  
104.154182930018 111.985567835684 109.52020660772 113.597215383696  
112.365278258185  
POU3F4 121.434713764246 116.983869766097 120.01190102634  
124.758906471654 120.238706364491 112.962180108363 112.710573586525  
117.923459503989 109.574386044714 122.506058130261 151.312853764675  
112.771141378159  
POU4F1 127.820096020782 156.169405925094 151.456702092528  
151.367402326399 142.628296442123 142.903851392611 161.948033313443

164.011683602245 156.740412695351 146.370084152094 152.032418787633  
164.347168837655  
POU4F2 134.932416370825 140.379874810685 144.013615296685  
155.759861336991 138.061295629934 143.857385585662 139.209080672396  
136.843164021899 143.152993168137 159.650116062266 132.894049694258  
143.778327403708  
POU4F3 137.348951314875 131.981505236332 122.243585162452  
131.193538235053 128.247871411825 117.904366738895 128.651081092914  
124.592771536872 117.621220321128 123.518170356322 124.491884305455  
132.809364188497  
POU5F1 142.628296442123 137.744318243173 129.614692778261  
138.994857740356 136.515951031895 135.945030816689 227.587590278412  
131.648308760913 149.385103319547 123.82555184043 167.91761500242  
186.551385094902  
POU5F1P1 116.759526220736 129.675420096163 128.322884322951  
120.853961156534 151.083551412109 127.137447808551 367.025117016472  
137.819642907456 174.246705740225 118.426600479326 305.16668987495  
235.76573393374  
POU5F2 106.088807114602 114.255733119076 126.026938396257  
113.133798430215 111.276543583667 108.515401509039 109.176852761745  
107.655624022312 122.469113037809 116.850851308701 121.539958110688  
117.703025026759  
POU6F1 221.424451092316 200.741234443918 205.930921729192  
240.94056877904 170.233084517898 148.186698759452 173.488272345038  
166.606522485953 166.714793209109 157.50873249647 175.656204695951  
157.419333185365  
POU6F2 156.802353238128 143.786767828146 123.354093930164  
155.471795004237 157.623092996114 140.434905471935 136.362761829761  
136.790457887057 122.763138007612 163.045605069267 133.07218865002  
139.241145027974  
PP14571 131.578042179715 121.014538677616 186.103491222924  
136.942583515174 133.310323593945 124.033766796333 129.007924852801  
162.970595558845 159.241573314833 139.785767470943 171.982071800592  
140.012295249756  
PP8961 164.562302265155 155.945838519586 142.264536484668  
153.54898879562 159.324816814876 162.308297940279 161.129770392464  
168.161117444474 141.917318809044 145.837985729893 140.217243202557  
147.032210333966  
PPA1 1231.92253664482 1247.91041567746 1715.51071085304 1437.5568316065  
1287.3125466789 2895.71836177599 3586.00189997341 2684.69013589621  
2590.80821234237 2905.12297639092 2523.91287654539 4238.41681589316  
PPA2 4635.42002659719 4628.04544865227 3930.2841381915 4327.90939653054  
1053.09915077366 5094.53287522452 2563.02488807613 4183.06379632713  
3046.47354587949 2227.70654174379 3989.14883668905 2874.43919426772  
PPAN 180.952017616136 194.055394488452 170.465177938235 221.82340413039  
320.707687986324 220.136131941508 218.18756955522 232.344545356395  
189.472541628897 255.992494620859 195.532022060219 266.80383076887  
PPAN-P2RY11 144.542320520523 142.736148814019 122.27785621724  
148.856482636773 169.598493862848 151.318320077986 139.182623417751  
143.429394097222 125.645986634914 138.921608664788 151.470844748137  
146.069543494352  
PPAP2A 606.003956839826 498.180196203245 660.535644289024  
361.327436394941 563.648536446918 1154.86609813021 1259.38111177521



1634.20135156938 1634.20135156938 269.468453936818 696.003998372271  
 597.189355986293  
 PPAP2B 1487.12201643008 1047.2693539616 1163.13845502757  
 698.358285634451 263.994460303088 475.540659315339 427.542390397986  
 323.737610506003 342.037040881785 246.912159676595 519.672796004691  
 382.069677030369  
 PPAP2C 159.52833930625 181.354279096644 161.73079180403  
 156.988189750309 600.635914090365 463.99922423125 405.130899553871  
 348.241471067257 385.379119927642 169.132693907633 493.887026009442  
 369.434158443561  
 PPAPDC1A 150.313058722346 160.297609596399 159.311949668403  
 154.579913524947 169.764014031526 158.292581724934 158.58863949084  
 164.160608039304 158.967160833334 220.415211013843 154.555255038453  
 173.408784502027  
 PPAPDC1B 207.545424360094 213.26158748941 219.8511043213  
 206.428618912264 544.580311371212 900.233783407148 346.917113326564  
 398.673582680257 470.868288641048 205.185206972064 406.369889501135  
 335.142319387164  
 PPAPDC2 182.725987056391 214.86995782548 213.123453925578  
 227.209630859635 204.842791081358 235.905788497166 236.676029292922  
 257.813193543819 232.986366625889 206.042395282286 311.10841853984  
 231.728984785324  
 PPAPDC3 344.856199123543 393.198813167839 387.224184063662  
 602.371843434907 113.822580779824 124.777895136212 110.977904932371  
 119.135701239571 112.219585614955 132.895500657638 110.735199684144  
 109.140708667012  
 PPARA 147.838660813476 145.085091507228 154.600966693059 146.512045729234  
 124.103321614841 131.76829141949 134.725434838052 132.664379033058  
 135.81863662958 134.782388051531 165.523150623132 137.350851760173  
 PPARBP 556.863361789449 571.64723305848 523.937128789616  
 445.661863626419 290.802509012089 554.511983790164 619.045921382959  
 931.598413783099 599.735180191091 410.337491313251 588.458314503034  
 488.379057110543  
 PPARD 196.638594797353 195.353512458837 171.589889474122 211.966139902562  
 231.462907786174 183.545741265706 181.467708718758 188.685460181066  
 179.265395910119 216.859640534581 201.702688815038 203.943245360496  
 PPARG 155.971045744096 235.680462167404 225.050796356289 148.725162101789  
 796.052115217208 1044.91923772265 1323.91781040143 1116.95795024994  
 1442.11349373764 163.661196423902 959.897744425251 1699.8374761666  
 PPARGC1A 540.078145038497 496.697565640162 368.276805218658  
 697.581541438891 139.925844631843 151.76341973891 156.221773628832  
 158.404154056472 149.747347428419 152.826356673175 133.106005881815  
 148.284412570438  
 PPARGC1B 317.839512360245 399.762451559805 307.124331101976  
 645.183207984114 163.889522525848 187.997940126066 155.690773461824  
 203.456296907031 142.34471764492 138.197500836501 240.497413647633  
 232.590542016298  
 PPAT 241.453456707114 230.227432807772 209.811693771836 231.018059960001  
 266.286483421453 431.686900474971 272.277433294605 389.051174954505  
 378.728516779744 286.085833802132 255.3451781862 356.770158430601  
 PPBP 211.419445018736 192.314484368435 181.238505183667 213.324226314713  
 174.332913952768 191.112009690591 199.490190715307 244.486311003619  
 186.112835637689 341.015631528464 171.552010365305 172.430211711547

PPBPL2 128.548201588898 145.594378536072 131.951649373072  
 124.075077123156 149.758865915467 121.416038813102 122.323876787207  
 139.674001912099 120.177385114315 118.902823494379 143.685368799972  
 130.326980619676  
 PPCDC 117.703025026759 109.37466528113 107.780763250481 104.483909687253  
 107.544568250154 106.746545626069 114.673517800886 116.514299377365  
 109.274221164316 106.147993332294 135.372516179244 103.550817366724  
 PPCS 813.454826901794 809.362464219294 847.564628337955 765.128667448261  
 1029.43177809276 913.684449305965 1876.64079464928 1044.52286986369  
 1016.18143428327 1065.36715400306 1606.01395227661 1138.44837250274  
 PPDPF 321.750495072759 291.313681141442 331.251075774227 423.607299503704  
 1448.64875525408 609.309339417625 844.462124058351 330.457534783492  
 485.87138934376 480.923468806193 490.022369664024 696.131296166255  
 PPEF1 129.895388481159 129.158212237299 125.019064287385 124.321503368855  
 123.173506315166 130.637567221512 126.544685937984 117.193620642373  
 122.442590463781 123.442970398288 139.486304455662 135.844983721014  
 PPEF2 127.096476403758 132.236355533277 147.745780820004 149.818888178632  
 129.242093568433 138.244585395561 146.029647001623 134.89415027205  
 136.026302491961 127.199124606827 130.955161943331 140.201501710276  
 PPFIA1 382.562403424855 361.516275756449 358.52459123416  
 357.773949920377 336.898462056187 427.452114719877 412.129826478453  
 341.197826517049 303.184785797741 454.732029358748 281.037762232619  
 383.503040287678  
 PPFIA2 140.804008584006 141.233642252649 128.066043751951  
 143.787766055379 115.855948612544 110.624328647003 110.1278204598  
 109.851507510788 108.404733392914 116.695313319162 122.408016372747  
 107.961322525982  
 PPFIA3 130.822330736013 153.784923783551 139.697477263244  
 150.308048500142 159.706443636973 159.605110015497 155.400191634632  
 134.378951325825 144.692900548503 124.415058391979 149.631696044063  
 146.785478478701  
 PPFIA4 153.279026396412 151.76341973891 143.440420261133  
 145.239119337981 165.703810120915 136.497295707149 221.561252012695  
 144.597060118959 162.007384919302 238.095599711942 157.049773524382  
 173.287859527767  
 PPFIBP1 367.518273773904 401.359711029934 296.20443113482  
 340.860684371038 176.612866969431 236.326943078666 231.769926214655  
 203.87884605779 248.927790738447 258.552964322998 265.712482648121  
 243.807038920733  
 PPFIBP2 534.083703564903 633.401624753368 488.249967208882  
 373.760551592844 733.86133557115 1089.16489859253 1683.83803339436  
 1248.69137283095 2466.36457617864 833.198511430615 3078.76695443407  
 1848.27927621606  
 PPHLN1 236.219981978324 242.948136060281 248.887522059485  
 201.507971833902 201.773745532242 278.168897504985 327.010503005631  
 289.616527814137 259.025042304848 389.96566674501 278.005620372937  
 335.47484353322  
 PPIA 153.5256657638 161.903016201041 174.698724064671 141.913984244672  
 178.106013202731 204.318316638312 236.401834189942 270.945325305492  
 220.288758600588 216.353502371227 277.073510273425 456.038981546175  
 PPIAL4A 7681.48027081818 8211.38792799248 9139.73212514992  
 7555.47017983216 10900.1783397368 13758.4768543075 13944.7649147227  
 16480.781374867 15924.2167735021 18953.8127741918 17830.1333276624  
 21956.7541751958

|         |                  |                  |                  |                  |
|---------|------------------|------------------|------------------|------------------|
| PPIAL4C | 137.591469499374 | 142.970256312313 | 127.155818626031 |                  |
|         | 141.296574431203 | 119.062611098235 | 122.490271802207 | 146.06717772919  |
|         | 142.796371223204 | 128.931946787934 | 132.418902141838 | 150.593928635647 |
|         | 123.434963905308 |                  |                  |                  |
| PPIAL4G | 124.840101287634 | 124.324855155055 | 110.662552491706 |                  |
|         | 134.549628985766 | 118.139487760542 | 141.189008902155 | 122.365693072105 |
|         | 123.207402172696 | 146.10417547509  | 170.473956720945 | 131.865164933746 |
|         | 132.154131623051 |                  |                  |                  |
| PPIAP19 | 143.625188247966 | 149.364498870469 | 165.827405735044 |                  |
|         | 141.587109176431 | 139.201122725213 | 134.70848693317  | 137.545063966957 |
|         | 137.752238510249 | 143.759171254761 | 142.282861913548 | 133.238296113721 |
|         | 143.258488502799 |                  |                  |                  |
| PPIB    | 179.996590340102 | 181.340312140534 | 184.148058872585 | 153.295838391099 |
|         | 260.85776723575  | 236.933960698783 | 296.553550946307 | 182.938824846376 |
|         | 242.348427307994 | 209.229537873706 | 315.615758089471 | 330.080428155378 |
| PPIC    | 755.42757464615  | 604.687265229902 | 695.595965352335 | 588.863382995875 |
|         | 561.761160223609 | 517.676093149981 | 998.631321857182 | 765.333633142088 |
|         | 360.90109922539  | 1699.8374761666  | 697.299604049748 | 609.939982655706 |
| PPID    | 141.706292773073 | 152.488480322526 | 143.410917415691 | 142.826898321575 |
|         | 178.304914997023 | 146.202611204712 | 173.544556426164 | 157.14512525321  |
|         | 161.155280539113 | 167.822075935474 | 156.740412695351 | 167.260319361746 |
| PPIE    | 306.486275677467 | 311.612118247493 | 441.001837510132 | 310.815067427296 |
|         | 361.904370514991 | 483.174262289559 | 454.64556253724  | 364.191263843897 |
|         | 438.146919555296 | 413.172954892025 | 294.997671630798 | 422.973606694449 |
| PPIF    | 149.977924522553 | 154.037622223246 | 136.454911192129 | 154.316929706697 |
|         | 170.807514224412 | 163.18585933431  | 174.338440780636 | 155.53992663898  |
|         | 155.893018702615 | 152.620244087653 | 243.080229016932 | 222.028626209166 |
| PPIG    | 513.292377117011 | 516.429067667758 | 420.95713139384  | 402.866491417369 |
|         | 280.398987330256 | 322.837446618323 | 314.90123632547  | 312.129861040709 |
|         | 267.696284751923 | 270.520229426015 | 291.537725613819 | 347.932135290714 |
| PPIH    | 431.799795646414 | 485.373169494941 | 435.796737132969 | 524.245387973163 |
|         | 1020.19774509086 | 1070.4597488302  | 769.958422740085 | 881.561688713557 |
|         | 856.74270641707  | 711.491528818004 | 623.409211766224 | 766.420275252501 |
| PPIL1   | 227.441436540742 | 190.843795579234 | 176.670752486376 | 203.487137264    |
|         | 241.799709160815 | 392.824840252824 | 322.028360309592 | 325.12056698785  |
|         | 318.850765099332 | 369.434158443561 | 325.751369001105 | 392.824840252824 |
| PPIL2   | 139.018588215263 | 148.493435517221 | 134.796088225931 | 145.120347147471 |
|         | 148.859129298141 | 137.188849160569 | 155.899547877596 | 135.728336465002 |
|         | 136.337076023706 | 129.361783301027 | 145.076068630259 | 135.897498591391 |
| PPIL3   | 430.412897698085 | 411.603820288919 | 494.175437345451 | 373.925939492544 |
|         | 279.541294184609 | 407.244564912365 | 459.171226689178 | 276.476790719416 |
|         | 394.414934831535 | 404.95944990868  | 368.418553384965 | 416.307629596091 |
| PPIL4   | 136.603035996281 | 127.314089756429 | 123.586359806158 | 124.924794564647 |
|         | 124.901759819007 | 116.70650322987  | 112.758617084341 | 123.288028185949 |
|         | 114.835386789236 | 130.2867846895   | 127.650229552084 | 120.721341479615 |
| PPIL5   | 154.740395921562 | 154.423801637411 | 153.941193682697 | 151.256546638599 |
|         | 187.231049280818 | 169.095270479344 | 152.291176493005 | 205.4648759901   |
|         | 169.391557085902 | 176.449549075475 | 157.381401974279 | 183.193029399643 |
| PPIL6   | 150.49183794045  | 153.285830139349 | 146.777258330572 | 127.625252349231 |
|         | 133.382099379709 | 127.458099438957 | 118.604395992281 | 136.698189351878 |
|         | 123.004137408444 | 124.624046191085 | 143.145483889918 | 131.593705080542 |
| PPL     | 418.420753332232 | 437.248311551717 | 433.019478861638 | 547.042461070351 |
|         | 423.489441909617 | 267.069665000047 | 280.033528476199 | 448.371946119074 |
|         | 406.998800177456 | 2078.76377557352 | 384.216141843863 | 308.877027622691 |

|        |                  |                  |                  |                  |
|--------|------------------|------------------|------------------|------------------|
| PPM1A  | 156.779004465552 | 157.358696886078 | 164.078423844421 | 146.536055773073 |
|        | 153.943227610765 | 175.608958881476 | 166.795671029174 | 160.022481227931 |
|        | 160.096507818256 | 188.959655155629 | 161.00635457883  | 188.623897093065 |
| PPM1B  | 366.007451523992 | 345.565843875296 | 337.342034950908 | 340.366016191232 |
|        | 244.797792477941 | 356.268960813032 | 300.83667045718  | 296.830999357172 |
|        | 263.707476735938 | 191.3765085801   | 174.991941844263 | 257.032174266905 |
| PPM1D  | 216.836094088131 | 203.206743799353 | 246.152798696993 | 182.300628120658 |
|        | 181.635664531851 | 228.968779778407 | 175.819983804497 | 250.928804390353 |
|        | 277.285526811736 | 192.130214856642 | 191.937607311711 | 211.369442150136 |
| PPM1E  | 160.537464426971 | 181.412790232996 | 167.304721591124 | 173.132747018514 |
|        | 165.350777445902 | 173.690008681514 | 166.182850621447 | 154.584367902971 |
|        | 169.881866987359 | 153.985529457122 | 162.192879711747 | 205.162633740798 |
| PPM1F  | 1101.66868138797 | 1073.40463823132 | 1223.06438074895 | 1262.96801072965 |
|        | 784.72162514331  | 611.36406319509  | 447.372026268156 | 658.202765061937 |
|        | 744.523059417351 | 545.026293696209 | 630.473042320288 | 526.896146537814 |
| PPM1G  | 798.1490651671   | 938.049312229961 | 912.143424293236 | 1062.03157932144 |
|        | 1876.64079464928 | 1539.80266129509 | 1255.62991601665 | 1500.16816750361 |
|        | 1269.67110104843 | 1004.6207350158  | 1204.32784721885 | 1389.93393245455 |
| PPM1H  | 157.57914268719  | 186.961638857905 | 159.746802905903 | 166.819234137224 |
|        | 237.078644686891 | 337.728737393381 | 360.39998507367  | 403.104188866804 |
|        | 410.954095610904 | 150.148902196995 | 207.400490077106 | 161.112906953532 |
| PPM1J  | 109.832757716464 | 129.633387503618 | 118.95971064289  | 115.097376525707 |
|        | 109.635825046436 | 121.672811608791 | 112.565341690522 | 115.450352881048 |
|        | 119.125002207396 | 122.603226380439 | 137.170666175895 | 124.561511833959 |
| PPM1K  | 424.665056900526 | 428.340060893467 | 442.220572301795 | 390.284689962661 |
|        | 167.121623035375 | 345.062426573519 | 237.191866335979 | 291.50783830983  |
|        | 251.731327363027 | 240.182016388745 | 301.051775938853 | 254.936706344174 |
| PPM1L  | 125.806943645484 | 107.40922161073  | 116.449064666763 | 118.983932995126 |
|        | 125.060387518072 | 119.934231033302 | 112.096627288813 | 115.473431881597 |
|        | 120.402155551818 | 105.348008821162 | 118.863150637476 | 116.519527499611 |
| PPM1M  | 686.923164688096 | 632.031410234577 | 646.461274173693 | 653.749043828462 |
|        | 395.425715632302 | 262.53374754047  | 351.665934915634 | 267.028096234702 |
|        | 391.326200093611 | 302.735372807236 | 432.372995789404 | 317.659548748735 |
| PPM2C  | 218.794112567823 | 220.742788129847 | 217.576547690525 | 206.972440734038 |
|        | 194.002075848131 | 212.363151537303 | 195.333029746339 | 172.951567541592 |
|        | 196.329602378007 | 181.914505612128 | 194.789918629905 | 202.230920499592 |
| PPME1  | 446.262895953004 | 432.372995789404 | 364.597798667541 | 479.261755380872 |
|        | 724.442411170786 | 452.843213944986 | 399.724529998085 | 408.263886786123 |
|        | 320.774102343889 | 540.797164107185 | 283.556453980797 | 378.967410725775 |
| PPOX   | 365.727197088581 | 412.202049714695 | 401.584032365337 | 540.946852709312 |
|        | 557.405157178952 | 477.275332763887 | 310.365203383647 | 399.872401268958 |
|        | 335.013713757031 | 384.464383569801 | 374.106258053201 | 329.660368915848 |
| PPP1CA | 269.072221443403 | 293.692083555844 | 279.495192828873 |                  |
|        | 295.463118191589 | 1462.31151845458 | 1091.12493937368 | 800.373159084181 |
|        | 617.318955611228 | 659.27672123763  | 778.846928848361 | 640.255747986724 |
|        | 841.285351463894 |                  |                  |                  |
| PPP1CB | 1251.15912264225 | 1184.88559645917 | 1994.00516809361 |                  |
|        | 1236.56870367797 | 427.637083424453 | 1147.96742431386 | 737.42784787426  |
|        | 649.906677394861 | 506.029788151779 | 882.429823267754 | 853.314313182949 |
|        | 384.464383569801 |                  |                  |                  |
| PPP1CC | 3282.73711809465 | 2828.97255380291 | 3862.57980488881 |                  |
|        | 2305.11856249143 | 2083.02482378721 | 3403.37530051435 | 2775.84742592713 |
|        | 3106.94181270197 | 3342.8737952486  | 2563.02488807613 | 2630.78185410861 |
|        | 2850.98525554116 |                  |                  |                  |

PPP1R10 657.562129888446 657.562129888446 545.362650746876  
753.007562127186 548.014025722956 488.884511065882 344.298510200653  
422.520372346993 430.94199035855 639.184296110069 329.535023880129  
313.967636827811

PPP1R11 2050.34883263932 2111.32236867229 2672.77147589342  
2515.7035557541 1879.08108720938 1955.96772733047 1942.08859727404  
1910.08485008041 2615.07927836881 2069.70335195314 2350.01764791897  
2459.05558915812

PPP1R12A 979.761537450366 863.086199215353 1210.40302822121  
907.610179738644 254.359737178714 275.101766414328 248.085349787686  
477.87583927675 242.253995801882 257.573614085223 268.568824794145  
298.028932089399

PPP1R12B 301.798676825176 264.355693070937 398.272713014637  
291.476113017794 172.412059174046 156.13331481937 177.976550224863  
155.368204597287 175.96841318924 167.586897846525 169.061364889307  
185.002106079042

PPP1R12C 686.679573646733 843.075879568455 667.421612441201  
1409.42016970226 487.799854351205 222.565515020501 270.568660560796  
240.814860403562 261.117845544884 192.07791693203 242.471259857978  
224.008253365957

PPP1R13B 584.433155497378 771.694853062033 408.361368902627  
1073.40463823132 379.788696204016 259.767151797583 499.048754087189  
391.252450588331 336.5543056115 345.832589037442 494.347792360629  
490.849163737598

PPP1R13L 207.384408045502 220.312301059818 230.749601687217  
193.569894919176 953.861218000678 289.257002046658 659.106229917309  
302.408563830315 402.694564608582 610.591049634222 662.373189001788  
469.407481002198

PPP1R14A 5714.36902486392 5894.79176478976 4621.99241522677  
9970.08052783908 286.035428568826 261.171723011396 187.4351946569  
294.808980631295 259.316557834724 366.788087591332 201.152639979358  
216.53417734069

PPP1R14B 777.651238374269 813.454826901794 599.735180191091  
922.877217016704 4367.38154535901 2334.97297889593 1401.67503392145  
1281.1883621512 967.797017108447 2611.61260614408 2694.98079256089  
2703.76111776248

PPP1R14C 133.698455862488 153.713298074917 132.874263672434  
164.901810642726 193.134414137433 152.733409144267 145.660417208595  
155.690773461824 165.960176666275 687.789976218334 149.631696044063  
148.934593102452

PPP1R14D 138.159966250659 143.405079593778 158.308558656144  
150.580133889656 151.318320077986 150.78145177853 166.277960843095  
261.171723011396 443.732580517751 144.877789873062 140.756898474665  
149.042693712098

PPP1R15A 2379.15291239548 2427.21100330388 2542.44286642873  
2255.92551080483 1875.21979956596 2091.73580292332 1414.95226752155  
1255.62991601665 1345.8970795036 3536.14527317085 878.520681466946  
847.276523445973

PPP1R15B 160.293522619371 158.795335941084 140.864196804152  
145.858537779106 154.828782972852 156.248684477916 147.245636620228  
149.427217345037 153.78045746564 130.205764567934 183.416437587938  
185.673549367125

PPP1R16A 229.660838239474 252.957489543915 225.31216514083  
297.862653495715 624.825216056495 423.562598841704 335.533053221675

545.566596665916 612.374364731095 410.42088953434 858.020739710943  
553.368945998847  
PPP1R16B 143.867013358737 149.842326869644 144.972694558182  
144.328571856869 153.267549449395 150.122035262873 143.658600740177  
200.934618257908 277.501071684448 154.420795931034 170.801761175916  
160.848201202361  
PPP1R1A 215.635313821029 202.041958613989 261.844708446856  
239.050379187643 146.897528834303 150.352308475398 131.93683726912  
136.71484425521 130.511042322504 126.129564039673 109.536381305315  
175.495965414493  
PPP1R1B 175.51767355303 171.267907653007 175.121069571371  
164.808139478109 151.911494020123 142.567737460006 151.899063970777  
384.733313349438 178.329946332806 152.377056383547 143.320787131532  
157.14512525321  
PPP1R1C 136.342634691443 129.956519535525 130.392575279055  
130.746465595759 133.220878146063 127.648224668964 135.241029533819  
134.808485735121 132.976977898242 143.741676966126 142.986412837634  
135.616911926164  
PPP1R2 717.025533065694 741.433093896472 844.462124058351  
616.523853569261 649.438995824208 1071.47374315822 475.403662030875  
825.781627776577 1296.10827265334 681.429327723794 1215.96648642927  
827.863789600981  
PPP1R2P3 149.141033677244 144.798664281991 135.503338987971  
140.260053206523 123.541709359809 161.417207801991 149.380733719756  
139.418394104487 120.433080754232 143.539741029895 141.539503634005  
141.121364213272  
PPP1R2P9 133.964163727962 136.824357247954 139.900523831258  
129.127563278016 141.299677389827 127.640525889316 131.237720549768  
141.123272165499 127.199124606827 135.583556015955 122.478089682405  
138.221749464651  
PPP1R3A 137.700691136287 131.785053503951 139.082897743357  
139.85010721496 135.884635448277 143.764266466204 124.415058391979  
146.722211039754 125.600500146679 135.839123867443 140.78582131501  
142.02866433901  
PPP1R3B 152.685860451112 152.296774123599 169.574755162815  
171.941887376462 139.046174587432 145.957934576055 149.500457158616  
144.930066324767 130.217791888656 175.711836112986 143.917152377544  
142.195764444916  
PPP1R3C 2568.95060767776 1885.93146154931 1894.14699530855  
1650.77281891596 863.738809424958 1417.76295714364 2822.48671794913  
1597.53010317504 2568.95060767776 358.415933397099 2269.44503773126  
1747.33558205825  
PPP1R3D 195.561296046507 204.681956301306 205.830321788612  
187.997940126066 257.740674565975 307.518881119091 240.465165615601  
205.930921729192 207.298994298453 199.327939161502 226.315173823168  
192.095235288818  
PPP1R3E 219.8511043213 201.661941695238 273.073938260793  
201.085046871333 170.901599088282 169.561657768387 180.364089931995  
174.006516433854 179.932404140099 172.073751088968 170.423881865022  
197.699100346967  
PPP1R3F 171.229729917612 187.852455291319 176.77183598995  
203.510106134882 265.712482648121 141.345379144177 122.699993989189  
146.466967386428 126.301178976594 140.190234214948 162.547569833931  
140.504486195539

PPP1R7 543.001249586573 571.136519973808 662.373189001788  
778.846928848361 345.135289739599 321.794887577351 353.187829498591  
332.749676505218 416.075109522039 500.343476678562 504.502047826003  
479.469659712246  
PPP1R8 165.169920299969 167.442950045855 167.337624316172  
185.617936412633 156.487049947247 208.713555471888 194.86492119218  
216.53417734069 180.698727334322 201.458970969685 188.0434100445  
191.284275676256  
PPP1R9A 266.162244070031 326.379855547052 273.197814995543  
290.241064926886 208.983138060317 320.024259346646 296.497100375888  
227.177100762395 191.777253122672 129.419280058541 191.074428905553  
191.418673767345  
PPP1R9B 126.678746008577 130.816301920872 131.613738869093  
133.374199939042 140.669947387892 125.556444423391 144.665869508406  
139.117053855066 139.018588215263 150.817922696097 126.55925846644  
146.334446516009  
PPP2CA 2051.45788386541 2023.92614092273 1850.98311401165  
1899.94714976387 1309.01193284992 1767.70023790753 2376.52728883131  
2151.9395095819 1940.42283070543 3246.86605825129 2039.55802107872  
2340.90990677253  
PPP2CB 691.205738835917 501.434722063309 664.809419789814  
431.861762635568 328.550286726543 338.585771590234 431.546135503733  
320.360917595936 485.373169494941 829.740755449333 419.4017188518  
459.771019162573  
PPP2R1A 2718.440149645 3413.39994653641 2299.23805014176  
3829.87905458534 6179.86800320807 2028.67873136046 2258.30916111153  
2365.99940149374 3119.93811557461 1746.30519466572 1958.96627327952  
1675.35431076885  
PPP2R1B 142.013370954791 155.868109161417 142.590631181358  
150.063082731931 161.673818303367 157.50873249647 153.784923783551  
193.472317111841 167.586897846525 154.892452237027 161.592528958127  
189.726075394359  
PPP2R2A 730.34994035645 587.654093308465 772.399017166118  
684.715981522999 597.795856268827 804.800251415824 1070.4597488302  
511.25179427158 789.752781067888 1064.12835214671 702.265884752474  
895.821578104681  
PPP2R2B 496.03509813734 439.616817413027 399.476401949891  
391.039114500903 202.718428167217 230.806950763402 728.485195792194  
353.005548289786 466.4890990178 172.338509138759 450.566031840493  
299.754985162237  
PPP2R2C 163.487737425232 157.541796722309 152.552277008504  
177.752497164503 147.053391763304 150.227629690236 134.606126134531  
134.136687154241 134.02083946631 633.594811068524 142.85695042665  
158.554429311951  
PPP2R2D 267.222762759781 263.606930507829 276.089623957012  
271.713695056313 280.204167582951 232.151020756625 344.45331938267  
236.676029292922 254.315783394932 217.576547690525 299.33156125224  
303.300028849873  
PPP2R3A 254.036619126409 260.746952459282 263.800363357443  
289.616527814137 161.00635457883 221.491633607126 187.572517928061  
205.705962405954 181.898985277176 207.864808684047 203.487137264  
195.194505906435  
PPP2R3B 251.588748783592 197.034073391478 285.980446338971  
200.264756078778 200.934618257908 186.345823604119 181.722373730185

167.724233915361 182.984076352185 148.453646012886 156.389361240637  
161.960392594363  
PPP2R3C 521.215655189324 449.952497751758 600.757699463777  
437.122373082112 317.061815822659 670.347447480331 391.706404954357  
394.101052511043 420.871349359404 407.152764702613 433.928818077527  
418.772484676858  
PPP2R4 330.590986934704 367.327273578513 312.903508201275  
490.631757904175 714.052063877292 262.416137698884 234.550692915716  
260.787104931135 357.773949920377 263.379982742085 592.613689704907  
222.919473675549  
PPP2R5A 743.510369438587 799.759250503507 909.727616721285  
782.448692528135 353.774297577869 320.214614455231 277.539110964815  
219.462274506333 358.152044880733 448.858580689107 362.306819797508  
391.569187190375  
PPP2R5B 249.763375041547 220.510248260182 200.405532717305  
245.997705723007 196.136080427522 156.787932134605 189.389457481768  
142.717436384151 157.094001180073 201.661941695238 193.502988612307  
141.090356426567  
PPP2R5C 221.635333304767 235.905788497166 259.742175498038  
223.094496588657 233.786136606682 244.350562866593 335.858047332641  
275.888299685521 240.182016388745 311.04252785157 261.322374889497  
339.172031360524  
PPP2R5D 224.547982731402 225.730739636442 233.36028792331  
257.813193543819 309.229066204308 193.190059954084 182.57496767012  
182.68965110437 172.421637564661 210.5689532432 212.190707408572  
169.052101570616  
PPP2R5E 1105.80735904293 1106.75785702993 1040.29664343743  
721.966539760341 740.527607312565 674.101599637653 681.591028334969  
962.559482864549 745.844395215451 941.572186137467 743.915675090182  
933.723483173584  
PPP3CA 243.159062832085 196.759802659759 250.342080183479  
200.443940449586 213.145460679531 212.497773003032 259.338947392465  
202.568071395884 187.216245895253 240.591548171052 233.71520737817  
206.521761031181  
PPP3CB 2187.3010896903 1862.88548451154 2269.44503773126  
2227.70654174379 360.756455184184 260.642170838161 413.757630469808  
331.164053277361 458.875979229339 409.282410265733 457.905741500454  
407.711669482083  
PPP3CC 459.30568829087 360.812953749077 448.54309632232  
330.241479004885 197.205792984885 235.43707989982 263.936023499588  
206.521761031181 261.469732730752 437.601814037248 276.434192872962  
330.405026390912  
PPP3R1 621.354393918348 540.005877322817 434.325609889068  
568.555967950896 1205.45751308367 414.797416270335 285.594100976705  
264.685862877779 327.164773632634 304.937584086529 226.623172906957  
349.65350886897  
PPP3R2 110.735199684144 112.026113831896 118.93828679356  
122.418378964982 116.425301253959 104.861024325857 113.262357892613  
113.504670764963 112.404562115306 111.908965758799 123.798513338021  
108.21185649774  
PPP4C 526.416479408056 643.306565600931 592.387650564803 621.489906442001  
2539.87833317526 2691.41389079777 1687.85201395597 1715.51071085304  
1708.87666406131 1223.06438074895 1503.2049371911 1477.10828981572



PPP4R1 816.580880338838 752.585744322608 656.867138022837  
 714.6859666834 620.614820117452 1102.73689840572 894.734451279225  
 1068.63350031223 820.652972219658 2234.85920641661 1617.44377452783  
 779.922653392712  
 PPP4R1L 160.989242461839 146.362705590778 156.262515148436  
 146.764908249803 142.19728670565 136.357788670568 135.5237675623  
 132.608622131443 149.710337205986 138.391203321266 137.545063966957  
 129.549673572516  
 PPP4R2 136.537117054998 150.761696482387 138.997524526643  
 131.530256606799 138.117916412819 142.240333104987 136.72715888684  
 144.30699572795 142.655287071175 149.952762225731 157.565633456909  
 145.10302792449  
 PPP4R4 136.248506185974 139.217113811817 131.237720549768  
 134.463094391766 144.249339611941 127.95281733488 140.357427912361  
 130.278980631435 135.582230137515 142.671190279415 148.04206955657  
 143.776637809106  
 PPP5C 116.46192274217 127.683344133492 143.598567970841 142.385902610309  
 138.16337207876 134.845202154446 131.841436867483 120.337241026338  
 145.556318940043 133.343243441383 127.051075205085 130.491742824575  
 PPP6C 1180.7055699511 1181.97868824758 1067.80176606977 1177.01310527577  
 1360.85309203233 852.649997188692 847.276523445973 939.213447046823  
 1225.33666840349 1398.60850048351 748.703265448403 822.129234065933  
 PPPDE1 846.985164747386 772.776364492813 829.740755449333  
 598.095370768587 448.54309632232 1036.40082234884 496.328898534802  
 851.633522004342 543.710330214344 620.760947818536 551.622587349813  
 938.918431240228  
 PPPDE2 201.593025256991 240.465165615601 200.591916768948  
 256.202924421798 803.840404197117 310.8725368426 454.030083521756  
 362.581768268116 494.538861626895 655.665164535648 391.644649726254  
 486.947380524463  
 PPRC1 574.262112643403 572.049540360134 436.222568287601 569.353661326724  
 693.516351173476 397.737702926328 458.282682131641 385.750371084  
 440.203336761263 360.243484271891 519.829743770022 594.92419264579  
 PPT1 2426.2098937241 2580.98143004019 2046.64499507352 2048.13524244516  
 2572.01353724341 2012.36542989953 2938.06458269406 2523.91287654539  
 2779.89882032092 1793.75125318113 1594.05763963363 1318.3633082502  
 PPT2 167.121623035375 164.389447533163 162.342112922504 164.545596179262  
 175.974598536074 156.714081537525 169.806644442071 163.474261351901  
 143.685368799972 167.389632521521 155.441190892146 169.752525994991  
 PPTC7 439.33566689752 319.966785546419 493.887026009442 284.715092831843  
 220.258804437828 469.333357789149 305.615423200097 316.281469585496  
 338.223462327622 289.21739941764 379.615659443164 466.777454704543  
 PPWD1 250.376178742476 215.506175859782 340.547010951537 196.117609477292  
 148.692602243778 246.616749748028 378.509324619452 251.546290552828  
 254.517135747445 301.49286558088 300.985037429772 318.348505551265  
 PPY 120.114423236962 131.608580511282 124.869732867761 141.356127724777  
 140.646946425036 174.202069525223 140.682757521394 138.336667434109  
 148.516653846017 147.129702047639 143.082880435412 148.162914253981  
 PPY2 103.202873534814 108.43334699667 125.227513212286 109.044879188971  
 109.044879188971 107.498500136859 104.285022032604 111.11656427738  
 116.514299377365 113.432757764419 114.45792163942 109.333276735523  
 PPYR1 130.477824552202 133.308383825604 121.157614971438 120.975542702338  
 131.458411820485 114.494394548044 132.908367372426 117.913545753709  
 117.316790136526 119.849895979393 136.679405220947 119.608334527504

PQBP1 276.756415094228 273.152907354565 331.32397534437 293.4021207271  
341.096072280715 339.598452080917 280.798003990849 336.898462056187  
242.188218870393 258.145539382199 225.820503820866 261.988345506548  
PQLC1 1409.42016970226 1619.67820476414 1599.12034906314 1821.08523647593  
2822.48671794913 1230.00744483191 1478.09582385838 1596.33832632698  
1748.77270039774 1675.35431076885 1257.00798908017 1174.0922389136  
PQLC2 143.449303333495 156.594337089784 141.03218895811 151.627496656808  
158.308558656144 138.968690339299 147.648020819059 149.423230365631  
142.324077852852 145.122171099946 153.649235507812 140.229267364503  
PQLC3 756.390518977556 617.185364180303 791.402660066193 437.601814037248  
943.23069404564 591.437752991512 651.759589129833 536.46884541183  
427.637083424453 628.344122779625 1009.42265467472 656.32782132983  
PRAC 145.514859606031 177.60876237572 153.679479224178 166.239339129505  
124.238319768621 166.396160626179 109.128394735532 115.180659017144  
119.911515364639 118.626815116752 124.300285428221 119.590540166384  
PRAF2 283.982575660968 312.224309341171 292.693830444839 362.445813697676  
532.394088545421 327.010503005631 317.061815822659 289.576706584644  
239.73396414153 287.374706071354 207.417884407459 241.320049298228  
PRAGMIN 235.162439885207 226.454107654372 165.947514372877  
235.867149024041 740.973440818582 473.853999833395 341.015631528464  
434.176007498693 832.014011481807 1159.44907165386 509.400965222318  
793.501244347257  
PRAM1 117.575009754326 124.863832760607 118.553226856337 128.543460982378  
118.342067845126 115.755585907264 124.469415593643 130.92186531563  
118.192302821514 124.851025681014 135.375268329248 119.787925356307  
PRAME 125.596067857941 130.753793881071 125.940081665592 122.969215709433  
158.735283017367 150.911524755251 128.099484678519 131.712745388563  
135.164117176127 128.554574566655 147.143407224469 133.274292647041  
PRAMEF1 137.188245017099 127.57284871013 154.150568177135  
147.500009766324 141.97908047949 138.028813480968 153.922713834296  
137.033134002983 143.086872363116 143.959910170676 139.762998983487  
133.42964827086  
PRAMEF10 135.535020220081 123.58053320223 128.914885412263  
125.326393776938 130.742940708861 127.827096314406 128.490341173553  
121.51208055933 124.334450753704 130.935922915902 130.563089905046  
123.752109790056  
PRAMEF11 129.176532377543 125.247402280272 126.858621735156  
128.191959554459 126.162713269943 135.458682745495 122.978576290038  
132.772085211553 126.402405227897 136.031744903648 124.555847618988  
126.072053958666  
PRAMEF12 136.19725093985 141.410953064267 140.091378604453  
147.537691509156 122.786030993629 151.41546939633 145.658251059524  
142.567737460006 125.350567304651 148.82892305156 153.248199842194  
133.769848328557  
PRAMEF13 138.340652133783 124.883575464443 134.657787366869  
124.539006083936 144.349602838518 124.905889975958 149.288034848931  
132.895500657638 138.875827888646 132.589411973628 128.396326753926  
135.778099658349  
PRAMEF14 144.256029338053 133.511698282195 135.789381967525  
141.363863974586 144.544001385895 149.749660071593 141.628203045085  
150.566842106244 153.752502094283 147.720061897962 140.150884219813  
139.888008605915  
PRAMEF15 132.027020683413 142.07664288788 139.494962965774  
132.916608405637 137.129864761402 134.696571019896 135.105147647223

141.269923271838 132.099223798262 134.990075720145 142.253826696208  
140.370626016794  
PRAMEF16 113.756115251188 126.928328902507 123.660836177932  
115.18875509198 106.285472845323 115.208555742308 110.16174213285  
112.904318310632 122.796362813922 119.998260435095 109.932577444858  
113.816165294487  
PRAMEF17 132.875314170399 151.698385134218 148.79958121087  
151.293676705634 145.709172732805 148.100508271232 143.778327403708  
154.973990421257 153.030069116717 141.360125377949 148.286700314107  
155.561821955048  
PRAMEF18 128.530540860266 122.724429060184 128.318545300038  
126.168223112165 106.491867793742 122.75516501062 145.630497368137  
132.855812035005 114.466368742403 135.244303669342 133.277326912499  
120.816130267055  
PRAMEF19 139.970213028387 163.899808733609 156.399808270033  
163.636550341231 159.026102446297 151.421099926743 164.274491958161  
151.519845657755 152.237183848896 162.155834067128 147.865114383296  
166.746037983859  
PRAMEF2 127.019978195283 125.683334853039 144.617654961472  
140.790450703097 137.677396262152 126.743579586052 138.942901099402  
146.795608819024 147.903030308715 145.276745572405 122.447154928139  
144.288714958892  
PRAMEF20 135.182524652868 130.12032144763 131.066795873915  
127.164076119599 134.307941199626 117.561878567749 121.545189875973  
140.083495854322 121.497645719165 134.534815676852 127.485734862624  
128.99859423584  
PRAMEF21 159.365070384451 150.599425944486 140.82351325907  
156.176537862398 152.20173979854 158.216790540415 141.821550320574  
138.514356748249 155.168592130392 151.354187593773 132.969187044132  
130.947003916049  
PRAMEF22 133.211362932569 126.013957128603 131.532660547328  
129.801342433836 153.667355714857 147.28750335168 133.745413210496  
125.398875527365 143.365976841902 137.076766238637 117.060696904303  
131.260111979219  
PRAMEF3 137.976533193418 127.354826381656 135.30767047671  
132.133979108537 145.168031449425 128.066043751951 134.46179453106  
131.468537312778 124.119104345119 132.924341641217 140.300833590056  
129.34905533265  
PRAMEF4 142.185903088074 130.625263889919 147.18858211611  
131.185836673529 130.870198462514 139.008854444223 133.830860948014  
140.462651395483 130.632096412204 138.411148122407 117.212164526913  
144.89403947454  
PRAMEF5 142.981967333546 138.838795320713 170.361237529247  
152.301556397498 147.038700869156 161.614426723521 151.506013510204  
154.064184525311 152.364417528975 165.67554738735 147.113541493157  
155.207839370162  
PRAMEF6 121.764933633063 123.991249190444 129.105655010455  
118.393203921859 122.566970430133 118.547605249191 121.181654892305  
122.129348411763 124.157302365291 123.905462079972 111.956783714784  
117.639216182057  
PRAMEF7 142.548833391567 140.295307451188 138.748941735079  
134.449083873514 137.089392202166 140.699287635171 132.6175371563  
136.436762791912 139.904952662852 143.440420261133 137.77601089414  
139.356478232855

PRAMEF8 119.229322984564 105.236768436069 123.789035728194  
 114.658668711121 115.113000553093 114.378420394004 111.538651711074  
 128.51523581959 120.182787241888 121.855752708908 136.83883055114  
 115.692324946633  
 PRAMEF9 164.146345008398 140.602170750673 168.668125438154  
 157.089650890944 135.904163043783 163.714231827866 150.670783991982  
 137.450774903611 138.97776257708 151.367402326399 145.096707533824  
 145.43470695949  
 PRAP1 165.080825814849 137.435736170779 168.763640193219 141.855655600443  
 158.263657373911 149.343930487315 146.257923971069 152.035992124554  
 142.715449859191 170.241254308841 125.935071837868 147.16778072296  
 PRB1 148.663860923774 149.535008475427 151.338765231607 155.438218501542  
 155.952902855994 151.102431192559 159.98205335759 148.284412570438  
 159.476343366991 164.910911528819 134.928967716193 158.92254744379  
 PRB2 126.022145004164 128.840466579373 132.083532534267 132.311344653106  
 128.453729430951 127.980776299586 130.342425029134 133.278923716119  
 126.209426865327 130.516632662261 129.608034744581 137.372131049785  
 PRB3 167.532512839891 163.298729857831 169.744100665038 163.432972512188  
 163.086539217826 165.642728895682 164.256764783784 171.028432989066  
 156.248684477916 150.84999247088 155.150904036206 163.996649606636  
 PRB4 134.47218436552 138.121905080822 134.527165454543 148.996601285688  
 124.334450753704 155.431833398023 138.319321806028 137.344198938623  
 130.975606477621 136.327014189932 137.96452133771 138.753419730571  
 PRC1 191.348260799746 231.981501596284 170.417054311946 245.978723809154  
 632.278924237678 849.158029646233 473.260534978556 725.443026984982  
 1137.42879398351 818.445501500731 300.937118739654 923.383014892221  
 PRCC 216.9491329483 218.314136992677 208.456472621593 274.494074082359  
 320.936905584424 266.101158071711 273.984715370774 271.238736772408  
 270.945325305492 222.484058975856 222.624150073858 307.945884504629  
 PRCD 131.305785417254 141.88072888667 126.995207465164 130.548611758921  
 137.478556403046 135.170925092209 121.903115540516 119.95959059725  
 106.491867793742 129.684916104674 139.779754416105 120.297848408451  
 PRCP 2018.81730267601 2084.44431604433 1345.8970795036 1584.81089248914  
 1949.60516542965 1061.29067124163 3253.76017336684 1732.52466021178  
 1889.05071563459 1594.05763963363 1296.10827265334 1199.35864276583  
 PRDM1 163.07139884152 214.824908522393 134.769926504916 134.762169062357  
 143.913625824599 197.938447651153 153.320911882529 221.491633607126  
 246.710233781784 323.149792143481 172.186384820044 179.421854100287  
 PRDM10 190.489530928259 183.804849355341 225.99848688881  
 187.93380542729 211.941623411369 190.077302802065 213.833894542292  
 213.447886742681 203.475080163804 227.689356258276 238.375823012603  
 236.082185670774  
 PRDM11 153.95855605751 132.171282327983 126.700147643  
 135.814893730549 137.778033050658 136.929570710155 113.58962177275  
 130.567443018832 128.992837936606 127.342017026873 137.746488181995  
 124.899019467557  
 PRDM12 117.449306773025 110.448948495323 108.483284007316  
 116.884397420467 103.448244268961 112.558241320112 113.199690522854  
 114.673517800886 110.885714048075 106.182551369456 109.669517182289  
 110.510191137073  
 PRDM13 142.91818218442 157.12360611723 175.395900648455  
 123.893768254549 135.057847490193 135.098343717085 139.87715485885  
 150.232470359841 151.808767243647 141.08625682411 131.835171530369  
 142.920939571001

PRDM14 132.043196381009 142.690911343704 137.294246530224  
 149.25705328406 135.330241638301 149.851792558427 131.223691762533  
 133.296200563657 132.381685434931 138.165240772401 127.57284871013  
 146.861981788662  
 PRDM15 132.822351718257 136.964780183468 146.71164737466  
 130.004329307977 139.025598691696 134.658664100744 131.558842131826  
 150.314462939164 135.405742719464 131.159946917777 132.268445799639  
 134.465488237877  
 PRDM16 149.827791077797 136.037555727438 143.496669740707  
 145.900272803108 146.803549606737 133.164566694394 136.962442874268  
 140.264060906597 140.016122996485 138.508015596135 133.847494826806  
 144.203716525289  
 PRDM2 174.663845688179 171.202766078337 161.335677383485 182.118544602205  
 145.900272803108 147.803464591663 156.304678960663 135.583556015955  
 136.593346330215 143.990328432869 147.734708927825 140.655002540298  
 PRDM4 736.140249105836 697.299604049748 728.485195792194 583.314509855875  
 504.709613434391 998.157643452741 975.685771692095 710.228463443265  
 1194.42925868786 736.603605876572 803.840404197117 1037.46485756166  
 PRDM5 115.830631252469 112.133567992833 120.235652849894 119.288554466773  
 126.27814255539 119.257387524365 121.599883734552 117.546508214236  
 122.480000773859 113.919529047225 118.797046082278 115.896463925125  
 PRDM6 211.183499580683 221.411372022459 313.828943866034 231.915272112361  
 166.767004180603 148.342114514468 166.214167530158 169.368090266817  
 172.926288703434 149.682150633146 159.49930229951 146.21362402936  
 PRDM7 149.016767620428 127.310437599803 162.769643886845 157.792868983503  
 159.182533998843 242.410260751835 153.636804025106 175.679405338399  
 162.774716879847 144.436358527414 147.576533768761 142.049776668507  
 PRDM8 856.424155671931 670.571106793204 605.21685916883 564.588706307423  
 152.743680985848 167.505381046729 212.959246855759 191.795952536469  
 210.218440444631 206.77605957523 188.959655155629 177.32104138164  
 PRDM9 131.288785100733 140.092648878007 151.301484852387 128.917399281607  
 122.749182465923 133.148442269517 134.256243410916 127.374600506681  
 137.13615301204 140.113334247294 145.045633612194 137.200433808907  
 PRDX1 3636.59530016939 3700.75770419386 4628.04544865227 3949.19206005238  
 8053.22070239424 5106.27623905309 5094.53287522452 8864.70614223459  
 7948.88765120294 6720.10473881011 3490.77593331727 4206.37667440908  
 PRDX2 465.683139139622 431.413030534188 678.365575489532 470.42403724799  
 1967.82064011967 1722.26954281876 1318.3633082502 1641.70484603137  
 728.743541467167 1244.67453201339 326.417021307859 1202.74869573717  
 PRDX3 690.010326122574 652.429025114523 1360.24752587939 728.485195792194  
 540.584471920486 1298.60552708737 1141.49294161587 1326.95332435394  
 1474.70984232307 900.233783407148 997.460212152591 2033.67956299225  
 PRDX4 731.513306289481 766.176882605175 746.296354515617 607.26455470867  
 3083.98169220838 2416.49806112207 1854.11328962023 2744.77453865893  
 1717.09434498876 1687.06111969368 1040.29664343743 1293.38808483663  
 PRDX5 2255.92551080483 2441.05534211996 2496.17211592866 2046.64499507352  
 8532.46059476152 5281.353685715 5947.89821087362 3246.86605825129  
 1584.81089248914 4343.46317176151 5455.91604383389 4377.59943975549  
 PRDX6 2273.12164779441 2332.98074920207 2374.1382412432 2446.31228564539  
 2063.42824094932 2193.376951552 1528.49457104932 2007.0121037284  
 2227.70654174379 1586.00600118477 1282.38953612054 1885.93146154931  
 PREB 365.362177671146 325.011269531407 273.044064077 436.155731212592  
 529.04238100948 311.04252785157 302.219514290905 333.270203737291  
 296.333944172375 226.936810012475 210.822216545773 265.028512407839

|         |                  |                  |                  |                  |
|---------|------------------|------------------|------------------|------------------|
| PRED57  | 114.41737808857  | 116.961391747202 | 124.772219140795 |                  |
|         | 125.250900940748 | 113.199690522854 | 115.827175143972 | 116.300028266671 |
|         | 122.982686879394 | 113.292688210897 | 119.449118660481 | 123.795544787736 |
|         | 108.04922729993  |                  |                  |                  |
| PREI3   | 272.885527139137 | 269.62298406345  | 370.555627307623 | 243.425632941131 |
|         | 235.650688823345 | 662.781145703653 | 311.544429285897 | 384.97980473847  |
|         | 307.570405241182 | 437.248311551717 | 348.457808063307 | 473.057488824363 |
| PRELID1 | 511.374117402707 | 526.970555181851 | 501.005898087825 |                  |
|         | 737.42784787426  | 620.163512570453 | 522.486866458783 | 608.129959758538 |
|         | 631.408955630318 | 728.930140593418 | 891.637685856145 | 606.679284487803 |
|         | 672.13164205724  |                  |                  |                  |
| PRELID2 | 127.259038241163 | 122.466276478613 | 123.406144497577 |                  |
|         | 113.077691687266 | 124.853659050216 | 128.637470206958 | 126.364445020215 |
|         | 119.974853329265 | 123.062390088305 | 144.361871207081 | 157.663460168247 |
|         | 122.00079209554  |                  |                  |                  |
| PRELP   | 284.272977025491 | 242.188218870393 | 323.667189206453 | 249.823314327355 |
|         | 148.404000406948 | 131.595868226775 | 149.984657985607 | 136.386031133644 |
|         | 140.431591727649 | 147.985843605585 | 141.002002397727 | 139.044150521333 |
| PREP    | 336.434368527549 | 364.964572587289 | 409.477576085245 | 358.092809491843 |
|         | 442.86942574917  | 473.370240289761 | 555.259469428492 | 538.252273740419 |
|         | 307.264586007015 | 563.490027149224 | 562.089999265955 | 450.688800547981 |
| PREPL   | 580.474775712828 | 474.750156829195 | 485.731287873723 | 480.797281489891 |
|         | 212.460476372263 | 397.660202059209 | 301.428024926428 | 294.871848467326 |
|         | 310.718449468465 | 304.811116024094 | 270.973600107882 | 373.760551592844 |
| PREX1   | 147.053391763304 | 146.929717840755 | 142.093180304661 | 162.244691888031 |
|         | 273.806452412737 | 175.784250947874 | 164.787637367264 | 178.734634888773 |
|         | 179.880812358974 | 153.694557276814 | 156.763364462534 | 145.155989928336 |
| PREX2   | 126.960777504772 | 125.058165131184 | 125.339305282874 | 126.939543057414 |
|         | 118.144109564626 | 129.375772737722 | 128.578494940165 | 115.631414599991 |
|         | 118.521075843163 | 114.421383025971 | 112.710573586525 | 123.766373146588 |
| PRF1    | 164.442400539653 | 163.72257517759  | 145.26329339067  | 149.548900791507 |
|         | 160.131256419524 | 173.798554769204 | 143.747664482225 | 174.205940911242 |
|         | 216.559563381808 | 152.230489051339 | 148.838294770082 | 150.833523101057 |
| PRG1    | 137.03111066852  | 145.900272803108 | 125.304045138994 | 126.022145004164 |
|         | 126.652197216347 | 128.700516033555 | 132.352268262631 | 118.797046082278 |
|         | 139.811873260553 | 132.887701822875 | 138.144881525877 | 133.957160768065 |
| PRG2    | 188.252507246148 | 163.586549438955 | 189.192494970145 | 170.111653122193 |
|         | 160.168654167074 | 162.586012723045 | 162.085813676373 | 158.244741207036 |
|         | 173.010799217261 | 172.030687707578 | 143.795399778897 | 172.345201438148 |
| PRG3    | 110.256771079797 | 110.148555045276 | 101.761615925097 | 119.618176258524 |
|         | 108.62191665589  | 117.773743603829 | 107.02909139647  | 108.148715413122 |
|         | 106.772581387455 | 108.955761698524 | 108.061315311823 | 112.534864678892 |
| PRG4    | 129.353536603449 | 133.892661981648 | 151.181422205549 | 138.993251266382 |
|         | 134.192409943723 | 149.565725707356 | 144.373226011578 | 148.450023054885 |
|         | 132.125545886181 | 147.379741260871 | 136.236441543681 | 140.632573759426 |
| PRH1    | 138.726894569892 | 132.354503055131 | 136.66358267095  | 140.958277301476 |
|         | 138.625680450198 | 138.478911439144 | 131.941069239017 | 130.680629893396 |
|         | 141.741892403029 | 141.830432745537 | 153.088710298368 | 142.896723827753 |
| PRH2    | 124.028748209411 | 125.509221735447 | 113.40684693417  | 120.633217745524 |
|         | 124.253582884351 | 115.445219455559 | 125.396523818173 | 123.827771590213 |
|         | 117.897556445952 | 119.573635447638 | 133.266524623338 | 125.318166919844 |
| PRHOXNB | 108.226917034591 | 122.646850766733 | 125.855451679929 |                  |
|         | 133.42964827086  | 123.662678397678 | 124.277983696239 | 122.436106757578 |

135.609239096236 127.484178603011 128.4702079007 114.191245210321  
140.680326850085  
PRIC285 531.555532787504 284.104619768635 197.049616858296  
244.544473246593 1196.34528225417 1617.44377452783 2578.85391480563  
1017.09497861942 1364.83036157729 837.872187194784 1170.88763035931  
939.213447046823  
PRICKLE1 1272.14273680177 1338.83705469394 694.644744547412  
1410.58825009446 160.096507818256 205.362816362477 239.148333781084  
290.241064926886 222.508914765788 537.698489904622 170.028047334267  
164.529828080312  
PRICKLE2 2131.68478964427 2016.52142068599 1904.39962279504  
2449.76376608893 264.476846259384 289.576706584644 212.363151537303  
244.307627077001 336.002793042439 239.33642662112 291.577778800314  
236.108432603479  
PRICKLE3 148.47676851933 139.870306695324 129.508144066344  
146.595540577994 297.708113541379 157.378317015602 154.156272284591  
150.794680375075 159.862252588012 147.790720062226 157.394035451151  
140.06989960847  
PRICKLE4 1340.79810963983 1315.66699943181 1496.0924333403  
1170.07851727046 1402.14708471728 2399.88695085752 2656.38138490746  
2086.15449885278 2350.01764791897 2174.62979843528 1171.62361359992  
2895.71836177599  
PRIM1 200.405532717305 199.101099226668 216.154203111101 190.002630382394  
366.317263094585 329.263397240111 315.752980521266 420.248838397618  
446.194196064909 276.351810999317 269.053237303244 285.05846406041  
PRIM2 138.227082687797 123.225792525733 117.316790136526 122.716563069312  
167.637638693195 116.672561618582 149.247514768446 127.263061874385  
141.874188629438 132.059507616101 159.838626443912 137.826458479398  
PRIM2A 147.635761512135 145.909456876796 142.903851392611  
146.139817421758 137.215025712057 198.113398073968 188.7348696188  
211.035617136177 184.873459141947 195.630643168176 155.247452081206  
186.257814752354  
PRIMA1 133.533718725309 127.365142833355 136.589250394236  
133.500750738061 140.14062775887 130.66863243733 129.801342433836  
130.717649923511 123.02546895475 123.21732068638 120.126700838056  
137.778033050658  
PRINS 167.491399614986 163.352317556107 155.513572243604 162.997720993338  
128.994977935861 202.524668687686 174.587558727209 163.280786875496  
175.28261759639 174.816099615132 192.548337508559 228.317527475322  
PRKAA1 715.039905439621 739.085574858917 611.088604425595  
694.429144766435 285.46340356157 993.34112647221 511.996883507889  
855.112210714686 470.578335285993 432.174413144791 965.673699120049  
554.511983790164  
PRKAA2 150.52625734893 136.205702793983 139.856251508283  
131.863018503922 128.899712906082 114.364953312191 124.190161132628  
124.381674909742 115.29099102455 139.782152941027 112.436972452838  
124.811760828557  
PRKAB1 314.182403961681 347.411500022053 290.802509012089  
337.271784551586 388.096183735126 286.901115411673 243.839402991061  
249.80160363144 305.768201359278 234.041863839123 422.840163973614  
269.345125874858  
PRKAB2 623.050854309724 578.297031096292 699.550347374567  
710.003412772888 215.272800347166 233.300864925399 241.203521822269

315.130912368929 221.849661343124 275.013838208239 329.214958614925  
253.009376944901  
PRKACA 134.929915732246 137.348951314875 129.242093568433  
139.400521576978 139.39442529119 127.179420421981 128.671626815639  
130.717649923511 127.713286292101 126.795016307175 145.418696807842  
126.34649262976  
PRKACB 138.763250836766 134.863223806176 137.011595584638  
140.169200413643 135.705904966172 137.702802090925 140.680326850085  
140.981666934622 141.758827837244 140.165450892713 141.850952191423  
152.152106138031  
PRKACG 119.544004279354 123.45581374935 133.048720362039  
135.56878810365 144.28597792625 116.896087423948 127.694189114288  
117.79844873842 118.619176257622 141.65642171417 137.728163622673  
125.231476412101  
PRKAG1 308.726328440723 313.967636827811 412.344820823968  
379.200576951933 261.922485502971 370.617422894068 391.911768848267  
413.913442080187 346.78158577526 398.193129265416 342.717252404581  
309.47429862515  
PRKAG2 503.59466398882 394.294057009443 458.782864873657  
403.208138816247 184.862871179765 187.561298131124 219.96819201774  
209.960795065047 187.529556428609 193.16411905957 164.890716656336  
277.726756691133  
PRKAG3 123.678365506247 111.895279866421 122.423561732526  
121.588054040961 126.396385337235 121.459780480915 119.920097823022  
118.955314417914 119.161972571516 114.209249333221 128.700516033555  
124.574323079707  
PRKAR1A 1576.21727854603 1792.35343044443 1654.58270183167  
1741.0131951509 782.448692528135 1516.97921112926 902.089561157715  
897.958748317315 1667.86825735893 987.78377957731 1967.82064011967  
2230.45015969936  
PRKAR1B 169.306573880401 145.369791572077 164.661445411833  
186.591941221632 202.797135825668 185.374745525698 205.830321788612  
172.926288703434 233.103476996669 164.811120992602 146.10417547509  
245.153736298067  
PRKAR2A 212.239485199343 171.644710031098 202.887417145119  
189.567241599215 269.726397478364 298.460273458181 272.885527139137  
215.094633380547 377.89330639683 292.145553580042 211.572396862776  
207.023221559302  
PRKAR2B 128.134246199718 123.13812550459 151.573920235798  
130.92186531563 114.290611267606 133.544149685358 142.277688403441  
143.035245560484 135.188445928844 131.532660547328 116.497714896018  
120.918190840083  
PRKCA 1347.75629878765 1172.96121022579 1060.24125879951 1107.99131702522  
217.969738417693 528.098472417251 320.360917595936 433.82566459288  
263.64863646012 185.165469121763 762.8576747113 393.375554593484  
PRKCABP 163.20714296121 155.828962183804 156.880120259304  
200.934618257908 238.770586150777 171.145909843389 186.653791045656  
167.365850007748 153.857048476879 183.900171917391 196.566937667522  
195.033792280119  
PRKCB 218.896760804208 204.851374931284 291.994364783888 216.32785564297  
133.031431118772 157.094001180073 250.443147156029 150.494260282384  
176.11287574658 134.271916545532 186.708059183893 141.117659724704  
PRKCB1 306.387898121409 275.509805464276 395.386242257877  
318.690043546203 127.259038241163 142.625414022199 388.096183735126



|         |                  |                  |                  |                  |
|---------|------------------|------------------|------------------|------------------|
|         | 179.15284184774  | 225.546125484563 | 120.351217130679 | 182.118544602205 |
|         | 128.129780978486 |                  |                  |                  |
| PRKCD   | 425.001043358831 | 519.27448770158  | 499.776233241535 | 870.409935772423 |
|         | 1252.28642463619 | 678.684323057327 | 1048.85768964657 | 720.710754387733 |
|         | 929.198774489695 | 560.913732951675 | 604.047164856689 | 925.009157785129 |
| PRKCDBP | 2144.52984392647 | 2786.35558271661 | 1942.08859727404 |                  |
|         | 4037.15442268836 | 338.934501259414 | 235.704824490397 | 201.748876422401 |
|         | 233.59297160203  | 394.186683910377 | 1000.91520225219 | 178.606255846041 |
|         | 224.062024091915 |                  |                  |                  |
| PRKCE   | 192.565733545715 | 181.313333665614 | 168.963976596839 | 175.044940252247 |
|         | 151.81754291846  | 162.769643886845 | 181.425012248539 | 132.379706531581 |
|         | 131.371129237005 | 123.896578371318 | 162.609829456486 | 148.211354898758 |
| PRKCG   | 124.025104622631 | 120.379393989882 | 119.658703392877 | 125.241484840139 |
|         | 121.526724715417 | 128.471437314295 | 131.257901340773 | 117.728410015076 |
|         | 124.126715773068 | 121.821868944354 | 143.941358917251 | 127.480717762966 |
| PRKCH   | 313.708197191587 | 316.409887372431 | 256.538195034956 | 332.885488115858 |
|         | 622.561634660589 | 435.603911474926 | 549.359675306309 | 625.374595058488 |
|         | 674.905270154355 | 503.757797957538 | 806.290662664708 | 360.285027176918 |
| PRKCI   | 259.229153662504 | 250.577945492981 | 264.109049504585 | 279.232290927348 |
|         | 272.994195639694 | 266.347965690851 | 279.541294184609 | 248.43491649623  |
|         | 242.299252896647 | 286.996908547553 | 303.09499683953  | 241.782750858091 |
| PRKCQ   | 169.583355171423 | 174.727439318223 | 147.412608079997 | 145.412368252632 |
|         | 150.746423638097 | 179.198164545975 | 142.697827839203 | 161.212598761378 |
|         | 194.125840053843 | 150.431052959951 | 175.679405338399 | 202.568071395884 |
| PRKCSH  | 383.626469817252 | 444.945078908489 | 407.615019710707 |                  |
|         | 466.4890990178   | 919.165331064155 | 485.136339836897 | 720.710754387733 |
|         | 608.959089074987 | 407.760503937821 | 635.536499281829 | 546.841563406813 |
|         | 501.863855158062 |                  |                  |                  |
| PRKCZ   | 150.99622088333  | 158.100395482569 | 151.389433433911 | 144.252481420079 |
|         | 436.731545612902 | 225.927425596831 | 265.972387419683 | 219.729169245025 |
|         | 216.880896769751 | 261.814227719605 | 275.101766414328 | 263.352118305612 |
| PRKD1   | 517.529147171876 | 521.625146077176 | 632.843164522867 | 604.237898104299 |
|         | 133.491963477649 | 159.470818285679 | 248.330154701293 | 171.537040561599 |
|         | 141.345379144177 | 139.792313018728 | 188.836327151669 | 163.456245724169 |
| PRKD2   | 204.999796322451 | 212.710910778949 | 186.04763660516  | 225.335753745598 |
|         | 628.710901107436 | 279.452819132461 | 279.495192828873 | 265.992741398183 |
|         | 298.403224729528 | 227.418630852215 | 249.292766428035 | 294.922183826144 |
| PRKD3   | 149.815494316469 | 162.472783116487 | 158.774910841987 | 132.031693838834 |
|         | 136.146383365709 | 170.283532007581 | 154.33224999163  | 150.445647133244 |
|         | 142.421913396368 | 165.607095120227 | 194.312315077985 | 168.882806817001 |
| PRKDC   | 288.913660405191 | 265.791342287571 | 287.455622143233 | 303.300028849873 |
|         | 428.782703561238 | 419.593558001947 | 315.615758089471 | 376.443086293235 |
|         | 404.618867159141 | 361.327436394941 | 366.073387075385 | 344.487982154705 |
| PRKG1   | 144.529801006864 | 152.097609803404 | 144.631407964232 | 157.216793735479 |
|         | 126.784243009941 | 125.783265980169 | 132.774127230452 | 130.058902161953 |
|         | 126.268418132    | 130.546471770588 | 130.160236228857 | 134.238642042323 |
| PRKG2   | 149.565725707356 | 139.437073790935 | 155.936011795688 | 155.785933672918 |
|         | 170.390200730789 | 148.620766059526 | 165.424516708502 | 155.04585737344  |
|         | 148.713747597311 | 162.039394839415 | 141.999730335668 | 150.2214516849   |
| PRKRA   | 943.677679525947 | 748.38293089716  | 1053.65938651514 | 834.788058321257 |
|         | 473.151324002277 | 1197.00004043747 | 735.8141982568   | 905.751410113646 |
|         | 700.877661166739 | 899.336817124312 | 808.837225580351 | 787.017214032692 |
| PRKRIP1 | 354.656612182522 | 367.898258897888 | 370.678040372273 |                  |
|         | 449.598181155897 | 310.23294370018  | 342.878522959461 | 437.601814037248 |

|        |                  |                  |                  |                  |
|--------|------------------|------------------|------------------|------------------|
|        | 414.713379367927 | 472.793332506369 | 331.523536427527 | 511.374117402707 |
|        | 459.068582584181 |                  |                  |                  |
| PRKRIR | 799.132592914065 | 844.187489702587 | 790.561585641193 |                  |
|        | 737.843412273272 | 869.245621105614 | 1871.91894530722 | 935.042067053226 |
|        | 810.396770151757 | 599.208370337812 | 628.000860165888 | 948.734577648136 |
|        | 1119.71228054585 |                  |                  |                  |
| PRKX   | 202.718428167217 | 198.549047189499 | 217.013533525724 | 222.565515020501 |
|        | 200.944865673409 | 414.333324610267 | 222.051005238856 | 259.229153662504 |
|        | 251.511405838796 | 232.492398623889 | 192.69687837782  | 286.642323413104 |
| PRKY   | 232.414763435965 | 186.388067641269 | 275.101766414328 | 260.278595572575 |
|        | 185.359195899057 | 132.253450751554 | 259.316557834724 | 294.697622870418 |
|        | 257.989863290786 | 138.925802905636 | 302.069236363626 | 481.037647470809 |
| PRL    | 143.188958538221 | 120.816130267055 | 140.36425603453  | 126.737230874367 |
|        | 138.489443610941 | 127.055165613236 | 146.293735120772 | 132.416618775337 |
|        | 141.266129417042 | 123.994188725172 | 136.466367853188 | 133.465593684519 |
| PRLH   | 153.818325601312 | 148.320310040998 | 158.160604786093 | 155.335777680002 |
|        | 154.159124458167 | 139.096536887753 | 153.690189121681 | 147.875855077738 |
|        | 149.759516805355 | 155.187900101727 | 144.472969298036 | 148.235495611248 |
| PRLHR  | 116.751145098777 | 114.849872458647 | 112.977469350139 | 109.654666772771 |
|        | 107.260023460914 | 113.708683868028 | 112.348094614855 | 114.711310011993 |
|        | 104.544792793756 | 110.794219964997 | 122.038534506506 | 112.884916986215 |
| PRLR   | 126.63730651721  | 132.247611790269 | 122.042136913991 | 124.585675323305 |
|        | 129.89329138222  | 131.774882989257 | 126.87882572904  | 122.115925891088 |
|        | 137.448412532999 | 163.280786875496 | 143.526983440589 | 128.897493103888 |
| PRM1   | 148.723165059122 | 147.040759979063 | 148.459522588338 | 144.170287726456 |
|        | 110.624328647003 | 128.717719117128 | 126.515480612924 | 128.551335256123 |
|        | 144.743281367797 | 134.85809559975  | 120.473038066927 | 115.600308687778 |
| PRM2   | 150.091854035356 | 134.635645106042 | 125.181327386534 | 125.435268901131 |
|        | 129.645982978155 | 123.117923525539 | 113.043089777907 | 119.257387524365 |
|        | 123.156154667242 | 115.211731367278 | 112.005939063045 | 119.301746097298 |
| PRM3   | 132.057808599068 | 156.355520513868 | 137.187640876289 | 131.878155417065 |
|        | 135.558239627426 | 131.419663282022 | 138.407207709066 | 138.269955723817 |
|        | 140.48372620406  | 136.261907928796 | 149.035590153457 | 135.875595614483 |
| PRMT1  | 496.991561192565 | 585.234286698678 | 581.54874141672  | 717.419388886784 |
|        | 1713.93035637146 | 1060.24125879951 | 976.782815449208 | 761.32108609503  |
|        | 1336.75600604068 | 654.305724263754 | 895.463355957918 | 993.774175699873 |
| PRMT10 | 273.152907354565 | 250.963601187362 | 310.426513884979 |                  |
|        | 280.170464338141 | 251.347519777204 | 268.111403429364 | 264.779154931102 |
|        | 265.29629764006  | 258.21341068758  | 321.977549744483 | 332.082749517913 |
|        | 262.061371466369 |                  |                  |                  |
| PRMT2  | 677.023591987179 | 760.272612245092 | 716.229989890801 | 909.388774224614 |
|        | 259.900447705311 | 227.209630859635 | 427.766660764042 | 372.54091392596  |
|        | 397.153801851621 | 536.46884541183  | 415.642099109855 | 316.125364442611 |
| PRMT3  | 386.679822751367 | 334.52685347521  | 420.248838397618 | 309.580750386386 |
|        | 353.437466689101 | 452.517134370928 | 378.308562999445 | 621.173315178959 |
|        | 426.249411635589 | 719.766799746895 | 536.9324595176   | 426.132037075477 |
| PRMT5  | 386.16563750478  | 379.862305342147 | 408.10780961711  | 379.016207754533 |
|        | 523.306451464643 | 363.255517622046 | 360.90109922539  | 402.564148020948 |
|        | 347.932135290714 | 508.127470400078 | 557.868300839263 | 402.965083947376 |
| PRMT6  | 269.194172034595 | 280.453895029319 | 304.751330890753 | 277.75958501062  |
|        | 591.189034068137 | 472.279492678374 | 292.524552445564 | 537.698489904622 |
|        | 513.20896845398  | 321.750495072759 | 323.896313343796 | 284.104619768635 |

|         |                  |                  |                  |                  |
|---------|------------------|------------------|------------------|------------------|
| PRMT7   | 158.411846122784 | 171.61704153463  | 199.70041209487  | 170.95650329595  |
|         | 253.601378730911 | 148.31140879454  | 161.781529659549 | 167.456481678813 |
|         | 201.865955150869 | 165.122737166322 | 169.975329631607 | 160.090914414578 |
| PRMT8   | 142.528480882047 | 118.533346268154 | 142.876069462608 | 144.499680685194 |
|         | 140.391753835434 | 128.820757822782 | 139.278366709094 | 138.113751487484 |
|         | 131.750053934548 | 139.493025452991 | 153.731233276485 | 142.088243118644 |
| PRND    | 114.400185930969 | 133.491384633321 | 116.282988576774 | 110.988514718572 |
|         | 112.710573586525 | 109.003365273337 | 104.36042819601  | 117.692662275393 |
|         | 114.302645757446 | 133.922855125616 | 113.627435441258 | 111.928204694188 |
| PRNP    | 3909.47437917608 | 3737.57754066891 | 3712.67025366957 | 3387.5366256957  |
|         | 988.297682407351 | 2715.55326746591 | 2486.24762158293 | 702.779943547386 |
|         | 1608.40826380713 | 3976.40140405628 | 449.952497751758 | 1003.36623972843 |
| PRNPIP  | 199.101099226668 | 219.753039699136 | 200.179796117115 |                  |
|         | 238.847091900666 | 312.019603761673 | 240.734451149197 | 249.763375041547 |
|         | 216.680795762761 | 217.576547690525 | 218.058543664561 | 193.124599671798 |
|         | 188.515336186633 |                  |                  |                  |
| PRNT    | 139.609751976657 | 130.290454258898 | 143.632325018964 | 138.947760022173 |
|         | 132.340183565771 | 157.070500065037 | 127.398873370484 | 148.094036534405 |
|         | 133.001613667656 | 155.346805606742 | 133.206919058442 | 146.252974508529 |
| PRO0132 | 131.648308760913 | 136.674553275255 | 123.804039963953 |                  |
|         | 126.029431525943 | 135.364039983762 | 152.948391119096 | 130.742940708861 |
|         | 135.752004489749 | 142.993401965852 | 131.076562651831 | 115.678486138934 |
|         | 139.723117427543 |                  |                  |                  |
| PRO0611 | 145.511473738224 | 136.175268696202 | 142.978818998012 |                  |
|         | 133.378374710498 | 135.33941967076  | 137.388190728367 | 142.009798151592 |
|         | 140.326012404526 | 144.361871207081 | 135.855243915966 | 135.429199205506 |
|         | 121.515872228716 |                  |                  |                  |
| PRO0628 | 312.224309341171 | 279.668007824988 | 393.500781010617 |                  |
|         | 255.12306184224  | 163.951459935477 | 494.875547886209 | 212.050953977485 |
|         | 210.290500215377 | 218.106150021482 | 310.23294370018  | 177.457362387052 |
|         | 240.792557915987 |                  |                  |                  |
| PRO1768 | 128.630613404354 | 125.765399556488 | 131.466580723837 |                  |
|         | 121.45175516842  | 141.599211622756 | 129.226815062589 | 140.466612569756 |
|         | 111.538651711074 | 122.883806494491 | 158.335952927257 | 134.078506829054 |
|         | 130.909388246758 |                  |                  |                  |
| PRO1853 | 1306.20183851747 | 1107.29687889378 | 1468.50184641042 |                  |
|         | 985.637230639964 | 218.334273320319 | 980.67040349547  | 557.405157178952 |
|         | 925.009157785129 | 668.853969513382 | 572.407760064901 | 1275.43768532088 |
|         | 720.710754387733 |                  |                  |                  |
| PRO1880 | 143.078022283871 | 136.783974483005 | 130.701801496564 |                  |
|         | 127.683344133492 | 141.664271607079 | 138.758688249557 | 125.481506166304 |
|         | 130.097543328456 | 132.99989565368  | 136.903588075134 | 151.540744107423 |
|         | 128.755697083014 |                  |                  |                  |
| PROC    | 136.563471322998 | 144.023798119335 | 125.154784284706 | 128.001109846227 |
|         | 144.896960245309 | 137.000868503792 | 178.976116597291 | 136.735930829008 |
|         | 145.280485286937 | 140.105675520432 | 175.040086358446 | 156.961070790639 |
| PROCA1  | 174.787077606165 | 183.226294747874 | 194.374817778819 |                  |
|         | 174.396061906109 | 179.973655632636 | 171.85890372225  | 197.169703621888 |
|         | 197.687858915757 | 173.325724300712 | 184.682478530334 | 169.475714234887 |
|         | 193.173703015873 |                  |                  |                  |
| PROCR   | 321.426100243434 | 246.80306998812  | 237.521746704115 | 279.969975697164 |
|         | 284.715092831843 | 661.545179083009 | 514.463945278314 | 221.561252012695 |
|         | 212.107842040568 | 310.718449468465 | 354.922901990615 | 535.861738240441 |

|           |                  |                  |                  |                  |
|-----------|------------------|------------------|------------------|------------------|
| PRODH     | 122.144209450757 | 151.796986456254 | 127.921209207879 | 126.362418476129 |
|           | 113.708683868028 | 303.09499683953  | 126.992697289075 | 143.08841562593  |
|           | 111.848472437543 | 242.871915060884 | 178.684992551017 | 131.302225305148 |
| PRODH2    | 149.574353706911 | 147.064543281269 | 142.518266591748 |                  |
|           | 130.705091244939 | 132.54577436954  | 131.144774362059 | 134.55255098289  |
|           | 140.101511236793 | 135.877646659023 | 118.510960607141 | 142.635015113687 |
|           | 139.734784859495 |                  |                  |                  |
| PROK1     | 134.604565335211 | 135.427985445559 | 124.606795061928 | 141.226901872221 |
|           | 150.626826756019 | 130.928718312512 | 143.594003495859 | 130.619624347751 |
|           | 143.985850833974 | 153.176268095608 | 157.524049610272 | 152.461930328923 |
| PROK2     | 136.518409978222 | 143.67880977119  | 125.587057468028 | 142.77817647952  |
|           | 145.949736782839 | 127.931887647108 | 134.29036009792  | 130.274288258599 |
|           | 160.268754786532 | 361.516275756449 | 143.587562550004 | 148.424970450231 |
| PROKR1    | 104.248226402465 | 104.483909687253 | 100.746407116143 |                  |
|           | 111.810575716678 | 105.839106819841 | 115.631414599991 | 106.450154495663 |
|           | 115.208555742308 | 116.328330266803 | 113.947948541258 | 111.11656427738  |
|           | 107.697601478064 |                  |                  |                  |
| PROKR2    | 154.43808450305  | 145.762724663455 | 159.090982014161 |                  |
|           | 152.210867113591 | 163.442257036536 | 175.805472275887 | 187.607426452073 |
|           | 153.920180168328 | 147.366877428537 | 157.702540365469 | 139.97636570613  |
|           | 162.624786423084 |                  |                  |                  |
| PROL1     | 151.106858426994 | 130.810353054091 | 164.357373919714 | 177.976550224863 |
|           | 141.127519700052 | 151.716042884808 | 158.221595000183 | 141.277227483198 |
|           | 155.330215726109 | 155.219860096943 | 132.373302367869 | 153.293125258215 |
| PROM1     | 474.517750753745 | 467.681480781925 | 236.809829701921 | 164.256764783784 |
|           | 160.338146803754 | 192.224242967539 | 135.32160992961  | 160.589575894314 |
|           | 161.614426723521 | 131.907246423067 | 138.144881525877 | 184.694741621812 |
| PROM2     | 434.855262284265 | 974.544773560873 | 475.213525346293 | 305.050933898691 |
|           | 6409.23524786095 | 2462.87034563426 | 3342.8737952486  | 1809.58702081877 |
|           | 2012.36542989953 | 2192.17997650999 | 6156.29203791697 | 4697.94415026712 |
| PROP1     | 141.213588194832 | 142.124876403709 | 148.570769470645 | 134.35958389775  |
|           | 145.383354200298 | 146.508628678304 | 143.618454531431 | 147.988883293205 |
|           | 144.914015211747 | 162.427505889157 | 144.940119680152 | 160.752581271996 |
| PROS1     | 884.248568386012 | 687.987647193563 | 631.653707589221 | 651.43207839949  |
|           | 173.488272345038 | 308.031816782343 | 389.853534237748 | 272.01602406899  |
|           | 283.084102918359 | 876.288248962843 | 196.860228537112 | 183.744959461078 |
| ProSAPiP1 | 212.073472189229 | 182.515302191173 | 225.189991540262 |                  |
|           | 197.962159288376 | 272.639413442579 | 192.188662949149 | 217.940575516933 |
|           | 190.138730960643 | 168.061346742356 | 160.113042196058 | 152.401204710292 |
|           | 181.261666651301 |                  |                  |                  |
| PROSC     | 701.208391798006 | 692.945420109927 | 971.99484515987  | 575.386048896223 |
|           | 5624.32062666666 | 1808.26383618901 | 677.503643398297 | 850.882404546093 |
|           | 701.847905027147 | 535.612000577004 | 781.790858580895 | 639.011144305614 |
| PROX1     | 134.746175914762 | 157.041481397151 | 124.88118767481  | 122.396214045451 |
|           | 130.967476533254 | 131.374680878107 | 122.959518532165 | 113.620070198869 |
|           | 118.646119379542 | 109.96017424123  | 129.711973013336 | 124.267394371656 |
| PROX2     | 139.174188535843 | 141.81391138301  | 121.903115540516 | 134.711144967036 |
|           | 125.28279436853  | 140.497181450706 | 137.717859035645 | 135.761591144857 |
|           | 128.351235762192 | 145.241301006518 | 130.659631155616 | 123.773753287854 |
| PROZ      | 128.645334554749 | 112.456644814178 | 116.547306374097 | 120.288469716375 |
|           | 107.205247133938 | 111.366283149236 | 116.241531823869 | 114.067790137477 |
|           | 119.735807506447 | 122.144209450757 | 119.237802375552 | 104.285022032604 |
| PRPF18    | 198.522123898437 | 228.820894086914 | 210.960900130785 |                  |
|           | 194.88319590729  | 279.232290927348 | 305.499194075747 | 238.770586150777 |

173.577723566555 200.633009710701 209.662262708551 279.834616502591  
 224.335742510577  
 PRPF19 609.665323786904 661.096668635469 546.274050902567  
 693.339946866196 835.834013018438 959.126054626181 503.285430318683  
 523.216537391852 530.267835989435 642.647554580301 593.821622986351  
 614.775559038663  
 PRPF3 753.997560938003 696.650617523899 778.639512538949 733.195136251155  
 633.104379362137 652.201948082657 588.076436392983 852.649997188692  
 826.314416168552 658.47864958685 798.758496171493 1356.43255022363  
 PRPF31 953.549801897112 1066.25208226214 1027.96306543235  
 1477.10828981572 3270.88476148156 1115.53524128833 1124.67710585154  
 1119.71228054585 1305.2232532959 892.515788744891 705.529158880221  
 670.097523566652  
 PRPF38A 218.862705238592 205.200459980187 246.710233781784  
 227.350260241585 234.126500054945 252.280435525505 226.871028543248  
 253.009376944901 241.890850719625 203.487137264 235.183590602209  
 209.362806125315  
 PRPF38B 175.245611094434 182.335981256243 200.22145130696  
 184.348894461271 167.871703133182 188.277563426829 176.382377784553  
 176.783978625103 187.196424491482 168.906637816046 198.701991021316  
 194.312315077985  
 PRPF39 150.003399000079 158.73040336393 141.067419336609  
 136.623658204558 136.463867598256 144.785852437305 165.347173283335  
 152.095584118603 141.860850603561 158.153875553171 177.567833691547  
 129.263794008537  
 PRPF4 506.290241222253 501.863855158062 441.684169663552 507.95331185029  
 571.838717184447 588.863382995875 450.99430272315 606.851072672402  
 567.869601934138 631.408955630318 774.774214696342 427.249733213787  
 PRPF40A 249.80160363144 251.307020289291 267.422232051733  
 171.449326065013 253.30325545013 711.491528818004 264.456926651554  
 362.65285317327 337.728737393381 477.160464512705 290.502085667398  
 492.930906036297  
 PRPF40B 143.436675541053 139.1434049136 139.681211082196  
 140.652086055776 142.942021904533 130.056727701826 140.74035966401  
 137.96452133771 128.568463697992 125.876114993687 142.62707251786  
 132.66318177913  
 PRPF4B 194.88319590729 175.21512930507 190.389158930835  
 176.214950733324 181.088268167074 227.092319765009 200.302384864371  
 189.726075394359 190.904614772409 183.804849355341 214.888126361789  
 213.813667557079  
 PRPF6 166.925695810781 189.528686948872 252.697160031025 190.975263192006  
 219.597808863947 195.333029746339 261.366143735074 193.945494721138  
 199.637257550762 214.546528079149 184.682478530334 227.177100762395  
 PRPF8 1438.33289891548 1532.47920327769 1608.40826380713 1939.1525084845  
 3015.70954394585 1519.38642390142 1010.73988405469 1131.22418479945  
 1124.67710585154 1293.70593826709 1583.79384467611 1625.55754007235  
 PRPH 184.041062308263 297.544216175512 149.915251958706 194.775234425687  
 121.462385497795 119.95666716163 115.172427482285 126.085039271526  
 125.418782388128 123.281489592543 136.507961715591 114.867454554206  
 PRPH2 197.526492324088 188.878770168595 173.726420791056 202.869364962231  
 181.578228610334 153.402227428787 175.495965414493 185.220017451419  
 170.145574727175 176.680708339236 146.915247627846 159.749576166342

PRPS1 508.302878624289 522.486866458783 749.220616713093 466.141717595301  
650.0804221227 667.892385395063 522.300029971277 640.568342662067  
509.880640462 687.494132125365 501.863855158062 571.439520427295  
PRPS1L1 141.862767428244 130.674263597931 141.956996308304  
127.681662711369 137.485252316816 131.649830934459 136.316003989725  
131.975248488461 140.085359251038 133.453702113571 139.78795317086  
140.809956497396  
PRPS2 479.395948662331 418.319283832879 767.861763134136 306.232249422327  
503.466550870577 715.93836911426 458.782864873657 1406.73270115373  
546.181615768667 644.97200337335 623.68308750251 471.510683045651  
PRPSAP1 712.067161025165 695.321886304133 853.535700321202  
790.321331435096 719.13080264227 1326.95332435394 1388.91423772335  
1235.75946952752 1177.01310527577 995.812184456562 1043.14253624883  
1537.71464618832  
PRPSAP2 357.140791982825 316.081825144651 428.850337327605  
317.353318759931 354.263934274937 498.534168389928 281.53843450593  
595.409419899436 392.582612044755 587.181357555703 461.581199513891  
390.897464546943  
PRR10 120.835207882788 141.056924917269 126.148379057536 147.255680306221  
129.522339467532 129.404017329613 141.425393615228 153.031479923324  
137.821010169859 145.172776053 161.965270932582 146.720204808211  
PRR11 126.452500728601 130.827726862159 123.960761343425 118.743966166637  
138.645156942894 217.646777099512 148.448349327493 225.335753745598  
207.692077301142 202.193338797533 128.862699779871 243.10297424873  
PRR12 150.244284323504 168.763640193219 157.946585085332 185.071775840607  
193.472317111841 154.828782972852 148.807422049327 152.504620068655  
150.152613183213 158.371599884762 162.383584508358 151.081339000609  
PRR13 1696.69982157582 2009.21931102311 1834.08657010335 2010.57142784228  
3905.35300751401 2479.34567973462 3876.04966263281 5138.28186306948  
3648.38765465889 2021.92898855142 3062.22499714914 2801.66917828364  
PRR14 1249.89496565284 1392.89422203207 1342.29111510713 1737.57015396357  
1538.78070281348 1353.61552261489 1036.40082234884 1431.52979384867  
1299.4782626583 1043.14253624883 863.086199215353 975.315904185938  
PRR15 129.596851280135 136.13751015238 135.978826529736 149.730467498266  
163.85327708023 155.578524031078 158.330403004116 149.31184788671  
158.723133891017 132.413527125434 194.029961195972 188.093450717857  
PRR15L 126.935731176024 167.662761175661 131.155117105954  
149.921414617149 360.605223912114 147.589201160993 308.208276315292  
331.018914429561 621.489906442001 159.716066475442 355.14024238296  
282.335582153109  
PRR16 157.248117633013 157.692519370734 140.2533871084 136.131453703981  
125.4408430419 133.173541338355 123.929180327423 129.253638326633  
151.137791721752 145.503718833974 147.077695919758 122.408016372747  
PRR17 139.890519860289 135.532073704799 151.210814209064 141.266129417042  
163.863677822465 150.261107471642 140.525013926642 142.853399942089  
139.923187410488 154.71904132098 129.654234837398 146.978110148492  
PRR18 124.905889975958 115.194730717797 126.288011849541 128.536721595589  
123.875478428652 124.336297973344 129.551260802518 133.131953362455  
118.342067845126 129.198366503027 158.150949554785 133.117701703454  
PRR19 153.869144282319 147.508817393901 149.535844856123 147.454902803231  
193.704510912321 154.003862874241 155.785933672918 162.259941098076  
162.642344529383 172.652645920958 159.016247993816 169.619338456208  
PRR20B 127.346646117375 121.968807253639 111.086170834553  
129.246066890078 131.977212025523 124.710368327189 127.277128410056

116.91470505098 129.362793087439 135.6149724596 139.256416415149  
124.668658660052  
PRR20C 140.286870147975 131.470883854661 140.574129695953  
139.054140295282 129.147246809319 136.093473732174 132.819726980184  
138.289361041588 143.131495116356 128.920313557255 152.964940071133  
127.669334230458  
PRR20D 122.84779238795 132.395993254065 129.203236898198  
126.056493244568 137.908991199407 125.422348389595 122.90702157852  
109.719356131043 131.038758046782 125.405373274081 117.203783530266  
110.014935095391  
PRR20E 131.312580984876 133.475605284211 137.402567669086  
121.215558351076 134.495938988321 123.038646914863 139.515794685984  
125.117333434527 146.256076936456 134.463094391766 140.752616434418  
120.560056224145  
PRR22 147.565485281003 145.547037566774 124.731056918418 143.429394097222  
166.587100972754 165.347173283335 136.639637503571 141.561769570516  
140.180208418327 143.116451998409 155.494095135266 150.380814008952  
PRR23A 144.654765322941 137.358139652612 135.814893730549  
130.983136465761 133.231066635063 142.916274989816 126.609398779757  
131.33321167357 127.329144632232 150.875392181869 130.779805222363  
142.448384713937  
PRR25 136.919702354166 143.303309656177 141.913001976093 145.528676983944  
125.644134465307 136.124385992905 126.446675008883 126.189005734462  
136.995197143668 127.321890980445 138.28745132277 142.470799054068  
PRR3 202.458096827378 207.890408761692 178.106013202731 241.782750858091  
228.025383952578 165.376358421533 202.761449711661 169.36029946801  
171.06385200256 148.069725041021 203.642739476708 195.561296046507  
PRR4 144.528360135884 152.483240622367 151.269442319766 156.265168005937  
147.553953240464 126.858621735156 143.532014058535 151.744902566627  
144.428776560885 151.518116154483 154.618685493541 165.767629164724  
PRR5 204.862387642573 205.403820910921 197.169703621888 225.050796356289  
309.538690289233 200.001438979007 170.636731478608 175.073595611435  
168.974155750959 182.958991847218 176.883702717029 202.524668687686  
PRR7 127.073045558761 132.155877196474 124.300285428221 132.943957535655  
338.223462327622 172.077522197357 141.642547489983 156.78124246844  
124.090268443064 182.32514927211 148.149216812602 168.10131060526  
PRR8 149.441862883882 161.134322621805 143.672118850295 144.683260413888  
134.434198188045 145.526941881413 129.925548182204 146.574656147816  
134.835962366555 149.990378213915 160.441879289883 139.103395748894  
PRRC1 478.606567465979 474.917507160629 549.692164962653 426.995700632434  
352.50679573356 696.976036382401 1024.59845685519 989.77058497525  
610.337659723539 959.897744425251 892.038018567941 813.034056288861  
PRRG1 243.793465720264 223.128108720503 182.827395663312 182.897563195019  
153.257097727888 227.847614397311 207.417884407459 181.722373730185  
219.940167815376 204.5274881834 153.770852731422 213.447886742681  
PRRG2 187.93380542729 228.524222740306 178.476483428474 171.035391211596  
2309.63504858248 877.598505913096 1426.56252600395 717.886050056576  
1080.02576143033 647.955521647635 820.249910349431 1138.00644332379  
PRRG3 145.200638964782 167.536828038178 144.96021415188 150.073816271065  
134.418976976995 144.660095230819 133.682715540066 152.829437376835  
139.785767470943 154.564478911791 142.853399942089 139.532508621268  
PRRG4 340.098306132634 321.696082249696 361.687156919012 313.708197191587  
198.885004378065 313.099028594073 286.901115411673 310.23294370018  
254.447650810819 551.92688162618 279.969975697164 283.048002376743

PRRT1 188.910933952136 219.96819201774 209.112959748917 258.311739685895  
143.712450441816 144.439320591901 132.243900762936 136.149732574763  
134.66169946771 126.426212216646 158.617209794418 127.905616521853  
PRRT2 553.123179808258 736.140249105836 668.570984110088 668.853969513382  
131.275712196961 155.558839375761 173.395370400371 154.861507590906  
159.879600154928 128.163613794257 151.65364467801 144.079935036119  
PRRT3 229.85833221434 264.955939320296 283.527656956105 299.717935831288  
504.502047826003 194.240372898704 403.292651623365 238.823244541016  
245.997705723007 148.344941331885 194.488249052694 212.836093887552  
PRRX1 373.803772983872 398.512947526406 254.393421265604 483.549698382115  
159.973758408655 157.264673452646 142.837688062688 161.866405026758  
197.762169504041 404.445038343721 158.819151102054 148.504996616452  
PRRX2 647.666334416707 584.919615953457 302.532985701607 489.403061697031  
251.138401278632 162.638805580226 124.964977322158 140.793616429174  
213.652091843896 484.131020584378 192.61436632814 224.89911221799  
PRSS1 116.889373249017 122.519746599387 123.510413258172 113.597215383696  
128.22735290389 123.267817390796 120.925930409474 103.772221923105  
120.387275261633 115.47716627378 114.812254477058 123.601413134287  
PRSS12 147.651620353593 146.9554120076 137.893630842968  
146.609485664113 161.305860691151 137.858371717399 167.764352429391  
162.358237198517 154.037622223246 153.705394500855 143.514848892447  
142.848438163322  
PRSS16 131.406366653787 109.384112020063 133.012006684865  
119.586157804692 126.037968297611 153.420392741659 166.863589702453  
128.131324375789 157.425924587516 156.191659799142 138.006973261364  
209.960795065047  
PRSS2 137.76307316083 131.638954862848 133.954514563283 169.101676908756  
227.64196401771 153.850588492326 133.94667806086 147.52178512946  
139.697477263244 188.605328108654 137.504147221623 132.249906289203  
PRSS21 140.103020838882 143.199780767096 133.470643135354  
142.717436384151 139.993960054847 145.500011956699 147.320976507643  
137.129864761402 136.599305161841 153.964765831852 136.607783800741  
151.159145294127  
PRSS22 127.816596414779 139.823017208731 123.269635151963  
117.499697378893 283.191303666907 210.061754644824 228.852495818211  
170.158189150422 200.712182818203 364.840751972169 245.766885283797  
231.796421262015  
PRSS23 5213.40342339233 4800.99572384569 3408.6535437109  
6919.4226838505 405.130899553871 841.623780229898 619.487800014979  
514.463945278314 497.269957926657 616.523853569261 987.564350211893  
310.640107228956  
PRSS27 133.871685084945 138.047487233711 125.166940410459  
117.870230005125 177.976550224863 121.924036463998 134.401733295755  
139.211746200839 163.119211741255 686.198351821711 146.9069812014  
126.189005734462  
PRSS3 143.144153021901 155.074348411767 142.338352884053 152.422690241301  
294.922183826144 164.072443259668 137.53234136613 206.257167235126  
168.197255166255 343.767393640683 147.838660813476 143.558088035758  
PRSS33 108.683531606889 127.749992538985 119.578240680666  
109.770126492743 122.368581795931 116.294180301039 125.027095330593  
110.586147059226 115.995309578182 118.537378726617 119.301746097298  
119.548432046443  
PRSS35 185.816827784447 197.326259802349 203.206743799353  
196.519125510368 154.935741493562 161.573975848093 158.014017648839



151.479748626813 160.932913244423 177.355210393749 132.64813248505  
 143.229240978574  
 PRSS36 137.877756077011 148.547259731346 136.960656707275  
 131.99470265134 153.149523560021 141.634246722965 132.665590728755  
 149.326216726716 144.288714958892 149.927773276383 153.011923016494  
 135.855243915966  
 PRSS37 115.785084044427 122.903428611669 108.970432124412  
 107.949834974369 112.891050337488 109.242622591321 121.174618503873  
 111.810575716678 114.818898581401 114.68345964966 124.095340478326  
 115.435942397626  
 PRSS38 116.858439910319 122.914680091926 108.730058525654  
 117.119533897652 108.730058525654 113.416743649576 111.457176315964  
 114.528407572496 111.137519376499 108.167670899938 110.820329153348  
 108.036254606246  
 PRSS42 162.285199080777 143.926968000575 162.756185479013  
 140.477307701027 169.441789096441 146.98903251354 154.43808450305  
 173.586160103539 167.121623035375 147.579672274205 156.698856643638  
 154.33224999163  
 PRSS48 160.082087242964 152.563532872898 137.599810249536  
 140.794929983858 148.304863957659 152.633139090274 137.13615301204  
 134.011746666371 133.841519663164 128.190822428484 131.232417654705  
 141.174971007547  
 PRSS7 162.117224868654 149.450921195838 161.348562186667 160.006185904123  
 144.982462113231 148.65131922365 151.606932937644 138.121905080822  
 147.171090285223 152.689610196981 150.998881139061 148.780775862239  
 PRSS8 144.454141873387 194.186994486095 139.018588215263 141.463324155943  
 2518.88171283899 1251.15912264225 967.797017108447 294.069353373633  
 514.61297221467 1449.33679383001 363.89527566597 419.846584903512  
 PRSSL1 129.031338314175 120.422401793885 146.047948193303  
 131.437847958077 150.156865995098 131.416923875254 144.562038493733  
 133.473140653666 144.287786573389 151.32179802686 141.129013595331  
 143.582187466814  
 PRTFDC1 351.759100605991 279.000687630846 475.038389500056  
 319.927209914181 232.276667029184 165.213327555428 161.740466814881  
 195.608619642038 183.385868234361 170.01557699913 167.149578610266  
 254.424207773566  
 PRTG 125.897190440417 127.077668562103 131.132508349222 129.687743133943  
 124.370381674692 131.067958183644 129.7536873083 137.689158155552  
 131.868557613642 137.672798701643 123.126240234396 129.652331277375  
 PRTN3 131.619951110473 137.48217464385 132.57219914253 129.026732674277  
 132.363645381743 127.233439204926 134.166297738657 141.137459291428  
 129.315412536491 133.509538648848 145.064773625365 141.914966520049  
 PRUNE 359.329520507158 401.189904619902 384.97980473847 373.656487297238  
 323.391456630794 403.208138816247 344.992791638415 399.620724969771  
 308.974786799114 247.111032124864 279.159925913207 357.928880740814  
 PRUNE2 590.849222581206 548.138527647594 623.68308750251  
 620.371912523332 131.358797630945 148.993620368781 135.313148180961  
 136.362761829761 142.801645268128 144.283716416188 145.850605495564  
 130.960045345375  
 PRX 137.408247668043 142.521260841187 134.94189148503 124.558026853954  
 132.106673891288 128.069504716124 126.81140158672 130.124601660028  
 126.274585491044 127.255966406144 153.201155202974 131.972669163481

|        |                  |                  |                  |                  |
|--------|------------------|------------------|------------------|------------------|
| PRY    | 136.287909668938 | 169.192327500032 | 145.612695657243 | 134.682319733908 |
|        | 138.204611862656 | 133.197002327259 | 152.373931758229 | 134.793399942417 |
|        | 145.828229656781 | 140.258615682066 | 127.182067293944 | 140.055272520317 |
| PRY2   | 167.380798617981 | 167.70368494182  | 163.340435089911 | 180.867208892996 |
|        | 159.920703254935 | 162.312313953026 | 170.541689758579 | 165.257737836487 |
|        | 171.768618884215 | 162.531630234824 | 146.06054700771  | 171.212749388553 |
| PSAP   | 9016.04641569485 | 8558.70496234991 | 8053.22070239424 | 10449.7190201942 |
|        | 9403.76665152182 | 4266.92715355342 | 10953.6229702446 | 5912.48904507462 |
|        | 8709.2221371432  | 6312.36452724398 | 9527.86367804896 | 6500.1854485891  |
| PSAPL1 | 155.702330867056 | 155.191446350891 | 144.64136816491  |                  |
|        | 140.968351978909 | 149.41357273704  | 140.49145570631  | 147.365589667009 |
|        | 142.863268359757 | 139.295597388725 | 140.300833590056 | 142.583098605144 |
|        | 137.453705355364 |                  |                  |                  |
| PSAT1  | 151.627496656808 | 152.72717701452  | 133.796029401157 | 143.04129238495  |
|        | 268.885346595453 | 226.203994206714 | 182.851203073653 | 314.557323400201 |
|        | 263.058972886829 | 479.866450988091 | 160.35668299062  | 157.148880624381 |
| PSCA   | 249.737588031219 | 321.750495072759 | 305.096320805078 | 152.673212084312 |
|        | 2107.99357083999 | 2291.40912229281 | 5609.58233117244 | 5213.40342339233 |
|        | 5955.10816224456 | 208.14618424983  | 768.053694275398 | 3490.77593331727 |
| PSCD1  | 604.453803994875 | 614.957397883514 | 392.539157974899 | 529.700356666006 |
|        | 396.345382600445 | 639.011144305614 | 611.36406319509  | 853.535700321202 |
|        | 1034.68475089075 | 720.077057619735 | 1069.93503700632 | 965.673699120049 |
| PSCD2  | 208.64349688412  | 209.004374703564 | 240.915496717526 | 216.645552082667 |
|        | 336.639473916174 | 226.173501275026 | 269.892633574243 | 200.98533822317  |
|        | 238.461248099002 | 244.307627077001 | 251.414717011661 | 233.36028792331  |
| PSCD4  | 167.817232948801 | 163.326102597955 | 152.925281215593 | 156.381599544223 |
|        | 177.401771322485 | 122.170662903259 | 142.249715102513 | 188.515336186633 |
|        | 255.305647212135 | 195.724873069362 | 158.882535865069 | 129.148634038268 |
| PSCDBP | 160.70138318726  | 158.906481816035 | 147.885769870843 |                  |
|        | 151.705219298578 | 146.384051525624 | 180.035652063942 | 168.238615437246 |
|        | 207.674249122047 | 251.20133703465  | 165.74458564887  | 174.454754564111 |
|        | 163.904137395349 |                  |                  |                  |
| PSD    | 402.026356201632 | 494.747087458483 | 428.462270756201 | 872.320823993033 |
|        | 147.809934374849 | 143.331929080227 | 129.025000034273 | 122.00079209554  |
|        | 153.328585916625 | 150.193479279784 | 132.693707848508 | 134.397255719047 |
| PSD2   | 122.873661677648 | 131.110018165002 | 125.710199961297 | 133.009854792992 |
|        | 227.558441474918 | 229.77428612216  | 134.310685502031 | 151.501794696948 |
|        | 217.327543190687 | 128.572388808833 | 165.803549113373 | 135.020690381988 |
| PSD3   | 159.0794075765   | 153.348110626071 | 154.904424749528 | 151.259426521768 |
|        | 155.194521954405 | 156.71199811686  | 193.832033192375 | 151.440732942734 |
|        | 160.828718858381 | 154.7326161316   | 260.554343693588 | 169.87591929982  |
| PSD4   | 155.694213876736 | 153.45050352117  | 117.552229262461 | 122.883806494491 |
|        | 301.428024926428 | 199.947823264085 | 151.808767243647 | 229.805500520256 |
|        | 197.100205890532 | 230.855806094267 | 391.039114500903 | 396.345382600445 |
| PSEN1  | 141.173167283016 | 146.34029698108  | 142.822594215168 | 140.515996180923 |
|        | 146.286319248569 | 140.481148289418 | 149.551030995489 | 157.713227527385 |
|        | 151.479748626813 | 156.151075965844 | 146.271180025157 | 156.880120259304 |
| PSEN2  | 376.082040863747 | 368.711718874343 | 376.692422468905 | 425.708048519408 |
|        | 359.703969802888 | 338.129250886594 | 347.081036934975 | 204.584643964409 |
|        | 286.856346704286 | 233.20900339048  | 264.741946816665 | 385.584224833836 |
| PSENE1 | 166.830529779692 | 186.215602572358 | 167.751604259111 |                  |
|        | 168.71216652064  | 590.849222581206 | 309.861048237742 | 259.426050921239 |
|        | 341.901565692251 | 434.325609889068 | 261.251965523684 | 439.852826905352 |
|        | 368.879825610754 |                  |                  |                  |

|           |                  |                  |                  |                  |
|-----------|------------------|------------------|------------------|------------------|
| PSG1      | 122.333765477428 | 128.093945009882 | 116.688949603376 | 111.802672864815 |
|           | 129.420716653358 | 127.006746526023 | 122.557981210434 | 131.792339956719 |
|           | 554.282040414368 | 125.381865040574 | 146.70298187005  | 111.467722538327 |
| PSG10     | 131.652854369619 | 121.391637838137 | 127.193553054979 | 129.579455072999 |
|           | 135.102827224896 | 116.723991721647 | 123.058261039164 | 127.065518421996 |
|           | 116.428373788459 | 129.546714583043 | 115.420810993676 | 130.758707848676 |
| PSG11     | 123.09149124559  | 125.995374488153 | 122.796362813922 | 118.184571821176 |
|           | 132.038012025708 | 117.131720092783 | 120.714981493593 | 128.074531806621 |
|           | 132.820927638053 | 138.580264357741 | 139.51836763472  | 134.696571019896 |
| PSG2      | 128.141725976839 | 130.455560026617 | 128.779829252045 | 140.184082384548 |
|           | 131.285279061742 | 140.63666629522  | 136.015561289357 | 139.72868421672  |
|           | 166.001279428607 | 152.439608473915 | 141.067419336609 | 141.323417580648 |
| PSG3      | 136.149732574763 | 143.554726863556 | 153.222807811478 | 163.538862303362 |
|           | 140.180208418327 | 149.536681241497 | 154.64077390011  | 136.962442874268 |
|           | 231.462907786174 | 177.688568435599 | 136.84488044614  | 144.713108022551 |
| PSG4      | 152.710827148511 | 146.457939801041 | 156.16485596016  | 145.855671447779 |
|           | 151.256546638599 | 146.023710941284 | 145.163084967499 | 136.922282125029 |
|           | 449.598181155897 | 159.327764602722 | 153.350690419636 | 146.388285560372 |
| PSG5      | 149.869314204354 | 136.687813884132 | 132.48841450242  | 134.885883559391 |
|           | 134.737901773547 | 129.591396165575 | 147.123477579978 | 134.175287993769 |
|           | 148.932696684374 | 134.530516701271 | 136.01865173754  | 130.646956516128 |
| PSG6      | 128.734694496357 | 128.284564251279 | 123.896578371318 | 124.555847618988 |
|           | 130.807596523171 | 121.705065573911 | 119.403831071089 | 122.05954649985  |
|           | 134.072912593456 | 122.083357581665 | 125.914267820741 | 122.111982327877 |
| PSG7      | 123.646558103253 | 131.268454024753 | 122.343979874508 | 136.670253859184 |
|           | 126.013957128603 | 137.993406215861 | 133.348510114432 | 120.201521341263 |
|           | 162.689415085423 | 123.777133327569 | 135.504526903482 | 126.526489290128 |
| PSG8      | 108.497209666203 | 110.212739445    | 110.858201415824 | 105.010952544907 |
|           | 108.318510762416 | 109.398997827329 | 114.624259793353 | 112.666812944192 |
|           | 115.371180170291 | 114.358099210532 | 117.546508214236 | 105.741092375243 |
| PSG9      | 103.012774960061 | 121.021776527531 | 118.180919555585 | 120.951365231971 |
|           | 114.078271807864 | 117.017844025726 | 119.525701528869 | 123.571641517019 |
|           | 212.607094117882 | 137.002473710189 | 128.980519133484 | 116.252227301161 |
| PSIP1     | 388.477382640003 | 399.537363692534 | 437.049581919144 | 314.949772661046 |
|           | 196.860228537112 | 202.927700504034 | 172.230528631803 | 207.598754515294 |
|           | 218.839681873515 | 205.149094703318 | 187.439567353342 | 180.747527895349 |
| psiTPTE22 | 128.436499050769 | 144.479410859199 | 144.665869508406 |                  |
|           | 146.927825526831 | 125.617143363441 | 136.699011428085 | 131.761564745495 |
|           | 138.058404474114 | 140.976675511847 | 143.694412162756 | 136.042982529628 |
|           | 141.73799456072  |                  |                  |                  |
| PSKH1     | 145.270140096768 | 161.886342770305 | 165.613274361543 | 177.039190810529 |
|           | 248.850686917567 | 131.216673806987 | 146.904354404095 | 136.003277940379 |
|           | 169.725534829981 | 129.077660633761 | 199.837938317725 | 127.080149144234 |
| PSKH2     | 119.643417329571 | 120.744994574029 | 124.381674909742 | 111.000303209442 |
|           | 125.859158049343 | 122.583461806645 | 121.805145639822 | 115.702900810606 |
|           | 116.89487516867  | 113.694351010121 | 133.215151497536 | 110.829107724132 |
| PSMA1     | 493.492348317616 | 472.279492678374 | 643.306565600931 | 470.95418656881  |
|           | 611.36406319509  | 820.652972219658 | 807.92851898782  | 840.623505494489 |
|           | 859.860994525775 | 1063.5903770389  | 942.900963522948 | 688.915534194306 |
| PSMA2     | 271.004741629789 | 265.148061007894 | 288.370985514978 | 296.333944172375 |
|           | 374.337030706199 | 358.843277491684 | 338.46332239699  | 310.465070184707 |
|           | 283.701987275608 | 268.568824794145 | 366.857139377277 | 399.620724969771 |

|        |                  |                  |                  |                  |
|--------|------------------|------------------|------------------|------------------|
| PSMA3  | 568.040362658955 | 497.916883763059 | 727.114956464515 | 427.637083424453 |
|        | 799.759250503507 | 724.103864917969 | 769.34961339184  | 1151.89087953837 |
|        | 909.388774224614 | 840.623505494489 | 950.144166422001 | 1398.60850048351 |
| PSMA4  | 1414.95226752155 | 1464.04124596264 | 1555.28458491244 | 1225.33666840349 |
|        | 1912.2369374258  | 3173.14004739767 | 2574.74962955426 | 2379.15291239548 |
|        | 2553.92770795014 | 2056.90127387648 | 2452.1304336603  | 2841.96460830166 |
| PSMA5  | 1333.73334006986 | 1477.10828981572 | 1656.02721259517 | 1298.60552708737 |
|        | 2660.39990175415 | 3862.57980488881 | 3294.92439159154 | 3921.67860557329 |
|        | 3855.33040541264 | 2120.14463347544 | 3019.57419253979 | 3829.87905458534 |
| PSMA6  | 1369.89073267996 | 1571.87128697931 | 1673.5387396582  | 1321.17236442448 |
|        | 3994.64569045702 | 6960.46610781696 | 2666.06582231934 | 3789.1316515671  |
|        | 2853.14759681683 | 3301.98381607571 | 2871.34694522381 | 3130.30693451802 |
| PSMA7  | 144.54895913821  | 145.520832968878 | 139.969155812688 | 137.258429777402 |
|        | 172.707821624271 | 175.313689069815 | 171.130215858803 | 152.628220216104 |
|        | 146.539196738195 | 167.713268780664 | 140.002249873656 | 181.412790232996 |
| PSMA8  | 101.431474941041 | 113.726931741236 | 111.810575716678 | 109.586955365611 |
|        | 117.889524670597 | 114.545476919992 | 105.408689610638 | 114.888157310977 |
|        | 117.261443445891 | 112.558241320112 | 121.519309043513 | 114.987285062108 |
| PSMB1  | 5049.57929757135 | 4651.384971332   | 4866.98027226798 | 4671.10203385528 |
|        | 6571.35528952186 | 4697.94415026712 | 5489.19362780613 | 5932.37714987741 |
|        | 5965.21815409254 | 5327.13051940508 | 5558.51089816921 | 6233.78489807054 |
| PSMB10 | 1903.13326109546 | 2369.233048505   | 1856.05025952611 |                  |
|        | 2744.77453865893 | 3829.87905458534 | 1269.67110104843 | 2033.67956299225 |
|        | 3481.90072759183 | 5825.9968524214  | 1953.88327754946 | 3463.23822434026 |
|        | 3615.76740804718 |                  |                  |                  |
| PSMB11 | 141.497125111619 | 140.099069486005 | 132.645196037302 |                  |
|        | 138.049846456876 | 120.839256811295 | 153.149523560021 | 132.598022317288 |
|        | 141.828740140733 | 137.519771130707 | 144.879364072868 | 140.496058408953 |
|        | 133.854760285591 |                  |                  |                  |
| PSMB2  | 781.461780481171 | 856.74270641707  | 990.55038742453  | 1057.80846320642 |
|        | 2043.73482086765 | 1566.65825409044 | 1328.84172386373 | 1897.92061704124 |
|        | 1887.82245931444 | 1357.48791782399 | 923.383014892221 | 1704.25279485563 |
| PSMB3  | 1657.72357544205 | 2193.376951552   | 1542.35486950856 | 2208.49325118803 |
|        | 2691.41389079777 | 3850.41246770812 | 3078.76695443407 | 5811.97916044218 |
|        | 3810.98043907046 | 2645.72125268628 | 2014.48411650613 | 2845.0377634896  |
| PSMB4  | 1454.94889750152 | 1555.28458491244 | 1623.92991386706 | 1657.72357544205 |
|        | 2681.48138915107 | 2162.46602203822 | 2010.57142784228 | 2670.9151276786  |
|        | 1818.92700816112 | 1606.01395227661 | 1382.95068105649 | 2446.31228564539 |
| PSMB5  | 1114.85422895959 | 1014.63777151551 | 1344.1288416533  | 1076.62597781124 |
|        | 1643.08061372695 | 1085.38819961412 | 1756.88092410303 | 1656.02721259517 |
|        | 1281.9073569335  | 1386.56788941677 | 1353.61552261489 | 1901.97972168836 |
| PSMB6  | 2733.68308784024 | 3046.47354587949 | 3246.86605825129 | 3896.49785254733 |
|        | 2240.33212242003 | 3976.40140405628 | 1980.4589291261  | 3504.77617298452 |
|        | 2708.20624364471 | 3348.7622174821  | 2210.67250954072 | 3688.68740405322 |
| PSMB7  | 1540.71556891815 | 1640.99641023476 | 1776.38646235135 | 1595.22997714906 |
|        | 1324.56751399862 | 2124.12760841901 | 1682.64624665931 | 1940.42283070543 |
|        | 2258.30916111153 | 3363.51782842264 | 2000.47497636965 | 1707.09830463606 |
| PSMB8  | 305.854543429221 | 340.301980622308 | 234.814109965002 | 295.330307669482 |
|        | 466.257158794525 | 249.379605914827 | 369.906476027936 | 435.48544637769  |
|        | 753.997560938003 | 349.910535555712 | 754.406896156858 | 651.675427664911 |
| PSMB9  | 164.808139478109 | 176.547853494057 | 144.781438651649 | 150.584633044901 |
|        | 166.521472376759 | 147.045944019838 | 165.673535349675 | 241.134385745554 |
|        | 351.665934915634 | 186.127543877065 | 279.113984512619 | 309.181150342727 |

|         |                  |                  |                  |                  |
|---------|------------------|------------------|------------------|------------------|
| PSMC1   | 3930.2841381915  | 4511.9116742833  | 4214.83058308503 | 4359.98094976179 |
|         | 2369.233048505   | 2656.38138490746 | 2882.51330563735 | 3757.39261544326 |
|         | 2601.89405525276 | 3328.99028463277 | 2863.51286169094 | 3833.73632806344 |
| PSMC2   | 1326.95332435394 | 1327.65573168233 | 1689.00127592755 | 1304.37930719411 |
|         | 1544.45026075974 | 1850.98311401165 | 1685.33737186733 | 2295.16438420175 |
|         | 1554.16120123599 | 1798.5819962261  | 1563.71477584676 | 2299.23805014176 |
| PSMC3   | 1371.56635975955 | 1452.63736288691 | 1071.00507864299 | 1758.7809492929  |
|         | 614.514126276981 | 826.771587455122 | 690.903797251841 | 1315.66699943181 |
|         | 902.089561157715 | 1039.46136549795 | 732.630306104841 | 613.063954859056 |
| PSMC3IP | 149.910521500364 | 146.738411200698 | 165.51742391186  |                  |
|         | 146.800324349321 | 155.227218488935 | 150.19577351885  | 161.289708941062 |
|         | 183.115511373872 | 180.15338103     | 171.155660467037 | 150.538541347453 |
|         | 161.632610858756 |                  |                  |                  |
| PSMC4   | 214.082408290757 | 190.787437782456 | 297.609793563225 | 194.552533397944 |
|         | 341.64890727921  | 618.661249163439 | 455.930204471585 | 581.54874141672  |
|         | 567.715714233608 | 447.521645706162 | 217.050602253281 | 530.819778703194 |
| PSMC5   | 2648.41012401723 | 2845.0377634896  | 2799.0487754899  | 3093.38255333143 |
|         | 1292.13921040404 | 1895.72330348767 | 2083.02482378721 | 2789.67986601883 |
|         | 2081.45603839306 | 2459.05558915812 | 2508.50428529255 | 3215.41238464601 |
| PSMC6   | 499.776233241535 | 404.726926716133 | 676.570119607984 | 339.843776738468 |
|         | 495.099443245153 | 734.469481390593 | 819.887322757281 | 844.778755052304 |
|         | 664.19083888799  | 1009.42265467472 | 839.901173743755 | 972.468110850466 |
| PSMD1   | 816.266384662324 | 807.604205890244 | 920.840069938767 | 984.695710317818 |
|         | 444.584594376357 | 566.543765584009 | 456.201998988891 | 595.593867616527 |
|         | 624.264994653057 | 690.246312542011 | 344.128576341892 | 708.268962600305 |
| PSMD10  | 332.24505665756  | 349.128741707506 | 455.564394647943 |                  |
|         | 298.028932089399 | 452.357898123926 | 662.373189001788 | 511.891269255193 |
|         | 457.130051460676 | 557.702374840532 | 571.838717184447 | 392.582612044755 |
|         | 619.380514697732 |                  |                  |                  |
| PSMD11  | 215.744552410805 | 230.620456579897 | 243.425632941131 |                  |
|         | 227.467161919443 | 456.530337997907 | 251.546290552828 | 260.045018348182 |
|         | 315.565349831797 | 258.25658838015  | 285.402072939954 | 272.351487980415 |
|         | 221.093229309411 |                  |                  |                  |
| PSMD12  | 5789.71932579854 | 5759.5586948816  | 7539.6945050098  |                  |
|         | 6500.1854485891  | 1654.58270183167 | 6810.50193989514 | 4088.12910138929 |
|         | 5521.74673982411 | 5558.51089816921 | 4266.92715355342 | 2303.0998502001  |
|         | 4956.21683075884 |                  |                  |                  |
| PSMD13  | 200.443940449586 | 203.475080163804 | 241.134385745554 |                  |
|         | 219.151144724168 | 207.488522933448 | 198.90533452253  | 195.269099451599 |
|         | 183.255119298602 | 181.062188174871 | 216.126000558319 | 259.184713471619 |
|         | 186.866029149035 |                  |                  |                  |
| PSMD14  | 587.388038484307 | 516.892850913889 | 649.438995824208 |                  |
|         | 551.086785904249 | 909.020708316287 | 1379.26881813339 | 848.154015576436 |
|         | 1202.74869573717 | 1068.63350031223 | 1203.47834989609 | 917.646958427824 |
|         | 1370.61156801632 |                  |                  |                  |
| PSMD2   | 811.362219801362 | 873.010676463707 | 912.878077940014 | 905.233241047678 |
|         | 1695.26858186096 | 1027.48490028905 | 893.264940736694 | 1039.46136549795 |
|         | 1001.92763014266 | 1200.94425675913 | 990.55038742453  | 842.87865208079  |
| PSMD3   | 215.967319486874 | 231.846509449829 | 242.695286989672 | 225.64288602828  |
|         | 388.477382640003 | 223.128108720503 | 291.261765585473 | 763.263858769038 |
|         | 379.292531644085 | 325.12056698785  | 210.852300463808 | 280.494088228226 |
| PSMD4   | 1001.92763014266 | 983.094485868275 | 1391.89900758685 | 1187.62490367696 |
|         | 1165.95924778817 | 760.272612245092 | 878.520681466946 | 1135.49876948815 |
|         | 815.779445689417 | 935.784743413185 | 721.603421985572 | 998.631321857182 |

|          |                  |                  |                  |                  |
|----------|------------------|------------------|------------------|------------------|
| PSMD5    | 188.490807652188 | 199.423120300557 | 204.877041314502 | 223.128108720503 |
|          | 179.478756495687 | 152.179281925254 | 207.624240598841 | 179.914070416793 |
|          | 214.933911087009 | 234.531140131763 | 210.692705153337 | 173.189465201573 |
| PSMD6    | 1132.27988339924 | 1108.61301774472 | 1336.75600604068 | 945.830852603704 |
|          | 1953.88327754946 | 1936.88813111969 | 1590.87426068638 | 1447.07989164988 |
|          | 1885.93146154931 | 1992.71224011906 | 1401.67503392145 | 1728.86115695979 |
| PSMD7    | 785.290353402444 | 750.10819423982  | 1292.13921040404 | 727.814681346494 |
|          | 806.88003660673  | 1058.55850972326 | 1062.749459378   | 863.738809424958 |
|          | 1505.09908072606 | 1015.63768413332 | 1164.61390835016 | 1581.06548216423 |
| PSMD8    | 611.772512110915 | 645.806954296487 | 539.27766384282  | 762.8576747113   |
|          | 724.607317443904 | 1266.53539318831 | 719.369561410372 | 843.936924659514 |
|          | 1184.88559645917 | 859.113541787323 | 594.92419264579  | 717.270096456387 |
| PSMD9    | 179.753400474369 | 178.035700298977 | 198.004357069446 | 215.802713097166 |
|          | 170.145574727175 | 186.033093285894 | 154.13120950189  | 150.084909674721 |
|          | 182.248178961707 | 173.424541543058 | 171.099675679944 | 153.571517567657 |
| PSME1    | 1627.02882286283 | 1513.28088592885 | 1427.27262061653 | 1445.72064343302 |
|          | 2213.1043022626  | 1257.00798908017 | 1916.46158204806 | 2162.46602203822 |
|          | 2046.64499507352 | 1942.08859727404 | 2970.34597432588 | 3066.69261114251 |
| PSME2    | 913.684449305965 | 926.670867201327 | 794.636255515909 | 812.298381693378 |
|          | 1237.56662467492 | 1122.92917004037 | 1605.2454230722  | 3342.8737952486  |
|          | 2637.62596741408 | 1986.81354260292 | 2808.78353621111 | 3721.86725798812 |
| PSME3    | 476.076903428247 | 460.089380701982 | 508.127470400078 | 499.776233241535 |
|          | 423.256021602613 | 650.911886508922 | 721.966539760341 | 1016.18143428327 |
|          | 955.604404066769 | 430.329437928013 | 764.774225930479 | 651.759589129833 |
| PSME4    | 1299.4782626583  | 865.800709006332 | 868.86246684338  | 847.276523445973 |
|          | 1369.89073267996 | 1916.46158204806 | 1470.23096656138 | 1514.53784631689 |
|          | 895.821578104681 | 1098.78649254838 | 1187.62490367696 | 1421.04485772969 |
| PSMF1    | 689.04773343291  | 815.045148478814 | 737.42784787426  | 874.816697884109 |
|          | 763.263858769038 | 710.999354960979 | 470.578335285993 | 534.745066397679 |
|          | 684.866405921987 | 548.686094748117 | 611.208083466988 | 504.709613434391 |
| PSMG1    | 316.364342983155 | 292.429831186609 | 454.133372808458 | 263.888891822857 |
|          | 362.899103657252 | 666.570977208535 | 548.138527647594 | 663.451243037105 |
|          | 525.515169794593 | 1082.00448164658 | 454.492780042353 | 509.01330998156  |
| PSMG2    | 999.658013198849 | 908.352265585374 | 1510.77099418802 | 803.133619199479 |
|          | 460.941286124613 | 1752.50728312967 | 1148.80141486692 | 1584.81089248914 |
|          | 1322.14570224119 | 1390.95426299323 | 1702.68441407727 | 1712.47877322331 |
| PSMG3    | 183.447807651728 | 203.244917049745 | 175.38376293575  | 188.941900997781 |
|          | 410.731869154912 | 232.556667737827 | 260.314440448486 | 238.548578086943 |
|          | 234.399431238026 | 240.971675534641 | 328.826483579278 | 332.24505665756  |
| PSMG4    | 258.552964322998 | 268.328002606268 | 357.063270015318 | 253.975577255772 |
|          | 389.686045618228 | 317.550000625189 | 321.524921332256 | 348.808646570544 |
|          | 336.120322555703 | 365.950612890149 | 392.6758818959   | 450.468410589415 |
| PSORS1C1 | 159.584350289413 | 147.588213090285 | 152.064982697394 |                  |
|          | 158.625060605976 | 163.686535888943 | 286.035428568826 | 174.255919030841 |
|          | 236.707875629511 | 187.63609695026  | 155.478383896934 | 162.702767346393 |
|          | 191.128539630621 |                  |                  |                  |
| PSORS1C2 | 162.192879711747 | 178.358003030064 | 158.232100962615 |                  |
|          | 155.3394927753   | 435.095843349921 | 171.059849459102 | 193.858884443593 |
|          | 197.341423434688 | 309.798246248863 | 158.523941833883 | 175.245611094434 |
|          | 181.439775614781 |                  |                  |                  |
| PSORS1C3 | 130.179742057015 | 154.637740117457 | 129.568951363607 |                  |
|          | 133.964163727962 | 170.577057395536 | 131.322008851059 | 1850.98311401165 |
|          | 257.989863290786 | 332.343558229873 | 133.34207595093  | 747.322544683874 |
|          | 899.336817124312 |                  |                  |                  |

|         |                  |                  |                  |                  |
|---------|------------------|------------------|------------------|------------------|
| PSPC1   | 221.272872023413 | 242.253995801882 | 233.300864925399 | 210.550995170071 |
|         | 249.925640256322 | 281.740495452842 | 294.808980631295 | 277.101000223971 |
|         | 270.847923557176 | 241.134385745554 | 276.5177779623   | 349.485727214325 |
| PSPH    | 153.709230037306 | 155.198503964295 | 168.841313096346 | 145.787468865642 |
|         | 168.197255166255 | 145.08246303652  | 152.518729390047 | 160.127254444487 |
|         | 169.656238760589 | 154.080778100852 | 158.622993108149 | 159.099495828517 |
| PSPHL   | 146.033591220134 | 164.48570046081  | 148.204194003593 | 154.594339065082 |
|         | 156.328454726363 | 153.389279691913 | 150.093684245826 | 166.489436134841 |
|         | 149.31020447459  | 153.974384951787 | 160.19942770666  | 163.570018900148 |
| PSPN    | 106.285472845323 | 107.049865500702 | 109.536381305315 | 115.572088632106 |
|         | 116.106772298898 | 118.070716076005 | 113.23302126254  | 115.224011128183 |
|         | 114.598636725763 | 113.627435441258 | 134.990075720145 | 113.292688210897 |
| PSRC1   | 141.794898246882 | 162.240414467004 | 138.771088752839 | 163.480722123193 |
|         | 257.775569674531 | 158.747029092329 | 151.002218995005 | 173.440596296333 |
|         | 170.439725847568 | 164.491207767654 | 169.168869363848 | 181.135519188216 |
| PSTK    | 138.56812029378  | 144.587253120884 | 160.598186999524 | 155.945838519586 |
|         | 138.685330935707 | 136.321816321193 | 145.745466612541 | 176.019082929386 |
|         | 156.399808270033 | 151.742938010671 | 175.857952663383 | 158.371599884762 |
| PSTPIP1 | 125.088717405087 | 120.07404952486  | 106.522641798274 |                  |
|         | 120.809659457873 | 127.274768398849 | 122.370148442415 | 111.086170834553 |
|         | 116.695313319162 | 157.361421272816 | 120.786630750686 | 132.908367372426 |
|         | 117.815045605383 |                  |                  |                  |
| PSTPIP2 | 187.15740398852  | 190.045156046541 | 187.871017629994 |                  |
|         | 152.573063322741 | 257.622317771472 | 214.684538620841 | 246.710233781784 |
|         | 415.011847890313 | 299.851173200352 | 196.860228537112 | 269.448201975645 |
|         | 203.223604138192 |                  |                  |                  |
| PTAFR   | 188.475801713801 | 160.415807880532 | 172.836730741407 | 182.074569356713 |
|         | 183.921173538112 | 168.878645908397 | 181.062188174871 | 169.607072855818 |
|         | 174.92026613834  | 206.236303011662 | 163.024215671479 | 238.904826940476 |
| PTAR1   | 555.959424692051 | 602.86705608228  | 435.69811966429  | 610.759447723026 |
|         | 271.713695056313 | 367.130155304037 | 283.952604729032 | 332.24505665756  |
|         | 300.675907594637 | 355.609033348692 | 520.218545108099 | 276.756415094228 |
| PTBP1   | 3598.30438198858 | 4417.98524179686 | 2751.75479578587 | 3869.12225821096 |
|         | 11017.1478502767 | 5314.0635307876  | 4441.92485662082 | 6720.10473881011 |
|         | 6548.65498784806 | 4743.19967685595 | 4103.06565237121 | 5521.74673982411 |
| PTBP2   | 889.26314145856  | 726.346459754217 | 1019.627634011   | 643.660739343159 |
|         | 162.342112922504 | 300.675907594637 | 203.960838492793 | 286.945784387294 |
|         | 241.251507026982 | 277.359422005775 | 193.98814423456  | 272.41397350779  |
| PTCD1   | 501.166869173253 | 627.803400871547 | 690.010326122574 | 715.638378711433 |
|         | 994.802763887989 | 562.891241563711 | 825.345092964844 | 1172.4103691525  |
|         | 751.568940762011 | 499.964000319181 | 524.640879446426 | 693.339946866196 |
| PTCD2   | 183.568426758223 | 202.568071395884 | 232.641965649602 | 180.354899434843 |
|         | 158.213784310645 | 179.338652960181 | 179.905809470907 | 165.30072618497  |
|         | 160.822287037366 | 200.902123076244 | 165.430811083128 | 183.371103136697 |
| PTCD3   | 126.330382425318 | 136.227202534196 | 132.498092935232 | 137.550607284001 |
|         | 129.192326574697 | 153.398587738216 | 124.585675323305 | 135.385133545332 |
|         | 128.135216461862 | 123.207402172696 | 153.420392741659 | 151.466689967666 |
| PTCH1   | 202.909188070184 | 205.08372943071  | 135.648283568148 | 172.276968413879 |
|         | 150.927628184034 | 112.190904058889 | 122.636980845207 | 122.149756212115 |
|         | 120.733009784454 | 126.319103548711 | 150.082561726876 | 123.510413258172 |
| PTCH2   | 122.670689386332 | 134.828360289676 | 124.672483602517 | 124.568534983277 |
|         | 118.312891459156 | 122.719785082196 | 129.24482916531  | 121.968807253639 |
|         | 118.393203921859 | 124.876226351169 | 134.784568023655 | 117.619337212037 |

PTCHD1 714.052063877292 601.521068811063 608.351527783086  
 462.948429969719 280.948704707655 873.256632365737 420.248838397618  
 227.092319765009 125.768053724055 118.180919555585 370.678040372273  
 124.269446398587  
 PTCHD2 133.902707525069 125.435268901131 128.306607216705  
 154.347332766547 134.668233738635 145.25198093836 150.208809981642  
 135.616911926164 145.493977576106 125.217733034761 143.934585983797  
 121.56625295788  
 PTCHD3 130.016401638936 127.753065449769 131.641435734821  
 127.409603645289 124.705614182596 133.009854792992 133.749271961438  
 129.013667813486 123.711828013052 138.235127932016 140.689631427359  
 138.167369090026  
 PTCRA 153.643157329902 148.062245676711 149.361498483705 154.698312173556  
 155.63671938031 146.95272087759 144.720594512581 143.579660352652  
 141.691135410429 148.118705147238 159.879600154928 139.178245419517  
 PTDSS1 628.197839884392 637.30300219673 619.045921382959  
 557.026028810367 1133.22524345111 1116.95795024994 815.779445689417  
 714.274201838067 1185.70008959602 715.93836911426 589.070196307574  
 793.071192619058  
 PTDSS2 283.191303666907 369.906476027936 321.977549744483  
 354.656612182522 526.182262872235 196.329602378007 199.991077347491  
 180.641419603362 196.450308368198 243.501083338279 284.595024875896  
 154.493246900289  
 PTEN 397.577760464197 398.193129265416 365.590174280114 323.737610506003  
 318.850765099332 278.737944234055 354.336462793628 291.537725613819  
 327.635520861099 521.30110104669 382.902151239988 372.475112554793  
 PTENP1 121.95061962467 134.335309757663 144.2753860947  
 132.86879723151 123.595133376092 118.859745315302 141.008604646743  
 133.62358240645 140.26557508894 139.324006489527 149.7565121110538  
 132.677272839165  
 PTER 122.941711366641 145.864902319111 128.723261477217 128.583503171594  
 116.958052905168 161.485353443949 137.185243517766 121.945541820091  
 117.494422663086 129.114161128113 158.439409064812 122.834017529045  
 PTF1A 134.885883559391 128.689465747173 136.271412363498 116.388079393669  
 135.241029533819 135.989816139218 136.566588903194 146.934990457666  
 121.459780480915 139.469148541078 142.99844601139 129.918038866006  
 PTGDR 146.245915271213 142.50631960137 147.221425204534 152.088488171996  
 141.301503201175 134.78059811237 139.880733465536 133.953303801604  
 141.064086298948 141.033948839613 134.516390697561 137.700110923212  
 PTGDS 618.058496806334 552.662610888399 383.503040287678 307.124331101976  
 292.23287968517 206.010481981919 192.314484368435 550.671679318681  
 2511.04500638697 505.143815448613 135.735535533738 148.779043570204  
 PTGER1 145.298109334141 151.110467345727 124.045745662173  
 122.909152047474 145.919359461744 123.603972078897 120.050548624975  
 134.250052775987 193.945494721138 145.048033586779 156.546769952772  
 125.371128588617  
 PTGER2 175.139231359014 166.640325848102 128.002822538671  
 129.455347273068 136.835889180879 188.348499229585 131.688038068545  
 155.365673279823 158.6953558198 127.099995420363 154.701413581915  
 141.398513269219  
 PTGER3 138.798959235723 135.399032687551 137.701271351806  
 132.005753222789 132.596941171401 130.380766252137 124.650711299942  
 127.047679628867 126.203255277356 131.904624845305 126.549876718792  
 124.654146040634



|        |                  |                  |                  |                  |
|--------|------------------|------------------|------------------|------------------|
| PTGER4 | 536.9324595176   | 578.084277076692 | 346.78158577526  |                  |
|        | 532.063437013967 | 715.43295523922  | 1513.28088592885 | 553.90008440429  |
|        | 967.123240442957 | 307.124331101976 | 257.534293550585 | 579.318912497928 |
|        | 397.2528907311   |                  |                  |                  |
| PTGES  | 411.71606840872  | 463.091387717305 | 246.369521698487 | 279.202256032476 |
|        | 734.469481390593 | 391.326200093611 | 269.726397478364 | 203.071186284148 |
|        | 302.637859140061 | 507.710604451713 | 593.639955546556 | 283.556453980797 |
| PTGES2 | 295.187978994932 | 308.726328440723 | 335.059844742031 |                  |
|        | 382.233826557803 | 1423.02563792293 | 329.926864732606 | 331.62124160152  |
|        | 426.548994267836 | 424.025588636796 | 534.505132658177 | 537.419316887523 |
|        | 409.592855687405 |                  |                  |                  |
| PTGES3 | 1142.09977159958 | 1097.60805874165 | 1355.07170485397 |                  |
|        | 721.31849915135  | 2352.01196541874 | 1217.29687282094 | 1656.02721259517 |
|        | 1769.6386910047  | 1778.73916100529 | 1756.88092410303 | 1467.50846948144 |
|        | 1677.93424842267 |                  |                  |                  |
| PTGFR  | 336.212224495877 | 364.840751972169 | 333.131139447511 | 299.851173200352 |
|        | 146.512045729234 | 147.8838487685   | 130.539632182729 | 132.245217686793 |
|        | 148.697019570015 | 148.938822951404 | 145.10302792449  | 141.611712747368 |
| PTGFRN | 712.433345978749 | 811.912727084669 | 686.923164688096 |                  |
|        | 969.360864006371 | 448.106077184152 | 374.033009122079 | 376.007938436483 |
|        | 344.575967665039 | 329.926864732606 | 652.654673756838 | 514.002313819685 |
|        | 460.089380701982 |                  |                  |                  |
| PTGIR  | 141.904041228678 | 154.248226423862 | 128.135216461862 | 123.968639555673 |
|        | 130.368933537243 | 123.58727715816  | 134.01566484034  | 132.570225520163 |
|        | 142.282861913548 | 144.30699572795  | 151.387150218354 | 139.082897743357 |
| PTGIS  | 2230.45015969936 | 2539.87833317526 | 2363.50330960038 | 3721.86725798812 |
|        | 177.874821397216 | 137.141081365469 | 156.803516898875 | 156.144934427609 |
|        | 173.260348096238 | 161.148734808267 | 138.670077127324 | 153.391895732807 |
| PTGR1  | 375.255445179952 | 412.048097766066 | 423.396271159345 | 347.3483417873   |
|        | 854.224454791713 | 1146.84239258543 | 1337.38160266788 | 1444.45946291517 |
|        | 952.357976050712 | 874.816697884109 | 2032.50052162637 | 559.559921312181 |
| PTGR2  | 1087.69177809384 | 881.561688713557 | 1039.92160906839 | 808.300067805897 |
|        | 212.171281020103 | 893.264940736694 | 434.325609889068 | 637.30300219673  |
|        | 467.681480781925 | 386.817736004263 | 1450.44557173645 | 472.030150842569 |
| PTGS1  | 6114.33638002734 | 5947.89821087362 | 6548.65498784806 | 7218.21759302518 |
|        | 137.48217464385  | 155.104697146664 | 131.975248488461 | 141.21138348075  |
|        | 162.427505889157 | 282.836518011311 | 162.297999435613 | 163.991378703958 |
| PTGS2  | 1144.53002508973 | 1388.91423772335 | 926.670867201327 | 1235.02626456572 |
|        | 713.525134497596 | 473.057488824363 | 580.347496467173 | 748.38293089716  |
|        | 307.982260548106 | 459.171226689178 | 1312.44215746801 | 406.638419179213 |
| PTH    | 144.102872001089 | 141.043668963717 | 138.785538575745 | 141.369723386494 |
|        | 132.300508985399 | 135.232878188098 | 129.065491477375 | 137.97889661868  |
|        | 140.502667595362 | 145.718019736542 | 127.625252349231 | 138.483436753942 |
| PTH1R  | 241.987100712218 | 290.213039891361 | 173.611295051326 | 395.133831206474 |
|        | 131.572485018063 | 137.973211667003 | 124.621381699241 | 138.354300118735 |
|        | 142.531683761072 | 136.553568679965 | 147.255680306221 | 138.503460596289 |
| PTH2   | 148.695212949639 | 148.486946087388 | 137.552979154943 | 132.913891550054 |
|        | 146.044279076949 | 140.239948346946 | 151.032389358279 | 140.934144636302 |
|        | 151.064422836695 | 141.019494314354 | 151.751963310212 | 137.415158613413 |
| PTH2R  | 186.447049658314 | 157.016659994185 | 166.036553680319 | 194.014764659513 |
|        | 177.990274115348 | 404.172535442156 | 373.033658917608 | 181.823450464129 |
|        | 168.27980269501  | 372.255208814622 | 150.0674092434   | 179.067275037015 |

|         |                  |                  |                  |                  |
|---------|------------------|------------------|------------------|------------------|
| PTHLH   | 187.852455291319 | 174.953232190285 | 175.262884960324 | 162.274094333189 |
|         | 139.39112068213  | 166.091736766853 | 233.192751618176 | 160.473772347376 |
|         | 140.174087049513 | 1982.3154578939  | 169.556358586336 | 136.529820456592 |
| PTK2    | 1147.96742431386 | 1170.07851727046 | 1067.30106203503 | 869.542306259337 |
|         | 971.99484515987  | 1396.4168898623  | 1364.83036157729 | 1652.77814259264 |
|         | 2101.93705983383 | 1062.03157932144 | 2005.76678571689 | 1804.63762008613 |
| PTK2B   | 167.791351000743 | 164.448110885609 | 165.638672456873 | 181.550597645633 |
|         | 179.794718712964 | 167.536828038178 | 161.402322405903 | 159.438084699061 |
|         | 172.20451139581  | 163.72257517759  | 186.529656751005 | 169.301498852556 |
| PTK6    | 146.164093136588 | 176.431477850092 | 157.860515609693 | 148.507598818039 |
|         | 1227.94401191112 | 487.537691131703 | 705.737228226014 | 337.342034950908 |
|         | 367.825328832492 | 705.020444579319 | 523.306451464643 | 766.710479603963 |
| PTK7    | 224.466829629468 | 253.65959805538  | 141.884995734267 | 187.784865705837 |
|         | 362.795691170335 | 280.033528476199 | 435.603911474926 | 168.805630890928 |
|         | 178.584378959369 | 442.12886967939  | 418.889972660958 | 315.963526790659 |
| PTK9    | 146.035731780312 | 140.300833590056 | 155.211976328553 | 145.902572804249 |
|         | 148.930073905413 | 142.027930009598 | 181.294497402507 | 159.115391667901 |
|         | 154.173439471404 | 132.141918502025 | 156.351734527745 | 164.753886197136 |
| PTMA    | 2385.5958396359  | 2225.59207490574 | 1766.15001427132 | 1327.65573168233 |
|         | 2932.64120183406 | 1348.80530206238 | 2171.00457877604 | 1609.54149931375 |
|         | 2518.88171283899 | 1394.31467757456 | 4166.43837922103 | 2502.72913594103 |
| PTMS    | 939.213447046823 | 1188.08712008638 | 716.731984660463 | 1717.09434498876 |
|         | 222.848935978648 | 262.756237406794 | 225.189991540262 | 259.868701878844 |
|         | 213.382179917193 | 415.178470246749 | 295.187978994932 | 252.365946808078 |
| PTN     | 245.640193659159 | 209.54573978355  | 200.652195873026 | 215.718714189719 |
|         | 210.64483507528  | 148.470120335761 | 156.818197172306 | 163.773702843544 |
|         | 153.453969224725 | 170.768398273919 | 155.026276988302 | 195.160353691349 |
| PTOV1   | 1458.13354165836 | 1806.24732793591 | 1353.61552261489 | 2131.68478964427 |
|         | 5213.40342339233 | 1128.60314361459 | 1578.87371296418 | 893.264940736694 |
|         | 1594.05763963363 | 1253.05700051015 | 1456.76683429755 | 1142.09977159958 |
| PTP4A1  | 341.973002478932 | 322.64731764456  | 610.915977337787 |                  |
|         | 337.487980551006 | 185.706228572019 | 247.845708587624 | 200.468804559127 |
|         | 226.871028543248 | 213.324226314713 | 223.094496588657 | 142.674671804361 |
|         | 213.412498914309 |                  |                  |                  |
| PTP4A2  | 2087.55358504021 | 1990.94596595493 | 1663.71411325131 |                  |
|         | 1867.55140010155 | 769.009371389327 | 1813.79641422879 | 1562.9779683714  |
|         | 1423.02563792293 | 1360.24752587939 | 640.029195821436 | 1307.96033038529 |
|         | 1077.33874251157 |                  |                  |                  |
| PTP4A3  | 192.340135076104 | 221.916075811355 | 218.393783552484 |                  |
|         | 250.342080183479 | 191.467626362851 | 162.624786423084 | 152.948391119096 |
|         | 162.254062646631 | 171.809717138613 | 163.416011199431 | 162.472783116487 |
|         | 206.937770272939 |                  |                  |                  |
| PTPDC1  | 146.731584143625 | 143.050004021764 | 137.649424237506 |                  |
|         | 150.269618125943 | 145.858537779106 | 140.213080190065 | 123.639062358695 |
|         | 143.565597315289 | 132.23149173224  | 144.439320591901 | 152.526785074182 |
|         | 137.618447592489 |                  |                  |                  |
| PTPLA   | 693.180345649331 | 616.523853569261 | 830.684999498776 | 779.340880980422 |
|         | 166.076692502428 | 151.557004418682 | 163.584613764633 | 156.768976123975 |
|         | 166.061891147234 | 258.605188272761 | 171.896929562022 | 161.740466814881 |
| PTPLAD1 | 648.823677010146 | 678.937151822411 | 678.937151822411 |                  |
|         | 468.170972478717 | 721.11578916385  | 1550.61855325662 | 1967.82064011967 |
|         | 1125.28599595312 | 1364.1224589383  | 658.202765061937 | 1925.60246708149 |
|         | 1038.34611017219 |                  |                  |                  |

PTPHAD2 4081.13406129846 3798.89743803968 3099.71798305764  
 3328.99028463277 619.045921382959 3033.50962589321 1733.96382719909  
 2558.91648313228 1929.52146517699 1338.83705469394 3408.6535437109  
 1630.1630053946  
 PTPHBA 860.315938621256 850.562379837947 725.443026984982 725.065727257421  
 913.934874451961 1861.19763103381 1011.9675459648 1123.93087912174  
 1255.62991601665 1479.69309189156 959.532977061027 941.065508539108  
 PTPHBT 585.371892598422 523.073926509865 508.735412486964  
 527.139476504986 740.800822095116 514.463945278314 868.86246684338  
 1424.04009914668 725.216684507759 870.887539668967 458.953009417683  
 488.249967208882  
 PTPHBT 1027.11849332495 995.263014856158 985.637230639964 966.281849197568  
 1007.7803477458 1010.73988405469 1281.1883621512 858.742139354587  
 1005.62130301653 961.931130189779 985.087150371964 996.240188311002  
 PTPHBT 1889.05071563459 1752.50728312967 1732.52466021178  
 1876.64079464928 595.409419899436 922.877217016704 923.130629121442  
 714.052063877292 1106.21439150501 992.744093752678 826.771587455122  
 759.534249620343  
 PTPHBT 528.650794915616 508.861268738074 540.584471920486  
 420.017044147123 387.355661073935 425.969575503375 376.627801547869  
 344.529927973082 318.297819854586 918.742625270041 324.949988230276  
 519.450899933049  
 PTPHBT 277.86338481075 274.047586063773 314.095043876244  
 229.130679600654 240.994507285383 864.908449769749 637.695341427976  
 689.271009631393 583.455617065556 394.962978677736 590.142817130684  
 652.826023701545  
 PTPHBT 176.449549075475 155.343619434375 165.797170648964  
 161.463042036376 173.647320180498 142.034369454643 160.113042196058  
 147.541437871615 148.922537778634 158.404154056472 148.084844579881  
 167.776363541939  
 PTPHBT 155.63671938031 141.334394187941 157.40255559397  
 169.552424961465 165.181215117323 150.445647133244 152.124910935545  
 132.681475162386 142.135495724286 142.583801756932 160.073510173041  
 148.466658640201  
 PTPHBT 150.498954408708 145.289151849318 169.527424356913 140.137435303984  
 142.379120254855 182.235490620172 224.466829629468 190.318957029666  
 189.389457481768 229.835576260403 184.111756696658 195.256498208339  
 PTPHBT 143.745594527046 165.686655824416 147.160858915857  
 141.799236109474 179.730694272916 149.160808104789 167.620915011868  
 140.028169667777 358.975346234854 223.747350951099 139.201122725213  
 154.146962684738  
 PTPHBT 118.663847950696 130.947003916049 134.072912593456  
 113.769815606191 132.53122878527 111.826509343353 162.609829456486  
 137.778033050658 163.873355370767 131.719227272527 122.274656361883  
 212.710910778949  
 PTPHBT 142.106329280184 134.968848574511 132.282125790062  
 135.999030570565 138.145677924612 136.269445455239 133.665206343648  
 142.720769329396 133.299599411025 139.329693510525 138.664401460739  
 139.314945862113  
 PTPHBT 182.861900982333 174.890624803452 210.448904052352  
 144.840218312168 176.364184489318 154.623548525522 185.154876233931  
 140.191264837331 152.767228183775 206.521761031181 161.499923812379  
 173.488272345038

PTPN22 138.237030685795 128.050677475339 126.713610681382  
 135.173464753848 137.149156133537 133.816601264067 129.92319548307  
 143.047617455953 155.268650584431 139.121639005366 142.646570636529  
 129.397378057767  
 PTPN23 158.282899758551 172.080853336015 152.670691262738  
 158.869463014801 354.132752995385 152.447978675887 175.019580368717  
 139.776830704087 170.164668347783 161.866405026758 170.212679845194  
 152.620244087653  
 PTPN3 143.660679324057 149.061464748604 162.056622258216 132.183250916482  
 231.769926214655 180.690409026809 204.681956301306 188.079188251085  
 201.016287924499 300.199170426996 322.506898833351 210.973303650385  
 PTPN4 223.496400038284 230.161369375718 209.596792486876 259.935831886014  
 216.403542903805 286.642323413104 254.013921962363 264.779154931102  
 227.499335248402 227.033342447929 232.231236745251 288.436880408624  
 PTPN5 125.73560975196 124.632373951797 121.231939494619 128.773129597793  
 122.716563069312 125.712260481294 130.838350486331 123.256613702254  
 123.488418655586 122.376432064286 154.696686113784 123.612648219993  
 PTPN6 147.666724626127 151.191822057706 141.972403120632 141.125248464806  
 326.246702537465 176.587559615019 267.149525812834 254.013921962363  
 280.948704707655 180.085975596327 224.497348027469 229.660838239474  
 PTPN7 146.434716985396 139.131857948357 134.666505160831 147.86104992164  
 149.225754384299 150.584633044901 142.313725116274 146.669620721254  
 163.504122327429 148.861141988806 158.292581724934 146.142934874698  
 PTPN9 169.956827727468 158.699778625671 158.302977853133 183.071150926068  
 166.754995454382 163.788418732315 184.473198008234 165.031678768564  
 152.54039461337 166.32555285213 183.247396324425 194.569325586241  
 PTPRA 329.722135361491 377.353441970543 269.468453936818 358.52459123416  
 362.095074331893 316.623219008156 270.421697521366 235.997227173296  
 264.8472508692 306.677271064305 325.320888625297 286.133496092533  
 PTPRB 200.72147365413 217.125327913156 185.002106079042 224.396933003452  
 158.463444189819 251.062649517773 234.947745514175 498.180196203245  
 201.186963432715 183.214922844221 180.994249258457 188.695527267631  
 PTPRC 139.282741110499 135.134213292186 129.76141737109 128.436499050769  
 127.663578933727 130.163574198827 139.119638136874 137.326796995017  
 145.000523037022 136.089888639987 135.341892490559 133.962129094978  
 PTPRCAP 148.44261900795 160.825408895349 124.811760828557  
 145.648810303756 166.04965258862 149.350630572336 155.794309652357  
 195.400963839097 354.067771806542 146.448568700393 228.588693548447  
 137.50266393001  
 PTPRD 332.400086578723 234.370850809531 217.165036362034 197.775397831129  
 135.497033143331 138.59175751301 132.071099697667 132.381685434931  
 142.005703694973 162.642344529383 142.472724215037 139.480361732772  
 PTPRE 190.534176839652 171.51411661213 152.646642492666 159.213940274232  
 180.63469438043 276.714748212739 233.029655807246 175.551853899221  
 225.783771938969 195.547320133122 252.10470581893 300.047728281275  
 PTPRF 1057.80846320642 1280.57297272231 1122.92917004037 1396.4168898623  
 4743.19967685595 4477.54806526552 4353.66854914351 3793.02341602102  
 2847.42635118026 2988.45928881468 3712.67025366957 3930.2841381915  
 PTPRG 226.449705559354 212.890259409988 190.534176839652 219.0221768576  
 270.92671642109 196.598810934837 188.797908601851 191.445291899108  
 195.316077537716 183.735201125198 186.886677174192 195.981555981238  
 PTPRH 135.453399741892 159.115391667901 156.430981244063 158.946177055546  
 143.827500301207 126.324771800638 144.89403947454 157.754622099874  
 144.277263594387 142.637421204193 173.121618125421 153.176268095608

|        |                  |                  |                  |                  |
|--------|------------------|------------------|------------------|------------------|
| PTPRJ  | 150.71435300188  | 142.810564324354 | 149.441862883882 | 157.490138425943 |
|        | 158.295583769612 | 142.112120308118 | 168.10131060526  | 149.013011292165 |
|        | 142.77817647952  | 156.737219981981 | 157.309058982117 | 156.290018816692 |
| PTPRK  | 555.366765340014 | 524.392279804734 | 521.714719320355 | 563.490027149224 |
|        | 451.718912714608 | 371.280926727395 | 678.365575489532 | 650.0804221227   |
|        | 416.475440894731 | 523.717949503639 | 728.930140593418 | 737.650963292668 |
| PTPRM  | 420.502251256406 | 434.716530273383 | 410.002817143111 | 427.249733213787 |
|        | 732.352357321273 | 537.698489904622 | 868.40984928812  | 833.430847243676 |
|        | 645.438835606933 | 321.367338145787 | 426.548994267836 | 787.874585290601 |
| PTPRN  | 143.107570838895 | 127.325087202483 | 151.841652724562 | 147.673016541108 |
|        | 137.056500339577 | 156.105736111274 | 144.612549022264 | 144.40361834862  |
|        | 140.418010366997 | 146.233195164295 | 138.003440266411 | 142.900756181761 |
| PTPRN2 | 150.170712508944 | 138.26050964606  | 137.267307036807 |                  |
|        | 158.36796888959  | 126.316613675316 | 143.347066447019 | 136.222421297872 |
|        | 126.340955733062 | 150.333572271902 | 138.800986934663 | 155.575152212736 |
|        | 163.799748670842 |                  |                  |                  |
| PTPRO  | 143.147325939994 | 134.28095064513  | 132.955473649746 | 155.582036890436 |
|        | 135.829273398594 | 128.929244741296 | 131.144774362059 | 139.785767470943 |
|        | 185.113098620798 | 130.001889950186 | 172.045843691642 | 139.333282400639 |
| PTPRQ  | 132.584454429269 | 141.117659724704 | 138.223001481672 | 148.237980436128 |
|        | 124.522974214212 | 140.78582131501  | 154.792156982219 | 157.797222258336 |
|        | 144.411176964424 | 143.727514442914 | 153.4392054301   | 146.418147447541 |
| PTPRR  | 147.387754442307 | 164.313238416498 | 159.42746786085  | 145.43470695949  |
|        | 274.316982298975 | 953.549801897112 | 852.649997188692 | 2775.84742592713 |
|        | 371.767182305618 | 150.439715066903 | 185.617936412633 | 511.779988437654 |
| PTPRS  | 155.558839375761 | 144.477267427347 | 149.019120812629 | 145.274345879987 |
|        | 142.801645268128 | 140.485102148597 | 156.296046600921 | 148.80452641061  |
|        | 143.399877326927 | 145.68886453261  | 154.177340021162 | 144.405191855684 |
| PTPRT  | 140.496058408953 | 144.592987736094 | 135.253713075341 | 138.737332306848 |
|        | 146.871145679651 | 144.199054675488 | 135.842090777339 | 136.5680632044   |
|        | 145.882793872634 | 143.665359343809 | 154.746081871718 | 149.151791028837 |
| PTPRU  | 196.598810934837 | 223.279017022443 | 185.691922436569 | 176.810979494826 |
|        | 762.8576747113   | 400.180574613078 | 625.699971780258 | 265.670643951648 |
|        | 274.627303114477 | 171.602950766191 | 560.602047253306 | 469.794672718173 |
| PTPRV  | 137.902953501634 | 127.261349543394 | 135.550882872661 | 130.736466113571 |
|        | 117.324368138398 | 144.232318517281 | 127.036976462046 | 129.143168240589 |
|        | 132.277920991504 | 140.343790129071 | 113.184495948936 | 138.785538575745 |
| PTPRZ1 | 145.675032688915 | 132.081286801266 | 142.217762896203 |                  |
|        | 141.301503201175 | 151.273261581765 | 122.093290585838 | 128.954113816227 |
|        | 120.967523586161 | 125.091038614268 | 341.096072280715 | 128.005043478952 |
|        | 125.519298131694 |                  |                  |                  |
| PTRF   | 19087.9532735841 | 21110.9013462062 | 15053.7547401937 | 26375.3000727296 |
|        | 746.777330152729 | 929.198774489695 | 436.834825721843 | 971.99484515987  |
|        | 1571.87128697931 | 3734.705550862   | 553.368945998847 | 507.56875910742  |
| PTRH1  | 200.831877950718 | 202.314814594735 | 246.061496821699 | 225.209315195163 |
|        | 384.883635849576 | 217.560691345072 | 217.910445051307 | 272.885527139137 |
|        | 198.15257384667  | 319.490670412394 | 180.941090529551 | 209.196695368783 |
| PTRH2  | 309.283897272661 | 291.683896942007 | 345.977609212137 | 251.062649517773 |
|        | 296.721891842563 | 620.371912523332 | 584.433155497378 | 618.058496806334 |
|        | 629.197022551069 | 520.761305892651 | 403.292651623365 | 728.176339659082 |
| PTS    | 727.425595270342 | 601.997464467917 | 709.778171909457 | 471.946284490029 |
|        | 1131.96129284658 | 715.43295523922  | 664.60530723006  | 707.048754700047 |
|        | 934.546444634669 | 809.545702751155 | 854.815394943219 | 814.471143753335 |

|         |                  |                  |                  |                  |
|---------|------------------|------------------|------------------|------------------|
| PTTG1   | 206.89716102989  | 250.84781675544  | 208.045210163121 | 237.266455875982 |
|         | 593.639955546556 | 910.982557417978 | 516.892850913889 | 1086.33540858772 |
|         | 709.303384219887 | 1637.66306286151 | 282.137282466192 | 768.053694275398 |
| PTTG1IP | 2511.04500638697 | 2227.70654174379 | 2418.66999907188 |                  |
|         | 2168.58813300343 | 1031.59140059071 | 1849.21906428944 | 2087.55358504021 |
|         | 1554.16120123599 | 2111.32236867229 | 1788.35884039549 | 2390.41825815872 |
|         | 2149.13404212591 |                  |                  |                  |
| PTTG2   | 142.155463269751 | 156.114825514646 | 147.882530392424 | 154.479733759712 |
|         | 126.743579586052 | 153.126111237668 | 145.793794049657 | 129.286782862113 |
|         | 129.226815062589 | 129.767878283811 | 142.690911343704 | 133.372231702721 |
| PTTG3P  | 163.108825245937 | 188.959655155629 | 145.123845983625 |                  |
|         | 186.156006020985 | 501.005898087825 | 608.816123736392 | 404.073802241516 |
|         | 934.173273294189 | 460.807117177285 | 1277.0921553877  | 284.104619768635 |
|         | 607.805002786409 |                  |                  |                  |
| PTX3    | 110.804248212067 | 118.300797467864 | 120.450111018432 | 113.492900106468 |
|         | 104.406314027414 | 110.602406076036 | 114.77964341895  | 116.491342107103 |
|         | 111.127245394321 | 116.839796680107 | 113.470356909765 | 105.375878824562 |
| PUF60   | 1532.47920327769 | 1741.0131951509  | 1712.47877322331 | 2253.7522632414  |
|         | 3334.16277752222 | 1845.87311313269 | 1493.90578573732 | 2039.55802107872 |
|         | 3029.07443443457 | 2168.58813300343 | 1289.56069670699 | 2112.84348677276 |
| PUM1    | 1603.87451959083 | 1748.77270039774 | 1651.68171717875 | 1609.54149931375 |
|         | 1186.23169583595 | 1698.08853832248 | 1746.30519466572 | 1651.68171717875 |
|         | 1548.09554827056 | 1537.71464618832 | 1906.81344236287 | 1687.06111969368 |
| PUM2    | 956.76879975749  | 953.099915501575 | 1434.1439428394  | 864.547109080675 |
|         | 450.99430272315  | 1008.43888926584 | 853.314313182949 | 873.408431189194 |
|         | 879.301932542031 | 649.906677394861 | 1024.59845685519 | 781.208872924532 |
| PURA    | 515.929937825133 | 497.110852407681 | 449.859227376918 | 413.555310697751 |
|         | 209.33028918341  | 331.888150158628 | 270.360397503276 | 250.911817769829 |
|         | 208.666760987764 | 266.964673763497 | 298.664864578349 | 267.285998701386 |
| PURB    | 1648.22531304741 | 1512.28202818467 | 1519.38642390142 | 1586.00600118477 |
|         | 630.176145684641 | 977.999660785113 | 811.564396886535 | 764.137504481329 |
|         | 1032.11574332305 | 725.621153262924 | 902.394410348792 | 1387.90327883679 |
| PURG    | 163.726898336284 | 152.660373241584 | 166.111496598928 | 145.97512573326  |
|         | 153.059432055089 | 172.965746521132 | 158.854659281803 | 159.040409182674 |
|         | 149.17815859943  | 155.43577761798  | 165.055636629118 | 170.430478598594 |
| PUS1    | 258.4424008891   | 241.845941562418 | 261.96528977292  | 276.867974638972 |
|         | 672.862678078975 | 470.154677948419 | 461.482735533799 | 502.499539192864 |
|         | 557.214020485204 | 359.440639663655 | 423.740836541835 | 598.095370768587 |
| PUS10   | 111.286141277084 | 118.24368469845  | 117.969576809288 | 105.551878332786 |
|         | 136.44218532882  | 140.297320819858 | 127.820096020782 | 156.233573126063 |
|         | 139.159510392614 | 123.574319348191 | 140.16233428205  | 121.803676441059 |
| PUS3    | 311.544429285897 | 336.898462056187 | 341.251360936154 | 340.903961204211 |
|         | 265.110264596425 | 239.003718699156 | 276.089623957012 | 274.595218795127 |
|         | 245.153736298067 | 202.300293733922 | 349.773289724658 | 247.236004734567 |
| PUS7    | 332.343558229873 | 330.641230715217 | 312.557093674533 | 336.490076158135 |
|         | 587.54075434249  | 471.315730378641 | 358.298768623212 | 534.083703564903 |
|         | 418.062540009856 | 602.480822390671 | 345.832589037442 | 619.223672253014 |
| PUS7L   | 174.962380276394 | 190.76537287329  | 223.496400038284 | 207.864808684047 |
|         | 192.640717683236 | 219.228720772236 | 225.275049011909 | 201.593025256991 |
|         | 179.389797867379 | 201.517356610591 | 188.431244390961 | 179.211502448703 |
| PUSL1   | 138.50032459657  | 148.25001336038  | 132.54355871539  | 143.40955339735  |
|         | 474.517750753745 | 222.243523614518 | 224.118739978257 | 198.088834624665 |
|         | 205.742386129597 | 227.847614397311 | 223.107391048316 | 223.311817085871 |

|        |                  |                  |                  |                  |
|--------|------------------|------------------|------------------|------------------|
| PVALB  | 121.492896642899 | 140.659276788384 | 148.794293762142 | 128.077692981235 |
|        | 146.867740388881 | 145.594378536072 | 134.224781719944 | 163.074919710259 |
|        | 141.099781722697 | 133.07218865002  | 565.509446660206 | 521.625146077176 |
| PVR    | 189.472541628897 | 178.955938825556 | 148.96493117884  | 206.715020025609 |
|        | 237.601064742453 | 165.686655824416 | 159.584350289413 | 162.861320877227 |
|        | 175.774461934758 | 175.679405338399 | 159.716066475442 | 160.099731578122 |
| PVRIG  | 122.816049839521 | 120.964862799634 | 119.301746097298 | 110.727742629085 |
|        | 123.683553177379 | 124.522974214212 | 114.032874859062 | 151.592787806315 |
|        | 220.113261580385 | 122.909152047474 | 160.082087242964 | 121.926377140115 |
| PVRL1  | 144.636277619886 | 145.056914913573 | 139.14544832776  | 131.722397988741 |
|        | 313.351441953859 | 173.38031514498  | 165.476670465739 | 164.185346950306 |
|        | 163.586549438955 | 198.338416756432 | 169.417764098848 | 221.471811658459 |
| PVRL2  | 237.01460308334  | 229.130679600654 | 178.966169998125 | 215.219246394594 |
|        | 511.670320118232 | 278.095939961034 | 263.250833727291 | 207.993943398697 |
|        | 327.062810389635 | 221.322724563472 | 229.77428612216  | 241.845941562418 |
| PVRL3  | 678.937151822411 | 525.789451405743 | 561.761160223609 | 549.460612060753 |
|        | 284.321253087512 | 296.962992349662 | 241.845941562418 | 299.513950278952 |
|        | 309.155070674445 | 290.541184606565 | 219.661502916874 | 237.521746704115 |
| PVRL4  | 128.020911959353 | 151.770791549511 | 120.252164075308 | 106.719519490874 |
|        | 337.39574303968  | 335.533053221675 | 234.661864595717 | 179.779007442837 |
|        | 244.101521795539 | 249.590923098575 | 366.564822549834 | 250.626556981376 |
| PVT1   | 138.136901441896 | 147.191114491117 | 148.803188053248 | 146.548348470748 |
|        | 141.683298500736 | 179.593817076317 | 147.082068348591 | 156.037150880384 |
|        | 155.660302399877 | 173.816408146725 | 161.937384157098 | 178.52221226882  |
| PWP1   | 769.958422740085 | 718.871732206362 | 974.544773560873 | 625.544719251096 |
|        | 629.707646271678 | 1176.62418139379 | 1046.13353853089 | 928.151632070573 |
|        | 986.972987865318 | 1275.43768532088 | 876.783710734594 | 1071.47374315822 |
| PWP2   | 136.935498266723 | 126.322527679273 | 132.098421212796 | 118.863150637476 |
|        | 152.237183848896 | 149.419308407564 | 143.422419261603 | 156.911538642765 |
|        | 162.422173095045 | 161.050438117555 | 190.736796322054 | 163.340435089911 |
| PWRN1  | 128.967855397644 | 120.48691656248  | 136.120813399579 | 141.81391138301  |
|        | 154.894196413558 | 131.479997342133 | 156.248684477916 | 136.489566741917 |
|        | 179.354796119133 | 127.271423859953 | 211.555248754731 | 150.148902196995 |
| PWRN2  | 144.642717750351 | 140.163936299053 | 148.504996616452 | 137.969750384554 |
|        | 137.689158155552 | 138.655815405894 | 142.33269270703  | 129.880696706381 |
|        | 136.475652722007 | 131.560971848628 | 135.726760147904 | 127.166821363722 |
| PWWP2  | 140.304810288752 | 162.861320877227 | 155.488346781292 | 164.970438494223 |
|        | 261.639437655633 | 158.882535865069 | 162.320894555337 | 171.884800118791 |
|        | 161.316521450944 | 145.906601611338 | 214.52087460757  | 205.765822478178 |
| PWWP2A | 252.365946808078 | 228.270158363878 | 209.684346388892 |                  |
|        | 227.847614397311 | 166.835922279372 | 192.752224665459 | 178.572212478544 |
|        | 191.692830869809 | 174.448910958935 | 198.597176657619 | 225.130011390856 |
|        | 188.252507246148 |                  |                  |                  |
| PWWP2B | 225.664432111551 | 254.235762677639 | 211.468099571442 |                  |
|        | 292.746711619565 | 829.126529857044 | 322.099431638246 | 361.082957133644 |
|        | 370.678040372273 | 297.368197598038 | 260.045018348182 | 598.924339094496 |
|        | 549.162299481184 |                  |                  |                  |
| PXDN   | 1281.9073569335  | 1372.63540073207 | 1112.4055726239  | 1648.22531304741 |
|        | 196.345065354654 | 247.528753010193 | 181.400788152988 | 219.171591031864 |
|        | 348.848550937417 | 900.039744829725 | 272.854435771465 | 318.971509860209 |
| PXDNL  | 142.137885203233 | 129.497266827284 | 139.380610974147 | 130.143953880391 |
|        | 134.614988219821 | 134.011746666371 | 135.193659028591 | 127.610304071204 |
|        | 136.316003989725 | 133.970510683179 | 133.077760160486 | 143.488761023636 |

|        |                  |                  |                  |                  |
|--------|------------------|------------------|------------------|------------------|
| PXK    | 204.161375686761 | 185.405774238391 | 205.381840116054 | 202.819949307954 |
|        | 186.345823604119 | 222.086635504858 | 184.426874913406 | 183.905926269285 |
|        | 177.379186278216 | 192.954269340616 | 174.881557472722 | 189.94130405123  |
| PXMP2  | 193.98814423456  | 193.674681547989 | 231.796421262015 | 201.383739902873 |
|        | 458.33221423434  | 272.968792195442 | 328.826483579278 | 212.669156800241 |
|        | 302.945860276233 | 322.778260588465 | 213.301947003462 | 341.197826517049 |
| PXMP3  | 235.961605948276 | 215.47323777134  | 285.05846406041  | 191.937607311711 |
|        | 277.000882284125 | 361.218491712891 | 283.645434184168 | 319.560819487616 |
|        | 282.47352481715  | 333.822167152866 | 328.33387481068  | 246.63579788514  |
| PXMP4  | 188.181647474317 | 187.443940151794 | 199.637257550762 | 198.390247605355 |
|        | 170.522853717911 | 259.338947392465 | 186.460034745907 | 192.789886894821 |
|        | 181.85552254233  | 163.267148547147 | 182.919385608842 | 178.542247857251 |
| PXN    | 331.795832780176 | 319.128582107184 | 278.385151185788 | 375.767528676937 |
|        | 372.475112554793 | 209.960795065047 | 268.78904911703  | 204.183472655276 |
|        | 233.047541132048 | 190.843795579234 | 322.889296658955 | 227.441436540742 |
| PXT1   | 137.634298014431 | 134.816810619174 | 157.361421272816 | 140.388212037661 |
|        | 150.717996520257 | 141.269923271838 | 153.934872807607 | 147.928629511539 |
|        | 161.640122360448 | 135.254996386778 | 127.884750925048 | 138.102654893864 |
| PYCARD | 246.492735271771 | 263.800363357443 | 183.115511373872 |                  |
|        | 250.602978521808 | 364.964572587289 | 456.530337997907 | 710.003412772888 |
|        | 403.208138816247 | 444.082440002333 | 1019.627634011   | 909.020708316287 |
|        | 1029.09818399518 |                  |                  |                  |
| PYCR1  | 142.405569257901 | 143.215828010442 | 145.952759497544 | 154.524588318927 |
|        | 453.875259610173 | 217.86728342043  | 197.740912476527 | 194.352807599399 |
|        | 158.779261405573 | 160.799950553311 | 147.592770523507 | 173.121618125421 |
| PYCR2  | 603.764427348016 | 638.393099392849 | 670.097523566652 | 744.523059417351 |
|        | 1118.86225415732 | 901.197085099854 | 969.360864006371 | 489.528040775004 |
|        | 669.731546951281 | 494.175437345451 | 1005.62130301653 | 1147.96742431386 |
| PYCR1  | 127.139903623331 | 141.681266095578 | 148.607885635446 | 144.724040494873 |
|        | 215.453915231774 | 145.758423590784 | 149.808222023726 | 184.25384366282  |
|        | 157.709832297666 | 150.019181654237 | 162.203570429542 | 155.319717753912 |
| PYDC1  | 132.297716337104 | 138.395943168158 | 150.28169442832  | 157.77047742735  |
|        | 142.163834995141 | 141.492458250787 | 130.887769728442 | 146.323776429268 |
|        | 140.029808783762 | 135.206755687105 | 130.056727701826 | 146.125125252096 |
| PYDC2  | 130.970694919879 | 133.014551645069 | 141.345379144177 | 141.88072888667  |
|        | 137.694556514044 | 133.006192351471 | 130.06068534054  | 145.511473738224 |
|        | 128.984613946021 | 131.619951110473 | 129.307025798583 | 137.210805338701 |
| PYGB   | 5467.84611694564 | 5437.78386044638 | 3684.05513498098 | 8292.04796307133 |
|        | 1175.27165286568 | 536.805979562807 | 362.581768268116 | 375.131728190867 |
|        | 471.510683045651 | 702.981741565482 | 530.561387049511 | 484.131020584378 |
| PYGL   | 465.54817048856  | 479.138177792954 | 484.028175202673 | 280.337475979102 |
|        | 474.216057978384 | 530.969825236996 | 1257.32413345748 | 733.648333788712 |
|        | 416.546844844021 | 2355.29862638453 | 2578.85391480563 | 982.367000148189 |
| PYGM   | 281.53843450593  | 353.912654262209 | 245.723316636363 | 605.040026490154 |
|        | 146.882746173951 | 127.631770516132 | 130.25146185271  | 128.763176477983 |
|        | 130.110413621436 | 136.995866452787 | 152.224281847792 | 129.095469955392 |
| PYGO1  | 123.913203953936 | 121.830137285032 | 119.469328303796 | 120.706421084476 |
|        | 132.829401072883 | 133.827296071709 | 134.455623159793 | 125.126100642395 |
|        | 134.325520377207 | 123.403099206878 | 134.712935556892 | 125.724143659093 |
| PYGO2  | 206.715020025609 | 204.283030911897 | 193.358728044565 | 295.607161318725 |
|        | 298.256131536504 | 163.336324451735 | 165.041296694491 | 172.491604217899 |
|        | 194.819597436776 | 140.699287635171 | 181.148062201932 | 169.45559708224  |
| PYHIN1 | 153.041407358576 | 145.090639086338 | 138.873925577739 |                  |
|        | 136.097571072206 | 134.491232148834 | 147.78095608696  | 147.919058170753 |



|         |                  |                  |                  |                  |
|---------|------------------|------------------|------------------|------------------|
|         | 156.66832364923  | 173.082167545676 | 148.153776704837 | 150.696963699371 |
|         | 153.011923016494 |                  |                  |                  |
| PYROXD1 | 183.795632040455 | 132.8310947234   | 165.2958475168   |                  |
|         | 133.796029401157 | 159.588575526536 | 171.202766078337 | 163.352317556107 |
|         | 191.924177620803 | 174.727439318223 | 225.423403713718 | 170.725486814469 |
|         | 187.686326872667 |                  |                  |                  |
| PYY     | 136.539130156863 | 123.93800397666  | 133.058788697693 | 136.410841327254 |
|         | 134.403789206552 | 141.412317125776 | 134.364838071696 | 137.357339430515 |
|         | 141.239354296152 | 140.513291662274 | 144.654765322941 | 136.578058206829 |
| PYY2    | 128.556280049403 | 134.620896927473 | 135.776154891006 | 147.376482709004 |
|         | 141.37694311902  | 135.984077601778 | 132.220398477217 | 150.072005848234 |
|         | 142.000874773182 | 142.19728670565  | 118.514618614167 | 135.168792286819 |
| PZP     | 142.448384713937 | 162.488819873513 | 165.41729888767  | 139.14544832776  |
|         | 150.820808770853 | 141.359142214228 | 142.752536416014 | 153.697775290962 |
|         | 145.632060621034 | 139.835983835267 | 144.946362772133 | 138.414916506716 |
| QARS    | 2753.89649259242 | 3298.73393277409 | 2979.27692778783 | 4255.59773503364 |
|         | 5955.10816224456 | 3277.24948092771 | 4477.54806526552 | 3501.86788138647 |
|         | 4562.75659565027 | 3463.23822434026 | 4457.64479507833 | 4103.06565237121 |
| QDPR    | 745.482863218223 | 723.428294037428 | 729.202002368627 | 678.365575489532 |
|         | 765.333633142088 | 470.578335285993 | 696.131296166255 | 656.867138022837 |
|         | 361.829819621662 | 601.997464467917 | 341.714401872192 | 560.757496975779 |
| QKI     | 157.912864169081 | 141.678529125136 | 155.124158030085 | 139.825088162247 |
|         | 143.426053070219 | 147.734708927825 | 154.291717784335 | 146.503431281242 |
|         | 153.731233276485 | 157.997750997487 | 146.392657608076 | 160.6823824476   |
| QPCT    | 163.873355370767 | 175.165305179665 | 199.327939161502 | 181.157738347957 |
|         | 159.775479686193 | 222.134519361117 | 215.532132200821 | 426.364663722264 |
|         | 292.28857006885  | 193.028341755594 | 552.167699318911 | 389.800620731411 |
| QPCTL   | 155.511086289504 | 173.816408146725 | 187.997940126066 | 139.902610126952 |
|         | 206.73292907905  | 178.130223302924 | 164.935120145905 | 162.664254855131 |
|         | 181.412790232996 | 149.693559841189 | 151.121293928309 | 160.778296470857 |
| QPRT    | 263.250833727291 | 328.486476842582 | 216.403542903805 | 364.527677995774 |
|         | 862.669120338424 | 156.589829166493 | 197.618757939729 | 580.164288826741 |
|         | 573.644925180854 | 198.701991021316 | 480.101253056873 | 136.03581843125  |
| QRFP    | 113.460835359833 | 123.45004246675  | 119.040642659337 | 114.384296185446 |
|         | 120.752194675024 | 109.30275288389  | 114.721282552636 | 116.263405190786 |
|         | 112.790552379447 | 119.498312996987 | 132.32633643811  | 126.195222228248 |
| QRFPR   | 7308.57540715512 | 7342.79622458743 | 7245.25086222102 | 6652.21610967461 |
|         | 875.38834441246  | 6091.9840719327  | 2537.90501983425 | 4477.54806526552 |
|         | 3277.24948092771 | 2684.69013589621 | 3136.27991502603 | 3328.99028463277 |
| QRICH1  | 316.801725268792 | 331.164053277361 | 344.737964092526 |                  |
|         | 354.922901990615 | 453.457361487577 | 361.768552564027 | 387.827718022473 |
|         | 324.346723939622 | 447.521645706162 | 347.147961254829 | 397.153801851621 |
|         | 354.263934274937 |                  |                  |                  |
| QRICH2  | 127.04953162892  | 125.460535433764 | 107.580425848009 |                  |
|         | 118.192302821514 | 131.397850276558 | 117.81168010976  | 121.281990195113 |
|         | 131.314766140505 | 116.19219007097  | 121.464383202986 | 147.176801913145 |
|         | 117.803508098322 |                  |                  |                  |
| QRSL1   | 115.884253217495 | 137.706893763747 | 132.031693838834 | 137.938310376106 |
|         | 127.365142833355 | 142.960875909369 | 154.657316209848 | 127.58382536792  |
|         | 140.964208731587 | 133.281505040209 | 157.87020867396  | 140.194414869595 |
| QSER1   | 142.354731066206 | 155.410704148925 | 149.630481387506 | 141.70844587896  |
|         | 147.937679308903 | 135.175806654971 | 159.203584692924 | 141.42859050659  |
|         | 147.766043861937 | 153.189490068047 | 148.560326703328 | 150.126627487419 |

QSOX1 1685.33737186733 1274.39152410752 967.123240442957 1010.73988405469  
2087.55358504021 571.136519973808 967.123240442957 816.580880338838  
617.474181543858 661.826149512811 1138.00644332379 714.91842349236  
QSOX2 186.625452120269 204.637887777803 209.54573978355 196.566937667522  
228.499052416183 217.125327913156 175.693873820963 211.572396862776  
252.655315526015 211.995890899864 197.443711199904 195.447966116819  
QTRT1 282.870785313621 261.251965523684 283.918434443669 289.164969943385  
299.568830444875 277.501071684448 282.244214637625 264.273245283343  
236.326943078666 255.305647212135 246.288681426405 287.287337931982  
QTRTD1 209.070372320593 204.616225498655 206.376365685112  
233.59297160203 234.322989368622 325.642275889649 268.406778092906  
306.232249422327 352.418229893699 239.148333781084 259.72035004624  
304.679197422439  
R3HCC1 547.367381020623 601.640387246951 730.042712083388  
713.525134497596 652.429025114523 497.411169898778 709.136137559152  
513.816017871024 562.711562649704 623.409211766224 572.049540360134  
522.400055538966  
R3HDM1 217.715143869654 196.117609477292 242.019489058244  
222.526610842047 225.890195278753 216.903719298575 202.44778603643  
220.533113603343 213.26158748941 241.706645643141 208.14618424983  
199.327939161502  
R3HDM2 226.763252784108 223.373877165342 237.825857080173  
228.739556788924 224.6588173737 219.996410908721 264.383922859446  
218.433524126584 250.766180970907 194.686527131656 229.594081405784  
215.673878830563  
R3HDM1 135.571239294086 133.340152756136 144.78971417658  
142.553175839278 131.836036241459 123.391298926957 132.834433153076  
127.891997005285 135.556943919872 134.356796881432 152.702847643082  
134.499588539919  
RAB10 2295.16438420175 2712.07480130502 2590.80821234237 2316.49886419499  
2986.6208659209 5467.84611694564 3073.40543048878 4359.98094976179  
3304.82581034038 4938.42484385053 2662.43181510326 3989.14883668905  
RAB11A 2193.376951552 2146.4265920569 2255.92551080483  
2037.96470181871 1772.75453735112 4095.76073123843 3033.50962589321  
2941.69058596077 4095.76073123843 2332.98074920207 4836.4008757421  
4477.54806526552  
RAB11B 128.5581535393 134.48825480809 136.015561289357  
136.263658288289 156.467759630936 137.11719450122 130.265055842999  
136.029898048127 130.199581370385 140.091378604453 158.213784310645  
139.828781354865  
RAB11FIP1 250.542405852865 339.598452080917 342.096409626768  
266.347965690851 4697.94415026712 2605.13680290987 1001.92763014266  
913.934874451961 1307.96033038529 548.014025722956 1015.10079945997  
936.957730361063  
RAB11FIP2 477.275332763887 484.230510636533 559.236012019639  
482.592481827722 188.417078622503 297.544216175512 292.468585109951  
312.286788541158 276.434192872962 227.375773052577 162.082166316002  
333.822167152866  
RAB11FIP3 1206.59866455529 1116.19403476786 1295.27257578314  
1537.71464618832 936.221322010828 714.6859666834 1093.85316636801  
1003.93455977232 898.877732360841 694.288215755716 931.598413783099  
686.028214419557  
RAB11FIP4 124.05019986924 126.566165822427 120.574820369421  
121.675007387533 751.077307018319 250.085444708918 211.035617136177

|           |                  |                  |                  |                  |
|-----------|------------------|------------------|------------------|------------------|
|           | 348.506289278042 | 331.684298221133 | 130.031303483631 | 319.966785546419 |
|           | 159.466972602203 |                  |                  |                  |
| RAB11FIP5 | 488.249967208882 | 441.578261054602 | 362.376153348015 |                  |
|           | 434.390613381746 | 560.913732951675 | 373.096629378654 | 383.10686624119  |
|           | 322.576886792502 | 220.330477277988 | 542.883453307    | 251.959823608766 |
|           | 329.82030842286  |                  |                  |                  |
| RAB12     | 185.765000029242 | 181.261666651301 | 183.081450609516 | 168.634534857593 |
|           | 171.345989796519 | 257.602370597316 | 199.746775121317 | 180.179981672095 |
|           | 205.322733011516 | 177.393812005949 | 232.960832410426 | 234.370850809531 |
| RAB13     | 765.128667448261 | 793.501244347257 | 633.762608454521 | 713.832153334389 |
|           | 390.501797367707 | 534.920870202582 | 637.30300219673  | 450.566031840493 |
|           | 472.961857076681 | 518.760142491104 | 275.609716327452 | 640.90860274227  |
| RAB14     | 181.467708718758 | 170.614129599775 | 161.412427590994 | 151.132586978278 |
|           | 180.719868519867 | 171.671895682052 | 163.104822161892 | 182.873752254411 |
|           | 180.881464829981 | 168.422826952385 | 211.736398352592 | 164.659092629962 |
| RAB15     | 144.073739611496 | 203.675655444583 | 151.823845684041 | 140.081280065913 |
|           | 861.516925304722 | 386.379891865411 | 457.411248351795 | 330.641230715217 |
|           | 462.437471715008 | 144.231539210695 | 903.503768217033 | 485.576566972696 |
| RAB17     | 149.874424976813 | 167.106870400592 | 149.247514768446 | 137.910618360623 |
|           | 521.714719320355 | 539.471166362469 | 634.356322976353 | 305.615423200097 |
|           | 780.105135529728 | 355.048838683854 | 719.628501451187 | 536.067857235731 |
| RAB18     | 248.562843471699 | 240.915496717526 | 245.110761598207 | 192.627266049516 |
|           | 223.601312199935 | 208.385295246155 | 222.526610842047 | 178.751706380632 |
|           | 195.10410545445  | 216.805365763069 | 232.046814892685 | 211.786963444117 |
| RAB19     | 153.128027266281 | 127.03153185998  | 128.137646789236 | 140.538020869886 |
|           | 130.069789939568 | 151.543678860049 | 130.66511389864  | 150.70383460714  |
|           | 138.514356748249 | 150.003399000079 | 121.103620738719 | 144.470642732973 |
| RAB1A     | 377.661589835101 | 381.867665449509 | 348.36178568457  | 362.095074331893 |
|           | 234.661864595717 | 479.261755380872 | 366.408565514304 | 450.99430272315  |
|           | 355.290621188435 | 370.140588087649 | 338.326304736048 | 377.89330639683  |
| RAB1B     | 224.805404798696 | 242.440966395613 | 242.570588364106 | 261.500728878974 |
|           | 419.047108206042 | 220.345184229077 | 241.917371866481 | 220.098071755353 |
|           | 197.298982267459 | 295.571900619972 | 283.645434184168 | 312.808044035117 |
| rab1c     | 152.721146962124 | 148.945466917496 | 143.137158027738 | 140.586497829504 |
|           | 143.277771142501 | 129.786941565218 | 123.22295112139  | 136.660600727111 |
|           | 144.445496145045 | 145.029298288869 | 144.96670085147  | 150.552186000149 |
| RAB20     | 124.629877200816 | 135.161667673191 | 135.335107344583 | 129.495680232567 |
|           | 221.849661343124 | 225.238369884803 | 186.309367281625 | 162.786351190659 |
|           | 187.769988580599 | 139.694950277714 | 187.529556428609 | 234.28146549561  |
| RAB21     | 573.846138124455 | 569.353661326724 | 689.821785472506 | 482.226889092547 |
|           | 413.398641688413 | 439.394914369983 | 516.177596584059 | 2078.76377557352 |
|           | 557.026028810367 | 771.512332113075 | 516.577357935963 | 467.777995124655 |
| RAB22A    | 815.388288623756 | 768.053694275398 | 775.382397816601 |                  |
|           | 674.905270154355 | 542.379137999196 | 1355.07170485397 | 1201.82026045778 |
|           | 498.641091757363 | 646.117381960716 | 1257.32413345748 | 587.893636997642 |
|           | 853.314313182949 |                  |                  |                  |
| RAB23     | 2599.421026133   | 1790.53556140959 | 2203.82462320864 | 1906.81344236287 |
|           | 246.95071325085  | 202.819949307954 | 238.782040902727 | 207.831299397177 |
|           | 268.264885392368 | 309.423768054614 | 176.533058719908 | 179.55905250703  |
| RAB24     | 373.096629378654 | 385.750371084    | 373.860920943049 | 473.260534978556 |
|           | 239.572670410818 | 207.864808684047 | 347.73629731446  | 285.798047501616 |
|           | 288.370985514978 | 455.124190541055 | 281.618175110153 | 333.970844203158 |

|        |                  |                  |                  |                  |
|--------|------------------|------------------|------------------|------------------|
| RAB25  | 179.810507975486 | 340.239348689005 | 224.869569455052 | 163.470025318612 |
|        | 1542.35486950856 | 1892.8338612507  | 2744.77453865893 | 2741.71904421456 |
|        | 1965.13870083236 | 2751.75479578587 | 3371.24667467952 | 4671.10203385528 |
| RAB26  | 118.909153405102 | 120.571074646092 | 126.191057198995 | 117.123891785437 |
|        | 174.192898940601 | 120.827732270626 | 128.883828419932 | 150.809693773343 |
|        | 129.123522999226 | 138.242983316259 | 149.390481900424 | 121.796519488793 |
| RAB27A | 181.593291870136 | 182.074569356713 | 192.475309217696 |                  |
|        | 197.357728220717 | 147.313494489487 | 152.188770978528 | 151.717558541683 |
|        | 144.779146672553 | 172.197077149985 | 160.478519202775 | 151.905534823403 |
|        | 153.44628692569  |                  |                  |                  |
| RAB27B | 133.088758771353 | 127.844624093148 | 130.198147836925 |                  |
|        | 129.265788005518 | 131.732416355002 | 144.748564682545 | 137.670655293096 |
|        | 140.099069486005 | 133.78629612147  | 141.954467306745 | 141.94585838352  |
|        | 121.653754668804 |                  |                  |                  |
| RAB28  | 170.035994634371 | 165.320977593677 | 194.430896269275 | 171.722839172783 |
|        | 159.289148392284 | 214.050918459805 | 219.288597751645 | 193.428733288774 |
|        | 212.291528248457 | 215.84044779962  | 183.443006525616 | 223.84997313236  |
| RAB2A  | 298.028932089399 | 302.637859140061 | 316.081825144651 | 247.307128520272 |
|        | 793.300636780035 | 550.434931878586 | 563.140382824149 | 552.962676093514 |
|        | 850.882404546093 | 785.599211190431 | 624.638115878703 | 563.011988279542 |
| RAB2B  | 1713.93035637146 | 1431.52979384867 | 1698.08853832248 | 1336.15622439522 |
|        | 503.285430318683 | 1049.52258147141 | 922.50743596248  | 1373.08023518911 |
|        | 992.320202251161 | 1263.64725236472 | 1715.51071085304 | 1400.81554054664 |
| RAB30  | 175.302832015761 | 149.153827025981 | 156.920867019849 | 176.650953513413 |
|        | 157.70581824787  | 131.757695616207 | 150.904618960507 | 171.455216889348 |
|        | 157.742948919213 | 168.991551886143 | 166.14867551435  | 144.217621961908 |
| RAB31  | 3938.94050658589 | 2444.835635949   | 3354.38704439295 | 2200.94974896771 |
|        | 379.102958448288 | 761.89271251455  | 421.459312180809 | 940.008438825765 |
|        | 865.800709006332 | 1963.23068846837 | 851.633522004342 | 569.47446215213  |
| RAB32  | 578.947889414387 | 429.922530506572 | 441.435444003241 | 412.582051585078 |
|        | 619.635734567779 | 476.495282784602 | 444.584594376357 | 330.321113875647 |
|        | 419.690542859168 | 651.43207839949  | 316.623219008156 | 313.099028594073 |
| RAB33A | 158.650226303456 | 165.041296694491 | 171.11282933168  |                  |
|        | 186.866029149035 | 142.185345091219 | 144.910863590251 | 158.784190231286 |
|        | 160.423982411027 | 166.232856234879 | 133.900005368973 | 149.851792558427 |
|        | 164.99860393383  |                  |                  |                  |
| RAB33B | 789.043948009585 | 727.114956464515 | 439.394914369983 |                  |
|        | 737.650963292668 | 189.136114953249 | 263.295012964476 | 258.695920967489 |
|        | 244.797792477941 | 224.424524191566 | 213.7326050342   | 287.751093664085 |
|        | 185.843639043466 |                  |                  |                  |
| RAB34  | 737.843412273272 | 602.371843434907 | 740.800822095116 | 747.804958601763 |
|        | 179.509758601636 | 643.660739343159 | 777.410297605252 | 231.796421262015 |
|        | 442.220572301795 | 330.703588385626 | 149.936366672592 | 561.379619105609 |
| RAB35  | 424.855168311509 | 442.12886967939  | 435.183433729519 | 453.17378995737  |
|        | 567.869601934138 | 335.059844742031 | 346.996310517446 | 256.326661031361 |
|        | 365.97903110365  | 366.007451523992 | 551.086785904249 | 377.024120035829 |
| RAB36  | 142.211357324461 | 139.657182434153 | 126.856038484436 | 140.393624985807 |
|        | 244.849563563729 | 129.092409995043 | 170.473956720945 | 124.738217731488 |
|        | 200.264756078778 | 103.772221923105 | 188.724274062294 | 156.723502568908 |
| RAB37  | 173.082167545676 | 163.829218786716 | 149.073650082048 | 153.803195520637 |
|        | 150.952264779196 | 146.997906452598 | 144.724040494873 | 148.577336081778 |
|        | 155.183210738478 | 149.042693712098 | 144.708780756278 | 151.231685705236 |

RAB38 219.638478100747 221.18757533703 196.169988112042 207.651142295123  
742.517302567436 405.322847383739 1622.17491781572 363.777212750779  
276.5177779623 2859.94396089224 733.648333788712 476.168679880357  
RAB39 113.924310293916 121.522634801124 118.195512252508 118.331237160995  
132.822351718257 118.963119420175 127.669334230458 111.65024009102  
115.502679218125 118.689408983786 118.547605249191 125.513881890201  
RAB39B 109.416512252532 120.53428198263 115.572088632106  
118.134614195753 105.952640312359 112.832122823829 99.7487411813724  
116.632612170106 112.916256784817 113.970633751086 105.976284291356  
114.488760619745  
RAB3A 138.266328639467 150.439715066903 134.936025073531 131.659187927328  
131.079066781806 134.257928609741 137.269267022826 148.079107235035  
137.654833215154 139.825088162247 137.672798701643 173.532300173223  
RAB3B 135.193659028591 126.368170959337 121.483610947845 126.301178976594  
256.237185590901 164.472980733552 134.374551571013 178.745112514526  
139.823017208731 118.679664392666 179.30729544595 139.85010721496  
RAB3C 139.583514773196 153.774548290902 131.93683726912 163.833372505148  
132.352268262631 155.734509841719 147.70836747108 134.712935556892  
125.189588215659 150.599425944486 131.486917325752 143.705475208192  
RAB3D 128.0366252162 145.962664629275 127.132970760907 127.903393519351  
149.108582827136 124.29420915051 137.170666175895 129.599661790972  
121.679013405559 170.091913791176 146.298733090986 132.653795458388  
RAB3GAP1 2303.0998502001 2456.36776585765 2185.46850787298  
2215.43744802035 548.138527647594 887.147199303294 827.863789600981  
1065.74382494535 1084.5920943349 1510.77099418802 1165.95924778817  
1110.43791444289  
RAB3GAP2 525.515169794593 609.504365141529 517.020259129974  
513.428413503031 292.693830444839 702.460234202652 599.52440136406  
409.743899750699 569.656573915709 553.757847979529 463.091387717305  
959.126054626181  
RAB3IL1 795.037968409957 930.704688414069 537.216291942143  
993.774175699873 225.99848688881 151.540744107423 172.186384820044  
185.258354905314 225.75155298452 260.921177985439 160.234704406302  
147.085006263446  
RAB3IP 357.259935567823 343.571296297462 391.782120640025  
249.379605914827 976.360310504918 3052.86038628748 1162.8644618472  
4030.42725798136 1448.64875525408 916.4187683687 904.733257358133  
1659.80909859514  
RAB40A 159.413535577361 127.58382536792 145.610045243277  
146.709967739596 142.469353808346 162.793214727475 148.072816925413  
145.791950392049 159.534017722536 185.591700082272 158.92254744379  
154.469132478321  
RAB40AL 130.483765953389 106.437660157036 111.687524205412  
112.75167046116 112.729141678141 112.476111928742 106.204350278634  
117.428152859221 116.011005504201 110.448948495323 123.400143662218  
123.81177057082  
RAB40B 844.778755052304 901.644194512187 773.057095787974  
875.38834441246 428.462270756201 534.745066397679 883.702573960415  
1099.80705776268 430.833137328233 473.529519031797 635.234445318087  
578.947889414387  
RAB40C 986.65554605455 1166.86593572716 1518.13775377335  
1303.33810980467 3552.78712528922 1801.74467005923 2974.04694562902  
2399.88695085752 1776.38646235135 1596.33832632698 1630.1630053946  
1825.10168716051

|        |                  |                  |                  |                  |
|--------|------------------|------------------|------------------|------------------|
| RAB41  | 120.686906898624 | 110.910693353871 | 121.316836274255 | 116.252227301161 |
|        | 127.224081416987 | 118.122186617611 | 121.747622617011 | 118.173752075833 |
|        | 117.805556408194 | 126.402405227897 | 145.887262601586 | 115.524441144063 |
| RAB42  | 142.163834995141 | 141.588478913204 | 150.331324340476 | 129.208429861964 |
|        | 154.562761981868 | 151.295855278218 | 152.001155788544 | 139.780552911146 |
|        | 146.062050819539 | 148.739888930189 | 162.819608252826 | 166.932757191847 |
| RAB43  | 147.446381217887 | 147.433388299999 | 145.054873480806 | 149.040720727554 |
|        | 218.794112567823 | 162.208028489943 | 164.661445411833 | 161.26917182967  |
|        | 192.224242967539 | 171.338371572269 | 177.450674276588 | 163.432972512188 |
| RAB4A  | 247.806371601734 | 215.718714189719 | 351.292682758926 | 207.815226999953 |
|        | 277.86338481075  | 236.548439331855 | 256.795346052751 | 179.880812358974 |
|        | 265.866465528654 | 262.196293231028 | 187.50236021149  | 317.163768837813 |
| RAB4B  | 235.133284525241 | 227.144441241869 | 236.676029292922 | 269.927694984528 |
|        | 444.082440002333 | 270.92671642109  | 251.324685584062 | 289.724297749772 |
|        | 293.317880637519 | 257.100909006193 | 231.314944217099 | 282.797367565702 |
| RAB5A  | 351.448985413528 | 344.070947256963 | 544.669441360594 | 258.830885826237 |
|        | 419.690542859168 | 469.714826990063 | 638.393099392849 | 884.248568386012 |
|        | 670.571106793204 | 694.429144766435 | 409.691865300362 | 570.533103778482 |
| RAB5B  | 3396.40593844715 | 3545.8833678963  | 3749.80462365748 | 4536.46344538492 |
|        | 1881.90353127141 | 2263.73444150082 | 2718.440149645   | 2856.14739820295 |
|        | 4118.58682247781 | 2456.36776585765 | 2553.92770795014 | 2076.51786803222 |
| RAB5C  | 440.319777672273 | 512.184962338131 | 377.538276846051 | 548.288640768746 |
|        | 1055.22233969473 | 566.647927867646 | 643.306565600931 | 757.877066703516 |
|        | 656.867138022837 | 439.394914369983 | 852.099019968701 | 552.662610888399 |
| RAB6A  | 329.023836559229 | 355.443758121675 | 340.301980622308 | 326.055727207966 |
|        | 325.493177980483 | 358.217145707718 | 273.75192868583  | 254.188830191845 |
|        | 261.171723011396 | 385.463209972694 | 367.825328832492 | 277.285526811736 |
| RAB6B  | 149.042693712098 | 162.870317933909 | 149.317146997809 | 151.470844748137 |
|        | 146.114159600635 | 162.466301774088 | 134.927386619223 | 184.041062308263 |
|        | 137.395895014456 | 138.62994237184  | 159.563866056798 | 143.167719135403 |
| RAB6C  | 128.244549276386 | 134.831550401848 | 123.424145707079 | 135.232878188098 |
|        | 114.644722005728 | 121.824805374887 | 129.072173761566 | 126.919867899174 |
|        | 120.13937451914  | 123.756349408641 | 122.804934452095 | 123.119524624735 |
| RAB7A  | 3222.23985545506 | 3968.38723079061 | 3090.52810501797 | 3575.60827968852 |
|        | 1665.14066952917 | 1738.96798001895 | 2358.46955614953 | 2157.50118108142 |
|        | 3378.126661761   | 3636.59530016939 | 2076.51786803222 | 2001.92441724356 |
| RAB7B  | 440.038896046559 | 329.333236839082 | 222.051005238856 | 344.298510200653 |
|        | 152.219906297607 | 128.917399281607 | 147.385714746214 | 136.886677060418 |
|        | 228.384686248604 | 334.709049890042 | 154.586825710624 | 135.254996386778 |
| RAB7L1 | 249.680729921602 | 182.997980582218 | 366.564822549834 |                  |
|        | 202.943987922418 | 161.655336107432 | 146.694318629238 | 217.074639597142 |
|        | 178.377461551319 | 248.690121805116 | 201.800357785022 | 187.48055574295  |
|        | 195.674128236589 |                  |                  |                  |
| RAB8A  | 910.541650889451 | 864.161191021297 | 862.132582849511 | 980.120729515821 |
|        | 721.603421985572 | 1009.42265467472 | 962.559482864549 | 1189.11053680293 |
|        | 1095.52349352502 | 1153.5175534971  | 1127.07858210156 | 1005.62130301653 |
| RAB8B  | 975.315904185938 | 931.598413783099 | 665.936368667321 | 637.892677173103 |
|        | 572.913714991136 | 642.647554580301 | 779.022508413529 | 499.964000319181 |
|        | 626.104755496369 | 487.537691131703 | 775.781735108886 | 578.465753476561 |
| RAB9A  | 556.725550806207 | 552.298965378403 | 576.873245313776 | 511.891269255193 |
|        | 519.672796004691 | 589.541347392215 | 892.038018567941 | 1147.96742431386 |
|        | 672.637760135254 | 940.008438825765 | 1105.80735904293 | 490.153210371094 |

RAB9B 706.759905439674 857.090339943417 998.631321857182 1075.3328563531  
150.557982810339 170.87247413028 158.608479354755 147.702785358046  
151.276193269421 165.654773882752 133.860077101582 174.483233557264  
RAB9P1 151.214631373344 158.208998509937 156.460374293022  
150.449621353865 146.706846930708 164.48570046081 162.890650672747  
161.89906072679 145.690634269858 148.406031732776 122.018200592563  
151.722405598425  
RABAC1 1368.91287156398 1552.69879081022 983.777608766079  
1801.74467005923 3608.10730106542 553.757847979529 804.362909579005  
554.115756730498 592.613689704907 814.471143753335 554.115756730498  
329.406649846151  
RABEP1 763.263858769038 714.274201838067 1064.12835214671  
735.165830487162 331.848516303011 533.279122416818 226.334672545273  
268.660078500783 380.754569467715 437.122373082112 310.533399024851  
408.10780961711  
RABEP2 136.095753586495 148.329635131296 139.051656180599  
135.889764019762 148.553324405123 146.929717840755 123.482626777491  
129.38021642675 142.043121538885 138.789908033669 142.09146795308  
167.370030272847  
RABEPK 1181.1611856364 1235.02626456572 1246.2895253224  
1449.33679383001 1090.20254511452 869.245621105614 845.150147618462  
1000.91520225219 946.640841062802 1100.17618574297 1034.2217095753  
740.800822095116  
RABGAP1 2069.70335195314 2300.9407349072 2452.1304336603  
2730.50913686613 661.545179083009 594.180861801958 521.714719320355  
662.04757187541 779.022508413529 808.300067805897 763.533962249076  
438.533112511098  
RABGAP1L 286.818166898922 267.839640412797 300.602422224047  
273.806452412737 188.797908601851 178.394895649664 225.050796356289  
233.272000923172 260.955030428944 219.228720772236 230.91747428831  
196.922837906592  
RABGEF1 376.791876040886 271.858059712406 347.73629731446  
269.853718252574 215.115324454215 223.107391048316 241.527811817146  
245.723316636363 217.86728342043 261.592512762969 218.156162474715  
215.247472744419  
RABGGTA 133.31378749951 128.513011425662 123.237851647499  
130.388530183353 172.403953571339 127.485734862624 145.729212592937  
138.942901099402 144.930066324767 174.441287575034 152.915692742755  
134.151372457715  
RABGGTB 579.493790910006 530.819778703194 639.38881853171  
472.030150842569 380.514553097613 530.267835989435 829.740755449333  
623.508710830895 511.670320118232 720.214044399108 569.236322997211  
712.433345978749  
RABIF 142.103519373191 145.331858938535 134.158454639998 141.420747583126  
139.907840403521 135.825931047185 150.578023008958 152.635792342068  
150.452467115669 138.091795130567 161.788118050564 158.98007855379  
RABL2A 219.729169245025 208.194788326109 252.171420358437  
229.85833221434 178.920528149177 245.351459157365 193.394225360968  
194.80575419836 208.72873686638 197.47340234886 237.78482574225  
188.973595445056  
RABL2B 351.395760651605 331.464977124667 347.411500022053  
348.575690346536 241.706645643141 362.849380477089 255.12306184224  
314.949772661046 333.533043832976 222.593554194453 442.493108530222  
264.628012152168

|          |                  |                  |                  |                  |
|----------|------------------|------------------|------------------|------------------|
| RABL3    | 183.358807104988 | 190.125009931628 | 270.604799126393 | 170.596937075493 |
|          | 236.651601701157 | 216.582862850259 | 262.139211406599 | 247.08460296705  |
|          | 273.911741951291 | 371.06697207449  | 208.237011955037 | 307.518881119091 |
| RABL4    | 396.126485121994 | 456.530337997907 | 382.902151239988 | 523.591472915151 |
|          | 707.404709303506 | 292.366934378643 | 294.922183826144 | 329.926864732606 |
|          | 415.388760988459 | 272.117599603586 | 287.83303360511  | 304.479999301061 |
| RABL5    | 126.802963197337 | 141.733840643889 | 128.119556520151 | 119.98864381644  |
|          | 124.851025681014 | 141.315230997077 | 122.667593730152 | 130.955161943331 |
|          | 125.141185839817 | 119.949050292223 | 135.049657594221 | 129.825824640378 |
| RAC1     | 1501.18820017008 | 1466.08446530283 | 1581.06548216423 | 1424.04009914668 |
|          | 1388.91423772335 | 997.460212152591 | 1803.06322760249 | 1178.08490218853 |
|          | 1236.56870367797 | 1601.19401366685 | 1832.35076992253 | 1849.21906428944 |
| RAC2     | 555.109005518622 | 468.496972957503 | 327.164773632634 | 386.960778432157 |
|          | 1091.12493937368 | 468.712260193746 | 823.297606185721 | 976.360310504918 |
|          | 2127.22258112242 | 2197.44189747261 | 829.126529857044 | 1662.51399707484 |
| RAC3     | 136.475652722007 | 135.054931772725 | 137.803749343493 | 147.545667896282 |
|          | 181.813812621767 | 160.060406629689 | 139.437073790935 | 164.562302265155 |
|          | 139.055016538739 | 164.955263076598 | 180.290887733427 | 146.867740388881 |
| RACGAP1  | 159.724824188037 | 177.428161690048 | 158.183045411298 |                  |
|          | 187.365807314802 | 313.967636827811 | 405.766055310869 | 227.144441241869 |
|          | 394.186683910377 | 323.04019262387  | 294.22752955801  | 185.154876233931 |
|          | 270.787490294555 |                  |                  |                  |
| RAD1     | 191.59400638652  | 167.130843160309 | 188.39062571513  | 148.396148091332 |
|          | 171.093611712143 | 244.897869154624 | 172.057586741925 | 231.0814970959   |
|          | 176.382377784553 | 165.511561121012 | 185.843639043466 | 172.28937151007  |
| RAD17    | 146.770267005869 | 135.803599969904 | 153.263883774915 | 155.917655560227 |
|          | 126.573673878042 | 137.138266859156 | 150.911524755251 | 148.147294674218 |
|          | 153.187148832063 | 144.179880084235 | 161.983987604    | 154.113228966411 |
| RAD18    | 126.0944894315   | 137.246089511045 | 139.113675690483 | 133.452032750397 |
|          | 148.515730201538 | 138.263361518905 | 138.397152876585 | 141.879359965317 |
|          | 145.256660345252 | 147.556482119673 | 133.691053105482 | 137.06192448185  |
| RAD21    | 790.321331435096 | 808.55123510297  | 869.542306259337 | 571.439520427295 |
|          | 464.577839898252 | 781.208872924532 | 716.420861490714 | 946.273229715791 |
|          | 916.4187683687   | 666.570977208535 | 614.094097408035 | 720.907992182476 |
| RAD23A   | 1410.58825009446 | 1472.54829263217 | 1281.1883621512  |                  |
|          | 2055.27692947656 | 1294.18114559128 | 779.022508413529 | 792.247301083075 |
|          | 725.621153262924 | 723.250763797522 | 644.301665020526 | 840.276501350383 |
|          | 695.321886304133 |                  |                  |                  |
| RAD23B   | 265.332196877456 | 232.778488697337 | 265.754141836026 |                  |
|          | 221.849661343124 | 224.67853219142  | 352.741885295157 | 265.712482648121 |
|          | 231.955750250711 | 351.395760651605 | 418.319283832879 | 377.27961559752  |
|          | 350.308420518351 |                  |                  |                  |
| RAD50    | 186.296882059398 | 182.346834032145 | 201.337186768645 | 169.089896796513 |
|          | 152.853860043701 | 178.636555178682 | 214.888126361789 | 183.988537525989 |
|          | 163.653662369257 | 211.941623411369 | 240.706548931192 | 207.150354734189 |
| RAD51    | 313.025250337353 | 329.82030842286  | 270.181005097697 | 299.29004204677  |
|          | 195.69447353356  | 268.930428617695 | 261.028644858795 | 270.894153548841 |
|          | 247.683819429859 | 225.505978789388 | 282.836518011311 | 259.935831886014 |
| RAD51AP1 | 171.36717256867  | 197.298982267459 | 193.37618381669  |                  |
|          | 180.408639020724 | 390.752579014611 | 520.585319342817 | 285.05846406041  |
|          | 608.351527783086 | 444.945078908489 | 325.082620845425 | 209.258707976348 |
|          | 445.348044448953 |                  |                  |                  |
| RAD51AP2 | 125.940081665592 | 133.545405737639 | 154.586825710624 |                  |
|          | 149.327794670124 | 141.611712747368 | 135.33941967076  | 140.493975416335 |



138.570150372729 132.158817539201 134.998632527009 127.503849690009  
149.907472831817  
RAD51C 217.748916080172 217.684410907748 263.183010631644  
211.736398352592 219.0221768576 322.302219773624 279.000687630846  
300.937118739654 338.260976633501 199.813528853649 209.279164243868  
335.059844742031  
RAD51L1 126.462522391125 125.130703953031 131.736694577111  
123.657246099004 123.035401501279 118.593717189375 128.36533737469  
122.903428611669 150.439715066903 135.233957017664 134.810212106122  
127.434873844923  
RAD51L3 161.534421340752 167.408314067262 158.565676210997  
171.775741648309 186.551385094902 152.088488171996 183.879114762264  
159.951697830252 165.118167086792 158.509885816997 152.826356673175  
158.919340819357  
RAD52 165.364935913232 155.710272937386 166.533191390639 171.644710031098  
154.98147307591 179.730694272916 178.717719615544 159.665989587555  
152.877058628512 175.010849510711 149.997047695778 166.592366578462  
RAD54B 147.376482709004 141.604832186257 148.717545103261  
135.980886879513 194.445463745418 196.136080427522 190.444387031552  
218.058543664561 212.050953977485 169.136919982294 194.617252921731  
172.084184539157  
RAD54L 135.588132669957 165.45479542657 125.486324819682  
141.579159431339 359.256193328366 294.17588071297 191.58185405868  
221.127492253636 237.88097138936 176.761123480566 166.760758231104  
239.388546850124  
RAD54L2 613.063954859056 590.646248924596 546.755305058958  
725.443026984982 446.601751145647 396.40172043456 369.018856220394  
372.689712716797 516.755267232127 292.28857006885 323.244664586314  
364.113665301598  
RAD9A 174.812134675989 184.387409077972 159.337816095012 203.071186284148  
292.839392578318 277.75958501062 294.697622870418 193.466377788318  
200.342786450248 218.106150021482 206.972440734038 219.49354518392  
RAD9B 152.798927898416 133.213697351807 137.687480242109 152.077204721895  
149.188357651896 149.77596374205 139.927773713324 146.359038260378  
139.734784859495 156.494323415504 142.617474507282 142.609678462615  
RADIL 155.52533851273 174.045229095003 141.174971007547 186.722842989058  
144.116298946718 137.290687951485 125.889860278265 136.440671408022  
134.797624902585 137.871870950302 136.396579126676 132.611864316181  
RAE1 201.337186768645 218.615551704188 241.293046687076 225.505978789388  
723.250763797522 463.622673539254 474.917507160629 278.168897504985  
362.95684683529 329.263397240111 318.004190156313 297.757657398146  
RAET1E 148.079107235035 152.964940071133 145.43470695949  
145.511473738224 147.145932651151 154.070450565144 146.828099826146  
148.609721587632 145.132183293421 155.004104153679 146.443892388756  
143.209289043824  
RAET1G 128.986795394842 135.886859004208 131.034010150362  
128.745737514912 267.097999873387 147.858339902055 185.591700082272  
144.432181150583 151.9565369062 288.88486628661 188.291563792748  
152.331011756244  
RAET1K 133.966277922005 144.905870145004 144.868337748544  
148.479865869644 145.650356702429 140.571143847885 141.256915527472  
155.405519023053 146.968599872798 155.026276988302 154.499313851756  
146.240060512152

|         |                  |                  |                  |                  |
|---------|------------------|------------------|------------------|------------------|
| RAET1L  | 134.633286312653 | 130.004329307977 | 141.221162787167 |                  |
|         | 144.490452173336 | 147.576533768761 | 132.277920991504 | 142.382367938838 |
|         | 125.058165131184 | 150.555125135002 | 179.764260117544 | 122.236134282757 |
|         | 140.03443832328  |                  |                  |                  |
| RAF1    | 826.771587455122 | 704.653073777277 | 800.739422189427 | 801.52891824571  |
|         | 627.066031322234 | 492.207833630086 | 537.419316887523 | 863.086199215353 |
|         | 831.610501402173 | 496.218605366298 | 398.272713014637 | 538.872348151809 |
| RAG1    | 135.675570204709 | 150.891358590974 | 142.713318779614 | 152.30599498619  |
|         | 120.345546077894 | 127.287538993899 | 143.683545371898 | 147.178598908199 |
|         | 159.646538408414 | 148.856482636773 | 164.092847913322 | 144.511488474344 |
| RAG1AP1 | 223.703371558666 | 221.027562527572 | 239.635531434767 |                  |
|         | 188.194202408999 | 618.661249163439 | 454.133372808458 | 626.582864105324 |
|         | 578.947889414387 | 350.22221782412  | 356.154842959851 | 347.557792829093 |
|         | 505.704957182936 |                  |                  |                  |
| RAG2    | 114.524341239889 | 118.500956349352 | 111.616460084889 | 115.211731367278 |
|         | 116.828333047376 | 123.179986410723 | 112.891050337488 | 117.251233255966 |
|         | 112.142263331903 | 121.053766591551 | 112.962180108363 | 113.321454160244 |
| RAGE    | 560.602047253306 | 533.37609065123  | 332.194163016646 | 709.303384219887 |
|         | 188.291563792748 | 220.415211013843 | 283.27806319488  | 335.623336587396 |
|         | 296.830999357172 | 553.198321853202 | 253.538171006307 | 699.800360892516 |
| RAI1    | 445.763740779039 | 493.887026009442 | 390.670702155192 | 561.062594540005 |
|         | 712.067161025165 | 658.968318349334 | 599.208370337812 | 830.684999498776 |
|         | 340.547010951537 | 440.579262120451 | 816.266384662324 | 577.801009921199 |
| RAI14   | 3042.88425356552 | 1538.78070281348 | 1574.65731564294 | 1895.72330348767 |
|         | 910.087388930485 | 1235.02626456572 | 2293.05058904656 | 675.281131488524 |
|         | 1311.34904760947 | 881.15414246017  | 1284.19937294949 | 1131.96129284658 |
| RAI2    | 326.45984882427  | 358.415933397099 | 361.218491712891 | 350.392951395182 |
|         | 135.47852126603  | 139.739448838436 | 141.920967855989 | 146.49022197174  |
|         | 132.148166773943 | 145.578721432709 | 141.920967855989 | 150.023791544584 |
| RALA    | 1337.38160266788 | 1409.42016970226 | 1235.02626456572 | 1417.76295714364 |
|         | 906.359365544713 | 1423.02563792293 | 1167.72023351098 | 1233.99503576308 |
|         | 1442.94175124818 | 2330.60389526686 | 962.559482864549 | 1912.2369374258  |
| RALB    | 932.505095432049 | 960.491731797061 | 1233.99503576308 | 734.469481390593 |
|         | 717.270096456387 | 944.92617668298  | 759.802694618208 | 668.286400833485 |
|         | 973.543357809971 | 2515.7035557541  | 815.388288623756 | 1357.48791782399 |
| RALBP1  | 401.750302347978 | 490.849163737598 | 432.92947962962  |                  |
|         | 507.710604451713 | 527.226517960073 | 798.389385197471 | 647.273409499313 |
|         | 1028.80076860235 | 1426.56252600395 | 443.853458865556 | 847.564628337955 |
|         | 469.206346008875 |                  |                  |                  |
| RALGAP1 | 487.993796425035 | 398.673582680257 | 468.170972478717 |                  |
|         | 366.408565514304 | 221.930333726352 | 463.802270256246 | 301.695991929957 |
|         | 350.077206368839 | 247.899467998443 | 324.203537490975 | 401.189904619902 |
|         | 352.897241809959 |                  |                  |                  |
| RALGAP2 | 141.156434225355 | 135.809383370957 | 135.504526903482 |                  |
|         | 136.981043383326 | 150.376234759097 | 175.38376293575  | 169.834078550805 |
|         | 164.442400539653 | 163.198834359304 | 156.880120259304 | 174.795822188504 |
|         | 156.110073009771 |                  |                  |                  |
| RALGAPB | 235.453139389486 | 242.299252896647 | 193.569894919176 |                  |
|         | 202.041958613989 | 255.039661999732 | 311.670576741448 | 383.407365952689 |
|         | 241.734804013256 | 269.300548648755 | 338.026161865853 | 221.424451092316 |
|         | 261.286548990435 |                  |                  |                  |
| RALGDS  | 669.124699103132 | 860.315938621256 | 801.702878226247 |                  |
|         | 789.752781067888 | 883.702573960415 | 867.601542930533 | 607.979208454176 |

656.32782132983 794.165408266062 1316.31088187364 615.254768508691  
851.633522004342  
RALGPS1 272.16090053595 287.703569453502 370.466403181536  
331.383533814347 229.689010178622 282.442528230519 260.157440518033  
299.935166870211 275.437030326768 207.940596890723 487.799854351205  
279.070493043898  
RALGPS2 153.083451626042 155.835077077665 142.928920246687  
140.615078497305 186.04763660516 151.423936838934 154.990319019521  
176.440625367948 163.967616022079 163.899808733609 162.812665683603  
156.572774198042  
RALY 713.525134497596 852.099019968701 646.704226815099 1017.6969123529  
1958.96627327952 1127.89414462606 1007.7803477458 953.099915501575  
792.247301083075 533.279122416818 600.430996779799 910.541650889451  
RALYL 139.182623417751 131.02157879562 134.717258604899 129.140978620864  
147.07272598888 140.895053453126 138.1693725329 136.573928520456  
130.365804613342 124.058332474379 118.184571821176 151.655854407186  
RAMP1 612.61438059983 582.062758687489 662.04757187541 845.646455991008  
108.543795408713 114.209249333221 115.37736249419 119.551741097918  
148.951632781748 117.144778357339 108.669141498627 115.713909155043  
RAMP2 254.517135747445 309.580750386386 213.584269089596 298.460273458181  
203.652936507291 249.354198174438 206.585387130993 183.42877315644  
194.88319590729 209.840035045167 181.823450464129 188.475801713801  
RAMP3 224.92725876841 245.582279957584 216.102897582821 264.8472508692  
188.378996128521 204.5274881834 155.974463324915 197.618757939729  
251.915179734134 153.485731788293 156.964080041261 147.155738185574  
RAN 809.068563907145 808.837225580351 1170.07851727046 747.587723573212  
1177.01310527577 2114.9754128463 2031.01186679713 1615.60472592991  
1918.14260920544 2698.5455305009 871.268905562551 2189.53914329263  
RANBP1 876.783710734594 841.623780229898 847.276523445973  
854.815394943219 2187.3010896903 2493.5484556802 1440.14449872047  
2046.64499507352 2149.13404212591 1718.80498208397 1309.01193284992  
2271.82656399253  
RANBP10 325.96632528242 299.80615152845 319.560819487616  
384.16579891756 340.668473351494 249.763375041547 223.220997990627  
256.370052241046 308.803322140241 289.434186747703 347.812754957414  
256.590289281076  
RANBP17 117.137027732123 112.936472036608 121.603608840998  
123.545404885618 108.415715678948 106.491867793742 105.132185249959  
106.772581387455 113.451566510208 115.53736269794 118.873687561838  
109.038182799871  
RANBP2 187.645390502607 179.49202902995 219.638478100747  
193.37618381669 164.09586442373 224.707455448421 172.866517097198  
177.639351778834 170.568719982587 186.345823604119 142.436624546651  
187.903298116031  
RANBP2L1 152.124910935545 151.669421563954 138.548983773386  
154.657316209848 138.5270206057 139.089444892187 161.755290291637  
134.628807679002 134.698857213208 147.9084767638 166.582931148846  
160.975741751317  
RANBP3 258.109876262342 279.452819132461 286.310923582432  
328.969023478451 345.832589037442 304.900910626137 319.868227988842  
260.85776723575 257.5097052677 260.67310907387 235.595194918187  
267.869879189095  
RANBP3L 186.460034745907 188.593378315122 287.242697383558  
212.223906015932 143.281050499332 139.223480216048 146.209104824109

142.563762845657 139.473459411633 138.186616955926 123.29908883119  
 135.017953588568  
 RANBP6 239.871536598083 212.460476372263 209.070372320593  
 168.166938045454 169.895672129542 244.132645171301 176.038123840296  
 280.414161197286 188.847480174391 249.354198174438 211.059870865354  
 200.045606111354  
 RANBP9 155.158028043823 154.124057382276 156.938149948126  
 132.66318177913 161.281195929918 139.914034708144 157.358696886078  
 149.752188104803 159.79463502085 164.763269377973 182.950456188966  
 146.29600238749  
 RANGAP1 501.005898087825 607.499206410372 455.392133846517  
 521.83794739314 3495.66977000028 1899.94714976387 1375.76915021882  
 1894.14699530855 1514.53784631689 1281.9073569335 1710.60409578293  
 1317.1258783404  
 RANGRF 171.626438561923 170.212679845194 162.98885109088  
 165.634117939571 131.879526177089 157.192320902906 129.190900922265  
 147.373174160478 143.853643511287 123.166013119235 195.033792280119  
 124.853659050216  
 RAP1A 218.000351930307 194.734255772365 248.360540656183 205.341121539273  
 162.465251412937 175.262884960324 155.625320865565 173.189465201573  
 171.059849459102 183.979513272793 165.549190801014 182.143506470859  
 RAP1B 249.234065130083 224.62335524729 175.269675831824 214.100698312272  
 165.504532455205 284.236970342827 263.52595855321 442.86942574917  
 175.874387612235 208.406980186223 269.300548648755 171.014432075829  
 RAP1BL 298.209907157762 283.191303666907 375.255445179952  
 214.499670852615 226.871028543248 746.523071806534 584.199252444401  
 1309.7660860424 490.464012303239 536.067857235731 640.90860274227  
 430.412897698085  
 RAP1GAP 160.256877369493 233.394506254045 223.975677959345  
 141.935435502163 2041.03024136014 1430.20038077595 583.455617065556  
 1574.65731564294 1880.35608492553 755.79669622705 1227.36706427754  
 2023.92614092273  
 RAP1GDS1 229.933577323411 193.544035570799 235.216589534371  
 194.055394488452 190.125009931628 330.321113875647 228.524222740306  
 275.072079692264 247.845708587624 350.803378042804 204.5274881834  
 260.85776723575  
 RAP2A 439.207122335648 430.590533290315 444.663812851378 339.98018551524  
 313.412131722189 689.04773343291 374.169744342352 351.395760651605  
 391.252450588331 751.568940762011 457.411248351795 342.717252404581  
 RAP2B 152.109178223495 153.848852170776 141.639216893245 141.290905146249  
 147.702785358046 158.299765118221 145.806935833967 165.638672456873  
 139.002932985183 147.270369342438 156.361037318986 156.490654498766  
 RAP2C 322.302219773624 312.557093674533 370.140588087649 323.51769984082  
 240.706548931192 425.348619281876 290.867822301134 263.204269632206  
 377.462793982812 385.050282185255 346.78158577526 326.417021307859  
 RAPGEF1 307.020265874666 354.263934274937 330.850098426464  
 499.176926371542 351.395760651605 217.202541167691 244.925472495705  
 251.011148303246 253.385592447339 265.068532248682 245.195406638979  
 197.12840030662  
 RAPGEF2 486.425387717472 378.920456227378 341.819090221654  
 346.118765910093 222.086635504858 410.845034795716 372.757091748175  
 364.895113721763 322.506898833351 297.12411625104 355.519647649551  
 298.776176246196

RAPGEF3 167.194306682927 165.908756485356 127.742948876822  
 142.734103971267 120.599440204711 123.256613702254 123.042372128864  
 119.370219299491 125.217733034761 118.312891459156 133.346626315812  
 128.853089272901  
 RAPGEF4 139.78795317086 147.216303852902 137.575688681319  
 130.524630778991 131.256325361974 175.819983804497 128.751758311249  
 150.093684245826 141.555366493541 143.764266466204 158.104336050835  
 147.872625576731  
 RAPGEF5 262.171775165261 343.307036883726 197.205792984885  
 237.078644686891 173.624709850889 249.292766428035 162.488819873513  
 168.763640193219 171.155660467037 337.585502787016 172.816477996646  
 223.941946219233  
 RAPGEF6 308.877027622691 382.327656839936 365.362177671146  
 312.406286993239 223.551813819581 382.069677030369 365.727197088581  
 321.426100243434 271.638179116269 342.315456386729 331.383533814347  
 370.617422894068  
 RAPGEFL1 211.786963444117 229.284931844047 213.338918839446  
 175.960788330149 760.272612245092 776.807656744828 1570.39362935859  
 2217.82628612929 1112.4055726239 732.040299742444 1559.26487922551  
 1595.22997714906  
 RAPH1 174.909258852845 190.889832855403 167.91761500242 161.434331154045  
 159.368376366657 250.602978521808 183.513101761782 198.620777452192  
 176.66175597182 182.833961304079 281.694635436938 154.938900278679  
 RAPSN 129.140978620864 116.685023927951 125.612670947405 121.824805374887  
 122.376432064286 111.765812595638 124.439917584199 139.000248033373  
 132.227561632637 127.028640787946 154.623548525522 121.341177395499  
 RARA 244.689936990021 277.026538720417 211.891710626953 297.544216175512  
 224.805404798696 254.013921962363 199.756584044664 231.698163424706  
 208.869189492052 168.018785514306 206.275885047321 234.322989368622  
 RARB 202.00431685587 231.698163424706 247.015574724901 276.961847241646  
 124.96926662367 141.241717979079 128.284564251279 133.847494826806  
 150.981208776163 135.182524652868 140.941447663862 133.046435968561  
 RARG 123.424145707079 134.608734423113 127.555954288973 123.195738824794  
 134.081308836364 127.928195199945 126.938068475032 149.306122206718  
 144.787836177147 143.614075503775 157.739526559807 156.141123407905  
 RARRES1 235.933451977398 263.352118305612 270.894153548841  
 205.52620827767 2662.43181510326 252.473612525884 2515.7035557541  
 475.927798702033 9527.86367804896 344.247544510881 152.30599498619  
 165.844762875582  
 RARRES2 2172.89794460273 2087.55358504021 1875.21979956596  
 1871.91894530722 316.663128947813 460.408628542721 259.643957326575  
 510.226374558703 927.478050257292 730.34994035645 208.257420634745  
 221.050093964575  
 RARRES3 863.738809424958 742.517302567436 606.679284487803  
 748.38293089716 307.020265874666 212.190707408572 527.707841428677  
 549.692164962653 888.706978062337 283.014222473749 292.366934378643  
 847.564628337955  
 RARS 1279.15873231449 1220.30347076968 1177.70376288106 1275.43768532088  
 1043.14253624883 1597.53010317504 1965.13870083236 1599.12034906314  
 1540.71556891815 2553.92770795014 1411.90426595229 1708.87666406131  
 RARS2 488.3790571110543 517.881547706391 482.048928546145 502.598518192729  
 383.259887828605 662.58366387795 632.278924237678 433.405369327168  
 440.657747083721 657.77730563722 809.545702751155 513.428413503031

RASA1 298.625127845168 296.497100375888 331.848516303011 278.168897504985  
266.442565636226 323.51769984082 358.355621069787 252.171420358437  
301.798676825176 405.409668978569 284.195575802966 353.385210690169  
RASA2 169.158049136321 166.850279817976 165.581217879395 157.555410977564  
153.538565948453 224.67853219142 193.813717161291 180.518621542868  
165.085010975035 187.729071402782 171.86363382331 211.118308738617  
RASA3 194.352807599399 229.594081405784 209.662262708551 252.957489543915  
138.827262145272 141.437891956239 136.859366444351 166.85671415475  
143.601057437842 126.952836653857 165.154844613899 166.14867551435  
RASA4 119.535267326862 127.44620898647 142.29309119138 128.833756478439  
132.934955542743 126.499257771192 122.287535209629 123.188205093415  
119.822587087968 124.426019186373 148.525224975266 132.973551954067  
RASA4P 302.570932942847 311.208703262497 295.778154263981  
377.462793982812 246.63579788514 237.456245064363 299.039192744355  
216.181417552574 221.561252012695 244.990374822652 327.811191081135  
288.596513753617  
RASAL1 131.545287070888 128.490341173553 128.539969915702  
124.33863635868 206.149539851803 124.124076599417 158.193008411967  
154.300058278533 151.665244763743 201.152639979358 142.930903395131  
135.289246539398  
RASAL2 132.092910274836 134.834641868502 133.082433951922  
125.645986634914 137.31708798874 127.484178603011 125.859158049343  
127.543729713161 129.471713415228 143.180247878507 145.39813290003  
124.095340478326  
RASAL3 224.298067319406 196.942880967705 152.401204710292  
185.016336026382 193.674681547989 161.250520154112 186.794165469219  
212.730163981978 403.47026424469 185.706228572019 190.238332933452  
178.377461551319  
RASD1 217.074639597142 415.388760988459 149.160808104789 162.909468312298  
141.306418675404 635.819650434542 122.223184326586 156.69025356689  
169.072574423443 272.639413442579 171.059849459102 246.327991259259  
RASD2 296.20443113482 401.87674893993 471.315730378641 630.176145684641  
196.839016616283 132.828179725129 136.485034823945 140.820807603291  
144.529801006864 129.730685860688 134.943005383277 127.279107079261  
RASEF 142.495333453346 220.136131941508 142.703116372162 130.300169316346  
478.040234382488 237.521746704115 126.310788291075 227.965783945702  
505.302263971007 321.049000153127 583.192225756596 173.161152247499  
RASGEF1A 116.609122768341 112.612099135361 110.024815508703  
104.544792793756 112.790552379447 113.09980008288 117.980052938167  
106.829040075772 106.829040075772 108.497209666203 127.844624093148  
120.501697624977  
RASGEF1B 119.849895979393 130.883516197483 124.077104101209  
124.222529964098 123.689439578326 119.67745324922 115.371180170291  
113.370762349233 124.905889975958 121.801291293249 123.24533179875  
140.2533871084  
RASGEF1C 129.553282780541 126.494665743087 125.884565343075  
126.072053958666 131.761564745495 130.624702758052 124.225294244156  
134.202497785854 124.723519607109 117.112667504781 127.887666721519  
126.76986764971  
RASGRF1 128.628637585951 133.489068665353 140.471953101887  
137.71627781928 134.58799530734 134.8745127454 144.008961720971  
143.655901618594 138.285325970867 136.494339004002 152.158269344693  
138.438792881135

RASGRF2 124.28313315915 112.198629213643 112.78323842342  
114.545476919992 122.566970430133 111.312348806957 125.547399456656  
120.497796762933 114.45792163942 114.696935316053 126.561067704708  
125.45936959544

RASGRP1 137.674025476238 136.321816321193 124.501262458393  
115.101971719657 160.618586213311 119.498312996987 136.596127228365  
146.57274511202 214.785381549181 292.037861000784 179.896659891106  
126.762116571216

RASGRP2 220.661922683143 237.312766830206 210.015199832609  
305.398934391579 138.525131957094 140.184082384548 142.097126256137  
147.696506705909 172.152570321727 133.331037738063 145.110145981908  
141.023875058322

RASGRP3 166.12184890921 180.022646625687 137.198654302648  
154.798287249541 159.895303363094 229.347135478142 160.992494552269  
204.596753034535 223.253794809571 151.836705989155 225.64288602828  
175.704031930103

RASGRP4 143.870849001074 143.473523258521 140.89666990854  
134.624322761212 147.354535468933 140.332045911008 144.419657674797  
135.046003135933 136.649743237542 133.399632102473 137.091932621041  
142.414323129638

RASIP1 411.160709628865 532.596772298766 253.789045068884  
478.909308632726 310.917191279571 305.343879847672 198.631354372924  
266.964673763497 551.622587349813 453.282973743379 277.180850774168  
464.812091712746

RASL10A 129.330592465123 144.216394153095 131.77642590781  
133.427561208907 162.192879711747 183.50553222647 132.393669306489  
239.924227955313 169.368090266817 132.189426012448 159.588575526536  
143.836637098747

RASL10B 190.471158323247 167.149578610266 150.313058722346  
178.294972422671 171.521579011287 170.091913791176 163.446813963119  
161.573975848093 155.979380606594 164.274491958161 162.689415085423  
177.065616871886

RASL11A 160.227729155903 188.444498848767 142.993401965852  
155.130745957603 157.278791893435 148.949829934611 162.134726710448  
163.679104694139 146.517645037071 158.915858403237 150.663062131717  
157.186747372076

RASL11B 276.414209660023 232.414763435965 379.862305342147  
151.221783750989 351.759100605991 317.719381113816 166.627372924295  
628.939201051801 874.348941257592 180.941090529551 275.996693627151  
150.431052959951

RASL12 2293.05058904656 2263.73444150082 1491.05501052706  
3062.22499714914 160.833948531272 167.164675439456 153.661632990172  
160.254101852355 218.644953001365 172.707821624271 143.100436913184  
148.344941331885

RASSF1 269.100400678077 231.955750250711 227.209630859635  
221.359331823286 240.836979012241 199.191065549132 163.053121879323  
174.357336296554 192.441337304606 173.751615672365 154.546460872415  
173.272062328378

RASSF10 144.836902182737 151.360575274272 157.895460674072  
137.706893763747 124.786029449452 142.230934617475 148.620766059526  
132.885515958081 143.840979923821 152.534482748598 138.873925577739  
138.89579816122

RASSF2 391.500696444149 349.773289724658 178.819486867379  
443.125195744202 689.04773343291 505.83860711693 170.452989060697

236.772907994543 350.658722333252 163.346402397924 306.59090554099  
178.320732186309  
RASSF3 117.958297137758 131.356437247149 113.154880173167  
116.273000405449 128.014092519305 108.683531606889 123.7615105541  
116.300028266671 108.715328458556 119.06600048679 154.611011734772  
112.046615825307  
RASSF4 182.209056248253 166.767004180603 160.073510173041  
176.5588805282 131.151578665754 123.336074100984 134.346754381858  
143.313605534609 172.973175988757 134.70636200986 165.654773882752  
125.345611085082  
RASSF5 244.627091189503 269.892633574243 216.181417552574  
209.984545596312 251.161789722751 253.42022722564 326.758278851698  
255.638433159437 462.553267274302 304.751330890753 291.994364783888  
415.388760988459  
RASSF6 254.235762677639 228.414049417352 238.978845152474  
206.548878646452 150.170712508944 210.5689532432 237.854774190873  
231.018059960001 184.267958772058 184.954673605577 319.223127076041  
215.558688906165  
RASSF7 275.543576337502 361.327436394941 277.101000223971  
223.531323159808 2905.12297639092 955.143610867351 1887.82245931444  
1079.58110075176 1293.70593826709 1452.63736288691 1651.68171717875  
1312.75601392984  
RASSF8 149.398118078302 138.149037534929 157.021010130169  
143.532014058535 154.501338425995 157.631978594005 152.432477504097  
144.551233687082 148.336126836362 139.303747021408 144.89062965996  
146.694318629238  
RASSF9 182.235490620172 174.767697866801 186.999459152483  
190.389158930835 156.720090761933 145.928643520352 171.028432989066  
144.004831360797 160.186527465164 171.731395791818 140.508390945342  
153.719751724358  
RAVER1 228.384686248604 283.701987275608 222.675370226786  
301.139737613279 537.419316887523 267.149525812834 242.848821222611  
257.44230597145 233.536023295039 238.847091900666 243.038392457584  
244.627091189503  
RAVER2 399.762451559805 419.593558001947 427.637083424453  
394.35596596181 188.070213212057 173.773876769683 245.399847987183  
177.123497519231 177.780479906048 272.885527139137 181.991820141929  
234.484787292284  
RAX 139.892371997205 147.688664545959 148.143367490426 144.073739611496  
139.796168741191 141.956996308304 134.604565335211 129.358112503486  
128.901707304582 144.235298492095 126.209426865327 129.928047362701  
RAX2 278.651369597422 258.830885826237 263.936023499588 258.036064876416  
181.431827312784 245.426639190893 202.193338797533 247.015574724901  
205.244843885276 210.030846572444 214.86995782548 221.889331385023  
RAXL1 1916.46158204806 1788.35884039549 1460.24985399013 1778.73916100529  
358.60777927888 1420.27222765071 790.790236361922 1368.91287156398  
809.068563907145 690.010326122574 1054.47292895417 826.08372791138  
RB1 172.652645920958 158.263657373911 183.905926269285 152.641885687726  
164.043866642712 282.742833166843 147.485960802692 195.269099451599  
215.532132200821 327.696359071012 211.369442150136 252.919704128539  
RB1CC1 644.11603826131 592.613689704907 703.815551883635  
580.347496467173 534.505132658177 687.987647193563 664.19083888799  
574.896304593109 726.556553101727 606.851072672402 506.898635822094  
391.039114500903



|        |                  |                  |                  |                  |
|--------|------------------|------------------|------------------|------------------|
| RBAK   | 135.223957492606 | 131.111930163369 | 142.21279866857  | 128.893208935783 |
|        | 120.757288533244 | 155.803946849495 | 180.070209705044 | 153.664503112778 |
|        | 142.356747337127 | 135.650546885518 | 153.758353103323 | 166.515199732076 |
| RBBP4  | 279.75914135192  | 275.343591424586 | 305.398934391579 | 249.737588031219 |
|        | 257.534293550585 | 810.396770151757 | 417.865461351681 | 377.89330639683  |
|        | 399.537363692534 | 257.706904467657 | 441.873247266342 | 393.707031354025 |
| RBBP5  | 185.830435830545 | 157.466686487471 | 236.219981978324 | 165.350777445902 |
|        | 135.37120759813  | 164.136551371866 | 189.362958041175 | 167.46432961654  |
|        | 226.936810012475 | 180.20999937977  | 201.365457496683 | 208.64349688412  |
| RBBP6  | 203.370353613423 | 188.062732621031 | 190.270819689158 | 207.850956786183 |
|        | 182.055718892894 | 201.507971833902 | 191.365014963729 | 178.885625009973 |
|        | 172.866517097198 | 182.725987056391 | 186.563913311757 | 194.014764659513 |
| RBBP7  | 847.863177169335 | 935.042067053226 | 989.396074034945 | 879.809795251142 |
|        | 782.746481112316 | 813.034056288861 | 807.3257139219   | 1603.87451959083 |
|        | 1018.38836615952 | 544.222458349696 | 887.147199303294 | 809.545702751155 |
| RBBP8  | 195.481680273686 | 192.375251343504 | 194.143649677822 | 174.274996381853 |
|        | 224.824362819477 | 289.761702484888 | 261.065986251886 | 660.535644289024 |
|        | 376.627801547869 | 362.65285317327  | 322.443089373063 | 339.598452080917 |
| RBBP9  | 213.847316974717 | 230.893665210918 | 204.057019122032 | 200.387623661458 |
|        | 212.822328466993 | 422.840163973614 | 242.253995801882 | 205.886398618369 |
|        | 240.94056877904  | 236.933960698783 | 218.811490883852 | 213.891435492914 |
| RBCK1  | 486.047284379068 | 435.332573825425 | 392.198487606534 | 529.529314022043 |
|        | 1191.88706134921 | 451.317592236192 | 393.796356067403 | 389.177193459    |
|        | 474.750156829195 | 449.598181155897 | 504.275299381356 | 506.898635822094 |
| RBED1  | 219.519896184851 | 239.33642662112  | 249.379605914827 | 273.651114834013 |
|        | 222.028626209166 | 232.385176936256 | 215.037122365095 | 198.055877414824 |
|        | 197.981112645168 | 195.316077537716 | 262.629961694573 | 207.993943398697 |
| RBKS   | 186.430014478919 | 194.014764659513 | 180.80811429888  | 201.186963432715 |
|        | 267.451611731669 | 214.904634494921 | 203.616580991715 | 225.850439131864 |
|        | 189.49408026215  | 177.143397572907 | 175.529441666151 | 213.077884261943 |
| RBL1   | 130.270184521521 | 132.352268262631 | 143.539741029895 | 126.217702283708 |
|        | 139.469148541078 | 155.826394389322 | 139.113675690483 | 143.256590560776 |
|        | 147.8838487685   | 144.587253120884 | 126.890841187249 | 146.002585729701 |
| RBL2   | 480.797281489891 | 423.826189747546 | 720.364080505785 | 398.796188440256 |
|        | 556.31484498921  | 544.852019338212 | 791.137867905579 | 485.576566972696 |
|        | 565.843200661721 | 603.906237227931 | 1019.627634011   | 694.288215755716 |
| RBM    | 119.26921157552  | 128.044165393924 | 134.89031458837  | 136.884799902348 |
|        | 151.635752404534 | 135.923022674367 | 131.882887826338 | 132.105184573944 |
|        | 131.367075440559 | 158.631298154353 | 123.563243360247 | 151.613134875009 |
| RBM10  | 921.140932799223 | 1034.68475089075 | 843.075879568455 | 1249.89496565284 |
|        | 1270.76282064793 | 962.559482864549 | 847.863177169335 | 1089.16489859253 |
|        | 990.206369590236 | 874.348941257592 | 827.157920721418 | 992.744093752678 |
| RBM11  | 164.413893089607 | 141.765004355609 | 153.888212689508 | 150.817922696097 |
|        | 148.611352905643 | 162.774716879847 | 182.310140388705 | 148.211354898758 |
|        | 168.223865801948 | 139.082897743357 | 148.201649039381 | 149.157934946623 |
| RBM12  | 301.087947101876 | 291.779980648289 | 251.61451602376  | 263.084557246752 |
|        | 320.214614455231 | 528.921893077914 | 390.752579014611 | 362.95684683529  |
|        | 352.22815095475  | 342.878522959461 | 358.60777927888  | 377.661589835101 |
| RBM12B | 327.384671423687 | 369.198837083585 | 299.616447269111 |                  |
|        | 279.26508919212  | 249.339449789861 | 367.518273773904 | 341.819090221654 |
|        | 319.018213637357 | 294.280238648737 | 201.383739902873 | 327.251620296271 |
|        | 294.280238648737 |                  |                  |                  |

|        |                  |                  |                  |                  |
|--------|------------------|------------------|------------------|------------------|
| RBM14  | 1121.87292339787 | 1167.72023351098 | 873.256632365737 | 1323.91781040143 |
|        | 2332.98074920207 | 941.572186137467 | 1061.29067124163 | 998.631321857182 |
|        | 1090.20254511452 | 747.322544683874 | 678.684323057327 | 829.992212133165 |
| RBM15  | 537.510539142248 | 544.852019338212 | 373.096629378654 | 483.174262289559 |
|        | 324.177924877233 | 590.646248924596 | 455.778776920897 | 521.512936372701 |
|        | 318.628084728596 | 378.38874489611  | 471.816954259146 | 306.111172289632 |
| RBM15B | 201.004491067972 | 217.491746961471 | 187.407526616724 |                  |
|        | 250.037172478288 | 337.728737393381 | 223.311817085871 | 251.588748783592 |
|        | 247.528753010193 | 356.921627358141 | 151.09670688533  | 289.911635155481 |
|        | 324.713347085998 |                  |                  |                  |
| RBM16  | 283.556453980797 | 239.148333781084 | 327.635520861099 | 239.941641600769 |
|        | 219.462274506333 | 273.478372861114 | 275.609716327452 | 274.427235605909 |
|        | 223.703371558666 | 260.314440448486 | 265.174306663185 | 247.779718065751 |
| RBM17  | 1002.88224342342 | 946.273229715791 | 918.162638134305 | 996.240188311002 |
|        | 358.152044880733 | 745.482863218223 | 417.191960489528 | 555.366765340014 |
|        | 431.093544964576 | 322.956882599715 | 636.56692204969  | 543.933989965705 |
| RBM18  | 181.840985962045 | 176.810979494826 | 185.258354905314 | 169.095270479344 |
|        | 233.394506254045 | 181.715992480635 | 202.324795686879 | 199.947823264085 |
|        | 195.740661051834 | 317.719381113816 | 211.22652563815  | 200.08007665693  |
| RBM19  | 151.839306445341 | 147.257773507186 | 162.096065738375 | 158.208998509937 |
|        | 146.136820062093 | 159.199045715212 | 149.642946071295 | 145.526941881413 |
|        | 123.959050197189 | 145.378779757104 | 141.305605155722 | 152.993555372242 |
| RBM20  | 243.336550161566 | 219.228720772236 | 254.315783394932 | 252.593574250965 |
|        | 139.197364191101 | 141.169908353507 | 140.418010366997 | 164.03801002919  |
|        | 157.960172706254 | 172.045843691642 | 139.123489349026 | 165.890492422031 |
| RBM22  | 1690.96371604294 | 1838.18547839898 | 1573.03248861784 | 1587.84395475807 |
|        | 963.343120586863 | 1268.73280473728 | 1889.05071563459 | 1777.29626660109 |
|        | 1524.46745239811 | 2200.94974896771 | 1701.43479420427 | 1618.64901092072 |
| RBM23  | 1006.03677177164 | 1019.627634011   | 874.348941257592 | 960.491731797061 |
|        | 854.815394943219 | 675.281131488524 | 888.371107987343 | 687.789976218334 |
|        | 879.809795251142 | 727.814681346494 | 1042.40539020413 | 1039.92160906839 |
| RBM24  | 200.001438979007 | 207.400490077106 | 227.467161919443 | 206.753993163216 |
|        | 133.814720785534 | 130.09050436943  | 138.42029331811  | 132.038012025708 |
|        | 138.156430188312 | 138.129281196474 | 130.860938463815 | 140.906421938377 |
| RBM25  | 1417.76295714364 | 1378.40627876546 | 1264.90442763788 | 1474.70984232307 |
|        | 653.500279510032 | 735.449040059761 | 768.053694275398 | 1074.96415574964 |
|        | 917.646958427824 | 843.936924659514 | 1639.76556136383 | 1414.95226752155 |
| RBM26  | 285.507315916663 | 211.609763150578 | 337.22646304739  | 217.24573005272  |
|        | 243.191238594142 | 274.891033696257 | 301.304268871606 | 303.795701960506 |
|        | 350.926679856514 | 311.670576741448 | 302.905840432998 | 405.843083758177 |
| RBM27  | 288.728608411903 | 241.105817192695 | 297.757657398146 | 209.362806125315 |
|        | 192.273528391588 | 284.13865992802  | 249.09278446472  | 255.527764534636 |
|        | 198.055877414824 | 286.856346704286 | 235.680462167404 | 293.600165830839 |
| RBM28  | 230.10433160008  | 197.827534617557 | 211.085778902367 | 240.497413647633 |
|        | 301.49286558088  | 222.675370226786 | 283.807827536147 | 257.740674565975 |
|        | 226.919545367682 | 246.327991259259 | 215.094633380547 | 267.696284751923 |
| RBM3   | 366.961565952239 | 354.205670284123 | 506.898635822094 | 414.538237455116 |
|        | 179.57046217355  | 539.008286968106 | 309.5988292104   | 374.872358131797 |
|        | 332.082749517913 | 394.186683910377 | 378.24336892367  | 462.948429969719 |
| RBM33  | 772.061917233344 | 827.863789600981 | 876.783710734594 | 1014.23822508445 |
|        | 304.679197422439 | 1162.09529660662 | 676.570119607984 | 809.068563907145 |
|        | 712.067161025165 | 585.721610434501 | 764.493610798958 | 1027.11849332495 |

|        |                  |                  |                  |                  |
|--------|------------------|------------------|------------------|------------------|
| RBM34  | 465.29290512169  | 464.907454552364 | 504.141861790903 | 385.888395433066 |
|        | 293.4021207271   | 633.401624753368 | 598.095370768587 | 813.772804994191 |
|        | 574.496860164135 | 737.843412273272 | 809.068563907145 | 896.185223980593 |
| RBM35A | 149.614643716246 | 146.398454169593 | 167.063762404009 |                  |
|        | 155.253032078086 | 225.362253409428 | 263.994460303088 | 256.174286655796 |
|        | 274.179232297038 | 249.193270428348 | 297.921617748468 | 159.266921692363 |
|        | 243.425632941131 |                  |                  |                  |
| RBM38  | 848.620986404914 | 1003.36623972843 | 662.213423011533 | 1712.47877322331 |
|        | 1293.38808483663 | 310.026522549372 | 372.54091392596  | 233.572055978465 |
|        | 269.379272725008 | 156.34272729153  | 214.824908522393 | 209.229537873706 |
| RBM39  | 581.191693771646 | 453.760162338163 | 378.037190077449 | 476.383294794912 |
|        | 323.20628717764  | 572.262848718437 | 611.772512110915 | 382.401290201025 |
|        | 408.758021864761 | 336.981561928411 | 522.486866458783 | 367.229293432041 |
| RBM4   | 205.560952959537 | 187.645390502607 | 265.829122816166 | 182.165681034082 |
|        | 329.214958614925 | 353.437466689101 | 369.070376276471 | 280.848426993226 |
|        | 354.405235378302 | 302.069236363626 | 271.713695056313 | 388.887050777137 |
| RBM41  | 166.368623023308 | 154.993784224548 | 163.053121879323 | 149.477373469387 |
|        | 153.804419092743 | 172.421637564661 | 168.37043566813  | 184.377923161698 |
|        | 176.194292036542 | 176.516540713888 | 186.482547532546 | 203.276353321185 |
| RBM42  | 739.874432767734 | 898.877732360841 | 551.086785904249 | 1237.56662467492 |
|        | 2039.55802107872 | 659.483452217461 | 652.201948082657 | 650.911886508922 |
|        | 814.471143753335 | 575.386048896223 | 540.359249705821 | 462.144334719146 |
| RBM43  | 213.145460679531 | 186.268881719287 | 251.161789722751 | 206.937770272939 |
|        | 146.40033464957  | 149.601145171769 | 166.503112149416 | 196.716209382446 |
|        | 171.521579011287 | 162.54008293513  | 196.117609477292 | 166.007913607742 |
| RBM44  | 122.194493542073 | 124.542879928448 | 125.840932898827 | 109.398997827329 |
|        | 121.88070274109  | 114.466368742403 | 120.479270037091 | 113.301733735994 |
|        | 125.589744938813 | 135.061176512365 | 124.124076599417 | 118.303150165804 |
| RBM45  | 213.754156680604 | 225.275049011909 | 212.933062534244 | 246.263259852067 |
|        | 268.148673257455 | 376.443086293235 | 359.256193328366 | 269.194172034595 |
|        | 261.203388718689 | 268.961643716282 | 294.808980631295 | 304.357050745605 |
| RBM46  | 127.926270257252 | 142.939578759097 | 154.043604150962 | 150.72835989269  |
|        | 135.148723192316 | 126.372374084002 | 135.86924353735  | 140.837360719964 |
|        | 144.245174255133 | 154.273953018148 | 130.473842500245 | 141.949098898957 |
| RBM47  | 170.661808797506 | 268.885346595453 | 185.706228572019 | 156.477249817844 |
|        | 960.775251871864 | 1203.47834989609 | 1199.35864276583 | 1704.25279485563 |
|        | 2187.3010896903  | 584.433155497378 | 1507.39761667421 | 832.014011481807 |
| RBM4B  | 445.661863626419 | 417.36454228858  | 528.767644181119 | 471.15333189869  |
|        | 279.668007824988 | 433.751675703425 | 542.267204956846 | 555.607185132941 |
|        | 485.309521583972 | 341.64890727921  | 522.77407098992  | 560.362502519639 |
| RBM5   | 2141.855356411   | 1675.35431076885 | 2320.41293992992 | 1825.10168716051 |
|        | 990.55038742453  | 1920.16520804856 | 1782.2498613913  | 1223.06438074895 |
|        | 1923.19560386389 | 1544.45026075974 | 1505.90883940934 | 1788.35884039549 |
| RBM6   | 1043.14253624883 | 816.266384662324 | 1085.38819961412 | 1058.55850972326 |
|        | 436.834825721843 | 633.104379362137 | 632.565736446505 | 390.979822976551 |
|        | 798.758496171493 | 506.898635822094 | 846.985164747386 | 681.510173233582 |
| RBM7   | 207.920724788669 | 222.544542998356 | 244.054469051058 | 160.592404712197 |
|        | 232.667968049771 | 217.307872538386 | 266.71318061066  | 281.168898910065 |
|        | 227.689356258276 | 209.362806125315 | 227.375773052577 | 266.652805624826 |
| RBM8A  | 112.252555403121 | 110.586147059226 | 123.75974844367  | 109.182623414389 |
|        | 114.200099628087 | 119.202966460612 | 120.793974839773 | 122.843792000493 |
|        | 124.904518221898 | 106.719519490874 | 138.215708514725 | 127.466779212194 |

|          |                  |                  |                  |                  |
|----------|------------------|------------------|------------------|------------------|
| RBM9     | 1074.96415574964 | 1099.80705776268 | 929.69741581954  | 1099.37392456694 |
|          | 630.473042320288 | 491.709723745226 | 523.717949503639 | 449.304281526081 |
|          | 473.151324002277 | 514.463945278314 | 455.21285026588  | 599.307072499899 |
| RBMS1    | 428.340060893467 | 414.538237455116 | 362.742120043509 | 266.80383076887  |
|          | 519.27448770158  | 775.382397816601 | 570.26564132238  | 413.398641688413 |
|          | 362.376153348015 | 635.819650434542 | 375.767528676937 | 779.623566217277 |
| RBMS2    | 186.515784641119 | 169.534469894464 | 156.427158441352 | 219.709231012465 |
|          | 153.377182895472 | 113.748724650063 | 150.215811815246 | 135.565256045133 |
|          | 140.283106734666 | 149.029275579026 | 168.628947766217 | 127.325087202483 |
| RBMS2P   | 171.298701141684 | 179.764260117544 | 180.913502162011 |                  |
|          | 185.984938124891 | 182.624130582754 | 218.058543664561 | 190.506201184419 |
|          | 167.063762404009 | 192.61436632814  | 185.493554506958 | 175.510160114891 |
|          | 146.332425559689 |                  |                  |                  |
| RBMS3    | 219.351080515508 | 176.194292036542 | 202.041958613989 | 168.052288484172 |
|          | 120.912905886428 | 137.546487338984 | 127.114560076444 | 133.236084190243 |
|          | 123.507963359911 | 131.552276774901 | 134.23001942966  | 130.418739793498 |
| RBMX     | 664.025683218037 | 721.11578916385  | 907.904780399957 | 606.38343657878  |
|          | 645.806954296487 | 868.86246684338  | 821.465895280454 | 787.874585290601 |
|          | 696.277780670166 | 769.009371389327 | 791.137867905579 | 715.43295523922  |
| RBMX2    | 298.979106293393 | 272.666435295288 | 350.741303038926 | 278.469340236003 |
|          | 295.678097392123 | 311.10841853984  | 317.719381113816 | 273.252023367028 |
|          | 248.562843471699 | 278.775971122032 | 332.885488115858 | 267.149525812834 |
| RBMXL2   | 145.636906369786 | 133.334314509183 | 144.876300850115 |                  |
|          | 138.365589511693 | 135.421804561804 | 135.805294188016 | 150.961462514387 |
|          | 161.195562296834 | 140.680326850085 | 129.205783382977 | 120.170269310738 |
|          | 143.920134762902 |                  |                  |                  |
| RBMY1A1  | 122.204249636472 | 123.084040312047 | 121.905741525277 |                  |
|          | 118.401963042662 | 274.564508105177 | 116.635455849571 | 130.429076594441 |
|          | 125.902015309754 | 123.383334044683 | 137.391141254051 | 117.946664604751 |
|          | 121.014538677616 |                  |                  |                  |
| RBMY1A3P | 121.072192130078 | 120.922042875444 | 125.653011880654 |                  |
|          | 131.08389186558  | 126.730314982553 | 132.851791525098 | 120.304037458526 |
|          | 122.733870240098 | 114.334059060506 | 124.551603326682 | 135.179273562536 |
|          | 125.068362001087 |                  |                  |                  |
| RBMY1B   | 145.904866987074 | 144.631407964232 | 176.995049477843 |                  |
|          | 153.238678313147 | 183.633719048831 | 187.336349390012 | 145.934643000545 |
|          | 142.858554460651 | 149.975892236985 | 143.477670915091 | 139.211746200839 |
|          | 169.192327500032 |                  |                  |                  |
| RBMY1D   | 140.954264409241 | 143.206100064821 | 139.136845089275 |                  |
|          | 123.635470154191 | 147.169765031208 | 138.336667434109 | 132.332128706656 |
|          | 139.097764484641 | 127.926270257252 | 144.754401731628 | 121.930362099901 |
|          | 135.937066152894 |                  |                  |                  |
| RBMY1E   | 139.684885298498 | 151.972509608956 | 127.765987130281 |                  |
|          | 165.41729888767  | 469.333357789149 | 136.786462547129 | 137.347554578171 |
|          | 142.514794686932 | 134.113464449375 | 135.878996521596 | 127.713286292101 |
|          | 133.203064891923 |                  |                  |                  |
| RBMY1F   | 110.296425545476 | 105.859916438163 | 98.4947439453387 |                  |
|          | 104.505454151012 | 116.566190779365 | 102.166449349339 | 104.681530703922 |
|          | 109.038182799871 | 98.1433670546536 | 107.239841465534 | 111.608386387842 |
|          | 119.810421687953 |                  |                  |                  |
| RBMY1J   | 136.986022901377 | 141.990639998829 | 140.260053206523 |                  |
|          | 136.225792549383 | 298.926727289387 | 137.49980051179  | 143.905680376268 |
|          | 135.489000274316 | 138.328508662816 | 139.427216913809 | 130.37185420347  |
|          | 137.649424237506 |                  |                  |                  |

RBMY2EP 130.516632662261 115.624167024067 125.609542142983  
 124.869732867761 137.179058645907 123.21112178671 125.172189715764  
 118.360186663758 131.290698895743 124.449679223202 130.418739793498  
 131.954310449801  
 RBMY2FP 126.019246614944 136.121873179928 136.324020406359  
 126.457337803727 148.87242524521 137.306031826007 161.229621453539  
 143.184697704389 169.691392833277 192.168634727505 179.648479201164  
 162.656951764783  
 RBMY3AP 124.775529469869 136.959011188915 149.593135821045  
 138.461113585594 151.839306445341 132.809364188497 123.132178371802  
 139.127442770828 142.963036923104 116.784024112826 144.345080865349  
 122.595766303833  
 RBP1 1475.41920838384 1525.24196488688 1147.33034082693 1292.13921040404  
 345.565843875296 302.113807121396 186.345823604119 247.779718065751  
 423.607299503704 1058.55850972326 185.17273221366 222.484058975856  
 RBP2 124.828626063272 135.071400668179 128.36121178972 124.365185583133  
 118.294324274616 128.920313557255 130.138945493943 123.660836177932  
 125.830917527594 134.614988219821 150.521719129181 116.919109599361  
 RBP3 108.570463496052 105.31352471598 105.25877906031 106.000943456483  
 119.275061991187 112.14768481333 117.008277388399 112.096627288813  
 116.70650322987 105.096927149239 107.727848546225 112.832122823829  
 RBP4 172.128489882364 155.289242914919 165.860075368566 146.626517077288  
 137.042097702398 142.313725116274 145.493977576106 143.145483889918  
 132.695992860853 136.708746582636 125.467668442298 141.78867917709  
 RBP5 190.111477641308 172.310673499572 162.802392115386 178.045931314857  
 193.48293264444 157.280532261425 171.071893074072 167.67272339144  
 179.704370382771 162.702767346393 170.622615783608 145.97512573326  
 RBP7 193.753062958207 203.19299227665 174.812134675989 182.588697551677  
 179.501659253141 190.002630382394 188.308588359317 168.244523461915  
 165.262738484387 148.567630572897 148.905860943967 163.982415393606  
 RBPJ 179.432235153344 189.799091507686 168.427124752461 166.863589702453  
 158.963726206466 163.19340939648 165.080825814849 183.719279448844  
 196.169988112042 199.423120300557 189.693218759349 152.72717701452  
 RBPJL 157.041481397151 150.046300135261 144.934103671894 143.06806126472  
 147.946236579299 150.709091532746 168.906637816046 156.453108485249  
 140.341589053972 158.216790540415 158.726115143818 156.130224537288  
 RBPMS 470.95418656881 464.196512015649 586.642581067137 498.965895763801  
 183.115511373872 182.439945229388 206.876572583814 182.118544602205  
 190.371287639453 156.224769056915 255.039661999732 171.768618884215  
 RBPMS2 9514.74328718935 9323.53099359448 9527.86367804896  
 12749.804597566 673.176084400831 216.53417734069 155.386226046894  
 247.236004734567 244.954917633904 176.27969404442 137.499290547619  
 169.909886347082  
 RBX1 1942.08859727404 1698.08853832248 1854.11328962023 1466.82170436229  
 2563.02488807613 4134.02613649483 2051.45788386541 2059.09598012857  
 2833.30537635103 2635.31067044245 2153.17165155392 2811.84191700516  
 RC3H1 144.955918499353 121.203149121743 126.924014801186 123.797585446062  
 123.179986410723 132.196506161702 130.430917518283 120.867408760075  
 135.013075032671 118.109991440011 136.428826558493 133.388533738482  
 RC3H2 286.230656780335 246.288681426405 257.602370597316 209.070372320593  
 247.806371601734 223.573080955095 250.217137496422 192.737713851863  
 243.283375388645 313.322307299463 277.501071684448 203.04864785056  
 RCADH5 326.703488388966 303.300028849873 362.502631441716  
 298.664864578349 168.477388641982 360.756455184184 225.803528238368

|        |                  |                  |                  |                  |
|--------|------------------|------------------|------------------|------------------|
|        | 249.400820221233 | 340.239348689005 | 229.907632927358 | 203.999142031297 |
|        | 211.208937901871 |                  |                  |                  |
| RCAN1  | 438.231717096337 | 297.834209533939 | 242.72424280444  | 255.793823796456 |
|        | 172.857643600385 | 208.895657507883 | 216.836094088131 | 166.162656500954 |
|        | 214.991170762327 | 295.727275232995 | 177.639351778834 | 165.607095120227 |
| RCAN2  | 2482.27419621925 | 2886.92690692502 | 2309.63504858248 | 2406.67187918735 |
|        | 128.973904070983 | 223.531323159808 | 127.943935415045 | 204.5274881834   |
|        | 295.330307669482 | 192.655899720909 | 182.827395663312 | 158.463444189819 |
| RCAN3  | 133.830860948014 | 133.768419410758 | 143.419034484087 | 125.828998007608 |
|        | 198.489278156437 | 136.543603346919 | 158.767439363085 | 166.64535048582  |
|        | 159.196987090991 | 221.171478972931 | 169.764014031526 | 184.414609874199 |
| RCBTB1 | 135.925813154268 | 136.960656707275 | 129.025000034273 |                  |
|        | 122.813441348997 | 134.113464449375 | 155.680330654611 | 130.240366272285 |
|        | 133.274292647041 | 141.678529125136 | 121.177681858671 | 162.766038656637 |
|        | 133.890597982015 |                  |                  |                  |
| RCBTB2 | 225.362253409428 | 219.351080515508 | 240.561105692347 |                  |
|        | 211.419445018736 | 162.047249964859 | 179.286187825363 | 142.052454741558 |
|        | 195.256498208339 | 200.486683704179 | 228.9901869793   | 179.100368312505 |
|        | 232.621526025603 |                  |                  |                  |
| RCC1   | 131.110018165002 | 119.730174479044 | 115.02681415256  | 124.086902599543 |
|        | 171.099675679944 | 145.265512354674 | 144.570725886413 | 131.865164933746 |
|        | 125.693321471759 | 129.935532080325 | 141.793216038882 | 139.14544832776  |
| RCC2   | 829.740755449333 | 1421.04485772969 | 795.037968409957 | 1594.05763963363 |
|        | 3810.98043907046 | 3490.77593331727 | 1910.08485008041 | 3282.73711809465 |
|        | 4309.86375945008 | 2578.85391480563 | 2995.42172749615 | 2350.01764791897 |
| RCCD1  | 146.029647001623 | 139.765361891899 | 138.53403492914  | 146.240060512152 |
|        | 127.327765407459 | 127.109798012351 | 148.551340840517 | 138.645156942894 |
|        | 143.019052979243 | 129.612536218578 | 163.267148547147 | 145.686092190716 |
| RCE1   | 181.941224633917 | 182.786177632757 | 161.577683729655 | 176.410016510249 |
|        | 524.855915371246 | 297.708113541379 | 269.053237303244 | 214.933911087009 |
|        | 215.897620927751 | 345.209128382239 | 210.478088018501 | 286.945784387294 |
| RCHY1  | 150.359906271672 | 150.582568022489 | 153.34166495223  | 138.28374062778  |
|        | 140.826051635712 | 162.819608252826 | 146.531692460121 | 157.912864169081 |
|        | 148.967232828819 | 143.851670859917 | 152.454414703534 | 167.547551072373 |
| RCL1   | 174.568253693395 | 181.771654391653 | 195.569517538477 | 143.993611400272 |
|        | 204.090674444834 | 210.590774758661 | 171.671895682052 | 316.590387560909 |
|        | 212.571491543077 | 231.819341041105 | 283.326226944158 | 203.456296907031 |
| RCN1   | 1184.88559645917 | 1273.6393529108  | 694.429144766435 | 836.613819700658 |
|        | 1480.52638217173 | 1047.78978081493 | 2352.01196541874 | 1386.56788941677 |
|        | 1890.86868383409 | 764.137504481329 | 1445.72064343302 | 724.777166238211 |
| RCN2   | 287.287337931982 | 247.683819429859 | 403.984761333129 | 196.053808536366 |
|        | 514.354512083591 | 1392.89422203207 | 1456.76683429755 | 747.322544683874 |
|        | 848.154015576436 | 675.978379566859 | 652.429025114523 | 1247.02514044778 |
| RCN3   | 298.460273458181 | 267.342817344746 | 235.933451977398 | 286.469773081481 |
|        | 2913.2685312165  | 204.453822958077 | 182.130970182242 | 206.585387130993 |
|        | 219.044271073282 | 316.801725268792 | 165.2958475168   | 163.284853420896 |
| RCOR1  | 120.577995272053 | 118.100611964852 | 115.53736269794  | 113.568261995787 |
|        | 118.442856984861 | 120.964862799634 | 119.150626141327 | 112.219585614955 |
|        | 114.638254225216 | 119.049388179929 | 117.261443445891 | 115.795989631016 |
| RCOR2  | 203.125568980238 | 234.094722315007 | 192.465510013851 | 270.847923557176 |
|        | 484.028175202673 | 191.160340745501 | 157.341422939225 | 170.974759483946 |
|        | 200.179796117115 | 162.10411532202  | 298.460273458181 | 275.203046536524 |

|       |                  |                  |                  |                  |
|-------|------------------|------------------|------------------|------------------|
| RCOR3 | 1011.14472068314 | 1062.749459378   | 1243.11900823259 | 1065.74382494535 |
|       | 294.48534582475  | 546.029974898225 | 503.59466398882  | 335.790909130243 |
|       | 461.581199513891 | 353.774297577869 | 809.729160605727 | 820.652972219658 |
| RCP9  | 147.05034328496  | 166.298554732581 | 132.418902141838 | 164.736294372006 |
|       | 144.757068610657 | 161.713311969291 | 163.575300618666 | 161.744366588564 |
|       | 160.176567985923 | 140.709981878311 | 163.788418732315 | 208.095384605737 |
| RCSD1 | 218.615551704188 | 213.7326050342   | 207.138680369683 | 209.93789387724  |
|       | 152.303524109428 | 147.510848198689 | 140.531789506024 | 172.750926094884 |
|       | 198.506786870804 | 145.870135196037 | 167.70368494182  | 134.93814894432  |
| RCVRN | 140.471953101887 | 133.301527400458 | 141.426756696799 | 154.250656489421 |
|       | 125.77343813277  | 148.245974323625 | 144.389805078873 | 148.43357593249  |
|       | 140.242272149424 | 129.779076484273 | 142.563762845657 | 132.587392944892 |
| RD3   | 143.438417529799 | 142.833025633146 | 143.548858367002 | 128.96181458192  |
|       | 133.274292647041 | 130.962368929833 | 132.481710681317 | 138.165240772401 |
|       | 137.794858639838 | 150.922279808832 | 142.201672822989 | 126.921925660996 |
| RDBP  | 234.432954093705 | 240.341031437493 | 232.321454436688 | 276.434192872962 |
|       | 323.628636799403 | 264.741946816665 | 288.913660405191 | 267.372241661758 |
|       | 227.418630852215 | 270.069634610818 | 216.033564783918 | 275.908856196757 |
| RDH10 | 373.361263985383 | 265.972387419683 | 299.986758612161 | 221.768507175814 |
|       | 353.187829498591 | 338.406266073063 | 318.73799597811  | 461.143361255467 |
|       | 661.826149512811 | 189.0608798771   | 237.989479738133 | 240.663883443935 |
| RDH11 | 1207.11788506001 | 1581.06548216423 | 1126.46241487062 | 1861.19763103381 |
|       | 713.832153334389 | 634.046843336128 | 1005.62130301653 | 1027.11849332495 |
|       | 979.019125719101 | 1020.19774509086 | 890.810315261602 | 891.194779815063 |
| RDH12 | 117.49013401175  | 119.060186838239 | 118.015175851934 | 117.969576809288 |
|       | 145.259981479761 | 129.871985352583 | 119.207503310618 | 116.746018509166 |
|       | 235.063474370925 | 129.661073814998 | 131.193538235053 | 119.645983822002 |
| RDH13 | 285.46340356157  | 371.819911874273 | 264.355693070937 | 386.067573158514 |
|       | 1343.2623011534  | 314.337680575998 | 837.603727062008 | 345.897250519387 |
|       | 320.648966489586 | 478.38361571213  | 390.897464546943 | 291.167223094542 |
| RDH14 | 1034.68475089075 | 1204.7397215229  | 1176.62418139379 | 1309.01193284992 |
|       | 1259.75918248468 | 805.120147618984 | 1064.12835214671 | 841.623780229898 |
|       | 667.892385395063 | 672.348723983535 | 746.523071806534 | 967.797017108447 |
| RDH16 | 122.300069045533 | 132.668344126625 | 122.382304966782 | 132.37223410529  |
|       | 132.883408554592 | 132.168821720799 | 152.20173979854  | 130.998637545686 |
|       | 121.519309043513 | 141.193081790037 | 126.484819755399 | 121.895778599116 |
| RDH5  | 378.037190077449 | 325.999687273862 | 314.182403961681 | 495.099443245153 |
|       | 158.49220347186  | 153.097557560333 | 129.672284417918 | 216.836094088131 |
|       | 246.237243726748 | 174.177944561595 | 164.299585578035 | 173.611295051326 |
| RDH8  | 146.306467130749 | 144.008961720971 | 141.205975588506 | 158.95714101556  |
|       | 156.581569063195 | 140.377179372804 | 161.895435127054 | 154.368499839507 |
|       | 147.78095608696  | 157.976810829398 | 132.348603553752 | 145.158039427157 |
| RDM1  | 141.879359965317 | 161.821372157067 | 145.07503221134  | 149.390481900424 |
|       | 149.548900791507 | 165.491193869938 | 147.192815700248 | 204.057019122032 |
|       | 176.001771318766 | 142.448384713937 | 141.010588053284 | 158.411846122784 |
| RDX   | 451.718912714608 | 401.584032365337 | 443.853458865556 | 353.385210690169 |
|       | 959.126054626181 | 267.422232051733 | 621.825622897512 | 546.029974898225 |
|       | 201.085046871333 | 283.645434184168 | 654.881990232975 | 265.972387419683 |
| REC8  | 216.53417734069  | 202.718428167217 | 219.753039699136 | 208.838523729744 |
|       | 177.151218006672 | 163.582678113215 | 212.915949933033 | 239.762135294506 |
|       | 291.994364783888 | 191.365014963729 | 273.835371304535 | 281.405355165228 |
| RECK  | 656.32782132983  | 528.478292835214 | 445.089930641391 | 446.509863498357 |
|       | 147.879286704    | 166.440530119785 | 146.669620721254 | 151.758970249544 |
|       | 163.290050020756 | 161.371477511362 | 148.029259633449 | 144.310362660942 |

|        |                  |                  |                  |                  |
|--------|------------------|------------------|------------------|------------------|
| RECQL  | 301.871924474014 | 327.696359071012 | 316.237519859859 | 304.547738011742 |
|        | 209.487240895674 | 311.269750643358 | 274.047586063773 | 359.703969802888 |
|        | 314.646369385896 | 377.148528768679 | 329.48021621087  | 279.668007824988 |
| RECQL4 | 165.942761337382 | 147.954079022076 | 138.728765780512 |                  |
|        | 156.046085830566 | 330.321113875647 | 207.400490077106 | 175.452986514346 |
|        | 229.181725450534 | 230.546762514966 | 153.488903967311 | 158.63432604978  |
|        | 194.552533397944 |                  |                  |                  |
| RECQL5 | 144.970383956581 | 155.444668113276 | 147.624372080117 |                  |
|        | 153.655778377717 | 156.228039404029 | 144.154217446011 | 147.951996191313 |
|        | 150.69097927373  | 159.115391667901 | 131.726540162023 | 160.742365719929 |
|        | 149.556644928013 |                  |                  |                  |
| REEP1  | 1411.2586496281  | 1747.33558205825 | 1722.26954281876 | 2320.41293992992 |
|        | 111.336798977475 | 134.387256336429 | 110.544044723728 | 111.743461522689 |
|        | 133.368199807997 | 108.861243071977 | 115.896463925125 | 110.138220982557 |
| REEP2  | 297.466255000163 | 344.529927973082 | 240.94056877904  | 608.959089074987 |
|        | 105.050093408041 | 119.366599958278 | 117.071585083051 | 106.719519490874 |
|        | 108.2359175332   | 109.700513642061 | 110.286187184448 | 119.517021355598 |
| REEP3  | 126.230887413874 | 126.186758919929 | 126.143886553557 | 116.241531823869 |
|        | 153.477432230141 | 125.324187741972 | 136.321816321193 | 135.9489027281   |
|        | 140.992801405088 | 142.179197020805 | 151.852294315212 | 131.284359027597 |
| REEP4  | 133.120273569229 | 162.203570429542 | 191.924177620803 | 152.356731704094 |
|        | 402.866491417369 | 186.156006020985 | 274.01377986185  | 200.767743455226 |
|        | 212.33360547376  | 268.698146407497 | 268.961643716282 | 221.322724563472 |
| REEP5  | 2941.69058596077 | 2698.5455305009  | 2941.69058596077 | 2330.60389526686 |
|        | 603.906237227931 | 2390.41825815872 | 2230.45015969936 | 2028.67873136046 |
|        | 1573.03248861784 | 2185.46850787298 | 3103.4192907748  | 2525.90466050731 |
| REEP6  | 138.655815405894 | 162.447903830131 | 143.290642777702 | 137.754373055094 |
|        | 2135.04382065446 | 980.120729515821 | 427.98782239715  | 942.900963522948 |
|        | 353.674560414317 | 223.311817085871 | 424.578659172414 | 429.992169596618 |
| REG1A  | 138.530236176135 | 142.313725116274 | 154.343424387068 | 171.595724119779 |
|        | 152.524106827617 | 164.466332705334 | 146.701489210289 | 134.524644163286 |
|        | 135.767818903328 | 125.353389826276 | 138.132390735567 | 147.939682463235 |
| REG1B  | 153.354921961854 | 155.861829925386 | 143.665359343809 | 155.465250172768 |
|        | 162.638805580226 | 145.108281984556 | 153.066630483602 | 147.510848198689 |
|        | 135.082715974111 | 141.262319193649 | 146.482652762374 | 161.12121879514  |
| REG1P  | 137.410687900298 | 143.799113486767 | 145.267225993057 | 133.425151103622 |
|        | 148.482530949134 | 148.794293762142 | 135.864853829421 | 139.878752507646 |
|        | 137.180793826675 | 129.25124636593  | 147.677900030844 | 141.216869032251 |
| REG3A  | 137.27298184582  | 142.671190279415 | 143.697931551096 | 147.743331160624 |
|        | 141.256915527472 | 141.81391138301  | 128.124456615525 | 158.477017294725 |
|        | 152.526785074182 | 128.876385705559 | 144.290286088611 | 148.224587582189 |
| REG3G  | 130.097543328456 | 124.35374445763  | 132.978746105877 | 123.336074100984 |
|        | 127.893555451807 | 128.576310682958 | 131.853183159267 | 128.327528039933 |
|        | 125.048770476506 | 129.366567668463 | 138.108184983014 | 126.265475477399 |
| REG4   | 117.335748689217 | 114.223991452083 | 103.691075663721 | 119.427342766092 |
|        | 115.35376992547  | 126.708817316134 | 110.858201415824 | 126.777633512781 |
|        | 118.348153875356 | 115.053039576143 | 131.18368961955  | 115.137475087954 |
| REL    | 156.813992534584 | 159.891562221587 | 144.112401069818 | 125.742631850732 |
|        | 149.274901871663 | 316.955298948771 | 238.124340832815 | 276.224613560582 |
|        | 223.389795643722 | 208.507486041165 | 302.219514290905 | 209.596792486876 |
| RELA   | 206.77605957523  | 177.083095120017 | 216.559563381808 | 203.642739476708 |
|        | 344.992791638415 | 224.167511918105 | 214.991170762327 | 206.321272734099 |
|        | 233.82434521462  | 211.395593720534 | 195.057830521304 | 202.178451227304 |



|        |                  |                  |                  |                  |
|--------|------------------|------------------|------------------|------------------|
| RELB   | 178.347708009405 | 185.199972151831 | 143.082880435412 | 177.306794546105 |
|        | 256.370052241046 | 202.44778603643  | 159.891562221587 | 218.314136992677 |
|        | 228.542423012958 | 179.30729544595  | 252.222481637238 | 207.269530621176 |
| RELL1  | 292.893332413185 | 286.506419296679 | 247.504198063293 | 233.047541132048 |
|        | 198.795112039249 | 197.947433984294 | 176.176392369178 | 189.853136769155 |
|        | 216.457866890673 | 260.370285504512 | 205.966111721195 | 190.871696848118 |
| RELL2  | 150.48236051337  | 148.323729699672 | 164.89597889259  | 145.265512354674 |
|        | 235.291035302211 | 165.904887259203 | 197.565122821625 | 193.48293264444  |
|        | 156.073428882485 | 211.916602665089 | 184.241640200823 | 221.027562527572 |
| RELN   | 199.947823264085 | 181.941224633917 | 157.11867820027  | 211.809434609469 |
|        | 119.717408713154 | 123.306499698566 | 121.778756075848 | 121.636361281148 |
|        | 124.469415593643 | 115.392989580183 | 115.734230176652 | 128.195916531413 |
| RELT   | 136.068644730893 | 127.930072902878 | 130.169291786693 | 130.724642809645 |
|        | 124.17231659571  | 123.916497557628 | 125.79193748535  | 128.129780978486 |
|        | 130.729989463558 | 130.712515995658 | 141.332402615602 | 126.611663427876 |
| REM1   | 157.546123603057 | 182.545896049446 | 133.218742606195 | 198.522123898437 |
|        | 125.861564323476 | 114.906396746556 | 113.025793645043 | 119.249084967945 |
|        | 150.620603731907 | 126.301178976594 | 119.261305304165 | 116.363556872071 |
| REM2   | 153.378150559081 | 169.940177050294 | 151.121293928309 | 155.172667450053 |
|        | 140.943732564849 | 165.808660192901 | 147.150063462728 | 150.0674092434   |
|        | 128.551335256123 | 140.839056652898 | 145.308548379215 | 151.674143983846 |
| REN    | 119.950579480571 | 114.880348648147 | 122.766778018066 | 116.989409891761 |
|        | 128.044165393924 | 113.810645407837 | 117.523834738903 | 126.526489290128 |
|        | 121.311836944721 | 132.677272839165 | 159.655362710407 | 127.274768398849 |
| RENBP  | 281.49247863022  | 315.130912368929 | 260.278595572575 | 526.970555181851 |
|        | 431.093544964576 | 187.519053043173 | 142.255657518926 | 190.389158930835 |
|        | 316.237519859859 | 139.6391154169   | 162.416774743901 | 154.764283765316 |
| REP15  | 141.76964678852  | 146.181764812924 | 166.780319723055 | 158.185593294878 |
|        | 164.160608039304 | 141.571389983164 | 138.285325970867 | 139.880733465536 |
|        | 168.180063344887 | 125.400741907779 | 178.072538529634 | 164.164463389212 |
| REPIN1 | 412.048097766066 | 513.662594875431 | 563.339837352678 |                  |
|        | 623.508710830895 | 774.180202250076 | 538.369868115137 | 1144.07896461196 |
|        | 750.494286476465 | 1026.61404215739 | 273.073938260793 | 705.020444579319 |
|        | 657.562129888446 |                  |                  |                  |
| REPS1  | 162.168246402027 | 166.671563123047 | 199.620978536397 | 186.939168482155 |
|        | 147.027904536486 | 157.368974632451 | 178.347708009405 | 152.459041674768 |
|        | 152.654938328424 | 166.868688936939 | 163.385727569154 | 152.101695555105 |
| REPS2  | 138.53179773391  | 133.564350740049 | 140.334331111538 | 132.508133846896 |
|        | 181.37137053478  | 137.299908075811 | 151.508738608925 | 163.340435089911 |
|        | 158.594064857041 | 137.944260488223 | 201.186963432715 | 147.920946479942 |
| RER1   | 330.321113875647 | 328.401537339876 | 339.012225830929 | 355.714202328378 |
|        | 690.582550537485 | 398.892968579918 | 562.089999265955 | 399.537363692534 |
|        | 467.90388853336  | 376.791876040886 | 486.778046640624 | 471.315730378641 |
| RERE   | 1047.2693539616  | 1115.34267967366 | 1160.25775445193 | 1500.16816750361 |
|        | 386.960778432157 | 402.026356201632 | 433.314881387431 | 451.621888586656 |
|        | 565.97975389646  | 207.815226999953 | 638.287221212947 | 329.722135361491 |
| REGG   | 419.690542859168 | 490.464012303239 | 535.041545916303 | 452.961307006622 |
|        | 148.938822951404 | 163.54669668396  | 149.473505461585 | 160.099731578122 |
|        | 177.630246034993 | 177.083095120017 | 146.887506793665 | 142.700311964178 |
| RERGL  | 354.981966077502 | 705.311256840178 | 246.533813165981 | 481.238450505207 |
|        | 140.26557508894  | 133.850733997442 | 131.989955864584 | 156.194996994993 |
|        | 279.113984512619 | 146.406344338757 | 119.774204444899 | 110.475453268997 |
| RESP18 | 133.621325902558 | 133.399632102473 | 142.296446144179 |                  |
|        | 135.693520183014 | 144.492756323647 | 142.971972776388 | 164.160608039304 |

|          |                  |                  |                  |                  |
|----------|------------------|------------------|------------------|------------------|
|          | 145.684294398911 | 148.592330216136 | 127.954231630338 | 125.712260481294 |
|          | 137.981446468611 |                  |                  |                  |
| REST     | 137.846463796994 | 147.15999706579  | 136.37481047902  | 141.164985468046 |
|          | 142.348246621217 | 140.401508808129 | 136.969124414576 | 150.761696482387 |
|          | 146.692827583525 | 146.563078818674 | 149.636887782574 | 152.528571776589 |
| RET      | 147.740657356905 | 145.01322767825  | 137.20509387214  | 145.44629057846  |
|          | 153.488903967311 | 142.402227523617 | 138.317443162096 | 152.516485296644 |
|          | 131.46193427125  | 141.356127724777 | 146.64560446484  | 144.088525606919 |
| RETN     | 121.942777234608 | 128.84738760112  | 172.758230728437 | 143.399877326927 |
|          | 133.97321873161  | 135.59027155522  | 127.404415477384 | 134.285191872099 |
|          | 139.256416415149 | 158.072347847051 | 116.558752619296 | 130.779805222363 |
| RETNLB   | 142.501655618849 | 148.764956861822 | 154.420795931034 |                  |
|          | 144.529801006864 | 165.307808075027 | 159.946124520038 | 152.47429737104  |
|          | 145.588981165456 | 146.40033464957  | 154.354658146438 | 150.878323882503 |
|          | 143.893751699551 |                  |                  |                  |
| RETSAT   | 237.191866335979 | 217.778414825515 | 350.22221782412  |                  |
|          | 227.926444925478 | 333.131139447511 | 275.252966071473 | 256.99019407912  |
|          | 308.877027622691 | 231.202047619476 | 400.845137156678 | 251.588748783592 |
|          | 186.625452120269 |                  |                  |                  |
| REV1     | 607.979208454176 | 606.851072672402 | 620.371912523332 | 510.285766295993 |
|          | 339.490955270138 | 560.180656219785 | 591.437752991512 | 479.469659712246 |
|          | 407.052451784773 | 478.606567465979 | 688.464980326689 | 605.437395034282 |
| REV3L    | 199.149959995133 | 165.471587934831 | 204.103018614608 | 140.763592237598 |
|          | 110.003750007057 | 151.865924163231 | 144.456324230938 | 134.074425424613 |
|          | 137.358139652612 | 147.461480849333 | 149.975892236985 | 144.432181150583 |
| REXO1    | 225.850439131864 | 236.899421827427 | 221.916075811355 | 297.368197598038 |
|          | 300.675907594637 | 274.235001739215 | 299.935166870211 | 255.413231082357 |
|          | 232.918330930051 | 157.898632788579 | 271.897511879509 | 264.383922859446 |
| REXO1L1  | 119.627380812035 | 108.955761698524 | 115.389934936253 |                  |
|          | 125.134516902118 | 110.735199684144 | 120.406577236405 | 114.234369421536 |
|          | 106.629065516249 | 111.448871835514 | 125.021217009254 | 132.161764435769 |
|          | 117.958297137758 |                  |                  |                  |
| REXO1L2P | 131.468537312778 | 129.875986080057 | 130.242779079309 |                  |
|          | 130.99564079691  | 140.225329742578 | 133.146347243168 | 140.014167357286 |
|          | 114.400185930969 | 124.460064642088 | 141.939368369872 | 134.361064431414 |
|          | 134.785623496928 |                  |                  |                  |
| REXO1L3P | 147.129702047639 | 149.879951192667 | 163.788418732315 |                  |
|          | 146.336371857755 | 153.907737500104 | 139.408234219133 | 128.102787239877 |
|          | 148.760280320258 | 141.202092246048 | 161.806144472744 | 138.681348536008 |
|          | 138.489443610941 |                  |                  |                  |
| REXO1L5P | 134.865577264797 | 156.978585870854 | 143.211127738941 |                  |
|          | 136.812841133892 | 137.992477770842 | 141.33919297402  | 136.19725093985  |
|          | 140.074841537258 | 136.691234705997 | 134.031960707639 | 148.448349327493 |
|          | 148.65131922365  |                  |                  |                  |
| REXO1L6P | 114.358099210532 | 137.834158814913 | 118.269780903508 |                  |
|          | 117.445284668654 | 119.702874945404 | 129.920586100555 | 136.184427467391 |
|          | 121.027465953657 | 129.687743133943 | 116.664031217378 | 138.317443162096 |
|          | 128.268241654928 |                  |                  |                  |
| REXO2    | 2462.87034563426 | 2061.9164323309  | 2694.98079256089 | 2511.04500638697 |
|          | 2558.91648313228 | 934.173273294189 | 2197.44189747261 | 1836.22560264874 |
|          | 1982.3154578939  | 1825.10168716051 | 1896.69856822105 | 1332.11815966955 |
| REXO4    | 450.120868656638 | 434.855262284265 | 458.282682131641 | 537.216291942143 |
|          | 560.481802403627 | 320.360917595936 | 433.82566459288  | 369.198837083585 |
|          | 569.353661326724 | 493.071213662125 | 150.224472335504 | 341.761516859319 |

|        |                  |                  |                  |                  |
|--------|------------------|------------------|------------------|------------------|
| RFC1   | 381.57978490093  | 398.61164689194  | 467.04976953755  | 395.261210769232 |
|        | 239.704459251571 | 303.138041758745 | 373.656487297238 | 318.690043546203 |
|        | 358.654569870431 | 379.016207754533 | 338.223462327622 | 308.208276315292 |
| RFC2   | 174.775676782795 | 168.682307349713 | 176.371404525626 | 163.066051106092 |
|        | 183.894417745549 | 191.814634229865 | 180.518621542868 | 217.050602253281 |
|        | 204.415267938007 | 229.594081405784 | 159.936703616817 | 236.809829701921 |
| RFC3   | 147.285764611006 | 145.625205055601 | 145.229637715814 | 147.433388299999 |
|        | 155.715728894101 | 224.588225855066 | 162.022232949254 | 186.345823604119 |
|        | 196.399050990244 | 187.833356349429 | 156.702300398105 | 199.776140037612 |
| RFC4   | 250.060734219351 | 228.499052416183 | 264.805236346895 | 259.426050921239 |
|        | 486.425387717472 | 341.819090221654 | 383.682951666155 | 521.215655189324 |
|        | 623.508710830895 | 445.95114929414  | 259.796092536601 | 381.808809625801 |
| RFC5   | 206.571433405844 | 214.019190624184 | 197.2893692747   | 217.165036362034 |
|        | 412.648926259488 | 319.490670412394 | 357.514919818489 | 379.862305342147 |
|        | 427.345809255426 | 381.740838644647 | 306.193157874683 | 313.248029961291 |
| RFESD  | 157.986640251147 | 146.070871543153 | 159.046016068252 | 164.520247586053 |
|        | 155.798048652444 | 151.801558435863 | 189.528686948872 | 146.524138043215 |
|        | 148.482530949134 | 171.826623289946 | 178.563665283267 | 161.670800376344 |
| RFFL   | 191.322056430728 | 173.919504730673 | 185.984938124891 | 166.346572488391 |
|        | 184.801068553988 | 210.882890077598 | 185.31769184805  | 241.353916553991 |
|        | 210.478088018501 | 165.307808075027 | 185.507663455634 | 210.478088018501 |
| RFK    | 146.215459988012 | 146.165632086981 | 149.516743790585 | 139.625635881693 |
|        | 134.85590586532  | 138.56812029378  | 141.466287523861 | 139.611455791957 |
|        | 138.603793282123 | 140.885012530186 | 152.182968451691 | 133.731500722599 |
| RFNG   | 344.247544510881 | 369.156887999872 | 350.077206368839 | 428.340060893467 |
|        | 638.77182631975  | 324.067396271281 | 528.098472417251 | 493.715108157171 |
|        | 300.83667045718  | 315.689865927834 | 283.191303666907 | 404.445038343721 |
| RFP    | 262.452869676209 | 271.568797887976 | 247.746304138866 | 262.861105654051 |
|        | 273.197814995543 | 284.940858938629 | 394.186683910377 | 219.246271924313 |
|        | 250.82359383789  | 211.692743811486 | 761.726829618132 | 269.006221210929 |
| RFPL1  | 123.170639180926 | 133.374199939042 | 140.659276788384 | 127.209043595332 |
|        | 139.260868989409 | 131.423918669689 | 146.775403409562 | 140.770705453805 |
|        | 147.113541493157 | 153.200153031275 | 164.208044717557 | 132.37450516592  |
| RFPL1S | 120.094156375538 | 130.488972210403 | 129.977863589097 |                  |
|        | 134.877046981678 | 128.663320241092 | 128.585911203394 | 124.720004905439 |
|        | 123.977467396003 | 133.738587139139 | 127.229854957588 | 146.007311764212 |
|        | 127.215777044942 |                  |                  |                  |
| RFPL2  | 129.79093244374  | 139.847813838017 | 124.521130036013 | 133.832462719784 |
|        | 142.073529553425 | 131.809235171629 | 138.483436753942 | 135.673080643346 |
|        | 132.088335186716 | 126.203255277356 | 128.425838805072 | 136.539849534341 |
| RFPL3  | 135.82038791723  | 140.321675137237 | 137.744318243173 | 132.897554980037 |
|        | 134.955823960889 | 143.247977741752 | 138.466136108202 | 144.411176964424 |
|        | 131.216673806987 | 138.76667538162  | 125.596067857941 | 132.079255703621 |
| RFPL3S | 129.253638326633 | 130.657342262492 | 124.095340478326 |                  |
|        | 117.590393673861 | 136.008118769513 | 138.870636101334 | 129.603952706231 |
|        | 130.33205883588  | 133.238296113721 | 118.465111174212 | 136.330636532576 |
|        | 131.036225888592 |                  |                  |                  |
| RFPL4A | 154.876638004094 | 172.259627777465 | 154.843607752473 |                  |
|        | 175.767556472012 | 162.834961996238 | 145.917220112846 | 147.205511952997 |
|        | 163.586549438955 | 148.975112606364 | 171.022976593689 | 159.867178630115 |
|        | 142.768691899824 |                  |                  |                  |
| RFPL4B | 145.281664250703 | 132.291157461345 | 140.701132362458 |                  |
|        | 143.519786615253 | 136.011474063229 | 129.051642626091 | 137.805436529896 |

|         |                  |                  |                  |                  |
|---------|------------------|------------------|------------------|------------------|
|         | 146.488402397597 | 138.562576783507 | 146.803549606737 | 141.743873995642 |
|         | 129.43892498257  |                  |                  |                  |
| RFT1    | 120.418709541104 | 126.216519704249 | 125.14833026167  | 120.964862799634 |
|         | 137.913497715424 | 116.52455193626  | 130.018928906449 | 120.39039576721  |
|         | 137.609831343223 | 136.402156383599 | 151.26137860684  | 127.729912390394 |
| RFTN1   | 1235.75946952752 | 1165.05055932899 | 604.453803994875 | 1007.41624313399 |
|         | 311.806908624308 | 482.344514972063 | 341.2887754025   | 506.290241222253 |
|         | 960.491731797061 | 1040.29664343743 | 397.307515234646 | 648.161646065464 |
| RFTN2   | 309.538690289233 | 249.129943906228 | 222.332748220525 | 236.164692035094 |
|         | 124.752198904184 | 162.668896609848 | 117.928456234796 | 161.490941000872 |
|         | 155.218336968191 | 169.725534829981 | 184.672330560677 | 118.891276329399 |
| RFFWD2  | 677.802147190757 | 633.594811068524 | 628.710901107436 | 617.318955611228 |
|         | 1232.66885974069 | 900.039744829725 | 955.143610867351 | 1692.01248523526 |
|         | 928.151632070573 | 604.237898104299 | 834.537908087672 | 1405.2134783352  |
| RFFWD3  | 276.830814061474 | 314.486603134656 | 238.461248099002 | 284.638865013916 |
|         | 460.089380701982 | 537.419316887523 | 409.477576085245 | 618.829716818725 |
|         | 650.494111214312 | 611.772512110915 | 492.780880796036 | 784.72162514331  |
| RFX1    | 320.936905584424 | 299.170431746759 | 225.730739636442 | 265.028512407839 |
|         | 478.847650837714 | 233.690524419327 | 234.214191437687 | 261.721726664029 |
|         | 305.451247405518 | 290.135914275115 | 294.033003779363 | 268.111403429364 |
| RFX2    | 213.877482604185 | 231.890885094917 | 165.003646188775 | 169.206723147505 |
|         | 170.439725847568 | 128.649329515033 | 141.15458637181  | 122.716563069312 |
|         | 125.429085234515 | 126.428284589412 | 150.95033946042  | 120.882166798648 |
| RFX3    | 142.305484770249 | 143.774841336279 | 149.164469334038 | 148.905860943967 |
|         | 146.67875644027  | 142.501655618849 | 139.094167748687 | 148.551340840517 |
|         | 135.200049257744 | 146.176240539176 | 135.173464753848 | 146.276706674761 |
| RFX4    | 144.81320329947  | 142.191569406599 | 144.903414594588 | 135.484360570738 |
|         | 131.025725443485 | 137.337681987169 | 138.416716745934 | 132.953762692926 |
|         | 140.567565996849 | 134.487476333464 | 150.215811815246 | 136.80943340993  |
| RFX5    | 390.501797367707 | 378.151202933526 | 428.66614441422  | 425.969575503375 |
|         | 311.208703262497 | 283.27806319488  | 291.779980648289 | 568.935113269368 |
|         | 431.019896339435 | 275.929414239664 | 504.709613434391 | 385.522443482    |
| RFX6    | 149.867541008113 | 151.889644436875 | 148.785977829275 | 142.137885203233 |
|         | 142.024171830924 | 163.661196423902 | 146.479009988445 | 152.301556397498 |
|         | 142.540433565262 | 149.153827025981 | 148.253612913109 | 145.864902319111 |
| RFX7    | 667.892385395063 | 776.98412594767  | 723.250763797522 | 733.86133557115  |
|         | 630.670530516275 | 849.784051720996 | 1103.81439809121 | 697.774882173237 |
|         | 839.324324662619 | 627.803400871547 | 1033.03719406038 | 953.099915501575 |
| RFXANK  | 245.811312606484 | 256.291984914927 | 256.614964511846 |                  |
|         | 332.343558229873 | 381.740838644647 | 317.244256751418 | 326.962330523237 |
|         | 328.550286726543 | 264.779154931102 | 320.936905584424 | 278.219561902233 |
|         | 279.834616502591 |                  |                  |                  |
| RFXAP   | 155.828962183804 | 158.708054164813 | 166.489436134841 | 166.944701842349 |
|         | 138.866469244936 | 172.80265044721  | 146.501559368223 | 141.770977101211 |
|         | 178.628885995439 | 139.242481781927 | 158.834483073542 | 160.828718858381 |
| RFXDC2  | 129.138035235415 | 160.848201202361 | 140.083495854322 |                  |
|         | 143.905680376268 | 126.63730651721  | 165.665796569389 | 140.805322576253 |
|         | 135.373824773008 | 129.389420352857 | 121.107979534361 | 155.069048442532 |
|         | 166.606522485953 |                  |                  |                  |
| RG9MTD1 | 181.803275243281 | 177.812335593522 | 194.789918629905 |                  |
|         | 173.260348096238 | 216.903719298575 | 257.534293550585 | 269.300548648755 |
|         | 249.234065130083 | 223.872330412144 | 197.72068061775  | 209.913460781088 |
|         | 248.594000664466 |                  |                  |                  |

|         |                  |                  |                  |                  |
|---------|------------------|------------------|------------------|------------------|
| RG9MTD2 | 160.553214127047 | 150.991991926229 | 138.752600540409 |                  |
|         | 150.232470359841 | 143.917152377544 | 201.676984786688 | 163.141010815086 |
|         | 186.708059183893 | 216.05364037271  | 153.039237274992 | 182.453722105813 |
|         | 162.638805580226 |                  |                  |                  |
| RG9MTD3 | 227.689356258276 | 207.173653740239 | 258.695920967489 |                  |
|         | 223.638850960288 | 177.549330396268 | 204.574706925957 | 200.456087759904 |
|         | 186.1961391235   | 186.999459152483 | 181.294497402507 | 193.554028681854 |
|         | 193.660159482867 |                  |                  |                  |
| RGAG1   | 128.753623886188 | 115.29099102455  | 118.461037435114 | 110.925532078514 |
|         | 123.773753287854 | 120.735176435195 | 117.692662275393 | 115.090463537716 |
|         | 115.520278378747 | 112.309528593741 | 118.076139318165 | 119.112063328364 |
| RGAG4   | 144.924212639731 | 150.391286215189 | 139.880733465536 | 140.357427912361 |
|         | 117.15886922795  | 120.138014822486 | 127.524310543779 | 122.27785621724  |
|         | 119.655162437465 | 115.417648857825 | 140.074841537258 | 122.392159083328 |
| RGL1    | 1586.00600118477 | 1481.24705642453 | 878.167149313285 | 1241.59946353857 |
|         | 277.726756691133 | 698.590134238302 | 375.189005729903 | 381.182514249587 |
|         | 557.513306351027 | 437.344765185802 | 460.807117177285 | 334.350011399462 |
| RGL2    | 269.345125874858 | 302.696004448559 | 255.839878446312 | 358.975346234854 |
|         | 535.49374437073  | 250.060734219351 | 330.143103381406 | 240.511797905018 |
|         | 275.543576337502 | 231.846509449829 | 385.379119927642 | 286.901115411673 |
| RGL3    | 143.004090696463 | 167.186780161168 | 179.203783335674 | 152.826356673175 |
|         | 177.343586047942 | 165.027938535393 | 166.850279817976 | 178.717719615544 |
|         | 150.331324340476 | 138.56436658053  | 172.050718136571 | 184.954673605577 |
| RGL4    | 182.969563278473 | 172.612152484322 | 158.319248599976 | 154.417731984391 |
|         | 176.75095377028  | 148.951632781748 | 173.09379121032  | 164.377227860031 |
|         | 192.209344004015 | 170.313045875402 | 174.338440780636 | 155.868109161417 |
| RGMA    | 439.928008927647 | 420.95713139384  | 373.452370692334 | 600.838420404663 |
|         | 165.320977593677 | 214.86995782548  | 194.029961195972 | 191.628693083169 |
|         | 213.966288689715 | 311.449205777595 | 177.415756020166 | 183.081450609516 |
| RGMB    | 212.147155923729 | 203.544294328395 | 193.892810132985 | 229.230239609291 |
|         | 157.233463720262 | 160.906550609416 | 180.994249258457 | 161.316521450944 |
|         | 156.098240321674 | 167.521700144143 | 166.108206159312 | 167.949422301257 |
| RGN     | 176.830879422227 | 175.262884960324 | 271.713695056313 | 182.397795261147 |
|         | 131.029333093048 | 147.664505309713 | 143.470181156799 | 140.16233428205  |
|         | 146.764908249803 | 150.035890574132 | 148.570769470645 | 143.175483349968 |
| RGNEF   | 124.295334523889 | 120.565485864499 | 125.150706047419 | 115.00776048097  |
|         | 122.804934452095 | 124.217337143269 | 123.794432024417 | 121.736056336879 |
|         | 127.661634554996 | 135.507247740621 | 149.269417496936 | 134.216088147701 |
| RGP1    | 153.992763544073 | 152.393260140571 | 155.108146847158 | 153.494456800685 |
|         | 166.688771186254 | 127.527378949803 | 147.550385608773 | 156.926617030752 |
|         | 150.875392181869 | 157.096799934494 | 154.455641374384 | 176.049946762504 |
| RGPD1   | 132.70109232982  | 122.696382705233 | 132.075718397284 | 132.752401872376 |
|         | 134.601565799073 | 125.848597767733 | 132.132474135959 | 147.808262170269 |
|         | 164.910911528819 | 134.744175117719 | 165.009696356892 | 135.688346453694 |
| RGPD2   | 129.961042190085 | 122.708102546276 | 142.101865506094 | 114.441223528256 |
|         | 118.465111174212 | 160.57963709333  | 134.187456260969 | 146.6886556805   |
|         | 154.300058278533 | 144.12472003202  | 164.678646890649 | 149.933919274985 |
| RGPD3   | 134.769926504916 | 137.194467539969 | 161.688125121941 | 144.725650040212 |
|         | 125.386545354096 | 127.945144368504 | 133.628391175037 | 130.191876914166 |
|         | 133.755609587969 | 120.418709541104 | 135.679481480408 | 145.517559593811 |
| RGPD4   | 117.436119533535 | 131.774882989257 | 136.362144891335 | 129.928047362701 |
|         | 119.645983822002 | 134.475296383752 | 133.689255383855 | 141.836648910979 |
|         | 146.785478478701 | 143.256590560776 | 150.761696482387 | 136.327014189932 |

|       |                  |                  |                  |                  |
|-------|------------------|------------------|------------------|------------------|
| RGPD5 | 133.74051512341  | 137.974323288786 | 138.159966250659 | 132.966873990501 |
|       | 134.178733595096 | 139.904952662852 | 133.216489794592 | 136.022614387461 |
|       | 138.919240037475 | 136.301442794928 | 134.635645106042 | 138.728765780512 |
| RGPD6 | 114.768639931659 | 120.915108114673 | 113.199690522854 | 104.285022032604 |
|       | 106.238539254093 | 128.783262618114 | 100.841352336505 | 110.562310620515 |
|       | 109.817705421158 | 110.16174213285  | 123.386622160181 | 104.406314027414 |
| RGPD8 | 184.954673605577 | 145.122171099946 | 216.209052148435 | 154.091431691072 |
|       | 139.289968250444 | 306.486275677467 | 171.180188911669 | 189.784608429624 |
|       | 214.617852048151 | 244.627091189503 | 164.15288821931  | 237.78482574225  |
| RGR   | 143.974551393951 | 164.109321257638 | 165.919497521143 | 151.079500558067 |
|       | 155.710272937386 | 166.803359138942 | 160.131256419524 | 151.338765231607 |
|       | 144.643770374264 | 150.734560844391 | 154.187420367647 | 153.815239954928 |
| RGS1  | 1651.68171717875 | 1437.5568316065  | 3510.24464112094 | 1660.70040058102 |
|       | 188.891032176388 | 864.547109080675 | 274.891033696257 | 591.013515828247 |
|       | 571.439520427295 | 890.810315261602 | 274.831898505989 | 432.515970951769 |
| RGS10 | 495.241179224412 | 456.038981546175 | 495.438672949441 | 445.089930641391 |
|       | 276.138650967632 | 216.705908017858 | 370.877260088621 | 401.102586700919 |
|       | 534.276129011237 | 344.070947256963 | 270.462865174106 | 307.768302846647 |
| RGS11 | 305.451247405518 | 243.65518489122  | 611.208083466988 | 352.50679573356  |
|       | 149.09398454596  | 174.09267813338  | 139.837616209536 | 158.150949554785 |
|       | 155.924471321076 | 140.462651395483 | 133.745413210496 | 149.4401812      |
| RGS12 | 193.569894919176 | 193.245087824217 | 188.444498848767 | 193.641927801805 |
|       | 246.552713031445 | 183.3378528327   | 343.200277800027 | 208.42712014566  |
|       | 230.469548500304 | 313.480307434343 | 300.150235383065 | 280.127735578097 |
| RGS13 | 146.440630638891 | 144.413210364148 | 143.517327774456 | 148.096551269076 |
|       | 139.730999352036 | 137.076766238637 | 144.129889080946 | 146.040995022257 |
|       | 145.741465098455 | 141.345379144177 | 125.738320262644 | 141.166605868578 |
| RGS14 | 135.989816139218 | 144.570725886413 | 143.816567683093 | 127.540848073484 |
|       | 152.244018820259 | 144.345080865349 | 154.452964510369 | 150.088034336851 |
|       | 139.900523831258 | 142.436624546651 | 134.4811029314   | 135.379284233708 |
| RGS16 | 163.926432479673 | 207.298994298453 | 156.467759630936 | 165.731179108649 |
|       | 850.562379837947 | 677.503643398297 | 680.509421043347 | 376.276954313674 |
|       | 202.819949307954 | 194.014764659513 | 204.237952297239 | 272.770616373687 |
| RGS17 | 219.619022209985 | 268.724338967108 | 203.652936507291 | 216.880896769751 |
|       | 240.410292351169 | 163.396651801661 | 429.351447428661 | 292.145553580042 |
|       | 166.850279817976 | 653.047570485109 | 332.599191067433 | 489.75389978732  |
| RGS18 | 137.808307749725 | 135.190698960212 | 124.153063838817 | 126.464893786922 |
|       | 130.285187693932 | 128.429007921588 | 129.075693654369 | 161.338215647108 |
|       | 160.567934923347 | 137.745887988474 | 166.89285636895  | 136.219537152338 |
| RGS19 | 212.497773003032 | 200.618080312379 | 193.786889748038 | 170.725486814469 |
|       | 507.040326298457 | 358.355621069787 | 397.985856484851 | 303.858574395969 |
|       | 426.032234135861 | 330.590986934704 | 449.408793796673 | 457.130051460676 |
| RGS2  | 6851.54963413886 | 8958.34797715349 | 7699.37963536892 | 10135.7800994367 |
|       | 240.511797905018 | 839.901173743755 | 304.636618563775 | 779.922653392712 |
|       | 459.854279050269 | 1269.67110104843 | 250.84781675544  | 290.754210152709 |
| RGS20 | 112.661607612444 | 118.134614195753 | 118.879931299016 | 112.015423658372 |
|       | 119.422996538444 | 117.555999801887 | 123.259322051795 | 118.289405191861 |
|       | 114.093935026467 | 262.171775165261 | 125.498081339586 | 117.078720392441 |
| RGS21 | 148.510023599641 | 169.612203020686 | 150.769819282075 | 143.061415008831 |
|       | 146.65668813596  | 148.149216812602 | 157.50873249647  | 152.798927898416 |
|       | 149.37190049932  | 161.683243808528 | 170.835513021958 | 156.01406297447  |
| RGS22 | 180.599150102184 | 179.460777888284 | 193.084818760857 | 170.585366369563 |
|       | 146.652641667543 | 170.099045774947 | 149.586651393588 | 150.709091532746 |
|       | 165.500088159872 | 155.951509643078 | 114.574362093931 | 146.934990457666 |

|        |                  |                  |                  |                  |
|--------|------------------|------------------|------------------|------------------|
| RGS3   | 135.271290872348 | 135.031430487047 | 133.192757350144 | 129.938723074546 |
|        | 132.550022967297 | 139.691470247318 | 134.257928609741 | 132.850601603567 |
|        | 134.115085057026 | 144.12742465348  | 137.102353661381 | 134.235164622221 |
| RGS4   | 173.735045816949 | 227.965783945702 | 166.674240866931 | 167.858490180471 |
|        | 139.750281709938 | 132.092910274836 | 168.73918684069  | 136.173596381385 |
|        | 171.254015232189 | 420.95713139384  | 136.881019970399 | 169.349922114861 |
| RGS5   | 2708.20624364471 | 2379.15291239548 | 1912.2369374258  | 1611.58245311122 |
|        | 192.96586114861  | 1014.23822508445 | 170.590817818414 | 450.468410589415 |
|        | 556.863361789449 | 270.421697521366 | 243.191238594142 | 314.949772661046 |
| RGS6   | 135.980886879513 | 124.261531006131 | 117.889524670597 | 119.261305304165 |
|        | 129.740166478951 | 137.17370871536  | 143.377902352319 | 137.499290547619 |
|        | 124.666487633365 | 127.640525889316 | 167.941671074236 | 137.466291815166 |
| RGS7   | 112.227434965199 | 128.745737514912 | 109.016991399605 | 115.920514336615 |
|        | 126.563876945046 | 127.123123583856 | 114.618608815885 | 116.759526220736 |
|        | 125.00254973945  | 116.934457270701 | 146.097201498811 | 117.089207321783 |
| RGS7BP | 132.303506517431 | 130.215290990406 | 116.572001618531 |                  |
|        | 116.59404046487  | 121.360822445187 | 127.789230402245 | 116.902574164498 |
|        | 120.01190102634  | 119.122305582754 | 120.196595293401 | 126.816402300701 |
|        | 118.383317097375 |                  |                  |                  |
| RGS8   | 147.494937826597 | 152.222732770706 | 144.328571856869 | 158.973872644973 |
|        | 150.95033946042  | 142.110469428644 | 155.702330867056 | 158.675960205792 |
|        | 156.763364462534 | 150.346002924933 | 156.930119977809 | 164.136551371866 |
| RGS9   | 121.524679741065 | 130.985360700521 | 123.357205547181 | 121.118933682515 |
|        | 115.427201752401 | 112.916256784817 | 113.470356909765 | 115.816156193574 |
|        | 117.585207821853 | 115.293844461817 | 119.360478719424 | 111.366283149236 |
| RGS9BP | 148.729753117861 | 152.511331178337 | 148.060086496148 |                  |
|        | 160.247370279802 | 149.190528937822 | 119.922676683808 | 127.385776388242 |
|        | 124.548598801497 | 122.232732968363 | 122.410340121549 | 130.847215795313 |
|        | 116.828333047376 |                  |                  |                  |
| RGSL1  | 138.60849268758  | 125.639355645626 | 142.461941376108 | 144.458829225668 |
|        | 127.251594986725 | 132.953762692926 | 130.009322405768 | 133.876636039037 |
|        | 127.687299576139 | 120.37619371663  | 122.232732968363 | 135.095095470362 |
| RGSL2  | 136.916286605302 | 163.165374495635 | 158.425950902309 | 151.305201022012 |
|        | 140.613151527886 | 167.430767074847 | 148.507598818039 | 156.477249817844 |
|        | 140.929424764561 | 144.898770838913 | 125.202468372015 | 140.313216623427 |
| RHAG   | 123.998343902602 | 107.221547998974 | 133.556805738801 | 118.871735074285 |
|        | 111.691973758042 | 115.180659017144 | 119.842470751496 | 116.346181133756 |
|        | 121.396223519559 | 132.197346228417 | 126.468167800414 | 125.247402280272 |
| RHBDD1 | 281.341452463344 | 289.724297749772 | 287.287337931982 |                  |
|        | 304.111808763793 | 236.548439331855 | 164.15288821931  | 258.532432007328 |
|        | 212.272826965935 | 264.201932544662 | 261.721726664029 | 237.146972312448 |
|        | 246.237243726748 |                  |                  |                  |
| RHBDD2 | 868.066644155313 | 911.782783698439 | 553.90008440429  |                  |
|        | 904.211195986553 | 2744.77453865893 | 761.726829618132 | 602.480822390671 |
|        | 1077.95929298567 | 569.967953318205 | 501.005898087825 | 1082.00448164658 |
|        | 1086.8615735568  |                  |                  |                  |
| RHBDD3 | 198.166270627544 | 227.499335248402 | 175.302832015761 |                  |
|        | 333.439929772897 | 625.152889992949 | 187.443940151794 | 189.434597063058 |
|        | 267.483886037099 | 180.798671424395 | 155.899547877596 | 261.814227719605 |
|        | 217.715143869654 |                  |                  |                  |
| RHBDF1 | 1348.80530206238 | 995.812184456562 | 995.263014856158 |                  |
|        | 851.633522004342 | 1975.83062789692 | 989.396074034945 | 1034.2217095753  |
|        | 585.721610434501 | 777.901979189395 | 1348.80530206238 | 829.740755449333 |
|        | 2063.42824094932 |                  |                  |                  |

RHPDF2 168.963976596839 174.873893094923 154.661456780865  
 170.737352030035 387.827718022473 272.193578770314 232.801257700571  
 358.60777927888 432.174413144791 408.7151485563 312.903508201275  
 447.059120541009  
 RHBDL1 161.295030274012 158.92254744379 197.298982267459  
 198.374163029174 189.461090469712 193.008902902654 140.632573759426  
 192.032080013216 162.085813676373 185.220017451419 136.718598487513  
 157.733042033549  
 RHBDL2 1015.10079945997 866.413995755699 823.658996207582  
 853.314313182949 275.794847140407 1170.88763035931 624.978351618077  
 833.841469195516 664.809419789814 543.170902795966 998.631321857182  
 589.240581642145  
 RHBDL3 325.173931553891 299.513950278952 246.95071325085  
 363.706789137022 168.007337847195 185.275787562938 157.12360611723  
 176.964088090133 214.295260811046 179.74065086312 148.874533472738  
 193.148369507405  
 RHBG 134.169645445889 150.403702679274 134.596391166462 134.407776033032  
 204.453822958077 170.145574727175 197.12840030662 206.113290588613  
 193.48293264444 150.232470359841 179.632562895905 167.842122798757  
 RHCE 116.449064666763 116.263405190786 110.428616140857 115.80245224388  
 123.809866652834 109.978693735206 108.818976813708 115.058061620379  
 112.365278258185 115.51493368527 128.312170913496 112.875136585606  
 RHCG 136.584199831088 121.262147572365 121.377666938052 122.89752183991  
 136.904851056919 136.275207732661 119.645983822002 140.182150393054  
 134.928967716193 871.268905562551 147.740657356905 125.624661345169  
 RHD 117.003205777245 120.767950825369 121.665157726433 121.320750074882  
 114.68345964966 118.764650384561 124.947565043721 115.400592594965  
 125.783265980169 117.598778415488 124.375348764151 118.218098644268  
 RHEB 1895.72330348767 1809.58702081877 2515.7035557541 1612.79779117655  
 1776.38646235135 1843.76920134139 1774.22769195939 1978.95750795951  
 2444.835635949 1777.29626660109 999.658013198849 2590.80821234237  
 RHEBL1 139.076978731572 142.414323129638 126.413124995943  
 130.928718312512 137.681280789305 139.241145027974 138.378425715239  
 141.470472968171 143.943676099522 131.296518221093 159.922627970233  
 138.474429223902  
 RHO 108.179513318734 105.221735747452 108.288420807873 109.599589420575  
 105.771723307783 109.586955365611 103.94864861172 114.119002354873  
 108.386545220984 106.102093734748 114.209249333221 108.167670899938  
 RHOA 4417.98524179686 4592.14655702906 4749.69040198959 4651.384971332  
 7786.96143641382 4486.35687688252 4016.35381420598 3850.41246770812  
 6233.78489807054 4037.15442268836 3749.80462365748 4159.96851384358  
 RHOB 4124.03779111916 4477.54806526552 4343.46317176151 4866.98027226798  
 1195.07608384189 1966.09691567857 519.940347384877 1487.12201643008  
 606.003956839826 681.677841333095 2131.68478964427 838.267069860172  
 RHOBTB1 157.612067634423 150.168496148941 158.039920243116  
 135.264074941678 133.545405737639 128.280225530201 124.381674909742  
 144.346988809708 143.49969914174 133.239703270008 184.021010234322  
 132.02259465879  
 RHOBTB2 190.520750756082 197.405472374722 228.713818522476  
 216.209052148435 193.777175793218 219.318938396989 193.275162354467  
 174.737828693216 184.758754197435 145.301551442388 250.515579402334  
 199.288100834476  
 RHOBTB3 1067.80176606977 747.804958601763 809.729160605727  
 631.106334754678 153.075594260208 369.974231530826 1336.15622439522



|         |                  |                  |                  |                  |
|---------|------------------|------------------|------------------|------------------|
|         | 257.477501542521 | 532.596772298766 | 325.999687273862 | 1331.18605673705 |
|         | 417.262521411065 |                  |                  |                  |
| RHOC    | 2837.36293710422 | 3219.27851139047 | 2151.9395095819  | 3195.71436046397 |
|         | 1767.70023790753 | 994.213397985121 | 2059.09598012857 | 1407.43503866211 |
|         | 1418.60088387728 | 2952.67114077688 | 2222.16226526877 | 1006.24899131914 |
| RHOD    | 232.892635502424 | 249.354198174438 | 210.165098572428 | 283.499120551905 |
|         | 542.883453307    | 250.25959091612  | 241.105817192695 | 197.740912476527 |
|         | 177.257355909681 | 1367.19652160532 | 279.413335686746 | 268.034972830233 |
| RHOF    | 141.345379144177 | 145.481279504679 | 168.327600230929 | 157.955606242401 |
|         | 169.089896796513 | 168.906637816046 | 155.056545639862 | 149.657951204528 |
|         | 162.638805580226 | 151.60113116166  | 149.742140955184 | 154.524588318927 |
| RHOG    | 528.556049506759 | 560.362502519639 | 452.24100098898  | 576.10291008626  |
|         | 1117.77397620221 | 378.695635790714 | 486.197269936713 | 501.863855158062 |
|         | 797.501324589697 | 913.934874451961 | 624.264994653057 | 508.449904285771 |
| RHOH    | 165.257737836487 | 154.353588150152 | 145.399617429804 | 152.465176508162 |
|         | 147.777050372032 | 161.371477511362 | 152.230489051339 | 146.644317248414 |
|         | 155.343619434375 | 160.353649786837 | 154.542190113901 | 145.291984088491 |
| RHOJ    | 402.140437036706 | 403.657727266403 | 346.917113326564 | 432.174413144791 |
|         | 156.32137627012  | 167.341759854203 | 152.534482748598 | 163.146581498065 |
|         | 188.797908601851 | 158.503284955019 | 157.649902282769 | 143.519786615253 |
| RHOQ    | 2427.21100330388 | 2358.46955614953 | 2558.91648313228 | 2111.32236867229 |
|         | 879.301932542031 | 1246.2895253224  | 748.015452242839 | 951.371815352591 |
|         | 1128.60314361459 | 705.311256840178 | 844.187489702587 | 562.387692458382 |
| RHOT1   | 454.34729744062  | 365.82705202869  | 590.515758538373 | 334.199307788576 |
|         | 518.925188630246 | 370.227329649269 | 392.824840252824 | 469.407481002198 |
|         | 366.636754272029 | 387.827718022473 | 325.011269531407 | 373.656487297238 |
| RHOT2   | 450.566031840493 | 455.486248388968 | 443.623904480087 | 558.934004505074 |
|         | 670.347447480331 | 463.488995330457 | 453.875259610173 | 616.995114856023 |
|         | 434.855262284265 | 504.709613434391 | 612.758976723556 | 549.96567374713  |
| RHOU    | 849.158029646233 | 1140.40904196731 | 799.759250503507 | 578.650614747598 |
|         | 2995.42172749615 | 3354.38704439295 | 1519.38642390142 | 1660.70040058102 |
|         | 3055.80298721424 | 211.966139902562 | 1845.87311313269 | 3143.77161008321 |
| RHOV    | 123.960761343425 | 133.487774861252 | 117.078720392441 | 104.780306305981 |
|         | 161.825134481279 | 166.489436134841 | 150.48236051337  | 146.554017952963 |
|         | 269.006221210929 | 263.845733455915 | 205.121123131992 | 173.790848780011 |
| RHOXF1  | 124.624046191085 | 133.229571269367 | 124.635917999969 |                  |
|         | 118.239637776941 | 122.82388804774  | 120.816130267055 | 118.298444816712 |
|         | 119.631847624882 | 115.840266274696 | 123.010614051218 | 123.67449826277  |
|         | 121.396223519559 |                  |                  |                  |
| RHOXF2  | 134.46179453106  | 118.95971064289  | 138.688881393504 |                  |
|         | 130.195234920895 | 132.223321299997 | 128.594951429021 | 136.151754558226 |
|         | 120.62139061084  | 139.22776505842  | 125.932540615682 | 131.755881982599 |
|         | 132.535722328813 |                  |                  |                  |
| RHOXF2B | 167.91761500242  | 131.449370465834 | 152.993555372242 |                  |
|         | 159.615233521257 | 139.986119754908 | 145.576880854443 | 145.511473738224 |
|         | 135.301844382418 | 141.65642171417  | 156.597497458992 | 142.302618019732 |
|         | 134.669763149268 |                  |                  |                  |
| RHPN1   | 155.942609847585 | 173.364586678954 | 152.362546746522 | 157.264673452646 |
|         | 211.595513743111 | 172.259627777465 | 170.381897441659 | 233.129544542265 |
|         | 196.942880967705 | 157.494596757446 | 174.02138265758  | 171.16807372519  |
| RHPN2   | 245.240006198482 | 300.83667045718  | 217.748916080172 | 229.689010178622 |
|         | 524.541494680558 | 559.559921312181 | 1033.03719406038 | 710.76653239801  |
|         | 956.153239481189 | 689.271009631393 | 268.78904911703  | 357.006610037663 |

|         |                  |                  |                  |                  |
|---------|------------------|------------------|------------------|------------------|
| RIBC1   | 110.333339548402 | 117.820996523337 | 119.221976571036 | 113.112450527382 |
|         | 113.862790983655 | 112.456644814178 | 116.625518828978 | 119.034003473459 |
|         | 112.884916986215 | 110.688722702767 | 123.178049594968 | 105.25877906031  |
| RIBC2   | 111.11656427738  | 112.190904058889 | 106.015691274983 | 122.05954649985  |
|         | 104.223476853877 | 115.738984899365 | 117.264555636952 | 109.69466049307  |
|         | 106.923686318112 | 108.655415285806 | 111.178024950204 | 122.662260070778 |
| RIC3    | 184.085616342099 | 176.328994356625 | 234.588584245938 | 158.579717282881 |
|         | 142.68640844948  | 143.455941298415 | 128.620852653765 | 146.437565098335 |
|         | 147.677900030844 | 160.096507818256 | 162.652929339533 | 154.534605635191 |
| RIC8A   | 838.63350090385  | 924.040923247227 | 864.908449769749 | 1086.33540858772 |
|         | 714.6859666834   | 580.996071040561 | 621.173315178959 | 638.287221212947 |
|         | 727.425595270342 | 989.77058497525  | 668.570984110088 | 422.12964420709  |
| RIC8B   | 435.332573825425 | 413.913442080187 | 427.542390397986 | 456.126096817454 |
|         | 235.704824490397 | 251.939696394174 | 282.604890044452 | 267.869879189095 |
|         | 266.162244070031 | 292.185246573643 | 343.666488527549 | 268.148673257455 |
| RICH2   | 303.638516587721 | 335.47484353322  | 310.690317681243 | 367.983166440977 |
|         | 265.470314691221 | 202.397972518715 | 190.736796322054 | 137.601181150371 |
|         | 151.981708806765 | 147.891442774921 | 149.398118078302 | 124.025104622631 |
| RICS    | 259.868701878844 | 285.594100976705 | 258.807028561407 | 207.036293322882 |
|         | 719.369561410372 | 879.301932542031 | 515.597523880328 | 620.371912523332 |
|         | 418.574045635945 | 354.840474468573 | 968.157701932137 | 1444.45946291517 |
| RICTOR  | 132.437234970375 | 138.548983773386 | 141.678529125136 |                  |
|         | 134.811625739766 | 114.874358180801 | 123.577138762427 | 128.713131994442 |
|         | 128.853089272901 | 120.418709541104 | 114.223991452083 | 162.923734210933 |
|         | 129.301839663122 |                  |                  |                  |
| RIF1    | 193.843978773764 | 191.554396977588 | 183.545741265706 | 160.979182561773 |
|         | 227.884445686928 | 228.384686248604 | 187.50236021149  | 190.889832855403 |
|         | 179.61374889626  | 229.729195963667 | 181.914505612128 | 202.44778603643  |
| RIG     | 123.277867938275 | 122.476178620771 | 133.514843630183 | 145.604066669916 |
|         | 131.322008851059 | 136.478114537536 | 128.131324375789 | 129.123522999226 |
|         | 137.42213762011  | 170.035994634371 | 146.132506246152 | 145.045633612194 |
| RILP    | 137.97889661868  | 147.091280396135 | 140.885012530186 | 142.285486339143 |
|         | 136.824357247954 | 140.792400101142 | 130.601241656346 | 148.908758741034 |
|         | 147.032210333966 | 151.142149775806 | 151.84373370805  | 155.147962740503 |
| RILPL1  | 1071.47374315822 | 984.181272274704 | 1085.92360670051 |                  |
|         | 1198.53117439169 | 502.063888359427 | 496.328898534802 | 824.427857809495 |
|         | 705.529158880221 | 384.733313349438 | 852.436775264873 | 618.437282203498 |
|         | 336.981561928411 |                  |                  |                  |
| RILPL2  | 205.705962405954 | 212.959246855759 | 256.764450748941 |                  |
|         | 149.661929885679 | 189.192494970145 | 207.218779485342 | 216.32785564297  |
|         | 225.005311517365 | 340.800632878807 | 230.947339143332 | 289.761702484888 |
|         | 218.393783552484 |                  |                  |                  |
| RIMBP2  | 106.685578858702 | 117.078720392441 | 113.927168436775 |                  |
|         | 119.446359837504 | 101.761615925097 | 102.786517901308 | 114.835386789236 |
|         | 118.694037994926 | 108.557097186828 | 116.20967792121  | 123.813766735115 |
|         | 110.804248212067 |                  |                  |                  |
| RIMBP3  | 134.102929804129 | 117.81168010976  | 123.591078216224 |                  |
|         | 143.956726538569 | 140.007937555694 | 121.316836274255 | 121.45175516842  |
|         | 128.236840746655 | 135.403206634483 | 133.64938083537  | 128.105527466559 |
|         | 130.965418847276 |                  |                  |                  |
| RIMBP3B | 125.612670947405 | 135.393901125889 | 128.618422306397 |                  |
|         | 123.794432024417 | 129.065491477375 | 134.469653093466 | 125.160161268474 |
|         | 124.267394371656 | 130.344292132363 | 140.122611763254 | 130.516632662261 |
|         | 137.799016648135 |                  |                  |                  |

RIMBP3C 131.434121613176 136.647239621513 149.467626202395  
138.850077456103 153.083451626042 139.513752499004 126.614876404146  
139.607944722497 132.183250916482 137.412952822912 146.404727168045  
125.738320262644  
RIMKLA 130.639974588163 124.551603326682 151.316421810192  
139.180086017033 118.500956349352 135.078198678379 129.116354997747  
116.889373249017 123.905462079972 138.813126946007 121.434713764246  
127.458099438957  
RIMKLB 320.390351199433 309.47429862515 227.774354299962  
299.669394721682 149.248860010742 193.945494721138 143.914415729816  
160.265389854694 173.182013165174 241.675251479835 145.870135196037  
136.547868436335  
RIMS1 104.285022032604 108.62191665589 105.741092375243 110.61165787102  
116.412881235587 112.635430248416 107.622342073167 109.425878885118  
103.826308328446 99.26400442869 122.075440298074 108.868679899494  
RIMS2 154.088770236213 150.006621336954 207.581907737176 168.841313096346  
162.513107496558 139.809114250476 159.913028912492 197.100205890532  
146.264686158155 172.108795190633 192.891507272665 151.976432805924  
RIMS3 386.960778432157 470.746477818201 388.096183735126 702.265884752474  
185.525760847281 162.077455145261 134.058035351684 187.352655464866  
150.123784990646 151.865924163231 176.810979494826 150.508851767517  
RIMS4 176.901042102323 174.515815532892 172.142411008084 206.321272734099  
173.66499836293 192.340135076104 153.336395746742 175.128935809466  
160.35668299062 212.272826965935 162.732574014686 174.787077606165  
RIN1 161.144841967903 202.253560413436 155.23152084421 169.725534829981  
295.727275232995 153.5256657638 185.950131245699 169.306573880401  
172.304496150036 270.33685210971 187.519053043173 203.125568980238  
RIN2 600.919152191636 712.699853328955 535.861738240441 486.334840298921  
468.496972957503 675.978379566859 596.3549500121 411.603820288919  
397.449905380349 999.159652508318 270.945325305492 473.60579090007  
RIN3 150.297422529071 177.123497519231 126.872912960681 202.718428167217  
176.456539071735 117.937856116492 126.262349005661 140.85139374336  
126.732121894377 140.226586111216 129.313576009092 120.626155234319  
RING1 2369.233048505 2330.60389526686 2547.53445585552 2414.22821062457  
2277.60839052397 1040.29664343743 2041.03024136014 1466.82170436229  
1800.25771851544 1801.74467005923 1409.42016970226 1766.15001427132  
RINL 204.415267938007 191.754626760061 194.413759761549 181.922907273871  
120.015436934157 121.438875373878 196.001089662818 156.508428796592  
234.322989368622 122.396214045451 164.03801002919 184.974347306539  
RINT1 195.740661051834 191.112009690591 240.224826736571 194.753955100069  
254.315783394932 294.033003779363 273.550544349798 308.726328440723  
211.483693299981 288.221041179309 240.182016388745 273.197814995543  
RIOK1 214.968589907686 197.51109998167 181.558764396201 209.023926358109  
183.568426758223 232.231236745251 204.877041314502 191.200215655114  
175.711836112986 235.372592051464 183.214922844221 226.055406842613  
RIOK2 315.130912368929 276.830814061474 376.962937292973 253.495214569632  
188.654966029389 270.520229426015 278.651369597422 222.268494113686  
244.486311003619 388.710465457313 340.193863653875 291.105673222859  
RIOK3 504.617795280805 375.767528676937 782.139151423572 308.767036855508  
432.372995789404 591.189034068137 815.045148478814 972.468110850466  
581.828502821435 1961.26255930192 656.32782132983 1156.19575610918  
RIPK1 384.16579891756 406.54518900348 332.599191067433 536.253405705975  
245.082816415008 331.747622606378 285.768837438859 293.482512212153  
344.786541451395 266.19823384117 361.829819621662 330.457534783492

|         |                  |                   |                  |                  |
|---------|------------------|-------------------|------------------|------------------|
| RIPK2   | 273.073938260793 | 274.316982298975  | 304.111808763793 | 272.666435295288 |
|         | 456.817057099146 | 538.872348151809  | 510.285766295993 | 623.888568444132 |
|         | 662.04757187541  | 540.005877322817  | 553.90008440429  | 518.17401959981  |
| RIPK3   | 151.029785584386 | 151.142149775806  | 126.233395051706 | 146.84403879162  |
|         | 171.329984719612 | 165.459993078103  | 144.882207209439 | 168.878645908397 |
|         | 153.929167381674 | 227.267783818298  | 370.466403181536 | 234.461229199142 |
| RIPK4   | 166.958831664154 | 210.165098572428  | 193.98814423456  | 178.083311435916 |
|         | 338.326304736048 | 314.014654357569  | 384.16579891756  | 307.906312092805 |
|         | 257.941367816557 | 319.283603277754  | 385.978867521533 | 387.135002880995 |
| RIPK5   | 345.832589037442 | 462.265785715695  | 408.263886786123 | 462.686385881492 |
|         | 232.960832410426 | 311.544429285897  | 253.098839084408 | 210.620764703468 |
|         | 347.557792829093 | 239.452559981542  | 263.426870776148 | 360.551560710852 |
| RIPPLY1 | 143.284230032303 | 150.878323882503  | 147.550385608773 |                  |
|         | 157.994474909749 | 142.194507957661  | 149.290007708698 | 160.010501226517 |
|         | 135.443856371548 | 137.982667022604  | 150.79785758452  | 137.784270510433 |
|         | 135.238301951626 |                   |                  |                  |
| RIPPLY2 | 141.422441104854 | 125.528638246486  | 131.709341771599 |                  |
|         | 127.620377473963 | 146.501559368223  | 147.127908355066 | 140.669947387892 |
|         | 133.171854425031 | 145.28524062436   | 136.515951031895 | 154.8975607055   |
|         | 141.346722137248 |                   |                  |                  |
| RIT1    | 162.308297940279 | 203.524150518033  | 184.085616342099 | 176.176392369178 |
|         | 257.24481414803  | 217.847954914851  | 300.401370666633 | 236.985483155452 |
|         | 218.615551704188 | 314.486603134656  | 288.221041179309 | 305.451247405518 |
| RIT2    | 113.292688210897 | 110.544044723728  | 121.049927973123 | 110.810963139914 |
|         | 115.649568330705 | 111.188410935711  | 117.593226427794 | 112.41270361848  |
|         | 120.14201542563  | 103.734303632543  | 136.867987890996 | 112.649012857276 |
| RKHD1   | 117.682034050478 | 126.816402300701  | 110.510191137073 | 109.092840191351 |
|         | 118.737244693366 | 113.627435441258  | 125.80798551086  | 116.806720503431 |
|         | 118.689408983786 | 122.490271802207  | 125.358906118533 | 127.723052839953 |
| RLBP1   | 150.263578317272 | 149.678629612616  | 158.665476708054 | 162.505305538911 |
|         | 135.798387504219 | 142.07664288788   | 140.648918459179 | 139.258468432364 |
|         | 145.289151849318 | 158.919340819357  | 135.452340998039 | 153.5256657638   |
| RLBP1L1 | 117.976107125982 | 120.257886394616  | 126.214166842097 |                  |
|         | 119.525701528869 | 124.551603326682  | 126.777633512781 | 121.194138394375 |
|         | 115.51493368527  | 122.312652834289  | 118.697969266426 | 138.002258986172 |
|         | 115.944280729914 |                   |                  |                  |
| RLF     | 307.410175748955 | 252.171420358437  | 283.191303666907 | 213.178648382852 |
|         | 295.507504000509 | 223.601312199935  | 296.333944172375 | 278.737944234055 |
|         | 255.945470052489 | 342.096409626768  | 289.434186747703 | 234.020419732787 |
| RLN1    | 102.094370876743 | 112.57049236673   | 114.421383025971 | 120.208584170364 |
|         | 122.89752183991  | 111.5386517111074 | 113.143436184959 | 130.543453631154 |
|         | 119.346574301289 | 134.922488718676  | 102.786517901308 | 123.563243360247 |
| RLN2    | 122.317877997527 | 138.504398858454  | 130.856249657101 | 125.739946257697 |
|         | 151.118430469429 | 142.194507957661  | 129.446928016147 | 164.652795899742 |
|         | 136.113421708277 | 135.11447856347   | 135.931715324468 | 125.510101829837 |
| RLN3    | 136.028011201077 | 128.637470206958  | 127.6516565653   | 131.84454376953  |
|         | 121.930362099901 | 144.89403947454   | 150.939877261936 | 128.867710054234 |
|         | 131.519455635415 | 127.261349543394  | 150.084909674721 | 126.887989471803 |
| RLTPR   | 119.103219740679 | 120.01190102634   | 109.770126492743 | 107.961322525982 |
|         | 116.369395555451 | 111.703224727793  | 110.286187184448 | 123.195738824794 |
|         | 135.017196494069 | 121.818632020666  | 123.281489592543 | 113.557349524174 |
| RMI1    | 178.072538529634 | 190.371287639453  | 190.56172211779  | 182.095387488796 |
|         | 252.761035334279 | 207.05325577114   | 220.742788129847 | 267.747633122387 |
|         | 230.91747428831  | 201.773745532242  | 212.5119818331   | 192.878416717298 |

RMND1 190.138730960643 184.241640200823 231.517412929077 218.08515867102  
167.532512839891 219.564603776774 217.435155984897 196.566937667522  
198.549047189499 237.88097138936 225.583966894864 192.548337508559  
RMND5A 184.322250984457 162.304178370233 188.623897093065  
164.281196089736 178.628885995439 156.594337089784 153.795665190439  
181.840985962045 163.805257266374 214.991170762327 137.138266859156  
156.05583229359  
RMND5B 224.251136332123 265.919002666885 247.72190598581  
341.43511159996 275.929414239664 183.255119298602 297.12411625104  
207.123420880185 206.098534554876 257.408058436941 219.687151891777  
228.797912452429  
RMRP 149.149858208397 144.880785634179 131.440195723963 144.882207209439  
161.212598761378 139.273651128094 148.923977949304 154.026743830591  
196.096936985479 167.384121560438 193.974325897472 138.652735298338  
RMST 165.602175302848 172.108795190633 140.599584289987 149.734395134321  
164.1572198075 153.97869518398 145.615291241733 137.282635754873  
149.763038696374 147.408515025368 157.481645415121 148.28101912019  
RN5S9 1023.94850651125 854.224454791713 618.140160251927 596.3549500121  
711.166793546075 663.782083028745 1268.73280473728 845.150147618462  
1788.35884039549 504.436992949763 953.549801897112 418.062540009856  
RN7SK 513.662594875431 536.609777988581 358.217145707718 395.386242257877  
379.016207754533 529.963453165714 1577.15895478896 985.637230639964  
2751.75479578587 448.95671696823 945.830852603704 431.686900474971  
RN7SL1 27028.8951412615 27667.4034204988 27501.6698286039  
28930.8933474342 23427.4695172122 29162.1093037754 27028.8951412615  
26010.7684336005 25295.5071561111 26010.7684336005 14755.8570847826  
26522.0142925211  
RNASE1 779.340880980422 662.58366387795 489.022371276542  
751.568940762011 317.659548748735 824.427857809495 340.366016191232  
620.614820117452 894.734451279225 493.347308943133 684.180060287047  
314.337680575998  
RNASE10 179.250373572781 148.242794464181 174.840923772532  
159.393410854649 173.586160103539 154.150568177135 177.123497519231  
165.139423820186 155.981989040279 176.167129202773 192.07791693203  
172.138554350738  
RNASE11 112.436972452838 119.119693776276 115.37736249419  
116.118745494794 120.410307377977 115.692324946633 110.562310620515  
126.457337803727 119.949050292223 123.786227856015 120.638330368388  
127.806138997958  
RNASE12 106.393497890486 102.932013031511 97.8058879269165  
109.438965262717 111.577400298092 109.425878885118 105.925737068775  
98.4947439453387 109.30275288389 114.768639931659 112.38543517651  
97.8058879269165  
RNASE13 140.025668085978 138.474429223902 139.508029141287  
141.706292773073 147.202510900548 151.115031304764 146.023710941284  
136.901107766796 145.928643520352 141.176376265078 124.582577275358  
152.680068580858  
RNASE2 177.338445842102 144.298011270428 135.699583036042  
149.338249249161 151.377932495104 147.52178512946 159.633987751501  
157.745805838008 164.38282966938 154.670631900834 156.759600627542  
175.395900648455  
RNASE3 108.118551275778 116.533361070234 108.939608619532  
104.03442843396 109.087574814292 107.605526304445 115.975794003391

107.466184687811 105.521320791331 112.38543517651 121.874296836854  
113.05681175258  
RNASE4 514.002313819685 400.060972573122 641.645855499704  
314.708587131145 136.84488044614 147.570734399004 175.608958881476  
148.534143255537 155.952902855994 321.25076864104 151.129620221785  
138.29167712246  
RNASE6 169.355185349431 164.39910609636 157.702540365469  
145.226278521493 157.555410977564 230.947339143332 163.809967446414  
269.927694984528 250.963601187362 215.194909819764 194.092089507551  
174.540209145695  
RNASE7 111.867464669155 115.496108000499 115.750690887988  
105.521320791331 137.844113743956 105.467761348787 137.127587786536  
121.057111457792 114.867454554206 1362.75971646355 142.258574581718  
112.825399620524  
RNASE8 133.115543233699 133.414198431469 132.047328970556  
145.304050333309 124.700663661371 138.557464672111 138.256765189241  
141.470472968171 123.042372128864 144.292679144059 104.248226402465  
141.632147679743  
RNASE9 143.655901618594 134.319316977485 141.642547489983  
134.904123162692 141.321547895734 124.42974326791 129.931923954109  
141.248526020456 142.171459019791 133.929311295884 119.000436602325  
127.617449871137  
RNASEH1 1013.03054571763 919.626220838414 1032.4540300024  
953.099915501575 414.403321220432 1061.79595707572 698.086166782221  
609.504365141529 639.011144305614 513.816017871024 599.52440136406  
667.892385395063  
RNASEH2A 174.448910958935 187.280334341504 154.209689403188  
193.589480577091 756.390518977556 464.907454552364 280.204167582951  
426.032234135861 283.896516724446 255.839878446312 250.737252834098  
257.5097052677  
RNASEH2B 467.681480781925 547.817028243811 423.826189747546  
499.891000749138 445.089930641391 387.135002880995 236.082185670774  
318.244342364572 426.769986378276 394.65807885612 547.042461070351  
583.697431061521  
RNASEH2C 204.654489493854 183.708917501519 215.744552410805  
202.061887608293 175.073595611435 157.997750997487 152.323927317575  
141.555366493541 162.351212914573 140.983230581181 155.550532734718  
150.786618560854  
RNASEK 1316.31088187364 1551.90775589919 1632.07671492041  
1574.65731564294 2456.36776585765 1656.02721259517 1247.91041567746  
1214.16777512885 1453.88161495484 1501.18820017008 2580.98143004019  
1100.81588201714  
RNASEL 297.921617748468 260.443814523694 358.732947927445  
313.248029961291 309.423768054614 223.496400038284 324.481229901658  
362.095074331893 398.571054759451 283.556453980797 428.09583118349  
377.800067476868  
RNASEN 305.720812071583 303.380479700334 328.969023478451  
358.298768623212 289.368511254335 330.405026390912 376.082040863747  
541.642309122976 340.42197893246 307.570405241182 358.732947927445  
315.306271141071  
RNASET2 2468.47687203968 2751.75479578587 2459.05558915812  
2219.71846304201 11360.2921551609 3989.14883668905 5846.17594234628  
6006.01682776552 10579.8650348916 2213.1043022626 8514.94395408164  
7354.94071109106

|         |                  |                  |                  |                  |
|---------|------------------|------------------|------------------|------------------|
| RND1    | 124.183297351614 | 113.043089777907 | 115.25307661968  | 123.312000381122 |
|         | 119.845508281414 | 113.995301093609 | 108.970432124412 | 117.990622156287 |
|         | 120.574820369421 | 110.536316697732 | 120.77691423934  | 112.248047602652 |
| RND2    | 217.353396632732 | 203.04864785056  | 226.871028543248 | 192.340135076104 |
|         | 189.708396835236 | 175.030373805031 | 143.572668991313 | 145.977658128528 |
|         | 164.981665344298 | 136.020600085547 | 144.421572284568 | 146.654925456132 |
| RND3    | 1004.6207350158  | 509.292779821787 | 332.666916002481 | 268.224669588188 |
|         | 323.841518852386 | 937.593129242257 | 558.621429366984 | 474.517750753745 |
|         | 480.22496056277  | 831.289724465877 | 788.244353085369 | 324.671490117952 |
| RNF10   | 292.429831186609 | 316.281469585496 | 253.327404004524 | 341.819090221654 |
|         | 286.996908547553 | 233.07015384759  | 222.919473675549 | 209.279164243868 |
|         | 257.075088169589 | 247.280717385562 | 293.234972169244 | 230.284216427158 |
| RNF103  | 806.88003660673  | 825.781627776577 | 994.213397985121 |                  |
|         | 738.892511276134 | 602.371843434907 | 602.703887178113 | 705.311256840178 |
|         | 714.6859666834   | 506.80969228563  | 507.56875910742  | 686.198351821711 |
|         | 549.359675306309 |                  |                  |                  |
| RNF11   | 202.778539118009 | 192.441337304606 | 227.288015854809 | 175.744275464701 |
|         | 243.65518489122  | 288.68376542946  | 279.452819132461 | 222.709720471134 |
|         | 242.787656836745 | 336.5543056115   | 208.793650722271 | 286.194197552489 |
| RNF111  | 171.180188911669 | 167.830629616121 | 164.066839397676 |                  |
|         | 168.150270765792 | 145.610045243277 | 153.95615286919  | 148.231928963878 |
|         | 153.952788086758 | 147.558603709566 | 144.08344708327  | 208.895657507883 |
|         | 156.863232221623 |                  |                  |                  |
| RNF112  | 242.5085895186   | 210.502556087175 | 228.317527475322 |                  |
|         | 219.729169245025 | 164.09586442373  | 151.440732942734 | 144.476157581998 |
|         | 153.318678468245 | 147.716353308549 | 168.358323243918 | 158.163599942547 |
|         | 154.38209765671  |                  |                  |                  |
| RNF113A | 265.43897208356  | 310.026522549372 | 270.679613997675 |                  |
|         | 314.610979086485 | 443.125195744202 | 485.373169494941 | 532.235193634196 |
|         | 405.183882455109 | 372.088129459528 | 307.124331101976 | 563.140382824149 |
|         | 300.886032768166 |                  |                  |                  |
| RNF113B | 134.76586363177  | 145.536260846052 | 139.948097704949 |                  |
|         | 142.249715102513 | 150.193479279784 | 143.045416067967 | 132.168821720799 |
|         | 144.110544384466 | 145.728370703165 | 143.390971600678 | 154.01988200569  |
|         | 142.00857631537  |                  |                  |                  |
| RNF114  | 869.937761943249 | 811.362219801362 | 878.520681466946 |                  |
|         | 780.461254794127 | 748.703265448403 | 834.537908087672 | 1645.05161227372 |
|         | 762.584280908728 | 1532.47920327769 | 747.587723573212 | 1166.86593572716 |
|         | 807.604205890244 |                  |                  |                  |
| RNF115  | 488.57622466019  | 354.45785837703  | 437.601814037248 |                  |
|         | 294.922183826144 | 230.589110372454 | 272.16090053595  | 222.736706411035 |
|         | 224.62335524729  | 194.092089507551 | 266.99947481587  | 195.078843867124 |
|         | 244.011434605133 |                  |                  |                  |
| RNF12   | 145.89593390936  | 157.322594990954 | 142.427198128376 | 159.90466743683  |
|         | 134.331420680628 | 136.236441543681 | 133.573744633212 | 129.743808480368 |
|         | 141.503351545458 | 149.589901372799 | 131.880438747579 | 142.409003426775 |
| RNF121  | 465.102234374389 | 496.823662262772 | 341.761516859319 |                  |
|         | 513.662594875431 | 523.435696794756 | 284.574888587832 | 346.691690520054 |
|         | 303.184785797741 | 288.481981529558 | 262.577672828611 | 347.985315257161 |
|         | 313.708197191587 |                  |                  |                  |
| RNF122  | 300.199170426996 | 309.423768054614 | 183.130891975122 |                  |
|         | 290.688850193983 | 169.466129742085 | 187.264411519101 | 177.468210189888 |
|         | 178.186273279101 | 166.792003878736 | 198.925776755081 | 172.783430414523 |
|         | 160.374491283254 |                  |                  |                  |

RNF123 304.636618563775 328.078808625906 361.829819621662  
399.664121956178 533.893360199271 333.200230327106 413.687046868111  
412.736636437651 425.348619281876 429.680602294138 448.106077184152  
425.708048519408

RNF125 167.612577768782 160.096507818256 190.318957029666  
180.837420957945 150.942078067308 148.499207368959 148.632332840817  
170.490099282436 176.689683169567 168.570133927038 151.515460040167  
158.007926822094

RNF126 272.077877821339 295.778154263981 296.915883082902  
297.332272659995 451.317592236192 477.741216640575 370.227329649269  
321.750495072759 369.974231530826 471.598175637494 579.049608568926  
556.725550806207

RNF126P1 153.209409960324 147.305679046765 151.216992571364  
149.956759038516 163.102043862117 151.989476683722 157.419333185365  
176.208206282902 176.995049477843 158.308558656144 153.426409060413  
148.18197556044

RNF128 142.948238172973 179.250373572781 162.841318222066  
133.670967970136 547.817028243811 924.630951485299 523.216537391852  
462.437471715008 672.348723983535 225.169110687004 576.10291008626  
718.142991571468

RNF13 270.651318838953 234.841813258798 276.961847241646 220.345184229077  
194.847305068008 238.124340832815 256.648540685098 226.919545367682  
309.861048237742 244.440857688518 244.73233791067 247.528753010193

RNF130 685.080426814888 640.029195821436 730.34994035645  
638.393099392849 207.718619151226 338.223462327622 426.032234135861  
415.388760988459 267.285998701386 453.926991868451 405.570281788901  
299.234482744038

RNF133 138.45137517137 149.398118078302 160.960599932898  
175.073595611435 148.107004870598 158.68792959603 149.155345369055  
144.710613442383 141.54943189147 134.845202154446 156.205127163263  
157.516278302035

RNF135 204.959164579011 225.803528238368 206.669783013221  
229.542259738438 385.463209972694 165.055636629118 277.652851236546  
256.820546409632 198.004357069446 213.123453925578 241.203521822269  
212.420616436137

RNF138 195.16856673253 177.306794546105 181.215046876308  
173.233357775898 155.569733738768 274.595218795127 153.152921890232  
212.147155923729 179.369845168822 176.371404525626 175.626096716758  
177.103802332144

RNF138P1 129.313576009092 129.503934996314 124.752198904184  
118.912989775436 135.822999023257 129.223293862861 126.127630885864  
133.45690661612 127.863583325139 128.041191307652 130.06441029462  
126.476866025397

RNF139 125.519298131694 114.191245210321 116.87586240208  
114.598636725763 110.536316697732 107.07609243233 116.425301253959  
118.684077097437 105.606964521964 117.841844605128 122.924017262559  
116.416896654975

RNF14 454.732029358748 439.727046291381 526.896146537814 403.405544395163  
252.697160031025 353.912654262209 453.593585032712 375.038561820137  
306.632103708321 396.861835715943 534.608644989102 436.331333134628

RNF141 242.019489058244 262.416137698884 230.424145472916  
249.182288871072 210.620764703468 213.990575186237 205.705962405954  
281.996583337694 202.662466141301 335.013713757031 324.067396271281  
203.752540576935



RNF144 307.728083981504 336.5543056115 280.292616101827  
303.241375487319 318.487401106209 227.965783945702 146.065491816894  
316.722160860531 343.307036883726 592.284071247642 249.80160363144  
447.909277144896  
RNF144A 249.09278446472 251.731327363027 208.016730103629  
204.942500423413 224.869569455052 204.914390718161 128.635684412304  
266.99947481587 259.625943627223 399.963640581639 210.266075382636  
306.838596239511  
RNF144B 133.363883851093 158.98666068453 135.32730674455  
128.168460083895 195.906137340918 130.365804613342 183.556662533396  
189.472541628897 211.135364208221 251.546290552828 182.68965110437  
139.856251508283  
RNF145 503.466550870577 427.151797273226 705.020444579319  
446.262895953004 183.314276033531 193.871324880919 487.07860019179  
257.685284145848 262.756237406794 952.357976050712 369.434158443561  
440.745866155629  
RNF146 216.077955163344 190.506201184419 293.825372123877  
227.806050911154 181.865456674829 198.470718196139 224.251136332123  
176.86489466512 190.125009931628 189.633348499854 166.606522485953  
206.605699708924  
RNF148 143.454771158075 147.379741260871 142.801645268128  
164.773489952844 174.576132939661 152.127001840405 183.719279448844  
154.849264978968 152.173055053184 145.821544099585 155.02097482487  
165.080825814849  
RNF149 500.469781477166 540.078145038497 525.515169794593  
399.872401268958 1208.9240215109 899.336817124312 1192.72383754851  
779.340880980422 849.784051720996 1273.6393529108 1638.72366638732  
1313.89440013246  
RNF150 2195.41077320434 2656.38138490746 1730.30703463073  
3384.19521857242 125.533538277681 132.714532888989 120.485138937899  
131.007779278656 175.350734537491 155.71830087869 120.188885479773  
117.79844873842  
RNF151 131.766114156138 127.866992108488 133.830860948014  
133.63022526522 141.466287523861 131.157702791998 130.560969214272  
128.213678179359 132.498092935232 136.944378905743 130.582210755516  
131.887778588005  
RNF152 146.376149543438 144.510775519908 158.523941833883  
155.60532199001 148.630293791756 156.157567405927 140.664817970066  
157.105644688583 143.331929080227 157.233463720262 150.493049106543  
154.789187466057  
RNF157 146.303959493672 147.598602877625 122.297401003756  
124.267394371656 172.46311371589 136.115306932124 126.695387748732  
130.06441029462 134.784568023655 126.176505541577 139.701504237962  
123.61956613951  
RNF160 212.915949933033 195.674128236589 242.096692715029  
192.709473588165 178.997098204457 326.570967321756 259.184713471619  
240.994507285383 291.883157643902 259.064601204239 205.987280015028  
286.376638135463  
RNF165 243.95334982553 303.423450627377 209.568066932367  
375.407747753058 150.971453664961 164.910911528819 193.245087824217  
169.311264420133 167.70368494182 215.40037757604 136.728975205893  
432.604462607037  
RNF166 188.836327151669 205.509515144263 198.244854812728  
211.844563155792 232.699786290509 222.456810024193 187.73896437823

178.946928223991 178.531913384538 151.716042884808 178.014057622594  
176.317805247749  
RNF167 579.318912497928 691.916554922896 585.721610434501  
861.119262963015 598.287431134037 635.234445318087 426.649095732979  
484.480643763982 436.482580413523 537.982214580518 1040.73829397913  
469.540421642173  
RNF168 135.405742719464 152.146033353926 138.920141982606  
161.688125121941 135.803599969904 148.844916975586 154.904424749528  
129.476648077532 134.653131708903 158.579717282881 160.70138318726  
145.214575855337  
RNF169 169.271175460047 192.07791693203 171.602950766191  
191.220064414876 167.206513789165 173.520662003159 163.62582285753  
165.443069511115 165.947514372877 203.389294254141 178.404791189835  
187.365807314802  
RNF17 116.519527499611 124.056405566491 126.536245975137 126.492058851464  
118.076139318165 124.661088039427 126.635105491524 128.069504716124  
126.819413901915 122.863612588759 115.174678745401 125.311403516443  
RNF170 243.080229016932 230.947339143332 277.726756691133  
240.376851873817 141.010588053284 401.750302347978 268.885346595453  
212.396522888943 200.72147365413 187.519053043173 204.851374931284  
219.814706416471  
RNF175 181.758545723241 174.635853531194 173.10229478279  
182.798526632723 149.023962828426 166.681646517413 171.49930976135  
147.091280396135 148.401698825687 147.903030308715 157.77398996415  
166.239339129505  
RNF180 160.272632590118 157.955606242401 159.012011848781  
145.513333676569 136.03117924052 135.437227744668 137.584340154725  
137.614020921217 131.829906202014 140.550044737476 154.16370087233  
133.12641302705  
RNF181 1108.61301774472 1233.99503576308 1092.33328323944  
1403.09138858507 2816.29814823646 2046.64499507352 2698.5455305009  
2080.47567326037 1466.82170436229 1442.94175124818 1084.5920943349  
1782.2498613913  
RNF182 128.462674862751 127.931887647108 128.082956839709  
135.420780282429 128.163613794257 141.471127716868 140.611071681667  
137.929082565223 137.103879676652 142.592455241752 128.76720970745  
127.385776388242  
RNF183 118.167740643871 127.137447808551 123.179986410723  
118.195512252508 130.588481497083 116.981243525714 129.711973013336  
126.364445020215 125.519298131694 125.110064579814 148.479218400487  
129.692578787988  
RNF185 236.401834189942 221.322724563472 225.169110687004  
299.754985162237 195.795728497916 180.34788837703 175.158180187883  
150.751386127903 170.892319361167 201.320381706496 176.214950733324  
162.192879711747  
RNF186 165.085010975035 157.643461899964 166.14867551435  
142.693337885596 169.028519464989 164.078423844421 164.438724387992  
179.973655632636 171.487594589922 163.575300618666 184.437810305792  
158.483006541613  
RNF187 184.923312649584 169.488652117125 197.565122821625  
184.148058872585 260.955030428944 211.438615793742 241.867699338253  
165.654773882752 197.859546367676 260.642170838161 195.218005582618  
203.816305810343

RNF190 102.522925993233 110.475453268997 120.231559540009  
111.788481822686 106.263441906404 124.930303940168 113.256481034259  
118.076139318165 119.899649497032 102.474380813907 121.942777234608  
109.635825046436

RNF19A 283.326226944158 268.370347292603 357.259935567823  
245.607130404306 244.280971257965 398.512947526406 323.276514394119  
237.113813706224 350.741303038926 228.284236550547 373.452370692334  
372.94852645418

RNF19B 208.983138060317 201.269380130546 227.033342447929  
203.913123559942 243.622678182687 241.648044508699 288.542264120468  
229.017256104437 301.591430919567 335.3366819308 298.776176246196  
228.058870735016

RNF2 125.761205967344 143.945039636839 125.160161268474 118.122186617611  
143.796699867588 128.955241553429 137.933122094638 122.891946370542  
124.975454733084 129.583916648999 150.479320779862 123.913203953936

RNF20 1048.26872286983 1054.47292895417 969.360864006371 1181.97868824758  
464.128022170285 411.221560795912 433.491835341321 476.495282784602  
516.577357935963 419.126814511305 753.654626233604 298.256131536504

RNF207 159.922627970233 149.141033677244 158.911404625381  
146.65668813596 141.073316497949 162.002221893617 155.281950758369  
141.904041228678 162.333158524811 154.755544586846 194.775234425687  
190.843795579234

RNF208 137.054278745724 136.341358916638 129.838790698396  
130.33205883588 150.471558219667 136.499228715856 127.265211069837  
143.53550972177 130.559515534303 137.997756995882 140.999877170481  
129.055874691136

RNF212 165.808660192901 154.679076303046 157.697168349028  
174.657352858049 153.189490068047 139.234549949916 140.055272520317  
140.868946922293 144.12742465348 152.654938328424 140.334331111538  
141.735123971775

RNF213 441.873247266342 413.000072500071 330.193132765826  
364.022018936132 254.668502187945 394.810886122555 319.283603277754  
324.56043349882 281.278843600876 269.261595558589 471.069295685718  
346.065746911798

RNF214 171.982071800592 168.847039069786 172.707821624271  
176.194292036542 197.146035305296 135.08927101395 154.591116158776  
149.082061203661 160.914009756867 162.945789604505 165.565284723155  
166.091736766853

RNF215 168.095061700814 181.558764396201 152.447978675887  
141.134173683836 222.005022189667 151.819220292189 160.143443392509  
159.98636352484 157.237147919803 138.962649407431 162.876684781936  
170.439725847568

RNF216 464.907454552364 467.347509383673 542.544172683021  
671.821418586421 283.326226944158 262.629961694573 361.390981655795  
370.466403181536 315.47473326786 325.252108402192 294.535979194434  
420.160939829121

RNF216L 223.453776362112 221.297127685676 232.344545356395  
235.905788497166 250.928804390353 188.891032176388 232.892635502424  
234.693846527867 187.30908753142 203.777944180067 218.298791348295  
256.897177822238

RNF217 184.387409077972 157.807476284733 177.976550224863  
157.399880496076 109.098105822556 106.719519490874 148.79958121087  
110.242638217587 121.915043935246 203.298764374262 164.48570046081  
117.093818506721

RNF219 469.333357789149 501.005898087825 536.46884541183  
457.650982600462 368.879825610754 658.746224115551 368.637819994033  
436.331333134628 440.038896046559 474.750156829195 521.30110104669  
552.298965378403  
RNF220 490.269418483997 587.181357555703 506.290241222253  
702.049571167356 749.515603904233 399.664121956178 476.383294794912  
430.100415399881 536.609777988581 526.416479408056 493.071213662125  
463.091387717305  
RNF24 238.88138498771 291.616195651001 159.113259830623 273.044064077  
382.069677030369 254.607324522225 252.851164967726 188.593378315122  
194.998142472864 221.975219056555 175.41089164969 164.625407872446  
RNF25 169.852769679312 175.593421867771 156.273445355976 205.57572471694  
199.305626149918 174.92026613834 199.327939161502 155.924471321076  
171.87497136272 175.055634340766 163.926432479673 148.656917603142  
RNF26 304.679197422439 394.186683910377 294.595972099366 489.528040775004  
851.633522004342 168.013310840048 279.26508919212 254.768537214795  
247.746304138866 185.485858719975 227.587590278412 220.379186481273  
RNF31 389.853534237748 349.382889326613 279.113984512619 489.260272645085  
438.817248820137 229.689010178622 328.680312364877 291.020789939476  
260.370285504512 294.535979194434 413.555310697751 343.346755862776  
RNF32 156.328454726363 147.640100078933 159.918778562802 155.63671938031  
150.2214516849 150.560305000601 154.686025022972 161.793144242885  
152.142909854773 154.371946675862 140.929424764561 162.431674335726  
RNF34 308.517561840596 304.058158731957 282.742833166843 282.442528230519  
399.364160668615 331.999693230194 416.392874553797 356.376890469558  
480.36420271348 303.184785797741 333.868818855397 368.374002925137  
RNF38 623.888568444132 555.959424692051 806.290662664708 546.029974898225  
207.104548555929 310.23294370018 228.125521373477 276.867974638972  
263.568160216149 220.312301059818 267.589020526148 220.362946606131  
RNF39 130.224324464992 132.941478943584 118.631771242606 120.835207882788  
235.76573393374 145.762724663455 222.156471143857 131.849442776642  
183.013090662119 452.961307006622 203.752540576935 135.650546885518  
RNF4 251.704037951295 221.975219056555 284.798325549665 246.748589597262  
318.004190156313 349.540558521616 371.06697207449 343.767393640683  
382.401290201025 264.805236346895 345.062426573519 373.290426793366  
RNF40 264.955939320296 285.131244588624 236.548439331855 319.128582107184  
395.386242257877 268.370347292603 282.392419584508 264.476846259384  
257.132618311227 278.095939961034 242.188218870393 252.280435525505  
RNF41 226.144012966486 220.816812192169 214.499670852615 239.621756857095  
212.798133015556 165.590892262736 172.338509138759 173.708509414674  
170.737352030035 136.24103678923 174.075670633438 167.164675439456  
RNF43 113.919529047225 116.373841472226 117.069094451283 96.0426636429757  
138.60849268758 126.106777865128 129.23899614612 142.883466086309  
214.100698312272 133.141683141696 139.652974659584 130.114464233633  
RNF44 211.160781061336 260.955030428944 235.063474370925 269.495247190598  
274.092048989484 236.052008824688 339.54582149284 329.660368915848  
318.112626495401 306.896732729554 355.213322760505 324.177924877233  
RNF5 206.164058935215 202.761449711661 233.047541132048 215.335795337978  
247.746304138866 200.688465653117 206.164058935215 178.262619516994  
217.264041781337 193.477624805335 215.506175859782 199.837938317725  
RNF5P1 437.122373082112 416.475440894731 547.681206272188  
396.345382600445 494.347792360629 450.566031840493 566.647927867646  
358.415933397099 667.421612441201 524.855915371246 456.817057099146  
467.681480781925

|         |                  |                  |                  |                  |
|---------|------------------|------------------|------------------|------------------|
| RNF6    | 118.553226856337 | 119.455615461113 | 122.799487123057 | 121.347339077474 |
|         | 116.142650095476 | 133.470643135354 | 118.866073031304 | 123.338921824167 |
|         | 129.25124636593  | 131.938898032483 | 115.43068422162  | 134.811625739766 |
| RNF7    | 998.157643452741 | 966.731520471976 | 1014.63777151551 | 1004.6207350158  |
|         | 956.153239481189 | 1051.98943987926 | 1269.67110104843 | 1012.44277312494 |
|         | 1114.85422895959 | 933.723483173584 | 1532.47920327769 | 1687.85201395597 |
| RNF8    | 182.950456188966 | 170.361237529247 | 163.726898336284 | 159.241573314833 |
|         | 181.898985277176 | 160.488225997984 | 200.964306455257 | 157.729732484131 |
|         | 176.77183598995  | 165.219393390909 | 174.177944561595 | 173.176900454904 |
| RNFT1   | 158.213784310645 | 137.694556514044 | 144.28597792625  | 134.244658505187 |
|         | 159.887898257218 | 341.128917971124 | 247.779718065751 | 289.297370738382 |
|         | 227.558441474918 | 232.344545356395 | 186.66469040433  | 275.972447693982 |
| RNFT2   | 133.337863400762 | 153.092864798642 | 141.225533609907 | 147.946236579299 |
|         | 163.500384982242 | 191.58185405868  | 204.396576475753 | 151.174536186463 |
|         | 168.783725505491 | 138.42216862811  | 156.69025356689  | 152.511331178337 |
| RNGTT   | 575.386048896223 | 595.409419899436 | 505.302263971007 | 784.170983714588 |
|         | 363.025385707747 | 529.529314022043 | 492.930906036297 | 434.943371634824 |
|         | 458.218913259336 | 523.216537391852 | 459.30568829087  | 523.073926509865 |
| RNH1    | 615.058712877418 | 588.197697799448 | 535.20662670885  | 756.618969995355 |
|         | 814.471143753335 | 380.754569467715 | 323.086368767924 | 308.281798808746 |
|         | 417.36454228858  | 727.114956464515 | 402.564148020948 | 322.837446618323 |
| RNMT    | 533.54045706916  | 504.709613434391 | 688.464980326689 | 619.635734567779 |
|         | 225.505978789388 | 628.344122779625 | 586.642581067137 | 607.805002786409 |
|         | 644.11603826131  | 542.379137999196 | 577.98969050409  | 552.494327858264 |
| RNMTL1  | 434.325609889068 | 499.436680354749 | 512.541205235935 |                  |
|         | 664.025683218037 | 318.561557474749 | 525.920873434688 | 331.164053277361 |
|         | 516.755267232127 | 380.243136469602 | 309.098519056843 | 496.218605366298 |
|         | 510.659785046811 |                  |                  |                  |
| RNPC2   | 152.646642492666 | 167.370030272847 | 159.847116478652 | 146.865904106038 |
|         | 145.819198235878 | 175.395900648455 | 168.27980269501  | 155.518807026156 |
|         | 134.327229861635 | 141.925012927873 | 149.619141707962 | 154.812587513407 |
| RNPC3   | 289.576706584644 | 276.351810999317 | 250.577945492981 | 271.615621030842 |
|         | 193.609985124825 | 220.487665103019 | 209.070372320593 | 211.941623411369 |
|         | 219.687151891777 | 201.893722965557 | 274.974304050999 | 243.308625792448 |
| RNPEP   | 369.592501881153 | 445.505512764045 | 349.054741747798 | 419.532420763449 |
|         | 1300.40889834984 | 568.701661112562 | 627.803400871547 | 432.174413144791 |
|         | 565.509446660206 | 789.752781067888 | 709.136137559152 | 1004.97723186946 |
| RNPEPL1 | 195.185025611945 | 196.734037460218 | 160.932913244423 |                  |
|         | 248.643311972844 | 252.473612525884 | 155.494095135266 | 160.91894600916  |
|         | 153.694557276814 | 166.404164069728 | 151.773749014775 | 273.478372861114 |
|         | 171.202766078337 |                  |                  |                  |
| RNPS1   | 671.387334588652 | 724.607317443904 | 688.684644604218 | 885.713964813911 |
|         | 1310.60610806797 | 686.198351821711 | 579.318912497928 | 770.632068590053 |
|         | 595.752426322468 | 622.692834629555 | 580.347496467173 | 691.205738835917 |
| RNU1-3  | 843.075879568455 | 628.000860165888 | 461.822629852953 |                  |
|         | 534.920870202582 | 822.545007054668 | 531.711823481265 | 2065.51724858579 |
|         | 1020.19774509086 | 858.020739710943 | 1989.38201206555 | 651.235249028924 |
|         | 644.11603826131  |                  |                  |                  |
| RNU1-5  | 1030.56836625083 | 833.841469195516 | 507.827473844576 |                  |
|         | 683.179460779062 | 935.042067053226 | 684.180060287047 | 2299.23805014176 |
|         | 1192.72383754851 | 1082.75419087929 | 2496.17211592866 | 879.144005147183 |
|         | 773.330948077036 |                  |                  |                  |
| RNU105A | 157.227118680396 | 153.293125258215 | 144.534143943252 |                  |
|         | 132.677272839165 | 182.698275130489 | 175.148318011395 | 236.833653794223 |

216.929969034881 149.106615763242 204.260800563197 170.910998705968  
187.196424491482  
RNU105B 144.868337748544 142.063338490772 136.311902195562  
134.270043564053 134.986030185477 133.969054754299 141.278654291193  
163.175801793143 137.412952822912 133.372231702721 139.844984829379  
150.035890574132  
RNU105C 132.748478264583 156.033897758869 156.594337089784  
130.920010795017 137.402567669086 142.839077978518 137.67649674999  
121.855752708908 130.546471770588 136.480458837869 156.531951576859  
139.569462087818  
RNU11 174.898012759712 196.889520085412 150.936747236094 184.014707797674  
195.755450324985 208.932692585748 357.006610037663 204.842791081358  
171.40549153673 583.619362840814 197.068795788491 175.617504025145  
RNU12 140.224464809602 142.846100831941 160.769011617127 167.063762404009  
157.358696886078 161.148734808267 157.089650890944 158.960488862727  
137.812249316763 194.903531690239 148.410647472149 143.422419261603  
RNU1A3 662.781145703653 622.834462068316 431.413030534188  
572.548647437438 777.410297605252 695.086203058575 1868.82736251524  
927.478050257292 904.733257358133 1666.80650105101 952.357976050712  
656.660582895703  
RNU1F1 420.017044147123 355.290621188435 291.914408947328  
327.951753740503 527.597948979568 455.313553278155 828.276436883306  
479.866450988091 359.577827010792 917.646958427824 535.612000577004  
386.679822751367  
RNU1G2 877.255923473532 660.096727566678 433.314881387431  
522.77407098992 770.19255305977 514.002313819685 1865.44709751822  
1006.03677177164 904.211195986553 2050.34883263932 675.480482223958  
633.401624753368  
RNU2-1 155.62770968777 161.740466814881 151.418316929551  
153.85854399897 165.964183460825 157.592607345742 164.032302455558  
154.302619274576 165.537853089052 166.932757191847 146.940545711162  
134.089308635893  
RNU4-1 315.014639682046 217.560691345072 191.128539630621  
177.802767772786 229.835576260403 176.167129202773 187.833356349429  
160.543465620248 192.860161535869 269.006221210929 178.200678423426  
155.710272937386  
RNU4-2 467.944850290806 298.827660296715 245.811312606484  
253.049869714368 353.571106279836 322.028360309592 526.182262872235  
254.101184686036 298.085365348496 383.503040287678 310.026522549372  
228.349507726225  
RNU4ATAC 169.107948050094 187.389039221193 127.152744243038  
152.550031868259 474.378918787006 366.317263094585 186.296882059398  
176.340265963032 191.486717579847 245.766885283797 204.89842561202  
162.531630234824  
RNU5A 169.332207863684 165.406452831375 153.597557478169 140.557871626905  
228.270158363878 305.669636871734 170.901599088282 159.515698265424  
178.06221214103 278.687780705367 149.585616718523 167.692053273833  
RNU5D 133.745413210496 150.677852949794 136.453821861379 140.50127034921  
141.045379969014 131.534097198718 140.556631658219 161.740466814881  
138.259512736404 150.956247643013 148.654099017805 148.112717810117  
RNU6-1 2847.42635118026 2544.58522979036 1748.77270039774  
2056.90127387648 3195.71436046397 4030.42725798136 2363.50330960038  
2874.43919426772 3019.57419253979 1214.16777512885 1126.46241487062  
1244.67453201339

|          |                  |                  |                  |                  |
|----------|------------------|------------------|------------------|------------------|
| RNU6-15  | 3066.69261114251 | 2280.20302441765 | 1789.51979173209 |                  |
|          | 2230.45015969936 | 3168.27825058989 | 4520.84412831414 | 2337.64145466514 |
|          | 2599.421026133   | 2804.99820187198 | 1276.14915305515 | 1170.07851727046 |
|          | 1339.83170225337 |                  |                  |                  |
| RNU6ATAC | 154.962835391567 | 165.597236278435 | 147.565485281003 |                  |
|          | 145.724294862079 | 362.376153348015 | 154.533544838819 | 258.489608621438 |
|          | 217.670330817769 | 200.944865673409 | 164.281196089736 | 173.647320180498 |
|          | 160.293522619371 |                  |                  |                  |
| RNU86    | 145.880661952783 | 157.546123603057 | 163.48462232122  | 145.00699763203  |
|          | 141.772724512502 | 191.128539630621 | 152.609055890822 | 153.601918768668 |
|          | 142.988500173397 | 179.338652960181 | 166.932757191847 | 174.214747421898 |
| RNY1     | 574.896304593109 | 556.725550806207 | 393.115606440229 | 420.647394044431 |
|          | 318.628084728596 | 323.149792143481 | 698.882871686866 | 416.475440894731 |
|          | 323.896313343796 | 286.310923582432 | 483.174262289559 | 264.779154931102 |
| RNY3     | 559.0867397858   | 508.572981581855 | 467.681480781925 | 397.307515234646 |
|          | 294.871848467326 | 751.896334334052 | 554.115756730498 | 601.640387246951 |
|          | 459.771019162573 | 351.515059400947 | 474.629173435475 | 429.457884032977 |
| RNY4     | 922.009043194023 | 636.048536814356 | 624.978351618077 | 525.6579615077   |
|          | 251.869781014029 | 403.292651623365 | 994.802763887989 | 504.709613434391 |
|          | 263.845733455915 | 286.469773081481 | 423.966625351913 | 241.917371866481 |
| RNY5     | 297.176755638159 | 260.278595572575 | 211.916602665089 | 256.538195034956 |
|          | 1736.03342040646 | 1106.21439150501 | 6508.71638048514 | 6500.1854485891  |
|          | 3909.47437917608 | 582.062758687489 | 4763.89426388268 | 1530.45813438919 |
| ROBLD3   | 1733.96382719909 | 2249.8123426309  | 1895.72330348767 |                  |
|          | 2753.89649259242 | 2208.49325118803 | 3586.00189997341 | 2410.32095582515 |
|          | 4373.91897463938 | 2863.51286169094 | 2000.47497636965 | 2430.70635781622 |
|          | 3387.5366256957  |                  |                  |                  |
| ROBO1    | 142.33269270703  | 145.534520042669 | 131.241878941749 | 135.120878931851 |
|          | 142.166650343224 | 136.55090238808  | 132.334666750573 | 142.96594961303  |
|          | 152.798927898416 | 152.315376022976 | 179.501659253141 | 128.582520754296 |
| ROBO2    | 130.49338418515  | 140.03202338666  | 137.634298014431 | 138.490683208102 |
|          | 135.915252483475 | 142.934869757362 | 125.810756286648 | 143.802883430376 |
|          | 167.389632521521 | 147.919058170753 | 118.684077097437 | 140.605866597575 |
| ROBO3    | 286.642323413104 | 257.132618311227 | 221.127492253636 | 281.53843450593  |
|          | 196.657475905674 | 176.650953513413 | 162.178410412809 | 181.508873226705 |
|          | 205.612579504495 | 161.761125440228 | 181.758545723241 | 170.998961353556 |
| ROBO4    | 190.098509544816 | 207.104548555929 | 167.500410857353 | 198.549047189499 |
|          | 160.549597620339 | 170.05799929575  | 146.696029753123 | 148.100508271232 |
|          | 152.356731704094 | 153.899573902499 | 153.528429414138 | 142.385902610309 |
| ROCK1    | 246.152798696993 | 226.701637237203 | 235.530986541549 | 232.801257700571 |
|          | 143.53550972177  | 147.405050592353 | 151.796986456254 | 184.530853446688 |
|          | 165.476670465739 | 166.239339129505 | 194.374817778819 | 183.708917501519 |
| ROCK2    | 15463.4998494462 | 14454.6736124756 | 18338.3001930708 | 18720.0460735814 |
|          | 10280.5093368677 | 16230.8346205808 | 11326.5935775813 | 14417.2696849334 |
|          | 14755.8570847826 | 11741.7473778842 | 7902.9189607838  | 14699.3902364192 |
| ROD1     | 872.320823993033 | 1149.90248188644 | 693.781708146282 | 654.881990232975 |
|          | 1629.32740709526 | 2157.50118108142 | 2114.9754128463  | 3000.46298223166 |
|          | 4397.32311216672 | 3130.30693451802 | 3168.27825058989 | 2059.09598012857 |
| ROGDI    | 228.797912452429 | 271.989060206794 | 206.876572583814 | 353.50447714719  |
|          | 257.338950719432 | 137.933986165139 | 180.837420957945 | 173.240598306749 |
|          | 172.707821624271 | 200.506615977654 | 232.918330930051 | 186.140970908638 |
| ROM1     | 260.591336959281 | 294.17588071297  | 280.595515386655 | 288.770330002807 |
|          | 251.039117540764 | 262.488050186425 | 304.985269874607 | 244.627091189503 |
|          | 234.243977361232 | 257.292125083248 | 231.439252571168 | 256.924134409998 |

|               |                  |                  |                  |                  |
|---------------|------------------|------------------|------------------|------------------|
| ROMO1         | 2320.41293992992 | 2508.50428529255 | 1793.75125318113 | 2751.75479578587 |
|               | 4228.5490138553  | 3949.19206005238 | 7038.48958943724 | 5396.55955971617 |
|               | 3843.07094386605 | 4377.59943975549 | 2521.58055221647 | 4000.45196171119 |
| ROPN1         | 117.962188157317 | 135.6149724596   | 116.647291878845 | 121.027465953657 |
|               | 136.888915439473 | 142.183154756458 | 122.136861827049 | 126.76986764971  |
|               | 131.114995025516 | 121.144174389418 | 125.081880303992 | 127.097605337434 |
| ROPN1B        | 136.598215718877 | 142.363309192458 | 142.922549076496 |                  |
|               | 142.667173697017 | 144.898770838913 | 144.48495176385  | 143.574584852426 |
|               | 141.801472885127 | 142.21279866857  | 138.494266722799 | 148.789295862953 |
|               | 143.833779139502 |                  |                  |                  |
| ROPN1L        | 145.756455015309 | 139.153897381147 | 164.801505601099 |                  |
|               | 149.642946071295 | 138.649502040582 | 171.935132459373 | 159.026102446297 |
|               | 169.815053752464 | 148.408616955694 | 189.114794029657 | 155.734509841719 |
|               | 152.755535408382 |                  |                  |                  |
| ROR1          | 260.195256836955 | 236.470206707351 | 232.699786290509 | 248.330154701293 |
|               | 144.601370216162 | 160.92643755328  | 152.702847643082 | 161.451253146578 |
|               | 154.918405633244 | 143.672118850295 | 152.528571776589 | 156.695440330379 |
| ROR2          | 709.136137559152 | 745.153336165802 | 628.485648053393 | 983.094485868275 |
|               | 118.970693476152 | 135.648906382608 | 123.789035728194 | 123.700076467648 |
|               | 156.430981244063 | 226.334672545273 | 150.077555721391 | 115.445219455559 |
| RORA          | 165.406452831375 | 155.130745957603 | 143.144153021901 | 145.25198093836  |
|               | 140.274655651173 | 135.787323859105 | 134.237133546276 | 137.00532429734  |
|               | 139.717662557602 | 185.717123241832 | 134.04235176608  | 129.568951363607 |
| RORB          | 181.193963616037 | 213.990575186237 | 124.449679223202 | 125.065813262416 |
|               | 126.058167594519 | 114.43491928161  | 125.00254973945  | 113.769815606191 |
|               | 116.230993734675 | 122.022611139895 | 127.818137805569 | 123.505435008269 |
| RORC          | 150.28169442832  | 141.797497681512 | 141.147683040881 | 133.998381302146 |
|               | 147.232015056035 | 141.056924917269 | 155.383166865192 | 145.180346905484 |
|               | 167.083758835476 | 134.06834346533  | 150.042173991463 | 143.333211390741 |
| ROS1          | 125.729079191033 | 132.804216633852 | 114.056147008769 | 113.78644620959  |
|               | 116.363556872071 | 114.479886899622 | 112.114933398547 | 116.023563001039 |
|               | 112.943630133093 | 126.51808376464  | 120.682485578097 | 114.170354748872 |
| RP1           | 147.379741260871 | 148.049570580734 | 147.75625228531  | 142.551161883518 |
|               | 123.24533179875  | 146.910471989835 | 143.163083976105 | 150.835044630002 |
|               | 141.302075343586 | 143.333211390741 | 122.699993989189 | 144.479410859199 |
| RP11-49G10.8  | 163.529157756197 | 158.200211812067 | 195.282045838381 |                  |
|               | 165.613274361543 | 145.606098951179 | 182.851203073653 | 153.815239954928 |
|               | 149.441862883882 | 150.477774834676 | 162.373508183992 | 151.585818981801 |
|               | 170.561596645385 |                  |                  |                  |
| RP11-529I10.4 | 254.9636051363   | 247.899467998443 | 239.419200107721 |                  |
|               | 288.968909550533 | 213.531307836195 | 273.514200733343 | 351.188086838653 |
|               | 273.402804140541 | 263.47760086159  | 300.247304779062 | 268.832884350157 |
|               | 471.946284490029 |                  |                  |                  |
| RP13-360B22.2 | 153.184575380093 | 141.205975588506 | 139.375386456759 |                  |
|               | 141.994082714379 | 149.747347428419 | 142.232918684259 | 154.869171648942 |
|               | 142.776295389006 | 145.036719629525 | 142.541728149687 | 154.360558958914 |
|               | 155.737364431382 |                  |                  |                  |
| RP1L1         | 115.491262364277 | 130.625263889919 | 124.70219935334  | 126.995207465164 |
|               | 113.816165294487 | 123.683553177379 | 125.162662242842 | 122.535728427528 |
|               | 123.650702461773 | 124.794260959228 | 152.06044555622  | 132.413527125434 |
| RP2           | 126.391083453973 | 129.198366503027 | 136.881724888516 | 132.631819830347 |
|               | 126.25011972597  | 260.157440518033 | 143.978912435831 | 204.787016443123 |
|               | 170.370934381883 | 187.280334341504 | 156.756159786366 | 171.816841286562 |



|              |                  |                  |                  |                  |
|--------------|------------------|------------------|------------------|------------------|
| RP5-1022P6.2 | 256.964577037118 | 244.307627077001 | 219.351080515508 |                  |
|              | 291.839070398338 | 191.616483214712 | 211.555248754731 | 176.397715825653 |
|              | 175.529441666151 | 203.265559787292 | 365.441289363381 | 173.372949622338 |
|              | 197.762169504041 |                  |                  |                  |
| RP9          | 403.984761333129 | 475.833242673151 | 548.138527647594 | 516.577357935963 |
|              | 472.961857076681 | 393.198813167839 | 450.468410589415 | 503.757797957538 |
|              | 455.124190541055 | 474.517750753745 | 362.019824026781 | 780.961416212309 |
| RP9P         | 198.783034238774 | 183.951404362826 | 215.698924670416 | 223.703371558666 |
|              | 153.83891040723  | 167.07092218037  | 144.579725208643 | 144.898770838913 |
|              | 151.80632463295  | 185.088667707155 | 155.376656335974 | 159.678281513591 |
| RPA1         | 769.586135629964 | 715.43295523922  | 942.900963522948 | 908.704610877319 |
|              | 491.496499481595 | 1013.60354455825 | 558.440840319738 | 1062.03157932144 |
|              | 595.882696498804 | 939.213447046823 | 651.998433127992 | 633.104379362137 |
| RPA2         | 1092.74905085695 | 1044.91923772265 | 1024.95957828641 | 1103.81439809121 |
|              | 1450.44557173645 | 1482.92498205315 | 1226.74043569231 | 1980.4589291261  |
|              | 1077.95929298567 | 1146.84239258543 | 1214.77298621465 | 843.936924659514 |
| RPA3         | 375.539588956213 | 506.659740456829 | 511.670320118232 | 400.98290237416  |
|              | 2792.13364570755 | 1405.2134783352  | 1069.93503700632 | 1971.42527720714 |
|              | 1527.87148052149 | 1294.18114559128 | 608.611927946607 | 1438.33289891548 |
| RPA4         | 190.125009931628 | 235.261278607182 | 195.88263399968  | 182.515302191173 |
|              | 156.671252606074 | 255.039661999732 | 169.607072855818 | 156.316333575406 |
|              | 134.712935556892 | 153.145176413765 | 159.331110936668 | 165.553581848949 |
| RPAIN        | 620.163512570453 | 603.906237227931 | 756.618969995355 | 580.474775712828 |
|              | 374.718289636553 | 1247.91041567746 | 534.505132658177 | 1073.40463823132 |
|              | 738.579262579782 | 612.758976723556 | 483.845891531326 | 1074.96415574964 |
| RPAP1        | 232.801257700571 | 217.148957110623 | 252.432175363972 | 300.358738353443 |
|              | 289.956528242564 | 176.735168607281 | 175.485672103348 | 187.48055574295  |
|              | 182.055718892894 | 162.022232949254 | 175.810411923013 | 171.706534562905 |
| RPAP2        | 350.741303038926 | 345.062426573519 | 345.291295192574 | 368.637819994033 |
|              | 214.050918459805 | 513.662594875431 | 320.154891655397 | 469.64693728427  |
|              | 316.722160860531 | 216.154203111101 | 427.637083424453 | 308.726328440723 |
| RPAP3        | 160.407690552027 | 173.142436025281 | 194.734255772365 | 170.54511631708  |
|              | 212.312154721246 | 183.83720937589  | 218.369954323686 | 258.311739685895 |
|              | 240.005943851098 | 193.744461104128 | 188.685460181066 | 264.905947922753 |
| RPE          | 165.274189050141 | 161.965270932582 | 186.257814752354 | 145.289151849318 |
|              | 144.927731613526 | 151.808767243647 | 185.997327421952 | 157.231166272318 |
|              | 187.572517928061 | 225.950750084197 | 198.374163029174 | 216.457866890673 |
| RPE65        | 112.832122823829 | 116.029201658798 | 113.773684331489 | 112.649012857276 |
|              | 124.066239570648 | 115.157321350379 | 107.697601478064 | 112.509731206295 |
|              | 109.098105822556 | 110.707755436868 | 112.547907748842 | 112.096627288813 |
| RPESP        | 2741.71904421456 | 2037.96470181871 | 2502.72913594103 | 2921.59274577877 |
|              | 138.22823004719  | 173.951605889009 | 146.978110148492 | 218.18756955522  |
|              | 279.541294184609 | 152.199095472082 | 146.644317248414 | 185.905819051223 |
| RPF1         | 305.16668987495  | 280.913748398876 | 307.264586007015 | 303.795701960506 |
|              | 420.871349359404 | 540.359249705821 | 415.82312615045  | 465.029298672645 |
|              | 395.049127927637 | 381.971539806271 | 334.101619029105 | 398.571054759451 |
| RPF2         | 989.396074034945 | 990.814111681408 | 1165.05055932899 | 898.877732360841 |
|              | 973.543357809971 | 1119.71228054585 | 1364.1224589383  | 1130.32966481315 |
|              | 817.036222521723 | 1458.13354165836 | 1305.2232532959  | 1487.12201643008 |
| RPGR         | 149.668587078867 | 147.89884142817  | 156.949439724914 | 138.036876466521 |
|              | 147.272072245929 | 192.932285494022 | 139.005788243703 | 180.913502162011 |
|              | 158.584934514596 | 148.275939659102 | 149.408530395745 | 150.761696482387 |
| RPGRI1       | 129.125709963326 | 124.17231659571  | 114.133473556359 |                  |
|              | 110.602406076036 | 113.947948541258 | 124.606795061928 | 110.764586138261 |

138.265155903051 138.442378791712 129.623601211364 117.883635746379  
 113.347609066395  
 RPH3A 175.262884960324 169.496129800444 152.353494489233 159.856190281237  
 160.839277476397 183.071150926068 145.534520042669 144.842687993057  
 153.675939908241 158.014017648839 170.951009118578 163.632148441668  
 RPH3AL 155.287837763675 171.768618884215 180.430425314885  
 186.679199600379 236.052008824688 176.995049477843 175.573400981771  
 173.334154083555 170.266415287865 155.383166865192 171.384487293154  
 189.114794029657  
 RPIA 355.80042210486 346.173614351499 312.177191402945 394.962978677736  
 728.743541467167 447.297590650141 585.371892598422 694.644744547412  
 517.676093149981 267.901632267999 723.807658768693 385.978867521533  
 RPL10 130.99288239869 122.535728427528 136.337076023706 131.373012256275  
 123.031945101045 123.202829470888 131.904624845305 123.681353449198  
 141.811563725942 138.467624450885 109.471542280224 127.83967243279  
 RPL10A 10135.7800994367 8812.91092406563 10250.645112753  
 9044.54885739666 7190.89891723932 7969.0710242842 13090.0615116619  
 9251.21629832018 8532.46059476152 9671.66667662331 15297.9020958577  
 11777.9172529698  
 RPL10L 174.988886541341 142.715449859191 138.647667867725  
 143.363002903815 138.709991561675 157.446725405803 147.543411823657  
 147.638057399165 156.602240897907 125.752962155179 132.573953444192  
 133.324531689254  
 RPL11 17658.0552091534 18061.615487998 17141.9934540963 16230.8346205808  
 13276.1713779481 18287.6015702456 19806.1316481524 21650.9263365935  
 16533.5738137081 19806.1316481524 18338.3001930708 18562.671630167  
 RPL12 7038.48958943724 7104.65816621275 11777.9172529698 6156.29203791697  
 4995.96906061198 5688.84918819457 8496.2506227676 7802.25987814138  
 6960.46610781696 10790.3738999898 10024.4662743012 7266.3946293904  
 RPL12P6 319.090371885653 300.094509257518 579.678635803225  
 292.839392578318 287.83303360511 307.665281863258 482.965800108538  
 342.403428822464 324.615093103582 599.208370337812 710.531876484467  
 380.562212796792  
 RPL13 1357.48791782399 1323.05745869565 1243.96721244424 930.704688414069  
 997.460212152591 391.911768848267 743.915675090182 393.914413372142  
 482.226889092547 882.798927428142 1475.41920838384 646.933504790891  
 RPL13A 4183.06379632713 4206.37667440908 5281.353685715  
 3536.14527317085 6188.04738762584 3869.12225821096 10075.6573898939  
 4299.06288109563 5080.63091497522 7003.06505884735 5233.72882607795  
 6105.64727031051  
 RPL13AP3 136.059884933876 125.914267820741 138.20899000519  
 132.431566491955 113.23302126254 132.580937663749 120.876732151192  
 121.739219824085 128.194171809998 131.646121568612 131.749403497912  
 115.468921844902  
 RPL13L 530.561387049511 653.264945856916 458.705688226305  
 627.335757721489 686.198351821711 284.534369213195 644.301665020526  
 360.39998507367 363.539983343859 767.861763134136 1168.68074786473  
 491.290438575428

RPL14 1328.38230265655 942.41077071058 1176.01058971561 778.639512538949  
709.303384219887 716.731984660463 1504.15682715484 674.571475335107  
895.114975754684 830.684999498776 1562.9779683714 671.387334588652  
RPL14L 5825.9968524214 5532.93454600454 7054.92270618408  
5506.81944079182 2630.78185410861 5291.83393775761 8445.36695108418  
4367.38154535901 6006.01682776552 5992.92384160188 5122.60899285635  
6358.5018930218  
RPL15 6214.77579017084 5396.55955971617 7992.84111657183 3917.05893989806  
1810.68433539154 3876.04966263281 5265.74259211695 4309.86375945008  
4266.92715355342 2219.71846304201 3775.41389938231 4457.64479507833  
RPL17 7585.47289520004 7681.48027081818 9433.53967760357 6114.33638002734  
6601.004284244 8768.32269645116 10836.7380675792 10930.6720259935  
8581.41617729997 10170.8669218992 11554.7330886956 10280.5093368677  
RPL18 20887.0399135573 22354.1731362334 19496.8914296296 22750.0246358215  
27501.6698286039 19806.1316481524 25295.5071561111 19087.9532735841  
24731.0629964468 22543.625434682 29532.7890259497 18421.818380318  
RPL18A 16818.1954169657 16480.781374867 16480.781374867  
17009.4268910772 27667.4034204988 17067.0086403248 19434.8698477145  
18501.379301537 17749.5685495445 20764.6732139063 23318.4614981217  
19661.6741558107  
RPL19 11777.9172529698 12334.7921691489 13276.1713779481 11190.1778174002  
12022.5515181682 13324.7465248375 18338.3001930708 21956.7541751958  
17496.0674176329 15420.9668207676 23878.0022344804 17749.5685495445  
RPL21 4938.42484385053 4491.96934862425 6571.35528952186 3348.7622174821  
3338.13980198211 5714.36902486392 6919.4226838505 3968.38723079061  
5327.13051940508 6601.004284244 4425.66777919789 8558.70496234991  
RPL22 2550.08769415478 2288.63508719706 4159.96851384358 1557.00226259883  
1167.72023351098 3015.70954394585 4562.75659565027 3749.80462365748  
2915.72823797537 2542.44286642873 2786.35558271661 3222.23985545506  
RPL22L1 163.843143947012 169.285901212492 159.199045715212  
145.493977576106 150.51537512828 158.495606141226 135.723554819107  
152.702847643082 148.16526158216 148.913181799692 198.760049629983  
146.007311764212  
RPL23 9671.66667662331 8473.21873478131 9272.37780151073 6409.23524786095  
8581.41617729997 8787.57716309558 15420.9668207676 11647.9643290124  
7699.37963536892 8617.2437024568 12109.3049135906 8072.83367137971  
RPL23A 424.495400604335 482.677635089583 346.635777358159  
357.835334661098 1605.2454230722 734.97763567765 1704.25279485563  
1307.19490564658 638.287221212947 613.279465441319 701.847905027147  
882.429823267754  
RPL23AP13 478.38361571213 437.122373082112 452.961307006622  
321.627969147543 237.692959394487 285.05846406041 340.800632878807  
271.154246147262 227.32463765717 266.032134528055 281.238656291587  
227.499335248402  
RPL23AP53 367.825328832492 339.490955270138 376.54010486682  
373.361263985383 151.768699486923 192.209344004015 209.623583937962  
229.130679600654 225.850439131864 254.447650810819 257.44230597145  
200.506615977654  
RPL23AP7 386.379891865411 368.637819994033 447.579975492958  
382.630113452429 343.833659987063 312.808044035117 509.880640462  
443.853458865556 317.061815822659 389.051174954505 417.865461351681  
363.539983343859

|          |                  |                  |                  |                  |
|----------|------------------|------------------|------------------|------------------|
| RPL24    | 12171.1997841553 | 11554.7330886956 | 14866.8264879369 | 8787.57716309558 |
|          | 15667.6576521981 | 14651.3379687477 | 16588.0599171804 | 15667.6576521981 |
|          | 17067.0086403248 | 17404.1167486753 | 14454.6736124756 | 15194.4972103372 |
| RPL26    | 4335.76831372031 | 4373.91897463938 | 6059.74270502037 | 2913.2685312165  |
|          | 5874.57722671552 | 7631.6124232898  | 7218.21759302518 | 7491.93659373205 |
|          | 5138.28186306948 | 8322.20177173035 | 10930.6720259935 | 4711.21389812942 |
| RPL26L1  | 320.707687986324 | 318.73799597811  | 354.531898366438 |                  |
|          | 287.503594820801 | 454.133372808458 | 576.298671053238 | 603.338538383128 |
|          | 483.699436940387 | 386.16563750478  | 832.622843175217 | 323.276514394119 |
|          | 547.367381020623 |                  |                  |                  |
| RPL27    | 12334.7921691489 | 11809.4804843301 | 13758.4768543075 | 11112.4298269818 |
|          | 11071.0448447818 | 14499.7866852901 | 17404.1167486753 | 17067.0086403248 |
|          | 12968.2945749    | 12493.2940668467 | 21110.9013462062 | 14454.6736124756 |
| RPL27A   | 17830.1333276624 | 17749.5685495445 | 18760.3823237058 |                  |
|          | 15924.2167735021 | 15704.7314387339 | 14228.7550296952 | 22543.625434682  |
|          | 19889.8233042542 | 23656.0669757593 | 31402.6950316226 | 15194.4972103372 |
|          | 20381.3859535625 |                  |                  |                  |
| RPL28    | 191.112009690591 | 216.290279815413 | 170.655648004461 | 208.476367897256 |
|          | 514.463945278314 | 182.798526632723 | 235.680462167404 | 189.90406457741  |
|          | 228.45211887819  | 258.915802108562 | 240.07282016658  | 147.272072245929 |
| RPL29    | 127.802645313091 | 146.873719524815 | 138.197500836501 | 138.334626498686 |
|          | 989.77058497525  | 675.596864001032 | 701.847905027147 | 423.966625351913 |
|          | 480.712219116621 | 1118.86225415732 | 449.598181155897 | 340.239348689005 |
| RPL29P2  | 153.630125822178 | 157.225479764928 | 151.998942684339 |                  |
|          | 143.849399031223 | 157.162523271165 | 171.595724119779 | 160.446191353364 |
|          | 149.402679897813 | 141.135840314665 | 159.646538408414 | 202.60339529874  |
|          | 147.341597963918 |                  |                  |                  |
| RPL3     | 13902.1067272762 | 15354.74541236   | 16925.9167115963 | 14699.3902364192 |
|          | 11150.5512437377 | 12334.7921691489 | 15561.8923517816 | 14544.3732040823 |
|          | 14073.4649333964 | 13217.7001749493 | 17658.0552091534 | 17211.1455384358 |
| RPL30    | 10632.4185569238 | 10449.7190201942 | 13142.4763966378 | 7082.28969354712 |
|          | 18501.379301537  | 16179.0939169232 | 18665.5217411582 | 17211.1455384358 |
|          | 16588.0599171804 | 14037.2575989329 | 14073.4649333964 | 17404.1167486753 |
| RPL31    | 14454.6736124756 | 13360.9483836861 | 15561.8923517816 | 12283.9915232122 |
|          | 18061.615487998  | 16818.1954169657 | 17009.4268910772 | 15116.95436573   |
|          | 13142.4763966378 | 16742.6286866851 | 19434.8698477145 | 17067.0086403248 |
| RPL31P10 | 138.334626498686 | 130.114464233633 | 146.040995022257 |                  |
|          | 137.994334667126 | 145.308548379215 | 127.833653828539 | 143.155998311198 |
|          | 158.330403004116 | 131.090975815768 | 129.005211657936 | 168.398366575579 |
|          | 143.948375780951 |                  |                  |                  |
| RPL31P11 | 155.376656335974 | 168.205277839471 | 134.565199667396 |                  |
|          | 146.14494790114  | 149.987571884748 | 151.206697943841 | 174.274996381853 |
|          | 148.215172022129 | 148.853877151493 | 152.327247552986 | 156.136962310077 |
|          | 155.942609847585 |                  |                  |                  |
| RPL32    | 5521.74673982411 | 5479.24427823207 | 4956.21683075884 | 4477.54806526552 |
|          | 6271.34208268488 | 5115.14161559446 | 6500.1854485891  | 6203.08085790474 |
|          | 5265.74259211695 | 5410.50736002544 | 3684.05513498098 | 5327.13051940508 |
| RPL32P3  | 173.050039480459 | 157.6811998968   | 161.724388995749 |                  |
|          | 171.155660467037 | 158.751241730465 | 177.123497519231 | 151.690538050817 |
|          | 156.998563448664 | 145.989546968117 | 145.797047170492 | 136.225792549383 |
|          | 159.236429097777 |                  |                  |                  |
| RPL34    | 322.263925912805 | 290.135914275115 | 372.374101464689 | 292.468585109951 |
|          | 549.569374872629 | 885.927972780392 | 945.403379196643 | 702.049571167356 |
|          | 720.364080505785 | 984.181272274704 | 686.923164688096 | 660.907502776003 |

|         |                  |                  |                  |                  |
|---------|------------------|------------------|------------------|------------------|
| RPL35   | 11112.4298269818 | 12022.5515181682 | 10312.8407173696 | 14037.2575989329 |
|         | 16077.1585881362 | 8211.38792799248 | 9596.10781313429 | 9192.8966763778  |
|         | 11918.214537866  | 13526.3170858629 | 10579.8650348916 | 7681.48027081818 |
| RPL35A  | 10608.0671430066 | 10765.0336035748 | 12022.5515181682 |                  |
|         | 8096.28093399619 | 10741.3064142855 | 13853.9715872573 | 15704.7314387339 |
|         | 16179.0939169232 | 15667.6576521981 | 15238.4097431619 | 15851.5830405813 |
|         | 15116.95436573   |                  |                  |                  |
| RPL36   | 2399.88695085752 | 2355.29862638453 | 2219.71846304201 | 2076.51786803222 |
|         | 5636.26097921507 | 3744.5666678861  | 5207.37974585707 | 3798.89743803968 |
|         | 2236.73950603157 | 5382.31371568106 | 4095.76073123843 | 2900.55309635211 |
| RPL36A  | 124.347680638586 | 141.751174078324 | 140.49145570631  |                  |
|         | 147.368455727098 | 315.064477782052 | 196.908612360694 | 179.49202902995  |
|         | 173.424541543058 | 223.666832044186 | 313.828943866034 | 174.840923772532 |
|         | 172.80265044721  |                  |                  |                  |
| RPL36AL | 6776.11712291246 | 5748.57645553386 | 7389.95365139168 |                  |
|         | 4793.22133852447 | 2627.12900283627 | 3575.60827968852 | 6296.24208225227 |
|         | 6851.54963413886 | 5410.50736002544 | 7354.94071109106 | 6470.73189429877 |
|         | 7699.37963536892 |                  |                  |                  |
| RPL37   | 260.554343693588 | 244.350562866593 | 324.009703043876 | 246.552713031445 |
|         | 160.690442125281 | 245.082816415008 | 200.688465653117 | 197.981112645168 |
|         | 187.132496910208 | 165.977852973826 | 255.374689750672 | 176.393864881259 |
| RPL37A  | 9527.86367804896 | 8982.75408120297 | 9759.87403504619 |                  |
|         | 8617.2437024568  | 8261.82420896892 | 7167.29945083872 | 9671.66667662331 |
|         | 8881.86480594052 | 9970.08052783908 | 8030.19731415448 | 7292.0342195035  |
|         | 10790.3738999898 |                  |                  |                  |
| RPL38   | 17975.1602090863 | 17211.1455384358 | 16123.3486890049 | 17141.9934540963 |
|         | 18562.671630167  | 16328.5991894287 | 20381.3859535625 | 18562.671630167  |
|         | 19806.1316481524 | 19189.4835303597 | 21315.9767866977 | 20048.679735668  |
| RPL39   | 9272.37780151073 | 9527.86367804896 | 10953.6229702446 | 7266.3946293904  |
|         | 21315.9767866977 | 22354.1731362334 | 16742.6286866851 | 16642.71853486   |
|         | 16362.989744896  | 15745.699731183  | 24377.1316448061 | 12493.2940668467 |
| RPL39L  | 262.913054904154 | 246.63579788514  | 332.798130757632 |                  |
|         | 257.880331012233 | 1894.14699530855 | 282.076744753348 | 206.303338709554 |
|         | 440.916522871266 | 421.140525880287 | 213.556015518863 | 180.085975596327 |
|         | 570.771089597761 |                  |                  |                  |
| RPL3L   | 129.737882221259 | 150.301540078433 | 131.977212025523 | 133.75142055959  |
|         | 132.232444196227 | 132.873213182775 | 152.382558543399 | 136.466367853188 |
|         | 145.661617610928 | 134.78059811237  | 133.519359066907 | 141.543147273205 |
| RPL4    | 8121.54750071211 | 6670.51138785163 | 8864.70614223459 | 7838.92787031423 |
|         | 5532.93454600454 | 3684.05513498098 | 8211.38792799248 | 3515.36256599555 |
|         | 4486.35687688252 | 5175.17279574945 | 7332.15849011291 | 7656.97151002785 |
| RPL41   | 15532.9759169142 | 16179.0939169232 | 17568.5229948989 | 13526.3170858629 |
|         | 15463.4998494462 | 18953.8127741918 | 12368.1423473066 | 15463.4998494462 |
|         | 17658.0552091534 | 13758.4768543075 | 9272.37780151073 | 15603.3490258675 |
| RPL5    | 9349.76443528011 | 10417.5218406801 | 9470.58919937464 | 9852.51412359574 |
|         | 5122.60899285635 | 6028.67062754577 | 8072.83367137971 | 5734.76405709934 |
|         | 5776.63686968234 | 4635.42002659719 | 13700.8527522612 | 6368.23123771343 |
| RPL6    | 8596.90650022148 | 9908.59593023839 | 9192.8966763778  | 9596.10781313429 |
|         | 8617.2437024568  | 8473.21873478131 | 10900.1783397368 | 9527.86367804896 |
|         | 11235.4970815873 | 9527.86367804896 | 11709.9785619141 | 10202.2226913537 |
| RPL7    | 2337.64145466514 | 2063.42824094932 | 2992.18604022433 | 1554.16120123599 |
|         | 2127.22258112242 | 2804.99820187198 | 4206.37667440908 | 2124.12760841901 |
|         | 1875.21979956596 | 2708.20624364471 | 5213.40342339233 | 2061.9164323309  |

|         |                  |                  |                  |                  |
|---------|------------------|------------------|------------------|------------------|
| RPL7A   | 3684.05513498098 | 4068.18567686753 | 4682.62607750437 | 3850.41246770812 |
|         | 4592.14655702906 | 2344.11548437508 | 4503.01240138314 | 3706.41283595794 |
|         | 3495.66977000028 | 6470.73189429877 | 9820.93899217345 | 2867.63319136936 |
| RPL7L1  | 10329.1999331936 | 10474.0047946187 | 10106.8225600705 |                  |
|         | 10862.3952192141 | 3447.19587767281 | 10222.4435857673 | 6652.21610967461 |
|         | 8982.75408120297 | 8182.20106181946 | 6281.01687932005 | 6339.16392696068 |
|         | 7468.70895916615 |                  |                  |                  |
| RPL8    | 3436.32495553246 | 6830.46932926077 | 5455.91604383389 | 6138.10904830456 |
|         | 7167.29945083872 | 4763.89426388268 | 6253.84268792816 | 4811.88424516272 |
|         | 7573.69742026367 | 6877.52553567598 | 9403.76665152182 | 6484.36742084268 |
| RPL9    | 7930.82679738435 | 7266.3946293904  | 8496.2506227676  | 5240.40795364202 |
|         | 9219.38828280399 | 8368.88320476021 | 9793.92604780228 | 7631.6124232898  |
|         | 6271.34208268488 | 8739.02966610274 | 9759.87403504619 | 7601.58151657937 |
| RPLP0   | 2213.1043022626  | 2321.41228376157 | 3983.37592132018 | 2355.29862638453 |
|         | 2263.73444150082 | 6460.4291301245  | 8709.2221371432  | 7354.94071109106 |
|         | 7371.9761952537  | 7873.0525548049  | 4503.01240138314 | 9323.53099359448 |
| RPLPOP2 | 124.474221706022 | 139.921002429353 | 132.570225520163 |                  |
|         | 146.897528834303 | 127.424848301217 | 129.743808480368 | 126.479964493857 |
|         | 143.177915754998 | 137.872742675806 | 136.832494876249 | 117.255496552581 |
|         | 124.758906471654 |                  |                  |                  |
| RPLP1   | 14181.1182110192 | 15745.699731183  | 12818.0509395717 | 14798.1358474998 |
|         | 12493.2940668467 | 9527.86367804896 | 15603.3490258675 | 9820.93899217345 |
|         | 14300.8562978211 | 14938.5975217303 | 13758.4768543075 | 16533.5738137081 |
| RPLP2   | 29162.1093037754 | 29532.7890259497 | 26522.0142925211 | 29162.1093037754 |
|         | 28530.8435957612 | 26010.7684336005 | 23190.7842325067 | 29532.7890259497 |
|         | 28344.4547971342 | 22035.2646000952 | 18720.0460735814 | 27667.4034204988 |
| RPN1    | 2198.4268389426  | 2253.7522632414  | 1958.96627327952 | 1685.33737186733 |
|         | 7371.9761952537  | 2905.12297639092 | 3270.88476148156 | 3038.02573182546 |
|         | 3560.23794634993 | 2392.93562797606 | 3592.7878705048  | 3149.26998719015 |
| RPN2    | 767.054576874115 | 888.371107987343 | 438.340341490622 | 680.743052197025 |
|         | 1554.16120123599 | 1721.20676889116 | 2111.32236867229 | 1089.58643309156 |
|         | 1496.0924333403  | 1038.93733638848 | 1859.88000417483 | 1373.08023518911 |
| RPP14   | 213.813667557079 | 207.785320401354 | 179.880812358974 | 215.094633380547 |
|         | 174.540209145695 | 162.500485773812 | 165.380225715852 | 169.482586449402 |
|         | 198.135240691225 | 180.437648146588 | 163.632148441668 | 178.425137262105 |
| RPP21   | 2048.13524244516 | 2605.13680290987 | 2845.0377634896  | 3455.20639616159 |
|         | 5195.2087608308  | 3262.24877138481 | 2653.47752512393 | 3226.53426370323 |
|         | 3430.76532174701 | 2500.07677977147 | 1899.94714976387 | 2635.31067044245 |
| RPP25   | 263.084557246752 | 234.041863839123 | 185.233210060342 | 169.800006803362 |
|         | 398.512947526406 | 170.775283924087 | 141.499192356469 | 206.488530785667 |
|         | 161.877378749103 | 132.442771000976 | 186.813888805838 | 220.533113603343 |
| RPP30   | 124.317870455205 | 138.338280468272 | 133.257477196196 | 135.783125948784 |
|         | 125.98519427755  | 129.973380117841 | 128.850480964163 | 127.740057874561 |
|         | 129.132523684894 | 138.688881393504 | 142.403121638265 | 132.86879723151  |
| RPP38   | 148.145136066071 | 164.126980102525 | 155.612543356905 | 153.744962185987 |
|         | 218.393783552484 | 260.41082304175  | 179.821008257902 | 194.86492119218  |
|         | 185.706228572019 | 165.177036955944 | 166.223079895236 | 199.397633942623 |
| RPP40   | 454.984562256248 | 561.761160223609 | 438.870464403215 | 647.273409499313 |
|         | 1144.92109214621 | 990.206369590236 | 890.121325723286 | 866.147379099606 |
|         | 609.665323786904 | 1064.85152398919 | 951.371815352591 | 1015.63768413332 |
| RPPH1   | 175.693873820963 | 195.69447353356  | 163.22059466037  | 145.864902319111 |
|         | 199.555406967021 | 164.433462115832 | 251.704037951295 | 199.933148219784 |
|         | 180.225637790292 | 181.003812824014 | 238.685014863143 | 169.940177050294 |

|         |                  |                  |                  |                  |
|---------|------------------|------------------|------------------|------------------|
| RPRC1   | 4214.83058308503 | 5058.57872936027 | 4763.89426388268 | 7308.57540715512 |
|         | 1756.88092410303 | 1584.81089248914 | 1618.64901092072 | 1687.06111969368 |
|         | 2225.59207490574 | 3290.27308365921 | 1861.19763103381 | 2234.85920641661 |
| RPRD1A  | 477.741216640575 | 461.229315272354 | 726.556553101727 |                  |
|         | 405.409668978569 | 217.670330817769 | 660.315285709317 | 397.737702926328 |
|         | 519.829743770022 | 526.896146537814 | 413.913442080187 | 412.801213309591 |
|         | 481.86545778383  |                  |                  |                  |
| RPRD1B  | 249.354198174438 | 243.35880641566  | 255.677315946354 |                  |
|         | 270.069634610818 | 227.668046559074 | 305.720812071583 | 349.128741707506 |
|         | 251.347519777204 | 273.984715370774 | 250.82359383789  | 247.407442038488 |
|         | 290.288001750744 |                  |                  |                  |
| RPRD2   | 370.301819403832 | 460.941286124613 | 415.011847890313 | 484.764806127211 |
|         | 262.416137698884 | 344.379733302418 | 354.531898366438 | 514.002313819685 |
|         | 315.752980521266 | 322.614169214764 | 427.766660764042 | 429.922530506572 |
| RPRM    | 291.994364783888 | 406.224345292389 | 247.550312458738 | 565.97975389646  |
|         | 264.054997398621 | 202.718428167217 | 218.393783552484 | 157.639688257892 |
|         | 187.519053043173 | 130.865693081945 | 476.383294794912 | 216.929969034881 |
| RPRML   | 112.394223360492 | 117.672645717508 | 126.902441495413 | 123.361179535626 |
|         | 115.848659135231 | 107.930325780047 | 112.851805868467 | 110.050374895171 |
|         | 108.970432124412 | 115.257318321108 | 115.316430915446 | 127.182067293944 |
| RPS10   | 18562.671630167  | 20510.096303537  | 16179.0939169232 | 20647.6275450554 |
|         | 21409.4415798676 | 21315.9767866977 | 19087.9532735841 | 20764.6732139063 |
|         | 17830.1333276624 | 19434.8698477145 | 15704.7314387339 | 18953.8127741918 |
| RPS10P3 | 251.787648609546 | 221.471811658459 | 262.60377731258  |                  |
|         | 224.62335524729  | 234.738241125899 | 200.633009710701 | 278.775971122032 |
|         | 205.830321788612 | 209.196695368783 | 250.885949055834 | 361.390981655795 |
|         | 266.162244070031 |                  |                  |                  |
| RPS11   | 18720.0460735814 | 20381.3859535625 | 19806.1316481524 | 17404.1167486753 |
|         | 30573.5859783923 | 21110.9013462062 | 25002.6870134094 | 23427.4695172122 |
|         | 26719.5528617739 | 21315.9767866977 | 25295.5071561111 | 25295.5071561111 |
| RPS12   | 22543.625434682  | 20647.6275450554 | 24731.0629964468 | 18220.6383250956 |
|         | 15561.8923517816 | 15194.4972103372 | 28193.3833726673 | 22872.0444589809 |
|         | 21754.9904891312 | 28095.1627766565 | 31402.6950316226 | 28344.4547971342 |
| RPS13   | 10397.3656932566 | 9192.8966763778  | 12615.8332290932 | 6691.04319670055 |
|         | 4124.03779111916 | 6138.10904830456 | 9171.47979464736 | 8496.2506227676  |
|         | 8787.57716309558 | 14073.4649333964 | 14499.7866852901 | 8030.19731415448 |
| RPS14   | 11918.214537866  | 11777.9172529698 | 12109.3049135906 | 10579.8650348916 |
|         | 12654.3779830648 | 9671.66667662331 | 15667.6576521981 | 12171.1997841553 |
|         | 9323.53099359448 | 16642.71853486   | 22872.0444589809 | 13423.8921651885 |
| RPS15   | 5265.74259211695 | 5080.63091497522 | 4503.01240138314 | 4367.38154535901 |
|         | 9433.53967760357 | 5558.51089816921 | 6990.13809515289 | 5281.353685715   |
|         | 4141.8682669995  | 6484.36742084268 | 4773.62220024088 | 5655.12135336698 |
| RPS15A  | 9139.73212514992 | 8739.02966610274 | 10202.2226913537 |                  |
|         | 6776.11712291246 | 14181.1182110192 | 12968.2945749    | 13809.2057928642 |
|         | 11918.214537866  | 9293.35991367953 | 11554.7330886956 | 10661.2216586049 |
|         | 12283.9915232122 |                  |                  |                  |
| RPS16   | 22354.1731362334 | 22872.0444589809 | 22035.2646000952 | 22872.0444589809 |
|         | 22872.0444589809 | 25002.6870134094 | 20989.6494028551 | 21315.9767866977 |
|         | 25558.9005130606 | 19661.6741558107 | 17749.5685495445 | 20099.9833491654 |
| RPS17   | 10449.7190201942 | 10250.645112753  | 10988.2836796736 | 9470.58919937464 |
|         | 15297.9020958577 | 12022.5515181682 | 15116.95436573   | 10250.645112753  |
|         | 13902.1067272762 | 14983.8256502293 | 15603.3490258675 | 14037.2575989329 |

|          |                  |                  |                  |                  |
|----------|------------------|------------------|------------------|------------------|
| RPS18    | 6470.73189429877 | 7802.25987814138 | 6484.36742084268 | 6737.97308530049 |
|          | 10765.0336035748 | 9192.8966763778  | 14544.3732040823 | 7969.0710242842  |
|          | 8514.94395408164 | 13902.1067272762 | 16974.4822983201 | 10360.162704111  |
| RPS19    | 18862.7632438112 | 22035.2646000952 | 16742.6286866851 | 22035.2646000952 |
|          | 26522.0142925211 | 23053.5660790052 | 24377.1316448061 | 23656.0669757593 |
|          | 25808.3502428915 | 18862.7632438112 | 29868.1819370827 | 21315.9767866977 |
| RPS19BP1 | 559.899430596368 | 535.041545916303 | 649.906677394861 |                  |
|          | 640.255747986724 | 1116.19403476786 | 654.881990232975 | 561.379619105609 |
|          | 568.310800941091 | 632.843164522867 | 463.622673539254 | 506.290241222253 |
|          | 601.164127925014 |                  |                  |                  |
| RPS2     | 4793.22133852447 | 4892.17875938832 | 6188.04738762584 | 4404.79209330918 |
|          | 13142.4763966378 | 8163.29201165065 | 14348.4009261372 | 10661.2216586049 |
|          | 7902.9189607838  | 12877.2152068971 | 12283.9915232122 | 12334.7921691489 |
| RPS20    | 16588.0599171804 | 14181.1182110192 | 13902.1067272762 | 10417.5218406801 |
|          | 11709.9785619141 | 12171.1997841553 | 15745.699731183  | 15990.893941344  |
|          | 19661.6741558107 | 18287.6015702456 | 26522.0142925211 | 17009.4268910772 |
| RPS21    | 645.806954296487 | 654.52788411248  | 782.746481112316 | 619.380514697732 |
|          | 1777.29626660109 | 3046.47354587949 | 3592.7878705048  | 1510.77099418802 |
|          | 1694.24232555141 | 2518.88171283899 | 929.69741581954  | 1334.69145271749 |
| RPS23    | 2328.65814406636 | 3237.94149351627 | 4323.76731419005 | 2210.67250954072 |
|          | 514.61297221467  | 1673.5387396582  | 764.493610798958 | 847.863177169335 |
|          | 424.855168311509 | 608.816123736392 | 822.545007054668 | 1001.65849130836 |
| RPS24    | 9560.32907282993 | 10862.3952192141 | 9251.21629832018 | 10632.4185569238 |
|          | 7631.6124232898  | 7122.07276863122 | 10024.4662743012 | 7930.82679738435 |
|          | 8596.90650022148 | 7468.70895916615 | 7342.79622458743 | 9070.86397918429 |
| RPS25    | 20099.9833491654 | 20048.679735668  | 23318.4614981217 | 17749.5685495445 |
|          | 13645.150201952  | 14348.4009261372 | 20647.6275450554 | 20647.6275450554 |
|          | 19189.4835303597 | 16480.781374867  | 26375.3000727296 | 25002.6870134094 |
| RPS26    | 841.944755849006 | 1007.7803477458  | 886.157279090932 | 608.816123736392 |
|          | 1447.07989164988 | 1118.28423222707 | 1015.10079945997 | 1583.79384467611 |
|          | 1639.76556136383 | 1132.27988339924 | 1948.24432908972 | 1041.58583268313 |
| RPS26L   | 5532.93454600454 | 6960.46610781696 | 4635.42002659719 |                  |
|          | 4929.26915002209 | 6324.87600301793 | 4602.81651147558 | 3765.25491426198 |
|          | 7308.57540715512 | 7585.47289520004 | 3843.07094386605 | 15809.9561036761 |
|          | 3677.23129570773 |                  |                  |                  |
| RPS26P10 | 266.442565636226 | 276.434192872962 | 305.200911653347 |                  |
|          | 213.634295832535 | 321.177982468322 | 317.121202656311 | 280.848426993226 |
|          | 447.059120541009 | 351.998551165704 | 313.708197191587 | 1235.75946952752 |
|          | 252.548942594125 |                  |                  |                  |
| RPS26P11 | 2782.94647782764 | 3078.76695443407 | 3103.4192907748  |                  |
|          | 2083.02482378721 | 3862.57980488881 | 3630.80752744347 | 2833.30537635103 |
|          | 5455.91604383389 | 5601.24254062491 | 3168.27825058989 | 6312.36452724398 |
|          | 2938.06458269406 |                  |                  |                  |
| RPS27    | 21650.9263365935 | 22182.4877079778 | 21110.9013462062 | 18862.7632438112 |
|          | 20099.9833491654 | 22182.4877079778 | 16974.4822983201 | 21409.4415798676 |
|          | 21551.9994556128 | 16974.4822983201 | 16480.781374867  | 20989.6494028551 |
| RPS27A   | 17009.4268910772 | 16925.9167115963 | 18220.6383250956 |                  |
|          | 17067.0086403248 | 17404.1167486753 | 15603.3490258675 | 16533.5738137081 |
|          | 18760.3823237058 | 15745.699731183  | 16925.9167115963 | 12968.2945749    |
|          | 18061.615487998  |                  |                  |                  |
| RPS27L   | 1767.70023790753 | 1750.21700780511 | 2382.87910783088 |                  |
|          | 1297.25632532536 | 930.25842384208  | 1535.27496251381 | 1832.35076992253 |
|          | 1171.62361359992 | 1892.8338612507  | 1403.09138858507 | 1189.69730508119 |
|          | 1303.94157493616 |                  |                  |                  |



|         |                   |                  |                  |                  |
|---------|-------------------|------------------|------------------|------------------|
| RPS28   | 8787.57716309558  | 10329.1999331936 | 7354.94071109106 | 9219.38828280399 |
|         | 10608.0671430066  | 10608.0671430066 | 13563.1694195379 | 11554.7330886956 |
|         | 7519.94306346326  | 9820.93899217345 | 13090.0615116619 | 10024.4662743012 |
| RPS29   | 14348.4009261372  | 13944.7649147227 | 14108.0461617941 | 11874.9808592281 |
|         | 18720.0460735814  | 15297.9020958577 | 16179.0939169232 | 17568.5229948989 |
|         | 17009.4268910772  | 16533.5738137081 | 11326.5935775813 | 17496.0674176329 |
| RPS3    | 10360.162704111   | 10704.4678928541 | 13190.4826009741 | 8445.36695108418 |
|         | 17658.0552091534  | 13142.4763966378 | 16397.4527321924 | 11190.1778174002 |
|         | 10417.5218406801  | 13423.8921651885 | 20099.9833491654 | 16480.781374867  |
| RPS3A   | 16328.5991894287  | 15420.9668207676 | 15238.4097431619 | 15238.4097431619 |
|         | 16642.71853486    | 18862.7632438112 | 17975.1602090863 | 14454.6736124756 |
|         | 15420.9668207676  | 14592.6308255978 | 17211.1455384358 | 16179.0939169232 |
| RPS4X   | 3855.33040541264  | 3890.14358014877 | 5748.57645553386 | 2468.47687203968 |
|         | 1889.05071563459  | 4425.66777919789 | 6339.16392696068 | 3855.33040541264 |
|         | 3684.05513498098  | 5874.57722671552 | 8649.07367196998 | 6793.99737496637 |
| RPS4Y1  | 4359.98094976179  | 3149.26998719015 | 4847.77258830631 |                  |
|         | 3391.3005983725   | 4214.83058308503 | 190.843795579234 | 6776.11712291246 |
|         | 3430.76532174701  | 4030.42725798136 | 575.722713461982 | 5532.93454600454 |
|         | 7786.96143641382  |                  |                  |                  |
| RPS4Y2  | 802.304294140514  | 618.058496806334 | 865.435843446989 |                  |
|         | 493.209107049493  | 683.019502027271 | 153.647343267295 | 1313.89440013246 |
|         | 589.409235971915  | 604.687265229902 | 190.471158323247 | 1492.15137418791 |
|         | 1344.87842417496  |                  |                  |                  |
| RPS5    | 8918.58940386786  | 8768.32269645116 | 8342.70113690382 | 8261.82420896892 |
|         | 20764.6732139063  | 11647.9643290124 | 15924.2167735021 | 13013.8166277495 |
|         | 13090.0615116619  | 14228.7550296952 | 20887.0399135573 | 13976.0448927093 |
| RPS6    | 13013.8166277495  | 14348.4009261372 | 14755.8570847826 | 14592.6308255978 |
|         | 12283.9915232122  | 15990.893941344  | 21650.9263365935 | 18338.3001930708 |
|         | 15851.5830405813  | 15990.893941344  | 22035.2646000952 | 13902.1067272762 |
| RPS6KA1 | 159.05213637758   | 169.311264420133 | 133.794524856909 |                  |
|         | 140.767270136561  | 328.019503002384 | 246.428746807313 | 180.315825600347 |
|         | 186.951061159734  | 192.375251343504 | 221.889331385023 | 200.902123076244 |
|         | 217.576547690525  |                  |                  |                  |
| RPS6KA2 | 331.215872600406  | 307.410175748955 | 290.037325939883 |                  |
|         | 267.097999873387  | 209.684346388892 | 194.724219884752 | 191.861598059182 |
|         | 181.081050726043  | 183.988537525989 | 154.003862874241 | 225.005311517365 |
|         | 168.547575047205  |                  |                  |                  |
| RPS6KA3 | 158.125437004665  | 152.461930328923 | 161.866405026758 |                  |
|         | 143.639894909386  | 163.19340939648  | 169.061364889307 | 158.072347847051 |
|         | 221.359331823286  | 153.251468534012 | 163.534117903837 | 169.028519464989 |
|         | 158.260676113325  |                  |                  |                  |
| RPS6KA4 | 407.518324776453  | 509.702881232139 | 391.569187190375 |                  |
|         | 706.628675634893  | 1192.47480377375 | 511.113083958771 | 389.500591134279 |
|         | 352.665030560239  | 348.808646570544 | 813.034056288861 | 821.465895280454 |
|         | 461.229315272354  |                  |                  |                  |
| RPS6KA5 | 358.092809491843  | 372.894376776771 | 385.463209972694 |                  |
|         | 321.31562287169   | 201.637540930213 | 261.39435936661  | 268.52833723726  |
|         | 216.755681508811  | 194.753955100069 | 232.200025766422 | 190.45739385453  |
|         | 171.051948060796  |                  |                  |                  |
| RPS6KA6 | 126.511314417328  | 130.105800581241 | 142.370721565016 |                  |
|         | 133.233826283531  | 184.758754197435 | 123.720229113779 | 165.558963147657 |
|         | 150.348608467097  | 152.872139211415 | 129.329521415816 | 144.068734533254 |
|         | 142.9711114541774 |                  |                  |                  |

RPS6KB1 849.784051720996 802.643357549193 679.557656724243  
819.887322757281 373.189809737885 783.755776589969 576.873245313776  
531.217306770605 546.611519125021 565.059609779245 621.489906442001  
760.272612245092  
RPS6KB2 565.059609779245 683.019502027271 549.359675306309  
825.345092964844 1895.72330348767 1160.78730097715 1223.06438074895  
694.907086612929 683.365770196967 1146.3535752748 866.147379099606  
951.371815352591  
RPS6KC1 269.62298406345 241.251507026982 258.605188272761  
258.16437138327 188.431244390961 213.046162847735 219.901025447571  
193.522811257085 232.590542016298 217.353396632732 323.149792143481  
221.849661343124  
RPS6KL1 153.511995286293 159.177303894223 139.625635881693  
152.902458879101 156.280701500421 154.884821436554 155.966610886886  
166.014450044695 144.806478328053 134.4380641709 164.288645768576  
139.746733428525  
RPS6P1 3232.96611074938 3417.22292085668 3798.89743803968  
3122.71790981947 2096.25803773108 4621.99241522677 8958.34797715349  
5437.78386044638 4068.18567686753 5396.55955971617 7371.9761952537  
4095.76073123843  
RPS7 262.139211406599 258.632372536866 293.12968694683 234.5655184349  
626.104755496369 844.462124058351 906.359365544713 601.164127925014  
442.334886941795 1061.29067124163 377.083379021079 545.566596665916  
RPS8 9852.51412359574 9596.10781313429 11071.0448447818 8342.70113690382  
12221.7819812315 9908.59593023839 15354.74541236 11392.4189359453  
10862.3952192141 13944.7649147227 24098.0251582624 14592.6308255978  
RPS9 5250.88041666757 5455.91604383389 6271.34208268488 5582.64254130978  
13090.0615116619 5032.66681917478 10048.4260790604 4836.4008757421  
7292.0342195035 8581.41617729997 7601.58151657937 7838.92787031423  
RPSA 5327.13051940508 5601.24254062491 5582.64254130978 6427.33783376005  
9970.08052783908 7266.3946293904 10312.8407173696 5609.58233117244  
8617.2437024568 7753.61594300904 6114.33638002734 10312.8407173696  
RPTN 118.677203713024 129.547309629132 126.061141885666 116.472796471694  
129.058085094891 133.902707525069 123.046069309901 122.056070994213  
112.832122823829 153.557991189227 122.109009629395 116.428373788459  
RPTOR 173.939159471022 207.488522933448 184.989027770708 247.504198063293  
178.270849389719 161.115842628581 182.055718892894 166.917552275021  
166.81024151246 158.767439363085 150.235026770931 143.73525260312  
RPUSD1 174.192898940601 175.302832015761 145.875240619257  
194.445463745418 611.772512110915 249.858562350415 303.555333002419  
269.238332581564 210.77489002666 210.061754644824 204.654489493854  
236.772907994543  
RPUSD2 337.39574303968 424.495400604335 384.464383569801  
459.388390392518 551.206833852215 321.524921332256 571.273512452931  
385.888395433066 584.433155497378 322.263925912805 406.458130553679  
456.201998988891  
RPUSD3 282.442528230519 351.665934915634 427.452114719877  
446.07651799079 1031.38207659547 336.786227017391 636.56692204969  
616.188923504376 509.292779821787 525.789451405743 358.415933397099  
515.597523880328  
RPUSD4 1096.61874892572 1084.95095717937 1145.96710556468  
1084.5920943349 816.823443819069 622.561634660589 899.667912542118  
956.153239481189 831.289724465877 562.089999265955 608.129959758538  
954.488185198006

|        |                  |                  |                  |                  |
|--------|------------------|------------------|------------------|------------------|
| RQCD1  | 224.396933003452 | 188.654966029389 | 202.162432624505 | 188.864388750448 |
|        | 237.312766830206 | 212.460476372263 | 316.524115715585 | 265.43897208356  |
|        | 346.635777358159 | 324.401611136662 | 243.283375388645 | 360.684900316265 |
| RRAD   | 333.131139447511 | 318.348505551265 | 280.848426993226 | 264.955939320296 |
|        | 131.750053934548 | 140.457727109762 | 139.902610126952 | 133.964163727962 |
|        | 154.030432279825 | 188.543051108601 | 140.132816040735 | 142.095289977576 |
| RRAGA  | 2313.56743052616 | 2352.01196541874 | 2982.80580616089 | 2365.99940149374 |
|        | 1197.00004043747 | 1166.86593572716 | 1237.56662467492 | 1794.82283439196 |
|        | 1669.97250023755 | 2053.71550326011 | 1689.00127592755 | 1226.10881264804 |
| RRAGB  | 282.719121652073 | 261.844708446856 | 294.871848467326 | 243.622678182687 |
|        | 251.833571288967 | 289.037033338975 | 251.161789722751 | 285.258824662946 |
|        | 219.8511043213   | 209.811693771836 | 395.386242257877 | 238.654367531982 |
| RRAGC  | 592.284071247642 | 671.821418586421 | 556.725550806207 | 659.673052713372 |
|        | 421.929674562786 | 386.221302830248 | 430.220363263561 | 372.149771075286 |
|        | 414.797416270335 | 790.561585641193 | 429.680602294138 | 327.811191081135 |
| RRAGD  | 1355.66237447026 | 1326.95332435394 | 1219.36024606325 | 1064.85152398919 |
|        | 330.590986934704 | 289.616527814137 | 1039.92160906839 | 214.175691239597 |
|        | 256.202924421798 | 1324.56751399862 | 206.73292907905  | 363.025385707747 |
| RRAS   | 3921.67860557329 | 3938.94050658589 | 3921.67860557329 | 6028.67062754577 |
|        | 459.652708187549 | 312.845219991659 | 520.218545108099 | 319.090371885653 |
|        | 552.494327858264 | 1094.67740173529 | 421.140525880287 | 543.389747823877 |
| RRAS2  | 294.17588071297  | 189.205724390913 | 298.926727289387 | 192.680681636018 |
|        | 313.18989508207  | 242.348427307994 | 218.96845208513  | 198.066837203458 |
|        | 217.715143869654 | 490.153210371094 | 172.509081696309 | 190.045156046541 |
| RRBP1  | 986.004777675332 | 1048.85768964657 | 504.436992949763 | 1186.23169583595 |
|        | 1269.67110104843 | 575.23272138912  | 572.913714991136 | 553.90008440429  |
|        | 729.202002368627 | 613.631311147328 | 682.730262408017 | 408.263886786123 |
| RRBE1  | 149.190528937822 | 143.013801508709 | 144.455233048041 | 147.027904536486 |
|        | 148.87690497281  | 142.45411401883  | 148.522580898717 | 147.450681897766 |
|        | 149.851792558427 | 202.524668687686 | 171.835438335216 | 161.825134481279 |
| RRH    | 163.030275835038 | 140.175724588255 | 166.77329045424  | 154.861507590906 |
|        | 148.470120335761 | 144.699084515687 | 170.140610481718 | 157.021010130169 |
|        | 145.887262601586 | 150.737888487925 | 144.39135701666  | 148.838294770082 |
| RRM1   | 1601.19401366685 | 1434.1439428394  | 1576.21727854603 | 1355.66237447026 |
|        | 1080.02576143033 | 1978.95750795951 | 1278.30505902957 | 2350.01764791897 |
|        | 2120.14463347544 | 2151.9395095819  | 697.774882173237 | 1470.23096656138 |
| RRM2   | 129.594440309419 | 125.668463983985 | 113.326628149066 | 120.094156375538 |
|        | 149.100294463597 | 331.251075774227 | 165.286724415145 | 233.335353447342 |
|        | 219.709231012465 | 211.555248754731 | 157.656220148041 | 278.428310548805 |
| RRM2B  | 201.458970969685 | 202.797135825668 | 185.905819051223 | 149.297012645798 |
|        | 163.18585933431  | 238.724909152512 | 206.227392581929 | 218.735620596634 |
|        | 189.37832342197  | 172.80265044721  | 167.491399614986 | 196.691380885508 |
| RRN3   | 468.569725051459 | 478.847650837714 | 525.920873434688 | 510.659785046811 |
|        | 335.301103690781 | 504.838017072725 | 533.140740560189 | 619.223672253014 |
|        | 345.832589037442 | 413.863345223345 | 1103.81439809121 | 699.550347374567 |
| RRN3P2 | 205.612579504495 | 174.012972901793 | 177.428161690048 |                  |
|        | 196.759802659759 | 138.094719587545 | 147.823552813852 | 157.656220148041 |
|        | 144.5368823731   | 156.497059936271 | 162.063689419737 | 136.660600727111 |
|        | 149.223102493474 |                  |                  |                  |
| RRP1   | 175.670738308809 | 200.591916768948 | 187.812436252228 | 224.547982731402 |
|        | 362.65285317327  | 269.831616158113 | 333.533043832976 | 208.955110569558 |
|        | 316.081825144651 | 251.224369831275 | 221.561252012695 | 237.146972312448 |

|        |                  |                  |                  |                  |
|--------|------------------|------------------|------------------|------------------|
| RRP12  | 198.94325874493  | 196.144420005021 | 155.625320865565 | 220.415211013843 |
|        | 396.708183244581 | 237.575788579215 | 208.42712014566  | 191.679217737051 |
|        | 240.994507285383 | 173.592875508663 | 200.712182818203 | 258.012234458166 |
| RRP15  | 287.593221911064 | 260.41082304175  | 244.627091189503 | 269.62298406345  |
|        | 317.949646885539 | 353.005548289786 | 311.375563161772 | 238.904826940476 |
|        | 289.667302610069 | 398.075524915003 | 309.229066204308 | 531.555532787504 |
| RRP1B  | 175.452986514346 | 168.261511797218 | 184.611146047556 | 142.853399942089 |
|        | 165.149464497921 | 217.353396632732 | 181.229308386808 | 225.96618659877  |
|        | 206.236303011662 | 175.717830026564 | 207.831299397177 | 166.503112149416 |
| RRP7A  | 427.390091157726 | 615.88518704181  | 314.949772661046 | 696.003998372271 |
|        | 1573.03248861784 | 453.875259610173 | 515.929937825133 | 780.461254794127 |
|        | 887.147199303294 | 783.059427015955 | 563.907454700224 | 922.009043194023 |
| RRP7B  | 27844.5606756791 | 27844.5606756791 | 26906.6343314539 | 26082.8089351205 |
|        | 19087.9532735841 | 28344.4547971342 | 21754.9904891312 | 27028.8951412615 |
|        | 28193.3833726673 | 23656.0669757593 | 19356.3155476146 | 27284.7333124039 |
| RRP8   | 630.894382644903 | 576.873245313776 | 771.059329972125 | 871.913035811066 |
|        | 355.048838683854 | 272.712242893937 | 345.977609212137 | 406.133430120039 |
|        | 368.134303229682 | 492.377642058095 | 324.871248300476 | 280.033528476199 |
| RRP9   | 159.701028026285 | 158.109836032481 | 154.688685142904 | 148.697019570015 |
|        | 384.733313349438 | 172.438141471784 | 190.357437485436 | 176.5588805282   |
|        | 195.929328710358 | 192.224242967539 | 184.758754197435 | 211.720536220806 |
| RRS1   | 345.977609212137 | 322.153713097778 | 484.363052437459 | 331.215872600406 |
|        | 529.963453165714 | 600.757699463777 | 381.4054004349   | 519.112018353676 |
|        | 396.126485121994 | 310.8725368426   | 292.911761762431 | 418.645775576811 |
| RS1    | 132.418902141838 | 136.749771286979 | 133.891337645936 | 134.20988291379  |
|        | 148.334425146129 | 126.670227417269 | 133.519359066907 | 157.277051544704 |
|        | 147.748142622566 | 151.531667383273 | 134.151372457715 | 136.925645302362 |
| RSAD1  | 271.568797887976 | 308.148212607944 | 240.283918204202 | 328.401537339876 |
|        | 248.010317392179 | 222.365208637146 | 226.144012966486 | 236.082185670774 |
|        | 195.239829623017 | 150.292858985795 | 249.354198174438 | 194.831347257735 |
| RSAD2  | 277.256341592701 | 162.312313953026 | 189.887788314879 | 169.482586449402 |
|        | 141.5739152922   | 144.773767973816 | 235.43707989982  | 167.268645224361 |
|        | 175.626096716758 | 189.985520850855 | 181.79418355897  | 180.528296177577 |
| RSBN1  | 662.958637409597 | 690.903797251841 | 699.270931701696 | 606.851072672402 |
|        | 391.326200093611 | 728.930140593418 | 574.399909181723 | 486.778046640624 |
|        | 367.567681162661 | 261.844708446856 | 483.699436940387 | 404.172535442156 |
| RSBN1L | 281.44159425243  | 251.665539319612 | 325.43977732888  |                  |
|        | 239.452559981542 | 244.054469051058 | 205.476230849391 | 239.003718699156 |
|        | 277.501071684448 | 201.954167006591 | 182.384190694142 | 227.715558644326 |
|        | 277.596303701405 |                  |                  |                  |
| RSC1A1 | 146.499065641095 | 151.318320077986 | 133.988494850477 |                  |
|        | 140.03202338666  | 217.646777099512 | 171.212749388553 | 178.304914997023 |
|        | 188.308588359317 | 195.50039162477  | 231.202047619476 | 215.219246394594 |
|        | 157.568150431884 |                  |                  |                  |
| RSF1   | 218.156162474715 | 199.70041209487  | 208.214764518526 | 159.074001164836 |
|        | 155.176714087209 | 144.237691418911 | 173.907933001446 | 179.74065086312  |
|        | 159.752644678596 | 146.54504551183  | 218.896760804208 | 195.577739376082 |
| RSHL1  | 141.420747583126 | 136.069631519097 | 155.522274777451 | 149.355389396683 |
|        | 139.709959820327 | 138.365589511693 | 164.929445749888 | 153.114065147266 |
|        | 142.607578275494 | 153.943227610765 | 134.498439965049 | 139.251886500377 |
| RSHL3  | 147.46607538135  | 143.629760301493 | 137.740497848238 | 139.803568564059 |
|        | 143.378998368344 | 146.506263412584 | 139.623194916971 | 138.334626498686 |
|        | 145.020615552964 | 132.75673287656  | 141.106863165059 | 134.445893291422 |

|          |                   |                  |                  |                  |
|----------|-------------------|------------------|------------------|------------------|
| RSL1D1   | 840.276501350383  | 721.31849915135  | 1174.0922389136  |                  |
|          | 678.937151822411  | 828.683748921915 | 865.435843446989 | 1119.71228054585 |
|          | 756.618969995355  | 799.132592914065 | 1260.50387106816 | 607.805002786409 |
|          | 945.403379196643  |                  |                  |                  |
| RSL24D1  | 3463.23822434026  | 3042.88425356552 | 4759.17973319588 |                  |
|          | 2258.309161111153 | 3298.73393277409 | 2850.98525554116 | 3038.02573182546 |
|          | 1413.37062765856  | 2622.87486749984 | 2372.26073354008 | 2979.27692778783 |
|          | 2104.59597571915  |                  |                  |                  |
| RSPH1    | 112.776764215618  | 118.348153875356 | 120.816130267055 | 118.117957479382 |
|          | 115.002176041974  | 126.798976470472 | 113.76411537952  | 127.500754400224 |
|          | 161.72730923536   | 118.215641556163 | 114.200099628087 | 116.221426977629 |
| RSPH10B  | 143.568691825659  | 140.784853736558 | 141.505120938773 |                  |
|          | 139.793683692104  | 144.574566623882 | 143.853643511287 | 147.28750335168  |
|          | 141.232464220879  | 142.126620107418 | 137.393871430276 | 136.387904287903 |
|          | 137.22727238555   |                  |                  |                  |
| RSPH10B2 | 142.093180304661  | 142.00857631537  | 155.086559474139 |                  |
|          | 131.038758046782  | 156.437949042181 | 135.42020418391  | 142.17773831901  |
|          | 134.445893291422  | 148.513451315042 | 132.158817539201 | 131.85737847837  |
|          | 140.171749368266  |                  |                  |                  |
| RSPH3    | 225.238369884803  | 219.661502916874 | 292.893332413185 | 178.647726085678 |
|          | 220.079379312889  | 192.046442148183 | 250.82359383789  | 202.041958613989 |
|          | 219.996410908721  | 360.605223912114 | 301.250189051376 | 298.301504581296 |
| RSPH9    | 163.51024840263   | 152.14012587515  | 145.844961942581 | 143.184697704389 |
|          | 168.418529261977  | 147.882530392424 | 167.025336068642 | 143.458937009197 |
|          | 152.746799687103  | 146.677241054745 | 152.821735300697 | 158.080749926756 |
| RSPO1    | 139.094167748687  | 132.664984879523 | 113.597215383696 | 110.718864165172 |
|          | 118.167740643871  | 115.101971719657 | 110.266032635568 | 114.209249333221 |
|          | 129.656088836537  | 112.736231367296 | 136.893392154262 | 111.389873428517 |
| RSPO2    | 190.66473033826   | 158.439409064812 | 161.365443930448 | 135.952202055637 |
|          | 144.212231875922  | 164.513371267476 | 152.340010735322 | 142.970256312313 |
|          | 150.46224324459   | 174.568253693395 | 161.182901898379 | 161.129770392464 |
| RSPO3    | 338.026161865853  | 318.06081614151  | 342.147414141627 | 342.315456386729 |
|          | 172.652645920958  | 159.922627970233 | 133.762141373091 | 137.132095345234 |
|          | 169.16155608071   | 181.941224633917 | 140.802033706122 | 154.783699020901 |
| RSPO4    | 111.62514398781   | 116.236538651031 | 111.032156655273 | 115.520278378747 |
|          | 123.622533094122  | 115.174678745401 | 111.568329540016 | 114.987285062108 |
|          | 116.639787832302  | 112.57049236673  | 127.585851003779 | 111.152235113722 |
| RSPRY1   | 1430.20038077595  | 1075.3328563531  | 779.022508413529 |                  |
|          | 715.039905439621  | 488.505191823403 | 784.412433571927 | 602.141151173094 |
|          | 449.952497751758  | 650.679096367632 | 473.370240289761 | 870.409935772423 |
|          | 593.090436323333  |                  |                  |                  |
| RSRC1    | 163.946569217706  | 159.838626443912 | 183.531156021887 | 136.621654800082 |
|          | 250.602978521808  | 152.954944775793 | 195.963361515546 | 313.536451935268 |
|          | 257.534293550585  | 255.71113398292  | 181.453575300661 | 163.500384982242 |
| RSRC2    | 597.651682540611  | 569.133295913677 | 641.774812292709 | 562.387692458382 |
|          | 378.4377409749    | 564.200165295159 | 586.366632966978 | 626.104755496369 |
|          | 564.948126039762  | 569.133295913677 | 268.885346595453 | 617.185364180303 |
| RSU1     | 559.668195903429  | 560.015499136193 | 612.758976723556 | 714.494228450456 |
|          | 193.544035570799  | 253.009376944901 | 199.378179817518 | 212.050953977485 |
|          | 198.737421468412  | 259.625943627223 | 242.269784551092 | 205.381840116054 |
| RTBDN    | 126.611663427876  | 126.630787911053 | 125.342580368417 | 120.696557306298 |
|          | 135.508803488048  | 126.702705908175 | 129.949894903048 | 129.187574143637 |
|          | 124.825103464238  | 121.402905161896 | 132.387242907281 | 125.768053724055 |

|         |                  |                  |                  |                  |
|---------|------------------|------------------|------------------|------------------|
| RTCD1   | 267.372241661758 | 246.049729366987 | 375.539588956213 | 252.697160031025 |
|         | 311.481739745423 | 376.791876040886 | 660.907502776003 | 532.235193634196 |
|         | 579.318912497928 | 796.936154737659 | 364.191263843897 | 522.300029971277 |
| RTDR1   | 138.469997677004 | 133.836390935612 | 153.299196905367 | 143.752697178913 |
|         | 143.73525260312  | 127.323157914914 | 147.365589667009 | 124.285969778268 |
|         | 132.275953817076 | 144.433543176593 | 109.806338826826 | 149.416411285088 |
| RTTEL1  | 169.864628707043 | 173.250350363688 | 163.081050585097 | 186.167877791105 |
|         | 193.245087824217 | 179.854800301573 | 181.157738347957 | 158.967160833334 |
|         | 158.295583769612 | 170.241254308841 | 172.965746521132 | 168.091278015885 |
| RTF1    | 169.733427590141 | 175.891947478891 | 183.193029399643 | 188.131876231735 |
|         | 175.302832015761 | 167.040031488406 | 147.376482709004 | 166.17959304455  |
|         | 168.841313096346 | 162.668896609848 | 181.183277133224 | 181.479652131104 |
| RTKN    | 158.747029092329 | 166.076692502428 | 155.05329654089  | 168.156002330441 |
|         | 143.598567970841 | 555.607185132941 | 155.737364431382 | 166.868688936939 |
|         | 164.256764783784 | 362.306819797508 | 149.294728629784 | 146.851307767958 |
| RTKN2   | 137.698423468762 | 124.28313315915  | 141.499192356469 | 161.581641777014 |
|         | 148.551340840517 | 166.722369066673 | 160.70138318726  | 157.736101691222 |
|         | 143.116451998409 | 139.127442770828 | 139.249869918235 | 141.301503201175 |
| RTL1    | 142.00857631537  | 150.123784990646 | 162.606273401226 | 139.236217474885 |
|         | 153.114065147266 | 151.604093626944 | 150.148902196995 | 153.655778377717 |
|         | 160.825408895349 | 144.199054675488 | 148.729753117861 | 142.290253129837 |
| RTN1    | 146.559502785264 | 163.081050585097 | 149.560505078257 | 148.23392074197  |
|         | 142.253826696208 | 153.714902281332 | 139.127442770828 | 148.364138636002 |
|         | 149.331805754859 | 152.291176493005 | 151.821324922628 | 146.016920431468 |
| RTN2    | 155.456077670662 | 160.254101852355 | 155.893018702615 | 192.399146702036 |
|         | 182.453722105813 | 156.822477235844 | 185.41739522833  | 141.50968031684  |
|         | 147.182394557583 | 148.585224298375 | 180.437648146588 | 146.238333981318 |
| RTN3    | 395.049127927637 | 416.933146258428 | 385.522443482    | 381.014521577291 |
|         | 215.426918011158 | 286.431013744652 | 206.391403266202 | 232.105867345662 |
|         | 219.351080515508 | 275.169415154893 | 222.508914765788 | 197.827534617557 |
| RTN4    | 2063.42824094932 | 1713.93035637146 | 2005.76678571689 | 1583.79384467611 |
|         | 1140.40904196731 | 1029.09818399518 | 1557.00226259883 | 1227.36706427754 |
|         | 916.026216386031 | 1178.83933381069 | 1386.56788941677 | 1115.34267967366 |
| RTN4IP1 | 231.314944217099 | 229.907632927358 | 255.992494620859 |                  |
|         | 248.185148749493 | 291.50783830983  | 240.836979012241 | 273.152907354565 |
|         | 274.70018535436  | 254.768537214795 | 188.322853571195 | 218.106150021482 |
|         | 289.761702484888 |                  |                  |                  |
| RTN4R   | 169.441789096441 | 183.482640529727 | 203.436527043293 | 190.534176839652 |
|         | 236.745054217055 | 208.237011955037 | 212.473610495213 | 188.695527267631 |
|         | 182.529167529936 | 288.596513753617 | 153.888212689508 | 221.491633607126 |
| RTN4RL1 | 165.954266127697 | 200.302384864371 | 168.790464803746 |                  |
|         | 159.544710238172 | 148.260672564835 | 158.025633316671 | 149.164469334038 |
|         | 166.040918339519 | 149.061464748604 | 202.943987922418 | 161.781529659549 |
|         | 158.670835881902 |                  |                  |                  |
| RTN4RL2 | 140.184082384548 | 146.981521393075 | 149.260811184287 |                  |
|         | 143.281050499332 | 145.814268094808 | 146.481298877242 | 154.265581535942 |
|         | 145.296229550382 | 133.36168342199  | 144.974813243462 | 141.18490443471  |
|         | 141.971207380159 |                  |                  |                  |
| RTP1    | 176.810979494826 | 103.448244268961 | 127.578272480621 | 130.797498958616 |
|         | 158.950169226637 | 121.689416823766 | 141.982743538528 | 143.376817049362 |
|         | 143.695901115673 | 138.026155846749 | 156.046085830566 | 147.713967317159 |
| RTP2    | 117.316790136526 | 127.320624058583 | 123.735827460404 | 125.958139354095 |
|         | 114.893462783007 | 117.834484996559 | 120.450111018432 | 110.286187184448 |
|         | 115.485515429446 | 114.711310011993 | 151.102431192559 | 120.628904050564 |

|         |                  |                  |                  |                  |
|---------|------------------|------------------|------------------|------------------|
| RTP3    | 140.602170750673 | 144.895601314903 | 142.89427871125  | 133.627389970495 |
|         | 139.217113811817 | 129.751916520201 | 143.222342904886 | 132.74579603362  |
|         | 131.454955038299 | 142.101865506094 | 137.282038401275 | 141.724442944322 |
| RTP4    | 155.810034593382 | 137.987255649072 | 125.94880312094  | 126.786434897401 |
|         | 252.894371238554 | 125.9888344762   | 325.999687273862 | 188.268774618164 |
|         | 429.812058546782 | 144.478339139298 | 447.297590650141 | 281.071129128589 |
| RTTN    | 308.281798808746 | 359.703969802888 | 407.589300080181 | 351.337287690674 |
|         | 240.182016388745 | 297.332272659995 | 276.284517459626 | 300.793542873709 |
|         | 297.862653495715 | 691.916554922896 | 188.797908601851 | 290.582957824549 |
| RUFY1   | 190.331589656379 | 184.306452616482 | 199.854728619468 | 189.552385508772 |
|         | 167.226663395855 | 154.562761981868 | 188.654966029389 | 168.906637816046 |
|         | 172.28937151007  | 249.193270428348 | 226.203994206714 | 205.987280015028 |
| RUFY2   | 153.582185523361 | 161.608941774391 | 158.554429311951 | 147.428180649939 |
|         | 143.582187466814 | 143.290642777702 | 157.288308753975 | 153.974384951787 |
|         | 141.970301370404 | 148.109847175216 | 164.766295057217 | 152.364417528975 |
| RUFY3   | 396.212732639272 | 373.189809737885 | 430.649188209901 | 344.737964092526 |
|         | 239.388546850124 | 244.307627077001 | 267.901632267999 | 234.484787292284 |
|         | 243.159062832085 | 391.252450588331 | 257.100909006193 | 229.443064589306 |
| RUFY4   | 123.478896502015 | 125.617143363441 | 116.241531823869 | 116.881212516879 |
|         | 113.064645688715 | 122.149756212115 | 122.197625748146 | 137.729777643977 |
|         | 124.731056918418 | 127.000175858468 | 116.134550788966 | 119.555954372381 |
| RUNDC1  | 413.330906392915 | 376.124744806171 | 379.911829623463 |                  |
|         | 389.381039495553 | 326.176058036757 | 484.131020584378 | 462.686385881492 |
|         | 642.255110250493 | 514.124012546829 | 315.565349831797 | 489.260272645085 |
|         | 444.712990986138 |                  |                  |                  |
| RUNDC2A | 269.831616158113 | 238.782040902727 | 265.110264596425 |                  |
|         | 300.675907594637 | 158.723133891017 | 188.767121505943 | 143.92831903543  |
|         | 159.730925830278 | 161.813099560175 | 168.618667871117 | 153.118492567137 |
|         | 160.499355902773 |                  |                  |                  |
| RUNDC2B | 139.611455791957 | 135.894512504725 | 139.941724115063 |                  |
|         | 122.621839614189 | 161.501062527272 | 151.04846635538  | 139.571752933877 |
|         | 130.858419819734 | 129.210356735226 | 135.613240463445 | 141.67277923437  |
|         | 138.255457081996 |                  |                  |                  |
| RUNDC2C | 756.246712133116 | 731.513306289481 | 623.409211766224 |                  |
|         | 785.008529077795 | 293.12968694683  | 461.581199513891 | 329.023836559229 |
|         | 369.906476027936 | 293.482512212153 | 309.36704220687  | 430.649188209901 |
|         | 274.047586063773 |                  |                  |                  |
| RUNDC3A | 125.234097725749 | 116.214857935694 | 110.315549501241 |                  |
|         | 116.70650322987  | 162.178410412809 | 166.447510782568 | 108.386545220984 |
|         | 115.795989631016 | 123.538037290702 | 131.125175244494 | 142.836229345273 |
|         | 137.627338682823 |                  |                  |                  |
| RUNDC3B | 329.604568691377 | 348.848550937417 | 192.737713851863 |                  |
|         | 289.21739941764  | 161.769370009823 | 245.900840732668 | 166.735962853075 |
|         | 156.904781904311 | 147.978039160763 | 181.193963616037 | 150.232470359841 |
|         | 147.171090285223 |                  |                  |                  |
| RUNX1   | 152.670691262738 | 160.35668299062  | 137.066799877341 | 132.758313782606 |
|         | 179.54034642468  | 206.585387130993 | 216.102897582821 | 234.980382243116 |
|         | 207.384408045502 | 184.937088280378 | 326.758278851698 | 265.470314691221 |
| RUNX1T1 | 189.461090469712 | 185.997327421952 | 205.871133967588 |                  |
|         | 195.547320133122 | 144.165277164871 | 151.535177950367 | 150.767158077219 |
|         | 146.336371857755 | 146.343230597246 | 154.579913524947 | 143.662865541299 |
|         | 143.754105312957 |                  |                  |                  |

|        |                  |                  |                  |                  |
|--------|------------------|------------------|------------------|------------------|
| RUNX2  | 143.780803045394 | 133.63022526522  | 129.818020166075 | 126.711037295629 |
|        | 132.119370332298 | 132.719730606922 | 147.973274498131 | 131.512174491572 |
|        | 129.848276446896 | 140.191954630636 | 143.881744063934 | 125.400741907779 |
| RUNX3  | 179.880812358974 | 181.135519188216 | 147.866011743792 | 173.892380305166 |
|        | 149.899789105328 | 154.548286860883 | 190.427022049167 | 217.094085829328 |
|        | 324.067396271281 | 182.109092947203 | 177.874821397216 | 173.372949622338 |
| RUSC1  | 1222.014210447   | 1470.23096656138 | 849.389818300305 | 1451.64055568759 |
|        | 2050.34883263932 | 1940.42283070543 | 1003.36623972843 | 2307.82327595071 |
|        | 1030.56836625083 | 1853.20812924694 | 1518.13775377335 | 2307.82327595071 |
| RUSC2  | 407.052451784773 | 494.175437345451 | 362.095074331893 | 600.635914090365 |
|        | 148.729753117861 | 137.052507691254 | 124.83124879272  | 148.299945894738 |
|        | 125.932540615682 | 156.71199811686  | 157.848456517169 | 123.786227856015 |
| RUTBC2 | 120.131839791515 | 143.061415008831 | 149.869314204354 |                  |
|        | 131.866599432062 | 135.807494668545 | 144.883597913037 | 141.062226285596 |
|        | 131.649830934459 | 139.739448838436 | 134.811625739766 | 117.279162323013 |
|        | 142.34471764492  |                  |                  |                  |
| RUVBL1 | 178.496344474999 | 188.490807652188 | 197.91325268683  |                  |
|        | 198.166270627544 | 363.777212750779 | 309.155070674445 | 262.671819506189 |
|        | 316.237519859859 | 362.019824026781 | 255.74096237558  | 240.792557915987 |
|        | 271.113617350982 |                  |                  |                  |
| RUVBL2 | 337.935183275743 | 289.474517971859 | 348.711663415777 |                  |
|        | 360.90109922539  | 1049.52258147141 | 486.778046640624 | 418.574045635945 |
|        | 481.751102333172 | 614.957397883514 | 529.228238133018 | 391.252450588331 |
|        | 527.294087043601 |                  |                  |                  |
| RWDD1  | 1610.38263368771 | 1379.95968831696 | 2014.48411650613 | 1473.70433292382 |
|        | 1101.66868138797 | 833.198511430615 | 1473.70433292382 | 1000.48723872058 |
|        | 779.340880980422 | 1415.67109281133 | 1395.63393859192 | 1337.38160266788 |
| RWDD2A | 323.95355217044  | 255.3451781862   | 367.898258897888 |                  |
|        | 272.117599603586 | 254.424207773566 | 279.325065941252 | 423.607299503704 |
|        | 312.177191402945 | 269.072221443403 | 256.820546409632 | 296.603054615145 |
|        | 250.602978521808 |                  |                  |                  |
| RWDD2B | 197.100205890532 | 178.52221226882  | 180.132104305583 |                  |
|        | 217.628802427037 | 184.167124143272 | 202.214495168688 | 176.516540713888 |
|        | 215.558688906165 | 190.331589656379 | 198.244854812728 | 219.394500571586 |
|        | 209.840035045167 |                  |                  |                  |
| RWDD3  | 199.96834355685  | 216.522992914538 | 288.026656721827 | 238.782040902727 |
|        | 203.357914242777 | 219.792171863015 | 221.719848707318 | 226.893147371644 |
|        | 214.639374741553 | 270.462865174106 | 263.64863646012  | 256.424415389574 |
| RWDD4A | 459.068582584181 | 422.590112942156 | 438.146919555296 |                  |
|        | 418.889972660958 | 265.572253407219 | 492.377642058095 | 376.54010486682  |
|        | 423.045329000756 | 351.02823853348  | 478.293220151258 | 429.268202514543 |
|        | 442.220572301795 |                  |                  |                  |
| RXFP1  | 106.522641798274 | 114.384296185446 | 119.492844191924 | 110.138220982557 |
|        | 110.662552491706 | 103.99234480919  | 120.574820369421 | 108.483284007316 |
|        | 110.347631909888 | 137.910618360623 | 134.362834437771 | 129.522339467532 |
| RXFP2  | 129.391376518208 | 123.662678397678 | 136.711382832269 | 128.533900744619 |
|        | 129.190900922265 | 137.320792454356 | 131.814528687104 | 140.760983862166 |
|        | 136.988519762443 | 131.067958183644 | 134.121026382437 | 135.233957017664 |
| RXFP3  | 117.893918180502 | 126.656077572961 | 114.129044806825 | 121.434713764246 |
|        | 116.977202125093 | 122.281263517691 | 115.572088632106 | 110.419222236698 |
|        | 114.805810485989 | 122.365693072105 | 122.873661677648 | 126.037968297611 |
| RXFP4  | 139.078162119733 | 121.841080387875 | 125.331215990597 | 138.27272971335  |
|        | 130.617505834747 | 145.090639086338 | 134.546975273631 | 128.883828419932 |
|        | 125.717328918165 | 124.746457912284 | 140.103020838882 | 150.232470359841 |



|         |                  |                  |                  |                  |
|---------|------------------|------------------|------------------|------------------|
| RXRA    | 1375.76915021882 | 1701.43479420427 | 1366.06309834426 | 2041.03024136014 |
|         | 3570.21370790206 | 1347.10650016064 | 1637.66306286151 | 1376.84058291266 |
|         | 1840.14350831655 | 880.719593734606 | 3205.74787769881 | 1758.7809492929  |
| RXRB    | 610.337659723539 | 669.124699103132 | 923.383014892221 | 806.591035100794 |
|         | 826.771587455122 | 489.75389978732  | 668.127527385348 | 579.318912497928 |
|         | 638.393099392849 | 582.527835746927 | 588.197697799448 | 500.643499051523 |
| RXRG    | 123.312000381122 | 119.567911704298 | 128.39171386085  | 132.985645792864 |
|         | 121.952255635669 | 119.399971165857 | 120.819163462986 | 120.574820369421 |
|         | 123.29908883119  | 119.281300456243 | 138.182987173284 | 120.988749021323 |
| RYBP    | 1609.54149931375 | 1447.07989164988 | 1006.69598892631 | 988.297682407351 |
|         | 1285.02292965374 | 1731.62376348283 | 981.313778685019 | 963.343120586863 |
|         | 1006.24899131914 | 625.544719251096 | 1418.60088387728 | 970.634736994313 |
| RYK     | 683.179460779062 | 599.735180191091 | 799.132592914065 | 561.761160223609 |
|         | 590.142817130684 | 850.562379837947 | 738.087203930249 | 676.570119607984 |
|         | 739.52947559669  | 450.851711160136 | 759.058176862524 | 797.501324589697 |
| RYR1    | 160.031506612501 | 163.014903707857 | 155.129304059037 | 170.568719982587 |
|         | 268.600782558985 | 163.991378703958 | 173.87113073582  | 168.061346742356 |
|         | 160.543465620248 | 185.830435830545 | 146.923382271905 | 156.445294524594 |
| RYR2    | 259.316557834724 | 235.183590602209 | 235.453139389486 | 335.301103690781 |
|         | 142.910616700526 | 150.058160923921 | 142.264536484668 | 159.48526814715  |
|         | 166.688771186254 | 135.728336465002 | 155.187900101727 | 143.0235772247   |
| RYR3    | 368.879825610754 | 484.480643763982 | 339.54582149284  | 660.907502776003 |
|         | 133.006192351471 | 122.527517633626 | 130.088408942008 | 117.928456234796 |
|         | 130.255689301211 | 115.816156193574 | 127.545397354821 | 119.558626216818 |
| S100A1  | 152.054874792646 | 125.990762414974 | 135.114056458478 |                  |
|         | 136.861019517134 | 134.545983176488 | 127.83654093961  | 140.020294940544 |
|         | 135.114056458478 | 128.890685255595 | 139.526241501184 | 155.400191634632 |
|         | 131.58537948771  |                  |                  |                  |
| S100A10 | 6691.04319670055 | 5825.9968524214  | 4198.61471038267 |                  |
|         | 5714.36902486392 | 2578.85391480563 | 1023.29995420518 | 2572.01353724341 |
|         | 1415.67109281133 | 2986.6208659209  | 18220.6383250956 | 2837.36293710422 |
|         | 4635.42002659719 |                  |                  |                  |
| S100A11 | 627.066031322234 | 864.908449769749 | 573.846138124455 |                  |
|         | 729.202002368627 | 2863.51286169094 | 2760.57475805426 | 3668.19307488953 |
|         | 2392.93562797606 | 2084.44431604433 | 4965.25728333142 | 8416.19700892758 |
|         | 5789.71932579854 |                  |                  |                  |
| S100A12 | 124.449679223202 | 125.982423431253 | 123.494412056415 |                  |
|         | 116.89487516867  | 136.037555727438 | 267.483886037099 | 139.577443171489 |
|         | 116.046983032621 | 146.658048787833 | 835.834013018438 | 125.843089077365 |
|         | 117.289037817013 |                  |                  |                  |
| S100A13 | 546.181615768667 | 525.515169794593 | 452.357898123926 |                  |
|         | 548.455251483009 | 573.509780150018 | 387.908774438461 | 276.414209660023 |
|         | 248.465457421469 | 344.45331938267  | 476.249239197777 | 319.927209914181 |
|         | 422.520372346993 |                  |                  |                  |
| S100A14 | 147.241136598626 | 151.453985465369 | 138.052032298683 |                  |
|         | 122.817695619508 | 334.350011399462 | 276.961847241646 | 219.78041403077  |
|         | 310.758803815671 | 252.628516068724 | 1311.34904760947 | 171.028432989066 |
|         | 346.566241319814 |                  |                  |                  |
| S100A16 | 295.607161318725 | 357.514919818489 | 207.73395131954  |                  |
|         | 373.290426793366 | 1626.34607278613 | 1538.78070281348 | 673.502723625773 |
|         | 416.715760038095 | 804.800251415824 | 6560.30885074315 | 262.79667156266  |
|         | 1792.35343044443 |                  |                  |                  |
| S100A2  | 139.231340020014 | 151.815211341628 | 136.202953030465 |                  |
|         | 130.058902161953 | 119.229322984564 | 178.153527134452 | 971.170460915918 |

155.972754525145 136.085524091635 3963.40575974446 576.997804865103  
2395.75453574049  
S100A3 177.742616962629 202.643624039869 143.787766055379  
207.400490077106 146.522066289381 135.607537832704 149.758215028408  
145.409722106953 138.491922816359 157.155105022743 301.695991929957  
1333.73334006986  
S100A4 6105.64727031051 4965.25728333142 4206.37667440908  
4103.06565237121 1666.80650105101 2590.80821234237 8163.29201165065  
2406.67187918735 2845.0377634896 1967.82064011967 16742.6286866851  
21551.9994556128  
S100A5 126.972399784537 122.102644097132 144.079935036119  
149.31184788671 198.004357069446 137.899291413431 162.312313953026  
153.231965895778 169.33926580273 129.447773229782 160.584760930779  
160.567934923347  
S100A6 8322.20177173035 8416.19700892758 7190.89891723932  
6830.46932926077 15924.2167735021 19889.8233042542 14755.8570847826  
12749.804597566 13809.2057928642 9514.74328718935 16077.1585881362  
18665.5217411582  
S100A7 134.703474191011 136.040524807653 131.335344547051  
149.457761307441 149.810655120216 157.415211954103 149.292552957665  
141.503351545458 243.425632941131 2527.99279063127 153.318678468245  
133.944538335319  
S100A7A 125.259164818744 135.44496453026 131.786437478446  
141.492458250787 122.351186755611 165.565284723155 145.587386656619  
139.494962965774 133.74051512341 149.339492984504 147.272072245929  
122.843792000493  
S100A7L2 139.303747021408 128.162546179362 136.240503841228  
126.359440164601 132.404879616886 132.051614319023 127.349190705235  
141.571389983164 137.752238510249 135.125414452178 131.257901340773  
124.215466523555  
S100A8 198.088834624665 514.124012546829 173.035013611377  
216.559563381808 733.49038042129 1086.33540858772 2053.71550326011  
716.229989890801 2970.34597432588 27501.6698286039 2162.46602203822  
255.903775525554  
S100A9 216.731618532814 361.687156919012 157.423242850568  
178.209994522672 7245.25086222102 23427.4695172122 10474.0047946187  
1018.38836615952 12171.1997841553 20510.096303537 2031.01186679713  
2168.58813300343  
S100B 117.910259090745 115.170176263172 121.778756075848 127.787016137049  
120.812738312059 124.313901870563 114.805810485989 115.68358702028  
106.238539254093 110.651971902576 127.31790396929 116.787791109549  
S100G 114.44610607807 111.137519376499 113.970633751086 124.295334523889  
109.255470590389 119.387459594521 109.398997827329 113.487357534546  
118.372047967248 112.488125161387 116.038950886552 129.57551086282  
S100P 1901.97972168836 3115.11499025766 2763.86550710042 436.222568287601  
18146.8167991873 23190.7842325067 23427.4695172122 13142.4763966378  
20510.096303537 877.255923473532 16328.5991894287 18338.3001930708  
S100PBP 255.493109705211 257.813193543819 304.937584086529  
275.794847140407 212.473610495213 261.96528977292 266.032134528055  
259.277693314055 248.993716339029 251.268669431283 252.733973271584  
256.648540685098  
S100Z 139.400521576978 135.151438845363 135.645439440707 145.977658128528  
145.003900788534 128.129780978486 151.902352951251 142.643027992419  
135.934976183762 130.476322267589 134.192409943723 134.58308783752

|        |                  |                  |                  |                  |
|--------|------------------|------------------|------------------|------------------|
| S1PR1  | 182.508415915215 | 227.558441474918 | 155.63328143658  | 210.030846572444 |
|        | 137.97889661868  | 187.852455291319 | 147.928629511539 | 174.807363753172 |
|        | 210.5689532432   | 154.988494760267 | 163.542848861552 | 137.463764193883 |
| S1PR2  | 139.513752499004 | 149.599523779175 | 128.685065364693 | 143.572668991313 |
|        | 130.357913155625 | 135.984077601778 | 133.36168342199  | 156.611727364072 |
|        | 125.154784284706 | 134.793399942417 | 124.574323079707 | 138.684070773064 |
| S1PR3  | 528.767644181119 | 381.484062427466 | 397.577760464197 | 324.25775261173  |
|        | 321.568127272161 | 172.926288703434 | 152.746799687103 | 172.622816559412 |
|        | 224.224264678645 | 186.460034745907 | 139.486304455662 | 128.090665893885 |
| S1PR4  | 140.818413826758 | 139.112639975752 | 145.385816618728 | 140.891239201308 |
|        | 129.384531576943 | 144.528360135884 | 144.352987324713 | 154.679076303046 |
|        | 197.427788552936 | 151.663203772586 | 143.287237534352 | 136.970505971671 |
| S1PR5  | 118.025603140924 | 141.59046197203  | 124.746457912284 | 123.031945101045 |
|        | 180.265418365803 | 226.871028543248 | 388.573321838751 | 175.462290891421 |
|        | 151.167024833049 | 223.058699622386 | 258.075566417241 | 299.717935831288 |
| SAA1   | 129.067538010904 | 126.182856027765 | 129.636135486593 | 126.969504644414 |
|        | 120.304037458526 | 119.049388179929 | 143.177915754998 | 122.837807905774 |
|        | 133.63668145135  | 141.16066528405  | 142.594553057288 | 122.197625748146 |
| SAA2   | 109.66209172615  | 115.80656409185  | 112.000309477972 | 113.460835359833 |
|        | 128.097206000942 | 117.172431931323 | 136.317978146216 | 115.5765427629   |
|        | 140.43729728368  | 109.832757716464 | 154.027862576708 | 116.433239116749 |
| SAA4   | 121.75662526451  | 124.96926662367  | 121.066593359525 | 130.674263597931 |
|        | 131.641435734821 | 130.205168168299 | 134.051756243089 | 134.673861365626 |
|        | 153.926214082991 | 130.761385822314 | 144.70348930646  | 124.851025681014 |
| SAAL1  | 323.04019262387  | 321.524921332256 | 364.443097338814 | 372.088129459528 |
|        | 322.443089373063 | 410.954095610904 | 333.270203737291 | 414.114051645565 |
|        | 348.506289278042 | 606.003956839826 | 402.473870771741 | 369.906476027936 |
| SAC    | 144.750407738866 | 141.296574431203 | 141.536764775726 | 140.171749368266 |
|        | 150.391286215189 | 135.499195435803 | 148.970251898527 | 134.46179453106  |
|        | 134.010031592003 | 142.139331321085 | 148.45148523399  | 153.126111237668 |
| SAC3D1 | 376.276954313674 | 439.394914369983 | 336.845908630493 |                  |
|        | 580.164288826741 | 1084.10984365393 | 541.896444696137 | 365.590174280114 |
|        | 328.969023478451 | 330.505633088656 | 316.722160860531 | 264.383922859446 |
|        | 299.616447269111 |                  |                  |                  |
| SACM1L | 717.886050056576 | 596.54904286299  | 524.392279804734 |                  |
|        | 635.234445318087 | 488.379057110543 | 662.04757187541  | 575.23272138912  |
|        | 603.569635276204 | 727.114956464515 | 384.16579891756  | 672.13164205724  |
|        | 525.920873434688 |                  |                  |                  |
| SACS   | 464.812091712746 | 283.377663208926 | 273.984715370774 | 279.113984512619 |
|        | 131.085965122946 | 130.565986980021 | 139.298169516832 | 134.686251400642 |
|        | 151.519845657755 | 171.740347129234 | 146.798444724408 | 131.164778405297 |
| SAE1   | 5122.60899285635 | 4945.87677849967 | 6028.67062754577 | 5655.12135336698 |
|        | 9171.47979464736 | 6548.65498784806 | 3417.22292085668 | 5314.0635307876  |
|        | 7190.89891723932 | 2837.36293710422 | 2965.38280248519 | 3413.39994653641 |
| SAFB   | 665.602699607102 | 659.27672123763  | 799.423640530777 | 828.276436883306 |
|        | 800.013123376748 | 583.938727139698 | 772.061917233344 | 712.94845413251  |
|        | 740.973440818582 | 761.097992055119 | 665.936368667321 | 759.058176862524 |
| SAFB2  | 843.936924659514 | 899.336817124312 | 1004.6207350158  | 953.549801897112 |
|        | 658.47864958685  | 675.083275037052 | 864.161191021297 | 1034.2217095753  |
|        | 769.34961339184  | 656.660582895703 | 561.761160223609 | 733.86133557115  |
| SAG    | 130.535859816562 | 131.913786256215 | 141.028377381019 | 138.110317032494 |
|        | 131.013719535992 | 150.026314061051 | 132.924341641217 | 136.359189516452 |
|        | 145.442914818456 | 137.508097741526 | 124.238319768621 | 127.605805815475 |

SAGE1 129.180990946063 129.654234837398 131.757695616207 133.713275043978  
137.363483527372 130.150998843383 125.498081339586 124.113451627593  
135.779516940893 130.656206845965 130.302829773323 128.81022558263  
SALL1 108.515401509039 118.095936088242 100.04568139926 111.366283149236  
105.49491265382 109.384112020063 105.284300851422 108.62191665589  
109.140708667012 97.8058879269165 115.033355516602 104.03442843396  
SALL2 314.063025950327 372.149771075286 442.86942574917 354.205670284123  
320.305852961452 189.915720614467 294.535979194434 225.64288602828  
210.117033165026 180.231462528702 225.050796356289 199.681103910705  
SALL3 143.823368276815 131.823019555685 131.81975648701 132.769455423385  
130.624702758052 143.802883430376 131.527148910356 125.021217009254  
126.834926242799 124.441699369614 149.306122206718 116.335864439545  
SALL4 122.742891063864 174.454754564111 143.277771142501 135.632298302036  
330.193132765826 423.489441909617 236.251507822415 201.507971833902  
139.699189528879 168.261511797218 163.566535828036 144.592987736094  
SAMD1 216.680795762761 215.744552410805 212.531329857909 288.026656721827  
416.392874553797 201.289402228512 265.572253407219 202.458096827378  
193.261343922604 254.235762677639 245.01029221002 190.318957029666  
SAMD10 168.668125438154 163.566535828036 181.840985962045  
168.935348409102 265.219444616245 204.415267938007 187.336349390012  
156.803516898875 175.857952663383 159.362293777146 160.423982411027  
208.270622752385  
SAMD11 234.693846527867 210.942865876533 200.944865673409  
171.39347085745 173.726420791056 166.640325848102 151.16261275916  
157.572446865749 183.397833894087 150.964506212368 209.385358804928  
176.883702717029  
SAMD12 112.999642731096 104.505454151012 107.949834974369  
101.761615925097 122.418378964982 115.02681415256 121.201267751612  
119.802832736435 123.306499698566 117.141089194822 128.435400481403  
108.984922760455  
SAMD13 155.952902855994 154.316929706697 152.667721542507  
181.813812621767 140.85139374336 154.250656489421 148.943735606315  
165.586397236489 149.388974859453 160.215396651606 190.111477641308  
205.322733011516  
SAMD14 147.626071601072 144.974813243462 137.872742675806  
150.794680375075 128.593112520767 117.995551728392 115.702900810606  
125.547399456656 135.386650538345 128.322884322951 134.275773172492  
142.318709347082  
SAMD3 128.959487155628 123.153925912632 129.499283650632 132.016944935305  
125.398875527365 121.047419779542 129.105655010455 130.467450968785  
143.969566798989 127.720117789235 132.74579603362 129.286782862113  
SAMD4A 180.798671424395 168.790464803746 183.613051401168  
180.710636205653 158.814407805803 172.050718136571 165.880071298733  
145.739537463907 152.230489051339 187.965294229013 139.667714422309  
163.661196423902  
SAMD4B 307.264586007015 300.675907594637 186.406439948242  
370.945254716657 492.780880796036 245.399847987183 206.203717450138  
186.679199600379 234.461229199142 205.4648759901 218.134101819445  
173.544556426164  
SAMD5 150.328995030071 152.213746577124 131.635641515901 122.238996815745  
135.945030816689 124.134916773123 131.000186898437 140.10798818623  
127.971270734569 124.436549041911 177.214422668922 122.176811388389

SAMD6 173.325724300712 171.528350399075 192.680681636018 156.311009595629  
 168.389069732474 173.250350363688 180.250420976613 173.468958175014  
 167.100039749329 192.475309217696 183.280853265083 190.125009931628  
 SAMD7 148.553324405123 132.57219914253 152.617507769717 144.507230362869  
 153.770852731422 163.736324784234 158.000456937922 142.808871284256  
 137.365567527202 158.779261405573 146.666759322506 145.298109334141  
 SAMD8 155.598586699376 161.466192326759 150.845846206549 151.349739492368  
 176.397715825653 151.221783750989 205.765822478178 169.220974415101  
 176.516540713888 165.066555355918 148.717545103261 144.763700813057  
 SAMD9 252.015257713669 195.230219990395 139.21331678591 168.773340961473  
 134.241917425247 157.010145291837 574.779350011402 511.113083958771  
 397.985856484851 614.957397883514 538.647888236878 611.208083466988  
 SAMD9L 283.918434443669 200.790119570144 173.347463632976  
 221.050093964575 135.56878810365 165.031678768564 242.72424280444  
 210.14307111352 285.507315916663 206.35895739543 262.452869676209  
 243.95334982553  
 SAMHD1 119.739204799544 115.608857734241 123.98775110588  
 112.825399620524 113.479382235297 116.90832995093 123.728481007459  
 116.230993734675 126.494665743087 119.32696696175 114.970485002776  
 119.023688551496  
 SAMM50 684.715981522999 745.844395215451 868.40984928812  
 805.875557314697 747.804958601763 1126.46241487062 578.465753476561  
 1177.01310527577 577.33849844574 637.30300219673 530.819778703194  
 1002.44383771056  
 SAMSN1 149.343930487315 160.72009357092 161.104993402456  
 142.399253818882 166.027988561421 180.658930225735 139.955389033983  
 177.582314734704 191.708350637714 176.465559710285 147.44463861207  
 143.378998368344  
 SAP130 300.675907594637 297.636316709322 352.303782547593  
 315.912220767901 438.03648998391 393.500781010617 270.201322204641  
 348.36178568457 299.754985162237 348.457808063307 323.737610506003  
 368.548135194271  
 SAP18 656.009451448101 620.163512570453 701.847905027147 672.13164205724  
 181.048789688798 376.374248850987 218.433524126584 191.543371466252  
 280.913748398876 129.103133449097 264.936739264566 286.282132382462  
 SAP30 371.819911874273 440.404188514231 441.785666261936 404.95944990868  
 370.301819403832 279.598585549004 399.071041584646 306.550948766362  
 287.402339322061 359.518199449791 209.662262708551 199.798533722581  
 SAP30BP 257.408058436941 293.4021207271 208.869189492052  
 334.101619029105 214.595639477696 208.587188476069 178.209994522672  
 191.207048581306 201.773745532242 180.710636205653 180.047231265069  
 186.708059183893  
 SAP30L 634.556887178869 607.26455470867 636.048536814356  
 595.752426322468 1105.10063745656 567.143102792772 1325.77498031227  
 779.022508413529 621.354393918348 1007.41624313399 1183.1601379136  
 805.120147618984  
 SAPS1 223.419092696074 264.429717032654 218.944052733757 286.194197552489  
 616.188923504376 246.186104432792 264.158648784101 226.055406842613  
 278.598913464804 222.365208637146 264.654879741889 234.661864595717  
 SAPS2 323.276514394119 288.68376542946 273.432712475089 273.864293250688  
 215.506175859782 334.101619029105 191.725728813959 234.925852373127  
 239.20206002 246.428746807313 212.037224737798 374.657816575897

|        |                  |                  |                  |                  |
|--------|------------------|------------------|------------------|------------------|
| SAPS3  | 679.822276398569 | 753.997560938003 | 734.469481390593 | 751.269009484639 |
|        | 421.690849282483 | 718.670564185576 | 418.968095159939 | 418.968095159939 |
|        | 484.363052437459 | 422.434778100827 | 774.180202250076 | 644.741046498743 |
| SAR1A  | 943.23069404564  | 735.449040059761 | 811.362219801362 | 800.373159084181 |
|        | 373.361263985383 | 412.801213309591 | 485.309521583972 | 382.806570442504 |
|        | 639.184296110069 | 471.720496000839 | 663.782083028745 | 608.611927946607 |
| SAR1B  | 241.251507026982 | 202.278323489515 | 229.907632927358 | 175.148318011395 |
|        | 351.515059400947 | 311.481739745423 | 383.626469817252 | 367.327273578513 |
|        | 323.788197265954 | 450.99430272315  | 273.550544349798 | 347.224999246223 |
| SAR1P3 | 152.725025539491 | 147.549947713282 | 139.959629641771 |                  |
|        | 133.391421497441 | 133.645044060866 | 132.079255703621 | 134.28095064513  |
|        | 133.090474303043 | 127.720117789235 | 142.658562927154 | 138.952082680577 |
|        | 143.116451998409 |                  |                  |                  |
| SARDH  | 145.315039707314 | 144.826861308997 | 130.960045345375 | 136.998259410887 |
|        | 164.264079172779 | 126.077945699709 | 154.900676756492 | 130.466571969657 |
|        | 120.967523586161 | 161.83241639654  | 129.532122459128 | 136.931476050688 |
| SARM1  | 217.628802427037 | 237.078644686891 | 186.794165469219 | 299.616447269111 |
|        | 293.528601172819 | 237.146972312448 | 203.11015591813  | 287.455622143233 |
|        | 205.630948393225 | 147.854171854456 | 195.674128236589 | 170.046856179083 |
| SARS   | 666.847934976479 | 615.485984065221 | 866.765054377214 | 677.023591987179 |
|        | 396.04031733841  | 416.933146258428 | 592.613689704907 | 503.466550870577 |
|        | 647.439372562271 | 888.04996477314  | 462.437471715008 | 528.556049506759 |
| SARS2  | 413.913442080187 | 606.162976359615 | 450.851711160136 | 661.545179083009 |
|        | 1115.34267967366 | 718.449150898903 | 874.816697884109 | 721.11578916385  |
|        | 888.371107987343 | 577.33849844574  | 635.819650434542 | 914.654262296682 |
| SART1  | 145.133151090252 | 145.791950392049 | 141.117659724704 | 146.084461430546 |
|        | 140.579839043912 | 123.563243360247 | 123.771380912926 | 122.679628839976 |
|        | 111.743461522689 | 127.962546712222 | 143.422419261603 | 104.861024325857 |
| SART3  | 152.808771946509 | 159.773576221107 | 147.604213625382 | 168.000247148058 |
|        | 171.982071800592 | 144.064214573005 | 160.156127781701 | 154.996829706812 |
|        | 168.773340961473 | 154.426605816862 | 218.269847477919 | 154.607214750531 |
| SASH1  | 665.936368667321 | 553.615252472149 | 541.351092873522 | 432.088303693555 |
|        | 435.983803453746 | 543.001249586573 | 700.601917911532 | 535.612000577004 |
|        | 649.906677394861 | 406.458130553679 | 686.028214419557 | 334.857690525582 |
| SASH3  | 144.114177076352 | 149.73250641246  | 120.413468119484 | 144.182891591399 |
|        | 176.641899861006 | 128.460750472464 | 127.109798012351 | 162.411156818437 |
|        | 221.171478972931 | 138.014046365103 | 160.379168489216 | 129.491732597331 |
| SASS6  | 165.926301648161 | 164.634694036993 | 177.72965427263  | 181.876635968785 |
|        | 182.827395663312 | 208.291714758548 | 175.647878042257 | 196.974807677659 |
|        | 193.858884443593 | 171.384487293154 | 153.54898879562  | 183.152005135504 |
| SAT1   | 1798.5819962261  | 1699.8374761666  | 1522.87703817058 | 1096.10636044885 |
|        | 1501.18820017008 | 3083.98169220838 | 6441.13602696535 | 4141.8682669995  |
|        | 9378.87287299048 | 6441.13602696535 | 5080.63091497522 | 2010.57142784228 |
| SAT2   | 593.639955546556 | 610.915977337787 | 818.445501500731 | 616.995114856023 |
|        | 514.002313819685 | 533.54045706916  | 533.279122416818 | 478.38361571213  |
|        | 381.253673759781 | 505.83860711693  | 338.075238647592 | 351.395760651605 |
| SATB1  | 186.679199600379 | 198.701991021316 | 231.202047619476 | 226.055406842613 |
|        | 163.946569217706 | 218.773153183388 | 177.235586767256 | 208.095384605737 |
|        | 170.966588957686 | 196.169988112042 | 181.976252906929 | 180.132104305583 |
| SATB2  | 204.740183832461 | 175.462290891421 | 152.566490804809 | 178.014057622594 |
|        | 170.614129599775 | 156.441368290572 | 194.617252921731 | 175.38376293575  |
|        | 163.456245724169 | 160.92643755328  | 135.135834717193 | 132.825240485239 |

|        |                  |                  |                  |                  |
|--------|------------------|------------------|------------------|------------------|
| SATL1  | 147.943844184702 | 135.906115546805 | 128.309602266886 | 119.711070285785 |
|        | 140.206268652318 | 130.509415570889 | 133.897397228615 | 123.046069309901 |
|        | 147.939682463235 | 141.849319373594 | 147.382177739631 | 136.321816321193 |
| SAV1   | 243.772412032046 | 230.447203571825 | 233.71520737817  | 211.609763150578 |
|        | 136.287909668938 | 139.931092990984 | 143.756242843438 | 165.476670465739 |
|        | 151.833386901811 | 198.681190016247 | 153.741061283101 | 156.381599544223 |
| SBDS   | 1387.90327883679 | 874.348941257592 | 1501.18820017008 | 742.517302567436 |
|        | 343.270642449751 | 446.948699651916 | 541.460843251764 | 473.60579090007  |
|        | 403.292651623365 | 895.114975754684 | 516.755267232127 | 761.32108609503  |
| SBDSP  | 381.625983354158 | 333.131139447511 | 659.106229917309 | 299.234482744038 |
|        | 218.917357155289 | 270.604799126393 | 282.797367565702 | 292.802762636861 |
|        | 270.520229426015 | 489.403061697031 | 227.288015854809 | 455.665927568395 |
| SBF1   | 505.404271675438 | 492.637241687561 | 418.420753332232 | 636.56692204969  |
|        | 692.53483413403  | 408.510567121592 | 462.144334719146 | 422.840163973614 |
|        | 624.978351618077 | 733.49038042129  | 355.609033348692 | 575.23272138912  |
| SBF2   | 223.81987303579  | 227.050629701762 | 272.077877821339 | 216.929969034881 |
|        | 145.737361356678 | 161.720405760536 | 169.574755162815 | 177.438968923426 |
|        | 182.130970182242 | 200.915806094193 | 220.959843573708 | 191.322056430728 |
| SBK1   | 134.981272056795 | 150.696963699371 | 136.779180530712 | 129.70974867852  |
|        | 468.93543246394  | 519.564563632951 | 323.788197265954 | 417.36454228858  |
|        | 247.806371601734 | 131.330974614437 | 208.816482659752 | 341.564749445905 |
| SBK2   | 130.122672154144 | 131.761564745495 | 135.32160992961  | 134.909230280708 |
|        | 136.028011201077 | 139.664055668127 | 128.105527466559 | 129.672284417918 |
|        | 131.587987756056 | 123.807693112932 | 139.636177212128 | 129.185514320138 |
| SBNO1  | 126.88066987372  | 122.379537202709 | 143.030777754448 | 109.69466049307  |
|        | 122.423561732526 | 133.819095523687 | 137.929082565223 | 146.283340399533 |
|        | 136.767307268217 | 134.369532556726 | 152.511331178337 | 138.888049140099 |
| SBNO2  | 187.955617187544 | 216.783051958345 | 166.582931148846 | 216.033564783918 |
|        | 326.570967321756 | 217.969738417693 | 185.100455193182 | 221.82340413039  |
|        | 242.141362101262 | 345.897250519387 | 254.812605074045 | 169.642188114285 |
| SBSN   | 114.027244455291 | 129.818020166075 | 120.649467083125 | 107.260023460914 |
|        | 119.530214079037 | 123.323528039848 | 115.066084565112 | 122.300069045533 |
|        | 127.987449338817 | 5609.58233117244 | 166.4983332269   | 117.144778357339 |
| SC4MOL | 231.257543784864 | 244.486311003619 | 214.617852048151 |                  |
|        | 214.595639477696 | 335.059844742031 | 355.290621188435 | 786.62709337246  |
|        | 376.627801547869 | 631.408955630318 | 1580.27059464289 | 479.261755380872 |
|        | 470.95418656881  |                  |                  |                  |
| SC5DL  | 288.88486628661  | 311.269750643358 | 377.800067476868 | 253.867947800583 |
|        | 465.926873285563 | 542.267204956846 | 1059.19317548869 | 1108.61301774472 |
|        | 303.380479700334 | 541.460843251764 | 537.828979447378 | 403.405544395163 |
| SC65   | 242.971958493453 | 272.854435771465 | 186.778334749551 | 284.798325549665 |
|        | 405.766055310869 | 203.913123559942 | 205.852731236069 | 230.367251714289 |
|        | 235.019573994855 | 205.52620827767  | 182.508415915215 | 191.740596601895 |
| SCAF1  | 147.790720062226 | 165.244616507084 | 147.510848198689 | 145.163084967499 |
|        | 287.334035234496 | 136.843164021899 | 139.403087367992 | 135.049657594221 |
|        | 155.741507341843 | 144.744603095605 | 160.382971629272 | 133.495243957927 |
| SCAMP1 | 646.461274173693 | 665.106631364961 | 687.700356531038 |                  |
|        | 717.686676823785 | 385.317560758502 | 637.457322054293 | 748.161769171818 |
|        | 372.088129459528 | 409.592855687405 | 765.532997390972 | 724.607317443904 |
|        | 743.023225859813 |                  |                  |                  |
| SCAMP2 | 214.785381549181 | 196.519125510368 | 169.206723147505 |                  |
|        | 231.462907786174 | 208.080089376299 | 195.816317534388 | 184.569063297206 |
|        | 187.710185880162 | 207.453490385508 | 182.665357598121 | 177.296424297967 |
|        | 201.555964610849 |                  |                  |                  |

SCAMP3 386.067573158514 431.304147578425 363.025385707747  
535.49374437073 1233.99503576308 668.127527385348 725.621153262924  
769.958422740085 687.269774217064 532.063437013967 471.15333189869  
808.55123510297

SCAMP4 184.167124143272 184.029968090084 147.297163685914  
173.959556466614 319.639103463458 212.443407602682 223.279017022443  
177.091809538824 174.941551089279 174.461487057542 205.679992893049  
219.619022209985

SCAMP5 125.12823219142 140.177708471199 120.024235522682  
126.997614441981 222.394280571312 162.199381540369 309.720081933252  
265.366632264085 189.575681012578 121.138461509096 213.194154171149  
212.037224737798

SCAND1 366.636754272029 406.736165197168 357.835334661098  
364.113665301598 1125.95664591686 731.848844821402 947.425912541091  
645.183207984114 642.934824227327 454.235121917464 529.529314022043  
495.769802520637

SCAND2 152.964940071133 155.295464263911 155.699649538664  
161.108249802467 149.41564356447 158.104336050835 168.244523461915  
156.525347260458 161.496700767073 162.28074297013 158.330403004116  
160.411218029114

SCAND3 130.63390061855 127.434873844923 137.790718305537  
124.336297973344 144.419657674797 153.018378403144 150.117906461237  
121.801291293249 141.229805348717 145.862497313025 144.787836177147  
129.699765645519

SCAP 981.313778685019 1191.88706134921 1189.11053680293 1360.85309203233  
6760.37324850804 3968.38723079061 3671.86460903374 3354.38704439295  
3338.13980198211 1218.64951314553 2172.89794460273 2012.36542989953

SCAPER 348.506289278042 329.263397240111 331.164053277361  
348.848550937417 173.964378226631 200.371280127668 224.224264678645  
182.886100305943 217.940575516933 313.077481033093 213.877482604185  
237.641190133427

SCARA3 369.78624104057 423.152420192284 530.969825236996  
722.725186727796 176.390014020936 137.586032396204 149.538429805372  
122.607404698857 144.55710963567 131.626173473789 147.23376282233  
131.68571824487

SCARA5 2300.9407349072 1526.66232186013 1158.88528996131  
1526.66232186013 105.859916438163 138.023752854109 119.092335265325  
135.025907096066 171.49930976135 115.999443701343 130.579954890389  
108.226917034591

SCARB1 244.101521795539 294.746622369436 259.338947392465  
340.800632878807 1183.82018168635 256.291984914927 421.690849282483  
283.084102918359 453.282973743379 240.005943851098 199.01458214661  
261.671277686467

SCARB2 4866.98027226798 4441.92485662082 3504.77617298452  
3668.19307488953 2091.73580292332 3241.23835624706 4569.44477073589  
3869.12225821096 5800.06300826802 2913.2685312165 3883.05620256963  
3495.66977000028

SCARF1 130.584348445667 128.833756478439 122.426568507144  
126.148379057536 128.090665893885 124.170242736875 119.83679981791  
131.444734367396 124.571807093748 120.441732791854 135.907702243922  
127.799190369808

SCARF2 181.566951620202 196.310746973798 153.78045746564  
154.722895261876 139.1434049136 126.464893786922 123.554769032715



129.680406696779 147.385714746214 156.678686363755 137.790718305537  
119.275061991187  
SCARNA1 121.021776527531 113.23302126254 113.005774989833  
121.564626579011 140.457727109762 138.913591568111 127.430408113725  
127.604087759266 113.09980008288 126.997614441981 122.65547320922  
122.292692083352  
SCARNA10 161.481227197715 163.380402251758 176.300743660299  
170.807514224412 191.651818696629 198.885004378065 198.549047189499  
173.70035122661 193.008902902654 216.645552082667 154.869171648942  
225.335753745598  
SCARNA11 154.771737131348 131.173355686001 128.510903178542  
136.534812980964 158.712241098927 137.488665424434 173.121618125421  
151.194282143046 125.065813262416 139.597493526257 164.942652212218  
140.466612569756  
SCARNA12 160.690442125281 152.935963398921 148.905860943967  
141.248526020456 187.550461418888 155.516697616637 160.496585125233  
158.14434287956 155.545904088857 142.279695592224 174.854570705  
168.634534857593  
SCARNA13 142.978818998012 150.880818951088 147.896919205072  
126.611663427876 170.731358903019 150.070213543579 187.978627462391  
155.166786601813 165.074983746785 151.567693140302 180.231462528702  
177.073245863872  
SCARNA14 109.851507510788 138.116568200293 124.334450753704  
126.640141760199 147.896919205072 115.789536577324 140.552143090027  
140.989597586699 145.547037566774 151.914252332792 147.001408450583  
106.797707723826  
SCARNA15 147.022594294963 143.127795310829 143.554726863556  
134.519697269443 148.201649039381 130.957441406855 149.326216726716  
146.197678850188 126.042731009527 130.700175060255 150.734560844391  
147.87699690647  
SCARNA16 151.84373370805 157.885229749634 150.573523216151  
159.170943469313 154.487546030444 177.151218006672 163.67719444924  
188.708596785144 175.469375624274 169.534469894464 173.035013611377  
184.437810305792  
SCARNA17 132.668344126625 145.841028932318 137.891372981851  
128.36533737469 134.47218436552 145.221594295772 126.720031203392  
123.694678408411 120.65473121078 148.678869698203 138.254479653425  
133.239703270008  
SCARNA18 132.05513812578 133.009854792992 140.798706399757  
134.132312782731 179.914070416793 179.57046217355 225.335753745598  
188.118989395838 164.824914851636 139.446914318877 197.298982267459  
148.638400592682  
SCARNA2 160.945886507456 161.799743586569 130.681371063005  
136.563471322998 129.786941565218 127.966883271903 130.970694919879  
130.290454258898 150.295611829265 171.086559024882 154.479733759712  
129.887187837732  
SCARNA20 131.919387743094 128.686425820835 112.858669660245  
112.629266772219 132.804216633852 121.23469201559 129.722382881611  
119.176139463015 129.46430369977 128.440024330942 128.529525886337  
129.374418059091  
SCARNA21 154.04507750156 139.781351410748 135.08927101395  
142.739686751422 134.91697121091 138.981712781568 147.348400730286  
158.335952927257 145.104173410801 141.587109176431 166.515199732076  
123.072413274454

SCARNA22 162.808270845998 135.335107344583 171.677654793775  
154.938900278679 173.161152247499 165.692508737757 148.94765984808  
143.521510363933 136.669003646622 152.743680985848 157.805871400914  
171.671895682052

SCARNA23 137.519771130707 138.811681811959 166.099940078284  
137.323320121918 126.326609619996 123.786227856015 124.02280670421  
152.244018820259 132.295937828888 137.710725379804 148.173215617922  
132.053242760381

SCARNA27 128.097206000942 142.431979387165 124.401083237195  
142.726324048628 137.16842164453 151.739221728872 141.486042999328  
149.341736870692 126.673587174832 147.835936450126 119.297561749232  
153.885582272269

SCARNA3 197.543089645432 152.646642492666 240.734451149197  
144.83282018024 129.541049979717 270.651318838953 186.167877791105  
429.457884032977 195.474525582555 193.315380090713 189.985520850855  
226.35854874278

SCARNA4 133.065366727222 149.615585907229 131.089811472017  
119.168045349254 133.463464118897 164.99860393383 121.224389883994  
142.732625557628 137.033870931133 134.943746757751 149.604507483606  
146.194467350201

SCARNA5 134.972933635542 137.491366243256 128.466244127634  
138.698178321535 155.449724554217 141.310253828965 137.799016648135  
144.035936160694 126.324771800638 147.60284257326 130.93033679281  
151.183847738922

SCARNA6 129.372522073479 121.57069706238 138.487657776553  
126.155486659114 135.185283076286 130.979513420888 126.34649262976  
134.125038192486 125.704264033102 121.320750074882 130.524630778991  
134.698857213208

SCARNA7 146.633627492419 160.113042196058 139.313456284725  
147.425856984368 154.831307586538 155.444668113276 157.800913051929  
140.53597287752 132.128418409996 140.656633546501 203.693188114912  
148.204194003593

SCARNA8 129.618097261902 124.443643568527 125.038427667173  
140.326012404526 130.847215795313 149.827791077797 151.034392433934  
151.497680466119 142.461941376108 137.460936879873 148.895841777421  
132.063395162855

SCARNA9 184.742960975938 252.894371238554 172.552923333095  
204.489837323989 193.028341755594 199.620978536397 253.202436065011  
187.700723296295 237.825857080173 239.845747958475 310.690317681243  
629.97342429259

SCARNA9L 141.74792000689 141.683298500736 139.263602290256  
144.705559511075 147.009325721272 154.728941096647 134.152586955217  
139.534014289993 149.691340727994 148.22974445263 149.839827383681  
137.555903296788

SCCPDH 255.677315946354 256.820546409632 309.937351755502  
284.995098167431 413.084646927035 771.294254795752 806.591035100794  
412.277592266475 303.300028849873 191.335616210093 918.742625270041  
441.684169663552

SCD 595.593867616527 876.783710734594 785.599211190431 514.213675499369  
3545.8833678963 201.954167006591 4214.83058308503 3270.88476148156  
9793.92604780228 3648.38765465889 1767.70023790753 1174.69701182094

SCD5 173.299643109576 157.776321544382 155.747694056319 144.931901042924  
122.120307446003 124.35374445763 138.062345982865 119.107992692097  
127.792241991414 157.176001400747 131.626173473789 132.091532692048

SCEL 140.413503801467 141.644521617419 128.005043478952 129.777173431404  
123.981053866137 143.501380161409 136.287909668938 142.744045151046  
139.62718946833 427.872407051254 146.165632086981 137.157492354617  
SCFD1 549.96567374713 432.92947962962 480.593729033799 419.846584903512  
310.690317681243 346.356312668445 457.548150688248 563.140382824149  
482.739666411407 749.515603904233 268.930428617695 708.534025308731  
SCFD2 165.459993078103 161.874184077257 158.380964047483 181.062188174871  
153.111226896983 142.876069462608 158.185593294878 146.042460762767  
152.945550129539 186.406439948242 164.808139478109 166.452651396293  
SCG2 135.892248893607 147.52178512946 164.541417588646 163.72257517759  
150.653030597808 173.204163917896 163.885645883066 137.79714923769  
137.649424237506 154.166668493152 149.153827025981 151.714420758741  
SCG3 143.614075503775 150.682964448325 138.800986934663 142.093180304661  
128.429007921588 143.405079593778 143.020244241091 144.019824700027  
148.94765984808 142.667173697017 143.555987405898 168.150270765792  
SCG5 138.97776257708 134.298521475727 113.400050190315 129.767878283811  
135.531326977319 130.610414667274 134.825699448987 140.103020838882  
192.512661648653 193.134414137433 139.997245010492 287.374706071354  
SCGB1A1 133.689255383855 155.785933672918 141.455841055881  
156.901209828741 131.410793139723 138.050999864689 154.428779374984  
126.809252651352 149.277880094957 156.630366766924 132.224831869802  
173.233357775898  
SCGB1C1 127.555954288973 130.782296492278 135.390226050803  
129.466612376702 117.123891785437 120.599440204711 118.708644971927  
117.093818506721 124.837187124441 116.773599713111 124.213104788426  
119.319884675074  
SCGB1D1 133.59686364883 127.368207232723 143.78994470501  
148.616543842015 149.437212090587 149.44520146627 140.671406418004  
152.265624144393 141.28700484445 144.985280401441 122.962219297463  
151.70917316194  
SCGB1D2 118.825948323992 124.310436914027 145.887262601586  
146.577524520274 127.407418037777 137.248465324584 133.203064891923  
154.021906399992 151.210814209064 135.54708602175 106.450154495663  
131.87404363664  
SCGB1D4 103.691075663721 101.761615925097 107.013012418356  
109.669517182289 108.148715413122 111.243322115126 109.817705421158  
107.156457065853 101.761615925097 99.0767996209245 138.634814756987  
107.802792435066  
SCGB2A1 99.9173294438729 138.679545821015 112.729141678141  
134.722574388775 114.835386789236 115.25307661968 110.304102941202  
236.164692035094 101.530900217921 109.266533255266 129.023206862713  
130.894384800009  
SCGB2A2 159.026102446297 142.560797028716 137.206961927035  
183.472290949588 159.354364289526 166.932757191847 184.462286724102  
155.30926640293 158.726115143818 163.970187373891 138.891642304194  
160.91894600916  
SCGB3A1 123.463861015933 118.9952230535 115.672307128514  
118.269780903508 186.321879879561 173.287859527767 119.252737868132  
114.421383025971 119.562180492359 123.347836436966 142.45047744931  
171.414869677333  
SCGB3A2 137.129864761402 145.02142927266 150.479320779862  
127.982696242304 134.784568023655 150.019181654237 149.31184788671  
143.053727675518 144.240470871638 133.143695166498 155.52533851273  
161.651643789597

|        |                  |                  |                  |                  |
|--------|------------------|------------------|------------------|------------------|
| SCGBL  | 128.739880189022 | 113.536570797896 | 112.054379249781 | 122.213445520365 |
|        | 123.318763391117 | 117.193620642373 | 112.693431140524 | 109.098105822556 |
|        | 121.44564199541  | 110.838647534175 | 131.218141814078 | 114.520066232155 |
| SCGN   | 108.148715413122 | 126.176505541577 | 116.58452862953  | 115.613348109569 |
|        | 111.765812595638 | 108.730058525654 | 117.790593990682 | 101.915858150866 |
|        | 111.349642316073 | 112.714282429822 | 112.239647575661 | 107.622342073167 |
| SCHIP1 | 461.722481634933 | 322.213266293148 | 334.857690525582 |                  |
|        | 351.854828413334 | 164.466332705334 | 149.176808507529 | 137.961504178836 |
|        | 130.441808139335 | 139.201122725213 | 148.309872393    | 142.848438163322 |
|        | 179.091917512822 |                  |                  |                  |
| SCIN   | 151.503307004675 | 142.079184950618 | 179.950904921667 | 151.237088659409 |
|        | 224.963277964548 | 296.290104133844 | 171.636121363019 | 228.058870735016 |
|        | 171.262412981612 | 163.014903707857 | 166.335294339013 | 152.123526286669 |
| SCLT1  | 164.816672737691 | 146.453030317456 | 153.95855605751  | 136.807118099948 |
|        | 143.769240322865 | 154.086510608016 | 149.574353706911 | 170.758319048911 |
|        | 160.549597620339 | 154.493246900289 | 165.120452110746 | 175.832474809232 |
| SCLY   | 154.881797585583 | 156.123528587917 | 168.560093633607 | 170.326474367867 |
|        | 123.841366760069 | 143.52474218953  | 145.684294398911 | 151.461857714097 |
|        | 152.488480322526 | 146.856133875296 | 184.915526626619 | 154.118601977256 |
| SCMH1  | 352.562711030848 | 381.57978490093  | 426.896707161414 | 450.120868656638 |
|        | 295.367125961621 | 206.650760711745 | 245.900840732668 | 235.291035302211 |
|        | 247.550312458738 | 187.15740398852  | 252.056131165397 | 274.70018535436  |
| SCML1  | 211.535720730612 | 180.599150102184 | 193.064450357153 | 170.497804969996 |
|        | 149.150824615486 | 196.819022688128 | 166.068489027866 | 182.508415915215 |
|        | 178.863722055499 | 189.770558810153 | 157.178048352017 | 173.395370400371 |
| SCML2  | 130.689272423595 | 133.988494850477 | 137.460936879873 | 123.908458472687 |
|        | 126.423739360894 | 122.399241018147 | 119.934231033302 | 130.080728694308 |
|        | 120.371374172279 | 130.883516197483 | 141.471127716868 | 124.441699369614 |
| SCML4  | 113.734280863323 | 111.204065131669 | 121.583096465567 | 114.133473556359 |
|        | 112.809629077555 | 115.566303449363 | 112.612099135361 | 116.196676877996 |
|        | 117.48427100606  | 110.003750007057 | 112.936472036608 | 110.838647534175 |
| SCN10A | 121.743701509981 | 107.431455226979 | 126.816402300701 |                  |
|        | 111.065596151792 | 114.512028664352 | 121.45175516842  | 113.451566510208 |
|        | 116.685023927951 | 115.664551127497 | 120.857635836068 | 133.465593684519 |
|        | 121.22760405399  |                  |                  |                  |
| SCN11A | 131.239986488033 | 184.862871179765 | 130.718729445329 |                  |
|        | 118.895095992424 | 115.624167024067 | 114.062099086818 | 116.977202125093 |
|        | 110.333339548402 | 106.000943456483 | 113.025793645043 | 121.018722403628 |
|        | 112.936472036608 |                  |                  |                  |
| SCN1A  | 149.274901871663 | 156.923675862035 | 147.401387099359 | 151.130401750721 |
|        | 142.985328317347 | 148.299945894738 | 163.398614249033 | 147.688664545959 |
|        | 142.633121727277 | 129.313576009092 | 137.246089511045 | 158.819151102054 |
| SCN1B  | 152.61583482402  | 158.85003890975  | 137.488665424434 | 144.667638908504 |
|        | 131.823019555685 | 128.458132030921 | 123.943080151532 | 128.495276191943 |
|        | 122.932745723044 | 126.230887413874 | 136.929570710155 | 134.943005383277 |
| SCN2A  | 140.608266389167 | 154.569432344392 | 133.82390829608  | 146.629335531037 |
|        | 131.534097198718 | 125.318166919844 | 124.624046191085 | 148.356726939122 |
|        | 138.35738548449  | 127.558034562151 | 140.016122996485 | 126.260691770282 |
| SCN2B  | 162.58152435515  | 171.896929562022 | 171.689722533849 | 193.554028681854 |
|        | 150.690143057308 | 147.043228493047 | 143.31590446076  | 160.419358656559 |
|        | 142.358754646258 | 154.395261192114 | 130.258933321051 | 158.380964047483 |
| SCN3A  | 131.473001455317 | 125.752962155179 | 124.582577275358 | 129.6505724783   |
|        | 118.360186663758 | 124.460064642088 | 126.705446263769 | 131.617027772841 |
|        | 124.103321614841 | 130.420753247797 | 127.816596414779 | 124.140880678888 |

SCN3B 129.551260802518 124.68729078792 128.052753068991 119.931415360373  
124.592771536872 119.759350702482 123.117923525539 127.419227292862  
118.724348027528 126.724973604103 140.767270136561 122.543903508753  
SCN4A 122.372558045688 106.522641798274 119.044902525459 124.370381674692  
121.782864344131 116.787791109549 119.131613164405 106.470524594239  
114.749597426757 123.839006667113 128.26423663004 118.684077097437  
SCN4B 211.438615793742 263.994460303088 140.316066297536 271.154246147262  
136.679405220947 152.808771946509 137.971108694323 146.865904106038  
150.021512237553 135.735535533738 138.920141982606 151.855884026072  
SCN5A 138.049846456876 131.757695616207 142.281657284178 132.287326702468  
138.267726309873 128.910261453632 149.805955402639 149.79295887612  
131.938898032483 138.461113585594 142.160941592768 139.377027955744  
SCN7A 133.66893163718 124.786029449452 133.887192869502 128.011387527117  
130.380766252137 125.672285485643 118.838332117453 118.256000539093  
128.742617750403 128.209771391087 161.148734808267 128.533900744619  
SCN8A 119.188446525733 122.634741242406 133.969054754299 132.887701822875  
130.700175060255 123.259322051795 120.452958447555 123.916497557628  
115.613348109569 126.338676765473 148.714406471586 123.949411804458  
SCN9A 153.248199842194 147.211769989922 145.076068630259 148.838294770082  
128.396326753926 126.048382998393 130.005909892804 132.748478264583  
124.616629956864 134.717258604899 138.913591568111 128.052753068991  
SCNM1 263.568160216149 305.906480933354 376.124744806171 305.720812071583  
350.926679856514 340.728888109597 284.675990197899 371.941204080246  
326.908959531021 344.021696764791 243.10297424873 306.716682293251  
SCNN1A 234.126500054945 360.243484271891 395.786295710815  
155.728609337723 523.073926509865 192.095235288818 3173.14004739767  
375.255445179952 2979.27692778783 246.355720496468 3552.78712528922  
4327.90939653054  
SCNN1B 164.678646890649 180.518621542868 153.379118228796  
128.247871411825 837.872187194784 207.674249122047 176.486551181451  
698.086166782221 148.029259633449 273.044064077 548.014025722956  
190.520750756082  
SCNN1D 336.5543056115 303.241375487319 365.864755316163  
413.757630469808 190.111477641308 217.811099067262 184.915526626619  
191.912670416334 200.668298229815 284.595024875896 178.790758444269  
203.487137264  
SCNN1G 133.004765428575 137.258429777402 136.158508521357  
129.189479305468 443.623904480087 484.028175202673 225.095016600703  
1251.15912264225 224.027605834751 194.143649677822 327.384671423687  
255.677315946354  
SCO1 493.715108157171 485.136339836897 591.437752991512 447.779854598556  
589.070196307574 884.747476952289 615.485984065221 879.809795251142  
785.599211190431 772.776364492813 1062.03157932144 753.997560938003  
SCO2 316.623219008156 299.039192744355 274.736124442229 261.844708446856  
636.382696018633 447.674610082872 429.680602294138 395.716879127149  
535.354724252178 630.670530516275 499.683188662742 473.370240289761  
SCOC 384.365878895439 410.337491313251 501.738490253982 359.935451429371  
510.972389503051 696.650617523899 757.406530000489 506.898635822094  
552.962676093514 689.04773343291 524.973621024573 789.401526545277  
SCP2 161.281195929918 163.781674803361 148.818562911616 153.679479224178  
161.434331154045 169.403422185018 209.684346388892 214.295260811046  
156.224769056915 159.148717478277 185.591700082272 194.337080066417  
SCPEP1 1037.00025848491 841.285351463894 1242.61637859159  
639.688482258192 1133.87328758676 845.150147618462 3608.10730106542

|        |                  |                  |                  |                  |
|--------|------------------|------------------|------------------|------------------|
|        | 1999.10320742823 | 2334.97297889593 | 619.045921382959 | 692.359779743985 |
|        | 501.600329334497 |                  |                  |                  |
| SCRG1  | 404.445038343721 | 438.340341490622 | 509.01330998156  | 595.593867616527 |
|        | 121.734873711651 | 123.977467396003 | 119.551741097918 | 112.612099135361 |
|        | 125.339305282874 | 117.820996523337 | 119.915330116696 | 128.648559784611 |
| SCRIB  | 279.113984512619 | 306.838596239511 | 286.642323413104 | 382.562403424855 |
|        | 544.222458349696 | 408.993744895434 | 425.826693178023 | 473.73182675469  |
|        | 585.552940765069 | 653.749043828462 | 473.151324002277 | 470.42403724799  |
| SCRN1  | 1321.17236442448 | 1133.22524345111 | 1390.95426299323 | 1202.74869573717 |
|        | 390.670702155192 | 265.536429548886 | 783.059427015955 | 381.808809625801 |
|        | 386.598037190663 | 387.068276379114 | 552.298965378403 | 529.700356666006 |
| SCRN2  | 168.418529261977 | 155.272264997151 | 164.268280525424 | 150.690143057308 |
|        | 154.607214750531 | 183.568426758223 | 168.611652451329 | 167.67952650068  |
|        | 169.534469894464 | 156.65842876856  | 176.670752486376 | 168.674809329231 |
| SCRN3  | 180.250420976613 | 180.456659320226 | 204.489837323989 | 193.292596471113 |
|        | 154.884821436554 | 213.813667557079 | 200.767743455226 | 179.198164545975 |
|        | 174.737828693216 | 167.180406126438 | 171.080373870373 | 185.938983266802 |
| SCRT1  | 116.588138374632 | 130.630504666374 | 130.074786642758 | 136.683683776616 |
|        | 133.802898895457 | 130.104021521854 | 128.845396683172 | 131.652854369619 |
|        | 125.058165131184 | 130.849201993866 | 146.812248482145 | 128.634431242405 |
| SCRT2  | 117.937856116492 | 131.458411820485 | 123.935072913078 | 119.097521397712 |
|        | 128.050677475339 | 118.622346984257 | 119.759350702482 | 127.473812381059 |
|        | 123.45581374935  | 123.077592992679 | 118.07991087231  | 119.704436785439 |
| SCT    | 140.522470775478 | 124.796876920269 | 128.806964077824 | 126.561067704708 |
|        | 126.292433523959 | 127.226937898225 | 121.118933682515 | 118.841699953612 |
|        | 121.805145639822 | 110.662552491706 | 132.762755202326 | 125.621467040793 |
| SCTR   | 124.546520456419 | 115.702900810606 | 129.167602517633 | 120.196595293401 |
|        | 124.989313193779 | 121.010811158088 | 135.369146072643 | 119.643417329571 |
|        | 129.942594772751 | 118.650091706226 | 142.239620906411 | 122.329290563769 |
| SCUBE1 | 165.504532455205 | 157.807476284733 | 151.466689967666 |                  |
|        | 144.181359740481 | 139.874118224204 | 165.386056999339 | 138.675023495021 |
|        | 164.043866642712 | 142.586051173329 | 128.417571004317 | 126.48691003872  |
|        | 137.326796995017 |                  |                  |                  |
| SCUBE2 | 377.27961559752  | 397.577760464197 | 345.433025456954 |                  |
|        | 322.36247485445  | 421.459312180809 | 188.623897093065 | 628.197839884392 |
|        | 759.802694618208 | 1461.64901688125 | 150.170712508944 | 926.670867201327 |
|        | 167.157420848604 |                  |                  |                  |
| SCUBE3 | 126.295856316628 | 137.629855378016 | 137.11719450122  |                  |
|        | 147.720061897962 | 130.66863243733  | 114.290611267606 | 121.371348717752 |
|        | 114.977135060317 | 116.519527499611 | 115.559551514777 | 143.281050499332 |
|        | 122.868393258957 |                  |                  |                  |
| SCXA   | 173.751615672365 | 133.789738760547 | 138.780488114634 | 143.934585983797 |
|        | 231.439252571168 | 173.741466458636 | 180.747527895349 | 207.138680369683 |
|        | 178.647726085678 | 154.286043402527 | 160.496585125233 | 163.951459935477 |
| SCXB   | 127.665162524824 | 133.810472192646 | 133.845056524142 | 128.927103442679 |
|        | 125.461701282922 | 115.795989631016 | 124.317870455205 | 135.829273398594 |
|        | 126.620889938532 | 126.887989471803 | 138.117916412819 | 127.866992108488 |
| SCYE1  | 127.588907178652 | 130.189958197332 | 123.88619164923  | 123.711828013052 |
|        | 145.739537463907 | 139.921002429353 | 134.483162806498 | 132.584454429269 |
|        | 138.508015596135 | 120.773552653073 | 131.092140169861 | 133.723437619233 |
| SCYL1  | 1017.09497861942 | 1102.73689840572 | 1008.43888926584 | 1468.50184641042 |
|        | 2215.43744802035 | 935.784743413185 | 1008.875250028   | 761.586663689579 |
|        | 881.561688713557 | 1145.96710556468 | 1067.80176606977 | 855.415038498392 |

|          |                  |                  |                  |                  |
|----------|------------------|------------------|------------------|------------------|
| SCYL1BP1 | 202.253560413436 | 192.640717683236 | 217.327543190687 |                  |
|          | 183.676020826291 | 208.067404132325 | 264.201932544662 | 207.902853533132 |
|          | 253.65959805538  | 213.097664319741 | 239.12905945808  | 223.013753785002 |
|          | 248.850686917567 |                  |                  |                  |
| SCYL2    | 420.160939829121 | 371.224296589448 | 412.129826478453 | 321.426100243434 |
|          | 473.260534978556 | 554.950092776254 | 574.262112643403 | 667.421612441201 |
|          | 507.95331185029  | 710.76653239801  | 515.929937825133 | 571.950858678221 |
| SCYL3    | 218.487334022128 | 204.695311233073 | 214.295260811046 | 222.508914765788 |
|          | 181.803275243281 | 219.129781831192 | 209.196695368783 | 243.501083338279 |
|          | 198.437113196596 | 195.474525582555 | 253.975577255772 | 253.42022722564  |
| SDAD1    | 1259.38111177521 | 1345.8970795036  | 1397.84878368705 | 1596.33832632698 |
|          | 938.499337889075 | 967.797017108447 | 1115.34267967366 | 1521.61996270758 |
|          | 1352.14737073174 | 1008.875250028   | 1002.88224342342 | 1451.64055568759 |
| SDC1     | 280.204167582951 | 426.132037075477 | 319.927209914181 | 187.550461418888 |
|          | 4635.42002659719 | 3066.69261114251 | 3643.11229751348 | 2127.22258112242 |
|          | 2065.51724858579 | 3643.11229751348 | 2645.72125268628 | 4073.21075791737 |
| SDC2     | 742.751664201272 | 489.403061697031 | 623.508710830895 | 540.797164107185 |
|          | 166.2468445883   | 231.728984785324 | 200.08007665693  | 166.47851613068  |
|          | 176.340265963032 | 175.121069571371 | 202.421990203844 | 213.510783808898 |
| SDC3     | 134.936025073531 | 144.762006548375 | 148.056333887679 | 149.536681241497 |
|          | 152.516485296644 | 138.5270206057   | 147.110929610347 | 142.543569032033 |
|          | 149.912481263284 | 134.877046981678 | 146.493927564338 | 143.08841562593  |
| SDC4     | 1059.80292026589 | 1238.11700377838 | 765.128667448261 | 1538.78070281348 |
|          | 2360.87760349888 | 1183.1601379136  | 1389.93393245455 | 904.211195986553 |
|          | 921.546033242474 | 679.191060100076 | 1748.77270039774 | 1083.26599217847 |
| SDC4P    | 139.828781354865 | 137.058578192268 | 154.871166693561 | 143.870849001074 |
|          | 130.820415610578 | 147.821639002833 | 133.41548225025  | 129.998824457005 |
|          | 145.039617860588 | 141.42859050659  | 145.354740501503 | 155.803946849495 |
| SDCBP    | 464.323065038265 | 440.916522871266 | 575.722713461982 | 318.971509860209 |
|          | 281.278843600876 | 493.071213662125 | 390.194764817385 | 563.779294315901 |
|          | 561.858563298512 | 949.789710063337 | 302.113807121396 | 420.95713139384  |
| SDCBP2   | 141.4587810296   | 143.915205639368 | 134.185202200317 |                  |
|          | 135.81863662958  | 233.129544542265 | 313.888035511709 | 253.009376944901 |
|          | 201.676984786688 | 207.560911665319 | 332.885488115858 | 575.23272138912  |
|          | 276.184421402511 |                  |                  |                  |
| SDCCAG1  | 291.914408947328 | 305.499194075747 | 426.548994267836 |                  |
|          | 266.964673763497 | 189.528686948872 | 253.580286414227 | 313.828943866034 |
|          | 351.759100605991 | 285.798047501616 | 363.539983343859 | 298.165097953983 |
|          | 345.686640885419 |                  |                  |                  |
| SDCCAG10 | 718.449150898903 | 699.550347374567 | 893.264940736694 |                  |
|          | 776.98412594767  | 398.673582680257 | 398.272713014637 | 789.043948009585 |
|          | 461.314247041387 | 524.640879446426 | 704.152296359463 | 619.487800014979 |
|          | 742.517302567436 |                  |                  |                  |
| SDCCAG3  | 319.812293134357 | 326.640168906375 | 368.948300262634 |                  |
|          | 363.777212750779 | 393.707031354025 | 334.443733461841 | 325.320888625297 |
|          | 296.962992349662 | 441.112782197591 | 462.553267274302 | 437.931339781992 |
|          | 262.171775165261 |                  |                  |                  |
| SDCCAG3L | 136.173596381385 | 151.128838696891 | 153.389279691913 |                  |
|          | 145.540872377507 | 132.762755202326 | 157.277051544704 | 150.874014332213 |
|          | 143.074187168031 | 149.269417496936 | 174.840923772532 | 148.00952002903  |
|          | 157.547814187442 |                  |                  |                  |
| SDCCAG8  | 154.959217895243 | 156.441368290572 | 148.072816925413 |                  |
|          | 152.514455788489 | 138.664401460739 | 164.50490221903  | 156.361037318986 |

|         |                  |                  |                  |                  |
|---------|------------------|------------------|------------------|------------------|
|         | 170.901599088282 | 160.78368986036  | 173.272062328378 | 182.67941458824  |
|         | 198.549047189499 |                  |                  |                  |
| SDF2    | 632.843164522867 | 696.131296166255 | 665.341859712345 | 586.867772838753 |
|         | 1235.75946952752 | 1076.09385014053 | 1170.07851727046 | 2089.82894186824 |
|         | 1237.56662467492 | 697.581541438891 | 990.814111681408 | 902.822697602452 |
| SDF2L1  | 735.165830487162 | 824.070046083713 | 506.659740456829 |                  |
|         | 1088.25132365974 | 2799.0487754899  | 931.325266360957 | 669.330078861673 |
|         | 1313.89440013246 | 1191.26028342929 | 615.662993833692 | 705.737228226014 |
|         | 1315.66699943181 |                  |                  |                  |
| SDF4    | 525.6579615077   | 553.198321853202 | 403.104188866804 | 571.136519973808 |
|         | 979.761537450366 | 636.56692204969  | 656.009451448101 | 596.246316033079 |
|         | 590.515758538373 | 467.187222441283 | 419.272193677273 | 509.512410867348 |
| SDHA    | 713.087392708048 | 777.651238374269 | 859.860994525775 | 857.55777793754  |
|         | 909.388774224614 | 544.669441360594 | 562.387692458382 | 829.992212133165 |
|         | 520.585319342817 | 480.593729033799 | 545.566596665916 | 620.760947818536 |
| SDHAF1  | 310.465070184707 | 356.154842959851 | 325.173931553891 |                  |
|         | 411.039234404499 | 838.63350090385  | 286.996908547553 | 335.3366819308   |
|         | 270.604799126393 | 379.911829623463 | 239.363511706064 | 298.625127845168 |
|         | 285.980446338971 |                  |                  |                  |
| SDHAF2  | 933.723483173584 | 992.320202251161 | 856.039380523678 |                  |
|         | 1094.67740173529 | 1046.65224316733 | 1528.49457104932 | 1640.99641023476 |
|         | 1199.35864276583 | 1195.07608384189 | 916.836022395768 | 1156.19575610918 |
|         | 1632.84261181074 |                  |                  |                  |
| SDHALP1 | 898.877732360841 | 858.742139354587 | 874.816697884109 |                  |
|         | 728.176339659082 | 345.977609212137 | 971.170460915918 | 601.018867455333 |
|         | 727.114956464515 | 642.484527246259 | 568.935113269368 | 694.02978779693  |
|         | 693.516351173476 |                  |                  |                  |
| SDHAP2  | 1465.2419150392  | 1466.82170436229 | 1030.97051104597 |                  |
|         | 1195.6335460045  | 352.945088028205 | 850.125434374005 | 1130.32966481315 |
|         | 829.126529857044 | 1129.76078220457 | 793.501244347257 | 1073.40463823132 |
|         | 1037.00025848491 |                  |                  |                  |
| SDHAP3  | 159.287816317316 | 155.595651896155 | 158.85003890975  |                  |
|         | 152.729355306724 | 144.252481420079 | 168.982086590306 | 167.756465178715 |
|         | 156.224769056915 | 156.973511952828 | 146.865904106038 | 166.068489027866 |
|         | 152.552277008504 |                  |                  |                  |
| SDHB    | 1536.52218968817 | 1294.74864310494 | 1932.39418448203 | 1442.94175124818 |
|         | 1750.21700780511 | 2476.51542420593 | 1751.22580157752 | 2242.73511149559 |
|         | 1752.50728312967 | 2046.64499507352 | 1290.39741199701 | 2293.05058904656 |
| SDHC    | 431.304147578425 | 407.615019710707 | 427.872407051254 | 442.590987372759 |
|         | 496.328898534802 | 738.37559871635  | 444.826775824095 | 550.24496459253  |
|         | 454.34729744062  | 533.37609065123  | 348.640185950469 | 635.819650434542 |
| SDHD    | 595.752426322468 | 551.350758868377 | 822.545007054668 | 535.612000577004 |
|         | 475.927798702033 | 549.359675306309 | 842.87865208079  | 941.936830901588 |
|         | 561.609211243027 | 487.358720934063 | 864.547109080675 | 1046.13353853089 |
| SDK1    | 145.204870282027 | 164.491207767654 | 154.352518161283 | 163.390929975591 |
|         | 182.711318507496 | 145.728370703165 | 153.694557276814 | 158.098055917452 |
|         | 150.893280574091 | 141.914966520049 | 139.900523831258 | 132.906201428703 |
| SDK2    | 176.145076825955 | 161.930142040623 | 172.345201438148 | 154.227433553131 |
|         | 142.240333104987 | 144.629350188283 | 136.159825652148 | 158.138862054715 |
|         | 155.227218488935 | 164.120602897751 | 151.034392433934 | 164.185346950306 |
| SDPR    | 1689.00127592755 | 2101.93705983383 | 2213.1043022626  | 2470.86113150126 |
|         | 158.193008411967 | 260.591336959281 | 163.996649606636 | 185.233210060342 |
|         | 184.530853446688 | 155.166786601813 | 153.374296511216 | 179.35113214277  |



SDR16C5 116.639787832302 123.561016079801 128.140333650496  
121.087514445827 119.382151435379 126.484819755399 124.802639338573  
119.735807506447 119.539713878832 157.15947600423 141.733840643889  
134.657787366869

SDR39U1 127.245190474707 137.445344116574 146.577524520274  
136.061992660698 142.825203517688 135.511902377219 153.969493052468  
147.289061374598 131.510494315469 136.384308041001 146.042460762767  
169.725534829981

SDR42E1 138.161690144518 143.632325018964 142.307520290692  
139.027836356854 201.530921073488 151.879398444495 228.243668453958  
137.357339430515 182.292947734054 233.129544542265 208.932692585748  
223.453776362112

SDR9C7 143.331929080227 140.214475962177 154.798287249541  
146.986891588172 141.342216963124 139.125340284813 140.839056652898  
151.245520459264 134.56134674893 204.219197797869 127.648224668964  
139.220877923507

SDS 150.0512732245 148.808928892047 150.956247643013 154.291717784335  
161.182901898379 138.598167973067 164.377227860031 166.068489027866  
154.894196413558 163.463191619941 143.41350503793 142.851432926979

SDSL 194.143649677822 232.385176936256 165.074983746785 198.885004378065  
1170.07851727046 431.546135503733 335.623336587396 236.933960698783  
440.404188514231 282.190861594303 254.879772480457 384.733313349438

SEBOX 133.733674016447 126.268418132 138.462826342765 133.455138380277  
124.840101287634 127.760995691556 130.592061896237 142.675752131935  
136.238646974312 135.078198678379 140.599584289987 135.711590400394

SEC1 129.434594784981 134.349043119219 127.783892576352 122.329290563769  
135.114056458478 122.550707067805 127.42914358124 142.099541115973  
138.632146452173 129.295956874012 129.594440309419 132.70109232982

SEC11A 2246.89876694944 1887.82245931444 2227.70654174379  
1359.63626195826 2653.47752512393 2165.41403521012 3321.1350545346  
1821.08523647593 2470.86113150126 1895.72330348767 3930.2841381915  
3083.98169220838

SEC11B 117.590393673861 140.411200873743 130.06441029462  
132.529247880813 133.191797029676 134.981272056795 133.651203764842  
133.352279794853 133.404671629495 130.06068534054 124.324855155055  
128.335132315812

SEC11C 649.438995824208 745.482863218223 922.50743596248  
586.246004571452 1238.11700377838 1594.05763963363 1432.93880448974  
2965.38280248519 2605.13680290987 1515.38811502277 654.52788411248  
1946.45172007314

SEC13 357.191675549592 371.168752104821 365.727197088581 462.025126897013  
1083.26599217847 445.905756082569 485.87138934376 555.109005518622  
802.017244099902 514.922742487521 403.657727266403 408.037874667173

SEC14L1 156.638070437044 158.064409011013 144.494401248678  
156.605568633665 156.265168005937 171.455216889348 167.121623035375  
175.704031930103 175.663960113118 203.510106134882 159.68134949161  
151.933078262284

SEC14L2 144.266864839344 144.139062513587 129.601234646954  
133.533718725309 149.999838961906 123.285059856341 156.787932134605  
134.927386619223 132.873213182775 178.320732186309 145.791950392049  
139.219476681919

SEC14L3 154.091431691072 142.221542344035 142.530082312562  
150.056508971921 135.527445907621 146.6306281408 136.156548919515

144.977958320895 148.720181793879 156.957578703389 139.161483596756  
135.946808893146  
SEC14L4 111.577400298092 118.474291525263 119.341806810441  
109.255470590389 176.176392369178 115.440152891339 116.433239116749  
114.072600760808 228.968779778407 114.412739085949 155.080900277147  
103.520748827831  
SEC14L5 158.188039933865 148.556161762978 157.481645415121  
168.427124752461 152.842777535666 137.430946130817 148.155692596378  
150.339554736141 142.688809469455 140.028169667777 129.779076484273  
143.475725571943  
SEC15L2 156.141123407905 147.734708927825 164.417770955805  
145.34041912391 143.565597315289 164.696616863082 150.91730768674  
158.8246699332 154.503958858173 164.962201718762 146.714957631903  
168.365262340217  
SEC16A 796.052115217208 936.957730361063 585.234286698678  
1255.62991601665 1778.73916100529 473.529519031797 498.965895763801  
545.362650746876 777.651238374269 546.611519125021 739.52947559669  
478.180723959397  
SEC16B 114.290611267606 117.773743603829 120.283706459738  
113.043089777907 112.026113831896 122.428943658306 112.166192839859  
114.995889945366 125.193729067011 110.061459744714 132.819726980184  
119.094868654252  
SEC22A 351.292682758926 362.306819797508 316.801725268792  
407.442337662943 277.459328083162 343.571296297462 461.229315272354  
452.077434390612 448.767690095033 487.799854351205 327.062810389635  
415.497783305278  
SEC22B 395.588345893987 412.801213309591 385.238961394234  
364.895113721763 445.661863626419 373.545629693667 474.629173435475  
505.704957182936 520.962651968997 355.213322760505 345.897250519387  
406.458130553679  
SEC22C 289.09614335372 276.653753970476 339.448524400708  
262.913054904154 242.902900881585 241.987100712218 265.791342287571  
252.894371238554 240.410292351169 310.989043012841 201.105520537151  
273.864293250688  
SEC23A 182.346834032145 163.582678113215 205.966111721195  
163.446813963119 146.155809402461 174.66966623557 154.007244208673  
150.19577351885 149.856041300199 195.831574717135 157.723341862468  
154.91429973744  
SEC23B 294.48534582475 283.163770658619 257.941367816557  
296.497100375888 566.813343200268 1039.46136549795 606.38343657878  
794.165408266062 1029.43177809276 644.868034665476 616.188923504376  
684.180060287047  
SEC23IP 274.934292929666 241.799709160815 276.057101476947  
208.983138060317 236.108432603479 282.963958072528 287.889774984754  
235.32095278846 235.867149024041 185.002106079042 326.908959531021  
327.566026396726  
SEC24A 270.462865174106 261.203388718689 229.97640195632  
219.422260093722 230.806950763402 256.964577037118 328.33387481068  
247.746304138866 246.77831953556 286.774606295106 243.861834405092  
231.39684528494  
SEC24B 263.606930507829 221.849661343124 305.499194075747  
224.089220507176 180.881464829981 311.375563161772 279.325065941252  
243.35880641566 226.565823278767 259.511314588868 219.638478100747  
294.535979194434

SEC24C 710.531876484467 684.866405921987 691.632061537999  
933.723483173584 707.048754700047 500.643499051523 598.287431134037  
472.514017604645 686.028214419557 463.802270256246 825.345092964844  
728.743541467167

SEC24D 407.244564912365 308.088967616175 313.248029961291  
258.532432007328 249.80160363144 302.696004448559 259.72035004624  
307.81941988503 465.029298672645 274.343238288436 229.85833221434  
272.238922498583

SEC31A 1400.81554054664 1257.00798908017 1271.46608195833  
1211.94273385872 603.569635276204 717.686676823785 1048.26872286983  
908.704610877319 1211.39534395597 1131.22418479945 1003.36623972843  
817.913210743023

SEC31B 157.649902282769 150.513804134588 150.123784990646  
140.870849757111 136.438788088263 151.921235758457 142.601556980614  
136.841506794489 145.756455015309 140.511988097197 165.491193869938  
145.498372398845

SEC61A1 2055.27692947656 2550.08769415478 1369.89073267996  
2886.92690692502 4327.90939653054 2833.30537635103 2979.27692778783  
2174.62979843528 4198.61471038267 2112.84348677276 2340.90990677253  
2547.53445585552

SEC61A2 134.565199667396 131.652854369619 126.488299049827  
120.812738312059 159.379420001197 256.326661031361 136.440671408022  
138.688881393504 140.578378782903 137.120973494952 148.603077434646  
162.06940121135

SEC61B 2116.39371296122 2258.30916111153 1610.38263368771  
1813.79641422879 3029.07443443457 2741.71904421456 2192.17997650999  
2530.00219297102 3354.38704439295 3000.46298223166 3029.07443443457  
1989.38201206555

SEC61G 2596.43650409044 2515.7035557541 2753.89649259242  
2206.7447886564 6737.97308530049 3342.8737952486 4238.41681589316  
4847.77258830631 5589.21471380445 5955.10816224456 2932.64120183406  
7054.92270618408

SEC62 377.148528768679 373.925939492544 364.766154056243 378.088675670786  
176.516540713888 394.186683910377 269.006221210929 349.623729591612  
292.366934378643 203.04864785056 205.244843885276 264.526189799049

SEC63 237.492603094091 212.854068610681 296.721891842563 204.415267938007  
190.787437782456 185.544411160039 214.019190624184 211.34069504665  
198.925776755081 190.975263192006 222.118666699301 215.81995779019

SECISBP2 570.533103778482 478.909308632726 618.661249163439  
462.437471715008 306.193157874683 299.935166870211 424.37437028833  
314.610979086485 564.056592672374 356.770158430601 641.774812292709  
479.053300726301

SECISBP2L 327.251620296271 354.981966077502 380.310795921752  
345.209128382239 204.851374931284 287.503594820801 377.593087606046  
261.592512762969 379.983165400941 375.038561820137 279.26508919212  
339.069385816411

SECTM1 148.482530949134 155.615655460277 164.58158284856  
153.585849286113 156.423687034312 153.34166495223 154.783699020901  
159.650116062266 162.416774743901 254.315783394932 158.109836032481  
161.090443294391

SEH1L 189.770558810153 181.294497402507 212.147155923729 161.673818303367  
167.568776552757 326.640168906375 206.521761031181 276.089623957012  
229.689010178622 291.221427744817 220.661922683143 275.841929188802

|          |                  |                  |                  |                  |
|----------|------------------|------------------|------------------|------------------|
| SEL1L    | 156.65842876856  | 151.392024228289 | 137.853137973756 | 140.768926302035 |
|          | 116.437403962939 | 134.954988522413 | 134.607501073433 | 154.360558958914 |
|          | 123.453048609213 | 128.207440197765 | 162.914301705151 | 153.432933930805 |
| SEL1L2   | 196.880135762817 | 170.243136294537 | 135.448170440824 |                  |
|          | 138.30326146769  | 148.916981164664 | 135.830453690107 | 162.453586139402 |
|          | 137.033870931133 | 147.135640862542 | 127.911258242431 | 142.017169259522 |
|          | 134.134810805413 |                  |                  |                  |
| SEL1L3   | 341.501397478593 | 412.736636437651 | 383.259887828605 |                  |
|          | 535.861738240441 | 422.840163973614 | 385.238961394234 | 931.598413783099 |
|          | 884.747476952289 | 1031.38207659547 | 537.828979447378 | 1123.93087912174 |
|          | 620.371912523332 |                  |                  |                  |
| SELE     | 147.213616261735 | 152.137669424501 | 143.618454531431 | 151.500282404318 |
|          | 148.574661934068 | 136.071856104688 | 132.681475162386 | 145.070927449969 |
|          | 152.191393042132 | 138.883710791382 | 140.593510265137 | 145.233055765001 |
| SELENBP1 | 439.852826905352 | 595.882696498804 | 499.436680354749 |                  |
|          | 559.236012019639 | 458.218913259336 | 220.533113603343 | 164.191906588579 |
|          | 390.809169896009 | 363.150472154973 | 167.73288535728  | 175.902751522861 |
|          | 171.528350399075 |                  |                  |                  |
| SELI     | 175.28261759639  | 175.437651670246 | 165.781667492391 | 197.815264620906 |
|          | 220.9384439772   | 392.6758818959   | 283.701987275608 | 452.843213944986 |
|          | 255.56301534833  | 304.590636814607 | 256.764450748941 | 352.50679573356  |
| SELK     | 407.875393458322 | 321.31562287169  | 437.248311551717 | 342.403428822464 |
|          | 448.767690095033 | 399.248044997427 | 421.384700184923 | 369.974231530826 |
|          | 421.056268094661 | 374.106258053201 | 327.635520861099 | 352.665030560239 |
| SELL     | 113.672605838627 | 111.922007318017 | 107.67395123577  | 110.662552491706 |
|          | 124.635917999969 | 129.369968549738 | 128.101371225192 | 178.955938825556 |
|          | 215.967319486874 | 143.063345350253 | 124.132215738502 | 112.578934972566 |
| SELM     | 2775.84742592713 | 2677.17579532816 | 2819.92361643968 | 3277.24948092771 |
|          | 751.568940762011 | 404.21236980164  | 816.580880338838 | 542.009873308344 |
|          | 416.638529499878 | 360.053590374552 | 209.070372320593 | 197.298982267459 |
| SELO     | 262.416137698884 | 244.73233791067  | 240.994507285383 | 295.571900619972 |
|          | 715.638378711433 | 303.051124835907 | 256.820546409632 | 264.8472508692   |
|          | 256.538195034956 | 235.933451977398 | 325.642275889649 | 276.714748212739 |
| SELP     | 163.805257266374 | 180.867208892996 | 133.966277922005 | 148.980330875743 |
|          | 116.670491972948 | 129.116354997747 | 133.921012946195 | 134.406692724353 |
|          | 167.164675439456 | 120.094156375538 | 159.13662975347  | 122.031894952046 |
| SELPLG   | 154.821960325589 | 156.678686363755 | 152.877058628512 |                  |
|          | 135.343380336913 | 144.092864444802 | 140.245786278057 | 145.797047170492 |
|          | 142.942021904533 | 154.426605816862 | 159.606633817645 | 141.319594283071 |
|          | 157.213868854329 |                  |                  |                  |
| SELS     | 689.821785472506 | 571.950858678221 | 594.180861801958 | 458.151323130855 |
|          | 716.229989890801 | 1052.553421812   | 980.120729515821 | 921.140932799223 |
|          | 1416.93831202323 | 948.734577648136 | 1136.14069801696 | 1146.3535752748  |
| SELT     | 316.457274749526 | 294.997671630798 | 272.277433294605 | 259.184713471619 |
|          | 266.162244070031 | 365.140886302762 | 377.538276846051 | 290.326832430372 |
|          | 435.095843349921 | 259.094411953361 | 339.753059801136 | 324.067396271281 |
| SELV     | 156.494323415504 | 148.614214326995 | 169.158049136321 | 147.653573379877 |
|          | 155.488346781292 | 151.456702092528 | 148.627264102939 | 129.065491477375 |
|          | 159.746802905903 | 151.440732942734 | 120.157438564977 | 142.68640844948  |
| SEMA3A   | 429.595453454621 | 366.317263094585 | 646.933504790891 |                  |
|          | 459.771019162573 | 137.360220389719 | 167.273378118452 | 157.431972439046 |
|          | 180.719868519867 | 168.674809329231 | 187.673748059596 | 145.513333676569 |
|          | 168.418529261977 |                  |                  |                  |

SEMA3B 283.499120551905 210.692705153337 198.722993687455  
210.061754644824 133.31378749951 125.052770277549 162.560758971445  
124.213104788426 140.423711213355 128.217078449064 168.790464803746  
117.449306773025

SEMA3C 754.97177863997 669.330078861673 713.525134497596  
555.959424692051 910.541650889451 713.832153334389 706.628675634893  
651.43207839949 373.545629693667 401.840794789616 859.113541787323  
581.828502821435

SEMA3D 161.237544868191 139.22543724535 147.369767631957  
160.735428753783 141.927204640355 121.519309043513 122.238996815745  
143.385915173392 122.399241018147 131.761564745495 141.719556176029  
129.647514123731

SEMA3E 2789.67986601883 2730.50913686613 2895.71836177599  
3033.50962589321 391.644649726254 2127.22258112242 952.357976050712  
1414.95226752155 1208.9240215109 916.026216386031 1221.58522138654  
1081.47077865393

SEMA3F 203.456296907031 241.383657414248 183.493455947795  
190.889832855403 2176.59445919725 642.484527246259 779.623566217277  
310.142754559096 695.086203058575 336.338518973032 451.621888586656  
690.010326122574

SEMA3G 148.219406063533 179.037397826592 126.87100632595  
163.621658579697 117.910259090745 123.574319348191 110.256771079797  
138.706520278166 133.122174596886 119.119693776276 142.776295389006  
109.113476990309

SEMA4A 201.059635671301 194.072260528037 203.475080163804  
163.262893278578 820.652972219658 309.798246248863 664.025683218037  
219.044271073282 370.227329649269 329.406649846151 306.011283364888  
598.647226284738

SEMA4B 262.79667156266 363.445110627483 279.232290927348  
375.316610221279 885.927972780392 507.236601481067 888.04996477314  
255.156682699288 348.711663415777 998.157643452741 902.089561157715  
1201.82026045778

SEMA4C 344.45331938267 475.038389500056 501.166869173253  
633.104379362137 290.420307322101 276.476790719416 271.713695056313  
185.727947276958 182.897563195019 198.257497903131 237.521746704115  
282.190861594303

SEMA4D 330.193132765826 361.082957133644 145.915129713165  
147.285764611006 674.338740875512 254.101184686036 399.664121956178  
472.279492678374 613.846166856328 435.901794650816 424.665056900526  
381.014521577291

SEMA4F 207.960802948119 178.083311435916 170.446156541317  
214.331491507489 253.218123990428 218.839681873515 283.46492196692  
216.403542903805 161.657344146676 229.157389498775 178.512206531256  
186.268881719287

SEMA4G 144.179880084235 149.05280915667 142.446514275674  
147.439303942026 187.63609695026 146.65668813596 149.464962540085  
151.015243921984 182.384190694142 133.617501101389 167.408314067262  
138.43190460314

SEMA5A 216.381643581705 246.492735271771 190.825209733575  
208.095384605737 457.130051460676 573.509780150018 456.126096817454  
717.419388886784 330.908743070095 153.326420485822 404.073802241516  
233.192751618176

SEMA5B 152.689610196981 167.456481678813 145.136075215082  
162.940190224943 170.179304745674 154.379788206936 158.002906093899

|        |                  |                  |                  |                  |
|--------|------------------|------------------|------------------|------------------|
|        | 147.970243979273 | 154.057771254252 | 153.721460633166 | 141.552315273863 |
|        | 142.446514275674 |                  |                  |                  |
| SEMA6A | 337.22646304739  | 444.584594376357 | 301.304268871606 |                  |
|        | 352.22815095475  | 265.366632264085 | 1171.62361359992 | 983.777608766079 |
|        | 901.197085099854 | 574.035124314622 | 438.146919555296 | 903.824331691969 |
|        | 2760.57475805426 |                  |                  |                  |
| SEMA6B | 153.251468534012 | 158.617209794418 | 160.176567985923 |                  |
|        | 166.024236370752 | 154.990319019521 | 151.216992571364 | 153.519207482423 |
|        | 160.91894600916  | 151.174536186463 | 162.756185479013 | 154.051705030348 |
|        | 146.481298877242 |                  |                  |                  |
| SEMA6C | 167.139257044999 | 176.86489466512  | 134.877046981678 |                  |
|        | 202.545147073902 | 148.582022536314 | 116.142650095476 | 119.854401979951 |
|        | 159.065612005442 | 143.720044122451 | 128.81022558263  | 137.466291815166 |
|        | 118.9952230535   |                  |                  |                  |
| SEMA6D | 137.913497715424 | 142.988500173397 | 143.447768653042 |                  |
|        | 145.022242996923 | 134.770852936106 | 138.038446102921 | 147.970243979273 |
|        | 142.95001632948  | 130.961207132451 | 144.660095230819 | 133.978783899572 |
|        | 150.613624696604 |                  |                  |                  |
| SEMA7A | 157.353493980339 | 153.149523560021 | 151.718492863169 |                  |
|        | 139.061072394426 | 195.816317534388 | 146.242897296397 | 160.136209944279 |
|        | 137.570343435498 | 150.754492902512 | 165.898288304503 | 132.839431368337 |
|        | 157.944355564411 |                  |                  |                  |
| SEMG1  | 1201.82026045778 | 345.977609212137 | 204.82244206816  | 173.142436025281 |
|        | 133.930997975106 | 136.70715656782  | 143.234195669431 | 133.602002328114 |
|        | 129.221482161409 | 128.389494971858 | 131.123149002831 | 130.641217515008 |
| SEMG2  | 315.430399077266 | 164.253219197128 | 193.16411905957  | 168.05687638693  |
|        | 148.654099017805 | 139.611455791957 | 136.13751015238  | 148.201649039381 |
|        | 150.376234759097 | 171.035391211596 | 141.777089987975 | 139.054140295282 |
| SENP1  | 146.823157886228 | 147.225911875196 | 141.616920429839 | 120.906553066296 |
|        | 129.640303191006 | 126.643229085068 | 136.823008283157 | 156.497059936271 |
|        | 137.014698467096 | 139.356478232855 | 141.353084959289 | 124.982744176925 |
| SENP2  | 338.260976633501 | 286.774606295106 | 400.621427274425 | 321.910803473854 |
|        | 256.291984914927 | 317.659548748735 | 267.190228116903 | 239.73396414153  |
|        | 288.728608411903 | 244.668813440638 | 276.476790719416 | 302.768870633398 |
| SENP3  | 135.06498850776  | 136.454911192129 | 120.342513393659 | 141.425393615228 |
|        | 148.206529935876 | 133.274292647041 | 125.044092929562 | 132.774127230452 |
|        | 133.54741488531  | 134.628807679002 | 159.466972602203 | 133.642815510945 |
| SENP5  | 271.287767448621 | 243.402781509365 | 289.21739941764  | 231.0814970959   |
|        | 232.046814892685 | 280.170464338141 | 236.707875629511 | 232.465880700217 |
|        | 243.468673768141 | 228.588693548447 | 236.592839463278 | 267.939624375137 |
| SENP6  | 340.903961204211 | 274.595218795127 | 381.014521577291 | 245.640193659159 |
|        | 200.094610104813 | 341.761516859319 | 301.591430919567 | 250.085444708918 |
|        | 266.252875242286 | 261.988345506548 | 274.564508105177 | 306.486275677467 |
| SENP7  | 374.56251861444  | 344.575967665039 | 310.758803815671 | 306.011283364888 |
|        | 185.100455193182 | 221.424451092316 | 260.224777636733 | 207.076364103755 |
|        | 211.369442150136 | 206.321272734099 | 358.479218923158 | 292.839392578318 |
| SENP8  | 142.505050582588 | 142.968008233583 | 139.199446543251 | 146.460464282676 |
|        | 161.34427428845  | 134.991379445799 | 149.453103369806 | 141.931274901572 |
|        | 139.365595511181 | 147.205511952997 | 139.760425990939 | 148.962593686337 |
| SEP15  | 1007.41624313399 | 909.727616721285 | 953.549801897112 | 673.176084400831 |
|        | 1319.3522488218  | 2395.75453574049 | 2285.86163259073 | 2580.98143004019 |
|        | 2441.05534211996 | 1440.14449872047 | 2244.6916226146  | 2567.4299860517  |
| SEPHS1 | 492.05680879106  | 532.786041960586 | 494.875547886209 |                  |
|        | 527.930077857945 | 573.244735292944 | 1165.95924778817 | 367.327273578513 |

|         |                  |                  |                  |                  |
|---------|------------------|------------------|------------------|------------------|
|         | 451.887564294551 | 403.907009699589 | 291.056913909578 | 467.347509383673 |
|         | 503.466550870577 |                  |                  |                  |
| SEPHS2  | 353.078842299761 | 307.264586007015 | 313.351441953859 |                  |
|         | 358.415933397099 | 710.76653239801  | 696.003998372271 | 548.686094748117 |
|         | 662.373189001788 | 460.24741151155  | 476.168679880357 | 589.409235971915 |
|         | 430.833137328233 |                  |                  |                  |
| SEPN1   | 470.578335285993 | 651.43207839949  | 347.487059316081 | 948.150767619765 |
|         | 1155.4487861163  | 519.112018353676 | 319.768792196774 | 378.509324619452 |
|         | 325.12056698785  | 257.989863290786 | 600.757699463777 | 547.817028243811 |
| SEPP1   | 609.504365141529 | 468.93543246394  | 539.853394831917 | 353.98839683842  |
|         | 175.510160114891 | 500.848273432862 | 281.881563164961 | 665.341859712345 |
|         | 497.629319581786 | 417.442660073269 | 358.217145707718 | 343.200277800027 |
| SEPSECS | 137.398748156909 | 157.425924587516 | 144.924212639731 |                  |
|         | 146.033591220134 | 151.992112109698 | 145.483667452136 | 150.822586904738 |
|         | 155.846106540378 | 170.202597821861 | 143.399877326927 | 154.951136632863 |
|         | 139.760425990939 |                  |                  |                  |
| SEPT1   | 147.78095608696  | 151.198928680018 | 152.104170622003 | 148.448349327493 |
|         | 160.419358656559 | 155.007516124803 | 163.390929975591 | 154.281674854552 |
|         | 172.245089970803 | 150.259400712685 | 148.490236128772 | 140.347131743987 |
| SEPT10  | 159.199045715212 | 159.977528879208 | 187.729071402782 |                  |
|         | 146.915247627846 | 151.546908501054 | 175.111460651956 | 177.780479906048 |
|         | 151.159145294127 | 148.81406900745  | 210.822216545773 | 184.085616342099 |
|         | 186.482547532546 |                  |                  |                  |
| SEPT11  | 838.93563319979  | 671.387334588652 | 473.151324002277 |                  |
|         | 768.334658920971 | 354.783364481955 | 614.239716118509 | 561.251860964966 |
|         | 751.896334334052 | 422.02217814979  | 571.950858678221 | 593.462634352052 |
|         | 533.140740560189 |                  |                  |                  |
| SEPT12  | 173.132747018514 | 159.207567680134 | 173.586160103539 |                  |
|         | 167.206513789165 | 159.012011848781 | 171.644710031098 | 155.582036890436 |
|         | 147.379741260871 | 145.043494048779 | 144.460541430705 | 160.32812671237  |
|         | 164.630705813584 |                  |                  |                  |
| SEPT13  | 175.551853899221 | 188.0434100445   | 182.095387488796 |                  |
|         | 144.727773039491 | 148.670562837021 | 156.66832364923  | 149.361498483705 |
|         | 166.355086055404 | 169.306573880401 | 147.011838288594 | 162.863781294205 |
|         | 181.530767521222 |                  |                  |                  |
| SEPT14  | 138.173547382901 | 133.604705630582 | 138.616719975373 |                  |
|         | 158.726115143818 | 145.000523037022 | 130.054105892394 | 133.927844489731 |
|         | 125.079330440615 | 126.958366599622 | 151.196713920345 | 103.99234480919  |
|         | 149.402679897813 |                  |                  |                  |
| SEPT2   | 2867.63319136936 | 2491.33490046283 | 2822.48671794913 | 2618.64973582507 |
|         | 956.76879975749  | 1701.43479420427 | 2000.47497636965 | 1722.26954281876 |
|         | 1973.20689165831 | 1592.29734618345 | 2099.85702995194 | 2500.07677977147 |
| SEPT3   | 138.548983773386 | 146.524138043215 | 134.678445085174 | 127.749992538985 |
|         | 166.007913607742 | 233.464856303761 | 163.159571059471 | 145.00699763203  |
|         | 167.993851183401 | 154.187420367647 | 147.515088047628 | 190.889832855403 |
| SEPT4   | 182.310140388705 | 192.789886894821 | 202.421990203844 | 201.221839281282 |
|         | 143.860092956392 | 149.320667417893 | 143.157807632147 | 149.8919086368   |
|         | 171.62327142765  | 166.330001480033 | 157.232314992094 | 146.910471989835 |
| SEPT5   | 282.335582153109 | 297.921617748468 | 258.727309442475 | 311.10841853984  |
|         | 345.649572073924 | 298.827660296715 | 148.67584969749  | 175.186435016433 |
|         | 232.778488697337 | 235.742017851879 | 187.812436252228 | 271.823243396395 |
| SEPT6   | 229.97640195632  | 217.89028736436  | 277.256341592701 | 280.453895029319 |
|         | 147.161720770972 | 165.118167086792 | 144.310362660942 | 153.903993884123 |
|         | 178.209994522672 | 153.941193682697 | 140.630844296177 | 147.289061374598 |

SEPT7 697.581541438891 578.947889414387 557.026028810367 539.125423322738  
 310.989043012841 262.861105654051 328.919401925375 329.263397240111  
 305.398934391579 396.212732639272 414.267332328081 472.669956708398  
 SEPT8 155.249688219254 158.188039933865 160.43939815269 160.648791273795  
 150.629932241703 169.417764098848 174.991941844263 157.301617257941  
 163.362182585182 151.808767243647 141.876237297525 169.933706225406  
 SEPT9 6652.21610967461 8096.28093399619 5506.81944079182 10836.7380675792  
 8445.36695108418 4743.19967685595 6203.08085790474 5008.4888270731  
 5859.56559124843 4047.99200599472 5489.19362780613 8881.86480594052  
 SEPW1 2763.86550710042 3012.49794349837 2390.41825815872 4124.03779111916  
 1132.27988339924 2274.75133434566 1632.07671492041 1276.14915305515  
 1232.66885974069 1163.13845502757 2274.75133434566 1552.69879081022  
 SEPX1 1794.82283439196 2410.32095582515 1896.69856822105 4118.58682247781  
 1790.53556140959 1221.58522138654 1075.3328563531 1006.24899131914  
 2530.00219297102 1199.35864276583 970.166036472486 848.154015576436  
 SERAC1 174.807363753172 164.15288821931 170.439725847568  
 176.802886129341 169.826068012389 159.307394610466 168.21856603538  
 168.628947766217 146.830752309354 167.568776552757 173.751615672365  
 164.773489952844  
 SERBP1 971.170460915918 906.359365544713 832.622843175217  
 828.683748921915 456.990425618007 1374.92806285803 769.009371389327  
 1112.4055726239 672.13164205724 562.387692458382 852.649997188692  
 736.332743195416  
 SERF1A 153.22516060649 159.491388998564 175.805472275887  
 145.029298288869 162.825380100343 165.723126764006 177.401771322485  
 150.374573177474 159.735182155088 162.173506492562 165.283700641161  
 170.12010526854  
 SERF1B 237.88097138936 212.78038645414 306.43742010208  
 216.9491329483 265.992741398183 285.659010982301 313.077481033093  
 227.267783818298 287.967349876429 352.418229893699 359.935451429371  
 511.374117402707  
 SERF2 2527.99279063127 2255.92551080483 2316.49886419499 2132.90676194993  
 2376.52728883131 1804.63762008613 3219.27851139047 1880.35608492553  
 2760.57475805426 2325.02143920169 2273.12164779441 2718.440149645  
 SERGEF 773.803350315426 694.644744547412 879.301932542031  
 899.336817124312 262.913054904154 265.972387419683 345.565843875296  
 311.806908624308 283.645434184168 462.144334719146 431.182384100794  
 239.845747958475  
 SERHL 155.790759250672 161.837272617767 158.545435407585 156.433603187722  
 153.178934750919 143.492758492895 147.055697988856 138.480633738745  
 144.63774603725 139.14544832776 135.536810684197 144.329979284786  
 SERHL2 130.255689301211 150.308048500142 145.195065312551  
 130.128585442593 131.683942368268 138.060245284993 129.145457341484  
 128.259909378964 127.56862018147 127.017795831706 123.725998173975  
 143.303309656177  
 SERINC1 976.050097371579 874.816697884109 989.77058497525  
 661.390308090982 286.541028896473 396.212732639272 510.226374558703  
 427.637083424453 405.032674307193 597.189355986293 701.208391798006  
 518.478990211753  
 SERINC2 173.919504730673 260.157440518033 225.387674139093  
 151.159145294127 2470.86113150126 1190.62010668045 2269.44503773126  
 907.306121257236 593.090436323333 934.546444634669 308.803322140241  
 2698.5455305009



SERINC3 466.257158794525 434.390613381746 483.312894744803  
378.24336892367 414.538237455116 490.849163737598 733.195136251155  
411.878556907186 478.606567465979 546.029974898225 380.562212796792  
441.958777965408

SERINC4 148.43357593249 146.635140441079 139.783725419023  
147.889486635135 150.059862107155 145.095023408224 148.742216703684  
130.714375454354 152.362546746522 149.048057509964 146.190750749851  
145.043494048779

SERINC5 128.303046695142 130.906507319074 135.254996386778  
116.230993734675 143.807102980397 146.281429685059 131.786437478446  
143.705475208192 150.000851192531 126.814332513301 140.710840725439  
134.768694020981

SERP1 370.877260088621 332.798130757632 390.372738176917 294.368406238222  
423.826189747546 658.202765061937 536.46884541183 738.892511276134  
1009.42265467472 481.238450505207 670.347447480331 499.436680354749

SERP2 213.028568789661 230.672056810885 212.171281020103 225.583966894864  
197.049616858296 215.115324454215 144.032779435658 141.97908047949  
204.299375966441 119.297561749232 129.910866236901 356.530530468568

SERPINA1 133.862203806529 141.028377381019 132.16600019449  
138.259512736404 209.60319248212 142.124876403709 146.351622020606  
175.638328370133 222.156471143857 181.036375971015 158.380964047483  
142.419777428399

SERPINA10 130.160236228857 151.364528898537 131.611842804029  
142.974541687789 136.981043383326 119.849895979393 142.534195262988  
132.989846726946 141.294094833197 152.805525883571 145.496033735748  
161.788118050564

SERPINA11 155.298546821687 144.233097828078 147.52403424052  
154.518641757391 141.336866031027 155.283003653612 148.808928892047  
146.070871543153 151.09670688533 149.408530395745 147.942495862714  
147.471494294543

SERPINA12 115.033355516602 116.87586240208 111.848472437543  
123.042372128864 120.035437167539 119.349376960211 122.828060462887  
116.074423050416 111.43827410589 109.176852761745 115.605206174867  
113.356070669308

SERPINA13 131.119810851017 129.756642179083 128.209771391087  
123.609527892227 115.491262364277 120.020781939389 120.470801825675  
115.678486138934 122.197625748146 124.460064642088 150.741291526753  
119.480037559953

SERPINA2 141.976051648478 137.324247703318 138.285325970867  
141.791001213681 138.29167712246 152.152106138031 133.18744841514  
140.702685210277 133.742490937191 149.164469334038 142.397433929092  
140.238423894192

SERPINA3 2118.73410871718 1279.9555644913 1170.88763035931  
504.502047826003 198.135240691225 210.117033165026 167.057202756618  
215.532132200821 333.91440669951 245.269004485826 127.034985265748  
207.960802948119

SERPINA4 125.439033142431 127.727311123825 119.810421687953  
122.20752192519 115.37736249419 129.583916648999 111.794102015354  
117.900892627473 119.693318959661 113.388450168062 114.830474086443  
118.201092260839

SERPINA5 161.019770036957 152.470980074365 141.178668371671  
143.530190096012 144.358535632993 140.85139374336 154.368499839507  
145.27890423835 142.930903395131 145.928643520352 127.763186950161  
147.570734399004

SERPINA6 110.014935095391 110.093565974873 109.176852761745  
107.013012418356 106.522641798274 101.713609383766 109.242622591321  
105.521320791331 111.73388372572 110.202982683256 123.065355919378  
114.364953312191

SERPINA7 130.849201993866 138.759744193844 130.346150829949  
127.844624093148 133.810472192646 132.161764435769 130.410584413031  
134.105941085621 137.556552701816 131.623527073985 145.658251059524  
126.473768158566

SERPINA9 121.687187898743 127.620377473963 126.539877052899  
127.047679628867 122.389557272277 122.644105247178 120.682485578097  
135.038195181839 132.317972465689 129.095469955392 110.256771079797  
133.930997975106

SERPINB1 280.453895029319 259.672238210968 349.330629649093  
288.542264120468 322.956882599715 404.445038343721 560.481802403627  
428.462270756201 466.257158794525 3152.64817044581 419.763812610671  
636.970243888917

SERPINB10 110.753661013519 120.481712066062 115.902030217102  
115.305518560239 119.785062256421 123.351112976814 112.394223360492  
108.404733392914 117.662611650515 124.942701123337 140.175724588255  
124.518818352113

SERPINB11 142.135495724286 147.991572632747 165.4474699807  
147.70836747108 142.208987267497 139.237360556305 147.751554743466  
138.735156909846 151.841652724562 162.403942351933 132.70442458261  
147.52403424052

SERPINB12 103.240215392215 107.013012418356 106.285472845323  
108.868679899494 99.5148073333731 108.9291713877 121.997885377703  
109.625579596864 107.498500136859 113.301733735994 109.342230674869  
113.504670764963

SERPINB13 168.45157400976 167.365850007748 141.791001213681  
167.011846920792 154.423801637411 160.159630699959 136.466367853188  
147.416991272497 141.872426752329 2135.04382065446 154.207656926108  
163.600888221193

SERPINB2 144.092864444802 135.111066946207 152.109178223495  
146.720204808211 148.195611015135 143.351341716363 154.201375471487  
140.877230937687 137.129864761402 2363.50330960038 154.737117718424  
143.956726538569

SERPINB3 130.0140921487 134.394503574535 129.495680232567  
126.355699811531 122.714122084817 126.934059693116 125.868080230094  
134.172033051676 135.168792286819 1892.8338612507 143.990328432869  
126.528589411462

SERPINB4 113.557349524174 132.727133259694 106.315801001506  
110.382724813928 112.321396616213 106.126202301438 109.851507510788  
105.348008821162 120.915108114673 471.069295685718 119.087972087745  
118.45291712775

SERPINB5 155.92082882492 279.541294184609 172.370108210895  
133.661553334004 216.033564783918 763.263858769038 415.957832362051  
408.037874667173 248.613373429151 3378.126661761 1699.8374761666  
1931.16906839143

SERPINB6 1712.47877322331 1762.09874961415 1764.53168329081  
2124.12760841901 1044.91923772265 902.394410348792 1158.88528996131  
1051.98943987926 1246.2895253224 1427.27262061653 692.53483413403  
1191.26028342929

SERPINB7 172.438141471784 137.819642907456 144.964084792568  
165.926301648161 157.130045415943 163.234966251618 139.519321690754

154.681604647652 148.082026641671 198.620777452192 140.928627507036  
146.448568700393  
SERPINB8 139.418394104487 152.426527124644 136.886677060418  
140.073208365817 175.161742647546 193.544035570799 182.478971050701  
176.883702717029 173.161152247499 408.263886786123 200.001438979007  
188.836327151669  
SERPINB9 140.615078497305 135.315732654507 148.408616955694  
150.592269931732 149.427217345037 137.103879676652 151.196713920345  
137.864637728155 134.901659808633 146.768631086088 129.386300987308  
149.944351491364  
SERPINC1 120.043811428091 130.559515534303 117.667611937195  
108.830525786872 111.515588041012 118.230408871812 125.683334853039  
115.118170902045 115.572088632106 125.606269267903 125.126100642395  
117.386273592501  
SERPIND1 147.299872426498 141.420747583126 147.790720062226  
138.397152876585 147.716353308549 128.851785111932 134.239416179248  
146.110545700163 148.388093331273 136.238646974312 143.823368276815  
136.764881711137  
SERPINE1 230.424145472916 224.062024091915 170.835513021958  
156.445294524594 231.517412929077 425.471195039676 467.347509383673  
263.800363357443 223.747350951099 741.875751347917 310.075815009404  
818.445501500731  
SERPINE2 4255.59773503364 4579.62296570302 1515.38811502277  
5965.21815409254 737.193295872614 268.52833723726 298.776176246196  
456.656123023446 1809.58702081877 1303.94157493616 412.582051585078  
222.709720471134  
SERPINE3 143.689257983705 149.023962828426 136.899405404096  
142.664793323255 139.919332373983 150.552186000149 146.047948193303  
127.401551376191 127.740057874561 147.454902803231 135.682971958096  
129.977863589097  
SERPINF1 1080.95725397659 817.529344685717 601.640387246951  
710.76653239801 166.9499656083 216.929969034881 144.708780756278  
276.351810999317 294.746622369436 306.550948766362 224.724262742427  
143.807102980397  
SERPINF2 148.160350542849 151.295855278218 137.381470768186  
165.863118584978 157.367331080003 125.522498880785 126.241307445165  
123.577138762427 128.292627005614 123.510413258172 136.113421708277  
111.837468699281  
SERPING1 1197.58205444449 949.789710063337 734.97763567765  
742.128229715198 197.405472374722 187.48055574295 163.672213020803  
211.483693299981 337.87475687838 252.761035334279 189.472541628897  
184.294172429054  
SERPINH1 1112.4055726239 1117.77397620221 560.180656219785  
1510.77099418802 1849.21906428944 674.571475335107 780.961416212309  
533.279122416818 681.810927901806 1085.38819961412 1053.09915077366  
595.120528902501  
SERPINI1 163.661196423902 168.150270765792 156.304678960663  
154.343424387068 152.887471821971 156.402578892869 137.674025476238  
145.985223908092 159.218886890035 183.693300680495 164.601022396674  
141.837427928962  
SERPINI2 122.125746529725 109.274221164316 116.053859681399  
121.653754668804 114.977135060317 108.604763499678 117.773743603829  
106.102093734748 110.501341211051 103.202873534814 109.793568518462  
113.799997627317

SERTAD1 845.369108604819 687.494132125365 490.153210371094  
422.520372346993 1580.27059464289 924.312051919404 993.34112647221  
735.8141982568 833.198511430615 722.725186727796 747.804958601763  
494.175437345451  
SERTAD2 1058.55850972326 1039.92160906839 896.625415670455  
950.144166422001 866.765054377214 1641.70484603137 1183.82018168635  
1782.2498613913 1165.05055932899 1520.59210521859 1052.553421812  
944.92617668298  
SERTAD3 224.062024091915 282.442528230519 229.373686092654  
333.970844203158 406.133430120039 277.596303701405 322.614169214764  
206.502189514795 220.60173086462 181.991820141929 209.54573978355  
202.797135825668  
SERTAD4 269.853718252574 296.915883082902 241.418016203544  
305.325519265387 140.385509382606 398.354212009426 185.165469121763  
118.134614195753 140.699287635171 156.731291756066 164.39910609636  
168.156002330441  
SESN1 500.643499051523 584.433155497378 447.995213144892 500.343476678562  
267.028096234702 342.998459706966 527.930077857945 515.158921349383  
396.40172043456 379.615659443164 436.891409783298 346.996310517446  
SESN2 141.695537669891 161.655336107432 141.698329968978 150.956247643013  
209.596792486876 166.214167530158 209.304654633004 162.216377983292  
158.167384416968 159.765585531442 167.040031488406 147.931880092099  
SESN3 134.432461986523 144.81320329947 137.495288670441 135.670409501435  
233.464856303761 139.399195840117 165.827405735044 137.393871430276  
140.574129695953 168.982086590306 153.538565948453 156.06439656393  
SESTD1 636.56692204969 467.90388853336 1077.33874251157  
437.770841893227 237.266455875982 812.75075757351 604.047164856689  
441.331937921872 282.742833166843 285.214585324341 507.236601481067  
443.125195744202  
SET 2151.9395095819 2107.99357083999 2537.90501983425 1790.53556140959  
2118.73410871718 2753.89649259242 1442.94175124818 2508.50428529255  
3143.77161008321 2572.01353724341 2502.72913594103 1827.03179366146  
SETBP1 1318.3633082502 1383.68977267418 987.78377957731  
1392.89422203207 333.91440669951 300.602422224047 223.373877165342  
312.705458415152 234.28146549561 156.068308349225 201.016287924499  
185.071775840607  
SETD1A 327.89660021611 457.411248351795 321.568127272161  
563.907454700224 495.56459361431 344.021696764791 342.403428822464  
336.845908630493 330.553659265085 323.462252156562 325.12056698785  
267.422232051733  
SETD1B 236.052008824688 208.713555471888 207.338645756456  
286.376638135463 242.695286989672 170.446156541317 185.856755885891  
175.350734537491 211.595513743111 163.593106951255 188.878770168595  
207.400490077106  
SETD2 1009.42265467472 875.7694907383 1018.80178630497 1095.04571025381  
776.411045078049 832.622843175217 799.759250503507 674.338740875512  
962.559482864549 757.066786599446 614.239716118509 943.23069404564  
SETD3 1372.63540073207 1307.96033038529 1499.07462479938 1901.97972168836  
482.048928546145 339.753059801136 542.009873308344 504.141861790903  
497.759125486158 607.499206410372 482.677635089583 544.222458349696  
SETD4 143.40955339735 152.323927317575 160.374491283254 146.392657608076  
157.997750997487 197.543089645432 159.349719495214 162.683665945044  
166.360005474414 178.647726085678 157.915292037378 176.641899861006

SETD5 150.794680375075 166.611809859059 152.650867743471 184.62149494522  
 177.491294133515 162.904897605929 168.37850726499 169.107948050094  
 167.719651771357 145.675032688915 172.46311371589 164.534790315992  
 SETD6 245.01029221002 228.086256222312 291.167223094542 230.620456579897  
 222.526610842047 241.557810100265 192.059255232313 282.045333787115  
 236.548439331855 269.853718252574 260.129513331703 258.25658838015  
 SETD7 117.555999801887 110.304102941202 118.955314417914 133.41548225025  
 122.136861827049 110.510191137073 113.326628149066 107.697601478064  
 118.289405191861 119.730174479044 115.649568330705 111.010889276873  
 SETD8 355.443758121675 336.490076158135 328.730722366546 437.931339781992  
 443.444024128516 296.24781576525 324.671490117952 290.184801898828  
 523.216537391852 335.858047332641 317.719381113816 333.131139447511  
 SETDB1 392.6758818959 457.548150688248 401.750302347978  
 516.755267232127 391.039114500903 352.22815095475 405.975221091252  
 429.922530506572 424.495400604335 298.256131536504 390.809169896009  
 484.764806127211  
 SETDB2 592.387650564803 644.11603826131 607.979208454176  
 743.023225859813 260.045018348182 299.754985162237 173.306283668215  
 286.230656780335 363.445110627483 333.745543022749 482.226889092547  
 331.464977124667  
 SETMAR 557.702374840532 593.462634352052 838.267069860172  
 580.645924062301 428.09583118349 377.800067476868 483.845891531326  
 785.599211190431 712.94845413251 295.278972023002 403.043257175264  
 599.926717145115  
 SETX 352.418229893699 293.482512212153 375.038561820137 257.775569674531  
 199.490190715307 244.054469051058 173.979001863717 192.353768499582  
 249.339449789861 231.915272112361 222.285940575778 184.029968090084  
 SEZ6 154.847114601403 150.380814008952 178.153527134452 157.231166272318  
 148.707332454527 151.411708598688 154.854538639035 159.678281513591  
 152.57905274438 153.770852731422 136.754116864655 161.466192326759  
 SEZ6L 107.385565665491 103.660742045068 115.755585907264 101.149125916797  
 115.939620871703 116.074423050416 113.636570490048 106.685578858702  
 108.895922800601 107.580425848009 114.078271807864 125.843089077365  
 SEZ6L2 138.53403492914 152.31268334586 137.995313285692  
 144.165277164871 824.746488539942 431.019896339435 410.138738410101  
 240.878804911613 179.624208193114 197.262062021667 191.200215655114  
 200.456087759904  
 SF1 219.288597751645 198.374163029174 199.408907117764 191.987301954927  
 212.643559782754 234.214191437687 191.074428905553 184.365354978005  
 169.496129800444 186.482547532546 222.086635504858 202.278323489515  
 SF3A1 170.313045875402 187.871017629994 172.568852318369 188.695527267631  
 171.022976593689 182.763057221385 176.456539071735 192.059255232313  
 179.203783335674 149.630481387506 174.807363753172 180.923089242255  
 SF3A2 540.190808200264 703.29965727829 711.729857540712 919.626220838414  
 1123.93087912174 644.741046498743 726.731270955732 653.879734066271  
 637.892677173103 589.722914993267 497.110852407681 545.362650746876  
 SF3A3 1717.09434498876 1808.26383618901 2076.51786803222 1929.52146517699  
 913.684449305965 1984.47173096657 1359.63626195826 1873.84654908146  
 1666.80650105101 1402.14708471728 1230.00744483191 1243.96721244424  
 SF3B1 424.578659172414 363.594808277506 496.991561192565 301.546624239855  
 368.548135194271 797.501324589697 487.696347726467 627.335757721489  
 493.071213662125 476.782624160552 704.152296359463 697.581541438891  
 SF3B14 883.140984728615 763.533962249076 1108.61301774472  
 676.293399523316 2801.66917828364 2036.43904731226 1990.94596595493

|        |                  |                  |                  |                  |
|--------|------------------|------------------|------------------|------------------|
|        | 1713.93035637146 | 1278.30505902957 | 1870.52504853779 | 1793.75125318113 |
|        | 1752.50728312967 |                  |                  |                  |
| SF3B2  | 1217.29687282094 | 1225.33666840349 | 1178.08490218853 | 1206.59866455529 |
|        | 1412.56164938199 | 1356.43255022363 | 934.173273294189 | 753.389428590366 |
|        | 843.075879568455 | 1028.80076860235 | 669.124699103132 | 865.435843446989 |
| SF3B3  | 368.134303229682 | 405.322847383739 | 320.097510212422 | 330.944203807675 |
|        | 831.289724465877 | 346.173614351499 | 473.370240289761 | 318.628084728596 |
|        | 546.841563406813 | 346.78158577526  | 439.207122335648 | 396.126485121994 |
| SF3B4  | 1332.82617944131 | 1444.45946291517 | 1474.70984232307 | 1623.92991386706 |
|        | 4318.50925204407 | 1853.20812924694 | 1759.9632914516  | 2760.57475805426 |
|        | 2263.73444150082 | 1571.87128697931 | 2242.73511149559 | 2291.40912229281 |
| SF3B5  | 758.863418917419 | 919.165331064155 | 802.643357549193 | 938.499337889075 |
|        | 1712.47877322331 | 1084.10984365393 | 1357.48791782399 | 919.165331064155 |
|        | 1133.22524345111 | 1283.68791110988 | 733.195136251155 | 1087.69177809384 |
| SF4    | 332.464176231219 | 366.073387075385 | 414.888512708716 | 412.129826478453 |
|        | 571.273512452931 | 431.974037914233 | 382.485769373364 | 386.960778432157 |
|        | 321.049000153127 | 383.583234619781 | 377.661589835101 | 356.921627358141 |
| SFI1   | 141.444958186793 | 151.362686497226 | 133.676112304498 | 140.000880942015 |
|        | 150.639235242268 | 138.889999702313 | 136.162938063831 | 141.145419751161 |
|        | 146.519312568214 | 133.590552542806 | 156.883255634126 | 149.260811184287 |
| SFMBT1 | 165.647471565959 | 168.582192754233 | 153.02549014611  |                  |
|        | 163.773702843544 | 270.021093158885 | 214.355086255855 | 190.471158323247 |
|        | 186.733394375839 | 198.583407008317 | 193.589480577091 | 178.878444404192 |
|        | 205.244843885276 |                  |                  |                  |
| SFMBT2 | 226.712995229189 | 206.027235767232 | 152.79367157305  |                  |
|        | 180.192015483309 | 148.297939240474 | 136.360358731063 | 152.415752253205 |
|        | 187.057683141644 | 160.050872656883 | 167.186780161168 | 160.648791273795 |
|        | 147.85133493803  |                  |                  |                  |
| SFN    | 160.898061905021 | 267.939624375137 | 141.446916444258 | 131.521311288114 |
|        | 1637.66306286151 | 469.107624227456 | 575.722713461982 | 650.263737836685 |
|        | 447.372026268156 | 7433.03226979876 | 420.248838397618 | 520.761305892651 |
| SFPQ   | 362.502631441716 | 296.721891842563 | 270.069634610818 | 283.760131847707 |
|        | 459.854279050269 | 425.13721408756  | 289.434186747703 | 397.2528907311   |
|        | 370.066087375401 | 332.464176231219 | 538.484170364629 | 346.635777358159 |
| SFRP1  | 1219.36024606325 | 720.710754387733 | 453.926991868451 | 388.002365247498 |
|        | 159.570288565855 | 153.59485367224  | 150.971453664961 | 154.38209765671  |
|        | 456.298408568636 | 504.502047826003 | 146.174492025087 | 144.794806650252 |
| SFRP2  | 2363.50330960038 | 1395.63393859192 | 1615.60472592991 | 1254.19980463817 |
|        | 141.006540481119 | 167.46432961654  | 134.97404076644  | 155.669470674985 |
|        | 452.606433325387 | 693.781708146282 | 124.672483602517 | 135.565256045133 |
| SFRP4  | 225.142823691625 | 184.724071110756 | 182.984076352185 | 239.474937674583 |
|        | 142.17773831901  | 145.82344959902  | 148.74881415573  | 142.798248249144 |
|        | 167.416417895159 | 158.414776465951 | 130.172041917023 | 144.446903878863 |
| SFRP5  | 105.450273343324 | 125.739946257697 | 116.814269969508 | 104.248226402465 |
|        | 111.232274546928 | 126.65748100631  | 111.73388372572  | 102.851152421943 |
|        | 108.199628274798 | 113.184495948936 | 108.970432124412 | 116.491342107103 |
| SFRS1  | 2449.76376608893 | 2208.49325118803 | 2444.835635949   | 2021.92898855142 |
|        | 2048.13524244516 | 2653.47752512393 | 2036.43904731226 | 2921.59274577877 |
|        | 3083.98169220838 | 1834.08657010335 | 2691.41389079777 | 3301.98381607571 |
| SFRS10 | 1395.63393859192 | 1275.43768532088 | 1044.00217726486 |                  |
|        | 1197.58205444449 | 1508.24281455057 | 1097.18236659974 | 1284.19937294949 |
|        | 1373.67062432073 | 1388.91423772335 | 1052.553421812   | 1279.9555644913  |
|        | 1062.03157932144 |                  |                  |                  |

SFRS11 458.282682131641 351.337287690674 386.305638633172  
228.616558999054 307.124331101976 484.568420044471 598.449359425056  
563.011988279542 466.777454704543 418.889972660958 622.561634660589  
511.25179427158  
SFRS12 359.776068595698 337.39574303968 317.061815822659  
305.252666831522 279.026742408164 292.429831186609 357.191675549592  
245.426639190893 262.488050186425 295.099840299681 306.716682293251  
353.826834642154  
SFRS12IP1 122.460829835477 130.354641020141 145.507330257603  
140.912921321622 132.983739057264 121.480455781173 148.224587582189  
134.842877075983 144.148833164952 163.290050020756 136.814736808725  
153.044682186978  
SFRS13A 165.181215117323 159.706443636973 187.65716654049  
147.856285290748 185.691922436569 267.747633122387 245.110761598207  
217.307872538386 227.668046559074 209.385358804928 175.262884960324  
226.020769172424  
SFRS13B 117.619337212037 128.056668224393 120.020781939389  
120.744994574029 112.736231367296 122.007909794484 127.342017026873  
117.897556445952 109.52020660772 110.735199684144 127.247764390727  
109.266533255266  
SFRS14 726.346459754217 603.764427348016 809.545702751155  
697.299604049748 568.310800941091 787.615195903993 670.097523566652  
804.800251415824 693.781708146282 543.389747823877 666.570977208535  
743.915675090182  
SFRS15 429.096075419528 406.028724866233 390.897464546943  
498.43420754121 406.736165197168 433.019478861638 411.784922368377  
383.182507425579 488.379057110543 307.264586007015 309.720081933252  
411.878556907186  
SFRS16 223.094496588657 251.959823608766 178.06221214103  
330.590986934704 328.078808625906 178.878444404192 198.004357069446  
184.157941055948 189.758013811338 175.101284960252 250.911817769829  
203.888365494623  
SFRS17A 702.981741565482 593.821622986351 753.007562127186  
623.409211766224 688.247581763352 969.811933814244 1203.47834989609  
1041.58583268313 1074.19589851599 525.920873434688 877.255923473532  
1441.29676998365  
SFRS18 1037.97124386242 668.286400833485 1133.87328758676  
619.045921382959 289.761702484888 388.782774926005 738.579262579782  
464.907454552364 679.822276398569 641.645855499704 761.32108609503  
1084.10984365393  
SFRS2 2084.44431604433 1769.6386910047 2048.13524244516 1459.31031099055  
2131.68478964427 4373.91897463938 3130.30693451802 4397.32311216672  
4238.41681589316 3015.70954394585 2590.80821234237 5240.40795364202  
SFRS2B 402.299165610893 407.442337662943 510.659785046811  
334.443733461841 541.642309122976 417.103816140912 605.795439342384  
660.096727566678 424.285848583977 847.863177169335 841.285351463894  
654.108318810728  
SFRS2IP 497.629319581786 521.215655189324 511.113083958771  
472.961857076681 348.067061666237 692.095005197252 566.543765584009  
805.875557314697 556.31484498921 594.713185954954 632.031410234577  
640.568342662067  
SFRS3 318.06081614151 294.115163083721 331.999693230194 235.019573994855  
262.452869676209 385.135014083686 332.543652462234 412.202049714695  
266.563990988678 296.75326294587 313.099028594073 342.998459706966

|         |                  |                  |                  |                  |
|---------|------------------|------------------|------------------|------------------|
| SFRS4   | 2677.17579532816 | 2511.04500638697 | 4047.99200599472 | 2344.11548437508 |
|         | 1459.31031099055 | 2635.31067044245 | 2355.29862638453 | 2681.48138915107 |
|         | 2091.73580292332 | 2269.44503773126 | 2926.06746795504 | 2599.421026133   |
| SFRS5   | 2470.86113150126 | 1854.11328962023 | 2944.63971819193 | 1544.45026075974 |
|         | 1904.39962279504 | 1522.87703817058 | 3012.49794349837 | 1650.77281891596 |
|         | 3298.73393277409 | 2183.18692530644 | 4697.94415026712 | 2782.94647782764 |
| SFRS6   | 2681.48138915107 | 2568.95060767776 | 2192.17997650999 | 2288.63508719706 |
|         | 1973.20689165831 | 5789.71932579854 | 2932.64120183406 | 3290.27308365921 |
|         | 3664.38955037715 | 2131.68478964427 | 3693.4058156307  | 3287.37172778474 |
| SFRS7   | 836.613819700658 | 706.759905439674 | 777.651238374269 | 573.509780150018 |
|         | 479.053300726301 | 1372.63540073207 | 1066.25208226214 | 2171.00457877604 |
|         | 675.083275037052 | 535.861738240441 | 612.374364731095 | 906.886423608706 |
| SFRS8   | 471.315730378641 | 419.763812610671 | 391.039114500903 | 535.758943850734 |
|         | 407.760503937821 | 360.185005480216 | 347.557792829093 | 330.405026390912 |
|         | 353.005548289786 | 367.130155304037 | 457.130051460676 | 368.825190022937 |
| SFRS9   | 1358.29475573637 | 1339.83170225337 | 1514.53784631689 | 822.545007054668 |
|         | 5467.84611694564 | 3304.82581034038 | 3976.40140405628 | 2995.42172749615 |
|         | 4743.19967685595 | 3515.36256599555 | 2677.17579532816 | 3586.00189997341 |
| SFT2D1  | 576.451964662024 | 560.180656219785 | 675.596864001032 |                  |
|         | 468.712260193746 | 2346.47361943533 | 1452.63736288691 | 2459.05558915812 |
|         | 1683.83803339436 | 1937.83242524439 | 1803.06322760249 | 1626.34607278613 |
|         | 2733.68308784024 |                  |                  |                  |
| SFT2D2  | 158.452089329714 | 152.390371614602 | 156.745051321143 |                  |
|         | 150.544779197947 | 211.183499580683 | 184.25384366282  | 162.778480318754 |
|         | 186.112835637689 | 181.914505612128 | 179.509758601636 | 166.506602328929 |
|         | 192.914362049985 |                  |                  |                  |
| SFT2D3  | 149.614643716246 | 141.735123971775 | 147.420580715112 |                  |
|         | 136.978738825445 | 177.19138801548  | 149.327794670124 | 154.161892545061 |
|         | 138.098165515898 | 154.889079187405 | 130.902319266342 | 206.502189514795 |
|         | 183.214922844221 |                  |                  |                  |
| SFTA1P  | 151.796986456254 | 137.885506916098 | 126.290840923683 |                  |
|         | 130.25146185271  | 128.671626815639 | 121.681261213422 | 127.427014611349 |
|         | 135.357424384319 | 131.999299893526 | 138.69392148885  | 137.222125237171 |
|         | 120.538535752185 |                  |                  |                  |
| SFTA2   | 114.812254477058 | 123.671944323239 | 126.511314417328 | 118.628559951472 |
|         | 473.73182675469  | 122.20752192519  | 120.915108114673 | 122.953869661977 |
|         | 178.4648111133   | 119.412461116903 | 131.045970236632 | 124.180511991605 |
| SFTA3   | 123.256613702254 | 141.105812351905 | 143.763292219833 | 126.557869929234 |
|         | 128.730649233876 | 130.249430984172 | 138.521952850632 | 133.399632102473 |
|         | 146.160188002433 | 137.079479050963 | 131.069515666204 | 144.454141873387 |
| SFTPA1  | 127.979574243743 | 136.366798516444 | 181.550597645633 |                  |
|         | 123.875478428652 | 135.554736716321 | 131.958760372325 | 153.000232171457 |
|         | 144.101376910581 | 147.172440755724 | 152.295451313545 | 135.840528665314 |
|         | 153.39738748803  |                  |                  |                  |
| SFTPA1B | 113.769815606191 | 126.158204790885 | 122.685360126599 |                  |
|         | 125.976052547953 | 129.938723074546 | 118.970693476152 | 119.319884675074 |
|         | 116.67463130093  | 114.223991452083 | 103.448244268961 | 134.201392031199 |
|         | 114.290611267606 |                  |                  |                  |
| SFTPA2  | 131.488316643424 | 125.645986634914 | 124.783306383852 |                  |
|         | 116.919109599361 | 122.469113037809 | 118.091125088778 | 121.341177395499 |
|         | 123.868848032411 | 125.882246459692 | 122.476178620771 | 121.242099666967 |
|         | 121.48867035121  |                  |                  |                  |
| SFTPA2B | 133.446934298801 | 150.938312240902 | 149.17815859943  |                  |
|         | 160.98571841915  | 147.858339902055 | 150.063082731931 | 159.213940274232 |



|       |                  |                  |                  |                  |
|-------|------------------|------------------|------------------|------------------|
|       | 144.555718186987 | 143.598567970841 | 152.699431442817 | 146.474228901408 |
|       | 144.324313048777 |                  |                  |                  |
| SFTP  | 123.231397809701 | 136.888915439473 | 146.321713521846 | 157.301617257941 |
|       | 131.17119492692  | 144.195705502443 | 142.06907380533  | 137.379558348782 |
|       | 138.942901099402 | 139.721730597003 | 143.658600740177 | 142.863268359757 |
| SFTPC | 127.486697506397 | 128.944295118239 | 126.165220332132 | 121.728711587014 |
|       | 131.951649373072 | 124.738217731488 | 114.849872458647 | 121.838802846453 |
|       | 121.501959818928 | 122.985117824212 | 137.876234091056 | 123.96665768708  |
| SFTPD | 178.872635061826 | 151.433634564939 | 244.990374822652 | 186.231346659144 |
|       | 151.237088659409 | 159.324816814876 | 162.846914172627 | 155.27707167384  |
|       | 165.314290446922 | 217.847954914851 | 114.155592351175 | 148.987672562273 |
| SFXN1 | 204.802810257516 | 168.477388641982 | 141.294094833197 | 170.164668347783 |
|       | 212.915949933033 | 239.871536598083 | 326.354469134694 | 231.462907786174 |
|       | 231.287362732197 | 424.495400604335 | 218.839681873515 | 278.142283306934 |
| SFXN2 | 139.029404397979 | 136.722636695506 | 123.265810024678 | 122.194493542073 |
|       | 152.14012587515  | 138.600017737884 | 134.447878635716 | 141.914966520049 |
|       | 146.617853918109 | 134.033751039071 | 147.013598868335 | 143.149424892482 |
| SFXN3 | 179.932404140099 | 173.109461200603 | 198.356420768703 | 194.403848868583 |
|       | 155.317754378283 | 183.214922844221 | 164.018470368389 | 160.078122267577 |
|       | 191.665827345888 | 177.415756020166 | 187.978627462391 | 186.089988569287 |
| SFXN4 | 393.579552385074 | 418.420753332232 | 429.457884032977 | 457.779218916808 |
|       | 458.875979229339 | 446.262895953004 | 519.27448770158  | 364.265100349672 |
|       | 475.833242673151 | 306.43742010208  | 453.058639550475 | 767.377380800066 |
| SFXN5 | 187.216245895253 | 182.263724979519 | 155.868109161417 | 248.229468372363 |
|       | 440.038896046559 | 206.802308105224 | 165.723126764006 | 174.663845688179 |
|       | 187.082082429597 | 198.568180234676 | 202.819949307954 | 188.181647474317 |
| SGCA  | 550.566402986082 | 619.995008098949 | 594.92419264579  | 1068.63350031223 |
|       | 120.231559540009 | 124.176944998906 | 118.743966166637 | 124.847325289068 |
|       | 141.292421722594 | 122.965328766807 | 138.110317032494 | 126.814332513301 |
| SGCB  | 376.867306473426 | 341.819090221654 | 463.802270256246 | 337.342034950908 |
|       | 137.658183450715 | 161.182901898379 | 167.817232948801 | 160.73807125195  |
|       | 189.83433085782  | 249.554443204445 | 152.038902807701 | 164.276668889213 |
| SGCD  | 234.214191437687 | 233.842749683689 | 235.595194918187 | 208.932692585748 |
|       | 122.089332300031 | 129.049273337631 | 126.468167800414 | 122.793816135585 |
|       | 134.089308635893 | 144.602386056543 | 120.915108114673 | 129.307025798583 |
| SGCE  | 675.083275037052 | 562.232754247201 | 1418.60088387728 | 394.186683910377 |
|       | 197.262062021667 | 509.702881232139 | 831.610501402173 | 410.002817143111 |
|       | 332.885488115858 | 260.016906472407 | 176.347535860374 | 378.585058475083 |
| SGCG  | 225.927425596831 | 162.592306630033 | 155.896065329825 | 172.120772549791 |
|       | 112.528908277828 | 119.412461116903 | 114.644722005728 | 117.883635746379 |
|       | 115.958740595234 | 131.548634017902 | 132.475414208533 | 128.217078449064 |
| SGCZ  | 113.58962177275  | 122.408016372747 | 118.366859032979 | 118.486195373059 |
|       | 120.212294184999 | 118.900338956203 | 117.274977920103 | 118.303150165804 |
|       | 126.816402300701 | 127.43866970659  | 124.794260959228 | 115.566303449363 |
| SGEF  | 146.290334865039 | 139.465935832583 | 142.81401345781  | 153.926214082991 |
|       | 120.377793842621 | 135.031430487047 | 152.194337248455 | 132.796012953422 |
|       | 137.488665424434 | 128.949103967865 | 137.118488157416 | 132.109267393571 |
| SGIP1 | 159.393410854649 | 147.473875763319 | 136.570817174009 | 133.491963477649 |
|       | 101.316813921703 | 118.820154030256 | 108.333135424315 | 120.397683153445 |
|       | 144.801071221985 | 153.871893011106 | 125.572299527276 | 115.080736217256 |
| SGK   | 677.265576269103 | 674.905270154355 | 579.049608568926 | 524.855915371246 |
|       | 291.369577397743 | 1825.10168716051 | 280.494088228226 | 1118.86225415732 |
|       | 955.143610867351 | 4386.83308119416 | 743.023225859813 | 403.812520074723 |

|        |                  |                  |                  |                  |
|--------|------------------|------------------|------------------|------------------|
| SGK1   | 396.861835715943 | 357.006610037663 | 444.945078908489 | 343.121661664987 |
|        | 210.981555130408 | 1278.30505902957 | 230.697077917675 | 672.862678078975 |
|        | 686.445635754196 | 3450.46728258139 | 384.97980473847  | 305.542978609337 |
| SGK196 | 130.795318552623 | 138.768904143023 | 121.255814891176 |                  |
|        | 131.38881091292  | 135.794342110159 | 131.185836673529 | 140.09417711803  |
|        | 130.4631522533   | 119.150626141327 | 116.961391747202 | 128.756818133357 |
|        | 128.876385705559 |                  |                  |                  |
| SGK2   | 124.053190169486 | 127.811923445503 | 124.679444852938 | 123.327238774943 |
|        | 142.187694439611 | 143.722135315998 | 129.418256130391 | 135.866980620144 |
|        | 135.036576196425 | 125.208803405105 | 141.069243738242 | 122.924017262559 |
| SGK269 | 123.168787977805 | 123.893768254549 | 121.066593359525 |                  |
|        | 110.735199684144 | 106.551076380988 | 110.448948495323 | 127.555954288973 |
|        | 116.59404046487  | 135.139676303901 | 128.318545300038 | 123.884643288534 |
|        | 121.480455781173 |                  |                  |                  |
| SGK3   | 192.475309217696 | 174.006516433854 | 163.024215671479 | 164.615113709166 |
|        | 124.033766796333 | 168.470685171939 | 156.934589811742 | 178.847858667374 |
|        | 162.033909093358 | 201.748876422401 | 201.167206950576 | 152.725025539491 |
| SGMS1  | 157.182954894643 | 154.630837508249 | 159.650116062266 | 182.736067431579 |
|        | 148.541832125061 | 186.077477713775 | 181.238505183667 | 160.707290343231 |
|        | 185.923374274306 | 179.985468369202 | 161.813099560175 | 196.470718183575 |
| SGMS2  | 189.160454951382 | 145.89593390936  | 152.868787961804 | 143.925616978401 |
|        | 156.654450436728 | 162.026757124868 | 146.34029698108  | 148.770315933249 |
|        | 143.897248922317 | 159.384480972135 | 137.636900130922 | 138.584190903303 |
| SGOL1  | 141.78867917709  | 144.152325539824 | 139.326694135427 | 146.979988781462 |
|        | 204.237952297239 | 177.538262133568 | 165.031678768564 | 246.327991259259 |
|        | 201.517356610591 | 176.236140830355 | 135.704067249674 | 177.538262133568 |
| SGOL2  | 123.467227007155 | 132.043196381009 | 146.393953146723 | 134.53861441495  |
|        | 141.088456756806 | 161.408318705503 | 143.625188247966 | 160.159630699959 |
|        | 147.610616423185 | 153.926214082991 | 139.648187461906 | 151.04846635538  |
| SGPL1  | 184.157941055948 | 191.777253122672 | 180.698727334322 | 191.297539967707 |
|        | 406.638419179213 | 426.364663722264 | 503.967725251906 | 362.376153348015 |
|        | 403.657727266403 | 263.888891822857 | 728.743541467167 | 423.740836541835 |
| SGPP1  | 121.303696898208 | 109.719356131043 | 118.792612926619 | 100.841352336505 |
|        | 105.31352471598  | 128.927103442679 | 125.666013736767 | 134.187456260969 |
|        | 116.087696503753 | 139.826273596452 | 110.885714048075 | 114.384296185446 |
| SGPP2  | 155.124158030085 | 178.262619516994 | 162.945789604505 | 144.587253120884 |
|        | 201.139510041141 | 227.736106796551 | 331.464977124667 | 320.024259346646 |
|        | 532.394088545421 | 466.58966852405  | 554.511983790164 | 238.230110356671 |
| SGSH   | 718.871732206362 | 741.875751347917 | 641.12919339861  | 940.716682221364 |
|        | 715.93836911426  | 821.465895280454 | 762.182213353032 | 347.985315257161 |
|        | 473.853999833395 | 659.27672123763  | 567.317223907142 | 762.182213353032 |
| SGSM1  | 252.280435525505 | 252.655315526015 | 250.542405852865 | 249.449151040445 |
|        | 208.016730103629 | 160.72962443421  | 178.106013202731 | 158.774910841987 |
|        | 141.267715391739 | 147.195127201893 | 147.368455727098 | 147.26204590693  |
| SGSM2  | 2089.82894186824 | 2242.73511149559 | 2426.2098937241  | 2426.2098937241  |
|        | 897.0125616892   | 1450.44557173645 | 1208.9240215109  | 1934.30779703747 |
|        | 1321.17236442448 | 2076.51786803222 | 2083.02482378721 | 1892.8338612507  |
| SGSM3  | 244.18714778846  | 245.082816415008 | 235.091443641056 | 249.292766428035 |
|        | 399.762451559805 | 240.07282016658  | 246.492735271771 | 232.519482087835 |
|        | 215.607567127195 | 228.524222740306 | 361.904370514991 | 227.52352046188  |
| SGTA   | 283.645434184168 | 308.877027622691 | 230.161369375718 | 453.593585032712 |
|        | 531.555532787504 | 236.617896560938 | 270.945325305492 | 218.773153183388 |
|        | 216.991823988763 | 231.314944217099 | 278.274343962656 | 216.209052148435 |

SGTB 139.321570881862 132.344296085487 134.01566484034 149.560505078257  
144.19473076362 135.409613764459 124.668658660052 135.452340998039  
136.393655406964 129.153882779488 117.937856116492 136.959011188915  
SH2B1 288.770330002807 331.62124160152 336.002793042439 356.84281623052  
278.942695435238 203.11015591813 238.978845152474 229.230239609291  
248.260998007814 285.102778078056 311.806908624308 251.511405838796  
SH2B2 147.322622473251 165.977852973826 143.635367691412 162.723310549554  
230.10433160008 143.667207351415 169.948277715908 161.129770392464  
158.691830524781 183.568426758223 152.054874792646 189.770558810153  
SH2B3 411.603820288919 387.224184063662 309.155070674445 345.627266482686  
260.314440448486 262.913054904154 224.766155406229 246.263259852067  
393.707031354025 323.896313343796 245.900840732668 303.09499683953  
SH2D1A 214.229228850802 196.880135762817 187.30908753142  
207.977817300376 171.350620456505 183.416437587938 212.210383398591  
213.754156680604 307.728083981504 182.508415915215 210.448904052352  
176.53912635694  
SH2D1B 146.488402397597 151.958818313561 146.316145173343  
150.717996520257 140.081280065913 138.588751758469 149.511776997149  
158.933097712363 156.46322298175 147.796610216375 133.113581756557  
154.491373296392  
SH2D2A 167.087850057037 156.339564110766 162.702767346393  
153.524100996368 177.371157649894 173.484307104751 174.417259650516  
174.027190728107 174.991941844263 178.222120802125 137.691870502653  
167.67272339144  
SH2D3A 123.494412056415 110.794219964997 117.760045671142  
115.687997771921 160.724319010751 180.549865708041 180.54209603289  
133.138022149658 137.954283575143 215.769986055534 177.123497519231  
205.476230849391  
SH2D3C 139.987681290389 163.93199635496 127.779401352802  
151.308872564827 151.106858426994 140.849966309018 127.581332110857  
134.551054564417 154.336009472285 132.465501156958 120.590654346066  
134.91213977595  
SH2D4A 203.999142031297 209.487240895674 202.230920499592  
155.993849743656 249.064573038094 226.936810012475 524.541494680558  
256.729891423908 255.770193180874 255.462706428149 457.779218916808  
580.645924062301  
SH2D4B 130.385747820089 124.461997520222 137.728163622673  
126.017158064032 126.523201566273 128.209771391087 125.563646710294  
129.340996658802 119.866898356501 131.611842804029 131.477589792769  
129.001192144163  
SH2D5 149.502132524093 145.412368252632 156.551925771312 154.818414925242  
151.354187593773 152.834894011142 142.876069462608 138.295019395552  
149.788558681761 187.30908753142 149.250205265163 162.664254855131  
SH2D6 122.799487123057 112.977469350139 121.177681858671 107.498500136859  
110.068122112671 119.229322984564 106.470524594239 117.766156390814  
107.466184687811 111.389873428517 118.397482835514 117.12833256636  
SH2D7 120.948246352846 116.118745494794 114.200099628087 125.768053724055  
113.852849454448 137.727466311162 129.029151164978 123.56917054142  
118.909153405102 130.172041917023 128.618422306397 115.053039576143  
SH3BGR 191.924177620803 190.645917992472 247.236004734567  
195.447966116819 145.120347147471 149.380733719756 146.395248696835  
152.868787961804 150.660106369128 152.247504238261 151.3362561751  
170.835513021958

SH3BGRL 1226.10881264804 1000.91520225219 1728.86115695979  
1003.36623972843 297.332272659995 568.310800941091 598.924339094496  
443.444024128516 468.170972478717 533.893360199271 561.062594540005  
528.478292835214

SH3BGRL2 739.085574858917 811.144838166905 624.467319041884  
684.428198622716 412.344820823968 646.933504790891 457.905741500454  
727.814681346494 720.907992182476 438.533112511098 737.843412273272  
260.045018348182

SH3BGRL3 719.369561410372 701.208391798006 501.434722063309  
885.927972780392 2153.17165155392 1073.40463823132 867.601542930533  
1053.09915077366 1193.82799849555 2210.67250954072 900.233783407148  
1115.53524128833

SH3BP1 138.349773531218 161.968835903764 132.291157461345  
131.528729642144 512.723592291378 367.732191251547 249.263194321516  
258.605188272761 313.581986704048 215.037122365095 395.521241316058  
371.127480221666

SH3BP2 129.305455204291 147.079157199448 142.126620107418  
140.113334247294 158.058346079359 158.658110539162 178.488874074222  
173.979001863717 177.874821397216 202.214495168688 192.022864170934  
192.680681636018

SH3BP4 325.859917318516 359.991823789356 267.800523478098  
306.333710880618 380.821355948507 278.192669077191 402.866491417369  
216.102897582821 342.245182599593 470.868288641048 484.658140651032  
325.96632528242

SH3BP5 145.819198235878 144.601370216162 156.923675862035  
148.758316681306 163.824878791966 154.273953018148 146.944628763232  
152.970079142629 152.710827148511 141.860850603561 135.073449743301  
149.020824600931

SH3BP5L 210.043556816529 272.351487980415 207.05325577114  
392.909481887174 371.168752104821 173.161152247499 181.412790232996  
211.104243881644 199.87003105816 159.320692108734 227.441436540742  
187.955617187544

SH3D19 1309.01193284992 842.567990276734 1601.19401366685  
783.755776589969 241.039766283972 421.303580698397 360.812953749077  
290.867822301134 251.039117540764 536.253405705975 474.517750753745  
265.754141836026

SH3GL1 354.336462793628 332.666916002481 352.22815095475  
354.132752995385 528.478292835214 387.711471687237 437.836503489425  
392.909481887174 347.292438587205 619.223672253014 539.720389702148  
415.322560616847

SH3GL2 207.718619151226 272.770616373687 277.596303701405  
193.466377788318 212.691702227442 195.078843867124 127.080149144234  
160.050872656883 124.418295003824 124.451718955086 165.511561121012  
131.38881091292

SH3GL3 300.793542873709 263.568160216149 372.594990024312  
382.902151239988 119.092335265325 110.670057121283 113.347609066395  
122.799487123057 111.538651711074 213.847316974717 131.530256606799  
125.277752749246

SH3GLB1 507.95331185029 430.220363263561 590.646248924596  
415.011847890313 775.5664718389 1024.59845685519 1058.55850972326  
976.050097371579 809.545702751155 1450.44557173645 919.165331064155  
1026.61404215739

SH3GLB2 1906.81344236287 1946.45172007314 1859.88000417483  
2051.45788386541 4536.46344538492 2176.59445919725 1946.45172007314

1570.39362935859 2867.63319136936 1109.08288440559 3963.40575974446  
1818.92700816112  
SH3KBP1 408.361368902627 392.365008240567 231.180528071672  
335.698400607132 677.265576269103 374.46180489079 254.188830191845  
974.544773560873 579.049608568926 403.812520074723 238.183096218311  
190.138730960643  
SH3MD4 157.021010130169 127.581332110857 169.956827727468  
127.211469322857 147.164348704012 143.88649412841 145.212306927438  
148.323729699672 140.543382412084 139.804518460303 139.271829906127  
162.37762946664  
SH3PXD2A 2792.13364570755 2599.421026133 1699.8374761666  
3282.73711809465 512.467731561858 631.408955630318 913.684449305965  
577.250493023431 880.140852200235 1680.25851465727 2189.53914329263  
1614.00098175383  
SH3PXD2B 421.384700184923 388.638095539186 276.32528705384  
489.909407178594 156.96934803556 186.447049658314 131.954310449801  
177.257355909681 188.924084292126 276.057101476947 192.331142672469  
221.424451092316  
SH3RF1 222.243523614518 212.607094117882 210.729945718068  
151.64806573742 180.549865708041 226.35854874278 270.021093158885  
291.167223094542 306.677271064305 197.740912476527 386.917038897322  
279.413335686746  
SH3RF2 182.515302191173 177.438968923426 165.665796569389  
185.332215198617 173.250350363688 156.456332386608 159.504327477065  
152.741229289112 151.498981429633 948.150767619765 209.304654633004  
178.551434222154  
SH3RF3 223.765583953184 211.692743811486 199.714647839712  
247.194197143562 136.19481894871 145.235087732482 154.431051053529  
157.288308753975 153.554159360954 154.604363252526 144.760229351772  
136.967408633308  
SH3TC1 151.318320077986 150.968998243223 126.180714796187  
131.757695616207 181.976252906929 160.353649786837 158.723133891017  
148.714406471586 173.416999972133 242.996248524203 200.204064462384  
326.45984882427  
SH3TC2 143.271346378958 142.053649707364 127.349190705235  
127.325087202483 136.308565710257 131.025725443485 148.027464692171  
141.577373924378 127.473812381059 134.891736344801 165.597236278435  
135.244303669342  
SH3YL1 355.609033348692 425.348619281876 374.872358131797  
231.39684528494 687.987647193563 723.640113902925 961.355625338687  
1280.57297272231 528.556049506759 431.093544964576 965.031655021246  
986.65554605455  
SHANK1 111.381427322188 107.395559299582 116.360144963753  
118.47752077032 98.6941019230576 104.58424134098 111.935554828717  
105.31352471598 110.820329153348 120.822923434486 109.098105822556  
112.693431140524  
SHANK2 138.052032298683 145.136075215082 124.566313603935  
141.584554523423 139.117053855066 166.540134051424 164.39557148282  
124.261531006131 128.014092519305 117.097159106043 180.327051100611  
155.974463324915  
SHANK3 483.174262289559 420.647394044431 259.511314588868  
369.198837083585 246.88857694249 371.457568934695 182.798526632723  
252.222481637238 290.288001750744 304.292209676095 229.835576260403  
265.670643951648

|         |                  |                  |                  |                  |
|---------|------------------|------------------|------------------|------------------|
| SHARPIN | 222.736706411035 | 251.268669431283 | 223.918931440768 |                  |
|         | 288.313931067158 | 360.90109922539  | 161.481227197715 | 222.177290763736 |
|         | 239.649306804266 | 266.982073722644 | 232.414763435965 | 252.280435525505 |
|         | 212.531329857909 |                  |                  |                  |
| SHB     | 290.037325939883 | 272.16090053595  | 223.389795643722 | 344.021696764791 |
|         | 324.671490117952 | 220.362946606131 | 204.802810257516 | 161.694109087893 |
|         | 180.850779069931 | 237.989479738133 | 231.0814970959   | 208.983138060317 |
| SHBG    | 163.54669668396  | 165.027938535393 | 178.358003030064 | 179.163748161358 |
|         | 144.173163762502 | 174.012972901793 | 148.046961712162 | 141.202092246048 |
|         | 160.203521879896 | 158.171302275984 | 147.074807267102 | 151.81754291846  |
| SHC1    | 671.821418586421 | 778.639512538949 | 472.514017604645 | 824.746488539942 |
|         | 1030.97051104597 | 669.124699103132 | 1104.61581891596 | 706.628675634893 |
|         | 542.267204956846 | 833.841469195516 | 591.641325402032 | 1104.61581891596 |
| SHC2    | 168.238615437246 | 156.417000271727 | 171.481917188224 | 156.239937979051 |
|         | 142.428578698775 | 153.350690419636 | 153.241806795134 | 151.059401217656 |
|         | 158.610249594568 | 147.253919952267 | 155.801832826848 | 150.650926518959 |
| SHC3    | 147.006482557682 | 135.68605915552  | 127.356622898971 | 131.143808097612 |
|         | 177.306794546105 | 176.47556448977  | 124.466986821169 | 141.132694466739 |
|         | 112.776764215618 | 114.520066232155 | 164.198494818485 | 170.035994634371 |
| SHC4    | 137.438984175012 | 131.31716158922  | 118.866073031304 | 125.236926572282 |
|         | 127.247764390727 | 122.005340508177 | 136.758262322199 | 117.724353829377 |
|         | 119.551741097918 | 126.398884382537 | 132.737464610403 | 124.263901299025 |
| SHCBP1  | 11874.9808592281 | 12690.801964606  | 11392.4189359453 |                  |
|         | 12368.1423473066 | 4425.66777919789 | 11918.214537866  | 7082.28969354712 |
|         | 10397.3656932566 | 10222.4435857673 | 7016.12801650552 | 8840.92490099301 |
|         | 8514.94395408164 |                  |                  |                  |
| SHD     | 122.216479103528 | 126.759554774012 | 113.644993086829 | 114.561836290349 |
|         | 169.349922114861 | 132.591496435822 | 141.38612990166  | 129.497266827284 |
|         | 132.02259465879  | 127.622397233692 | 116.670491972948 | 117.051541123239 |
| SHE     | 204.5274881834   | 206.186324475847 | 159.036647992998 | 214.434355263652 |
|         | 139.664055668127 | 171.61704153463  | 140.641308444844 | 154.758831302515 |
|         | 162.743192424569 | 140.747967724586 | 160.537464426971 | 155.255279503782 |
| SHF     | 165.186696781985 | 171.660157220703 | 153.709230037306 | 196.777776509371 |
|         | 156.481871341275 | 141.565599104245 | 147.584176709986 | 153.062710222618 |
|         | 148.607885635446 | 133.76515446791  | 148.707332454527 | 150.72014060286  |
| SHFM1   | 1262.96801072965 | 1414.95226752155 | 1478.09582385838 | 1118.86225415732 |
|         | 2414.22821062457 | 2789.67986601883 | 3522.61692270848 | 3042.88425356552 |
|         | 3115.11499025766 | 2521.58055221647 | 2466.36457617864 | 4266.92715355342 |
| SHH     | 136.152290887509 | 119.905127545336 | 122.472909598385 | 109.355444907633 |
|         | 115.231121959397 | 121.71538073735  | 119.608334527504 | 115.845468537936 |
|         | 117.335748689217 | 111.127245394321 | 141.015441854424 | 120.935863853101 |
| SHISA2  | 146.608010450782 | 151.577450119302 | 160.937256625847 |                  |
|         | 160.806678614325 | 176.410016510249 | 269.379272725008 | 236.326943078666 |
|         | 176.953099943185 | 175.617504025145 | 205.322733011516 | 142.157512965166 |
|         | 172.8993416872   |                  |                  |                  |
| SHISA3  | 188.431244390961 | 185.544411160039 | 184.387409077972 |                  |
|         | 193.275162354467 | 142.14654303591  | 132.70442458261  | 128.917399281607 |
|         | 134.397255719047 | 146.470444212748 | 135.647660756548 | 133.006192351471 |
|         | 137.999190557332 |                  |                  |                  |
| SHISA4  | 175.847256673734 | 173.408784502027 | 160.562164904057 |                  |
|         | 172.583615020042 | 184.332299740724 | 166.587100972754 | 154.874899874233 |
|         | 142.25795237339  | 152.868787961804 | 172.091884817207 | 168.847039069786 |
|         | 160.613630476912 |                  |                  |                  |

|         |                  |                  |                  |                  |
|---------|------------------|------------------|------------------|------------------|
| SHISA5  | 2036.43904731226 | 2032.50052162637 | 1232.66885974069 |                  |
|         | 2074.29945034697 | 16742.6286866851 | 3348.7622174821  | 4548.5418978622  |
|         | 2000.47497636965 | 4875.22637286719 | 1180.7055699511  | 4847.77258830631 |
|         | 3062.22499714914 |                  |                  |                  |
| SHKBP1  | 184.937088280378 | 189.044966519228 | 179.026308021985 |                  |
|         | 224.92725876841  | 565.97975389646  | 214.4829383264   | 208.869189492052 |
|         | 223.81987303579  | 222.456810024193 | 196.691380885508 | 157.717145014769 |
|         | 202.114480291084 |                  |                  |                  |
| SHMT1   | 171.358746749715 | 178.294972422671 | 160.390564881326 | 165.342790388607 |
|         | 259.229153662504 | 355.372836460906 | 196.880135762817 | 343.307036883726 |
|         | 245.426639190893 | 310.690317681243 | 313.641656294638 | 162.317084707395 |
| SHMT2   | 611.208083466988 | 771.059329972125 | 512.723592291378 | 687.789976218334 |
|         | 3648.38765465889 | 2166.68174726155 | 1471.01897242089 | 2135.04382065446 |
|         | 2271.82656399253 | 2146.4265920569  | 1074.19589851599 | 2046.64499507352 |
| SHOC2   | 468.060528109338 | 477.626693328013 | 498.180196203245 | 366.788087591332 |
|         | 238.588762326319 | 327.696359071012 | 317.457588721567 | 267.67093646012  |
|         | 305.096320805078 | 317.600728351694 | 393.796356067403 | 392.909481887174 |
| SHOX    | 130.135721123253 | 122.644105247178 | 126.802963197337 | 125.396523818173 |
|         | 127.55397077248  | 128.432188632218 | 125.677019190255 | 126.423739360894 |
|         | 124.901759819007 | 124.29420915051  | 122.97487285065  | 129.725706669166 |
| SHOX2   | 138.005168756932 | 144.856801451884 | 132.674061422332 | 139.866536599877 |
|         | 144.968459820523 | 134.193482579542 | 132.245217686793 | 142.903851392611 |
|         | 138.885230982475 | 143.475725571943 | 157.83121828793  | 141.370957100324 |
| SHPK    | 408.993744895434 | 388.477382640003 | 352.180110869664 | 476.168679880357 |
|         | 500.246996975    | 640.568342662067 | 367.439588680092 | 296.721891842563 |
|         | 399.620724969771 | 650.494111214312 | 492.377642058095 | 589.541347392215 |
| SHPRH   | 160.43939815269  | 166.998311158378 | 168.091278015885 | 156.090871391873 |
|         | 160.32812671237  | 169.764014031526 | 168.682307349713 | 166.88833169342  |
|         | 159.130076733711 | 154.412506915569 | 179.060189557496 | 172.973175988757 |
| SHQ1    | 198.285073991956 | 172.157660228549 | 176.070695522397 | 189.509062639279 |
|         | 267.190228116903 | 230.201464318433 | 234.980382243116 | 225.61275910008  |
|         | 266.468621734455 | 266.842778974988 | 203.298764374262 | 253.463871742303 |
| SHRM    | 1451.64055568759 | 674.338740875512 | 881.561688713557 | 492.930906036297 |
|         | 361.218491712891 | 273.550544349798 | 234.531140131763 | 331.848516303011 |
|         | 381.971539806271 | 240.465165615601 | 155.578524031078 | 200.264756078778 |
| SHROOM1 | 154.938900278679 | 164.455111983634 | 156.290018816692 |                  |
|         | 126.308622415913 | 186.866029149035 | 129.32466533596  | 263.426870776148 |
|         | 172.28937151007  | 178.455966482206 | 132.431566491955 | 210.989806933158 |
|         | 121.965131419551 |                  |                  |                  |
| SHROOM2 | 141.797497681512 | 160.247370279802 | 127.883124527039 |                  |
|         | 140.007937555694 | 292.468585109951 | 868.40984928812  | 496.560127152436 |
|         | 615.058712877418 | 301.908667220208 | 227.092319765009 | 416.715760038095 |
|         | 360.39998507367  |                  |                  |                  |
| SHROOM3 | 340.547010951537 | 219.901025447571 | 219.96819201774  |                  |
|         | 190.309453030884 | 182.798526632723 | 159.811778680604 | 156.218834695891 |
|         | 234.588584245938 | 195.795728497916 | 162.212442593001 | 147.86104992164  |
|         | 153.962758393332 |                  |                  |                  |
| SHROOM4 | 4579.62296570302 | 4323.76731419005 | 4367.38154535901 |                  |
|         | 4198.61471038267 | 466.4890990178   | 3211.2719052157  | 1421.72388964898 |
|         | 2149.13404212591 | 1753.58770316818 | 1527.87148052149 | 1989.38201206555 |
|         | 1665.14066952917 |                  |                  |                  |
| SI      | 126.25011972597  | 131.338853426561 | 134.551054564417 | 133.065366727222 |
|         | 127.302714624905 | 126.295856316628 | 135.481300250507 | 129.621296567128 |
|         | 121.871105084095 | 126.332299789266 | 143.019052979243 | 135.367261617271 |

SIAE 138.829793136954 143.484004107893 151.577450119302 146.481298877242  
578.465753476561 182.665357598121 226.640323471375 258.759507964221  
228.766847429517 2309.63504858248 173.879952136931 203.852316712377  
SIAH1 407.152764702613 396.611050163857 496.218605366298 370.617422894068  
444.192734921566 538.252273740419 471.816954259146 424.025588636796  
614.239716118509 625.699971780258 421.459312180809 482.677635089583  
SIAH2 322.956882599715 312.286788541158 329.660368915848 289.001004912528  
271.638179116269 215.866644799363 251.062649517773 249.633252091596  
450.566031840493 337.487980551006 278.737944234055 211.941623411369  
SIAH3 127.605805815475 139.094167748687 131.87052926802 122.423561732526  
131.216673806987 135.412051450659 146.800324349321 132.083532534267  
121.973581817041 136.058527150792 157.881569297409 145.625205055601  
SIDT1 142.599815022061 146.390223079987 159.678281513591 139.771342253058  
162.716712951629 204.260800563197 169.257035030405 196.990867962546  
173.708509414674 151.029785584386 207.488522933448 195.929328710358  
SIDT2 1218.64951314553 1357.48791782399 1414.95226752155 1830.56003081769  
965.673699120049 283.163770658619 547.681206272188 595.882696498804  
668.127527385348 510.434895296759 619.635734567779 388.966303073519  
SIGIRR 227.806050911154 241.782750858091 205.058210447711  
253.009376944901 351.02823853348 202.583967728957 181.354279096644  
202.421990203844 214.714726648332 203.652936507291 249.554443204445  
188.7348696188  
SIGLEC1 126.151017944639 111.457176315964 119.422996538444  
122.54127694717 122.914680091926 121.341177395499 110.594755513247  
119.890260409414 127.389942368953 115.692324946633 118.432307370605  
125.481506166304  
SIGLEC10 121.803676441059 113.262357892613 117.740022708444  
118.336654504789 117.913545753709 124.342911165267 125.009237968576  
150.142724640067 208.983138060317 126.934059693116 156.154079736651  
120.857635836068  
SIGLEC11 131.689227690818 137.570343435498 122.620634570073  
149.34605615699 129.155804800869 120.702740607924 129.077660633761  
117.575009754326 127.015086299437 120.948246352846 134.233014993992  
125.301602026407  
SIGLEC12 134.53215156472 142.61284507038 143.470181156799  
151.248365605631 145.286983999628 140.378255168229 150.275163835924  
138.659387475119 143.120621855946 142.399253818882 147.643985046683  
138.588751758469  
SIGLEC14 134.56134674893 142.707913210557 136.151754558226  
144.619374612317 179.203783335674 141.592180897595 168.261511797218  
166.289763097913 890.810315261602 147.100947801261 345.433025456954  
125.526744092256  
SIGLEC15 140.047749881567 138.348160604288 143.236593995493  
160.766121558583 150.513804134588 132.934955542743 155.494095135266  
157.6811998968 162.916978850245 153.907737500104 139.491769969541  
168.974155750959  
SIGLEC16 122.547842148486 132.466796864599 118.442856984861  
128.363331337379 133.686850910378 120.843429388102 129.290542121353  
116.310166003024 127.558034562151 134.203949774763 142.548833391567  
121.53632327554  
SIGLEC5 134.002424083826 132.076865522593 137.47514052942  
145.82344959902 118.430401197079 128.497571151343 141.437891956239  
133.439077726411 136.074837228096 132.535722328813 143.489951789296  
128.344679872625



|          |                  |                  |                  |                  |
|----------|------------------|------------------|------------------|------------------|
| SIGLEC6  | 183.013090662119 | 187.231049280818 | 185.359195899057 |                  |
|          | 166.77329045424  | 159.301581158613 | 179.411426984263 | 170.212679845194 |
|          | 159.68134949161  | 151.526337610068 | 167.451782810394 | 160.960599932898 |
|          | 165.836534881802 |                  |                  |                  |
| SIGLEC7  | 134.944488136297 | 134.091723054647 | 131.846160346403 |                  |
|          | 129.138035235415 | 130.593846004132 | 122.944699010173 | 122.5651974076   |
|          | 128.009286101341 | 131.879526177089 | 124.418295003824 | 139.055892787717 |
|          | 129.953801496113 |                  |                  |                  |
| SIGLEC8  | 127.239282651919 | 128.029736384348 | 113.536570797896 |                  |
|          | 121.739219824085 | 119.036965883266 | 134.56314960832  | 123.391298926957 |
|          | 123.807693112932 | 134.774591679724 | 118.584773788416 | 145.412368252632 |
|          | 117.841844605128 |                  |                  |                  |
| SIGLEC9  | 152.358795162474 | 125.187617901961 | 139.894559834783 |                  |
|          | 142.369661737453 | 137.729777643977 | 147.145932651151 | 133.43194756868  |
|          | 167.70368494182  | 141.320571086026 | 143.532014058535 | 143.383697128285 |
|          | 143.354858193994 |                  |                  |                  |
| SIGLECP3 | 128.140333650496 | 123.796657561057 | 111.196610704726 |                  |
|          | 117.205525129664 | 123.315362903961 | 120.793974839773 | 113.238466329843 |
|          | 120.384210318    | 115.605206174867 | 116.225440873023 | 121.598249850839 |
|          | 116.533361070234 |                  |                  |                  |
| SIGMAR1  | 300.709410518382 | 311.848379951974 | 387.617166711971 |                  |
|          | 341.564749445905 | 492.930906036297 | 332.978350226738 | 235.867149024041 |
|          | 240.283918204202 | 247.643123415644 | 431.974037914233 | 266.99947481587  |
|          | 250.963601187362 |                  |                  |                  |
| SIK1     | 246.989526028884 | 290.688850193983 | 222.736706411035 | 246.355720496468 |
|          | 386.221302830248 | 704.152296359463 | 298.926727289387 | 375.407747753058 |
|          | 447.579975492958 | 669.731546951281 | 254.424207773566 | 455.486248388968 |
| SIK2     | 162.923734210933 | 157.976810829398 | 132.629453540571 | 154.546460872415 |
|          | 150.42705284743  | 136.454911192129 | 132.934955542743 | 126.887989471803 |
|          | 132.855812035005 | 124.548598801497 | 150.820808770853 | 128.713131994442 |
| SIK3     | 914.654262296682 | 1001.35912007916 | 951.371815352591 | 900.233783407148 |
|          | 368.637819994033 | 345.977609212137 | 247.746304138866 | 451.718912714608 |
|          | 411.221560795912 | 382.630113452429 | 368.711718874343 | 332.296938254329 |
| SIKE     | 147.54950981909  | 153.07993334035  | 169.36029946801  | 137.510586346207 |
|          | 147.909588100857 | 186.276450732044 | 184.332299740724 | 150.945167884077 |
|          | 150.287472248483 | 183.853381322135 | 141.196795654442 | 158.845174721328 |
| SIL1     | 469.714826990063 | 544.30845362168  | 381.484062427466 | 645.806954296487 |
|          | 522.899203071911 | 247.72190598581  | 434.943371634824 | 433.594928641214 |
|          | 290.914381066573 | 413.983821839274 | 271.430915699592 | 303.858574395969 |
| SILV     | 150.308048500142 | 156.798431595608 | 134.698857213208 | 145.203083375014 |
|          | 243.441938832251 | 181.566951620202 | 182.588697551677 | 186.089988569287 |
|          | 197.938447651153 | 188.093450717857 | 174.214747421898 | 162.050520530297 |
| SIM1     | 143.541810469447 | 137.337681987169 | 144.046646189442 | 143.574584852426 |
|          | 132.021249712589 | 144.496429994489 | 142.93332947113  | 143.825062714273 |
|          | 140.508390945342 | 150.794680375075 | 134.48825480809  | 136.74788009263  |
| SIM2     | 144.30699572795  | 137.024230648861 | 151.660152977515 | 144.090047165489 |
|          | 201.320381706496 | 231.819341041105 | 236.427507270325 | 190.682392100564 |
|          | 174.812134675989 | 139.765361891899 | 165.480489678822 | 163.275138097131 |
| SIN3A    | 622.834462068316 | 663.214972254236 | 807.3257139219   | 662.04757187541  |
|          | 357.972320648217 | 395.588345893987 | 477.626693328013 | 379.387095129725 |
|          | 480.484639351046 | 551.350758868377 | 534.745066397679 | 576.298671053238 |
| SIN3B    | 344.128576341892 | 396.212732639272 | 334.199307788576 | 511.547907091166 |
|          | 326.417021307859 | 187.572517928061 | 252.280435525505 | 256.202924421798 |
|          | 213.301947003462 | 253.218123990428 | 228.979483128684 | 206.098534554876 |

|         |                  |                  |                  |                  |
|---------|------------------|------------------|------------------|------------------|
| SIP1    | 204.378245089766 | 187.561298131124 | 235.905788497166 | 167.442950045855 |
|         | 276.476790719416 | 207.940596890723 | 250.481442411876 | 361.160881334174 |
|         | 218.470365730283 | 309.0578543424   | 187.572517928061 | 231.846509449829 |
| SIPA1   | 316.165926273381 | 324.713347085998 | 287.402339322061 | 340.42197893246  |
|         | 752.142287661845 | 324.713347085998 | 474.216057978384 | 372.475112554793 |
|         | 463.488995330457 | 387.403502892897 | 385.888395433066 | 313.351441953859 |
| SIPA1L1 | 178.262619516994 | 152.547558436703 | 163.159571059471 |                  |
|         | 160.75642485037  | 187.057683141644 | 173.09379121032  | 178.476483428474 |
|         | 168.660907237558 | 172.750926094884 | 171.494975393562 | 170.505553609318 |
|         | 190.077302802065 |                  |                  |                  |
| SIPA1L2 | 889.054356462993 | 967.123240442957 | 544.222458349696 |                  |
|         | 903.144845227364 | 399.248044997427 | 395.133831206474 | 784.170983714588 |
|         | 321.31562287169  | 398.193129265416 | 958.63560158343  | 672.637760135254 |
|         | 733.195136251155 |                  |                  |                  |
| SIPA1L3 | 158.584934514596 | 158.8246699332   | 146.975258859244 |                  |
|         | 154.354658146438 | 164.198494818485 | 163.352317556107 | 141.356127724777 |
|         | 152.743680985848 | 165.836534881802 | 165.954266127697 | 200.08007665693  |
|         | 166.784804508647 |                  |                  |                  |
| SIRPA   | 753.654626233604 | 661.826149512811 | 350.658722333252 | 683.861021234927 |
|         | 235.162439885207 | 195.141733146452 | 197.859546367676 | 252.761035334279 |
|         | 373.760551592844 | 659.673052713372 | 235.933451977398 | 263.058972886829 |
| SIRPB1  | 107.816312357067 | 117.943511615792 | 110.242638217587 |                  |
|         | 117.990622156287 | 125.9713489569   | 123.02546895475  | 118.308102542942 |
|         | 124.423556743827 | 110.727742629085 | 120.517691208358 | 112.449662536973 |
|         | 128.519448608754 |                  |                  |                  |
| SIRPB2  | 123.488418655586 | 116.678969343492 | 126.823886603295 |                  |
|         | 137.908991199407 | 131.613738869093 | 138.831297375659 | 133.542620077059 |
|         | 145.015434711984 | 151.104891644466 | 141.083966525597 | 132.464205461991 |
|         | 133.879079395215 |                  |                  |                  |
| SIRPD   | 152.452246595937 | 162.940190224943 | 165.100811808026 | 148.539881077647 |
|         | 148.649619242172 | 160.73807125195  | 137.877756077011 | 151.727603285205 |
|         | 152.207601283271 | 173.611295051326 | 174.663845688179 | 169.720414035325 |
| SIRPG   | 120.270397272069 | 126.069594320759 | 122.659174808512 | 126.115828232308 |
|         | 125.342580368417 | 121.072192130078 | 125.326393776938 | 137.408247668043 |
|         | 141.934351226006 | 118.944068268432 | 138.18056202179  | 132.224831869802 |
| SIRT1   | 496.328898534802 | 466.58966852405  | 507.137104111742 | 353.078842299761 |
|         | 230.079664410595 | 296.051639873628 | 308.621688157016 | 292.037861000784 |
|         | 280.723379809959 | 198.863347487219 | 355.048838683854 | 236.35479928448  |
| SIRT2   | 197.565122821625 | 212.396522888943 | 238.548578086943 | 245.042781391047 |
|         | 328.60529053804  | 232.444867422559 | 218.811490883852 | 183.04531185589  |
|         | 200.591916768948 | 226.623172906957 | 225.99848688881  | 162.536009333787 |
| SIRT3   | 135.007473769551 | 138.341918073941 | 131.050255325564 | 138.808591995741 |
|         | 133.44592405762  | 125.079330440615 | 126.741498575874 | 131.436176224725 |
|         | 138.850077456103 | 138.684070773064 | 127.749992538985 | 128.824243581806 |
| SIRT4   | 149.593135821045 | 162.98885109088  | 191.554396977588 | 184.014707797674 |
|         | 115.29099102455  | 101.597648528389 | 119.439518481059 | 131.393633337276 |
|         | 127.811923445503 | 115.157321350379 | 126.533083459283 | 112.729141678141 |
| SIRT5   | 205.495823410422 | 198.489278156437 | 232.986366625889 | 205.08372943071  |
|         | 200.443940449586 | 177.562561297777 | 260.591336959281 | 204.802810257516 |
|         | 215.84044779962  | 195.141733146452 | 234.094722315007 | 238.509970054862 |
| SIRT6   | 187.607426452073 | 161.951996906162 | 141.613898853625 | 143.161623642178 |
|         | 187.494677180331 | 151.110467345727 | 157.032746784217 | 138.383183017683 |
|         | 161.790909578234 | 140.509950286228 | 166.674240866931 | 151.367402326399 |

|        |                  |                  |                  |                  |
|--------|------------------|------------------|------------------|------------------|
| SIRT7  | 145.295447692151 | 143.279331050175 | 153.311705636864 | 152.251128595777 |
|        | 238.149614104568 | 267.67093646012  | 254.447650810819 | 374.9555524303   |
|        | 306.277823025572 | 248.761038207278 | 220.217745732407 | 289.474517971859 |
| SIT1   | 146.826292449698 | 155.441190892146 | 152.432477504097 | 152.382558543399 |
|        | 141.356127724777 | 153.332110179758 | 153.647343267295 | 158.517778100137 |
|        | 163.319882002763 | 167.830629616121 | 166.014450044695 | 147.875855077738 |
| SIVA   | 800.373159084181 | 791.840531191783 | 732.352357321273 | 918.742625270041 |
|        | 2242.73511149559 | 700.877661166739 | 978.389902096994 | 876.783710734594 |
|        | 771.059329972125 | 1024.59845685519 | 681.172359997071 | 1105.80735904293 |
| SIVA1  | 947.766127685083 | 1000.48723872058 | 1080.95725397659 | 952.724512915813 |
|        | 3315.21586182496 | 910.087388930485 | 1096.10636044885 | 1149.90248188644 |
|        | 1007.7803477458  | 1221.58522138654 | 702.779943547386 | 1531.54387233661 |
| SIX1   | 120.184782039538 | 138.698178321535 | 115.270544506813 | 109.898406285895 |
|        | 134.018379799826 | 127.478474451121 | 126.428284589412 | 128.69455713173  |
|        | 128.324383749931 | 125.195549796301 | 118.470400686096 | 134.102929804129 |
| SIX2   | 142.017169259522 | 151.893573927407 | 128.576310682958 | 152.215146681655 |
|        | 312.557093674533 | 155.590197324062 | 156.020996568814 | 135.87026484074  |
|        | 130.085138325818 | 139.22776505842  | 138.510722755317 | 145.968285147454 |
| SIX3   | 121.18490040448  | 121.316836274255 | 119.087972087745 | 129.299810898979 |
|        | 130.933379257307 | 120.003095000297 | 122.763138007612 | 127.622397233692 |
|        | 125.386545354096 | 123.038646914863 | 111.708970469189 | 130.621860095981 |
| SIX4   | 174.149718758884 | 217.287912825619 | 157.468934439452 | 181.722373730185 |
|        | 385.888395433066 | 197.427788552936 | 435.095843349921 | 299.29004204677  |
|        | 235.905788497166 | 149.213990424575 | 326.176058036757 | 204.851374931284 |
| SIX5   | 721.31849915135  | 861.119262963015 | 914.654262296682 | 1138.44837250274 |
|        | 984.181272274704 | 281.618175110153 | 466.083451075744 | 295.973370766318 |
|        | 381.121621815163 | 404.366325262322 | 322.213266293148 | 189.160454951382 |
| SIX6   | 132.148166773943 | 138.598167973067 | 143.085022888434 | 133.647637744785 |
|        | 152.445022409208 | 163.143613079037 | 142.481897141275 | 143.839170216353 |
|        | 151.029785584386 | 137.966987037709 | 124.844481048039 | 151.10837100314  |
| SKA1   | 143.461785113446 | 132.998223400178 | 144.825231501747 | 132.499182058275 |
|        | 198.205113187281 | 236.427507270325 | 180.733673680261 | 272.193578770314 |
|        | 216.705908017858 | 177.60876237572  | 175.269675831824 | 203.389294254141 |
| SKA2   | 331.164053277361 | 341.197826517049 | 317.949646885539 | 308.148212607944 |
|        | 226.144012966486 | 394.962978677736 | 301.250189051376 | 462.686385881492 |
|        | 407.152764702613 | 339.252515920242 | 236.772907994543 | 416.075109522039 |
| SKAP1  | 187.561298131124 | 169.713585775118 | 156.141123407905 | 147.587100090547 |
|        | 179.338652960181 | 216.805365763069 | 242.81187187788  | 352.741885295157 |
|        | 325.320888625297 | 125.073353210914 | 222.565515020501 | 364.527677995774 |
| SKAP2  | 396.345382600445 | 376.082040863747 | 422.434778100827 | 368.466518140043 |
|        | 234.243977361232 | 295.278972023002 | 458.151323130855 | 370.617422894068 |
|        | 638.129080224049 | 297.071121022183 | 542.009873308344 | 480.797281489891 |
| SKCG-1 | 136.781417098789 | 139.938739652347 | 139.97636570613  |                  |
|        | 141.760529549196 | 135.2979041294   | 132.769455423385 | 136.648306684974 |
|        | 134.517774302213 | 142.603436693587 | 136.158508521357 | 130.470034945295 |
|        | 145.203083375014 |                  |                  |                  |
| SKI    | 198.356420768703 | 206.391403266202 | 233.232319881243 | 225.950750084197 |
|        | 211.269041187154 | 190.138730960643 | 192.954269340616 | 195.776369840059 |
|        | 179.122374556365 | 226.055406842613 | 193.028341755594 | 184.071078414327 |
| SKIL   | 145.468654174037 | 139.049085468313 | 131.412979573687 | 146.428534132236 |
|        | 149.320667417893 | 143.901267937876 | 168.384397488011 | 150.166324293431 |
|        | 155.3016514732   | 151.976432805924 | 154.579913524947 | 145.463105638655 |

SKIP 139.970213028387 128.462674862751 116.989409891761 124.469415593643  
126.022145004164 126.890841187249 126.848211027661 145.904866987074  
124.35721327773 138.638573020758 135.449919220607 131.280092370361  
SKIV2L 454.64556253724 541.460843251764 471.816954259146  
584.548578914846 871.913035811066 348.506289278042 794.165408266062  
492.780880796036 506.898635822094 530.969825236996 530.387315639095  
480.712219116621  
SKIV2L2 408.201232787978 364.191263843897 517.881547706391  
388.887050777137 266.756647182704 338.075238647592 494.067878734396  
537.216291942143 300.482945704017 536.609777988581 625.932910814208  
557.026028810367  
SKP1 915.579581760396 855.112210714686 904.211195986553 682.315322994357  
328.826483579278 748.161769171818 650.263737836685 748.703265448403  
600.430996779799 584.548578914846 285.258824662946 800.373159084181  
SKP1A 530.387315639095 524.541494680558 611.36406319509 409.282410265733  
369.838429521168 645.438835606933 758.863418917419 641.774812292709  
528.478292835214 873.256632365737 736.603605876572 751.896334334052  
SKP2 213.914599384797 228.9901869793 221.027562527572 234.370850809531  
442.590987372759 593.990687449346 404.726926716133 691.205738835917  
620.899414581162 362.019824026781 302.462763120177 430.590533290315  
SLA 177.415756020166 164.935120145905 142.711117470317 147.815673580657  
151.877035446575 184.518666956721 159.055956234445 275.437030326768  
341.197826517049 176.714471790643 183.236087954054 153.589626253969  
SLA2 133.86835278231 138.381508741146 133.031431118772 131.330974614437  
132.243900762936 128.888149939072 132.37450516592 131.058360514673  
136.403353223002 130.352674121108 117.824694297846 126.501648842366  
SLAIN1 185.560737176115 179.220691178402 217.560691345072  
196.310746973798 170.306241656131 146.363991934916 154.179891883612  
172.214433016685 186.563913311757 140.354508398385 157.967824935915  
141.990639998829  
SLAIN2 225.065765924246 234.768591315095 274.235001739215  
215.585089158905 156.420501464224 189.784608429624 158.448557470725  
158.205235596076 158.429761055869 171.552010365305 175.832474809232  
179.198164545975  
SLAMF1 149.599523779175 125.666013736767 121.781562010645  
125.674471551099 128.407968177242 125.231476412101 127.327765407459  
140.225329742578 184.937088280378 115.440152891339 166.825501664231  
128.331867822629  
SLAMF6 154.146962684738 146.139817421758 138.436029489092  
132.624674205566 130.766401858384 153.654616088862 156.873097743717  
242.382534384155 291.105673222859 149.742140955184 172.758230728437  
141.369723386494  
SLAMF7 159.895303363094 145.349023185855 154.542190113901  
163.741411769369 151.984619204523 159.185616602396 182.346834032145  
171.345989796519 192.804447792672 189.044966519228 166.440530119785  
158.216790540415  
SLAMF8 137.50266393001 143.045416067967 142.113150767261  
148.199249855894 160.573172150801 146.431166706908 168.210416363286  
218.393783552484 226.086733606951 172.774914399844 160.078122267577  
147.096559685764  
SLAMF9 146.31468639383 148.807422049327 143.245660951425  
156.7940590796 154.291717784335 156.630366766924 163.231460026317  
150.754492902512 152.238845270993 165.797170648964 164.665907233149  
148.901723851925

SLBP 439.394914369983 377.225452025984 413.330906392915 367.732191251547  
600.757699463777 642.934824227327 773.330948077036 903.824331691969  
938.918431240228 806.88003660673 583.314509855875 815.045148478814  
SLC10A1 143.598567970841 131.832311911703 132.767474034305  
140.299459596491 158.919340819357 126.178476831007 228.879434668972  
135.29954024755 153.811165696928 121.360822445187 145.591320521493  
130.00310962336  
SLC10A2 144.720594512581 140.947852529815 137.940675746397  
130.820415610578 126.780096523484 143.844153373367 144.095471610836  
146.95272087759 139.534014289993 131.527148910356 146.70774472499  
137.312488161187  
SLC10A3 329.146025181674 338.665115108128 292.185246573643  
357.672950588403 667.421612441201 332.400086578723 491.034395489684  
258.145539382199 259.094411953361 419.593558001947 309.181150342727  
310.142754559096  
SLC10A4 126.199219102601 126.159880038854 118.060781901686  
121.841080387875 137.374784875444 129.831076624826 137.672798701643  
133.037138438863 128.054394154801 119.98864381644 125.649525720177  
135.360087349634  
SLC10A5 113.609215169397 114.835386789236 122.007909794484  
107.187035835972 112.75167046116 114.400185930969 112.239647575661  
107.205247133938 109.067239220744 122.480000773859 127.209043595332  
107.863971340407  
SLC10A6 134.197892075036 140.916876460413 151.070654092886  
132.336431473522 142.601556980614 142.833025633146 132.948096807634  
125.926774314737 115.473431881597 232.892635502424 119.278231442871  
127.486216183602  
SLC10A7 150.78145177853 146.349773982488 141.561097275802  
134.451423371791 135.403206634483 154.774977482202 163.18585933431  
152.309460630038 157.11867820027 154.79534193124 156.381599544223  
168.618667871117  
SLC11A1 125.455347031878 119.830261862805 118.488997046932  
117.137027732123 151.592787806315 124.164523121103 127.931887647108  
145.471090720048 163.799748670842 235.650688823345 119.119693776276  
121.381365873873  
SLC11A2 629.707646271678 715.039905439621 541.460843251764  
630.473042320288 624.467319041884 687.269774217064 1856.05025952611  
1145.96710556468 2037.96470181871 903.144845227364 730.042712083388  
847.863177169335  
SLC12A1 142.157512965166 147.856285290748 157.096799934494  
151.433634564939 136.779180530712 148.390417679848 144.944095553004  
133.886091996863 132.472505035111 135.452340998039 125.27625242915  
150.038722708606  
SLC12A2 283.084102918359 277.75958501062 232.918330930051  
257.24481414803 216.582862850259 260.098788125373 237.146972312448  
295.099840299681 416.307629596091 266.135477775641 312.339824919124  
246.748589597262  
SLC12A3 153.620767586182 149.057388078138 161.390489603929  
152.609055890822 160.303394115537 147.628367263728 144.375109087466  
140.174087049513 148.856482636773 154.398416018484 124.541257225826  
149.327005696336  
SLC12A4 259.094411953361 257.534293550585 266.681711962236  
291.221427744817 224.766155406229 129.253638326633 177.500110974116

126.609398779757 127.808579455383 177.582314734704 226.989201461085  
157.512561489621  
SLC12A5 133.576812299149 134.595090783504 152.301556397498  
148.211354898758 150.244284323504 155.150904036206 149.908997158341  
150.952264779196 143.292552892073 144.606963457243 139.734784859495  
148.272252953881  
SLC12A6 140.248610391566 149.826291268485 130.172041917023  
145.36249226764 133.020551937677 130.334622987505 149.505323932806  
137.4552565025 140.912921321622 225.142823691625 140.43729728368  
140.936204899093  
SLC12A7 118.614641349402 121.080413308265 112.534864678892  
112.943630133093 130.682112236817 123.150299476109 117.893918180502  
117.390049487174 119.308345676905 114.936648783324 145.299625153537  
108.715328458556  
SLC12A8 185.583997792931 173.714940254592 177.214422668922  
186.733394375839 312.705458415152 234.768591315095 219.687151891777  
208.045210163121 281.792602269388 229.046153362151 169.036409026328  
201.365457496683  
SLC12A9 534.745066397679 576.997804865103 609.939982655706  
684.180060287047 1984.47173096657 799.759250503507 955.604404066769  
882.798927428142 579.678635803225 646.461274173693 843.936924659514  
1223.68146968716  
SLC13A1 145.146797807275 154.329176514501 148.732027660387  
164.357373919714 162.397078614596 156.901209828741 159.42746786085  
143.870849001074 145.148058824491 169.556358586336 144.195705502443  
151.3362561751  
SLC13A2 160.525939340745 153.582185523361 171.714973501563  
165.885072907195 141.424508069834 165.870621884073 154.598520288855  
150.863099494798 160.27511502306 149.848740870148 137.52653395793  
168.854819201403  
SLC13A3 132.84268776659 118.66946078241 120.931585398914  
122.180428703208 130.461084106455 129.201101445773 130.423465505321  
124.61344300674 129.47419698487 130.824958143557 148.401698825687  
126.22472822166  
SLC13A4 147.939682463235 144.877789873062 145.165443106042  
156.865049786218 163.636550341231 175.476184387338 147.199961777192  
156.671252606074 150.829439012542 138.1774127311 140.553613300431  
136.19083681188  
SLC13A5 113.632002873855 113.886420801388 110.273174147374  
112.394223360492 118.230408871812 115.923424095859 108.779204939177  
115.080736217256 116.929398630733 126.802963197337 137.107621189522  
123.010614051218  
SLC14A1 324.481229901658 305.720812071583 229.230239609291  
169.598493862848 194.831347257735 407.957436380989 350.658722333252  
1183.82018168635 283.416246133873 140.936204899093 1154.86609813021  
1037.97124386242  
SLC14A2 120.046892432373 118.505980204837 122.190734676247  
119.207503310618 131.221105247771 116.346181133756 126.488299049827  
119.666650919579 128.0366252162 119.894737403889 112.904318310632  
120.07034081564  
SLC15A1 119.95959059725 105.583474813289 118.770061426689  
107.156457065853 127.456181182121 120.530092530622 133.707285280448  
126.941650500751 126.442999559539 135.075759558051 160.319687451789  
213.364858759772

SLC15A2 120.786630750686 122.351186755611 128.101371225192  
121.545189875973 128.521380879209 127.856634523494 132.306569548052  
147.717748449017 147.379741260871 127.67121559907 154.973990421257  
131.208112906919

SLC15A3 604.047164856689 424.665056900526 295.187978994932  
393.707031354025 413.913442080187 227.52352046188 342.037040881785  
358.897128592042 912.483177705931 382.960724128105 255.638433159437  
297.921617748468

SLC15A4 460.651156484562 451.210172051464 319.090371885653  
378.967410725775 377.593087606046 273.959220003188 382.701467158304  
358.479218923158 381.323457262383 592.613689704907 381.121621815163  
375.856200488667

SLC16A1 134.880138942756 143.296580629431 153.494456800685  
141.70123350351 150.985061659285 140.229267364503 139.574895021783  
133.280418227922 138.050999864689 147.395335979341 148.859129298141  
126.089217853289

SLC16A10 124.160433356046 124.086902599543 109.832757716464  
124.153063838817 132.620474788855 133.090474303043 147.333142209628  
145.247717878099 131.972669163481 164.601022396674 148.155692596378  
118.514618614167

SLC16A11 126.017158064032 131.744454088995 129.192326574697  
127.824005374202 125.381865040574 124.699127988314 135.65700435306  
129.737882221259 121.483610947845 119.810421687953 119.643417329571  
137.267307036807

SLC16A12 13563.1694195379 12493.2940668467 12916.6904389018  
13190.4826009741 3706.41283595794 14073.4649333964 7266.3946293904  
11281.201625198 9820.93899217345 6919.4226838505 7446.59106452583  
8982.75408120297

SLC16A13 164.276668889213 144.998415908498 137.85150144918  
154.007244208673 137.668179813327 134.596391166462 131.136073942692  
145.892876412762 136.653140842194 127.291712212051 147.610616423185  
123.632031112507

SLC16A14 191.018168651394 163.451063547847 150.531753446398  
155.02097482487 157.909530751723 159.961729971624 143.41350503793  
148.888698484378 179.863096463897 135.837733533444 146.210814568357  
164.970438494223

SLC16A2 201.731223995887 227.774354299962 155.214638707046  
250.30085097088 156.169405925094 137.276586668477 135.135834717193  
124.272447276746 149.925051977052 154.433679792749 174.498521167568  
138.558300898079

SLC16A3 440.404188514231 540.584471920486 202.253560413436  
428.850337327605 2779.89882032092 740.196934996626 2039.55802107872  
728.930140593418 989.396074034945 1347.10650016064 2063.42824094932  
1495.04587558545

SLC16A4 169.909886347082 154.722895261876 176.516540713888  
168.547575047205 137.614020921217 155.924471321076 202.819949307954  
148.235495611248 166.792003878736 141.94585838352 138.240874738649  
140.372463604232

SLC16A5 208.456472621593 211.012142461725 221.253717494488  
167.830629616121 953.549801897112 585.075322115635 445.661863626419  
354.205670284123 1268.73280473728 247.194197143562 634.356322976353  
263.994460303088

SLC16A6 145.01322767825 148.861141988806 157.003367685421  
152.772177215856 179.863096463897 167.284724396943 163.889522525848

145.628239642187 158.000456937922 157.787233338636 132.088335186716  
150.680628549529  
SLC16A7 114.977135060317 121.837571435384 116.416896654975  
114.234369421536 104.681530703922 118.510960607141 119.218909479403  
119.315932907373 114.85602874727 120.633217745524 148.211354898758  
117.097159106043  
SLC16A8 112.605287278882 111.956783714784 114.841964705981  
114.730641277464 103.550817366724 108.43334699667 104.739307327595  
110.858201415824 115.649568330705 108.984922760455 139.423432468886  
116.70650322987  
SLC16A9 284.195575802966 242.5085895186 230.399207047948  
279.668007824988 116.300028266671 240.410292351169 119.755151432304  
151.933078262284 164.886944426276 158.434048174501 356.770158430601  
412.941907828617  
SLC17A1 137.337298233161 129.253638326633 135.400054238597  
140.194414869595 142.759452994928 142.729945734027 131.31716158922  
131.071614211431 131.326536951329 133.185908839766 135.479300698192  
144.499680685194  
SLC17A2 159.337816095012 140.968351978909 150.053948736789  
129.145457341484 145.744039709418 138.657241641263 148.175206259619  
144.935571704834 151.839306445341 161.430219824313 150.680628549529  
142.592455241752  
SLC17A3 135.294664456623 129.088718286391 127.736712231221  
123.288028185949 129.7137422914 123.998343902602 127.2369420721  
139.023486014525 126.158204790885 118.115015846489 160.825408895349  
137.388190728367  
SLC17A4 133.608461289137 138.734437288431 149.026243159195  
160.816803370151 135.913632939299 142.22515098612 159.867178630115  
145.212306927438 119.202966460612 145.511473738224 134.218867540274  
146.316145173343  
SLC17A5 128.434301921433 129.116354997747 121.501959818928  
128.824243581806 131.667508767686 122.673596593654 122.834017529045  
123.789035728194 123.607412609763 128.086493618022 135.289246539398  
136.411722212312  
SLC17A6 124.036907709461 125.400741907779 110.448948495323  
131.765387886767 108.970432124412 124.70219935334 126.476866025397  
114.027244455291 116.685023927951 120.918190840083 129.476648077532  
125.909917932316  
SLC17A7 142.438586625317 179.30729544595 139.125340284813  
187.686326872667 128.947211021681 126.583342262489 116.346181133756  
125.982423431253 129.596851280135 123.111192189217 144.301577198126  
130.677737553727  
SLC17A8 114.373370072994 120.231559540009 115.785084044427  
115.672307128514 115.097376525707 110.486191378104 98.1433670546536  
111.672450681359 115.231121959397 120.602818832247 120.027996187915  
112.114933398547  
SLC17A9 168.687845035401 162.54008293513 161.44729973777  
174.92026613834 158.072347847051 152.22701178148 146.223880979601  
167.984051648058 168.570133927038 176.214950733324 126.124937863679  
151.877035446575  
SLC18A1 154.537240112989 160.117742879282 159.588575526536  
150.098708715617 155.810034593382 166.910561772689 151.78607484924  
152.937861585496 156.846991384413 166.917552275021 151.933078262284  
147.034021626893



SLC18A2 117.990622156287 112.742895297124 121.434713764246  
103.448244268961 107.993707827557 111.722827315911 114.099623939954  
109.318922864507 121.924036463998 115.170176263172 112.747067417774  
107.976233194926  
SLC18A3 105.25877906031 112.534864678892 112.841406363391  
108.061315311823 100.841352336505 108.118551275778 107.67395123577  
107.74537523456 117.141089194822 124.370381674692 116.445184223804  
120.71782441569  
SLC19A1 131.246704975084 154.159124458167 134.819406064011  
165.483218650824 472.793332506369 211.869300324471 232.200025766422  
202.44778603643 263.509066170434 160.267072311782 209.487240895674  
188.277563426829  
SLC19A2 232.465880700217 196.536086443884 233.82434521462  
261.322374889497 230.469548500304 222.285940575778 259.767151797583  
243.839402991061 223.778708427552 252.851164967726 221.322724563472  
236.651601701157  
SLC19A3 152.035992124554 165.192945734166 146.672270660899  
164.072443259668 148.01816554072 161.979914539039 161.34427428845  
159.862252588012 142.12808103815 150.993910190626 147.225911875196  
146.218767446679  
SLC1A1 165.607095120227 150.287472248483 145.814268094808  
170.801761175916 121.918698091955 134.551054564417 145.069840844153  
126.064311640223 115.890431424899 128.925288777749 132.37450516592  
120.272964182307  
SLC1A2 139.615706918035 155.018009545475 117.546508214236  
125.422348389595 127.545397354821 133.233826283531 132.223321299997  
120.602818832247 119.532740676246 136.621173927187 150.72014060286  
126.952836653857  
SLC1A3 178.863722055499 169.691392833277 126.895669261503  
156.304678960663 312.645778869254 171.287186905764 204.509884908059  
238.88138498771 259.575461599189 223.339132121796 160.625367261779  
127.842177770276  
SLC1A4 192.767155566493 184.709768457405 161.948033313443  
174.873893094923 152.393260140571 150.339554736141 136.418105816557  
144.784835438567 147.2233876988 141.805028495425 147.169765031208  
126.722212054469  
SLC1A5 498.534168389928 533.784151495549 388.887050777137  
304.679197422439 2537.90501983425 506.659740456829 1177.70376288106  
455.21285026588 851.221199352646 595.752426322468 1077.33874251157  
527.498114662967  
SLC1A6 114.664782541261 116.346181133756 114.170354748872  
110.242638217587 424.285848583977 112.298254005045 284.574888587832  
125.861564323476 270.421697521366 108.036254606246 167.237705290905  
113.773684331489  
SLC1A7 154.395261192114 167.719651771357 167.07092218037  
203.888365494623 484.903322308422 139.048016900762 187.167255451988  
178.684992551017 147.562757301251 158.312614511836 301.49286558088  
152.685860451112  
SLC20A1 715.43295523922 616.339439383796 829.126529857044  
456.530337997907 1065.74382494535 5859.56559124843 1836.22560264874  
1492.83354014907 1342.29111510713 861.786094902013 3829.87905458534  
5361.3600315322  
SLC20A2 478.847650837714 458.875979229339 482.466736153026  
591.437752991512 411.221560795912 457.548150688248 661.545179083009

260.921177985439 281.53843450593 471.315730378641 388.887050777137  
316.590387560909  
SLC22A1 146.508628678304 157.879839844491 158.770502070553  
151.316421810192 132.9990595243 140.877230937687 149.083667086067  
139.746733428525 147.946236579299 140.798706399757 156.62031503525  
138.883710791382  
SLC22A10 135.830453690107 131.157702791998 126.499257771192  
131.380387461901 130.479845410716 125.110064579814 136.470025638057  
126.662329971897 130.29531841096 133.805991920905 129.4807689399  
127.484178603011  
SLC22A11 123.341568893224 112.436972452838 130.260174841484  
133.363883851093 125.114303270024 134.682319733908 127.263061874385  
122.385508330707 130.602539780714 129.910866236901 132.053242760381  
134.491232148834  
SLC22A12 134.423260547727 124.22833964472 129.114161128113  
130.669539169739 125.661697165943 129.719122724699 121.263939656119  
129.717701654435 130.736466113571 129.007924852801 138.53179773391  
136.392389842232  
SLC22A13 136.092086452096 128.497571151343 136.679405220947  
141.204458186976 127.67121559907 142.93332947113 118.109991440011  
148.212445624699 143.587562550004 125.475308885588 139.725987763226  
141.468076901305  
SLC22A14 134.371254010574 117.619337212037 154.607214750531  
143.778327403708 143.070170783764 127.893555451807 143.607579034109  
146.268073519544 137.495288670441 144.522461545204 126.395209041884  
142.934869757362  
SLC22A15 154.124057382276 143.2438241778 138.735156909846  
126.902441495413 146.97334315047 155.498580125421 145.432667767652  
164.172084711099 133.711821318079 262.913054904154 147.544539855657  
149.813838004575  
SLC22A16 108.779204939177 109.242622591321 115.371180170291  
115.14883090249 122.174036435094 111.788481822686 113.112450527382  
126.199219102601 114.631759839092 114.805810485989 137.212568398657  
113.852849454448  
SLC22A17 510.811470658575 530.969825236996 459.771019162573  
496.328898534802 264.355693070937 221.664431984861 220.362946606131  
193.064450357153 209.070372320593 211.160781061336 163.159571059471  
207.173653740239  
SLC22A18 151.148295679242 157.895460674072 137.312488161187  
135.701041557713 334.199307788576 185.027902485379 150.423586547273  
169.903088388196 175.21512930507 182.143506470859 202.343343669937  
178.751706380632  
SLC22A18AS 110.518806964366 127.269672881591 111.895279866421  
106.953841653951 189.94130405123 138.829793136954 126.948090173876  
131.292195405993 127.678512375099 241.734804013256 152.319720089773  
225.275049011909  
SLC22A2 139.244051199144 136.101501973431 136.614620534169  
136.888915439473 129.431497372577 136.195555442748 146.166710487448  
141.267715391739 138.85328409337 136.408314486465 130.63591305094  
145.941674563997  
SLC22A20 135.407536491819 126.520909083643 124.821581853501  
135.348086420636 141.767311448808 143.163083976105 129.933228671483  
154.528396813382 144.249339611941 153.962758393332 146.128066033346  
141.36525744062

SLC22A23 217.287912825619 224.466829629468 236.899421827427  
229.076507182239 280.292616101827 307.906312092805 351.515059400947  
245.110761598207 283.952604729032 566.543765584009 308.767036855508  
250.481442411876

SLC22A24 153.412469512967 146.696029753123 147.182394557583  
146.218767446679 130.559515534303 137.128849888863 144.986655090517  
157.353493980339 151.384762644292 144.237691418911 160.407690552027  
134.371254010574

SLC22A25 148.334425146129 156.630366766924 153.792925101459  
150.058160923921 140.395662148924 152.945550129539 142.64421300687  
134.528971384442 140.264060906597 141.76964678852 119.092335265325  
142.861359851088

SLC22A3 149.026243159195 158.950169226637 142.717436384151  
149.952762225731 133.660514488153 130.215290990406 134.041098536814  
121.144174389418 129.083756379376 147.057116881846 123.940632366675  
129.343440464729

SLC22A4 138.29167712246 140.419686138586 158.8054811093  
147.243263182654 155.02097482487 147.879286704 154.21623304309  
150.059862107155 143.895399273595 166.1677526 126.253319664664  
144.982462113231

SLC22A5 220.098071755353 200.08007665693 219.597808863947  
172.80265044721 235.261278607182 232.321454436688 316.623219008156  
366.073387075385 330.590986934704 203.983168778488 440.745866155629  
310.174932137546

SLC22A6 142.316441155937 136.831280469398 129.45936538019  
132.404879616886 121.410606617535 120.975542702338 132.582062079623  
136.357788670568 126.872912960681 123.929180327423 141.858928084825  
137.276586668477

SLC22A7 146.95272087759 135.457871301652 142.592455241752  
147.393178410954 157.656220148041 138.56436658053 142.690911343704  
141.344034069373 142.119327380686 146.323776429268 139.585373400347  
141.015441854424

SLC22A8 114.278113876915 113.22850386845 109.003365273337  
113.199690522854 110.296425545476 115.366496551426 109.098105822556  
107.949834974369 105.952640312359 112.534864678892 118.269780903508  
107.48180681159

SLC22A9 142.869595099569 136.6729514905 138.746987455826  
138.261506562904 145.041430440608 146.156634581799 147.4182675362  
142.879705723262 145.404469340821 136.111569529393 137.649424237506  
145.221594295772

SLC23A1 134.283467987991 136.2727333616 141.70844587896  
135.047546966745 141.281116867082 137.663941989772 141.657914155491  
143.827500301207 146.67875644027 148.925418133902 143.967197319361  
137.045772853855

SLC23A2 169.502103689662 177.696849418064 144.977958320895  
142.097126256137 195.645181575647 329.722135361491 213.077884261943  
237.078644686891 293.925995360234 142.623106544789 269.006221210929  
243.979769719186

SLC23A3 135.725202462502 137.714430743204 116.029201658798  
121.174618503873 124.676743480622 139.005788243703 142.232918684259  
205.121123131992 203.19299227665 128.400741751903 216.9491329483  
171.714973501563

SLC24A1 169.642188114285 175.111460651956 150.775805918537  
171.954184094677 167.397758092427 164.365630106697 233.335353447342

166.433933349193 212.531329857909 168.327600230929 262.416137698884  
240.465165615601  
SLC24A2 138.820797333519 125.367386907897 150.142724640067  
132.324630056168 135.48250324478 135.416008633632 130.960045345375  
136.016912147651 140.019540869992 143.040254576088 137.528342105233  
141.455841055881  
SLC24A3 794.165408266062 733.195136251155 516.177596584059  
783.059427015955 123.446714388901 189.160454951382 138.352562277336  
143.506243892155 162.464201058576 310.640107228956 313.480307434343  
136.278361222532  
SLC24A4 135.52861375119 140.899799480834 140.299459596491  
132.686915065196 143.123983359386 134.445893291422 144.246749835693  
141.226901872221 144.328571856869 142.106329280184 145.464640276742  
138.708304921088  
SLC24A5 110.952108124186 108.807891863679 112.404562115306  
107.126004317323 109.318922864507 116.507315786826 118.474291525263  
103.826308328446 114.533677697026 115.958740595234 142.171459019791  
116.764795914545  
SLC24A6 460.742037437298 501.166869173253 389.96566674501  
516.892850913889 1014.63777151551 651.759589129833 949.789710063337  
630.176145684641 789.971871940893 613.063954859056 551.350758868377  
734.469481390593  
SLC25A1 434.390613381746 447.674610082872 422.520372346993  
546.611519125021 2703.76111776248 547.042461070351 670.856008549143  
797.73902873919 652.654673756838 763.533962249076 475.833242673151  
763.263858769038  
SLC25A10 207.624240598841 193.428733288774 203.487137264  
173.497575259833 1139.76755449089 478.180723959397 478.847650837714  
933.723483173584 415.957832362051 266.101158071711 383.259887828605  
475.540659315339  
SLC25A11 366.473258467746 376.867306473426 266.842778974988  
519.450899933049 411.968307579588 208.914498369991 189.567241599215  
224.805404798696 213.990575186237 231.239126548656 251.915179734134  
234.626574390973  
SLC25A12 436.482580413523 388.966303073519 433.928818077527  
454.133372808458 163.885645883066 215.219246394594 203.125568980238  
206.876572583814 170.490099282436 218.393783552484 257.706904467657  
270.973600107882  
SLC25A13 281.168898910065 314.845965872164 222.943046618742  
267.190228116903 807.604205890244 630.894382644903 535.49374437073  
694.429144766435 829.740755449333 317.121202656311 428.462270756201  
916.4187683687  
SLC25A14 241.917371866481 226.595006724068 251.731327363027  
240.306287921209 257.941367816557 378.862741410359 296.375305136807  
241.293046687076 284.675990197899 237.358925391616 223.941946219233  
281.037762232619  
SLC25A15 162.447903830131 160.876228450608 138.739176678465  
172.297698667311 282.870785313621 269.261595558589 207.598754515294  
190.111477641308 196.691380885508 234.461229199142 202.458096827378  
274.831898505989  
SLC25A16 204.219197797869 187.824032557194 168.618667871117  
212.854068610681 152.175423676063 166.635366968851 194.552533397944  
173.115418167551 168.744610747563 162.240414467004 180.698727334322  
188.348499229585

SLC25A17 164.986006226427 190.389158930835 180.142758394321  
164.917470819096 182.851203073653 213.510783808898 203.642739476708  
201.969002368045 197.51109998167 206.972440734038 240.253944604431  
216.427103365727  
SLC25A18 166.209190082084 150.707113487334 150.601874392926  
164.708712337156 163.73339229802 174.246705740225 156.808992920564  
177.223953859764 162.210235526457 159.752644678596 151.245520459264  
156.698856643638  
SLC25A19 285.258824662946 283.982575660968 303.608918161742  
367.898258897888 321.31562287169 388.192984832638 272.314332734711  
405.469705787631 391.039114500903 304.985269874607 314.292700455545  
317.839512360245  
SLC25A2 123.007103885415 130.66511389864 118.604395992281  
117.003205777245 112.314595956147 117.672645717508 117.546508214236  
111.716607815635 114.556542069712 123.351112976814 119.355650892262  
118.05386204863  
SLC25A20 263.379982742085 291.444155562134 272.16090053595  
244.73233791067 205.612579504495 264.429717032654 212.272826965935  
225.820503820866 251.939696394174 204.031081842809 269.238332581564  
221.869191666931  
SLC25A21 137.267307036807 127.720117789235 133.65688823581  
128.071379991958 120.436408685057 124.853659050216 126.680992733621  
129.24482916531 125.4408430419 130.083266044947 103.012774960061  
116.746018509166  
SLC25A22 156.964080041261 170.4583554058 142.586051173329  
181.088268167074 384.16579891756 238.745953695925 246.031568259337  
303.555333002419 325.96632528242 245.426639190893 326.640168906375  
287.145105895235  
SLC25A23 3983.37592132018 4663.03253705034 4938.42484385053  
7519.94306346326 422.520372346993 478.479988875208 496.991561192565  
289.257002046658 219.814706416471 350.58427958432 555.959424692051  
510.555184032017  
SLC25A24 137.172030225913 144.636277619886 140.451465188624  
134.17351030102 153.653453808799 199.250680260804 155.542691937539  
165.549190801014 172.259627777465 330.143103381406 167.365850007748  
242.902900881585  
SLC25A25 265.110264596425 270.069634610818 228.414049417352  
269.981476129439 195.414464905232 213.097664319741 156.239937979051  
187.205674045893 186.156006020985 212.473610495213 161.636411303968  
174.971350923613  
SLC25A26 186.733394375839 187.336349390012 222.365208637146  
189.83433085782 178.531913384538 205.908052642222 230.227432807772  
153.271518348258 210.711890471222 200.741234443918 186.268881719287  
207.453490385508  
SLC25A27 172.741890316331 160.742365719929 250.885949055834  
136.202953030465 114.830474086443 122.469113037809 141.319594283071  
170.266415287865 116.331428876124 125.413619056436 145.983627592197  
126.941650500751  
SLC25A28 1665.14066952917 1587.84395475807 2423.84327263111  
1411.2586496281 680.743052197025 963.343120586863 1649.46398639795  
993.774175699873 1218.05434595121 930.25842384208 732.877169346979  
1236.56870367797  
SLC25A29 191.543371466252 193.190059954084 217.074639597142  
189.082778234831 350.308420518351 185.570062118736 192.465510013851

198.568180234676 160.446191353364 143.589222264786 181.036375971015  
228.100112133941  
SLC25A3 1867.55140010155 1580.27059464289 2395.75453574049  
1810.68433539154 1276.14915305515 1863.96986643676 2418.66999907188  
2801.66917828364 2004.19532096239 2208.49325118803 1724.22121078776  
2530.00219297102  
SLC25A30 129.449242018727 120.77691423934 130.818181991958  
125.12823219142 120.560056224145 123.065355919378 114.768639931659  
127.385776388242 121.531401500498 120.046892432373 127.517446456116  
134.703474191011  
SLC25A31 135.559535347364 124.242539075734 147.512290383685  
139.748733350375 128.205022859019 128.666652639862 135.946808893146  
146.34029698108 146.635140441079 126.682913361149 149.545278163222  
153.393651104539  
SLC25A32 136.735930829008 123.97336552797 116.258629237662  
117.442158626871 124.578552584603 114.01599035448 119.249084967945  
121.260355515095 128.583503171594 115.277302351501 143.576177625265  
110.900309203531  
SLC25A33 130.546471770588 140.958277301476 142.37457375182  
135.412051450659 150.696963699371 132.86879723151 159.636846021745  
140.121874960672 147.006482557682 152.179281925254 119.373287155621  
139.099483279141  
SLC25A34 166.760758231104 168.082591651722 154.755544586846  
161.129770392464 152.755535408382 136.05434446747 128.150801169886  
173.372949622338 163.245806772716 125.908576249439 158.371599884762  
136.430232926793  
SLC25A35 126.890841187249 135.43939472868 131.176413983785  
127.247764390727 149.927773276383 129.728266017061 119.330439721904  
144.565926379402 383.74357557363 113.521599852465 174.107661206415  
119.180033382937  
SLC25A36 354.531898366438 271.196028302639 389.500591134279  
217.670330817769 224.396933003452 376.692422468905 386.221302830248  
394.810886122555 328.269845211173 384.97980473847 321.177982468322  
373.925939492544  
SLC25A37 364.895113721763 291.839070398338 308.803322140241  
300.150235383065 245.378747269929 215.194909819764 275.929414239664  
172.251953149975 297.071121022183 287.924891622962 204.489837323989  
223.220997990627  
SLC25A38 350.926679856514 328.919401925375 383.033242143031  
338.585771590234 480.36420271348 301.188296465202 288.596513753617  
217.148957110623 295.851459742115 145.210787864362 284.798325549665  
226.565823278767  
SLC25A39 1073.40463823132 1293.38808483663 1058.55850972326  
1371.56635975955 4711.21389812942 2601.89405525276 3119.93811557461  
2691.41389079777 2649.39312662326 3219.27851139047 1268.73280473728  
2037.96470181871  
SLC25A4 1809.58702081877 1737.57015396357 3200.61067185412  
2596.43650409044 458.607367472574 663.451243037105 1095.52349352502  
1071.47374315822 710.76653239801 706.292905820227 400.550044186372  
817.529344685717  
SLC25A40 156.043994260248 159.099495828517 166.223079895236  
168.095061700814 234.156713102803 185.405774238391 188.322853571195  
176.66175597182 167.049197726715 200.179796117115 158.297624312257  
186.388067641269

SLC25A41 140.43729728368 145.760577027524 139.715836473047  
160.159630699959 127.575660581922 151.617989938924 148.44261900795  
143.558088035758 143.065258692424 130.867819112143 120.827732270626  
123.048352070915  
SLC25A42 293.17183601265 302.601458409102 349.623729591612  
375.131728190867 281.369059516242 250.342080183479 302.788940260961  
299.717935831288 311.612118247493 216.181417552574 258.145539382199  
203.87884605779  
SLC25A43 253.697419495959 231.547654653783 255.638433159437  
214.229228850802 294.535979194434 272.077877821339 229.26243866226  
309.997909440664 474.629173435475 767.662367310672 327.749926183823  
318.778978094743  
SLC25A44 422.23268864343 440.745866155629 353.912654262209  
455.930204471585 543.389747823877 570.771089597761 460.089380701982  
668.127527385348 493.887026009442 414.538237455116 520.962651968997  
733.49038042129  
SLC25A45 142.883466086309 147.985843605585 156.445294524594  
150.023791544584 157.751477529076 159.276726310525 159.0794075765  
149.524040913256 160.48993837044 153.6855881767 150.070213543579  
172.612152484322  
SLC25A46 319.927209914181 282.719121652073 286.587945301875  
294.17588071297 342.998459706966 317.061815822659 378.4377409749  
320.390351199433 291.313681141442 776.98412594767 329.406649846151  
361.327436394941  
SLC25A5 4847.77258830631 5572.23400804004 7617.316805798  
6990.13809515289 16230.8346205808 11509.9289491201 8864.70614223459  
13217.7001749493 10202.2226913537 10048.4260790604 10741.3064142855  
11281.201625198  
SLC25A6 2979.27692778783 3184.98944679038 2653.47752512393  
3968.38723079061 5506.81944079182 1925.60246708149 4043.28299602858  
3122.71790981947 2452.1304336603 1554.16120123599 5759.5586948816  
5265.74259211695  
SLC26A1 134.203949774763 129.961042190085 138.512938877774  
134.506216147934 128.997028325896 129.329521415816 131.391434131813  
125.542301916791 131.841436867483 137.298549014192 130.314247368361  
137.592523459311  
SLC26A10 170.290455446376 170.878962027347 175.857952663383  
200.890547965585 137.079479050963 147.537691509156 136.368258257435  
159.384480972135 147.954079022076 143.849399031223 141.16066528405  
147.500009766324  
SLC26A11 174.737828693216 175.073595611435 190.018871923219  
177.11682975342 183.82450756022 202.568071395884 224.869569455052  
180.986305037222 182.873752254411 170.966588957686 180.408639020724  
187.710185880162  
SLC26A2 197.859546367676 209.684346388892 205.57572471694  
208.690347128273 183.236087954054 178.628885995439 236.141982516399  
376.082040863747 171.916201289104 185.602093266907 283.084102918359  
200.146843808423  
SLC26A3 121.384582834956 124.102216523803 120.733009784454  
128.118890154386 124.947565043721 118.718048764985 117.380281099932  
120.511896155396 122.568743478314 115.967513057229 128.402511355513  
116.214857935694  
SLC26A4 114.217867810848 120.351217130679 118.226036680442  
120.428171428188 115.834056091815 114.893462783007 119.993313087183

119.882472552083 119.920097823022 133.228074579352 129.656088836537  
114.342980656214  
SLC26A5 147.236728188605 148.380555606786 153.200153031275  
149.879951192667 153.423579724911 149.335288055732 138.455775926409  
160.390564881326 139.938739652347 145.34533633425 153.738794649373  
141.302647488314  
SLC26A6 186.551385094902 185.691922436569 195.630643168176  
185.923374274306 532.063437013967 239.789994201722 252.404931238338  
203.563098303937 227.236255752375 320.877897822963 165.836534881802  
243.538374440134  
SLC26A7 138.119788738226 132.464205461991 133.181855719499  
127.935614145702 130.856249657101 119.815258991448 142.798248249144  
130.253372129786 128.771367080039 146.343230597246 140.411200873743  
131.215202712283  
SLC26A8 138.036876466521 135.485867373592 136.783974483005  
131.662585510218 133.095245865663 137.7872481668 134.325520377207  
132.976977898242 138.29167712246 133.864612785572 134.352155462211  
133.969054754299  
SLC26A9 111.178024950204 113.810645407837 112.282839763467  
116.653897702566 109.96017424123 118.173752075833 113.61408868553  
114.790717658188 113.905364405553 110.875112640101 124.45782375705  
113.184495948936  
SLC27A1 378.728516779744 430.649188209901 366.788087591332  
587.654093308465 322.302219773624 266.964673763497 232.465880700217  
231.63127072986 208.838523729744 172.631499322646 239.572670410818  
246.355720496468  
SLC27A2 130.272086123019 152.371569700039 131.945667475797  
122.226875707253 949.260897408911 332.666916002481 423.966625351913  
377.148528768679 284.995098167431 138.401406375804 316.663128947813  
206.77605957523  
SLC27A3 693.781708146282 726.556553101727 658.47864958685  
674.571475335107 1610.38263368771 758.517101659762 404.445038343721  
740.196934996626 421.384700184923 643.468308027006 385.798784913201  
996.999238316991  
SLC27A4 105.49491265382 112.000309477972 129.758303592589  
117.331280455759 125.280736217267 123.58053320223 96.8261937365062  
117.455432751161 113.694351010121 122.503984297406 148.329635131296  
118.547605249191  
SLC27A5 215.47323777134 202.60339529874 187.881334544018  
197.618757939729 288.026656721827 190.045156046541 250.84781675544  
192.022864170934 146.579930401696 149.127963327999 177.88534558205  
148.673763368264  
SLC27A6 129.343440464729 143.941358917251 125.104229604098  
134.464053009101 131.930814868433 121.018722403628 135.344498171119  
138.704839659727 133.482237631013 141.476041451832 140.680326850085  
132.624674205566  
SLC28A1 131.102996816222 133.56263739203 135.267015629083  
141.092486112278 132.245217686793 131.950295185477 136.180063437699  
130.476322267589 135.588132669957 122.592960588642 147.150063462728  
134.189023892662  
SLC28A2 137.068717031383 152.368485416992 136.434045183143  
145.286983999628 141.765004355609 139.941724115063 142.316441155937  
147.359279533039 154.2433882385 163.868129628544 146.366013190845  
136.643481414354



SLC28A3 115.194730717797 116.751145098777 122.254824223167  
120.488694213288 128.229729571899 116.061356450855 110.670057121283  
120.406577236405 124.63978985808 352.303782547593 114.441223528256  
116.112013454335

SLC29A1 358.479218923158 344.737964092526 388.192984832638  
364.678403892354 439.207122335648 214.082408290757 249.680729921602  
274.831898505989 201.458970969685 166.4983332269 208.476367897256  
238.149614104568

SLC29A2 143.137158027738 150.601874392926 135.719702250709  
132.602336133471 373.860920943049 127.279107079261 165.45479542657  
150.620603731907 143.514848892447 150.405715534245 152.407614042236  
193.098116087792

SLC29A3 201.748876422401 189.434597063058 225.095016600703  
170.646233722767 488.249967208882 281.304989265608 439.727046291381  
262.196293231028 255.59042517603 145.193296081527 630.176145684641  
277.501071684448

SLC29A4 204.137195524755 223.359785518285 202.568071395884  
306.896732729554 296.088938872643 146.474228901408 132.680140469504  
172.866517097198 155.569733738768 140.283106734666 141.695537669891  
180.658930225735

SLC2A1 399.364160668615 681.429327723794 480.797281489891  
296.657844888195 5992.92384160188 1492.83354014907 11432.8213906428  
2720.83642320419 1258.16519121331 9433.53967760357 4635.42002659719  
3976.40140405628

SLC2A10 343.946831770916 293.448046685909 329.333236839082  
260.955030428944 534.608644989102 512.723592291378 476.495282784602  
359.776068595698 340.028737478082 232.621526025603 497.411169898778  
269.62298406345

SLC2A11 147.975551540256 147.301909062399 164.008063563113  
146.882746173951 137.861973133557 156.511202150773 143.582187466814  
149.759516805355 146.209104824109 203.816305810343 152.624623171797  
144.313841064968

SLC2A12 258.532432007328 214.100698312272 264.955939320296  
187.046760972666 131.155117105954 129.343440464729 141.037217406848  
129.467792559297 119.998260435095 144.346988809708 134.251843621261  
121.039678049579

SLC2A13 116.780639688465 125.256339476772 114.44610607807  
134.423260547727 109.37466528113 120.006982591236 115.277302351501  
114.589757401741 112.605287278882 108.079149792796 118.951526834915  
112.599970121166

SLC2A14 130.93033679281 144.316475814221 134.094231940612  
137.95243466771 124.134916773123 132.04032925495 125.876114993687  
131.125175244494 132.439176846818 152.767228183775 147.043228493047  
122.873661677648

SLC2A2 106.41329572636 104.714872508838 108.557097186828  
103.202873534814 102.421174406474 114.133473556359 114.021546689428  
112.264005988662 117.131720092783 108.638680369061 127.690860707933  
124.116400777472

SLC2A3 1865.44709751822 3008.43964505208 1213.06007305892  
3012.49794349837 275.888299685521 1146.3535752748 313.581986704048  
526.416479408056 869.542306259337 1420.27222765071 454.732029358748  
321.119758814618

SLC2A4 132.411757518105 121.118933682515 125.765399556488  
143.707084981291 119.622243247836 124.186557690235 115.687997771921

138.261506562904 116.793408204625 147.624372080117 131.49254872524  
125.111993560078  
SLC2A4RG 284.236970342827 311.966971734249 298.347201056937  
316.955298948771 619.380514697732 350.166837086936 323.391456630794  
278.192669077191 249.129943906228 312.557093674533 211.269041187154  
283.701987275608  
SLC2A5 168.427124752461 198.753297290444 188.671807443641  
234.063633889254 159.055956234445 158.014017648839 170.040914594182  
172.451128796055 222.565515020501 225.730739636442 179.376968970326  
153.952788086758  
SLC2A6 178.416969664816 181.183277133224 166.411219327671  
167.719651771357 1114.10687039922 239.73396414153 252.761035334279  
684.428198622716 744.225336494008 167.958792571511 438.870464403215  
243.839402991061  
SLC2A7 114.826501559828 117.455432751161 114.41737808857  
119.442114850181 139.864176113337 114.539671934155 118.076139318165  
124.88118767481 117.097159106043 115.649568330705 120.304037458526  
120.36402353147  
SLC2A8 1718.80498208397 1978.12229412176 3387.5366256957  
3241.23835624706 1804.63762008613 715.638378711433 620.163512570453  
428.850337327605 395.716879127149 344.529927973082 493.715108157171  
390.194764817385  
SLC2A9 134.247361216412 131.358797630945 131.21740780848  
133.717451195844 207.73395131954 137.376602654929 177.296424297967  
158.319248599976 144.619374612317 184.462286724102 157.028963417138  
190.700515036197  
SLC30A1 164.247251507109 177.619101765848 160.010501226517  
167.575968906119 315.182134426778 208.257420634745 263.800363357443  
178.096998157452 186.653791045656 417.865461351681 248.360540656183  
186.007710175103  
SLC30A10 132.247611790269 129.026732674277 133.220878146063  
138.98468042464 146.247825342634 135.527445907621 134.748177388398  
128.683044953833 143.971152352313 132.751406897891 135.481300250507  
135.292532783991  
SLC30A2 129.467202466655 143.393174544776 134.944488136297  
153.792925101459 689.271009631393 192.737713851863 219.192900411543  
302.696004448559 221.050093964575 124.646093292382 394.294057009443  
136.300195727908  
SLC30A3 157.555410977564 164.357373919714 160.592404712197  
210.64483507528 266.347965690851 162.358237198517 172.259627777465  
180.850779069931 159.504327477065 180.889946069121 169.607072855818  
143.913625824599  
SLC30A4 168.124936529582 155.397301207102 141.478253058549  
145.830916005206 129.906744036052 129.272835188209 123.145830746127  
132.693707848508 134.158454639998 127.213640193364 146.867740388881  
118.497920969001  
SLC30A5 207.400490077106 197.605208310432 213.26158748941  
205.200459980187 211.468099571442 291.883157643902 345.649572073924  
219.901025447571 217.287912825619 302.945860276233 192.113217321485  
295.241644408321  
SLC30A6 128.812729239283 122.371715108957 137.916872642522  
132.703034017237 133.922855125616 150.403702679274 141.838206951224  
137.904786382385 139.191746593825 136.319655432311 142.414323129638  
149.462835741621

SLC30A7 862.669120338424 1119.23362648056 536.067857235731  
726.346459754217 654.663838918786 1685.33737186733 1029.75852676191  
986.004777675332 1081.47077865393 495.56459361431 1294.74864310494  
802.643357549193

SLC30A8 133.762141373091 132.923237903246 112.771141378159  
134.408846338374 113.460835359833 115.963144087717 122.702175900246  
107.841100741858 116.316845829267 121.681261213422 120.114423236962  
122.969215709433

SLC30A9 995.263014856158 1008.43888926584 935.423045210635  
892.868661511516 551.086785904249 695.321886304133 1156.19575610918  
689.04773343291 966.731520471976 663.451243037105 858.524630425687  
992.320202251161

SLC31A1 325.525450750788 216.755681508811 289.257002046658  
240.147082836599 269.261595558589 253.218123990428 260.999345837027  
383.583234619781 426.649095732979 466.257158794525 362.581768268116  
248.403014089812

SLC31A2 190.189217962555 193.472317111841 214.4829383264  
166.085469368498 220.379186481273 249.680729921602 231.728984785324  
286.133496092533 372.024884481775 563.907454700224 250.542405852865  
163.02140155858

SLC32A1 161.849023343715 159.307394610466 135.247018354192  
151.561151654372 151.930565620382 163.697117248984 142.103519373191  
157.078563342652 146.031321571566 158.477017294725 126.573673878042  
150.283447275981

SLC33A1 221.411372022459 224.588225855066 208.42712014566  
214.684538620841 273.106088088825 260.67310907387 316.081825144651  
398.075524915003 372.255208814622 256.127197303751 186.103491222924  
265.866465528654

SLC34A1 146.058477355527 135.778099658349 149.477373469387  
135.018710687313 153.850588492326 146.983646662811 152.296774123599  
138.785538575745 154.412506915569 137.524968609776 141.815571093975  
142.656762407774

SLC34A2 155.911387663464 167.658560306884 148.069725041021  
153.528429414138 143.025570700585 169.184111483933 148.332750352364  
150.97777780024 138.452698593232 152.030182228463 148.956326355381  
162.274094333189

SLC34A3 108.415715678948 105.164790181452 110.952108124186  
111.691973758042 115.384304932365 101.530900217921 107.828378413233  
115.738984899365 100.325215581101 115.366496551426 118.480344364831  
114.314425748312

SLC35A1 706.628675634893 596.743397794872 931.598413783099  
524.640879446426 453.760162338163 547.367381020623 1052.553421812  
552.494327858264 491.635435224507 560.757496975779 1415.67109281133  
510.226374558703

SLC35A2 183.708917501519 203.370353613423 180.569583206488  
213.097664319741 483.699436940387 383.033242143031 408.60092780174  
507.137104111742 413.172954892025 309.229066204308 254.065327837176  
358.654569870431

SLC35A3 256.093363520707 230.263678910356 312.484289357493  
215.167086358143 326.908959531021 442.027630433527 538.872348151809  
367.439588680092 568.040362658955 407.615019710707 341.901565692251  
392.198487606534

SLC35A4 306.333710880618 435.48544637769 348.111872425949  
501.434722063309 471.069295685718 264.628012152168 343.833659987063

288.026656721827 295.463118191589 448.260934224454 382.327656839936  
337.521614253267  
SLC35A5 369.906476027936 323.737610506003 344.298510200653  
387.068276379114 297.228563607097 364.678403892354 394.35596596181  
658.968318349334 681.429327723794 374.033009122079 609.939982655706  
431.019896339435  
SLC35B1 431.861762635568 415.82312615045 370.945254716657  
413.687046868111 592.079898463345 1152.50523614436 1017.6969123529  
1209.56018864779 1309.7660860424 800.739422189427 671.134356672693  
1144.92109214621  
SLC35B2 466.909037277853 530.387315639095 415.497783305278  
548.138527647594 1532.47920327769 628.000860165888 761.89271251455  
548.869880723909 517.23393716516 668.570984110088 779.022508413529  
821.020339593525  
SLC35B3 258.807028561407 218.269847477919 247.307128520272  
236.292053621233 348.457808063307 302.1846598234 269.831616158113  
296.428342247529 339.32415558339 173.10229478279 296.20443113482  
248.761038207278  
SLC35B4 251.011148303246 266.652805624826 224.089220507176  
284.473085899219 158.185593294878 188.118989395838 155.150904036206  
189.403934838648 156.78124246844 188.878770168595 208.456472621593  
188.231614694297  
SLC35C1 246.748589597262 268.52833723726 255.3451781862  
291.883157643902 703.587139938769 335.142319387164 434.716530273383  
326.325210657599 298.926727289387 331.999693230194 396.526590512521  
255.3451781862  
SLC35C2 263.183010631644 281.341452463344 239.452559981542  
317.061815822659 434.509391836336 277.026538720417 409.592855687405  
255.273375146278 277.726756691133 247.779718065751 329.926864732606  
271.356289141017  
SLC35D1 112.612099135361 125.000876313893 149.457761307441  
161.094103878416 154.248226423862 135.532820436394 160.277755404001  
143.990328432869 151.617989938924 151.004738508108 127.112296857923  
155.902461107328  
SLC35D2 240.94056877904 230.508733145583 239.541516080716  
232.556667737827 226.25694727283 191.284275676256 240.971675534641  
198.004357069446 229.406012088782 244.5675215931 474.216057978384  
256.964577037118  
SLC35D3 120.110473925082 113.283359026655 116.943791343147  
114.002925521932 103.594872791657 119.746227888415 112.520199390427  
123.7421178083 124.536322123442 113.58962177275 113.249267122926  
115.656801309856  
SLC35E1 2288.63508719706 1986.81354260292 2703.76111776248  
1949.60516542965 493.622989939072 2074.29945034697 1136.76110352875  
1451.64055568759 1133.87328758676 1076.09385014053 1652.77814259264  
1132.27988339924  
SLC35E2 166.835922279372 132.319254588053 158.07640654075  
159.771672778698 135.774569629738 148.673763368264 151.669421563954  
136.632837717704 156.007630568494 128.705587172572 141.494666823639  
138.97443063851  
SLC35E3 349.382889326613 348.98762709818 375.856200488667  
343.048904374136 282.442528230519 2293.05058904656 500.132469062228  
1853.20812924694 456.656123023446 448.644778906048 510.434895296759  
328.269845211173

SLC35E4 156.863232221623 152.155760355248 203.223604138192  
182.644319628554 210.761398461329 168.427124752461 162.574338133241  
137.09814291566 158.473244125101 158.175138008678 145.002309193867  
158.16210235723

SLC35F1 227.209630859635 225.64288602828 189.01309885917  
204.89842561202 176.820928772968 180.192015483309 162.15259972225  
174.255919030841 168.847039069786 195.561296046507 159.738700107615  
190.405863264717

SLC35F2 166.298554732581 168.824578400555 154.166668493152  
149.552704503066 273.303240462047 231.018059960001 202.458096827378  
162.642344529383 205.821101661022 318.971509860209 226.114369645703  
312.557093674533

SLC35F3 130.70867409848 129.589056071463 126.796253980623  
129.610980807708 122.251178920649 133.836390935612 130.238231520218  
124.15094220181 133.702845956639 125.777193592751 132.637443692683  
132.361106053517

SLC35F4 112.332130647215 135.650546885518 116.378552206652  
117.946664604751 106.450154495663 120.050548624975 126.27024495428  
116.780639688465 111.608386387842 111.423140302983 119.535267326862  
122.428943658306

SLC35F5 229.74418058711 265.712482648121 267.901632267999  
220.9384439772 279.75914135192 320.707687986324 370.678040372273  
234.243977361232 255.866847225916 298.403224729528 343.767393640683  
306.773350448741

SLC36A1 227.092319765009 206.446584387595 215.247472744419  
239.924227955313 213.510783808898 155.130745957603 189.250846546817  
226.35854874278 197.112749959833 252.919704128539 212.691702227442  
191.310372695208

SLC36A2 119.192893408873 113.769815606191 125.645986634914  
121.344724993789 116.943791343147 124.317870455205 120.118873350459  
141.03218895811 105.816457443844 125.00254973945 131.056011738962  
126.137627769256

SLC36A3 122.727385599754 126.819413901915 122.498794845416  
127.084267631845 118.60878652724 128.477342430713 123.166013119235  
127.706499722854 119.26921157552 130.887769728442 127.086470811408  
135.9097041056

SLC36A4 303.724140156439 340.028737478082 203.727455875381  
324.401611136662 161.930142040623 175.222531098958 139.957560460935  
201.059635671301 163.681014961332 121.154389729409 126.580227722115  
155.686889874806

SLC37A1 174.205940911242 164.092847913322 151.500282404318  
164.066839397676 288.436880408624 365.286234166621 255.413231082357  
368.548135194271 549.162299481184 157.358696886078 331.018914429561  
342.555640222963

SLC37A2 109.087574814292 111.639177843969 112.394223360492  
119.330439721904 175.040086358446 116.412881235587 150.035890574132  
120.157438564977 115.47716627378 116.653897702566 153.230304322351  
148.611352905643

SLC37A3 228.820894086914 214.413674287972 229.157389498775  
194.500222559978 192.992546726522 222.764568757453 224.707455448421  
236.548439331855 220.415211013843 222.177290763736 200.242239130026  
304.152390210727

SLC37A4 354.205670284123 358.479218923158 433.751675703425  
422.434778100827 1590.87426068638 650.679096367632 840.623505494489

1194.42925868786 981.313778685019 457.130051460676 555.758485277905  
769.009371389327  
SLC38A1 241.168936008174 308.621688157016 229.567444213626  
213.145460679531 583.619362840814 1547.16936835284 1007.41624313399  
977.450397042213 1154.1046856215 544.956712516196 964.093668483033  
965.031655021246  
SLC38A10 162.660027294291 164.268280525424 148.291518446423  
160.168654167074 515.597523880328 257.338950719432 223.778708427552  
174.749832388791 224.707455448421 139.55065372881 233.842749683689  
250.060734219351  
SLC38A11 153.187148832063 169.271175460047 129.83316008718  
140.09417711803 140.474338177948 156.265168005937 146.218767446679  
139.313456284725 345.291295192574 152.418315087218 150.942078067308  
132.179747646893  
SLC38A2 1662.51399707484 1721.20676889116 1114.85422895959  
1200.94425675913 1771.39155164347 4690.93553472125 3152.64817044581  
2841.96460830166 2210.67250954072 1611.58245311122 4722.64356477773  
2882.51330563735  
SLC38A3 128.086493618022 132.653795458388 132.595360509902  
146.437565098335 144.4421922847 136.698189351878 141.879359965317  
141.225533609907 126.089217853289 123.857527555048 140.012295249756  
135.823975527501  
SLC38A4 164.236417852165 160.72962443421 204.078331021637  
156.540165645256 158.6953558198 369.275635424092 241.453456707114  
988.788192022196 447.674610082872 165.337956130606 143.689257983705  
411.451612988791  
SLC38A5 180.20999937977 185.165469121763 159.592581700976  
170.313045875402 164.413893089607 155.056545639862 166.024236370752  
170.417054311946 161.34427428845 422.590112942156 193.674681547989  
171.935132459373  
SLC38A6 238.685014863143 235.961605948276 244.162496497466  
211.572396862776 188.767121505943 199.597685421675 271.113617350982  
174.979501466228 201.593025256991 200.98533822317 222.77938191298  
243.732074437237  
SLC38A7 185.923374274306 187.082082429597 162.333158524811  
239.277801396834 255.066583469964 162.47662918768 174.100921524023  
162.390356943447 176.5588805282 211.869300324471 184.862871179765  
161.155280539113  
SLC38A8 169.257035030405 157.213868854329 158.6067091347  
151.794243108455 177.630246034993 169.232677769521 157.948814637726  
157.759149893048 165.436881839632 165.364935913232 155.926739769177  
171.636121363019  
SLC38A9 181.622689471026 177.874821397216 161.027590226123  
163.315865817864 149.667440131648 169.428195354763 229.076507182239  
227.847614397311 177.567833691547 236.508498739509 240.994507285383  
202.761449711661  
SLC39A1 537.828979447378 584.813665097407 462.888171502285  
574.896304593109 1383.68977267418 604.047164856689 766.420275252501  
624.264994653057 407.518324776453 550.901056837273 1291.12004949379  
913.684449305965  
SLC39A10 169.561657768387 181.889592946523 152.29434111068  
167.395369670065 176.810979494826 249.823314327355 175.084729757407  
175.165305179665 187.955617187544 217.287912825619 210.392662092721  
202.504840299605

SLC39A11 181.340312140534 223.703371558666 166.187099519035  
214.639374741553 302.601458409102 458.607367472574 493.347308943133  
543.001249586573 561.761160223609 247.307128520272 377.148528768679  
409.073045356073

SLC39A12 128.745737514912 157.800913051929 161.144841967903  
121.419301042072 130.297203474319 128.83022039037 123.498540254464  
130.928718312512 137.326796995017 137.179058645907 126.110426731941  
127.282374513433

SLC39A13 147.113541493157 141.368078865065 134.018379799826  
134.56763097313 146.010474018786 128.711308958929 123.732299841696  
134.968848574511 130.924141812334 130.744788360182 176.75095377028  
132.703034017237

SLC39A14 527.139476504986 348.067061666237 354.840474468573  
352.811351813364 208.321765801227 183.247396324425 191.616483214712  
170.05799929575 182.357065848298 198.285073991956 193.412827246366  
183.226294747874

SLC39A2 126.652197216347 126.428284589412 126.476866025397  
120.880547922392 128.655549652719 120.543881800775 168.618667871117  
118.650091706226 374.9555524303 188.118989395838 129.887187837732  
115.310953814885

SLC39A3 258.489608621438 306.193157874683 270.520229426015  
346.917113326564 681.172359997071 492.05680879106 463.880793292701  
483.429488817674 318.423602671236 381.57978490093 303.795701960506  
368.948300262634

SLC39A4 125.362754088168 132.425596223397 133.406312157375  
126.185560760543 250.577945492981 152.47429737104 155.158028043823  
200.001438979007 173.526005872207 143.745594527046 201.748876422401  
198.055877414824

SLC39A5 136.448045428081 146.612602970963 161.965270932582  
152.97753810644 144.777043589925 135.956116718089 141.971207380159  
157.952018720438 148.991357883449 135.966929064294 144.476157581998  
137.103116666893

SLC39A6 210.590774758661 204.470661830972 232.046814892685  
183.64389891975 321.794887577351 834.187014201026 732.040299742444  
1162.09529660662 816.266384662324 529.700356666006 556.725550806207  
703.815551883635

SLC39A7 156.682781772069 143.94902198632 150.851504454247  
159.693019552703 200.591916768948 158.120079903425 210.900056977861  
160.019067307733 179.950904921667 162.996129396867 184.801068553988  
167.350290326189

SLC39A8 166.964057265095 143.707084981291 137.704257049203  
132.739435456445 177.759729226623 151.61049450647 152.789338329505  
177.742616962629 175.9510758779 166.570606752678 147.343712869579  
148.930073905413

SLC39A9 188.557113298055 163.764600217347 187.425086057782  
199.620978536397 179.74065086312 174.979501466228 250.542405852865  
177.93138555339 206.521761031181 177.223953859764 183.604011732066  
225.4575611466

SLC3A1 120.041623078295 109.96017424123 112.867662941811  
123.474836673474 112.547907748842 122.992700222262 114.788353738907  
117.028963434266 114.155592351175 110.553759711075 138.1342592966  
98.4947439453387

SLC3A2 312.484289357493 313.099028594073 251.939696394174  
281.037762232619 533.140740560189 320.154891655397 504.9864660689

329.82030842286 342.717252404581 1051.45401327176 336.5543056115  
297.970735665595  
SLC40A1 518.17401959981 534.505132658177 572.753294955207  
349.910535555712 232.778488697337 313.248029961291 1010.23703166498  
400.783945471037 1097.60805874165 198.979744266277 506.430593289427  
274.627303114477  
SLC41A1 230.053292316517 214.068044241507 200.302384864371  
261.671277686467 306.896732729554 233.36028792331 266.252875242286  
164.264079172779 193.124599671798 143.675696734051 238.037110997575  
214.566711351899  
SLC41A2 166.842970309527 145.107068919893 140.277228495746  
147.925744210234 213.813667557079 151.803707178383 157.547814187442  
243.793465720264 141.794898246882 151.054834307689 114.942849575931  
141.67277923437  
SLC41A3 403.812520074723 497.759125486158 450.468410589415  
556.568221094639 916.026216386031 584.433155497378 643.905401805862  
407.052451784773 628.344122779625 389.109250187902 455.392133846517  
525.287367366192  
SLC43A1 181.229308386808 221.050093964575 235.795627549799  
231.146155346291 170.028047334267 131.037491961571 143.030777754448  
130.166741978483 139.807421433384 129.835713633923 136.161633283029  
158.221595000183  
SLC43A2 161.139253742858 172.045843691642 137.821010169859  
196.378888436237 330.553659265085 182.827395663312 166.47851613068  
342.998459706966 209.785886171295 178.939268046323 306.486275677467  
219.687151891777  
SLC43A3 172.544504923991 187.494677180331 154.954906872501  
192.07791693203 149.863063160222 145.587386656619 135.127041919869  
135.403206634483 153.998849486363 144.642717750351 127.3079781139  
144.675182563174  
SLC44A1 805.600599570258 832.911633923496 813.772804994191  
523.435696794756 1164.22995893381 1885.93146154931 2045.24382334506  
2137.44704613378 1371.56635975955 1948.24432908972 2374.1382412432  
1383.68977267418  
SLC44A2 1018.80178630497 1136.76110352875 712.94845413251  
1178.08490218853 3304.82581034038 1241.59946353857 1648.22531304741  
1426.56252600395 2269.44503773126 840.276501350383 3413.39994653641  
1107.29687889378  
SLC44A3 168.570133927038 160.343551497512 160.979182561773  
123.11447940203 417.103816140912 979.761537450366 565.609400092543  
707.173691257322 882.037055216609 235.563592256037 856.039380523678  
997.460212152591  
SLC44A4 7948.88765120294 8140.6363797934 7873.0525548049  
8666.41250683965 2982.80580616089 8881.86480594052 5396.55955971617  
7266.3946293904 7656.97151002785 4819.85672511343 4548.5418978622  
6203.08085790474  
SLC44A5 154.288075172115 162.802392115386 153.966815534288  
149.306122206718 146.425476034368 192.512661648653 161.430219824313  
175.040086358446 173.189465201573 216.615694348945 125.215194276842  
209.304654633004  
SLC45A1 149.538429805372 158.799917136119 156.546769952772  
157.058912028958 163.697117248984 148.486946087388 137.700110923212  
136.02474314035 148.504996616452 131.628021008753 134.113464449375  
138.69392148885



SLC45A2 149.85385474029 149.495077381649 144.363095380388  
138.006973261364 146.738411200698 144.243598691782 155.041173289759  
186.007710175103 148.415036326153 142.487424651482 144.233097828078  
146.772611341214

SLC45A3 188.145154995617 166.289763097913 143.780803045394  
161.627546190964 504.436992949763 258.807028561407 282.335582153109  
155.494095135266 282.511614929917 159.90466743683 359.776068595698  
634.906566690042

SLC45A4 199.555406967021 221.359331823286 255.12306184224  
266.442565636226 221.127492253636 215.84044779962 200.867515935703  
175.857952663383 148.49560238679 167.357570666817 201.458970969685  
241.799709160815

SLC46A1 143.669490888725 145.892876412762 178.3652866131  
148.26621607986 607.805002786409 162.18174589792 220.60173086462  
183.693300680495 157.322594990954 162.846914172627 134.961156870831  
165.314290446922

SLC46A2 155.861829925386 176.390014020936 169.321832528939  
155.143752422033 145.315875226867 148.87242524521 165.186696781985  
166.549192709614 166.489436134841 152.215146681655 114.242056888286  
139.587192809431

SLC46A3 317.206754773681 296.75326294587 430.220363263561  
322.778260588465 184.187847236508 231.63127072986 284.831817899986  
202.145180994821 222.794196053536 266.057472924341 175.840639511966  
175.28261759639

SLC47A1 136.685430908977 128.721889684665 117.598778415488  
121.736056336879 125.450077160575 120.95428135683 114.567609871292  
126.967212770393 128.312170913496 126.809252651352 111.497241941203  
116.784024112826

SLC47A2 136.751654856807 137.52743802861 141.825162897153  
125.926774314737 134.02083946631 134.734429133481 147.253919952267  
124.566313603935 123.231397809701 815.779445689417 135.584602494174  
127.42914358124

SLC48A1 314.014654357569 285.214585324341 330.553659265085  
349.623729591612 340.239348689005 212.33360547376 261.171723011396  
210.015199832609 235.704824490397 223.89854167651 384.051170099325  
233.914433380121

SLC4A1 167.350290326189 132.70109232982 129.493805009651  
147.796610216375 153.047317528007 146.165632086981 148.323729699672  
149.343930487315 158.886786960196 144.049503774298 136.295523520203  
137.478556403046

SLC4A10 111.985567835684 122.333765477428 121.93549478261  
119.502758763438 119.763020707899 122.287535209629 115.257318321108  
121.381365873873 118.604395992281 124.561511833959 134.676039394438  
117.856184272322

SLC4A11 149.283495832731 162.161282071736 135.375268329248  
145.010108826238 674.905270154355 317.949646885539 224.396933003452  
271.004741629789 183.3378528327 173.714940254592 209.727089546377  
466.257158794525

SLC4A1AP 183.416437587938 156.801189586018 221.768507175814  
159.365070384451 194.655710454472 198.815448428294 210.061754644824  
219.638478100747 187.50236021149 206.413554839865 227.806050911154  
168.935348409102

SLC4A2 347.3483417873 310.533399024851 304.985269874607  
374.268489263941 852.649997188692 251.039117540764 259.826625866106

269.495247190598 327.89660021611 241.320049298228 255.866847225916  
317.309949792707  
SLC4A3 127.998531115697 154.686025022972 130.714375454354  
146.404727168045 132.297716337104 136.355319997318 122.35832958054  
125.134516902118 126.085039271526 129.918038866006 138.997524526643  
139.685629122498  
SLC4A4 143.532014058535 148.104173238606 147.914242618083  
136.3615279557 148.776470607859 153.443397882028 144.135407364167  
171.896929562022 136.835889180879 130.288547755599 146.506263412584  
143.611930851914  
SLC4A5 888.706978062337 840.623505494489 751.896334334052  
742.751664201272 288.968909550533 881.15414246017 555.109005518622  
625.544719251096 500.343476678562 467.944850290806 670.856008549143  
507.342877360289  
SLC4A7 539.125423322738 389.109250187902 465.29290512169  
376.791876040886 345.062426573519 473.260534978556 277.129985959184  
314.126706052299 356.770158430601 299.616447269111 218.393783552484  
333.745543022749  
SLC4A8 128.702882993588 125.493004972076 125.259164818744  
125.885715928839 125.193729067011 116.802432258299 121.212521750566  
136.423161205425 123.929180327423 121.945541820091 131.981505236332  
119.341806810441  
SLC4A9 109.506450285923 119.180033382937 129.898242234869  
114.278113876915 119.01236045062 120.96098661114 116.053859681399  
126.499257771192 110.408301129053 111.09179957013 124.699127988314  
111.11656427738  
SLC5A1 139.875260384886 143.429394097222 137.5954358221  
135.139676303901 159.506275317015 139.951275828765 150.096558906597  
148.932696684374 147.784078315091 150.198869833614 146.278921849776  
150.663062131717  
SLC5A10 146.345451252228 144.328571856869 139.782152941027  
142.956870642583 142.861359851088 138.360286408926 149.401462362512  
149.437212090587 134.185202200317 142.032814623366 130.945807039197  
136.570817174009  
SLC5A11 140.541925660368 151.65364467801 143.050004021764  
158.933097712363 145.549126188292 149.839827383681 140.464476678448  
131.498890334548 140.510889880872 135.609239096236 140.03443832328  
136.356895672212  
SLC5A12 124.140880678888 132.639070127232 125.926774314737  
126.398884382537 134.087875547168 128.163613794257 131.587987756056  
123.265810024678 132.526286141997 129.446928016147 149.518870320398  
127.678512375099  
SLC5A2 136.175268696202 126.423739360894 136.463867598256  
126.146213417225 129.47419698487 129.374418059091 123.595133376092  
127.152744243038 119.119693776276 122.789656787728 133.929311295884  
123.166013119235  
SLC5A3 177.862368731138 177.825648107126 162.716712951629  
204.337844243869 167.337624316172 170.974759483946 165.342790388607  
158.278496385543 154.177340021162 153.752502094283 157.273309095198  
143.039251441179  
SLC5A4 113.077691687266 125.603448542611 117.619337212037  
116.540729581355 101.597648528389 113.256481034259 111.603221942108  
112.841406363391 111.549719888905 108.589444216106 121.522634801124  
107.32960937124

SLC5A5 124.372963874507 113.192313147111 114.613368640356  
121.984179437382 113.400050190315 125.165254272421 114.888157310977  
110.212739445 117.251233255966 117.930665298163 125.851611268218  
106.900679222135  
SLC5A6 245.553138677866 289.956528242564 281.792602269388  
282.604890044452 2080.47567326037 852.099019968701 589.240581642145  
491.709723745226 438.958573676953 332.032371697186 359.991823789356  
393.500781010617  
SLC5A7 142.976123206776 121.607527525765 140.395662148924  
125.655823846115 117.078720392441 117.227635924674 116.416896654975  
169.860061216981 113.891385601095 107.32960937124 155.478383896934  
102.024765473404  
SLC5A8 1271.46608195833 1269.67110104843 1106.21439150501  
1092.33328323944 228.100112133941 766.420275252501 393.115606440229  
552.167699318911 409.477576085245 359.162549472301 814.110601393539  
477.489368828457  
SLC5A9 161.755290291637 158.610249594568 165.904887259203  
163.661196423902 171.481917188224 174.177944561595 152.470980074365  
171.433001048839 159.2488784104 166.998311158378 138.745560049251  
165.430811083128  
SLC6A1 143.62103263895 137.936605651724 136.584199831088  
147.013598868335 153.440952021924 150.232470359841 135.855243915966  
141.560424984281 151.660152977515 139.278366709094 136.794860440446  
137.7872481668  
SLC6A10P 362.252813848151 449.408793796673 382.562403424855  
685.354305381323 3581.36347643133 347.292438587205 981.781076110568  
487.901310664037 296.24781576525 559.899430596368 488.14606875418  
415.749051861123  
SLC6A11 132.790039196443 138.192550945411 163.672213020803  
137.352231982942 163.37518739397 145.280485286937 142.514794686932  
140.875923123766 149.035590153457 136.507961715591 148.986058473609  
138.628169506372  
SLC6A12 163.960242712692 139.211746200839 180.501409705275  
144.738871562895 161.646807806182 160.395053149199 148.227581116046  
160.446191353364 185.100455193182 149.400244837133 174.332913952768  
157.449891798638  
SLC6A13 135.767818903328 157.233463720262 142.039943511086  
137.306031826007 145.39813290003 141.221162787167 135.632298302036  
140.818413826758 146.287161912291 131.665421461826 138.030842581932  
132.99989565368  
SLC6A14 124.659387568671 124.541257225826 121.648921929686  
136.159825652148 128.440024330942 131.223691762533 121.88070274109  
116.276003190171 139.305220220411 138.719480482945 143.519786615253  
124.491884305455  
SLC6A15 125.579970155301 120.538535752185 120.216999784094  
124.491884305455 129.811504562622 117.32734978289 119.767154020462  
120.342513393659 116.552626146967 117.040953580545 131.287142490322  
125.649525720177  
SLC6A16 276.925017614147 272.639413442579 273.806452412737  
299.390443444504 167.416417895159 179.648479201164 146.779054605199  
165.900156600776 172.364618542922 163.73339229802 144.858656365799  
158.155486390053  
SLC6A17 147.8838487685 150.180037731272 135.291264978088  
136.348252715447 145.064773625365 137.700110923212 138.1342592966

155.655771857361 141.508424382665 129.675420096163 137.172030225913  
136.565191271943  
SLC6A18 109.886197655915 113.249267122926 113.740942665269  
113.274668934773 126.599418127637 112.332130647215 114.574362093931  
111.243322115126 112.78323842342 115.16087297104 121.56625295788  
114.835386789236  
SLC6A19 153.610428214886 124.466986821169 143.868962478182  
145.536260846052 139.948097704949 143.523051024982 133.94206203396  
136.888915439473 143.053727675518 159.961729971624 123.510413258172  
132.992071643179  
SLC6A2 127.83654093961 143.258488502799 117.639216182057  
157.627490896581 124.28313315915 128.462674862751 129.450937831864  
136.678188851101 123.955819747616 126.476866025397 147.532747354296  
131.525916493834  
SLC6A20 152.052084712417 152.109178223495 147.809934374849  
158.617209794418 147.821639002833 162.304178370233 151.09974848374  
150.993910190626 158.224122084011 144.534143943252 151.428283279424  
149.921414617149  
SLC6A3 115.914842445934 128.449200385351 115.174678745401  
133.519359066907 124.119104345119 119.882472552083 117.953453145685  
123.994188725172 107.344825308293 120.714981493593 122.992700222262  
117.048846466839  
SLC6A4 116.486929280635 120.36718185387 115.692324946633  
120.418709541104 134.616051224668 118.924317138158 114.977135060317  
125.843089077365 158.521812954982 120.07404952486 138.256111134072  
134.307336063739  
SLC6A5 147.288282361079 148.263293819238 176.547853494057  
133.663595328149 156.548858402702 142.942021904533 147.436408919939  
129.378442664568 140.493975416335 143.162353807279 145.036719629525  
144.501995579502  
SLC6A6 138.628169506372 165.080825814849 141.576177844986  
127.466779212194 185.673549367125 154.329176514501 167.030667499538  
179.321622114583 144.490452173336 140.323425587628 149.393022408213  
157.443127950708  
SLC6A7 149.734395134321 143.901267937876 152.921328522953  
150.767158077219 129.340996658802 151.113342302947 172.403953571339  
154.542190113901 159.973758408655 145.7202993771 146.084461430546  
158.872962797815  
SLC6A8 287.455622143233 337.077153882632 285.402072939954  
436.331333134628 2736.98692493933 225.169110687004 614.239716118509  
300.53017771156 242.269784551092 402.026356201632 445.763740779039  
274.564508105177  
SLC6A9 183.545741265706 212.037224737798 202.797135825668  
283.701987275608 159.951697830252 164.198494818485 152.026310884327  
147.202510900548 152.021576565132 199.288100834476 149.525115175915  
135.878996521596  
SLC7A1 658.968318349334 533.54045706916 403.405544395163  
714.274201838067 378.38874489611 321.696082249696 362.019824026781  
177.246890307643 455.486248388968 1451.64055568759 717.025533065694  
694.02978779693  
SLC7A10 131.179786925029 142.599815022061 123.835583753941  
140.812334019209 132.765046522676 162.678619800767 131.514114515895  
129.76141737109 130.609596267168 137.378528742953 140.717348834454  
128.848008246639

SLC7A11 106.603674195422 105.348008821162 109.318922864507  
112.38543517651 110.234403581151 107.283814651497 122.201293962463  
113.470356909765 120.560056224145 130.362378233288 121.855752708908  
106.030441145334  
SLC7A13 112.000309477972 117.131720092783 103.09089100768  
119.548432046443 116.176068923513 121.039678049579 116.566190779365  
111.000303209442 115.975794003391 109.793568518462 127.753065449769  
111.765812595638  
SLC7A14 120.873985900666 120.272964182307 121.455843337023  
121.391637838137 102.932013031511 110.804248212067 111.188410935711  
103.94864861172 112.321396616213 111.848472437543 111.448871835514  
111.802672864815  
SLC7A2 189.307823427362 225.387674139093 158.241349852419  
183.138955445765 164.295628750438 181.508873226705 146.139817421758  
161.646807806182 130.201635099678 132.647152200128 160.573172150801  
143.796699867588  
SLC7A3 129.320210774045 138.032265227728 128.803632055969  
123.389038274913 120.793974839773 118.850495684547 134.260779370821  
118.070716076005 116.998277297063 136.044670179122 151.369387642458  
130.346150829949  
SLC7A4 171.238423077347 159.867178630115 151.879398444495  
156.748330788367 236.985483155452 194.388383297922 214.968589907686  
183.735201125198 182.235490620172 160.562164904057 216.102897582821  
382.630113452429  
SLC7A5 548.138527647594 642.057106241761 463.99922423125  
978.389902096994 1485.776977235 843.075879568455 1079.58110075176  
718.449150898903 520.761305892651 3855.33040541264 334.607533045929  
754.607039665508  
SLC7A5P1 127.576966524587 129.614692778261 130.189958197332  
133.99046926032 132.681475162386 135.654614839107 135.844983721014  
132.903959880979 132.735371358102 129.956519535525 139.295597388725  
129.161305053472  
SLC7A6 217.435155984897 186.257814752354 177.780479906048  
197.205792984885 154.808798024399 147.889486635135 158.477017294725  
160.006185904123 211.395593720534 167.278879415171 128.793186785667  
142.765490244223  
SLC7A6OS 186.033093285894 179.35113214277 218.917357155289  
196.734037460218 172.677083810424 169.391557085902 184.008405576875  
179.711363255355 204.509884908059 192.680681636018 148.916981164664  
167.380798617981  
SLC7A7 225.189991540262 219.940167815376 199.305626149918  
197.72068061775 179.674744176904 182.644319628554 158.312614511836  
255.225145197422 368.466518140043 271.823243396395 242.299252896647  
179.61374889626  
SLC7A8 170.212679845194 176.533058719908 147.15764785567  
146.785478478701 180.619956937489 167.941671074236 173.829219279719  
184.638141004171 162.735609734946 163.829218786716 233.129544542265  
159.735182155088  
SLC7A9 200.603836348642 174.202069525223 188.599353117244  
189.693218759349 166.988725688589 168.882806817001 157.688982037448  
218.917357155289 164.319378349317 164.529828080312 183.676020826291  
157.103246263523  
SLC8A1 127.42914358124 126.241307445165 128.931946787934  
128.105527466559 118.764650384561 123.062390088305 116.558752619296

120.887938517877 114.44610607807 125.029516472944 119.330439721904  
117.32734978289  
SLC8A2 334.772648743153 413.863345223345 353.774297577869  
767.054576874115 296.603054615145 165.960176666275 209.60319248212  
180.528296177577 138.688881393504 122.120307446003 160.27511502306  
159.036647992998  
SLC8A3 131.138322527536 135.18026749895 121.843992693814  
132.490323093932 124.700663661371 122.843792000493 116.947370388179  
119.023688551496 122.924017262559 128.816610738922 139.687574432387  
124.079109459437  
SLC9A1 679.191060100076 739.251974981981 659.483452217461  
714.91842349236 4343.46317176151 2730.50913686613 3140.51157972795  
1303.33810980467 1879.08108720938 677.503643398297 1718.80498208397  
1873.84654908146  
SLC9A10 135.829273398594 145.352802493486 140.628614910068  
153.630125822178 130.304743083321 152.007436762651 164.21464602746  
149.848740870148 130.814702312493 145.493977576106 120.241528853563  
130.657342262492  
SLC9A11 174.560168983121 136.290486122369 150.198869833614  
142.139331321085 148.275939659102 142.534195262988 140.985432994867  
144.274198800981 141.5739152922 145.369791572077 143.07651558428  
155.253032078086  
SLC9A2 157.466686487471 186.904126552483 187.336349390012  
158.653161314597 444.945078908489 430.833137328233 354.981966077502  
502.598518192729 576.10291008626 183.26554404668 338.866471651692  
192.168634727505  
SLC9A3 156.346014084316 163.788418732315 208.14618424983  
183.348764012358 167.093409692227 167.190857452131 190.174729017089  
186.222567239198 159.848342125486 180.850779069931 166.04965258862  
179.932404140099  
SLC9A3R1 233.047541132048 233.300864925399 181.813812621767  
212.890259409988 1338.83705469394 585.371892598422 645.806954296487  
695.595965352335 719.13080264227 2203.82462320864 394.73732350607  
660.535644289024  
SLC9A3R2 112.649012857276 133.278923716119 113.292688210897  
115.491262364277 119.911515364639 114.740948266517 114.585818507336  
116.558752619296 112.675715371087 109.625579596864 133.882126180703  
121.51208055933  
SLC9A4 148.126745515891 148.563428310413 141.241717979079  
133.911650164508 162.063689419737 149.933919274985 151.183847738922  
155.61996871093 192.418895349837 163.245806772716 161.050438117555  
156.357126871243  
SLC9A5 160.399059317919 164.736294372006 143.922878410438  
169.428195354763 165.239214141562 184.577511730401 164.406564594296  
161.972922129453 166.135707525987 152.386986818959 162.846914172627  
156.75001042701  
SLC9A6 190.889832855403 179.57046217355 170.775283924087  
183.3378528327 200.536814571322 186.377571176623 164.545596179262  
157.656220148041 153.423579724911 178.096998157452 163.714231827866  
177.450674276588  
SLC9A7 147.875855077738 151.224289879776 152.188770978528  
144.035936160694 187.572517928061 159.466972602203 155.813740201987  
166.285052506316 146.06717772919 171.671895682052 169.674931517111  
158.473244125101

SLC9A8 212.272826965935 279.26508919212 281.49247863022  
353.187829498591 262.139211406599 190.031339775209 198.620777452192  
200.867515935703 180.549865708041 150.863099494798 196.922837906592  
193.196556480538

SLC9A9 376.54010486682 372.689712716797 354.922901990615  
319.966785546419 123.118724072534 126.25011972597 134.469653093466  
154.750512277909 174.866036336378 155.777281781161 112.729141678141  
126.747647332766

SLCO1A2 123.872097378045 121.134305707234 129.47419698487  
124.982744176925 121.271403807802 123.046069309901 131.451173463405  
120.894583222813 122.323876787207 154.594339065082 135.259226552938  
132.811368246405

SLCO1B1 141.59474425685 133.672964925321 132.416618775337  
135.493053871272 137.395895014456 140.326012404526 136.513942889781  
132.963761182049 134.85590586532 136.267313223808 146.75924072364  
134.641840638331

SLCO1B3 111.065596151792 107.74537523456 116.947370388179  
114.644722005728 124.464941711781 109.482330324734 114.28381541078  
119.548432046443 111.065596151792 328.969023478451 120.428171428188  
122.333765477428

SLCO1C1 129.740166478951 129.099780410063 131.880438747579  
133.067237748129 128.421242037748 126.830269821364 122.547842148486  
122.928863588006 121.212521750566 120.53428198263 111.336798977475  
122.506058130261

SLCO2A1 473.73182675469 469.206346008875 181.003812824014  
238.654367531982 219.49354518392 641.338900241674 216.645552082667  
480.36420271348 499.776233241535 317.163768837813 294.595972099366  
230.053292316517

SLCO2B1 337.521614253267 253.833756857339 235.407064742194  
267.747633122387 366.240941980786 296.428342247529 227.236255752375  
436.586158384666 530.819778703194 275.101766414328 379.102958448288  
236.470206707351

SLCO3A1 167.547551072373 166.187099519035 155.243643210534  
153.606787306076 164.811120992602 145.669033804967 185.374745525698  
151.581593330224 148.785977829275 151.507376053438 192.512661648653  
151.923356524322

SLCO4A1 191.146276657897 204.019377262081 181.654319266685  
193.858884443593 264.273245283343 227.806050911154 297.022984365795  
165.789846154721 179.100368312505 204.770742504612 202.041958613989  
176.5588805282

SLCO4C1 128.093945009882 131.572485018063 136.504438803108  
127.562924931536 129.167602517633 127.314089756429 144.845726048937  
129.732352495012 131.391434131813 137.31708798874 128.056668224393  
126.782805974059

SLCO5A1 137.091932621041 129.127563278016 145.584615439295  
130.907879150229 126.908123260394 123.538037290702 133.11040099808  
145.126091016414 155.358918578397 151.299425811105 135.904163043783  
142.879705723262

SLCO6A1 113.09980008288 116.632612170106 107.205247133938  
110.014935095391 102.474380813907 117.943511615792 119.301746097298  
110.024815508703 130.467450968785 122.578170988039 117.570749340011  
156.818197172306

SLED1 149.023962828426 153.532954370572 139.892371997205 162.308297940279  
133.571962238112 142.005703694973 159.926719599391 150.115482378938  
152.099431258333 152.007436762651 151.64806573742 133.115543233699  
SLFN11 364.678403892354 343.417041721907 235.742017851879  
321.568127272161 164.763269377973 211.118308738617 183.100286716683  
204.161375686761 360.551560710852 344.575967665039 176.256840061919  
187.50236021149  
SLFN12 154.574826922632 157.36568754472 177.19138801548  
152.593934787262 158.584934514596 158.779261405573 195.946096353894  
243.589099648895 198.411812737082 183.406510146725 168.358323243918  
166.404164069728  
SLFN12L 153.435218661228 140.52997588229 143.434571922656  
135.057847490193 140.706490845379 146.179543599917 141.134173683836  
151.342902631318 125.572299527276 148.512096079648 123.141928612324  
151.174536186463  
SLFN13 146.121258547443 154.849264978968 130.388530183353  
157.927709922368 108.751654061536 148.329635131296 116.784024112826  
209.146021798649 213.847316974717 128.304919825754 149.725422365342  
124.222529964098  
SLFN14 135.096321258167 137.16842164453 142.284050423299  
132.340183565771 162.723310549554 147.479390172796 140.784853736558  
137.457453776513 141.336866031027 130.567443018832 144.28597792625  
137.725329029129  
SLFN5 172.764511709731 168.289492873475 215.143973502566 164.043866642712  
174.406779990708 186.886677174192 264.476846259384 216.991823988763  
217.202541167691 187.65716654049 194.36669779004 215.532132200821  
SLFNL1 119.023688551496 123.072413274454 110.536316697732  
122.962219297463 102.851152421943 114.598636725763 113.487357534546  
118.689408983786 113.938636269013 115.863243613121 132.941478943584  
111.826509343353  
SLIC1 135.650546885518 141.023875058322 139.613193302406 146.929717840755  
144.0534341937 134.722574388775 144.448503894295 132.548259643258  
161.281195929918 150.387906232396 122.399241018147 166.472068379965  
SLIT1 122.600274773736 147.635761512135 124.455340203012 129.549673572516  
121.263939656119 141.919263493165 132.091532692048 120.543881800775  
127.382266838772 125.990762414974 140.899799480834 129.386300987308  
SLIT2 1870.52504853779 1402.14708471728 998.157643452741 1227.36706427754  
165.880071298733 192.61436632814 151.045803695015 159.311949668403  
186.722842989058 244.251315474587 153.149523560021 162.127697884504  
SLIT3 1515.38811502277 1206.59866455529 689.271009631393 1397.84878368705  
403.907009699589 233.496804016764 213.324226314713 163.538862303362  
222.051005238856 161.102731941183 400.180574613078 216.615694348945  
SLITRK1 142.970256312313 136.85323853426 135.711590400394  
133.552141086987 132.989846726946 135.43939472868 131.449370465834  
136.81406168343 130.822330736013 134.996443685544 133.095245865663  
127.503849690009  
SLITRK2 147.885769870843 160.349557404154 133.001613667656  
185.233210060342 134.145771195572 127.799190369808 124.408996713299  
131.757695616207 134.580526467375 128.623302491798 149.05280915667  
131.412979573687  
SLITRK3 169.036409026328 179.704370382771 165.844762875582  
203.089661928125 149.664506761117 160.932913244423 141.966490100288  
153.146646647258 143.454771158075 160.390564881326 149.023962828426  
159.918778562802



|         |                  |                  |                  |                  |
|---------|------------------|------------------|------------------|------------------|
| SLITRK4 | 137.360220389719 | 142.812521349963 | 145.662818023154 |                  |
|         | 127.451155926679 | 117.619337212037 | 126.314233529267 | 115.949513659403 |
|         | 124.777895136212 | 125.895972730616 | 157.280532261425 | 146.26936366452  |
|         | 108.34997967774  |                  |                  |                  |
| SLITRK5 | 157.77047742735  | 169.321832528939 | 169.257035030405 |                  |
|         | 162.37762946664  | 168.982086590306 | 156.9540270155   | 178.657325741035 |
|         | 182.608712782878 | 151.037282417145 | 182.165681034082 | 148.539881077647 |
|         | 171.61704153463  |                  |                  |                  |
| SLITRK6 | 209.727089546377 | 277.180850774168 | 229.347135478142 |                  |
|         | 189.250846546817 | 235.453139389486 | 411.451612988791 | 593.090436323333 |
|         | 357.584458526365 | 146.355229778997 | 161.657344146676 | 695.086203058575 |
|         | 789.043948009585 |                  |                  |                  |
| SLK     | 423.256021602613 | 421.929674562786 | 440.916522871266 | 421.459312180809 |
|         | 420.248838397618 | 459.30568829087  | 523.306451464643 | 431.304147578425 |
|         | 440.745866155629 | 715.039905439621 | 832.335328912437 | 661.390308090982 |
| SLMAP   | 9793.92604780228 | 7122.07276863122 | 7082.28969354712 | 8473.21873478131 |
|         | 761.586663689579 | 754.607039665508 | 724.777166238211 | 538.484170364629 |
|         | 1065.74382494535 | 791.137867905579 | 1072.82323999638 | 641.645855499704 |
| SLMO1   | 186.021181691517 | 173.635827398273 | 196.657475905674 | 196.287131027947 |
|         | 134.799648755296 | 131.545287070888 | 135.286686011087 | 126.652197216347 |
|         | 146.803549606737 | 142.866874321248 | 134.650161382949 | 136.81406168343  |
| SLMO2   | 133.404671629495 | 130.928718312512 | 140.117644705946 | 138.645156942894 |
|         | 144.89062965996  | 164.942652212218 | 144.967580333329 | 117.316790136526 |
|         | 136.623658204558 | 142.892198239879 | 164.442400539653 | 146.698766621345 |
| SLN     | 149.651553512698 | 168.27980269501  | 165.031678768564 | 158.679903271595 |
|         | 151.755205401737 | 168.327600230929 | 152.921328522953 | 126.185560760543 |
|         | 137.71280215369  | 155.851264092344 | 155.883386742315 | 153.02549014611  |
| SLPI    | 1022.11537745428 | 509.988617641229 | 254.133112176024 | 134.61114877396  |
|         | 189.092674335503 | 137.353149614081 | 511.547907091166 | 129.477908941439 |
|         | 143.728569494708 | 8532.46059476152 | 247.942904862478 | 205.630948393225 |
| SLTM    | 602.703887178113 | 608.611927946607 | 605.437395034282 | 564.749082802433 |
|         | 313.099028594073 | 378.4377409749   | 642.057106241761 | 631.819659701092 |
|         | 713.23381913235  | 437.836503489425 | 859.860994525775 | 828.683748921915 |
| SLU7    | 315.689865927834 | 287.287337931982 | 355.519647649551 | 301.638918685657 |
|         | 220.876114717642 | 273.044064077    | 368.825190022937 | 297.708113541379 |
|         | 282.101714660307 | 511.547907091166 | 547.516635695872 | 278.775971122032 |
| SLURP1  | 116.973126196102 | 114.084543168359 | 110.304102941202 |                  |
|         | 111.032156655273 | 116.136849683574 | 124.842426851438 | 124.844481048039 |
|         | 117.470731811595 | 121.905741525277 | 145.610045243277 | 143.851670859917 |
|         | 138.664401460739 |                  |                  |                  |
| SMA3    | 116.07902130325  | 115.884253217495 | 129.233595525585 | 139.870306695324 |
|         | 118.276198592775 | 145.837985729893 | 131.590180562108 | 128.87498876738  |
|         | 135.067056559409 | 131.285279061742 | 127.287538993899 | 133.691053105482 |
| SMA4    | 460.514672966125 | 348.241471067257 | 774.997895985917 | 241.383657414248 |
|         | 178.584378959369 | 422.520372346993 | 301.955019831714 | 389.800620731411 |
|         | 362.849380477089 | 408.60092780174  | 341.43511159996  | 517.42417250172  |
| SMA5    | 162.063689419737 | 148.334425146129 | 189.528686948872 | 142.268018184723 |
|         | 133.631676386591 | 159.845890841215 | 160.98571841915  | 159.046016068252 |
|         | 154.143331594812 | 189.589053840976 | 185.525760847281 | 201.186963432715 |
| SMAD1   | 141.200676699805 | 145.426171336045 | 128.554574566655 | 148.816369706133 |
|         | 144.73389393695  | 155.119146797226 | 170.01557699913  | 160.92643755328  |
|         | 157.6811998968   | 158.834483073542 | 142.383723965616 | 156.873097743717 |

|          |                  |                  |                  |                  |
|----------|------------------|------------------|------------------|------------------|
| SMAD2    | 155.813740201987 | 166.917552275021 | 175.717830026564 | 160.211460008777 |
|          | 154.611011734772 | 172.562162872242 | 166.415922313464 | 166.430881793156 |
|          | 162.37762946664  | 167.370030272847 | 154.79534193124  | 160.937256625847 |
| SMAD3    | 841.623780229898 | 740.196934996626 | 639.011144305614 | 615.058712877418 |
|          | 513.428413503031 | 556.31484498921  | 1019.627634011   | 412.129826478453 |
|          | 566.647927867646 | 380.888728347647 | 1555.28458491244 | 2039.55802107872 |
| SMAD4    | 1033.03719406038 | 821.020339593525 | 1059.80292026589 | 644.11603826131  |
|          | 482.226889092547 | 571.64723305848  | 593.821622986351 | 719.369561410372 |
|          | 826.08372791138  | 683.655205499779 | 650.0804221227   | 591.013515828247 |
| SMAD5    | 694.907086612929 | 655.094843900848 | 624.638115878703 | 526.726224327409 |
|          | 223.918931440768 | 524.725307261999 | 779.922653392712 | 371.168752104821 |
|          | 288.88486628661  | 555.607185132941 | 294.746622369436 | 538.252273740419 |
| SMAD5OS  | 173.951605889009 | 168.618667871117 | 164.458565398812 |                  |
|          | 180.528296177577 | 151.137791721752 | 184.482849019679 | 152.733409144267 |
|          | 168.302168350095 | 157.213868854329 | 169.232677769521 | 160.839277476397 |
|          | 155.828962183804 |                  |                  |                  |
| SMAD6    | 429.812058546782 | 499.176926371542 | 460.514672966125 | 439.394914369983 |
|          | 620.760947818536 | 443.005424069211 | 671.387334588652 | 278.274343962656 |
|          | 990.55038742453  | 211.891710626953 | 1226.74043569231 | 1294.74864310494 |
| SMAD7    | 243.691004557778 | 250.18189549573  | 235.183590602209 | 188.308588359317 |
|          | 242.948136060281 | 178.000672046849 | 264.273245283343 | 185.046826969912 |
|          | 322.153713097778 | 210.103974340881 | 339.98018551524  | 228.713818522476 |
| SMAD9    | 221.916075811355 | 179.203783335674 | 208.291714758548 | 158.380964047483 |
|          | 128.563180697606 | 139.734784859495 | 141.721829342179 | 124.541257225826 |
|          | 141.902711692778 | 134.545983176488 | 168.161117444474 | 129.513590304528 |
| SMAGP    | 145.2572048057   | 164.914114315732 | 139.6391154169   | 152.543005423742 |
|          | 433.405369327168 | 275.468194644053 | 267.839640412797 | 423.740836541835 |
|          | 622.834462068316 | 238.770586150777 | 233.464856303761 | 311.670576741448 |
| SMAP1    | 261.39435936661  | 260.370285504512 | 298.827660296715 | 257.740674565975 |
|          | 237.854774190873 | 323.276514394119 | 229.017256104437 | 187.754968096521 |
|          | 216.381643581705 | 309.283897272661 | 263.52595855321  | 217.607230767028 |
| SMAP2    | 732.877169346979 | 805.120147618984 | 589.722914993267 | 772.776364492813 |
|          | 494.604716660887 | 674.905270154355 | 608.816123736392 | 1111.47772523331 |
|          | 1046.65224316733 | 552.962676093514 | 513.662594875431 | 626.582864105324 |
| SMARCA1  | 504.275299381356 | 420.017044147123 | 554.115756730498 |                  |
|          | 387.711471687237 | 200.360518276784 | 392.004079531068 | 430.590533290315 |
|          | 257.534293550585 | 280.246711704036 | 273.668871896558 | 360.812953749077 |
|          | 514.354512083591 |                  |                  |                  |
| SMARCA2  | 1165.95924778817 | 1033.03719406038 | 1051.98943987926 |                  |
|          | 1098.20033709043 | 479.261755380872 | 406.54518900348  | 376.443086293235 |
|          | 644.97200337335  | 1113.05943954513 | 458.705688226305 | 938.499337889075 |
|          | 409.883222213537 |                  |                  |                  |
| SMARCA4  | 1015.63768413332 | 1135.49876948815 | 1039.46136549795 |                  |
|          | 1366.06309834426 | 1989.38201206555 | 1789.51979173209 | 1582.0221231161  |
|          | 2055.27692947656 | 1955.96772733047 | 1747.33558205825 | 1939.1525084845  |
|          | 1925.60246708149 |                  |                  |                  |
| SMARCA5  | 402.824964079515 | 345.291295192574 | 359.024299091145 |                  |
|          | 266.468621734455 | 359.493075382333 | 442.766704003254 | 493.622989939072 |
|          | 387.305348482856 | 502.598518192729 | 455.313553278155 | 470.154677948419 |
|          | 439.852826905352 |                  |                  |                  |
| SMARCAD1 | 222.764568757453 | 251.588748783592 | 213.097664319741 |                  |
|          | 197.51109998167  | 174.787077606165 | 373.033658917608 | 288.823376348944 |
|          | 297.466255000163 | 279.879377933144 | 259.979459472217 | 276.284517459626 |
|          | 383.259887828605 |                  |                  |                  |

SMARCAL1 305.768201359278 300.53017771156 282.652193666078  
 367.567681162661 276.830814061474 228.852495818211 306.333710880618  
 260.195256836955 325.570839576032 282.335582153109 347.224999246223  
 271.238736772408  
 SMARCB1 335.858047332641 382.401290201025 290.326832430372  
 441.785666261936 821.020339593525 605.437395034282 375.856200488667  
 455.778776920897 478.699172220804 468.496972957503 443.005424069211  
 506.165100641525  
 SMARCC1 1324.56751399862 1147.33034082693 1444.45946291517  
 1214.77298621465 2132.90676194993 1772.75453735112 1340.79810963983  
 955.604404066769 2174.62979843528 889.26314145856 1854.11328962023  
 1290.39741199701  
 SMARCC2 271.113617350982 301.871924474014 312.406286993239  
 266.534316786801 307.518881119091 268.698146407497 326.703488388966  
 324.009703043876 324.401611136662 223.453776362112 324.713347085998  
 325.493177980483  
 SMARCD1 409.282410265733 433.751675703425 388.477382640003  
 492.637241687561 476.782624160552 488.505191823403 467.944850290806  
 574.496860164135 577.801009921199 443.005424069211 573.644925180854  
 610.070236234299  
 SMARCD2 305.499194075747 338.326304736048 288.505502880424  
 363.255517622046 842.22767901391 592.387650564803 517.23393716516  
 428.66614441422 580.347496467173 292.965109701719 394.65807885612  
 683.179460779062  
 SMARCD3 319.768792196774 332.400086578723 281.44159425243  
 513.518424350159 187.216245895253 170.79303550487 166.521472376759  
 145.99474597064 157.909530751723 134.48825480809 142.22515098612  
 181.467708718758  
 SMARCE1 661.826149512811 596.246316033079 626.857289492802  
 659.27672123763 318.112626495401 837.603727062008 761.32108609503  
 993.34112647221 687.700356531038 318.004190156313 719.13080264227  
 796.936154737659  
 SMC1A 171.610742435469 153.649235507812 184.056274452194 162.320894555337  
 151.923356524322 161.466192326759 136.826606228323 152.552277008504  
 145.372579207362 175.245611094434 158.473244125101 161.530878860883  
 SMC1B 137.011595584638 147.011838288594 140.38936578649 160.073510173041  
 169.583355171423 156.146154578237 139.181131600753 154.96616957771  
 161.365443930448 161.501062527272 133.070896773384 166.2468445883  
 SMC2 189.324370290702 215.558688906165 190.255797389524 237.358925391616  
 188.952730860801 210.245551279259 173.879952136931 230.179200974631  
 191.179662650057 237.940015617254 185.950131245699 180.142758394321  
 SMC3 295.463118191589 287.242697383558 353.243400332397 243.807038920733  
 217.628802427037 292.317998405609 255.3451781862 256.394563537658  
 273.864293250688 274.564508105177 320.979443123471 365.140886302762  
 SMC4 200.468804559127 205.966111721195 194.941454173896 188.959655155629  
 366.408565514304 350.308420518351 310.301616266762 394.892918166519  
 353.437466689101 286.431013744652 220.772387104223 392.365008240567  
 SMC5 161.795378938402 157.521230460545 165.673535349675 160.48993837044  
 200.688465653117 152.104170622003 157.227118680396 151.126252768792  
 152.518729390047 152.970079142629 129.404017329613 162.668896609848  
 SMC6 149.833346575446 144.526499066594 136.720837676326 145.03804642447  
 171.994330847901 159.781313090489 148.846121873401 136.366798516444  
 165.737618983611 231.796421262015 175.7330682766 193.124599671798

|        |                  |                  |                  |                  |
|--------|------------------|------------------|------------------|------------------|
| SMCHD1 | 158.467572658719 | 175.882911801581 | 175.111460651956 |                  |
|        | 150.038722708606 | 151.660152977515 | 154.156272284591 | 151.349739492368 |
|        | 162.54567071663  | 147.702785358046 | 144.377501600001 | 151.334463063946 |
|        | 159.994376562272 |                  |                  |                  |
| SMCP   | 139.762998983487 | 143.360311218423 | 131.693923403533 | 134.558435781672 |
|        | 143.694412162756 | 147.784078315091 | 132.379706531581 | 138.230197299262 |
|        | 142.160941592768 | 139.097764484641 | 162.050520530297 | 140.759006929593 |
| SMCR5  | 1028.80076860235 | 1059.19317548869 | 760.572409199179 | 1043.14253624883 |
|        | 272.193578770314 | 1116.19403476786 | 695.321886304133 | 889.6617510875   |
|        | 671.134356672693 | 484.568420044471 | 1023.94850651125 | 703.29965727829  |
| SMCR7  | 127.323157914914 | 148.11536596061  | 153.658747612827 | 143.776637809106 |
|        | 140.460927375243 | 132.895500657638 | 133.854760285591 | 136.244995503799 |
|        | 145.819198235878 | 149.175458427847 | 130.874283538818 | 143.526983440589 |
| SMCR7L | 392.06522028189  | 403.292651623365 | 331.747622606378 |                  |
|        | 446.698665191047 | 301.695991929957 | 372.894376776771 | 361.969355316032 |
|        | 388.477382640003 | 371.127480221666 | 343.270642449751 | 436.982960786839 |
|        | 376.189276074918 |                  |                  |                  |
| SMCR8  | 148.81406900745  | 149.956759038516 | 143.914415729816 | 142.313725116274 |
|        | 155.023934989559 | 154.746081871718 | 148.284412570438 | 163.413365060063 |
|        | 153.104072845043 | 141.990639998829 | 137.06192448185  | 172.741890316331 |
| SMEK1  | 130.872296869843 | 132.820927638053 | 129.431497372577 | 132.224831869802 |
|        | 142.671190279415 | 122.547842148486 | 135.141067086648 | 132.845116298605 |
|        | 137.493436771898 | 115.137475087954 | 133.495243957927 | 126.314233529267 |
| SMEK2  | 650.0804221227   | 550.24496459253  | 717.419388886784 | 460.651156484562 |
|        | 497.411169898778 | 638.77182631975  | 629.707646271678 | 623.050854309724 |
|        | 627.066031322234 | 627.526008812413 | 807.604205890244 | 671.563789496889 |
| SMEK3P | 131.945667475797 | 142.058086679048 | 130.905135502296 |                  |
|        | 139.543551482943 | 144.259643132933 | 136.831280469398 | 143.973464003036 |
|        | 128.202619705343 | 134.381042390464 | 133.495243957927 | 139.361120875198 |
|        | 117.900892627473 |                  |                  |                  |
| SMG1   | 296.657844888195 | 248.010317392179 | 378.695635790714 | 265.148061007894 |
|        | 241.890850719625 | 373.860920943049 | 360.756455184184 | 399.664121956178 |
|        | 295.099840299681 | 359.329520507158 | 367.518273773904 | 361.26540006942  |
| SMG5   | 319.490670412394 | 295.571900619972 | 383.407365952689 | 377.148528768679 |
|        | 1231.92253664482 | 633.594811068524 | 781.208872924532 | 773.803350315426 |
|        | 1055.79590411506 | 508.302878624289 | 585.552940765069 | 638.77182631975  |
| SMG6   | 164.126980102525 | 186.460034745907 | 224.439293045835 | 223.975677959345 |
|        | 163.07139884152  | 155.911387663464 | 168.460095116205 | 164.68600028429  |
|        | 158.953705937936 | 159.724824188037 | 167.43630698726  | 167.724233915361 |
| SMG7   | 383.033242143031 | 393.579552385074 | 288.968909550533 | 413.398641688413 |
|        | 410.533157400023 | 241.867699338253 | 312.129861040709 | 329.214958614925 |
|        | 289.09614335372  | 258.489608621438 | 386.16563750478  | 291.883157643902 |
| SMN1   | 159.491388998564 | 154.061101136889 | 165.896420029269 | 158.109836032481 |
|        | 147.335403843539 | 159.746802905903 | 162.259941098076 | 146.462544135666 |
|        | 157.415211954103 | 169.408892048115 | 167.190857452131 | 188.268774618164 |
| SMN2   | 139.220877923507 | 138.054470878471 | 151.273261581765 | 149.675363177375 |
|        | 143.066552389513 | 140.908882557383 | 142.822594215168 | 133.397734409167 |
|        | 141.683298500736 | 149.72025962797  | 186.939168482155 | 141.547112973262 |
| SMNDC1 | 475.213525346293 | 392.909481887174 | 385.978867521533 |                  |
|        | 321.367338145787 | 445.214621023114 | 411.505580458401 | 466.777454704543 |
|        | 372.255208814622 | 336.70893120135  | 351.585604465402 | 366.240941980786 |
|        | 440.038896046559 |                  |                  |                  |

|         |                  |                  |                  |                  |
|---------|------------------|------------------|------------------|------------------|
| SMO     | 224.497348027469 | 270.12941437975  | 187.645390502607 | 236.809829701921 |
|         | 256.795346052751 | 157.768329108254 | 216.154203111101 | 151.914252332792 |
|         | 171.816841286562 | 135.294664456623 | 149.736837985314 | 169.428195354763 |
| SMOC1   | 123.315362903961 | 122.327353563917 | 127.456181182121 | 134.142423026264 |
|         | 141.567425892004 | 122.125746529725 | 130.792692240592 | 128.108066199718 |
|         | 122.149756212115 | 117.781804727205 | 124.464941711781 | 124.28033876033  |
| SMOC2   | 1965.13870083236 | 1995.6000523628  | 1885.93146154931 | 2811.84191700516 |
|         | 198.925776755081 | 206.275885047321 | 171.51411661213  | 214.434355263652 |
|         | 278.687780705367 | 204.470661830972 | 145.335830265052 | 154.466614452651 |
| SMOX    | 170.684848540493 | 171.909358721737 | 157.952018720438 | 172.28937151007  |
|         | 255.59042517603  | 182.197625235191 | 173.782474972742 | 158.36796888959  |
|         | 153.238678313147 | 181.950658782069 | 147.901594006094 | 189.283071231248 |
| SMPD1   | 206.098534554876 | 205.476230849391 | 188.166168428752 | 271.087125858775 |
|         | 165.808660192901 | 166.85671415475  | 175.437651670246 | 148.620766059526 |
|         | 165.122737166322 | 173.325724300712 | 164.647634120888 | 144.281217246178 |
| SMPD2   | 156.825157746082 | 152.829437376835 | 159.606633817645 | 137.934850241054 |
|         | 360.551560710852 | 159.706443636973 | 233.809899915394 | 203.524150518033 |
|         | 167.698883940638 | 153.88383201628  | 217.748916080172 | 229.26243866226  |
| SMPD3   | 126.988118823204 | 108.497209666203 | 125.170874841845 | 117.470731811595 |
|         | 107.531907287727 | 117.724353829377 | 116.214857935694 | 123.474836673474 |
|         | 123.791515424464 | 126.235567899449 | 124.775529469869 | 122.729918525032 |
| SMPD4   | 137.587917564413 | 139.299062352035 | 135.957972463728 | 135.648906382608 |
|         | 145.635453468646 | 133.905162024888 | 139.041005010106 | 141.821550320574 |
|         | 139.271829906127 | 149.910521500364 | 167.912321820083 | 149.066522533956 |
| SMPDL3A | 353.98839683842  | 225.209315195163 | 289.761702484888 |                  |
|         | 193.472317111841 | 131.314766140505 | 331.062744782933 | 294.48534582475  |
|         | 210.165098572428 | 285.882780066861 | 395.786295710815 | 523.591472915151 |
|         | 241.944581086483 |                  |                  |                  |
| SMPDL3B | 115.755585907264 | 122.385508330707 | 121.107979534361 |                  |
|         | 121.818632020666 | 150.494260282384 | 220.446775597113 | 124.809739073169 |
|         | 126.022145004164 | 147.645530163725 | 124.944563166658 | 128.597272557033 |
|         | 140.460927375243 |                  |                  |                  |
| SMPX    | 233.975864722289 | 215.635313821029 | 246.355720496468 | 357.584458526365 |
|         | 137.555253894825 | 135.959893035019 | 133.839554874862 | 134.142423026264 |
|         | 146.100551577766 | 136.330636532576 | 127.588907178652 | 139.117053855066 |
| SMR3A   | 152.57905274438  | 139.449895159273 | 166.404164069728 | 154.38209765671  |
|         | 128.820757822782 | 127.265211069837 | 141.348548071751 | 149.902420337518 |
|         | 146.162330544539 | 144.949897872252 | 146.378522944864 | 146.264686158155 |
| SMR3B   | 148.720181793879 | 146.14494790114  | 137.874370839801 | 144.043818335414 |
|         | 140.639012372681 | 139.785767470943 | 157.895460674072 | 162.870317933909 |
|         | 142.643027992419 | 158.160604786093 | 147.397591251955 | 131.263641389894 |
| SMS     | 1193.82799849555 | 900.233783407148 | 1377.75266942574 | 892.038018567941 |
|         | 1073.40463823132 | 990.55038742453  | 882.798927428142 | 1480.52638217173 |
|         | 804.362909579005 | 2041.03024136014 | 648.823677010146 | 527.930077857945 |
| SMTN    | 3793.02341602102 | 4103.06565237121 | 4309.86375945008 | 7292.0342195035  |
|         | 335.013713757031 | 242.253995801882 | 234.126500054945 | 208.456472621593 |
|         | 169.705236302448 | 228.675099004411 | 181.135519188216 | 182.055718892894 |
| SMTNL1  | 148.501654210579 | 146.108551647446 | 171.145909843389 |                  |
|         | 157.385256442734 | 149.007288765628 | 154.657316209848 | 141.950778601653 |
|         | 138.777120638896 | 153.241806795134 | 162.748836971539 | 151.397068235685 |
|         | 164.553511697702 |                  |                  |                  |
| SMTNL2  | 176.029791617989 | 169.860061216981 | 196.566937667522 |                  |
|         | 265.110264596425 | 161.877378749103 | 153.770852731422 | 142.796371223204 |

|        |                  |                  |                  |                  |
|--------|------------------|------------------|------------------|------------------|
|        | 148.57301274812  | 157.328404229451 | 144.964084792568 | 119.673343767067 |
|        | 170.737352030035 |                  |                  |                  |
| SMU1   | 391.252450588331 | 343.617417488962 | 465.41233536979  | 350.983969007868 |
|        | 259.374392296079 | 336.490076158135 | 379.476768908492 | 315.912220767901 |
|        | 358.355621069787 | 437.770841893227 | 398.423396126075 | 323.737610506003 |
| SMUG1  | 553.368945998847 | 598.287431134037 | 529.529314022043 | 753.654626233604 |
|        | 1060.24125879951 | 887.471553448641 | 1662.51399707484 | 781.461780481171 |
|        | 1025.27246494218 | 697.299604049748 | 790.790236361922 | 1233.27155759407 |
| SMURF1 | 168.016048154878 | 167.559703634539 | 161.434331154045 |                  |
|        | 149.871960981882 | 173.071892362758 | 163.390929975591 | 157.684694038023 |
|        | 167.751604259111 | 162.18174589792  | 159.870967387108 | 177.055023182887 |
|        | 159.936703616817 |                  |                  |                  |
| SMURF2 | 126.88329158544  | 129.165440930558 | 136.869117921313 |                  |
|        | 131.302225305148 | 120.377793842621 | 132.604589324628 | 131.885529813944 |
|        | 129.330592465123 | 135.764392116216 | 125.75980494927  | 142.487424651482 |
|        | 134.13812854554  |                  |                  |                  |
| SMYD1  | 116.86635524597  | 128.368669716591 | 105.010952544907 | 116.087696503753 |
|        | 117.144778357339 | 110.068122112671 | 112.916256784817 | 112.10312035128  |
|        | 122.236134282757 | 113.61408868553  | 122.010855318111 | 122.456286448252 |
| SMYD2  | 190.018871923219 | 178.313238745665 | 198.840533461525 | 190.318957029666 |
|        | 279.325065941252 | 371.693808540758 | 295.571900619972 | 214.8478629277   |
|        | 260.016906472407 | 455.665927568395 | 391.185365567603 | 424.201556056759 |
| SMYD3  | 337.87475687838  | 361.218491712891 | 445.661863626419 | 365.727197088581 |
|        | 507.710604451713 | 464.577839898252 | 564.41151411028  | 859.860994525775 |
|        | 275.101766414328 | 471.946284490029 | 621.946994961864 | 614.239716118509 |
| SMYD4  | 336.002793042439 | 359.162549472301 | 296.962992349662 | 297.285037835812 |
|        | 186.007710175103 | 181.003812824014 | 146.155809402461 | 193.813717161291 |
|        | 187.673748059596 | 205.260673843294 | 207.651142295123 | 179.821008257902 |
| SMYD5  | 180.698727334322 | 185.905819051223 | 164.043866642712 | 190.444387031552 |
|        | 201.186963432715 | 171.086559024882 | 162.397078614596 | 142.872683795338 |
|        | 167.370030272847 | 168.21856603538  | 183.071150926068 | 180.315825600347 |
| SNAG1  | 117.015097017246 | 123.294321716108 | 118.047978285706 | 122.554760526767 |
|        | 122.891946370542 | 111.708970469189 | 120.660349211375 | 112.502812746669 |
|        | 118.650091706226 | 119.092335265325 | 131.744454088995 | 117.399753685854 |
| SNAI1  | 113.536570797896 | 117.879058520659 | 108.9291713877   | 116.373841472226 |
|        | 114.631759839092 | 111.457176315964 | 104.633603136988 | 108.830525786872 |
|        | 112.825399620524 | 114.822700007686 | 110.518806964366 | 111.722827315911 |
| SNAI2  | 341.43511159996  | 294.535979194434 | 215.81995779019  | 211.995890899864 |
|        | 170.892319361167 | 259.826625866106 | 278.469340236003 | 197.378801636702 |
|        | 220.578790067967 | 1069.93503700632 | 340.668473351494 | 532.950400370668 |
| SNAI3  | 149.818888178632 | 157.28429690041  | 151.933078262284 | 129.155804800869 |
|        | 152.213746577124 | 162.447903830131 | 134.722574388775 | 128.033383607545 |
|        | 158.841505957036 | 146.839641617491 | 143.296580629431 | 139.966813133326 |
| SNAP23 | 266.61343130101  | 233.272000923172 | 257.706904467657 |                  |
|        | 204.959164579011 | 177.065616871886 | 241.353916553991 | 331.999693230194 |
|        | 255.462706428149 | 309.098519056843 | 288.631429069336 | 304.402066421813 |
|        | 289.434186747703 |                  |                  |                  |
| SNAP25 | 143.686906051698 | 133.769848328557 | 125.162662242842 |                  |
|        | 127.299853592344 | 118.154953746492 | 127.617449871137 | 119.822587087968 |
|        | 125.478878240473 | 177.84188738734  | 126.872912960681 | 132.903959880979 |
|        | 139.397282021664 |                  |                  |                  |
| SNAP29 | 264.383922859446 | 260.554343693588 | 405.130899553871 |                  |
|        | 318.112626495401 | 211.679799388351 | 235.48876511325  | 270.727749014046 |

177.84188738734 253.754869975548 241.105817192695 232.492398623889  
 285.594100976705  
 SNAP47 227.350260241585 235.997227173296 204.337844243869  
 255.903775525554 279.159925913207 215.532132200821 262.196293231028  
 184.102171963542 232.321454436688 236.219981978324 217.628802427037  
 257.989863290786  
 SNAP91 148.8870854102 150.670783991982 137.159781458748  
 122.82388804774 204.019377262081 268.406778092906 363.539983343859  
 170.966588957686 239.31180635241 123.732299841696 263.994460303088  
 123.094324479352  
 SNAPC1 801.702878226247 834.187014201026 575.546802138889  
 657.77730563722 230.893665210918 757.066786599446 484.230510636533  
 552.662610888399 464.577839898252 403.104188866804 754.607039665508  
 474.629173435475  
 SNAPC2 553.757847979529 605.437395034282 575.386048896223  
 877.598505913096 390.021666378804 346.635777358159 219.103510284905  
 284.748764120614 201.893722965557 277.314675225943 237.216435972201  
 321.750495072759  
 SNAPC3 219.246271924313 207.05325577114 284.321253087512  
 241.320049298228 195.20398666139 204.89842561202 216.903719298575  
 186.722842989058 203.675655444583 240.376851873817 215.019239034819  
 201.085046871333  
 SNAPC4 472.030150842569 576.10291008626 356.323554000768  
 710.531876484467 789.971871940893 471.816954259146 379.292531644085  
 423.562598841704 596.743397794872 487.901310664037 506.165100641525  
 345.135289739599  
 SNAPC5 195.141733146452 192.095235288818 217.24573005272  
 194.80575419836 194.569325586241 151.144521344129 197.815264620906  
 180.15338103 170.941404165185 180.561514455864 182.310140388705  
 192.59376129133  
 SNAPIN 305.93974940209 287.924891622962 331.523536427527  
 340.966515437272 328.200548902445 340.098306132634 354.656612182522  
 404.445038343721 331.848516303011 320.467139255533 379.387095129725  
 418.163219634152  
 SNAR-I 121.278346729876 125.911259629489 125.326393776938  
 141.543147273205 144.281217246178 117.667611937195 126.049905221996  
 126.139188586523 129.031338314175 122.682761393215 124.821581853501  
 127.657961561231  
 SNCA 232.641965649602 198.840533461525 233.103476996669 218.735620596634  
 175.29178007783 161.694109087893 175.38376293575 178.512206531256  
 177.500110974116 214.38058301395 153.059432055089 160.361025839456  
 SNCAIP 221.82340413039 246.594244983507 172.222262910052  
 243.225815954365 192.130214856642 174.23955831109 212.669156800241  
 230.447203571825 258.605188272761 230.179200974631 146.83577460518  
 237.492603094091  
 SNCB 144.81689330206 142.971972776388 142.637421204193 142.124876403709  
 141.836648910979 146.384051525624 160.001115445038 154.096542063701  
 142.348246621217 152.350537364705 140.213080190065 149.490064894136  
 SNCG 175.857952663383 241.675251479835 252.810636571566 155.62770968777  
 776.98412594767 918.742625270041 2502.72913594103 1362.1486006778  
 1282.38953612054 130.105800581241 1982.3154578939 1573.03248861784  
 SND1 1014.63777151551 931.325266360957 1251.15912264225 906.359365544713  
 1490.02976786379 832.014011481807 649.906677394861 730.34994035645  
 993.34112647221 800.373159084181 484.230510636533 736.140249105836

|            |                  |                  |                  |                  |
|------------|------------------|------------------|------------------|------------------|
| SNED1      | 136.722636695506 | 152.617507769717 | 145.544996009633 | 156.277567608825 |
|            | 147.127908355066 | 146.683594365673 | 154.265581535942 | 146.617853918109 |
|            | 146.359038260378 | 143.25481667885  | 142.508525378171 | 157.723341862468 |
| SNF8       | 828.276436883306 | 859.547169028149 | 813.454826901794 | 942.41077071058  |
|            | 645.183207984114 | 649.906677394861 | 890.810315261602 | 787.615195903993 |
|            | 771.294254795752 | 692.945420109927 | 664.025683218037 | 710.003412772888 |
| SNHG1      | 421.303580698397 | 324.615093103582 | 399.620724969771 | 287.334035234496 |
|            | 360.243484271891 | 588.678767007017 | 776.98412594767  | 712.067161025165 |
|            | 588.678767007017 | 577.250493023431 | 564.588706307423 | 885.104778820041 |
| SNHG10     | 105.164790181452 | 108.779204939177 | 122.816872726758 |                  |
|            | 116.342242990651 | 149.921414617149 | 122.506058130261 | 125.371128588617 |
|            | 113.09980008288  | 119.95959059725  | 133.463464118897 | 144.757068610657 |
|            | 119.062611098235 |                  |                  |                  |
| SNHG11     | 221.231455446574 | 216.506914782226 | 262.233918187791 |                  |
|            | 245.269004485826 | 244.544473246593 | 288.481981529558 | 368.418553384965 |
|            | 235.680462167404 | 240.497413647633 | 255.866847225916 | 227.614623963331 |
|            | 256.370052241046 |                  |                  |                  |
| SNHG12     | 178.997098204457 | 184.462286724102 | 158.890522392445 |                  |
|            | 153.228048041467 | 169.378422829858 | 152.566490804809 | 247.899467998443 |
|            | 198.506786870804 | 196.001089662818 | 218.592402813219 | 255.413231082357 |
|            | 252.957489543915 |                  |                  |                  |
| SNHG3      | 139.679681813932 | 141.59474425685  | 138.541779821934 | 153.426409060413 |
|            | 150.36160186175  | 174.991941844263 | 163.794436953711 | 156.759600627542 |
|            | 147.774588146924 | 199.746775121317 | 139.502856192876 | 147.420580715112 |
| SNHG3-RCC1 | 137.734887788912 | 136.737964237109 | 138.102654893864 |                  |
|            | 140.343790129071 | 344.575967665039 | 187.425086057782 | 254.517135747445 |
|            | 236.326943078666 | 188.131876231735 | 160.73807125195  | 321.794887577351 |
|            | 154.088770236213 |                  |                  |                  |
| SNHG4      | 125.050945917101 | 124.922004609558 | 134.842877075983 | 132.329892644992 |
|            | 137.603046125938 | 149.593135821045 | 136.130027137459 | 147.085006263446 |
|            | 152.629680152219 | 127.585851003779 | 148.072816925413 | 156.200313064999 |
| SNHG5      | 4262.23145131525 | 4318.50925204407 | 4579.62296570302 | 5106.27623905309 |
|            | 617.318955611228 | 2841.96460830166 | 8473.21873478131 | 1421.04485772969 |
|            | 3570.21370790206 | 2045.24382334506 | 4671.10203385528 | 1843.76920134139 |
| SNHG6      | 3290.27308365921 | 2574.74962955426 | 4190.38366101529 | 2479.34567973462 |
|            | 1002.44383771056 | 1626.34607278613 | 3106.94181270197 | 2414.22821062457 |
|            | 2099.85702995194 | 1910.08485008041 | 1675.35431076885 | 1727.7144253077  |
| SNHG7      | 427.542390397986 | 403.984761333129 | 816.266384662324 | 416.933146258428 |
|            | 659.673052713372 | 258.075566417241 | 689.590642377619 | 236.833653794223 |
|            | 427.766660764042 | 259.252807304272 | 642.255110250493 | 553.90008440429  |
| SNHG8      | 326.908959531021 | 228.879434668972 | 322.837446618323 | 156.040073232376 |
|            | 254.909076658804 | 200.179796117115 | 895.821578104681 | 630.670530516275 |
|            | 425.59810308048  | 309.720081933252 | 606.003956839826 | 460.408628542721 |
| SNHG9      | 533.37609065123  | 522.664475688419 | 504.838017072725 | 438.870464403215 |
|            | 1863.96986643676 | 1778.73916100529 | 563.779294315901 | 1090.20254511452 |
|            | 1180.7055699511  | 319.685597963267 | 411.968307579588 | 461.940616438547 |
| SNIP       | 112.026113831896 | 108.131097605872 | 118.619176257622 | 112.309528593741 |
|            | 127.167918433035 | 100.325215581101 | 113.680875214845 | 105.375878824562 |
|            | 111.312348806957 | 104.633603136988 | 123.185652476312 | 107.930325780047 |
| SNIP1      | 315.513423195489 | 338.223462327622 | 334.101619029105 | 317.949646885539 |
|            | 374.9555524303   | 454.235121917464 | 432.515970951769 | 401.267425721838 |
|            | 334.52685347521  | 312.129861040709 | 294.22752955801  | 320.024259346646 |



SNN 185.359195899057 218.672831303767 216.9491329483 234.738241125899  
237.113813706224 205.852731236069 306.59090554099 188.131876231735  
208.955110569558 202.314814594735 227.177100762395 251.224369831275  
SNORA1 136.278361222532 112.268518171041 120.711150688559  
141.345379144177 152.662446724781 134.425483661043 143.481112776388  
151.176697752603 147.449186980143 136.2336179571 137.120973494952  
147.889486635135  
SNORA10 153.140087873773 163.315865817864 168.919352453652  
158.723133891017 193.124599671798 217.074639597142 231.670761847089  
233.975864722289 185.570062118736 190.700515036197 193.629237856758  
200.944865673409  
SNORA11 132.16600019449 128.168460083895 141.255406288178  
139.383528389668 126.112672816035 146.832797779597 150.211719786127  
133.71610564207 132.751406897891 134.389518389888 144.998415908498  
129.501028506432  
SNORA11B 129.34905533265 137.294246530224 123.640123613529  
150.799400717425 149.977924522553 127.532665057083 152.254519859308  
127.824005374202 134.46179453106 132.076865522593 152.439608473915  
139.574895021783  
SNORA11C 154.798287249541 158.915858403237 153.187148832063  
140.701132362458 142.542648587888 148.124586158123 137.052507691254  
152.78638215326 151.585818981801 159.406462604758 156.296046600921  
157.668307146391  
SNORA11D 208.555506929113 170.577057395536 166.315369318355  
147.959740692766 199.01458214661 193.04138438685 186.831266888028  
160.861929142249 180.923089242255 152.67564185705 248.643311972844  
222.544542998356  
SNORA11E 170.720018572735 163.697117248984 143.196234996376  
171.629605754643 154.190469538568 163.996649606636 149.055493714692  
153.498332327444 147.769702509047 142.903851392611 151.216992571364  
171.229729917612  
SNORA12 164.39557148282 134.929915732246 130.551216910933  
140.469508410073 234.895245871534 266.032134528055 780.734359041347  
550.566402986082 365.046815163035 182.644319628554 496.03509813734  
234.814109965002  
SNORA13 134.442947822188 132.769455423385 147.385714746214  
131.067958183644 138.938546468136 142.483308497682 166.825501664231  
148.304863957659 144.48495176385 145.412368252632 127.566369352079  
186.359770878343  
SNORA14A 131.724061631389 138.407207709066 119.915330116696  
139.348494759948 147.338615809214 152.321890796527 130.199581370385  
151.445254181497 143.035245560484 137.794858639838 143.893751699551  
142.248293068033  
SNORA14B 148.435419356331 132.498092935232 137.788504385206  
148.342114514468 146.215459988012 172.657668514226 143.587562550004  
150.765477999064 146.204122329465 147.552635527742 148.079107235035  
151.717558541683  
SNORA15 126.069594320759 123.777133327569 122.84603217721  
120.450111018432 125.324187741972 131.690417323838 137.71280215369  
139.972797966319 131.606765174514 115.033355516602 133.243679173608  
137.740497848238  
SNORA16A 144.470642732973 133.519359066907 150.540599489506  
134.441142158135 177.851689709807 150.000851192531 227.441436540742

201.458970969685 166.570606752678 146.541890150631 175.551853899221  
178.928873342925  
SNORA16B 129.193229483846 124.712789674509 114.893462783007  
136.205702793983 115.594489123676 132.12082208253 135.063259138429  
125.114303270024 125.367386907897 123.132178371802 127.9928491829  
131.880438747579  
SNORA17 113.694351010121 138.925802905636 129.425699141995  
132.822351718257 140.995418231627 133.913578037255 140.664817970066  
133.324531689254 140.941447663862 141.416706868124 150.142724640067  
141.985130140173  
SNORA18 186.388067641269 166.036553680319 189.726075394359  
148.570769470645 269.053237303244 270.568660560796 257.168308311848  
249.193270428348 201.837695818264 319.639103463458 264.983729290122  
312.286788541158  
SNORA19 126.216519704249 133.370488470007 115.264104392064  
132.322618637842 126.479964493857 121.624218243474 132.624674205566  
113.536570797896 122.343979874508 132.521681289019 130.058902161953  
130.278980631435  
SNORA20 136.184427467391 132.365002835934 148.149216812602  
128.488598467312 135.099515818368 126.528589411462 143.138613573764  
145.380971596154 137.644942697483 134.266373965186 149.556644928013  
140.169200413643  
SNORA21 135.205434173702 128.580625868379 137.401137659118  
128.83022039037 165.139423820186 134.4811029314 264.429717032654  
225.783771938969 163.181323768362 178.106013202731 173.408784502027  
151.9441336438  
SNORA22 153.723169560972 154.108689872903 240.054164412429  
135.738699497293 162.090585987836 177.296424297967 159.298815559223  
168.687845035401 155.835077077665 139.062140755714 168.132172570809  
151.808767243647  
SNORA23 144.445496145045 137.286331849749 149.613701531197  
137.614020921217 139.204218271711 162.06940121135 157.524049610272  
159.379420001197 131.474485888864 125.887854850942 140.845958602151  
138.706520278166  
SNORA24 215.558688906165 172.677083810424 198.135240691225  
127.585851003779 156.572774198042 218.592402813219 318.930960243303  
354.579728909336 258.036064876416 369.198837083585 349.248144552634  
667.693216401836  
SNORA25 550.124359517322 303.795701960506 305.93974940209  
213.674150322581 286.945784387294 406.028724866233 446.948699651916  
260.314440448486 244.011434605133 234.126500054945 443.259619455624  
601.018867455333  
SNORA26 154.227433553131 128.432188632218 130.176734524308  
143.791908191551 158.665476708054 163.579282884905 176.284693922048  
152.837739128546 170.290455446376 141.639216893245 170.024833610695  
170.596937075493  
SNORA27 143.446317006075 148.87690497281 145.163084967499  
140.121874960672 140.617663657037 188.557113298055 211.183499580683  
164.288645768576 167.658560306884 144.058006677487 193.218266574099  
185.816827784447  
SNORA28 191.84511431253 180.142758394321 155.762890407496  
146.112388101621 197.775397831129 246.250251445835 288.436880408624  
236.35479928448 188.027848008991 177.708263037199 238.588762326319  
173.306283668215

SNORA29 182.984076352185 177.524818593325 181.578228610334  
180.590215659031 170.417054311946 169.132693907633 159.815932985135  
160.833948531272 176.980780681976 157.592607345742 164.726382689707  
178.262619516994

SNORA2A 133.969054754299 133.392177866353 114.3172128566  
126.433146708506 125.486324819682 121.36708642226 141.500790455788  
127.130769263811 137.869471689534 126.917669470999 133.181855719499  
132.23149173224

SNORA2B 126.941650500751 119.866898356501 109.52020660772  
123.98775110588 153.165872773973 158.902676384853 201.186963432715  
160.478519202775 158.573561336755 133.019479277371 143.397823965608  
134.275773172492

SNORA3 136.556183079815 130.570050159191 139.318078285343  
130.800427334056 154.900676756492 145.245316640391 170.198508633417  
165.537853089052 150.336115779606 172.403953571339 177.151218006672  
144.63774603725

SNORA30 140.579839043912 151.327544435847 148.31140879454  
135.943252855457 169.87591929982 146.413845130977 200.72147365413  
177.666582096539 155.851264092344 137.446745269821 170.807514224412  
147.648020819059

SNORA31 150.105503384881 150.875392181869 157.296892205781  
135.010937737018 131.12953085854 155.61996871093 131.427686241226  
141.599211622756 133.862203806529 222.675370226786 162.216377983292  
153.338193960419

SNORA32 191.335616210093 143.934585983797 163.146581498065  
130.24527031028 171.791030104358 189.693218759349 202.061887608293  
163.010527914347 150.227629690236 155.143752422033 205.200459980187  
240.814860403562

SNORA33 216.457866890673 176.849238577762 167.912321820083  
182.084333814175 148.560326703328 184.223623297663 205.495823410422  
207.218779485342 162.342112922504 243.839402991061 169.541411677993  
291.056913909578

SNORA34 136.708746582636 139.458529687684 125.3200677275  
133.420267697961 149.678629612616 154.783699020901 134.56314960832  
152.080057231881 154.87316176388 147.715160308036 138.936872956065  
144.00214898009

SNORA35 136.341358916638 150.642465826166 154.722895261876  
156.834059922255 135.729333877406 152.134895623504 163.02140155858  
138.106499370074 143.303309656177 166.040918339519 126.042731009527  
151.115031304764

SNORA36A 128.001109846227 110.865668451601 122.010855318111  
120.669452856028 120.891023626809 119.034003473459 118.891276329399  
113.334665910428 115.409568875238 117.74682797375 138.850077456103  
124.164523121103

SNORA36B 141.752031758589 125.013839352291 132.730924522748  
123.561016079801 126.137627769256 135.980886879513 121.018722403628  
128.697647007046 123.11447940203 142.321476446203 142.155463269751  
140.427188241455

SNORA36C 127.342017026873 140.058153633802 142.003414252064  
127.284885819903 135.81863662958 133.307149027384 138.783017264895  
135.895945142328 133.164566694394 129.015422924366 140.947852529815  
157.200582422961

SNORA37 155.379116566097 136.482609639417 131.970514300585  
145.78573175226 135.741404460897 147.232015056035 141.336866031027

144.785852437305 141.619432083003 137.488665424434 150.283447275981  
135.792966926642  
SNORA38 139.452773383624 136.03581843125 126.948090173876  
124.170242736875 145.306369509684 130.892302357045 144.597060118959  
141.398513269219 125.929743286163 131.228779762508 125.250900940748  
160.30784625946  
SNORA38B 154.101698334466 142.986412837634 155.777281781161  
143.937726155116 172.992936821292 147.983109171553 179.220691178402  
161.992141305029 151.780459290205 169.619338456208 157.680109819782  
153.152921890232  
SNORA39 113.071787850611 113.773684331489 135.164117176127  
124.794260959228 117.781804727205 139.082897743357 128.626051185037  
125.005019889478 114.721282552636 133.360017767635 124.982744176925  
133.487774861252  
SNORA4 140.717348834454 140.605866597575 135.507247740621  
156.357126871243 139.56332664295 162.914301705151 163.125317704446  
156.169405925094 144.096624787142 148.486946087388 157.248117633013  
166.741762854246  
SNORA40 117.244895482991 134.02083946631 143.695901115673  
111.549719888905 127.890438577754 128.245734702114 141.775100066311  
144.350683356627 133.564350740049 144.988803993714 136.092086452096  
136.864106181375  
SNORA41 153.568321662387 123.21112178671 142.988500173397  
135.177043138545 161.466192326759 221.152973486208 170.401653214867  
191.297539967707 176.75095377028 178.572212478544 192.224242967539  
165.436881839632  
SNORA42 134.301187092088 158.167384416968 147.694098231655  
154.190469538568 253.975577255772 242.614881095485 273.61337724143  
273.478372861114 206.650760711745 140.036463888037 237.045634416039  
211.468099571442  
SNORA43 148.530422089937 141.050384368733 143.403396831929  
133.286702819953 147.079157199448 137.386308389265 148.461172387171  
150.129367314696 138.944595164363 146.063554646851 147.024759173313  
159.420533375725  
SNORA45 217.327543190687 208.348515119045 199.378179817518  
201.016287924499 192.059255232313 211.595513743111 200.443940449586  
209.051768656607 197.049616858296 224.528190554963 271.356289141017  
205.705962405954  
SNORA46 139.741862925156 151.126252768792 141.512008928271  
134.058035351684 157.776321544382 135.154441560264 173.850390626782  
140.619606039582 149.744358230709 140.10798818623 140.73456875677  
150.981208776163  
SNORA47 147.541437871615 152.272198017355 159.738700107615  
134.403789206552 144.30699572795 160.180961887686 149.895214204184  
137.150183536061 136.754116864655 147.988883293205 140.304810288752  
137.322392546784  
SNORA48 143.281050499332 149.79295887612 161.134322621805  
134.688504981603 148.016402654687 133.138744413911 155.114892891737  
168.000247148058 138.921608664788 134.30624644595 153.62335478774  
147.78847662997  
SNORA49 158.064409011013 160.136209944279 174.971350923613  
172.486839924297 192.286192329464 189.235998474945 188.515336186633  
170.992074907355 163.396651801661 169.028519464989 170.54511631708  
163.024215671479

SNORA50 119.618176258524 148.461172387171 144.528360135884  
135.699583036042 140.411200873743 144.193756031386 148.269123639781  
125.093376753408 153.972471779464 144.787836177147 157.295602588814  
145.662818023154

SNORA51 121.094060100325 123.413596815384 124.019707408094  
126.473768158566 138.086270564406 126.262349005661 133.241744350369  
131.903632821793 125.815256068004 134.378951325825 131.159946917777  
130.454496708632

SNORA52 133.801549026691 135.947855806592 122.985117824212  
119.882472552083 120.626155234319 119.432201417811 125.402714360058  
121.271403807802 125.710199961297 127.938245853896 122.863612588759  
131.93683726912

SNORA53 140.855078775719 139.029404397979 131.83430682495  
179.137734914428 139.435000959919 141.657914155491 147.643985046683  
144.886005815977 141.29868389128 136.092086452096 134.002424083826  
131.668163693171

SNORA54 145.733828447934 133.465593684519 125.241484840139  
138.802633518223 134.285191872099 132.801619479245 126.056493244568  
147.260260687975 136.274199465472 135.301844382418 134.865577264797  
138.338280468272

SNORA55 144.525782437057 138.719480482945 142.431979387165  
126.732121894377 138.113751487484 137.157492354617 157.126460242995  
171.49930976135 143.523051024982 132.54355871539 148.510023599641  
141.391508027714

SNORA56 133.439077726411 149.952762225731 147.508817393901  
130.488972210403 161.160974998803 149.026243159195 158.639313207233  
140.550044737476 127.280740785862 149.138678142327 148.89180107448  
177.083095120017

SNORA57 153.244758030666 145.428297145967 131.38692240237  
135.237042337721 187.097765940131 161.530878860883 247.806371601734  
205.058210447711 167.976680048356 173.281506912652 178.928873342925  
236.745054217055

SNORA58 175.974598536074 192.655899720909 184.102171963542  
174.903798946103 173.432960318793 187.529556428609 189.082778234831  
169.179630363359 163.714231827866 170.95650329595 182.861900982333  
167.077669654786

SNORA59A 179.821008257902 160.53152291979 154.579913524947  
163.843143947012 299.717935831288 212.854068610681 202.927700504034  
185.783374935551 177.862368731138 191.58185405868 162.18174589792  
212.798133015556

SNORA59B 142.64421300687 116.742079521048 129.1829592305  
128.232091717966 156.7940590796 145.01322767825 125.701083319929  
132.815753681623 135.889764019762 130.973504803813 136.332399354517  
127.003974141317

SNORA5A 138.186616955926 133.423376063284 134.619470709414  
130.124601660028 143.301399292539 130.778164962583 173.526005872207  
157.466686487471 115.217608555334 138.980079440205 133.816601264067  
130.4631522533

SNORA5B 136.507961715591 146.599636794606 132.598022317288  
143.984222627806 152.296774123599 136.692495869097 122.759905480504  
133.353762794271 138.57506931811 132.329892644992 153.481752643937  
132.524377835171

SNORA5C 151.266352916239 161.348562186667 132.348603553752  
166.85671415475 168.560093633607 143.423040505897 178.320732186309

158.645402461996 158.869463014801 194.617252921731 166.795671029174  
142.416237823488  
SNORA6 187.572517928061 160.945886507456 176.849238577762  
162.110943457969 234.28146549561 269.468453936818 274.494074082359  
202.230920499592 212.312154721246 207.514489132778 205.612579504495  
219.422260093722  
SNORA60 141.94585838352 126.460390022632 128.725044326566  
121.371348717752 128.436499050769 140.802033706122 123.81177057082  
121.815538475678 137.508097741526 127.377356715337 128.318545300038  
126.398884382537  
SNORA61 364.265100349672 228.968779778407 323.95355217044  
239.541516080716 334.709049890042 549.162299481184 663.214972254236  
1024.95957828641 733.49038042129 363.255517622046 539.471166362469  
1015.10079945997  
SNORA62 173.87113073582 180.610891208146 183.693300680495  
177.652022895288 221.664431984861 273.106088088825 209.727089546377  
210.316431648335 205.476230849391 208.214764518526 237.88097138936  
234.182164952936  
SNORA63 146.20679320119 136.689064885984 125.818432070199  
123.354093930164 244.401472859026 169.246302492166 323.462252156562  
257.132618311227 190.357437485436 177.93138555339 196.486499238623  
211.395593720534  
SNORA64 204.851374931284 179.74065086312 199.579818754014  
162.431674335726 163.653662369257 223.703371558666 223.918931440768  
205.45079491218 190.825209733575 200.618080312379 169.619338456208  
217.778414825515  
SNORA65 150.734560844391 160.906550609416 182.786177632757  
165.45479542657 176.830879422227 183.348764012358 186.529656751005  
179.674744176904 163.010527914347 175.98210925643 174.364798143068  
197.405472374722  
SNORA66 167.040031488406 163.102043862117 171.521579011287  
169.201608999937 165.055636629118 180.850779069931 199.459711023907  
188.7348696188 167.304721591124 164.808139478109 171.768618884215  
183.482640529727  
SNORA67 240.631264915238 204.787016443123 273.61337724143  
157.751477529076 329.779210536849 575.722713461982 337.342034950908  
297.609793563225 262.349315496653 470.746477818201 273.959220003188  
291.839070398338  
SNORA68 140.010730572075 138.555443236183 155.026276988302  
137.381470768186 157.40255559397 139.220877923507 174.012972901793  
144.425214066833 141.380276932556 167.125830254039 170.585366369563  
169.271175460047  
SNORA69 136.236441543681 128.40650280096 144.562038493733  
144.900785401228 136.154522071917 147.539226876636 133.292854943218  
141.062226285596 143.945039636839 138.659387475119 133.52971984184  
132.576755070703  
SNORA70 383.407365952689 277.817786943873 474.216057978384  
276.224613560582 201.555964610849 720.364080505785 535.861738240441  
377.661589835101 334.056545911557 524.392279804734 467.187222441283  
822.88742008931  
SNORA70B 186.886677174192 181.123571246557 179.015669199358  
175.101284960252 170.878962027347 262.79667156266 194.921021761976  
201.415695076278 274.564508105177 169.33926580273 320.360917595936  
214.904634494921

SNORA70C 166.099940078284 175.148318011395 184.377923161698  
180.418707740532 175.908645445479 248.562843471699 190.700515036197  
190.291185322482 222.028626209166 153.477432230141 262.60377731258  
190.947996918605

SNORA71A 125.374764771516 131.666853845458 131.739418639854  
128.309602266886 159.611551480901 157.826457203706 162.347140552869  
129.808590871788 131.582231577364 131.119810851017 122.03508430361  
136.84488044614

SNORA71B 112.314595956147 124.297848065172 128.936628289974  
132.836513637574 135.764392116216 131.683942368268 142.116311513299  
121.010811158088 128.662680062294 132.695992860853 132.854078420045  
122.262664384198

SNORA71C 140.222121251146 154.431051053529 146.202611204712  
142.836229345273 164.048326497989 158.287108069245 163.951459935477  
137.773960847088 154.187420367647 141.050384368733 148.861141988806  
138.117916412819

SNORA71D 123.406144497577 132.916608405637 133.399632102473  
122.287535209629 124.585675323305 132.379706531581 125.009237968576  
133.533718725309 130.621860095981 132.764150075465 140.423711213355  
125.696434307671

SNORA72 166.257275241937 151.589273633331 162.649092834422  
144.961976523279 145.640156204495 187.145134088286 162.472783116487  
149.707357499252 147.127908355066 164.545596179262 153.989839987975  
167.337624316172

SNORA73A 127.104097294238 132.928639483854 123.929180327423  
129.448507622171 161.172420368335 169.293852989203 232.231236745251  
200.964306455257 156.581569063195 175.974598536074 156.368487784719  
188.20675818131

SNORA73B 172.926288703434 154.057771254252 168.116928722035  
184.241640200823 175.656204695951 216.427103365727 252.593574250965  
202.97197145851 166.819234137224 187.63609695026 189.37832342197  
210.666799498141

SNORA74A 142.049776668507 147.015427944761 156.007630568494  
157.821491577808 159.678281513591 145.536260846052 154.033776287398  
158.598999414864 155.253032078086 141.576177844986 142.898851434337  
140.849966309018

SNORA74B 134.522715664256 136.903588075134 137.650917262528  
139.299062352035 143.494511683426 136.360358731063 162.945789604505  
137.260359343758 140.194414869595 125.189588215659 156.662150993832  
128.22735290389

SNORA75 146.090291252325 150.324132011201 132.634538733205  
155.842195370853 138.296933822299 141.204458186976 150.885460975199  
154.826710617351 151.74392028547 139.953572663277 148.650469230481  
158.863516051439

SNORA76 160.143443392509 162.893396525252 147.951996191313  
148.605816748229 193.744461104128 170.701964358516 171.589889474122  
178.878444404192 180.493406236326 182.827395663312 196.819022688128  
221.272872023413

SNORA77 266.286483421453 234.182164952936 294.746622369436  
218.314136992677 158.080749926756 181.354279096644 135.475597372104  
151.295855278218 156.030794481734 153.929167381674 155.313873664923  
185.727947276958

SNORA78 120.560056224145 127.242627779136 144.265352127763  
142.601556980614 143.21411610625 137.459095066272 145.314204192565

129.020356016653 133.902707525069 144.883597913037 146.311966562883  
131.051711775229  
SNORA79 142.311108110185 144.035936160694 124.918089223417  
127.065518421996 133.155925118245 133.175265384038 134.585762409782  
139.934460900409 135.875595614483 127.993841618875 136.319655432311  
143.783078837501  
SNORA7A 127.57284871013 142.207501807009 123.067278658698  
120.410307377977 151.04846635538 164.417770955805 156.126009063311  
157.130045415943 148.776470607859 149.235222982395 153.600132368924  
133.452032750397  
SNORA7B 214.200081541057 188.924084292126 236.651601701157  
184.029968090084 218.70412656621 246.031568259337 251.347519777204  
250.82359383789 246.389203940944 244.596233138747 268.698146407497  
237.692959394487  
SNORA8 199.933148219784 181.898985277176 196.144420005021  
145.681968019851 195.618369827396 212.291528248457 216.209052148435  
219.151144724168 182.02250582556 259.426050921239 231.462907786174  
272.854435771465  
SNORA80 189.567241599215 220.415211013843 167.599784887933  
215.744552410805 259.064601204239 301.051775938853 247.504198063293  
211.012142461725 178.920528149177 278.335289966805 199.798533722581  
205.185206972064  
SNORA81 125.990762414974 141.70123350351 138.345393524161  
133.048720362039 133.689255383855 133.012692824038 133.985582992986  
131.347213356457 135.175806654971 135.527445907621 135.420780282429  
124.558026853954  
SNORA84 133.804489975068 141.934351226006 131.062360037777  
127.797666392002 142.151209745109 178.027417594263 122.480000773859  
156.4687904356 145.058110060639 133.736252068443 123.434963905308  
144.439320591901  
SNORA9 114.77964341895 115.37736249419 118.424520312293  
109.552501987529 156.316333575406 128.407235487011 174.116797337377  
141.033948839613 132.113317893587 123.752109790056 148.49560238679  
138.4303531022  
SNORD10 161.463042036376 125.689884251847 136.058527150792  
137.027334042585 140.038295509875 171.262412981612 141.381186911604  
154.423801637411 144.81077501446 173.38031514498 157.126460242995  
158.041568121766  
SNORD100 165.027938535393 145.391496022306 153.714902281332  
150.123784990646 143.488029865295 150.765477999064 146.388285560372  
158.63432604978 151.650777127117 183.969897305028 167.791351000743  
205.871133967588  
SNORD101 138.916830356763 135.078198678379 141.602233757588  
167.949422301257 138.74117178479 139.138329217724 149.599523779175  
131.144774362059 157.423242850568 165.443069511115 138.221749464651  
136.77666893627  
SNORD102 127.199124606827 137.969750384554 116.316845829267  
129.123522999226 128.045931477827 127.174074003712 133.296200563657  
119.285026330891 119.097521397712 135.420780282429 131.77099316122  
130.988294699995  
SNORD103A 121.588054040961 126.298187538812 151.961811748754  
139.841822983821 126.997614441981 181.062188174871 132.295937828888  
142.900756181761 127.887666721519 164.15288821931 135.388750095746  
153.51550202829



SNORD104 339.32415558339 305.252666831522 238.037110997575  
314.014654357569 230.332652534446 239.924227955313 671.563789496889  
431.093544964576 343.121661664987 368.948300262634 414.713379367927  
605.583144451322

SNORD105 128.882160435252 148.118705147238 132.200648560899  
137.263202517233 126.294085960617 135.683892897583 146.125125252096  
140.77762487941 138.333435927107 147.702785358046 135.068883036882  
145.06205326107

SNORD107 137.908991199407 130.925881698601 135.855243915966  
135.08927101395 136.557466007228 128.102787239877 142.958906063186  
136.13751015238 134.608734423113 133.446934298801 120.979417552159  
131.454955038299

SNORD108 138.274057264688 142.027930009598 141.636604735133  
131.074021609161 128.144653206398 135.722321387765 134.134810805413  
134.91697121091 133.830860948014 141.484730939562 125.111993560078  
138.737332306848

SNORD109A 133.370488470007 140.192644427334 132.541420804792  
123.413596815384 139.103395748894 112.3786222545 141.048882618651  
124.28033876033 125.727521491768 123.632031112507 112.666812944192  
137.850437814788

SNORD109B 147.701092466105 146.632312874102 134.972933635542  
136.351332391315 154.064184525311 127.869038038293 149.630481387506  
132.47775411384 146.694318629238 144.02847768185 127.109798012351  
130.545285774056

SNORD11 172.245089970803 169.963805688413 152.983678871668  
147.875855077738 153.848852170776 336.845908630493 190.520750756082  
197.205792984885 177.223953859764 178.43642939806 183.795632040455  
206.010481981919

SNORD110 163.93199635496 170.910998705968 154.321219471319  
141.670426206169 197.72068061775 201.661941695238 204.914390718161  
157.481645415121 160.150336334888 167.395369670065 168.052288484172  
165.163490032007

SNORD111 122.850678471084 118.047978285706 126.482660154852  
113.740942665269 129.715948793051 119.586157804692 121.79022464086  
133.579067514064 128.002822538671 131.736694577111 147.294408903227  
129.96280577492

SNORD111B 147.077695919758 150.319052894567 141.706292773073  
136.328447182666 149.502132524093 146.326067008478 139.313456284725  
144.964084792568 120.208584170364 134.821778017915 138.842935439006  
140.559553697317

SNORD112 134.845202154446 139.558611792069 125.093376753408  
123.190757763412 113.58962177275 134.066948803697 130.477824552202  
133.665206343648 132.7284396337 144.035936160694 104.223476853877  
142.011019998327

SNORD113-1 146.476960694197 137.229871801676 122.180428703208  
143.342736976496 141.777089987975 122.013040475143 134.592495777159  
140.527521345097 145.245316640391 140.416247564103 128.236840746655  
135.987450822209

SNORD113-2 121.632494500096 130.567443018832 134.4811029314  
141.558927907067 138.600017737884 137.473779155388 130.803561448083  
130.753266976637 126.941650500751 125.879198238067 109.228587997052  
134.458958352588

SNORD113-3 138.601616246182 142.082257952004 132.956860864455  
127.871445879091 131.347213356457 127.903393519351 141.640292723776

127.685469299406 137.225659453984 131.474485888864 139.799467834109  
137.258429777402  
SNORD113-4 133.742490937191 132.54355871539 142.584504912189  
138.625680450198 138.584190903303 137.344198938623 140.692586715322  
141.455841055881 132.693707848508 137.358139652612 148.118705147238  
146.108551647446  
SNORD113-5 128.331867822629 120.110473925082 130.619624347751  
124.930303940168 118.070716076005 131.113462585488 134.746175914762  
120.702740607924 127.006746526023 133.583297305219 121.53632327554  
124.365185583133  
SNORD113-6 133.661553334004 140.06989960847 112.987890650593  
128.346598756853 125.634045420702 132.559118679298 127.00963790814  
125.328704545727 124.261531006131 142.336164180947 139.182623417751  
112.642429076777  
SNORD113-7 145.237221169839 135.708804956764 139.696266471271  
129.851616807075 144.328571856869 142.003414252064 130.209752198964  
131.972669163481 152.199095472082 121.805145639822 141.698329968978  
124.190161132628  
SNORD113-8 124.210840121525 124.42747321736 131.732416355002  
134.553754121862 119.480037559953 132.529247880813 123.312000381122  
122.82388804774 121.031695489398 130.433405111592 110.496084922302  
136.855445270531  
SNORD113-9 143.727514442914 129.89329138222 125.215194276842  
131.085965122946 126.875483714734 140.283106734666 138.02757574324  
128.949103967865 129.845344493418 122.337240239463 119.395894479869  
129.299810898979  
SNORD114-1 146.832797779597 157.898632788579 154.959217895243  
141.78867917709 145.03221570575 148.991357883449 126.322527679273  
134.038213827843 143.772376623996 141.982743538528 157.997750997487  
140.016122996485  
SNORD114-11 133.587927144452 115.18875509198 129.541049979717  
128.411138850655 142.33269270703 126.168223112165 133.579067514064  
117.097159106043 141.76964678852 115.01682934323 131.177396785633  
118.537378726617  
SNORD114-13 132.428675012593 118.05386204863 122.610529927104  
116.58452862953 126.285743744314 133.122174596886 122.165046954625  
114.01599035448 129.198366503027 114.524341239889 118.553226856337  
132.300508985399  
SNORD114-17 127.451155926679 121.297234504922 141.108383815109  
145.198638080646 124.88118767481 136.300195727908 140.201501710276  
143.532014058535 151.340728221261 124.3501719829 122.696382705233  
122.399241018147  
SNORD114-19 138.117916412819 141.839647226623 142.842130077535  
132.923237903246 143.41350503793 153.068898842283 156.007630568494  
145.36249226764 135.1951749488 149.260811184287 128.501189288377  
134.310685502031  
SNORD114-2 143.019052979243 163.099009810658 141.561097275802  
159.524235332529 127.690860707933 152.868787961804 153.434076291764  
142.179197020805 155.7441762827 189.603621918298 164.717809928624  
153.305679563467  
SNORD114-24 133.550008967009 114.664782541261 123.156154667242  
117.289037817013 122.667593730152 130.944610173285 121.080413308265  
113.05681175258 132.871179509995 119.899649497032 125.481506166304  
125.982423431253

SNORD114-27 112.528908277828 113.238466329843 117.937856116492  
136.093473732174 139.356478232855 150.211719786127 132.363645381743  
145.168031449425 117.567991653999 120.02611584057 120.740986472733  
122.089332300031

SNORD114-29 134.545175953914 134.616051224668 145.323212897142  
122.098850053347 151.178586065066 129.938723074546 138.233799607706  
126.573673878042 154.634289463743 137.812249316763 119.849895979393  
142.238908711402

SNORD114-3 253.789045068884 227.350260241585 134.038213827843  
211.438615793742 133.801549026691 151.826103919919 133.332052638448  
129.269919529415 150.290025009187 147.238896426423 140.701132362458  
131.836036241459

SNORD114-30 134.657787366869 115.142111396055 151.252137441251  
133.469323412904 121.476730561812 125.293640452686 117.203783530266  
116.533361070234 105.050093408041 133.012692824038 128.115993005977  
123.02879683948

SNORD114-31 134.996443685544 133.753999983813 134.762169062357  
132.128418409996 130.689272423595 151.034392433934 126.750850861235  
121.157614971438 131.102996816222 126.5929421833 143.528208105237  
137.714430743204

SNORD114-4 124.225294244156 134.946677624454 139.866536599877  
133.82548013342 149.736837985314 141.432461374482 133.063422581428  
145.800379695397 126.526489290128 130.836079676477 129.666957539624  
140.146894533044

SNORD114-7 142.678267012725 151.466689967666 121.505178996279  
133.948997488604 128.165775629664 149.579428189895 122.706176540192  
142.187694439611 133.079097536801 155.30926640293 134.931263946202  
144.505072819693

SNORD114-8 135.30767047671 116.486929280635 120.418709541104  
137.687480242109 133.585425721984 138.649502040582 152.129092774005  
125.809027384863 114.255733119076 129.507297276862 109.016991399605  
139.623194916971

SNORD115-48 132.216453078716 139.532508621268 132.791529812877  
122.714122084817 130.346150829949 141.799236109474 148.951632781748  
130.983136465761 144.206951207576 141.67550758321 138.176475815041  
128.576310682958

SNORD116-13 140.801129972945 147.145932651151 142.939578759097  
138.204611862656 131.369177333568 117.598778415488 135.231458421096  
132.566074764755 138.014046365103 138.510722755317 148.960077949157  
126.241307445165

SNORD116-2 151.9441336438 166.925695810781 181.508873226705  
165.327972973978 140.667415746111 149.078664825533 140.829927714838  
162.914301705151 128.680762033378 156.873097743717 153.767488352037  
160.006185904123

SNORD116-27 148.709795687391 172.491604217899 135.386650538345  
171.376976179465 138.990971069382 139.473459411633 128.729687597908  
145.636906369786 143.313605534609 132.336431473522 118.505980204837  
156.745051321143

SNORD116-29 131.894919149666 140.849966309018 144.096624787142  
123.535803027153 141.905641114703 145.352802493486 121.483610947845  
133.478829770103 130.870198462514 139.894559834783 117.652693591865  
143.16930809425

SNORD116-4 119.263824982583 126.746388125956 123.02167644694  
125.362754088168 108.43334699667 127.3079781139 121.170340423391

116.412881235587 121.207040901483 118.348153875356 122.773736159743  
124.288632450364  
SNORD117 145.780927034516 154.398416018484 140.66266106824  
157.328404229451 146.201445857452 158.505363728431 145.306369509684  
146.278921849776 148.764956861822 144.513730107393 158.450323390379  
149.366554238043  
SNORD119 124.621381699241 122.339819585312 146.617853918109  
130.973504803813 140.774304412579 127.685469299406 141.521742442341  
137.435736170779 146.257923971069 139.161483596756 133.725177339262  
138.688881393504  
SNORD11B 133.876636039037 143.122278808091 149.427217345037  
145.584615439295 138.354300118735 184.167124143272 133.327778635672  
155.253032078086 140.756898474665 139.286592412216 137.694556514044  
136.5680632044  
SNORD12 136.81406168343 145.437544062449 123.703840971923  
133.909219998872 142.365009028839 145.291984088491 178.584378959369  
157.04599638368 145.630497368137 134.060214479265 174.406779990708  
149.6730835169  
SNORD121A 135.937066152894 142.874797429568 134.062423178775  
135.075759558051 155.542691937539 117.688941284427 143.342736976496  
118.279772712167 127.6516565653 129.55573546861 121.54835308632  
130.215290990406  
SNORD121B 141.198692540628 146.402352419692 123.943080151532  
151.312853764675 134.885883559391 127.982696242304 130.718729445329  
124.452631766045 145.25198093836 129.626276841426 124.998601194756  
131.838522109796  
SNORD123 131.773304233929 119.693318959661 137.757902615328  
120.524859681034 125.911259629489 147.123477579978 178.096998157452  
163.451063547847 156.704278982517 125.40832206502 148.323729699672  
150.500676225569  
SNORD124 124.174140125309 103.36057518781 121.739219824085  
121.483610947845 131.260111979219 120.880547922392 141.919263493165  
128.102787239877 131.267177634269 140.222121251146 115.840266274696  
120.024235522682  
SNORD125 144.364319564075 144.578454791104 131.530256606799  
131.395959781477 129.606271613463 142.785631812039 151.675188266676  
149.182972268104 126.682913361149 139.844984829379 144.136328845967  
128.69455713173  
SNORD126 122.813441348997 137.6160344044 139.591231478841  
123.058261039164 146.644317248414 140.882766779119 137.416133786828  
130.457981404612 127.949413503055 141.323417580648 133.340152756136  
130.085138325818  
SNORD127 133.414840339315 130.166741978483 137.819642907456  
114.308806726044 120.235652849894 114.334059060506 138.624689897665  
124.070171664904 122.828060462887 124.486701452062 133.564350740049  
122.587545171646  
SNORD12B 131.252368756892 140.251168248117 137.91121726927  
134.152586955217 122.729918525032 133.628391175037 145.810213943313  
170.290455446376 137.177271162749 124.317870455205 144.029891756677  
144.094168021923  
SNORD12C 154.143331594812 158.573561336755 171.69834783037  
148.910032628503 166.741762854246 222.593554194453 202.741211613885  
240.792557915987 206.127493726541 220.567951704044 174.229093061024  
192.737713851863

SNORD13 420.95713139384 824.427857809495 258.384059994446  
318.06081614151 745.153336165802 488.746614111382 503.466550870577  
524.855915371246 798.389385197471 343.417041721907 488.505191823403  
483.699436940387

SNORD14A 196.245297362955 190.5930909277 183.302479730653  
173.182013165174 163.69172577831 247.145700155364 184.602704530362  
292.28857006885 186.66469040433 232.127996106421 505.560841055884  
206.186324475847

SNORD14B 152.286545050749 155.851264092344 163.474261351901  
146.517645037071 157.535792192753 165.333608076984 178.496344474999  
162.723310549554 146.197678850188 184.473198008234 184.332299740724  
159.317429821638

SNORD15A 141.775100066311 115.68358702028 138.846543789882  
121.289159587394 133.533020887439 131.381189141974 138.224383646894  
124.372963874507 123.75974844367 143.720044122451 111.568329540016  
125.496553386629

SNORD15B 169.552424961465 147.094123051131 139.128751917566  
147.901594006094 139.981905225845 199.423120300557 177.428161690048  
168.991551886143 162.267841475739 144.227440632196 146.050714008913  
161.104993402456

SNORD16 146.940545711162 161.559920910487 140.206268652318  
147.508817393901 158.25554353787 156.423687034312 148.185877739583  
172.468440317443 168.697565122105 147.79341726211 159.765585531442  
149.6036366066

SNORD17 162.056622258216 173.656241217331 158.109836032481  
141.013392458859 147.595573192579 180.15338103 171.338371572269  
149.068713925139 172.80265044721 177.428161690048 164.241874094897  
175.686248503777

SNORD18A 142.633121727277 125.742631850732 133.922855125616  
136.37481047902 129.213523302268 132.472505035111 138.349773531218  
136.751654856807 128.83448656124 111.992738490468 119.062611098235  
129.971670681199

SNORD18B 149.959767051801 133.97321873161 141.215542377796  
142.722227179256 128.262195551255 148.336126836362 119.159078990339  
136.881019970399 167.559703634539 146.054535585464 143.827500301207  
126.180714796187

SNORD18C 133.900005368973 131.053007222565 135.481300250507  
132.680140469504 128.785472881136 140.395662148924 129.286782862113  
137.109541758085 138.928287624746 148.192121257421 145.108281984556  
130.056727701826

SNORD19 130.06441029462 136.988519762443 127.218362452043  
126.471321085803 132.322618637842 138.301397056664 133.250966691407  
130.924141812334 117.915500197992 122.018200592563 146.735616237082  
137.253971514177

SNORD19B 137.871870950302 148.194450105682 165.459993078103  
147.2233876988 136.730623822061 146.590495255969 150.538541347453  
147.059096208832 147.309245779031 128.499303407596 146.390223079987  
171.775741648309

SNORD1A 150.680628549529 148.551340840517 145.00699763203  
150.48744233923 156.707737817443 167.395369670065 167.341759854203  
157.298181833321 158.292581724934 177.401771322485 148.327340543504  
157.08300736206

SNORD1B 139.249869918235 155.911387663464 145.762724663455  
126.587030905413 130.390722272955 137.177271162749 130.12638520846

146.20028051948 133.175265384038 125.535877109652 130.133760815676  
140.885915460425  
SNORD1C 139.664055668127 112.282839763467 123.817878562971  
122.854722097864 128.910261453632 146.854523122404 128.910261453632  
152.024383072265 136.364830851128 141.200676699805 133.111791289725  
129.990534497026  
SNORD2 126.708817316134 136.463867598256 126.853028093579  
130.975606477621 140.987694585232 126.075528093376 119.682747854629  
138.345393524161 123.595133376092 134.828360289676 138.855454645579  
126.025161261042  
SNORD20 113.840813583258 137.894482933806 128.720517906732  
113.87024833117 113.388450168062 118.505980204837 118.863150637476  
130.832462487806 125.299513989334 110.61165787102 113.845770994796  
119.252737868132  
SNORD21 231.338258067616 189.235998474945 190.170250158984  
192.441337304606 169.496129800444 176.236140830355 159.563866056798  
176.001771318766 162.649092834422 154.716750150891 158.450323390379  
196.615914367563  
SNORD22 171.671895682052 162.678619800767 167.796474464069  
147.919058170753 138.942901099402 158.221595000183 177.598422362298  
167.811412309356 159.276726310525 155.191446350891 175.757588503244  
161.803438841859  
SNORD24 139.567367353959 132.092910274836 142.910616700526  
149.99203906203 131.393633337276 147.983109171553 139.886499402506  
133.455138380277 142.05571112803 132.334666750573 135.137615432923  
140.656633546501  
SNORD25 193.098116087792 167.92409473064 161.748547772524  
165.757295630254 155.957570398118 162.373508183992 183.894417745549  
179.265395910119 179.57046217355 170.561596645385 168.991551886143  
185.627515956848  
SNORD26 133.336063137966 137.578516107502 117.166509072455  
124.998601194756 117.289037817013 142.381669157145 135.127041919869  
122.431337063053 132.016944935305 132.220398477217 119.636334259263  
136.303510503231  
SNORD27 144.417333931582 152.327247552986 145.96012463103  
149.85385474029 147.913148020331 174.364798143068 146.97334315047  
146.010474018786 146.944628763232 144.671459266861 122.194493542073  
139.287871460674  
SNORD28 131.404001006643 115.3611179192 133.446934298801  
128.186963138555 138.872536475067 126.862274244977 137.792150225149  
126.343040504566 128.856640014006 132.699715693605 113.708683868028  
139.503379198116  
SNORD30 158.869463014801 163.039564280484 135.980886879513  
170.483686891321 160.791355483048 174.187510325385 136.344248873826  
203.11015591813 179.896659891106 158.788210937339 136.955651763743  
163.919426088318  
SNORD31 172.310673499572 153.066630483602 159.784369379077  
174.214747421898 170.95650329595 224.869569455052 239.24587884234  
276.32528705384 214.355086255855 173.97085982677 251.039117540764  
229.933577323411  
SNORD32A 183.42877315644 195.10410545445 220.288758600588  
172.457165477145 244.350562866593 294.595972099366 540.584471920486  
273.152907354565 217.148957110623 243.772412032046 295.507504000509  
328.919401925375

SNORD32B 137.340844554597 160.853480692082 149.042693712098  
153.934872807607 146.440630638891 167.350290326189 171.706534562905  
153.690189121681 142.301581642006 153.241806795134 158.411846122784  
163.51024840263

SNORD33 208.869189492052 211.595513743111 188.780089746036  
203.960838492793 304.900910626137 284.764628939128 352.418229893699  
286.035428568826 239.079352337243 182.633773540249 308.208276315292  
259.742175498038

SNORD34 128.568463697992 160.590990297027 162.481362579872  
155.326276840738 185.169100632101 193.124599671798 196.802641002079  
165.797170648964 168.491878435329 170.145574727175 150.152613183213  
174.246705740225

SNORD35A 167.871703133182 184.157941055948 169.311264420133  
175.462290891421 174.364798143068 187.380064367869 190.549084022965  
167.237705290905 172.430211711547 171.481917188224 168.188793271919  
189.539458686123

SNORD35B 172.084184539157 177.780479906048 196.014841240142  
175.656204695951 239.148333781084 357.006610037663 281.926552464214  
278.687780705367 265.174306663185 231.462907786174 220.010399552402  
259.277693314055

SNORD36A 189.816900281053 196.053808536366 210.973303650385  
185.727947276958 220.896363324634 307.124331101976 251.993821914623  
252.015257713669 230.697077917675 301.139737613279 306.773350448741  
268.328002606268

SNORD36B 130.455560026617 136.829137120584 138.877999126533  
132.659196898439 140.300833590056 136.171728950893 131.198284945008  
114.567609871292 127.642215862573 126.895669261503 133.120273569229  
137.416133786828

SNORD36C 218.369954323686 187.472028627511 173.964378226631  
198.863347487219 177.96452209396 231.439252571168 237.641190133427  
250.737252834098 207.531908382266 242.538036654192 298.827660296715  
187.280334341504

SNORD37 139.324006489527 139.907840403521 136.065134838221  
132.155877196474 142.446514275674 146.554017952963 132.421863261746  
155.641860356683 149.907472831817 133.195030751476 122.211000410541  
122.038534506506

SNORD38A 183.236087954054 178.245841646175 136.987403767185  
175.251238431716 171.051948060796 200.22145130696 202.00431685587  
163.198834359304 157.976810829398 150.623182458747 205.804144075374  
211.269041187154

SNORD38B 172.827288328708 156.026806913759 160.549597620339  
158.058346079359 170.553940654493 158.699778625671 146.31468639383  
132.192775993078 129.89329138222 143.080742311914 122.75516501062  
135.798387504219

SNORD3A 2180.31963682546 2039.55802107872 1245.47421607111  
934.173273294189 671.821418586421 2970.34597432588 407.052451784773  
471.720496000839 452.732079010502 1936.88813111969 836.613819700658  
352.562711030848

SNORD3C 819.151876775691 785.599211190431 511.779988437654  
374.56251861444 335.938170230765 1105.80735904293 188.027848008991  
234.626574390973 215.698924670416 807.92851898782 339.598452080917  
202.369905673351

SNORD3D 3315.21586182496 2649.39312662326 1721.20676889116  
1121.87292339787 1023.94850651125 4671.10203385528 524.855915371246

654.52788411248 559.668195903429 2828.97255380291 973.543357809971  
528.098472417251  
SNORD41 122.99993610249 132.437234970375 148.272252953881  
132.996622574111 137.331864485838 140.515996180923 147.959112022939  
133.209211811498 122.265071206163 145.591320521493 132.950480329605  
133.122174596886  
SNORD42A 138.598167973067 142.278523641008 127.935614145702  
139.527577649638 124.446264376282 103.240215392215 120.62139061084  
120.184782039538 124.972772541334 116.625518828978 124.666487633365  
135.915252483475  
SNORD42B 152.514455788489 135.291264978088 129.953801496113  
142.999526950651 151.342902631318 159.420533375725 174.909258852845  
180.610891208146 163.108825245937 141.166605868578 141.391508027714  
168.511517285223  
SNORD43 169.725534829981 170.483686891321 156.567519536997  
153.78976320015 143.436675541053 172.992936821292 154.861507590906  
154.949840064881 159.52833930625 165.286724415145 155.124158030085  
148.797226586765  
SNORD44 158.113794378426 144.520435611318 143.381277901138  
144.741063866547 154.716750150891 149.764447995426 137.415158613413  
159.253029632045 151.455343772857 146.629335531037 136.951350782053  
160.573172150801  
SNORD45A 123.185652476312 129.111259771449 125.021217009254  
132.8615886934 125.285502203677 129.990534497026 127.558034562151  
117.374025543149 119.107992692097 130.249430984172 119.562180492359  
118.294324274616  
SNORD45B 128.40650280096 130.016401638936 125.802001118545  
133.939847853073 118.109991440011 127.57284871013 125.379842077431  
140.502667595362 143.063345350253 138.652735298338 112.891050337488  
124.157302365291  
SNORD45C 150.36160186175 149.595375008252 158.408494909763  
156.516250236679 130.539632182729 134.41693612969 149.143087870963  
139.566124411099 141.778060508776 157.195967361907 148.47676851933  
144.801071221985  
SNORD46 242.948136060281 256.648540685098 208.125844007298  
195.282045838381 169.791616021987 194.125840053843 171.935132459373  
173.959556466614 194.847305068008 146.044279076949 176.11287574658  
170.452989060697  
SNORD47 137.662135592983 125.162662242842 135.875595614483  
144.744603095605 155.6299578128 147.185378560761 140.439698763808  
137.714430743204 151.783090997855 139.42531690926 135.954961086609  
140.309394542299  
SNORD48 133.812639120892 122.136861827049 114.290611267606  
121.06219555903 153.626180103404 126.51808376464 139.501279970508  
134.283467987991 122.201293962463 155.303903514061 166.692386207143  
138.079494235456  
SNORD49A 144.368355737187 167.100039749329 140.827965102541  
134.283467987991 149.85385474029 158.543671159518 163.542848861552  
164.736294372006 162.178410412809 170.892319361167 157.361421272816  
188.322853571195  
SNORD4A 178.606255846041 184.873459141947 163.593106951255  
164.791545858875 265.829122816166 269.072221443403 250.342080183479  
362.306819797508 241.293046687076 194.775234425687 214.355086255855  
272.968792195442



SNORD4B 188.335102005839 172.338509138759 200.867515935703  
151.002218995005 172.657668514226 207.531908382266 185.071775840607  
201.105520537151 175.832474809232 155.76860362365 168.33854702953  
257.602370597316

SNORD5 137.243864288111 127.9928491829 130.454496708632  
125.951927536494 154.027862576708 135.507247740621 129.247701136266  
131.257901340773 124.726035027951 140.793616429174 125.945916345628  
115.47716627378

SNORD50A 140.469508410073 151.899063970777 140.572442284673  
135.296271683847 131.434121613176 148.461172387171 141.186913979346  
130.277107538053 124.077104101209 141.801472885127 126.65748100631  
127.681662711369

SNORD50B 127.044367488881 153.723169560972 120.714981493593  
140.103020838882 125.830917527594 151.863048206341 138.041411135053  
133.158570377793 120.204469421484 131.437847958077 127.612859839494  
140.206268652318

SNORD51 141.535381351126 147.127908355066 136.971869448818  
140.279222720709 158.517778100137 167.408314067262 164.910911528819  
158.384505840662 145.411264691728 151.671024612136 162.013164369593  
155.402421581195

SNORD52 175.065781438801 157.709832297666 162.812665683603  
167.278879415171 163.681014961332 170.390200730789 177.812335593522  
168.861884032201 165.307808075027 153.59485367224 194.186994486095  
190.281570660806

SNORD53 137.559204418819 146.357214078158 128.276471459777  
130.66511389864 138.215708514725 141.208106961875 129.847481170604  
134.477081392474 120.835207882788 153.853856339585 128.907618218883  
133.659475650376

SNORD54 171.545695383454 152.939759795631 135.461112284848  
151.535177950367 130.10852948682 156.756159786366 156.502051001988  
161.916155040522 156.632939064629 136.317978146216 159.606633817645  
166.272237117441

SNORD55 207.674249122047 208.164674386141 164.558875058199  
197.47340234886 208.194788326109 204.378245089766 211.844563155792  
178.222120802125 184.451469623426 176.029791617989 179.432235153344  
198.737421468412

SNORD56 179.632562895905 180.578528984075 157.273309095198  
170.158189150422 206.321272734099 331.62124160152 175.686248503777  
155.158028043823 207.764456828813 156.420501464224 163.582678113215  
174.461487057542

SNORD56B 163.607125532236 145.677477231455 152.849810441802  
148.175206259619 156.18389905051 143.527595771607 149.513744292932  
162.285199080777 146.743260100643 179.411426984263 127.696578575874  
149.188357651896

SNORD57 137.850437814788 154.894196413558 149.200848439601  
141.115539663314 155.890403934674 211.012142461725 169.003310163058  
163.566535828036 165.257737836487 159.276726310525 146.069543494352  
166.143084832472

SNORD58A 137.473779155388 115.927914533359 152.222732770706  
125.628281846465 129.001192144163 130.495294897642 131.04767483614  
136.319655432311 143.123983359386 140.510889880872 121.281990195113  
124.285969778268

SNORD58B 132.604589324628 120.027996187915 151.015243921984  
145.675032688915 159.650116062266 130.625825024195 166.570606752678

144.41489969974 135.15791174418 150.670783991982 158.434048174501  
140.453219944445  
SNORD58C 132.973551954067 126.064311640223 115.440152891339  
125.77343813277 153.679479224178 127.263061874385 148.222477811166  
131.432729794636 120.507930710099 126.630787911053 140.077307351596  
145.404469340821  
SNORD59A 136.042982529628 140.471953101887 152.702847643082  
155.741507341843 144.820843146628 150.685245572093 141.872426752329  
138.48552149031 144.820843146628 137.68634745111 139.951275828765  
159.515698265424  
SNORD59B 178.179238056905 158.477017294725 140.441521267218  
155.323822771755 145.107068919893 148.868265867275 140.527521345097  
142.238908711402 141.466287523861 134.283467987991 160.131256419524  
160.256877369493  
SNORD6 149.057388078138 149.538429805372 142.976123206776  
138.915185051749 146.633627492419 196.207631868755 184.041062308263  
170.706932460836 158.617209794418 186.625452120269 178.734634888773  
211.035617136177  
SNORD60 115.907902010701 129.25124636593 130.457981404612  
120.131839791515 128.604270382206 126.494665743087 138.877999126533  
134.460035654795 137.27506604142 138.005168756932 133.378374710498  
123.237851647499  
SNORD61 109.552501987529 122.985117824212 112.612099135361  
120.177385114315 121.110498703017 121.44564199541 130.847215795313  
125.707228291312 125.990762414974 116.268259618103 130.790872334222  
122.05954649985  
SNORD62B 160.628894266843 155.014930599769 124.370381674692  
144.708780756278 152.169087619827 139.883360543042 140.416247564103  
143.984222627806 146.421195733989 128.867710054234 137.53152210411  
136.528123792599  
SNORD63 150.737888487925 124.661088039427 171.768618884215  
146.446922196868 146.609485664113 128.217078449064 150.540599489506  
138.677282903963 143.539741029895 134.604565335211 137.363483527372  
152.699431442817  
SNORD64 153.154592981962 130.773945967285 164.601022396674  
144.879364072868 149.638361598695 151.792921211607 159.082447644277  
142.637421204193 175.055634340766 149.308475163534 136.545742688573  
163.37518739397  
SNORD65 160.822287037366 151.403431105471 136.745596788338  
138.033668840392 139.535490288426 187.645390502607 137.265533487496  
163.20714296121 136.428826558493 157.982146236108 156.098240321674  
161.002880798225  
SNORD66 147.81143020317 141.721829342179 135.233957017664  
136.922282125029 129.148634038268 129.176532377543 131.051711775229  
119.535267326862 138.919240037475 127.226937898225 115.550587451456  
118.239637776941  
SNORD67 157.280532261425 162.702767346393 152.244018820259  
160.429643729685 147.539226876636 147.648020819059 171.414869677333  
154.821960325589 162.560758971445 172.491604217899 146.725123303782  
164.223990197735  
SNORD68 348.640185950469 337.119524477446 244.73233791067  
281.369059516242 241.944581086483 198.411812737082 251.61451602376  
236.427507270325 226.824313642101 261.500728878974 265.919002666885  
258.532432007328

SNORD69 159.170943469313 159.253029632045 146.125125252096  
164.21464602746 189.552385508772 312.484289357493 283.416246133873  
187.443940151794 217.408824020423 179.96623248843 171.086559024882  
245.454945056317

SNORD7 150.247639459773 152.650867743471 149.795655754301  
136.649743237542 123.395897439193 129.499283650632 171.689722533849  
174.406779990708 136.373761435722 128.229729571899 155.097300548684  
140.814009587096

SNORD70 125.572299527276 118.663847950696 141.232464220879  
138.412897151567 120.85013281321 121.303696898208 127.269672881591  
144.290286088611 128.386309075038 131.136073942692 113.274668934773  
137.448412532999

SNORD71 183.472290949588 178.878444404192 139.400521576978  
190.56172211779 126.097544650407 141.490911535087 137.290687951485  
128.806964077824 140.678336884951 130.535859816562 149.427217345037  
150.576660798865

SNORD72 130.850419527271 138.928287624746 139.750281709938  
144.498245098592 132.409582164007 136.387904287903 130.124601660028  
123.791515424464 127.998531115697 146.554017952963 127.464485396039  
140.113334247294

SNORD73A 156.090871391873 144.771457221413 157.927709922368  
141.397046998678 178.245841646175 204.862387642573 156.961070790639  
188.20675818131 163.926432479673 154.2228051929 170.150889760372  
165.337956130606

SNORD74 147.469101571149 139.251886500377 134.089308635893  
125.472342351466 126.935731176024 152.192865138174 129.38021642675  
150.593928635647 144.738871562895 133.45690661612 133.509538648848  
146.351622020606

SNORD76 138.576978828316 131.611842804029 145.424827607383  
125.94880312094 132.615324904193 144.955918499353 137.443463471483  
169.434164890542 124.168162885295 160.903342063542 153.713298074917  
178.035700298977

SNORD77 116.20008794813 110.113844434493 125.488511939819  
141.599211622756 152.315376022976 122.136861827049 117.815045605383  
138.1693725329 118.430401197079 127.211469322857 122.180428703208  
108.626570637194

SNORD78 128.284564251279 123.586359806158 140.925705285169  
122.170662903259 138.182987173284 109.46255295836 116.850851308701  
114.412739085949 139.522018789485 138.739176678465 119.341806810441  
124.370381674692

SNORD79 136.547868436335 123.062390088305 129.185514320138  
135.680872395032 121.782864344131 113.734280863323 122.662260070778  
126.77232818113 117.408465686218 123.728481007459 108.9291713877  
114.76337651891

SNORD8 162.100547394235 143.112205432731 151.560202480724  
134.194555223935 149.874424976813 174.417259650516 157.994474909749  
152.823566129571 143.356999170877 145.780927034516 180.561514455864  
156.102877632001

SNORD80 198.055877414824 191.310372695208 177.716742595321  
158.104336050835 163.146581498065 279.541294184609 206.488530785667  
233.914433380121 210.751430486845 315.863232876382 219.78041403077  
426.548994267836

SNORD83A 141.191500203423 138.53954980556 128.087991226561  
129.797601100832 160.247370279802 139.375386456759 140.752616434418

138.377628971966 133.414198431469 150.000345076364 151.532859494021  
128.014092519305  
SNORD83B 190.002630382394 178.072538529634 152.067897082883  
186.951061159734 163.024215671479 218.369954323686 171.287186905764  
157.499803444188 180.096239155058 179.137734914428 191.056705282378  
213.338918839446  
SNORD84 226.287196839644 198.863347487219 183.152005135504  
192.891507272665 153.54898879562 166.320461361356 157.038121210505  
165.530397739051 157.541796722309 152.550031868259 143.423661752881  
148.527528612375  
SNORD85 136.281630801995 124.606795061928 134.8745127454  
132.517166202071 151.433634564939 128.176779923348 119.261305304165  
124.042153387391 131.846160346403 131.202090507576 136.645091356305  
124.650711299942  
SNORD87 159.932941342403 166.662801900754 138.499293816467  
146.879019367939 130.215290990406 158.74180418577 167.325227483198  
148.654099017805 171.433001048839 161.874184077257 162.592306630033  
179.779007442837  
SNORD88B 128.517315006019 137.632470240792 142.03837243998  
149.831566330214 161.618479762188 150.767158077219 150.868712184357  
140.571143847885 139.866536599877 147.764068958635 156.328454726363  
131.853183159267  
SNORD88C 149.471240458766 131.551085224112 136.942583515174  
129.626276841426 117.523834738903 137.253971514177 141.543147273205  
128.08497128067 124.715454831847 132.551989498706 128.324383749931  
131.628021008753  
SNORD89 249.263194321516 241.168936008174 270.293807247372  
204.019377262081 215.219246394594 448.715938510132 347.620001353026  
343.417041721907 361.620362526358 371.369895979832 368.220523234399  
296.290104133844  
SNORD9 149.08527298577 140.772074031028 153.018378403144  
154.744065805492 143.349486755648 148.086979061158 141.091421265404  
151.961811748754 149.783542909965 169.681582570965 136.699011428085  
154.080778100852  
SNORD90 125.386545354096 137.884051774657 154.884821436554  
135.116985816353 125.044092929562 139.765361891899 132.695992860853  
124.460064642088 123.860747215706 126.50870982427 109.140708667012  
127.177422395113  
SNORD91A 116.382348831504 131.626173473789 136.788269716383  
137.459095066272 127.320624058583 132.456945758174 122.220327032799  
135.999030570565 132.624674205566 120.577995272053 130.617505834747  
121.522634801124  
SNORD91B 138.147658465394 138.763250836766 128.191959554459  
138.240874738649 129.956519535525 143.976395954528 132.106673891288  
123.738223146912 134.493062923443 121.834248129933 153.45050352117  
140.976675511847  
SNORD92 135.934976183762 135.173464753848 110.838647534175  
136.332399354517 126.435928518593 126.418295908353 138.618761382177  
129.994160770036 130.646956516128 133.573744633212 131.234140286502  
125.00254973945  
SNORD93 125.802927749616 118.148476979319 129.25124636593  
105.096927149239 117.986939058467 114.798573331978 108.131097605872  
119.763020707899 126.652197216347 126.845048064014 133.422190038356  
121.734873711651

SNORD94 145.806935833967 147.925744210234 161.997058981786  
155.595651896155 141.236939351298 153.477432230141 161.434331154045  
142.839077978518 154.988494760267 149.79295887612 177.679330300381  
171.022976593689

SNORD95 176.874265462986 178.12073430094 159.98636352484  
174.357336296554 163.495175710216 144.949897872252 161.172420368335  
160.839277476397 148.227581116046 178.476483428474 154.993784224548  
156.548858402702

SNORD96A 193.589480577091 172.568852318369 138.50032459657  
148.336126836362 158.68792959603 175.28261759639 166.4983332269  
163.108825245937 166.382301680189 225.99848688881 167.662761175661  
195.608619642038

SNORD96B 138.296933822299 142.930903395131 134.703474191011  
131.76272538453 136.348252715447 134.181819177347 125.531371673679  
147.425856984368 134.964619235561 125.121517583946 136.238646974312  
138.525131957094

SNORD97 153.787447416111 141.828740140733 161.559920910487  
148.794293762142 150.765477999064 158.188039933865 144.454141873387  
135.259226552938 132.357517495246 145.464640276742 155.283003653612  
146.932655562613

SNORD98 117.040953580545 115.25307661968 129.391376518208  
129.289216846128 135.079944196457 128.793186785667 130.609596267168  
113.274668934773 128.174382934295 134.397255719047 112.534864678892  
117.602986362773

SNORD99 219.394500571586 221.869191666931 173.21291920566  
171.504939477949 143.52228069239 183.181125586276 201.850932289186  
248.887522059485 176.245698601389 168.210416363286 179.932404140099  
245.640193659159

SNPH 223.373877165342 222.565515020501 191.179662650057 311.715351215263  
204.378245089766 166.925695810781 159.561431866706 148.188717941032  
151.879398444495 149.270818605598 142.063338490772 141.580944960818

SNRK 751.568940762011 961.931130189779 552.298965378403 794.636255515909  
348.171901445232 601.401329244185 414.333324610267 356.84281623052  
476.076903428247 651.675427664911 490.464012303239 474.750156829195

SNRNP200 482.739666411407 504.275299381356 533.279122416818  
591.641325402032 185.997327421952 234.243977361232 190.255797389524  
182.335981256243 205.930921729192 230.447203571825 297.708113541379  
225.480366837274

SNRNP25 195.019706886336 250.542405852865 237.88097138936  
275.39986964837 199.714647839712 209.596792486876 203.223604138192  
194.552533397944 199.490190715307 168.813895764991 157.073850948746  
189.552385508772

SNRNP27 368.548135194271 365.864755316163 410.216584967666  
314.386320310898 609.504365141529 466.909037277853 462.437471715008  
408.60092780174 427.151797273226 598.647226284738 349.054741747798  
414.596948083067

SNRNP35 212.119922561453 216.645552082667 206.650760711745  
248.085349787686 209.464347017443 172.707821624271 216.506914782226  
204.509884908059 242.019489058244 206.715020025609 237.249949461085  
211.809434609469

SNRNP40 575.546802138889 647.955521647635 645.183207984114  
603.569635276204 966.281849197568 1284.19937294949 677.802147190757  
1303.94157493616 724.777166238211 636.56692204969 789.043948009585  
717.419388886784

SNRNP48 154.555255038453 147.549947713282 143.897248922317  
 150.866204945762 126.362418476129 138.030842581932 142.599815022061  
 145.615291241733 137.846463796994 140.92377681377 152.518729390047  
 142.047828639169  
 SNRNP70 1322.14570224119 1281.1883621512 1382.95068105649  
 1455.75693295732 2203.82462320864 1231.92253664482 1303.94157493616  
 1432.93880448974 1794.82283439196 1186.23169583595 1322.14570224119  
 1301.18893681695  
 SNRP70 124.638075441482 129.750835425023 136.047032834863  
 130.607857562345 135.719702250709 116.939471420419 134.113464449375  
 131.199163732231 131.481679396553 155.52533851273 113.609215169397  
 135.306127055224  
 SNRPA 429.922530506572 483.067471841953 446.07651799079 581.828502821435  
 1136.14069801696 549.96567374713 468.496972957503 471.510683045651  
 514.354512083591 377.800067476868 360.756455184184 400.98290237416  
 SNRPA1 1048.85768964657 914.654262296682 961.355625338687  
 802.304294140514 1721.20676889116 2932.64120183406 1667.86825735893  
 2296.30423509176 2748.51360874099 1648.22531304741 1512.28202818467  
 1990.94596595493  
 SNRPB 677.503643398297 873.408431189194 753.654626233604 799.423640530777  
 7699.37963536892 3099.71798305764 1659.80909859514 1627.02882286283  
 2340.90990677253 2087.55358504021 1721.20676889116 1762.09874961415  
 SNRPB2 795.464850398761 761.097992055119 934.546444634669  
 581.54874141672 981.313778685019 1618.64901092072 1347.10650016064  
 1284.19937294949 1495.04587558545 1084.95095717937 1048.26872286983  
 1189.69730508119  
 SNRPC 422.520372346993 418.772484676858 449.952497751758 472.405334652317  
 726.346459754217 762.584280908728 749.859130465356 831.289724465877  
 691.632061537999 643.905401805862 479.138177792954 749.859130465356  
 SNRPD1 201.800357785022 178.619580818758 187.472028627511  
 178.179238056905 219.422260093722 308.564935340635 223.253794809571  
 299.234482744038 227.441436540742 206.876572583814 233.757965816721  
 266.468621734455  
 SNRPD2 3033.50962589321 3436.32495553246 2956.63335018838  
 3290.27308365921 6105.64727031051 7491.93659373205 6760.37324850804  
 6560.30885074315 7144.3257417116 4183.06379632713 3222.23985545506  
 4913.55892033682  
 SNRPD3 291.537725613819 242.787656836745 407.957436380989  
 210.218440444631 213.240181616274 495.89837457901 317.00629920068  
 297.862653495715 334.857690525582 281.44159425243 445.661863626419  
 400.060972573122  
 SNRPE 128.999893183462 140.574129695953 130.812309202831 144.351763882823  
 132.311344653106 129.55573546861 143.861970001207 139.932849289354  
 134.283467987991 130.12638520846 157.259599894923 136.949403128211  
 SNRPF 952.724512915813 1160.78730097715 1167.72023351098 907.904780399957  
 3033.50962589321 3378.126661761 2462.87034563426 4486.35687688252  
 3481.90072759183 2627.12900283627 2414.22821062457 3671.86460903374  
 SNRPG 3078.76695443407 3177.80599774525 2376.52728883131 2350.01764791897  
 16328.5991894287 11554.7330886956 4410.68280125001 7167.29945083872  
 5748.57645553386 3883.05620256963 3038.02573182546 6253.84268792816  
 SNRPN 567.143102792772 547.042461070351 731.848844821402 454.984562256248  
 559.668195903429 207.440700355457 960.775251871864 316.801725268792  
 970.634736994313 414.713379367927 733.86133557115 430.329437928013

|       |                  |                  |                  |                  |
|-------|------------------|------------------|------------------|------------------|
| SNTA1 | 611.088604425595 | 628.344122779625 | 708.056533282983 | 927.478050257292 |
|       | 430.100415399881 | 263.321559283966 | 265.028512407839 | 187.871017629994 |
|       | 176.371404525626 | 249.884250040189 | 211.535720730612 | 193.275162354467 |
| SNTB1 | 235.063474370925 | 235.162439885207 | 200.001438979007 | 221.272872023413 |
|       | 116.388079393669 | 135.931715324468 | 119.95959059725  | 199.597685421675 |
|       | 203.544294328395 | 217.327543190687 | 163.636550341231 | 125.008209861774 |
| SNTB2 | 1460.24985399013 | 1180.7055699511  | 995.812184456562 | 1124.67710585154 |
|       | 598.924339094496 | 584.919615953457 | 463.488995330457 | 384.883635849576 |
|       | 494.875547886209 | 499.776233241535 | 410.533157400023 | 485.026081242201 |
| SNTG1 | 112.642429076777 | 118.144109564626 | 115.170176263172 | 113.238466329843 |
|       | 125.220416203903 | 130.119313219923 | 109.793568518462 | 108.807891863679 |
|       | 150.346002924933 | 116.412881235587 | 149.941056059544 | 119.06600048679  |
| SNTG2 | 114.874358180801 | 110.651971902576 | 121.281990195113 | 110.315549501241 |
|       | 107.40922161073  | 110.315549501241 | 109.781334128478 | 112.14768481333  |
|       | 110.212739445    | 113.857477830423 | 116.943791343147 | 99.5148073333731 |
| SNTN  | 126.364445020215 | 112.096627288813 | 112.449662536973 | 117.141089194822 |
|       | 114.217867810848 | 115.550587451456 | 119.000436602325 | 117.436119533535 |
|       | 110.804248212067 | 123.035401501279 | 120.436408685057 | 111.549719888905 |
| SNUPN | 390.979822976551 | 364.895113721763 | 400.23671843715  | 443.343806055858 |
|       | 290.688850193983 | 337.487980551006 | 378.862741410359 | 266.316485802808 |
|       | 394.101052511043 | 306.838596239511 | 298.403224729528 | 336.898462056187 |
| SNURF | 364.331860640225 | 339.843776738468 | 475.833242673151 | 309.798246248863 |
|       | 325.082620845425 | 202.061887608293 | 730.34994035645  | 283.163770658619 |
|       | 783.755776589969 | 366.564822549834 | 332.24505665756  | 368.134303229682 |
| SNW1  | 425.348619281876 | 381.014521577291 | 458.953009417683 | 404.172535442156 |
|       | 293.986292438714 | 309.997909440664 | 356.323554000768 | 398.796188440256 |
|       | 319.685597963267 | 517.23393716516  | 592.284071247642 | 467.90388853336  |
| SNX1  | 283.014222473749 | 260.224777636733 | 345.38424761963  | 256.424415389574 |
|       | 136.029898048127 | 190.165771406362 | 193.315380090713 | 194.617252921731 |
|       | 223.154771092064 | 194.240372898704 | 274.534901548678 | 273.303240462047 |
| SNX10 | 158.127523362251 | 150.680628549529 | 145.784526088216 | 155.3016514732   |
|       | 261.89195025254  | 181.668090319293 | 235.563592256037 | 212.460476372263 |
|       | 281.659653592151 | 237.191866335979 | 167.304721591124 | 236.141982516399 |
| SNX11 | 279.598585549004 | 282.652193666078 | 228.125521373477 | 327.749926183823 |
|       | 347.3483417873   | 270.727749014046 | 333.822167152866 | 326.45984882427  |
|       | 325.252108402192 | 266.892524131545 | 333.439929772897 | 260.554343693588 |
| SNX12 | 130.933379257307 | 143.539741029895 | 123.069963218224 | 144.231539210695 |
|       | 204.5274881834   | 134.10070984606  | 127.800634041606 | 124.484589975207 |
|       | 131.08389186558  | 144.808774137749 | 222.77938191298  | 130.068063785009 |
| SNX13 | 191.310372695208 | 184.204036882642 | 183.482640529727 | 159.879600154928 |
|       | 278.192669077191 | 221.359331823286 | 315.513423195489 | 252.957489543915 |
|       | 196.053808536366 | 254.722836822616 | 300.765518378297 | 304.713434036642 |
| SNX14 | 254.424207773566 | 263.084557246752 | 269.194172034595 | 255.74096237558  |
|       | 363.539983343859 | 398.796188440256 | 488.14606875418  | 398.61164689194  |
|       | 256.174286655796 | 372.594990024312 | 804.800251415824 | 451.718912714608 |
| SNX15 | 133.807992913171 | 145.298109334141 | 144.595393134144 | 139.664055668127 |
|       | 149.842326869644 | 121.807661901776 | 136.372712400493 | 133.927844489731 |
|       | 137.48217464385  | 140.85139374336  | 138.401406375804 | 124.802639338573 |
| SNX16 | 246.616749748028 | 212.531329857909 | 207.850956786183 | 238.482863150124 |
|       | 155.158028043823 | 192.418895349837 | 169.022351348819 | 164.319378349317 |
|       | 154.061101136889 | 211.535720730612 | 131.926504315744 | 147.059096208832 |
| SNX17 | 1035.0797237176  | 1185.70008959602 | 1120.87534972745 | 1356.43255022363 |
|       | 2192.17997650999 | 876.783710734594 | 1166.86593572716 | 907.904780399957 |
|       | 841.944755849006 | 878.520681466946 | 1014.23822508445 | 1188.08712008638 |

|       |                  |                  |                  |                  |
|-------|------------------|------------------|------------------|------------------|
| SNX18 | 125.141185839817 | 111.286141277084 | 135.038195181839 | 140.493975416335 |
|       | 136.722636695506 | 135.550882872661 | 149.267019532847 | 134.55255098289  |
|       | 128.844026422327 | 134.772545694636 | 123.159407368236 | 126.798976470472 |
| SNX19 | 320.597495751519 | 261.426617866925 | 279.668007824988 | 294.808980631295 |
|       | 211.104243881644 | 184.102171963542 | 155.162310001164 | 207.453490385508 |
|       | 163.753434774656 | 197.049616858296 | 295.851459742115 | 235.563592256037 |
| SNX2  | 578.811908030805 | 596.3549500121   | 986.972987865318 | 665.106631364961 |
|       | 369.198837083585 | 532.394088545421 | 768.67030514096  | 679.557656724243 |
|       | 692.359779743985 | 1127.89414462606 | 562.543347322063 | 670.571106793204 |
| SNX20 | 116.342242990651 | 123.551225884748 | 120.456817031716 | 115.995309578182 |
|       | 124.672483602517 | 118.988269692812 | 112.78323842342  | 113.568261995787 |
|       | 120.585506729733 | 114.867454554206 | 127.218362452043 | 116.378552206652 |
| SNX21 | 209.004374703564 | 211.766884719761 | 188.36361073603  | 226.565823278767 |
|       | 194.637233028442 | 157.021010130169 | 158.396149470397 | 134.76586363177  |
|       | 138.913591568111 | 144.826861308997 | 168.643026828823 | 135.857403020659 |
| SNX22 | 230.161369375718 | 248.03801051527  | 273.152907354565 | 270.651318838953 |
|       | 250.82359383789  | 213.93763684072  | 235.997227173296 | 236.745054217055 |
|       | 228.9901869793   | 258.012234458166 | 212.890259409988 | 242.787656836745 |
| SNX24 | 171.579123521304 | 157.612067634423 | 153.230304322351 | 167.764352429391 |
|       | 161.189717452004 | 137.933986165139 | 183.969897305028 | 162.505305538911 |
|       | 147.260260687975 | 292.068293167526 | 158.536178747273 | 155.569733738768 |
| SNX25 | 206.428618912264 | 168.854819201403 | 221.411372022459 | 186.033093285894 |
|       | 159.06002608158  | 178.072538529634 | 205.804144075374 | 173.204163917896 |
|       | 182.453722105813 | 201.365457496683 | 170.67334244323  | 147.038700869156 |
| SNX26 | 364.022018936132 | 396.126485121994 | 492.05680879106  | 473.947538805454 |
|       | 228.968779778407 | 308.974786799114 | 255.225145197422 | 283.952604729032 |
|       | 298.347201056937 | 292.468585109951 | 190.825209733575 | 407.442337662943 |
| SNX27 | 1471.01897242089 | 1764.53168329081 | 1701.43479420427 | 2390.41825815872 |
|       | 710.531876484467 | 926.670867201327 | 801.52891824571  | 1274.39152410752 |
|       | 1059.80292026589 | 839.901173743755 | 710.76653239801  | 1014.23822508445 |
| SNX29 | 314.337680575998 | 347.3483417873   | 318.690043546203 | 379.862305342147 |
|       | 295.851459742115 | 207.581907737176 | 221.070448906398 | 247.899467998443 |
|       | 233.690524419327 | 216.24497587588  | 250.037172478288 | 194.092089507551 |
| SNX3  | 1910.08485008041 | 1685.33737186733 | 2684.69013589621 | 2001.92441724356 |
|       | 1809.58702081877 | 1294.18114559128 | 2496.17211592866 | 1825.10168716051 |
|       | 1689.00127592755 | 2900.55309635211 | 2365.99940149374 | 1870.52504853779 |
| SNX30 | 242.348427307994 | 212.050953977485 | 227.32463765717  | 208.42712014566  |
|       | 201.593025256991 | 241.105817192695 | 237.961826989344 | 259.826625866106 |
|       | 283.377663208926 | 253.601378730911 | 458.705688226305 | 202.643624039869 |
| SNX31 | 191.665827345888 | 291.056913909578 | 290.502085667398 | 181.294497402507 |
|       | 766.710479603963 | 1313.89440013246 | 788.244353085369 | 1440.14449872047 |
|       | 2502.72913594103 | 213.531307836195 | 2288.63508719706 | 714.494228450456 |
| SNX32 | 136.749771286979 | 138.953926269905 | 139.82050388626  | 144.826861308997 |
|       | 137.326796995017 | 134.527165454543 | 138.032967032276 | 145.239119337981 |
|       | 142.385902610309 | 135.279197125157 | 137.689158155552 | 140.779962389412 |
| SNX33 | 255.770193180874 | 287.145105895235 | 220.791884858764 | 277.652851236546 |
|       | 458.440488401029 | 204.574706925957 | 308.38513924253  | 185.46843333826  |
|       | 197.191648960563 | 349.248144552634 | 321.568127272161 | 244.251315474587 |
| SNX4  | 392.539157974899 | 343.048904374136 | 360.551560710852 | 289.368511254335 |
|       | 598.095370768587 | 1158.88528996131 | 663.451243037105 | 851.221199352646 |
|       | 922.877217016704 | 498.641091757363 | 611.772512110915 | 601.997464467917 |
| SNX5  | 300.602422224047 | 297.368197598038 | 317.00629920068  | 261.639437655633 |
|       | 228.649073045499 | 466.4890990178   | 473.151324002277 | 378.585058475083 |
|       | 447.182566890086 | 468.93543246394  | 495.241179224412 | 632.278924237678 |



|        |                  |                  |                  |                  |
|--------|------------------|------------------|------------------|------------------|
| SNX6   | 331.888150158628 | 312.645778869254 | 294.410833087913 | 404.54681330209  |
|        | 272.770616373687 | 226.020769172424 | 244.101521795539 | 302.532985701607 |
|        | 250.602978521808 | 342.717252404581 | 240.12078342024  | 290.802509012089 |
| SNX7   | 179.624208193114 | 170.758319048911 | 204.564770370164 | 160.240052678401 |
|        | 273.073938260793 | 275.794847140407 | 373.361263985383 | 279.202256032476 |
|        | 191.160340745501 | 266.71318061066  | 260.85776723575  | 252.138168292964 |
| SNX8   | 211.941623411369 | 222.709720471134 | 180.179981672095 | 287.83303360511  |
|        | 608.611927946607 | 211.22652563815  | 275.888299685521 | 257.100909006193 |
|        | 238.548578086943 | 257.813193543819 | 191.146276657897 | 256.237185590901 |
| SNX9   | 142.034369454643 | 148.563428310413 | 136.540568915609 | 135.279197125157 |
|        | 140.890227770353 | 137.244552699212 | 124.828626063272 | 127.305306470493 |
|        | 136.029898048127 | 136.86685787001  | 129.758303592589 | 133.966277922005 |
| SOAT1  | 146.515240633175 | 139.027836356854 | 136.146383365709 | 127.0631494857   |
|        | 155.388752614336 | 147.62157260418  | 144.231539210695 | 153.126111237668 |
|        | 141.746976260176 | 145.472859089272 | 175.437651670246 | 140.377179372804 |
| SOAT2  | 143.603022117503 | 145.095023408224 | 160.992494552269 | 132.637443692683 |
|        | 125.215194276842 | 137.165966740473 | 142.563762845657 | 134.414562784832 |
|        | 125.272796155561 | 140.125575976708 | 145.875240619257 | 139.430808017891 |
| SOBP   | 409.691865300362 | 408.993744895434 | 399.364160668615 | 542.883453307    |
|        | 122.007909794484 | 131.941069239017 | 128.561593533226 | 119.915330116696 |
|        | 133.008987820479 | 126.124937863679 | 133.917283965036 | 127.155818626031 |
| SOCS1  | 239.003718699156 | 206.149539851803 | 172.827288328708 | 202.797135825668 |
|        | 234.531140131763 | 153.217287503221 | 169.927157878764 | 182.529167529936 |
|        | 218.209523110843 | 207.417884407459 | 165.627852733455 | 160.105903942674 |
| SOCS2  | 510.434895296759 | 599.52440136406  | 371.767182305618 | 523.073926509865 |
|        | 228.901579068997 | 329.214958614925 | 226.960024551778 | 224.361277033882 |
|        | 249.680729921602 | 251.665539319612 | 214.546528079149 | 234.531140131763 |
| SOCS3  | 188.013181859196 | 240.792557915987 | 146.025781495177 | 159.009211991511 |
|        | 159.009211991511 | 271.113617350982 | 167.125830254039 | 154.661456780865 |
|        | 180.192015483309 | 252.593574250965 | 153.922713834296 | 181.966110264509 |
| SOCS4  | 191.074428905553 | 187.380064367869 | 195.414464905232 | 171.345989796519 |
|        | 175.428000742222 | 294.697622870418 | 184.493681387276 | 206.186324475847 |
|        | 173.468958175014 | 165.597236278435 | 190.889832855403 | 189.174957940401 |
| SOCS5  | 165.39758732     | 169.656238760589 | 179.704370382771 | 164.541417588646 |
|        | 164.337486856997 | 183.764215745794 | 179.55905250703  | 161.724388995749 |
|        | 151.397068235685 | 162.122250419992 | 165.926301648161 | 159.406462604758 |
| SOCS6  | 157.87020867396  | 141.892214695902 | 148.913181799692 | 134.53215156472  |
|        | 154.250656489421 | 138.778496466408 | 148.454344601562 | 151.387150218354 |
|        | 141.835615574452 | 162.547569833931 | 167.298438019561 | 145.070927449969 |
| SOCS7  | 153.807525239478 | 150.694215349678 | 168.170370963766 | 158.960488862727 |
|        | 188.557113298055 | 171.967974673053 | 167.741556663724 | 158.483006541613 |
|        | 152.534482748598 | 175.29178007783  | 138.780488114634 | 157.227118680396 |
| SOD1   | 6960.46610781696 | 7354.94071109106 | 8532.46059476152 | 6760.37324850804 |
|        | 5859.56559124843 | 7406.86318549013 | 8596.90650022148 | 11479.7406150358 |
|        | 10474.0047946187 | 4773.62220024088 | 5049.57929757135 | 6114.33638002734 |
| SOD2   | 252.171420358437 | 258.384059994446 | 280.798003990849 | 250.766180970907 |
|        | 337.822337721287 | 240.439368352772 | 324.009703043876 | 391.644649726254 |
|        | 728.176339659082 | 510.811470658575 | 338.510045856515 | 303.051124835907 |
| SOD3   | 549.359675306309 | 456.656123023446 | 263.379982742085 | 422.840163973614 |
|        | 142.307520290692 | 118.05386204863  | 120.527518013376 | 151.508738608925 |
|        | 164.948785167149 | 132.137634927459 | 133.56263739203  | 118.797046082278 |
| SOHLH1 | 128.659393756477 | 121.675007387533 | 134.966883985611 |                  |
|        | 143.744075931566 | 147.391535316043 | 126.242935839683 | 124.288632450364 |

|        |                  |                  |                  |                  |
|--------|------------------|------------------|------------------|------------------|
|        | 137.360220389719 | 129.1829592305   | 128.697647007046 | 129.034770823878 |
|        | 121.699702849509 |                  |                  |                  |
| SOHLH2 | 150.587882657674 | 149.829363505519 | 150.868712184357 |                  |
|        | 180.680595239651 | 145.368059425439 | 158.975786937923 | 151.354187593773 |
|        | 144.456324230938 | 141.469818222503 | 143.426053070219 | 155.938283930571 |
|        | 144.710613442383 |                  |                  |                  |
| SOLH   | 193.358728044565 | 202.129153259445 | 181.823450464129 | 211.208937901871 |
|        | 272.571092944711 | 195.033792280119 | 214.803167803712 | 210.77489002666  |
|        | 200.204064462384 | 199.149959995133 | 214.904634494921 | 216.126000558319 |
| SON    | 457.292146759215 | 409.743899750699 | 470.746477818201 | 390.573484082597 |
|        | 277.026538720417 | 569.236322997211 | 458.440488401029 | 430.505037012814 |
|        | 585.075322115635 | 388.782774926005 | 392.198487606534 | 526.182262872235 |
| SORBS1 | 2491.33490046283 | 1710.60409578293 | 1965.13870083236 |                  |
|        | 1850.98311401165 | 130.653971083035 | 154.528396813382 | 131.326536951329 |
|        | 146.805832438977 | 141.809577413906 | 128.763176477983 | 152.20173979854  |
|        | 127.101752724954 |                  |                  |                  |
| SORBS2 | 1204.32784721885 | 1017.6969123529  | 1431.52979384867 |                  |
|        | 1263.64725236472 | 145.63870792125  | 163.586549438955 | 151.2639801322   |
|        | 205.244843885276 | 188.417078622503 | 162.337707154123 | 185.583997792931 |
|        | 149.262900833177 |                  |                  |                  |
| SORBS3 | 349.485727214325 | 373.803772983872 | 352.741885295157 |                  |
|        | 413.084646927035 | 196.378888436237 | 152.377056383547 | 136.824357247954 |
|        | 147.034021626893 | 170.974759483946 | 202.643624039869 | 138.098165515898 |
|        | 146.900087470856 |                  |                  |                  |
| SORCS1 | 268.961643716282 | 234.461229199142 | 198.374163029174 |                  |
|        | 207.138680369683 | 149.288034848931 | 142.643027992419 | 152.498222035534 |
|        | 147.502116289881 | 151.538112896642 | 147.006482557682 | 149.441862883882 |
|        | 157.301617257941 |                  |                  |                  |
| SORCS2 | 161.035985824654 | 175.704031930103 | 123.722744366103 |                  |
|        | 233.129544542265 | 111.632811186988 | 109.438965262717 | 117.024039521425 |
|        | 119.502758763438 | 121.219323788324 | 116.465213348716 | 135.061176512365 |
|        | 124.536322123442 |                  |                  |                  |
| SORCS3 | 141.71400004456  | 140.481148289418 | 169.999692055871 |                  |
|        | 147.364301916733 | 144.494401248678 | 157.800913051929 | 150.063082731931 |
|        | 139.532508621268 | 151.094682146074 | 147.803464591663 | 147.473875763319 |
|        | 145.487783396345 |                  |                  |                  |
| SORD   | 142.968008233583 | 152.432477504097 | 142.588013648337 | 143.860092956392 |
|        | 226.114369645703 | 167.237705290905 | 252.628516068724 | 209.258707976348 |
|        | 150.772752327567 | 204.862387642573 | 353.98839683842  | 189.070238523683 |
| SORL1  | 340.800632878807 | 399.620724969771 | 383.626469817252 | 254.101184686036 |
|        | 472.514017604645 | 686.679573646733 | 1055.79590411506 | 730.042712083388 |
|        | 554.115756730498 | 215.897620927751 | 1535.27496251381 | 1658.78888936164 |
| SORT1  | 481.630922092112 | 515.929937825133 | 553.368945998847 | 699.550347374567 |
|        | 341.015631528464 | 451.210172051464 | 398.272713014637 | 317.273940108333 |
|        | 387.908774438461 | 300.985037429772 | 368.0573385048   | 322.64731764456  |
| SOS1   | 133.524698103972 | 135.735535533738 | 143.643259003393 | 123.884643288534 |
|        | 147.635761512135 | 160.707290343231 | 152.277810621542 | 161.852665901359 |
|        | 145.650356702429 | 144.615156175885 | 158.708054164813 | 146.683594365673 |
| SOS2   | 170.446156541317 | 159.820341130737 | 202.193338797533 | 153.816782770382 |
|        | 144.724040494873 | 165.511561121012 | 171.835438335216 | 161.12121879514  |
|        | 155.035727630756 | 202.909188070184 | 169.695658738618 | 214.38058301395  |
| SOST   | 150.014842228372 | 132.122273848715 | 135.804447076318 | 140.898380345452 |
|        | 139.018588215263 | 138.144085131733 | 137.066799877341 | 141.169908353507 |
|        | 126.148379057536 | 171.62327142765  | 138.416716745934 | 138.56436658053  |

|         |                  |                  |                  |                  |
|---------|------------------|------------------|------------------|------------------|
| SOSTDC1 | 179.026308021985 | 185.706228572019 | 150.784262878145 |                  |
|         | 177.93138555339  | 159.655362710407 | 152.112177721714 | 154.928072022777 |
|         | 153.45050352117  | 144.131743978192 | 143.673778816953 | 166.433933349193 |
|         | 135.628982370682 |                  |                  |                  |
| SOX1    | 122.327353563917 | 115.738984899365 | 110.784682137658 | 114.664782541261 |
|         | 112.90900939264  | 110.774802298005 | 115.18875509198  | 107.91011371422  |
|         | 107.714294216913 | 116.196676877996 | 136.62213567467  | 99.0767996209245 |
| SOX10   | 134.401733295755 | 134.56134674893  | 147.743331160624 | 174.441287575034 |
|         | 104.091301211096 | 113.262357892613 | 106.147993332294 | 124.915772594451 |
|         | 110.594755513247 | 111.616460084889 | 120.521509788705 | 108.626570637194 |
| SOX11   | 141.67277923437  | 139.613193302406 | 143.996350813566 | 140.646946425036 |
|         | 132.832556359483 | 141.640292723776 | 139.258468432364 | 133.552141086987 |
|         | 138.086270564406 | 162.895923745031 | 129.47419698487  | 132.346363545288 |
| SOX12   | 129.801342433836 | 155.820194280153 | 146.090291252325 | 145.938780249776 |
|         | 132.795064859079 | 130.080728694308 | 124.3501719829   | 130.122672154144 |
|         | 141.770977101211 | 124.242539075734 | 143.784022884904 | 128.588822671032 |
| SOX13   | 329.535023880129 | 394.101052511043 | 306.838596239511 | 381.625983354158 |
|         | 528.921893077914 | 355.879841671975 | 460.24741151155  | 273.959220003188 |
|         | 346.917113326564 | 234.301520483864 | 506.029788151779 | 576.636077770998 |
| SOX14   | 150.0084730766   | 138.605661097886 | 162.15259972225  | 147.449186980143 |
|         | 183.447807651728 | 149.599523779175 | 168.314966639178 | 152.099431258333 |
|         | 152.08574341962  | 145.424827607383 | 137.779607093226 | 140.197487078987 |
| SOX15   | 374.761007556839 | 396.708183244581 | 542.267204956846 | 377.353441970543 |
|         | 146.094951139804 | 889.6617510875   | 857.090339943417 | 232.276667029184 |
|         | 142.137885203233 | 2850.98525554116 | 505.704957182936 | 1218.05434595121 |
| SOX17   | 177.72965427263  | 179.100368312505 | 124.897463208595 | 166.32555285213  |
|         | 126.673587174832 | 135.040794634617 | 113.891385601095 | 132.094446606227 |
|         | 133.864612785572 | 124.140880678888 | 146.105844205919 | 122.139832263188 |
| SOX18   | 774.997895985917 | 1125.28599595312 | 445.348044448953 | 995.263014856158 |
|         | 534.745066397679 | 730.34994035645  | 272.193578770314 | 746.777330152729 |
|         | 805.120147618984 | 543.710330214344 | 458.607367472574 | 336.845908630493 |
| SOX2    | 150.552186000149 | 153.19516365535  | 156.731291756066 | 157.826457203706 |
|         | 142.563762845657 | 169.408892048115 | 146.334446516009 | 205.57572471694  |
|         | 151.206697943841 | 150.412929574507 | 138.9183380982   | 153.326420485822 |
| SOX21   | 158.384505840662 | 160.026178505749 | 143.184697704389 | 160.822287037366 |
|         | 238.782040902727 | 163.426663985855 | 183.493455947795 | 238.400565506288 |
|         | 146.984267484873 | 258.830885826237 | 160.898061905021 | 169.101676908756 |
| SOX20T  | 142.409003426775 | 133.780423932326 | 132.141232809073 |                  |
|         | 148.763098715961 | 141.411635093377 | 133.330215359653 | 144.190203286506 |
|         | 142.236565028336 | 129.007924852801 | 154.057771254252 | 142.937182720493 |
|         | 139.306122448857 |                  |                  |                  |
| SOX3    | 133.35096649325  | 137.20509387214  | 130.71040889651  | 136.470025638057 |
|         | 135.217240511902 | 129.865581506307 | 136.392389842232 | 128.331867822629 |
|         | 133.807992913171 | 115.35376992547  | 131.215938257574 | 130.753266976637 |
| SOX30   | 146.517645037071 | 143.031909545902 | 139.104796184094 | 138.695481214267 |
|         | 137.634298014431 | 135.218648235324 | 134.983884722607 | 139.051656180599 |
|         | 135.221786448517 | 139.697477263244 | 165.4474699807   | 136.687813884132 |
| SOX4    | 417.262521411065 | 571.838717184447 | 354.405235378302 | 397.2528907311   |
|         | 1344.1288416533  | 1479.69309189156 | 1171.62361359992 | 1516.97921112926 |
|         | 1092.33328323944 | 487.993796425035 | 1399.41653736746 | 1379.26881813339 |
| SOX5    | 124.783306383852 | 119.911515364639 | 124.574323079707 | 119.044902525459 |
|         | 118.04359489354  | 122.087107663865 | 125.04156726504  | 126.083599163604 |
|         | 124.317870455205 | 125.729079191033 | 138.647667867725 | 123.403099206878 |

|        |                  |                  |                  |                  |
|--------|------------------|------------------|------------------|------------------|
| SOX6   | 138.945855414918 | 144.249339611941 | 135.369146072643 | 145.28524062436  |
|        | 138.223001481672 | 146.218767446679 | 123.588194516972 | 139.706279455371 |
|        | 136.762273376313 | 138.753419730571 | 138.675023495021 | 133.067237748129 |
| SOX7   | 172.169129806643 | 187.550461418888 | 168.205277839471 | 190.843795579234 |
|        | 178.083311435916 | 240.147082836599 | 189.092674335503 | 173.640326140494 |
|        | 147.074807267102 | 326.354469134694 | 164.295628750438 | 166.910561772689 |
| SOX8   | 290.638110977807 | 251.011148303246 | 221.961758403614 | 307.728083981504 |
|        | 151.780459290205 | 180.240305360865 | 153.653453808799 | 168.668125438154 |
|        | 182.711318507496 | 158.550259547851 | 170.129558603697 | 154.924190468067 |
| SOX9   | 153.873826757907 | 158.295583769612 | 140.427188241455 | 152.146033353926 |
|        | 203.675655444583 | 149.341736870692 | 146.119700458464 | 133.737573120711 |
|        | 269.448201975645 | 137.445344116574 | 143.030777754448 | 143.879597098414 |
| SP1    | 549.162299481184 | 623.050854309724 | 594.713185954954 | 660.096727566678 |
|        | 405.469705787631 | 565.609400092543 | 683.179460779062 | 509.292779821787 |
|        | 723.640113902925 | 534.920870202582 | 875.38834441246  | 803.133619199479 |
| SP100  | 201.931760074628 | 194.903531690239 | 187.993907528473 | 175.686248503777 |
|        | 152.633139090274 | 155.30926640293  | 176.927500850631 | 171.880470629305 |
|        | 202.741211613885 | 154.928072022777 | 237.906142045719 | 216.755681508811 |
| SP110  | 364.113665301598 | 356.05426191171  | 324.615093103582 | 320.707687986324 |
|        | 189.174957940401 | 221.82340413039  | 326.379855547052 | 258.075566417241 |
|        | 380.562212796792 | 291.105673222859 | 476.917496749381 | 334.709049890042 |
| SP140  | 144.386561289985 | 138.811681811959 | 139.353080958675 | 133.096984735092 |
|        | 150.885460975199 | 146.785478478701 | 153.169450192935 | 157.615017085961 |
|        | 193.148369507405 | 146.347213904792 | 155.219860096943 | 146.16125926956  |
| SP140L | 154.493246900289 | 155.715728894101 | 163.62582285753  |                  |
|        | 148.835389500419 | 127.558034562151 | 145.155989928336 | 181.308852106289 |
|        | 176.912121142015 | 170.350891928203 | 223.184064606222 | 184.365354978005 |
|        | 176.236140830355 |                  |                  |                  |
| SP2    | 205.830321788612 | 206.753993163216 | 197.378801636702 | 216.24497587588  |
|        | 318.690043546203 | 222.508914765788 | 190.057030596611 | 217.778414825515 |
|        | 231.915272112361 | 219.103510284905 | 196.676479140094 | 227.668046559074 |
| SP3    | 341.128917971124 | 337.521614253267 | 280.337475979102 | 268.600782558985 |
|        | 225.31216514083  | 313.708197191587 | 247.015574724901 | 255.493109705211 |
|        | 219.638478100747 | 280.656087497806 | 283.874600697211 | 278.168897504985 |
| SP4    | 277.406445570925 | 259.316557834724 | 306.59090554099  | 236.617896560938 |
|        | 200.668298229815 | 240.376851873817 | 208.321765801227 | 206.571433405844 |
|        | 193.832033192375 | 163.159571059471 | 254.607324522225 | 246.710233781784 |
| SP5    | 133.480196904786 | 151.60113116166  | 143.177915754998 | 128.816610738922 |
|        | 122.329290563769 | 126.017158064032 | 110.068122112671 | 126.623026026721 |
|        | 170.342828808493 | 129.724604278515 | 111.196610704726 | 114.002925521932 |
| SP6    | 149.8919086368   | 150.070213543579 | 144.930066324767 | 156.441368290572 |
|        | 140.04612725812  | 202.230920499592 | 143.247977741752 | 155.164238647284 |
|        | 238.230110356671 | 144.287786573389 | 212.147155923729 | 155.53992663898  |
| SP7    | 136.497295707149 | 127.604087759266 | 129.108534267222 | 131.885529813944 |
|        | 134.053685488055 | 157.787233338636 | 140.763592237598 | 138.323567041191 |
|        | 142.658562927154 | 123.07559417607  | 142.302618019732 | 154.301338771241 |
| SP8    | 124.796876920269 | 128.856640014006 | 123.538037290702 | 129.564482772168 |
|        | 126.151017944639 | 121.75662526451  | 122.031894952046 | 123.227904580467 |
|        | 131.125175244494 | 128.184708916755 | 140.293431620804 | 121.400652285172 |
| SPA17  | 214.566711351899 | 239.845747958475 | 260.591336959281 | 269.345125874858 |
|        | 401.189904619902 | 316.364342983155 | 258.348298226232 | 380.053166305637 |
|        | 339.379250332987 | 204.438365139666 | 288.68376542946  | 356.62074247786  |
| SPACA1 | 164.661445411833 | 136.72715888684  | 152.758653228708 |                  |
|        | 141.67277923437  | 148.704917490429 | 146.029647001623 | 159.758196845781 |

155.346805606742 147.81143020317 137.597788349982 147.28750335168  
 166.111496598928  
 SPACA3 118.841699953612 127.893555451807 116.196676877996  
 111.178024950204 117.279162323013 114.835386789236 112.219585614955  
 118.825948323992 115.389934936253 106.900679222135 148.056333887679  
 115.400592594965  
 SPACA4 114.970485002776 109.266533255266 109.098105822556  
 115.157321350379 112.714282429822 118.470400686096 119.01559016005  
 119.669441891401 115.305518560239 115.384304932365 147.135640862542  
 120.602818832247  
 SPACA5 124.68729078792 125.558877611499 119.347975622523  
 117.343165720552 115.496108000499 115.933805625814 108.497209666203  
 118.749046585251 114.589757401741 119.01990099776 111.794102015354  
 114.373370072994  
 SPACA5B 123.535803027153 118.104763610751 121.438875373878  
 143.884263862698 122.194493542073 134.346754381858 132.487362867399  
 123.153925912632 122.476178620771 120.100672968415 131.454955038299  
 130.058902161953  
 SPAG1 154.159124458167 158.411846122784 149.402679897813 148.1283706199  
 187.461448376593 210.165098572428 187.812436252228 203.335012796883  
 234.156713102803 158.445124076906 219.129781831192 181.277683429417  
 SPAG11A 111.956783714784 111.848472437543 118.076139318165  
 112.298254005045 101.981823814699 115.68358702028 111.1002996982  
 111.276543583667 119.701313125748 110.764586138261 117.316790136526  
 111.328185454541  
 SPAG11B 121.480455781173 124.186557690235 125.143281492089  
 125.374764771516 123.470830748348 127.683344133492 121.47058227778  
 123.296382913131 117.296972688814 128.0366252162 131.383113302567  
 134.209210120802  
 SPAG16 184.518666956721 187.057683141644 198.166270627544  
 169.488652117125 225.050796356289 166.007913607742 236.052008824688  
 193.689806171113 199.235895708128 176.735168607281 250.82359383789  
 263.888891822857  
 SPAG17 150.860090477342 154.38209765671 145.200638964782  
 136.120813399579 143.88649412841 152.533283125562 138.096262211809  
 149.17815859943 147.835936450126 148.898587505337 176.725347194807  
 157.166379887259  
 SPAG4 131.785053503951 134.517774302213 119.202966460612 119.355650892262  
 574.399909181723 205.742386129597 419.690542859168 439.492285515997  
 298.519371102278 149.277880094957 267.069665000047 232.363656167375  
 SPAG4L 129.044445373107 123.711828013052 116.263405190786  
 122.201293962463 118.749046585251 126.819413901915 129.210356735226  
 121.807661901776 119.792515907708 128.967855397644 143.275056599274  
 121.084348994747  
 SPAG5 139.602168254761 147.584176709986 137.201149245092 135.878996521596  
 216.522992914538 211.208937901871 162.337707154123 313.773476049783  
 194.161930642068 168.491878435329 162.488819873513 185.342353172151  
 SPAG6 133.769848328557 141.209958892647 144.757068610657 144.968459820523  
 133.318665755015 144.601370216162 137.543128522665 149.597396040729  
 146.316145173343 143.650172124086 141.561769570516 144.992993261203  
 SPAG7 407.957436380989 446.601751145647 414.200068430184 624.264994653057  
 277.817786943873 261.065986251886 271.568797887976 355.519647649551  
 271.858059712406 321.568127272161 348.575690346536 422.688531130043

SPAG8 138.096262211809 122.881793230233 136.400959554698 143.523051024982  
120.511896155396 126.33556674738 129.835713633923 134.319316977485  
125.955431094455 126.401145439668 130.890314257211 141.717466442384  
SPAG9 400.845137156678 312.845219991659 478.606567465979 323.149792143481  
243.336550161566 318.297819854586 337.973433871323 412.941907828617  
376.374248850987 477.056706273413 383.503040287678 311.04252785157  
SPAM1 128.594951429021 125.04327844782 123.364999283696 118.312891459156  
115.587874563785 129.680406696779 118.08607083874 115.999443701343  
126.656077572961 128.460750472464 127.055165613236 118.115015846489  
SPANXA1 125.598828334465 127.179420421981 117.834484996559  
122.809241232029 119.660942849265 129.415078042622 126.121516564343  
127.787890405862 124.028748209411 134.759283147919 128.578494940165  
128.751758311249  
SPANXA2 156.407166112409 130.571827557149 179.711363255355  
154.501338425995 138.751781355083 138.684070773064 144.5368823731  
146.252974508529 144.482364671273 147.225911875196 136.988519762443  
148.082026641671  
SPANXB1 137.77601089414 136.03420235737 148.779043570204  
161.481227197715 144.910863590251 145.395042579024 142.61573330083  
147.285764611006 170.446156541317 147.980827857138 147.595573192579  
167.612577768782  
SPANXB2 125.800508653231 120.602818832247 127.00963790814  
126.274585491044 130.0140921487 133.725177339262 137.161065320948  
127.646032547296 131.017355402204 124.072512083237 129.284384810812  
133.65688823581  
SPANXC 132.8615886934 116.397855001959 138.938546468136  
147.04481509758 132.645196037302 136.101501973431 141.733840643889  
130.694506122253 131.069515666204 149.44788347071 132.794042648627  
132.533234335153  
SPANXD 117.428152859221 131.950972277537 123.089110282465  
135.5237675623 114.76337651891 119.029186503752 139.545451634208  
128.400741751903 134.93455083142 141.596078062845 114.730641277464  
120.163286072512  
SPANXE 137.033134002983 131.863018503922 131.165798722835  
136.526706711584 129.973380117841 133.203064891923 136.185953087697  
130.255689301211 136.91779948054 131.732416355002 130.607857562345  
134.569883788949  
SPANXF1 124.329980024986 120.204469421484 129.072173761566  
122.013040475143 136.618643817686 131.926504315744 124.910390240995  
130.900049359243 142.759452994928 137.46978401237 114.936648783324  
131.975248488461  
SPANXN1 125.467668442298 111.312348806957 117.312094804205  
106.393497890486 110.496084922302 122.891946370542 112.227434965199  
116.497714896018 105.193775204124 110.408301129053 120.557880292561  
114.734439905052  
SPANXN2 122.557981210434 119.673343767067 112.046615825307  
120.09801164252 121.805145639822 117.356389952799 111.336798977475  
125.677019190255 118.180919555585 104.091301211096 105.771723307783  
113.133798430215  
SPANXN3 151.360575274272 174.229093061024 126.396385337235  
179.810507975486 124.124076599417 154.607214750531 158.933097712363  
148.945466917496 147.183889426843 147.606311227037 134.541606996118  
150.82596027483

SPANXN4 111.895279866421 119.613985826308 106.854721604889  
130.93033679281 110.727742629085 116.947370388179 94.3531468700382  
111.204065131669 108.570463496052 100.477911152746 109.087574814292  
106.182551369456

SPANXN5 157.745805838008 140.812334019209 148.698658730008  
151.557004418682 137.700110923212 142.032814623366 154.447449691409  
145.464640276742 131.380387461901 152.518729390047 132.593747375239  
142.963036923104

SPARC 4491.96934862425 3359.62015747752 2563.02488807613 4222.55224241399  
414.333324610267 1261.61611961272 403.043257175264 748.161769171818  
760.272612245092 2300.9407349072 313.888035511709 544.580311371212

SPARCL1 7433.03226979876 6560.30885074315 9219.38828280399  
5467.84611694564 210.165098572428 1822.14935116363 439.852826905352  
1062.749459378 1359.63626195826 498.812823949508 418.319283832879  
394.65807885612

SPAST 194.22713184875 209.070372320593 197.100205890532 171.161297672182  
234.789040617681 326.908959531021 218.997165156081 313.828943866034  
194.352807599399 203.752540576935 280.398987330256 222.315451077459

SPATA1 125.780294378066 110.256771079797 113.78323485587  
120.046892432373 120.988749021323 113.886420801388 108.148715413122  
111.922007318017 123.725998173975 123.303143302526 108.2359175332  
123.225792525733

SPATA12 146.755803731358 127.464485396039 138.664401460739  
128.601885372662 145.912712700067 143.823368276815 139.949563856936  
138.944595164363 147.013598868335 139.268052431476 134.679882781788  
143.517327774456

SPATA13 195.755450324985 199.01458214661 164.389447533163  
177.083095120017 147.322622473251 164.914114315732 149.97218338771  
168.052288484172 204.337844243869 133.43362126395 171.791030104358  
153.807525239478

SPATA16 133.82390829608 129.491732597331 161.010206405916  
120.846789922177 149.106615763242 144.769824608083 134.089308635893  
152.50843414723 124.641892391159 142.579346058088 127.084267631845  
146.114159600635

SPATA17 117.274977920103 124.88118767481 117.995551728392  
117.552229262461 143.429394097222 131.662585510218 156.548858402702  
165.134931755194 167.268645224361 144.30519737569 152.640683776403  
160.997179739138

SPATA18 200.618080312379 171.86363382331 223.339132121796  
126.741498575874 131.884208813525 130.440164900487 163.22480684222  
127.057574934679 213.447886742681 162.982557003317 139.427216913809  
232.667968049771

SPATA19 147.385714746214 150.261107471642 151.07661060324  
158.200211812067 163.805257266374 165.634117939571 145.952759497544  
169.271175460047 151.004738508108 148.744599622165 142.373521903746  
148.668081483434

SPATA2 170.410704499804 171.579123521304 176.810979494826  
176.256840061919 179.037397826592 171.610742435469 195.141733146452  
151.164936050256 157.6790197503 154.783699020901 172.297698667311  
156.949439724914

SPATA20 390.670702155192 346.118765910093 569.866002248352  
388.416668785633 1069.93503700632 503.466550870577 542.379137999196  
1305.2232532959 544.669441360594 463.187551361986 1105.10063745656  
514.124012546829

SPATA21 98.6941019230576 106.030441145334 119.613985826308  
110.942138645171 110.202982683256 117.078720392441 119.083957999725  
112.547907748842 108.148715413122 111.11656427738 106.341910466588  
111.886543737378  
SPATA22 150.292858985795 146.512045729234 166.655585160657  
156.160899295182 158.872962797815 153.654616088862 159.966729941991  
160.211460008777 152.550031868259 151.128838696891 127.869038038293  
152.834894011142  
SPATA2L 264.109049504585 249.858562350415 242.471259857978  
228.649073045499 985.637230639964 468.170972478717 385.798784913201  
342.717252404581 335.698400607132 335.389274425025 516.892850913889  
391.326200093611  
SPATA3 145.540872377507 148.840533233712 154.518641757391  
144.974813243462 147.18858211611 145.09280363189 160.247370279802  
159.487615985875 139.032275257901 152.422690241301 137.049677918041  
155.518807026156  
SPATA4 142.577102697682 134.769926504916 146.142934874698  
142.14116448528 143.783078837501 129.290542121353 139.018588215263  
136.855445270531 146.303959493672 151.730862403472 147.630900093277  
140.533704857854  
SPATA5 144.217621961908 131.260111979219 154.558968826495  
145.985223908092 133.043503979161 137.824985884649 132.700404009928  
145.299625153537 153.879427186342 146.725123303782 135.705904966172  
140.89666990854  
SPATA5L1 287.558897878375 297.285037835812 337.521614253267  
276.32528705384 315.828726297864 298.085365348496 339.753059801136  
292.965109701719 344.487982154705 364.265100349672 255.770193180874  
338.223462327622  
SPATA6 151.259426521768 129.687743133943 136.962442874268  
132.84666796678 141.741892403029 138.97776257708 138.643442050615  
134.493062923443 136.977435235496 127.604087759266 136.269445455239  
122.220327032799  
SPATA7 247.899467998443 223.389795643722 269.300548648755  
226.173501275026 213.468420853218 173.416999972133 274.595218795127  
191.160340745501 164.299585578035 224.298067319406 247.373571011712  
218.000351930307  
SPATA8 115.672307128514 120.530092530622 115.725323816619  
119.083957999725 114.00959999268 119.407293854922 119.412461116903  
111.691973758042 109.482330324734 116.787791109549 130.712515995658  
120.160652344221  
SPATA9 140.05419835434 143.330025840618 157.6790197503  
137.876995081933 156.594337089784 153.899573902499 149.103778494524  
149.480971898888 145.378779757104 136.691234705997 160.415807880532  
142.101865506094  
SPATC1 138.376176600064 137.990806386929 143.778327403708  
138.594435323838 144.845726048937 135.193659028591 136.831887671476  
139.268942501979 139.071908528327 137.782648137869 149.500457158616  
136.792957035581  
SPATS1 143.25481667885 159.276726310525 146.517645037071  
160.72009357092 158.767439363085 165.327972973978 145.259981479761  
156.589829166493 152.483240622367 149.707357499252 149.42148494796  
155.70645844794  
SPATS2 250.911817769829 250.037172478288 275.755038921952  
214.52087460757 211.395593720534 243.95334982553 331.795832780176



|         |                  |                  |                  |                  |
|---------|------------------|------------------|------------------|------------------|
|         | 355.990908506973 | 304.058158731957 | 349.816819166182 | 221.070448906398 |
|         | 257.813193543819 |                  |                  |                  |
| SPATS2L | 616.339439383796 | 586.867772838753 | 571.439520427295 |                  |
|         | 460.089380701982 | 672.637760135254 | 831.610501402173 | 711.491528818004 |
|         | 2369.233048505   | 577.56891124468  | 1233.27155759407 | 2505.8565544797  |
|         | 1606.01395227661 |                  |                  |                  |
| SPC24   | 276.284517459626 | 306.333710880618 | 281.694635436938 | 315.430399077266 |
|         | 622.692834629555 | 502.731019454502 | 311.269750643358 | 566.228690652783 |
|         | 330.758879244143 | 325.320888625297 | 312.705458415152 | 448.95671696823  |
| SPC25   | 157.203304477454 | 152.73588666971  | 151.392024228289 | 148.275939659102 |
|         | 183.676020826291 | 183.023316857537 | 148.764956861822 | 169.561657768387 |
|         | 179.137734914428 | 163.146581498065 | 154.179891883612 | 164.103306492559 |
| SPCS1   | 1263.64725236472 | 1190.62010668045 | 1666.80650105101 | 980.67040349547  |
|         | 5115.14161559446 | 7771.28016059011 | 7354.94071109106 | 8401.40370474392 |
|         | 5521.74673982411 | 2449.76376608893 | 2708.20624364471 | 3909.47437917608 |
| SPCS2   | 733.86133557115  | 651.675427664911 | 842.22767901391  | 679.822276398569 |
|         | 1125.28599595312 | 1195.07608384189 | 1117.77397620221 | 1239.66725147648 |
|         | 1247.02514044778 | 977.999660785113 | 1076.09385014053 | 1369.89073267996 |
| SPCS3   | 200.371280127668 | 197.687858915757 | 221.390817970859 | 214.38058301395  |
|         | 392.198487606534 | 209.112959748917 | 241.734804013256 | 301.188296465202 |
|         | 279.598585549004 | 273.864293250688 | 230.179200974631 | 303.986544460218 |
| SPDEF   | 147.150063462728 | 171.11282933168  | 148.446949168794 | 172.764511709731 |
|         | 269.892633574243 | 155.566065673542 | 158.779261405573 | 129.313576009092 |
|         | 153.865702787334 | 143.035625780446 | 181.277683429417 | 205.830321788612 |
| SPDYA   | 139.522018789485 | 136.156548919515 | 136.198583459346 | 149.182972268104 |
|         | 146.179543599917 | 140.74035966401  | 137.639342727211 | 134.590666885938 |
|         | 133.095245865663 | 140.245786278057 | 137.552979154943 | 142.586051173329 |
| SPDYC   | 152.327247552986 | 141.393814611166 | 134.78059811237  | 120.387275261633 |
|         | 149.462835741621 | 146.696029753123 | 134.901659808633 | 135.873325130921 |
|         | 135.814893730549 | 134.036236880951 | 137.280933631075 | 141.799236109474 |
| SPDYE1  | 128.42287610189  | 134.241917425247 | 141.657167932865 |                  |
|         | 136.749771286979 | 150.508851767517 | 140.232244264861 | 138.855454645579 |
|         | 137.235469802064 | 170.423881865022 | 140.775447163954 | 139.877953680967 |
|         | 138.743505629497 |                  |                  |                  |
| SPEF1   | 162.28074297013  | 132.088335186716 | 174.717158790668 | 171.916201289104 |
|         | 147.284005815059 | 174.375388013694 | 163.764600217347 | 153.358189612307 |
|         | 141.5311434224   | 152.942824158634 | 147.863198012238 | 155.865540894526 |
| SPEF2   | 138.706520278166 | 144.377501600001 | 139.041005010106 | 136.003277940379 |
|         | 137.702036719238 | 132.469190523971 | 133.223310036542 | 139.048016900762 |
|         | 136.19083681188  | 137.563246867433 | 140.451465188624 | 136.684557340005 |
| SPEG    | 160.604195264968 | 144.351763882823 | 177.065616871886 | 165.355764467096 |
|         | 158.679903271595 | 166.422360032182 | 141.046537113211 | 156.822477235844 |
|         | 159.317429821638 | 149.710337205986 | 161.72730923536  | 173.450023117394 |
| SPEM1   | 165.307808075027 | 168.156002330441 | 176.347535860374 | 171.444558905575 |
|         | 154.16370087233  | 168.460095116205 | 162.039394839415 | 160.0697586671   |
|         | 177.457362387052 | 156.774097885381 | 163.607125532236 | 185.140211988926 |
| SPEN    | 961.355625338687 | 1074.19589851599 | 953.099915501575 | 1218.05434595121 |
|         | 864.161191021297 | 665.106631364961 | 717.419388886784 | 912.143424293236 |
|         | 835.284130042504 | 666.204695328096 | 450.327710374141 | 782.448692528135 |
| SPERT   | 120.876732151192 | 115.858924428037 | 117.244895482991 | 116.519527499611 |
|         | 178.200678423426 | 122.664353374047 | 118.797046082278 | 140.683411903185 |
|         | 122.392159083328 | 136.988519762443 | 169.656238760589 | 140.930897231705 |
| SPESPI  | 125.060387518072 | 127.123123583856 | 158.347972566681 |                  |
|         | 125.935071837868 | 125.555029794845 | 133.290168428696 | 245.582279957584 |

|        |                  |                  |                  |                  |
|--------|------------------|------------------|------------------|------------------|
|        | 121.965131419551 | 115.68358702028  | 118.414329128347 | 143.477670915091 |
|        | 178.014057622594 |                  |                  |                  |
| SPG11  | 533.893360199271 | 492.930906036297 | 643.660739343159 | 482.965800108538 |
|        | 364.766154056243 | 433.82566459288  | 872.512754090023 | 542.121375354644 |
|        | 776.98412594767  | 764.493610798958 | 1184.88559645917 | 863.738809424958 |
| SPG20  | 313.412131722189 | 277.596303701405 | 321.426100243434 | 232.830038701628 |
|        | 163.215507313506 | 176.953099943185 | 200.934618257908 | 182.42088387266  |
|        | 172.741890316331 | 169.036409026328 | 172.8993416872   | 219.661502916874 |
| SPG21  | 186.925138700818 | 173.325724300712 | 221.45275440794  | 180.132104305583 |
|        | 226.334672545273 | 265.366632264085 | 305.096320805078 | 235.867149024041 |
|        | 268.698146407497 | 327.89660021611  | 206.186324475847 | 290.502085667398 |
| SPG3A  | 539.008286968106 | 498.965895763801 | 561.858563298512 | 543.710330214344 |
|        | 182.644319628554 | 201.969002368045 | 166.944701842349 | 248.729653566598 |
|        | 221.093229309411 | 252.733973271584 | 291.476113017794 | 304.111808763793 |
| SPG7   | 407.442337662943 | 461.088572554864 | 466.909037277853 | 559.559921312181 |
|        | 499.176926371542 | 452.077434390612 | 493.887026009442 | 475.540659315339 |
|        | 445.089930641391 | 373.290426793366 | 384.365878895439 | 440.579262120451 |
| SPHAR  | 301.546624239855 | 301.49286558088  | 311.269750643358 | 306.277823025572 |
|        | 202.761449711661 | 167.380798617981 | 206.802308105224 | 138.044751228397 |
|        | 175.882911801581 | 183.744959461078 | 235.43707989982  | 200.360518276784 |
| SPHK1  | 143.62315472858  | 144.096048197835 | 123.972321838378 | 138.613373798613 |
|        | 152.670691262738 | 122.139832263188 | 126.890841187249 | 129.985797334276 |
|        | 140.007937555694 | 194.337080066417 | 124.758906471654 | 123.291258843371 |
| SPHK2  | 532.063437013967 | 540.359249705821 | 624.106546150735 | 578.297031096292 |
|        | 2183.18692530644 | 1301.61742965939 | 703.29965727829  | 937.375361806971 |
|        | 1989.38201206555 | 417.731815310276 | 562.387692458382 | 720.077057619735 |
| SPHKAP | 128.179293878252 | 114.14858855653  | 126.203255277356 |                  |
|        | 120.216999784094 | 119.221976571036 | 107.40922161073  | 128.488598467312 |
|        | 117.917454674671 | 117.870230005125 | 126.686404772601 | 137.03111066852  |
|        | 112.851805868467 |                  |                  |                  |
| SPI1   | 163.521095869383 | 152.818046945164 | 135.831453841801 | 173.432960318793 |
|        | 193.871324880919 | 146.84403879162  | 166.32555285213  | 200.264756078778 |
|        | 237.950921053386 | 189.362958041175 | 207.023221559302 | 164.043866642712 |
| SPIB   | 154.345378564437 | 155.974463324915 | 162.416774743901 | 159.997580819443 |
|        | 162.327039624723 | 164.21464602746  | 166.819234137224 | 169.852769679312 |
|        | 199.916301659113 | 146.981521393075 | 154.705630035232 | 152.296774123599 |
| SPIC   | 144.744603095605 | 160.368226341458 | 146.64560446484  | 141.121364213272 |
|        | 143.376817049362 | 173.082167545676 | 161.189717452004 | 154.645353009618 |
|        | 146.351622020606 | 149.393022408213 | 132.122273848715 | 145.7202993771   |
| SPIN1  | 274.343238288436 | 263.707476735938 | 224.497348027469 | 220.92105843037  |
|        | 230.749601687217 | 194.80575419836  | 172.80265044721  | 165.154844613899 |
|        | 195.674128236589 | 200.591916768948 | 291.779980648289 | 181.654319266685 |
| SPIN2A | 139.494962965774 | 136.609461559853 | 138.609972011765 |                  |
|        | 146.097201498811 | 147.442483242063 | 150.84999247088  | 147.255680306221 |
|        | 149.856951631661 | 133.337863400762 | 156.84104238878  | 128.725044326566 |
|        | 147.52178512946  |                  |                  |                  |
| SPIN2B | 136.805379739087 | 132.418902141838 | 143.138613573764 |                  |
|        | 138.002258986172 | 128.140333650496 | 131.736694577111 | 128.033383607545 |
|        | 127.104097294238 | 137.260359343758 | 132.115817176834 | 128.81022558263  |
|        | 134.95415308911  |                  |                  |                  |
| SPIN3  | 232.363656167375 | 211.966139902562 | 256.897177822238 | 227.884445686928 |
|        | 211.995890899864 | 217.910445051307 | 224.6588173737   | 241.867699338253 |
|        | 237.692959394487 | 200.712182818203 | 207.440700355457 | 262.756237406794 |

SPIN4 254.63506290698 258.16437138327 176.176392369178 242.787656836745  
286.506419296679 193.48293264444 174.284268998257 250.885949055834  
196.955723006838 348.98762709818 204.802810257516 217.148957110623  
SPINK1 760.070180572621 3518.84173951107 2105.87438782831  
359.822784070765 28930.8933474342 27667.4034204988 17211.1455384358  
26082.8089351205 26522.0142925211 1292.13921040404 12022.5515181682  
28930.8933474342  
SPINK2 148.26621607986 154.831307586538 170.676752248138  
140.992801405088 168.139351579682 168.358323243918 159.413535577361  
146.70298187005 149.964827055916 142.427198128376 141.186913979346  
146.20028051948  
SPINK4 126.214166842097 111.802672864815 129.007924852801  
111.928204694188 129.722382881611 118.614641349402 119.870661213608  
128.599254558082 122.187031504466 113.504670764963 120.988749021323  
161.481227197715  
SPINK5 171.247946863662 160.411218029114 153.100979553727  
153.377182895472 164.373697447004 160.648791273795 148.785977829275  
182.275998840116 170.931788192825 1358.29475573637 161.010206405916  
171.784981874184  
SPINK5L2 119.842470751496 129.692578787988 129.610980807708  
146.353239460684 119.50754902958 118.167740643871 127.696578575874  
125.787353491408 115.954828435072 133.16868415814 129.561012565141  
121.294366964074  
SPINK5L3 135.255560836581 124.263901299025 144.191491000257  
159.701028026285 152.532083511961 138.084801633774 159.694731358599  
129.267923706188 151.766607453172 149.756512110538 140.120051507626  
144.377501600001  
SPINK6 116.572001618531 129.906744036052 118.126133973555  
118.9952230535 125.598828334465 123.296382913131 126.877293296185  
134.391386851101 127.193553054979 126.611663427876 118.589392612801  
122.368581795931  
SPINK7 119.092335265325 111.826509343353 107.126004317323  
113.256481034259 113.432757764419 119.931415360373 123.603972078897  
128.350073358056 112.036753245281 1096.61874892572 137.127587786536  
150.807308519367  
SPINK8 120.201521341263 133.976997391944 155.62770968777  
127.866992108488 174.92026613834 148.046961712162 146.179543599917  
141.262319193649 147.768191157163 132.509125105338 105.900294919664  
146.301300103564  
SPINK9 138.062345982865 129.286782862113 131.700854556022  
129.226815062589 122.365693072105 124.086902599543 124.019707408094  
129.405749374776 129.253638326633 127.344210958898 142.342811880173  
131.986590029726  
SPINLW1 149.427217345037 157.381401974279 137.429832103492  
141.691135410429 139.995623005154 142.411117330429 148.930073905413  
148.522580898717 139.082897743357 137.977714900989 151.142149775806  
154.722895261876  
SPINT1 131.314766140505 145.709172732805 130.37185420347  
125.754741914111 480.923468806193 240.341031437493 396.611050163857  
221.930333726352 354.840474468573 248.229468372363 328.431289733169  
260.129513331703  
SPINT2 833.841469195516 1319.3522488218 1257.32413345748  
780.961416212309 16397.4527321924 11479.7406150358 7873.0525548049

7054.92270618408 10506.1271023809 4847.77258830631 9293.35991367953  
 6028.67062754577  
 SPINT3 194.529045934216 209.229537873706 189.044966519228  
 200.964306455257 166.784804508647 205.781486117242 180.01471631205  
 178.083311435916 165.031678768564 178.200678423426 179.779007442837  
 185.507663455634  
 SPINT4 123.086596566142 122.592960588642 128.259909378964  
 137.04010227318 139.897320032723 137.681280789305 127.808579455383  
 129.338551879984 132.20764558027 137.220718873614 149.029275579026  
 119.873844587252  
 SPIRE1 1764.53168329081 1608.40826380713 1687.06111969368  
 1699.17470788219 164.478006648035 756.390518977556 619.995008098949  
 197.169703621888 225.065765924246 890.121325723286 191.59400638652  
 213.531307836195  
 SPIRE2 153.293125258215 170.111653122193 146.683594365673  
 124.080382291282 371.819911874273 185.342353172151 178.440907093913  
 348.575690346536 165.163490032007 136.587165242663 373.290426793366  
 231.517412929077  
 SPN 763.880957432979 694.907086612929 484.230510636533 618.661249163439  
 172.376544221034 324.615093103582 221.322724563472 266.468621734455  
 222.005022189667 233.82434521462 260.41082304175 225.64288602828  
 SPNS1 483.549698382115 578.465753476561 475.686805714298 734.71562355687  
 1336.15622439522 1076.62597781124 784.412433571927 761.89271251455  
 743.023225859813 717.419388886784 528.478292835214 491.496499481595  
 SPNS2 179.137734914428 197.582402276079 164.763269377973 163.143613079037  
 311.157764305033 190.947996918605 190.031339775209 208.555506929113  
 275.252966071473 210.33390115739 231.180528071672 167.395369670065  
 SPNS3 142.571259316029 132.659196898439 137.644942697483 133.213697351807  
 161.937384157098 132.22974656114 138.625680450198 144.662545137915  
 158.33974431499 158.679903271595 138.820797333519 159.334165651951  
 SPO11 144.494401248678 130.574019477669 144.160494362602 137.499290547619  
 138.601616246182 146.71868686671 148.895841777421 139.97127025207  
 143.950279111815 139.690093593646 149.710337205986 146.503431281242  
 SPOCD1 163.863677822465 178.751706380632 135.822022526034  
 130.933379257307 233.07015384759 295.099840299681 3024.62888503536  
 214.241635800083 141.592180897595 217.89028736436 1794.82283439196  
 2775.84742592713  
 SPOCK1 465.926873285563 368.374002925137 496.426739836535  
 413.863345223345 183.056707813352 174.313718712035 325.96632528242  
 263.64863646012 173.017662861015 215.300064529551 515.729905361375  
 210.590774758661  
 SPOCK2 170.040914594182 208.838523729744 202.662466141301  
 187.196424491482 296.553550946307 248.403014089812 381.867665449509  
 540.797164107185 976.782815449208 245.997705723007 351.998551165704  
 237.312766830206  
 SPOCK3 143.00932329728 154.737117718424 139.278366709094  
 147.587100090547 129.419280058541 116.91470505098 165.327972973978  
 133.231066635063 143.294217840279 120.114423236962 148.989286668424  
 143.030777754448  
 SPON1 2416.49806112207 1912.2369374258 1934.30779703747 1751.22580157752  
 275.101766414328 290.541184606565 167.07092218037 284.715092831843  
 516.177596584059 285.83626978316 155.737364431382 201.139510041141

|        |                  |                  |                  |                  |
|--------|------------------|------------------|------------------|------------------|
| SPON2  | 260.224777636733 | 242.570588364106 | 156.095520355029 | 313.480307434343 |
|        | 141.722817732641 | 117.112667504781 | 115.718600552187 | 127.044367488881 |
|        | 157.848456517169 | 186.156006020985 | 117.847744476387 | 124.362182111222 |
| SPOP   | 3963.40575974446 | 2905.12297639092 | 2242.73511149559 | 3810.98043907046 |
|        | 411.878556907186 | 558.810095726517 | 665.936368667321 | 742.128229715198 |
|        | 810.769136227155 | 477.87583927675  | 760.272612245092 | 573.509780150018 |
| SPOPL  | 252.789376168324 | 231.018059960001 | 286.376638135463 | 221.070448906398 |
|        | 174.168079247768 | 306.896732729554 | 206.915239638443 | 225.142823691625 |
|        | 216.277178481058 | 197.687858915757 | 246.237243726748 | 265.110264596425 |
| SPP1   | 174.988886541341 | 172.722177339418 | 159.79463502085  | 145.643752002787 |
|        | 266.842778974988 | 224.062024091915 | 541.896444696137 | 376.124744806171 |
|        | 441.873247266342 | 1421.72388964898 | 421.836020491624 | 332.194163016646 |
| SPP2   | 134.694911833015 | 144.077080621909 | 149.759516805355 | 156.964080041261 |
|        | 142.05051822522  | 139.684141478459 | 148.086979061158 | 144.468333012278 |
|        | 137.850437814788 | 144.664600892248 | 124.922004609558 | 143.096097305398 |
| SPPL2A | 482.344514972063 | 537.828979447378 | 420.647394044431 |                  |
|        | 355.443758121675 | 1239.66725147648 | 652.826023701545 | 1035.0797237176  |
|        | 878.520681466946 | 1022.11537745428 | 822.88742008931  | 654.305724263754 |
|        | 1047.78978081493 |                  |                  |                  |
| SPPL2B | 156.392603045231 | 165.537853089052 | 147.722646851008 |                  |
|        | 189.726075394359 | 186.06425658259  | 164.011683602245 | 177.055023182887 |
|        | 165.82215325714  | 166.77329045424  | 169.482586449402 | 168.668125438154 |
|        | 160.773510498005 |                  |                  |                  |
| SPPL3  | 189.142295015168 | 224.963277964548 | 199.397633942623 | 221.796935051107 |
|        | 192.767155566493 | 228.45211887819  | 239.649306804266 | 168.483273292464 |
|        | 203.389294254141 | 211.357321758564 | 212.571491543077 | 219.151144724168 |
| SPR    | 393.115606440229 | 417.615521090665 | 444.712990986138 | 514.124012546829 |
|        | 1001.35912007916 | 515.929937825133 | 427.249733213787 | 423.256021602613 |
|        | 237.989479738133 | 264.628012152168 | 372.94852645418  | 298.625127845168 |
| SPRED1 | 931.325266360957 | 943.23069404564  | 569.47446215213  |                  |
|        | 741.255013151687 | 572.262848718437 | 726.346459754217 | 514.124012546829 |
|        | 283.014222473749 | 408.444629429553 | 686.923164688096 | 251.704037951295 |
|        | 778.846928848361 |                  |                  |                  |
| SPRED2 | 210.692705153337 | 226.114369645703 | 180.070209705044 |                  |
|        | 193.912456093767 | 289.164969943385 | 315.828726297864 | 338.585771590234 |
|        | 342.037040881785 | 263.426870776148 | 199.88618355278  | 369.373283422151 |
|        | 423.826189747546 |                  |                  |                  |
| SPRED3 | 140.667415746111 | 144.281217246178 | 141.735123971775 |                  |
|        | 143.001661958814 | 144.886005815977 | 142.906227759701 | 140.818413826758 |
|        | 134.990075720145 | 136.003277940379 | 130.714375454354 | 141.204458186976 |
|        | 149.99203906203  |                  |                  |                  |
| SPRN   | 154.681604647652 | 143.464614171516 | 147.922706629104 | 163.51024840263  |
|        | 145.198638080646 | 145.998177732093 | 150.854580568572 | 147.980827857138 |
|        | 137.670655293096 | 172.020235319192 | 144.432181150583 | 140.77762487941  |
| SPRR1A | 208.080089376299 | 494.875547886209 | 233.20900339048  |                  |
|        | 311.208703262497 | 18665.5217411582 | 1214.77298621465 | 457.779218916808 |
|        | 8182.20106181946 | 2291.40912229281 | 29162.1093037754 | 1707.09830463606 |
|        | 240.12078342024  |                  |                  |                  |
| SPRR1B | 143.127795310829 | 166.257275241937 | 145.06205326107  |                  |
|        | 146.264686158155 | 748.38293089716  | 185.30916081621  | 149.483826392464 |
|        | 377.27961559752  | 193.394225360968 | 15561.8923517816 | 285.131244588624 |
|        | 182.508415915215 |                  |                  |                  |
| SPRR2A | 137.514952067562 | 148.387171320858 | 144.589482298525 |                  |
|        | 177.679330300381 | 183.83720937589  | 152.049243916141 | 156.859539612504 |

142.217762896203 132.061436165754 13479.8546809758 246.492735271771  
164.763269377973  
SPRR2B 125.67874617392 124.336297973344 122.527517633626  
111.055738573603 112.629266772219 121.138461509096 117.212164526913  
124.300285428221 117.815045605383 280.170464338141 143.544671705984  
120.644987579644  
SPRR2C 115.392989580183 113.09980008288 107.431455226979  
109.680532131035 117.688941284427 108.62191665589 114.093935026467  
126.915338864323 111.000303209442 1438.33289891548 138.897393621114  
101.713609383766  
SPRR2D 147.642693777383 143.565597315289 161.229621453539  
162.54008293513 155.911387663464 147.385714746214 160.799950553311  
147.77581925435 189.693218759349 5347.78127066964 168.50246276469  
143.066552389513  
SPRR2E 134.734429133481 134.314636524922 123.178049594968  
118.547605249191 139.214589768245 134.202497785854 127.720117789235  
132.518394343751 131.753135000312 3298.73393277409 162.961792330623  
135.038195181839  
SPRR2F 134.759283147919 153.184575380093 144.499680685194  
148.192121257421 186.447049658314 140.567565996849 145.889336010424  
156.779004465552 161.708130705995 12615.8332290932 338.739180103373  
140.885012530186  
SPRR2G 118.604395992281 115.5765427629 100.841352336505  
117.716094828779 114.358099210532 111.908965758799 108.570463496052  
116.082361389405 127.537152847147 1131.96129284658 117.218616752346  
112.736231367296  
SPRR3 117.212164526913 177.93138555339 131.804952187685 117.555999801887  
383.583234619781 366.007451523992 311.157764305033 2462.87034563426  
237.078644686891 15116.95436573 438.146919555296 123.943080151532  
SPRR4 134.386109951859 135.798387504219 127.771225410866 133.702845956639  
154.604363252526 139.232893342069 137.27506604142 124.632373951797  
131.785053503951 159.298815559223 145.431393142782 134.932416370825  
SPRY1 1273.6393529108 1382.12750708801 571.838717184447 1048.26872286983  
296.375305136807 861.119262963015 459.53652431464 382.069677030369  
404.726926716133 385.317560758502 325.570839576032 360.361719991381  
SPRY2 1029.09818399518 1226.74043569231 626.298707790229 1231.37475540937  
254.065327837176 535.49374437073 567.869601934138 295.463118191589  
498.334266735594 290.802509012089 815.779445689417 516.892850913889  
SPRY3 123.410467384598 123.403099206878 118.006338536085 116.335864439545  
115.550587451456 105.221735747452 126.623026026721 117.112667504781  
120.543881800775 115.834056091815 139.018588215263 123.798513338021  
SPRY4 178.684992551017 189.853136769155 150.933724024651 177.267145265362  
177.296424297967 189.872997882033 159.138344477256 154.248226423862  
171.426334687626 205.950347620158 198.023465629218 187.769988580599  
SPRYD3 808.300067805897 835.834013018438 923.130629121442  
1114.10687039922 783.755776589969 371.168752104821 540.359249705821  
559.899430596368 701.208391798006 552.790706181938 683.470866056244  
563.339837352678  
SPRYD4 164.116142541038 177.652022895288 179.432235153344  
172.230528631803 339.448524400708 178.320732186309 241.168936008174  
180.881464829981 200.405532717305 209.304654633004 231.63127072986  
284.351529744475  
SPRYD5 143.157807632147 140.401508808129 127.255966406144  
127.946346172549 130.195234920895 141.180647782041 139.054140295282

|         |                  |                  |                  |                  |
|---------|------------------|------------------|------------------|------------------|
|         | 133.402515225624 | 140.938442055097 | 140.845958602151 | 195.316077537716 |
|         | 138.049846456876 |                  |                  |                  |
| SPSB1   | 395.425715632302 | 460.651156484562 | 343.617417488962 | 405.843083758177 |
|         | 308.767036855508 | 218.08515867102  | 281.996583337694 | 247.504198063293 |
|         | 324.671490117952 | 311.10841853984  | 232.363656167375 | 230.399207047948 |
| SPSB2   | 197.795275907042 | 206.89716102989  | 174.149718758884 | 209.960795065047 |
|         | 572.548647437438 | 151.473239782301 | 318.850765099332 | 218.031238893075 |
|         | 197.848577663238 | 181.832218001701 | 188.40383184521  | 186.1961391235   |
| SPSB3   | 792.101559967381 | 912.878077940014 | 1333.73334006986 | 1059.80292026589 |
|         | 1222.59895569348 | 1252.28642463619 | 938.499337889075 | 1255.02720867812 |
|         | 1266.53539318831 | 1220.30347076968 | 1186.96351738518 | 936.221322010828 |
| SPSB4   | 124.42747321736  | 128.662039886682 | 102.786517901308 | 116.258629237662 |
|         | 119.312201620247 | 118.773864607553 | 112.949643549398 | 123.638001112969 |
|         | 121.177681858671 | 122.615852682436 | 134.12948758412  | 115.507474401239 |
| SPTA1   | 133.184279519985 | 139.328340242696 | 119.319884675074 | 132.177829138863 |
|         | 141.476041451832 | 161.019770036957 | 143.074187168031 | 145.095023408224 |
|         | 136.028011201077 | 130.408519735001 | 140.805322576253 | 149.154586195586 |
| SPTAN1  | 1313.89440013246 | 1382.95068105649 | 863.738809424958 |                  |
|         | 1862.88548451154 | 506.029788151779 | 302.768870633398 | 304.479999301061 |
|         | 388.966303073519 | 290.135914275115 | 306.068269136821 | 714.274201838067 |
|         | 346.411586524655 |                  |                  |                  |
| SPTB    | 118.424520312293 | 118.126133973555 | 115.907902010701 | 114.265920150451 |
|         | 114.10470841717  | 119.168045349254 | 111.584425166104 | 123.141928612324 |
|         | 120.270397272069 | 116.07902130325  | 125.038427667173 | 119.578240680666 |
| SPTBN1  | 840.623505494489 | 952.724512915813 | 468.93543246394  |                  |
|         | 771.059329972125 | 212.890259409988 | 205.381840116054 | 190.098509544816 |
|         | 263.888891822857 | 224.361277033882 | 282.719121652073 | 197.762169504041 |
|         | 241.019436415703 |                  |                  |                  |
| SPTBN2  | 165.192945734166 | 158.483006541613 | 173.329939140886 |                  |
|         | 161.906823008445 | 181.550597645633 | 162.216377983292 | 161.930142040623 |
|         | 165.160977512574 | 156.926617030752 | 164.541417588646 | 161.683243808528 |
|         | 160.050872656883 |                  |                  |                  |
| SPTBN4  | 162.668896609848 | 163.741411769369 | 168.477388641982 |                  |
|         | 183.181125586276 | 148.527528612375 | 145.371273337639 | 159.694731358599 |
|         | 156.907788377794 | 149.049931380459 | 148.072816925413 | 151.543678860049 |
|         | 150.048431572712 |                  |                  |                  |
| SPTBN5  | 124.568534983277 | 126.84966022925  | 138.726894569892 |                  |
|         | 119.486895914055 | 144.256029338053 | 118.601228886344 | 113.919529047225 |
|         | 142.509635237928 | 137.458274418943 | 139.403087367992 | 171.61704153463  |
|         | 140.431591727649 |                  |                  |                  |
| SPTLC1  | 3721.86725798812 | 3490.77593331727 | 3342.8737952486  |                  |
|         | 3184.98944679038 | 657.058213650454 | 3598.30438198858 | 1595.22997714906 |
|         | 2376.52728883131 | 1836.22560264874 | 1712.47877322331 | 2410.32095582515 |
|         | 1868.82736251524 |                  |                  |                  |
| SPTLC2  | 151.054834307689 | 179.198164545975 | 160.090914414578 |                  |
|         | 144.96021415188  | 162.766038656637 | 159.801315111886 | 191.284275676256 |
|         | 182.969563278473 | 172.758230728437 | 195.577739376082 | 284.675990197899 |
|         | 215.967319486874 |                  |                  |                  |
| SPTLC3  | 153.703682621695 | 138.058404474114 | 154.918405633244 |                  |
|         | 147.055213172078 | 168.427124752461 | 182.810581377888 | 165.67554738735  |
|         | 177.355210393749 | 225.275049011909 | 206.937770272939 | 160.892163220381 |
|         | 190.76537287329  |                  |                  |                  |
| SPTY2D1 | 280.749681050778 | 253.538171006307 | 258.16437138327  |                  |
|         | 220.876114717642 | 169.422015793848 | 252.404931238338 | 216.457866890673 |

|          |                  |                  |                  |                  |
|----------|------------------|------------------|------------------|------------------|
|          | 269.62298406345  | 230.749601687217 | 334.316711893654 | 249.029098902357 |
|          | 181.036375971015 |                  |                  |                  |
| SPZ1     | 127.427014611349 | 114.504409331018 | 129.43892498257  | 102.421174406474 |
|          | 118.298444816712 | 107.714294216913 | 112.884916986215 | 121.908945872994 |
|          | 113.119021336236 | 117.093818506721 | 133.78629612147  | 125.666013736767 |
| SQLE     | 212.223906015932 | 210.925203743958 | 185.046826969912 | 185.997327421952 |
|          | 515.729905361375 | 343.346755862776 | 346.411586524655 | 458.440488401029 |
|          | 607.499206410372 | 1046.65224316733 | 387.617166711971 | 444.479355480138 |
| SQRDL    | 228.901579068997 | 228.125521373477 | 223.220997990627 | 234.214191437687 |
|          | 160.27511502306  | 174.006516433854 | 189.136114953249 | 217.560691345072 |
|          | 262.233918187791 | 421.459312180809 | 199.288100834476 | 186.309367281625 |
| SQSTM1   | 6077.64695330731 | 6460.4291301245  | 10579.8650348916 |                  |
|          | 7681.48027081818 | 7992.84111657183 | 3258.07532987071 | 7104.65816621275 |
|          | 7218.21759302518 | 8739.02966610274 | 7786.96143641382 | 3706.41283595794 |
|          | 3938.94050658589 |                  |                  |                  |
| SR140    | 414.797416270335 | 313.248029961291 | 479.053300726301 | 260.224777636733 |
|          | 268.454310218604 | 374.761007556839 | 713.525134497596 | 350.803378042804 |
|          | 702.265884752474 | 507.137104111742 | 372.594990024312 | 663.668537495345 |
| SRA1     | 234.789040617681 | 251.414717011661 | 251.959823608766 | 250.515579402334 |
|          | 211.419445018736 | 192.804447792672 | 191.525291860022 | 192.640717683236 |
|          | 191.543371466252 | 250.139061165593 | 186.679199600379 | 182.292947734054 |
| SRBD1    | 267.589020526148 | 280.170464338141 | 279.834616502591 | 298.403224729528 |
|          | 256.964577037118 | 271.468939477052 | 206.571433405844 | 271.568797887976 |
|          | 298.256131536504 | 240.915496717526 | 249.858562350415 | 258.489608621438 |
| SRC      | 451.985108262982 | 490.022369664024 | 325.642275889649 | 594.92419264579  |
|          | 1299.4782626583  | 782.448692528135 | 983.094485868275 | 416.933146258428 |
|          | 488.505191823403 | 204.396576475753 | 603.338538383128 | 539.008286968106 |
| SRCAP    | 174.483233557264 | 192.273528391588 | 198.568180234676 | 200.322334039458 |
|          | 231.915272112361 | 177.84188738734  | 175.891947478891 | 152.898148619937 |
|          | 162.233096422572 | 205.765822478178 | 185.673549367125 | 159.046016068252 |
| SRCRB4D  | 124.124076599417 | 133.757741295765 | 129.920586100555 |                  |
|          | 127.622397233692 | 109.924867620862 | 130.34939602913  | 126.599418127637 |
|          | 123.395897439193 | 124.892438890234 | 116.59404046487  | 120.041623078295 |
|          | 124.542879928448 |                  |                  |                  |
| SRD5A1   | 155.625320865565 | 168.443386067427 | 154.046550866249 |                  |
|          | 168.132172570809 | 234.063633889254 | 180.733673680261 | 215.718714189719 |
|          | 260.591336959281 | 180.468984099647 | 243.441938832251 | 168.958694643382 |
|          | 174.775676782795 |                  |                  |                  |
| SRD5A2   | 125.052770277549 | 138.836422729663 | 140.058153633802 |                  |
|          | 127.123123583856 | 134.401733295755 | 134.460035654795 | 135.99579763634  |
|          | 153.681775929182 | 116.802432258299 | 143.558088035758 | 137.701271351806 |
|          | 122.54127694717  |                  |                  |                  |
| SRD5A2L2 | 123.219903763265 | 134.432461986523 | 126.643229085068 |                  |
|          | 130.770335966929 | 128.411138850655 | 125.865974180252 | 126.473768158566 |
|          | 118.540620928268 | 122.005340508177 | 122.514826802737 | 144.32655838488  |
|          | 124.174140125309 |                  |                  |                  |
| SRD5A3   | 129.842252702648 | 157.04599638368  | 141.010588053284 |                  |
|          | 129.417232210341 | 179.358460170348 | 153.121693371757 | 158.384505840662 |
|          | 228.739556788924 | 153.95855605751  | 165.627852733455 | 152.599052194143 |
|          | 146.595540577994 |                  |                  |                  |
| SREBF1   | 225.75155298452  | 225.61275910008  | 182.165681034082 |                  |
|          | 273.911741951291 | 586.642581067137 | 145.889336010424 | 250.085444708918 |
|          | 297.332272659995 | 312.645778869254 | 305.16668987495  | 340.800632878807 |
|          | 258.348298226232 |                  |                  |                  |



SREBF2 158.316173597874 173.082167545676 160.078122267577  
178.885625009973 173.440596296333 156.818197172306 177.182321788711  
172.568852318369 163.616115299926 165.411052799773 181.157738347957  
183.619184925353  
SRF 3843.07094386605 4309.86375945008 3757.39261544326 6296.24208225227  
1266.53539318831 1355.66237447026 896.625415670455 893.676600121113  
975.315904185938 968.157701932137 613.846166856328 850.125434374005  
SRFBP1 229.130679600654 255.374689750672 189.685949591531  
220.661922683143 205.930921729192 288.370985514978 267.800523478098  
216.126000558319 202.909188070184 263.936023499588 280.453895029319  
286.506419296679  
SRGAP1 360.124745133393 374.033009122079 280.494088228226  
331.251075774227 238.654367531982 248.531972733475 222.086635504858  
427.872407051254 208.64349688412 193.674681547989 197.262062021667  
190.309453030884  
SRGAP2 146.146800933028 140.898380345452 142.316441155937  
143.931400351525 151.973681370675 149.196539425588 148.945466917496  
152.913814113632 156.357126871243 143.165150890885 157.288308753975  
145.068754246476  
SRGAP2L 169.860061216981 165.866987051333 142.005703694973  
143.455941298415 139.636177212128 146.457939801041 158.007926822094  
170.801761175916 147.125005489393 157.328404229451 153.083451626042  
148.570769470645  
SRGAP3 183.302479730653 186.021181691517 185.997327421952  
152.286545050749 151.698385134218 144.615156175885 165.964183460825  
237.191866335979 174.161146689117 156.307551403822 171.238423077347  
178.661439148013  
SRGN 610.915977337787 557.702374840532 491.635435224507 377.27961559752  
223.747350951099 1442.11349373764 442.220572301795 1215.96648642927  
1561.87054049124 1076.62597781124 361.687156919012 425.001043358831  
SRI 257.477501542521 245.675725760577 268.454310218604 227.033342447929  
393.914413372142 543.389747823877 622.834462068316 388.002365247498  
270.568660560796 253.164596735793 383.74357557363 558.251384152474  
SRL 191.297539967707 257.292125083248 163.134784474437 399.364160668615  
158.420821486138 154.632563476364 140.058153633802 155.785933672918  
151.751963310212 154.229914729772 137.429832103492 146.927825526831  
SRM 390.372738176917 402.026356201632 287.656436278551 583.619362840814  
1063.5903770389 476.076903428247 257.075088169589 331.684298221133  
458.440488401029 341.251360936154 297.609793563225 413.502150181875  
SRMS 127.242627779136 130.737690721877 119.237802375552 121.072192130078  
131.081793789906 117.097159106043 124.036907709461 123.159407368236  
114.995889945366 116.70650322987 134.086301127594 118.93828679356  
SRP14 2253.7522632414 2043.73482086765 3270.88476148156 1931.16906839143  
873.408431189194 2712.07480130502 3447.19587767281 3083.98169220838  
3226.53426370323 3052.86038628748 2760.57475805426 3294.92439159154  
SRP14P1 2168.58813300343 1944.15673951528 3528.62443098065  
1680.25851465727 858.524630425687 2449.76376608893 3298.73393277409  
2430.70635781622 3122.71790981947 3262.24877138481 2767.77385345718  
3450.46728258139  
SRP19 685.620637807134 710.76653239801 514.124012546829 599.52440136406  
509.702881232139 662.958637409597 951.772948602094 729.729297413233  
640.029195821436 1136.14069801696 696.475639532595 937.375361806971

|        |                  |                  |                  |                  |
|--------|------------------|------------------|------------------|------------------|
| SRP54  | 575.722713461982 | 533.140740560189 | 616.523853569261 | 430.329437928013 |
|        | 545.362650746876 | 1174.0922389136  | 592.079898463345 | 856.039380523678 |
|        | 657.231047829537 | 730.042712083388 | 783.059427015955 | 734.97763567765  |
| SRP68  | 683.861021234927 | 748.161769171818 | 890.507257588957 | 842.567990276734 |
|        | 482.739666411407 | 603.764427348016 | 829.992212133165 | 731.284098301795 |
|        | 774.180202250076 | 596.934339406636 | 568.935113269368 | 1071.83063260499 |
| SRP72  | 326.83982672544  | 409.477576085245 | 380.146996799549 | 338.665115108128 |
|        | 346.173614351499 | 521.714719320355 | 601.401329244185 | 580.996071040561 |
|        | 707.404709303506 | 669.330078861673 | 599.208370337812 | 538.647888236878 |
| SRP9   | 1346.53215685106 | 1411.90426595229 | 1556.41573079892 | 1177.70376288106 |
|        | 1696.69982157582 | 3721.86725798812 | 2635.31067044245 | 2037.96470181871 |
|        | 2456.36776585765 | 1689.00127592755 | 2605.13680290987 | 3921.67860557329 |
| SRPK1  | 323.51769984082  | 375.038561820137 | 373.290426793366 | 337.87475687838  |
|        | 641.338900241674 | 1431.52979384867 | 1116.19403476786 | 938.918431240228 |
|        | 747.804958601763 | 721.603421985572 | 1131.22418479945 | 1183.82018168635 |
| SRPK2  | 203.004815689972 | 186.04763660516  | 224.805404798696 | 179.551640851353 |
|        | 179.49202902995  | 247.08460296705  | 391.252450588331 | 230.855806094267 |
|        | 189.539458686123 | 333.270203737291 | 306.387898121409 | 433.189221987242 |
| SRPK3  | 208.194788326109 | 194.921021761976 | 164.870860592068 | 244.596233138747 |
|        | 126.544685937984 | 130.732397679661 | 112.957395064957 | 131.863018503922 |
|        | 121.344724993789 | 113.572326615571 | 124.933738341123 | 117.706795566317 |
| SRPR   | 309.580750386386 | 329.214958614925 | 302.381946749711 | 357.259935567823 |
|        | 718.670564185576 | 275.609716327452 | 401.584032365337 | 392.539157974899 |
|        | 449.304281526081 | 290.914381066573 | 335.3366819308   | 349.054741747798 |
| SRPRB  | 599.735180191091 | 625.374595058488 | 474.517750753745 | 566.647927867646 |
|        | 737.42784787426  | 721.11578916385  | 615.88518704181  | 811.144838166905 |
|        | 939.213447046823 | 731.848844821402 | 519.940347384877 | 672.637760135254 |
| SRPX   | 2703.76111776248 | 1957.48508632607 | 1449.33679383001 | 1332.11815966955 |
|        | 125.073353210914 | 190.111477641308 | 155.069048442532 | 231.769926214655 |
|        | 262.629961694573 | 352.50679573356  | 154.127346849182 | 148.980330875743 |
| SRPX2  | 310.598930734244 | 303.638516587721 | 268.370347292603 | 309.181150342727 |
|        | 299.851173200352 | 200.668298229815 | 568.701661112562 | 188.605328108654 |
|        | 220.896363324634 | 289.368511254335 | 923.130629121442 | 388.002365247498 |
| SRR    | 165.267693285882 | 182.130970182242 | 189.915720614467 | 177.812335593522 |
|        | 141.715307041887 | 159.374355553219 | 128.402511355513 | 147.815673580657 |
|        | 140.54700821058  | 132.524377835171 | 154.876638004094 | 133.175265384038 |
| SRRD   | 267.747633122387 | 253.049869714368 | 252.919704128539 | 258.605188272761 |
|        | 277.539110964815 | 361.082957133644 | 338.934501259414 | 279.159925913207 |
|        | 296.553550946307 | 309.538690289233 | 294.697622870418 | 270.847923557176 |
| SRRM1  | 1496.0924333403  | 1359.63626195826 | 1465.2419150392  | 1079.58110075176 |
|        | 1692.01248523526 | 1780.97169244555 | 1466.82170436229 | 1707.09830463606 |
|        | 1454.94889750152 | 1190.62010668045 | 1347.75629878765 | 1800.25771851544 |
| SRRM1L | 233.335353447342 | 210.852300463808 | 275.609716327452 |                  |
|        | 191.651818696629 | 246.676401619881 | 290.420307322101 | 280.656087497806 |
|        | 237.854774190873 | 247.145700155364 | 236.251507822415 | 239.12905945808  |
|        | 262.416137698884 |                  |                  |                  |
| SRRM2  | 4150.8511719558  | 3833.73632806344 | 3396.40593844715 | 4373.91897463938 |
|        | 2437.63566094439 | 1894.14699530855 | 2185.46850787298 | 2068.04582900231 |
|        | 2856.14739820295 | 2466.36457617864 | 2637.62596741408 | 2261.31473132315 |
| SRRM4  | 116.796995589816 | 114.987285062108 | 108.179513318734 | 112.179019393947 |
|        | 112.126521532091 | 119.427342766092 | 116.061356450855 | 110.718864165172 |
|        | 120.706421084476 | 118.703108284564 | 112.227434965199 | 116.106772298898 |

|        |                  |                  |                  |                  |
|--------|------------------|------------------|------------------|------------------|
| SRRM5  | 140.290598244169 | 144.615156175885 | 137.624217507306 | 129.320210774045 |
|        | 146.293735120772 | 147.728018766726 | 141.266129417042 | 136.759322361584 |
|        | 151.433634564939 | 141.432461374482 | 162.140112952434 | 138.601616246182 |
| SRXN1  | 349.816819166182 | 313.351441953859 | 331.937313503755 | 353.674560414317 |
|        | 492.637241687561 | 479.638653311025 | 278.142283306934 | 317.457588721567 |
|        | 302.847274046748 | 483.429488817674 | 275.888299685521 | 356.413190087706 |
| SRY    | 128.872496485403 | 129.83316008718  | 123.720229113779 | 136.154522071917 |
|        | 124.833659452957 | 120.493082096235 | 113.832885222354 | 117.274977920103 |
|        | 139.258468432364 | 123.735827460404 | 131.986590029726 | 119.911515364639 |
| SS18   | 376.692422468905 | 357.928880740814 | 358.092809491843 | 368.0573385048   |
|        | 233.272000923172 | 360.39998507367  | 339.598452080917 | 407.615019710707 |
|        | 378.037190077449 | 378.509324619452 | 427.084392965651 | 382.327656839936 |
| SS18L1 | 291.577778800314 | 241.599271777806 | 237.734385188542 |                  |
|        | 227.52352046188  | 224.92725876841  | 435.983803453746 | 307.982260548106 |
|        | 265.919002666885 | 275.755038921952 | 209.74583569369  | 307.665281863258 |
|        | 300.793542873709 |                  |                  |                  |
| SS18L2 | 1200.94425675913 | 1412.56164938199 | 1043.14253624883 |                  |
|        | 1051.98943987926 | 3073.40543048878 | 3522.61692270848 | 2206.7447886564  |
|        | 2033.67956299225 | 2947.51998516453 | 1731.62376348283 | 1785.92695250894 |
|        | 2392.93562797606 |                  |                  |                  |
| SSB    | 480.593729033799 | 500.643499051523 | 545.566596665916 | 451.718912714608 |
|        | 592.822841077599 | 685.848203651889 | 551.622587349813 | 641.645855499704 |
|        | 484.028175202673 | 561.062594540005 | 681.591028334969 | 687.269774217064 |
| SSBP1  | 1003.36623972843 | 1035.98574557331 | 1357.48791782399 | 852.099019968701 |
|        | 1242.61637859159 | 1982.3154578939  | 1804.63762008613 | 2081.45603839306 |
|        | 1775.32632165475 | 1858.12855367119 | 1169.43742964112 | 2915.72823797537 |
| SSBP2  | 592.822841077599 | 481.238450505207 | 574.6506349984   | 537.419316887523 |
|        | 199.837938317725 | 179.704370382771 | 344.487982154705 | 191.25724234927  |
|        | 196.226732738526 | 407.760503937821 | 196.245297362955 | 210.960900130785 |
| SSBP3  | 229.046153362151 | 240.836979012241 | 219.422260093722 | 236.251507822415 |
|        | 224.089220507176 | 194.430896269275 | 181.922907273871 | 189.589053840976 |
|        | 174.229093061024 | 183.013090662119 | 171.051948060796 | 162.039394839415 |
| SSBP4  | 230.201464318433 | 234.399431238026 | 191.405362404386 | 259.316557834724 |
|        | 394.414934831535 | 347.866264631778 | 245.915473236403 | 288.436880408624 |
|        | 243.441938832251 | 205.830321788612 | 316.081825144651 | 426.896707161414 |
| SSFA2  | 213.634295832535 | 186.077477713775 | 236.833653794223 | 158.064409011013 |
|        | 149.883237874886 | 265.110264596425 | 158.799917136119 | 164.824914851636 |
|        | 180.354899434843 | 332.082749517913 | 167.958792571511 | 180.022646625687 |
| SSH1   | 202.524668687686 | 188.348499229585 | 220.92105843037  | 200.486683704179 |
|        | 172.457165477145 | 147.796610216375 | 204.260800563197 | 158.503284955019 |
|        | 168.52952604693  | 164.299585578035 | 235.372592051464 | 208.690347128273 |
| SSH2   | 236.191384383802 | 277.000882284125 | 232.801257700571 | 262.139211406599 |
|        | 370.466403181536 | 224.274329367512 | 270.520229426015 | 566.647927867646 |
|        | 396.988248940183 | 254.879772480457 | 273.073938260793 | 280.913748398876 |
| SSH3   | 289.001004912528 | 369.78624104057  | 408.7151485563   | 308.208276315292 |
|        | 1571.87128697931 | 1163.13845502757 | 1975.83062789692 | 734.71562355687  |
|        | 699.06539333455  | 868.86246684338  | 2285.86163259073 | 2222.16226526877 |
| SSNA1  | 401.189904619902 | 373.452370692334 | 369.275635424092 | 505.302263971007 |
|        | 860.315938621256 | 442.86942574917  | 308.148212607944 | 358.092809491843 |
|        | 411.359106929985 | 468.339735327273 | 708.056533282983 | 302.1846598234   |
| SSPN   | 2236.73950603157 | 1876.64079464928 | 1452.63736288691 | 1562.9779683714  |
|        | 263.845733455915 | 238.183096218311 | 206.89716102989  | 335.858047332641 |
|        | 186.866029149035 | 190.189217962555 | 373.893428804488 | 307.728083981504 |

|        |                  |                  |                  |                  |
|--------|------------------|------------------|------------------|------------------|
| SSPO   | 145.544996009633 | 142.728311130348 | 126.563876945046 | 144.892454033336 |
|        | 145.498372398845 | 133.667852983262 | 140.957024692542 | 155.878493935166 |
|        | 142.397433929092 | 135.453399741892 | 127.898533598679 | 146.84403879162  |
| SSR1   | 599.52440136406  | 619.223672253014 | 574.896304593109 | 488.379057110543 |
|        | 651.759589129833 | 1083.26599217847 | 998.157643452741 | 769.34961339184  |
|        | 793.071192619058 | 1029.09818399518 | 685.080426814888 | 1091.12493937368 |
| SSR2   | 340.728888109597 | 299.717935831288 | 451.887564294551 | 291.020789939476 |
|        | 574.896304593109 | 905.233241047678 | 624.106546150735 | 798.943242964857 |
|        | 636.048536814356 | 406.736165197168 | 507.040326298457 | 757.406530000489 |
| SSR3   | 152.925281215593 | 167.139257044999 | 197.543089645432 | 154.611011734772 |
|        | 152.131804134092 | 164.905467905433 | 197.51109998167  | 215.698924670416 |
|        | 218.334273320319 | 188.0434100445   | 206.89716102989  | 193.930569647995 |
| SSR4   | 1522.87703817058 | 1562.9779683714  | 1372.85779994364 | 1460.24985399013 |
|        | 6460.4291301245  | 5846.17594234628 | 4262.23145131525 | 4682.62607750437 |
|        | 3890.14358014877 | 2157.50118108142 | 3396.40593844715 | 4536.46344538492 |
| SSRP1  | 262.53374754047  | 282.511614929917 | 302.362619893594 | 336.981561928411 |
|        | 369.513420606401 | 412.344820823968 | 307.518881119091 | 277.180850774168 |
|        | 286.901115411673 | 277.073510273425 | 280.292616101827 | 314.126706052299 |
| SSSCA1 | 144.710613442383 | 153.005366371425 | 132.751406897891 |                  |
|        | 141.474583706011 | 272.456310079164 | 175.543924200429 | 188.74403596953  |
|        | 142.688809469455 | 149.016767620428 | 199.101099226668 | 155.794309652357 |
|        | 160.43939815269  |                  |                  |                  |
| SST    | 134.790410101679 | 124.710368327189 | 142.919910421524 | 132.052428537192 |
|        | 4651.384971332   | 125.005019889478 | 191.056705282378 | 135.274205069488 |
|        | 144.062079886084 | 150.624740697168 | 121.728711587014 | 146.840735518984 |
| SSTR1  | 141.907307422968 | 144.886005815977 | 146.557058433232 | 130.728465509213 |
|        | 125.574201687659 | 132.981346767415 | 131.302225305148 | 128.978197156274 |
|        | 126.659859384257 | 127.715766031466 | 127.644315207178 | 134.585762409782 |
| SSTR2  | 2452.1304336603  | 2837.36293710422 | 2141.855356411   | 3664.38955037715 |
|        | 326.703488388966 | 1178.08490218853 | 606.003956839826 | 842.567990276734 |
|        | 718.142991571468 | 549.96567374713  | 1050.40488466179 | 654.305724263754 |
| SSTR3  | 157.895460674072 | 143.436675541053 | 151.345630073141 | 129.665507668047 |
|        | 152.401204710292 | 154.496005175117 | 154.892452237027 | 145.43470695949  |
|        | 150.442821494908 | 148.848823912244 | 127.507557925713 | 138.19108838324  |
| SSTR4  | 111.43827410589  | 135.947855806592 | 118.625070307695 | 118.697969266426 |
|        | 112.578934972566 | 107.431455226979 | 103.660742045068 | 105.816457443844 |
|        | 117.227635924674 | 110.670057121283 | 133.087166272749 | 127.921209207879 |
| SSTR5  | 106.923686318112 | 105.467761348787 | 114.888157310977 | 112.166192839859 |
|        | 101.915858150866 | 102.474380813907 | 108.34997967774  | 106.315801001506 |
|        | 109.29279076901  | 113.487357534546 | 106.102093734748 | 105.010952544907 |
| SSU72  | 2129.84680802619 | 2521.58055221647 | 1694.24232555141 | 2572.01353724341 |
|        | 4671.10203385528 | 1806.24732793591 | 2988.45928881468 | 3024.62888503536 |
|        | 2112.84348677276 | 2399.88695085752 | 1894.14699530855 | 1601.19401366685 |
| SSX1   | 143.810050834214 | 135.407536491819 | 141.860850603561 | 139.374832382299 |
|        | 138.45137517137  | 143.403396831929 | 131.84454376953  | 139.537865511933 |
|        | 149.85385474029  | 142.588013648337 | 145.815454490804 | 132.928639483854 |
| SSX2   | 132.498092935232 | 133.807992913171 | 131.90169441925  | 128.11006485185  |
|        | 135.137615432923 | 138.16337207876  | 137.128849888863 | 134.998632527009 |
|        | 129.748891462506 | 131.87404363664  | 133.103403333542 | 133.453702113571 |
| SSX2IP | 200.204064462384 | 205.322733011516 | 200.964306455257 |                  |
|        | 211.369442150136 | 166.085469368498 | 236.508498739509 | 160.449911844008 |
|        | 174.898012759712 | 172.857643600385 | 205.282221255986 | 162.505305538911 |
|        | 184.278213908263 |                  |                  |                  |

SSX3 141.838206951224 135.789381967525 145.906601611338 143.222342904886  
142.683117062711 144.173163762502 140.92377681377 151.687402863648  
148.600270795407 142.825203517688 147.891442774921 140.077307351596  
SSX4 144.298011270428 134.420446702459 137.936605651724 135.892248893607  
138.323567041191 135.400054238597 147.89884142817 136.185953087697  
144.221488906376 144.599578905334 130.887769728442 135.241029533819  
SSX4B 139.295597388725 134.352155462211 141.038721816572 142.783159341229  
133.061016674211 134.66169946771 135.603160096973 131.736694577111  
135.311373781882 130.647944268116 132.118118271944 130.14600240687  
SSX5 120.984641102879 131.40880014672 123.077592992679 117.710502693638  
123.586359806158 122.046901607713 121.047419779542 121.311836944721  
123.700076467648 115.890431424899 144.937697857147 130.559515534303  
SSX6 132.018833785059 134.038213827843 130.779805222363 132.365002835934  
123.482626777491 126.626904958599 125.14833026167 129.935532080325  
119.083957999725 131.092140169861 130.444766583917 137.379558348782  
SSX7 112.449662536973 115.053039576143 115.821231468312 114.85602874727  
106.982655360194 112.114933398547 108.631224817901 113.845770994796  
109.384112020063 112.971776964469 115.090463537716 109.859878974527  
SSX8 116.186846885411 111.886543737378 118.167740643871 120.876732151192  
112.642429076777 120.894583222813 123.424145707079 128.779829252045  
131.707530115415 131.58537948771 129.715948793051 118.406487008528  
SSX9 120.891023626809 126.112672816035 126.921925660996 122.399241018147  
121.215558351076 134.028626989933 128.725044326566 127.908872828095  
122.777544465711 126.499257771192 120.693808603805 137.945878061978  
ST13 1775.32632165475 1561.87054049124 1948.24432908972 1215.96648642927  
729.499296070289 1136.14069801696 797.501324589697 1022.11537745428  
995.812184456562 949.260897408911 1249.89496565284 1098.20033709043  
ST14 123.756349408641 136.563471322998 127.279107079261 110.202982683256  
2544.58522979036 301.250189051376 489.118864124059 399.724529998085  
458.151323130855 253.463871742303 515.432065049838 792.101559967381  
ST18 153.974384951787 153.453969224725 164.000772606739 142.01454627498  
125.331215990597 161.04173806448 147.638057399165 139.62718946833  
140.925705285169 145.954700424725 124.242539075734 172.142411008084  
ST20 142.836229345273 136.534812980964 135.9489027281 142.833025633146  
129.045934344719 125.455347031878 128.06233429201 125.558877611499  
134.262346867514 144.806478328053 126.305273697185 132.363645381743  
ST3GAL1 399.620724969771 424.578659172414 303.555333002419  
455.564394647943 488.57622466019 721.603421985572 636.048536814356  
757.406530000489 646.461274173693 245.553138677866 589.541347392215  
772.399017166118  
ST3GAL2 162.652929339533 165.642728895682 169.800006803362  
201.931760074628 203.693188114912 171.247946863662 169.271175460047  
170.01557699913 174.483233557264 153.38494705081 149.576563410584  
179.191401472241  
ST3GAL3 313.351441953859 335.239364345057 309.229066204308  
460.941286124613 169.992657041967 158.625060605976 172.142411008084  
157.15947600423 157.457468761338 165.613274361543 160.122274989224  
158.179586948369  
ST3GAL4 286.310923582432 250.25959091612 224.824362819477  
237.961826989344 955.604404066769 427.98782239715 558.051041108282  
412.048097766066 485.136339836897 162.199381540369 423.607299503704  
676.293399523316  
ST3GAL5 485.373169494941 537.350891960682 557.214020485204  
313.773476049783 1937.83242524439 1029.43177809276 1228.89116158868

366.705048374078 1967.82064011967 203.11015591813 1881.90353127141  
1128.60314361459  
ST3GAL6 167.746786642066 152.219906297607 142.724123724574  
156.243337414127 140.554684822646 126.383238335161 129.45936538019  
133.031431118772 128.637470206958 177.96452209396 123.403099206878  
123.817878562971  
ST5 450.688800547981 415.497783305278 398.892968579918 531.421912541822  
192.375251343504 164.525784478026 173.964378226631 159.570288565855  
171.731395791818 188.685460181066 201.850932289186 159.946124520038  
ST6GAL1 163.290050020756 172.794570587596 153.568321662387  
163.442257036536 246.049729366987 176.547853494057 131.288785100733  
261.286548990435 376.962937292973 142.843882404269 146.96155692518  
133.832462719784  
ST6GAL2 104.321352818065 116.858439910319 113.582654469735  
118.945264994404 109.978693735206 111.448871835514 121.613684281664  
108.43334699667 119.806933383138 100.841352336505 128.591292689996  
106.772581387455  
ST6GALNAC1 123.588194516972 128.788443476759 143.065258692424  
151.669421563954 133.011320549232 115.545558600232 153.350690419636  
139.675292022085 152.390371614602 131.507618414676 158.774910841987  
125.47382560976  
ST6GALNAC2 295.330307669482 311.916199912898 187.529556428609  
251.61451602376 231.955750250711 161.663893432522 276.867974638972  
168.394330931524 282.137282466192 366.705048374078 644.449861831749  
232.556667737827  
ST6GALNAC3 189.662974464847 194.002075848131 211.869300324471  
200.146843808423 149.749660071593 189.192494970145 174.313718712035  
166.32555285213 151.349739492368 158.74180418577 150.352308475398  
157.273309095198  
ST6GALNAC4 220.567951704044 222.764568757453 193.660159482867  
320.812909889014 377.083379021079 187.205674045893 165.430811083128  
185.027902485379 180.179981672095 210.41046499545 162.735609734946  
167.474790447134  
ST6GALNAC5 281.119138040097 201.530921073488 247.806371601734  
223.154771092064 112.428707152237 117.552229262461 123.977467396003  
117.178495957357 122.891946370542 135.783125948784 128.87498876738  
109.495342943278  
ST6GALNAC6 832.014011481807 844.462124058351 752.142287661845  
974.007008568051 372.94852645418 243.839402991061 214.162670073541  
189.01309885917 241.383657414248 306.946103334814 232.879578820053  
179.241385747152  
ST7 281.037762232619 293.646275396425 283.014222473749 308.330044958513  
251.224369831275 214.295260811046 238.461248099002 269.345125874858  
222.8766610624 255.198862778405 216.705908017858 280.848426993226  
ST7L 159.207567680134 145.590150838776 154.252727576218 145.826955036113  
140.05012958679 136.275207732661 139.333282400639 143.94902198632  
144.143692745479 140.559553697317 147.320976507643 145.010108826238  
ST7OT1 149.975892236985 141.592180897595 147.038700869156  
146.065491816894 121.743701509981 149.747347428419 129.411734209444  
135.573170189235 125.371128588617 133.895547281411 150.751386127903  
139.293775885106  
ST7OT2 129.21974206851 143.491142564838 146.526744516344  
151.945412775776 130.314247368361 127.520134825082 149.228977421003

118.331237160995 149.502132524093 151.171716392043 125.162662242842  
 147.863198012238  
 ST7OT3 136.313623567821 135.559535347364 133.403409882362  
 120.78129870199 147.43089976575 135.484360570738 134.30854633824  
 119.049388179929 129.743808480368 146.709967739596 145.090639086338  
 136.333928675403  
 ST7OT4 164.256764783784 150.929236917651 161.972922129453  
 138.647667867725 145.621384219688 133.642815510945 150.991991926229  
 153.051143478997 141.830432745537 151.330035086652 138.078854535139  
 133.871685084945  
 ST8SIA1 233.953994677015 224.251136332123 282.335582153109  
 195.88263399968 139.002213373439 138.108184983014 130.104021521854  
 163.086539217826 138.887159625058 136.44218532882 132.985645792864  
 131.246704975084  
 ST8SIA2 142.963036923104 138.254479653425 156.986053534635  
 143.980608339892 156.84104238878 135.395071593072 167.421776383056  
 132.263954832097 144.217621961908 196.001089662818 152.503159091556  
 147.815673580657  
 ST8SIA3 164.357373919714 162.660027294291 146.768631086088  
 155.078035506545 159.138344477256 146.861981788662 167.521700144143  
 159.59942312149 145.681968019851 173.372949622338 148.507598818039  
 146.283340399533  
 ST8SIA4 151.169283505727 153.934872807607 146.153528461264  
 151.032389358279 138.745560049251 139.762998983487 141.471127716868  
 147.032210333966 149.473505461585 147.469101571149 140.567565996849  
 147.541437871615  
 ST8SIA5 134.541606996118 123.574319348191 134.231634410324  
 126.65748100631 131.4182935715 126.791714564926 137.840396641618  
 143.432889871079 138.789908033669 155.194521954405 134.21500333869  
 130.351302840602  
 ST8SIA6 125.637138636558 126.791714564926 120.660349211375  
 125.889860278265 120.39039576721 128.194171809998 121.980744551615  
 120.135349166633 117.045020667394 112.528908277828 151.305201022012  
 124.253582884351  
 STAB1 321.977549744483 281.054445185438 225.256708701787 267.535469518664  
 195.282045838381 193.704510912321 152.452246595937 198.338416756432  
 246.112720011613 175.019580368717 174.526176588454 165.249658565871  
 STAB2 148.492328039604 133.615958668897 137.04010227318 148.408616955694  
 142.192934622228 127.947547987882 142.724123724574 132.034701177759  
 137.239088768176 136.434045183143 137.587917564413 132.295937828888  
 STAC 178.751706380632 198.166270627544 136.282608531191 186.794165469219  
 119.451099896048 117.837894438834 129.079917151186 115.830631252469  
 121.248923222807 109.74983281634 145.656767712617 118.104763610751  
 STAC2 149.225754384299 140.875923123766 134.384963577069 134.256243410916  
 135.679481480408 157.841520434044 130.201635099678 139.807421433384  
 131.045970236632 126.017158064032 160.822287037366 137.318442197233  
 STAC3 125.101995710829 136.106596229215 128.897493103888 122.355409068882  
 118.235640920527 142.791015845309 131.933026690056 124.624046191085  
 124.401083237195 124.880103153948 122.449574852865 131.665421461826  
 STAG1 306.277823025572 275.169415154893 311.848379951974 268.111403429364  
 225.423403713718 245.269004485826 260.370285504512 279.325065941252  
 242.81187187788 330.193132765826 204.019377262081 283.874600697211

STAG2 240.410292351169 219.814706416471 234.301520483864 195.66091457697  
 277.501071684448 313.322307299463 259.229153662504 235.650688823345  
 250.085444708918 242.787656836745 238.270501389189 170.423881865022  
 STAG3 118.924317138158 138.820797333519 139.727248583626 122.759905480504  
 155.405519023053 137.816691265242 142.354731066206 129.487458179949  
 152.373931758229 121.274997609378 156.714081537525 142.19728670565  
 STAG3L1 198.470718196139 181.695203523798 288.313931067158  
 161.26201213997 192.627266049516 259.511314588868 211.809434609469  
 249.292766428035 217.353396632732 213.097664319741 197.049616858296  
 341.251360936154  
 STAG3L2 832.911633923496 947.766127685083 894.100792722707  
 838.93563319979 587.026042400878 977.450397042213 486.524284354103  
 841.285351463894 579.493790910006 481.751102333172 480.712219116621  
 950.818917078515  
 STAG3L3 854.815394943219 979.019125719101 858.020739710943  
 813.772804994191 606.851072672402 895.463355957918 478.479988875208  
 885.927972780392 563.011988279542 415.011847890313 368.548135194271  
 960.491731797061  
 STAG3L4 199.275716402358 188.7348696188 220.567951704044  
 216.582862850259 181.783275804424 150.691815494794 195.547320133122  
 166.981212790122 156.71199811686 157.055133233709 166.746037983859  
 238.588762326319  
 STAM 253.65959805538 215.426918011158 209.74583569369 197.24751449599  
 281.659653592151 242.871915060884 265.332196877456 233.884660128222  
 250.676092725829 285.355815566148 321.977549744483 350.166837086936  
 STAM2 165.370800097602 157.86653024793 197.895094054577 172.065593177758  
 197.427788552936 302.905840432998 195.795728497916 212.037224737798  
 170.768398273919 254.668502187945 181.479652131104 238.617228632505  
 STAMBP 385.522443482 396.526590512521 501.600329334497  
 372.475112554793 463.298781071364 492.780880796036 646.704226815099  
 516.577357935963 502.499539192864 561.251860964966 528.556049506759  
 438.146919555296  
 STAMBPL1 504.709613434391 413.983821839274 434.943371634824  
 340.728888109597 235.019573994855 214.824908522393 282.926325589238  
 293.528601172819 324.949988230276 190.534176839652 328.078808625906  
 358.092809491843  
 STAP1 149.341736870692 138.044751228397 145.333097940759 143.333211390741  
 139.613193302406 138.924820359912 136.935498266723 148.861141988806  
 153.189490068047 149.754842928462 123.709293439934 141.860850603561  
 STAP2 144.32655838488 154.520935683104 135.940629737073 128.820757822782  
 339.663295617139 245.997705723007 286.230656780335 254.065327837176  
 215.802713097166 207.785320401354 310.465070184707 325.80154888448  
 STAR 136.003277940379 143.06806126472 135.47852126603 148.000706956532  
 131.558842131826 138.709148238818 127.593764897583 137.395895014456  
 140.36425603453 124.880103153948 151.04846635538 136.534812980964  
 STARD10 331.062744782933 418.062540009856 339.379250332987  
 397.985856484851 1732.52466021178 746.296354515617 999.658013198849  
 413.000072500071 507.56875910742 756.246712133116 627.526008812413  
 852.436775264873  
 STARD13 384.051170099325 351.079435946154 268.885346595453  
 369.974231530826 138.388749930671 193.218266574099 133.014551645069  
 142.683117062711 146.690308698414 146.940545711162 141.533138525284  
 140.907889482107



STARD3 201.415695076278 200.84691030169 175.9219991997  
220.217745732407 384.296190598736 268.600782558985 288.221041179309  
407.244564912365 271.430915699592 228.560346647306 264.355693070937  
229.594081405784

STARD3NL 211.468099571442 189.603621918298 241.599271777806  
173.02970820174 224.224264678645 224.981439707657 216.277178481058  
224.766155406229 237.854774190873 226.203994206714 267.190228116903  
339.917319653382

STARD4 144.763700813057 137.219943946724 132.671227062948  
124.422548323449 136.683683776616 138.003440266411 141.811563725942  
131.04767483614 136.990610254852 154.831307586538 135.267015629083  
127.849141499408

STARD5 194.257024100927 169.072574423443 187.796440205485  
166.872332652008 183.979513272793 160.892163220381 230.10433160008  
158.414776465951 179.460777888284 262.691387377392 224.424524191566  
242.070630946726

STARD6 149.473505461585 153.756213924949 144.542320520523  
146.95272087759 148.027464692171 133.654232991228 160.395053149199  
143.423661752881 139.311816781874 164.276668889213 138.679545821015  
131.84454376953

STARD7 760.272612245092 751.568940762011 815.779445689417  
715.43295523922 788.244353085369 1232.66885974069 1011.14472068314  
1103.81439809121 1027.96306543235 752.142287661845 1408.08614963928  
1023.94850651125

STARD8 198.620777452192 294.595972099366 191.467626362851  
349.99912485533 147.248053518914 154.515091049526 119.573635447638  
152.857278986877 151.563917522864 139.013404849037 167.484236948415  
132.303506517431

STARD9 156.852187451794 166.741762854246 206.77605957523  
152.783534456473 151.113342302947 163.086539217826 149.435684626505  
150.833523101057 154.684874039602 148.709795687391 130.33205883588  
139.715836473047

STAT1 1136.14069801696 821.465895280454 537.419316887523 607.805002786409  
895.114975754684 990.814111681408 1021.81988990874 1327.65573168233  
2932.64120183406 1026.61404215739 2168.58813300343 1146.84239258543

STAT2 1995.6000523628 1627.02882286283 1154.1046856215 1522.87703817058  
1218.64951314553 1360.24752587939 2392.93562797606 1564.8868894162  
2337.64145466514 1053.65938651514 2385.5958396359 1208.25171673432

STAT3 623.68308750251 672.348723983535 629.707646271678 807.604205890244  
425.708048519408 422.02217814979 418.062540009856 640.90860274227  
803.60413590137 753.389428590366 449.103432410618 398.971838949075

STAT4 180.913502162011 164.910911528819 130.445920648705 153.311705636864  
157.546123603057 171.444558905575 158.85003890975 192.980781927122  
254.287838845201 171.706534562905 161.202844994203 152.853860043701

STAT5A 727.114956464515 791.137867905579 582.527835746927  
877.255923473532 415.011847890313 307.768302846647 264.109049504585  
439.122658719747 411.160709628865 197.277310409328 206.391403266202  
252.432175363972

STAT5B 317.00629920068 281.304989265608 288.221041179309  
257.643855420381 184.873459141947 209.60319248212 238.375823012603  
284.638865013916 198.659595851481 209.54573978355 225.664432111551  
210.41046499545

|         |                  |                  |                  |                  |
|---------|------------------|------------------|------------------|------------------|
| STAT6   | 448.371946119074 | 489.909407178594 | 681.429327723794 | 459.068582584181 |
|         | 506.659740456829 | 404.073802241516 | 699.550347374567 | 478.479988875208 |
|         | 560.180656219785 | 389.800620731411 | 1022.55215097491 | 625.544719251096 |
| STATH   | 143.313605534609 | 132.899305777714 | 130.735223763219 | 132.216453078716 |
|         | 137.358139652612 | 137.974846427694 | 132.089375920534 | 142.411117330429 |
|         | 138.687013437904 | 143.831294912255 | 129.495680232567 | 138.005168756932 |
| STAU1   | 1088.25132365974 | 1069.25265476373 | 1197.00004043747 | 1176.01058971561 |
|         | 1199.35864276583 | 1159.44907165386 | 1841.63015706195 | 1192.47480377375 |
|         | 1627.02882286283 | 1114.85422895959 | 816.580880338838 | 1053.65938651514 |
| STAU2   | 235.291035302211 | 233.572055978465 | 212.730163981978 | 230.399207047948 |
|         | 226.203994206714 | 302.219514290905 | 195.033792280119 | 213.382179917193 |
|         | 271.468939477052 | 226.086733606951 | 191.093283411655 | 245.675725760577 |
| STBD1   | 236.899421827427 | 204.862387642573 | 193.753062958207 | 191.056705282378 |
|         | 179.932404140099 | 137.014698467096 | 207.044774373302 | 218.369954323686 |
|         | 282.045333787115 | 175.7330682766   | 194.753955100069 | 159.384480972135 |
| STC1    | 342.717252404581 | 590.142817130684 | 160.676606760965 | 226.334672545273 |
|         | 174.903798946103 | 441.958777965408 | 284.534369213195 | 200.810204162831 |
|         | 238.509970054862 | 328.14373061894  | 232.200025766422 | 273.432712475089 |
| STC2    | 458.440488401029 | 381.740838644647 | 355.372836460906 | 401.359711029934 |
|         | 162.689415085423 | 250.911817769829 | 208.628626112623 | 144.795448147175 |
|         | 192.709473588165 | 350.166837086936 | 229.26243866226  | 177.428161690048 |
| STEAP1  | 143.090886224647 | 147.619451225526 | 146.696029753123 |                  |
|         | 134.318290950377 | 176.121563444364 | 186.733394375839 | 194.819597436776 |
|         | 217.715143869654 | 247.340470321453 | 193.974325897472 | 173.115418167551 |
|         | 142.135495724286 |                  |                  |                  |
| STEAP2  | 238.946506103155 | 235.453139389486 | 243.191238594142 |                  |
|         | 170.998961353556 | 186.222567239198 | 185.17273221366  | 254.424207773566 |
|         | 225.169110687004 | 321.367338145787 | 153.888212689508 | 284.534369213195 |
|         | 165.586397236489 |                  |                  |                  |
| STEAP3  | 143.618454531431 | 163.113457178357 | 137.736771579507 |                  |
|         | 140.244919506549 | 313.480307434343 | 309.229066204308 | 192.992546726522 |
|         | 218.209523110843 | 199.681103910705 | 207.104548555929 | 295.778154263981 |
|         | 290.213039891361 |                  |                  |                  |
| STEAP4  | 137.767900781368 | 160.353649786837 | 134.655842662899 |                  |
|         | 136.83470470035  | 150.507308901391 | 133.491963477649 | 129.031338314175 |
|         | 132.37450516592  | 134.585762409782 | 192.640717683236 | 103.826308328446 |
|         | 133.050798832332 |                  |                  |                  |
| STELLAR | 141.216869032251 | 144.335732650795 | 159.749576166342 |                  |
|         | 136.473948855498 | 136.978738825445 | 143.987296454585 | 146.915247627846 |
|         | 141.88777975766  | 143.834501071806 | 146.95272087759  | 144.750407738866 |
|         | 141.213588194832 |                  |                  |                  |
| STGC3   | 172.992936821292 | 163.880402141404 | 194.36669779004  | 199.397633942623 |
|         | 168.04198447141  | 167.629008083436 | 173.044636575826 | 165.781667492391 |
|         | 146.846301957637 | 159.542015162519 | 152.169087619827 | 154.360558958914 |
| STH     | 159.130076733711 | 147.024759173313 | 137.957654220875 | 174.116797337377 |
|         | 137.337681987169 | 128.381433897602 | 133.862203806529 | 126.331341103654 |
|         | 133.619092072157 | 132.639070127232 | 142.385902610309 | 125.146558509674 |
| STIL    | 164.057147728625 | 198.004357069446 | 184.591789011195 | 180.761100930677 |
|         | 350.077206368839 | 537.982214580518 | 261.721726664029 | 551.622587349813 |
|         | 385.750371084    | 269.100400678077 | 209.112959748917 | 345.977609212137 |
| STIM1   | 395.786295710815 | 409.206158277764 | 530.561387049511 | 480.101253056873 |
|         | 338.585771590234 | 219.729169245025 | 255.59042517603  | 223.573080955095 |
|         | 295.727275232995 | 371.941204080246 | 264.109049504585 | 194.655710454472 |

STIM2 223.531323159808 222.794196053536 173.315097944835 203.777944180067  
201.661941695238 254.936706344174 401.359711029934 243.468673768141  
294.535979194434 191.543371466252 236.617896560938 232.735767435327  
STIP1 1003.93455977232 1023.94850651125 1011.14472068314 1439.37593006882  
1832.35076992253 1413.37062765856 932.076509242794 1186.96351738518  
1001.65849130836 826.08372791138 996.240188311002 1048.85768964657  
STK10 180.265418365803 177.32104138164 175.199369463703 237.854774190873  
203.888365494623 165.545136704242 160.584760930779 195.69447353356  
188.033890834418 171.521579011287 193.832033192375 196.716209382446  
STK11 277.685488726472 305.451247405518 226.287196839644 354.840474468573  
351.079435946154 150.380814008952 168.873282919232 162.802392115386  
183.314276033531 187.625536724681 315.513423195489 175.891947478891  
STK11IP 189.94130405123 233.82434521462 170.892319361167  
282.742833166843 334.101619029105 176.194292036542 181.889592946523  
179.854800301573 211.012142461725 189.567241599215 236.141982516399  
229.907632927358  
STK16 150.46669393448 162.453586139402 163.153676643372 162.793214727475  
158.660859266099 158.092775850886 164.429483677715 159.824012085212  
171.180188911669 165.647471565959 189.450316943845 173.142436025281  
STK17A 171.916201289104 148.770315933249 170.040914594182  
157.895460674072 140.102266035804 150.564099989221 160.78368986036  
176.062665550409 157.649902282769 134.013748718539 132.195666100325  
142.084294087481  
STK17B 144.265352127763 138.993251266382 142.757327296852  
134.122776198036 168.867373925372 147.077695919758 143.305848051593  
159.110614190088 169.784837251279 222.456810024193 181.048789688798  
147.959740692766  
STK19 499.964000319181 477.275332763887 473.853999833395 564.41151411028  
453.926991868451 419.690542859168 478.38361571213 397.307515234646  
475.038389500056 556.725550806207 289.164969943385 454.732029358748  
STK24 1177.01310527577 1259.38111177521 1294.74864310494 1209.56018864779  
1398.60850048351 1449.33679383001 1721.20676889116 1117.77397620221  
2010.57142784228 2043.73482086765 2558.91648313228 3008.43964505208  
STK25 675.596864001032 772.399017166118 779.340880980422 899.667912542118  
590.515758538373 417.442660073269 606.679284487803 407.957436380989  
680.743052197025 1039.92160906839 740.800822095116 831.289724465877  
STK3 847.276523445973 833.430847243676 755.42757464615 872.512754090023  
503.093655556038 518.925188630246 481.453770150269 441.684169663552  
661.096668635469 590.646248924596 261.286548990435 304.900910626137  
STK31 118.850495684547 121.146511496024 119.746227888415 111.765812595638  
133.966277922005 124.907788504503 122.144209450757 131.800533523123  
122.274656361883 119.627380812035 135.079944196457 139.021552573529  
STK32A 128.314990390649 129.018088749395 145.500011956699  
145.957934576055 179.286187825363 187.903298116031 218.735620596634  
222.005022189667 142.339740800356 151.885992695789 183.152005135504  
157.575902297677  
STK32B 216.974834077975 228.739556788924 174.202069525223  
267.589020526148 129.527271401014 124.86699236406 128.336332748047  
116.947370388179 127.814109293214 133.804489975068 141.484730939562  
126.865622462379  
STK32C 135.441550832737 130.233769058693 141.623851511993  
161.316521450944 179.950904921667 164.89597889259 159.495272062735  
155.988447182637 154.679076303046 171.40549153673 149.303427221111  
137.581659385375

|        |                  |                  |                  |                  |
|--------|------------------|------------------|------------------|------------------|
| STK33  | 169.101676908756 | 157.723341862468 | 173.675115244522 | 182.292947734054 |
|        | 133.897397228615 | 139.308325848216 | 135.680872395032 | 123.732299841696 |
|        | 150.343825300998 | 135.092226300609 | 127.427014611349 | 135.964630862223 |
| STK35  | 277.026538720417 | 260.52593414721  | 268.78904911703  | 295.153786338687 |
|        | 402.213774592085 | 401.461825804111 | 281.238656291587 | 297.921617748468 |
|        | 288.913660405191 | 270.92671642109  | 272.314332734711 | 279.232290927348 |
| STK36  | 787.874585290601 | 801.051513639714 | 792.101559967381 | 1167.72023351098 |
|        | 528.098472417251 | 502.935749606918 | 700.353187874339 | 473.151324002277 |
|        | 617.185364180303 | 504.838017072725 | 637.30300219673  | 752.585744322608 |
| STK38  | 905.751410113646 | 849.158029646233 | 918.742625270041 | 913.684449305965 |
|        | 596.246316033079 | 442.334886941795 | 965.673699120049 | 701.208391798006 |
|        | 781.790858580895 | 456.201998988891 | 1057.1528284934  | 510.972389503051 |
| STK38L | 405.130899553871 | 232.200025766422 | 241.383657414248 |                  |
|        | 225.99848688881  | 153.02127620577  | 180.698727334322 | 151.783090997855 |
|        | 199.135932984641 | 155.04585737344  | 152.303524109428 | 210.502556087175 |
|        | 144.744603095605 |                  |                  |                  |
| STK39  | 775.5664718389   | 787.017214032692 | 1103.13439876128 | 890.121325723286 |
|        | 648.38049615541  | 481.86545778383  | 794.636255515909 | 553.615252472149 |
|        | 1017.6969123529  | 651.998433127992 | 890.507257588957 | 895.114975754684 |
| STK4   | 1323.91781040143 | 1510.77099418802 | 1508.24281455057 | 1405.2134783352  |
|        | 735.449040059761 | 1123.93087912174 | 2244.6916226146  | 1026.61404215739 |
|        | 1438.33289891548 | 1107.99131702522 | 935.042067053226 | 1178.83933381069 |
| STK40  | 946.640841062802 | 1154.86609813021 | 870.409935772423 | 1838.18547839898 |
|        | 491.635435224507 | 339.843776738468 | 422.12964420709  | 401.87674893993  |
|        | 469.714826990063 | 622.561634660589 | 333.970844203158 | 356.323554000768 |
| STMN1  | 140.506191791073 | 146.384051525624 | 145.177195093247 | 146.20679320119  |
|        | 236.899421827427 | 406.638419179213 | 186.021181691517 | 220.487665103019 |
|        | 295.420691959792 | 181.889592946523 | 194.257024100927 | 231.600532144945 |
| STMN2  | 147.600825146067 | 158.171302275984 | 152.358795162474 | 141.209958892647 |
|        | 130.122672154144 | 156.34272729153  | 139.172437503442 | 148.679832253778 |
|        | 136.370317464946 | 152.042744996136 | 146.054535585464 | 156.157567405927 |
| STMN3  | 1167.72023351098 | 1096.61874892572 | 805.600599570258 | 1130.32966481315 |
|        | 362.306819797508 | 1204.7397215229  | 361.516275756449 | 340.547010951537 |
|        | 495.241179224412 | 475.540659315339 | 207.598754515294 | 334.199307788576 |
| STMN4  | 143.494511683426 | 143.421288665418 | 160.014635964846 | 171.844483419604 |
|        | 139.21331678591  | 142.958906063186 | 140.401508808129 | 127.00963790814  |
|        | 137.904786382385 | 133.872561340464 | 135.884635448277 | 136.561852783331 |
| STOM   | 2437.63566094439 | 2159.2992548378  | 2099.85702995194 | 1904.39962279504 |
|        | 720.214044399108 | 650.0804221227   | 1561.10217536347 | 666.847934976479 |
|        | 1091.12493937368 | 390.809169896009 | 459.53652431464  | 339.448524400708 |
| STOML1 | 250.82359383789  | 250.376178742476 | 191.040134068942 |                  |
|        | 322.956882599715 | 260.157440518033 | 136.409960447884 | 155.498580125421 |
|        | 139.860093278582 | 151.212606106351 | 142.976123206776 | 158.098055917452 |
|        | 158.937341335707 |                  |                  |                  |
| STOML2 | 1231.37475540937 | 1277.0921553877  | 1183.1601379136  |                  |
|        | 1419.4638331856  | 1563.71477584676 | 1823.53870218167 | 1204.32784721885 |
|        | 1355.07170485397 | 1493.90578573732 | 1908.81864728547 | 1695.26858186096 |
|        | 1097.60805874165 |                  |                  |                  |
| STOML3 | 123.161953011069 | 125.044092929562 | 137.299908075811 |                  |
|        | 140.833666276568 | 145.144401160102 | 147.436408919939 | 143.082880435412 |
|        | 146.413845130977 | 140.077307351596 | 137.022366035333 | 144.87013280941  |
|        | 166.068489027866 |                  |                  |                  |

STON1 688.247581763352 718.142991571468 1777.29626660109 1011.9675459648  
 108.226917034591 121.522634801124 103.772221923105 112.190904058889  
 117.652693591865 134.109051944736 117.552229262461 117.274977920103  
 STON1-GTF2A1L 140.630844296177 144.69686018715 148.656917603142  
 137.345542507421 128.266906202941 125.143281492089 115.316430915446  
 125.231476412101 115.137475087954 127.26820735867 109.552501987529  
 125.269726165403  
 STON2 135.100687929821 133.270582482753 116.533361070234 131.965184111199  
 125.653011880654 131.796941315992 144.678895821726 138.755173333171  
 129.780648518219 148.530422089937 153.238678313147 150.564099989221  
 STOX1 183.779065928447 171.731395791818 187.625536724681 164.191906588579  
 171.16807372519 208.72873686638 200.486683704179 180.219813240126  
 168.248982292489 164.39910609636 162.739253457398 177.355210393749  
 STOX2 606.679284487803 871.268905562551 499.544050752036 723.640113902925  
 327.89660021611 558.051041108282 549.460612060753 806.591035100794  
 386.461076717316 348.241471067257 271.087125858775 200.371280127668  
 STRA13 846.084919104262 867.601542930533 916.026216386031  
 882.798927428142 2230.45015969936 2295.16438420175 1754.99663827472  
 3655.63669142687 2410.32095582515 982.367000148189 1495.04587558545  
 2620.17683549005  
 STRA6 163.352317556107 144.432181150583 144.400004730049 165.947514372877  
 149.477373469387 157.269049853539 164.472980733552 163.97516075705  
 159.650116062266 153.498332327444 158.76356962428 165.960176666275  
 STRA8 116.615250922316 122.69021100699 132.985645792864 115.608857734241  
 116.449064666763 126.512613967438 125.710199961297 120.77691423934  
 117.532063783977 117.766156390814 123.518170356322 117.923459503989  
 STRADA 319.283603277754 305.669636871734 301.638918685657  
 329.214958614925 254.722836822616 381.971539806271 395.327097512479  
 415.642099109855 413.084646927035 299.754985162237 307.264586007015  
 481.933386283351  
 STRADB 265.919002666885 256.964577037118 303.724140156439  
 260.314440448486 258.036064876416 383.407365952689 280.723379809959  
 351.998551165704 227.050629701762 227.926444925478 268.600782558985  
 219.638478100747  
 STRAP 1392.89422203207 1236.56870367797 1561.87054049124 957.54149804446  
 1652.77814259264 1416.93831202323 1620.7954553764 2065.51724858579  
 2203.82462320864 1794.82283439196 1524.46745239811 1867.55140010155  
 STRBP 141.434699050015 166.506602328929 167.130843160309 153.461396593156  
 222.820391338687 207.076364103755 203.436527043293 228.001046173405  
 269.141120401835 211.419445018736 241.799709160815 160.251996476232  
 STRC 147.459385142695 146.303959493672 134.203949774763 135.419628087842  
 126.988118823204 151.665244763743 147.902312155661 162.244691888031  
 154.783699020901 141.119491147925 155.333294650676 140.928627507036  
 STRN 179.49202902995 191.830711714844 183.385868234361 187.673748059596  
 199.135932984641 191.445291899108 200.506615977654 208.348515119045  
 187.833356349429 202.114480291084 176.912121142015 199.378179817518  
 STRN3 562.232754247201 409.592855687405 933.723483173584 353.437466689101  
 247.373571011712 369.726867521935 308.564935340635 354.840474468573  
 308.564935340635 501.301694626942 323.391456630794 540.584471920486  
 STRN4 197.169703621888 206.802308105224 217.670330817769 241.845941562418  
 404.726926716133 205.612579504495 221.82340413039 198.597176657619  
 239.970202560698 195.981555981238 183.464897811105 194.388383297922

|       |                  |                  |                  |                  |
|-------|------------------|------------------|------------------|------------------|
| STS   | 139.534014289993 | 143.5709409749   | 127.034985265748 | 134.255021727555 |
|       | 130.211247943634 | 151.27882940428  | 135.961724275921 | 138.692057950694 |
|       | 169.992657041967 | 133.176970578909 | 147.414834563852 | 133.606068125828 |
| STS-1 | 149.500457158616 | 170.452989060697 | 125.034243098087 | 126.3539479619   |
|       | 421.255522475862 | 249.263194321516 | 356.62074247786  | 528.921893077914 |
|       | 535.49374437073  | 139.875260384886 | 181.340312140534 | 308.330044958513 |
| STT3A | 711.491528818004 | 621.489906442001 | 688.915534194306 | 498.180196203245 |
|       | 865.800709006332 | 927.478050257292 | 948.734577648136 | 1269.67110104843 |
|       | 979.761537450366 | 480.484639351046 | 1031.38207659547 | 1155.4487861163  |
| STT3B | 167.442950045855 | 171.16807372519  | 199.53455266342  | 127.269672881591 |
|       | 362.502631441716 | 456.298408568636 | 363.025385707747 | 342.878522959461 |
|       | 515.327420453564 | 392.198487606534 | 284.940858938629 | 407.152764702613 |
| STUB1 | 676.570119607984 | 802.017244099902 | 936.957730361063 | 841.623780229898 |
|       | 933.408902924063 | 541.258721278882 | 694.288215755716 | 540.584471920486 |
|       | 513.662594875431 | 785.008529077795 | 348.808646570544 | 652.429025114523 |
| STX10 | 451.210172051464 | 456.126096817454 | 492.930906036297 | 474.216057978384 |
|       | 888.04996477314  | 602.371843434907 | 551.823767223086 | 610.070236234299 |
|       | 410.337491313251 | 557.026028810367 | 527.707841428677 | 449.598181155897 |
| STX11 | 140.946008063839 | 148.91835407218  | 122.03508430361  | 111.010889276873 |
|       | 110.113844434493 | 127.859873416515 | 129.307025798583 | 133.94206203396  |
|       | 177.214422668922 | 197.962159288376 | 154.884821436554 | 118.689408983786 |
| STX12 | 680.250735532287 | 578.811908030805 | 561.379619105609 | 563.779294315901 |
|       | 273.709160508205 | 460.941286124613 | 432.174413144791 | 434.325609889068 |
|       | 365.727197088581 | 331.747622606378 | 543.933989965705 | 357.191675549592 |
| STX16 | 849.389818300305 | 716.731984660463 | 1261.61611961272 | 769.586135629964 |
|       | 559.899430596368 | 911.340266389071 | 1191.26028342929 | 696.650617523899 |
|       | 884.747476952289 | 770.19255305977  | 891.637685856145 | 1089.16489859253 |
| STX17 | 186.222567239198 | 176.364184489318 | 181.695203523798 | 202.887417145119 |
|       | 185.233210060342 | 174.866036336378 | 171.994330847901 | 181.364325529405 |
|       | 178.3652866131   | 203.943245360496 | 180.468984099647 | 173.459008248696 |
| STX18 | 126.362418476129 | 142.487424651482 | 129.737882221259 | 123.974409226349 |
|       | 124.213104788426 | 117.593226427794 | 129.541049979717 | 127.016845640004 |
|       | 146.808519947394 | 124.103321614841 | 162.683665945044 | 140.150884219813 |
| STX19 | 136.465185148237 | 154.8975607055   | 139.59941545613  | 151.473239782301 |
|       | 137.25054616038  | 151.546908501054 | 130.100501333725 | 146.690308698414 |
|       | 141.842919268688 | 317.309949792707 | 120.910703698292 | 152.371569700039 |
| STX1A | 210.502556087175 | 194.125840053843 | 201.186963432715 | 237.249949461085 |
|       | 205.011514211101 | 158.167384416968 | 212.396522888943 | 223.496400038284 |
|       | 184.989027770708 | 201.041792159394 | 190.002630382394 | 277.101000223971 |
| STX1B | 124.592771536872 | 163.36682525399  | 133.695284981677 | 133.173541338355 |
|       | 126.378952839132 | 134.336279655683 | 127.434873844923 | 142.907969322845 |
|       | 135.518752716008 | 130.95176570982  | 110.296425545476 | 135.622888091037 |
| STX2  | 543.170902795966 | 407.152764702613 | 471.720496000839 | 410.337491313251 |
|       | 133.743708220112 | 150.496616601699 | 139.242481781927 | 150.817922696097 |
|       | 168.71216652064  | 208.291714758548 | 163.661196423902 | 137.282038401275 |
| STX3  | 334.199307788576 | 307.906312092805 | 269.100400678077 | 290.914381066573 |
|       | 405.183882455109 | 949.260897408911 | 531.555532787504 | 538.369868115137 |
|       | 1107.99131702522 | 373.189809737885 | 504.838017072725 | 688.247581763352 |
| STX4  | 421.255522475862 | 444.082440002333 | 422.338508598153 | 547.817028243811 |
|       | 546.399972543938 | 429.268202514543 | 506.562512021352 | 480.22496056277  |
|       | 411.285747588622 | 428.850337327605 | 403.720036930931 | 498.05778289794  |
| STX5  | 548.455251483009 | 566.417354841707 | 502.598518192729 | 637.30300219673  |
|       | 626.857289492802 | 405.409668978569 | 480.593729033799 | 459.652708187549 |
|       | 472.514017604645 | 549.162299481184 | 464.577839898252 | 317.904396212359 |

|         |                  |                  |                  |                  |
|---------|------------------|------------------|------------------|------------------|
| STX6    | 343.270642449751 | 388.887050777137 | 372.54091392596  | 364.840751972169 |
|         | 382.806570442504 | 561.858563298512 | 585.721610434501 | 620.899414581162 |
|         | 554.950092776254 | 686.679573646733 | 655.431236290512 | 838.63350090385  |
| STX7    | 207.138680369683 | 181.022635001204 | 272.571092944711 | 208.406980186223 |
|         | 192.153420834889 | 167.958792571511 | 213.966288689715 | 211.505504834207 |
|         | 193.753062958207 | 287.558897878375 | 202.943987922418 | 209.146021798649 |
| STX8    | 803.60413590137  | 717.270096456387 | 977.999660785113 | 696.277780670166 |
|         | 319.868227988842 | 440.038896046559 | 385.678901612324 | 429.595453454621 |
|         | 381.182514249587 | 674.338740875512 | 393.914413372142 | 247.307128520272 |
| STXBP1  | 166.489436134841 | 160.644747532952 | 183.32467147543  |                  |
|         | 165.149464497921 | 135.437227744668 | 129.652331277375 | 141.28700484445  |
|         | 139.984102798711 | 148.076841184769 | 162.774716879847 | 139.809114250476 |
|         | 140.269160279333 |                  |                  |                  |
| STXBP2  | 152.476932186797 | 185.816827784447 | 136.674553275255 |                  |
|         | 134.155655670103 | 1619.67820476414 | 611.208083466988 | 652.429025114523 |
|         | 821.265710686098 | 451.380376296813 | 532.596772298766 | 660.096727566678 |
|         | 581.191693771646 |                  |                  |                  |
| STXBP3  | 225.005311517365 | 237.825857080173 | 338.075238647592 |                  |
|         | 187.15740398852  | 206.127493726541 | 376.189276074918 | 367.229293432041 |
|         | 399.071041584646 | 297.228563607097 | 457.905741500454 | 348.506289278042 |
|         | 377.083379021079 |                  |                  |                  |
| STXBP4  | 181.123571246557 | 165.870621884073 | 201.850932289186 |                  |
|         | 163.227953876329 | 146.166710487448 | 165.570531605115 | 160.549597620339 |
|         | 170.394088019518 | 162.656951764783 | 179.400220328552 | 145.500011956699 |
|         | 163.298729857831 |                  |                  |                  |
| STXBP5  | 221.152973486208 | 197.02284475852  | 203.317264638828 |                  |
|         | 191.207048581306 | 341.128917971124 | 230.589110372454 | 227.847614397311 |
|         | 246.912159676595 | 204.183472655276 | 259.184713471619 | 316.801725268792 |
|         | 187.673748059596 |                  |                  |                  |
| STXBP5L | 137.926193455157 | 151.540744107423 | 158.344330353326 |                  |
|         | 149.098381037466 | 127.648224668964 | 126.585679159459 | 125.095999326598 |
|         | 122.937281123348 | 141.686945908315 | 136.580363776109 | 133.489068665353 |
|         | 127.654130155446 |                  |                  |                  |
| STXBP6  | 665.106631364961 | 570.26564132238  | 515.327420453564 |                  |
|         | 563.339837352678 | 130.444766583917 | 151.477239868429 | 141.33919297402  |
|         | 149.810655120216 | 134.776714949136 | 129.852833137493 | 127.211469322857 |
|         | 134.56314960832  |                  |                  |                  |
| STYK1   | 128.377928524315 | 146.770267005869 | 140.912921321622 | 128.835216648178 |
|         | 137.17370871536  | 116.844361858869 | 145.106362864355 | 160.945886507456 |
|         | 141.706292773073 | 134.867806860993 | 180.3779211444   | 154.296467085914 |
| STYX    | 138.586620636835 | 134.682319733908 | 149.135934269866 | 147.232015056035 |
|         | 159.046016068252 | 152.942824158634 | 143.982561564661 | 141.166605868578 |
|         | 130.282212339065 | 153.131271100637 | 130.104911048507 | 149.744358230709 |
| STYXL1  | 286.541028896473 | 337.87475687838  | 286.774606295106 |                  |
|         | 377.89330639683  | 714.494228450456 | 388.710465457313 | 644.449861831749 |
|         | 768.334658920971 | 697.774882173237 | 663.214972254236 | 568.701661112562 |
|         | 699.06539333455  |                  |                  |                  |
| SUB1    | 521.714719320355 | 457.779218916808 | 501.946140974776 | 399.724529998085 |
|         | 396.861835715943 | 505.704957182936 | 417.731815310276 | 701.847905027147 |
|         | 356.268960813032 | 585.234286698678 | 481.630922092112 | 423.152420192284 |
| SUCLA2  | 322.614169214764 | 321.568127272161 | 439.207122335648 |                  |
|         | 336.002793042439 | 206.010481981919 | 365.199125315964 | 215.094633380547 |
|         | 276.434192872962 | 313.708197191587 | 765.333633142088 | 285.355815566148 |
|         | 459.854279050269 |                  |                  |                  |

SUCLG1 2127.22258112242 1955.96772733047 3008.43964505208  
2192.17997650999 1214.16777512885 2523.91287654539 1627.02882286283  
2099.85702995194 1601.19401366685 1738.96798001895 1565.64079526732  
2124.12760841901  
SUCLG2 1061.29067124163 935.784743413185 1274.39152410752  
850.882404546093 851.221199352646 780.961416212309 1160.25775445193  
1222.014210447 1595.22997714906 1028.39666838369 1314.62071412501  
1233.99503576308  
SUCNR1 129.633387503618 123.668707648172 138.60849268758  
136.591299462104 138.516066340784 125.328704545727 139.657182434153  
135.650546885518 144.416116810532 150.300108097623 137.253971514177  
139.378915474473  
SUDS3 187.016569445646 176.622758931306 156.208747691032 197.169703621888  
169.574755162815 143.754105312957 136.333928675403 142.032814623366  
147.642693777383 175.065781438801 193.173703015873 162.28074297013  
SUFU 121.796519488793 137.644942697483 119.95666716163 117.402330163871  
136.599305161841 113.947948541258 130.150998843383 111.232274546928  
114.358099210532 115.485515429446 151.965103021638 111.204065131669  
SUGT1 273.369722814068 241.203521822269 281.071129128589 270.12941437975  
225.335753745598 212.749668083641 183.443006525616 198.456392063513  
270.12941437975 220.876114717642 126.529763042574 244.280971257965  
SUGT1L1 168.21856603538 148.176995739142 144.122748003206  
136.895650862562 153.408890091225 141.40690581885 146.050714008913  
150.019181654237 149.574353706911 141.173167283016 146.900087470856  
170.568719982587  
SUGT1P 140.105675520432 154.291717784335 170.992074907355  
152.277810621542 164.525784478026 152.805525883571 135.556943919872  
154.153249796248 128.023203858837 157.919709478746 153.251468534012  
145.128919984856  
SULF1 381.971539806271 307.480644393018 391.706404954357 357.972320648217  
185.46843333826 172.544504923991 150.542478166361 211.660148497276  
334.140757209353 810.769136227155 165.797170648964 163.356993518952  
SULF2 279.452819132461 251.833571288967 195.050834479424 232.960832410426  
133.979788317851 129.725706669166 138.875827888646 169.16155608071  
204.787016443123 551.206833852215 162.919656039331 157.381401974279  
SULT1A1 2418.66999907188 2293.05058904656 2107.99357083999  
1982.3154578939 730.34994035645 2770.7811954029 1149.90248188644  
1861.19763103381 1381.07447204233 1086.8615735568 1797.65684760558  
1594.05763963363  
SULT1A2 172.197077149985 169.368090266817 151.902352951251  
160.411218029114 233.997642139328 437.248311551717 196.014841240142  
281.369059516242 210.392662092721 147.245636620228 239.649306804266  
171.426334687626  
SULT1A3 166.04965258862 183.348764012358 174.909258852845  
167.912321820083 235.48876511325 509.512410867348 227.467161919443  
252.851164967726 228.616558999054 176.927500850631 217.513118676535  
187.425086057782  
SULT1A4 205.08372943071 222.156471143857 209.840035045167  
205.930921729192 318.297819854586 883.702573960415 254.133112176024  
337.521614253267 322.837446618323 167.782882015229 314.182403961681  
200.618080312379  
SULT1B1 156.073428882485 156.477249817844 141.050384368733  
159.973758408655 158.747029092329 159.159106382346 169.349922114861



165.177036955944 133.757741295765 137.623019849539 127.769405736754  
149.241358552148  
SULT1C2 136.201103852785 135.736764623155 139.602168254761  
137.625415175495 137.172030225913 129.311134743311 124.28033876033  
141.975416815475 134.880138942756 130.173734963758 137.936605651724  
137.685104040843  
SULT1C3 124.800221241981 138.753419730571 133.834423222601  
136.111569529393 156.333133322672 141.449119281888 126.952836653857  
151.627496656808 132.653795458388 137.232722233042 118.360186663758  
142.705504445895  
SULT1C4 142.428578698775 130.529367177452 156.037150880384  
138.846543789882 138.548983773386 146.586879656174 136.089888639987  
133.92485496581 144.794806650252 143.447768653042 143.40955339735  
143.867013358737  
SULT1E1 132.320536722841 127.274768398849 130.677737553727  
128.848008246639 147.544539855657 161.046418048832 125.463718280745  
129.541049979717 145.424827607383 126.442999559539 147.032210333966  
140.837360719964  
SULT2A1 148.863297062269 164.630705813584 161.930142040623  
157.130045415943 215.802713097166 535.612000577004 1424.79466712859  
368.466518140043 647.666334416707 130.545285774056 147.004172510641  
149.149858208397  
SULT2B1 127.943935415045 141.127519700052 129.933228671483  
140.946729014405 143.953043041292 128.986795394842 143.672118850295  
143.793506250131 141.476041451832 674.101599637653 138.566954604414  
141.706292773073  
SULT4A1 129.368045611894 129.260551359984 118.841699953612  
123.004137408444 135.68605915552 146.176240539176 124.484589975207  
124.853659050216 136.811620595243 120.118873350459 150.269618125943  
139.613193302406  
SULT6B1 165.638672456873 138.831297375659 152.173055053184  
149.628421263062 139.808267839368 152.842777535666 160.880152014981  
153.044682186978 147.856285290748 160.399059317919 162.110943457969  
153.756213924949  
SUMF1 449.220056843562 459.652708187549 363.195371577097 447.521645706162  
1001.92763014266 386.067573158514 902.394410348792 491.290438575428  
870.887539668967 535.758943850734 778.846928848361 620.614820117452  
SUMF2 1236.56870367797 1398.60850048351 1198.53117439169 1416.93831202323  
1812.07394646463 708.534025308731 821.265710686098 1349.84215478798  
814.110601393539 1074.19589851599 1229.47460924638 1386.56788941677  
SUMO1 197.262062021667 169.568915494577 175.840639511966 158.7912155022  
174.549929320587 188.181647474317 196.583548193097 205.509515144263  
174.526176588454 189.539458686123 216.755681508811 196.096936985479  
SUMO1P1 133.154004369076 133.631676386591 147.07272598888  
155.456077670662 139.718191989129 141.767311448808 147.196687432745  
148.275031171973 153.126111237668 138.334626498686 125.079330440615  
136.092086452096  
SUMO1P3 385.678901612324 358.60777927888 417.987533397449  
342.998459706966 289.09614335372 475.686805714298 379.670492165938  
481.630922092112 389.853534237748 420.017044147123 597.651682540611  
393.914413372142  
SUMO2 1447.07989164988 1329.90419210779 1865.44709751822 977.999660785113  
1389.93393245455 2572.01353724341 2845.0377634896 2833.30537635103  
3052.86038628748 1966.09691567857 2952.67114077688 3890.14358014877

|         |                  |                  |                  |                  |
|---------|------------------|------------------|------------------|------------------|
| SUMO3   | 1940.42283070543 | 1903.13326109546 | 1438.33289891548 | 1492.15137418791 |
|         | 1587.84395475807 | 1505.09908072606 | 2782.94647782764 | 2622.87486749984 |
|         | 2799.0487754899  | 3282.73711809465 | 1812.07394646463 | 2691.41389079777 |
| SUMO4   | 158.845174721328 | 161.564505054217 | 171.350620456505 | 150.314462939164 |
|         | 132.419898122309 | 132.074571281938 | 158.554429311951 | 148.067562465748 |
|         | 144.188147197178 | 163.996649606636 | 155.078035506545 | 155.478383896934 |
| SUNC1   | 139.718721422663 | 127.980776299586 | 119.48998115497  | 121.821868944354 |
|         | 124.899019467557 | 123.612648219993 | 129.55573546861  | 135.936021164312 |
|         | 128.368669716591 | 128.282999719959 | 138.036876466521 | 118.597739444445 |
| SUOX    | 365.590174280114 | 389.686045618228 | 381.625983354158 | 448.858580689107 |
|         | 399.476401949891 | 326.325210657599 | 361.687156919012 | 503.093655556038 |
|         | 728.485195792194 | 260.489744360233 | 471.946284490029 | 275.252966071473 |
| SUPT16H | 1659.80909859514 | 1490.02976786379 | 1756.88092410303 |                  |
|         | 1641.70484603137 | 1037.00025848491 | 800.739422189427 | 903.824331691969 |
|         | 1344.87842417496 | 1006.03677177164 | 876.783710734594 | 1195.6335460045  |
|         | 1190.62010668045 |                  |                  |                  |
| SUPT3H  | 182.453722105813 | 168.052288484172 | 216.277178481058 |                  |
|         | 180.276082632155 | 172.230528631803 | 155.622257285651 | 193.609985124825 |
|         | 137.658183450715 | 175.363223521128 | 174.767697866801 | 192.375251343504 |
|         | 189.589053840976 |                  |                  |                  |
| SUPT4H1 | 356.84281623052  | 375.651196211048 | 459.068582584181 |                  |
|         | 385.238961394234 | 255.527764534636 | 449.220056843562 | 507.040326298457 |
|         | 502.281584081805 | 655.431236290512 | 368.220523234399 | 379.546197364027 |
|         | 519.27448770158  |                  |                  |                  |
| SUPT5H  | 595.270107963842 | 708.779490017407 | 550.566402986082 |                  |
|         | 912.878077940014 | 1285.54492194393 | 542.544172683021 | 451.380376296813 |
|         | 436.731545612902 | 581.54874141672  | 340.098306132634 | 438.958573676953 |
|         | 330.703588385626 |                  |                  |                  |
| SUPT6H  | 240.971675534641 | 269.530151236658 | 227.350260241585 |                  |
|         | 292.366934378643 | 425.59810308048  | 190.625250757654 | 183.201926323188 |
|         | 230.424145472916 | 198.257497903131 | 151.589273633331 | 248.531972733475 |
|         | 174.08222895937  |                  |                  |                  |
| SUPT7L  | 122.362585067453 | 114.056147008769 | 127.070677267233 |                  |
|         | 135.966929064294 | 127.427014611349 | 125.40172813004  | 134.608734423113 |
|         | 134.95415308911  | 142.22515098612  | 125.668463983985 | 146.011694647614 |
|         | 132.976977898242 |                  |                  |                  |
| SUPV3L1 | 284.764628939128 | 280.531844086775 | 328.919401925375 |                  |
|         | 319.417555901733 | 228.852495818211 | 287.195290301363 | 284.715092831843 |
|         | 284.595024875896 | 264.526189799049 | 217.684410907748 | 246.355720496468 |
|         | 318.004190156313 |                  |                  |                  |
| SURF1   | 539.27766384282  | 535.612000577004 | 590.3584324045   | 490.153210371094 |
|         | 547.681206272188 | 395.425715632302 | 440.657747083721 | 482.344514972063 |
|         | 503.466550870577 | 549.692164962653 | 439.122658719747 | 352.741885295157 |
| SURF2   | 185.332215198617 | 194.753955100069 | 199.170488640762 | 190.238332933452 |
|         | 210.117033165026 | 183.82450756022  | 201.569913451219 | 198.113398073968 |
|         | 181.135519188216 | 214.355086255855 | 180.578528984075 | 199.579818754014 |
| SURF4   | 927.478050257292 | 907.904780399957 | 764.774225930479 | 982.367000148189 |
|         | 2227.70654174379 | 689.271009631393 | 654.663838918786 | 784.72162514331  |
|         | 1138.44837250274 | 834.537908087672 | 1282.84159765715 | 587.893636997642 |
| SURF6   | 652.201948082657 | 832.014011481807 | 795.720196538039 | 1029.43177809276 |
|         | 718.142991571468 | 424.912426797488 | 574.496860164135 | 747.587723573212 |
|         | 759.802694618208 | 592.387650564803 | 1514.53784631689 | 533.784151495549 |

|          |                  |                  |                  |                  |
|----------|------------------|------------------|------------------|------------------|
| SUSD1    | 179.321622114583 | 190.357437485436 | 142.829099538363 | 143.378998368344 |
|          | 441.873247266342 | 208.838523729744 | 221.424451092316 | 207.514489132778 |
|          | 262.861105654051 | 196.583548193097 | 451.985108262982 | 231.018059960001 |
| SUSD2    | 304.058158731957 | 262.139211406599 | 206.521761031181 | 269.141120401835 |
|          | 285.798047501616 | 213.382179917193 | 220.896363324634 | 296.051639873628 |
|          | 932.505095432049 | 248.965394617795 | 158.200211812067 | 206.321272734099 |
| SUSD3    | 117.331280455759 | 122.786030993629 | 124.486701452062 | 118.039780360151 |
|          | 150.182173149394 | 115.435942397626 | 128.528510920423 | 143.812863334832 |
|          | 169.667751894226 | 134.932416370825 | 144.565926379402 | 127.637319802339 |
| SUSD4    | 123.507963359911 | 126.330382425318 | 123.062390088305 | 116.635455849571 |
|          | 145.226278521493 | 141.781482381513 | 140.928627507036 | 121.843992693814 |
|          | 123.21112178671  | 146.920496801962 | 133.370488470007 | 134.451423371791 |
| SUSD5    | 173.334154083555 | 174.820064644203 | 153.468933239223 | 166.4983332269   |
|          | 151.908841481413 | 155.868109161417 | 154.884821436554 | 174.155599133789 |
|          | 158.053654524927 | 154.373739162815 | 160.811051590991 | 156.531951576859 |
| SUV39H1  | 223.778708427552 | 277.501071684448 | 232.845268785472 |                  |
|          | 319.223127076041 | 700.353187874339 | 661.096668635469 | 332.032371697186 |
|          | 800.013123376748 | 469.930860750773 | 308.330044958513 | 240.224826736571 |
|          | 354.067771806542 |                  |                  |                  |
| SUV39H2  | 157.551854647702 | 147.9084767638   | 187.710185880162 |                  |
|          | 154.760697311395 | 179.632562895905 | 169.667751894226 | 174.155599133789 |
|          | 185.544411160039 | 168.398366575579 | 181.308852106289 | 177.508603290389 |
|          | 140.678336884951 |                  |                  |                  |
| SUV420H1 | 219.709231012465 | 190.348359536057 | 200.831877950718 |                  |
|          | 192.878416717298 | 250.84781675544  | 248.085349787686 | 276.138650967632 |
|          | 215.365809536522 | 207.624240598841 | 454.133372808458 | 232.845268785472 |
|          | 249.554443204445 |                  |                  |                  |
| SUV420H2 | 129.422854634791 | 137.318442197233 | 146.851307767958 |                  |
|          | 130.455560026617 | 152.861304149219 | 141.535381351126 | 136.553568679965 |
|          | 152.358795162474 | 141.334394187941 | 138.28745132277  | 178.035700298977 |
|          | 141.879359965317 |                  |                  |                  |
| SUZ12    | 2185.46850787298 | 2496.17211592866 | 2111.32236867229 | 1848.27927621606 |
|          | 7815.98936145067 | 3103.4192907748  | 2723.55722258794 | 4979.31150268741 |
|          | 3586.00189997341 | 2105.87438782831 | 1883.74008471233 | 2630.78185410861 |
| SUZ12P   | 157.089650890944 | 149.91705328815  | 159.508223180752 |                  |
|          | 144.460541430705 | 169.806644442071 | 164.337486856997 | 166.330001480033 |
|          | 179.30729544595  | 158.092775850886 | 150.998881139061 | 153.709230037306 |
|          | 157.237147919803 |                  |                  |                  |
| SV2A     | 156.218834695891 | 193.945494721138 | 154.371946675862 | 139.201122725213 |
|          | 161.520362399369 | 138.872536475067 | 147.902312155661 | 136.472404812817 |
|          | 165.232545721733 | 144.464071397369 | 137.848546040474 | 179.015669199358 |
| SV2B     | 208.214764518526 | 193.832033192375 | 190.189217962555 | 198.023465629218 |
|          | 166.540134051424 | 171.579123521304 | 164.109321257638 | 187.561298131124 |
|          | 174.221939793486 | 175.601912488918 | 164.673579538023 | 169.598493862848 |
| SV2C     | 119.466200987489 | 119.281300456243 | 115.18875509198  | 106.576058729493 |
|          | 119.352995485911 | 118.000757530896 | 124.840101287634 | 119.613985826308 |
|          | 110.296425545476 | 121.335907318019 | 143.290642777702 | 121.303696898208 |
| SVEP1    | 1759.9632914516  | 1095.04571025381 | 1103.81439809121 | 730.34994035645  |
|          | 203.960838492793 | 226.25694727283  | 172.169129806643 | 233.047541132048 |
|          | 353.187829498591 | 284.438411011954 | 128.563180697606 | 127.218362452043 |
| SVIL     | 2653.47752512393 | 2532.82545752082 | 3545.8833678963  | 3237.94149351627 |
|          | 421.140525880287 | 227.483999162038 | 304.713434036642 | 255.198862778405 |
|          | 261.592512762969 | 400.676876982655 | 350.392951395182 | 276.5177779623   |

|        |                  |                  |                  |                  |
|--------|------------------|------------------|------------------|------------------|
| SVIP   | 128.372225487481 | 126.511314417328 | 134.044789094272 | 126.090985925439 |
|        | 128.400741751903 | 129.46430369977  | 128.077692981235 | 135.485867373592 |
|        | 143.560065338939 | 125.35643274458  | 141.150016212967 | 140.792400101142 |
| SVOP   | 127.558034562151 | 124.083648029911 | 118.924317138158 | 139.184647003326 |
|        | 120.452958447555 | 117.74682797375  | 125.141185839817 | 111.366283149236 |
|        | 116.925863450165 | 119.550086560732 | 120.163286072512 | 114.43491928161  |
| SVOPL  | 113.708683868028 | 120.188885479773 | 115.118170902045 | 117.412956162665 |
|        | 137.217104547797 | 111.596690019694 | 110.17590675298  | 114.835386789236 |
|        | 111.484426481816 | 124.755684505209 | 150.387906232396 | 116.58452862953  |
| SWAP70 | 556.568221094639 | 433.11536069928  | 526.625936680738 |                  |
|        | 329.333236839082 | 376.692422468905 | 458.782864873657 | 659.673052713372 |
|        | 572.913714991136 | 517.993093601127 | 1088.25132365974 | 814.471143753335 |
|        | 345.494740481759 |                  |                  |                  |
| SYAP1  | 1056.43975075255 | 1052.553421812   | 867.369315017411 | 911.782783698439 |
|        | 394.73732350607  | 1290.39741199701 | 715.039905439621 | 1084.10984365393 |
|        | 805.875557314697 | 708.056533282983 | 1066.25208226214 | 757.877066703516 |
| SYCE1  | 142.356747337127 | 130.483765953389 | 148.147294674218 | 136.144068118165 |
|        | 132.320536722841 | 152.064982697394 | 134.808485735121 | 143.967197319361 |
|        | 134.85809559975  | 145.692644807799 | 122.953869661977 | 130.255689301211 |
| SYCE1L | 176.340265963032 | 173.010799217261 | 164.922193471904 |                  |
|        | 168.805630890928 | 193.641927801805 | 169.036409026328 | 173.586160103539 |
|        | 148.003041725027 | 171.504939477949 | 150.152613183213 | 167.842122798757 |
|        | 165.851677392967 |                  |                  |                  |
| SYCE2  | 151.794243108455 | 145.932170561687 | 138.940564112156 | 127.581332110857 |
|        | 148.696116257083 | 142.039943511086 | 145.412368252632 | 143.799113486767 |
|        | 137.694556514044 | 138.426531345939 | 132.031693838834 | 130.546471770588 |
| SYCN   | 149.048057509964 | 143.070170783764 | 143.242308032336 | 133.771691580031 |
|        | 142.318709347082 | 150.829439012542 | 139.589612144962 | 140.83570584033  |
|        | 142.898851434337 | 150.042173991463 | 141.038721816572 | 146.355229778997 |
| SYCP1  | 128.411138850655 | 126.153806511702 | 120.521509788705 | 133.478829770103 |
|        | 131.432729794636 | 127.949413503055 | 132.920775987309 | 122.5651974076   |
|        | 122.706176540192 | 120.272964182307 | 119.052729327147 | 123.330142002791 |
| SYCP2  | 145.844961942581 | 135.102827224896 | 135.774569629738 | 131.887778588005 |
|        | 139.898996725236 | 149.910521500364 | 139.450341736722 | 168.52952604693  |
|        | 137.294246530224 | 139.22543724535  | 146.231937458616 | 133.755609587969 |
| SYCP2L | 122.768405654503 | 118.438942370745 | 124.542879928448 |                  |
|        | 116.929398630733 | 124.193603137858 | 118.708644971927 | 110.735199684144 |
|        | 129.750835425023 | 117.728410015076 | 110.068122112671 | 134.013748718539 |
|        | 113.274668934773 |                  |                  |                  |
| SYCP3  | 140.933444607646 | 147.123477579978 | 136.421163870578 | 145.112399373761 |
|        | 140.602170750673 | 144.487533992157 | 138.412897151567 | 139.358218798638 |
|        | 140.381386314817 | 136.718598487513 | 136.338683078123 | 140.137435303984 |
| SYDE1  | 541.258721278882 | 572.753294955207 | 378.891597719939 | 681.429327723794 |
|        | 353.826834642154 | 178.976116597291 | 193.412827246366 | 190.471158323247 |
|        | 190.489530928259 | 229.85833221434  | 180.501409705275 | 160.290104492275 |
| SYDE2  | 171.022976593689 | 200.456087759904 | 156.801189586018 | 179.863096463897 |
|        | 168.969180646603 | 174.761105961773 | 162.033909093358 | 159.154102271517 |
|        | 154.79534193124  | 161.212598761378 | 166.135707525987 | 169.36029946801  |
| SYF2   | 803.840404197117 | 818.445501500731 | 1179.42590997099 | 757.066786599446 |
|        | 559.236012019639 | 712.433345978749 | 919.626220838414 | 781.208872924532 |
|        | 817.529344685717 | 766.420275252501 | 691.916554922896 | 744.808064061459 |
| SYK    | 199.058972781223 | 209.304654633004 | 190.444387031552 | 145.503718833974 |
|        | 514.213675499369 | 316.524115715585 | 337.487980551006 | 385.978867521533 |
|        | 464.812091712746 | 509.702881232139 | 298.085365348496 | 283.163770658619 |

|         |                  |                  |                  |                  |
|---------|------------------|------------------|------------------|------------------|
| SYMPK   | 227.965783945702 | 292.145553580042 | 160.290104492275 | 323.276514394119 |
|         | 470.95418656881  | 154.197254746757 | 238.904826940476 | 188.724274062294 |
|         | 213.584269089596 | 179.44023315251  | 267.028096234702 | 155.211976328553 |
| SYN1    | 133.847494826806 | 136.220324225816 | 137.068717031383 | 130.49338418515  |
|         | 142.806728419652 | 118.331237160995 | 133.951322753098 | 124.408996713299 |
|         | 129.511465164539 | 127.998531115697 | 133.184279519985 | 129.867246424399 |
| SYN2    | 147.074807267102 | 143.993611400272 | 133.738587139139 | 133.594446233378 |
|         | 142.594553057288 | 143.893751699551 | 146.604519441812 | 147.694098231655 |
|         | 147.547944397578 | 148.444479022559 | 162.289781945582 | 143.685368799972 |
| SYN3    | 124.277983696239 | 126.516782182087 | 131.792339956719 | 127.6078497227   |
|         | 128.952986088886 | 133.355353808577 | 114.68345964966  | 129.203236898198 |
|         | 121.825639714374 | 136.293084080479 | 139.56332664295  | 135.268963938932 |
| SYNC    | 148.87242524521  | 135.63604256516  | 142.688809469455 | 135.380208104863 |
|         | 107.221547998974 | 121.286130275542 | 131.342562516383 | 120.740986472733 |
|         | 128.327528039933 | 137.337681987169 | 117.873333897609 | 122.056070994213 |
| SYNC1   | 916.026216386031 | 607.979208454176 | 476.076903428247 | 573.244735292944 |
|         | 141.382096896508 | 182.919385608842 | 167.077669654786 | 168.477388641982 |
|         | 169.764014031526 | 170.306241656131 | 126.956303896995 | 176.155413809391 |
| SYNCRIP | 457.411248351795 | 427.084392965651 | 445.505512764045 |                  |
|         | 439.492285515997 | 987.78377957731  | 1027.11849332495 | 854.224454791713 |
|         | 860.315938621256 | 1251.15912264225 | 1230.63920848575 | 1277.0921553877  |
|         | 1442.94175124818 |                  |                  |                  |
| SYNE1   | 135.088149158147 | 131.193538235053 | 132.539585717666 | 130.461084106455 |
|         | 126.775180133301 | 128.377928524315 | 128.901707304582 | 129.228874611916 |
|         | 133.42964827086  | 131.282091618102 | 133.869109970003 | 133.209211811498 |
| SYNE2   | 170.164668347783 | 180.219813240126 | 154.360558958914 | 167.370030272847 |
|         | 163.081050585097 | 177.132361355899 | 162.735609734946 | 167.500410857353 |
|         | 179.779007442837 | 184.187847236508 | 199.555406967021 | 150.48744233923  |
| SYNGAP1 | 129.626276841426 | 131.84454376953  | 118.401963042662 |                  |
|         | 117.078720392441 | 104.483909687253 | 105.375878824562 | 107.205247133938 |
|         | 107.049865500702 | 102.255408120852 | 106.772581387455 | 113.432757764419 |
|         | 106.719519490874 |                  |                  |                  |
| SYNGR1  | 200.017741240426 | 194.202977693583 | 187.389039221193 |                  |
|         | 204.544266331066 | 221.027562527572 | 146.110545700163 | 171.481917188224 |
|         | 137.303701514064 | 152.906352463546 | 128.738746025289 | 195.474525582555 |
|         | 148.649619242172 |                  |                  |                  |
| SYNGR2  | 121.79022464086  | 106.147993332294 | 108.530158480237 |                  |
|         | 116.67463130093  | 142.234554325754 | 111.922007318017 | 133.470643135354 |
|         | 118.180919555585 | 126.017158064032 | 109.209241676429 | 133.382099379709 |
|         | 122.959518532165 |                  |                  |                  |
| SYNGR3  | 113.440171712791 | 110.033746435328 | 112.714282429822 |                  |
|         | 119.767154020462 | 115.816156193574 | 110.727742629085 | 111.886543737378 |
|         | 113.656820701744 | 125.631073476381 | 125.905785653648 | 130.10852948682  |
|         | 114.412739085949 |                  |                  |                  |
| SYNGR4  | 129.984214994811 | 118.206034087145 | 125.121517583946 |                  |
|         | 117.724353829377 | 130.854818615966 | 114.41737808857  | 119.701313125748 |
|         | 119.876835248732 | 104.681530703922 | 115.914842445934 | 117.017844025726 |
|         | 120.521509788705 |                  |                  |                  |
| SYNJ1   | 203.206743799353 | 214.617852048151 | 167.764352429391 | 197.405472374722 |
|         | 152.390371614602 | 174.515815532892 | 161.084088366981 | 174.491551019128 |
|         | 176.317805247749 | 144.458829225668 | 164.955263076598 | 150.920224503051 |
| SYNJ2   | 240.497413647633 | 199.149959995133 | 236.772907994543 | 194.734255772365 |
|         | 148.638400592682 | 156.642441706727 | 176.267796612066 | 159.854639082837 |
|         | 157.288308753975 | 140.171749368266 | 169.733427590141 | 163.821142892643 |

|         |                  |                  |                  |                  |
|---------|------------------|------------------|------------------|------------------|
| SYNJ2BP | 2081.45603839306 | 2542.44286642873 | 1586.00600118477 |                  |
|         | 2736.98692493933 | 303.907003535357 | 857.55777793754  | 635.37511798786  |
|         | 890.810315261602 | 651.998433127992 | 595.882696498804 | 1334.69145271749 |
|         | 891.637685856145 |                  |                  |                  |
| SYNM    | 9881.69734721233 | 8787.57716309558 | 9171.47979464736 | 12615.8332290932 |
|         | 157.010145291837 | 168.261511797218 | 149.274901871663 | 142.221542344035 |
|         | 183.302479730653 | 143.961467163406 | 143.759171254761 | 154.455641374384 |
| SYNPO   | 127.189310473419 | 112.321396616213 | 116.65880728655  | 114.874358180801 |
|         | 104.36042819601  | 108.404733392914 | 115.235444833856 | 105.164790181452 |
|         | 110.624328647003 | 118.104763610751 | 132.282125790062 | 111.616460084889 |
| SYNPO2  | 908.352265585374 | 719.766799746895 | 767.662367310672 |                  |
|         | 897.0125616892   | 142.613654158833 | 158.565676210997 | 145.850605495564 |
|         | 142.03837243998  | 159.046016068252 | 145.917220112846 | 142.318709347082 |
|         | 141.898948675823 |                  |                  |                  |
| SYNPO2L | 126.464893786922 | 123.341568893224 | 115.128667174745 |                  |
|         | 114.504409331018 | 129.102182717009 | 111.389873428517 | 118.757973008463 |
|         | 118.983932995126 | 123.375592272781 | 113.362825181676 | 138.45137517137  |
|         | 121.988237521196 |                  |                  |                  |
| SYNPR   | 122.068058346443 | 124.876226351169 | 116.043095688871 | 119.75069850668  |
|         | 129.982236484842 | 125.171532277078 | 127.799190369808 | 130.222025384406 |
|         | 125.578037001199 | 115.734230176652 | 120.799317509529 | 132.737464610403 |
| SYP     | 123.738223146912 | 135.377118045038 | 123.58053320223  | 132.53122878527  |
|         | 127.409603645289 | 119.341806810441 | 118.712730897987 | 119.288554466773 |
|         | 111.525984720592 | 111.683074830042 | 123.129785564258 | 115.460136318681 |
| SYPL1   | 492.534183006883 | 562.543347322063 | 717.886050056576 | 420.248838397618 |
|         | 1231.37475540937 | 1651.68171717875 | 1300.40889834984 | 1746.30519466572 |
|         | 951.772948602094 | 1301.61742965939 | 1071.47374315822 | 2856.14739820295 |
| SYPL2   | 179.973655632636 | 179.501659253141 | 177.60876237572  | 221.491633607126 |
|         | 151.134466830828 | 128.105527466559 | 121.628827418997 | 138.504398858454 |
|         | 154.021906399992 | 132.602336133471 | 149.31184788671  | 134.260779370821 |
| SYS1    | 383.259887828605 | 298.301504581296 | 389.260166168847 | 297.228563607097 |
|         | 199.408907117764 | 178.476483428474 | 390.098830270926 | 193.292596471113 |
|         | 215.673878830563 | 220.169099923628 | 304.636618563775 | 220.60173086462  |
| SYT1    | 127.740057874561 | 130.582210755516 | 110.575582352222 | 117.611606270124 |
|         | 123.711828013052 | 135.609239096236 | 179.785198362326 | 223.408447580188 |
|         | 138.444427173667 | 139.430808017891 | 161.548130965486 | 126.825785762925 |
| SYT10   | 131.592172917738 | 127.048605625519 | 166.671563123047 | 160.482734190577 |
|         | 148.306990501663 | 125.526744092256 | 142.667173697017 | 155.731897985566 |
|         | 133.077760160486 | 152.024383072265 | 128.818684264163 | 134.10070984606  |
| SYT11   | 2280.20302441765 | 1846.61430264854 | 2758.01526530661 | 2033.67956299225 |
|         | 211.609763150578 | 503.59466398882  | 261.39435936661  | 450.688800547981 |
|         | 598.287431134037 | 389.381039495553 | 300.793542873709 | 335.013713757031 |
| SYT12   | 139.442091671938 | 151.891318080151 | 137.062807038518 | 133.322752419739 |
|         | 143.247977741752 | 147.604213625382 | 135.237042337721 | 142.64421300687  |
|         | 130.455560026617 | 136.864106181375 | 163.432972512188 | 132.8310947234   |
| SYT13   | 142.140247900227 | 154.187420367647 | 137.904786382385 | 148.104173238606 |
|         | 159.446705611995 | 144.096624787142 | 162.212442593001 | 134.549628985766 |
|         | 131.33321167357  | 144.023798119335 | 131.835171530369 | 148.895841777421 |
| SYT14   | 147.821639002833 | 136.643481414354 | 131.702788057359 | 141.67550758321  |
|         | 149.4401812      | 145.724294862079 | 151.418316929551 | 155.722314592388 |
|         | 156.333133322672 | 132.475414208533 | 149.069732302093 | 141.256915527472 |
| SYT14L  | 125.802927749616 | 133.711821318079 | 129.104084188187 |                  |
|         | 123.420635380886 | 125.769903262265 | 129.125709963326 | 130.272086123019 |

|        |                  |                  |                  |                  |
|--------|------------------|------------------|------------------|------------------|
|        | 120.527518013376 | 117.166509072455 | 131.038758046782 | 126.87100632595  |
|        | 120.046892432373 |                  |                  |                  |
| SYT15  | 209.023926358109 | 208.869189492052 | 201.383739902873 | 197.049616858296 |
|        | 160.143443392509 | 173.182013165174 | 187.097765940131 | 189.136114953249 |
|        | 200.360518276784 | 169.752525994991 | 199.459711023907 | 197.326259802349 |
| SYT16  | 126.690066353698 | 138.456465793474 | 124.348926304504 | 124.811760828557 |
|        | 130.879745244903 | 134.774591679724 | 118.547605249191 | 118.677203713024 |
|        | 123.551225884748 | 116.373841472226 | 145.323212897142 | 112.684334910243 |
| SYT17  | 178.804669910283 | 186.161941811411 | 136.49035374704  | 129.933228671483 |
|        | 168.841313096346 | 161.603317039244 | 214.068044241507 | 191.018168651394 |
|        | 174.214747421898 | 142.729945734027 | 285.214585324341 | 178.496344474999 |
| SYT2   | 133.198832503062 | 136.55090238808  | 140.000880942015 | 132.421863261746 |
|        | 143.100436913184 | 161.80922869659  | 167.350290326189 | 156.609370182062 |
|        | 151.169283505727 | 137.884051774657 | 126.943978009809 | 150.942078067308 |
| SYT3   | 143.007237184254 | 128.389494971858 | 122.962219297463 | 127.895989232696 |
|        | 137.670655293096 | 137.517461260687 | 130.63390061855  | 131.839890565869 |
|        | 119.548432046443 | 142.736148814019 | 161.139253742858 | 132.7284396337   |
| SYT4   | 115.923424095859 | 133.36168342199  | 99.7487411813724 | 117.494422663086 |
|        | 112.693431140524 | 107.531907287727 | 101.761615925097 | 118.625070307695 |
|        | 102.421174406474 | 105.816457443844 | 115.639101191444 | 115.718600552187 |
| SYT5   | 127.633362302159 | 128.097206000942 | 141.862767428244 | 135.449919220607 |
|        | 137.310014841869 | 130.116771999391 | 115.194730717797 | 137.599810249536 |
|        | 146.869927141655 | 154.615097099186 | 128.518381802959 | 132.987389721592 |
| SYT6   | 129.705735906962 | 125.780294378066 | 127.587379082064 | 129.57551086282  |
|        | 137.706893763747 | 125.742631850732 | 136.380523452336 | 136.123129580618 |
|        | 139.342430217926 | 125.624661345169 | 128.580625868379 | 135.999030570565 |
| SYT7   | 142.650451413991 | 171.775741648309 | 135.421804561804 | 154.886628987246 |
|        | 274.974304050999 | 192.980781927122 | 193.945494721138 | 193.412827246366 |
|        | 634.774041584043 | 234.947745514175 | 255.793823796456 | 211.660148497276 |
| SYT8   | 173.810080280732 | 160.32812671237  | 156.022967076728 | 135.763497910794 |
|        | 420.647394044431 | 200.72147365413  | 138.35538364303  | 232.960832410426 |
|        | 141.208106961875 | 180.364089931995 | 197.72068061775  | 334.101619029105 |
| SYT9   | 164.181915898563 | 157.530573508003 | 158.030237507443 | 215.558688906165 |
|        | 168.205277839471 | 176.382377784553 | 173.287859527767 | 155.902461107328 |
|        | 163.298729857831 | 160.493314658788 | 150.250193889942 | 160.368226341458 |
| SYTTL1 | 138.416716745934 | 159.620467672898 | 139.730999352036 | 113.799997627317 |
|        | 849.389818300305 | 357.514919818489 | 680.250735532287 | 412.648926259488 |
|        | 319.560819487616 | 370.390323116113 | 663.451243037105 | 836.235700891687 |
| SYTTL2 | 492.637241687561 | 433.019478861638 | 272.193578770314 | 281.570685561526 |
|        | 342.487952136318 | 254.359737178714 | 277.817786943873 | 314.845965872164 |
|        | 252.957489543915 | 200.387623661458 | 650.911886508922 | 411.359106929985 |
| SYTTL3 | 205.428900832926 | 205.630948393225 | 183.633719048831 | 199.933148219784 |
|        | 150.073816271065 | 169.771005675296 | 154.908975734985 | 169.920799931309 |
|        | 174.332913952768 | 158.411846122784 | 173.939159471022 | 159.824012085212 |
| SYTTL4 | 375.767528676937 | 392.6758818959   | 283.701987275608 | 366.317263094585 |
|        | 280.494088228226 | 252.789376168324 | 211.609763150578 | 302.021033686056 |
|        | 238.904826940476 | 166.515199732076 | 200.264756078778 | 309.580750386386 |
| SYTTL5 | 128.878051599968 | 130.378441113977 | 125.285502203677 | 146.290334865039 |
|        | 139.285128128996 | 140.805322576253 | 142.888281750232 | 158.723133891017 |
|        | 148.753891406126 | 129.195962576953 | 155.572357799741 | 137.065315360321 |
| SYVN1  | 348.808646570544 | 399.364160668615 | 368.0573385048   | 421.836020491624 |
|        | 662.373189001788 | 345.135289739599 | 433.189221987242 | 406.54518900348  |
|        | 446.948699651916 | 405.843083758177 | 440.916522871266 | 325.907037744936 |

|       |                  |                  |                  |                  |
|-------|------------------|------------------|------------------|------------------|
| T     | 135.08927101395  | 130.477824552202 | 142.036037957345 | 143.901267937876 |
|       | 137.299908075811 | 136.121343288722 | 139.071908528327 | 148.725162101789 |
|       | 146.007311764212 | 149.286184588967 | 131.928871107722 | 143.795399778897 |
| T-SP1 | 149.010477279209 | 132.110906510601 | 161.592528958127 | 166.285052506316 |
|       | 149.204816953404 | 154.865107093653 | 153.248199842194 | 141.992490695142 |
|       | 162.457778455279 | 151.577450119302 | 159.735182155088 | 151.067819234238 |
| T1560 | 142.278523641008 | 147.385714746214 | 155.798048652444 | 151.342902631318 |
|       | 156.46322298175  | 152.192865138174 | 144.059368898969 | 157.675974692761 |
|       | 133.048720362039 | 146.728881202697 | 136.015561289357 | 154.250656489421 |
| TAAR1 | 152.577131215027 | 144.559193410932 | 168.37043566813  | 144.107029869771 |
|       | 139.329693510525 | 148.767517078508 | 151.554352209634 | 140.958277301476 |
|       | 144.035936160694 | 142.432995657729 | 153.358189612307 | 151.548865569913 |
| TAAR2 | 153.399787997793 | 144.896960245309 | 149.108582827136 | 141.56459720769  |
|       | 138.325950428197 | 159.524235332529 | 157.6790197503   | 156.763364462534 |
|       | 148.587929928134 | 169.220974415101 | 151.808767243647 | 158.330403004116 |
| TAAR3 | 127.982696242304 | 158.63432604978  | 128.019837242559 | 144.629350188283 |
|       | 137.877756077011 | 143.560065338939 | 131.631968933144 | 144.345080865349 |
|       | 151.540744107423 | 165.186696781985 | 138.89354244296  | 141.505120938773 |
| TAAR5 | 145.241301006518 | 132.864018034342 | 121.396223519559 | 130.535859816562 |
|       | 114.790717658188 | 135.271290872348 | 146.26936366452  | 118.060781901686 |
|       | 167.912321820083 | 139.365595511181 | 138.276865331434 | 125.331215990597 |
| TAAR6 | 139.271829906127 | 131.552276774901 | 156.852187451794 | 146.198331189991 |
|       | 142.238908711402 | 136.807118099948 | 150.856917125736 | 140.995418231627 |
|       | 142.545823714168 | 152.791390145148 | 134.346754381858 | 136.922282125029 |
| TAAR8 | 151.239879652761 | 162.546620272507 | 131.722397988741 | 141.536764775726 |
|       | 152.386986818959 | 138.828562311512 | 136.254966566424 | 146.892065987724 |
|       | 137.536053775531 | 145.619570216377 | 130.970694919879 | 142.412731964179 |
| TAAR9 | 147.988883293205 | 160.364644321965 | 136.258073395013 | 150.508851767517 |
|       | 155.622257285651 | 136.308565710257 | 137.237089899964 | 148.263293819238 |
|       | 151.273261581765 | 144.038859705973 | 135.317796804151 | 151.41546939633  |
| TAC1  | 138.223001481672 | 134.503552797411 | 140.177708471199 | 139.685629122498 |
|       | 157.560117350562 | 142.084294087481 | 141.398513269219 | 148.086979061158 |
|       | 133.592691897675 | 145.365935017728 | 129.977863589097 | 137.398748156909 |
| TAC3  | 123.927736719427 | 127.099995420363 | 129.01094835739  | 127.820096020782 |
|       | 286.642323413104 | 132.297716337104 | 127.325087202483 | 182.397795261147 |
|       | 200.114704018645 | 127.220812636148 | 196.136080427522 | 125.28279436853  |
| TAC4  | 124.387133895009 | 124.168162885295 | 130.06068534054  | 121.71538073735  |
|       | 121.047419779542 | 120.901639342731 | 128.050677475339 | 121.640681916546 |
|       | 123.166013119235 | 130.390722272955 | 131.298129667973 | 128.17223916536  |
| TACC1 | 6919.4226838505  | 7389.95365139168 | 7601.58151657937 | 8496.2506227676  |
|       | 885.104778820041 | 5894.79176478976 | 2273.12164779441 | 2982.80580616089 |
|       | 3099.71798305764 | 794.636255515909 | 1931.16906839143 | 837.603727062008 |
| TACC2 | 961.931130189779 | 895.114975754684 | 985.087150371964 | 1229.47460924638 |
|       | 348.36178568457  | 246.533813165981 | 334.377352542623 | 170.028047334267 |
|       | 225.927425596831 | 273.353254857377 | 514.354512083591 | 315.752980521266 |
| TACC3 | 150.191645194625 | 159.130076733711 | 131.223691762533 | 168.996965070202 |
|       | 786.160002434066 | 453.058639550475 | 203.752540576935 | 292.911761762431 |
|       | 371.457568934695 | 231.890885094917 | 159.561431866706 | 247.280717385562 |
| TACO1 | 401.584032365337 | 414.267332328081 | 401.267425721838 | 507.137104111742 |
|       | 453.058639550475 | 441.785666261936 | 528.556049506759 | 539.008286968106 |
|       | 545.566596665916 | 533.140740560189 | 454.984562256248 | 562.543347322063 |
| TACR1 | 114.638254225216 | 123.960761343425 | 116.421771593211 | 115.830631252469 |
|       | 116.196676877996 | 118.442856984861 | 130.842257229979 | 113.262357892613 |
|       | 116.300028266671 | 121.849460555655 | 129.573520898314 | 118.025603140924 |



|         |                  |                  |                  |                  |
|---------|------------------|------------------|------------------|------------------|
| TACR2   | 471.598175637494 | 362.376153348015 | 842.567990276734 | 417.024088698182 |
|         | 154.136467767927 | 154.834679562341 | 175.073595611435 | 166.095964870713 |
|         | 158.85003890975  | 163.726898336284 | 171.36717256867  | 179.730694272916 |
| TACR3   | 147.442483242063 | 152.452246595937 | 170.091913791176 | 173.761036260869 |
|         | 161.234304237838 | 159.758196845781 | 164.455111983634 | 178.320732186309 |
|         | 152.251128595777 | 159.820341130737 | 170.737352030035 | 157.041481397151 |
| TACSTD1 | 149.292552957665 | 251.939696394174 | 161.463042036376 |                  |
|         | 137.429832103492 | 2708.20624364471 | 1980.4589291261  | 972.902937649492 |
|         | 1974.49672149862 | 2118.73410871718 | 568.040362658955 | 769.958422740085 |
|         | 2187.3010896903  |                  |                  |                  |
| TACSTD2 | 910.982557417978 | 3905.35300751401 | 2330.60389526686 |                  |
|         | 510.972389503051 | 22354.1731362334 | 13276.1713779481 | 18562.671630167  |
|         | 15851.5830405813 | 20764.6732139063 | 13276.1713779481 | 15532.9759169142 |
|         | 19356.3155476146 |                  |                  |                  |
| TADA1L  | 221.768507175814 | 210.729945718068 | 240.12078342024  |                  |
|         | 189.348690353874 | 277.359422005775 | 589.240581642145 | 302.113807121396 |
|         | 416.546844844021 | 241.168936008174 | 240.054164412429 | 288.182388699147 |
|         | 367.898258897888 |                  |                  |                  |
| TADA2A  | 151.561151654372 | 146.713861499546 | 142.027930009598 |                  |
|         | 138.123754096875 | 147.364301916733 | 150.672985449063 | 148.516653846017 |
|         | 194.112534914308 | 149.742140955184 | 158.020651857664 | 163.889522525848 |
|         | 158.767439363085 |                  |                  |                  |
| TADA2B  | 361.327436394941 | 309.318403417731 | 344.070947256963 |                  |
|         | 316.364342983155 | 204.681956301306 | 207.138680369683 | 252.32907388173  |
|         | 229.907632927358 | 303.986544460218 | 243.65518489122  | 317.353318759931 |
|         | 278.219561902233 |                  |                  |                  |
| TADA3   | 330.080428155378 | 340.487850009685 | 291.020789939476 | 428.09583118349  |
|         | 765.532997390972 | 293.692083555844 | 374.872358131797 | 318.73799597811  |
|         | 351.515059400947 | 286.703712311781 | 364.840751972169 | 327.324711245289 |
| TAF1    | 172.951567541592 | 155.988447182637 | 161.655336107432 | 145.45768403614  |
|         | 144.69686018715  | 156.84104238878  | 148.43357593249  | 139.792313018728 |
|         | 157.919709478746 | 153.366677608026 | 176.27969404442  | 160.127254444487 |
| TAF10   | 496.560127152436 | 509.512410867348 | 370.798852361374 | 662.958637409597 |
|         | 1146.3535752748  | 559.668195903429 | 764.137504481329 | 681.677841333095 |
|         | 864.161191021297 | 847.564628337955 | 1017.6969123529  | 576.997804865103 |
| TAF11   | 143.431389389919 | 148.782907912893 | 159.154102271517 | 152.026310884327 |
|         | 152.935963398921 | 173.513108409372 | 157.733042033549 | 140.227863970629 |
|         | 137.344198938623 | 163.632148441668 | 147.537691509156 | 155.114892891737 |
| TAF12   | 235.704824490397 | 230.367251714289 | 283.46492196692  | 222.848935978648 |
|         | 231.981501596284 | 245.042781391047 | 303.483515328621 | 380.888728347647 |
|         | 291.720204789005 | 339.069385816411 | 227.884445686928 | 247.899467998443 |
| TAF13   | 218.058543664561 | 212.5119818331   | 184.709768457405 | 214.175691239597 |
|         | 171.059849459102 | 196.922837906592 | 176.761123480566 | 176.317805247749 |
|         | 184.204036882642 | 191.200215655114 | 156.994265858123 | 164.652795899742 |
| TAF15   | 507.040326298457 | 814.471143753335 | 462.437471715008 | 1224.49891389348 |
|         | 1197.58205444449 | 363.195371577097 | 418.772484676858 | 572.262848718437 |
|         | 585.234286698678 | 271.615621030842 | 1600.10235468018 | 493.347308943133 |
| TAF1A   | 146.097201498811 | 140.086978441723 | 140.290598244169 | 130.297203474319 |
|         | 138.397152876585 | 151.954389699615 | 145.566861062922 | 144.81077501446  |
|         | 145.132183293421 | 140.391753835434 | 145.326803807448 | 159.606633817645 |
| TAF1B   | 208.14618424983  | 198.470718196139 | 163.661196423902 | 160.91894600916  |
|         | 397.985856484851 | 351.448985413528 | 291.056913909578 | 194.903531690239 |
|         | 243.191238594142 | 322.64731764456  | 218.369954323686 | 314.386320310898 |

|       |                  |                  |                  |                  |
|-------|------------------|------------------|------------------|------------------|
| TAF1C | 460.941286124613 | 483.312894744803 | 472.961857076681 | 576.298671053238 |
|       | 404.54681330209  | 328.730722366546 | 417.262521411065 | 458.282682131641 |
|       | 464.196512015649 | 347.292438587205 | 410.138738410101 | 488.14606875418  |
| TAF1D | 197.298982267459 | 180.493406236326 | 188.641397688261 | 150.843975804117 |
|       | 180.022646625687 | 160.493314658788 | 283.982575660968 | 191.074428905553 |
|       | 156.230806240545 | 339.32415558339  | 335.301103690781 | 237.191866335979 |
| TAF1L | 203.616580991715 | 186.140970908638 | 265.572253407219 | 189.174957940401 |
|       | 170.701964358516 | 248.43491649623  | 227.32463765717  | 220.816812192169 |
|       | 214.904634494921 | 227.52352046188  | 215.037122365095 | 254.9636051363   |
| TAF2  | 256.022057262325 | 247.015574724901 | 300.047728281275 | 220.710324965453 |
|       | 228.086256222312 | 513.428413503031 | 340.668473351494 | 363.150472154973 |
|       | 406.54518900348  | 413.084646927035 | 304.713434036642 | 367.518273773904 |
| TAF3  | 168.991551886143 | 172.877947895827 | 165.134931755194 | 166.506602328929 |
|       | 150.748298569951 | 185.886737029845 | 156.417000271727 | 161.577683729655 |
|       | 164.717809928624 | 157.225479764928 | 148.791182443623 | 181.914505612128 |
| TAF4  | 416.215253990273 | 382.701467158304 | 426.032234135861 | 416.307629596091 |
|       | 608.351527783086 | 816.580880338838 | 745.153336165802 | 561.761160223609 |
|       | 614.514126276981 | 353.571106279836 | 513.20896845398  | 571.136519973808 |
| TAF4B | 174.08222895937  | 179.55905250703  | 154.8975607055   | 176.77183598995  |
|       | 170.350891928203 | 131.572485018063 | 134.517774302213 | 158.541906931082 |
|       | 139.579764449867 | 158.420821486138 | 146.582858169664 | 122.789656787728 |
| TAF5  | 189.726075394359 | 185.617936412633 | 214.396920524803 | 187.247062073247 |
|       | 139.779754416105 | 156.068308349225 | 152.29434111068  | 169.695658738618 |
|       | 173.050039480459 | 131.121343131082 | 157.40255559397  | 159.913028912492 |
| TAF5L | 138.269955723817 | 131.2834389999   | 123.150299476109 | 125.099672022917 |
|       | 136.001505582342 | 119.655162437465 | 122.405469833024 | 131.655316312379 |
|       | 116.850851308701 | 120.082391311921 | 149.467626202395 | 133.333067546558 |
| TAF6  | 174.587558727209 | 171.130215858803 | 195.929328710358 | 211.483693299981 |
|       | 244.766289564524 | 148.219406063533 | 172.446482096058 | 165.813771791917 |
|       | 166.368623023308 | 135.146767090951 | 167.637638693195 | 171.298701141684 |
| TAF6L | 380.514553097613 | 433.491835341321 | 408.510567121592 | 590.646248924596 |
|       | 1059.80292026589 | 575.546802138889 | 460.651156484562 | 357.063270015318 |
|       | 310.23294370018  | 267.970798709017 | 329.068463281182 | 395.049127927637 |
| TAF7  | 471.946284490029 | 411.359106929985 | 460.089380701982 | 356.62074247786  |
|       | 271.897511879509 | 377.89330639683  | 491.290438575428 | 470.746477818201 |
|       | 339.753059801136 | 824.427857809495 | 520.585319342817 | 443.964363178742 |
| TAF7L | 119.107992692097 | 116.112013454335 | 122.937281123348 | 114.987285062108 |
|       | 152.89366585726  | 118.727279917776 | 113.249267122926 | 127.806138997958 |
|       | 136.815411937352 | 122.595766303833 | 145.507330257603 | 116.134550788966 |
| TAF8  | 117.735411259153 | 120.460433297007 | 144.754401731628 | 119.498312996987 |
|       | 185.727947276958 | 116.103369028871 | 128.306607216705 | 146.533374238616 |
|       | 145.478233255862 | 137.195906276069 | 159.997580819443 | 131.80257432775  |
| TAF9  | 189.114794029657 | 198.90533452253  | 220.772387104223 | 195.400963839097 |
|       | 178.179238056905 | 239.970202560698 | 319.490670412394 | 253.933478547515 |
|       | 224.298067319406 | 398.61164689194  | 291.720204789005 | 336.786227017391 |
| TAF9B | 105.551878332786 | 107.949834974369 | 111.716607815635 | 116.176068923513 |
|       | 113.542803491215 | 104.896224175106 | 105.096927149239 | 109.255470590389 |
|       | 114.970485002776 | 94.3531468700382 | 108.296042016208 | 99.26400442869   |
| TAF9L | 235.742017851879 | 251.347519777204 | 361.516275756449 | 217.148957110623 |
|       | 181.294497402507 | 299.33156125224  | 263.64863646012  | 215.335795337978 |
|       | 225.005311517365 | 259.374392296079 | 229.97640195632  | 205.282221255986 |
| TAGAP | 135.730331297139 | 144.170287726456 | 131.01107240791  | 127.990453128978 |
|       | 124.083648029911 | 130.282212339065 | 132.978746105877 | 140.009593108693 |
|       | 142.661504601445 | 159.055956234445 | 130.684569384626 | 133.953303801604 |

|        |                  |                  |                  |                  |
|--------|------------------|------------------|------------------|------------------|
| TAGLN  | 16077.1585881362 | 15238.4097431619 | 17404.1167486753 | 20510.096303537  |
|        | 534.276129011237 | 1370.61156801632 | 325.642275889649 | 1137.42879398351 |
|        | 1306.20183851747 | 1306.20183851747 | 321.049000153127 | 589.409235971915 |
| TAGLN2 | 576.997804865103 | 720.364080505785 | 372.149771075286 |                  |
|        | 610.591049634222 | 3954.24763752814 | 2300.9407349072  | 1465.2419150392  |
|        | 1731.62376348283 | 1733.96382719909 | 1289.56069670699 | 1095.52349352502 |
|        | 1816.3719976564  |                  |                  |                  |
| TAGLN3 | 135.634385846692 | 137.310014841869 | 115.51493368527  |                  |
|        | 141.232464220879 | 131.177396785633 | 124.632373951797 | 132.186120302011 |
|        | 130.628967781841 | 142.394644827434 | 135.338077911839 | 131.958760372325 |
|        | 171.059849459102 |                  |                  |                  |
| tAKR   | 134.132312782731 | 133.804489975068 | 138.426531345939 | 140.479321382192 |
|        | 144.375109087466 | 135.683892897583 | 135.705904966172 | 151.212606106351 |
|        | 132.677272839165 | 130.027227278931 | 132.062415660672 | 125.826111950648 |
| TAL1   | 135.75568942028  | 136.171728950893 | 125.187617901961 | 124.464941711781 |
|        | 127.0631494857   | 131.945667475797 | 129.928047362701 | 128.032141013681 |
|        | 122.268560536152 | 123.439897913722 | 148.031899566208 | 121.679013405559 |
| TAL2   | 131.679566454851 | 122.031894952046 | 128.800907223807 | 122.742891063864 |
|        | 116.288113598488 | 121.197702744078 | 119.346574301289 | 124.933738341123 |
|        | 122.868393258957 | 114.987285062108 | 136.008118769513 | 128.528510920423 |
| TALDO1 | 1516.97921112926 | 1730.30703463073 | 2012.36542989953 |                  |
|        | 2166.68174726155 | 2508.50428529255 | 1607.52029676299 | 1181.1611856364  |
|        | 1628.24528041404 | 1999.10320742823 | 2176.59445919725 | 1024.95957828641 |
|        | 1010.23703166498 |                  |                  |                  |
| TANC1  | 447.521645706162 | 364.443097338814 | 404.618867159141 | 268.78904911703  |
|        | 222.736706411035 | 335.301103690781 | 226.565823278767 | 285.131244588624 |
|        | 239.845747958475 | 381.323457262383 | 159.06002608158  | 331.795832780176 |
| TANC2  | 204.438365139666 | 222.646371492347 | 172.942666836182 | 182.263724979519 |
|        | 394.65807885612  | 422.434778100827 | 420.361583975644 | 741.689442253375 |
|        | 585.721610434501 | 283.982575660968 | 639.688482258192 | 583.455617065556 |
| TANK   | 236.251507822415 | 226.334672545273 | 287.593221911064 | 199.776140037612 |
|        | 198.066837203458 | 208.983138060317 | 236.508498739509 | 233.82434521462  |
|        | 224.135228192655 | 254.013921962363 | 231.547654653783 | 250.676092725829 |
| TAOK1  | 710.228463443265 | 515.158921349383 | 290.638110977807 | 317.206754773681 |
|        | 614.957397883514 | 328.969023478451 | 280.913748398876 | 320.877897822963 |
|        | 247.307128520272 | 237.266455875982 | 399.762451559805 | 255.413231082357 |
| TAOK2  | 171.626438561923 | 187.686326872667 | 164.146345008398 | 223.872330412144 |
|        | 249.823314327355 | 186.309367281625 | 185.583997792931 | 170.67334244323  |
|        | 183.83720937589  | 142.049776668507 | 180.850779069931 | 182.997980582218 |
| TAOK3  | 200.114704018645 | 186.1961391235   | 208.406980186223 | 180.008152341531 |
|        | 190.002630382394 | 186.640167849568 | 218.839681873515 | 176.980780681976 |
|        | 192.548337508559 | 183.130891975122 | 246.369521698487 | 188.36361073603  |
| TAP1   | 818.445501500731 | 951.371815352591 | 409.073045356073 | 601.800326895295 |
|        | 1965.13870083236 | 562.543347322063 | 935.784743413185 | 1593.49895307361 |
|        | 5347.78127066964 | 1350.87073284396 | 3510.24464112094 | 1822.14935116363 |
| TAP2   | 162.47662918768  | 169.220974415101 | 140.765231611948 | 139.316189199729 |
|        | 175.686248503777 | 148.130993521745 | 139.365595511181 | 182.292947734054 |
|        | 223.474531516972 | 166.635366968851 | 176.390014020936 | 190.270819689158 |
| TAPBP  | 404.172535442156 | 473.947538805454 | 338.739180103373 | 535.041545916303 |
|        | 746.523071806534 | 317.600728351694 | 643.468308027006 | 405.130899553871 |
|        | 584.548578914846 | 565.313436777992 | 1102.73689840572 | 566.417354841707 |
| TAPBPL | 226.893147371644 | 212.836093887552 | 241.890850719625 |                  |
|        | 240.706548931192 | 238.823244541016 | 175.686248503777 | 246.186104432792 |

|         |                  |                  |                  |                  |
|---------|------------------|------------------|------------------|------------------|
|         | 347.3483417873   | 287.593221911064 | 234.925852373127 | 442.698000781597 |
|         | 347.147961254829 |                  |                  |                  |
| TAPT1   | 434.073729807058 | 398.571054759451 | 372.024884481775 | 357.140791982825 |
|         | 209.568066932367 | 246.676401619881 | 210.290500215377 | 195.303469330682 |
|         | 265.402310598892 | 185.950131245699 | 294.653534388707 | 220.816812192169 |
| TARBP1  | 229.594081405784 | 195.282045838381 | 193.412827246366 |                  |
|         | 184.826234215216 | 248.204358220728 | 399.476401949891 | 295.420691959792 |
|         | 236.809829701921 | 240.283918204202 | 262.629961694573 | 342.147414141627 |
|         | 291.577778800314 |                  |                  |                  |
| TARBP2  | 181.735072060023 | 187.069074575776 | 201.954167006591 |                  |
|         | 212.147155923729 | 404.073802241516 | 267.342817344746 | 330.758879244143 |
|         | 291.683896942007 | 313.828943866034 | 282.604890044452 | 262.389583658305 |
|         | 358.355621069787 |                  |                  |                  |
| TARDBP  | 345.494740481759 | 339.012225830929 | 326.45984882427  |                  |
|         | 323.95355217044  | 156.34272729153  | 374.56251861444  | 237.216435972201 |
|         | 229.85833221434  | 237.171424222756 | 180.680595239651 | 225.209315195163 |
|         | 256.729891423908 |                  |                  |                  |
| TARP    | 138.701086464887 | 127.150222504237 | 147.754489751457 | 134.227796103219 |
|         | 136.271412363498 | 133.9382467268   | 142.34956863109  | 157.979749139651 |
|         | 138.359423363142 | 141.70844587896  | 143.094799968981 | 133.625358030199 |
| TARS    | 837.872187194784 | 643.660739343159 | 767.054576874115 | 598.287431134037 |
|         | 646.117381960716 | 1031.38207659547 | 777.901979189395 | 756.068695265118 |
|         | 683.019502027271 | 1160.25775445193 | 977.450397042213 | 585.371892598422 |
| TARS2   | 207.560911665319 | 247.622351589081 | 215.272800347166 | 290.582957824549 |
|         | 300.53017771156  | 261.469732730752 | 269.379272725008 | 293.281098275134 |
|         | 236.809829701921 | 250.647644543963 | 244.990374822652 | 252.655315526015 |
| TARSL2  | 177.567833691547 | 191.467626362851 | 199.250680260804 |                  |
|         | 208.776711004753 | 165.277935422113 | 178.270849389719 | 164.084737224884 |
|         | 168.697565122105 | 171.85890372225  | 157.499803444188 | 167.858490180471 |
|         | 177.468210189888 |                  |                  |                  |
| TAS1R1  | 110.325803953516 | 121.121686280797 | 112.198629213643 |                  |
|         | 108.697696080014 | 119.466200987489 | 116.514299377365 | 120.76311889397  |
|         | 109.140708667012 | 105.551878332786 | 103.888971448792 | 110.829107724132 |
|         | 112.790552379447 |                  |                  |                  |
| TAS1R2  | 163.500384982242 | 176.11287574658  | 165.74458564887  |                  |
|         | 160.368226341458 | 162.970595558845 | 168.21856603538  | 168.295044843056 |
|         | 181.950658782069 | 168.897620634337 | 171.314681729657 | 150.303703193967 |
|         | 165.752558888845 |                  |                  |                  |
| TAS1R3  | 126.205931638442 | 124.810749946769 | 148.632332840817 |                  |
|         | 122.932745723044 | 126.921925660996 | 144.579725208643 | 130.613760017864 |
|         | 145.902572804249 | 133.753999983813 | 121.75662526451  | 134.71514094826  |
|         | 126.330382425318 |                  |                  |                  |
| TAS2R1  | 116.258629237662 | 127.605805815475 | 121.391637838137 |                  |
|         | 127.380083832809 | 113.370762349233 | 109.781334128478 | 113.492900106468 |
|         | 109.156349683299 | 120.452958447555 | 128.990911924499 | 132.712573198794 |
|         | 118.930792960643 |                  |                  |                  |
| TAS2R10 | 126.253319664664 | 140.271557921345 | 123.281489592543 |                  |
|         | 133.280418227922 | 120.633217745524 | 123.007103885415 | 125.769903262265 |
|         | 135.449044827893 | 124.746457912284 | 114.470670941078 | 138.121905080822 |
|         | 133.031431118772 |                  |                  |                  |
| TAS2R13 | 123.889427666612 | 117.069094451283 | 129.23899614612  |                  |
|         | 124.627339426244 | 122.00079209554  | 134.018379799826 | 131.04482088126  |
|         | 126.759554774012 | 124.093412630817 | 122.447154928139 | 115.664551127497 |
|         | 136.2336179571   |                  |                  |                  |

TAS2R14 145.045633612194 132.926799887017 129.372522073479  
146.885404321622 146.713861499546 119.152881350581 153.146646647258  
138.123754096875 132.027020683413 130.209752198964 142.362022977137  
161.017267304159  
TAS2R16 142.804411455413 130.022574966461 131.244759170642  
147.885769870843 142.230934617475 136.893392154262 122.985117824212  
136.971869448818 124.170242736875 123.386622160181 131.915864620669  
130.557209560361  
TAS2R19 116.378552206652 129.442111153737 112.661607612444  
120.727504500018 131.560971848628 110.304102941202 115.884253217495  
120.252164075308 116.355027746922 115.285392699073 112.590379042108  
118.802030418792  
TAS2R3 129.026732674277 136.68056120003 132.324630056168  
134.4811029314 131.121343131082 144.574566623882 135.310766630401  
145.658251059524 144.36033726557 140.304810288752 115.30786313391  
122.644105247178  
TAS2R30 132.198536906752 138.301397056664 140.26206122305  
132.352268262631 144.649656552 138.458816023289 134.005402534879  
141.817230824364 125.013839352291 149.52880714343 136.03581843125  
152.379441401583  
TAS2R31 114.314425748312 116.043095688871 121.559477523123  
135.9097041056 112.404562115306 115.296915259091 119.044902525459  
113.170014668758 112.436972452838 129.47419698487 121.973581817041  
120.308260557986  
TAS2R38 104.154182930018 106.829040075772 105.976284291356  
102.343275379164 101.431474941041 100.966979609222 109.37466528113  
113.112450527382 103.594872791657 101.597648528389 117.995551728392  
101.915858150866  
TAS2R39 132.464205461991 124.758906471654 142.434356144925  
129.813090345837 129.409091049705 128.042181036687 121.672811608791  
121.410606617535 128.354163132392 131.397850276558 141.380276932556  
122.821563586744  
TAS2R4 153.998849486363 136.042982529628 135.479300698192  
143.769240322865 145.187490179166 155.846106540378 155.218336968191  
138.903450375532 158.56996905631 148.054367166566 156.873097743717  
152.291176493005  
TAS2R40 158.404154056472 133.470643135354 135.65700435306  
145.159572111039 146.482652762374 149.383429241903 138.028813480968  
141.413350601693 143.140502042489 140.708683675555 153.882081780197  
133.399632102473  
TAS2R41 162.373508183992 148.499207368959 155.011931456736  
146.808519947394 166.825501664231 154.705630035232 149.377153449536  
162.547569833931 152.68344738009 176.001771318766 139.939863187181  
172.403953571339  
TAS2R42 137.888195199363 145.043494048779 154.632563476364  
142.316441155937 131.65084896906 138.638573020758 151.702809524494  
140.307931763353 124.210840121525 138.631273903053 141.256915527472  
128.02595294499  
TAS2R43 145.584615439295 143.628147237159 140.971253689199  
143.903216264503 141.131578372349 162.71020036416 146.031321571566  
160.825408895349 160.0697586671 157.08300736206 154.101698334466  
136.955651763743  
TAS2R45 133.399632102473 133.800111596565 143.917152377544  
123.53212786736 128.082956839709 149.473505461585 142.090009728666

146.136820062093 145.002309193867 151.456702092528 129.932576311158  
139.338384535905  
TAS2R46 143.895399273595 158.779261405573 148.412895185127  
133.257477196196 157.361421272816 144.725650040212 149.560505078257  
139.131857948357 156.368487784719 159.331110936668 128.023203858837  
149.471240458766  
TAS2R49 151.334463063946 139.345434097957 154.153249796248  
173.387549650592 152.577131215027 154.938900278679 149.772157318769  
142.372470063444 164.970438494223 151.585818981801 141.779801021888  
146.982584024102  
TAS2R5 125.433502200592 127.718341524417 115.999443701343  
110.900309203531 125.937660544107 126.216519704249 132.294365151614  
150.319052894567 129.692578787988 131.324822348301 143.322199505844  
124.927989289122  
TAS2R50 111.398760606544 113.799997627317 104.03442843396  
110.234403581151 109.552501987529 118.461037435114 114.042914237667  
103.550817366724 102.661440700541 112.063713561549 103.660742045068  
112.949643549398  
TAS2R60 140.793616429174 153.083451626042 133.050798832332  
141.476041451832 130.339214643083 139.62718946833 153.189490068047  
147.254800126614 142.259196792767 131.766114156138 114.364953312191  
126.931328660501  
TAS2R7 123.482626777491 116.360144963753 121.18490040448  
116.221426977629 121.545189875973 105.408689610638 121.632494500096  
112.126521532091 117.404906698431 109.817705421158 113.321454160244  
113.687931899298  
TAS2R8 131.409796639443 126.667650990284 138.038446102921  
124.863832760607 141.066106476109 133.296200563657 131.102996816222  
123.179986410723 122.472909598385 128.002822538671 126.089217853289  
131.655316312379  
TAS2R9 160.461846976268 139.748733350375 157.094001180073  
168.3523504179 148.255769084026 141.255406288178 169.072574423443  
152.511331178337 156.037150880384 170.974759483946 142.942021904533  
155.101850847148  
TASP1 173.121618125421 157.688982037448 172.28937151007 166.330001480033  
167.380798617981 216.991823988763 176.533058719908 181.593291870136  
195.645181575647 180.060096787617 175.148318011395 241.648044508699  
TAT 116.335864439545 113.636570490048 104.896224175106 109.781334128478  
116.796995589816 116.780639688465 121.799209715087 116.476747183738  
112.340161674529 107.930325780047 120.257886394616 115.605206174867  
TATDN1 291.369577397743 298.664864578349 367.567681162661  
262.756237406794 252.10470581893 291.616195651001 410.845034795716  
332.138346958671 354.656612182522 356.268960813032 465.029298672645  
374.337030706199  
TATDN2 434.509391836336 441.873247266342 323.149792143481  
492.207833630086 639.38881853171 380.146996799549 280.007569817323  
383.682951666155 461.822629852953 289.761702484888 366.317263094585  
374.761007556839  
TATDN3 292.468585109951 313.536451935268 323.04019262387  
320.024259346646 207.453490385508 351.585604465402 291.537725613819  
295.607161318725 322.36247485445 320.774102343889 281.740495452842  
331.32397534437  
TAX1BP1 2217.82628612929 1936.88813111969 2801.66917828364  
1589.70261092241 1806.24732793591 1859.88000417483 2334.97297889593

3062.22499714914 2527.99279063127 2198.4268389426 3501.86788138647  
3122.71790981947  
TAX1BP3 1078.41947691758 948.150767619765 695.086203058575  
1153.5175534971 2532.82545752082 748.015452242839 1367.19652160532  
1027.48490028905 705.020444579319 1775.32632165475 1667.86825735893  
2277.60839052397  
TAZ 187.625536724681 207.674249122047 175.960788330149 194.488249052694  
226.841838641151 163.099009810658 173.484307104751 163.346402397924  
180.590215659031 179.923966067226 190.471158323247 180.690409026809  
TBC1D1 207.890408761692 189.872997882033 204.842791081358  
244.689936990021 177.696849418064 181.500222423634 191.830711714844  
152.362546746522 180.035652063942 167.030667499538 153.762995131216  
164.433462115832  
TBC1D10A 189.509062639279 197.895094054577 200.790119570144  
224.424524191566 396.526590512521 205.45079491218 179.57046217355  
177.598422362298 163.042083189818 252.197271817794 284.995098167431  
240.182016388745  
TBC1D10B 267.483886037099 318.004190156313 229.77428612216  
375.189005729903 521.83794739314 295.727275232995 234.156713102803  
210.550995170071 224.186573847185 207.05325577114 258.830885826237  
206.68694753419  
TBC1D10C 159.42746786085 148.294870328642 131.894919149666  
126.069594320759 138.980079440205 129.723501897231 131.892151111901  
192.580288063603 349.382889326613 120.043811428091 175.585857393085  
137.21916902421  
TBC1D12 162.762473039474 151.841652724562 143.388028226208  
142.153830345183 140.113334247294 155.07594431078 150.384559054133  
143.392073068497 143.074187168031 137.457453776513 152.573063322741  
151.334463063946  
TBC1D13 262.861105654051 322.099431638246 268.328002606268  
409.073045356073 304.811116024094 196.001089662818 186.551385094902  
202.869364962231 222.526610842047 202.129153259445 296.75326294587  
173.353648927895  
TBC1D14 478.180723959397 555.366765340014 463.187551361986  
778.28014337938 490.849163737598 437.344765185802 559.899430596368  
474.216057978384 492.637241687561 405.130899553871 466.257158794525  
487.19625805337  
TBC1D15 436.586158384666 406.369889501135 512.184962338131  
348.457808063307 404.876478833713 524.640879446426 390.372738176917  
1505.90883940934 518.925188630246 495.769802520637 388.477382640003  
297.176755638159  
TBC1D16 224.67853219142 213.556015518863 241.987100712218  
293.448046685909 242.037132958656 275.972447693982 233.975864722289  
257.622317771472 252.432175363972 314.646369385896 225.065765924246  
249.339449789861  
TBC1D17 279.159925913207 301.546624239855 305.050933898691  
338.260976633501 332.032371697186 164.299585578035 199.408907117764  
175.805472275887 188.118989395838 177.851689709807 191.467626362851  
163.234966251618  
TBC1D19 252.548942594125 234.156713102803 275.584858082096  
230.749601687217 190.045156046541 171.465178761171 235.372592051464  
180.501409705275 195.863843860549 199.854728619468 175.222531098958  
223.154771092064

TBC1D2 182.886100305943 219.288597751645 197.962159288376  
207.076364103755 417.442660073269 283.701987275608 447.995213144892  
294.997671630798 397.660202059209 832.014011481807 435.796737132969  
272.193578770314

TBC1D20 424.37437028833 411.968307579588 343.346755862776  
478.38361571213 279.000687630846 270.490971664802 246.850599569231  
262.389583658305 264.685862877779 265.866465528654 353.774297577869  
233.82434521462

TBC1D21 128.207440197765 135.010937737018 128.853089272901  
129.295956874012 145.566861062922 131.666853845458 129.647514123731  
145.133151090252 134.206518622834 130.224324464992 149.492550066785  
139.39442529119

TBC1D22A 187.48055574295 180.1204762193 167.093409692227  
203.298764374262 216.102897582821 187.796440205485 197.762169504041  
164.647634120888 188.070213212057 240.878804911613 222.315451077459  
226.458509834965

TBC1D22B 197.667299074218 206.972440734038 180.34788837703  
222.086635504858 180.902950045351 162.317084707395 190.76537287329  
166.192990554427 171.338371572269 174.068974937318 179.509758601636  
166.305219348008

TBC1D23 181.294497402507 187.993907528473 271.770138565186  
150.290025009187 171.071893074072 257.372740535895 278.061498892643  
266.892524131545 279.790257881254 371.819911874273 199.776140037612  
241.418016203544

TBC1D24 156.923675862035 159.185616602396 136.106596229215  
145.478233255862 182.665357598121 127.112296857923 133.900005368973  
132.878638378328 137.4552565025 129.745892720738 168.925131238831  
133.11040099808

TBC1D25 169.012926546641 174.498521167568 148.782907912893  
165.900156600776 176.420075374686 157.692519370734 144.754401731628  
141.119491147925 143.107570838895 159.41078351918 166.587100972754  
143.92831903543

TBC1D26 134.867806860993 139.543551482943 160.906550609416  
128.521380879209 142.41737138634 135.24841020592 147.863198012238  
156.511202150773 142.255657518926 136.543603346919 143.616189776965  
140.477307701027

TBC1D28 156.280701500421 151.716042884808 145.739537463907  
140.987694585232 145.658251059524 152.578091976678 144.78971417658  
152.91729346961 147.15764785567 153.804419092743 153.829636228764  
150.396462763607

TBC1D29 106.491867793742 100.966979609222 112.495783269169  
101.915858150866 108.296042016208 99.0767996209245 102.661440700541  
106.126202301438 106.667175621971 109.29279076901 113.980716384814  
115.118170902045

TBC1D2B 963.343120586863 903.144845227364 672.13164205724  
844.187489702587 654.52788411248 500.469781477166 579.493790910006  
402.694564608582 611.540759532294 421.583441056026 1448.64875525408  
461.722481634933

TBC1D3 166.433933349193 157.797222258336 165.436881839632  
155.906054212876 162.678619800767 198.954254778846 231.547654653783  
217.380892198811 180.578528984075 164.630705813584 212.396522888943  
165.82215325714

TBC1D3B 155.63328143658 154.512619892977 164.794626785115  
157.269049853539 173.260348096238 199.756584044664 282.561381978659



246.95071325085 195.513703253634 213.338918839446 184.611146047556  
220.345184229077  
TBC1D3C 162.955366577418 153.6855881767 161.968835903764  
145.744039709418 159.35787888191 173.115418167551 226.449705559354  
205.305702209672 176.328994356625 193.218266574099 210.103974340881  
197.605208310432  
TBC1D3E 120.880547922392 126.421148348261 130.465221782084  
133.419239158866 139.834535091869 130.135721123253 140.469508410073  
136.557466007228 124.740700441589 132.780055030907 153.152921890232  
123.615802924067  
TBC1D3F 175.98210925643 159.036647992998 183.236087954054  
172.364618542922 175.946843919065 158.344330353326 191.220064414876  
165.737618983611 164.87433908877 227.558441474918 166.182850621447  
185.405774238391  
TBC1D3G 201.289402228512 165.267693285882 182.470538043064  
179.198164545975 211.736398352592 266.652805624826 409.883222213537  
365.441289363381 311.966971734249 283.46492196692 431.799795646414  
261.96528977292  
TBC1D3H 138.805103589625 140.554684822646 153.328585916625  
148.522580898717 161.636411303968 158.25554353787 188.567747377006  
180.34788837703 168.830344627025 159.508223180752 186.854553034865  
159.758196845781  
TBC1D3I 180.837420957945 155.223806761489 188.515336186633  
169.36029946801 191.814634229865 215.019239034819 339.448524400708  
357.972320648217 250.577945492981 254.359737178714 277.129985959184  
260.642170838161  
TBC1D4 186.1961391235 204.5274881834 226.221973502783  
194.413759761549 200.84691030169 224.251136332123 211.535720730612  
197.699100346967 220.345184229077 260.999345837027 198.066837203458  
227.847614397311  
TBC1D5 167.620915011868 152.733409144267 194.655710454472  
190.405863264717 182.495117800073 222.990586491219 198.489278156437  
222.051005238856 202.943987922418 180.336623146341 156.273445355976  
201.004491067972  
TBC1D7 284.940858938629 353.385210690169 292.068293167526  
420.502251256406 848.154015576436 485.87138934376 532.786041960586  
324.177924877233 474.378918787006 374.169744342352 349.128741707506  
420.017044147123  
TBC1D8 236.470206707351 231.239126548656 274.70018535436  
232.519482087835 228.797912452429 451.718912714608 327.480268032814  
308.38513924253 285.594100976705 242.348427307994 748.38293089716  
357.259935567823  
TBC1D8B 141.102274192049 142.919910421524 142.34956863109  
143.861970001207 143.799113486767 141.350135458015 152.146033353926  
144.746134643761 146.482652762374 150.507308901391 139.54738445816  
151.831627236638  
TBC1D9 353.826834642154 335.858047332641 315.689865927834  
261.028644858795 388.002365247498 580.645924062301 662.04757187541  
780.105135529728 1072.82323999638 353.437466689101 753.997560938003  
348.711663415777  
TBC1D9B 408.7151485563 426.249411635589 337.077153882632  
485.731287873723 292.28857006885 276.057101476947 465.809961695043  
286.901115411673 270.293807247372 695.086203058575 454.854528472591  
303.608918161742

|         |                  |                  |                  |                  |
|---------|------------------|------------------|------------------|------------------|
| TBCA    | 3270.88476148156 | 3200.61067185412 | 4410.68280125001 | 2620.17683549005 |
|         | 3883.05620256963 | 3954.24763752814 | 6810.50193989514 | 3744.5666678861  |
|         | 4353.66854914351 | 4732.31591164752 | 4175.70090899755 | 6179.86800320807 |
| TBCB    | 1339.83170225337 | 1539.80266129509 | 1204.32784721885 | 2045.24382334506 |
|         | 2154.00589005104 | 1599.12034906314 | 1038.93733638848 | 1378.40627876546 |
|         | 1227.36706427754 | 1158.88528996131 | 751.077307018319 | 984.181272274704 |
| TBCC    | 166.091736766853 | 178.014057622594 | 174.787077606165 | 196.169988112042 |
|         | 341.973002478932 | 188.952730860801 | 237.113813706224 | 191.220064414876 |
|         | 245.378747269929 | 213.178648382852 | 207.581907737176 | 248.330154701293 |
| TBCCD1  | 162.484777758676 | 168.04198447141  | 138.544053540799 |                  |
|         | 144.994931561779 | 187.443940151794 | 158.774910841987 | 165.027938535393 |
|         | 161.393953325115 | 170.401653214867 | 166.04965258862  | 169.012926546641 |
|         | 145.560161803925 |                  |                  |                  |
| TBCD    | 307.316241247336 | 379.983165400941 | 273.550544349798 | 412.048097766066 |
|         | 572.049540360134 | 317.493387040816 | 284.043349407812 | 372.024884481775 |
|         | 370.678040372273 | 229.660838239474 | 206.35895739543  | 275.996693627151 |
| TBCE    | 336.380724981693 | 293.317880637519 | 344.021696764791 | 292.60467054075  |
|         | 268.832884350157 | 588.458314503034 | 384.97980473847  | 607.499206410372 |
|         | 411.71606840872  | 593.090436323333 | 352.665030560239 | 567.715714233608 |
| TBCEL   | 124.879018642505 | 119.573635447638 | 127.377356715337 | 122.079685222733 |
|         | 141.81391138301  | 110.935688075738 | 126.755389668637 | 124.528206512938 |
|         | 128.255141263975 | 120.397683153445 | 130.487480197325 | 126.902441495413 |
| TBK1    | 535.20662670885  | 498.334266735594 | 547.817028243811 | 494.875547886209 |
|         | 401.102586700919 | 789.752781067888 | 741.689442253375 | 1914.96285167893 |
|         | 730.042712083388 | 552.167699318911 | 611.088604425595 | 803.60413590137  |
| TBKBP1  | 156.654450436728 | 178.872635061826 | 151.043967734248 |                  |
|         | 224.6588173737   | 161.470611189347 | 133.487774861252 | 140.511988097197 |
|         | 136.317978146216 | 141.976051648478 | 150.394483608039 | 160.518055978242 |
|         | 143.784022884904 |                  |                  |                  |
| TBL1X   | 1364.83036157729 | 1565.64079526732 | 1340.79810963983 | 1978.12229412176 |
|         | 552.167699318911 | 381.808809625801 | 587.654093308465 | 367.567681162661 |
|         | 580.996071040561 | 343.200277800027 | 416.392874553797 | 387.711471687237 |
| TBL1XR1 | 237.961826989344 | 213.634295832535 | 319.352940751688 |                  |
|         | 180.54209603289  | 237.71636970719  | 439.727046291381 | 373.290426793366 |
|         | 393.375554593484 | 400.621427274425 | 273.402804140541 | 333.822167152866 |
|         | 353.621264641814 |                  |                  |                  |
| TBL1Y   | 138.85328409337  | 140.318155161909 | 124.895023786422 | 135.433229702209 |
|         | 138.763250836766 | 135.18026749895  | 129.89329138222  | 140.204023682096 |
|         | 143.62103263895  | 123.235136639469 | 138.980079440205 | 131.856313046545 |
| TBL2    | 177.500110974116 | 186.939168482155 | 186.813888805838 | 167.330860677012 |
|         | 473.057488824363 | 197.859546367676 | 289.474517971859 | 265.972387419683 |
|         | 268.224669588188 | 248.43491649623  | 244.544473246593 | 280.531844086775 |
| TBL3    | 189.01309885917  | 199.662592246931 | 220.415211013843 | 243.246632667118 |
|         | 273.61337724143  | 187.183762762259 | 194.002075848131 | 202.357989894268 |
|         | 179.49202902995  | 216.209052148435 | 159.48526814715  | 181.715992480635 |
| TBN     | 183.130891975122 | 169.933706225406 | 164.96631670799  | 177.355210393749 |
|         | 172.478461106269 | 161.577683729655 | 153.097557560333 | 167.43630698726  |
|         | 156.210423316722 | 179.026308021985 | 167.030667499538 | 173.951605889009 |
| TBP     | 345.627266482686 | 330.080428155378 | 413.555310697751 | 376.007938436483 |
|         | 325.173931553891 | 312.339824919124 | 388.966303073519 | 344.45331938267  |
|         | 303.09499683953  | 380.393153331219 | 350.983969007868 | 361.829819621662 |
| TBPL1   | 487.799854351205 | 420.446810988909 | 603.906237227931 | 414.403321220432 |
|         | 477.741216640575 | 472.108893832845 | 530.387315639095 | 601.997464467917 |
|         | 486.197269936713 | 698.590134238302 | 644.301665020526 | 510.434895296759 |

|        |                  |                  |                  |                  |
|--------|------------------|------------------|------------------|------------------|
| TBPL2  | 119.862037840843 | 121.553107861517 | 122.780453116176 | 113.78323485587  |
|        | 134.270043564053 | 116.685023927951 | 114.133473556359 | 122.969215709433 |
|        | 116.987471433258 | 113.609215169397 | 137.48217464385  | 128.124456615525 |
| TBR1   | 156.010027635627 | 154.562761981868 | 128.429007921588 | 181.668090319293 |
|        | 158.795335941084 | 148.437676259828 | 145.122171099946 | 165.239214141562 |
|        | 149.4401812      | 147.236728188605 | 141.588478913204 | 165.954266127697 |
| TBRG1  | 139.555322603323 | 138.603793282123 | 143.844153373367 | 142.478528530514 |
|        | 136.269445455239 | 138.1342592966   | 134.296645422941 | 137.561067667054 |
|        | 147.796610216375 | 126.528589411462 | 164.202554380274 | 142.907969322845 |
| TBRG4  | 293.018282386003 | 295.935625475189 | 270.231637012624 | 355.990908506973 |
|        | 881.15414246017  | 332.543652462234 | 411.71606840872  | 332.032371697186 |
|        | 314.845965872164 | 327.164773632634 | 367.382105696814 | 463.298781071364 |
| TBX1   | 133.755609587969 | 138.359423363142 | 134.335309757663 | 134.834641868502 |
|        | 404.445038343721 | 266.892524131545 | 137.539385624206 | 141.786962606666 |
|        | 153.687536747147 | 130.321133400634 | 201.320381706496 | 249.09278446472  |
| TBX10  | 121.505178996279 | 134.824147038515 | 140.092648878007 | 138.086270564406 |
|        | 153.795665190439 | 144.715167331434 | 134.406692724353 | 132.604589324628 |
|        | 121.619593453259 | 142.669207969715 | 155.287837763675 | 130.684569384626 |
| TBX15  | 113.542803491215 | 123.881658891576 | 114.308806726044 | 112.208950290962 |
|        | 121.75662526451  | 117.461198576063 | 127.964855970099 | 133.0349214478   |
|        | 118.764650384561 | 138.281188275319 | 166.382301680189 | 147.512290383685 |
| TBX18  | 174.396061906109 | 163.396651801661 | 187.216245895253 | 164.455111983634 |
|        | 144.924212639731 | 164.313238416498 | 163.010527914347 | 183.358807104988 |
|        | 152.702847643082 | 155.575152212736 | 159.046016068252 | 159.331110936668 |
| TBX19  | 175.805472275887 | 172.951567541592 | 183.795632040455 | 168.538117820213 |
|        | 152.409211647994 | 165.992542962911 | 163.758054869675 | 165.757295630254 |
|        | 167.395369670065 | 166.506602328929 | 145.200638964782 | 194.002075848131 |
| TBX2   | 1230.00744483191 | 1687.06111969368 | 563.140382824149 | 1520.59210521859 |
|        | 3655.63669142687 | 1890.86868383409 | 810.396770151757 | 2043.73482086765 |
|        | 1771.39155164347 | 238.400565506288 | 1632.07671492041 | 2398.71483410593 |
| TBX20  | 140.348718082786 | 141.600833670693 | 141.67277923437  | 143.426053070219 |
|        | 144.224287382131 | 140.443415669628 | 136.029898048127 | 147.588213090285 |
|        | 139.613193302406 | 133.800111596565 | 139.038833073872 | 140.226586111216 |
| TBX21  | 153.295838391099 | 161.424105316969 | 160.192540519103 | 161.534421340752 |
|        | 177.281197832647 | 157.233463720262 | 245.607130404306 | 163.125317704446 |
|        | 180.008152341531 | 166.526875572556 | 198.549047189499 | 196.245297362955 |
| TBX22  | 138.319321806028 | 149.18603646016  | 135.722321387765 | 134.671840308041 |
|        | 137.976533193418 | 155.673532440475 | 137.667514826346 | 155.064761390765 |
|        | 141.931274901572 | 146.748572532267 | 142.707913210557 | 155.362503575715 |
| TBX3   | 284.104619768635 | 389.800620731411 | 264.273245283343 | 218.862705238592 |
|        | 502.499539192864 | 692.729789121701 | 681.810927901806 | 545.760623858473 |
|        | 793.891277937782 | 171.636121363019 | 890.121325723286 | 800.739422189427 |
| TBX4   | 133.67719550997  | 134.545983176488 | 152.808771946509 | 138.657241641263 |
|        | 119.67745324922  | 112.208950290962 | 114.10470841717  | 119.198789189881 |
|        | 131.013719535992 | 122.051473363557 | 114.704831217037 | 113.716741872499 |
| TBX5   | 138.89354244296  | 128.398711525305 | 137.693410133625 | 134.160100276452 |
|        | 135.047546966745 | 128.440024330942 | 125.979152567959 | 136.364830851128 |
|        | 131.393633337276 | 134.399228996542 | 129.798965780918 | 127.095347480109 |
| TBX6   | 142.853399942089 | 137.485252316816 | 134.549628985766 | 137.907709799074 |
|        | 138.859261763075 | 139.552533656255 | 152.791390145148 | 140.890227770353 |
|        | 143.175483349968 | 142.30928744202  | 164.753886197136 | 144.924212639731 |
| TBXA2R | 131.269526665478 | 128.528510920423 | 116.230993734675 |                  |
|        | 120.891023626809 | 128.413213851142 | 125.859158049343 | 116.718099363329 |

122.180428703208 122.527517633626 117.639216182057 123.881658891576  
 118.122186617611  
 TBXAS1 191.651818696629 194.655710454472 166.263781040251  
 187.461448376593 168.753660955229 166.563411635721 177.955579729463  
 233.997642139328 232.845268785472 195.353512458837 192.273528391588  
 225.583966894864  
 TC2N 144.781438651649 142.303654405005 125.060387518072 123.086596566142  
 236.707875629511 193.689806171113 220.113261580385 219.564603776774  
 200.08007665693 292.911761762431 293.600165830839 289.576706584644  
 TCAM1 134.038213827843 122.932745723044 136.211694310501 127.740057874561  
 150.687819649072 190.444387031552 143.942810095867 148.714406471586  
 153.345834660643 131.519455635415 133.146347243168 142.505050582588  
 TCAP 119.763020707899 123.507963359911 118.474291525263 119.257387524365  
 119.257387524365 121.06219555903 126.17342715006 133.467092274663  
 123.338921824167 120.998665308561 130.104911048507 118.492287441192  
 TCBA1 121.36708642226 131.97938329944 107.316786994369 128.211076776316  
 124.807244018373 117.212164526913 123.61956613951 124.302581985661  
 132.008330288281 122.749182465923 124.358414281035 165.590892262736  
 TCEA1 301.304268871606 293.281098275134 433.189221987242 278.274343962656  
 258.012234458166 462.553267274302 406.369889501135 477.160464512705  
 483.845891531326 460.089380701982 271.568797887976 402.564148020948  
 TCEA2 392.13175568099 358.152044880733 522.664475688419 415.178470246749  
 365.590174280114 479.053300726301 332.343558229873 172.403953571339  
 224.528190554963 156.818197172306 156.745051321143 224.135228192655  
 TCEA3 1868.82736251524 1767.70023790753 1634.20135156938 1349.84215478798  
 1606.01395227661 418.244376024741 443.259619455624 1218.05434595121  
 736.963699775724 203.125568980238 1020.19774509086 987.78377957731  
 TCEAL1 348.921877633633 300.765518378297 736.140249105836  
 265.402310598892 274.534901548678 308.726328440723 337.119524477446  
 221.152973486208 188.348499229585 177.011776399483 463.754869412768  
 319.128582107184  
 TCEAL2 1167.26555140613 1013.03054571763 1692.01248523526  
 1255.02720867812 141.858181090478 172.973175988757 137.936605651724  
 148.185056724262 158.272071464923 150.70383460714 128.734694496357  
 233.671878221507  
 TCEAL3 3262.24877138481 2926.06746795504 3734.705550862  
 2656.38138490746 2001.92441724356 846.985164747386 1663.71411325131  
 589.541347392215 509.702881232139 521.625146077176 1687.85201395597  
 971.99484515987  
 TCEAL4 2786.35558271661 2527.99279063127 3890.14358014877  
 2518.88171283899 1303.94157493616 1043.14253624883 1252.28642463619  
 708.779490017407 751.077307018319 804.362909579005 1438.33289891548  
 1144.53002508973  
 TCEAL5 129.505139430366 137.85150144918 124.133566248466  
 118.689408983786 125.287738115754 122.480000773859 117.706795566317  
 118.81294782091 129.301839663122 112.74498133815 151.418316929551  
 137.757902615328  
 TCEAL6 148.306990501663 137.916872642522 139.744142223177  
 131.18368961955 136.147810636915 138.266328639467 128.848008246639  
 133.587927144452 127.831950458406 125.522498880785 129.167602517633  
 138.074645385322  
 TCEAL7 206.21848253717 189.83433085782 223.573080955095  
 173.347463632976 151.002218995005 149.659505956629 144.920107068083

150.006621336954 145.536260846052 159.513465644268 150.648444878067  
 145.756455015309  
 TCEAL8 776.807656744828 782.139151423572 844.778755052304  
 726.000622725287 1204.7397215229 822.88742008931 1111.88018487186  
 507.56875910742 757.406530000489 552.494327858264 863.738809424958  
 1098.78649254838  
 TCEANC 127.601379088239 125.093376753408 122.095978653755  
 133.403409882362 133.422190038356 129.269919529415 141.148849622103  
 135.601916560736 131.928871107722 113.334665910428 127.70306883967  
 124.635917999969  
 TCEB1 719.628501451187 731.284098301795 705.311256840178 636.781477235579  
 1382.12750708801 1329.3013039618 1413.37062765856 1442.11349373764  
 1971.42527720714 1421.04485772969 1269.67110104843 1395.63393859192  
 TCEB1P3 131.924162435354 144.542320520523 145.695402948337  
 137.897243684023 163.593106951255 156.720090761933 157.856019979644  
 135.271290872348 145.661617610928 154.462766419353 140.914966429342  
 138.796257513868  
 TCEB2 1732.52466021178 1800.25771851544 1832.35076992253 2261.31473132315  
 2280.20302441765 2244.6916226146 2234.85920641661 1904.39962279504  
 1656.02721259517 2271.82656399253 2174.62979843528 1694.24232555141  
 TCEB3 280.990656342284 280.085692727562 355.14024238296 370.301819403832  
 421.583441056026 274.371523790341 402.299165610893 387.711471687237  
 375.316610221279 412.648926259488 241.251507026982 381.4054004349  
 TCEB3B 125.995374488153 143.985850833974 141.097257687941  
 131.432729794636 139.657182434153 124.705614182596 134.840285218383  
 128.306607216705 140.216148769999 131.400031203603 129.603952706231  
 129.612536218578  
 TCEB3C 117.716094828779 104.681530703922 116.472796471694  
 114.290611267606 102.563722570171 99.7487411813724 104.896224175106  
 117.289037817013 105.900294919664 117.907840952685 110.1278204598  
 119.288554466773  
 TCEB3CL 139.582054825147 136.639637503571 139.955389033983  
 135.25612528874 142.567737460006 140.759006929593 136.679405220947  
 143.713962738562 146.442734810495 145.601922576321 158.989652405732  
 129.358112503486  
 TCEB3CL2 134.741781820234 140.258615682066 131.938898032483  
 133.704706615071 132.261161069329 146.209104824109 126.784243009941  
 124.809739073169 134.61114877396 123.959050197189 137.633384124577  
 124.101111442605  
 TCERG1 225.820503820866 191.692830869809 230.053292316517  
 186.021181691517 204.616225498655 254.447650810819 322.684910198242  
 228.317527475322 218.773153183388 320.812909889014 305.906480933354  
 349.99912485533  
 TCERG1L 143.141852982371 121.672811608791 114.174153178166  
 124.772219140795 107.049865500702 120.585506729733 121.144174389418  
 122.410340121549 127.261349543394 126.061141885666 135.647660756548  
 125.932540615682  
 TCF1 121.846349358116 123.312000381122 123.315362903961 135.078198678379  
 123.656016678934 122.809241232029 116.14662237541 117.590393673861  
 131.672014089487 119.096195018596 139.696266471271 125.450077160575  
 TCF12 311.208703262497 310.075815009404 321.627969147543 259.625943627223  
 186.244764337256 330.944203807675 325.525450750788 254.393421265604  
 289.21739941764 340.366016191232 239.871536598083 369.646624431062

|        |                  |                  |                  |                  |
|--------|------------------|------------------|------------------|------------------|
| TCF15  | 128.432188632218 | 122.423561732526 | 124.699127988314 | 125.347442446239 |
|        | 266.892524131545 | 169.963805688413 | 124.28313315915  | 128.554574566655 |
|        | 132.383542877819 | 114.790717658188 | 148.934593102452 | 119.346574301289 |
| TCF19  | 146.357214078158 | 144.774621469452 | 143.766249538352 | 139.446914318877 |
|        | 156.567519536997 | 136.420062669039 | 135.722321387765 | 149.538429805372 |
|        | 161.437972329744 | 144.329979284786 | 145.056914913573 | 148.739888930189 |
| TCF2   | 114.421383025971 | 116.647291878845 | 121.653754668804 | 118.900338956203 |
|        | 186.359770878343 | 154.843607752473 | 144.585120811896 | 206.915239638443 |
|        | 202.024504592763 | 121.591962855513 | 210.550995170071 | 169.984859264412 |
| TCF20  | 228.524222740306 | 225.783771938969 | 227.050629701762 | 243.468673768141 |
|        | 231.890885094917 | 243.159062832085 | 211.555248754731 | 239.33642662112  |
|        | 214.499670852615 | 223.220997990627 | 242.348427307994 | 274.534901548678 |
| TCF21  | 686.445635754196 | 617.318955611228 | 299.669394721682 | 361.969355316032 |
|        | 151.954389699615 | 173.21291920566  | 155.483400816946 | 164.769320792025 |
|        | 228.414049417352 | 154.011708696954 | 143.512348693556 | 158.679903271595 |
| TCF23  | 181.400788152988 | 155.561821955048 | 155.820194280153 | 148.49560238679  |
|        | 169.220974415101 | 160.277755404001 | 152.767228183775 | 165.67554738735  |
|        | 154.892452237027 | 157.604224004016 | 158.183045411298 | 153.585849286113 |
| TCF25  | 1623.92991386706 | 1738.96798001895 | 1741.0131951509  | 2065.51724858579 |
|        | 1438.33289891548 | 1225.33666840349 | 1382.12750708801 | 596.54904286299  |
|        | 1727.7144253077  | 1573.03248861784 | 1625.55754007235 | 1744.58410715956 |
| TCF3   | 232.830038701628 | 289.164969943385 | 192.209344004015 | 333.533043832976 |
|        | 373.760551592844 | 403.657727266403 | 233.129544542265 | 385.238961394234 |
|        | 308.148212607944 | 298.028932089399 | 346.862322263052 | 270.360397503276 |
| TCF4   | 1199.35864276583 | 1252.28642463619 | 903.144845227364 | 967.797017108447 |
|        | 187.145134088286 | 429.922530506572 | 146.355229778997 | 226.565823278767 |
|        | 362.252813848151 | 352.945088028205 | 168.547575047205 | 191.25724234927  |
| TCF7   | 124.300285428221 | 121.705065573911 | 123.921903967493 | 123.400143662218 |
|        | 129.257947818865 | 118.792612926619 | 121.945541820091 | 122.436106757578 |
|        | 127.215777044942 | 131.17119492692  | 130.624702758052 | 126.378952839132 |
| TCF7L1 | 202.278323489515 | 222.8766610624   | 171.552010365305 |                  |
|        | 251.731327363027 | 131.190238038695 | 122.522978939399 | 129.422854634791 |
|        | 135.386650538345 | 128.651081092914 | 133.995928435022 | 135.43939472868  |
|        | 119.172965618216 |                  |                  |                  |
| TCF7L2 | 223.220997990627 | 213.412498914309 | 169.598493862848 |                  |
|        | 209.596792486876 | 164.701183249762 | 164.68600028429  | 162.161282071736 |
|        | 160.066390229416 | 158.249743182741 | 154.951136632863 | 191.335616210093 |
|        | 188.118989395838 |                  |                  |                  |
| TCFL5  | 349.910535555712 | 301.428024926428 | 365.541609015117 | 284.891415492568 |
|        | 335.533053221675 | 200.810204162831 | 612.758976723556 | 262.79667156266  |
|        | 166.12695134858  | 290.241064926886 | 176.839917795004 | 274.343238288436 |
| TCHH   | 145.187490179166 | 149.786445079456 | 162.422173095045 | 172.562162872242 |
|        | 165.286724415145 | 164.757907224537 | 154.7326161316   | 152.925281215593 |
|        | 147.657151780506 | 399.071041584646 | 162.900556089071 | 169.072574423443 |
| TCHHL1 | 119.308345676905 | 110.935688075738 | 119.172965618216 |                  |
|        | 107.841100741858 | 121.834248129933 | 118.235640920527 | 117.598778415488 |
|        | 117.356389952799 | 116.280157890082 | 117.716094828779 | 110.707755436868 |
|        | 112.699674279523 |                  |                  |                  |
| TCHP   | 217.491746961471 | 201.593025256991 | 238.509970054862 | 197.087015414039 |
|        | 184.148058872585 | 211.995890899864 | 219.619022209985 | 212.497773003032 |
|        | 237.266455875982 | 251.939696394174 | 200.591916768948 | 218.529160053398 |
| TCIRG1 | 286.901115411673 | 287.967349876429 | 225.783771938969 |                  |
|        | 330.850098426464 | 508.572981581855 | 189.49408026215  | 219.462274506333 |

|         |                  |                  |                  |                  |
|---------|------------------|------------------|------------------|------------------|
|         | 264.936739264566 | 254.359737178714 | 228.713818522476 | 332.464176231219 |
|         | 270.069634610818 |                  |                  |                  |
| TCL1A   | 145.843639385175 | 146.59366188125  | 140.402944266863 | 150.52625734893  |
|         | 146.479009988445 | 146.349773982488 | 132.053242760381 | 140.893078149667 |
|         | 196.310746973798 | 162.6762533989   | 142.06907380533  | 142.77817647952  |
| TCL1B   | 194.753955100069 | 206.73292907905  | 173.250350363688 | 196.486499238623 |
|         | 143.897248922317 | 169.791616021987 | 197.277310409328 | 172.521737547052 |
|         | 173.87113073582  | 186.57665470145  | 182.57496767012  | 191.665827345888 |
| TCL6    | 124.738217731488 | 133.667852983262 | 122.093290585838 | 123.010614051218 |
|         | 127.416912237613 | 125.386545354096 | 126.53466470733  | 130.576944864484 |
|         | 126.129564039673 | 126.77232818113  | 144.975882336334 | 127.718341524417 |
| TCN1    | 110.093565974873 | 138.216926722025 | 114.520066232155 | 118.737244693366 |
|         | 148.212445624699 | 354.405235378302 | 154.584367902971 | 364.443097338814 |
|         | 132.645196037302 | 1785.92695250894 | 2300.9407349072  | 11479.7406150358 |
| TCN2    | 248.965394617795 | 208.690347128273 | 227.965783945702 | 262.061371466369 |
|         | 269.927694984528 | 198.760049629983 | 171.350620456505 | 209.362806125315 |
|         | 205.200459980187 | 172.578252260002 | 213.468420853218 | 169.475714234887 |
| TCOF1   | 118.176124626025 | 122.292692083352 | 116.929398630733 | 118.015175851934 |
|         | 129.253638326633 | 117.735411259153 | 117.49013401175  | 121.014538677616 |
|         | 115.80656409185  | 118.410091682499 | 125.304045138994 | 115.672307128514 |
| TCP1    | 463.187551361986 | 447.297590650141 | 555.959424692051 | 408.037874667173 |
|         | 462.265785715695 | 618.829716818725 | 855.112210714686 | 887.147199303294 |
|         | 707.715412321304 | 895.463355957918 | 933.723483173584 | 864.161191021297 |
| TCP10   | 142.605816057276 | 139.404820141366 | 135.494894933583 | 136.434045183143 |
|         | 132.269567096683 | 137.378528742953 | 136.501159644992 | 140.157553508141 |
|         | 137.337681987169 | 137.468570135972 | 136.384308041001 | 143.053727675518 |
| TCP10L  | 186.420541099902 | 183.735201125198 | 182.439945229388 |                  |
|         | 185.783374935551 | 139.817493158675 | 151.081339000609 | 151.007812189859 |
|         | 153.519207482423 | 164.126980102525 | 177.874821397216 | 170.966588957686 |
|         | 155.762890407496 |                  |                  |                  |
| TCP10L2 | 130.619624347751 | 122.868393258957 | 121.736056336879 |                  |
|         | 123.150299476109 | 122.053867525393 | 120.62139061084  | 128.056668224393 |
|         | 116.919109599361 | 121.661141741782 | 120.410307377977 | 112.292129754508 |
|         | 109.355444907633 |                  |                  |                  |
| TCP11   | 150.43722766614  | 137.747088378131 | 158.675960205792 | 163.014903707857 |
|         | 155.108146847158 | 157.77398996415  | 152.964940071133 | 142.248293068033 |
|         | 156.611727364072 | 153.19516365535  | 144.826861308997 | 175.400802387403 |
| TCP11L1 | 187.824032557194 | 172.403953571339 | 191.418673767345 |                  |
|         | 171.433001048839 | 172.319604146201 | 145.528676983944 | 172.741890316331 |
|         | 169.598493862848 | 160.970946091146 | 191.112009690591 | 165.022029012505 |
|         | 147.946236579299 |                  |                  |                  |
| TCP11L2 | 134.404472539902 | 125.136745288071 | 131.814528687104 |                  |
|         | 125.870730238298 | 135.993598471576 | 126.695387748732 | 158.138862054715 |
|         | 131.400031203603 | 139.502856192876 | 182.938824846376 | 143.444109491884 |
|         | 136.214432257698 |                  |                  |                  |
| TCTA    | 239.572670410818 | 298.028932089399 | 324.671490117952 | 329.48021621087  |
|         | 305.325519265387 | 262.259969786927 | 333.200230327106 | 237.961826989344 |
|         | 344.379733302418 | 170.417054311946 | 256.370052241046 | 273.61337724143  |
| TCTE1   | 103.734303632543 | 104.321352818065 | 107.260023460914 | 115.332409360957 |
|         | 108.461141538047 | 110.575582352222 | 108.247365868673 | 118.900338956203 |
|         | 111.161283080299 | 113.192313147111 | 118.109991440011 | 114.785989868306 |
| TCTE3   | 131.899614022767 | 150.690143057308 | 159.48526814715  | 142.192934622228 |
|         | 145.1382587433   | 140.03443832328  | 151.971337856271 | 157.58224826673  |
|         | 150.180037731272 | 148.317958829244 | 134.998632527009 | 160.520677267863 |

TCTEX1D1 136.612903661685 134.415163103911 112.645720918926  
 113.163651806803 105.712302595131 112.309528593741 119.349376960211  
 112.884916986215 119.218909479403 122.399241018147 133.766199453456  
 109.728809191027  
 TCTEX1D2 235.530986541549 264.905947922753 274.202831856221  
 276.79778275734 655.431236290512 540.584471920486 212.78038645414  
 538.605085454393 628.000860165888 189.853136769155 275.584858082096  
 340.668473351494  
 TCTEX1D4 148.227581116046 148.396148091332 171.161297672182  
 153.738794649373 153.630125822178 141.619432083003 143.056098955473  
 143.583650664594 145.929907161493 149.538429805372 143.59105195427  
 143.461785113446  
 TCTN1 432.92947962962 344.128576341892 388.966303073519 450.851711160136  
 314.095043876244 340.903961204211 440.038896046559 273.197814995543  
 453.760162338163 394.576038252334 162.668896609848 318.423602671236  
 TCTN2 112.891050337488 119.466200987489 124.372963874507 122.072091994548  
 137.804977813144 118.761737418652 124.42747321736 135.503338987971  
 122.624828884731 121.215558351076 130.626965797365 127.518790633514  
 TCTN3 276.351810999317 233.335353447342 224.851680313689 244.18714778846  
 244.990374822652 228.499052416183 315.828726297864 200.915806094193  
 205.886398618369 179.854800301573 363.025385707747 219.901025447571  
 TDG 785.008529077795 822.129234065933 565.313436777992 787.017214032692  
 857.090339943417 2087.55358504021 988.788192022196 1680.25851465727  
 1452.63736288691 1021.81988990874 812.75075757351 1065.74382494535  
 TDGF1 145.09280363189 136.940275156257 155.608876496443 147.677900030844  
 149.327794670124 153.891667472876 152.673212084312 144.937697857147  
 138.391203321266 140.05012958679 120.319621393685 148.222477811166  
 TDGF3 124.69564501518 122.211000410541 134.986030185477 129.547309629132  
 119.150626141327 130.935922915902 133.587927144452 130.004329307977  
 125.865974180252 129.394359810841 127.488853386792 127.6078497227  
 TDH 107.638492587723 108.101686347192 108.266328505986 108.266328505986  
 121.826474059574 122.03508430361 124.566313603935 154.978243057971  
 108.036254606246 107.697601478064 143.013801508709 168.082591651722  
 TDO2 130.282212339065 145.635453468646 138.848119273081 129.015422924366  
 137.923852688695 151.445254181497 143.783078837501 183.568426758223  
 186.708059183893 687.269774217064 187.852455291319 138.021559586328  
 TDP1 2010.57142784228 1733.96382719909 1867.55140010155 1856.05025952611  
 509.400965222318 1496.0924333403 722.974310297586 1096.10636044885  
 903.144845227364 937.593129242257 974.544773560873 934.173273294189  
 TDRD1 1094.67740173529 1203.47834989609 1059.19317548869 1081.47077865393  
 253.580286414227 767.054576874115 440.916522871266 627.803400871547  
 528.650794915616 522.400055538966 605.21685916883 551.350758868377  
 TDRD10 206.127493726541 180.478294414245 153.748035612441  
 168.04198447141 143.550908565401 170.866433766203 159.170943469313  
 153.336395746742 152.908358615016 166.143084832472 152.983678871668  
 162.333158524811  
 TDRD12 138.3792224631 134.158454639998 136.116468624715  
 147.154433852975 175.593421867771 151.191822057706 139.871928127715  
 148.412895185127 154.261443597434 137.957654220875 139.737748157901  
 361.620362526358  
 TDRD3 235.183590602209 231.670761847089 270.92671642109 247.899467998443  
 193.554028681854 189.83433085782 169.552424961465 224.118739978257  
 212.443407602682 216.836094088131 229.076507182239 226.893147371644



|        |                  |                  |                  |                  |
|--------|------------------|------------------|------------------|------------------|
| TDRD5  | 110.536316697732 | 119.373287155621 | 117.15886922795  | 105.62620788923  |
|        | 127.218362452043 | 141.134173683836 | 116.472796471694 | 143.141852982371 |
|        | 170.706932460836 | 114.325967923393 | 157.298181833321 | 169.257035030405 |
| TDRD6  | 198.004357069446 | 184.482849019679 | 192.331142672469 | 162.629257046871 |
|        | 136.685430908977 | 157.524049610272 | 159.446705611995 | 226.203994206714 |
|        | 162.289781945582 | 154.959217895243 | 167.769114519774 | 172.355215322173 |
| TDRD7  | 378.088675670786 | 330.143103381406 | 371.552970811499 | 365.441289363381 |
|        | 229.157389498775 | 213.240181616274 | 244.954917633904 | 248.613373429151 |
|        | 276.057101476947 | 323.20628717764  | 418.968095159939 | 244.897869154624 |
| TDRD9  | 144.498245098592 | 151.992112109698 | 129.765440519589 | 149.634975068742 |
|        | 148.620766059526 | 192.878416717298 | 134.936025073531 | 133.080437161283 |
|        | 146.493927564338 | 135.778099658349 | 132.277920991504 | 228.45211887819  |
| TDRG1  | 149.182972268104 | 151.694193636313 | 153.358189612307 | 139.131857948357 |
|        | 154.379788206936 | 131.430921437192 | 145.169804325334 | 127.983873767722 |
|        | 134.635645106042 | 130.113673389232 | 150.672985449063 | 141.811563725942 |
| TDRKH  | 151.492236411757 | 144.36033726557  | 130.207485841284 | 149.980924447339 |
|        | 176.070695522397 | 149.582406567077 | 157.466686487471 | 150.602976963975 |
|        | 170.233084517898 | 143.419034484087 | 147.125005489393 | 157.821491577808 |
| TEAD1  | 118.488997046932 | 118.331237160995 | 120.371374172279 | 118.589392612801 |
|        | 125.802001118545 | 132.367155914392 | 124.066239570648 | 119.349376960211 |
|        | 122.018200592563 | 121.787875792887 | 128.637470206958 | 123.418266047461 |
| TEAD2  | 1085.38819961412 | 1342.29111510713 | 1031.38207659547 | 1748.77270039774 |
|        | 3784.59114921916 | 1429.25367024696 | 192.340135076104 | 252.056131165397 |
|        | 890.121325723286 | 457.650982600462 | 169.184111483933 | 214.803167803712 |
| TEAD3  | 517.42417250172  | 543.710330214344 | 563.011988279542 | 695.086203058575 |
|        | 446.948699651916 | 286.194197552489 | 468.569725051459 | 233.809899915394 |
|        | 290.754210152709 | 292.693830444839 | 720.364080505785 | 359.518199449791 |
| TEAD4  | 146.96155692518  | 161.603317039244 | 138.227082687797 | 141.103517863832 |
|        | 157.654040469774 | 151.747595672228 | 137.864637728155 | 145.650356702429 |
|        | 152.080057231881 | 201.837695818264 | 146.934990457666 | 158.579717282881 |
| TEC    | 163.829218786716 | 130.009322405768 | 170.95650329595  | 147.823552813852 |
|        | 149.6036366066   | 167.337624316172 | 144.499680685194 | 149.664506761117 |
|        | 154.398416018484 | 155.785933672918 | 158.869463014801 | 149.190528937822 |
| TECPR1 | 198.311821616128 | 263.321559283966 | 217.910445051307 |                  |
|        | 298.573180660083 | 270.201322204641 | 157.350979071365 | 194.212177449077 |
|        | 222.526610842047 | 248.16594076495  | 186.708059183893 | 223.496400038284 |
|        | 224.298067319406 |                  |                  |                  |
| TECPR2 | 127.500754400224 | 140.571143847885 | 131.432729794636 |                  |
|        | 134.93814894432  | 119.643417329571 | 117.445284668654 | 110.651971902576 |
|        | 120.311723366684 | 125.18424162353  | 104.826135297161 | 126.755389668637 |
|        | 118.955314417914 |                  |                  |                  |
| TECR   | 881.15414246017  | 1118.86225415732 | 969.811933814244 | 869.245621105614 |
|        | 5291.83393775761 | 1975.83062789692 | 1728.86115695979 | 2263.73444150082 |
|        | 2032.50052162637 | 3115.11499025766 | 1603.87451959083 | 1343.2623011534  |
| TECTA  | 119.198789189881 | 115.524441144063 | 116.186846885411 | 117.374025543149 |
|        | 112.282839763467 | 116.632612170106 | 119.9652990395   | 113.980716384814 |
|        | 124.758906471654 | 117.412956162665 | 127.121068682846 | 115.097376525707 |
| TECTB  | 119.567911704298 | 123.563243360247 | 134.741781820234 | 124.474221706022 |
|        | 118.006338536085 | 113.791585365477 | 129.497266827284 | 117.805556408194 |
|        | 115.157321350379 | 121.080413308265 | 132.589411973628 | 113.031636180748 |
| TEDDM1 | 155.651798065702 | 158.937341335707 | 174.177944561595 |                  |
|        | 150.874014332213 | 165.926301648161 | 156.976539870288 | 150.328995030071 |
|        | 155.018009545475 | 139.517413585211 | 157.971293294367 | 149.495077381649 |
|        | 142.338352884053 |                  |                  |                  |

|         |                  |                  |                  |                  |
|---------|------------------|------------------|------------------|------------------|
| TEF     | 258.915802108562 | 524.973621024573 | 272.314332734711 | 961.355625338687 |
|         | 210.266075382636 | 139.837616209536 | 176.883702717029 | 171.216275057884 |
|         | 142.514794686932 | 169.574755162815 | 237.854774190873 | 160.496585125233 |
| TEK     | 256.820546409632 | 291.476113017794 | 210.030846572444 | 288.913660405191 |
|         | 178.320732186309 | 200.934618257908 | 173.635827398273 | 197.191648960563 |
|         | 219.619022209985 | 178.863722055499 | 161.470611189347 | 155.522274777451 |
| TEKT1   | 154.198394507279 | 157.944355564411 | 135.663734178125 | 126.237900397603 |
|         | 141.541355091514 | 136.712083407769 | 143.675696734051 | 141.850952191423 |
|         | 137.094814176566 | 163.976361576383 | 166.754995454382 | 146.677241054745 |
| TEKT2   | 189.539458686123 | 183.676020826291 | 174.767697866801 | 174.313718712035 |
|         | 159.74220366735  | 192.465510013851 | 167.658560306884 | 174.02138265758  |
|         | 184.377923161698 | 161.651643789597 | 171.521579011287 | 168.166938045454 |
| TEKT3   | 160.98571841915  | 154.043604150962 | 126.515480612924 | 130.890314257211 |
|         | 103.888971448792 | 117.274977920103 | 116.134550788966 | 114.812254477058 |
|         | 107.828378413233 | 111.10737497653  | 134.442947822188 | 96.8261937365062 |
| TEKT4   | 150.213657393257 | 137.22727238555  | 158.963726206466 | 163.385727569154 |
|         | 136.381593416533 | 122.447154928139 | 141.019494314354 | 126.992697289075 |
|         | 136.724298878331 | 140.860339862967 | 127.773292289242 | 143.703367582367 |
| TEKT5   | 144.450810504499 | 155.201655653645 | 140.855078775719 | 142.80027343095  |
|         | 169.232677769521 | 137.21916902421  | 134.197892075036 | 148.846121873401 |
|         | 147.619451225526 | 132.969187044132 | 128.753623886188 | 164.491207767654 |
| TELO2   | 172.030687707578 | 177.371157649894 | 162.664254855131 | 134.590666885938 |
|         | 318.348505551265 | 131.81975648701  | 202.129153259445 | 192.627266049516 |
|         | 217.165036362034 | 208.666760987764 | 318.930960243303 | 265.402310598892 |
| TENC1   | 179.211502448703 | 183.371103136697 | 153.59485367224  | 193.892810132985 |
|         | 145.928643520352 | 140.501968970549 | 134.700543462375 | 135.294664456623 |
|         | 130.516632662261 | 135.409613764459 | 147.281035392817 | 130.698850298016 |
| TEP1    | 169.028519464989 | 137.404525565336 | 174.338440780636 | 165.673535349675 |
|         | 134.883708339914 | 148.190696520521 | 143.950279111815 | 140.860339862967 |
|         | 160.57963709333  | 181.439775614781 | 131.672014089487 | 171.140106467064 |
| TEPP    | 137.820326536962 | 140.018786803502 | 140.154925193842 | 148.665627690915 |
|         | 158.528301072565 | 134.224781719944 | 202.545147073902 | 137.190593489949 |
|         | 197.357728220717 | 134.257928609741 | 150.991991926229 | 134.555873832434 |
| TERC    | 129.732352495012 | 141.176376265078 | 124.749727939593 | 133.978783899572 |
|         | 175.363223521128 | 178.186273279101 | 159.005459875338 | 146.184624424737 |
|         | 149.164469334038 | 134.383024487323 | 119.26921157552  | 130.808911605271 |
| TERF1   | 340.668473351494 | 337.342034950908 | 324.177924877233 | 296.553550946307 |
|         | 241.527811817146 | 176.839917795004 | 210.761398461329 | 186.515784641119 |
|         | 205.728673153914 | 195.66091457697  | 219.288597751645 | 191.814634229865 |
| TERF2   | 478.909308632726 | 411.451612988791 | 548.686094748117 | 452.24100098898  |
|         | 302.021033686056 | 330.703588385626 | 321.25076864104  | 301.871924474014 |
|         | 329.263397240111 | 228.025383952578 | 374.718289636553 | 407.615019710707 |
| TERF2IP | 906.359365544713 | 798.758496171493 | 858.524630425687 |                  |
|         | 748.161769171818 | 456.201998988891 | 449.598181155897 | 472.514017604645 |
|         | 452.167674725454 | 544.462032960964 | 525.287367366192 | 439.727046291381 |
|         | 622.561634660589 |                  |                  |                  |
| TERT    | 118.497920969001 | 113.268379270385 | 122.557981210434 | 120.935863853101 |
|         | 124.521130036013 | 119.763020707899 | 120.696557306298 | 123.896578371318 |
|         | 119.192893408873 | 120.846789922177 | 128.124456615525 | 125.422348389595 |
| TES     | 250.647644543963 | 238.548578086943 | 176.340265963032 | 279.541294184609 |
|         | 145.793794049657 | 148.922537778634 | 172.7330526128   | 173.395370400371 |
|         | 175.946843919065 | 162.933658389727 | 186.06425658259  | 202.397972518715 |

|        |                  |                  |                  |                  |
|--------|------------------|------------------|------------------|------------------|
| TESC   | 356.413190087706 | 577.98969050409  | 421.384700184923 | 242.096692715029 |
|        | 1265.88446775977 | 1593.49895307361 | 672.348723983535 | 645.438835606933 |
|        | 2165.41403521012 | 186.886677174192 | 3598.30438198858 | 1501.18820017008 |
| TESK1  | 530.122419830951 | 582.642500194997 | 567.317223907142 | 833.198511430615 |
|        | 499.683188662742 | 396.526590512521 | 309.538690289233 | 282.836518011311 |
|        | 339.172031360524 | 339.753059801136 | 275.252966071473 | 281.168898910065 |
| TESK2  | 160.91894600916  | 189.784608429624 | 159.241573314833 | 164.991522994763 |
|        | 367.130155304037 | 212.473610495213 | 254.991678321253 | 326.1109406486   |
|        | 183.583432296209 | 223.253794809571 | 196.399050990244 | 127.471479301983 |
| TESSP1 | 136.251820364823 | 136.614620534169 | 126.667650990284 |                  |
|        | 163.146581498065 | 142.071492722749 | 147.196687432745 | 131.692626563078 |
|        | 136.965376129304 | 137.697452180659 | 146.885404321622 | 136.818557078622 |
|        | 129.672284417918 |                  |                  |                  |
| TESSP5 | 134.460035654795 | 149.779323547896 | 151.436802637988 |                  |
|        | 146.635140441079 | 174.979501466228 | 164.319378349317 | 155.752117896424 |
|        | 145.97330701968  | 162.786351190659 | 164.942652212218 | 169.349922114861 |
|        | 160.459100056689 |                  |                  |                  |
| TET1   | 141.822974252935 | 175.638328370133 | 144.363095380388 | 217.353396632732 |
|        | 117.907840952685 | 137.81819274774  | 155.612543356905 | 123.240482782331 |
|        | 126.921925660996 | 148.697019570015 | 141.174971007547 | 129.13353785479  |
| TET2   | 147.51773051441  | 141.539503634005 | 131.136073942692 | 123.09149124559  |
|        | 121.203149121743 | 131.181537219479 | 135.957972463728 | 122.557981210434 |
|        | 127.55397077248  | 129.668506092785 | 140.669947387892 | 128.653335099674 |
| TET3   | 171.589889474122 | 164.337486856997 | 172.26834556696  | 177.235586767256 |
|        | 181.148062201932 | 162.100547394235 | 147.310807346272 | 154.205877662428 |
|        | 155.471795004237 | 164.448110885609 | 153.244758030666 | 162.634670715627 |
| TEX10  | 323.896313343796 | 250.766180970907 | 264.456926651554 | 262.389583658305 |
|        | 370.066087375401 | 312.019603761673 | 263.321559283966 | 245.399847987183 |
|        | 281.44159425243  | 249.449151040445 | 286.856346704286 | 206.027235767232 |
| TEX101 | 113.432757764419 | 104.03442843396  | 113.769815606191 |                  |
|        | 115.755585907264 | 124.190161132628 | 118.60878652724  | 110.234403581151 |
|        | 112.208950290962 | 110.829107724132 | 168.847039069786 | 116.382348831504 |
|        | 110.1278204598   |                  |                  |                  |
| TEX11  | 149.759516805355 | 152.50843414723  | 145.491525555916 | 154.086510608016 |
|        | 138.993251266382 | 151.301484852387 | 137.996291911198 | 150.756776447358 |
|        | 157.162523271165 | 148.859129298141 | 142.049776668507 | 152.954944775793 |
| TEX12  | 153.888212689508 | 143.172744119235 | 149.764447995426 | 156.205127163263 |
|        | 155.699649538664 | 135.645439440707 | 149.829363505519 | 143.25481667885  |
|        | 140.132816040735 | 134.582098893327 | 124.16920280673  | 134.495938988321 |
| TEX13A | 115.572088632106 | 113.857477830423 | 106.551076380988 |                  |
|        | 113.756115251188 | 118.95971064289  | 120.538535752185 | 128.583503171594 |
|        | 109.176852761745 | 128.604270382206 | 125.418782388128 | 126.061141885666 |
|        | 118.533346268154 |                  |                  |                  |
| TEX13B | 138.877999126533 | 118.366859032979 | 139.016274575854 |                  |
|        | 133.329392986316 | 134.011746666371 | 121.107979534361 | 130.878000486351 |
|        | 130.548611758921 | 125.885715928839 | 136.029898048127 | 147.866909109733 |
|        | 135.231458421096 |                  |                  |                  |
| TEX14  | 129.854478528455 | 122.702175900246 | 124.235958498969 | 132.878638378328 |
|        | 129.591396165575 | 123.019430618632 | 120.046892432373 | 128.944295118239 |
|        | 130.41429837092  | 129.140978620864 | 122.603226380439 | 126.763282018991 |
| TEX15  | 147.803464591663 | 132.303506517431 | 147.452986308926 | 156.883255634126 |
|        | 165.908756485356 | 123.015371659847 | 159.185616602396 | 141.28700484445  |
|        | 140.617663657037 | 153.295838391099 | 141.997165490755 | 141.647300896529 |

TEX2 822.129234065933 681.677841333095 764.137504481329 848.620986404914  
 322.837446618323 440.404188514231 384.780426529733 354.336462793628  
 332.464176231219 742.751664201272 379.670492165938 468.496972957503  
 TEX261 233.161848094769 226.144012966486 251.915179734134  
 244.668813440638 413.983821839274 344.575967665039 246.80306998812  
 249.524956682907 248.085349787686 231.572677616684 290.135914275115  
 252.593574250965  
 TEX264 243.861834405092 294.922183826144 338.406266073063  
 308.803322140241 1464.04124596264 337.935183275743 590.515758538373  
 387.477198908304 425.969575503375 331.251075774227 378.797952580504  
 411.968307579588  
 TEX28 119.352995485911 117.760045671142 128.205022859019 121.377666938052  
 112.987890650593 116.288113598488 115.101971719657 125.77343813277  
 112.590379042108 117.561878567749 131.095431530473 118.591554881375  
 TEX9 130.317604643904 142.203367260558 127.9575507576 132.486311240725  
 134.294287947795 131.582231577364 135.913632939299 133.935910746769  
 142.208987267497 136.540568915609 124.533543270311 137.00397800873  
 TF 175.946843919065 170.381897441659 182.57496767012 179.037397826592  
 135.797170561599 167.713268780664 144.771457221413 155.140371265225  
 141.882859092658 140.781647532361 155.960886801091 153.488903967311  
 TFAM 305.325519265387 348.506289278042 283.123157828849 314.063025950327  
 396.40172043456 360.852730026133 501.738490253982 408.201232787978  
 412.648926259488 306.193157874683 512.312880441098 522.486866458783  
 TFAMP1 123.93800397666 131.380387461901 132.86879723151  
 139.403087367992 141.015441854424 123.748788684337 137.182323015758  
 130.479845410716 130.147848418265 133.133892264995 126.88329158544  
 130.420753247797  
 TFAP2A 149.783542909965 171.042491047256 148.764956861822  
 150.756776447358 158.973872644973 190.682392100564 295.099840299681  
 183.657525723012 208.75656341402 813.772804994191 243.5383744440134  
 218.209523110843  
 TFAP2B 132.535722328813 141.037217406848 130.706882659433  
 133.495243957927 146.861981788662 116.316845829267 128.541715437188  
 142.607578275494 140.103020838882 124.641892391159 148.302775746627  
 125.846029991447  
 TFAP2C 140.383646018409 172.552923333095 146.229239731545  
 120.628904050564 564.200165295159 827.400420888645 557.026028810367  
 214.991170762327 236.292053621233 634.906566690042 304.751330890753  
 275.468194644053  
 TFAP2D 149.200848439601 137.794858639838 143.703367582367  
 129.329521415816 146.64835267642 148.962593686337 134.618121709059  
 157.516278302035 151.208728458188 140.311843829601 151.739221728872  
 131.734429913106  
 TFAP2E 147.161720770972 164.256764783784 157.863585655333  
 149.949425756405 145.239119337981 156.543267949167 147.78095608696  
 160.293522619371 147.091280396135 159.762733951454 128.309602266886  
 156.243337414127  
 TFAP4 164.438724387992 147.261153294747 147.502116289881 178.245841646175  
 229.373686092654 163.982415393606 164.841156516242 158.49220347186  
 157.225479764928 161.202844994203 168.720694813918 147.598602877625  
 TFB1M 333.049612399093 326.1109406486 502.731019454502 337.077153882632  
 216.05364037271 366.564822549834 400.472835504879 371.819911874273  
 352.121800955822 333.049612399093 517.23393716516 596.076764072945

|         |                  |                  |                  |                  |
|---------|------------------|------------------|------------------|------------------|
| TFB2M   | 272.456310079164 | 290.802509012089 | 373.033658917608 | 247.72190598581  |
|         | 522.486866458783 | 903.503768217033 | 772.776364492813 | 834.187014201026 |
|         | 576.298671053238 | 383.407365952689 | 708.779490017407 | 880.719593734606 |
| TFCP2   | 305.577166690215 | 354.579728909336 | 351.515059400947 | 347.866264631778 |
|         | 401.960630197091 | 305.451247405518 | 441.112782197591 | 402.026356201632 |
|         | 427.542390397986 | 388.326080754063 | 361.429760858441 | 402.473870771741 |
| TFCP2L1 | 166.671563123047 | 135.90207451581  | 144.011792962785 |                  |
|         | 132.709845352383 | 251.20133703465  | 260.746952459282 | 170.497804969996 |
|         | 205.908052642222 | 155.902461107328 | 257.44230597145  | 218.96845208513  |
|         | 191.525291860022 |                  |                  |                  |
| TFDP1   | 450.220658078322 | 401.542072222692 | 434.61711290583  | 345.686640885419 |
|         | 712.433345978749 | 1188.08712008638 | 871.913035811066 | 790.790236361922 |
|         | 1104.61581891596 | 1272.14273680177 | 704.448123154868 | 1783.8031212092  |
| TFDP2   | 178.984409575632 | 183.719279448844 | 224.707455448421 | 189.450316943845 |
|         | 207.123420880185 | 189.482046688226 | 208.291714758548 | 245.915473236403 |
|         | 215.453915231774 | 180.619956937489 | 188.335102005839 | 203.675655444583 |
| TFDP3   | 116.919109599361 | 108.715328458556 | 117.071585083051 | 108.2359175332   |
|         | 116.989409891761 | 113.133798430215 | 120.626155234319 | 115.107214937219 |
|         | 114.062099086818 | 109.140708667012 | 112.264005988662 | 109.669517182289 |
| TFE3    | 254.359737178714 | 248.562843471699 | 245.399847987183 | 290.802509012089 |
|         | 271.087125858775 | 204.877041314502 | 193.148369507405 | 183.100286716683 |
|         | 173.929353266244 | 173.488272345038 | 222.332748220525 | 185.128661141884 |
| TFEB    | 181.991820141929 | 154.150568177135 | 173.121618125421 | 205.149094703318 |
|         | 136.705326991088 | 141.528115502473 | 157.216793735479 | 138.091795130567 |
|         | 156.572774198042 | 147.966224814966 | 172.329225247019 | 160.865949438448 |
| TFEC    | 143.231806900648 | 144.89403947454  | 134.034970203523 | 137.370670726978 |
|         | 135.025907096066 | 130.967476533254 | 137.52653395793  | 132.311344653106 |
|         | 130.657342262492 | 134.55255098289  | 141.143572141958 | 138.471894596606 |
| TFF1    | 126.241307445165 | 134.361064431414 | 130.572923512809 | 126.085039271526 |
|         | 122.142323014287 | 121.860428893248 | 128.40650280096  | 129.055874691136 |
|         | 128.162546179362 | 120.979417552159 | 143.62315472858  | 812.298381693378 |
| TFF2    | 167.180406126438 | 194.212177449077 | 162.634670715627 | 162.624786423084 |
|         | 203.563098303937 | 154.33224999163  | 143.245660951425 | 153.202157381228 |
|         | 147.696506705909 | 157.21132653949  | 132.047328970556 | 403.47026424469  |
| TFF3    | 511.670320118232 | 396.861835715943 | 449.304281526081 | 487.358720934063 |
|         | 138.279775054156 | 198.597176657619 | 161.965270932582 | 188.671807443641 |
|         | 162.536009333787 | 148.439740062804 | 144.227440632196 | 401.584032365337 |
| TFG     | 691.397238677552 | 552.167699318911 | 593.821622986351 | 658.746224115551 |
|         | 702.460234202652 | 791.402660066193 | 1189.11053680293 | 1122.92917004037 |
|         | 1974.49672149862 | 1302.54547114701 | 644.741046498743 | 902.089561157715 |
| TFIP11  | 329.333236839082 | 314.095043876244 | 297.022984365795 |                  |
|         | 324.79327985156  | 314.810001770583 | 343.307036883726 | 352.562711030848 |
|         | 325.320888625297 | 336.845908630493 | 414.200068430184 | 333.200230327106 |
|         | 306.43742010208  |                  |                  |                  |
| TFPI    | 678.684323057327 | 431.861762635568 | 451.210172051464 | 337.39574303968  |
|         | 162.28074297013  | 238.770586150777 | 263.74335003375  | 224.424524191566 |
|         | 271.791126011275 | 337.652945958921 | 216.506914782226 | 215.84044779962  |
| TFPI2   | 156.003233745771 | 131.419663282022 | 143.881744063934 | 135.166677520468 |
|         | 148.486946087388 | 136.400959554698 | 131.887778588005 | 134.653131708903 |
|         | 140.738977175997 | 160.441879289883 | 122.985117824212 | 121.774697402171 |
| TFPT    | 253.754869975548 | 291.105673222859 | 274.281532397691 | 381.323457262383 |
|         | 1567.89763050645 | 536.46884541183  | 613.063954859056 | 360.551560710852 |
|         | 308.441120735095 | 255.413231082357 | 362.252813848151 | 504.838017072725 |

|          |                  |                  |                  |                  |
|----------|------------------|------------------|------------------|------------------|
| TFR2     | 146.9554120076   | 153.448882783807 | 143.629760301493 | 148.222477811166 |
|          | 187.082082429597 | 140.21908493941  | 155.496190048502 | 160.131256419524 |
|          | 152.004130711617 | 149.226700202481 | 150.029313080668 | 137.612446150193 |
| TFRC     | 802.643357549193 | 868.066644155313 | 796.699879495384 | 346.78158577526  |
|          | 3504.77617298452 | 2470.86113150126 | 14037.2575989329 | 4635.42002659719 |
|          | 2712.07480130502 | 5138.28186306948 | 3046.47354587949 | 2473.22803972431 |
| TG       | 118.44089966163  | 114.658668711121 | 115.058061620379 | 112.046615825307 |
|          | 109.425878885118 | 112.851805868467 | 122.079685222733 | 109.728809191027 |
|          | 117.910259090745 | 118.764650384561 | 131.696834332724 | 124.588594750916 |
| TGDS     | 227.050629701762 | 232.621526025603 | 265.174306663185 | 213.447886742681 |
|          | 238.400565506288 | 314.646369385896 | 240.283918204202 | 212.822328466993 |
|          | 268.724338967108 | 283.874600697211 | 351.515059400947 | 340.903961204211 |
| TGFA     | 138.838795320713 | 165.022029012505 | 143.925616978401 | 141.168198348093 |
|          | 361.768552564027 | 222.268494113686 | 247.053215951505 | 383.802494922918 |
|          | 218.559622620349 | 564.588706307423 | 269.770777921703 | 288.221041179309 |
| TGFB1    | 127.112296857923 | 136.002391758473 | 125.139029579691 | 118.226036680442 |
|          | 117.48427100606  | 121.462385497795 | 117.781804727205 | 123.703840971923 |
|          | 127.781732819297 | 119.819082491115 | 113.119021336236 | 118.206034087145 |
| TGFB1I1  | 1862.88548451154 | 2157.50118108142 | 2176.59445919725 |                  |
|          | 2874.43919426772 | 209.258707976348 | 170.179304745674 | 160.30784625946  |
|          | 163.113457178357 | 198.760049629983 | 335.623336587396 | 157.919709478746 |
|          | 203.913123559942 |                  |                  |                  |
| TGFB2    | 150.809693773343 | 145.45768403614  | 129.705735906962 | 127.712004247155 |
|          | 142.902838068479 | 132.958521136    | 139.494962965774 | 132.727133259694 |
|          | 130.016401638936 | 130.900049359243 | 129.171589574238 | 123.535803027153 |
| TGFB3    | 1675.35431076885 | 1175.27165286568 | 724.103864917969 | 1614.00098175383 |
|          | 144.736213465651 | 137.639342727211 | 119.655162437465 | 146.508628678304 |
|          | 224.588225855066 | 340.193863653875 | 165.647471565959 | 151.573920235798 |
| TGFBI    | 2249.8123426309  | 1918.14260920544 | 1014.23822508445 | 1426.56252600395 |
|          | 591.763423878737 | 854.815394943219 | 2523.91287654539 | 1353.61552261489 |
|          | 1586.00600118477 | 12654.3779830648 | 570.26564132238  | 611.772512110915 |
| TGFBR1   | 142.485427762372 | 126.825785762925 | 144.439320591901 |                  |
|          | 123.827771590213 | 133.324531689254 | 122.773736159743 | 114.384296185446 |
|          | 112.747067417774 | 121.768195574022 | 128.597272557033 | 137.056500339577 |
|          | 121.841080387875 |                  |                  |                  |
| TGFBR2   | 1502.3444541735  | 1254.19980463817 | 1049.52258147141 |                  |
|          | 1061.79595707572 | 492.05680879106  | 651.998433127992 | 498.641091757363 |
|          | 496.328898534802 | 688.684644604218 | 552.662610888399 | 992.320202251161 |
|          | 454.64556253724  |                  |                  |                  |
| TGFBR3   | 4222.55224241399 | 4055.40322213638 | 3784.59114921916 |                  |
|          | 3038.02573182546 | 945.830852603704 | 1774.22769195939 | 1597.53010317504 |
|          | 1285.54492194393 | 1011.9675459648  | 214.52087460757  | 1382.12750708801 |
|          | 1082.75419087929 |                  |                  |                  |
| TGFBRAP1 | 272.639413442579 | 342.769825986756 | 304.357050745605 |                  |
|          | 325.859917318516 | 276.089623957012 | 412.863887464545 | 338.665115108128 |
|          | 478.909308632726 | 310.640107228956 | 316.237519859859 | 275.203046536524 |
|          | 387.908774438461 |                  |                  |                  |
| TGIF1    | 179.230909178397 | 222.20526515049  | 201.139510041141 | 171.006582229921 |
|          | 491.35949123223  | 359.703969802888 | 305.93974940209  | 438.870464403215 |
|          | 342.769825986756 | 308.281798808746 | 290.954496559897 | 306.387898121409 |
| TGIF2    | 258.759507964221 | 275.609716327452 | 242.871915060884 | 252.197271817794 |
|          | 294.653534388707 | 436.222568287601 | 549.162299481184 | 245.607130404306 |
|          | 351.759100605991 | 152.262147284452 | 255.839878446312 | 353.187829498591 |

|         |                  |                  |                  |                  |
|---------|------------------|------------------|------------------|------------------|
| TGIF2LX | 129.628859533303 | 133.026094667212 | 123.974409226349 |                  |
|         | 140.688570032068 | 130.288547755599 | 122.607404698857 | 130.001889950186 |
|         | 137.556552701816 | 131.342562516383 | 131.378893655618 | 121.952255635669 |
|         | 134.06996703302  |                  |                  |                  |
| TGIF2LY | 145.10302792449  | 166.936975782665 | 148.107004870598 |                  |
|         | 149.400244837133 | 155.92082882492  | 163.846242743377 | 150.156865995098 |
|         | 162.147989253357 | 139.570313872946 | 165.789846154721 | 161.354014292373 |
|         | 134.503552797411 |                  |                  |                  |
| TGM1    | 158.002906093899 | 151.10837100314  | 148.11536596061  | 146.014110816045 |
|         | 143.641777655752 | 151.442463705271 | 167.087850057037 | 149.091925032548 |
|         | 162.955366577418 | 4836.4008757421  | 171.338371572269 | 134.722574388775 |
| TGM2    | 889.6617510875   | 1050.40488466179 | 1121.87292339787 | 1652.77814259264 |
|         | 263.352118305612 | 175.101284960252 | 180.680595239651 | 279.969975697164 |
|         | 412.277592266475 | 166.388683552371 | 189.482046688226 | 208.016730103629 |
| TGM3    | 138.704839659727 | 160.525939340745 | 169.612203020686 | 159.563866056798 |
|         | 125.789509802098 | 173.586160103539 | 168.538117820213 | 159.26101905957  |
|         | 167.114291248266 | 176.390014020936 | 162.347140552869 | 167.139257044999 |
| TGM4    | 149.264997927508 | 136.318816786684 | 140.767270136561 | 150.208809981642 |
|         | 145.03804642447  | 131.085965122946 | 142.390243984362 | 129.703791330416 |
|         | 123.571641517019 | 136.3615279557   | 142.173279109959 | 147.150063462728 |
| TGM5    | 131.941069239017 | 129.985797334276 | 128.543460982378 | 133.654232991228 |
|         | 131.198284945008 | 129.737882221259 | 133.913578037255 | 135.535915449183 |
|         | 129.451882171632 | 159.990561741675 | 137.201149245092 | 126.259029676691 |
| TGM6    | 119.822587087968 | 124.116400777472 | 129.514490386931 | 124.876226351169 |
|         | 114.987285062108 | 110.838647534175 | 116.445184223804 | 117.958297137758 |
|         | 125.924219382375 | 122.834017529045 | 139.767216030715 | 126.662329971897 |
| TGM7    | 156.901209828741 | 126.782805974059 | 151.206697943841 | 135.807494668545 |
|         | 134.051756243089 | 151.72544764489  | 156.581569063195 | 130.01207836961  |
|         | 149.513744292932 | 143.271346378958 | 147.716353308549 | 146.871145679651 |
| TGOLN2  | 1039.92160906839 | 977.227184625781 | 1269.67110104843 |                  |
|         | 863.086199215353 | 873.879064183441 | 970.634736994313 | 974.007008568051 |
|         | 1724.22121078776 | 1501.18820017008 | 734.97763567765  | 991.081498002429 |
|         | 1303.33810980467 |                  |                  |                  |
| TGS1    | 136.2727333616   | 149.427217345037 | 153.711354087243 | 131.674409480919 |
|         | 146.983646662811 | 144.690880401712 | 127.097605337434 | 144.143692745479 |
|         | 139.013404849037 | 146.764908249803 | 148.975112606364 | 133.806992413298 |
| TH      | 145.731800133702 | 156.233573126063 | 142.859971805867 | 126.66432941518  |
|         | 2599.421026133   | 294.746622369436 | 241.706645643141 | 428.09583118349  |
|         | 1417.76295714364 | 128.141725976839 | 533.784151495549 | 284.595024875896 |
| TH1L    | 578.650614747598 | 653.500279510032 | 615.058712877418 | 588.678767007017 |
|         | 4722.64356477773 | 2427.21100330388 | 1584.81089248914 | 1045.49947183547 |
|         | 1279.9555644913  | 1016.18143428327 | 1027.48490028905 | 1139.76755449089 |
| THADA   | 220.876114717642 | 236.052008824688 | 223.373877165342 | 257.032174266905 |
|         | 249.354198174438 | 267.939624375137 | 231.63127072986  | 342.096409626768 |
|         | 246.152798696993 | 186.961638857905 | 198.745359220907 | 225.209315195163 |
| THAP1   | 176.849238577762 | 197.526492324088 | 218.314136992677 | 180.250420976613 |
|         | 182.958991847218 | 272.885527139137 | 213.484986945295 | 205.149094703318 |
|         | 193.04138438685  | 201.004491067972 | 210.5689532432   | 202.99342484328  |
| THAP10  | 205.185206972064 | 203.652936507291 | 266.316485802808 |                  |
|         | 173.66499836293  | 261.500728878974 | 144.375109087466 | 289.576706584644 |
|         | 174.92026613834  | 267.097999873387 | 157.192320902906 | 252.365946808078 |
|         | 237.420951138877 |                  |                  |                  |
| THAP11  | 1097.60805874165 | 1093.85316636801 | 1364.1224589383  |                  |
|         | 1228.89116158868 | 1085.92360670051 | 732.040299742444 | 986.65554605455  |

|       |                  |                  |                  |                  |
|-------|------------------|------------------|------------------|------------------|
|       | 798.758496171493 | 1055.22233969473 | 848.154015576436 | 1080.42884514937 |
|       | 955.143610867351 |                  |                  |                  |
| THAP2 | 142.734103971267 | 149.516743790585 | 158.760577365464 | 171.373932115412 |
|       | 141.86836086844  | 136.758262322199 | 164.092847913322 | 163.942131559267 |
|       | 162.683665945044 | 152.004130711617 | 130.998637545686 | 147.132625797946 |
| THAP3 | 138.824082857747 | 147.970243979273 | 146.681183890181 | 130.882463936853 |
|       | 158.226547375305 | 162.895923745031 | 166.176511176489 | 153.108902978819 |
|       | 157.615017085961 | 150.421116058494 | 144.302925948596 | 130.642810886161 |
| THAP4 | 131.556892859203 | 115.048402956574 | 130.479845410716 | 122.469113037809 |
|       | 122.392159083328 | 134.931263946202 | 125.193729067011 | 134.20988291379  |
|       | 123.817878562971 | 142.821131835602 | 111.09179957013  | 152.483240622367 |
| THAP5 | 158.863516051439 | 153.929167381674 | 163.413365060063 | 151.151297821117 |
|       | 156.69025356689  | 155.46017572591  | 150.961462514387 | 156.942156078314 |
|       | 156.316333575406 | 136.144068118165 | 135.261561433405 | 153.792925101459 |
| THAP6 | 202.162432624505 | 194.789918629905 | 243.441938832251 | 221.961758403614 |
|       | 191.830711714844 | 192.286192329464 | 242.871915060884 | 187.145134088286 |
|       | 215.115324454215 | 217.148957110623 | 191.679217737051 | 206.502189514795 |
| THAP7 | 180.3779211444   | 185.765000029242 | 182.624130582754 | 186.6902304653   |
|       | 213.966288689715 | 164.726382689707 | 180.113222861966 | 178.200678423426 |
|       | 182.827395663312 | 146.210814568357 | 157.560117350562 | 170.720018572735 |
| THAP8 | 138.930413256469 | 179.54034642468  | 158.726115143818 | 201.289402228512 |
|       | 156.801189586018 | 131.391434131813 | 146.858292465699 | 142.438586625317 |
|       | 142.843882404269 | 145.335830265052 | 153.589626253969 | 137.438984175012 |
| THAP9 | 113.773684331489 | 116.988440658494 | 117.602986362773 | 125.572299527276 |
|       | 108.9291713877   | 112.428707152237 | 114.539671934155 | 114.860437706855 |
|       | 113.687931899298 | 113.422559344178 | 124.480385254916 | 107.260023460914 |
| THBD  | 148.361088792223 | 171.145909843389 | 132.423043364573 | 133.367085445965 |
|       | 202.421990203844 | 299.513950278952 | 175.960788330149 | 178.997098204457 |
|       | 183.04531185589  | 720.364080505785 | 173.240598306749 | 231.338258067616 |
| THBS1 | 1071.00507864299 | 780.461254794127 | 710.76653239801  | 236.427507270325 |
|       | 179.648479201164 | 1184.3199328099  | 390.809169896009 | 544.580311371212 |
|       | 282.282663608264 | 688.247581763352 | 879.809795251142 | 472.793332506369 |
| THBS2 | 2072.01578063404 | 1982.3154578939  | 1378.40627876546 | 910.087388930485 |
|       | 250.885949055834 | 206.027235767232 | 173.334154083555 | 256.99019407912  |
|       | 369.156887999872 | 1228.89116158868 | 173.863373934746 | 141.315230997077 |
| THBS3 | 761.32108609503  | 615.058712877418 | 459.388390392518 | 730.042712083388 |
|       | 333.270203737291 | 197.308952757609 | 352.897241809959 | 315.3930052781   |
|       | 240.376851873817 | 267.939624375137 | 379.788696204016 | 307.570405241182 |
| THBS4 | 160.799950553311 | 237.216435972201 | 157.08300736206  | 479.469659712246 |
|       | 133.554822920765 | 133.18744841514  | 150.78145177853  | 149.029275579026 |
|       | 161.585555680663 | 139.301435614165 | 134.58799530734  | 138.215708514725 |
| THEG  | 158.335952927257 | 137.03111066852  | 137.969750384554 | 148.707332454527 |
|       | 151.679534447228 | 139.324006489527 | 150.807308519367 | 139.361120875198 |
|       | 142.882391486465 | 144.848839185565 | 153.219954133957 | 145.525623473128 |
| THEM2 | 334.316711893654 | 357.584458526365 | 438.611973005212 | 377.024120035829 |
|       | 391.252450588331 | 274.179232297038 | 476.168679880357 | 540.946852709312 |
|       | 433.751675703425 | 336.490076158135 | 295.973370766318 | 543.810043433181 |
| THEM4 | 116.225440873023 | 115.231121959397 | 122.54127694717  | 113.989682635964 |
|       | 166.709393547104 | 127.152744243038 | 131.442186260672 | 126.295856316628 |
|       | 117.790593990682 | 121.036054511761 | 160.941804737367 | 137.95243466771  |
| THEM5 | 134.55255098289  | 134.949572471421 | 136.289197889565 | 131.345038923753 |
|       | 136.767307268217 | 143.741676966126 | 143.837402372008 | 137.225659453984 |
|       | 135.673080643346 | 135.607537832704 | 151.081339000609 | 140.248610391566 |



|        |                  |                  |                  |                  |
|--------|------------------|------------------|------------------|------------------|
| THEX1  | 123.681353449198 | 125.75980494927  | 121.267153348313 | 121.599883734552 |
|        | 151.064422836695 | 132.261161069329 | 140.286870147975 | 125.130703953031 |
|        | 126.121516564343 | 126.048382998393 | 165.558963147657 | 129.297217956843 |
| THG1L  | 163.113457178357 | 155.741507341843 | 154.611011734772 | 143.152993168137 |
|        | 158.531514776098 | 134.772545694636 | 202.97197145851  | 154.935741493562 |
|        | 163.858222964048 | 199.235895708128 | 217.560691345072 | 151.387150218354 |
| THNSL1 | 173.850390626782 | 164.413893089607 | 181.202396068658 |                  |
|        | 164.726382689707 | 280.007569817323 | 183.894417745549 | 192.418895349837 |
|        | 186.447049658314 | 191.365014963729 | 159.138344477256 | 174.471304281502 |
|        | 182.588697551677 |                  |                  |                  |
| THNSL2 | 188.322853571195 | 191.897449038297 | 160.361025839456 |                  |
|        | 183.804849355341 | 144.167857433516 | 144.986655090517 | 148.911306526869 |
|        | 145.498372398845 | 170.376620730856 | 148.818562911616 | 191.628693083169 |
|        | 152.617507769717 |                  |                  |                  |
| THOC1  | 419.532420763449 | 421.690849282483 | 421.140525880287 | 423.152420192284 |
|        | 651.235249028924 | 424.134483971176 | 384.464383569801 | 527.597948979568 |
|        | 362.502631441716 | 385.888395433066 | 485.136339836897 | 413.913442080187 |
| THOC2  | 852.649997188692 | 1015.63768413332 | 573.509780150018 | 964.473774310687 |
|        | 484.764806127211 | 869.542306259337 | 837.023434916281 | 702.265884752474 |
|        | 737.843412273272 | 430.728137105601 | 944.47112348734  | 554.800688991977 |
| THOC3  | 157.547814187442 | 169.31618330657  | 184.294172429054 | 145.48456035752  |
|        | 219.940167815376 | 267.970798709017 | 662.213423011533 | 370.140588087649 |
|        | 234.693846527867 | 595.409419899436 | 217.353396632732 | 360.991542429346 |
| THOC4  | 206.521761031181 | 194.413759761549 | 210.942865876533 | 175.757588503244 |
|        | 378.585058475083 | 504.709613434391 | 415.497783305278 | 577.56891124468  |
|        | 432.515970951769 | 411.285747588622 | 211.609763150578 | 719.628501451187 |
| THOC5  | 450.327710374141 | 484.568420044471 | 584.813665097407 | 677.802147190757 |
|        | 355.213322760505 | 434.176007498693 | 279.668007824988 | 305.499194075747 |
|        | 359.776068595698 | 445.763740779039 | 283.163770658619 | 259.025042304848 |
| THOC6  | 238.124340832815 | 193.336246844237 | 189.235998474945 | 235.350819745387 |
|        | 488.746614111382 | 230.893665210918 | 287.374706071354 | 206.937770272939 |
|        | 202.97197145851  | 328.431289733169 | 236.292053621233 | 288.505502880424 |
| THOC7  | 1641.70484603137 | 1445.72064343302 | 2311.05587511258 | 1322.14570224119 |
|        | 2615.07927836881 | 1649.46398639795 | 2601.89405525276 | 1800.25771851544 |
|        | 2296.30423509176 | 2666.06582231934 | 1637.66306286151 | 2074.29945034697 |
| THOP1  | 314.486603134656 | 370.798852361374 | 260.999345837027 | 476.782624160552 |
|        | 830.455793617181 | 502.063888359427 | 331.523536427527 | 364.597798667541 |
|        | 331.164053277361 | 316.165926273381 | 270.33685210971  | 307.906312092805 |
| THPO   | 147.805819921429 | 133.218742606195 | 136.520811697544 | 133.731500722599 |
|        | 150.761696482387 | 131.897352210959 | 147.54950981909  | 142.978818998012 |
|        | 145.549126188292 | 168.205277839471 | 151.70035428516  | 138.62994237184  |
| THRA   | 287.889774984754 | 277.285526811736 | 251.347519777204 | 336.5543056115   |
|        | 147.49720952988  | 169.052101570616 | 139.440415574681 | 160.923897048848 |
|        | 162.863781294205 | 219.687151891777 | 158.89305345139  | 144.667638908504 |
| THRAP3 | 242.570588364106 | 238.770586150777 | 329.88790758321  |                  |
|        | 223.81987303579  | 230.161369375718 | 247.550312458738 | 309.658122422202 |
|        | 268.406778092906 | 293.692083555844 | 312.224309341171 | 186.57665470145  |
|        | 323.04019262387  |                  |                  |                  |
| THRAP5 | 163.306853098724 | 193.48293264444  | 170.158189150422 |                  |
|        | 165.654773882752 | 223.531323159808 | 168.323141675824 | 174.568253693395 |
|        | 166.085469368498 | 164.841156516242 | 208.713555471888 | 172.077522197357 |
|        | 158.299765118221 |                  |                  |                  |

|         |                  |                  |                  |                  |
|---------|------------------|------------------|------------------|------------------|
| THRB    | 131.426355444136 | 132.881693683384 | 121.094060100325 | 126.814332513301 |
|         | 138.30326146769  | 128.266906202941 | 149.18603646016  | 123.959050197189 |
|         | 123.728481007459 | 122.408016372747 | 137.022366035333 | 134.9404536551   |
| THRSP   | 155.794309652357 | 132.913891550054 | 150.542478166361 | 155.452842883109 |
|         | 145.514859606031 | 144.499680685194 | 138.201164395948 | 147.400082178491 |
|         | 152.340010735322 | 153.667355714857 | 149.41564356447  | 131.692626563078 |
| THSD1   | 137.731390340708 | 140.706490845379 | 141.842919268688 | 134.932416370825 |
|         | 134.160100276452 | 141.997165490755 | 134.096283448464 | 126.178476831007 |
|         | 138.223001481672 | 154.162796706044 | 147.409936250284 | 146.14494790114  |
| THSD1P  | 140.981666934622 | 133.441783287131 | 147.697973457776 |                  |
|         | 136.185953087697 | 129.368045611894 | 136.639637503571 | 129.01094835739  |
|         | 128.386309075038 | 137.844113743956 | 136.641140715439 | 143.157807632147 |
|         | 140.398923642686 |                  |                  |                  |
| THSD3   | 110.266032635568 | 115.750690887988 | 112.371497988132 | 113.748724650063 |
|         | 116.871350997346 | 115.572088632106 | 114.774530966446 | 124.892438890234 |
|         | 121.572462089942 | 126.013957128603 | 130.700175060255 | 114.65036208773  |
| THSD4   | 175.121069571371 | 172.857643600385 | 137.120973494952 | 141.398513269219 |
|         | 151.094682146074 | 124.28313315915  | 132.493888285566 | 136.026302491961 |
|         | 133.368199807997 | 185.405774238391 | 136.641140715439 | 136.319655432311 |
| THSD7A  | 145.177195093247 | 134.253399256648 | 141.267715391739 |                  |
|         | 143.594003495859 | 115.030084788083 | 136.591299462104 | 146.238333981318 |
|         | 141.513636348978 | 138.006973261364 | 132.885515958081 | 153.095594614683 |
|         | 137.361967082029 |                  |                  |                  |
| THSD7B  | 134.312156667838 | 135.254996386778 | 134.008118774075 |                  |
|         | 136.164270397912 | 125.488511939819 | 132.466796864599 | 134.064206964444 |
|         | 129.532122459128 | 130.302829773323 | 135.237042337721 | 145.114382599368 |
|         | 124.740700441589 |                  |                  |                  |
| THTPA   | 128.08497128067  | 123.916497557628 | 120.883785696583 | 135.715745768179 |
|         | 159.455596750304 | 119.375727296235 | 122.659174808512 | 117.480506535399 |
|         | 122.84779238795  | 112.817015523662 | 141.97478198531  | 118.298444816712 |
| THUMPD1 | 495.56459361431  | 525.920873434688 | 713.087392708048 |                  |
|         | 447.372026268156 | 318.73799597811  | 457.650982600462 | 550.901056837273 |
|         | 585.075322115635 | 360.991542429346 | 381.867665449509 | 444.663812851378 |
|         | 487.799854351205 |                  |                  |                  |
| THUMPD2 | 312.601510033941 | 286.945784387294 | 335.239364345057 |                  |
|         | 297.609793563225 | 260.746952459282 | 409.691865300362 | 425.13721408756  |
|         | 456.298408568636 | 212.223906015932 | 412.202049714695 | 404.726926716133 |
|         | 450.851711160136 |                  |                  |                  |
| THUMPD3 | 143.31590446076  | 156.179501567984 | 155.502363062633 |                  |
|         | 131.468537312778 | 184.135651836627 | 145.154323430995 | 190.947996918605 |
|         | 200.424975825325 | 181.566951620202 | 159.891562221587 | 204.1974438819   |
|         | 161.354014292373 |                  |                  |                  |
| THY1    | 903.503768217033 | 845.646455991008 | 268.660078500783 | 1339.83170225337 |
|         | 378.695635790714 | 269.300548648755 | 140.067809125008 | 312.808044035117 |
|         | 510.972389503051 | 873.879064183441 | 208.838523729744 | 237.754067231793 |
| THYN1   | 371.00603789759  | 329.48021621087  | 437.931339781992 | 328.078808625906 |
|         | 352.741885295157 | 276.414209660023 | 397.660202059209 | 382.186095123659 |
|         | 373.656487297238 | 247.942904862478 | 381.740838644647 | 464.436380568216 |
| TIA1    | 345.209128382239 | 274.534901548678 | 386.379891865411 | 261.366143735074 |
|         | 564.41151411028  | 892.038018567941 | 550.24496459253  | 616.701037274509 |
|         | 476.782624160552 | 374.215345412947 | 509.512410867348 | 612.374364731095 |
| TIAF1   | 542.379137999196 | 655.665164535648 | 457.548150688248 | 796.439819579938 |
|         | 937.375361806971 | 293.12968694683  | 306.111172289632 | 430.833137328233 |
|         | 392.13175568099  | 732.352357321273 | 439.33566689752  | 345.38424761963  |

|        |                  |                  |                  |                  |
|--------|------------------|------------------|------------------|------------------|
| TIAL1  | 286.469773081481 | 245.850813387241 | 269.770777921703 | 227.441436540742 |
|        | 256.687384001447 | 245.766885283797 | 358.415933397099 | 254.359737178714 |
|        | 283.191303666907 | 285.659010982301 | 346.996310517446 | 397.449905380349 |
| TIAM1  | 132.332128706656 | 154.889079187405 | 163.284853420896 | 138.57506931811  |
|        | 197.962159288376 | 318.487401106209 | 208.666760987764 | 263.52595855321  |
|        | 217.050602253281 | 256.687384001447 | 225.189991540262 | 258.4424008891   |
| TIAM2  | 268.224669588188 | 252.138168292964 | 250.928804390353 | 335.142319387164 |
|        | 142.02169810999  | 137.559204418819 | 151.665244763743 | 151.639515017015 |
|        | 147.416991272497 | 141.565098155081 | 136.949403128211 | 141.076652697698 |
| TICAM1 | 251.414717011661 | 245.978723809154 | 277.817786943873 |                  |
|        | 281.238656291587 | 431.861762635568 | 271.064405562085 | 329.333236839082 |
|        | 325.43977732888  | 274.120234926832 | 378.308562999445 | 360.185005480216 |
|        | 388.638095539186 |                  |                  |                  |
| TICAM2 | 295.047418816148 | 312.019603761673 | 252.015257713669 |                  |
|        | 337.973433871323 | 182.57496767012  | 147.790720062226 | 204.031081842809 |
|        | 186.033093285894 | 190.152824885328 | 284.043349407812 | 194.22713184875  |
|        | 165.143417235314 |                  |                  |                  |
| TIE1   | 162.500485773812 | 158.660859266099 | 129.628859533303 | 138.592943322694 |
|        | 129.369968549738 | 131.503936441405 | 118.787630332168 | 140.460927375243 |
|        | 147.270369342438 | 121.497645719165 | 147.123477579978 | 122.093290585838 |
| TIFA   | 142.129680127408 | 162.914301705151 | 168.942165573542 | 145.416733388652 |
|        | 136.708746582636 | 177.825648107126 | 169.631386764054 | 140.671406418004 |
|        | 183.023316857537 | 166.272237117441 | 182.109092947203 | 162.919656039331 |
| TIFAB  | 140.557871626905 | 143.537785553911 | 146.621996129313 | 131.794065532001 |
|        | 145.426171336045 | 137.854873498783 | 138.510722755317 | 134.640783050966 |
|        | 138.041411135053 | 139.703304553486 | 140.313216623427 | 137.262309660909 |
| TIGA1  | 1477.10828981572 | 1645.05161227372 | 2639.60135568    | 1180.7055699511  |
|        | 684.715981522999 | 491.635435224507 | 2479.34567973462 | 834.788058321257 |
|        | 685.354305381323 | 1797.65684760558 | 2200.94974896771 | 1516.97921112926 |
| TIGD1  | 162.039394839415 | 139.182623417751 | 153.821728151219 | 165.586397236489 |
|        | 147.108661317945 | 139.801108744526 | 168.687845035401 | 148.525224975266 |
|        | 142.534195262988 | 149.490064894136 | 136.448045428081 | 149.348231806916 |
| TIGD2  | 144.94824685435  | 168.166938045454 | 176.934111889209 | 173.939159471022 |
|        | 223.094496588657 | 182.67941458824  | 335.698400607132 | 255.839878446312 |
|        | 223.107391048316 | 199.077893147154 | 242.253995801882 | 214.991170762327 |
| TIGD3  | 146.428534132236 | 127.879723100698 | 147.821639002833 | 125.810756286648 |
|        | 139.140647941752 | 131.696834332724 | 147.494937826597 | 140.301945597122 |
|        | 144.013615296685 | 139.238936770274 | 142.601556980614 | 158.770502070553 |
| TIGD4  | 106.102093734748 | 104.739307327595 | 105.467761348787 | 108.646136431909 |
|        | 103.734303632543 | 106.182551369456 | 114.691842968597 | 108.730058525654 |
|        | 106.746545626069 | 120.819163462986 | 131.050255325564 | 119.395894479869 |
| TIGD5  | 270.787490294555 | 321.367338145787 | 294.069353373633 | 355.14024238296  |
|        | 883.140984728615 | 348.921877633633 | 592.957842630046 | 411.285747588622 |
|        | 444.663812851378 | 352.562711030848 | 582.527835746927 | 423.966625351913 |
| TIGD6  | 159.41078351918  | 163.066051106092 | 168.753660955229 | 182.478971050701 |
|        | 149.556644928013 | 186.778334749551 | 171.145909843389 | 153.072429774613 |
|        | 178.665552649698 | 179.211502448703 | 163.936973279176 | 209.051768656607 |
| TIGD7  | 269.053237303244 | 249.193270428348 | 308.877027622691 | 304.844121431627 |
|        | 181.081050726043 | 163.014903707857 | 189.160454951382 | 246.594244983507 |
|        | 212.396522888943 | 173.829219279719 | 304.937584086529 | 133.682715540066 |
| TIGIT  | 132.471014832851 | 133.463464118897 | 142.664793323255 | 142.701714161281 |
|        | 137.42845093653  | 135.023016176493 | 135.509927917168 | 132.692027897739 |
|        | 149.490064894136 | 134.446758753426 | 169.940177050294 | 123.318763391117 |

TIMD4 124.811760828557 132.128418409996 117.123891785437 120.324139035544  
125.170874841845 112.054379249781 121.116206210402 133.861140449832  
169.826068012389 118.47752077032 168.861884032201 113.432757764419  
TIMELESS 170.370934381883 199.87003105816 166.788336808924  
176.347535860374 652.826023701545 710.228463443265 435.48544637769  
990.206369590236 843.545962045705 609.309339417625 385.317560758502  
598.449359425056  
TIMM10 506.898635822094 333.439929772897 300.314088267108  
304.900910626137 668.286400833485 802.017244099902 582.642500194997  
598.924339094496 729.499296070289 420.743637858421 182.235490620172  
594.38228123675  
TIMM13 132.589411973628 135.360087349634 137.848546040474  
144.414055029474 158.439409064812 159.660564323984 121.99477069153  
140.597877909094 142.501655618849 139.633941983246 143.436675541053  
145.022242996923  
TIMM17A 153.34166495223 175.79375235478 182.929326147069  
150.126627487419 145.190896872008 170.725486814469 172.28937151007  
168.124936529582 165.364935913232 160.667815093292 159.065612005442  
165.154844613899  
TIMM17B 337.434882771953 350.392951395182 378.088675670786  
422.12964420709 815.779445689417 787.425941491281 497.629319581786  
567.715714233608 555.109005518622 302.570932942847 609.100385482325  
548.455251483009  
TIMM22 640.255747986724 774.442392607873 788.244353085369  
970.166036472486 397.737702926328 615.058712877418 301.49286558088  
444.826775824095 549.692164962653 472.108893832845 463.802270256246  
553.198321853202  
TIMM23 735.449040059761 730.34994035645 841.285351463894  
670.856008549143 621.489906442001 1172.96121022579 1006.24899131914  
810.769136227155 999.658013198849 893.676600121113 871.528156184927  
1255.02720867812  
TIMM23B 147.192815700248 154.232310911696 163.426663985855  
150.496616601699 145.917220112846 167.653412908384 166.099940078284  
152.692483731643 153.461396593156 157.028963417138 166.85671415475  
173.024402954772  
TIMM44 320.812909889014 316.623219008156 326.640168906375  
414.596948083067 296.290104133844 265.402310598892 239.33642662112  
253.385592447339 206.257167235126 296.962992349662 234.738241125899  
216.403542903805  
TIMM50 115.235444833856 115.450352881048 116.118745494794  
118.757973008463 109.817705421158 118.807135693934 118.070716076005  
112.292129754508 112.977469350139 107.48180681159 131.444734367396  
105.665621968915  
TIMM8A 158.216790540415 172.641322197031 134.991379445799  
157.612067634423 263.568160216149 150.746423638097 199.516043142784  
178.563665283267 182.095387488796 216.731618532814 224.588225855066  
202.927700504034  
TIMM8B 237.601064742453 232.321454436688 207.298994298453  
241.353916553991 382.186095123659 405.183882455109 294.595972099366  
285.659010982301 279.26508919212 240.253944604431 313.536451935268  
314.751799003704  
TIMM9 447.674610082872 376.007938436483 578.465753476561 360.991542429346  
362.95684683529 271.945851739635 430.94199035855 371.06697207449  
330.281193038198 450.220658078322 452.961307006622 401.102586700919

|         |                  |                  |                  |                  |
|---------|------------------|------------------|------------------|------------------|
| TIMP1   | 7332.15849011291 | 7539.6945050098  | 4141.8682669995  | 9433.53967760357 |
|         | 7292.0342195035  | 5992.92384160188 | 3855.33040541264 | 2756.22069438696 |
|         | 4892.17875938832 | 3342.8737952486  | 2715.55326746591 | 4335.76831372031 |
| TIMP2   | 2410.32095582515 | 2036.43904731226 | 1936.88813111969 | 1974.49672149862 |
|         | 215.057917795456 | 242.188218870393 | 189.539458686123 | 263.606930507829 |
|         | 395.327097512479 | 697.774882173237 | 226.020769172424 | 218.18756955522  |
| TIMP3   | 2111.32236867229 | 1828.66165670455 | 1554.16120123599 | 2005.76678571689 |
|         | 245.582279957584 | 577.801009921199 | 630.894382644903 | 276.582734590058 |
|         | 309.580750386386 | 338.075238647592 | 478.293220151258 | 481.751102333172 |
| TIMP4   | 190.850639994777 | 204.489837323989 | 158.226547375305 | 230.015981563049 |
|         | 141.735123971775 | 132.098421212796 | 143.020244241091 | 135.59027155522  |
|         | 134.105941085621 | 127.089567789608 | 139.530196462344 | 182.529167529936 |
| TINAG   | 180.290887733427 | 150.507308901391 | 157.979749139651 | 157.663460168247 |
|         | 164.281196089736 | 173.810080280732 | 155.207839370162 | 151.65364467801  |
|         | 159.362293777146 | 159.443697452694 | 158.963726206466 | 168.682307349713 |
| TINAGL1 | 183.26554404668  | 211.300733064951 | 168.05687638693  |                  |
|         | 208.955110569558 | 427.249733213787 | 361.160881334174 | 811.912727084669 |
|         | 197.848577663238 | 298.460273458181 | 131.977212025523 | 245.640193659159 |
|         | 643.13571432061  |                  |                  |                  |
| TINF2   | 865.800709006332 | 721.966539760341 | 993.774175699873 | 913.934874451961 |
|         | 365.950612890149 | 372.149771075286 | 600.430996779799 | 516.429067667758 |
|         | 626.857289492802 | 1828.66165670455 | 341.128917971124 | 394.73732350607  |
| TINP1   | 2332.98074920207 | 2385.5958396359  | 3226.53426370323 | 1627.02882286283 |
|         | 864.547109080675 | 1561.10217536347 | 3789.1316515671  | 1319.3522488218  |
|         | 1542.35486950856 | 3510.24464112094 | 3455.20639616159 | 2129.84680802619 |
| TIPARP  | 510.659785046811 | 755.79669622705  | 557.405157178952 |                  |
|         | 423.489441909617 | 369.070376276471 | 702.981741565482 | 608.351527783086 |
|         | 607.26455470867  | 506.165100641525 | 854.224454791713 | 621.173315178959 |
|         | 566.543765584009 |                  |                  |                  |
| TIPIN   | 142.383723965616 | 134.746175914762 | 124.124076599417 | 126.262349005661 |
|         | 217.094085829328 | 147.401387099359 | 142.991135981933 | 170.257439890277 |
|         | 180.364089931995 | 172.942666836182 | 153.000232171457 | 149.480971898888 |
| TIPRL   | 266.395569467956 | 245.723316636363 | 301.546624239855 | 238.375823012603 |
|         | 249.263194321516 | 489.403061697031 | 277.219796733134 | 334.772648743153 |
|         | 235.595194918187 | 357.972320648217 | 278.469340236003 | 395.133831206474 |
| TIRAP   | 158.74180418577  | 156.863232221623 | 180.680595239651 | 172.758230728437 |
|         | 186.112835637689 | 151.9565369062   | 160.014635964846 | 164.008063563113 |
|         | 158.645402461996 | 150.212688586568 | 169.447827110558 | 184.365354978005 |
| TJAP1   | 8864.70614223459 | 9715.20127757161 | 8633.71708020651 | 15420.9668207676 |
|         | 837.413261433363 | 821.020339593525 | 771.059329972125 | 829.740755449333 |
|         | 864.547109080675 | 522.486866458783 | 606.162976359615 | 643.468308027006 |
| TJP1    | 952.357976050712 | 744.808064061459 | 1069.93503700632 | 686.679573646733 |
|         | 284.798325549665 | 455.665927568395 | 448.54309632232  | 307.410175748955 |
|         | 470.746477818201 | 618.661249163439 | 462.553267274302 | 574.399909181723 |
| TJP2    | 236.292053621233 | 225.169110687004 | 291.476113017794 | 214.546528079149 |
|         | 316.457274749526 | 250.766180970907 | 287.593221911064 | 311.670576741448 |
|         | 328.969023478451 | 347.932135290714 | 438.7446527797   | 264.955939320296 |
| TJP3    | 118.601228886344 | 145.799530970042 | 149.113794439994 | 131.690417323838 |
|         | 516.088776850623 | 347.3483417873   | 296.603054615145 | 389.853534237748 |
|         | 342.935878735854 | 115.988180787152 | 378.585058475083 | 217.910445051307 |
| TK1     | 129.616142780279 | 147.865114383296 | 123.694678408411 | 137.894482933806 |
|         | 1372.63540073207 | 350.658722333252 | 294.653534388707 | 558.251384152474 |
|         | 635.819650434542 | 361.829819621662 | 221.975219056555 | 530.969825236996 |

|       |                  |                  |                  |                  |
|-------|------------------|------------------|------------------|------------------|
| TK2   | 254.447650810819 | 195.532022060219 | 233.842749683689 | 265.829122816166 |
|       | 236.164692035094 | 205.260673843294 | 188.490807652188 | 176.038123840296 |
|       | 178.734634888773 | 208.895657507883 | 221.594737497504 | 187.461448376593 |
| TKT   | 1848.27927621606 | 2374.1382412432  | 3643.11229751348 | 3315.21586182496 |
|       | 13563.1694195379 | 1442.94175124818 | 3019.57419253979 | 1626.34607278613 |
|       | 2193.376951552   | 2274.75133434566 | 1358.29475573637 | 1764.53168329081 |
| TKTL1 | 193.245087824217 | 149.045654499682 | 179.163748161358 | 187.112176929485 |
|       | 205.45079491218  | 175.810411923013 | 169.642188114285 | 164.02617650236  |
|       | 175.269675831824 | 162.110943457969 | 162.802392115386 | 172.783430414523 |
| TKTL2 | 104.977794653504 | 100.325215581101 | 106.576058729493 | 111.11656427738  |
|       | 112.179019393947 | 114.860437706855 | 114.788353738907 | 112.476111928742 |
|       | 109.355444907633 | 115.992487254175 | 112.282839763467 | 108.446988282853 |
| TLCD1 | 125.815256068004 | 133.53523683945  | 121.752481757054 | 117.667611937195 |
|       | 1027.11849332495 | 155.129304059037 | 408.10780961711  | 481.238450505207 |
|       | 360.605223912114 | 237.420951138877 | 260.016906472407 | 180.54209603289  |
| TLE1  | 404.95944990868  | 424.025588636796 | 316.590387560909 | 324.56043349882  |
|       | 834.187014201026 | 385.750371084    | 302.696004448559 | 736.963699775724 |
|       | 374.56251861444  | 340.903961204211 | 458.151323130855 | 176.062665550409 |
| TLE2  | 520.585319342817 | 602.480822390671 | 664.60530723006  | 1011.14472068314 |
|       | 627.803400871547 | 297.921617748468 | 435.183433729519 | 356.268960813032 |
|       | 516.429067667758 | 124.003914369077 | 510.061974830525 | 341.501397478593 |
| TLE3  | 132.484079454476 | 142.56910547147  | 111.423140302983 | 126.698158279472 |
|       | 146.464937541891 | 127.058373069911 | 150.279529635193 | 130.611233072509 |
|       | 151.379761514526 | 163.960242712692 | 135.554736716321 | 130.564962937297 |
| TLE4  | 583.022090879298 | 497.411169898778 | 408.444629429553 | 295.420691959792 |
|       | 206.027235767232 | 217.380892198811 | 195.364709354814 | 297.228563607097 |
|       | 228.852495818211 | 271.397087928135 | 283.416246133873 | 214.662648581622 |
| TLE6  | 141.609037401299 | 145.67389337654  | 136.951350782053 | 139.609751976657 |
|       | 449.304281526081 | 127.884750925048 | 269.927694984528 | 215.194909819764 |
|       | 219.901025447571 | 125.386545354096 | 160.338146803754 | 126.292433523959 |
| TLK1  | 307.768302846647 | 295.607161318725 | 321.696082249696 | 301.908667220208 |
|       | 268.724338967108 | 238.310077556167 | 176.890596690798 | 202.129153259445 |
|       | 166.964057265095 | 240.283918204202 | 187.069074575776 | 201.105520537151 |
| TLK2  | 400.783945471037 | 344.45331938267  | 475.540659315339 | 380.562212796792 |
|       | 238.685014863143 | 375.539588956213 | 400.060972573122 | 400.180574613078 |
|       | 431.799795646414 | 412.277592266475 | 352.811351813364 | 494.347792360629 |
| TLL1  | 184.557630172634 | 165.70840218273  | 135.628982370682 | 139.420025842675 |
|       | 152.915692742755 | 146.222195387635 | 140.712618356383 | 155.737364431382 |
|       | 162.28074297013  | 151.317370941112 | 152.902458879101 | 133.951322753098 |
| TLL2  | 135.726760147904 | 136.061992660698 | 136.691234705997 | 129.108534267222 |
|       | 128.346598756853 | 128.856640014006 | 120.422401793885 | 132.472505035111 |
|       | 126.972399784537 | 115.14883090249  | 125.997109913348 | 136.03117924052  |
| TLN1  | 1334.69145271749 | 1415.67109281133 | 1649.46398639795 | 2285.86163259073 |
|       | 417.615521090665 | 272.117599603586 | 252.655315526015 | 301.638918685657 |
|       | 327.811191081135 | 416.861099188252 | 350.803378042804 | 220.217745732407 |
| TLN2  | 213.484986945295 | 234.322989368622 | 176.874265462986 | 250.963601187362 |
|       | 287.593221911064 | 136.935498266723 | 149.619141707962 | 150.670783991982 |
|       | 164.198494818485 | 137.504147221623 | 155.143752422033 | 135.259226552938 |
| TLR1  | 130.088408942008 | 133.101674466013 | 127.354826381656 | 131.516100334597 |
|       | 110.408301129053 | 120.71782441569  | 107.221547998974 | 123.010614051218 |
|       | 147.307419859572 | 136.392389842232 | 151.497680466119 | 115.107214937219 |
| TLR10 | 134.991379445799 | 131.190238038695 | 140.826051635712 | 138.756638791139 |
|       | 136.093473732174 | 140.513291662274 | 147.228812647235 | 141.370957100324 |
|       | 181.491120129045 | 132.623563631011 | 152.470980074365 | 133.143695166498 |

|         |                  |                  |                  |                  |
|---------|------------------|------------------|------------------|------------------|
| TLR2    | 121.884067622971 | 122.965328766807 | 121.047419779542 | 118.684077097437 |
|         | 102.166449349339 | 121.144174389418 | 109.586955365611 | 112.298254005045 |
|         | 110.838647534175 | 117.60787142216  | 117.078720392441 | 126.019246614944 |
| TLR3    | 140.826051635712 | 147.118987674809 | 133.757741295765 | 132.858424396011 |
|         | 126.825785762925 | 141.062226285596 | 131.132508349222 | 166.595529296463 |
|         | 178.997098204457 | 142.324077852852 | 166.108206159312 | 146.559502785264 |
| TLR4    | 153.062710222618 | 154.340042518983 | 140.504486195539 | 127.566369352079 |
|         | 126.87100632595  | 137.578516107502 | 153.903993884123 | 139.214589768245 |
|         | 147.925744210234 | 142.861359851088 | 194.403848868583 | 160.045715314465 |
| TLR5    | 278.274343962656 | 243.793465720264 | 351.448985413528 | 241.917371866481 |
|         | 186.420541099902 | 251.787648609546 | 274.179232297038 | 195.50039162477  |
|         | 227.847614397311 | 264.741946816665 | 182.084333814175 | 210.316431648335 |
| TLR6    | 134.904123162692 | 138.79473329684  | 138.882483367088 | 142.281657284178 |
|         | 143.2438241778   | 133.286702819953 | 141.653917856148 | 140.678336884951 |
|         | 154.7326161316   | 153.041407358576 | 157.016659994185 | 137.404525565336 |
| TLR7    | 150.694215349678 | 159.942971344216 | 137.929082565223 | 144.402160347818 |
|         | 135.129656281091 | 133.875667250136 | 125.887854850942 | 196.329602378007 |
|         | 173.38031514498  | 127.026168862919 | 154.501338425995 | 143.922878410438 |
| TLR8    | 133.604705630582 | 134.673861365626 | 135.383585408897 | 142.815817738837 |
|         | 130.763957515652 | 136.428826558493 | 137.114604159523 | 161.237544868191 |
|         | 149.168758815526 | 143.569894807386 | 145.233055765001 | 147.479390172796 |
| TLR9    | 120.846789922177 | 118.902823494379 | 115.649568330705 | 125.393848851951 |
|         | 134.233014993992 | 113.400050190315 | 117.392898601408 | 119.382151435379 |
|         | 127.177422395113 | 113.209569103727 | 122.072091994548 | 131.414690782328 |
| TLX1    | 125.313515459103 | 124.418295003824 | 122.309041354217 | 121.665157726433 |
|         | 121.884067622971 | 125.929743286163 | 122.490271802207 | 124.297848065172 |
|         | 132.458764637407 | 126.690066353698 | 150.767158077219 | 124.225294244156 |
| TLX1NB  | 133.511698282195 | 134.528971384442 | 145.801228425692 |                  |
|         | 141.391508027714 | 136.660600727111 | 126.924014801186 | 137.183566882805 |
|         | 130.925881698601 | 128.78647242525  | 121.545189875973 | 141.522701487198 |
|         | 145.921381300813 |                  |                  |                  |
| TLX2    | 132.223321299997 | 118.424520312293 | 122.368581795931 | 129.102182717009 |
|         | 126.282575548237 | 133.459221120979 | 119.11586630281  | 134.734429133481 |
|         | 120.263659727964 | 128.090665893885 | 114.631759839092 | 126.460390022632 |
| TLX3    | 114.927420605185 | 128.628637585951 | 144.600474557974 | 142.677386111317 |
|         | 146.231937458616 | 164.857465272302 | 136.858037332222 | 127.520134825082 |
|         | 136.539849534341 | 121.04331582508  | 156.548858402702 | 129.79093244374  |
| TM2D1   | 747.077451281453 | 704.448123154868 | 718.871732206362 | 613.279465441319 |
|         | 928.672013047007 | 880.140852200235 | 1328.84172386373 | 1096.61874892572 |
|         | 1059.19317548869 | 825.781627776577 | 771.512332113075 | 1453.88161495484 |
| TM2D2   | 225.169110687004 | 201.969002368045 | 236.191384383802 | 187.425086057782 |
|         | 335.698400607132 | 424.201556056759 | 211.118308738617 | 212.239485199343 |
|         | 197.667299074218 | 166.587100972754 | 218.2454853526   | 215.194909819764 |
| TM2D3   | 585.933822585718 | 637.695341427976 | 618.829716818725 | 545.362650746876 |
|         | 475.038389500056 | 548.288640768746 | 860.315938621256 | 517.676093149981 |
|         | 575.857954264295 | 453.760162338163 | 690.903797251841 | 749.220616713093 |
| TM4SF1  | 1971.42527720714 | 2822.48671794913 | 861.786094902013 |                  |
|         | 2574.74962955426 | 926.283018664897 | 925.656701707763 | 451.147418314412 |
|         | 1726.15788525017 | 1589.70261092241 | 1614.00098175383 | 472.405334652317 |
|         | 537.216291942143 |                  |                  |                  |
| TM4SF18 | 214.888126361789 | 184.187847236508 | 153.448882783807 |                  |
|         | 159.966729941991 | 162.127697884504 | 288.436880408624 | 141.408545519654 |
|         | 196.759802659759 | 191.056705282378 | 189.758013811338 | 160.243405030742 |
|         | 185.997327421952 |                  |                  |                  |

TM4SF19 130.325073627151 122.888626394154 128.045931477827  
137.144001915831 132.008330288281 130.394687030464 127.595574823053  
130.226993687215 129.278833426752 936.221322010828 140.486376016494  
128.158605637751

TM4SF20 131.371129237005 143.725497952919 129.067538010904  
134.719531559829 139.527577649638 137.110908101966 115.420810993676  
134.93814894432 130.169291786693 140.784853736558 130.657342262492  
144.942289590793

TM4SF4 126.506749037908 127.209043595332 114.953328013917  
122.753419925997 131.516100334597 110.942138645171 115.041324824728  
176.497706091676 466.58966852405 112.65454329872 145.239119337981  
116.360144963753

TM4SF5 119.281300456243 121.320750074882 121.588054040961  
134.994013668445 115.999443701343 121.429270259367 113.071787850611  
120.524859681034 111.708970469189 117.449306773025 117.499697378893  
112.219585614955

TM6SF1 141.38612990166 149.630481387506 136.19725093985  
141.344034069373 119.558626216818 127.011594171986 128.862699779871  
137.782648137869 156.976539870288 144.425214066833 162.155834067128  
115.496108000499

TM6SF2 114.696935316053 123.351112976814 123.615802924067  
122.673596593654 124.310436914027 123.168787977805 120.196595293401  
127.814109293214 121.736056336879 127.83654093961 129.005211657936  
126.097544650407

TM7SF2 169.948277715908 223.474531516972 204.378245089766  
174.540209145695 2926.06746795504 668.286400833485 1192.47480377375  
1081.47077865393 988.297682407351 438.958573676953 371.941204080246  
568.935113269368

TM7SF3 614.239716118509 649.906677394861 671.134356672693  
513.816017871024 299.234482744038 496.560127152436 577.801009921199  
683.861021234927 438.870464403215 775.781735108886 522.400055538966  
857.55777793754

TM7SF4 121.065278765151 121.898921780569 118.192302821514  
105.839106819841 120.672291867109 114.774530966446 125.535877109652  
118.07991087231 121.583096465567 121.580726825432 127.500754400224  
117.917454674671

TM9SF1 184.278213908263 183.905926269285 185.41739522833  
173.484307104751 289.859695541999 192.022864170934 255.839878446312  
262.349315496653 210.245551279259 261.286548990435 253.65959805538  
246.80306998812

TM9SF2 933.408902924063 900.839073800181 977.227184625781  
648.549890890375 1645.05161227372 2104.59597571915 1939.1525084845  
1419.4638331856 1925.60246708149 1412.56164938199 2089.82894186824  
2886.92690692502

TM9SF3 781.790858580895 803.133619199479 627.335757721489  
886.157279090932 453.282973743379 515.432065049838 796.439819579938  
568.701661112562 740.800822095116 544.852019338212 1258.16519121331  
788.244353085369

TM9SF4 621.946994961864 563.648536446918 544.107739610054  
597.651682540611 608.816123736392 792.101559967381 1334.69145271749  
746.296354515617 893.264940736694 794.165408266062 1000.91520225219  
685.080426814888

TMBIM1 757.066786599446 819.151876775691 892.038018567941  
985.087150371964 1038.34611017219 801.051513639714 1696.69982157582



|        |                  |                  |                  |                  |
|--------|------------------|------------------|------------------|------------------|
|        | 572.407760064901 | 966.281849197568 | 1250.58586679251 | 1789.51979173209 |
|        | 805.875557314697 |                  |                  |                  |
| TMBIM4 | 2532.82545752082 | 1906.81344236287 | 2938.06458269406 |                  |
|        | 1415.67109281133 | 1816.3719976564  | 11392.4189359453 | 3378.126661761   |
|        | 8649.07367196998 | 3062.22499714914 | 2947.51998516453 | 2828.97255380291 |
|        | 5049.57929757135 |                  |                  |                  |
| TMBIM6 | 5410.50736002544 | 6470.73189429877 | 5213.40342339233 |                  |
|        | 5207.37974585707 | 8514.94395408164 | 7717.01422791837 | 8787.57716309558 |
|        | 12818.0509395717 | 12916.6904389018 | 4882.16892310839 | 13902.1067272762 |
|        | 7122.07276863122 |                  |                  |                  |
| TMC1   | 145.346970289157 | 127.829001155781 | 155.655771857361 | 135.064123820327 |
|        | 142.837688062688 | 144.708780756278 | 163.72257517759  | 147.78095608696  |
|        | 155.393326732887 | 121.174618503873 | 136.573928520456 | 152.315376022976 |
| TMC2   | 131.49577981738  | 135.651829752462 | 116.987471433258 | 128.377928524315 |
|        | 129.705735906962 | 113.504670764963 | 119.562180492359 | 132.220398477217 |
|        | 125.160161268474 | 116.987471433258 | 135.961724275921 | 106.876902604214 |
| TMC3   | 142.192934622228 | 154.256214901103 | 174.646321871605 | 183.879114762264 |
|        | 145.142331981651 | 173.056715623574 | 162.933658389727 | 155.124158030085 |
|        | 149.180704382192 | 188.695527267631 | 159.683695366575 | 164.438724387992 |
| TMC4   | 187.997940126066 | 190.165771406362 | 164.959415532174 | 200.114704018645 |
|        | 1794.82283439196 | 312.903508201275 | 517.020259129974 | 708.056533282983 |
|        | 761.097992055119 | 244.162496497466 | 1130.32966481315 | 590.142817130684 |
| TMC5   | 123.773753287854 | 121.274997609378 | 111.985567835684 | 121.341177395499 |
|        | 121.107979534361 | 126.629012619208 | 122.522978939399 | 119.472410874778 |
|        | 146.817659734182 | 121.843992693814 | 162.033909093358 | 116.736174147084 |
| TMC6   | 221.093229309411 | 224.361277033882 | 200.08007665693  | 224.588225855066 |
|        | 1194.42925868786 | 693.516351173476 | 823.658996207582 | 325.642275889649 |
|        | 761.586663689579 | 347.985315257161 | 399.364160668615 | 836.613819700658 |
| TMC7   | 127.195619567384 | 142.160941592768 | 131.369177333568 | 124.235958498969 |
|        | 159.282348516052 | 246.989526028884 | 232.250434241457 | 247.280717385562 |
|        | 171.884800118791 | 138.008679609979 | 317.457588721567 | 246.77831953556  |
| TMC8   | 155.465250172768 | 167.07092218037  | 147.942495862714 | 145.801228425692 |
|        | 185.560737176115 | 157.474913177177 | 156.191659799142 | 162.212442593001 |
|        | 174.375388013694 | 152.798927898416 | 150.442821494908 | 159.688862680139 |
| TMCC1  | 170.941404165185 | 163.07139884152  | 148.556161762978 | 152.237183848896 |
|        | 135.603160096973 | 129.400895994387 | 140.2533871084   | 150.042173991463 |
|        | 161.44729973777  | 134.585762409782 | 164.078423844421 | 148.863297062269 |
| TMCC2  | 119.974853329265 | 129.591396165575 | 117.12833256636  | 128.165775629664 |
|        | 98.4947439453387 | 97.8058879269165 | 99.26400442869   | 111.152235113722 |
|        | 107.365390754133 | 110.858201415824 | 124.33863635868  | 116.858439910319 |
| TMCC3  | 164.008063563113 | 183.236087954054 | 144.96670085147  | 188.335102005839 |
|        | 121.201267751612 | 132.05513812578  | 123.45581374935  | 128.042181036687 |
|        | 125.658396221949 | 128.463982896081 | 151.198928680018 | 127.56862018147  |
| TMCO1  | 1188.08712008638 | 1249.89496565284 | 1194.42925868786 | 807.92851898782  |
|        | 2723.55722258794 | 4836.4008757421  | 3157.98451877581 | 3294.92439159154 |
|        | 3396.40593844715 | 2083.02482378721 | 2670.9151276786  | 4318.50925204407 |
| TMCO2  | 145.056914913573 | 126.856038484436 | 128.666652639862 | 147.68047828662  |
|        | 145.594378536072 | 143.157807632147 | 145.081468030567 | 127.165448734253 |
|        | 143.692305478191 | 146.824420102008 | 138.35738548449  | 140.782522936146 |
| TMCO3  | 310.758803815671 | 262.488050186425 | 297.176755638159 | 305.93974940209  |
|        | 291.261765585473 | 224.6588173737   | 269.345125874858 | 253.495214569632 |
|        | 304.679197422439 | 408.758021864761 | 269.831616158113 | 292.068293167526 |

|         |                  |                  |                  |                  |
|---------|------------------|------------------|------------------|------------------|
| TMCO4   | 167.273378118452 | 163.474261351901 | 165.467462247066 | 159.98205335759  |
|         | 209.811693771836 | 156.508428796592 | 159.23414970379  | 179.163748161358 |
|         | 175.327597807738 | 134.569883788949 | 232.385176936256 | 165.158465031363 |
| TMCO5A  | 126.137627769256 | 129.242093568433 | 119.759350702482 |                  |
|         | 136.085524091635 | 141.422441104854 | 117.77708734157  | 134.192409943723 |
|         | 119.701313125748 | 126.452500728601 | 137.546487338984 | 140.754706171596 |
|         | 124.083648029911 |                  |                  |                  |
| TMCO6   | 161.325409589612 | 155.6299578128   | 156.611727364072 | 159.895303363094 |
|         | 205.149094703318 | 138.670077127324 | 202.162432624505 | 151.40067812803  |
|         | 162.52512327258  | 200.204064462384 | 188.118989395838 | 163.362182585182 |
| TMCO7   | 161.608941774391 | 162.890650672747 | 185.801540278924 | 169.963805688413 |
|         | 155.413300826229 | 147.600825146067 | 170.974759483946 | 152.09245741643  |
|         | 178.745112514526 | 160.519366617702 | 206.321272734099 | 169.903088388196 |
| TMED1   | 532.235193634196 | 445.214621023114 | 460.408628542721 | 498.43420754121  |
|         | 855.112210714686 | 547.202354339933 | 796.052115217208 | 614.957397883514 |
|         | 587.181357555703 | 719.13080264227  | 591.437752991512 | 625.152889992949 |
| TMED10  | 372.374101464689 | 308.441120735095 | 465.029298672645 |                  |
|         | 284.438411011954 | 206.186324475847 | 367.567681162661 | 379.615659443164 |
|         | 550.901056837273 | 407.875393458322 | 776.411045078049 | 648.161646065464 |
|         | 698.882871686866 |                  |                  |                  |
| TMED10P | 1435.4236709581  | 1310.60610806797 | 1287.3125466789  |                  |
|         | 990.206369590236 | 4857.3155917904  | 1409.42016970226 | 3062.22499714914 |
|         | 3103.4192907748  | 1936.88813111969 | 4118.58682247781 | 3251.62784659994 |
|         | 3664.38955037715 |                  |                  |                  |
| TMED2   | 1222.59895569348 | 1148.80141486692 | 1727.7144253077  | 752.585744322608 |
|         | 2303.0998502001  | 2568.95060767776 | 3354.38704439295 | 2926.06746795504 |
|         | 3334.16277752222 | 2005.76678571689 | 2681.48138915107 | 2822.48671794913 |
| TMED3   | 1639.76556136383 | 1865.44709751822 | 1450.44557173645 | 1912.2369374258  |
|         | 5479.24427823207 | 3749.80462365748 | 6409.23524786095 | 4612.81760689869 |
|         | 3989.14883668905 | 2847.42635118026 | 2572.01353724341 | 4722.64356477773 |
| TMED4   | 509.400965222318 | 506.029788151779 | 574.399909181723 | 427.151797273226 |
|         | 2007.0121037284  | 744.225336494008 | 1569.13457493554 | 912.483177705931 |
|         | 1111.47772523331 | 633.762608454521 | 901.644194512187 | 1167.26555140613 |
| TMED5   | 430.833137328233 | 417.865461351681 | 493.347308943133 | 287.195290301363 |
|         | 499.776233241535 | 1665.14066952917 | 921.140932799223 | 1712.47877322331 |
|         | 1164.22995893381 | 546.181615768667 | 803.133619199479 | 905.233241047678 |
| TMED6   | 142.623106544789 | 138.110317032494 | 117.634514818946 | 119.643417329571 |
|         | 132.329892644992 | 120.891023626809 | 123.650702461773 | 142.802965008073 |
|         | 160.676606760965 | 131.38881091292  | 145.635453468646 | 116.558752619296 |
| TMED7   | 534.608644989102 | 466.257158794525 | 518.760142491104 | 386.85874184746  |
|         | 388.638095539186 | 665.602699607102 | 614.514126276981 | 489.022371276542 |
|         | 412.344820823968 | 862.669120338424 | 302.272304483941 | 681.510173233582 |
| TMED8   | 117.284724854784 | 130.686857648764 | 118.673325109944 | 127.365142833355 |
|         | 123.291258843371 | 132.823333905679 | 123.21112178671  | 121.468398802591 |
|         | 128.963962067821 | 126.364445020215 | 139.057572927874 | 121.003207135942 |
| TMED9   | 1032.4540300024  | 1100.81588201714 | 913.684449305965 | 1178.83933381069 |
|         | 1896.69856822105 | 1347.75629878765 | 3090.52810501797 | 1955.96772733047 |
|         | 1391.89900758685 | 1949.60516542965 | 2905.12297639092 | 1887.82245931444 |
| TMEFF1  | 132.66318177913  | 142.774449777424 | 153.033582154882 |                  |
|         | 144.779146672553 | 138.27272971335  | 140.175724588255 | 151.484420979498 |
|         | 159.781313090489 | 144.592987736094 | 190.96184674871  | 113.791585365477 |
|         | 146.479009988445 |                  |                  |                  |
| TMEFF2  | 179.509758601636 | 157.940873610797 | 146.40033464957  |                  |
|         | 142.409003426775 | 108.079149792796 | 111.559325333192 | 112.005939063045 |

114.585818507336 123.117923525539 116.609122768341 124.682396766302  
116.369395555451  
TMEM1 173.044636575826 169.527424356913 157.592607345742 166.14867551435  
149.267019532847 168.969180646603 155.773639092819 154.705630035232  
166.257275241937 157.11867820027 175.960788330149 171.537040561599  
TMEM100 288.436880408624 253.009376944901 206.802308105224  
216.991823988763 143.840979923821 175.442400672352 136.79732903972  
144.70348930646 173.563363508314 143.804903119745 150.129367314696  
148.73620012231  
TMEM101 429.351447428661 528.556049506759 536.9324595176  
579.318912497928 710.228463443265 387.477198908304 948.150767619765  
579.678635803225 596.54904286299 514.124012546829 431.413030534188  
592.957842630046  
TMEM102 119.288554466773 131.941069239017 116.897299691798  
114.378420394004 123.82555184043 122.94737290641 128.973904070983  
112.371497988132 116.007006375993 117.910259090745 135.616911926164  
119.920097823022  
TMEM103 143.423661752881 125.301602026407 151.70917316194  
142.274440538785 153.869144282319 131.590180562108 142.934869757362  
150.255511248598 146.940545711162 145.39060898147 138.775095929764  
159.495272062735  
TMEM104 129.566451901256 122.412141495264 114.099623939954  
134.986030185477 138.341918073941 125.584202037776 121.580726825432  
130.342425029134 125.840932898827 132.179747646893 129.875986080057  
114.960460615926  
TMEM105 155.660302399877 145.770601609392 149.460660195293  
164.423960071908 195.481680273686 139.694950277714 132.216453078716  
154.124057382276 149.091925032548 169.992657041967 185.493554506958  
183.138955445765  
TMEM106A 2874.43919426772 2841.96460830166 2139.42448145954  
2043.73482086765 355.879841671975 2305.11856249143 989.396074034945  
1595.22997714906 1244.67453201339 988.788192022196 2352.01196541874  
1275.43768532088  
TMEM106B 397.861172312706 392.06522028189 427.345809255426  
307.597733293218 216.53417734069 328.269845211173 280.337475979102  
296.20443113482 234.789040617681 273.106088088825 342.037040881785  
303.241375487319  
TMEM106C 850.882404546093 980.67040349547 674.338740875512  
816.823443819069 658.068932688816 860.688314783077 925.205399154409  
1124.67710585154 1073.40463823132 644.11603826131 690.582550537485  
969.811933814244  
TMEM107 176.208206282902 179.973655632636 165.163490032007  
166.272237117441 305.050933898691 155.111346336412 164.816672737691  
219.0221768576 230.079664410595 161.17923997423 192.878416717298  
157.067264221207  
TMEM108 254.065327837176 284.831817899986 396.345382600445  
377.538276846051 245.553138677866 144.049503774298 139.847813838017  
158.445124076906 148.930073905413 139.515794685984 149.273560793513  
146.959154938248  
TMEM109 1143.0779222425 1213.06007305892 1300.40889834984  
1369.89073267996 1215.96648642927 933.408902924063 438.340341490622  
481.037647470809 588.197697799448 638.287221212947 440.038896046559  
601.800326895295

TMEM11 172.916234073981 149.844677055508 132.703034017237  
143.834501071806 578.297031096292 155.55288776049 135.027715094704  
191.322056430728 169.590101694098 209.785886171295 185.382647297259  
148.532339759414

TMEM110 133.872561340464 122.959518532165 123.853588042292  
121.263939656119 195.400963839097 125.79193748535 149.949425756405  
154.620194499553 143.403396831929 139.725987763226 145.44629057846  
126.216519704249

TMEM111 1139.14730341921 1207.11788506001 1746.30519466572  
1239.13016938378 1524.46745239811 1240.4863200811 1650.77281891596  
1608.40826380713 1720.14021303639 1461.64901688125 1641.70484603137  
1558.22238167317

TMEM115 480.22496056277 552.790706181938 457.411248351795  
576.997804865103 1193.82799849555 524.392279804734 674.338740875512  
366.408565514304 721.603421985572 517.676093149981 642.057106241761  
550.671679318681

TMEM116 248.887522059485 266.892524131545 364.895113721763  
213.046162847735 241.675251479835 314.095043876244 304.900910626137  
203.616580991715 272.193578770314 207.338645756456 266.756647182704  
223.531323159808

TMEM117 219.901025447571 212.171281020103 264.054997398621  
243.441938832251 251.324685584062 467.944850290806 341.901565692251  
231.728984785324 197.47340234886 261.117845544884 228.284236550547  
248.729653566598

TMEM118 155.759861336991 162.37762946664 145.022242996923  
146.983646662811 315.863232876382 333.91440669951 574.035124314622  
302.462763120177 274.01377986185 146.503431281242 156.221773628832  
185.856755885891

TMEM119 1957.48508632607 1896.69856822105 214.050918459805  
702.460234202652 239.452559981542 263.204269632206 231.372316734945  
313.967636827811 392.365008240567 291.683896942007 160.0697586671  
159.065612005442

TMEM120A 764.493610798958 818.225731093346 576.451964662024  
941.936830901588 1100.81588201714 423.396271159345 542.544172683021  
499.321667633972 321.177982468322 269.194172034595 358.780920910909  
654.881990232975

TMEM120B 115.840266274696 121.031695489398 127.107223387937  
119.95959059725 133.76515446791 124.3501719829 121.543207264598  
124.359615295938 128.331867822629 129.603952706231 128.486896700405  
129.961042190085

TMEM121 111.525984720592 113.748724650063 124.650711299942  
110.865668451601 117.420765321056 107.638492587723 115.053039576143  
114.874358180801 101.149125916797 113.321454160244 129.743808480368  
108.148715413122

TMEM123 940.716682221364 886.517088614968 1186.23169583595  
592.387650564803 1339.83170225337 2089.82894186824 2518.88171283899  
2153.17165155392 1574.65731564294 2124.12760841901 2087.55358504021  
2470.86113150126

TMEM125 131.593705080542 171.835438335216 127.401551376191  
121.636361281148 312.080864996592 300.247304779062 158.109836032481  
256.495848662843 332.194163016646 156.105736111274 219.462274506333  
247.407442038488

TMEM126A 394.294057009443 380.664528809678 487.696347726467  
345.494740481759 451.210172051464 493.347308943133 910.541650889451

799.759250503507 537.698489904622 795.037968409957 420.017044147123  
712.94845413251  
TMEM126B 1054.47292895417 960.775251871864 1196.34528225417  
977.227184625781 728.485195792194 602.86705608228 674.571475335107  
819.887322757281 669.602939159192 1091.12493937368 634.774041584043  
659.106229917309  
TMEM127 200.360518276784 204.378245089766 189.136114953249  
222.415704486709 189.575681012578 186.854553034865 229.31486399741  
178.904696191996 178.186273279101 182.810581377888 259.094411953361  
185.493554506958  
TMEM128 199.681103910705 169.232677769521 186.296882059398  
185.240692860387 224.547982731402 192.655899720909 156.259214645427  
234.841813258798 248.010317392179 202.041958613989 215.81995779019  
223.279017022443  
TMEM129 195.078843867124 206.376365685112 192.548337508559  
218.209523110843 217.435155984897 167.325227483198 182.786177632757  
176.680708339236 160.382971629272 172.142411008084 206.915239638443  
211.183499580683  
TMEM130 111.722827315911 124.433114779288 118.100611964852  
114.613368640356 114.314425748312 114.342980656214 113.422559344178  
111.065596151792 116.214857935694 109.398997827329 120.488694213288  
112.742895297124  
TMEM131 996.999238316991 852.436775264873 1443.68785521063  
859.860994525775 791.137867905579 1292.13921040404 1344.87842417496  
1141.13648305827 1297.25632532536 1336.75600604068 1097.18236659974  
1379.95968831696  
TMEM132A 131.46193427125 147.393178410954 124.130599753093  
137.082234284426 882.798927428142 380.888728347647 331.215872600406  
211.891710626953 226.893147371644 270.021093158885 154.475735552851  
237.940015617254  
TMEM132B 157.729732484131 146.579073345319 168.384397488011  
142.991135981933 155.004104153679 153.182836319911 155.3394927753  
148.155692596378 165.100811808026 149.944351491364 162.039394839415  
162.904897605929  
TMEM132C 141.424508069834 135.732616463819 129.828896822571  
140.138870925001 129.80429516198 137.25054616038 134.354215877283  
141.934351226006 141.382096896508 136.308565710257 135.774569629738  
135.817028661429  
TMEM132D 126.314233529267 148.286700314107 133.854760285591  
123.814841047589 148.13657736444 134.072912593456 148.673763368264  
149.72025962797 142.303654405005 153.920180168328 116.958052905168  
143.534617425725  
TMEM132E 125.649525720177 117.575009754326 113.356070669308  
114.14858855653 126.388778582602 128.816610738922 118.966992191892  
115.242526386551 110.602406076036 122.247130087475 136.5680632044  
124.889829874126  
TMEM133 139.677109265241 153.34166495223 134.423260547727  
150.419668144913 130.189958197332 147.368455727098 138.652735298338  
160.395053149199 129.888444399067 131.089811472017 188.070213212057  
151.690538050817  
TMEM134 443.259619455624 501.600329334497 463.091387717305  
513.036729214095 3099.71798305764 1213.61170930345 1145.35733270036  
886.157279090932 901.644194512187 978.389902096994 1149.3250945792  
1388.91423772335

TMEM135 247.550312458738 217.094085829328 206.186324475847  
223.496400038284 293.281098275134 193.912456093767 313.888035511709  
284.764628939128 214.595639477696 197.895094054577 219.878230463206  
242.253995801882

TMEM136 272.01602406899 227.033342447929 247.194197143562  
269.468453936818 201.913709602894 139.851678406637 185.650862663633  
136.87712607887 150.394483608039 180.096239155058 209.362806125315  
165.789846154721

TMEM137 1152.50523614436 1300.40889834984 864.161191021297  
798.1490651671 225.546125484563 673.824770556885 548.869880723909  
698.590134238302 431.974037914233 390.021666378804 277.561376169965  
421.384700184923

TMEM138 257.534293550585 246.031568259337 251.09230266334  
256.495848662843 307.363302726074 417.262521411065 636.382696018633  
353.98839683842 302.381946749711 325.96632528242 315.182134426778  
550.901056837273

TMEM139 122.888626394154 118.426600479326 115.988180787152  
122.305514440939 233.757965816721 122.376432064286 152.166586496729  
117.781804727205 202.041958613989 108.715328458556 110.408301129053  
103.012774960061

TMEM140 293.692083555844 327.811191081135 327.324711245289  
377.661589835101 152.435416154284 139.54021659275 260.489744360233  
220.217745732407 309.997909440664 151.06209123698 294.17588071297  
167.42476096854

TMEM141 352.354687089427 436.331333134628 375.407747753058  
390.501797367707 1536.52218968817 330.641230715217 574.6506349984  
719.766799746895 593.821622986351 618.437282203498 1132.27988339924  
731.513306289481

TMEM143 192.209344004015 184.348894461271 210.692705153337  
237.78482574225 252.733973271584 159.19183334563 185.220017451419  
211.369442150136 179.601348561497 157.423242850568 162.233096422572  
172.877947895827

TMEM144 167.961390966538 174.568253693395 152.648490300617  
132.189426012448 177.235586767256 269.006221210929 255.493109705211  
335.239364345057 338.075238647592 262.60377731258 406.028724866233  
323.20628717764

TMEM145 175.29178007783 157.745805838008 164.208044717557  
150.166324293431 259.338947392465 286.774606295106 217.969738417693  
165.459993078103 175.693873820963 169.385340991747 175.543924200429  
238.88138498771

TMEM146 133.667852983262 135.24841020592 133.45690661612  
129.43892498257 140.548371692813 140.45860949168 131.208112906919  
134.049094181433 145.358431402568 147.382177739631 130.852932147831  
150.687819649072

TMEM147 848.154015576436 955.143610867351 1086.33540858772  
716.731984660463 6044.78942014135 2877.92845389611 2320.41293992992  
3157.98451877581 4276.70912292877 1937.83242524439 2036.43904731226  
2426.2098937241

TMEM148 124.720004905439 126.230887413874 134.408846338374  
135.275284142536 127.931887647108 119.949050292223 125.435268901131  
123.814841047589 131.933026690056 125.924219382375 131.76829141949  
133.473140653666

TMEM149 180.493406236326 175.840639511966 153.507553306723  
177.688568435599 577.33849844574 263.800363357443 235.261278607182

273.75192868583 326.354469134694 230.806950763402 169.403422185018  
290.135914275115  
TMMEM14A 326.055727207966 292.965109701719 404.54681330209  
256.127197303751 639.688482258192 751.568940762011 700.877661166739  
650.494111214312 569.133295913677 738.579262579782 264.201932544662  
1152.50523614436  
TMMEM14B 998.631321857182 810.769136227155 902.822697602452  
630.894382644903 1072.37500318471 1218.05434595121 916.026216386031  
817.913210743023 1766.15001427132 1247.02514044778 1527.87148052149  
1467.50846948144  
TMMEM14C 2225.59207490574 1929.52146517699 2627.12900283627  
1730.30703463073 1785.92695250894 2414.22821062457 2760.57475805426  
1808.26383618901 1827.03179366146 2376.52728883131 1397.84878368705  
2523.91287654539  
TMMEM14D 944.92617668298 644.301665020526 1309.7660860424  
573.074116810032 850.125434374005 1129.76078220457 1658.78888936164  
1316.31088187364 1502.3444541735 1583.79384467611 1368.91287156398  
2045.24382334506  
TMMEM14E 157.565633456909 142.796371223204 150.924948809354  
149.068713925139 146.915247627846 145.615291241733 147.939682463235  
129.233595525585 146.920496801962 133.762141373091 144.30519737569  
133.308383825604  
TMMEM150A 549.047065540118 546.399972543938 590.849222581206  
658.202765061937 895.821578104681 430.590533290315 755.42757464615  
468.93543246394 365.441289363381 474.378918787006 817.913210743023  
406.369889501135  
TMMEM150B 147.004172510641 153.230304322351 175.9510758779  
162.033909093358 188.836327151669 168.03501792841 169.179630363359  
155.323822771755 155.595651896155 162.247608931408 169.895672129542  
170.585366369563  
TMMEM150C 159.253029632045 159.650116062266 154.665212863369  
186.57665470145 168.783725505491 179.230909178397 143.533725135227  
152.323927317575 167.521700144143 161.627546190964 158.025633316671  
157.87020867396  
TMMEM151 143.537785553911 134.479828866339 128.490341173553  
130.205764567934 126.711037295629 139.236217474885 129.52578899011  
127.274768398849 158.505363728431 168.682307349713 149.297012645798  
134.045938361221  
TMMEM151A 130.041462255766 121.150371270451 123.952494134263  
131.954310449801 133.466342977488 125.405373274081 127.044367488881  
129.608034744581 129.711973013336 129.508990861362 130.466571969657  
125.798453479983  
TMMEM151B 129.195962576953 146.604519441812 132.125545886181  
137.537197575152 151.32179802686 146.826292449698 133.792673129743  
150.775805918537 134.741781820234 123.048352070915 141.33919297402  
150.948076715456  
TMMEM154 258.727309442475 331.215872600406 286.541028896473  
171.650247980576 464.196512015649 1454.94889750152 1197.58205444449  
1206.09815575399 1204.7397215229 1213.06007305892 1910.08485008041  
1113.05943954513  
TMMEM155 159.349719495214 148.18197556044 137.386308389265  
138.18056202179 132.642931022024 131.876061826583 133.104560685558  
169.541411677993 173.544556426164 154.713713332354 138.836422729663  
125.915689078001

TMEM156 312.129861040709 304.547738011742 236.427507270325  
292.965109701719 145.660417208595 315.182134426778 226.173501275026  
318.423602671236 265.572253407219 196.880135762817 272.968792195442  
210.353341004865

TMEM158 2992.18604022433 1557.00226259883 1800.25771851544  
1278.30505902957 356.268960813032 251.665539319612 211.208937901871  
391.569187190375 900.839073800181 1113.05943954513 453.593585032712  
290.867822301134

TMEM159 357.006610037663 291.369577397743 520.120193442648  
366.007451523992 290.326832430372 259.025042304848 314.557323400201  
302.945860276233 239.762135294506 286.035428568826 388.573321838751  
243.772412032046

TMEM160 499.321667633972 517.676093149981 477.626693328013  
471.510683045651 4892.17875938832 1333.73334006986 635.038752622494  
1143.0779222425 822.129234065933 728.743541467167 608.351527783086  
785.290353402444

TMEM161A 160.402220755071 143.351341716363 134.576622528874  
156.543267949167 246.327991259259 146.065491816894 169.909886347082  
147.677900030844 145.56468363155 144.262612328341 168.205277839471  
153.140087873773

TMEM161B 170.784229026842 151.226242696197 185.560737176115  
156.96934803556 167.70368494182 162.267841475739 181.530767521222  
143.492758492895 153.159425380743 177.793860516896 170.376620730856  
188.308588359317

TMEM163 131.527148910356 137.902953501634 136.511669406292  
135.832454000859 225.130011390856 315.752980521266 172.926288703434  
301.798676825176 164.032302455558 146.698766621345 339.252515920242  
160.082087242964

TMEM164 171.304896264805 178.584378959369 178.055019987648  
193.16411905957 237.171424222756 176.791758333054 163.868129628544  
177.296424297967 161.061119536632 167.900071375885 159.98205335759  
174.812134675989

TMEM165 245.082816415008 198.257497903131 226.449705559354  
196.363005912532 508.127470400078 391.706404954357 587.026042400878  
423.607299503704 553.123179808258 400.98290237416 447.059120541009  
406.028724866233

TMEM166 122.821563586744 133.146347243168 126.776406817106  
121.95061962467 143.689257983705 125.472342351466 117.040953580545  
125.855451679929 110.847680175669 155.837866295709 132.154131623051  
116.989409891761

TMEM167A 254.188830191845 212.669156800241 234.626574390973  
232.414763435965 309.580750386386 249.590923098575 403.907009699589  
293.350292227077 310.815067427296 426.249411635589 285.63245179313  
391.185365567603

TMEM167B 491.35949123223 440.495339027491 488.884511065882  
406.224345292389 283.416246133873 560.015499136193 491.906642849373  
483.067471841953 519.940347384877 391.185365567603 564.948126039762  
582.527835746927

TMEM168 177.065616871886 165.350777445902 175.679405338399  
146.363991934916 195.239829623017 218.794112567823 233.272000923172  
232.151020756625 182.028675726969 220.047563627558 204.862387642573  
251.414717011661

TMEM169 142.945392802281 148.863297062269 154.261443597434  
163.612347715773 147.153129531937 152.699431442817 152.532083511961



163.432972512188 165.880071298733 158.554429311951 160.096507818256  
144.534143943252  
TMMEM16A 190.506201184419 250.342080183479 170.335930486215  
185.220017451419 568.701661112562 374.106258053201 140.800226245569  
152.670691262738 175.752091217351 215.635313821029 192.980781927122  
217.24573005272  
TMMEM16B 153.758353103323 151.801558435863 142.303654405005  
153.83891040723 152.752870674108 147.060637536615 131.76829141949  
157.688982037448 143.41350503793 155.111346336412 156.330571337475  
149.377153449536  
TMMEM16C 106.900679222135 112.264005988662 109.425878885118  
116.588138374632 121.497645719165 117.399753685854 130.886164807755  
115.332409360957 112.528908277828 108.061315311823 112.971776964469  
104.442909315944  
TMMEM16D 152.990523860831 145.176141415244 146.038599656417  
144.007071548045 147.925744210234 133.517685144186 133.152523054305  
146.986891588172 130.12032144763 124.68729078792 136.862764950361  
141.520125030042  
TMMEM16J 157.385256442734 146.9069812014 157.663460168247  
134.620896927473 137.00532429734 135.190698960212 152.017655364287  
147.471494294543 147.155738185574 147.584176709986 144.942289590793  
145.547037566774  
TMMEM17 8473.21873478131 7786.96143641382 8918.58940386786  
7539.6945050098 769.34961339184 6652.21610967461 2763.86550710042  
4793.22133852447 3643.11229751348 2723.55722258794 3586.00189997341  
3408.6535437109  
TMMEM170A 171.221972336784 169.725534829981 170.052320640686  
143.038248313305 290.213039891361 209.213115976788 208.895657507883  
185.950131245699 211.692743811486 329.146025181674 239.970202560698  
202.662466141301  
TMMEM170B 312.903508201275 310.365203383647 298.776176246196  
362.95684683529 176.256840061919 237.88097138936 215.143973502566  
176.431477850092 169.552424961465 143.974551393951 148.644800418517  
159.14477373952  
TMMEM171 112.015423658372 111.475394003575 111.217595631623  
123.857527555048 119.459625817735 118.500956349352 128.165775629664  
118.463074287151 118.802030418792 142.025834438974 122.621839614189  
130.814702312493  
TMMEM173 462.437471715008 482.344514972063 267.535469518664  
370.140588087649 263.52595855321 256.495848662843 349.99912485533  
275.584858082096 384.883635849576 496.697565640162 310.301616266762  
320.305852961452  
TMMEM174 126.700147643 129.155804800869 107.239841465534  
140.881084272745 123.656016678934 132.975603230163 137.641136471239  
145.237221169839 144.141837615086 138.395943168158 150.602976963975  
124.842426851438  
TMMEM175 574.6506349984 638.287221212947 573.074116810032  
804.800251415824 332.666916002481 266.135477775641 597.459920611726  
537.06835963726 566.543765584009 405.032674307193 464.812091712746  
657.231047829537  
TMMEM176A 343.121661664987 301.695991929957 211.059870865354  
222.118666699301 233.536023295039 223.551813819581 169.963805688413  
273.550544349798 387.135002880995 275.696829424061 212.272826965935  
211.679799388351

TMEM176B 242.752995772995 191.220064414876 139.725987763226  
144.405191855684 136.682172321984 123.781002620866 132.346363545288  
167.620915011868 197.618757939729 140.434086004204 149.255405438966  
134.383024487323

TMEM177 164.652795899742 184.085616342099 189.758013811338  
221.561252012695 320.774102343889 222.709720471134 277.026538720417  
273.984715370774 233.272000923172 258.109876262342 269.495247190598  
273.514200733343

TMEM178 152.662446724781 156.818197172306 144.170287726456  
130.169291786693 124.844481048039 133.921012946195 146.256076936456  
150.405715534245 131.086904662241 131.426355444136 224.824362819477  
165.773929204209

TMEM179 111.10737497653 121.984179437382 115.337592860132  
107.727848546225 113.025793645043 104.248226402465 119.567911704298  
116.58452862953 114.77964341895 117.178495957357 129.725706669166  
114.056147008769

TMEM179B 466.4890990178 549.569374872629 392.6758818959  
476.076903428247 2124.12760841901 595.882696498804 950.144166422001  
612.06231165648 595.120528902501 481.630922092112 742.128229715198  
947.766127685083

TMEM18 199.813528853649 199.490190715307 203.149001616967  
193.245087824217 164.018470368389 197.405472374722 200.98533822317  
172.774914399844 158.517778100137 181.277683429417 207.764456828813  
171.759102794108

TMEM180 160.251996476232 143.650172124086 146.345451252228  
179.601348561497 256.093363520707 185.661496988658 186.215602572358  
168.511517285223 197.2893692747 165.619206216088 174.483233557264  
207.850956786183

TMEM181 1416.93831202323 1364.83036157729 1299.4782626583  
1253.05700051015 881.561688713557 1189.69730508119 1937.83242524439  
1176.62418139379 1259.38111177521 1177.70376288106 946.273229715791  
1680.25851465727

TMEM182 135.943252855457 150.182173149394 146.072585331002  
142.798248249144 149.907472831817 136.77666893627 148.81406900745  
144.968459820523 152.948391119096 140.552143090027 159.461778054423  
169.422015793848

TMEM183A 637.695341427976 569.967953318205 607.805002786409  
539.853394831917 615.88518704181 866.413995755699 721.31849915135  
547.202354339933 780.734359041347 920.083835296898 573.074116810032  
823.658996207582

TMEM183B 1113.05943954513 967.797017108447 1093.85316636801  
886.517088614968 1044.52286986369 1364.83036157729 1151.30600388403  
899.667912542118 1407.43503866211 1559.26487922551 900.839073800181  
1459.31031099055

TMEM184A 142.276853170778 142.474762834848 121.803676441059  
113.536570797896 365.362177671146 155.865540894526 222.593554194453  
302.847274046748 328.401537339876 427.151797273226 302.601458409102  
265.219444616245

TMEM184B 463.802270256246 527.597948979568 398.075524915003  
573.846138124455 1160.78730097715 420.361583975644 430.100415399881  
363.963951509433 399.248044997427 292.317998405609 536.067857235731  
311.806908624308

TMEM184C 310.815067427296 266.442565636226 314.292700455545  
261.592512762969 262.061371466369 300.886032768166 388.326080754063

381.323457262383 387.827718022473 401.87674893993 393.98210915852  
387.477198908304  
TMMEM185A 289.616527814137 304.152390210727 328.486476842582  
320.305852961452 437.601814037248 340.42197893246 391.400480065  
340.098306132634 287.145105895235 305.615423200097 340.547010951537  
362.019824026781  
TMMEM185B 263.005303710717 263.47760086159 248.993716339029  
270.727749014046 427.390091157726 244.797792477941 264.654879741889  
269.530151236658 241.320049298228 400.180574613078 309.997909440664  
311.715351215263  
TMMEM186 165.108876136738 141.269923271838 182.886100305943  
195.532022060219 160.270693676597 174.301952147167 170.350891928203  
204.710203150526 173.979001863717 149.783542909965 170.87247413028  
186.904126552483  
TMMEM187 200.688465653117 216.381643581705 270.490971664802  
219.564603776774 504.838017072725 212.272826965935 210.478088018501  
230.975434289172 217.748916080172 251.959823608766 229.881164774875  
216.522992914538  
TMMEM188 367.983166440977 311.806908624308 287.084253886676  
287.084253886676 255.770193180874 393.115606440229 412.941907828617  
309.580750386386 360.812953749077 452.843213944986 450.468410589415  
418.244376024741  
TMMEM189 399.724529998085 459.854279050269 371.168752104821  
574.262112643403 949.789710063337 645.183207984114 1131.96129284658  
360.243484271891 521.83794739314 522.664475688419 806.88003660673  
447.674610082872  
TMMEM189-UBE2V1 280.723379809959 276.284517459626 315.828726297864  
269.300548648755 369.156887999872 407.589300080181 814.471143753335  
339.252515920242 405.469705787631 546.755305058958 339.172031360524  
477.160464512705  
TMMEM19 208.016730103629 213.584269089596 250.82359383789  
179.841665686703 202.230920499592 237.989479738133 265.670643951648  
894.100792722707 208.348515119045 218.644953001365 392.539157974899  
231.439252571168  
TMMEM190 131.340453291188 135.527445907621 150.046300135261  
124.676743480622 145.264402868435 125.920663904983 113.064645688715  
132.883408554592 116.276003190171 132.930042559647 117.445284668654  
121.961568081299  
TMMEM191A 796.699879495384 635.37511798786 559.899430596368  
644.449861831749 250.766180970907 729.499296070289 419.047108206042  
586.867772838753 413.330906392915 357.140791982825 617.833194119379  
413.687046868111  
TMMEM191B 147.913148020331 142.548833391567 136.332399354517  
143.632325018964 201.954167006591 213.652091843896 171.869472272081  
172.612152484322 186.257814752354 178.928873342925 174.202069525223  
192.789886894821  
TMMEM191C 132.598022317288 122.832196877991 120.538535752185  
128.501189288377 137.336914480226 140.279222720709 133.176970578909  
137.243175880462 144.777043589925 133.082433951922 149.477373469387  
152.609055890822  
TMMEM192 178.313238745665 186.886677174192 227.64196401771  
219.753039699136 199.991077347491 235.261278607182 267.422232051733  
233.953994677015 237.601064742453 215.019239034819 163.843143947012  
212.119922561453

TMEM194 279.834616502591 273.369722814068 288.88486628661  
282.076744753348 242.657224881824 259.72035004624 250.885949055834  
285.402072939954 244.280971257965 274.627303114477 203.960838492793  
212.190707408572

TMEM194A 302.768870633398 320.877897822963 311.544429285897  
326.176058036757 263.084557246752 281.659653592151 266.99947481587  
334.056545911557 315.689865927834 282.101714660307 221.093229309411  
190.975263192006

TMEM194B 145.223648967115 140.13515064896 132.930042559647  
123.089110282465 135.400054238597 146.83577460518 135.848022588175  
139.377027955744 149.202628825354 126.418295908353 161.24755274554  
131.2360427855

TMEM195 150.166324293431 137.183566882805 136.099663831028  
139.369815367465 136.732319750425 127.988951225086 156.285963197762  
154.856345114916 139.065849548762 135.92712081285 149.698664700146  
157.481645415121

TMEM196 119.11586630281 118.93828679356 123.202829470888  
118.289405191861 118.93828679356 116.252227301161 101.597648528389  
115.896463925125 113.924310293916 117.893918180502 116.263405190786  
111.217595631623

TMEM198 147.530719472217 156.34272729153 145.096707533824  
160.954017627605 163.331424612891 143.324235640446 133.379872189405  
118.836387680022 130.912137250515 129.748891462506 157.604224004016  
143.739231124536

TMEM199 231.439252571168 210.529782898493 214.082408290757  
217.89028736436 494.067878734396 273.709160508205 355.879841671975  
434.716530273383 320.707687986324 255.677315946354 252.514569129392  
262.79667156266

TMEM2 263.800363357443 320.360917595936 181.593291870136 165.703810120915  
727.425595270342 669.602939159192 798.943242964857 582.642500194997  
1870.52504853779 345.494740481759 1232.66885974069 599.208370337812

TMEM20 128.06233429201 130.265055842999 124.433114779288  
123.872097378045 154.445840992357 141.668101962049 145.079450753969  
167.532512839891 138.175538905334 144.173163762502 137.830435972191  
171.916201289104

TMEM200A 266.118317370425 239.704459251571 280.913748398876  
221.18757533703 178.394895649664 196.419891542139 181.971189935628  
144.446903878863 183.464897811105 175.840639511966 155.180238551547  
163.373180928181

TMEM200B 133.743708220112 165.586397236489 155.134796468704  
168.744610747563 143.107570838895 148.15920634463 135.088149158147  
141.37694311902 139.157088843803 140.318155161909 151.71942719041  
147.256726902984

TMEM200C 143.750656408155 139.805930686563 149.758215028408  
145.329128512407 149.912481263284 142.02169810999 137.103879676652  
128.920313557255 133.463464118897 144.970383956581 130.009322405768  
135.52861375119

TMEM201 121.371348717752 123.738223146912 116.977202125093  
120.691810909148 195.316077537716 122.102644097132 131.473743669996  
121.278346729876 133.921012946195 124.883575464443 128.640202262896  
127.263061874385

TMEM202 143.791908191551 129.499283650632 149.306122206718  
144.540174041867 151.619329363527 146.040995022257 149.869314204354

146.192761134077 143.265532486512 137.352231982942 155.164238647284  
168.389069732474  
TMEM203 607.126514742951 658.068932688816 632.565736446505  
720.710754387733 809.545702751155 510.061974830525 544.669441360594  
492.637241687561 677.265576269103 670.571106793204 637.457322054293  
446.262895953004  
TMEM204 275.437030326768 278.061498892643 194.352807599399  
261.775269058607 240.591548171052 303.858574395969 156.96934803556  
262.452869676209 211.269041187154 186.077477713775 201.517356610591  
180.276082632155  
TMEM205 1562.9779683714 1931.16906839143 1946.45172007314  
1783.8031212092 5748.57645553386 3608.10730106542 3149.26998719015  
2291.40912229281 1051.98943987926 1347.75629878765 1951.69651954627  
1984.47173096657  
TMEM206 177.812335593522 148.003041725027 158.49220347186  
139.617608585463 266.217879616686 469.540421642173 234.484787292284  
178.696562301918 312.129861040709 269.300548648755 184.638141004171  
428.462270756201  
TMEM207 148.437676259828 148.91835407218 144.568417378353  
160.882229345156 136.104027032045 142.772680460689 154.390764802264  
159.957371011316 164.172084711099 157.231166272318 174.66966623557  
171.677654793775  
TMEM208 266.652805624826 287.455622143233 259.252807304272  
244.797792477941 447.182566890086 323.737610506003 407.152764702613  
340.800632878807 535.041545916303 512.467731561858 387.477198908304  
432.372995789404  
TMEM209 288.631429069336 281.49247863022 279.026742408164  
202.278323489515 412.129826478453 598.095370768587 423.489441909617  
549.96567374713 418.645775576811 378.4377409749 368.637819994033  
515.158921349383  
TMEM211 98.4947439453387 103.550817366724 112.993452506946  
120.235652849894 118.258886189283 110.1278204598 103.36057518781  
110.1278204598 108.167670899938 110.256771079797 106.36673326724  
120.493082096235  
TMEM213 159.90466743683 152.534482748598 150.038722708606  
148.805974222925 137.063689600869 143.774841336279 165.896420029269  
164.673579538023 157.856019979644 158.48793705795 151.379761514526  
150.142724640067  
TMEM214 513.20896845398 473.853999833395 486.425387717472  
601.164127925014 734.97763567765 369.78624104057 329.146025181674  
304.357050745605 328.019503002384 297.332272659995 358.092809491843  
284.574888587832  
TMEM215 137.075665247855 122.343979874508 129.485710719291  
120.616979607398 130.376941311222 142.541728149687 125.707228291312  
119.207503310618 117.570749340011 114.893462783007 117.74682797375  
134.178733595096  
TMEM216 458.607367472574 487.901310664037 416.861099188252  
379.788696204016 831.08287594363 871.268905562551 699.06539333455  
612.61438059983 598.647226284738 486.197269936713 864.161191021297  
862.669120338424  
TMEM217 140.374644951491 138.017249996128 142.358754646258  
143.772376623996 165.647471565959 173.635827398273 176.208206282902  
150.694215349678 162.022232949254 144.760229351772 175.452986514346  
192.07791693203

TMEM218 437.489929507567 377.661589835101 353.50447714719  
418.163219634152 754.406896156858 325.96632528242 255.74096237558  
255.066583469964 499.544050752036 254.768537214795 650.494111214312  
427.637083424453

TMEM219 899.667912542118 1091.12493937368 638.77182631975  
1055.22233969473 1465.2419150392 968.157701932137 802.304294140514  
655.665164535648 825.781627776577 509.512410867348 1096.61874892572  
995.263014856158

TMEM22 202.193338797533 193.292596471113 192.61436632814  
187.205674045893 156.859539612504 183.744959461078 129.477908941439  
135.738699497293 142.052454741558 154.818414925242 151.893573927407  
154.618685493541

TMEM220 146.70594914192 147.241136598626 151.045803695015  
120.585506729733 149.155345369055 134.399228996542 136.22416508552  
140.648918459179 134.255021727555 128.888149939072 121.072192130078  
134.152586955217

TMEM222 224.766155406229 268.600782558985 195.816317534388  
301.304268871606 390.897464546943 231.287362732197 204.616225498655  
222.794196053536 199.209279169496 192.96586114861 319.812293134357  
180.265418365803

TMEM225 141.010588053284 152.57040089034 139.188234030711  
130.00035719456 141.332402615602 139.650726173186 142.612035986517  
146.063554646851 137.388190728367 144.604714612091 147.951996191313  
137.961504178836

TMEM229B 140.508390945342 145.780927034516 135.455283504668  
147.040759979063 172.468440317443 149.190528937822 137.497145594629  
148.158062155247 141.181931072161 144.685707282641 178.313238745665  
151.151297821117

TMEM231 172.186384820044 164.048326497989 181.354279096644  
172.657668514226 191.179662650057 172.108795190633 159.331110936668  
164.347168837655 174.155599133789 156.208747691032 152.692483731643  
161.099805358232

TMEM232 119.237802375552 125.212404794262 115.830631252469  
127.189310473419 115.417648857825 151.237088659409 122.466276478613  
151.606932937644 123.732299841696 134.527165454543 122.494779505958  
118.879931299016

TMEM233 128.748663215466 138.011923055019 136.60514429355  
127.943935415045 124.142882936234 132.251093122058 117.390049487174  
105.25877906031 117.144778357339 128.748663215466 143.394704760983  
120.96098661114

TMEM25 200.536814571322 206.413554839865 219.0221768576  
234.182164952936 207.815226999953 187.73896437823 200.603836348642  
196.001089662818 173.599961799334 162.047249964859 160.791355483048  
198.620777452192

TMEM26 155.049051256459 148.87242524521 144.430478845702  
163.960242712692 149.453103369806 145.977658128528 128.997028325896  
155.639666182376 154.136467767927 137.764057655114 160.98571841915  
153.171822092714

TMEM27 156.531951576859 148.02460124587 141.503351545458  
140.578378782903 129.313576009092 144.96670085147 135.800997202323  
160.361025839456 157.809081184874 132.71633377967 164.066839397676  
144.012704126852

TMEM30A 800.013123376748 837.872187194784 636.382696018633  
697.97116981445 244.954917633904 734.139557942719 786.160002434066

545.026293696209 734.71562355687 446.948699651916 1451.64055568759  
790.321331435096  
TMMEM30B 278.775971122032 400.550044186372 333.970844203158  
240.253944604431 604.047164856689 499.964000319181 1051.98943987926  
969.811933814244 534.083703564903 782.139151423572 597.952909577121  
912.878077940014  
TMMEM31 121.945541820091 123.798513338021 123.968639555673  
112.449662536973 132.371165851333 121.781562010645 122.543903508753  
123.9209907098 127.548070199148 115.409568875238 141.632147679743  
118.578205738502  
TMMEM33 185.856755885891 182.633773540249 174.510523238374  
170.98312926 208.406980186223 246.327991259259 257.100909006193  
220.312301059818 266.032134528055 239.24587884234 196.716209382446  
247.683819429859  
TMMEM34 139.667714422309 141.913001976093 137.022366035333  
125.073353210914 137.271702725819 152.673212084312 141.505120938773  
142.61573330083 162.039394839415 138.015301767961 150.639235242268  
159.35787888191  
TMMEM35 340.239348689005 330.944203807675 485.87138934376  
390.021666378804 184.204036882642 206.77605957523 184.505279093688  
169.534469894464 209.727089546377 191.207048581306 150.423586547273  
174.890624803452  
TMMEM37 131.255028381669 131.13101959543 118.527464364564  
140.40754434058 132.765046522676 125.894755032594 142.46680970401  
134.52098220054 159.922627970233 144.70348930646 144.782706468281  
128.803632055969  
TMMEM38A 153.989839987975 149.09398454596 170.099045774947  
174.221939793486 192.188662949149 151.128838696891 156.906285133852  
146.050714008913 141.925012927873 164.032302455558 150.031863363697  
149.450921195838  
TMMEM38B 168.470685171939 163.653662369257 191.881157918071  
171.795878750365 210.550995170071 191.665827345888 191.160340745501  
187.833356349429 195.141733146452 312.080864996592 147.702785358046  
166.730974538475  
TMMEM39A 210.5689532432 200.831877950718 191.692830869809  
184.135651836627 226.960024551778 242.570588364106 223.453776362112  
203.852316712377 238.400565506288 161.031148038478 227.689356258276  
173.624709850889  
TMMEM39B 387.477198908304 403.104188866804 430.590533290315  
485.87138934376 504.9864660689 373.925939492544 348.413827101046  
378.037190077449 373.925939492544 365.286234166621 324.671490117952  
367.130155304037  
TMMEM4 436.834825721843 333.868818855397 420.871349359404 313.581986704048  
1158.057104827 1078.41947691758 1391.89900758685 1133.22524345111  
1301.18893681695 625.932910814208 897.51782613323 961.931130189779  
TMMEM40 115.520278378747 131.410793139723 119.01236045062  
112.858669660245 205.200459980187 154.847114601403 230.469548500304  
182.02250582556 169.417764098848 245.978723809154 259.935831886014  
219.519896184851  
TMMEM41A 173.459008248696 154.252727576218 184.008405576875  
132.606735652984 271.430915699592 399.071041584646 541.764013317002  
302.113807121396 506.430593289427 439.207122335648 167.474790447134  
370.227329649269

TMEM41B 591.89966781883 665.936368667321 634.774041584043  
670.571106793204 475.833242673151 623.68308750251 616.014975366684  
776.98412594767 908.352265585374 829.992212133165 1197.00004043747  
463.488995330457

TMEM42 402.694564608582 367.382105696814 484.658140651032  
394.101052511043 491.290438575428 295.893482074241 469.64693728427  
359.935451429371 421.690849282483 413.555310697751 406.816482069141  
329.926864732606

TMEM43 2112.84348677276 1500.16816750361 1612.79779117655  
1315.66699943181 772.776364492813 1120.3009282887 1593.49895307361  
1437.5568316065 1263.64725236472 1565.64079526732 1458.13354165836  
1754.99663827472

TMEM44 188.027848008991 186.161941811411 153.44628692569  
181.048789688798 181.123571246557 209.023926358109 177.742616962629  
201.800357785022 210.502556087175 367.439588680092 304.811116024094  
292.746711619565

TMEM45A 304.111808763793 247.373571011712 197.341423434688  
182.470538043064 158.425950902309 157.759149893048 300.602422224047  
171.982071800592 210.529782898493 839.324324662619 144.889019483712  
146.185931276053

TMEM45B 203.04864785056 317.061815822659 195.256498208339  
124.828626063272 386.917038897322 193.832033192375 481.86545778383  
605.040026490154 269.261595558589 199.397633942623 796.936154737659  
406.998800177456

TMEM47 3417.22292085668 2627.12900283627 2215.43744802035  
2423.84327263111 864.908449769749 1206.09815575399 993.774175699873  
673.176084400831 659.673052713372 321.31562287169 653.047570485109  
873.256632365737

TMEM48 158.380964047483 162.110943457969 148.046961712162  
173.071892362758 385.379119927642 287.83303360511 279.202256032476  
334.52685347521 203.244917049745 253.30325545013 186.866029149035  
248.965394617795

TMEM49 1113.59310757948 767.377380800066 577.56891124468  
705.020444579319 633.594811068524 1471.01897242089 1281.9073569335  
1059.19317548869 1272.14273680177 2313.56743052616 1485.776977235  
1692.01248523526

TMEM5 557.405157178952 592.284071247642 800.373159084181 528.921893077914  
459.171226689178 499.891000749138 1065.74382494535 1689.00127592755  
972.902937649492 1044.91923772265 922.877217016704 940.008438825765

TMEM50A 246.428746807313 243.159062832085 253.580286414227  
270.021093158885 256.614964511846 263.47760086159 195.353512458837  
283.048002376743 255.903775525554 234.588584245938 434.792010353541  
248.229468372363

TMEM50B 913.934874451961 940.008438825765 1218.64951314553  
943.677679525947 495.89837457901 1257.32413345748 869.542306259337  
943.23069404564 1094.67740173529 378.862741410359 677.9972761887  
734.71562355687

TMEM51 1260.50387106816 1227.94401191112 1065.36715400306  
790.561585641193 4448.67183518984 3363.51782842264 4386.83308119416  
2388.03256067711 3008.43964505208 1202.74869573717 3359.62015747752  
4511.9116742833

TMEM52 154.620194499553 160.48993837044 153.248199842194  
146.190750749851 207.150354734189 161.061119536632 176.797322143648



144.64757514198 143.200939506995 154.503958858173 136.751654856807  
151.716042884808  
TMMEM53 144.880785634179 130.689272423595 129.756642179083  
122.965328766807 309.937351755502 136.865340099645 132.729682072409  
138.084801633774 145.311964807443 141.600833670693 160.402220755071  
147.75625228531  
TMMEM54 357.928880740814 513.518424350159 336.067655676466  
556.725550806207 3384.19521857242 1037.46485756166 1251.56853099362  
758.517101659762 1235.75946952752 959.532977061027 2053.71550326011  
1347.75629878765  
TMMEM55A 236.592839463278 206.715020025609 248.229468372363  
239.12905945808 121.311836944721 140.408989128575 132.045595972712  
131.300342835696 158.809865241567 141.943910304145 122.247130087475  
134.544368736184  
TMMEM55B 339.54582149284 360.475989559226 303.986544460218  
385.522443482 619.487800014979 216.209052148435 299.234482744038  
361.969355316032 270.231637012624 369.373283422151 285.102778078056  
365.950612890149  
TMMEM56 131.921799405427 131.198284945008 145.095023408224  
120.527518013376 160.203521879896 126.298187538812 142.268018184723  
191.348260799746 123.265810024678 112.456644814178 145.221594295772  
116.486929280635  
TMMEM57 148.951632781748 166.17959304455 156.105736111274  
165.597236278435 183.406510146725 262.452869676209 215.194909819764  
223.042575796603 190.174729017089 220.242344043437 224.92725876841  
200.688465653117  
TMMEM59 3371.24667467952 3664.38955037715 4124.03779111916  
2269.44503773126 3917.05893989806 7003.06505884735 6670.51138785163  
5572.23400804004 4641.8793590085 3566.89107958971 8768.32269645116  
6571.35528952186  
TMMEM59L 140.138870925001 145.371926271034 178.790758444269  
139.22543724535 154.537240112989 154.950488347516 147.202510900548  
133.014551645069 145.301551442388 156.895079878556 161.657344146676  
159.120172969378  
TMMEM60 495.099443245153 444.663812851378 491.496499481595  
361.390981655795 496.03509813734 484.903322308422 663.782083028745  
601.018867455333 694.429144766435 643.13571432061 907.904780399957  
1141.13648305827  
TMMEM61 165.71382076724 176.587559615019 212.443407602682  
215.365809536522 173.690008681514 164.164463389212 147.553953240464  
153.011923016494 153.435218661228 173.640326140494 149.8919086368  
170.918584418153  
TMMEM62 412.863887464545 480.712219116621 460.941286124613  
564.200165295159 499.891000749138 648.549890890375 1102.38234645327  
423.826189747546 769.586135629964 308.208276315292 855.415038498392  
548.288640768746  
TMMEM63A 191.628693083169 194.374817778819 182.222567053422  
199.408907117764 488.884511065882 197.827534617557 355.14024238296  
188.891032176388 253.538171006307 157.765771942689 446.393631025049  
365.82705202869  
TMMEM63B 257.44230597145 284.043349407812 235.261278607182  
286.856346704286 617.833194119379 282.045333787115 323.737610506003  
205.679992893049 252.894371238554 266.162244070031 564.056592672374  
283.123157828849

TMEM63C 123.294321716108 124.738217731488 138.737332306848  
126.938068475032 136.015561289357 128.056668224393 121.837571435384  
132.758313782606 115.545558600232 137.30143217822 140.48372620406  
126.718380351644

TMEM64 155.908951665928 149.25705328406 168.654753237204  
140.694993778394 290.954496559897 245.553138677866 154.746081871718  
222.484058975856 368.825190022937 187.183762762259 189.528686948872  
161.906823008445

TMEM65 164.696616863082 167.226663395855 178.804669910283  
185.570062118736 173.372949622338 190.318957029666 183.482640529727  
145.044563826542 165.627852733455 168.538117820213 145.131215503044  
164.116142541038

TMEM66 3954.24763752814 4280.66857663502 3963.40575974446  
3046.47354587949 2775.84742592713 2811.84191700516 4836.4008757421  
3883.05620256963 4602.81651147558 3215.41238464601 4037.15442268836  
4373.91897463938

TMEM67 165.773929204209 162.513107496558 159.39197109516  
143.356999170877 153.092864798642 158.73040336393 167.662761175661  
142.518266591748 164.541417588646 157.524049610272 138.858138379065  
174.576132939661

TMEM68 140.236618351922 147.928629511539 136.618643817686  
150.26025408974 140.938442055097 144.329979284786 138.142193489481  
150.213657393257 150.484823814674 142.518266591748 163.175801793143  
147.064543281269

TMEM69 467.777995124655 437.489929507567 607.26455470867  
553.615252472149 517.993093601127 885.104778820041 1042.40539020413  
1057.80846320642 1035.0797237176 798.1490651671 718.670564185576  
1040.29664343743

TMEM70 202.99342484328 218.031238893075 195.474525582555  
224.766155406229 223.778708427552 208.64349688412 231.698163424706  
172.345201438148 205.804144075374 185.997327421952 248.330154701293  
213.847316974717

TMEM71 150.000345076364 149.300089212177 132.090454301889  
153.498332327444 105.925737068775 122.392159083328 121.242099666967  
143.2438241778 140.805322576253 139.104796184094 137.159781458748  
118.712730897987

TMEM72 137.21916902421 127.139903623331 145.261662166215  
138.3792224631 143.741676966126 153.432933930805 131.899614022767  
149.416411285088 144.112401069818 140.28485470716 149.151791028837  
131.237720549768

TMEM74 180.354899434843 163.456245724169 199.118281632221  
169.705236302448 144.70348930646 159.615233521257 170.858049313581  
159.307394610466 145.208597795717 151.067819234238 133.625358030199  
139.400521576978

TMEM75 124.682396766302 143.999000471746 136.981043383326  
131.392533729943 119.627380812035 149.801573181126 132.428675012593  
140.724541696229 155.92082882492 157.615017085961 119.920097823022  
154.061101136889

TMEM76 135.054931772725 136.879615833565 140.393624985807  
133.165893710176 138.334031211616 122.724429060184 130.35985690876  
136.507961715591 133.906867716171 144.461999591223 127.720117789235  
129.462319953515

TMEM77 240.814860403562 221.664431984861 211.535720730612  
188.53221484746 264.628012152168 296.75326294587 372.94852645418

342.935878735854 378.38874489611 175.363223521128 177.083095120017  
268.52833723726  
TMMEM79 219.192900411543 319.223127076041 215.98963200839  
233.671878221507 940.008438825765 579.049608568926 577.56891124468  
699.06539333455 1282.84159765715 3598.30438198858 502.281584081805  
1227.36706427754  
TMMEM8 257.989863290786 261.988345506548 176.465559710285 350.741303038926  
866.147379099606 244.73233791067 354.405235378302 331.464977124667  
419.272193677273 234.738241125899 354.067771806542 312.406286993239  
TMMEM80 203.436527043293 211.289598823191 246.389203940944  
243.402781509365 190.098509544816 172.686798187142 176.901042102323  
177.143397572907 190.057030596611 164.172084711099 202.741211613885  
183.236087954054  
TMMEM81 128.699441450952 137.179058645907 121.908945872994  
131.447941902406 128.827129738041 126.676875319815 116.179625689647  
125.851611268218 117.093818506721 135.013075032671 143.909501365162  
124.840101287634  
TMMEM82 145.929907161493 153.255318944823 170.79303550487  
155.191446350891 159.544710238172 154.808798024399 154.302619274576  
162.98885109088 162.481362579872 146.551475711785 140.730085305185  
151.045803695015  
TMMEM83 146.233195164295 129.425699141995 129.051642626091  
133.975526667571 136.946137446743 141.917318809044 129.930888107958  
133.9382467268 125.9713489569 136.865340099645 137.188849160569  
140.804008584006  
TMMEM84 147.513689209024 143.576177625265 156.456332386608  
150.26025408974 146.26936366452 149.151791028837 158.473244125101  
149.827791077797 153.557991189227 165.249658565871 127.7962242731  
163.280786875496  
TMMEM85 725.621153262924 692.729789121701 1061.29067124163  
639.184296110069 892.868661511516 1411.2586496281 1978.95750795951  
1154.1046856215 1782.2498613913 1710.60409578293 774.997895985917  
1597.53010317504  
TMMEM86A 161.506431005203 169.279866966079 152.31268334586  
171.247946863662 174.820064644203 157.394035451151 175.313689069815  
153.571517567657 155.417694869593 144.520435611318 175.573400981771  
145.861217875066  
TMMEM86B 159.650116062266 157.649902282769 131.041996482401  
150.021512237553 202.357989894268 160.496585125233 145.466538006138  
166.506602328929 203.456296907031 161.769370009823 151.917359928516  
174.690052785405  
TMMEM87A 2200.94974896771 2171.00457877604 2521.58055221647  
1626.34607278613 1211.39534395597 4377.59943975549 4579.62296570302  
3253.76017336684 4793.22133852447 4124.03779111916 3143.77161008321  
5008.4888270731  
TMMEM87B 144.858656365799 133.99226161886 144.975347788913  
137.575688681319 199.70041209487 187.673748059596 160.806678614325  
188.277563426829 161.010206405916 183.358807104988 199.001860912128  
246.152798696993  
TMMEM88 160.932913244423 187.955617187544 130.095585254401  
188.490807652188 152.883970401452 184.473198008234 131.681566829159  
180.478294414245 144.031305845388 131.963419175907 194.500222559978  
138.866469244936

TMEM89 138.091795130567 144.629350188283 135.945030816689  
139.21825391822 144.581747568524 144.807626228351 133.302364521094  
134.018379799826 133.379872189405 121.103620738719 129.11843197744  
130.744788360182

TMEM8B 179.854800301573 174.406779990708 156.768976123975  
146.602252563413 166.925695810781 179.273936200852 169.612203020686  
148.056333887679 146.155809402461 166.842970309527 171.994330847901  
177.457362387052

TMEM9 385.135014083686 397.2528907311 300.150235383065 334.607533045929  
677.802147190757 496.991561192565 406.224345292389 530.267835989435  
443.125195744202 436.586158384666 459.652708187549 584.548578914846

TMEM90A 134.354215877283 119.539713878832 158.459129254226  
132.484079454476 127.74861041569 175.210232663606 131.460388562433  
121.377666938052 135.725202462502 141.470472968171 139.909719416938  
137.215025712057

TMEM90B 179.30729544595 169.447827110558 137.471563342956  
137.188849160569 130.839508306116 125.236926572282 135.393901125889  
123.545404885618 124.66386961898 158.670835881902 133.090474303043  
130.863753083296

TMEM91 625.699971780258 614.775559038663 515.158921349383  
699.06539333455 506.290241222253 475.038389500056 281.570685561526  
455.665927568395 592.079898463345 1001.92763014266 360.605223912114  
421.583441056026

TMEM92 111.000303209442 121.801291293249 110.875112640101  
114.826501559828 118.161192318422 112.693431140524 108.683531606889  
108.199628274798 118.900338956203 139.779754416105 112.987890650593  
117.028963434266

TMEM93 401.631377313065 451.887564294551 451.621888586656  
487.537691131703 561.251860964966 833.841469195516 631.408955630318  
724.442411170786 597.189355986293 619.75986112089 638.77182631975  
849.784051720996

TMEM95 118.547605249191 127.777945516765 131.963419175907  
131.534097198718 124.922004609558 125.911259629489 142.413527544686  
143.407371444437 131.117294275244 136.316003989725 116.070254821073  
119.725487374119

TMEM97 522.300029971277 991.081498002429 700.877661166739  
608.611927946607 7519.94306346326 3581.36347643133 3949.19206005238  
4441.92485662082 6793.99737496637 684.715981522999 3215.41238464601  
1029.43177809276

TMEM98 699.270931701696 673.176084400831 393.914413372142  
463.754869412768 776.030689773414 265.332196877456 446.819873986024  
1142.09977159958 658.47864958685 350.983969007868 198.356420768703  
322.506898833351

TMEM99 253.009376944901 277.86338481075 254.991678321253  
251.833571288967 441.331937921872 400.845137156678 499.544050752036  
598.449359425056 598.924339094496 385.798784913201 367.898258897888  
416.392874553797

TMEM9B 660.907502776003 693.516351173476 468.712260193746  
536.46884541183 460.24741151155 701.208391798006 708.779490017407  
899.336817124312 861.786094902013 1027.48490028905 2180.31963682546  
990.55038742453

TMF1 141.596078062845 144.287786573389 167.357570666817 140.232244264861  
168.358323243918 175.29178007783 188.959655155629 156.883255634126  
199.854728619468 210.852300463808 182.711318507496 196.583548193097

TMIE 148.791182443623 141.329559699056 154.21623304309 170.091913791176  
152.980843102933 141.135840314665 142.084294087481 137.42845093653  
147.040759979063 143.260448301109 154.21623304309 157.256812907353  
TMIGD1 179.265395910119 155.166786601813 150.799400717425  
160.992494552269 157.337193457189 162.240414467004 187.112176929485  
171.358746749715 160.496585125233 145.003900788534 168.594235675558  
149.865644080359  
TMIGD2 144.104372749581 161.417207801991 172.599654598668  
154.47187360425 163.59704679338 145.744039709418 162.531630234824  
140.163936299053 151.92638745703 166.640325848102 153.121693371757  
168.969180646603  
TMLHE 211.118308738617 217.264041781337 212.050953977485 253.385592447339  
192.878416717298 202.324795686879 220.816812192169 189.082778234831  
201.731223995887 223.496400038284 200.456087759904 232.385176936256  
TMOD1 888.04996477314 773.803350315426 1682.64624665931 789.043948009585  
152.465176508162 151.379761514526 134.175287993769 146.904354404095  
159.606633817645 151.869928694006 142.584504912189 148.683761948082  
TMOD2 224.824362819477 216.731618532814 230.201464318433 211.626970008102  
140.35175858015 143.080742311914 151.761369162723 140.965498009244  
150.95033946042 164.066839397676 128.814967091609 144.474814266475  
TMOD3 170.614129599775 153.798367953373 152.101695555105 146.533374238616  
221.889331385023 197.605208310432 176.440625367948 164.337486856997  
195.724873069362 239.003718699156 190.125009931628 195.66091457697  
TMOD4 148.82892305156 185.063870458561 143.390971600678 192.022864170934  
122.343979874508 134.992686224944 125.185929751363 138.090158433822  
136.020600085547 125.060387518072 148.970251898527 128.899712906082  
TMPO 131.712745388563 131.739418639854 120.304037458526 131.226834630025  
151.899063970777 177.955579729463 134.821778017915 195.114012321877  
174.928155956396 141.067419336609 154.13120950189 144.375109087466  
TMPRSS11A 145.453460204097 158.089922688997 142.974541687789  
180.719868519867 139.803568564059 162.161282071736 153.005366371425  
153.759707372298 139.175421159925 183.719279448844 141.075421936212  
144.792035839249  
TMPRSS11B 131.488316643424 139.636177212128 138.698178321535  
140.152177370089 146.110545700163 152.599052194143 134.494167613686  
134.176925491721 148.056333887679 148.723165059122 159.524235332529  
142.12808103815  
TMPRSS11D 108.036254606246 104.285022032604 104.934718065476  
111.078930787656 104.714872508838 116.112013454335 106.982655360194  
115.264104392064 109.669517182289 2137.44704613378 151.2639801322  
110.562310620515  
TMPRSS11E 167.796474464069 158.299765118221 163.714231827866  
157.932243807202 157.341422939225 148.945466917496 149.355389396683  
143.013801508709 142.167918879613 164.253219197128 113.995301093609  
148.373866613126  
TMPRSS11E2 120.433080754232 136.811620595243 126.072053958666  
124.285969778268 140.350144438462 123.709293439934 131.429247528936  
117.380281099932 120.276236447255 307.518881119091 138.654301345398  
131.99470265134  
TMPRSS11F 125.077260389449 129.741644654541 127.226937898225  
118.021169080914 128.513011425662 132.587392944892 116.486929280635  
125.800508653231 135.367261617271 163.616115299926 130.881629774224  
115.572088632106

TMPRSS12 154.298262671775 142.819669471009 142.954747193455  
139.048016900762 155.873969001251 146.524138043215 144.6567095695  
150.409919207059 155.346805606742 145.286983999628 172.478461106269  
145.466538006138

TMPRSS13 151.742938010671 162.294114485312 182.897563195019  
152.035992124554 182.235490620172 136.19725093985 167.040031488406  
150.507308901391 159.082447644277 173.586160103539 149.141033677244  
174.737828693216

TMPRSS2 130.339214643083 186.345823604119 221.796935051107  
153.658747612827 833.430847243676 552.662610888399 670.347447480331  
1037.00025848491 3441.9805896226 208.64349688412 1347.10650016064  
705.020444579319

TMPRSS3 129.669484303621 133.111791289725 136.390047634643  
138.015301767961 130.705091244939 125.413619056436 133.64938083537  
130.071397809203 150.73248190848 126.819413901915 149.007288765628  
157.971293294367

TMPRSS4 128.217078449064 145.584615439295 125.826111950648  
122.860898886143 344.379733302418 156.228039404029 544.30845362168  
182.897563195019 126.969504644414 263.800363357443 544.580311371212  
249.737588031219

TMPRSS5 126.268418132 144.68114486527 125.962178569021  
121.903115540516 137.50266393001 121.049927973123 123.972321838378  
121.094060100325 116.597352307016 109.536381305315 145.411264691728  
126.182856027765

TMPRSS6 133.171854425031 129.470831357565 123.839006667113  
129.904942554979 130.701801496564 154.889079187405 130.75707278606  
140.2533871084 126.820834043224 124.61344300674 136.596127228365  
124.652072110334

TMPRSS7 147.253919952267 158.760577365464 163.456245724169  
160.031506612501 163.432972512188 163.93199635496 171.62327142765  
163.977562404508 159.227123133854 176.355556618289 163.922353493317  
145.665155500862

TMPRSS9 134.340512608931 133.52271411034 143.090886224647  
124.712789674509 146.840735518984 147.697973457776 141.828740140733  
148.856482636773 147.661748633455 133.670967970136 117.303671445328  
147.657151780506

TMSB10 10048.4260790604 10900.1783397368 6877.52553567598  
12022.5515181682 17211.1455384358 13190.4826009741 10222.4435857673  
16974.4822983201 20099.9833491654 25808.3502428915 23190.7842325067  
13853.9715872573

TMSB15A 127.31790396929 175.495965414493 113.924310293916  
128.0805889548 226.640323471375 157.535792192753 120.984641102879  
124.031916322066 249.029098902357 143.888318202599 105.348008821162  
483.067471841953

TMSB4X 15053.7547401937 15851.5830405813 13217.7001749493  
16588.0599171804 12406.7143043992 13944.7649147227 12283.9915232122  
15420.9668207676 15238.4097431619 11709.9785619141 7771.28016059011  
13276.1713779481

TMSB4Y 148.391885541349 146.787927492706 183.82450756022  
165.70840218273 137.881776548665 143.821269460523 144.39135701666  
195.316077537716 167.796474464069 140.581943144813 184.557630172634  
194.374817778819

|         |                  |                  |                  |                  |
|---------|------------------|------------------|------------------|------------------|
| TMSL3   | 4437.40805296517 | 4030.42725798136 | 2648.41012401723 | 3570.21370790206 |
|         | 3000.46298223166 | 2775.84742592713 | 3994.64569045702 | 3700.75770419386 |
|         | 2733.68308784024 | 3029.07443443457 | 3757.39261544326 | 5874.57722671552 |
| TMTC1   | 275.755038921952 | 218.811490883852 | 262.259969786927 | 195.043838688467 |
|         | 154.2228051929   | 293.080122239022 | 154.912576362196 | 279.026742408164 |
|         | 165.406452831375 | 191.056705282378 | 149.964827055916 | 146.31468639383  |
| TMTC2   | 189.092674335503 | 155.965426559332 | 172.877947895827 | 136.180063437699 |
|         | 156.88782735706  | 189.971144220643 | 156.481871341275 | 467.944850290806 |
|         | 161.979914539039 | 134.517774302213 | 197.938447651153 | 146.519312568214 |
| TMTC3   | 157.535792192753 | 153.569919606708 | 178.657325741035 | 162.802392115386 |
|         | 182.263724979519 | 259.094411953361 | 217.89028736436  | 338.46332239699  |
|         | 199.118281632221 | 223.013753785002 | 161.972922129453 | 237.473927775823 |
| TMTC4   | 174.42996813062  | 166.388683552371 | 143.30977386038  | 146.97334315047  |
|         | 214.4829383264   | 277.314675225943 | 182.907444581093 | 207.05325577114  |
|         | 205.781486117242 | 151.535177950367 | 212.473610495213 | 232.151020756625 |
| TMUB1   | 462.888171502285 | 602.703887178113 | 406.133430120039 | 718.670564185576 |
|         | 2530.00219297102 | 778.28014337938  | 778.846928848361 | 726.000622725287 |
|         | 540.078145038497 | 457.548150688248 | 779.922653392712 | 1165.05055932899 |
| TMUB2   | 375.316610221279 | 411.505580458401 | 333.676803661366 | 482.857203798212 |
|         | 441.785666261936 | 291.313681141442 | 432.726040933545 | 304.013547190343 |
|         | 386.917038897322 | 315.47473326786  | 496.991561192565 | 315.863232876382 |
| TMX1    | 394.186683910377 | 393.98210915852  | 379.983165400941 | 311.544429285897 |
|         | 793.891277937782 | 579.923640505245 | 528.767644181119 | 683.019502027271 |
|         | 401.631377313065 | 641.338900241674 | 742.517302567436 | 694.644744547412 |
| TMX3    | 260.314440448486 | 219.78041403077  | 337.487980551006 | 224.251136332123 |
|         | 186.406439948242 | 264.233381434738 | 186.103491222924 | 288.728608411903 |
|         | 269.62298406345  | 253.098839084408 | 215.057917795456 | 294.17588071297  |
| TMX4    | 656.660582895703 | 517.42417250172  | 619.995008098949 | 434.943371634824 |
|         | 696.003998372271 | 417.191960489528 | 258.075566417241 | 298.256131536504 |
|         | 287.889774984754 | 276.284517459626 | 249.129943906228 | 299.669394721682 |
| TNC     | 684.180060287047 | 563.339837352678 | 373.760551592844 | 403.292651623365 |
|         | 184.387409077972 | 277.256341592701 | 220.136131941508 | 268.328002606268 |
|         | 359.822784070765 | 375.255445179952 | 244.401472859026 | 244.990374822652 |
| TncRNA  | 149.223102493474 | 167.949422301257 | 147.985843605585 |                  |
|         | 175.573400981771 | 151.451443480833 | 181.098584949344 | 242.221324619171 |
|         | 166.277960843095 | 166.611809859059 | 153.758353103323 | 156.783896946556 |
|         | 172.698181201849 |                  |                  |                  |
| TNF     | 116.043095688871 | 127.6516565653   | 123.135918415235 | 118.438942370745 |
|         | 136.6729514905   | 125.668463983985 | 130.076926011271 | 134.264584077125 |
|         | 155.402421581195 | 152.397984799517 | 129.95138839192  | 152.395272857974 |
| TNFAIP1 | 496.823662262772 | 442.220572301795 | 379.546197364027 |                  |
|         | 502.281584081805 | 858.020739710943 | 633.762608454521 | 654.108318810728 |
|         | 593.320132696649 | 766.176882605175 | 608.959089074987 | 446.819873986024 |
|         | 430.505037012814 |                  |                  |                  |
| TNFAIP2 | 241.494710905339 | 278.335289966805 | 168.854819201403 |                  |
|         | 221.171478972931 | 1449.33679383001 | 496.823662262772 | 754.406896156858 |
|         | 1040.29664343743 | 593.462634352052 | 132.665590728755 | 828.276436883306 |
|         | 986.972987865318 |                  |                  |                  |
| TNFAIP3 | 296.553550946307 | 519.940347384877 | 220.379186481273 |                  |
|         | 227.64196401771  | 219.753039699136 | 229.483578414375 | 195.239829623017 |
|         | 253.697419495959 | 336.434368527549 | 397.577760464197 | 228.086256222312 |
|         | 264.109049504585 |                  |                  |                  |
| TNFAIP6 | 198.863347487219 | 201.152639979358 | 150.724359913994 |                  |
|         | 169.642188114285 | 154.65319127051  | 146.517645037071 | 138.296933822299 |

144.154217446011 154.648806105422 275.584858082096 156.290018816692  
145.766684470184  
TNFAIP8 149.860490620507 156.085949215738 152.957297648595  
132.390330703084 165.380225715852 147.607202745865 221.961758403614  
193.275162354467 189.528686948872 334.199307788576 265.791342287571  
200.22145130696  
TNFAIP8L1 425.826693178023 503.466550870577 592.079898463345  
529.228238133018 426.649095732979 398.193129265416 227.065194522692  
457.650982600462 317.00629920068 350.308420518351 199.916301659113  
433.82566459288  
TNFAIP8L2 110.408301129053 109.552501987529 110.764586138261  
114.977135060317 103.168665937677 119.717408713154 114.740948266517  
114.726808450831 119.98864381644 99.7487411813724 139.021552573529  
114.213405341709  
TNFAIP8L3 934.546444634669 738.087203930249 527.707841428677  
700.877661166739 131.38881091292 143.641777655752 133.297361715205  
144.023798119335 159.479962316199 274.047586063773 152.829437376835  
147.123477579978  
TNFRSF10A 150.109192774079 168.818595386221 148.199249855894  
156.576585764311 145.520832968878 222.736706411035 227.267783818298  
189.324370290702 220.312301059818 328.401537339876 262.093405224922  
318.930960243303  
TNFRSF10B 192.512661648653 200.146843808423 167.737220954468  
197.12840030662 197.326259802349 288.313931067158 363.706789137022  
227.209630859635 297.285037835812 391.782120640025 359.822784070765  
535.20662670885  
TNFRSF10C 165.219393390909 164.011683602245 130.0140921487  
154.101698334466 159.932941342403 142.980393157113 165.219393390909  
141.515788643986 159.801315111886 143.184697704389 179.297628357211  
150.945167884077  
TNFRSF10D 165.938009275308 178.946928223991 156.818197172306  
159.491388998564 154.360558958914 141.652000792271 149.335288055732  
157.269049853539 186.215602572358 151.403431105471 156.083002868004  
126.837151457845  
TNFRSF11A 132.32633643811 126.938068475032 137.165966740473  
153.929167381674 141.853711139375 164.587657424569 144.99221793877  
135.920830568556 135.823975527501 142.888281750232 144.084441938143  
155.259089547817  
TNFRSF11B 108.296042016208 111.908965758799 117.517649866653  
110.081964209973 122.646850766733 128.662039886682 117.962188157317  
117.585207821853 169.466129742085 118.673325109944 130.975606477621  
135.425518707018  
TNFRSF12A 773.057095787974 255.866847225916 166.396160626179  
161.708130705995 692.359779743985 282.719121652073 543.810043433181  
258.532432007328 370.877260088621 1034.2217095753 246.112720011613  
426.769986378276  
TNFRSF13B 114.494394548044 106.953841653951 126.542112891953  
112.729141678141 124.796876920269 125.486324819682 116.412881235587  
139.541759919059 185.743212726702 127.9575507576 132.820927638053  
124.460064642088  
TNFRSF13C 124.772219140795 127.473812381059 128.835216648178  
120.201521341263 121.553107861517 112.809629077555 112.65454329872  
127.344210958898 141.50968031684 127.941584184869 149.693559841189  
120.418709541104



TNFRSF14 1297.25632532536 1155.4487861163 1118.86225415732  
1089.58643309156 1850.98311401165 1170.07851727046 1495.04587558545  
1638.72366638732 2596.43650409044 881.561688713557 2718.440149645  
2871.34694522381

TNFRSF17 111.312348806957 115.47716627378 119.403831071089  
120.843429388102 121.278346729876 120.126700838056 131.419663282022  
225.480366837274 190.850639994777 106.315801001506 126.722212054469  
125.478878240473

TNFRSF18 129.004264497725 126.037968297611 120.638330368388  
127.023543953724 145.272073426254 138.768904143023 132.780890129463  
157.519633258844 157.821491577808 140.655002540298 134.55255098289  
130.476322267589

TNFRSF19 227.236255752375 216.680795762761 163.621658579697  
215.272800347166 136.349603320553 138.279431175685 135.980886879513  
142.428578698775 344.915370555826 179.810507975486 136.871568211946  
143.550908565401

TNFRSF1A 1421.72388964898 1596.33832632698 1084.5920943349  
1792.35343044443 2833.30537635103 964.093668483033 1845.87311313269  
671.387334588652 1382.12750708801 1462.31151845458 1082.75419087929  
1148.80141486692

TNFRSF1B 310.026522549372 445.348044448953 218.615551704188  
397.153801851621 257.880331012233 226.678503956411 244.440857688518  
670.856008549143 852.099019968701 286.230656780335 318.850765099332  
347.487059316081

TNFRSF21 861.786094902013 2418.66999907188 938.049312229961  
593.990687449346 8163.29201165065 5165.90865799172 7631.6124232898  
5670.70220800096 9470.58919937464 2246.89876694944 7930.82679738435  
9433.53967760357

TNFRSF25 187.673748059596 183.033044475752 163.042083189818  
166.17959304455 256.99019407912 305.768201359278 277.406445570925  
337.434882771953 383.407365952689 925.205399154409 386.738154577763  
355.879841671975

TNFRSF4 167.782882015229 160.713790305656 156.71199811686  
156.646803208934 190.921283434627 191.961269585431 183.472290949588  
178.780662099615 228.086256222312 165.82215325714 154.466614452651  
166.330001480033

TNFRSF6B 170.892319361167 195.630643168176 180.468984099647  
168.873282919232 151.540744107423 137.280933631075 149.659505956629  
167.645930148254 195.532022060219 331.937313503755 153.534763364558  
177.306794546105

TNFRSF8 136.301442794928 143.967197319361 134.190511945944  
131.340453291188 136.115306932124 130.317604643904 132.664379033058  
141.323417580648 142.630563791102 132.031693838834 145.255676667046  
134.641840638331

TNFRSF9 127.269672881591 128.685065364693 131.891352872004  
127.333963230749 139.242481781927 138.487657776553 124.213104788426  
126.928328902507 142.029398672217 129.260551359984 152.204730003016  
129.994160770036

TNFSF10 334.857690525582 255.493109705211 260.443814523694  
247.806371601734 137.367390177293 165.277935422113 514.354512083591  
518.478990211753 721.11578916385 852.649997188692 1162.09529660662  
375.651196211048

TNFSF11 136.146383365709 128.300838927918 144.160494362602  
136.099663831028 139.013404849037 125.130703953031 141.964796033176

135.010937737018 137.118488157416 146.242897296397 155.561821955048  
154.894196413558  
TNFSF12 471.816954259146 475.927798702033 535.612000577004  
532.596772298766 173.986750195954 167.796474464069 163.584613764633  
164.773489952844 175.717830026564 147.362120584524 192.493439659184  
156.433603187722  
TNFSF12-TNFSF13 143.607579034109 152.238845270993 137.96452133771  
164.625407872446 139.178245419517 128.872496485403 141.426756696799  
141.755954088275 151.301484852387 143.00521196918 153.952788086758  
141.577373924378  
TNFSF13 128.56495182759 129.694178995061 126.695387748732  
123.130981962217 146.536055773073 130.423465505321 117.078720392441  
130.429076594441 130.423465505321 124.676743480622 141.397046998678  
122.212222959338  
TNFSF13B 257.622317771472 240.75934760601 208.507486041165  
228.675099004411 187.264411519101 213.966288689715 224.135228192655  
252.365946808078 337.652945958921 273.651114834013 212.239485199343  
218.298791348295  
TNFSF14 1008.43888926584 1138.44837250274 894.46029531926  
1005.62130301653 309.5988292104 1044.00217726486 696.650617523899  
826.08372791138 704.448123154868 567.143102792772 969.360864006371  
700.601917911532  
TNFSF15 479.138177792954 457.905741500454 455.124190541055  
453.760162338163 177.355210393749 408.361368902627 271.522696252995  
321.049000153127 286.431013744652 278.469340236003 343.346755862776  
299.80615152845  
TNFSF18 125.677019190255 126.908123260394 112.14768481333  
123.235136639469 135.391788614828 135.789381967525 123.179986410723  
122.610529927104 121.150371270451 116.632612170106 135.244303669342  
116.070254821073  
TNFSF4 166.14867551435 151.086688327023 172.197077149985  
149.865644080359 136.378203924435 144.937697857147 144.940119680152  
145.502055020513 163.446813963119 142.872683795338 145.921381300813  
152.173055053184  
TNFSF8 131.887778588005 159.909121784808 154.812587513407  
157.654040469774 162.435363603304 159.957371011316 156.605568633665  
166.346572488391 171.689722533849 148.47415004128 154.417731984391  
152.760855359297  
TNFSF9 177.491294133515 160.655929233978 146.132506246152  
147.216303852902 154.533544838819 176.680708339236 158.565676210997  
154.055550115498 150.500676225569 192.258863431747 154.156272284591  
165.500088159872  
TNIK 142.249715102513 143.187539073659 161.813099560175 138.760800146167  
113.672605838627 126.134393447943 110.448948495323 124.985249190127  
135.950465168457 133.70941349665 140.169200413643 148.11536596061  
TNIP1 555.259469428492 624.978351618077 620.614820117452 793.891277937782  
528.767644181119 343.048904374136 649.052806726591 385.317560758502  
406.028724866233 911.782783698439 484.131020584378 467.347509383673  
TNIP2 229.31486399741 219.394500571586 229.076507182239 201.593025256991  
306.43742010208 229.85833221434 271.945851739635 239.452559981542  
281.618175110153 254.517135747445 286.376638135463 270.021093158885  
TNIP3 133.585425721984 138.388749930671 120.122719226116 130.880795616911  
134.163388748526 135.30767047671 119.763020707899 146.495845282846  
142.859971805867 135.75568942028 144.134485888258 124.093412630817

|          |                  |                  |                  |                  |
|----------|------------------|------------------|------------------|------------------|
| TNK1     | 138.112168847027 | 142.596113491002 | 133.290168428696 | 139.295597388725 |
|          | 146.96155692518  | 143.626022875491 | 151.780459290205 | 156.562197068687 |
|          | 148.452947427498 | 135.311980936088 | 171.844483419604 | 141.786962606666 |
| TNK2     | 367.439588680092 | 374.106258053201 | 495.89837457901  | 461.314247041387 |
|          | 653.749043828462 | 436.982960786839 | 446.07651799079  | 507.95331185029  |
|          | 496.218605366298 | 407.518324776453 | 443.623904480087 | 377.225452025984 |
| TNKS     | 155.964242240771 | 165.904887259203 | 171.504939477949 | 167.542332146706 |
|          | 154.343424387068 | 152.628220216104 | 145.7202993771   | 153.82440233533  |
|          | 151.06209123698  | 178.628885995439 | 148.124586158123 | 157.940873610797 |
| TNKS1BP1 | 334.709049890042 | 336.845908630493 | 242.948136060281 |                  |
|          | 332.219608862536 | 736.963699775724 | 624.264994653057 | 437.489929507567 |
|          | 303.762967437478 | 268.961643716282 | 621.825622897512 | 409.592855687405 |
|          | 335.301103690781 |                  |                  |                  |
| TNKS2    | 138.43190460314  | 122.449574852865 | 132.181365505556 | 132.257989841046 |
|          | 118.180919555585 | 127.193553054979 | 121.71538073735  | 136.718598487513 |
|          | 107.431455226979 | 145.640156204495 | 119.391213033544 | 120.839256811295 |
| TNMD     | 145.459919416288 | 142.017169259522 | 135.311980936088 | 131.004145546364 |
|          | 135.082715974111 | 133.874468336025 | 129.895388481159 | 125.769903262265 |
|          | 128.186963138555 | 141.953114738413 | 134.401733295755 | 129.775280076365 |
| TNN      | 144.188147197178 | 136.254966566424 | 149.554174907798 | 155.997210529742 |
|          | 136.801338583441 | 150.936747236094 | 151.88244935494  | 153.926214082991 |
|          | 157.555410977564 | 153.633095853017 | 145.022242996923 | 138.586620636835 |
| TNNC1    | 140.227863970629 | 166.368623023308 | 134.452938571435 | 144.038859705973 |
|          | 264.983729290122 | 251.09230266334  | 180.240305360865 | 220.772387104223 |
|          | 298.776176246196 | 145.383354200298 | 201.81649023518  | 306.677271064305 |
| TNNC2    | 158.100395482569 | 151.744902566627 | 151.477239868429 | 128.019837242559 |
|          | 121.47058227778  | 126.290840923683 | 108.061315311823 | 114.021546689428 |
|          | 147.245636620228 | 103.660742045068 | 119.346574301289 | 112.957395064957 |
| TNNI1    | 107.531907287727 | 108.818976813708 | 104.681530703922 | 104.681530703922 |
|          | 111.020070405368 | 110.553759711075 | 109.669517182289 | 109.355444907633 |
|          | 114.768639931659 | 113.222264855561 | 125.569364049349 | 118.604395992281 |
| TNNI2    | 164.841156516242 | 178.43642939806  | 268.961643716282 | 132.038012025708 |
|          | 287.402339322061 | 763.880957432979 | 143.641777655752 | 666.204695328096 |
|          | 174.624446035895 | 182.152956182443 | 234.370850809531 | 436.155731212592 |
| TNNI3    | 123.357205547181 | 125.861564323476 | 116.90832995093  | 127.745801270205 |
|          | 202.583967728957 | 139.860093278582 | 139.452773383624 | 132.277920991504 |
|          | 118.955314417914 | 128.783262618114 | 113.315182274675 | 133.058788697693 |
| TNNI3K   | 137.853137973756 | 148.977202433511 | 142.521260841187 |                  |
|          | 152.415752253205 | 147.043228493047 | 130.160236228857 | 114.970485002776 |
|          | 124.101111442605 | 114.314425748312 | 142.793573585472 | 138.725927120257 |
|          | 138.094719587545 |                  |                  |                  |
| TNNT1    | 112.340161674529 | 125.208803405105 | 104.321352818065 | 108.9291713877   |
|          | 121.699702849509 | 121.961568081299 | 116.501174707117 | 111.457176315964 |
|          | 114.691842968597 | 182.222567053422 | 131.789877096016 | 130.672586991186 |
| TNNT2    | 330.641230715217 | 415.113340335205 | 458.047799748696 | 674.101599637653 |
|          | 135.622888091037 | 181.340312140534 | 134.537123332992 | 154.197254746757 |
|          | 158.503284955019 | 155.452842883109 | 173.109461200603 | 212.050953977485 |
| TNNT3    | 191.418673767345 | 210.5689532432   | 142.858554460651 | 204.770742504612 |
|          | 113.071787850611 | 120.065876525792 | 111.722827315911 | 117.141089194822 |
|          | 113.071787850611 | 124.238319768621 | 128.209771391087 | 251.915179734134 |
| TNP1     | 172.84784588171  | 153.885582272269 | 161.195562296834 | 189.872997882033 |
|          | 145.97330701968  | 155.417694869593 | 176.75095377028  | 150.070213543579 |
|          | 162.312313953026 | 163.480722123193 | 154.232310911696 | 149.04685599998  |

|        |                  |                  |                  |                  |
|--------|------------------|------------------|------------------|------------------|
| TNP2   | 150.672985449063 | 131.984467471242 | 141.953114738413 | 135.020690381988 |
|        | 152.104170622003 | 141.811563725942 | 139.473459411633 | 137.550607284001 |
|        | 143.447768653042 | 130.758707848676 | 119.083957999725 | 132.268445799639 |
| TNPO1  | 509.988617641229 | 458.151323130855 | 470.42403724799  | 378.862741410359 |
|        | 275.343591424586 | 351.188086838653 | 364.964572587289 | 304.152390210727 |
|        | 273.353254857377 | 341.564749445905 | 352.897241809959 | 360.243484271891 |
| TNPO2  | 1518.13775377335 | 1658.78888936164 | 1516.97921112926 | 2107.99357083999 |
|        | 1202.74869573717 | 1699.17470788219 | 903.503768217033 | 1259.75918248468 |
|        | 1088.25132365974 | 883.702573960415 | 1091.12493937368 | 973.543357809971 |
| TNPO3  | 566.417354841707 | 657.77730563722  | 552.962676093514 | 776.411045078049 |
|        | 546.029974898225 | 389.051174954505 | 520.470790410856 | 436.222568287601 |
|        | 390.979822976551 | 384.216141843863 | 595.270107963842 | 479.395948662331 |
| TNR    | 151.671024612136 | 139.15175079191  | 136.294479720968 | 133.621325902558 |
|        | 135.573170189235 | 126.606163970149 | 122.863612588759 | 142.434356144925 |
|        | 139.367493349339 | 135.191440283047 | 126.178476831007 | 149.25240100689  |
| TNRC15 | 419.902534806131 | 368.825190022937 | 404.95944990868  |                  |
|        | 378.509324619452 | 247.899467998443 | 280.749681050778 | 290.754210152709 |
|        | 237.989479738133 | 273.75192868583  | 284.104619768635 | 264.429717032654 |
|        | 331.848516303011 |                  |                  |                  |
| TNRC18 | 165.597236278435 | 160.932913244423 | 157.049773524382 |                  |
|        | 140.227863970629 | 168.682307349713 | 163.885645883066 | 176.849238577762 |
|        | 156.151075965844 | 143.629760301493 | 153.088710298368 | 154.118601977256 |
|        | 162.560758971445 |                  |                  |                  |
| TNRC4  | 147.955701866515 | 154.691783046492 | 130.955161943331 | 143.385915173392 |
|        | 162.259941098076 | 156.191659799142 | 139.870306695324 | 167.357570666817 |
|        | 140.936204899093 | 154.350107666084 | 132.601272107742 | 145.906601611338 |
| TNRC6A | 271.713695056313 | 248.43491649623  | 254.287838845201 |                  |
|        | 265.332196877456 | 168.323141675824 | 203.888365494623 | 204.137195524755 |
|        | 213.194154171149 | 197.405472374722 | 178.542247857251 | 245.553138677866 |
|        | 213.914599384797 |                  |                  |                  |
| TNRC6B | 363.594808277506 | 306.277823025572 | 378.24336892367  |                  |
|        | 286.587945301875 | 185.717123241832 | 271.087125858775 | 219.878230463206 |
|        | 260.642170838161 | 237.249949461085 | 219.96819201774  | 237.191866335979 |
|        | 262.691387377392 |                  |                  |                  |
| TNRC6C | 153.474566767304 | 151.0189104086   | 166.452651396293 |                  |
|        | 157.237147919803 | 160.843325877861 | 162.351212914573 | 153.848852170776 |
|        | 174.177944561595 | 165.158465031363 | 166.784804508647 | 139.527577649638 |
|        | 153.882081780197 |                  |                  |                  |
| TNRC9  | 131.762145063734 | 173.424541543058 | 137.029726467523 | 139.15175079191  |
|        | 315.963526790659 | 403.907009699589 | 438.146919555296 | 419.902534806131 |
|        | 227.64196401771  | 133.346626315812 | 492.930906036297 | 335.239364345057 |
| TNS1   | 770.19255305977  | 984.695710317818 | 556.31484498921  | 1513.28088592885 |
|        | 175.857952663383 | 145.875240619257 | 158.98007855379  | 163.736324784234 |
|        | 177.976550224863 | 179.451637129672 | 165.177036955944 | 176.516540713888 |
| TNS3   | 1227.94401191112 | 1281.9073569335  | 1044.91923772265 | 1293.38808483663 |
|        | 1082.00448164658 | 488.379057110543 | 456.656123023446 | 906.359365544713 |
|        | 1141.49294161587 | 589.070196307574 | 1209.56018864779 | 1240.4863200811  |
| TNS4   | 116.019123495537 | 125.038427667173 | 121.821868944354 | 120.106270603148 |
|        | 130.721987260546 | 127.31790396929  | 135.589211439847 | 147.211769989922 |
|        | 143.137158027738 | 139.54738445816  | 153.776361241587 | 135.494894933583 |
| TNXA   | 181.215046876308 | 185.886737029845 | 182.907444581093 | 191.160340745501 |
|        | 175.121069571371 | 154.760697311395 | 170.531713392258 | 167.961390966538 |
|        | 166.007913607742 | 161.636411303968 | 144.237691418911 | 168.919352453652 |

|         |                  |                  |                  |                  |
|---------|------------------|------------------|------------------|------------------|
| TNXB    | 136.593346330215 | 128.118223792086 | 135.906115546805 | 133.921012946195 |
|         | 132.496547953595 | 130.013085255256 | 134.160100276452 | 129.594440309419 |
|         | 124.053190169486 | 133.215151497536 | 122.002822875994 | 118.465111174212 |
| TOB1    | 761.89271251455  | 807.3257139219   | 1061.79595707572 | 824.070046083713 |
|         | 1327.65573168233 | 2249.8123426309  | 1628.24528041404 | 3765.25491426198 |
|         | 1623.92991386706 | 932.505095432049 | 1065.36715400306 | 1089.58643309156 |
| TOB2    | 237.146972312448 | 302.272304483941 | 294.48534582475  | 245.915473236403 |
|         | 252.432175363972 | 233.59297160203  | 230.620456579897 | 246.369521698487 |
|         | 193.16411905957  | 225.61275910008  | 397.449905380349 | 254.668502187945 |
| TOE1    | 159.379420001197 | 162.808270845998 | 142.984243805285 | 147.701092466105 |
|         | 175.670738308809 | 172.591885279428 | 161.592528958127 | 182.560363283264 |
|         | 155.02097482487  | 149.997047695778 | 165.181215117323 | 161.338215647108 |
| TOLLIP  | 301.139737613279 | 303.555333002419 | 307.480644393018 |                  |
|         | 390.752579014611 | 329.604568691377 | 304.237479317271 | 249.193270428348 |
|         | 270.787490294555 | 265.61506544085  | 271.522696252995 | 344.487982154705 |
|         | 281.881563164961 |                  |                  |                  |
| TOM1    | 376.189276074918 | 408.811415529922 | 302.809011218879 | 387.827718022473 |
|         | 639.011144305614 | 315.130912368929 | 345.627266482686 | 298.625127845168 |
|         | 399.872401268958 | 824.070046083713 | 231.257543784864 | 254.991678321253 |
| TOM1L1  | 133.382099379709 | 123.198873421356 | 133.800111596565 |                  |
|         | 123.786227856015 | 133.909219998872 | 168.783725505491 | 190.614236149496 |
|         | 175.819983804497 | 179.009510246709 | 176.953099943185 | 162.728630453745 |
|         | 171.410912120195 |                  |                  |                  |
| TOM1L2  | 141.88777975766  | 141.42859050659  | 131.548634017902 |                  |
|         | 137.25679451567  | 191.310372695208 | 142.80027343095  | 148.727953739127 |
|         | 158.157097243342 | 154.475735552851 | 297.708113541379 | 184.348894461271 |
|         | 148.846121873401 |                  |                  |                  |
| TOMM20  | 1282.84159765715 | 1177.70376288106 | 1937.83242524439 |                  |
|         | 840.276501350383 | 725.621153262924 | 2021.92898855142 | 2157.50118108142 |
|         | 1916.46158204806 | 2028.67873136046 | 2244.6916226146  | 1552.69879081022 |
|         | 2586.87941889443 |                  |                  |                  |
| TOMM20L | 140.388212037661 | 146.728881202697 | 147.022594294963 |                  |
|         | 140.296609941747 | 139.694950277714 | 152.743680985848 | 129.616142780279 |
|         | 140.213080190065 | 148.656917603142 | 121.039678049579 | 146.579073345319 |
|         | 120.812738312059 |                  |                  |                  |
| TOMM22  | 801.051513639714 | 828.683748921915 | 866.413995755699 |                  |
|         | 796.052115217208 | 811.564396886535 | 1434.1439428394  | 1037.97124386242 |
|         | 1185.70008959602 | 902.822697602452 | 921.140932799223 | 1092.74905085695 |
|         | 1239.13016938378 |                  |                  |                  |
| TOMM34  | 562.387692458382 | 713.525134497596 | 579.493790910006 |                  |
|         | 632.278924237678 | 2320.41293992992 | 1838.18547839898 | 2828.97255380291 |
|         | 1448.64875525408 | 1513.28088592885 | 660.535644289024 | 2080.47567326037 |
|         | 1158.057104827   |                  |                  |                  |
| TOMM40  | 806.591035100794 | 907.306121257236 | 901.644194512187 |                  |
|         | 1013.60354455825 | 5300.67886821231 | 3450.46728258139 | 1982.3154578939  |
|         | 2758.01526530661 | 2744.77453865893 | 1736.03342040646 | 1116.19403476786 |
|         | 2139.42448145954 |                  |                  |                  |
| TOMM40L | 257.602370597316 | 320.774102343889 | 213.432084172541 |                  |
|         | 384.365878895439 | 218.592402813219 | 248.330154701293 | 200.094610104813 |
|         | 209.54573978355  | 206.21848253717  | 170.4583554058   | 241.599271777806 |
|         | 272.500572765647 |                  |                  |                  |
| TOMM5   | 596.743397794872 | 548.455251483009 | 747.587723573212 | 433.928818077527 |
|         | 2146.4265920569  | 1259.38111177521 | 752.142287661845 | 760.272612245092 |
|         | 1034.2217095753  | 1282.84159765715 | 1086.8615735568  | 650.263737836685 |

|          |                  |                  |                  |                  |
|----------|------------------|------------------|------------------|------------------|
| TOMM6    | 1721.20676889116 | 1663.71411325131 | 1564.8868894162  | 1345.8970795036  |
|          | 1620.7954553764  | 2491.33490046283 | 2926.06746795504 | 2225.59207490574 |
|          | 2583.46653460894 | 2426.2098937241  | 1876.64079464928 | 3106.94181270197 |
| TOMM7    | 12577.0915543468 | 12046.9345159347 | 11647.9643290124 | 12171.1997841553 |
|          | 4938.42484385053 | 4722.64356477773 | 8401.40370474392 | 7699.37963536892 |
|          | 7969.0710242842  | 7389.95365139168 | 6484.36742084268 | 10836.7380675792 |
| TOMM70A  | 1427.27262061653 | 1612.79779117655 | 1667.86825735893 |                  |
|          | 1540.71556891815 | 683.365770196967 | 1242.61637859159 | 1092.74905085695 |
|          | 1347.10650016064 | 1334.69145271749 | 812.298381693378 | 1177.01310527577 |
|          | 858.020739710943 |                  |                  |                  |
| TOP      | 132.517166202071 | 115.531710316716 | 140.217243202557 | 158.610249594568 |
|          | 142.723175448765 | 141.822974252935 | 151.132586978278 | 146.920496801962 |
|          | 152.486212022518 | 158.6953558198   | 159.730925830278 | 135.812301062763 |
| TOP1     | 159.19183334563  | 159.344044864557 | 171.644710031098 | 162.199381540369 |
|          | 186.529656751005 | 197.795275907042 | 195.160353691349 | 185.275787562938 |
|          | 190.736796322054 | 157.668307146391 | 202.99342484328  | 178.780662099615 |
| TOP1MT   | 220.487665103019 | 221.594737497504 | 217.778414825515 |                  |
|          | 179.57046217355  | 268.961643716282 | 271.287767448621 | 233.59297160203  |
|          | 271.468939477052 | 232.023739004791 | 252.473612525884 | 250.766180970907 |
|          | 337.822337721287 |                  |                  |                  |
| TOP1P1   | 137.911816180518 | 143.46919253255  | 136.342634691443 |                  |
|          | 148.848823912244 | 148.530422089937 | 141.712693059287 | 149.962143642332 |
|          | 142.956870642583 | 141.019494314354 | 136.855445270531 | 133.71610564207  |
|          | 142.869595099569 |                  |                  |                  |
| TOP1P2   | 274.202831856221 | 256.729891423908 | 214.888126361789 |                  |
|          | 216.126000558319 | 299.039192744355 | 349.773289724658 | 358.60777927888  |
|          | 298.460273458181 | 339.252515920242 | 333.349203784021 | 361.969355316032 |
|          | 302.570932942847 |                  |                  |                  |
| TOP2A    | 114.936648783324 | 192.244413515864 | 114.726808450831 | 180.986305037222 |
|          | 1174.69701182094 | 3073.40543048878 | 886.157279090932 | 3241.23835624706 |
|          | 1681.54485582868 | 724.607317443904 | 421.056268094661 | 983.094485868275 |
| TOP2B    | 1565.64079526732 | 1687.85201395597 | 1810.68433539154 | 1521.61996270758 |
|          | 3855.33040541264 | 5073.27433952351 | 2637.62596741408 | 4562.75659565027 |
|          | 3321.1350545346  | 1023.94850651125 | 2479.34567973462 | 2441.05534211996 |
| TOP3A    | 276.714748212739 | 298.776176246196 | 274.831898505989 | 333.270203737291 |
|          | 233.20900339048  | 343.767393640683 | 219.171591031864 | 305.542978609337 |
|          | 273.709160508205 | 239.403872988317 | 258.489608621438 | 221.512905853031 |
| TOP3B    | 195.353512458837 | 188.641397688261 | 226.387465899611 | 213.556015518863 |
|          | 328.431289733169 | 275.169415154893 | 296.75326294587  | 268.724338967108 |
|          | 382.960724128105 | 250.718986968076 | 233.300864925399 | 278.498278821829 |
| TOPBP1   | 435.603911474926 | 442.86942574917  | 415.957832362051 |                  |
|          | 449.103432410618 | 347.147961254829 | 663.668537495345 | 432.604462607037 |
|          | 740.800822095116 | 757.066786599446 | 493.887026009442 | 330.193132765826 |
|          | 642.255110250493 |                  |                  |                  |
| TOPORS   | 192.399146702036 | 190.850639994777 | 196.429685815196 |                  |
|          | 174.727439318223 | 173.675115244522 | 178.284294783418 | 166.263781040251 |
|          | 177.235586767256 | 178.606255846041 | 176.289693941489 | 223.042575796603 |
|          | 177.508603290389 |                  |                  |                  |
| TOR1A    | 486.197269936713 | 482.857203798212 | 524.855915371246 | 424.855168311509 |
|          | 538.647888236878 | 515.597523880328 | 498.334266735594 | 504.617795280805 |
|          | 431.861762635568 | 426.132037075477 | 255.992494620859 | 420.502251256406 |
| TOR1AIP1 | 1309.7660860424  | 1029.75852676191 | 1525.24196488688 |                  |
|          | 998.631321857182 | 527.707841428677 | 653.500279510032 | 1053.09915077366 |

687.700356531038 538.252273740419 717.270096456387 972.468110850466  
1032.11574332305  
TOR1AIP2 150.507308901391 139.361120875198 151.865924163231  
135.303322290834 196.536086443884 141.97478198531 244.668813440638  
153.661632990172 156.813992534584 145.724294862079 159.811778680604  
151.004738508108  
TOR1B 261.922485502971 261.500728878974 257.292125083248 291.105673222859  
241.134385745554 232.892635502424 251.787648609546 248.299149406938  
292.468585109951 308.148212607944 496.560127152436 211.419445018736  
TOR2A 149.335288055732 138.639410179404 144.64757514198 145.331858938535  
264.779154931102 185.240692860387 178.235281981508 188.780089746036  
209.960795065047 186.6902304653 191.665827345888 210.605864685448  
TOR3A 248.729653566598 252.280435525505 196.363005912532 204.681956301306  
367.327273578513 415.749051861123 311.612118247493 569.133295913677  
336.490076158135 217.380892198811 320.774102343889 499.964000319181  
TOX 156.16485596016 189.070238523683 152.382558543399 184.542232315662  
106.126202301438 104.934718065476 107.727848546225 127.891997005285  
113.852849454448 113.924310293916 113.05681175258 103.202873534814  
TOX2 227.614623963331 274.70018535436 216.353502371227 240.836979012241  
149.565725707356 151.449690439424 149.262900833177 148.763098715961  
161.608941774391 158.007926822094 138.700301754711 154.270034951209  
TOX3 138.624689897665 138.902097203056 121.54835308632 122.174036435094  
295.047418816148 636.970243888917 494.875547886209 617.67819271245  
264.429717032654 124.828626063272 555.109005518622 694.907086612929  
TOX4 374.657816575897 368.220523234399 374.56251861444 363.343480850598  
181.889592946523 204.283030911897 229.97640195632 237.575788579215  
201.616302398819 233.394506254045 281.304989265608 239.474937674583  
TP53 167.226663395855 169.784837251279 185.396765725228 148.153776704837  
243.402781509365 271.196028302639 187.63609695026 202.909188070184  
208.587188476069 204.851374931284 183.3378528327 206.257167235126  
TP53AIP1 125.227513212286 147.232015056035 136.831280469398  
147.330897105911 132.659196898439 140.121874960672 137.146961654597  
156.430981244063 143.149424892482 204.318316638312 141.54943189147  
147.725396196054  
TP53AP1 199.001860912128 212.312154721246 211.118308738617  
223.551813819581 410.845034795716 299.669394721682 488.884511065882  
477.489368828457 286.642323413104 233.809899915394 394.962978677736  
603.569635276204  
TP53BP1 453.058639550475 370.066087375401 510.226374558703  
429.595453454621 300.358738353443 295.778154263981 391.500696444149  
438.431160975498 571.273512452931 332.543652462234 400.23671843715  
535.041545916303  
TP53BP2 255.305647212135 257.032174266905 239.474937674583  
262.629961694573 259.935831886014 345.686640885419 232.385176936256  
206.428618912264 240.663883443935 351.02823853348 234.693846527867  
403.657727266403  
TP53I11 160.655929233978 152.032418787633 159.097020087275  
160.082087242964 274.235001739215 158.95714101556 149.831566330214  
163.416011199431 161.225608630791 145.776143302784 181.54273463264  
167.384121560438  
TP53I13 1105.10063745656 1141.49294161587 892.515788744891  
1082.00448164658 5776.63686968234 1341.78081782818 1545.71251527145  
3424.65126200697 1301.61742965939 1243.11900823259 1262.96801072965  
1482.92498205315

TP53I3 164.365630106697 177.073245863872 135.943252855457  
 173.250350363688 263.204269632206 183.32467147543 214.933911087009  
 333.533043832976 184.473198008234 285.258824662946 318.971509860209  
 351.515059400947  
 TP53INP1 428.237210115667 616.701037274509 533.37609065123  
 467.512355593598 332.543652462234 661.390308090982 537.510539142248  
 726.556553101727 891.637685856145 417.987533397449 1050.90881385623  
 448.106077184152  
 TP53INP2 894.734451279225 939.213447046823 932.505095432049  
 1561.87054049124 215.967319486874 236.292053621233 190.125009931628  
 196.310746973798 207.076364103755 232.801257700571 199.058972781223  
 183.531156021887  
 TP53RK 223.474531516972 244.401472859026 217.847954914851  
 237.01460308334 313.536451935268 674.742955681908 531.421912541822  
 265.174306663185 349.773289724658 201.415695076278 425.001043358831  
 320.812909889014  
 TP53TG1 189.434597063058 194.092089507551 213.556015518863  
 220.60173086462 368.0573385048 198.659595851481 300.443499140896  
 224.224264678645 186.359770878343 191.093283411655 347.081036934975  
 303.724140156439  
 TP53TG3 141.321547895734 142.470799054068 138.371873773284  
 140.907889482107 153.011923016494 135.764392116216 167.961390966538  
 142.365009028839 132.764150075465 128.699441450952 122.607404698857  
 131.719227272527  
 TP53TG5 143.893751699551 142.011019998327 153.085975710144  
 144.951973735763 158.946177055546 158.33974431499 154.94587631386  
 146.858292465699 158.459129254226 150.587882657674 140.475688390415  
 142.13191463827  
 TP63 243.425632941131 461.143361255467 273.911741951291 158.505363728431  
 1214.77298621465 1512.28202818467 1419.4638331856 958.005138077899  
 615.058712877418 1507.39761667421 1515.38811502277 1458.13354165836  
 TP73 109.038182799871 123.922817231917 119.926169902322 117.837894438834  
 114.860437706855 114.115609163126 113.687931899298 113.947948541258  
 113.947948541258 102.024765473404 118.663847950696 113.192313147111  
 TP73L 213.194154171149 374.406855727422 294.653534388707 168.161117444474  
 1067.30106203503 1726.15788525017 1303.33810980467 950.144166422001  
 660.907502776003 1875.21979956596 1618.64901092072 1610.38263368771  
 TPBG 415.497783305278 341.901565692251 374.169744342352 333.676803661366  
 724.103864917969 193.502988612307 365.046815163035 199.662592246931  
 177.355210393749 557.513306351027 354.263934274937 223.975677959345  
 TPCN1 127.368207232723 120.276236447255 129.633387503618 136.794860440446  
 164.910911528819 122.642077625035 131.12953085854 124.720004905439  
 129.061316880624 137.018521754443 140.38686070363 129.621296567128  
 TPCN2 310.301616266762 325.173931553891 362.445813697676 432.372995789404  
 447.674610082872 289.297370738382 235.063474370925 246.63579788514  
 291.537725613819 251.472556189141 269.194172034595 344.298510200653  
 TPD52 206.391403266202 181.747090380435 230.079664410595 185.706228572019  
 166.209190082084 204.019377262081 195.776369840059 179.821008257902  
 203.510106134882 180.528296177577 158.364031234356 159.674396591041  
 TPD52L1 534.920870202582 458.953009417683 1113.59310757948  
 558.251384152474 188.567747377006 178.262619516994 161.382041789666  
 159.688862680139 226.055406842613 729.499296070289 176.382377784553  
 264.158648784101



|         |                  |                  |                  |                  |
|---------|------------------|------------------|------------------|------------------|
| TPD52L2 | 1411.90426595229 | 1482.92498205315 | 1490.02976786379 |                  |
|         | 1865.44709751822 | 1720.14021303639 | 1759.9632914516  | 2028.67873136046 |
|         | 758.863418917419 | 1254.19980463817 | 1715.51071085304 | 1077.95929298567 |
|         | 1019.627634011   |                  |                  |                  |
| TPD52L3 | 123.418266047461 | 123.379461430902 | 118.727279917776 |                  |
|         | 120.693808603805 | 118.991494185841 | 117.754181884939 | 120.96098661114  |
|         | 112.624137732184 | 115.113000553093 | 117.442158626871 | 141.500790455788 |
|         | 119.785062256421 |                  |                  |                  |
| TPH1    | 118.109991440011 | 124.033766796333 | 132.784949538167 | 122.351186755611 |
|         | 120.957197551997 | 113.694351010121 | 123.296382913131 | 130.593846004132 |
|         | 114.624259793353 | 121.901018642508 | 138.74117178479  | 123.150299476109 |
| TPH2    | 122.97487285065  | 123.406144497577 | 112.599970121166 | 114.242056888286 |
|         | 134.361949431678 | 112.547907748842 | 125.021217009254 | 120.170269310738 |
|         | 120.322292418128 | 119.087972087745 | 123.271452939936 | 122.013040475143 |
| TPI1    | 1880.35608492553 | 2014.48411650613 | 1870.52504853779 | 2346.47361943533 |
|         | 7491.93659373205 | 4055.40322213638 | 4923.36698713285 | 5748.57645553386 |
|         | 4323.76731419005 | 7446.59106452583 | 4043.28299602858 | 4866.98027226798 |
| TPK1    | 172.750926094884 | 171.626438561923 | 201.085046871333 | 167.106870400592 |
|         | 172.509081696309 | 201.085046871333 | 175.752091217351 | 171.722839172783 |
|         | 183.193029399643 | 170.08485436731  | 211.766884719761 | 233.786136606682 |
| TPM1    | 6156.29203791697 | 6156.29203791697 | 8445.36695108418 | 10024.4662743012 |
|         | 297.805768288377 | 420.567884340705 | 419.846584903512 | 309.181150342727 |
|         | 405.409668978569 | 527.139476504986 | 308.726328440723 | 292.23287968517  |
| TPM2    | 20217.6497214386 | 18562.671630167  | 20048.679735668  | 20764.6732139063 |
|         | 430.728137105601 | 539.27766384282  | 304.937584086529 | 546.755305058958 |
|         | 856.424155671931 | 1024.95957828641 | 250.342080183479 | 386.960778432157 |
| TPM3    | 170.251197850968 | 194.240372898704 | 171.660157220703 | 158.10628865476  |
|         | 265.791342287571 | 333.822167152866 | 245.153736298067 | 310.301616266762 |
|         | 263.123584372086 | 330.908743070095 | 197.873787638411 | 402.694564608582 |
| TPM4    | 591.189034068137 | 440.038896046559 | 479.761165832339 | 614.514126276981 |
|         | 265.402310598892 | 415.642099109855 | 554.652979820908 | 325.493177980483 |
|         | 325.43977732888  | 751.269009484639 | 527.498114662967 | 368.0573385048   |
| TPMT    | 405.64711132293  | 384.733313349438 | 389.051174954505 | 351.395760651605 |
|         | 315.565349831797 | 548.686094748117 | 295.973370766318 | 494.067878734396 |
|         | 481.037647470809 | 461.482735533799 | 496.823662262772 | 472.514017604645 |
| TPO     | 122.197625748146 | 123.547821639269 | 117.404906698431 | 120.39039576721  |
|         | 125.199837162105 | 118.269780903508 | 123.084040312047 | 118.930792960643 |
|         | 124.494727558127 | 111.7529190597   | 143.772376623996 | 123.991249190444 |
| TPP1    | 660.096727566678 | 681.172359997071 | 677.9972761887   | 726.731270955732 |
|         | 275.437030326768 | 277.285526811736 | 411.603820288919 | 470.42403724799  |
|         | 660.535644289024 | 792.247301083075 | 471.720496000839 | 274.77366169918  |
| TPP2    | 189.205724390913 | 182.644319628554 | 187.824032557194 | 177.990274115348 |
|         | 148.046961712162 | 203.19299227665  | 179.810507975486 | 165.673535349675 |
|         | 177.450674276588 | 180.478294414245 | 222.415704486709 | 224.62335524729  |
| TPPP    | 168.882806817001 | 169.422015793848 | 206.937770272939 | 195.185025611945 |
|         | 123.588194516972 | 144.373226011578 | 151.083551412109 | 138.813126946007 |
|         | 134.700543462375 | 135.111066946207 | 124.012439490264 | 129.105655010455 |
| TPPP2   | 122.878790127038 | 137.165966740473 | 123.059971161711 | 117.958297137758 |
|         | 126.139188586523 | 123.56917054142  | 119.213217733213 | 113.071787850611 |
|         | 127.683344133492 | 122.600274773736 | 128.23910347716  | 120.871693555514 |
| TPPP3   | 222.624150073858 | 240.182016388745 | 165.813771791917 | 271.638179116269 |
|         | 136.235029743075 | 137.134190411005 | 151.865924163231 | 144.039601001475 |
|         | 146.725123303782 | 142.707913210557 | 144.981106020985 | 147.243263182654 |

|        |                  |                  |                  |                  |
|--------|------------------|------------------|------------------|------------------|
| TPR    | 362.581768268116 | 347.224999246223 | 328.550286726543 | 324.481229901658 |
|        | 312.484289357493 | 322.778260588465 | 348.808646570544 | 388.192984832638 |
|        | 319.927209914181 | 324.615093103582 | 377.538276846051 | 423.045329000756 |
| TPRG1  | 121.905741525277 | 118.283346939564 | 118.970693476152 | 113.542803491215 |
|        | 110.448948495323 | 102.255408120852 | 114.999628959921 | 111.286141277084 |
|        | 125.117333434527 | 121.912927816178 | 125.576103876855 | 125.347442446239 |
| TPRG1L | 2430.70635781622 | 2382.87910783088 | 2808.78353621111 |                  |
|        | 2847.42635118026 | 1000.05896885496 | 1309.7660860424  | 1537.71464618832 |
|        | 1374.92806285803 | 1207.11788506001 | 1542.35486950856 | 1500.16816750361 |
|        | 1859.88000417483 |                  |                  |                  |
| TPRKB  | 208.690347128273 | 183.815810733176 | 229.116153948948 | 201.987081022654 |
|        | 324.481229901658 | 493.622989939072 | 356.268960813032 | 406.638419179213 |
|        | 316.281469585496 | 361.969355316032 | 315.014639682046 | 384.97980473847  |
| TPRX1  | 113.791585365477 | 104.58424134098  | 112.736231367296 | 108.604763499678 |
|        | 128.158605637751 | 96.0426636429757 | 106.667175621971 | 105.49491265382  |
|        | 112.971776964469 | 114.977135060317 | 109.978693735206 | 103.398929051742 |
| TPRXL  | 110.22624111837  | 124.458944194526 | 113.980716384814 | 122.007909794484 |
|        | 177.567833691547 | 123.271452939936 | 137.31708798874  | 116.52455193626  |
|        | 121.801291293249 | 128.959487155628 | 128.389494971858 | 128.65678873939  |
| TPSAB1 | 2627.12900283627 | 1780.97169244555 | 1448.64875525408 |                  |
|        | 1896.69856822105 | 323.04019262387  | 377.593087606046 | 151.312853764675 |
|        | 477.275332763887 | 1408.08614963928 | 234.094722315007 | 163.234966251618 |
|        | 199.275716402358 |                  |                  |                  |
| TPSB2  | 2101.93705983383 | 1231.37475540937 | 962.559482864549 | 1174.0922389136  |
|        | 230.263678910356 | 265.260411490697 | 129.155804800869 | 339.753059801136 |
|        | 909.020708316287 | 188.973595445056 | 161.066226957782 | 156.033897758869 |
| TPSD1  | 112.565341690522 | 116.155949676272 | 116.558752619296 | 124.522974214212 |
|        | 119.285026330891 | 118.24368469845  | 115.384304932365 | 114.265920150451 |
|        | 104.091301211096 | 114.428050500096 | 126.338676765473 | 121.018722403628 |
| TPSG1  | 140.137435303984 | 123.813766735115 | 122.816872726758 | 119.819082491115 |
|        | 127.206177583275 | 114.350596695469 | 115.217608555334 | 115.47716627378  |
|        | 118.109991440011 | 113.112450527382 | 116.572001618531 | 113.78323485587  |
| TPST1  | 1046.13353853089 | 872.512754090023 | 1091.12493937368 | 1033.48252432603 |
|        | 303.380479700334 | 253.385592447339 | 213.046162847735 | 261.500728878974 |
|        | 267.342817344746 | 287.287337931982 | 296.915883082902 | 199.854728619468 |
| TPST2  | 264.526189799049 | 287.593221911064 | 244.689936990021 | 231.846509449829 |
|        | 622.142195892701 | 444.663812851378 | 538.156335788156 | 365.864755316163 |
|        | 492.207833630086 | 478.909308632726 | 554.800688991977 | 282.870785313621 |
| TPT1   | 16397.4527321924 | 16328.5991894287 | 17324.7697569598 | 14181.1182110192 |
|        | 12109.3049135906 | 14108.0461617941 | 11598.65499235   | 14499.7866852901 |
|        | 16362.989744896  | 17067.0086403248 | 10608.0671430066 | 20887.0399135573 |
| TPTE   | 120.402155551818 | 117.67638166062  | 113.78644620959  | 118.414329128347 |
|        | 110.081964209973 | 125.846029991447 | 126.549876718792 | 115.417648857825 |
|        | 116.67463130093  | 122.634741242406 | 110.315549501241 | 126.083599163604 |
| TPTE2  | 130.140958819402 | 133.948997488604 | 134.457932303561 | 130.326980619676 |
|        | 126.084319215509 | 136.297963196301 | 136.585541662028 | 127.097605337434 |
|        | 122.079685222733 | 137.767900781368 | 129.187574143637 | 130.147848418265 |
| TPX2   | 137.151210946281 | 151.64806573742  | 143.21411610625  | 147.218415065692 |
|        | 409.883222213537 | 507.040326298457 | 240.054164412429 | 360.361719991381 |
|        | 364.527677995774 | 300.094509257518 | 188.45479937455  | 299.039192744355 |
| TRA1P2 | 253.933478547515 | 182.02250582556  | 199.746775121317 |                  |
|        | 173.986750195954 | 231.39684528494  | 234.841813258798 | 354.067771806542 |
|        | 308.088967616175 | 299.039192744355 | 263.52595855321  | 284.574888587832 |
|        | 313.828943866034 |                  |                  |                  |

|          |                  |                  |                  |                  |
|----------|------------------|------------------|------------------|------------------|
| TRA2A    | 387.305348482856 | 406.998800177456 | 503.285430318683 | 302.696004448559 |
|          | 311.670576741448 | 568.040362658955 | 564.588706307423 | 501.434722063309 |
|          | 388.416668785633 | 368.879825610754 | 383.10686624119  | 720.214044399108 |
| TRABD    | 1294.74864310494 | 1406.73270115373 | 1231.92253664482 | 1485.776977235   |
|          | 2234.85920641661 | 2596.43650409044 | 1638.72366638732 | 2913.2685312165  |
|          | 2009.21931102311 | 1699.17470788219 | 3119.93811557461 | 3737.57754066891 |
| TRADD    | 195.400963839097 | 194.724219884752 | 185.816827784447 | 210.711890471222 |
|          | 322.028360309592 | 198.840533461525 | 272.639413442579 | 216.9491329483   |
|          | 235.32095278846  | 303.138041758745 | 223.601312199935 | 268.370347292603 |
| TRAF1    | 170.931788192825 | 159.43317827517  | 166.192990554427 | 175.395900648455 |
|          | 158.233862587586 | 140.706490845379 | 159.218886890035 | 163.495175710216 |
|          | 162.072695554798 | 143.78994470501  | 161.481227197715 | 163.69172577831  |
| TRAF2    | 175.902751522861 | 200.944865673409 | 135.33941967076  | 221.027562527572 |
|          | 233.82434521462  | 153.606787306076 | 144.544001385895 | 152.952479729682 |
|          | 168.511517285223 | 137.52653395793  | 198.226525986857 | 156.494323415504 |
| TRAF3    | 142.586051173329 | 147.809934374849 | 149.851792558427 | 146.238333981318 |
|          | 162.702767346393 | 137.352231982942 | 152.356731704094 | 165.274189050141 |
|          | 161.761125440228 | 151.174536186463 | 169.948277715908 | 136.596127228365 |
| TRAF3IP1 | 166.89285636895  | 181.439775614781 | 182.698275130489 |                  |
|          | 175.199369463703 | 163.165374495635 | 162.072695554798 | 151.374665021513 |
|          | 154.179891883612 | 148.090431893307 | 169.061364889307 | 155.924471321076 |
|          | 168.875964392526 |                  |                  |                  |
| TRAF3IP2 | 255.56301534833  | 248.965394617795 | 298.625127845168 |                  |
|          | 223.429738319185 | 365.650071660806 | 289.001004912528 | 333.868818855397 |
|          | 280.170464338141 | 271.989060206794 | 642.934824227327 | 266.19823384117  |
|          | 424.285848583977 |                  |                  |                  |
| TRAF3IP3 | 137.127587786536 | 125.496553386629 | 120.527518013376 |                  |
|          | 128.09266452749  | 127.776112651456 | 123.67449826277  | 122.568743478314 |
|          | 142.467552395104 | 184.844915350411 | 142.853399942089 | 153.714902281332 |
|          | 115.830631252469 |                  |                  |                  |
| TRAF4    | 133.243679173608 | 133.819095523687 | 123.100949494673 | 130.056727701826 |
|          | 594.180861801958 | 243.793465720264 | 184.348894461271 | 189.74261433647  |
|          | 186.747375844319 | 131.050255325564 | 197.687858915757 | 178.835679834487 |
| TRAF5    | 276.138650967632 | 251.511405838796 | 245.915473236403 | 271.945851739635 |
|          | 121.255814891176 | 133.416938451465 | 160.724319010751 | 137.68634745111  |
|          | 162.203570429542 | 134.863223806176 | 203.727455875381 | 204.616225498655 |
| TRAF6    | 169.003310163058 | 156.976539870288 | 171.473538842796 | 176.849238577762 |
|          | 166.635366968851 | 156.698856643638 | 156.061579024549 | 162.71020036416  |
|          | 161.16688895179  | 177.990274115348 | 159.835577644136 | 148.478570934155 |
| TRAF7    | 140.502667595362 | 152.459041674768 | 134.918496279185 | 158.183045411298 |
|          | 251.307020289291 | 133.975526667571 | 157.607445509297 | 147.369767631957 |
|          | 154.13120950189  | 152.503159091556 | 163.470025318612 | 149.595375008252 |
| TRAFD1   | 308.208276315292 | 334.857690525582 | 328.401537339876 |                  |
|          | 361.082957133644 | 420.160939829121 | 349.816819166182 | 442.334886941795 |
|          | 375.958347293549 | 563.779294315901 | 252.810636571566 | 372.894376776771 |
|          | 336.120322555703 |                  |                  |                  |
| TRAIIP   | 120.773552653073 | 117.356389952799 | 131.188208693139 | 130.675745275992 |
|          | 222.051005238856 | 149.023962828426 | 127.484178603011 | 141.208106961875 |
|          | 151.299425811105 | 135.441550832737 | 143.16930809425  | 136.964780183468 |
| TRAK1    | 397.660202059209 | 442.027630433527 | 392.746574862867 | 365.541609015117 |
|          | 1118.28423222707 | 1251.56853099362 | 1289.56069670699 | 805.120147618984 |
|          | 1701.43479420427 | 485.731287873723 | 1648.22531304741 | 1550.61855325662 |

TRAK2 1403.90487313049 1347.75629878765 1048.26872286983 1643.08061372695  
 280.414161197286 482.739666411407 275.39986964837 446.194196064909  
 366.564822549834 340.547010951537 437.836503489425 228.616558999054  
 TRAM1 3253.76017336684 3029.07443443457 3066.69261114251 2234.85920641661  
 3684.05513498098 6358.5018930218 5734.76405709934 4732.31591164752  
 8416.19700892758 4000.45196171119 3807.16206340771 4150.8511719558  
 TRAM1L1 139.681211082196 135.532073704799 136.543603346919  
 136.308565710257 128.134246199718 145.641373616866 133.460655803085  
 143.442361602626 158.384505840662 150.403702679274 139.748733350375  
 136.882429810263  
 TRAM2 438.817248820137 353.187829498591 377.462793982812 348.506289278042  
 219.8511043213 191.616483214712 211.786963444117 194.500222559978  
 212.789259549841 227.209630859635 232.590542016298 199.170488640762  
 TRAP1 377.800067476868 465.29290512169 488.505191823403 537.698489904622  
 996.240188311002 520.962651968997 454.492780042353 562.387692458382  
 487.799854351205 492.05680879106 436.331333134628 487.358720934063  
 TRAPPC1 545.362650746876 624.638115878703 447.674610082872  
 833.841469195516 736.603605876572 803.840404197117 610.337659723539  
 669.330078861673 528.767644181119 849.158029646233 922.009043194023  
 731.284098301795  
 TRAPPC10 121.57069706238 122.667593730152 140.909875639658  
 125.769903262265 128.705587172572 130.991496243273 126.700147643  
 120.031976318697 128.155080148958 119.455615461113 139.864176113337  
 129.925548182204  
 TRAPPC2 289.21739941764 275.794847140407 307.083179338165  
 331.937313503755 223.0506375638 523.717949503639 252.514569129392  
 314.337680575998 293.12968694683 248.129640673859 291.261765585473  
 317.600728351694  
 TRAPPC2L 1130.32966481315 1475.41920838384 1360.85309203233  
 1640.99641023476 1021.25947613827 1230.63920848575 1293.70593826709  
 845.369108604819 1006.69598892631 1382.95068105649 1006.03677177164  
 1432.93880448974  
 TRAPPC2P1 197.72068061775 195.033792280119 275.343591424586  
 171.69834783037 196.759802659759 274.202831856221 448.715938510132  
 240.94056877904 381.014521577291 326.379855547052 262.577672828611  
 299.106362530855  
 TRAPPC3 1241.59946353857 1334.69145271749 1394.31467757456  
 1573.03248861784 782.139151423572 1011.14472068314 871.268905562551  
 905.233241047678 724.607317443904 1060.24125879951 866.413995755699  
 735.449040059761  
 TRAPPC4 711.729857540712 629.707646271678 780.734359041347  
 602.480822390671 692.095005197252 569.133295913677 701.481003619067  
 1098.78649254838 765.128667448261 632.565736446505 974.007008568051  
 828.276436883306  
 TRAPPC5 648.549890890375 636.382696018633 648.161646065464  
 641.645855499704 2523.91287654539 1156.19575610918 1396.4168898623  
 1147.33034082693 861.516925304722 1162.09529660662 1231.92253664482  
 913.22732386079  
 TRAPPC6A 342.487952136318 430.412897698085 329.263397240111  
 463.488995330457 1650.77281891596 627.066031322234 739.874432767734  
 576.636077770998 617.318955611228 149.040720727554 561.858563298512  
 361.429760858441  
 TRAPPC6B 441.435444003241 407.875393458322 295.571900619972  
 406.458130553679 244.132645171301 214.803167803712 304.402066421813

|         |                  |                  |                  |                  |
|---------|------------------|------------------|------------------|------------------|
|         | 257.032174266905 | 229.443064589306 | 306.59090554099  | 434.390613381746 |
|         | 318.628084728596 |                  |                  |                  |
| TRAPPC9 | 277.726756691133 | 319.685597963267 | 260.045018348182 |                  |
|         | 385.798784913201 | 266.19823384117  | 193.134414137433 | 186.886677174192 |
|         | 169.028519464989 | 211.660148497276 | 174.313718712035 | 187.903298116031 |
|         | 207.254220247481 |                  |                  |                  |
| TRAT1   | 160.346554422714 | 163.521095869383 | 162.466301774088 | 154.959217895243 |
|         | 160.035282578603 | 167.194306682927 | 160.906550609416 | 168.197255166255 |
|         | 170.13453211897  | 152.31268334586  | 147.669708191955 | 159.166059518117 |
| TRDMT1  | 130.351302840602 | 134.226711030456 | 124.588594750916 |                  |
|         | 125.400741907779 | 123.527903217158 | 121.381365873873 | 125.525241361472 |
|         | 115.16087297104  | 121.730973193225 | 121.459780480915 | 126.910075365358 |
|         | 115.631414599991 |                  |                  |                  |
| TRDN    | 132.664379033058 | 141.97478198531  | 132.8615886934   | 134.022324496729 |
|         | 126.090985925439 | 139.757191608836 | 141.158593399952 | 127.314089756429 |
|         | 126.294971135521 | 134.576622528874 | 137.881776548665 | 132.181365505556 |
| TREH    | 144.829773937102 | 124.930303940168 | 124.705614182596 | 123.168787977805 |
|         | 131.000186898437 | 122.216479103528 | 135.730331297139 | 132.409582164007 |
|         | 118.540620928268 | 139.459975305985 | 142.382367938838 | 135.310766630401 |
| TREM1   | 123.706910388724 | 141.008604646743 | 125.224197852606 | 127.74861041569  |
|         | 127.637319802339 | 137.393871430276 | 130.454496708632 | 123.383334044683 |
|         | 128.197031700084 | 246.237243726748 | 135.880955433228 | 129.329521415816 |
| TREM2   | 145.919359461744 | 138.426531345939 | 147.278236958386 | 144.65238608866  |
|         | 158.312614511836 | 164.673579538023 | 159.832405510505 | 162.895923745031 |
|         | 153.774548290902 | 175.148318011395 | 136.829137120584 | 133.995928435022 |
| TREML1  | 160.419358656559 | 164.032302455558 | 156.061579024549 |                  |
|         | 174.881557472722 | 154.904424749528 | 190.939726271153 | 185.706228572019 |
|         | 155.558839375761 | 166.540134051424 | 164.769320792025 | 145.877943006533 |
|         | 157.233463720262 |                  |                  |                  |
| TREML2  | 139.844984829379 | 122.770033312519 | 147.23376282233  |                  |
|         | 135.18026749895  | 132.508133846896 | 139.168307371516 | 131.153457976248 |
|         | 131.330974614437 | 138.136901441896 | 130.336466131215 | 154.710000519109 |
|         | 139.13396769999  |                  |                  |                  |
| TREML2P | 107.544568250154 | 113.427848757112 | 116.615250922316 |                  |
|         | 129.654234837398 | 119.934231033302 | 111.09179957013  | 115.785084044427 |
|         | 118.761737418652 | 113.40684693417  | 123.612648219993 | 128.736591902501 |
|         | 116.751145098777 |                  |                  |                  |
| TREML3  | 145.872258115708 | 142.694748293332 | 142.428578698775 |                  |
|         | 137.702802090925 | 143.628147237159 | 140.78902818186  | 140.26206122305  |
|         | 134.952584272187 | 137.800512046163 | 147.535225305685 | 135.728336465002 |
|         | 141.127519700052 |                  |                  |                  |
| TREML4  | 112.684334910243 | 106.066897223031 | 106.685578858702 |                  |
|         | 111.73388372572  | 112.190904058889 | 106.685578858702 | 114.200099628087 |
|         | 110.501341211051 | 104.442909315944 | 108.446988282853 | 110.22624111837  |
|         | 108.79453730066  |                  |                  |                  |
| TRERF1  | 166.795671029174 | 154.347332766547 | 151.570977428443 |                  |
|         | 149.460660195293 | 175.752091217351 | 148.763098715961 | 200.387623661458 |
|         | 169.649251828199 | 162.373508183992 | 217.050602253281 | 185.661496988658 |
|         | 207.417884407459 |                  |                  |                  |
| TREX1   | 132.510116371195 | 141.129013595331 | 130.179742057015 | 136.770515182612 |
|         | 141.659197251282 | 135.52861375119  | 142.126620107418 | 142.215285988753 |
|         | 138.334626498686 | 130.829825154842 | 128.060612106762 | 133.358701657264 |

|         |                  |                  |                  |                  |
|---------|------------------|------------------|------------------|------------------|
| TREX2   | 128.075865243385 | 128.79607493422  | 131.882887826338 | 134.434198188045 |
|         | 125.132610413051 | 141.576177844986 | 139.17480484652  | 135.335107344583 |
|         | 130.617505834747 | 148.26621607986  | 144.185406500473 | 145.762724663455 |
| TRH     | 124.922004609558 | 104.223476853877 | 118.029258839619 | 110.875112640101 |
|         | 116.280157890082 | 103.888971448792 | 116.155949676272 | 113.597215383696 |
|         | 113.125349503734 | 103.520748827831 | 106.263441906404 | 112.464951599416 |
| TRHDE   | 148.049570580734 | 134.978785580693 | 132.106673891288 | 140.965498009244 |
|         | 139.278366709094 | 133.467092274663 | 125.416113646128 | 136.220324225816 |
|         | 154.079355899056 | 133.238296113721 | 114.072600760808 | 146.470444212748 |
| TRHR    | 130.524630778991 | 129.382242021964 | 122.595766303833 | 122.254824223167 |
|         | 138.338280468272 | 130.354641020141 | 139.348494759948 | 127.581332110857 |
|         | 133.805991920905 | 133.704706615071 | 132.367155914392 | 125.04156726504  |
| TRIAPI  | 412.344820823968 | 474.517750753745 | 379.200576951933 |                  |
|         | 433.594928641214 | 530.387315639095 | 643.13571432061  | 682.315322994357 |
|         | 557.513306351027 | 807.604205890244 | 730.988069115919 | 632.278924237678 |
|         | 780.734359041347 |                  |                  |                  |
| TRIB1   | 1443.68785521063 | 1381.07447204233 | 239.33642662112  | 314.292700455545 |
|         | 1526.66232186013 | 4397.32311216672 | 787.615195903993 | 2074.29945034697 |
|         | 1920.16520804856 | 738.892511276134 | 1975.83062789692 | 1176.62418139379 |
| TRIB2   | 504.838017072725 | 504.9864660689   | 376.867306473426 | 509.512410867348 |
|         | 480.712219116621 | 232.046814892685 | 327.062810389635 | 201.269380130546 |
|         | 388.477382640003 | 234.322989368622 | 644.97200337335  | 435.901794650816 |
| TRIB3   | 165.82215325714  | 191.679217737051 | 126.314233529267 | 131.709341771599 |
|         | 1246.2895253224  | 395.927222009721 | 405.766055310869 | 223.551813819581 |
|         | 373.033658917608 | 879.809795251142 | 185.519000961898 | 152.669206395402 |
| TRIL    | 317.309949792707 | 272.077877821339 | 163.336324451735 | 396.459213999636 |
|         | 149.604507483606 | 119.548432046443 | 123.288028185949 | 119.360478719424 |
|         | 152.617507769717 | 128.108066199718 | 136.425263391752 | 134.922488718676 |
| TRIM10  | 150.102853150151 | 149.651553512698 | 138.394923932916 |                  |
|         | 149.619141707962 | 141.013392458859 | 141.67277923437  | 155.431833398023 |
|         | 142.920939571001 | 145.08246303652  | 144.542320520523 | 139.32751718663  |
|         | 143.157807632147 |                  |                  |                  |
| TRIM11  | 198.437113196596 | 234.243977361232 | 206.149539851803 |                  |
|         | 216.457866890673 | 572.753294955207 | 408.201232787978 | 443.732580517751 |
|         | 278.095939961034 | 457.779218916808 | 284.798325549665 | 398.571054759451 |
|         | 423.396271159345 |                  |                  |                  |
| TRIM13  | 589.541347392215 | 663.451243037105 | 615.485984065221 |                  |
|         | 619.995008098949 | 221.74200490054  | 723.428294037428 | 362.899103657252 |
|         | 529.04238100948  | 511.25179427158  | 363.963951509433 | 449.304281526081 |
|         | 592.079898463345 |                  |                  |                  |
| TRIM14  | 129.875986080057 | 120.971313945446 | 125.293640452686 |                  |
|         | 126.330382425318 | 132.775182047159 | 125.77343813277  | 132.478801067837 |
|         | 136.903588075134 | 128.182419321978 | 129.389420352857 | 142.448384713937 |
|         | 135.489000274316 |                  |                  |                  |
| TRIM15  | 123.104790590045 | 116.897299691798 | 117.642441794442 |                  |
|         | 118.235640920527 | 120.53428198263  | 123.946808975704 | 119.586157804692 |
|         | 124.66386961898  | 121.067907968175 | 134.434198188045 | 132.897554980037 |
|         | 126.693235227579 |                  |                  |                  |
| TRIM16  | 154.16370087233  | 147.098474227445 | 147.436408919939 |                  |
|         | 147.697973457776 | 148.492328039604 | 150.606329295069 | 141.488910091973 |
|         | 150.333572271902 | 148.620766059526 | 161.331326682743 | 148.358847576281 |
|         | 151.954389699615 |                  |                  |                  |
| TRIM16L | 102.474380813907 | 116.67463130093  | 114.755442050481 |                  |
|         | 111.886543737378 | 129.626276841426 | 107.187035835972 | 114.494394548044 |

105.284300851422 113.38168751499 109.669517182289 117.889524670597  
114.133473556359  
TRIM17 135.250379276888 137.28323311107 135.849839822066  
134.95415308911 164.084737224884 150.115482378938 198.583407008317  
131.440195723963 205.830321788612 136.584199831088 184.844915350411  
142.433675899702  
TRIM2 674.742955681908 693.339946866196 587.181357555703 550.124359517322  
324.067396271281 666.847934976479 496.823662262772 427.249733213787  
276.089623957012 231.018059960001 476.495282784602 523.717949503639  
TRIM21 253.385592447339 236.833653794223 223.154771092064  
264.429717032654 201.702688815038 214.566711351899 207.023221559302  
230.91747428831 319.352940751688 241.453456707114 365.199125315964  
208.955110569558  
TRIM22 252.894371238554 171.216275057884 207.440700355457  
161.803438841859 119.849895979393 191.507657960386 148.683761948082  
236.508498739509 404.366325262322 248.260998007814 320.097510212422  
208.194788326109  
TRIM23 156.904781904311 160.791355483048 187.280334341504  
155.176714087209 144.873034900013 154.113228966411 172.612152484322  
149.42148494796 145.984425747963 188.033890834418 184.900027626401  
156.136962310077  
TRIM24 210.316431648335 197.2893692747 222.156471143857  
205.804144075374 565.843200661721 455.930204471585 610.591049634222  
353.437466689101 723.807658768693 203.791916347213 235.261278607182  
313.480307434343  
TRIM25 287.703569453502 214.662648581622 263.321559283966  
270.894153548841 434.176007498693 284.104619768635 393.98210915852  
395.386242257877 452.961307006622 203.276353321185 500.848273432862  
344.070947256963  
TRIM26 280.595515386655 333.745543022749 313.967636827811  
401.631377313065 576.451964662024 420.160939829121 381.625983354158  
335.3366819308 408.510567121592 298.209907157762 408.444629429553  
475.833242673151  
TRIM27 163.346402397924 159.845890841215 168.994258456498  
154.962835391567 316.623219008156 215.47323777134 303.907003535357  
177.371157649894 200.371280127668 158.408494909763 555.366765340014  
230.893665210918  
TRIM28 394.414934831535 529.700356666006 455.21285026588  
606.162976359615 2291.40912229281 532.596772298766 488.249967208882  
469.714826990063 830.684999498776 431.799795646414 420.95713139384  
359.991823789356  
TRIM29 152.887471821971 165.947514372877 173.863373934746  
156.4687904356 555.607185132941 313.773476049783 271.154246147262  
209.93789387724 233.464856303761 446.262895953004 308.621688157016  
474.216057978384  
TRIM3 192.655899720909 215.84044779962 210.711890471222 215.019239034819  
152.337631025368 145.158039427157 134.579005092929 145.444483891989  
138.940564112156 159.615233521257 162.595632367022 141.521742442341  
TRIM31 144.551233687082 164.696616863082 144.351763882823  
133.99226161886 241.019436415703 198.722993687455 135.779516940893  
303.638516587721 428.462270756201 158.497697017082 426.896707161414  
184.473198008234  
TRIM32 211.035617136177 238.823244541016 218.334273320319  
214.86995782548 283.701987275608 180.680595239651 196.169988112042

183.545741265706 224.396933003452 209.568066932367 293.692083555844  
181.991820141929  
TRIM33 482.677635089583 445.95114929414 565.97975389646  
401.750302347978 384.641319423853 776.98412594767 559.668195903429  
614.239716118509 583.697431061521 476.383294794912 412.277592266475  
615.058712877418  
TRIM34 118.991494185841 114.498610080481 125.98519427755  
118.027430976118 117.312094804205 119.886433564236 120.379393989882  
117.841844605128 121.774697402171 122.631814400575 124.59097574481  
112.41270361848  
TRIM35 152.601626526117 156.151075965844 160.79631681714  
150.336115779606 166.143084832472 173.577723566555 164.748676009072  
154.493246900289 156.662150993832 155.393326732887 151.770791549511  
167.769114519774  
TRIM36 140.671406418004 148.234708174518 144.102872001089  
143.250386570155 143.252983617945 151.07661060324 139.969155812688  
144.934103671894 149.684922983176 150.667001746475 146.70594914192  
145.017264740722  
TRIM37 180.719868519867 164.880911221767 207.598754515294  
164.529828080312 159.926719599391 211.085778902367 188.070213212057  
211.555248754731 188.39062571513 178.847858667374 164.491207767654  
194.430896269275  
TRIM38 393.375554593484 390.809169896009 344.856199123543  
329.722135361491 210.448904052352 1174.69701182094 529.529314022043  
481.453770150269 344.737964092526 279.790257881254 577.801009921199  
632.565736446505  
TRIM39 291.444155562134 285.507315916663 309.36704220687  
336.120322555703 191.628693083169 173.024402954772 193.134414137433  
181.036375971015 191.170105307944 179.61374889626 183.633719048831  
182.786177632757  
TRIM4 544.956712516196 641.645855499704 524.725307261999 481.751102333172  
497.759125486158 491.35949123223 592.284071247642 775.5664718389  
555.259469428492 424.751154004399 351.188086838653 774.997895985917  
TRIM40 132.950480329605 127.83654093961 122.399241018147  
134.790410101679 138.322109975426 133.077760160486 141.913001976093  
133.487774861252 140.770705453805 127.00963790814 122.389557272277  
141.048882618651  
TRIM41 356.323554000768 346.917113326564 357.35857422585  
323.841518852386 326.055727207966 255.413231082357 330.505633088656  
358.654569870431 291.056913909578 438.03648998391 362.445813697676  
348.848550937417  
TRIM42 122.82388804774 118.117957479382 115.502679218125  
118.397482835514 118.406487008528 110.347631909888 110.942138645171  
119.830261862805 120.193580405229 117.634514818946 125.313515459103  
116.67463130093  
TRIM43 144.214589452164 163.045605069267 133.453702113571  
154.336009472285 139.767216030715 165.757295630254 157.932243807202  
157.454558821261 159.89988762842 186.778334749551 156.990325995053  
151.340728221261  
TRIM44 1125.28599595312 1074.96415574964 1105.10063745656  
1131.22418479945 572.407760064901 596.246316033079 563.907454700224  
527.930077857945 710.531876484467 486.334840298921 1059.80292026589  
384.051170099325



TRIM45 230.447203571825 212.190707408572 263.888891822857  
238.430350258686 206.164058935215 221.272872023413 196.922837906592  
203.357914242777 218.058543664561 162.147989253357 163.97516075705  
217.165036362034

TRIM46 137.017882995262 146.150048478173 141.968949222821  
160.399059317919 144.439320591901 132.181365505556 135.358837968905  
127.213640193364 127.971270734569 146.202611204712 138.800986934663  
160.806678614325

TRIM47 326.354469134694 350.46078795627 257.740674565975  
483.312894744803 148.227581116046 126.235567899449 133.360017767635  
144.265352127763 161.17923997423 205.305702209672 198.90533452253  
152.452246595937

TRIM48 156.351734527745 156.221773628832 143.056098955473  
173.586160103539 156.650388509656 161.108249802467 172.387657419201  
155.651798065702 160.887121295848 147.697973457776 134.737901773547  
151.330035086652

TRIM49 135.135834717193 131.04767483614 134.327229861635  
130.182320154521 137.222125237171 134.078506829054 130.221351857959  
135.945030816689 129.610980807708 127.04217189075 118.04359489354  
145.850605495564

TRIM5 188.878770168595 172.707821624271 210.900056977861 154.360558958914  
181.183277133224 194.092089507551 185.359195899057 205.282221255986  
252.171420358437 242.657224881824 245.269004485826 216.9491329483

TRIM50 136.03117924052 144.490452173336 155.449724554217  
135.659271030454 152.68344738009 129.699765645519 129.780648518219  
141.825162897153 138.13987378399 135.601916560736 153.38494705081  
144.954595802474

TRIM52 274.736124442229 269.567704345075 386.960778432157  
228.384686248604 156.090871391873 182.624130582754 192.848268768579  
223.531323159808 202.887417145119 197.146035305296 204.877041314502  
168.197255166255

TRIM53 128.501189288377 123.720229113779 134.318290950377  
126.338676765473 130.975606477621 127.890438577754 127.617449871137  
133.511698282195 122.759905480504 125.979152567959 138.446492794924  
126.547883999721

TRIM54 125.830917527594 119.285026330891 128.194171809998  
129.031338314175 132.956860864455 147.001408450583 133.018406625714  
129.645982978155 119.725487374119 128.032141013681 135.003236040032  
131.426355444136

TRIM55 125.134516902118 120.85013281321 125.28279436853  
120.29173510435 124.998601194756 117.646963986512 120.894583222813  
131.074021609161 124.992439957206 128.759751330525 118.816986517698  
127.220812636148

TRIM56 451.887564294551 454.64556253724 384.365878895439  
404.21236980164 238.946506103155 237.078644686891 342.147414141627  
337.22646304739 308.517561840596 201.702688815038 567.465201338735  
521.215655189324

TRIM58 155.669470674985 158.679903271595 136.475652722007  
159.026102446297 161.397788731595 158.562631157512 155.465250172768  
140.557871626905 143.548858367002 144.83363420705 148.132450240784  
145.70726782469

TRIM59 138.323567041191 129.477908941439 128.396326753926  
135.872060352476 123.801380911257 140.077307351596 132.839431368337

148.94765984808 130.98982984989 142.757327296852 131.457554839083  
149.294728629784  
TRIM6 173.142436025281 175.573400981771 161.657344146676 185.591700082272  
166.001279428607 119.555954372381 134.161664663192 155.143752422033  
258.532432007328 175.908645445479 198.979744266277 130.603837917984  
TRIM6-TRIM34 134.89415027205 122.547842148486 124.411213807179  
127.000175858468 131.406366653787 124.66386961898 139.853333847856  
131.911579676047 127.601379088239 127.918847837351 116.796995589816  
123.722744366103  
TRIM60 169.279866966079 150.833523101057 167.976680048356  
168.491878435329 160.221974600577 169.147351642004 150.790155351217  
166.760758231104 150.534608517044 149.586651393588 152.418315087218  
170.179304745674  
TRIM61 158.205235596076 159.170943469313 147.505345299689  
148.072816925413 129.752997624387 145.919359461744 144.206259414981  
143.774841336279 163.480722123193 178.619580818758 150.540599489506  
161.359609192977  
TRIM62 148.086979061158 148.016402654687 179.46936343225  
159.534017722536 230.91747428831 190.549084022965 140.158309892319  
159.929830440641 171.229729917612 131.015519445322 169.806644442071  
155.945838519586  
TRIM63 206.042395282286 210.199788806189 510.285766295993  
250.481442411876 150.290025009187 143.342736976496 128.717719117128  
143.082880435412 147.630900093277 156.157567405927 150.573523216151  
142.732625557628  
TRIM64 156.205127163263 140.025668085978 139.482462221798  
140.878935632862 165.74458564887 139.72868421672 156.365413649149  
145.735532706214 144.886005815977 148.516653846017 151.976432805924  
149.696766215866  
TRIM65 261.89195025254 194.475822533231 263.295012964476  
214.824908522393 226.315173823168 173.919504730673 168.773340961473  
238.230110356671 179.96623248843 194.403848868583 179.137734914428  
185.783374935551  
TRIM66 299.754985162237 301.051775938853 394.294057009443  
398.61164689194 233.884660128222 216.126000558319 244.18714778846  
350.308420518351 285.931444518474 287.041585684111 523.216537391852  
254.013921962363  
TRIM67 134.000363767958 130.548611758921 131.12953085854  
127.859873416515 144.023798119335 119.612288460361 136.256456726841  
119.159078990339 126.595668758744 141.907307422968 152.486212022518  
128.122197525844  
TRIM68 434.943371634824 423.256021602613 425.826693178023  
467.347509383673 413.330906392915 213.468420853218 305.577166690215  
360.285027176918 337.521614253267 314.708587131145 291.914408947328  
232.918330930051  
TRIM69 137.627338682823 136.566588903194 136.184427467391  
136.333928675403 132.053242760381 131.280092370361 128.745737514912  
134.064206964444 140.922678400415 134.498439965049 140.281512754823  
129.384531576943  
TRIM7 139.399195840117 140.267351731167 135.29954024755 136.246543311291  
132.6175371563 129.942594772751 137.058578192268 138.842935439006  
127.445199722147 472.514017604645 181.37137053478 172.310673499572  
TRIM71 121.084348994747 126.924014801186 115.090463537716  
112.404562115306 115.958740595234 111.525984720592 115.725323816619

119.755151432304 113.529619135543 119.586157804692 120.387275261633  
124.300285428221  
TRIM72 115.750690887988 137.393871430276 118.276198592775  
124.847325289068 150.405715534245 137.049677918041 133.389930962407  
121.657744897668 132.122273848715 122.236134282757 130.408519735001  
129.338551879984  
TRIM73 171.314681729657 157.779441363536 158.452089329714  
155.358918578397 163.413365060063 152.277810621542 165.808660192901  
159.331110936668 157.656220148041 162.390356943447 148.31140879454  
159.241573314833  
TRIM74 131.503936441405 140.439698763808 131.410793139723  
140.941447663862 141.628203045085 151.654749538573 142.419777428399  
161.485353443949 139.798414027439 131.257901340773 120.948246352846  
137.086936444421  
TRIM75 146.08320115156 141.054587977578 123.563243360247  
151.181422205549 131.464229237662 129.148634038268 131.683942368268  
147.664505309713 125.253637835638 145.459919416288 129.372522073479  
154.999192460283  
TRIM78P 146.790059505709 145.566861062922 149.797850183848  
141.114148695402 134.227796103219 139.466683069609 146.948261640482  
142.791015845309 147.397591251955 146.366013190845 157.36568754472  
137.534079082878  
TRIM8 1258.16519121331 1583.79384467611 1236.56870367797 1836.22560264874  
1097.60805874165 696.277780670166 1880.35608492553 806.290662664708  
1499.07462479938 529.368609163949 1623.92991386706 1748.77270039774  
TRIM9 148.193285676977 152.883970401452 140.938442055097 151.632801137039  
152.906352463546 134.364838071696 172.319604146201 156.146154578237  
149.736837985314 170.326474367867 258.605188272761 149.613701531197  
TRIML1 161.046418048832 158.058346079359 147.345558455805  
144.313841064968 167.040031488406 145.89801576671 150.075738752092  
155.52533851273 135.688346453694 159.620467672898 169.434164890542  
150.042173991463  
TRIML2 139.587192809431 133.749271961438 134.682319733908  
129.601234646954 129.263794008537 138.959040014432 123.431969470387  
129.125709963326 125.598828334465 147.595573192579 139.029404397979  
120.727504500018  
TRIO 209.867189613436 225.423403713718 211.572396862776 260.999345837027  
208.869189492052 199.916301659113 221.849661343124 200.094610104813  
154.881797585583 213.990575186237 189.589053840976 204.942500423413  
TRIOBP 558.440840319738 572.913714991136 466.083451075744  
611.36406319509 591.89966781883 389.109250187902 546.611519125021  
462.779122987815 440.319777672273 393.579552385074 869.937761943249  
575.386048896223  
TRIP10 428.850337327605 338.739180103373 185.220017451419  
302.408563830315 393.198813167839 174.100921524023 198.568180234676  
159.633987751501 183.568426758223 384.566987097657 259.374392296079  
262.861105654051  
TRIP11 413.000072500071 369.434158443561 485.373169494941  
383.626469817252 329.48021621087 274.120234926832 424.134483971176  
470.578335285993 415.749051861123 423.966625351913 580.996071040561  
444.584594376357  
TRIP12 871.268905562551 782.448692528135 984.181272274704  
624.978351618077 517.529147171876 685.080426814888 754.97177863997

|         |                  |                  |                  |                  |
|---------|------------------|------------------|------------------|------------------|
|         | 661.390308090982 | 827.863789600981 | 1021.25947613827 | 1039.92160906839 |
|         | 903.144845227364 |                  |                  |                  |
| TRIP13  | 140.719388544476 | 182.143506470859 | 169.036409026328 |                  |
|         | 163.593106951255 | 753.997560938003 | 907.306121257236 | 317.904396212359 |
|         | 693.180345649331 | 368.374002925137 | 449.745016106912 | 200.146843808423 |
|         | 396.611050163857 |                  |                  |                  |
| TRIP4   | 311.269750643358 | 335.623336587396 | 433.11536069928  | 267.939624375137 |
|         | 289.21739941764  | 406.816482069141 | 386.461076717316 | 393.579552385074 |
|         | 408.201232787978 | 569.866002248352 | 369.726867521935 | 525.138476928759 |
| TRIP6   | 1238.11700377838 | 1265.88446775977 | 1324.56751399862 | 1316.31088187364 |
|         | 3378.126661761   | 626.857289492802 | 1906.81344236287 | 1004.97723186946 |
|         | 736.603605876572 | 1293.38808483663 | 1561.87054049124 | 2101.93705983383 |
| TRIT1   | 439.727046291381 | 435.603911474926 | 469.333357789149 | 318.850765099332 |
|         | 476.917496749381 | 1001.92763014266 | 1198.53117439169 | 822.88742008931  |
|         | 844.778755052304 | 540.584471920486 | 1057.80846320642 | 920.342429282889 |
| TRK1    | 179.009510246709 | 194.312315077985 | 174.92026613834  | 212.78038645414  |
|         | 424.751154004399 | 151.869928694006 | 274.427235605909 | 265.829122816166 |
|         | 321.492900106953 | 155.876231451789 | 269.468453936818 | 135.945030816689 |
| TRMT1   | 383.182507425579 | 393.013539328766 | 378.151202933526 | 451.147418314412 |
|         | 424.855168311509 | 492.637241687561 | 428.237210115667 | 463.298781071364 |
|         | 382.630113452429 | 480.797281489891 | 360.285027176918 | 446.194196064909 |
| TRMT11  | 177.84188738734  | 167.304721591124 | 190.111477641308 |                  |
|         | 150.606329295069 | 153.643157329902 | 178.455966482206 | 180.336623146341 |
|         | 184.462286724102 | 161.965270932582 | 192.709473588165 | 198.925776755081 |
|         | 202.583967728957 |                  |                  |                  |
| TRMT112 | 2649.39312662326 | 2466.36457617864 | 3321.1350545346  |                  |
|         | 1914.96285167893 | 5382.31371568106 | 4882.16892310839 | 4722.64356477773 |
|         | 3522.61692270848 | 3976.40140405628 | 4697.94415026712 | 3474.0924656878  |
|         | 3807.16206340771 |                  |                  |                  |
| TRMT12  | 374.169744342352 | 408.758021864761 | 360.053590374552 |                  |
|         | 455.08515350006  | 371.767182305618 | 342.935878735854 | 430.728137105601 |
|         | 289.001004912528 | 477.87583927675  | 343.307036883726 | 356.921627358141 |
|         | 373.361263985383 |                  |                  |                  |
| TRMT2A  | 146.524138043215 | 145.551717838423 | 137.81819274774  |                  |
|         | 151.98710761363  | 150.003399000079 | 137.066799877341 | 150.449621353865 |
|         | 149.518870320398 | 138.094719587545 | 131.148926523383 | 155.752117896424 |
|         | 141.696969082758 |                  |                  |                  |
| TRMT2B  | 163.621658579697 | 152.620244087653 | 163.97516075705  |                  |
|         | 143.287237534352 | 147.872625576731 | 157.688982037448 | 146.038599656417 |
|         | 146.798444724408 | 149.532459719175 | 141.186913979346 | 144.682202635712 |
|         | 140.413503801467 |                  |                  |                  |
| TRMT5   | 1156.19575610918 | 1033.48252432603 | 1375.76915021882 | 908.352265585374 |
|         | 1934.30779703747 | 1841.63015706195 | 1302.54547114701 | 2642.24374855334 |
|         | 2185.46850787298 | 1897.92061704124 | 1429.25367024696 | 1974.49672149862 |
| TRMT6   | 161.142723532061 | 173.563363508314 | 173.112439658454 | 146.616041788595 |
|         | 424.201556056759 | 246.355720496468 | 208.690347128273 | 204.219197797869 |
|         | 184.724071110756 | 179.896659891106 | 189.915720614467 | 200.741234443918 |
| TRMT61A | 343.666488527549 | 364.678403892354 | 359.935451429371 |                  |
|         | 525.920873434688 | 329.023836559229 | 180.336623146341 | 242.948136060281 |
|         | 198.979744266277 | 197.895094054577 | 185.063870458561 | 173.87113073582  |
|         | 207.298994298453 |                  |                  |                  |
| TRMU    | 183.168629351124 | 180.63469438043  | 148.282715835607 | 200.506615977654 |
|         | 213.077884261943 | 209.727089546377 | 155.683727621475 | 167.337624316172 |
|         | 187.205674045893 | 150.547096071626 | 174.127444395862 | 199.118281632221 |

|          |                  |                  |                  |                  |
|----------|------------------|------------------|------------------|------------------|
| TRNAU1AP | 159.942971344216 | 170.974759483946 | 164.811120992602 |                  |
|          | 151.615675144083 | 148.090431893307 | 160.256877369493 | 172.578252260002 |
|          | 162.735609734946 | 164.000772606739 | 164.429483677715 | 202.178451227304 |
|          | 152.534482748598 |                  |                  |                  |
| TRNP1    | 356.770158430601 | 316.955298948771 | 388.573321838751 | 312.961981998512 |
|          | 2144.52984392647 | 206.876572583814 | 602.703887178113 | 743.023225859813 |
|          | 351.448985413528 | 268.600782558985 | 1259.75918248468 | 796.699879495384 |
| TRNT1    | 164.791545858875 | 180.250420976613 | 162.439052954676 | 180.698727334322 |
|          | 205.804144075374 | 174.448910958935 | 185.519000961898 | 174.045229095003 |
|          | 180.913502162011 | 176.641899861006 | 204.337844243869 | 206.915239638443 |
| TRO      | 300.314088267108 | 252.593574250965 | 261.117845544884 | 247.236004734567 |
|          | 171.473538842796 | 167.782882015229 | 160.423982411027 | 178.425137262105 |
|          | 205.966111721195 | 192.932285494022 | 156.020996568814 | 203.357914242777 |
| TROAP    | 169.598493862848 | 165.154844613899 | 153.047317528007 | 189.160454951382 |
|          | 352.418229893699 | 266.681711962236 | 207.488522933448 | 411.784922368377 |
|          | 341.64890727921  | 236.548439331855 | 152.970079142629 | 239.050379187643 |
| TROVE2   | 1085.92360670051 | 1018.38836615952 | 834.537908087672 |                  |
|          | 855.112210714686 | 301.546624239855 | 806.591035100794 | 630.176145684641 |
|          | 636.970243888917 | 460.408628542721 | 530.819778703194 | 526.896146537814 |
|          | 745.844395215451 |                  |                  |                  |
| TRPA1    | 158.434048174501 | 146.854523122404 | 156.813992534584 | 154.534605635191 |
|          | 155.3394927753   | 151.374665021513 | 151.747595672228 | 143.475725571943 |
|          | 150.093684245826 | 164.198494818485 | 132.263954832097 | 147.241136598626 |
| TRPC1    | 530.819778703194 | 469.540421642173 | 424.751154004399 | 441.112782197591 |
|          | 153.792925101459 | 181.991820141929 | 181.081050726043 | 175.656204695951 |
|          | 150.496616601699 | 153.519207482423 | 147.681723355535 | 137.545063966957 |
| TRPC2    | 133.724135305758 | 125.150706047419 | 125.995374488153 | 138.462826342765 |
|          | 117.093818506721 | 130.659631155616 | 132.210100574787 | 121.988237521196 |
|          | 126.759554774012 | 115.502679218125 | 133.913578037255 | 128.599254558082 |
| TRPC3    | 152.543005423742 | 135.306127055224 | 151.459397907666 | 120.114423236962 |
|          | 123.557722415957 | 116.621735695217 | 110.382724813928 | 110.594755513247 |
|          | 136.05610450926  | 123.849651946683 | 138.818492907643 | 123.069963218224 |
| TRPC4    | 145.801228425692 | 165.347173283335 | 160.748082658758 | 160.459100056689 |
|          | 132.206133020786 | 143.197131668608 | 143.945039636839 | 137.994334667126 |
|          | 153.761061653202 | 159.603586227897 | 156.519196335454 | 142.034369454643 |
| TRPC4AP  | 645.183207984114 | 676.293399523316 | 446.262895953004 |                  |
|          | 718.449150898903 | 882.429823267754 | 1186.96351738518 | 1144.92109214621 |
|          | 683.470866056244 | 852.926365088632 | 788.244353085369 | 643.306565600931 |
|          | 740.196934996626 |                  |                  |                  |
| TRPC5    | 127.26820735867  | 132.22974656114  | 121.805145639822 | 127.356622898971 |
|          | 123.706910388724 | 125.685852196342 | 124.313901870563 | 119.11586630281  |
|          | 128.56495182759  | 136.862764950361 | 159.640027194076 | 129.732352495012 |
| TRPC6    | 134.41693612969  | 134.002424083826 | 117.575009754326 | 123.607412609763 |
|          | 112.817015523662 | 121.076652800015 | 120.517691208358 | 125.5109819304   |
|          | 125.220416203903 | 128.001109846227 | 226.640323471375 | 118.95971064289  |
| TRPC7    | 111.078930787656 | 104.934718065476 | 108.34997967774  | 120.915108114673 |
|          | 110.718864165172 | 120.574820369421 | 107.239841465534 | 103.240215392215 |
|          | 111.596690019694 | 100.04568139926  | 120.686906898624 | 116.552626146967 |
| TRPM1    | 145.572363722788 | 140.041977349982 | 151.470844748137 | 151.665244763743 |
|          | 130.173734963758 | 133.120273569229 | 160.50439457257  | 132.854078420045 |
|          | 140.195820033314 | 149.217191121377 | 131.314766140505 | 151.221783750989 |
| TRPM2    | 133.728378162206 | 129.689855810051 | 134.266373965186 | 126.265475477399 |
|          | 270.894153548841 | 167.769114519774 | 222.764568757453 | 129.728266017061 |
|          | 218.487334022128 | 164.981665344298 | 216.126000558319 | 192.140442881209 |

|       |                  |                  |                  |                  |
|-------|------------------|------------------|------------------|------------------|
| TRPM3 | 138.902097203056 | 152.386986818959 | 134.929915732246 | 144.842687993057 |
|       | 131.904128832616 | 137.636900130922 | 147.760782452857 | 135.864853829421 |
|       | 132.933035878334 | 144.388851371784 | 141.359142214228 | 140.52059487958  |
| TRPM4 | 327.635520861099 | 338.129250886594 | 211.941623411369 | 261.469732730752 |
|       | 1830.56003081769 | 657.231047829537 | 687.789976218334 | 1043.14253624883 |
|       | 927.137881369911 | 629.381791489871 | 1177.70376288106 | 692.945420109927 |
| TRPM5 | 115.524441144063 | 109.140708667012 | 108.760780994582 | 114.902673141786 |
|       | 125.136745288071 | 114.65036208773  | 118.226036680442 | 112.605287278882 |
|       | 121.47058227778  | 104.406314027414 | 120.547683754604 | 110.594755513247 |
| TRPM6 | 133.278923716119 | 138.100014158367 | 128.631814147997 | 122.989642938474 |
|       | 121.330383384978 | 130.156775178934 | 116.437403962939 | 120.351217130679 |
|       | 126.777633512781 | 128.588822671032 | 116.029201658798 | 130.584348445667 |
| TRPM7 | 164.615113709166 | 148.364138636002 | 152.97753810644  | 145.89801576671  |
|       | 148.124586158123 | 169.909886347082 | 157.982146236108 | 148.516653846017 |
|       | 151.821324922628 | 148.598920567714 | 175.670738308809 | 149.327005696336 |
| TRPM8 | 136.078724167996 | 135.837733533444 | 149.125425566378 | 138.156430188312 |
|       | 131.234140286502 | 118.597739444445 | 132.005753222789 | 142.45411401883  |
|       | 134.147586627141 | 132.987389721592 | 129.099780410063 | 135.880955433228 |
| TRPS1 | 184.223623297663 | 203.149001616967 | 224.89911221799  | 185.30916081621  |
|       | 145.588183908855 | 150.854580568572 | 158.208998509937 | 147.305679046765 |
|       | 167.893596681867 | 137.894482933806 | 179.880812358974 | 153.202157381228 |
| TRPT1 | 466.392151902286 | 486.524284354103 | 610.759447723026 | 565.164961255054 |
|       | 975.685771692095 | 847.564628337955 | 1121.87292339787 | 619.75986112089  |
|       | 674.571475335107 | 782.448692528135 | 744.225336494008 | 990.814111681408 |
| TRPV1 | 127.980776299586 | 129.374418059091 | 125.513881890201 | 121.801291293249 |
|       | 120.188885479773 | 117.710502693638 | 123.379461430902 | 128.165775629664 |
|       | 124.629877200816 | 124.251699375036 | 138.068164255305 | 128.102787239877 |
| TRPV2 | 215.673878830563 | 195.019706886336 | 129.79093244374  | 194.143649677822 |
|       | 169.192327500032 | 138.9183380982   | 126.338676765473 | 145.229637715814 |
|       | 164.914114315732 | 149.300089212177 | 145.814268094808 | 129.586337068199 |
| TRPV3 | 145.547037566774 | 146.256076936456 | 126.506749037908 | 129.520140995675 |
|       | 159.154102271517 | 141.08625682411  | 137.239088768176 | 126.611663427876 |
|       | 136.227202534196 | 132.649409216699 | 149.490064894136 | 138.882483367088 |
| TRPV4 | 140.943732564849 | 134.383024487323 | 146.798444724408 | 139.499652059557 |
|       | 200.127994198329 | 147.903030308715 | 144.277263594387 | 140.639012372681 |
|       | 137.312488161187 | 139.706279455371 | 150.626826756019 | 140.416247564103 |
| TRPV5 | 138.050999864689 | 134.553754121862 | 143.021435512861 | 133.94667806086  |
|       | 137.957654220875 | 137.649424237506 | 140.903091584884 | 136.169525758215 |
|       | 140.684066288019 | 130.701801496564 | 146.31980311926  | 131.319783710908 |
| TRPV6 | 130.35985690876  | 136.181791404331 | 141.048882618651 | 134.312156667838 |
|       | 156.71199811686  | 136.085524091635 | 160.117742879282 | 136.68056120003  |
|       | 139.408959884266 | 139.350622585937 | 145.559419404453 | 139.242481781927 |
| TRQ1  | 158.14434287956  | 145.051794777243 | 153.131271100637 | 134.522715664256 |
|       | 192.980781927122 | 134.91697121091  | 151.841652724562 | 171.610742435469 |
|       | 151.885992695789 | 156.525347260458 | 181.364325529405 | 133.137299889323 |
| TRR1  | 156.508428796592 | 129.984214994811 | 130.42746492878  | 147.51773051441  |
|       | 150.163801964104 | 138.866469244936 | 177.508603290389 | 158.531514776098 |
|       | 146.164093136588 | 165.333608076984 | 145.70726782469  | 149.338249249161 |
| TRRAP | 912.878077940014 | 1018.80178630497 | 897.51782613323  | 1221.58522138654 |
|       | 1574.65731564294 | 928.672013047007 | 1149.3250945792  | 1552.69879081022 |
|       | 1344.1288416533  | 856.039380523678 | 1119.71228054585 | 1545.71251527145 |
| TRUB1 | 157.099868633958 | 152.495540563792 | 207.467591256549 | 147.768191157163 |
|       | 154.705630035232 | 184.008405576875 | 169.975329631607 | 159.13662975347  |
|       | 172.412059174046 | 169.368090266817 | 146.621996129313 | 219.709231012465 |

|         |                  |                  |                  |                  |
|---------|------------------|------------------|------------------|------------------|
| TRUB2   | 185.30916081621  | 182.357065848298 | 201.731223995887 | 234.484787292284 |
|         | 196.889520085412 | 227.926444925478 | 199.837938317725 | 207.150354734189 |
|         | 221.359331823286 | 218.96845208513  | 200.98533822317  | 213.674150322581 |
| TRY1    | 142.469353808346 | 136.632837717704 | 141.453255692229 | 166.81024151246  |
|         | 137.141081365469 | 150.091854035356 | 140.279222720709 | 151.770791549511 |
|         | 151.567693140302 | 155.842195370853 | 151.59613008133  | 142.058086679048 |
| TRY6    | 115.066084565112 | 133.495243957927 | 122.365693072105 | 128.341887728118 |
|         | 133.087166272749 | 130.009322405768 | 136.591299462104 | 141.035566928475 |
|         | 129.436712663487 | 132.744261207073 | 141.262319193649 | 131.346126135605 |
| TRYX3   | 132.439176846818 | 134.848210768603 | 127.026168862919 | 123.662678397678 |
|         | 131.162118170837 | 122.018200592563 | 127.855167644203 | 131.510494315469 |
|         | 129.902965506953 | 130.99564079691  | 143.187539073659 | 118.770061426689 |
| TSC1    | 335.698400607132 | 330.321113875647 | 367.025117016472 | 389.500591134279 |
|         | 213.382179917193 | 239.109163320417 | 243.893774595317 | 236.191384383802 |
|         | 280.204167582951 | 210.290500215377 | 335.698400607132 | 222.156471143857 |
| TSC2    | 213.274106157675 | 212.591357254196 | 237.78482574225  | 267.839640412797 |
|         | 289.037033338975 | 210.043556816529 | 209.840035045167 | 186.813888805838 |
|         | 192.188662949149 | 193.704510912321 | 182.897563195019 | 197.873787638411 |
| TSC22D1 | 882.037055216609 | 983.777608766079 | 1015.10079945997 |                  |
|         | 724.442411170786 | 595.752426322468 | 806.88003660673  | 353.826834642154 |
|         | 1136.76110352875 | 935.784743413185 | 759.802694618208 | 478.479988875208 |
|         | 610.337659723539 |                  |                  |                  |
| TSC22D2 | 1137.42879398351 | 696.475639532595 | 502.281584081805 |                  |
|         | 453.282973743379 | 714.91842349236  | 465.029298672645 | 588.197697799448 |
|         | 480.797281489891 | 382.485769373364 | 972.902937649492 | 527.294087043601 |
|         | 469.107624227456 |                  |                  |                  |
| TSC22D3 | 853.314313182949 | 876.288248962843 | 800.013123376748 |                  |
|         | 662.58366387795  | 276.351810999317 | 494.538861626895 | 266.842778974988 |
|         | 591.189034068137 | 613.631311147328 | 383.939800422489 | 240.054164412429 |
|         | 346.78158577526  |                  |                  |                  |
| TSC22D4 | 229.347135478142 | 263.426870776148 | 241.105817192695 |                  |
|         | 320.154891655397 | 480.22496056277  | 250.963601187362 | 258.145539382199 |
|         | 232.385176936256 | 273.668871896558 | 176.121563444364 | 330.553659265085 |
|         | 297.071121022183 |                  |                  |                  |
| TSEN15  | 212.291528248457 | 214.739818213164 | 195.645181575647 |                  |
|         | 201.480444219547 | 199.776140037612 | 195.474525582555 | 273.044064077    |
|         | 246.152798696993 | 201.320381706496 | 206.21848253717  | 191.987301954927 |
|         | 233.536023295039 |                  |                  |                  |
| TSEN2   | 406.458130553679 | 384.780426529733 | 447.372026268156 | 420.446810988909 |
|         | 309.098519056843 | 654.52788411248  | 412.277592266475 | 421.056268094661 |
|         | 440.495339027491 | 342.487952136318 | 463.298781071364 | 675.596864001032 |
| TSEN34  | 976.360310504918 | 1130.32966481315 | 1211.39534395597 |                  |
|         | 1105.80735904293 | 4882.16892310839 | 1904.39962279504 | 2118.73410871718 |
|         | 1611.58245311122 | 1530.45813438919 | 1254.19980463817 | 1307.19490564658 |
|         | 1017.6969123529  |                  |                  |                  |
| TSEN54  | 164.890716656336 | 194.60309399944  | 163.824878791966 |                  |
|         | 194.617252921731 | 340.728888109597 | 271.858059712406 | 254.287838845201 |
|         | 264.604297630839 | 231.769926214655 | 175.400802387403 | 205.45079491218  |
|         | 248.531972733475 |                  |                  |                  |
| TSFM    | 200.518684601283 | 189.2642795052   | 198.885004378065 | 215.194909819764 |
|         | 255.156682699288 | 235.680462167404 | 221.685824197352 | 349.330629649093 |
|         | 245.195406638979 | 230.332652534446 | 209.023926358109 | 237.854774190873 |

|          |                  |                  |                  |                  |
|----------|------------------|------------------|------------------|------------------|
| TSG1     | 133.173541338355 | 148.149216812602 | 131.429247528936 | 137.784270510433 |
|          | 151.09670688533  | 137.72327986309  | 132.206133020786 | 137.187640876289 |
|          | 131.945667475797 | 148.770315933249 | 108.167670899938 | 132.311344653106 |
| TSG101   | 902.089561157715 | 795.464850398761 | 1025.88559245013 |                  |
|          | 792.634423781309 | 565.164961255054 | 761.586663689579 | 692.53483413403  |
|          | 874.816697884109 | 1097.18236659974 | 1345.8970795036  | 1142.09977159958 |
|          | 683.655205499779 |                  |                  |                  |
| TSGA10   | 125.484453841158 | 130.326980619676 | 122.362585067453 |                  |
|          | 123.93800397666  | 119.079680805247 | 163.946569217706 | 130.140958819402 |
|          | 147.769702509047 | 136.452338158252 | 133.268239762624 | 149.155345369055 |
|          | 128.729687597908 |                  |                  |                  |
| TSGA10IP | 141.765004355609 | 150.265385257579 | 151.792921211607 |                  |
|          | 146.179543599917 | 133.583297305219 | 143.877226672663 | 150.460618402778 |
|          | 147.585987099202 | 153.871893011106 | 152.93058803161  | 145.957934576055 |
|          | 158.295583769612 |                  |                  |                  |
| TSGA13   | 104.483909687253 | 114.27112025541  | 123.535803027153 |                  |
|          | 115.343251487944 | 116.987471433258 | 116.280157890082 | 116.884397420467 |
|          | 119.432201417811 | 117.084984190461 | 117.255496552581 | 126.418295908353 |
|          | 111.515588041012 |                  |                  |                  |
| TSGA14   | 188.36361073603  | 173.182013165174 | 212.073472189229 |                  |
|          | 173.056715623574 | 216.277178481058 | 190.22021453133  | 229.230239609291 |
|          | 255.770193180874 | 283.235844022826 | 195.123919692348 | 249.449151040445 |
|          | 385.379119927642 |                  |                  |                  |
| TSHB     | 112.75167046116  | 121.168550902281 | 112.520199390427 | 121.23469201559  |
|          | 109.384112020063 | 110.050374895171 | 115.285392699073 | 116.736174147084 |
|          | 113.432757764419 | 119.578240680666 | 118.527464364564 | 111.398760606544 |
| TSHR     | 130.812309202831 | 130.221351857959 | 138.27272971335  | 136.893392154262 |
|          | 136.969124414576 | 137.987255649072 | 133.812639120892 | 131.2360427855   |
|          | 136.463867598256 | 141.370957100324 | 125.381865040574 | 141.84653748835  |
| TSHZ1    | 510.972389503051 | 621.173315178959 | 527.226517960073 | 577.250493023431 |
|          | 157.800913051929 | 244.514230664694 | 230.263678910356 | 302.1846598234   |
|          | 281.369059516242 | 256.291984914927 | 292.23287968517  | 251.268669431283 |
| TSHZ2    | 421.929674562786 | 516.755267232127 | 327.062810389635 | 538.605085454393 |
|          | 143.942810095867 | 179.163748161358 | 170.390200730789 | 162.155834067128 |
|          | 218.18756955522  | 149.049931380459 | 193.084818760857 | 223.128108720503 |
| TSHZ3    | 1569.13457493554 | 1309.7660860424  | 1184.88559645917 | 1421.04485772969 |
|          | 161.874184077257 | 241.782750858091 | 173.387549650592 | 187.519053043173 |
|          | 187.903298116031 | 220.345184229077 | 390.670702155192 | 170.590817818414 |
| TSIX     | 138.523677181131 | 128.925288777749 | 132.695992860853 | 124.142882936234 |
|          | 127.43866970659  | 120.342513393659 | 136.749771286979 | 115.639101191444 |
|          | 131.449370465834 | 130.217791888656 | 125.579970155301 | 119.498312996987 |
| TSKS     | 122.646850766733 | 114.749597426757 | 125.649525720177 | 136.944378905743 |
|          | 108.199628274798 | 105.816457443844 | 113.177330690612 | 115.3611179192   |
|          | 111.409447323674 | 116.0999658586   | 118.836387680022 | 120.806180547422 |
| TSKU     | 426.132037075477 | 450.220658078322 | 318.196134631178 | 304.479999301061 |
|          | 866.413995755699 | 552.167699318911 | 1539.80266129509 | 384.566987097657 |
|          | 474.917507160629 | 760.070180572621 | 1088.25132365974 | 942.41077071058  |
| TSLP     | 137.901317305531 | 145.633647856775 | 134.897958140444 | 144.597060118959 |
|          | 130.907879150229 | 138.618761382177 | 133.065366727222 | 129.586337068199 |
|          | 119.432201417811 | 143.980608339892 | 148.842322753916 | 133.905162024888 |
| TSN      | 172.816477996646 | 174.909258852845 | 154.350107666084 | 155.417694869593 |
|          | 137.612446150193 | 162.652929339533 | 136.788269716383 | 145.005991300977 |
|          | 143.884263862698 | 134.319316977485 | 214.739818213164 | 133.34207595093  |



TSNARE1 122.636980845207 133.392177866353 130.491742824575  
124.079109459437 127.578272480621 118.201092260839 119.730174479044  
120.816130267055 117.289037817013 122.82388804774 126.895669261503  
121.164978896057  
TSNAX 201.913709602894 173.21291920566 264.983729290122 165.443069511115  
149.949425756405 377.225452025984 239.762135294506 327.251620296271  
227.177100762395 269.424055734143 208.363905749882 344.379733302418  
TSNAXIP1 137.725329029129 143.903216264503 145.56468363155  
160.853480692082 146.637799077812 134.203949774763 132.418902141838  
141.5311434224 133.724656321495 133.552141086987 138.748941735079  
139.503379198116  
TSP50 149.032116392457 152.409211647994 163.697117248984 155.072752529178  
155.041173289759 135.017196494069 149.269417496936 154.607214750531  
137.75060150486 141.125248464806 134.799648755296 142.261639670072  
TSPAN1 155.824409540332 190.96184674871 159.476343366991  
148.258850340107 350.58427958432 172.934156790775 310.815067427296  
153.989839987975 149.565725707356 149.8035588048 330.944203807675  
142.603436693587  
TSPAN10 123.547821639269 125.390139830237 112.488125161387  
131.903632821793 161.475694690038 130.822330736013 201.507971833902  
132.665590728755 128.548201588898 233.07015384759 146.142934874698  
120.660349211375  
TSPAN11 127.086470811408 134.91697121091 123.166013119235  
124.632373951797 131.371129237005 123.058261039164 116.664031217378  
120.325985681299 124.509816436474 119.720132373023 125.840932898827  
127.302714624905  
TSPAN12 134.978785580693 156.890299350025 160.30784625946  
156.62031503525 169.744100665038 162.505305538911 211.357321758564  
242.299252896647 166.85671415475 145.428297145967 301.428024926428  
223.89854167651  
TSPAN13 237.358925391616 258.868119227979 207.204293555178  
155.114892891737 691.632061537999 590.3584324045 543.170902795966  
784.170983714588 429.096075419528 241.203521822269 886.157279090932  
1185.70008959602  
TSPAN14 264.201932544662 293.600165830839 256.471672362567  
319.352940751688 499.436680354749 318.628084728596 520.761305892651  
355.213322760505 958.005138077899 296.553550946307 1236.56870367797  
897.0125616892  
TSPAN15 342.037040881785 398.075524915003 275.509805464276  
511.996883507889 438.431160975498 226.989201461085 207.104548555929  
189.83433085782 292.839392578318 152.50843414723 428.66614441422  
326.758278851698  
TSPAN16 123.727239584489 118.510960607141 116.828333047376  
127.84589484404 131.705912986393 124.627339426244 118.176124626025  
123.058261039164 120.93965087814 123.494412056415 133.567630962178  
128.988736837863  
TSPAN17 413.084646927035 407.760503937821 302.021033686056  
495.56459361431 716.731984660463 757.406530000489 757.877066703516  
700.601917911532 471.069295685718 842.87865208079 826.314416168552  
908.352265585374  
TSPAN18 462.686385881492 592.822841077599 438.817248820137  
925.009157785129 132.118118271944 139.051656180599 127.31790396929  
135.416008633632 151.64806573742 145.329128512407 156.75001042701  
168.588120398433

TSPAN19 131.500591219916 153.633095853017 143.895399273595  
149.233023751582 149.714982846365 146.013430937168 159.307394610466  
149.933919274985 151.613134875009 156.88782735706 138.227082687797  
136.466367853188

TSPAN2 280.033528476199 278.428310548805 255.770193180874  
267.451611731669 143.571804980507 132.998223400178 136.432109029368  
137.068717031383 144.525782437057 136.881019970399 127.019978195283  
138.724959677368

TSPAN3 541.460843251764 511.374117402707 654.305724263754  
409.592855687405 328.14373061894 702.779943547386 1615.60472592991  
920.840069938767 420.361583975644 990.814111681408 689.821785472506  
1302.54547114701

TSPAN31 663.451243037105 556.31484498921 505.143815448613  
544.852019338212 434.325609889068 370.945254716657 969.811933814244  
634.046843336128 708.268962600305 594.92419264579 788.693133735893  
672.348723983535

TSPAN32 158.130933580414 142.745838888446 154.501338425995  
162.233096422572 129.165440930558 135.773386496434 125.542301916791  
135.719702250709 153.647343267295 136.008118769513 127.093255830978  
128.730649233876

TSPAN33 550.24496459253 480.593729033799 186.420541099902  
188.580458613357 609.665323786904 244.219585315024 395.049127927637  
512.541205235935 413.398641688413 168.405786851399 215.426918011158  
232.083160165968

TSPAN4 489.75389978732 482.965800108538 382.186095123659  
459.652708187549 194.903531690239 172.8993416872 154.533544838819  
214.785381549181 238.430350258686 259.826625866106 175.617504025145  
159.879600154928

TSPAN5 225.96618659877 258.695920967489 255.413231082357  
224.89911221799 401.542072222692 300.401370666633 378.967410725775  
307.480644393018 194.80575419836 411.784922368377 319.283603277754  
150.899664887945

TSPAN6 210.989806933158 248.761038207278 243.159062832085  
188.74403596953 885.713964813911 912.483177705931 658.47864958685  
596.743397794872 683.470866056244 313.248029961291 1089.58643309156  
532.596772298766

TSPAN7 366.564822549834 428.66614441422 310.598930734244  
417.103816140912 163.741411769369 255.992494620859 171.373932115412  
210.751430486845 259.742175498038 172.26834556696 177.524818593325  
188.503673684625

TSPAN8 257.338950719432 276.582734590058 301.798676825176  
222.394280571312 736.140249105836 1035.0797237176 509.400965222318  
1336.15622439522 1142.44180956604 159.491388998564 3195.71436046397  
396.40172043456

TSPAN9 1967.82064011967 2299.23805014176 1595.22997714906  
1859.88000417483 1119.71228054585 763.533962249076 847.564628337955  
973.543357809971 1556.41573079892 1328.38230265655 813.454826901794  
1009.42265467472

TSP0 1104.61581891596 1260.50387106816 926.283018664897 1024.95957828641  
11509.9289491201 6271.34208268488 2360.87760349888 2627.12900283627  
4663.03253705034 4323.76731419005 5811.97916044218 5213.40342339233

TSPY1 129.344834474578 150.064179085845 132.329892644992 128.372225487481  
141.588478913204 118.902823494379 134.445893291422 131.123149002831  
126.077945699709 130.803561448083 125.20712393273 138.301397056664

|        |                  |                  |                  |                  |
|--------|------------------|------------------|------------------|------------------|
| TSPY2  | 135.832454000859 | 141.84653748835  | 126.670227417269 | 140.334331111538 |
|        | 141.114148695402 | 122.746185691827 | 131.861469782134 | 129.7137422914   |
|        | 123.716400094852 | 131.216673806987 | 136.919702354166 | 137.737908250097 |
| TSPY3  | 119.922676683808 | 141.753560518393 | 112.227434965199 | 117.060696904303 |
|        | 128.007359083768 | 123.926293128246 | 130.799009128937 | 126.009358591395 |
|        | 121.792573534134 | 130.346150829949 | 115.053039576143 | 139.119638136874 |
| TSPYL1 | 926.283018664897 | 738.37559871635  | 993.34112647221  |                  |
|        | 632.843164522867 | 616.014975366684 | 582.062758687489 | 576.451964662024 |
|        | 729.499296070289 | 604.047164856689 | 576.451964662024 | 505.83860711693  |
|        | 681.172359997071 |                  |                  |                  |
| TSPYL2 | 309.423768054614 | 265.332196877456 | 359.493075382333 |                  |
|        | 247.280717385562 | 194.86492119218  | 159.854639082837 | 163.262893278578 |
|        | 228.414049417352 | 186.482547532546 | 164.098880989592 | 194.055394488452 |
|        | 162.58152435515  |                  |                  |                  |
| TSPYL3 | 286.587945301875 | 295.893482074241 | 312.129861040709 |                  |
|        | 325.525450750788 | 256.394563537658 | 171.880470629305 | 226.055406842613 |
|        | 177.812335593522 | 167.384121560438 | 154.539367933684 | 168.969180646603 |
|        | 198.954254778846 |                  |                  |                  |
| TSPYL4 | 148.803188053248 | 173.088291472857 | 160.648791273795 |                  |
|        | 159.14477373952  | 130.93033679281  | 117.093818506721 | 117.67638166062  |
|        | 118.039780360151 | 135.092226300609 | 127.104097294238 | 161.019770036957 |
|        | 159.977528879208 |                  |                  |                  |
| TSPYL5 | 437.601814037248 | 362.742120043509 | 418.163219634152 |                  |
|        | 319.812293134357 | 661.390308090982 | 547.516635695872 | 497.269957926657 |
|        | 489.260272645085 | 223.373877165342 | 136.211694310501 | 212.210383398591 |
|        | 430.728137105601 |                  |                  |                  |
| TSPYL6 | 148.673763368264 | 144.082452235267 | 145.351662473858 |                  |
|        | 136.087702679172 | 136.067657949844 | 142.42442972908  | 142.906227759701 |
|        | 147.333142209628 | 142.64161581553  | 146.98903251354  | 169.45559708224  |
|        | 160.19942770666  |                  |                  |                  |
| TSR1   | 239.73396414153  | 227.806050911154 | 320.707687986324 | 256.924134409998 |
|        | 141.78867917709  | 277.459328083162 | 179.009510246709 | 213.634295832535 |
|        | 204.681956301306 | 229.567444213626 | 223.220997990627 | 223.638850960288 |
| TSR2   | 1385.28044421961 | 1396.4168898623  | 1389.93393245455 | 1386.56788941677 |
|        | 1798.5819962261  | 951.772948602094 | 873.408431189194 | 1632.84261181074 |
|        | 986.441377365124 | 863.086199215353 | 588.334329592604 | 696.277780670166 |
| TSSC1  | 248.299149406938 | 330.281193038198 | 335.142319387164 | 360.551560710852 |
|        | 485.136339836897 | 540.190808200264 | 459.068582584181 | 508.449904285771 |
|        | 461.229315272354 | 372.94852645418  | 330.703588385626 | 473.73182675469  |
| TSSC4  | 749.515603904233 | 880.719593734606 | 743.023225859813 | 1101.66868138797 |
|        | 768.053694275398 | 480.923468806193 | 402.425130776131 | 441.112782197591 |
|        | 468.060528109338 | 448.54309632232  | 334.316711893654 | 308.441120735095 |
| TSSK1B | 113.326628149066 | 120.76311889397  | 123.725998173975 |                  |
|        | 116.958052905168 | 116.134550788966 | 109.37466528113  | 124.511674561183 |
|        | 131.060030943633 | 119.673343767067 | 126.713610681382 | 142.027930009598 |
|        | 124.809739073169 |                  |                  |                  |
| TSSK2  | 159.213940274232 | 151.228823957828 | 164.981665344298 | 178.89423690001  |
|        | 165.960176666275 | 149.689071018094 | 160.140509175287 | 149.795655754301 |
|        | 170.483686891321 | 189.472541628897 | 163.19340939648  | 174.549929320587 |
| TSSK3  | 135.351344868436 | 149.327794670124 | 154.94587631386  | 130.656206845965 |
|        | 133.026094667212 | 137.033870931133 | 140.138870925001 | 157.909530751723 |
|        | 132.598022317288 | 126.976353967127 | 127.229854957588 | 146.814457904682 |

|        |                  |                  |                  |                  |
|--------|------------------|------------------|------------------|------------------|
| TSSK4  | 135.715745768179 | 135.621035941292 | 130.262411213764 | 143.394704760983 |
|        | 146.065491816894 | 139.280151859534 | 137.086936444421 | 127.964855970099 |
|        | 138.664401460739 | 136.246543311291 | 117.805556408194 | 140.781647532361 |
| TSSK6  | 163.81485578613  | 151.431513447721 | 151.674143983846 | 156.949439724914 |
|        | 137.747088378131 | 158.085935267091 | 139.907840403521 | 155.893018702615 |
|        | 157.948814637726 | 152.348210524663 | 143.085022888434 | 156.69025356689  |
| TST    | 792.634423781309 | 1110.43791444289 | 1248.69137283095 | 1244.67453201339 |
|        | 9793.92604780228 | 5382.31371568106 | 1834.08657010335 | 2635.31067044245 |
|        | 2895.71836177599 | 664.343553341563 | 1424.04009914668 | 2684.69013589621 |
| TSTA3  | 200.98533822317  | 204.710203150526 | 183.247396324425 | 242.440966395613 |
|        | 664.343553341563 | 284.272977025491 | 256.202924421798 | 375.651196211048 |
|        | 516.088776850623 | 451.621888586656 | 321.367338145787 | 319.768792196774 |
| TSTD1  | 184.62149494522  | 165.062129636008 | 183.255119298602 | 152.11956441072  |
|        | 461.413469623811 | 580.347496467173 | 400.98290237416  | 427.452114719877 |
|        | 307.81941988503  | 377.951523644306 | 412.736636437651 | 559.0867397858   |
| TSTD2  | 192.61436632814  | 185.071775840607 | 232.105867345662 | 195.577739376082 |
|        | 177.752497164503 | 194.186994486095 | 208.270622752385 | 203.149001616967 |
|        | 182.209056248253 | 194.584034984339 | 177.93138555339  | 219.2695037071   |
| TTBK1  | 112.971776964469 | 127.044367488881 | 121.743701509981 | 108.483284007316 |
|        | 109.482330324734 | 111.603221942108 | 112.649012857276 | 114.664782541261 |
|        | 114.325967923393 | 114.441223528256 | 123.905462079972 | 120.255081121925 |
| TTBK2  | 140.464476678448 | 133.957160768065 | 127.629258006335 | 130.626965797365 |
|        | 114.27112025541  | 122.699993989189 | 127.166821363722 | 133.003743285746 |
|        | 126.766964875664 | 136.852403978525 | 137.644942697483 | 125.220416203903 |
| TTC1   | 370.617422894068 | 395.133831206474 | 440.319777672273 | 442.220572301795 |
|        | 217.074639597142 | 227.418630852215 | 355.519647649551 | 277.026538720417 |
|        | 290.541184606565 | 510.972389503051 | 388.710465457313 | 315.182134426778 |
| TTC12  | 176.603760647035 | 157.994474909749 | 172.667770359278 | 190.736796322054 |
|        | 197.2893692747   | 160.192540519103 | 180.561514455864 | 172.531836863525 |
|        | 163.385727569154 | 160.843325877861 | 211.891710626953 | 156.923675862035 |
| TTC13  | 209.112959748917 | 201.987081022654 | 222.005022189667 | 172.376544221034 |
|        | 194.337080066417 | 324.481229901658 | 232.023739004791 | 295.935625475189 |
|        | 218.031238893075 | 191.405362404386 | 236.251507822415 | 275.609716327452 |
| TTC14  | 523.306451464643 | 406.638419179213 | 495.655170027296 | 322.889296658955 |
|        | 196.676479140094 | 353.285905782951 | 299.29004204677  | 256.897177822238 |
|        | 330.641230715217 | 327.062810389635 | 484.363052437459 | 367.644907862372 |
| TTC15  | 718.670564185576 | 710.999354960979 | 692.945420109927 | 796.699879495384 |
|        | 533.784151495549 | 538.156335788156 | 489.75389978732  | 509.01330998156  |
|        | 400.472835504879 | 427.084392965651 | 565.059609779245 | 543.584413650467 |
| TTC16  | 134.09920571607  | 132.517166202071 | 128.730649233876 | 135.643341446691 |
|        | 152.397984799517 | 146.722211039754 | 128.765369834041 | 122.659174808512 |
|        | 130.606211166873 | 143.879597098414 | 171.262412981612 | 128.174382934295 |
| TTC17  | 585.075322115635 | 574.035124314622 | 713.23381913235  | 518.760142491104 |
|        | 374.169744342352 | 310.301616266762 | 398.423396126075 | 390.284689962661 |
|        | 385.050282185255 | 392.06522028189  | 618.058496806334 | 392.582612044755 |
| TTC18  | 182.907444581093 | 155.76568091161  | 190.5930909277   | 153.705394500855 |
|        | 152.769931978291 | 175.139231359014 | 161.916155040522 | 161.627546190964 |
|        | 151.015243921984 | 126.599418127637 | 155.971045744096 | 145.551717838423 |
| TTC19  | 400.353795948162 | 404.21236980164  | 354.205670284123 | 300.602422224047 |
|        | 376.962937292973 | 842.87865208079  | 361.829819621662 | 624.467319041884 |
|        | 385.584224833836 | 361.904370514991 | 821.265710686098 | 365.650071660806 |
| TTC21A | 161.108249802467 | 150.784262878145 | 152.945550129539 |                  |
|        | 155.295464263911 | 167.984051648058 | 136.832494876249 | 151.092066533546 |

142.50631960137 157.277051544704 119.645983822002 173.063002566542  
 122.03508430361  
 TTC21B 133.500750738061 136.470025638057 143.596530151289  
 134.949572471421 129.599661790972 138.052032298683 131.879526177089  
 133.305679931132 139.894559834783 138.204611862656 137.586032396204  
 131.46193427125  
 TTC22 150.471558219667 138.276865331434 146.404727168045 148.861141988806  
 137.517461260687 136.368258257435 137.310014841869 143.92831903543  
 160.664407431261 144.688515462537 154.607214750531 156.609370182062  
 TTC23 260.746952459282 288.481981529558 223.722742062251 277.406445570925  
 190.281570660806 183.795632040455 239.871536598083 186.854553034865  
 203.004815689972 320.648966489586 173.986750195954 209.568066932367  
 TTC23L 134.244658505187 155.3016514732 135.399032687551  
 155.007516124803 150.409919207059 159.424105896749 147.264690436042  
 146.198331189991 137.79714923769 136.133538781918 134.420446702459  
 150.933724024651  
 TTC24 111.802672864815 125.920663904983 131.595868226775 131.814528687104  
 127.918847837351 140.732618320154 141.308299074832 122.274656361883  
 125.787353491408 136.984172424718 120.577995272053 133.998381302146  
 TTC25 164.202554380274 175.442400672352 159.055956234445 157.155105022743  
 125.328704545727 140.675094228846 162.624786423084 185.706228572019  
 154.108689872903 117.873333897609 145.912712700067 145.444483891989  
 TTC26 192.465510013851 181.081050726043 221.685824197352 192.273528391588  
 230.284216427158 189.528686948872 216.353502371227 228.284236550547  
 216.209052148435 233.232319881243 156.018200674475 196.955723006838  
 TTC27 367.229293432041 335.938170230765 349.773289724658 360.361719991381  
 374.657816575897 669.731546951281 426.249411635589 532.950400370668  
 370.945254716657 429.457884032977 325.999687273862 452.843213944986  
 TTC28 149.902420337518 144.464071397369 140.254665008195 133.819095523687  
 143.219722736891 142.421913396368 147.059096208832 152.254519859308  
 151.836705989155 141.88072888667 138.704839659727 145.44629057846  
 TTC29 139.378915474473 121.188761627967 147.980827857138 162.072695554798  
 140.44966014021 169.072574423443 159.771672778698 150.904618960507  
 170.951009118578 148.874533472738 114.048136176142 160.156127781701  
 TTC3 1736.03342040646 1465.2419150392 1643.08061372695 1666.80650105101  
 459.771019162573 1101.66868138797 1044.91923772265 1182.50261323518  
 1399.41653736746 850.882404546093 1083.26599217847 813.454826901794  
 TTC30A 151.196713920345 171.595724119779 187.057683141644  
 166.068489027866 183.033044475752 166.904990069484 162.317084707395  
 157.419333185365 153.018378403144 161.04173806448 170.243136294537  
 181.157738347957  
 TTC30B 137.049677918041 147.183889426843 156.622993107052  
 132.300508985399 163.621658579697 140.868946922293 165.590892262736  
 149.6036366066 164.545596179262 144.977958320895 164.389447533163  
 156.901209828741  
 TTC31 329.068463281182 325.80154888448 356.154842959851 380.754569467715  
 419.4017188518 340.547010951537 344.786541451395 366.240941980786  
 275.072079692264 326.055727207966 340.487850009685 351.02823853348  
 TTC32 336.067655676466 277.652851236546 332.24505665756 264.456926651554  
 280.656087497806 384.883635849576 287.041585684111 272.712242893937  
 261.922485502971 374.657816575897 236.985483155452 292.145553580042  
 TTC33 173.681078272467 188.797908601851 168.643026828823 159.41078351918  
 166.111496598928 174.615694779386 167.442950045855 237.492603094091  
 149.076146942797 155.46017572591 188.166168428752 145.299625153537

|        |                  |                  |                  |                  |
|--------|------------------|------------------|------------------|------------------|
| TTC34  | 130.249430984172 | 132.021249712589 | 143.546629073997 | 126.110426731941 |
|        | 134.314636524922 | 126.976353967127 | 136.984172424718 | 123.665983073461 |
|        | 126.569482909992 | 123.055210862247 | 123.877609932461 | 132.049224908868 |
| TTC35  | 215.607567127195 | 224.396933003452 | 204.299375966441 | 218.794112567823 |
|        | 173.839053227554 | 160.374491283254 | 237.71636970719  | 190.45739385453  |
|        | 223.184064606222 | 214.904634494921 | 244.132645171301 | 215.037122365095 |
| TTC36  | 138.694701349366 | 140.934844668435 | 129.461160777216 | 129.92319548307  |
|        | 146.531692460121 | 136.687813884132 | 134.731687541347 | 144.161672064561 |
|        | 127.336648342283 | 123.478896502015 | 145.404469340821 | 128.381433897602 |
| TTC37  | 650.911886508922 | 587.026042400878 | 1010.73988405469 | 485.026081242201 |
|        | 237.358925391616 | 684.715981522999 | 849.784051720996 | 400.621427274425 |
|        | 580.164288826741 | 890.507257588957 | 576.298671053238 | 764.493610798958 |
| TTC38  | 411.221560795912 | 377.27961559752  | 470.578335285993 | 504.838017072725 |
|        | 316.722160860531 | 338.326304736048 | 266.80383076887  | 274.343238288436 |
|        | 258.16437138327  | 287.751093664085 | 226.841838641151 | 248.465457421469 |
| TTC39A | 117.950058826379 | 141.389330839189 | 125.920663904983 |                  |
|        | 122.323876787207 | 118.963119420175 | 137.194467539969 | 144.699084515687 |
|        | 124.238319768621 | 131.832311911703 | 122.809241232029 | 129.618097261902 |
|        | 131.554055357245 |                  |                  |                  |
| TTC39B | 169.043206258073 | 159.021304119265 | 162.192879711747 |                  |
|        | 149.977924522553 | 155.741507341843 | 146.97334315047  | 153.918462601781 |
|        | 152.57905274438  | 147.335403843539 | 194.445463745418 | 148.727953739127 |
|        | 146.748572532267 |                  |                  |                  |
| TTC39C | 161.592528958127 | 159.693019552703 | 146.222195387635 |                  |
|        | 137.473779155388 | 222.794196053536 | 156.277567608825 | 197.873787638411 |
|        | 222.675370226786 | 175.341310423897 | 246.533813165981 | 168.427124752461 |
|        | 170.091913791176 |                  |                  |                  |
| TTC3L  | 138.684070773064 | 146.002585729701 | 145.847629576886 | 152.459041674768 |
|        | 130.483765953389 | 121.915043935246 | 149.25240100689  | 125.655823846115 |
|        | 139.482462221798 | 124.69564501518  | 131.391434131813 | 139.94624507228  |
| TTC4   | 904.733257358133 | 920.840069938767 | 1051.45401327176 | 946.640841062802 |
|        | 699.984140389009 | 949.789710063337 | 992.744093752678 | 1109.08288440559 |
|        | 999.159652508318 | 931.598413783099 | 1109.08288440559 | 864.547109080675 |
| TTC5   | 267.422232051733 | 243.839402991061 | 278.142283306934 | 225.438177833064 |
|        | 273.432712475089 | 246.457698183615 | 246.457698183615 | 250.037172478288 |
|        | 256.291984914927 | 298.085365348496 | 266.80383076887  | 284.534369213195 |
| TTC6   | 101.981823814699 | 114.526374388145 | 113.694351010121 | 111.09179957013  |
|        | 120.901639342731 | 115.896463925125 | 118.379914726645 | 110.774802298005 |
|        | 122.561285351587 | 118.424520312293 | 118.537378726617 | 113.339155126202 |
| TTC7A  | 161.202844994203 | 149.31184788671  | 160.816803370151 | 156.611727364072 |
|        | 193.974325897472 | 151.992112109698 | 146.31980311926  | 156.290018816692 |
|        | 142.771243742561 | 173.66499836293  | 143.101750222256 | 146.290334865039 |
| TTC7B  | 153.597557478169 | 151.858466721347 | 143.710449544388 | 141.628203045085 |
|        | 139.036978052242 | 119.974853329265 | 152.150445265201 | 138.250288796456 |
|        | 144.731299077209 | 134.842877075983 | 174.707059022891 | 135.717491814078 |
| TTC8   | 194.240372898704 | 200.424975825325 | 202.178451227304 | 214.295260811046 |
|        | 170.361237529247 | 191.628693083169 | 198.311821616128 | 256.291984914927 |
|        | 179.211502448703 | 196.638594797353 | 261.671277686467 | 259.064601204239 |
| TTC9   | 126.555972138115 | 122.527517633626 | 146.128066033346 | 133.192757350144 |
|        | 139.408234219133 | 125.572299527276 | 153.448882783807 | 131.12953085854  |
|        | 157.776321544382 | 141.114148695402 | 161.552475294424 | 139.535490288426 |
| TTC9B  | 131.355356245179 | 133.932594124721 | 125.2051300372   | 130.816301920872 |
|        | 130.257242615762 | 133.26167785455  | 129.434594784981 | 116.839796680107 |
|        | 116.491342107103 | 120.288469716375 | 130.829825154842 | 127.161975533812 |

|        |                  |                  |                  |                  |
|--------|------------------|------------------|------------------|------------------|
| TTC9C  | 168.477388641982 | 188.033890834418 | 212.33360547376  | 185.382647297259 |
|        | 203.752540576935 | 209.146021798649 | 205.966111721195 | 192.848268768579 |
|        | 204.596753034535 | 172.451128796055 | 197.667299074218 | 194.998142472864 |
| TTF1   | 184.029968090084 | 178.200678423426 | 201.987081022654 | 181.215046876308 |
|        | 174.229093061024 | 170.568719982587 | 155.393326732887 | 175.030373805031 |
|        | 172.698181201849 | 176.410016510249 | 171.433001048839 | 149.141033677244 |
| TTF2   | 211.34069504665  | 215.897620927751 | 190.700515036197 | 173.656241217331 |
|        | 440.579262120451 | 1112.4055726239  | 328.401537339876 | 795.464850398761 |
|        | 571.64723305848  | 371.00603789759  | 320.648966489586 | 719.369561410372 |
| TTK    | 152.902458879101 | 180.430425314885 | 156.373163373309 | 187.903298116031 |
|        | 531.217306770605 | 651.235249028924 | 262.171775165261 | 505.83860711693  |
|        | 322.778260588465 | 311.269750643358 | 191.365014963729 | 390.372738176917 |
| TTL    | 684.866405921987 | 594.180861801958 | 551.622587349813 | 837.603727062008 |
|        | 281.694635436938 | 529.368609163949 | 375.767528676937 | 424.665056900526 |
|        | 386.379891865411 | 544.462032960964 | 752.585744322608 | 482.965800108538 |
| TTLL1  | 170.655648004461 | 176.397715825653 | 183.583432296209 | 219.318938396989 |
|        | 190.56172211779  | 152.31268334586  | 150.73248190848  | 160.828718858381 |
|        | 158.226547375305 | 160.423982411027 | 169.920799931309 | 152.669206395402 |
| TTLL10 | 102.725375719353 | 100.746407116143 | 110.1278204598   |                  |
|        | 104.798333931019 | 112.298254005045 | 113.432757764419 | 110.865668451601 |
|        | 105.096927149239 | 115.988180787152 | 96.8261937365062 | 125.181327386534 |
|        | 110.865668451601 |                  |                  |                  |
| TTLL11 | 162.574338133241 | 170.951009118578 | 168.183542846746 |                  |
|        | 178.847858667374 | 149.490064894136 | 152.169087619827 | 174.890624803452 |
|        | 153.767488352037 | 155.313873664923 | 193.554028681854 | 127.314089756429 |
|        | 146.528945049588 |                  |                  |                  |
| TTLL12 | 282.47352481715  | 354.840474468573 | 216.783051958345 |                  |
|        | 446.601751145647 | 1525.24196488688 | 527.498114662967 | 326.1109406486   |
|        | 342.147414141627 | 430.329437928013 | 591.189034068137 | 499.776233241535 |
|        | 502.598518192729 |                  |                  |                  |
| TTLL13 | 139.696266471271 | 120.456817031716 | 129.135985676046 |                  |
|        | 132.580937663749 | 114.638254225216 | 124.140880678888 | 127.926270257252 |
|        | 120.046892432373 | 130.532559074698 | 119.11586630281  | 141.691135410429 |
|        | 117.22284971665  |                  |                  |                  |
| TTLL2  | 138.679545821015 | 140.338622198206 | 135.049657594221 | 144.474814266475 |
|        | 131.838522109796 | 152.452246595937 | 149.579428189895 | 130.298686386894 |
|        | 134.860896462638 | 148.350919010575 | 117.692662275393 | 147.748142622566 |
| TTLL3  | 270.847923557176 | 226.936810012475 | 252.404931238338 | 222.919473675549 |
|        | 178.878444404192 | 189.250846546817 | 240.915496717526 | 228.025383952578 |
|        | 216.32785564297  | 198.760049629983 | 292.802762636861 | 192.992546726522 |
| TTLL4  | 152.89366585726  | 132.149015697532 | 137.21916902421  | 159.815932985135 |
|        | 175.222531098958 | 164.109321257638 | 160.066390229416 | 155.035727630756 |
|        | 192.59376129133  | 181.238505183667 | 180.304585602206 | 193.704510912321 |
| TTLL5  | 216.859640534581 | 236.592839463278 | 223.474531516972 | 249.400820221233 |
|        | 235.742017851879 | 152.662446724781 | 218.794112567823 | 214.714726648332 |
|        | 212.420616436137 | 235.48876511325  | 324.25775261173  | 220.136131941508 |
| TTLL6  | 142.551161883518 | 134.534815676852 | 137.176144667253 | 148.045391886623 |
|        | 124.313901870563 | 147.182394557583 | 152.760855359297 | 138.724959677368 |
|        | 147.905406818238 | 143.865717051998 | 136.539130156863 | 137.726769003181 |
| TTLL7  | 226.020769172424 | 188.475801713801 | 359.577827010792 | 163.788418732315 |
|        | 118.283346939564 | 132.620474788855 | 120.773552653073 | 128.523703756493 |
|        | 148.549257493128 | 121.653754668804 | 139.510764003291 | 131.798931481549 |

TTLL8 137.457453776513 141.476041451832 164.116142541038 137.694556514044  
155.247452081206 164.708712337156 154.426605816862 151.216992571364  
138.698178321535 142.240333104987 166.007913607742 165.2045030333  
TTLL9 138.487657776553 134.909230280708 137.641136471239 132.873213182775  
137.443463471483 139.182623417751 128.775477649887 140.021640936288  
129.664016819143 132.875314170399 137.419090451631 129.201101445773  
TTN 126.05295868521 127.101752724954 123.439897913722 123.860747215706  
119.192893408873 122.900675062181 122.243585162452 123.45004246675  
118.9803314875 121.387799881297 134.09920571607 121.134305707234  
TTPA 112.005939063045 124.062863592295 127.625252349231 122.309041354217  
121.181654892305 132.440818532628 124.197397333928 129.953801496113  
121.979059173287 123.541709359809 129.777173431404 121.588054040961  
TTPAL 277.219796733134 243.336550161566 252.249994170536 263.936023499588  
280.558463661137 351.759100605991 357.584458526365 262.488050186425  
287.455622143233 414.596948083067 347.932135290714 297.609793563225  
TTR 166.692386207143 141.895211025017 181.479652131104 156.934589811742  
162.289781945582 196.657475905674 144.049503774298 319.768792196774  
161.108249802467 144.249339611941 160.50439457257 140.888439624918  
TTRAP 203.642739476708 230.201464318433 203.831047867731 196.031541155674  
196.691380885508 168.854819201403 193.466377788318 187.247062073247  
197.12840030662 187.645390502607 248.613373429151 189.567241599215  
TTY1 156.609370182062 151.032389358279 165.249658565871 141.073316497949  
140.572442284673 142.987456501707 165.149464497921 144.961976523279  
135.873325130921 127.422129210789 142.180927190578 151.034392433934  
TTY10 114.302645757446 129.021781431809 111.992738490468  
108.43334699667 127.954231630338 120.01190102634 107.156457065853  
127.389942368953 118.628559951472 117.051541123239 135.526248253492  
109.156349683299  
TTY11 137.528342105233 139.966813133326 136.492892469272  
134.642898234003 132.149864626575 143.745594527046 126.946305561543  
144.900785401228 130.226993687215 144.008961720971 151.330035086652  
140.44966014021  
TTY12 112.3786222545 118.825948323992 112.758617084341  
108.910588012315 119.341806810441 116.929398630733 123.159407368236  
109.564709878576 115.725323816619 115.927914533359 130.001889950186  
109.817705421158  
TTY13 142.928920246687 136.603035996281 135.783125948784  
130.154756165574 133.315888375614 143.336538157639 147.959112022939  
129.596851280135 131.157702791998 128.262195551255 132.976977898242  
143.492758492895  
TTY14 140.377179372804 139.801108744526 193.098116087792  
137.089392202166 151.773749014775 113.388450168062 130.169291786693  
119.455615461113 152.500670025483 124.288632450364 157.406969627689  
246.616749748028  
TTY15 167.237705290905 146.455182336561 139.60494712939  
148.770315933249 151.449690439424 152.573063322741 173.714940254592  
151.210814209064 174.962380276394 124.080382291282 143.31117188259  
168.52952604693  
TTY16 155.272264997151 148.925418133902 144.521448574711  
155.951509643078 141.311749168934 163.181323768362 145.424827607383  
147.330897105911 139.063209125209 142.401333414583 145.665155500862  
137.687480242109  
TTY17A 138.129281196474 138.580264357741 134.628807679002  
129.03753569157 137.968932080074 137.971108694323 142.886493948916



138.994857740356 138.338280468272 147.696506705909 142.179197020805  
146.879019367939  
TTY17B 126.476866025397 133.88072491369 120.571074646092  
136.227202534196 126.915338864323 134.442947822188 135.738699497293  
121.242099666967 123.357205547181 119.52150378372 122.089332300031  
124.690141443832  
TTY17C 125.212404794262 121.531401500498 129.570960882942  
138.588751758469 122.615852682436 124.368438691944 122.211000410541  
138.1342592966 121.347339077474 133.401620574886 126.442999559539  
134.686251400642  
TTY18 130.530963116318 132.894049694258 145.998177732093  
141.059033576475 147.592770523507 160.469645948225 139.286592412216  
156.723502568908 142.934869757362 141.398513269219 137.808307749725  
149.763038696374  
TTY19 124.821581853501 153.653453808799 137.047288508371  
144.73389393695 141.59046197203 153.998849486363 151.226242696197  
147.962721373177 131.464229237662 147.867815214392 141.703410265546  
148.603077434646  
TTY2 131.132508349222 136.77666893627 137.246089511045 144.754401731628  
144.599578905334 131.027605835275 142.427198128376 139.54021659275  
139.591231478841 137.408247668043 137.42845093653 143.601057437842  
TTY20 115.072622367144 119.873844587252 111.860763079995  
143.004090696463 112.971776964469 123.703840971923 133.154004369076  
128.530540860266 124.411213807179 121.926377140115 129.397378057767  
127.496885890349  
TTY21 140.906421938377 135.313148180961 125.328704545727  
134.339535632463 127.732838320554 129.322481607056 143.799113486767  
134.553754121862 137.217104547797 137.066799877341 136.18698517676  
130.563756903074  
TTY22 146.42288214248 131.575356402693 129.717701654435  
126.423739360894 136.764881711137 143.377902352319 150.860090477342  
131.218141814078 137.093170378295 136.625136565562 130.40517506216  
128.451788292588  
TTY23 120.100672968415 134.445893291422 119.645983822002  
130.601241656346 129.236471271181 128.563180697606 120.543881800775  
120.693808603805 125.484453841158 123.141928612324 120.394220715157  
123.687439699754  
TTY3 115.80245224388 131.816989019024 136.934313990609 124.248997533959  
121.170340423391 140.775447163954 132.759440588374 137.888195199363  
131.651851665521 136.801338583441 130.094233130309 144.389328224541  
TTY3B 121.22760405399 120.319621393685 132.952355710395  
129.315412536491 129.067538010904 128.200531810126 122.673596593654  
124.821581853501 132.118118271944 129.378442664568 135.144908040903  
126.630787911053  
TTY4 126.77232818113 121.645021899034 152.593934787262 137.192570825063  
130.697148466042 141.647300896529 130.435589649362 120.590654346066  
130.131800537628 146.165632086981 131.558842131826 112.841406363391  
TTY4B 156.883255634126 153.244758030666 147.348400730286  
155.598586699376 141.670426206169 143.660679324057 148.562200783472  
140.626181314061 143.555987405898 153.173746756225 135.102827224896  
158.095373931016  
TTY4C 134.094231940612 123.494412056415 123.588194516972  
127.863583325139 133.820936825552 129.485710719291 133.414198431469

129.158212237299 126.897804011992 131.362128083159 133.379872189405  
 125.493004972076  
 TTTY5 133.018406625714 128.525769531728 142.693337885596 133.079097536801  
 133.12904935533 131.378893655618 145.472859089272 148.000706956532  
 135.728336465002 134.145771195572 134.595090783504 141.725882943927  
 TTTY6 136.669003646622 137.000868503792 137.262309660909 138.224383646894  
 143.667207351415 135.379284233708 143.405079593778 140.675094228846  
 131.628021008753 134.86940314824 155.162310001164 134.423260547727  
 TTTY6B 141.634246722965 140.125575976708 137.181558419086  
 143.094799968981 152.097609803404 138.573829193205 122.098850053347  
 152.207601283271 144.946362772133 140.14062775887 133.425151103622  
 141.890803125137  
 TTTY7 150.489651880905 145.270140096768 148.922537778634 140.464476678448  
 137.014698467096 147.022594294963 135.701041557713 144.249339611941  
 145.70726782469 151.554352209634 135.146767090951 140.611071681667  
 TTTY7B 147.922706629104 148.206529935876 168.813895764991  
 146.038599656417 143.780803045394 175.857952663383 182.165681034082  
 158.390337945372 157.646948327818 141.537578081123 146.099555861577  
 149.630481387506  
 TTTY8 123.470830748348 129.808590871788 116.806720503431 115.559551514777  
 124.05019986924 119.122305582754 125.063596569451 119.32696696175  
 120.37619371663 118.626815116752 146.499065641095 124.210840121525  
 TTTY8B 115.587874563785 127.945144368504 138.600017737884  
 148.439740062804 129.138035235415 121.391637838137 131.244759170642  
 129.176532377543 129.969400693456 129.694178995061 100.746407116143  
 147.079157199448  
 TTTY9A 123.857527555048 132.604589324628 120.441732791854  
 126.587030905413 121.800250499722 111.398760606544 133.505261458701  
 131.280092370361 144.393688888553 117.523834738903 124.225294244156  
 117.244895482991  
 TTTY9B 115.02681415256 111.381427322188 110.266032635568  
 112.054379249781 114.3172128566 114.77964341895 122.408016372747  
 113.512670856029 114.28381541078 110.925532078514 125.566982723725  
 109.806338826826  
 TTYH1 132.002835547397 131.164778405297 129.971670681199 144.417333931582  
 417.024088698182 133.423376063284 154.049004176595 152.179281925254  
 150.28508305615 138.870636101334 154.881797585583 131.989955864584  
 TTYH2 133.286702819953 137.206961927035 127.099995420363 129.942594772751  
 126.413124995943 128.262195551255 130.745626975281 133.54741488531  
 126.549876718792 123.059971161711 146.110545700163 126.0944894315  
 TTYH3 221.471811658459 239.762135294506 156.490654498766 220.113261580385  
 739.251974981981 338.260976633501 290.638110977807 274.235001739215  
 328.486476842582 344.487982154705 402.026356201632 484.028175202673  
 TUB 204.695311233073 222.593554194453 238.847091900666 252.432175363972  
 139.844984829379 141.431172407792 138.920141982606 129.83316008718  
 140.239948346946 138.864844664017 132.066488589395 145.237221169839  
 TUBA1A 6500.1854485891 7838.92787031423 6384.66090426598  
 11392.4189359453 10862.3952192141 8445.36695108418 5506.81944079182  
 9219.38828280399 11509.9289491201 7308.57540715512 4323.76731419005  
 7491.93659373205  
 TUBA1B 9171.47979464736 12877.2152068971 8140.6363797934  
 18562.671630167 15116.95436573 13976.0448927093 9433.53967760357  
 15354.74541236 18061.615487998 8649.07367196998 8096.28093399619  
 12916.6904389018

TUBA1C 2395.75453574049 2863.51286169094 2748.51360874099  
4068.18567686753 13976.0448927093 8812.91092406563 5955.10816224456  
10360.162704111 12690.801964606 7815.98936145067 3727.70199176703  
7585.47289520004  
TUBA3C 119.666650919579 127.699226067847 112.962180108363  
119.301746097298 114.470670941078 129.785078660064 108.79453730066  
109.806338826826 120.76311889397 112.957395064957 130.883516197483  
113.66416989856  
TUBA3D 200.902123076244 193.777175793218 182.32514927211  
228.025383952578 377.538276846051 291.444155562134 230.806950763402  
280.990656342284 355.213322760505 299.717935831288 220.510248260182  
248.16594076495  
TUBA3E 150.155154998981 140.350144438462 134.05596537871  
131.950295185477 143.818379692331 152.379441401583 124.563594928763  
149.844677055508 162.327039624723 136.08297876405 133.143695166498  
135.07697911271  
TUBA4 109.536381305315 102.522925993233 107.450945262092 111.596690019694  
116.925863450165 116.360144963753 106.797707723826 117.034228068173  
112.179019393947 114.466368742403 116.074423050416 103.94864861172  
TUBA4A 519.27448770158 583.192225756596 606.003956839826  
698.590134238302 258.868119227979 224.805404798696 1145.96710556468  
300.985037429772 511.547907091166 2648.41012401723 1120.87534972745  
723.807658768693  
TUBA8 140.622130978368 129.104084188187 137.269267022826 141.819762045169  
160.632809953993 130.836079676477 149.999838961906 131.156409942604  
133.792673129743 146.577524520274 136.109975252514 145.542888937635  
TUBAL3 141.970301370404 135.367261617271 139.793683692104  
131.668163693171 149.498020676126 123.773753287854 148.841427991125  
121.709375771276 136.779180530712 131.543439103033 132.510116371195  
124.624046191085  
TUBB 1492.15137418791 1758.7809492929 1600.10235468018 2307.82327595071  
2753.89649259242 2767.77385345718 1951.69651954627 2299.23805014176  
2459.05558915812 2154.00589005104 2296.30423509176 2670.9151276786  
TUBB1 151.846610656503 127.545397354821 138.798959235723 166.311421907434  
140.356164189622 134.756377802151 154.443360208399 160.811051590991  
141.659197251282 156.259214645427 125.617143363441 131.869543437146  
TUBB2A 535.49374437073 564.749082802433 358.479218923158  
816.580880338838 384.97980473847 216.974834077975 169.475714234887  
180.047231265069 208.125844007298 1413.37062765856 259.979459472217  
190.371287639453  
TUBB2B 155.223806761489 214.714726648332 129.24482916531  
211.269041187154 154.094285855743 125.768053724055 165.504532455205  
141.019494314354 235.650688823345 140.60741459333 165.074983746785  
219.044271073282  
TUBB2C 942.900963522948 1313.89440013246 845.150147618462  
2127.22258112242 4477.54806526552 2001.92441724356 1098.20033709043  
1957.48508632607 3328.99028463277 2107.99357083999 1320.74943817958  
1172.96121022579  
TUBB3 127.951403055054 162.668896609848 118.783904603368 126.868970616955  
562.543347322063 1262.96801072965 173.440596296333 667.156197045748  
301.304268871606 1073.40463823132 223.408447580188 394.810886122555  
TUBB4 157.463122989559 139.08460576146 160.473772347376 162.147989253357  
150.476228905372 202.943987922418 167.822075935474 153.969493052468  
167.190857452131 155.917655560227 145.26329339067 166.263781040251

|         |                  |                  |                  |                  |
|---------|------------------|------------------|------------------|------------------|
| TUBB4Q  | 323.667189206453 | 465.809961695043 | 271.468939477052 |                  |
|         | 701.208391798006 | 771.512332113075 | 370.555627307623 | 237.492603094091 |
|         | 339.663295617139 | 554.511983790164 | 540.190808200264 | 353.50447714719  |
|         | 269.726397478364 |                  |                  |                  |
| TUBB6   | 748.940715378564 | 793.300636780035 | 677.503643398297 | 1025.27246494218 |
|         | 143.543607779991 | 212.890259409988 | 137.737908250097 | 181.048789688798 |
|         | 194.403848868583 | 979.761537450366 | 166.1601847682   | 161.217964573491 |
| TUBB8   | 103.550817366724 | 110.858201415824 | 108.461141538047 | 112.340161674529 |
|         | 113.133798430215 | 118.855500322915 | 112.179019393947 | 111.475394003575 |
|         | 112.000309477972 | 108.007762863766 | 122.120307446003 | 118.08607083874  |
| TUBD1   | 251.324685584062 | 238.588762326319 | 275.013838208239 | 211.595513743111 |
|         | 161.813099560175 | 184.187847236508 | 191.937607311711 | 206.825575257029 |
|         | 241.599271777806 | 169.147351642004 | 177.371157649894 | 145.03221570575  |
| TUBE1   | 265.972387419683 | 228.100112133941 | 308.088967616175 | 192.465510013851 |
|         | 190.189217962555 | 179.432235153344 | 217.811099067262 | 177.267145265362 |
|         | 187.069074575776 | 180.315825600347 | 197.112749959833 | 194.500222559978 |
| TUBG1   | 234.996704304673 | 254.101184686036 | 253.049869714368 | 307.518881119091 |
|         | 532.596772298766 | 434.855262284265 | 413.502150181875 | 688.247581763352 |
|         | 422.973606694449 | 315.430399077266 | 274.371523790341 | 332.599191067433 |
| TUBG2   | 453.593585032712 | 460.24741151155  | 597.189355986293 | 405.322847383739 |
|         | 190.682392100564 | 324.177924877233 | 480.797281489891 | 507.040326298457 |
|         | 220.169099923628 | 351.188086838653 | 588.076436392983 | 850.562379837947 |
| TUBGCP2 | 600.635914090365 | 687.700356531038 | 565.059609779245 |                  |
|         | 873.010676463707 | 567.317223907142 | 332.464176231219 | 438.231717096337 |
|         | 305.252666831522 | 405.975221091252 | 340.728888109597 | 480.593729033799 |
|         | 341.015631528464 |                  |                  |                  |
| TUBGCP3 | 120.311723366684 | 128.207440197765 | 133.095245865663 |                  |
|         | 111.683074830042 | 111.127245394321 | 120.184782039538 | 112.57049236673  |
|         | 120.507930710099 | 131.704192327287 | 117.555999801887 | 112.957395064957 |
|         | 128.678484452077 |                  |                  |                  |
| TUBGCP4 | 233.82434521462  | 229.660838239474 | 301.747788416496 |                  |
|         | 224.466829629468 | 176.465559710285 | 270.462865174106 | 316.165926273381 |
|         | 234.126500054945 | 291.020789939476 | 354.45785837703  | 209.867189613436 |
|         | 254.287838845201 |                  |                  |                  |
| TUBGCP5 | 284.748764120614 | 241.293046687076 | 246.63579788514  |                  |
|         | 262.416137698884 | 210.030846572444 | 246.552713031445 | 263.47760086159  |
|         | 255.866847225916 | 273.514200733343 | 317.839512360245 | 254.315783394932 |
|         | 342.611951034707 |                  |                  |                  |
| TUBGCP6 | 201.365457496683 | 202.99342484328  | 197.667299074218 |                  |
|         | 229.907632927358 | 173.751615672365 | 207.692077301142 | 195.981555981238 |
|         | 184.473198008234 | 212.591357254196 | 187.296479395462 | 207.384408045502 |
|         | 205.200459980187 |                  |                  |                  |
| TUFM    | 789.752781067888 | 881.15414246017  | 787.017214032692 | 951.772948602094 |
|         | 3177.80599774525 | 1549.30900090605 | 853.535700321202 | 1291.12004949379 |
|         | 910.541650889451 | 971.99484515987  | 1522.87703817058 | 968.548243081111 |
| TUFT1   | 865.435843446989 | 591.641325402032 | 664.025683218037 | 618.829716818725 |
|         | 1545.71251527145 | 1580.27059464289 | 1558.22238167317 | 1990.94596595493 |
|         | 1151.30600388403 | 1595.22997714906 | 1069.25265476373 | 1871.91894530722 |
| TUG1    | 3883.05620256963 | 4228.5490138553  | 3219.27851139047 | 4206.37667440908 |
|         | 2466.36457617864 | 2550.08769415478 | 3052.86038628748 | 3994.64569045702 |
|         | 3850.41246770812 | 1692.01248523526 | 3994.64569045702 | 3173.14004739767 |
| TULP1   | 111.703224727793 | 119.307131534253 | 118.584773788416 | 115.789536577324 |
|         | 138.903450375532 | 112.502812746669 | 105.236768436069 | 120.906553066296 |
|         | 126.488299049827 | 115.896463925125 | 123.019430618632 | 100.637271902591 |

|         |                  |                  |                  |                  |
|---------|------------------|------------------|------------------|------------------|
| TULP2   | 111.204065131669 | 114.893462783007 | 117.028963434266 | 131.726540162023 |
|         | 122.572634128442 | 108.446988282853 | 113.005774989833 | 116.378552206652 |
|         | 107.239841465534 | 119.150626141327 | 113.238466329843 | 122.436106757578 |
| TULP3   | 194.125840053843 | 208.628626112623 | 210.64483507528  | 207.488522933448 |
|         | 187.769988580599 | 153.261002653668 | 204.299375966441 | 190.76537287329  |
|         | 184.672330560677 | 174.881557472722 | 180.952017616136 | 169.136919982294 |
| TULP4   | 269.424055734143 | 230.015981563049 | 257.643855420381 | 232.641965649602 |
|         | 232.830038701628 | 225.438177833064 | 257.706904467657 | 221.74200490054  |
|         | 219.246271924313 | 297.285037835812 | 346.635777358159 | 266.101158071711 |
| TUSC1   | 213.556015518863 | 211.34069504665  | 231.0814970959   | 226.114369645703 |
|         | 337.935183275743 | 232.492398623889 | 203.04864785056  | 189.174957940401 |
|         | 190.625250757654 | 302.462763120177 | 186.447049658314 | 173.250350363688 |
| TUSC2   | 222.365208637146 | 219.564603776774 | 203.370353613423 | 242.570588364106 |
|         | 349.99912485533  | 265.219444616245 | 239.572670410818 | 220.578790067967 |
|         | 241.734804013256 | 188.503673684625 | 207.150354734189 | 272.16090053595  |
| TUSC3   | 207.531908382266 | 210.117033165026 | 196.860228537112 | 185.717123241832 |
|         | 447.579975492958 | 719.628501451187 | 1154.86609813021 | 677.9972761887   |
|         | 689.590642377619 | 345.38424761963  | 578.650614747598 | 868.40984928812  |
| TUSC4   | 554.282040414368 | 553.757847979529 | 696.650617523899 | 654.52788411248  |
|         | 925.656701707763 | 940.716682221364 | 866.765054377214 | 741.875751347917 |
|         | 1017.09497861942 | 545.760623858473 | 580.859914041323 | 717.686676823785 |
| TUSC5   | 140.728126380228 | 136.537117054998 | 129.969400693456 | 129.871985352583 |
|         | 137.961504178836 | 144.02239659305  | 135.940629737073 | 137.961504178836 |
|         | 136.324020406359 | 130.71040889651  | 126.265475477399 | 149.599523779175 |
| TUT1    | 162.98885109088  | 160.992494552269 | 161.295030274012 | 170.784229026842 |
|         | 317.00629920068  | 163.340435089911 | 220.288758600588 | 174.727439318223 |
|         | 172.591885279428 | 142.630563791102 | 182.181756507598 | 156.930119977809 |
| TWF1    | 155.201655653645 | 156.453108485249 | 176.155413809391 | 142.025834438974 |
|         | 157.466686487471 | 359.822784070765 | 313.351441953859 | 279.790257881254 |
|         | 225.64288602828  | 322.153713097778 | 190.716424123036 | 285.931444518474 |
| TWF2    | 466.083451075744 | 511.779988437654 | 416.715760038095 | 549.569374872629 |
|         | 1603.87451959083 | 773.057095787974 | 643.660739343159 | 429.680602294138 |
|         | 545.200687301057 | 525.515169794593 | 885.927972780392 | 697.774882173237 |
| TWIST1  | 384.641319423853 | 417.103816140912 | 395.927222009721 |                  |
|         | 471.598175637494 | 150.555125135002 | 171.345989796519 | 145.864902319111 |
|         | 150.102853150151 | 168.314966639178 | 296.603054615145 | 146.96472350529  |
|         | 160.247370279802 |                  |                  |                  |
| TWIST2  | 206.802308105224 | 189.74261433647  | 172.631499322646 |                  |
|         | 190.549084022965 | 135.099515818368 | 143.114384950467 | 143.947729578484 |
|         | 143.857385585662 | 143.470181156799 | 145.358431402568 | 144.477267427347 |
|         | 144.206259414981 |                  |                  |                  |
| TWISTNB | 226.640323471375 | 193.028341755594 | 204.914390718161 |                  |
|         | 212.669156800241 | 158.153875553171 | 192.07791693203  | 196.399050990244 |
|         | 173.863373934746 | 170.452989060697 | 170.390200730789 | 169.179630363359 |
|         | 210.502556087175 |                  |                  |                  |
| TWSG1   | 874.348941257592 | 709.303384219887 | 887.471553448641 | 507.236601481067 |
|         | 709.136137559152 | 1411.90426595229 | 829.126529857044 | 1114.85422895959 |
|         | 1411.90426595229 | 719.628501451187 | 363.195371577097 | 679.557656724243 |
| TXK     | 133.627389970495 | 107.622342073167 | 121.917596225576 | 107.802792435066 |
|         | 120.35956894661  | 127.354826381656 | 131.49254872524  | 166.111496598928 |
|         | 159.273225917177 | 121.559477523123 | 164.748676009072 | 132.664379033058 |
| TXLNA   | 1255.02720867812 | 1462.31151845458 | 1177.01310527577 | 1698.08853832248 |
|         | 2365.99940149374 | 1488.37146754184 | 1353.61552261489 | 1663.71411325131 |
|         | 1635.35544761095 | 1014.23822508445 | 1671.82101590797 | 1283.68791110988 |

TXLNB 124.602474178438 120.006982591236 117.703025026759 118.406487008528  
130.59886317117 121.087514445827 129.990534497026 149.073650082048  
121.416038813102 122.373400988227 124.571807093748 129.221482161409  
TXN 3570.21370790206 3226.53426370323 5373.2173152906 2670.9151276786  
9937.36968397141 6021.68798558746 5601.24254062491 7446.59106452583  
6830.46932926077 11777.9172529698 7733.95252458705 7948.88765120294  
TXN2 194.488249052694 186.831266888028 178.262619516994 217.684410907748  
229.26243866226 195.353512458837 169.674931517111 194.143649677822  
216.181417552574 174.928155956396 239.148333781084 233.129544542265  
TXNDC11 295.851459742115 343.833659987063 279.921244070981  
339.753059801136 437.049581919144 286.587945301875 289.956528242564  
336.5543056115 310.989043012841 283.377663208926 282.870785313621  
281.792602269388  
TXNDC12 869.245621105614 1051.45401327176 975.685771692095  
767.861763134136 1578.87371296418 4022.23000497332 3468.14455177277  
3727.70199176703 2043.73482086765 1609.54149931375 2176.59445919725  
3277.24948092771  
TXNDC14 827.157920721418 795.037968409957 848.620986404914  
694.02978779693 1213.61170930345 1458.13354165836 1165.95924778817  
888.04996477314 1170.88763035931 1151.30600388403 1293.38808483663  
1503.2049371911  
TXNDC15 310.640107228956 290.954496559897 381.808809625801  
349.054741747798 199.756584044664 267.190228116903 275.169415154893  
293.794745907663 232.200025766422 275.298642145005 221.719848707318  
228.270158363878  
TXNDC16 145.185902174023 162.147989253357 188.093450717857  
141.028377381019 142.551161883518 149.141033677244 152.79367157305  
143.118188813831 154.760697311395 155.176714087209 146.301300103564  
147.8838487685  
TXNDC17 1373.67062432073 1804.63762008613 1239.66725147648  
1218.64951314553 6919.4226838505 5825.9968524214 6601.004284244  
9881.69734721233 2786.35558271661 6460.4291301245 4477.54806526552  
4198.61471038267  
TXNDC2 145.472859089272 143.165150890885 145.120347147471  
140.989597586699 133.490805791504 148.618327213374 136.654902685184  
142.081013617671 150.026314061051 136.758262322199 132.784949538167  
135.594186066942  
TXNDC3 171.212749388553 129.330592465123 162.668896609848  
151.477239868429 141.008604646743 165.972090075204 162.090585987836  
162.919656039331 148.247826830556 156.502051001988 142.866874321248  
144.578454791104  
TXNDC5 438.7446527797 373.290426793366 376.627801547869  
391.706404954357 483.429488817674 621.173315178959 697.581541438891  
799.132592914065 746.777330152729 429.351447428661 332.138346958671  
414.888512708716  
TXNDC6 157.841520434044 139.859453080651 144.688515462537  
139.979025013908 153.44628692569 144.597060118959 137.453705355364  
138.178987367473 154.630837508249 145.594378536072 153.432933930805  
133.083877012766  
TXNDC8 152.518729390047 146.309171902112 148.382228428693  
144.660095230819 131.527148910356 156.448355269561 168.643026828823  
151.518116154483 157.309058982117 162.439052954676 126.075528093376  
155.966610886886

|           |                  |                  |                  |                  |
|-----------|------------------|------------------|------------------|------------------|
| TXNDC9    | 246.95071325085  | 249.379605914827 | 225.423403713718 |                  |
|           | 193.777175793218 | 496.560127152436 | 523.937128789616 | 302.1846598234   |
|           | 381.867665449509 | 372.689712716797 | 378.695635790714 | 446.194196064909 |
|           | 304.058158731957 |                  |                  |                  |
| TXNIP     | 10988.2836796736 | 12749.804597566  | 14348.4009261372 | 10329.1999331936 |
|           | 2618.64973582507 | 4047.99200599472 | 7519.94306346326 | 13526.3170858629 |
|           | 5213.40342339233 | 790.790236361922 | 14300.8562978211 | 14983.8256502293 |
| TXNL1     | 366.073387075385 | 321.177982468322 | 426.649095732979 | 252.015257713669 |
|           | 455.665927568395 | 314.780899041937 | 407.589300080181 | 484.363052437459 |
|           | 565.059609779245 | 456.530337997907 | 488.746614111382 | 490.631757904175 |
| TXNL2     | 231.915272112361 | 223.496400038284 | 292.60467054075  | 221.916075811355 |
|           | 292.802762636861 | 450.220658078322 | 439.616817413027 | 363.445110627483 |
|           | 402.425130776131 | 474.629173435475 | 430.100415399881 | 573.074116810032 |
| TXNL4A    | 131.125175244494 | 129.704763615045 | 141.66312605042  |                  |
|           | 117.696262292883 | 168.6016897585   | 180.01471631205  | 187.472028627511 |
|           | 179.286187825363 | 185.275787562938 | 167.949422301257 | 157.83460319212  |
|           | 195.474525582555 |                  |                  |                  |
| TXNL4B    | 223.666832044186 | 197.146035305296 | 231.257543784864 |                  |
|           | 176.839917795004 | 183.201926323188 | 180.913502162011 | 179.764260117544 |
|           | 180.590215659031 | 207.674249122047 | 185.374745525698 | 156.176537862398 |
|           | 184.724071110756 |                  |                  |                  |
| TXNRD1    | 2074.29945034697 | 994.802763887989 | 2116.39371296122 |                  |
|           | 1108.61301774472 | 256.022057262325 | 271.770138565186 | 222.394280571312 |
|           | 318.348505551265 | 283.46492196692  | 289.576706584644 | 232.667968049771 |
|           | 256.873090834376 |                  |                  |                  |
| TXNRD2    | 189.192494970145 | 217.380892198811 | 211.012142461725 |                  |
|           | 262.259969786927 | 367.825328832492 | 164.38282966938  | 196.117609477292 |
|           | 170.844002412425 | 158.377396672742 | 202.397972518715 | 216.427103365727 |
|           | 196.053808536366 |                  |                  |                  |
| TXNRD3IT1 | 137.144001915831 | 126.25011972597  | 135.598709185334 |                  |
|           | 134.968848574511 | 140.158309892319 | 139.807421433384 | 129.666957539624 |
|           | 138.274057264688 | 135.809383370957 | 143.913625824599 | 133.9382467268   |
|           | 134.944488136297 |                  |                  |                  |
| TYK2      | 690.246312542011 | 724.442411170786 | 689.04773343291  | 917.646958427824 |
|           | 1091.69584249713 | 935.042067053226 | 886.517088614968 | 1310.60610806797 |
|           | 1064.85152398919 | 1010.23703166498 | 989.77058497525  | 805.600599570258 |
| TYMP      | 173.088291472857 | 165.576758218571 | 153.62335478774  | 139.491769969541 |
|           | 299.463563393179 | 157.742948919213 | 198.783034238774 | 223.747350951099 |
|           | 302.021033686056 | 797.28465621772  | 234.28146549561  | 189.044966519228 |
| TYMS      | 149.73250641246  | 215.607567127195 | 168.295044843056 | 193.689806171113 |
|           | 1427.70292953827 | 599.307072499899 | 464.907454552364 | 892.515788744891 |
|           | 810.396770151757 | 889.054356462993 | 315.064477782052 | 946.640841062802 |
| TYR       | 119.418866166776 | 114.174153178166 | 113.301733735994 | 117.829228895897 |
|           | 112.875136585606 | 116.925863450165 | 119.539713878832 | 109.384112020063 |
|           | 110.081964209973 | 119.535267326862 | 114.618608815885 | 112.495783269169 |
| TYRO3     | 238.482863150124 | 259.374392296079 | 156.136962310077 | 230.469548500304 |
|           | 338.510045856515 | 207.269530621176 | 193.674681547989 | 163.54669668396  |
|           | 210.803130108618 | 234.432954093705 | 187.700723296295 | 222.624150073858 |
| TYRO3P    | 117.897556445952 | 118.544870925791 | 113.470356909765 |                  |
|           | 122.69021100699  | 126.553693803748 | 108.589444216106 | 110.333339548402 |
|           | 108.515401509039 | 115.270544506813 | 118.540620928268 | 114.841964705981 |
|           | 117.992729826121 |                  |                  |                  |
| TYROBP    | 532.786041960586 | 305.343879847672 | 327.696359071012 |                  |
|           | 292.524552445564 | 342.245182599593 | 536.609777988581 | 461.940616438547 |

|           |                  |                  |                  |                  |
|-----------|------------------|------------------|------------------|------------------|
|           | 984.695710317818 | 1419.4638331856  | 829.126529857044 | 511.996883507889 |
|           | 412.736636437651 |                  |                  |                  |
| TYRP1     | 120.809659457873 | 128.040201586267 | 127.818137805569 | 146.999370190363 |
|           | 111.992738490468 | 119.449118660481 | 120.733009784454 | 117.907840952685 |
|           | 107.605526304445 | 126.228513847262 | 124.121555438466 | 116.300028266671 |
| TYSND1    | 261.988345506548 | 281.659653592151 | 261.426617866925 |                  |
|           | 272.994195639694 | 535.758943850734 | 256.022057262325 | 563.339837352678 |
|           | 353.571106279836 | 272.500572765647 | 301.188296465202 | 590.646248924596 |
|           | 537.350891960682 |                  |                  |                  |
| TYW1      | 235.563592256037 | 237.692959394487 | 276.5177779623   | 232.778488697337 |
|           | 198.506786870804 | 247.899467998443 | 250.737252834098 | 304.844121431627 |
|           | 282.076744753348 | 285.46340356157  | 291.616195651001 | 320.525885538523 |
| TYW1B     | 341.361299896997 | 394.414934831535 | 396.988248940183 | 362.581768268116 |
|           | 282.797367565702 | 280.656087497806 | 338.026161865853 | 533.140740560189 |
|           | 526.625936680738 | 351.292682758926 | 342.487952136318 | 465.102234374389 |
| TYW3      | 673.176084400831 | 628.197839884392 | 736.603605876572 | 691.916554922896 |
|           | 185.905819051223 | 260.888612454097 | 320.597495751519 | 352.50679573356  |
|           | 263.52595855321  | 266.563990988678 | 392.430873293903 | 322.889296658955 |
| U1SNRNPBP | 200.558971047462 | 206.620708230452 | 233.496804016764 |                  |
|           | 217.748916080172 | 228.560346647306 | 231.547654653783 | 279.879377933144 |
|           | 260.129513331703 | 351.934158805882 | 277.180850774168 | 277.026538720417 |
|           | 300.199170426996 |                  |                  |                  |
| U2AF1     | 362.195903246495 | 380.754569467715 | 387.355661073935 | 403.582461109859 |
|           | 521.215655189324 | 389.800620731411 | 366.317263094585 | 366.564822549834 |
|           | 563.339837352678 | 319.352940751688 | 517.529147171876 | 367.825328832492 |
| U2AF1L2   | 687.700356531038 | 714.052063877292 | 723.640113902925 |                  |
|           | 832.014011481807 | 278.428310548805 | 712.699853328955 | 412.048097766066 |
|           | 720.077057619735 | 456.201998988891 | 345.291295192574 | 500.469781477166 |
|           | 470.578335285993 |                  |                  |                  |
| U2AF1L4   | 171.573342518254 | 170.179304745674 | 180.968659614238 |                  |
|           | 182.222567053422 | 185.447093292348 | 166.8846964604   | 158.625060605976 |
|           | 173.364586678954 | 175.245611094434 | 155.981989040279 | 166.788336808924 |
|           | 159.997580819443 |                  |                  |                  |
| U2AF2     | 685.848203651889 | 704.152296359463 | 778.28014337938  | 756.068695265118 |
|           | 2299.23805014176 | 1107.99131702522 | 1218.64951314553 | 1208.25171673432 |
|           | 1421.04485772969 | 780.461254794127 | 1013.03054571763 | 1086.33540858772 |
| U58       | 128.276471459777 | 139.47828235176  | 131.665421461826 | 139.303747021408 |
|           | 129.194132399305 | 122.053867525393 | 133.24828292554  | 120.035437167539 |
|           | 132.137634927459 | 127.128042857811 | 124.668658660052 | 109.947300629824 |
| UACA      | 136.152290887509 | 142.296446144179 | 126.064311640223 | 130.677737553727 |
|           | 127.211469322857 | 116.958052905168 | 117.255496552581 | 116.588138374632 |
|           | 119.75069850668  | 131.177396785633 | 138.925802905636 | 128.086493618022 |
| UAP1      | 912.143424293236 | 592.957842630046 | 481.751102333172 | 396.611050163857 |
|           | 690.010326122574 | 530.561387049511 | 421.583441056026 | 438.7446527797   |
|           | 396.459213999636 | 521.83794739314  | 420.567884340705 | 379.387095129725 |
| UAP1L1    | 243.807038920733 | 216.485113690708 | 228.499052416183 |                  |
|           | 228.058870735016 | 200.22145130696  | 152.883970401452 | 165.642728895682 |
|           | 154.127346849182 | 169.220974415101 | 203.265559787292 | 172.652645920958 |
|           | 166.540134051424 |                  |                  |                  |
| UBA1      | 2841.96460830166 | 3258.07532987071 | 2249.8123426309  | 3515.36256599555 |
|           | 10075.6573898939 | 3219.27851139047 | 2215.43744802035 | 3677.23129570773 |
|           | 2437.63566094439 | 2273.12164779441 | 2473.22803972431 | 1701.43479420427 |



|         |                  |                  |                  |                  |
|---------|------------------|------------------|------------------|------------------|
| UBA2    | 187.965294229013 | 190.736796322054 | 196.269193578525 | 173.766372029062 |
|         | 218.672831303767 | 269.100400678077 | 245.042781391047 | 217.940575516933 |
|         | 286.230656780335 | 300.83667045718  | 241.734804013256 | 222.764568757453 |
| UBA3    | 203.475080163804 | 186.529656751005 | 255.374689750672 | 199.637257550762 |
|         | 241.383657414248 | 709.136137559152 | 449.304281526081 | 400.353795948162 |
|         | 598.449359425056 | 458.33221423434  | 269.424055734143 | 479.138177792954 |
| UBA5    | 225.803528238368 | 232.465880700217 | 299.568830444875 | 198.489278156437 |
|         | 266.032134528055 | 267.222762759781 | 266.442565636226 | 322.213266293148 |
|         | 364.022018936132 | 280.749681050778 | 259.252807304272 | 302.219514290905 |
| UBA52   | 8982.75408120297 | 8596.90650022148 | 8666.41250683965 | 10360.162704111  |
|         | 6628.17856159198 | 9450.52572756597 | 10608.0671430066 | 10765.0336035748 |
|         | 9349.76443528011 | 7838.92787031423 | 6233.78489807054 | 9016.04641569485 |
| UBA6    | 462.779122987815 | 486.653672099699 | 411.603820288919 | 394.810886122555 |
|         | 690.903797251841 | 562.387692458382 | 740.973440818582 | 514.354512083591 |
|         | 688.464980326689 | 805.120147618984 | 634.906566690042 | 759.802694618208 |
| UBA7    | 584.199252444401 | 513.292377117011 | 543.710330214344 | 594.713185954954 |
|         | 694.644744547412 | 186.939168482155 | 818.225731093346 | 570.771089597761 |
|         | 1071.83063260499 | 317.550000625189 | 904.211195986553 | 750.494286476465 |
| UBAC1   | 1507.39761667421 | 1610.38263368771 | 1677.93424842267 | 2157.50118108142 |
|         | 1392.89422203207 | 678.365575489532 | 821.020339593525 | 648.161646065464 |
|         | 920.840069938767 | 1239.13016938378 | 600.264940641426 | 560.481802403627 |
| UBAC2   | 572.753294955207 | 565.509446660206 | 574.496860164135 | 563.011988279542 |
|         | 938.918431240228 | 848.154015576436 | 876.288248962843 | 530.819778703194 |
|         | 987.564350211893 | 685.848203651889 | 835.834013018438 | 972.902937649492 |
| UBAP1   | 449.523996620257 | 440.657747083721 | 577.801009921199 | 482.466736153026 |
|         | 361.390981655795 | 401.87674893993  | 316.364342983155 | 394.35596596181  |
|         | 491.906642849373 | 922.877217016704 | 311.481739745423 | 276.925017614147 |
| UBAP2   | 196.287131027947 | 183.493455947795 | 216.645552082667 | 191.322056430728 |
|         | 280.848426993226 | 240.005943851098 | 215.247472744419 | 202.324795686879 |
|         | 280.033528476199 | 300.150235383065 | 283.46492196692  | 173.979001863717 |
| UBAP2L  | 877.598505913096 | 765.333633142088 | 911.782783698439 |                  |
|         | 760.272612245092 | 655.665164535648 | 660.907502776003 | 712.067161025165 |
|         | 991.611982265221 | 763.263858769038 | 484.363052437459 | 690.246312542011 |
|         | 999.159652508318 |                  |                  |                  |
| UBASH3A | 115.208555742308 | 120.208584170364 | 114.122395647516 |                  |
|         | 117.312094804205 | 120.816130267055 | 122.662260070778 | 115.524441144063 |
|         | 116.983869766097 | 125.019064287385 | 115.566303449363 | 127.756214708077 |
|         | 117.523834738903 |                  |                  |                  |
| UBASH3B | 136.434045183143 | 133.120273569229 | 115.305518560239 |                  |
|         | 150.899664887945 | 173.121618125421 | 144.393688888553 | 163.988099963018 |
|         | 196.076386020815 | 190.716424123036 | 136.209796259197 | 137.445344116574 |
|         | 154.904424749528 |                  |                  |                  |
| UBB     | 7122.07276863122 | 7190.89891723932 | 9293.35991367953 | 7631.6124232898  |
|         | 5489.19362780613 | 10953.6229702446 | 7371.9761952537  | 15053.7547401937 |
|         | 9881.69734721233 | 8768.32269645116 | 10533.5868398404 | 7371.9761952537  |
| UBC     | 14798.1358474998 | 15603.3490258675 | 18287.6015702456 | 13324.7465248375 |
|         | 13217.7001749493 | 17658.0552091534 | 15194.4972103372 | 16123.3486890049 |
|         | 19356.3155476146 | 17975.1602090863 | 11777.9172529698 | 15463.4998494462 |
| UBD     | 160.078122267577 | 178.885625009973 | 162.06940121135  | 181.479652131104 |
|         | 149.350630572336 | 193.428733288774 | 242.996248524203 | 260.098788125373 |
|         | 398.971838949075 | 182.67941458824  | 381.808809625801 | 248.643311972844 |
| UBE1    | 892.038018567941 | 1115.53524128833 | 748.703265448403 | 1211.39534395597 |
|         | 3430.76532174701 | 1177.70376288106 | 759.534249620343 | 1186.23169583595 |
|         | 905.233241047678 | 778.28014337938  | 715.93836911426  | 568.701661112562 |

UBE1C 229.406012088782 214.499670852615 263.426870776148 220.487665103019  
 230.179200974631 349.054741747798 302.272304483941 271.397087928135  
 314.751799003704 277.000882284125 258.915802108562 294.697622870418  
 UBE1DC1 168.697565122105 168.000247148058 181.922907273871  
 153.97869518398 221.768507175814 191.861598059182 205.260673843294  
 256.538195034956 262.79667156266 258.998065427002 196.287131027947  
 231.314944217099  
 UBE2A 390.573484082597 333.533043832976 381.121621815163 320.979443123471  
 539.27766384282 706.292905820227 426.132037075477 606.679284487803  
 609.504365141529 733.195136251155 501.946140974776 535.758943850734  
 UBE2B 166.563411635721 165.960176666275 197.72068061775 165.471587934831  
 151.589273633331 207.384408045502 196.777776509371 157.490138425943  
 174.075670633438 198.205113187281 150.841261270382 174.187510325385  
 UBE2C 132.57219914253 176.820928772968 130.870198462514 161.234304237838  
 1827.03179366146 1609.54149931375 808.837225580351 1113.59310757948  
 909.727616721285 596.54904286299 264.779154931102 689.821785472506  
 UBE2CBP 175.585857393085 195.414464905232 205.821101661022  
 182.248178961707 168.538117820213 172.486839924297 186.747375844319  
 173.488272345038 159.942971344216 183.531156021887 165.386056999339  
 180.952017616136  
 UBE2D1 124.539006083936 141.760529549196 144.095471610836  
 145.414563914801 121.57069706238 124.246363878094 139.232893342069  
 136.415734370763 136.454911192129 133.290168428696 124.183297351614  
 133.839554874862  
 UBE2D2 285.05846406041 281.168898910065 257.100909006193  
 285.131244588624 185.046826969912 245.723316636363 240.706548931192  
 207.902853533132 192.009562635198 224.062024091915 218.944052733757  
 206.127493726541  
 UBE2D3 928.672013047007 797.73902873919 1090.20254511452  
 646.933504790891 641.645855499704 1077.95929298567 1307.96033038529  
 1245.47421607111 1617.44377452783 1485.776977235 1200.94425675913  
 1311.34904760947  
 UBE2D4 548.288640768746 565.313436777992 668.853969513382  
 866.147379099606 267.069665000047 282.511614929917 389.109250187902  
 408.361368902627 405.183882455109 342.998459706966 437.489929507567  
 431.546135503733  
 UBE2DNL 128.789304988964 147.400082178491 154.347332766547  
 170.87247413028 167.491399614986 147.748142622566 153.807525239478  
 140.012295249756 149.500457158616 165.51742391186 148.309872393  
 161.89906072679  
 UBE2E1 1634.20135156938 1371.56635975955 1509.69760873558  
 1514.53784631689 1978.12229412176 1614.00098175383 1439.37593006882  
 1281.9073569335 1699.17470788219 1374.92806285803 1313.89440013246  
 1499.07462479938  
 UBE2E2 1158.057104827 1222.59895569348 1129.76078220457  
 1435.4236709581 171.444558905575 182.495117800073 158.911404625381  
 253.463871742303 267.535469518664 1505.09908072606 223.339132121796  
 325.570839576032  
 UBE2E3 218.773153183388 237.191866335979 229.26243866226  
 216.522992914538 283.760131847707 446.601751145647 249.400820221233  
 280.127735578097 285.659010982301 324.25775261173 387.135002880995  
 372.374101464689

UBE2F 956.153239481189 965.673699120049 1119.23362648056 1037.97124386242  
 554.950092776254 870.409935772423 805.875557314697 522.17701271254  
 808.837225580351 1929.52146517699 815.045148478814 1018.80178630497  
 UBE2G1 385.463209972694 356.376890469558 478.180723959397  
 357.006610037663 329.263397240111 495.56459361431 338.326304736048  
 490.631757904175 423.740836541835 586.642581067137 421.929674562786  
 542.883453307  
 UBE2G2 791.137867905579 702.265884752474 825.345092964844  
 986.972987865318 229.347135478142 362.65285317327 434.073729807058  
 461.581199513891 525.789451405743 499.176926371542 587.026042400878  
 461.581199513891  
 UBE2H 399.071041584646 309.098519056843 346.356312668445 287.041585684111  
 285.30221551106 260.787104931135 485.136339836897 499.176926371542  
 359.256193328366 416.075109522039 495.89837457901 467.187222441283  
 UBE2I 444.479355480138 453.058639550475 450.99430272315 490.464012303239  
 1018.80178630497 768.67030514096 826.771587455122 773.057095787974  
 766.710479603963 740.196934996626 582.382786876656 873.408431189194  
 UBE2J1 549.569374872629 574.6506349984 496.03509813734  
 565.509446660206 354.579728909336 798.758496171493 495.099443245153  
 526.285114043212 552.790706181938 491.034395489684 435.332573825425  
 482.739666411407  
 UBE2J2 178.035700298977 170.350891928203 175.165305179665  
 192.244413515864 244.689936990021 192.032080013216 201.235056368151  
 191.708350637714 192.095235288818 175.891947478891 188.093450717857  
 196.226732738526  
 UBE2K 146.539196738195 148.340380102097 170.079723856247 201.517356610591  
 181.79418355897 153.913513669361 151.71942719041 179.026308021985  
 161.126686827391 174.202069525223 183.100286716683 187.167255451988  
 UBE2L3 384.464383569801 424.855168311509 439.023181761356  
 628.485648053393 382.960724128105 352.945088028205 234.588584245938  
 222.365208637146 293.825372123877 288.913660405191 218.862705238592  
 287.558897878375  
 UBE2L6 726.731270955732 790.561585641193 524.973621024573  
 708.056533282983 389.96566674501 435.332573825425 1025.27246494218  
 696.976036382401 1233.27155759407 897.0125616892 866.765054377214  
 953.861218000678  
 UBE2M 2296.30423509176 2388.03256067711 2518.88171283899 2905.12297639092  
 5800.06300826802 2227.70654174379 2004.19532096239 2093.67403119512  
 3290.27308365921 2039.55802107872 1903.13326109546 2107.99357083999  
 UBE2MP1 140.992801405088 136.801338583441 144.926838698422  
 137.410687900298 141.166605868578 139.909719416938 140.004456934031  
 137.73313146889 139.681211082196 136.05434446747 144.685707282641  
 134.888404433315  
 UBE2N 792.247301083075 869.245621105614 831.289724465877 760.572409199179  
 562.232754247201 1462.31151845458 1208.25171673432 1519.38642390142  
 1168.68074786473 873.408431189194 1061.79595707572 1403.09138858507  
 UBE2NL 146.328876892698 143.184697704389 155.247452081206  
 144.152325539824 149.482399138862 137.871870950302 139.432567336814  
 142.601556980614 145.861217875066 137.709120153505 155.368204597287  
 155.004104153679  
 UBE2O 220.578790067967 255.677315946354 222.605195861218 322.213266293148  
 364.331860640225 272.666435295288 318.628084728596 278.385151185788  
 259.672238210968 241.987100712218 181.941224633917 243.589099648895

UBE2Q1 243.979769719186 277.256341592701 235.162439885207  
 274.14931964455 345.732364434125 493.887026009442 330.590986934704  
 453.457361487577 417.191960489528 247.550312458738 365.140886302762  
 585.933822585718  
 UBE2Q2 1474.70984232307 1258.16519121331 1401.67503392145  
 1269.67110104843 408.7151485563 737.650963292668 838.63350090385  
 390.897464546943 490.269418483997 1414.95226752155 376.443086293235  
 542.267204956846  
 UBE2QP2 169.527424356913 151.492236411757 138.852212944492  
 177.379186278216 167.186780161168 171.537040561599 164.690739760426  
 153.159425380743 156.589829166493 181.048789688798 137.042097702398  
 155.405519023053  
 UBE2R2 190.270819689158 193.148369507405 169.520544329439  
 183.708917501519 149.63291071048 141.170937695272 144.871396308673  
 145.760577027524 163.570018900148 167.284724396943 245.522497675754  
 161.655336107432  
 UBE2S 145.580238427531 156.187809481625 135.911903336544 167.284724396943  
 147.736397115265 137.415158613413 140.567565996849 149.408530395745  
 133.171854425031 140.296609941747 132.487362867399 155.639666182376  
 UBE2T 167.58143328723 191.525291860022 178.997098204457 191.146276657897  
 505.404271675438 503.967725251906 358.092809491843 468.339735327273  
 620.163512570453 303.051124835907 281.168898910065 704.152296359463  
 UBE2U 114.953328013917 124.731056918418 119.608334527504 126.652197216347  
 121.918698091955 119.899649497032 117.060696904303 123.683553177379  
 130.71040889651 131.110018165002 150.701579893607 112.590379042108  
 UBE2V1 154.722895261876 158.505363728431 154.091431691072  
 153.551359970644 154.199534276226 169.012926546641 185.002106079042  
 147.512290383685 165.773929204209 161.189717452004 161.12121879514  
 164.39733878009  
 UBE2V2 472.669956708398 414.797416270335 612.374364731095  
 413.913442080187 371.457568934695 450.99430272315 549.692164962653  
 535.041545916303 697.581541438891 699.06539333455 480.797281489891  
 539.27766384282  
 UBE2W 203.410932496844 191.814634229865 197.526492324088 198.783034238774  
 158.390337945372 221.719848707318 211.595513743111 205.428900832926  
 184.365354978005 192.914362049985 174.192898940601 179.451637129672  
 UBE2Z 285.768837438859 313.888035511709 260.746952459282 308.281798808746  
 398.796188440256 261.89195025254 325.12056698785 259.374392296079  
 309.283897272661 324.713347085998 354.45785837703 293.746733527346  
 UBE3A 870.409935772423 892.515788744891 783.373390305885 861.786094902013  
 651.998433127992 619.380514697732 640.568342662067 476.076903428247  
 606.38343657878 656.009451448101 682.315322994357 673.824770556885  
 UBE3B 519.564563632951 439.023181761356 436.891409783298 477.626693328013  
 243.468673768141 229.74418058711 291.476113017794 248.16594076495  
 337.22646304739 236.651601701157 336.981561928411 244.219585315024  
 UBE3C 730.673649872205 696.003998372271 936.560290736127 940.008438825765  
 688.684644604218 945.403379196643 887.147199303294 1097.18236659974  
 987.78377957731 1056.43975075255 620.371912523332 1301.61742965939  
 UBE4A 433.82566459288 502.170430910893 524.245387973163 419.902534806131  
 450.468410589415 448.858580689107 489.528040775004 560.180656219785  
 433.019478861638 238.375823012603 468.060528109338 520.470790410856  
 UBE4B 827.863789600981 694.02978779693 905.751410113646 815.045148478814  
 491.709723745226 456.038981546175 506.165100641525 465.54817048856  
 600.919152191636 468.170972478717 604.737834405874 411.71606840872

UBFD1 180.680595239651 168.813895764991 154.533544838819 167.629008083436  
 292.640251411131 129.294026995663 222.605195861218 175.313689069815  
 181.247766545135 183.314276033531 190.348359536057 153.568321662387  
 UBIAD1 283.46492196692 322.576886792502 294.535979194434  
 334.772648743153 861.119262963015 521.625146077176 494.347792360629  
 392.746574862867 383.939800422489 396.988248940183 401.87674893993  
 374.106258053201  
 UBL3 810.769136227155 832.622843175217 1062.03157932144 618.140160251927  
 290.184801898828 622.692834629555 591.763423878737 349.540558521616  
 593.990687449346 459.854279050269 773.330948077036 626.104755496369  
 UBL4A 534.276129011237 544.580311371212 547.042461070351 768.053694275398  
 548.455251483009 378.308562999445 324.871248300476 273.911741951291  
 322.443089373063 291.994364783888 142.589312139207 291.914408947328  
 UBL4B 139.690093593646 129.541049979717 133.532323053215 134.527165454543  
 135.651829752462 127.03153185998 125.058165131184 126.65748100631  
 121.224389883994 130.751522895053 134.93814894432 136.497295707149  
 UBL5 835.284130042504 748.940715378564 827.157920721418 692.729789121701  
 905.751410113646 1932.39418448203 1460.24985399013 1436.57771711084  
 1134.64039256323 1242.61637859159 1326.95332435394 1639.76556136383  
 UBL7 186.359770878343 196.676479140094 201.349209185128 243.589099648895  
 255.413231082357 175.617504025145 209.464347017443 157.348475799643  
 204.219197797869 221.916075811355 218.917357155289 189.0608798771  
 UBLCP1 492.930906036297 441.785666261936 418.645775576811  
 426.132037075477 256.424415389574 283.235844022826 428.66614441422  
 448.95671696823 275.343591424586 986.004777675332 427.151797273226  
 486.778046640624  
 UBN1 406.224345292389 425.13721408756 432.969886744613 512.895335481876  
 469.794672718173 363.594808277506 454.984562256248 560.362502519639  
 483.429488817674 486.653672099699 340.728888109597 375.407747753058  
 UBN2 265.670643951648 245.269004485826 308.974786799114 268.885346595453  
 184.844915350411 268.660078500783 292.145553580042 287.656436278551  
 252.056131165397 242.019489058244 265.754141836026 266.442565636226  
 UBOX5 166.17959304455 168.511517285223 167.226663395855 183.657525723012  
 197.24751449599 171.11282933168 152.14012587515 161.281195929918  
 150.870830294349 156.702300398105 164.227134687088 165.781667492391  
 UBP1 1473.70433292382 1355.66237447026 1479.69309189156 1501.18820017008  
 1210.40302822121 953.861218000678 869.937761943249 802.017244099902  
 852.649997188692 628.485648053393 1010.73988405469 833.430847243676  
 UBQLN1 544.852019338212 507.710604451713 589.541347392215  
 524.541494680558 511.891269255193 423.045329000756 346.356312668445  
 427.766660764042 566.813343200268 661.390308090982 452.843213944986  
 399.724529998085  
 UBQLN2 1301.61742965939 1370.61156801632 1255.02720867812  
 1191.88706134921 1295.27257578314 1406.73270115373 1407.43503866211  
 1728.86115695979 1587.84395475807 1453.88161495484 1806.24732793591  
 1069.25265476373  
 UBQLN3 164.417770955805 172.7330526128 158.244741207036  
 174.866036336378 165.355764467096 134.031960707639 121.54835308632  
 169.777032044409 160.379168489216 141.565098155081 168.996965070202  
 165.100811808026  
 UBQLN4 1136.76110352875 1215.96648642927 920.342429282889  
 1480.52638217173 1946.45172007314 1072.82323999638 875.38834441246  
 1491.05501052706 972.468110850466 1011.9675459648 1220.30347076968  
 1231.92253664482

|        |                  |                  |                  |                  |
|--------|------------------|------------------|------------------|------------------|
| UBQLNL | 187.132496910208 | 160.127254444487 | 147.172440755724 |                  |
|        | 178.394895649664 | 131.060030943633 | 121.952255635669 | 130.814702312493 |
|        | 127.829001155781 | 140.958277301476 | 127.650229552084 | 158.675960205792 |
|        | 127.015086299437 |                  |                  |                  |
| UBR1   | 126.129564039673 | 127.152744243038 | 132.560292119968 | 126.526489290128 |
|        | 125.840932898827 | 137.773185451062 | 148.353927712013 | 126.409995188106 |
|        | 150.542478166361 | 134.750046135498 | 151.992112109698 | 132.211379936941 |
| UBR2   | 372.149771075286 | 360.053590374552 | 405.032674307193 | 367.439588680092 |
|        | 252.789376168324 | 476.917496749381 | 411.505580458401 | 340.239348689005 |
|        | 340.903961204211 | 394.810886122555 | 352.741885295157 | 432.969886744613 |
| UBR3   | 328.401537339876 | 296.603054615145 | 381.4054004349   | 289.724297749772 |
|        | 293.080122239022 | 420.446810988909 | 319.927209914181 | 292.185246573643 |
|        | 286.818166898922 | 322.576886792502 | 187.097765940131 | 435.603911474926 |
| UBR4   | 1053.65938651514 | 910.982557417978 | 1409.42016970226 | 943.23069404564  |
|        | 1057.1528284934  | 975.685771692095 | 743.510369438587 | 636.048536814356 |
|        | 1071.00507864299 | 659.900771633223 | 667.892385395063 | 840.276501350383 |
| UBR5   | 509.702881232139 | 472.514017604645 | 510.061974830525 | 517.881547706391 |
|        | 331.32397534437  | 475.213525346293 | 416.546844844021 | 396.861835715943 |
|        | 496.697565640162 | 330.944203807675 | 494.538861626895 | 433.11536069928  |
| UBR7   | 304.811116024094 | 282.926325589238 | 302.945860276233 | 257.622317771472 |
|        | 241.648044508699 | 220.772387104223 | 233.161848094769 | 233.394506254045 |
|        | 241.077618798955 | 276.582734590058 | 231.39684528494  | 245.997705723007 |
| UBTD1  | 294.653534388707 | 330.405026390912 | 254.036619126409 | 384.97980473847  |
|        | 500.848273432862 | 180.430425314885 | 272.571092944711 | 189.94130405123  |
|        | 208.456472621593 | 240.94056877904  | 175.192902120699 | 209.913460781088 |
| UBTD2  | 183.998458233995 | 190.921283434627 | 185.432587490792 | 192.767155566493 |
|        | 174.873893094923 | 179.026308021985 | 205.65398844108  | 196.053808536366 |
|        | 174.417259650516 | 233.161848094769 | 199.813528853649 | 190.22021453133  |
| UBTF   | 198.815448428294 | 198.620777452192 | 177.910104644497 | 211.357321758564 |
|        | 201.337186768645 | 179.015669199358 | 164.553511697702 | 168.594235675558 |
|        | 173.459008248696 | 170.54511631708  | 167.447964370395 | 163.778790431064 |
| UBTFL2 | 151.456702092528 | 141.208106961875 | 155.349728277626 |                  |
|        | 160.176567985923 | 153.992763544073 | 155.456077670662 | 137.618447592489 |
|        | 159.749576166342 | 140.829927714838 | 160.473772347376 | 152.593934787262 |
|        | 140.300833590056 |                  |                  |                  |
| UBTFL5 | 148.382228428693 | 130.402496960735 | 118.095936088242 |                  |
|        | 136.009969058857 | 127.016845640004 | 134.463094391766 | 122.789656787728 |
|        | 130.700175060255 | 144.32655838488  | 129.063617408979 | 116.491342107103 |
|        | 131.444734367396 |                  |                  |                  |
| UBXD7  | 133.296200563657 | 152.166586496729 | 171.80440912191  | 162.229052648595 |
|        | 145.472859089272 | 157.298181833321 | 170.818182800759 | 153.363629311799 |
|        | 161.581641777014 | 172.329225247019 | 160.882229345156 | 141.535381351126 |
| UBXN1  | 2137.44704613378 | 2198.4268389426  | 2718.440149645   | 2295.16438420175 |
|        | 1595.22997714906 | 1282.84159765715 | 1594.05763963363 | 1162.8644618472  |
|        | 1217.29687282094 | 1659.80909859514 | 1089.16489859253 | 1157.02365469464 |
| UBXN10 | 133.628391175037 | 129.343440464729 | 131.986590029726 |                  |
|        | 149.119815471009 | 140.48372620406  | 133.532323053215 | 124.433114779288 |
|        | 131.410793139723 | 139.39442529119  | 132.64813248505  | 176.735168607281 |
|        | 132.332128706656 |                  |                  |                  |
| UBXN11 | 145.34041912391  | 142.187694439611 | 146.440630638891 |                  |
|        | 152.823566129571 | 188.515336186633 | 151.224289879776 | 153.077763784905 |
|        | 156.602240897907 | 154.384766720753 | 143.899201949317 | 151.045803695015 |
|        | 143.692305478191 |                  |                  |                  |

|         |                  |                  |                  |                  |
|---------|------------------|------------------|------------------|------------------|
| UBXN2A  | 746.777330152729 | 819.887322757281 | 739.085574858917 |                  |
|         | 750.494286476465 | 299.106362530855 | 702.265884752474 | 517.993093601127 |
|         | 730.988069115919 | 415.178470246749 | 693.516351173476 | 424.025588636796 |
|         | 481.238450505207 |                  |                  |                  |
| UBXN2B  | 218.134101819445 | 224.869569455052 | 344.529927973082 |                  |
|         | 234.243977361232 | 203.831047867731 | 290.954496559897 | 258.311739685895 |
|         | 273.709160508205 | 307.597733293218 | 255.527764534636 | 264.526189799049 |
|         | 258.759507964221 |                  |                  |                  |
| UBXN4   | 1004.97723186946 | 912.143424293236 | 1167.26555140613 | 875.7694907383   |
|         | 1149.90248188644 | 2995.42172749615 | 1635.35544761095 | 1741.0131951509  |
|         | 1356.43255022363 | 1403.90487313049 | 840.623505494489 | 1666.80650105101 |
| UBXN6   | 521.30110104669  | 720.907992182476 | 635.536499281829 | 754.406896156858 |
|         | 986.972987865318 | 563.779294315901 | 647.439372562271 | 548.138527647594 |
|         | 414.267332328081 | 619.487800014979 | 433.594928641214 | 523.937128789616 |
| UBXN7   | 133.879079395215 | 151.269442319766 | 152.274957846518 | 134.569883788949 |
|         | 138.887159625058 | 162.192879711747 | 150.129367314696 | 156.813992534584 |
|         | 153.667355714857 | 151.823845684041 | 148.493435517221 | 160.932913244423 |
| UBXN8   | 136.884799902348 | 121.613684281664 | 136.265972909993 | 111.328185454541 |
|         | 134.981272056795 | 132.600208090551 | 180.15338103     | 143.397823965608 |
|         | 166.20327698517  | 157.134782748175 | 170.758319048911 | 170.541689758579 |
| UCA1    | 166.936975782665 | 149.8919086368   | 150.359906271672 | 134.596391166462 |
|         | 238.548578086943 | 372.594990024312 | 2779.89882032092 | 454.732029358748 |
|         | 756.618969995355 | 188.079188251085 | 639.011144305614 | 152.411545237204 |
| UCHL1   | 720.214044399108 | 656.32782132983  | 812.298381693378 | 787.874585290601 |
|         | 146.49022197174  | 153.358189612307 | 148.991357883449 | 132.253450751554 |
|         | 172.578252260002 | 171.85890372225  | 147.341597963918 | 212.691702227442 |
| UCHL3   | 345.649572073924 | 329.535023880129 | 381.182514249587 | 354.981966077502 |
|         | 565.509446660206 | 988.788192022196 | 538.484170364629 | 452.517134370928 |
|         | 588.458314503034 | 1158.057104827   | 713.525134497596 | 1067.80176606977 |
| UCHL5   | 211.135364208221 | 213.432084172541 | 234.980382243116 | 180.060096787617 |
|         | 350.803378042804 | 270.360397503276 | 311.670576741448 | 460.941286124613 |
|         | 269.424055734143 | 435.69811966429  | 223.389795643722 | 471.598175637494 |
| UCHL5IP | 332.296938254329 | 350.926679856514 | 302.069236363626 |                  |
|         | 407.875393458322 | 443.964363178742 | 327.635520861099 | 234.094722315007 |
|         | 263.994460303088 | 242.72424280444  | 258.21341068758  | 237.456245064363 |
|         | 261.541138637729 |                  |                  |                  |
| UCK1    | 180.113222861966 | 197.357728220717 | 181.431827312784 | 195.755450324985 |
|         | 218.487334022128 | 155.951509643078 | 176.797322143648 | 157.944355564411 |
|         | 175.670738308809 | 169.583355171423 | 168.091278015885 | 156.275506468809 |
| UCK2    | 153.95615286919  | 152.188770978528 | 149.904691068054 | 141.611712747368 |
|         | 403.405544395163 | 404.366325262322 | 193.912456093767 | 315.064477782052 |
|         | 239.621756857095 | 320.214614455231 | 220.079379312889 | 352.22815095475  |
| UCKL1   | 698.882871686866 | 689.04773343291  | 906.359365544713 | 706.759905439674 |
|         | 1340.79810963983 | 1638.72366638732 | 1766.15001427132 | 713.525134497596 |
|         | 885.104778820041 | 989.396074034945 | 769.009371389327 | 882.037055216609 |
| UCKL1OS | 135.37120759813  | 120.992440100307 | 136.077039612526 |                  |
|         | 123.56917054142  | 127.342017026873 | 132.786500984297 | 138.184717352015 |
|         | 126.277165320165 | 126.695387748732 | 134.151979705092 | 108.362609680556 |
|         | 119.682747854629 |                  |                  |                  |
| UCMA    | 129.072173761566 | 115.310953814885 | 129.090955637629 | 120.304037458526 |
|         | 112.198629213643 | 121.181654892305 | 123.875478428652 | 121.583096465567 |
|         | 113.192313147111 | 117.058031811694 | 132.128418409996 | 119.446359837504 |

|        |                  |                  |                  |                  |
|--------|------------------|------------------|------------------|------------------|
| UCN    | 170.737352030035 | 166.904990069484 | 204.415267938007 | 191.59400638652  |
|        | 196.955723006838 | 145.229637715814 | 149.902420337518 | 148.204194003593 |
|        | 152.049243916141 | 182.300628120658 | 176.791758333054 | 153.295838391099 |
| UCN2   | 117.47631318854  | 126.482660154852 | 103.734303632543 | 119.787925356307 |
|        | 107.638492587723 | 123.972321838378 | 118.029258839619 | 135.205434173702 |
|        | 118.537378726617 | 376.443086293235 | 155.60532199001  | 172.667770359278 |
| UCN3   | 143.561114996045 | 117.390049487174 | 122.603226380439 | 127.128042857811 |
|        | 133.988494850477 | 115.316430915446 | 116.106772298898 | 118.249148086655 |
|        | 118.070716076005 | 128.882160435252 | 136.103088234442 | 116.179625689647 |
| UCP1   | 150.496616601699 | 135.420780282429 | 144.940119680152 | 132.891375982227 |
|        | 152.498222035534 | 147.281035392817 | 151.351938656508 | 159.0794075765   |
|        | 137.864637728155 | 138.994857740356 | 136.293084080479 | 146.869927141655 |
| UCP2   | 159.762733951454 | 185.602093266907 | 149.288034848931 | 153.423579724911 |
|        | 1454.94889750152 | 325.80154888448  | 617.67819271245  | 690.010326122574 |
|        | 1023.94850651125 | 147.968104627262 | 373.096629378654 | 228.675099004411 |
| UCP3   | 135.823975527501 | 139.519321690754 | 140.03202338666  | 152.957297648595 |
|        | 126.398884382537 | 133.123444023892 | 128.663320241092 | 133.160197638474 |
|        | 129.16337177104  | 125.666013736767 | 149.31020447459  | 119.530214079037 |
| UCRC   | 356.530530468568 | 366.564822549834 | 327.811191081135 | 429.812058546782 |
|        | 346.635777358159 | 459.068582584181 | 354.263934274937 | 343.270642449751 |
|        | 401.840794789616 | 323.391456630794 | 536.609777988581 | 514.002313819685 |
| UEVLD  | 178.696562301918 | 165.436881839632 | 192.878416717298 | 143.950279111815 |
|        | 153.836520485018 | 199.209279169496 | 193.95909424044  | 188.0434100445   |
|        | 170.313045875402 | 240.734451149197 | 203.410932496844 | 188.062732621031 |
| UFC1   | 923.383014892221 | 842.22767901391  | 1247.02514044778 | 831.610501402173 |
|        | 844.462124058351 | 2185.46850787298 | 1587.84395475807 | 1969.67552562117 |
|        | 1593.49895307361 | 1115.34267967366 | 2723.55722258794 | 2608.95227456417 |
| UFD1L  | 134.70848693317  | 139.979025013908 | 135.741404460897 | 125.569364049349 |
|        | 158.915858403237 | 151.436802637988 | 123.051777473512 | 139.174188535843 |
|        | 147.958483355783 | 128.449200385351 | 159.273225917177 | 138.928287624746 |
| UFM1   | 420.647394044431 | 357.063270015318 | 478.699172220804 | 300.443499140896 |
|        | 215.931781291835 | 460.742037437298 | 452.24100098898  | 401.750302347978 |
|        | 540.797164107185 | 601.018867455333 | 500.343476678562 | 517.881547706391 |
| UFSP1  | 141.919263493165 | 140.152177370089 | 152.415752253205 | 152.719997757291 |
|        | 213.123453925578 | 149.41357273704  | 141.753560518393 | 136.895650862562 |
|        | 130.336466131215 | 135.745821200254 | 161.024665355184 | 145.395042579024 |
| UFSP2  | 736.332743195416 | 761.32108609503  | 761.586663689579 | 707.715412321304 |
|        | 289.616527814137 | 324.79327985156  | 471.510683045651 | 439.207122335648 |
|        | 469.540421642173 | 819.488546995594 | 433.82566459288  | 449.220056843562 |
| UGCG   | 500.343476678562 | 512.312880441098 | 316.623219008156 | 275.298642145005 |
|        | 678.365575489532 | 681.677841333095 | 397.861172312706 | 364.766154056243 |
|        | 596.246316033079 | 844.462124058351 | 712.699853328955 | 336.70893120135  |
| UGCGL1 | 245.351459157365 | 228.926077117474 | 170.024833610695 |                  |
|        | 199.135932984641 | 234.461229199142 | 259.277693314055 | 177.103802332144 |
|        | 208.628626112623 | 214.546528079149 | 194.979795724712 | 233.161848094769 |
|        | 222.593554194453 |                  |                  |                  |
| UGCGL2 | 379.615659443164 | 399.724529998085 | 406.224345292389 |                  |
|        | 412.202049714695 | 307.597733293218 | 625.374595058488 | 367.898258897888 |
|        | 394.65807885612  | 401.267425721838 | 281.694635436938 | 685.848203651889 |
|        | 702.779943547386 |                  |                  |                  |
| UGDH   | 1059.19317548869 | 884.248568386012 | 759.534249620343 | 831.289724465877 |
|        | 889.054356462993 | 1445.72064343302 | 1265.88446775977 | 1565.64079526732 |
|        | 2198.4268389426  | 503.093655556038 | 721.11578916385  | 629.381791489871 |



UGP2 575.857954264295 498.534168389928 749.859130465356 469.930860750773  
397.153801851621 395.261210769232 497.759125486158 477.056706273413  
374.106258053201 677.802147190757 526.726224327409 431.093544964576  
UGT1A1 132.076865522593 144.718507303105 129.743808480368  
128.446229320855 159.968531285904 142.444072809204 381.121621815163  
192.331142672469 480.101253056873 136.664500207966 205.282221255986  
508.861268738074  
UGT1A10 154.108689872903 150.931114848235 129.711973013336  
121.260355515095 138.499293816467 581.37957221282 125.377377116057  
602.480822390671 152.435416154284 171.487594589922 195.447966116819  
1510.77099418802  
UGT1A3 159.997580819443 155.737364431382 177.88534558205  
159.177303894223 167.500410857353 146.443892388756 158.23884088767  
156.466728833063 181.922907273871 167.547551072373 168.248982292489  
160.786907816025  
UGT1A4 143.432889871079 146.194467350201 159.771672778698  
121.425298866613 150.126627487419 159.643566663742 149.691340727994  
140.756898474665 152.353494489233 141.299677389827 143.769240322865  
161.139253742858  
UGT1A5 141.033948839613 124.70219935334 119.107992692097  
146.84891312893 128.453729430951 128.851785111932 126.359440164601  
140.279222720709 127.597601325212 130.606211166873 130.736466113571  
152.710827148511  
UGT1A6 125.689884251847 138.112168847027 134.11753210296  
123.433466678767 294.115163083721 269.726397478364 1114.10687039922  
338.026161865853 1741.0131951509 197.24751449599 673.824770556885  
1549.30900090605  
UGT1A7 150.709091532746 139.81502919163 160.006185904123  
144.792035839249 148.570769470645 246.77831953556 152.232245164212  
219.318938396989 134.091723054647 216.880896769751 151.81251450855  
293.528601172819  
UGT1A8 121.919799968293 124.74291205933 127.095347480109  
118.88525116298 130.99288239869 126.87100632595 112.340161674529  
135.839123867443 131.950295185477 148.269123639781 128.730649233876  
127.742948876822  
UGT1A9 135.982797108848 157.516278302035 169.534469894464  
151.727603285205 170.801761175916 156.525347260458 160.026178505749  
158.863516051439 140.485102148597 143.728569494708 130.70867409848  
151.930565620382  
UGT2A1 133.271506838359 120.479270037091 134.614988219821  
128.628637585951 129.838790698396 125.9713489569 128.699441450952  
124.791221329502 129.290542121353 135.231458421096 122.466276478613  
136.767307268217  
UGT2A2 125.533538277681 118.338713846941 117.408465686218  
123.13812550459 116.814269969508 120.024235522682 121.476730561812  
103.99234480919 137.720747340105 111.032156655273 121.968807253639  
123.315362903961  
UGT2A3 153.018378403144 138.336667434109 149.374282007673  
149.335288055732 150.399313562031 141.753560518393 153.532954370572  
210.529782898493 151.958818313561 166.289763097913 138.328508662816  
144.526499066594  
UGT2B10 115.120702589487 127.164076119599 115.35376992547  
111.196610704726 141.090356426567 115.766358387923 116.074423050416

469.107624227456 144.281217246178 113.680875214845 159.166059518117  
118.918962530408  
UGT2B11 143.327730271099 164.227134687088 159.966729941991  
165.985885671398 227.065194522692 201.987081022654 174.483233557264  
456.126096817454 292.524552445564 159.706443636973 156.843997723699  
233.690524419327  
UGT2B15 124.213104788426 121.201267751612 133.54741488531  
120.675356009213 132.154131623051 128.50733429744 125.674471551099  
585.552940765069 124.381674909742 121.353233207209 124.697283474333  
121.821868944354  
UGT2B17 140.182150393054 147.645530163725 142.12808103815  
143.138613573764 152.026310884327 144.979749941424 143.846734516914  
693.339946866196 176.47556448977 144.532420788945 154.98147307591  
139.201122725213  
UGT2B28 113.512670856029 118.684077097437 110.636713168363  
117.251233255966 130.621860095981 116.321559000405 111.867464669155  
130.483765953389 123.93800397666 122.412141495264 135.315732654507  
143.673778816953  
UGT2B4 142.85695042665 142.837688062688 152.801801823442  
141.997165490755 133.048720362039 138.553151063218 138.56812029378  
138.20899000519 132.996622574111 137.192570825063 134.341489592504  
142.116311513299  
UGT2B7 148.400132332444 162.774716879847 150.421116058494  
144.559193410932 400.353795948162 353.571106279836 350.741303038926  
520.218545108099 946.273229715791 165.232545721733 384.733313349438  
605.795439342384  
UGT3A1 126.81140158672 146.639556437847 124.624046191085  
121.014538677616 119.305917403956 140.66266106824 140.079516848788  
139.231340020014 135.279197125157 137.376602654929 129.13353785479  
142.240333104987  
UGT3A2 117.883635746379 129.835713633923 124.825103464238  
129.896049960104 125.431735524937 118.360186663758 116.86635524597  
122.160459795959 132.709845352383 115.664551127497 130.30561086685  
117.279162323013  
UGT8 143.001661958814 124.441699369614 133.802898895457 135.114056458478  
137.649424237506 132.137634927459 130.285187693932 135.364039983762  
141.168198348093 133.601133679159 131.848213704003 135.325617701062  
UHMK1 174.012972901793 168.753660955229 151.276193269421 139.071908528327  
183.251257770829 285.46340356157 249.884250040189 220.876114717642  
195.364709354814 219.661502916874 177.281197832647 266.756647182704  
UHRF1 149.726968520487 165.607095120227 145.989546968117 140.223599881961  
701.481003619067 477.056706273413 215.967319486874 501.166869173253  
578.650614747598 432.969886744613 199.327939161502 477.056706273413  
UHRF1BP1 301.747788416496 273.61337724143 304.900910626137  
264.273245283343 223.013753785002 285.882780066861 295.187978994932  
309.861048237742 259.72035004624 293.17183601265 362.849380477089  
255.273375146278  
UHRF1BP1L 168.05687638693 157.907190910755 162.505305538911  
172.370108210895 164.652795899742 165.262738484387 162.592306630033  
174.08222895937 159.554978842683 155.952902855994 153.700168798494  
148.925418133902  
UHRF2 268.406778092906 239.24587884234 315.430399077266 215.40037757604  
145.695402948337 172.329225247019 167.976680048356 295.241644408321  
218.794112567823 266.534316786801 210.353341004865 210.882890077598

|         |                  |                  |                  |                  |
|---------|------------------|------------------|------------------|------------------|
| UIMC1   | 1224.49891389348 | 1099.37392456694 | 1451.64055568759 | 1259.75918248468 |
|         | 378.037190077449 | 534.505132658177 | 694.02978779693  | 662.58366387795  |
|         | 553.90008440429  | 960.491731797061 | 808.300067805897 | 909.388774224614 |
| ULBP1   | 147.648020819059 | 119.915330116696 | 153.661632990172 | 144.914015211747 |
|         | 128.445065383646 | 177.94501172269  | 156.293025312901 | 133.040952285855 |
|         | 128.08497128067  | 178.488874074222 | 142.112120308118 | 153.354921961854 |
| ULBP2   | 139.811873260553 | 148.936888662374 | 144.845726048937 | 120.822923434486 |
|         | 158.179586948369 | 194.831347257735 | 167.698883940638 | 153.606787306076 |
|         | 147.138814313885 | 393.013539328766 | 160.92643755328  | 166.320461361356 |
| ULBP3   | 124.915772594451 | 126.168223112165 | 112.015423658372 | 120.979417552159 |
|         | 130.119313219923 | 108.655415285806 | 112.747067417774 | 118.126133973555 |
|         | 109.832757716464 | 123.794432024417 | 129.740166478951 | 122.295222990408 |
| ULK1    | 636.048536814356 | 731.848844821402 | 955.143610867351 | 866.413995755699 |
|         | 1124.67710585154 | 667.156197045748 | 868.066644155313 | 807.3257139219   |
|         | 837.603727062008 | 1549.30900090605 | 628.000860165888 | 538.484170364629 |
| ULK2    | 290.213039891361 | 251.704037951295 | 314.646369385896 | 293.080122239022 |
|         | 220.959843573708 | 234.531140131763 | 190.96184674871  | 221.512905853031 |
|         | 156.702300398105 | 176.783978625103 | 186.640167849568 | 165.995251661994 |
| ULK3    | 188.20675818131  | 166.447510782568 | 204.137195524755 | 188.567747377006 |
|         | 216.880896769751 | 184.569063297206 | 189.114794029657 | 176.214950733324 |
|         | 219.753039699136 | 219.519896184851 | 212.545989139388 | 162.337707154123 |
| ULK4    | 157.233463720262 | 158.98007855379  | 143.801139839773 | 157.306022722324 |
|         | 142.765490244223 | 162.970595558845 | 124.300285428221 | 154.838407529853 |
|         | 165.900156600776 | 148.286700314107 | 149.921414617149 | 156.073428882485 |
| UMOD    | 132.774127230452 | 133.231066635063 | 135.9097041056   | 141.907307422968 |
|         | 132.589411973628 | 129.434594784981 | 138.384797779855 | 144.507230362869 |
|         | 134.978785580693 | 141.923103467306 | 143.776637809106 | 135.383585408897 |
| UMODL1  | 126.65748100631  | 134.495938988321 | 136.231747456996 |                  |
|         | 135.513494853742 | 128.759751330525 | 133.201157825808 | 135.51506573405  |
|         | 131.106613067333 | 131.249240371529 | 137.816691265242 | 127.924195488323 |
|         | 136.60514429355  |                  |                  |                  |
| UMPS    | 152.188770978528 | 158.025633316671 | 168.188793271919 | 177.457362387052 |
|         | 150.891358590974 | 211.369442150136 | 184.724071110756 | 163.632148441668 |
|         | 178.878444404192 | 172.951567541592 | 143.161623642178 | 168.018785514306 |
| UNC119  | 195.630643168176 | 205.149094703318 | 189.403934838648 |                  |
|         | 190.364362436485 | 774.442392607873 | 295.420691959792 | 392.746574862867 |
|         | 465.809961695043 | 284.764628939128 | 280.948704707655 | 271.770138565186 |
|         | 327.696359071012 |                  |                  |                  |
| UNC119B | 207.514489132778 | 197.47340234886  | 245.850813387241 |                  |
|         | 233.07015384759  | 229.881164774875 | 180.142758394321 | 222.20526515049  |
|         | 201.748876422401 | 206.446584387595 | 201.593025256991 | 205.705962405954 |
|         | 165.757295630254 |                  |                  |                  |
| UNC13A  | 148.096551269076 | 155.30926640293  | 144.092864444802 |                  |
|         | 140.66266106824  | 140.330400168187 | 145.677477231455 | 143.320787131532 |
|         | 133.672964925321 | 139.595986615703 | 137.114604159523 | 144.877789873062 |
|         | 147.019460117987 |                  |                  |                  |
| UNC13B  | 192.860161535869 | 191.665827345888 | 181.148062201932 |                  |
|         | 217.202541167691 | 218.529160053398 | 197.51109998167  | 177.491294133515 |
|         | 179.950904921667 | 190.889832855403 | 233.635876830148 | 205.322733011516 |
|         | 173.182013165174 |                  |                  |                  |
| UNC13C  | 148.949829934611 | 148.590732065459 | 147.598602877625 |                  |
|         | 152.224281847792 | 157.50792056793  | 142.419777428399 | 142.836229345273 |
|         | 142.705504445895 | 141.408545519654 | 150.91730768674  | 148.702473828167 |
|         | 142.739686751422 |                  |                  |                  |

UNC13D 185.984938124891 198.783034238774 150.820808770853  
 151.914252332792 380.664528809678 173.325724300712 172.478461106269  
 168.919352453652 204.019377262081 196.486499238623 239.419200107721  
 255.374689750672  
 UNC45A 637.892677173103 776.030689773414 784.170983714588  
 817.036222521723 749.859130465356 426.896707161414 345.209128382239  
 321.84712975195 400.98290237416 405.64711132293 429.096075419528  
 399.364160668615  
 UNC45B 142.436624546651 128.309602266886 129.358112503486  
 134.477081392474 127.121068682846 132.894049694258 134.615519721195  
 128.284564251279 124.83124879272 137.793462381778 143.912136782374  
 130.568746582504  
 UNC50 1192.72383754851 1003.93455977232 1437.5568316065 842.87865208079  
 1106.21439150501 1628.24528041404 1491.05501052706 1235.02626456572  
 1534.21175984308 1154.86609813021 1804.63762008613 1733.96382719909  
 UNC5A 128.895325544109 126.626904958599 114.638254225216 107.697601478064  
 125.162662242842 104.154182930018 110.22624111837 110.325803953516  
 122.888626394154 120.77691423934 123.501843029993 126.520909083643  
 UNC5B 154.166668493152 161.305860691151 144.155591092387 136.188868917386  
 192.565733545715 162.237172404557 153.387113356064 151.788278519057  
 178.572212478544 176.830879422227 404.445038343721 206.236303011662  
 UNC5C 167.67952650068 174.274996381853 179.509758601636 184.813094907887  
 163.091280469234 163.346402397924 149.175458427847 167.330860677012  
 173.741466458636 172.599654598668 167.384121560438 167.559703634539  
 UNC5CL 155.218336968191 141.914966520049 167.315702949236  
 152.796423361971 143.422419261603 173.050039480459 142.431979387165  
 147.995991912855 149.297012645798 154.657316209848 155.55288776049  
 183.018203688404  
 UNC5D 110.774802298005 109.806338826826 116.7299185256 111.152235113722  
 108.557097186828 121.057111457792 113.521599852465 112.436972452838  
 108.669141498627 122.830376253922 141.284962125757 110.368392735494  
 UNC84A 593.320132696649 456.298408568636 724.777166238211  
 376.276954313674 456.656123023446 484.480643763982 505.83860711693  
 459.854279050269 465.102234374389 486.778046640624 413.983821839274  
 807.3257139219  
 UNC84B 5149.78271096158 6358.5018930218 5396.55955971617  
 7332.15849011291 9671.66667662331 2847.42635118026 4732.31591164752  
 4343.46317176151 4722.64356477773 2303.0998502001 4527.53010866974  
 4520.84412831414  
 UNC93A 131.583841535781 121.22760405399 122.94737290641  
 128.41549156443 118.148476979319 125.095999326598 118.201092260839  
 117.67638166062 121.441901286752 123.491930765117 127.325087202483  
 122.572634128442  
 UNC93B1 245.454945056317 239.388546850124 223.941946219233  
 219.814706416471 1466.82170436229 326.246702537465 512.541205235935  
 453.760162338163 346.566241319814 230.91747428831 662.213423011533  
 490.022369664024  
 UNCX 132.04032925495 139.39112068213 135.609239096236 144.352987324713  
 143.155998311198 144.510775519908 139.805930686563 147.764068958635  
 138.525131957094 131.868557613642 128.870079563075 138.885230982475  
 UNG 224.869569455052 266.347965690851 269.006221210929 300.199170426996  
 613.279465441319 588.334329592604 492.780880796036 574.779350011402  
 511.996883507889 402.425130776131 410.731869154912 520.962651968997

UNG2 143.685368799972 142.650451413991 140.319851351329 148.956326355381  
150.261107471642 142.788848338402 153.888212689508 159.362293777146  
154.049004176595 143.193305421206 155.952902855994 152.501914553441  
UNK 127.302714624905 148.147294674218 134.028626989933 147.335403843539  
151.234397206563 152.373931758229 169.784837251279 131.098301310768  
156.34272729153 152.470980074365 129.286782862113 166.17959304455  
UNKL 173.647320180498 176.486551181451 177.524818593325 196.880135762817  
185.570062118736 148.789295862953 173.017662861015 160.247370279802  
154.996829706812 137.954283575143 163.709174813901 154.507721014473  
UNQ1940 188.277563426829 163.910041674646 267.483886037099  
151.369387642458 137.27506604142 134.76586363177 136.290486122369  
120.910703698292 139.195281937545 147.572660963285 130.812309202831  
152.713528089347  
UNQ5830 153.6855881767 153.418095627352 144.603401904061  
170.394088019518 152.095584118603 154.316929706697 150.496616601699  
138.266328639467 167.842122798757 139.979025013908 140.309394542299  
170.024833610695  
UNQ6975 136.638141963514 141.786962606666 164.337486856997  
145.777778096701 153.655778377717 142.540433565262 133.738587139139  
148.742216703684 159.334165651951 152.746799687103 133.753999983813  
151.442463705271  
UNQ9370 133.775716376056 107.816312357067 134.679882781788  
113.268379270385 115.270544506813 155.598586699376 126.647643493986  
127.954231630338 139.186416741431 120.931585398914 110.014935095391  
130.818181991958  
UNQ9433 157.675974692761 133.15144076432 155.101850847148  
160.461846976268 160.945886507456 165.908756485356 194.22713184875  
206.21848253717 210.015199832609 168.238615437246 170.577057395536  
240.439368352772  
UNQ9438 109.016991399605 120.790536146461 114.213405341709  
115.35376992547 124.285969778268 111.020070405368 116.70650322987  
119.029186503752 114.902673141786 112.858669660245 120.669452856028  
113.791585365477  
UOX 129.900540030251 116.547306374097 114.01599035448 124.387133895009  
122.817695619508 115.649568330705 106.829040075772 121.425298866613  
117.178495957357 133.311212623667 127.742948876822 123.168787977805  
UPB1 121.93549478261 122.020405846301 105.132185249959 120.93965087814  
117.131720092783 113.557349524174 109.266533255266 124.49814598066  
117.590393673861 106.450154495663 121.168550902281 115.619116556625  
UPF1 391.569187190375 426.364663722264 361.768552564027 589.953707188378  
466.141717595301 374.268489263941 364.840751972169 387.355661073935  
401.461825804111 333.676803661366 300.602422224047 346.917113326564  
UPF2 980.120729515821 969.360864006371 1056.43975075255 1069.93503700632  
562.891241563711 1299.4782626583 524.725307261999 561.609211243027  
554.800688991977 418.420753332232 625.152889992949 613.631311147328  
UPF3A 564.588706307423 488.57622466019 481.238450505207 491.496499481595  
284.638865013916 453.593585032712 331.747622606378 253.754869975548  
449.952497751758 334.101619029105 529.368609163949 616.339439383796  
UPF3B 386.221302830248 353.774297577869 427.390091157726 385.317560758502  
289.724297749772 267.535469518664 299.390443444504 311.481739745423  
322.614169214764 297.636316709322 266.032134528055 317.550000625189  
UPK1A 769.009371389327 1519.38642390142 2274.75133434566 277.459328083162  
1510.77099418802 1401.67503392145 2200.94974896771 3721.86725798812  
11017.1478502767 268.724338967108 3219.27851139047 6077.64695330731

|         |                  |                  |                  |                  |
|---------|------------------|------------------|------------------|------------------|
| UPK1B   | 146.197678850188 | 140.692586715322 | 165.411052799773 | 148.598920567714 |
|         | 286.085833802132 | 657.562129888446 | 513.292377117011 | 1531.54387233661 |
|         | 204.103018614608 | 182.495117800073 | 1994.00516809361 | 175.302832015761 |
| UPK2    | 115.435942397626 | 170.801761175916 | 174.540209145695 | 116.688949603376 |
|         | 6091.9840719327  | 361.327436394941 | 1200.94425675913 | 2637.62596741408 |
|         | 1910.08485008041 | 133.998381302146 | 2530.00219297102 | 1061.79595707572 |
| UPK3A   | 132.22974656114  | 165.149464497921 | 146.21362402936  | 122.746185691827 |
|         | 1334.69145271749 | 185.801540278924 | 179.015669199358 | 406.736165197168 |
|         | 369.018856220394 | 130.792692240592 | 330.850098426464 | 281.341452463344 |
| UPK3B   | 149.6036366066   | 155.475804754732 | 156.090871391873 | 142.843006238215 |
|         | 169.733427590141 | 287.558897878375 | 531.217306770605 | 408.811415529922 |
|         | 166.722369066673 | 158.829144564361 | 372.024884481775 | 373.860920943049 |
| UPLP    | 1420.27222765071 | 1318.3633082502  | 1142.44180956604 | 749.859130465356 |
|         | 675.596864001032 | 1218.64951314553 | 2542.44286642873 | 988.297682407351 |
|         | 1750.21700780511 | 3862.57980488881 | 2736.98692493933 | 3518.84173951107 |
| UPP1    | 261.775269058607 | 258.012234458166 | 221.272872023413 | 251.959823608766 |
|         | 381.4054004349   | 382.960724128105 | 214.229228850802 | 378.4377409749   |
|         | 290.037325939883 | 2007.0121037284  | 291.50783830983  | 352.303782547593 |
| UPP2    | 163.074919710259 | 142.62707251786  | 145.581755438161 | 155.355051932357 |
|         | 160.735428753783 | 150.204636832734 | 166.422360032182 | 158.691830524781 |
|         | 152.057315195367 | 162.320894555337 | 140.968351978909 | 164.018470368389 |
| UPRT    | 237.045634416039 | 229.31486399741  | 230.263678910356 | 218.334273320319 |
|         | 242.5085895186   | 231.0814970959   | 281.792602269388 | 210.882890077598 |
|         | 258.695920967489 | 239.704459251571 | 295.463118191589 | 255.039661999732 |
| UQCC    | 333.349203784021 | 353.078842299761 | 367.644907862372 | 387.477198908304 |
|         | 268.406778092906 | 390.670702155192 | 580.859914041323 | 483.174262289559 |
|         | 410.002817143111 | 356.323554000768 | 314.095043876244 | 333.676803661366 |
| UQCR    | 210.103974340881 | 242.848821222611 | 267.028096234702 | 292.068293167526 |
|         | 212.531329857909 | 197.565122821625 | 171.140106467064 | 199.408907117764 |
|         | 176.397715825653 | 192.532222258033 | 178.780662099615 | 213.584269089596 |
| UQCRB   | 303.795701960506 | 280.414161197286 | 363.445110627483 | 250.737252834098 |
|         | 425.001043358831 | 601.997464467917 | 449.523996620257 | 580.645924062301 |
|         | 578.811908030805 | 547.817028243811 | 276.089623957012 | 494.067878734396 |
| UQCRC1  | 1102.73689840572 | 1373.08023518911 | 1181.1611856364  |                  |
|         | 1840.14350831655 | 3528.62443098065 | 1785.92695250894 | 1082.75419087929 |
|         | 1225.33666840349 | 1468.50184641042 | 1665.14066952917 | 1339.83170225337 |
|         | 1411.90426595229 |                  |                  |                  |
| UQCRC2  | 736.963699775724 | 809.545702751155 | 1038.93733638848 |                  |
|         | 712.699853328955 | 427.98782239715  | 768.053694275398 | 858.742139354587 |
|         | 864.908449769749 | 687.987647193563 | 852.926365088632 | 1226.10881264804 |
|         | 1079.58110075176 |                  |                  |                  |
| UQCRFS1 | 2382.87910783088 | 2608.95227456417 | 3304.82581034038 |                  |
|         | 2723.55722258794 | 6652.21610967461 | 4929.26915002209 | 3495.66977000028 |
|         | 4503.01240138314 | 4621.99241522677 | 2995.42172749615 | 3917.05893989806 |
|         | 4621.99241522677 |                  |                  |                  |
| UQCRH   | 2282.94927629821 | 2578.85391480563 | 3495.66977000028 | 2104.59597571915 |
|         | 4081.13406129846 | 5327.13051940508 | 6044.78942014135 | 5702.11995823367 |
|         | 5636.26097921507 | 4663.03253705034 | 4875.22637286719 | 7519.94306346326 |
| UQCRHL  | 5624.32062666666 | 6776.11712291246 | 5811.97916044218 |                  |
|         | 6021.68798558746 | 11554.7330886956 | 10202.2226913537 | 10106.8225600705 |
|         | 10280.5093368677 | 11777.9172529698 | 7555.47017983216 | 10474.0047946187 |
|         | 11554.7330886956 |                  |                  |                  |

|        |                  |                  |                  |                  |
|--------|------------------|------------------|------------------|------------------|
| UQCRQ  | 4773.62220024088 | 4536.46344538492 | 4671.10203385528 | 3963.40575974446 |
|        | 7354.94071109106 | 10106.8225600705 | 8840.92490099301 | 10790.3738999898 |
|        | 11071.0448447818 | 11071.0448447818 | 6919.4226838505  | 8401.40370474392 |
| URB1   | 203.960838492793 | 177.910104644497 | 166.592366578462 | 165.131463797217 |
|        | 181.971189935628 | 201.415695076278 | 196.031541155674 | 166.819234137224 |
|        | 172.319604146201 | 206.73292907905  | 177.772019227116 | 220.661922683143 |
| URB2   | 219.814706416471 | 213.123453925578 | 218.70412656621  | 207.785320401354 |
|        | 302.735372807236 | 368.637819994033 | 297.757657398146 | 348.413827101046 |
|        | 260.157440518033 | 235.822266856967 | 217.778414825515 | 354.705553237406 |
| URG4   | 496.218605366298 | 599.208370337812 | 538.605085454393 | 703.587139938769 |
|        | 561.379619105609 | 345.649572073924 | 543.710330214344 | 403.812520074723 |
|        | 353.385210690169 | 559.559921312181 | 417.731815310276 | 549.569374872629 |
| URM1   | 1266.53539318831 | 1492.15137418791 | 1098.20033709043 | 1942.08859727404 |
|        | 2521.58055221647 | 1010.23703166498 | 926.283018664897 | 936.957730361063 |
|        | 1479.69309189156 | 1257.00798908017 | 1521.61996270758 | 1021.81988990874 |
| UROC1  | 148.186698759452 | 155.180238551547 | 140.077307351596 | 149.857861968652 |
|        | 137.476047500852 | 139.071908528327 | 147.43089976575  | 136.670253859184 |
|        | 128.608401533371 | 144.185406500473 | 144.908551199481 | 172.03919618445  |
| UROD   | 1519.38642390142 | 1427.27262061653 | 1841.63015706195 | 1841.63015706195 |
|        | 1759.9632914516  | 1514.53784631689 | 1319.3522488218  | 1391.89900758685 |
|        | 1098.20033709043 | 1352.14737073174 | 1037.97124386242 | 963.343120586863 |
| UROS   | 858.742139354587 | 906.886423608706 | 1075.3328563531  | 1348.80530206238 |
|        | 829.740755449333 | 459.388390392518 | 678.937151822411 | 705.987531074737 |
|        | 831.08287594363  | 585.552940765069 | 462.948429969719 | 609.100385482325 |
| USE1   | 167.315702949236 | 177.990274115348 | 181.500222423634 | 174.006516433854 |
|        | 175.269675831824 | 160.361025839456 | 169.434164890542 | 185.743212726702 |
|        | 173.611295051326 | 166.600109853461 | 165.731179108649 | 180.179981672095 |
| USF1   | 276.5177779623   | 266.964673763497 | 275.996693627151 | 325.12056698785  |
|        | 324.203537490975 | 348.98762709818  | 266.286483421453 | 307.982260548106 |
|        | 249.171307797736 | 181.79418355897  | 318.423602671236 | 348.640185950469 |
| USF2   | 380.146996799549 | 392.582612044755 | 348.848550937417 | 513.20896845398  |
|        | 993.774175699873 | 337.521614253267 | 377.148528768679 | 313.412131722189 |
|        | 342.403428822464 | 301.369680426563 | 339.012225830929 | 282.101714660307 |
| USH1C  | 118.974727968283 | 125.59966423779  | 128.389494971858 | 133.334314509183 |
|        | 129.96280577492  | 116.902574164498 | 125.865974180252 | 119.810421687953 |
|        | 118.401963042662 | 120.611442477736 | 107.170981307304 | 112.198629213643 |
| USH1G  | 156.597497458992 | 160.499355902773 | 176.256840061919 | 151.26137860684  |
|        | 177.393812005949 | 168.139351579682 | 178.872635061826 | 159.674396591041 |
|        | 168.873282919232 | 169.956827727468 | 190.045156046541 | 170.885640563747 |
| USH2A  | 135.061176512365 | 124.768399055809 | 131.523538461751 | 124.551603326682 |
|        | 126.809252651352 | 126.536245975137 | 127.478474451121 | 127.086470811408 |
|        | 128.236840746655 | 129.994160770036 | 124.69564501518  | 129.445240570626 |
| USH3A  | 107.205247133938 | 140.543382412084 | 136.2336179571   | 123.505435008269 |
|        | 127.799190369808 | 124.915772594451 | 144.955918499353 | 129.902965506953 |
|        | 135.190698960212 | 135.379284233708 | 133.504078347324 | 128.425838805072 |
| USHBP1 | 151.869928694006 | 140.038295509875 | 138.49309476462  |                  |
|        | 141.771850804164 | 156.756159786366 | 137.30143217822  | 135.878996521596 |
|        | 126.355699811531 | 133.869867161978 | 130.684569384626 | 141.8268805463   |
|        | 129.625046507677 |                  |                  |                  |
| USMG5  | 179.286187825363 | 128.047981250943 | 129.140978620864 | 123.689439578326 |
|        | 352.665030560239 | 138.394923932916 | 396.526590512521 | 140.798706399757 |
|        | 482.965800108538 | 191.486717579847 | 349.540558521616 | 607.126514742951 |

|         |                  |                  |                  |                  |
|---------|------------------|------------------|------------------|------------------|
| USO1    | 1355.07170485397 | 1149.3250945792  | 1470.23096656138 | 880.719593734606 |
|         | 847.276523445973 | 1092.74905085695 | 1629.32740709526 | 1427.27262061653 |
|         | 1737.57015396357 | 1229.47460924638 | 1554.16120123599 | 1399.41653736746 |
| USP1    | 234.5655184349   | 235.372592051464 | 244.544473246593 | 210.989806933158 |
|         | 262.349315496653 | 295.241644408321 | 224.724262742427 | 281.304989265608 |
|         | 258.012234458166 | 226.506852362359 | 198.205113187281 | 256.093363520707 |
| USP10   | 412.415549375221 | 324.009703043876 | 482.344514972063 | 320.877897822963 |
|         | 403.582461109859 | 367.327273578513 | 389.381039495553 | 392.365008240567 |
|         | 473.60579090007  | 416.215253990273 | 410.216584967666 | 507.236601481067 |
| USP11   | 397.449905380349 | 352.418229893699 | 413.687046868111 | 358.217145707718 |
|         | 367.382105696814 | 278.942695435238 | 326.246702537465 | 296.141012087256 |
|         | 256.127197303751 | 230.749601687217 | 276.582734590058 | 312.601510033941 |
| USP12   | 158.109836032481 | 136.843164021899 | 169.271175460047 | 158.76356962428  |
|         | 164.247251507109 | 175.010849510711 | 148.670562837021 | 178.027417594263 |
|         | 165.797170648964 | 163.059196519365 | 156.307551403822 | 160.382971629272 |
| USP13   | 423.562598841704 | 383.033242143031 | 415.388760988459 | 432.515970951769 |
|         | 182.68965110437  | 266.80383076887  | 171.759102794108 | 229.74418058711  |
|         | 219.422260093722 | 204.113356572343 | 158.579717282881 | 191.445291899108 |
| USP14   | 383.583234619781 | 324.481229901658 | 397.449905380349 | 339.012225830929 |
|         | 223.81987303579  | 307.020265874666 | 186.077477713775 | 246.552713031445 |
|         | 203.357914242777 | 229.805500520256 | 210.030846572444 | 293.986292438714 |
| USP15   | 300.886032768166 | 273.709160508205 | 341.361299896997 | 277.726756691133 |
|         | 197.47340234886  | 255.493109705211 | 205.612579504495 | 262.093405224922 |
|         | 223.551813819581 | 240.663883443935 | 208.42712014566  | 241.251507026982 |
| USP16   | 365.140886302762 | 383.682951666155 | 462.553267274302 | 342.935878735854 |
|         | 234.626574390973 | 373.656487297238 | 477.056706273413 | 389.381039495553 |
|         | 474.216057978384 | 406.638419179213 | 459.771019162573 | 442.027630433527 |
| USP17   | 129.223872979789 | 120.998665308561 | 143.07651558428  | 112.993452506946 |
|         | 143.25481667885  | 144.627784383455 | 133.757741295765 | 129.059722322306 |
|         | 125.277002586952 | 120.691810909148 | 136.489566741917 | 126.362418476129 |
| USP17L5 | 132.923237903246 | 131.766114156138 | 131.336902822702 |                  |
|         | 123.117923525539 | 123.111192189217 | 117.986939058467 | 125.725832564087 |
|         | 130.249430984172 | 127.893555451807 | 114.995889945366 | 130.726640485925 |
|         | 124.324855155055 |                  |                  |                  |
| USP18   | 136.078724167996 | 127.224081416987 | 140.283106734666 | 119.562180492359 |
|         | 146.370084152094 | 198.055877414824 | 164.268280525424 | 183.371103136697 |
|         | 182.197625235191 | 153.857048476879 | 176.927500850631 | 164.38282966938  |
| USP19   | 155.592219571564 | 167.887047631073 | 151.196713920345 | 170.636731478608 |
|         | 248.299149406938 | 166.376907377447 | 177.355210393749 | 166.440530119785 |
|         | 162.599466021255 | 147.519991961858 | 152.251128595777 | 166.385492585683 |
| USP2    | 148.485884677572 | 145.987228759402 | 162.54008293513  | 147.320976507643 |
|         | 146.877475544399 | 134.799648755296 | 150.003399000079 | 135.940629737073 |
|         | 157.967824935915 | 152.758653228708 | 143.333211390741 | 151.497680466119 |
| USP20   | 125.655823846115 | 124.910390240995 | 118.348153875356 | 129.476648077532 |
|         | 129.992015202357 | 127.95281733488  | 119.360478719424 | 112.771141378159 |
|         | 118.879931299016 | 120.96098661114  | 122.646850766733 | 119.207503310618 |
| USP21   | 215.506175859782 | 226.623172906957 | 219.103510284905 | 256.687384001447 |
|         | 300.709410518382 | 208.363905749882 | 238.685014863143 | 250.30085097088  |
|         | 204.851374931284 | 195.20398666139  | 222.943046618742 | 239.148333781084 |
| USP22   | 140.89390566467  | 150.786618560854 | 156.396579029788 | 153.354921961854 |
|         | 202.849544035436 | 154.362571105094 | 148.983182193411 | 160.150336334888 |
|         | 166.515199732076 | 163.781674803361 | 152.295451313545 | 149.250205265163 |



|        |                  |                  |                  |                  |
|--------|------------------|------------------|------------------|------------------|
| USP24  | 548.014025722956 | 468.712260193746 | 720.077057619735 | 592.079898463345 |
|        | 371.00603789759  | 691.632061537999 | 547.202354339933 | 687.494132125365 |
|        | 571.136519973808 | 500.246996975    | 661.390308090982 | 643.306565600931 |
| USP25  | 191.220064414876 | 187.729071402782 | 171.130215858803 | 174.389706515542 |
|        | 134.534815676852 | 125.04327844782  | 124.093412630817 | 118.792612926619 |
|        | 126.435928518593 | 151.387150218354 | 153.075594260208 | 127.79057041268  |
| USP26  | 143.239666389592 | 138.53403492914  | 136.387904287903 | 135.182524652868 |
|        | 134.477081392474 | 146.174492025087 | 136.452338158252 | 123.563243360247 |
|        | 132.966873990501 | 141.929924728222 | 134.285191872099 | 136.659134200122 |
| USP27X | 147.673016541108 | 158.863516051439 | 147.379741260871 |                  |
|        | 170.684848540493 | 170.035994634371 | 145.241301006518 | 164.634694036993 |
|        | 148.336126836362 | 158.23562423217  | 176.128369308989 | 155.362503575715 |
|        | 158.558471586662 |                  |                  |                  |
| USP28  | 146.629335531037 | 152.385014030957 | 164.423960071908 | 172.451128796055 |
|        | 143.864036545717 | 147.901594006094 | 145.418696807842 | 145.112399373761 |
|        | 143.045416067967 | 144.101376910581 | 162.390356943447 | 142.464394555901 |
| USP29  | 111.73388372572  | 109.416512252532 | 112.298254005045 | 117.766156390814 |
|        | 109.30275288389  | 109.087574814292 | 106.576058729493 | 104.442909315944 |
|        | 108.779204939177 | 116.825172441325 | 124.980683327416 | 103.307703547649 |
| USP3   | 570.771089597761 | 462.888171502285 | 630.894382644903 | 487.799854351205 |
|        | 887.471553448641 | 859.547169028149 | 1230.63920848575 | 751.269009484639 |
|        | 2093.67403119512 | 846.425467119342 | 1049.52258147141 | 1322.14570224119 |
| USP30  | 124.874757806833 | 121.849460555655 | 135.726760147904 | 117.255496552581 |
|        | 162.050520530297 | 142.356747337127 | 176.049946762504 | 138.739176678465 |
|        | 175.084729757407 | 155.979380606594 | 155.865540894526 | 165.411052799773 |
| USP31  | 152.422690241301 | 132.379706531581 | 127.895989232696 | 142.584504912189 |
|        | 128.914885412263 | 143.470181156799 | 161.852665901359 | 131.928871107722 |
|        | 128.429007921588 | 149.97218338771  | 159.773576221107 | 142.228042097379 |
| USP32  | 152.705458417973 | 149.622695843398 | 140.411200873743 | 145.999823250463 |
|        | 138.081268025435 | 154.558968826495 | 149.921414617149 | 152.454414703534 |
|        | 145.107675450957 | 146.194467350201 | 159.420533375725 | 155.731897985566 |
| USP33  | 184.974347306539 | 182.095387488796 | 177.825648107126 | 143.990328432869 |
|        | 196.031541155674 | 261.639437655633 | 204.695311233073 | 200.712182818203 |
|        | 253.327404004524 | 226.841838641151 | 199.037998955485 | 221.18757533703  |
| USP34  | 349.773289724658 | 340.966515437272 | 482.677635089583 | 354.263934274937 |
|        | 230.620456579897 | 518.17401959981  | 395.386242257877 | 446.07651799079  |
|        | 353.98839683842  | 421.056268094661 | 405.766055310869 | 429.680602294138 |
| USP35  | 175.313689069815 | 203.11015591813  | 195.981555981238 | 207.531908382266 |
|        | 185.816827784447 | 178.496344474999 | 163.170983091116 | 153.399787997793 |
|        | 149.997047695778 | 142.276853170778 | 160.887121295848 | 167.893596681867 |
| USP36  | 308.088967616175 | 315.828726297864 | 348.640185950469 | 317.273940108333 |
|        | 253.867947800583 | 399.872401268958 | 438.817248820137 | 369.592501881153 |
|        | 315.130912368929 | 433.019478861638 | 200.094610104813 | 308.088967616175 |
| USP37  | 281.304989265608 | 279.921244070981 | 262.389583658305 | 271.468939477052 |
|        | 231.670761847089 | 235.595194918187 | 248.299149406938 | 225.275049011909 |
|        | 244.350562866593 | 278.274343962656 | 232.023739004791 | 238.037110997575 |
| USP38  | 440.916522871266 | 454.732029358748 | 462.144334719146 | 393.500781010617 |
|        | 328.730722366546 | 479.395948662331 | 594.92419264579  | 462.888171502285 |
|        | 563.648536446918 | 433.314881387431 | 399.724529998085 | 564.749082802433 |
| USP39  | 571.273512452931 | 574.262112643403 | 756.068695265118 | 546.755305058958 |
|        | 621.173315178959 | 744.808064061459 | 490.269418483997 | 557.214020485204 |
|        | 465.54817048856  | 500.469781477166 | 417.528353577952 | 499.891000749138 |

|        |                  |                  |                  |                  |
|--------|------------------|------------------|------------------|------------------|
| USP4   | 213.791379190359 | 214.933911087009 | 242.787656836745 | 236.401834189942 |
|        | 181.412790232996 | 260.016906472407 | 347.224999246223 | 213.240181616274 |
|        | 232.960832410426 | 337.521614253267 | 312.557093674533 | 336.338518973032 |
| USP40  | 140.768926302035 | 142.469353808346 | 144.321757243275 | 144.246749835693 |
|        | 141.834582245454 | 157.252701277198 | 158.95714101556  | 160.557818466874 |
|        | 161.806144472744 | 146.701489210289 | 165.380225715852 | 170.79303550487  |
| USP41  | 162.240414467004 | 157.446725405803 | 154.291717784335 | 155.815785551964 |
|        | 159.327764602722 | 159.146745596683 | 172.237115475147 | 164.970438494223 |
|        | 160.256877369493 | 159.046016068252 | 150.989202517615 | 162.100547394235 |
| USP42  | 327.062810389635 | 295.367125961621 | 323.225475312396 | 290.867822301134 |
|        | 293.17183601265  | 307.866499851733 | 306.486275677467 | 332.543652462234 |
|        | 279.026742408164 | 278.942695435238 | 281.926552464214 | 426.364663722264 |
| USP43  | 138.064951932825 | 162.519642881848 | 143.622093679845 | 177.780479906048 |
|        | 133.891337645936 | 153.726935957906 | 147.135640862542 | 144.373226011578 |
|        | 136.701400398129 | 172.186384820044 | 155.298546821687 | 163.113457178357 |
| USP44  | 144.822943770596 | 134.332550221597 | 160.050872656883 | 148.158062155247 |
|        | 142.882391486465 | 141.386812131149 | 155.651798065702 | 144.511488474344 |
|        | 148.956326355381 | 138.436029489092 | 142.560797028716 | 156.834059922255 |
| USP45  | 174.727439318223 | 137.048292841566 | 165.71382076724  | 131.525916493834 |
|        | 117.976107125982 | 145.797047170492 | 129.425699141995 | 129.394359810841 |
|        | 138.997524526643 | 135.358837968905 | 155.214638707046 | 147.928629511539 |
| USP46  | 179.764260117544 | 203.004815689972 | 186.388067641269 | 205.908052642222 |
|        | 198.166270627544 | 240.12078342024  | 198.954254778846 | 170.918584418153 |
|        | 262.60377731258  | 177.679330300381 | 261.065986251886 | 195.333029746339 |
| USP47  | 515.327420453564 | 448.858580689107 | 546.841563406813 | 587.54075434249  |
|        | 135.375268329248 | 214.396920524803 | 154.737117718424 | 168.634534857593 |
|        | 199.477350542491 | 158.573561336755 | 339.54582149284  | 197.543089645432 |
| USP48  | 188.924084292126 | 183.294526267593 | 192.789886894821 | 169.184111483933 |
|        | 228.384686248604 | 214.933911087009 | 248.965394617795 | 240.224826736571 |
|        | 220.876114717642 | 204.842791081358 | 220.047563627558 | 206.548878646452 |
| USP49  | 10024.4662743012 | 10222.4435857673 | 8211.38792799248 | 9378.87287299048 |
|        | 1094.67740173529 | 7681.48027081818 | 2982.80580616089 | 5467.84611694564 |
|        | 4159.96851384358 | 3237.94149351627 | 7038.48958943724 | 4061.24537355697 |
| USP5   | 1283.68791110988 | 1639.76556136383 | 1372.85779994364 | 2217.82628612929 |
|        | 2392.93562797606 | 1022.11537745428 | 827.400420888645 | 1275.43768532088 |
|        | 1084.95095717937 | 941.065508539108 | 1055.79590411506 | 1139.14730341921 |
| USP50  | 124.693253194681 | 112.891050337488 | 122.959518532165 | 119.079680805247 |
|        | 111.876915242732 | 109.454483612299 | 114.874358180801 | 118.614641349402 |
|        | 108.318510762416 | 114.191245210321 | 135.559535347364 | 113.536570797896 |
| USP51  | 129.105655010455 | 141.777089987975 | 130.900049359243 | 121.893446546512 |
|        | 128.814967091609 | 112.666812944192 | 120.827732270626 | 119.926169902322 |
|        | 115.174678745401 | 131.423918669689 | 122.932745723044 | 112.357261386644 |
| USP53  | 168.188793271919 | 144.649656552    | 162.082166316002 | 145.660417208595 |
|        | 141.770977101211 | 180.304585602206 | 170.099045774947 | 180.837420957945 |
|        | 165.041296694491 | 188.671807443641 | 171.941887376462 | 165.443069511115 |
| USP54  | 199.579818754014 | 162.57736365619  | 179.624208193114 | 164.109321257638 |
|        | 169.777032044409 | 166.298554732581 | 170.069291215013 | 168.323141675824 |
|        | 181.183277133224 | 159.182533998843 | 159.650116062266 | 183.583432296209 |
| USP6   | 132.985645792864 | 113.938636269013 | 123.051777473512 | 112.026113831896 |
|        | 119.931415360373 | 123.694678408411 | 118.26427946535  | 123.494412056415 |
|        | 126.699152957332 | 127.209043595332 | 156.437949042181 | 147.125005489393 |
| USP6NL | 152.758653228708 | 172.622816559412 | 134.294287947795 |                  |
|        | 143.50323531501  | 228.058870735016 | 268.224669588188 | 173.056715623574 |

|        |                  |                  |                  |                  |
|--------|------------------|------------------|------------------|------------------|
|        | 147.728018766726 | 182.066922756289 | 148.490236128772 | 194.002075848131 |
|        | 178.339211170442 |                  |                  |                  |
| USP7   | 401.960630197091 | 360.551560710852 | 369.906476027936 | 431.304147578425 |
|        | 368.825190022937 | 381.484062427466 | 374.215345412947 | 411.451612988791 |
|        | 478.479988875208 | 284.321253087512 | 390.372738176917 | 416.215253990273 |
| USP8   | 476.917496749381 | 458.607367472574 | 417.024088698182 | 400.783945471037 |
|        | 605.437395034282 | 415.82312615045  | 522.400055538966 | 341.64890727921  |
|        | 487.537691131703 | 479.638653311025 | 476.249239197777 | 517.23393716516  |
| USP9X  | 525.920873434688 | 480.484639351046 | 555.109005518622 | 481.037647470809 |
|        | 300.247304779062 | 569.967953318205 | 423.562598841704 | 478.699172220804 |
|        | 427.390091157726 | 441.684169663552 | 429.457884032977 | 466.58966852405  |
| USP9Y  | 164.172084711099 | 143.399877326927 | 145.591320521493 | 127.718341524417 |
|        | 129.476648077532 | 121.441901286752 | 183.348764012358 | 187.93380542729  |
|        | 156.046085830566 | 112.841406363391 | 188.981391266203 | 203.960838492793 |
| USPL1  | 371.127480221666 | 335.013713757031 | 384.216141843863 | 251.665539319612 |
|        | 188.252507246148 | 259.229153662504 | 271.468939477052 | 261.844708446856 |
|        | 321.910803473854 | 236.676029292922 | 316.457274749526 | 480.593729033799 |
| UST    | 384.733313349438 | 263.52595855321  | 308.281798808746 | 234.28146549561  |
|        | 171.589889474122 | 279.026742408164 | 412.202049714695 | 188.74403596953  |
|        | 258.915802108562 | 217.074639597142 | 360.39998507367  | 223.373877165342 |
| UTF1   | 113.083678884076 | 113.791585365477 | 111.055738573603 | 108.530158480237 |
|        | 116.433239116749 | 104.285022032604 | 111.484426481816 | 109.932577444858 |
|        | 115.845468537936 | 115.76177719261  | 143.697931551096 | 115.211731367278 |
| UTP11L | 667.156197045748 | 728.485195792194 | 924.040923247227 |                  |
|        | 752.142287661845 | 504.275299381356 | 659.106229917309 | 499.176926371542 |
|        | 717.686676823785 | 648.823677010146 | 621.354393918348 | 490.153210371094 |
|        | 709.778171909457 |                  |                  |                  |
| UTP14A | 298.301504581296 | 316.895545640437 | 400.924914238052 |                  |
|        | 291.683896942007 | 260.41082304175  | 432.515970951769 | 287.242697383558 |
|        | 344.021696764791 | 325.907037744936 | 334.377352542623 | 273.044064077    |
|        | 379.670492165938 |                  |                  |                  |
| UTP14C | 369.198837083585 | 345.732364434125 | 424.578659172414 |                  |
|        | 326.246702537465 | 254.812605074045 | 407.875393458322 | 175.400802387403 |
|        | 347.620001353026 | 432.372995789404 | 272.666435295288 | 339.379250332987 |
|        | 563.490027149224 |                  |                  |                  |
| UTP15  | 186.06425658259  | 173.87113073582  | 170.430478598594 | 181.500222423634 |
|        | 144.951973735763 | 211.766884719761 | 204.654489493854 | 168.801737310947 |
|        | 168.50246276469  | 185.359195899057 | 180.569583206488 | 209.279164243868 |
| UTP18  | 195.282045838381 | 191.040134068942 | 204.959164579011 | 164.890716656336 |
|        | 232.492398623889 | 352.303782547593 | 300.199170426996 | 539.27766384282  |
|        | 351.292682758926 | 280.558463661137 | 305.398934391579 | 331.164053277361 |
| UTP20  | 133.141683141696 | 142.902838068479 | 138.405215507471 | 138.367321366804 |
|        | 150.3259737066   | 135.624881949214 | 145.665155500862 | 135.393901125889 |
|        | 144.528360135884 | 139.21331678591  | 119.161972571516 | 144.482364671273 |
| UTP23  | 249.379605914827 | 227.209630859635 | 223.359785518285 | 225.664432111551 |
|        | 176.86489466512  | 262.093405224922 | 252.810636571566 | 238.617228632505 |
|        | 280.990656342284 | 248.204358220728 | 226.055406842613 | 295.278972023002 |
| UTP3   | 238.344676327918 | 228.184535093641 | 204.318316638312 | 211.679799388351 |
|        | 425.13721408756  | 229.542259738438 | 305.768201359278 | 305.050933898691 |
|        | 336.639473916174 | 270.490971664802 | 392.746574862867 | 301.369680426563 |
| UTP6   | 821.265710686098 | 728.930140593418 | 823.297606185721 | 797.501324589697 |
|        | 2274.75133434566 | 1057.80846320642 | 861.119262963015 | 1594.05763963363 |
|        | 1230.63920848575 | 945.403379196643 | 673.502723625773 | 879.301932542031 |

|        |                  |                  |                  |                  |
|--------|------------------|------------------|------------------|------------------|
| UTRN   | 173.526005872207 | 150.709091532746 | 171.537040561599 | 144.78971417658  |
|        | 156.349030617265 | 154.973990421257 | 170.918584418153 | 169.656238760589 |
|        | 172.128489882364 | 162.975988989106 | 168.156002330441 | 177.94501172269  |
| UTS2   | 141.382096896508 | 136.973804637915 | 147.706402141169 | 142.768691899824 |
|        | 152.323927317575 | 154.01988200569  | 144.526499066594 | 143.440420261133 |
|        | 147.463822782303 | 151.979221390032 | 142.05571112803  | 144.850211439338 |
| UTS2D  | 144.165277164871 | 148.986058473609 | 144.482364671273 | 145.992883153161 |
|        | 131.926504315744 | 144.861804210272 | 130.198147836925 | 141.289009185018 |
|        | 147.15999706579  | 127.075899925865 | 137.344198938623 | 131.961236721149 |
| UTS2R  | 152.504620068655 | 136.946137446743 | 140.431591727649 | 140.868946922293 |
|        | 142.112120308118 | 148.052222389368 | 150.241585041178 | 139.044150521333 |
|        | 126.828097770667 | 126.153806511702 | 135.345616014558 | 135.182524652868 |
| UTX    | 235.407064742194 | 253.933478547515 | 286.996908547553 | 212.396522888943 |
|        | 258.830885826237 | 337.434882771953 | 343.767393640683 | 382.701467158304 |
|        | 220.446775597113 | 208.194788326109 | 293.825372123877 | 259.472319994929 |
| UTY    | 194.655710454472 | 160.648791273795 | 160.379168489216 | 197.848577663238 |
|        | 144.634118305223 | 125.879198238067 | 124.277983696239 | 158.760577365464 |
|        | 168.813895764991 | 126.186758919929 | 178.835679834487 | 138.281188275319 |
| UVRAG  | 205.226635237992 | 205.026176598298 | 241.168936008174 | 211.012142461725 |
|        | 175.767556472012 | 195.547320133122 | 185.342353172151 | 179.601348561497 |
|        | 182.747079625619 | 207.692077301142 | 222.028626209166 | 185.186497037695 |
| UXS1   | 145.635453468646 | 156.71199811686  | 190.45739385453  | 203.17525411575  |
|        | 179.46936343225  | 190.389158930835 | 175.857952663383 | 154.808798024399 |
|        | 154.124057382276 | 140.671406418004 | 174.866036336378 | 140.067809125008 |
| UXT    | 965.031655021246 | 1026.61404215739 | 982.367000148189 | 826.771587455122 |
|        | 1303.33810980467 | 1415.67109281133 | 1167.26555140613 | 1619.67820476414 |
|        | 1196.34528225417 | 1284.19937294949 | 1942.08859727404 | 1307.19490564658 |
| VAC14  | 143.628147237159 | 150.885460975199 | 141.123272165499 | 151.855884026072 |
|        | 158.514079887374 | 136.104027032045 | 139.733149319736 | 137.52653395793  |
|        | 158.25554353787  | 150.775805918537 | 162.254062646631 | 147.592770523507 |
| VAMP1  | 215.057917795456 | 216.836094088131 | 298.301504581296 | 254.668502187945 |
|        | 153.485731788293 | 143.204058393718 | 148.541832125061 | 161.651643789597 |
|        | 186.813888805838 | 170.490099282436 | 173.850390626782 | 165.67554738735  |
| VAMP2  | 856.039380523678 | 826.08372791138  | 497.269957926657 | 912.483177705931 |
|        | 429.457884032977 | 456.817057099146 | 213.194154171149 | 251.833571288967 |
|        | 204.161375686761 | 250.84781675544  | 631.653707589221 | 244.925472495705 |
| VAMP3  | 1255.62991601665 | 1307.19490564658 | 1328.38230265655 | 1368.91287156398 |
|        | 1029.09818399518 | 1332.82617944131 | 1118.28423222707 | 979.761537450366 |
|        | 961.355625338687 | 1528.49457104932 | 936.221322010828 | 1299.4782626583  |
| VAMP4  | 244.73233791067  | 225.480366837274 | 220.136131941508 | 206.825575257029 |
|        | 208.914498369991 | 195.645181575647 | 230.424145472916 | 215.272800347166 |
|        | 185.950131245699 | 338.406266073063 | 299.463563393179 | 265.332196877456 |
| VAMP5  | 1278.30505902957 | 1317.1258783404  | 1318.3633082502  | 1252.28642463619 |
|        | 696.131296166255 | 726.000622725287 | 831.08287594363  | 1036.40082234884 |
|        | 1127.89414462606 | 735.449040059761 | 479.469659712246 | 524.640879446426 |
| VAMP7  | 432.969886744613 | 420.248838397618 | 477.489368828457 | 309.658122422202 |
|        | 717.886050056576 | 813.772804994191 | 490.022369664024 | 583.192225756596 |
|        | 643.660739343159 | 654.108318810728 | 452.732079010502 | 511.113083958771 |
| VAMP8  | 509.512410867348 | 789.752781067888 | 460.24741151155  | 554.115756730498 |
|        | 3896.49785254733 | 2962.11407134162 | 5213.40342339233 | 2608.95227456417 |
|        | 3140.51157972795 | 2063.42824094932 | 3536.14527317085 | 3046.47354587949 |
| VANGL1 | 121.294366964074 | 122.68719599986  | 113.163651806803 |                  |
|        | 111.286141277084 | 129.567701626404 | 121.387799881297 | 126.462522391125 |

|        |                  |                  |                  |                  |
|--------|------------------|------------------|------------------|------------------|
|        | 126.720031203392 | 124.873289279767 | 154.947359473187 | 151.535177950367 |
|        | 121.360822445187 |                  |                  |                  |
| VANGL2 | 258.830885826237 | 246.748589597262 | 250.911817769829 |                  |
|        | 255.493109705211 | 375.407747753058 | 248.965394617795 | 186.6902304653   |
|        | 266.563990988678 | 338.585771590234 | 221.297127685676 | 422.434778100827 |
|        | 413.084646927035 |                  |                  |                  |
| VAPA   | 178.636555178682 | 201.320381706496 | 207.692077301142 | 206.35895739543  |
|        | 134.703474191011 | 184.989027770708 | 188.708596785144 | 165.39758732     |
|        | 165.565284723155 | 171.221972336784 | 204.942500423413 | 164.373697447004 |
| VAPB   | 285.798047501616 | 276.414209660023 | 209.398724613377 | 288.68376542946  |
|        | 203.335012796883 | 181.85552254233  | 178.628885995439 | 145.698637908482 |
|        | 139.246945739764 | 153.610428214886 | 200.506615977654 | 158.658110539162 |
| VARS   | 215.802713097166 | 252.056131165397 | 219.729169245025 | 300.047728281275 |
|        | 595.882696498804 | 350.926679856514 | 323.04019262387  | 284.940858938629 |
|        | 270.92671642109  | 263.448958595597 | 306.111172289632 | 293.080122239022 |
| VARS2  | 296.603054615145 | 379.670492165938 | 284.438411011954 | 512.184962338131 |
|        | 682.730262408017 | 343.946831770916 | 534.276129011237 | 336.279209908669 |
|        | 313.099028594073 | 227.587590278412 | 313.967636827811 | 328.730722366546 |
| VASH1  | 264.158648784101 | 293.080122239022 | 259.575461599189 | 412.863887464545 |
|        | 260.370285504512 | 168.861884032201 | 180.528296177577 | 185.938983266802 |
|        | 208.237011955037 | 187.494677180331 | 195.513703253634 | 156.756159786366 |
| VASH2  | 225.31216514083  | 198.285073991956 | 203.913123559942 | 185.165469121763 |
|        | 223.975677959345 | 530.819778703194 | 176.497706091676 | 197.489903263216 |
|        | 288.631429069336 | 148.18197556044  | 181.771654391653 | 304.292209676095 |
| VASN   | 1427.70292953827 | 1290.39741199701 | 512.895335481876 | 1061.29067124163 |
|        | 848.620986404914 | 246.288681426405 | 218.2454853526   | 345.494740481759 |
|        | 591.437752991512 | 469.794672718173 | 191.284275676256 | 239.277801396834 |
| VASP   | 263.509066170434 | 327.89660021611  | 238.430350258686 | 461.722481634933 |
|        | 360.285027176918 | 201.383739902873 | 244.054469051058 | 177.508603290389 |
|        | 190.939726271153 | 206.275885047321 | 309.658122422202 | 237.113813706224 |
| VAT1   | 1969.67552562117 | 2192.17997650999 | 1825.10168716051 | 2388.03256067711 |
|        | 901.197085099854 | 708.779490017407 | 496.697565640162 | 1317.1258783404  |
|        | 869.937761943249 | 758.517101659762 | 580.164288826741 | 403.208138816247 |
| VAT1L  | 205.908052642222 | 196.839016616283 | 145.126091016414 | 182.624130582754 |
|        | 148.57301274812  | 185.493554506958 | 158.06129717954  | 180.3779211444   |
|        | 177.96452209396  | 142.802965008073 | 155.011931456736 | 161.543072816738 |
| VAV1   | 185.801540278924 | 154.533544838819 | 159.643566663742 | 158.384505840662 |
|        | 170.692146255416 | 146.838547724148 | 140.383646018409 | 138.207553349985 |
|        | 175.805472275887 | 137.540275229889 | 155.468848105615 | 149.219602109121 |
| VAV2   | 280.913748398876 | 260.314440448486 | 222.526610842047 | 236.745054217055 |
|        | 274.891033696257 | 229.729195963667 | 187.280334341504 | 194.655710454472 |
|        | 209.840035045167 | 220.772387104223 | 391.400480065    | 264.685862877779 |
| VAV3   | 151.939710544553 | 198.815448428294 | 145.987228759402 | 140.077307351596 |
|        | 387.617166711971 | 519.27448770158  | 497.53605530806  | 519.564563632951 |
|        | 496.03509813734  | 339.843776738468 | 817.529344685717 | 158.751241730465 |
| VAX1   | 128.351235762192 | 147.553953240464 | 135.987450822209 | 141.083966525597 |
|        | 127.325087202483 | 140.493975416335 | 119.578240680666 | 137.438984175012 |
|        | 129.861693025157 | 131.593705080542 | 142.598106777707 | 127.539091409962 |
| VAX2   | 153.761061653202 | 134.629996026323 | 136.418105816557 | 153.600132368924 |
|        | 188.490807652188 | 173.675115244522 | 150.394483608039 | 157.960172706254 |
|        | 146.996442729408 | 157.36568754472  | 143.756242843438 | 148.149216812602 |
| VBP1   | 509.292779821787 | 586.366632966978 | 702.981741565482 | 533.54045706916  |
|        | 1102.38234645327 | 1158.057104827   | 926.670867201327 | 1010.05884008623 |
|        | 786.62709337246  | 907.306121257236 | 738.37559871635  | 1107.99131702522 |

|        |                  |                  |                  |                  |
|--------|------------------|------------------|------------------|------------------|
| VCAM1  | 551.92688162618  | 569.236322997211 | 183.214922844221 | 251.588748783592 |
|        | 195.033792280119 | 266.19823384117  | 172.084184539157 | 273.864293250688 |
|        | 459.171226689178 | 265.028512407839 | 210.117033165026 | 289.859695541999 |
| VCAN   | 1331.18605673705 | 1194.42925868786 | 600.264940641426 | 1466.08446530283 |
|        | 259.316557834724 | 294.410833087913 | 206.548878646452 | 535.20662670885  |
|        | 595.270107963842 | 1832.35076992253 | 258.868119227979 | 357.063270015318 |
| VCL    | 5479.24427823207 | 5558.51089816921 | 5240.40795364202 | 6368.23123771343 |
|        | 697.299604049748 | 1250.58586679251 | 1107.99131702522 | 821.020339593525 |
|        | 762.182213353032 | 822.545007054668 | 1033.48252432603 | 1129.76078220457 |
| VCP    | 621.825622897512 | 727.425595270342 | 741.255013151687 | 846.425467119342 |
|        | 993.34112647221  | 736.332743195416 | 621.946994961864 | 597.952909577121 |
|        | 722.974310297586 | 1140.40904196731 | 737.42784787426  | 629.707646271678 |
| VCPIP1 | 296.830999357172 | 319.417555901733 | 301.908667220208 |                  |
|        | 289.859695541999 | 229.046153362151 | 362.306819797508 | 284.798325549665 |
|        | 262.061371466369 | 275.888299685521 | 243.807038920733 | 218.209523110843 |
|        | 266.964673763497 |                  |                  |                  |
| VCX    | 117.611606270124 | 181.453575300661 | 144.510062568989 | 137.725329029129 |
|        | 229.200570583629 | 502.499539192864 | 246.049729366987 | 186.747375844319 |
|        | 121.480455781173 | 131.470883854661 | 254.188830191845 | 219.940167815376 |
| VCX-C  | 137.012646671173 | 163.714231827866 | 145.958718601763 | 139.898996725236 |
|        | 219.537335167901 | 474.14051635531  | 228.968779778407 | 181.479652131104 |
|        | 137.144001915831 | 127.982696242304 | 252.432175363972 | 235.350819745387 |
| VCX2   | 133.391421497441 | 134.227796103219 | 143.193305421206 | 137.669753723768 |
|        | 143.683545371898 | 142.191569406599 | 134.615519721195 | 133.420267697961 |
|        | 138.936872956065 | 139.010652831798 | 138.698178321535 | 142.974541687789 |
| VCX3A  | 139.299062352035 | 165.851677392967 | 152.295451313545 | 142.93332947113  |
|        | 185.591700082272 | 267.372241661758 | 183.633719048831 | 169.619338456208 |
|        | 136.818557078622 | 151.214631373344 | 191.348260799746 | 183.42877315644  |
| VCX3B  | 124.215466523555 | 132.992071643179 | 116.321559000405 | 128.766289767459 |
|        | 122.501785735146 | 130.680629893396 | 142.284050423299 | 125.247402280272 |
|        | 134.970609100459 | 128.51523581959  | 131.176413983785 | 122.501785735146 |
| VCY    | 130.394687030464 | 142.493119780028 | 128.949103967865 | 120.767950825369 |
|        | 136.724298878331 | 155.53992663898  | 131.77099316122  | 138.363553671822 |
|        | 132.332128706656 | 149.725422365342 | 141.021723049782 | 131.362128083159 |
| VCY1B  | 107.156457065853 | 105.62620788923  | 117.104945989023 | 109.067239220744 |
|        | 113.274668934773 | 116.155949676272 | 109.536381305315 | 109.552501987529 |
|        | 110.670057121283 | 115.672307128514 | 133.74051512341  | 117.442158626871 |
| VDAC1  | 1557.00226259883 | 1549.30900090605 | 1502.3444541735  | 1475.41920838384 |
|        | 3387.5366256957  | 2328.65814406636 | 3290.27308365921 | 3566.89107958971 |
|        | 3211.2719052157  | 4367.38154535901 | 3890.14358014877 | 3384.19521857242 |
| VDAC2  | 143.47200560038  | 138.508015596135 | 137.00532429734  | 132.466796864599 |
|        | 140.293431620804 | 127.597601325212 | 125.104229604098 | 128.229729571899 |
|        | 116.449064666763 | 115.600308687778 | 135.049657594221 | 136.201103852785 |
| VDAC3  | 3876.04966263281 | 3829.87905458534 | 4465.66734676111 | 4276.70912292877 |
|        | 3890.14358014877 | 7446.59106452583 | 3200.61067185412 | 4404.79209330918 |
|        | 2395.75453574049 | 3222.23985545506 | 2069.70335195314 | 3270.88476148156 |
| VDR    | 148.835389500419 | 148.846121873401 | 154.201375471487 | 146.376149543438 |
|        | 167.542332146706 | 156.88782735706  | 164.181915898563 | 163.697117248984 |
|        | 176.86489466512  | 160.806678614325 | 144.346988809708 | 175.363223521128 |
| VEGFA  | 171.155660467037 | 165.51742391186  | 156.803516898875 | 159.199045715212 |
|        | 315.47473326786  | 362.376153348015 | 460.742037437298 | 319.283603277754 |
|        | 270.787490294555 | 600.757699463777 | 375.189005729903 | 579.049608568926 |

|         |                  |                  |                  |                  |
|---------|------------------|------------------|------------------|------------------|
| VEGFB   | 1890.86868383409 | 1455.75693295732 | 2091.73580292332 | 1767.70023790753 |
|         | 1068.63350031223 | 629.707646271678 | 918.162638134305 | 338.075238647592 |
|         | 591.89966781883  | 1005.62130301653 | 646.933504790891 | 720.364080505785 |
| VEGFC   | 231.819341041105 | 237.961826989344 | 257.132618311227 | 205.226635237992 |
|         | 199.477350542491 | 172.370108210895 | 164.38282966938  | 237.825857080173 |
|         | 189.114794029657 | 463.99922423125  | 161.115842628581 | 187.407526616724 |
| VENTX   | 146.580787463084 | 140.794273204984 | 121.628827418997 | 132.283682066898 |
|         | 125.422348389595 | 116.363556872071 | 132.14412512622  | 118.029258839619 |
|         | 134.596391166462 | 119.370219299491 | 138.341918073941 | 118.021169080914 |
| VENTXP1 | 140.856864690669 | 150.088034336851 | 143.461785113446 |                  |
|         | 145.351662473858 | 150.851504454247 | 146.916683989962 | 145.729212592937 |
|         | 146.522066289381 | 154.604363252526 | 153.545086287929 | 159.148717478277 |
|         | 147.73141408795  |                  |                  |                  |
| VENTXP7 | 138.205338749495 | 140.357427912361 | 147.160858915857 |                  |
|         | 144.016137459279 | 145.810213943313 | 145.43470695949  | 145.414563914801 |
|         | 147.87699690647  | 144.318556353673 | 136.973804637915 | 148.993620368781 |
|         | 130.790872334222 |                  |                  |                  |
| VEPH1   | 107.07609243233  | 99.7487411813724 | 114.412739085949 | 102.094370876743 |
|         | 103.398929051742 | 109.599589420575 | 106.551076380988 | 111.032156655273 |
|         | 115.332409360957 | 119.237802375552 | 110.033746435328 | 102.522925993233 |
| VEZF1   | 3083.98169220838 | 3066.69261114251 | 3309.66193624859 | 3301.98381607571 |
|         | 654.881990232975 | 1903.13326109546 | 1322.14570224119 | 1540.71556891815 |
|         | 1649.46398639795 | 579.318912497928 | 1035.98574557331 | 2078.76377557352 |
| VEZT    | 541.764013317002 | 546.841563406813 | 493.622989939072 | 699.800360892516 |
|         | 300.314088267108 | 371.819911874273 | 418.889972660958 | 309.155070674445 |
|         | 325.493177980483 | 459.652708187549 | 408.201232787978 | 507.040326298457 |
| VEZF    | 157.187894260746 | 124.042153387391 | 147.362120584524 | 142.95001632948  |
|         | 157.035739033122 | 204.347931209047 | 157.273309095198 | 160.035282578603 |
|         | 135.532820436394 | 163.714231827866 | 167.586897846525 | 161.189717452004 |
| VGLL1   | 174.840923772532 | 225.565045396166 | 188.924084292126 | 203.652936507291 |
|         | 1008.43888926584 | 505.404271675438 | 741.433093896472 | 1048.26872286983 |
|         | 724.103864917969 | 210.199788806189 | 509.988617641229 | 376.962937292973 |
| VGLL2   | 153.524100996368 | 142.088243118644 | 142.785631812039 | 145.085091507228 |
|         | 138.838795320713 | 139.934460900409 | 140.987694585232 | 148.493435517221 |
|         | 147.849116400978 | 143.544671705984 | 154.212927357622 | 133.223310036542 |
| VGLL3   | 278.192669077191 | 220.258804437828 | 238.375823012603 | 163.686535888943 |
|         | 156.646803208934 | 247.454326301069 | 207.368252249039 | 167.941671074236 |
|         | 264.158648784101 | 124.186557690235 | 223.531323159808 | 179.389797867379 |
| VGLL4   | 1161.39230511792 | 1605.2454230722  | 1008.875250028   | 1432.93880448974 |
|         | 1596.33832632698 | 680.94167651697  | 1141.13648305827 | 1625.55754007235 |
|         | 984.695710317818 | 985.087150371964 | 1776.38646235135 | 979.761537450366 |
| VHL     | 420.567884340705 | 482.048928546145 | 352.50679573356  | 444.374521095495 |
|         | 785.008529077795 | 768.334658920971 | 697.299604049748 | 698.358285634451 |
|         | 1021.81988990874 | 408.10780961711  | 938.049312229961 | 716.731984660463 |
| VHLL    | 117.688941284427 | 103.888971448792 | 99.5148073333731 | 121.057111457792 |
|         | 114.28381541078  | 115.582048644075 | 105.348008821162 | 112.321396616213 |
|         | 109.728809191027 | 111.161283080299 | 122.850678471084 | 115.316430915446 |
| VIL1    | 105.771723307783 | 114.927420605185 | 103.520748827831 | 105.816457443844 |
|         | 109.274221164316 | 115.066084565112 | 120.177385114315 | 111.161283080299 |
|         | 112.999642731096 | 102.851152421943 | 108.751654061536 | 105.467761348787 |
| VIL2    | 2965.38280248519 | 3909.47437917608 | 3371.24667467952 | 2660.39990175415 |
|         | 14037.2575989329 | 4938.42484385053 | 8261.82420896892 | 5874.57722671552 |
|         | 5115.14161559446 | 5122.60899285635 | 9852.51412359574 | 4359.98094976179 |

|          |                  |                  |                  |                  |
|----------|------------------|------------------|------------------|------------------|
| VILL     | 148.431101051574 | 142.678267012725 | 144.935571704834 | 125.593595066736 |
|          | 159.624341769644 | 126.460390022632 | 117.279162323013 | 126.87100632595  |
|          | 129.871985352583 | 117.331280455759 | 146.470444212748 | 156.160899295182 |
| VIM      | 7406.86318549013 | 6810.50193989514 | 6720.10473881011 | 5811.97916044218 |
|          | 791.840531191783 | 1332.11815966955 | 772.399017166118 | 1783.8031212092  |
|          | 3315.21586182496 | 2718.440149645   | 1492.83354014907 | 959.897744425251 |
| VIP      | 145.060085149395 | 187.65716654049  | 125.600500146679 | 123.849651946683 |
|          | 127.368207232723 | 134.777979170126 | 129.313576009092 | 125.321968563987 |
|          | 116.288113598488 | 123.964042357475 | 127.077668562103 | 112.896360244636 |
| VIPR1    | 273.402804140541 | 294.697622870418 | 314.845965872164 | 247.111032124864 |
|          | 457.548150688248 | 473.947538805454 | 686.679573646733 | 361.218491712891 |
|          | 338.46332239699  | 266.756647182704 | 836.235700891687 | 487.597040819879 |
| VIPR2    | 247.622351589081 | 271.397087928135 | 203.693188114912 | 215.532132200821 |
|          | 133.408354896584 | 155.625320865565 | 170.807514224412 | 152.217243924816 |
|          | 144.544001385895 | 134.493062923443 | 136.005756600948 | 138.223001481672 |
| VISA     | 175.186435016433 | 202.397972518715 | 164.970438494223 | 188.7348696188   |
|          | 497.629319581786 | 200.536814571322 | 201.837695818264 | 181.491120129045 |
|          | 180.619956937489 | 173.599961799334 | 237.961826989344 | 175.819983804497 |
| VIT      | 291.883157643902 | 212.996456841785 | 251.039117540764 | 269.006221210929 |
|          | 145.485453268383 | 148.168587884369 | 150.531753446398 | 144.877789873062 |
|          | 144.6567095695   | 150.82596027483  | 140.995418231627 | 151.208728458188 |
| VKORC1   | 2305.11856249143 | 2337.64145466514 | 1914.96285167893 |                  |
|          | 2863.51286169094 | 1845.87311313269 | 1227.65550420162 | 1490.02976786379 |
|          | 1169.43742964112 | 1074.96415574964 | 1556.41573079892 | 1732.52466021178 |
|          | 1050.40488466179 |                  |                  |                  |
| VKORC1L1 | 198.885004378065 | 197.859546367676 | 199.135932984641 |                  |
|          | 201.041792159394 | 515.929937825133 | 203.265559787292 | 272.968792195442 |
|          | 295.278972023002 | 290.954496559897 | 281.53843450593  | 219.729169245025 |
|          | 320.648966489586 |                  |                  |                  |
| VLDLR    | 245.042781391047 | 215.219246394594 | 294.17588071297  | 267.696284751923 |
|          | 154.698312173556 | 128.84676695859  | 150.581350951154 | 154.146962684738 |
|          | 149.857861968652 | 328.019503002384 | 195.724873069362 | 145.68886453261  |
| VMAC     | 115.217608555334 | 123.318763391117 | 124.133566248466 | 115.170176263172 |
|          | 145.346970289157 | 121.263939656119 | 121.377666938052 | 125.920663904983 |
|          | 112.10312035128  | 119.486895914055 | 152.545261723881 | 122.414781975236 |
| VMD2L3   | 134.907397302852 | 134.27783583528  | 129.272835188209 |                  |
|          | 131.583841535781 | 146.777258330572 | 155.71830087869  | 124.474221706022 |
|          | 141.857434100065 | 146.440630638891 | 153.339992195184 | 133.12904935533  |
|          | 133.556805738801 |                  |                  |                  |
| VMO1     | 153.911165277809 | 156.191659799142 | 128.372225487481 | 140.378255168229 |
|          | 125.35643274458  | 122.075440298074 | 123.306499698566 | 142.551161883518 |
|          | 145.502055020513 | 125.236926572282 | 160.806678614325 | 136.566588903194 |
| VN1R1    | 152.185397218918 | 151.742938010671 | 160.553214127047 | 168.183542846746 |
|          | 158.699778625671 | 133.34207595093  | 144.143692745479 | 141.634246722965 |
|          | 161.417207801991 | 149.744358230709 | 105.551878332786 | 155.475804754732 |
| VN1R2    | 158.919340819357 | 159.241573314833 | 161.673818303367 | 172.552923333095 |
|          | 168.521601064374 | 160.031506612501 | 164.736294372006 | 163.653662369257 |
|          | 163.843143947012 | 173.240598306749 | 161.035985824654 | 170.636731478608 |
| VN1R4    | 142.246864759311 | 141.40586900422  | 169.920799931309 | 123.108694517244 |
|          | 121.23469201559  | 150.180037731272 | 159.683695366575 | 132.53122878527  |
|          | 147.628367263728 | 163.991378703958 | 127.928195199945 | 138.239251358245 |
| VN1R5    | 149.247514768446 | 154.475735552851 | 168.358323243918 | 191.112009690591 |
|          | 179.241385747152 | 152.8810245209   | 154.507721014473 | 149.274901871663 |
|          | 157.12360611723  | 147.774588146924 | 160.140509175287 | 168.443386067427 |



|        |                   |                  |                  |                  |
|--------|-------------------|------------------|------------------|------------------|
| VNN1   | 133.564350740049  | 118.480344364831 | 133.292854943218 | 129.546119539687 |
|        | 130.410584413031  | 120.675356009213 | 133.181855719499 | 125.631073476381 |
|        | 128.666652639862  | 136.115306932124 | 154.771737131348 | 114.115609163126 |
| VNN2   | 121.556331561879  | 126.75720720361  | 115.30786313391  | 122.220327032799 |
|        | 118.32560379073   | 125.050945917101 | 120.122719226116 | 155.198503964295 |
|        | 154.033776287398  | 142.728311130348 | 149.292552957665 | 128.105527466559 |
| VNN3   | 140.583804906052  | 141.70844587896  | 150.102853150151 | 156.144934427609 |
|        | 154.236652966294  | 152.429970809069 | 143.302354471175 | 145.274345879987 |
|        | 148.670562837021  | 142.586051173329 | 133.888892883291 | 142.307520290692 |
| VOPP1  | 141.639216893245  | 141.74792000689  | 152.778732614944 | 120.054065939835 |
|        | 171.671895682052  | 178.619580818758 | 151.440732942734 | 164.836381332774 |
|        | 198.205113187281  | 144.386561289985 | 156.194996994993 | 209.385358804928 |
| VPRBP  | 153.829636228764  | 167.011846920792 | 155.333294650676 | 146.867740388881 |
|        | 194.125840053843  | 173.142436025281 | 155.026276988302 | 137.31708798874  |
|        | 167.887047631073  | 158.960488862727 | 176.236140830355 | 165.149464497921 |
| VPREB1 | 117.754181884939  | 103.168665937677 | 115.211731367278 |                  |
|        | 112.424606178394  | 106.719519490874 | 102.343275379164 | 120.857635836068 |
|        | 117.261443445891  | 106.030441145334 | 101.431474941041 | 106.900679222135 |
|        | 109.740801301993  |                  |                  |                  |
| VPREB3 | 126.711037295629  | 129.123522999226 | 122.153996665065 |                  |
|        | 120.184782039538  | 124.42974326791  | 119.360478719424 | 118.912989775436 |
|        | 129.452826518288  | 240.971675534641 | 124.720004905439 | 117.089207321783 |
|        | 116.186846885411  |                  |                  |                  |
| VPS11  | 227.587590278412  | 229.347135478142 | 247.845708587624 | 235.742017851879 |
|        | 198.631354372924  | 158.058346079359 | 240.631264915238 | 208.214764518526 |
|        | 179.593817076317  | 192.273528391588 | 233.671878221507 | 200.902123076244 |
| VPS13A | 232.231236745251  | 215.115324454215 | 245.317436234586 |                  |
|        | 183.894417745549  | 140.726084514407 | 187.754968096521 | 165.698527470382 |
|        | 183.951404362826  | 163.794436953711 | 243.861834405092 | 214.785381549181 |
|        | 145.832751296646  |                  |                  |                  |
| VPS13B | 142.456527359961  | 140.427188241455 | 140.590802695412 |                  |
|        | 127.220812636148  | 132.622032754473 | 134.549628985766 | 133.75142055959  |
|        | 140.211016178402  | 137.419835194075 | 130.435589649362 | 142.818122106598 |
|        | 139.420025842675  |                  |                  |                  |
| VPS13C | 368.374002925137  | 432.515970951769 | 293.281098275134 |                  |
|        | 426.249411635589  | 185.140211988926 | 254.188830191845 | 257.477501542521 |
|        | 206.548878646452  | 241.494710905339 | 234.814109965002 | 259.826625866106 |
|        | 241.675251479835  |                  |                  |                  |
| VPS13D | 159.887898257218  | 164.82904652634  | 146.413845130977 |                  |
|        | 179.711363255355  | 133.346626315812 | 143.082880435412 | 139.130560988108 |
|        | 127.849141499408  | 127.496885890349 | 137.199718376452 | 139.94624507228  |
|        | 137.443463471483  |                  |                  |                  |
| VPS16  | 251.833571288967  | 260.888612454097 | 256.424415389574 | 324.203537490975 |
|        | 411.359106929985  | 366.705048374078 | 267.67093646012  | 315.306271141071 |
|        | 284.748764120614  | 280.453895029319 | 297.970735665595 | 322.302219773624 |
| VPS18  | 333.439929772897  | 356.921627358141 | 228.968779778407 | 462.553267274302 |
|        | 482.857203798212  | 182.886100305943 | 225.005311517365 | 192.244413515864 |
|        | 266.6817111962236 | 179.46936343225  | 314.708587131145 | 199.058972781223 |
| VPS24  | 295.420691959792  | 262.349315496653 | 438.431160975498 | 343.946831770916 |
|        | 260.224777636733  | 308.621688157016 | 313.099028594073 | 335.013713757031 |
|        | 264.955939320296  | 485.136339836897 | 279.452819132461 | 459.171226689178 |
| VPS25  | 213.602504580364  | 237.906142045719 | 229.933577323411 | 216.755681508811 |
|        | 465.54817048856   | 486.524284354103 | 540.078145038497 | 774.774214696342 |
|        | 550.434931878586  | 611.540759532294 | 374.56251861444  | 472.108893832845 |

VPS26 382.902151239988 350.983969007868 406.458130553679 333.049612399093  
253.754869975548 277.359422005775 334.607533045929 264.905947922753  
260.67310907387 304.357050745605 382.186095123659 352.180110869664  
VPS26A 1780.97169244555 1492.83354014907 1849.21906428944  
1208.9240215109 722.725186727796 1303.94157493616 1202.74869573717  
885.104778820041 1014.23822508445 1245.47421607111 1751.22580157752  
1539.80266129509  
VPS26B 340.301980622308 366.857139377277 394.65807885612  
529.963453165714 730.988069115919 290.582957824549 395.133831206474  
311.916199912898 278.555009982029 227.236255752375 271.397087928135  
257.44230597145  
VPS28 623.409211766224 732.630306104841 588.458314503034 836.235700891687  
1035.0797237176 593.320132696649 530.969825236996 697.97116981445  
959.532977061027 573.509780150018 617.474181543858 614.094097408035  
VPS29 1418.60088387728 1257.32413345748 2601.89405525276 941.065508539108  
1421.04485772969 2886.92690692502 1958.96627327952 2193.376951552  
2819.92361643968 2089.82894186824 1742.84803427086 2694.98079256089  
VPS33A 140.074841537258 167.637638693195 224.251136332123  
174.23955831109 219.519896184851 203.616580991715 229.85833221434  
215.40037757604 221.322724563472 248.531972733475 217.148957110623  
224.869569455052  
VPS33B 241.019436415703 246.552713031445 267.451611731669  
266.162244070031 270.847923557176 211.786963444117 286.996908547553  
226.020769172424 272.456310079164 261.469732730752 239.388546850124  
324.481229901658  
VPS35 1182.50261323518 1197.58205444449 1629.32740709526 1097.18236659974  
1168.68074786473 2748.51360874099 2219.71846304201 2952.67114077688  
2775.84742592713 1717.09434498876 656.009451448101 2837.36293710422  
VPS36 890.121325723286 868.40984928812 901.197085099854 936.957730361063  
303.555333002419 790.790236361922 282.963958072528 416.638529499878  
562.891241563711 566.417354841707 996.999238316991 1099.37392456694  
VPS37A 532.596772298766 473.529519031797 480.22496056277  
537.828979447378 324.009703043876 335.239364345057 467.681480781925  
443.005424069211 345.209128382239 440.657747083721 335.858047332641  
343.307036883726  
VPS37B 391.782120640025 447.372026268156 318.297819854586  
566.228690652783 1706.06615968622 456.201998988891 624.264994653057  
403.657727266403 553.757847979529 410.002817143111 912.483177705931  
562.089999265955  
VPS37C 1881.90353127141 1967.82064011967 1731.62376348283  
2416.49806112207 2645.72125268628 1623.92991386706 1481.24705642453  
1307.96033038529 1315.66699943181 1206.09815575399 1188.08712008638  
1497.32522786098  
VPS37D 302.601458409102 292.23287968517 325.80154888448  
388.096183735126 387.068276379114 232.105867345662 345.38424761963  
244.132645171301 171.071893074072 183.764215745794 139.078162119733  
539.125423322738  
VPS39 235.350819745387 248.729653566598 255.462706428149 390.098830270926  
213.324226314713 161.195562296834 214.4829383264 160.429643729685  
229.567444213626 186.215602572358 241.706645643141 182.478971050701  
VPS41 1298.60552708737 1098.78649254838 1139.76755449089 1009.42265467472  
352.180110869664 828.276436883306 687.494132125365 668.853969513382  
698.590134238302 612.61438059983 870.887539668967 656.867138022837

|       |                  |                  |                  |                  |
|-------|------------------|------------------|------------------|------------------|
| VPS45 | 503.093655556038 | 453.457361487577 | 514.463945278314 | 468.060528109338 |
|       | 295.973370766318 | 523.073926509865 | 465.683139139622 | 627.526008812413 |
|       | 372.94852645418  | 443.343806055858 | 431.974037914233 | 666.847934976479 |
| VPS4A | 345.686640885419 | 373.545629693667 | 306.896732729554 | 444.082440002333 |
|       | 442.027630433527 | 233.82434521462  | 235.704824490397 | 224.396933003452 |
|       | 257.602370597316 | 206.825575257029 | 296.497100375888 | 240.283918204202 |
| VPS4B | 657.058213650454 | 693.180345649331 | 810.769136227155 | 596.743397794872 |
|       | 637.457322054293 | 1180.7055699511  | 982.367000148189 | 1618.64901092072 |
|       | 1431.52979384867 | 1570.39362935859 | 1449.33679383001 | 1276.14915305515 |
| VPS52 | 285.562276640039 | 287.751093664085 | 378.38874489611  | 307.906312092805 |
|       | 397.064325578854 | 283.416246133873 | 368.879825610754 | 337.077153882632 |
|       | 341.251360936154 | 327.207408852474 | 437.344765185802 | 397.307515234646 |
| VPS53 | 134.877046981678 | 128.327528039933 | 156.904781904311 | 138.97443063851  |
|       | 131.232417654705 | 154.007244208673 | 147.983937675946 | 148.503282415207 |
|       | 136.635413632094 | 165.523150623132 | 147.121049266117 | 138.925802905636 |
| VPS54 | 179.122374556365 | 169.502103689662 | 196.117609477292 | 168.854819201403 |
|       | 157.049773524382 | 210.942865876533 | 199.714647839712 | 201.041792159394 |
|       | 180.060096787617 | 198.226525986857 | 214.162670073541 | 217.531179216305 |
| VPS72 | 415.749051861123 | 461.413469623811 | 458.218913259336 | 571.273512452931 |
|       | 737.650963292668 | 383.583234619781 | 363.594808277506 | 449.859227376918 |
|       | 419.532420763449 | 323.788197265954 | 271.945851739635 | 479.261755380872 |
| VPS8  | 277.180850774168 | 247.145700155364 | 266.057472924341 | 277.180850774168 |
|       | 214.991170762327 | 284.715092831843 | 298.706655333472 | 239.970202560698 |
|       | 260.787104931135 | 280.723379809959 | 283.27806319488  | 264.355693070937 |
| VRK1  | 168.538117820213 | 182.897563195019 | 188.40383184521  | 181.966110264509 |
|       | 337.119524477446 | 378.151202933526 | 245.811312606484 | 359.024299091145 |
|       | 236.855293143293 | 220.742788129847 | 205.908052642222 | 273.911741951291 |
| VRK2  | 188.7348696188   | 167.206513789165 | 210.620764703468 | 161.700258550244 |
|       | 182.222567053422 | 201.016287924499 | 172.942666836182 | 218.811490883852 |
|       | 195.711047893396 | 327.010503005631 | 191.554396977588 | 185.154876233931 |
| VRK3  | 192.07791693203  | 215.037122365095 | 180.15338103     | 243.10297424873  |
|       | 415.322560616847 | 266.99947481587  | 329.722135361491 | 368.134303229682 |
|       | 509.988617641229 | 268.224669588188 | 269.379272725008 | 262.389583658305 |
| VSIG1 | 159.592581700976 | 136.855445270531 | 143.744075931566 | 145.819198235878 |
|       | 165.619206216088 | 147.208176455806 | 146.728881202697 | 141.369723386494 |
|       | 152.646642492666 | 130.215290990406 | 153.579955370444 | 165.179126023422 |
| VSIG2 | 287.751093664085 | 519.564563632951 | 443.732580517751 | 145.346970289157 |
|       | 8211.38792799248 | 1961.26255930192 | 3083.98169220838 | 2537.90501983425 |
|       | 2635.31067044245 | 165.342790388607 | 4800.99572384569 | 4309.86375945008 |
| VSIG4 | 159.354364289526 | 148.454344601562 | 166.910561772689 | 173.708509414674 |
|       | 163.607125532236 | 188.40383184521  | 149.204816953404 | 178.790758444269 |
|       | 164.202554380274 | 213.215996114827 | 171.644710031098 | 169.999692055871 |
| VSIG6 | 138.751781355083 | 149.286184588967 | 163.946569217706 | 151.392024228289 |
|       | 133.508702281664 | 147.088665779406 | 133.117701703454 | 150.498954408708 |
|       | 152.385014030957 | 140.767270136561 | 154.049004176595 | 148.400132332444 |
| VSIG8 | 147.153129531937 | 151.855884026072 | 135.346501914337 | 146.890877830248 |
|       | 137.974323288786 | 135.907702243922 | 130.316282003711 | 141.724442944322 |
|       | 133.590552542806 | 125.038427667173 | 137.463764193883 | 141.599211622756 |
| VSNL1 | 178.847858667374 | 182.235490620172 | 168.37850726499  | 184.365354978005 |
|       | 151.463200570499 | 161.788118050564 | 153.285830139349 | 149.286184588967 |
|       | 143.959910170676 | 477.489368828457 | 156.032346112587 | 154.988494760267 |
| VSTM1 | 140.18668846839  | 144.982462113231 | 140.772074031028 | 136.338683078123 |
|       | 140.125575976708 | 139.986119754908 | 158.445124076906 | 152.08574341962  |
|       | 162.890650672747 | 160.43939815269  | 125.489777118532 | 159.710615852435 |

VSTM2 137.546487338984 132.521681289019 124.090268443064 127.777945516765  
124.915772594451 115.14883090249 116.168270198375 115.566303449363  
111.860763079995 115.327402810793 132.115817176834 116.759526220736  
VSTM2A 147.78847662997 123.354093930164 129.865581506307  
116.670491972948 143.050004021764 139.482462221798 135.033601686007  
133.850733997442 134.582098893327 124.682396766302 144.724040494873  
121.423030266904  
VSTM2B 135.753430034183 132.446406243531 125.04327844782  
122.494779505958 137.237089899964 135.743159681223 138.316043447788  
143.011042973347 135.54708602175 131.785053503951 150.471558219667  
135.605541734293  
VSTM2L 124.777895136212 129.732352495012 108.055271136842  
125.809027384863 137.514952067562 113.112450527382 162.656951764783  
121.248923222807 114.342980656214 112.365278258185 109.740801301993  
120.688909943167  
VSX1 117.790593990682 127.075899925865 124.080382291282 119.50754902958  
126.585679159459 129.835713633923 121.024572716324 125.701083319929  
119.13963074637 119.943408501009 117.356389952799 124.019707408094  
VSX2 129.069366041625 122.484351696828 121.826474059574 139.694950277714  
125.997109913348 144.191491000257 128.276471459777 127.903393519351  
126.386738502885 123.75974844367 137.853137973756 126.139188586523  
VTA1 190.572712684622 220.661922683143 188.20675818131 195.078843867124  
237.989479738133 289.859695541999 327.696359071012 322.614169214764  
223.89854167651 258.311739685895 289.576706584644 328.969023478451  
VTCN1 138.113751487484 142.876069462608 120.757288533244 113.440171712791  
154.916023131856 130.847215795313 1088.25132365974 210.199788806189  
294.033003779363 120.177385114315 147.117286738537 116.46192274217  
VTI1A 130.383001462828 130.800427334056 134.364838071696 133.788197693571  
135.139676303901 121.687187898743 127.545397354821 130.790872334222  
136.504438803108 134.432461986523 146.574656147816 119.618176258524  
VTI1B 654.52788411248 575.060457772307 787.615195903993 647.666334416707  
395.927222009721 335.698400607132 560.757496975779 380.146996799549  
373.860920943049 707.715412321304 783.373390305885 707.173691257322  
VTN 120.441732791854 129.546119539687 111.398760606544 126.421148348261  
100.325215581101 101.761615925097 111.475394003575 111.616460084889  
114.378420394004 104.739307327595 116.155949676272 113.76411537952  
VTRNA1-1 266.316485802808 224.547982731402 161.061119536632  
227.050629701762 210.981555130408 151.70035428516 226.595006724068  
179.478756495687 233.129544542265 236.191384383802 213.324226314713  
139.452773383624  
VTRNA1-2 118.718048764985 137.415646199256 121.215558351076  
125.749024723383 131.136073942692 148.361088792223 212.822328466993  
160.520677267863 136.180063437699 149.155345369055 164.478006648035  
136.599305161841  
VWA1 416.933146258428 550.566402986082 421.459312180809 838.267069860172  
439.852826905352 303.300028849873 337.822337721287 197.405472374722  
301.051775938853 191.665827345888 282.47352481715 177.562561297777  
VWA2 120.076742232995 115.235444833856 129.003317344469 117.069094451283  
128.329985147034 116.604371744082 128.045931477827 121.492896642899  
119.586157804692 112.166192839859 132.665590728755 129.102182717009  
VWA3A 130.613760017864 153.000232171457 123.868848032411 141.544454931788  
128.742617750403 138.494266722799 141.992490695142 131.371129237005  
151.755205401737 144.243598691782 164.02617650236 136.436762791912

|        |                  |                  |                  |                  |
|--------|------------------|------------------|------------------|------------------|
| VWA3B  | 123.069963218224 | 128.39171386085  | 123.168787977805 | 121.297234504922 |
|        | 130.073005698714 | 123.094324479352 | 133.482237631013 | 132.611864316181 |
|        | 134.04235176608  | 137.345542507421 | 160.724319010751 | 121.885476832858 |
| VWA5A  | 390.897464546943 | 338.585771590234 | 320.936905584424 | 359.577827010792 |
|        | 351.998551165704 | 213.847316974717 | 178.863722055499 | 244.689936990021 |
|        | 260.314440448486 | 186.296882059398 | 299.513950278952 | 263.52595855321  |
| VWA5B1 | 150.613624696604 | 143.163083976105 | 131.421663453164 |                  |
|        | 133.357385559881 | 145.261662166215 | 128.398711525305 | 126.893023101449 |
|        | 139.395743826525 | 133.160197638474 | 151.228823957828 | 143.733505359106 |
|        | 149.133055368147 |                  |                  |                  |
| VWC2   | 152.767228183775 | 141.857434100065 | 131.823019555685 | 142.707913210557 |
|        | 132.955473649746 | 155.072752529178 | 146.716053772448 | 122.194493542073 |
|        | 147.357032438442 | 129.869363181125 | 131.436176224725 | 145.591320521493 |
| VWCE   | 129.852833137493 | 135.237042337721 | 127.622397233692 | 136.478114537536 |
|        | 118.553226856337 | 123.069963218224 | 126.77232818113  | 136.251820364823 |
|        | 124.521130036013 | 122.254824223167 | 130.054105892394 | 132.850601603567 |
| VWDE   | 118.912989775436 | 133.849237689264 | 132.533234335153 | 129.143168240589 |
|        | 131.512174491572 | 126.148379057536 | 155.893018702615 | 133.056659202188 |
|        | 121.22760405399  | 133.322752419739 | 123.315362903961 | 133.016668180102 |
| VWF    | 2233.00694575483 | 4095.76073123843 | 1430.20038077595 | 4621.99241522677 |
|        | 1535.27496251381 | 878.986106116952 | 1339.83170225337 | 1986.81354260292 |
|        | 3038.02573182546 | 1157.02365469464 | 1044.91923772265 | 574.035124314622 |
| WAC    | 983.094485868275 | 882.037055216609 | 1334.69145271749 | 814.759191652981 |
|        | 695.321886304133 | 574.896304593109 | 750.10819423982  | 679.822276398569 |
|        | 662.373189001788 | 723.428294037428 | 567.143102792772 | 861.786094902013 |
| WAPAL  | 134.257928609741 | 155.641860356683 | 135.605541734293 | 154.686025022972 |
|        | 151.72544764489  | 164.39557148282  | 137.014698467096 | 158.602687876661 |
|        | 146.59366188125  | 165.169920299969 | 173.250350363688 | 156.646803208934 |
| WARS   | 652.429025114523 | 768.334658920971 | 470.154677948419 | 966.731520471976 |
|        | 628.939201051801 | 320.597495751519 | 363.255517622046 | 642.934824227327 |
|        | 947.425912541091 | 656.32782132983  | 508.302878624289 | 455.124190541055 |
| WARS2  | 181.354279096644 | 189.840366340622 | 189.633348499854 | 154.630837508249 |
|        | 137.25679451567  | 233.232319881243 | 187.325542100762 | 166.452651396293 |
|        | 143.716377201615 | 180.569583206488 | 279.202256032476 | 157.66595229182  |
| WAS    | 251.347519777204 | 207.514489132778 | 199.101099226668 | 222.820391338687 |
|        | 310.718449468465 | 346.476121089685 | 267.970798709017 | 496.991561192565 |
|        | 812.75075757351  | 281.119138040097 | 288.261250589513 | 199.637257550762 |
| WASF1  | 126.662329971897 | 119.583378101838 | 129.096939267543 | 136.818557078622 |
|        | 136.734131465433 | 133.044969965784 | 131.934680869554 | 131.173355686001 |
|        | 127.993841618875 | 132.313884627836 | 139.811873260553 | 128.669887479835 |
| WASF2  | 681.172359997071 | 944.92617668298  | 838.93563319979  | 1504.15682715484 |
|        | 1077.95929298567 | 458.440488401029 | 449.103432410618 | 447.909277144896 |
|        | 426.995700632434 | 719.369561410372 | 767.377380800066 | 360.475989559226 |
| WASF3  | 351.188086838653 | 279.202256032476 | 344.487982154705 | 268.660078500783 |
|        | 225.387674139093 | 236.833653794223 | 277.359422005775 | 170.439725847568 |
|        | 155.908951665928 | 184.111756696658 | 154.140863428961 | 160.180961887686 |
| WASH1  | 279.26508919212  | 294.22752955801  | 327.384671423687 | 379.983165400941 |
|        | 318.244342364572 | 416.715760038095 | 283.918434443669 | 429.268202514543 |
|        | 228.349507726225 | 386.544913399837 | 212.33360547376  | 257.573614085223 |
| WASH2P | 230.697077917675 | 191.84511431253  | 248.531972733475 |                  |
|        | 203.727455875381 | 198.863347487219 | 220.60173086462  | 190.348359536057 |
|        | 234.5655184349   | 206.488530785667 | 238.430350258686 | 211.104243881644 |
|        | 202.193338797533 |                  |                  |                  |

WASH3P 179.44023315251 160.073510173041 214.639374741553  
 165.200303470106 175.055634340766 188.685460181066 174.92026613834  
 174.812134675989 174.498521167568 196.536086443884 188.580458613357  
 170.992074907355  
 WASH5P 207.902853533132 203.335012796883 234.768591315095  
 242.996248524203 476.249239197777 1669.97250023755 218.000351930307  
 1708.87666406131 204.318316638312 176.347535860374 191.740596601895  
 203.004815689972  
 WASL 1329.3013039618 1474.70984232307 1467.50846948144 1020.19774509086  
 1113.05943954513 1379.95968831696 1482.92498205315 1371.56635975955  
 847.863177169335 1194.42925868786 1317.1258783404 1908.81864728547  
 WASPIP 302.462763120177 263.509066170434 361.26540006942  
 254.287838845201 124.261531006131 148.263293819238 128.247871411825  
 185.016336026382 231.728984785324 185.673549367125 193.472317111841  
 142.106329280184  
 WBP1 469.794672718173 474.378918787006 592.613689704907 480.36420271348  
 792.634423781309 685.620637807134 631.106334754678 848.154015576436  
 454.133372808458 397.737702926328 718.871732206362 524.725307261999  
 WBP11 516.429067667758 515.327420453564 531.555532787504 458.782864873657  
 631.408955630318 489.909407178594 574.896304593109 730.673649872205  
 624.106546150735 517.42417250172 422.338508598153 557.513306351027  
 WBP11P1 148.255769084026 147.376482709004 146.373162751863  
 149.557833322995 138.28745132277 145.261662166215 146.877475544399  
 147.229463256281 145.418696807842 141.540429359732 135.795717307603  
 143.151478156897  
 WBP2 4367.38154535901 4404.79209330918 4743.19967685595 4836.4008757421  
 3463.23822434026 2277.60839052397 3481.90072759183 3468.14455177277  
 4280.66857663502 3309.66193624859 2091.73580292332 2627.12900283627  
 WBP2NL 147.552635527742 129.102182717009 149.929454280702  
 155.198503964295 137.267307036807 153.922713834296 140.60741459333  
 142.318709347082 147.598602877625 146.359038260378 130.088408942008  
 132.674061422332  
 WBP4 564.056592672374 413.502150181875 637.457322054293 393.98210915852  
 216.615694348945 342.096409626768 225.209315195163 307.083179338165  
 304.237479317271 343.048904374136 358.355621069787 399.762451559805  
 WBP5 1698.08853832248 1602.63977096867 1471.01897242089 1164.22995893381  
 207.977817300376 2437.63566094439 2913.2685312165 1785.92695250894  
 2114.9754128463 1045.49947183547 2376.52728883131 2406.67187918735  
 WBSCR16 176.128369308989 180.085975596327 203.357914242777  
 218.672831303767 246.710233781784 175.757588503244 177.538262133568  
 188.242091666446 169.488652117125 166.12184890921 170.918584418153  
 189.633348499854  
 WBSCR17 138.316043447788 132.580937663749 124.183297351614  
 146.349773982488 129.846685899183 120.257886394616 116.552626146967  
 115.14883090249 115.450352881048 121.860428893248 145.858537779106  
 117.284724854784  
 WBSCR19 169.784837251279 173.387549650592 175.784250947874  
 181.823450464129 171.722839172783 170.052320640686 165.866987051333  
 178.416969664816 169.246302492166 157.425924587516 163.821142892643  
 171.595724119779  
 WBSCR22 752.142287661845 714.6859666834 796.936154737659  
 679.191060100076 1963.23068846837 863.738809424958 842.567990276734  
 833.198511430615 933.408902924063 569.47446215213 832.622843175217  
 1376.84058291266

|         |                   |                  |                  |                  |
|---------|-------------------|------------------|------------------|------------------|
| WBSCR23 | 123.58053320223   | 116.310166003024 | 132.390330703084 |                  |
|         | 113.40684693417   | 126.295856316628 | 131.142841840284 | 129.865581506307 |
|         | 132.282125790062  | 119.943408501009 | 123.096995744616 | 163.113457178357 |
|         | 116.897299691798  |                  |                  |                  |
| WBSCR27 | 183.32467147543   | 182.410688592378 | 215.194909819764 |                  |
|         | 181.607253339427  | 512.312880441098 | 169.136919982294 | 245.850813387241 |
|         | 178.984409575632  | 215.47323777134  | 185.193234472203 | 174.941551089279 |
|         | 198.004357069446  |                  |                  |                  |
| WBSCR28 | 140.675094228846  | 142.478528530514 | 130.799009128937 |                  |
|         | 134.262346867514  | 189.205724390913 | 130.195234920895 | 137.244552699212 |
|         | 127.699226067847  | 134.189023892662 | 137.176144667253 | 136.93893152919  |
|         | 130.213596986351  |                  |                  |                  |
| WDFY1   | 1144.07896461196  | 1162.09529660662 | 750.10819423982  | 884.747476952289 |
|         | 555.109005518622  | 824.746488539942 | 819.488546995594 | 657.77730563722  |
|         | 1069.25265476373  | 1161.39230511792 | 1152.50523614436 | 738.087203930249 |
| WDFY2   | 233.394506254045  | 199.037998955485 | 252.628516068724 | 200.831877950718 |
|         | 176.680708339236  | 290.090495047722 | 167.941671074236 | 197.582402276079 |
|         | 222.415704486709  | 624.106546150735 | 237.71636970719  | 212.996456841785 |
| WDFY3   | 170.692146255416  | 177.103802332144 | 169.482586449402 | 175.874387612235 |
|         | 160.127254444487  | 199.776140037612 | 191.093283411655 | 192.61436632814  |
|         | 173.440596296333  | 167.536828038178 | 175.9510758779   | 188.797908601851 |
| WDFY4   | 134.668233738635  | 141.416706868124 | 137.549175595441 | 153.758353103323 |
|         | 133.379872189405  | 153.658747612827 | 133.561188057423 | 145.711007027894 |
|         | 189.552385508772  | 134.147586627141 | 118.355532305846 | 132.641236788053 |
| WDHD1   | 144.8010712221985 | 138.26050964606  | 134.55255098289  | 144.448503894295 |
|         | 154.688685142904  | 179.091917512822 | 139.54021659275  | 155.680330654611 |
|         | 149.622695843398  | 168.150270765792 | 151.07661060324  | 149.317146997809 |
| WDR1    | 3038.02573182546  | 2666.06582231934 | 2850.98525554116 | 3371.24667467952 |
|         | 2089.82894186824  | 1713.93035637146 | 2210.67250954072 | 2061.9164323309  |
|         | 2446.31228564539  | 1774.22769195939 | 2398.71483410593 | 2174.62979843528 |
| WDR12   | 227.926444925478  | 234.126500054945 | 273.959220003188 | 225.065765924246 |
|         | 276.5177779623    | 810.769136227155 | 348.506289278042 | 725.065727257421 |
|         | 528.098472417251  | 466.141717595301 | 413.330906392915 | 546.611519125021 |
| WDR13   | 920.840069938767  | 945.403379196643 | 897.958748317315 | 1276.14915305515 |
|         | 876.288248962843  | 501.600329334497 | 727.814681346494 | 742.517302567436 |
|         | 580.474775712828  | 683.179460779062 | 784.412433571927 | 689.04773343291  |
| WDR16   | 131.641435734821  | 134.604565335211 | 131.069515666204 | 133.918638123756 |
|         | 136.80943340993   | 142.03837243998  | 132.472505035111 | 136.781417098789 |
|         | 126.013957128603  | 135.952202055637 | 138.792521681771 | 135.830453690107 |
| WDR17   | 151.727603285205  | 131.973896985615 | 140.323425587628 | 143.922878410438 |
|         | 134.970609100459  | 129.914077170794 | 124.837187124441 | 131.479997342133 |
|         | 129.422854634791  | 126.722212054469 | 142.079184950618 | 128.471437314295 |
| WDR18   | 842.22767901391   | 1111.88018487186 | 844.187489702587 | 1186.96351738518 |
|         | 3115.11499025766  | 1942.08859727404 | 1416.93831202323 | 1803.06322760249 |
|         | 1544.45026075974  | 1923.19560386389 | 1337.38160266788 | 1095.04571025381 |
| WDR19   | 427.084392965651  | 425.001043358831 | 566.543765584009 | 372.255208814622 |
|         | 211.786963444117  | 354.922901990615 | 369.592501881153 | 331.215872600406 |
|         | 484.764806127211  | 354.531898366438 | 208.955110569558 | 240.734451149197 |
| WDR20   | 270.181005097697  | 307.81941988503  | 271.430915699592 | 348.241471067257 |
|         | 235.530986541549  | 200.360518276784 | 236.592839463278 | 236.470206707351 |
|         | 205.282221255986  | 268.406778092906 | 225.505978789388 | 255.198862778405 |
| WDR21A  | 242.037132958656  | 213.194154171149 | 275.203046536524 |                  |
|         | 249.354198174438  | 226.712995229189 | 230.10433160008  | 256.764450748941 |

|        |                  |                  |                  |                  |
|--------|------------------|------------------|------------------|------------------|
|        | 207.864808684047 | 190.189217962555 | 231.439252571168 | 263.568160216149 |
|        | 253.385592447339 |                  |                  |                  |
| WDR21C | 134.241917425247 | 133.215151497536 | 137.672798701643 |                  |
|        | 148.212445624699 | 168.674809329231 | 132.271437329873 | 134.333679772065 |
|        | 144.007071548045 | 132.620474788855 | 125.73560975196  | 150.503278880269 |
|        | 130.321133400634 |                  |                  |                  |
| WDR22  | 613.631311147328 | 603.061485415867 | 708.268962600305 | 800.013123376748 |
|        | 273.152907354565 | 271.568797887976 | 371.369895979832 | 304.751330890753 |
|        | 287.195290301363 | 304.547738011742 | 314.845965872164 | 400.180574613078 |
| WDR23  | 537.350891960682 | 542.544172683021 | 573.644925180854 | 537.510539142248 |
|        | 213.447886742681 | 351.998551165704 | 340.547010951537 | 341.128917971124 |
|        | 308.031816782343 | 317.061815822659 | 455.124190541055 | 349.816819166182 |
| WDR24  | 171.329984719612 | 199.756584044664 | 176.579096613849 | 195.239829623017 |
|        | 211.535720730612 | 305.398934391579 | 183.152005135504 | 250.647644543963 |
|        | 181.607253339427 | 162.351212914573 | 179.411426984263 | 190.96184674871  |
| WDR25  | 258.632372536866 | 283.645434184168 | 190.549084022965 | 348.413827101046 |
|        | 302.905840432998 | 135.461112284848 | 149.645548888832 | 158.902676384853 |
|        | 156.707737817443 | 171.473538842796 | 172.057586741925 | 149.956759038516 |
| WDR26  | 545.200687301057 | 436.586158384666 | 509.988617641229 | 368.711718874343 |
|        | 210.925203743958 | 480.484639351046 | 395.645016679312 | 269.468453936818 |
|        | 352.354687089427 | 580.474775712828 | 413.757630469808 | 446.819873986024 |
| WDR27  | 272.314332734711 | 263.845733455915 | 320.467139255533 | 259.025042304848 |
|        | 168.657830209313 | 179.880812358974 | 239.789994201722 | 208.932692585748 |
|        | 166.925695810781 | 214.200081541057 | 182.263724979519 | 181.148062201932 |
| WDR3   | 134.008118774075 | 134.325520377207 | 126.915338864323 | 131.136073942692 |
|        | 130.406895174038 | 134.964619235561 | 136.241569739318 | 142.110469428644 |
|        | 124.720004905439 | 131.999299893526 | 148.618327213374 | 134.835962366555 |
| WDR31  | 132.493888285566 | 130.285187693932 | 139.057572927874 | 132.23149173224  |
|        | 125.290320836648 | 132.224831869802 | 132.529247880813 | 129.362793087439 |
|        | 138.221749464651 | 132.440818532628 | 139.757191608836 | 126.667650990284 |
| WDR33  | 318.297819854586 | 278.095939961034 | 332.082749517913 | 261.814227719605 |
|        | 263.74335003375  | 281.881563164961 | 305.669636871734 | 240.376851873817 |
|        | 292.893332413185 | 359.493075382333 | 306.277823025572 | 339.753059801136 |
| WDR34  | 251.138401278632 | 233.426170535227 | 186.276450732044 | 288.631429069336 |
|        | 915.579581760396 | 227.350260241585 | 211.34069504665  | 254.9636051363   |
|        | 264.355693070937 | 213.93763684072  | 253.789045068884 | 194.281839133887 |
| WDR35  | 176.194292036542 | 169.733427590141 | 217.89028736436  | 159.23414970379  |
|        | 139.321570881862 | 203.642739476708 | 167.984051648058 | 166.746037983859 |
|        | 158.06915048955  | 166.692386207143 | 182.357065848298 | 175.810411923013 |
| WDR36  | 387.224184063662 | 400.783945471037 | 440.203336761263 | 389.109250187902 |
|        | 232.519482087835 | 588.197697799448 | 351.02823853348  | 390.194764817385 |
|        | 242.871915060884 | 425.708048519408 | 377.225452025984 | 419.047108206042 |
| WDR37  | 331.937313503755 | 288.072720517427 | 337.87475687838  | 324.671490117952 |
|        | 308.441120735095 | 380.243136469602 | 301.051775938853 | 316.955298948771 |
|        | 281.071129128589 | 280.531844086775 | 337.119524477446 | 319.927209914181 |
| WDR38  | 132.383542877819 | 135.744202879162 | 139.799467834109 | 142.655287071175 |
|        | 134.041098536814 | 126.88066987372  | 144.141837615086 | 143.78994470501  |
|        | 135.758133410577 | 136.695790688466 | 137.620843137286 | 135.484360570738 |
| WDR4   | 220.288758600588 | 218.058543664561 | 200.84691030169  | 252.919704128539 |
|        | 408.361368902627 | 279.202256032476 | 258.012234458166 | 319.490670412394 |
|        | 341.015631528464 | 276.653753970476 | 249.339449789861 | 337.22646304739  |
| WDR40A | 425.13721408756  | 443.259619455624 | 368.134303229682 |                  |
|        | 403.720036930931 | 692.945420109927 | 690.246312542011 | 616.188923504376 |



697.299604049748 779.922653392712 687.987647193563 641.12919339861  
 476.495282784602  
 WDR40B 155.851264092344 151.194282143046 168.483273292464  
 157.546123603057 133.680691168661 146.264686158155 166.563411635721  
 151.998942684339 148.25001336038 155.471795004237 146.580787463084  
 155.924471321076  
 WDR41 253.975577255772 255.435582426271 280.398987330256 260.52593414721  
 224.439293045835 209.662262708551 277.726756691133 241.944581086483  
 165.471587934831 429.096075419528 370.066087375401 296.497100375888  
 WDR42A 1440.14449872047 1732.52466021178 1797.65684760558  
 2273.12164779441 341.901565692251 996.240188311002 648.823677010146  
 764.774225930479 619.223672253014 561.379619105609 1018.38836615952  
 639.38881853171  
 WDR42C 146.165632086981 120.799317509529 132.970515991525  
 135.210887148305 138.093181144173 138.748941735079 161.603317039244  
 132.164132609317 135.973752893694 137.165966740473 135.153588830407  
 138.9878987332  
 WDR43 209.417052464583 194.112534914308 177.478925091583 178.665552649698  
 242.871915060884 410.42088953434 248.927790738447 282.137282466192  
 246.748589597262 272.500572765647 189.2642795052 320.390351199433  
 WDR44 259.643957326575 227.884445686928 243.225815954365 244.766289564524  
 186.925138700818 197.205792984885 171.595724119779 188.941900997781  
 185.856755885891 210.266075382636 196.096936985479 178.728925255163  
 WDR45 179.687464522203 190.939726271153 175.073595611435 214.162670073541  
 243.038392457584 235.795627549799 216.381643581705 206.098534554876  
 200.065184172871 167.70368494182 197.02284475852 161.371477511362  
 WDR45L 469.407481002198 412.582051585078 449.220056843562  
 405.766055310869 427.151797273226 733.49038042129 677.023591987179  
 1146.84239258543 1171.62361359992 600.264940641426 488.884511065882  
 995.812184456562  
 WDR46 336.786227017391 461.722481634933 322.576886792502 532.950400370668  
 574.6506349984 396.04031733841 389.588346573823 391.782120640025  
 365.864755316163 424.578659172414 327.324711245289 316.955298948771  
 WDR47 185.046826969912 166.173429365582 208.321765801227 155.803946849495  
 142.272117655292 232.083160165968 175.840639511966 176.347535860374  
 168.882806817001 276.414209660023 168.702991603656 170.233084517898  
 WDR48 408.444629429553 503.285430318683 639.688482258192 465.683139139622  
 467.387427864242 566.813343200268 515.729905361375 342.769825986756  
 631.653707589221 470.578335285993 492.534183006883 410.954095610904  
 WDR49 156.978585870854 149.499238912407 147.114698384834 147.870549240703  
 148.717545103261 147.81143020317 156.589829166493 150.003399000079  
 145.314204192565 152.486212022518 134.10070984606 147.988883293205  
 WDR5 192.022864170934 223.042575796603 177.955579729463 245.850813387241  
 287.751093664085 184.204036882642 163.915489303508 175.400802387403  
 195.019706886336 221.093229309411 199.991077347491 167.226663395855  
 WDR51A 193.148369507405 243.589099648895 181.54273463264  
 203.410932496844 1460.24985399013 677.9972761887 414.403321220432  
 416.215253990273 689.821785472506 437.489929507567 256.964577037118  
 465.41233536979  
 WDR51B 263.888891822857 238.124340832815 271.989060206794  
 225.820503820866 229.729195963667 373.803772983872 310.075815009404  
 1214.77298621465 305.050933898691 308.38513924253 193.930569647995  
 277.685488726472

|       |                  |                  |                  |                  |
|-------|------------------|------------------|------------------|------------------|
| WDR52 | 156.602240897907 | 157.070500065037 | 153.209409960324 | 157.381401974279 |
|       | 148.186698759452 | 149.545278163222 | 160.786907816025 | 151.456702092528 |
|       | 153.399787997793 | 144.750407738866 | 158.691830524781 | 151.791580876522 |
| WDR53 | 173.250350363688 | 158.579717282881 | 153.000232171457 | 149.317146997809 |
|       | 180.315825600347 | 175.400802387403 | 182.384190694142 | 208.816482659752 |
|       | 205.428900832926 | 217.013533525724 | 185.027902485379 | 195.123919692348 |
| WDR54 | 412.277592266475 | 529.529314022043 | 500.246996975    | 432.604462607037 |
|       | 2847.42635118026 | 698.882871686866 | 1043.14253624883 | 1001.65849130836 |
|       | 747.322544683874 | 1149.90248188644 | 411.285747588622 | 761.89271251455  |
| WDR55 | 201.969002368045 | 194.831347257735 | 173.169905329013 | 211.555248754731 |
|       | 173.879952136931 | 180.719868519867 | 284.236970342827 | 216.077955163344 |
|       | 176.176392369178 | 374.46180489079  | 326.45984882427  | 283.014222473749 |
| WDR57 | 255.273375146278 | 251.915179734134 | 312.080864996592 | 252.733973271584 |
|       | 467.512355593598 | 817.342172321486 | 422.840163973614 | 648.823677010146 |
|       | 478.847650837714 | 395.588345893987 | 397.064325578854 | 509.400965222318 |
| WDR59 | 793.891277937782 | 749.515603904233 | 882.798927428142 | 759.058176862524 |
|       | 447.909277144896 | 624.467319041884 | 709.778171909457 | 688.915534194306 |
|       | 726.000622725287 | 601.800326895295 | 730.34994035645  | 810.769136227155 |
| WDR5B | 137.093170378295 | 133.984078167807 | 132.197346228417 | 135.164117176127 |
|       | 141.70123350351  | 127.718341524417 | 150.476228905372 | 160.221974600577 |
|       | 187.893420010787 | 120.15332480712  | 165.239214141562 | 138.033668840392 |
| WDR6  | 1715.51071085304 | 1859.88000417483 | 1906.81344236287 | 2081.45603839306 |
|       | 3111.50508060882 | 1208.25171673432 | 1692.01248523526 | 1309.01193284992 |
|       | 1764.53168329081 | 1059.19317548869 | 1316.31088187364 | 1424.79466712859 |
| WDR60 | 343.048904374136 | 342.878522959461 | 427.151797273226 | 302.362619893594 |
|       | 233.953994677015 | 343.417041721907 | 387.477198908304 | 320.305852961452 |
|       | 277.406445570925 | 241.944581086483 | 289.82072316082  | 370.301819403832 |
| WDR61 | 502.499539192864 | 496.218605366298 | 546.399972543938 | 406.816482069141 |
|       | 517.676093149981 | 1138.44837250274 | 1356.43255022363 | 614.514126276981 |
|       | 1200.03423010236 | 974.544773560873 | 798.389385197471 | 1129.15018335354 |
| WDR62 | 119.711070285785 | 143.047617455953 | 122.634741242406 | 121.197702744078 |
|       | 212.037224737798 | 151.717558541683 | 132.64813248505  | 138.035272644139 |
|       | 133.297361715205 | 121.893446546512 | 137.959775678716 | 126.893023101449 |
| WDR63 | 132.338144393918 | 139.256416415149 | 126.298187538812 | 130.672586991186 |
|       | 135.407536491819 | 147.688664545959 | 133.879079395215 | 138.296933822299 |
|       | 129.945543636232 | 155.63328143658  | 149.416411285088 | 140.83570584033  |
| WDR64 | 129.4807689399   | 157.277051544704 | 125.9713489569   | 145.799530970042 |
|       | 146.070871543153 | 150.303703193967 | 139.54738445816  | 136.815411937352 |
|       | 138.100014158367 | 154.101698334466 | 118.694037994926 | 123.847186739627 |
| WDR65 | 142.06907380533  | 149.377153449536 | 152.6969498938   | 144.454141873387 |
|       | 149.020824600931 | 155.3016514732   | 143.438417529799 | 137.058578192268 |
|       | 136.80943340993  | 148.951632781748 | 158.041568121766 | 146.90847051471  |
| WDR66 | 171.884800118791 | 160.676606760965 | 154.287059283977 | 151.776232847515 |
|       | 142.274440538785 | 162.481362579872 | 166.958831664154 | 161.655336107432 |
|       | 167.858490180471 | 1241.59946353857 | 124.766436060041 | 142.354731066206 |
| WDR67 | 184.451469623426 | 198.954254778846 | 184.775001243453 | 217.227441947056 |
|       | 175.960788330149 | 259.316557834724 | 200.652195873026 | 400.845137156678 |
|       | 348.241471067257 | 199.209279169496 | 195.400963839097 | 211.555248754731 |
| WDR68 | 242.787656836745 | 289.616527814137 | 264.201932544662 | 305.542978609337 |
|       | 608.129959758538 | 766.176882605175 | 539.853394831917 | 623.409211766224 |
|       | 739.085574858917 | 525.138476928759 | 441.958777965408 | 588.678767007017 |
| WDR69 | 131.430921437192 | 117.623103460369 | 122.965328766807 | 128.05898686833  |
|       | 121.739219824085 | 127.842177770276 | 115.795989631016 | 125.539199863559 |
|       | 133.594446233378 | 126.217702283708 | 129.32466533596  | 125.050945917101 |

|       |                  |                  |                  |                  |
|-------|------------------|------------------|------------------|------------------|
| WDR7  | 252.514569129392 | 230.10433160008  | 265.028512407839 | 237.754067231793 |
|       | 179.451637129672 | 183.152005135504 | 188.503673684625 | 189.567241599215 |
|       | 207.138680369683 | 192.493439659184 | 190.427022049167 | 177.143397572907 |
| WDR70 | 438.958573676953 | 468.569725051459 | 458.607367472574 | 527.707841428677 |
|       | 393.264726588522 | 451.621888586656 | 467.187222441283 | 686.198351821711 |
|       | 360.361719991381 | 408.811415529922 | 526.416479408056 | 394.414934831535 |
| WDR72 | 115.582048644075 | 213.833894542292 | 112.156010486085 | 124.533543270311 |
|       | 1475.41920838384 | 2537.90501983425 | 1512.28202818467 | 1261.61611961272 |
|       | 1347.75629878765 | 1298.60552708737 | 3348.7622174821  | 2677.17579532816 |
| WDR73 | 308.803322140241 | 305.615423200097 | 335.790909130243 | 354.067771806542 |
|       | 174.214747421898 | 290.688850193983 | 336.380724981693 | 250.766180970907 |
|       | 311.269750643358 | 200.22145130696  | 256.174286655796 | 329.263397240111 |
| WDR74 | 583.697431061521 | 666.344430142655 | 533.784151495549 | 628.000860165888 |
|       | 418.574045635945 | 615.88518704181  | 413.913442080187 | 419.763812610671 |
|       | 413.555310697751 | 378.585058475083 | 515.327420453564 | 420.647394044431 |
| WDR75 | 694.02978779693  | 787.615195903993 | 753.997560938003 | 733.49038042129  |
|       | 510.061974830525 | 1212.55338792557 | 657.77730563722  | 799.423640530777 |
|       | 684.428198622716 | 869.937761943249 | 935.423045210635 | 885.927972780392 |
| WDR76 | 150.960096893517 | 157.87020867396  | 149.919344933814 | 151.613134875009 |
|       | 168.437049123012 | 155.303903514061 | 147.164348704012 | 159.266921692363 |
|       | 163.668476670167 | 158.000456937922 | 148.883263903527 | 163.643554173995 |
| WDR77 | 208.666760987764 | 220.533113603343 | 239.003718699156 | 242.902900881585 |
|       | 378.728516779744 | 273.806452412737 | 467.04976953755  | 377.024120035829 |
|       | 409.743899750699 | 242.614881095485 | 376.276954313674 | 340.366016191232 |
| WDR78 | 132.6175371563   | 134.658664100744 | 124.072512083237 | 126.75720720361  |
|       | 138.331509117817 | 128.251087452744 | 130.249430984172 | 129.995417218564 |
|       | 136.519697160267 | 126.446675008883 | 130.844272373448 | 131.820842728171 |
| WDR79 | 163.165374495635 | 171.521579011287 | 157.912864169081 | 197.378801636702 |
|       | 243.793465720264 | 219.394500571586 | 140.229267364503 | 192.113217321485 |
|       | 157.907190910755 | 151.301484852387 | 192.130214856642 | 131.996032643928 |
| WDR8  | 360.812953749077 | 336.338518973032 | 336.639473916174 | 371.06697207449  |
|       | 644.301665020526 | 545.760623858473 | 446.601751145647 | 576.10291008626  |
|       | 454.732029358748 | 429.992169596618 | 375.255445179952 | 539.853394831917 |
| WDR81 | 255.945470052489 | 360.90109922539  | 265.992741398183 | 404.876478833713 |
|       | 400.060972573122 | 240.75934760601  | 194.60309399944  | 258.868119227979 |
|       | 213.046162847735 | 254.101184686036 | 276.925017614147 | 216.645552082667 |
| WDR82 | 1233.27155759407 | 1084.10984365393 | 1156.19575610918 | 1412.56164938199 |
|       | 632.031410234577 | 894.734451279225 | 857.55777793754  | 598.647226284738 |
|       | 1252.28642463619 | 749.220616713093 | 771.059329972125 | 938.049312229961 |
| WDR85 | 158.292581724934 | 152.064982697394 | 156.759600627542 | 135.87026484074  |
|       | 176.138621462315 | 143.227410286571 | 137.790718305537 | 148.530422089937 |
|       | 136.201103852785 | 146.753212022975 | 170.169402943662 | 149.335288055732 |
| WDR86 | 148.297939240474 | 182.833961304079 | 153.474566767304 | 205.428900832926 |
|       | 134.671840308041 | 127.696578575874 | 127.077668562103 | 136.541973790157 |
|       | 142.081013617671 | 134.01566484034  | 155.104697146664 | 214.132445321197 |
| WDR87 | 136.557466007228 | 141.905641114703 | 145.081468030567 | 147.543411823657 |
|       | 153.38494705081  | 151.59613008133  | 155.715728894101 | 153.752502094283 |
|       | 146.466967386428 | 148.247826830556 | 147.428180649939 | 158.297624312257 |
| WDR88 | 133.050798832332 | 132.960708384399 | 122.312652834289 | 132.748478264583 |
|       | 126.494665743087 | 128.893208935783 | 139.31967261371  | 127.644315207178 |
|       | 133.269658133558 | 137.96452133771  | 139.889264227467 | 112.317996234709 |
| WDR89 | 148.976157516273 | 139.180086017033 | 146.604519441812 | 152.479402912801 |
|       | 146.402352419692 | 144.853868519575 | 150.300108097623 | 160.402220755071 |
|       | 148.544887355857 | 151.362686497226 | 152.291176493005 | 139.711696905287 |

|         |                  |                  |                  |                  |
|---------|------------------|------------------|------------------|------------------|
| WDR90   | 166.272237117441 | 168.720694813918 | 181.193963616037 | 165.2045030333   |
|         | 298.301504581296 | 212.073472189229 | 188.40383184521  | 245.900840732668 |
|         | 215.81995779019  | 192.153420834889 | 218.559622620349 | 213.468420853218 |
| WDR91   | 188.641397688261 | 188.291563792748 | 215.47323777134  | 191.040134068942 |
|         | 201.441808401878 | 244.990374822652 | 290.502085667398 | 208.080089376299 |
|         | 221.768507175814 | 377.353441970543 | 199.88618355278  | 238.482863150124 |
| WDR92   | 256.127197303751 | 218.18756955522  | 288.631429069336 | 269.726397478364 |
|         | 278.168897504985 | 260.999345837027 | 207.960802948119 | 280.656087497806 |
|         | 242.538036654192 | 183.447807651728 | 223.373877165342 | 198.597176657619 |
| WDR93   | 129.930888107958 | 133.737573120711 | 136.067657949844 | 129.360773522498 |
|         | 137.376602654929 | 132.86711707789  | 138.113751487484 | 142.383723965616 |
|         | 138.510722755317 | 146.227452269648 | 124.635917999969 | 144.96021415188  |
| WDSOF1  | 273.75192868583  | 261.721726664029 | 240.07282016658  |                  |
|         | 239.871536598083 | 455.930204471585 | 428.462270756201 | 318.690043546203 |
|         | 442.027630433527 | 455.08515350006  | 275.39986964837  | 497.759125486158 |
|         | 344.915370555826 |                  |                  |                  |
| WDSUB1  | 261.639437655633 | 287.195290301363 | 337.822337721287 |                  |
|         | 251.138401278632 | 285.980446338971 | 382.485769373364 | 297.419034136005 |
|         | 262.756237406794 | 267.190228116903 | 310.465070184707 | 314.90123632547  |
|         | 275.298642145005 |                  |                  |                  |
| WDTC1   | 137.471563342956 | 155.438218501542 | 149.742140955184 | 183.583432296209 |
|         | 152.503159091556 | 131.141668650877 | 138.731957926247 | 137.118488157416 |
|         | 120.501697624977 | 143.632325018964 | 115.072622367144 | 130.00310962336  |
| WDYHV1  | 260.489744360233 | 258.25658838015  | 303.051124835907 |                  |
|         | 237.575788579215 | 283.527656956105 | 231.39684528494  | 241.383657414248 |
|         | 247.971366020963 | 302.570932942847 | 211.786963444117 | 245.454945056317 |
|         | 253.124449721731 |                  |                  |                  |
| WEE1    | 602.141151173094 | 443.853458865556 | 474.917507160629 | 349.330629649093 |
|         | 520.585319342817 | 443.125195744202 | 469.407481002198 | 502.170430910893 |
|         | 459.30568829087  | 407.711669482083 | 610.915977337787 | 398.193129265416 |
| WEE2    | 133.467092274663 | 122.247130087475 | 131.04482088126  | 136.452338158252 |
|         | 127.7962242731   | 134.737901773547 | 132.083532534267 | 122.109009629395 |
|         | 128.872496485403 | 127.310437599803 | 134.640783050966 | 132.865704994046 |
| WFDC1   | 1828.66165670455 | 1287.3125466789  | 938.918431240228 | 1220.30347076968 |
|         | 136.739754726714 | 229.130679600654 | 133.959208066964 | 230.620456579897 |
|         | 204.999796322451 | 198.840533461525 | 145.952759497544 | 213.178648382852 |
| WFDC10A | 131.216673806987 | 148.26621607986  | 146.791505538166 |                  |
|         | 147.617354114584 | 150.91730768674  | 141.606501859513 | 155.842195370853 |
|         | 160.379168489216 | 145.01322767825  | 135.353539458856 | 114.234369421536 |
|         | 138.156430188312 |                  |                  |                  |
| WFDC10B | 155.673532440475 | 162.769643886845 | 179.828494168009 |                  |
|         | 184.157941055948 | 125.484453841158 | 122.501785735146 | 122.007909794484 |
|         | 137.15571320152  | 129.987548571478 | 128.194171809998 | 129.077660633761 |
|         | 128.300838927918 |                  |                  |                  |
| WFDC11  | 151.81251450855  | 139.892371997205 | 139.013404849037 |                  |
|         | 159.337816095012 | 144.81077501446  | 159.7197697044   | 152.769931978291 |
|         | 143.217978435486 | 140.378255168229 | 131.986590029726 | 142.217762896203 |
|         | 141.466287523861 |                  |                  |                  |
| WFDC12  | 139.159510392614 | 135.848022588175 | 144.710613442383 |                  |
|         | 141.308299074832 | 150.016550610991 | 129.741644654541 | 144.240470871638 |
|         | 145.549126188292 | 140.44966014021  | 143.602039774312 | 132.285835971705 |
|         | 137.445344116574 |                  |                  |                  |
| WFDC13  | 136.823008283157 | 113.031636180748 | 121.320750074882 |                  |
|         | 128.952986088886 | 142.21279866857  | 147.576533768761 | 149.070750686003 |

|         |                  |                  |                  |                  |
|---------|------------------|------------------|------------------|------------------|
|         | 139.2454524913   | 133.370488470007 | 148.727953739127 | 162.748836971539 |
|         | 157.83460319212  |                  |                  |                  |
| WFDC2   | 245.582279957584 | 242.72424280444  | 192.954269340616 | 395.521241316058 |
|         | 340.193863653875 | 225.64288602828  | 203.149001616967 | 137.491366243256 |
|         | 153.030069116717 | 142.64421300687  | 157.237147919803 | 175.840639511966 |
| WFDC3   | 188.062732621031 | 173.70035122661  | 205.742386129597 | 189.799091507686 |
|         | 146.476960694197 | 137.652358744527 | 143.629760301493 | 135.25123092324  |
|         | 149.601145171769 | 133.699547652179 | 137.93067182632  | 138.098165515898 |
| WFDC5   | 156.818197172306 | 146.450806121927 | 163.170983091116 | 161.636411303968 |
|         | 156.05583229359  | 160.459100056689 | 167.782882015229 | 147.229463256281 |
|         | 158.213784310645 | 528.275591281419 | 150.952264779196 | 161.968835903764 |
| WFDC6   | 141.141047405344 | 152.08574341962  | 133.089616534434 | 125.661697165943 |
|         | 156.030794481734 | 137.336914480226 | 137.499290547619 | 126.118745937997 |
|         | 138.684070773064 | 146.875733210901 | 141.884995734267 | 139.166537591866 |
| WFDC8   | 125.008209861774 | 129.669484303621 | 132.419898122309 | 126.277165320165 |
|         | 137.536053775531 | 134.907397302852 | 130.651062724029 | 120.748910864064 |
|         | 135.056517225198 | 123.410467384598 | 131.800533523123 | 123.081299769162 |
| WFDC9   | 138.212860360467 | 145.239119337981 | 126.887989471803 | 123.809866652834 |
|         | 116.252227301161 | 138.317443162096 | 125.400741907779 | 130.541449457342 |
|         | 139.232893342069 | 136.225792549383 | 140.457727109762 | 131.226834630025 |
| WFIKKN1 | 157.368974632451 | 127.963701335952 | 141.327299595068 |                  |
|         | 129.902965506953 | 133.504078347324 | 144.606963457243 | 150.829439012542 |
|         | 149.980924447339 | 138.265155903051 | 139.440415574681 | 120.594874820899 |
|         | 137.056500339577 |                  |                  |                  |
| WFIKKN2 | 108.760780994582 | 109.003365273337 | 103.772221923105 |                  |
|         | 109.46255295836  | 106.629065516249 | 112.599970121166 | 99.9173294438729 |
|         | 112.3786222545   | 115.090463537716 | 120.241528853563 | 113.620070198869 |
|         | 105.284300851422 |                  |                  |                  |
| WFS1    | 3164.55070502403 | 3062.22499714914 | 3315.21586182496 | 3793.02341602102 |
|         | 1754.99663827472 | 595.409419899436 | 661.096668635469 | 622.561634660589 |
|         | 1182.50261323518 | 291.020789939476 | 383.583234619781 | 648.823677010146 |
| WHAMM   | 273.252023367028 | 224.424524191566 | 241.320049298228 | 242.410260751835 |
|         | 177.812335593522 | 199.378179817518 | 307.083179338165 | 240.734451149197 |
|         | 230.723142236623 | 220.896363324634 | 280.085692727562 | 225.664432111551 |
| WHAMML1 | 139.974586762939 | 144.880785634179 | 141.299677389827 |                  |
|         | 136.737964237109 | 138.458816023289 | 133.71610564207  | 134.302726684539 |
|         | 138.384797779855 | 150.129367314696 | 130.143953880391 | 128.101371225192 |
|         | 130.142263689536 |                  |                  |                  |
| WHDC1L1 | 151.650777127117 | 145.466538006138 | 136.850940500212 |                  |
|         | 156.723502568908 | 135.412051450659 | 155.326276840738 | 142.168934978042 |
|         | 132.628358688595 | 136.560048419149 | 127.123123583856 | 139.664055668127 |
|         | 127.661634554996 |                  |                  |                  |
| WHDC1L2 | 163.380402251758 | 151.045803695015 | 157.940873610797 |                  |
|         | 140.916876460413 | 147.140771901106 | 141.59474425685  | 143.447768653042 |
|         | 144.252481420079 | 144.511488474344 | 143.239666389592 | 145.534520042669 |
|         | 143.639894909386 |                  |                  |                  |
| WHSC1   | 135.203507726561 | 135.722321387765 | 138.704839659727 | 140.995418231627 |
|         | 140.423711213355 | 137.982667022604 | 129.819820730239 | 139.941724115063 |
|         | 134.319316977485 | 136.466367853188 | 134.678445085174 | 140.743917481548 |
| WHSC1L1 | 159.696443182844 | 167.164675439456 | 167.018380617832 |                  |
|         | 150.188128594079 | 237.575788579215 | 208.194788326109 | 165.274189050141 |
|         | 158.562631157512 | 148.155692596378 | 158.645402461996 | 172.364618542922 |
|         | 166.355086055404 |                  |                  |                  |

|       |                  |                  |                  |                  |
|-------|------------------|------------------|------------------|------------------|
| WHSC2 | 213.046162847735 | 211.118308738617 | 214.785381549181 | 300.401370666633 |
|       | 388.710465457313 | 207.831299397177 | 234.399431238026 | 203.652936507291 |
|       | 211.419445018736 | 184.518666956721 | 248.791254839869 | 198.257497903131 |
| WIBG  | 259.374392296079 | 290.754210152709 | 206.585387130993 | 304.751330890753 |
|       | 469.930860750773 | 333.868818855397 | 427.151797273226 | 427.084392965651 |
|       | 350.166837086936 | 319.768792196774 | 539.27766384282  | 339.490955270138 |
| WIF1  | 171.80440912191  | 174.187510325385 | 154.136467767927 | 168.071171406779 |
|       | 143.739231124536 | 157.590017103385 | 179.61374889626  | 147.51773051441  |
|       | 152.743680985848 | 179.648479201164 | 151.015243921984 | 146.577524520274 |
| WIPF1 | 170.198508633417 | 157.55776414649  | 178.751706380632 | 151.780459290205 |
|       | 130.477824552202 | 140.356164189622 | 125.5449326311   | 161.189717452004 |
|       | 169.607072855818 | 150.761696482387 | 139.010652831798 | 142.126620107418 |
| WIPF2 | 145.594378536072 | 136.815411937352 | 137.378528742953 | 134.963301368391 |
|       | 139.532508621268 | 163.470025318612 | 148.012353232918 | 139.644701550661 |
|       | 153.173746756225 | 132.568354349687 | 155.319717753912 | 154.623548525522 |
| WIPF3 | 124.395047385025 | 136.893392154262 | 122.615852682436 | 147.471494294543 |
|       | 132.985645792864 | 139.703304553486 | 133.895547281411 | 139.609751976657 |
|       | 128.751758311249 | 148.538400348149 | 125.542301916791 | 147.407093814154 |
| WIPI1 | 258.036064876416 | 237.88097138936  | 233.757965816721 | 244.132645171301 |
|       | 218.369954323686 | 269.770777921703 | 224.824362819477 | 262.629961694573 |
|       | 296.375305136807 | 269.981476129439 | 225.730739636442 | 249.489170536758 |
| WIPI2 | 184.102171963542 | 228.058870735016 | 179.358460170348 | 261.541138637729 |
|       | 248.887522059485 | 197.582402276079 | 179.376968970326 | 172.934156790775 |
|       | 183.406510146725 | 161.094103878416 | 194.941454173896 | 186.813888805838 |
| WISP1 | 127.800634041606 | 140.003353399494 | 132.973551954067 | 133.473140653666 |
|       | 144.883597913037 | 138.114344944865 | 125.107483348755 | 129.049273337631 |
|       | 140.222860564605 | 218.314136992677 | 131.282765307273 | 125.367386907897 |
| WISP2 | 543.389747823877 | 395.261210769232 | 409.592855687405 | 327.164773632634 |
|       | 182.886100305943 | 141.344034069373 | 166.868688936939 | 150.570540340126 |
|       | 153.231965895778 | 171.935132459373 | 138.764042772731 | 147.532747354296 |
| WISP3 | 138.640919060725 | 128.597272557033 | 137.995313285692 | 136.489566741917 |
|       | 129.374418059091 | 137.063689600869 | 135.108420614547 | 129.301839663122 |
|       | 190.165771406362 | 401.584032365337 | 136.614620534169 | 455.21285026588  |
| WIT-1 | 128.856640014006 | 143.675696734051 | 124.269446398587 | 130.062015525637 |
|       | 122.921245774755 | 122.408016372747 | 124.913645688325 | 119.373287155621 |
|       | 132.54355871539  | 105.741092375243 | 125.143281492089 | 117.570749340011 |
| WIT1  | 147.343712869579 | 142.335251387423 | 133.137299889323 | 151.702809524494 |
|       | 141.075421936212 | 137.118488157416 | 141.943910304145 | 142.584504912189 |
|       | 141.693224578298 | 143.965049742993 | 119.387459594521 | 131.865164933746 |
| WIZ   | 163.442257036536 | 149.929454280702 | 154.232310911696 | 176.317805247749 |
|       | 167.658560306884 | 137.660051943656 | 132.769455423385 | 136.77260462185  |
|       | 147.651620353593 | 127.935614145702 | 141.678529125136 | 142.995274641765 |
| WNK1  | 742.128229715198 | 670.856008549143 | 721.11578916385  | 792.247301083075 |
|       | 322.778260588465 | 327.951753740503 | 409.206158277764 | 463.880793292701 |
|       | 504.436992949763 | 786.160002434066 | 467.944850290806 | 393.115606440229 |
| WNK2  | 171.216275057884 | 162.502895638492 | 155.427282703527 | 164.413893089607 |
|       | 212.739915809291 | 130.12638520846  | 115.445219455559 | 124.802639338573 |
|       | 118.45291712775  | 119.403831071089 | 124.05019986924  | 128.523703756493 |
| WNK3  | 146.495845282846 | 147.971492964243 | 143.870849001074 | 143.565597315289 |
|       | 155.728609337723 | 147.502116289881 | 147.289061374598 | 175.495965414493 |
|       | 145.604066669916 | 148.607885635446 | 143.965049742993 | 152.832573288735 |
| WNK4  | 107.365390754133 | 114.412739085949 | 111.409447323674 | 113.687931899298 |
|       | 124.800221241981 | 101.915858150866 | 107.993707827557 | 128.478724185042 |
|       | 129.27634490676  | 117.847744476387 | 118.201092260839 | 111.457176315964 |

|        |                  |                  |                  |                  |
|--------|------------------|------------------|------------------|------------------|
| WNT1   | 116.038950886552 | 119.334967856721 | 125.367386907897 | 117.824694297846 |
|        | 112.949643549398 | 118.95971064289  | 120.235652849894 | 113.989682635964 |
|        | 124.568534983277 | 127.758381206968 | 128.957236136715 | 122.69021100699  |
| WNT10A | 144.262612328341 | 163.413365060063 | 126.037968297611 |                  |
|        | 120.724926760252 | 113.018985316061 | 124.378096177801 | 251.869781014029 |
|        | 134.469653093466 | 138.132390735567 | 219.8511043213   | 382.806570442504 |
|        | 467.512355593598 |                  |                  |                  |
| WNT10B | 138.657241641263 | 121.699702849509 | 111.632811186988 |                  |
|        | 126.972399784537 | 115.030084788083 | 120.122719226116 | 115.327402810793 |
|        | 125.28279436853  | 109.37466528113  | 118.184571821176 | 114.638254225216 |
|        | 121.709375771276 |                  |                  |                  |
| WNT11  | 150.163801964104 | 141.010588053284 | 122.607404698857 | 134.817665153925 |
|        | 143.618454531431 | 124.825103464238 | 117.028963434266 | 117.937856116492 |
|        | 129.507297276862 | 137.190593489949 | 140.738977175997 | 128.835216648178 |
| WNT16  | 145.704057360697 | 142.034369454643 | 134.498439965049 | 131.839890565869 |
|        | 129.483116877682 | 136.452338158252 | 137.950955473086 | 134.601565799073 |
|        | 129.041254463346 | 134.331420680628 | 148.000706956532 | 134.335309757663 |
| WNT2   | 144.324313048777 | 150.701579893607 | 131.730758460802 | 142.804411455413 |
|        | 148.278828579424 | 135.144908040903 | 145.409722106953 | 149.801573181126 |
|        | 134.052720862102 | 186.185055364718 | 149.805955402639 | 155.496190048502 |
| WNT2B  | 240.734451149197 | 209.913460781088 | 177.652022895288 | 177.742616962629 |
|        | 148.578688042147 | 161.354014292373 | 148.274122690409 | 151.289464845626 |
|        | 159.065612005442 | 158.735283017367 | 145.058110060639 | 148.388093331273 |
| WNT3   | 136.879615833565 | 127.282374513433 | 130.700175060255 | 127.56862018147  |
|        | 153.697775290962 | 162.488819873513 | 206.753993163216 | 162.55521875551  |
|        | 130.092881020271 | 126.033673708286 | 166.936975782665 | 149.609501725707 |
| WNT3A  | 111.975027473284 | 117.834484996559 | 118.21084414402  | 118.866073031304 |
|        | 120.887938517877 | 125.982423431253 | 113.274668934773 | 118.342067845126 |
|        | 120.131839791515 | 124.752198904184 | 121.094060100325 | 113.23302126254  |
| WNT4   | 180.518621542868 | 131.086904662241 | 117.199217938531 | 140.44966014021  |
|        | 133.88072491369  | 156.572774198042 | 173.577723566555 | 142.246864759311 |
|        | 151.461857714097 | 251.414717011661 | 128.99859423584  | 158.58863949084  |
| WNT5A  | 180.667897257797 | 194.403848868583 | 164.562302265155 | 126.931328660501 |
|        | 147.955701866515 | 332.296938254329 | 227.64196401771  | 276.138650967632 |
|        | 251.61451602376  | 434.325609889068 | 303.005912224195 | 372.894376776771 |
| WNT5B  | 219.597808863947 | 377.024120035829 | 202.278323489515 | 711.166793546075 |
|        | 120.157438564977 | 122.389557272277 | 127.758381206968 | 126.398884382537 |
|        | 127.822440239962 | 122.679628839976 | 146.927825526831 | 124.907788504503 |
| WNT6   | 157.016659994185 | 153.477432230141 | 143.521510363933 | 153.481752643937 |
|        | 142.133238886052 | 142.693337885596 | 150.014842228372 | 146.800324349321 |
|        | 134.243435358729 | 146.013430937168 | 152.244018820259 | 149.756512110538 |
| WNT7A  | 137.466291815166 | 156.745051321143 | 146.565265415908 | 148.951632781748 |
|        | 147.253919952267 | 139.654648891206 | 151.650777127117 | 150.737888487925 |
|        | 135.455283504668 | 171.869472272081 | 142.002145315543 | 136.341358916638 |
| WNT7B  | 155.15575204653  | 158.344330353326 | 159.636846021745 | 153.011923016494 |
|        | 343.307036883726 | 355.990908506973 | 283.556453980797 | 231.47915227815  |
|        | 212.016247864691 | 182.009471368798 | 335.013713757031 | 481.630922092112 |
| WNT8A  | 125.666013736767 | 120.433080754232 | 126.98588570464  | 143.065258692424 |
|        | 131.679566454851 | 121.468398802591 | 128.692917766138 | 120.322292418128 |
|        | 127.670274911298 | 122.167669805597 | 149.357617406983 | 132.393669306489 |
| WNT8B  | 116.291146910202 | 112.428707152237 | 112.57049236673  | 109.536381305315 |
|        | 117.193620642373 | 107.622342073167 | 117.943511615792 | 109.113476990309 |
|        | 113.256481034259 | 115.450352881048 | 131.144774362059 | 107.156457065853 |

|        |                  |                  |                  |                  |
|--------|------------------|------------------|------------------|------------------|
| WNT9A  | 130.880795616911 | 125.027095330593 | 123.084040312047 | 127.921209207879 |
|        | 122.063996556575 | 121.406758670435 | 115.25307661968  | 126.775180133301 |
|        | 120.590654346066 | 123.296382913131 | 133.173541338355 | 127.427014611349 |
| WNT9B  | 123.129785564258 | 110.242638217587 | 120.691810909148 | 137.555253894825 |
|        | 129.391376518208 | 126.919867899174 | 124.422548323449 | 125.486324819682 |
|        | 124.443643568527 | 134.880138942756 | 142.368601917778 | 126.992697289075 |
| WRB    | 327.207408852474 | 300.602422224047 | 345.732364434125 | 244.101521795539 |
|        | 218.773153183388 | 394.101052511043 | 418.163219634152 | 368.948300262634 |
|        | 507.137104111742 | 277.101000223971 | 341.64890727921  | 343.048904374136 |
| WRN    | 181.003812824014 | 178.847858667374 | 186.231346659144 | 174.09267813338  |
|        | 191.665827345888 | 204.489837323989 | 237.396466740419 | 198.356420768703 |
|        | 192.532222258033 | 235.183590602209 | 225.927425596831 | 235.822266856967 |
| WRNIP1 | 374.033009122079 | 340.42197893246  | 355.990908506973 |                  |
|        | 352.418229893699 | 573.074116810032 | 413.502150181875 | 618.437282203498 |
|        | 492.930906036297 | 453.593585032712 | 564.749082802433 | 365.727197088581 |
|        | 526.625936680738 |                  |                  |                  |
| WSB1   | 2033.67956299225 | 1468.50184641042 | 1361.54107116915 | 1551.90775589919 |
|        | 276.714748212739 | 741.689442253375 | 825.034504959272 | 1865.44709751822 |
|        | 732.877169346979 | 1318.3633082502  | 905.233241047678 | 772.776364492813 |
| WSB2   | 600.430996779799 | 630.473042320288 | 488.57622466019  | 587.026042400878 |
|        | 1113.59310757948 | 758.863418917419 | 1131.22418479945 | 622.348802511009 |
|        | 1378.40627876546 | 713.832153334389 | 1273.6393529108  | 734.139557942719 |
| WSCD1  | 150.204636832734 | 153.943227610765 | 136.895650862562 | 146.402352419692 |
|        | 124.086902599543 | 135.852591930882 | 143.327730271099 | 142.919910421524 |
|        | 128.221548195595 | 137.20253329376  | 157.572446865749 | 142.401333414583 |
| WSCD2  | 125.710199961297 | 142.185345091219 | 125.3200677275   | 137.344198938623 |
|        | 161.402322405903 | 122.312652834289 | 122.84603217721  | 133.970510683179 |
|        | 125.034243098087 | 118.492287441192 | 168.687845035401 | 126.365861978893 |
| WT1    | 132.354503055131 | 137.118488157416 | 137.675597243706 | 126.777633512781 |
|        | 126.948090173876 | 133.731500722599 | 127.520134825082 | 122.329290563769 |
|        | 131.930814868433 | 126.987002259013 | 143.188958538221 | 130.588481497083 |
| WTAP   | 243.038392457584 | 256.022057262325 | 260.955030428944 | 199.681103910705 |
|        | 284.675990197899 | 280.494088228226 | 344.856199123543 | 303.608918161742 |
|        | 264.983729290122 | 291.167223094542 | 276.867974638972 | 346.173614351499 |
| WTIP   | 236.508498739509 | 228.212753830905 | 220.458449424062 | 245.317436234586 |
|        | 429.595453454621 | 181.889592946523 | 257.292125083248 | 180.392337212428 |
|        | 222.646371492347 | 219.537335167901 | 170.335930486215 | 202.314814594735 |
| WWC1   | 124.411213807179 | 137.680019787902 | 128.620852653765 | 107.76497424356  |
|        | 367.898258897888 | 264.805236346895 | 379.788696204016 | 378.38874489611  |
|        | 571.838717184447 | 445.905756082569 | 601.997464467917 | 471.816954259146 |
| WWC2   | 136.998259410887 | 140.10798818623  | 139.611455791957 | 142.527422462824 |
|        | 122.223184326586 | 125.166940410459 | 127.084267631845 | 117.12833256636  |
|        | 132.94603323912  | 132.873213182775 | 144.321757243275 | 123.725998173975 |
| WWC3   | 386.85874184746  | 330.850098426464 | 383.10686624119  | 325.082620845425 |
|        | 248.403014089812 | 165.092451754065 | 274.934292929666 | 193.37618381669  |
|        | 219.564603776774 | 289.257002046658 | 219.318938396989 | 221.411372022459 |
| WWOX   | 158.814407805803 | 181.823450464129 | 145.478233255862 | 176.289693941489 |
|        | 160.970946091146 | 142.284050423299 | 145.654559623732 | 139.658932672049 |
|        | 138.967080709927 | 138.512938877774 | 148.245974323625 | 146.446922196868 |
| WWP1   | 660.535644289024 | 677.503643398297 | 724.607317443904 | 696.650617523899 |
|        | 336.067655676466 | 388.887050777137 | 419.272193677273 | 621.825622897512 |
|        | 1149.90248188644 | 601.640387246951 | 489.403061697031 | 392.746574862867 |



|        |                  |                  |                  |                  |
|--------|------------------|------------------|------------------|------------------|
| WWP2   | 165.314290446922 | 159.957371011316 | 162.155834067128 | 145.944809232038 |
|        | 170.866433766203 | 160.592404712197 | 151.299425811105 | 154.491373296392 |
|        | 167.468390483999 | 168.310680227156 | 167.893596681867 | 201.987081022654 |
| WWTR1  | 163.778790431064 | 135.3969732106   | 180.01471631205  | 135.404474671036 |
|        | 134.271916545532 | 117.870230005125 | 116.89487516867  | 127.271423859953 |
|        | 136.263658288289 | 132.409582164007 | 134.673861365626 | 108.730058525654 |
| XAB2   | 717.419388886784 | 923.383014892221 | 693.339946866196 | 1169.43742964112 |
|        | 1352.14737073174 | 1931.16906839143 | 652.826023701545 | 981.781076110568 |
|        | 675.978379566859 | 412.415549375221 | 587.54075434249  | 386.305638633172 |
| XAF1   | 925.205399154409 | 425.969575503375 | 292.802762636861 | 392.06522028189  |
|        | 194.029961195972 | 212.691702227442 | 386.817736004263 | 314.014654357569 |
|        | 534.608644989102 | 350.741303038926 | 564.200165295159 | 375.038561820137 |
| XAGE-4 | 144.794806650252 | 144.370811043456 | 142.334338599752 |                  |
|        | 162.861320877227 | 142.110469428644 | 154.912576362196 | 141.604832186257 |
|        | 141.822974252935 | 147.971492964243 | 153.664503112778 | 137.336914480226 |
|        | 146.675159409376 |                  |                  |                  |
| XAGE1  | 143.945039636839 | 140.191264837331 | 141.895211025017 | 132.587392944892 |
|        | 142.047828639169 | 139.522018789485 | 134.686251400642 | 135.37120759813  |
|        | 136.459509901229 | 131.523538461751 | 132.05513812578  | 132.031693838834 |
| XAGE1A | 140.759006929593 | 142.324077852852 | 133.387065801837 |                  |
|        | 129.730685860688 | 136.807118099948 | 141.5068665919   | 142.846100831941 |
|        | 146.590495255969 | 131.696834332724 | 140.018786803502 | 143.942810095867 |
|        | 135.829273398594 |                  |                  |                  |
| XAGE1B | 161.708130705995 | 141.770977101211 | 153.336395746742 |                  |
|        | 142.869595099569 | 150.517832812714 | 149.791777262424 | 152.783534456473 |
|        | 152.518729390047 | 149.327794670124 | 138.755173333171 | 149.827791077797 |
|        | 151.766607453172 |                  |                  |                  |
| XAGE1C | 128.473834314632 | 125.124011798043 | 124.28313315915  |                  |
|        | 146.64835267642  | 136.855445270531 | 135.381131982323 | 142.537484065487 |
|        | 153.121693371757 | 135.835518477299 | 137.068717031383 | 142.728311130348 |
|        | 130.680629893396 |                  |                  |                  |
| XAGE1D | 124.757229519631 | 155.511086289504 | 141.839647226623 |                  |
|        | 154.281674854552 | 137.42213762011  | 179.369845168822 | 144.587253120884 |
|        | 144.850211439338 | 140.881084272745 | 137.77601089414  | 148.967232828819 |
|        | 141.357668647617 |                  |                  |                  |
| XAGE1E | 157.58659226599  | 134.036236880951 | 149.326216726716 |                  |
|        | 169.864628707043 | 171.254015232189 | 144.32655838488  | 150.657800679032 |
|        | 127.532665057083 | 157.619627711954 | 120.992440100307 | 169.072574423443 |
|        | 160.970946091146 |                  |                  |                  |
| XAGE2  | 141.686945908315 | 143.626022875491 | 148.038291195414 | 152.577131215027 |
|        | 133.15144076432  | 145.819198235878 | 150.42705284743  | 139.681211082196 |
|        | 137.549175595441 | 152.789338329505 | 129.431497372577 | 137.172030225913 |
| XAGE2B | 113.799997627317 | 115.954828435072 | 127.458099438957 |                  |
|        | 118.342067845126 | 117.436119533535 | 129.095469955392 | 118.553226856337 |
|        | 121.036054511761 | 120.611442477736 | 126.439948611449 | 151.411708598688 |
|        | 116.994216357989 |                  |                  |                  |
| XAGE3  | 118.783904603368 | 115.582048644075 | 113.61408868553  | 119.263824982583 |
|        | 113.492900106468 | 115.855948612544 | 119.103219740679 | 114.768639931659 |
|        | 116.969799327195 | 121.419301042072 | 135.474070994652 | 118.567548265638 |
| XAGE5  | 110.707755436868 | 114.234369421536 | 112.476111928742 | 115.750690887988 |
|        | 107.156457065853 | 108.247365868673 | 109.038182799871 | 108.461141538047 |
|        | 107.949834974369 | 109.599589420575 | 120.641590368902 | 110.148555045276 |

|       |                  |                  |                  |                  |
|-------|------------------|------------------|------------------|------------------|
| XBP1  | 860.688314783077 | 737.650963292668 | 579.318912497928 | 497.916883763059 |
|       | 1936.88813111969 | 3188.90202907403 | 3566.89107958971 | 3976.40140405628 |
|       | 5437.78386044638 | 1230.00744483191 | 2051.45788386541 | 1965.13870083236 |
| XCL1  | 124.217337143269 | 135.973752893694 | 139.094167748687 | 130.491742824575 |
|       | 135.419628087842 | 136.08040874432  | 142.436624546651 | 129.003317344469 |
|       | 145.892876412762 | 136.84840505336  | 126.782805974059 | 134.413962468434 |
| XCL2  | 161.299920355406 | 156.073428882485 | 162.592306630033 | 159.320692108734 |
|       | 173.507835230243 | 155.582036890436 | 164.571974509529 | 155.475804754732 |
|       | 156.801189586018 | 171.545695383454 | 152.09245741643  | 143.394704760983 |
| XCR1  | 133.725177339262 | 132.328948598599 | 129.594440309419 | 119.663182347566 |
|       | 127.820096020782 | 129.16337177104  | 126.539877052899 | 127.030113960477 |
|       | 126.253319664664 | 128.413213851142 | 138.113751487484 | 127.107223387937 |
| XDH   | 126.33556674738  | 127.773292289242 | 134.42983422342  | 127.03153185998  |
|       | 127.377356715337 | 170.878962027347 | 167.893596681867 | 159.085639414089 |
|       | 144.522461545204 | 195.057830521304 | 251.833571288967 | 151.936543085044 |
| XG    | 132.186120302011 | 129.529372508883 | 133.541333581593 | 118.572988141773 |
|       | 115.975794003391 | 120.672291867109 | 122.109009629395 | 115.085961282227 |
|       | 122.262664384198 | 187.852455291319 | 116.961391747202 | 111.188410935711 |
| XGPY2 | 144.715167331434 | 151.819220292189 | 152.842777535666 | 140.071879210324 |
|       | 143.987296454585 | 146.624631389743 | 143.368327095618 | 144.615156175885 |
|       | 150.82596027483  | 155.993849743656 | 143.247977741752 | 154.861507590906 |
| XIAP  | 217.89028736436  | 204.031081842809 | 203.544294328395 | 166.036553680319 |
|       | 206.937770272939 | 254.668502187945 | 226.531255313921 | 238.068308163643 |
|       | 257.24481414803  | 241.293046687076 | 357.191675549592 | 282.392419584508 |
| XIRP1 | 116.625518828978 | 112.776764215618 | 108.751654061536 | 111.989153105684 |
|       | 110.942138645171 | 111.632811186988 | 104.442909315944 | 109.128394735532 |
|       | 107.40922161073  | 104.321352818065 | 109.817705421158 | 120.235652849894 |
| XIRP2 | 117.218616752346 | 113.862790983655 | 115.463150857002 | 122.204249636472 |
|       | 118.825948323992 | 110.419222236698 | 119.13963074637  | 114.062099086818 |
|       | 130.418739793498 | 110.465934808915 | 134.877046981678 | 116.176068923513 |
| XIST  | 204.990512488181 | 352.50679573356  | 166.46473789699  | 253.754869975548 |
|       | 176.198555355383 | 260.443814523694 | 207.651142295123 | 168.180063344887 |
|       | 187.686326872667 | 211.660148497276 | 195.269099451599 | 192.804447792672 |
| XK    | 144.665869508406 | 151.645636946799 | 177.011776399483 | 150.880818951088 |
|       | 186.496160803789 | 138.091795130567 | 106.491867793742 | 184.542232315662 |
|       | 141.145419751161 | 116.558752619296 | 122.917915232153 | 104.934718065476 |
| XKR3  | 130.646956516128 | 120.050548624975 | 161.094103878416 | 138.476953078729 |
|       | 132.510116371195 | 123.111192189217 | 134.696571019896 | 142.707913210557 |
|       | 120.767950825369 | 119.387459594521 | 108.266328505986 | 126.479964493857 |
| XKR4  | 251.224369831275 | 202.943987922418 | 206.113290588613 | 230.201464318433 |
|       | 151.045803695015 | 127.213640193364 | 135.223957492606 | 149.267019532847 |
|       | 141.045379969014 | 131.277646716635 | 152.459041674768 | 140.756898474665 |
| XKR5  | 134.696571019896 | 130.836079676477 | 142.52234368939  | 154.146962684738 |
|       | 127.831950458406 | 121.201267751612 | 151.360575274272 | 129.404017329613 |
|       | 134.270043564053 | 129.413729619216 | 119.275061991187 | 139.111604268732 |
| XKR6  | 143.533725135227 | 157.627490896581 | 152.413389525982 | 160.690442125281 |
|       | 189.799091507686 | 150.863099494798 | 182.608712782878 | 146.54504551183  |
|       | 168.156002330441 | 148.299945894738 | 170.417054311946 | 171.552010365305 |
| XKR7  | 125.962178569021 | 120.511896155396 | 107.531907287727 | 115.550587451456 |
|       | 121.818632020666 | 105.179281694336 | 112.977469350139 | 115.559551514777 |
|       | 116.082361389405 | 112.428707152237 | 122.742891063864 | 111.716607815635 |
| XKR8  | 163.77183097588  | 173.640326140494 | 165.262738484387 | 178.130223302924 |
|       | 211.483693299981 | 152.617507769717 | 173.088291472857 | 185.100455193182 |
|       | 158.63432604978  | 163.758054869675 | 168.04198447141  | 163.352317556107 |

|         |                  |                  |                  |                  |
|---------|------------------|------------------|------------------|------------------|
| XKR9    | 142.255657518926 | 132.17294083844  | 117.79844873842  | 126.743579586052 |
|         | 142.26998944788  | 142.163834995141 | 121.572462089942 | 132.125545886181 |
|         | 135.883877544991 | 127.044367488881 | 150.065275447769 | 122.786030993629 |
| XKRX    | 148.732027660387 | 129.871985352583 | 158.617209794418 | 138.354300118735 |
|         | 182.938824846376 | 154.542190113901 | 155.172667450053 | 158.943005736645 |
|         | 193.245087824217 | 158.473244125101 | 156.534634574244 | 143.934585983797 |
| XKRY    | 115.646023142125 | 106.393497890486 | 105.900294919664 | 123.977467396003 |
|         | 111.985567835684 | 126.121516564343 | 105.221735747452 | 119.26921157552  |
|         | 115.923424095859 | 114.533677697026 | 118.393203921859 | 126.3539479619   |
| XKRY2   | 121.30744400137  | 125.364821583438 | 130.528198937596 | 129.861693025157 |
|         | 136.434045183143 | 130.142263689536 | 128.936628289974 | 129.493805009651 |
|         | 126.84966022925  | 113.963798749897 | 131.988591391373 | 118.9803314875   |
| XLKD1   | 225.583966894864 | 166.346572488391 | 161.050438117555 | 211.692743811486 |
|         | 112.867662941811 | 135.840528665314 | 117.696262292883 | 110.138220982557 |
|         | 127.440987506769 | 106.088807114602 | 115.247223837316 | 110.266032635568 |
| XPA     | 240.792557915987 | 240.511797905018 | 366.857139377277 | 304.590636814607 |
|         | 179.663258610881 | 172.319604146201 | 211.505504834207 | 201.731223995887 |
|         | 188.291563792748 | 241.845941562418 | 239.363511706064 | 205.011514211101 |
| XPC     | 799.423640530777 | 806.591035100794 | 861.119262963015 | 627.803400871547 |
|         | 693.339946866196 | 482.965800108538 | 936.560290736127 | 1064.85152398919 |
|         | 807.3257139219   | 550.566402986082 | 1030.97051104597 | 704.448123154868 |
| XPNPEP1 | 754.607039665508 | 822.88742008931  | 748.940715378564 |                  |
|         | 867.601542930533 | 590.646248924596 | 801.52891824571  | 1238.11700377838 |
|         | 915.579581760396 | 1179.42590997099 | 986.972987865318 | 1599.12034906314 |
|         | 1448.64875525408 |                  |                  |                  |
| XPNPEP2 | 242.188218870393 | 238.724909152512 | 243.861834405092 |                  |
|         | 271.113617350982 | 151.823845684041 | 125.587057468028 | 133.917283965036 |
|         | 142.198234546084 | 144.423509403938 | 143.967197319361 | 158.125437004665 |
|         | 137.491366243256 |                  |                  |                  |
| XPNPEP3 | 15561.8923517816 | 14499.7866852901 | 16818.1954169657 |                  |
|         | 17496.0674176329 | 4238.41681589316 | 17141.9934540963 | 8558.70496234991 |
|         | 12406.7143043992 | 12109.3049135906 | 8163.29201165065 | 9349.76443528011 |
|         | 9636.32818474581 |                  |                  |                  |
| XPO1    | 1242.61637859159 | 947.425912541091 | 895.114975754684 | 845.150147618462 |
|         | 902.089561157715 | 1544.45026075974 | 907.610179738644 | 1346.53215685106 |
|         | 918.742625270041 | 1006.24899131914 | 1144.92109214621 | 1028.39666838369 |
| XPO4    | 399.248044997427 | 388.192984832638 | 433.82566459288  | 408.263886786123 |
|         | 261.251965523684 | 563.140382824149 | 349.485727214325 | 389.260166168847 |
|         | 412.129826478453 | 434.943371634824 | 557.026028810367 | 650.679096367632 |
| XPO5    | 270.973600107882 | 282.797367565702 | 234.925852373127 | 298.165097953983 |
|         | 332.24505665756  | 425.826693178023 | 287.703569453502 | 300.247304779062 |
|         | 325.751369001105 | 363.706789137022 | 295.571900619972 | 324.346723939622 |
| XPO6    | 426.769986378276 | 435.796737132969 | 377.353441970543 | 558.440840319738 |
|         | 625.932910814208 | 741.255013151687 | 551.92688162618  | 506.165100641525 |
|         | 627.526008812413 | 565.843200661721 | 474.917507160629 | 534.505132658177 |
| XPO7    | 246.288681426405 | 206.303338709554 | 262.691387377392 | 197.699100346967 |
|         | 316.524115715585 | 343.270642449751 | 429.812058546782 | 293.12968694683  |
|         | 359.363523948825 | 473.60579090007  | 272.885527139137 | 466.392151902286 |
| XPOT    | 163.22059466037  | 174.587558727209 | 167.149578610266 | 162.039394839415 |
|         | 185.544411160039 | 195.481680273686 | 227.614623963331 | 328.486476842582 |
|         | 204.35801867216  | 322.302219773624 | 162.828844182372 | 207.384408045502 |
| XPR1    | 332.798130757632 | 345.209128382239 | 329.604568691377 | 284.104619768635 |
|         | 664.025683218037 | 841.944755849006 | 513.816017871024 | 1105.10063745656 |
|         | 1158.057104827   | 510.285766295993 | 900.039744829725 | 685.848203651889 |

|          |                  |                  |                  |                  |
|----------|------------------|------------------|------------------|------------------|
| XRCC1    | 220.330477277988 | 264.685862877779 | 285.131244588624 | 350.308420518351 |
|          | 417.191960489528 | 293.448046685909 | 321.750495072759 | 346.303862540751 |
|          | 362.742120043509 | 293.281098275134 | 245.110761598207 | 233.635876830148 |
| XRCC2    | 3447.19587767281 | 3164.55070502403 | 3575.60827968852 | 2553.92770795014 |
|          | 385.050282185255 | 1957.48508632607 | 990.55038742453  | 1512.28202818467 |
|          | 1240.4863200811  | 1046.13353853089 | 1497.32522786098 | 1059.80292026589 |
| XRCC3    | 194.702974020747 | 181.467708718758 | 176.603760647035 | 201.850932289186 |
|          | 516.177596584059 | 178.209994522672 | 196.519125510368 | 255.12306184224  |
|          | 222.394280571312 | 194.002075848131 | 243.65518489122  | 223.703371558666 |
| XRCC4    | 116.718099363329 | 110.408301129053 | 108.604763499678 | 127.206177583275 |
|          | 132.490323093932 | 116.225440873023 | 109.760525674874 | 129.914077170794 |
|          | 124.415058391979 | 122.568743478314 | 124.69169730955  | 123.117923525539 |
| XRCC5    | 488.746614111382 | 492.780880796036 | 842.87865208079  | 405.032674307193 |
|          | 275.642882589307 | 905.751410113646 | 745.482863218223 | 578.650614747598 |
|          | 763.533962249076 | 626.582864105324 | 1108.61301774472 | 1136.76110352875 |
| XRCC6    | 1166.86593572716 | 1227.36706427754 | 1249.89496565284 | 1261.61611961272 |
|          | 1373.67062432073 | 2005.76678571689 | 1073.40463823132 | 1490.02976786379 |
|          | 1557.00226259883 | 1232.66885974069 | 1350.87073284396 | 1364.1224589383  |
| XRCC6BP1 | 250.577945492981 | 263.74335003375  | 328.14373061894  |                  |
|          | 277.561376169965 | 312.339824919124 | 331.018914429561 | 261.117845544884 |
|          | 536.253405705975 | 256.394563537658 | 307.982260548106 | 240.94056877904  |
|          | 329.48021621087  |                  |                  |                  |
| XRN1     | 390.021666378804 | 417.528353577952 | 355.443758121675 | 395.049127927637 |
|          | 242.096692715029 | 354.981966077502 | 382.186095123659 | 310.8725368426   |
|          | 361.687156919012 | 290.638110977807 | 380.664528809678 | 348.457808063307 |
| XRN2     | 228.349507726225 | 210.882890077598 | 317.493387040816 | 226.595006724068 |
|          | 218.106150021482 | 484.658140651032 | 296.051639873628 | 273.806452412737 |
|          | 304.844121431627 | 258.036064876416 | 255.198862778405 | 317.457588721567 |
| XRRA1    | 184.577511730401 | 173.176900454904 | 192.493439659184 | 186.257814752354 |
|          | 177.72965427263  | 158.213784310645 | 172.836730741407 | 160.143443392509 |
|          | 168.358323243918 | 166.819234137224 | 157.922718487881 | 167.100039749329 |
| XYLB     | 159.835577644136 | 166.277960843095 | 130.022574966461 | 158.911404625381 |
|          | 203.913123559942 | 159.349719495214 | 227.926444925478 | 183.023316857537 |
|          | 175.158180187883 | 152.713528089347 | 162.072695554798 | 164.295628750438 |
| XYLT1    | 200.867515935703 | 156.301214161102 | 165.885072907195 | 138.032265227728 |
|          | 140.334331111538 | 135.588132669957 | 137.974323288786 | 180.290887733427 |
|          | 170.12010526854  | 152.346098251128 | 147.688664545959 | 144.224287382131 |
| XYLT2    | 917.188039935737 | 1167.26555140613 | 941.936830901588 | 1120.87534972745 |
|          | 958.005138077899 | 707.404709303506 | 1346.53215685106 | 1083.26599217847 |
|          | 756.246712133116 | 712.433345978749 | 591.763423878737 | 702.049571167356 |
| YAF2     | 241.706645643141 | 242.471259857978 | 240.253944604431 | 275.755038921952 |
|          | 148.060086496148 | 215.897620927751 | 185.46843333826  | 194.831347257735 |
|          | 169.271175460047 | 151.327544435847 | 168.982086590306 | 180.569583206488 |
| YAP1     | 2189.53914329263 | 1980.4589291261  | 1957.48508632607 | 1808.26383618901 |
|          | 662.781145703653 | 368.0573385048   | 647.955521647635 | 447.297590650141 |
|          | 526.182262872235 | 1034.68475089075 | 735.449040059761 | 653.749043828462 |
| YARS     | 1280.57297272231 | 1226.10881264804 | 761.726829618132 | 1597.53010317504 |
|          | 1413.37062765856 | 1047.2693539616  | 1277.0921553877  | 873.010676463707 |
|          | 1402.14708471728 | 1632.84261181074 | 888.371107987343 | 755.42757464615  |
| YARS2    | 292.839392578318 | 262.061371466369 | 344.379733302418 | 229.881164774875 |
|          | 390.194764817385 | 546.611519125021 | 676.293399523316 | 611.088604425595 |
|          | 538.484170364629 | 604.737834405874 | 463.187551361986 | 588.458314503034 |

|        |                  |                  |                  |                  |
|--------|------------------|------------------|------------------|------------------|
| YBX1   | 4327.90939653054 | 4043.28299602858 | 4641.8793590085  | 4819.85672511343 |
|        | 3396.40593844715 | 4628.04544865227 | 2941.69058596077 | 3304.82581034038 |
|        | 3258.07532987071 | 4262.23145131525 | 2423.84327263111 | 3566.89107958971 |
| YBX2   | 166.289763097913 | 205.852731236069 | 152.733409144267 | 289.956528242564 |
|        | 134.35958389775  | 134.93455083142  | 147.001408450583 | 176.167129202773 |
|        | 123.872097378045 | 143.377902352319 | 123.202829470888 | 137.132095345234 |
| YDD19  | 143.667207351415 | 154.236652966294 | 141.88072888667  | 137.7724100594   |
|        | 140.92066676704  | 152.459041674768 | 157.058912028958 | 158.58863949084  |
|        | 144.986655090517 | 137.209801101689 | 147.982280671798 | 153.56082876276  |
| YDJC   | 152.122141650397 | 160.176567985923 | 152.829437376835 | 138.444427173667 |
|        | 562.711562649704 | 307.945884504629 | 302.021033686056 | 392.06522028189  |
|        | 216.680795762761 | 248.16594076495  | 358.152044880733 | 305.720812071583 |
| YEATS2 | 495.438672949441 | 408.60092780174  | 453.875259610173 |                  |
|        | 408.811415529922 | 308.621688157016 | 335.858047332641 | 468.060528109338 |
|        | 472.030150842569 | 441.684169663552 | 683.861021234927 | 411.603820288919 |
|        | 426.464641742092 |                  |                  |                  |
| YEATS4 | 207.692077301142 | 204.113356572343 | 275.794847140407 |                  |
|        | 178.920528149177 | 362.581768268116 | 3447.19587767281 | 469.930860750773 |
|        | 1832.35076992253 | 509.01330998156  | 415.642099109855 | 204.564770370164 |
|        | 416.933146258428 |                  |                  |                  |
| YES1   | 530.969825236996 | 569.866002248352 | 464.812091712746 | 519.940347384877 |
|        | 1239.13016938378 | 1041.58583268313 | 734.71562355687  | 982.367000148189 |
|        | 629.381791489871 | 965.031655021246 | 688.915534194306 | 787.425941491281 |
| YIF1A  | 587.026042400878 | 674.101599637653 | 633.401624753368 | 847.564628337955 |
|        | 2491.33490046283 | 894.46029531926  | 1047.2693539616  | 659.673052713372 |
|        | 765.333633142088 | 1007.7803477458  | 905.751410113646 | 746.523071806534 |
| YIF1B  | 266.918302307596 | 279.070493043898 | 241.782750858091 | 314.751799003704 |
|        | 1130.32966481315 | 549.692164962653 | 374.337030706199 | 319.128582107184 |
|        | 371.819911874273 | 280.848426993226 | 280.558463661137 | 263.606930507829 |
| YIPF1  | 494.604716660887 | 491.290438575428 | 509.14726076246  | 499.683188662742 |
|        | 515.158921349383 | 724.777166238211 | 777.651238374269 | 732.630306104841 |
|        | 588.076436392983 | 652.826023701545 | 746.777330152729 | 617.67819271245  |
| YIPF2  | 164.962201718762 | 167.430767074847 | 144.358535632993 | 156.654450436728 |
|        | 245.675725760577 | 156.290018816692 | 237.266455875982 | 189.389457481768 |
|        | 186.167877791105 | 205.57572471694  | 190.904614772409 | 155.27707167384  |
| YIPF3  | 1118.86225415732 | 1186.23169583595 | 1078.41947691758 | 1385.28044421961 |
|        | 2026.85580212422 | 1627.02882286283 | 2277.60839052397 | 1403.09138858507 |
|        | 1615.60472592991 | 1027.11849332495 | 1936.88813111969 | 1482.15461429206 |
| YIPF4  | 261.814227719605 | 254.63506290698  | 287.83303360511  | 231.981501596284 |
|        | 482.677635089583 | 317.163768837813 | 425.471195039676 | 345.209128382239 |
|        | 368.948300262634 | 530.122419830951 | 324.615093103582 | 325.082620845425 |
| YIPF5  | 215.019239034819 | 244.596233138747 | 203.071186284148 | 223.747350951099 |
|        | 164.332073056902 | 165.885072907195 | 233.572055978465 | 171.561940747015 |
|        | 184.241640200823 | 250.928804390353 | 254.909076658804 | 178.394895649664 |
| YIPF6  | 957.54149804446  | 889.26314145856  | 956.76879975749  | 626.857289492802 |
|        | 620.899414581162 | 1456.76683429755 | 1006.69598892631 | 683.365770196967 |
|        | 1324.56751399862 | 743.510369438587 | 873.408431189194 | 901.197085099854 |
| YIPF7  | 169.713585775118 | 160.839277476397 | 196.226732738526 | 163.996649606636 |
|        | 134.394503574535 | 146.014790698087 | 162.007384919302 | 153.741061283101 |
|        | 145.63870792125  | 155.820194280153 | 149.902420337518 | 149.65417821994  |
| YJEFN3 | 150.907594445048 | 161.002880798225 | 138.944595164363 |                  |
|        | 137.127587786536 | 121.531401500498 | 130.396593013401 | 125.134516902118 |
|        | 229.076507182239 | 142.336164180947 | 135.43939472868  | 160.180961887686 |
|        | 132.5130209643   |                  |                  |                  |

|        |                  |                  |                  |                  |
|--------|------------------|------------------|------------------|------------------|
| YKT6   | 133.360017767635 | 134.113464449375 | 118.258886189283 | 129.513590304528 |
|        | 127.855167644203 | 140.714455864886 | 121.003207135942 | 129.828896822571 |
|        | 114.711310011993 | 136.645091356305 | 153.255318944823 | 136.692495869097 |
| YLPM1  | 117.781804727205 | 128.927103442679 | 137.961504178836 | 126.841836614341 |
|        | 149.487167787687 | 132.300508985399 | 133.62358240645  | 140.223599881961 |
|        | 136.84840505336  | 142.954747193455 | 139.265915951162 | 133.523706103471 |
| YME1L1 | 309.229066204308 | 267.372241661758 | 464.128022170285 |                  |
|        | 277.817786943873 | 342.935878735854 | 385.888395433066 | 382.562403424855 |
|        | 343.666488527549 | 482.466736153026 | 496.03509813734  | 426.249411635589 |
|        | 505.404271675438 |                  |                  |                  |
| YOD1   | 187.352655464866 | 184.569063297206 | 186.268881719287 | 155.507030276749 |
|        | 154.197254746757 | 254.9636051363   | 232.830038701628 | 206.042395282286 |
|        | 205.362816362477 | 218.917357155289 | 205.821101661022 | 290.688850193983 |
| YPEL1  | 173.147311624838 | 165.4474699807   | 210.529782898493 | 182.439945229388 |
|        | 160.664407431261 | 188.335102005839 | 163.102043862117 | 165.160977512574 |
|        | 202.927700504034 | 135.056517225198 | 221.253717494488 | 141.158593399952 |
| YPEL2  | 293.873921048642 | 237.266455875982 | 404.172535442156 | 249.925640256322 |
|        | 173.520662003159 | 222.028626209166 | 204.078331021637 | 209.44506543433  |
|        | 232.151020756625 | 260.591336959281 | 194.445463745418 | 200.603836348642 |
| YPEL3  | 539.720389702148 | 691.632061537999 | 682.315322994357 | 667.421612441201 |
|        | 1204.32784721885 | 707.173691257322 | 1147.96742431386 | 496.823662262772 |
|        | 740.527607312565 | 540.946852709312 | 1118.86225415732 | 430.94199035855  |
| YPEL4  | 156.01406297447  | 149.505323932806 | 127.299853592344 | 128.289680999565 |
|        | 126.115828232308 | 119.192893408873 | 121.06219555903  | 123.108694517244 |
|        | 129.322481607056 | 145.068061371609 | 141.125248464806 | 132.338144393918 |
| YPEL5  | 1845.87311313269 | 1871.91894530722 | 2007.0121037284  | 1687.85201395597 |
|        | 721.966539760341 | 1554.16120123599 | 1185.70008959602 | 1151.30600388403 |
|        | 827.400420888645 | 741.255013151687 | 1777.29626660109 | 819.488546995594 |
| YRDC   | 3994.64569045702 | 3495.66977000028 | 3896.49785254733 | 2645.72125268628 |
|        | 586.867772838753 | 3671.86460903374 | 1731.62376348283 | 2863.51286169094 |
|        | 2382.87910783088 | 1656.02721259517 | 2900.55309635211 | 2285.86163259073 |
| YSK4   | 130.423465505321 | 126.649739818781 | 126.446675008883 | 131.458411820485 |
|        | 123.916497557628 | 134.036236880951 | 126.326609619996 | 125.136745288071 |
|        | 126.191057198995 | 137.639342727211 | 127.128042857811 | 129.828896822571 |
| YTHDC1 | 776.411045078049 | 792.634423781309 | 740.973440818582 |                  |
|        | 748.015452242839 | 628.344122779625 | 460.807117177285 | 753.997560938003 |
|        | 714.494228450456 | 709.136137559152 | 499.891000749138 | 589.722914993267 |
|        | 577.250493023431 |                  |                  |                  |
| YTHDC2 | 171.935132459373 | 164.816672737691 | 164.652795899742 |                  |
|        | 129.711973013336 | 129.397378057767 | 216.836094088131 | 205.950347620158 |
|        | 175.608958881476 | 168.210416363286 | 210.761398461329 | 233.809899915394 |
|        | 204.82244206816  |                  |                  |                  |
| YTHDF1 | 575.23272138912  | 695.086203058575 | 563.779294315901 |                  |
|        | 612.61438059983  | 1048.26872286983 | 1211.39534395597 | 1408.08614963928 |
|        | 684.866405921987 | 806.591035100794 | 584.919615953457 | 667.156197045748 |
|        | 718.871732206362 |                  |                  |                  |
| YTHDF2 | 409.380002417794 | 479.261755380872 | 448.260934224454 |                  |
|        | 373.803772983872 | 795.720196538039 | 906.886423608706 | 764.774225930479 |
|        | 818.445501500731 | 715.43295523922  | 667.693216401836 | 971.170460915918 |
|        | 682.075583857856 |                  |                  |                  |
| YTHDF3 | 423.152420192284 | 378.38874489611  | 508.449904285771 |                  |
|        | 338.075238647592 | 298.085365348496 | 557.214020485204 | 358.152044880733 |
|        | 476.168679880357 | 501.863855158062 | 415.749051861123 | 474.378918787006 |
|        | 376.443086293235 |                  |                  |                  |

|        |                  |                  |                  |                  |
|--------|------------------|------------------|------------------|------------------|
| YWHAB  | 1822.14935116363 | 1827.03179366146 | 1951.69651954627 | 1849.21906428944 |
|        | 1487.12201643008 | 4166.43837922103 | 5115.14161559446 | 3200.61067185412 |
|        | 3103.4192907748  | 2720.83642320419 | 3083.98169220838 | 3793.02341602102 |
| YWHAE  | 297.544216175512 | 332.978350226738 | 319.966785546419 | 305.615423200097 |
|        | 389.260166168847 | 416.075109522039 | 329.535023880129 | 325.96632528242  |
|        | 279.921244070981 | 372.757091748175 | 412.129826478453 | 476.782624160552 |
| YWHAG  | 902.394410348792 | 808.300067805897 | 666.344430142655 | 790.790236361922 |
|        | 689.590642377619 | 739.085574858917 | 697.97116981445  | 806.88003660673  |
|        | 823.658996207582 | 1050.90881385623 | 787.615195903993 | 1231.37475540937 |
| YWHAH  | 5859.56559124843 | 5506.81944079182 | 4095.76073123843 | 6214.77579017084 |
|        | 1923.19560386389 | 2473.22803972431 | 1451.64055568759 | 2886.92690692502 |
|        | 2567.4299860517  | 3211.2719052157  | 1963.23068846837 | 2358.46955614953 |
| YWHAQ  | 4995.96906061198 | 5467.84611694564 | 5992.92384160188 | 5479.24427823207 |
|        | 12968.2945749    | 8532.46059476152 | 6156.29203791697 | 7190.89891723932 |
|        | 4979.31150268741 | 10579.8650348916 | 3968.38723079061 | 6585.34962362923 |
| YWHAZ  | 2751.75479578587 | 2642.24374855334 | 2828.97255380291 | 2174.62979843528 |
|        | 2947.51998516453 | 4995.96906061198 | 2891.03258768937 | 3510.24464112094 |
|        | 4732.31591164752 | 5702.11995823367 | 2307.82327595071 | 3290.27308365921 |
| YY1    | 1214.77298621465 | 1401.67503392145 | 1125.28599595312 | 1174.69701182094 |
|        | 1370.61156801632 | 878.520681466946 | 1294.74864310494 | 1293.38808483663 |
|        | 1135.49876948815 | 1426.56252600395 | 1264.90442763788 | 1267.5716872154  |
| YY1AP1 | 615.485984065221 | 651.235249028924 | 609.665323786904 |                  |
|        | 721.603421985572 | 526.625936680738 | 409.883222213537 | 418.319283832879 |
|        | 486.334840298921 | 386.960778432157 | 440.038896046559 | 574.399909181723 |
|        | 512.541205235935 |                  |                  |                  |
| YY2    | 129.818020166075 | 123.538037290702 | 121.760488406107 | 118.646119379542 |
|        | 120.979417552159 | 124.857461801227 | 131.90169441925  | 147.799806976046 |
|        | 119.862037840843 | 118.619176257622 | 126.301178976594 | 127.980776299586 |
| ZACN   | 108.751654061536 | 111.691973758042 | 118.777105073561 | 113.427848757112 |
|        | 110.925532078514 | 125.500790447338 | 126.061141885666 | 114.913534674899 |
|        | 107.07609243233  | 115.855948612544 | 111.603221942108 | 116.023563001039 |
| ZADH2  | 492.207833630086 | 683.470866056244 | 492.637241687561 | 653.047570485109 |
|        | 194.055394488452 | 375.958347293549 | 282.045333787115 | 329.88790758321  |
|        | 306.946103334814 | 251.704037951295 | 354.840474468573 | 382.902151239988 |
| ZAK    | 1530.45813438919 | 1648.22531304741 | 3688.68740405322 | 1279.9555644913  |
|        | 157.881569297409 | 412.129826478453 | 216.033564783918 | 247.340470321453 |
|        | 275.013838208239 | 433.11536069928  | 169.705236302448 | 257.941367816557 |
| ZAN    | 124.370381674692 | 125.693321471759 | 121.271403807802 | 125.840932898827 |
|        | 133.720904256137 | 124.755684505209 | 120.089228795888 | 124.513891912986 |
|        | 125.187617901961 | 126.17342715006  | 148.421611987655 | 126.25011972597  |
| ZAP70  | 151.09974848374  | 136.923876486522 | 140.794929983858 | 142.872683795338 |
|        | 139.870306695324 | 132.54355871539  | 138.199559519849 | 145.900272803108 |
|        | 151.318320077986 | 138.212860360467 | 155.813740201987 | 139.894559834783 |
| ZAR1   | 139.184647003326 | 126.919867899174 | 141.811563725942 | 145.601922576321 |
|        | 147.754489751457 | 147.75625228531  | 133.71965790848  | 141.083966525597 |
|        | 141.652000792271 | 139.073785024092 | 140.348718082786 | 136.482609639417 |
| ZBBX   | 159.317429821638 | 165.731179108649 | 181.088268167074 | 198.597176657619 |
|        | 174.483233557264 | 194.014764659513 | 196.345065354654 | 166.074254447178 |
|        | 183.294526267593 | 171.884800118791 | 175.79375235478  | 174.526176588454 |
| ZBED1  | 881.561688713557 | 1090.20254511452 | 888.04996477314  | 1242.61637859159 |
|        | 811.912727084669 | 822.545007054668 | 674.101599637653 | 1251.56853099362 |
|        | 897.51782613323  | 651.235249028924 | 1411.2586496281  | 708.779490017407 |

ZBED2 105.236768436069 99.26400442869 105.925737068775 106.522641798274  
141.786962606666 114.155592351175 121.917596225576 118.622346984257  
125.328704545727 274.70018535436 118.712730897987 106.066897223031  
ZBED3 177.919885012006 199.118281632221 155.945838519586 205.630948393225  
122.160459795959 128.5581535393 119.911515364639 131.345038923753  
137.534079082878 142.108805047729 129.246066890078 125.101995710829  
ZBED4 178.06221214103 170.825161347825 161.090443294391 200.456087759904  
217.531179216305 393.914413372142 249.590923098575 285.30221551106  
257.573614085223 238.904826940476 247.528753010193 296.962992349662  
ZBED5 741.255013151687 723.640113902925 801.051513639714 538.156335788156  
528.275591281419 740.973440818582 817.342172321486 675.480482223958  
560.015499136193 535.20662670885 1342.29111510713 542.009873308344  
ZBP1 144.212231875922 159.266921692363 146.462544135666 164.302998010829  
143.650172124086 161.470611189347 148.143367490426 197.443711199904  
227.736106796551 157.293090577042 162.085813676373 137.04010227318  
ZBTB1 131.141668650877 154.2228051929 156.714081537525 142.541728149687  
150.837717923505 148.603077434646 149.31020447459 144.316475814221  
151.790240553272 142.747793303346 149.547635666621 159.476343366991  
ZBTB10 142.217762896203 142.064680109047 136.874135348635  
133.62358240645 143.370698101204 137.944260488223 138.89354244296  
155.62770968777 130.06441029462 133.984078167807 152.166586496729  
132.282125790062  
ZBTB11 207.440700355457 187.132496910208 188.431244390961  
188.384810832084 198.620777452192 192.130214856642 188.093450717857  
212.691702227442 201.913709602894 166.754995454382 193.912456093767  
191.297539967707  
ZBTB12 117.815045605383 107.260023460914 118.134614195753  
117.380281099932 115.678486138934 123.566522075398 117.889524670597  
110.925532078514 111.1002996982 108.638680369061 122.290822230565  
110.942138645171  
ZBTB16 308.441120735095 455.930204471585 361.620362526358  
314.126706052299 141.613898853625 210.103974340881 139.650726173186  
183.472290949588 144.092864444802 141.518491890811 142.858554460651  
145.358431402568  
ZBTB17 360.551560710852 423.489441909617 305.451247405518  
453.875259610173 425.471195039676 254.424207773566 295.893482074241  
331.937313503755 416.215253990273 348.171901445232 319.685597963267  
319.283603277754  
ZBTB2 211.483693299981 211.995890899864 165.880071298733 207.123420880185  
169.077657790409 192.914362049985 205.52620827767 193.394225360968  
170.676752248138 168.824578400555 205.742386129597 183.613051401168  
ZBTB20 1128.60314361459 1218.64951314553 1045.49947183547  
1176.62418139379 232.250434241457 259.900447705311 242.070630946726  
299.986758612161 455.778776920897 233.884660128222 424.285848583977  
311.916199912898  
ZBTB22 501.301694626942 639.184296110069 504.709613434391  
702.981741565482 588.458314503034 441.001837510132 846.084919104262  
463.754869412768 616.995114856023 548.288640768746 782.746481112316  
703.587139938769  
ZBTB24 250.342080183479 280.007569817323 240.836979012241  
278.219561902233 263.295012964476 294.368406238222 278.88183549759  
303.907003535357 261.671277686467 237.641190133427 330.405026390912  
295.727275232995



ZBTB25 184.348894461271 168.132172570809 196.676479140094  
151.899063970777 173.387549650592 162.333158524811 179.109090120497  
184.974347306539 169.631386764054 169.777032044409 188.567747377006  
199.423120300557

ZBTB26 126.118745937997 128.182419321978 127.416912237613  
119.087972087745 136.959011188915 116.784024112826 107.544568250154  
125.696434307671 120.602818832247 125.326393776938 140.639012372681  
122.813441348997

ZBTB3 207.218779485342 216.53417734069 199.235895708128 244.280971257965  
295.187978994932 137.907709799074 210.502556087175 162.416774743901  
170.835513021958 167.984051648058 227.736106796551 160.816803370151

ZBTB32 159.730925830278 162.466301774088 148.057700860759  
154.445840992357 141.401480567426 164.608496326181 158.499787920522  
161.988082494464 155.412002482153 164.726382689707 134.336279655683  
146.919110530891

ZBTB33 536.067857235731 543.933989965705 443.259619455624  
444.479355480138 957.54149804446 1459.31031099055 1111.47772523331  
1144.92109214621 1096.61874892572 746.777330152729 1122.92917004037  
933.408902924063

ZBTB34 214.86995782548 200.017741240426 232.590542016298  
208.895657507883 178.445384902129 175.245611094434 169.541411677993  
175.341310423897 172.934156790775 183.416437587938 187.30908753142  
161.795378938402

ZBTB37 131.87052926802 150.348608467097 139.709959820327  
124.995087711332 126.230887413874 141.828740140733 148.87690497281  
135.526248253492 137.660051943656 135.913632939299 115.995309578182  
123.7421178083

ZBTB38 171.602950766191 189.292740365891 237.249949461085  
174.158372889364 153.056369304663 193.813717161291 187.893420010787  
191.777253122672 201.365457496683 213.447886742681 186.733394375839  
205.568338705555

ZBTB39 183.513101761782 170.858049313581 180.923089242255  
189.389457481768 185.891520823789 196.245297362955 203.544294328395  
201.81649023518 186.975609955892 173.798554769204 175.462290891421  
186.6902304653

ZBTB4 1992.71224011906 2050.34883263932 1775.32632165475 2198.4268389426  
538.156335788156 455.778776920897 545.200687301057 460.24741151155  
438.340341490622 508.449904285771 764.137504481329 403.292651623365

ZBTB40 513.036729214095 431.686900474971 591.189034068137  
538.252273740419 271.113617350982 321.426100243434 459.771019162573  
379.670492165938 407.615019710707 271.430915699592 360.684900316265  
377.951523644306

ZBTB41 124.145492642453 126.075528093376 136.195555442748  
131.328478053136 125.955431094455 143.716377201615 129.442111153737  
155.07594431078 155.166786601813 151.546908501054 167.782882015229  
161.102731941183

ZBTB42 232.556667737827 264.741946816665 209.279164243868  
327.696359071012 839.901173743755 266.252875242286 546.399972543938  
411.359106929985 486.425387717472 238.310077556167 633.594811068524  
492.05680879106

ZBTB43 482.592481827722 454.030083521756 387.068276379114  
385.463209972694 207.785320401354 308.877027622691 261.96528977292  
276.830814061474 273.152907354565 467.04976953755 301.908667220208  
235.961605948276

ZBTB44 253.463871742303 241.867699338253 194.161930642068  
223.601312199935 375.316610221279 179.037397826592 269.448201975645  
245.317436234586 199.813528853649 182.560363283264 286.587945301875  
213.240181616274

ZBTB45 258.012234458166 274.235001739215 280.204167582951  
311.269750643358 583.192225756596 256.202924421798 296.290104133844  
287.195290301363 386.85874184746 224.224264678645 259.146673652222  
262.139211406599

ZBTB46 185.905819051223 201.616302398819 124.336297973344  
165.337956130606 139.13396769999 136.674553275255 122.766778018066  
138.328508662816 180.34788837703 143.577865527891 147.096559685764  
125.326393776938

ZBTB47 262.296456281666 284.675990197899 244.596233138747  
307.410175748955 268.78904911703 172.451128796055 202.483493595704  
151.663203772586 186.103491222924 160.449911844008 207.960802948119  
190.018871923219

ZBTB48 365.82705202869 411.285747588622 350.58427958432  
462.833644033427 391.706404954357 379.862305342147 459.973764138144  
449.220056843562 592.822841077599 410.533157400023 499.048754087189  
497.269957926657

ZBTB5 228.212753830905 237.78482574225 253.495214569632 211.300733064951  
235.867149024041 243.283375388645 186.244764337256 204.654489493854  
228.025383952578 244.689936990021 243.159062832085 208.42712014566

ZBTB6 161.903016201041 166.162656500954 179.57046217355 167.491399614986  
168.643026828823 172.722177339418 188.013181859196 165.262738484387  
172.942666836182 181.148062201932 163.340435089911 175.41089164969

ZBTB7A 165.896420029269 174.168079247768 206.972440734038  
195.816317534388 213.674150322581 185.617936412633 200.322334039458  
191.093283411655 174.02138265758 187.550461418888 218.794112567823  
189.205724390913

ZBTB7B 174.255919030841 175.670738308809 160.92643755328  
185.17273221366 207.692077301142 157.675974692761 210.353341004865  
162.678619800767 171.610742435469 227.350260241585 156.630366766924  
182.335981256243

ZBTB7C 164.231281729415 184.102171963542 142.351705613006  
178.142393629606 416.307629596091 310.075815009404 219.2695037071  
406.224345292389 400.845137156678 150.191645194625 363.706789137022  
358.897128592042

ZBTB8A 370.945254716657 356.84281623052 224.027605834751  
340.028737478082 213.891435492914 292.23287968517 215.057917795456  
222.919473675549 191.897449038297 198.437113196596 263.250833727291  
246.457698183615

ZBTB8OS 197.51109998167 181.247766545135 187.365807314802  
210.761398461329 210.803130108618 238.685014863143 240.94056877904  
267.422232051733 234.947745514175 232.641965649602 245.082816415008  
260.098788125373

ZBTB9 236.772907994543 266.681711962236 189.971144220643 264.805236346895  
487.537691131703 354.132752995385 369.275635424092 247.550312458738  
317.904396212359 233.029655807246 337.342034950908 279.541294184609

ZC3H10 315.828726297864 327.207408852474 327.207408852474  
360.475989559226 250.626556981376 180.63469438043 218.615551704188  
218.592402813219 198.374163029174 205.871133967588 214.019190624184  
203.11015591813

ZC3H11A 172.297698667311 160.608674893418 163.794436953711  
172.050718136571 169.607072855818 178.707066209511 180.641419603362  
172.667770359278 183.764215745794 172.197077149985 156.411563412665  
195.282045838381  
ZC3H11B 814.110601393539 738.892511276134 726.346459754217  
604.453803994875 432.92947962962 620.899414581162 589.541347392215  
462.144334719146 692.729789121701 634.556887178869 918.162638134305  
979.019125719101  
ZC3H12A 170.825161347825 194.529045934216 147.854171854456  
151.463200570499 297.757657398146 356.413190087706 327.89660021611  
250.84781675544 545.026293696209 310.533399024851 461.822629852953  
400.472835504879  
ZC3H12B 285.172001915966 263.204269632206 233.129544542265  
296.088938872643 192.009562635198 138.687013437904 270.462865174106  
142.034369454643 158.455783755247 150.014842228372 168.654753237204  
124.818436949131  
ZC3H12C 472.405334652317 355.372836460906 382.401290201025  
298.085365348496 273.044064077 188.543051108601 302.462763120177  
333.868818855397 211.085778902367 180.690409026809 376.867306473426  
243.501083338279  
ZC3H12D 134.499588539919 126.388778582602 119.693318959661  
124.955676894776 148.66474430472 136.959011188915 133.229571269367  
132.313884627836 127.464485396039 141.863234980537 141.849319373594  
135.423839577038  
ZC3H13 143.419034484087 135.802258952006 133.160197638474  
141.956996308304 125.566982723725 138.032265227728 120.297848408451  
118.492287441192 131.592172917738 116.112013454335 155.558839375761  
115.34945441214  
ZC3H14 163.432972512188 164.478006648035 184.758754197435  
143.151478156897 142.501655618849 160.227729155903 160.215396651606  
172.008994980259 148.727953739127 155.333294650676 167.568776552757  
159.354364289526  
ZC3H15 426.995700632434 363.89527566597 548.455251483009  
352.562711030848 282.963958072528 797.28465621772 504.838017072725  
582.382786876656 527.707841428677 597.952909577121 856.424155671931  
687.494132125365  
ZC3H18 174.357336296554 192.59376129133 179.632562895905  
206.605699708924 297.368197598038 159.951697830252 177.93138555339  
174.890624803452 274.047586063773 197.087015414039 228.797912452429  
194.584034984339  
ZC3H3 349.623729591612 438.431160975498 387.477198908304 570.771089597761  
679.191060100076 463.298781071364 417.103816140912 493.622989939072  
580.645924062301 454.030083521756 317.949646885539 409.477576085245  
ZC3H4 520.470790410856 640.568342662067 650.263737836685 755.42757464615  
846.985164747386 449.523996620257 477.275332763887 541.764013317002  
586.642581067137 358.298768623212 491.112594297928 456.990425618007  
ZC3H5 619.995008098949 606.679284487803 587.654093308465 820.652972219658  
428.237210115667 395.327097512479 528.275591281419 346.356312668445  
542.121375354644 535.041545916303 352.418229893699 456.817057099146  
ZC3H6 162.766038656637 168.744610747563 140.244052740397 143.974551393951  
135.111066946207 123.935072913078 132.729682072409 137.591469499374  
135.760578586004 138.279087298069 153.83891040723 129.599661790972  
ZC3H7A 467.347509383673 362.019824026781 574.035124314622  
389.686045618228 302.1846598234 292.468585109951 314.810001770583

323.896313343796 335.301103690781 353.912654262209 310.23294370018  
311.269750643358  
ZC3H7B 129.904942554979 134.565199667396 126.531502877517  
138.13987378399 150.78145177853 123.662678397678 123.004137408444  
129.420716653358 116.746018509166 126.072053958666 148.562200783472  
121.177681858671  
ZC3H8 189.044966519228 172.197077149985 213.891435492914 159.227123133854  
226.173501275026 236.809829701921 199.555406967021 308.148212607944  
237.71636970719 267.869879189095 266.892524131545 305.16668987495  
ZC3HAV1 313.888035511709 286.085833802132 328.826483579278  
288.436880408624 298.664864578349 297.609793563225 402.473870771741  
493.887026009442 401.189904619902 311.375563161772 400.845137156678  
344.786541451395  
ZC3HAV1L 144.235298492095 147.485960802692 152.004130711617  
149.007288765628 170.825161347825 151.289464845626 149.977924522553  
145.648810303756 141.943910304145 153.271518348258 156.151075965844  
165.225475655526  
ZC3HC1 582.382786876656 617.67819271245 521.215655189324  
776.030689773414 439.928008927647 386.598037190663 488.505191823403  
681.591028334969 562.543347322063 534.745066397679 407.152764702613  
506.562512021352  
ZC4H2 153.801971958265 170.636731478608 164.191906588579 168.643026828823  
173.497575259833 149.244970309131 158.359440014674 126.786434897401  
174.717158790668 129.848276446896 146.652641667543 150.096558906597  
ZCCHC10 142.663334893424 142.25795237339 134.329334422886  
141.596078062845 140.177708471199 140.35175858015 145.980929136129  
138.42216862811 132.804216633852 133.832462719784 150.993910190626  
138.100014158367  
ZCCHC11 315.182134426778 268.034972830233 338.934501259414  
258.727309442475 219.78041403077 285.507315916663 257.534293550585  
292.429831186609 214.241635800083 303.858574395969 251.324685584062  
276.830814061474  
ZCCHC12 125.712260481294 115.332409360957 131.092140169861  
114.10470841717 116.092815232176 124.668658660052 131.157702791998  
236.592839463278 161.837272617767 124.952026709219 132.529247880813  
124.897463208595  
ZCCHC13 128.211076776316 127.7962242731 114.28381541078  
103.550817366724 117.178495957357 120.873985900666 117.575009754326  
114.43491928161 115.224011128183 111.956783714784 115.975794003391  
120.224154897296  
ZCCHC14 841.285351463894 809.068563907145 615.254768508691  
719.13080264227 278.005620372937 311.208703262497 290.541184606565  
261.028644858795 283.527656956105 323.667189206453 272.500572765647  
273.668871896558  
ZCCHC16 122.522978939399 137.239088768176 129.269919529415  
136.074837228096 125.612670947405 126.433146708506 119.613985826308  
119.312201620247 132.596941171401 131.062360037777 127.215777044942  
124.070171664904  
ZCCHC17 414.403321220432 391.500696444149 441.331937921872  
388.782774926005 454.34729744062 496.426739836535 424.665056900526  
505.302263971007 361.429760858441 469.333357789149 341.015631528464  
374.872358131797  
ZCCHC2 120.957197551997 119.739204799544 109.859878974527  
116.46192274217 121.018722403628 113.927168436775 123.108694517244

117.218616752346 113.22850386845 115.002176041974 144.801071221985  
124.752198904184  
ZCCHC24 1876.64079464928 1984.47173096657 1222.014210447  
2627.12900283627 184.267958772058 241.077618798955 227.050629701762  
243.807038920733 277.652851236546 309.47429862515 196.942880967705  
231.572677616684  
ZCCHC3 196.450308368198 197.231408726321 188.654966029389  
185.507663455634 327.951753740503 156.020996568814 157.809081184874  
165.027938535393 176.587559615019 143.16930809425 238.617228632505  
155.280897870265  
ZCCHC4 117.028963434266 126.528589411462 135.831453841801  
109.574386044714 145.323212897142 134.840285218383 139.522018789485  
128.047981250943 153.176268095608 138.548983773386 137.318442197233  
135.503338987971  
ZCCHC5 135.015161451899 140.408989128575 143.360311218423  
144.298011270428 137.340844554597 123.312000381122 125.071387239411  
129.661073814998 125.309861084957 130.416957431512 130.368933537243  
129.998824457005  
ZCCHC6 367.898258897888 356.62074247786 214.019190624184  
310.301616266762 240.07282016658 254.065327837176 279.704940529618  
240.75934760601 304.013547190343 287.195290301363 287.924891622962  
237.906142045719  
ZCCHC7 493.209107049493 443.125195744202 625.152889992949  
382.960724128105 366.857139377277 376.962937292973 322.506898833351  
378.920456227378 371.552970811499 513.662594875431 509.14726076246  
295.187978994932  
ZCCHC8 289.368511254335 236.772907994543 369.646624431062  
173.395370400371 199.353823724989 314.221257518059 287.967349876429  
310.917191279571 317.802633831405 339.917319653382 359.099750692694  
322.153713097778  
ZCCHC9 447.059120541009 349.540558521616 593.090436323333  
396.988248940183 297.609793563225 316.722160860531 809.729160605727  
415.957832362051 456.990425618007 695.321886304133 491.906642849373  
563.779294315901  
ZCRB1 251.039117540764 208.555506929113 202.01798254763 207.890408761692  
173.773876769683 175.647878042257 274.736124442229 312.903508201275  
250.737252834098 174.296028319781 251.20133703465 222.508914765788  
ZCWPW1 436.982960786839 472.405334652317 677.023591987179  
530.969825236996 284.534369213195 237.961826989344 387.711471687237  
303.138041758745 319.283603277754 210.64483507528 422.02217814979  
268.930428617695  
ZCWPW2 156.018200674475 135.310766630401 222.415704486709  
210.266075382636 142.368601917778 132.498092935232 137.056500339577  
123.801380911257 152.095584118603 136.995866452787 130.340819826224  
136.219537152338  
ZDBF2 119.548432046443 136.818557078622 138.907036194384 131.65084896906  
143.920134762902 123.413596815384 129.125709963326 137.793462381778  
125.393848851951 117.946664604751 121.085931709943 115.988180787152  
ZDHHC1 272.666435295288 357.259935567823 345.209128382239  
381.182514249587 426.769986378276 201.458970969685 194.488249052694  
227.236255752375 189.461090469712 254.552034511333 205.185206972064  
200.001438979007  
ZDHHC11 224.588225855066 216.277178481058 217.811099067262  
228.212753830905 143.548858367002 164.357373919714 150.396462763607

189.235998474945 142.059921012561 143.611930851914 174.09267813338  
170.516743115762  
ZDHHC11B 134.748177388398 133.556805738801 119.655162437465  
131.045970236632 146.142934874698 121.036054511761 127.683344133492  
139.299062352035 142.842130077535 140.639012372681 135.848022588175  
128.925288777749  
ZDHHC12 188.348499229585 207.960802948119 185.342353172151  
233.82434521462 888.706978062337 235.019573994855 262.093405224922  
285.63245179313 298.028932089399 391.400480065 396.611050163857  
260.224777636733  
ZDHHC13 151.715231819606 149.668587078867 160.76044995335  
146.293735120772 225.730739636442 325.173931553891 205.121123131992  
214.662648581622 217.013533525724 249.09278446472 248.229468372363  
204.161375686761  
ZDHHC14 387.827718022473 396.781827940009 247.454326301069  
310.640107228956 372.689712716797 155.290648078877 216.53417734069  
236.219981978324 224.62335524729 240.07282016658 183.013090662119  
180.889946069121  
ZDHHC15 125.2051300372 128.116795372698 117.367470441908  
113.927168436775 106.797707723826 123.406144497577 114.14858855653  
122.508761687823 126.580227722115 110.496084922302 118.619176257622  
108.483284007316  
ZDHHC16 372.024884481775 385.050282185255 329.82030842286  
433.019478861638 554.652979820908 321.049000153127 738.37559871635  
402.965083947376 483.174262289559 436.155731212592 454.34729744062  
644.868034665476  
ZDHHC17 461.143361255467 406.133430120039 529.963453165714  
358.843277491684 212.591357254196 316.590387560909 278.274343962656  
286.856346704286 286.085833802132 262.954856857756 243.691004557778  
301.871924474014  
ZDHHC18 226.701637237203 220.169099923628 217.646777099512  
264.604297630839 463.488995330457 281.119138040097 217.327543190687  
231.257543784864 286.703712311781 325.751369001105 232.250434241457  
190.56172211779  
ZDHHC19 177.524818593325 156.66832364923 147.748142622566  
158.895584550655 158.095373931016 167.173670781451 221.152973486208  
195.963361515546 164.99860393383 136.229159638766 154.683723064797  
163.336324451735  
ZDHHC2 181.79418355897 159.009211991511 171.844483419604  
185.816827784447 152.158269344693 203.943245360496 240.410292351169  
166.964057265095 207.920724788669 181.3859695951 297.757657398146  
164.066839397676  
ZDHHC20 168.634534857593 184.758754197435 166.622070620588  
158.760577365464 201.365457496683 182.68965110437 217.353396632732  
187.069074575776 174.205940911242 227.884445686928 166.981212790122  
211.104243881644  
ZDHHC21 124.992439957206 111.065596151792 115.890431424899  
118.965055790274 131.280092370361 145.440471538068 125.467668442298  
126.259029676691 133.66893163718 133.016668180102 145.476377346532  
127.036976462046  
ZDHHC22 124.574323079707 113.326628149066 129.652331277375  
113.76411537952 113.321454160244 116.465213348716 123.11447940203  
124.288632450364 119.711070285785 115.725323816619 139.995623005154  
129.099780410063

ZDHHC23 150.922279808832 155.926739769177 145.024148458133  
133.876636039037 202.114480291084 373.189809737885 227.558441474918  
251.039117540764 323.51769984082 150.555125135002 509.880640462  
291.779980648289

ZDHHC24 166.767004180603 166.320461361356 156.407166112409  
181.508873226705 465.683139139622 183.482640529727 215.115324454215  
190.189217962555 181.081050726043 173.532300173223 204.787016443123  
171.262412981612

ZDHHC3 290.184801898828 272.885527139137 254.768537214795  
221.411372022459 402.965083947376 310.815067427296 345.135289739599  
255.56301534833 341.2887754025 188.431244390961 575.857954264295  
309.658122422202

ZDHHC4 299.935166870211 315.689865927834 389.177193459  
346.996310517446 459.068582584181 258.605188272761 391.039114500903  
289.09614335372 251.414717011661 323.51769984082 280.007569817323  
465.926873285563

ZDHHC5 327.811191081135 340.668473351494 336.338518973032  
418.574045635945 557.702374840532 540.005877322817 483.067471841953  
455.930204471585 434.943371634824 596.3549500121 873.010676463707  
577.98969050409

ZDHHC6 470.868288641048 414.888512708716 487.901310664037  
420.567884340705 395.588345893987 571.273512452931 694.907086612929  
537.982214580518 721.966539760341 354.922901990615 722.725186727796  
606.38343657878

ZDHHC7 1168.3174645384 1158.057104827 1356.43255022363  
1311.34904760947 939.213447046823 699.270931701696 1080.02576143033  
632.278924237678 928.672013047007 656.867138022837 761.89271251455  
999.658013198849

ZDHHC8 2043.73482086765 2129.84680802619 1879.08108720938  
2466.36457617864 3226.53426370323 2023.92614092273 1894.14699530855  
1241.59946353857 1326.95332435394 2486.24762158293 1788.35884039549  
2496.17211592866

ZDHHC8P 170.150889760372 156.768976123975 176.802886129341  
138.497931380734 159.762733951454 162.660027294291 212.933062534244  
143.211127738941 147.975551540256 153.798367953373 183.735201125198  
146.122816653035

ZDHHC9 293.281098275134 330.505633088656 253.65959805538  
312.339824919124 1074.19589851599 640.029195821436 658.068932688816  
496.697565640162 705.311256840178 714.6859666834 554.950092776254  
587.388038484307

ZEB1 137.276586668477 133.889858322181 174.448910958935 132.203310946961  
117.834484996559 122.466276478613 107.863971340407 104.739307327595  
127.116637906391 126.492058851464 118.584773788416 106.603674195422

ZEB2 511.25179427158 420.567884340705 425.001043358831 386.679822751367  
148.967232828819 189.389457481768 173.708509414674 186.244764337256  
192.046442148183 205.546628064296 158.404154056472 152.064982697394

ZER1 292.28857006885 342.037040881785 274.371523790341 506.898635822094  
274.70018535436 156.904781904311 168.254689624696 156.981921830638  
169.920799931309 165.773929204209 208.291714758548 157.58659226599

ZFAND1 341.096072280715 352.665030560239 550.901056837273  
261.39435936661 282.926325589238 356.376890469558 352.303782547593  
382.902151239988 392.430873293903 370.466403181536 477.056706273413  
384.883635849576

ZFAND2A 644.868034665476 509.14726076246 549.96567374713  
542.544172683021 463.880793292701 416.638529499878 540.946852709312  
513.662594875431 448.715938510132 528.650794915616 383.939800422489  
593.821622986351

ZFAND2B 398.423396126075 423.740836541835 447.059120541009  
501.600329334497 448.95671696823 297.228563607097 351.337287690674  
286.587945301875 512.312880441098 544.107739610054 418.062540009856  
407.875393458322

ZFAND3 376.627801547869 419.690542859168 355.609033348692  
561.858563298512 421.303580698397 220.633692394229 332.749676505218  
215.950811436427 279.232290927348 259.767151797583 353.243400332397  
297.544216175512

ZFAND5 3664.38955037715 3862.57980488881 4088.12910138929  
2915.72823797537 3232.96611074938 3359.62015747752 2910.00269086567  
3015.70954394585 3130.30693451802 2111.32236867229 3668.19307488953  
2363.50330960038

ZFAND6 254.936706344174 236.032288046282 305.615423200097  
243.080229016932 249.633252091596 384.780426529733 408.510567121592  
369.018856220394 501.946140974776 416.392874553797 337.728737393381  
442.86942574917

ZFAT 152.221694141976 138.377628971966 141.253030949701 143.242308032336  
144.879364072868 140.479321382192 145.670066571941 139.621016978072  
143.879597098414 133.581450824362 144.669509071181 147.469101571149

ZFATAS 130.457981404612 136.547868436335 130.402496960735  
125.73560975196 131.176413983785 126.139188586523 136.178501890585  
134.924082270115 131.956481591804 130.506708993193 126.763282018991  
130.062015525637

ZFC3H1 385.798784913201 288.968909550533 397.985856484851  
246.533813165981 238.230110356671 344.737964092526 383.802494922918  
737.42784787426 319.128582107184 279.704940529618 423.152420192284  
353.571106279836

ZFHX2 163.390929975591 155.490897312915 153.582185523361 154.329176514501  
151.325068155715 129.848276446896 159.032710656826 163.36682525399  
152.146033353926 124.411213807179 169.999692055871 141.414384085164

ZFHX3 824.427857809495 1067.80176606977 785.008529077795 1194.42925868786  
849.158029646233 932.076509242794 1211.39534395597 738.579262579782  
1047.2693539616 490.464012303239 1064.85152398919 1007.7803477458

ZFHX4 214.933911087009 180.747527895349 254.936706344174 186.515784641119  
120.402155551818 118.134614195753 122.729918525032 114.428050500096  
121.752481757054 136.184427467391 106.982655360194 119.442114850181

ZFP1 205.381840116054 207.036293322882 209.44506543433 208.75656341402  
195.474525582555 165.863118584978 177.708263037199 171.954184094677  
175.302832015761 157.568150431884 200.065184172871 170.866433766203

ZFP106 1210.40302822121 956.76879975749 1435.4236709581  
1144.53002508973 267.939624375137 354.531898366438 390.501797367707  
424.201556056759 537.216291942143 432.515970951769 544.462032960964  
359.099750692694

ZFP112 206.488530785667 216.403542903805 236.985483155452  
235.291035302211 210.529782898493 209.54573978355 254.065327837176  
252.432175363972 311.916199912898 224.497348027469 293.281098275134  
202.162432624505

ZFP14 200.944865673409 212.443407602682 295.973370766318 238.037110997575  
149.742140955184 210.199788806189 211.012142461725 179.785198362326  
200.767743455226 147.761965925044 203.11015591813 169.179630363359



|         |                  |                  |                  |                  |
|---------|------------------|------------------|------------------|------------------|
| ZFP161  | 260.955030428944 | 278.598913464804 | 328.680312364877 |                  |
|         | 254.83131041241  | 246.186104432792 | 300.793542873709 | 261.426617866925 |
|         | 256.424415389574 | 284.638865013916 | 251.039117540764 | 334.199307788576 |
|         | 294.368406238222 |                  |                  |                  |
| ZFP2    | 188.671807443641 | 215.950811436427 | 248.729653566598 | 238.548578086943 |
|         | 133.305679931132 | 120.26749529985  | 131.489715975987 | 137.31372820934  |
|         | 124.433114779288 | 135.74368127919  | 168.10131060526  | 115.072622367144 |
| ZFP28   | 116.802432258299 | 128.351235762192 | 124.275741099764 | 119.057157701097 |
|         | 108.04922729993  | 108.530158480237 | 113.388450168062 | 107.170981307304 |
|         | 116.472796471694 | 121.709375771276 | 146.031321571566 | 118.144109564626 |
| ZFP3    | 203.943245360496 | 207.651142295123 | 216.485113690708 | 231.202047619476 |
|         | 165.048922660581 | 276.32528705384  | 181.123571246557 | 249.029098902357 |
|         | 168.389069732474 | 157.162523271165 | 242.871915060884 | 235.162439885207 |
| ZFP30   | 160.055242985219 | 180.336623146341 | 176.019082929386 | 200.08007665693  |
|         | 207.993943398697 | 211.300733064951 | 204.318316638312 | 190.22021453133  |
|         | 195.776369840059 | 146.83577460518  | 192.244413515864 | 174.587558727209 |
| ZFP36   | 3688.68740405322 | 6233.78489807054 | 3157.98451877581 | 2799.0487754899  |
|         | 1583.79384467611 | 6214.77579017084 | 1859.88000417483 | 1927.467713716   |
|         | 1939.1525084845  | 8292.04796307133 | 1873.84654908146 | 4166.43837922103 |
| ZFP36L1 | 3712.67025366957 | 3843.07094386605 | 3136.27991502603 |                  |
|         | 3188.90202907403 | 1441.29676998365 | 1247.02514044778 | 1550.61855325662 |
|         | 2036.43904731226 | 3205.74787769881 | 2974.04694562902 | 2360.87760349888 |
|         | 2144.52984392647 |                  |                  |                  |
| ZFP36L2 | 415.957832362051 | 349.054741747798 | 364.331860640225 |                  |
|         | 259.672238210968 | 340.608165077422 | 631.106334754678 | 390.573484082597 |
|         | 564.056592672374 | 349.722963659175 | 735.165830487162 | 274.891033696257 |
|         | 559.236012019639 |                  |                  |                  |
| ZFP37   | 175.529441666151 | 201.123529130035 | 184.862871179765 | 181.261666651301 |
|         | 160.349557404154 | 131.113462585488 | 127.333963230749 | 178.707066209511 |
|         | 161.80922869659  | 163.681014961332 | 168.018785514306 | 150.503278880269 |
| ZFP41   | 117.392898601408 | 121.526724715417 | 121.027465953657 | 117.879058520659 |
|         | 122.197625748146 | 120.135349166633 | 121.23469201559  | 113.143436184959 |
|         | 118.139487760542 | 118.955314417914 | 128.300838927918 | 118.480344364831 |
| ZFP42   | 154.321219471319 | 173.017662861015 | 138.921608664788 | 139.018588215263 |
|         | 139.131857948357 | 158.463444189819 | 138.289361041588 | 137.832597613423 |
|         | 136.158508521357 | 203.19299227665  | 125.189588215659 | 141.461435494985 |
| ZFP57   | 180.070209705044 | 153.903993884123 | 149.08527298577  | 164.959415532174 |
|         | 154.21623304309  | 136.68056120003  | 151.965103021638 | 137.794858639838 |
|         | 153.118492567137 | 168.521601064374 | 143.365976841902 | 145.679907578808 |
| ZFP62   | 150.617039206311 | 162.546620272507 | 146.176240539176 | 160.53152291979  |
|         | 162.403942351933 | 146.347213904792 | 160.315029612814 | 190.125009931628 |
|         | 135.634385846692 | 168.223865801948 | 164.558875058199 | 162.961792330623 |
| ZFP64   | 144.902807664593 | 126.127630885864 | 143.098246338022 | 147.066582834257 |
|         | 135.464231003771 | 145.956477465634 | 149.535008475427 | 135.735535533738 |
|         | 147.045944019838 | 156.239937979051 | 147.784078315091 | 149.227646026658 |
| ZFP82   | 243.501083338279 | 231.202047619476 | 255.225145197422 | 252.789376168324 |
|         | 150.319052894567 | 132.028327486943 | 192.532222258033 | 144.94824685435  |
|         | 233.884660128222 | 161.997058981786 | 212.291528248457 | 141.743873995642 |
| ZFP90   | 653.749043828462 | 636.56692204969  | 714.274201838067 | 564.948126039762 |
|         | 306.068269136821 | 356.921627358141 | 527.139476504986 | 625.699971780258 |
|         | 589.722914993267 | 560.481802403627 | 756.246712133116 | 482.048928546145 |
| ZFP91   | 1021.25947613827 | 968.157701932137 | 973.543357809971 | 856.424155671931 |
|         | 656.009451448101 | 909.727616721285 | 797.28465621772  | 587.54075434249  |
|         | 739.874432767734 | 931.325266360957 | 911.340266389071 | 980.120729515821 |

ZFP92 171.481917188224 163.689130813058 146.548348470748 162.649092834422  
160.382971629272 132.659196898439 149.871960981882 170.223509007961  
164.587657424569 133.41548225025 163.099009810658 154.033776287398  
ZFP95 113.862790983655 123.541709359809 117.672645717508 115.468921844902  
112.488125161387 114.618608815885 124.285969778268 124.930303940168  
122.447154928139 116.973126196102 134.4380641709 117.123891785437  
ZFPL1 177.143397572907 204.299375966441 197.947433984294 213.891435492914  
526.416479408056 233.029655807246 193.892810132985 190.700515036197  
209.662262708551 218.735620596634 232.444867422559 210.729945718068  
ZFPM1 326.325210657599 364.265100349672 348.241471067257 400.23671843715  
637.30300219673 349.382889326613 241.799709160815 261.39435936661  
223.042575796603 209.004374703564 332.749676505218 301.304268871606  
ZFPM2 244.251315474587 236.745054217055 367.289651112346 219.103510284905  
115.310953814885 132.920775987309 135.573170189235 136.311902195562  
143.973464003036 136.755975832051 127.0631494857 115.247223837316  
ZFR 1095.52349352502 976.050097371579 1138.44837250274 746.523071806534  
634.556887178869 1154.1046856215 739.251974981981 1093.21579738952  
711.166793546075 709.136137559152 726.556553101727 808.837225580351  
ZFR2 138.891642304194 136.093473732174 128.050677475339 134.990075720145  
136.198583459346 123.959050197189 151.477239868429 133.24611329193  
145.34041912391 121.553107861517 149.339492984504 131.193538235053  
ZFX 210.14307111352 195.755450324985 230.367251714289 194.002075848131  
165.154844613899 279.921244070981 223.311817085871 253.580286414227  
184.655641182839 182.066922756289 180.132104305583 198.722993687455  
ZFY 156.75001042701 151.243948028303 153.143706194386 145.850605495564  
158.244741207036 127.781732819297 157.298181833321 167.315702949236  
157.301617257941 132.216453078716 152.467764730004 190.506201184419  
ZFYVE1 203.276353321185 192.752224665459 231.846509449829  
246.389203940944 187.833356349429 167.025336068642 189.678680702271  
181.183277133224 182.084333814175 217.748916080172 243.246632667118  
207.674249122047  
ZFYVE16 240.994507285383 234.588584245938 240.376851873817  
233.914433380121 172.097502416776 229.076507182239 260.356834114611  
185.374745525698 203.089661928125 266.316485802808 238.310077556167  
245.195406638979  
ZFYVE19 367.025117016472 408.444629429553 373.189809737885  
558.621429366984 447.995213144892 272.238922498583 477.741216640575  
323.04019262387 428.850337327605 411.505580458401 448.715938510132  
307.982260548106  
ZFYVE20 1545.71251527145 1550.61855325662 1717.09434498876  
1646.76016031831 592.387650564803 798.1490651671 845.646455991008  
1242.61637859159 926.283018664897 609.100385482325 811.564396886535  
702.460234202652  
ZFYVE21 1771.39155164347 1880.35608492553 1785.92695250894  
1667.86825735893 774.997895985917 506.029788151779 1078.41947691758  
903.144845227364 671.563789496889 1255.62991601665 202.545147073902  
855.112210714686  
ZFYVE26 462.265785715695 506.562512021352 510.434895296759  
591.189034068137 250.963601187362 236.141982516399 401.267425721838  
368.418553384965 432.969886744613 574.399909181723 490.849163737598  
334.772648743153  
ZFYVE27 151.589273633331 154.445840992357 137.658183450715  
138.810236692956 150.034959799695 152.291176493005 148.120968141789

146.240060512152 151.581593330224 137.15571320152 174.006516433854  
 147.41591291423  
 ZFYVE28 120.691810909148 107.32960937124 114.826501559828  
 114.122395647516 111.299115402008 117.238968848218 123.872097378045  
 116.604371744082 110.694256186941 115.491262364277 115.755585907264  
 117.781804727205  
 ZFYVE9 145.539731152955 140.675094228846 142.500537230642  
 130.020743385543 139.969155812688 152.199095472082 147.132625797946  
 147.849116400978 139.642457979496 147.038700869156 155.908951665928  
 140.40754434058  
 ZGPAT 226.565823278767 255.638433159437 245.351459157365 289.434186747703  
 362.019824026781 324.346723939622 430.412897698085 242.253995801882  
 250.342080183479 315.130912368929 234.768591315095 291.720204789005  
 ZHX1 168.310680227156 187.625536724681 177.343586047942 165.602175302848  
 143.470181156799 179.896659891106 189.915720614467 187.380064367869  
 181.148062201932 159.781313090489 200.468804559127 190.716424123036  
 ZHX2 467.90388853336 476.076903428247 498.641091757363 528.478292835214  
 255.866847225916 210.77489002666 195.577739376082 215.897620927751  
 289.724297749772 222.605195861218 257.292125083248 258.21341068758  
 ZHX3 529.228238133018 523.306451464643 787.425941491281 575.23272138912  
 179.015669199358 232.879578820053 226.203994206714 204.299375966441  
 196.583548193097 307.945884504629 203.943245360496 189.678680702271  
 ZIC1 153.230304322351 131.200042525339 136.792957035581 136.639637503571  
 145.404469340821 144.551233687082 130.844272373448 154.002560770216  
 140.288612271406 135.989816139218 120.706421084476 132.878638378328  
 ZIC2 156.262515148436 163.22059466037 175.573400981771 164.696616863082  
 163.858222964048 251.993821914623 238.344676327918 197.938447651153  
 213.338918839446 266.217879616686 173.450023117394 209.33028918341  
 ZIC3 128.417571004317 139.617608585463 147.338615809214 112.365278258185  
 123.853588042292 131.426355444136 129.142073426086 137.288653308858  
 119.049388179929 140.208983238283 135.291264978088 153.200153031275  
 ZIC4 112.936472036608 118.015175851934 116.355027746922 123.720229113779  
 115.371180170291 110.382724813928 120.931585398914 110.804248212067  
 124.42747321736 104.36042819601 117.284724854784 116.871350997346  
 ZIC5 124.142882936234 121.774697402171 134.753783025994 135.217240511902  
 127.080149144234 147.942495862714 140.92066676704 161.922462797736  
 155.211976328553 141.028377381019 143.884263862698 123.351112976814  
 ZIK1 150.606329295069 169.077657790409 190.96184674871 145.569870279379  
 133.18744841514 141.156434225355 169.895672129542 210.942865876533  
 226.458509834965 199.947823264085 206.585387130993 171.106189029362  
 ZIM2 152.628220216104 168.654753237204 171.86363382331 164.009873572691  
 161.26201213997 147.494937826597 171.40549153673 163.41031443893  
 148.767517078508 154.64077390011 151.641486303453 146.16821907742  
 ZIM3 156.783896946556 159.710615852435 143.356999170877 145.728370703165  
 168.773340961473 140.49969612403 140.704317015307 163.07139884152  
 149.423230365631 160.050872656883 182.644319628554 174.027190728107  
 ZKSCAN1 253.327404004524 232.960832410426 256.495848662843  
 236.219981978324 164.877625122523 205.509515144263 259.575461599189  
 315.014639682046 259.146673652222 211.269041187154 252.548942594125  
 369.592501881153  
 ZKSCAN2 234.399431238026 241.077618798955 221.502269474715  
 303.483515328621 177.214422668922 189.205724390913 199.637257550762  
 170.866433766203 178.055019987648 184.286192995915 179.46936343225  
 195.740661051834

ZKSCAN3 189.552385508772 208.895657507883 205.026176598298  
234.531140131763 209.93789387724 169.87591929982 208.125844007298  
171.714973501563 182.300628120658 198.055877414824 208.067404132325  
176.208206282902

ZKSCAN4 229.076507182239 223.311817085871 238.782040902727  
228.284236550547 222.456810024193 206.127493726541 277.75958501062  
209.785886171295 229.594081405784 231.372316734945 196.615914367563  
226.841838641151

ZKSCAN5 151.2639801322 166.570606752678 155.172667450053  
156.707737817443 159.891562221587 157.950416670957 163.697117248984  
155.964242240771 146.775403409562 163.298729857831 159.124592503759  
148.758316681306

ZMAT1 152.409211647994 147.79341726211 161.708130705995 151.273261581765  
145.274345879987 141.248526020456 134.897153824521 134.192409943723  
140.474338177948 139.042034301544 141.613898853625 141.97908047949

ZMAT2 656.867138022837 712.94845413251 712.067161025165 686.028214419557  
282.47352481715 466.083451075744 1241.59946353857 995.812184456562  
759.534249620343 1587.84395475807 1080.02576143033 1113.59310757948

ZMAT3 9450.52572756597 9378.87287299048 9793.92604780228 9994.54490550759  
1999.10320742823 8096.28093399619 3829.87905458534 6368.23123771343  
5281.353685715 4309.86375945008 5702.11995823367 4811.88424516272

ZMAT4 126.17133877948 149.467626202395 136.188868917386 141.368078865065  
135.151438845363 128.798413084891 125.645986634914 126.912226185444  
133.43362126395 151.137791721752 125.052770277549 155.511086289504

ZMAT5 214.461773810376 200.536814571322 249.400820221233 231.600532144945  
539.008286968106 260.278595572575 234.814109965002 251.414717011661  
316.801725268792 235.162439885207 222.177290763736 212.363151537303

ZMIZ1 2414.22821062457 1873.84654908146 1836.22560264874 1927.467713716  
1157.02365469464 1149.90248188644 1282.38953612054 1559.26487922551  
1854.11328962023 816.580880338838 1280.57297272231 3643.11229751348

ZMIZ2 230.723142236623 210.989806933158 228.001046173405 222.794196053536  
201.480444219547 163.385727569154 202.214495168688 337.119524477446  
266.756647182704 176.208206282902 235.216589534371 210.117033165026

ZMPSTE24 1453.88161495484 1813.79641422879 1675.35431076885  
1358.29475573637 1792.35343044443 2081.45603839306 1599.12034906314  
1801.74467005923 1372.63540073207 1113.59310757948 1528.49457104932  
1507.39761667421

ZMYM1 288.542264120468 314.221257518059 314.557323400201 309.36704220687  
305.16668987495 288.182388699147 307.728083981504 344.604699562938  
271.522696252995 238.745953695925 280.494088228226 267.67093646012

ZMYM2 260.016906472407 224.824362819477 288.913660405191 219.638478100747  
226.287196839644 386.817736004263 297.332272659995 262.139211406599  
339.54582149284 307.81941988503 355.443758121675 421.459312180809

ZMYM3 221.18757533703 231.372316734945 219.441959146815 263.448958595597  
264.8472508692 174.396061906109 198.456392063513 158.48793705795  
205.341121539273 169.466129742085 195.906137340918 168.238615437246

ZMYM4 444.826775824095 412.129826478453 389.381039495553 400.845137156678  
239.73396414153 437.049581919144 343.307036883726 443.732580517751  
374.406855727422 321.426100243434 338.026161865853 382.806570442504

ZMYM5 168.974155750959 161.573975848093 188.062732621031 166.1677526  
156.934589811742 218.393783552484 199.53455266342 178.496344474999  
185.295480519718 242.72424280444 173.416999972133 241.706645643141

ZMYM6 415.322560616847 365.727197088581 412.415549375221 279.026742408164  
350.46078795627 352.418229893699 653.264945856916 489.909407178594  
436.222568287601 464.128022170285 953.099915501575 605.040026490154  
ZMYND10 117.144778357339 115.420810993676 114.00959999268  
117.672645717508 122.94737290641 115.37736249419 114.373370072994  
111.62514398781 121.400652285172 108.530158480237 119.663182347566  
112.809629077555  
ZMYND11 1832.35076992253 1870.52504853779 1876.64079464928  
1617.44377452783 979.019125719101 1135.49876948815 511.670320118232  
703.587139938769 575.386048896223 460.742037437298 1111.88018487186  
1066.25208226214  
ZMYND12 164.68600028429 156.280701500421 208.348515119045  
173.21291920566 234.814109965002 153.582185523361 200.944865673409  
228.9901869793 211.104243881644 183.193029399643 176.100691355682  
163.753434774656  
ZMYND15 139.046174587432 135.964630862223 122.75516501062  
123.173506315166 127.422129210789 128.44311762955 124.526220300907  
142.108805047729 145.190896872008 140.672863685822 155.92082882492  
124.186557690235  
ZMYND17 161.289708941062 158.499787920522 167.250667092211  
169.744100665038 144.340734361996 128.304919825754 144.741063866547  
152.581729298159 139.989830921287 149.241358552148 130.49338418515  
156.349030617265  
ZMYND19 228.025383952578 244.162496497466 237.492603094091  
282.045333787115 615.254768508691 342.403428822464 293.080122239022  
353.243400332397 359.935451429371 465.926873285563 289.667302610069  
301.051775938853  
ZMYND8 205.305702209672 220.217745732407 257.573614085223  
205.026176598298 269.567704345075 335.013713757031 583.022090879298  
242.471259857978 300.047728281275 206.149539851803 386.305638633172  
339.54582149284  
ZNF10 258.311739685895 230.806950763402 296.553550946307 238.978845152474  
162.945789604505 214.461773810376 175.617504025145 181.976252906929  
186.077477713775 180.658930225735 219.940167815376 165.863118584978  
ZNF100 142.524413202292 145.659334130032 147.666724626127  
163.607125532236 159.170943469313 144.463035490582 155.268650584431  
149.049931380459 155.63328143658 139.406427549733 141.311749168934  
148.350919010575  
ZNF101 124.01558540593 136.249621724093 127.271423859953  
121.067907968175 141.002002397727 138.897393621114 137.408247668043  
160.156127781701 144.856801451884 155.8871985642 164.608496326181  
147.502116289881  
ZNF107 145.041430440608 140.971253689199 151.808767243647  
141.597692730835 128.616121042106 135.641355114263 146.838547724148  
159.390531348676 143.251685088165 143.893751699551 145.728370703165  
141.585172896047  
ZNF114 143.594003495859 154.744065805492 144.675182563174  
152.362546746522 129.208429861964 145.387562372871 143.795399778897  
151.655854407186 143.188958538221 150.701579893607 149.687372584136  
135.871162593642  
ZNF117 113.347609066395 111.949644842971 113.570294287496  
119.780654293448 117.274977920103 112.026113831896 112.365278258185  
119.920097823022 115.18875509198 112.026113831896 133.491963477649  
117.390049487174

ZNF12 322.778260588465 252.548942594125 205.260673843294 217.715143869654  
212.291528248457 250.626556981376 271.823243396395 220.345184229077  
197.873787638411 199.756584044664 295.241644408321 272.01602406899  
ZNF121 127.905616521853 122.098850053347 110.678680817471  
97.8058879269165 161.790909578234 238.344676327918 187.754968096521  
204.137195524755 156.040073232376 130.863753083296 207.269530621176  
175.663960113118  
ZNF124 154.746081871718 153.95855605751 152.134895623504  
141.200676699805 157.103246263523 206.89716102989 177.450674276588  
199.037998955485 162.337707154123 149.805955402639 187.871017629994  
193.589480577091  
ZNF131 173.281506912652 166.549192709614 160.19942770666  
157.484541464879 167.796474464069 172.237115475147 160.604195264968  
244.73233791067 180.290887733427 171.262412981612 248.403014089812  
189.816900281053  
ZNF132 147.604213625382 159.298815559223 173.408784502027  
150.287472248483 154.321219471319 153.241806795134 137.745887988474  
176.587559615019 167.421776383056 147.954079022076 176.77183598995  
153.387113356064  
ZNF133 269.530151236658 249.234065130083 300.482945704017  
337.728737393381 216.783051958345 275.888299685521 289.82072316082  
221.45275440794 238.770586150777 299.935166870211 188.924084292126  
285.46340356157  
ZNF134 169.496129800444 188.724274062294 183.443006525616  
160.227729155903 164.587657424569 166.143084832472 201.458970969685  
190.057030596611 215.335795337978 191.692830869809 229.805500520256  
171.880470629305  
ZNF135 257.813193543819 258.964323941464 290.184801898828  
317.659548748735 147.995991912855 119.370219299491 113.370762349233  
122.759905480504 171.345989796519 137.808307749725 231.955750250711  
129.286782862113  
ZNF136 179.785198362326 171.455216889348 179.338652960181  
170.918584418153 141.42859050659 155.60532199001 174.767697866801  
164.808139478109 156.682781772069 151.71942719041 170.320777845496  
166.587100972754  
ZNF137 213.412498914309 210.316431648335 258.012234458166  
219.96819201774 170.23937234395 183.464897811105 237.575788579215  
317.550000625189 289.474517971859 212.443407602682 292.693830444839  
209.785886171295  
ZNF138 156.748330788367 143.943676099522 148.235495611248  
151.423936838934 150.878323882503 171.494975393562 174.26780796802  
178.313238745665 154.924190468067 164.39557148282 172.916234073981  
180.364089931995  
ZNF14 11235.4970815873 10790.3738999898 11432.8213906428 9937.36968397141  
1062.749459378 9937.36968397141 4175.70090899755 8163.29201165065  
6324.87600301793 4222.55224241399 6006.01682776552 5479.24427823207  
ZNF140 208.257420634745 231.63127072986 199.87003105816  
230.806950763402 193.04138438685 233.103476996669 223.747350951099  
231.314944217099 221.152973486208 177.742616962629 288.770330002807  
199.933148219784  
ZNF141 121.242099666967 125.318166919844 111.962852412774  
124.132215738502 122.834017529045 125.000876313893 119.062611098235  
121.613684281664 120.36718185387 122.498794845416 138.407207709066  
126.910075365358

ZNF142 347.812754957414 293.018282386003 371.819911874273  
402.140437036706 324.949988230276 321.84712975195 358.975346234854  
312.080864996592 379.016207754533 439.492285515997 370.877260088621  
415.957832362051

ZNF143 265.148061007894 237.601064742453 321.524921332256  
249.234065130083 207.598754515294 247.307128520272 258.552964322998  
243.402781509365 245.269004485826 284.940858938629 263.448958595597  
264.054997398621

ZNF146 547.516635695872 491.635435224507 404.445038343721  
435.183433729519 472.405334652317 621.489906442001 785.008529077795  
805.600599570258 870.409935772423 405.183882455109 695.321886304133  
569.866002248352

ZNF148 1524.46745239811 2346.47361943533 1424.79466712859  
2567.4299860517 897.958748317315 1733.96382719909 1163.13845502757  
1167.72023351098 1145.35733270036 836.235700891687 1121.87292339787  
871.913035811066

ZNF154 166.346572488391 165.48594766783 184.278213908263  
203.335012796883 150.75878820215 144.798664281991 140.624437508178  
148.605816748229 162.904897605929 159.130076733711 166.944701842349  
157.604224004016

ZNF155 149.730467498266 143.431389389919 151.040909999868  
164.15288821931 152.97753810644 159.611551480901 161.102731941183  
154.312374306932 163.07139884152 158.953705937936 163.004844049672  
159.124592503759

ZNF157 168.847039069786 159.070355781276 167.719651771357  
143.544671705984 152.796423361971 142.049776668507 144.787836177147  
155.801832826848 137.956295878287 156.007630568494 150.3259737066  
146.71164737466

ZNF16 173.782474972742 184.426874913406 200.915806094193 203.999142031297  
159.89988762842 154.402315635227 160.828718858381 194.734255772365  
195.66091457697 180.798671424395 163.600888221193 178.072538529634

ZNF160 321.177982468322 323.244664586314 323.841518852386  
290.389345090634 192.827534610486 253.327404004524 305.252666831522  
267.149525812834 316.165926273381 192.804447792672 299.754985162237  
250.18189549573

ZNF165 191.3765085801 192.954269340616 170.313045875402  
154.710000519109 275.298642145005 291.720204789005 478.040234382488  
293.986292438714 299.106362530855 285.931444518474 285.05846406041  
236.833653794223

ZNF167 147.368455727098 153.93927752488 155.490897312915  
169.806644442071 172.502036705114 169.752525994991 164.02617650236  
156.407166112409 146.40904127542 146.6306281408 146.481298877242  
156.774097885381

ZNF169 115.878861991823 107.976233194926 125.584202037776  
124.251699375036 113.214390213004 124.768399055809 110.952108124186  
118.109991440011 120.891023626809 117.218616752346 130.653971083035  
120.447140228396

ZNF17 296.141012087256 304.985269874607 279.26508919212 300.53017771156  
197.169703621888 201.893722965557 281.304989265608 269.100400678077  
267.939624375137 249.489170536758 271.823243396395 204.990512488181

ZNF174 175.222531098958 165.257737836487 169.179630363359  
183.236087954054 202.622747952763 167.692053273833 160.361025839456  
162.863781294205 167.484236948415 146.025781495177 177.688568435599  
167.049197726715

ZNF175 234.531140131763 230.975434289172 230.672056810885  
237.906142045719 234.301520483864 213.584269089596 954.488185198006  
205.185206972064 597.795856268827 168.412162365467 1014.63777151551  
186.231346659144

ZNF177 228.739556788924 196.169988112042 278.061498892643  
217.847954914851 200.652195873026 167.73288535728 270.293807247372  
199.397633942623 163.59704679338 215.607567127195 277.86338481075  
185.046826969912

ZNF18 266.842778974988 274.831898505989 261.028644858795 291.537725613819  
202.162432624505 255.770193180874 218.592402813219 314.386320310898  
182.346834032145 174.205940911242 221.796935051107 177.549330396268

ZNF180 129.281564491007 137.296790373528 146.06717772919  
142.954747193455 149.416411285088 147.617354114584 135.991630745082  
142.703116372162 129.4807689399 140.995418231627 134.469653093466  
144.665869508406

ZNF181 164.253219197128 164.063104872636 185.165469121763  
135.358837968905 136.751654856807 123.668707648172 183.963578322984  
153.818325601312 173.450023117394 126.274585491044 215.950811436427  
138.924820359912

ZNF182 135.897498591391 139.557059245431 144.287786573389  
126.834926242799 133.819095523687 141.710076413441 139.835983835267  
156.880120259304 152.829437376835 140.66266106824 168.302168350095  
149.912481263284

ZNF184 147.098474227445 145.837985729893 146.105844205919  
133.617501101389 146.413845130977 160.887121295848 171.573342518254  
160.060406629689 158.960488862727 164.99860393383 170.08485436731  
150.122035262873

ZNF185 178.946928223991 215.81995779019 209.93789387724  
203.524150518033 618.058496806334 595.593867616527 622.692834629555  
490.022369664024 711.491528818004 3994.64569045702 557.702374840532  
536.609777988581

ZNF187 256.370052241046 251.039117540764 257.032174266905  
321.177982468322 158.895584550655 147.452986308926 221.491633607126  
170.98312926 176.927500850631 159.399804351771 206.413554839865  
169.447827110558

ZNF189 228.879434668972 211.357321758564 207.993943398697  
204.695311233073 167.692053273833 155.15575204653 178.551434222154  
173.66499836293 179.730694272916 134.596391166462 206.999289979742  
158.953705937936

ZNF19 136.937327692084 135.303322290834 160.822287037366 142.211357324461  
136.452338158252 140.539606951892 139.051656180599 129.195962576953  
143.737021989907 155.566065673542 130.748852926994 144.727773039491

ZNF192 133.682715540066 126.381288663037 134.227253565741  
131.707530115415 125.367386907897 142.171459019791 138.365589511693  
128.734694496357 139.860093278582 131.572485018063 146.065491816894  
137.902953501634

ZNF193 261.721726664029 250.30085097088 247.407442038488  
232.492398623889 204.877041314502 264.355693070937 308.726328440723  
259.900447705311 283.163770658619 221.930333726352 200.387623661458  
342.147414141627

ZNF195 194.281839133887 207.453490385508 164.914114315732  
181.148062201932 209.023926358109 295.973370766318 284.595024875896  
295.893482074241 294.595972099366 267.622579012917 264.604297630839  
267.535469518664



ZNF197 189.528686948872 196.076386020815 183.294526267593  
206.469040492609 160.469645948225 170.313045875402 175.055634340766  
156.61494867164 181.991820141929 159.016247993816 182.143506470859  
172.916234073981  
ZNF2 184.682478530334 182.763057221385 201.256649338315 196.839016616283  
168.347445148881 173.526005872207 190.939726271153 183.513101761782  
176.289693941489 156.638070437044 171.816841286562 161.316521450944  
ZNF20 245.978723809154 226.25694727283 283.556453980797 260.787104931135  
225.275049011909 318.73799597811 304.679197422439 393.500781010617  
241.527811817146 234.789040617681 354.656612182522 332.138346958671  
ZNF200 143.262288751967 144.096048197835 138.242983316259  
139.325478877749 161.393953325115 185.627515956848 178.780662099615  
174.364798143068 186.089988569287 144.784835438567 185.199972151831  
152.643087608513  
ZNF202 145.131215503044 162.812665683603 166.904990069484  
147.805819921429 165.080825814849 133.889858322181 163.081050585097  
165.844762875582 141.599211622756 134.784568023655 165.249658565871  
167.933231844271  
ZNF204 172.961115357569 168.911840239685 160.113042196058  
127.125906877098 109.574386044714 117.611606270124 180.690409026809  
112.867662941811 121.93549478261 161.646807806182 143.265532486512  
118.646119379542  
ZNF205 192.130214856642 192.627266049516 194.903531690239  
224.224264678645 216.731618532814 183.708917501519 197.049616858296  
172.722177339418 174.890624803452 170.866433766203 183.568426758223  
181.758545723241  
ZNF207 854.224454791713 853.535700321202 789.043948009585  
876.783710734594 1120.87534972745 1465.2419150392 1515.38811502277  
1338.83705469394 1233.99503576308 1332.82617944131 1297.25632532536  
1649.46398639795  
ZNF208 128.51523581959 133.384498169568 133.41548225025  
136.707951572916 135.616911926164 124.772219140795 130.365804613342  
121.774697402171 123.632031112507 118.727279917776 130.238231520218  
123.652744849563  
ZNF211 220.510248260182 243.225815954365 291.105673222859  
218.298791348295 208.363905749882 225.75155298452 427.872407051254  
374.406855727422 321.119758814618 303.795701960506 584.919615953457  
211.135364208221  
ZNF212 259.472319994929 339.917319653382 266.252875242286  
379.102958448288 363.89527566597 365.82705202869 396.40172043456  
510.555184032017 352.741885295157 329.535023880129 411.784922368377  
415.82312615045  
ZNF213 165.545136704242 188.231614694297 187.046760972666  
200.001438979007 416.933146258428 195.69447353356 230.672056810885  
203.244917049745 241.675251479835 161.860953918795 187.965294229013  
196.345065354654  
ZNF214 138.768904143023 134.774591679724 134.406692724353  
134.081308836364 134.445893291422 129.161305053472 132.275953817076  
129.79093244374 147.764068958635 140.976675511847 128.440024330942  
131.48517604564  
ZNF215 122.917915232153 125.596067857941 121.203149121743  
124.259971940951 161.463042036376 168.116928722035 114.818898581401  
137.045772853855 197.205792984885 184.694741621812 126.5764774133  
116.465213348716

ZNF217 438.340341490622 390.021666378804 413.000072500071  
286.431013744652 750.10819423982 923.383014892221 787.874585290601  
762.182213353032 738.37559871635 332.194163016646 545.760623858473  
835.834013018438

ZNF219 620.899414581162 801.702878226247 692.729789121701  
1360.24752587939 841.623780229898 218.529160053398 374.9555524303  
219.519896184851 216.755681508811 251.324685584062 640.568342662067  
337.39574303968

ZNF22 540.005877322817 575.23272138912 506.80969228563 533.140740560189  
396.988248940183 564.749082802433 405.64711132293 424.912426797488  
494.604716660887 382.401290201025 674.742955681908 609.504365141529

ZNF221 120.272964182307 137.418345713224 129.994160770036  
127.713286292101 132.566074764755 115.840266274696 113.170014668758  
123.341568893224 121.138461509096 116.179625689647 139.790098895306  
117.805556408194

ZNF222 162.383584508358 155.150904036206 188.941900997781  
157.108043150259 155.218336968191 154.820187615267 183.568426758223  
187.784865705837 196.908612360694 163.736324784234 199.353823724989  
162.909468312298

ZNF223 2720.83642320419 2763.86550710042 2578.85391480563  
2523.91287654539 530.122419830951 2358.46955614953 1293.38808483663  
1645.05161227372 1410.58825009446 1649.46398639795 1973.20689165831  
1378.40627876546

ZNF224 148.913181799692 148.553324405123 153.653453808799  
139.725987763226 131.748753064488 166.592366578462 205.930921729192  
180.250420976613 202.129153259445 174.941551089279 203.816305810343  
154.586825710624

ZNF225 175.417320301614 174.296028319781 198.583407008317  
185.856755885891 191.59400638652 193.472317111841 197.357728220717  
202.99342484328 187.710185880162 196.096936985479 164.935120145905  
177.001637712889

ZNF226 161.34427428845 175.055634340766 173.656241217331  
153.008756051525 215.673878830563 231.372316734945 226.43414383055  
210.989806933158 272.854435771465 190.371287639453 216.929969034881  
224.588225855066

ZNF227 220.079379312889 204.842791081358 211.766884719761  
207.023221559302 192.848268768579 208.016730103629 200.204064462384  
210.729945718068 239.541516080716 228.968779778407 210.942865876533  
184.775001243453

ZNF229 135.4702891855 131.829906202014 126.834926242799  
129.579455072999 130.955161943331 132.076865522593 132.799355149191  
139.631165400881 141.630183595813 150.434376975922 151.921235758457  
126.05295868521

ZNF23 213.833894542292 204.999796322451 242.848821222611 191.754626760061  
154.645353009618 178.464811133 189.450316943845 179.037397826592  
224.008253365957 172.421637564661 241.320049298228 170.394088019518

ZNF230 148.104173238606 154.615097099186 147.289061374598  
125.452973441746 141.353084959289 173.599961799334 172.916234073981  
175.29178007783 177.696849418064 135.117970717813 163.988099963018  
139.989830921287

ZNF232 264.983729290122 217.227441947056 229.130679600654  
215.673878830563 176.317805247749 238.823244541016 169.238325933605  
235.162439885207 179.400220328552 174.006516433854 185.627515956848  
176.393864881259

ZNF233 145.684294398911 133.460655803085 143.305848051593  
143.88649412841 132.328948598599 135.15791174418 138.474429223902  
140.563079852037 146.9069812014 139.409685553177 152.045391611927  
131.339653356438

ZNF234 315.752980521266 281.278843600876 263.707476735938  
234.947745514175 181.439775614781 308.148212607944 288.505502880424  
252.10470581893 355.879841671975 211.595513743111 329.023836559229  
235.261278607182

ZNF235 153.67215573765 165.139423820186 182.958991847218  
178.106013202731 147.113541493157 168.611652451329 160.73807125195  
192.224242967539 201.748876422401 165.763459146818 181.840985962045  
165.673535349675

ZNF236 139.94624507228 134.931263946202 140.506191791073  
130.163574198827 124.183297351614 130.033927910392 125.528638246486  
147.505345299689 139.752845127584 143.127795310829 159.245344068037  
140.765231611948

ZNF238 137.320792454356 137.77107995457 145.210787864362  
144.532420788945 134.465488237877 138.50252234048 133.827296071709  
136.087702679172 130.495294897642 133.083877012766 154.665212863369  
130.532559074698

ZNF239 281.846246549202 233.914433380121 328.078808625906  
282.335582153109 205.950347620158 194.161930642068 202.60339529874  
212.643559782754 240.75934760601 152.818046945164 163.647306551474  
316.364342983155

ZNF24 155.722314592388 146.046894253919 165.286724415145 139.526241501184  
158.598999414864 214.241635800083 184.451469623426 184.482849019679  
203.777944180067 175.608958881476 215.365809536522 177.343586047942

ZNF248 526.970555181851 400.472835504879 588.678767007017  
437.049581919144 246.031568259337 267.622579012917 276.224613560582  
203.642739476708 238.782040902727 178.89423690001 271.287767448621  
280.798003990849

ZNF25 687.269774217064 605.21685916883 1057.80846320642 570.916936074747  
223.429738319185 263.52595855321 297.609793563225 273.432712475089  
277.073510273425 218.000351930307 276.961847241646 300.094509257518

ZNF250 191.912670416334 187.325542100762 220.510248260182  
206.275885047321 142.717436384151 170.941404165185 164.880911221767  
173.484307104751 207.218779485342 155.641860356683 151.113342302947  
159.961729971624

ZNF251 160.045715314465 166.404164069728 186.951061159734  
192.992546726522 171.706534562905 191.897449038297 169.391557085902  
162.624786423084 174.08222895937 164.497445195378 176.641899861006  
174.707059022891

ZNF252 593.990687449346 573.244735292944 600.635914090365  
781.461780481171 276.653753970476 415.957832362051 656.867138022837  
844.462124058351 932.862030475849 384.733313349438 540.584471920486  
524.245387973163

ZNF253 168.295044843056 156.834059922255 156.01406297447  
178.676812740925 156.916784141484 157.659824861915 180.290887733427  
160.281830914755 148.186698759452 164.347168837655 160.78368986036  
145.632060621034

ZNF254 158.906481816035 167.201570648434 155.55288776049  
155.798048652444 169.355185349431 191.708350637714 189.37832342197  
209.623583937962 158.975786937923 163.876218743322 187.336349390012  
182.984076352185

ZNF256 226.871028543248 250.085444708918 236.082185670774  
269.261595558589 195.043838688467 166.014450044695 232.276667029184  
298.573180660083 313.322307299463 196.207631868755 270.604799126393  
224.186573847185  
ZNF257 120.15332480712 136.670253859184 137.017882995262  
156.720090761933 155.518807026156 128.708956947928 134.990075720145  
132.16600019449 144.760229351772 136.617105945904 130.694506122253  
145.346970289157  
ZNF259 225.702629835215 222.285940575778 219.78041403077  
246.049729366987 571.439520427295 258.4424008891 339.069385816411  
319.352940751688 286.945784387294 221.272872023413 248.562843471699  
333.439929772897  
ZNF26 349.99912485533 304.844121431627 335.698400607132 297.708113541379  
223.666832044186 255.156682699288 316.409887372431 216.705908017858  
275.584858082096 249.633252091596 274.01377986185 267.970798709017  
ZNF260 260.67310907387 262.861105654051 269.072221443403  
247.454326301069 288.823376348944 357.191675549592 406.998800177456  
526.625936680738 783.373390305885 255.12306184224 541.258721278882  
327.635520861099  
ZNF263 614.094097408035 654.663838918786 566.813343200268  
834.187014201026 418.163219634152 496.218605366298 723.807658768693  
454.984562256248 647.955521647635 346.996310517446 430.412897698085  
573.244735292944  
ZNF264 467.04976953755 369.018856220394 471.15333189869  
317.493387040816 193.292596471113 196.399050990244 309.283897272661  
403.043257175264 378.4377409749 291.444155562134 291.221427744817  
317.244256751418  
ZNF266 274.179232297038 320.390351199433 297.862653495715  
299.513950278952 194.403848868583 360.361719991381 267.589020526148  
284.798325549665 269.726397478364 221.45275440794 331.251075774227  
242.570588364106  
ZNF267 154.892452237027 158.080749926756 157.733042033549  
139.098623879237 154.400124981573 167.180406126438 146.384051525624  
133.930997975106 150.815117344434 149.865644080359 139.972797966319  
141.76964678852  
ZNF268 135.639558187703 136.995197143668 136.478114537536  
125.556444423391 133.357385559881 133.443807124822 133.040952285855  
151.698385134218 145.041430440608 159.584350289413 135.419628087842  
131.35955406222  
ZNF271 423.826189747546 346.411586524655 511.374117402707  
349.722963659175 157.12360611723 303.724140156439 243.538374440134  
266.80383076887 243.622678182687 196.144420005021 311.544429285897  
229.805500520256  
ZNF273 121.174618503873 122.042136913991 126.211525910631  
115.29099102455 121.231939494619 126.533083459283 124.863832760607  
142.986412837634 123.977467396003 116.230993734675 147.570734399004  
135.105147647223  
ZNF274 232.023739004791 207.150354734189 274.934292929666  
204.596753034535 225.702629835215 211.809434609469 332.194163016646  
332.885488115858 371.280926727395 270.727749014046 312.601510033941  
230.806950763402  
ZNF275 301.49286558088 314.90123632547 349.485727214325  
261.171723011396 425.969575503375 448.644778906048 335.301103690781

307.665281863258 356.413190087706 211.118308738617 287.242697383558  
338.665115108128  
ZNF276 151.581593330224 168.183542846746 185.295480519718  
188.384810832084 192.59376129133 181.971189935628 172.248521526206  
163.396651801661 153.369334953677 157.032746784217 144.986655090517  
163.19340939648  
ZNF277 382.401290201025 348.921877633633 674.905270154355  
334.709049890042 383.802494922918 315.912220767901 588.458314503034  
437.344765185802 314.095043876244 734.469481390593 451.147418314412  
550.566402986082  
ZNF28 176.953099943185 166.600109853461 190.125009931628 166.430881793156  
216.680795762761 175.044940252247 267.069665000047 196.583548193097  
197.526492324088 178.551434222154 185.275787562938 208.291714758548  
ZNF280A 130.939543211439 108.760780994582 114.400185930969  
114.39161822971 107.283814651497 121.877276961306 116.998277297063  
117.552229262461 109.898406285895 108.557097186828 121.006569103388  
116.742079521048  
ZNF280B 149.547635666621 152.074017988748 156.126009063311  
166.64535048582 176.543489871572 146.634383964797 139.161483596756  
163.373180928181 136.261907928796 131.981505236332 141.426756696799  
151.68523937819  
ZNF280C 205.260673843294 181.54273463264 227.715558644326  
193.052112923573 205.185206972064 260.489744360233 203.563098303937  
217.513118676535 193.786889748038 190.174729017089 193.148369507405  
221.916075811355  
ZNF280D 177.896726792666 178.780662099615 176.008711524598  
166.879042308539 252.171420358437 186.06425658259 269.530151236658  
194.88319590729 199.746775121317 295.187978994932 177.267145265362  
194.88319590729  
ZNF281 577.250493023431 493.492348317616 395.133831206474  
408.10780961711 370.140588087649 607.26455470867 307.264586007015  
477.626693328013 374.46180489079 400.472835504879 381.57978490093  
377.148528768679  
ZNF282 226.919545367682 302.768870633398 242.440966395613  
418.772484676858 658.968318349334 286.230656780335 322.64731764456  
359.162549472301 265.028512407839 268.930428617695 320.467139255533  
337.87475687838  
ZNF283 171.677654793775 148.43357593249 151.308872564827  
155.061749542085 142.122556679441 157.565633456909 182.886100305943  
170.522853717911 208.406980186223 197.947433984294 193.95909424044  
168.007337847195  
ZNF284 146.291932367254 124.019707408094 131.631968933144  
134.516390697561 128.978197156274 127.361974492821 138.175538905334  
138.720489866687 132.897554980037 136.282608531191 138.166546598846  
123.738223146912  
ZNF285A 225.275049011909 222.456810024193 307.410175748955  
276.184421402511 226.221973502783 177.990274115348 258.25658838015  
316.165926273381 404.445038343721 164.841156516242 265.43897208356  
140.227863970629  
ZNF285B 130.290454258898 146.65668813596 139.061072394426  
136.037555727438 130.669539169739 136.330636532576 139.089444892187  
148.936888662374 153.202157381228 138.570150372729 144.997250967317  
135.63604256516

ZNF286A 140.907889482107 124.726035027951 135.458682745495  
112.528908277828 109.536381305315 188.033890834418 119.281300456243  
138.654301345398 125.146558509674 155.402421581195 130.870198462514  
129.253638326633

ZNF286C 215.98963200839 195.239829623017 213.710058427654  
237.396466740419 148.874533472738 256.093363520707 152.829437376835  
201.085046871333 152.371569700039 133.423376063284 151.68523937819  
160.150336334888

ZNF287 115.639101191444 133.537552829999 130.552857965694  
132.277920991504 111.423140302983 128.39171386085 118.184571821176  
120.964862799634 109.613208767992 100.746407116143 149.453103369806  
121.539958110688

ZNF292 151.081339000609 165.342790388607 159.286484253487  
138.192550945411 156.399808270033 157.990467804353 175.847256673734  
151.130401750721 168.906637816046 167.212960569538 184.742960975938  
175.593421867771

ZNF295 374.215345412947 284.715092831843 213.634295832535  
192.188662949149 195.078843867124 300.094509257518 270.651318838953  
260.888612454097 207.651142295123 207.624240598841 220.312301059818  
195.316077537716

ZNF296 157.142101889337 168.111124820968 140.774304412579  
168.966578601686 889.26314145856 526.182262872235 741.875751347917  
564.200165295159 504.838017072725 202.253560413436 263.707476735938  
686.923164688096

ZNF3 163.239195865198 164.078423844421 157.350979071365 172.641322197031  
156.126009063311 184.937088280378 175.21512930507 190.645917992472  
168.412162365467 150.691815494794 180.179981672095 205.52620827767

ZNF30 183.613051401168 173.287859527767 209.362806125315 197.146035305296  
153.774548290902 212.933062534244 214.461773810376 249.953902454701  
223.339132121796 167.604959895451 243.979769719186 180.408639020724

ZNF300 128.525769531728 129.041254463346 123.361179535626  
119.062611098235 142.29309119138 129.185514320138 132.043196381009  
149.760883745928 116.621735695217 128.477342430713 128.917399281607  
148.309872393

ZNF302 458.33221423434 432.604462607037 408.993744895434  
486.947380524463 271.238736772408 300.443499140896 391.782120640025  
354.922901990615 404.21236980164 246.676401619881 425.471195039676  
267.747633122387

ZNF304 196.269193578525 179.067275037015 163.632148441668  
206.010481981919 185.765000029242 164.352366170527 228.649073045499  
192.273528391588 193.912456093767 167.330860677012 238.847091900666  
147.955701866515

ZNF311 124.077104101209 133.074027423549 118.144109564626  
116.95195122318 110.501341211051 119.32696696175 102.851152421943  
109.471542280224 116.664031217378 120.843429388102 126.230887413874  
144.930066324767

ZNF317 266.468621734455 254.83131041241 246.049729366987  
301.747788416496 281.168898910065 274.494074082359 305.343879847672  
309.75140197669 283.326226944158 256.648540685098 376.082040863747  
277.75958501062

ZNF318 333.970844203158 333.049612399093 341.714401872192  
343.417041721907 276.414209660023 366.408565514304 331.062744782933  
245.811312606484 233.71520737817 286.282132382462 314.386320310898  
295.463118191589

ZNF319 268.111403429364 300.937118739654 346.691690520054  
357.514919818489 903.503768217033 264.654879741889 428.462270756201  
304.292209676095 611.088604425595 288.505502880424 502.598518192729  
420.871349359404  
ZNF32 303.09499683953 288.221041179309 323.51769984082 293.794745907663  
227.050629701762 224.118739978257 256.897177822238 236.401834189942  
209.464347017443 209.090788790449 309.283897272661 269.468453936818  
ZNF320 302.362619893594 305.768201359278 351.665934915634  
278.428310548805 312.903508201275 246.748589597262 843.936924659514  
324.871248300476 240.465165615601 230.263678910356 370.555627307623  
591.763423878737  
ZNF321 133.067237748129 145.368059425439 147.905406818238  
127.57284871013 193.723953003899 130.970694919879 187.443940151794  
170.08485436731 168.10131060526 137.361967082029 176.155413809391  
170.497804969996  
ZNF322A 363.89527566597 391.782120640025 366.705048374078  
377.593087606046 244.219585315024 372.94852645418 377.353441970543  
222.508914765788 277.180850774168 230.201464318433 306.838596239511  
328.019503002384  
ZNF322B 181.157738347957 204.914390718161 160.833948531272  
165.511561121012 187.729071402782 170.007845523415 234.020419732787  
158.76356962428 161.189717452004 153.690189121681 184.306452616482  
179.794718712964  
ZNF323 257.075088169589 278.498278821829 232.250434241457  
326.570967321756 182.346834032145 178.657325741035 174.646321871605  
188.291563792748 151.043967734248 258.532432007328 189.708396835236  
158.784190231286  
ZNF324 319.560819487616 408.10780961711 269.424055734143  
417.191960489528 501.946140974776 299.717935831288 254.235762677639  
232.845268785472 221.685824197352 171.106189029362 218.773153183388  
212.33360547376  
ZNF324B 186.345823604119 187.365807314802 212.854068610681  
155.490897312915 227.774354299962 173.450023117394 204.337844243869  
179.582086214179 206.149539851803 173.907933001446 183.42877315644  
177.896726792666  
ZNF326 160.75642485037 169.306573880401 204.695311233073  
165.134931755194 167.806420483187 195.513703253634 185.507663455634  
199.118281632221 191.616483214712 181.412790232996 161.160974998803  
208.476367897256  
ZNF329 341.64890727921 319.018213637357 383.682951666155  
374.718289636553 242.971958493453 222.415704486709 463.622673539254  
440.745866155629 273.369722814068 223.941946219233 429.351447428661  
261.775269058607  
ZNF330 326.962330523237 353.285905782951 346.118765910093  
345.433025456954 191.220064414876 244.954917633904 248.360540656183  
271.615621030842 590.646248924596 321.794887577351 233.82434521462  
276.138650967632  
ZNF331 239.050379187643 231.287362732197 227.375773052577  
206.340478393262 251.915179734134 253.164596735793 240.561105692347  
175.902751522861 331.747622606378 182.275998840116 197.526492324088  
158.188039933865  
ZNF333 182.77693508164 179.94333102877 242.221324619171  
184.801068553988 150.084909674721 184.493681387276 191.467626362851

183.676020826291 160.364644321965 158.63432604978 164.848970268132  
167.741556663724  
ZNF334 158.23562423217 148.951632781748 171.449326065013  
142.222833574043 158.98666068453 157.909530751723 143.46919253255  
160.493314658788 161.26201213997 163.470025318612 136.434045183143  
148.945466917496  
ZNF335 175.199369463703 159.097020087275 174.155599133789  
187.016569445646 165.2958475168 144.333945716394 169.956827727468  
168.867373925372 168.552631639996 136.618643817686 161.94312376726  
162.52512327258  
ZNF337 725.065727257421 568.555967950896 687.789976218334  
616.701037274509 271.791126011275 380.514553097613 1235.02626456572  
412.344820823968 389.381039495553 274.202831856221 583.619362840814  
454.854528472591  
ZNF33A 198.15257384667 241.019436415703 276.867974638972  
220.772387104223 197.873787638411 171.689722533849 213.447886742681  
179.753400474369 227.350260241585 170.522853717911 318.348505551265  
270.568660560796  
ZNF33B 346.566241319814 358.732947927445 553.757847979529  
379.387095129725 250.003965480779 308.208276315292 410.533157400023  
220.60173086462 448.858580689107 191.029458520006 706.292905820227  
561.251860964966  
ZNF34 244.849563563729 286.133496092533 291.779980648289 311.806908624308  
125.915689078001 150.907594445048 183.397833894087 140.323425587628  
143.236593995493 153.787447416111 195.618369827396 161.514651272858  
ZNF341 183.853381322135 199.681103910705 194.686527131656  
255.945470052489 347.932135290714 205.403820910921 255.770193180874  
338.129250886594 235.133284525241 193.544035570799 210.900056977861  
193.98814423456  
ZNF343 252.919704128539 245.399847987183 262.093405224922  
248.965394617795 223.359785518285 181.922907273871 181.247766545135  
174.23955831109 188.981391266203 177.343586047942 234.432954093705  
164.647634120888  
ZNF345 144.496429994489 151.879398444495 146.832797779597  
160.861929142249 147.178598908199 146.190750749851 157.595468761042  
161.072844903925 156.923675862035 153.100979553727 158.153875553171  
163.910041674646  
ZNF346 199.118281632221 214.38058301395 183.969897305028  
238.124340832815 112.264005988662 134.051756243089 143.744075931566  
156.353914172996 150.837717923505 150.449621353865 147.335403843539  
133.184279519985  
ZNF347 188.623897093065 165.511561121012 175.774461934758  
181.578228610334 170.67334244323 142.303654405005 161.419873271162  
191.029458520006 171.358746749715 152.210867113591 164.185346950306  
169.206723147505  
ZNF35 318.004190156313 267.422232051733 221.664431984861 266.032134528055  
247.280717385562 297.805768288377 248.403014089812 214.617852048151  
264.905947922753 211.059870865354 227.483999162038 253.975577255772  
ZNF350 141.606501859513 137.066799877341 181.607253339427  
136.142380560596 153.369334953677 139.297276687352 142.339740800356  
171.595724119779 203.652936507291 147.508817393901 190.165771406362  
155.172667450053  
ZNF354A 136.015561289357 149.604507483606 126.435928518593  
123.277867938275 123.518170356322 122.232732968363 129.486584446672



137.318442197233 130.339214643083 122.531675048414 158.639313207233  
133.043503979161  
ZNF354B 163.326102597955 137.830435972191 153.477432230141  
159.660564323984 150.346002924933 149.049931380459 155.02097482487  
165.504532455205 145.485453268383 151.372219350291 135.819512270582  
153.610428214886  
ZNF354C 128.941490662452 129.77374228644 143.799113486767  
142.234554325754 123.671944323239 143.519786615253 146.301300103564  
141.117659724704 141.13343407335 137.42845093653 115.858924428037  
129.469949305913  
ZNF358 1746.30519466572 2056.90127387648 2553.92770795014  
2681.48138915107 2344.11548437508 991.081498002429 1064.85152398919  
800.739422189427 900.233783407148 557.214020485204 1078.41947691758  
814.759191652981  
ZNF362 813.034056288861 950.818917078515 966.731520471976  
1281.9073569335 817.342172321486 593.821622986351 684.180060287047  
522.77407098992 616.339439383796 471.510683045651 571.64723305848  
604.687265229902  
ZNF364 1492.83354014907 1189.11053680293 1165.95924778817  
1462.31151845458 530.819778703194 712.94845413251 481.751102333172  
611.36406319509 458.282682131641 631.653707589221 252.789376168324  
711.166793546075  
ZNF365 133.78629612147 142.392860474555 140.040420521312  
134.084602409011 136.919702354166 138.094719587545 142.693337885596  
139.667714422309 133.397734409167 176.382377784553 132.541420804792  
138.980079440205  
ZNF366 143.579660352652 145.185902174023 130.205764567934  
164.442400539653 127.524310543779 144.942289590793 135.641355114263  
147.937679308903 151.76341973891 135.883119645931 170.516743115762  
135.651829752462  
ZNF367 139.380610974147 160.50439457257 153.600132368924  
151.712097221291 163.390929975591 169.681582570965 145.764704553373  
146.075794515889 156.346014084316 145.806935833967 141.634246722965  
154.252727576218  
ZNF37A 148.340380102097 150.570540340126 145.442914818456  
144.224287382131 143.433730894402 142.713318779614 143.007237184254  
148.720181793879 144.02239659305 134.970609100459 143.711449989619  
134.339535632463  
ZNF37B 156.259214645427 136.162938063831 142.05571112803  
137.11719450122 141.21138348075 146.007311764212 144.368355737187  
144.013615296685 140.10798818623 144.454141873387 140.373554273624  
134.4811029314  
ZNF382 128.936628289974 125.342580368417 147.327675057481  
131.474485888864 139.055892787717 137.834158814913 136.121873179928  
126.247378598596 134.335309757663 131.261903118177 124.477586539576  
121.138461509096  
ZNF383 210.266075382636 198.583407008317 213.966288689715  
174.820064644203 188.959655155629 163.024215671479 211.626970008102  
216.559563381808 213.240181616274 181.976252906929 202.849544035436  
194.475822533231  
ZNF384 225.335753745598 255.12306184224 209.887047474042  
273.073938260793 219.792171863015 171.140106467064 188.417078622503  
181.966110264509 190.975263192006 179.037397826592 259.575461599189  
199.135932984641

ZNF385A 214.803167803712 210.015199832609 162.013164369593  
200.688465653117 445.505512764045 255.903775525554 276.714748212739  
245.850813387241 230.332652534446 241.782750858091 607.126514742951  
355.048838683854

ZNF385B 156.301214161102 147.401387099359 140.553613300431  
150.348608467097 140.899799480834 137.811776724675 137.03111066852  
140.441521267218 126.536245975137 167.350290326189 148.340380102097  
130.92186531563

ZNF385C 156.585665091824 152.129092774005 140.656633546501  
152.650867743471 152.504620068655 148.501654210579 141.839647226623  
156.200313064999 146.887506793665 156.311009595629 132.71633377967  
142.103519373191

ZNF385D 213.26158748941 195.160353691349 168.150270765792  
201.969002368045 153.603765998461 190.057030596611 161.761125440228  
162.519642881848 190.077302802065 182.873752254411 164.696616863082  
159.643566663742

ZNF391 109.482330324734 102.563722570171 119.949050292223  
108.021898335735 105.375878824562 117.513523498725 115.816156193574  
119.237802375552 107.385565665491 118.783904603368 118.000757530896  
110.16174213285

ZNF394 5992.92384160188 5425.58761099475 5800.06300826802  
5396.55955971617 627.335757721489 4118.58682247781 1748.77270039774  
2882.51330563735 2242.73511149559 1742.84803427086 2055.27692947656  
2180.31963682546

ZNF395 1064.12835214671 1284.19937294949 1237.56662467492  
1074.19589851599 1329.90419210779 822.129234065933 1639.76556136383  
827.863789600981 1111.88018487186 1827.03179366146 1265.88446775977  
917.646958427824

ZNF396 138.652735298338 127.706499722854 129.409899416034  
136.679405220947 129.499283650632 139.119638136874 126.752999657665  
130.724642809645 124.272447276746 129.1829592305 124.86699236406  
133.517685144186

ZNF397 167.58143328723 166.415922313464 166.600109853461  
147.196687432745 137.982667022604 142.535416473783 158.890522392445  
169.984859264412 147.118987674809 135.907702243922 156.06439656393  
139.986119754908

ZNF397OS 134.336279655683 130.309092946921 149.712320986646  
132.381685434931 126.106777865128 143.527595771607 139.980504765791  
163.570018900148 137.914673796317 156.333133322672 139.403087367992  
126.946305561543

ZNF398 237.825857080173 228.001046173405 210.266075382636  
202.44778603643 260.715580924916 283.807827536147 221.930333726352  
278.555009982029 249.858562350415 162.056622258216 253.495214569632  
226.919545367682

ZNF404 140.590802695412 143.294217840279 199.191065549132  
127.068313862984 122.405469833024 124.740700441589 177.257355909681  
128.827129738041 138.43301474649 153.152921890232 147.52178512946  
116.929398630733

ZNF407 220.742788129847 258.605188272761 260.642170838161  
319.685597963267 179.779007442837 164.811120992602 175.874387612235  
183.531156021887 183.894417745549 173.121618125421 216.680795762761  
196.117609477292

ZNF408 160.466187961848 186.66469040433 143.307838525991  
231.769926214655 327.811191081135 228.560346647306 234.925852373127

181.098584949344 188.0434100445 224.396933003452 242.5085895186  
178.676812740925  
ZNF409 174.698724064671 152.913814113632 152.504620068655  
146.770267005869 159.636846021745 144.007071548045 143.001661958814  
145.870135196037 137.42845093653 133.724135305758 136.321816321193  
147.074807267102  
ZNF41 131.792339956719 132.033116673897 128.044165393924 128.876385705559  
125.742631850732 132.283682066898 133.570075399424 122.54127694717  
123.096995744616 125.874313058552 128.276471459777 125.187617901961  
ZNF410 522.664475688419 437.770841893227 452.606433325387  
288.823376348944 361.516275756449 419.126814511305 390.979822976551  
407.711669482083 468.93543246394 491.906642849373 514.922742487521  
457.779218916808  
ZNF414 177.582314734704 167.380798617981 159.159106382346  
184.387409077972 191.322056430728 162.841318222066 162.975988989106  
147.449186980143 154.600966693059 147.114698384834 154.281674854552  
174.068974937318  
ZNF415 285.980446338971 292.802762636861 338.223462327622  
278.005620372937 280.127735578097 167.030667499538 321.426100243434  
280.723379809959 281.49247863022 272.16090053595 371.767182305618  
289.001004912528  
ZNF416 169.33926580273 175.626096716758 164.352366170527  
167.451782810394 188.131876231735 142.843882404269 166.46473789699  
189.292740365891 201.800357785022 143.695901115673 202.761449711661  
148.155692596378  
ZNF417 160.441879289883 169.720414035325 188.818012746123  
159.922627970233 178.804669910283 191.987301954927 200.114704018645  
195.724873069362 214.413674287972 164.652795899742 186.089988569287  
149.541917326637  
ZNF418 183.879114762264 177.491294133515 184.260835471542  
230.508733145583 175.21512930507 139.314945862113 142.049776668507  
171.36717256867 193.502988612307 143.265532486512 165.424516708502  
149.032116392457  
ZNF419 353.912654262209 359.363523948825 389.588346573823  
398.354212009426 297.071121022183 268.832884350157 444.712990986138  
526.182262872235 671.387334588652 513.518424350159 425.348619281876  
318.06081614151  
ZNF420 177.246890307643 161.852665901359 206.257167235126  
155.988447182637 163.880402141404 156.609370182062 188.593378315122  
191.937607311711 177.32104138164 154.227433553131 163.552608805894  
153.285830139349  
ZNF423 208.895657507883 224.135228192655 150.696963699371  
204.509884908059 181.876635968785 155.966610886886 143.488761023636  
146.559502785264 147.10214400501 145.06205326107 168.223865801948  
159.728097053356  
ZNF425 196.889520085412 184.398672994943 268.568824794145  
210.960900130785 178.045931314857 215.558688906165 175.744275464701  
214.803167803712 195.577739376082 196.942880967705 202.662466141301  
176.901042102323  
ZNF426 257.573614085223 240.147082836599 354.981966077502  
235.961605948276 136.770515182612 245.195406638979 221.231455446574  
226.315173823168 205.185206972064 220.9384439772 264.158648784101  
179.57046217355

ZNF428 3090.52810501797 3073.40543048878 2871.34694522381  
3251.62784659994 3930.2841381915 1999.10320742823 2303.0998502001  
1742.84803427086 2233.00694575483 1237.56662467492 2112.84348677276  
2087.55358504021

ZNF429 118.239637776941 131.613738869093 124.075077123156  
108.131097605872 110.977904932371 121.123130624519 134.507558495307  
129.928047362701 126.868970616955 123.275246170603 165.665796569389  
151.511808301993

ZNF43 139.491769969541 146.283340399533 144.690880401712 140.383646018409  
157.826457203706 171.161297672182 150.521719129181 171.941887376462  
143.475725571943 136.220324225816 154.696686113784 152.309460630038

ZNF430 13247.3528304243 12968.2945749 12334.7921691489  
13090.0615116619 3536.14527317085 12577.0915543468 7245.25086222102  
10135.7800994367 9514.74328718935 6409.23524786095 6271.34208268488  
8617.2437024568

ZNF431 143.695901115673 148.729753117861 150.968998243223  
129.990534497026 181.070689877681 215.037122365095 264.233381434738  
211.085778902367 173.044636575826 210.353341004865 220.92105843037  
188.924084292126

ZNF432 153.095594614683 162.52512327258 196.399050990244  
155.518807026156 199.101099226668 186.758038665014 230.284216427158  
211.626970008102 181.098584949344 187.529556428609 249.823314327355  
171.800143883192

ZNF433 205.742386129597 200.98533822317 192.130214856642  
215.115324454215 176.964088090133 213.338918839446 228.270158363878  
271.989060206794 209.023926358109 225.130011390856 214.595639477696  
228.001046173405

ZNF434 270.679613997675 272.571092944711 295.330307669482  
302.021033686056 228.926077117474 327.384671423687 346.78158577526  
445.089930641391 337.973433871323 263.426870776148 263.321559283966  
270.201322204641

ZNF436 170.585366369563 177.415756020166 185.950131245699  
178.707066209511 206.89716102989 292.524552445564 369.373283422151  
323.276514394119 255.493109705211 169.87591929982 236.508498739509  
243.225815954365

ZNF438 325.082620845425 351.02823853348 412.736636437651  
417.987533397449 173.353648927895 162.58152435515 178.153527134452  
169.211708954329 158.439409064812 155.198503964295 186.309367281625  
174.615694779386

ZNF439 233.914433380121 207.692077301142 262.671819506189  
209.090788790449 175.469375624274 163.69172577831 400.550044186372  
198.815448428294 208.932692585748 150.549883779193 462.025126897013  
240.836979012241

ZNF44 125.256339476772 124.342911165267 119.083957999725 125.334995649504  
104.442909315944 118.833188167696 118.970693476152 118.891276329399  
110.138220982557 110.727742629085 124.411213807179 118.628559951472

ZNF440 136.222421297872 119.252737868132 135.991630745082  
154.350107666084 123.732299841696 144.432181150583 140.49969612403  
149.589901372799 144.873034900013 131.648308760913 136.846912694371  
134.73970457131

ZNF441 119.044902525459 119.087972087745 122.236134282757  
116.043095688871 114.452922529209 121.739219824085 126.928328902507  
134.084602409011 132.099223798262 110.024815508703 123.692366307662  
129.452826518288

ZNF442 201.152639979358 198.506786870804 176.056306041601  
183.693300680495 153.132559737356 183.604011732066 173.919504730673  
173.798554769204 147.066582834257 160.525939340745 170.775283924087  
199.87003105816

ZNF443 161.172420368335 180.290887733427 190.077302802065  
153.041407358576 216.755681508811 296.20443113482 214.904634494921  
297.544216175512 205.950347620158 173.964378226631 225.702629835215  
215.300064529551

ZNF444 283.807827536147 362.65285317327 281.405355165228  
435.48544637769 577.801009921199 226.287196839644 262.259969786927  
220.379186481273 247.053215951505 221.027562527572 282.244214637625  
214.499670852615

ZNF445 119.802832736435 131.83430682495 118.572988141773  
113.214390213004 116.653897702566 111.1002996982 106.315801001506  
112.599970121166 115.702900810606 106.000943456483 106.603674195422  
108.646136431909

ZNF446 226.796825544749 240.971675534641 254.722836822616  
295.727275232995 392.365008240567 242.787656836745 309.75140197669  
266.395569467956 269.567704345075 209.464347017443 307.945884504629  
240.94056877904

ZNF449 120.09801164252 116.449064666763 127.849141499408  
124.541257225826 127.152744243038 123.383334044683 123.98775110588  
114.099623939954 122.385508330707 112.661607612444 136.011474063229  
137.280933631075

ZNF45 186.103491222924 175.601912488918 194.552533397944 174.971350923613  
190.993590849624 243.538374440134 223.474531516972 255.992494620859  
323.20628717764 192.188662949149 241.168936008174 199.813528853649

ZNF451 367.732191251547 323.086368767924 386.598037190663  
280.033528476199 194.112534914308 364.766154056243 257.643855420381  
246.186104432792 226.841838641151 226.35854874278 201.415695076278  
269.100400678077

ZNF452 154.136467767927 136.790457887057 158.044938495884  
137.748443205818 156.407166112409 134.301956886107 134.793399942417  
141.96771965623 140.037379695961 171.071893074072 138.212860360467  
135.832454000859

ZNF454 171.759102794108 166.311421907434 141.213588194832  
193.084818760857 150.72014060286 123.789035728194 134.285191872099  
148.692602243778 146.11669387238 138.775095929764 140.28485470716  
137.821010169859

ZNF460 169.791616021987 151.259426521768 152.035992124554  
158.834483073542 142.58227004035 148.610537244399 149.492550066785  
145.89801576671 141.037217406848 221.768507175814 138.981712781568  
131.244759170642

ZNF461 124.666487633365 146.323776429268 143.628147237159  
148.620766059526 149.25705328406 132.419898122309 137.919253591105  
132.240470270795 134.838366830668 165.430811083128 147.378228560979  
144.564250008106

ZNF462 926.670867201327 1134.64039256323 708.779490017407  
1266.53539318831 295.893482074241 260.370285504512 194.584034984339  
190.871696848118 248.594000664466 256.022057262325 159.289148392284  
301.49286558088

ZNF467 192.140442881209 206.321272734099 238.904826940476  
224.135228192655 248.729653566598 189.461090469712 138.704839659727

184.900027626401 184.135651836627 236.833653794223 203.586310608403  
272.666435295288  
ZNF468 149.196539425588 161.061119536632 136.903588075134  
147.818956338752 165.932628858503 162.857083430123 153.761061653202  
169.552424961465 183.82450756022 138.936872956065 175.210232663606  
168.408974578263  
ZNF469 165.277935422113 159.670815631794 163.936973279176  
175.537039794925 156.806407903626 150.576660798865 158.834483073542  
167.698883940638 158.414776465951 191.38608906576 153.02127620577  
158.364031234356  
ZNF470 193.801858215025 168.365262340217 185.783374935551  
175.51767355303 180.276082632155 135.267015629083 182.32514927211  
162.453586139402 161.951996906162 176.300743660299 177.393812005949  
157.692519370734  
ZNF471 253.833756857339 260.129513331703 324.871248300476  
228.317527475322 157.612067634423 140.925705285169 211.869300324471  
216.05364037271 210.900056977861 136.728975205893 188.503673684625  
178.358003030064  
ZNF473 187.336349390012 206.521761031181 203.04864785056  
212.171281020103 257.075088169589 210.266075382636 252.919704128539  
223.84997313236 225.583966894864 206.113290588613 219.537335167901  
222.990586491219  
ZNF474 129.375772737722 131.693923403533 134.270043564053  
130.611233072509 126.177491182442 134.367115858307 138.681348536008  
143.247977741752 141.935435502163 123.922817231917 125.761205967344  
130.238231520218  
ZNF479 149.061464748604 154.579913524947 166.515199732076  
125.5109819304 153.005366371425 157.186747372076 152.57040089034  
159.867178630115 143.172744119235 146.06717772919 147.796610216375  
167.117957101613  
ZNF48 145.877943006533 152.057315195367 136.341358916638 156.880120259304  
170.423881865022 141.544454931788 150.851504454247 146.599636794606  
138.196640512429 133.610143526954 144.318556353673 138.891642304194  
ZNF480 250.963601187362 326.246702537465 246.594244983507  
317.244256751418 272.968792195442 261.028644858795 340.239348689005  
346.996310517446 472.669956708398 203.888365494623 491.290438575428  
301.546624239855  
ZNF483 1394.31467757456 1089.58643309156 1462.31151845458  
954.488185198006 217.684410907748 978.389902096994 443.005424069211  
633.104379362137 520.120193442648 458.440488401029 577.56891124468  
477.275332763887  
ZNF484 173.347463632976 174.807363753172 149.500457158616  
146.6306281408 168.818595386221 155.386226046894 127.797666392002  
146.210814568357 157.654040469774 170.568719982587 217.531179216305  
139.086498524774  
ZNF485 172.857643600385 159.113259830623 193.48293264444  
175.341310423897 184.937088280378 173.939159471022 192.789886894821  
179.828494168009 173.577723566555 162.481362579872 201.731223995887  
211.891710626953  
ZNF486 20048.679735668 18862.7632438112 17830.1333276624  
18146.8167991873 4359.98094976179 18501.379301537 9759.87403504619  
15704.7314387339 14108.0461617941 8787.57716309558 13142.4763966378  
10608.0671430066

ZNF487 138.724959677368 121.047419779542 131.800533523123  
129.723501897231 121.464383202986 117.662611650515 131.188208693139  
119.387459594521 129.311134743311 123.182903611854 129.098408596418  
116.688949603376

ZNF488 144.107029869771 145.42029807396 140.018786803502  
131.968781256081 327.164773632634 152.197327387252 164.541417588646  
151.214631373344 167.474790447134 130.778164962583 142.535416473783  
143.626857507866

ZNF490 153.044682186978 140.781647532361 144.763700813057  
149.693559841189 146.832797779597 162.297999435613 172.310673499572  
163.516075721791 159.997580819443 157.264673452646 197.47340234886  
160.27511502306

ZNF491 161.667782505656 158.68792959603 164.236417852165  
164.757907224537 138.218392984717 158.863516051439 148.147294674218  
145.378779757104 142.96594961303 148.278828579424 154.016622581204  
140.26557508894

ZNF492 144.608882758506 139.697477263244 140.543382412084  
138.16337207876 133.411087000196 151.554352209634 133.66893163718  
149.08527298577 134.296645422941 143.853643511287 136.582137928022  
136.313623567821

ZNF493 207.173653740239 241.944581086483 242.971958493453  
256.291984914927 174.116797337377 209.417052464583 201.041792159394  
234.789040617681 166.091736766853 165.154844613899 230.367251714289  
178.404791189835

ZNF496 155.237180851323 158.531514776098 168.783725505491  
160.887121295848 160.343551497512 174.985831291764 155.468848105615  
174.515815532892 157.061602966797 167.442950045855 140.687016530974  
159.576585660511

ZNF497 121.018722403628 124.381674909742 124.592771536872  
120.565485864499 143.401971479167 129.213523302268 123.814841047589  
145.100964170053 128.910261453632 126.022145004164 124.484589975207  
119.237802375552

ZNF498 159.390531348676 160.979182561773 146.608010450782  
159.784369379077 153.202157381228 152.783534456473 178.284294783418  
167.658560306884 131.872583529419 158.125437004665 177.11682975342  
161.636411303968

ZNF500 278.335289966805 269.468453936818 311.04252785157  
317.802633831405 364.597798667541 299.80615152845 319.685597963267  
287.402339322061 259.426050921239 301.955019831714 216.403542903805  
276.867974638972

ZNF501 142.556535259086 143.660679324057 139.679681813932  
140.717348834454 127.740057874561 119.795945889846 129.502730573463  
134.501410126169 135.395071593072 135.741404460897 132.913891550054  
114.308806726044

ZNF502 176.890596690798 199.96834355685 255.56301534833  
198.840533461525 145.806935833967 173.10229478279 147.221425204534  
185.295480519718 172.446482096058 189.070238523683 162.10411532202  
175.573400981771

ZNF503 447.779854598556 542.379137999196 368.374002925137  
587.181357555703 195.230219990395 153.383776309267 438.958573676953  
196.470718183575 346.173614351499 348.111872425949 388.192984832638  
215.453915231774

ZNF506 129.77374228644 137.123016784819 130.435589649362  
128.798413084891 141.668101962049 134.576622528874 136.468434653208

120.876732151192 123.786227856015 131.266386010519 130.265055842999  
133.277326912499  
ZNF507 168.398366575579 163.104822161892 167.268645224361  
162.683665945044 134.549628985766 166.341564850299 175.128935809466  
175.9219991997 153.131271100637 139.080142195118 186.591941221632  
161.451253146578  
ZNF509 183.633719048831 178.000672046849 190.993590849624  
175.176693060261 147.341597963918 180.327051100611 187.710185880162  
177.19138801548 177.524818593325 137.693410133625 166.472068379965  
198.659595851481  
ZNF510 128.944295118239 151.201263631883 163.647306551474  
126.162713269943 134.924082270115 121.421165640171 123.522738813733  
144.338069855334 140.870849757111 112.190904058889 151.037282417145  
133.408354896584  
ZNF511 514.922742487521 591.89966781883 620.163512570453  
723.807658768693 635.038752622494 367.983166440977 482.592481827722  
449.103432410618 476.495282784602 508.735412486964 529.854965483609  
691.632061537999  
ZNF512 596.076764072945 504.141861790903 784.412433571927  
467.777995124655 301.908667220208 654.305724263754 461.722481634933  
460.089380701982 433.82566459288 236.032288046282 751.568940762011  
560.913732951675  
ZNF512B 180.468984099647 182.736067431579 228.384686248604  
213.123453925578 264.955939320296 216.457866890673 394.962978677736  
191.056705282378 215.057917795456 203.960838492793 243.455305933211  
285.172001915966  
ZNF513 235.795627549799 263.448958595597 207.545424360094  
321.119758814618 379.670492165938 243.622678182687 267.483886037099  
378.088675670786 226.35854874278 230.508733145583 486.197269936713  
348.36178568457  
ZNF514 283.377663208926 260.642170838161 367.327273578513  
303.138041758745 168.547575047205 274.281532397691 235.961605948276  
193.892810132985 232.363656167375 243.468673768141 417.36454228858  
269.981476129439  
ZNF516 160.449911844008 172.245089970803 184.832531598928  
156.102877632001 145.063062479224 158.514079887374 140.615078497305  
149.25705328406 148.260672564835 151.908841481413 152.748807709142  
146.621996129313  
ZNF517 141.803250679131 152.319720089773 150.964506212368  
154.420795931034 142.06907380533 136.919702354166 142.290253129837  
134.592495777159 133.469323412904 133.71610564207 147.535225305685  
137.742393475755  
ZNF518A 273.806452412737 266.286483421453 280.531844086775  
254.188830191845 212.210383398591 379.983165400941 350.58427958432  
384.365878895439 289.859695541999 273.252023367028 399.476401949891  
359.256193328366  
ZNF518B 346.356312668445 363.255517622046 424.285848583977  
361.160881334174 273.514200733343 396.988248940183 400.353795948162  
894.46029531926 576.997804865103 258.759507964221 182.851203073653  
514.799179506754  
ZNF519 201.085046871333 213.484986945295 275.642882589307  
278.142283306934 143.454771158075 159.196987090991 152.163489631563  
165.080825814849 148.431101051574 152.122141650397 147.694098231655  
146.434716985396



ZNF521 291.839070398338 275.072079692264 176.47556448977  
285.882780066861 120.07404952486 125.596067857941 122.651702760414  
132.595360509902 129.916677638819 131.880438747579 137.812249316763  
124.944563166658

ZNF524 361.687156919012 402.366797969833 333.592915218163  
503.466550870577 1006.03677177164 281.238656291587 399.762451559805  
264.355693070937 457.292146759215 291.476113017794 430.590533290315  
307.81941988503

ZNF525 201.49630027392 193.786889748038 213.7326050342  
194.202977693583 218.031238893075 210.478088018501 265.219444616245  
239.24587884234 267.869879189095 216.033564783918 213.484986945295  
232.321454436688

ZNF526 364.191263843897 433.928818077527 317.353318759931  
420.361583975644 300.094509257518 360.812953749077 327.384671423687  
408.510567121592 397.2528907311 235.704824490397 308.031816782343  
297.368197598038

ZNF527 148.911306526869 139.442091671938 157.252701277198  
124.68729078792 140.137435303984 150.922279808832 151.210814209064  
126.734835642553 135.559535347364 146.927825526831 148.585224298375  
145.060085149395

ZNF528 129.295956874012 127.74861041569 125.146558509674  
131.465404975492 125.999595008166 129.072173761566 131.123149002831  
132.647642341683 121.979059173287 121.294366964074 128.4702079007  
121.837571435384

ZNF529 560.362502519639 425.229044880287 452.843213944986  
431.413030534188 283.084102918359 378.797952580504 388.477382640003  
386.598037190663 442.027630433527 300.358738353443 370.617422894068  
299.513950278952

ZNF530 120.027996187915 117.644702868748 115.775525016883  
110.575582352222 127.476819912992 112.000309477972 118.761737418652  
131.880438747579 114.048136176142 124.847325289068 119.612288460361  
123.277867938275

ZNF532 551.086785904249 627.526008812413 458.875979229339  
587.388038484307 190.947996918605 184.294172429054 121.48867035121  
178.245841646175 236.899421827427 267.190228116903 233.786136606682  
226.936810012475

ZNF533 211.595513743111 181.865456674829 181.135519188216  
156.585665091824 156.519196335454 151.776232847515 170.676752248138  
146.660826209767 155.917655560227 188.131876231735 125.04156726504  
124.63978985808

ZNF534 148.551340840517 124.321503368855 135.154441560264  
150.968998243223 130.586509996354 135.046003135933 133.274292647041  
133.203064891923 117.754181884939 124.256773437346 143.198622036573  
123.748788684337

ZNF536 205.322733011516 179.582086214179 137.93067182632  
134.06996703302 145.437544062449 154.286043402527 134.555873832434  
148.975112606364 145.578721432709 135.203507726561 153.801971958265  
140.021640936288

ZNF540 214.739818213164 185.374745525698 198.522123898437  
231.698163424706 119.767154020462 144.782706468281 132.081286801266  
134.54796737809 135.474070994652 126.077945699709 130.005909892804  
128.08497128067

ZNF541 164.066839397676 169.956827727468 175.670738308809  
168.511517285223 209.913460781088 134.140533647509 194.352807599399

167.791351000743 146.68489318358 139.211746200839 135.446072698039  
139.217113811817  
ZNF542 140.460927375243 131.324822348301 124.160433356046  
118.56332995149 116.780639688465 121.640681916546 116.070254821073  
115.594489123676 123.940632366675 118.597739444445 124.447971788029  
117.728410015076  
ZNF543 172.020235319192 183.744959461078 160.865949438448  
179.400220328552 161.010206405916 154.088770236213 226.221973502783  
186.6902304653 178.096998157452 162.52512327258 184.167124143272  
167.965981130329  
ZNF544 299.390443444504 331.32397534437 341.973002478932  
353.774297577869 285.83626978316 427.249733213787 381.014521577291  
592.284071247642 656.32782132983 421.929674562786 431.686900474971  
428.959561932229  
ZNF546 115.473431881597 118.154953746492 112.971776964469  
116.566190779365 111.956783714784 113.238466329843 114.470670941078  
117.628564992187 117.60787142216 108.751654061536 117.015097017246  
114.405811161631  
ZNF547 141.306418675404 132.909653744628 160.281830914755  
141.765004355609 153.255318944823 141.391508027714 166.526875572556  
151.188412354358 126.678746008577 168.697565122105 127.874934513708  
157.130045415943  
ZNF548 309.155070674445 283.46492196692 293.986292438714  
214.261611197599 169.695658738618 245.640193659159 271.064405562085  
329.406649846151 285.05846406041 268.832884350157 257.032174266905  
247.454326301069  
ZNF549 10661.2216586049 10048.4260790604 11479.7406150358  
10222.4435857673 1367.19652160532 10360.162704111 4343.46317176151  
7406.86318549013 6044.78942014135 4214.83058308503 7003.06505884735  
5250.88041666757  
ZNF550 157.449891798638 170.342828808493 159.615233521257  
158.92538634742 151.191822057706 146.31468639383 179.198164545975  
200.017741240426 202.778539118009 161.144841967903 185.997327421952  
163.215507313506  
ZNF551 146.316145173343 150.914644894869 149.05280915667  
152.791390145148 148.898587505337 175.626096716758 167.130843160309  
220.9384439772 199.837938317725 143.747664482225 211.660148497276  
165.977852973826  
ZNF552 136.039076665712 137.683228179974 142.836229345273  
126.394032757479 150.129367314696 174.491551019128 261.592512762969  
164.109321257638 228.675099004411 144.889824569599 263.379982742085  
148.646699255797  
ZNF554 125.798453479983 145.650356702429 134.218867540274  
144.082452235267 150.098708715617 132.269567096683 137.210805338701  
123.561016079801 129.798965780918 131.442186260672 137.459095066272  
122.018200592563  
ZNF555 200.322334039458 174.881557472722 180.690409026809  
165.665796569389 160.073510173041 168.73918684069 156.998563448664  
182.222567053422 170.731358903019 158.244741207036 156.727153398506  
153.804419092743  
ZNF556 106.854721604889 114.77964341895 113.687931899298  
115.639101191444 139.909719416938 175.679405338399 217.307872538386  
133.165893710176 120.626155234319 117.335748689217 153.899573902499  
126.609398779757

ZNF557 531.711823481265 542.121375354644 447.909277144896  
450.688800547981 246.77831953556 505.302263971007 365.541609015117  
514.124012546829 355.372836460906 332.599191067433 575.386048896223  
350.46078795627

ZNF558 234.243977361232 245.153736298067 237.989479738133  
240.734451149197 187.407526616724 236.470206707351 236.292053621233  
156.863232221623 183.100286716683 194.847305068008 228.542423012958  
217.646777099512

ZNF559 403.292651623365 310.917191279571 346.476121089685  
351.448985413528 211.357321758564 242.037132958656 306.193157874683  
283.918434443669 227.965783945702 225.438177833064 341.564749445905  
293.646275396425

ZNF560 105.900294919664 116.106772298898 113.955459033122  
113.572326615571 110.804248212067 123.884643288534 114.223991452083  
118.567548265638 121.508233749444 121.543207264598 123.595133376092  
116.95195122318

ZNF561 223.311817085871 210.41046499545 214.461773810376  
217.910445051307 185.342353172151 191.38608906576 274.202831856221  
198.374163029174 180.392337212428 162.15259972225 293.080122239022  
203.206743799353

ZNF562 577.56891124468 635.234445318087 524.640879446426  
594.180861801958 363.594808277506 1104.61581891596 431.304147578425  
847.564628337955 547.817028243811 480.712219116621 805.875557314697  
601.521068811063

ZNF563 188.959655155629 199.947823264085 162.599466021255  
186.831266888028 147.055213172078 151.273261581765 140.559553697317  
150.701579893607 158.704425428694 160.411218029114 186.388067641269  
144.927731613526

ZNF564 224.089220507176 245.317436234586 229.443064589306  
227.614623963331 217.148957110623 216.181417552574 244.350562866593  
258.830885826237 210.085329463347 173.395370400371 353.674560414317  
243.893774595317

ZNF565 196.136080427522 202.909188070184 205.121123131992  
218.106150021482 163.284853420896 238.375823012603 219.49354518392  
209.984545596312 239.572670410818 150.650926518959 194.212177449077  
163.010527914347

ZNF566 144.460541430705 142.368601917778 155.358918578397  
132.285835971705 124.93629294955 146.787927492706 141.560424984281  
146.565265415908 162.547569833931 131.744454088995 156.846991384413  
136.120813399579

ZNF567 138.8603234411 142.390243984362 135.058525398122  
138.79473329684 134.149446827982 140.469508410073 149.106615763242  
161.335677383485 162.242553163421 149.579428189895 163.996649606636  
136.089888639987

ZNF568 170.553940654493 164.562302265155 158.205235596076  
164.608496326181 163.438043894189 137.457453776513 150.921252152443  
146.725123303782 155.651798065702 145.320945010364 152.805525883571  
161.646807806182

ZNF569 139.691470247318 160.914009756867 151.004738508108  
134.509830749072 149.460660195293 131.928871107722 151.849653154534  
140.680326850085 128.189685312596 134.56763097313 161.134322621805  
139.752845127584

ZNF57 159.977528879208 152.872139211415 155.368204597287 147.297163685914  
145.957934576055 176.849238577762 176.245698601389 174.42996813062  
145.704057360697 146.830752309354 179.582086214179 164.808139478109  
ZNF570 138.866469244936 126.118745937997 126.5764774133  
134.460035654795 148.291518446423 128.697647007046 124.715454831847  
132.317972465689 136.887796245371 126.506749037908 157.990467804353  
130.339214643083  
ZNF571 172.612152484322 165.737618983611 197.068795788491  
175.608958881476 182.32514927211 167.724233915361 173.063002566542  
180.364089931995 175.686248503777 162.560758971445 146.274284557421  
178.863722055499  
ZNF572 134.029984991385 148.832461329713 144.574566623882  
145.656767712617 145.311964807443 138.928287624746 134.244658505187  
140.936204899093 144.291482611374 143.572668991313 149.744358230709  
141.560424984281  
ZNF573 429.268202514543 391.706404954357 416.392874553797  
409.380002417794 155.228605554943 494.067878734396 222.268494113686  
286.642323413104 307.480644393018 198.113398073968 389.260166168847  
184.862871179765  
ZNF574 134.606126134531 147.463822782303 129.925548182204  
159.040409182674 249.449151040445 117.910259090745 134.168381235167  
128.877218650072 154.316929706697 130.860938463815 139.969155812688  
130.586509996354  
ZNF575 141.259186690966 136.253264628863 144.988803993714  
127.389942368953 122.924017262559 131.507618414676 135.335931168501  
129.548491595432 135.457059862669 130.810353054091 130.616175018332  
120.043811428091  
ZNF576 217.307872538386 217.513118676535 225.256708701787  
234.126500054945 268.660078500783 302.069236363626 292.366934378643  
258.4424008891 358.843277491684 251.588748783592 229.200570583629  
324.56043349882  
ZNF577 994.213397985121 1011.9675459648 860.315938621256  
1031.59140059071 233.59297160203 725.621153262924 453.457361487577  
614.775559038663 465.926873285563 435.332573825425 533.140740560189  
506.029788151779  
ZNF578 145.08853313195 151.484420979498 138.891642304194  
140.656633546501 141.793216038882 147.019460117987 136.70715656782  
127.245190474707 128.147484804104 146.002585729701 128.582520754296  
132.243900762936  
ZNF579 192.286192329464 243.732074437237 205.341121539273  
290.326832430372 459.973764138144 203.244917049745 218.298791348295  
182.095387488796 210.666799498141 170.361237529247 184.041062308263  
190.850639994777  
ZNF580 253.601378730911 284.321253087512 241.077618798955  
377.225452025984 264.563741039382 189.136114953249 198.737421468412  
169.590101694098 193.660159482867 175.656204695951 222.394280571312  
210.925203743958  
ZNF581 414.713379367927 564.41151411028 554.950092776254  
672.348723983535 1861.19763103381 366.961565952239 1240.4863200811  
417.987533397449 524.245387973163 537.350891960682 565.609400092543  
500.246996975  
ZNF582 128.997028325896 153.538565948453 131.239986488033  
127.265211069837 129.623601211364 119.669441891401 126.0944894315

127.585851003779 125.488511939819 133.026879831536 155.759861336991  
132.782967735893  
ZNF583 197.378801636702 209.5184563244 207.514489132778  
216.506914782226 195.724873069362 175.363223521128 223.429738319185  
233.20900339048 216.582862850259 143.795399778897 228.212753830905  
198.244854812728  
ZNF584 151.459397907666 145.78573175226 164.659092629962  
158.272071464923 139.380610974147 139.892371997205 167.114291248266  
154.33224999163 146.240060512152 142.85695042665 133.397734409167  
158.36796888959  
ZNF585A 225.505978789388 240.283918204202 253.601378730911  
234.339913501761 163.400576719974 258.868119227979 210.960900130785  
238.847091900666 243.793465720264 265.174306663185 242.141362101262  
218.369954323686  
ZNF585B 152.534482748598 144.39135701666 136.308565710257  
139.214589768245 130.842257229979 138.558300898079 142.19728670565  
141.389330839189 137.453705355364 136.764881711137 128.611740835252  
128.389494971858  
ZNF586 307.597733293218 282.045333787115 319.018213637357  
274.974304050999 267.67093646012 330.908743070095 520.962651968997  
361.516275756449 374.872358131797 307.020265874666 251.224369831275  
323.244664586314  
ZNF587 141.461435494985 140.728126380228 134.036236880951  
134.147586627141 140.110258415883 134.02083946631 138.246963115014  
140.258615682066 147.691011072898 137.660051943656 147.253919952267  
138.086270564406  
ZNF589 190.405863264717 197.981112645168 228.616558999054  
285.931444518474 174.045229095003 159.253029632045 152.840202260007  
160.870390779084 169.940177050294 149.731486951892 161.8627732644  
144.64757514198  
ZNF592 151.698385134218 136.863435564225 148.400915576999  
149.687372584136 175.350734537491 142.154646805122 142.073529553425  
136.737964237109 146.728881202697 144.820843146628 170.878962027347  
140.085359251038  
ZNF593 483.067471841953 599.926717145115 379.476768908492  
582.642500194997 2418.66999907188 2197.44189747261 1823.53870218167  
1372.63540073207 1082.00448164658 630.176145684641 1312.75601392984  
1034.68475089075  
ZNF594 230.469548500304 232.250434241457 269.892633574243  
219.044271073282 172.604689611475 158.528301072565 181.036375971015  
178.166289723365 221.916075811355 177.976550224863 187.057683141644  
222.394280571312  
ZNF595 155.868109161417 133.419239158866 127.330523871944  
161.496700767073 142.097126256137 159.867178630115 148.278828579424  
136.897888440409 143.451080466172 133.158570377793 133.11040099808  
140.041977349982  
ZNF596 145.239119337981 135.487310036251 152.524106827617  
141.5311434224 138.19108838324 140.719388544476 142.788848338402  
146.931186694342 149.339492984504 125.12823219142 139.186416741431  
143.45723206497  
ZNF597 137.096785940897 128.680762033378 104.739307327595  
123.955819747616 118.773864607553 131.498890334548 121.815538475678  
122.932745723044 129.765440519589 119.060186838239 174.832495287192  
153.705394500855

ZNF598 376.007938436483 375.958347293549 389.800620731411  
402.965083947376 635.37511798786 369.592501881153 403.104188866804  
393.707031354025 388.887050777137 679.557656724243 408.758021864761  
414.200068430184

ZNF599 139.14544832776 146.552529779774 145.380971596154  
152.31268334586 140.18668846839 141.587109176431 141.342216963124  
136.147810636915 143.122278808091 137.7872481668 146.814457904682  
139.981905225845

ZNF600 859.547169028149 794.636255515909 776.98412594767  
909.727616721285 213.097664319741 309.538690289233 247.622351589081  
266.19823384117 222.736706411035 261.922485502971 275.696829424061  
237.216435972201

ZNF605 205.679992893049 220.458449424062 203.960838492793  
210.942865876533 178.488874074222 157.295602588814 181.876635968785  
194.125840053843 203.524150518033 197.543089645432 213.584269089596  
185.100455193182

ZNF606 189.758013811338 210.605864685448 194.529045934216  
222.177290763736 189.307823427362 148.069725041021 158.080749926756  
192.095235288818 247.236004734567 148.147294674218 185.830435830545  
150.105503384881

ZNF607 131.580226088647 139.289968250444 142.804411455413  
139.344344562134 135.357424384319 140.223599881961 134.904123162692  
134.811625739766 142.073529553425 143.877226672663 152.148784410501  
137.237089899964

ZNF608 189.403934838648 173.071892362758 144.629350188283  
173.325724300712 169.649251828199 174.737828693216 164.784346867158  
181.668090319293 142.612035986517 172.084184539157 215.247472744419  
264.456926651554

ZNF609 294.115163083721 285.562276640039 232.276667029184  
322.302219773624 207.023221559302 196.450308368198 229.284931844047  
181.022635001204 230.201464318433 179.932404140099 317.244256751418  
239.572670410818

ZNF610 146.696029753123 149.707357499252 152.350537364705  
176.019082929386 148.907136936731 141.174971007547 179.100368312505  
170.108500366942 176.440625367948 140.223599881961 159.815932985135  
157.298181833321

ZNF611 158.76356962428 151.206697943841 168.824578400555  
153.206468539619 162.592306630033 165.537853089052 167.395369670065  
166.587100972754 162.320894555337 146.455182336561 180.54209603289  
152.719997757291

ZNF613 206.027235767232 222.051005238856 243.589099648895  
233.536023295039 226.055406842613 188.995551740427 217.227441947056  
247.111032124864 231.63127072986 193.777175793218 340.098306132634  
192.009562635198

ZNF614 258.964323941464 261.117845544884 284.272977025491  
244.350562866593 269.62298406345 252.548942594125 245.766885283797  
311.04252785157 273.197814995543 159.241573314833 241.944581086483  
196.880135762817

ZNF615 325.12056698785 326.525579400607 442.493108530222  
310.365203383647 253.327404004524 257.132618311227 291.839070398338  
343.571296297462 341.128917971124 215.81995779019 278.428310548805  
227.209630859635

ZNF616 160.331940529151 164.824914851636 145.780927034516  
149.797850183848 168.974155750959 141.858928084825 186.866029149035

217.910445051307 222.848935978648 175.186435016433 190.843795579234  
157.073850948746  
ZNF618 195.84531580224 179.109090120497 172.468440317443  
177.223953859764 225.438177833064 166.754995454382 167.454132228122  
190.165771406362 198.815448428294 184.832531598928 161.603317039244  
192.512661648653  
ZNF619 150.564099989221 185.493554506958 146.782830477983  
143.601057437842 144.071652839025 139.6492947529 157.200582422961  
152.748807709142 152.254519859308 155.550532734718 125.176747824384  
142.872683795338  
ZNF620 111.691973758042 122.180428703208 123.259322051795  
120.925930409474 115.531710316716 112.867662941811 120.37619371663  
108.386545220984 119.057157701097 111.820208385514 123.513588004371  
112.190904058889  
ZNF621 362.795691170335 300.199170426996 330.758879244143  
316.409887372431 302.272304483941 276.79778275734 328.019503002384  
358.217145707718 478.293220151258 234.768591315095 280.246711704036  
311.612118247493  
ZNF622 771.694853062033 818.761934233826 831.610501402173  
801.702878226247 821.862271569917 956.76879975749 1018.80178630497  
1236.56870367797 836.613819700658 955.143610867351 869.245621105614  
760.070180572621  
ZNF623 146.323776429268 136.176688025337 147.245636620228  
139.130560988108 138.834309377225 135.964630862223 145.338156577438  
133.43194756868 148.654099017805 137.159781458748 153.140087873773  
145.015434711984  
ZNF624 168.552631639996 161.979914539039 194.212177449077  
184.518666956721 163.356993518952 160.488225997984 163.108825245937  
171.835438335216 157.519633258844 153.774548290902 183.50553222647  
148.600270795407  
ZNF625 147.547944397578 143.784022884904 163.653662369257  
140.641308444844 159.820341130737 146.11669387238 141.831014532008  
149.689071018094 160.511688319771 149.664506761117 141.521742442341  
143.823368276815  
ZNF626 180.047231265069 183.998458233995 206.027235767232  
187.472028627511 585.234286698678 160.584760930779 560.602047253306  
161.102731941183 151.234397206563 155.964242240771 428.569462312363  
341.2887754025  
ZNF627 353.50447714719 354.783364481955 354.263934274937  
329.604568691377 388.782774926005 629.97342429259 499.683188662742  
574.6506349984 388.710465457313 274.595218795127 540.005877322817  
435.983803453746  
ZNF628 156.06439656393 171.221972336784 187.50236021149  
193.801858215025 210.478088018501 163.868129628544 160.773510498005  
148.635174393031 161.534421340752 181.558764396201 146.604519441812  
151.736824723671  
ZNF629 251.959823608766 292.893332413185 225.065765924246  
400.550044186372 286.133496092533 214.200081541057 301.546624239855  
220.079379312889 229.31486399741 158.364031234356 226.506852362359  
231.890885094917  
ZNF630 181.889592946523 186.007710175103 206.548878646452  
167.692053273833 195.447966116819 178.696562301918 180.231462528702  
194.186994486095 158.989652405732 131.023892409073 246.748589597262  
173.132747018514

ZNF638 312.845219991659 298.460273458181 258.25658838015  
250.18189549573 239.079352337243 234.28146549561 318.778978094743  
251.665539319612 242.221324619171 234.550692915716 378.308562999445  
299.33156125224

ZNF639 168.205277839471 147.138814313885 170.692146255416  
182.560363283264 162.695319777455 166.958831664154 172.370108210895  
148.320310040998 160.791355483048 169.852769679312 146.785478478701  
149.441862883882

ZNF641 391.039114500903 419.846584903512 265.148061007894  
361.768552564027 174.323881548679 183.619184925353 186.66469040433  
166.526875572556 183.815810733176 153.748035612441 196.207631868755  
202.214495168688

ZNF642 176.176392369178 173.577723566555 171.816841286562  
172.412059174046 175.98210925643 170.561596645385 185.691922436569  
185.071775840607 165.239214141562 172.486839924297 165.576758218571  
170.784229026842

ZNF643 147.973274498131 155.289242914919 145.704057360697  
152.915692742755 174.296028319781 155.449724554217 153.131271100637  
173.87113073582 146.044279076949 167.250667092211 155.516697616637  
153.582185523361

ZNF644 292.911761762431 271.770138565186 298.256131536504  
250.577945492981 208.713555471888 286.703712311781 275.101766414328  
246.850599569231 223.429738319185 224.008253365957 251.161789722751  
255.156682699288

ZNF645 145.770601609392 146.040995022257 135.217240511902  
160.435789207464 154.479733759712 134.599629045981 127.261349543394  
129.70974867852 130.362378233288 159.207567680134 111.381427322188  
140.42579083092

ZNF646 130.776213987522 135.956116718089 135.790955294639  
147.858339902055 160.511688319771 121.065278765151 145.380971596154  
149.744358230709 146.608010450782 132.645196037302 159.406462604758  
127.088916295784

ZNF648 118.684077097437 109.255470590389 120.114423236962  
103.168665937677 113.597215383696 115.600308687778 108.167670899938  
104.896224175106 120.118873350459 123.291258843371 111.243322115126  
120.100672968415

ZNF649 161.886342770305 171.924364939807 150.19577351885  
152.14012587515 206.236303011662 143.884263862698 120.184782039538  
174.441287575034 155.673532440475 129.450937831864 175.176693060261  
127.139903623331

ZNF650 239.452559981542 216.24497587588 310.365203383647  
227.587590278412 245.489266602897 353.674560414317 277.000882284125  
244.440857688518 260.746952459282 249.524956682907 240.878804911613  
352.945088028205

ZNF652 4592.14655702906 4175.70090899755 3655.63669142687  
4520.84412831414 857.55777793754 4773.62220024088 2162.46602203822  
3586.00189997341 2403.42261883515 1927.467713716 4124.03779111916  
2572.01353724341

ZNF653 285.594100976705 322.302219773624 282.561381978659  
354.405235378302 333.745543022749 333.270203737291 282.652193666078  
285.355815566148 253.933478547515 287.703569453502 317.273940108333  
259.184713471619

ZNF654 175.656204695951 167.018380617832 181.277683429417  
145.880661952783 164.841156516242 216.033564783918 217.202541167691



180.142758394321 173.995889755792 212.730163981978 207.368252249039  
211.012142461725  
ZNF655 139.444577046509 136.71484425521 142.19728670565  
142.859971805867 147.78847662997 149.88598449818 155.164238647284  
135.736764623155 146.434716985396 150.503278880269 169.661107080542  
227.558441474918  
ZNF658 162.739253457398 167.278879415171 175.767556472012  
142.261639670072 152.868787961804 153.418095627352 148.780775862239  
168.437049123012 144.375109087466 150.677852949794 200.964306455257  
173.681078272467  
ZNF658B 142.658562927154 150.519775958405 161.979914539039  
144.092864444802 146.580787463084 157.468934439452 152.11956441072  
150.308048500142 153.519207482423 148.188717941032 175.019580368717  
143.667207351415  
ZNF66 132.363645381743 130.097543328456 128.115993005977 134.998632527009  
149.589901372799 137.220718873614 136.964780183468 135.217240511902  
130.01207836961 126.416290818296 119.9652990395 132.981346767415  
ZNF660 137.605244950708 166.20327698517 157.742948919213  
143.947729578484 150.620603731907 160.117742879282 145.917220112846  
134.522715664256 145.843639385175 140.865990571023 131.997666258618  
158.185593294878  
ZNF662 154.433679792749 171.816841286562 145.002309193867  
158.712241098927 195.711047893396 137.239088768176 120.611442477736  
113.791585365477 184.322250984457 112.340161674529 252.138168292964  
163.18585933431  
ZNF663 145.85414203374 156.481871341275 137.086936444421  
150.503278880269 132.975603230163 143.759171254761 132.140547119679  
142.736148814019 149.797850183848 141.208106961875 128.601885372662  
148.153776704837  
ZNF664 162.026757124868 168.570133927038 248.850686917567  
159.334165651951 151.669421563954 290.389345090634 219.080383154432  
281.119138040097 315.182134426778 174.229093061024 151.367402326399  
264.8472508692  
ZNF665 149.659505956629 155.086559474139 149.584582050615  
142.995274641765 154.47187360425 157.78390301218 140.435724944447  
147.384050169545 133.509538648848 181.735072060023 113.262357892613  
140.911080286243  
ZNF667 161.470611189347 148.47415004128 223.184064606222  
154.104321553472 150.380814008952 131.162118170837 137.427338867944  
183.604011732066 210.882890077598 141.642547489983 165.080825814849  
139.505864135281  
ZNF668 252.197271817794 240.497413647633 228.212753830905  
315.3930052781 576.997804865103 377.024120035829 345.062426573519  
324.949988230276 328.550286726543 226.020769172424 291.056913909578  
308.803322140241  
ZNF669 651.675427664911 656.867138022837 521.83794739314  
593.639955546556 239.24587884234 635.038752622494 452.843213944986  
588.334329592604 418.772484676858 385.238961394234 487.358720934063  
580.859914041323  
ZNF670 161.26917182967 151.821324922628 148.574661934068  
143.086872363116 153.156264091925 179.35113214277 187.881334544018  
186.886677174192 169.933706225406 161.26201213997 154.273953018148  
163.67719444924

ZNF671 260.157440518033 253.580286414227 373.545629693667  
272.351487980415 155.46017572591 157.231166272318 158.699778625671  
164.126980102525 201.004491067972 243.589099648895 308.38513924253  
200.712182818203

ZNF672 463.99922423125 511.547907091166 420.160939829121  
629.381791489871 752.585744322608 375.255445179952 532.063437013967  
568.555967950896 567.465201338735 410.138738410101 405.469705787631  
524.541494680558

ZNF673 190.255797389524 176.245698601389 196.310746973798  
180.035652063942 161.144841967903 188.131876231735 181.783275804424  
195.474525582555 182.310140388705 177.333305785248 179.525651423361  
194.529045934216

ZNF674 28344.4547971342 28193.3833726673 28193.3833726673  
31402.6950316226 20647.6275450554 31402.6950316226 28530.8435957612  
29868.1819370827 28530.8435957612 28530.8435957612 16925.9167115963  
30573.5859783923

ZNF675 140.372463604232 136.683683776616 135.120878931851  
134.446758753426 145.487783396345 144.273011517032 166.289763097913  
161.849023343715 136.948039394935 142.290253129837 150.682964448325  
156.798431595608

ZNF676 153.690189121681 141.38749436393 148.090431893307  
157.121142139431 156.605568633665 156.866867371872 138.119788738226  
164.208044717557 154.379788206936 161.708130705995 161.079169854907  
183.056707813352

ZNF677 119.651470884046 118.909153405102 115.194730717797  
124.766436060041 117.883635746379 113.687931899298 128.576310682958  
118.787630332168 114.278113876915 123.015371659847 138.717541782317  
116.07902130325

ZNF678 124.650711299942 123.952494134263 118.397482835514  
122.368581795931 118.646119379542 130.147848418265 126.471321085803  
112.758617084341 112.248047602652 110.190708230962 104.633603136988  
125.044092929562

ZNF679 130.268322464805 151.216992571364 146.606442726047  
131.456697863268 164.497445195378 178.377461551319 235.133284525241  
315.689865927834 170.516743115762 164.018470368389 244.627091189503  
223.339132121796

ZNF680 193.412827246366 240.706548931192 187.082082429597  
228.349507726225 283.982575660968 240.465165615601 402.213774592085  
420.446810988909 244.73233791067 190.098509544816 189.872997882033  
405.322847383739

ZNF681 155.471795004237 146.072585331002 134.519697269443  
145.193296081527 182.275998840116 156.546769952772 188.724274062294  
204.914390718161 154.21623304309 158.774910841987 216.290279815413  
170.18781660707

ZNF682 4621.99241522677 4238.41681589316 4520.84412831414  
4299.06288109563 614.775559038663 4016.35381420598 1818.92700816112  
3019.57419253979 2299.23805014176 1772.75453735112 2982.80580616089  
2282.94927629821

ZNF683 146.155809402461 158.890522392445 144.73389393695  
179.451637129672 152.573063322741 134.485835304676 129.664016819143  
153.51550202829 157.189041157784 171.924364939807 159.354364289526  
142.466067016788

ZNF684 170.069291215013 145.100964170053 162.427505889157  
134.750046135498 160.331940529151 168.687845035401 166.2468445883

189.840366340622 163.77183097588 146.934990457666 156.237282338037  
146.058477355527  
ZNF687 145.289151849318 146.174492025087 157.337193457189  
184.041062308263 215.194909819764 153.028658323116 138.959040014432  
160.553214127047 137.102353661381 142.882391486465 165.139423820186  
143.031909545902  
ZNF688 196.566937667522 213.215996114827 211.555248754731  
253.697419495959 248.613373429151 217.684410907748 207.123420880185  
200.486683704179 180.113222861966 199.037998955485 220.742788129847  
170.417054311946  
ZNF689 593.462634352052 506.165100641525 551.92688162618  
512.723592291378 460.807117177285 609.939982655706 580.996071040561  
614.094097408035 467.777995124655 373.452370692334 632.843164522867  
478.699172220804  
ZNF69 5734.76405709934 5521.74673982411 5688.84918819457 4875.22637286719  
726.000622725287 4327.90939653054 2007.0121037284 3055.80298721424  
2041.03024136014 1722.26954281876 3793.02341602102 2421.87041217217  
ZNF691 168.04198447141 177.802767772786 210.478088018501  
243.893774595317 184.157941055948 162.955366577418 168.958694643382  
165.320977593677 155.590197324062 143.716377201615 181.578228610334  
171.941887376462  
ZNF692 217.050602253281 218.773153183388 221.297127685676  
227.668046559074 231.146155346291 237.216435972201 338.129250886594  
266.057472924341 213.123453925578 196.16056297158 317.163768837813  
351.292682758926  
ZNF695 144.290286088611 147.1476865809 141.442825487243  
142.543569032033 161.134322621805 153.801971958265 137.044079235724  
193.336246844237 143.322199505844 148.01816554072 139.568610307888  
147.185378560761  
ZNF696 211.085778902367 213.791379190359 267.67093646012  
265.43897208356 385.678901612324 210.550995170071 275.996693627151  
281.44159425243 307.16835174775 241.599271777806 222.675370226786  
269.892633574243  
ZNF697 141.626504154989 148.641780441227 140.736051985112  
146.281429685059 184.569063297206 150.711857623087 165.333608076984  
148.983182193411 163.22638035169 154.469132478321 184.071078414327  
174.284268998257  
ZNF699 171.718906292137 165.430811083128 183.64389891975  
154.173439471404 153.964765831852 164.841156516242 166.558080305926  
150.73248190848 157.507108643575 147.867815214392 173.182013165174  
177.812335593522  
ZNF7 231.728984785324 223.154771092064 237.420951138877 232.046814892685  
179.163748161358 223.778708427552 274.974304050999 291.577778800314  
317.244256751418 281.846246549202 256.729891423908 300.765518378297  
ZNF70 121.157614971438 120.675356009213 119.252737868132 123.960761343425  
123.964042357475 120.297848408451 122.921245774755 122.362585067453  
120.744994574029 125.688786329422 132.8310947234 133.475605284211  
ZNF700 303.005912224195 294.368406238222 342.769825986756  
308.726328440723 247.236004734567 389.500591134279 374.718289636553  
517.23393716516 358.217145707718 269.530151236658 527.597948979568  
408.7151485563  
ZNF701 157.619627711954 160.520677267863 167.373416675264  
152.244018820259 208.257420634745 151.998942684339 212.107842040568

214.684538620841 231.600532144945 146.887506793665 233.36028792331  
190.5930909277  
ZNF702P 144.023798119335 154.025625092599 147.973274498131  
130.592061896237 154.954906872501 120.984641102879 312.808044035117  
207.890408761692 275.696829424061 209.398724613377 280.595515386655  
191.754626760061  
ZNF703 154.373739162815 159.728097053356 149.377153449536  
154.816213491233 407.615019710707 182.907444581093 152.225646808517  
142.558109812638 147.479390172796 141.482344048665 135.393901125889  
159.199045715212  
ZNF704 137.702802090925 131.77099316122 130.967476533254  
135.131890100292 134.187456260969 108.543795408713 117.144778357339  
121.118933682515 133.037138438863 113.597215383696 125.077260389449  
122.162753353761  
ZNF705A 141.5739152922 131.521311288114 134.172033051676  
138.60849268758 147.664505309713 136.156548919515 127.975441922402  
129.797601100832 146.865904106038 171.941887376462 139.51836763472  
133.661553334004  
ZNF705D 141.834582245454 138.188522429661 145.426171336045  
148.461172387171 156.243337414127 143.637018777217 142.413527544686  
151.70917316194 139.350622585937 133.905162024888 141.66312605042  
144.165277164871  
ZNF706 409.477576085245 382.744523022686 328.431289733169  
336.067655676466 298.460273458181 336.5543056115 229.594081405784  
207.400490077106 271.713695056313 246.63579788514 285.768837438859  
195.438353051306  
ZNF707 154.64077390011 145.064773625365 166.746037983859  
193.544035570799 182.763057221385 193.660159482867 155.061749542085  
172.138554350738 168.418529261977 200.371280127668 158.179586948369  
160.990868498842  
ZNF708 119.119693776276 121.937556824952 118.909153405102  
114.155592351175 124.248997533959 135.585648980469 140.447933562667  
144.92594578882 121.567879358508 113.769815606191 160.099731578122  
133.220878146063  
ZNF709 121.459780480915 133.459221120979 126.941650500751  
124.025104622631 123.632031112507 119.319884675074 128.229729571899  
122.662260070778 124.910390240995 122.194493542073 139.117776552573  
123.545404885618  
ZNF71 142.470799054068 125.071387239411 147.532747354296 123.410467384598  
138.882483367088 133.215151497536 135.341892490559 155.507030276749  
145.858537779106 134.756377802151 162.274094333189 138.640919060725  
ZNF710 120.35956894661 110.774802298005 107.993707827557  
125.558877611499 111.086170834553 117.199217938531 101.530900217921  
103.448244268961 107.013012418356 116.969799327195 107.638492587723  
105.221735747452  
ZNF711 129.413729619216 131.404001006643 118.966992191892  
126.080780033301 126.042731009527 123.096995744616 129.338551879984  
132.894049694258 119.544004279354 131.406366653787 119.931415360373  
137.85618381155  
ZNF713 163.215507313506 168.061346742356 183.744959461078  
182.152956182443 158.779261405573 163.799748670842 154.061101136889  
162.812665683603 174.389706515542 181.400788152988 183.905926269285  
166.655585160657

ZNF714 119.049388179929 121.419301042072 111.041656398985  
120.122719226116 131.58537948771 148.031899566208 139.502856192876  
169.612203020686 119.631847624882 122.442590463781 165.752558888845  
129.680406696779

ZNF716 191.241000498118 194.029961195972 205.322733011516  
185.661496988658 161.412427590994 171.86363382331 191.795952536469  
176.650953513413 164.791545858875 188.941900997781 171.414869677333  
167.357570666817

ZNF717 159.307394610466 159.688862680139 180.814610631281  
143.710449544388 155.049051256459 199.980312703646 169.888264971936  
169.332207863684 190.348359536057 191.467626362851 143.745594527046  
198.205113187281

ZNF718 154.710000519109 161.911468506919 149.190528937822  
158.503284955019 156.136962310077 153.597557478169 158.249743182741  
153.888212689508 151.295855278218 157.821491577808 149.168758815526  
185.17273221366

ZNF720 193.16411905957 151.773749014775 177.94501172269  
156.293025312901 152.620244087653 156.490654498766 158.92538634742  
175.101284960252 149.536681241497 137.065315360321 153.100979553727  
160.825408895349

ZNF721 430.94199035855 459.973764138144 397.861172312706  
348.067061666237 258.727309442475 359.329520507158 420.647394044431  
709.778171909457 642.255110250493 402.564148020948 383.682951666155  
417.442660073269

ZNF728 152.209234189672 143.804903119745 151.690538050817  
138.981712781568 149.269417496936 138.625680450198 167.604959895451  
167.547551072373 141.653917856148 148.342114514468 169.095270479344  
151.98710761363

ZNF738 13276.1713779481 12654.3779830648 9881.69734721233  
12968.2945749 1582.0221231161 10661.2216586049 4318.50925204407  
7519.94306346326 6105.64727031051 3869.12225821096 9044.54885739666  
5981.08862268291

ZNF74 179.35113214277 188.131876231735 185.519000961898 211.395593720534  
203.544294328395 174.498521167568 178.885625009973 181.635664531851  
182.624130582754 172.157660228549 195.88263399968 185.717123241832

ZNF740 174.155599133789 164.625407872446 159.98205335759  
218.433524126584 181.247766545135 169.45559708224 152.60462513339  
147.128805198619 175.148318011395 162.808270845998 189.552385508772  
171.345989796519

ZNF746 378.695635790714 386.917038897322 417.865461351681  
371.457568934695 579.318912497928 518.281245498542 454.854528472591  
542.267204956846 436.982960786839 498.334266735594 305.200911653347  
618.140160251927

ZNF747 169.695658738618 133.297361715205 168.838723365068  
154.520935683104 159.0794075765 128.348910964448 159.29430824799  
139.342430217926 140.208983238283 143.112205432731 144.597060118959  
143.939522733945

ZNF749 140.067809125008 131.926504315744 143.416816860089  
135.309431186017 157.394035451151 133.441783287131 145.183463058696  
138.783017264895 141.908791151061 152.342712570625 149.933919274985  
156.567519536997

ZNF750 194.979795724712 276.32528705384 194.88319590729  
151.409290231274 470.42403724799 692.53483413403 639.38881853171

971.170460915918 931.598413783099 2853.14759681683 958.005138077899  
1039.46136549795  
ZNF75A 210.448904052352 255.066583469964 224.335742510577  
270.360397503276 197.231408726321 188.671807443641 221.635333304767  
330.143103381406 243.308625792448 243.793465720264 303.051124835907  
180.096239155058  
ZNF75D 258.21341068758 245.195406638979 281.369059516242  
257.338950719432 248.16594076495 238.400565506288 262.577672828611  
234.768591315095 248.03801051527 224.186573847185 228.270158363878  
237.825857080173  
ZNF76 259.426050921239 259.72035004624 251.224369831275 292.317998405609  
285.882780066861 196.144420005021 220.876114717642 201.152639979358  
185.974598267418 202.061887608293 241.557810100265 190.904614772409  
ZNF761 168.660907237558 143.770808464879 183.513101761782  
147.009325721272 169.722974413341 206.113290588613 207.560911665319  
274.494074082359 338.510045856515 174.576132939661 177.862368731138  
158.915858403237  
ZNF763 280.292616101827 263.64863646012 310.142754559096  
285.172001915966 222.415704486709 209.070372320593 184.25384366282  
192.465510013851 190.534176839652 169.077657790409 275.972447693982  
194.202977693583  
ZNF764 146.626517077288 153.209409960324 148.297939240474  
148.932696684374 163.960242712692 147.274945970072 137.623019849539  
147.364301916733 164.678646890649 150.682964448325 159.798024189461  
150.694215349678  
ZNF765 132.125545886181 134.310685502031 152.935963398921  
148.812015298003 171.967974673053 155.05329654089 173.10229478279  
167.201570648434 157.337193457189 147.436408919939 153.279026396412  
154.951136632863  
ZNF766 265.866465528654 256.394563537658 287.751093664085  
240.054164412429 320.154891655397 252.10470581893 338.739180103373  
402.140437036706 360.39998507367 239.73396414153 458.440488401029  
289.257002046658  
ZNF767 355.048838683854 338.075238647592 312.224309341171  
391.326200093611 144.731299077209 202.193338797533 200.127994198329  
192.314484368435 190.809584998617 190.318957029666 247.550312458738  
234.301520483864  
ZNF768 280.494088228226 256.99019407912 272.351487980415  
272.927830312746 330.241479004885 184.611146047556 238.745953695925  
175.148318011395 221.975219056555 181.70730090195 245.915473236403  
206.73292907905  
ZNF77 136.303510503231 138.570150372729 135.532820436394 133.995928435022  
159.771672778698 175.663960113118 164.295628750438 195.816317534388  
147.614293127043 139.85010721496 187.550461418888 191.777253122672  
ZNF770 407.615019710707 458.782864873657 543.389747823877  
439.616817413027 300.047728281275 322.614169214764 538.369868115137  
361.904370514991 522.17701271254 511.891269255193 461.088572554864  
444.082440002333  
ZNF771 171.40549153673 176.66175597182 213.914599384797  
201.49630027392 154.816213491233 186.813888805838 165.586397236489  
160.667815093292 151.369387642458 149.714982846365 151.176697752603  
154.076216899447  
ZNF772 150.134337895481 141.822974252935 152.272198017355  
145.534520042669 142.444072809204 136.859366444351 150.28169442832

184.602704530362 164.647634120888 149.597396040729 195.230219990395  
152.385014030957  
ZNF773 407.589300080181 356.323554000768 419.126814511305  
374.033009122079 185.41739522833 532.235193634196 301.747788416496  
392.582612044755 373.803772983872 308.726328440723 481.751102333172  
283.760131847707  
ZNF774 140.870849757111 124.446264376282 140.806935772116  
139.293775885106 144.36033726557 128.417571004317 184.862871179765  
127.31283918221 159.090982014161 138.142193489481 132.752401872376  
159.504327477065  
ZNF775 213.382179917193 271.287767448621 246.112720011613  
372.94852645418 231.0814970959 148.85250180736 188.45479937455  
164.448110885609 178.270849389719 158.030237507443 165.376358421533  
150.213657393257  
ZNF776 146.660826209767 161.891809608511 148.443549012341  
134.592495777159 141.319594283071 158.425950902309 161.090443294391  
163.607125532236 190.700515036197 136.351332391315 198.135240691225  
157.631978594005  
ZNF777 311.848379951974 429.268202514543 353.187829498591  
488.505191823403 630.894382644903 332.885488115858 356.376890469558  
325.999687273862 311.375563161772 348.921877633633 306.946103334814  
367.289651112346  
ZNF778 159.13662975347 160.625367261779 159.177303894223  
156.333133322672 166.730974538475 154.296467085914 145.136075215082  
156.095520355029 152.75709431059 160.632809953993 129.902965506953  
154.273953018148  
ZNF780A 122.662260070778 124.625603721372 127.833653828539  
129.336402686549 133.475605284211 131.792339956719 123.964042357475  
126.750850861235 126.686404772601 122.072091994548 126.121516564343  
135.2979041294  
ZNF780B 135.556943919872 141.992490695142 146.739552899981  
145.770601609392 142.542648587888 138.345393524161 141.86836086844  
157.87020867396 138.026155846749 158.712241098927 126.426212216646  
142.729945734027  
ZNF781 128.973904070983 124.370381674692 142.995274641765  
133.545405737639 125.624661345169 122.382304966782 127.811923445503  
139.841822983821 129.522339467532 119.198789189881 148.678869698203  
124.480385254916  
ZNF782 152.573063322741 142.630563791102 154.598520288855  
139.42531690926 127.123123583856 146.763046352405 139.602168254761  
136.882429810263 154.828782972852 141.241717979079 130.988294699995  
133.469323412904  
ZNF783 251.546290552828 275.584858082096 199.037998955485  
293.482512212153 283.556453980797 280.453895029319 250.676092725829  
350.658722333252 236.470206707351 157.013200713587 203.524150518033  
261.922485502971  
ZNF784 201.661941695238 211.135364208221 275.696829424061  
252.10470581893 297.419034136005 218.487334022128 266.217879616686  
229.26243866226 250.885949055834 212.643559782754 212.312154721246  
210.043556816529  
ZNF785 196.031541155674 174.383193885933 210.290500215377  
208.507486041165 167.003917876371 209.984545596312 197.962159288376  
169.077657790409 196.287131027947 173.353648927895 170.223509007961  
192.022864170934

ZNF786 4682.62607750437 4410.68280125001 3664.38955037715  
4251.82554412383 587.893636997642 3136.27991502603 1472.54829263217  
2309.63504858248 1570.39362935859 1333.73334006986 2305.11856249143  
1695.26858186096

ZNF787 494.347792360629 628.710901107436 581.191693771646  
849.784051720996 1442.94175124818 671.563789496889 901.197085099854  
705.020444579319 1320.74943817958 678.365575489532 640.029195821436  
795.037968409957

ZNF788 178.142393629606 192.009562635198 167.965981130329  
263.509066170434 149.283495832731 145.03804642447 170.158189150422  
144.81320329947 152.910433120981 144.868337748544 146.910471989835  
141.476041451832

ZNF789 180.142758394321 170.992074907355 161.83241639654  
179.220691178402 175.704031930103 203.586310608403 190.309453030884  
226.595006724068 189.482046688226 175.38376293575 196.310746973798  
228.125521373477

ZNF79 147.724021517135 150.72014060286 182.118544602205 165.307808075027  
133.065366727222 126.902441495413 121.049927973123 133.063422581428  
141.892214695902 120.675356009213 139.260868989409 115.702900810606

ZNF790 169.061364889307 183.979513272793 178.885625009973  
153.412469512967 130.036744891822 165.186696781985 146.612602970963  
142.892198239879 136.142380560596 146.782830477983 145.459919416288  
150.657800679032

ZNF791 458.953009417683 455.08515350006 511.891269255193  
401.584032365337 177.508603290389 451.147418314412 338.260976633501  
309.538690289233 279.000687630846 290.502085667398 307.597733293218  
317.121202656311

ZNF792 156.589829166493 189.192494970145 179.923966067226  
195.630643168176 211.720536220806 391.400480065 309.229066204308  
219.709231012465 334.199307788576 172.722177339418 404.366325262322  
317.00629920068

ZNF793 132.813199199389 122.561285351587 140.10798818623  
125.596067857941 142.169951083733 127.442587366678 139.361120875198  
147.920946479942 121.170340423391 141.547112973262 141.880044424342  
131.659187927328

ZNF799 124.186557690235 122.428943658306 134.005402534879  
131.166819048309 119.366599958278 149.308475163534 125.851611268218  
151.492236411757 138.50252234048 130.392575279055 141.266129417042  
133.370488470007

ZNF8 151.821324922628 158.473244125101 174.866036336378 157.148880624381  
154.033776287398 145.502055020513 163.769959129611 144.217621961908  
170.23937234395 143.313605534609 168.878645908397 158.16210235723

ZNF80 187.196424491482 188.308588359317 197.618757939729 184.602704530362  
181.261666651301 193.98814423456 170.684848540493 172.169129806643  
189.816900281053 190.405863264717 168.744610747563 178.939268046323

ZNF800 277.946395491073 275.101766414328 254.065327837176  
196.16056297158 314.221257518059 363.539983343859 324.203537490975  
356.62074247786 290.389345090634 333.131139447511 313.351441953859  
369.974231530826

ZNF804A 134.490327004118 144.068734533254 162.695319777455  
145.621384219688 139.395743826525 162.766038656637 126.872912960681  
136.977435235496 151.71942719041 139.883360543042 110.347631909888  
155.98413216883



ZNF804B 123.735827460404 123.077592992679 120.397683153445  
123.75974844367 129.52578899011 128.449200385351 129.612536218578  
125.2051300372 117.561878567749 122.882799858239 131.967245387861  
128.346598756853  
ZNF805 203.553696099031 210.448904052352 207.173653740239  
187.796440205485 170.483686891321 182.310140388705 257.622317771472  
183.937484597232 258.964323941464 183.493455947795 223.722742062251  
196.450308368198  
ZNF806 139.703304553486 124.480385254916 125.851611268218  
130.95176570982 136.225792549383 130.548611758921 137.680019787902  
139.39112068213 129.497266827284 136.463867598256 125.974463216884  
132.890396520305  
ZNF807 148.342114514468 178.766654213173 163.868129628544  
170.731358903019 150.215811815246 137.632470240792 163.487737425232  
147.292241873554 144.825231501747 156.361037318986 143.546629073997  
137.563246867433  
ZNF808 125.079330440615 136.065134838221 127.476819912992  
122.508761687823 130.609596267168 123.891115326934 128.007359083768  
123.11447940203 134.89031458837 125.318166919844 137.926193455157  
123.161953011069  
ZNF81 114.143874572202 122.201293962463 117.781804727205 102.474380813907  
116.664031217378 119.261305304165 118.144109564626 119.894737403889  
117.781804727205 124.885950473434 137.144001915831 117.324368138398  
ZNF812 141.18490443471 145.291984088491 142.674671804361  
149.8919086368 168.180063344887 182.969563278473 1771.39155164347  
795.037968409957 291.914408947328 475.403662030875 270.293807247372  
137.100207190052  
ZNF813 180.022646625687 179.411426984263 199.077893147154  
195.946096353894 206.469040492609 232.344545356395 232.444867422559  
224.963277964548 211.736398352592 158.610249594568 165.900156600776  
197.618757939729  
ZNF815 158.147502554814 146.176240539176 135.75568942028  
137.201149245092 149.040720727554 133.570075399424 138.722672835109  
152.364417528975 131.378893655618 147.232015056035 164.043866642712  
145.628239642187  
ZNF816A 252.628516068724 297.419034136005 239.12905945808  
258.552964322998 543.810043433181 216.485113690708 686.923164688096  
496.218605366298 651.235249028924 215.950811436427 880.719593734606  
633.594811068524  
ZNF818 138.544053540799 125.801254883675 138.266328639467  
139.472008268541 168.830344627025 137.581659385375 143.013801508709  
131.114995025516 131.913786256215 120.757288533244 156.420501464224  
130.300169316346  
ZNF821 237.396466740419 203.642739476708 202.397972518715  
251.993821914623 189.044966519228 220.113261580385 238.400565506288  
188.952730860801 239.474937674583 234.063633889254 234.925852373127  
212.959246855759  
ZNF823 198.722993687455 206.502189514795 225.664432111551  
212.050953977485 398.075524915003 525.138476928759 672.862678078975  
695.321886304133 366.240941980786 230.161369375718 748.015452242839  
357.584458526365  
ZNF826 114.830474086443 111.584425166104 125.374764771516  
112.081127853476 117.374025543149 110.810963139914 122.312652834289

122.878790127038 110.688722702767 118.064858133264 121.752481757054  
108.683531606889  
ZNF827 657.77730563722 979.761537450366 661.545179083009  
1280.57297272231 306.773350448741 282.137282466192 399.248044997427  
327.811191081135 526.416479408056 238.88138498771 491.635435224507  
446.07651799079  
ZNF828 359.822784070765 399.476401949891 317.839512360245  
378.308562999445 375.539588956213 437.770841893227 302.069236363626  
375.767528676937 399.364160668615 392.365008240567 384.566987097657  
444.663812851378  
ZNF829 135.774569629738 132.933035878334 141.797497681512  
145.96012463103 132.965467229606 141.232464220879 147.677900030844  
136.08297876405 137.574131495849 154.24500773656 133.376631703373  
133.699547652179  
ZNF83 386.544913399837 225.005311517365 343.417041721907 160.989242461839  
237.940015617254 142.073529553425 407.957436380989 383.503040287678  
454.235121917464 309.658122422202 471.510683045651 320.154891655397  
ZNF830 154.239755912437 164.241874094897 164.15288821931  
195.711047893396 189.509062639279 160.914009756867 218.314136992677  
167.629008083436 187.167255451988 167.906766146651 199.854728619468  
173.225064625094  
ZNF831 144.351763882823 147.774588146924 138.709991561675  
137.384815877899 143.541810469447 143.810050834214 127.736712231221  
141.500790455788 157.466686487471 134.580526467375 143.04129238495  
134.457932303561  
ZNF833 122.223184326586 112.348094614855 118.761737418652  
125.050945917101 124.571807093748 123.700076467648 119.746227888415  
136.434045183143 110.966212705086 117.728410015076 124.522974214212  
106.285472845323  
ZNF835 146.40033464957 142.139331321085 143.06806126472  
146.079727388849 152.57040089034 123.055210862247 136.878656455606  
142.38097037888 138.458816023289 127.289269745461 141.518491890811  
142.643027992419  
ZNF836 154.04507750156 163.463191619941 175.044940252247  
156.684098441572 172.531836863525 157.200582422961 189.784608429624  
155.388752614336 172.230528631803 156.417000271727 181.593291870136  
158.241349852419  
ZNF837 156.126009063311 161.172420368335 169.184111483933  
162.168246402027 507.137104111742 238.509970054862 204.378245089766  
261.775269058607 263.606930507829 172.612152484322 245.378747269929  
214.546528079149  
ZNF839 205.861932396193 224.89911221799 310.075815009404  
186.447049658314 208.628626112623 196.287131027947 227.350260241585  
238.183096218311 193.052112923573 205.560952959537 223.184064606222  
214.617852048151  
ZNF84 370.227329649269 369.646624431062 486.047284379068 427.872407051254  
206.753993163216 382.233826557803 316.457274749526 372.81255844018  
358.415933397099 183.255119298602 377.593087606046 316.004332524937  
ZNF840 123.07559417607 132.194221038804 129.130212375815  
131.164778405297 132.416618775337 132.559118679298 126.369211783863  
127.299853592344 128.927103442679 124.45782375705 138.838795320713  
127.993841618875  
ZNF841 194.445463745418 193.589480577091 185.896304740844  
250.542405852865 244.514230664694 123.877609932461 238.724909152512

170.251197850968 255.527764534636 264.936739264566 186.778334749551  
212.854068610681  
ZNF843 133.906867716171 139.602168254761 135.747939020471  
129.878330410179 132.930042559647 136.293084080479 144.916193282062  
140.044536042073 114.41737808857 145.051794777243 142.282861913548  
133.095245865663  
ZNF844 195.608619642038 181.308852106289 204.113356572343  
174.461487057542 141.799236109474 147.176801913145 176.53912635694  
154.388776919015 163.868129628544 145.528676983944 165.954266127697  
150.484823814674  
ZNF845 220.379186481273 244.849563563729 219.192900411543  
239.24587884234 260.67310907387 224.224264678645 212.119922561453  
248.403014089812 314.486603134656 250.376178742476 255.527764534636  
213.791379190359  
ZNF846 145.010108826238 154.016622581204 152.974593669153  
162.416774743901 147.057116881846 171.545695383454 168.570133927038  
150.69097927373 152.42111372681 144.627784383455 144.439320591901  
150.868712184357  
ZNF85 131.234140286502 123.801380911257 126.793778645808 113.451566510208  
157.203304477454 123.849651946683 150.319052894567 158.594064857041  
122.644105247178 118.743966166637 166.722369066673 123.247698282967  
ZNF860 580.645924062301 597.795856268827 533.140740560189  
442.027630433527 183.657525723012 454.854528472591 274.70018535436  
381.4054004349 281.037762232619 275.972447693982 566.228690652783  
338.406266073063  
ZNF862 136.670253859184 139.809114250476 153.891667472876  
140.983230581181 146.764908249803 152.182968451691 163.432972512188  
154.321219471319 142.228042097379 158.726115143818 140.06989960847  
180.01471631205  
ZNF878 127.681662711369 124.058332474379 136.635413632094  
132.334666750573 121.425298866613 129.561012565141 124.568534983277  
134.408846338374 113.487357534546 136.175268696202 129.935532080325  
127.500754400224  
ZNF90 128.725044326566 133.985582992986 137.629855378016 140.918728758975  
129.382242021964 160.349557404154 128.574419295906 146.434716985396  
138.872536475067 119.257387524365 138.30326146769 140.74035966401  
ZNF91 602.480822390671 580.859914041323 651.759589129833 414.888512708716  
689.821785472506 614.775559038663 3177.80599774525 541.460843251764  
548.138527647594 422.973606694449 1758.7809492929 578.297031096292  
ZNF92 130.037840598918 132.822351718257 125.443242860371 131.951649373072  
133.54741488531 139.755211300398 140.190234214948 138.267726309873  
131.878155417065 126.484819755399 137.393871430276 129.499283650632  
ZNF93 237.734385188542 233.757965816721 228.852495818211 251.511405838796  
167.083758835476 251.472556189141 215.365809536522 265.536429548886  
195.078843867124 190.549084022965 238.946506103155 222.675370226786  
ZNF98 141.825162897153 144.333945716394 137.52653395793 153.964765831852  
150.52625734893 156.102877632001 159.009211991511 146.716053772448  
151.449690439424 145.26329339067 148.344941331885 140.345652629553  
ZNF99 143.303309656177 146.979988781462 148.478570934155 145.741465098455  
143.931400351525 129.431497372577 153.126111237668 160.892163220381  
148.353927712013 143.085022888434 147.893916750136 180.518621542868  
ZNF91 596.3549500121 539.125423322738 431.974037914233 560.180656219785  
411.603820288919 328.019503002384 1017.09497861942 388.096183735126  
699.550347374567 327.811191081135 655.665164535648 449.523996620257

ZNHIT1 1079.58110075176 1113.05943954513 972.902937649492  
 1149.90248188644 2837.36293710422 1367.19652160532 1522.87703817058  
 1586.00600118477 1285.54492194393 1464.04124596264 856.74270641707  
 2055.27692947656  
 ZNHIT2 199.01458214661 226.055406842613 198.631354372924  
 238.724909152512 591.013515828247 275.584858082096 302.381946749711  
 251.588748783592 229.933577323411 216.403542903805 301.871924474014  
 275.509805464276  
 ZNHIT3 519.829743770022 505.83860711693 852.099019968701  
 442.12886967939 837.603727062008 1092.33328323944 1315.66699943181  
 1504.15682715484 1250.58586679251 926.283018664897 785.599211190431  
 813.772804994191  
 ZNHIT6 436.155731212592 394.810886122555 464.436380568216  
 386.817736004263 699.550347374567 901.644194512187 570.533103778482  
 634.774041584043 513.292377117011 393.500781010617 396.126485121994  
 451.496617003797  
 ZNRD1 225.546125484563 240.561105692347 235.822266856967 220.169099923628  
 480.797281489891 509.292779821787 673.176084400831 337.935183275743  
 430.590533290315 372.088129459528 485.026081242201 638.287221212947  
 ZNRF1 121.212521750566 131.065633574494 117.790593990682 120.333487171575  
 115.101971719657 117.718893827092 119.107992692097 123.777133327569  
 125.443242860371 114.002925521932 143.52474218953 129.822926691091  
 ZNRF2 127.310437599803 131.121343131082 114.721282552636 122.985117824212  
 239.649306804266 125.187617901961 130.433405111592 132.043196381009  
 121.072192130078 132.428675012593 174.383193885933 153.481752643937  
 ZNRF3 178.222120802125 164.466332705334 193.315380090713 187.769988580599  
 175.847256673734 199.490190715307 154.312374306932 184.915526626619  
 767.377380800066 157.094001180073 156.357126871243 187.812436252228  
 ZNRF4 116.397855001959 122.629146433216 126.55925846644 129.152825130086  
 125.068362001087 123.974409226349 126.670227417269 125.45936959544  
 122.673596593654 115.174678745401 119.375727296235 140.85139374336  
 ZP1 122.985117824212 115.572088632106 114.234369421536 122.385508330707  
 116.639787832302 106.797707723826 117.79844873842 115.35376992547  
 140.236618351922 119.207503310618 103.202873534814 119.673343767067  
 ZP2 113.122185375734 113.76411537952 131.593705080542 131.351303131574  
 120.843429388102 112.420505354139 117.335748689217 115.778736387131  
 113.051381310122 114.589757401741 106.576058729493 102.932013031511  
 ZP3 305.343879847672 325.525450750788 319.868227988842 327.89660021611  
 323.896313343796 255.71113398292 212.420616436137 263.707476735938  
 198.568180234676 210.316431648335 188.74403596953 228.243668453958  
 ZP4 115.834056091815 114.350596695469 119.119693776276 127.193553054979  
 110.910693353871 115.524441144063 118.426600479326 119.469328303796  
 119.172965618216 120.799317509529 137.656508322742 116.973126196102  
 ZPBP 113.716741872499 116.425301253959 115.550587451456 108.362609680556  
 120.428171428188 112.642429076777 126.734835642553 114.524341239889  
 120.36402353147 111.506345174435 125.693321471759 110.234403581151  
 ZPBP2 131.890554636938 128.521380879209 133.489068665353 130.00035719456  
 127.678512375099 139.56332664295 137.67649674999 208.291714758548  
 136.380523452336 128.695695565175 140.040420521312 141.572652632051  
 ZPLD1 145.150191397375 125.967294930279 152.337631025368 142.732625557628  
 128.189685312596 124.947565043721 134.669763149268 133.685254707686  
 112.420505354139 137.559204418819 121.898921780569 121.728711587014  
 ZRANB1 339.98018551524 378.728516779744 410.337491313251  
 360.812953749077 256.820546409632 216.290279815413 269.424055734143

200.360518276784 284.043349407812 218.433524126584 179.478756495687  
244.797792477941  
ZRANB2 1377.75266942574 1320.74943817958 1307.96033038529  
1077.33874251157 589.953707188378 1209.56018864779 1028.80076860235  
744.808064061459 1106.75785702993 875.7694907383 799.759250503507  
1044.52286986369  
ZRANB3 130.935922915902 130.213596986351 129.015422924366  
140.826051635712 137.814391189269 145.272073426254 135.544048708523  
118.547605249191 135.616911926164 136.859366444351 132.437234970375  
125.202468372015  
ZRSR2 223.975677959345 236.427507270325 240.663883443935 262.349315496653  
142.301581642006 199.516043142784 161.744366588564 206.469040492609  
164.208044717557 145.961394624627 167.341759854203 169.31618330657  
ZSCAN1 112.464951599416 118.951526834915 106.797707723826  
105.741092375243 114.740948266517 107.67395123577 110.935688075738  
122.284431229917 102.474380813907 126.064311640223 106.772581387455  
112.612099135361  
ZSCAN10 125.83678485646 124.422548323449 118.492287441192  
116.408126010926 129.614692778261 116.751145098777 117.511162285879  
112.268518171041 100.477911152746 102.725375719353 132.176598634979  
113.58962177275  
ZSCAN12 189.070238523683 165.491193869938 186.758038665014  
187.893420010787 160.461846976268 160.429643729685 146.443892388756  
172.909795209733 159.327764602722 143.277771142501 155.223806761489  
168.801737310947  
ZSCAN12L1 164.784346867158 177.143397572907 176.121563444364  
179.932404140099 188.348499229585 173.892380305166 163.982415393606  
164.413893089607 169.806644442071 191.525291860022 187.561298131124  
208.666760987764  
ZSCAN16 173.690008681514 166.223079895236 156.119899067238  
151.540744107423 220.567951704044 275.509805464276 315.565349831797  
278.142283306934 267.67093646012 137.326796995017 264.456926651554  
285.798047501616  
ZSCAN18 1789.51979173209 1635.35544761095 2398.71483410593  
1556.41573079892 869.542306259337 327.566026396726 889.6617510875  
989.396074034945 1037.46485756166 264.983729290122 1107.29687889378  
540.359249705821  
ZSCAN2 154.261443597434 164.072443259668 150.655359765209  
179.026308021985 225.950750084197 203.652936507291 215.769986055534  
215.506175859782 223.094496588657 148.782907912893 216.05364037271  
214.082408290757  
ZSCAN20 143.653452869664 150.232470359841 154.908975734985  
157.547814187442 168.082591651722 147.954079022076 150.75878820215  
152.470980074365 142.726324048628 142.879705723262 154.059436186574  
150.303703193967  
ZSCAN21 255.903775525554 234.020419732787 300.793542873709  
311.916199912898 211.572396862776 208.75656341402 201.441808401878  
249.449151040445 194.979795724712 196.598810934837 185.717123241832  
252.10470581893  
ZSCAN22 133.556805738801 134.998632527009 120.507930710099  
139.106442824079 135.862790395984 131.393633337276 144.858656365799  
141.006540481119 156.311009595629 125.377377116057 155.303903514061  
114.696935316053

ZSCAN23 126.87882572904 136.131453703981 130.113673389232  
144.117964288763 145.024925752814 141.698329968978 141.696969082758  
142.954747193455 135.562700479444 138.928287624746 126.620889938532  
126.222105816959  
ZSCAN29 144.28597792625 146.84403879162 149.6730835169  
139.285128128996 179.297628357211 135.238301951626 145.646191500321  
170.4583554058 151.606932937644 146.136820062093 177.896726792666  
135.190698960212  
ZSCAN4 121.838802846453 121.71538073735 126.080780033301  
121.107979534361 119.95666716163 118.401963042662 234.182164952936  
146.328876892698 143.35902319003 118.601228886344 236.899421827427  
124.989313193779  
ZSCAN5A 141.949098898957 157.378317015602 128.736591902501  
138.861385127242 138.197500836501 149.505323932806 183.071150926068  
205.200459980187 165.654773882752 172.502036705114 158.541906931082  
139.001493765421  
ZSCAN5B 124.00806841872 122.832196877991 121.23469201559  
127.615631240096 143.354858193994 127.271423859953 131.362128083159  
146.526744516344 115.920514336615 132.758313782606 131.968781256081  
125.296240086615  
ZSWIM1 504.502047826003 529.963453165714 402.866491417369  
580.996071040561 837.023434916281 507.827473844576 871.528156184927  
471.069295685718 493.715108157171 424.37437028833 668.853969513382  
439.207122335648  
ZSWIM2 124.365185583133 125.250900940748 151.946691918521  
131.961236721149 140.857793157932 129.098408596418 132.409582164007  
137.339511714364 137.234384760487 121.371348717752 111.703224727793  
129.216693566478  
ZSWIM3 137.31708798874 138.279431175685 146.70594914192  
147.154433852975 152.049243916141 156.603904756947 174.006516433854  
151.71942719041 149.712320986646 140.232244264861 154.011708696954  
147.292241873554  
ZSWIM4 229.835576260403 365.650071660806 263.123584372086  
252.851164967726 443.853458865556 436.731545612902 378.695635790714  
381.484062427466 253.601378730911 301.747788416496 423.489441909617  
314.221257518059  
ZSWIM5 249.292766428035 288.823376348944 266.162244070031  
358.780920910909 188.027848008991 159.0794075765 207.467591256549  
184.937088280378 149.149858208397 156.385100395531 165.120452110746  
166.688771186254  
ZSWIM6 736.603605876572 640.90860274227 465.926873285563  
543.389747823877 280.990656342284 289.956528242564 416.933146258428  
303.423450627377 244.514230664694 364.191263843897 352.562711030848  
437.601814037248  
ZSWIM7 578.297031096292 656.009451448101 463.298781071364  
730.673649872205 329.82030842286 480.712219116621 362.742120043509  
358.52459123416 409.282410265733 326.758278851698 819.488546995594  
228.766847429517  
ZUFSP 199.077893147154 192.980781927122 214.595639477696 210.478088018501  
244.486311003619 237.78482574225 294.746622369436 258.036064876416  
245.553138677866 270.787490294555 228.384686248604 239.871536598083  
ZW10 423.607299503704 431.182384100794 495.099443245153 484.028175202673  
611.540759532294 406.369889501135 414.200068430184 514.61297221467  
450.327710374141 415.82312615045 469.407481002198 567.869601934138

|        |                  |                  |                  |                  |
|--------|------------------|------------------|------------------|------------------|
| ZWILCH | 173.488272345038 | 185.525760847281 | 170.706932460836 |                  |
|        | 175.327597807738 | 305.451247405518 | 299.29004204677  | 253.601378730911 |
|        | 307.597733293218 | 317.309949792707 | 266.347965690851 | 234.626574390973 |
|        | 294.22752955801  |                  |                  |                  |
| ZWINT  | 124.766436060041 | 126.466530783073 | 120.696557306298 | 128.02595294499  |
|        | 153.031479923324 | 188.924084292126 | 153.770852731422 | 202.314814594735 |
|        | 234.126500054945 | 151.619329363527 | 147.15999706579  | 193.502988612307 |
| ZXDA   | 148.337793323867 | 147.278236958386 | 138.267726309873 | 150.657800679032 |
|        | 151.102431192559 | 151.045803695015 | 141.730912072471 | 153.059432055089 |
|        | 137.53234136613  | 144.026432356249 | 144.883597913037 | 142.30928744202  |
| ZXDB   | 163.37518739397  | 167.906766146651 | 184.204036882642 | 147.761965925044 |
|        | 165.723126764006 | 144.608882758506 | 161.724388995749 | 191.897449038297 |
|        | 148.255769084026 | 143.830319259804 | 189.853136769155 | 146.10417547509  |
| ZXDC   | 185.717123241832 | 162.229052648595 | 167.384121560438 | 172.008994980259 |
|        | 207.269530621176 | 193.95909424044  | 180.493406236326 | 212.749668083641 |
|        | 196.136080427522 | 202.44778603643  | 228.852495818211 | 169.826068012389 |
| ZYG11A | 135.039901725369 | 133.288181734813 | 129.603952706231 |                  |
|        | 137.804977813144 | 121.341177395499 | 131.899614022767 | 129.489867764242 |
|        | 126.503135702506 | 136.446877465751 | 127.740057874561 | 133.389930962407 |
|        | 139.892371997205 |                  |                  |                  |
| ZYG11B | 2586.87941889443 | 2601.89405525276 | 1990.94596595493 |                  |
|        | 2087.55358504021 | 1098.20033709043 | 2280.20302441765 | 1468.50184641042 |
|        | 1606.01395227661 | 995.263014856158 | 820.652972219658 | 1394.31467757456 |
|        | 826.771587455122 |                  |                  |                  |
| ZYX    | 2277.60839052397 | 2365.99940149374 | 2273.12164779441 | 3677.23129570773 |
|        | 880.140852200235 | 617.67819271245  | 578.650614747598 | 572.548647437438 |
|        | 595.409419899436 | 1062.749459378   | 466.083451075744 | 597.952909577121 |
| ZZEF1  | 415.388760988459 | 458.218913259336 | 484.568420044471 | 635.819650434542 |
|        | 229.97640195632  | 290.638110977807 | 255.374689750672 | 430.220363263561 |
|        | 361.327436394941 | 293.234972169244 | 467.90388853336  | 446.393631025049 |
| ZZZ3   | 468.93543246394  | 482.739666411407 | 518.925188630246 | 418.968095159939 |
|        | 431.799795646414 | 434.943371634824 | 540.190808200264 | 490.849163737598 |
|        | 560.362502519639 | 503.285430318683 | 354.132752995385 | 491.112594297928 |
